# Supplementary material
Source: publisher site journal article supplement (https://www.dovepress.com/article/322372)
Supplement: Supplementary file 1 [file get_supplementary_file.php]

Contralateral DRG

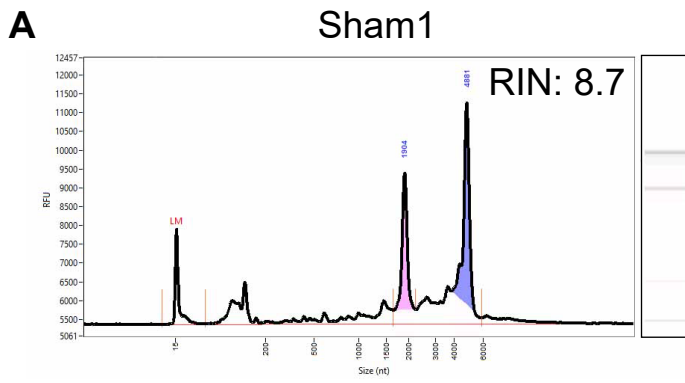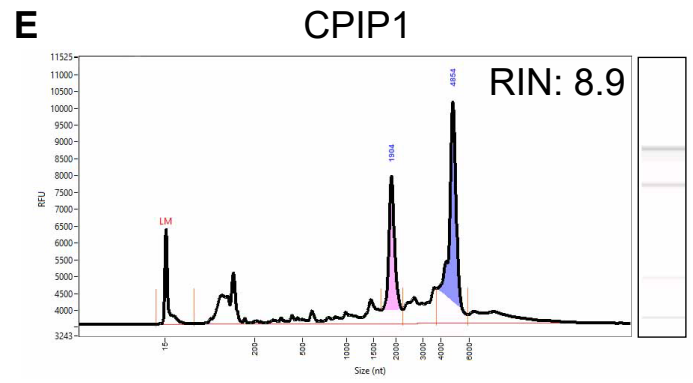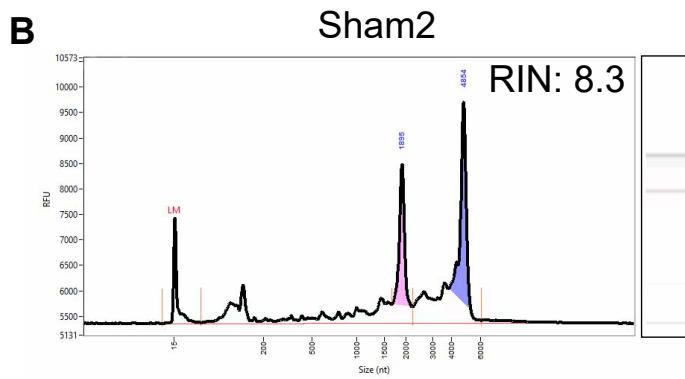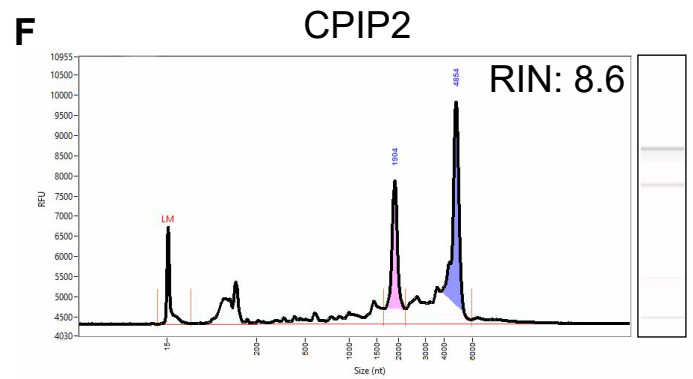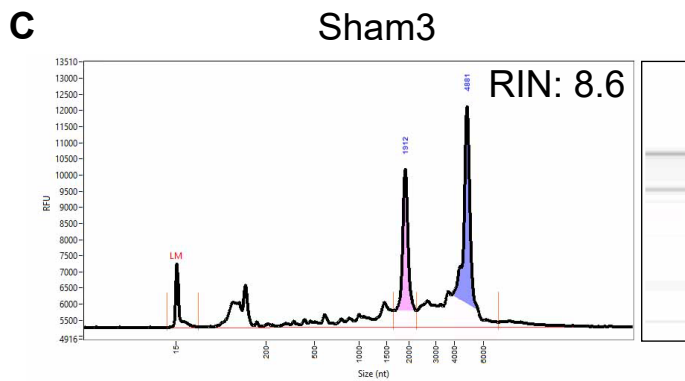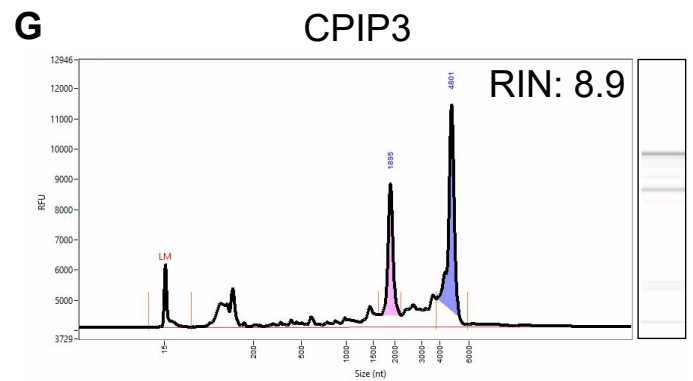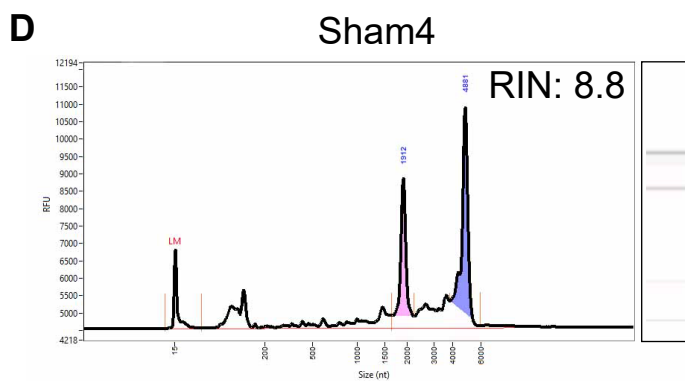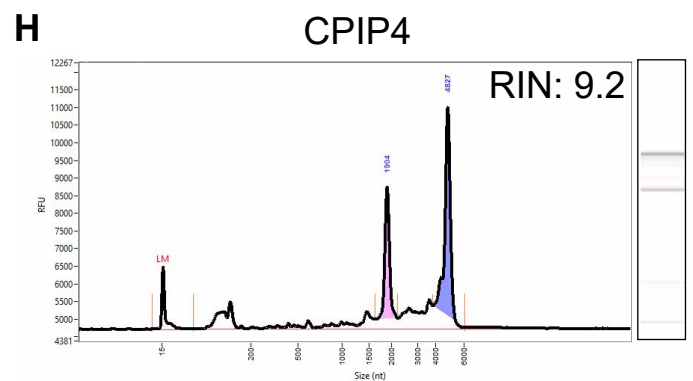

Suppl. Fig. 1 We managed to obtain high quality RNA for RNA-Seq analysis.

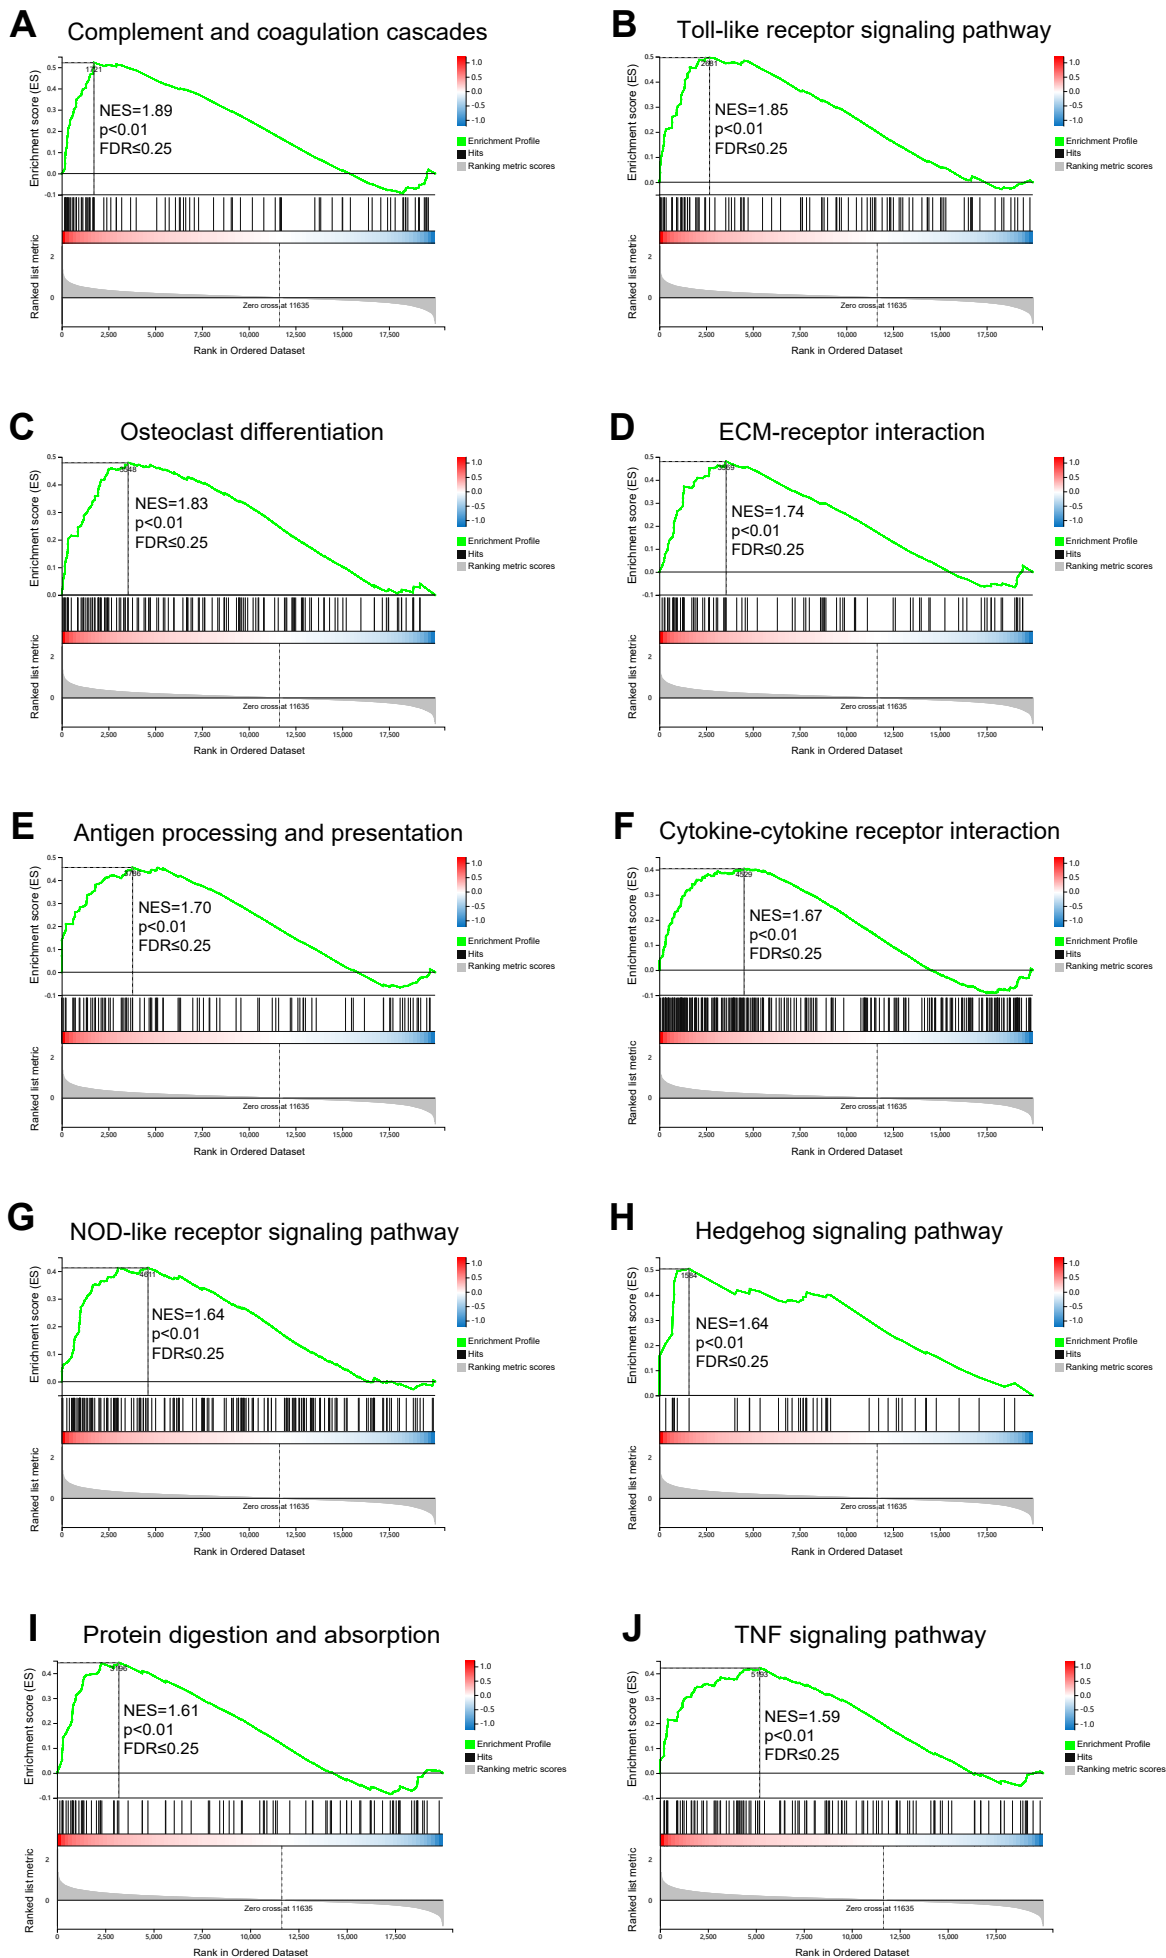

Suppl. Fig. 2 The top 10 most significantly upregulated pathways from GSEA analysis.  $FDR \leq 0.25$  and  $NES > 1.0$  were adopted as the criterion for judging significance

## Suppl. Table 1 Human pain genes

| Feature.ID          | gene_symbol | gene_name                                                                                                       |
|---------------------|-------------|-----------------------------------------------------------------------------------------------------------------|
| ENSRNOG00000016043  | Aqp4        | aquaporin 4 [Source:RGD Symbol;Acc:2143]                                                                        |
| ENSRNOG00000002919  | Gfap        | glial fibrillary acidic protein [Source:RGD Symbol;Acc:2679]                                                    |
| ENSRNOG00000011207  | Gh1         | growth hormone 1 [Source:RGD Symbol;Acc:2686]                                                                   |
| ENSRNOG00000008310  | Mpo         | myeloperoxidase [Source:RGD Symbol;Acc:1592081]                                                                 |
| ENSRNOG00000017374  | Prl         | prolactin [Source:RGD Symbol;Acc:3403]                                                                          |
| ENSRNOG00000012686  | Pomc        | proopiomelanocortin [Source:RGD Symbol;Acc:3366]                                                                |
| ENSRNOG00000017539  | Mmp9        | matrix metalloproteinase 9 [Source:RGD Symbol;Acc:621320]                                                       |
| ENSRNOG00000018808  | Vip         | vasoactive intestinal peptide [Source:RGD Symbol;Acc:621647]                                                    |
| ENSRNOG00000006641  | Dbh         | dopamine beta-hydroxylase (dopamine beta-monooxygenase) [Source:RGD Symbol;Acc:62046]                           |
| ENSRNOG00000012471  | Thbs4       | thrombospondin 4 [Source:RGD Symbol;Acc:62046]                                                                  |
| ENSRNOG00000018445  | Agt         | angiotensinogen (serpin peptidase inhibitor, clade A, member 8) [Source:RGD Symbol;Acc:621822]                  |
| ENSRNOG00000016311  | Slc6a2      | solute carrier family 6 (neurotransmitter transporter), member 2 [Source:RGD Symbol;Acc:621822]                 |
| ENSRNOG00000000694  | Dao         | D-amino-acid oxidase [Source:RGD Symbol;Acc:621138]                                                             |
| ENSRNOG000000037852 | Pirt        | phosphoinositide-interacting regulator of transient receptor potential channels [Source:RGD Symbol;Acc:1565284] |
| ENSRNOG00000004089  | Enpp2       | ectonucleotide pyrophosphatase/phosphodiesterase 2 [Source:RGD Symbol;Acc:69298]                                |
| ENSRNOG00000018285  | Kcna2       | potassium voltage-gated channel, shaker-related subfamily, member 2 [Source:RGD Symbol;Acc:2950]                |
| ENSRNOG00000005309  | Scn8a       | sodium channel, voltage gated, type VIII, alpha subunit [Source:RGD Symbol;Acc:3638]                            |
| ENSRNOG00000005989  | Scn1a       | sodium channel, voltage-gated, type I, alpha subunit [Source:RGD Symbol;Acc:69364]                              |
| ENSRNOG00000006639  | Scn9a       | sodium channel, voltage-gated, type IX, alpha subunit [Source:RGD Symbol;Acc:69368]                             |
| ENSRNOG000000033531 | Cacna2d1    | calcium channel, voltage-dependent, alpha2/delta subunit 1 [Source:RGD Symbol;Acc:2118]                         |
| ENSRNOG00000017469  | Anxa1       | annexin A1 [Source:RGD Symbol;Acc:2118]                                                                         |
| ENSRNOG00000015550  | Ptgds       | prostaglandin D2 synthase (brain) [Source:RGD Symbol;Acc:3433]                                                  |
| ENSRNOG00000009348  | Nos3        | nitric oxide synthase 3, endothelial cell [Source:RGD Symbol;Acc:3186]                                          |
| ENSRNOG00000014938  | Gabrb3      | gamma-aminobutyric acid (GABA) A receptor, beta 3 [Source:RGD Symbol;Acc:2651]                                  |

|                    |          |                                                                                                                        |
|--------------------|----------|------------------------------------------------------------------------------------------------------------------------|
| ENSRNOG00000014938 | Gabrb3   | gamma-aminobutyric acid (GABA) A receptor, beta 3 [Source:RGD Symbol;Acc:2651]                                         |
| ENSRNOG00000016654 | Galr1    | galanin receptor 1 [Source:RGD                                                                                         |
| ENSRNOG00000008431 | Gabbr2   | gamma-aminobutyric acid (GABA) B receptor 2 [Source:RGD Symbol;Acc:619864]                                             |
| ENSRNOG00000019482 | Gnao1    | guanine nucleotide binding protein (G protein), alpha activating activity polypeptide O [Source:RGD Symbol;Acc:628732] |
| ENSRNOG00000005369 | Kcnj3    | potassium inwardly-rectifying channel, subfamily J, member 3 [Source:RGD                                               |
| ENSRNOG00000032473 | Scn10a   | sodium channel, voltage-gated, type X, alpha subunit [Source:RGD Symbol;Acc:3629]                                      |
| ENSRNOG00000012972 | Alox5    | arachidonate 5-lipoxygenase [Source:RGD Symbol;Acc:2096]                                                               |
| ENSRNOG00000016575 | Tnfrsf1b | tumor necrosis factor receptor superfamily, member 1b [Source:RGD Symbol;Acc:621238]                                   |
| ENSRNOG00000020652 | Tgfb1    | transforming growth factor, beta 1 [Source:RGD Symbol;Acc:69051]                                                       |
| ENSRNOG00000003622 | Cybb     | cytochrome b-245, beta polypeptide [Source:RGD Symbol;Acc:620574]                                                      |
| ENSRNOG00000000782 | Trim10   | tripartite motif-containing 10 [Source:RGD Symbol;Acc:1359438]                                                         |
| ENSRNOG00000007354 | Trpa1    | transient receptor potential cation channel, subfamily A, member 1 [Source:RGD Symbol;Acc:1303284]                     |
| ENSRNOG00000019035 | Trpm8    | transient receptor potential cation channel, subfamily M, member 8 [Source:RGD Symbol;Acc:620762]                      |
| ENSRNOG00000019750 | Kcna1    | potassium voltage-gated channel, shaker-related subfamily, member 1 [Source:RGD Symbol;Acc:2949]                       |
| ENSRNOG00000050006 | Agtr2    | angiotensin II receptor, type 2 [Source:RGD Symbol;Acc:2072]                                                           |
| ENSRNOG00000014294 | Ptpn6    | protein tyrosine phosphatase, non-receptor type 6 [Source:RGD Symbol;Acc:620660]                                       |
| ENSRNOG00000037274 | L1cam    | L1 cell adhesion molecule [Source:RGD Symbol;Acc:619777]                                                               |
| ENSRNOG00000005917 | Pawr     | PRKC, apoptosis, WT1, regulator [Source:RGD Symbol;Acc:69065]                                                          |
| ENSRNOG00000016163 | Slc1a3   | solute carrier family 1 (glial high affinity glutamate transporter), member 3 [Source:RGD Symbol;Acc:3698]             |
| ENSRNOG00000008223 | Cnr1     | cannabinoid receptor 1 (brain) [Source:RGD Symbol;Acc:2369]                                                            |
| ENSRNOG00000006715 | Ccr1     | chemokine (C-C motif) receptor 1 [Source:RGD Symbol;Acc:708446]                                                        |
| ENSRNOG00000004560 | Cacna1b  | calcium channel, voltage-dependent, N type, alpha 1B subunit [Source:RGD                                               |
| ENSRNOG00000018191 | Oprm1    | opioid receptor, mu 1 [Source:RGD Symbol;Acc:3234]                                                                     |
| ENSRNOG00000000442 | Notch4   | notch 4 [Source:RGD Symbol;Acc:1303282]                                                                                |



|                    |         |                                                                                                                  |
|--------------------|---------|------------------------------------------------------------------------------------------------------------------|
| ENSRNOG00000000436 | Egfl8   | EGF-like-domain, multiple 8 [Source:RGD Symbol;Acc:1549706]                                                      |
| ENSRNOG00000000463 | Col11a2 | collagen, type XI, alpha 2 [Source:RGD Symbol;Acc:2373]                                                          |
| ENSRNOG00000018369 | Prx     | periaxin [Source:RGD Symbol;Acc:619960]                                                                          |
| ENSRNOG00000027037 | Alox12  | arachidonate 12-lipoxygenase [Source:RGD Symbol;Acc:1311159]                                                     |
| ENSRNOG00000012662 | Lyst    | lysosomal trafficking regulator [Source:MGI Symbol;Acc:MGI:107448]                                               |
| ENSRNOG00000005871 | Il1rn   | interleukin 1 receptor antagonist [Source:RGD Symbol;Acc:621159]                                                 |
| ENSRNOG00000009956 | Wnk1    | WNK lysine deficient protein kinase 1 [Source:RGD Symbol;Acc:621141]                                             |
| ENSRNOG00000000187 | Csf2rb  | colony stimulating factor 2 receptor, beta, low-affinity (granulocyte-macrophage) [Source:RGD Symbol;Acc:620189] |
| ENSRNOG00000015773 | Il21r   | interleukin 21 receptor [Source:RGD Symbol;Acc:1304950]                                                          |
| ENSRNOG00000031665 | Ace2    | angiotensin I converting enzyme 2 [Source:RGD Symbol;Acc:728890]                                                 |
| ENSRNOG00000004118 | Frmpd4  | FERM and PDZ domain containing 4 [Source:RGD Symbol;Acc:1566031]                                                 |
| ENSRNOG00000000599 | Lama4   | laminin, alpha 4 [Source:RGD Symbol;Acc:1560062]                                                                 |
| ENSRNOG00000045952 | Ephb4   | EPH receptor B4 [Source:RGD Symbol;Acc:1583193]                                                                  |
| ENSRNOG00000021031 | Grn     | granulin [Source:RGD Symbol;Acc:61983]                                                                           |
| ENSRNOG00000011680 | Il16    | interleukin 16 [Source:RGD                                                                                       |
| ENSRNOG00000011522 | Hcn1    | hyperpolarization-activated cyclic nucleotide-gated potassium channel 1 [Source:RGD Symbol;Acc:620688]           |
| ENSRNOG00000003491 | Prkca   | protein kinase C, alpha [Source:RGD Symbol;Acc:3395]                                                             |
| ENSRNOG00000013463 | Kcnj8   | potassium inwardly-rectifying channel, subfamily J, member 8 [Source:RGD                                         |
| ENSRNOG00000005196 | Slc12a6 | solute carrier family 12, member 6 [Source:RGD Symbol;Acc:1311335]                                               |
| ENSRNOG00000016147 | Slc17a6 | solute carrier family 17 (vesicular glutamate transporter), member 6 [Source:RGD Symbol;Acc:620531]              |
| ENSRNOG00000003741 | Nptx1   | neuronal pentraxin I [Source:RGD Symbol;Acc:628894]                                                              |
| ENSRNOG00000047466 | Bdnf    | brain-derived neurotrophic factor [Source:RGD Symbol;Acc:2202]                                                   |
| ENSRNOG00000027770 | Trpm3   | transient receptor potential cation channel, subfamily M, member 3 [Source:RGD Symbol;Acc:1304888]               |
| ENSRNOG00000018054 | F2rl2   | coagulation factor II (thrombin) receptor-like 2 [Source:RGD Symbol;Acc:620871]                                  |
| ENSRNOG00000015603 | Prkce   | protein kinase C, epsilon [Source:RGD Symbol;Acc:61925]                                                          |

|                    |          |                                                                                               |
|--------------------|----------|-----------------------------------------------------------------------------------------------|
| ENSRNOG00000004630 | Rag1     | recombination activating gene 1 [Source:RGD Symbol;Acc:619790]                                |
| ENSRNOG00000018839 | Ntrk2    | neurotrophic tyrosine kinase, receptor, type 2 [Source:RGD Symbol;Acc:3213]                   |
| ENSRNOG00000014427 | Chrn4    | cholinergic receptor, nicotinic, beta 4 (neuronal) [Source:RGD Symbol;Acc:2351]               |
| ENSRNOG00000014183 | Gnaq     | guanine nucleotide binding protein (G protein), q polypeptide [Source:RGD Symbol;Acc:620770]  |
| ENSRNOG00000016112 | Cd274    | CD274 molecule [Source:RGD Symbol;Acc:1566211]                                                |
| ENSRNOG00000033581 | Tnxb     | tenascin XB [Source:MGI Symbol;Acc:MGI:1932137]                                               |
| ENSRNOG00000046242 | Klf7     | Kruppel-like factor 7 (ubiquitous) [Source:RGD Symbol;Acc:1306029]                            |
| ENSRNOG00000006632 | Rps6ka3  | ribosomal protein S6 kinase polypeptide 3 [Source:RGD Symbol;Acc:1563860]                     |
| ENSRNOG00000011130 | Calca    | calcitonin-related polypeptide alpha [Source:RGD Symbol;Acc:2254]                             |
| ENSRNOG00000015835 | Cacna2d2 | calcium channel, voltage-dependent, alpha 2/delta subunit 2 [Source:RGD Symbol;Acc:620770]    |
| ENSRNOG00000031890 | Ncam1    | neural cell adhesion molecule 1 [Source:RGD Symbol;Acc:67378]                                 |
| ENSRNOG00000049882 | Adcyap1  | adenylate cyclase activating polypeptide 1 [Source:RGD Symbol;Acc:2037]                       |
| ENSRNOG00000014149 | Npy1r    | neuropeptide Y receptor Y1 [Source:RGD Symbol;Acc:3198]                                       |
| ENSRNOG00000022635 | Dlg2     | discs, large homolog 2 (Drosophila) [Source:RGD Symbol;Acc:619895]                            |
| ENSRNOG00000017286 | Ephx2    | epoxide hydrolase 2, cytoplasmic [Source:RGD Symbol;Acc:620732]                               |
| ENSRNOG00000012840 | Sparc    | secreted protein, acidic, cysteine-rich (osteonectin) [Source:RGD Symbol;Acc:3742]            |
| ENSRNOG00000016294 | Cd4      | Cd4 molecule [Source:RGD Symbol;Acc:2306]                                                     |
| ENSRNOG00000003476 | Slc6a4   | solute carrier family 6 (neurotransmitter transporter), member 4 [Source:RGD Symbol;Acc:3714] |
| ENSRNOG00000011808 | Ghrhr    | growth hormone releasing hormone receptor [Source:RGD Symbol;Acc:2688]                        |
| ENSRNOG00000007447 | Pla2g4b  | phospholipase A2, group IVB (cytosolic) [Source:RGD Symbol;Acc:1308658]                       |
| ENSRNOG00000023664 | Lepr     | leptin receptor [Source:RGD Symbol;Acc:3001]                                                  |
| ENSRNOG00000006030 | Ptprz1   | protein tyrosine phosphatase, receptor-type, Z polypeptide 1 [Source:RGD Symbol;Acc:3455]     |
| ENSRNOG00000013925 | Nox4     | NADPH oxidase 4 [Source:RGD Symbol;Acc:620600]                                                |
| ENSRNOG00000008552 | P2rx3    | purinergic receptor P2X, ligand-gated ion channel, 3 [Source:RGD Symbol;Acc:620253]           |
| ENSRNOG00000002657 | Pla2g4a  | phospholipase A2, group IVA (cytosolic, calcium-dependent) [Source:RGD Symbol;Acc:620253]     |
| ENSRNOG00000003300 | Btg2     | BTG family, member 2 [Source:RGD Symbol;Acc:2225]                                             |

|                     |         |                                                                                                             |
|---------------------|---------|-------------------------------------------------------------------------------------------------------------|
| ENSRNOG00000008943  | Penk    | proenkephalin [Source:RGD Symbol;Acc:68946]                                                                 |
| ENSRNOG00000002981  | Cacna1g | calcium channel, voltage-dependent, T type, alpha 1G subunit [Source:RGD                                    |
| ENSRNOG00000008180  | Lyn     | LYN proto-oncogene, Src family tyrosine kinase [Source:RGD Symbol;Acc:621017]                               |
| ENSRNOG000000047800 | C5ar1   | complement component 5a receptor 1 [Source:RGD Symbol;Acc:70553]                                            |
| ENSRNOG000000010199 | Glrb    | glycine receptor, beta [Source:RGD Symbol;Acc:2706]                                                         |
| ENSRNOG000000014152 | Kcnip3  | Kv channel interacting protein 3, calsenilin [Source:RGD Symbol;Acc:70888]                                  |
| ENSRNOG000000003241 | Gabrg2  | gamma-aminobutyric acid (GABA) A receptor, gamma 2 [Source:RGD Symbol;Acc:61966]                            |
| ENSRNOG000000003241 | Gabrg2  | gamma-aminobutyric acid (GABA) A receptor, gamma 2 [Source:RGD Symbol;Acc:61966]                            |
| ENSRNOG000000006920 | Htr3b   | 5-hydroxytryptamine (serotonin) receptor 3B, ionotropic [Source:RGD Symbol;Acc:61820]                       |
| ENSRNOG000000001849 | Mapk1   | mitogen activated protein kinase 1 [Source:RGD Symbol;Acc:70500]                                            |
| ENSRNOG000000002079 | Mapk10  | mitogen activated protein kinase 10 [Source:RGD Symbol;Acc:3663]                                            |
| ENSRNOG000000000836 | Ltb     | lymphotoxin beta (TNF superfamily, member 3) [Source:RGD Symbol;Acc:1303162]                                |
| ENSRNOG000000000439 | Ager    | advanced glycosylation end product-specific receptor [Source:RGD Symbol;Acc:69258]                          |
| ENSRNOG000000042458 | Stau2   | staufen double-stranded RNA binding protein 2 [Source:RGD Symbol;Acc:621479]                                |
| ENSRNOG000000012920 | Col9a1  | collagen, type IX, alpha 1 [Source:RGD Symbol;Acc:1309425]                                                  |
| ENSRNOG000000006527 | Slc6a1  | solute carrier family 6 (neurotransmitter transporter), member 1 [Source:RGD Symbol;Acc:620533]             |
| ENSRNOG000000017220 | Tcirg1  | T-cell, immune regulator 1, ATPase, H+ transporting, lysosomal V0 subunit A3 [Source:RGD Symbol;Acc:735136] |
| ENSRNOG000000012961 | Klf7    | Kruppel-like factor 7 (ubiquitous) [Source:RGD Symbol;Acc:1306029]                                          |
| ENSRNOG000000002823 | Mapk9   | mitogen-activated protein kinase 9 [Source:RGD Symbol;Acc:628847]                                           |
| ENSRNOG000000008364 | Cat     | catalase [Source:RGD Symbol;Acc:2279]                                                                       |
| ENSRNOG000000028589 | Gria2   | glutamate receptor, ionotropic, AMPA 2 [Source:RGD Symbol;Acc:61862]                                        |
| ENSRNOG000000008574 | Vdr     | vitamin D (1,25-dihydroxyvitamin D3) receptor [Source:RGD Symbol;Acc:3959]                                  |
| ENSRNOG000000000441 | Gpsm3   | G-protein signaling modulator 3 [Source:RGD Symbol;Acc:1303014]                                             |
| ENSRNOG000000046731 | Cacna1a | calcium channel, voltage-dependent, P/Q type, alpha 1A subunit                                              |
| ENSRNOG000000006877 | Efnb1   | ephrin B1 [Source:RGD Symbol;Acc:2540]                                                                      |
| ENSRNOG000000033641 | Prkg1   | protein kinase, cGMP-dependent, type 1 [Source:EntrezGene;Acc:54286]                                        |

|                    |        |                                                                                                           |
|--------------------|--------|-----------------------------------------------------------------------------------------------------------|
| ENSRNOG00000020155 | Mapk8  | mitogen-activated protein kinase 8 [Source:RGD Symbol;Acc:621506]                                         |
| ENSRNOG00000014232 | P2ry1  | purinergic receptor P2Y, G-protein coupled, 1 [Source:RGD Symbol;Acc:3242]                                |
| ENSRNOG00000010665 | Ccr7   | chemokine (C-C motif) receptor 7 [Source:RGD Symbol;Acc:735151]                                           |
| ENSRNOG00000000459 | Psmb9  | proteasome (prosome, macropain) subunit, beta type, 9 [Source:RGD Symbol;Acc:3427]                        |
| ENSRNOG00000030118 | Msn    | moesin [Source:RGD Symbol;Acc:621260]                                                                     |
| ENSRNOG00000005392 | Ngfr   | nerve growth factor receptor [Source:RGD Symbol;Acc:3177]                                                 |
| ENSRNOG00000015654 | Ghr    | growth hormone receptor [Source:RGD Symbol;Acc:2687]                                                      |
| ENSRNOG00000029318 | Tyrp1  | tyrosinase-related protein 1 [Source:RGD Symbol;Acc:1593266]                                              |
| ENSRNOG00000032706 | Kcnk18 | potassium channel, subfamily K, member 18 [Source:RGD Symbol;Acc:1303091]                                 |
| ENSRNOG00000020193 | Runx2  | runt-related transcription factor 2 [Source:RGD Symbol;Acc:2282]                                          |
| ENSRNOG00000012061 | Prkcb  | protein kinase C, beta [Source:RGD Symbol;Acc:3396]                                                       |
| ENSRNOG00000037984 | Sccpdh | saccharopine dehydrogenase (putative) [Source:RGD Symbol;Acc:1311440]                                     |
| ENSRNOG00000049054 | Ntsr2  | neurotensin receptor 2 [Source:RGD Symbol;Acc:70962]                                                      |
| ENSRNOG00000012721 | Ednra  | endothelin receptor type A [Source:RGD Symbol;Acc:2535]                                                   |
| ENSRNOG00000007346 | Grasp  | GRP1 (general receptor for phosphoinositides 1)-associated scaffold protein [Source:RGD Symbol;Acc:70554] |
| ENSRNOG00000010392 | Nrg1   | neuregulin 1 [Source:RGD Symbol;Acc:621341]                                                               |
| ENSRNOG00000000855 | Lst1   | leukocyte specific transcript 1 [Source:RGD Symbol;Acc:620077]                                            |
| ENSRNOG00000011820 | Acpp   | acid phosphatase, prostate [Source:RGD Symbol;Acc:2023]                                                   |
| ENSRNOG00000004978 | Prkacb | protein kinase, cAMP dependent, catalytic, beta [Source:RGD Symbol;Acc:1310574]                           |
| ENSRNOG00000025053 | Lrp1   | low density lipoprotein receptor-related protein 1 [Source:RGD Symbol;Acc:1307535]                        |
| ENSRNOG00000008305 | Sc5d   | sterol-C5-desaturase [Source:RGD Symbol;Acc:620775]                                                       |
| ENSRNOG00000032659 | Plcl1  | phospholipase C-like 1 [Source:RGD Symbol;Acc:708420]                                                     |
| ENSRNOG00000023993 | Kif1a  | kinesin family member 1A [Source:RGD Symbol;Acc:1304996]                                                  |
| ENSRNOG00000007159 | Ccl2   | chemokine (C-C motif) ligand 2 [Source:RGD Symbol;Acc:3645]                                               |
| ENSRNOG00000004517 | Igf1   | insulin-like growth factor 1 [Source:RGD Symbol;Acc:2868]                                                 |
| ENSRNOG00000000837 | Tnf    | tumor necrosis factor [Source:RGD Symbol;Acc:3876]                                                        |

|                    |         |                                                                                                           |
|--------------------|---------|-----------------------------------------------------------------------------------------------------------|
| ENSRNOG00000019422 | Egr1    | early growth response 1 [Source:RGD Symbol;Acc:2544]                                                      |
| ENSRNOG00000007647 | Oprk1   | opioid receptor, kappa 1 [Source:RGD Symbol;Acc:69426]                                                    |
| ENSRNOG00000002753 | Adam11  | ADAM metallopeptidase domain 11 [Source:RGD Symbol;Acc:1307515]                                           |
| ENSRNOG00000010906 | Ccl5    | chemokine (C-C motif) ligand 5 [Source:RGD Symbol;Acc:69069]                                              |
| ENSRNOG00000000470 | Vps52   | vacuolar protein sorting 52 homolog (S. cerevisiae) [Source:RGD Symbol;Acc:3618]                          |
| ENSRNOG00000009822 | Tlr2    | toll-like receptor 2 [Source:RGD Symbol;Acc:735138]                                                       |
| ENSRNOG00000012283 | Chrna6  | cholinergic receptor, nicotinic, alpha 6 (neuronal) [Source:RGD Symbol;Acc:69281]                         |
| ENSRNOG00000002390 | Gnb2l1  | guanine nucleotide binding protein (G protein), beta polypeptide 2 like 1 [Source:RGD Symbol;Acc:69229]   |
| ENSRNOG00000001992 | Atp6v1a | ATPase, H <sup>+</sup> transporting, lysosomal V1 subunit A [Source:RGD Symbol;Acc:1596464]               |
| ENSRNOG00000012876 | Slc6a13 | solute carrier family 6 (neurotransmitter transporter), member 13 [Source:RGD Symbol;Acc:620788]          |
| ENSRNOG00000007372 | Casp1   | caspase 1 [Source:RGD Symbol;Acc:2274]                                                                    |
| ENSRNOG00000049402 | Nbl1    | neuroblastoma 1, DAN family BMP antagonist [Source:RGD Symbol;Acc:3151]                                   |
| ENSRNOG00000003680 | Gabrb2  | gamma-aminobutyric acid (GABA) A receptor, beta 2 [Source:RGD Symbol;Acc:2650]                            |
| ENSRNOG00000002863 | Cacna1e | calcium channel, voltage-dependent, R type, alpha 1E subunit [Source:RGD Symbol;Acc:2246]                 |
| ENSRNOG00000032884 | Scn11a  | sodium channel, voltage-gated, type XI, alpha subunit [Source:RGD Symbol;Acc:3630]                        |
| ENSRNOG00000007374 | Tac1    | tachykinin, precursor 1 [Source:RGD Symbol;Acc:3807]                                                      |
| ENSRNOG00000006335 | Klhl9   | kelch-like family member 9 [Source:RGD Symbol;Acc:1304814]                                                |
| ENSRNOG00000003442 | Adora1  | adenosine A1 receptor [Source:RGD Symbol;Acc:2048]                                                        |
| ENSRNOG00000031801 | Ephb3   | Eph receptor B3 [Source:RGD Symbol;Acc:1305602]                                                           |
| ENSRNOG00000009882 | Ppp3ca  | protein phosphatase 3, catalytic subunit, alpha isozyme [Source:RGD Symbol;Acc:3382]                      |
| ENSRNOG00000019486 | Trpv1   | transient receptor potential cation channel, subfamily V, member 1 [Source:RGD Symbol;Acc:628841]         |
| ENSRNOG00000015971 | Slc12a2 | solute carrier family 12 (sodium/potassium/chloride transporter), member 2 [Source:RGD Symbol;Acc:620809] |
| ENSRNOG00000008890 | Slc18a2 | solute carrier family 18 (vesicular monoamine transporter), member 2 [Source:RGD Symbol;Acc:3694]         |



|                     |         |                                                                                                       |
|---------------------|---------|-------------------------------------------------------------------------------------------------------|
| ENSRNOG00000012531  | Ephb2   | Eph receptor B2 [Source:RGD Symbol;Acc:1564232]                                                       |
| ENSRNOG00000003866  | Cxcr4   | chemokine (C-X-C motif) receptor 4 [Source:RGD Symbol;Acc:620465]                                     |
| ENSRNOG00000018346  | Agtr1a  | angiotensin II receptor, type 1a [Source:RGD Symbol;Acc:2070]                                         |
| ENSRNOG00000016384  | Pik3cb  | phosphatidylinositol-4,5-bisphosphate 3-kinase, catalytic subunit beta [Source:RGD Symbol;Acc:620917] |
| ENSRNOG00000002746  | Fstl1   | follistatin-like 1 [Source:MGI Symbol;Acc:MGI:102793]                                                 |
| ENSRNOG00000004677  | Zeb2    | zinc finger E-box binding homeobox 2 [Source:RGD Symbol;Acc:1307272]                                  |
| ENSRNOG00000004332  | Egfr    | epidermal growth factor receptor [Source:RGD Symbol;Acc:2543]                                         |
| ENSRNOG00000007603  | Gabbr1  | gamma-aminobutyric acid (GABA) A receptor, rho 1 [Source:RGD Symbol;Acc:61900]                        |
| ENSRNOG00000017819  | Cd14    | CD14 molecule [Source:RGD                                                                             |
| ENSRNOG00000001195  | Trpv4   | transient receptor potential cation channel, subfamily V, member 4 [Source:RGD Symbol;Acc:69337]      |
| ENSRNOG00000009260  | Cnr2    | cannabinoid receptor 2 (macrophage) [Source:RGD Symbol;Acc:619713]                                    |
| ENSRNOG00000005007  | Scn3a   | sodium channel, voltage-gated, type III, alpha [Source:RGD Symbol;Acc:3635]                           |
| ENSRNOG00000001658  | Kcnj6   | potassium inwardly-rectifying channel, subfamily J, member 6 [Source:RGD                              |
| ENSRNOG00000004810  | Plcb1   | phospholipase C, beta 1 (phosphoinositide-specific) [Source:RGD Symbol;Acc:3344]                      |
| ENSRNOG00000011039  | Gch1    | GTP cyclohydrolase 1 [Source:RGD Symbol;Acc:61992]                                                    |
| ENSRNOG00000009338  | Kras    | Kirsten rat sarcoma viral oncogene [Source:RGD Symbol;Acc:2981]                                       |
| ENSRNOG00000006320  | Ptges   | prostaglandin E synthase [Source:RGD Symbol;Acc:62076]                                                |
| ENSRNOG000000030888 | Rela    | v-rel avian reticuloendotheliosis viral oncogene homolog A [Source:RGD Symbol;Acc:727889]             |
| ENSRNOG00000003170  | Nlrp3   | NLR family, pyrin domain containing 3 [Source:RGD Symbol;Acc:1308314]                                 |
| ENSRNOG00000014172  | Npy5r   | neuropeptide Y receptor Y5 [Source:RGD Symbol;Acc:3199]                                               |
| ENSRNOG00000000456  | Psmb8   | proteasome (prosome, macropain) subunit, beta type, 8 [Source:RGD Symbol;Acc:3426]                    |
| ENSRNOG00000027030  | Adm     | adrenomedullin [Source:RGD Symbol;Acc:2047]                                                           |
| ENSRNOG00000000465  | Slc39a7 | solute carrier family 39 (zinc transporter), member 7 [Source:RGD Symbol;Acc:1593280]                 |
| ENSRNOG000000032162 | Atf1    | activating transcription factor 1 [Source:RGD Symbol;Acc:1307360]                                     |
| ENSRNOG000000030404 | Arrb1   | arrestin, beta 1 [Source:RGD Symbol;Acc:2156]                                                         |
| ENSRNOG00000000833  | Vars2   | valyl-tRNA synthetase 2, mitochondrial [Source:RGD Symbol;Acc:1303122]                                |

|                    |          |                                                                                                                       |
|--------------------|----------|-----------------------------------------------------------------------------------------------------------------------|
| ENSRNOG00000006450 | Erb2     | v-erb-b2 avian erythroblastic leukemia viral oncogene 2 [Source:RGD Symbol;Acc:2561]                                  |
| ENSRNOG0000000431  | Atf6b    | activating transcription factor 6 beta [Source:RGD Symbol;Acc:1303317]                                                |
| ENSRNOG00000004026 | Atp2b1   | ATPase, Ca <sup>++</sup> transporting, plasma membrane 1 [Source:RGD Symbol;Acc:621303]                               |
| ENSRNOG00000008292 | Hif1a    | hypoxia-inducible factor 1, alpha subunit (basic helix-loop-helix transcription factor) [Source:RGD Symbol;Acc:61928] |
| ENSRNOG00000031312 | Tnfrsf1a | tumor necrosis factor receptor superfamily, member 1a [Source:RGD Symbol;Acc:621237]                                  |
| ENSRNOG00000001442 | Por      | P450 (cytochrome) oxidoreductase [Source:RGD Symbol;Acc:68335]                                                        |
| ENSRNOG00000010997 | Ednrb    | endothelin receptor type B [Source:RGD Symbol;Acc:2536]                                                               |
| ENSRNOG00000030763 | Dpp4     | dipeptidylpeptidase 4 [Source:RGD Symbol;Acc:2515]                                                                    |
| ENSRNOG00000049213 | Npy2r    | neuropeptide Y receptor Y2 [Source:RGD Symbol;Acc:620475]                                                             |
| ENSRNOG00000020778 | Chrb2    | cholinergic receptor, nicotinic, beta 2 (neuronal) [Source:RGD Symbol;Acc:2350]                                       |
| ENSRNOG00000020005 | Map2k2   | mitogen activated protein kinase kinase 2 [Source:RGD Symbol;Acc:61888]                                               |
| ENSRNOG00000018714 | Arl5b    | ADP-ribosylation factor-like 5B [Source:RGD Symbol;Acc:1305569]                                                       |
| ENSRNOG00000014751 | Ret      | ret proto-oncogene [Source:RGD Symbol;Acc:3556]                                                                       |
| ENSRNOG00000012074 | Ifngr1   | interferon gamma receptor 1 [Source:RGD Symbol;Acc:620570]                                                            |
| ENSRNOG00000000433 | Prrt1    | proline-rich transmembrane protein 1 [Source:RGD Symbol;Acc:1359348]                                                  |
| ENSRNOG00000029726 | Gstm1    | glutathione S-transferase mu 1 [Source:RGD Symbol;Acc:2755]                                                           |
| ENSRNOG00000016756 | Ptgir    | prostaglandin I2 (prostacyclin) receptor (IP) [Source:RGD Symbol;Acc:1310890]                                         |
| ENSRNOG00000013042 | Htr1b    | 5-hydroxytryptamine (serotonin) receptor 1B, G protein-coupled [Source:RGD Symbol;Acc:2846]                           |
| ENSRNOG00000004649 | Il1b     | interleukin 1 beta [Source:RGD                                                                                        |
| ENSRNOG00000002305 | Slc15a2  | solute carrier family 15 (oligopeptide transporter), member 2 [Source:RGD                                             |
| ENSRNOG00000007415 | Ptgs1    | prostaglandin-endoperoxide synthase 1 [Source:RGD Symbol;Acc:3439]                                                    |
| ENSRNOG00000013412 | Creb1    | cAMP responsive element binding protein 1 [Source:RGD Symbol;Acc:620218]                                              |
| ENSRNOG00000010064 | Abcc4    | ATP-binding cassette, subfamily C (CFTR/MRP), member 4 [Source:RGD Symbol;Acc:620266]                                 |
| ENSRNOG00000014862 | Gabrg3   | gamma-aminobutyric acid (GABA) A receptor, gamma 3 [Source:RGD Symbol;Acc:621735]                                     |
| ENSRNOG00000049771 | Gstt1    | glutathione S-transferase theta 1 [Source:RGD Symbol;Acc:2765]                                                        |



|                    |         |                                                                                                                     |
|--------------------|---------|---------------------------------------------------------------------------------------------------------------------|
| ENSRNOG00000017854 | Ucp2    | uncoupling protein 2 (mitochondrial, proton carrier) [Source:RGD Symbol;Acc:3932]                                   |
| ENSRNOG00000006867 | Etv1    | ets variant 1 [Source:RGD Symbol;Acc:1312007]                                                                       |
| ENSRNOG00000004060 | Calm2   | calmodulin 2 [Source:RGD Symbol;Acc:2258]                                                                           |
| ENSRNOG00000021745 | Bhlhe22 | basic helix-loop-helix family, member e22 [Source:RGD Symbol;Acc:1305451]                                           |
| ENSRNOG00000019073 | Ikbkb   | inhibitor of kappa light polypeptide gene enhancer in B-cells, kinase beta [Source:RGD Symbol;Acc:621375]           |
| ENSRNOG00000019048 | Sod2    | superoxide dismutase 2, mitochondrial [Source:RGD Symbol;Acc:3732]                                                  |
| ENSRNOG00000007706 | Prkaa2  | protein kinase, AMP-activated, alpha 2 catalytic subunit [Source:RGD Symbol;Acc:620893]                             |
| ENSRNOG00000008345 | Clcn6   | chloride channel, voltage-sensitive 6 [Source:RGD Symbol;Acc:1305379]                                               |
| ENSRNOG00000011145 | Crhr2   | corticotropin releasing hormone receptor 2 [Source:RGD Symbol;Acc:70547]                                            |
| ENSRNOG00000000467 | Ring1   | ring finger protein 1 [Source:RGD Symbol;Acc:3576]                                                                  |
| ENSRNOG00000010063 | Htr2a   | 5-hydroxytryptamine (serotonin) receptor 2A, G protein-coupled [Source:RGD                                          |
| ENSRNOG00000016892 | Nr2f6   | nuclear receptor subfamily 2, group F, member 6 [Source:RGD Symbol;Acc:621685]                                      |
| ENSRNOG00000009556 | Prokr1  | prokineticin receptor 1 [Source:RGD Symbol;Acc:708443]                                                              |
| ENSRNOG00000013634 | Myd88   | myeloid differentiation primary response 88 [Source:RGD Symbol;Acc:735043]                                          |
| ENSRNOG00000018107 | Zfand5  | zinc finger, AN1-type domain 5 [Source:RGD Symbol;Acc:1310776]                                                      |
| ENSRNOG00000021256 | Adra1d  | adrenoceptor alpha 1D [Source:RGD Symbol;Acc:62064]                                                                 |
| ENSRNOG00000000774 | Gabbr1  | gamma-aminobutyric acid (GABA) B receptor 1 [Source:RGD Symbol;Acc:621537]                                          |
| ENSRNOG00000010458 | Pik3ca  | phosphatidylinositol-4,5-bisphosphate 3-kinase, catalytic subunit alpha [Source:RGD Symbol;Acc:620916]              |
| ENSRNOG00000007456 | Calb1   | calbindin 1 [Source:RGD Symbol;Acc:69340]                                                                           |
| ENSRNOG00000011507 | Pick1   | protein interacting with PRKCA 1 [Source:RGD Symbol;Acc:69437]                                                      |
| ENSRNOG00000045816 | Gria1   | glutamate receptor, ionotropic, AMPA 1 [Source:RGD Symbol;Acc:621531]                                               |
| ENSRNOG00000018712 | CAMK2A  | Uncharacterized protein [Source:UniProtKB/TrEMBL;Acc:F1LZG4]                                                        |
| ENSRNOG00000000839 | Nfkbil1 | nuclear factor of kappa light polypeptide gene enhancer in B-cells inhibitor-like 1 [Source:RGD Symbol;Acc:1303310] |
| ENSRNOG00000004575 | Il1a    | interleukin 1 alpha [Source:RGD                                                                                     |
| ENSRNOG00000007645 | Kcnj9   | potassium inwardly-rectifying channel, subfamily J, member 9 [Source:RGD                                            |
| ENSRNOG00000016385 | Gabrd   | gamma-aminobutyric acid (GABA) A receptor, delta [Source:RGD Symbol;Acc:61901]                                      |

|                    |         |                                                                                        |
|--------------------|---------|----------------------------------------------------------------------------------------|
| ENSRNOG00000016385 | Gabrd   | gamma-aminobutyric acid (GABA) A receptor, delta [Source:RGD Symbol;Acc:61901]         |
| ENSRNOG00000016768 | Oprl1   | opiate receptor-like 1 [Source:RGD Symbol;Acc:68438]                                   |
| ENSRNOG00000005723 | Grin3a  | glutamate receptor, ionotropic, N-methyl-D-aspartate 3A [Source:RGD Symbol;Acc:621704] |
| ENSRNOG00000013171 | Grm2    | glutamate receptor, metabotropic 2 [Source:RGD Symbol;Acc:2743]                        |
| ENSRNOG00000005438 | Pcsk2   | proprotein convertase subtilisin/kexin type 2 [Source:RGD Symbol;Acc:3273]             |
| ENSRNOG00000016221 | Scn2b   | sodium channel, voltage-gated, type II, beta subunit [Source:RGD Symbol;Acc:3633]      |
| ENSRNOG00000037270 | Avpr2   | arginine vasopressin receptor 2 [Source:RGD Symbol;Acc:2186]                           |
| ENSRNOG00000031440 | Nova1   | neuro-oncological ventral antigen 1 [Source:RGD Symbol;Acc:621345]                     |
| ENSRNOG00000000231 | Kctd17  | potassium channel tetramerization domain containing 17 [Source:RGD                     |
| ENSRNOG00000000805 | Gja1    | gap junction protein, alpha 1 [Source:RGD Symbol;Acc:2690]                             |
| ENSRNOG00000016571 | Ngf     | nerve growth factor (beta polypeptide) [Source:RGD Symbol;Acc:1598328]                 |
| ENSRNOG00000005509 | Pak7    | p21 protein (Cdc42/Rac)-activated kinase 7 [Source:RGD Symbol;Acc:1312009]             |
| ENSRNOG00000000435 | Ppt2    | palmitoyl-protein thioesterase 2 [Source:RGD Symbol;Acc:620375]                        |
| ENSRNOG00000002229 | Adcy5   | adenylate cyclase 5 [Source:RGD Symbol;Acc:71014]                                      |
| ENSRNOG00000048043 | F2r     | coagulation factor II (thrombin) receptor [Source:RGD Symbol;Acc:2586]                 |
| ENSRNOG00000012259 | Il22ra2 | interleukin 22 receptor, alpha 2 [Source:RGD Symbol;Acc:1303169]                       |
| ENSRNOG00000019842 | Artn    | artemin [Source:RGD Symbol;Acc:621427]                                                 |
| ENSRNOG00000033893 | Cacna1h | calcium channel, voltage-dependent, T type, alpha 1H subunit [Source:RGD               |
| ENSRNOG00000014524 | S1pr3   | sphingosine-1-phosphate receptor 3 [Source:RGD Symbol;Acc:1583843]                     |
| ENSRNOG00000013610 | Chrna5  | cholinergic receptor, nicotinic, alpha 5 (neuronal) [Source:RGD Symbol;Acc:2347]       |
| ENSRNOG00000050233 | Cchcr1  | coiled-coil alpha-helical rod protein 1 [Source:RGD Symbol;Acc:1302992]                |
| ENSRNOG00000006957 | Gria4   | glutamate receptor, ionotropic, AMPA 4 [Source:RGD Symbol;Acc:61863]                   |
| ENSRNOG00000029778 | Maob    | monoamine oxidase B [Source:RGD Symbol;Acc:3041]                                       |
| ENSRNOG00000010262 | Hdc     | histidine decarboxylase [Source:RGD Symbol;Acc:2790]                                   |
| ENSRNOG00000047300 | Bdkrb2  | bradykinin receptor B2 [Source:RGD Symbol;Acc:2201]                                    |
| ENSRNOG00000043210 | Ppp3r1  | protein phosphatase 3, regulatory subunit B, alpha [Source:RGD Symbol;Acc:69230]       |

|                    |         |                                                                                                               |
|--------------------|---------|---------------------------------------------------------------------------------------------------------------|
| ENSRNOG00000000440 | Pbx2    | pre-B-cell leukemia homeobox 2 [Source:RGD Symbol;Acc:1303084]                                                |
| ENSRNOG00000014776 | Adcy7   | adenylate cyclase 7 [Source:RGD Symbol;Acc:619966]                                                            |
| ENSRNOG00000003171 | Mpz     | myelin protein zero [Source:RGD Symbol;Acc:3109]                                                              |
| ENSRNOG00000002227 | Kit     | v-kit Hardy-Zuckerman 4 feline sarcoma viral oncogene homolog [Source:RGD Symbol;Acc:620568]                  |
| ENSRNOG00000013439 | Cpn1    | carboxypeptidase N, polypeptide 1 [Source:RGD Symbol;Acc:70931]                                               |
| ENSRNOG00000004641 | Sstr4   | somatostatin receptor 4 [Source:RGD Symbol;Acc:3764]                                                          |
| ENSRNOG00000013681 | Kcns1   | potassium voltage-gated channel, delayed-rectifier, subfamily S, member 1 [Source:RGD Symbol;Acc:621524]      |
| ENSRNOG00000019728 | Itgam   | integrin, alpha M [Source:RGD Symbol;Acc:621670]                                                              |
| ENSRNOG00000002336 | Gabra4  | gamma-aminobutyric acid (GABA) A receptor, alpha 4 [Source:RGD Symbol;Acc:621670]                             |
| ENSRNOG00000019752 | Slc29a1 | solute carrier family 29 (equilibrative nucleoside transporter), member 1 [Source:RGD Symbol;Acc:61899]       |
| ENSRNOG00000013953 | Ntrk1   | neurotrophic tyrosine kinase, receptor, type 1 [Source:RGD Symbol;Acc:620144]                                 |
| ENSRNOG00000001130 | Nos1    | nitric oxide synthase 1, neuronal [Source:RGD Symbol;Acc:3184]                                                |
| ENSRNOG00000003800 | Rgs9    | regulator of G-protein signaling 9 [Source:RGD Symbol;Acc:3572]                                               |
| ENSRNOG00000008195 | Ywhaz   | tyrosine 3-monooxygenase/tryptophan 5-monooxygenase activation protein, zeta [Source:RGD Symbol;Acc:3980]     |
| ENSRNOG00000012346 | Epb41l2 | erythrocyte membrane protein band 4.1-like 2 [Source:RGD Symbol;Acc:1563977]                                  |
| ENSRNOG00000025100 | Ikbke   | inhibitor of kappa light polypeptide gene enhancer in B-cells, kinase epsilon [Source:RGD Symbol;Acc:1308352] |
| ENSRNOG00000013231 | Ptafr   | platelet-activating factor receptor [Source:RGD Symbol;Acc:61897]                                             |
| ENSRNOG00000018526 | Dlg4    | discs, large homolog 4 (Drosophila) [Source:RGD Symbol;Acc:68424]                                             |
| ENSRNOG00000010254 | Htr1a   | 5-hydroxytryptamine (serotonin) receptor 1A, G protein-coupled [Source:RGD Symbol;Acc:2845]                   |
| ENSRNOG00000014367 | Ephb6   | Eph receptor B6 [Source:RGD Symbol;Acc:1306163]                                                               |
| ENSRNOG00000042499 | Tmsb10  | thymosin, beta 10 [Source:RGD Symbol;Acc:62022]                                                               |
| ENSRNOG00000012674 | Adrb3   | adrenoceptor beta 3 [Source:RGD Symbol;Acc:2061]                                                              |
| ENSRNOG00000000196 | Cyp19a1 | cytochrome P450, family 19, subfamily a, polypeptide 1 [Source:RGD Symbol;Acc:2457]                           |

|                     |         |                                                                                                 |
|---------------------|---------|-------------------------------------------------------------------------------------------------|
| ENSRNOG00000006226  | Cacng2  | calcium channel, voltage-dependent, gamma subunit 2 [Source:RGD Symbol;Acc:71095]               |
| ENSRNOG00000001928  | Il1rap  | interleukin 1 receptor accessory protein [Source:RGD Symbol;Acc:2893]                           |
| ENSRNOG000000012458 | Cyp2e1  | cytochrome P450, family 2, subfamily e, polypeptide 1 [Source:RGD Symbol;Acc:2475]              |
| ENSRNOG00000000466  | Hsd17b8 | hydroxysteroid (17-beta) dehydrogenase 8 [Source:RGD Symbol;Acc:1303158]                        |
| ENSRNOG000000010522 | Tlr4    | toll-like receptor 4 [Source:RGD                                                                |
| ENSRNOG000000007410 | Dab1    | Dab, reelin signal transducer, homolog 1 (Drosophila) [Source:RGD Symbol;Acc:628770]            |
| ENSRNOG000000002327 | Gabrb1  | gamma-aminobutyric acid (GABA) A receptor, beta 1 [Source:RGD Symbol;Acc:2649]                  |
| ENSRNOG000000021102 | Scn1b   | sodium channel, voltage-gated, type I, beta subunit [Source:RGD Symbol;Acc:3631]                |
| ENSRNOG000000008553 | Mthfr   | methylenetetrahydrofolate reductase (NAD(P)H) [Source:RGD Symbol;Acc:1309952]                   |
| ENSRNOG000000023095 | Npepps  | aminopeptidase puromycin sensitive [Source:RGD Symbol;Acc:619962]                               |
| ENSRNOG000000046972 | Chrm2   | cholinergic receptor, muscarinic 2 [Source:RGD Symbol;Acc:620023]                               |
| ENSRNOG000000014530 | Nav2    | neuron navigator 2 [Source:RGD Symbol;Acc:619778]                                               |
| ENSRNOG000000046247 | Akr1b10 | aldo-keto reductase family 1, member B10 (aldose reductase) [Source:RGD                         |
| ENSRNOG000000004890 | Adcy8   | adenylate cyclase 8 (brain) [Source:RGD Symbol;Acc:2036]                                        |
| ENSRNOG000000009848 | Il18    | interleukin 18 [Source:RGD Symbol;Acc:2889]                                                     |
| ENSRNOG000000030483 | Rabggta | Rab geranylgeranyltransferase, alpha subunit [Source:RGD Symbol;Acc:621697]                     |
| ENSRNOG000000002773 | Rgs4    | regulator of G-protein signaling 4 [Source:RGD Symbol;Acc:3567]                                 |
| ENSRNOG000000029610 | Kcnd2   | potassium voltage-gated channel, Shal-related subfamily, member 2 [Source:RGD Symbol;Acc:68393] |
| ENSRNOG000000009166 | Ddx24   | DEAD (Asp-Glu-Ala-Asp) box helicase 24 [Source:RGD Symbol;Acc:727929]                           |
| ENSRNOG000000000854 | Ncr3    | natural cytotoxicity triggering receptor 3 [Source:RGD Symbol;Acc:727881]                       |
| ENSRNOG000000037160 | Bloc1s6 | biogenesis of lysosomal organelles complex-1, subunit 6, pallidin [Source:RGD                   |
| ENSRNOG000000016456 | Il33    | interleukin 33 [Source:RGD                                                                      |
| ENSRNOG000000000515 | Mapk13  | mitogen activated protein kinase 13 [Source:RGD Symbol;Acc:3045]                                |
| ENSRNOG000000032463 | Rap1a   | RAP1A, member of RAS oncogene family [Source:RGD Symbol;Acc:1359694]                            |
| ENSRNOG000000029813 | Hmgb1   | high mobility group box 1 [Source:RGD Symbol;Acc:2802]                                          |

|                    |         |                                                                                                                  |
|--------------------|---------|------------------------------------------------------------------------------------------------------------------|
| ENSRNOG00000005697 | Slc6a11 | solute carrier family 6 (neurotransmitter transporter), member 11 [Source:RGD Symbol;Acc:628737]                 |
| ENSRNOG00000011205 | Ccl3    | chemokine (C-C motif) ligand 3 [Source:RGD Symbol;Acc:3647]                                                      |
| ENSRNOG00000017197 | Pdgfb   | platelet-derived growth factor beta polypeptide [Source:RGD Symbol;Acc:3283]                                     |
| ENSRNOG00000007551 | Inadl   | InaD-like (Drosophila) [Source:RGD Symbol;Acc:1565362]                                                           |
| ENSRNOG00000009085 | Prkag2  | protein kinase, AMP-activated, gamma 2 non-catalytic subunit [Source:RGD                                         |
| ENSRNOG00000013902 | P2ry12  | purinergic receptor P2Y, G-protein coupled, 12 [Source:RGD Symbol;Acc:621681]                                    |
| ENSRNOG00000030157 | Dhx16   | DEAH (Asp-Glu-Ala-His) box polypeptide 16 [Source:RGD Symbol;Acc:1302963]                                        |
| ENSRNOG00000007390 | Nfkbia  | nuclear factor of kappa light polypeptide gene enhancer in B-cells inhibitor, alpha [Source:RGD Symbol;Acc:3171] |
| ENSRNOG00000014018 | St8sia1 | ST8 alpha-N-acetyl-neuraminide alpha-2,8-sialyltransferase 1 [Source:RGD                                         |
| ENSRNOG00000018509 | Cx3cr1  | chemokine (C-X3-C motif) receptor 1 [Source:RGD Symbol;Acc:620137]                                               |
| ENSRNOG00000018058 | Runx3   | runt-related transcription factor 3 [Source:RGD Symbol;Acc:620082]                                               |
| ENSRNOG00000018488 | Cd40    | CD40 molecule, TNF receptor superfamily member 5 [Source:RGD Symbol;Acc:619830]                                  |
| ENSRNOG00000024808 | Stk39   | serine threonine kinase 39 [Source:RGD Symbol;Acc:621643]                                                        |
| ENSRNOG00000016378 | Map3k8  | mitogen-activated protein kinase kinase kinase 8 [Source:RGD Symbol;Acc:620969]                                  |
| ENSRNOG00000019716 | Ntf3    | neurotrophin 3 [Source:RGD                                                                                       |
| ENSRNOG00000008922 | Trim14  | tripartite motif-containing 14 [Source:RGD Symbol;Acc:1311514]                                                   |
| ENSRNOG00000048719 | Dtnbp1  | dystrobrevin binding protein 1 [Source:EntrezGene;Acc:641528]                                                    |
| ENSRNOG00000018524 | Ezr     | ezrin [Source:RGD Symbol;Acc:621161]                                                                             |
| ENSRNOG00000015541 | Gnb3    | guanine nucleotide binding protein (G protein), beta polypeptide 3 [Source:RGD                                   |
| ENSRNOG00000011946 | Ptn     | pleiotrophin [Source:RGD Symbol;Acc:3444]                                                                        |
| ENSRNOG00000000464 | Rxrb    | retinoid X receptor beta [Source:RGD Symbol;Acc:3611]                                                            |
| ENSRNOG00000003745 | Atf3    | activating transcription factor 3 [Source:RGD Symbol;Acc:2165]                                                   |
| ENSRNOG00000002922 | Adora2b | adenosine A2B receptor [Source:RGD Symbol;Acc:2050]                                                              |
| ENSRNOG00000009745 | Ppp3cc  | protein phosphatase 3, catalytic subunit, gamma isoform [Source:MGI                                              |
| ENSRNOG00000001300 | P2rx4   | purinergic receptor P2X, ligand-gated ion channel 4 [Source:RGD Symbol;Acc:62073]                                |
| ENSRNOG00000013572 | Lxn     | latexin [Source:RGD Symbol;Acc:68361]                                                                            |



|                     |         |                                                                                                             |
|---------------------|---------|-------------------------------------------------------------------------------------------------------------|
| ENSRNOG00000028426  | Mcf2l   | MCF.2 cell line derived transforming sequence-like [Source:RGD Symbol;Acc:619782]                           |
| ENSRNOG00000017106  | Csnk1a1 | casein kinase 1, alpha 1 [Source:RGD Symbol;Acc:71098]                                                      |
| ENSRNOG00000018260  | Hrh2    | histamine receptor H 2 [Source:RGD Symbol;Acc:2831]                                                         |
| ENSRNOG00000009299  | Adra2c  | adrenoceptor alpha 2C [Source:RGD Symbol;Acc:2058]                                                          |
| ENSRNOG00000007781  | Stau1   | staufen double-stranded RNA binding protein 1 [Source:RGD Symbol;Acc:621778]                                |
| ENSRNOG00000014361  | Edn1    | endothelin 1 [Source:RGD Symbol;Acc:2532]                                                                   |
| ENSRNOG00000017927  | Drd4    | dopamine receptor D4 [Source:RGD Symbol;Acc:2522]                                                           |
| ENSRNOG00000019217  | Adrb2   | adrenoceptor beta 2, surface [Source:RGD Symbol;Acc:2060]                                                   |
| ENSRNOG00000015393  | Slc32a1 | solute carrier family 32 (GABA vesicular transporter), member 1 [Source:RGD Symbol;Acc:621402]              |
| ENSRNOG00000005257  | Prkaca  | protein kinase, cAMP-dependent, catalytic, alpha [Source:RGD Symbol;Acc:3389]                               |
| ENSRNOG00000001313  | Gnaz    | guanine nucleotide binding protein (G protein), alpha z polypeptide [Source:RGD Symbol;Acc:2717]            |
| ENSRNOG000000048636 | Il2rb   | interleukin 2 receptor, beta [Source:RGD Symbol;Acc:2896]                                                   |
| ENSRNOG00000004488  | Bdkrb1  | bradykinin receptor B1 [Source:RGD Symbol;Acc:620401]                                                       |
| ENSRNOG00000023226  | S100a10 | S100 calcium binding protein A10 [Source:RGD Symbol;Acc:628655]                                             |
| ENSRNOG000000046468 | Ptgfr   | prostaglandin F receptor [Source:RGD Symbol;Acc:3436]                                                       |
| ENSRNOG00000019270  | P2ry6   | pyrimidinergic receptor P2Y, G-protein coupled, 6 [Source:RGD Symbol;Acc:620269]                            |
| ENSRNOG00000001575  | Grik1   | glutamate receptor, ionotropic, kainate 1 [Source:RGD Symbol;Acc:2732]                                      |
| ENSRNOG00000017392  | Fgf2    | fibroblast growth factor 2 [Source:RGD Symbol;Acc:2609]                                                     |
| ENSRNOG00000010325  | Ptger3  | prostaglandin E receptor 3 (subtype EP3) [Source:RGD Symbol;Acc:3435]                                       |
| ENSRNOG00000017625  | Htr2b   | 5-hydroxytryptamine (serotonin) receptor 2B, G protein-coupled [Source:RGD                                  |
| ENSRNOG00000012060  | Gucy1b3 | guanylate cyclase 1, soluble, beta 3 [Source:RGD Symbol;Acc:2769]                                           |
| ENSRNOG000000046889 | Dbi     | diazepam binding inhibitor (GABA receptor modulator, acyl-CoA binding protein) [Source:RGD Symbol;Acc:2490] |
| ENSRNOG000000031331 | Fpr2    | formyl peptide receptor 2 [Source:RGD Symbol;Acc:1584013]                                                   |
| ENSRNOG00000009922  | Prlhr   | prolactin releasing hormone receptor [Source:RGD Symbol;Acc:71037]                                          |

|                    |          |                                                                                                    |
|--------------------|----------|----------------------------------------------------------------------------------------------------|
| ENSRNOG00000009742 | Rad52    | RAD52 homolog ( <i>S. cerevisiae</i> ) [Source:RGD Symbol;Acc:1304975]                             |
| ENSRNOG00000001890 | Txnrd2   | thioredoxin reductase 2 [Source:RGD Symbol;Acc:61960]                                              |
| ENSRNOG00000003773 | Hmox2    | heme oxygenase (decycling) 2 [Source:RGD Symbol;Acc:67402]                                         |
| ENSRNOG00000003338 | Pmp22    | peripheral myelin protein 22 [Source:RGD Symbol;Acc:3359]                                          |
| ENSRNOG00000010176 | Map2k1   | mitogen activated protein kinase kinase 1 [Source:RGD Symbol;Acc:70495]                            |
| ENSRNOG00000037262 | Mecp2    | methyl CpG binding protein 2 [Source:RGD Symbol;Acc:3075]                                          |
| ENSRNOG00000001704 | Runx1    | runt-related transcription factor 1 [Source:RGD Symbol;Acc:2283]                                   |
| ENSRNOG00000018674 | Ntrk3    | neurotrophic tyrosine kinase, receptor, type 3 [Source:RGD Symbol;Acc:3214]                        |
| ENSRNOG00000020865 | Ano1     | anoctamin 1, calcium activated chloride channel [Source:RGD Symbol;Acc:1310786]                    |
| ENSRNOG00000001216 | Trpm2    | transient receptor potential cation channel, subfamily M, member 2 [Source:RGD Symbol;Acc:1311889] |
| ENSRNOG00000000432 | Fkbp1    | FK506 binding protein-like [Source:RGD Symbol;Acc:1303227]                                         |
| ENSRNOG00000002705 | Vps4b    | vacuolar protein sorting 4 homolog B ( <i>S. cerevisiae</i> ) [Source:RGD Symbol;Acc:1305969]      |
| ENSRNOG00000038193 | Mc1r     | melanocortin 1 receptor [Source:RGD Symbol;Acc:1312046]                                            |
| ENSRNOG00000006595 | Htr3a    | 5-hydroxytryptamine (serotonin) receptor 3A, ionotropic [Source:RGD Symbol;Acc:61818]              |
| ENSRNOG00000015049 | Scn5a    | sodium channel, voltage-gated, type V, alpha subunit [Source:RGD Symbol;Acc:3637]                  |
| ENSRNOG00000008031 | Cacna2d4 | calcium channel, voltage-dependent, alpha 2/delta subunit 4 [Source:RGD Symbol;Acc:1589721]        |
| ENSRNOG00000011513 | Gla      | galactosidase, alpha [Source:RGD Symbol;Acc:1589721]                                               |
| ENSRNOG00000005368 | Ppp3r2   | protein phosphatase 3, regulatory subunit B, beta [Source:RGD Symbol;Acc:69232]                    |
| ENSRNOG00000007387 | Per1     | period circadian clock 1 [Source:RGD Symbol;Acc:727863]                                            |
| ENSRNOG00000047647 | Il2ra    | interleukin 2 receptor, alpha [Source:RGD Symbol;Acc:2895]                                         |
| ENSRNOG00000010105 | S100a11  | S100 calcium binding protein A11 [Source:RGD Symbol;Acc:1303295]                                   |
| ENSRNOG00000000457 | Tap1     | transporter 1, ATP-binding cassette, sub-family B (MDR/TAP) [Source:RGD Symbol;Acc:3817]           |
| ENSRNOG00000002391 | Gla4     | glycine receptor, alpha 4 [Source:RGD Symbol;Acc:1564103]                                          |
| ENSRNOG00000017752 | Mccc2    | methylcrotonoyl-CoA carboxylase 2 (beta) [Source:RGD Symbol;Acc:1310279]                           |
| ENSRNOG00000003515 | Ephx1    | epoxide hydrolase 1, microsomal (xenobiotic) [Source:RGD Symbol;Acc:2557]                          |



|                    |          |                                                                                                        |
|--------------------|----------|--------------------------------------------------------------------------------------------------------|
| ENSRNOG00000014504 | Il1r1    | interleukin 1 receptor, type I [Source:RGD Symbol;Acc:2892]                                            |
| ENSRNOG00000019308 | Arrb2    | arrestin, beta 2 [Source:RGD Symbol;Acc:2157]                                                          |
| ENSRNOG00000004327 | Ddc      | dopa decarboxylase (aromatic L-amino acid decarboxylase) [Source:RGD Symbol;Acc:2494]                  |
| ENSRNOG00000028505 | Rps18    | ribosomal protein S18 [Source:RGD Symbol;Acc:3595]                                                     |
| ENSRNOG00000011501 | Atp1b3   | ATPase, Na <sup>+</sup> /K <sup>+</sup> transporting, beta 3 polypeptide [Source:RGD Symbol;Acc:2172]  |
| ENSRNOG00000007607 | Nr4a1    | nuclear receptor subfamily 4, group A, member 1 [Source:RGD Symbol;Acc:620029]                         |
| ENSRNOG00000008080 | Hrh3     | histamine receptor H3 [Source:RGD Symbol;Acc:620630]                                                   |
| ENSRNOG00000000818 | Nrm      | nurim (nuclear envelope membrane protein) [Source:RGD Symbol;Acc:1302966]                              |
| ENSRNOG00000019283 | P2ry2    | purinergic receptor P2Y, G-protein coupled, 2 [Source:RGD Symbol;Acc:62088]                            |
| ENSRNOG00000007624 | Il4      | interleukin 4 [Source:RGD Symbol;Acc:2898]                                                             |
| ENSRNOG00000001295 | S100b    | S100 calcium binding protein B [Source:RGD Symbol;Acc:3615]                                            |
| ENSRNOG00000002948 | Abcc3    | ATP-binding cassette, subfamily C (CFTR/MRP), member 3 [Source:RGD Symbol;Acc:71101]                   |
| ENSRNOG00000000455 | Tap2     | transporter 2, ATP-binding cassette, sub-family B (MDR/TAP) [Source:RGD Symbol;Acc:3818]               |
| ENSRNOG00000021441 | Reln     | reelin [Source:RGD Symbol;Acc:3553]                                                                    |
| ENSRNOG00000018385 | Chrm1    | cholinergic receptor, muscarinic 1 [Source:RGD Symbol;Acc:2342]                                        |
| ENSRNOG00000029128 | Cyp2d5   | cytochrome P450, family 2, subfamily d, polypeptide 5 [Source:RGD Symbol;Acc:628630]                   |
| ENSRNOG00000000840 | Atp6v1g2 | ATPase, H <sup>+</sup> transporting, lysosomal V1 subunit G2 [Source:RGD Symbol;Acc:1303186]           |
| ENSRNOG00000022485 | Chuk     | conserved helix-loop-helix ubiquitous kinase [Source:RGD Symbol;Acc:1306661]                           |
| ENSRNOG00000020410 | Th       | tyrosine hydroxylase [Source:RGD Symbol;Acc:3853]                                                      |
| ENSRNOG00000002848 | Maoa     | monoamine oxidase A [Source:RGD Symbol;Acc:61898]                                                      |
| ENSRNOG00000008831 | Hcn2     | hyperpolarization activated cyclic nucleotide-gated potassium channel 2 [Source:RGD Symbol;Acc:620689] |
| ENSRNOG00000043124 | Cckar    | cholecystokinin A receptor [Source:RGD Symbol;Acc:2289]                                                |
| ENSRNOG00000000007 | Gad1     | glutamate decarboxylase 1 [Source:RGD Symbol;Acc:2652]                                                 |
| ENSRNOG00000020783 | Ntf4     | neurotrophin 4 [Source:RGD Symbol;Acc:3212]                                                            |
| ENSRNOG00000049410 | Chrm3    | cholinergic receptor, muscarinic 3 [Source:RGD Symbol;Acc:2343]                                        |
| ENSRNOG00000010519 | Cyp39a1  | cytochrome P450, family 39, subfamily a, polypeptide 1 [Source:RGD Symbol;Acc:2049]                    |
| ENSRNOG00000001302 | Adora2a  | adenosine A2a receptor [Source:RGD Symbol;Acc:2049]                                                    |

|                    |          |                                                                                                 |
|--------------------|----------|-------------------------------------------------------------------------------------------------|
| ENSRNOG00000020577 | Pip5k1c  | phosphatidylinositol-4-phosphate 5-kinase, type I, gamma [Source:RGD                            |
| ENSRNOG00000008015 | Fos      | FBJ osteosarcoma oncogene [Source:RGD Symbol;Acc:2626]                                          |
| ENSRNOG00000017828 | Egr3     | early growth response 3 [Source:RGD Symbol;Acc:2545]                                            |
| ENSRNOG00000047129 | Tcf19    | transcription factor 19 [Source:RGD Symbol;Acc:1302974]                                         |
| ENSRNOG00000001889 | Comt     | catechol-O-methyltransferase [Source:RGD Symbol;Acc:2379]                                       |
| ENSRNOG00000012703 | Crh      | corticotropin releasing hormone [Source:RGD Symbol;Acc:620505]                                  |
| ENSRNOG00000047545 | Adra2a   | adrenoceptor alpha 2A [Source:RGD Symbol;Acc:2056]                                              |
| ENSRNOG00000021685 | Cdk5r1   | cyclin-dependent kinase 5, regulatory subunit 1 (p35) [Source:RGD Symbol;Acc:629472]            |
| ENSRNOG00000022719 | Abcb1b   | ATP-binding cassette, subfamily B (MDR/TAP), member 1B [Source:RGD Symbol;Acc:3318]             |
| ENSRNOG00000050658 | Tacr2    | tachykinin receptor 2 [Source:RGD Symbol;Acc:3812]                                              |
| ENSRNOG00000013240 | Ptger4   | prostaglandin E receptor 4 (subtype EP4) [Source:RGD Symbol;Acc:628641]                         |
| ENSRNOG00000020045 | Drgx     | dorsal root ganglia homeobox [Source:RGD Symbol;Acc:628616]                                     |
| ENSRNOG00000000437 | Agpat1   | 1-acylglycerol-3-phosphate O-acyltransferase 1 [Source:RGD Symbol;Acc:1303287]                  |
| ENSRNOG00000010362 | Anxa2    | annexin A2 [Source:RGD Symbol;Acc:621170]                                                       |
| ENSRNOG00000004179 | Nts      | neurotensin [Source:RGD Symbol;Acc:621612]                                                      |
| ENSRNOG00000003104 | Trpv2    | transient receptor potential cation channel, subfamily V, member 2 [Source:RGD Symbol;Acc:3965] |
| ENSRNOG00000012417 | Iapp     | islet amyloid polypeptide [Source:RGD Symbol;Acc:2854]                                          |
| ENSRNOG00000020657 | Shc1     | SHC (Src homology 2 domain containing) transforming protein 1 [Source:RGD Symbol;Acc:620446]    |
| ENSRNOG00000008111 | Il5      | interleukin 5 [Source:RGD Symbol;Acc:2900]                                                      |
| ENSRNOG00000046667 | Fosb     | FBJ osteosarcoma oncogene B [Source:RGD Symbol;Acc:1308198]                                     |
| ENSRNOG00000032585 | Hspa8    | heat shock 70kDa protein 8 [Source:RGD Symbol;Acc:621725]                                       |
| ENSRNOG00000000831 | Gtf2h4   | general transcription factor II H, polypeptide 4 [Source:RGD Symbol;Acc:1303309]                |
| ENSRNOG00000005041 | Crip2    | cysteine-rich protein 2 [Source:RGD Symbol;Acc:1302959]                                         |
| ENSRNOG00000031287 | Cacna2d3 | calcium channel, voltage-dependent, alpha2/delta subunit 3 [Source:RGD                          |
| ENSRNOG00000021128 | Kcnj11   | potassium inwardly rectifying channel, subfamily J, member 11 [Source:RGD                       |
| ENSRNOG00000021259 | Prnp     | prion protein [Source:RGD Symbol;Acc:3410]                                                      |

|                    |          |                                                                                                                    |
|--------------------|----------|--------------------------------------------------------------------------------------------------------------------|
| ENSRNOG00000031535 | Ptgdr    | prostaglandin D2 receptor [Source:RGD Symbol;Acc:619707]                                                           |
| ENSRNOG00000021463 | Ppara    | peroxisome proliferator activated receptor alpha [Source:RGD Symbol;Acc:3369]                                      |
| ENSRNOG00000012562 | Grin3b   | glutamate receptor, ionotropic, N-methyl-D-aspartate 3B [Source:RGD Symbol;Acc:621705]                             |
| ENSRNOG00000023258 | Nfkb1    | nuclear factor of kappa light polypeptide gene enhancer in B-cells 1 [Source:RGD Symbol;Acc:70498]                 |
| ENSRNOG00000013506 | Zfand6   | zinc finger, AN1-type domain 6 [Source:RGD Symbol;Acc:1359317]                                                     |
| ENSRNOG00000018789 | Asic1    | acid-sensing (proton-gated) ion channel 1 [Source:RGD Symbol;Acc:71062]                                            |
| ENSRNOG00000031163 | Nfkbiz   | nuclear factor of kappa light polypeptide gene enhancer in B-cells inhibitor, zeta [Source:RGD Symbol;Acc:1310834] |
| ENSRNOG00000011672 | Tph1     | tryptophan hydroxylase 1 [Source:RGD Symbol;Acc:3895]                                                              |
| ENSRNOG00000003687 | Rgs2     | regulator of G-protein signaling 2 [Source:RGD Symbol;Acc:621665]                                                  |
| ENSRNOG00000009522 | Adra1a   | adrenoceptor alpha 1A [Source:RGD Symbol;Acc:2055]                                                                 |
| ENSRNOG00000047931 | Tmsb4x   | thymosin, beta 4, X chromosome [Source:RGD Symbol;Acc:621622]                                                      |
| ENSRNOG00000045949 | Faah     | fatty acid amide hydrolase [Source:RGD Symbol;Acc:61808]                                                           |
| ENSRNOG00000001296 | P2rx7    | purinergic receptor P2X, ligand-gated ion channel, 7 [Source:RGD Symbol;Acc:3241]                                  |
| ENSRNOG00000007581 | Slc17a8  | solute carrier family 17 (vesicular glutamate transporter), member 8 [Source:RGD Symbol;Acc:628870]                |
| ENSRNOG00000001090 | Stard13  | StAR-related lipid transfer (START) domain containing 13 [Source:RGD Symbol;Acc:628870]                            |
| ENSRNOG00000011526 | Pcsk6    | proprotein convertase subtilisin/kexin type 6 [Source:RGD Symbol;Acc:3246]                                         |
| ENSRNOG00000004900 | Crhr1    | corticotropin releasing hormone receptor 1 [Source:RGD Symbol;Acc:61276]                                           |
| ENSRNOG00000011847 | Grk4     | G protein-coupled receptor kinase 4 [Source:RGD Symbol;Acc:61858]                                                  |
| ENSRNOG00000013604 | Gpx4     | glutathione peroxidase 4 [Source:RGD Symbol;Acc:69226]                                                             |
| ENSRNOG00000038205 | Gng5     | guanine nucleotide binding protein (G protein), gamma 5 [Source:RGD Symbol;Acc:620807]                             |
| ENSRNOG00000011891 | Atp6v1b2 | ATPase, H transporting, lysosomal V1 subunit B2 [Source:RGD Symbol;Acc:620284]                                     |
| ENSRNOG00000001500 | Rab4b    | RAB4B, member RAS oncogene family [Source:RGD Symbol;Acc:620931]                                                   |
| ENSRNOG00000047028 | Mmp24    | matrix metalloproteinase 24 [Source:RGD Symbol;Acc:620202]                                                         |
| ENSRNOG00000016216 | Sft2d3   | SFT2 domain containing 3 [Source:RGD Symbol;Acc:1561764]                                                           |

|                    |           |                                                                                                                                 |
|--------------------|-----------|---------------------------------------------------------------------------------------------------------------------------------|
| ENSRNOG00000026036 | Pdyn      | prodynorphin [Source:RGD Symbol;Acc:62054]                                                                                      |
| ENSRNOG00000009790 | Kcnk3     | potassium channel, subfamily K, member 3 [Source:RGD Symbol;Acc:61997]                                                          |
| ENSRNOG00000026293 | Jun       | jun proto-oncogene [Source:RGD Symbol;Acc:2943]                                                                                 |
| ENSRNOG00000002991 | Srr       | serine racemase [Source:RGD                                                                                                     |
| ENSRNOG00000016725 | lkbkap    | inhibitor of kappa light polypeptide gene enhancer in B-cells, kinase complex-associated protein [Source:RGD Symbol;Acc:620072] |
| ENSRNOG00000012772 | Nqo1      | NAD(P)H dehydrogenase, quinone 1 [Source:RGD Symbol;Acc:2503]                                                                   |
| ENSRNOG00000022523 | Fkbp5     | FK506 binding protein 5 [Source:RGD Symbol;Acc:1309155]                                                                         |
| ENSRNOG00000021063 | Grin2d    | glutamate receptor, ionotropic, N-methyl D-aspartate 2D [Source:RGD Symbol;Acc:2740]                                            |
| ENSRNOG00000009540 | Gpr3      | G protein-coupled receptor 3 [Source:RGD Symbol;Acc:628686]                                                                     |
| ENSRNOG00000048706 | Nox1      | NADPH oxidase 1 [Source:RGD Symbol;Acc:620598]                                                                                  |
| ENSRNOG00000024390 | Osm       | oncostatin M [Source:RGD                                                                                                        |
| ENSRNOG00000014615 | Grk6      | G protein-coupled receptor kinase 6 [Source:RGD Symbol;Acc:61986]                                                               |
| ENSRNOG00000049517 | Tnfaip3   | tumor necrosis factor, alpha-induced protein 3 [Source:RGD Symbol;Acc:1589275]                                                  |
| ENSRNOG00000029571 | Coq10a    | coenzyme Q10 homolog A ( <i>S. cerevisiae</i> ) [Source:RGD Symbol;Acc:1562447]                                                 |
| ENSRNOG00000008498 | Gabarapl1 | GABA(A) receptor-associated protein like 1 [Source:RGD Symbol;Acc:1596143]                                                      |
| ENSRNOG00000012098 | Adcyap1r1 | adenylate cyclase activating polypeptide 1 receptor 1 [Source:RGD Symbol;Acc:2038]                                              |
| ENSRNOG00000014508 | Mgll      | monoglyceride lipase [Source:RGD Symbol;Acc:71039]                                                                              |
| ENSRNOG00000011006 | Stoml3    | stomatin (Epb7.2)-like 3 [Source:RGD Symbol;Acc:1311090]                                                                        |
| ENSRNOG00000010531 | Oprd1     | opioid receptor, delta 1 [Source:RGD Symbol;Acc:3233]                                                                           |
| ENSRNOG00000017002 | Adrb1     | adrenoceptor beta 1 [Source:RGD Symbol;Acc:2059]                                                                                |
| ENSRNOG00000011406 | Ccl4      | chemokine (C-C motif) ligand 4 [Source:RGD Symbol;Acc:620441]                                                                   |
| ENSRNOG00000000513 | Mapk14    | mitogen activated protein kinase 14 [Source:RGD Symbol;Acc:70496]                                                               |
| ENSRNOG00000018003 | F2rl1     | coagulation factor II (thrombin) receptor-like 1 [Source:RGD Symbol;Acc:620866]                                                 |
| ENSRNOG00000015232 | Pip5k1b   | phosphatidylinositol-4-phosphate 5-kinase, type I, beta [Source:RGD Symbol;Acc:1310914]                                         |
| ENSRNOG00000002953 | P2ry4     | pyrimidinergic receptor P2Y, G-protein coupled, 4 [Source:RGD Symbol;Acc:61798]                                                 |
| ENSRNOG00000013963 | Il6st     | interleukin 6 signal transducer [Source:RGD Symbol;Acc:2903]                                                                    |
| ENSRNOG00000002164 | Nmu       | neuromedin U [Source:RGD Symbol;Acc:68388]                                                                                      |

|                    |         |                                                                                                       |
|--------------------|---------|-------------------------------------------------------------------------------------------------------|
| ENSRNOG00000028404 | Ppp1r1b | protein phosphatase 1, regulatory (inhibitor) subunit 1B [Source:RGD Symbol;Acc:621859]               |
| ENSRNOG00000037456 | P2rx2   | purinergic receptor P2X, ligand-gated ion channel, 2 [Source:RGD Symbol;Acc:620251]                   |
| ENSRNOG00000003569 | Gabra6  | gamma-aminobutyric acid (GABA) A receptor, alpha 6 [Source:RGD Symbol;Acc:61861]                      |
| ENSRNOG00000011071 | Nt5e    | 5' nucleotidase, ecto [Source:RGD Symbol;Acc:61956]                                                   |
| ENSRNOG00000013076 | Csnk1e  | casein kinase 1, epsilon [Source:RGD Symbol;Acc:62045]                                                |
| ENSRNOG00000017679 | Cckbr   | cholecystokinin B receptor [Source:RGD Symbol;Acc:2290]                                               |
| ENSRNOG00000009450 | Hcn4    | hyperpolarization activated cyclic nucleotide-gated potassium channel 4 [Source:RGD Symbol;Acc:71065] |
| ENSRNOG00000011900 | Fmr1    | fragile X mental retardation 1 [Source:RGD Symbol;Acc:2623]                                           |
| ENSRNOG00000016340 | Plcg1   | phospholipase C, gamma 1 [Source:RGD Symbol;Acc:3347]                                                 |
| ENSRNOG00000018454 | Apoe    | apolipoprotein E [Source:RGD Symbol;Acc:2138]                                                         |
| ENSRNOG00000005289 | Prkd3   | protein kinase D3 [Source:RGD Symbol;Acc:1310236]                                                     |
| ENSRNOG00000014096 | Nr3c1   | nuclear receptor subfamily 3, group C, member 1 [Source:RGD Symbol;Acc:2741]                          |
| ENSRNOG00000021726 | Tlr3    | toll-like receptor 3 [Source:RGD Symbol;Acc:735171]                                                   |
| ENSRNOG00000033119 | Plcb4   | phospholipase C, beta 4 [Source:RGD Symbol;Acc:3345]                                                  |
| ENSRNOG00000037931 | Plaur   | plasminogen activator, urokinase receptor [Source:RGD Symbol;Acc:620597]                              |
| ENSRNOG00000011439 | Grk5    | G protein-coupled receptor kinase 5 [Source:RGD Symbol;Acc:61985]                                     |
| ENSRNOG00000021068 | Pip5k1a | phosphatidylinositol-4-phosphate 5-kinase, type 1, alpha [Source:RGD Symbol;Acc:61985]                |
| ENSRNOG00000007682 | Gria3   | glutamate receptor, ionotropic, AMPA 3 [Source:RGD Symbol;Acc:70958]                                  |
| ENSRNOG00000009514 | Mme     | membrane metallo-endopeptidase [Source:RGD Symbol;Acc:3098]                                           |
| ENSRNOG00000005853 | Tacr1   | tachykinin receptor 1 [Source:RGD Symbol;Acc:3811]                                                    |
| ENSRNOG00000005343 | Esr2    | estrogen receptor 2 (ER beta) [Source:RGD Symbol;Acc:2582]                                            |
| ENSRNOG00000001548 | Nfe2l2  | nuclear factor, erythroid 2-like 2 [Source:RGD Symbol;Acc:620360]                                     |
| ENSRNOG00000009968 | Ercc8   | excision repair cross-complementation group 8 [Source:RGD Symbol;Acc:1311570]                         |
| ENSRNOG00000018854 | Nppc    | natriuretic peptide C [Source:RGD Symbol;Acc:620850]                                                  |
| ENSRNOG00000017582 | Cnga3   | cyclic nucleotide gated channel alpha 3 [Source:RGD Symbol;Acc:70948]                                 |



|                     |         |                                                                                           |
|---------------------|---------|-------------------------------------------------------------------------------------------|
| ENSRNOG00000003661  | Hn1     | hematological and neurological expressed 1 [Source:RGD Symbol;Acc:1359325]                |
| ENSRNOG000000032707 | Egf     | epidermal growth factor [Source:RGD Symbol;Acc:2542]                                      |
| ENSRNOG00000014010  | Gfra2   | GDNF family receptor alpha 2 [Source:RGD Symbol;Acc:61809]                                |
| ENSRNOG000000043451 | Spp1    | secreted phosphoprotein 1 [Source:RGD Symbol;Acc:3752]                                    |
| ENSRNOG000000007894 | Mpdz    | multiple PDZ domain protein [Source:RGD Symbol;Acc:3105]                                  |
| ENSRNOG00000014248  | ErbB4   | v-erb-b2 avian erythroblastic leukemia viral oncogene 4 [Source:RGD Symbol;Acc:620486]    |
| ENSRNOG00000006997  | App     | amyloid beta (A4) precursor protein [Source:RGD Symbol;Acc:2139]                          |
| ENSRNOG000000025083 | Pacsin1 | protein kinase C and casein kinase substrate in neurons 1 [Source:RGD Symbol;Acc:3247]    |
| ENSRNOG000000007420 | Hrh1    | histamine receptor H 1 [Source:RGD Symbol;Acc:2830]                                       |
| ENSRNOG000000046487 | Pou5f1  | POU class 5 homeobox 1 [Source:RGD Symbol;Acc:1359491]                                    |
| ENSRNOG00000010146  | Ndn     | necdin, melanoma antigen (MAGE) family member [Source:RGD Symbol;Acc:1310526]             |
| ENSRNOG00000018892  | Hcrt    | hypocretin [Source:RGD Symbol;Acc:2786]                                                   |
| ENSRNOG00000015156  | Gal     | galanin/GMAP prepropeptide [Source:RGD Symbol;Acc:61954]                                  |
| ENSRNOG00000010331  | Ctsb    | cathepsin B [Source:RGD Symbol;Acc:621509]                                                |
| ENSRNOG000000032930 | Trim26  | tripartite motif-containing 26 [Source:RGD Symbol;Acc:1359126]                            |
| ENSRNOG000000007019 | Asic2   | acid-sensing (proton-gated) ion channel 2 [Source:RGD Symbol;Acc:2017]                    |
| ENSRNOG000000027204 | Map6    | microtubule-associated protein 6 [Source:RGD Symbol;Acc:61804]                            |
| ENSRNOG00000014648  | Efnb2   | ephrin B2 [Source:RGD Symbol;Acc:1309497]                                                 |
| ENSRNOG000000000838 | Lta     | lymphotoxin alpha [Source:RGD Symbol;Acc:2520]                                            |
| ENSRNOG000000008428 | Drd2    | dopamine receptor D2 [Source:RGD Symbol;Acc:2520]                                         |
| ENSRNOG00000001715  | Ece2    | endothelin-converting enzyme 2 [Source:RGD Symbol;Acc:1303039]                            |
| ENSRNOG000000033796 | Kcnj5   | potassium inwardly-rectifying channel, subfamily J, member 5 [Source:RGD Symbol;Acc:3434] |
| ENSRNOG000000004094 | Ptger1  | prostaglandin E receptor 1 (subtype EP1) [Source:RGD Symbol;Acc:620020]                   |
| ENSRNOG000000050968 | Ptger2  | prostaglandin E receptor 2 (subtype EP2) [Source:RGD Symbol;Acc:620992]                   |
| ENSRNOG000000006870 | Mtdh    | metadherin [Source:RGD Symbol;Acc:2523]                                                   |
| ENSRNOG000000005338 | Drd5    | dopamine receptor D5 [Source:RGD Symbol;Acc:620458]                                       |
| ENSRNOG00000016326  | Cx3cl1  | chemokine (C-X3-C motif) ligand 1 [Source:RGD Symbol;Acc:620458]                          |

|                     |         |                                                                                                         |
|---------------------|---------|---------------------------------------------------------------------------------------------------------|
| ENSRNOG00000006589  | Mif     | macrophage migration inhibitory factor (glycosylation-inhibiting factor) [Source:RGD Symbol;Acc:621163] |
| ENSRNOG00000019358  | Esr1    | estrogen receptor 1 [Source:RGD Symbol;Acc:2581]                                                        |
| ENSRNOG00000009884  | Lgals1  | lectin, galactoside-binding, soluble, 1 [Source:RGD Symbol;Acc:69355]                                   |
| ENSRNOG00000019606  | Trpv3   | transient receptor potential cation channel, subfamily V, member 3 [Source:RGD Symbol;Acc:1564531]      |
| ENSRNOG00000018985  | Adrbk1  | adrenergic, beta, receptor kinase 1 [Source:RGD Symbol;Acc:2062]                                        |
| ENSRNOG00000028733  | Prkar1b | protein kinase, cAMP dependent regulatory, type I, beta [Source:RGD Symbol;Acc:3392]                    |
| ENSRNOG00000028858  | Rbmx1b  | RNA binding motif protein, X-linked-like 1B [Source:RGD Symbol;Acc:1585845]                             |
| ENSRNOG00000020351  | Vps4a   | vacuolar protein sorting 4 homolog A (S. cerevisiae) [Source:RGD Symbol;Acc:628810]                     |
| ENSRNOG00000034241  | Set     | SET nuclear proto-oncogene [Source:RGD Symbol;Acc:1307467]                                              |
| ENSRNOG00000013448  | Mrgprd  | MAS-related GPR, member D [Source:RGD Symbol;Acc:738040]                                                |
| ENSRNOG00000026171  | Bbs4    | Bardet-Biedl syndrome 4 [Source:RGD Symbol;Acc:1309134]                                                 |
| ENSRNOG00000000827  | Ier3    | immediate early response 3 [Source:RGD Symbol;Acc:1303321]                                              |
| ENSRNOG00000009265  | Kcnk9   | potassium channel, subfamily K, member 9 [Source:RGD Symbol;Acc:621451]                                 |
| ENSRNOG00000003069  | Cd38    | CD38 molecule [Source:RGD Symbol;Acc:2303]                                                              |
| ENSRNOG00000028708  | Ntsr1   | neurotensin receptor 1 [Source:RGD Symbol;Acc:1306076]                                                  |
| ENSRNOG00000014761  | Rasd2   | RASD family, member 2 [Source:RGD Symbol;Acc:628594]                                                    |
| ENSRNOG00000002343  | Uchl1   | ubiquitin carboxyl-terminal esterase L1 (ubiquitin thiolesterase) [Source:RGD Symbol;Acc:1309340]       |
| ENSRNOG00000006984  | Mapk11  | mitogen-activated protein kinase 11 [Source:RGD Symbol;Acc:1309340]                                     |
| ENSRNOG00000018200  | Gad2    | glutamate decarboxylase 2 [Source:RGD Symbol;Acc:2653]                                                  |
| ENSRNOG00000015430  | Nlgn2   | neuroligin 2 [Source:RGD Symbol;Acc:621118]                                                             |
| ENSRNOG00000002653  | Kcnk2   | potassium channel, subfamily K, member 2 [Source:RGD Symbol;Acc:621448]                                 |
| ENSRNOG00000048186  | F2rl3   | coagulation factor II (thrombin) receptor-like 3 [Source:RGD Symbol;Acc:620872]                         |
| ENSRNOG00000047175  | Cryaa   | crystallin, alpha A [Source:RGD Symbol;Acc:1559468]                                                     |
| ENSRNOG000000032813 | Mdc1    | mediator of DNA damage checkpoint 1 [Source:RGD Symbol;Acc:1559468]                                     |
| ENSRNOG00000000826  | Flot1   | flotillin 1 [Source:RGD Symbol;Acc:70991]                                                               |
| ENSRNOG00000017556  | Chrm4   | cholinergic receptor, muscarinic 4 [Source:RGD Symbol;Acc:2344]                                         |



|                     |         |                                                                                       |
|---------------------|---------|---------------------------------------------------------------------------------------|
| ENSRNOG00000004622  | Calcr1  | calcitonin receptor-like [Source:RGD Symbol;Acc:2255]                                 |
| ENSRNOG00000010633  | Acsl1   | acyl-CoA synthetase long-chain family member 1 [Source:RGD Symbol;Acc:2015]           |
| ENSRNOG00000014290  | Grm1    | glutamate receptor, metabotropic 1 [Source:RGD Symbol;Acc:2742]                       |
| ENSRNOG00000019194  | Pitx3   | paired-like homeodomain 3 [Source:RGD Symbol;Acc:3332]                                |
| ENSRNOG00000002525  | Ptgs2   | prostaglandin-endoperoxide synthase 2 [Source:RGD Symbol;Acc:620349]                  |
| ENSRNOG00000016429  | Grm5    | glutamate receptor, metabotropic 5 [Source:RGD Symbol;Acc:2746]                       |
| ENSRNOG00000000438  | Rnf5    | ring finger protein 5, E3 ubiquitin protein ligase [Source:RGD Symbol;Acc:1588458]    |
| ENSRNOG00000019598  | Vegfa   | vascular endothelial growth factor A [Source:RGD Symbol;Acc:619991]                   |
| ENSRNOG00000012819  | Gdnf    | glial cell derived neurotrophic factor [Source:RGD Symbol;Acc:2677]                   |
| ENSRNOG00000010870  | Foxn1   | forkhead box N1 [Source:RGD                                                           |
| ENSRNOG00000026805  | Csf2    | colony stimulating factor 2 (granulocyte-macrophage) [Source:RGD Symbol;Acc:621065]   |
| ENSRNOG00000007081  | Xdh     | xanthine dehydrogenase [Source:RGD Symbol;Acc:62043]                                  |
| ENSRNOG00000017727  | Prlr    | prolactin receptor [Source:RGD                                                        |
| ENSRNOG00000016066  | Bambi   | BMP and activin membrane-bound inhibitor [Source:RGD Symbol;Acc:621831]               |
| ENSRNOG00000026772  | Drd3    | dopamine receptor D3 [Source:RGD Symbol;Acc:2521]                                     |
| ENSRNOG00000021150  | Plcb3   | phospholipase C, beta 3 (phosphatidylinositol-specific) [Source:RGD Symbol;Acc:61993] |
| ENSRNOG00000010898  | Prok2   | prokineticin 2 [Source:RGD Symbol;Acc:620280]                                         |
| ENSRNOG00000009372  | Tacr3   | tachykinin receptor 3 [Source:RGD Symbol;Acc:3810]                                    |
| ENSRNOG00000011621  | Hnrnpc  | heterogeneous nuclear ribonucleoprotein C [Source:RGD Symbol;Acc:1309982]             |
| ENSRNOG00000023943  | Gbp1    | guanylate binding protein 1, interferon-inducible [Source:RGD Symbol;Acc:1311877]     |
| ENSRNOG00000019409  | Lipk    | lipase, family member K [Source:RGD Symbol;Acc:1309724]                               |
| ENSRNOG00000013291  | Cyp2c23 | cytochrome P450, family 2, subfamily c, polypeptide 23 [Source:RGD                    |
| ENSRNOG00000006397  | Chrm5   | cholinergic receptor, muscarinic 5 [Source:RGD Symbol;Acc:620027]                     |
| ENSRNOG00000014688  | Prkcg   | protein kinase C, gamma [Source:RGD Symbol;Acc:3397]                                  |
| ENSRNOG00000026096  | Taar9   | trace amine-associated receptor 9 [Source:RGD Symbol;Acc:631383]                      |
| ENSRNOG00000019321  | Cck     | cholecystokinin [Source:RGD Symbol;Acc:2288]                                          |
| ENSRNOG000000050841 | Ache    | acetylcholinesterase [Source:MGI Symbol;Acc:MGI:87876]                                |

|                    |          |                                                                                                         |
|--------------------|----------|---------------------------------------------------------------------------------------------------------|
| ENSRNOG00000017521 | Gpr55    | G protein-coupled receptor 55 [Source:RGD Symbol;Acc:1559828]                                           |
| ENSRNOG00000050997 | Ifrd1    | interferon-related developmental regulator 1 [Source:RGD Symbol;Acc:2867]                               |
| ENSRNOG00000018111 | Slc12a5  | solute carrier family 12 (potassium-chloride transporter), member 5 [Source:RGD Symbol;Acc:620811]      |
| ENSRNOG00000033790 | Hnrnpu   | heterogeneous nuclear ribonucleoprotein U [Source:RGD Symbol;Acc:620372]                                |
| ENSRNOG00000020650 | Slc17a7  | solute carrier family 17 (vesicular glutamate transporter), member 7 [Source:RGD Symbol;Acc:620101]     |
| ENSRNOG00000011726 | Grin1    | glutamate receptor, ionotropic, N-methyl D-aspartate 1 [Source:RGD Symbol;Acc:2736]                     |
| ENSRNOG00000036685 | Npb      | neuropeptide B [Source:RGD                                                                              |
| ENSRNOG00000019834 | Hsp90ab1 | heat shock protein 90 alpha (cytosolic), class B member 1 [Source:RGD Symbol;Acc:1303075]               |
| ENSRNOG00000019208 | P2rx5    | purinergic receptor P2X, ligand-gated ion channel, 5 [Source:RGD Symbol;Acc:620256]                     |
| ENSRNOG00000008839 | Pparg    | peroxisome proliferator-activated receptor gamma [Source:RGD Symbol;Acc:3371]                           |
| ENSRNOG00000008276 | Adcy1    | adenylate cyclase 1 (brain) [Source:RGD Symbol;Acc:1309318]                                             |
| ENSRNOG00000008380 | Asic3    | acid-sensing (proton-gated) ion channel 3 [Source:RGD Symbol;Acc:708578]                                |
| ENSRNOG00000014604 | Sigmar1  | sigma non-opioid intracellular receptor 1 [Source:RGD Symbol;Acc:68364]                                 |
| ENSRNOG00000001606 | Adamts5  | ADAM metalloproteinase with thrombospondin type 1 motif, 5 [Source:RGD                                  |
| ENSRNOG00000029165 | Stx1a    | syntaxin 1A (brain) [Source:RGD Symbol;Acc:69430]                                                       |
| ENSRNOG00000011815 | Sgk1     | serum/glucocorticoid regulated kinase 1 [Source:RGD Symbol;Acc:3668]                                    |
| ENSRNOG00000030019 | Atp1a1   | ATPase, Na <sup>+</sup> /K <sup>+</sup> transporting, alpha 1 polypeptide [Source:RGD Symbol;Acc:2167]  |
| ENSRNOG00000000596 | Fyn      | FYN proto-oncogene, Src family tyrosine kinase [Source:RGD Symbol;Acc:2641]                             |
| ENSRNOG00000009385 | Pik3cg   | phosphatidylinositol-4,5-bisphosphate 3-kinase, catalytic subunit gamma [Source:RGD Symbol;Acc:1306468] |
| ENSRNOG00000030877 | Htr2c    | 5-hydroxytryptamine (serotonin) receptor 2C, G protein-coupled [Source:RGD Symbol;Acc:2848]             |
| ENSRNOG00000019601 | Mapk3    | mitogen activated protein kinase 3 [Source:RGD Symbol;Acc:3046]                                         |
| ENSRNOG00000014231 | Pnoc     | prepronociceptin [Source:RGD                                                                            |
| ENSRNOG00000011202 | Chrna4   | cholinergic receptor, nicotinic, alpha 4 (neuronal) [Source:RGD Symbol;Acc:2346]                        |
| ENSRNOG00000029756 | P2ry13   | purinergic receptor P2Y, G-protein coupled, 13 [Source:RGD Symbol;Acc:1302941]                          |
| ENSRNOG00000039265 | Psmg4    | proteasome (prosome, macropain) assembly chaperone 4 [Source:RGD Symbol;Acc:1589955]                    |

|                     |         |                                                                                                                                   |
|---------------------|---------|-----------------------------------------------------------------------------------------------------------------------------------|
| ENSRNOG00000000830  | Ddr1    | discoidin domain receptor tyrosine kinase 1 [Source:RGD Symbol;Acc:2252]                                                          |
| ENSRNOG00000010711  | Dicer1  | dicer 1, ribonuclease type III [Source:RGD Symbol;Acc:1309381]                                                                    |
| ENSRNOG00000004400  | Avpr1a  | arginine vasopressin receptor 1A [Source:RGD Symbol;Acc:2185]                                                                     |
| ENSRNOG00000010882  | Sptlc1  | serine palmitoyltransferase, long chain base subunit 1 [Source:RGD Symbol;Acc:1307140]                                            |
| ENSRNOG00000019525  | Hspa9   | heat shock protein 9 [Source:RGD Symbol;Acc:1311806]                                                                              |
| ENSRNOG00000008017  | Cdk5    | cyclin-dependent kinase 5 [Source:RGD Symbol;Acc:70514]                                                                           |
| ENSRNOG00000017890  | Crhbp   | corticotropin releasing hormone binding protein [Source:RGD Symbol;Acc:2403]                                                      |
| ENSRNOG00000003880  | Tph2    | tryptophan hydroxylase 2 [Source:RGD Symbol;Acc:631332]                                                                           |
| ENSRNOG00000018692  | Mc4r    | melanocortin 4 receptor [Source:RGD Symbol;Acc:3057]                                                                              |
| ENSRNOG00000010278  | Il6     | interleukin 6 [Source:RGD Symbol;Acc:2901]                                                                                        |
| ENSRNOG00000017601  | Srd5a1  | steroid-5-alpha-reductase, alpha polypeptide 1 (3-oxo-5 alpha-steroid delta 4-dehydrogenase alpha 1) [Source:RGD Symbol;Acc:3757] |
| ENSRNOG00000007865  | Ephb1   | Eph receptor B1 [Source:RGD Symbol;Acc:2556]                                                                                      |
| ENSRNOG00000020254  | Per2    | period circadian clock 2 [Source:RGD Symbol;Acc:61945]                                                                            |
| ENSRNOG00000048887  | NOS2    | Uncharacterized protein [Source:UniProtKB/TrEMBL;Acc:M0R8I7]                                                                      |
| ENSRNOG00000020478  | Camk4   | calcium/calmodulin-dependent protein kinase IV [Source:RGD Symbol;Acc:2264]                                                       |
| ENSRNOG000000031189 | Ido1    | indoleamine 2,3-dioxygenase 1 [Source:RGD Symbol;Acc:619989]                                                                      |
| ENSRNOG000000031743 | Gbp2    | guanylate binding protein 2, interferon-inducible [Source:RGD Symbol;Acc:621810]                                                  |
| ENSRNOG00000000622  | Hint1   | histidine triad nucleotide binding protein 1 [Source:RGD Symbol;Acc:1593411]                                                      |
| ENSRNOG00000004005  | Camk2b  | calcium/calmodulin-dependent protein kinase II beta [Source:RGD Symbol;Acc:2262]                                                  |
| ENSRNOG00000020681  | Pth2    | parathyroid hormone 2 [Source:RGD Symbol;Acc:1559447]                                                                             |
| ENSRNOG00000027976  | Il22ra1 | interleukin 22 receptor, alpha 1 [Source:RGD Symbol;Acc:1559655]                                                                  |
| ENSRNOG00000016346  | Prkcd   | protein kinase C, delta [Source:RGD Symbol;Acc:67383]                                                                             |
| ENSRNOG00000015788  | Adora3  | adenosine A3 receptor [Source:RGD Symbol;Acc:2051]                                                                                |
| ENSRNOG00000017348  | Il2     | interleukin 2 [Source:RGD Symbol;Acc:620047]                                                                                      |
| ENSRNOG00000050358  | Galr2   | galanin receptor 2 [Source:RGD Symbol;Acc:1559447]                                                                                |
| ENSRNOG00000021225  | Oxt     | oxytocin/neurophysin 1 prepropeptide [Source:RGD Symbol;Acc:3238]                                                                 |
| ENSRNOG00000020877  | Pyy     | peptide YY (mapped) [Source:RGD Symbol;Acc:1593289]                                                                               |

|                    |         |                                                                                               |
|--------------------|---------|-----------------------------------------------------------------------------------------------|
| ENSRNOG00000007104 | Itpr1   | inositol 1,4,5-trisphosphate receptor, type 1 [Source:RGD Symbol;Acc:2933]                    |
| ENSRNOG00000000521 | Cdkn1a  | cyclin-dependent kinase inhibitor 1A [Source:RGD Symbol;Acc:69328]                            |
| ENSRNOG00000023688 | Drd1    | dopamine receptor D1 [Source:RGD Symbol;Acc:2518]                                             |
| ENSRNOG00000000878 | Slc44a4 | solute carrier family 44, member 4 [Source:RGD Symbol;Acc:1303167]                            |
| ENSRNOG00000033942 | Grin2a  | glutamate receptor, ionotropic, N-methyl D-aspartate 2A [Source:RGD Symbol;Acc:2737]          |
| ENSRNOG00000019374 | Csk     | c-src tyrosine kinase [Source:RGD Symbol;Acc:1308800]                                         |
| ENSRNOG00000012489 | Cacnb3  | calcium channel, voltage-dependent, beta 3 subunit [Source:RGD Symbol;Acc:2248]               |
| ENSRNOG00000017019 | Lmx1b   | LIM homeobox transcription factor 1 beta [Source:RGD Symbol;Acc:620843]                       |
| ENSRNOG00000048522 | Avpr1b  | arginine vasopressin receptor 1B [Source:RGD Symbol;Acc:61886]                                |
| ENSRNOG00000019779 | Disc1   | disrupted in schizophrenia 1 [Source:RGD Symbol;Acc:631359]                                   |
| ENSRNOG00000027060 | Galr3   | galanin receptor 3 [Source:RGD Symbol;Acc:MGI:95747]                                          |
| ENSRNOG00000013588 | Gla1    | glycine receptor, alpha 1 subunit [Source:MGI Symbol;Acc:MGI:95749]                           |
| ENSRNOG00000049792 | Gla3    | glycine receptor, alpha 3 subunit [Source:MGI Symbol;Acc:MGI:95749]                           |
| ENSRNOG00000008766 | Grin2b  | glutamate receptor, ionotropic, N-methyl D-aspartate 2B [Source:RGD Symbol;Acc:2738]          |
| ENSRNOG00000016999 | Grp     | gastrin releasing peptide [Source:RGD Symbol;Acc:621740]                                      |
| ENSRNOG00000024204 | Ifne    | interferon, epsilon [Source:RGD Symbol;Acc:1565065]                                           |
| ENSRNOG00000004647 | Il10    | interleukin 10 [Source:RGD Symbol;Acc:2886]                                                   |
| ENSRNOG00000007652 | Il13    | interleukin 13 [Source:RGD Symbol;Acc:68949]                                                  |
| ENSRNOG00000014118 | Klkb1   | kallikrein B, plasma 1 [Source:RGD Symbol;Acc:67382]                                          |
| ENSRNOG00000005806 | Oxtr    | oxytocin receptor [Source:RGD Symbol;Acc:620964]                                              |
| ENSRNOG00000004165 | Prkd1   | protein kinase D1 [Source:RGD Symbol;Acc:620964]                                              |
| ENSRNOG00000017302 | Slc6a3  | solute carrier family 6 (neurotransmitter transporter), member 3 [Source:RGD Symbol;Acc:3715] |
| ENSRNOG00000021518 | Trim31  | tripartite motif-containing 31 [Source:RGD Symbol;Acc:1308607]                                |
| ENSRNOG00000028907 | Ugt2b7  | UDP glucuronosyltransferase 2 family, polypeptide B7 [Source:RGD Symbol;Acc:1308607]          |

**Suppl. Table 2 Genes enriched in nociceptors**

| <b>All results</b> |                           |               |                             |                      |
|--------------------|---------------------------|---------------|-----------------------------|----------------------|
| <b>gene</b>        | <b>locus</b>              | <b>status</b> | <b>FPKM dissociated DRG</b> | <b>FPKM MACS DRG</b> |
| Cbr2               | chr11:120729484-120732021 | OK            | 2.10579                     | 0                    |
| Chil3              | chr3:106147553-106167564  | OK            | 1.40549                     | 0                    |
| Cyp4f15            | chr17:32685658-32703349   | OK            | 1.79184                     | 0                    |
| Cyt11              | chr5:37735518-37739820    | OK            | 1.02638                     | 0                    |
| Dhrs2              | chr14:55222006-55241440   | OK            | 2.75366                     | 0                    |
| Dpt                | chr1:164796731-164824266  | OK            | 2.45633                     | 0                    |
| Fam180a            | chr6:35312745-35326141    | OK            | 1.43753                     | 0                    |
| Fgf2               | chr3:37348652-37404830    | OK            | 1.53402                     | 0                    |
| Gkn3               | chr6:87383318-87388935    | OK            | 1.55253                     | 0                    |
| Gm266              | chr12:111484608-111485823 | OK            | 1.02517                     | 0                    |
| GpnmB              | chr6:49036517-49058182    | OK            | 1.71284                     | 0                    |
| I730030J21Rik      | chr15:100730504-100732737 | OK            | 3.77109                     | 0                    |
| Inmt               | chr6:55170626-55174990    | OK            | 2.03308                     | 0                    |
| Lypd2              | chr15:74732251-74734313   | OK            | 3.31616                     | 0                    |
| Ms4a6c             | chr19:11469367-11482196   | OK            | 0.913721                    | 0                    |
| Musk               | chr4:58285961-58374303    | OK            | 1.60751                     | 0                    |
| Retnla             | chr16:48842551-48844461   | OK            | 2.15859                     | 0                    |
| Rlbp1              | chr7:79374869-79387027    | OK            | 4.69787                     | 0                    |
| Slc25a18           | chr6:120773767-120793982  | OK            | 1.08341                     | 0                    |
| Tmem119            | chr5:113793728-113800352  | OK            | 1.28718                     | 0                    |
| Tpsb2              | chr17:25366332-25368092   | OK            | 1.13464                     | 0                    |
| Snhg9              | chr17:24719530-24719965   | OK            | 0.980643                    | 0                    |
| Snord22            | chr19:8723486-8726326     | OK            | 30.6743                     | 0                    |
| Snord15b           | chr7:99477896-99483709    | OK            | 4.91646                     | 0                    |
| 0610038B21Rik      | chr8:77250365-77518578    | NOTEST        | 0.0698523                   | 0                    |
| 1100001G20Rik      | chr11:83746939-83752646   | NOTEST        | 1.02833                     | 0                    |
| 1110015O18Rik      | chr3:4798707-4814911      | NOTEST        | 0.0371664                   | 0                    |
| 1300002K09Rik      | chr4:45848946-45887008    | NOTEST        | 0.131576                    | 0                    |
| 1600010M07Rik      | chr7:109998376-110006646  | NOTEST        | 0.130584                    | 0                    |
| 1600019K03Rik      | chr16:35503169-35509419   | NOTEST        | 0.0719973                   | 0                    |
| 1700001J11Rik      | chr9:40050557-40053025    | NOTEST        | 0.0231706                   | 0                    |
| 1700001K23Rik      | chr19:53248735-53255205   | NOTEST        | 0.0568585                   | 0                    |
| 1700003G13Rik      | chr9:45318265-45347580    | NOTEST        | 0.0343639                   | 0                    |
| 1700003M07Rik      | chr4:129960373-129965138  | NOTEST        | 0.0674483                   | 0                    |
| 1700007F19Rik      | chr3:58141706-58163807    | NOTEST        | 0.0857626                   | 0                    |
| 1700007P06Rik      | chr1:187048406-187215446  | NOTEST        | 0.0798946                   | 0                    |
| 1700008I05Rik      | chrX:135654697-135693790  | NOTEST        | 0.0722297                   | 0                    |
| 1700011E24Rik      | chr17:87389570-87427741   | NOTEST        | 0.0552445                   | 0                    |
| 1700013F07Rik      | chr3:108537583-108544697  | NOTEST        | 0.0919839                   | 0                    |
| 1700015F17Rik      | chr5:5437826-5479143      | NOTEST        | 0.364438                    | 0                    |
| 1700017G19Rik      | chr3:40504864-40522912    | NOTEST        | 0.00719854                  | 0                    |
| 1700017N19Rik      | chr10:100592385-100618391 | NOTEST        | 0.0490064                   | 0                    |
| 1700019B03Rik      | chr8:3470861-3487178      | NOTEST        | 0.0244129                   | 0                    |
| 1700020L24Rik      | chr11:83437693-83441232   | NOTEST        | 0.12078                     | 0                    |
| 1700020N18Rik      | chr1:91404878-91406029    | NOTEST        | 0.307079                    | 0                    |
| 1700029F12Rik      | chr13:97021863-97035254   | NOTEST        | 0.0218903                   | 0                    |
| 1700029M20Rik      | chr4:135626654-135630198  | NOTEST        | 0.00731143                  | 0                    |



|               |                           |        |            |   |
|---------------|---------------------------|--------|------------|---|
| 1700040L02Rik | chr10:68430955-68541875   | NOTEST | 0.226297   | 0 |
| 1700042G15Rik | chr4:57359791-57364292    | NOTEST | 0.0105459  | 0 |
| 1700060C20Rik | chr2:158182532-158229224  | NOTEST | 0.0506396  | 0 |
| 1700064M15Rik | chr12:99626052-99627974   | NOTEST | 0.0442266  | 0 |
| 1700067K01Rik | chr8:84001705-84004770    | NOTEST | 0.0366095  | 0 |
| 1700084C01Rik | chr1:169928938-169934653  | NOTEST | 0.365021   | 0 |
| 1700092M07Rik | chr19:8740717-8741225     | NOTEST | 0.0968271  | 0 |
| 1700094J05Rik | chr10:76351253-76442912   | NOTEST | 0.0229058  | 0 |
| 1700101E01Rik | chr2:28955480-29055066    | NOTEST | 0.0249813  | 0 |
| 1700105P06Rik | chr19:7356463-7383557     | NOTEST | 0.144122   | 0 |
| 1700108F19Rik | chr14:76677567-76687108   | NOTEST | 0.0242751  | 0 |
| 1700109G14Rik | chr14:61292982-61305334   | NOTEST | 0.150187   | 0 |
| 1700109H08Rik | chr5:3571715-3637101      | NOTEST | 0.0652587  | 0 |
| 1700113H08Rik | chr10:87058045-87230599   | NOTEST | 0.0772444  | 0 |
| 1700120C14Rik | chr15:99224975-99262041   | NOTEST | 0.106959   | 0 |
| 1700120K04Rik | chr7:127603902-127604445  | NOTEST | 0.0476387  | 0 |
| 1700123O21Rik | chr16:5884792-7412480     | NOTEST | 0.0342582  | 0 |
| 1700124L16Rik | chr6:83761758-83762508    | NOTEST | 0.12354    | 0 |
| 1700125H20Rik | chr11:85171095-85181154   | NOTEST | 0.0502327  | 0 |
| 1810019D21Rik | chr8:106131182-106138722  | NOTEST | 0.0329069  | 0 |
| 1810021B22Rik | chr15:89071197-89075854   | NOTEST | 0.0717244  | 0 |
| 1810064F22Rik | chr9:22055459-22389206    | NOTEST | 0.0163948  | 0 |
| 1810065E05Rik | chr11:58421110-58426023   | NOTEST | 0.177419   | 0 |
| 2010001E11Rik | chr10:39920381-39926923   | NOTEST | 0.00826321 | 0 |
| 2010005H15Rik | chr16:36221561-36257427   | NOTEST | 0.105724   | 0 |
| 2010106C02Rik | chr17:86167784-86657919   | NOTEST | 0.0430369  | 0 |
| 2010109I03Rik | chr15:74878335-74881704   | NOTEST | 0.0108027  | 0 |
| 2010308F09Rik | chrX:13234640-13247733    | NOTEST | 0.0602376  | 0 |
| 2210010C04Rik | chr6:41030267-41035509    | NOTEST | 0.0364497  | 0 |
| 2210407C18Rik | chr11:58608205-58613492   | NOTEST | 0.263034   | 0 |
| 2300002M23Rik | chr17:35567484-35568945   | NOTEST | 0.017406   | 0 |
| 2310002D06Rik | chr12:80507205-80517954   | NOTEST | 0.185726   | 0 |
| 2310002J15Rik | chr2:25238818-25239897    | NOTEST | 0.0673416  | 0 |
| 2310015B20Rik | chr10:70204666-70219711   | NOTEST | 0.439057   | 0 |
| 2310015D24Rik | chr16:13514130-13520419   | NOTEST | 0.0398512  | 0 |
| 2310016D03Rik | chr12:30410558-30467358   | NOTEST | 0.0383315  | 0 |
| 2310042E22Rik | chr16:21152658-21153944   | NOTEST | 0.0148819  | 0 |
| 2310057J18Rik | chr10:28972287-28986306   | NOTEST | 0.159823   | 0 |
| 2410137M14Rik | chr17:36977700-36981237   | NOTEST | 0.0260362  | 0 |
| 2610528A11Rik | chr14:37102139-37110101   | NOTEST | 0.0664013  | 0 |
| 2810404M03Rik | chr8:41827266-42046202    | NOTEST | 0.0185553  | 0 |
| 2810405F15Rik | chr2:116074547-116076096  | NOTEST | 0.0127876  | 0 |
| 2810433D01Rik | chr11:102619506-102624416 | NOTEST | 0.226077   | 0 |
| 2810459M11Rik | chr1:86045862-86055456    | NOTEST | 0.273099   | 0 |
| 2810471M01Rik | chr11:28681563-28693276   | NOTEST | 0.0369514  | 0 |
| 2900057B20Rik | chr18:75820177-76148564   | NOTEST | 0.0211897  | 0 |
| 3110015C05Rik | chr13:111211468-111229431 | NOTEST | 0.0219545  | 0 |
| 3110035E14Rik | chr1:9548045-9631092      | NOTEST | 0.0229789  | 0 |
| 3830403N18Rik | chrX:56136571-56153496    | NOTEST | 0.0197435  | 0 |
| 3830417A13Rik | chrX:64173547-64178778    | NOTEST | 0.0622205  | 0 |
| 4732490B19Rik | chr11:113203314-113209669 | NOTEST | 0.0166935  | 0 |
| 4833403I15Rik | chr18:46850038-46905446   | NOTEST | 0.0646761  | 0 |
| 4833411C07Rik | chr8:10899921-10902334    | NOTEST | 0.0354974  | 0 |

|               |                           |        |            |   |
|---------------|---------------------------|--------|------------|---|
| 4833417C18Rik | chr11:95858816-95861046   | NOTEST | 0.0615944  | 0 |
| 4921507L20Rik | chr2:93980033-94010730    | NOTEST | 0.0247373  | 0 |
| 4921530L21Rik | chr14:95881265-95882775   | NOTEST | 0.018071   | 0 |
| 4930401O10Rik | chr11:71928470-71940122   | NOTEST | 0.0276579  | 0 |
| 4930405J17Rik | chr10:20148919-20281590   | NOTEST | 0.0405162  | 0 |
| 4930415O20Rik | chr15:98571003-98589588   | NOTEST | 0.0946623  | 0 |
| 4930426D05Rik | chr18:21550376-21656107   | NOTEST | 0.0121375  | 0 |
| 4930431P03Rik | chr14:44954899-44961307   | NOTEST | 0.016018   | 0 |
| 4930432J09Rik | chr14:103977627-104027142 | NOTEST | 0.0537822  | 0 |
| 4930433N12Rik | chr9:3190268-3199813      | NOTEST | 0.0136673  | 0 |
| 4930444M15Rik | chr14:76514557-76520855   | NOTEST | 0.0125025  | 0 |
| 4930452G13Rik | chr14:79702919-79712930   | NOTEST | 0.0207389  | 0 |
| 4930465K10Rik | chr18:77714183-77715445   | NOTEST | 0.0516901  | 0 |
| 4930465M20Rik | chr12:107723742-107735488 | NOTEST | 0.0146696  | 0 |
| 4930467D21Rik | chr5:97392416-97588126    | NOTEST | 0.00688988 | 0 |
| 4930471C04Rik | chr14:64099294-64104235   | NOTEST | 0.0568139  | 0 |
| 4930479D17Rik | chr6:146657217-146665403  | NOTEST | 0.104003   | 0 |
| 4930483J18Rik | chr15:81190852-81192757   | NOTEST | 0.0408263  | 0 |
| 4930483O08Rik | chr7:133128250-133142457  | NOTEST | 0.0208302  | 0 |
| 4930502A04Rik | chr9:68470901-68520200    | NOTEST | 0.0243855  | 0 |
| 4930509E16Rik | chr9:72518249-72531858    | NOTEST | 0.0554732  | 0 |
| 4930524B15Rik | chr11:31965632-31979651   | NOTEST | 0.00916934 | 0 |
| 4930525D18Rik | chr9:114341110-114364627  | NOTEST | 0.024811   | 0 |
| 4930542C21Rik | chr16:38017322-38054526   | NOTEST | 0.0487699  | 0 |
| 4930544M13Rik | chr13:114607227-114697822 | NOTEST | 0.028373   | 0 |
| 4930545L23Rik | chr2:134786163-135475258  | NOTEST | 0.00837278 | 0 |
| 4930546K05Rik | chr9:42182237-42209231    | NOTEST | 0.00576351 | 0 |
| 4930555B11Rik | chr2:57181830-57188257    | NOTEST | 0.0129417  | 0 |
| 4930556N09Rik | chr10:97035767-97061059   | NOTEST | 0.0223982  | 0 |
| 4930563E18Rik | chr18:10706859-10711832   | NOTEST | 0.0270451  | 0 |
| 4930579G18Rik | chr14:54642160-54690742   | NOTEST | 0.0144698  | 0 |
| 4930583K01Rik | chr7:118243906-118245551  | NOTEST | 0.104589   | 0 |
| 4930595M18Rik | chrX:81419574-81458122    | NOTEST | 0.00659061 | 0 |
| 4931406B18Rik | chr7:43492043-43505938    | NOTEST | 0.0364922  | 0 |
| 4931423N10Rik | chr2:23207475-23267129    | NOTEST | 0.009825   | 0 |
| 4931429P17Rik | chr13:47960329-48018608   | NOTEST | 0.0977569  | 0 |
| 4931440F15Rik | chr11:29692897-30026033   | NOTEST | 0.00608425 | 0 |
| 4931440J10Rik | chr14:62663666-62830126   | NOTEST | 0.0250497  | 0 |
| 4932414N04Rik | chr2:68657883-68748465    | NOTEST | 0.00528892 | 0 |
| 4932441J04Rik | chr5:57570083-57717919    | NOTEST | 0.331554   | 0 |
| 4933400C23Rik | chr9:92718715-92795711    | NOTEST | 0.03349    | 0 |
| 4933401H06Rik | chr3:135825278-135888572  | NOTEST | 0.043969   | 0 |
| 4933402C06Rik | chr7:40674736-40691260    | NOTEST | 0.0228196  | 0 |
| 4933405L10Rik | chr8:105708302-105710168  | NOTEST | 0.0210156  | 0 |
| 4933406F09Rik | chr14:7412472-7422685     | NOTEST | 0.0157959  | 0 |
| 4933406G16Rik | chr11:19065274-19075740   | NOTEST | 0.0141918  | 0 |
| 4933407L21Rik | chr1:85928482-85931756    | NOTEST | 0.197995   | 0 |
| 4933408N05Rik | chr8:114205639-114374070  | NOTEST | 0.0521482  | 0 |
| 4933411E08Rik | chr10:117925458-117948307 | NOTEST | 0.0371639  | 0 |
| 4933411G11Rik | chr5:143181016-143205068  | NOTEST | 0.00930555 | 0 |
| 4933411K16Rik | chr19:42045850-42070939   | NOTEST | 0.0278198  | 0 |
| 4933412O06Rik | chr13:15781663-15802630   | NOTEST | 0.0187204  | 0 |
| 4933413J09Rik | chr14:26357546-26400456   | NOTEST | 0.0181182  | 0 |



|               |                           |        |            |   |
|---------------|---------------------------|--------|------------|---|
| 4933416C03Rik | chr10:116018362-116274929 | NOTEST | 0.00887428 | 0 |
| 4933416M06Rik | chr13:101254318-101293396 | NOTEST | 0.0505879  | 0 |
| 4933422A05Rik | chr9:35281104-35285423    | NOTEST | 0.0157761  | 0 |
| 4933422H20Rik | chr11:115440544-115448268 | NOTEST | 0.118631   | 0 |
| 4933427D06Rik | chr6:89096114-89110037    | NOTEST | 0.0146381  | 0 |
| 4933430M04Rik | chr11:24481908-24569951   | NOTEST | 0.101688   | 0 |
| 4933432K03Rik | chr7:121587385-121589836  | NOTEST | 0.140523   | 0 |
| 4933433G15Rik | chr9:75410183-75415537    | NOTEST | 0.0169714  | 0 |
| 4933439K11Rik | chr1:172521129-172550806  | NOTEST | 0.0466968  | 0 |
| 5031425F14Rik | chr2:166447450-166458770  | NOTEST | 0.0600514  | 0 |
| 5330413P13Rik | chr2:131820005-131847656  | NOTEST | 0.00560845 | 0 |
| 5430402O13Rik | chr6:50566642-50596590    | NOTEST | 0.135627   | 0 |
| 5430419D17Rik | chr7:131174401-131250945  | NOTEST | 0.0125819  | 0 |
| 5430421N21Rik | chr15:101431013-101491512 | NOTEST | 0.0103634  | 0 |
| 5530401A14Rik | chr11:80880162-81968396   | NOTEST | 0.0117907  | 0 |
| 5730435O14Rik | chr10:41538848-41587753   | NOTEST | 0.0390855  | 0 |
| 5730559C18Rik | chr1:136213521-136234280  | NOTEST | 0.0312713  | 0 |
| 5830416I19Rik | chr5:64044972-64050226    | NOTEST | 0.0158593  | 0 |
| 5830418P13Rik | chr9:103423577-103480328  | NOTEST | 0.00975221 | 0 |
| 6030407O03Rik | chr1:73618380-73864466    | NOTEST | 0.054449   | 0 |
| 6030466F02Rik | chr8:123733957-123739941  | NOTEST | 0.013984   | 0 |
| 6430531B16Rik | chr7:139972302-139978755  | NOTEST | 0.107584   | 0 |
| 6530411M01Rik | chr17:9147718-9168022     | NOTEST | 0.317147   | 0 |
| 7630403G23Rik | chr9:34042370-34059019    | NOTEST | 0.0220294  | 0 |
| 9030619P08Rik | chr15:75427605-75431829   | NOTEST | 0.0246851  | 0 |
| 9130227L01Rik | chr1:55931240-55972098    | NOTEST | 0.00945517 | 0 |
| 9130409I23Rik | chr1:181051236-181060667  | NOTEST | 0.0429884  | 0 |
| 9330158H04Rik | chr6:36333137-36524774    | NOTEST | 0.0494641  | 0 |
| 9330175E14Rik | chr8:94433126-94435103    | NOTEST | 0.02496    | 0 |
| 9330179D12Rik | chr6:127125708-127212419  | NOTEST | 0.121608   | 0 |
| 9430018G01Rik | chr6:43345006-43666175    | NOTEST | 0.018685   | 0 |
| 9530027J09Rik | chrX:48256933-48285426    | NOTEST | 0.0116206  | 0 |
| 9630013A20Rik | chr14:84443562-84537060   | NOTEST | 0.0735575  | 0 |
| 9630028B13Rik | chr1:185429356-185441819  | NOTEST | 0.00536959 | 0 |
| A1cf          | chr19:31868760-31949406   | NOTEST | 0.0150662  | 0 |
| A230020J21Rik | chr1:191005831-191029781  | NOTEST | 0.0111389  | 0 |
| A330048O09Rik | chr13:48272417-48273884   | NOTEST | 0.151321   | 0 |
| A330070K13Rik | chr5:130369457-130840645  | NOTEST | 0.0798984  | 0 |
| A330076C08Rik | chr13:44193588-44216487   | NOTEST | 0.0204146  | 0 |
| A430078G23Rik | chr8:3353414-3390299      | NOTEST | 0.024491   | 0 |
| A530016L24Rik | chr12:112489447-112499927 | NOTEST | 0.00661502 | 0 |
| A530064D06Rik | chr17:48151895-48167257   | NOTEST | 0.0433066  | 0 |
| A530099J19Rik | chr13:19727416-19732951   | NOTEST | 0.0354392  | 0 |
| A630020A06    | chr15:3996038-4015858     | NOTEST | 0.0106507  | 0 |
| A630077J23Rik | chr4:43751858-43759464    | NOTEST | 0.0213992  | 0 |
| A730020M07Rik | chr3:121634935-121646453  | NOTEST | 0.123691   | 0 |
| A730090N16Rik | chr3:65109367-65378225    | NOTEST | 0.0318365  | 0 |
| A830009L08Rik | chr13:91368989-91388085   | NOTEST | 0.0197724  | 0 |
| A930001A20Rik | chr3:14971200-15002727    | NOTEST | 0.0444078  | 0 |
| A930001C03Rik | chr19:4425456-4477143     | NOTEST | 0.0226637  | 0 |
| A930003A15Rik | chr16:19876567-19884274   | NOTEST | 0.0630948  | 0 |
| A930006I01Rik | chr2:103338600-103372764  | NOTEST | 0.00897951 | 0 |
| A930009A15Rik | chr10:115450313-115587780 | NOTEST | 0.625976   | 0 |

|          |                           |        |            |   |
|----------|---------------------------|--------|------------|---|
| AI607873 | chr1:173723427-173741809  | NOTEST | 0.270564   | 0 |
| AU019990 | chr2:132598195-132653064  | NOTEST | 0.00866522 | 0 |
| AU022793 | chr15:39962648-39967515   | NOTEST | 0.010335   | 0 |
| AU040972 | chr11:79339891-79581609   | NOTEST | 0.0232048  | 0 |
| AW495222 | chr13:93674435-93752823   | NOTEST | 0.165272   | 0 |
| AW822252 | chrX:53696921-53716578    | NOTEST | 0.0207153  | 0 |
| Aass     | chr6:23072172-23132986    | NOTEST | 0.363167   | 0 |
| Abcb11   | chr2:69238281-69342616    | NOTEST | 0.00366491 | 0 |
| Abcc2    | chr19:43782307-43838218   | NOTEST | 0.013223   | 0 |
| Abcg5    | chr17:84658233-84700333   | NOTEST | 0.00934817 | 0 |
| Acan     | chr7:79053482-79115099    | NOTEST | 0.27768    | 0 |
| Acot3    | chr12:84052150-84059564   | NOTEST | 0.0502852  | 0 |
| Acot5    | chr12:84069324-84076019   | NOTEST | 0.0146784  | 0 |
| Actbl2   | chr13:111255012-111257749 | NOTEST | 0.00635107 | 0 |
| Actc1    | chr2:114047288-114052811  | NOTEST | 0.0434025  | 0 |
| Actg2    | chr6:83512908-83536251    | NOTEST | 0.6673     | 0 |
| Actl7b   | chr4:56740004-56741425    | NOTEST | 0.0141335  | 0 |
| Adam18   | chr8:24602245-24674755    | NOTEST | 0.00892198 | 0 |
| Adam28   | chr14:68604997-68655842   | NOTEST | 0.00509327 | 0 |
| Adam7    | chr14:68497336-68533689   | NOTEST | 0.0117783  | 0 |
| Adamdec1 | chr14:68563386-68582072   | NOTEST | 0.0315242  | 0 |
| Adig     | chr2:158502611-158508198  | NOTEST | 0.0377116  | 0 |
| Adora3   | chr3:105870857-105924044  | NOTEST | 0.0101217  | 0 |
| Adrb3    | chr8:27225775-27229588    | NOTEST | 0.0148465  | 0 |
| Agbl2    | chr2:90782743-90816231    | NOTEST | 0.239347   | 0 |
| Agmat    | chr4:141746674-141759263  | NOTEST | 0.0143338  | 0 |
| Agr2     | chr12:35992924-36004081   | NOTEST | 0.0290052  | 0 |
| Ahsg     | chr16:22857844-22899451   | NOTEST | 0.0536265  | 0 |
| Aicda    | chr6:122553808-122564180  | NOTEST | 0.00829204 | 0 |
| Akr1b7   | chr6:34412361-34423137    | NOTEST | 0.0513321  | 0 |
| Aldh8a1  | chr10:21377299-21396578   | NOTEST | 0.016809   | 0 |
| Alx1     | chr10:103007846-103028777 | NOTEST | 0.00751208 | 0 |
| Alx3     | chr3:107595030-107605875  | NOTEST | 0.0375681  | 0 |
| Alx4     | chr2:93642433-93681339    | NOTEST | 0.0321387  | 0 |
| Amdhd1   | chr10:93523337-93540033   | NOTEST | 0.00775613 | 0 |
| Ampd1    | chr3:103074013-103099720  | NOTEST | 0.0170444  | 0 |
| Ankrd1   | chr19:36111964-36119844   | NOTEST | 0.0232925  | 0 |
| Ankrd22  | chr19:34100942-34166041   | NOTEST | 0.0103834  | 0 |
| Ankrd63  | chr2:118699102-118703963  | NOTEST | 0.0110511  | 0 |
| Ankrd7   | chr6:18866317-18879584    | NOTEST | 0.058915   | 0 |
| Ankub1   | chr3:57667421-57692537    | NOTEST | 0.210056   | 0 |
| Ano9     | chr7:141101218-141117806  | NOTEST | 0.00572869 | 0 |
| Anxa10   | chr8:62057041-62123193    | NOTEST | 0.0105119  | 0 |
| Aox2     | chr1:58278325-58379264    | NOTEST | 0.00752063 | 0 |
| Apela    | chr8:65028416-65037336    | NOTEST | 0.0208985  | 0 |
| Apoa1    | chr9:46228629-46230469    | NOTEST | 0.0219473  | 0 |
| Apoc2    | chr7:19671578-19677941    | NOTEST | 0.0616829  | 0 |
| Apof     | chr10:128267996-128270151 | NOTEST | 0.0192871  | 0 |
| Apol6    | chr15:77015486-77057108   | NOTEST | 0.054348   | 0 |
| Apol7b   | chr15:77422208-77447460   | NOTEST | 0.00850021 | 0 |
| Apol7d   | chr1:71653334-71662843    | NOTEST | 0.0173944  | 0 |
| Aqp12    | chr1:93006333-93012269    | NOTEST | 0.0194956  | 0 |
| Aqp2     | chr15:99579055-99584545   | NOTEST | 0.03985    | 0 |

|               |                           |        |            |   |
|---------------|---------------------------|--------|------------|---|
| Aqp5          | chr15:99591027-99594829   | NOTEST | 0.0127686  | 0 |
| Aqp7          | chr4:41033073-41048136    | NOTEST | 0.0304778  | 0 |
| Aqp8          | chr7:123462293-123468003  | NOTEST | 0.0134322  | 0 |
| Arhgap15os    | chr2:43748823-44387623    | NOTEST | 0.0598514  | 0 |
| Arhgap40      | chr2:158512795-158550628  | NOTEST | 0.0293479  | 0 |
| Arhgap8       | chr15:84714628-84772207   | NOTEST | 0.0537307  | 0 |
| Arl14epl      | chr18:46921814-46934222   | NOTEST | 0.00890044 | 0 |
| Arl9          | chr5:77004054-77061522    | NOTEST | 0.0811829  | 0 |
| Armc4         | chr18:7088232-7297901     | NOTEST | 0.00525308 | 0 |
| Arr3          | chrX:100605496-100618493  | NOTEST | 0.0148927  | 0 |
| Arsi          | chr18:60912239-60917768   | NOTEST | 0.178116   | 0 |
| Art1          | chr7:102101742-102111148  | NOTEST | 0.120915   | 0 |
| Art2b         | chr7:101578859-101581161  | NOTEST | 0.0484039  | 0 |
| Asb10         | chr5:24532696-24540448    | NOTEST | 0.0420317  | 0 |
| Asb11         | chrX:164438100-164459100  | NOTEST | 0.0862043  | 0 |
| Asb16         | chr11:102268822-102278061 | NOTEST | 0.0786297  | 0 |
| Asgr2         | chr11:70092643-70106186   | NOTEST | 0.0625033  | 0 |
| Aspdh         | chr7:44465434-44467751    | NOTEST | 0.0944149  | 0 |
| Atp12a        | chr14:56365067-56388551   | NOTEST | 0.0134392  | 0 |
| Atp1a4        | chr1:172223507-172258424  | NOTEST | 0.0577967  | 0 |
| Atp4b         | chr8:13386208-13396778    | NOTEST | 0.0315291  | 0 |
| Atp6v0d2      | chr4:19876837-19922566    | NOTEST | 0.0307565  | 0 |
| Avpr1b        | chr1:131599113-131612000  | NOTEST | 0.00948384 | 0 |
| Azgp1         | chr5:137981520-137990232  | NOTEST | 0.184686   | 0 |
| B230119M05Rik | chrX:134684561-134686462  | NOTEST | 0.0249854  | 0 |
| B230214G05Rik | chr15:88314873-88372651   | NOTEST | 0.0137222  | 0 |
| B430010I23Rik | chr8:40990911-41133726    | NOTEST | 0.00750083 | 0 |
| B430306N03Rik | chr17:48316161-48326511   | NOTEST | 0.0440516  | 0 |
| BB123696      | chr13:52729369-52757205   | NOTEST | 0.0576029  | 0 |
| BB557941      | chr2:57127476-57181754    | NOTEST | 0.160721   | 0 |
| BC021785      | chr10:39946911-39986646   | NOTEST | 0.0173282  | 0 |
| BC024139      | chr15:76101487-76126556   | NOTEST | 0.00706151 | 0 |
| BC027072      | chr17:71743554-71752885   | NOTEST | 0.00334902 | 0 |
| BC030870      | chr8:65085614-65129537    | NOTEST | 0.0999094  | 0 |
| BC039771      | chr2:145701194-145753672  | NOTEST | 0.0649972  | 0 |
| BC089597      | chr10:127866475-127877319 | NOTEST | 0.0162131  | 0 |
| Bach2os       | chr4:32417434-32586108    | NOTEST | 0.0228511  | 0 |
| Barhl1        | chr2:28907679-28916440    | NOTEST | 0.0110775  | 0 |
| Barx1         | chr13:48663035-48666507   | NOTEST | 0.0472579  | 0 |
| Bbox1         | chr2:110265082-110305725  | NOTEST | 0.0255313  | 0 |
| Bcl2a1b       | chr9:89199272-89207838    | NOTEST | 0.470327   | 0 |
| Bcl2l10       | chr9:75347757-75351640    | NOTEST | 0.0188656  | 0 |
| Bdkrb1        | chr12:105604090-105605428 | NOTEST | 0.0151686  | 0 |
| Best3         | chr10:116986313-117025040 | NOTEST | 0.187842   | 0 |
| Bglap2        | chr3:88377735-88378699    | NOTEST | 0.124878   | 0 |
| Bhlha15       | chr5:144190285-144194441  | NOTEST | 0.0150039  | 0 |
| Bpifa2        | chr2:154008275-154016073  | NOTEST | 0.0479862  | 0 |
| Bpifa5        | chr2:154162606-154168446  | NOTEST | 0.1632     | 0 |
| Bpifb4        | chr2:153940861-153963852  | NOTEST | 0.0437738  | 0 |
| Bpifc         | chr10:85959690-86011860   | NOTEST | 0.0161363  | 0 |
| Bricd5        | chr17:24473549-24479078   | NOTEST | 0.0203222  | 0 |
| Btbd16        | chr7:130774068-130825899  | NOTEST | 0.143201   | 0 |
| Btbd18        | chr2:84659078-84668781    | NOTEST | 0.0115932  | 0 |

|               |                            |        |            |   |
|---------------|----------------------------|--------|------------|---|
| Btn2a2        | chr13:23477062-23488857    | NOTEST | 0.154435   | 0 |
| C130021I20Rik | chr2:33641192-33645663     | NOTEST | 0.516077   | 0 |
| C130026L21Rik | chr5:111581560-111587153   | NOTEST | 0.0105248  | 0 |
| C130080G10Rik | chr2:114054395-114061502   | NOTEST | 0.0434078  | 0 |
| C1ql1         | chr11:102939263-102946461  | NOTEST | 0.128783   | 0 |
| C230035I16Rik | chr13:23427975-23431017    | NOTEST | 0.161559   | 0 |
| C330021F23Rik | chr8:3567997-3584776       | NOTEST | 0.0620698  | 0 |
| C3ar1         | chr6:122847139-122856157   | NOTEST | 0.389779   | 0 |
| C730002L08Rik | chr19:20492714-20556410    | NOTEST | 0.0260592  | 0 |
| C8a           | chr4:104815679-104876398   | NOTEST | 0.00483123 | 0 |
| C9            | chr15:6445332-6498476      | NOTEST | 0.010297   | 0 |
| C920009B18Rik | chr10:22158608-22374139    | NOTEST | 0.00771863 | 0 |
| Cacng1        | chr11:107703217-107716476  | NOTEST | 0.018189   | 0 |
| Capn12        | chr7:28881655-28962280     | NOTEST | 0.0534655  | 0 |
| Capn13        | chr17:73306463-73399296    | NOTEST | 0.00798247 | 0 |
| Capns2        | chr8:92855349-92919279     | NOTEST | 0.0422637  | 0 |
| Capsl         | chr15:9436027-9466035      | NOTEST | 0.176577   | 0 |
| Car5a         | chr8:121907832-121944912   | NOTEST | 0.0329251  | 0 |
| Casq2         | chr3:102086454-102146512   | NOTEST | 0.641449   | 0 |
| Catsper4      | chr4:134211967-134227383   | NOTEST | 0.0139382  | 0 |
| Cav3          | chr6:112459504-112472872   | NOTEST | 0.0743643  | 0 |
| Ccdc108       | chr1:74902079-74935599     | NOTEST | 0.0228797  | 0 |
| Ccdc129       | chr6:55837017-55978598     | NOTEST | 0.022629   | 0 |
| Ccdc146       | chr5:21292960-21424677     | NOTEST | 0.0171444  | 0 |
| Ccdc153       | chr9:44240676-44247306     | NOTEST | 0.020598   | 0 |
| Ccdc185       | chr1:182747125-182749180   | NOTEST | 0.0104029  | 0 |
| Ccdc19        | chr1:172521129-172550806   | NOTEST | 0.044327   | 0 |
| Ccdc33        | chr9:58028681-58118823     | NOTEST | 0.0218911  | 0 |
| Ccdc36        | chr9:108403632-108428482   | NOTEST | 0.0334341  | 0 |
| Ccdc38        | chr10:93540631-93605245    | NOTEST | 0.0111387  | 0 |
| Ccdc42        | chr11:68587036-68597951    | NOTEST | 0.0570088  | 0 |
| Ccdc63        | chr5:122108051-122138062   | NOTEST | 0.132496   | 0 |
| Ccdc7         | chr8:128980018-129065492   | NOTEST | 0.0146105  | 0 |
| Ccer1         | chr10:97644067-97967090    | NOTEST | 0.00967132 | 0 |
| Cck           | chr9:121489823-121495694   | NOTEST | 0.284405   | 0 |
| Ccl12         | chr11:82101844-82103399    | NOTEST | 0.652058   | 0 |
| Ccl19         | chr4_JH584294_random:10233 | NOTEST | 0.0646249  | 0 |
| Ccl21a,Gm1987 | chr4_JH584294_random:12065 | LOWDAT | 0.104784   | 0 |
| Ccl21c        | chr4_GL456350_random:21132 | NOTEST | 0.0586854  | 0 |
| Ccl8          | chr11:82115184-82116799    | NOTEST | 0.343666   | 0 |
| Ccna1         | chr3:55045468-55055055     | NOTEST | 0.0133462  | 0 |
| Ccr4          | chr9:114490315-114496544   | NOTEST | 0.00665678 | 0 |
| Ccr8          | chr9:120092132-120094906   | NOTEST | 0.0744428  | 0 |
| Cd163l1       | chr7:140218266-140231145   | NOTEST | 0.00529027 | 0 |
| Cd1d2         | chr3:86986585-86989532     | NOTEST | 0.0173923  | 0 |
| Cd200r1       | chr16:44765735-44794977    | NOTEST | 0.0617471  | 0 |
| Cd200r2       | chr16:44867096-44915840    | NOTEST | 0.0104103  | 0 |
| Cd200r3       | chr16:44943677-44981380    | NOTEST | 0.0329409  | 0 |
| Cd209a        | chr8:3743394-3748984       | NOTEST | 0.410691   | 0 |
| Cd209b        | chr8:3917654-3926841       | NOTEST | 0.0412324  | 0 |
| Cd209e        | chr8:3847972-3854286       | NOTEST | 0.0102707  | 0 |
| Cd209g        | chr8:4134735-4137707       | NOTEST | 0.0390573  | 0 |
| Cd300e        | chr11:115051916-115062038  | NOTEST | 0.0312969  | 0 |

|             |                           |        |            |   |
|-------------|---------------------------|--------|------------|---|
| Cd300ld     | chr11:114982445-114989886 | NOTEST | 0.208377   | 0 |
| Cd5l        | chr3:87357880-87371074    | NOTEST | 0.0309302  | 0 |
| Cdh17       | chr4:11758156-11817905    | NOTEST | 0.00527728 | 0 |
| Cdr1        | chrX:61183245-61185558    | NOTEST | 0.0253976  | 0 |
| Ceacam16    | chr7:19852002-19861299    | NOTEST | 0.02472    | 0 |
| Ceacam20    | chr7:19965411-19991111    | NOTEST | 0.018757   | 0 |
| Ceacam3     | chr7:17150399-17163231    | NOTEST | 0.0100433  | 0 |
| Ces1d       | chr8:93166071-93197804    | NOTEST | 0.0383444  | 0 |
| Ces2c       | chr8:104847067-104854482  | NOTEST | 0.0103012  | 0 |
| Cftr        | chr6:18170686-18322769    | NOTEST | 0.00843671 | 0 |
| Chmp4c      | chr3:10366972-10391005    | NOTEST | 0.0885294  | 0 |
| Chn1os3     | chr2:73596525-73775346    | NOTEST | 0.0201216  | 0 |
| Chrdl2      | chr7:100006403-100034726  | NOTEST | 0.0792247  | 0 |
| Chrm5       | chr2:112479071-112480817  | NOTEST | 0.109304   | 0 |
| Chrna2      | chr14:66140959-66152948   | NOTEST | 0.010348   | 0 |
| Chrnd       | chr1:87190596-87200070    | NOTEST | 0.00582627 | 0 |
| Chrng       | chr1:87205810-87211835    | NOTEST | 0.0112182  | 0 |
| Chst4       | chr8:110029074-110039334  | NOTEST | 0.00957505 | 0 |
| Clca6       | chr3:144952485-144975045  | NOTEST | 0.0122667  | 0 |
| Cldn16      | chr16:26463134-26482764   | NOTEST | 0.017772   | 0 |
| Cldn2       | chrX:139800807-139811388  | NOTEST | 0.0980482  | 0 |
| Cldn22      | chr8:47824481-47825475    | NOTEST | 0.225334   | 0 |
| Cldn3       | chr5:134986213-135001350  | NOTEST | 0.0800983  | 0 |
| Cldn7       | chr11:69964778-69967886   | NOTEST | 0.0683264  | 0 |
| Clec10a     | chr11:70166622-70170836   | NOTEST | 0.321336   | 0 |
| Clec12b     | chr6:129375512-129385874  | NOTEST | 0.0276576  | 0 |
| Clec2h      | chr6:128662384-128677374  | NOTEST | 0.0289806  | 0 |
| Clec2i      | chr6:128848043-128898167  | NOTEST | 0.0670556  | 0 |
| Clec3a      | chr8:114418033-114428133  | NOTEST | 0.012615   | 0 |
| Clec4a3     | chr6:122952514-122969878  | NOTEST | 0.44121    | 0 |
| Clec4b1     | chr6:123049961-123071555  | NOTEST | 0.198106   | 0 |
| Clec4n      | chr6:123229842-123247024  | NOTEST | 0.207677   | 0 |
| Clec5a      | chr6:40529090-40910666    | NOTEST | 0.0775583  | 0 |
| Cml3        | chr6:85760630-85765744    | NOTEST | 0.0315551  | 0 |
| Cnfn        | chr7:25367615-25369724    | NOTEST | 0.060127   | 0 |
| Cnga1       | chr5:72603696-72642752    | NOTEST | 0.00717679 | 0 |
| Col9a1      | chr1:24177609-24252738    | NOTEST | 0.00664613 | 0 |
| Cox8b       | chr7:140898941-140900446  | NOTEST | 0.106659   | 0 |
| Cpa2        | chr6:30541641-30564473    | NOTEST | 0.126399   | 0 |
| Cpa4        | chr6:30568375-30591747    | NOTEST | 0.0277812  | 0 |
| Cphx1,Cphx2 | chr14:26221903-26235740   | LOWDAT | 0.0311139  | 0 |
| Cphx2       | chr14:26221903-26235740   | NOTEST | 0.0168467  | 0 |
| Cplx4       | chr18:65955721-65970178   | NOTEST | 0.0117137  | 0 |
| Cpn2        | chr16:30256378-30267532   | NOTEST | 0.00785395 | 0 |
| Cpvl        | chr6:53873278-53978673    | NOTEST | 0.0401224  | 0 |
| Cpz         | chr5:35502217-35525626    | NOTEST | 0.517305   | 0 |
| Crb2        | chr2:37776248-38287384    | NOTEST | 0.0286502  | 0 |
| Crb3        | chr17:57062276-57065914   | NOTEST | 0.0349888  | 0 |
| Creb3l3     | chr10:81084332-81098872   | NOTEST | 0.0180043  | 0 |
| Crisp1      | chr17:40293757-40319207   | NOTEST | 0.412206   | 0 |
| Crnde       | chr8:92326030-92356120    | NOTEST | 0.0945975  | 0 |
| Crp         | chr1:172698055-172699966  | NOTEST | 0.0107731  | 0 |
| Crx         | chr7:15865946-15879955    | NOTEST | 0.0120245  | 0 |



|               |                            |        |            |   |
|---------------|----------------------------|--------|------------|---|
| Crybb2        | chr5:113058264-113068766   | NOTEST | 0.205169   | 0 |
| Cryga         | chr1:65100388-65103363     | NOTEST | 0.139135   | 0 |
| Crygn         | chr5:24751001-24757843     | NOTEST | 0.233651   | 0 |
| Crygs         | chr16:22805202-22811410    | NOTEST | 0.615936   | 0 |
| Csn1s2a       | chr5:87774566-87788797     | NOTEST | 0.152557   | 0 |
| Csprs         | chr1_GL456221_random:11157 | NOTEST | 0.00723098 | 0 |
| Csrp3         | chr7:48830397-48848051     | NOTEST | 0.0541587  | 0 |
| Cst12         | chr2:148789360-148793437   | NOTEST | 0.295314   | 0 |
| Ctrb1         | chr8:111686509-111691010   | NOTEST | 0.023598   | 0 |
| Ctsg          | chr14:56099880-56102574    | NOTEST | 0.0862473  | 0 |
| Cxcl13        | chr5:95956938-95961068     | NOTEST | 0.0168117  | 0 |
| Cxcr5         | chr9:44511786-44526421     | NOTEST | 0.0640672  | 0 |
| Cyct          | chr2:76353942-76360448     | NOTEST | 0.040489   | 0 |
| Cyp11a1       | chr9:58015016-58027023     | NOTEST | 0.0539122  | 0 |
| Cyp24a1       | chr2:170482964-170519070   | NOTEST | 0.0218493  | 0 |
| Cyp27b1       | chr10:127048245-127053006  | NOTEST | 0.00820233 | 0 |
| Cyp2b10       | chr7:25897657-25926624     | NOTEST | 0.0404331  | 0 |
| Cyp2c66       | chr19:39113897-39186756    | NOTEST | 0.0112874  | 0 |
| Cypt2         | chrX:105499771-105500637   | NOTEST | 0.0328583  | 0 |
| D030018L15Rik | chr15:96073336-96079552    | NOTEST | 0.0171221  | 0 |
| D030025P21Rik | chr12:84783211-84879755    | NOTEST | 0.0368317  | 0 |
| D330045A20Rik | chrX:139480366-139554580   | NOTEST | 0.106342   | 0 |
| D630024D03Rik | chr11:31800687-31824547    | NOTEST | 0.179431   | 0 |
| D630029K05Rik | chr10:116964739-116969107  | NOTEST | 0.0293533  | 0 |
| D630033O11Rik | chr9:43259878-43280075     | NOTEST | 0.374827   | 0 |
| D630039A03Rik | chr4:57908383-57916264     | NOTEST | 0.00638717 | 0 |
| D6Ert527e     | chr6:87104745-87113003     | NOTEST | 0.027551   | 0 |
| D830013O20Rik | chr12:73364074-73409563    | NOTEST | 0.0332661  | 0 |
| D830030K20Rik | chr14:3846244-3856080      | NOTEST | 0.0133163  | 0 |
| D830032E09Rik | chr1:107917258-107950947   | NOTEST | 0.00846342 | 0 |
| D830046C22Rik | chr5:139359738-139460534   | NOTEST | 0.0253714  | 0 |
| D930015M05Rik | chr2:92403646-92434069     | NOTEST | 0.0195982  | 0 |
| Dcdc2b        | chr4:129608330-129614257   | NOTEST | 0.0519345  | 0 |
| Dct           | chr14:118012789-118052246  | NOTEST | 0.00781439 | 0 |
| Ddo           | chr10:40630010-40649931    | NOTEST | 0.168365   | 0 |
| Defb20        | chr2:152477062-152479934   | NOTEST | 0.153412   | 0 |
| Defb28        | chr2:152518254-152521447   | NOTEST | 0.166453   | 0 |
| Defb30        | chr14:63034086-63037846    | NOTEST | 0.0685829  | 0 |
| Dhrs7c        | chr11:67798270-67816002    | NOTEST | 0.0979871  | 0 |
| Dhrs9         | chr2:69380461-69403086     | NOTEST | 0.0545617  | 0 |
| Dio3          | chr12:110279229-110281097  | NOTEST | 0.010335   | 0 |
| Dio3os        | chr12:110275384-110278129  | NOTEST | 0.0160018  | 0 |
| Dlx2          | chr2:71543407-71546754     | NOTEST | 0.0160585  | 0 |
| Dlx5          | chr6:6877800-6882068       | NOTEST | 0.0153011  | 0 |
| Dlx6          | chr6:6820545-6869533       | NOTEST | 0.0223113  | 0 |
| Dmr           | chr5:144244436-144361005   | NOTEST | 0.0342588  | 0 |
| Dmrt2         | chr19:25672410-25678991    | NOTEST | 0.00902272 | 0 |
| Dmrta1        | chr4:89688197-89694766     | NOTEST | 0.022404   | 0 |
| Dnajb13       | chr7:100503019-100514815   | NOTEST | 0.0798729  | 0 |
| Dnajb7        | chr15:81400187-81454888    | NOTEST | 0.0393572  | 0 |
| Dnase2b       | chr3:146581372-146631483   | NOTEST | 0.0178666  | 0 |
| Dpep2         | chr8:105985056-105996423   | NOTEST | 0.0439541  | 0 |
| Dpep3         | chr8:105973519-105979419   | NOTEST | 0.0232883  | 0 |

|                   |                           |        |            |   |
|-------------------|---------------------------|--------|------------|---|
| Dpy19I2           | chr9:24557047-24696293    | NOTEST | 0.0168459  | 0 |
| Dsc3              | chr18:19960929-20002097   | NOTEST | 0.00336462 | 0 |
| Dspp              | chr5:104170711-104180127  | NOTEST | 0.00380478 | 0 |
| Duoxa2            | chr2:122298899-122302885  | NOTEST | 0.0115969  | 0 |
| Dynap             | chr18:70240428-70244584   | NOTEST | 0.117504   | 0 |
| E030003E18Rik     | chr19:20492714-20556410   | NOTEST | 0.749112   | 0 |
| E030019B06Rik     | chr7:139600950-139616329  | NOTEST | 0.0256015  | 0 |
| E130018N17Rik     | chr2:168152602-168154513  | NOTEST | 0.046585   | 0 |
| E130215H24Rik     | chr2:150618110-150668932  | NOTEST | 0.561693   | 0 |
| E130304I02Rik     | chr7:35772345-35838074    | NOTEST | 0.071873   | 0 |
| E230016K23Rik     | chr11:83582060-83623693   | NOTEST | 0.0288133  | 0 |
| E230029C05Rik     | chr7:90029158-90049071    | NOTEST | 0.140418   | 0 |
| E330013P04Rik     | chr19:60144674-60162591   | NOTEST | 0.0183675  | 0 |
| E330017A01Rik     | chr16:58635261-58638403   | NOTEST | 0.0682257  | 0 |
| E330017L17Rik     | chr4:129906225-129908996  | NOTEST | 0.0310037  | 0 |
| E330021D16Rik     | chr6:136400318-136415569  | NOTEST | 0.0119897  | 0 |
| E330034G19Rik     | chr14:24293363-24309959   | NOTEST | 0.0124985  | 0 |
| Ear1              | chr14:43818764-43819639   | NOTEST | 0.539961   | 0 |
| Ear6,Ear7         | chr14:51853767-51854642   | NOTEST | 0.0634893  | 0 |
| Ear7              | chr14:51853767-51854642   | LOWDAT | 0.198717   | 0 |
| Eci3              | chr13:34924408-34963809   | NOTEST | 0.0422964  | 0 |
| Ect2l             | chr10:18129021-18210890   | NOTEST | 0.0420444  | 0 |
| Efcab9            | chr11:32522732-32527574   | NOTEST | 0.244762   | 0 |
| Eif4e1b           | chr13:54783997-54788458   | NOTEST | 0.0114456  | 0 |
| Elane             | chr10:79697304-80369637   | NOTEST | 0.213373   | 0 |
| Elf5              | chr2:103412097-103450988  | NOTEST | 0.335418   | 0 |
| Ell3              | chr2:121439026-121442601  | NOTEST | 0.0226488  | 0 |
| Emr4              | chr17:55749983-55853662   | NOTEST | 0.0926888  | 0 |
| Epgn              | chr5:91027516-91035212    | NOTEST | 0.0357044  | 0 |
| Epha1             | chr6:42349827-42380558    | NOTEST | 0.0447817  | 0 |
| Epo               | chr5:137483019-137485816  | NOTEST | 0.0380831  | 0 |
| Eppk1             | chr15:76101487-76126556   | NOTEST | 0.00732999 | 0 |
| Epx               | chr11:87863997-87875536   | NOTEST | 0.0548187  | 0 |
| Erbp4             | chr1:68039965-69108059    | NOTEST | 0.0996245  | 0 |
| Erich4            | chr7:25614620-25615892    | NOTEST | 0.144701   | 0 |
| Esp8              | chr17:40520021-40530702   | NOTEST | 0.0478127  | 0 |
| Eva1a             | chr6:82041627-82093099    | NOTEST | 0.797782   | 0 |
| Evi2a-evi2b,Evi2b | chr11:79339891-79581609   | NOTEST | 0.00351872 | 0 |
| Eya4              | chr10:23104167-23349903   | NOTEST | 0.169663   | 0 |
| F7                | chr8:13026033-13035809    | NOTEST | 0.0109853  | 0 |
| Faim3             | chr1:130865776-130880790  | NOTEST | 0.232658   | 0 |
| Fam181a           | chr12:103314958-103317065 | NOTEST | 0.099995   | 0 |
| Fam187a           | chr11:102881243-102886731 | NOTEST | 0.0267512  | 0 |
| Fam187b           | chr7:30973803-30989725    | NOTEST | 0.0698183  | 0 |
| Fam227b           | chr2:125859108-126152004  | NOTEST | 0.0763982  | 0 |
| Fam229a           | chr4:129491189-129491956  | NOTEST | 0.0486419  | 0 |
| Fam26f            | chr10:34126066-34127972   | NOTEST | 0.0965756  | 0 |
| Fam3b             | chr16:97471085-97504936   | NOTEST | 0.0599714  | 0 |
| Fam47e            | chr5:92571536-92591284    | NOTEST | 0.121619   | 0 |
| Fam71a            | chr1:191162583-191164817  | NOTEST | 0.0094822  | 0 |
| Fam71e2           | chr7:4753225-4771270      | NOTEST | 0.00774709 | 0 |
| Fam83a            | chr15:57985902-58010702   | NOTEST | 0.0193785  | 0 |
| Fat2              | chr11:55250609-55312257   | NOTEST | 0.00850917 | 0 |

|               |                           |        |            |   |
|---------------|---------------------------|--------|------------|---|
| Fate1         | chrX:71972985-71989046    | NOTEST | 0.0775341  | 0 |
| Fbxo43        | chr15:36150059-36164884   | NOTEST | 0.00950366 | 0 |
| Fbxw16        | chr9:109432317-109449140  | NOTEST | 0.0246331  | 0 |
| Fcer1a        | chr1:173221270-173227229  | NOTEST | 0.0418633  | 0 |
| Fcer2a        | chr8:3681736-3694174      | NOTEST | 0.082901   | 0 |
| Fcgbp         | chr7:28071235-28120864    | NOTEST | 0.00914579 | 0 |
| Fcgr1         | chr3:96282908-96293969    | NOTEST | 0.241399   | 0 |
| Fcgr4         | chr1:171018925-171029761  | NOTEST | 0.166149   | 0 |
| Fcna          | chr2:25624666-25627974    | NOTEST | 0.275869   | 0 |
| Fcnb          | chr2:28076478-28084878    | NOTEST | 0.0388277  | 0 |
| Fcrl1         | chr3:87376386-87392133    | NOTEST | 0.0595541  | 0 |
| Fer1l4        | chr2:156019139-156052947  | NOTEST | 0.00325415 | 0 |
| Fev           | chr1:74881508-74885408    | NOTEST | 0.0547363  | 0 |
| Ffar4         | chr19:38097078-38114263   | NOTEST | 0.0144665  | 0 |
| Fga           | chr3:83026152-83033617    | NOTEST | 0.00746821 | 0 |
| Fgf16         | chrX:105764476-105776532  | NOTEST | 0.0181478  | 0 |
| Fgf21         | chr7:45613889-45615490    | NOTEST | 0.0216879  | 0 |
| Fgf8          | chr19:45736797-45742884   | NOTEST | 0.0214209  | 0 |
| Fgfr4         | chr13:55152817-55168759   | NOTEST | 0.0309023  | 0 |
| Fhl5          | chr4:25199908-25242876    | NOTEST | 0.214562   | 0 |
| Fitm1         | chr14:55575673-55576952   | NOTEST | 0.0243058  | 0 |
| Fkbp6         | chr5:135291703-135350044  | NOTEST | 0.0166663  | 0 |
| Fmo4          | chr1:162793882-162812549  | NOTEST | 0.255973   | 0 |
| Folr4         | chr9:14885813-14903951    | NOTEST | 0.0155529  | 0 |
| Foxa1         | chr12:57540631-57546121   | NOTEST | 0.0172302  | 0 |
| Foxd4         | chr19:24898964-24901309   | NOTEST | 0.00803155 | 0 |
| Foxh1         | chr15:76668223-76669948   | NOTEST | 0.0442992  | 0 |
| Foxi2         | chr7:135410366-135413615  | NOTEST | 0.0368251  | 0 |
| Foxl1         | chr8:121127684-121130644  | NOTEST | 0.0183144  | 0 |
| Foxn1         | chr11:78357576-78386608   | NOTEST | 0.00525923 | 0 |
| G630090E17Rik | chr10:39946911-39986646   | NOTEST | 0.0699512  | 0 |
| G6b           | chr17:35062692-35066184   | NOTEST | 0.043403   | 0 |
| Gabrp         | chr11:33550780-33578957   | NOTEST | 0.0055896  | 0 |
| Gad1os        | chr2:70489939-70602012    | NOTEST | 0.0265099  | 0 |
| Gal3st2       | chr1:93861343-93876494    | NOTEST | 0.00608887 | 0 |
| Gapdhs        | chr7:30729778-30743681    | NOTEST | 0.0137039  | 0 |
| Gapt          | chr13:110352614-110357172 | NOTEST | 0.104273   | 0 |
| Gareml        | chr5:30103583-30154980    | NOTEST | 0.148869   | 0 |
| Gata4         | chr14:63198914-63245260   | NOTEST | 0.0396015  | 0 |
| Gata6         | chr18:11042036-11085635   | NOTEST | 0.0827777  | 0 |
| Gbx2          | chr1:89927961-89931176    | NOTEST | 0.0100171  | 0 |
| Gcg           | chr2:62474529-62483653    | NOTEST | 0.01816    | 0 |
| Gchfr         | chr2:119167787-119172389  | NOTEST | 0.555823   | 0 |
| Gcsam         | chr16:45610439-45622867   | NOTEST | 0.0339501  | 0 |
| Gdf5          | chr2:155941024-155945364  | NOTEST | 0.0823171  | 0 |
| Gfral         | chr9:76164101-76213657    | NOTEST | 0.00857738 | 0 |
| Gja10         | chr4:32600864-32602382    | NOTEST | 0.0538519  | 0 |
| Gja3          | chr14:57034459-57058030   | NOTEST | 0.0229871  | 0 |
| Gja6          | chrX:160768012-160994681  | NOTEST | 0.0106218  | 0 |
| Gjb3          | chr4:127325234-127330836  | NOTEST | 0.0395219  | 0 |
| Gjb4          | chr4:127351085-127354081  | NOTEST | 0.0268324  | 0 |
| Gjb5          | chr4:127354808-127358164  | NOTEST | 0.125216   | 0 |
| Gldnos        | chr9:54268579-54341777    | NOTEST | 0.0305591  | 0 |

|         |                           |        |             |   |
|---------|---------------------------|--------|-------------|---|
| Gli2    | chr1:118834060-119053619  | NOTEST | 0.154519    | 0 |
| Glp1r   | chr17:30901866-30936510   | NOTEST | 0.0704683   | 0 |
| Glr4    | chrX:136732947-136803361  | NOTEST | 0.0159879   | 0 |
| Gltpd2  | chr11:70519208-70520736   | NOTEST | 0.032241    | 0 |
| Glyat13 | chr17:40904740-40914350   | NOTEST | 0.0271426   | 0 |
| Gm10364 | chr14:55038461-55042976   | NOTEST | 0.154086    | 0 |
| Gm10390 | chr5:120116512-120198971  | NOTEST | 0.051636    | 0 |
| Gm10406 | chr14:7006114-7027449     | NOTEST | 0.00919031  | 0 |
| Gm10416 | chr5:109833500-109834142  | NOTEST | 0.567405    | 0 |
| Gm10433 | chr12:100187967-100193538 | NOTEST | 0.0181012   | 0 |
| Gm10440 | chr5:54349991-54358542    | NOTEST | 0.0353109   | 0 |
| Gm10536 | chr18:56936259-56940518   | NOTEST | 0.0174301   | 0 |
| Gm10556 | chr18:4812485-4850959     | NOTEST | 0.00928842  | 0 |
| Gm10635 | chr9:79444036-79519302    | NOTEST | 0.00517167  | 0 |
| Gm10649 | chr8:76749086-76900173    | NOTEST | 0.0273708   | 0 |
| Gm10653 | chr9:62838786-62875917    | NOTEST | 0.0334679   | 0 |
| Gm10745 | chr3:11823228-11844359    | NOTEST | 0.0146224   | 0 |
| Gm10768 | chr19:43838802-43840845   | NOTEST | 0.010471    | 0 |
| Gm10787 | chr10:77011994-77022214   | NOTEST | 0.0247742   | 0 |
| Gm10804 | chr2:93419101-93469874    | NOTEST | 0.00787996  | 0 |
| Gm10863 | chr15:79166065-79216401   | NOTEST | 0.595902    | 0 |
| Gm11190 | chr11:77912126-77929288   | NOTEST | 0.0393422   | 0 |
| Gm11201 | chr11:79014800-79146354   | NOTEST | 0.017021    | 0 |
| Gm11346 | chr13:24582188-24733806   | NOTEST | 0.071927    | 0 |
| Gm11351 | chr13:25921034-25966316   | NOTEST | 0.0428284   | 0 |
| Gm11517 | chr11:96789135-96808640   | NOTEST | 0.181856    | 0 |
| Gm11541 | chr11:94694497-94704499   | NOTEST | 0.0108972   | 0 |
| Gm11627 | chr11:102576398-102579119 | NOTEST | 0.475805    | 0 |
| Gm11978 | chr11:6650147-6677475     | NOTEST | 0.0311024   | 0 |
| Gm12    | chr11:98598290-98599586   | NOTEST | 0.0277713   | 0 |
| Gm12130 | chr11:38491547-38520045   | NOTEST | 0.00764573  | 0 |
| Gm12159 | chr11:45102865-45116928   | NOTEST | 0.0146225   | 0 |
| Gm12633 | chr4:90359624-90361314    | NOTEST | 0.125362    | 0 |
| Gm12709 | chr4:102760134-103011965  | NOTEST | 0.0225554   | 0 |
| Gm13031 | chr4:140906359-140957902  | NOTEST | 0.070183    | 0 |
| Gm13154 | chr4:147553276-147585201  | NOTEST | 0.00655524  | 0 |
| Gm13546 | chr2:58163973-58177063    | NOTEST | 0.0223707   | 0 |
| Gm13547 | chr2:29761527-29764089    | NOTEST | 0.0810325   | 0 |
| Gm13939 | chr2:109902395-109913319  | NOTEST | 0.0158725   | 0 |
| Gm14015 | chr2:106463822-106523103  | NOTEST | 0.00972215  | 0 |
| Gm14207 | chr2:119321198-119335666  | NOTEST | 0.0456392   | 0 |
| Gm14548 | chr7:3731632-3915501      | NOTEST | 0.000530765 | 0 |
| Gm14812 | chrX:99405330-99443797    | NOTEST | 0.0121185   | 0 |
| Gm15055 | chr6:52102948-52113684    | NOTEST | 0.0489179   | 0 |
| Gm15348 | chr8:12706943-12719127    | NOTEST | 0.0108399   | 0 |
| Gm15401 | chr6:72626370-72789045    | NOTEST | 0.0222595   | 0 |
| Gm15471 | chr3:103193822-103854618  | NOTEST | 0.0401632   | 0 |
| Gm1564  | chr11:102665584-102682238 | NOTEST | 0.00393146  | 0 |
| Gm15880 | chr7:80586631-80688877    | NOTEST | 0.00600248  | 0 |
| Gm15941 | chr15:37366174-37792428   | NOTEST | 0.0118906   | 0 |
| Gm15987 | chr6:128934380-128984707  | NOTEST | 0.0183465   | 0 |
| Gm16325 | chr3:146641931-146651715  | NOTEST | 0.0350077   | 0 |
| Gm16523 | chr2:39066214-39190730    | NOTEST | 0.00778323  | 0 |

|              |                            |        |            |   |
|--------------|----------------------------|--------|------------|---|
| Gm16907      | chr13:62964892-63431745    | NOTEST | 0.0209271  | 0 |
| Gm17359      | chr3:79345375-79567679     | NOTEST | 0.0339089  | 0 |
| Gm19557      | chr19:47501047-47537020    | NOTEST | 0.0623145  | 0 |
| Gm1965       | chr6:89141004-89146016     | NOTEST | 0.0227615  | 0 |
| Gm19689      | chr17:83033591-83078225    | NOTEST | 0.012845   | 0 |
| Gm1987       | chr4_JH584294_random:12065 | NOTEST | 0.103468   | 0 |
| Gm19897      | chr7:28766751-28788665     | NOTEST | 0.0356188  | 0 |
| Gm20110      | chr10:99609170-99658134    | NOTEST | 0.0101819  | 0 |
| Gm20125      | chr10:16951093-17095782    | NOTEST | 0.00503126 | 0 |
| Gm20187      | chr12:27090236-27114995    | NOTEST | 0.0194425  | 0 |
| Gm20743      | chr1:164863120-164871438   | NOTEST | 0.705457   | 0 |
| Gm20744      | chr7:82070386-82081758     | NOTEST | 0.0079428  | 0 |
| Gm20754      | chr3:73066350-73594830     | NOTEST | 0.152548   | 0 |
| Gm20756      | chr6:25931425-25977227     | NOTEST | 0.0118272  | 0 |
| Gm2083,Mup19 | chr4:61778324-61782224     | NOTEST | 0.0237024  | 0 |
| Gm3002       | chr14:3814912-3830681      | NOTEST | 0.00383297 | 0 |
| Gm3776       | chr9:78257128-78269166     | NOTEST | 0.0289448  | 0 |
| Gm4432       | chr17:32196271-32284133    | NOTEST | 0.0220146  | 0 |
| Gm4477       | chr6:85706706-85708561     | NOTEST | 0.0480195  | 0 |
| Gm4489       | chr10:122119696-122130558  | NOTEST | 0.0572785  | 0 |
| Gm4792       | chr10:94293662-94298703    | NOTEST | 0.0283405  | 0 |
| Gm4861       | chr3:137550044-137552622   | NOTEST | 0.0213992  | 0 |
| Gm4961       | chr5:30092939-30097686     | NOTEST | 0.0178211  | 0 |
| Gm4975       | chr8:63924693-63952170     | NOTEST | 0.00454996 | 0 |
| Gm4984       | chrX:12651882-12652820     | NOTEST | 0.0234439  | 0 |
| Gm5084       | chr13:60205470-60216018    | NOTEST | 0.00946143 | 0 |
| Gm5105       | chr3:138048760-138067388   | NOTEST | 0.0586905  | 0 |
| Gm5111       | chr6:48589444-48590584     | NOTEST | 0.0932247  | 0 |
| Gm5431       | chr11:48887421-48902152    | NOTEST | 0.0708136  | 0 |
| Gm5475       | chr15:100423192-100428150  | NOTEST | 0.0425356  | 0 |
| Gm5523       | chr1:13785684-13786929     | NOTEST | 0.0339809  | 0 |
| Gm5640       | chrX:74639118-74645635     | NOTEST | 0.0128992  | 0 |
| Gm572        | chr4:148643316-148671572   | NOTEST | 0.0299538  | 0 |
| Gm5741       | chr8:85067567-85067982     | NOTEST | 0.126024   | 0 |
| Gm5833       | chr1:138640094-138682075   | NOTEST | 0.00996356 | 0 |
| Gm5936       | chrX:74837195-74843369     | NOTEST | 0.00681908 | 0 |
| Gm595        | chrX:48841465-48877713     | NOTEST | 0.00896575 | 0 |
| Gm6083       | chr5:29537948-29538624     | NOTEST | 0.0683707  | 0 |
| Gm614        | chrX:101261376-101263992   | NOTEST | 0.0655101  | 0 |
| Gm6150       | chr10:9684721-9691909      | NOTEST | 0.0185401  | 0 |
| Gm6307       | chr2:180370857-180401802   | NOTEST | 0.0177319  | 0 |
| Gm6408       | chr5:146481942-146484702   | NOTEST | 0.0195782  | 0 |
| Gm6588       | chr5:112419150-112577198   | NOTEST | 0.00862209 | 0 |
| Gm6614       | chr6:141972195-142008745   | NOTEST | 0.00920083 | 0 |
| Gm6634       | chr3:70772378-70807291     | NOTEST | 0.0201172  | 0 |
| Gm6642       | chr19:30564486-31765033    | NOTEST | 0.0432888  | 0 |
| Gm6936       | chr16:49980459-49997475    | NOTEST | 0.0428293  | 0 |
| Gm7361       | chr5:26257761-26262188     | NOTEST | 0.032364   | 0 |
| Gm7538       | chr5:119194312-119200018   | NOTEST | 0.0293343  | 0 |
| Gm7903       | chrX:135373283-135383393   | NOTEST | 0.0141701  | 0 |
| Gm805        | chr12:86169340-86195102    | NOTEST | 0.0112583  | 0 |
| Gm806        | chr13:50467306-50475355    | NOTEST | 0.00733575 | 0 |
| Gm8300       | chr12:87514315-87518265    | NOTEST | 0.0115493  | 0 |



|           |                           |        |            |   |
|-----------|---------------------------|--------|------------|---|
| Gm833     | chr4:152697539-152700922  | NOTEST | 0.108668   | 0 |
| Gm8439    | chr4:120588744-120609672  | NOTEST | 0.16713    | 0 |
| Gm8579    | chr6:3288518-3317019      | NOTEST | 0.0343072  | 0 |
| Gm8787    | chrX:79330512-79358068    | NOTEST | 0.0614443  | 0 |
| Gm8801    | chr17:35947153-35953317   | NOTEST | 0.0103412  | 0 |
| Gm9054    | chr3:95985509-95986967    | NOTEST | 0.066299   | 0 |
| Gm906     | chr13:50245180-50250308   | NOTEST | 0.0116647  | 0 |
| Gm973     | chr1:59516263-59634509    | NOTEST | 0.0887906  | 0 |
| Gm9733    | chr3:15296550-15332302    | NOTEST | 0.0389908  | 0 |
| Gmfg      | chr7:28437446-28446895    | NOTEST | 0.0477235  | 0 |
| Gnat1     | chr9:107674473-107679592  | NOTEST | 0.00802904 | 0 |
| Gng13     | chr17:25717171-25727415   | NOTEST | 0.0854875  | 0 |
| Gngt1     | chr6:3994011-3997436      | NOTEST | 0.0255173  | 0 |
| Golt1a    | chr1:133309822-133323026  | NOTEST | 0.042511   | 0 |
| Got1l1    | chr8:27197458-27202547    | NOTEST | 0.0307076  | 0 |
| Gpr101    | chrX:57496667-57503757    | NOTEST | 0.00349425 | 0 |
| Gpr110    | chr17:43270346-43324406   | NOTEST | 0.0107217  | 0 |
| Gpr12     | chr5:146582149-146585239  | NOTEST | 0.0349587  | 0 |
| Gpr183    | chr14:121878605-122021035 | NOTEST | 0.125255   | 0 |
| Gpr20     | chr15:73694606-73707505   | NOTEST | 0.195537   | 0 |
| Gpr25     | chr1:136258913-136260873  | NOTEST | 0.116403   | 0 |
| Gpr84     | chr15:103308234-103310438 | NOTEST | 0.0134946  | 0 |
| Gpx6      | chr13:21312202-21319624   | NOTEST | 0.017176   | 0 |
| Grifin    | chr5:140563188-140565067  | NOTEST | 0.151001   | 0 |
| Grin2a    | chr16:9577709-9992533     | NOTEST | 0.00422239 | 0 |
| Grin2b    | chr6:135729804-136173511  | NOTEST | 0.00220244 | 0 |
| Grm6      | chr11:50850684-50866208   | NOTEST | 0.00465434 | 0 |
| Gsg1      | chr6:135237329-135254336  | NOTEST | 0.0316369  | 0 |
| Gsta1     | chr9:78230668-78242683    | NOTEST | 0.0245344  | 0 |
| Gsta2     | chr9:78331019-78347145    | NOTEST | 0.0297994  | 0 |
| Gstm3     | chr3:107963695-107969174  | NOTEST | 0.0387215  | 0 |
| Gucy2f    | chrX:142079288-142196936  | NOTEST | 0.00906041 | 0 |
| Gys2      | chr6:142422612-142473109  | NOTEST | 0.013568   | 0 |
| H2-Eb2    | chr17:34325674-34341410   | NOTEST | 0.0330617  | 0 |
| H2-M9     | chr17:36640424-36642644   | NOTEST | 0.0469149  | 0 |
| H2-Oa     | chr17:34083842-34095309   | NOTEST | 0.0826846  | 0 |
| H2-Q2     | chr17:35342332-35345722   | NOTEST | 0.0372202  | 0 |
| H2-T3     | chr17:36185570-36190151   | NOTEST | 0.00975221 | 0 |
| Hao       | chr17:83831353-83846790   | NOTEST | 0.147479   | 0 |
| Hao2      | chr3:98874518-98893230    | NOTEST | 0.00875488 | 0 |
| Has2os    | chr15:56665626-56694546   | NOTEST | 0.192378   | 0 |
| Havcr2    | chr11:46193848-46589232   | NOTEST | 0.0698728  | 0 |
| Hcst      | chr7:30417711-30419854    | NOTEST | 0.207704   | 0 |
| Hes7      | chr11:69120452-69123259   | NOTEST | 0.0466851  | 0 |
| Hgd       | chr16:37580152-37632026   | NOTEST | 0.0257754  | 0 |
| Hhla1     | chr15:65922442-65976804   | NOTEST | 0.0338247  | 0 |
| Hils1     | chr11:94962776-94976327   | NOTEST | 0.0290749  | 0 |
| Hist1h2ap | chr13:21833023-21833575   | LOWDAI | 0.0793447  | 0 |
| Hist1h4j  | chr13:21735095-21735407   | NOTEST | 0.151582   | 0 |
| Hist2h2ab | chr3:96219915-96220353    | NOTEST | 0.137823   | 0 |
| Hist4h4   | chr6:136803992-136804431  | NOTEST | 0.068622   | 0 |
| Hmgb4     | chr4:127988043-128567656  | NOTEST | 0.073668   | 0 |
| Hormad2   | chr11:4346382-4441082     | NOTEST | 0.031058   | 0 |

|               |                           |        |            |   |
|---------------|---------------------------|--------|------------|---|
| Hoxa11        | chr6:52242104-52249769    | NOTEST | 0.0596712  | 0 |
| Hoxa11os      | chr6:52242104-52249769    | NOTEST | 0.0302045  | 0 |
| Hpgds         | chr6:65117292-65144730    | NOTEST | 0.168377   | 0 |
| Hrasls5       | chr19:7612568-7639238     | NOTEST | 0.0230348  | 0 |
| Hsd11b2       | chr8:105518745-105523988  | NOTEST | 0.0841356  | 0 |
| Hsd17b13      | chr5:103955441-103977388  | NOTEST | 0.0168261  | 0 |
| Hsd17b2       | chr8:117701945-117759029  | NOTEST | 0.0339345  | 0 |
| Hsd17b3       | chr13:64058273-64089201   | NOTEST | 0.0148819  | 0 |
| Hsd17b6       | chr10:127990935-128007508 | NOTEST | 0.0128276  | 0 |
| Hsd3b1        | chr3:98852196-98859794    | NOTEST | 0.022722   | 0 |
| Hsf3          | chrX:96306866-96357240    | NOTEST | 0.0302789  | 0 |
| Hspb3         | chr13:113662895-113663676 | NOTEST | 0.0673416  | 0 |
| Htr2c         | chrX:146962512-147197277  | NOTEST | 0.0855653  | 0 |
| I830077J02Rik | chr3:105925890-105932664  | NOTEST | 0.1558     | 0 |
| Ifi44l        | chr3:151758736-151762891  | NOTEST | 0.0475755  | 0 |
| Ifltd1        | chr6:145397234-145434925  | NOTEST | 0.100141   | 0 |
| Igf2bp1       | chr11:95957163-96005944   | NOTEST | 0.00692    | 0 |
| Igf2bp3       | chr6:49085217-49214954    | NOTEST | 0.00803172 | 0 |
| Igf2os        | chr7:142650767-142670356  | NOTEST | 0.0368146  | 0 |
| Igfbp1        | chr11:7197786-7202546     | NOTEST | 0.0122322  | 0 |
| Igsf1         | chrX:49782536-49797745    | NOTEST | 0.160295   | 0 |
| Il12a         | chr3:68690643-68698547    | NOTEST | 0.0311713  | 0 |
| Il1a          | chr2:129297369-129309972  | NOTEST | 0.0199879  | 0 |
| Il1rapl2      | chrX:137571548-138846955  | NOTEST | 0.115876   | 0 |
| Il1rl2        | chr1:40324626-40365471    | NOTEST | 0.250573   | 0 |
| Il20          | chr1:130907191-130911296  | NOTEST | 0.0260027  | 0 |
| Il20ra        | chr10:19712586-19760053   | NOTEST | 0.0193475  | 0 |
| Il21          | chr3:37222758-37232636    | NOTEST | 0.0374702  | 0 |
| Il22ra2       | chr10:19622027-19634681   | NOTEST | 0.0922826  | 0 |
| Il25          | chr14:54932694-54935836   | NOTEST | 0.624986   | 0 |
| Il2ra         | chr2:11642791-11693194    | NOTEST | 0.159782   | 0 |
| Il4           | chr11:53612460-53618665   | NOTEST | 0.042363   | 0 |
| Ins2          | chr7:142678655-142679708  | NOTEST | 0.07965    | 0 |
| Irx4          | chr13:73260496-73269620   | NOTEST | 0.0210587  | 0 |
| Itih1         | chr14:30929179-30943289   | NOTEST | 0.00633037 | 0 |
| Itih3         | chr14:30908573-30923587   | NOTEST | 0.408622   | 0 |
| Izumo1        | chr7:45621810-45627242    | NOTEST | 0.0124888  | 0 |
| Izumo3        | chr4:92144317-92147221    | NOTEST | 0.0152056  | 0 |
| Kcne2         | chr16:92292388-92298133   | NOTEST | 0.0129359  | 0 |
| Kcnj5         | chr9:32314782-32344237    | NOTEST | 0.00400567 | 0 |
| Kcnv2         | chr19:27322618-27337179   | NOTEST | 0.00724189 | 0 |
| Kera          | chr10:97607204-97613688   | NOTEST | 0.0614597  | 0 |
| Kif6          | chr17:49615171-49909847   | NOTEST | 0.144587   | 0 |
| Kirrel2       | chr7:30447765-30457515    | NOTEST | 0.0352522  | 0 |
| Kiss1         | chr1:133327211-133329722  | NOTEST | 0.0589362  | 0 |
| Klb           | chr5:65348410-65384003    | NOTEST | 0.0261962  | 0 |
| Klk13         | chr7:43712566-43726758    | NOTEST | 0.0207548  | 0 |
| Klk1b27       | chr7:44052289-44056711    | NOTEST | 0.050112   | 0 |
| Klra1         | chr6:129972081-130386874  | NOTEST | 0.0235114  | 0 |
| Klra15        | chr6:129972081-130386874  | NOTEST | 0.0221823  | 0 |
| Klra19,Klra6  | chr6:129972081-130386874  | NOTEST | 0.01599    | 0 |
| Klra2         | chr6:131219234-131247362  | NOTEST | 0.175585   | 0 |
| Klra4         | chr6:129972081-130386874  | NOTEST | 0.0304051  | 0 |

|              |                           |        |            |   |
|--------------|---------------------------|--------|------------|---|
| Klra6        | chr6:129972081-130386874  | NOTEST | 0.00184694 | 0 |
| Klrb1        | chr6:128706507-128723046  | NOTEST | 0.0411292  | 0 |
| Klrb1f       | chr6:129045900-129057471  | NOTEST | 0.0356851  | 0 |
| Klri1        | chr6:129697217-129717132  | NOTEST | 0.0271464  | 0 |
| Kmo          | chr1:175632192-175660853  | NOTEST | 0.103822   | 0 |
| Kng1         | chr16:23058299-23082078   | NOTEST | 0.0200956  | 0 |
| Krt14        | chr11:100203161-100207510 | NOTEST | 0.0367794  | 0 |
| Krt15        | chr11:100131758-100135949 | NOTEST | 0.0113445  | 0 |
| Krt17        | chr11:100256216-100260989 | NOTEST | 0.0254762  | 0 |
| Krt2         | chr15:101810688-101818169 | NOTEST | 0.0502562  | 0 |
| Krt20        | chr11:99428402-99438153   | NOTEST | 0.0609075  | 0 |
| Krt36        | chr11:100102012-100105626 | NOTEST | 0.0110167  | 0 |
| Krt40        | chr11:99537484-99543158   | NOTEST | 0.0316979  | 0 |
| Krt42        | chr11:100262881-100269871 | NOTEST | 0.0128067  | 0 |
| Krt7         | chr15:101412402-101427806 | NOTEST | 0.0767973  | 0 |
| Krt78        | chr15:101946003-101954287 | NOTEST | 0.0275162  | 0 |
| Krt8         | chr15:101996710-102004342 | NOTEST | 0.0594949  | 0 |
| Krt80        | chr15:101349570-101370125 | NOTEST | 0.307326   | 0 |
| Krt82        | chr15:101541220-101550659 | NOTEST | 0.00850928 | 0 |
| Krtdap       | chr7:30787904-30791083    | NOTEST | 0.796866   | 0 |
| LOC100043315 | chr15:95097621-95149318   | NOTEST | 0.0200889  | 0 |
| LOC100504608 | chr10:127032904-127041394 | NOTEST | 0.112646   | 0 |
| LOC100862268 | chr3:127161304-127168290  | NOTEST | 0.0213093  | 0 |
| LOC101243624 | chr3:132842201-132878596  | NOTEST | 0.496738   | 0 |
| LOC102632423 | chr6:118300166-118308719  | NOTEST | 0.0779436  | 0 |
| LOC102633035 | chr9:101342193-101348017  | NOTEST | 0.0136056  | 0 |
| Lair1        | chr7:4007072-4063204      | NOTEST | 0.566976   | 0 |
| Lalba        | chr15:98480399-98482683   | NOTEST | 0.0367692  | 0 |
| Lce1d        | chr3:92685498-92687210    | NOTEST | 0.0363239  | 0 |
| Lce1g        | chr3:92750150-92752338    | NOTEST | 0.0509566  | 0 |
| Lce6a        | chr3:92620084-92621660    | NOTEST | 0.149568   | 0 |
| Ldlrad1      | chr4:107209179-107217914  | NOTEST | 0.0244443  | 0 |
| Ldoc1        | chrX:61709615-61710950    | NOTEST | 0.355622   | 0 |
| Lgals12      | chr19:7596660-7607176     | NOTEST | 0.0142803  | 0 |
| Lhx3         | chr2:26200211-26208249    | NOTEST | 0.0187429  | 0 |
| Lhx4         | chr1:155701693-155742027  | NOTEST | 0.00977125 | 0 |
| Lhx8         | chr3:154306293-154330560  | NOTEST | 0.00907616 | 0 |
| Lhx9         | chr1:138825185-138847579  | NOTEST | 0.0300018  | 0 |
| Lilra5       | chr7:4237753-4243463      | NOTEST | 0.147921   | 0 |
| Lincrna-cox2 | chr1:150159042-150164948  | NOTEST | 0.0104441  | 0 |
| Lipc         | chr9:70798127-70934808    | NOTEST | 0.104273   | 0 |
| Lipn         | chr19:34067357-34084918   | NOTEST | 0.0429716  | 0 |
| Lman1l       | chr9:57607032-57620774    | NOTEST | 0.0112186  | 0 |
| Loxhd1       | chr18:77281957-77442257   | NOTEST | 0.00772217 | 0 |
| Lpo          | chr11:87806427-87826114   | NOTEST | 0.0118153  | 0 |
| Lrp2bp       | chr8:46010601-46029476    | NOTEST | 0.048975   | 0 |
| Lrrc10       | chr10:117045340-117046768 | NOTEST | 0.0298168  | 0 |
| Lrrc26       | chr2:25289910-25319187    | NOTEST | 0.0160561  | 0 |
| Lrrc30       | chr17:67630964-67632723   | NOTEST | 0.01035    | 0 |
| Lrrc38       | chr4:143349749-143371028  | NOTEST | 0.0247437  | 0 |
| Lrrc52       | chr1:167445674-167466780  | NOTEST | 0.093089   | 0 |
| Lta          | chr17:35203164-35205351   | NOTEST | 0.0436811  | 0 |
| Ltb4r2       | chr14:55761427-55763229   | NOTEST | 0.015623   | 0 |

|              |                           |        |            |   |
|--------------|---------------------------|--------|------------|---|
| Ltc4s        | chr11:50236471-50238471   | NOTEST | 0.226142   | 0 |
| Ly6g6e       | chr17:35076941-35078804   | NOTEST | 0.110352   | 0 |
| Ly6k         | chr15:74796873-74799968   | NOTEST | 0.0302518  | 0 |
| Lyg2         | chr1:37905922-37916493    | NOTEST | 0.014572   | 0 |
| Lypd4        | chr7:24864619-24869691    | NOTEST | 0.0180783  | 0 |
| Lyzl4        | chr9:121577842-121641566  | NOTEST | 0.0203431  | 0 |
| Madcam1      | chr10:79664573-79668536   | NOTEST | 0.0141451  | 0 |
| Mansc4       | chr6:147075061-147087032  | NOTEST | 0.109865   | 0 |
| Mapk15       | chr15:75993768-75999153   | NOTEST | 0.0521542  | 0 |
| 35489        | chr1:184786766-184811300  | NOTEST | 0.0453229  | 0 |
| Marcksl1-ps4 | chr13:4248734-4249777     | NOTEST | 0.0410143  | 0 |
| Matn3        | chr12:8947928-8972028     | NOTEST | 0.0866777  | 0 |
| Mb           | chr15:77015486-77057108   | NOTEST | 0.0448601  | 0 |
| Mcemp1       | chr8:3665761-3668905      | NOTEST | 0.20934    | 0 |
| Mcpt8        | chr14:56082163-56085197   | NOTEST | 0.0525732  | 0 |
| Meiob        | chr17:24804381-24839787   | NOTEST | 0.0222103  | 0 |
| Mep1b        | chr18:21072343-21100199   | NOTEST | 0.0169725  | 0 |
| Mesp1        | chr7:79792240-79793590    | NOTEST | 0.0369036  | 0 |
| Mettl21c     | chr1:44009407-44020006    | NOTEST | 0.0425267  | 0 |
| Mfsd6l       | chr11:68556185-68558245   | NOTEST | 0.0103747  | 0 |
| Mia          | chr7:27179740-27181149    | NOTEST | 0.823989   | 0 |
| Micalcl      | chr7:112368307-112413104  | NOTEST | 0.123993   | 0 |
| Milr1        | chr11:106751225-106779537 | NOTEST | 0.200962   | 0 |
| Mir3473e     | chr5:31624438-31697610    | NOTEST | 105.866    | 0 |
| Mir546       | chr10:126978716-126999975 | LOWDAT | 6.87382    | 0 |
| Mir8101      | chr11:102195746-102230172 | LOWDAT | 15.6832    | 0 |
| Mlana        | chr19:29697940-29708306   | NOTEST | 0.0668971  | 0 |
| Mlxipl       | chr5:135106890-135138382  | NOTEST | 0.0759063  | 0 |
| Mmp12        | chr9:7347373-7360461      | NOTEST | 0.0100714  | 0 |
| Mmp3         | chr9:7445821-7455974      | NOTEST | 0.0215511  | 0 |
| Mogat1       | chr1:78511059-78538173    | NOTEST | 0.326524   | 0 |
| Mrgprb1      | chr7:48444112-48456342    | NOTEST | 0.0738262  | 0 |
| Mrgprb2      | chr7:48550965-48558086    | NOTEST | 0.0457857  | 0 |
| Mrgprh       | chr17:12876033-12877842   | NOTEST | 0.188969   | 0 |
| Mrgprx2      | chr7:48478618-48499270    | NOTEST | 0.0113335  | 0 |
| Mro          | chr18:73859386-73879134   | NOTEST | 0.674356   | 0 |
| Mroh5        | chr15:73786935-73839671   | NOTEST | 0.0236849  | 0 |
| Ms4a1        | chr19:11196816-11299884   | NOTEST | 0.598675   | 0 |
| Ms4a6d       | chr19:11586605-11604804   | NOTEST | 0.249127   | 0 |
| Ms4a7        | chr19:11321038-11336146   | NOTEST | 0.34785    | 0 |
| Ms4a8a       | chr19:11067470-11081103   | NOTEST | 0.0206917  | 0 |
| Msr1         | chr8:39467447-40227787    | NOTEST | 0.357828   | 0 |
| Msx2         | chr13:53466880-53472780   | NOTEST | 0.0246535  | 0 |
| Mt4          | chr8:94137203-94139031    | NOTEST | 0.0955504  | 0 |
| Mtl5         | chr19:3388856-3407823     | NOTEST | 0.0711727  | 0 |
| Mtnr1a       | chr8:45069209-45088506    | NOTEST | 0.147928   | 0 |
| Mup20        | chr4:62050234-62054117    | NOTEST | 0.156193   | 0 |
| Mybpc1       | chr10:88518278-88605152   | NOTEST | 0.0146766  | 0 |
| Myh15        | chr16:49057485-49199104   | NOTEST | 0.0542741  | 0 |
| Myh2         | chr11:67171026-67197517   | NOTEST | 0.00928302 | 0 |
| Myh6         | chr14:54941920-54966607   | NOTEST | 0.00330134 | 0 |
| Myh7         | chr14:54968786-54994549   | NOTEST | 0.00914111 | 0 |
| Mylk2        | chr2:152911351-152923065  | NOTEST | 0.0249804  | 0 |

|           |                          |        |            |   |
|-----------|--------------------------|--------|------------|---|
| Myo3a     | chr2:22227502-22423370   | NOTEST | 0.0320803  | 0 |
| Myot      | chr18:44334073-44355722  | NOTEST | 0.00907806 | 0 |
| Myoz1     | chr14:20649101-20656540  | NOTEST | 0.11585    | 0 |
| Naa11     | chr5:97382208-97392330   | NOTEST | 0.0121669  | 0 |
| Nanos3    | chr8:84173732-84176552   | NOTEST | 0.102439   | 0 |
| Nanp      | chr2:151029684-151039379 | NOTEST | 0.0329645  | 0 |
| Nat3      | chr8:67523853-67548627   | NOTEST | 0.0324075  | 0 |
| Nat8      | chr6:85830386-85831890   | NOTEST | 0.0236374  | 0 |
| Nepn      | chr10:52391607-52404604  | NOTEST | 0.0106224  | 0 |
| Nespas    | chr2:174281236-174346742 | NOTEST | 0.00889609 | 0 |
| Neu2      | chr1:87574026-87597840   | NOTEST | 0.282976   | 0 |
| Neu4      | chr1:94020492-94028330   | NOTEST | 0.0042273  | 0 |
| Nkx2-2    | chr2:147177545-147331681 | NOTEST | 0.00872163 | 0 |
| Nkx6-1    | chr5:101659196-101664711 | NOTEST | 0.156318   | 0 |
| Nlrc4     | chr17:74426294-74459108  | NOTEST | 0.0749413  | 0 |
| Nlrp1a    | chr11:71091196-71144704  | NOTEST | 0.0114243  | 0 |
| Nlrp1b    | chr11:71153101-71230733  | NOTEST | 0.0388764  | 0 |
| Nlrp1c-ps | chr11:71242429-71285232  | NOTEST | 0.0108537  | 0 |
| Nlrp6     | chr7:140920901-140929192 | NOTEST | 0.0166801  | 0 |
| Nme8      | chr13:19645078-19697760  | NOTEST | 0.0114727  | 0 |
| Nobox     | chr6:43303673-43309554   | NOTEST | 0.0107644  | 0 |
| Npbwr1    | chr1:5913706-5917398     | NOTEST | 0.0101215  | 0 |
| Npffr1    | chr10:61595483-61626385  | NOTEST | 0.0494283  | 0 |
| Nphs1     | chr7:30460057-30488609   | NOTEST | 0.00315039 | 0 |
| Nphs2     | chr1:156310734-156328035 | NOTEST | 0.0280776  | 0 |
| Nppa      | chr4:148000745-148002067 | NOTEST | 0.0275378  | 0 |
| Nppc      | chr1:86666292-86670573   | NOTEST | 0.139742   | 0 |
| Nps       | chr7:135268618-135272942 | NOTEST | 0.0245719  | 0 |
| Npy6r     | chr18:44270126-44277700  | NOTEST | 0.0684104  | 0 |
| Nr0b2     | chr4:133553389-133556536 | NOTEST | 0.477353   | 0 |
| Nr1i2     | chr16:38248348-38294824  | NOTEST | 0.0165648  | 0 |
| Nt5c1a    | chr4:123201552-123216207 | NOTEST | 0.239834   | 0 |
| Nxph2     | chr2:23321245-23401973   | NOTEST | 0.0446457  | 0 |
| Oas1f     | chr5:120847366-120857986 | NOTEST | 0.0302361  | 0 |
| Oas1h     | chr5:120861421-120873505 | NOTEST | 0.0145449  | 0 |
| Obp2b     | chr2:25737008-25740097   | NOTEST | 0.0326043  | 0 |
| Ocstamp   | chr2:165395449-165400394 | NOTEST | 0.0183701  | 0 |
| Odf3      | chr7:140847915-140850925 | NOTEST | 0.0223824  | 0 |
| Odf3l1    | chr9:56848658-56851963   | NOTEST | 0.278132   | 0 |
| Olah      | chr2:3341987-3366569     | NOTEST | 0.0278783  | 0 |
| Olf1245   | chr2:89574711-89575773   | NOTEST | 0.0211733  | 0 |
| Olf1249   | chr2:89629939-89630896   | NOTEST | 0.0213992  | 0 |
| Olf1254   | chr2:89788405-89789350   | NOTEST | 0.0232222  | 0 |
| Olf1259   | chr2:89943183-89944113   | NOTEST | 0.145177   | 0 |
| Olf1344   | chr7:6439901-6440867     | NOTEST | 0.184667   | 0 |
| Olf1361   | chr13:21658367-21659321  | NOTEST | 0.0758698  | 0 |
| Olf1371   | chr11:52213051-52213987  | NOTEST | 0.0264682  | 0 |
| Olf1393   | chr11:49280149-49281085  | NOTEST | 0.0999524  | 0 |
| Olf212    | chr6:116506515-116517965 | NOTEST | 0.00696706 | 0 |
| Olf221    | chr14:52035173-52036109  | NOTEST | 0.023508   | 0 |
| Olf222    | chr11:59570781-59571738  | NOTEST | 0.136559   | 0 |
| Olf284    | chr15:98340021-98340939  | NOTEST | 0.141154   | 0 |
| Olf419    | chr1:174249888-174250976 | NOTEST | 0.0364435  | 0 |



|               |                           |        |            |   |
|---------------|---------------------------|--------|------------|---|
| Olfr48        | chr2:89844065-89844971    | NOTEST | 0.0521252  | 0 |
| Olfr503       | chr7:108544526-108545498  | NOTEST | 0.0488654  | 0 |
| Olfr550       | chr7:102578468-102579506  | NOTEST | 0.0424118  | 0 |
| Olfr561       | chr7:102774525-102775470  | NOTEST | 0.0232222  | 0 |
| Olfr761       | chr17:37952050-37953022   | NOTEST | 0.0461957  | 0 |
| Olfr859       | chr9:19808319-19809249    | NOTEST | 0.0962912  | 0 |
| Olfr898       | chr9:38349084-38350035    | NOTEST | 0.0475028  | 0 |
| Olig2         | chr16:91225549-91228677   | NOTEST | 0.0081436  | 0 |
| Onecut3       | chr10:80494905-80517260   | NOTEST | 0.0742649  | 0 |
| Opn5          | chr17:42556782-42611313   | NOTEST | 0.134244   | 0 |
| Optc          | chr1:133897193-133907999  | NOTEST | 0.0484579  | 0 |
| Osr1          | chr12:9574441-9581500     | NOTEST | 0.328888   | 0 |
| Osr2          | chr15:35296111-35303305   | NOTEST | 0.22935    | 0 |
| Ostn          | chr16:27307640-27351209   | NOTEST | 0.0151341  | 0 |
| Otogl         | chr10:107762309-107912134 | NOTEST | 0.065499   | 0 |
| Otol1         | chr3:70007612-70028708    | NOTEST | 0.103379   | 0 |
| Otos          | chr1:92644217-92648841    | NOTEST | 0.251105   | 0 |
| Ovol3         | chr7:30232073-30236765    | NOTEST | 0.0194867  | 0 |
| Pah           | chr10:87521794-87584137   | NOTEST | 0.00937749 | 0 |
| Pax1          | chr2:147364993-147375048  | NOTEST | 0.0718198  | 0 |
| Pax3          | chr1:78101266-78197136    | NOTEST | 0.0202472  | 0 |
| Pax5          | chr4:44531505-44710440    | NOTEST | 0.101633   | 0 |
| Pax7          | chr4:139738080-139832968  | NOTEST | 0.00918775 | 0 |
| Pax9          | chr12:56695638-56711230   | NOTEST | 0.132495   | 0 |
| Pdcd1lg2      | chr19:29410918-29472927   | NOTEST | 0.00500932 | 0 |
| Pde6c         | chr19:38132780-38183951   | NOTEST | 0.0131773  | 0 |
| Pdilt         | chr7:119486586-119523482  | NOTEST | 0.0537087  | 0 |
| Pdxk-ps       | chr17:32076082-32091423   | NOTEST | 0.033075   | 0 |
| Pdzd9         | chr7:120635188-120670343  | NOTEST | 0.0437722  | 0 |
| Pgam2         | chr11:5801636-5803796     | NOTEST | 0.17856    | 0 |
| Pgr15l        | chrX:97072595-97082104    | NOTEST | 0.00642964 | 0 |
| Pigr          | chr1:130826683-130852249  | NOTEST | 0.00499013 | 0 |
| Pilrb2        | chr5:137865828-137871758  | NOTEST | 0.0522649  | 0 |
| Pin1rt1       | chr2:104713925-104716290  | NOTEST | 0.0183256  | 0 |
| Pira11        | chr7:3731632-3915501      | NOTEST | 0.0266586  | 0 |
| Pira4,Pira7   | chr7:3731632-3915501      | LOWDAT | 0.00907811 | 0 |
| Pira6         | chr7:3731632-3915501      | NOTEST | 0.0245507  | 0 |
| Pira7         | chr7:3731632-3915501      | NOTEST | 0.00036711 | 0 |
| Pitx3         | chr19:46131898-46148325   | NOTEST | 0.0164399  | 0 |
| Pkhd1         | chr1:20057778-20618057    | NOTEST | 0.00514188 | 0 |
| Pla2g2c       | chr4:138709836-138744575  | NOTEST | 0.0242393  | 0 |
| Pla2g4d       | chr2:120265868-120289069  | NOTEST | 0.0163765  | 0 |
| Plac1         | chrX:53070001-53114405    | NOTEST | 0.0409386  | 0 |
| Plac9a,Plac9b | chr14:26167317-26182351   | LOWDAT | 7.17E-05   | 0 |
| Plb1          | chr5:32232707-32364356    | NOTEST | 0.199833   | 0 |
| Plekhg6       | chr6:125362650-125380504  | NOTEST | 0.0232513  | 0 |
| Plscr5        | chr9:92192935-92209698    | NOTEST | 0.13169    | 0 |
| Pnma5         | chrX:73033980-73037103    | NOTEST | 0.0159796  | 0 |
| Pof1b         | chrX:112638426-112698651  | NOTEST | 0.00872696 | 0 |
| Pou1f1        | chr16:65520628-65533981   | NOTEST | 0.0528431  | 0 |
| Pou3f3os      | chr1:42648199-42694825    | NOTEST | 0.0975665  | 0 |
| Pou3f4        | chrX:110814464-110815550  | NOTEST | 0.020598   | 0 |
| Ppp1r14d      | chr2:119218118-119229865  | NOTEST | 0.0299087  | 0 |

|         |                           |        |            |   |
|---------|---------------------------|--------|------------|---|
| Ppp1r3g | chr13:35967905-35970388   | NOTEST | 0.0172851  | 0 |
| Pramel7 | chr2:87489087-87492418    | NOTEST | 0.0109787  | 0 |
| Prdm6   | chr18:53464545-53575857   | NOTEST | 0.178565   | 0 |
| Prg3    | chr2:84988214-84993886    | NOTEST | 0.0230974  | 0 |
| Prl7a1  | chr13:27633363-27642493   | NOTEST | 0.0257059  | 0 |
| Prnd    | chr2:131909927-131956131  | NOTEST | 0.0621251  | 0 |
| Prok2   | chr6:99711298-99726392    | NOTEST | 0.064062   | 0 |
| Prom2   | chr2:127526952-127541417  | NOTEST | 0.462445   | 0 |
| Prr19   | chr7:25301358-25304133    | NOTEST | 0.0166877  | 0 |
| Prss34  | chr17:25298393-25300161   | NOTEST | 0.101735   | 0 |
| Prss44  | chr9:110813993-110817999  | NOTEST | 0.0111264  | 0 |
| Psapl1  | chr5:36017180-36398139    | NOTEST | 0.00686648 | 0 |
| Psg17   | chr7:18813936-18821591    | NOTEST | 0.0102418  | 0 |
| Psg19   | chr7:18786301-18798510    | NOTEST | 0.00733888 | 0 |
| Pter    | chr2:12924040-13010864    | NOTEST | 0.449479   | 0 |
| Ptgdr2  | chr19:10937159-10949266   | NOTEST | 0.0140941  | 0 |
| Ptgs2os | chr1:150076660-150099766  | NOTEST | 0.0383395  | 0 |
| Ptprh   | chr7:4548613-4604041      | NOTEST | 0.00953319 | 0 |
| Ptprv   | chr1:135108497-135132575  | NOTEST | 0.0158088  | 0 |
| Pzp     | chr6:128438756-128526720  | NOTEST | 0.0304031  | 0 |
| Qrfp    | chr2:31806167-31810518    | NOTEST | 0.00723287 | 0 |
| Qrich2  | chr11:116441324-116454347 | NOTEST | 0.00928656 | 0 |
| Rab17   | chr1:90958132-90969620    | NOTEST | 0.0118788  | 0 |
| Rad51b  | chr12:79297281-79814690   | NOTEST | 0.0526616  | 0 |
| Raet1b  | chr10:22158608-22374139   | LOWDAT | 0.0174357  | 0 |
| Raet1d  | chr10:22158608-22374139   | NOTEST | 0.0151603  | 0 |
| Rem1    | chr2:152627007-152635191  | NOTEST | 0.358699   | 0 |
| Ren1    | chr1:133350565-133360323  | NOTEST | 0.0273162  | 0 |
| Ren2    | chr1:133350565-133360323  | NOTEST | 2.16E-05   | 0 |
| Rergl   | chr6:139493181-139501909  | NOTEST | 0.0360196  | 0 |
| Rfx4    | chr10:84756047-84906538   | NOTEST | 0.0125242  | 0 |
| Rgn     | chrX:20549817-20562087    | NOTEST | 0.0531679  | 0 |
| Rgs13   | chr1:144138666-144177372  | NOTEST | 0.0133022  | 0 |
| Ribc2   | chr15:85132098-85144569   | NOTEST | 0.023755   | 0 |
| Ripply1 | chrX:139779680-139782353  | NOTEST | 0.112638   | 0 |
| Rln1    | chr19:29331754-29334670   | NOTEST | 0.141257   | 0 |
| Rnase10 | chr14:51007750-51010758   | NOTEST | 0.0949521  | 0 |
| Rnase6  | chr14:51129067-51131121   | NOTEST | 0.177024   | 0 |
| Rnf222  | chr11:68888552-68895015   | NOTEST | 0.00770352 | 0 |
| Rorb    | chr19:18930608-19111196   | NOTEST | 0.00600577 | 0 |
| Ros1    | chr10:52045925-52195244   | NOTEST | 0.00252778 | 0 |
| Rpe65   | chr3:159599180-159625307  | NOTEST | 0.0511161  | 0 |
| Rpl39l  | chr16:10170227-10174911   | NOTEST | 0.0536542  | 0 |
| Rubie   | chr14:46568330-46575851   | NOTEST | 0.0589593  | 0 |
| S100z   | chr13:95477300-95478655   | NOTEST | 0.157229   | 0 |
| Sbk2    | chr7:4957080-4964348      | NOTEST | 0.0388643  | 0 |
| Scgb1a1 | chr19:9083641-9087956     | NOTEST | 1.25821    | 0 |
| Scimp   | chr11:70790931-70812561   | NOTEST | 0.0617826  | 0 |
| Scnn1g  | chr7:121734506-121768477  | NOTEST | 0.0193783  | 0 |
| Scrg1   | chr8:57455922-57477585    | NOTEST | 0.0717778  | 0 |
| Sct     | chr7:141278328-141279133  | NOTEST | 0.0525667  | 0 |
| Sebox   | chr11:78503512-78505081   | NOTEST | 0.0148957  | 0 |
| Sel1l2  | chr2:140229857-140389710  | NOTEST | 0.0330383  | 0 |

|           |                           |        |            |   |
|-----------|---------------------------|--------|------------|---|
| Selenbp2  | chr3:94693572-94704406    | NOTEST | 0.0229873  | 0 |
| Serpina3k | chr12:104338485-104345739 | NOTEST | 0.0229932  | 0 |
| Serpina5  | chr12:104101112-104106137 | NOTEST | 0.00821784 | 0 |
| Serpinb10 | chr1:107529002-107549271  | NOTEST | 0.0300443  | 0 |
| Serpinb6e | chr13:33832344-33843408   | NOTEST | 0.0274234  | 0 |
| Sfrp2     | chr3:83766320-83774314    | NOTEST | 0.390651   | 0 |
| Sfta2     | chr17:35649707-35650569   | NOTEST | 0.0599048  | 0 |
| Sftpc     | chr14:70520941-70524081   | NOTEST | 0.0303072  | 0 |
| Sgca      | chr11:94962776-94976327   | NOTEST | 0.034194   | 0 |
| Sh2d7     | chr9:54538983-54545020    | NOTEST | 0.00752814 | 0 |
| Siglec1   | chr2:131069219-131086765  | NOTEST | 0.116953   | 0 |
| Siglece   | chr7:43651069-43660161    | NOTEST | 0.208037   | 0 |
| Siglech   | chr7:55768177-55778833    | NOTEST | 0.210206   | 0 |
| Sirpb1a   | chr3:15371826-15426427    | NOTEST | 0.0355256  | 0 |
| Sit1      | chr4:43482082-43483709    | NOTEST | 0.0505312  | 0 |
| Six3      | chr17:85620833-85626191   | NOTEST | 0.0357143  | 0 |
| Six3os1   | chr17:85601931-85618396   | NOTEST | 0.0142708  | 0 |
| Skint3    | chr4:112232244-112300468  | NOTEST | 0.0247571  | 0 |
| Slamf6    | chr1:171917536-171943868  | NOTEST | 0.0302254  | 0 |
| Slamf8    | chr1:172581376-172590568  | NOTEST | 0.0765726  | 0 |
| Slc10a5   | chr3:10331733-10335656    | NOTEST | 0.00462297 | 0 |
| Slc13a2   | chr11:78394484-78422185   | NOTEST | 0.0193763  | 0 |
| Slc15a1   | chr14:121459620-121505254 | NOTEST | 0.0781668  | 0 |
| Slc16a5   | chr11:115462472-115474398 | NOTEST | 0.0312111  | 0 |
| Slc18a3   | chr14:32408202-32465909   | NOTEST | 0.00728004 | 0 |
| Slc22a1   | chr17:12648874-12675838   | NOTEST | 0.0293212  | 0 |
| Slc22a12  | chr19:6535855-6543070     | NOTEST | 0.00785256 | 0 |
| Slc24a1   | chr9:64922860-64951607    | NOTEST | 0.0136879  | 0 |
| Slc25a31  | chr3:40708870-40726094    | NOTEST | 0.0101015  | 0 |
| Slc26a3   | chr12:31438218-31473919   | NOTEST | 0.013461   | 0 |
| Slc26a4   | chr12:31519818-31559969   | NOTEST | 0.0193297  | 0 |
| Slc27a2   | chr2:126553023-126588243  | NOTEST | 0.0332156  | 0 |
| Slc32a1   | chr2:158610757-158615747  | NOTEST | 0.00618492 | 0 |
| Slc36a1os | chr11:55191718-55197682   | NOTEST | 0.486367   | 0 |
| Slc39a4   | chr15:76612382-76616852   | NOTEST | 0.00850442 | 0 |
| Slc46a2   | chr4:59905898-59915056    | NOTEST | 0.038702   | 0 |
| Slc5a10   | chr11:61672781-61720799   | NOTEST | 0.0505605  | 0 |
| Slc6a18   | chr13:73661749-73678023   | NOTEST | 0.0137123  | 0 |
| Slc6a2    | chr8:92961046-93001667    | NOTEST | 0.0436755  | 0 |
| Slc7a10   | chr7:35186384-35215345    | NOTEST | 0.0490943  | 0 |
| Slc7a13   | chr4:19818726-19842213    | NOTEST | 0.0193966  | 0 |
| Slco1a6   | chr6:142085767-142186149  | NOTEST | 0.0061873  | 0 |
| Slco6c1   | chr1:97059448-97128303    | NOTEST | 0.193561   | 0 |
| Slurp1    | chr15:74726643-74728026   | NOTEST | 0.160897   | 0 |
| Smco2     | chr6:146850109-146871404  | NOTEST | 0.0181514  | 0 |
| Smim9     | chrX:75146056-75163751    | NOTEST | 0.0345019  | 0 |
| Smpdl3b   | chr4:132732965-132757171  | NOTEST | 0.128465   | 0 |
| Snora74a  | chr18:35553409-35558316   | NOTEST | 0.690469   | 0 |
| Snora7a   | chr6:115774556-115808743  | NOTEST | 11.6757    | 0 |
| Sox1      | chr8:12385770-12436732    | NOTEST | 0.00949092 | 0 |
| Sox30     | chr11:45980309-46017992   | NOTEST | 0.0126535  | 0 |
| Sp7       | chr15:102357176-102366271 | NOTEST | 0.0407474  | 0 |
| Spag17    | chr3:99885416-100162403   | NOTEST | 0.00447538 | 0 |

|            |                           |        |            |   |
|------------|---------------------------|--------|------------|---|
| Spata17    | chr1:187048406-187215446  | NOTEST | 0.171443   | 0 |
| Spata20    | chr11:94478903-94485310   | NOTEST | 0.0237577  | 0 |
| Spata22    | chr11:73329740-73346044   | NOTEST | 0.0491746  | 0 |
| Spata31    | chr13:64917405-64923195   | NOTEST | 0.00531048 | 0 |
| Spata31d1a | chr13:59700082-59706197   | NOTEST | 0.0042211  | 0 |
| Spata31d1c | chr13:65033057-65038004   | NOTEST | 0.00603369 | 0 |
| Spata4     | chr8:54600780-54610098    | NOTEST | 0.056656   | 0 |
| Speer4a    | chr5:26034269-26039505    | NOTEST | 0.0139927  | 0 |
| Spesp1     | chr9:62270728-62282179    | NOTEST | 0.00647453 | 0 |
| Spi1       | chr2:91096796-91115756    | NOTEST | 0.721037   | 0 |
| Spink5     | chr18:43963240-44022487   | NOTEST | 0.00352605 | 0 |
| Spns3      | chr11:72498155-72550246   | NOTEST | 0.0768889  | 0 |
| Spo11      | chr2:172979841-172993576  | NOTEST | 0.0122979  | 0 |
| Spp2       | chr1:88407018-88426438    | NOTEST | 0.195428   | 0 |
| Sstr3      | chr15:78537014-78544345   | NOTEST | 0.00488431 | 0 |
| Sstr5      | chr17:25489874-25497288   | NOTEST | 0.0378007  | 0 |
| Ssu2       | chr6:112359323-112388023  | NOTEST | 0.0643833  | 0 |
| Stab2      | chr10:86841209-87007942   | NOTEST | 0.0244536  | 0 |
| Stfa1      | chr16:36277147-36285371   | NOTEST | 0.0801118  | 0 |
| Strc       | chr2:121358640-121380940  | NOTEST | 0.00289595 | 0 |
| Sult6b1    | chr17:78883937-78906992   | NOTEST | 0.00866989 | 0 |
| Sycp3      | chr10:88459586-88503970   | NOTEST | 0.253831   | 0 |
| Syngr4     | chr7:45886844-45896711    | NOTEST | 0.0313073  | 0 |
| Sypl2      | chr3:108212265-108226599  | NOTEST | 0.0633521  | 0 |
| T          | chr17:8434422-8442496     | NOTEST | 0.0104539  | 0 |
| Tarm1      | chr7:3489075-3502552      | NOTEST | 0.0897705  | 0 |
| Tbpl2      | chr2:24071365-24096595    | NOTEST | 0.0105425  | 0 |
| Tbx20      | chr9:24720811-24774303    | NOTEST | 0.00551712 | 0 |
| Tceal7     | chrX:136224040-136226100  | NOTEST | 0.0446885  | 0 |
| Tcf21      | chr10:22817274-22820128   | NOTEST | 0.0177628  | 0 |
| Tcl1       | chr12:105216754-105222737 | NOTEST | 0.0178481  | 0 |
| Tctex1d4   | chr4:117126812-117133952  | NOTEST | 0.02071    | 0 |
| Tdrd12     | chr7:35493609-35537744    | NOTEST | 0.0462152  | 0 |
| Tectb      | chr19:55180884-55196313   | NOTEST | 0.00682054 | 0 |
| Tekt1      | chr11:72344716-72362442   | NOTEST | 0.0720625  | 0 |
| Tex11      | chrX:100838647-101059639  | NOTEST | 0.0141084  | 0 |
| Tex13      | chrX:140808306-140813433  | NOTEST | 0.0100697  | 0 |
| Tex19.1    | chr11:121146142-121148313 | NOTEST | 0.0335323  | 0 |
| Tex35      | chr1:157099147-157108645  | NOTEST | 0.0247967  | 0 |
| Tex37      | chr6:70913088-70918922    | NOTEST | 0.0267379  | 0 |
| Tfap2b     | chr1:19208913-19238845    | NOTEST | 0.00474019 | 0 |
| Tfpi2      | chr6:3962594-3968354      | NOTEST | 0.212265   | 0 |
| Tgm1       | chr14:55700008-55713492   | NOTEST | 0.00630734 | 0 |
| Theg       | chr10:79576476-79587136   | NOTEST | 0.0198595  | 0 |
| Thpo       | chr16:20724453-20742384   | NOTEST | 0.0167112  | 0 |
| Ticam2     | chr18:46558230-46574533   | NOTEST | 0.149418   | 0 |
| Timd4      | chr11:46810798-46844333   | NOTEST | 0.0625551  | 0 |
| Timm8a2    | chr14:122034673-122038422 | NOTEST | 0.0272582  | 0 |
| Tldc2      | chr2:157087054-157096481  | NOTEST | 0.16849    | 0 |
| Tlr11      | chr14:50357913-50363663   | NOTEST | 0.0235639  | 0 |
| Tlr8       | chrX:167242731-167263788  | NOTEST | 0.129914   | 0 |
| Tm4sf19    | chr16:32400505-32408227   | NOTEST | 0.0172574  | 0 |
| Tm4sf20    | chr1:82756648-82768456    | NOTEST | 0.0148488  | 0 |

|             |                           |        |            |   |
|-------------|---------------------------|--------|------------|---|
| Tm4sf4      | chr3:57425409-57441675    | NOTEST | 0.0627692  | 0 |
| Tmbim7      | chr5:3657003-3679544      | NOTEST | 0.0129612  | 0 |
| Tmc2        | chr2:130195193-130264445  | NOTEST | 0.146615   | 0 |
| Tmco2       | chr4:121105650-121109226  | NOTEST | 0.0313221  | 0 |
| Tmco5       | chr2:116878690-116892500  | NOTEST | 0.0196584  | 0 |
| Tmem125     | chr4:118540940-118543726  | NOTEST | 0.0213256  | 0 |
| Tmem139     | chr6:42261969-42264555    | NOTEST | 0.0375111  | 0 |
| Tmem213     | chr6:38048482-38254009    | NOTEST | 0.173068   | 0 |
| Tmem215     | chr4:40472179-40475653    | NOTEST | 0.00776518 | 0 |
| Tmem217     | chr17:29526017-29549593   | NOTEST | 0.0258754  | 0 |
| Tmem235     | chr11:117860751-117865543 | NOTEST | 0.0212091  | 0 |
| Tmem27      | chrX:164090186-164118859  | NOTEST | 0.456266   | 0 |
| Tmem45a     | chr16:56805160-56886163   | NOTEST | 0.260238   | 0 |
| Tmevpg1     | chr10:118502034-118556525 | NOTEST | 0.0351295  | 0 |
| Tmprss11f   | chr5:86521225-86632424    | NOTEST | 0.0047173  | 0 |
| Tnfrsf17    | chr16:11313808-11320068   | NOTEST | 0.0298596  | 0 |
| Tnfsf4      | chr1:161395437-161418206  | NOTEST | 0.0122412  | 0 |
| Tnip3       | chr6:65590397-65634040    | NOTEST | 0.00510206 | 0 |
| Tnmd        | chrX:133851007-133865578  | NOTEST | 0.295451   | 0 |
| Tnni3k      | chr3:154786290-155055407  | NOTEST | 0.029902   | 0 |
| Tnp1        | chr1:73015074-73015899    | NOTEST | 0.0810106  | 0 |
| Tns4        | chr11:99065677-99089306   | NOTEST | 0.0386143  | 0 |
| Tpsab1      | chr17:25343244-25345562   | NOTEST | 0.0568209  | 0 |
| Tpsg1       | chr17:25370552-25433783   | NOTEST | 0.0349199  | 0 |
| Trdn        | chr10:33083482-33476709   | NOTEST | 0.0126613  | 0 |
| Trem3       | chr17:48247728-48258847   | NOTEST | 0.11712    | 0 |
| Treml4      | chr17:48264294-48275358   | NOTEST | 0.0127151  | 0 |
| Trh         | chr6:92242060-92244650    | NOTEST | 0.0299998  | 0 |
| Trim30b     | chr7:104355397-104358646  | NOTEST | 0.0133966  | 0 |
| Trim30e-ps1 | chr7:104532958-104535361  | NOTEST | 0.021567   | 0 |
| Trim34b     | chr7:104329470-104336617  | NOTEST | 0.0120942  | 0 |
| Trim55      | chr3:19644459-19691599    | NOTEST | 0.0216513  | 0 |
| Trim63      | chr4:134315119-134329629  | NOTEST | 0.0763533  | 0 |
| Trp73       | chr4:154056248-154140208  | NOTEST | 0.0265532  | 0 |
| Trpm5       | chr7:143071528-143094642  | NOTEST | 0.00822801 | 0 |
| Trpv3       | chr11:73267619-73297200   | NOTEST | 0.015328   | 0 |
| Tsga13      | chr6:30896980-30915573    | NOTEST | 0.0193907  | 0 |
| Tsnaxip1    | chr8:105827743-105844676  | NOTEST | 0.00802103 | 0 |
| Tssk6       | chr8:69894181-69903518    | NOTEST | 0.0459136  | 0 |
| Tuba3a      | chr6:125278273-125286042  | NOTEST | 0.0271156  | 0 |
| Tulp1       | chr17:28351518-28365143   | NOTEST | 0.0302701  | 0 |
| Txndc2      | chr17:65637504-65642204   | NOTEST | 0.0105667  | 0 |
| Ube2u       | chr4:100478866-100550145  | NOTEST | 0.0146896  | 0 |
| Ucma        | chr2:4976121-4985748      | NOTEST | 0.0262543  | 0 |
| Ucn2        | chr9:108986162-108987164  | NOTEST | 0.0227625  | 0 |
| Ugt1a1      | chr1:88055410-88220002    | NOTEST | 0.014312   | 0 |
| Ugt1a5      | chr1:88055410-88220002    | NOTEST | 0.198673   | 0 |
| Ugt1a7c     | chr1:88055410-88220002    | NOTEST | 0.222926   | 0 |
| Unc93a      | chr17:13108616-13131791   | NOTEST | 0.0197881  | 0 |
| Urah        | chr7:140835495-140846769  | NOTEST | 0.0798859  | 0 |
| Usp50       | chr2:126761049-126783460  | NOTEST | 0.204898   | 0 |
| Utf1        | chr7:139943855-139945112  | NOTEST | 0.0190059  | 0 |
| Uts2        | chr4:150997096-151001810  | NOTEST | 0.117328   | 0 |



|               |                           |        |            |           |
|---------------|---------------------------|--------|------------|-----------|
| V1rd18,V1rd19 | chr7:24003090-24004247    | NOTEST | 0.0202832  | 0         |
| V1rd19        | chr7:24003090-24004247    | LOWDAT | 0.0225695  | 0         |
| Vgll2         | chr10:52022685-52028471   | NOTEST | 0.157026   | 0         |
| Vip           | chr10:5639217-5647614     | NOTEST | 0.0511686  | 0         |
| Vmn1r212      | chr13:22883087-22884161   | NOTEST | 0.0197758  | 0         |
| Vmn1r228      | chr17:20776058-20777501   | NOTEST | 0.0138823  | 0         |
| Vmn1r5        | chr6:56985341-56986289    | NOTEST | 0.0244115  | 0         |
| Vmn2r20       | chr6:123385261-123418061  | NOTEST | 0.00815906 | 0         |
| Vmn2r47       | chr7:9816781-9841325      | NOTEST | 0.00817297 | 0         |
| Vmn2r84       | chr10:130385799-130394241 | NOTEST | 0.0141872  | 0         |
| Vmn2r86       | chr10:130446198-130455894 | NOTEST | 0.00686648 | 0         |
| Vmn2r90       | chr17:17703940-17734167   | NOTEST | 0.00673699 | 0         |
| Vnn1          | chr10:23894687-23905343   | NOTEST | 0.224009   | 0         |
| Vnn3          | chr10:23851461-23869843   | NOTEST | 0.0327166  | 0         |
| Vrtn          | chr12:84641018-84651455   | NOTEST | 0.0174758  | 0         |
| Vsig4         | chrX:96247202-96293438    | NOTEST | 0.0279109  | 0         |
| Vsig8         | chr1:172555937-172563717  | NOTEST | 0.0479021  | 0         |
| Wbp2nl        | chr15:82298983-82314558   | NOTEST | 0.0173313  | 0         |
| Wdr64         | chr1:175698592-175815733  | NOTEST | 0.0231544  | 0         |
| Wdr86         | chr5:24712268-24730680    | NOTEST | 0.0753219  | 0         |
| Wdr96         | chr19:47736856-47837361   | NOTEST | 0.00299348 | 0         |
| Wee2          | chr6:40442862-40466815    | NOTEST | 0.01919    | 0         |
| Wfdc12        | chr2:164189230-164190558  | NOTEST | 0.0348325  | 0         |
| Wfdc13        | chr2:164685106-164687706  | NOTEST | 0.0197758  | 0         |
| Wfdc15a       | chr2:164198871-164200117  | NOTEST | 0.0689087  | 0         |
| Wfdc18        | chr11:83709003-83711360   | NOTEST | 0.161524   | 0         |
| Wnt10b        | chr15:98771751-98778150   | NOTEST | 0.0768918  | 0         |
| Wnt2          | chr6:17988939-18030445    | NOTEST | 0.143238   | 0         |
| Wnt8b         | chr19:44493471-44514273   | NOTEST | 0.0155623  | 0         |
| Wt1           | chr2:105126528-105173614  | NOTEST | 0.0251832  | 0         |
| Xcr1          | chr9:123852314-123862029  | NOTEST | 0.0375751  | 0         |
| Xirp1         | chr9:120013754-120023598  | NOTEST | 0.0600434  | 0         |
| Zan           | chr5:137378636-137477064  | NOTEST | 0.00861259 | 0         |
| Zbbx          | chr3:75037906-75143723    | NOTEST | 0.017383   | 0         |
| Zfp345        | chr2:150470990-150485063  | NOTEST | 0.0149566  | 0         |
| Zfp36l3       | chrX:53772685-53776394    | NOTEST | 0.00667822 | 0         |
| Zfp648        | chr1:154201186-154205674  | NOTEST | 0.00961924 | 0         |
| Zfp663        | chr2:165351296-165362119  | NOTEST | 0.622045   | 0         |
| Zfp819        | chr7:43607168-43618279    | NOTEST | 0.00728664 | 0         |
| Zglp1         | chr9:21062392-21067093    | NOTEST | 0.155909   | 0         |
| Zim3          | chr7:6730582-6976662      | NOTEST | 0.00532631 | 0         |
| Cyp4b1-ps2    | chr4:115582037-115583127  | OK     | 0          | 2.1262    |
| Scarna13      | chr12:105030616-105032279 | OK     | 0          | 4.27251   |
| Snora16a      | chr4:132308677-132311024  | OK     | 0          | 10.4224   |
| Snora65       | chr2:32961711-32964045    | OK     | 0          | 83.0789   |
| Snora70       | chrX:74270815-74273135    | OK     | 0          | 8.09522   |
| 1110028F18Rik | chr8:106587142-106594820  | NOTEST | 0          | 0.0160092 |
| 1600029I14Rik | chr9:99456242-99568899    | NOTEST | 0          | 0.0653683 |
| 1700007K09Rik | chr7:131325930-131329499  | NOTEST | 0          | 0.040805  |
| 1700011H14Rik | chr14:49226358-49245428   | NOTEST | 0          | 0.047255  |
| 1700012L04Rik | chrX:9272783-9313245      | NOTEST | 0          | 0.397581  |
| 1700022I11Rik | chr4:42969945-42974325    | NOTEST | 0          | 0.0166569 |
| 1700029P11Rik | chr15:81980539-81981563   | NOTEST | 0          | 0.0277215 |

|               |                           |        |   |            |
|---------------|---------------------------|--------|---|------------|
| 1700030L20Rik | chr3:136435269-136449349  | NOTEST | 0 | 0.0248324  |
| 1700054M17Rik | chr2:118277097-118373419  | NOTEST | 0 | 0.0924635  |
| 1700071K01Rik | chr11:80880162-81968396   | NOTEST | 0 | 0.0272591  |
| 1700072O05Rik | chr6:120554795-120574204  | NOTEST | 0 | 0.0829912  |
| 1700084E18Rik | chr2:30237197-30237631    | NOTEST | 0 | 0.161597   |
| 1700097N02Rik | chr17:30622440-30626905   | NOTEST | 0 | 0.14923    |
| 1810046K07Rik | chr9:51289685-51328917    | NOTEST | 0 | 0.0817598  |
| 2310007B03Rik | chr1:93151354-93160948    | NOTEST | 0 | 0.0803566  |
| 2310030A07Rik | chr1:150319416-150346771  | NOTEST | 0 | 0.158133   |
| 2610028E06Rik | chr4:125887850-125922310  | NOTEST | 0 | 0.0478866  |
| 2610318N02Rik | chr16:17113397-17125106   | NOTEST | 0 | 0.0214358  |
| 2700086A05Rik | chr6:52169061-52213597    | NOTEST | 0 | 0.21289    |
| 3110099E03Rik | chr2:115493512-115512201  | NOTEST | 0 | 0.016012   |
| 4732416N19Rik | chr6:148047415-148444352  | NOTEST | 0 | 0.116577   |
| 4921506M07Rik | chr12:57564114-57622109   | NOTEST | 0 | 0.0763686  |
| 4930404I05Rik | chr16:90936096-91044379   | NOTEST | 0 | 0.0235614  |
| 4930405L22Rik | chr5:45926821-45932409    | NOTEST | 0 | 0.113339   |
| 4930428G15Rik | chr9:115336160-115341924  | NOTEST | 0 | 0.112833   |
| 4930440I19Rik | chr2:78051176-78194430    | NOTEST | 0 | 0.0218571  |
| 4930469G21Rik | chr1:161142711-161170507  | NOTEST | 0 | 0.0302908  |
| 4930482G09Rik | chr3:153147942-153152108  | NOTEST | 0 | 0.0292664  |
| 4930500F04Rik | chr5:149847746-149864280  | NOTEST | 0 | 0.060614   |
| 4930507D10Rik | chr11:80850380-80858300   | NOTEST | 0 | 0.0384323  |
| 4930546C10Rik | chr18:68889486-68951528   | NOTEST | 0 | 0.0092184  |
| 4930594C11Rik | chr1:37439339-37541016    | NOTEST | 0 | 0.0306352  |
| 4931406H21Rik | chr14:25459184-25666747   | NOTEST | 0 | 0.00535218 |
| 4932702P03Rik | chr13:24905599-24939049   | NOTEST | 0 | 0.0396499  |
| 4933402N22Rik | chr5:11918042-11922804    | NOTEST | 0 | 0.0491035  |
| 4933403O08Rik | chrX:112239048-112243852  | NOTEST | 0 | 0.0138242  |
| 4933406M09Rik | chr1:134385939-134390983  | NOTEST | 0 | 0.0284351  |
| 4933413G19Rik | chr6:128362993-128385144  | NOTEST | 0 | 0.0205212  |
| 4933424G05Rik | chr18:14968684-15151446   | NOTEST | 0 | 0.0140989  |
| 4933436E23Rik | chr1:139379451-139402852  | NOTEST | 0 | 0.0214142  |
| 5430437J10Rik | chr15:5496317-5594983     | NOTEST | 0 | 0.0189352  |
| 5730460C07Rik | chr3:153789304-153792087  | NOTEST | 0 | 0.0279805  |
| 5830428M24Rik | chr12:69464786-69475550   | NOTEST | 0 | 0.0219955  |
| 8030423J24Rik | chr13:70882947-70884503   | NOTEST | 0 | 0.162207   |
| 9130024F11Rik | chr1:56971468-56975196    | NOTEST | 0 | 0.00515138 |
| 9830107B12Rik | chr17:48125604-48146307   | NOTEST | 0 | 0.020279   |
| A430090L17Rik | chr13:113794507-114157461 | NOTEST | 0 | 0.0112286  |
| A630023P12Rik | chr5:110514922-110525979  | NOTEST | 0 | 0.0415308  |
| A630075F10Rik | chr2:170061239-170070778  | NOTEST | 0 | 0.0219657  |
| A730082K24Rik | chr7:114948649-114983967  | NOTEST | 0 | 0.041016   |
| A930019D19Rik | chr2:146241298-146512004  | NOTEST | 0 | 0.0514238  |
| AI463170      | chr12:76533559-76579039   | NOTEST | 0 | 0.253567   |
| Abca14        | chr7:120203963-120325352  | NOTEST | 0 | 0.00700619 |
| Abhd16b       | chr2:181493205-181494980  | NOTEST | 0 | 0.0115738  |
| Actl10        | chr2:154544404-154558853  | NOTEST | 0 | 0.0140274  |
| Adam24        | chr8:40675093-40682199    | NOTEST | 0 | 0.00681206 |
| Aim1l         | chr4:134068451-134092504  | NOTEST | 0 | 0.0143542  |
| Akap14        | chrX:37126762-37168842    | NOTEST | 0 | 0.0143591  |
| Ankk1         | chr9:49415221-49427021    | NOTEST | 0 | 0.0508279  |
| Ankrd60       | chr2:173568660-173578341  | NOTEST | 0 | 0.0211681  |

|               |                           |        |   |            |
|---------------|---------------------------|--------|---|------------|
| Apol11a       | chr15:77508270-77517319   | NOTEST | 0 | 0.349938   |
| Apon          | chr10:128254130-128255901 | NOTEST | 0 | 0.0153578  |
| Arhgap33os    | chr7:30515121-30522193    | NOTEST | 0 | 0.00890738 |
| B230323A14Rik | chr9:69761145-69830199    | NOTEST | 0 | 0.0408549  |
| B930092H01Rik | chr9:61259226-61293809    | NOTEST | 0 | 0.00922768 |
| BC021614      | chr19:4057486-4059294     | NOTEST | 0 | 0.123295   |
| BC024386      | chr7:140906063-140907967  | NOTEST | 0 | 0.03233    |
| BC051019      | chr7:109703736-109723771  | NOTEST | 0 | 0.0104588  |
| BC094916      | chr1:173521310-173535957  | NOTEST | 0 | 0.0795529  |
| Bhmt          | chr13:93616890-93637758   | NOTEST | 0 | 0.034944   |
| Bmp8b         | chr4:123105164-123126091  | NOTEST | 0 | 0.00834574 |
| Bpifb6        | chr2:153900387-153912793  | NOTEST | 0 | 0.044539   |
| Bsx           | chr9:40874126-40877972    | NOTEST | 0 | 0.160775   |
| Btn1a1        | chr13:23456992-23465901   | NOTEST | 0 | 0.0190294  |
| C130083M11Rik | chr5:52199983-52216433    | NOTEST | 0 | 0.0893568  |
| C330024C12Rik | chr17:87192215-87194942   | NOTEST | 0 | 0.0305354  |
| C730027H18Rik | chr10:71168736-71182040   | NOTEST | 0 | 0.0622826  |
| C8b           | chr4:104766316-104804548  | NOTEST | 0 | 0.0112132  |
| Cabp4         | chr19:4135422-4139609     | NOTEST | 0 | 0.0148064  |
| Car6          | chr4:150187015-150201135  | NOTEST | 0 | 0.0501168  |
| Ccdc27        | chr4:154026643-154042677  | NOTEST | 0 | 0.0339371  |
| Ccdc54        | chr16:50589858-50654166   | NOTEST | 0 | 0.0833582  |
| Ccdc73        | chr2:104886323-105017027  | NOTEST | 0 | 0.00485351 |
| Cdhr3         | chr12:33033795-33092875   | NOTEST | 0 | 0.0142177  |
| Cdx1          | chr18:61018861-61036199   | NOTEST | 0 | 0.0799387  |
| Ceacam15      | chr7:16671330-16675705    | NOTEST | 0 | 0.0575654  |
| Chil6         | chr3:106387383-106406182  | NOTEST | 0 | 0.0747059  |
| Cidec         | chr6:113424635-113435755  | NOTEST | 0 | 0.0405266  |
| Clcnkb        | chr4:141404356-141415988  | NOTEST | 0 | 0.0203736  |
| Cldn20        | chr17:3326572-3557713     | NOTEST | 0 | 0.451086   |
| Cldn6         | chr17:23679364-23682446   | NOTEST | 0 | 0.0139733  |
| Clec4b2       | chr6:123173022-123204671  | NOTEST | 0 | 0.0217001  |
| Cplx3         | chr9:57599991-57606281    | NOTEST | 0 | 0.00684034 |
| Csf3          | chr11:98701312-98703629   | NOTEST | 0 | 0.0374253  |
| Cxcr1         | chr1:74191785-74194631    | NOTEST | 0 | 0.0470604  |
| Cyp17a1       | chr19:46667164-46673000   | NOTEST | 0 | 0.0119133  |
| D030025E07Rik | chr3:128117014-128231605  | NOTEST | 0 | 0.00847409 |
| D230030E09Rik | chr12:118518296-118530193 | NOTEST | 0 | 0.0268401  |
| D730045A05Rik | chr18:73928485-74064949   | NOTEST | 0 | 0.0536201  |
| Daw1          | chr1:83159761-83210572    | NOTEST | 0 | 0.0150405  |
| Dbh           | chr2:27165506-27183204    | NOTEST | 0 | 0.0109817  |
| Dbhos         | chr2:27144897-27162703    | NOTEST | 0 | 0.0171354  |
| Dear1         | chr3:84815576-84979198    | NOTEST | 0 | 0.280164   |
| Dmbt1         | chr7:131032075-131121628  | NOTEST | 0 | 0.0144486  |
| Dnmt3l        | chr10:78030021-78063622   | NOTEST | 0 | 0.0212046  |
| Dupd1         | chr14:21676571-21714576   | NOTEST | 0 | 0.0252997  |
| E130201H02Rik | chr7:120597624-120598475  | NOTEST | 0 | 0.307716   |
| E230008N13Rik | chr4:45890302-45950774    | NOTEST | 0 | 0.00372094 |
| En1           | chr1:120602486-120607991  | NOTEST | 0 | 0.0463121  |
| F12           | chr13:55417965-55426802   | NOTEST | 0 | 0.0103454  |
| Fabp1         | chr6:71199887-71205023    | NOTEST | 0 | 0.0660175  |
| Fam166a       | chr2:25218744-25224702    | NOTEST | 0 | 0.0421379  |
| Fam166b       | chr4:43381981-43429134    | NOTEST | 0 | 0.0199064  |

|         |                            |        |   |            |
|---------|----------------------------|--------|---|------------|
| Fam216b | chr14:78081023-78089007    | NOTEST | 0 | 0.0213911  |
| Fam83b  | chr9:76490704-76545804     | NOTEST | 0 | 0.0123862  |
| Fer1l5  | chr1:36372290-36422110     | NOTEST | 0 | 0.0217489  |
| Ffar3   | chr7:30854329-30856178     | NOTEST | 0 | 0.0127994  |
| Fmo9    | chr1:166662054-166681845   | NOTEST | 0 | 0.0268411  |
| Foxi3   | chr6:70956605-70961066     | NOTEST | 0 | 0.0227127  |
| Foxn4   | chr5:114254163-114273761   | NOTEST | 0 | 0.00656538 |
| Frs3os  | chr17:47695206-47704286    | NOTEST | 0 | 0.0261525  |
| Gm10012 | chr17:25882113-25919714    | NOTEST | 0 | 0.129663   |
| Gm11166 | chr17:13096659-13098472    | NOTEST | 0 | 0.0150925  |
| Gm11437 | chr11:84148360-84167476    | NOTEST | 0 | 0.0189689  |
| Gm11554 | chr11:99798185-99809896    | NOTEST | 0 | 0.0318919  |
| Gm12295 | chr11:65277653-65287833    | NOTEST | 0 | 0.00608297 |
| Gm12409 | chr4:45762376-45764223     | NOTEST | 0 | 0.0970044  |
| Gm12718 | chr4:103382499-103492188   | NOTEST | 0 | 0.0302428  |
| Gm13283 | chr4:88760773-88761584     | NOTEST | 0 | 0.0747306  |
| Gm13490 | chr2:51656965-51732009     | NOTEST | 0 | 0.00885605 |
| Gm136   | chr4:34743787-34756259     | NOTEST | 0 | 0.049695   |
| Gm14085 | chr2:122484940-122528040   | NOTEST | 0 | 0.0323019  |
| Gm14164 | chr2:152345668-152376566   | NOTEST | 0 | 0.0101372  |
| Gm14501 | chrX:9350598-9351137       | NOTEST | 0 | 0.127151   |
| Gm15319 | chr8:20337663-20363202     | NOTEST | 0 | 0.0282176  |
| Gm15698 | chr11:88964665-88966917    | NOTEST | 0 | 0.0318542  |
| Gm1720  | chrX:166662024-166689812   | NOTEST | 0 | 0.0420171  |
| Gm17745 | chr10:93336231-93348879    | NOTEST | 0 | 0.0611744  |
| Gm20878 | chr4_GL456350_random:17325 | LOWDAT | 0 | 0.106441   |
| Gm21586 | chr4:41889794-42462993     | LOWDAT | 0 | 0.225133   |
| Gm2176  | chr18:80541891-80544546    | NOTEST | 0 | 0.0509677  |
| Gm2381  | chr7:42816826-42867234     | NOTEST | 0 | 0.00468907 |
| Gm3336  | chr8:70718542-70722635     | NOTEST | 0 | 0.0204962  |
| Gm3417  | chr17:14964188-15022449    | NOTEST | 0 | 0.0164483  |
| Gm4566  | chr17:71333200-71341804    | NOTEST | 0 | 0.124552   |
| Gm4846  | chr1:166483612-166497588   | NOTEST | 0 | 0.0118075  |
| Gm4956  | chr1:21285245-21298312     | NOTEST | 0 | 0.0411645  |
| Gm5083  | chr13:44121166-44125179    | NOTEST | 0 | 0.0182124  |
| Gm5122  | chr9:61017068-61019797     | NOTEST | 0 | 0.0303107  |
| Gm5136  | chr10:108497649-109010975  | NOTEST | 0 | 0.0199565  |
| Gm5415  | chr1:32172805-32657738     | NOTEST | 0 | 0.0307458  |
| Gm5424  | chr2:31470269-31520670     | LOWDAT | 0 | 4.64E-05   |
| Gm5464  | chr14:66868849-66871005    | NOTEST | 0 | 0.00930954 |
| Gm5512  | chr19:12905230-12906985    | NOTEST | 0 | 7.03E-06   |
| Gm5531  | chr1:153874344-153876871   | NOTEST | 0 | 0.0469191  |
| Gm5547  | chr3:105815566-105817359   | NOTEST | 0 | 0.144064   |
| Gm5901  | chr7:105371210-105400054   | NOTEST | 0 | 0.0243089  |
| Gm7457  | chr6:142814230-142964452   | NOTEST | 0 | 0.00805613 |
| Gm8267  | chr14:44717166-44724987    | NOTEST | 0 | 0.0527302  |
| Gm8363  | chr17:5480988-5483069      | NOTEST | 0 | 0.0115862  |
| Gm853   | chr4:130209108-130222295   | NOTEST | 0 | 0.00974062 |
| Gm8989  | chr7:106322395-106324528   | LOWDAT | 0 | 0.0185228  |
| Gnrh1   | chr14:67745228-67749436    | NOTEST | 0 | 0.740139   |
| Gp6     | chr7:4368712-4397744       | NOTEST | 0 | 0.0192161  |
| Gpr142  | chr11:114798923-114806745  | NOTEST | 0 | 0.101761   |
| Gsdmc4  | chr15:63891264-63912297    | NOTEST | 0 | 0.00966694 |

|              |                           |        |   |            |
|--------------|---------------------------|--------|---|------------|
| Gtf2a1l      | chr17:88668659-88715150   | NOTEST | 0 | 0.0137714  |
| Gzmb         | chr14:56258857-56262260   | NOTEST | 0 | 0.83026    |
| H2-M1        | chr17:36670007-36672197   | NOTEST | 0 | 0.0700595  |
| H2-M10.5     | chr17:36772909-36776235   | NOTEST | 0 | 0.0659789  |
| Heatr9       | chr11:83511678-83522099   | NOTEST | 0 | 0.039469   |
| Hemt1        | chr15:74819075-74824436   | NOTEST | 0 | 0.143868   |
| Heph1l       | chr9:15051840-15112108    | NOTEST | 0 | 0.0297443  |
| Hesx1        | chr14:27000361-27002325   | NOTEST | 0 | 0.0195266  |
| Hgfac        | chr5:35041552-35048436    | NOTEST | 0 | 0.0114526  |
| Hist1h2ae    | chr13:23570662-23571220   | NOTEST | 0 | 0.11209    |
| Hist1h2ag    | chr13:22042477-22042949   | NOTEST | 0 | 0.816721   |
| Hist1h2ai    | chr13:21716411-21716859   | NOTEST | 0 | 0.0752612  |
| Hist1h2ak    | chr13:21753376-21753912   | NOTEST | 0 | 0.878623   |
| Hist1h2bm    | chr13:21722043-21722526   | NOTEST | 0 | 0.199751   |
| Hist1h3c     | chr13:23745041-23745521   | NOTEST | 0 | 0.679807   |
| Hist1h4d     | chr13:23581601-23581969   | NOTEST | 0 | 1.14133    |
| Hist1h4n     | chr13:21811745-21812150   | NOTEST | 0 | 0.237999   |
| Hist2h2ac    | chr3:96220412-96220880    | NOTEST | 0 | 0.799904   |
| Hist2h2bb    | chr3:96269699-96270192    | NOTEST | 0 | 0.513369   |
| Hmx2         | chr7:131554061-131556582  | NOTEST | 0 | 0.0155603  |
| Hmx3         | chr7:131542962-131544931  | NOTEST | 0 | 0.0932437  |
| Hsd3b6       | chr3:98805503-98814443    | NOTEST | 0 | 0.0122025  |
| Hyal6        | chr6:24733244-24745452    | NOTEST | 0 | 0.00601948 |
| Ifitm5       | chr7:140948961-140950239  | NOTEST | 0 | 0.0724484  |
| Ifng         | chr10:118441046-118445892 | NOTEST | 0 | 0.102336   |
| Kcnmb3       | chr3:32472320-32491969    | NOTEST | 0 | 0.0728276  |
| Kcnmb4os1    | chr10:116417867-116473523 | NOTEST | 0 | 0.0998928  |
| Klk12        | chr7:43769099-43773481    | NOTEST | 0 | 0.0938547  |
| Klra10       | chr6:129972081-130386874  | NOTEST | 0 | 0.174101   |
| Klra14-ps    | chr6:129972081-130386874  | NOTEST | 0 | 0.067549   |
| Klra3        | chr6:129972081-130386874  | NOTEST | 0 | 0.129649   |
| Klra33       | chr6:129972081-130386874  | LOWDAT | 0 | 0.119207   |
| Klra5        | chr6:129898991-129913224  | NOTEST | 0 | 0.0384731  |
| Klra9        | chr6:129972081-130386874  | NOTEST | 0 | 0.281869   |
| Klrc2        | chr6:129656345-129660596  | NOTEST | 0 | 0.225029   |
| Klrc3        | chr6:129639084-129643288  | NOTEST | 0 | 0.232206   |
| Krt13        | chr11:100117595-100121495 | NOTEST | 0 | 0.0164002  |
| Krt16        | chr11:100246090-100248902 | NOTEST | 0 | 0.0286289  |
| Krt6a        | chr15:101689927-101694305 | NOTEST | 0 | 0.273167   |
| LOC102634431 | chr9:8544141-8740988      | NOTEST | 0 | 0.0197629  |
| LOC102635087 | chr9:71168775-71208122    | NOTEST | 0 | 0.0122455  |
| LOC381967    | chr7:99260480-99267218    | NOTEST | 0 | 0.0492622  |
| Lactbl1      | chr4:136622620-136638110  | NOTEST | 0 | 0.0103869  |
| Lgals2       | chr15:78842646-78855529   | NOTEST | 0 | 0.202109   |
| Lipm         | chr19:34100942-34166041   | NOTEST | 0 | 0.00727395 |
| Mc5r         | chr18:68337602-68339711   | NOTEST | 0 | 0.0811362  |
| Mcpt1        | chr14:56017963-56020391   | NOTEST | 0 | 0.121711   |
| Mir686       | chr14:54614119-54617995   | LOWDAT | 0 | 2.54399    |
| Mir8094      | chr17:35241745-35253707   | NOTEST | 0 | 40.5585    |
| Mir8098      | chr14:62837689-62956886   | LOWDAT | 0 | 3.37048    |
| Mir8114      | chr1:153899925-153909723  | NOTEST | 0 | 63.4114    |
| Mogat2       | chr7:99219083-99238611    | NOTEST | 0 | 0.0290832  |
| Mrpl23       | chr7:142533116-142540742  | NOTEST | 0 | 0.119336   |



|             |                           |        |   |            |
|-------------|---------------------------|--------|---|------------|
| Ms4a13      | chr19:11169417-11196723   | NOTEST | 0 | 0.0155426  |
| Mst1        | chr9:108080435-108085027  | NOTEST | 0 | 0.142853   |
| Myf6        | chr10:107492859-107494729 | NOTEST | 0 | 0.0218035  |
| Myl10       | chr5:136693145-136701094  | NOTEST | 0 | 0.0476405  |
| Myog        | chr1:134290003-134292548  | NOTEST | 0 | 0.014259   |
| Naaladl1    | chr19:6105797-6115555     | NOTEST | 0 | 0.0106955  |
| Nhlrc4      | chr17:25942232-25944931   | NOTEST | 0 | 0.0962129  |
| Olfr1034    | chr2:86046443-86047466    | NOTEST | 0 | 0.0236919  |
| Olfr1163    | chr2:88070364-88071407    | NOTEST | 0 | 0.0869045  |
| Olfr1392    | chr11:49293296-49294322   | NOTEST | 0 | 0.0221779  |
| Olfr1396    | chr11:49037659-49135387   | NOTEST | 0 | 0.0292453  |
| Olfr153     | chr2:87532034-87532958    | NOTEST | 0 | 0.0946311  |
| Olfr421-ps1 | chr1:174151480-174152530  | NOTEST | 0 | 0.0215454  |
| Olfr552     | chr7:102604355-102605309  | NOTEST | 0 | 0.0486398  |
| Olfr700     | chr7:106805509-106806460  | NOTEST | 0 | 0.0244182  |
| Oxct2a      | chr4:123312649-123343252  | NOTEST | 0 | 0.0142437  |
| Oxgr1       | chr14:120019584-120042435 | NOTEST | 0 | 0.00617698 |
| Pam16       | chr16:4616465-4624946     | NOTEST | 0 | 0.400838   |
| Pglyrp4     | chr3:90726905-90741517    | NOTEST | 0 | 0.0322525  |
| Phxr4       | chr9:13431360-13432740    | NOTEST | 0 | 0.0154762  |
| Pklr        | chr3:89136141-89146594    | NOTEST | 0 | 0.654393   |
| Plg         | chr17:12378608-12419384   | NOTEST | 0 | 0.0421668  |
| Pou5f2      | chr13:77708689-78166240   | NOTEST | 0 | 0.0688097  |
| Ppifos      | chr14:25694169-25701282   | NOTEST | 0 | 0.0276272  |
| Proz        | chr8:13060907-13075006    | NOTEST | 0 | 0.00828058 |
| Prss27      | chr17:24038242-24045949   | NOTEST | 0 | 0.061682   |
| Prss50      | chr9:110857966-110864628  | NOTEST | 0 | 0.0182109  |
| Pspn        | chr17:56999456-57000018   | NOTEST | 0 | 0.140472   |
| Rab25       | chr3:88542028-88548279    | NOTEST | 0 | 0.0666478  |
| Rbm44       | chr1:91145102-91170795    | NOTEST | 0 | 0.0721529  |
| Reg3b       | chr6:78370884-78373466    | NOTEST | 0 | 0.0329347  |
| Rhox8       | chrX:37874775-37878944    | NOTEST | 0 | 0.151343   |
| Rnu12       | chr15:83149644-83149794   | NOTEST | 0 | 2.30161    |
| Rrh         | chr3:129808574-129822505  | NOTEST | 0 | 0.0305869  |
| Serpina1a   | chr12:103853294-103863619 | NOTEST | 0 | 0.0653348  |
| Serpina1c   | chr12:103894925-103904950 | NOTEST | 0 | 0.0607056  |
| Serpinb9b   | chr13:33027413-33040558   | NOTEST | 0 | 0.0365129  |
| Serpinc1    | chr1:160978605-161003014  | NOTEST | 0 | 0.0398942  |
| Sftpb       | chr6:72304609-72314373    | NOTEST | 0 | 0.0141233  |
| Sh2d1b1     | chr1:170277323-170285662  | NOTEST | 0 | 0.017654   |
| Skint8      | chr4:111919554-111950356  | NOTEST | 0 | 0.0201822  |
| Sla2        | chr2:156863121-156887078  | NOTEST | 0 | 0.019814   |
| Slc17a4     | chr13:23897888-23915007   | NOTEST | 0 | 0.0286498  |
| Slc23a3     | chr1:75125541-75133890    | NOTEST | 0 | 0.00980283 |
| Spata31d1d  | chr13:59725924-59731752   | NOTEST | 0 | 0.0107957  |
| Spdyb       | chr5:143216315-143225882  | NOTEST | 0 | 0.0120747  |
| Spint5      | chr2:164715304-164718068  | NOTEST | 0 | 0.372818   |
| Srrm4os     | chr5:116438721-116591817  | NOTEST | 0 | 0.00690752 |
| St8sia3os   | chr18:64157723-64277180   | NOTEST | 0 | 0.0836995  |
| Stmn1-rs1   | chr9:115242581-115310421  | NOTEST | 0 | 0.0235308  |
| Svs3a       | chr2:164289267-164291500  | NOTEST | 0 | 0.0182858  |
| Tac2        | chr10:127724477-127731768 | NOTEST | 0 | 0.171608   |
| Tbx5        | chr5:119834662-119885218  | NOTEST | 0 | 0.00583229 |

|           |                            |        |             |            |
|-----------|----------------------------|--------|-------------|------------|
| Tcp10a    | chr17:7324659-7345860      | NOTEST | 0           | 0.0469565  |
| Tcte3     | chr17:14964188-15022449    | LOWDAT | 0           | 0.166928   |
| Terc      | chr3:96414436-96414833     | NOTEST | 0           | 0.214802   |
| Tktl1     | chrX:74177258-74208498     | NOTEST | 0           | 0.0160268  |
| Tktl2     | chr8:66511739-66519199     | NOTEST | 0           | 0.00741675 |
| Tmem239   | chr2:130406521-130407794   | NOTEST | 0           | 0.103893   |
| Tmprss11a | chr5:86410409-86468990     | NOTEST | 0           | 0.00740466 |
| Tmprss11d | chr5:86302853-86373387     | NOTEST | 0           | 0.00986685 |
| Tmprss11e | chr5:86705185-86745807     | NOTEST | 0           | 0.0113332  |
| Tmsb15a   | chrX:135718666-135720673   | NOTEST | 0           | 0.589893   |
| Tnnt2     | chr1:135836333-135852268   | NOTEST | 0           | 0.0753965  |
| Trim61    | chr8:64998447-65018688     | NOTEST | 0           | 0.00930679 |
| Trpv5     | chr6:41652769-41680723     | NOTEST | 0           | 0.0545113  |
| Ttll2     | chr17:7350903-7352696      | NOTEST | 0           | 0.015304   |
| Tubal3    | chr13:3924694-3935277      | NOTEST | 0           | 0.0188367  |
| Ubd       | chr17:37193891-37196101    | NOTEST | 0           | 0.0746622  |
| Ugt2a1    | chr5:87459489-87490871     | NOTEST | 0           | 0.00039218 |
| Ugt2a2    | chr5:87459489-87490871     | NOTEST | 0           | 0.0247285  |
| Vmn1r53   | chr6:90223316-90224438     | NOTEST | 0           | 0.0396944  |
| Vmn1r89   | chr7:13219338-13220289     | NOTEST | 0           | 0.295608   |
| Vmn2r118  | chr17:55592340-55624672    | NOTEST | 0           | 0.0154071  |
| Vmn2r46   | chr7:9754635-9770571       | NOTEST | 0           | 0.0169341  |
| Vmn2r7    | chr3:64632862-64844743     | NOTEST | 0           | 0.0239029  |
| Vpreb1    | chr16:16868400-16869255    | NOTEST | 0           | 0.307778   |
| Vwa5b1    | chr4:138568968-138623992   | NOTEST | 0           | 0.00496925 |
| Wdr38     | chr2:38998308-39005131     | NOTEST | 0           | 0.151343   |
| Wfdc8     | chr2:164596457-164613626   | NOTEST | 0           | 0.00832899 |
| Wt1os     | chr2:105076537-105126510   | NOTEST | 0           | 0.0118557  |
| Zdhhc19   | chr16:32496280-32507214    | NOTEST | 0           | 0.0164597  |
| Zf12      | chrX_GL456233_random:15964 | NOTEST | 0           | 0.0202009  |
| Zg16      | chr7:127050155-127051977   | NOTEST | 0           | 0.0848077  |
| Ndufs5    | chr4:123712709-123718186   | OK     | 0.000477027 | 2.04338    |
| Naip7     | chr13:100281120-100317688  | NOTEST | 1.94E-05    | 0.0213745  |
| Gata1     | chrX:7959259-7967910       | OK     | 0.00947746  | 2.69833    |
| Rhag      | chr17:40811148-40840754    | OK     | 0.032456    | 7.84823    |
| Kel       | chr6:41686329-41704325     | OK     | 0.0287919   | 5.26575    |
| Btnl10    | chr11:58918056-58926965    | OK     | 0.0195514   | 3.0869     |
| Gfi1b     | chr2:28609449-28621982     | OK     | 0.0105936   | 1.44809    |
| Gypa      | chr8:80494044-80510785     | OK     | 0.202132    | 25.7526    |
| Hemgn     | chr4:46393988-46404183     | OK     | 0.135543    | 14.8647    |
| Gm867     | chr10:75935572-75940672    | OK     | 0.0188656   | 1.94285    |
| Apol11b   | chr15:77633950-77643286    | OK     | 0.101921    | 10.3909    |
| Cldn13    | chr5:134914249-134915530   | OK     | 0.0942723   | 8.96922    |
| Sfn14     | chr11:83275111-83286726    | OK     | 0.0354569   | 3.23075    |
| Ermap     | chr4:119175456-119190011   | OK     | 0.0732344   | 6.42366    |
| Rhd       | chr4:134864535-134896172   | OK     | 0.171048    | 13.8615    |
| Slc4a1    | chr11:102348819-102365281  | OK     | 0.645247    | 51.4081    |
| Icam4     | chr9:21029372-21030531     | OK     | 0.0244789   | 1.85941    |
| Ctse      | chr1:131638313-131675507   | OK     | 0.222778    | 14.5107    |
| Klf1      | chr8:84901927-84905295     | OK     | 0.0903362   | 5.88028    |
| Spta1     | chr1:174172775-174248449   | OK     | 0.0733772   | 4.49132    |
| Trim10    | chr17:36869573-36877833    | OK     | 0.231192    | 12.4368    |
| Ankle1    | chr8:71406011-71409904     | OK     | 0.0193966   | 0.95466    |

|                    |                           |        |            |          |
|--------------------|---------------------------|--------|------------|----------|
| Epb4.2             | chr2:121018216-121036755  | OK     | 0.127933   | 5.84297  |
| Cd8a               | chr6:71373426-71379171    | NOTEST | 0.00554984 | 0.230191 |
| Hbb-bs             | chr7:103826522-103827929  | OK     | 96.2702    | 3953.83  |
| Masp2              | chr4:148602543-148626996  | NOTEST | 0.00563459 | 0.224264 |
| Tspo2              | chr17:48448434-48451501   | OK     | 0.141051   | 5.51543  |
| Kif18b             | chr11:102905518-102925124 | OK     | 0.0263865  | 1.00203  |
| Pdzk1ip1           | chr4:115088707-115093894  | OK     | 0.16783    | 5.79831  |
| Hist1h2ao,Hist1h2a | chr13:21833023-21833575   | OK     | 0.0464062  | 1.5531   |
| Crct1              | chr3:93014204-93015686    | OK     | 0.0353742  | 1.1707   |
| 1300017J02Rik      | chr9:103250529-103288297  | OK     | 0.0512295  | 1.69326  |
| Alas2              | chrX:150547384-150570622  | OK     | 6.50897    | 201.419  |
| Hba-a2             | chr11:32283671-32284493   | OK     | 63.594     | 1957.3   |
| 1700028K03Rik      | chr5:107534710-107661853  | NOTEST | 0.00594533 | 0.178143 |
| Cyp2c55            | chr19:39007018-39042687   | NOTEST | 0.00963408 | 0.287933 |
| Ube2c              | chr2:164769928-164772902  | OK     | 0.496417   | 14.0226  |
| Nfe2               | chr15:103248217-103255416 | OK     | 0.18185    | 5.13329  |
| 6330415B21Rik      | chr6:76881636-77979667    | NOTEST | 0.00955305 | 0.268041 |
| Epor               | chr9:21958898-21963576    | OK     | 0.0857778  | 2.37176  |
| Mki67              | chr7:135689787-135716379  | OK     | 0.369636   | 10.0538  |
| Prf1               | chr10:61297835-61304263   | NOTEST | 0.0173961  | 0.401597 |
| Car1               | chr3:14766213-14808365    | OK     | 0.345281   | 7.80341  |
| Grap2              | chr15:80572596-80652854   | OK     | 0.0448599  | 0.990724 |
| Klre1              | chr6:129578285-129585827  | NOTEST | 0.0227305  | 0.496289 |
| Daf2               | chr1:130388527-130422999  | NOTEST | 0.0287523  | 0.6273   |
| Hbb-b1,Hbb-bs      | chr7:103826522-103827929  | OK     | 155.108    | 3377.95  |
| Hbb-bt             | chr7:103812523-103813923  | OK     | 51.1775    | 1034.35  |
| Fgf3               | chr7:144838611-144843348  | NOTEST | 0.0162673  | 0.328727 |
| Slc43a1            | chr2:84839407-84863586    | OK     | 0.242325   | 4.7879   |
| Mybl2              | chr2:163054634-163084687  | NOTEST | 0.0372921  | 0.730492 |
| Nusap1             | chr2:119609531-119650160  | OK     | 0.216987   | 4.09208  |
| Gpr128             | chr16:56724608-56795858   | NOTEST | 0.0064427  | 0.118009 |
| Neil3              | chr8:53586866-53639065    | OK     | 0.067003   | 1.2255   |
| Gm11426            | chr11:82633352-82636309   | NOTEST | 0.0170008  | 0.305122 |
| LOC171588          | chr2:144459279-144467794  | NOTEST | 0.012712   | 0.224643 |
| Mobp               | chr9:120149741-120176091  | OK     | 0.494799   | 8.57956  |
| Sap25              | chr5:137629122-137642902  | NOTEST | 0.0096383  | 0.164077 |
| Unc5cl             | chr17:48454900-48468684   | NOTEST | 0.0146146  | 0.24854  |
| Ccna2              | chr3:36552605-36571996    | OK     | 0.395881   | 6.67646  |
| Isg20              | chr7:78913423-78920396    | OK     | 1.74712    | 29.3999  |
| Aurkb              | chr11:69045642-69051662   | OK     | 0.0684495  | 1.14832  |
| Fasl               | chr1:161780691-161788495  | NOTEST | 0.0194923  | 0.321238 |
| Pif1               | chr9:65587204-65595962    | NOTEST | 0.0264475  | 0.43413  |
| Hist1h3e           | chr13:23561895-23562365   | NOTEST | 0.0739174  | 1.2099   |
| 6030468B19Rik      | chr11:117797659-117807308 | NOTEST | 0.0196852  | 0.316655 |
| Gzma               | chr13:113093826-113100981 | OK     | 0.223322   | 3.47837  |
| Pnp2               | chr14:50956140-50964749   | NOTEST | 0.0525949  | 0.818568 |
| Ncr1               | chr7:4337723-4345164      | NOTEST | 0.0392352  | 0.603336 |
| Cenpf              | chr1:189640613-189688086  | OK     | 0.0791485  | 1.20094  |
| Adm2               | chr15:89322898-89324730   | NOTEST | 0.0176225  | 0.262315 |
| 1190002F15Rik      | chr6:134929091-134951718  | OK     | 0.32655    | 4.84995  |
| Klri2              | chr6:129729040-129740484  | NOTEST | 0.00924046 | 0.136252 |
| Ccnb2              | chr9:70407688-70421554    | OK     | 0.28556    | 4.16736  |
| Hist1h2ad          | chr13:23574380-23574915   | NOTEST | 0.0487913  | 0.703508 |

|               |                          |        |            |           |
|---------------|--------------------------|--------|------------|-----------|
| Ptpn20        | chr14:33589269-33640754  | NOTEST | 0.00595769 | 0.0837988 |
| Xcl1          | chr1:164931647-164935510 | NOTEST | 0.0658728  | 0.916067  |
| AI662270      | chr11:83223575-83226584  | OK     | 0.330556   | 4.56945   |
| Slc39a2       | chr14:51893609-51896745  | NOTEST | 0.00903547 | 0.120178  |
| Oas3          | chr5:120753097-120777659 | OK     | 0.0813801  | 1.07989   |
| Mmel1         | chr4:154869584-154895530 | NOTEST | 0.005886   | 0.0780474 |
| Gdf1          | chr8:70315774-70353273   | OK     | 0.120626   | 1.5969    |
| 9830132P13Rik | chr3:127916170-127955220 | NOTEST | 0.00888107 | 0.117237  |
| Klk7          | chr7:43811443-43816359   | NOTEST | 0.0104441  | 0.137242  |
| Gp9           | chr6:87778135-87779762   | NOTEST | 0.0265612  | 0.346236  |
| C730036E19Rik | chr1:151138033-151144095 | NOTEST | 0.00746535 | 0.0968218 |
| Esco2         | chr14:65819026-65833969  | OK     | 0.0997203  | 1.27084   |
| Top2a         | chr11:98992946-99024189  | OK     | 0.339108   | 4.18752   |
| Kif14         | chr1:136467934-136531511 | NOTEST | 0.0339521  | 0.414901  |
| Mylk3         | chr8:85324928-85365324   | OK     | 0.0781472  | 0.954595  |
| C630031E19Rik | chr12:29528383-29923209  | NOTEST | 0.0131145  | 0.159225  |
| 8430431K14Rik | chr19:30564486-31765033  | NOTEST | 0.012141   | 0.147232  |
| Ppp1r42       | chr1:9968621-10009136    | NOTEST | 0.0170246  | 0.206002  |
| Il7r          | chr15:9506158-9529876    | NOTEST | 0.0228179  | 0.269494  |
| Cdc6          | chr11:98907888-98923942  | OK     | 0.0831984  | 0.969188  |
| Mageb3        | chr2:121953770-122015326 | NOTEST | 0.0085887  | 0.0995664 |
| Cckbr         | chr7:105425819-105436338 | OK     | 0.0732628  | 0.848669  |
| A530088E08Rik | chr17:32390660-32404808  | NOTEST | 0.0101156  | 0.116532  |
| Fam46c        | chr3:100471535-100489192 | OK     | 1.58978    | 18.2088   |
| 1810053B23Rik | chr16:93343715-93359543  | NOTEST | 0.0167955  | 0.190259  |
| Ms4a4b        | chr19:11443557-11463548  | OK     | 0.124309   | 1.4061    |
| Cldn8         | chr16:88560825-88563183  | NOTEST | 0.00746946 | 0.0844721 |
| Nkg7          | chr7:43437137-43438246   | OK     | 0.135945   | 1.509     |
| Trim58        | chr11:58640464-58652404  | OK     | 0.179913   | 1.9805    |
| Apol10a       | chr15:77477046-77491069  | NOTEST | 0.00607777 | 0.066729  |
| Rrm2          | chr12:24708253-24714146  | OK     | 0.780061   | 8.52398   |
| Il1bos        | chr2:129364579-129375733 | NOTEST | 0.0161901  | 0.174508  |
| Dtl           | chr1:191537364-191575534 | NOTEST | 0.0525587  | 0.554755  |
| Casc5         | chr2:119047118-119104121 | OK     | 0.0824826  | 0.868288  |
| Eqtn          | chr4:94907266-94928843   | NOTEST | 0.0201331  | 0.211247  |
| Klrc1         | chr6:129666015-129678973 | NOTEST | 0.0198436  | 0.207607  |
| Lax1          | chr1:133679028-133690108 | NOTEST | 0.0653583  | 0.68125   |
| Tal1          | chr4:115056425-115071755 | OK     | 0.397239   | 4.12904   |
| Pdia2         | chr17:26195998-26199087  | NOTEST | 0.0233207  | 0.241408  |
| Dlgap5        | chr14:47387778-47418407  | OK     | 0.146811   | 1.51385   |
| Dntt          | chr19:41029274-41059525  | NOTEST | 0.0367712  | 0.378612  |
| Xist          | chrX:103431516-103484957 | NOTEST | 0.0128597  | 0.132394  |
| Olig3         | chr10:19356538-19358604  | NOTEST | 0.0477312  | 0.480439  |
| Rbm38         | chr2:173021901-173034731 | OK     | 1.07555    | 10.7971   |
| Ccdc169       | chr3:55137338-55172936   | NOTEST | 0.00677087 | 0.0676126 |
| BC016579      | chr16:45626847-45654118  | NOTEST | 0.00914651 | 0.0906148 |
| Cxcr3         | chrX:101731535-101734147 | NOTEST | 0.0229291  | 0.226658  |
| Cd8b1         | chr6:71322811-71337451   | NOTEST | 0.0540418  | 0.529195  |
| E2f8          | chr7:48866428-48881041   | OK     | 0.21306    | 1.99523   |
| Vmn1r90       | chr7:14530653-14623066   | LOWDAT | 0.0362366  | 0.33872   |
| Depdc1a       | chr3:159495432-159529955 | NOTEST | 0.0235852  | 0.220229  |
| A330093E20Rik | chr18:45560153-46045260  | NOTEST | 0.0165405  | 0.152028  |
| Tnk1          | chr11:69846371-69858730  | NOTEST | 0.011708   | 0.106858  |

|               |                           |        |            |           |
|---------------|---------------------------|--------|------------|-----------|
| Sgol1         | chr17:53674786-53689315   | NOTEST | 0.0587685  | 0.535894  |
| Bmp8a         | chr4:123312649-123343252  | NOTEST | 0.0541952  | 0.48382   |
| Pbk           | chr14:65805910-65817822   | OK     | 0.127966   | 1.13555   |
| Fam132b       | chr1:91366429-91374217    | NOTEST | 0.0123224  | 0.107465  |
| Cnga2         | chrX:71991874-72010218    | NOTEST | 0.00606704 | 0.0525187 |
| Hist1h2ah     | chr13:22035121-22035643   | NOTEST | 0.0541367  | 0.468083  |
| Ccdc64b       | chr17:23660522-23677449   | NOTEST | 0.0205971  | 0.177365  |
| Sprr1a        | chr3:92483953-92485881    | OK     | 0.723039   | 6.19335   |
| Gm14393       | chr2:175061548-175067769  | NOTEST | 0.0424722  | 0.363189  |
| Mc1r          | chr8:123407081-123410744  | NOTEST | 0.00525835 | 0.0444157 |
| Il18r1        | chr1:40465551-40500854    | NOTEST | 0.0355955  | 0.300274  |
| Lrr1          | chr12:69168813-69179010   | NOTEST | 0.0553121  | 0.462453  |
| Samd3         | chr10:26229706-26272172   | NOTEST | 0.0102976  | 0.0857074 |
| Myb           | chr10:21124929-21160984   | NOTEST | 0.0869677  | 0.713044  |
| Tbrg3         | chr15:82808625-82912134   | NOTEST | 0.00427919 | 0.0349015 |
| Tspan33       | chr6:29694255-29718558    | OK     | 1.00736    | 8.20401   |
| Ecel1         | chr1:87147654-87156356    | OK     | 0.278622   | 2.25497   |
| 2810417H13Rik | chr9:65828925-65908794    | OK     | 0.135117   | 1.09276   |
| Aspm          | chr1:139454772-139494088  | NOTEST | 0.0662011  | 0.534681  |
| Xlr           | chrX:53777117-53797706    | NOTEST | 0.0200594  | 0.161541  |
| Hist1h3g      | chr13:23535417-23535909   | NOTEST | 0.127946   | 1.03017   |
| Il2rb         | chr15:78480548-78495066   | OK     | 0.114517   | 0.921651  |
| Gm21119       | chr8:20614926-20640703    | NOTEST | 0.00744376 | 0.0594779 |
| Tnfaip2       | chr12:111442660-111455018 | OK     | 0.359602   | 2.86945   |
| Gpr115        | chr17:42656886-42692284   | NOTEST | 0.0251348  | 0.199751  |
| 1700012D14Rik | chr7:111117672-111122675  | NOTEST | 0.0759572  | 0.597541  |
| Ccnb1         | chr13:100778738-100786486 | NOTEST | 0.101942   | 0.79874   |
| Khdc1a        | chr1:21349676-21352199    | NOTEST | 0.00921665 | 0.0706271 |
| Rpl12         | chr2:32961711-32964045    | NOTEST | 0.0743772  | 0.562436  |
| Acp5          | chr9:22055459-22389206    | OK     | 0.262037   | 1.9679    |
| Erdr1         | chrY:90785441-90816465    | NOTEST | 0.0678179  | 0.50896   |
| Trim59        | chr3:69035293-69044742    | OK     | 0.776675   | 5.72103   |
| Slc25a37      | chr14:69241850-69285103   | OK     | 3.87775    | 28.5614   |
| 1700093K21Rik | chr11:23516202-23519942   | NOTEST | 0.0215613  | 0.1583    |
| 4931431C16Rik | chr5:35581226-35613801    | NOTEST | 0.00635609 | 0.0463147 |
| Aqp9          | chr9:71110658-71163289    | NOTEST | 0.0974552  | 0.706041  |
| Klrg1         | chr6:122270596-122282833  | NOTEST | 0.0425878  | 0.306637  |
| Tnfrsf14      | chr4:154922209-154928077  | OK     | 0.381935   | 2.74482   |
| Usp44         | chr10:93831554-93858087   | NOTEST | 0.0229759  | 0.164511  |
| Gm4847        | chr1:166628970-166647693  | NOTEST | 0.00684806 | 0.0485994 |
| C030023E24Rik | chrX:61191292-61194164    | OK     | 0.665575   | 4.72172   |
| Grb7          | chr11:98446833-98455373   | NOTEST | 0.0230186  | 0.161959  |
| Apob          | chr12:7977676-8016839     | NOTEST | 0.00509044 | 0.0356437 |
| Olf1372-ps1   | chr11:52154875-52157907   | OK     | 0.19193    | 1.33346   |
| Cd3d          | chr9:44981785-44987052    | NOTEST | 0.0619978  | 0.427409  |
| Kif15         | chr9:122951080-123018733  | NOTEST | 0.113584   | 0.782936  |
| 4930467E23Rik | chr8:19729575-20063170    | NOTEST | 0.00674547 | 0.0461112 |
| Mfsd2b        | chr12:4862437-4874359     | OK     | 0.322602   | 2.2       |
| 4930474G06Rik | chr18:28560163-28998176   | NOTEST | 0.00654233 | 0.0443194 |
| Klrb1c        | chr6:128778484-128788641  | NOTEST | 0.0756945  | 0.512766  |
| BC049635      | chr4:42868002-42874203    | NOTEST | 0.0236048  | 0.159758  |
| 4732456N10Rik | chr15:101552355-101562950 | NOTEST | 0.0156095  | 0.105558  |
| Cdk1          | chr10:69336634-69352912   | OK     | 0.224095   | 1.51427   |



|               |                           |        |            |           |
|---------------|---------------------------|--------|------------|-----------|
| Snai3         | chr8:122454205-122460692  | NOTEST | 0.0139218  | 0.0940646 |
| 1700011A15Rik | chr15:101431013-101491512 | NOTEST | 0.0246192  | 0.166267  |
| Pkhd11l       | chr15:44457552-44597135   | NOTEST | 0.0917268  | 0.615495  |
| Klra7         | chr6:129972081-130386874  | NOTEST | 0.0645078  | 0.430377  |
| Mrgpra4       | chr7:47980793-47982296    | NOTEST | 0.0684675  | 0.456664  |
| Kif4          | chrX:100626064-100727271  | OK     | 0.121382   | 0.809371  |
| Trpm1         | chr7:64153834-64269759    | NOTEST | 0.00292866 | 0.0194527 |
| Ubap1l        | chr9:65361059-65380377    | NOTEST | 0.105629   | 0.700776  |
| Slc22a29      | chr19:8160167-8218839     | NOTEST | 0.00960568 | 0.0636796 |
| Hes3          | chr4:152285971-152291662  | OK     | 0.193338   | 1.27958   |
| Fam110c       | chr12:31073967-31079940   | NOTEST | 0.0156013  | 0.103219  |
| Ccdc175       | chr12:72085838-72185029   | NOTEST | 0.0216488  | 0.142436  |
| Nmur2         | chr11:56024989-56040987   | NOTEST | 0.010833   | 0.0711317 |
| Tmem91        | chr7:25669139-25675166    | OK     | 0.131112   | 0.846092  |
| Ceacam2       | chr7:25376818-25566417    | NOTEST | 0.00599894 | 0.0387045 |
| Fam219aos     | chr4:41517436-41569527    | NOTEST | 0.0321412  | 0.206839  |
| Hnf4g         | chr3:3508029-3659800      | NOTEST | 0.035811   | 0.230107  |
| Kcnk16        | chr14:20262755-20269162   | NOTEST | 0.0269018  | 0.172106  |
| Serpina9      | chr12:103996619-104013652 | NOTEST | 0.0251366  | 0.159253  |
| Ddx43         | chr9:78395776-78423589    | NOTEST | 0.00857656 | 0.054248  |
| Sp5           | chr2:70474922-70477726    | NOTEST | 0.0090842  | 0.0574436 |
| Rsad2         | chr12:26442742-26456452   | OK     | 4.61319    | 29.11     |
| Hist1h4c      | chr13:23698083-23698458   | NOTEST | 0.0935192  | 0.586261  |
| Slc14a1       | chr18:78100090-78142119   | OK     | 0.420107   | 2.63185   |
| Hist1h3i      | chr13:21782914-21783397   | NOTEST | 0.0647763  | 0.405085  |
| Syce1l        | chr8:113635585-113655533  | NOTEST | 0.0318445  | 0.198843  |
| Hmmr          | chr11:40701387-40733437   | OK     | 0.246277   | 1.53347   |
| Neurog1       | chr13:56250497-56252163   | NOTEST | 0.0220184  | 0.136996  |
| C030016D13Rik | chr19:27430036-27432631   | NOTEST | 0.0372264  | 0.231333  |
| Cenpa         | chr5:30666901-30674826    | OK     | 0.621008   | 3.85636   |
| F830002L21Rik | chr10:43593426-43630913   | OK     | 0.183752   | 1.14088   |
| Uhrf1         | chr17:56303336-56323486   | OK     | 0.206621   | 1.28267   |
| Ctcf1         | chr2:173093608-173119525  | NOTEST | 0.0181239  | 0.11223   |
| Lat           | chr7:126363827-126369534  | NOTEST | 0.0833006  | 0.511368  |
| D930020B18Rik | chr10:121641700-121693914 | NOTEST | 0.00998131 | 0.0606935 |
| Ctsw          | chr19:5465239-5468498     | NOTEST | 0.0804627  | 0.488803  |
| Otp           | chr13:94875626-94883681   | NOTEST | 0.0164672  | 0.0993638 |
| Clspn         | chr4:126556979-126593903  | NOTEST | 0.0793412  | 0.478624  |
| Cst7          | chr2:150570414-150578944  | NOTEST | 0.0632111  | 0.378373  |
| Gm15612       | chr6:88842557-88874044    | NOTEST | 0.0117615  | 0.0702505 |
| Ubash3a       | chr17:31208065-31242403   | NOTEST | 0.0456254  | 0.270767  |
| Slc22a13      | chr9:119192977-119209105  | NOTEST | 0.0106988  | 0.0633642 |
| C2cd4a        | chr9:67830531-67832330    | NOTEST | 0.0168146  | 0.0995151 |
| D6Ert474e     | chr6:143245887-143297879  | NOTEST | 0.00672449 | 0.039751  |
| Hmgb2         | chr8:57511842-57515999    | OK     | 0.209235   | 1.22445   |
| Gm14827       | chrX:94442731-94447727    | NOTEST | 0.0947267  | 0.550689  |
| C1ql4         | chr15:99084753-99087728   | OK     | 4.3798     | 25.459    |
| Trim29        | chr9:43310762-43336125    | NOTEST | 0.0142495  | 0.082828  |
| Snhg11        | chr2:158375637-158386145  | OK     | 36.2003    | 209.829   |
| Hbq1a         | chr11:32300068-32300873   | NOTEST | 0.188325   | 1.08649   |
| Pglyrp2       | chr17:32412460-32424167   | NOTEST | 0.00888778 | 0.0512333 |
| Eomes         | chr9:118478188-118486132  | NOTEST | 0.00962721 | 0.0552741 |
| Ccl5          | chr11:83525778-83530518   | OK     | 1.01888    | 5.83732   |

|               |                           |        |            |           |
|---------------|---------------------------|--------|------------|-----------|
| Adcy10        | chr1:165485182-165576773  | NOTEST | 0.00343494 | 0.0195494 |
| A230028O05Rik | chr16:25059638-25069058   | NOTEST | 0.00664135 | 0.0377337 |
| Tgm6          | chr2:130112415-130154232  | NOTEST | 0.00582574 | 0.0330807 |
| Bpgm          | chr6:34476355-34505610    | OK     | 12.7385    | 72.2734   |
| Lrrc2         | chr9:110951544-110984064  | NOTEST | 0.0450165  | 0.255135  |
| Cenpe         | chr3:135212562-135273540  | OK     | 0.205055   | 1.16099   |
| Ovol2         | chr2:144305175-144332080  | OK     | 0.493444   | 2.78361   |
| Gm128         | chr3:95236919-95241109    | NOTEST | 0.0152382  | 0.0857071 |
| Aldh3b2       | chr19:3972327-3981665     | NOTEST | 0.0268463  | 0.150753  |
| Nccrp1        | chr7:28543595-28547254    | OK     | 0.264021   | 1.479     |
| Slc12a3       | chr8:94329207-94366221    | NOTEST | 0.0336092  | 0.187466  |
| Hbq1b         | chr11:32286963-32287912   | OK     | 0.455816   | 2.54028   |
| Cdca8         | chr4:124918464-124936917  | OK     | 0.908597   | 5.05147   |
| C330024D21Rik | chr5:67463897-67477899    | NOTEST | 0.00671923 | 0.0373114 |
| Sdr9c7        | chr10:127898534-127911759 | NOTEST | 0.00727126 | 0.0403179 |
| Trim71        | chr9:114511272-114564369  | NOTEST | 0.0352112  | 0.195216  |
| Cdc25c        | chr18:34732996-34751533   | NOTEST | 0.0821318  | 0.454569  |
| Meg3          | chr12:109540995-109571729 | OK     | 38.0262    | 206.413   |
| Mcm10         | chr2:4990723-5012791      | NOTEST | 0.118474   | 0.642151  |
| Cd200r4       | chr16:44820727-44839150   | NOTEST | 0.0107587  | 0.0580826 |
| Plk1          | chr7:122159436-122169875  | OK     | 0.290002   | 1.56212   |
| 1600023N17Rik | chr5:45668700-45669708    | NOTEST | 0.153745   | 0.823789  |
| Cldn26        | chr16:8409275-8425136     | NOTEST | 0.103307   | 0.551248  |
| Kif23         | chr9:61917277-61946799    | OK     | 0.78142    | 4.16384   |
| B230216G23Rik | chr6:142413430-142419740  | OK     | 0.283862   | 1.51106   |
| Slc51a        | chr16:32475577-32487879   | OK     | 0.993672   | 5.28095   |
| Ttll8         | chr15:88913897-88954418   | NOTEST | 0.00620278 | 0.0329502 |
| Gm7244        | chr9:31271400-31275385    | NOTEST | 0.0378577  | 0.201102  |
| 5830432E09Rik | chr7:135537823-135686294  | NOTEST | 0.0258122  | 0.137111  |
| Arhgef39      | chr4:43496143-43499660    | OK     | 0.234328   | 1.24303   |
| Crh           | chr3:19693400-19695396    | NOTEST | 0.0461257  | 0.244589  |
| 4921511I17Rik | chr12:12262138-12392475   | NOTEST | 0.0329624  | 0.174054  |
| Ncapg         | chr5:45669924-45857540    | OK     | 0.292486   | 1.54393   |
| Pde4c         | chr8:70724063-70751176    | OK     | 2.32634    | 12.2795   |
| Gm7325        | chr17:45600966-45602102   | OK     | 0.369347   | 1.94889   |
| 4930467K11Rik | chr10:57478382-57486353   | NOTEST | 0.0331705  | 0.174547  |
| Serpina1d     | chr12:103763586-103773633 | NOTEST | 0.0146814  | 0.0765781 |
| Slc16a10      | chr10:40033534-40142254   | OK     | 0.597818   | 3.10946   |
| Ticrr         | chr7:79660195-79714186    | NOTEST | 0.0349331  | 0.180847  |
| 2610203C22Rik | chr1:9548045-9631092      | NOTEST | 0.138084   | 0.712299  |
| Cel           | chr2:28555819-28563362    | NOTEST | 0.0204136  | 0.105144  |
| Peg3os        | chr7:6705959-6730419      | NOTEST | 0.0842843  | 0.433522  |
| Ube2l6        | chr2:84798827-84810003    | OK     | 16.003     | 81.988    |
| Slc30a2       | chr4:134343045-134354484  | NOTEST | 0.012367   | 0.0631032 |
| 9230105E05Rik | chr10:120361274-120476935 | NOTEST | 0.13234    | 0.671856  |
| Gm10248       | chr14:22019711-23094571   | NOTEST | 0.00680704 | 0.0344767 |
| Odf3b         | chr15:89377448-89379254   | NOTEST | 0.0192702  | 0.0966745 |
| Slc1a7        | chr4:107968333-108013532  | NOTEST | 0.0317095  | 0.158505  |
| Adamts19      | chr18:58836763-59053678   | NOTEST | 0.125333   | 0.624098  |
| Kcna3         | chr3:107036161-107038129  | OK     | 0.328046   | 1.62404   |
| Mettl21e      | chr1:44204069-44218931    | NOTEST | 0.0305771  | 0.151027  |
| Slc25a21      | chr12:56712633-57197472   | NOTEST | 0.0821572  | 0.405416  |
| Ccdc83        | chr7:90223877-90265432    | NOTEST | 0.0304169  | 0.149617  |

|               |                           |        |            |           |
|---------------|---------------------------|--------|------------|-----------|
| Wfdc2         | chr2:164562715-164568506  | OK     | 4.90589    | 24.0105   |
| Gm6402        | chr17:30215523-30576287   | OK     | 0.320219   | 1.55862   |
| Kcnq1ot1      | chr7:143107253-143427042  | NOTEST | 0.0504931  | 0.245702  |
| AI854517      | chr7:79500025-79534403    | NOTEST | 0.00487134 | 0.0237025 |
| BC048644      | chr8:121907832-121944912  | NOTEST | 0.0177256  | 0.0862046 |
| H2-T24        | chr17:35994503-36038174   | OK     | 0.376481   | 1.82536   |
| Prss38        | chr11:59372668-59375653   | NOTEST | 0.0175572  | 0.0847636 |
| E2f2          | chr4:136172393-136196056  | OK     | 1.31658    | 6.34808   |
| Stil          | chr4:115000117-115043198  | NOTEST | 0.100036   | 0.481273  |
| 6430411K18Rik | chr12:109590168-109595403 | OK     | 0.360805   | 1.73186   |
| 4930431F12Rik | chr5:44966200-44978805    | NOTEST | 0.0171709  | 0.0824001 |
| Cdh9          | chr15:16778100-16856777   | OK     | 2.69985    | 12.9506   |
| Cdcp1         | chr9:123172284-123216038  | NOTEST | 0.00527234 | 0.025286  |
| Bhlha9        | chr11:76672469-76673676   | OK     | 5.44651    | 26.0586   |
| Pnliprp2      | chr19:58759722-58777534   | NOTEST | 0.0133266  | 0.0636693 |
| Cd160         | chr3:96798762-96829351    | NOTEST | 0.0154989  | 0.0740402 |
| 9430060I03Rik | chr1:92933542-92950590    | NOTEST | 0.0233475  | 0.110515  |
| Rdh7          | chr10:127884026-127888733 | NOTEST | 0.0126682  | 0.0598511 |
| Cd247         | chr1:165788680-166002634  | NOTEST | 0.0970832  | 0.456874  |
| Ckap2l        | chr2:129268209-129297212  | OK     | 0.356805   | 1.67783   |
| Gpat2         | chr2:127425198-127436092  | NOTEST | 0.0450894  | 0.211755  |
| 2410076I21Rik | chr9:58582239-58741559    | OK     | 0.656255   | 3.0802    |
| Gm15915       | chr10:93641048-93745972   | NOTEST | 0.0275321  | 0.129021  |
| Kifc1         | chr17:33875665-33890633   | OK     | 0.407315   | 1.90434   |
| Smim6         | chr11:115892594-115933492 | NOTEST | 0.144465   | 0.67219   |
| Th            | chr7:142892775-142899966  | OK     | 44.8482    | 208.333   |
| Zfp457        | chr13:67292450-67306412   | NOTEST | 0.0481346  | 0.223295  |
| Igll1         | chr16:16860670-16863985   | NOTEST | 0.0822257  | 0.380516  |
| Gm11240       | chr4:73791243-73798378    | NOTEST | 0.132075   | 0.611065  |
| Gimap3        | chr6:48764463-48770851    | NOTEST | 0.167478   | 0.77368   |
| Depdc1b       | chr13:108316336-108389557 | OK     | 0.259469   | 1.19863   |
| Dmc1          | chr15:79561497-79605109   | NOTEST | 0.158146   | 0.729807  |
| Ctcflos       | chr2:173124748-173133204  | NOTEST | 0.101796   | 0.466903  |
| Dyrk4         | chr6:126876198-126921839  | OK     | 0.27075    | 1.24087   |
| Rps12         | chr10:23785182-23787209   | NOTEST | 0.0624642  | 0.286264  |
| Ccl1          | chr11:82176665-82179812   | OK     | 0.537493   | 2.45743   |
| Slc6a9        | chr4:117835257-117872470  | OK     | 1.13517    | 5.16866   |
| Mfi2          | chr16:31878809-31899019   | NOTEST | 0.0665334  | 0.301534  |
| Fam92b        | chr8:120166396-120177469  | NOTEST | 0.0860773  | 0.389374  |
| Apol7e        | chr15:77698888-77719288   | NOTEST | 0.0164538  | 0.0743617 |
| Smco1         | chr16:32271608-32274779   | NOTEST | 0.0181686  | 0.0815578 |
| Eppin         | chr2:164588342-164593571  | OK     | 0.586676   | 2.6286    |
| Acmsd         | chr1:127729412-127774054  | NOTEST | 0.0592235  | 0.262238  |
| Mrgpra3       | chr7:47588949-47601372    | OK     | 14.0776    | 62.2377   |
| Mis18bp1      | chr12:65132734-65172580   | NOTEST | 0.100865   | 0.444115  |
| Cdca5         | chr19:6085096-6091773     | NOTEST | 0.179473   | 0.789443  |
| Ceacam10      | chr7:24777203-24784655    | OK     | 4.77003    | 20.9802   |
| Trim40        | chr17:36881597-36890125   | NOTEST | 0.0272583  | 0.119652  |
| Gm20199       | chr9:59388553-59486374    | NOTEST | 0.0340962  | 0.14893   |
| Slc38a5       | chrX:8271380-8280176      | OK     | 0.596494   | 2.60135   |
| Birc5         | chr11:117849236-117855743 | OK     | 1.87645    | 8.16802   |
| Amy1          | chr3:113555951-113577750  | OK     | 3.44901    | 14.9848   |
| Orc1          | chr4:108579453-108614831  | NOTEST | 0.0999768  | 0.433987  |

|                      |                           |        |            |           |
|----------------------|---------------------------|--------|------------|-----------|
| Gdf15                | chr8:70629393-70631635    | NOTEST | 0.10003    | 0.434192  |
| Lrrc10b              | chr19:10455370-10457447   | OK     | 0.688486   | 2.98492   |
| A730046J19Rik        | chrX:144153694-144166274  | NOTEST | 0.0228581  | 0.0990697 |
| Tnfrsf4              | chr4:156013694-156016589  | NOTEST | 0.0957322  | 0.414711  |
| Gm6994               | chr14:77156762-77721763   | NOTEST | 0.0201543  | 0.0867393 |
| Prr22                | chr17:56770275-56772134   | OK     | 0.259126   | 1.11291   |
| Dmrt1                | chr19:25505705-25604328   | NOTEST | 0.00888306 | 0.0381473 |
| Gm7444               | chr9:56027635-56031573    | NOTEST | 0.0092088  | 0.0394701 |
| A930011O12Rik        | chr14:64588114-64593961   | OK     | 3.72841    | 15.9681   |
| Dbx2                 | chr15:95623562-95654771   | NOTEST | 0.181918   | 0.776753  |
| Cacna1i              | chr15:80287237-80398292   | OK     | 2.17031    | 9.25567   |
| 4933408J17Rik        | chr10:93540631-93605245   | NOTEST | 0.0226257  | 0.0964573 |
| Pnpla5               | chr15:84112620-84123175   | NOTEST | 0.0244014  | 0.104006  |
| Nxn1                 | chr8:71560554-71566649    | NOTEST | 0.0353471  | 0.150472  |
| Gm15328              | chr18:16816406-16822783   | NOTEST | 0.0436555  | 0.185584  |
| Agrp                 | chr8:105566694-105579845  | OK     | 0.397135   | 1.68531   |
| Nup210l              | chr3:90104131-90212017    | NOTEST | 0.0510436  | 0.216474  |
| H1foo                | chr6:115944938-115950233  | NOTEST | 0.0177001  | 0.074987  |
| Klhl31               | chr9:77636731-77660122    | NOTEST | 0.00300541 | 0.0126991 |
| Klra18,Klra33,Klra40 | chr6:129972081-130386874  | NOTEST | 0.0404217  | 0.17073   |
| Mbnl3                | chrX:51113493-51205832    | NOTEST | 0.0349247  | 0.14624   |
| Hrg                  | chr16:22951071-22961659   | NOTEST | 0.0930146  | 0.388396  |
| Bub1                 | chr2:127800199-127831859  | OK     | 0.186519   | 0.777656  |
| Gm15816              | chr8:22974835-23150497    | NOTEST | 0.0365998  | 0.152577  |
| Wfdc10               | chr2:164656045-164657368  | NOTEST | 0.0707644  | 0.294562  |
| Kcna7                | chr7:45405959-45411382    | NOTEST | 0.0113709  | 0.0472688 |
| 4930581F22Rik        | chr9:35046578-35175987    | NOTEST | 0.144835   | 0.601863  |
| Slc17a8              | chr10:89574019-89621249   | OK     | 3.91945    | 16.2287   |
| Gm20139              | chr10:19141748-19207947   | OK     | 0.370484   | 1.53032   |
| Gm9767               | chr10:25991185-26079447   | OK     | 0.271128   | 1.11872   |
| Epha8                | chr4:136929418-136956816  | OK     | 0.219647   | 0.904977  |
| Gm16853              | chr9:21367870-21411720    | NOTEST | 0.0204577  | 0.0840222 |
| Bcl2l15              | chr3:103193822-103854618  | NOTEST | 0.134671   | 0.551548  |
| Cdca3                | chr6:124830175-124833701  | OK     | 0.760673   | 3.09085   |
| Oas1e                | chr5:120786311-120795530  | NOTEST | 0.0106517  | 0.0431318 |
| Mlph                 | chr1:90915099-90951142    | NOTEST | 0.0743053  | 0.30076   |
| Tm6sf2               | chr8:70072931-70080052    | NOTEST | 0.132454   | 0.535667  |
| Col7a1               | chr9:108953744-108984875  | NOTEST | 0.135676   | 0.546124  |
| Tekt2                | chr4:126322120-126325199  | NOTEST | 0.166275   | 0.668229  |
| Ly6i                 | chr15:74979811-74983430   | NOTEST | 0.023914   | 0.0960406 |
| Unc13d               | chr11:116062095-116077961 | OK     | 0.697353   | 2.78781   |
| Myf5                 | chr10:107482907-107486134 | NOTEST | 0.0279805  | 0.111169  |
| Nxpe2                | chr9:48318003-48340898    | OK     | 3.11021    | 12.3391   |
| Sbk3                 | chr7:4965259-4970961      | OK     | 0.317208   | 1.25345   |
| Kif2c                | chr4:117159632-117182624  | NOTEST | 0.144341   | 0.570357  |
| A930016O22Rik        | chr7:19411093-19421583    | NOTEST | 0.0800535  | 0.316211  |
| Msmg                 | chr4:43562633-43587487    | NOTEST | 0.029923   | 0.117988  |
| Stac3                | chr10:127501716-127508815 | NOTEST | 0.145358   | 0.573055  |
| St14                 | chr9:31088589-31131799    | NOTEST | 0.133549   | 0.526097  |
| Tmprss11c            | chr5:86231480-86289308    | OK     | 1.71747    | 6.76192   |
| Ppef2                | chr5:92226973-92253159    | NOTEST | 0.0590067  | 0.232083  |
| Pet117               | chr2:144368982-144407675  | OK     | 1.61105    | 6.33562   |
| Cct8l1               | chr5:25516066-25518027    | NOTEST | 0.0378248  | 0.148486  |

|               |                           |        |            |           |
|---------------|---------------------------|--------|------------|-----------|
| Ndc80         | chr17:71496099-71526857   | NOTEST | 0.19155    | 0.743601  |
| Ildr1         | chr16:36693977-36726804   | NOTEST | 0.0189732  | 0.0734718 |
| A930013F10Rik | chr8:22628118-22653437    | OK     | 0.306522   | 1.1841    |
| BC107364      | chr3:96433787-96452306    | NOTEST | 0.038688   | 0.149362  |
| Fbxl13        | chr5:21483846-21645605    | NOTEST | 0.0295555  | 0.113857  |
| Il4i1         | chr7:44812255-44849079    | NOTEST | 0.0678917  | 0.26123   |
| Serpina1b     | chr12:103728155-103738189 | NOTEST | 0.0158032  | 0.0606558 |
| E530001F21Rik | chrX:105164377-105165505  | OK     | 0.35153    | 1.34691   |
| 5730508B09Rik | chr3:127869687-127896323  | OK     | 7.51956    | 28.8094   |
| Btg3          | chr16:78359859-78376785   | NOTEST | 0.189327   | 0.72527   |
| Spag5         | chr11:78301590-78322454   | OK     | 0.458577   | 1.74977   |
| Gm20751       | chr13:43716790-43719038   | NOTEST | 0.148989   | 0.568233  |
| Baiap2l2      | chr15:79258194-79285509   | NOTEST | 0.146411   | 0.556758  |
| Tnfsf14       | chr17:57189473-57194181   | NOTEST | 0.0412424  | 0.156649  |
| Clca3         | chr3:145004536-145032776  | NOTEST | 0.0188878  | 0.0715555 |
| Wnt11         | chr7:98835111-98854747    | OK     | 0.564211   | 2.13514   |
| 9530052E02Rik | chr8:10986963-11054541    | NOTEST | 0.0457016  | 0.172858  |
| Muc2          | chr7:141690339-141754694  | NOTEST | 0.0277035  | 0.104525  |
| Aknad1        | chr3:108739657-108782309  | NOTEST | 0.00758042 | 0.0285466 |
| Opn1sw        | chr6:29348105-29380513    | NOTEST | 0.0252411  | 0.0950442 |
| Dgkk          | chrX:6873483-6948363      | OK     | 1.61636    | 6.07713   |
| E030024N20Rik | chr19:16132830-16387453   | NOTEST | 0.0165384  | 0.0619857 |
| Fut1          | chr7:45617605-45621059    | NOTEST | 0.0316148  | 0.118362  |
| Zfp57         | chr17:37001162-37010729   | OK     | 0.738508   | 2.75978   |
| Gm1123        | chr9:99006964-99035690    | NOTEST | 0.076683   | 0.285749  |
| Gm7271        | chr5:76484076-76516628    | OK     | 47.0629    | 174.27    |
| E330033B04Rik | chr15:96268563-96275275   | NOTEST | 0.102031   | 0.377377  |
| Gm10677       | chr9:47530351-47853385    | NOTEST | 0.0192045  | 0.0709225 |
| Gm4787        | chr12:81376990-81379486   | NOTEST | 0.118844   | 0.438148  |
| C1s2          | chr6:124624624-124636085  | NOTEST | 0.0483772  | 0.177286  |
| Itih4         | chr14:30886475-30901986   | NOTEST | 0.0299691  | 0.109816  |
| Ska1          | chr18:74195298-74207818   | NOTEST | 0.0366525  | 0.134134  |
| Nmur1         | chr1:86386324-86388141    | OK     | 0.920592   | 3.36519   |
| Grxcr1        | chr5:68031834-68166398    | NOTEST | 0.0804247  | 0.29293   |
| Klrk1         | chr6:129610322-129623864  | NOTEST | 0.0544205  | 0.19679   |
| Prss45        | chr9:110834587-110841310  | NOTEST | 0.0521332  | 0.188389  |
| Olfir239      | chr17:33199061-33200009   | NOTEST | 0.0216587  | 0.078161  |
| Prc1          | chr7:80294450-80316259    | OK     | 1.09255    | 3.93444   |
| Nek2          | chr1:191821472-191833049  | NOTEST | 0.223482   | 0.804713  |
| Sh2d4b        | chr14:40815867-40892965   | OK     | 1.20091    | 4.31643   |
| Mirg          | chr12:109734980-109749457 | OK     | 4.23411    | 15.2178   |
| Nkx6-3        | chr8:23153270-23158948    | NOTEST | 0.00894859 | 0.0321181 |
| Plcz1         | chr6:139989721-140041417  | NOTEST | 0.00919272 | 0.0329913 |
| Myoz3         | chr18:60573716-60591716   | NOTEST | 0.00569622 | 0.0204293 |
| Gm6559        | chr6:51379709-51392791    | NOTEST | 0.0374143  | 0.134095  |
| Duxbl1,Duxbl2 | chr14:26262257-26269434   | NOTEST | 0.00914602 | 0.0327518 |
| Sis           | chr3:72888559-72966866    | NOTEST | 0.00337914 | 0.0120659 |
| BC018473      | chr11:116752166-116757883 | NOTEST | 0.00628479 | 0.0223981 |
| Klra13-ps     | chr6:129972081-130386874  | NOTEST | 0.0297134  | 0.10581   |
| Ryr1          | chr7:29003339-29125151    | NOTEST | 0.0703013  | 0.249842  |
| Ect2          | chr3:27097221-27153878    | OK     | 0.465342   | 1.65261   |
| Fbp2          | chr13:62836884-62858370   | OK     | 1.70161    | 6.01929   |
| Lgals3        | chr14:47373859-47386167   | OK     | 4.03869    | 14.2712   |



|               |                           |        |            |           |
|---------------|---------------------------|--------|------------|-----------|
| Tdg           | chr10:82629837-82690650   | OK     | 0.243566   | 0.858913  |
| Cenph         | chr13:100759685-100775899 | OK     | 0.352502   | 1.23911   |
| Tulp2         | chr7:45473562-45522603    | NOTEST | 0.0130506  | 0.0458715 |
| Tespa1        | chr10:130322851-130362642 | NOTEST | 0.0237432  | 0.0833923 |
| 4930578M01Rik | chr15:98985964-98989281   | NOTEST | 0.0917     | 0.322027  |
| Itk           | chr11:46193848-46589232   | OK     | 0.737862   | 2.59118   |
| 4930488L21Rik | chr8:93810837-93969388    | NOTEST | 0.0109655  | 0.0384743 |
| Gm20324       | chr15:82808625-82912134   | NOTEST | 0.151757   | 0.53108   |
| Cenpu         | chr8:46552068-46617200    | NOTEST | 0.192645   | 0.674083  |
| Misp          | chr10:79697304-80369637   | OK     | 0.691547   | 2.418     |
| Kif11         | chr19:37376402-37421859   | OK     | 0.631244   | 2.20066   |
| Dppa5a        | chr9:78367053-78368199    | NOTEST | 0.241354   | 0.840675  |
| Klk11         | chr7:43774616-43779262    | NOTEST | 0.101254   | 0.352494  |
| Ccdc68        | chr18:69925558-69969484   | OK     | 12.0693    | 41.9807   |
| Rtdr1         | chr10:74957476-75032586   | NOTEST | 0.0163495  | 0.0567522 |
| Dhrs11        | chr11:84820727-84829003   | OK     | 3.07042    | 10.6437   |
| Galr3         | chr15:79030873-79043558   | NOTEST | 0.0165248  | 0.0572432 |
| Doc2g         | chr19:4003384-4007005     | OK     | 0.355656   | 1.23064   |
| Tgm5          | chr2:121046110-121085759  | OK     | 0.369721   | 1.27862   |
| Tecrl         | chr5:83278121-83355195    | NOTEST | 0.0256399  | 0.0886354 |
| 1810010D01Rik | chr7:145205817-145208119  | NOTEST | 0.0513496  | 0.177272  |
| 5033406O09Rik | chr12:111941990-111944482 | NOTEST | 0.135002   | 0.465929  |
| Bmp15         | chrX:6314105-6320723      | OK     | 1.91327    | 6.59549   |
| Hrh1          | chr6:114397935-114483296  | OK     | 0.998586   | 3.43802   |
| D730005E14Rik | chr15:79889531-79908429   | NOTEST | 0.0314953  | 0.108399  |
| Serpinf2      | chr11:75431735-75439501   | NOTEST | 0.00864993 | 0.0297587 |
| Fcamr         | chr1:130800901-130814740  | NOTEST | 0.0209144  | 0.0719242 |
| Epb4.1        | chr4:131923426-132075313  | OK     | 8.8784     | 30.5311   |
| Snx22         | chr9:66060168-66069731    | OK     | 0.323069   | 1.10867   |
| Samd11        | chr4:156236009-156255338  | OK     | 0.788571   | 2.70398   |
| Gm5088        | chr14:89896223-89899447   | NOTEST | 0.0180586  | 0.0618454 |
| Kcne3         | chr7:100176669-100184869  | OK     | 0.251717   | 0.859352  |
| Cd3g          | chr9:44969571-44980431    | NOTEST | 0.10471    | 0.357209  |
| Orm3          | chr4:63356161-63359511    | NOTEST | 0.0904936  | 0.308693  |
| Card11        | chr5:140872998-141000596  | OK     | 2.49761    | 8.51389   |
| Cib3          | chr8:72204334-72212837    | NOTEST | 0.173411   | 0.590815  |
| Gpr151        | chr18:42578019-42579652   | OK     | 0.837626   | 2.85308   |
| Pkd2l1        | chr19:44147636-44192442   | NOTEST | 0.00583505 | 0.0198709 |
| 4930407I10Rik | chr15:82059150-82066538   | NOTEST | 0.00429861 | 0.0146363 |
| Prrt4         | chr6:29169229-29179584    | OK     | 0.861844   | 2.93168   |
| 4930550L24Rik | chrX:58911460-58920304    | NOTEST | 0.0525285  | 0.178681  |
| Hus1b         | chr13:30813917-30974047   | NOTEST | 0.0721573  | 0.245161  |
| Espl1         | chr15:102296292-102324356 | NOTEST | 0.188698   | 0.640868  |
| Fscn2         | chr11:120361533-120368173 | NOTEST | 0.0778904  | 0.264399  |
| Gm4349        | chr3:95427348-95431085    | NOTEST | 0.0176032  | 0.0597378 |
| Asf1b         | chr8:83955693-83970195    | OK     | 0.6673     | 2.26174   |
| Slc39a5       | chr10:128395930-128401224 | NOTEST | 0.022016   | 0.0746157 |
| Hoxd3         | chr2:74710043-74748271    | OK     | 1.20557    | 4.082     |
| A330032B11Rik | chr19:37021290-37207471   | NOTEST | 0.0224628  | 0.0760522 |
| 1600029O15Rik | chr9:58196296-58208808    | OK     | 0.30813    | 1.04067   |
| Serpnb2       | chr1:107511422-107525600  | NOTEST | 0.00971404 | 0.0327538 |
| Gm4532        | chr7:127232417-127233130  | OK     | 0.333366   | 1.12268   |
| Trim72        | chr7:128004377-128011393  | NOTEST | 0.0855138  | 0.28798   |

|               |                           |        |            |           |
|---------------|---------------------------|--------|------------|-----------|
| P2rx2         | chr5:110339811-110343035  | OK     | 1.94761    | 6.54405   |
| 1700024F13Rik | chr13:3498049-3501393     | NOTEST | 0.0370278  | 0.124224  |
| Tacr1         | chr6:82402474-82560104    | NOTEST | 0.0177805  | 0.0596294 |
| Cox7b2        | chr5:71442822-71548205    | NOTEST | 0.146068   | 0.489858  |
| Hmbs          | chr9:44336347-44344228    | OK     | 6.04483    | 20.2652   |
| Fxyd2         | chr9:45399708-45410278    | OK     | 607.391    | 2035.6    |
| Slc10a2       | chr8:5085622-5105232      | NOTEST | 0.247392   | 0.829102  |
| Chrna4        | chr2:181022310-181039177  | OK     | 1.29536    | 4.31961   |
| Krt27         | chr11:99345565-99351094   | OK     | 1.35563    | 4.51088   |
| Gm2518        | chr19:8772521-8786417     | NOTEST | 0.0565341  | 0.188035  |
| Soat2         | chr15:102150574-102163436 | OK     | 0.407721   | 1.35426   |
| Nts           | chr10:102481755-102490418 | OK     | 5.18462    | 17.1737   |
| Rasal3        | chr17:32390660-32404808   | NOTEST | 0.101892   | 0.337413  |
| Spata19       | chr9:27396820-27401710    | NOTEST | 0.0395757  | 0.130974  |
| Wfdc17        | chr11:83704055-83706269   | OK     | 0.621283   | 2.05284   |
| Dna2          | chr10:62947028-62974188   | NOTEST | 0.15996    | 0.527202  |
| Cd3e          | chr9:44998742-45009590    | NOTEST | 0.206635   | 0.680081  |
| Cdc20         | chr4:118428092-118437343  | OK     | 0.556489   | 1.83137   |
| 4831440E17Rik | chr5:25499796-25504473    | OK     | 0.261283   | 0.85816   |
| Wnt16         | chr6:22288226-22298522    | OK     | 0.754555   | 2.47505   |
| Hsd17b1       | chr11:101078410-101080505 | NOTEST | 0.146402   | 0.478567  |
| Gsg2          | chr11:73090594-73147449   | NOTEST | 0.107697   | 0.351941  |
| Tnnc1         | chr14:31208311-31211711   | OK     | 0.401156   | 1.31079   |
| Tmem102       | chr11:69803594-69806038   | NOTEST | 0.0820079  | 0.267887  |
| Ttll6         | chr11:96133785-96165452   | OK     | 0.384423   | 1.2547    |
| Miat          | chr5:112213227-112228948  | OK     | 18.1515    | 59.2417   |
| Cd6           | chr19:10789338-10830058   | NOTEST | 0.0754871  | 0.246129  |
| Rhox5         | chrX:37754607-37808878    | NOTEST | 0.16755    | 0.546179  |
| Neurog3       | chr10:62133089-62134763   | OK     | 0.471801   | 1.53613   |
| Mrgprb5       | chr7:48168016-48168985    | OK     | 5.94189    | 19.335    |
| 5830473C10Rik | chr5:90561208-90597906    | OK     | 0.620974   | 2.01515   |
| Hist1h2bk     | chr13:22035820-22036320   | NOTEST | 0.0581438  | 0.188409  |
| Fancd2        | chr6:113531681-113596285  | OK     | 0.316179   | 1.02428   |
| Wdfy1         | chr1:79702261-79761769    | OK     | 3.67641    | 11.9041   |
| Gpx2-ps1      | chr7:100227606-100278872  | NOTEST | 0.151163   | 0.489317  |
| Mei1          | chr15:82070116-82126814   | NOTEST | 0.0811366  | 0.262513  |
| Mtap7d3       | chrX:56797952-56822325    | NOTEST | 0.105888   | 0.342247  |
| Glp2r         | chr11:67706429-67771153   | NOTEST | 0.00389602 | 0.0125722 |
| Tex21         | chr12:76198689-76246746   | NOTEST | 0.0102304  | 0.032936  |
| AW551984      | chr9:39587395-39604124    | OK     | 1.6063     | 5.16749   |
| Rpl36a        | chrX:134585653-134588062  | NOTEST | 0.316538   | 1.0173    |
| Cd36          | chr5:17781689-17888959    | OK     | 1.2316     | 3.95285   |
| AU015836      | chrX:93968655-93975470    | NOTEST | 0.0329138  | 0.105402  |
| Spc25         | chr2:69193894-69206190    | OK     | 0.565667   | 1.81145   |
| 2310002F09Rik | chr7:43745465-43755936    | OK     | 0.376958   | 1.20673   |
| Fshr          | chr17:88984951-89200675   | NOTEST | 0.0149251  | 0.0477107 |
| Gabrr3        | chr16:59407381-59461739   | NOTEST | 0.0145175  | 0.0463986 |
| Kif20a        | chr18:34598614-34651736   | OK     | 0.509782   | 1.62876   |
| Cdca2         | chr14:67676353-67715841   | NOTEST | 0.213041   | 0.680107  |
| Mrgprx1       | chr7:48020970-48027597    | OK     | 14.431     | 46.0247   |
| Tnfsf11       | chr14:78277445-78308043   | NOTEST | 0.0173997  | 0.0554444 |
| Gm20611       | chr10:61031302-61038080   | NOTEST | 0.0208556  | 0.0664525 |
| Crip3         | chr17:46428941-46431771   | NOTEST | 0.227589   | 0.724264  |

|               |                           |        |            |           |
|---------------|---------------------------|--------|------------|-----------|
| Il31ra        | chr13:112522806-112580662 | OK     | 6.35222    | 20.2027   |
| Sowahd        | chrX:37048844-37050418    | NOTEST | 0.239692   | 0.762284  |
| Fam19a4       | chr6:96831208-97060411    | OK     | 25.392     | 80.7151   |
| Ucp1          | chr8:83290347-83298456    | NOTEST | 0.0491324  | 0.156053  |
| Ptpn7         | chr1:135132724-135145320  | NOTEST | 0.0813104  | 0.257974  |
| Nrp           | chr12:87428077-87472299   | NOTEST | 0.104258   | 0.330767  |
| Ambn          | chr5:88456010-88468529    | NOTEST | 0.0104354  | 0.0330946 |
| Slamf1        | chr1:171767131-171801184  | NOTEST | 0.0288627  | 0.0915021 |
| Slc2a4rg-ps   | chr2:181384249-181387596  | OK     | 0.336885   | 1.06795   |
| Ptk6          | chr2:181195123-181202789  | NOTEST | 0.0649342  | 0.205687  |
| Ftx           | chrX:103560909-103623754  | OK     | 1.09547    | 3.46438   |
| Slc44a4       | chr17:34914465-34930436   | NOTEST | 0.0155464  | 0.0491384 |
| Tspan32       | chr7:143005045-143019485  | NOTEST | 0.172793   | 0.545344  |
| Dapk2         | chr9:66158225-66272242    | OK     | 7.28147    | 22.9663   |
| Gch1          | chr14:47153894-47189402   | OK     | 1.31756    | 4.15424   |
| Erich2        | chr2:70489939-70602012    | NOTEST | 0.0541494  | 0.170644  |
| Dlx1          | chr2:71529444-71537891    | NOTEST | 0.0344964  | 0.108592  |
| 4932438H23Rik | chr16:91053934-91069145   | NOTEST | 0.00814652 | 0.0256364 |
| Ppm1n         | chr7:19276806-19280049    | OK     | 0.336859   | 1.05989   |
| Gabrd         | chr4:155384978-155398069  | NOTEST | 0.240032   | 0.754699  |
| 9530059O14Rik | chr9:122572500-122580647  | NOTEST | 0.134141   | 0.420848  |
| Plekhg4       | chr8:105375380-105413487  | NOTEST | 0.135534   | 0.423313  |
| Rad54l        | chr4:116075464-116123690  | NOTEST | 0.149798   | 0.467569  |
| Klk9          | chr7:43791890-43796756    | NOTEST | 0.0270652  | 0.0844196 |
| 2010003K11Rik | chr19:4496787-4498583     | NOTEST | 0.125781   | 0.391986  |
| Kcnj6         | chr16:94748682-94997696   | OK     | 0.674143   | 2.10084   |
| Mcoln2        | chr3:146149832-146195512  | NOTEST | 0.0987469  | 0.307356  |
| C230029M16    | chr10:118920380-118927143 | NOTEST | 0.0249122  | 0.0775172 |
| Rag1          | chr2:101638251-101649532  | NOTEST | 0.0744439  | 0.231488  |
| Rdh18-ps      | chr10:127824215-127846565 | NOTEST | 0.0254941  | 0.0792499 |
| Gm7102        | chr19:61174685-61176309   | NOTEST | 0.0363355  | 0.112926  |
| Snurf         | chr7:59982500-60140219    | OK     | 19.1497    | 59.5016   |
| H2-Q7,H2-Q9   | chr17:35439154-35443773   | OK     | 0.60352    | 1.87201   |
| Gm19619       | chr5:91257570-91283076    | NOTEST | 0.0335167  | 0.103924  |
| 2810008D09Rik | chr11:117076782-117078955 | OK     | 7.18133    | 22.2027   |
| Ctrl          | chr8:105931993-105933862  | NOTEST | 0.238767   | 0.737873  |
| Insm1         | chr2:146221996-146225018  | OK     | 3.41746    | 10.5448   |
| Ccdc18        | chr5:108132913-108232949  | NOTEST | 0.0976845  | 0.300915  |
| Ncaph         | chr2:127103809-127133954  | OK     | 0.426932   | 1.31357   |
| Scin          | chr12:40059770-40134228   | OK     | 4.54131    | 13.9631   |
| Cdk3-ps       | chr11:116216001-116220287 | NOTEST | 0.117446   | 0.361048  |
| Ccdc147       | chr19:47937711-48035379   | NOTEST | 0.18491    | 0.5682    |
| Grin2c        | chr11:115249168-115267243 | NOTEST | 0.2071     | 0.635571  |
| Klf5          | chr14:99298690-99313409   | OK     | 14.1979    | 43.5496   |
| Fgg           | chr3:83007895-83015049    | OK     | 0.639573   | 1.96055   |
| Foxl2os       | chr9:98949154-98955310    | NOTEST | 0.0194389  | 0.0595696 |
| Nlrp12        | chr7:3221509-3249740      | NOTEST | 0.083256   | 0.254756  |
| BC089491      | chr7:28284651-28291134    | NOTEST | 0.29604    | 0.90442   |
| Kcnk7         | chr19:5704475-5707101     | NOTEST | 0.114194   | 0.348701  |
| Lrrc36        | chr8:105413621-105464086  | NOTEST | 0.178118   | 0.543361  |
| Gm3696        | chr14:7083024-7105457     | NOTEST | 0.0365489  | 0.11146   |
| Mxd3          | chr13:55322054-55329730   | OK     | 0.261751   | 0.797098  |
| Slc5a11       | chr7:123214865-123273251  | OK     | 0.591262   | 1.79935   |

|               |                           |        |           |           |
|---------------|---------------------------|--------|-----------|-----------|
| 5031426D15Rik | chr2:6539698-7396198      | NOTEST | 0.0263719 | 0.0801674 |
| Nppb          | chr4:147985787-147987205  | OK     | 11.5426   | 34.9622   |
| Ddx26b        | chrX:56454838-56507843    | OK     | 4.37415   | 13.2397   |
| Fgf23         | chr6:127072901-127082296  | NOTEST | 0.0973722 | 0.294601  |
| Ubl4b         | chr3:107553697-107555073  | NOTEST | 0.0164681 | 0.0498196 |
| Adam8         | chr7:139978937-139992509  | OK     | 2.11102   | 6.38586   |
| Nlrc3         | chr16:3946932-3976632     | NOTEST | 0.0877194 | 0.265306  |
| Ly86          | chr13:37345344-37419036   | OK     | 58.9898   | 178.365   |
| Gm16998       | chr10:54075921-54081081   | NOTEST | 0.0188286 | 0.0568517 |
| Rnf112        | chr11:61448416-61453992   | OK     | 45.0243   | 135.9     |
| Plaur         | chr7:24462499-24475873    | OK     | 3.06948   | 9.23192   |
| Mslnl         | chr17:25736039-25748330   | NOTEST | 0.0613453 | 0.184269  |
| Ovgp1         | chr3:105973801-105987423  | OK     | 0.346111  | 1.03883   |
| 0610040F04Rik | chr6:108577035-108666925  | NOTEST | 0.0118704 | 0.0356197 |
| Ulbp1         | chr10:7444872-7473477     | NOTEST | 0.08835   | 0.264933  |
| Smyd1         | chr6:71213939-71262281    | OK     | 1.09813   | 3.28885   |
| Foxe3         | chr4:114925146-114926013  | NOTEST | 0.0292539 | 0.0875913 |
| Murc          | chr4:48663513-48673492    | NOTEST | 0.0949679 | 0.284308  |
| Tmem158       | chr9:123259056-123260789  | OK     | 51.1339   | 152.882   |
| Ada           | chr2:163726570-163750239  | OK     | 1.66099   | 4.96515   |
| Wfdc5         | chr2:164176324-164182742  | NOTEST | 0.0642909 | 0.192158  |
| Sectm1b       | chr11:121053422-121063569 | OK     | 0.498768  | 1.48974   |
| Gcnt1         | chr19:17326140-17372844   | OK     | 0.422423  | 1.26159   |
| Rtp2          | chr16:23925547-23930794   | NOTEST | 0.024063  | 0.0718155 |
| Ldhal6b       | chr17:5410863-5440260     | NOTEST | 0.0699844 | 0.208841  |
| Sh2d2a        | chr3:87846754-87855722    | NOTEST | 0.0155607 | 0.0464102 |
| Celf3         | chr3:94478294-94492198    | OK     | 4.51423   | 13.4408   |
| 1700023L04Rik | chr6:29985328-29993531    | OK     | 0.27397   | 0.815524  |
| Smim5         | chr11:115892594-115933492 | OK     | 5.47549   | 16.2571   |
| Dnase1l2      | chr17:24440767-24443101   | OK     | 0.365634  | 1.08512   |
| Spn           | chr7:127132231-127137823  | OK     | 0.272044  | 0.807257  |
| Slc5a4a       | chr10:76147450-76189265   | NOTEST | 0.0272096 | 0.0807202 |
| Gm10494       | chr17:79506048-79510486   | NOTEST | 0.0161805 | 0.0479969 |
| Eid3          | chr10:82833950-82897724   | NOTEST | 0.0467968 | 0.138763  |
| 2010016I18Rik | chr3:106481985-106547761  | NOTEST | 0.0380159 | 0.112678  |
| 1700011L22Rik | chr8:79210429-79248583    | OK     | 1.18807   | 3.51613   |
| Irs3          | chr5:137643031-137645714  | OK     | 0.916665  | 2.71156   |
| A630023A22Rik | chr14:34051129-34102754   | NOTEST | 0.125305  | 0.370373  |
| AI504432      | chr3:107039503-107054322  | OK     | 0.844824  | 2.49635   |
| Ppl           | chr16:5086290-5132481     | OK     | 0.370966  | 1.09492   |
| Nuf2          | chr1:169497933-169531464  | OK     | 0.566677  | 1.67052   |
| Gm14378       | chr8:4248213-4251423      | NOTEST | 0.279423  | 0.822352  |
| Fam167a       | chr14:63436393-63465502   | OK     | 2.31177   | 6.79963   |
| Nmu           | chr5:76183879-76469519    | NOTEST | 0.14015   | 0.41218   |
| Bspry         | chr4:62480066-62497298    | NOTEST | 0.0683168 | 0.20089   |
| Phtf1os       | chr3:103914119-104007491  | NOTEST | 0.164785  | 0.484513  |
| Gm5886        | chr6:133763998-133767403  | NOTEST | 0.206083  | 0.603734  |
| H2-Q6,H2-Q8   | chr17:35424846-35428361   | LOWDAT | 0.447323  | 1.31006   |
| Nptxr         | chr15:79786350-79834333   | OK     | 20.273    | 59.214    |
| AI661453      | chr17:47412733-47470638   | NOTEST | 0.180392  | 0.526429  |
| 1500017E21Rik | chr19:36554638-36689479   | NOTEST | 0.0427559 | 0.124762  |
| Mrgpra9       | chr7:47234918-47252848    | OK     | 0.449589  | 1.30919   |
| Lmtk3         | chr7:45783946-45804142    | OK     | 1.25379   | 3.64816   |

|                   |                           |        |            |           |
|-------------------|---------------------------|--------|------------|-----------|
| Dnase1l3          | chr14:7965189-7994182     | OK     | 4.15721    | 12.0824   |
| Cpn1              | chr19:43956307-43986520   | OK     | 2.41052    | 7.00292   |
| Casp1             | chr9:5298516-5307281      | OK     | 3.56451    | 10.3536   |
| Rgs8              | chr1:153653036-153697665  | OK     | 12.7367    | 36.9804   |
| Tnfrsf13b         | chr11:61140834-61147642   | NOTEST | 0.166862   | 0.484308  |
| Ckap2             | chr8:22168151-22185819    | OK     | 0.626485   | 1.81821   |
| Ppp1r32           | chr19:10474256-10482897   | NOTEST | 0.043483   | 0.12619   |
| F420014N23Rik     | chr10:127190377-127211622 | NOTEST | 0.0536863  | 0.155537  |
| Gas5              | chr1:161035165-161038537  | OK     | 5.47199    | 15.8505   |
| Bub1b             | chr2:118598210-118641592  | OK     | 1.12937    | 3.27016   |
| Ifrd2             | chr9:107587717-107593038  | OK     | 1.76227    | 5.10185   |
| Gm5803            | chr15:22713819-22714984   | NOTEST | 0.089371   | 0.258476  |
| Cabp5             | chr7:13398154-13408878    | NOTEST | 0.0235946  | 0.0681953 |
| Dkk1              | chr7:45207524-45211883    | OK     | 1.03653    | 2.99205   |
| Lck               | chr4:129548343-129573641  | OK     | 0.564132   | 1.62664   |
| Sell              | chr1:164062075-164080785  | NOTEST | 0.227993   | 0.656265  |
| Gpr6              | chr10:41070492-41071584   | NOTEST | 0.0820719  | 0.236196  |
| Zdhhc23           | chr16:43969145-43979050   | OK     | 2.51237    | 7.22064   |
| Npc11             | chr11:6211010-6230245     | NOTEST | 0.0896169  | 0.2575    |
| Fetub             | chr16:22918381-22939768   | NOTEST | 0.146782   | 0.421381  |
| Als2cr11          | chr1:59050505-59094900    | NOTEST | 0.0461367  | 0.132375  |
| Ercc6l            | chrX:102142819-102157091  | NOTEST | 0.109137   | 0.31306   |
| Clca4             | chr3:144822623-144849302  | NOTEST | 0.122819   | 0.35105   |
| Knstrn            | chr2:118814002-118836212  | NOTEST | 0.266499   | 0.760027  |
| Gm609             | chr16:45416754-45492969   | NOTEST | 0.159431   | 0.454604  |
| 9330111N05Rik     | chr13:80964073-81079857   | NOTEST | 0.0303392  | 0.0864134 |
| Mns1              | chr9:72438528-72491959    | OK     | 1.05243    | 2.9941    |
| Scn2b             | chr9:45079182-45135606    | OK     | 19.398     | 55.1479   |
| Serpina11         | chr12:103980242-103989957 | OK     | 1.46376    | 4.1596    |
| Kcnh6             | chr11:106008202-106034064 | OK     | 11.2649    | 32.0067   |
| Acad10            | chr5:121621028-121660510  | OK     | 1.11727    | 3.17368   |
| Exph5             | chr9:53301669-53381158    | NOTEST | 0.204893   | 0.581621  |
| Gp1ba             | chr11:70639121-70642055   | NOTEST | 0.00637121 | 0.0180834 |
| Dfnb59            | chr2:76650272-76658554    | NOTEST | 0.141868   | 0.402369  |
| Cpne5             | chr17:29156520-29237790   | OK     | 0.77759    | 2.204     |
| Papolb            | chr5:142484838-142551098  | NOTEST | 0.0848793  | 0.240262  |
| Slc17a9           | chr2:180725338-180742278  | NOTEST | 0.0344534  | 0.0974511 |
| Igj               | chr5:88519808-88527897    | NOTEST | 0.111724   | 0.315916  |
| Cd4               | chr6:124864692-124888209  | NOTEST | 0.206645   | 0.583876  |
| Atp7b             | chr8:21994347-22060074    | NOTEST | 0.115635   | 0.326546  |
| Kif22             | chr7:127027730-127042420  | OK     | 1.18407    | 3.33883   |
| Slc10a3-ubl4,Ubl4 | chrX:74365717-74373349    | OK     | 0.56682    | 1.59721   |
| C130060C02Rik     | chr19:15985074-16010912   | NOTEST | 0.0551696  | 0.15545   |
| Pax8              | chr2:24420550-24475599    | OK     | 0.390466   | 1.09746   |
| Patl2             | chr2:122120107-122186189  | NOTEST | 0.210537   | 0.591265  |
| Cdc25b            | chr2:131127411-131604824  | OK     | 2.62652    | 7.36692   |
| Adat3             | chr10:80602879-80615783   | OK     | 0.73733    | 2.06706   |
| 1700024P16Rik     | chr4:104913455-105016863  | OK     | 0.435201   | 1.21873   |
| Cd244             | chr1:171559192-171585316  | NOTEST | 0.0391853  | 0.109596  |
| Stx3              | chr19:11775117-11819403   | OK     | 2.72897    | 7.62657   |
| D7Erttd715e       | chr7:59969576-59974431    | OK     | 14.8775    | 41.5111   |
| Ankrd37           | chr8:45975527-45999850    | OK     | 1.45097    | 4.04545   |
| Efcab3            | chr11:105092218-105117537 | NOTEST | 0.0425204  | 0.118441  |



|               |                           |        |            |           |
|---------------|---------------------------|--------|------------|-----------|
| Lin28b        | chr10:45376618-45470201   | OK     | 0.535819   | 1.49244   |
| Tmem221       | chr8:71554302-71558871    | OK     | 0.423294   | 1.17803   |
| Figl1         | chr11:11800287-11808962   | OK     | 0.514336   | 1.43109   |
| Myo1a         | chr10:127705255-127720940 | OK     | 10.8712    | 30.2437   |
| Cyp4f39       | chr17:32452722-32493320   | OK     | 6.78942    | 18.8514   |
| Nxpe5         | chr5:138225903-138251875  | OK     | 0.424424   | 1.17803   |
| 1700034F02Rik | chr11:29545841-29578352   | NOTEST | 0.00825448 | 0.0228678 |
| Rarres1       | chr3:67478885-67515523    | OK     | 34.6985    | 96.0882   |
| Tpx2          | chr2:152847963-152895321  | OK     | 0.879977   | 2.43656   |
| Mroh6         | chr15:75882933-75888723   | NOTEST | 0.0114953  | 0.0318274 |
| Tbx21         | chr11:97098006-97115331   | NOTEST | 0.07351    | 0.20339   |
| Ccdc150       | chr1:54250682-54368727    | NOTEST | 0.033001   | 0.0912642 |
| Ppp1r1a       | chr15:103530278-103537992 | OK     | 21.8334    | 60.3361   |
| Paqr5         | chr9:61953737-62026790    | OK     | 11.8149    | 32.6304   |
| 4933406C10Rik | chr12:32919383-32953789   | NOTEST | 0.0622322  | 0.171733  |
| Zfp831        | chr2:174643533-174710830  | NOTEST | 0.00568454 | 0.015679  |
| Fbxo5         | chr10:5799157-5805465     | OK     | 0.868858   | 2.38003   |
| Btk           | chrX:134542340-134583140  | NOTEST | 0.182625   | 0.499472  |
| Cysltr2       | chr14:73029127-73049114   | OK     | 4.93942    | 13.5079   |
| Rhcg          | chr7:79593362-79617657    | NOTEST | 0.0176498  | 0.0481805 |
| 9330175M20Rik | chr1:51218385-51333779    | NOTEST | 0.0717462  | 0.195556  |
| Pask          | chr1:93309436-93342788    | OK     | 0.421014   | 1.14718   |
| Gm19424       | chr19:41746960-41750097   | NOTEST | 0.142887   | 0.389327  |
| Lpar5         | chr6:125067919-125082472  | OK     | 8.18619    | 22.2504   |
| Osmr          | chr15:6813576-6874313     | OK     | 10.5765    | 28.7426   |
| Gzmm          | chr10:79689019-79695260   | NOTEST | 0.191509   | 0.520145  |
| Rasgrp1       | chr2:117279992-117342877  | OK     | 50.6337    | 137.336   |
| Rnf223        | chr4:156132169-156133419  | NOTEST | 0.081178   | 0.220157  |
| Dynlt1a       | chr17:6270469-6317474     | OK     | 0.298852   | 0.809722  |
| Tmem86b       | chr7:4628039-4630482      | OK     | 1.15599    | 3.13094   |
| Nxph3         | chr11:95509845-95514565   | OK     | 5.79728    | 15.6915   |
| Tmc8          | chr11:117782296-117793137 | OK     | 0.34343    | 0.929422  |
| Gm10560       | chr4:156021644-156023824  | OK     | 1.12557    | 3.04175   |
| Il18rap       | chr1:40515361-40551705    | NOTEST | 0.0764731  | 0.20647   |
| Kcnk12        | chr17:87745820-87797994   | OK     | 7.44636    | 20.0779   |
| Hrh2          | chr13:54192128-54222432   | OK     | 0.731512   | 1.97224   |
| Zfpm1         | chr8:122282140-122337247  | OK     | 2.21234    | 5.9598    |
| Setd4         | chr16:93583460-93603815   | OK     | 0.58571    | 1.57733   |
| Lrrn4         | chr2:132868515-132880862  | OK     | 0.96967    | 2.61018   |
| Fam124b       | chr1:80198698-80213944    | NOTEST | 0.0528042  | 0.142013  |
| Serpina1e     | chr12:103946931-103956897 | OK     | 1.10543    | 2.96651   |
| Celf6         | chr9:59578336-59607292    | OK     | 19.8591    | 53.2602   |
| Tbc1d2        | chr4:46604389-46650199    | OK     | 0.426011   | 1.14128   |
| Adam1a        | chr5:121518603-121521695  | OK     | 1.3993     | 3.74303   |
| Sh2d1a        | chrX:42502607-42522075    | NOTEST | 0.0262147  | 0.0700874 |
| Avpr1a        | chr10:122448498-122453453 | OK     | 0.397698   | 1.05919   |
| Oas1a         | chr5:120896256-120907525  | OK     | 0.572428   | 1.51787   |
| 1700019N19Rik | chr19:58785802-58794414   | NOTEST | 0.0476723  | 0.126349  |
| Fam117a       | chr11:95337017-95381872   | OK     | 2.77542    | 7.34463   |
| Capn9         | chr8:124576110-124618731  | OK     | 2.78996    | 7.38192   |
| Rspo4         | chr2:151842926-151874668  | OK     | 1.97533    | 5.22009   |
| 2810442I21Rik | chr11:16934708-16951282   | NOTEST | 0.0892046  | 0.235664  |
| T2            | chr17:8372395-8422726     | OK     | 0.831402   | 2.19496   |

|               |                           |        |            |            |
|---------------|---------------------------|--------|------------|------------|
| Gm9920        | chr15:55099916-55259273   | NOTEST | 0.0924746  | 0.243998   |
| Ptafr         | chr4:132564066-132580866  | OK     | 0.708301   | 1.8683     |
| Slc9b2        | chr3:135307699-135342767  | OK     | 0.627987   | 1.65533    |
| Proc          | chr18:32123125-32139570   | NOTEST | 0.0628642  | 0.1657     |
| 4933405D12Rik | chr3:122882591-122924116  | NOTEST | 0.091561   | 0.241126   |
| Hist1h1d      | chr13:23555031-23555807   | OK     | 0.513513   | 1.35204    |
| Gm8909        | chr17:36164443-36168537   | NOTEST | 0.0474222  | 0.124734   |
| Gm4759        | chr7:106421549-106441073  | NOTEST | 0.0423378  | 0.111138   |
| Pthr1         | chr2:32775820-32784405    | OK     | 12.4205    | 32.5967    |
| Saa2          | chr7:46751832-46754314    | NOTEST | 0.0424134  | 0.11123    |
| Atp4a         | chr7:30712208-30725534    | NOTEST | 0.0258499  | 0.0676288  |
| 2510049J12Rik | chr6:115583546-115592576  | NOTEST | 0.0142541  | 0.0372868  |
| Gm13498       | chr2:50909683-50911846    | OK     | 2.56652    | 6.71282    |
| Smpd5         | chr15:76294433-76307245   | OK     | 0.696273   | 1.81997    |
| A430093F15Rik | chr19:10740946-10786043   | NOTEST | 0.0348375  | 0.0910478  |
| Obscn         | chr11:58994255-59136375   | NOTEST | 0.0662541  | 0.172904   |
| 1700003M02Rik | chr4:34711331-34730206    | OK     | 3.44232    | 8.98301    |
| Arhgap33      | chr7:30522225-30535060    | OK     | 3.11078    | 8.1175     |
| 1700020D05Rik | chr19:5495277-5510489     | NOTEST | 0.106684   | 0.278194   |
| Kifc5b        | chr17:26917090-26932579   | OK     | 0.440917   | 1.1478     |
| Ctnx3         | chr18:57468485-57478134   | OK     | 48.4221    | 125.877    |
| Ppp1r2-ps3    | chr19:30538875-30539679   | OK     | 2.78031    | 7.22249    |
| AB041803      | chr6:31093562-31218474    | NOTEST | 0.266483   | 0.691975   |
| E030030I06Rik | chr10:22113049-22149270   | NOTEST | 0.0497549  | 0.129029   |
| Gfra2         | chr14:70890129-70979838   | OK     | 68.3953    | 177.267    |
| A3galt2       | chr4:128759257-128769298  | OK     | 17.2829    | 44.7644    |
| Aspg          | chr12:112106682-112127573 | NOTEST | 0.0199669  | 0.0516743  |
| Fsip1         | chr2:118204887-118256966  | NOTEST | 0.18632    | 0.481822   |
| Zfp296        | chr7:19577286-19580656    | OK     | 0.443336   | 1.1456     |
| Hist2h4       | chr3:96262933-96263317    | NOTEST | 0.37639    | 0.972046   |
| Gpr35         | chr1:92973118-92986391    | OK     | 8.8864     | 22.9123    |
| Rgs10         | chr7:128373624-128418172  | OK     | 137.501    | 354.443    |
| Fut2          | chr7:45648590-45666394    | NOTEST | 0.0935123  | 0.240991   |
| Olfir570      | chr7:102900368-102901307  | NOTEST | 0.023412   | 0.060291   |
| Spc24         | chr9:21755441-21760286    | OK     | 0.573153   | 1.47596    |
| Lxn           | chr3:67430114-67475068    | OK     | 184.94     | 476.185    |
| Qrfpr         | chr3:36179425-36222275    | NOTEST | 0.181904   | 0.468349   |
| Mak           | chr13:41025119-41079706   | NOTEST | 0.0325167  | 0.0836917  |
| Acpp          | chr9:104288239-104337722  | OK     | 131.722    | 338.437    |
| 1700003F12Rik | chr2:154544404-154558853  | NOTEST | 0.0710764  | 0.182389   |
| Atp13a4       | chr16:29396037-29544864   | NOTEST | 0.0957505  | 0.245001   |
| Barhl2        | chr5:106452522-106458166  | NOTEST | 0.0329901  | 0.0843201  |
| Card14        | chr11:119314786-119355510 | OK     | 1.24613    | 3.1744     |
| Ttc22         | chr4:106622448-106640187  | OK     | 0.453345   | 1.15442    |
| Cmtm8         | chr9:114789344-114844152  | OK     | 2.31264    | 5.88826    |
| Ms4a3         | chr19:11629496-11640834   | OK     | 5.0909     | 12.9377    |
| Wfdc3         | chr2:164731225-164743267  | NOTEST | 0.321436   | 0.816812   |
| Tmem150b      | chr7:4690927-4725251      | OK     | 0.526226   | 1.337      |
| 9530091C08Rik | chr9:68653785-69388246    | NOTEST | 0.00221162 | 0.00561443 |
| Cd5           | chr19:10718142-10738974   | NOTEST | 0.0585539  | 0.148534   |
| Arx           | chrX:93286645-93298355    | NOTEST | 0.00680974 | 0.0172452  |
| Gm11549       | chr3:36515056-36521445    | OK     | 3.66638    | 9.28461    |
| Ldb2          | chr5:44472132-44799746    | OK     | 47.2482    | 119.582    |

|               |                           |        |            |            |
|---------------|---------------------------|--------|------------|------------|
| Otog          | chr7:46240986-46311434    | NOTEST | 0.00348332 | 0.00881551 |
| AA465934      | chr11:83291698-83298977   | NOTEST | 0.32169    | 0.814025   |
| Uba1y         | chrY:818712-844224        | NOTEST | 0.116176   | 0.293943   |
| Pnpla3        | chr15:84167815-84189521   | OK     | 3.99589    | 10.0945    |
| Nrn1l         | chr8:105893569-105895015  | OK     | 18.4387    | 46.5793    |
| 1700034P13Rik | chr1:9723195-9771256      | NOTEST | 0.0265693  | 0.0670916  |
| Esyt3         | chr9:99309966-99358530    | OK     | 1.13978    | 2.87138    |
| Bag2          | chr1:33745483-33757750    | OK     | 11.2876    | 28.4295    |
| Nt5e          | chr9:88327608-88372089    | OK     | 16.3601    | 41.2015    |
| Ptger2        | chr14:44988110-45003820   | OK     | 0.428315   | 1.07798    |
| Melk          | chr4:44300916-44364675    | NOTEST | 0.193802   | 0.487286   |
| P2ry1         | chr3:61002784-61008982    | OK     | 22.9793    | 57.7654    |
| Ms4a2         | chr19:11615520-11623719   | NOTEST | 0.224797   | 0.564963   |
| Gm1661        | chr4:117213332-117251917  | NOTEST | 0.208215   | 0.523229   |
| Fndc9         | chr11:46193848-46589232   | NOTEST | 0.00886964 | 0.0222704  |
| Irx5          | chr8:92357795-92361456    | NOTEST | 0.031675   | 0.0794793  |
| Tslp          | chr18:32663641-32866420   | NOTEST | 0.0389953  | 0.097845   |
| Wdr27         | chr17:14818671-14943124   | NOTEST | 0.0678915  | 0.170207   |
| Btnl1         | chr17:34377131-34386028   | NOTEST | 0.0751904  | 0.188419   |
| Trim14        | chr4:46505071-46536141    | OK     | 3.15203    | 7.8985     |
| Tmprss3       | chr17:31179267-31198974   | NOTEST | 0.00635473 | 0.0159166  |
| Mrgpra1       | chr7:47334874-47354240    | OK     | 0.490179   | 1.2275     |
| Bbc3          | chr7:16309582-16318334    | OK     | 2.62663    | 6.57248    |
| Hist1h2bn     | chr13:21754122-21754553   | NOTEST | 0.237969   | 0.594771   |
| Insm2         | chr12:55598916-55602017   | OK     | 6.3283     | 15.813     |
| Isg15         | chr4:156199423-156200818  | OK     | 7.47716    | 18.6832    |
| Pkp3          | chr7:141078228-141090510  | OK     | 0.769076   | 1.92128    |
| Gdf2          | chr14:33941038-33947198   | NOTEST | 0.0130653  | 0.0326143  |
| Rad54b        | chr4:11558919-11615808    | NOTEST | 0.118332   | 0.295068   |
| Troap         | chr15:99074972-99083409   | NOTEST | 0.0714732  | 0.17805    |
| Kntc1         | chr5:123749725-123821593  | OK     | 0.944889   | 2.35265    |
| Lor           | chr3:92080270-92083142    | NOTEST | 0.144185   | 0.358922   |
| Nnat          | chr2:157556361-157566361  | OK     | 13.8098    | 34.3594    |
| Mss51         | chr14:20482863-20496901   | NOTEST | 0.080989   | 0.201471   |
| Dffb          | chr4:153964448-153975081  | OK     | 0.784644   | 1.94947    |
| Rsrp1         | chr4:134923624-134927370  | OK     | 75.0788    | 186.398    |
| Nptx2         | chr5:144545886-144557478  | OK     | 45.6728    | 113.352    |
| Rasa4         | chr5:136083915-136111861  | OK     | 7.09664    | 17.5833    |
| Gnb3          | chr6:124834239-124840275  | OK     | 0.968905   | 2.40041    |
| Eaf2          | chr16:36792883-36874826   | NOTEST | 0.107442   | 0.266145   |
| Cntd1         | chr11:101279202-101302267 | NOTEST | 0.179723   | 0.444949   |
| Irx6          | chr8:92674401-92680080    | NOTEST | 0.1262     | 0.312406   |
| E230016M11Rik | chr6:67035095-67080652    | OK     | 0.468474   | 1.15947    |
| Efcab7        | chr4:99829499-99912783    | OK     | 0.854679   | 2.1134     |
| Pla2g2d       | chr4:138775734-138782143  | NOTEST | 0.0989037  | 0.244454   |
| Slc6a4        | chr11:76998596-77032343   | NOTEST | 0.0981696  | 0.242614   |
| Adam5         | chr8:24727092-24824369    | OK     | 0.601024   | 1.48486    |
| Fanci         | chr7:79392337-79466273    | NOTEST | 0.0694285  | 0.171332   |
| Cckar         | chr5:53698484-53707704    | OK     | 11.4473    | 28.2087    |
| Dnd1          | chr18:36760238-36766214   | NOTEST | 0.178049   | 0.438555   |
| Runx1         | chr16:92601465-92826074   | OK     | 19.5781    | 48.1965    |
| Hist1h2ac     | chr13:23683472-23683959   | NOTEST | 0.0607993  | 0.149668   |
| Oscar         | chr7:3609814-3616157      | NOTEST | 0.214099   | 0.527007   |

|               |                           |        |            |            |
|---------------|---------------------------|--------|------------|------------|
| Car8          | chr4:8141492-8239041      | OK     | 4.48229    | 11.0306    |
| Apoa2         | chr1:171225053-171226379  | OK     | 0.590359   | 1.45262    |
| Lmod3         | chr6:97238527-97252780    | NOTEST | 0.0173599  | 0.0426986  |
| Figf          | chrX:164373547-164402647  | OK     | 0.853517   | 2.0986     |
| Pate2         | chr9:35669638-35672889    | NOTEST | 0.0512469  | 0.125844   |
| Dok1          | chr6:83030935-83033471    | OK     | 6.42803    | 15.7749    |
| Cenpk         | chr13:104205121-104249622 | OK     | 0.716076   | 1.75701    |
| Dusp26        | chr8:31089661-31097047    | OK     | 92.656     | 227.328    |
| Mms22l        | chr4:24496461-24602948    | NOTEST | 0.242418   | 0.594628   |
| 6720483E21Rik | chr1:20888649-20890473    | NOTEST | 0.114803   | 0.281231   |
| Rnpc3         | chr3:113605066-113630149  | OK     | 4.75545    | 11.6329    |
| Gm9962        | chr7:57387271-57510009    | NOTEST | 0.0291638  | 0.0713392  |
| 9530053A07Rik | chr7:28129465-28164811    | OK     | 0.325732   | 0.795881   |
| Adam4         | chr12:81419548-81421878   | NOTEST | 0.0347465  | 0.0848058  |
| Lrrc39        | chr3:116562972-116630986  | NOTEST | 0.0758977  | 0.185082   |
| Mcm7          | chr5:138164588-138171862  | OK     | 1.16194    | 2.83319    |
| Ccnb3         | chrX:6979651-7041619      | NOTEST | 0.00369715 | 0.00899494 |
| Syt5          | chr7:4539764-4546567      | OK     | 33.5326    | 81.4237    |
| Col20a1       | chr2:180986534-181017540  | NOTEST | 0.0951896  | 0.231136   |
| 4933432I09Rik | chr16:18209685-18213863   | NOTEST | 0.196227   | 0.476267   |
| Fendrr        | chr8:121054881-121083032  | NOTEST | 0.0812099  | 0.196932   |
| Msantd2       | chr9:37489320-37524150    | OK     | 2.10882    | 5.11001    |
| Mal2          | chr15:54571365-54602846   | OK     | 89.8087    | 217.472    |
| Oas1b         | chr5:120812634-120824160  | OK     | 0.697219   | 1.68767    |
| AI450353      | chr11:83291698-83298977   | NOTEST | 0.34521    | 0.834835   |
| Sox11         | chr12:27334267-27342718   | OK     | 2.29673    | 5.55328    |
| A230056P14Rik | chr7:55962530-56019573    | OK     | 0.783233   | 1.89333    |
| Carhsp1       | chr16:8658586-8672153     | OK     | 38.8019    | 93.7669    |
| Gadl1         | chr9:115909454-116076176  | OK     | 2.06023    | 4.978      |
| Recq14        | chr15:76701541-76710559   | OK     | 0.472468   | 1.14154    |
| Lrrc69        | chr4:14665753-14796052    | NOTEST | 0.0160081  | 0.0386484  |
| Ankrd2        | chr19:42036037-42045110   | NOTEST | 0.0610612  | 0.147365   |
| Nol4          | chr18:22693154-23041653   | OK     | 1.51917    | 3.66621    |
| Dok2          | chr14:70774380-70778494   | NOTEST | 0.327504   | 0.789521   |
| Marveld2      | chr13:100595956-100616971 | OK     | 0.900917   | 2.17088    |
| Ptcra         | chr17:46755662-46763712   | NOTEST | 0.0845577  | 0.203698   |
| Galnt3        | chr2:66082765-66124793    | OK     | 1.59467    | 3.84135    |
| Reg4          | chr3:98222155-98236748    | NOTEST | 0.0197193  | 0.0474986  |
| Pou4f2        | chr8:78433008-78436652    | OK     | 7.57354    | 18.2333    |
| 4930447C04Rik | chr12:72881108-72917765   | OK     | 0.969441   | 2.33364    |
| Sst           | chr16:23889580-23890844   | OK     | 15.8063    | 38.0425    |
| Il1b          | chr2:129364579-129375733  | OK     | 0.506692   | 1.21938    |
| Pomc          | chr12:3954944-3960643     | OK     | 0.634829   | 1.52759    |
| Stxbp2        | chr8:3631159-3643644      | OK     | 1.45739    | 3.50428    |
| Hist3h2bb-ps  | chr11:58954047-58954512   | NOTEST | 0.338128   | 0.812513   |
| Grm2          | chr9:106644533-106656109  | NOTEST | 0.0388699  | 0.0933552  |
| AI839979      | chr5:31569591-31571397    | NOTEST | 0.268149   | 0.64401    |
| Fndc3c1       | chrX:106420042-106485229  | NOTEST | 0.00394758 | 0.00946373 |
| Gm6225        | chr18:3266353-3366863     | NOTEST | 0.0222551  | 0.053353   |
| Smc2          | chr4:52439248-52488259    | OK     | 1.68685    | 4.04227    |
| Pdlim1        | chr19:40222238-40271616   | OK     | 6.50473    | 15.5801    |
| Mir17hg       | chr14:115044304-115046728 | NOTEST | 0.233342   | 0.558836   |
| Nbl1          | chr4:139082291-139092970  | OK     | 90.5025    | 216.711    |

|               |                           |        |            |            |
|---------------|---------------------------|--------|------------|------------|
| Ngfrap1       | chrX:136270252-136271978  | OK     | 124.467    | 297.984    |
| Ass1          | chr2:31470269-31520670    | OK     | 5.05376    | 12.0911    |
| Gpx2          | chr12:76792334-76795554   | OK     | 2.10114    | 5.0265     |
| 9230116N13Rik | chr1:136411915-136440220  | NOTEST | 0.111543   | 0.266526   |
| Tmem207       | chr16:26503792-26526771   | NOTEST | 0.013626   | 0.0325461  |
| Gm14391       | chr2:175869237-175988574  | NOTEST | 0.1394     | 0.332927   |
| Wnt9b         | chr11:103727362-103749821 | NOTEST | 0.00398432 | 0.00950157 |
| Zbtb32        | chr7:30589680-30592942    | NOTEST | 0.020489   | 0.0488072  |
| Prr11         | chr11:86583864-87555823   | OK     | 0.422881   | 1.00618    |
| Dgkz          | chr2:91932821-91963563    | OK     | 161.227    | 383.569    |
| Kcng2         | chr18:80294543-80364254   | OK     | 4.65535    | 11.0753    |
| Firre         | chrX:50555743-50635258    | OK     | 5.76584    | 13.7161    |
| Grik1         | chr16:87895896-88290258   | OK     | 85.2794    | 202.837    |
| Kcnip2        | chr19:45792345-45816063   | OK     | 54.5379    | 129.711    |
| Bnc1          | chr7:81966661-81992299    | NOTEST | 0.329767   | 0.783795   |
| Rps17         | chr7:81342732-81345234    | OK     | 7.47309    | 17.7607    |
| Ccr3          | chr9:124021970-124031689  | NOTEST | 0.0160848  | 0.0382177  |
| Zfp40         | chr17:23173868-23193228   | OK     | 5.62862    | 13.3714    |
| Gm16702       | chr17:8372395-8422726     | OK     | 3.31534    | 7.87118    |
| Bhlhe23       | chr2:180774380-180776900  | NOTEST | 0.0213177  | 0.0505988  |
| Pax2          | chr19:44757393-44837869   | OK     | 0.434894   | 1.032      |
| Artn          | chr4:117926159-117929763  | NOTEST | 0.0864633  | 0.205139   |
| Rpl37         | chr15:5116612-5119140     | OK     | 0.761993   | 1.80744    |
| AW112010      | chr19:11047611-11050566   | OK     | 1.48961    | 3.52989    |
| Hoxd4         | chr2:74710043-74748271    | OK     | 1.35756    | 3.21688    |
| Anks6         | chr4:47015688-47057306    | OK     | 1.87075    | 4.42884    |
| 0610040B10Rik | chr5:143329307-143332704  | OK     | 1.1839     | 2.80041    |
| Phf11a        | chr14:59276912-59297522   | NOTEST | 0.105351   | 0.249113   |
| Arid3a        | chr10:79697304-80369637   | OK     | 1.54369    | 3.64926    |
| Arglu1        | chr8:8666575-8690537      | OK     | 18.9163    | 44.6715    |
| Baat          | chr4:49489417-49506558    | NOTEST | 0.0406035  | 0.0957485  |
| Rnf138rt1     | chrX:163760138-163761332  | NOTEST | 0.14322    | 0.337617   |
| Chek1         | chr9:36708481-36726658    | OK     | 0.432508   | 1.01857    |
| Rad51ap1      | chr6:126923418-126939555  | OK     | 0.538617   | 1.26793    |
| Zbtb48        | chr4:152019775-152027671  | OK     | 2.24282    | 5.27835    |
| Ptprcap       | chr19:4154645-4156710     | NOTEST | 0.346128   | 0.814334   |
| Atf5          | chr7:44812255-44849079    | OK     | 32.3517    | 75.8435    |
| Synpr         | chr14:13284779-13615469   | OK     | 145.602    | 341.308    |
| Gpr162        | chr6:124858444-124863917  | OK     | 10.1986    | 23.9063    |
| Rps26         | chr10:128624528-128626506 | OK     | 20.3079    | 47.6016    |
| 4930511M06Rik | chr18:57533825-57731065   | NOTEST | 0.0473286  | 0.110932   |
| Il12rb2       | chr6:67292017-67376137    | NOTEST | 0.00586453 | 0.0137449  |
| Celf5         | chr10:81459227-81482709   | OK     | 1.49541    | 3.5044     |
| 1810020O05Rik | chr6:87675592-87690847    | OK     | 0.562171   | 1.31734    |
| Leng8         | chr7:4137055-4148173      | OK     | 8.73878    | 20.4569    |
| Mst1r         | chr9:107906888-107920383  | OK     | 2.3233     | 5.43661    |
| Prkcd         | chr14:30595353-30626208   | OK     | 119.971    | 280.535    |
| Isl2          | chr9:55541148-55546178    | OK     | 81.7221    | 190.99     |
| Cct6b         | chr11:82719247-82764321   | OK     | 0.536505   | 1.25384    |
| Tk1           | chr11:117815518-117839908 | OK     | 0.813461   | 1.89868    |
| Tmsb15b2      | chrX:136954987-136976874  | OK     | 3.65562    | 8.532      |
| Tmem45b       | chr9:31426195-31464238    | OK     | 109.094    | 254.443    |
| Slc10a6       | chr5:103605710-103629403  | OK     | 3.81745    | 8.89477    |



|               |                           |        |            |           |
|---------------|---------------------------|--------|------------|-----------|
| Syt7          | chr19:10389089-10453181   | OK     | 45.1442    | 105.048   |
| Sectm1a       | chr11:121067402-121081139 | NOTEST | 0.0372614  | 0.0866816 |
| Atp6v1c2      | chr12:17266594-17324730   | OK     | 0.699755   | 1.6267    |
| Socs2         | chr10:95411489-95416857   | OK     | 15.5128    | 36.0513   |
| Plxnc1        | chr10:94790865-94944578   | OK     | 59.4887    | 138.2     |
| Dgki          | chr6:36846021-37299976    | OK     | 28.7491    | 66.759    |
| Arntl2        | chr6:146805529-146833529  | OK     | 1.07242    | 2.4853    |
| Gm527         | chr12:64917910-64924591   | OK     | 5.7805     | 13.3832   |
| Mnd1-ps       | chr14:9550093-11162032    | NOTEST | 0.177922   | 0.411582  |
| Fam122b       | chrX:53243414-53269805    | OK     | 6.41953    | 14.8418   |
| Hspa1b        | chr17:34956428-34959238   | OK     | 7.25762    | 16.7635   |
| Mroh2b        | chr15:4898736-4962201     | OK     | 0.369026   | 0.851818  |
| Ypel1         | chr16:17070138-17111252   | OK     | 2.79554    | 6.45239   |
| Adamts9       | chr6:92772698-92901441    | OK     | 2.30415    | 5.31534   |
| Slc45a3       | chr1:131962914-131982972  | OK     | 10.3901    | 23.9633   |
| Ssh3          | chr19:4261668-4269172     | OK     | 4.71871    | 10.8794   |
| Gpr179        | chr11:97332108-97352073   | OK     | 0.801764   | 1.84786   |
| Asb17         | chr3:153844246-153853615  | NOTEST | 0.0444486  | 0.102411  |
| AI182371      | chr2:35081860-35100685    | NOTEST | 0.0595432  | 0.137163  |
| Ccnf          | chr17:24223231-24251409   | OK     | 0.557261   | 1.28313   |
| Snora28       | chr12:111538100-111546753 | OK     | 21.1351    | 48.6556   |
| Parvg         | chr15:84324719-84342978   | NOTEST | 0.200726   | 0.461273  |
| Vsig2         | chr9:37539254-37544205    | NOTEST | 0.378961   | 0.870476  |
| Ptgdr         | chr14:44851234-44859375   | OK     | 17.4054    | 39.9455   |
| Snhg7         | chr2:26637175-26640244    | OK     | 2.69981    | 6.19551   |
| Pbld1         | chr10:63061616-63077536   | NOTEST | 0.0388517  | 0.0891489 |
| Fam222a       | chr5:114568250-114613218  | OK     | 3.33616    | 7.64935   |
| Gna14         | chr19:16435666-16610818   | OK     | 33.7869    | 77.4094   |
| Ccdc106       | chr7:5056151-5060784      | OK     | 2.09559    | 4.79841   |
| Cldn23        | chr8:35824708-35826559    | NOTEST | 0.0527935  | 0.120817  |
| Gm2694        | chr8:87472811-87525554    | OK     | 0.660911   | 1.5093    |
| Far2          | chr6:148047415-148444352  | OK     | 2.72214    | 6.21646   |
| Trpc3         | chr3:36620481-36690167    | OK     | 36.0726    | 82.3544   |
| Rnf207        | chr4:152297213-152318625  | OK     | 1.01733    | 2.32187   |
| Serinc2       | chr4:130253496-130275586  | OK     | 15.0028    | 34.229    |
| Gpr160        | chr3:30855949-30897194    | OK     | 1.82919    | 4.16929   |
| Gm9895        | chr19:29067300-29069503   | NOTEST | 0.430573   | 0.98099   |
| 2700038G22Rik | chr5:23787743-24161231    | NOTEST | 0.136561   | 0.310715  |
| Foxp3         | chrX:7558561-7605420      | NOTEST | 0.00492933 | 0.0112083 |
| Slc37a1       | chr17:31295482-31350698   | OK     | 6.56055    | 14.9124   |
| Rfx2          | chr17:56775896-56831008   | NOTEST | 0.281945   | 0.640718  |
| Ttc29         | chr8:78213341-78394326    | OK     | 0.69368    | 1.57626   |
| Samd14        | chr11:95009878-95026087   | OK     | 57.6525    | 130.988   |
| Slc6a5        | chr7:49910298-49959493    | NOTEST | 0.00759599 | 0.0172575 |
| Kif20b        | chr19:34922357-34975731   | NOTEST | 0.293247   | 0.666051  |
| C030034I22Rik | chr17:69416446-69419192   | OK     | 0.43681    | 0.99193   |
| Gm4262        | chr16:11008897-11015184   | NOTEST | 0.0193223  | 0.0438427 |
| Grhl1         | chr12:24572286-24617391   | NOTEST | 0.248395   | 0.563256  |
| Luc7l3        | chr11:94291138-94321911   | OK     | 17.4366    | 39.5349   |
| Spata25       | chr2:164827381-164828534  | NOTEST | 0.0278496  | 0.0631177 |
| Dbf4          | chr5:8396968-8422716      | OK     | 0.580265   | 1.31477   |
| 4930413F20Rik | chr15:34572798-34679204   | NOTEST | 0.018058   | 0.0408573 |
| Fam179a       | chr17:71673260-71729669   | OK     | 1.17159    | 2.64921   |

|               |                           |        |            |           |
|---------------|---------------------------|--------|------------|-----------|
| Klk4          | chr7:43881171-43885804    | NOTEST | 0.0333058  | 0.0752927 |
| Ccno          | chr13:112987801-112990778 | NOTEST | 0.173734   | 0.392597  |
| N4bp2l1       | chr5:150571642-150594525  | OK     | 4.54131    | 10.2614   |
| BC006965      | chr11:112663926-112711356 | NOTEST | 0.0092061  | 0.0207976 |
| Apol7a        | chr15:77388216-77399110   | NOTEST | 0.00770406 | 0.0174018 |
| Aoc1          | chr6:48895254-48909187    | NOTEST | 0.00651248 | 0.0147101 |
| Nog           | chr11:89300637-89302559   | OK     | 2.94987    | 6.66094   |
| Rpl9          | chr5:65388363-65391431    | NOTEST | 0.107007   | 0.241607  |
| Snhg5         | chr9:88521052-88522897    | OK     | 4.4266     | 9.99172   |
| D5Erttd605e   | chr5:147418619-147423044  | NOTEST | 0.0200526  | 0.0452507 |
| Wbp5          | chrX:136245079-136247139  | OK     | 51.7891    | 116.818   |
| Txn1          | chr4:57943372-57956411    | OK     | 306.98     | 692.156   |
| Cyp4b1        | chr4:115624727-115647705  | OK     | 0.954019   | 2.15038   |
| Rpl28         | chr7:4792964-4794547      | OK     | 1.18254    | 2.66489   |
| Myom2         | chr8:15057652-15133419    | NOTEST | 0.0929623  | 0.209389  |
| Zfp521        | chr18:13687013-13972733   | OK     | 8.80978    | 19.8338   |
| Slc38a8       | chr8:119479602-119501698  | OK     | 0.429212   | 0.966263  |
| Kcni4         | chr5:48389502-49285659    | OK     | 87.0295    | 195.867   |
| 2700099C18Rik | chr17:94750099-94834799   | NOTEST | 0.247139   | 0.555733  |
| Tnfrsf9       | chr4:150920154-150946102  | NOTEST | 0.0662946  | 0.148834  |
| Stom          | chr2:35313989-35337009    | OK     | 12.2939    | 27.5976   |
| Mzb1          | chr18:35647264-35649367   | NOTEST | 0.0980406  | 0.220072  |
| Slc16a12      | chr19:34668405-34747111   | OK     | 5.98954    | 13.4435   |
| Tnr           | chr1:159523768-159924922  | OK     | 2.80068    | 6.27876   |
| Rgs4          | chr1:169741476-169747642  | OK     | 464.407    | 1041.02   |
| Iqgap3        | chr3:88082050-88121048    | OK     | 1.33967    | 3.00173   |
| Ccdc88c       | chr12:100912699-101028983 | NOTEST | 0.288005   | 0.644756  |
| Cyp2j12       | chr4:96099317-96141152    | OK     | 4.24458    | 9.50122   |
| Pkmyt1        | chr17:23726335-23740330   | OK     | 3.27464    | 7.32691   |
| Actl9         | chr17:33432898-33434267   | NOTEST | 0.062533   | 0.139756  |
| Tlx3          | chr11:33200751-33203588   | OK     | 38.5865    | 86.1592   |
| Atg16l2       | chr7:101289615-101302088  | OK     | 2.3425     | 5.23037   |
| 5830454E08Rik | chr9:120577330-120578073  | OK     | 0.593118   | 1.32418   |
| Ccdc171       | chr4:83525544-83864670    | OK     | 0.849986   | 1.89522   |
| Myt1          | chr2:181763331-181827775  | OK     | 15.019     | 33.4874   |
| Tubb2b        | chr13:34127007-34130354   | OK     | 164.977    | 367.79    |
| Plcl2         | chr17:50509546-50688494   | OK     | 4.73354    | 10.5475   |
| Gabrb1        | chr5:71700015-72137244    | OK     | 0.969031   | 2.15792   |
| Ces2g         | chr8:104961717-104969537  | OK     | 0.886945   | 1.97509   |
| Gimap7        | chr6:48718620-48724636    | NOTEST | 0.0323043  | 0.0718821 |
| Plekha5       | chr6:140424098-140594906  | OK     | 6.34873    | 14.1264   |
| Cdk15         | chr1:59256906-59352369    | OK     | 23.266     | 51.7423   |
| Hyls1         | chr9:35559465-35570069    | OK     | 3.45701    | 7.68484   |
| Gabrq         | chrX:72825177-72842602    | NOTEST | 0.032565   | 0.0723487 |
| Nkain1        | chr4:130530130-130574036  | OK     | 5.79097    | 12.8652   |
| Tyms-ps       | chr10:87966670-87968017   | NOTEST | 0.123986   | 0.275309  |
| C7            | chr15:4988761-5063773     | NOTEST | 0.249904   | 0.554161  |
| Rgs14         | chr13:55369731-55384687   | OK     | 1.99404    | 4.42146   |
| Dimt1         | chr13:106947128-106960224 | OK     | 0.461631   | 1.02353   |
| Tia1          | chr6:86404218-86433405    | OK     | 3.80603    | 8.42912   |
| Tubb2a-ps2    | chr12:11882195-11882899   | OK     | 49.1676    | 108.887   |
| Grhl3         | chr4:135541887-135573620  | OK     | 3.72934    | 8.25651   |
| Casz1         | chr4:148804391-148954892  | OK     | 14.4527    | 31.9926   |

|               |                           |        |           |           |
|---------------|---------------------------|--------|-----------|-----------|
| Cdt1          | chr8:122568014-122573130  | OK     | 0.554214  | 1.22586   |
| Mef2b         | chr8:70152777-70167488    | NOTEST | 0.0792729 | 0.175324  |
| Crb1          | chr1:139198253-139377076  | NOTEST | 0.162324  | 0.358821  |
| Rasgef1a      | chr6:118066384-118091546  | OK     | 19.2068   | 42.4556   |
| Clk4          | chr11:51263170-51281764   | OK     | 10.8709   | 24.0167   |
| 4931429I11Rik | chr9:40894848-40964112    | OK     | 6.18992   | 13.6679   |
| Kcnn1         | chr8:70842048-70857008    | OK     | 9.03001   | 19.9238   |
| Prdm12        | chr2:31640036-31655795    | OK     | 64.8452   | 142.945   |
| Gpr150        | chr13:76054850-76056996   | OK     | 0.520957  | 1.14795   |
| Cd24a         | chr10:43579168-43584265   | OK     | 607.077   | 1337.68   |
| Kcnt1         | chr2:25863853-25918273    | OK     | 30.7203   | 67.6819   |
| Klrd1         | chr6:129591810-129598775  | NOTEST | 0.18936   | 0.417019  |
| Zfp575        | chr7:24583837-24608926    | OK     | 1.18829   | 2.61577   |
| Malat1        | chr19:5795689-5802671     | OK     | 49.1384   | 108.138   |
| Marveld3      | chr8:109947908-109962205  | OK     | 1.22076   | 2.68548   |
| Tmem233       | chr5:116040533-116083246  | OK     | 206.674   | 454.533   |
| Vstm5         | chr9:15239044-15259413    | OK     | 32.9116   | 72.312    |
| Aff2          | chrX:69360330-69868037    | OK     | 2.9213    | 6.41539   |
| Khdc3         | chr9:73102397-73104443    | NOTEST | 0.0347318 | 0.0762698 |
| Mmp25         | chr17:23629457-23645269   | OK     | 18.018    | 39.5623   |
| Neurog2       | chr3:127633144-127635631  | NOTEST | 0.018066  | 0.0396669 |
| Rnasel        | chr1:153749425-153764221  | OK     | 4.00174   | 8.78296   |
| Blvrb         | chr7:27447977-27465981    | OK     | 20.0896   | 44.0895   |
| Gcnt7         | chr2:172440577-172469899  | OK     | 0.448287  | 0.983249  |
| Mcm5          | chr8:75109527-75128439    | OK     | 1.39539   | 3.05764   |
| Gnat2         | chr3:108093065-108101430  | NOTEST | 0.0109471 | 0.0239849 |
| Col10a1       | chr10:34303611-34418528   | NOTEST | 0.221647  | 0.485374  |
| 9430021M05Rik | chr2:162661162-162675204  | OK     | 6.49662   | 14.22     |
| Fosl1         | chr19:5447697-5457563     | NOTEST | 0.130689  | 0.285875  |
| Camk2a        | chr18:60925631-60988152   | OK     | 46.25     | 101.101   |
| Rpp25         | chr9:57504101-57505447    | OK     | 1.35097   | 2.95215   |
| Serpina12     | chr12:104028768-104044443 | NOTEST | 0.0359299 | 0.0784613 |
| Slc35b3       | chr13:38932139-38960875   | OK     | 6.01332   | 13.1305   |
| 1700016K19Rik | chr11:75999911-76003569   | NOTEST | 0.049504  | 0.108094  |
| Cspp1         | chr1:10038217-10136768    | OK     | 1.89526   | 4.13697   |
| 5730408K05Rik | chr19:8883877-8890759     | OK     | 1.48863   | 3.24677   |
| Lmnb1         | chr18:56707812-56753424   | OK     | 1.94739   | 4.2447    |
| Trpc6         | chr9:8544141-8740988      | OK     | 7.13048   | 15.5383   |
| Cxcr6         | chr9:123789499-123851899  | NOTEST | 0.0801476 | 0.174639  |
| Zap70         | chr1:36761797-36782820    | NOTEST | 0.332509  | 0.724166  |
| Gbx1          | chr5:24504425-24526848    | OK     | 0.814436  | 1.77192   |
| Stamos        | chr2:14070332-14073934    | NOTEST | 0.135264  | 0.294225  |
| Drc1          | chr5:30341662-30366708    | OK     | 1.14572   | 2.49154   |
| Setd6         | chr8:95715912-95719004    | OK     | 5.06273   | 11.0097   |
| Ttr           | chr18:20665249-20674326   | NOTEST | 0.315221  | 0.684922  |
| Lyl1          | chr8:84701456-84800338    | OK     | 0.677069  | 1.47115   |
| Gm16386       | chr17:22776229-22817747   | OK     | 0.769252  | 1.6707    |
| Slc4a11       | chr2:130684107-130697519  | OK     | 7.3353    | 15.9202   |
| Gfap          | chr11:102887335-102897200 | NOTEST | 0.194518  | 0.421962  |
| Slc24a4       | chr12:102129418-102266749 | OK     | 0.620617  | 1.34515   |
| Spdef         | chr17:27714446-27728951   | NOTEST | 0.0748315 | 0.1621    |
| Chaf1a        | chr17:56040415-56068026   | OK     | 1.31044   | 2.83759   |
| Prpf39        | chr12:65036333-65073938   | OK     | 4.84175   | 10.4832   |

|               |                           |        |            |           |
|---------------|---------------------------|--------|------------|-----------|
| Dcx           | chrX:143855841-143933219  | OK     | 1.33613    | 2.89285   |
| Fbp1          | chr13:62864752-62888282   | OK     | 1.11026    | 2.40286   |
| Moxd1         | chr10:24223516-24302783   | OK     | 14.6084    | 31.5741   |
| Pla2g4b       | chr2:120027482-120043032  | NOTEST | 0.132506   | 0.28637   |
| Morc1         | chr16:48431236-48630905   | NOTEST | 0.155775   | 0.336321  |
| 5830403L16Rik | chr1:153849541-153851195  | NOTEST | 0.283179   | 0.61066   |
| Slc47a2       | chr11:61301630-61342860   | OK     | 2.04522    | 4.40459   |
| Morn3         | chr5:123037126-123046820  | NOTEST | 0.300032   | 0.646103  |
| Cpne2         | chr8:94533027-94570529    | OK     | 24.5861    | 52.9124   |
| Gm7694        | chr1:170298192-170306332  | OK     | 0.89462    | 1.92496   |
| Hmga2-ps1     | chr1:176814659-177020432  | OK     | 4.68591    | 10.0755   |
| Actn1         | chr12:80167541-80260371   | OK     | 17.404     | 37.4067   |
| D930016D06Rik | chr5:104525734-104554211  | OK     | 2.31003    | 4.96431   |
| Hmox1         | chr8:75093617-75100593    | OK     | 14.2657    | 30.6412   |
| Adora2b       | chr11:62248983-62266452   | OK     | 1.97068    | 4.23034   |
| Zfp7          | chr15:76879275-76892394   | OK     | 2.13283    | 4.5766    |
| Uox           | chr3:146581372-146631483  | NOTEST | 0.0110925  | 0.0237976 |
| Cnih2         | chr19:5088537-5098418     | OK     | 8.71718    | 18.7016   |
| Kcnk13        | chr12:99964498-100062682  | OK     | 4.61203    | 9.89282   |
| Fnbp1l        | chr3:122538718-122619714  | OK     | 7.40714    | 15.8865   |
| Adrb1         | chr19:56722371-56724862   | OK     | 0.739183   | 1.58501   |
| 4930429D17Rik | chr5:103230374-103299029  | NOTEST | 0.0128016  | 0.0274464 |
| 5430440P10Rik | chr14:105427558-105437716 | NOTEST | 0.0634014  | 0.135866  |
| Gm3558        | chr14:7545150-7568566     | NOTEST | 0.0916283  | 0.196102  |
| Fmnl1         | chr11:103171137-103198900 | OK     | 24.7759    | 52.9682   |
| Lamp3         | chr16:19653380-19706365   | NOTEST | 0.141978   | 0.303435  |
| Scn11a        | chr9:119753764-119825456  | OK     | 147.309    | 314.697   |
| Gm9958        | chr5:90366996-90368488    | NOTEST | 0.350459   | 0.747905  |
| Psd4          | chr2:24385396-24408729    | OK     | 1.27701    | 2.72471   |
| A230073K19Rik | chr7:59228749-59306727    | NOTEST | 0.0824118  | 0.175707  |
| Clec4e        | chr6:123281788-123289871  | NOTEST | 0.0898419  | 0.191507  |
| Rnf43         | chr11:87663086-87735539   | NOTEST | 0.0478024  | 0.101878  |
| Ltb           | chr17:35194506-35196305   | OK     | 0.485495   | 1.03407   |
| Sbno2         | chr10:79697304-80369637   | OK     | 8.29199    | 17.6457   |
| A930003O13Rik | chr5:22738910-23275597    | OK     | 0.41231    | 0.877171  |
| Efna2         | chr10:79697304-80369637   | OK     | 1.12038    | 2.38349   |
| Rtbdn         | chr8:84946990-84956603    | NOTEST | 0.340229   | 0.723264  |
| 4930563E22Rik | chr11:72211723-72218450   | OK     | 0.442097   | 0.939351  |
| Padi1         | chr4:140810992-140845778  | NOTEST | 0.0763471  | 0.162196  |
| Ccne2         | chr4:11191350-11254259    | OK     | 1.48582    | 3.15523   |
| Gadd45a       | chr6:67035095-67080652    | OK     | 17.9346    | 38.0728   |
| Eml5          | chr12:98746967-98901484   | OK     | 2.02138    | 4.29105   |
| Kcng3         | chr17:83585956-83631895   | OK     | 3.65145    | 7.74312   |
| Olfir560      | chr7:102740720-102759471  | NOTEST | 0.0232233  | 0.0492351 |
| Gpr133        | chr5:129096749-129204599  | OK     | 1.76725    | 3.7458    |
| Tiam2         | chr17:3326572-3557713     | OK     | 2.25662    | 4.78037   |
| 4930474N09Rik | chr12:99161276-99162808   | NOTEST | 0.0176988  | 0.0374789 |
| Il18bp        | chr7:102015076-102018155  | OK     | 0.60013    | 1.27069   |
| Panx3         | chr9:37659901-37669222    | NOTEST | 0.0550955  | 0.11663   |
| Gm525         | chr11:89073840-89093064   | OK     | 3.05454    | 6.45801   |
| E130309F12Rik | chr4:49059461-49340261    | OK     | 0.451073   | 0.953621  |
| Best2         | chr8:85007202-85014531    | NOTEST | 0.00973703 | 0.0205843 |
| LOC100504703  | chr10:127070480-127071101 | NOTEST | 0.720028   | 1.52214   |

|               |                           |        |           |           |
|---------------|---------------------------|--------|-----------|-----------|
| Clec2e        | chr6:129091815-129100903  | NOTEST | 0.0249005 | 0.0526274 |
| Pcgf1         | chr6:83078389-83080855    | OK     | 9.93021   | 20.9747   |
| F2            | chr2:91625319-91636414    | NOTEST | 0.0457201 | 0.096537  |
| Rian          | chr12:109603944-109661711 | OK     | 62.5428   | 132.025   |
| Tmc4          | chr7:3645268-3677553      | OK     | 0.614594  | 1.29731   |
| Gng5          | chr3:146499835-146505543  | OK     | 4.16999   | 8.80139   |
| Brca1         | chr11:101488763-101551955 | OK     | 0.523076  | 1.10395   |
| Ager          | chr17:34597849-34600937   | NOTEST | 0.232853  | 0.491242  |
| Hook1         | chr4:95959710-96024274    | OK     | 2.17373   | 4.57825   |
| Pnir          | chr4:21846326-21876475    | OK     | 8.89515   | 18.723    |
| Kif18a        | chr2:109280737-109341746  | OK     | 0.399216  | 0.839999  |
| Lrrc3         | chr10:77897575-77902536   | OK     | 6.87661   | 14.4667   |
| Rnf39         | chr17:36943050-36947986   | NOTEST | 0.325469  | 0.684657  |
| 8430426J06Rik | chr15:81242653-81251862   | NOTEST | 0.229305  | 0.482164  |
| Ppox          | chr1:171276991-171281186  | OK     | 3.56822   | 7.49837   |
| Rmi2          | chr16:10835058-10843235   | NOTEST | 0.0285002 | 0.0598863 |
| Fam220a       | chr5:143548705-143564525  | OK     | 17.5997   | 36.9734   |
| Ube2t         | chr1:134962564-134974179  | OK     | 1.05956   | 2.22313   |
| Mab21l1       | chr3:55625197-56183701    | OK     | 2.69624   | 5.65705   |
| Hist2h3b      | chr3:96268653-96269155    | NOTEST | 0.601384  | 1.26161   |
| 1110019D14Rik | chr6:13871568-13896421    | OK     | 1.11904   | 2.34693   |
| Ttk           | chr9:83834688-83872390    | NOTEST | 0.220512  | 0.46221   |
| Nhlh1         | chr1:172052291-172057596  | NOTEST | 0.0473946 | 0.0992762 |
| Ddit3         | chr10:127290792-127311786 | OK     | 16.8082   | 35.1896   |
| Tfr2          | chr5:137569839-137588081  | OK     | 0.691699  | 1.44686   |
| Zcchc7        | chr4:44756558-44932214    | OK     | 4.84868   | 10.1398   |
| Pcgf6         | chr19:47033618-47050845   | OK     | 2.88951   | 6.03753   |
| Plcb3         | chr19:6953712-6969814     | OK     | 113.299   | 236.447   |
| Shisa9        | chr16:11984112-12270904   | NOTEST | 0.0780468 | 0.162805  |
| Acvr1c        | chr2:58267452-58357758    | NOTEST | 0.0391231 | 0.0815581 |
| Gm10451       | chr12:76444496-76448698   | NOTEST | 0.126058  | 0.262644  |
| Slc5a1        | chr5:33104218-33162699    | NOTEST | 0.169464  | 0.353073  |
| A430105I19Rik | chr2:118754144-118762661  | OK     | 2.91073   | 6.06289   |
| Tmcc2         | chr1:132356314-132391281  | OK     | 22.2507   | 46.3042   |
| 2010107G23Rik | chr10:62107655-62111013   | OK     | 14.7269   | 30.6448   |
| Ror2          | chr13:53109316-53286109   | OK     | 3.49369   | 7.26975   |
| Fbxl19        | chr7:127746774-127768928  | OK     | 13.0497   | 27.1536   |
| Sned1         | chr1:93235896-93296448    | OK     | 1.97649   | 4.11224   |
| Pdzd3         | chr9:44247311-44251464    | NOTEST | 0.0608072 | 0.126384  |
| Kcnd3         | chr3:105448189-105674002  | OK     | 38.4005   | 79.7905   |
| Jak3          | chr8:71676382-71690577    | OK     | 0.999275  | 2.07448   |
| A330069E16Rik | chr2:91237145-91238357    | NOTEST | 0.385049  | 0.798625  |
| 2900005J15Rik | chr5:25100974-25103007    | OK     | 0.543907  | 1.12787   |
| Rbm3os        | chrX:8138974-8147963      | NOTEST | 0.251005  | 0.519962  |
| Eme1          | chr11:94629823-94653754   | NOTEST | 0.134912  | 0.279252  |
| Ccnl2         | chr4:155812488-155824543  | OK     | 7.1791    | 14.8544   |
| Msc           | chr1:14753345-14755966    | OK     | 1.78728   | 3.69486   |
| Tmem200a      | chr10:25991185-26079447   | OK     | 12.2716   | 25.3662   |
| Stx1a         | chr5:135023571-135051099  | OK     | 17.6794   | 36.5316   |
| St6galnac3    | chr3:153202508-153725133  | OK     | 2.99429   | 6.18212   |
| Cd209f        | chr8:4102792-4105764      | NOTEST | 0.0579488 | 0.119583  |
| Kncn          | chr4:115884399-115887964  | NOTEST | 0.0473492 | 0.0976726 |
| Mrgprb8       | chr7:48388525-48389648    | NOTEST | 0.0210386 | 0.0433811 |



|               |                           |        |            |           |
|---------------|---------------------------|--------|------------|-----------|
| N28178        | chr4:42917250-42941607    | OK     | 260.47     | 536.951   |
| Dscc1         | chr15:55076100-55090478   | NOTEST | 0.165149   | 0.34031   |
| Hebp1         | chr6:135137518-135168215  | OK     | 4.60255    | 9.48316   |
| B3gnt6        | chr7:98192414-98199475    | NOTEST | 0.333275   | 0.686676  |
| Ooep          | chr9:78376902-78378588    | OK     | 2.04034    | 4.20376   |
| Slc28a2       | chr2:122426476-122461130  | NOTEST | 0.0700735  | 0.144309  |
| Fam89a        | chr8:124740256-124751809  | OK     | 36.3109    | 74.7045   |
| Pabpc4        | chr4:123282910-123298835  | OK     | 3.17997    | 6.54203   |
| Nrg2          | chr18:36017657-36197160   | OK     | 2.98258    | 6.13335   |
| Vaultrc5      | chr18:36801762-36802107   | NOTEST | 0.138404   | 0.284586  |
| Pi4k2b        | chr5:52741573-52769344    | OK     | 3.08561    | 6.34115   |
| Fam193b       | chr13:55539315-55571120   | OK     | 4.23231    | 8.69723   |
| Tox2          | chr2:163225453-163323102  | OK     | 7.04412    | 14.4729   |
| Cd46          | chr1:195041899-195092248  | NOTEST | 0.404361   | 0.83043   |
| Dgkh          | chr14:78569608-78725089   | OK     | 91.3741    | 187.55    |
| A730036I17Rik | chr2:129218968-129235606  | NOTEST | 0.0219148  | 0.0449814 |
| Gpr39         | chr1:125676995-125912214  | NOTEST | 0.210472   | 0.43181   |
| Syt9          | chr7:107284774-107591365  | OK     | 45.6169    | 93.5697   |
| Hs3st3a1      | chr11:64433134-64522835   | NOTEST | 0.183489   | 0.376315  |
| Gm17801       | chr17:25260510-25275528   | NOTEST | 0.0607797  | 0.124585  |
| Asb4          | chr6:5383385-5433021      | NOTEST | 0.0521655  | 0.10692   |
| Npy2r         | chr3:82538382-82548085    | OK     | 8.22588    | 16.8471   |
| Nbeal2        | chr9:110624788-110654161  | OK     | 0.887227   | 1.81676   |
| Gm7334        | chr16:78359859-78376785   | LOWDAT | 0.254007   | 0.519596  |
| Hpca          | chr4:129105529-129121925  | OK     | 17.3732    | 35.5195   |
| Tcerg1l       | chr7:138208971-138397730  | OK     | 7.29298    | 14.9075   |
| Rab33a        | chrX:48519284-48530240    | OK     | 7.91763    | 16.1835   |
| Tmem30c       | chr16:57266138-57292851   | NOTEST | 0.0857414  | 0.17524   |
| Samsn1        | chr16:75858793-75909266   | OK     | 6.3077     | 12.8843   |
| Spink2        | chr5:77205105-77211471    | OK     | 3.25061    | 6.63676   |
| Gm12359       | chr11:98795768-98833807   | NOTEST | 0.131577   | 0.268638  |
| Hs6st2        | chrX:51386636-51681602    | OK     | 29.3921    | 60.0057   |
| Ttc14         | chr3:33800182-33844310    | OK     | 5.29474    | 10.8018   |
| Scg3          | chr9:75643365-75684056    | OK     | 410.621    | 837.423   |
| Dennd2d       | chr3:106481985-106547761  | NOTEST | 0.062981   | 0.128438  |
| Eps8l3        | chr3:107877229-107898685  | NOTEST | 0.0445588  | 0.0908255 |
| Gpr27         | chr6:99692678-99693818    | OK     | 3.36472    | 6.85752   |
| Clk1          | chr1:58411987-58424088    | OK     | 25.3472    | 51.6584   |
| Glod5         | chrX:8004200-8018492      | NOTEST | 0.222939   | 0.454304  |
| Cpox          | chr16:58670207-58680389   | OK     | 13.6337    | 27.7799   |
| Rs1           | chrX:160768012-160994681  | NOTEST | 0.00950576 | 0.0193503 |
| 1500015A07Rik | chr18:61726389-61728253   | OK     | 0.610384   | 1.24191   |
| Pcmt2         | chr2:181837853-181857460  | OK     | 12.3601    | 25.147    |
| S100a7a       | chr3:90654301-90658130    | OK     | 1.54178    | 3.13089   |
| Scn2a1        | chr2:65670444-65767447    | OK     | 1.45624    | 2.95711   |
| Vmn2r113      | chr17:22943183-22958814   | NOTEST | 0.00812794 | 0.0165041 |
| Eml1          | chr12:108371152-108702306 | OK     | 153.626    | 311.913   |
| St6galnac5    | chr3:152820709-152982207  | OK     | 5.84588    | 11.865    |
| Zfhx2         | chr14:55061658-55092048   | OK     | 6.69321    | 13.5768   |
| Rab27b        | chr18:69979130-70141590   | OK     | 19.4388    | 39.4178   |
| Gm13032       | chr4:140810992-140845778  | NOTEST | 0.0179097  | 0.0362989 |
| Rpl35         | chr2:38998308-39005131    | OK     | 1.39878    | 2.83257   |
| Cd2           | chr3:101275907-101287939  | NOTEST | 0.186236   | 0.37712   |

|               |                           |        |           |           |
|---------------|---------------------------|--------|-----------|-----------|
| Btbd19        | chr4:117119217-117125725  | OK     | 0.692281  | 1.40126   |
| Pak4          | chr7:28558818-28598184    | OK     | 4.08585   | 8.26713   |
| Cd44          | chr2:102811141-102901665  | OK     | 77.0094   | 155.691   |
| Stac          | chr9:111561433-111690216  | OK     | 28.6869   | 57.9941   |
| Snrpf         | chr10:93540631-93605245   | OK     | 3.87701   | 7.83686   |
| Trmt13        | chr3:116562972-116630986  | OK     | 0.687782  | 1.38998   |
| Zfp692        | chr11:58307068-58314613   | OK     | 2.71104   | 5.47694   |
| Brpf3         | chr17:28801125-28838789   | OK     | 2.17213   | 4.38471   |
| Iqcg          | chr16:32914099-33056186   | OK     | 3.54449   | 7.15002   |
| Fam109b       | chr15:82341178-82345710   | OK     | 0.511648  | 1.0318    |
| Sh2d4a        | chr8:68276527-68347704    | OK     | 1.37469   | 2.77163   |
| Ppp1r14b      | chr19:6975047-6977324     | OK     | 8.35059   | 16.836    |
| Ifit1         | chr19:34640888-34650009   | OK     | 9.09196   | 18.3208   |
| Csf2rb2       | chr15:78282507-78305721   | NOTEST | 0.303806  | 0.611477  |
| Tmem132c      | chr5:127241825-127565790  | OK     | 3.50219   | 7.04674   |
| Synpo2l       | chr14:20659417-20668306   | NOTEST | 0.0790128 | 0.158923  |
| Lef1          | chr3:131110296-131224357  | OK     | 1.61317   | 3.24289   |
| Slc38a6       | chr12:73286847-73354045   | OK     | 1.14197   | 2.29493   |
| Ces5a         | chr8:93499212-93535707    | NOTEST | 0.250564  | 0.503347  |
| 4930558J18Rik | chr1:57359221-57377544    | NOTEST | 0.0300976 | 0.0604573 |
| Olfcr632      | chr7:103937381-103938335  | NOTEST | 0.0242166 | 0.0486398 |
| Mrgprd        | chr7:145314834-145324059  | OK     | 66.7719   | 134.11    |
| Redrum        | chr18:54422294-54453294   | OK     | 2.82484   | 5.67168   |
| Syce2         | chr8:84872110-84893921    | NOTEST | 0.411574  | 0.826126  |
| Naip5         | chr13:100211739-100247336 | NOTEST | 0.228985  | 0.459551  |
| 39141         | chr15:26309071-26409573   | OK     | 10.5145   | 21.0836   |
| Tmem154       | chr3:84666191-84704575    | OK     | 1.24443   | 2.49511   |
| Fam46b        | chr4:133480132-133487940  | OK     | 0.830259  | 1.66432   |
| Kcnc2         | chr10:112271122-112466304 | OK     | 6.04687   | 12.1185   |
| Asb12         | chrX:95470198-95478129    | NOTEST | 0.0344169 | 0.0689697 |
| Flt3l         | chr7:45131188-45136432    | OK     | 1.7087    | 3.42131   |
| 1700019L03Rik | chr2:32775820-32784405    | NOTEST | 0.0123581 | 0.024726  |
| Cd28          | chr1:60746387-60773359    | NOTEST | 0.0927652 | 0.185554  |
| 2700069I18Rik | chr3:5177823-5415855      | NOTEST | 0.39299   | 0.785969  |
| Cd55          | chr1:130439029-130462740  | OK     | 132.616   | 265.221   |
| 1500012F01Rik | chr2:167035795-167065862  | OK     | 16.0004   | 31.9771   |
| Rspo1         | chr4:124986429-125009099  | OK     | 4.11246   | 8.21844   |
| Fam159a       | chr4:108367776-108383655  | NOTEST | 0.0278924 | 0.0557375 |
| Trpm6         | chr19:18749982-18892511   | NOTEST | 0.384492  | 0.768292  |
| Timeless      | chr10:128232062-128252941 | OK     | 4.49198   | 8.97523   |
| Apobec3       | chr15:79889531-79908429   | OK     | 1.27409   | 2.54383   |
| Gbp8          | chr5:105014152-105053561  | NOTEST | 0.0470767 | 0.0939261 |
| Nfil3         | chr13:52967208-52981039   | OK     | 2.84965   | 5.67917   |
| D330041H03Rik | chr17:24352022-24414513   | NOTEST | 0.0947459 | 0.188787  |
| Gabra2        | chr5:70961056-71095849    | OK     | 11.7759   | 23.463    |
| Lbr           | chr1:181815314-181842401  | OK     | 6.22334   | 12.3986   |
| Clasrp        | chr7:19581042-19604468    | OK     | 6.29815   | 12.5456   |
| Fam150b       | chr12:30884323-30911612   | OK     | 6.75444   | 13.4475   |
| Ap1m2         | chr9:21295456-21312333    | NOTEST | 0.137395  | 0.273453  |
| Nxpe4         | chr9:48362040-48400025    | OK     | 3.7046    | 7.37013   |
| Olfcr78       | chr7:102740720-102759471  | NOTEST | 0.24483   | 0.486996  |
| Hes6          | chr1:91411482-91413222    | OK     | 13.1416   | 26.1314   |
| Tyms          | chr5:30058199-30073625    | OK     | 0.412637  | 0.820506  |

|                |                           |        |           |           |
|----------------|---------------------------|--------|-----------|-----------|
| Mesdc1         | chr7:83880494-83884341    | OK     | 15.0591   | 29.933    |
| Elf1           | chr14:79459936-79582491   | OK     | 7.35937   | 14.6183   |
| Tspear         | chr10:77686568-77886769   | NOTEST | 0.283403  | 0.562303  |
| Pabpc1l        | chr2:164025223-164050538  | NOTEST | 0.119425  | 0.236761  |
| Rgs5           | chr1:169655500-169693526  | OK     | 53.9022   | 106.77    |
| Insl3          | chr8:71676382-71690577    | NOTEST | 0.0765364 | 0.151377  |
| 6720468P15Rik  | chr19:57508563-57512788   | OK     | 3.66293   | 7.23903   |
| Klhdc8b        | chr9:108447638-108465945  | OK     | 10.3035   | 20.3593   |
| Klhl29         | chr12:5077465-5375682     | OK     | 7.89542   | 15.5997   |
| Ptma           | chr1:86526735-86530698    | OK     | 86.392    | 170.656   |
| 9430008C03Rik  | chr2:158353699-158361522  | OK     | 0.999237  | 1.97367   |
| Clgn           | chr8:83389890-83426829    | OK     | 52.2039   | 103.082   |
| Pstpip2        | chr18:77794549-77882879   | OK     | 17.2132   | 33.9455   |
| Dpp10          | chr1:123332137-124045559  | OK     | 51.5312   | 101.586   |
| Mpp4           | chr1:59120934-59237231    | NOTEST | 0.0751818 | 0.148172  |
| Ipw            | chr7:59619157-59678878    | OK     | 0.781915  | 1.5408    |
| Spag16         | chr1:69826969-70725132    | NOTEST | 0.028962  | 0.0570535 |
| Catsper3       | chr13:55784578-55809000   | NOTEST | 0.162936  | 0.320862  |
| Nfkbid         | chr7:30423303-30428746    | NOTEST | 0.356157  | 0.701346  |
| 2210408F21Rik  | chr6:31220350-31337394    | OK     | 8.62795   | 16.9857   |
| Ak7            | chr12:105705981-105782447 | NOTEST | 0.189507  | 0.372975  |
| Stx2           | chr5:128984557-129008572  | OK     | 34.1865   | 67.2803   |
| A330076H08Rik  | chr7:61943900-61982359    | OK     | 0.930642  | 1.82933   |
| B130006D01Rik  | chr11:95723585-95726773   | NOTEST | 0.0230096 | 0.0452133 |
| Gm5868         | chr5:72581638-72587550    | NOTEST | 0.237034  | 0.465694  |
| 1110020A21Rik  | chr17:84917181-85023992   | OK     | 0.818063  | 1.60644   |
| Cgref1         | chr5:30933142-31348845    | OK     | 19.4011   | 38.0971   |
| Lrp8           | chr4:107802258-107876840  | OK     | 5.17825   | 10.1655   |
| Zfp54          | chr17:21423226-21435384   | OK     | 0.801844  | 1.57393   |
| Tmem79         | chr3:88328652-88334433    | OK     | 47.4108   | 93.0201   |
| Rps19-ps3      | chr4:147821776-147822202  | OK     | 1.5728    | 3.08407   |
| Sdc1           | chr12:8771395-8793687     | OK     | 10.299    | 20.1939   |
| 9130204L05Rik  | chr3:91088136-91090805    | OK     | 1.21567   | 2.3826    |
| Ak4            | chr4:101419288-101467771  | OK     | 1.08295   | 2.12214   |
| Raet1e         | chr10:22158608-22374139   | NOTEST | 0.037243  | 0.0729797 |
| Amer2          | chr14:60378285-60381003   | OK     | 8.67797   | 17.0024   |
| Npas2          | chr1:39194271-39363240    | OK     | 0.968766  | 1.89796   |
| Palm2          | chr4:57568247-57717128    | OK     | 14.0831   | 27.5765   |
| Mical1         | chr10:41476313-41487030   | OK     | 23.9169   | 46.8253   |
| Mtag2          | chr7:45339125-45370564    | OK     | 2.58039   | 5.04986   |
| Rgs11          | chr17:26202961-26211324   | OK     | 4.98534   | 9.74811   |
| Sowaha         | chr11:53476577-53480195   | OK     | 0.891227  | 1.7423    |
| Sdsl           | chr5:120458201-120472763  | OK     | 3.40431   | 6.65462   |
| Ankrd10        | chr8:11611580-11635757    | OK     | 10.1806   | 19.8991   |
| Pkig           | chr2:163658385-163726158  | OK     | 21.4591   | 41.9132   |
| Mettl7a2Higd1c | chr15:100353199-100384435 | OK     | 0.574074  | 1.12092   |
| Mapk7          | chr11:61488811-61494266   | OK     | 7.52896   | 14.6973   |
| Lpar3          | chr3:146220960-146286214  | OK     | 33.3301   | 65.0331   |
| Unc79          | chr12:102948858-103183997 | OK     | 1.39416   | 2.72009   |
| Eno3           | chr11:70657175-70662513   | OK     | 3.89248   | 7.58353   |
| 5730420D15Rik  | chr10:95417374-95428640   | NOTEST | 0.0202518 | 0.0394466 |
| Foxm1          | chr6:128362993-128385144  | OK     | 0.419501  | 0.816684  |
| Cabyr          | chr18:12741354-12755142   | NOTEST | 0.203167  | 0.395491  |

|                |                           |        |            |           |
|----------------|---------------------------|--------|------------|-----------|
| Mex3d          | chr10:80380354-80387651   | OK     | 5.90083    | 11.4837   |
| Htr4           | chr18:62324203-62467802   | OK     | 3.12981    | 6.08992   |
| Zdhhc12        | chr2:30078765-30093635    | OK     | 8.91271    | 17.3396   |
| Tbx1           | chr16:18581703-18590671   | NOTEST | 0.220611   | 0.429009  |
| Haus4          | chr14:54541784-54554361   | OK     | 9.32055    | 18.1198   |
| Arhgap26       | chr18:38993144-39376285   | OK     | 17.4433    | 33.8969   |
| Ubald2         | chr11:116434093-116439077 | OK     | 4.32152    | 8.39541   |
| Serpina3f      | chr12:104214543-104241934 | NOTEST | 0.0704475  | 0.136854  |
| 3000002C10Rik  | chr9:109830153-109831431  | OK     | 0.590028   | 1.14564   |
| Ccdc39         | chr3:33800182-33844310    | OK     | 1.46486    | 2.8442    |
| Rpl24          | chr16:55966274-55971437   | NOTEST | 0.523379   | 1.01553   |
| Catsperd       | chr17:56628142-56664456   | NOTEST | 0.275146   | 0.533529  |
| P2ry10         | chrX:107089334-107104970  | NOTEST | 0.15908    | 0.308358  |
| Mgam           | chr6:40529090-40910666    | NOTEST | 0.00563069 | 0.0109129 |
| Cks2           | chr13:51645231-51650662   | OK     | 1.25129    | 2.42509   |
| Dapk1          | chr13:60601946-60763191   | OK     | 22.1293    | 42.8703   |
| Gsdma          | chr11:98664350-98677708   | NOTEST | 0.115836   | 0.224393  |
| Trim6          | chr7:104218794-104235152  | NOTEST | 0.275748   | 0.533967  |
| Bcl2l14        | chr6:134396328-134438724  | OK     | 2.26517    | 4.38632   |
| Wbscr25        | chr5:134986213-135001350  | NOTEST | 0.0188915  | 0.0365798 |
| Kcnn3          | chr3:89520163-89672494    | OK     | 0.450565   | 0.872347  |
| Zcchc16        | chrX:144688906-145122410  | OK     | 0.424308   | 0.821113  |
| Drd3           | chr16:43762241-43822839   | NOTEST | 0.128316   | 0.248244  |
| Zc3hav1        | chr6:38310496-38354603    | OK     | 4.59618    | 8.89183   |
| E130102H24Rik  | chr4:101346523-101399185  | OK     | 1.42176    | 2.75028   |
| Rhebl1         | chr15:98877759-98881414   | OK     | 11.3531    | 21.9504   |
| Ago4           | chr4:126489542-126533458  | OK     | 1.24529    | 2.40404   |
| Cpne3          | chr4:19519251-19570104    | OK     | 78.7717    | 151.858   |
| Alk            | chr17:71868987-72604307   | OK     | 0.496443   | 0.956824  |
| Bach2          | chr4:32417434-32586108    | OK     | 3.07651    | 5.92365   |
| Oca2           | chr7:56239770-56536517    | NOTEST | 0.0363538  | 0.0699257 |
| Gm13247        | chr4:146501999-146546873  | NOTEST | 0.0260922  | 0.0501871 |
| Magi1          | chr6:93675452-94283917    | OK     | 41.8162    | 80.4143   |
| Frmd4b         | chr6:97286866-97617657    | OK     | 6.24471    | 12.0084   |
| Ccdc120        | chrX:7731713-7741324      | OK     | 1.87135    | 3.59558   |
| Grhl2          | chr15:37233035-37363568   | NOTEST | 0.0596189  | 0.114541  |
| Lca5           | chr9:83391354-83454574    | OK     | 1.36829    | 2.62866   |
| Rgs3           | chr4:62559846-62703019    | OK     | 14.8704    | 28.5645   |
| St6gal2        | chr17:55445716-55499226   | OK     | 2.20693    | 4.2363    |
| Nlrp5-ps       | chr7:14530653-14623066    | NOTEST | 0.140705   | 0.269902  |
| Lime1          | chr2:181381234-181383628  | OK     | 5.03112    | 9.63985   |
| Aldob          | chr4:49535994-49549483    | NOTEST | 0.134778   | 0.258214  |
| Gm10785        | chr16:91688897-91728802   | NOTEST | 0.131628   | 0.2521    |
| Gpha2          | chr19:6226400-6235840     | NOTEST | 0.22795    | 0.436351  |
| Klk5           | chr7:43842268-43851181    | OK     | 1.76412    | 3.37559   |
| Med10          | chr13:69809881-69816094   | OK     | 28.5195    | 54.5568   |
| Jmjd7-pla2g4b  | chr2:120027482-120043032  | NOTEST | 0.196791   | 0.376263  |
| Zbtb42         | chr12:112678839-112682747 | OK     | 1.5901     | 3.04015   |
| Otoa           | chr7:121083437-121163089  | OK     | 1.7636     | 3.37152   |
| AI413582       | chr17:27563768-27565727   | OK     | 62.8663    | 120.114   |
| F2rl3          | chr8:72761879-72763885    | OK     | 1.20701    | 2.30526   |
| Trim39         | chr17:36258872-36272004   | OK     | 4.43794    | 8.47515   |
| 1700047I17Rik2 | chr12:55199591-55217146   | OK     | 1.8105     | 3.45563   |

|               |                            |        |            |           |
|---------------|----------------------------|--------|------------|-----------|
| Itgal         | chr7:127296259-127335137   | NOTEST | 0.326141   | 0.621916  |
| Dgkg          | chr16:22466568-22657231    | OK     | 15.1395    | 28.8685   |
| Pafah1b3      | chr7:25295048-25297955     | OK     | 17.7411    | 33.8242   |
| Bex4          | chrX:136139044-136140437   | OK     | 3.98175    | 7.59061   |
| Ssbp3         | chr4:106911469-107049694   | OK     | 74.0814    | 141.182   |
| Cks1b         | chr3:89415471-89418291     | OK     | 4.41208    | 8.39969   |
| Ttll13        | chr7:80246375-80260821     | NOTEST | 0.100472   | 0.191262  |
| Ccdc141       | chr2:77009905-77170635     | OK     | 16.4857    | 31.3823   |
| Cenpn         | chr8:116921739-116941503   | OK     | 1.29275    | 2.46061   |
| Bglap         | chr3:88383494-88384466     | NOTEST | 0.117424   | 0.223195  |
| Rgs17         | chr10:5825663-5922400      | OK     | 11.214     | 21.3145   |
| Esr2          | chr12:76120418-76177259    | NOTEST | 0.0632988  | 0.120273  |
| Gm15760       | chr16:20545111-20548556    | NOTEST | 0.0321138  | 0.0610068 |
| Dennd2c       | chr3:103127555-103169733   | NOTEST | 0.26063    | 0.494934  |
| BC021891      | chr8:125910449-125947439   | OK     | 1.25414    | 2.38112   |
| Cd82          | chr2:93419101-93469874     | OK     | 49.1243    | 93.1965   |
| P2rx3         | chr2:84996551-85035834     | OK     | 111.77     | 211.955   |
| Tfap4         | chr16:4544660-4559720      | OK     | 1.93438    | 3.66707   |
| Rhov          | chr2:119269200-119271226   | OK     | 20.1123    | 38.11     |
| Gm2011        | chr3:40846998-40875609     | NOTEST | 0.118346   | 0.224228  |
| Gm14634       | chrX:12762277-12821492     | OK     | 0.610789   | 1.1569    |
| Hook2         | chr8:84990594-85003364     | OK     | 1.49548    | 2.83231   |
| Pisd-ps3      | chrUn_JH584304:52673-59689 | OK     | 10.6369    | 20.1336   |
| Ptbp3         | chr4:59471867-59549364     | OK     | 16.7017    | 31.6112   |
| Zfp945        | chr17:22846696-22867134    | OK     | 3.37713    | 6.39174   |
| Bahd1         | chr2:118901614-118924524   | OK     | 16.1137    | 30.4863   |
| Eps8l2        | chr7:141339001-141365110   | OK     | 1.48829    | 2.81346   |
| Dnttip1       | chr2:164746014-164768219   | OK     | 15.6025    | 29.4899   |
| Ndst3         | chr3:123526165-123672392   | OK     | 3.69179    | 6.97403   |
| Wdr95         | chr5:149489055-149611894   | NOTEST | 0.00844653 | 0.0159493 |
| 5730403I07Rik | chr9:77366411-77399416     | NOTEST | 0.0105401  | 0.0198961 |
| Prkcq         | chr2:11172381-11301226     | OK     | 33.6652    | 63.5433   |
| Rps20         | chr4:3834472-3835600       | OK     | 45.8977    | 86.5941   |
| Rpl11         | chr4:136049947-136053371   | OK     | 2.07808    | 3.91153   |
| Dtwd1         | chr2:126152140-126165277   | OK     | 2.00843    | 3.77943   |
| Mb21d1        | chr9:78430517-78443147     | NOTEST | 0.202981   | 0.381882  |
| Gnb4          | chr3:32583527-32616535     | OK     | 37.1262    | 69.8156   |
| Rbm12b1       | chr4:12140116-12146746     | OK     | 1.16765    | 2.19517   |
| Btc           | chr5:91357260-91402994     | NOTEST | 0.354702   | 0.666739  |
| Tnf           | chr17:35199366-35202007    | NOTEST | 0.0519757  | 0.097607  |
| Exo1          | chr1:175880777-175911396   | NOTEST | 0.0527208  | 0.0989963 |
| Cdc7          | chr5:106964321-106984439   | OK     | 1.63266    | 3.06533   |
| Gm10767       | chr13:66905414-66909166    | OK     | 1.08401    | 2.03449   |
| Slc25a43      | chrX:36743631-36777307     | OK     | 1.35012    | 2.53218   |
| Neur11a       | chr19:47178819-47259441    | OK     | 10.5139    | 19.7116   |
| Hist1h1e      | chr13:23621776-23622558    | OK     | 0.773806   | 1.45059   |
| Pdlim2        | chr14:70164217-70177672    | OK     | 10.2102    | 19.1391   |
| Tg            | chr15:66670769-66850720    | NOTEST | 0.0219524  | 0.0410926 |
| Sh2d5         | chr4:138250410-138260968   | OK     | 3.61108    | 6.75871   |
| Fam183b       | chr11:58792801-58801960    | NOTEST | 0.341717   | 0.639278  |
| 4632427E13Rik | chr7:92740705-92741459     | NOTEST | 0.219161   | 0.410001  |
| Ccdc40        | chr11:119228571-119265212  | OK     | 1.59934    | 2.99141   |
| Cblb          | chr16:52031548-52208046    | OK     | 7.94826    | 14.8617   |



|                 |                           |        |           |           |
|-----------------|---------------------------|--------|-----------|-----------|
| Rps2            | chr17:24720062-24721927   | OK     | 16.7024   | 31.2209   |
| 1700037H04Rik   | chr2:131127411-131604824  | OK     | 67.3404   | 125.832   |
| Cercam          | chr2:29869493-29882840    | OK     | 0.847901  | 1.58438   |
| Nktr            | chr9:121719180-121759943  | OK     | 7.72408   | 14.4296   |
| 4930503L19Rik   | chr18:70453139-70501065   | OK     | 2.89264   | 5.40215   |
| Prkca           | chr11:107933386-108343888 | OK     | 60.6531   | 113.27    |
| Cxadr           | chr16:78301670-78359785   | OK     | 0.478116  | 0.892804  |
| Izumo4          | chr10:80702692-80705382   | OK     | 13.6158   | 25.4237   |
| Arhgap28        | chr17:67842707-68004108   | OK     | 26.6613   | 49.7811   |
| A230103J11Rik   | chr8:85036914-85067120    | OK     | 0.714839  | 1.3347    |
| Mrgpra2b        | chr7:47463806-47489582    | OK     | 5.6603    | 10.5582   |
| Ptger3          | chr3:157566891-157644758  | OK     | 7.48439   | 13.9493   |
| Rassf7          | chr7:141215859-141218658  | OK     | 1.58342   | 2.95034   |
| Tle1            | chr4:72109944-72200893    | OK     | 22.0174   | 41.009    |
| Mrm1            | chr11:84813060-84819515   | OK     | 8.22271   | 15.3124   |
| Klhl2           | chr8:64739674-64849924    | OK     | 20.0227   | 37.28     |
| Gpr45           | chr1:42952871-43035449    | NOTEST | 0.32605   | 0.606963  |
| Mrgprb4         | chr7:48198212-48199178    | OK     | 13.4722   | 25.0583   |
| Tox3            | chr8:90247111-90348252    | OK     | 6.76159   | 12.5733   |
| Spata32         | chr11:103198943-103218432 | NOTEST | 0.212532  | 0.395189  |
| Efcab11         | chr12:99717530-99883442   | NOTEST | 0.237313  | 0.441189  |
| Actl6b          | chr5:137553554-137569573  | OK     | 16.2207   | 30.1525   |
| Smarca1         | chrX:47809369-47892552    | OK     | 8.83306   | 16.4138   |
| Cep135          | chr5:76591713-76646466    | OK     | 1.08826   | 2.02143   |
| Rpl7a           | chr2:26910806-26913311    | OK     | 3.35271   | 6.22703   |
| Rpl35a          | chr16:33056452-33060188   | OK     | 2.67763   | 4.97209   |
| 2900041M22Rik   | chr11:117611246-117613417 | OK     | 2.63729   | 4.89304   |
| 2610005L07Rik   | chr8:20385781-20424814    | OK     | 1.55033   | 2.87422   |
| Bex2            | chrX:136066564-136068236  | OK     | 194.481   | 360.474   |
| Irf2            | chr8:46739744-46847458    | OK     | 12.2905   | 22.779    |
| Slfm10-ps       | chr11:83028125-83040533   | NOTEST | 0.0535992 | 0.0993163 |
| Zfp821          | chr8:109705545-109724932  | OK     | 7.89405   | 14.6269   |
| Car7            | chr8:104446718-104624396  | OK     | 1.32306   | 2.45144   |
| Dancr           | chr5:74093082-74094336    | OK     | 0.88487   | 1.63903   |
| Rpl34,Rpl34-ps1 | chr3:130726826-130730398  | OK     | 5.61151   | 10.3902   |
| Plcx3           | chr15:4375490-4575579     | OK     | 19.7767   | 36.6044   |
| Zfp560          | chr9:20345135-20385158    | OK     | 1.73679   | 3.21449   |
| Ccnjl           | chr11:43528748-43586999   | OK     | 1.00446   | 1.85895   |
| Exosc6          | chr8:111056338-111057664  | OK     | 5.4963    | 10.1709   |
| Tmem164         | chrX:142681399-142843494  | OK     | 21.7072   | 40.1636   |
| Nsg2            | chr11:32000418-32059211   | OK     | 86.6828   | 160.373   |
| Ptpru           | chr4:131768456-131838278  | OK     | 1.20837   | 2.23472   |
| Fam83h          | chr15:76001091-76014336   | OK     | 3.06164   | 5.65939   |
| Crebzf          | chr7:90442780-90448043    | OK     | 14.169    | 26.1869   |
| Prr18           | chr17:8340405-8344113     | NOTEST | 0.232997  | 0.43062   |
| Celsr3          | chr9:108826319-108852969  | OK     | 4.83204   | 8.92905   |
| 5031425E22Rik   | chr5:23431807-23434353    | OK     | 3.52178   | 6.50371   |
| Abcb4           | chr5:8893720-8959226      | OK     | 2.55399   | 4.71446   |
| Fam71f2         | chr6:29281140-29290676    | NOTEST | 0.0705252 | 0.13015   |
| Agpat4          | chr17:12119283-12219640   | OK     | 27.808    | 51.3149   |
| Lcn2            | chr2:32384636-32387739    | OK     | 2.7482    | 5.07082   |
| Bnipl           | chr3:95241292-95251193    | NOTEST | 0.0813394 | 0.149982  |
| Sox4            | chr13:28950729-28953682   | OK     | 11.1473   | 20.5538   |

|               |                           |        |            |           |
|---------------|---------------------------|--------|------------|-----------|
| Fads3         | chr19:10041547-10059671   | OK     | 21.8271    | 40.2104   |
| Bora          | chr14:99046376-99074107   | OK     | 0.616714   | 1.1355    |
| Ankrd23       | chr1:36530533-36535729    | OK     | 0.700372   | 1.28936   |
| Rps6ka6       | chrX:111387836-111537959  | OK     | 2.47689    | 4.55945   |
| Gucy2g        | chr19:55198097-55241236   | NOTEST | 0.0860783  | 0.15842   |
| Wdr65         | chr4:118554550-118620405  | OK     | 0.542976   | 0.999187  |
| Rsph1         | chr17:31255019-31277356   | OK     | 1.91832    | 3.52971   |
| Fdx1          | chr9:51943306-51963533    | OK     | 10.1817    | 18.7279   |
| Rasef         | chr4:73714578-73790602    | OK     | 0.810342   | 1.49031   |
| Smyd3         | chr1:178955038-179518003  | OK     | 7.98327    | 14.6802   |
| Neur12        | chr2:164830729-164857708  | NOTEST | 0.466239   | 0.857219  |
| A930006K02Rik | chr16:91465103-91470123   | OK     | 1.31108    | 2.40976   |
| Ccdc138       | chr10:58497936-58576244   | OK     | 1.60343    | 2.94559   |
| Uaca          | chr9:60794547-60880370    | OK     | 22.1622    | 40.6741   |
| Pitpnc1       | chr11:107207891-107470720 | OK     | 65.7978    | 120.758   |
| Ap1ar         | chr3:127807264-127837492  | OK     | 67.1805    | 123.292   |
| Npff          | chr15:102523838-102524942 | NOTEST | 0.171962   | 0.315494  |
| Nat2          | chr8:67494874-67502578    | OK     | 1.60465    | 2.94322   |
| Dytn          | chr1:63622850-63686927    | NOTEST | 0.202535   | 0.371486  |
| Amica1        | chr9:45079182-45135606    | NOTEST | 0.336158   | 0.616517  |
| Trpa1         | chr1:14872647-14918862    | OK     | 18.6735    | 34.2468   |
| Basp1         | chr15:25363276-25413764   | OK     | 123.468    | 226.435   |
| Ccdc112       | chr18:46282150-46311928   | OK     | 2.68929    | 4.93188   |
| Hcn3          | chr3:89146774-89160157    | OK     | 11.1843    | 20.5054   |
| Lcorl         | chr5:45669924-45857540    | OK     | 6.83288    | 12.5249   |
| Pabpc1        | chr15:36595657-36608973   | OK     | 44.2272    | 81.0673   |
| Pnn           | chr12:59066918-59074017   | OK     | 11.9037    | 21.8101   |
| Lgals9        | chr11:78962978-78984924   | OK     | 52.4455    | 96.0884   |
| Prrxl1        | chr14:32599926-32649246   | OK     | 15.2569    | 27.9518   |
| Prr13         | chr15:102459169-102462806 | OK     | 136.241    | 249.499   |
| Slc2a4        | chr11:69942285-69948190   | NOTEST | 0.32489    | 0.594851  |
| Ica1l         | chr1:59989067-60043087    | OK     | 4.244      | 7.76989   |
| Gen1          | chr12:11240925-11265787   | OK     | 0.606877   | 1.11053   |
| Lrrc34        | chr3:30624266-30672431    | NOTEST | 0.354477   | 0.648502  |
| Gsta3         | chr1:21240584-21265575    | NOTEST | 0.104322   | 0.190782  |
| Fam227a       | chr15:79609575-79658956   | NOTEST | 0.267499   | 0.489176  |
| Arid5a        | chr1:36307732-36324029    | OK     | 2.216      | 4.05146   |
| Dedd2         | chr7:25202839-25219859    | OK     | 8.37647    | 15.308    |
| Fam161a       | chr11:23013386-23023741   | OK     | 1.79132    | 3.27193   |
| 1600002K03Rik | chr10:79697304-80369637   | OK     | 5.83944    | 10.6646   |
| Gnao1         | chr8:93810837-93969388    | OK     | 305.811    | 558.236   |
| 2610206C17Rik | chr7:84689639-84776549    | NOTEST | 0.138978   | 0.253673  |
| Stk32a        | chr18:43207696-43317481   | OK     | 2.42764    | 4.42923   |
| Thoc1         | chr18:9958179-10030149    | OK     | 5.19913    | 9.48538   |
| Sycp2         | chr2:178345295-178407658  | NOTEST | 0.0508383  | 0.0927409 |
| Hrh3          | chr2:180099464-180104407  | OK     | 1.27619    | 2.32684   |
| Pira2         | chr7:3731632-3915501      | NOTEST | 0.00986797 | 0.0179919 |
| A230057D06Rik | chr7:61705849-61927574    | OK     | 0.807676   | 1.47243   |
| Tpt1          | chr14:75845255-75848303   | OK     | 10.181     | 18.5585   |
| Fbxo9         | chr9:78081499-78109065    | OK     | 56.0671    | 102.087   |
| Tes           | chr6:17065148-17105825    | OK     | 4.88649    | 8.88822   |
| Nup210        | chr6:91013066-91116826    | OK     | 0.919379   | 1.6715    |
| Dmrtc1a       | chrX:102903220-102908687  | OK     | 1.62792    | 2.95928   |

|               |                           |        |           |           |
|---------------|---------------------------|--------|-----------|-----------|
| Lap3          | chr5:45493373-45512691    | OK     | 25.1905   | 45.7901   |
| Rasl10a       | chr11:5054130-5065327     | OK     | 1.62256   | 2.94809   |
| Tagln2        | chr1:172500245-172507375  | OK     | 126.898   | 230.401   |
| Efcab4b       | chr6:127577974-127629938  | OK     | 1.01033   | 1.83415   |
| Nyap1         | chr5:137730962-137739998  | OK     | 31.5156   | 57.1982   |
| Hsf5          | chr11:87617163-87659542   | NOTEST | 0.117029  | 0.212382  |
| Ino80dos      | chr1:63114470-63176822    | OK     | 0.91145   | 1.65387   |
| Unc13c        | chr9:73479423-73933567    | OK     | 6.69281   | 12.1403   |
| Tescl         | chr7:24333079-24333965    | NOTEST | 0.0550562 | 0.0998633 |
| Lrrc45        | chr11:120713952-120721127 | OK     | 4.78961   | 8.68751   |
| Arap1         | chr7:101348068-101412586  | OK     | 11.5387   | 20.9221   |
| Irak3         | chr10:120141653-120201537 | OK     | 1.34758   | 2.44271   |
| Tmem159       | chr7:120102425-120120986  | OK     | 7.42478   | 13.4583   |
| Adrbk1        | chr19:4285998-4306222     | OK     | 72.7445   | 131.821   |
| Srek1         | chr13:103741614-103764582 | OK     | 5.59321   | 10.1309   |
| Cep72         | chr13:74036494-74062285   | NOTEST | 0.284075  | 0.514492  |
| BC005764      | chr10:79697304-80369637   | OK     | 5.62949   | 10.1891   |
| Trim25        | chr11:88999402-89020293   | OK     | 6.65421   | 12.0343   |
| Slc9b1        | chr3:135348036-135397827  | NOTEST | 0.0247338 | 0.0447212 |
| Trmt10b       | chr4:45297167-45316131    | OK     | 5.23878   | 9.47058   |
| Gm16845       | chr9:22055459-22389206    | OK     | 0.585263  | 1.05786   |
| Hyi           | chr4:118359998-118409263  | OK     | 18.1355   | 32.766    |
| Trim11        | chr11:58978092-58991462   | OK     | 5.13837   | 9.27914   |
| Gm16861       | chr16:4886099-4941020     | NOTEST | 0.168131  | 0.303576  |
| Rpl39         | chrX:37082519-37085184    | OK     | 22.3741   | 40.3976   |
| Tshz2         | chr2:169633645-169888504  | OK     | 45.7996   | 82.683    |
| Ano2          | chr6:125690418-126040128  | NOTEST | 0.11535   | 0.208242  |
| Aire          | chr10:78030021-78063622   | NOTEST | 0.029465  | 0.0531677 |
| Impg2         | chr16:56204312-56273753   | NOTEST | 0.133467  | 0.240783  |
| Akap5         | chr12:76324890-76334151   | NOTEST | 0.21066   | 0.380038  |
| Ehbp11        | chr19:5707373-5726317     | OK     | 6.99689   | 12.6185   |
| Irf6          | chr1:193153111-193172035  | OK     | 2.78778   | 5.02536   |
| Magel2        | chr7:62376978-62381640    | NOTEST | 0.0665694 | 0.119954  |
| Slc12a7       | chr13:73763696-73816742   | OK     | 6.87407   | 12.3827   |
| Prph          | chr15:99055173-99058978   | OK     | 1065.39   | 1918.98   |
| Fech          | chr18:64456549-64489066   | OK     | 25.2883   | 45.5184   |
| Ctxn1         | chr8:4257645-4259274      | OK     | 36.7868   | 66.2085   |
| Unc13b        | chr4:43058983-43264887    | OK     | 3.84719   | 6.92389   |
| Pcna          | chr2:132249285-132253180  | OK     | 10.9499   | 19.698    |
| Rpl13a        | chr7:45125562-45128745    | OK     | 59.4109   | 106.875   |
| Preli2        | chr18:41875695-41951194   | OK     | 1.63873   | 2.94755   |
| Hells         | chr19:38930989-38968277   | OK     | 2.52552   | 4.54134   |
| 4931440P22Rik | chr3:65527484-65555518    | NOTEST | 0.0941028 | 0.169171  |
| Plek2         | chr12:78888696-78906938   | OK     | 2.36039   | 4.24287   |
| Sncg          | chr14:34370273-34374669   | OK     | 2246.55   | 4037.66   |
| Ppfia2        | chr10:106470309-106933468 | OK     | 9.36111   | 16.8239   |
| Scn3a         | chr2:65457117-65567492    | OK     | 0.967434  | 1.73802   |
| Efna1         | chr3:89271729-89280951    | OK     | 19.5254   | 35.0772   |
| Snrnp70       | chr7:45376453-45395647    | OK     | 33.8025   | 60.6618   |
| Rpl23a        | chr11:78180935-78183584   | OK     | 3.88955   | 6.97734   |
| Etohd2        | chr13:59769965-59823147   | NOTEST | 0.158624  | 0.284536  |
| Slc4a3        | chr1:75546265-75559431    | OK     | 4.56178   | 8.18272   |
| Rpl29         | chr9:106429538-106431567  | OK     | 30.6387   | 54.9577   |

|               |                           |        |           |           |
|---------------|---------------------------|--------|-----------|-----------|
| Zc3h12d       | chr10:7832469-7870397     | NOTEST | 0.312829  | 0.561078  |
| Ptpn5         | chr7:47077799-47133684    | OK     | 1.89782   | 3.4025    |
| Wdhd1         | chr14:47240943-47276857   | OK     | 1.79471   | 3.21556   |
| Arid3b        | chr9:57790504-57834234    | OK     | 1.19241   | 2.13638   |
| Timp1         | chrX:20848542-20920918    | OK     | 0.778278  | 1.39411   |
| Smpd4         | chr16:17619353-17644830   | OK     | 5.4875    | 9.82916   |
| ChkbCpt1b     | chr15:89416404-89429927   | NOTEST | 0.0199058 | 0.0356482 |
| Manr          | chr3:29891016-29924191    | NOTEST | 0.0295297 | 0.0528765 |
| 2810410L24Rik | chr11:120186649-120189856 | OK     | 0.593899  | 1.06322   |
| Pou2f2        | chr7:25091114-25132460    | OK     | 0.61623   | 1.10278   |
| Psd           | chr19:46304736-46327156   | OK     | 3.39088   | 6.0636    |
| Zfp760        | chr17:21707740-21725636   | OK     | 3.11496   | 5.56654   |
| Adrb2         | chr18:62177712-62179981   | OK     | 0.906627  | 1.61995   |
| Bok           | chr1:93685693-93695762    | OK     | 4.48124   | 8.00665   |
| Gmip          | chr8:69808686-69821870    | OK     | 2.00229   | 3.57503   |
| Gm14405       | chr2:176852791-176864437  | NOTEST | 0.0479782 | 0.085636  |
| Magi3         | chr3:104013264-104220406  | OK     | 54.14     | 96.6172   |
| Gucy2c        | chr6:136697283-136781742  | NOTEST | 0.0676638 | 0.120747  |
| Plekhn1       | chr4:156221455-156228542  | OK     | 0.575154  | 1.02632   |
| 2810032G03Rik | chr12:5376501-5416132     | OK     | 3.61615   | 6.45082   |
| Il2rg         | chrX:101264386-101268206  | OK     | 1.12355   | 2.00389   |
| Vgf           | chr5:137030294-137033351  | OK     | 43.5806   | 77.6806   |
| Agtr1a        | chr13:30336355-30382867   | OK     | 10.4187   | 18.5706   |
| Gpx1          | chr9:108339079-108340344  | OK     | 133.712   | 238.258   |
| Tmem151b      | chr17:45523433-45549677   | OK     | 21.208    | 37.7782   |
| Hsbp111       | chr18:80229755-80247102   | OK     | 21.3241   | 37.973    |
| Phactr3       | chr2:178118974-178338492  | OK     | 5.98244   | 10.6482   |
| Mylpf         | chr7:127211607-127214287  | OK     | 0.616143  | 1.09658   |
| D930015E06Rik | chr3:83898286-84040161    | OK     | 12.6101   | 22.441    |
| Hal           | chr10:93488767-93516743   | OK     | 3.42255   | 6.08885   |
| Tyw5          | chr1:57388243-57415958    | OK     | 5.59134   | 9.94701   |
| Kbtbd8        | chr6:95117879-95129793    | OK     | 1.90251   | 3.38416   |
| AA543186      | chr2:25327449-25332571    | NOTEST | 0.104231  | 0.185379  |
| Ccdc134       | chr15:82127921-82142202   | OK     | 2.76367   | 4.91481   |
| Grip1         | chr10:119454033-120112965 | OK     | 8.87331   | 15.775    |
| Rps10         | chr17:27630428-27635242   | NOTEST | 0.619949  | 1.10181   |
| Sh3yl1        | chr12:30911668-30960160   | OK     | 10.5829   | 18.8043   |
| Fam83d        | chr2:158768098-158786637  | OK     | 1.97571   | 3.50981   |
| Apol9b        | chr15:77729071-77736382   | NOTEST | 0.282868  | 0.502334  |
| 1700023F06Rik | chr11:103198943-103218432 | OK     | 0.792252  | 1.40688   |
| Atad5         | chr11:80089399-80135791   | OK     | 0.574918  | 1.02073   |
| Trip13        | chr13:73912461-73937767   | NOTEST | 0.340299  | 0.603817  |
| Tapbpl        | chr6:125224211-125239934  | OK     | 8.1358    | 14.4325   |
| Lmbr1l        | chr15:98903920-98918098   | OK     | 5.90722   | 10.4778   |
| A330033J07Rik | chr13:48044230-48264036   | OK     | 0.47131   | 0.835536  |
| Ano7          | chr1:93373895-93404304    | NOTEST | 0.0722721 | 0.128122  |
| Spaca6        | chr17:17830974-17839071   | NOTEST | 0.233831  | 0.414367  |
| Abhd14b       | chr9:106448639-106452918  | OK     | 10.4258   | 18.474    |
| Ammecr1       | chrX:142853473-142966728  | OK     | 0.885871  | 1.56926   |
| Gnaq          | chr19:16132830-16387453   | OK     | 103.772   | 183.723   |
| E4f1          | chr17:24443778-24455311   | OK     | 3.89283   | 6.89188   |
| Bex1          | chrX:136213971-136215513  | OK     | 7.13669   | 12.634    |
| Mrgbp         | chr2:180581303-180585634  | OK     | 2.00803   | 3.55426   |

|               |                           |        |           |           |
|---------------|---------------------------|--------|-----------|-----------|
| Pcsk9         | chr4:106442333-106464325  | OK     | 1.00593   | 1.78017   |
| Dhx58         | chr11:100694883-100704271 | OK     | 1.01214   | 1.79108   |
| Gm10872       | chr15:76266786-76292572   | NOTEST | 0.0420154 | 0.0743393 |
| Prkd1         | chr12:50341231-50649223   | OK     | 8.5444    | 15.1158   |
| 9330188P03Rik | chr14:105589548-105593929 | NOTEST | 0.363117  | 0.642358  |
| Mapk13        | chr17:28769316-28778704   | OK     | 0.504621  | 0.89246   |
| Ncapd3        | chr9:27030174-27095315    | OK     | 2.44547   | 4.32426   |
| Sigirr        | chr7:141091174-141100546  | OK     | 0.493003  | 0.871584  |
| Cpne8         | chr15:90487480-90679388   | OK     | 27.7905   | 49.1135   |
| Plekhs1       | chr19:56461636-56486729   | NOTEST | 0.0519692 | 0.0918376 |
| Zfp579        | chr7:4992851-4996101      | OK     | 3.33504   | 5.89324   |
| Schip1        | chr3:67892219-68626482    | OK     | 32.3523   | 57.1475   |
| Chia1         | chr3:106113381-106132116  | OK     | 3.64517   | 6.43652   |
| Cadm1         | chr9:47530351-47853385    | OK     | 126.225   | 222.86    |
| Mkrn3         | chr7:62417592-62420139    | NOTEST | 0.297425  | 0.524904  |
| D3Bwg0562e    | chr3:117319145-117360876  | OK     | 2.09499   | 3.69695   |
| Lpcat3        | chr6:124663103-124712178  | OK     | 13.7224   | 24.1941   |
| Gpr114        | chr8:94923693-94943290    | NOTEST | 0.0451881 | 0.0796643 |
| Ptms          | chr6:124913674-124917946  | OK     | 245.707   | 433.156   |
| Gm16701       | chr1:166974022-166999730  | OK     | 0.779058  | 1.37332   |
| Mycbpap       | chr11:94501346-94521502   | OK     | 1.15866   | 2.04246   |
| Serpina3m     | chr12:104387163-104394257 | NOTEST | 0.0382365 | 0.0673531 |
| Pde1b         | chr15:103503033-103530056 | OK     | 2.37965   | 4.19054   |
| Slc29a1       | chr17:45585199-45599603   | OK     | 20.305    | 35.7567   |
| Tstd1         | chr1:171419032-171420352  | OK     | 6.44466   | 11.341    |
| Trib3         | chr2:152337424-152344060  | OK     | 1.3836    | 2.4342    |
| Snx15         | chr19:6119403-6128215     | OK     | 14.821    | 26.0747   |
| Fam132a       | chr4:155962311-155966629  | OK     | 9.97493   | 17.5481   |
| Arhgap22      | chr14:33216822-33369936   | OK     | 8.40394   | 14.7835   |
| Bhlhe41       | chr6:145858242-145865420  | OK     | 10.4548   | 18.3911   |
| Atp1b3        | chr9:96332674-96364299    | OK     | 225.44    | 396.445   |
| Hist1h2bb     | chr13:23746733-23747223   | NOTEST | 0.25769   | 0.453078  |
| Odf2l         | chr3:145118588-145153915  | OK     | 4.35341   | 7.65299   |
| Ppih          | chr4:119300009-119320523  | OK     | 0.769308  | 1.3522    |
| M1ap          | chr6:82946921-83030309    | NOTEST | 0.0852971 | 0.149914  |
| 5330417C22Rik | chr3:108458068-108536522  | OK     | 4.24087   | 7.45161   |
| Pde11a        | chr2:75991131-76338653    | OK     | 13.8868   | 24.3954   |
| Tmem72        | chr6:116692724-116716758  | OK     | 13.2493   | 23.2693   |
| Zfp948        | chr17:21567045-21588682   | OK     | 6.52926   | 11.4649   |
| Syt1          | chr10:108497649-109010975 | OK     | 78.0097   | 136.955   |
| Mterf1b       | chr5:4192366-4197651      | OK     | 0.542523  | 0.951893  |
| 4930415F15Rik | chr11:11489265-11515190   | NOTEST | 0.297778  | 0.522355  |
| Shkbp1        | chr7:27342132-27356008    | OK     | 4.83404   | 8.47904   |
| Camk4         | chr18:32939040-33195767   | OK     | 4.08034   | 7.15175   |
| Gm14446       | chr19:34592887-34601968   | OK     | 1.43506   | 2.51496   |
| Mex3b         | chr7:82867332-82871576    | OK     | 3.73299   | 6.54178   |
| Slc26a1       | chr5:108629809-108685446  | NOTEST | 0.0645248 | 0.113031  |
| 9430091E24Rik | chr8:111094744-111145498  | OK     | 0.86873   | 1.52164   |
| Agtr1b        | chr3:20314472-20367177    | OK     | 3.74766   | 6.56257   |
| Ptprt         | chr2:161521987-162661147  | OK     | 23.346    | 40.878    |
| Ebf3          | chr7:137193670-137314445  | OK     | 21.3776   | 37.399    |
| Rpl30         | chr15:34440505-34443276   | OK     | 6.95372   | 12.1624   |
| Krt25         | chr11:99315843-99322941   | OK     | 1.31199   | 2.29364   |



|               |                           |        |           |           |
|---------------|---------------------------|--------|-----------|-----------|
| Shc1          | chr3:89418550-89430029    | OK     | 43.675    | 76.3483   |
| Rarg          | chr15:102234937-102257522 | OK     | 13.7816   | 24.0813   |
| Rpl10         | chrX:74270815-74273135    | OK     | 2.32308   | 4.05886   |
| Defb42        | chr14:63046990-63048606   | OK     | 3.20272   | 5.59576   |
| Rgs19         | chr2:181688418-181693977  | OK     | 5.38113   | 9.40142   |
| Fermt3        | chr19:6996130-7019469     | OK     | 0.449907  | 0.785602  |
| Fam129b       | chr2:32876133-32961255    | OK     | 33.6246   | 58.7031   |
| Inha          | chr1:75507076-75510354    | OK     | 3.47718   | 6.07008   |
| Rnh1          | chr7:141160325-141172851  | OK     | 46.898    | 81.8685   |
| Pde6d         | chr1:86543014-86582501    | OK     | 46.2263   | 80.6614   |
| Sft2d1        | chr17:8283812-8327442     | OK     | 5.57484   | 9.72513   |
| Hpn           | chr7:31098724-31115326    | NOTEST | 0.284256  | 0.49578   |
| C330027C09Rik | chr16:48994187-49019705   | OK     | 1.47119   | 2.56477   |
| Klhl5         | chr5:65131230-65168142    | OK     | 36.8512   | 64.2216   |
| Gm15446       | chr5:109933562-109941710  | OK     | 0.701844  | 1.22287   |
| 1600016N20Rik | chr7:141194129-141214080  | NOTEST | 0.0500061 | 0.0871242 |
| Mpped2        | chr2:106693458-106868360  | OK     | 20.0778   | 34.9805   |
| Chka          | chr19:3851772-3894369     | OK     | 26.8995   | 46.857    |
| Pld5          | chr1:175962305-176275312  | OK     | 19.7142   | 34.3149   |
| Rnf182        | chr13:43615796-43670944   | OK     | 2.46674   | 4.29204   |
| Fgf17         | chr14:70636204-70642268   | NOTEST | 0.0252555 | 0.0439416 |
| Clhc1         | chr4:134510998-134523922  | NOTEST | 0.130834  | 0.227622  |
| Egfem1        | chr3:29082576-29691056    | OK     | 2.06656   | 3.59525   |
| Kdm2b         | chr5:122870674-122989092  | OK     | 2.34352   | 4.07687   |
| Srrm3         | chr5:135818105-135874772  | OK     | 6.31068   | 10.9778   |
| Nrsn1         | chr13:25252038-25269996   | OK     | 45.1705   | 78.562    |
| 2010002M12Rik | chr19:34617050-34640743   | OK     | 0.487039  | 0.846773  |
| Tle2          | chr10:81575286-81590845   | OK     | 2.61361   | 4.54251   |
| S100a6        | chr3:90612893-90614414    | OK     | 511.496   | 888.956   |
| Hivep3        | chr4:119814677-120135411  | OK     | 2.93228   | 5.09581   |
| Arpc1b        | chr5:145114255-145128186  | OK     | 92.4992   | 160.686   |
| Ivns1abp      | chr1:151344497-151364445  | OK     | 79.5024   | 138.076   |
| Tpd52         | chr3:8929435-9004515      | OK     | 136.577   | 237.157   |
| Mycn          | chr12:12936092-12941836   | OK     | 2.75309   | 4.77765   |
| Ret           | chr6:118151747-118197744  | OK     | 162.265   | 281.532   |
| Pde6g         | chr11:120447609-120453483 | NOTEST | 0.201978  | 0.350406  |
| Vmn2r1        | chr3:64081641-64105458    | NOTEST | 0.0565634 | 0.0981134 |
| Acbd4         | chr11:103101687-103112199 | OK     | 21.3949   | 37.105    |
| Xkr7          | chr2:153031851-153055775  | OK     | 1.49154   | 2.5863    |
| Rbms1         | chr2:60751952-60963204    | OK     | 51.6348   | 89.5003   |
| Mefv          | chr16:3707214-3718124     | NOTEST | 0.0304385 | 0.0527508 |
| Pabpn1        | chr14:54894142-54898927   | OK     | 52.1674   | 90.3958   |
| Tacc3         | chr5:33658146-33672197    | OK     | 1.9261    | 3.3361    |
| Rpgr          | chrX:10158215-10216795    | OK     | 2.61823   | 4.53437   |
| Col17a1       | chr19:47646340-47692042   | NOTEST | 0.0336741 | 0.0583112 |
| Sapcd1        | chr17:35016578-35028016   | NOTEST | 0.0573356 | 0.0992771 |
| Scn3b         | chr9:40269215-40291618    | OK     | 32.0746   | 55.5313   |
| H2afy         | chr13:56073621-56135550   | OK     | 24.2043   | 41.9047   |
| Hist1h2bq     | chr13:21833742-21837530   | NOTEST | 0.0458446 | 0.0793658 |
| Slc7a7        | chr14:54360840-54417702   | OK     | 41.7696   | 72.3066   |
| 4933406I18Rik | chr7:114315478-114415161  | NOTEST | 0.101429  | 0.175518  |
| C530044C16Rik | chr6:50776114-50814894    | OK     | 1.03638   | 1.79304   |
| Rnf144a       | chr12:26306793-26415262   | OK     | 18.431    | 31.8791   |

|                |                             |        |           |           |
|----------------|-----------------------------|--------|-----------|-----------|
| Bcat2          | chr7:45567794-45589710      | OK     | 15.1224   | 26.1437   |
| Nedd4l         | chr18:64887755-65751537     | OK     | 54.1916   | 93.6837   |
| Hk1os          | chr10:62268854-62379908     | NOTEST | 0.302995  | 0.523716  |
| Dok4           | chr8:94857449-94876312      | OK     | 134.304   | 232.095   |
| Il4ra          | chr7:125552281-125579474    | OK     | 8.57857   | 14.8218   |
| Il9r           | chr11:32188996-32200279     | NOTEST | 0.0501431 | 0.0866269 |
| Tprg           | chr16:25286816-25422344     | NOTEST | 0.176835  | 0.305499  |
| Rbks           | chr5:31624438-31697610      | OK     | 2.74462   | 4.74128   |
| Gmnn           | chr13:24751844-24761937     | OK     | 5.29887   | 9.15314   |
| Ppil4          | chr10:7792893-7822563       | OK     | 5.77564   | 9.97188   |
| Hic2           | chr16:17233586-17263430     | OK     | 0.728424  | 1.25727   |
| Ccl21b,Gm13304 | chr4_JH584293_random:59768- | LOWDAT | 0.109169  | 0.188408  |
| Sftpa1         | chr14:41131787-41136373     | NOTEST | 0.0483116 | 0.0833607 |
| Ppil6          | chr10:41490438-41514288     | OK     | 0.565201  | 0.974974  |
| Wipf3          | chr6:54452882-54503768      | OK     | 35.7087   | 61.5735   |
| F2rl1          | chr13:95511729-95525240     | NOTEST | 0.299452  | 0.516207  |
| Maff           | chr15:79347677-79359076     | OK     | 2.77963   | 4.78945   |
| Mapk4          | chr18:73928485-74064949     | OK     | 7.01155   | 12.0766   |
| Adrbk2         | chr5:112910477-113015538    | OK     | 5.28975   | 9.11038   |
| Bri3           | chr5:144244436-144361005    | OK     | 18.9926   | 32.6968   |
| Map2k3os       | chr11:60920940-60931867     | OK     | 1.54624   | 2.66152   |
| Ube2ql1        | chr13:69702831-69739897     | OK     | 32.2267   | 55.4638   |
| Asic2          | chr11:80880162-81968396     | OK     | 40.7991   | 70.2082   |
| Oser1          | chr2:163405821-163419470    | OK     | 2.42392   | 4.17094   |
| Kpna2          | chr11:106988628-106999525   | OK     | 1.51568   | 2.60699   |
| Tmem116        | chr5:121452708-121495421    | NOTEST | 0.327675  | 0.563186  |
| Dclk3          | chr9:111439080-111489611    | OK     | 13.6059   | 23.3813   |
| Mgat4b         | chr11:50225334-50235103     | OK     | 38.5623   | 66.2632   |
| Slc3a1         | chr17:85028346-85090274     | NOTEST | 0.186369  | 0.320209  |
| Tmem173        | chr18:35733677-35740554     | OK     | 1.63434   | 2.80762   |
| Mvp            | chr7:126986859-127014594    | OK     | 20.6043   | 35.3945   |
| Gprin1         | chr13:54736672-54749669     | OK     | 3.99786   | 6.86501   |
| Fam76b         | chr9:13827726-13846522      | OK     | 3.42046   | 5.87067   |
| Ppef1          | chrX:160623093-160719972    | OK     | 38.8228   | 66.6284   |
| Flot1          | chr17:35823356-35832787     | OK     | 171.822   | 294.834   |
| Abcb10         | chr8:123952458-123983122    | OK     | 7.86847   | 13.4969   |
| Mb21d2         | chr16:28826175-28929698     | OK     | 7.15722   | 12.2722   |
| Pusl1          | chr4:155869566-155891762    | OK     | 8.21137   | 14.0785   |
| A930024E05Rik  | chr5:122989353-122998341    | OK     | 0.755499  | 1.2947    |
| Msh4           | chr3:153857140-153906138    | NOTEST | 0.0391702 | 0.0671127 |
| Kcnk18         | chr19:59219647-59237370     | OK     | 4.73889   | 8.11874   |
| Tusc5          | chr11:76679872-76698664     | OK     | 255.299   | 437.315   |
| Cenpv          | chr11:62524943-62539261     | OK     | 5.32295   | 9.11647   |
| Hnrnpm         | chr17:33646232-33685458     | OK     | 40.4298   | 69.2374   |
| Sri            | chr5:8046077-8069314        | OK     | 64.3832   | 110.227   |
| Arhgef1        | chr7:24902985-24926591      | OK     | 12.8669   | 22.0241   |
| Gm13826        | chr5:115102921-115110268    | OK     | 71.9509   | 123.14    |
| Tuft1          | chr3:94612758-94658806      | OK     | 1.32429   | 2.26609   |
| Ccm2l          | chr2:153065954-153081735    | OK     | 0.985551  | 1.68637   |
| 9930104L06Rik  | chr4:124937047-124944661    | OK     | 3.00025   | 5.13281   |
| Uroc1          | chr6:90333288-90364548      | NOTEST | 0.0281799 | 0.0482094 |
| Tbc1d1         | chr5:64160259-64351486      | OK     | 10.5281   | 18.0025   |
| Trmt112        | chr19:6909697-6921808       | OK     | 5.44984   | 9.31674   |

|               |                           |        |           |           |
|---------------|---------------------------|--------|-----------|-----------|
| Kcnf1         | chr12:17172099-17176888   | OK     | 1.25989   | 2.15347   |
| Slc5a2        | chr7:128265696-128298131  | NOTEST | 0.0166781 | 0.0284996 |
| Mmp17         | chr5:129584213-129608211  | OK     | 4.40699   | 7.52857   |
| Rab27a        | chr9:73044864-73097592    | OK     | 11.0969   | 18.9532   |
| Tnfaip8l3     | chr9:54025605-54068411    | OK     | 1.72395   | 2.94311   |
| Scn10a        | chr9:119608455-119719032  | OK     | 212.704   | 363.038   |
| Fam135a       | chr1:24010757-24100341    | OK     | 5.92361   | 10.1094   |
| Mum1          | chr10:79697304-80369637   | OK     | 11.3246   | 19.3222   |
| A330023F24Rik | chr1:195017398-195037908  | OK     | 0.623897  | 1.06415   |
| 6820431F20Rik | chr8:20268285-20297432    | OK     | 3.04634   | 5.1934    |
| 1700086O06Rik | chr18:38238404-38262629   | OK     | 2.24495   | 3.82712   |
| Rad52         | chr6:119902697-119922823  | OK     | 2.41727   | 4.11971   |
| Chfr          | chr5:110135829-110176504  | OK     | 8.18884   | 13.93     |
| Slc22a13b-ps  | chr9:119220490-119231692  | NOTEST | 0.130232  | 0.221522  |
| Cpt1b         | chr15:89416404-89429927   | NOTEST | 0.166404  | 0.283011  |
| Oas1g         | chr5:120876141-120887598  | NOTEST | 0.101769  | 0.17308   |
| 5830415F09Rik | chr4:46376974-46389423    | OK     | 1.44193   | 2.45176   |
| Gpd1l         | chr9:114899338-114933987  | OK     | 39.6072   | 67.3265   |
| Wnt2b         | chr3:104944804-104961709  | OK     | 8.98123   | 15.2657   |
| Scml2         | chrX:161162749-161258213  | NOTEST | 0.136078  | 0.231287  |
| Ccdc43        | chr11:102684687-102697725 | OK     | 17.3097   | 29.4188   |
| Il3ra         | chr14:14346494-14355490   | OK     | 1.42684   | 2.42477   |
| Bcl3          | chr7:19808461-19822755    | OK     | 3.25631   | 5.53258   |
| Cdh10         | chr15:18820328-19014234   | OK     | 5.44225   | 9.24196   |
| Taf1d         | chr9:15283336-15357788    | OK     | 5.35763   | 9.09531   |
| Suv420h2      | chr7:4740126-4747514      | OK     | 3.26363   | 5.5403    |
| Ska3          | chr14:57806560-57826163   | NOTEST | 0.359242  | 0.609665  |
| Scube2        | chr7:109798690-109865679  | OK     | 0.602419  | 1.02224   |
| B930059L03Rik | chr12:110591373-110592679 | NOTEST | 0.299704  | 0.508535  |
| 1700019D03Rik | chr1:52925126-52952840    | OK     | 5.26692   | 8.93559   |
| Arhgap39      | chr15:76723984-76818170   | OK     | 22.0067   | 37.3334   |
| Arl4d         | chr11:101665540-101667832 | OK     | 12.2816   | 20.8347   |
| Lat2          | chr5:134600102-134615025  | NOTEST | 0.19393   | 0.328863  |
| LOC101055769  | chr4:59260050-59269144    | NOTEST | 0.0798514 | 0.135395  |
| Ptprc         | chr1:138062858-138175305  | OK     | 0.778906  | 1.32032   |
| 2900076A07Rik | chr7:81523549-81531498    | OK     | 0.851502  | 1.44332   |
| Serpina3g     | chr12:104214543-104241934 | OK     | 35.9627   | 60.9505   |
| Gng2          | chr14:19872558-19977249   | OK     | 107.657   | 182.451   |
| Plagl1        | chr10:13090787-13131695   | OK     | 16.012    | 27.1259   |
| Gnal          | chr18:67088297-67245830   | OK     | 104.709   | 177.252   |
| Fbxl2         | chr9:113930933-114026751  | OK     | 26.0697   | 44.1212   |
| Gm6548        | chr17:78850504-78852544   | OK     | 11.8954   | 20.1281   |
| Def6          | chr17:28207777-28228608   | OK     | 11.0659   | 18.7181   |
| Zfp14         | chr7:30036358-30051396    | OK     | 2.90823   | 4.91467   |
| Slc18a2       | chr19:59260877-59296012   | NOTEST | 0.194613  | 0.328844  |
| Klk8          | chr7:43797576-43803822    | OK     | 0.884285  | 1.49404   |
| Gm13363       | chr1:30940302-30949755    | OK     | 1.3297    | 2.24648   |
| Ppp1r2        | chr16:30920553-31275697   | OK     | 102.376   | 172.864   |
| Ccnl1         | chr3:65946150-65958225    | OK     | 7.91788   | 13.3633   |
| H2afj         | chr6:136808247-136810074  | OK     | 6.72335   | 11.3473   |
| Klhl35        | chr7:99466003-99474020    | NOTEST | 0.188225  | 0.317586  |
| 9030612E09Rik | chr10:43174698-43176565   | NOTEST | 0.386569  | 0.652087  |
| Sun3          | chr11:9016053-9069354     | NOTEST | 0.0754905 | 0.127225  |

|               |                           |        |           |           |
|---------------|---------------------------|--------|-----------|-----------|
| Mbd6          | chr10:127266261-127288771 | OK     | 5.84564   | 9.84794   |
| Usmg5         | chr19:47067747-47090625   | OK     | 7.87325   | 13.2609   |
| F2rl2         | chr13:95627176-95891922   | OK     | 41.649    | 70.1458   |
| Gm8234        | chr3:58652041-58654041    | NOTEST | 0.183938  | 0.309769  |
| Scand1        | chr2:156311845-156375638  | OK     | 13.1561   | 22.1558   |
| Serac1        | chr17:5941279-6079739     | OK     | 2.74959   | 4.63013   |
| Apba1         | chr19:23758875-23949597   | OK     | 94.6435   | 159.304   |
| Kcnq1         | chr7:143107253-143427042  | NOTEST | 0.361826  | 0.609008  |
| Eif4ebp3      | chr18:36664059-36666324   | OK     | 1.99553   | 3.35815   |
| Snx11         | chr11:96767548-96777555   | OK     | 22.6302   | 38.0672   |
| 2610018G03Rik | chrX:50841435-50891850    | OK     | 2.07736   | 3.4941    |
| Ncapd2        | chr6:125168006-125191586  | OK     | 2.9484    | 4.95813   |
| Golga7b       | chr19:42247577-42270348   | OK     | 25.2693   | 42.4878   |
| Apol10b       | chr15:77584157-77596125   | NOTEST | 0.273813  | 0.460165  |
| Itpkb         | chr1:180326968-180423659  | OK     | 32.2869   | 54.2524   |
| Zfp593        | chr4:134243305-134245873  | OK     | 4.13132   | 6.94178   |
| Trpv4         | chr5:114622153-114658421  | OK     | 0.557272  | 0.936349  |
| Gm14023       | chr2:129297369-129309972  | NOTEST | 0.224971  | 0.377994  |
| Sfi1          | chr11:3124020-3193463     | OK     | 1.4522    | 2.43939   |
| Hist2h3c2     | chr3:96246684-96247348    | LOWDAT | 0.763375  | 1.28213   |
| Hoxb4         | chr11:96318266-96321638   | OK     | 2.25792   | 3.78752   |
| Htr5b         | chr1:121509772-121528465  | OK     | 3.40524   | 5.71148   |
| Camk1g        | chr1:193346345-193370282  | OK     | 11.2101   | 18.801    |
| Naa16         | chr14:79334506-79390668   | OK     | 1.46114   | 2.45038   |
| Csf2ra        | chr19:61224401-61228418   | OK     | 2.73535   | 4.58725   |
| Nudt8         | chr19:4000579-4002102     | OK     | 5.77339   | 9.68192   |
| Cep152        | chr2:125563087-125625113  | NOTEST | 0.437662  | 0.733913  |
| C130036L24Rik | chr1:86359573-86367964    | NOTEST | 0.260462  | 0.436614  |
| Sdcbp         | chr4:6365679-6396122      | OK     | 276.276   | 463.01    |
| Tmeff1        | chr4:48585192-48663131    | OK     | 14.65     | 24.5342   |
| Cenpi         | chrX:134308162-134362639  | NOTEST | 0.437996  | 0.733493  |
| Letm2         | chr8:25578489-25597487    | OK     | 3.56509   | 5.96974   |
| Col24a1       | chr3:145292471-145552005  | OK     | 1.02273   | 1.71227   |
| Gm5069        | chr1:180326968-180423659  | OK     | 2.99973   | 5.02192   |
| Atp1b4        | chrX:38316121-38336784    | NOTEST | 0.0181375 | 0.0303586 |
| Cklf          | chr8:104250860-104264936  | OK     | 3.10629   | 5.19769   |
| Wdr62         | chr7:30240137-30280421    | OK     | 1.07532   | 1.79931   |
| Gm5577        | chr6:87981682-87984180    | NOTEST | 0.526145  | 0.880322  |
| Tmem63a       | chr1:180942517-180975104  | OK     | 9.28726   | 15.5333   |
| Ptger1        | chr8:83666639-83699179    | OK     | 8.85994   | 14.8183   |
| Pde1c         | chr6:56069803-56369634    | OK     | 17.0232   | 28.4675   |
| Folr1         | chr7:101858330-101870788  | NOTEST | 0.0798682 | 0.13352   |
| Krit1         | chr5:3803164-3844515      | OK     | 5.49104   | 9.17818   |
| Ccin          | chr4:43983503-43985533    | NOTEST | 0.0381282 | 0.0637251 |
| Zfp949        | chr9:88548019-88571086    | OK     | 4.09247   | 6.83987   |
| AI847159      | chr2:129178147-129180673  | OK     | 0.634464  | 1.06027   |
| Dock4         | chr12:40446052-40846488   | OK     | 7.78319   | 13.0054   |
| Prkar2b       | chr12:31958478-32061279   | OK     | 110.598   | 184.753   |
| Kcnmb1        | chr11:33629340-33993193   | OK     | 11.2669   | 18.8194   |
| Fam43a        | chr16:30599722-30602797   | OK     | 3.18745   | 5.32389   |
| Mybpc2        | chr7:44501698-44524669    | NOTEST | 0.0835804 | 0.13957   |
| 5730422E09Rik | chr5:149119564-149182036  | NOTEST | 0.0240626 | 0.0401798 |
| Mroh7         | chr4:106680416-106727930  | NOTEST | 0.123624  | 0.206355  |

|               |                           |        |           |           |
|---------------|---------------------------|--------|-----------|-----------|
| Gm16973       | chr14:56668247-56701000   | OK     | 1.1314    | 1.88752   |
| Map7          | chr10:20148919-20281590   | OK     | 17.0187   | 28.3914   |
| 1600027J07Rik | chr8:103343877-103347534  | NOTEST | 0.173694  | 0.289672  |
| Pcdh12        | chr18:38267091-38284401   | OK     | 0.60287   | 1.00535   |
| Nipsnap3b     | chr4:53011923-53022059    | OK     | 22.0686   | 36.8      |
| Htr1f         | chr16:64924728-65105784   | OK     | 2.45691   | 4.09502   |
| Kctd16        | chr18:40258360-40531184   | OK     | 16.5833   | 27.6342   |
| Prim2         | chr1:33453807-33669794    | OK     | 2.05454   | 3.42356   |
| Trim56        | chr5:137111285-137116207  | OK     | 2.66716   | 4.44417   |
| Samd12        | chr15:53461800-53902436   | OK     | 14.9516   | 24.9023   |
| Anxa11        | chr14:25842154-25886804   | OK     | 16.5687   | 27.5909   |
| 1700001L19Rik | chr13:68597438-68614231   | OK     | 1.57287   | 2.61885   |
| Kcnd3os       | chr3:105448189-105674002  | NOTEST | 0.289842  | 0.48255   |
| Gm11974       | chr11:6525590-6528760     | OK     | 1.01383   | 1.68677   |
| Trnp1         | chr4:133491099-133498550  | OK     | 275.669   | 458.506   |
| 4930414L22Rik | chr6:72432798-72440615    | OK     | 3.10961   | 5.17162   |
| Impact        | chr18:12972251-12992948   | OK     | 39.0591   | 64.9521   |
| Tspan14       | chr14:40906443-40966807   | OK     | 28.4795   | 47.3584   |
| Atp13a5       | chr16:29231913-29378732   | NOTEST | 0.0870701 | 0.144758  |
| 9530077C05Rik | chr9:22411576-22444679    | OK     | 7.23609   | 12.0281   |
| Mafk          | chr5:139791535-139802652  | OK     | 5.724     | 9.51285   |
| Grip2         | chr6:91761509-91807393    | OK     | 1.36764   | 2.27281   |
| Tradd         | chr8:105258574-105264594  | OK     | 8.32771   | 13.8394   |
| Adamts3       | chr5:89673840-89883334    | OK     | 3.2099    | 5.33417   |
| Ocel1         | chr8:71371297-71373689    | OK     | 2.62144   | 4.35607   |
| Ifit2         | chr19:34550693-34576534   | OK     | 9.76742   | 16.2305   |
| Chek2         | chr5:110840016-110874133  | OK     | 0.61741   | 1.02551   |
| Gtpbp6        | chr5:110099968-110108197  | OK     | 12.4196   | 20.6244   |
| Baz1a         | chr12:54892988-54986336   | OK     | 1.12755   | 1.87235   |
| BC068157      | chr8:4209542-4217312      | OK     | 1.06116   | 1.7619    |
| Tspo          | chr15:83563572-83574203   | OK     | 12.7599   | 21.1802   |
| H13           | chr2:152669460-152708668  | OK     | 30.316    | 50.314    |
| Rras          | chr7:45018006-45021644    | OK     | 32.4943   | 53.9282   |
| BC065397      | chrX:136732947-136803361  | NOTEST | 0.347335  | 0.576371  |
| Crtam         | chr9:40972797-41004628    | NOTEST | 0.124273  | 0.206208  |
| Txndc11       | chr16:11066297-11134532   | OK     | 5.9909    | 9.93978   |
| Cd300lf       | chr11:115091430-115162240 | NOTEST | 0.161083  | 0.267187  |
| Gm14431       | chr2:176521003-176533821  | NOTEST | 0.173995  | 0.288517  |
| A930007I19Rik | chr19:29503662-29521987   | NOTEST | 0.0167229 | 0.0277204 |
| Il17d         | chr14:57524828-57543166   | OK     | 2.59416   | 4.2975    |
| 36585         | chr1:72427111-72536564    | OK     | 5.39699   | 8.94051   |
| Klk10         | chr7:43781053-43785410    | NOTEST | 0.118617  | 0.196468  |
| Srsf5         | chr12:80945503-80950507   | OK     | 41.6396   | 68.9623   |
| Gad1          | chr2:70489939-70602012    | NOTEST | 0.210834  | 0.349171  |
| 2700094K13Rik | chr2:84669220-84670708    | OK     | 25.4439   | 42.1285   |
| Rffl          | chr11:82781108-82871210   | OK     | 7.41325   | 12.2719   |
| Jph2          | chr2:163336241-163397993  | OK     | 1.25443   | 2.07627   |
| Odf2          | chr2:29889719-29931746    | OK     | 10.5923   | 17.5315   |
| Serf1         | chr13:100108018-100114233 | OK     | 29.6207   | 49.0251   |
| Rspo2         | chr15:43020794-43170818   | OK     | 25.2956   | 41.852    |
| 4930579K19Rik | chr9:98562459-98563611    | NOTEST | 0.186625  | 0.308751  |
| Nek1          | chr8:60993219-61130234    | OK     | 23.2814   | 38.5064   |
| Hnrnpa1       | chr15:103240396-103246698 | OK     | 9.99832   | 16.5366   |



|               |                           |        |           |           |
|---------------|---------------------------|--------|-----------|-----------|
| Unc5d         | chr8:28646716-29219636    | OK     | 0.814541  | 1.34675   |
| Hmgcll1       | chr9:76014976-76136350    | OK     | 3.82949   | 6.33092   |
| Trpc5         | chrX:144381670-144688180  | NOTEST | 0.448855  | 0.742006  |
| Chd5          | chr4:152338650-152390194  | OK     | 12.2881   | 20.3077   |
| Snx9          | chr17:5841379-5930711     | OK     | 14.5571   | 24.0496   |
| Mov10l1       | chr15:88982993-89055152   | NOTEST | 0.0622814 | 0.10286   |
| Tcp10b        | chr17:13061110-13082226   | NOTEST | 0.0673789 | 0.111189  |
| Zfp872        | chr9:22055459-22389206    | NOTEST | 0.0190567 | 0.0314472 |
| Snhg6         | chr1:9942024-9944118      | OK     | 13.8802   | 22.8905   |
| Rnase4        | chr14:51091076-51106151   | OK     | 10.4301   | 17.1995   |
| Msantd1       | chr5:34915914-34923839    | OK     | 0.577485  | 0.952228  |
| Gm5595        | chr7:42660107-42692718    | OK     | 1.04088   | 1.71623   |
| Pla2g12b      | chr10:59403684-59421976   | NOTEST | 0.184383  | 0.304008  |
| Palm          | chr10:79697304-80369637   | OK     | 50.3596   | 83.0273   |
| Diras2        | chr13:52504374-52530836   | OK     | 12.3861   | 20.4143   |
| Sema3e        | chr5:14025275-14256689    | OK     | 4.61343   | 7.6002    |
| Mcm2          | chr6:88883473-88898780    | OK     | 2.43115   | 4.00506   |
| Bin2          | chr15:100641081-100669500 | NOTEST | 0.247296  | 0.407382  |
| Zmat4         | chr8:23669660-24063116    | OK     | 11.6135   | 19.1313   |
| Rplp2         | chr7:141447649-141451342  | OK     | 3.86569   | 6.36469   |
| Slpi          | chr2:164354069-164356507  | NOTEST | 0.455674  | 0.749985  |
| Kcna4         | chr2:107290588-107298504  | OK     | 7.53034   | 12.3911   |
| Zfhx3         | chr8:108714643-108961636  | OK     | 13.1858   | 21.6859   |
| Kctd8         | chr5:69109284-69341709    | OK     | 23.9238   | 39.3445   |
| 4921536K21Rik | chr11:3886087-3895126     | NOTEST | 0.254312  | 0.417978  |
| Tssk4         | chr14:55650183-55652539   | NOTEST | 0.0634519 | 0.104277  |
| A330021E22Rik | chr5:5580981-5664232      | OK     | 3.07546   | 5.05415   |
| Epsti1        | chr14:77904238-78002656   | NOTEST | 0.35873   | 0.589417  |
| Gm10638       | chr8:86723937-86747060    | OK     | 1.5655    | 2.57101   |
| Srsf11        | chr3:158010492-158036639  | OK     | 17.0209   | 27.9447   |
| Lekr1         | chr3:65666227-65831162    | OK     | 1.11416   | 1.82901   |
| Zfhx4         | chr3:5177823-5415855      | OK     | 1.90743   | 3.1311    |
| Eri1          | chr8:35465264-35495533    | OK     | 2.33283   | 3.8284    |
| Yy2           | chrX:157547821-157598715  | OK     | 0.577947  | 0.948154  |
| Nlrc5         | chr8:94472762-94527272    | NOTEST | 0.401801  | 0.659111  |
| Plag1         | chr4:3901157-3938405      | OK     | 0.607983  | 0.997266  |
| Ier3          | chr17:35821712-35822911   | OK     | 19.0557   | 31.2557   |
| Stat4         | chr1:52008243-52107184    | NOTEST | 0.08032   | 0.131735  |
| Awat2         | chrX:100402221-100442717  | NOTEST | 0.0930636 | 0.152578  |
| 5530601H04Rik | chrX:105040853-105070124  | OK     | 0.828575  | 1.35831   |
| Zfp580        | chr7:5051531-5053723      | OK     | 10.177    | 16.681    |
| Card10        | chr15:78775135-78803042   | OK     | 3.80798   | 6.24095   |
| Akap7         | chr10:25169089-25299163   | OK     | 3.94237   | 6.46028   |
| Cenpj         | chr14:56526760-56571846   | OK     | 1.8555    | 3.04033   |
| Car11         | chr7:45699966-45704661    | OK     | 31.0535   | 50.8532   |
| Kri1          | chr9:21265284-21287969    | OK     | 8.83971   | 14.4642   |
| U2af1         | chr17:31647081-31658754   | OK     | 3.19741   | 5.23046   |
| Rpl10a        | chr17:28328470-28331033   | OK     | 0.897534  | 1.46809   |
| Ankrd6        | chr4:32804034-32950826    | OK     | 7.33709   | 11.9997   |
| Mxd1          | chr6:86647044-86669159    | OK     | 3.12438   | 5.10969   |
| Nek3          | chr8:22128282-22166435    | OK     | 3.9114    | 6.3935    |
| Tgm3          | chr2:130012339-130050399  | NOTEST | 0.0323166 | 0.0528212 |
| Pcdha6        | chr18:36930284-37841872   | OK     | 2.93361   | 4.79311   |

|                   |                           |        |           |           |
|-------------------|---------------------------|--------|-----------|-----------|
| Lbh               | chr17:72918304-72941946   | OK     | 34.9467   | 57.0966   |
| Rims2             | chr15:39198285-39684372   | OK     | 9.70151   | 15.8461   |
| 1700011I03Rik     | chr18:57533825-57731065   | OK     | 2.06732   | 3.37617   |
| Dsc2              | chr18:20030797-20059505   | NOTEST | 0.123236  | 0.201135  |
| Zim1              | chr7:6675442-6696432      | NOTEST | 0.460226  | 0.751049  |
| Sae1              | chr7:16320235-16387896    | OK     | 48.5883   | 79.2842   |
| Arhgap21          | chr2:20847918-20967721    | OK     | 14.0046   | 22.8512   |
| Rin1              | chr19:5050807-5057071     | NOTEST | 0.218165  | 0.355845  |
| Ctsl              | chr13:64363213-64370306   | OK     | 412.355   | 672.458   |
| Ccr9              | chr9:123767210-123783457  | NOTEST | 0.0210468 | 0.0343168 |
| Cacna2d2          | chr9:107399879-107529343  | OK     | 8.64915   | 14.1005   |
| Bnip2             | chr9:69989465-70011659    | OK     | 7.231     | 11.787    |
| Dek               | chr13:47043498-47106221   | OK     | 12.0578   | 19.6539   |
| Emilin2           | chr17:71252175-71310965   | NOTEST | 0.487382  | 0.794371  |
| Trim21            | chr7:102557919-102565482  | OK     | 1.99578   | 3.24965   |
| Tlx2              | chr6:83068324-83070225    | OK     | 40.7746   | 66.3746   |
| Sh3glb1           | chr3:144683677-144720335  | OK     | 22.8784   | 37.2402   |
| 4930577N17Rik     | chr3:51252719-51340644    | NOTEST | 0.267388  | 0.435112  |
| 2900060B14Rik     | chr1:118389057-118609462  | NOTEST | 0.0908016 | 0.147717  |
| Ddx55             | chr5:124552863-124569660  | OK     | 4.3463    | 7.06946   |
| Zcchc9            | chr13:91796532-91807696   | OK     | 7.08635   | 11.5253   |
| LOC101669761      | chr16:31959669-32003287   | NOTEST | 0.36311   | 0.590478  |
| Dazl              | chr17:50279392-50293620   | NOTEST | 0.151356  | 0.245956  |
| Ano3              | chr2:110655200-110950244  | OK     | 64.752    | 105.215   |
| A930015D03Rik     | chr17:35994503-36038174   | NOTEST | 0.495098  | 0.804463  |
| Ccdc105           | chr10:78746923-78753067   | NOTEST | 0.106185  | 0.172508  |
| Tspan2os          | chr3:102720230-102772310  | NOTEST | 0.534927  | 0.869     |
| Rab15             | chr12:76797962-76822524   | OK     | 69.9104   | 113.552   |
| Zfp92             | chrX:73411102-73426987    | NOTEST | 0.153638  | 0.249536  |
| Rnaset2a,Rnaset2b | chr17:8128590-8147832     | LOWDAT | 0.832519  | 1.35203   |
| Ccr7              | chr11:99144198-99155077   | NOTEST | 0.077599  | 0.126015  |
| Cacnb3            | chr15:98632327-98644536   | OK     | 109.195   | 177.31    |
| Tnfrsf11a         | chr1:105780722-105847981  | OK     | 8.86578   | 14.3961   |
| Cdkn1a            | chr17:29090985-29100722   | OK     | 34.7025   | 56.3435   |
| Ebf1              | chr11:44618099-45008096   | OK     | 46.4298   | 75.3745   |
| Klf8              | chrX:153238044-153396134  | OK     | 4.31985   | 7.00744   |
| Tomm6os           | chr17:47686644-47694736   | OK     | 0.524833  | 0.851314  |
| Anks1b            | chr10:89873508-90972984   | OK     | 9.88292   | 16.0303   |
| Slc35f4           | chr14:49298519-49525837   | OK     | 7.11492   | 11.5396   |
| Nup93             | chr8:94214600-94315066    | OK     | 38.9466   | 63.1548   |
| Catsper2          | chr2:121394354-121413792  | OK     | 0.740958  | 1.20096   |
| Tmem132e          | chr11:82388899-82446327   | OK     | 47.7418   | 77.3285   |
| Crip2             | chr12:113140235-113145506 | OK     | 227.863   | 369.02    |
| Pcbd1             | chr10:61089330-61094329   | OK     | 29.3864   | 47.5706   |
| Adk               | chr14:21052573-21448569   | OK     | 151.824   | 245.687   |
| Thra              | chr11:98741872-98765111   | OK     | 71.6991   | 116.023   |
| Cbln1             | chr8:87468852-87472592    | OK     | 1.83795   | 2.9741    |
| Mfsd10            | chr5:34633646-34637114    | OK     | 8.66608   | 14.0204   |
| Zfp389            | chr13:21504315-21506524   | NOTEST | 0.352606  | 0.570367  |
| Ptpro             | chr6:137252298-137464633  | OK     | 2.85574   | 4.61881   |
| 1700001C19Rik     | chr17:47412733-47470638   | NOTEST | 0.0594828 | 0.0961965 |
| Lrrc71            | chr3:87618750-87748623    | NOTEST | 0.0404877 | 0.0654733 |
| Arpc5             | chr1:152766541-152775580  | OK     | 89.9443   | 145.397   |

|               |                           |        |           |           |
|---------------|---------------------------|--------|-----------|-----------|
| Htr1a         | chr13:105443692-105448133 | OK     | 2.85328   | 4.61      |
| Syt14         | chr1:192897306-193035698  | OK     | 2.9174    | 4.7135    |
| S1pr2         | chr9:20965951-20976793    | OK     | 2.43156   | 3.92737   |
| Auts2         | chr5:131437681-132542343  | OK     | 11.2281   | 18.1319   |
| Kif9          | chr9:110476957-110525174  | OK     | 1.15807   | 1.87006   |
| Pde10a        | chr17:8526800-8986648     | OK     | 6.65739   | 10.7498   |
| Lcor          | chr19:41549638-41559781   | OK     | 0.673474  | 1.08735   |
| Nt5c          | chr11:115475676-115491814 | OK     | 46.189    | 74.5666   |
| Amz1          | chr5:140724126-140753312  | OK     | 0.877518  | 1.4166    |
| Dpys          | chr15:39768484-39857470   | NOTEST | 0.180244  | 0.29089   |
| Olf424        | chr1:174136745-174137693  | NOTEST | 0.0939526 | 0.151621  |
| Olf12         | chr1:92619880-92621001    | NOTEST | 0.0385743 | 0.0622346 |
| Tmem198       | chr1:75479531-75485693    | OK     | 3.2952    | 5.31415   |
| Hypk          | chr2:121457087-121458440  | OK     | 95.6832   | 154.252   |
| Slc25a27      | chr17:43641899-43667015   | OK     | 11.5684   | 18.6439   |
| B230216N24Rik | chr1:97821093-98095632    | OK     | 0.767852  | 1.23706   |
| Syt4          | chr18:31437807-31447415   | OK     | 126.698   | 204.117   |
| Nckap5l       | chr15:99422033-99457748   | OK     | 7.9067    | 12.7379   |
| Dynll1        | chr5:115297109-115300990  | OK     | 71.6479   | 115.39    |
| Tmsb4x        | chrX:167207093-167209218  | OK     | 1569.18   | 2527.15   |
| Cebpa         | chr7:35119292-35121931    | OK     | 2.18105   | 3.51178   |
| Srms          | chr2:181205562-181213171  | OK     | 0.640974  | 1.03189   |
| BC048679      | chr7:81494273-81498330    | NOTEST | 0.0467929 | 0.0753062 |
| Dock11        | chrX:35888831-36076562    | OK     | 32.6793   | 52.5807   |
| Pou4f1        | chr14:104462324-104467999 | OK     | 64.0662   | 103.05    |
| Plau          | chr14:20836661-20843388   | OK     | 4.48719   | 7.21527   |
| Ncapg2        | chr12:116405401-116463531 | OK     | 1.15936   | 1.86404   |
| 3110062M04Rik | chr6:34863145-34878065    | OK     | 0.989361  | 1.59044   |
| Fgd6          | chr10:94036000-94145339   | OK     | 1.39994   | 2.25043   |
| Amh           | chr10:80805247-80807648   | NOTEST | 0.122571  | 0.197033  |
| Klf10         | chr15:38291463-38300711   | OK     | 8.93888   | 14.3649   |
| Sidt1         | chr16:44240179-44332838   | NOTEST | 0.0325723 | 0.052342  |
| Pura          | chr18:36281161-36288244   | OK     | 12.7217   | 20.4349   |
| Hcrtr2        | chr9:76225879-76323578    | OK     | 3.93078   | 6.3124    |
| Arhgap17      | chr7:123279148-123369915  | OK     | 22.7859   | 36.5835   |
| Rgmb          | chr17:15806252-15826586   | OK     | 81.8353   | 131.338   |
| Zfp946        | chr17:22424267-22456689   | OK     | 7.15501   | 11.4831   |
| Serp2         | chr14:76532811-76556889   | OK     | 35.4418   | 56.8746   |
| Ccdc23        | chr4:119195309-119201298  | OK     | 10.849    | 17.4083   |
| Xylt2         | chr11:94663846-94677493   | OK     | 11.4072   | 18.3029   |
| Rps21         | chr2:180257378-180258444  | OK     | 132.184   | 212.087   |
| Acin1         | chr14:54642160-54690742   | OK     | 20.141    | 32.3123   |
| Nrn1          | chr13:36725621-36734477   | OK     | 332.066   | 532.674   |
| Zfp524        | chr7:5015507-5018488      | OK     | 4.01795   | 6.4444    |
| Stoml3        | chr3:53488792-53507652    | NOTEST | 0.0794465 | 0.127381  |
| Zfp78         | chr7:6363307-6382605      | OK     | 0.682799  | 1.09419   |
| Myt1l         | chr12:29528383-29923209   | OK     | 20.4567   | 32.7807   |
| Hpcal1        | chr12:17690813-17791926   | OK     | 78.9773   | 126.529   |
| Slit1         | chr19:41600256-41743856   | OK     | 27.3332   | 43.7851   |
| C2cd5         | chr6:143010919-143100152  | OK     | 12.8044   | 20.5105   |
| Xkr6          | chr14:63606529-63820410   | OK     | 0.647939  | 1.03773   |
| Myo18b        | chr5:112688875-112896362  | NOTEST | 0.0131307 | 0.0210225 |
| Stpg1         | chr4:135495986-135537803  | OK     | 1.34662   | 2.15555   |

|               |                           |        |           |           |
|---------------|---------------------------|--------|-----------|-----------|
| Slc22a4       | chr11:53983125-54028090   | OK     | 2.04856   | 3.27859   |
| 4921524J17Rik | chr8:85408758-85432841    | OK     | 5.82587   | 9.323     |
| Acot12        | chr13:91461096-91786148   | NOTEST | 0.0707131 | 0.113154  |
| Cd47          | chr16:49855653-49911683   | OK     | 59.6197   | 95.4018   |
| Fam124a       | chr14:62555736-62608485   | OK     | 5.03566   | 8.05694   |
| Zfp182        | chrX:21026183-21062038    | OK     | 1.66885   | 2.66991   |
| Gpr19         | chr6:134869091-134897925  | OK     | 5.87237   | 9.39217   |
| A730020E08Rik | chr6:61175603-62382863    | OK     | 0.664472  | 1.06201   |
| Ndn           | chr7:62348276-62349927    | OK     | 117.846   | 188.35    |
| Fgf13         | chrX:59062145-59585572    | OK     | 348.187   | 556.392   |
| Upk1a         | chr7:30603091-30612734    | NOTEST | 0.155495  | 0.248472  |
| Rgl2          | chr17:33929893-33937687   | OK     | 6.88732   | 11.0054   |
| Taf1c         | chr8:119575234-119605240  | OK     | 2.25501   | 3.60312   |
| Eogt          | chr6:97110943-97148883    | OK     | 6.82171   | 10.8985   |
| Zfand2b       | chr1:75168645-75171626    | OK     | 15.5276   | 24.8015   |
| 4930526I15Rik | chr9:124423250-124424856  | OK     | 1.74885   | 2.79319   |
| 1700011B04Rik | chr13:35181622-35188014   | NOTEST | 0.131769  | 0.210401  |
| Dcdc2a        | chr13:25056003-25210706   | NOTEST | 0.120338  | 0.192077  |
| Sema4d        | chr13:51701247-51793747   | OK     | 22.3474   | 35.662    |
| Prr14         | chr7:127471613-127476758  | OK     | 7.20552   | 11.4979   |
| Sfn           | chr4:133600555-133602168  | OK     | 3.4443    | 5.49386   |
| Dusp11        | chr6:85942268-85961667    | OK     | 9.22402   | 14.7046   |
| Mpzl3         | chr9:45055180-45075042    | OK     | 2.76212   | 4.40224   |
| Tsen34        | chr7:3693609-3701035      | OK     | 26.5219   | 42.2517   |
| Lrrc18        | chr14:32959546-33185066   | NOTEST | 0.149543  | 0.238199  |
| 9230114K14Rik | chr5:52190680-52197984    | OK     | 1.55982   | 2.48358   |
| Ccdc11        | chr18:74283099-74359984   | NOTEST | 0.0204972 | 0.0326176 |
| Cds2          | chr2:132263147-132312050  | OK     | 182.459   | 290.163   |
| Popdc2        | chr16:38362172-38378216   | NOTEST | 0.380555  | 0.605108  |
| Cdkl1         | chr12:69746847-69987002   | OK     | 3.73265   | 5.93367   |
| Rd3           | chr1:191977372-191988282  | NOTEST | 0.0159259 | 0.0253138 |
| 2310061J03Rik | chr16:55973267-56008912   | OK     | 1.63578   | 2.59978   |
| Rinl          | chr7:28788968-28798966    | OK     | 0.542833  | 0.86263   |
| Tpm4          | chr8:72135291-72153129    | OK     | 35.7666   | 56.8208   |
| Psme1         | chr14:55578493-55585254   | OK     | 17.9293   | 28.4622   |
| Ankrd13b      | chr11:77470486-77489678   | OK     | 25.701    | 40.7974   |
| Agfg2         | chr5:137650853-137684693  | OK     | 23.4885   | 37.2732   |
| Myd88         | chr9:119335987-119340040  | OK     | 4.48125   | 7.10972   |
| Il1r2         | chr1:40076211-40125226    | NOTEST | 0.293479  | 0.465551  |
| Fst           | chr13:114452261-114458730 | OK     | 1.01082   | 1.60315   |
| Ptgs2         | chr1:150100123-150108012  | OK     | 0.60157   | 0.953889  |
| Trim17        | chr11:58963780-58971729   | OK     | 0.594772  | 0.943076  |
| Ubald1        | chr16:4874778-4879851     | OK     | 36.3267   | 57.5929   |
| Avil          | chr10:127000708-127020994 | OK     | 281.18    | 445.734   |
| Gm3435        | chr17:14964188-15022449   | NOTEST | 0.270277  | 0.428335  |
| A630089N07Rik | chr16:98062511-98082439   | NOTEST | 0.279434  | 0.442791  |
| Zdhhc14       | chr17:5492599-5753891     | OK     | 11.4474   | 18.1396   |
| Rpl13         | chr8:123102349-123105242  | OK     | 6.81732   | 10.799    |
| Slc15a4       | chr5:127595665-127617392  | OK     | 10.8937   | 17.2554   |
| Akap17b       | chrX:36608182-36645414    | OK     | 5.67838   | 8.99437   |
| Chac2         | chr11:30954397-31102704   | OK     | 13.9732   | 22.1327   |
| Csnk1e        | chr15:79417851-79442057   | OK     | 22.3626   | 35.4156   |
| Ftl1          | chr7:45457943-45459886    | OK     | 112.766   | 178.568   |

|               |                           |        |           |           |
|---------------|---------------------------|--------|-----------|-----------|
| Lst1          | chr17:35185094-35188440   | OK     | 2.16486   | 3.42765   |
| Lrrc16b       | chr14:55491092-55508264   | OK     | 13.8522   | 21.931    |
| Deaf1         | chr7:141297175-141338783  | OK     | 14.2442   | 22.5458   |
| Cystm1        | chr18:36348623-36393370   | OK     | 71.8709   | 113.73    |
| Myadm         | chr7:3289037-3299349      | OK     | 64.868    | 102.636   |
| Gnb2          | chr5:137528128-137533229  | OK     | 139.399   | 220.471   |
| Gm8773        | chr5:5573798-5576203      | OK     | 1.6188    | 2.56009   |
| Rnaseh1       | chr12:28649601-28659591   | OK     | 6.38256   | 10.087    |
| Psg16         | chr7:17074039-17098971    | NOTEST | 0.23662   | 0.373945  |
| Cbr3          | chr16:93683218-93690991   | OK     | 5.65749   | 8.94062   |
| Ina           | chr19:46886830-47024346   | OK     | 17.3747   | 27.4544   |
| Gimap9        | chr6:48676134-48678704    | NOTEST | 0.504688  | 0.797469  |
| Tnfsf13b      | chr8:10006632-10035999    | OK     | 0.990825  | 1.56554   |
| Bax           | chr7:45461694-45466898    | OK     | 26.4263   | 41.741    |
| Mtcl1         | chr17:66336981-66449750   | OK     | 24.0222   | 37.933    |
| Tppp3         | chr8:105467491-105471422  | OK     | 1107.27   | 1747.59   |
| Samd1         | chr8:83997671-84000386    | OK     | 6.77596   | 10.6898   |
| Trpc4         | chr3:54156056-54318471    | OK     | 1.99546   | 3.14797   |
| D030028A08Rik | chr11:96944145-96977688   | OK     | 0.612628  | 0.964962  |
| Ralgps1       | chr2:33133418-33371494    | OK     | 3.90534   | 6.14954   |
| Terf1         | chr1:15805645-15844052    | OK     | 5.0476    | 7.94548   |
| Bst2          | chr8:71534261-71537437    | OK     | 11.2122   | 17.6475   |
| Unc119        | chr11:78343521-78349156   | OK     | 33.2972   | 52.4066   |
| Pvrl1         | chr9:43744575-43807461    | OK     | 16.2551   | 25.583    |
| Dok3          | chr13:55523234-55528538   | OK     | 0.789998  | 1.24306   |
| Pinx1         | chr14:63860311-63919859   | OK     | 2.45164   | 3.85734   |
| Aqp1          | chr6:55336298-55348555    | OK     | 152.59    | 240.062   |
| Fez1          | chr9:36843658-36878640    | OK     | 248.193   | 390.45    |
| Tbrg1         | chr9:37649181-37657312    | OK     | 31.7828   | 49.9972   |
| Crocc         | chr4:141016636-141060545  | OK     | 1.16823   | 1.83748   |
| Pgpep1l       | chr7:68236607-68264233    | NOTEST | 0.143835  | 0.226217  |
| Lsm5          | chr6:56701062-56704699    | NOTEST | 0.728071  | 1.14484   |
| Klf7          | chr1:64035670-64121389    | OK     | 61.001    | 95.9163   |
| Star          | chr8:25808512-25815982    | NOTEST | 0.313891  | 0.493524  |
| Hoxc9         | chr15:102977031-102984444 | OK     | 1.6868    | 2.65187   |
| Ccdc89        | chr7:90426311-90428664    | NOTEST | 0.453169  | 0.712255  |
| Ctu1          | chr7:43672030-43678297    | OK     | 2.34233   | 3.68116   |
| Npas1         | chr7:16455720-16476780    | NOTEST | 0.189552  | 0.297892  |
| Stmn1         | chr4:134468319-134473843  | OK     | 139.701   | 219.537   |
| Sh3bgrl3      | chr4:134127405-134128753  | OK     | 439.547   | 690.638   |
| Rpf1          | chr3:146506345-146521423  | OK     | 6.78278   | 10.6564   |
| Slc52a3       | chr2:151996510-152009258  | OK     | 2.97679   | 4.67665   |
| Efcab4a       | chr7:141461093-141466602  | OK     | 1.43588   | 2.25432   |
| Kcnk9         | chr15:72512118-72546279   | NOTEST | 0.361935  | 0.568158  |
| Edf1          | chr2:25557899-25562082    | OK     | 94.3087   | 148.027   |
| Tspan2        | chr3:102720230-102772310  | OK     | 33.2992   | 52.2534   |
| Tcp11         | chr17:28066746-28080639   | NOTEST | 0.0428251 | 0.0672002 |
| Rab10os       | chr12:3235790-3309969     | OK     | 1.68173   | 2.63864   |
| Mgat4a        | chr1:37439339-37541016    | OK     | 13.3019   | 20.8685   |
| Cdca7         | chr2:72476218-72486890    | OK     | 0.634014  | 0.994437  |
| Pqlc3         | chr12:16988647-17000118   | OK     | 32.7742   | 51.402    |
| Ptpn22        | chr3:103859794-103912252  | NOTEST | 0.208999  | 0.327782  |
| Ccdc109b      | chr3:129914959-129970206  | OK     | 17.7914   | 27.9008   |



|               |                           |        |           |           |
|---------------|---------------------------|--------|-----------|-----------|
| Sfswap        | chr5:129501230-129571384  | OK     | 8.15914   | 12.7857   |
| Gm20337       | chr12:80942651-80945399   | NOTEST | 0.327181  | 0.512673  |
| H2-D1         | chr17:35263093-35267497   | OK     | 95.4935   | 149.629   |
| Coro1a        | chr7:126699773-126704754  | OK     | 70.4661   | 110.39    |
| Snx10         | chr6:51523902-51590670    | OK     | 78.5115   | 122.982   |
| Rps15a-ps6    | chr11:6105691-6200451     | OK     | 2.2388    | 3.50689   |
| Faim          | chr9:98986372-99002019    | OK     | 19.4861   | 30.5213   |
| Znf512b       | chr2:181569152-181592461  | OK     | 7.87464   | 12.3314   |
| Tmem206       | chr1:191325964-191397041  | OK     | 4.95754   | 7.76201   |
| Gm15708       | chr5:144244436-144361005  | NOTEST | 0.0439548 | 0.0688111 |
| Popdc3        | chr10:45289304-45318450   | OK     | 15.5249   | 24.3028   |
| Fam189b       | chr3:89183224-89189289    | OK     | 183.273   | 286.819   |
| Ttll9         | chr2:152962484-153008482  | OK     | 0.771259  | 1.20697   |
| Tom1          | chr8:75033685-75070121    | NOTEST | 0.169823  | 0.265746  |
| Lig1          | chr7:13258966-13311427    | OK     | 5.75244   | 9.00162   |
| Cdyl          | chr13:35659861-35874064   | OK     | 4.48346   | 7.01444   |
| Mis18a        | chr16:90719311-90727371   | OK     | 2.70253   | 4.22807   |
| Ankrd13d      | chr19:4270179-4283137     | OK     | 29.8869   | 46.7557   |
| Gm2373        | chr13:97434969-97497664   | NOTEST | 0.045759  | 0.0715751 |
| Rps11         | chr7:45122387-45124389    | OK     | 88.7972   | 138.885   |
| Snhg10        | chr12:105030616-105032279 | OK     | 3.20285   | 5.00926   |
| Ptpla         | chr2:14026830-14056035    | OK     | 5.43302   | 8.496     |
| Spice1        | chr16:44347400-44388492   | OK     | 2.53649   | 3.96575   |
| Hdac9         | chr12:34047581-34917095   | OK     | 7.66699   | 11.987    |
| Tmsb10        | chr6:72957346-72958748    | OK     | 119.127   | 186.236   |
| F8a           | chrX:73228305-73230795    | OK     | 6.43214   | 10.0525   |
| Lrrc75b       | chr10:75550124-75560330   | OK     | 40.3832   | 63.1005   |
| Cnbd2         | chr2:156311845-156375638  | OK     | 0.577395  | 0.902057  |
| Gm13889       | chr2:93955809-93957100    | OK     | 78.923    | 123.286   |
| Rad23a        | chr8:84832281-84840641    | OK     | 28.7795   | 44.9554   |
| 6430550D23Rik | chr2:156000442-156007977  | NOTEST | 0.173153  | 0.27043   |
| Rpl31         | chr1:39367850-39478747    | OK     | 6.54957   | 10.2261   |
| Zgrf1         | chr3:127553488-127618023  | OK     | 0.557482  | 0.870309  |
| Med11         | chr11:70451930-70453726   | OK     | 12.812    | 19.989    |
| Pfkl          | chr10:77986948-78009796   | OK     | 25.7561   | 40.1815   |
| Psma5         | chr3:108256925-108279952  | OK     | 6.26175   | 9.76733   |
| Rbm43         | chr2:51924448-51935009    | OK     | 11.2139   | 17.4828   |
| Mtrr          | chr13:68560779-68582121   | OK     | 2.78742   | 4.34558   |
| Gemin2        | chr12:59013392-59027988   | OK     | 3.68594   | 5.74602   |
| Magohb        | chr6:131284388-131293244  | OK     | 5.36259   | 8.35972   |
| Ttc8          | chr12:98920573-98983238   | OK     | 4.37523   | 6.81996   |
| Ggta1         | chr2:35400178-35461425    | OK     | 8.74979   | 13.6284   |
| Vpreb3        | chr10:75948311-75949646   | NOTEST | 0.33802   | 0.526428  |
| Lrwd1         | chr5:136123065-136136074  | OK     | 4.49358   | 6.99637   |
| Trpv2         | chr11:62574485-62600305   | OK     | 28.3063   | 44.0709   |
| Gm15772       | chr11:68901565-68904534   | LOWDAT | 17.1243   | 26.6598   |
| Ap3b1         | chr13:94358959-94566316   | OK     | 6.48318   | 10.0919   |
| Cstf3         | chr2:104590483-104665425  | OK     | 12.372    | 19.2533   |
| Rpl32         | chr6:115774556-115808743  | OK     | 54.3847   | 84.6259   |
| Mcm3          | chr1:20803013-20820213    | OK     | 0.947566  | 1.47426   |
| 1500004A13Rik | chr3:88777056-88832487    | OK     | 6.09451   | 9.47892   |
| AY358078      | chr14:51800045-51826359   | NOTEST | 0.0955959 | 0.148678  |
| 1500011B03Rik | chr5:114808195-114813976  | OK     | 54.5371   | 84.803    |

|               |                           |        |           |           |
|---------------|---------------------------|--------|-----------|-----------|
| Ptpn9         | chr9:56994967-57071966    | OK     | 26.54     | 41.2644   |
| Srsf4         | chr4:131873638-131920029  | OK     | 12.6154   | 19.599    |
| Tmem169       | chr1:72284372-72302995    | OK     | 5.84383   | 9.07778   |
| Lmnb2         | chr10:80901362-80918245   | OK     | 3.75735   | 5.83574   |
| Gm17066       | chr14:105106727-105177327 | OK     | 6.10504   | 9.47992   |
| Fcho2         | chr13:98723405-98815449   | OK     | 6.43876   | 9.99801   |
| Ccdc166       | chr15:75979871-75982285   | OK     | 1.08608   | 1.6864    |
| Duox1         | chr2:122315671-122347972  | NOTEST | 0.0349272 | 0.0542266 |
| Rmnd5b        | chr11:51619772-51635896   | OK     | 15.4206   | 23.9334   |
| Cmah          | chr13:24327403-24477289   | NOTEST | 0.180049  | 0.279408  |
| Atxn2l        | chr7:126491707-126503302  | OK     | 24.2081   | 37.5655   |
| Chrna6        | chr8:27403211-27413944    | OK     | 22.9159   | 35.559    |
| Znhit1        | chr5:136982200-136996646  | OK     | 28.7654   | 44.6333   |
| Six1          | chr12:73041826-73046712   | OK     | 25.0527   | 38.8619   |
| Abca5         | chr11:110269368-110337716 | OK     | 27.7932   | 43.1036   |
| Klrb1b        | chr6:128813705-128826315  | NOTEST | 0.10367   | 0.160756  |
| 4933430I17Rik | chr4:62525368-62547993    | NOTEST | 0.127524  | 0.197689  |
| Oxld1         | chr11:120456603-120458063 | OK     | 3.78111   | 5.86147   |
| Rassf9        | chr10:102512221-102546560 | OK     | 1.85334   | 2.87268   |
| 1700026D08Rik | chr7:83775616-83794839    | NOTEST | 0.0492783 | 0.076367  |
| Prr16         | chr18:51117897-51304641   | OK     | 0.949278  | 1.47092   |
| Ddx17         | chr15:79516407-79546741   | OK     | 90.6371   | 140.441   |
| Ltv1          | chr10:13178637-13193137   | OK     | 13.0106   | 20.1568   |
| F930015N05Rik | chr11:64433134-64522835   | NOTEST | 0.147408  | 0.228361  |
| Btbd8         | chr5:107437996-107491596  | OK     | 3.02304   | 4.68211   |
| Gstp1         | chr19:4035410-4037912     | OK     | 32.3094   | 50.0362   |
| Phkg1         | chr5:129846989-129879083  | NOTEST | 0.065181  | 0.100927  |
| Xpo7          | chr14:70654245-70766628   | OK     | 6.58515   | 10.1932   |
| Tfdp1         | chr8:13338750-13378448    | OK     | 6.94446   | 10.7463   |
| Sox18         | chr2:181669836-181671640  | OK     | 2.00881   | 3.10833   |
| Lrrc8d        | chr5:105699968-105815215  | OK     | 32.5873   | 50.397    |
| Agk           | chr6:40325477-40396762    | OK     | 4.06561   | 6.28681   |
| Sertad4       | chr1:192844487-192855752  | OK     | 11.5593   | 17.874    |
| Pgm2l1        | chr7:100227606-100278872  | OK     | 72.8988   | 112.672   |
| Pold1         | chr7:44532743-44548815    | OK     | 2.10035   | 3.2458    |
| 4930486L24Rik | chr13:60842611-60864416   | NOTEST | 0.0788516 | 0.121851  |
| 1700026L06Rik | chr2:28692079-28699651    | NOTEST | 0.294839  | 0.455572  |
| Zfp128        | chr7:12881177-12893422    | OK     | 1.62887   | 2.51678   |
| Ranbp10       | chr8:105768307-105827350  | OK     | 9.84402   | 15.206    |
| Skap2         | chr6:51859164-52012549    | OK     | 16.4729   | 25.4385   |
| Arhgef28      | chr13:97898594-98206165   | OK     | 5.84518   | 9.02354   |
| Gpr97         | chr8:95017691-95045249    | NOTEST | 0.223699  | 0.345315  |
| Brdt          | chr5:107331193-107387058  | OK     | 2.15329   | 3.32254   |
| Enox1         | chr14:77156762-77721763   | OK     | 16.7506   | 25.8458   |
| Incenp        | chr19:9872296-9899533     | OK     | 3.01416   | 4.65042   |
| Lamb3         | chr1:193301993-193343878  | NOTEST | 0.0508262 | 0.078413  |
| Rcan3         | chr4:135412308-135433805  | OK     | 28.1986   | 43.4992   |
| Rmdn1         | chr4:19575065-19606932    | OK     | 3.96372   | 6.11225   |
| Coro2a        | chr4:46536936-46601929    | OK     | 51.1237   | 78.8252   |
| Cntn3         | chr6:102163305-102464667  | OK     | 3.90556   | 6.01962   |
| E2f4          | chr8:105297662-105305370  | OK     | 7.99122   | 12.3126   |
| Pcdha5        | chr18:36930284-37841872   | OK     | 1.58149   | 2.43636   |
| Snhg3         | chr4:132351932-132353686  | OK     | 12.9344   | 19.9236   |

|               |                           |        |           |           |
|---------------|---------------------------|--------|-----------|-----------|
| 4930430F08Rik | chr10:100488288-100589259 | OK     | 8.68616   | 13.3763   |
| 4931428F04Rik | chr8:105276446-105289528  | OK     | 10.5945   | 16.3139   |
| Ap1s3         | chr1:79606875-79671972    | NOTEST | 0.347191  | 0.534604  |
| Rufy2         | chr10:62980222-63023849   | OK     | 8.84357   | 13.6136   |
| Barx2         | chr9:31846043-31913285    | OK     | 2.41134   | 3.71184   |
| Btf3          | chr13:98309896-98317006   | OK     | 12.596    | 19.3817   |
| Rplp2-ps1     | chr12:75630593-75669537   | LOWDAT | 89.616    | 137.88    |
| Brinp2        | chr1:158245268-158356260  | OK     | 14.1124   | 21.7085   |
| Smc4          | chr3:69004971-69034623    | OK     | 10.1795   | 15.6575   |
| Erlin1        | chr19:44034942-44069785   | OK     | 6.77551   | 10.4203   |
| Osbpl8        | chr10:111164801-111297247 | OK     | 15.3315   | 23.5772   |
| Gm826         | chr2:160311400-160327494  | NOTEST | 0.0565697 | 0.0869873 |
| Brd9          | chr13:73937837-73960895   | OK     | 14.8591   | 22.8474   |
| Cacna2d1      | chr5:15934690-16374511    | OK     | 44.2517   | 68.0367   |
| Stk11ip       | chr1:75521528-75537335    | OK     | 8.09348   | 12.441    |
| Rac3          | chr11:120721467-120723969 | OK     | 27.6683   | 42.5214   |
| Acrbp         | chr6:125049926-125063265  | OK     | 0.623647  | 0.958298  |
| Myh9          | chr15:77760584-77842175   | OK     | 54.5248   | 83.7774   |
| Crybb3        | chr5:113075838-113081584  | OK     | 1.48837   | 2.28647   |
| Adrm1         | chr2:180171587-180176283  | OK     | 3.08907   | 4.74542   |
| Uri1          | chr7:37959991-38019552    | OK     | 10.0251   | 15.4005   |
| Polr2i        | chr7:30232073-30236765    | OK     | 7.72442   | 11.8657   |
| Slc25a24      | chr3:109123148-109168409  | OK     | 4.67637   | 7.18267   |
| Zfp112        | chr7:24112319-24127952    | OK     | 1.83121   | 2.81221   |
| Zc3h7a        | chr16:11136593-11176393   | OK     | 8.48492   | 13.0283   |
| Cxxc4         | chr3:134236494-134262089  | OK     | 4.70818   | 7.22896   |
| Foxo3         | chr10:42185785-42276742   | OK     | 14.673    | 22.5236   |
| Icmt          | chr4:152297213-152318625  | OK     | 47.2822   | 72.5743   |
| Steap1        | chr5:5736321-5749317      | OK     | 1.62276   | 2.4904    |
| Bbs5          | chr2:69647254-69667569    | OK     | 7.06313   | 10.8393   |
| Gramd4        | chr15:86057694-86137636   | OK     | 13.1833   | 20.2314   |
| Armxc6        | chrX:134748454-134751419  | OK     | 5.47151   | 8.39667   |
| Rsph3a        | chr17:7945613-7979556     | OK     | 4.85024   | 7.44288   |
| Cpne9         | chr6:113282306-113305571  | OK     | 1.86486   | 2.86163   |
| Atad2b        | chr12:4917352-5047410     | OK     | 2.09345   | 3.21147   |
| Snx7          | chr3:117781496-117868936  | OK     | 78.5812   | 120.526   |
| Gt(ROSA)26Sor | chr6:113046326-113077244  | OK     | 9.45276   | 14.4976   |
| Tac1          | chr6:7555070-7562973      | OK     | 188.8     | 289.472   |
| Dqx1          | chr6:83057843-83067219    | NOTEST | 0.100796  | 0.154512  |
| B3glct        | chr5:149678256-149762599  | OK     | 12.5912   | 19.2966   |
| Vmo1          | chr11:70513515-70514616   | NOTEST | 0.213469  | 0.327146  |
| Boc           | chr16:44485044-44558870   | OK     | 6.28079   | 9.62355   |
| C130071C03Rik | chr13:83728105-83735669   | NOTEST | 0.0608051 | 0.0931641 |
| Styx          | chr14:45351185-45388796   | OK     | 0.841353  | 1.28878   |
| Cpsf4         | chr5:145167212-145182041  | OK     | 3.42826   | 5.25137   |
| Apitd1        | chr4:149128348-149137600  | OK     | 3.11046   | 4.7642    |
| Vezt          | chr10:93968099-94035748   | OK     | 14.8229   | 22.7022   |
| Aacs          | chr5:125475872-125517403  | OK     | 54.855    | 84.0048   |
| Ccdc12        | chr9:110656502-110711593  | OK     | 7.84602   | 12.0152   |
| Asprv1        | chr6:86628173-86629704    | NOTEST | 0.300062  | 0.459481  |
| Slc25a38      | chr9:120110398-120124319  | OK     | 26.6602   | 40.8153   |
| Bdnf          | chr2:109674699-109727043  | OK     | 9.21153   | 14.1019   |
| Pop5          | chr5:115235850-115240970  | OK     | 48.1907   | 73.7546   |

|               |                           |        |           |          |
|---------------|---------------------------|--------|-----------|----------|
| Nol3          | chr8:105276446-105289528  | OK     | 42.3412   | 64.7975  |
| Tor4a         | chr2:25192719-25196813    | OK     | 0.531965  | 0.813896 |
| Tyk2          | chr9:21104067-21131275    | OK     | 3.00226   | 4.59339  |
| B4galt5       | chr2:167298444-167349178  | OK     | 32.7663   | 50.1142  |
| Hilpda        | chr6:29272487-29275449    | OK     | 6.20655   | 9.49182  |
| Abr           | chr11:76416731-76577739   | OK     | 60.7909   | 92.9577  |
| Taf10         | chr7:105731729-105744338  | OK     | 13.1464   | 20.1001  |
| Kifc2         | chr15:76660640-76668196   | OK     | 13.7947   | 21.0911  |
| Parpbp        | chr10:88091071-88146941   | NOTEST | 0.383115  | 0.585656 |
| Bend4         | chr5:67392146-67427799    | OK     | 3.48219   | 5.32293  |
| Fbxl22        | chr9:66350449-66514593    | NOTEST | 0.0979491 | 0.149725 |
| Cep70         | chr9:99243467-99300403    | OK     | 2.59781   | 3.97082  |
| Lmo7          | chr14:101729927-101934693 | OK     | 1.18156   | 1.80591  |
| Prdm8         | chr5:98180868-98187448    | OK     | 7.63028   | 11.6607  |
| G2e3          | chr12:51348229-51376986   | OK     | 1.64733   | 2.51731  |
| Snx21         | chr2:164786020-164804881  | OK     | 35.0435   | 53.5439  |
| Supt20        | chr3:54693104-54716837    | OK     | 11.1734   | 17.0716  |
| Safb2         | chr17:56562941-56584583   | OK     | 5.56278   | 8.49893  |
| Zdhhc13       | chr7:48789002-48827437    | OK     | 17.0199   | 26.0033  |
| Rab40c        | chr17:25882113-25919714   | OK     | 11.8805   | 18.1492  |
| 4930526L06Rik | chr19:11196816-11299884   | NOTEST | 0.0657233 | 0.100397 |
| Sp110         | chr1:85576898-85645036    | NOTEST | 0.210641  | 0.321696 |
| Wipf1         | chr2:73429609-73529487    | OK     | 13.8356   | 21.1291  |
| Upf3b         | chrX:37091833-37110322    | OK     | 10.3421   | 15.7934  |
| Cited1        | chrX:102247377-102252181  | OK     | 1.83207   | 2.79771  |
| Jph1          | chr1:16994939-17097889    | OK     | 1.10506   | 1.68751  |
| Lnx1          | chr5:74535481-74702903    | OK     | 5.00142   | 7.63579  |
| 1110007C09Rik | chr13:49202950-49216026   | OK     | 43.0135   | 65.6672  |
| BC020402      | chr10:7678970-7681158     | OK     | 0.987077  | 1.50649  |
| Plcl1         | chr1:55405945-55754285    | OK     | 3.47142   | 5.29757  |
| Rgs9bp        | chr7:35578995-35585582    | NOTEST | 0.192057  | 0.29308  |
| Utp18         | chr11:93859242-93885766   | OK     | 5.1263    | 7.82064  |
| 2700081O15Rik | chr19:7417624-7483291     | OK     | 14.2152   | 21.6817  |
| Zkscan2       | chr7:123478638-123500449  | OK     | 0.857653  | 1.30776  |
| Asl           | chr5:130011502-130024331  | OK     | 14.3327   | 21.8525  |
| Uimc1         | chr13:55027879-55100295   | OK     | 3.14577   | 4.79616  |
| Paxbp1        | chr16:90936096-91044379   | OK     | 3.57913   | 5.45664  |
| Ralgds        | chr2:28513166-28553082    | OK     | 21.7336   | 33.1256  |
| Ino80b        | chr6:83121827-83125029    | OK     | 9.04555   | 13.7858  |
| 8430408G22Rik | chr6:116633007-116673836  | OK     | 2.87787   | 4.38565  |
| Creld1        | chr6:113483568-113493338  | OK     | 99.6485   | 151.85   |
| 8430427H17Rik | chr2:153407460-153529971  | OK     | 19.812    | 30.1826  |
| 2010111I01Rik | chr13:62964892-63431745   | OK     | 21.6158   | 32.9262  |
| A230072C01Rik | chrX:20951664-20987349    | OK     | 2.43276   | 3.70432  |
| Glipr2        | chr4:43957701-43979118    | OK     | 7.24067   | 11.0245  |
| Ankrd12       | chr17:65967500-66077046   | OK     | 10.0006   | 15.222   |
| Tmem238       | chr7:4784784-4789560      | OK     | 0.978662  | 1.48958  |
| Rp9           | chr9:22448311-22468356    | OK     | 21.4134   | 32.5709  |
| Xpa           | chr4:46175221-46196311    | OK     | 6.0483    | 9.19955  |
| Bcl7c         | chr7:127704977-127708766  | OK     | 5.33232   | 8.10895  |
| Zmat5         | chr11:4704677-4737666     | OK     | 18.5755   | 28.2457  |
| Pla2g6        | chr15:79286227-79328371   | OK     | 12.034    | 18.2956  |
| Ost4          | chr5:30888851-30907788    | OK     | 36.7687   | 55.8999  |

|               |                           |        |            |           |
|---------------|---------------------------|--------|------------|-----------|
| Ydjc          | chr16:17146966-17148857   | OK     | 9.44873    | 14.3634   |
| Mroh2a        | chr1:88227019-88277579    | NOTEST | 0.00983456 | 0.0149486 |
| Rassf1        | chr9:107551554-107562267  | OK     | 5.79897    | 8.81436   |
| Rpusd1        | chr17:25727750-25731456   | OK     | 9.60435    | 14.597    |
| Gpatch4       | chr3:88043105-88055994    | OK     | 8.64985    | 13.1422   |
| Fbxo36        | chr1:84839840-84900486    | OK     | 7.63436    | 11.5993   |
| 2310036O22Rik | chr8:85026832-85030286    | OK     | 54.8491    | 83.333    |
| Fgf22         | chr10:79697304-80369637   | OK     | 1.08527    | 1.64852   |
| Rsrc2         | chr5:123728425-123749414  | OK     | 21.698     | 32.9512   |
| Flot2         | chr11:78037940-78060432   | OK     | 140.006    | 212.615   |
| Cbr1          | chr16:93607836-93610349   | OK     | 42.8434    | 65.0606   |
| Cep78         | chr19:15955772-15984989   | OK     | 4.21976    | 6.40722   |
| Kin           | chr2:10080611-10092701    | OK     | 4.96515    | 7.53595   |
| Wbscr17       | chr5:130874950-131307522  | OK     | 50.5631    | 76.7386   |
| Rbm39         | chr2:156147240-156180238  | OK     | 56.9051    | 86.3632   |
| Tec           | chr5:72755717-72868448    | OK     | 3.62284    | 5.4967    |
| Noxo1         | chr17:24696233-24700529   | NOTEST | 0.45217    | 0.686007  |
| Jph4          | chr14:55106825-55116935   | OK     | 50.6527    | 76.8172   |
| Gucd1         | chr10:75506813-75517322   | OK     | 11.2307    | 17.0291   |
| Msl3l2        | chr10:56014293-56228689   | OK     | 3.07007    | 4.65478   |
| Gabrr1        | chr4:33132555-33163588    | NOTEST | 0.0774743  | 0.117427  |
| Zfp827        | chr8:79028436-79193766    | OK     | 5.44555    | 8.25329   |
| Cyp2j13       | chr4:96042659-96077540    | NOTEST | 0.3997     | 0.605761  |
| Rab26os       | chr17:24528250-24528744   | OK     | 7.4724     | 11.3242   |
| Fam178a       | chr19:44931118-44984550   | OK     | 3.82463    | 5.79562   |
| Hhipl1        | chr12:108306269-108328300 | OK     | 0.787931   | 1.19397   |
| Zcchc18       | chrX:136981115-137038302  | OK     | 82.5457    | 125.059   |
| AW549877      | chr15:3982034-3995752     | OK     | 25.4253    | 38.5137   |
| Lgals4        | chr7:28833793-28841703    | OK     | 0.576801   | 0.873409  |
| B230112J18Rik | chr5:116312359-116318274  | NOTEST | 0.24396    | 0.369397  |
| Nagk          | chr6:83795056-83802556    | OK     | 44.0442    | 66.6892   |
| Grk5          | chr19:60889748-61092555   | OK     | 5.44676    | 8.24652   |
| Pknx2         | chr9:36890978-37147322    | OK     | 20.9052    | 31.6497   |
| Igflr1        | chr7:30565426-30567962    | OK     | 1.0531     | 1.59397   |
| Rps19bp1      | chr15:80260613-80264306   | OK     | 11.0525    | 16.7279   |
| Pygl          | chr12:70190814-70227683   | OK     | 11.1903    | 16.9344   |
| 2510002D24Rik | chr16:18836579-18840113   | OK     | 4.61409    | 6.98197   |
| Socs7         | chr11:97362550-97398542   | OK     | 20.1869    | 30.546    |
| Dennd6b       | chr15:89182212-89196474   | OK     | 4.23366    | 6.40561   |
| Mkrn1         | chr6:39397820-39420369    | OK     | 40.6156    | 61.4153   |
| Anxa5         | chr3:36448923-36475887    | OK     | 640.234    | 967.842   |
| Erich3        | chr3:154711132-154749012  | OK     | 3.48788    | 5.27207   |
| Prex1         | chr2:166566344-166722152  | OK     | 9.80022    | 14.8131   |
| Cenpw         | chr10:30196008-30200540   | OK     | 0.683784   | 1.03307   |
| Slc25a1       | chr16:17925210-17928219   | OK     | 65.4516    | 98.8534   |
| Rnf219        | chr14:104477533-104522666 | OK     | 9.73866    | 14.706    |
| Mypn          | chr10:63115794-63203952   | NOTEST | 0.217482   | 0.328411  |
| Klhl10        | chr11:100441923-100457024 | NOTEST | 0.0766204  | 0.115673  |
| Map2k3        | chr11:60932056-60952803   | OK     | 8.86907    | 13.3888   |
| Efcab5        | chr11:77089914-77188968   | NOTEST | 0.216468   | 0.326749  |
| Fah           | chr7:84585158-84605942    | OK     | 13.5849    | 20.5041   |
| Id4           | chr13:48044230-48264036   | OK     | 27.4859    | 41.4835   |
| Tmem74        | chr15:43866694-43870029   | OK     | 15.537     | 23.4386   |



|               |                           |        |           |           |
|---------------|---------------------------|--------|-----------|-----------|
| Anapc15       | chr7:101881324-101899545  | OK     | 3.51557   | 5.30314   |
| Pkd2l2        | chr18:34409422-34506823   | NOTEST | 0.213791  | 0.322439  |
| Plp2          | chrX:7657378-7671278      | OK     | 1.39736   | 2.10734   |
| Gstt2         | chr10:75831844-75834881   | OK     | 2.31535   | 3.49155   |
| Pcdhb5        | chr18:36930284-37841872   | OK     | 1.19172   | 1.79675   |
| 5730405015Rik | chrX:13042014-13045295    | OK     | 0.844177  | 1.27267   |
| Pin4          | chrX:102119464-102127673  | OK     | 1.75728   | 2.64885   |
| Ccdc84        | chr9:44407713-44418007    | OK     | 2.22504   | 3.35322   |
| Brca2         | chr5:150522620-150570146  | NOTEST | 0.330431  | 0.497937  |
| Rtn4rl1       | chr11:75193992-75267762   | OK     | 39.0057   | 58.7689   |
| 1110002L01Rik | chr12:3365131-3426747     | OK     | 2.56638   | 3.86465   |
| Gcnt2         | chr13:40859767-40960892   | OK     | 111.801   | 168.346   |
| Kl            | chr5:150952606-150993817  | NOTEST | 0.428157  | 0.644664  |
| Gm2109        | chr9:83691474-83693247    | NOTEST | 0.244343  | 0.367886  |
| 4930538K18Rik | chr4:119205054-119218217  | NOTEST | 0.260733  | 0.392498  |
| Myl6          | chr10:128490860-128493825 | OK     | 29.9911   | 45.1465   |
| Sirt7         | chr11:120618371-120625002 | OK     | 10.4161   | 15.6773   |
| Pde8a         | chr7:81213803-81333622    | OK     | 3.32466   | 5.00393   |
| Ugcg          | chr4:59189549-59222833    | OK     | 54.5559   | 82.1009   |
| Ankzf1        | chr1:75192159-75210778    | OK     | 4.97716   | 7.49008   |
| Pdcd5         | chr7:35641984-35647482    | OK     | 5.83743   | 8.78276   |
| 9530026P05Rik | chr6:92940581-93111749    | OK     | 1.24517   | 1.873     |
| Rps19         | chr7:24884713-24889802    | OK     | 6.28731   | 9.45734   |
| Piga          | chrX:164419786-164433915  | OK     | 1.33145   | 2.00233   |
| Rtl1          | chr12:109590168-109595403 | NOTEST | 0.0216792 | 0.0325983 |
| Zfp941        | chr7:140809676-140822178  | OK     | 5.76556   | 8.66933   |
| Atg4a         | chr3:103193822-103854618  | OK     | 3.67002   | 5.51392   |
| Chuk          | chr19:44073333-44107477   | OK     | 10.0965   | 15.1646   |
| Cdh1          | chr8:106603367-106670246  | OK     | 51.2669   | 76.9926   |
| Arfgap3       | chr15:83299739-83350247   | OK     | 30.2365   | 45.4072   |
| 2510009E07Rik | chr16:21649044-21694665   | OK     | 43.4253   | 65.2086   |
| Cacna1b       | chr2:24603888-24763152    | OK     | 22.0412   | 33.0934   |
| Rps18         | chr17:33951998-33955641   | OK     | 17.0506   | 25.5909   |
| Ppp1r1c       | chr2:79707779-79818546    | OK     | 123.184   | 184.878   |
| Nkiras2       | chr11:100622954-100650693 | OK     | 13.5898   | 20.3806   |
| Fam189a2      | chr19:23972749-24031019   | OK     | 12.7599   | 19.1264   |
| Slc8a1        | chr17:81373104-81738387   | OK     | 1.17097   | 1.75462   |
| A930012L18Rik | chr18:44425059-44812182   | NOTEST | 0.427455  | 0.640453  |
| Emp3          | chr7:45918022-45921426    | OK     | 28.6394   | 42.8926   |
| Ermn          | chr2:58045114-58052752    | NOTEST | 0.0329002 | 0.0492645 |
| Rrp36         | chr17:46667452-46674255   | OK     | 8.62876   | 12.9203   |
| Frat2         | chr19:41845975-41848132   | OK     | 5.63341   | 8.43484   |
| Skp1a         | chr11:52231994-52246858   | OK     | 724.433   | 1084.68   |
| Gm17762       | chr2:18025188-18037741    | NOTEST | 0.375605  | 0.562375  |
| Fzd5          | chr1:64730557-64737750    | OK     | 0.730593  | 1.09367   |
| Dbdd2         | chr2:164486139-164493323  | OK     | 8.37646   | 12.5353   |
| Yeats4        | chr10:117215140-117224507 | OK     | 21.2521   | 31.7957   |
| Dda1          | chr8:71469193-71486067    | OK     | 30.6088   | 45.794    |
| Gm10516       | chr1:192098545-192151025  | OK     | 3.87681   | 5.7998    |
| Nipal2        | chr15:34572798-34679204   | OK     | 10.0304   | 15.005    |
| Grk6          | chr13:55445071-55460927   | OK     | 21.0334   | 31.4649   |
| Cfp           | chrX:20925534-20931524    | OK     | 1.03046   | 1.54098   |
| Fam102b       | chr3:108970996-109027607  | OK     | 58.9717   | 88.1789   |

|               |                           |        |          |          |
|---------------|---------------------------|--------|----------|----------|
| Rps27,Rps27rt | chr3:90212666-90213648    | OK     | 1.71047  | 2.5573   |
| Tspan5        | chr3:138742194-138904424  | OK     | 48.6281  | 72.6711  |
| Zfp28         | chr7:6383317-6396637      | OK     | 1.32442  | 1.97916  |
| Ssna1         | chr2:25271038-25272418    | OK     | 22.1345  | 33.0758  |
| C77080        | chr4:129189794-129261404  | OK     | 38.9646  | 58.2246  |
| Rbm25         | chr12:83632233-83683123   | OK     | 23.8857  | 35.6753  |
| Fbxo22        | chr9:55208934-55283625    | OK     | 26.8944  | 40.1626  |
| Lclat1        | chr17:73107984-73243366   | OK     | 23.1676  | 34.5864  |
| Rnf7          | chr9:96470956-96478595    | OK     | 88.1451  | 131.59   |
| Eef1g         | chr19:8967040-8978180     | OK     | 16.534   | 24.6794  |
| Bbs9          | chr9:22475714-22888280    | OK     | 6.39062  | 9.53645  |
| Myc           | chr15:61985340-61990361   | OK     | 4.62496  | 6.89908  |
| Ccdc85a       | chr11:28385683-28584324   | OK     | 15.6701  | 23.3724  |
| Taf4a         | chr2:179912145-179976646  | OK     | 2.84517  | 4.24291  |
| Lypd6b        | chr2:49787685-49948846    | OK     | 4.15571  | 6.19621  |
| Irf7          | chr7:141263182-141266424  | OK     | 3.62568  | 5.4044   |
| Pten          | chr19:32757576-32826160   | OK     | 44.1691  | 65.8353  |
| Tmem256       | chr11:69838524-69839558   | OK     | 67.0782  | 99.9723  |
| Tcof1         | chr18:60813755-60848964   | OK     | 5.0445   | 7.51817  |
| Raph1         | chr1:60483184-60566765    | OK     | 18.42    | 27.4522  |
| Rnps1         | chr17:24414674-24425897   | OK     | 11.9318  | 17.7805  |
| 37499         | chrX:36910833-36989695    | OK     | 33.6244  | 50.1005  |
| Taf9b         | chrX:106206873-106221158  | OK     | 14.9687  | 22.2996  |
| Vav3          | chr3:109340682-109685694  | OK     | 7.73783  | 11.5268  |
| Clk2          | chr3:89164804-89177087    | OK     | 4.51737  | 6.72851  |
| 3110009E18Rik | chr1:120121186-120188189  | OK     | 1.41281  | 2.10349  |
| Tmem106a      | chr11:101582241-101591785 | OK     | 3.94941  | 5.87832  |
| Arrdc2        | chr8:70835137-70839720    | OK     | 4.91462  | 7.31391  |
| Xaf1          | chr11:72301628-72313733   | OK     | 2.52386  | 3.75594  |
| Kdsr          | chr1:106720409-106759742  | OK     | 11.18    | 16.6336  |
| Trim46        | chr3:89234176-89245897    | OK     | 13.9702  | 20.7803  |
| Zadh2         | chr18:84088157-84097514   | OK     | 20.4347  | 30.3931  |
| Plekha6       | chr1:133246096-133303435  | OK     | 54.1547  | 80.5455  |
| Slc9a3r2      | chr17:24639281-24650305   | OK     | 51.3576  | 76.3847  |
| Arl10         | chr13:54575012-54581128   | OK     | 10.2048  | 15.1697  |
| Pwwp2a        | chr11:43681997-43722633   | OK     | 3.84794  | 5.71899  |
| Palb2         | chr7:122107261-122132946  | NOTEST | 0.402595 | 0.59814  |
| 2900056M20Rik | chrX:152294823-152327493  | OK     | 5.94834  | 8.83192  |
| Ak8           | chr2:28700160-28813165    | OK     | 1.15001  | 1.70724  |
| Rabgap1l      | chr1:160219173-160792938  | OK     | 40.2849  | 59.8023  |
| Gtf3a         | chr5:146948656-146963797  | OK     | 11.6585  | 17.3057  |
| Mrgpre        | chr7:143778362-143784500  | OK     | 9.27307  | 13.7599  |
| Tmem29        | chrX:150397772-150459150  | OK     | 11.1274  | 16.5097  |
| Ccdc62        | chr5:123930688-123969895  | NOTEST | 0.248629 | 0.368796 |
| Gadd45g       | chr13:51846674-51848474   | OK     | 18.9937  | 28.1726  |
| Fam63a        | chr3:95282934-95307176    | OK     | 32.029   | 47.4904  |
| Leo1          | chr9:75441523-75466432    | OK     | 14.1059  | 20.914   |
| Rbm5          | chr9:107740494-107771002  | OK     | 25.401   | 37.66    |
| Ankrd24       | chr10:81628539-81647612   | OK     | 4.56136  | 6.76222  |
| Lrch4         | chr5:137629122-137642902  | OK     | 9.45851  | 14.0144  |
| Zmym6         | chr4:127077382-127124374  | OK     | 3.85734  | 5.71503  |
| Rep15         | chr6:147032536-147033518  | NOTEST | 0.589154 | 0.87284  |
| Jade3         | chrX:20425687-20519939    | OK     | 1.37096  | 2.03089  |

|               |                           |        |           |           |
|---------------|---------------------------|--------|-----------|-----------|
| Gtpbp2        | chr17:46161031-46169370   | OK     | 15.3827   | 22.7822   |
| Spag7         | chr11:70663768-70669416   | OK     | 37.4946   | 55.5262   |
| Apol8         | chr15:77748612-77755229   | OK     | 1.6896    | 2.50189   |
| Luc7l2        | chr6:38551443-38609470    | OK     | 24.3159   | 35.9973   |
| Mbnl2         | chr14:120275668-120431698 | OK     | 153.729   | 227.483   |
| Atp8b5        | chr4:43267158-43373831    | NOTEST | 0.28433   | 0.420719  |
| Pkp4          | chr2:59160849-59355205    | OK     | 10.2769   | 15.2051   |
| Angptl6       | chr9:20868641-20879710    | OK     | 2.87352   | 4.25075   |
| Adipoq        | chr16:23146535-23157968   | NOTEST | 0.0511444 | 0.0756559 |
| Tifa          | chr3:127789912-127798389  | OK     | 10.1599   | 15.0286   |
| Banp          | chr8:121950491-122029260  | OK     | 2.47605   | 3.66254   |
| Cisd3         | chr11:97685951-97688625   | OK     | 49.365    | 73.0155   |
| Zfp185        | chrX:72987338-73031543    | NOTEST | 0.164085  | 0.242667  |
| Tex9          | chr9:72438528-72491959    | OK     | 2.43912   | 3.60723   |
| Pgls          | chr8:71592183-71596267    | OK     | 25.0058   | 36.9778   |
| 6230400D17Rik | chr14:20702011-20704425   | NOTEST | 0.137109  | 0.202722  |
| Supt4a        | chr11:87737564-87743617   | OK     | 11.9622   | 17.6854   |
| Insl5         | chr4:103017872-103026842  | NOTEST | 0.108309  | 0.160116  |
| Abcg3         | chr5:104935056-104982717  | NOTEST | 0.0863284 | 0.127613  |
| Stk38         | chr17:28970884-29007937   | OK     | 5.05226   | 7.46493   |
| Cngb1         | chr8:95239042-95306585    | NOTEST | 0.104887  | 0.154942  |
| Zfp738        | chr13:67667440-67683512   | OK     | 5.01256   | 7.40435   |
| Stat2         | chr10:128270575-128292849 | OK     | 16.6849   | 24.6435   |
| Cnr2          | chr4:135895403-135920210  | NOTEST | 0.0557413 | 0.0823272 |
| Lyar          | chr5:38220481-38234306    | OK     | 5.02996   | 7.42635   |
| Cml2          | chr6:85865421-85869137    | NOTEST | 0.0703631 | 0.103874  |
| Tmem51os1     | chr4:142030992-142088101  | NOTEST | 0.123536  | 0.182359  |
| H2-Q5         | chr17:35394098-35395630   | NOTEST | 0.250321  | 0.369467  |
| Sh2b2         | chr5:136218148-136244903  | OK     | 1.10066   | 1.62434   |
| Smim22        | chr16:5007287-5008308     | NOTEST | 0.0746206 | 0.110121  |
| Gp1bb         | chr16:18620318-18629938   | OK     | 4.2694    | 6.29974   |
| AK010878      | chr12:102739829-102757810 | OK     | 3.66408   | 5.40642   |
| Hdac10        | chr15:89123302-89128700   | OK     | 6.36098   | 9.3837    |
| Camkk2        | chr5:122731169-122779410  | OK     | 8.01091   | 11.814    |
| Igsf9         | chr1:172482212-172498877  | NOTEST | 0.29145   | 0.429707  |
| Rbfox1        | chr16:5884792-7412480     | OK     | 64.6056   | 95.2511   |
| Wdr81         | chr11:75440942-75454717   | OK     | 5.05487   | 7.45098   |
| Fam107b       | chr2:3713457-3782134      | OK     | 25.2766   | 37.2577   |
| Tpcn2         | chr7:145253922-145283927  | OK     | 1.81071   | 2.66721   |
| Zfp354a       | chr11:51059256-51072799   | OK     | 1.13541   | 1.67212   |
| A230050P20Rik | chr9:20868641-20879710    | OK     | 6.21831   | 9.15741   |
| Hspb11        | chr4:107253933-107279888  | OK     | 11.2415   | 16.5544   |
| Lpar2         | chr8:69822564-69831102    | NOTEST | 0.0595496 | 0.0876802 |
| Dnajc17       | chr2:119172499-119217050  | OK     | 2.3246    | 3.42256   |
| Cd34          | chr1:194938820-194976959  | OK     | 28.4079   | 41.8246   |
| Nin           | chr12:70011434-70112035   | OK     | 3.63201   | 5.34412   |
| Cobl          | chr11:12236675-12464960   | OK     | 17.9751   | 26.443    |
| Rnf44         | chr13:54679398-54693960   | OK     | 24.5711   | 36.1367   |
| Abcc6         | chr7:45976379-46030286    | NOTEST | 0.057943  | 0.0852076 |
| St6galnac2    | chr11:116676704-116694660 | OK     | 1.33579   | 1.96419   |
| 9930012K11Rik | chr14:70154404-70159502   | OK     | 1.57709   | 2.31885   |
| Ccdc151       | chr9:21989870-22002634    | NOTEST | 0.515855  | 0.758197  |
| Pitpnm2       | chr5:124118688-124249760  | OK     | 45.5515   | 66.9324   |

|               |                           |        |           |           |
|---------------|---------------------------|--------|-----------|-----------|
| Trpv1         | chr11:73238258-73260507   | OK     | 44.4312   | 65.284    |
| Scn9a         | chr2:66440879-66634962    | OK     | 62.9032   | 92.4137   |
| Fbxl12        | chr9:20637748-20646789    | OK     | 2.62144   | 3.85075   |
| Ckap5         | chr2:91546321-91620665    | OK     | 65.4555   | 96.1479   |
| Rtel1         | chr2:181319723-181356616  | OK     | 2.75321   | 4.04381   |
| Plekho1       | chr3:95988835-95995839    | OK     | 14.9052   | 21.8915   |
| 9330159F19Rik | chr10:29211642-29230779   | OK     | 15.8453   | 23.2708   |
| Ppp1r35       | chr5:137778917-137780107  | OK     | 11.3607   | 16.6823   |
| Cyb5          | chr18:84851413-84879863   | OK     | 62.8847   | 92.3353   |
| Zbtb44        | chr9:31030643-31075885    | OK     | 3.25902   | 4.78517   |
| Qdpr          | chr5:45434031-45450229    | OK     | 99.2172   | 145.677   |
| Ptpr          | chr10:116018362-116274929 | OK     | 16.5822   | 24.3457   |
| BC029214      | chr2:25459487-25461094    | OK     | 11.302    | 16.5926   |
| Lonrf1        | chr8:36216063-36249516    | OK     | 10.4328   | 15.3163   |
| Dync1i2       | chr2:71211705-71263302    | OK     | 193.489   | 283.99    |
| Arhgef18      | chr8:3393007-3456600      | OK     | 10.6964   | 15.6957   |
| Trmt1         | chr8:84689246-84699808    | OK     | 13.0528   | 19.1533   |
| Chrm4         | chr2:91922188-91932297    | OK     | 3.58217   | 5.25588   |
| Nox1          | chrX:134059175-134111854  | NOTEST | 0.0282179 | 0.0413998 |
| Nubpl         | chr12:52097745-52310959   | OK     | 3.3522    | 4.91656   |
| Dapk3         | chr10:81183006-81193197   | OK     | 19.0629   | 27.9537   |
| Snhg4         | chr18:35553409-35558316   | OK     | 2.79508   | 4.09807   |
| Ankra2        | chr13:98263075-98274754   | OK     | 12.5703   | 18.4289   |
| Kdelc2        | chr9:53384022-53401867    | OK     | 7.81401   | 11.4544   |
| Dolpp1        | chr2:30392253-30415748    | OK     | 17.1587   | 25.1523   |
| Gpr176        | chr2:118277097-118373419  | OK     | 4.60399   | 6.74846   |
| Lats2         | chr14:57689661-57746123   | OK     | 16.3859   | 24.0178   |
| Ppp1r3fos     | chrX:7558561-7605420      | NOTEST | 0.129776  | 0.190187  |
| Nme4          | chr17:26091744-26095470   | OK     | 1.57283   | 2.30358   |
| Sec61g        | chr11:16501637-16508484   | NOTEST | 0.185685  | 0.271918  |
| Srsf9         | chr5:115327176-115333080  | OK     | 16.2144   | 23.7426   |
| A530050N04Rik | chr18:61470224-61484607   | NOTEST | 0.0680609 | 0.0996316 |
| Ypel3         | chr7:126776974-126780514  | OK     | 172.622   | 252.694   |
| Rfc5          | chr5:117379144-117389023  | OK     | 1.04113   | 1.52343   |
| Snx8          | chr5:140340302-140389247  | OK     | 7.75645   | 11.3485   |
| Parp11        | chr6:127453722-127494239  | OK     | 6.90991   | 10.1097   |
| Gramd1c       | chr16:43980349-44027945   | OK     | 0.746601  | 1.09217   |
| Slc35f5       | chr1:125561015-125595684  | OK     | 16.6209   | 24.3104   |
| Apex2         | chrX:150571506-150588149  | OK     | 1.86546   | 2.72847   |
| Calcb         | chr7:114718642-114723365  | OK     | 149.559   | 218.746   |
| Pola2         | chr19:5940542-5964206     | OK     | 3.31138   | 4.84181   |
| Agfg1         | chr1:82839482-82896275    | OK     | 34.9572   | 51.1127   |
| Mrps6         | chr16:92058321-92112227   | OK     | 67.3982   | 98.5301   |
| Ezh2          | chr6:47530273-47595030    | OK     | 1.33608   | 1.95311   |
| Sema4b        | chr7:80186840-80226524    | OK     | 13.6083   | 19.8928   |
| Mtmt14        | chr6:113237842-113281392  | OK     | 12.4944   | 18.2575   |
| 2610203C20Rik | chr9:41581338-41592487    | OK     | 3.82917   | 5.59503   |
| BC030867      | chr11:102248881-102265183 | OK     | 0.735324  | 1.07434   |
| Kcnab1        | chr3:65109367-65378225    | OK     | 62.6625   | 91.5469   |
| Trappc5       | chr8:3676476-3680921      | OK     | 16.9854   | 24.8138   |
| Tspan1        | chr4:116161880-116167598  | NOTEST | 0.339165  | 0.495283  |
| Epb4.1I5      | chr1:119545032-119649000  | OK     | 1.76095   | 2.57117   |
| Zbtbd6        | chr14:79451834-79454816   | NOTEST | 0.167491  | 0.244554  |

|               |                           |        |           |           |
|---------------|---------------------------|--------|-----------|-----------|
| Nfkbil1       | chr17:35220174-35235815   | OK     | 4.65952   | 6.80322   |
| Smad1         | chr8:79338397-79399468    | OK     | 18.7824   | 27.4135   |
| Stk19         | chr17:34823992-34836903   | OK     | 12.6746   | 18.496    |
| AI414108      | chr9:27352684-27357543    | OK     | 4.409     | 6.43253   |
| Gigyf1        | chr5:137518879-137527935  | OK     | 5.54022   | 8.08072   |
| Spag8         | chr4:43651329-43653552    | NOTEST | 0.0669435 | 0.0976352 |
| Pcdha9        | chr18:36930284-37841872   | OK     | 3.59346   | 5.24097   |
| Cyp26b1       | chr6:84571413-84593908    | OK     | 0.785081  | 1.14473   |
| Osbpl3        | chr6:50293326-50456170    | OK     | 72.5162   | 105.722   |
| Mafg          | chr11:120628350-120633547 | OK     | 32.091    | 46.7751   |
| Gpr61         | chr3:108148320-108154882  | OK     | 3.41303   | 4.97401   |
| Lactb         | chr9:66955392-66975484    | OK     | 5.4702    | 7.97193   |
| Nr6a1         | chr2:38723373-38926461    | OK     | 1.75352   | 2.55541   |
| Map4k5        | chr12:69746847-69987002   | OK     | 9.63466   | 14.0396   |
| Usp49         | chr17:47630689-47684067   | OK     | 2.88631   | 4.2056    |
| Prkx          | chrX:77762029-77795960    | OK     | 33.6808   | 49.0589   |
| A230001M10Rik | chr3:102262404-102288771  | NOTEST | 0.0225575 | 0.0328548 |
| Fkbp1b        | chr12:4833173-4841595     | OK     | 148.646   | 216.491   |
| Tada1         | chr1:166379166-166409828  | OK     | 7.64726   | 11.1373   |
| AI846148      | chr19:7356463-7383557     | OK     | 5.97281   | 8.69812   |
| Dvl1          | chr4:155847411-155863353  | OK     | 19.568    | 28.4874   |
| Tfrc          | chr16:32608895-32632794   | OK     | 39.5258   | 57.5397   |
| Eif1a         | chr18:46597703-46610225   | OK     | 27.7249   | 40.3572   |
| Cacna1c       | chr6:118587239-119221614  | OK     | 9.59312   | 13.9583   |
| Zbtb10        | chr3:9250566-9285332      | OK     | 5.22701   | 7.60495   |
| Tom1l1        | chr11:90638183-90687601   | OK     | 6.08732   | 8.85652   |
| Lsr           | chr7:30957769-30973469    | OK     | 1.3919    | 2.02504   |
| Uchl4         | chr9:64185792-64253605    | OK     | 2.80209   | 4.07635   |
| Hcn4          | chr9:58823511-58860955    | OK     | 2.98992   | 4.34958   |
| Cd97          | chr8:83715176-83741311    | OK     | 4.50125   | 6.54818   |
| Batf3         | chr1:191098413-191108943  | NOTEST | 0.232656  | 0.338444  |
| Nmi           | chr2:51948498-51973208    | OK     | 5.88805   | 8.56401   |
| Ppapdc1b      | chr8:25720047-25724887    | OK     | 7.2064    | 10.4803   |
| Pkd1l2        | chr8:116995678-117082449  | NOTEST | 0.333985  | 0.485692  |
| Pcdhgb8       | chr18:36930284-37841872   | NOTEST | 0.111672  | 0.16235   |
| Stt3b         | chr9:115242581-115310421  | OK     | 52.5974   | 76.464    |
| Snhg8         | chr3:123507551-123508336  | OK     | 4.87253   | 7.08303   |
| Mrpl57        | chr14:57826238-57828745   | OK     | 6.15684   | 8.94847   |
| 9430038I01Rik | chr7:137375568-137410756  | OK     | 1.33467   | 1.93959   |
| Prorsd1       | chr11:29511756-29515033   | OK     | 1.64695   | 2.3929    |
| Hoxa1         | chr6:52155366-52158317    | NOTEST | 0.384025  | 0.557952  |
| Gin1          | chr1:97770178-97792971    | OK     | 2.65175   | 3.85248   |
| Ift140        | chr17:25016085-25099497   | OK     | 9.00213   | 13.0779   |
| A230070E04Rik | chr14:68119544-68131371   | OK     | 3.66033   | 5.31724   |
| Man1c1        | chr4:134561689-134704290  | OK     | 11.7934   | 17.1298   |
| Mocs3         | chr2:168230621-168232303  | OK     | 3.94548   | 5.73004   |
| Slco4a1       | chr2:180460977-180474853  | OK     | 0.637311  | 0.925529  |
| 2010320M18Rik | chr8:70776861-70777606    | OK     | 5.68499   | 8.25559   |
| Acap3         | chr4:155891874-155907251  | OK     | 17.9243   | 26.0286   |
| 9030404E10Rik | chr16:30021841-30039479   | NOTEST | 0.295652  | 0.429286  |
| Enkur         | chr2:21180730-21205365    | NOTEST | 0.448249  | 0.650732  |
| Lmo2          | chr2:103957994-103981878  | OK     | 7.33895   | 10.6538   |
| Cenpl         | chr1:161070891-161086343  | OK     | 2.18284   | 3.16838   |



|               |                           |        |           |           |
|---------------|---------------------------|--------|-----------|-----------|
| Mob3a         | chr10:80685252-80701820   | OK     | 11.4418   | 16.606    |
| Pkp2          | chr16:16213344-16272712   | OK     | 0.660413  | 0.958338  |
| B230217O12Rik | chr19:57323196-57360899   | OK     | 7.49357   | 10.8704   |
| 2610001J05Rik | chr6:13869073-13871483    | OK     | 24.2599   | 35.1801   |
| Acy1          | chr9:106432980-106438236  | OK     | 2.72193   | 3.94709   |
| Zfp672        | chr11:58315113-58330339   | OK     | 6.21443   | 9.00781   |
| Ctla2b        | chr13:60895350-60897447   | OK     | 0.679424  | 0.984823  |
| Slc22a18      | chr7:143473754-143499332  | OK     | 8.93671   | 12.9535   |
| Clk3          | chr9:57750710-57765860    | OK     | 15.8202   | 22.9306   |
| Kcnj12        | chr11:61022563-61073267   | OK     | 16.4833   | 23.884    |
| Armcx4        | chrX:134686518-134697772  | OK     | 6.12125   | 8.86916   |
| Manf          | chr9:106887414-106891938  | OK     | 24.9568   | 36.1477   |
| Syn3          | chr10:86048745-86498896   | OK     | 2.27674   | 3.29707   |
| Fbl           | chr7:28169747-28179269    | OK     | 1.53098   | 2.21709   |
| Elavl3        | chr9:22015004-22052023    | OK     | 44.9874   | 65.1393   |
| Cdcp2         | chr4:107096890-107107748  | NOTEST | 0.0285264 | 0.0412959 |
| Rad17         | chr13:100617163-100651061 | OK     | 5.9386    | 8.59581   |
| Macrodl       | chr19:7056767-7198062     | OK     | 8.26483   | 11.9622   |
| Arrdc1        | chr2:24925351-24935281    | OK     | 13.7101   | 19.8421   |
| Gale          | chr4:135965164-135968178  | OK     | 15.4659   | 22.3793   |
| Sdk2          | chr11:113780789-114065951 | OK     | 2.22798   | 3.22379   |
| BC018507      | chr13:70588688-70637634   | OK     | 11.6618   | 16.8697   |
| Gps2          | chr11:69914191-69916591   | OK     | 6.64755   | 9.61502   |
| Wsb1          | chr11:79239381-79254695   | OK     | 20.0619   | 29.0089   |
| Stard6        | chr18:70453139-70501065   | NOTEST | 0.511805  | 0.740048  |
| Wdr63         | chr3:146040525-146108036  | NOTEST | 0.0439004 | 0.0634777 |
| Stat6         | chr10:127642985-127666703 | OK     | 32.3504   | 46.7627   |
| Mettl7a1      | chr15:100304816-100314348 | OK     | 23.4961   | 33.9637   |
| Dcaf15        | chr8:84097071-84104762    | OK     | 5.30522   | 7.66809   |
| Sdccag8       | chr1:176814659-177020432  | OK     | 4.78159   | 6.91049   |
| Otop2         | chr11:115307162-115332303 | NOTEST | 0.0317027 | 0.0458119 |
| Zfp830        | chr11:82764344-82767622   | OK     | 3.03104   | 4.37979   |
| Hagh          | chr17:24850489-24864450   | OK     | 84.8859   | 122.645   |
| Rrnad1        | chr3:87919543-87930195    | OK     | 3.29586   | 4.76133   |
| Mllt10        | chr2:18055236-18392830    | OK     | 3.54844   | 5.1258    |
| Dnajc5b       | chr3:19508594-19610862    | OK     | 0.627185  | 0.905676  |
| Ppwd1         | chr13:104205121-104249622 | OK     | 2.12397   | 3.06678   |
| Frrs1         | chr3:116859566-116903750  | NOTEST | 0.241398  | 0.348477  |
| Pik3cd        | chr4:149649167-149701629  | OK     | 16.6954   | 24.0902   |
| Mink1         | chr11:70562880-70614482   | OK     | 49.6519   | 71.6285   |
| Tnfsf15       | chr4:63724602-63745113    | NOTEST | 0.0489758 | 0.0706518 |
| Piezo2        | chr18:63010212-63387183   | OK     | 69.1812   | 99.7844   |
| Syng3         | chr17:24685091-24689949   | OK     | 119.336   | 172.041   |
| S100g         | chrX:162407199-163352564  | NOTEST | 0.299614  | 0.431928  |
| Rslcan18      | chr13:67069397-67114028   | NOTEST | 0.377323  | 0.543947  |
| Ikzf1         | chr11:11686212-11772926   | OK     | 0.756303  | 1.09001   |
| Wdr34         | chr2:30031557-30048879    | OK     | 5.4294    | 7.82499   |
| Tmem191c      | chr16:17276299-17278661   | OK     | 1.82621   | 2.63196   |
| Atxn7l2       | chr3:108202227-108210527  | OK     | 1.51264   | 2.17897   |
| Adc           | chr4:128932145-128962417  | OK     | 50.9081   | 73.3322   |
| Rbm4          | chr19:4784292-4811634     | OK     | 2.97613   | 4.28433   |
| 4933407K13Rik | chrX:75725457-75764699    | NOTEST | 0.374911  | 0.539702  |
| Mtmr1         | chrX:71364759-71419196    | OK     | 6.0012    | 8.6356    |

|               |                           |        |           |           |
|---------------|---------------------------|--------|-----------|-----------|
| Chd3          | chr11:69343272-69369426   | OK     | 42.2012   | 60.7024   |
| Ism1          | chr2:139678177-139758581  | OK     | 1.55308   | 2.23392   |
| Crmp1         | chr5:37242057-37292163    | OK     | 47.7852   | 68.7267   |
| Zfp292        | chr4:34803109-34882948    | OK     | 3.20163   | 4.60445   |
| Lifr          | chr15:7129571-7197489     | OK     | 114.786   | 165.066   |
| Paqr3         | chr5:96997688-97111596    | OK     | 5.26985   | 7.57818   |
| Vps4b         | chr1:106770787-106796725  | OK     | 41.5721   | 59.7737   |
| Vamp4         | chr1:162570827-162599078  | OK     | 46.4784   | 66.8229   |
| Fam89b        | chr19:5728086-5729666     | OK     | 90.3686   | 129.917   |
| Plekha3       | chr2:76675314-76697335    | OK     | 12.8034   | 18.4039   |
| Csrnp3        | chr2:65845766-66031546    | OK     | 12.4917   | 17.9557   |
| Mtss1         | chr15:58941233-59082026   | OK     | 16.2765   | 23.3956   |
| Rnf38         | chr4:44126211-44168283    | OK     | 14.332    | 20.5985   |
| Tpgs1         | chr10:79669409-79676126   | OK     | 35.3231   | 50.7672   |
| Irg1          | chr14:103047011-103056573 | NOTEST | 0.0647707 | 0.0930858 |
| 1810043H04Rik | chr11:120098933-120100424 | OK     | 15.1193   | 21.7277   |
| Ap4m1         | chr5:138172020-138187186  | OK     | 7.84564   | 11.2741   |
| Prmt2         | chr10:76207221-76237865   | OK     | 52.9646   | 76.1078   |
| Atxn7         | chr14:14012490-14107301   | OK     | 3.08926   | 4.43911   |
| Fbxl8         | chr8:105264647-105269326  | OK     | 2.22      | 3.18958   |
| Pnp           | chr14:50944302-50953412   | OK     | 2.70447   | 3.8851    |
| Mef2a         | chr7:67231162-67372858    | OK     | 34.2831   | 49.2413   |
| 5031434O11Rik | chr3:51515317-51567116    | NOTEST | 0.485366  | 0.696998  |
| Cpm           | chr10:117629499-117687352 | NOTEST | 0.359756  | 0.516544  |
| Meig1         | chr2:3409042-3422648      | NOTEST | 0.384979  | 0.55263   |
| Irf9          | chr14:55603984-55610030   | OK     | 7.31944   | 10.5061   |
| Mcf2l         | chr8:12915892-13020509    | OK     | 19.5324   | 28.0354   |
| Fbrs          | chr7:127485220-127491513  | OK     | 8.22476   | 11.805    |
| Hras          | chr7:141189933-141194004  | OK     | 38.365    | 55.058    |
| Gm10548       | chr18:34207774-34322190   | NOTEST | 0.160735  | 0.230633  |
| Ralbp1        | chr17:65848427-65885755   | OK     | 42.8336   | 61.4597   |
| Cdyl2         | chr8:116568723-116732991  | OK     | 4.68642   | 6.72307   |
| Gprin2        | chr14:34194440-34201633   | OK     | 1.91258   | 2.74356   |
| Acly          | chr11:100476351-100528000 | OK     | 179.654   | 257.651   |
| Parp8         | chr13:116854823-117025516 | OK     | 10.6559   | 15.282    |
| Adamts16      | chr13:70727807-70841810   | NOTEST | 0.177408  | 0.254292  |
| Efcab1        | chr16:14906645-14924522   | OK     | 4.12463   | 5.91189   |
| Osbpl6        | chr2:76406507-76600647    | OK     | 11.5383   | 16.5378   |
| Rbm15b        | chr9:106883984-106887000  | OK     | 11.6606   | 16.7126   |
| Krt10         | chr11:99385255-99389364   | OK     | 0.85731   | 1.22871   |
| Pdcd2         | chr17:15521574-15527301   | OK     | 14.9354   | 21.3988   |
| Zmym5         | chr14:56790584-56811716   | OK     | 6.13444   | 8.78902   |
| Bid           | chr6:120893118-120916820  | OK     | 14.7088   | 21.073    |
| Klc4          | chr17:46630630-46645144   | OK     | 13.6605   | 19.5641   |
| Pdcl3         | chr1:38987813-38997236    | OK     | 19.9361   | 28.5505   |
| Mapkapk5      | chr5:121525050-121545892  | OK     | 10.3439   | 14.8117   |
| Rab39         | chr9:53684109-53706232    | OK     | 13.4018   | 19.1896   |
| 2610034B18Rik | chr7:79925358-79935264    | OK     | 13.438    | 19.2392   |
| Swt1          | chr1:151367698-151428435  | OK     | 3.0396    | 4.34853   |
| Gyltl1b       | chr2:92365045-92371057    | NOTEST | 0.179613  | 0.256935  |
| Hirip3        | chr7:126861971-126865122  | OK     | 2.21249   | 3.16467   |
| Mapk11        | chr15:89142483-89149606   | OK     | 45.9643   | 65.7406   |
| Abrac1        | chr10:18011259-18023252   | OK     | 9.07583   | 12.9794   |

|               |                           |        |           |           |
|---------------|---------------------------|--------|-----------|-----------|
| Ccdc163       | chr4:116708929-116715104  | OK     | 1.60762   | 2.29896   |
| Epcam         | chr17:87635978-87651127   | NOTEST | 0.0288899 | 0.0413117 |
| Lag3          | chr6:124904358-124911705  | NOTEST | 0.351513  | 0.502418  |
| Rplp1         | chr9:61913282-61914510    | OK     | 155.792   | 222.639   |
| Map3k14       | chr11:103219763-103267401 | OK     | 1.65534   | 2.36525   |
| Bag1          | chr4:40936397-40948294    | OK     | 97.2731   | 138.966   |
| Vamp2         | chr11:69088527-69092381   | OK     | 297.805   | 425.344   |
| Actr5         | chr2:158624912-158639211  | OK     | 1.89787   | 2.70969   |
| Hn1           | chr11:115497352-115514370 | OK     | 82.0384   | 117.124   |
| Fam72a        | chr1:131527988-131539872  | NOTEST | 0.42842   | 0.611549  |
| Mnt           | chr11:74830923-74845725   | OK     | 12.3251   | 17.5931   |
| Usp12         | chr5:146734811-146794956  | OK     | 31.9607   | 45.6159   |
| Mnda          | chr1:173896354-173912922  | NOTEST | 0.0474549 | 0.0677252 |
| Slc1a6        | chr10:78780495-78814825   | OK     | 3.40324   | 4.8567    |
| Aff3          | chr1:38175990-38664955    | OK     | 17.6851   | 25.2298   |
| Nxf1          | chr19:8757102-8770910     | OK     | 13.2228   | 18.8631   |
| Hist3h2a      | chr11:58954684-58955192   | OK     | 24.8845   | 35.4986   |
| Syt10         | chr15:89782392-89841860   | NOTEST | 0.427605  | 0.609869  |
| Gpatch11      | chr17:78835515-78848308   | OK     | 10.4553   | 14.9091   |
| H2-Ke2        | chr17:33938908-33940343   | OK     | 48.1597   | 68.6696   |
| Usp18         | chr6:121245905-121270917  | OK     | 1.76193   | 2.51223   |
| Gm10640       | chr7:31162357-31170641    | NOTEST | 0.432879  | 0.617212  |
| Lsmem1        | chr12:40176385-40199315   | NOTEST | 0.121236  | 0.172858  |
| Ank3          | chr10:69533707-70027436   | OK     | 35.381    | 50.4455   |
| Nvl           | chr1:181093422-181144157  | OK     | 9.32227   | 13.2909   |
| Dazap1        | chr10:79697304-80369637   | OK     | 19.3674   | 27.5978   |
| Fbxw4         | chr19:45560614-45660193   | OK     | 7.58817   | 10.8107   |
| Abhd5         | chr9:122351615-122381523  | OK     | 12.9743   | 18.4828   |
| Vti1b         | chr12:79130787-79172458   | OK     | 90.9311   | 129.531   |
| Disp2         | chr2:118779718-118795175  | OK     | 73.9096   | 105.246   |
| Zfp428        | chr7:24507086-24515682    | OK     | 11.2079   | 15.9564   |
| Tmcc3         | chr10:94514856-94590954   | OK     | 11.6272   | 16.5511   |
| Lrriq4        | chr3:30624266-30672431    | NOTEST | 0.0619921 | 0.0882316 |
| Zkscan6       | chr11:65807243-65829239   | OK     | 3.31061   | 4.71113   |
| Atg16l1       | chr1:87756010-87792428    | OK     | 19.8535   | 28.2506   |
| Grrp1         | chr4:134251109-134254106  | OK     | 1.40555   | 1.99982   |
| Polk          | chr13:96480688-96542485   | OK     | 3.0217    | 4.29928   |
| 4921504A21Rik | chr5:19202367-19226555    | OK     | 0.908255  | 1.2922    |
| 2610015P09Rik | chr16:43889901-43964314   | OK     | 1.04686   | 1.48868   |
| Rnf31         | chr14:55591789-55603671   | OK     | 6.4684    | 9.19813   |
| Mcmdc2        | chr1:9908637-9940954      | NOTEST | 0.125468  | 0.178392  |
| D630041G03Rik | chr7:4464734-4480487      | OK     | 0.936911  | 1.33208   |
| Mtm1          | chrX:71210766-71315295    | OK     | 5.49765   | 7.81386   |
| Eif4e3        | chr6:99625136-99666771    | OK     | 19.9244   | 28.3177   |
| Prkrip1       | chr5:136180356-136198954  | OK     | 8.96851   | 12.7464   |
| Tmem236       | chr2:14174523-14221993    | NOTEST | 0.188372  | 0.267708  |
| Gm6654        | chr6:146642578-146650600  | OK     | 1.7506    | 2.4879    |
| Filip1        | chr9:79815561-79977882    | OK     | 10.1256   | 14.3897   |
| Rps8          | chr4:117153835-117156132  | OK     | 13.046    | 18.5398   |
| Ubn2          | chr6:38433924-38512763    | OK     | 2.21575   | 3.14875   |
| Ccp110        | chr7:118712610-118737018  | OK     | 25.5579   | 36.3123   |
| Zfp954        | chr7:7114682-7121476      | OK     | 6.96264   | 9.89205   |
| Erich1        | chr8:14027564-14090327    | OK     | 4.80446   | 6.82583   |

|               |                           |        |            |            |
|---------------|---------------------------|--------|------------|------------|
| Galk2         | chr2:125859108-126152004  | OK     | 8.13237    | 11.5501    |
| Zfp703        | chr8:26977335-26981462    | OK     | 13.1554    | 18.6828    |
| Tubb5         | chr17:35833919-35838301   | OK     | 471.615    | 669.754    |
| Crhr2         | chr6:55090048-55133016    | OK     | 0.646077   | 0.917498   |
| Slc6a20b      | chr9:123593819-123632565  | NOTEST | 0.00521741 | 0.00740801 |
| Mettl7a2      | chr15:100353199-100384435 | NOTEST | 0.115229   | 0.163587   |
| Cmss1         | chr16:57301999-57606867   | OK     | 6.77617    | 9.61968    |
| Slc45a2       | chr15:11000720-11029233   | NOTEST | 0.00578851 | 0.00821685 |
| Gm3414        | chr5:45669924-45857540    | OK     | 0.598485   | 0.849354   |
| Atg9a         | chr1:75180860-75192010    | OK     | 39.6846    | 56.3117    |
| Ahsa2         | chr11:23306894-23498039   | OK     | 15.1332    | 21.47      |
| Ppp3cc        | chr14:70217897-70289449   | OK     | 22.3936    | 31.7634    |
| Gm13152       | chr4:147175865-147513420  | OK     | 3.7816     | 5.36349    |
| 5330426P16Rik | chr16:50726750-50732773   | OK     | 8.85221    | 12.5546    |
| Luzp2         | chr7:54835244-55268888    | OK     | 37.6919    | 53.456     |
| Ccdc82        | chr9:13246978-13292353    | OK     | 4.09531    | 5.80804    |
| Vbp1          | chrX:75514296-75534946    | OK     | 65.5777    | 92.9922    |
| Ccdc34        | chr2:110017816-110050479  | OK     | 3.50591    | 4.97095    |
| Arhgap6       | chrX:168795098-169304440  | OK     | 0.822603   | 1.16633    |
| Tmem254c      | chr14:26202666-26207041   | LOWDAT | 1.0712     | 1.51862    |
| Lrrc8b        | chr5:105415774-105486189  | OK     | 23.9728    | 33.9846    |
| Oraov1        | chr7:144915193-144921137  | OK     | 17.0228    | 24.1311    |
| Rbck1         | chr2:152316333-152332639  | OK     | 22.3785    | 31.7197    |
| Mvd           | chr8:122433595-122443422  | OK     | 26.4792    | 37.5228    |
| Map3k19       | chr1:127815270-127840290  | NOTEST | 0.0102984  | 0.0145918  |
| Elk3          | chr10:93247415-93311159   | OK     | 2.88601    | 4.08918    |
| Zfp583        | chr7:6315664-6330434      | OK     | 1.39258    | 1.97302    |
| A530032D15Rik | chr1:85088138-85109853    | NOTEST | 0.0103433  | 0.0146534  |
| Xkr4          | chr1:3214481-3671498      | OK     | 1.76403    | 2.49894    |
| Nup62         | chr7:44812255-44849079    | OK     | 12.5044    | 17.709     |
| Chit1         | chr1:134111241-134151540  | NOTEST | 0.310582   | 0.439801   |
| AI317395      | chr10:40001572-40025268   | NOTEST | 0.350981   | 0.496948   |
| Dnajc12       | chr10:63382442-63408840   | OK     | 12.1688    | 17.2295    |
| A630066F11Rik | chr10:7630235-7664623     | OK     | 1.06466    | 1.50717    |
| 9530080O11Rik | chr4:95959710-96024274    | NOTEST | 0.596687   | 0.844581   |
| Zfp72         | chr13:74371425-74376566   | OK     | 2.35101    | 3.32719    |
| Zfp280d       | chr9:72274898-72363771    | OK     | 4.81193    | 6.80743    |
| Ston2         | chr12:91633008-91786436   | OK     | 5.10969    | 7.22744    |
| Slc7a6os      | chr8:106200437-106210933  | OK     | 7.03739    | 9.95409    |
| Fgfr1op       | chr17:8165517-8196470     | OK     | 9.01349    | 12.7473    |
| Uros          | chr7:133686329-133709295  | OK     | 17.4614    | 24.6946    |
| Id2           | chr12:25093798-25096092   | OK     | 19.5332    | 27.6187    |
| Gm16039       | chr6:8259287-8428765      | OK     | 4.48202    | 6.33675    |
| Tial1         | chr7:128439776-128461513  | OK     | 12.6382    | 17.8679    |
| Asun          | chr6:146549631-146577835  | OK     | 4.26957    | 6.03607    |
| Fxyd6         | chr9:45370184-45396159    | OK     | 44.4407    | 62.827     |
| BC005561      | chr5:104508351-104522383  | OK     | 1.83551    | 2.59457    |
| 9330151L19Rik | chr12:69189837-69199868   | OK     | 2.68853    | 3.79898    |
| Wiz           | chr17:32354049-32389439   | OK     | 11.9526    | 16.8852    |
| Phactr1       | chr13:42680622-43138512   | OK     | 40.4785    | 57.1806    |
| Sync          | chr4:129287620-129335370  | OK     | 13.6861    | 19.3308    |
| Pxmp2         | chr5:110274285-110286168  | OK     | 4.10718    | 5.80112    |
| Ell           | chr8:70539674-70592858    | OK     | 3.7874     | 5.3487     |

|               |                           |        |           |           |
|---------------|---------------------------|--------|-----------|-----------|
| Ppp1r3d       | chr2:178411205-178414463  | OK     | 2.58267   | 3.64728   |
| Slc40a1       | chr1:45908069-45925594    | OK     | 1.35597   | 1.91408   |
| Trak2         | chr1:58900449-58973482    | OK     | 19.1665   | 27.0416   |
| Trub1         | chr19:57452905-57491005   | OK     | 4.60372   | 6.49487   |
| Spats1        | chr17:45448936-45474938   | OK     | 0.75738   | 1.06832   |
| Gas8          | chr8:123518834-123536650  | OK     | 12.9089   | 18.2067   |
| 1110004E09Rik | chr16:90925810-90934849   | OK     | 12.6543   | 17.845    |
| Rpl6          | chr5:121204500-121209241  | OK     | 10.8548   | 15.3047   |
| Il17ra        | chr6:120463196-120483727  | OK     | 0.750577  | 1.05827   |
| Pcdha12       | chr18:36930284-37841872   | OK     | 5.30783   | 7.4829    |
| Tpk1          | chr6:43345006-43666175    | OK     | 4.35597   | 6.14078   |
| 1700034H15Rik | chr1:191894071-191913247  | NOTEST | 0.0892086 | 0.125759  |
| Mapk1ip1      | chr7:138835817-138846267  | OK     | 12.395    | 17.471    |
| 3110052M02Rik | chr17:21650610-21664966   | OK     | 3.3472    | 4.71746   |
| Mfsd4         | chr1:132026620-132068062  | OK     | 2.32517   | 3.27624   |
| Zswim3        | chr2:164805113-164822127  | OK     | 3.36949   | 4.74768   |
| Camta1        | chr4:151059522-151861768  | OK     | 51.8152   | 72.9913   |
| Snopc3        | chr4:83417743-83453340    | OK     | 5.56421   | 7.83753   |
| Abi1          | chr2:22895521-23040241    | OK     | 33.5948   | 47.3164   |
| Aaed1         | chr13:64291835-64312710   | OK     | 9.72587   | 13.696    |
| Fam53c        | chr18:34758905-34773760   | OK     | 26.3526   | 37.1072   |
| Appl2         | chr10:83600033-83648664   | OK     | 11.33     | 15.9507   |
| Caskin1       | chr17:24488782-24527938   | OK     | 39.4771   | 55.5718   |
| Wbp4          | chr14:79459936-79582491   | OK     | 28.3761   | 39.9319   |
| Cr2           | chr1:195136810-195176715  | NOTEST | 0.0975075 | 0.137196  |
| Anapc11       | chr11:120598420-120608198 | OK     | 20.2961   | 28.5567   |
| Hoxa4         | chr6:52169061-52213597    | OK     | 1.78307   | 2.50852   |
| Xbp1          | chr11:5520640-5525993     | OK     | 27.5776   | 38.7894   |
| Zfp551        | chr7:12415148-12422491    | OK     | 1.15949   | 1.63074   |
| Nle1          | chr11:82900767-82908395   | OK     | 3.30703   | 4.65047   |
| Prpf38b       | chr3:108902806-108911704  | OK     | 11.3195   | 15.9164   |
| Dalrd3        | chr9:108569891-108578670  | OK     | 17.1618   | 24.1304   |
| Pmm1          | chr15:81951105-81960930   | OK     | 113.605   | 159.725   |
| Stx4a         | chr7:127841807-127848965  | OK     | 36.1617   | 50.8392   |
| Tmem51        | chr4:142030992-142088101  | OK     | 7.24301   | 10.1825   |
| Fbxl16        | chr17:25809084-25821265   | OK     | 36.6526   | 51.517    |
| Pydc3         | chr1:173673679-173698392  | NOTEST | 0.220941  | 0.310499  |
| Mospd1        | chrX:53344593-53370559    | OK     | 10.0979   | 14.1782   |
| Mrpl27        | chr11:94653790-94660087   | OK     | 27.5473   | 38.6708   |
| Hexim1        | chr11:103116324-103119724 | OK     | 20.4274   | 28.6751   |
| Mtfr1l        | chr4:134525554-134535387  | OK     | 58.7917   | 82.5182   |
| Parp12        | chr6:39086411-39118349    | OK     | 5.5328    | 7.76485   |
| Rbm17         | chr2:11585438-11603199    | OK     | 23.8079   | 33.4116   |
| Brap          | chr5:121660562-121687249  | OK     | 67.1932   | 94.2934   |
| Mcf2          | chr17:87254442-87265947   | OK     | 34.8722   | 48.9333   |
| Uhrf1bp1l     | chr10:89744990-89819869   | OK     | 26.7892   | 37.5872   |
| Rac2          | chr15:78559168-78572783   | NOTEST | 0.530068  | 0.743621  |
| Pagr1a        | chr7:127015050-127017352  | OK     | 22.5466   | 31.6268   |
| Psip1         | chr4:83455680-83486448    | OK     | 53.8812   | 75.5798   |
| Srrt          | chr5:137295703-137307674  | OK     | 20.0831   | 28.1688   |
| Meis3         | chr7:16175324-16186503    | OK     | 12.8154   | 17.973    |
| Zfp541        | chr7:16071941-16096328    | NOTEST | 0.032677  | 0.0458204 |
| Wdsub1        | chr2:59852364-59882606    | OK     | 7.62131   | 10.6866   |



|               |                           |        |           |           |
|---------------|---------------------------|--------|-----------|-----------|
| B4galnt2      | chr11:95863558-95914871   | NOTEST | 0.017972  | 0.0251925 |
| Grik4         | chr9:42520411-42944371    | OK     | 21.2993   | 29.8478   |
| H2-M10.2      | chr17:36284280-36286421   | NOTEST | 0.236408  | 0.331287  |
| Trappc6a      | chr7:19508728-19516145    | OK     | 12.3801   | 17.3478   |
| Rpl14         | chr9:120571516-120574653  | OK     | 35.4235   | 49.6326   |
| Hspb8         | chr5:116408494-116422864  | OK     | 182.092   | 255.11    |
| AA987161      | chr13:67589438-67609707   | OK     | 2.93915   | 4.11721   |
| Dis3          | chr14:99076633-99254494   | OK     | 2.82368   | 3.95529   |
| Ino80d        | chr1:63047800-63114267    | OK     | 4.23319   | 5.92848   |
| Rad9a         | chr19:4192173-4201603     | OK     | 5.01771   | 7.0268    |
| 2310003H01Rik | chr11:120369561-120378746 | OK     | 5.54477   | 7.7626    |
| Tubb2a        | chr13:34074279-34078008   | OK     | 416.262   | 582.717   |
| Pnlcd1        | chr17:12888901-12910000   | NOTEST | 0.143517  | 0.200903  |
| Fam109a       | chr5:121849027-121854599  | OK     | 4.31392   | 6.03762   |
| Fbrsl1        | chr5:110361751-110448503  | OK     | 3.83912   | 5.37227   |
| Tprgl         | chr4:154157484-154160684  | OK     | 155.234   | 217.185   |
| Cbwd1         | chr19:24919915-24961616   | OK     | 9.0559    | 12.6689   |
| Il10rb        | chr16:91406234-91425834   | OK     | 35.3498   | 49.4475   |
| Hoxb5         | chr11:96303511-96306121   | OK     | 12.61     | 17.6386   |
| Pdzd4         | chrX:73793356-73824969    | OK     | 26.6612   | 37.2805   |
| Zmynd8        | chr2:165784151-165884838  | OK     | 12.8708   | 17.9967   |
| Sltm          | chr9:70542777-70592232    | OK     | 13.8618   | 19.3794   |
| Igsf3         | chr3:101377124-101463060  | OK     | 20.2002   | 28.2404   |
| Xrcc1         | chr7:24547149-24573438    | OK     | 4.85142   | 6.78215   |
| Bloc1s3       | chr7:19505803-19508331    | OK     | 9.23593   | 12.9097   |
| C920006O11Rik | chr9:78175913-78178882    | OK     | 0.925989  | 1.29421   |
| Hs1bp3        | chr12:8313432-8343824     | OK     | 6.48483   | 9.06338   |
| Samd10        | chr2:181595217-181599147  | OK     | 13.8844   | 19.4025   |
| Chkb          | chr15:89416404-89429927   | OK     | 14.3995   | 20.1222   |
| Trim36        | chr18:46165299-46212607   | OK     | 102.244   | 142.868   |
| Rps9          | chr7:3704040-3706897      | OK     | 256.585   | 358.524   |
| H2afy2        | chr10:61715262-61783864   | OK     | 6.40726   | 8.95271   |
| Med20         | chr17:47611595-47624418   | OK     | 11.7212   | 16.3752   |
| Icosl         | chr10:78069367-78079525   | OK     | 1.28892   | 1.80038   |
| Ahnak         | chr19:8989283-9076926     | OK     | 71.7617   | 100.229   |
| Tceal8        | chrX:136168983-136172251  | OK     | 18.8363   | 26.3065   |
| Dpp3          | chr19:4907228-4928287     | OK     | 38.1008   | 53.2072   |
| Rdh1          | chr10:127759762-127768299 | NOTEST | 0.0514426 | 0.071793  |
| Evi5l         | chr8:4166566-4193701      | OK     | 28.7361   | 40.1024   |
| B3gnt2        | chr11:22834738-22860336   | OK     | 27.2413   | 38.0157   |
| Pex6          | chr17:46711462-46725541   | OK     | 13.4689   | 18.7945   |
| Gm20748       | chr18:61639652-61665538   | OK     | 3.69491   | 5.15585   |
| Mllt3         | chr4:87769924-88033407    | OK     | 7.56646   | 10.5558   |
| Pde6h         | chr6:136954522-136963483  | NOTEST | 0.0456172 | 0.0636397 |
| Eepd1         | chr9:25481596-25604110    | OK     | 73.2067   | 102.129   |
| Pifo          | chr3:105996956-106014646  | OK     | 0.594813  | 0.829726  |
| Hist1h2bl     | chr13:21715712-21716143   | NOTEST | 0.450853  | 0.628871  |
| Lrrc42        | chr4:107233513-107253533  | OK     | 14.5577   | 20.3054   |
| Tcte1         | chr17:45523433-45549677   | NOTEST | 0.0785255 | 0.10949   |
| Gm16793       | chr8:35582502-35679449    | OK     | 0.991707  | 1.38238   |
| Tmtc4         | chr14:122918974-122983261 | OK     | 11.5131   | 16.0471   |
| Nol12         | chr15:78934932-78941910   | OK     | 5.15974   | 7.19146   |
| Wnt9a         | chr11:59306929-59333552   | OK     | 4.51122   | 6.28726   |

|               |                           |        |           |           |
|---------------|---------------------------|--------|-----------|-----------|
| Rab43         | chr6:87788852-87812164    | OK     | 4.2093    | 5.86575   |
| Zfp605        | chr5:110110091-110129794  | OK     | 2.81767   | 3.92582   |
| Esm1          | chr13:113209658-113218104 | OK     | 0.623328  | 0.868397  |
| Gm6297        | chr4:40720153-40757885    | NOTEST | 0.336488  | 0.468695  |
| Tgm7          | chr2:121093588-121109791  | NOTEST | 0.03634   | 0.0506142 |
| 3110082I17Rik | chr5:139359738-139460534  | OK     | 2.7556    | 3.83795   |
| Rpl38         | chr11:114344525-114757886 | OK     | 5.26964   | 7.3374    |
| Gtf2f1        | chr17:57003401-57011288   | OK     | 28.8616   | 40.172    |
| Lin54         | chr5:100442034-100500639  | OK     | 4.7792    | 6.65158   |
| Itga3         | chr11:95044481-95076714   | OK     | 22.0751   | 30.7228   |
| Armc7         | chr11:115475676-115491814 | OK     | 3.27795   | 4.56181   |
| Atp6v1f       | chr6:29467782-29470509    | OK     | 124.491   | 173.238   |
| Nob1          | chr8:107412488-107425038  | OK     | 10.2681   | 14.288    |
| Donson        | chr16:91679264-91688728   | OK     | 4.74397   | 6.60032   |
| Cdca4         | chr12:112820234-112829389 | OK     | 2.16774   | 3.0145    |
| Chrne         | chr11:70614882-70619194   | NOTEST | 0.0533093 | 0.0741268 |
| Mia2          | chr12:59095799-59109130   | NOTEST | 0.283968  | 0.394836  |
| Rpl31-ps12    | chr16:16753015-16829363   | OK     | 12.5483   | 17.4462   |
| Soga3         | chr10:29143995-29199628   | OK     | 59.4795   | 82.6734   |
| Galnt5        | chr2:57998154-58039171    | OK     | 10.9062   | 15.1582   |
| Coil          | chr11:88973934-88991613   | OK     | 6.43097   | 8.93779   |
| Gtse1         | chr15:85859706-85876573   | NOTEST | 0.368939  | 0.512753  |
| Rnf141        | chr7:110816534-110844381  | OK     | 14.111    | 19.6112   |
| Deptor        | chr15:55099916-55259273   | OK     | 32.8412   | 45.6376   |
| 2210404O09Rik | chr17:21879569-21909926   | OK     | 1.92696   | 2.67779   |
| Isl1          | chr13:116298269-116309688 | OK     | 36.9439   | 51.3377   |
| Nav1          | chr1:135434579-135585355  | OK     | 22.5518   | 31.3373   |
| Yeats2        | chr16:20141062-20232573   | OK     | 3.5603    | 4.94718   |
| Pvrl2         | chr7:19716643-19749573    | OK     | 18.6158   | 25.8673   |
| Nexn          | chr3:152236983-152266320  | OK     | 7.9376    | 11.0262   |
| Zfp791        | chr8:85109166-85123095    | OK     | 0.767449  | 1.06606   |
| Ttc25         | chr11:100545631-100572566 | NOTEST | 0.542033  | 0.752926  |
| Tonsl         | chr15:76626236-76639929   | OK     | 2.24231   | 3.11475   |
| Mllt11        | chr3:95181765-95236424    | OK     | 111.528   | 154.918   |
| Pik3ip1       | chr11:3202352-3479831     | OK     | 44.727    | 62.1215   |
| Ap5z1         | chr5:142463930-142478715  | OK     | 6.29698   | 8.74566   |
| Lrnf4         | chr19:4510471-4621752     | OK     | 10.7135   | 14.8768   |
| Mphosph6      | chr8:117791644-117801929  | OK     | 5.70747   | 7.92438   |
| Cdk5r2        | chr1:74855028-74857732    | OK     | 80.2391   | 111.395   |
| Anxa2         | chr9:69453682-69491785    | OK     | 723.856   | 1004.83   |
| Mfn1          | chr3:32529481-32579225    | OK     | 18.105    | 25.1295   |
| Psme2b        | chr11:48945351-48979398   | OK     | 26.6606   | 37.003    |
| Runx2         | chr17:44495986-45119284   | OK     | 1.1559    | 1.60423   |
| Ric8          | chr7:140857396-140882309  | OK     | 31.5964   | 43.8478   |
| Ewsr1         | chr11:5069686-5099088     | OK     | 19.4706   | 27.0202   |
| Nfkbie        | chr17:45555715-45563168   | OK     | 3.49464   | 4.84962   |
| Hist1h1a      | chr13:23763667-23764412   | NOTEST | 0.226302  | 0.314032  |
| Ahctf1        | chr1:179744903-179804015  | OK     | 4.45147   | 6.17638   |
| Tmem50a       | chr4:134897848-134914916  | OK     | 172.343   | 239.088   |
| Thop1         | chr10:81070082-81082360   | OK     | 18.7787   | 26.05     |
| Zfp1          | chr8:111643442-111671011  | OK     | 5.15838   | 7.15569   |
| Prkab1        | chr5:116013589-116024428  | OK     | 4.22944   | 5.86659   |
| Pot1b         | chr17:55652024-55712628   | OK     | 1.81467   | 2.51706   |

|               |                           |        |            |            |
|---------------|---------------------------|--------|------------|------------|
| Cndp2         | chr18:84667464-84685702   | OK     | 49.2023    | 68.2426    |
| Il13ra1       | chrX:36112138-36171261    | OK     | 3.30943    | 4.58959    |
| Wdr52         | chr16:44394798-44482428   | NOTEST | 0.0952021  | 0.132027   |
| Bnc2          | chr4:84272541-84675086    | OK     | 4.43177    | 6.14572    |
| Cenpc1        | chr5:86012024-86065583    | OK     | 8.48271    | 11.7627    |
| Rnf125        | chr18:20944624-20983848   | OK     | 16.1644    | 22.4133    |
| Rab3d         | chr9:21907510-21918121    | OK     | 41.0138    | 56.8623    |
| Tfpt          | chr7:3620323-3629929      | OK     | 10.5747    | 14.6555    |
| Rcan1         | chr16:92391950-92466169   | OK     | 37.7961    | 52.374     |
| Ube2j2        | chr4:155943812-155959604  | OK     | 3.00545    | 4.16462    |
| Ablim3        | chr18:61799392-61911852   | OK     | 14.6611    | 20.3137    |
| Slc36a1       | chr11:55204339-55236330   | OK     | 82.3964    | 114.142    |
| Uck2          | chr1:167226083-167285127  | OK     | 26.0414    | 36.0747    |
| Ccdc77        | chr6:120324321-120444574  | OK     | 1.50179    | 2.08032    |
| Map3k3        | chr11:106084901-106155434 | OK     | 7.0597     | 9.7733     |
| Siah3         | chr14:75455981-75526141   | OK     | 7.29489    | 10.0987    |
| Sertm1        | chr3:54897068-54915887    | OK     | 4.09613    | 5.67025    |
| Myef2         | chr2:125068126-125123660  | OK     | 17.8464    | 24.689     |
| Lama3         | chr18:12334023-12583012   | NOTEST | 0.462646   | 0.63991    |
| D6Wsu163e     | chr6:126939965-126975704  | OK     | 15.0848    | 20.8629    |
| Rnf113a2      | chr12:84409067-84450950   | OK     | 4.48311    | 6.19961    |
| Mppe1         | chr18:67088297-67245830   | OK     | 9.22008    | 12.7501    |
| Dpm2          | chr2:32570857-32573571    | OK     | 27.4569    | 37.968     |
| Casp2         | chr6:42265038-42282496    | OK     | 2.45152    | 3.39002    |
| Phip          | chr9:82866158-82975489    | OK     | 4.77343    | 6.59912    |
| Gm16938       | chr7:98121564-98184799    | NOTEST | 0.546405   | 0.75536    |
| 4933421O10Rik | chr4:33027138-33031323    | OK     | 1.53045    | 2.11555    |
| Lrrc59        | chr11:94629823-94653754   | OK     | 70.0136    | 96.7757    |
| Polr3d        | chr14:70438747-70443471   | OK     | 8.77053    | 12.1229    |
| Ncoa4         | chr14:32159886-32179855   | OK     | 6.37993    | 8.81747    |
| Pm20d2        | chr4:33170405-33189737    | OK     | 1.36314    | 1.88381    |
| Shisa5        | chr9:109038566-109057792  | OK     | 40.4613    | 55.9126    |
| Aurka         | chr2:172356189-172370570  | OK     | 2.57149    | 3.5532     |
| Vps36         | chr8:22192859-22218597    | OK     | 18.0868    | 24.9902    |
| Sh3gl1        | chr17:56009200-56036637   | OK     | 11.6231    | 16.059     |
| Acsl5         | chr19:55253368-55296628   | OK     | 26.8087    | 37.0376    |
| Srsf12        | chr4:33208990-33233340    | OK     | 3.38344    | 4.67422    |
| Islr2         | chr9:58196296-58208808    | OK     | 3.39725    | 4.69279    |
| Pcf11         | chr7:92643711-92669912    | OK     | 4.00854    | 5.53717    |
| Slc26a6       | chr9:108854042-108862143  | OK     | 1.73309    | 2.39366    |
| Pdcd7         | chr9:65346067-65359643    | OK     | 10.4727    | 14.4632    |
| Unc13a        | chr8:71626711-71671757    | OK     | 26.5973    | 36.7308    |
| Nxf3          | chrX:136072098-136085255  | NOTEST | 0.0196867  | 0.0271828  |
| Ddx54         | chr5:120613129-120634235  | OK     | 16.85      | 23.2655    |
| Tpm1          | chr9:67022592-67049213    | OK     | 167.682    | 231.463    |
| Phf20l1       | chr15:66577571-66645255   | OK     | 4.40925    | 6.08549    |
| Dnm2          | chr9:21424907-21510186    | OK     | 14.3372    | 19.7857    |
| Smc5          | chr19:23206440-23273897   | OK     | 5.11778    | 7.06242    |
| Gm10814       | chr19:5988544-6018459     | OK     | 0.752631   | 1.03861    |
| Arid4a        | chr12:71015966-71099351   | OK     | 4.72013    | 6.51331    |
| Ush2a         | chr1:188262837-188965039  | NOTEST | 0.00335189 | 0.00462492 |
| Arhgap18      | chr10:26772511-26918648   | OK     | 1.21314    | 1.67387    |
| Mlf1          | chr3:67374096-67400000    | OK     | 2.82708    | 3.90043    |

|                    |                           |        |            |            |
|--------------------|---------------------------|--------|------------|------------|
| Snap29             | chr16:17280350-17430826   | OK     | 13.5002    | 18.6247    |
| Dock8              | chr19:24999528-25202432   | OK     | 1.78383    | 2.46094    |
| Map1s              | chr8:70905973-70917529    | OK     | 18.0411    | 24.8869    |
| Thoc7              | chr14:13949011-13961313   | OK     | 32.9961    | 45.5134    |
| Jakmip3            | chr7:138940729-139083976  | OK     | 4.37707    | 6.03728    |
| Fxn                | chr19:24261452-24280586   | OK     | 2.69323    | 3.71473    |
| 2900008C10Rik      | chrX:12036737-12160355    | OK     | 7.94913    | 10.9605    |
| Ipmk               | chr10:71347792-71385885   | OK     | 8.462      | 11.6672    |
| Pcdha3             | chr18:36930284-37841872   | OK     | 2.99904    | 4.13431    |
| Erp29              | chr5:121444752-121452474  | OK     | 53.9136    | 74.3109    |
| Socs1              | chr16:10783808-10785536   | OK     | 1.57698    | 2.17323    |
| Ccdc74a            | chr16:17646469-17650738   | OK     | 12.7916    | 17.6278    |
| Pnma1              | chr12:84146130-84148489   | OK     | 1.84377    | 2.54082    |
| Slc6a20a           | chr9:123636906-123678832  | NOTEST | 0.228661   | 0.315058   |
| Fam169a            | chr13:97067286-97137926   | OK     | 12.0885    | 16.6526    |
| Ifnar1             | chr16:91485214-91510522   | OK     | 16.0892    | 22.1612    |
| Asxl3              | chr18:22345088-22530227   | OK     | 1.74055    | 2.39742    |
| Cers4              | chr8:4493404-4526079      | OK     | 30.0661    | 41.4025    |
| Spem1              | chr11:69820870-69822165   | NOTEST | 0.0389607  | 0.0536383  |
| Rrm1               | chr7:102441694-102469771  | OK     | 5.03731    | 6.93447    |
| Hist2h2aa1,Hist2h2 | chr3:96245456-96246052    | LOWDAT | 6.8344     | 9.40792    |
| Tbce               | chr13:13954673-14039600   | OK     | 16.1454    | 22.225     |
| Rhbdd3             | chr11:5099272-5106100     | OK     | 4.07253    | 5.60588    |
| Ribc1              | chrX:152004583-152016295  | NOTEST | 0.147482   | 0.202972   |
| 1600020E01Rik      | chr6:86527329-86564449    | OK     | 2.41986    | 3.33024    |
| Synj2              | chr17:5941279-6079739     | OK     | 8.02824    | 11.0477    |
| Atg7               | chr6:114643096-114860614  | OK     | 10.2517    | 14.1057    |
| S1pr4              | chr10:81497744-81500137   | NOTEST | 0.329605   | 0.453504   |
| Dcaf6              | chr1:165329500-165460463  | OK     | 27.6084    | 37.9855    |
| Trp53rk            | chr2:166793766-166799492  | OK     | 0.692656   | 0.952951   |
| Pacsin1            | chr17:27655590-27711117   | OK     | 82.257     | 113.168    |
| Exosc2             | chr2:31670736-31681307    | OK     | 11.9687    | 16.4635    |
| Ccdc87             | chr19:4839365-4842528     | NOTEST | 0.518287   | 0.712862   |
| Atp13a2            | chr4:140986872-141007701  | OK     | 68.6004    | 94.3401    |
| Rpp40              | chr13:35895103-35906347   | OK     | 2.462      | 3.38572    |
| Ccdc167            | chr17:29660600-29717017   | OK     | 3.70201    | 5.09093    |
| Cbx2               | chr11:119023028-119031270 | OK     | 1.4219     | 1.95516    |
| Arhgdia            | chr11:120577234-120581620 | OK     | 169.913    | 233.631    |
| Prr7               | chr13:55464266-55473155   | OK     | 4.24205    | 5.83259    |
| Dsc1               | chr18:20083470-20114773   | NOTEST | 0.00698479 | 0.00960361 |
| Endov              | chr11:119491346-119511465 | OK     | 4.25343    | 5.84801    |
| Rai1               | chr11:60105012-60220604   | OK     | 7.97059    | 10.9584    |
| Vps13a             | chr19:16615365-16780933   | OK     | 8.14247    | 11.1906    |
| Serpina3h          | chr12:104247895-104254405 | OK     | 0.655935   | 0.90131    |
| Ets1               | chr9:32696041-32757820    | OK     | 5.8515     | 8.03958    |
| Camk2n1            | chr4:138455147-138460126  | OK     | 16.3531    | 22.4669    |
| Rps5               | chr7:12922310-12926686    | OK     | 171.075    | 235.031    |
| Ubxn2b             | chr4:6191104-6219788      | OK     | 3.23038    | 4.43773    |
| Snapc5             | chr9:64179296-64182688    | OK     | 38.992     | 53.5612    |
| Ccdc66             | chr14:27428846-27508460   | OK     | 3.5866     | 4.92623    |
| Psmb8              | chr17:34198194-34201454   | OK     | 9.36762    | 12.8646    |
| Tenm1              | chrX:42532392-43274784    | OK     | 1.91252    | 2.62582    |
| 2810013P06Rik      | chr8:123042574-123044602  | OK     | 5.05345    | 6.93635    |

|               |                           |        |          |          |
|---------------|---------------------------|--------|----------|----------|
| Rpsa          | chr9:120127765-120132369  | OK     | 12.6436  | 17.3529  |
| Aars2         | chr17:45506840-45520843   | OK     | 7.15859  | 9.82064  |
| Actl6a        | chr3:32708545-32726971    | OK     | 8.48022  | 11.6316  |
| Igsf8         | chr1:172312406-172319835  | OK     | 47.7268  | 65.422   |
| Fubp1         | chr3:152210457-152236830  | OK     | 11.6062  | 15.9056  |
| Pcbd2         | chr13:55727367-55776830   | OK     | 21.9669  | 30.099   |
| Cntrl         | chr2:35109491-35178822    | OK     | 1.11938  | 1.53335  |
| Pml           | chr9:58217179-58249786    | OK     | 2.51833  | 3.4493   |
| Apoh          | chr11:108395296-108414396 | OK     | 1.58737  | 2.17341  |
| Pqbp1         | chrX:7894518-7899269      | OK     | 31.6328  | 43.3081  |
| Gm10125       | chr18:5491500-5775468     | NOTEST | 0.57912  | 0.792805 |
| Zfp449        | chrX:56346399-56365674    | OK     | 2.17902  | 2.9827   |
| Rbbp8         | chr18:11633275-11743207   | OK     | 2.2618   | 3.096    |
| Lpcat1        | chr13:73467382-73514538   | OK     | 14.107   | 19.3095  |
| Polb          | chr8:22628118-22653437    | OK     | 19.9856  | 27.3525  |
| Cir1          | chr2:73283871-73312592    | OK     | 6.04361  | 8.27129  |
| Nelfe         | chr17:34850390-34856372   | OK     | 11.2017  | 15.327   |
| Morc3         | chr16:93832120-93876073   | OK     | 5.84049  | 7.99121  |
| Acat3         | chr17:12916328-12940396   | NOTEST | 0.275833 | 0.377398 |
| Tsacc         | chr3:88282759-88296838    | OK     | 1.39115  | 1.90336  |
| Gm2027        | chr12:44221355-44224380   | NOTEST | 0.328513 | 0.449417 |
| Mpst          | chr15:78406711-78414015   | OK     | 12.8592  | 17.5898  |
| Prkra         | chr2:76629936-76647994    | OK     | 14.3452  | 19.6173  |
| Nudc          | chr4:133532541-133546027  | OK     | 38.4418  | 52.569   |
| Prkcg         | chr7:3303531-3331097      | NOTEST | 0.130141 | 0.17795  |
| 1190005I06Rik | chr8:120608601-120634382  | OK     | 2.9067   | 3.97332  |
| Homer2        | chr7:81600480-81706925    | OK     | 8.37204  | 11.4433  |
| Zfp513        | chr5:30933142-31348845    | OK     | 3.73448  | 5.1041   |
| Tspan8        | chr10:115817283-115849893 | OK     | 61.3673  | 83.8705  |
| Wdr48         | chr9:119894894-119937558  | OK     | 21.8916  | 29.9181  |
| Zc3h18        | chr8:122376615-122417360  | OK     | 5.65073  | 7.72165  |
| Pkia          | chr3:7366603-7445365      | OK     | 38.9521  | 53.225   |
| Gm11944       | chr11:3202352-3479831     | NOTEST | 0.514523 | 0.703051 |
| Pan3          | chr5:147430579-147548501  | OK     | 6.47194  | 8.84321  |
| Heca          | chr10:17900465-17948067   | OK     | 8.08296  | 11.0444  |
| Pcyt2         | chr11:120610086-120617890 | OK     | 36.2783  | 49.5696  |
| Sf3a2         | chr10:80798734-80804922   | OK     | 11.5169  | 15.7358  |
| Zfp867        | chr11:59461196-59472474   | OK     | 1.19501  | 1.6326   |
| Fbxo30        | chr10:11281329-11297969   | OK     | 7.21313  | 9.85436  |
| Rps3a1        | chr3:86137939-86142668    | OK     | 15.9397  | 21.7747  |
| Rgs1          | chr1:144244668-144249104  | NOTEST | 0.204752 | 0.279682 |
| Armc2         | chr10:41914989-42018382   | NOTEST | 0.56309  | 0.769091 |
| Bnip3l        | chr14:66985239-67008877   | OK     | 31.877   | 43.5377  |
| Prdm15        | chr16:97791466-97851227   | OK     | 1.50118  | 2.05014  |
| Lbx2          | chr6:83086364-83088241    | NOTEST | 0.224695 | 0.306818 |
| Dus3l         | chr17:56764750-56770093   | OK     | 13.8216  | 18.8721  |
| Mbip          | chr12:56328306-56345894   | OK     | 5.04544  | 6.88784  |
| Zfp771        | chr7:127244525-127254801  | OK     | 13.848   | 18.904   |
| Zbtb46        | chr2:181390885-181459426  | OK     | 3.76522  | 5.13923  |
| Sc1t1         | chr3:41626704-41742514    | OK     | 1.93189  | 2.63684  |
| 35673         | chr7:127214441-127218445  | OK     | 1.34535  | 1.83579  |
| Fcho1         | chr8:71708386-71725681    | OK     | 6.80245  | 9.28202  |
| Tmem194       | chr10:127677064-127701047 | OK     | 1.69454  | 2.31191  |



|               |                           |        |          |          |
|---------------|---------------------------|--------|----------|----------|
| Serpinb6a     | chr13:33917917-34002794   | OK     | 329.064  | 448.939  |
| Cdkn3         | chr14:46760540-46771525   | OK     | 5.30451  | 7.23669  |
| Spsb2         | chr6:124808940-124814296  | OK     | 6.11478  | 8.34179  |
| Bloc1s4       | chr5:36747373-36748679    | OK     | 5.31004  | 7.24317  |
| Rps6ka2       | chr17:7170114-7303316     | OK     | 41.3061  | 56.3419  |
| Sec11a        | chr7:80915378-80947550    | OK     | 28.7665  | 39.2371  |
| Pir           | chrX:164269430-164373013  | OK     | 17.4487  | 23.7951  |
| Atf4          | chr15:80255183-80257545   | OK     | 88.0221  | 120.032  |
| Ap3s1         | chr18:46741916-46790826   | OK     | 24.8028  | 33.8186  |
| Cep57         | chr9:13807787-13827107    | OK     | 3.84371  | 5.23819  |
| Msantd3       | chr4:48539945-48561920    | OK     | 6.13333  | 8.35835  |
| Map9          | chr3:82358071-82395268    | OK     | 15.5461  | 21.1858  |
| Carf          | chr1:60076867-60153953    | OK     | 1.89417  | 2.581    |
| L1cam         | chrX:73853779-73880834    | OK     | 133.896  | 182.433  |
| Zfp566        | chr7:30077336-30090510    | OK     | 1.23997  | 1.68941  |
| Cmpk1         | chr4:114960612-114987228  | OK     | 82.5652  | 112.486  |
| Otub2         | chr12:103376893-103406350 | OK     | 5.09367  | 6.9391   |
| Elmo3         | chr8:105305600-105310623  | NOTEST | 0.232186 | 0.316264 |
| Acvr2b        | chr9:119402500-119433506  | OK     | 1.01532  | 1.38288  |
| Ankrd39       | chr1:36538172-36547201    | OK     | 5.09418  | 6.93836  |
| Zfp282        | chr6:47877554-47908484    | OK     | 3.06618  | 4.176    |
| Sprn          | chr7:140137563-140154659  | OK     | 20.0144  | 27.2584  |
| Fam210b       | chr2:172345576-172355749  | OK     | 6.48608  | 8.83341  |
| Dlx3          | chr11:95120116-95125291   | OK     | 0.808386 | 1.10093  |
| Nme3          | chr17:24896499-24936977   | OK     | 17.2393  | 23.4895  |
| Slfn1         | chr11:83116844-83122659   | NOTEST | 0.184352 | 0.251007 |
| Tbcb          | chr7:30224130-30232029    | OK     | 81.341   | 110.741  |
| Crlf2         | chr5:109554708-109558993  | OK     | 5.96977  | 8.12686  |
| Rsu1          | chr2:13076966-13271415    | OK     | 54.7241  | 74.4881  |
| Spata2l       | chr8:123232257-123254175  | OK     | 1.35688  | 1.84688  |
| Lyst          | chr13:13590408-13777440   | OK     | 8.72546  | 11.876   |
| Lrfn1         | chr7:28451984-28482345    | OK     | 13.4747  | 18.3392  |
| Mettl25       | chr10:105763184-105841380 | OK     | 2.63127  | 3.58112  |
| Tmem88b       | chr4:155781590-155785874  | NOTEST | 0.458629 | 0.624134 |
| Uchl1os       | chr5:66626494-66687234    | NOTEST | 0.193358 | 0.263065 |
| Msh5          | chr17:35028604-35046723   | NOTEST | 0.086261 | 0.117356 |
| Lars2         | chr9:123366939-123462664  | OK     | 71.7978  | 97.6662  |
| Lysmd3        | chr13:81657805-81671890   | OK     | 4.31508  | 5.8686   |
| Enoph1        | chr5:100039993-100068765  | OK     | 17.7947  | 24.198   |
| Frg1          | chr8:41397453-41417118    | OK     | 18.6964  | 25.4202  |
| Gm4285        | chr14:75842917-75844964   | OK     | 0.872391 | 1.18612  |
| Pth2r         | chr1:65311256-65389244    | NOTEST | 0.103813 | 0.141134 |
| Rps6kb2       | chr19:4156976-4163245     | OK     | 7.81645  | 10.6262  |
| Zfp354b       | chr11:50921785-50931635   | OK     | 1.02819  | 1.39753  |
| Pja1          | chrX:99465733-99470735    | OK     | 64.1773  | 87.2154  |
| Wdr76         | chr2:121506722-121544859  | OK     | 0.84669  | 1.15042  |
| Ift46         | chr9:44773008-44792714    | OK     | 13.4399  | 18.2603  |
| Ifi35         | chr11:101448411-101458701 | OK     | 10.3443  | 14.0544  |
| Xpo1          | chr11:23256040-23297597   | OK     | 25.5259  | 34.6777  |
| D130009I18Rik | chr14:104639146-104966783 | OK     | 6.43346  | 8.73962  |
| Eef1a1        | chr9:78478453-78481724    | OK     | 422.679  | 574.163  |
| Flnc          | chr6:29433152-29461888    | OK     | 0.592426 | 0.804714 |
| Spopl         | chr2:23510053-23572104    | OK     | 6.69565  | 9.09412  |

|               |                           |        |            |            |
|---------------|---------------------------|--------|------------|------------|
| Arhgap1       | chr2:91650117-91672320    | OK     | 25.3269    | 34.3991    |
| Dnajc2        | chr5:21757276-21785165    | OK     | 15.7749    | 21.424     |
| Trim68        | chr7:102677579-102687326  | OK     | 3.07968    | 4.18247    |
| Rpl18         | chr7:45718070-45720835    | OK     | 4.63934    | 6.30056    |
| Gstp2         | chr19:4040287-4042221     | OK     | 4.16271    | 5.65322    |
| Spns2         | chr11:72451637-72489920   | OK     | 7.74783    | 10.5216    |
| Kti12         | chr4:108834677-108862119  | OK     | 6.02328    | 8.17949    |
| Taf5          | chr19:47067747-47090625   | OK     | 2.45766    | 3.33724    |
| Smarcb1       | chr10:75896768-75921614   | OK     | 27.2481    | 36.9982    |
| Tex30         | chr1:44086616-44102388    | OK     | 3.61737    | 4.91156    |
| C920021L13Rik | chr3:95871521-95891930    | NOTEST | 0.0830328  | 0.112726   |
| Cdc5l         | chr17:45391887-45433707   | OK     | 11.1607    | 15.1504    |
| Zfp511        | chr7:139995954-140040605  | OK     | 7.27194    | 9.86844    |
| Rasgrp4       | chr7:29134932-29156210    | NOTEST | 0.191334   | 0.259644   |
| Dos           | chr10:79697304-80369637   | OK     | 38.9158    | 52.8063    |
| Fert2         | chr17:63863980-64139496   | OK     | 8.89565    | 12.0686    |
| Rnf126        | chr10:79697304-80369637   | OK     | 17.2141    | 23.3532    |
| Chst14        | chr2:118926496-118928583  | OK     | 6.80672    | 9.23275    |
| Rsph3b        | chr17:6904715-6948356     | OK     | 5.99658    | 8.13321    |
| Capzb         | chr4:139192898-139291820  | OK     | 192.354    | 260.868    |
| Dctn6         | chr8:34090422-34108511    | OK     | 65.6827    | 89.0725    |
| Topaz1        | chr9:122747345-122802074  | NOTEST | 0.00337504 | 0.00457623 |
| Arhgap11a     | chr2:113831491-113848661  | OK     | 1.53082    | 2.07539    |
| Vmn2r29       | chr7:7212995-7278289      | OK     | 1.10032    | 1.4914     |
| Cab39l        | chr14:59440980-59548903   | OK     | 49.7716    | 67.4592    |
| Gpr165        | chrX:96713467-96719388    | OK     | 1.69152    | 2.29265    |
| Ikzf3         | chr11:98464692-98546031   | NOTEST | 0.154889   | 0.209924   |
| Nudt16l1      | chr16:4886099-4941020     | OK     | 37.385     | 50.6676    |
| Ppfia3        | chr7:45339125-45370564    | OK     | 18.9696    | 25.7045    |
| Uhrf2         | chr19:30030512-30093724   | OK     | 11.9213    | 16.1524    |
| Ppm1b         | chr17:84917181-85023992   | OK     | 38.8494    | 52.636     |
| Mpv17l        | chr16:13903160-13949619   | OK     | 10.7076    | 14.507     |
| Flrt3         | chr2:140395429-142390050  | OK     | 6.72926    | 9.117      |
| Zfp963        | chr8:69741638-69749962    | OK     | 1.37421    | 1.86165    |
| Epc1          | chr18:6435950-6516108     | OK     | 6.40326    | 8.67195    |
| Dyrk1b        | chr7:28179482-28187298    | OK     | 8.63313    | 11.691     |
| Mbl2          | chr19:30232956-30239682   | NOTEST | 0.16623    | 0.225109   |
| Fmo5          | chr3:97628803-97655287    | OK     | 2.28927    | 3.10007    |
| Jund          | chr8:70697738-70700616    | OK     | 52.5834    | 71.2002    |
| Clic1         | chr17:35050242-35058719   | OK     | 93.4509    | 126.533    |
| Lrif1         | chr3:106684986-106736576  | OK     | 6.53717    | 8.85099    |
| Muc13         | chr16:33794036-33819927   | NOTEST | 0.00581784 | 0.0078764  |
| Rps4l         | chr6:148047415-148444352  | OK     | 30.6989    | 41.5608    |
| Nudt17        | chr3:96696374-96708560    | OK     | 1.07554    | 1.45608    |
| 9330182L06Rik | chr5:9266192-9480717      | OK     | 26.8388    | 36.3337    |
| Hs6st3        | chr14:119138264-119869815 | OK     | 4.80942    | 6.51029    |
| H2-Q10        | chr17:35470088-35474563   | NOTEST | 0.0397937  | 0.053861   |
| Spata5l1      | chr2:122630624-122632704  | OK     | 2.13397    | 2.88802    |
| Spata1        | chr3:146450492-146499753  | OK     | 0.948008   | 1.28294    |
| Fam78a        | chr2:32066884-32083705    | NOTEST | 0.415761   | 0.562517   |
| Adamts10      | chr17:33524195-33553782   | OK     | 2.00232    | 2.70884    |
| Ccdc162       | chr10:41538848-41587753   | NOTEST | 0.450541   | 0.609453   |
| Tmsb15b1      | chrX:136954987-136976874  | OK     | 5.65468    | 7.64761    |

|                |                             |        |            |           |
|----------------|-----------------------------|--------|------------|-----------|
| Tmod4          | chr3:95124513-95129208      | NOTEST | 0.136536   | 0.184655  |
| Iba57          | chr11:59155368-59163745     | OK     | 2.37004    | 3.2048    |
| Zcchc3         | chr2:152411955-152415044    | OK     | 2.64128    | 3.57138   |
| Rngtt          | chr4:33310310-33502610      | OK     | 8.51833    | 11.5176   |
| Rad51d         | chr11:82871960-82890624     | OK     | 8.05088    | 10.8836   |
| Stk4           | chr2:164074177-164155521    | OK     | 8.69489    | 11.7541   |
| Vat1           | chr11:101458747-101466199   | OK     | 115.936    | 156.712   |
| Gnai2          | chr9:107614137-107635342    | OK     | 117.317    | 158.576   |
| Wdr17          | chr8:54629615-54724368      | OK     | 5.75322    | 7.77618   |
| Plscr3         | chr11:69846371-69858730     | OK     | 19.3513    | 26.154    |
| Ostf1          | chr19:18580363-18631813     | OK     | 100.854    | 136.307   |
| Rpa3           | chr6:8255935-8259141        | OK     | 4.71184    | 6.36785   |
| Zfp82          | chr7:30056033-30072823      | OK     | 1.75015    | 2.36512   |
| Tmem120b       | chr5:123076274-123117445    | OK     | 9.2645     | 12.5194   |
| Tefm           | chr11:80136677-80142153     | OK     | 3.39768    | 4.59096   |
| Ctdspl         | chr9:118926535-119044119    | OK     | 4.88524    | 6.60071   |
| Guf1           | chr5:69556941-69573630      | OK     | 4.38269    | 5.92165   |
| Gm20604        | chr12:102739829-102757810   | OK     | 5.37253    | 7.25905   |
| Ccdc103        | chr11:102881243-102886731   | OK     | 0.594853   | 0.803699  |
| Hoxa5          | chr6:52169061-52213597      | OK     | 3.93923    | 5.32199   |
| Gm13305,Gm2002 | chr4_JH584293_random:7077-2 | LOWDAT | 0.00920012 | 0.0124293 |
| Hsf1           | chr15:76477444-76500972     | OK     | 10.8904    | 14.7124   |
| Cacnb1         | chr11:98001507-98022627     | OK     | 19.3545    | 26.1438   |
| Palmd          | chr3:116918261-116984406    | OK     | 25.737     | 34.7543   |
| Adcy5          | chr16:35155635-35304549     | OK     | 16.278     | 21.9778   |
| Saysd1         | chr14:20075635-20083172     | OK     | 2.21991    | 2.99708   |
| Pck2           | chr14:55540265-55550017     | OK     | 20.6639    | 27.894    |
| 1810037I17Rik  | chr3:122924396-122926194    | OK     | 18.9435    | 25.5715   |
| Rps25          | chr9:44407713-44418007      | OK     | 11.2875    | 15.2355   |
| Scai           | chr2:39066214-39190730      | OK     | 3.56599    | 4.81268   |
| Sobp           | chr10:43002499-43174530     | OK     | 9.51241    | 12.8351   |
| Nova2          | chr7:18925887-18965319      | OK     | 2.03145    | 2.74076   |
| Prpsap2        | chr11:61729649-61762088     | OK     | 4.95236    | 6.67968   |
| Fpgs           | chr2:32646594-32694175      | OK     | 4.89525    | 6.60247   |
| Ilkap          | chr1:91375830-91398783      | OK     | 20.9846    | 28.3028   |
| Gramd2         | chr9:59707763-59716424      | OK     | 1.30727    | 1.76301   |
| Nudt13         | chr14:20294689-20317575     | OK     | 2.9333     | 3.95477   |
| LOC100038947   | chr3:15795146-15848487      | NOTEST | 0.0128583  | 0.0173318 |
| 1700123M08Rik  | chr4:11966573-11994295      | OK     | 1.09039    | 1.46974   |
| Dck            | chr5:88765012-88783277      | OK     | 14.4609    | 19.4902   |
| E030013I19Rik  | chr2:12106659-12312315      | NOTEST | 0.0604872  | 0.0815161 |
| Nudt6          | chr3:37404981-37419596      | OK     | 2.53381    | 3.4146    |
| 4930512B01Rik  | chr12:69746847-69987002     | NOTEST | 0.0132287  | 0.0178269 |
| Nlrx1          | chr9:44252712-44268599      | OK     | 4.66308    | 6.2838    |
| Tfdp2          | chr9:96196274-96323646      | OK     | 7.87807    | 10.6149   |
| A530054K11Rik  | chr13:67617000-67637753     | OK     | 2.99234    | 4.03119   |
| Taldo1         | chr7:141392159-141402976    | OK     | 79.2236    | 106.719   |
| Slc5a3         | chr16:92058321-92112227     | OK     | 5.75195    | 7.74757   |
| Tceal5         | chrX:136200950-136203851    | OK     | 7.25001    | 9.76512   |
| Far1           | chr7:113513833-113570888    | OK     | 40.9418    | 55.1415   |
| Gdpd5          | chr7:99381548-99460984      | OK     | 21.0836    | 28.3854   |
| Aldoart1       | chr4:72850582-72852634      | OK     | 3.65157    | 4.91594   |
| Spag4          | chr2:156065212-156069499    | OK     | 0.88949    | 1.19747   |

|               |                           |        |           |           |
|---------------|---------------------------|--------|-----------|-----------|
| Tex22         | chr12:113074501-113088914 | NOTEST | 0.0151483 | 0.0203894 |
| Nr2c2ap       | chr8:70130805-70139197    | OK     | 28.129    | 37.8596   |
| Gria1         | chr11:57011617-57330244   | OK     | 5.42034   | 7.29364   |
| Phf23         | chr11:69995765-70000011   | OK     | 24.164    | 32.5131   |
| Rgs16         | chr1:153740352-153745468  | OK     | 2.36615   | 3.18367   |
| Cep170b       | chr12:112722173-112746591 | OK     | 25.7207   | 34.6056   |
| Reps2         | chrX:162407199-163352564  | OK     | 16.9334   | 22.7783   |
| Chmp6         | chr11:119913809-119919552 | OK     | 21.8061   | 29.3285   |
| Glt25d1       | chr8:71611023-71624911    | OK     | 21.9236   | 29.4782   |
| Rcor3         | chr1:192098545-192151025  | OK     | 9.61505   | 12.9281   |
| Nadsyn1       | chr7:143795593-143822841  | OK     | 1.16245   | 1.56286   |
| Lypla2        | chr4:135968224-135972594  | OK     | 73.1883   | 98.3968   |
| Zfp442        | chr2:150407136-150451494  | OK     | 0.64689   | 0.869627  |
| Gimap8        | chr6:48647233-48660875    | OK     | 0.84252   | 1.13252   |
| Imp3          | chr9:56937499-56938398    | OK     | 23.3144   | 31.3359   |
| Ube2s         | chr7:4808013-4812340      | OK     | 1.27799   | 1.71758   |
| Plxna3        | chrX:74329065-74344689    | OK     | 4.05795   | 5.45362   |
| Bbx           | chr16:50191843-50432389   | OK     | 9.6044    | 12.9059   |
| Ythdf2        | chr4:132184915-132212256  | OK     | 15.6262   | 20.9946   |
| Llph          | chr10:120227059-120232070 | OK     | 5.06032   | 6.79748   |
| Txlna         | chr4:129626076-129641065  | OK     | 17.4856   | 23.4871   |
| Kctd3         | chr1:188971097-189007840  | OK     | 16.7829   | 22.5398   |
| Asb6          | chr2:30823097-30828300    | OK     | 18.1593   | 24.3857   |
| Npl           | chr1:153503015-153549714  | OK     | 1.92953   | 2.59096   |
| Ccdc55        | chr11:77044291-77078437   | OK     | 4.52902   | 6.08116   |
| Sun1          | chr5:139200636-139249839  | OK     | 18.0869   | 24.2835   |
| Orc6          | chr8:85299631-85308279    | OK     | 6.39207   | 8.58188   |
| Rita1         | chr5:120609059-120612589  | OK     | 5.8711    | 7.8817    |
| Tra2a         | chr6:49243920-49264052    | OK     | 26.0606   | 34.9822   |
| Tro           | chrX:150644709-150657583  | OK     | 32.3871   | 43.4737   |
| Ccdc174       | chr6:91878052-91899848    | OK     | 6.67906   | 8.96469   |
| Rpl19         | chr11:98026709-98030493   | OK     | 4.53488   | 6.08653   |
| Ift122        | chr6:115853527-115926699  | OK     | 15.3406   | 20.5893   |
| Trappc6b      | chr12:59043091-59061461   | OK     | 50.0995   | 67.2406   |
| Zfp329        | chr7:12803779-12818860    | OK     | 3.01233   | 4.04197   |
| Rpain         | chr11:70970199-70983026   | OK     | 7.2683    | 9.75259   |
| Park2         | chr17:10840383-12063360   | OK     | 3.05575   | 4.09984   |
| Slamf7        | chr1:171632402-171653037  | NOTEST | 0.0914495 | 0.122686  |
| Taok3         | chr5:117120128-117275098  | OK     | 9.49249   | 12.7346   |
| Icam1         | chr9:21015959-21028796    | OK     | 1.01883   | 1.36669   |
| B330016D10Rik | chr4:141546161-141548313  | NOTEST | 0.60401   | 0.810226  |
| Phf3          | chr1:30802341-30863256    | OK     | 7.2409    | 9.71088   |
| Tbca          | chr13:94788942-94842899   | OK     | 116.623   | 156.403   |
| Ints6         | chr14:62663666-62830126   | OK     | 2.27153   | 3.04583   |
| Jakmip1       | chr5:37050856-37125298    | OK     | 37.4217   | 50.1741   |
| Snrpd2        | chr7:19149837-19152726    | OK     | 35.7931   | 47.9898   |
| Zdhhc2        | chr8:40423814-40484842    | OK     | 127.073   | 170.369   |
| Otud7a        | chr7:63444771-63759027    | OK     | 8.38519   | 11.2421   |
| Tbcc          | chr17:46890620-46892463   | OK     | 20.4852   | 27.4638   |
| Aatf          | chr11:84422855-84513501   | OK     | 9.02317   | 12.0956   |
| AA388235      | chr17:33981491-33985358   | OK     | 1.60293   | 2.1485    |
| Pcsk1n        | chrX:7919821-7928607      | OK     | 158.381   | 212.24    |
| Lrrc15        | chr16:30269301-30283254   | NOTEST | 0.126524  | 0.169549  |

|               |                           |        |           |           |
|---------------|---------------------------|--------|-----------|-----------|
| Ldlrad4       | chr18:67933256-68255549   | OK     | 4.29958   | 5.76044   |
| Ruvbl2        | chr7:45421897-45434464    | OK     | 12.2063   | 16.3516   |
| 4930506M07Rik | chr19:58973357-59076069   | OK     | 6.34522   | 8.49998   |
| Ppan          | chr9:20888174-20892179    | OK     | 4.88343   | 6.53995   |
| Mef2d         | chr3:88142394-88169167    | OK     | 15.2276   | 20.3926   |
| Zfp444        | chr7:6172512-6193104      | OK     | 4.18026   | 5.59783   |
| Ift80         | chr3:68892498-69004570    | OK     | 14.5186   | 19.4353   |
| Zranb2        | chr3:157534396-157548339  | OK     | 43.0355   | 57.6051   |
| Ctnna2        | chr6:76881636-77979667    | OK     | 89.0763   | 119.221   |
| Srsf2         | chr11:116849896-116853094 | OK     | 54.5515   | 73.0115   |
| Zfp64         | chr2:168925360-168955587  | OK     | 4.71074   | 6.30415   |
| Commd7        | chr2:153616929-153632781  | OK     | 11.3079   | 15.1327   |
| Rbm12b2       | chr4:12089369-12096271    | OK     | 2.01092   | 2.69044   |
| Itsn2         | chr12:4593007-4738383     | OK     | 18.4069   | 24.618    |
| Rpl23         | chr11:97777525-97782439   | OK     | 6.32166   | 8.45475   |
| Pold4         | chr19:4231898-4233634     | OK     | 17.7232   | 23.6981   |
| Hjurp         | chr1:88227019-88277579    | OK     | 2.70548   | 3.61717   |
| Dusp13        | chr14:21733394-21748622   | NOTEST | 0.0354555 | 0.0474014 |
| Kiz           | chr2:146855888-146970089  | OK     | 9.74722   | 13.0274   |
| Tmem2         | chr19:21778339-21858360   | OK     | 8.83834   | 11.8124   |
| Celf1         | chr2:90940396-91019497    | OK     | 17.8647   | 23.8699   |
| Oaz1          | chr10:80826655-80829290   | OK     | 28.3174   | 37.8358   |
| Nt5c3         | chr6:56882401-56923932    | OK     | 21.0037   | 28.0596   |
| Zc3h11a       | chr1:133619870-133661399  | OK     | 19.9633   | 26.6686   |
| Ccdc94        | chr17:55952622-55967951   | OK     | 3.49592   | 4.66872   |
| Slc44a2       | chr9:21320718-21355028    | OK     | 59.1028   | 78.9258   |
| Cwc27         | chr13:104631326-104816953 | OK     | 8.49921   | 11.3495   |
| Crcp          | chr5:130029305-130060783  | OK     | 23.9247   | 31.9479   |
| Coro7         | chr16:4626883-4679720     | OK     | 31.5137   | 42.075    |
| Cstb          | chr10:78425669-78427622   | OK     | 58.1262   | 77.5899   |
| Elavl4        | chr4:110203736-110351911  | OK     | 89.6567   | 119.678   |
| Pfkfb2        | chr1:130689042-130729253  | OK     | 10.0602   | 13.4276   |
| Ano6          | chr15:95790842-95975472   | OK     | 24.5759   | 32.8004   |
| Atp11b        | chr3:35754137-35856276    | OK     | 14.576    | 19.4526   |
| U2af2         | chr7:5062142-5079945      | OK     | 24.4888   | 32.6799   |
| Fbxo48        | chr11:16951409-16954772   | NOTEST | 0.219098  | 0.292371  |
| Upf3a         | chr8:13785614-13798537    | OK     | 12.0415   | 16.0685   |
| Ormdl2        | chr10:128805675-128821631 | OK     | 4.35441   | 5.81012   |
| Camk2d        | chr3:126596972-126845054  | OK     | 74.6037   | 99.5436   |
| Clca1         | chr3:144730315-144760739  | NOTEST | 0.155857  | 0.207959  |
| Wdr55         | chr18:36760238-36766214   | OK     | 9.10812   | 12.1517   |
| Gabrr2        | chr4:33063111-33095865    | NOTEST | 0.0975066 | 0.130075  |
| Med6          | chr12:81573563-81594958   | OK     | 13.1089   | 17.4871   |
| Mta3          | chr17:83706162-83814905   | OK     | 30.9038   | 41.2233   |
| Dcaf12        | chr4:41291299-41314901    | OK     | 26.5783   | 35.4521   |
| Eml6          | chr11:29692897-30026033   | OK     | 3.14414   | 4.19376   |
| Ebna1bp2      | chr4:118620798-118631915  | OK     | 13.3399   | 17.7928   |
| Arfgef2       | chr2:166805580-166898051  | OK     | 36.6003   | 48.8168   |
| Fam114a1      | chr5:64970074-65041901    | OK     | 11.1747   | 14.9034   |
| Pgp           | chr17:24470472-24471596   | OK     | 42.6142   | 56.8302   |
| Rasip1        | chr7:45627536-45639092    | OK     | 4.02244   | 5.36366   |
| Dcaf12l1      | chrX:44786566-44790197    | OK     | 6.78037   | 9.03941   |
| Sec61b        | chr4:47474660-47483233    | OK     | 11.6546   | 15.5358   |



|               |                           |        |            |           |
|---------------|---------------------------|--------|------------|-----------|
| Morc2b        | chr17:33135589-33139683   | NOTEST | 0.307541   | 0.409816  |
| Gdf7          | chr12:8297917-8301954     | NOTEST | 0.0897677  | 0.119615  |
| Cited4        | chr4:120666562-120667820  | NOTEST | 0.431251   | 0.574637  |
| C530005A16Rik | chr4:116557726-116600266  | OK     | 1.09423    | 1.45803   |
| Hdx           | chrX:111575203-111697079  | OK     | 0.707372   | 0.942328  |
| Sbds          | chr5:130245731-130255462  | OK     | 52.5018    | 69.8902   |
| Sqstm1        | chr11:50200151-50210820   | OK     | 317.722    | 422.948   |
| Pex26         | chr6:121183666-121196185  | OK     | 5.68054    | 7.56123   |
| Lpxn          | chr19:12798608-12833808   | NOTEST | 0.266465   | 0.354681  |
| Polr2f        | chr15:79141366-79151767   | OK     | 30.767     | 40.9496   |
| Nap1l1        | chr10:111473191-111498150 | OK     | 39.9722    | 53.2011   |
| Ick           | chr9:78109191-78172109    | OK     | 5.03703    | 6.70364   |
| C2cd4b        | chr9:67759436-67760933    | NOTEST | 0.0494253  | 0.0657786 |
| Gfra3         | chr18:34689902-34720387   | OK     | 28.0764    | 37.3624   |
| Tshz3         | chr7:36698117-36773457    | OK     | 7.49333    | 9.97043   |
| Spdl1         | chr11:34809184-34833641   | NOTEST | 0.578281   | 0.7694    |
| Kctd10        | chr5:114314940-114380505  | OK     | 66.8162    | 88.8957   |
| Dnajb5        | chr4:42953093-42958732    | OK     | 7.07788    | 9.41656   |
| Asap1         | chr15:64086839-64382919   | OK     | 73.5561    | 97.8537   |
| Cer1          | chr4:82881750-82885151    | NOTEST | 0.600259   | 0.798537  |
| Ift172        | chr5:30933142-31348845    | OK     | 18.5229    | 24.6409   |
| Nop9          | chr14:55745692-55758424   | OK     | 4.54804    | 6.04872   |
| Snopc4        | chr2:26362764-26380653    | OK     | 2.79556    | 3.71659   |
| Mrpl54        | chr10:81264721-81266926   | OK     | 34.3619    | 45.6786   |
| Dhx37         | chr5:125414403-125434048  | OK     | 4.16619    | 5.53804   |
| Zfp46         | chr4:136286068-136293942  | OK     | 7.05195    | 9.37267   |
| Chmp2a        | chr7:13032005-13034777    | OK     | 60.1139    | 79.8828   |
| Hoxd11        | chr2:74679557-74687016    | OK     | 0.722153   | 0.959524  |
| Bves          | chr10:45335761-45369708   | OK     | 11.341     | 15.0683   |
| Smn1          | chr13:100123204-100137698 | OK     | 9.53745    | 12.6712   |
| Morf4l2       | chrX:136732947-136803361  | OK     | 135.648    | 180.212   |
| Milt6         | chr11:97663411-97685458   | OK     | 11.414     | 15.1624   |
| Gpr155        | chr2:73341505-73386480    | OK     | 18.1636    | 24.1278   |
| Gm8994        | chr6:136327538-136329983  | OK     | 0.845193   | 1.12257   |
| Rps15         | chr10:79697304-80369637   | OK     | 68.8578    | 91.4554   |
| Thg1l         | chr11:45945305-45955503   | OK     | 2.25464    | 2.9945    |
| Pfkfb4        | chr9:108991901-109032225  | OK     | 5.77795    | 7.6723    |
| A930004D18Rik | chr2:18025188-18037741    | OK     | 3.43013    | 4.55457   |
| 4833418N02Rik | chr17:87274885-87282814   | NOTEST | 0.382643   | 0.508072  |
| C230091D08Rik | chr7:59307923-59324149    | NOTEST | 0.0775314  | 0.102935  |
| Sfpq          | chr4:127021300-127037014  | OK     | 39.5509    | 52.5009   |
| Clec4f        | chr6:83644541-83656116    | NOTEST | 0.00783033 | 0.010393  |
| Dtx3          | chr10:127190377-127211622 | OK     | 30.4206    | 40.3766   |
| Rbm45         | chr2:76369983-76383767    | OK     | 11.3274    | 15.0323   |
| Nnt           | chr13:119334316-119409138 | OK     | 5.11486    | 6.7878    |
| Lnx2          | chr5:147016654-147076572  | OK     | 3.23568    | 4.29397   |
| Gpr180        | chr14:118137126-118164232 | OK     | 7.01592    | 9.31043   |
| Myl4          | chr11:104550662-104587219 | OK     | 1.68201    | 2.23195   |
| 2210016L21Rik | chr5:114942201-114948540  | OK     | 53.8282    | 71.4259   |
| Arpc2         | chr1:74236549-74268213    | OK     | 105.586    | 140.085   |
| Zfp772        | chr7:7202121-7209998      | OK     | 2.53129    | 3.35818   |
| Hexb          | chr13:97137936-97198357   | OK     | 71.2516    | 94.52     |
| Atp11c        | chrX:60223289-60403981    | OK     | 6.39827    | 8.48773   |

|               |                           |        |           |           |
|---------------|---------------------------|--------|-----------|-----------|
| 2810002D19Rik | chr2:94406706-94411680    | OK     | 2.93908   | 3.89885   |
| Evl           | chr12:108371152-108702306 | OK     | 57.6624   | 76.4852   |
| Rpl41         | chr10:128548109-128549168 | OK     | 274.448   | 363.948   |
| Rpl36a1       | chr12:69182733-69184067   | OK     | 50.6114   | 67.1101   |
| Rpl14-ps1     | chr7:45303154-45333780    | OK     | 198.189   | 262.786   |
| Pan2          | chr10:128303334-128321358 | OK     | 4.14337   | 5.49291   |
| Ikbkb         | chr8:22659204-22706583    | OK     | 8.96822   | 11.8889   |
| Lhfpl3        | chr5:22738910-23275597    | OK     | 20.5659   | 27.2581   |
| Npw           | chr17:24657329-24658425   | NOTEST | 0.0803163 | 0.106448  |
| Actr1b        | chr1:36699201-36709925    | OK     | 121.137   | 160.536   |
| Hnrnpab       | chr11:51584756-51606881   | OK     | 66.1274   | 87.6342   |
| U2af114       | chr7:30563339-30565364    | OK     | 21.0016   | 27.8281   |
| Fam57a        | chr11:76202055-76208257   | OK     | 7.46368   | 9.88953   |
| Polq          | chr16:37011785-37095417   | NOTEST | 0.275821  | 0.365467  |
| Crybg3        | chr16:59471774-59555752   | OK     | 2.14434   | 2.84098   |
| Fmo6          | chr1:162916550-162937225  | NOTEST | 0.127448  | 0.168842  |
| Cntnap4       | chr8:112570042-112882707  | OK     | 10.6341   | 14.0879   |
| Slc25a48      | chr13:56438354-56472363   | NOTEST | 0.0132919 | 0.0176082 |
| Upb1          | chr10:75406910-75441679   | NOTEST | 0.459879  | 0.609134  |
| Pgbd5         | chr8:124369048-124433936  | OK     | 21.5727   | 28.5654   |
| Lenep         | chr3:89401895-89402650    | OK     | 1.91161   | 2.53106   |
| Ccdc88a       | chr11:29374171-29510808   | OK     | 5.83045   | 7.7197    |
| Ccm2          | chr11:6546886-6596761     | OK     | 24.2821   | 32.1475   |
| Prkag2        | chr5:24862734-25100642    | OK     | 54.1791   | 71.7236   |
| Vwa5a         | chr9:38718267-38743337    | OK     | 127.885   | 169.285   |
| Sra1          | chr18:36667186-36670311   | OK     | 23.8345   | 31.5493   |
| 38046         | chr6:116338122-116409540  | OK     | 11.5749   | 15.3192   |
| Cacna1h       | chr17:25370552-25433783   | OK     | 8.9863    | 11.8924   |
| Zfp787        | chr7:6131488-6155971      | OK     | 4.43646   | 5.86947   |
| Nfkbib        | chr7:28756173-28766524    | OK     | 8.40796   | 11.123    |
| Pdia6         | chr12:17266594-17324730   | OK     | 51.2855   | 67.8409   |
| Nfu1          | chr6:87009835-87028461    | OK     | 26.2757   | 34.7575   |
| Sf3b5         | chr10:13008449-13009183   | OK     | 29.0423   | 38.4083   |
| Mamld1        | chrX:71050255-71154717    | OK     | 5.88769   | 7.7863    |
| 2610035F20Rik | chr14:122470376-122475199 | NOTEST | 0.0182049 | 0.024075  |
| Stat3         | chr11:100886809-100939511 | OK     | 101.526   | 134.262   |
| Cebpg         | chr7:35046421-35056566    | OK     | 10.7608   | 14.2246   |
| Cnot3         | chr7:3645268-3677553      | OK     | 5.72212   | 7.56308   |
| Naa40         | chr19:7225667-7241222     | OK     | 3.50391   | 4.63106   |
| Ttc32         | chr12:9029996-9036394     | OK     | 1.00161   | 1.32366   |
| Car10         | chr11:93099289-93601751   | OK     | 31.3808   | 41.4662   |
| Snca          | chr6:60731572-60829855    | OK     | 16.9348   | 22.3774   |
| Ept1          | chr5:30232617-30272430    | OK     | 26.6523   | 35.2168   |
| Rccd1         | chr7:80316615-80324454    | OK     | 1.44237   | 1.90579   |
| Akap12        | chr10:4266328-4359471     | OK     | 164.167   | 216.905   |
| Stat5b        | chr11:100780730-100850585 | OK     | 11.7615   | 15.5395   |
| Srpk1         | chr17:28589591-28622454   | OK     | 21.8353   | 28.8476   |
| Man2c1        | chr9:57129981-57142210    | OK     | 17.7278   | 23.4174   |
| Mphosph9      | chr5:124250958-124327972  | OK     | 2.10543   | 2.78095   |
| 2310033P09Rik | chr11:59208360-59210734   | OK     | 7.93208   | 10.4768   |
| Nol8          | chr13:49653077-49679016   | OK     | 4.96491   | 6.55664   |
| 0610012G03Rik | chr16:31947050-31948521   | OK     | 12.3041   | 16.2443   |
| 2310068J16Rik | chr15:99970064-100016358  | NOTEST | 0.359109  | 0.474083  |

|               |                           |        |           |           |
|---------------|---------------------------|--------|-----------|-----------|
| Fbxw9         | chr8:85036914-85067120    | OK     | 8.88827   | 11.7324   |
| Trim27        | chr13:21179930-21194723   | OK     | 4.8443    | 6.39441   |
| Traf3ip2      | chr10:39612933-39732007   | OK     | 2.47085   | 3.26148   |
| Tctex1d2      | chr16:32419701-32428892   | OK     | 11.8865   | 15.6897   |
| 2310034G01Rik | chr19:46348200-46348988   | NOTEST | 0.413291  | 0.545488  |
| Tmod1         | chr4:46039221-46138475    | OK     | 90.5648   | 119.531   |
| Dusp5         | chr19:53529317-53541322   | OK     | 12.1092   | 15.9821   |
| Rpa1          | chr11:75300258-75348383   | OK     | 35.1652   | 46.4112   |
| Rock1         | chr18:10064400-10181792   | OK     | 5.58851   | 7.375     |
| Bbs7          | chr3:36573142-36613389    | OK     | 9.0092    | 11.8887   |
| Ppp1r18       | chr17:35865594-35875596   | OK     | 9.37371   | 12.3683   |
| Gm3230        | chr2:19655805-19657897    | OK     | 0.799424  | 1.05472   |
| Arl6          | chr16:59613320-60605531   | OK     | 20.1675   | 26.6074   |
| Acsm3         | chr7:119760922-119794058  | NOTEST | 0.0377819 | 0.0498461 |
| Akap8l        | chr17:32321423-32350577   | OK     | 14.2659   | 18.8168   |
| Plxnd1        | chr6:115954810-115995005  | OK     | 30.0063   | 39.577    |
| Pole          | chr5:110286318-110337453  | OK     | 0.704268  | 0.928672  |
| Trpm4         | chr7:45303154-45333780    | OK     | 6.17506   | 8.13997   |
| 1700030K09Rik | chr8:72443879-72475233    | OK     | 2.48679   | 3.27729   |
| Slc2a2        | chr3:28697902-28728360    | NOTEST | 0.0461433 | 0.0608099 |
| Msh2          | chr17:87672556-87723713   | OK     | 22.0707   | 29.0828   |
| Zfp382        | chr7:30121947-30135032    | OK     | 5.84144   | 7.69686   |
| Rwdd1         | chr10:33996554-34019616   | OK     | 8.19543   | 10.798    |
| Gdap1l1       | chr2:163438466-163455324  | OK     | 25.8701   | 34.0853   |
| Rrbp1         | chr2:143947394-144011263  | OK     | 20.0198   | 26.3738   |
| Dnajc28       | chr16:91614256-91618999   | OK     | 2.10541   | 2.77321   |
| 4833420G17Rik | chr13:119462758-119486117 | OK     | 7.71213   | 10.1577   |
| Dpy30         | chr17:74299473-74323944   | OK     | 45.0643   | 59.3491   |
| Pkib          | chr10:57631980-57741112   | OK     | 3.87619   | 5.10487   |
| Dtd1          | chr2:144599952-144768747  | OK     | 25.7373   | 33.8914   |
| Eif5b         | chr1:37998009-38129662    | OK     | 12.8845   | 16.9651   |
| Zfp641        | chr15:98286121-98296083   | OK     | 2.35628   | 3.10251   |
| B4galt7       | chr13:55600110-55609954   | OK     | 6.67788   | 8.79275   |
| 5830418K08Rik | chr9:15283336-15357788    | OK     | 2.24479   | 2.95558   |
| Vash1         | chr12:86678699-86695681   | OK     | 31.1295   | 40.9783   |
| Nmral1        | chr16:4711317-4719356     | OK     | 1.40845   | 1.85394   |
| Pigv          | chr4:133661424-133672647  | OK     | 3.42158   | 4.50297   |
| Stam2         | chr2:52692205-52742149    | OK     | 12.4066   | 16.3255   |
| Rgs7          | chr1:175059075-175492545  | OK     | 33.4823   | 44.0569   |
| Igf1r         | chr7:67952256-68233667    | OK     | 11.7132   | 15.4119   |
| Itfg2         | chr6:128409443-128424910  | OK     | 13.2088   | 17.3785   |
| Mterfd2       | chr1:93299210-93305870    | OK     | 2.99957   | 3.94598   |
| Epc2          | chr2:49451485-49551609    | OK     | 5.55592   | 7.30827   |
| Rap2c         | chrX:51003913-51018018    | OK     | 25.6889   | 33.7876   |
| Mvk           | chr5:114444305-114460590  | OK     | 29.6652   | 39.0156   |
| Abcd4         | chr12:84602530-84617466   | OK     | 6.40216   | 8.41904   |
| Slc2a3        | chr6:122727808-122742745  | OK     | 28.3276   | 37.2507   |
| Fnbp1         | chr2:31026205-31142008    | OK     | 58.6683   | 77.1409   |
| Cep55         | chr19:38055024-38074425   | NOTEST | 0.228006  | 0.299757  |
| Ciz1          | chr2:32363009-32378313    | OK     | 9.00427   | 11.8378   |
| I7Rn6         | chr7:89918684-89941204    | OK     | 29.9746   | 39.3916   |
| Gmeb1         | chr4:132221024-132261549  | OK     | 2.49153   | 3.27417   |
| Nmb           | chr7:80902226-80905062    | OK     | 180.834   | 237.629   |

|          |                           |        |          |          |
|----------|---------------------------|--------|----------|----------|
| Zfp235   | chr7:24134162-24143241    | OK     | 1.99095  | 2.61621  |
| Snupn    | chr9:56950923-56983199    | OK     | 10.454   | 13.7353  |
| Cenpo    | chr12:4133396-4240123     | OK     | 0.885665 | 1.16359  |
| Iqcc     | chr4:129615616-129619093  | OK     | 3.99813  | 5.25228  |
| Il6      | chr5:30013160-30019968    | NOTEST | 0.280913 | 0.368983 |
| Ppil1    | chr17:29250834-29263971   | OK     | 12.9429  | 17.0001  |
| Fam229b  | chr10:39118807-39133895   | OK     | 8.01091  | 10.5179  |
| Leng9    | chr7:4148182-4149872      | OK     | 2.56318  | 3.36459  |
| Rps4x    | chrX:102184942-102188371  | OK     | 28.9273  | 37.9713  |
| Gpld1    | chr13:24943151-24991936   | OK     | 3.12239  | 4.09813  |
| Rbmx2    | chrX:48695003-48710719    | OK     | 3.4505   | 4.52848  |
| Adamts8  | chr9:30942562-30962858    | OK     | 2.35154  | 3.08568  |
| Glr3     | chr7:137437647-137468594  | OK     | 9.41993  | 12.3596  |
| Gpr75    | chr11:30885357-30893725   | OK     | 4.06615  | 5.33488  |
| Ptprk    | chr10:28074819-28597397   | OK     | 4.20958  | 5.52301  |
| Pmvk     | chr3:89459117-89469009    | OK     | 57.0625  | 74.857   |
| Mina     | chr16:59471774-59555752   | OK     | 6.17746  | 8.10354  |
| Gpr135   | chr12:72069617-72070991   | OK     | 4.36452  | 5.72527  |
| Nrf1     | chr6:30047987-30153458    | OK     | 3.60652  | 4.73023  |
| Esco1    | chr18:10566511-10610352   | OK     | 3.16855  | 4.15571  |
| Snx2     | chr18:53176364-53220860   | OK     | 32.7613  | 42.9627  |
| Tsfm     | chr10:127022331-127030814 | OK     | 11.8116  | 15.4884  |
| Riok1    | chr13:38036988-38061433   | OK     | 3.99798  | 5.24233  |
| Rnf166   | chr8:122466146-122476064  | OK     | 6.59147  | 8.64284  |
| Tsga10   | chr1:37754571-37865298    | OK     | 3.4001   | 4.458    |
| Anp32b   | chr4:46451116-46472523    | OK     | 31.9155  | 41.8456  |
| Hs6st1   | chr1:36068399-36106446    | OK     | 35.0814  | 45.9935  |
| Tprn     | chr2:25262597-25269886    | OK     | 4.16916  | 5.46583  |
| Diablo   | chr5:123510459-123524164  | OK     | 84.6026  | 110.908  |
| Mospd2   | chrX:164936170-164980375  | OK     | 10.5338  | 13.8079  |
| Map2k1   | chr9:64185792-64253605    | OK     | 72.9822  | 95.6483  |
| Gan      | chr8:117158134-117205186  | OK     | 9.02991  | 11.834   |
| Tshz1    | chr18:84011626-84086562   | OK     | 4.99368  | 6.54192  |
| Glr5     | chr12:105032688-105040910 | OK     | 53.6717  | 70.3044  |
| Rps6     | chr4:86854098-86857367    | OK     | 11.4656  | 15.0179  |
| Pdia5    | chr16:35397311-35490873   | OK     | 5.18582  | 6.79033  |
| Poln     | chr5:34007178-34169526    | NOTEST | 0.206119 | 0.269838 |
| Slc26a8  | chr17:28637778-28689987   | NOTEST | 0.241713 | 0.31635  |
| Trabd    | chr15:89076063-89087075   | OK     | 13.4233  | 17.5648  |
| Gpr21    | chr2:37443284-37566437    | OK     | 1.01218  | 1.32438  |
| Clcf1    | chr19:4214391-4222615     | NOTEST | 0.280117 | 0.366494 |
| Ubp1     | chr9:113930933-114026751  | OK     | 9.98989  | 13.0699  |
| Ppm1g    | chr5:30933142-31348845    | OK     | 33.0566  | 43.2446  |
| Unk      | chr11:116030315-116061214 | OK     | 3.49111  | 4.56681  |
| Thap3    | chr4:151982637-151988986  | OK     | 5.64453  | 7.38285  |
| Arrdc4   | chr7:68736993-68749238    | OK     | 8.23066  | 10.7652  |
| Slc25a53 | chrX:136981115-137038302  | OK     | 11.5336  | 15.0816  |
| Ptpn1    | chr2:167932326-167979385  | OK     | 8.84124  | 11.5608  |
| Gng3     | chr19:8836928-8848683     | OK     | 187.214  | 244.776  |
| Ubl4     | chrX:74365717-74373349    | OK     | 37.5119  | 49.0422  |
| Garnl3   | chr2:32986365-33087204    | OK     | 25.8283  | 33.7605  |
| Lzts1    | chr8:69135502-69140953    | OK     | 9.54265  | 12.473   |
| Top1     | chr2:160645896-160722763  | OK     | 18.7487  | 24.5056  |

|               |                           |        |           |           |
|---------------|---------------------------|--------|-----------|-----------|
| Tamm41        | chr6:115004380-115037874  | OK     | 5.49534   | 7.18245   |
| Iqce          | chr5:140663504-140702378  | OK     | 4.33856   | 5.67039   |
| Ttc13         | chr8:124671326-124721975  | OK     | 9.94462   | 12.9969   |
| Cep63         | chr9:102586577-102626124  | OK     | 6.49516   | 8.48855   |
| Ncor1         | chr11:62281472-62457332   | OK     | 22.1151   | 28.8968   |
| Nme2          | chr11:93949813-93956256   | OK     | 29.2449   | 38.2094   |
| Tardbp        | chr4:148602543-148626996  | OK     | 20.0143   | 26.1461   |
| Ethe1         | chr7:24583837-24608926    | OK     | 7.28919   | 9.52234   |
| Hmgxb4        | chr8:74993702-75031972    | OK     | 3.70257   | 4.83664   |
| 2610524H06Rik | chr5:114821936-114823468  | OK     | 13.5213   | 17.6573   |
| Ctdp1         | chr18:80407958-80469667   | OK     | 4.25585   | 5.55722   |
| Smug1         | chr15:103153289-103163284 | OK     | 5.67322   | 7.40777   |
| Josd1         | chr15:79674249-79687872   | OK     | 14.9933   | 19.5759   |
| Zmiz2         | chr11:6395124-6406162     | OK     | 34.0053   | 44.3985   |
| Ubac1         | chr2:25996957-26021760    | OK     | 17.7733   | 23.2036   |
| Cdca7l        | chr12:117843860-118199043 | NOTEST | 0.292051  | 0.381168  |
| Morn4         | chr19:42074938-42086370   | OK     | 34.7266   | 45.32     |
| Zfp408        | chr2:91643687-91649791    | OK     | 1.69507   | 2.21198   |
| Pigyl         | chr9:22055459-22389206    | OK     | 19.4909   | 25.4286   |
| Cdh7          | chr1:109983736-110139001  | NOTEST | 0.518576  | 0.676545  |
| Cdkl2         | chr5:92006073-92043042    | OK     | 31.6587   | 41.3024   |
| Rabggtb       | chr3:153907288-153912966  | OK     | 32.9185   | 42.9434   |
| Ifi27         | chr12:103433872-103443680 | OK     | 151.308   | 197.367   |
| Qtrtd1        | chr16:43861412-43889676   | OK     | 4.17418   | 5.44358   |
| Myo1h         | chr5:114314940-114380505  | NOTEST | 0.070899  | 0.0924393 |
| Ten1          | chr11:116171882-116215318 | OK     | 24.7389   | 32.2546   |
| Fubp3         | chr2:31572650-31617526    | OK     | 14.0491   | 18.3164   |
| Ring1         | chr17:34020791-34024680   | OK     | 8.70437   | 11.3463   |
| Tceanc        | chrX:166499814-166510478  | OK     | 0.990813  | 1.29151   |
| Zfp9          | chr6:118461949-118479273  | OK     | 6.11208   | 7.96685   |
| Mrps26        | chr2:130563756-130565394  | OK     | 27.1159   | 35.3432   |
| Mrpl34        | chr8:71464925-71465753    | OK     | 24.801    | 32.3242   |
| Gm10532       | chr18:75431220-75697696   | NOTEST | 0.025051  | 0.0326474 |
| Prrc1         | chr18:57354732-57392719   | OK     | 11.4104   | 14.8702   |
| Usp35         | chr7:97309379-97325964    | OK     | 21.8276   | 28.4434   |
| N6amt1        | chr16:87354184-87368649   | OK     | 12.6066   | 16.4269   |
| Dmtn          | chr14:70602183-70636048   | OK     | 57.2281   | 74.5439   |
| Htr2a         | chr14:74640839-74706859   | OK     | 2.76889   | 3.60638   |
| Numbl         | chr7:27258760-27282150    | OK     | 32.6063   | 42.4677   |
| Slc30a10      | chr1:185447115-185468761  | NOTEST | 0.145445  | 0.189431  |
| Trit1         | chr4:123016596-123054934  | OK     | 2.87683   | 3.74672   |
| Coa6          | chr8:126422500-126425435  | OK     | 18.0468   | 23.4995   |
| Zfp69         | chr4:120930136-120951701  | NOTEST | 0.435712  | 0.567345  |
| Acsl4         | chrX:142317992-142390535  | OK     | 27.0327   | 35.1988   |
| Trmt44        | chr5:35556208-35575070    | OK     | 1.71577   | 2.23402   |
| Ccdc101       | chr7:126649308-126672779  | OK     | 10.2229   | 13.3078   |
| Sestd1        | chr2:77180339-77280592    | OK     | 20.3206   | 26.4372   |
| Ccdc14        | chr16:34690615-34725194   | OK     | 0.703992  | 0.915891  |
| Sh3rf2        | chr18:42053709-42158695   | NOTEST | 0.0539836 | 0.0702308 |
| Tceal3        | chrX:136666374-136668377  | OK     | 31.9433   | 41.5524   |
| 5430416N02Rik | chr5:100420841-100429535  | OK     | 2.40944   | 3.13412   |
| Uckl1         | chr2:181569152-181592461  | OK     | 8.81636   | 11.4675   |
| Midn          | chr10:79697304-80369637   | OK     | 18.7587   | 24.3992   |



|               |                           |        |          |          |
|---------------|---------------------------|--------|----------|----------|
| Adra1d        | chr2:131127411-131604824  | OK     | 2.41863  | 3.14585  |
| Zfp563        | chr17:33089366-33110704   | OK     | 1.33407  | 1.73509  |
| Cmtm7         | chr9:114756835-114781993  | OK     | 3.00954  | 3.91353  |
| Cemip         | chr7:83932856-84086505    | OK     | 1.25251  | 1.6287   |
| Max           | chr12:76937268-76962248   | OK     | 22.8275  | 29.6824  |
| Nfat5         | chr8:107293469-107379517  | OK     | 11.9173  | 15.4957  |
| Tmem150c      | chr5:100077872-100159808  | OK     | 35.389   | 46.0102  |
| Siah1a        | chr8:86723937-86747060    | OK     | 16.06    | 20.8788  |
| Arrb2         | chr11:70432579-70440828   | OK     | 19.6809  | 25.5826  |
| Gpt           | chr15:76696763-76699675   | OK     | 1.3073   | 1.69907  |
| Ngdn          | chr14:55015453-55024137   | OK     | 13.0559  | 16.9669  |
| A830080D01Rik | chrX:159532667-159593081  | OK     | 2.80066  | 3.63926  |
| Larp7         | chr3:127536713-127553349  | OK     | 11.0672  | 14.3809  |
| Prr3          | chr17:35972538-35979825   | OK     | 4.80332  | 6.2411   |
| Sdccag3       | chr2:26382799-26389316    | OK     | 18.223   | 23.6775  |
| Ahi1          | chr10:20952546-21080429   | OK     | 11.6405  | 15.1234  |
| Fam228b       | chr12:4746215-4769267     | NOTEST | 0.101142 | 0.131393 |
| Mcm6          | chr1:128331590-128359656  | OK     | 3.8975   | 5.06314  |
| Ccdc116       | chr16:17139063-17144423   | NOTEST | 0.138615 | 0.180071 |
| Fam131b       | chr6:42315304-42324640    | OK     | 50.0867  | 65.0645  |
| Mterfd3       | chr10:85119432-85128027   | OK     | 7.92268  | 10.2917  |
| Cramp1l       | chr17:24961225-25015230   | OK     | 5.26401  | 6.83798  |
| Unc45a        | chr7:80325291-80340219    | OK     | 23.7567  | 30.8493  |
| Ldha          | chr7:46845803-46855627    | OK     | 144.211  | 187.255  |
| Ccdc71        | chr9:108447638-108465945  | OK     | 7.03957  | 9.1406   |
| Setd3         | chr12:108106430-108179284 | OK     | 42.6193  | 55.3391  |
| Dhrs13        | chr11:78032312-78037864   | OK     | 5.68274  | 7.37758  |
| Ppig          | chr2:69723087-69754059    | OK     | 11.6745  | 15.1546  |
| Flywch2       | chr17:23776917-23786077   | OK     | 8.07779  | 10.4853  |
| Phf11c        | chr14:59380832-59393512   | NOTEST | 0.375979 | 0.488029 |
| Ube2r2        | chr4:41136020-41193370    | OK     | 31.8085  | 41.2833  |
| 1810058I24Rik | chr6:35252698-35262059    | OK     | 54.0749  | 70.1747  |
| B3galnt2      | chr13:13954673-14039600   | OK     | 2.62694  | 3.40839  |
| Pex16         | chr2:92374675-92381220    | OK     | 17.1358  | 22.2296  |
| Wdr46         | chr17:33940722-33949695   | OK     | 4.01195  | 5.20423  |
| Pfn1          | chr11:70651846-70654650   | OK     | 274.356  | 355.87   |
| Msrb2         | chr2:19371635-19394971    | OK     | 24.8582  | 32.2401  |
| Tusc3         | chr8:39005866-39130817    | OK     | 88.3969  | 114.616  |
| 1700066M21Rik | chr1:57377619-57385422    | OK     | 17.5697  | 22.7769  |
| Oxsr1         | chr9:119238432-119322427  | OK     | 18.904   | 24.4989  |
| Zik1          | chr7:10487223-10495381    | OK     | 1.76623  | 2.28893  |
| Rexo2         | chr9:48468513-48480611    | OK     | 81.8596  | 106.085  |
| Zfp597        | chr16:3861543-3872374     | OK     | 3.47288  | 4.49968  |
| Rpl4          | chr9:64173386-64178562    | OK     | 154.934  | 200.734  |
| Arl15         | chr13:113794507-114157461 | OK     | 10.6941  | 13.8546  |
| Serpina3i     | chr12:104263121-104269365 | OK     | 1.65239  | 2.14048  |
| Haus8         | chr8:71251123-71272590    | OK     | 8.19309  | 10.6095  |
| Cd274         | chr19:29367437-29388094   | OK     | 3.00215  | 3.88727  |
| Igsf9b        | chr9:27299227-27334763    | OK     | 1.94536  | 2.51878  |
| Dnajb3        | chr1:88055410-88220002    | OK     | 1.20014  | 1.55357  |
| Pawr          | chr10:108332188-108414391 | OK     | 2.42905  | 3.14426  |
| Nacad         | chr11:6597822-6606054     | OK     | 63.8882  | 82.685   |
| Cln6          | chr9:62838786-62875917    | OK     | 16.2772  | 21.0645  |

|               |                           |        |           |           |
|---------------|---------------------------|--------|-----------|-----------|
| 1110038B12Rik | chr17:34950235-34952471   | OK     | 9.90029   | 12.8079   |
| Arpc1a        | chr5:145083868-145108756  | OK     | 113.019   | 146.205   |
| Pdcl          | chr2:37350073-37359332    | OK     | 23.6161   | 30.5504   |
| Krtcap3       | chr5:30933142-31348845    | NOTEST | 0.474974  | 0.614381  |
| Gm20300       | chr10:30603194-30606634   | OK     | 31.8124   | 41.138    |
| L1td1         | chr4:98726753-98738486    | NOTEST | 0.0128989 | 0.0166793 |
| Armc8         | chr9:99456242-99568899    | OK     | 22.1047   | 28.5809   |
| Ccdc28b       | chr4:129619273-129623908  | OK     | 11.6063   | 15.0064   |
| Lrrc46        | chr11:97034601-97041369   | OK     | 1.21514   | 1.57103   |
| Xrn2          | chr2:147013059-147077997  | OK     | 12.013    | 15.5312   |
| Prpf4b        | chr13:34875493-34902878   | OK     | 13.6844   | 17.691    |
| Ints10        | chr8:68793953-68827644    | OK     | 12.9349   | 16.7191   |
| C4a           | chr17:34809091-34823454   | NOTEST | 0.0205834 | 0.0266037 |
| Pprc1         | chr19:46056538-46072909   | OK     | 4.30667   | 5.5659    |
| Dctn2         | chr10:127266261-127288771 | OK     | 218.965   | 282.937   |
| Hsp90aa1      | chr12:110691035-110696395 | OK     | 181.129   | 234.043   |
| Gipc1         | chr8:83652677-83664789    | OK     | 34.7949   | 44.954    |
| Dgcr6         | chr16:18052859-18071632   | OK     | 29.4557   | 38.0534   |
| Gltscr2       | chr7:15937835-15946108    | OK     | 31.3533   | 40.5029   |
| Blk           | chr14:63372836-63417187   | NOTEST | 0.076005  | 0.0981703 |
| Scamp3        | chr3:89177484-89182770    | OK     | 52.7653   | 68.1359   |
| Rbm33         | chr5:28317188-28419242    | OK     | 3.83727   | 4.95505   |
| Ifi2712a      | chr12:103433872-103443680 | OK     | 11.6628   | 15.0597   |
| Pear1         | chr3:87749096-87768953    | OK     | 2.92082   | 3.7713    |
| Ccdc53        | chr10:88201096-88246158   | OK     | 18.0285   | 23.2764   |
| Atf3          | chr1:191170296-191183333  | OK     | 15.6533   | 20.209    |
| Cactin        | chr10:81321102-81326251   | OK     | 5.76359   | 7.44066   |
| Ccdc88b       | chr19:6844622-6858211     | NOTEST | 0.260182  | 0.335832  |
| Map3k6        | chr4:133240817-133252928  | OK     | 1.29065   | 1.66573   |
| Atg4d         | chr9:21265284-21287969    | OK     | 12.4725   | 16.0965   |
| Fli1          | chr9:32422207-32541368    | OK     | 2.6292    | 3.3928    |
| Zfp65         | chr13:67705305-67729173   | OK     | 2.08574   | 2.69093   |
| Prdm10        | chr9:31315106-31378543    | OK     | 1.21811   | 1.57142   |
| Spryd3        | chr15:102116527-102136215 | OK     | 82.388    | 106.263   |
| Cry1          | chr10:85131699-85185054   | OK     | 4.77643   | 6.16053   |
| Tnfrsf25      | chr4:152115933-152120119  | NOTEST | 0.366941  | 0.473256  |
| Nfatc2ip      | chr7:126382853-126396737  | OK     | 2.43067   | 3.13488   |
| Prkce         | chr17:86167784-86657919   | OK     | 85.013    | 109.632   |
| Smarcad1      | chr6:65042666-65116049    | OK     | 4.50904   | 5.81464   |
| Upp1          | chr11:9118007-9136170     | OK     | 0.7955    | 1.0258    |
| Rps3          | chr7:99477896-99483709    | OK     | 105.463   | 135.983   |
| Ophn1         | chrX:98557514-98890985    | OK     | 11.7126   | 15.1019   |
| Alyref        | chr11:120594515-120598365 | OK     | 17.5022   | 22.5666   |
| C87436        | chr6:86438397-86470387    | OK     | 6.8654    | 8.85199   |
| Cep170        | chr1:176733652-176807124  | OK     | 22.5713   | 29.0995   |
| Chst10        | chr1:38863872-38898160    | OK     | 3.56737   | 4.59896   |
| Tph2          | chr10:115078640-115185022 | NOTEST | 0.534543  | 0.689088  |
| 1810041L15Rik | chr15:84379202-84447097   | OK     | 18.7028   | 24.1083   |
| Gdf9          | chr11:53433285-53437902   | NOTEST | 0.404334  | 0.521176  |
| Exoc3l        | chr8:105289923-105296098  | NOTEST | 0.484309  | 0.624167  |
| Bdkrb2        | chr12:105563171-105593071 | OK     | 1.43733   | 1.85233   |
| Lca5l         | chr16:96158405-96192257   | NOTEST | 0.256613  | 0.330658  |
| Best1         | chr19:9985171-10001633    | OK     | 0.841904  | 1.08475   |

|               |                           |        |           |           |
|---------------|---------------------------|--------|-----------|-----------|
| Nop14         | chr5:34638535-34660148    | OK     | 10.284    | 13.25     |
| Metap1        | chr3:138458959-138489382  | OK     | 23.8895   | 30.7787   |
| Tmem179b      | chr19:8772521-8786417     | OK     | 6.521     | 8.40082   |
| Rsb1l1        | chr5:20893023-20956398    | OK     | 5.5739    | 7.18048   |
| Dnph1         | chr17:46496788-46499618   | OK     | 1.38054   | 1.77844   |
| Otud5         | chrX:7841830-7876626      | OK     | 16.4046   | 21.1303   |
| Tnrc6a        | chr7:123123884-123195296  | OK     | 11.6462   | 15.0005   |
| Caprin2       | chr6:148842511-148896126  | OK     | 7.10043   | 9.14519   |
| Mtfr1         | chr3:19187328-19220817    | OK     | 7.27063   | 9.36427   |
| Hsp90ab1      | chr17:45567777-45573261   | OK     | 1150.32   | 1481.54   |
| Jarid2        | chr13:44730773-44921643   | OK     | 5.4336    | 6.99811   |
| Nfrkb         | chr9:31386191-31421334    | OK     | 4.79719   | 6.17663   |
| Eef1b2        | chr1:63176830-63180486    | OK     | 56.7802   | 73.0996   |
| Zbtb7a        | chr10:81136270-81151657   | OK     | 27.6414   | 35.5813   |
| Akirin2       | chr4:34550614-34614942    | OK     | 48.879    | 62.9085   |
| Atad3aos      | chr4:155761191-155763560  | NOTEST | 0.295777  | 0.380665  |
| 2610020C07Rik | chr16:11203382-11254325   | NOTEST | 0.0604541 | 0.0778044 |
| P4htm         | chr9:108578825-108597600  | OK     | 29.3375   | 37.7563   |
| Dnah17        | chr11:117986856-118129219 | NOTEST | 0.0706397 | 0.090903  |
| Grpel2        | chr18:61712423-61726331   | OK     | 5.40257   | 6.95165   |
| Bola1         | chr3:96196587-96197586    | OK     | 8.52987   | 10.971    |
| Grik5         | chr7:25009850-25072369    | OK     | 14.5896   | 18.7627   |
| Maoa          | chrX:16619697-16687812    | OK     | 24.216    | 31.14     |
| Ap3m1         | chr14:21033741-21052442   | OK     | 14.3668   | 18.4743   |
| Ifrd1         | chr12:40203128-40223189   | OK     | 10.5608   | 13.5802   |
| Pus7l         | chr15:94522639-94543507   | OK     | 1.38598   | 1.78216   |
| Nup35         | chr2:80638811-80660071    | OK     | 1.06043   | 1.36335   |
| Catsperg1     | chr7:29181531-29214033    | NOTEST | 0.0252064 | 0.0324061 |
| Kif5b         | chr18:6201004-6241524     | OK     | 138.54    | 178.071   |
| Zmym1         | chr4:127047093-127061132  | OK     | 5.2366    | 6.73032   |
| 2410004N09Rik | chr18:33794891-33795989   | OK     | 4.79322   | 6.16034   |
| Gm10584       | chr7:132236254-132318291  | NOTEST | 0.326602  | 0.419713  |
| Vill          | chr9:119052777-119071525  | NOTEST | 0.272267  | 0.34986   |
| Kctd18        | chr1:57955100-57970084    | OK     | 4.78815   | 6.15249   |
| Ccdc142       | chr6:83101515-83109932    | OK     | 1.01027   | 1.29789   |
| Gdpc3         | chr7:126766413-126775645  | OK     | 3.6209    | 4.6517    |
| Mtfr1l        | chr10:5811886-5823943     | OK     | 1.94238   | 2.49521   |
| Tbkbp1        | chr11:97136170-97149712   | OK     | 7.45234   | 9.57279   |
| Sub1          | chr15:11981338-11996007   | OK     | 30.978    | 39.7917   |
| Yy1           | chr12:108793310-108816632 | OK     | 18.3656   | 23.59     |
| Gm1943        | chr8:109339799-109340908  | OK     | 4.45691   | 5.72468   |
| Zc2hc1a       | chr3:7503425-7553848      | OK     | 44.7811   | 57.5184   |
| Snx4          | chr16:33251455-33299562   | OK     | 24.8226   | 31.8814   |
| Cmpk2         | chr12:26469214-26479837   | OK     | 12.8857   | 16.55     |
| Gpr116        | chr17:43389465-43459557   | OK     | 9.16866   | 11.7741   |
| Ing5          | chr1:93803964-93822100    | OK     | 2.62692   | 3.37296   |
| Clta          | chr4:44012642-44032848    | OK     | 197.817   | 253.974   |
| Exo5          | chr4:120921201-120925005  | OK     | 3.64672   | 4.6819    |
| Fryl          | chr5:73020190-73256618    | OK     | 23.3836   | 30.0177   |
| Rpf2          | chr10:40223245-40247039   | OK     | 9.19227   | 11.8001   |
| Glt1d1        | chr5:127632261-127707520  | OK     | 3.09389   | 3.97161   |
| Hnrnph1       | chr11:50377718-50386528   | OK     | 57.4924   | 73.7914   |
| Dram2         | chr3:106547797-106575341  | OK     | 25.6397   | 32.8969   |

|               |                           |        |          |          |
|---------------|---------------------------|--------|----------|----------|
| Ncoa7         | chr10:30645581-30803107   | OK     | 59.3275  | 76.1133  |
| Shcbp1        | chr8:4735979-4779534      | NOTEST | 0.55853  | 0.716374 |
| Ska2          | chr11:86583864-87555823   | OK     | 4.1145   | 5.27708  |
| Cdk8          | chr5:146231674-146302874  | OK     | 7.48742  | 9.60171  |
| Sirt6         | chr10:81621785-81627608   | OK     | 7.62692  | 9.78021  |
| Rhoq          | chr17:86963110-87025401   | OK     | 34.9823  | 44.855   |
| Car2          | chr3:14886425-14900770    | OK     | 52.0851  | 66.7791  |
| Zdhhc18       | chr4:133606991-133633429  | OK     | 30.6669  | 39.3158  |
| Abtb2         | chr2:103566309-103718423  | OK     | 20.1527  | 25.8356  |
| Pdss1         | chr2:22895521-23040241    | OK     | 2.37835  | 3.04818  |
| Atg3          | chr16:45158828-45188538   | OK     | 34.0779  | 43.6694  |
| Oasl2         | chr5:114896933-114912245  | OK     | 14.6071  | 18.7179  |
| Zfp462        | chr4:54947944-55083563    | OK     | 5.99083  | 7.67587  |
| Zmynd11       | chr13:9684835-9765314     | OK     | 20.6837  | 26.5009  |
| Srp54a        | chr12:55080495-55115367   | OK     | 4.06915  | 5.21279  |
| Cnot2         | chr10:116485160-116581511 | OK     | 12.218   | 15.6508  |
| Gnl3          | chr14:30999825-31019131   | OK     | 11.7447  | 15.0439  |
| Scml4         | chr10:42860511-42960782   | OK     | 2.52352  | 3.23188  |
| Orai3         | chr7:127769814-127775150  | OK     | 10.5345  | 13.4906  |
| Rundc3a       | chr11:102393402-102402939 | OK     | 86.472   | 110.728  |
| Scnm1         | chr3:95129718-95134012    | OK     | 16.9477  | 21.7003  |
| Zcchc8        | chr5:123698301-123721044  | OK     | 2.82255  | 3.61386  |
| Ppp2cb        | chr8:33599620-33641976    | OK     | 57.5916  | 73.7359  |
| Tchp          | chr5:114707778-114722327  | OK     | 2.32827  | 2.9809   |
| Gpatch8       | chr11:102475915-102556158 | OK     | 11.4874  | 14.7073  |
| Pafah2        | chr4:134396319-134427412  | OK     | 6.73534  | 8.62275  |
| Zbtb24        | chr10:41450357-41465582   | OK     | 4.0055   | 5.1277   |
| Aadat         | chr8:60506123-60545677    | NOTEST | 0.154383 | 0.197614 |
| Lmna          | chr3:88481147-88503352    | OK     | 52.68    | 67.4207  |
| Tarbp2        | chr15:102518191-102523676 | OK     | 2.83231  | 3.62454  |
| 9130401M01Rik | chr15:58022270-58034294   | OK     | 12.9785  | 16.6085  |
| Ap1g2         | chr14:55094783-55106593   | OK     | 0.718732 | 0.919741 |
| Fdps          | chr3:89093587-89101967    | OK     | 20.846   | 26.6757  |
| Idi1          | chr13:8885605-8892396     | OK     | 11.278   | 14.4318  |
| Zfp61         | chr7:24291045-24299549    | OK     | 2.64115  | 3.37899  |
| Zc3h6         | chr2:128967401-129018563  | OK     | 1.79585  | 2.29744  |
| Zfp157        | chr5:138441475-138460694  | OK     | 2.143    | 2.74145  |
| Prrt2         | chr7:127017541-127021211  | OK     | 52.7652  | 67.4997  |
| Rpl8          | chr15:76904070-76906318   | OK     | 205.267  | 262.552  |
| Thrb          | chr14:17660959-18038088   | OK     | 1.25935  | 1.61079  |
| Mgst2         | chr3:51661192-51682675    | NOTEST | 0.362555 | 0.463728 |
| Chst12        | chr5:140505608-140525238  | OK     | 30.998   | 39.6414  |
| Fip1l1        | chr5:74535481-74702903    | OK     | 13.4766  | 17.2338  |
| Slc39a6       | chr18:24579880-24603817   | OK     | 40.5028  | 51.7945  |
| Nelfa         | chr5:33898179-33936258    | OK     | 5.21215  | 6.66503  |
| Egln2         | chr7:27158657-27166802    | OK     | 49.0063  | 62.6608  |
| Tmem74b       | chr2:151702007-151707310  | OK     | 1.15697  | 1.47931  |
| Hax1          | chr3:89995445-89998716    | OK     | 7.56285  | 9.66944  |
| Srsf7         | chr17:80200079-80207305   | OK     | 31.0143  | 39.6509  |
| Nbea          | chr3:55625197-56183701    | OK     | 4.04547  | 5.17156  |
| Ipcef1        | chr10:6788600-7038209     | NOTEST | 0.26265  | 0.335757 |
| Unkl          | chr17:25188399-25240116   | OK     | 5.36998  | 6.86313  |
| 4930412C18Rik | chr4:9770584-9823411      | OK     | 1.69172  | 2.16207  |

|               |                           |        |             |            |
|---------------|---------------------------|--------|-------------|------------|
| Siah2         | chr3:58674948-58692388    | OK     | 6.93666     | 8.86514    |
| Nufip2        | chr11:77686138-77717966   | OK     | 13.5049     | 17.257     |
| Adh7          | chr3:138210716-138239663  | NOTEST | 0.372999    | 0.476627   |
| Mphosph8      | chr14:56668247-56701000   | OK     | 29.9807     | 38.31      |
| Eif2ak3       | chr6:70844526-70905240    | OK     | 14.0958     | 18.0101    |
| Ccdc9         | chr7:16274041-16286795    | OK     | 9.47119     | 12.1007    |
| Plcd3         | chr11:103070295-103101658 | OK     | 1.56361     | 1.99708    |
| Ift88         | chr14:57424070-57517936   | OK     | 8.2664      | 10.5563    |
| Rragd         | chr4:32982997-33022180    | OK     | 20.6162     | 26.3176    |
| Kctd5         | chr17:24047719-24073485   | OK     | 18.1512     | 23.1703    |
| Trnau1ap      | chr4:132311762-132329538  | OK     | 7.56973     | 9.66132    |
| Uchl3         | chr14:101653966-101696125 | OK     | 7.54989     | 9.63568    |
| Dnmt1         | chr9:20907205-20959888    | OK     | 8.7559      | 11.1731    |
| Atp8a1        | chr5:67618138-67847431    | OK     | 68.2576     | 87.0939    |
| Dpysl5        | chr5:30711894-30799369    | OK     | 40.0023     | 51.0404    |
| Cecr2         | chr6:120666420-120771191  | NOTEST | 0.375469    | 0.479063   |
| Hist2h2aa2    | chr3:96245456-96246052    | NOTEST | 0.000110085 | 0.00014046 |
| Pacrgl        | chr5:48372391-48388756    | OK     | 6.58411     | 8.39941    |
| Nop58         | chr1:59685005-59711510    | OK     | 14.7056     | 18.7535    |
| Slc9a6        | chrX:56609834-56664230    | OK     | 58.4741     | 74.569     |
| Mapk14        | chr17:28691341-28748405   | OK     | 21.6595     | 27.6193    |
| Cep85         | chr4:134129857-134187085  | OK     | 4.01121     | 5.11491    |
| Zfp52         | chr17:21535538-21562601   | OK     | 3.39258     | 4.32603    |
| Gfod2         | chr8:105716112-105758607  | OK     | 14.0644     | 17.9328    |
| Fen1          | chr19:10199131-10203943   | OK     | 6.36359     | 8.11374    |
| Ddah1         | chr3:145758691-145894277  | OK     | 18.5647     | 23.6691    |
| Runx1t1       | chr4:13743301-13895055    | OK     | 4.0226      | 5.12852    |
| 2810004N23Rik | chr8:124839354-124863029  | OK     | 11.1758     | 14.2479    |
| Fam3a         | chrX:74384719-74393139    | OK     | 13.7101     | 17.4788    |
| Mtfr2         | chr10:20347818-20361669   | NOTEST | 0.19264     | 0.245593   |
| Arl13b        | chr16:62793688-62847040   | OK     | 3.32756     | 4.24134    |
| Nphp3         | chr9:104002543-104043811  | OK     | 1.13788     | 1.45009    |
| Lrch2         | chrX:147471693-147554081  | OK     | 2.16163     | 2.75459    |
| Drap1         | chr19:5406814-5424979     | OK     | 52.7178     | 67.1617    |
| Eif3h         | chr15:51786562-51865461   | OK     | 39.0603     | 49.7552    |
| Baiap3        | chr17:25240169-25256364   | NOTEST | 0.0811303   | 0.103341   |
| Kcnd1         | chrX:7823842-7836503      | OK     | 83.4742     | 106.315    |
| H2-T9         | chr17:36038408-36042702   | OK     | 2.41751     | 3.07874    |
| Zfp13         | chr17:23575851-23599487   | OK     | 2.39357     | 3.048      |
| Praf2         | chrX:7728570-7731063      | OK     | 90.9903     | 115.867    |
| Hint3         | chr10:30608206-30618366   | OK     | 39.282      | 50.0097    |
| Traf3ip1      | chr1:91494667-91529307    | OK     | 3.2353      | 4.11859    |
| Gm960         | chr19:4625840-4698668     | NOTEST | 0.13394     | 0.170491   |
| Rbfox3        | chr11:118489759-118911597 | OK     | 77.4856     | 98.6285    |
| Med8          | chr4:118409336-118415824  | OK     | 13.7933     | 17.5565    |
| Ropn1         | chr16:34651210-34678610   | NOTEST | 0.166272    | 0.21163    |
| Eed           | chr7:89954653-89980976    | OK     | 5.95105     | 7.57435    |
| Fxr1          | chr3:34020078-34081354    | OK     | 73.3216     | 93.3202    |
| Prkaa2        | chr4:105029649-105109898  | OK     | 12.6232     | 16.0645    |
| Kirrel3       | chr9:34488730-35036307    | OK     | 13.6581     | 17.3805    |
| Med15         | chr16:17651207-17722947   | OK     | 18.3831     | 23.3898    |
| Gfer          | chr17:24693190-24696156   | OK     | 5.1896      | 6.60297    |
| Catal         | chr2:34874435-34892133    | NOTEST | 0.24526     | 0.312002   |



|               |                           |        |           |           |
|---------------|---------------------------|--------|-----------|-----------|
| Upk1b         | chr16:38773183-38800203   | NOTEST | 0.0663974 | 0.0844652 |
| 2700062C07Rik | chr18:24470870-24477767   | OK     | 3.84296   | 4.88829   |
| Ankrd49       | chr9:14780197-14782964    | OK     | 6.18071   | 7.8616    |
| Gltscr1l      | chr17:46798115-46831413   | OK     | 6.19333   | 7.87762   |
| Wdr35         | chr12:8974000-9028847     | OK     | 9.6766    | 12.3075   |
| Rab3il1       | chr19:10018227-10035586   | OK     | 2.42723   | 3.08699   |
| AI429214      | chr8:36993574-36995533    | OK     | 0.742668  | 0.944492  |
| Uba7          | chr9:107975566-107984056  | OK     | 2.02934   | 2.5808    |
| Zfp455        | chr13:67194505-67209298   | OK     | 0.721556  | 0.917551  |
| Shoc2         | chr19:53892230-54033278   | OK     | 32.7167   | 41.5981   |
| Srsf1         | chr11:88047372-88053757   | OK     | 30.437    | 38.6986   |
| Caap1         | chr4:94500078-94556796    | OK     | 3.43824   | 4.37147   |
| Gmds          | chr13:31819585-32338544   | OK     | 8.75039   | 11.1243   |
| Utp14a        | chrX:48256933-48285426    | OK     | 6.1098    | 7.76723   |
| Ipo8          | chr6:148770683-148831467  | OK     | 18.8212   | 23.9261   |
| Pnkp          | chr7:44857145-44862929    | OK     | 10.1461   | 12.8975   |
| Ubb           | chr11:62551503-62553212   | OK     | 775.788   | 986.037   |
| Tgfbrap1      | chr1:43047268-43098622    | OK     | 12.2807   | 15.6036   |
| Fam60a        | chr6:148921058-148946432  | NOTEST | 0.305624  | 0.388305  |
| 2900055J20Rik | chr18:40256961-40257687   | OK     | 6.43375   | 8.17299   |
| Adora1        | chr1:134193447-134235457  | OK     | 34.4927   | 43.8114   |
| Acaa1a        | chr9:119341293-119350295  | OK     | 19.7016   | 25.0241   |
| Jmjd6         | chr11:116837431-116843449 | OK     | 7.8373    | 9.95407   |
| Phf1          | chr17:26933126-26937890   | OK     | 16.8584   | 21.4114   |
| Gpr68         | chr12:100876681-100908198 | OK     | 1.66626   | 2.11625   |
| Cwc22         | chr2:77895652-77946356    | OK     | 1.33668   | 1.69765   |
| Wdr78         | chr4:103038064-103114299  | OK     | 1.52583   | 1.93733   |
| Dgcr8         | chr16:18248882-18289168   | OK     | 7.70543   | 9.78306   |
| Tle4          | chr19:14448071-14597983   | OK     | 16.9735   | 21.5491   |
| Nufip1        | chr14:76110890-76137379   | OK     | 3.18107   | 4.03841   |
| E130309D14Rik | chr11:74619604-74641516   | OK     | 11.8809   | 15.0826   |
| Yod1          | chr1:130689042-130729253  | OK     | 4.51676   | 5.73395   |
| Fkbp1a        | chr2:151542498-151561691  | OK     | 234.539   | 297.718   |
| Gtf2h1        | chr7:46796093-46823800    | OK     | 16.2292   | 20.599    |
| Ip6k2         | chr9:108795993-108806333  | OK     | 22.0996   | 28.0496   |
| Specc1        | chr11:61956762-62223013   | OK     | 2.34517   | 2.97647   |
| Stip1         | chr19:7020695-7040026     | OK     | 126.306   | 160.244   |
| Commd1        | chr11:22899727-22982284   | OK     | 35.0553   | 44.4699   |
| 3110056K07Rik | chr12:70974622-71015823   | OK     | 2.8952    | 3.67244   |
| Crebrf        | chr17:26715649-26776626   | OK     | 11.0887   | 14.0645   |
| Mcm4          | chr16:15623896-15637400   | OK     | 4.87265   | 6.17939   |
| Rmdn3         | chr2:119136997-119157034  | OK     | 9.01206   | 11.4273   |
| Pkn1          | chr8:83666639-83699179    | OK     | 12.3964   | 15.7178   |
| Ankrd54       | chr15:79053093-79062859   | OK     | 5.28632   | 6.70241   |
| Sepw1         | chr7:15917207-15922371    | OK     | 525.486   | 666.249   |
| Crat          | chr2:30392253-30415748    | OK     | 8.45791   | 10.7208   |
| Hdgf          | chr3:87906320-87916132    | OK     | 70.4198   | 89.2553   |
| Pwp2          | chr10:78170909-78185149   | OK     | 8.03134   | 10.1793   |
| Mmp24         | chr2:155775343-155819203  | OK     | 11.9273   | 15.1172   |
| Zfp74         | chr7:29932790-29951893    | OK     | 3.09019   | 3.91591   |
| Lgals3bp      | chr11:118392751-118401931 | OK     | 31.9653   | 40.504    |
| BB283400      | chr6:30176622-30178040    | NOTEST | 0.246462  | 0.312296  |
| Zfp26         | chr9:20428317-20460160    | OK     | 2.60835   | 3.30496   |

|               |                           |        |            |            |
|---------------|---------------------------|--------|------------|------------|
| Arl8a         | chr1:135146833-135156268  | OK     | 203.789    | 258.183    |
| Agap3         | chr5:24452176-24502047    | OK     | 52.6592    | 66.7135    |
| Sat2          | chr11:69622108-69623869   | OK     | 3.58304    | 4.53923    |
| Gm765         | chr6:98238013-98342754    | OK     | 84.6957    | 107.286    |
| Tnfaip8       | chr18:49979426-50093229   | OK     | 1.31671    | 1.66789    |
| Gas2l1        | chr11:5054130-5065327     | OK     | 25.8709    | 32.7705    |
| Agbl4         | chr4:110397697-111663024  | OK     | 0.949075   | 1.20208    |
| Zfp869        | chr8:69705136-69716902    | OK     | 5.54393    | 7.02172    |
| Uba3          | chr6:97183815-97205642    | OK     | 48.1124    | 60.9302    |
| Cnppd1        | chr1:75135214-75142368    | OK     | 14.5443    | 18.419     |
| Armc3         | chr2:19199117-19310243    | NOTEST | 0.00660951 | 0.00837028 |
| Rpl21         | chr5:146832889-146837032  | OK     | 4.86683    | 6.16319    |
| Suv39h1       | chrX:8061170-8074760      | OK     | 6.71985    | 8.5097     |
| Clock         | chr5:76183879-76469519    | OK     | 9.11481    | 11.5424    |
| Mrpl14        | chr17:45686371-45698495   | OK     | 24.5004    | 31.0251    |
| Ptpn12        | chr5:20986644-21055797    | OK     | 13.4621    | 17.0467    |
| Polh          | chr17:46171992-46202625   | OK     | 3.50584    | 4.43923    |
| Maz           | chr7:127022136-127026479  | OK     | 41.3791    | 52.3903    |
| Plekhf2       | chr4:10988661-11007619    | OK     | 3.79757    | 4.80784    |
| Hdgfrp3       | chr7:81859000-81934459    | OK     | 13.2463    | 16.7698    |
| Trmt61a       | chr12:111678104-111683902 | OK     | 4.43562    | 5.61538    |
| Mx2           | chr16:97536080-97560901   | OK     | 1.0573     | 1.33835    |
| Smim14        | chr5:65448754-65492835    | OK     | 57.4799    | 72.7567    |
| Eif2s2        | chr2:154871409-154892906  | OK     | 11.2062    | 14.1844    |
| Pp2d1         | chr17:53479233-53539451   | NOTEST | 0.0151366  | 0.0191585  |
| Gck           | chr11:5900820-5950081     | NOTEST | 0.154679   | 0.195731   |
| Mfng          | chr15:78755882-78773445   | OK     | 1.04478    | 1.32193    |
| Tcf3          | chr10:80409164-80433653   | OK     | 6.04301    | 7.64476    |
| Ddx18         | chr1:121553834-121567980  | OK     | 1.7569     | 2.22232    |
| Irf5          | chr6:29526624-29537320    | OK     | 2.20208    | 2.78528    |
| Foxl2         | chr9:98955606-98958126    | NOTEST | 0.0727383  | 0.0920005  |
| Rtfdc1        | chr2:172440577-172469899  | OK     | 47.1706    | 59.6604    |
| Dctn1         | chr6:83165923-83200118    | OK     | 171.409    | 216.776    |
| Ago2          | chr15:73101624-73184947   | OK     | 11.2739    | 14.2557    |
| Mblac2        | chr13:81711416-81753275   | OK     | 13.0041    | 16.4434    |
| 3110057012Rik | chr3:40894276-40936307    | OK     | 0.913914   | 1.1556     |
| Hspbap1       | chr16:35770385-35828462   | OK     | 1.75039    | 2.21314    |
| Mcrs1         | chr15:99224975-99262041   | OK     | 3.59584    | 4.5464     |
| Ccnt2         | chr1:127774163-127804837  | OK     | 10.2573    | 12.9685    |
| Fsd1l         | chr4:53631470-53707009    | OK     | 23.6613    | 29.9146    |
| Pcbp4         | chr9:106453837-106465940  | OK     | 104.978    | 132.711    |
| Akap8         | chr17:32303675-32321153   | OK     | 14.0635    | 17.7761    |
| Tjap1         | chr17:46257850-46283026   | OK     | 3.32505    | 4.2026     |
| Blzf1         | chr1:164289799-164307484  | OK     | 7.46554    | 9.43561    |
| Gse1          | chr8:120488865-120589075  | OK     | 5.79108    | 7.31923    |
| Glis1         | chr4:107434718-107635059  | NOTEST | 0.207598   | 0.262332   |
| Pibf1         | chr14:99076633-99254494   | OK     | 3.43709    | 4.34326    |
| Ezh1          | chr11:101191114-101226450 | OK     | 20.9672    | 26.4913    |
| BC048403      | chr10:121739936-121752859 | OK     | 6.71983    | 8.48981    |
| Cradd         | chr10:95174745-95324097   | OK     | 4.59793    | 5.80897    |
| Tcf7          | chr11:52252603-52282571   | OK     | 1.13847    | 1.43823    |
| Gm3488        | chr14:5516278-5522929     | NOTEST | 0.0111748  | 0.0141171  |
| Aup1          | chr6:83054652-83057682    | OK     | 30.3839    | 38.3817    |

|               |                           |        |          |           |
|---------------|---------------------------|--------|----------|-----------|
| Tmeff2        | chr1:50927522-51187270    | OK     | 40.4556  | 51.1041   |
| Il6st         | chr13:112464069-112506860 | OK     | 128.608  | 162.426   |
| Usp15         | chr10:123113243-123196923 | OK     | 35.2381  | 44.5021   |
| Rfxap         | chr3:54803114-54807791    | OK     | 6.89675  | 8.70962   |
| Rev3l         | chr10:39732159-39875205   | OK     | 3.72617  | 4.70533   |
| Mettl18       | chr1:163994944-163997244  | OK     | 2.11197  | 2.66667   |
| Dph5          | chr3:115888182-115929323  | OK     | 7.6162   | 9.61565   |
| Zfp944        | chr17:22337988-22361400   | OK     | 4.33647  | 5.47468   |
| Dcps          | chr9:35046578-35175987    | OK     | 7.10807  | 8.97375   |
| Txlng         | chrX:162407199-163352564  | OK     | 4.72629  | 5.96574   |
| Ccdc148       | chr2:58821697-59018606    | OK     | 1.82689  | 2.30592   |
| 1110065P20Rik | chr4:124802548-124850730  | OK     | 20.994   | 26.4986   |
| Ccdc67        | chr9:15559863-15641220    | NOTEST | 0.068325 | 0.0862294 |
| Zfp414        | chr17:33629091-33631714   | OK     | 14.4635  | 18.2516   |
| Cdkn2aipnl    | chr11:51967630-51977336   | OK     | 19.9012  | 25.1127   |
| Trim67        | chr8:124793018-124834704  | OK     | 16.528   | 20.856    |
| Cdpf1         | chr15:85806971-85811697   | OK     | 10.1299  | 12.7806   |
| Zfp935        | chr13:62453015-62466812   | OK     | 3.72513  | 4.69946   |
| Bean1         | chr8:104170512-104219097  | OK     | 38.9508  | 49.1346   |
| Zfp207        | chr11:80383278-80405873   | OK     | 35.5801  | 44.8799   |
| Nxph4         | chr10:127525472-127534559 | OK     | 0.931196 | 1.1743    |
| Gpr161        | chr1:165295765-165321851  | OK     | 6.49424  | 8.18947   |
| Nras          | chr3:103058284-103067914  | OK     | 26.6041  | 33.5404   |
| Fam171a2      | chr11:102436980-102447663 | OK     | 15.9849  | 20.152    |
| Ghr           | chr15:3317754-3583352     | OK     | 16.0566  | 20.2391   |
| Cinp          | chr12:110872609-110889145 | OK     | 14.3726  | 18.1139   |
| S100a10       | chr3:93555116-93564645    | OK     | 588.072  | 741.137   |
| Ddx27         | chr2:167015312-167034945  | OK     | 8.03676  | 10.1285   |
| Plekhj1       | chr10:80796098-80798626   | OK     | 19.2347  | 24.24     |
| Src           | chr2:157424292-157471838  | OK     | 16.1921  | 20.405    |
| Wdr44         | chrX:23693116-23806001    | OK     | 11.765   | 14.8259   |
| Mc3r          | chr2:172248491-172251114  | NOTEST | 0.130266 | 0.164116  |
| Gsr           | chr8:33653237-33698162    | OK     | 39.689   | 50.0019   |
| Trp53bp1      | chr2:121171167-121271407  | OK     | 15.5774  | 19.6249   |
| Timm13        | chr10:80879815-80900969   | OK     | 49.1759  | 61.9372   |
| Dpf2          | chr19:5896515-5912871     | OK     | 25.3945  | 31.9831   |
| Rqcd1         | chr1:74409383-74588028    | OK     | 8.77182  | 11.0469   |
| Ranbp1        | chr16:18239978-18248694   | OK     | 43.5839  | 54.8876   |
| Cox5b         | chr1:36691486-36693388    | OK     | 11.22    | 14.1296   |
| Polm          | chr11:5827859-5838016     | OK     | 1.48553  | 1.87071   |
| Mthfs         | chr9:89211189-89240225    | OK     | 3.8878   | 4.89543   |
| Rexo1         | chr10:80540925-80561560   | OK     | 5.46681  | 6.88331   |
| Fbxl3         | chr14:103080238-103099509 | OK     | 20.2243  | 25.4634   |
| Qtrt1         | chr9:21411836-21420279    | OK     | 3.15484  | 3.97209   |
| Rgs7bp        | chr13:104947152-105054930 | OK     | 119.055  | 149.877   |
| Ppp1r36       | chr12:76417598-76439491   | NOTEST | 0.364967 | 0.459427  |
| Atf2          | chr2:73816508-73892639    | OK     | 23.1603  | 29.1545   |
| Phf7          | chr14:31237695-31251218   | OK     | 1.46863  | 1.84859   |
| Plek          | chr11:16971205-17008718   | OK     | 2.29079  | 2.88335   |
| Bend3         | chr10:43479139-43515417   | OK     | 1.80735  | 2.2746    |
| Glmn          | chr5:107534710-107661853  | OK     | 5.91595  | 7.44467   |
| Etaa1         | chr11:17938748-17953875   | OK     | 3.07142  | 3.86492   |
| Rnf113a1      | chrX:37191342-37192465    | OK     | 1.8052   | 2.2715    |

|                |                           |        |            |           |
|----------------|---------------------------|--------|------------|-----------|
| Dtymk          | chr1:93792575-93801934    | OK     | 18.7892    | 23.6407   |
| Mfhas1         | chr8:35582502-35679449    | OK     | 20.3653    | 25.6233   |
| Mark2          | chr19:7275395-7341860     | OK     | 22.2711    | 28.0199   |
| Pwp1           | chr10:85871830-85889103   | OK     | 10.5607    | 13.2867   |
| Cdr2           | chr7:120957036-120982312  | OK     | 25.9988    | 32.7087   |
| Pcdha10        | chr18:36930284-37841872   | OK     | 2.72173    | 3.42401   |
| Rp1            | chr1:4290845-4409241      | NOTEST | 0.00982648 | 0.0123618 |
| Txnrd2         | chr16:18348181-18479073   | OK     | 6.88566    | 8.66165   |
| Srsf6          | chr2:162931507-162937120  | OK     | 35.5607    | 44.7315   |
| Cabin1         | chr10:75646109-75764357   | OK     | 7.66995    | 9.64775   |
| Safb           | chr17:56584981-56606294   | OK     | 20.55      | 25.8488   |
| Aplf           | chr6:87628428-87672168    | OK     | 1.99041    | 2.50339   |
| Adora2a        | chr10:75316876-75334792   | OK     | 2.56491    | 3.22571   |
| Gbp10          | chr5:105215698-105239533  | NOTEST | 0.0251953  | 0.0316823 |
| Coro1b         | chr19:4148662-4154035     | OK     | 43.3641    | 54.5269   |
| Top3a          | chr11:60740058-60777365   | OK     | 1.96962    | 2.4765    |
| Ccar1          | chr10:62743927-62792368   | OK     | 13.6934    | 17.2171   |
| Mcts2          | chr2:152669460-152708668  | OK     | 8.5146     | 10.7051   |
| Piwil2         | chr14:70372479-70429094   | NOTEST | 0.490763   | 0.617009  |
| Rheb           | chr5:24802822-24842361    | OK     | 81.9203    | 102.979   |
| Kdm1a          | chr4:136550532-136602723  | OK     | 20.2931    | 25.5078   |
| Rims3          | chr4:120877868-120891560  | OK     | 50.2934    | 63.1945   |
| Ptov1          | chr7:44863067-44869788    | OK     | 64.1825    | 80.635    |
| Riok3          | chr18:12128849-12157367   | OK     | 24.2869    | 30.512    |
| Ube3a          | chr7:59228749-59306727    | OK     | 28.0804    | 35.2774   |
| Hnrnpf         | chr6:117900339-117925622  | OK     | 16.9863    | 21.3392   |
| Ids            | chrX:70343069-70365085    | OK     | 132.325    | 166.217   |
| Bik            | chr15:83526861-83544635   | NOTEST | 0.483631   | 0.607494  |
| Tmem234        | chr4:129600706-129607879  | OK     | 46.9629    | 58.9797   |
| B230219D22Rik  | chr13:55693123-55703500   | OK     | 34.7109    | 43.5924   |
| Mtus1          | chr8:40990911-41133726    | OK     | 34.4978    | 43.3245   |
| Tet2           | chr3:133463676-133544390  | OK     | 1.71313    | 2.1514    |
| Evpl           | chr11:116220558-116238091 | NOTEST | 0.155518   | 0.195294  |
| Snrnp48        | chr13:38204938-38227663   | OK     | 7.15499    | 8.98485   |
| Reep4          | chr14:70545250-70548935   | OK     | 2.8089     | 3.52704   |
| H2-M3          | chr17:37270233-37274485   | OK     | 5.50269    | 6.90856   |
| Hdac4          | chr1:91932748-92148393    | OK     | 7.7931     | 9.78393   |
| Nsl1           | chr1:191063020-191084558  | OK     | 0.838933   | 1.05325   |
| Mir8104        | chr10:122678761-122945793 | LOWDAT | 1374.47    | 1725.5    |
| Ufd1l          | chr16:18812293-18835261   | OK     | 38.5186    | 48.3542   |
| Uap1l1         | chr2:25361491-25365626    | OK     | 9.14701    | 11.4823   |
| 6330403K07Rik  | chr11:71031940-71033617   | OK     | 64.1932    | 80.5804   |
| Nup85          | chr11:115564443-115583924 | OK     | 11.6301    | 14.5988   |
| Tmem131        | chr1:36792188-36939527    | OK     | 16.4165    | 20.6044   |
| Lrrc29         | chr8:105312339-105326276  | NOTEST | 0.526258   | 0.660498  |
| Fam217a        | chr13:34909963-34919992   | NOTEST | 0.0249093  | 0.0312501 |
| 2810047C21Rik1 | chr7:8086046-8093037      | NOTEST | 0.151817   | 0.190448  |
| Sart3          | chr5:113742445-113771649  | OK     | 9.02126    | 11.3166   |
| Rpl27a         | chr7:109519194-109522369  | OK     | 25.1383    | 31.533    |
| Exoc5          | chr14:49012143-49087723   | OK     | 20.6231    | 25.8684   |
| B4galt6        | chr18:20684598-20746404   | OK     | 35.1549    | 44.096    |
| Lymr2          | chr4:32800258-32802254    | OK     | 16.2282    | 20.3509   |
| Bcap29         | chr12:31595353-31634658   | OK     | 34.2932    | 43.0034   |

|               |                           |        |           |           |
|---------------|---------------------------|--------|-----------|-----------|
| Mcoln1        | chr8:3500518-3515231      | OK     | 29.6657   | 37.192    |
| Snrpa         | chr7:27187005-27205386    | OK     | 14.4088   | 18.0635   |
| Pigu          | chr2:155278251-155357424  | OK     | 21.9625   | 27.5307   |
| Inadl         | chr4:98395825-98719603    | OK     | 33.1897   | 41.6025   |
| Rtkn          | chr6:83135807-83152579    | OK     | 30.2915   | 37.9669   |
| B930003M22Rik | chr17:10319918-10321141   | NOTEST | 0.38671   | 0.484677  |
| Rpl18a        | chr8:70894721-70897443    | OK     | 5.09413   | 6.38449   |
| Grm7          | chr6:110645597-111567230  | OK     | 25.6557   | 32.1534   |
| Setd1a        | chr7:127777388-127800119  | OK     | 7.86665   | 9.85865   |
| Mettl17       | chr14:51884841-51891868   | OK     | 3.30551   | 4.14242   |
| Galt          | chr4:41755252-41759125    | OK     | 5.78846   | 7.2531    |
| Rb1           | chr14:73195501-73325791   | OK     | 10.3049   | 12.9106   |
| Cttn          | chr7:143948404-144470935  | OK     | 39.3595   | 49.3094   |
| Fam154b       | chr7:82632959-82648528    | NOTEST | 0.153521  | 0.192315  |
| Gimap4        | chr6:48684577-48692062    | OK     | 2.70023   | 3.38186   |
| Zkscan14      | chr5:145194945-145201882  | OK     | 3.55002   | 4.44608   |
| Caml          | chr13:55623004-55632416   | OK     | 33.8048   | 42.3337   |
| Srp19         | chr18:34331144-34336599   | OK     | 46.8607   | 58.6786   |
| Rev1          | chr1:37998009-38129662    | OK     | 3.19315   | 3.99836   |
| Nagpa         | chr16:5195279-5204012     | OK     | 4.46737   | 5.59379   |
| Rab12         | chr15:89582526-89591923   | OK     | 8.67878   | 10.8655   |
| Atox1         | chr11:55446642-55461138   | OK     | 103.2     | 129.193   |
| Zfp131        | chr13:119765186-119790805 | OK     | 8.40271   | 10.5188   |
| Hoxd10        | chr2:74691890-74695106    | OK     | 2.32167   | 2.9063    |
| Prkar2a       | chr9:108692142-108749511  | OK     | 54.297    | 67.967    |
| Arrdc3        | chr13:80883421-80896043   | OK     | 9.65931   | 12.0896   |
| Mrps25        | chr6:92091417-92184023    | OK     | 6.37689   | 7.98079   |
| Cldn5         | chr16:18776846-18778262   | OK     | 21.5105   | 26.9158   |
| Sox12         | chr2:152393611-152398046  | OK     | 4.84058   | 6.05681   |
| Arid4b        | chr13:14063783-14199603   | OK     | 7.29058   | 9.12205   |
| Rundc3b       | chr5:8490335-8622952      | OK     | 8.17063   | 10.2231   |
| Arhgap23      | chr11:97450159-97502400   | OK     | 11.2652   | 14.0926   |
| Neil1         | chr9:57143255-57147034    | OK     | 1.58073   | 1.97742   |
| Brf1          | chr12:112959861-113000621 | OK     | 13.9974   | 17.5094   |
| Cd207         | chr6:83671206-83677857    | NOTEST | 0.0873782 | 0.109292  |
| Pirt          | chr11:66905631-66947086   | OK     | 268.09    | 335.321   |
| Hectd3        | chr4:116995347-117005277  | OK     | 20.6675   | 25.8479   |
| Adcyap1       | chr17:93199421-93205489   | OK     | 44.5798   | 55.7524   |
| Ccdc124       | chr8:70868226-70873490    | OK     | 81.3809   | 101.749   |
| C4bp-ps1      | chr1:130670201-130681571  | NOTEST | 0.0312984 | 0.0391234 |
| Ccdc181       | chr1:164275597-164287847  | OK     | 16.4564   | 20.5693   |
| Prr24         | chr7:16272012-16273692    | OK     | 14.8059   | 18.5049   |
| Nsa2          | chr13:97067286-97137926   | OK     | 4.29489   | 5.36766   |
| Wdr1          | chr5:38526812-38561595    | OK     | 109.528   | 136.882   |
| Fbxl6         | chr15:76535727-76538746   | OK     | 7.71261   | 9.63827   |
| Dcun1d3       | chr7:119853162-119895745  | OK     | 6.35817   | 7.94491   |
| Cdc14b        | chr13:64192544-64274988   | OK     | 4.73957   | 5.92233   |
| Limk2         | chr11:3202352-3479831     | OK     | 32.3705   | 40.4461   |
| 2410089E03Rik | chr15:8169105-8271158     | OK     | 4.45919   | 5.57127   |
| Senp6         | chr9:80066902-80144780    | OK     | 19.2715   | 24.0768   |
| Set           | chr2:30061995-30072577    | OK     | 29.2688   | 36.5598   |
| Vps37d        | chr5:135072899-135078266  | OK     | 4.38974   | 5.48257   |
| Strip1        | chr3:107612531-107631710  | OK     | 15.8829   | 19.8365   |



|               |                           |        |          |          |
|---------------|---------------------------|--------|----------|----------|
| 1500011K16Rik | chr2:127791376-127792488  | OK     | 28.1194  | 35.1181  |
| Trim7         | chr11:48826137-48850195   | OK     | 1.29802  | 1.62107  |
| Pycr2         | chr1:180904273-180908088  | OK     | 16.7703  | 20.9426  |
| Rbm28         | chr6:29123572-29164724    | OK     | 7.36634  | 9.19867  |
| Cml1          | chr6:85910153-85915677    | OK     | 3.574    | 4.46285  |
| Hnrnpa2b1     | chr6:51460434-51469894    | OK     | 83.8237  | 104.649  |
| Dcaf4         | chr12:83520465-83541992   | OK     | 10.5695  | 13.1954  |
| Ikzf5         | chr7:131388648-131410478  | OK     | 3.70137  | 4.62092  |
| Rbl1          | chr2:157145893-157204534  | OK     | 0.712958 | 0.890066 |
| Smagp         | chr15:100621339-100636940 | OK     | 1.01289  | 1.26437  |
| Capn10        | chr1:92933542-92950590    | OK     | 10.2212  | 12.7585  |
| Nfyb          | chr10:82748699-82764141   | OK     | 8.63147  | 10.7737  |
| Ube2f         | chr1:91250318-91286025    | OK     | 13.5639  | 16.9303  |
| Arv1          | chr8:124722138-124734123  | OK     | 2.83614  | 3.53986  |
| 1810009A15Rik | chr19:8883877-8890759     | OK     | 15.131   | 18.8844  |
| Hnrnp3        | chr10:62980222-63023849   | OK     | 10.5186  | 13.1268  |
| Otud1         | chr2:19658061-19660590    | OK     | 4.93043  | 6.1523   |
| Rfng          | chr11:120780744-120784204 | OK     | 16.2301  | 20.2499  |
| D10Bwg1379e   | chr10:18588010-18743758   | OK     | 15.3614  | 19.1655  |
| Plgrkt        | chr19:29348676-29361871   | OK     | 8.80561  | 10.9826  |
| Lasp1         | chr11:97799671-97838764   | OK     | 38.6557  | 48.2102  |
| Siah1b        | chrX:164070702-164076049  | OK     | 1.76444  | 2.20055  |
| Rab21         | chr10:115289861-115315591 | OK     | 67.9789  | 84.78    |
| Use1          | chr8:71366847-71369732    | OK     | 59.3756  | 74.0493  |
| 9330133O14Rik | chr8:122443655-122451322  | OK     | 1.27295  | 1.58746  |
| Ncor2         | chr5:125017152-125179214  | OK     | 17.0283  | 21.2353  |
| Ube2b         | chr11:51985145-52000466   | OK     | 107.696  | 134.303  |
| Pes1          | chr11:3963974-3980004     | OK     | 7.57287  | 9.44323  |
| Ccsap         | chr8:123840843-123860209  | OK     | 1.41909  | 1.76948  |
| Tceb2         | chr17:23803186-23829109   | OK     | 120.873  | 150.715  |
| Peli3         | chr19:4931854-4943092     | OK     | 9.4653   | 11.802   |
| Trappc9       | chr15:72589619-73061204   | OK     | 36.7127  | 45.7728  |
| Fzr1          | chr10:81366878-81378370   | OK     | 24.5662  | 30.6278  |
| Rap1gap2      | chr11:74383482-74590158   | OK     | 37.789   | 47.1121  |
| Cers5         | chr15:99735591-99772515   | OK     | 25.9717  | 32.3792  |
| Afmid         | chr11:117815518-117839908 | OK     | 1.50075  | 1.87096  |
| Fdft1         | chr14:63122461-63177793   | OK     | 86.9907  | 108.44   |
| Akt1s1        | chr7:44849223-44855421    | OK     | 30.5409  | 38.0599  |
| Nudt1         | chr5:140331921-140338135  | OK     | 5.13711  | 6.40023  |
| Alg8          | chr7:97371616-97392158    | OK     | 2.9698   | 3.69928  |
| Nipal3        | chr4:135448900-135494504  | OK     | 157.714  | 196.447  |
| Tut1          | chr19:8953849-8966210     | OK     | 5.94756  | 7.40763  |
| Rpap1         | chr2:119763958-119787537  | OK     | 4.3375   | 5.40227  |
| Nr1i3         | chr1:171213969-171222514  | NOTEST | 0.105303 | 0.131146 |
| Ogfod2        | chr5:124112337-124115476  | OK     | 14.4742  | 18.022   |
| 3632451O06Rik | chr14:49682018-49783367   | OK     | 63.7431  | 79.3666  |
| Rmi1          | chr13:58391950-58411149   | OK     | 3.01185  | 3.74965  |
| Scyl3         | chr1:163929099-163994781  | OK     | 4.67497  | 5.82013  |
| Hnrnpdl       | chr5:100033578-100039222  | OK     | 25.6796  | 31.9693  |
| Naca          | chr10:128035345-128048637 | OK     | 4.96631  | 6.18268  |
| Mak16         | chr8:31150315-31168724    | OK     | 7.51249  | 9.35229  |
| Ssbp4         | chr8:70597489-70608314    | OK     | 11.9998  | 14.9379  |
| Parp2         | chr14:50807945-50821300   | OK     | 6.37047  | 7.93     |

|               |                           |        |          |          |
|---------------|---------------------------|--------|----------|----------|
| Dnaja7        | chr11:100582835-100620168 | OK     | 71.331   | 88.7918  |
| B4galt1       | chr4:40804581-40854537    | OK     | 8.3358   | 10.3756  |
| Rbm34         | chr8:126947172-126971079  | OK     | 7.45433  | 9.27795  |
| Slc38a7       | chr8:95835922-95853491    | OK     | 15.0675  | 18.7523  |
| Zwilch        | chr9:64117146-64172931    | OK     | 1.92893  | 2.40045  |
| Polr3e        | chr7:120917743-120947432  | OK     | 6.32239  | 7.8673   |
| Gpank1        | chr17:35121495-35124815   | OK     | 5.48054  | 6.81958  |
| Trim38        | chr13:23782540-23791528   | NOTEST | 0.152141 | 0.189297 |
| Zfp287        | chr11:62711485-62729093   | OK     | 2.87852  | 3.58103  |
| Tmem181a      | chr17:6270469-6317474     | OK     | 11.2274  | 13.9659  |
| Med12l        | chr3:59006977-59344256    | OK     | 7.28396  | 9.06043  |
| Ormdl1        | chr1:53297094-53310245    | OK     | 7.64052  | 9.50288  |
| Zfp553        | chr7:127233442-127237860  | OK     | 4.69279  | 5.83653  |
| Aldh3b1       | chr19:3913490-3929716     | OK     | 5.42448  | 6.7462   |
| Rps24         | chr14:24490680-24496146   | OK     | 13.4944  | 16.7818  |
| Ccnc          | chr4:21727700-21767211    | OK     | 30.2218  | 37.584   |
| Ythdc1        | chr5:86804489-86836657    | OK     | 14.8503  | 18.4675  |
| Cpsf7         | chr19:10525243-10547735   | OK     | 14.8954  | 18.5229  |
| Lurap1l       | chr4:80910685-80954301    | OK     | 11.1911  | 13.9153  |
| Mrps12        | chr7:28739640-28741781    | OK     | 38.6999  | 48.1201  |
| Thap7         | chr16:17527981-17531052   | OK     | 10.5696  | 13.1414  |
| Cdkn1b        | chr6:134920400-134925525  | OK     | 39.6843  | 49.3371  |
| Cdnf          | chr2:3513064-3526376      | OK     | 3.20375  | 3.98248  |
| Pthr2         | chr11:86583864-87555823   | OK     | 3.9724   | 4.93721  |
| Rexo4         | chr2:26953562-26964386    | OK     | 12.2483  | 15.2208  |
| Evi5          | chr5:107744794-107875107  | OK     | 28.8348  | 35.8323  |
| Tcea1         | chr1:4857693-4897909      | OK     | 8.6913   | 10.7999  |
| Add2          | chr6:86028680-86124409    | OK     | 69.448   | 86.2881  |
| Dcaf13        | chr15:39112873-39146855   | OK     | 18.304   | 22.7382  |
| Chic2         | chr5:75006423-75044626    | OK     | 9.5363   | 11.846   |
| Hist3h2ba     | chr11:58948910-58949372   | OK     | 14.7779  | 18.3567  |
| Rassf3        | chr10:121410350-121476250 | OK     | 23.811   | 29.5767  |
| Spsb3         | chr17:24886673-24892147   | OK     | 20.7326  | 25.7526  |
| Zfp688        | chr7:127418965-127422034  | OK     | 5.9346   | 7.37083  |
| Wdr83os       | chr8:85080962-85082339    | OK     | 20.5622  | 25.5375  |
| Lgi1          | chr19:38264781-38308939   | OK     | 18.1029  | 22.4815  |
| Erh           | chr12:80634022-80643861   | OK     | 13.4362  | 16.686   |
| Igfbp2        | chr1:72824479-72852471    | OK     | 7.74411  | 9.61625  |
| Mif4gd        | chr11:115607918-115612969 | OK     | 6.99931  | 8.69106  |
| Gimap5        | chr6:48746196-48754200    | OK     | 0.998289 | 1.23941  |
| Zfp653        | chr9:22055459-22389206    | OK     | 3.02615  | 3.75621  |
| Azi2          | chr9:118040521-118150196  | OK     | 25.8291  | 32.0548  |
| Hdac7         | chr15:97784364-97844502   | OK     | 3.08082  | 3.82337  |
| Cpeb4         | chr11:31870939-31935635   | OK     | 21.8928  | 27.1689  |
| Trafd1        | chr5:121371724-121385615  | OK     | 16.9716  | 21.0608  |
| Krba1         | chr6:48395585-48419855    | OK     | 1.86715  | 2.31701  |
| Ppp1r3e       | chr14:54875596-54877538   | OK     | 9.56976  | 11.8751  |
| Acat2         | chr17:12943041-12960725   | OK     | 51.4763  | 63.8617  |
| Thumpd1       | chr7:119715093-119720798  | OK     | 17.1053  | 21.2186  |
| Pdcd2l        | chr7:34184496-34196647    | OK     | 8.86655  | 10.9982  |
| 4932438A13Rik | chr3:36863105-37053033    | OK     | 10.5892  | 13.1321  |
| Dgkq          | chr5:108629809-108685446  | OK     | 12.4275  | 15.4114  |
| Gm16894       | chr1:40076211-40125226    | NOTEST | 0.639389 | 0.792882 |

|               |                             |        |           |           |
|---------------|-----------------------------|--------|-----------|-----------|
| Whsc1l1       | chr8:25602305-25719667      | OK     | 10.8897   | 13.5019   |
| Dand5         | chr8:84815404-84832265      | OK     | 5.70602   | 7.07461   |
| Mogs          | chr6:83115505-83118898      | OK     | 9.80584   | 12.1577   |
| Mad2l1        | chr6:66535467-66540991      | OK     | 4.25107   | 5.26997   |
| Aloxe3        | chr11:69126376-69149115     | NOTEST | 0.0467813 | 0.0579929 |
| Mdp1          | chr14:55657878-55660508     | OK     | 17.5797   | 21.792    |
| Ubash3b       | chr9:41013640-41157494      | OK     | 78.4663   | 97.264    |
| Noxred1       | chr12:87221122-87238601     | NOTEST | 0.335438  | 0.415754  |
| Rbm10         | chrX:20615325-20650905      | OK     | 2.736     | 3.39092   |
| Dcxr          | chr11:120725372-120727281   | OK     | 2.10509   | 2.60871   |
| Brat1         | chr5:140705010-140719378    | OK     | 7.88697   | 9.77183   |
| Syt15         | chr14:34220045-34230421     | OK     | 1.47969   | 1.83299   |
| Xpc           | chr6:91489306-91515888      | OK     | 3.81656   | 4.72777   |
| Mrps33        | chr6:39801806-39810936      | OK     | 7.31873   | 9.06501   |
| Nwd2          | chr5:63649102-63810543      | OK     | 11.9914   | 14.8512   |
| Scmh1         | chr4:120405280-120530199    | OK     | 7.82806   | 9.69481   |
| Gpsm3         | chr17:34589805-34591754     | OK     | 3.3132    | 4.1032    |
| Rbm7          | chr9:48488696-48495330      | OK     | 12.7767   | 15.8231   |
| Gtpbp1        | chr15:79690895-79721479     | OK     | 6.59492   | 8.16646   |
| Pus7          | chr5:23740164-23783711      | OK     | 3.18997   | 3.94997   |
| Cpsf6         | chr10:117344667-117376973   | OK     | 12.2726   | 15.1964   |
| Nubp1         | chr16:10411937-10447350     | OK     | 8.2938    | 10.266    |
| Atp6v0b       | chr4:117884329-117887329    | OK     | 202.127   | 250.191   |
| Wdyhv1        | chr15:58141435-58158654     | OK     | 11.3558   | 14.0545   |
| Fnbp4         | chr2:90745369-90781020      | OK     | 5.48826   | 6.79104   |
| 1110032F04Rik | chr3:68869585-68872163      | OK     | 25.6682   | 31.761    |
| Zscan26       | chr13:21442174-21453727     | OK     | 12.7714   | 15.8009   |
| Mrpl33        | chr5:31613950-31622644      | OK     | 37.0518   | 45.8317   |
| Dpysl3        | chr18:43320978-43438286     | OK     | 184.032   | 227.63    |
| Il11ra2       | chr4_JH584294_random:1717-1 | NOTEST | 4.98E-07  | 6.16E-07  |
| Slc20a1       | chr2:129198772-129211612    | OK     | 41.9973   | 51.942    |
| Armcx1        | chrX:134717937-134721912    | OK     | 82.6933   | 102.262   |
| Exosc9        | chr3:36552605-36571996      | OK     | 19.9957   | 24.7245   |
| Cep83os       | chr10:94673492-94688613     | OK     | 8.34161   | 10.3136   |
| Gpi1          | chr7:34201326-34230336      | OK     | 90.8758   | 112.358   |
| Hspa1a        | chr17:34969358-34972156     | OK     | 5.73643   | 7.09214   |
| Prpf3         | chr3:95830621-95855753      | OK     | 4.49593   | 5.55836   |
| Eif3g         | chr9:20894348-20898590      | OK     | 64.4257   | 79.6477   |
| AI467606      | chr7:127091435-127094049    | OK     | 0.769688  | 0.951507  |
| Ube2a         | chrX:36874365-36884220      | OK     | 42.3142   | 52.2996   |
| Arpc3         | chr5:122391927-122406178    | OK     | 148.234   | 183.207   |
| Zfp865        | chr7:5020375-5033223        | OK     | 4.51541   | 5.58053   |
| Gab2          | chr7:97081750-97308951      | OK     | 9.79121   | 12.1008   |
| C230052I12Rik | chr7:35334236-35396767      | OK     | 2.82075   | 3.48607   |
| Uba5          | chr9:104046587-104063121    | OK     | 19.3659   | 23.9331   |
| Nxn           | chr11:76257225-76399141     | OK     | 10.6706   | 13.1871   |
| Steap3        | chr1:120226415-120271082    | OK     | 24.0315   | 29.6979   |
| Sertad2       | chr11:20543252-20653023     | OK     | 10.7214   | 13.2476   |
| Snapc1        | chr12:73964529-73984820     | OK     | 16.5546   | 20.4548   |
| Shc2          | chr10:79617937-79637918     | OK     | 43.1372   | 53.2959   |
| Vsig10l       | chr7:43463232-43472014      | OK     | 0.980913  | 1.21179   |
| Nipsnap1      | chr11:4874002-4894200       | OK     | 48.9889   | 60.5186   |
| Bcl2l2        | chr14:54883424-54888234     | OK     | 64.2281   | 79.3417   |

|               |                           |        |           |           |
|---------------|---------------------------|--------|-----------|-----------|
| 9530051G07Rik | chrX:153037628-153072915  | NOTEST | 0.180099  | 0.222431  |
| Cryl1         | chr14:57275033-57398483   | OK     | 6.64796   | 8.21029   |
| Mmp16         | chr4:17853481-18118734    | OK     | 2.16123   | 2.66906   |
| Metap2        | chr10:93858489-93891202   | OK     | 28.3951   | 35.0621   |
| Msl1          | chr11:98795768-98833807   | OK     | 22.7561   | 28.0936   |
| Lsm6          | chr8:78804867-78821152    | OK     | 7.67471   | 9.47443   |
| Pmm2          | chr16:8637706-8657524     | OK     | 10.9951   | 13.5714   |
| Ddb2          | chr2:91202911-91237066    | OK     | 2.08715   | 2.5759    |
| Slc16a3       | chr11:120948483-120959000 | OK     | 0.893042  | 1.10213   |
| Selk          | chr14:29968379-29975074   | OK     | 71.1424   | 87.7936   |
| Gmcl1         | chr6:86691767-86733378    | OK     | 22.7945   | 28.126    |
| 1190007I07Rik | chr10:82619850-82623228   | OK     | 2.37249   | 2.92676   |
| Serping1      | chr2:84765359-84775429    | OK     | 65.4482   | 80.7216   |
| Gga2          | chr7:121986721-122021198  | OK     | 29.2091   | 36.0247   |
| Cpb1          | chr3:20249483-20275729    | OK     | 5.00328   | 6.16997   |
| Cc2d1b        | chr4:108619955-108634122  | OK     | 20.7197   | 25.5432   |
| Plk4          | chr3:40799950-40816883    | OK     | 2.01666   | 2.48614   |
| Cyp2ab1       | chr16:20308386-20325404   | NOTEST | 0.0279117 | 0.0344088 |
| H2afz         | chr3:137864486-137866922  | OK     | 7.08793   | 8.73662   |
| Rrs1          | chr1:9545407-9547455      | OK     | 8.70733   | 10.7317   |
| Zfp263        | chr16:3744098-3750788     | OK     | 3.87505   | 4.77544   |
| F630042J09Rik | chr13:67278593-67283361   | NOTEST | 0.255247  | 0.314543  |
| Slc7a4        | chr16:17572017-17576671   | OK     | 6.08725   | 7.4999    |
| Tubgcp3       | chr8:12614276-12672100    | OK     | 11.3972   | 14.0413   |
| Tmem186       | chr16:8633730-8637701     | OK     | 6.54319   | 8.06089   |
| Dph6          | chr2:114516417-114654928  | OK     | 13.2409   | 16.3121   |
| Taf5l         | chr8:123996312-124021309  | OK     | 5.99973   | 7.38995   |
| Klhl18        | chr9:110425925-110476694  | OK     | 5.01444   | 6.17567   |
| Aip           | chr19:4099997-4125858     | OK     | 44.4734   | 54.7633   |
| Dyrk3         | chr1:131128440-131138234  | OK     | 3.00364   | 3.69844   |
| Klhdc4        | chr8:121796307-121829569  | OK     | 8.35863   | 10.2908   |
| Wash          | chr17:66111545-66120503   | OK     | 13.3538   | 16.4405   |
| Rab4a         | chr8:123805995-123835291  | OK     | 37.889    | 46.6379   |
| H2-K1         | chr17:33996011-34000333   | OK     | 43.3293   | 53.3327   |
| Kif26b        | chr1:178529124-178932857  | OK     | 5.04516   | 6.20961   |
| Zfp775        | chr6:48613179-48623227    | OK     | 1.55763   | 1.91709   |
| Pcbp3         | chr10:76761853-76961947   | OK     | 147.796   | 181.888   |
| Slc48a1       | chr15:97784364-97844502   | OK     | 62.5401   | 76.9658   |
| Sema3a        | chr5:13396783-13603485    | NOTEST | 0.0907856 | 0.111725  |
| Ifngr2        | chr16:91547093-91564007   | OK     | 34.418    | 42.3548   |
| Kansl3        | chr1:36335729-36369181    | OK     | 18.9577   | 23.3292   |
| Trpc2         | chr7:102065490-102096864  | NOTEST | 0.468093  | 0.575995  |
| 2700089E24Rik | chr6:133105238-133110899  | OK     | 33.8289   | 41.6242   |
| Ccdc149       | chr5:52374650-52471543    | OK     | 12.0777   | 14.8607   |
| Mccc1         | chr3:35959305-36053547    | OK     | 8.47542   | 10.4281   |
| Man2c1os      | chr9:57129981-57142210    | NOTEST | 0.360965  | 0.444123  |
| Trib2         | chr12:15791726-15816785   | OK     | 40.4515   | 49.7571   |
| Tmem100       | chr11:90030347-90036505   | OK     | 22.3301   | 27.4615   |
| Tmem109       | chr19:10870660-10881743   | OK     | 29.8583   | 36.7175   |
| Ptpn6         | chr6:124720706-124738709  | OK     | 1.32188   | 1.62532   |
| Ankrd16       | chr2:11777752-11790323    | OK     | 3.11216   | 3.8264    |
| Toe1          | chr4:116720954-116807559  | OK     | 5.66534   | 6.96503   |
| Bicd2         | chr13:49341548-49387026   | OK     | 18.0398   | 22.1767   |

|               |                           |        |           |           |
|---------------|---------------------------|--------|-----------|-----------|
| Tmem63c       | chr12:87026563-87090039   | OK     | 31.9756   | 39.3063   |
| Fam98b        | chr2:117249738-117271540  | OK     | 22.4235   | 27.5621   |
| Rcc2          | chr4:140701472-140723220  | OK     | 37.3695   | 45.9319   |
| Mbtd1         | chr11:93886218-93946984   | OK     | 2.57267   | 3.16202   |
| Stard4        | chr18:33201420-33213816   | OK     | 22.0561   | 27.1058   |
| Fbxw7         | chr3:84815576-84979198    | OK     | 31.0695   | 38.1789   |
| Mospd4        | chr18:46464933-46465816   | NOTEST | 0.0490825 | 0.0603136 |
| Tatdn3        | chr1:191045829-191062932  | OK     | 4.89394   | 6.01356   |
| Akr1b3        | chr6:34303929-34317489    | NOTEST | 0.523378  | 0.643063  |
| Cdk18         | chr1:132113546-132139685  | OK     | 1.90666   | 2.34237   |
| Dennd4a       | chr9:64811010-64919667    | OK     | 11.5695   | 14.2124   |
| Zfp758        | chr17:22361452-22377281   | OK     | 5.56395   | 6.83429   |
| Robo4         | chr9:37402045-37414022    | OK     | 2.61351   | 3.20993   |
| Snrpd1        | chr18:10617795-10628230   | OK     | 18.3911   | 22.5881   |
| Rtn4rl2       | chr2:84871945-84886692    | OK     | 13.7173   | 16.8446   |
| Malt1         | chr18:64887755-65751537   | OK     | 0.846987  | 1.03998   |
| Hscb          | chr5:110829069-110839777  | OK     | 8.28836   | 10.1767   |
| Eif4enif1     | chr11:3202352-3479831     | OK     | 14.2582   | 17.506    |
| Smarca5       | chr8:80699942-80739459    | OK     | 7.09857   | 8.71539   |
| Akap9         | chr5:3928185-4080204      | OK     | 8.08396   | 9.92493   |
| Ccdc130       | chr8:84257794-84270360    | OK     | 3.22483   | 3.95904   |
| Dusp22        | chr13:30660058-30711232   | OK     | 22.1725   | 27.2201   |
| B130034C11Rik | chr16:87496072-87504038   | NOTEST | 0.371867  | 0.456517  |
| Ttll3         | chr6:113378112-113414571  | OK     | 1.6676    | 2.04718   |
| Zdhhc20       | chr14:57832701-57890262   | OK     | 9.09343   | 11.1628   |
| 2810408I11Rik | chr1:64679868-64690659    | NOTEST | 0.131031  | 0.160844  |
| S100a5        | chr3:90608521-90611780    | NOTEST | 0.374563  | 0.459697  |
| Rps13         | chr7:116331506-116334190  | OK     | 1.30425   | 1.60047   |
| Chsy3         | chr18:59175339-59411336   | NOTEST | 0.475019  | 0.582893  |
| Zfp384        | chr6:125009237-125037870  | OK     | 5.06015   | 6.20854   |
| Mysm1         | chr4:94942040-94979100    | OK     | 3.128     | 3.83732   |
| N4bp2         | chr5:65763520-65826784    | NOTEST | 0.483399  | 0.592973  |
| Thoc6         | chr17:23660522-23677449   | OK     | 8.79227   | 10.7832   |
| Slc2a1        | chr4:119108744-119137329  | OK     | 27.6545   | 33.9133   |
| Arhgef11      | chr3:87618750-87748623    | OK     | 45.129    | 55.3179   |
| Pttg1         | chr11:43420247-43426248   | OK     | 33.6118   | 41.2001   |
| Trp53inp1     | chr4:11156440-11174377    | OK     | 6.66123   | 8.16397   |
| Fbxl15        | chr19:46328183-46338660   | OK     | 12.1212   | 14.8542   |
| Psmb10        | chr8:105935727-105938392  | OK     | 19.1293   | 23.4422   |
| Zfp715        | chr7:43296522-43313261    | OK     | 5.46049   | 6.69154   |
| Zfp810        | chr9:22055459-22389206    | OK     | 3.10017   | 3.79859   |
| Pla2g15       | chr8:106150398-106164715  | OK     | 9.26833   | 11.356    |
| Ccdc64        | chr5:115649285-115731559  | OK     | 13.6559   | 16.7291   |
| Car15         | chr16:17835275-17838186   | OK     | 1.32599   | 1.62398   |
| Spry2         | chr14:105891946-105896819 | OK     | 16.4923   | 20.1971   |
| Figla         | chr6:86017190-86020996    | NOTEST | 0.0617617 | 0.0756277 |
| Cox18         | chr5:90214724-90223996    | OK     | 10.2665   | 12.5712   |
| 2310009B15Rik | chr1:138851978-138856854  | OK     | 4.37156   | 5.35278   |
| Mipol1        | chr12:57230411-57457241   | OK     | 3.97921   | 4.87232   |
| Fsd2          | chr7:81534353-81566981    | NOTEST | 0.330442  | 0.404604  |
| Snrnp35       | chr5:124483154-124491122  | OK     | 8.5266    | 10.4402   |
| 3110007F17Rik | chrX:123103558-123143293  | OK     | 1.38393   | 1.69444   |
| Pcbp1         | chr6:86524496-86526165    | OK     | 101.001   | 123.659   |



|          |                            |        |           |           |
|----------|----------------------------|--------|-----------|-----------|
| Ctnnbip1 | chr4:149518240-149566437   | OK     | 27.0421   | 33.1075   |
| Irak1bp1 | chr9:82829805-82847688     | OK     | 4.50795   | 5.51883   |
| Fancf    | chr7:51860576-51862267     | OK     | 2.41537   | 2.95697   |
| Zfp58    | chr13:67490166-67500522    | OK     | 2.184     | 2.67348   |
| Nasp     | chr4:116601051-116627951   | OK     | 5.56454   | 6.81164   |
| Zfand2a  | chr5:139471215-139484491   | OK     | 23.0855   | 28.2592   |
| Nenf     | chr1:191306796-191318118   | OK     | 41.504    | 50.8051   |
| Zfand4   | chr6:116264218-116330304   | NOTEST | 0.520319  | 0.636919  |
| Lpgat1   | chr1:191718023-191784257   | OK     | 27.0478   | 33.1062   |
| Klkb1    | chr8:45269450-45294835     | NOTEST | 0.0384456 | 0.0470482 |
| Ppp1ca   | chr19:4192173-4201603      | OK     | 139.253   | 170.411   |
| Usp20    | chr2:30982278-31022655     | OK     | 66.5432   | 81.4277   |
| Clca5    | chr3:145070264-145099041   | NOTEST | 0.365835  | 0.447637  |
| Ptprm    | chr17:66666847-67354459    | OK     | 10.9474   | 13.3944   |
| Nedd8    | chr14:55662266-55671906    | OK     | 209.188   | 255.941   |
| Pcnp     | chr16:56015507-56029717    | OK     | 30.0042   | 36.707    |
| Naip6    | chr13:100281120-100317688  | NOTEST | 0.0642303 | 0.0785693 |
| Prss36   | chr7:127932637-127946725   | OK     | 2.06526   | 2.52624   |
| Ttc39c   | chr18:12643532-12737052    | OK     | 27.764    | 33.9594   |
| Phrf1    | chr7:141228787-141262751   | OK     | 8.26954   | 10.1138   |
| Rpl5     | chr5:107900527-107987077   | OK     | 7.6907    | 9.40548   |
| Lrriq1   | chr10:103063197-103236322  | OK     | 0.739587  | 0.904417  |
| Bard1    | chr1:71027534-71102972     | NOTEST | 0.579594  | 0.708761  |
| Nrbp2    | chr15:76085593-76090013    | OK     | 43.1593   | 52.776    |
| St8sia6  | chr2:13654935-13793520     | NOTEST | 0.398699  | 0.487508  |
| Rpl17    | chr18:75000476-75003381    | OK     | 0.907993  | 1.11011   |
| Pbrm1    | chr14:31019137-31121592    | OK     | 14.3479   | 17.5401   |
| Phf13    | chr4:151989630-151996179   | OK     | 6.11478   | 7.47508   |
| P4ha2    | chr11:54100923-54131667    | OK     | 6.64985   | 8.12912   |
| Mcu      | chr10:59446983-59616692    | OK     | 20.6847   | 25.2827   |
| Cops7b   | chr1:86587099-86606500     | OK     | 10.5063   | 12.8403   |
| Kif5a    | chr10:127225694-127263363  | OK     | 285.245   | 348.595   |
| Gfod1    | chr13:43195518-43304172    | OK     | 22.7575   | 27.8111   |
| Kdm6a    | chrX:18162666-18279358     | OK     | 4.68003   | 5.71915   |
| Dhrsx    | chr4_GL456216_random:15880 | OK     | 4.41734   | 5.3975    |
| Ppm1a    | chr12:72761210-72794940    | OK     | 93.8602   | 114.679   |
| Naaa     | chr5:92257659-92278181     | OK     | 19.2807   | 23.5564   |
| Sart1    | chr19:5377522-5390069      | OK     | 12.1852   | 14.8855   |
| Snhg1    | chr19:8723486-8726326      | OK     | 9.11458   | 11.1342   |
| Pcdha11  | chr18:36930284-37841872    | OK     | 3.01197   | 3.6789    |
| Mrps23   | chr11:88098057-88211507    | OK     | 30.6587   | 37.4471   |
| Dhx16    | chr17:35879777-35892668    | OK     | 7.8969    | 9.64523   |
| Slc25a19 | chr11:115614180-115628295  | OK     | 11.9246   | 14.5619   |
| Arl6ip4  | chr5:124116107-124118195   | OK     | 25.1789   | 30.7467   |
| Hp1bp3   | chr4:138216611-138244682   | OK     | 41.67     | 50.8775   |
| Katna1   | chr10:7725999-7763150      | OK     | 5.66162   | 6.9124    |
| Psme3    | chr11:101316250-101323530  | OK     | 38.441    | 46.9326   |
| Zc4h2    | chrX:95639193-95658509     | OK     | 9.24754   | 11.2903   |
| Mettl7a3 | chr15:100334928-100340169  | OK     | 19.9922   | 24.4045   |
| Oplah    | chr15:76294433-76307245    | OK     | 7.7582    | 9.46901   |
| Slc37a2  | chr9:37229148-37255738     | OK     | 1.10089   | 1.3432    |
| Zfand6   | chr7:84615053-84679351     | OK     | 43.8343   | 53.4774   |
| Mypop    | chr7:18991244-19001766     | OK     | 18.6644   | 22.7661   |

|               |                           |        |           |           |
|---------------|---------------------------|--------|-----------|-----------|
| Slc9a4        | chr1:40580226-40630731    | NOTEST | 0.0148159 | 0.018071  |
| Gnb1l         | chr16:18498712-18566680   | OK     | 1.21141   | 1.4775    |
| Pbx2          | chr17:34592470-34597341   | OK     | 20.4522   | 24.9445   |
| Slbp          | chr5:33640054-33652574    | OK     | 13.2399   | 16.1464   |
| Eno1b         | chr4:150237196-150248873  | OK     | 39.3701   | 48.0124   |
| Ttll11        | chr2:35751225-35979624    | OK     | 4.76746   | 5.81301   |
| Nxt1          | chr2:148672614-148676026  | OK     | 5.35964   | 6.53453   |
| Zfc3h1        | chr10:115384958-115432771 | OK     | 7.86686   | 9.59107   |
| Alox12b       | chr11:69157071-69169791   | NOTEST | 0.268599  | 0.327466  |
| Dhps          | chr8:85071756-85080746    | OK     | 24.7321   | 30.1522   |
| Hdgfrp2       | chr17:56079656-56109802   | OK     | 13.2152   | 16.1112   |
| Pgap1         | chr1:54472999-54557684    | OK     | 5.52181   | 6.73139   |
| C2cd2l        | chr9:44309236-44320282    | OK     | 15.9256   | 19.4121   |
| Cdc34         | chr10:79682194-79688398   | OK     | 31.1085   | 37.9169   |
| 3110040N11Rik | chr7:81782186-81789453    | OK     | 7.74799   | 9.44174   |
| Trim43c       | chr9:88839163-88858870    | NOTEST | 0.0209632 | 0.0255438 |
| Mtch1         | chr17:29332075-29347904   | OK     | 176.259   | 214.772   |
| Rrp9          | chr9:106477308-106485415  | OK     | 6.18211   | 7.53186   |
| Eapp          | chr12:54673466-54695865   | OK     | 21.0927   | 25.6933   |
| Gm11992       | chr11:9016053-9069354     | OK     | 0.775333  | 0.944333  |
| Dusp9         | chrX:73639440-73643514    | NOTEST | 0.0214844 | 0.0261673 |
| Tmem62        | chr2:120977061-121007842  | OK     | 14.6134   | 17.7958   |
| Ncbp2         | chr16:31948545-31958472   | OK     | 28.1608   | 34.2928   |
| Fam207a       | chr10:77486654-77515813   | OK     | 12.2663   | 14.9368   |
| 2610008E11Rik | chr10:79064373-79097600   | OK     | 4.64524   | 5.65646   |
| Ino80         | chr2:119373041-119477629  | OK     | 3.729     | 4.54055   |
| Tspan17       | chr13:54789404-54796775   | OK     | 115.485   | 140.613   |
| Coro1c        | chr5:113842438-113908706  | OK     | 35.7125   | 43.483    |
| Gabarap       | chr11:69991369-69994949   | OK     | 220.647   | 268.629   |
| Tnrc6c        | chr11:117654288-117763441 | OK     | 6.51874   | 7.93618   |
| Gm1673        | chr5:33983473-33985006    | OK     | 24.5876   | 29.9338   |
| Fam76a        | chr4:132899212-132922551  | OK     | 10.97     | 13.3538   |
| Nae1          | chr8:104446718-104624396  | OK     | 30.8121   | 37.5029   |
| Mier3         | chr13:111686177-111718594 | OK     | 4.70084   | 5.72152   |
| Bmyc          | chr2:25706878-25707719    | OK     | 26.7018   | 32.4988   |
| Hip1r         | chr5:123973627-124003215  | OK     | 15.1076   | 18.3865   |
| Npat          | chr9:53537046-53575627    | OK     | 2.91713   | 3.55025   |
| Suco          | chr1:161816111-161876661  | OK     | 12.0594   | 14.6731   |
| Vmac          | chr17:56713931-56717699   | OK     | 4.09266   | 4.97937   |
| Cxxc1         | chr18:74216211-74221491   | OK     | 8.94338   | 10.8807   |
| Tmem237       | chr1:59100592-59120096    | OK     | 16.1209   | 19.6121   |
| Irak2         | chr6:113638466-113695027  | OK     | 3.11772   | 3.79245   |
| Fam214b       | chr4:43032413-43046220    | OK     | 14.3345   | 17.4366   |
| Med17         | chr9:15260350-15279867    | OK     | 7.35248   | 8.9432    |
| Alcam         | chr16:52248995-52452997   | OK     | 60.352    | 73.4045   |
| Thoc5         | chr11:4895342-4928865     | OK     | 12.4075   | 15.0895   |
| Ube2g2        | chr10:77622320-77645990   | OK     | 27.8895   | 33.9171   |
| Ier5l         | chr2:30472640-30474199    | OK     | 2.3461    | 2.85298   |
| Micu2         | chr14:57916279-57999262   | OK     | 13.1552   | 15.9952   |
| Klhl7         | chr5:23787743-24161231    | OK     | 24.527    | 29.8184   |
| Nemf          | chr12:69311542-69357176   | OK     | 13.7174   | 16.6759   |
| Trmt1l        | chr1:151428647-151458183  | OK     | 14.5603   | 17.6988   |
| Zer1          | chr2:30097282-30124611    | OK     | 16.7865   | 20.4022   |

|               |                           |        |            |            |
|---------------|---------------------------|--------|------------|------------|
| Usp19         | chr9:108490675-108502337  | OK     | 42.7762    | 51.9877    |
| Krt75         | chr15:101563342-101573904 | NOTEST | 0.00524978 | 0.00637998 |
| Scaper        | chr9:55549882-55938115    | OK     | 11.4036    | 13.8572    |
| Luc7l         | chr17:26252909-26285506   | OK     | 20.5205    | 24.9338    |
| Cfl1          | chr19:5490454-5494031     | OK     | 440.671    | 535.438    |
| Wasf3         | chr5:146385005-146471125  | OK     | 13.3287    | 16.1947    |
| Dgka          | chr10:128706257-128744056 | OK     | 5.45069    | 6.62236    |
| Ttpal         | chr2:163602313-163619013  | OK     | 13.8622    | 16.8416    |
| Rchy1         | chr5:91948841-91972137    | OK     | 14.169     | 17.2137    |
| Aim1          | chr10:43950306-44004846   | NOTEST | 0.460599   | 0.55957    |
| Avl9          | chr6:56714904-56761911    | OK     | 13.5285    | 16.4349    |
| 1810030007Rik | chrX:12654883-12673546    | OK     | 12.8467    | 15.6059    |
| Olf658        | chr7:104642879-104647305  | NOTEST | 0.00594038 | 0.00721613 |
| Sprtn         | chr8:124897885-124903813  | OK     | 3.04695    | 3.70122    |
| Apip          | chr2:103073674-103092649  | OK     | 12.9998    | 15.79      |
| Ebp           | chrX:8185330-8193512      | OK     | 19.3954    | 23.5575    |
| Ttll1         | chr15:83483768-83510907   | OK     | 34.3463    | 41.7168    |
| Ddx49         | chr8:70282998-70302452    | OK     | 13.3712    | 16.2394    |
| AU041133      | chr10:82128012-82153065   | OK     | 2.03205    | 2.46774    |
| Fut11         | chr14:20694967-20700197   | OK     | 10.6942    | 12.987     |
| Fam136a       | chr6:86365682-86370058    | OK     | 10.7425    | 13.0447    |
| Tmsb15l       | chrX:136954987-136976874  | OK     | 15.4294    | 18.7351    |
| Ddx50         | chr10:62616022-62651198   | OK     | 13.3511    | 16.2105    |
| Casp3         | chr8:46617290-46639698    | OK     | 6.25258    | 7.59134    |
| Zfp788        | chr7:41633530-41651532    | OK     | 7.94288    | 9.64335    |
| Inpp5k        | chr11:75631019-75648865   | OK     | 22.7812    | 27.6578    |
| Tcf20         | chr15:82808625-82912134   | OK     | 10.2836    | 12.4839    |
| 37134         | chr16:18620318-18629938   | OK     | 164.418    | 199.596    |
| Pick1         | chr15:79229172-79249466   | OK     | 16.8038    | 20.3985    |
| Abce1         | chr8:79683441-79711740    | OK     | 39.9537    | 48.4807    |
| Ccdc107       | chr4:43493364-43495921    | OK     | 22.684     | 27.5247    |
| Htatip2       | chr7:49759105-49773999    | OK     | 48.9209    | 59.3587    |
| Sh3glb2       | chr2:30344776-30359316    | OK     | 91.2393    | 110.704    |
| Tmem251       | chr12:102739829-102757810 | OK     | 6.10533    | 7.40716    |
| Hpse2         | chr19:42788594-43388355   | NOTEST | 0.0408179  | 0.0495151  |
| Ercc6l2       | chr13:63815319-63900301   | OK     | 4.20177    | 5.09698    |
| Adprm         | chr11:67037879-67052618   | OK     | 9.7715     | 11.8534    |
| Gm9833        | chr3:10088276-10092562    | OK     | 18.3976    | 22.3164    |
| Polr2d        | chr18:31789158-31796701   | OK     | 13.4567    | 16.3204    |
| Ascc3         | chr10:50592668-50851202   | OK     | 4.84018    | 5.87011    |
| Ifi203        | chr1:173920402-173942492  | OK     | 1.37167    | 1.66352    |
| Rbm6          | chr9:107773558-107872819  | OK     | 8.37213    | 10.1527    |
| Spag6         | chr16:16753015-16829363   | NOTEST | 0.0397368  | 0.0481869  |
| Scamp4        | chr10:80602879-80615783   | OK     | 18.3357    | 22.23      |
| Ddhd2         | chr8:25725323-25754280    | OK     | 17.4642    | 21.1658    |
| Mta1          | chr12:113098277-113137206 | OK     | 18.3611    | 22.2511    |
| Zscan18       | chr7:12768091-12775658    | OK     | 3.19768    | 3.87467    |
| Mitd1         | chr1:37878889-37890411    | OK     | 5.76126    | 6.98039    |
| Eif4a1        | chr11:69666935-69672423   | OK     | 23.2912    | 28.2198    |
| Cpne1         | chr2:156071840-156111965  | OK     | 28.5884    | 34.6364    |
| Hpx           | chr7:105591610-105600116  | NOTEST | 0.0545851  | 0.0661306  |
| Rasgef1b      | chr5:99217419-99252927    | OK     | 4.60266    | 5.57617    |
| Ap1m1         | chr8:72240131-72257379    | OK     | 68.1135    | 82.5177    |

|               |                           |        |           |           |
|---------------|---------------------------|--------|-----------|-----------|
| Invs          | chr4:48279759-48473422    | OK     | 1.48731   | 1.80179   |
| Ireb2         | chr9:54863754-54912534    | OK     | 22.48     | 27.2326   |
| Mex3c         | chr18:73572704-73592578   | OK     | 15.8197   | 19.1624   |
| Kcnma1        | chr14:23298693-24004205   | OK     | 7.95318   | 9.63338   |
| Zfp386        | chr12:116047723-116063207 | OK     | 3.89668   | 4.71981   |
| Zfp94         | chr7:24301703-24316666    | OK     | 1.60381   | 1.94253   |
| Gpatch1       | chr7:35276543-35318440    | OK     | 5.58507   | 6.76454   |
| Nim1k         | chr13:119710093-119755882 | OK     | 2.30303   | 2.78936   |
| Uts2r         | chr11:121160270-121161973 | NOTEST | 0.0214742 | 0.0260079 |
| Tsg101        | chr7:46889026-46919930    | OK     | 25.9741   | 31.4573   |
| Ndst1         | chr18:60685975-60713389   | OK     | 17.2859   | 20.9342   |
| Coq2          | chr5:100654725-100674256  | OK     | 25.0901   | 30.3797   |
| Orc2          | chr1:58462770-58505109    | OK     | 10.3575   | 12.5399   |
| Ifi205        | chr1:174011997-174031755  | NOTEST | 0.0114238 | 0.0138297 |
| Cep57l1       | chr10:41718839-41809868   | OK     | 1.79644   | 2.17468   |
| Gm15421       | chr5:22486488-22550331    | OK     | 37.6804   | 45.6137   |
| Als2cl        | chr9:110880173-110900530  | OK     | 0.752515  | 0.910886  |
| Aarsd1        | chr11:101406839-101417433 | OK     | 23.8597   | 28.8765   |
| Fra10ac1      | chr19:38188478-38224132   | OK     | 8.35833   | 10.1148   |
| Stk11         | chr10:79697304-80369637   | OK     | 39.4082   | 47.6876   |
| Mrps24        | chr11:5703982-5707699     | OK     | 15.9194   | 19.2602   |
| BC005537      | chr13:24801656-24812899   | OK     | 102.524   | 124.038   |
| Ankrd61       | chr5:143871861-143909839  | NOTEST | 0.0124597 | 0.015074  |
| Zfp236        | chr18:82593596-82692734   | OK     | 4.0743    | 4.92862   |
| Rltpr         | chr8:105690905-105701095  | OK     | 21.1858   | 25.6279   |
| Igip          | chr18:36300100-36301478   | OK     | 34.7937   | 42.0875   |
| Lin37         | chr7:30555440-30559646    | OK     | 8.23555   | 9.96182   |
| Nlgn3         | chrX:101299178-101321350  | OK     | 16.8269   | 20.354    |
| Zfp710        | chr7:80024813-80092751    | OK     | 4.82196   | 5.83185   |
| Acbd5         | chr2:23068200-23114512    | OK     | 42.4958   | 51.3938   |
| Arvcf         | chr16:18348181-18479073   | OK     | 15.2464   | 18.4353   |
| Usp7          | chr16:8688721-8738342     | OK     | 35.3121   | 42.6951   |
| Ccdc117       | chr11:5528887-5542217     | OK     | 6.0966    | 7.37111   |
| Prr5          | chr15:84680997-84703673   | OK     | 11.0364   | 13.3432   |
| Oip5          | chr2:119609531-119650160  | OK     | 0.970703  | 1.17353   |
| 2610020H08Rik | chr7:119794129-119848941  | NOTEST | 0.352554  | 0.426212  |
| Anapc5        | chr5:122787460-122821342  | OK     | 62.6782   | 75.7685   |
| Zfp874b       | chr13:67471512-67484253   | OK     | 5.8298    | 7.04654   |
| Slc38a9       | chr13:112660765-112738752 | OK     | 9.23891   | 11.1655   |
| Lrrcc1        | chr3:14533787-14572658    | OK     | 4.49317   | 5.43011   |
| Kctd13        | chr7:126928878-126945609  | OK     | 18.7286   | 22.6337   |
| Zmynd19       | chr2:24949801-24959413    | OK     | 10.1968   | 12.3226   |
| Brwd1         | chr16:95992091-96082428   | OK     | 13.0356   | 15.7531   |
| Brd1          | chr15:88687034-88734219   | OK     | 9.25549   | 11.1846   |
| Smarcd2       | chr11:106263170-106272972 | OK     | 13.6335   | 16.4742   |
| Icos          | chr1:60977913-61000321    | NOTEST | 0.0235102 | 0.0284079 |
| Acot7         | chr4:152178099-152271855  | OK     | 309.913   | 374.435   |
| Gprc5d        | chr6:135105990-135118283  | NOTEST | 0.0144667 | 0.0174777 |
| Taf1a         | chr1:183388884-183410206  | OK     | 7.0325    | 8.49572   |
| 4932416H05Rik | chr2:129798368-129832285  | OK     | 1.23394   | 1.49061   |
| Chsy1         | chr7:66109514-66173798    | OK     | 6.60783   | 7.98108   |
| Fam219b       | chr9:57537527-57543187    | OK     | 15.3782   | 18.5723   |
| Myo9b         | chr8:71272713-71360712    | OK     | 6.52795   | 7.88375   |

|               |                           |        |           |           |
|---------------|---------------------------|--------|-----------|-----------|
| Setd1b        | chr5:123142192-123168630  | OK     | 4.93866   | 5.96391   |
| Ogt           | chrX:101640050-101684351  | OK     | 31.27     | 37.7603   |
| Gbp4          | chr5:105115766-105139586  | OK     | 0.805905  | 0.97316   |
| Eif3e         | chr15:43250039-43282736   | OK     | 28.9229   | 34.9242   |
| Rrp15         | chr1:186721086-186749358  | OK     | 3.65721   | 4.416     |
| Psma3         | chr12:70974622-71015823   | OK     | 11.9916   | 14.4793   |
| Hoxb2         | chr11:96351631-96354014   | OK     | 2.82797   | 3.41431   |
| Hnrnpu        | chr1:178328299-178337784  | OK     | 76.2836   | 92.0973   |
| Hnrnpr        | chr4:136310941-136345979  | OK     | 6.53836   | 7.89371   |
| Zdhhc16       | chr19:41933471-41981136   | OK     | 11.021    | 13.3052   |
| Scaf4         | chr16:90229143-90284425   | OK     | 6.16238   | 7.43957   |
| Capn8         | chr1:182565006-182632352  | NOTEST | 0.0647908 | 0.0782121 |
| Zfp768        | chr7:127342794-127345314  | OK     | 3.09231   | 3.73272   |
| Pih1d1        | chr7:45141839-45160064    | OK     | 22.0752   | 26.6434   |
| Mpv17l2       | chr8:70754678-70760921    | OK     | 20.4233   | 24.6476   |
| Med25         | chr7:44879385-44892366    | OK     | 17.7735   | 21.4494   |
| Slmo2         | chr2:174465090-174472941  | OK     | 27.4477   | 33.1242   |
| Zrsr2         | chrX:163935442-163958666  | OK     | 12.0529   | 14.5445   |
| Pde7a         | chr3:19223108-19311322    | OK     | 3.91977   | 4.72998   |
| Cyb561        | chr11:105933703-105944147 | OK     | 32.4323   | 39.1311   |
| Efcab10       | chr12:33394853-33401269   | OK     | 3.51962   | 4.24641   |
| Zbtb20        | chr16:42884369-43619123   | OK     | 7.63175   | 9.20745   |
| Klf13         | chr7:63886350-63938915    | OK     | 28.0829   | 33.8789   |
| Pdzrn3        | chr6:101149606-101377897  | OK     | 1.22666   | 1.47978   |
| Tmem107       | chr11:69070808-69073293   | OK     | 4.17417   | 5.03479   |
| Xndc1         | chr7:102065490-102096864  | OK     | 2.73119   | 3.29414   |
| Adam19        | chr11:46054501-46147347   | OK     | 19.7715   | 23.8467   |
| Alox12        | chr11:70241454-70255341   | OK     | 0.689467  | 0.831497  |
| Rhno1         | chr6:128356999-128362897  | OK     | 5.37068   | 6.4764    |
| H2-M5         | chr17:36986854-36989504   | NOTEST | 0.0742372 | 0.0895199 |
| Acap1         | chr11:69881566-69895539   | NOTEST | 0.218013  | 0.262888  |
| Stradb        | chr1:58973570-58995121    | OK     | 5.79998   | 6.99267   |
| Gabbr2        | chr4:46663897-46991714    | OK     | 44.7781   | 53.985    |
| Wrnip1        | chr13:32802029-32822610   | OK     | 21.4302   | 25.8363   |
| H2afx         | chr9:44334714-44336073    | OK     | 12.0762   | 14.5589   |
| Edc3          | chr9:57708568-57750162    | OK     | 8.31875   | 10.0284   |
| Robo2         | chr16:73892305-74410912   | OK     | 27.9687   | 33.7157   |
| Eif5a         | chr11:69916711-69921958   | OK     | 195.79    | 235.978   |
| Cdan1         | chr2:120716153-120731517  | OK     | 1.90579   | 2.29642   |
| Mcph1         | chr8:18595172-18803188    | OK     | 3.6513    | 4.39919   |
| Exosc7        | chr9:123113230-123136129  | OK     | 13.7028   | 16.505    |
| 6330408A02Rik | chr7:13258966-13311427    | OK     | 5.99315   | 7.21867   |
| 3300002I08Rik | chr2:150310936-150362765  | OK     | 1.94656   | 2.34453   |
| Ctu2          | chr8:122476142-122551329  | OK     | 3.73657   | 4.50021   |
| Chmp4b        | chr2:154657025-154694783  | OK     | 149.492   | 180.042   |
| Fam45a        | chr19:60811569-60836229   | OK     | 18.4184   | 22.1812   |
| Mcat          | chr15:83546796-83555711   | OK     | 6.44535   | 7.76144   |
| Dbnnd1        | chr8:123504717-123515455  | OK     | 13.0613   | 15.7278   |
| Abca7         | chr10:79697304-80369637   | OK     | 37.2888   | 44.9008   |
| Adcy6         | chr15:98589985-98607633   | OK     | 4.95376   | 5.96441   |
| Trappc8       | chr18:20817223-20896078   | OK     | 26.9296   | 32.421    |
| Pgm1          | chr5:64092949-64128158    | OK     | 2.46889   | 2.97142   |
| Lix1          | chr17:17402685-17459388   | OK     | 93.4086   | 112.41    |



|                 |                           |        |           |           |
|-----------------|---------------------------|--------|-----------|-----------|
| 1700094D03Rik   | chr3:89998759-90068347    | NOTEST | 0.545063  | 0.655904  |
| AK129341        | chr9:8076632-8134294      | OK     | 4.03718   | 4.85797   |
| Mphosph10       | chr7:64376540-64392236    | OK     | 8.27001   | 9.9509    |
| 1700061G19Rik   | chr17:56875632-56888838   | NOTEST | 0.0299902 | 0.0360828 |
| Stac2           | chr11:98036623-98053462   | OK     | 25.7092   | 30.9303   |
| Mplkip          | chr13:17695412-17699105   | OK     | 2.13957   | 2.57402   |
| Prcp            | chr7:92875252-92934581    | OK     | 11.9041   | 14.3199   |
| Zfp212          | chr6:47920567-47932637    | OK     | 4.9683    | 5.97647   |
| Srrm1           | chr4:135320483-135353214  | OK     | 17.4601   | 20.9998   |
| Wdr4            | chr17:31494321-31512487   | OK     | 5.30448   | 6.3795    |
| Mzf1            | chr7:13042302-13054764    | NOTEST | 0.34652   | 0.416729  |
| D430042O09Rik   | chr7:125707875-125874797  | OK     | 3.17384   | 3.81647   |
| Ccdc115         | chr1:34436669-34439672    | OK     | 11.3363   | 13.6314   |
| Klra8           | chr6:129972081-130386874  | NOTEST | 0.0367565 | 0.0441976 |
| Atp5g2          | chr15:102662867-102671047 | OK     | 4.12357   | 4.95799   |
| Ubxn6           | chr17:56068252-56074989   | OK     | 42.0403   | 50.5473   |
| Topbp1          | chr9:103305326-103350427  | OK     | 5.95893   | 7.16456   |
| Setd8           | chr5:124439929-124462307  | OK     | 33.4892   | 40.264    |
| Txn14a          | chr18:80206797-80225851   | OK     | 106.395   | 127.913   |
| Dido1           | chr2:180657962-180709999  | OK     | 7.34934   | 8.83538   |
| Arf6            | chr12:69372149-69375980   | OK     | 23.099    | 27.7694   |
| Dph7            | chr2:24962421-24975098    | OK     | 2.84831   | 3.42408   |
| Ptprg           | chr14:11553552-12242039   | OK     | 15.5746   | 18.7222   |
| Pih1d2          | chr9:50603900-50625000    | NOTEST | 0.534968  | 0.643045  |
| Atpaf2          | chr11:60400623-60417099   | OK     | 9.4511    | 11.3592   |
| Ffar1           | chr7:30860567-30861470    | NOTEST | 0.0230565 | 0.0277111 |
| Tbk1            | chr10:121546455-121586794 | OK     | 21.6692   | 26.0426   |
| Snrnp27         | chr6:86675168-86684491    | OK     | 21.1738   | 25.4443   |
| Las1l           | chrX:95935312-95956974    | OK     | 18.3311   | 22.0276   |
| Dmrta2          | chr4:109978024-109983684  | NOTEST | 0.0191437 | 0.0230031 |
| Ddx39           | chr8:83715176-83741311    | OK     | 3.89084   | 4.67501   |
| Ninl            | chr2:150934518-151009398  | OK     | 0.856019  | 1.0284    |
| Stk16           | chr1:75210828-75219253    | OK     | 13.7553   | 16.5217   |
| Cul4a           | chr8:13105720-13147939    | OK     | 23.8486   | 28.6419   |
| Wdr36           | chr18:32663641-32866420   | OK     | 14.6495   | 17.5931   |
| Erc1            | chr6:119570795-119848150  | OK     | 13.0904   | 15.715    |
| Armc6           | chr8:70220192-70263105    | OK     | 17.74     | 21.2958   |
| Rbm42           | chr7:30640994-30650228    | OK     | 28.8388   | 34.617    |
| Osbpl10         | chr9:115067278-115232223  | OK     | 24.9108   | 29.9015   |
| Smarcc2         | chr10:128459235-128490174 | OK     | 26.8533   | 32.2304   |
| Cd70            | chr17:57145996-57149777   | NOTEST | 0.025267  | 0.0303264 |
| Spef1           | chr2:131127411-131604824  | OK     | 2.02392   | 2.42896   |
| Slc16a2         | chrX:103697413-103821988  | OK     | 9.32458   | 11.1902   |
| Gcn1l1          | chr5:115565262-115622654  | OK     | 9.80721   | 11.7683   |
| Creld2          | chr15:88819645-88826681   | OK     | 5.1467    | 6.17541   |
| Taok2           | chr7:126865676-126884967  | OK     | 21.1946   | 25.4289   |
| Elmod1          | chr9:53911459-53975301    | OK     | 5.89865   | 7.07679   |
| Dynlt1c,Dynlt1f | chr17:6646605-6655939     | LOWDAT | 1.67558   | 2.01016   |
| Mapk3           | chr7:126759625-126765816  | OK     | 548.568   | 658.1     |
| Eif2s3y         | chrY:1010611-1028598      | OK     | 14.087    | 16.8996   |
| Zfp2            | chr11:50898711-50916161   | OK     | 5.59902   | 6.71636   |
| Senp7           | chr16:56075408-56190011   | OK     | 5.66166   | 6.79143   |
| Usp16           | chr16:87454984-87495869   | OK     | 11.5293   | 13.8296   |

|               |                           |        |            |           |
|---------------|---------------------------|--------|------------|-----------|
| Zwint         | chr10:72654894-72669789   | OK     | 96.2818    | 115.482   |
| Crlf3         | chr11:80046492-80080991   | OK     | 12.367     | 14.833    |
| Pold3         | chr7:100082112-100121500  | OK     | 3.92102    | 4.70262   |
| Pde12         | chr14:26664116-26669846   | OK     | 7.25766    | 8.70413   |
| Whsc1         | chr5:33843111-33897966    | OK     | 15.7898    | 18.9359   |
| Parp4         | chr14:56575618-56659798   | OK     | 10.3545    | 12.4163   |
| Hint1         | chr11:54866437-54870496   | OK     | 329.344    | 394.89    |
| Bcor          | chrX:12036737-12160355    | OK     | 2.88725    | 3.46151   |
| Mdm4          | chr1:132989844-133025348  | OK     | 5.95971    | 7.1446    |
| Tmem259       | chr10:79697304-80369637   | OK     | 41.6439    | 49.9207   |
| Rraga         | chr4:86575672-86577283    | OK     | 89.8317    | 107.686   |
| Recql         | chr6:142345696-142387087  | OK     | 7.4584     | 8.94058   |
| Cenpp         | chr13:49464058-49652731   | NOTEST | 0.689616   | 0.826649  |
| Rce1          | chr19:4622550-4625617     | OK     | 9.48518    | 11.3687   |
| Ppp2r2c       | chr5:36868569-36955078    | OK     | 119.959    | 143.766   |
| Svop          | chr5:114026912-114091380  | OK     | 39.2933    | 47.09     |
| Ywhab         | chr2:163995196-164018587  | OK     | 341.25     | 408.924   |
| BC025920      | chr10:81606307-81609836   | NOTEST | 0.563136   | 0.674809  |
| Denr          | chr5:123907274-123928832  | OK     | 25.6423    | 30.7271   |
| Mknk2         | chr10:80665329-80671976   | OK     | 15.1567    | 18.1619   |
| Idua          | chr5:108629809-108685446  | OK     | 2.92677    | 3.50703   |
| Smad4         | chr18:73639012-73703741   | OK     | 19.024     | 22.7952   |
| Acad12        | chr5:121598280-121618938  | OK     | 1.57274    | 1.88447   |
| Rpp21         | chr17:36255672-36257846   | OK     | 12.691     | 15.2046   |
| Fam21         | chr6:116208032-116262671  | OK     | 28.6191    | 34.2863   |
| Mthfr         | chr4:148039076-148059562  | OK     | 6.68598    | 8.00995   |
| Hoxb3         | chr11:96323125-96347930   | OK     | 2.20388    | 2.64007   |
| Colec10       | chr15:54410773-54466358   | NOTEST | 0.0207411  | 0.0248445 |
| Thyn1         | chr9:26999676-27030094    | OK     | 19.8767    | 23.8091   |
| Apba3         | chr10:81268171-81291581   | OK     | 7.16578    | 8.58079   |
| Nat1          | chr8:67490757-67492103    | NOTEST | 0.140809   | 0.16861   |
| Dph3          | chr14:32080516-32085692   | OK     | 13.5566    | 16.2317   |
| Dnaaf1        | chr8:119575234-119605240  | NOTEST | 0.0138986  | 0.0166408 |
| Capns1        | chr7:30186941-30195048    | OK     | 418.801    | 501.404   |
| Ythdc2        | chr18:44828664-44889720   | OK     | 5.77056    | 6.90673   |
| Pim2          | chrX:7878305-7883432      | OK     | 12.4808    | 14.9379   |
| Hmha1         | chr10:79697304-80369637   | OK     | 0.781513   | 0.935266  |
| 4933431E20Rik | chr3:107877229-107898685  | OK     | 11.7873    | 14.1055   |
| Cdipt         | chr7:126975913-126980501  | OK     | 85.493     | 102.307   |
| Ash2l         | chr8:25816000-25847694    | OK     | 13.6992    | 16.3932   |
| Tat           | chr8:109990435-109999804  | NOTEST | 0.00836831 | 0.010014  |
| Tcp10c        | chr17:13354571-13377223   | NOTEST | 0.0234803  | 0.028097  |
| Ccdc51        | chr9:109082495-109093363  | OK     | 2.53335    | 3.03143   |
| S100pbp       | chr4:129150824-129189482  | OK     | 7.71117    | 9.22682   |
| Tstd2         | chr4:46039221-46138475    | OK     | 6.84075    | 8.18491   |
| Prim1         | chr10:128015214-128030030 | OK     | 4.00964    | 4.79714   |
| Hist1h2bp     | chr13:21787487-21789213   | NOTEST | 0.139798   | 0.167241  |
| B3gnt4        | chr5:123510459-123524164  | NOTEST | 0.18736    | 0.224137  |
| AW554918      | chr18:25169019-25467321   | OK     | 2.34422    | 2.80432   |
| Fam129c       | chr8:71597645-71608149    | NOTEST | 0.326928   | 0.391078  |
| Rab23         | chr1:33719895-33742564    | OK     | 5.46215    | 6.53387   |
| Tmem57        | chr4:134802759-134853345  | OK     | 18.6473    | 22.3051   |
| Rnf214        | chr9:45863690-45936058    | OK     | 21.071     | 25.203    |

|               |                           |        |           |           |
|---------------|---------------------------|--------|-----------|-----------|
| Gnaz          | chr10:74957476-75032586   | OK     | 24.8105   | 29.6729   |
| Zfp385c       | chr11:100622954-100650693 | NOTEST | 0.0943047 | 0.112781  |
| Ssb           | chr2:69861561-69885615    | OK     | 54.4802   | 65.1515   |
| B3gnt3        | chr8:71691719-71701800    | NOTEST | 0.685655  | 0.819788  |
| Surf2         | chr2:26913377-26933511    | OK     | 12.7511   | 15.2442   |
| Szt2          | chr4:118359998-118409263  | OK     | 3.36647   | 4.02419   |
| Ern1          | chr11:106397619-106487796 | OK     | 2.07461   | 2.4797    |
| Gapdh         | chr6:125161851-125166467  | OK     | 10.1845   | 12.173    |
| Sifnl1        | chr4:120532230-120536661  | NOTEST | 0.0116687 | 0.0139459 |
| Hgs           | chr11:120467634-120483984 | OK     | 39.6441   | 47.3778   |
| Zswim8        | chr14:20707551-20723619   | OK     | 23.4488   | 28.0214   |
| Mill2         | chr7:18839965-18858653    | OK     | 1.86259   | 2.22573   |
| Bloc1s2       | chr19:44139246-44146446   | OK     | 8.15323   | 9.74252   |
| Uggt2         | chr14:118984984-119099434 | OK     | 2.22175   | 2.65473   |
| Rps27a        | chr11:29545841-29578352   | OK     | 4.3102    | 5.15001   |
| Zfp133-ps     | chr2:144459279-144467794  | OK     | 1.50904   | 1.80293   |
| Wibg          | chr10:128747878-128766568 | OK     | 8.55128   | 10.2163   |
| Fcf1          | chr12:84970929-84983303   | OK     | 5.45942   | 6.52174   |
| Fam117b       | chr1:59913005-59985348    | OK     | 20.8927   | 24.9573   |
| 1600014C10Rik | chr7:38183216-38197565    | OK     | 17.0196   | 20.3299   |
| Ppp1r16a      | chr15:76671679-76694915   | OK     | 13.3315   | 15.9235   |
| Ift57         | chr16:49699293-49765126   | OK     | 8.52192   | 10.1784   |
| Kif3b         | chr2:153291415-153333389  | OK     | 24.4936   | 29.254    |
| Oma1          | chr4:103313845-103366428  | OK     | 3.83212   | 4.57676   |
| Gtf2ird2      | chr5:134184037-134218143  | OK     | 4.6143    | 5.5109    |
| Ercc8         | chr13:108158737-108194981 | OK     | 2.5489    | 3.04394   |
| Capn11        | chr17:45630203-45659309   | OK     | 0.801883  | 0.957446  |
| Zscan20       | chr4:128583538-128610098  | OK     | 0.795968  | 0.950335  |
| Smc3          | chr19:53600395-53645831   | OK     | 11.0472   | 13.188    |
| Rangap1       | chr15:81704247-81729919   | OK     | 113.645   | 135.665   |
| Ppid          | chr3:79591388-79603650    | OK     | 18.5659   | 22.162    |
| Agtppb1       | chr13:59449534-59557347   | OK     | 91.9554   | 109.764   |
| Srp68         | chr11:116245165-116274217 | OK     | 26.9526   | 32.1716   |
| Pcnt          | chr10:76351253-76442912   | OK     | 2.78819   | 3.32799   |
| Telo2         | chr17:25099568-25115967   | OK     | 4.66653   | 5.56938   |
| Elmod2        | chr8:83312631-83332486    | OK     | 8.72339   | 10.4105   |
| R3hcc1l       | chr19:42518804-42592256   | OK     | 3.46799   | 4.13827   |
| Usp11         | chrX:20703908-20720539    | OK     | 9.61425   | 11.4698   |
| Cbx1          | chr11:96789135-96808640   | OK     | 10.9477   | 13.06     |
| Fam174a       | chr1:95313627-95335284    | OK     | 29.8842   | 35.6495   |
| Snx1          | chr9:66088126-66124886    | OK     | 38.0098   | 45.3369   |
| Lsm4          | chr8:70673230-70678752    | OK     | 26.7944   | 31.9595   |
| Csnk1g2       | chr10:80622779-80640771   | OK     | 52.585    | 62.7187   |
| Ccdc61        | chr7:18890883-18910404    | OK     | 3.76985   | 4.49606   |
| C2            | chr17:34862601-34882100   | OK     | 1.63055   | 1.94461   |
| Bcdin3d       | chr15:99470083-99474730   | OK     | 2.62045   | 3.12507   |
| Chrnbl        | chr11:69784035-69795937   | NOTEST | 0.543012  | 0.647573  |
| Tbcel         | chr9:42412316-42472226    | OK     | 21.1469   | 25.2133   |
| Os9           | chr10:127094258-127121160 | OK     | 35.8858   | 42.7862   |
| Gpr139        | chr7:119144322-119184374  | OK     | 4.56354   | 5.44096   |
| Rpl3          | chr15:80077780-80083406   | OK     | 16.6629   | 19.8657   |
| Prrg2         | chr7:45053606-45061652    | OK     | 4.52395   | 5.39319   |
| Stk25         | chr1:93512103-93635727    | OK     | 42.8243   | 51.0514   |

|               |                          |        |           |           |
|---------------|--------------------------|--------|-----------|-----------|
| Fam63b        | chr9:70599013-70657174   | OK     | 21.3894   | 25.4979   |
| Prdm1         | chr10:44437174-44458687  | NOTEST | 0.0948285 | 0.113042  |
| Pithd1        | chr4:135975601-135987244 | OK     | 36.9192   | 44.01     |
| Cage1         | chr13:38006051-38036937  | OK     | 1.09738   | 1.30813   |
| Elmo2         | chr2:165288030-165326479 | OK     | 21.8735   | 26.0728   |
| Arl1          | chr10:88731413-88743202  | OK     | 30.1067   | 35.8853   |
| Cdk20         | chr13:64432552-64439721  | OK     | 7.1033    | 8.46661   |
| Rb1cc1        | chr1:6214661-6276104     | OK     | 22.3339   | 26.6192   |
| Csnk2a1       | chr2:152226839-152281851 | OK     | 35.6213   | 42.4522   |
| Capn5         | chr7:98121564-98184799   | OK     | 65.6496   | 78.2362   |
| Vps33a        | chr5:123528759-123573015 | OK     | 35.9929   | 42.8869   |
| Ap1s1         | chr5:137034993-137046060 | OK     | 79.0524   | 94.1901   |
| 2700060E02Rik | chr14:19751256-19823823  | OK     | 9.82175   | 11.7024   |
| Dkk3          | chr7:112116018-112159057 | OK     | 60.1808   | 71.6975   |
| Zfp59         | chr7:27838583-27856774   | OK     | 1.76573   | 2.10362   |
| Gdi1          | chrX:74305011-74311867   | OK     | 232.897   | 277.461   |
| Eif2b3        | chr4:117019407-117086852 | OK     | 10.5775   | 12.6011   |
| Gm10509       | chr17:21690211-21692213  | OK     | 2.83212   | 3.37342   |
| Srsf10        | chr4:135856070-135869899 | OK     | 19.6119   | 23.3602   |
| Dus4l         | chr12:31640054-31654826  | OK     | 1.49565   | 1.78146   |
| Erc2          | chr14:27622441-28478537  | OK     | 20.401    | 24.2988   |
| Nsmce1        | chr7:125467639-125491542 | OK     | 14.1432   | 16.8446   |
| Pop4          | chr7:38262819-38271348   | OK     | 19.1489   | 22.8055   |
| Map4k3        | chr17:80580512-80728025  | OK     | 13.0172   | 15.5025   |
| Klk6          | chr7:43824543-43832027   | NOTEST | 0.0329842 | 0.0392788 |
| Zrsr1         | chr11:22899727-22982284  | OK     | 16.7105   | 19.8992   |
| Ly6g5b        | chr17:35113945-35115400  | NOTEST | 0.0213722 | 0.0254492 |
| Nov           | chr15:54745927-54753761  | OK     | 11.2097   | 13.3474   |
| Fig4          | chr10:41188171-41303241  | OK     | 28.1492   | 33.5171   |
| Akr1a1        | chr4:116636509-116651674 | OK     | 339.333   | 404.03    |
| Rpl22l1       | chr3:28805510-28807415   | OK     | 16.7184   | 19.9055   |
| B3gnt8        | chr7:25627623-25629490   | OK     | 14.2091   | 16.917    |
| Cct4          | chr11:22990592-23003336  | OK     | 81.3641   | 96.8624   |
| Snrpd3        | chr10:75518041-75535440  | OK     | 70.5348   | 83.9635   |
| Eif3a         | chr19:60761115-60790693  | OK     | 52.5898   | 62.5906   |
| Gm20605,Lrch4 | chr5:137629122-137642902 | OK     | 1.50759   | 1.79416   |
| Med21         | chr6:146642578-146650600 | OK     | 50.2859   | 59.8422   |
| Dctn3         | chr4:41714797-41723163   | OK     | 132.329   | 157.454   |
| Urod          | chr4:116990216-116994375 | OK     | 43.6097   | 51.8779   |
| Zfp251        | chr15:76852140-76871435  | OK     | 8.00609   | 9.5238    |
| Gm11110       | chr17:57092022-57107757  | NOTEST | 0.214488  | 0.255147  |
| Mtcp1         | chrX:75404846-75416543   | OK     | 5.49862   | 6.54016   |
| Rpl37a        | chr1:72711259-72713813   | OK     | 5.40912   | 6.43358   |
| Frs3          | chr17:47695206-47704286  | OK     | 7.48364   | 8.90081   |
| Tpm3          | chr3:90072650-90100902   | OK     | 20.5308   | 24.4162   |
| Colgalt2      | chr1:152399866-152510695 | OK     | 16.99     | 20.2049   |
| Daxx          | chr17:33909444-33915590  | OK     | 7.25719   | 8.63013   |
| Mrps18c       | chr5:100798758-100804467 | OK     | 51.8614   | 61.6713   |
| Lsm2          | chr17:34981853-34985893  | OK     | 8.16138   | 9.70479   |
| Kif21a        | chr15:90933274-91049951  | OK     | 222.947   | 265.106   |
| Ppp6r1        | chr7:4631494-4658950     | OK     | 45.8871   | 54.5635   |
| Ppp1r9b       | chr11:94991211-95006898  | OK     | 62.0268   | 73.751    |
| Phf14         | chr6:11925880-12081198   | OK     | 8.10836   | 9.63989   |

|               |                           |        |          |          |
|---------------|---------------------------|--------|----------|----------|
| Taz           | chrX:74282717-74290151    | OK     | 10.9296  | 12.994   |
| Mettl5        | chr2:69861561-69885615    | OK     | 9.50632  | 11.3012  |
| Snx12         | chrX:101097785-101222563  | OK     | 45.0284  | 53.526   |
| 2410127L17Rik | chr19:18670779-18704792   | OK     | 0.810781 | 0.963663 |
| Acot13        | chr13:24817954-24831489   | OK     | 50.1212  | 59.554   |
| Baz2b         | chr2:59899362-60125740    | OK     | 4.47998  | 5.32249  |
| Pam           | chr1:97821093-98095632    | OK     | 58.7063  | 69.7453  |
| Myl7          | chr11:5896636-5898782     | NOTEST | 0.125482 | 0.149071 |
| Cc2d1a        | chr8:84132827-84147753    | OK     | 9.69943  | 11.5225  |
| Zgpat         | chr2:181357689-181380793  | OK     | 8.74377  | 10.387   |
| Gnpnat1       | chr14:45351185-45388796   | OK     | 2.17063  | 2.5784   |
| Lrp1b         | chr2:40596772-42653598    | OK     | 0.844136 | 1.00263  |
| Ldb1          | chr19:46032600-46045211   | OK     | 28.4347  | 33.7718  |
| Tpra1         | chr6:88902250-88912240    | OK     | 14.8925  | 17.687   |
| Mars2         | chr1:55237176-55240058    | OK     | 3.32902  | 3.95304  |
| Phf10         | chr17:14943183-14961260   | OK     | 8.04462  | 9.55235  |
| Rybp          | chr6:100228564-100287358  | OK     | 3.45664  | 4.1043   |
| Mybl1         | chr1:9667410-9700209      | OK     | 1.37471  | 1.63215  |
| Gnl2          | chr4:125030013-125065657  | OK     | 23.6649  | 28.0945  |
| Snw1          | chr12:87428077-87472299   | OK     | 27.5445  | 32.6999  |
| Osm           | chr11:4236784-4241026     | NOTEST | 0.155663 | 0.184776 |
| Lin7c         | chr2:109890877-109900936  | OK     | 19.5424  | 23.1962  |
| Ppil2         | chr16:17070138-17111252   | OK     | 24.4286  | 28.9928  |
| Dhcr24        | chr4:106561037-106589113  | OK     | 165.49   | 196.392  |
| Vps54         | chr11:21239031-21371267   | OK     | 7.77603  | 9.22741  |
| Cep128        | chr12:90998491-91384409   | OK     | 1.21485  | 1.44158  |
| Vasp          | chr7:19256929-19271854    | OK     | 38.2236  | 45.3565  |
| Arnt          | chr3:95434389-95497239    | OK     | 6.11805  | 7.25923  |
| 36950         | chr19:37207544-37224457   | OK     | 29.2166  | 34.6618  |
| Vps37c        | chr19:10688814-10714419   | OK     | 22.5831  | 26.7896  |
| Xrcc6bp1      | chr10:126868427-126901371 | OK     | 2.91855  | 3.46186  |
| Sf1           | chr19:6363689-6378038     | OK     | 25.2152  | 29.9081  |
| Ints8         | chr4:11191350-11254259    | OK     | 9.8953   | 11.7363  |
| D030045P18Rik | chr10:45807703-45852018   | NOTEST | 0.137707 | 0.163327 |
| Wdr89         | chr12:75630593-75669537   | OK     | 1.26091  | 1.49549  |
| C78339        | chr13:46669521-46675773   | OK     | 27.3854  | 32.479   |
| Usp48         | chr4:137594188-137658537  | OK     | 18.5276  | 21.9721  |
| Golm1         | chr13:59634995-59675784   | OK     | 4.3163   | 5.11874  |
| Sugp1         | chr8:70042812-70071953    | OK     | 15.3118  | 18.1577  |
| Mier1         | chr4:103114389-103165754  | OK     | 6.8773   | 8.15525  |
| Mzt2          | chr16:15848440-15863322   | OK     | 17.106   | 20.2846  |
| Gcat          | chr15:79030873-79043558   | OK     | 3.87651  | 4.59647  |
| Hace1         | chr10:45577828-45712345   | OK     | 13.307   | 15.7776  |
| Rpp25l        | chr4:41712032-41713517    | OK     | 9.33444  | 11.0671  |
| Gdap10        | chr12:32820334-32853369   | NOTEST | 0.27299  | 0.323633 |
| Tmem55a       | chr4:14864218-14915260    | OK     | 40.1698  | 47.6202  |
| Mettl3        | chr14:52261758-52305124   | OK     | 12.5036  | 14.8218  |
| Gm12942       | chr4:127126042-127129660  | OK     | 1.67097  | 1.98058  |
| Mff           | chr1:82724917-82752389    | OK     | 76.3741  | 90.5215  |
| Sh3bgrl2      | chr9:83548337-83600291    | OK     | 102.629  | 121.638  |
| Banf1         | chr19:5364632-5371511     | OK     | 36.7207  | 43.5205  |
| Gda           | chr19:21391306-21472661   | OK     | 17.1158  | 20.2852  |
| B4galnt1      | chr10:127165155-127172340 | OK     | 12.6344  | 14.9735  |



|               |                           |        |           |           |
|---------------|---------------------------|--------|-----------|-----------|
| Ddx11         | chr17:66123519-66152168   | NOTEST | 0.487875  | 0.578026  |
| Peo1          | chr19:45006557-45012762   | OK     | 3.45812   | 4.09712   |
| Slc25a28      | chr19:43663800-43674881   | OK     | 9.61115   | 11.3853   |
| 38411         | chr10:127056049-127060184 | OK     | 8.41117   | 9.96295   |
| Slc4a5        | chr6:83237374-83304945    | NOTEST | 0.0943682 | 0.111768  |
| 1810011H11Rik | chr14:32785962-32817968   | NOTEST | 0.151422  | 0.179334  |
| Klhl24        | chr16:20097553-20127744   | OK     | 11.5174   | 13.6393   |
| 0610009B22Rik | chr11:51685384-51688634   | OK     | 31.8205   | 37.6784   |
| Cbx7          | chr15:79915806-79932646   | OK     | 11.2889   | 13.3666   |
| Tmem65        | chr15:58782268-58823427   | OK     | 52.1211   | 61.7132   |
| Lactb2        | chr1:13625899-13660509    | OK     | 16.4169   | 19.4348   |
| Gtf2f2        | chr14:75896936-76010865   | OK     | 9.35711   | 11.0772   |
| Tbc1d10c      | chr19:4184356-4191047     | NOTEST | 0.344297  | 0.407581  |
| Gskip         | chr12:105685351-105703057 | OK     | 23.5443   | 27.8707   |
| Trp53inp2     | chr2:155381855-155389847  | OK     | 49.2992   | 58.3576   |
| Thap2         | chr10:115369965-115384435 | OK     | 3.85849   | 4.56727   |
| Thrap3        | chr4:126164082-126202710  | OK     | 16.3469   | 19.3498   |
| Ywhah         | chr5:33018815-33027966    | OK     | 976.328   | 1155.61   |
| Zfp668        | chr7:127865358-127876823  | OK     | 2.80256   | 3.31697   |
| Smarca2       | chr19:26605159-26823907   | OK     | 37.7921   | 44.7285   |
| Ralgs2        | chr1:156804165-156939626  | OK     | 9.48943   | 11.2306   |
| Dcun1d5       | chr9:7184565-7207031      | OK     | 38.7834   | 45.8987   |
| Gm10778       | chr10:81812185-81826490   | NOTEST | 0.15717   | 0.185977  |
| Nudt10        | chrX:6168695-6172991      | OK     | 8.58627   | 10.1586   |
| Raver1        | chr9:21067513-21092008    | OK     | 12.4062   | 14.678    |
| Mtmr11        | chr3:96161969-96171718    | OK     | 3.34465   | 3.95612   |
| Cdc20b        | chr13:113035378-113091135 | NOTEST | 0.0513682 | 0.0607552 |
| Fam133b       | chr5:3543832-3570546      | OK     | 9.286     | 10.9828   |
| Lsm12         | chr11:102163488-102185256 | OK     | 16.5062   | 19.5215   |
| Polr2h        | chr16:20717825-20722265   | OK     | 12.2264   | 14.4588   |
| Chrac1        | chr15:73090411-73094075   | OK     | 11.4171   | 13.5015   |
| Gm10791       | chr16:84954435-85173707   | NOTEST | 0.0132946 | 0.0157207 |
| Tbpl1         | chr10:22645010-22731447   | OK     | 22.087    | 26.1172   |
| Dhx15         | chr5:52150202-52190546    | OK     | 47.0749   | 55.6612   |
| Mfsd7b        | chr1:191005831-191029781  | OK     | 10.3025   | 12.1813   |
| Hltf          | chr3:20057810-20118491    | OK     | 5.5994    | 6.61909   |
| Perp          | chr10:18845070-18857072   | OK     | 5.29269   | 6.25638   |
| Tigd5         | chr15:75909734-75914535   | OK     | 0.686529  | 0.811516  |
| Gadd45gip1    | chr8:84832281-84840641    | OK     | 13.8508   | 16.3713   |
| Dnaaf2        | chr12:69189837-69199868   | OK     | 1.70304   | 2.01286   |
| Tmem199       | chr11:78507054-78512168   | OK     | 26.4663   | 31.2808   |
| Gclc          | chr9:77754534-77794489    | OK     | 18.2383   | 21.5557   |
| Mier2         | chr10:79540244-79555091   | OK     | 6.50187   | 7.6844    |
| Lrrc3b        | chr14:15357515-15438987   | OK     | 8.5531    | 10.1083   |
| Lztfl1        | chr9:123697592-123717557  | OK     | 8.58835   | 10.1496   |
| Zfp707        | chr15:75969184-75975865   | OK     | 1.84932   | 2.18521   |
| Rnf220        | chr4:117271463-117496915  | OK     | 20.9671   | 24.7749   |
| Znhit2        | chr19:6061206-6062468     | OK     | 18.2854   | 21.6051   |
| Pstpip1       | chr9:56089975-56128890    | OK     | 4.7891    | 5.65844   |
| Ppp4r1l-ps    | chr2:173579319-173659539  | OK     | 1.21521   | 1.43573   |
| Camkmt        | chr17:85090699-85458580   | OK     | 8.14712   | 9.6255    |
| Nupl2         | chr5:24164962-24184008    | OK     | 3.24169   | 3.82973   |
| Qrs1          | chr10:43874189-43901736   | OK     | 11.6089   | 13.7143   |

|               |                           |        |           |          |
|---------------|---------------------------|--------|-----------|----------|
| Rnf5          | chr17:34601098-34603561   | OK     | 33.4349   | 39.4945  |
| Hspa2         | chr12:76404175-76406936   | OK     | 12.7739   | 15.0884  |
| Yrdc          | chr4:124850758-124862171  | OK     | 9.11198   | 10.763   |
| Lzts3         | chr2:130632764-130642844  | OK     | 10.7961   | 12.7511  |
| Eif2s1        | chr12:78862071-78887010   | OK     | 14.1942   | 16.7619  |
| Ksr2          | chr5:117414001-117767988  | OK     | 3.56908   | 4.21402  |
| Sp2           | chr11:96944145-96977688   | OK     | 4.9006    | 5.78607  |
| Uba1          | chrX:20658301-20683179    | OK     | 200.432   | 236.616  |
| Parvb         | chr15:84232042-84315609   | OK     | 45.9902   | 54.2922  |
| Aimp1         | chr3:132660497-132683879  | OK     | 38.036    | 44.8963  |
| 6430706D22Rik | chr1:88227019-88277579    | OK     | 16.8075   | 19.8389  |
| Hspbp1        | chr7:4660520-4684963      | OK     | 38.6872   | 45.6641  |
| Snrnp40       | chr4:130360131-130390030  | OK     | 9.76341   | 11.524   |
| Zdhhc5        | chr2:84671310-84715164    | OK     | 15.4054   | 18.1833  |
| Cpped1        | chr16:11803720-11930594   | OK     | 19.9741   | 23.5747  |
| Mad2l1bp      | chr17:46147384-46153551   | OK     | 10.7439   | 12.6797  |
| Sertad3       | chr7:27473839-27477364    | OK     | 5.12307   | 6.04613  |
| Dohh          | chr10:81384427-81388352   | OK     | 37.4143   | 44.1531  |
| Cfdp1         | chr8:111768472-111854310  | OK     | 52.8236   | 62.3346  |
| Arxes1        | chrX:136033366-136034946  | OK     | 9.22838   | 10.8893  |
| Gabpb1        | chr2:126628906-126676337  | OK     | 5.46962   | 6.45376  |
| Ptprf         | chr4:118208212-118291397  | OK     | 58.1237   | 68.5817  |
| 2310047M10Rik | chr11:69059774-69061576   | OK     | 20.3001   | 23.9522  |
| Armc10        | chr5:21645983-21662592    | OK     | 9.08219   | 10.7156  |
| Polr1c        | chr17:46243919-46248045   | OK     | 13.3797   | 15.786   |
| Cdc37         | chr9:21138540-21149906    | OK     | 56.1937   | 66.2979  |
| Tnks          | chr8:34829178-34965690    | OK     | 25.3287   | 29.8816  |
| Uchl1         | chr5:66626494-66687234    | OK     | 1918.64   | 2263.31  |
| Arl6ip5       | chr6:97210791-97233315    | OK     | 172.851   | 203.898  |
| Ankrd32       | chr13:77043087-77135468   | OK     | 4.701     | 5.54529  |
| BC055324      | chr1:163929099-163994781  | NOTEST | 0.582119  | 0.686656 |
| Kcns2         | chr15:34837354-34843407   | OK     | 0.830539  | 0.979656 |
| Hoxd3os1      | chr2:74710043-74748271    | NOTEST | 0.0928615 | 0.109524 |
| Pdzd7         | chr19:45015175-45045772   | OK     | 0.964011  | 1.13689  |
| Rps6ka4       | chr19:6829083-6840627     | OK     | 11.5247   | 13.5904  |
| Ak6           | chr13:100651342-100666415 | OK     | 9.63102   | 11.3564  |
| Mdm2          | chr10:117688874-117710758 | OK     | 10.795    | 12.729   |
| Tgtp1         | chr11:48985328-48992246   | NOTEST | 0.333182  | 0.392869 |
| Gm15455       | chr1:33835898-33838914    | OK     | 1.27505   | 1.5032   |
| Hdac2         | chr10:36974543-37001888   | OK     | 56.8601   | 67.0321  |
| Stard13       | chr5:151037514-151190193  | OK     | 17.7192   | 20.8889  |
| Xab2          | chr8:3610089-3621296      | OK     | 12.8068   | 15.0968  |
| Gm13375       | chr2:20968873-20970348    | OK     | 5.98826   | 7.05855  |
| Plk3          | chr4:117126812-117133952  | OK     | 6.08887   | 7.17711  |
| Psmc9         | chr5:123228189-123250125  | OK     | 8.18903   | 9.65167  |
| Myo1e         | chr9:70207349-70400067    | OK     | 53.2364   | 62.7414  |
| Rnf19a        | chr15:36239933-36283147   | OK     | 36.321    | 42.8013  |
| Nhlrc1        | chr13:47012556-47014850   | OK     | 5.59326   | 6.59084  |
| Araf          | chrX:20848542-20920918    | OK     | 83.8758   | 98.8353  |
| As3mt         | chr19:46707442-46741095   | OK     | 6.24625   | 7.35985  |
| 1110004F10Rik | chr7:116093379-116105210  | OK     | 53.025    | 62.4773  |
| Eif5          | chr12:111538100-111546753 | OK     | 76.2501   | 89.8417  |
| Slc25a39      | chr11:102402975-102407517 | OK     | 63.6488   | 74.9925  |

|               |                           |    |          |          |
|---------------|---------------------------|----|----------|----------|
| Wdr13         | chrX:8123300-8132858      | OK | 32.2262  | 37.968   |
| Pot1a         | chr6:25743734-25809226    | OK | 7.5104   | 8.84777  |
| Rps15a        | chr7:118104375-118116147  | OK | 6.40719  | 7.5476   |
| Ano8          | chr8:71469193-71486067    | OK | 21.2938  | 25.078   |
| Gabbr1        | chr17:37045965-37074305   | OK | 148.864  | 175.317  |
| Pim1          | chr17:29491044-29495459   | OK | 8.37956  | 9.86852  |
| Nrbf2         | chr10:67266688-67285281   | OK | 9.0607   | 10.6706  |
| Grb2          | chr11:115644143-115708597 | OK | 56.6401  | 66.7002  |
| Zc3h13        | chr14:75004109-75388146   | OK | 6.67996  | 7.86593  |
| Zmiz1         | chr14:25459184-25666747   | OK | 14.7136  | 17.3251  |
| Ncoa2         | chr1:13139158-13374083    | OK | 13.1105  | 15.4359  |
| Ict1          | chr11:115403765-115410913 | OK | 28.9015  | 34.0273  |
| Cdc45         | chr16:18780446-18811972   | OK | 1.44181  | 1.6975   |
| Dmwd          | chr7:19076199-19082775    | OK | 27.6008  | 32.4918  |
| Gm12657       | chr4:94565138-94603247    | OK | 1.4234   | 1.67563  |
| Fam188b       | chr6:55203382-55320222    | OK | 1.3938   | 1.64059  |
| Bcorl1        | chrX:48341357-48406728    | OK | 3.16332  | 3.72315  |
| Zfp943        | chr17:21962558-21994366   | OK | 6.97145  | 8.20393  |
| Oas1c         | chr5:120800198-120812514  | OK | 4.89623  | 5.76164  |
| Trim28        | chr7:13024151-13031032    | OK | 23.9845  | 28.2227  |
| Ap5b1         | chr19:5568073-5571261     | OK | 3.86224  | 4.54408  |
| Cdc42bpb      | chr12:111292971-111377718 | OK | 24.0776  | 28.3279  |
| Rfx3          | chr19:27761720-28011166   | OK | 1.08535  | 1.27678  |
| 1700123020Rik | chr14:54642160-54690742   | OK | 12.3693  | 14.5508  |
| Bank1         | chr3:136053363-136326046  | OK | 0.721894 | 0.849178 |
| Fam162a       | chr16:36043843-36071515   | OK | 42.8433  | 50.3915  |
| Mrpl9         | chr3:94443335-94448708    | OK | 27.05    | 31.8155  |
| Neil2         | chr14:63182444-63193525   | OK | 1.79142  | 2.10698  |
| Sft2d3        | chr18:31909093-31911903   | OK | 1.3355   | 1.57072  |
| Arih1         | chr9:59388553-59486374    | OK | 27.7479  | 32.629   |
| Chst5         | chr8:111889134-111910199  | OK | 1.66556  | 1.95855  |
| Myl12b        | chr17:70973962-70990516   | OK | 228.573  | 268.766  |
| Kdm5c         | chrX:152233226-152279099  | OK | 7.55178  | 8.87867  |
| Kcna5         | chr6:126532550-126535555  | OK | 0.829107 | 0.974778 |
| Cntrob        | chr11:69299495-69323873   | OK | 2.03552  | 2.39308  |
| Ctnnb1        | chr9:120933399-120960507  | OK | 180.885  | 212.647  |
| Ranbp17       | chr11:33211793-33513746   | OK | 2.72742  | 3.20622  |
| Ndufaf7       | chr17:78937134-78948052   | OK | 17.1161  | 20.1181  |
| Mndal         | chr1:173857219-173880187  | OK | 1.32824  | 1.56118  |
| Hps6          | chr19:46003477-46006173   | OK | 4.75096  | 5.58348  |
| Efr3b         | chr12:3962553-4038915     | OK | 17.9107  | 21.0468  |
| Taf15         | chr11:83473107-83506740   | OK | 19.3878  | 22.7825  |
| Rpusd3        | chr6:113415318-113419340  | OK | 3.39507  | 3.98951  |
| Exoc1         | chr5:76529310-76570298    | OK | 23.9977  | 28.1965  |
| Zmym3         | chrX:101404383-101420685  | OK | 15.1521  | 17.8008  |
| Mrpl2         | chr17:46646247-46650132   | OK | 24.954   | 29.3157  |
| Pisd-ps2      | chr17:3064317-3084183     | OK | 3.39441  | 3.98752  |
| Rdh13         | chr7:4425664-4445657      | OK | 7.59916  | 8.9261   |
| Hdac1         | chr4:129516103-129542646  | OK | 2.47926  | 2.91216  |
| Rfc2          | chr5:134582689-134598328  | OK | 16.051   | 18.8535  |
| Stmn2         | chr3:8509526-8561604      | OK | 868.995  | 1020.62  |
| Ppp2r5b       | chr19:6226400-6235840     | OK | 131.419  | 154.347  |
| Panx1         | chr9:15005784-15045478    | OK | 38.6576  | 45.4018  |

|             |                           |        |           |           |
|-------------|---------------------------|--------|-----------|-----------|
| Map1lc3a    | chr2:155276363-155278073  | OK     | 343.603   | 403.504   |
| Rrp1b       | chr17:32036161-32062862   | OK     | 1.92906   | 2.26523   |
| Zfp628      | chr7:4915216-4922003      | OK     | 3.28388   | 3.85572   |
| Rpusd4      | chr9:35267880-35275957    | OK     | 6.25473   | 7.34337   |
| Kdm4b       | chr17:56326049-56402873   | OK     | 9.60107   | 11.272    |
| Rnf10       | chr5:115241769-115272895  | OK     | 76.3949   | 89.6749   |
| Ece2        | chr16:20611600-20645915   | OK     | 36.5868   | 42.9467   |
| Setd5       | chr6:113077638-113153424  | OK     | 12.9469   | 15.196    |
| Rnf168      | chr16:32277460-32301439   | OK     | 13.7669   | 16.1584   |
| Chmp5       | chr4:40948552-40965302    | OK     | 88.7924   | 104.192   |
| Sh3d21      | chr4:126150601-126163341  | NOTEST | 0.615313  | 0.721992  |
| Hoxd8       | chr2:74704614-74707932    | OK     | 16.774    | 19.6787   |
| Cutc        | chr19:43753022-43768638   | OK     | 2.29909   | 2.69712   |
| Rad21       | chr15:51962603-51991760   | OK     | 40.1806   | 47.1365   |
| Tmtc3       | chr10:100443901-100487347 | OK     | 4.86183   | 5.70115   |
| Mir22hg     | chr11:75461538-75466690   | OK     | 14.6638   | 17.195    |
| Rnf25       | chr1:74593751-74601397    | OK     | 11.2962   | 13.2452   |
| Edem1       | chr6:108828640-108859356  | OK     | 9.83195   | 11.5279   |
| BC028528    | chr3:95871521-95891930    | OK     | 3.98293   | 4.66964   |
| Zfp90       | chr8:106415338-106425889  | OK     | 4.62034   | 5.41582   |
| Rbm14       | chr19:4784292-4811634     | OK     | 6.69789   | 7.85103   |
| Mettl4      | chr17:94727079-94749892   | OK     | 5.87153   | 6.88216   |
| Tank        | chr2:61578585-61654169    | OK     | 10.8889   | 12.7631   |
| Pus10       | chr11:23646478-23732876   | OK     | 1.65375   | 1.9383    |
| Lrch1       | chr14:74754672-74947877   | OK     | 4.33903   | 5.08556   |
| Gtf2ird1    | chr5:134357660-134456716  | OK     | 5.88387   | 6.89594   |
| Zfp808      | chr13:62129889-62173936   | NOTEST | 0.252411  | 0.295823  |
| Tymp        | chr15:89355718-89377037   | OK     | 1.08754   | 1.27452   |
| Esyt1       | chr10:128510249-128525859 | OK     | 101.869   | 119.38    |
| Rxrb        | chr17:34031811-34038403   | OK     | 18.1165   | 21.2295   |
| Nrap        | chr19:56287937-56390038   | NOTEST | 0.0518397 | 0.060743  |
| Ppp1r21     | chr17:88530123-88588367   | OK     | 19.5945   | 22.9592   |
| Cebpz       | chr17:78916498-78937070   | OK     | 8.86679   | 10.3888   |
| Rbm18       | chr2:36116078-36190283    | OK     | 23.8885   | 27.9882   |
| Syt6        | chr3:103193822-103854618  | OK     | 30.3091   | 35.5083   |
| Armcx5      | chrX:135742691-135803468  | OK     | 7.43836   | 8.71409   |
| Slx4ip      | chr2:136873780-137069778  | OK     | 2.37983   | 2.78798   |
| Dbnl        | chr11:5788482-5800980     | OK     | 50.7889   | 59.498    |
| Pdzrn4      | chr15:92396809-92771819   | NOTEST | 0.226495  | 0.265321  |
| Ikbke       | chr1:131254601-131279563  | NOTEST | 0.195116  | 0.22856   |
| Narf        | chr11:121237235-121255856 | OK     | 10.9218   | 12.7936   |
| Srp14       | chr2:118475842-118479696  | OK     | 143.974   | 168.637   |
| Jmjd7       | chr2:120027482-120043032  | OK     | 2.14701   | 2.51477   |
| Eid2        | chr7:28267880-28269168    | OK     | 21.6394   | 25.3426   |
| Frmd4a      | chr2:4152862-4614043      | OK     | 13.0229   | 15.2515   |
| Crnk11      | chr2:145917481-145934700  | OK     | 8.3876    | 9.82285   |
| Phka2       | chrX:160502165-160598878  | OK     | 5.18858   | 6.0759    |
| Tmprss11bnl | chr5:86659521-86676298    | NOTEST | 0.0442252 | 0.0517882 |
| Rps7        | chr12:28630846-28635953   | OK     | 0.983673  | 1.15185   |
| Txnrd1      | chr10:82833950-82897724   | OK     | 54.3032   | 63.581    |
| Terf2       | chr8:107069401-107096545  | OK     | 10.3077   | 12.0687   |
| Rnf135      | chr11:80183871-80199753   | OK     | 2.62675   | 3.07532   |
| Tet3        | chr6:83362373-83441678    | OK     | 3.98349   | 4.66345   |

|             |                           |        |          |           |
|-------------|---------------------------|--------|----------|-----------|
| Zbtb17      | chr4:141444672-141538597  | OK     | 4.73658  | 5.54506   |
| Vps72       | chr3:95111041-95123051    | OK     | 12.9136  | 15.117    |
| Llgl2       | chr11:115824057-115855780 | NOTEST | 0.286986 | 0.335855  |
| Ppp2r2d     | chr7:138846385-138883056  | OK     | 32.3341  | 37.8385   |
| Zfp595      | chr13:67312997-67332560   | OK     | 0.825596 | 0.96612   |
| Mcee        | chr7:64392770-64412119    | OK     | 21.9713  | 25.7101   |
| Srrm2       | chr17:23803186-23829109   | OK     | 28.2321  | 33.0357   |
| Ankrd34a    | chr3:96596635-96599778    | OK     | 1.54741  | 1.8106    |
| Gar1        | chr3:129824911-129831396  | OK     | 9.36529  | 10.9577   |
| Fbxo4       | chr15:3963563-3979573     | OK     | 1.83985  | 2.15262   |
| Gins1       | chr2:150909593-150931280  | OK     | 1.74015  | 2.03592   |
| D8Erttd738e | chr8:84246234-84249761    | OK     | 84.3121  | 98.64     |
| Galnt12     | chr4:47091952-47123042    | NOTEST | 0.193857 | 0.226793  |
| Gabra3      | chrX:72432675-72656246    | OK     | 4.44204  | 5.19623   |
| Rab37       | chr11:115091430-115162240 | OK     | 20.4681  | 23.9419   |
| Gpr4        | chr7:19212537-19224176    | NOTEST | 0.629314 | 0.736021  |
| Rbm3        | chrX:8138974-8147963      | OK     | 12.3301  | 14.4206   |
| Ttc9        | chr12:81631368-81664941   | OK     | 120.764  | 141.23    |
| Cript       | chr17:87025560-87035808   | OK     | 60.8249  | 71.1238   |
| Med13l      | chr5:118560718-118765437  | OK     | 6.64237  | 7.76603   |
| Mettl1      | chr10:127041931-127045461 | OK     | 12.5646  | 14.6899   |
| Rlf         | chr4:121145372-121188534  | OK     | 4.42109  | 5.16864   |
| Limd2       | chr11:106156255-106160142 | OK     | 9.37774  | 10.9626   |
| Cmb1        | chr15:31568911-31590119   | OK     | 14.6426  | 17.1171   |
| Ankmy2      | chr12:36157123-36197291   | OK     | 13.1955  | 15.4237   |
| Ncald       | chr15:37366174-37792428   | OK     | 74.611   | 87.2069   |
| Otud4       | chr8:79639675-79677755    | OK     | 13.4314  | 15.6989   |
| Acap2       | chr16:30920553-31275697   | OK     | 10.1088  | 11.8153   |
| Plekha1     | chr7:130865909-130913302  | OK     | 30.5896  | 35.7529   |
| Zfp420      | chr7:29859978-29877302    | OK     | 2.57977  | 3.0149    |
| Ppfbp1      | chr6:146888493-147032023  | OK     | 12.9443  | 15.1236   |
| Mtf2        | chr5:108065673-108109219  | OK     | 3.46644  | 4.04995   |
| Zfp664      | chr5:124862704-124888630  | OK     | 42.0057  | 49.0746   |
| Sstr2       | chr11:113619480-113625895 | OK     | 2.81827  | 3.29239   |
| Sars2       | chr7:28741967-28753879    | OK     | 5.94989  | 6.95058   |
| Ibtk        | chr9:85687359-85749334    | OK     | 5.22765  | 6.10643   |
| Rasa1       | chr13:85214698-85289486   | OK     | 18.8929  | 22.0655   |
| Wrn         | chr8:33234372-33385527    | OK     | 2.57105  | 3.00279   |
| Mzt1        | chr14:99034543-99046136   | OK     | 28.4286  | 33.1985   |
| Slc52a2     | chr15:76538942-76542130   | OK     | 6.41184  | 7.48675   |
| Trnt1       | chr6:106769137-106800087  | OK     | 21.4562  | 25.0513   |
| Selplg      | chr5:113817797-113830501  | NOTEST | 0.509328 | 0.59466   |
| Omp         | chr7:98121564-98184799    | OK     | 3.24813  | 3.79231   |
| Hfm1        | chr5:106840196-106925890  | OK     | 0.706937 | 0.825358  |
| Aanat       | chr11:116593686-116597680 | NOTEST | 0.078236 | 0.0913354 |
| Spats2l     | chr1:57774860-57948397    | OK     | 7.53964  | 8.80202   |
| Kank3       | chr17:33810522-33822914   | OK     | 4.23235  | 4.94094   |
| Enkd1       | chr8:105703651-105708168  | OK     | 1.0436   | 1.21829   |
| Gnb1        | chr4:155491360-155559269  | OK     | 367.696  | 429.177   |
| Cyfp2       | chr11:46193848-46589232   | OK     | 112.954  | 131.837   |
| Sel1l3      | chr5:53107082-53213452    | OK     | 14.2282  | 16.6067   |
| Tbccd1      | chr16:22813214-22857569   | OK     | 8.19464  | 9.56448   |
| Rfx1        | chr8:84066835-84096992    | OK     | 2.16316  | 2.52465   |



|               |                           |        |           |           |
|---------------|---------------------------|--------|-----------|-----------|
| Snora64       | chr17:24720062-24721927   | OK     | 37.2257   | 43.4434   |
| Ncoa5         | chr2:165000356-165034779  | OK     | 10.9598   | 12.79     |
| Dxo           | chr17:34837018-34839186   | OK     | 4.5489    | 5.30797   |
| Psmb5         | chr14:54614119-54617995   | OK     | 73.9159   | 86.2361   |
| Cars2         | chr8:11514016-11550771    | OK     | 6.52161   | 7.60834   |
| Pcgf2         | chr11:97688822-97700497   | OK     | 4.1692    | 4.86392   |
| Ppp4r2        | chr6:100833637-100868717  | OK     | 5.29141   | 6.17232   |
| Ttc5          | chr14:50765408-50785520   | OK     | 8.09589   | 9.4433    |
| Dhrs1         | chr14:55739019-55745684   | OK     | 98.0889   | 114.384   |
| Alg5          | chr3:54735538-54749795    | OK     | 14.3816   | 16.7702   |
| Syap1         | chrX:162407199-163352564  | OK     | 17.6008   | 20.524    |
| Sepsecs       | chr5:52643406-52669701    | OK     | 4.10746   | 4.78901   |
| Map3k12       | chr15:102470631-102517004 | OK     | 17.6356   | 20.5586   |
| Tmem161b      | chr13:84222295-84295966   | OK     | 4.3504    | 5.07135   |
| Flii          | chr11:60699689-60727221   | OK     | 43.3148   | 50.4855   |
| Bccip         | chr7:133709332-133881532  | OK     | 19.7594   | 23.0291   |
| Npdc1         | chr2:25403049-25409494    | OK     | 175.513   | 204.555   |
| Fam118b       | chr9:35211202-35267805    | OK     | 4.83471   | 5.63469   |
| Sike1         | chr3:102995739-103003914  | OK     | 9.27069   | 10.8036   |
| Ncbp1         | chr4:46138510-46172402    | OK     | 20.4363   | 23.813    |
| Bmper         | chr9:23223075-23485215    | OK     | 5.73411   | 6.68129   |
| 1700029J07Rik | chr8:45953605-45975252    | NOTEST | 0.655572  | 0.763809  |
| H2-K2         | chr17:33974658-33978791   | OK     | 1.11753   | 1.30192   |
| Hnrnpul2      | chr19:8819400-8834142     | OK     | 42.0617   | 49.0005   |
| Chchd5        | chr2:129129699-129134111  | OK     | 5.82559   | 6.78613   |
| Fam173b       | chr15:31602115-31617535   | OK     | 6.50656   | 7.57851   |
| Cct3          | chr3:88297134-88321766    | OK     | 124.754   | 145.307   |
| 2410004B18Rik | chr3:145938031-145944275  | OK     | 15.5489   | 18.1101   |
| Ncaph2        | chr15:89355718-89377037   | OK     | 24.1507   | 28.1281   |
| Gm3500        | chr14:5718333-5741602     | NOTEST | 0.0192766 | 0.0224512 |
| Cytip         | chr2:58129138-58160122    | NOTEST | 0.162248  | 0.188956  |
| C1galt1c1     | chrX:38630782-38635143    | OK     | 20.5114   | 23.8861   |
| Nosip         | chr7:45062428-45078503    | OK     | 27.2644   | 31.7445   |
| Nip7          | chr8:107056876-107060928  | OK     | 4.17668   | 4.8621    |
| Plekhm1       | chr11:103365091-103412664 | OK     | 4.00195   | 4.6581    |
| Nup37         | chr10:88146991-88178395   | OK     | 3.57599   | 4.16214   |
| Elavl2        | chr4:91250766-91399984    | OK     | 110.718   | 128.866   |
| Zfp229        | chr17:21733723-21748969   | OK     | 3.13147   | 3.64443   |
| Gm4944        | chr17:22197264-22225614   | OK     | 2.17435   | 2.53027   |
| Hdac5         | chr11:102195746-102230172 | OK     | 15.395    | 17.914    |
| Dnajc4        | chr19:6987910-6992272     | OK     | 5.90101   | 6.86653   |
| Mgarp         | chr3:51388412-51396547    | NOTEST | 0.255412  | 0.297199  |
| Cyb5r4        | chr9:87022028-87077774    | OK     | 10.6439   | 12.3844   |
| Fam103a1      | chr7:81762952-81769490    | OK     | 39.645    | 46.127    |
| Dnal4         | chr15:79761448-79774467   | OK     | 10.4069   | 12.1082   |
| Idh1          | chr1:65158615-65186479    | OK     | 82.8648   | 96.4066   |
| Ing1          | chr8:11556065-11563250    | OK     | 5.97767   | 6.95401   |
| Kcnu1         | chr8:25849622-25937934    | OK     | 1.37834   | 1.60346   |
| Wbscr16       | chr5:134148057-134176767  | OK     | 5.4585    | 6.34884   |
| Cacybp        | chr1:160202366-160212892  | OK     | 52.1647   | 60.6732   |
| Map2k7        | chr8:4238739-4247897      | OK     | 23.5898   | 27.4372   |
| Ndufv3        | chr17:31520114-31531325   | OK     | 147.874   | 171.96    |
| Atxn3         | chr12:101918900-101958243 | OK     | 8.42155   | 9.79289   |

|               |                            |        |           |           |
|---------------|----------------------------|--------|-----------|-----------|
| Snhg12        | chr4:132308677-132311024   | OK     | 12.7907   | 14.8728   |
| Narg2         | chr9:69397997-69433074     | OK     | 1.70536   | 1.98288   |
| Vwde          | chr6:13185610-13224965     | NOTEST | 0.254665  | 0.296097  |
| Zcchc6        | chr13:59769965-59823147    | OK     | 12.2287   | 14.2175   |
| Zfyve27       | chr19:42170566-42194592    | OK     | 21.3201   | 24.7867   |
| Zfp512        | chr5:31452435-31481753     | OK     | 13.5151   | 15.7114   |
| Adck4         | chr7:27233012-27257949     | OK     | 5.26209   | 6.11582   |
| Clec9a        | chr6:129408861-129424764   | NOTEST | 0.019372  | 0.0225143 |
| 4933404O12Rik | chr5:136919145-136937109   | OK     | 1.48703   | 1.72812   |
| Cuedc2        | chr19:46328183-46338660    | OK     | 55.3868   | 64.3653   |
| Atl2          | chr17:79848389-79896123    | OK     | 18.3642   | 21.3362   |
| Bst1          | chr5:43818892-43843468     | NOTEST | 0.330215  | 0.383646  |
| Exd2          | chr12:80463094-80498135    | OK     | 7.72684   | 8.97696   |
| Ndn12         | chr7:64756095-65156528     | OK     | 10.1682   | 11.8129   |
| Sipa1         | chr19:5651184-5663707      | OK     | 3.23064   | 3.75309   |
| Prcc          | chr3:87858902-87885562     | OK     | 23.5681   | 27.3757   |
| Cdc23         | chr18:34598614-34651736    | OK     | 8.38495   | 9.73952   |
| Csf2rb        | chr15:78325989-78351001    | OK     | 0.683667  | 0.794098  |
| Psmc3         | chr11:98682553-98695978    | OK     | 64.7121   | 75.1638   |
| Oaz2          | chr9:65676547-65690300     | OK     | 80.9421   | 94.0148   |
| Paip2         | chr18:35598666-35627227    | OK     | 138.337   | 160.664   |
| Mrps10        | chr17:47368886-47378679    | OK     | 16.6112   | 19.2911   |
| Ppp1r15a      | chr7:45522916-45526268     | OK     | 18.3901   | 21.3548   |
| Rbm41         | chrX:139889510-139998595   | OK     | 2.59843   | 3.01729   |
| Eif1ad        | chr19:5364632-5371511      | OK     | 12.3684   | 14.3616   |
| Hoxa7         | chr6:52215623-52218573     | OK     | 7.44776   | 8.64766   |
| Slx4          | chr16:3979105-4001678      | OK     | 1.28592   | 1.49308   |
| Tbc1d17       | chr7:44812255-44849079     | OK     | 12.8841   | 14.9595   |
| Kmt2b         | chr7:30568854-30588726     | OK     | 4.47247   | 5.19266   |
| Ankrd44       | chr1:54645339-54926387     | OK     | 2.88551   | 3.35009   |
| Ttll12        | chr15:83575093-83595157    | OK     | 7.74849   | 8.99549   |
| Hspe1         | chr1:55088147-55091317     | OK     | 26.5703   | 30.8436   |
| Tjp3          | chr10:81268171-81291581    | NOTEST | 0.0128932 | 0.0149661 |
| Stam          | chr2:14074111-14148330     | OK     | 30.9997   | 35.9813   |
| Cox16         | chr12:81470703-81485110    | OK     | 8.12352   | 9.42837   |
| Capn1         | chr19:5988544-6018459      | OK     | 88.9161   | 103.197   |
| Galnt18       | chr7:111471660-111779977   | OK     | 15.8235   | 18.3648   |
| Fgfr1op2      | chr6:146577910-146599198   | OK     | 34.9694   | 40.5849   |
| Ppp1r11       | chr17:36948354-36951792    | OK     | 35.3      | 40.9674   |
| Inpp4a        | chr1:37299837-37410740     | OK     | 46.3687   | 53.8105   |
| Tex2          | chr11:106502138-106612930  | OK     | 61.2301   | 71.054    |
| Ankrd26       | chr6:118502563-118562256   | OK     | 3.34255   | 3.87866   |
| Gramd1a       | chr7:31130126-31151050     | OK     | 21.8107   | 25.3085   |
| 1810043G02Rik | chr10:77978649-77985438    | OK     | 13.8747   | 16.097    |
| Cachd1        | chr4:100776678-101003748   | OK     | 8.60058   | 9.97815   |
| Pknx1         | chr17:31564772-31607693    | OK     | 3.75469   | 4.35601   |
| Spry3         | chrX_GL456233_random:10135 | OK     | 6.70147   | 7.77304   |
| Slc31a2       | chr4:62286428-62298412     | OK     | 8.93772   | 10.3667   |
| Ptpn18        | chr1:34459745-34473779     | NOTEST | 0.155238  | 0.180025  |
| Mustn1        | chr14:30879256-30881610    | OK     | 3.36569   | 3.90279   |
| Ntpcr         | chr8:125734202-125748235   | OK     | 12.7513   | 14.7858   |
| Romo1         | chr2:156123636-156145794   | OK     | 105.515   | 122.342   |
| Leprotil1     | chr8:34135571-34146739     | OK     | 91.0913   | 105.615   |

|                |                           |        |           |          |
|----------------|---------------------------|--------|-----------|----------|
| 1700030J22Rik  | chr8:116969598-116978943  | OK     | 1.67233   | 1.93877  |
| Nabp2          | chr10:128401394-128409796 | OK     | 33.0912   | 38.3608  |
| Edc4           | chr8:105880950-105893207  | OK     | 9.02701   | 10.4641  |
| Ppm1j          | chr3:104781055-104786017  | OK     | 74.5186   | 86.3804  |
| OTTMUSG0000001 | chr2:176619932-176636319  | LOWDAT | 0.194549  | 0.225479 |
| 4930426L09Rik  | chr2:18998318-18999804    | NOTEST | 0.119595  | 0.138599 |
| Mkln1          | chr6:31398827-31509477    | OK     | 23.9147   | 27.7144  |
| Uck1           | chr2:32236682-32260105    | OK     | 11.8536   | 13.7356  |
| Axin2          | chr11:108920348-108950781 | OK     | 2.80871   | 3.2543   |
| Ap3d1          | chr10:80706977-80742211   | OK     | 52.6161   | 60.9621  |
| Dnajb1         | chr8:83608174-83611903    | OK     | 29.008    | 33.6072  |
| Ppfia1         | chr7:144476754-144553729  | OK     | 8.23405   | 9.53751  |
| Tnip2          | chr5:34496095-34513979    | OK     | 1.55917   | 1.80597  |
| Gga1           | chr15:78877189-78894585   | OK     | 22.33     | 25.8645  |
| Rnf19b         | chr4:129058270-129084526  | OK     | 26.3171   | 30.4773  |
| Fut7           | chr2:25423241-25426373    | NOTEST | 0.297786  | 0.344828 |
| Fam118a        | chr15:85037061-85062830   | OK     | 6.05037   | 7.00606  |
| Rpl36          | chr17:56613394-56614246   | OK     | 1.73327   | 2.0069   |
| Eef1e1         | chr13:38645690-38659028   | OK     | 31.0764   | 35.9823  |
| Pitpnb         | chr5:111330762-111388359  | OK     | 23.1533   | 26.8062  |
| Rnpep          | chr1:135262698-135284084  | OK     | 12.7065   | 14.7102  |
| Ddx46          | chr13:55634998-55681267   | OK     | 12.4344   | 14.3938  |
| Gng4           | chr13:13784538-13827895   | OK     | 4.1252    | 4.77522  |
| Cldn12         | chr5:5505014-5514976      | OK     | 7.27527   | 8.42146  |
| Zfp12          | chr5:143235162-143248834  | OK     | 3.67771   | 4.2571   |
| Rc3h2          | chr2:37370070-37422903    | OK     | 17.2555   | 19.9725  |
| Pbdc1          | chrX:105079755-105117090  | OK     | 7.1864    | 8.31651  |
| Znrd1          | chr17:36954357-36958428   | OK     | 9.56355   | 11.0668  |
| Cep76          | chr18:67617396-67641336   | OK     | 2.23138   | 2.58209  |
| 4930529M08Rik  | chr2:145934783-145964226  | NOTEST | 0.33742   | 0.390448 |
| Tmem255a       | chrX:38189792-38252481    | OK     | 99.4186   | 115.032  |
| Map7d1         | chr4:126232167-126256319  | OK     | 60.3067   | 69.775   |
| Nhp2l1         | chr15:82041344-82047598   | OK     | 33.563    | 38.8317  |
| Otulin         | chr15:27605920-27630693   | OK     | 8.69524   | 10.0601  |
| Gm10069        | chr6:128438756-128526720  | OK     | 0.787056  | 0.910575 |
| Rcc1           | chr4:132331918-132345750  | OK     | 3.68186   | 4.25868  |
| Gm19345        | chr7:19852002-19861299    | OK     | 2.64382   | 3.05762  |
| Ranbp9         | chr13:43398375-43480973   | OK     | 22.4927   | 26.009   |
| Atpif1         | chr4:132530554-132533659  | OK     | 360.047   | 416.24   |
| Tex10          | chr4:48279759-48473422    | OK     | 8.35239   | 9.6554   |
| Gpr108         | chr17:57234914-57247641   | OK     | 20.4898   | 23.6852  |
| Isyna1         | chr8:70594480-70597290    | OK     | 13.9007   | 16.0662  |
| Snf8           | chr11:96034916-96047405   | OK     | 18.8844   | 21.8259  |
| Nell1          | chr7:49975349-50863289    | OK     | 3.0019    | 3.46949  |
| Hexa           | chr9:59539666-59565105    | OK     | 43.5525   | 50.3314  |
| Mri1           | chr8:84250575-84257324    | OK     | 5.35325   | 6.18643  |
| Arhgap27       | chr11:103331483-103363692 | OK     | 9.23315   | 10.6701  |
| Arid1a         | chr4:133679007-133753611  | OK     | 13.1256   | 15.1677  |
| Ccdc17         | chr4:116557726-116600266  | NOTEST | 0.283074  | 0.327099 |
| Stag3          | chr5:138280508-138312393  | NOTEST | 0.0918191 | 0.106097 |
| Pik3r2         | chr8:70768180-70776712    | OK     | 19.6161   | 22.6663  |
| Irf3           | chr7:44997647-45002848    | OK     | 8.47304   | 9.79051  |
| Hnrnpul1       | chr7:25722038-25754720    | OK     | 25.2874   | 29.2187  |

|               |                           |        |          |          |
|---------------|---------------------------|--------|----------|----------|
| Phc2          | chr4:128654701-128752881  | OK     | 32.4522  | 37.497   |
| Nrd1          | chr4:109000804-109202272  | OK     | 40.2354  | 46.4873  |
| Iws1          | chr18:32067733-32104331   | OK     | 4.55069  | 5.25754  |
| Numb          | chr12:83794033-83921934   | OK     | 15.1174  | 17.4654  |
| Higd1a        | chr9:121848559-121858000  | OK     | 21.5869  | 24.9364  |
| Slc35e2       | chr4:155601415-155624755  | OK     | 7.93959  | 9.17092  |
| Lrrtm2        | chr18:35118911-35254775   | OK     | 9.52362  | 11.0006  |
| Ccl28         | chr13:119623818-119654358 | NOTEST | 0.621744 | 0.718167 |
| Aldoart2      | chr12:55565204-55566896   | NOTEST | 0.251333 | 0.290279 |
| Xpot          | chr10:121587379-121626316 | OK     | 12.2295  | 14.1246  |
| Acbd3         | chr1:180726042-180754204  | OK     | 25.8475  | 29.8512  |
| Ap3b2         | chr7:81460398-81493925    | OK     | 64.2442  | 74.1949  |
| Ogg1          | chr6:113326975-113343922  | OK     | 4.99707  | 5.77104  |
| Zdhhc24       | chr19:4878667-4885397     | OK     | 13.158   | 15.195   |
| Mterf1a       | chr5:3890580-3893933      | OK     | 1.62601  | 1.87766  |
| Wdr53         | chr16:32247226-32257083   | OK     | 8.83955  | 10.2075  |
| Med28         | chr5:45520228-45529284    | OK     | 13.7148  | 15.8364  |
| Dcp1b         | chr6:118587239-119221614  | OK     | 1.72103  | 1.98722  |
| Klhl8         | chr5:103862049-103911229  | OK     | 4.98343  | 5.75369  |
| Kat7          | chr11:95271852-95310246   | OK     | 22.8659  | 26.3993  |
| Zfr           | chr15:12117850-12185449   | OK     | 46.8848  | 54.128   |
| Rabep2        | chr7:126428766-126463073  | OK     | 6.96662  | 8.04259  |
| Gnb2l1        | chr11:48800359-48806241   | OK     | 105.001  | 121.191  |
| Wapal         | chr14:34673927-34746217   | OK     | 10.7519  | 12.4074  |
| Poc5          | chr13:96388293-96415587   | OK     | 10.6388  | 12.2759  |
| Ppp1r12c      | chr7:4481520-4501680      | OK     | 27.3162  | 31.5193  |
| Dnajc3        | chr14:118937931-118981702 | OK     | 22.2563  | 25.6791  |
| Emc2          | chr15:43477228-43527777   | OK     | 61.4952  | 70.9521  |
| Ints9         | chr14:64950044-65039835   | OK     | 9.24288  | 10.6637  |
| Sde2          | chr1:180851150-180868114  | OK     | 6.39352  | 7.37598  |
| Celf4         | chr18:25477619-25753983   | OK     | 34.8774  | 40.235   |
| Crls1         | chr2:132846665-132866768  | OK     | 15.7644  | 18.1854  |
| Uqcc2         | chr17:27122664-27133891   | OK     | 88.0267  | 101.537  |
| 1110054M08Rik | chr16:24392555-24992578   | OK     | 2.67415  | 3.08444  |
| Fndc5         | chr4:129137059-129144593  | OK     | 20.811   | 24.0014  |
| Steap2        | chr5:5664828-5694568      | OK     | 2.67596  | 3.08617  |
| Ssrp1         | chr2:85037119-85047114    | OK     | 25.5867  | 29.5089  |
| Nbeal1        | chr1:60180598-60334705    | OK     | 5.6442   | 6.50868  |
| Cpeb1         | chr7:81347025-81454758    | OK     | 87.0088  | 100.324  |
| Gripap1       | chrX:7789992-7820567      | OK     | 36.2643  | 41.814   |
| Emd           | chrX:74254686-74257893    | OK     | 21.4505  | 24.7329  |
| Mettl6        | chr14:31478797-31494977   | OK     | 5.13789  | 5.92389  |
| Psrc1         | chr3:108383803-108388231  | NOTEST | 0.353287 | 0.407287 |
| Cisd1         | chr10:71330493-71344849   | OK     | 119.034  | 137.225  |
| Irak1         | chrX:74013913-74023936    | OK     | 12.7254  | 14.6696  |
| Serinc5       | chr13:92611137-92711946   | OK     | 56.063   | 64.6     |
| Alg10b        | chr15:90224310-90230554   | OK     | 10.6846  | 12.3104  |
| Zbtb1         | chr12:76370265-76388747   | OK     | 6.67017  | 7.6851   |
| Hmg20a        | chr9:56418845-56496936    | OK     | 19.9324  | 22.9601  |
| Reps1         | chr10:18055939-18125155   | OK     | 13.1781  | 15.1772  |
| Dock2         | chr11:34226820-34783905   | NOTEST | 0.474898 | 0.5469   |
| Nfatc3        | chr8:106059602-106130537  | OK     | 7.5156   | 8.654    |
| Srrm4         | chr5:116438721-116591817  | OK     | 2.47457  | 2.84933  |

|               |                           |        |          |           |
|---------------|---------------------------|--------|----------|-----------|
| Tbc1d10b      | chr7:127197458-127208468  | OK     | 28.6905  | 33.0346   |
| Cdh11         | chr8:102632994-102785111  | OK     | 40.9943  | 47.1989   |
| Rit1          | chr3:88716853-88731048    | OK     | 25.6366  | 29.5168   |
| Usf2          | chr7:30945247-30956803    | OK     | 12.4216  | 14.3015   |
| Mrps28        | chr3:8802145-8923857      | OK     | 12.0393  | 13.8576   |
| Eif2ak2       | chr17:78852549-78882572   | OK     | 8.83215  | 10.1653   |
| Etfa          | chr9:55454435-55512243    | OK     | 43.856   | 50.4697   |
| Oprm1         | chr10:6788600-7038209     | OK     | 4.62218  | 5.31885   |
| C1d           | chr11:17257617-17269176   | OK     | 18.691   | 21.5042   |
| Il10ra        | chr9:45253838-45269146    | OK     | 1.08614  | 1.24959   |
| Tprkb         | chr6:85915718-85930284    | OK     | 16.6579  | 19.1589   |
| Elof1         | chr9:22055459-22389206    | OK     | 15.6985  | 18.0547   |
| Prkcz         | chr4:155260117-155361428  | OK     | 16.1273  | 18.5476   |
| Fam188a       | chr2:12347263-12419460    | OK     | 72.277   | 83.1201   |
| Aoc2          | chr11:101325062-101329694 | NOTEST | 0.655681 | 0.754046  |
| 4930579G24Rik | chr3:79629078-79632819    | OK     | 1.751    | 2.01367   |
| Taf2          | chr15:55015128-55072152   | OK     | 7.3339   | 8.43338   |
| Kpna3         | chr14:61365185-61439947   | OK     | 25.2884  | 29.0795   |
| Kdm1b         | chr13:47043498-47106221   | OK     | 1.97004  | 2.26529   |
| Haus1         | chr18:77757566-77767780   | OK     | 10.2921  | 11.8346   |
| Zfp358        | chr8:3493137-3497208      | OK     | 9.10447  | 10.469    |
| Ddx28         | chr8:106009615-106011486  | OK     | 6.36793  | 7.32089   |
| Pex11g        | chr8:3458816-3467648      | OK     | 1.93529  | 2.22483   |
| Ssx2ip        | chr3:146404641-146440137  | OK     | 31.9717  | 36.7546   |
| A230056J06Rik | chr13:59580175-59585223   | NOTEST | 0.037336 | 0.0429186 |
| Pxk           | chr14:8098212-8165111     | OK     | 17.5754  | 20.1995   |
| Timm21        | chr18:84935024-84981392   | OK     | 5.17717  | 5.9496    |
| Twf1          | chr15:94577947-94589824   | OK     | 16.96    | 19.4903   |
| Bzw2          | chr12:36091834-36156825   | OK     | 11.1119  | 12.7693   |
| A330040F15Rik | chr19:12573524-12596566   | NOTEST | 0.235226 | 0.270304  |
| Uba2          | chr7:34140696-34168529    | OK     | 40.9076  | 47.0058   |
| Zbtb34        | chr2:33406107-33431324    | OK     | 1.49433  | 1.71704   |
| Brsk2         | chr7:141949750-142004243  | OK     | 30.269   | 34.7789   |
| Mrpl53        | chr6:83101515-83109932    | OK     | 37.9582  | 43.6127   |
| Cul7          | chr17:46650337-46664364   | OK     | 13.4964  | 15.505    |
| Eci1          | chr17:24426682-24439316   | OK     | 15.0991  | 17.3458   |
| Naglu         | chr11:101070093-101077671 | OK     | 5.77724  | 6.63661   |
| Nupr1l        | chr5:129908539-129911281  | NOTEST | 0.403191 | 0.463162  |
| Bud31         | chr5:145140396-145167104  | OK     | 31.3097  | 35.9653   |
| Psmc2         | chr5:21785282-21803784    | OK     | 93.831   | 107.782   |
| Ddx23         | chr15:98645506-98662889   | OK     | 19.9213  | 22.8824   |
| Gna11         | chr10:81528731-81545046   | OK     | 28.462   | 32.6923   |
| Ofd1          | chrX:166390032-166440704  | OK     | 2.44176  | 2.80445   |
| Mvb12a        | chr8:71542929-71548026    | OK     | 24.1053  | 27.6836   |
| Hmgb3         | chrX:71555992-71560654    | OK     | 7.51739  | 8.6331    |
| Zfp850        | chr7:27984470-28014115    | OK     | 1.27032  | 1.45881   |
| Csgalnact1    | chr8:68356780-68735146    | OK     | 7.21437  | 8.28338   |
| 2610306M01Rik | chr6:86848406-86849440    | OK     | 2.63697  | 3.0274    |
| Srp54b,Srp54c | chr12:55230167-55263480   | OK     | 4.5838   | 5.26219   |
| Klf16         | chr10:80567120-80577296   | OK     | 9.1668   | 10.5227   |
| Fam13c        | chr10:70440667-70599291   | OK     | 7.9304   | 9.10257   |
| Zfp622        | chr15:25984365-25998482   | OK     | 12.9867  | 14.9038   |
| Rtp4          | chr16:23609918-23614222   | OK     | 3.02397  | 3.47028   |



|               |                           |        |          |          |
|---------------|---------------------------|--------|----------|----------|
| Usf1          | chr1:171411680-171418742  | OK     | 13.6652  | 15.6813  |
| 1700029I15Rik | chr2:92382917-92383603    | NOTEST | 0.332923 | 0.381967 |
| Gpc1          | chr1:92831685-92860196    | OK     | 66.8521  | 76.6958  |
| Rusc2         | chr4:43381981-43429134    | OK     | 37.2673  | 42.7537  |
| Gtl3          | chr8:95420249-95434869    | OK     | 19.7815  | 22.6908  |
| Hexdc         | chr11:121177592-121229309 | OK     | 5.14979  | 5.90708  |
| Zbtb40        | chr4:136979731-137048695  | OK     | 1.66825  | 1.91351  |
| Ggnbp2        | chr11:84832360-84870738   | OK     | 30.6334  | 35.1368  |
| Adarb1        | chr10:77290726-77418273   | OK     | 12.3612  | 14.1784  |
| Psma1         | chr7:114264549-114276116  | OK     | 104.291  | 119.62   |
| Vps8          | chr16:21423117-21644681   | OK     | 12.2813  | 14.0864  |
| Tspan4        | chr7:141475235-141539857  | OK     | 22.3357  | 25.6171  |
| Setdb2        | chr14:59402010-59440877   | OK     | 1.96135  | 2.24942  |
| Cmas          | chr6:142756685-142775714  | OK     | 84.5754  | 96.9854  |
| Mapk6         | chr9:75386781-75410016    | OK     | 8.58969  | 9.84931  |
| Upf1          | chr8:70315774-70353273    | OK     | 18.9944  | 21.7796  |
| Prosc         | chr8:27042554-27056132    | OK     | 10.0668  | 11.5406  |
| St3gal6       | chr16:58470540-58523312   | OK     | 17.4946  | 20.0555  |
| Hira          | chr16:18876749-18970308   | OK     | 8.47409  | 9.71396  |
| Enthd2        | chr11:120090521-120098731 | OK     | 4.11165  | 4.71323  |
| Sssca1        | chr19:5730305-5731732     | OK     | 23.1755  | 26.5663  |
| Atg14         | chr14:47540892-47568434   | OK     | 4.72466  | 5.41494  |
| Zfp942        | chr17:21926962-21962464   | OK     | 4.46471  | 5.11663  |
| Fam32a        | chr8:72219729-72223775    | OK     | 41.6988  | 47.7808  |
| Twistnb       | chr12:33429623-33439380   | OK     | 5.76519  | 6.60559  |
| Apbb1ip       | chr2:22774326-22875653    | NOTEST | 0.279107 | 0.319793 |
| Ubtf          | chr11:102304559-102319096 | OK     | 16.7824  | 19.2285  |
| Snx31         | chr15:36504061-36555572   | NOTEST | 0.133822 | 0.153306 |
| Mroh1         | chr15:76380512-76477269   | OK     | 16.433   | 18.8211  |
| Oas2          | chr5:120730332-120749848  | NOTEST | 0.189177 | 0.216636 |
| Nudt16        | chr9:105129337-105131805  | OK     | 12.4672  | 14.2755  |
| A230046K03Rik | chr10:83543940-83596473   | OK     | 24.4317  | 27.9744  |
| Rapgef6       | chr11:54522844-54699286   | OK     | 16.091   | 18.424   |
| Nqo1          | chr8:107388224-107403205  | OK     | 5.53428  | 6.33605  |
| Dot1l         | chr10:80755205-80794347   | OK     | 2.49638  | 2.85796  |
| Cyp4f16       | chr17:32536628-32551797   | OK     | 2.41699  | 2.76704  |
| Plcg1         | chr2:160731309-160872990  | OK     | 9.86326  | 11.2911  |
| Stoml1        | chr9:58253163-58262524    | OK     | 68.1676  | 78.03    |
| Tfe3          | chrX:7762660-7775202      | OK     | 14.8863  | 17.0381  |
| Zfp661        | chr2:127575532-127584677  | OK     | 1.26049  | 1.44268  |
| Tgfb1i1       | chr7:128246811-128255699  | OK     | 14.2052  | 16.2577  |
| Eif6          | chr2:155819836-155826925  | OK     | 37.8611  | 43.3299  |
| Ppp2r3d       | chr9:124474345-124476862  | OK     | 3.30255  | 3.77948  |
| Sdad1         | chr5:92284009-92310024    | OK     | 6.18687  | 7.08032  |
| Bcl2l13       | chr6:120836229-120892842  | OK     | 15.8111  | 18.0944  |
| Prickle3      | chrX:7657378-7671278      | NOTEST | 0.542589 | 0.620931 |
| Rab9b         | chrX:136858150-136868540  | OK     | 16.538   | 18.9256  |
| Ptpn23        | chr9:110385088-110408210  | OK     | 14.569   | 16.6722  |
| Ndufs4        | chr13:114287794-114388094 | OK     | 41.2598  | 47.2137  |
| Srrd          | chr5:112326368-112343040  | OK     | 5.00609  | 5.72823  |
| Gpd2          | chr2:57237677-57370719    | OK     | 14.9709  | 17.1302  |
| Ccndbp1       | chr2:121008407-121016912  | OK     | 47.8161  | 54.709   |
| Psmg1         | chr16:95979934-95990903   | OK     | 9.08478  | 10.3942  |

|               |                           |        |           |           |
|---------------|---------------------------|--------|-----------|-----------|
| Ist1          | chr8:109614516-109693294  | OK     | 41.0623   | 46.9791   |
| 3110021N24Rik | chr4:108639258-108781904  | NOTEST | 0.15594   | 0.178408  |
| Scaf1         | chr7:45002949-45016249    | OK     | 29.9022   | 34.2058   |
| Aen           | chr7:78895926-78908833    | OK     | 10.1154   | 11.5706   |
| Cyp2c65       | chr19:39061005-39093948   | NOTEST | 0.0419779 | 0.0480116 |
| Bms1          | chr6:118383380-118419417  | OK     | 7.15529   | 8.18306   |
| Wsb2          | chr5:117357304-117378589  | OK     | 64.7668   | 74.0642   |
| Pank2         | chr2:131127411-131604824  | OK     | 9.24552   | 10.572    |
| Btbd1         | chr7:81792073-81829431    | OK     | 15.6141   | 17.8541   |
| Usp45         | chr4:21776269-21837872    | OK     | 16.1569   | 18.4706   |
| Dab2ip        | chr2:35549533-35730994    | OK     | 24.6014   | 28.123    |
| Suds3         | chr5:117091677-117115993  | OK     | 43.1226   | 49.2952   |
| Rpl7          | chr1:16101295-16104433    | OK     | 30.2355   | 34.5618   |
| Arrb1         | chr7:99535485-99606771    | OK     | 66.2211   | 75.696    |
| Ldoc1l        | chr15:84553397-84557823   | OK     | 11.9595   | 13.6685   |
| 9330020H09Rik | chr15:98543210-98570864   | NOTEST | 0.196669  | 0.224764  |
| Mepce         | chr5:137781905-137786701  | OK     | 11.4439   | 13.0776   |
| Tuba1a        | chr15:98949846-98953501   | OK     | 1159.63   | 1325.16   |
| Cpe           | chr8:64592550-64693040    | OK     | 509.322   | 582.014   |
| Cby1          | chr15:79659226-79667660   | OK     | 24.78     | 28.3157   |
| Lrg1          | chr17:56119677-56121946   | OK     | 1.72171   | 1.96732   |
| Scn5a         | chr9:119483407-119579016  | OK     | 1.646     | 1.88078   |
| Nfs1          | chr2:156123636-156145794  | OK     | 21.3794   | 24.4281   |
| Ccdc137       | chr11:120458128-120467600 | OK     | 10.2525   | 11.7143   |
| Qsox2         | chr2:26209129-26237420    | OK     | 7.99006   | 9.12816   |
| Tmem203       | chr2:25255438-25256352    | OK     | 7.84291   | 8.95953   |
| Zfp764        | chr7:127403667-127406822  | OK     | 2.0615    | 2.35487   |
| Osbpl7        | chr11:97050819-97068904   | OK     | 4.14626   | 4.73623   |
| Herc4         | chr10:63243796-63317881   | OK     | 8.06408   | 9.21091   |
| Hoxa3         | chr6:52169061-52213597    | OK     | 0.902394  | 1.03071   |
| Ptk2          | chr15:73205104-73423191   | OK     | 10.6198   | 12.1296   |
| Rabac1        | chr7:24969749-24972728    | OK     | 312.621   | 357.042   |
| Pisd-ps1      | chr11:3124020-3193463     | OK     | 1.27331   | 1.45423   |
| Nrxn1         | chr17:90033643-91092802   | OK     | 33.6484   | 38.4268   |
| Rnf32         | chr5:29195992-29225524    | OK     | 2.7465    | 3.13645   |
| Rnf180        | chr13:105147493-105293014 | OK     | 2.45578   | 2.80427   |
| Gm20939       | chr17:94864917-94878321   | OK     | 1.15396   | 1.31751   |
| Serinc3       | chr2:163623272-163645800  | OK     | 171.196   | 195.458   |
| Gppb1         | chr13:111425679-111490041 | OK     | 24.3489   | 27.7979   |
| Erf           | chr7:25242559-25250758    | OK     | 9.93301   | 11.3394   |
| 35854         | chr17:33685691-33718677   | OK     | 74.5072   | 85.0567   |
| Sirt1         | chr10:63319004-63339035   | OK     | 3.58452   | 4.09199   |
| Rpusd2        | chr2:119034789-119042197  | OK     | 1.7385    | 1.98448   |
| Preli1        | chr13:55322054-55329730   | OK     | 100.286   | 114.467   |
| Psma4         | chr9:54950256-54958030    | OK     | 33.7099   | 38.476    |
| Eif2a         | chr3:58521970-58557501    | OK     | 22.3259   | 25.4815   |
| Dkc1          | chrX:75095853-75130949    | OK     | 8.54499   | 9.75166   |
| Zfp316        | chr5:143249694-143270022  | OK     | 3.57646   | 4.08126   |
| Rad50         | chr11:53649518-53707319   | OK     | 5.60249   | 6.39313   |
| Zfp445        | chr9:122848909-122866006  | OK     | 21.2478   | 24.246    |
| Nkap          | chrX:37126762-37168842    | OK     | 5.05591   | 5.76933   |
| Dut           | chr2:125247247-125259049  | OK     | 8.68314   | 9.90799   |
| Mynn          | chr3:30602086-30619873    | OK     | 3.31255   | 3.77951   |

|               |                           |        |            |            |
|---------------|---------------------------|--------|------------|------------|
| Cops5         | chr1:10024599-10038159    | OK     | 88.1684    | 100.579    |
| E130307A14Rik | chr10:39612933-39732007   | OK     | 3.28413    | 3.74618    |
| Zc3h10        | chr10:128543564-128547744 | OK     | 5.33887    | 6.08981    |
| Tmem134       | chr19:4125959-4132307     | OK     | 13.7096    | 15.6375    |
| Rad18         | chr6:112619850-112696670  | OK     | 2.90374    | 3.31202    |
| Trak1         | chr9:121366957-121474918  | OK     | 40.0964    | 45.7235    |
| Psmc1         | chr12:100112330-100123364 | OK     | 82.9301    | 94.557     |
| Srsf3         | chr17:29032659-29043372   | OK     | 24.3703    | 27.7867    |
| Stag1         | chr9:100643622-100958544  | OK     | 5.0371     | 5.74312    |
| Plrg1         | chr3:83055537-83072291    | OK     | 26.3491    | 30.0344    |
| Gusb          | chr5:129989020-130002828  | OK     | 8.35349    | 9.52168    |
| Fdx1l         | chr9:21067513-21092008    | OK     | 22.2353    | 25.3439    |
| Ercc4         | chr16:13109735-13152009   | OK     | 4.11886    | 4.69386    |
| Secisbp2      | chr13:51651713-51683646   | OK     | 3.06667    | 3.49466    |
| Lsm14b        | chr2:180024986-180035461  | OK     | 31.4106    | 35.794     |
| Acot9         | chrX:155262499-155297507  | OK     | 15.9814    | 18.2096    |
| Dynlrb2       | chr8:116505014-116515915  | NOTEST | 0.56291    | 0.641381   |
| Ywhae         | chr11:75732886-75765841   | OK     | 447.401    | 509.764    |
| Esyt2         | chr12:116281221-116373098 | OK     | 20.0217    | 22.8121    |
| D19Bwg1357e   | chr19:27388701-27429820   | OK     | 14.0003    | 15.9514    |
| Camsap3       | chr8:3587449-3609075      | OK     | 9.35854    | 10.6623    |
| Zmat2         | chr18:36793922-36799660   | OK     | 53.3643    | 60.7836    |
| Igtp          | chr11:58199555-58207592   | OK     | 10.9418    | 12.463     |
| Shcbp1l       | chr1:153425208-153452574  | NOTEST | 0.115835   | 0.131937   |
| Mrpl52        | chr14:54426908-54429750   | OK     | 52.677     | 59.9923    |
| Fam216a       | chr5:122364583-122371963  | OK     | 16.14      | 18.3812    |
| D15Ert621e    | chr15:58415467-58457801   | OK     | 29.0526    | 33.0852    |
| Phf21a        | chr2:92184181-92364666    | OK     | 3.63375    | 4.1374     |
| Atp2c1        | chr9:105411361-105521257  | OK     | 47.6263    | 54.2248    |
| Sfxn1         | chr13:54071844-54108345   | OK     | 13.954     | 15.8861    |
| Nat10         | chr2:103721258-103761250  | OK     | 5.96074    | 6.7859     |
| Arhgap36      | chrX:49470449-49500250    | OK     | 11.1877    | 12.7355    |
| Atp13a1       | chr8:69791162-69807748    | OK     | 10.0379    | 11.4249    |
| Psmg4         | chr13:34162963-34178172   | OK     | 10.9132    | 12.4211    |
| Isoc2b        | chr7:4844959-4866179      | OK     | 3.66806    | 4.17361    |
| Zfr2          | chr10:81233162-81252123   | OK     | 9.95643    | 11.3279    |
| Prpf18        | chr2:4622166-4652086      | OK     | 16.046     | 18.2561    |
| Sharpin       | chr15:76347039-76351110   | OK     | 21.6811    | 24.6672    |
| Zmym2         | chr14:56887794-56962579   | OK     | 14.5501    | 16.5536    |
| Mrpl51        | chr6:125192199-125194392  | OK     | 20.4078    | 23.2164    |
| Cherp         | chr8:72443879-72475233    | OK     | 10.4261    | 11.8602    |
| Dph1          | chr11:75175942-75190483   | OK     | 8.10077    | 9.21397    |
| Kif17         | chr4:138262250-138301973  | OK     | 1.03088    | 1.17247    |
| Zfp677        | chr17:21383747-21399265   | OK     | 1.37131    | 1.55946    |
| Csrp2bp       | chr2:144368982-144407675  | OK     | 8.47365    | 9.63573    |
| Ccdc25        | chr14:65837301-65866604   | OK     | 21.891     | 24.8931    |
| Vars2         | chr17:35655634-35667592   | OK     | 5.5147     | 6.27054    |
| Slc4a1ap      | chr5:31526994-31554038    | OK     | 14.1241    | 16.0597    |
| Pex14         | chr4:148960534-149099812  | OK     | 27.7705    | 31.5706    |
| Acd           | chr8:105690905-105701095  | OK     | 10.2115    | 11.6085    |
| Ly6c1         | chr15:75044017-75048837   | OK     | 26.3012    | 29.8987    |
| Gm19434       | chr6:135188479-135194959  | NOTEST | 0.16655    | 0.18932    |
| Padi3         | chr4:140785368-140810648  | NOTEST | 0.00600347 | 0.00682422 |

|               |                           |        |           |           |
|---------------|---------------------------|--------|-----------|-----------|
| Dph2          | chr4:117888642-117892003  | OK     | 4.8119    | 5.46892   |
| Tdp1          | chr12:99884514-99955216   | OK     | 4.12211   | 4.68452   |
| Ddx25         | chr9:35541847-35558470    | OK     | 19.8389   | 22.5439   |
| Ly6a          | chr15:74994876-74998031   | OK     | 18.3379   | 20.8382   |
| Uba52         | chr8:70508265-70510367    | OK     | 23.4447   | 26.6403   |
| Actn4         | chr7:28881655-28962280    | OK     | 52.448    | 59.589    |
| Diexf         | chr1:193104402-193130251  | OK     | 2.79369   | 3.17399   |
| Tmem38a       | chr8:72572102-72587284    | OK     | 42.086    | 47.8114   |
| Dync1li1      | chr9:114688830-114723777  | OK     | 104.219   | 118.396   |
| Med22         | chr2:26905266-26910642    | OK     | 16.835    | 19.1244   |
| Snrpe         | chr1:133603870-133610280  | OK     | 16.1595   | 18.3565   |
| Mboat7        | chr7:3677788-3693525      | OK     | 20.6834   | 23.4952   |
| Foxj2         | chr6:122820183-122845366  | OK     | 7.08132   | 8.04361   |
| Zfp606        | chr7:12478304-12496235    | OK     | 1.9669    | 2.23412   |
| Apopt1        | chr12:111713268-111755055 | OK     | 13.8702   | 15.7499   |
| Zfp280c       | chrX:48541625-48594452    | OK     | 3.73353   | 4.23867   |
| 4921507P07Rik | chr6:50566642-50596590    | NOTEST | 0.19212   | 0.218099  |
| Kat5          | chr19:5603013-5610094     | OK     | 30.621    | 34.7572   |
| Rpia          | chr6:70765719-70792175    | OK     | 5.28581   | 5.99973   |
| Lsm1          | chr8:25785590-25803975    | OK     | 5.53742   | 6.28504   |
| Zfp689        | chr7:127442135-127449158  | OK     | 0.995752  | 1.13004   |
| Plcd4         | chr1:74409383-74588028    | OK     | 21.2393   | 24.1024   |
| Zfp619        | chr7:39517765-39540415    | NOTEST | 0.631275  | 0.716322  |
| Ubl7          | chr9:57910985-57929968    | OK     | 33.5579   | 38.0766   |
| Pycl          | chr15:75916462-75921560   | OK     | 8.7976    | 9.98148   |
| Calcoco1      | chr15:102706776-102722178 | OK     | 15.1556   | 17.195    |
| Dlgap3        | chr4:127169270-127237022  | OK     | 20.6137   | 23.3876   |
| Tmem214       | chr5:30869646-30877467    | OK     | 13.1272   | 14.8925   |
| Polr2e        | chr10:79697304-80369637   | OK     | 25.5793   | 29.0189   |
| Zfp105        | chr9:122923077-122931028  | OK     | 2.03882   | 2.31282   |
| Tsc1          | chr2:28641232-28691172    | OK     | 8.52663   | 9.6723    |
| Clip4         | chr17:71769690-71864210   | OK     | 29.5971   | 33.5737   |
| Snap47        | chr11:59407149-59449956   | OK     | 97.8968   | 111.035   |
| Pnpo          | chr11:96937815-96944019   | OK     | 15.0343   | 17.0506   |
| Them4         | chr3:94310131-94332532    | OK     | 18.2879   | 20.7401   |
| Zfp458        | chr13:67254917-67269068   | OK     | 1.44926   | 1.64326   |
| Nars2         | chr7:96951526-97064757    | OK     | 4.2683    | 4.83921   |
| Akirin1       | chr4:123735194-123750299  | OK     | 45.3731   | 51.4392   |
| Trim69        | chr2:122120107-122186189  | NOTEST | 0.0110669 | 0.0125462 |
| Rbm15         | chr3:107326109-107333289  | OK     | 2.53693   | 2.87551   |
| Ypel5         | chr17:72836703-72851195   | OK     | 66.5307   | 75.4091   |
| Acot8         | chr2:164786020-164804881  | OK     | 6.93394   | 7.85871   |
| Mctp2         | chr7:72077829-72306595    | OK     | 7.68094   | 8.70522   |
| Mlc1          | chr15:88955883-88978553   | OK     | 14.7972   | 16.7704   |
| Clpp          | chr17:56990263-56996371   | OK     | 17.4654   | 19.7933   |
| Stk35         | chr2:129798368-129832285  | OK     | 6.02395   | 6.82569   |
| Tiparp        | chr3:65527484-65555518    | OK     | 10.5919   | 12.0015   |
| Kdm4c         | chr4:74242496-74405864    | OK     | 5.61177   | 6.35729   |
| Eef2k         | chr7:120842830-120907219  | OK     | 6.6529    | 7.53662   |
| Ushbp1        | chr8:71384273-71395801    | OK     | 1.69485   | 1.91993   |
| Ubn1          | chr16:5050067-5086285     | OK     | 8.58644   | 9.72618   |
| Tmem55b       | chr14:50924948-50930849   | OK     | 35.64     | 40.3703   |
| D230025D16Rik | chr8:105225187-105255153  | OK     | 12.3996   | 14.0437   |

|               |                           |        |           |            |
|---------------|---------------------------|--------|-----------|------------|
| 6330549D23Rik | chr3:96601132-96629819    | OK     | 0.744256  | 0.84292    |
| Gm715         | chrX:60548007-60549216    | OK     | 1.40971   | 1.59655    |
| Prdx2         | chr8:84969647-84974313    | OK     | 215.868   | 244.442    |
| Zbtb8a        | chr4:129353631-129378028  | OK     | 2.29142   | 2.59388    |
| Ifit3         | chr19:34583528-34588982   | OK     | 7.41635   | 8.39507    |
| L2hgdh        | chr12:69690435-69724874   | OK     | 1.71246   | 1.9382     |
| Pydc4         | chr1:173591956-173599274  | NOTEST | 0.092814  | 0.105047   |
| 37680         | chr2:60209935-60248385    | OK     | 13.8936   | 15.7241    |
| Maf1          | chr15:76351293-76354378   | OK     | 23.0909   | 26.1285    |
| Ddx5          | chr11:106780355-106788494 | OK     | 137.68    | 155.788    |
| Pdf           | chr8:107046289-107048614  | OK     | 15.4495   | 17.4806    |
| Kat8          | chr7:127912516-127930113  | OK     | 9.73522   | 11.0135    |
| Naa35         | chr13:59585332-59634781   | OK     | 18.7289   | 21.1878    |
| Aff4          | chr11:53350766-53421830   | OK     | 27.3332   | 30.9128    |
| Smg1          | chr7:118131311-118243637  | OK     | 7.6077    | 8.60392    |
| Gpr85         | chr6:13835073-13839848    | OK     | 4.73239   | 5.35181    |
| Gm5126        | chrX:102932046-102934223  | NOTEST | 0.668699  | 0.756219   |
| Nsfl1c        | chr2:151494181-151511310  | OK     | 31.5317   | 35.6557    |
| Ilf3          | chr9:21367870-21411720    | OK     | 17.0813   | 19.3148    |
| Ppp1r12a      | chr10:108162399-108277575 | OK     | 14.3495   | 16.2252    |
| Gm9199        | chr14:73025602-73026890   | NOTEST | 0.0148544 | 0.0167952  |
| Add1          | chr5:34573713-34632305    | OK     | 107.088   | 121.065    |
| Tulp3         | chr6:128321160-128355851  | OK     | 8.71288   | 9.85006    |
| Skap1         | chr11:96464590-96759622   | NOTEST | 0.129373  | 0.146252   |
| Mettl2        | chr11:105126424-105141146 | OK     | 5.01204   | 5.66579    |
| Srd5a3        | chr5:76140272-76155503    | OK     | 19.672    | 22.237     |
| Nup155        | chr15:8109312-8159859     | OK     | 6.37076   | 7.20142    |
| Rai14         | chr15:10568977-10714631   | OK     | 3.72772   | 4.21342    |
| Prr33         | chr7:142460811-142516009  | NOTEST | 0.0188619 | 0.0213181  |
| Thoc2         | chrX:41794993-41911901    | OK     | 5.87845   | 6.64313    |
| Hnrnpl        | chr7:28810889-28822266    | OK     | 56.96     | 64.369     |
| Ric8b         | chr10:84917612-85018337   | OK     | 12.8448   | 14.5139    |
| Mettl16       | chr11:74770862-74818692   | OK     | 9.94993   | 11.2426    |
| Cebpb         | chr2:167688914-167690432  | OK     | 4.69946   | 5.30988    |
| Ola1          | chr2:73092800-73214447    | OK     | 52.7145   | 59.5606    |
| 3010026O09Rik | chr11:50174850-50200115   | OK     | 8.91718   | 10.0752    |
| Immnp2l       | chr12:41024089-41955588   | OK     | 3.4656    | 3.91549    |
| Ybx3          | chr6:131364857-131388450  | OK     | 16.313    | 18.4281    |
| Rbm8a         | chr3:96629927-96633791    | OK     | 14.331    | 16.1885    |
| Bcam          | chr7:19756137-19770532    | OK     | 282.193   | 318.736    |
| Lim2          | chr7:43430100-43435991    | NOTEST | 0.0517776 | 0.0584813  |
| Rrm2b         | chr15:37923952-37961055   | OK     | 15.3991   | 17.3924    |
| Zmat1         | chrX:134971372-135009209  | OK     | 2.96746   | 3.35149    |
| Dnajc8        | chr4:132535558-132553742  | OK     | 37.4941   | 42.3453    |
| Cyth1         | chr11:118164165-118248592 | OK     | 19.8102   | 22.3717    |
| Stat5a        | chr11:100859350-100885169 | OK     | 2.15841   | 2.43749    |
| Dll4          | chr2:119321198-119335666  | OK     | 1.21945   | 1.37701    |
| Wipi2         | chr5:142629583-142669370  | OK     | 40.2021   | 45.3924    |
| Adam25        | chr8:40752207-40756176    | NOTEST | 0.0066561 | 0.00751516 |
| Diap3         | chr14:86656322-87141114   | OK     | 2.9472    | 3.32749    |
| Tbc1d32       | chr10:56014293-56228689   | OK     | 4.18413   | 4.72401    |
| Pdia3         | chr2:121413901-121438686  | OK     | 156.427   | 176.608    |
| Sp100         | chr1:85650049-85709448    | OK     | 1.91953   | 2.16701    |



|               |                           |        |            |            |
|---------------|---------------------------|--------|------------|------------|
| Psma7         | chr2:180036366-180042464  | OK     | 138.787    | 156.677    |
| Rfesd         | chr13:76001534-76018712   | OK     | 7.25147    | 8.1851     |
| Pik3c3        | chr18:30272895-30348120   | OK     | 29.5476    | 33.3518    |
| Chd9          | chr8:90828834-91054508    | OK     | 6.31622    | 7.12936    |
| Gira1         | chr11:55514238-55608198   | NOTEST | 0.0161734  | 0.0182554  |
| Tmem160       | chr7:16452778-16455490    | OK     | 41.8444    | 47.2307    |
| Gucy2d        | chr7:98440415-98477478    | NOTEST | 0.00469068 | 0.00529429 |
| Cep89         | chr7:35397092-35438684    | OK     | 2.77624    | 3.1334     |
| Chchd6        | chr6:89383145-89595652    | OK     | 27.6751    | 31.2349    |
| Lrit1         | chr14:37054829-37064938   | NOTEST | 0.00391028 | 0.00441287 |
| Zswim7        | chr11:62267223-62281395   | OK     | 10.5258    | 11.8782    |
| Matr3         | chr18:35562157-35592045   | OK     | 65.4669    | 73.8764    |
| Tmem180       | chr19:46356879-46375254   | OK     | 10.1861    | 11.4944    |
| Eef2          | chr10:81176630-81182509   | OK     | 370.339    | 417.887    |
| Zbtb4         | chr11:69765911-69784026   | OK     | 31.8915    | 35.9853    |
| A630072M18Rik | chr5:20893023-20956398    | OK     | 1.38489    | 1.5626     |
| Zfp639        | chr3:32510549-32520833    | OK     | 10.6749    | 12.0443    |
| Hipk3         | chr2:104426481-104494489  | OK     | 22.0866    | 24.9188    |
| Msmo1         | chr8:64718144-64733578    | OK     | 122.832    | 138.569    |
| Cox11         | chr11:90638183-90687601   | OK     | 7.08133    | 7.98838    |
| Gm4827        | chr16:50019657-50072852   | NOTEST | 0.113689   | 0.12825    |
| Lrrtm3        | chr10:63430097-65003667   | OK     | 3.3068     | 3.73012    |
| Irf2bpl       | chr12:86880702-86884814   | OK     | 23.3236    | 26.3093    |
| Ggn           | chr7:29170209-29173933    | NOTEST | 0.40091    | 0.452227   |
| Keap1         | chr9:21229729-21239332    | OK     | 22.2201    | 25.0637    |
| Jmjd1c        | chr10:67127257-67256326   | OK     | 5.96568    | 6.7284     |
| Taf8          | chr17:47488049-47502287   | OK     | 4.91453    | 5.54269    |
| Fam149a       | chr8:45336714-45382291    | OK     | 7.35785    | 8.29771    |
| Trim26        | chr17:36837145-36859398   | OK     | 12.3814    | 13.9622    |
| Chchd1        | chr14:20702011-20704425   | OK     | 32.5118    | 36.6603    |
| Slc17a5       | chr9:78536486-78588045    | OK     | 12.8474    | 14.4857    |
| D10Wsu102e    | chr10:83360220-83368835   | OK     | 11.4931    | 12.9571    |
| Sarnp         | chr10:128821770-128877638 | OK     | 2.82327    | 3.18288    |
| Syn1          | chrX:20848542-20920918    | OK     | 173.587    | 195.695    |
| H3f3a         | chr1:180802567-180813603  | OK     | 17.5045    | 19.7338    |
| Apaf1         | chr10:90989310-91082743   | OK     | 2.15558    | 2.42984    |
| Ipp           | chr4:116507548-116538235  | OK     | 4.71629    | 5.31575    |
| Katnb1        | chr8:95081200-95142540    | OK     | 11.9457    | 13.4637    |
| Sdf2l1        | chr16:17130137-17132383   | OK     | 9.64682    | 10.8725    |
| Amacr         | chr15:10981755-10996624   | OK     | 6.02753    | 6.79178    |
| Phlda2        | chr7:143501547-143502524  | OK     | 0.975448   | 1.09912    |
| Tmem192       | chr8:64947184-64969037    | OK     | 17.3915    | 19.5965    |
| Mecr          | chr4:131843470-131867787  | OK     | 17.9416    | 20.2145    |
| Pink1         | chr4:138313409-138326296  | OK     | 141.257    | 159.145    |
| Anapc16       | chr10:59987908-60099990   | OK     | 35.9023    | 40.4482    |
| Nup88         | chr11:70844760-70969973   | OK     | 25.5769    | 28.8146    |
| Slc35a5       | chr16:45139572-45158673   | OK     | 28.0182    | 31.5643    |
| Sec22c        | chr9:121680044-121705029  | OK     | 9.68632    | 10.9118    |
| Ldlr          | chr9:21723575-21749918    | OK     | 63.3295    | 71.335     |
| D16Ert472e    | chr16:78540335-78576688   | NOTEST | 0.403096   | 0.454038   |
| Clnk          | chr5:38706456-38876693    | NOTEST | 0.0139522  | 0.0157113  |
| Triqk         | chr4:12906836-12981485    | OK     | 20.0727    | 22.6032    |
| Bpnt1         | chr1:185332158-185357769  | OK     | 36.4623    | 41.0529    |

|               |                           |        |           |           |
|---------------|---------------------------|--------|-----------|-----------|
| Vwce          | chr19:10634232-10665210   | NOTEST | 0.0109156 | 0.0122892 |
| Sqle          | chr15:59315091-59331193   | OK     | 111.848   | 125.914   |
| Tada3         | chr6:113366656-113377520  | OK     | 15.8106   | 17.7978   |
| Tcerg1        | chr18:42511486-42575785   | OK     | 17.0339   | 19.174    |
| Npr2          | chr4:43631934-43651240    | OK     | 40.7137   | 45.8261   |
| Ttc7          | chr17:87282885-87381770   | OK     | 1.55357   | 1.74863   |
| Vps33b        | chr7:80269654-80291579    | OK     | 9.37333   | 10.5498   |
| Prune         | chr3:95253673-95282076    | OK     | 21.3247   | 24.0004   |
| Hhex          | chr19:37434840-37440731   | NOTEST | 0.698535  | 0.786168  |
| Gopc          | chr10:52337023-52382124   | OK     | 20.3589   | 22.9129   |
| Ppp1r3b       | chr8:35375740-35388137    | OK     | 1.37453   | 1.54679   |
| Bcl2l1        | chr2:152754172-152831728  | OK     | 26.9076   | 30.2785   |
| Necab2        | chr8:119446718-119472635  | OK     | 7.69089   | 8.65434   |
| Cep192        | chr18:67800106-67885170   | OK     | 0.81205   | 0.913559  |
| 1810013L24Rik | chr16:8830099-8858924     | OK     | 28.4315   | 31.9846   |
| Atg101        | chr15:101284300-101290934 | OK     | 25.3687   | 28.5383   |
| Blm           | chr7:80454992-80535119    | OK     | 1.86708   | 2.10021   |
| Zfp655        | chr5:145231714-145247306  | OK     | 11.2265   | 12.6273   |
| Rnaseh2b      | chr14:62332104-62372992   | OK     | 6.14263   | 6.90891   |
| Ccser2        | chr14:36874935-36968764   | OK     | 98.1992   | 110.444   |
| Col4a3bp      | chr13:96542734-96640167   | OK     | 41.7067   | 46.9056   |
| Rragc         | chr4:123917432-123936997  | OK     | 54.8212   | 61.6535   |
| Ncf4          | chr15:78244810-78262580   | NOTEST | 0.237661  | 0.267269  |
| Nudt18        | chr14:70577846-70582571   | OK     | 8.44751   | 9.49959   |
| Tmem50b       | chr16:91574507-91597680   | OK     | 91.2629   | 102.628   |
| Topors        | chr4:40259605-40270221    | OK     | 5.58406   | 6.27863   |
| 2610307P16Rik | chr13:28460033-28885422   | OK     | 1.6876    | 1.8975    |
| Zfp933        | chr4:147822985-147848375  | OK     | 2.9234    | 3.28685   |
| Cd72          | chr4:43442276-43454626    | NOTEST | 0.576107  | 0.647695  |
| Gprasp1       | chrX:135742691-135803468  | OK     | 70.6598   | 79.4319   |
| Tep1          | chr14:50824060-50870554   | OK     | 6.47858   | 7.28125   |
| Baiap2        | chr11:119943091-120006782 | OK     | 6.61844   | 7.43827   |
| Mfsd9         | chr1:40772039-40790657    | OK     | 5.65634   | 6.35689   |
| Zeb1          | chr18:5491500-5775468     | OK     | 14.516    | 16.3135   |
| Map3k5        | chr10:19934525-20142750   | OK     | 9.58847   | 10.7751   |
| 3110021A11Rik | chr6:119848192-119849016  | NOTEST | 0.0555202 | 0.0623903 |
| Zfp781        | chr10:81901910-81930480   | NOTEST | 0.471091  | 0.52937   |
| Ippk          | chr13:49421222-49463060   | OK     | 5.43914   | 6.1118    |
| Stap2         | chr17:55997075-56005606   | NOTEST | 0.606414  | 0.681404  |
| Xrn1          | chr9:95954759-96053029    | OK     | 2.8756    | 3.23084   |
| Tax1bp1       | chr6:52713728-52766779    | OK     | 83.9055   | 94.2698   |
| Tmem14c       | chr13:41016249-41022582   | OK     | 59.7269   | 67.1034   |
| Adprh         | chr16:38445398-38452689   | OK     | 82.4026   | 92.5684   |
| Tbc1d25       | chrX:8154471-8176181      | OK     | 8.55344   | 9.60828   |
| Clip3         | chr7:30291752-30308367    | OK     | 168.289   | 189.036   |
| 5430427O19Rik | chrX:85870272-85891499    | NOTEST | 0.0627896 | 0.0705247 |
| 2510039O18Rik | chr4:147940894-147947314  | OK     | 15.5799   | 17.4975   |
| Smchd1        | chr17:71344492-71475343   | OK     | 6.00398   | 6.74273   |
| Tnip1         | chr11:54910786-54962940   | OK     | 17.7098   | 19.8879   |
| Csnk1g1       | chr9:65909009-66045014    | OK     | 6.96077   | 7.8164    |
| Tra2b         | chr16:22245740-22265929   | OK     | 15.6631   | 17.5876   |
| Ascc1         | chr10:59987908-60099990   | OK     | 15.2974   | 17.1758   |
| Zcchc14       | chr8:121598702-121651933  | OK     | 4.6348    | 5.20386   |

|               |                           |        |           |           |
|---------------|---------------------------|--------|-----------|-----------|
| Psmf1         | chr2:151716061-151741293  | OK     | 19.2122   | 21.5708   |
| Bin3          | chr14:70100144-70153791   | OK     | 11.2934   | 12.6782   |
| AU023762      | chr9:113496745-113587152  | NOTEST | 0.0797027 | 0.0894678 |
| Ubr1          | chr2:120850655-120970715  | OK     | 14.1898   | 15.9278   |
| Gm21284       | chr6:83543205-83588126    | NOTEST | 0.197351  | 0.221508  |
| Rc3h1         | chr1:160906410-160974976  | OK     | 16.196    | 18.1774   |
| D030047H15Rik | chr7:4074124-4136926      | NOTEST | 0.0718367 | 0.0806248 |
| Il7           | chr3:7572076-7613427      | OK     | 1.96826   | 2.209     |
| Serpina3n     | chr12:104406707-104414329 | OK     | 85.2516   | 95.6651   |
| Hsf2          | chr10:57486384-57513143   | OK     | 13.8681   | 15.5611   |
| B230217C12Rik | chr11:97840779-97843043   | OK     | 10.6263   | 11.9233   |
| Lypd1         | chr1:125676995-125912214  | OK     | 7.31812   | 8.21079   |
| Taf11         | chr17:27901127-27907724   | OK     | 20.7953   | 23.3312   |
| Brms1l        | chr12:55836365-55869735   | OK     | 32.3412   | 36.2849   |
| Mmaa          | chr8:79266423-79294956    | OK     | 3.9292    | 4.40731   |
| Wtap          | chr17:12966798-12992539   | OK     | 17.4457   | 19.5684   |
| Zbtb7c        | chr18:75820177-76148564   | OK     | 1.11598   | 1.25168   |
| Kidins220     | chr12:24974931-25059697   | OK     | 63.9516   | 71.7148   |
| Suz12         | chr11:79993105-80034123   | OK     | 16.9077   | 18.9588   |
| Fpgt          | chr3:155084918-155093378  | OK     | 8.23916   | 9.23857   |
| Ppp2r5d       | chr17:46674550-46705002   | OK     | 23.2257   | 26.0396   |
| Pcgf3         | chr5:108461331-108503099  | OK     | 14.645    | 16.4185   |
| Zfp335        | chr2:164891891-164911750  | OK     | 4.03153   | 4.5188    |
| Rictor        | chr15:6708380-6800400     | OK     | 7.38079   | 8.27241   |
| Rsl1d1        | chr16:11193036-11203292   | OK     | 21.0744   | 23.6198   |
| Exosc5        | chr7:25659152-25668032    | OK     | 12.7766   | 14.3193   |
| N6amt2        | chr14:57549597-57571569   | OK     | 19.8266   | 22.2198   |
| 37864         | chr9:25252438-25308571    | OK     | 118.975   | 133.334   |
| Brd3          | chr2:27445580-27475673    | OK     | 7.11815   | 7.97507   |
| Gnai3         | chr3:108107274-108146152  | OK     | 30.6773   | 34.3675   |
| Cdk5          | chr5:24418241-24423530    | OK     | 50.3012   | 56.3496   |
| BC051142      | chr17:34398819-34460734   | NOTEST | 0.392387  | 0.439489  |
| Cnpy4         | chr5:138187534-138193894  | OK     | 8.14638   | 9.12367   |
| Cdk9          | chr2:32705781-32712784    | OK     | 11.4524   | 12.826    |
| Paxip1        | chr5:27740080-27791550    | OK     | 4.63438   | 5.18986   |
| Brd4          | chr17:32196271-32284133   | OK     | 19.1297   | 21.4226   |
| Tmod2         | chr9:75565621-75611325    | OK     | 65.4681   | 73.3118   |
| Slc18b1       | chr10:23796985-23827968   | OK     | 5.3351    | 5.97363   |
| Ubl5          | chr9:20637748-20646789    | OK     | 34.4278   | 38.5437   |
| Thap1         | chr8:26158168-26164151    | OK     | 4.1987    | 4.70045   |
| Zfx           | chrX:94074630-94123407    | OK     | 3.48981   | 3.90682   |
| Nucb1         | chr7:45473562-45522603    | OK     | 64.0746   | 71.7252   |
| Ptp4a3        | chr15:73723144-73758766   | OK     | 8.60902   | 9.63668   |
| Csnk2a2       | chr8:95446095-95488820    | OK     | 8.06183   | 9.02342   |
| Stx7          | chr10:24149316-24188959   | OK     | 80.1927   | 89.7497   |
| Snx32         | chr19:5495277-5510489     | OK     | 36.5729   | 40.9299   |
| Cd2bp2        | chr7:127191659-127196077  | OK     | 22.1973   | 24.8406   |
| Morn1         | chr4:155086576-155145507  | OK     | 1.18132   | 1.32193   |
| Farsa         | chr8:84856985-84869257    | OK     | 16.2082   | 18.1369   |
| Fam92a        | chr4:12153721-12172015    | OK     | 15.8133   | 17.6942   |
| Thsd7a        | chr6:12311607-12749253    | OK     | 13.0239   | 14.5715   |
| A930011G23Rik | chr5:99297243-99729060    | NOTEST | 0.184735  | 0.206676  |
| Dis3l2        | chr1:86703803-87050097    | OK     | 8.53401   | 9.54741   |

|          |                           |        |          |          |
|----------|---------------------------|--------|----------|----------|
| Tctn3    | chr19:40596445-40612215   | OK     | 3.23976  | 3.62397  |
| Dpp7     | chr2:25352289-25356332    | OK     | 20.1563  | 22.5448  |
| Papd5    | chr8:88199212-88259722    | OK     | 7.2419   | 8.09972  |
| Mat2b    | chr11:40679313-40695203   | OK     | 54.7416  | 61.2256  |
| Thumpd3  | chr6:113046326-113077244  | OK     | 16.9824  | 18.9937  |
| Dr1      | chr5:108268896-108280521  | OK     | 15.9702  | 17.8614  |
| Kmt2a    | chr9:44803354-44881274    | OK     | 7.15575  | 8.00309  |
| Rnf41    | chr10:128411615-128441441 | OK     | 35.9172  | 40.1656  |
| Tceal1   | chrX:136708064-136709866  | OK     | 23.3861  | 26.1509  |
| Skp2     | chr15:9111981-9197450     | NOTEST | 0.583822 | 0.652802 |
| Cox6b2   | chr7:4751791-4753094      | OK     | 1.92834  | 2.15599  |
| Jakmip2  | chr18:43531407-43687773   | OK     | 18.8406  | 21.0641  |
| Maats1   | chr16:38297753-38341860   | NOTEST | 0.241022 | 0.26946  |
| Brd7     | chr8:88332310-88362191    | OK     | 11.2726  | 12.6023  |
| Zfp324   | chr7:12965863-12973822    | OK     | 2.80472  | 3.1355   |
| Zswim4   | chr8:84210941-84237042    | OK     | 7.1589   | 8.00185  |
| Utp23    | chr15:51877440-51884622   | OK     | 1.96687  | 2.19825  |
| Depdc7   | chr2:104721786-104742801  | OK     | 3.84039  | 4.29215  |
| Slc35d1  | chr4:103171717-103214884  | OK     | 3.01711  | 3.37186  |
| Brix1    | chr15:10474778-10485937   | OK     | 5.92955  | 6.62598  |
| Josd2    | chr7:44467979-44471658    | OK     | 22.2125  | 24.8171  |
| Arfip1   | chr3:84496063-84582625    | OK     | 19.4098  | 21.6851  |
| Psm10    | chrX:140948424-140956711  | OK     | 13.8599  | 15.4843  |
| Cep164   | chr9:45766945-45828638    | OK     | 4.13711  | 4.62115  |
| Sod1     | chr16:90220741-90226324   | OK     | 114.357  | 127.724  |
| Foxq1    | chr13:31558169-31560974   | NOTEST | 0.381041 | 0.425562 |
| BC053749 | chr7:30539133-30552272    | NOTEST | 0.720835 | 0.804992 |
| Ergic2   | chr6:148047415-148444352  | OK     | 15.1236  | 16.8892  |
| Rnf8     | chr17:29614830-29641659   | OK     | 13.0628  | 14.5868  |
| Dnajc13  | chr9:104151596-104262930  | OK     | 25.4705  | 28.4399  |
| BC002163 | chr4:123712709-123718186  | OK     | 90.2689  | 100.783  |
| Gmfb     | chr14:46808148-46822242   | OK     | 131.676  | 147.009  |
| Pds5b    | chr5:150673826-150810669  | OK     | 11.2686  | 12.5797  |
| Map3k1   | chr13:111746434-111808983 | OK     | 5.36892  | 5.99352  |
| Gle1     | chr2:29935408-29959432    | OK     | 15.6832  | 17.5069  |
| Slc13a1  | chr6:24088282-24168092    | NOTEST | 0.118667 | 0.132434 |
| Rtn2     | chr7:19282623-19296164    | OK     | 58.8271  | 65.6479  |
| Cox17    | chr16:38346998-38352763   | OK     | 116.871  | 130.42   |
| Ercc5    | chr1:44147743-44181260    | OK     | 6.06323  | 6.76527  |
| Adipor1  | chr1:134415466-134432341  | OK     | 110.2    | 122.951  |
| Cct6a    | chr5:129787355-129846443  | OK     | 109.943  | 122.656  |
| Xrcc6    | chr15:82016368-82040084   | OK     | 6.0985   | 6.80265  |
| Hoxc4    | chr15:103034394-103036852 | OK     | 1.61793  | 1.80469  |
| Shmt2    | chr10:127514938-127522444 | OK     | 9.76235  | 10.8892  |
| Smad2    | chr18:76241700-76311747   | OK     | 10.6988  | 11.9337  |
| Map3k2   | chr18:32163088-32236751   | OK     | 4.25069  | 4.74086  |
| Slc7a8   | chr14:54722214-54781886   | OK     | 9.39304  | 10.4759  |
| Nudcd2   | chr11:40733660-40740046   | OK     | 7.20579  | 8.03648  |
| Pclo     | chr5:14514917-14863459    | OK     | 12.1029  | 13.4973  |
| Cep120   | chr18:53648150-53744547   | OK     | 36.4058  | 40.5985  |
| Dusp3    | chr11:101971143-101984791 | OK     | 55.888   | 62.3179  |
| Inip     | chr4:59769646-59783855    | OK     | 4.75145  | 5.29786  |
| Cxcl12   | chr6:117168534-117181368  | OK     | 14.9249  | 16.6387  |

|               |                           |        |           |           |
|---------------|---------------------------|--------|-----------|-----------|
| Serbp1        | chr6:67266978-67289302    | OK     | 22.7583   | 25.3708   |
| Hist1h2bj     | chr13:22043229-22043658   | OK     | 2.01066   | 2.24146   |
| Cyp4x1        | chr4:115108681-115133977  | OK     | 10.2577   | 11.4345   |
| Gpr173        | chrX:152344645-152368111  | OK     | 5.81871   | 6.48563   |
| Rbm11         | chr16:75592890-75602825   | OK     | 19.0725   | 21.258    |
| 1810032O08Rik | chr11:116671659-116675798 | OK     | 2.23117   | 2.48672   |
| Gtf2h5        | chr17:6079827-6085485     | OK     | 52.0021   | 57.9465   |
| Sp4           | chr12:118231685-118301440 | OK     | 2.84192   | 3.16641   |
| Tbc1d22b      | chr17:29549801-29606808   | OK     | 8.70874   | 9.70297   |
| Cdk5rap2      | chr4:70223023-70410367    | OK     | 5.33208   | 5.94065   |
| Cul2          | chr18:3383224-3436700     | OK     | 28.1539   | 31.3666   |
| Necab1        | chr4:14930640-15149131    | OK     | 32.5568   | 36.2693   |
| Mrps15        | chr4:126046927-126055536  | OK     | 28.7143   | 31.9853   |
| Vopp1         | chr6:57752263-57825125    | OK     | 31.2166   | 34.772    |
| Rnf20         | chr4:49632059-49656886    | OK     | 19.3499   | 21.5512   |
| Rap2a         | chr14:120478460-120507192 | OK     | 27.9039   | 31.0782   |
| Cpt1c         | chr7:44959371-44974851    | OK     | 23.262    | 25.9079   |
| Cr1l          | chr1:195103787-195131570  | OK     | 11.8484   | 13.1951   |
| Prmt3         | chr7:49778357-49858265    | OK     | 19.6696   | 21.9043   |
| Peg3          | chr7:6705959-6730419      | OK     | 39.2361   | 43.6832   |
| Noc3l         | chr19:38788127-38819237   | OK     | 7.44544   | 8.28918   |
| Jak1          | chr4:101069037-101265282  | OK     | 110.31    | 122.805   |
| Zfp275        | chrX:73342619-73359080    | OK     | 7.41436   | 8.25376   |
| Tnk2          | chr16:32644642-32683493   | OK     | 38.1241   | 42.4398   |
| Tex261        | chr6:83770413-83775812    | OK     | 35.6233   | 39.6533   |
| Cnot7         | chr8:40492537-40634792    | OK     | 31.3561   | 34.8992   |
| Sorbs2        | chr8:45507787-45827906    | OK     | 6.6583    | 7.41055   |
| Mlycd         | chr8:119394891-119411088  | OK     | 9.86813   | 10.9829   |
| Heatr6        | chr11:83753636-83783754   | OK     | 7.67926   | 8.54639   |
| Mrps36        | chr13:100735939-100744659 | OK     | 3.39959   | 3.78334   |
| Pmf1          | chr3:88394142-88410316    | OK     | 3.60275   | 4.00941   |
| Fam120c       | chrX:151344222-151474134  | OK     | 7.43058   | 8.26907   |
| Tpr           | chr1:150361310-150466165  | OK     | 20.4117   | 22.7146   |
| Khdrbs3       | chr15:68928419-69093518   | OK     | 25.1625   | 28.0006   |
| Rnf6          | chr5:146209193-146221457  | OK     | 24.5132   | 27.2772   |
| Ttyh3         | chr5:140620577-140649031  | OK     | 18.012    | 20.0422   |
| Mrpl50        | chr4:49512596-49521083    | OK     | 18.8807   | 21.0082   |
| Jak2          | chr19:29251802-29313080   | OK     | 6.34091   | 7.05538   |
| Nat9          | chr11:115182831-115187316 | OK     | 12.068    | 13.427    |
| Ctage5        | chr12:59129745-59190220   | OK     | 26.9155   | 29.9461   |
| Ddx39b        | chr17:35241745-35253707   | OK     | 66.149    | 73.5773   |
| Zfp120        | chr2:150114406-150136678  | OK     | 3.17106   | 3.5271    |
| Fam185a       | chr5:21424902-21482124    | OK     | 5.98308   | 6.65451   |
| Flcn          | chr11:59791407-59810039   | OK     | 7.51551   | 8.35892   |
| Tk2           | chr8:104226690-104248558  | OK     | 14.4075   | 16.022    |
| Rab1b         | chr19:5099206-5106996     | OK     | 97.8157   | 108.759   |
| 2010315B03Rik | chr9:124291803-124312694  | OK     | 5.02941   | 5.59194   |
| Bcas2         | chr3:103171710-103179154  | OK     | 33.4169   | 37.1543   |
| Tagap1        | chr17:6954964-6961156     | OK     | 11.814    | 13.134    |
| Vcp           | chr4:42979963-43000507    | OK     | 84.9336   | 94.4232   |
| Rpn1          | chr6:88084472-88105304    | OK     | 33.0982   | 36.796    |
| Bag4          | chr8:25764538-25785209    | OK     | 9.05976   | 10.0719   |
| Il11          | chr7:4772377-4782857      | NOTEST | 0.0769965 | 0.0855981 |



|               |                          |        |          |           |
|---------------|--------------------------|--------|----------|-----------|
| Atp6v1e1      | chr6:120795243-120822685 | OK     | 261.413  | 290.613   |
| Nrp1          | chr8:128359072-128505475 | OK     | 30.1511  | 33.5178   |
| Mov10         | chr3:104794833-104818563 | OK     | 1.47704  | 1.64188   |
| Brip1         | chr11:86058135-86201193  | NOTEST | 0.084548 | 0.0939825 |
| Tcp11l2       | chr10:84576946-84614355  | OK     | 14.7021  | 16.3426   |
| Rrp7a         | chr15:83100204-83122801  | OK     | 32.7906  | 36.4491   |
| Cenpt         | chr8:105844677-105852008 | OK     | 3.44965  | 3.83445   |
| Zfyve1        | chr12:83546940-83597147  | OK     | 16.9713  | 18.8637   |
| Zfp523        | chr17:28177417-28205886  | OK     | 8.98483  | 9.98637   |
| Afg3l1        | chr8:123477861-123503916 | OK     | 7.59632  | 8.44301   |
| Rnf122        | chr8:31111845-31131473   | OK     | 2.76781  | 3.07618   |
| Hcfc2         | chr10:82699006-82741392  | OK     | 5.96174  | 6.6254    |
| Sgsm3         | chr15:80977764-81190757  | OK     | 12.9495  | 14.3908   |
| Ppapdc1a      | chr7:129257093-129391307 | OK     | 4.43072  | 4.92368   |
| Ripk2         | chr4:16123374-16163498   | OK     | 3.63597  | 4.04049   |
| Klhdc8a       | chr1:132298625-132307357 | OK     | 10.1919  | 11.3254   |
| Psmc4         | chr3:95032690-95042614   | OK     | 88.8769  | 98.7563   |
| Lins          | chr7:66689888-66717256   | OK     | 3.72574  | 4.13983   |
| Rere          | chr4:150281915-150621966 | OK     | 15.2187  | 16.9101   |
| Wdr77         | chr3:105942862-105969760 | OK     | 21.9097  | 24.3424   |
| Cars          | chr7:143557229-143600090 | OK     | 8.43464  | 9.37089   |
| Mrpl40        | chr16:18872017-18876637  | OK     | 20.222   | 22.4665   |
| Phax          | chr18:56525735-56587712  | OK     | 15.3512  | 17.055    |
| Fmn2          | chr1:174501824-174822729 | OK     | 7.73296  | 8.59119   |
| Nupr1         | chr7:126623245-126625470 | OK     | 6.33489  | 7.03783   |
| Chmp1b        | chr18:67088297-67245830  | OK     | 17.563   | 19.5073   |
| 1110034G24Rik | chr2:132690282-132751055 | OK     | 5.67354  | 6.30154   |
| Mcm8          | chr2:132816140-132844188 | OK     | 1.80034  | 1.99955   |
| Klhdc1        | chr12:69241831-69283961  | OK     | 3.95705  | 4.39447   |
| Rab28         | chr5:41624975-41708155   | OK     | 23.911   | 26.5533   |
| Rsbm1         | chr3:103914119-104007491 | OK     | 4.80766  | 5.33871   |
| Fbxo6         | chr4:148145715-148152135 | OK     | 8.54358  | 9.48703   |
| Ptdss2        | chr7:141131285-141156154 | OK     | 19.9884  | 22.1949   |
| Pdik1l        | chr4:134275004-134287846 | OK     | 2.46579  | 2.7378    |
| Vps37a        | chr8:40492537-40634792   | OK     | 7.78525  | 8.64319   |
| Ascl4         | chr10:85928490-85929647  | NOTEST | 0.493135 | 0.547449  |
| Crk           | chr11:75679258-75708428  | OK     | 37.8047  | 41.9666   |
| Rif1          | chr2:52072836-52122381   | OK     | 2.30965  | 2.56384   |
| Polr1d        | chr5:147077345-147111361 | OK     | 39.608   | 43.9631   |
| Lhfp15        | chr17:28575718-28583593  | OK     | 11.1883  | 12.4176   |
| 2900011O08Rik | chr16:13981701-14101494  | OK     | 59.7748  | 66.3395   |
| Nhp2          | chr11:51619772-51635896  | OK     | 22.1678  | 24.6017   |
| Mis12         | chr11:71007439-71027134  | OK     | 11.232   | 12.4651   |
| Eif3m         | chr2:104886323-105017027 | OK     | 10.4362  | 11.5818   |
| 1110038F14Rik | chr15:76948543-76950731  | OK     | 11.7792  | 13.0718   |
| Fnip2         | chr3:79345375-79567679   | OK     | 2.09393  | 2.32365   |
| Ctla2a        | chr13:60934154-60936625  | OK     | 4.21152  | 4.67347   |
| Smg5          | chr3:88336259-88362337   | OK     | 22.8179  | 25.3192   |
| Pnma2         | chr14:66911207-66920061  | OK     | 25.3012  | 28.0745   |
| N4bp2l2       | chr5:150635972-150665612 | OK     | 3.78493  | 4.19936   |
| Dlg5          | chr14:24133952-24245920  | OK     | 6.27108  | 6.95694   |
| Gm3258        | chr10:31332379-31445921  | OK     | 29.4555  | 32.6758   |
| Phlpp2        | chr8:109868602-109944671 | OK     | 7.29127  | 8.08837   |

|               |                           |        |             |            |
|---------------|---------------------------|--------|-------------|------------|
| Gss           | chr2:155563180-155592810  | OK     | 12.6381     | 14.0182    |
| Rpl26         | chr11:68901565-68904534   | NOTEST | 0.000547143 | 0.00060686 |
| Synrg         | chr11:83964430-84044576   | OK     | 21.9558     | 24.3505    |
| Mospd3        | chr5:137596646-137601059  | OK     | 11.27       | 12.4973    |
| Top3b         | chr16:16870890-16892986   | OK     | 7.76627     | 8.61148    |
| Cnot6         | chr11:49671496-49712722   | OK     | 9.7618      | 10.8237    |
| Cct2          | chr10:117050997-117063814 | OK     | 112.863     | 125.123    |
| Rrn3          | chr16:13780698-13814841   | OK     | 37.7459     | 41.8424    |
| Thnsl1        | chr2:21205723-21215009    | OK     | 6.53054     | 7.23918    |
| Tars          | chr15:11383662-11399658   | OK     | 14.6785     | 16.2701    |
| Pfdn5         | chr15:102326115-102331489 | OK     | 49.3233     | 54.6703    |
| Homer3        | chr8:70282998-70302452    | OK     | 3.83403     | 4.24962    |
| C030037D09Rik | chr11:88718642-88728572   | OK     | 1.0416      | 1.15444    |
| Capza1        | chr3:104822784-104864505  | OK     | 16.6334     | 18.4351    |
| Slc7a6        | chr8:106168874-106198704  | OK     | 11.0039     | 12.1957    |
| 9030624J02Rik | chr7:118740270-118841491  | OK     | 26.9768     | 29.8971    |
| Ampd2         | chr3:108074061-108086666  | OK     | 20.6889     | 22.9278    |
| Lin9          | chr1:180641333-180690687  | OK     | 0.824333    | 0.913463   |
| Tspyl2        | chrX:152336851-152342484  | OK     | 21.038      | 23.3127    |
| Zbtb25        | chr12:76348899-76369560   | OK     | 5.38488     | 5.96707    |
| Acbd7         | chr2:3336167-3340997      | NOTEST | 0.99625     | 1.1039     |
| Decr2         | chr17:26081210-26090164   | OK     | 15.3284     | 16.9838    |
| Cd151         | chr7:141467361-141471481  | OK     | 182.224     | 201.9      |
| Zswim5        | chr4:116877401-116989105  | OK     | 7.18226     | 7.95757    |
| Eif3b         | chr5:140419304-140443358  | OK     | 52.4558     | 58.1158    |
| Ddx21         | chr10:62580246-62602298   | OK     | 7.65705     | 8.48296    |
| Aes           | chr10:81559443-81566371   | OK     | 267.559     | 296.418    |
| Adam33        | chr2:131050816-131063814  | NOTEST | 0.209552    | 0.23214    |
| Osgep         | chr14:50915373-50924893   | OK     | 5.67048     | 6.28151    |
| Casp9         | chr4:141793611-141826003  | OK     | 14.1062     | 15.625     |
| Hinfp         | chr9:44295672-44305671    | OK     | 3.55822     | 3.94129    |
| Pcdha7        | chr18:36930284-37841872   | OK     | 2.85777     | 3.16537    |
| Arhgef25      | chr10:127182520-127190054 | OK     | 42.4526     | 47.0211    |
| Zfp598        | chr17:24669751-24682016   | OK     | 7.69188     | 8.51948    |
| Apc2          | chr10:79697304-80369637   | OK     | 27.473      | 30.4268    |
| Srebf2        | chr15:82147268-82204960   | OK     | 65.1832     | 72.188     |
| Ocll          | chrX:47912455-47965866    | OK     | 20.3043     | 22.4859    |
| Mrps17        | chr5:129715527-129718691  | OK     | 18.1219     | 20.0665    |
| Sf3b1         | chr1:54985169-55027478    | OK     | 35.8882     | 39.722     |
| 2310011J03Rik | chr10:79697304-80369637   | OK     | 20.5027     | 22.6878    |
| 0610037L13Rik | chr4:107889898-107897802  | OK     | 15.3947     | 17.0346    |
| Slc38a3       | chr9:107651154-107668968  | NOTEST | 0.35213     | 0.389591   |
| Abtb1         | chr6:88835913-88841935    | OK     | 25.0862     | 27.754     |
| Cnm3          | chr1:36511875-36528237    | OK     | 5.66238     | 6.26445    |
| 1110059G10Rik | chr9:122945088-122951000  | OK     | 3.80221     | 4.20578    |
| Nelfb         | chr2:25199711-25211489    | OK     | 30.9996     | 34.2899    |
| 4632434I11Rik | chr7:92857526-92874232    | NOTEST | 0.725075    | 0.801993   |
| Grn           | chr11:102430321-102436809 | OK     | 36.8356     | 40.7416    |
| Hsbp1         | chr8:119344537-119348929  | OK     | 94.2704     | 104.261    |
| Actr6         | chr10:89711972-89732295   | OK     | 8.58956     | 9.49885    |
| Zbed3         | chr13:95325236-95337841   | OK     | 2.66117     | 2.94285    |
| Tle6          | chr10:81590904-81600900   | OK     | 1.02294     | 1.13111    |
| Numa1         | chr7:101969842-102014959  | OK     | 17.8658     | 19.7546    |

|               |                            |        |           |           |
|---------------|----------------------------|--------|-----------|-----------|
| Zc3h14        | chr12:98746967-98901484    | OK     | 24.6358   | 27.2358   |
| Oacyl         | chr18:64887755-65751537    | NOTEST | 0.227092  | 0.251045  |
| Ip6k1         | chr9:108002647-108048782   | OK     | 66.3167   | 73.3026   |
| Tmem161a      | chr8:70172410-70183663     | OK     | 9.212     | 10.1819   |
| Wdr73         | chr7:80890722-80901269     | OK     | 6.79301   | 7.50823   |
| Uty           | chrY:1097143-1245738       | OK     | 5.07675   | 5.61041   |
| Swi5          | chr2:32278804-32288069     | OK     | 136.55    | 150.886   |
| Ttl17         | chr3:146852366-146982750   | OK     | 217.267   | 240.072   |
| Spata5        | chr3:37420279-37579095     | OK     | 4.693     | 5.18532   |
| Rars2         | chr4:34614957-34660167     | OK     | 9.32005   | 10.2973   |
| Trmt2b        | chrX:134222954-134276984   | OK     | 11.1601   | 12.3303   |
| AA474331      | chr10:39892759-39899238    | OK     | 2.26641   | 2.50402   |
| Nop16         | chr13:54584190-54590074    | OK     | 10.6328   | 11.747    |
| Cxcl5         | chr5:90759297-90761625     | NOTEST | 0.0340149 | 0.0375759 |
| Pgrmc1        | chrX:36598224-36606079     | OK     | 103.684   | 114.536   |
| Itpk1         | chr12:102568582-102704869  | OK     | 20.9463   | 23.1377   |
| Slc38a10      | chr11:120103950-120151351  | OK     | 30.7341   | 33.9481   |
| Cep97         | chr16:55899887-55934848    | OK     | 4.24664   | 4.69012   |
| Gorasp1       | chr9:119894894-119937558   | OK     | 9.48383   | 10.4737   |
| Ankrd13a      | chr5:114775139-114805820   | OK     | 14.1903   | 15.6704   |
| D430019H16Rik | chr12:105453855-105493095  | OK     | 10.1216   | 11.1772   |
| Pomgnt2       | chr9:121981605-121996026   | OK     | 23.4621   | 25.9061   |
| Irgm2         | chr11:58214976-58222783    | OK     | 4.79715   | 5.29657   |
| Gga3          | chr11:115584254-115603916  | OK     | 23.7249   | 26.1942   |
| Atp6v0e       | chr17:26676395-26699646    | OK     | 34.2377   | 37.7975   |
| Armcx3        | chrX:134756567-134761456   | OK     | 21.5793   | 23.8221   |
| BC037034      | chr5:138259657-138272754   | OK     | 33.3621   | 36.8282   |
| Prom1         | chr5:43993621-44101736     | OK     | 7.60556   | 8.3956    |
| Zfp277        | chr12:40315045-40445790    | OK     | 6.34422   | 7.00305   |
| Cdkn2aip      | chr8:47709343-47713931     | OK     | 3.65543   | 4.03465   |
| Supt5         | chr7:28314895-28338719     | OK     | 50.1766   | 55.3818   |
| Stim1         | chr7:102267823-102436855   | OK     | 23.6965   | 26.1526   |
| Krcc1         | chr6:71272018-71285319     | OK     | 9.07488   | 10.0137   |
| Zfp433        | chr10:81863933-81881086    | OK     | 0.754114  | 0.832114  |
| Prmt8         | chr6:127689008-127769159   | OK     | 21.2294   | 23.424    |
| Nap1l4        | chr7:143513578-143549120   | OK     | 77.5724   | 85.5905   |
| Tssc1         | chr12:28751827-28867491    | OK     | 18.0261   | 19.8881   |
| Zdhhc21       | chr4:82798737-82859661     | OK     | 20.9775   | 23.1429   |
| Gm20759       | chr11:86002657-86024350    | NOTEST | 0.0795083 | 0.0877109 |
| Tmem87b       | chr2:128818302-128854261   | OK     | 19.0905   | 21.0568   |
| Gm12070       | chr11:26785107-26787859    | OK     | 9.3645    | 10.3278   |
| Utp3          | chr5:88554482-88556083     | OK     | 27.0562   | 29.8358   |
| Fam192a       | chr8:94574940-94601726     | OK     | 19.7515   | 21.7805   |
| Zfp317        | chr9:19622090-19649731     | OK     | 6.78332   | 7.47951   |
| Cd3eap        | chr7:19345070-19359483     | OK     | 4.46919   | 4.92786   |
| Cdadcl1       | chr14:59559387-59597959    | OK     | 26.7054   | 29.4455   |
| Rprm          | chr2:54084092-54085552     | OK     | 46.2485   | 50.9916   |
| Hs2st1        | chr3:144431106-144570216   | OK     | 17.1351   | 18.8902   |
| Mau2          | chr8:70016122-70042734     | OK     | 15.369    | 16.9428   |
| Vamp7         | chrX_GL456233_random:10737 | OK     | 26.8283   | 29.5743   |
| Dnaja2        | chr8:85537639-85555271     | OK     | 73.0804   | 80.5589   |
| Vps18         | chr2:119288741-119298453   | OK     | 21.1455   | 23.3079   |
| Ubr5          | chr15:37967327-38078854    | OK     | 27.5163   | 30.329    |

|           |                           |        |          |          |
|-----------|---------------------------|--------|----------|----------|
| Cdc42     | chr4:137319695-137357759  | OK     | 246.116  | 271.274  |
| Hnrnp2    | chrX:134601285-134607054  | OK     | 46.4189  | 51.1621  |
| Tmx3      | chr18:90510153-90543267   | OK     | 43.8873  | 48.3713  |
| Cyb5r1    | chr1:134405989-134411738  | OK     | 76.6561  | 84.4814  |
| Tuba1c    | chr15:99029890-99038105   | OK     | 128.763  | 141.905  |
| Colec11   | chr12:28594172-28623290   | NOTEST | 0.18009  | 0.198452 |
| Zfp53     | chr17:21488987-21510477   | OK     | 1.80778  | 1.99207  |
| Casc3     | chr11:98795768-98833807   | OK     | 19.7867  | 21.8024  |
| Cyb5d1    | chr11:69393611-69395346   | OK     | 14.2281  | 15.6763  |
| Ccnt1     | chr15:98543210-98570864   | OK     | 6.29451  | 6.93504  |
| Ifitm7    | chr16:13981701-14101494   | NOTEST | 0.186995 | 0.206022 |
| Ate1      | chr7:130391493-130520369  | OK     | 19.2893  | 21.2519  |
| Slc19a3   | chr1:83012522-83038448    | NOTEST | 0.692879 | 0.763353 |
| Arsb      | chr13:93771678-93943016   | OK     | 18.4165  | 20.2895  |
| Fktn      | chr4:53714181-53763271    | OK     | 10.7878  | 11.8843  |
| Slc25a14  | chrX:48623577-48662298    | OK     | 22.4451  | 24.7254  |
| Zkscan8   | chr13:21513220-21531114   | OK     | 4.99856  | 5.50636  |
| Eps15l1   | chr8:72340995-72421474    | OK     | 21.4252  | 23.6012  |
| Asnsd1    | chr1:53344616-53352752    | OK     | 24.787   | 27.3042  |
| Hist1h2bf | chr13:23573759-23574190   | NOTEST | 0.546806 | 0.602327 |
| Rfc3      | chr5:151642823-151651208  | OK     | 3.74136  | 4.12053  |
| Cep112    | chr11:108425265-108860615 | OK     | 1.56887  | 1.72759  |
| Fam160a2  | chr7:105371210-105400054  | OK     | 5.6231   | 6.192    |
| Hmga1     | chr17:27556573-27563672   | OK     | 13.1318  | 14.4601  |
| Khk       | chr5:30921894-30931246    | OK     | 15.9024  | 17.5102  |
| Slc17a6   | chr7:51621829-51671126    | OK     | 78.5706  | 86.5121  |
| Tbc1d31   | chr15:57912198-57970068   | OK     | 1.24776  | 1.37367  |
| Dram1     | chr10:88322803-88357075   | NOTEST | 0.375782 | 0.41368  |
| Madd      | chr2:91137359-91183047    | OK     | 33.162   | 36.5046  |
| Mif       | chr10:75859352-75860250   | OK     | 48.9428  | 53.8732  |
| Gps1      | chr11:120784271-120789102 | OK     | 3.46253  | 3.81129  |
| Adar      | chr3:89715021-89764632    | OK     | 16.0745  | 17.6936  |
| Eif3l     | chr15:79075222-79094400   | OK     | 54.2726  | 59.7389  |
| Txnrd3    | chr6:89643987-89675529    | OK     | 6.64027  | 7.30847  |
| Pabpc5    | chrX:119927195-119930165  | NOTEST | 0.447634 | 0.492652 |
| Chd4      | chr6:125096162-125130501  | OK     | 48.8929  | 53.8074  |
| Iqsec3    | chr6:121372927-121473678  | OK     | 9.50278  | 10.4578  |
| Aspscr1   | chr11:120672972-120709446 | OK     | 25.5609  | 28.1289  |
| Zswim6    | chr13:107724616-107890064 | OK     | 10.0089  | 11.0142  |
| Wdr5      | chr2:27515146-27536538    | OK     | 8.93234  | 9.82918  |
| Nr1h2     | chr7:44549615-44553965    | OK     | 26.1774  | 28.8023  |
| Camk1     | chr6:113326975-113343922  | OK     | 24.4675  | 26.9196  |
| Plekhg3   | chr12:76533559-76579039   | OK     | 5.78887  | 6.3683   |
| Atp6v1d   | chr12:78842981-78861638   | OK     | 97.217   | 106.943  |
| Tmem60    | chr5:20882452-20886870    | OK     | 29.4553  | 32.4015  |
| Tmco6     | chr18:36735069-36744587   | OK     | 5.8318   | 6.41509  |
| Ap4e1     | chr2:127008710-127069814  | OK     | 4.81432  | 5.29566  |
| Wdr26     | chr1:181173225-181211978  | OK     | 20.0844  | 22.0919  |
| Psen2     | chr1:180227003-180256300  | OK     | 26.0418  | 28.641   |
| Rab5c     | chr11:100715265-100738130 | OK     | 77.6231  | 85.3648  |
| Eid2b     | chr7:28277705-28280129    | OK     | 4.69164  | 5.15933  |
| Tubd1     | chr11:86544990-86567360   | OK     | 2.31279  | 2.54324  |
| Mkln1os   | chr6:31366884-31398773    | OK     | 1.9593   | 2.15429  |

|               |                           |        |          |           |
|---------------|---------------------------|--------|----------|-----------|
| R3hdm4        | chr10:79697304-80369637   | OK     | 35.788   | 39.3496   |
| Cox20         | chr1:178319152-178322693  | OK     | 19.7731  | 21.7404   |
| Pnma3         | chrX:73064786-73068191    | OK     | 0.95506  | 1.05007   |
| Atrnl1        | chr19:57611033-58133340   | OK     | 72.4822  | 79.6908   |
| Tecta         | chr9:42329621-42399929    | OK     | 1.85338  | 2.03753   |
| Zfp326        | chr5:105876567-105915820  | OK     | 7.62037  | 8.37663   |
| Gm16515       | chr11:60902245-60913792   | OK     | 2.47563  | 2.72105   |
| Zc3h8         | chr2:128926267-128944020  | OK     | 3.68334  | 4.04796   |
| Zfp958        | chr8:4613169-4630231      | OK     | 3.97802  | 4.37179   |
| Gm6251        | chr10:20148919-20281590   | OK     | 24.5687  | 26.9955   |
| 2610002J02Rik | chr4:155249965-155256687  | OK     | 34.2925  | 37.6775   |
| Ykt6          | chr11:5955757-5967781     | OK     | 49.8057  | 54.7166   |
| Pex5          | chr6:124396815-124415067  | OK     | 17.3921  | 19.107    |
| Tmem218       | chr9:37208332-37223211    | OK     | 12.7528  | 14.01     |
| Farsb         | chr1:78310345-78488897    | OK     | 36.2181  | 39.7877   |
| Clec2d        | chr6:129180614-129186535  | OK     | 5.26782  | 5.78594   |
| Tssc4         | chr7:143069367-143071087  | OK     | 12.5397  | 13.7725   |
| Hdc           | chr2:126593659-126618678  | NOTEST | 0.523782 | 0.575228  |
| Hotair        | chr15:102944061-102947946 | NOTEST | 0.072671 | 0.0798065 |
| Bdp1          | chr13:100017993-100104070 | OK     | 4.23466  | 4.64989   |
| Rbms3         | chr9:116572746-117629913  | OK     | 80.6522  | 88.5578   |
| Nkapl         | chr13:21467046-21468501   | NOTEST | 0.300254 | 0.329685  |
| Svopl         | chr6:37983738-38046996    | NOTEST | 0.166634 | 0.182959  |
| 1110001J03Rik | chr6:38534860-38539449    | OK     | 17.9724  | 19.731    |
| Bsn           | chr9:108096021-108190383  | OK     | 15.4789  | 16.9928   |
| Rhog          | chr7:102239122-102250118  | OK     | 12.9749  | 14.2433   |
| Jrkl          | chr9:13242789-13245741    | OK     | 5.32001  | 5.84009   |
| Ulk3          | chr9:57589451-57596233    | OK     | 7.69611  | 8.44842   |
| Cst6          | chr19:5344704-5349574     | OK     | 1.94141  | 2.13108   |
| Paf1          | chr7:28392995-28399383    | OK     | 15.6666  | 17.1962   |
| Adra2b        | chr2:127363285-127367221  | NOTEST | 0.177598 | 0.194936  |
| Smek1         | chr12:101039408-101088927 | OK     | 5.73879  | 6.29888   |
| Eif4e         | chr3:138526190-138557599  | OK     | 21.9437  | 24.0846   |
| Itga4         | chr2:79255425-79428988    | OK     | 1.66725  | 1.82975   |
| Ostm1         | chr10:42678915-42702462   | OK     | 25.3619  | 27.8323   |
| Fem1b         | chr9:62791829-62811648    | OK     | 33.3715  | 36.6212   |
| Mtg1          | chr7:140137563-140154659  | OK     | 9.92924  | 10.8944   |
| Hmox2         | chr16:4726360-4789935     | OK     | 74.6028  | 81.854    |
| Tex264        | chr9:106658745-106685952  | OK     | 49.4341  | 54.2352   |
| Dgkeos        | chr11:89060750-89067884   | NOTEST | 0.161299 | 0.176962  |
| E430025E21Rik | chr15:59331996-59374152   | OK     | 27.6609  | 30.3435   |
| Sv2a          | chr3:96181226-96195180    | OK     | 27.2005  | 29.8369   |
| Urb1          | chr16:90751526-90810413   | OK     | 1.66421  | 1.82544   |
| Atxn1         | chr13:45549755-45964991   | OK     | 6.02883  | 6.61247   |
| Nadk2         | chr15:9071259-9110496     | OK     | 3.76561  | 4.12989   |
| Ubxn1         | chr19:8871558-8875656     | OK     | 68.9756  | 75.6405   |
| Per2          | chr1:91415981-91459328    | OK     | 2.00839  | 2.20216   |
| Foxp1         | chr6:98925341-99435345    | OK     | 4.90755  | 5.38078   |
| Ndufa6        | chr15:82350138-82354291   | OK     | 101.47   | 111.254   |
| Synpo2        | chr3:123076518-123236149  | OK     | 0.881025 | 0.965914  |
| Rundc1        | chr11:101418813-101435665 | OK     | 6.72824  | 7.37634   |
| Kcnmb4        | chr10:116417867-116473523 | OK     | 19.6407  | 21.5318   |
| Sec61a1       | chr6:88503606-88518800    | OK     | 50.3037  | 55.1457   |



|               |                           |        |           |           |
|---------------|---------------------------|--------|-----------|-----------|
| Wdr6          | chr9:108569891-108578670  | OK     | 32.213    | 35.3136   |
| 36403         | chr15:82274934-82294442   | OK     | 33.9543   | 37.2183   |
| Exoc2         | chr13:30813917-30974047   | OK     | 20.9386   | 22.9505   |
| Becn1         | chr11:101279202-101302267 | OK     | 67.9931   | 74.5141   |
| Ppap2c        | chr10:79526428-79533787   | OK     | 11.2909   | 12.3736   |
| 6330419J24Rik | chrX:56374585-56378470    | OK     | 4.63273   | 5.0766    |
| Ap4s1         | chr12:51608540-51738939   | OK     | 19.9857   | 21.9003   |
| Mrpl41        | chr2:24962421-24975098    | OK     | 15.4661   | 16.9476   |
| Fnip1         | chr11:54438178-54518241   | OK     | 4.16215   | 4.56064   |
| Pradc1        | chr6:85446784-85468477    | OK     | 5.1777    | 5.67321   |
| Ndufaf3       | chr9:108565864-108567342  | OK     | 20.9108   | 22.9116   |
| Amn1          | chr6:149157576-149188712  | OK     | 17.2438   | 18.8934   |
| Anxa7         | chr14:20455260-20480133   | OK     | 89.2376   | 97.7715   |
| Ccdc32        | chr2:119017778-119029393  | OK     | 16.9661   | 18.5875   |
| Gm6623        | chr17:36178776-36181364   | OK     | 1.55966   | 1.70842   |
| Cox19         | chr5:139337821-139345166  | OK     | 35.8228   | 39.2327   |
| Nadk          | chr4:155562391-155591001  | OK     | 16.438    | 18.0017   |
| Zfp322a       | chr13:23353102-23369208   | OK     | 6.09546   | 6.67428   |
| Ank2          | chr3:126921606-126998452  | OK     | 198.537   | 217.357   |
| Ankrd50       | chr3:38449260-38484816    | OK     | 16.8523   | 18.4461   |
| Abcc5         | chr16:20331303-20426394   | OK     | 47.2961   | 51.7623   |
| Gtf3c6        | chr10:40249202-40257665   | OK     | 16.5366   | 18.0974   |
| Eif3k         | chr7:28971371-28981888    | OK     | 99.9569   | 109.39    |
| Shq1          | chr6:100573081-100671157  | OK     | 1.72294   | 1.88549   |
| Polr1b        | chr2:129100995-129126595  | OK     | 3.32002   | 3.63308   |
| Nono          | chrX:101429650-101448593  | OK     | 39.4677   | 43.189    |
| Tmem67        | chr4:12039355-12088007    | OK     | 1.80254   | 1.97244   |
| Gm5124        | chrX:21360864-21364624    | OK     | 9.3441    | 10.2247   |
| Rbm26         | chr14:105106727-105177327 | OK     | 7.61799   | 8.33551   |
| Gm15787       | chr5:110135829-110176504  | NOTEST | 0.0329006 | 0.0359979 |
| Tceb1         | chr1:16642764-16656865    | OK     | 96.7942   | 105.892   |
| Zfp97         | chr17:17121382-17146878   | OK     | 1.1848    | 1.29613   |
| Zfp446        | chr7:12977847-12985716    | OK     | 1.74979   | 1.91401   |
| Agtrap        | chr4:148077060-148088064  | OK     | 12.8938   | 14.103    |
| D830026I12Rik | chr6:17197750-17205695    | NOTEST | 0.118672  | 0.129796  |
| Eml4          | chr17:83350930-83480359   | OK     | 7.55479   | 8.26265   |
| Taf1b         | chr12:24498580-24558571   | OK     | 7.67307   | 8.39196   |
| Dlgap4        | chr2:156613696-156764363  | OK     | 23.8883   | 26.1263   |
| Rad51         | chr2:119112816-119136070  | OK     | 0.915344  | 1.00108   |
| Ppm1l         | chr3:69316917-69555396    | OK     | 26.8296   | 29.3406   |
| Stx16         | chr2:174077050-174099771  | OK     | 17.2716   | 18.8874   |
| Stard3nl      | chr13:19357675-19395752   | OK     | 80.4595   | 87.9729   |
| Smim20        | chr5:53267105-53278540    | OK     | 31.0627   | 33.9586   |
| Nup205        | chr6:35177615-35247598    | OK     | 4.30498   | 4.70612   |
| Pgap3         | chr11:98388671-98400490   | OK     | 4.29188   | 4.69087   |
| Trim23        | chr13:104179097-104202048 | OK     | 9.94813   | 10.8728   |
| 1110057K04Rik | chr12:8208106-8285759     | OK     | 21.8681   | 23.9006   |
| Ilf2          | chr3:90476200-90491013    | OK     | 28.7782   | 31.4525   |
| App           | chr16:84954435-85173707   | OK     | 402.353   | 439.714   |
| Spata7        | chr12:98628141-98669819   | OK     | 5.81576   | 6.35498   |
| Trappc1       | chr11:69323985-69325793   | OK     | 92.7833   | 101.384   |
| Mecom         | chr3:29951295-30013204    | NOTEST | 0.083768  | 0.0915304 |
| Carm1         | chr9:21546893-21595970    | OK     | 18.168    | 19.8489   |

|               |                           |        |           |          |
|---------------|---------------------------|--------|-----------|----------|
| 4930506C21Rik | chr17:8283812-8327442     | NOTEST | 0.3512    | 0.383682 |
| Hbp1          | chr12:31654868-31950535   | OK     | 19.4116   | 21.2062  |
| 2700029M09Rik | chr8:60890450-60907572    | OK     | 23.1156   | 25.2489  |
| Mok           | chr12:110807797-110840939 | OK     | 1.27442   | 1.39188  |
| Zfp101        | chr17:33380178-33394637   | OK     | 2.44985   | 2.6751   |
| Tbc1d15       | chr10:115197870-115251493 | OK     | 11.6333   | 12.6979  |
| Parm1         | chr5:91517699-91623996    | OK     | 157.419   | 171.819  |
| Gbra2         | chrX:165129016-165326981  | NOTEST | 0.0963789 | 0.105195 |
| Slain2        | chr5:72914361-72978841    | OK     | 10.6472   | 11.621   |
| Alkbh1        | chr12:87428077-87472299   | OK     | 2.22902   | 2.43281  |
| Ttc9c         | chr19:8809074-8819294     | OK     | 14.5233   | 15.8505  |
| Pts           | chr9:50521616-50528641    | OK     | 20.2451   | 22.0937  |
| Zfp932        | chr5:109996526-110010411  | OK     | 5.38932   | 5.88079  |
| Mpdz          | chr4:81278499-81442805    | OK     | 18.215    | 19.8746  |
| R3hdm1        | chr1:128103305-128237735  | OK     | 12.992    | 14.1756  |
| Ccdc58        | chr16:36071659-36092118   | OK     | 3.56383   | 3.8884   |
| Nans          | chr4:46489328-46503438    | OK     | 17.5644   | 19.1628  |
| Zfp820        | chr17:21816875-21845759   | OK     | 1.49688   | 1.63306  |
| Tmc6          | chr11:117765984-117780683 | OK     | 13.668    | 14.9089  |
| Yipf4         | chr17:74489492-74500277   | OK     | 40.2634   | 43.9165  |
| Grcc10        | chr6:124739183-124741079  | OK     | 134.616   | 146.824  |
| Prdm4         | chr10:85891967-85916945   | OK     | 12.0638   | 13.1557  |
| Hspa5         | chr2:34772089-34776529    | OK     | 138.091   | 150.587  |
| Vwa5b2        | chr16:20589581-20605377   | OK     | 9.41269   | 10.264   |
| Sh3bgrl       | chrX:109095406-109162467  | OK     | 41.2814   | 45.0141  |
| A830010M20Rik | chr5:107497744-107512556  | OK     | 5.71887   | 6.23567  |
| Zfp109        | chr7:24227794-24237598    | OK     | 1.66578   | 1.81605  |
| Pigw          | chr11:84876312-84916356   | OK     | 2.26774   | 2.47228  |
| Phf12         | chr11:77982815-78030535   | OK     | 4.84127   | 5.27742  |
| Zfp800        | chr6:28239930-28261601    | OK     | 2.89978   | 3.16095  |
| Ilk           | chr7:105731729-105744338  | OK     | 54.4633   | 59.3648  |
| Rpa2          | chr4:132768359-132778746  | OK     | 5.00453   | 5.45461  |
| Cbfa2t3       | chr8:122625135-122699109  | OK     | 1.28907   | 1.405    |
| Atp6v1c1      | chr15:38661903-38692444   | OK     | 89.2058   | 97.2267  |
| Rpap2         | chr5:107534710-107661853  | OK     | 9.60892   | 10.4719  |
| Tcf19         | chr17:35512734-35516824   | OK     | 3.17467   | 3.45892  |
| Exosc4        | chr15:76327396-76330670   | OK     | 10.5017   | 11.4416  |
| Znhit3        | chr11:84876312-84916356   | OK     | 16.5799   | 18.0634  |
| Ubr2          | chr17:46928290-47010532   | OK     | 16.5857   | 18.0675  |
| Srfbp1        | chr18:52465692-52490738   | OK     | 5.46841   | 5.9568   |
| Elp5          | chr11:69968225-69990600   | OK     | 35.4129   | 38.5715  |
| Gkap1         | chr13:58233350-58274188   | OK     | 6.20672   | 6.75999  |
| Kcnj11        | chr7:46097122-46100764    | OK     | 3.85793   | 4.2013   |
| Abcc1         | chr16:14361557-14474878   | OK     | 4.97054   | 5.41238  |
| Slc26a11      | chr11:119355556-119381076 | OK     | 2.70891   | 2.94966  |
| Mrpl37        | chr4:107055873-107066866  | OK     | 25.6822   | 27.9641  |
| Crtc2         | chr3:90254280-90264125    | OK     | 12.5992   | 13.7178  |
| Orc4          | chr2:48814108-48949267    | OK     | 9.64962   | 10.5064  |
| Tmem35        | chrX:134295224-134305969  | OK     | 36.546    | 39.7869  |
| Camsap2       | chr1:136268122-136346104  | OK     | 34.1917   | 37.2159  |
| Litaf         | chr16:10959272-10993121   | OK     | 12.4158   | 13.5139  |
| Zkscan3       | chr13:21387003-21402755   | OK     | 6.47732   | 7.04973  |
| Trim35        | chr14:66295328-66311424   | OK     | 57.3109   | 62.3738  |

|               |                           |    |          |          |
|---------------|---------------------------|----|----------|----------|
| Slc8a2        | chr7:16130299-16160511    | OK | 1.81578  | 1.97616  |
| Usp31         | chr7:121642020-121707253  | OK | 29.7591  | 32.3875  |
| 0610011F06Rik | chr17:25875499-25877163   | OK | 16.6723  | 18.1448  |
| Fam195b       | chr11:120542887-120549727 | OK | 47.2906  | 51.4625  |
| Ddx51         | chr5:110653450-110660496  | OK | 3.11605  | 3.39094  |
| Fance         | chr17:28313529-28326574   | OK | 4.79506  | 5.21756  |
| Hint2         | chr4:43654226-43656445    | OK | 28.6116  | 31.1309  |
| Mbd4          | chr6:115840696-115853341  | OK | 1.56789  | 1.70593  |
| Eif2ak1       | chr5:143871861-143909839  | OK | 29.2316  | 31.8021  |
| Ttc27         | chr17:74717749-74863570   | OK | 9.2957   | 10.1122  |
| Capn7         | chr14:31336723-31371983   | OK | 22.138   | 24.0806  |
| Cav2          | chr6:17281184-17289130    | OK | 31.4157  | 34.1711  |
| Abcb1a        | chr5:8660091-8748570      | OK | 8.93255  | 9.71492  |
| Stk17b        | chr1:53755511-53785215    | OK | 1.92014  | 2.08829  |
| 9130221H12Rik | chr7:25228258-25237851    | OK | 2.91819  | 3.17372  |
| Arhgef15      | chr11:68943153-68956858   | OK | 2.37569  | 2.58348  |
| Rabggta       | chr14:55715876-55722176   | OK | 12.1452  | 13.2059  |
| Dgke          | chr11:89037581-89060748   | OK | 12.4744  | 13.5628  |
| Ubap2         | chr4:41194314-41275135    | OK | 35.1637  | 38.2299  |
| Smc6          | chr12:11265885-11319785   | OK | 8.93995  | 9.71898  |
| Pias1         | chr9:62880076-62980879    | OK | 10.0781  | 10.956   |
| Exosc10       | chr4:148558426-148582400  | OK | 9.07609  | 9.86546  |
| Gon4l         | chr3:88835230-88913950    | OK | 3.31158  | 3.59945  |
| Edn1          | chr13:42301269-42307989   | OK | 0.841345 | 0.914403 |
| Gng10         | chr4:59035155-59041899    | OK | 18.2228  | 19.8051  |
| Ercc2         | chr7:19382038-19404104    | OK | 6.0747   | 6.602    |
| Cmip          | chr8:117257018-117461505  | OK | 99.483   | 108.115  |
| Sgta          | chr10:81044072-81060154   | OK | 29.1466  | 31.6722  |
| Psemb4        | chr3:94884323-94886958    | OK | 216.38   | 235.127  |
| Zfp362        | chr4:128773084-128806112  | OK | 5.93612  | 6.45012  |
| Zbtb3         | chr19:8802495-8804854     | OK | 1.48196  | 1.61023  |
| Bcr           | chr10:75060895-75184923   | OK | 21.1217  | 22.9491  |
| Cwc25         | chr11:97745469-97766613   | OK | 8.95995  | 9.73454  |
| BC018242      | chr9:21937009-21948907    | OK | 17.9933  | 19.5484  |
| Ube2q1        | chr3:89773608-89783997    | OK | 26.6986  | 29.0042  |
| Htra2         | chr6:83034223-83054571    | OK | 15.3615  | 16.6862  |
| Cyth2         | chr7:45806636-45814316    | OK | 19.3501  | 21.0178  |
| Mea1          | chr17:46674550-46705002   | OK | 63.3825  | 68.845   |
| Epb4.1l4a     | chr18:33796326-34007206   | OK | 3.35444  | 3.6435   |
| Klc1          | chr12:111758848-111813841 | OK | 707.414  | 768.35   |
| Bsdc1         | chr4:129461678-129488432  | OK | 21.0634  | 22.8759  |
| B4galt3       | chr1:171270327-171276895  | OK | 14.4502  | 15.6929  |
| Ccser1        | chr6:61175603-62382863    | OK | 1.31119  | 1.42393  |
| Rbfox2        | chr15:77078989-77307053   | OK | 63.4175  | 68.8695  |
| Ddb1          | chr19:10605624-10629821   | OK | 94.9571  | 103.108  |
| Prkg1         | chr19:30564486-31765033   | OK | 23.2193  | 25.2125  |
| Dynlrb1       | chr2:155236532-155250277  | OK | 255.014  | 276.897  |
| Intu          | chr3:40540766-40704774    | OK | 0.814333 | 0.884153 |
| Atp5sl        | chr7:25619413-25625550    | OK | 12.6649  | 13.7503  |
| Tppp          | chr13:74009418-74035753   | OK | 7.54602  | 8.19204  |
| Ube2z         | chr11:96047430-96065364   | OK | 50.9879  | 55.3528  |
| Eno1,Eno1b    | chr4:150237196-150248873  | OK | 0.99741  | 1.08273  |
| Alkbh2        | chr5:114123933-114128176  | OK | 2.44207  | 2.65071  |

|               |                           |        |           |          |
|---------------|---------------------------|--------|-----------|----------|
| Sf3a3         | chr4:124714860-124732422  | OK     | 14.6098   | 15.8571  |
| Fam96b        | chr8:104639838-104641728  | OK     | 25.9569   | 28.1726  |
| Cep250        | chr2:155956557-155998900  | OK     | 8.51858   | 9.24469  |
| Polr3b        | chr10:84622436-84727178   | OK     | 11.0526   | 11.9946  |
| Chd8          | chr14:52198150-52237572   | OK     | 13.4861   | 14.635   |
| Dzip3         | chr16:48924227-48994112   | OK     | 11.6147   | 12.6026  |
| Extl3         | chr14:65052058-65098106   | OK     | 40.2321   | 43.6524  |
| Arid2         | chr15:96287521-96405463   | OK     | 4.21231   | 4.5704   |
| Srgap1        | chr10:121780990-122047315 | OK     | 14.1699   | 15.3726  |
| C330018D20Rik | chr18:56955830-56975379   | OK     | 2.83969   | 3.08045  |
| 2810428I15Rik | chr8:70504295-70506739    | OK     | 61.635    | 66.8545  |
| Lingo1        | chr9:56618474-56685253    | OK     | 25.6772   | 27.8504  |
| Baz1b         | chr5:135187322-135246129  | OK     | 11.2843   | 12.2394  |
| Fam208a       | chr14:27428846-27508460   | OK     | 4.47527   | 4.85386  |
| Rabgap1       | chr2:37443284-37566437    | OK     | 26.3065   | 28.5296  |
| Asxl2         | chr12:3426856-3506849     | OK     | 3.43415   | 3.72416  |
| Rab5a         | chr17:53479233-53539451   | OK     | 59.9166   | 64.9754  |
| Hsf2bp        | chr17:31944768-32034508   | NOTEST | 0.0765391 | 0.082995 |
| Gpatch2       | chr1:187215510-187351429  | OK     | 3.88214   | 4.20908  |
| Sbf1          | chr15:89288235-89315311   | OK     | 26.8506   | 29.1097  |
| Spred2        | chr11:19924441-20022597   | OK     | 26.4782   | 28.7058  |
| Hemk1         | chr9:107327081-107338350  | OK     | 2.50162   | 2.71191  |
| Adh5          | chr3:138437199-138455499  | OK     | 41.9892   | 45.519   |
| Gm5148        | chr3:37714189-37724360    | NOTEST | 0.125084  | 0.13559  |
| Wdr43         | chr17:71616214-71659031   | OK     | 7.15648   | 7.75731  |
| Fiz1          | chr7:5007055-5014728      | OK     | 5.56376   | 6.02964  |
| Grina         | chr15:76246806-76249904   | OK     | 297.154   | 322.036  |
| Cdk13         | chr13:17715961-17805097   | OK     | 6.12402   | 6.63671  |
| Tmod3         | chr9:75497783-75559657    | OK     | 10.7507   | 11.6505  |
| Elf2          | chr3:51252719-51340644    | OK     | 4.25804   | 4.61434  |
| Ptges3        | chr10:128058981-128077254 | OK     | 71.9153   | 77.9321  |
| Zfp871        | chr17:32765496-32788287   | OK     | 14.7203   | 15.9508  |
| Neu1          | chr17:34931252-34937297   | OK     | 11.3449   | 12.2928  |
| Herpud1       | chr8:94386499-94395358    | OK     | 29.5633   | 32.0333  |
| Fam131a       | chr16:20695056-20716636   | OK     | 20.0748   | 21.7512  |
| Ankib1        | chr5:3689998-3803124      | OK     | 13.1918   | 14.2929  |
| Ildr2         | chr1:166254138-166316832  | OK     | 1.79649   | 1.94643  |
| Kremen1       | chr11:5191552-5261610     | OK     | 6.45191   | 6.99033  |
| Hivep2        | chr10:13966378-14151378   | OK     | 11.1076   | 12.0343  |
| Nolc1         | chr19:46075846-46085543   | OK     | 13.1792   | 14.2786  |
| Mttp          | chr3:138089854-138143388  | OK     | 1.39978   | 1.5165   |
| Tmem151a      | chr19:50793336-5085477    | OK     | 47.709    | 51.6868  |
| Tcp1          | chr17:12916328-12940396   | OK     | 123.237   | 133.504  |
| Tubg2         | chr11:101155883-101161787 | OK     | 14.1474   | 15.3247  |
| Anapc10       | chr8:79711819-79777321    | OK     | 3.48769   | 3.77782  |
| Spred3        | chr7:29158828-29168647    | OK     | 3.87868   | 4.20123  |
| Stx5a         | chr19:8741423-8755642     | OK     | 18.1216   | 19.6276  |
| Spata13       | chr14:60634728-60764556   | OK     | 20.6927   | 22.41    |
| Tsen2         | chr6:115544703-115578336  | OK     | 7.25978   | 7.862    |
| Tgs1          | chr4:3574878-3616623      | OK     | 6.56101   | 7.10445  |
| Mettl14       | chr3:123368294-123385990  | OK     | 12.1294   | 13.1334  |
| Slc7a14       | chr3:31202855-31310319    | OK     | 26.7575   | 28.9657  |
| Ccl4          | chr11:83662583-83664683   | NOTEST | 0.610952  | 0.661127 |

|               |                           |        |           |           |
|---------------|---------------------------|--------|-----------|-----------|
| Surf4         | chr2:26913377-26933511    | OK     | 52.1748   | 56.4582   |
| Synm          | chr7:67730160-67759742    | OK     | 89.6264   | 96.9839   |
| Cnot8         | chr11:58104152-58118594   | OK     | 17.3519   | 18.7726   |
| Pygo2         | chr3:89430836-89435128    | OK     | 15.6059   | 16.8828   |
| Akip1         | chr7:109703736-109723771  | OK     | 4.21653   | 4.56136   |
| Med30         | chr15:52712444-52730431   | OK     | 20.3586   | 22.0184   |
| Mfsd11        | chr11:116854014-116875637 | OK     | 19.9022   | 21.5246   |
| A530072M11Rik | chr4:16164109-16266225    | NOTEST | 0.590715  | 0.638869  |
| Areg          | chr5:91139614-91148432    | NOTEST | 0.301837  | 0.326432  |
| Fam206a       | chr4:56749679-56809605    | OK     | 2.84114   | 3.0725    |
| Nmnat2        | chr1:152955100-153119261  | OK     | 49.1735   | 53.1745   |
| Cacna1s       | chr1:136052900-136119822  | NOTEST | 0.0443577 | 0.0479651 |
| Msto1         | chr3:88835230-88913950    | OK     | 14.8143   | 16.0159   |
| Rab7          | chr6:88000434-88013690    | OK     | 61.8404   | 66.8506   |
| Ccng1         | chr11:40748551-40755286   | OK     | 39.1027   | 42.2699   |
| Hnrnp1l       | chr17:80029486-80062268   | OK     | 15.8777   | 17.1635   |
| Bcas3         | chr11:85353163-85832388   | OK     | 22.213    | 24.0111   |
| Parp6         | chr9:59617283-59650290    | OK     | 43.3207   | 46.8263   |
| Tma16         | chr8:66476345-66486507    | OK     | 2.96192   | 3.20136   |
| Atxn7l3b      | chr10:112925427-112929026 | OK     | 61.0871   | 66.019    |
| Ssu72         | chr4:155704814-155733873  | OK     | 50.5579   | 54.6373   |
| Pcdhb17       | chr18:36930284-37841872   | OK     | 3.79852   | 4.10468   |
| Stub1         | chr17:25829042-25833361   | OK     | 63.6783   | 68.8064   |
| Pex19         | chr1:172126754-172136497  | OK     | 36.7438   | 39.7008   |
| Rtf1          | chr2:119675067-119735407  | OK     | 11.6205   | 12.5553   |
| Vtcn1         | chr3:100825458-100896922  | NOTEST | 0.090284  | 0.0975404 |
| Lamtor5       | chr3:107278857-107284081  | OK     | 38.4267   | 41.5143   |
| Bbs4          | chr9:59321965-59353508    | OK     | 18.4482   | 19.9294   |
| Surf6         | chr2:26890771-26902813    | OK     | 6.61476   | 7.14574   |
| Rhot2         | chr17:25838837-25861515   | OK     | 26.3173   | 28.4291   |
| Nampt         | chr12:32820334-32853369   | OK     | 11.7513   | 12.694    |
| Cuedc1        | chr11:88098057-88211507   | OK     | 10.8503   | 11.7203   |
| Mapk8         | chr14:33377898-33447158   | OK     | 15.7492   | 17.0119   |
| Zfp763        | chr17:33016863-33033381   | OK     | 4.52943   | 4.89235   |
| Gmpr2         | chr14:55672234-55678751   | OK     | 21.0208   | 22.7035   |
| Pkn2          | chr3:142790901-142882004  | OK     | 5.58136   | 6.02777   |
| Pex1          | chr5:3571715-3637101      | OK     | 3.31245   | 3.57723   |
| Ap2a2         | chr7:141562179-141633011  | OK     | 106.241   | 114.732   |
| Psmd11        | chr11:80428614-80472133   | OK     | 22.479    | 24.2753   |
| Tmx1          | chr12:70244534-70669399   | OK     | 31.6761   | 34.2072   |
| Cdk10         | chr8:123224840-123232256  | OK     | 12.5276   | 13.5283   |
| Tm7sf2        | chr19:6062820-6077187     | OK     | 52.1682   | 56.3315   |
| Strn3         | chr12:51608540-51738939   | OK     | 22.7673   | 24.5842   |
| Atl1          | chr12:69746847-69987002   | OK     | 96.6952   | 104.41    |
| Tceanc2       | chr4:107134161-107178366  | OK     | 4.90616   | 5.29757   |
| Zdhhc8        | chr16:18220752-18235136   | OK     | 28.8651   | 31.1668   |
| Papolg        | chr11:23862645-23895270   | OK     | 5.17753   | 5.5896    |
| Zcchc11       | chr4:108459425-108559415  | OK     | 2.87217   | 3.10033   |
| Mrps34        | chr17:24895119-24896273   | OK     | 35.6719   | 38.5052   |
| Gab3          | chrX:74988544-75084905    | NOTEST | 0.503258  | 0.543211  |
| Zfp930        | chr8:69209045-69230539    | OK     | 4.63721   | 5.00494   |
| Stmn4         | chr14:66344374-66361680   | OK     | 12.5154   | 13.5054   |
| Yme1l1        | chr2:23156504-23199260    | OK     | 34.253    | 36.962    |



|               |                           |        |           |           |
|---------------|---------------------------|--------|-----------|-----------|
| Trim43a       | chr9:88581035-88588819    | NOTEST | 0.0656984 | 0.070888  |
| Gal           | chr19:3409916-3414457     | OK     | 21.7703   | 23.4883   |
| D330050I16Rik | chr19:5377522-5390069     | NOTEST | 0.433446  | 0.467612  |
| Slc5a6        | chr5:30933142-31348845    | OK     | 4.50188   | 4.8563    |
| Rae1          | chr2:173000116-173015739  | OK     | 14.5746   | 15.7219   |
| Zfand3        | chr17:30005086-30210020   | OK     | 64.2691   | 69.3265   |
| Zfp51         | chr17:21450351-21465589   | OK     | 2.03928   | 2.19967   |
| Psemb3        | chr11:97703433-97713500   | OK     | 16.0349   | 17.2928   |
| Vps28         | chr15:76622087-76626027   | OK     | 113.935   | 122.868   |
| Pskh1         | chr8:105900473-105931802  | OK     | 5.29832   | 5.71368   |
| Ndufb4        | chr16:37647601-37654368   | OK     | 11.2123   | 12.0907   |
| Tesk1         | chr4:43442276-43454626    | OK     | 13.3849   | 14.4323   |
| Zc3h15        | chr2:83644577-83664616    | OK     | 42.2979   | 45.6052   |
| Htr5a         | chr5:27841946-27855086    | OK     | 1.14192   | 1.23116   |
| Alkbh8        | chr9:3335230-3385846      | OK     | 4.32947   | 4.66762   |
| Npm1          | chr11:33152497-33163206   | OK     | 22.5958   | 24.3558   |
| Tekt3         | chr11:62951192-63386069   | NOTEST | 0.0816893 | 0.0880498 |
| Atic          | chr1:71557155-71579403    | OK     | 27.7019   | 29.8578   |
| Trappc2l      | chr8:122611625-122615591  | OK     | 56.5959   | 60.9988   |
| Ddr1          | chr17:35681566-35704139   | OK     | 19.8463   | 21.3869   |
| Dhx35         | chr2:158794806-158858220  | OK     | 7.28985   | 7.85517   |
| Guk1          | chr11:59183854-59191952   | OK     | 70.4284   | 75.8887   |
| Slc35b4       | chr6:34155878-34177054    | OK     | 19.0571   | 20.5344   |
| Kcnmb2        | chr3:31902702-32200180    | OK     | 2.14936   | 2.31597   |
| C430049B03Rik | chrX:53053111-53057190    | NOTEST | 0.0632878 | 0.0681932 |
| Ppp1r8        | chr4:132826923-132843169  | OK     | 12.2858   | 13.2381   |
| Tcf15         | chr2:180598221-180642691  | NOTEST | 0.280876  | 0.302627  |
| Tmem87a       | chr2:120355308-120504919  | OK     | 18.0099   | 19.404    |
| Antxr2        | chr5:97884687-98030962    | OK     | 20.0755   | 21.6285   |
| 1700113A16Rik | chr3:88171559-88177785    | NOTEST | 0.442161  | 0.476358  |
| Rbbp6         | chr7:122970563-123002572  | OK     | 16.3161   | 17.5763   |
| Csnk1g3       | chr18:53862112-53955684   | OK     | 18.6404   | 20.0796   |
| Olfm1         | chr2:28193092-28230736    | OK     | 178.477   | 192.245   |
| Timm8a1       | chrX:134537257-134541629  | OK     | 5.39171   | 5.80763   |
| Lrfn5         | chr12:61524631-61845258   | OK     | 18.6363   | 20.0727   |
| Papd4         | chr13:93147399-93192283   | OK     | 1.84169   | 1.98355   |
| Nupl1         | chr14:60219467-60251378   | OK     | 23.2157   | 25.004    |
| Ube2h         | chr6:30211289-30304539    | OK     | 29.3474   | 31.6066   |
| Cd109         | chr9:78615545-78716260    | OK     | 1.5701    | 1.6909    |
| Gm12216       | chr11:53785488-53859256   | NOTEST | 0.161955  | 0.174415  |
| Npepps        | chr11:97205855-97280576   | OK     | 81.2105   | 87.4572   |
| Etv3          | chr3:87525577-87540158    | OK     | 7.54621   | 8.12633   |
| Rplp0         | chr5:115559466-115563729  | OK     | 40.8983   | 44.038    |
| Chaf1b        | chr16:93883900-93906106   | OK     | 0.870084  | 0.93688   |
| Utp15         | chr13:98246844-98262992   | OK     | 6.74947   | 7.26758   |
| Ccdc86        | chr19:10937159-10949266   | OK     | 2.62719   | 2.82882   |
| Cyb561d1      | chr3:108195770-108200834  | OK     | 7.80379   | 8.40273   |
| Mras          | chr9:99385419-99436712    | OK     | 25.3674   | 27.3124   |
| Dnajc14       | chr10:128805675-128821631 | OK     | 22.6841   | 24.4228   |
| Zfp330        | chr8:82763619-82774126    | OK     | 7.2288    | 7.78275   |
| Hoxa6         | chr6:52169061-52213597    | OK     | 1.02921   | 1.10808   |
| Psmd7         | chr8:107580379-107588482  | OK     | 86.4628   | 93.0874   |
| Txn1l         | chr18:63662800-63692359   | OK     | 54.6405   | 58.8264   |

|          |                           |        |          |          |
|----------|---------------------------|--------|----------|----------|
| Spast    | chr17:74338986-74391113   | OK     | 13.5205  | 14.5558  |
| Patz1    | chr11:3202352-3479831     | OK     | 7.07716  | 7.61872  |
| Hdac11   | chr6:91156814-91174683    | OK     | 40.6401  | 43.7465  |
| Wdr3     | chr3:99885416-100162403   | OK     | 5.05649  | 5.44296  |
| Pik3ca   | chr3:32436150-32468486    | OK     | 13.9374  | 15.0024  |
| Fam43b   | chr4:138394091-138396458  | OK     | 29.7782  | 32.0536  |
| Rab24    | chr13:55319222-55321980   | OK     | 25.0203  | 26.932   |
| Agbl5    | chr5:30888851-30907788    | OK     | 1.15372  | 1.24184  |
| Fchsd2   | chr7:101108774-101284405  | OK     | 17.2941  | 18.6147  |
| Psenen   | chr7:30561865-30563184    | OK     | 4.69423  | 5.05247  |
| Fam65a   | chr8:105605228-105622218  | OK     | 16.8442  | 18.1294  |
| Nrbp1    | chr5:30933142-31348845    | OK     | 48.2825  | 51.9648  |
| Rab6a    | chr7:100549116-100641268  | OK     | 245.381  | 264.093  |
| Fbxl17   | chr17:63045951-63500580   | OK     | 5.10524  | 5.49446  |
| Prpf31   | chr7:3629984-3642484      | OK     | 14.5201  | 15.6239  |
| Mrpl32   | chr13:14610300-14613037   | OK     | 22.5022  | 24.2119  |
| Btaf1    | chr19:36926078-37014057   | OK     | 4.7355   | 5.09511  |
| Enox2    | chrX:49009706-49288242    | OK     | 5.82102  | 6.26284  |
| Fam221a  | chr6:49367738-49389904    | OK     | 0.858622 | 0.923718 |
| Rnf114   | chr2:167481135-167516166  | OK     | 16.5199  | 17.7708  |
| Cd48     | chr1:171682054-171705257  | NOTEST | 0.455402 | 0.489883 |
| BC003331 | chr1:150361310-150466165  | OK     | 29.2639  | 31.4784  |
| Scoc     | chr8:83434491-83458396    | OK     | 85.53    | 92.0026  |
| Ttc12    | chr9:49436960-49486225    | OK     | 2.41222  | 2.59474  |
| Ucp2     | chr7:100493344-100502173  | OK     | 16.1314  | 17.3505  |
| Isoc1    | chr18:58659481-58679570   | OK     | 25.2611  | 27.1698  |
| Pcdh1    | chr18:38196693-38209762   | OK     | 20.9284  | 22.5094  |
| Stx18    | chr5:38039229-38159467    | OK     | 13.309   | 14.3141  |
| Itgb7    | chr15:102215994-102231935 | OK     | 0.845706 | 0.909537 |
| Mbd3     | chr10:80392540-80399479   | OK     | 24.5548  | 26.4078  |
| Cetn3    | chr13:81783291-81797157   | OK     | 40.3385  | 43.3819  |
| Ss18l1   | chr2:180042482-180070201  | OK     | 4.12698  | 4.43799  |
| Bptf     | chr11:107033080-107131922 | OK     | 9.68345  | 10.4124  |
| Gins3    | chr8:95633558-95645059    | OK     | 3.67346  | 3.94992  |
| Smc1a    | chrX:152016427-152061973  | OK     | 32.1945  | 34.6156  |
| Nap1l5   | chr6:58833699-58920396    | OK     | 154.851  | 166.495  |
| Sema4f   | chr6:82911884-82939750    | OK     | 35.9204  | 38.6199  |
| Hspa8    | chr9:40801272-40805199    | OK     | 251.821  | 270.716  |
| Eaf1     | chr14:31495078-31509858   | OK     | 21.5357  | 23.1503  |
| Bcl7a    | chr5:123344447-123374083  | OK     | 10.1512  | 10.9113  |
| Naa38    | chr11:69395790-69398234   | OK     | 57.946   | 62.282   |
| Akr1e1   | chr13:4592489-4609164     | OK     | 11.9205  | 12.8121  |
| Psmc14   | chr2:61711693-61800376    | OK     | 100.46   | 107.972  |
| Snrpb    | chr2:130171635-130179364  | OK     | 51.0157  | 54.8264  |
| Cyb5b    | chr8:107150660-107187470  | OK     | 66.4297  | 71.3899  |
| Aktip    | chr8:91070056-91135496    | OK     | 68.3966  | 73.4991  |
| Alg1     | chr16:5233620-5255956     | OK     | 18.3519  | 19.7197  |
| Slc35c2  | chr2:165276521-165287838  | OK     | 18.9533  | 20.3659  |
| Psmc3    | chr2:91054015-91059438    | OK     | 140.577  | 151.047  |
| Mad2l2   | chr4:148140489-148145696  | OK     | 5.09249  | 5.47167  |
| Wac      | chr18:7868831-7929028     | OK     | 14.8992  | 16.0073  |
| Rad23b   | chr4:55350041-55392237    | OK     | 76.4882  | 82.1754  |
| Kansl2   | chr15:98517657-98534269   | OK     | 4.57664  | 4.91673  |

|               |                           |        |            |            |
|---------------|---------------------------|--------|------------|------------|
| Gm11545       | chr11:94755135-94761182   | NOTEST | 0.00730647 | 0.00784894 |
| Stambp        | chr6:83543205-83588126    | OK     | 18.0778    | 19.4199    |
| Csmd1         | chr8:15892544-17535385    | OK     | 6.60151    | 7.09152    |
| Arg1          | chr10:24915206-24927470   | NOTEST | 0.193682   | 0.208004   |
| Ep300         | chr15:81586213-81652077   | OK     | 5.95203    | 6.39194    |
| 1110059E24Rik | chr19:21597312-21652791   | OK     | 14.153     | 15.1985    |
| Fkbp15        | chr4:62300341-62360548    | OK     | 16.4543    | 17.6694    |
| Mapk12        | chr15:89130583-89140703   | OK     | 14.2766    | 15.33      |
| Aprt          | chr8:122574636-122576907  | OK     | 33.6113    | 36.0904    |
| Ak2           | chr4:128993223-129011529  | OK     | 16.2388    | 17.4365    |
| Haus5         | chr7:30653707-30664994    | OK     | 0.916273   | 0.983643   |
| Tigd3         | chr19:5891137-5894107     | NOTEST | 0.526912   | 0.565609   |
| Irf2bp1       | chr7:19004064-19006763    | OK     | 10.1978    | 10.9464    |
| Bbs2          | chr8:94067953-94098811    | OK     | 8.61687    | 9.24937    |
| Cog5          | chr12:31654868-31950535   | OK     | 13.1224    | 14.0855    |
| Rfwd3         | chr8:111270943-111300222  | OK     | 4.57454    | 4.91028    |
| Magt1         | chrX:105968084-106011899  | OK     | 14.7899    | 15.8753    |
| Rabep1        | chr11:70844760-70969973   | OK     | 32.0012    | 34.349     |
| Lemd2         | chr17:27189599-27204438   | OK     | 10.67      | 11.4527    |
| Ranbp3        | chr17:56673224-56711769   | OK     | 17.2023    | 18.464     |
| Lamtor2       | chr3:88549818-88552927    | OK     | 84.7608    | 90.9746    |
| Rnaseh2c      | chr19:5601872-5602959     | OK     | 20.6176    | 22.1283    |
| Dock9         | chr14:121542038-121797734 | OK     | 13.1965    | 14.163     |
| Dclre1c       | chr2:3424130-3474986      | OK     | 2.64045    | 2.83365    |
| 2010012005Rik | chr19:46689905-46703382   | OK     | 10.6345    | 11.4126    |
| Gtf3c5        | chr2:28566244-28583279    | OK     | 9.58147    | 10.2823    |
| Ssbp1         | chr6:40471414-40481823    | OK     | 5.17745    | 5.55475    |
| Cwc15         | chr9:14500618-14510620    | OK     | 46.5163    | 49.9018    |
| Med4          | chr14:73510048-73518545   | OK     | 11.9442    | 12.8134    |
| Akt1          | chr12:112653820-112674276 | OK     | 83.4614    | 89.5282    |
| Rn45s         | chr17:39842996-39848829   | OK     | 701.06     | 752.01     |
| Trim15        | chr17:36860690-36867210   | NOTEST | 0.0115323  | 0.0123688  |
| Bysl          | chr17:47505050-47611492   | OK     | 7.66257    | 8.21744    |
| Srgap3        | chr6:112717971-112947266  | OK     | 38.6788    | 41.4794    |
| Pcdhga11      | chr18:36930284-37841872   | OK     | 5.23254    | 5.61134    |
| Gtf2a1        | chr12:91555261-91590487   | OK     | 15.635     | 16.7655    |
| Uggt1         | chr1:36140027-36244302    | OK     | 18.3825    | 19.711     |
| Sptlc1        | chr13:53332747-53377361   | OK     | 15.8325    | 16.9764    |
| Man1b1        | chr2:25332742-25352213    | OK     | 36.8007    | 39.4592    |
| Sgip1         | chr4:102760134-103011965  | OK     | 14.1636    | 15.1859    |
| Angel2        | chr1:190925107-190946491  | OK     | 7.97929    | 8.5539     |
| Ehmt1         | chr2:24790768-24919609    | OK     | 4.74919    | 5.09107    |
| Sp3           | chr2:72936431-72989249    | OK     | 11.4316    | 12.2542    |
| Prmt1         | chr7:44976754-44986420    | OK     | 39.8514    | 42.7149    |
| Tmem39b       | chr4:129676354-129696838  | OK     | 2.87464    | 3.08089    |
| Pnrc2         | chr4:135870925-135873846  | OK     | 15.4916    | 16.6027    |
| Ube2m         | chr7:13035119-13038275    | OK     | 117.545    | 125.958    |
| Wdr31         | chr4:62452631-62470895    | OK     | 0.962207   | 1.03102    |
| Mfsd6         | chr1:52656304-52727318    | OK     | 56.8294    | 60.8928    |
| Fbxw8         | chr5:118064980-118155458  | OK     | 16.8338    | 18.0364    |
| LOC101056043  | chr5:110361751-110448503  | OK     | 1.83795    | 1.96912    |
| Foxp4         | chr17:47867132-47924632   | OK     | 3.08972    | 3.31015    |
| Eif2b2        | chr12:85219512-85226628   | OK     | 22.099     | 23.6728    |

|               |                           |        |           |           |
|---------------|---------------------------|--------|-----------|-----------|
| Exoc7         | chr11:116287997-116306738 | OK     | 20.219    | 21.6565   |
| Lyrm4         | chr13:35978796-36117357   | OK     | 19.5557   | 20.9455   |
| Ctnnbl1       | chr2:157737400-157891903  | OK     | 15.0685   | 16.139    |
| Akt3          | chr1:177022114-177248767  | OK     | 61.2003   | 65.5449   |
| Syf2          | chr4:134930979-134937537  | OK     | 27.6176   | 29.5779   |
| Rnf139        | chr15:58889228-58933730   | OK     | 10.2228   | 10.948    |
| Epn1          | chr7:5080234-5098178      | OK     | 55.8376   | 59.7983   |
| 2500004C02Rik | chr2:153341156-153345810  | OK     | 1.1201    | 1.19943   |
| Nsun6         | chr2:14995130-15054872    | OK     | 3.60091   | 3.85594   |
| Wdr74         | chr19:8735838-8740624     | OK     | 15.5607   | 16.6621   |
| Armc5         | chr7:128234450-128245100  | OK     | 8.30521   | 8.89235   |
| Mrps30        | chr13:118380109-118387252 | OK     | 16.1071   | 17.2451   |
| Traf4         | chr11:78158422-78165550   | OK     | 1.4701    | 1.57394   |
| Lrrfip2       | chr9:111118110-111225668  | OK     | 11.2751   | 12.0715   |
| 2410004P03Rik | chr12:17004957-17011727   | NOTEST | 0.0351513 | 0.0376333 |
| Dip2c         | chr13:9276524-9668926     | OK     | 26.351    | 28.2108   |
| Txlnb         | chr10:17796218-17845663   | NOTEST | 0.172106  | 0.184249  |
| Cul9          | chr17:46500608-46546388   | OK     | 9.54504   | 10.2178   |
| Pcsk7         | chr9:45863690-45936058    | OK     | 7.37344   | 7.89302   |
| Med26         | chr8:72494558-72548310    | OK     | 1.87419   | 2.00599   |
| Pgam5         | chr5:110259134-110269899  | OK     | 15.5939   | 16.6898   |
| Fam73a        | chr3:152273459-152340407  | OK     | 35.9698   | 38.4957   |
| Orai1         | chr5:123015073-123030452  | OK     | 6.48605   | 6.94145   |
| Pcdhga12      | chr18:36930284-37841872   | OK     | 2.14782   | 2.29839   |
| Fam203a       | chr15:76368897-76371411   | OK     | 3.744     | 4.00619   |
| Ptplad1       | chr9:64986982-65021717    | OK     | 123.648   | 132.299   |
| Slc7a3        | chrX:101079220-101085352  | OK     | 2.799     | 2.99461   |
| D030056L22Rik | chr19:18713235-18718428   | OK     | 11.4173   | 12.2145   |
| Gnb5          | chr9:75306287-75345923    | OK     | 46.1399   | 49.3599   |
| Dnmt3a        | chr12:3806979-3914443     | OK     | 4.43642   | 4.74585   |
| Ufm1          | chr3:53853375-53863807    | OK     | 16.6431   | 17.8036   |
| Ubxn4         | chr1:128244180-128279377  | OK     | 27.1482   | 29.0408   |
| Tmem136       | chr9:43108652-43116570    | OK     | 2.29732   | 2.45713   |
| AI597479      | chr1:43098709-43115946    | OK     | 10.5855   | 11.3213   |
| Ctif          | chr18:75431220-75697696   | OK     | 41.5552   | 44.4362   |
| Spef2         | chr15:9662735-9748806     | NOTEST | 0.0502637 | 0.0537329 |
| Zranb1        | chr7:132949621-132983951  | OK     | 16.6119   | 17.7583   |
| Dstn          | chr2:143915330-143943324  | OK     | 125.883   | 134.567   |
| Slc30a6       | chr17:74395607-74424229   | OK     | 6.57647   | 7.02972   |
| Drg1          | chr11:3202352-3479831     | OK     | 69.2283   | 73.9941   |
| Abhd16a       | chr17:35089290-35102987   | OK     | 45.2922   | 48.4085   |
| Spg11         | chr2:122028579-122118386  | OK     | 4.71666   | 5.04108   |
| Neto2         | chr8:85636587-85691009    | OK     | 7.66465   | 8.1918    |
| Hist1h2an     | chr13:21786771-21787218   | NOTEST | 0.080995  | 0.0865627 |
| Zbtb14        | chr17:69383977-69390544   | OK     | 5.66124   | 6.05019   |
| Brms1         | chr19:5041403-5049917     | OK     | 18.3683   | 19.6283   |
| Rnf170        | chr8:26119379-26143869    | OK     | 7.04956   | 7.53254   |
| Rab35         | chr5:115631986-115647158  | OK     | 31.7069   | 33.8747   |
| Bcmo1         | chr8:117095864-117133720  | NOTEST | 0.210584  | 0.224979  |
| Larp1         | chr11:58009063-58062032   | OK     | 57.9457   | 61.9026   |
| Memo1         | chr17:74200699-74294863   | OK     | 28.7812   | 30.7453   |
| Chchd4        | chr6:91464275-91473423    | OK     | 11.8235   | 12.6295   |
| Polr2k        | chr15:36174009-36177012   | OK     | 4.41114   | 4.71158   |

|               |                           |        |           |           |
|---------------|---------------------------|--------|-----------|-----------|
| 9530082P21Rik | chr17:23749235-23754065   | NOTEST | 0.499644  | 0.533636  |
| Lamtor1       | chr7:101899807-101911903  | OK     | 36.4217   | 38.8963   |
| Ctbp1         | chr5:33247722-33275004    | OK     | 96.599    | 103.158   |
| L3mbtl2       | chr15:81663888-81697287   | OK     | 8.97142   | 9.57888   |
| Ppp4c         | chr7:126785867-126792471  | OK     | 24.5564   | 26.2182   |
| Cct5          | chr15:31590883-31601804   | OK     | 138.628   | 147.964   |
| Gm2061        | chr1:185447115-185468761  | NOTEST | 0.0138137 | 0.0147438 |
| Creb3         | chr4:43562633-43587487    | OK     | 36.5772   | 39.0379   |
| Odc1          | chr12:17544872-17551502   | OK     | 7.83208   | 8.35565   |
| C1qtnf4       | chr2:90885785-90890526    | OK     | 1.28149   | 1.36714   |
| Trem12        | chr17:48300037-48312534   | NOTEST | 0.0620464 | 0.0661784 |
| Ufl1          | chr4:25248585-25281821    | OK     | 7.15752   | 7.63412   |
| Tor1a         | chr2:30960560-30967918    | OK     | 14.0242   | 14.9566   |
| Sema3c        | chr5:17574815-17730267    | OK     | 7.42662   | 7.91958   |
| Zfp451        | chr1:33761540-33814595    | OK     | 10.8269   | 11.5444   |
| Cep95         | chr11:106789251-106818861 | OK     | 1.28104   | 1.36585   |
| 4930432K21Rik | chr8:84148037-84172597    | NOTEST | 0.67242   | 0.716903  |
| Minos1        | chr4:139101813-139131113  | OK     | 26.7227   | 28.4831   |
| Ctr9          | chr7:111028950-111056377  | OK     | 18.4216   | 19.6334   |
| 4930539M17Rik | chr3:9061963-9071076      | NOTEST | 0.028194  | 0.0300475 |
| Capn15        | chr17:25959555-25965505   | OK     | 5.81446   | 6.19612   |
| Klhl15        | chrX:94234929-94273515    | OK     | 3.21695   | 3.42803   |
| Pcsk2os1      | chr2:143535475-143816282  | OK     | 0.800829  | 0.853351  |
| Wdr12         | chr1:60076867-60153953    | OK     | 6.34583   | 6.76192   |
| Dmap1         | chr4:117674685-117682225  | OK     | 11.0787   | 11.8049   |
| Chst8         | chr7:34674467-34812711    | OK     | 13.659    | 14.5535   |
| Tnfrsf18      | chr4:156026341-156028891  | NOTEST | 0.113239  | 0.120653  |
| Abcf1         | chr17:35956818-35969750   | OK     | 25.8446   | 27.5367   |
| Actr2         | chr11:20062303-20112951   | OK     | 132.493   | 141.159   |
| Wdr5b         | chr16:36041189-36042974   | OK     | 1.61795   | 1.72362   |
| Zfp784        | chr7:5034445-5038446      | OK     | 1.34907   | 1.43718   |
| Pls3          | chrX:75785653-75875170    | OK     | 107.678   | 114.693   |
| Ttc26         | chr6:38381523-38427647    | OK     | 1.6172    | 1.72251   |
| Mnat1         | chr12:73123716-73273988   | OK     | 11.2254   | 11.9562   |
| Polr3gl       | chr3:96577873-96594158    | OK     | 8.48844   | 9.04072   |
| 2210013021Rik | chrX:153723553-153741296  | OK     | 61.7765   | 65.7924   |
| Tdrkh         | chr3:94413317-94431499    | OK     | 15.2526   | 16.2435   |
| Dhx32         | chr7:133709332-133881532  | OK     | 12.7179   | 13.544    |
| Zswim1        | chr2:164822685-164826867  | OK     | 7.26717   | 7.73907   |
| Dnaja1        | chr4:40720153-40757885    | OK     | 34.2142   | 36.4353   |
| Il1r1         | chr1:40439648-40465414    | NOTEST | 0.16143   | 0.1719    |
| Psm6          | chr14:14112184-14120904   | OK     | 79.1826   | 84.3175   |
| Ptges2        | chr2:32395889-32402740    | OK     | 13.1387   | 13.9907   |
| Klf17         | chr4:117756658-117765666  | NOTEST | 0.0154708 | 0.0164737 |
| Dhcr7         | chr7:143823166-143848410  | OK     | 47.3887   | 50.4577   |
| AI987944      | chr7:41372929-41393379    | OK     | 3.42914   | 3.65119   |
| Gm5089        | chr14:122181693-122451146 | NOTEST | 0.0437056 | 0.0465313 |
| Anks3         | chr16:4941414-4964237     | OK     | 7.79121   | 8.29458   |
| Tnik          | chr3:28263213-28670585    | OK     | 10.46     | 11.1355   |
| Insrr         | chr3:87796950-87816101    | OK     | 0.770861  | 0.820633  |
| Zfand1        | chr3:10339955-10351301    | OK     | 4.93254   | 5.25092   |
| Ppp3r2        | chr4:49661610-49845769    | NOTEST | 0.0602336 | 0.0641208 |
| Ndufv1        | chr19:4007498-4012755     | OK     | 103.959   | 110.667   |



|               |                           |        |           |           |
|---------------|---------------------------|--------|-----------|-----------|
| Bclaf1        | chr10:20312468-20342501   | OK     | 20.3698   | 21.6834   |
| Atad3a        | chr4:155740639-155761098  | OK     | 6.05776   | 6.44675   |
| Prkci         | chr3:30995770-31052740    | OK     | 16.7902   | 17.8652   |
| Ube2i         | chr17:25260510-25275528   | OK     | 19.6536   | 20.9119   |
| Rrp1          | chr10:78400361-78413043   | OK     | 104.392   | 111.064   |
| 1700102P08Rik | chr9:108392833-108397767  | NOTEST | 0.511711  | 0.544387  |
| Abcc4         | chr14:118482691-118706219 | OK     | 6.65334   | 7.07734   |
| Spryd7        | chr14:61534304-61556886   | OK     | 44.8959   | 47.7563   |
| Arpp19        | chr9:75037613-75060313    | OK     | 31.3113   | 33.3025   |
| Tmem253       | chr14:51984832-52020733   | NOTEST | 0.0878719 | 0.0934543 |
| Ercc1         | chr7:19345070-19359483    | OK     | 12.4702   | 13.2624   |
| Ube2q2        | chr9:55149368-55207529    | OK     | 27.9825   | 29.7594   |
| Zfp62         | chr11:49203499-49218816   | OK     | 6.62144   | 7.04174   |
| Mlst8         | chr17:24473549-24479078   | OK     | 13.2252   | 14.0641   |
| Nop2          | chr6:125131882-125144753  | OK     | 8.19789   | 8.7176    |
| Anapc7        | chr5:122422443-122444911  | OK     | 15.5274   | 16.5114   |
| Ucn           | chr5:30933142-31348845    | NOTEST | 0.0391705 | 0.0416515 |
| Fam114a2      | chr11:57482989-57518644   | OK     | 28.1661   | 29.9488   |
| Piezo1        | chr8:122476142-122551329  | OK     | 1.24689   | 1.32576   |
| BC061194      | chr2:18699021-18749605    | NOTEST | 0.482974  | 0.513436  |
| Otud3         | chr4:138895378-138913947  | OK     | 4.53931   | 4.82491   |
| Kmt2d         | chr15:98831668-98871205   | OK     | 5.30124   | 5.63441   |
| 4930404N11Rik | chr10:81357569-81365820   | NOTEST | 0.0350647 | 0.0372662 |
| Pef1          | chr4:130107555-130128134  | OK     | 70.802    | 75.2322   |
| Il27ra        | chr8:84021473-84042575    | NOTEST | 0.188076  | 0.199842  |
| Bola2         | chr7:126695999-126696693  | OK     | 80.5298   | 85.5629   |
| Jade2         | chr11:51813455-51857481   | OK     | 7.37312   | 7.83389   |
| Eif3d         | chr15:77958997-77970824   | OK     | 45.7033   | 48.5575   |
| Mob4          | chr1:55131244-55154899    | OK     | 42.1873   | 44.8214   |
| Sumo1         | chr1:59639433-59670834    | OK     | 30.9971   | 32.9266   |
| Pgd           | chr4:149149984-149166707  | OK     | 42.0393   | 44.6517   |
| Scg5          | chr2:113776312-113829091  | OK     | 59.1288   | 62.8005   |
| Gm5434        | chr12:36090378-36091829   | NOTEST | 0.564716  | 0.599777  |
| Wdr75         | chr1:45795500-45823613    | OK     | 13.4553   | 14.2906   |
| Pblid2        | chr10:63024511-63058812   | OK     | 2.00996   | 2.13468   |
| Tnfaip1       | chr11:78522849-78536260   | OK     | 19.9062   | 21.141    |
| Foxj3         | chr4:119539660-119629119  | OK     | 12.8167   | 13.6107   |
| Gm11127       | chr17:36042960-36058645   | NOTEST | 0.0461457 | 0.0490031 |
| Vps29         | chr5:122354412-122363287  | OK     | 95.5948   | 101.508   |
| Hr            | chr14:70554055-70573548   | OK     | 5.86608   | 6.2288    |
| Hsf4          | chr8:105269800-105275845  | OK     | 19.6897   | 20.9063   |
| Arhgap12      | chr18:6024449-6136098     | OK     | 18.8751   | 20.0381   |
| Zdhhc9        | chrX:48171970-48208702    | OK     | 33.5736   | 35.636    |
| Gtf2e2        | chr8:33731913-33777173    | OK     | 12.7499   | 13.5331   |
| Plekhm3       | chr1:64789120-64956824    | OK     | 23.9117   | 25.3798   |
| Ndufaf6       | chr4:11051045-11076205    | OK     | 5.97807   | 6.34509   |
| Slc35a3       | chr3:116670797-116712280  | OK     | 11.2946   | 11.988    |
| Galnt10       | chr11:57645441-57787500   | OK     | 7.52487   | 7.98525   |
| Prdm2         | chr4:143107390-143212709  | OK     | 13.9489   | 14.8008   |
| Nol7          | chr13:43398375-43480973   | OK     | 13.5866   | 14.4158   |
| Snx25         | chr8:46033260-46124146    | OK     | 18.8778   | 20.0296   |
| Akap11        | chr14:78492245-78536860   | OK     | 45.6597   | 48.4442   |
| Timm9         | chr12:71111427-71136675   | OK     | 17.7607   | 18.8438   |

|               |                           |        |           |           |
|---------------|---------------------------|--------|-----------|-----------|
| Psmg3         | chr5:139823593-139826843  | OK     | 18.3488   | 19.4673   |
| Pum1          | chr4:130663358-130781565  | OK     | 14.3917   | 15.2677   |
| Smarce1       | chr11:99209047-99231017   | OK     | 6.20384   | 6.58136   |
| Hnrnpc        | chr14:52073379-52104028   | OK     | 46.2345   | 49.0464   |
| Sfr1          | chr19:47731755-47735588   | OK     | 62.9157   | 66.7394   |
| Rps14         | chr18:60774595-60778546   | OK     | 78.1477   | 82.8881   |
| Ube2d3        | chr3:135438758-135467178  | OK     | 96.896    | 102.772   |
| Gm16287       | chr4:139175406-139180655  | NOTEST | 0.370189  | 0.392632  |
| Ybx1          | chr4:119277326-119294513  | OK     | 20.916    | 22.1838   |
| Ccnd3         | chr17:47505050-47611492   | OK     | 9.02801   | 9.57515   |
| Emc9          | chr14:55578493-55585254   | OK     | 53.5032   | 56.7452   |
| Nrip1         | chr16:76290861-76373049   | OK     | 9.0753    | 9.62471   |
| Trip12        | chr1:84721188-84839304    | OK     | 25.6577   | 27.2109   |
| Hmgb1         | chr5:149047226-149053037  | OK     | 11.5941   | 12.2938   |
| Mettl23       | chr11:116843514-116849740 | OK     | 5.16474   | 5.47642   |
| Olf917        | chr9:38664912-38665842    | NOTEST | 0.0237025 | 0.0251289 |
| Larp4         | chr15:99970064-100016358  | OK     | 15.2125   | 16.1279   |
| Zfp777        | chr6:48024187-48048114    | OK     | 6.47262   | 6.86138   |
| Tnpo2         | chr8:85036914-85067120    | OK     | 61.0201   | 64.6845   |
| Sec23b        | chr2:144556228-144590753  | OK     | 26.2857   | 27.8629   |
| Supt3         | chr17:44495986-45119284   | OK     | 17.1292   | 18.1562   |
| Tigit         | chr16:43648860-43664184   | NOTEST | 0.0226709 | 0.0240298 |
| C130050O18Rik | chr5:139359738-139460534  | NOTEST | 0.191525  | 0.202992  |
| Fbxo38        | chr18:62504058-62548743   | OK     | 11.0471   | 11.7075   |
| Thap6         | chr5:91948841-91972137    | OK     | 1.01432   | 1.07492   |
| Reep2         | chr18:34840588-34847463   | OK     | 105.306   | 111.589   |
| 1600002H07Rik | chr17:24215055-24220769   | OK     | 3.56371   | 3.77607   |
| Smim7         | chr8:72565197-72571048    | OK     | 34.5305   | 36.5865   |
| Rad9b         | chr5:122325507-122354195  | NOTEST | 0.69738   | 0.738854  |
| Nprl2         | chr9:107542208-107545706  | OK     | 15.5091   | 16.4313   |
| Frs2          | chr10:117070126-117148474 | OK     | 7.88309   | 8.35119   |
| Dirc2         | chr16:35694902-35769356   | OK     | 22.5504   | 23.8879   |
| Hist1h2bg     | chr13:23571399-23571863   | OK     | 3.8476    | 4.07556   |
| Ccdc159       | chr9:21921008-21935872    | OK     | 3.2577    | 3.45053   |
| Olf1167       | chr2:88148983-88150083    | NOTEST | 0.0192014 | 0.020337  |
| Surf1         | chr2:26913377-26933511    | OK     | 41.404    | 43.8499   |
| Ckmt2         | chr13:91853386-91876885   | NOTEST | 0.111901  | 0.118502  |
| Sec24a        | chr11:51692262-51756834   | OK     | 4.67094   | 4.9462    |
| Rab3gap2      | chr1:185204167-185329401  | OK     | 24.4416   | 25.8819   |
| Fchsd1        | chr18:37955558-37969731   | OK     | 5.91526   | 6.26323   |
| Nudt11        | chrX:6047506-6054751      | OK     | 10.7696   | 11.4018   |
| Hmgxb3        | chr18:61131276-61177050   | OK     | 9.12302   | 9.6584    |
| Hsph1         | chr5:149616844-149636315  | OK     | 107.801   | 114.125   |
| Rcan2         | chr17:43801850-44039516   | OK     | 144.972   | 153.466   |
| Ahsa1         | chr12:87266727-87273952   | OK     | 118.375   | 125.31    |
| Tinagl1       | chr4:130165599-130175122  | OK     | 6.54072   | 6.9239    |
| Pdzd11        | chrX:100622905-100625907  | OK     | 41.6488   | 44.0882   |
| Slc9a7        | chrX:20105754-20291764    | OK     | 11.8708   | 12.5658   |
| Psma2         | chr13:14613241-14625673   | OK     | 107.915   | 114.231   |
| H2-Ke6        | chr17:34026032-34028055   | OK     | 13.4732   | 14.2608   |
| Rusc1         | chr3:89083978-89093363    | OK     | 93.2239   | 98.6674   |
| Slc34a2       | chr5:53049352-53071663    | NOTEST | 0.386435  | 0.408911  |
| Zbtb22        | chr17:33916175-33919325   | OK     | 13.4244   | 14.2047   |

|           |                           |        |            |            |
|-----------|---------------------------|--------|------------|------------|
| Lonp2     | chr8:86624042-86716638    | OK     | 36.1242    | 38.223     |
| Map2k2    | chr10:81105946-81124697   | OK     | 30.9037    | 32.6961    |
| Optn      | chr2:5020641-5063938      | OK     | 20.9624    | 22.1766    |
| Arid1b    | chr17:4995073-5347656     | OK     | 7.53841    | 7.97486    |
| Dnmbp     | chr19:43846818-43940198   | OK     | 2.21875    | 2.34693    |
| Prkacb    | chr3:146729578-146812946  | OK     | 97.2008    | 102.81     |
| Slu7      | chr11:43433730-43447981   | OK     | 16.6533    | 17.6134    |
| BC005624  | chr2:30972832-30981941    | OK     | 26.0228    | 27.5229    |
| Arhgap9   | chr10:127321963-127341579 | NOTEST | 0.225022   | 0.237994   |
| Tmem130   | chr5:144735914-144761578  | OK     | 71.5731    | 75.6897    |
| Ccl2      | chr11:82035576-82037452   | OK     | 2.09036    | 2.21056    |
| Zfp39     | chr11:58888152-58904225   | OK     | 1.07664    | 1.13854    |
| Fbxo42    | chr4:141147921-141204062  | OK     | 9.98557    | 10.5594    |
| BC068281  | chr12:4843302-4856967     | OK     | 3.43308    | 3.63024    |
| Dusp28    | chr1:92906988-92908620    | OK     | 7.71401    | 8.15693    |
| Cdc42bpa  | chr1:179961088-180196020  | OK     | 33.7748    | 35.714     |
| Skiv2l2   | chr13:112800776-112927380 | OK     | 30.1246    | 31.8532    |
| Anapc2    | chr2:25272465-25285916    | OK     | 53.3406    | 56.4011    |
| Gmeb2     | chr2:181251450-181287966  | OK     | 4.16622    | 4.40521    |
| Klhl26    | chr8:70450227-70476943    | OK     | 14.2638    | 15.0813    |
| EU599041  | chr7:43214038-43226842    | NOTEST | 0.116419   | 0.123091   |
| Fsd1      | chr17:55986510-55996881   | OK     | 27.5983    | 29.1778    |
| Pvr       | chr7:19903577-19921143    | OK     | 4.72687    | 4.99714    |
| Ticam1    | chr17:56269461-56276767   | OK     | 2.70082    | 2.85504    |
| Sox17     | chr1:4490927-4497354      | OK     | 1.94903    | 2.06032    |
| Gpx3      | chr11:54902853-54910382   | OK     | 37.213     | 39.3376    |
| Pigc      | chr1:161942088-161979636  | OK     | 6.58678    | 6.96269    |
| Plxna4os1 | chr6:32144556-32588192    | NOTEST | 0.0201727  | 0.0213235  |
| Tbc1d8    | chr1:39367850-39478747    | OK     | 6.70467    | 7.08683    |
| Blcap     | chr2:157556361-157566361  | OK     | 31.7815    | 33.5929    |
| Dync2li1  | chr17:84626498-84655564   | OK     | 11.4498    | 12.1022    |
| Sfxn3     | chr19:45047575-45056383   | OK     | 46.9322    | 49.605     |
| Slc5a4b   | chr10:76058620-76111018   | NOTEST | 0.00891923 | 0.0094257  |
| Ubxn8     | chr8:33599620-33641976    | OK     | 7.72946    | 8.16816    |
| Trim47    | chr11:116105749-116110235 | OK     | 2.00157    | 2.1146     |
| Fastk     | chr5:24441039-24445235    | OK     | 30.3125    | 32.0239    |
| Polrmt    | chr10:79697304-80369637   | OK     | 5.72129    | 6.04429    |
| Nsmce4a   | chr7:130532525-130547381  | OK     | 19.2619    | 20.3466    |
| Lrit2     | chr14:37068048-37073735   | NOTEST | 0.00667228 | 0.00704774 |
| Fstl3     | chr10:79697304-80369637   | OK     | 3.86122    | 4.07819    |
| Lad1      | chr1:135818597-135833341  | NOTEST | 0.0123343  | 0.013027   |
| Eif4a2    | chr16:23107467-23127730   | OK     | 303.113    | 320.126    |
| Btbd2     | chr10:80642616-80657071   | OK     | 44.0343    | 46.5043    |
| Papola    | chr12:105784701-105838943 | OK     | 22.6844    | 23.9545    |
| Lin28a    | chr4:134003329-134018816  | NOTEST | 0.00524827 | 0.00554189 |
| Mettl10   | chr7:132827460-132852647  | OK     | 8.31855    | 8.78322    |
| Ch25h     | chr19:34473783-34475135   | OK     | 1.49058    | 1.57381    |
| Khynyn    | chr14:55884968-55896781   | OK     | 7.08015    | 7.4753     |
| Cluap1    | chr16:3909008-3941147     | OK     | 9.95057    | 10.5057    |
| Hmga2     | chr10:120361274-120476935 | NOTEST | 0.0086569  | 0.0091394  |
| Anapc4    | chr5:52834134-52866734    | OK     | 40.457     | 42.7111    |
| Pogz      | chr3:94837566-94883567    | OK     | 5.60442    | 5.91627    |
| Rpl7l1    | chr17:46773906-46782656   | OK     | 14.39      | 15.1894    |

|               |                           |        |            |            |
|---------------|---------------------------|--------|------------|------------|
| Itpa          | chr2:130667840-130681614  | OK     | 17.1826    | 18.1367    |
| Wwp2          | chr8:107436397-107558595  | OK     | 16.1895    | 17.0884    |
| Sco2          | chr15:89355718-89377037   | OK     | 11.8185    | 12.4747    |
| Zfp839        | chr12:110850278-110869998 | OK     | 2.18148    | 2.30237    |
| B4galt2       | chr4:117872999-117883476  | OK     | 7.72992    | 8.15778    |
| Smek2         | chr11:29172906-29220797   | OK     | 8.81151    | 9.29885    |
| Gm8221        | chr15:77618967-77627398   | NOTEST | 0.00208956 | 0.00220496 |
| Zbtb11        | chr16:55973267-56008912   | OK     | 10.3836    | 10.9568    |
| Pcdhb12       | chr18:36930284-37841872   | OK     | 1.35319    | 1.42781    |
| Rhoa          | chr9:108306204-108337939  | OK     | 106.455    | 112.324    |
| Zfp937        | chr2:150218098-150244874  | OK     | 1.28718    | 1.35813    |
| Tbc1d20       | chr2:152293871-152312590  | OK     | 13.7699    | 14.5286    |
| Cyhr1         | chr15:76643394-76660208   | OK     | 57.2275    | 60.3792    |
| Casp8ap2      | chr4:32615472-32653265    | OK     | 2.41011    | 2.54282    |
| Zfp786        | chr6:47819265-47830505    | NOTEST | 0.58896    | 0.621353   |
| Usp25         | chr16:77014068-77116780   | OK     | 25.5137    | 26.9151    |
| Nup50         | chr15:84923427-84942963   | OK     | 11.9018    | 12.5553    |
| Apex1         | chr14:50924948-50930849   | OK     | 20.5866    | 21.7158    |
| Maea          | chr5:33335571-33373294    | OK     | 69.777     | 73.5944    |
| Wdr83         | chr8:85071756-85080746    | OK     | 13.4665    | 14.2031    |
| Lhcgr         | chr17:88741548-88791976   | OK     | 1.25835    | 1.32714    |
| Wdr61         | chr9:54717152-54734549    | OK     | 20.0939    | 21.1918    |
| Ccnk          | chr12:108179737-108203359 | OK     | 7.20616    | 7.59989    |
| Paip1         | chr13:119428599-119460323 | OK     | 17.4156    | 18.3656    |
| Socs4         | chr14:47277142-47291591   | OK     | 7.15159    | 7.54137    |
| Asb3          | chr11:30954397-31102704   | OK     | 6.2061     | 6.54412    |
| Slc39a3       | chr10:81028539-81033912   | OK     | 19.4263    | 20.4844    |
| Ncf2          | chr1:152807889-152836990  | NOTEST | 0.518428   | 0.546659   |
| Bdh1          | chr16:31422296-31458901   | OK     | 9.1557     | 9.65371    |
| Mxd4          | chr5:34176579-34187710    | OK     | 19.6837    | 20.7532    |
| Sdhaf1        | chr7:30321408-30322375    | OK     | 8.35265    | 8.80579    |
| I830012O16Rik | chr19:34607956-34613401   | OK     | 3.37474    | 3.55755    |
| Gins2         | chr8:120488865-120589075  | OK     | 1.89523    | 1.99771    |
| Thap11        | chr8:105855102-105856950  | OK     | 8.33449    | 8.78503    |
| Acsl1         | chr8:46471041-46536050    | OK     | 16.0776    | 16.9466    |
| Mdc1          | chr17:35841497-35859670   | OK     | 3.40667    | 3.59068    |
| Gcc1          | chr6:28416602-28421724    | OK     | 7.9857     | 8.41674    |
| Iqcb1         | chr16:36792883-36874826   | OK     | 7.91809    | 8.34539    |
| Dtnbp1        | chr13:44922079-45002096   | OK     | 22.8607    | 24.093     |
| 2810403A07Rik | chr3:88685793-88712933    | OK     | 8.78639    | 9.25876    |
| Cchcr1        | chr17:35517115-35531015   | NOTEST | 0.631466   | 0.665382   |
| Prrc2a        | chr17:35149085-35164877   | OK     | 43.7591    | 46.1076    |
| Fancg         | chr4:43002336-43010301    | OK     | 5.23608    | 5.51705    |
| Ccdc178       | chr18:21810896-22171396   | NOTEST | 0.0544275  | 0.0573475  |
| Dmtf1         | chr5:9100736-9161776      | OK     | 12.4836    | 13.1528    |
| Trappc4       | chr9:44403758-44407548    | OK     | 78.8186    | 83.0361    |
| Rnf123        | chr9:108049289-108079375  | OK     | 21.4036    | 22.5479    |
| Angel1        | chr12:86700501-86726460   | OK     | 30.4002    | 32.0239    |
| Serpib8       | chr1:107590005-107608978  | OK     | 4.35027    | 4.58241    |
| Gemin6        | chr17:80224488-80228497   | OK     | 2.53019    | 2.66518    |
| Fbxl20        | chr11:98082553-98149616   | OK     | 12.7447    | 13.4239    |
| Ebf4          | chr2:130295938-130370481  | OK     | 4.36422    | 4.59668    |
| Zpr1          | chr9:46273063-46282642    | OK     | 13.042     | 13.7352    |

|               |                           |        |           |           |
|---------------|---------------------------|--------|-----------|-----------|
| Usp36         | chr11:118259652-118290244 | OK     | 4.19831   | 4.42112   |
| Stag2         | chrX:42149411-42277186    | OK     | 16.3094   | 17.1729   |
| Krr1          | chr10:111972694-111997264 | OK     | 4.87911   | 5.13723   |
| Nipa2         | chr7:55842070-55962493    | OK     | 17.2825   | 18.1968   |
| Fbxo25        | chr8:13907805-13940521    | OK     | 27.2305   | 28.6702   |
| Milt1         | chr17:56892610-56935388   | OK     | 6.73786   | 7.09368   |
| Clic3         | chr2:25456842-25458772    | NOTEST | 0.388339  | 0.408809  |
| Tmem170b      | chr13:41606215-41641357   | OK     | 4.31767   | 4.54526   |
| Zfp708        | chr13:67069397-67114028   | OK     | 1.52154   | 1.6017    |
| Ypel4         | chr2:84734203-84737877    | OK     | 13.7098   | 14.432    |
| Mterfd1       | chr13:66912097-67032405   | OK     | 7.79708   | 8.20744   |
| Pias4         | chr10:81153965-81167720   | OK     | 14.2447   | 14.994    |
| Mmd           | chr11:90249475-90278573   | OK     | 8.77366   | 9.2351    |
| Nsd1          | chr13:55209781-55318325   | OK     | 14.6746   | 15.4459   |
| Fmr1          | chrX:68678540-68717961    | OK     | 17.7464   | 18.6791   |
| Ccdc22        | chrX:7558561-7605420      | OK     | 7.46782   | 7.86028   |
| Zfp260        | chr7:30095075-30107614    | OK     | 19.5594   | 20.5864   |
| Ocln          | chr13:100497366-100552498 | OK     | 0.933468  | 0.982481  |
| Ccdc114       | chr7:45928397-45948956    | NOTEST | 0.360724  | 0.379651  |
| Atp6v0c       | chr17:24163864-24169429   | OK     | 54.1609   | 57.0016   |
| Cry2          | chr2:92403646-92434069    | OK     | 28.1576   | 29.6303   |
| Tgds          | chr14:118111910-118132765 | OK     | 1.75595   | 1.84778   |
| Tssk1         | chr16:17894202-17895653   | NOTEST | 0.0809928 | 0.0852178 |
| Upf2          | chr2:5951468-6056703      | OK     | 6.19547   | 6.51834   |
| Eif4h         | chr5:134619875-134639328  | OK     | 151.374   | 159.253   |
| Naa60         | chr16:3884618-3904781     | OK     | 30.8702   | 32.4749   |
| Nfe2l1        | chr11:96817413-96829968   | OK     | 194.306   | 204.405   |
| Zfp11         | chr19:6080037-6084891     | OK     | 12.1514   | 12.7821   |
| Zfp407        | chr18:84207701-84589504   | OK     | 3.0268    | 3.18345   |
| Pla2g4c       | chr7:13325666-13360668    | NOTEST | 0.156278  | 0.164364  |
| Mamdc4        | chr2:25563114-25571316    | NOTEST | 0.0967454 | 0.101749  |
| Pianp         | chr6:124996719-125003097  | OK     | 9.75732   | 10.2608   |
| 1200014J11Rik | chr11:73047866-73083579   | OK     | 4.83575   | 5.08505   |
| Fam204a       | chr19:60198585-60226697   | OK     | 9.75737   | 10.2583   |
| Dsn1          | chr2:156995061-157007075  | OK     | 1.1139    | 1.17102   |
| Zfp507        | chr7:35772345-35838074    | OK     | 4.55882   | 4.79246   |
| Zc3h12c       | chr9:52111984-52168111    | OK     | 2.7155    | 2.85467   |
| Gart          | chr16:91621396-91646972   | OK     | 15.496    | 16.2896   |
| Letm1         | chr5:33741351-33782704    | OK     | 28.5827   | 30.0461   |
| Gatsl2        | chr5:134099747-134141758  | OK     | 12.0556   | 12.6725   |
| Copb1         | chr7:114215558-114254680  | OK     | 31.8592   | 33.4892   |
| Rnf181        | chr6:72355482-72362381    | OK     | 56.0448   | 58.9117   |
| Taf9          | chr13:100651342-100666415 | OK     | 46.7851   | 49.1737   |
| Hyou1         | chr9:44379489-44392369    | OK     | 27.6181   | 29.0266   |
| Mars          | chr10:127290792-127311786 | OK     | 13.8422   | 14.5481   |
| Zcchc4        | chr5:52783066-52819765    | OK     | 3.70444   | 3.89279   |
| Med12         | chrX:101274090-101298934  | OK     | 4.37461   | 4.59688   |
| 4933426M11Rik | chr12:80790531-80880833   | OK     | 40.3811   | 42.4324   |
| Fopnl         | chr16:14299243-14317332   | OK     | 29.8904   | 31.4084   |
| Tfb1m         | chr17:3326572-3557713     | OK     | 9.39491   | 9.87033   |
| Rab8a         | chr8:72161199-72181366    | OK     | 17.2682   | 18.142    |
| Vps9d1        | chr8:123232257-123254175  | OK     | 10.5355   | 11.0684   |
| 2810429I04Rik | chr13:3478302-3492398     | NOTEST | 0.28535   | 0.299768  |



|               |                           |        |          |          |
|---------------|---------------------------|--------|----------|----------|
| Gne           | chr4:44034074-44084177    | OK     | 19.3012  | 20.2744  |
| Gabra1        | chr11:42130939-42182930   | OK     | 22.3333  | 23.4584  |
| Map3k8        | chr18:4331326-4352953     | NOTEST | 0.48803  | 0.512588 |
| Ccpg1         | chr9:72985503-73039699    | OK     | 69.23    | 72.7116  |
| Zbed6         | chr1:133619870-133661399  | OK     | 5.7388   | 6.02726  |
| Nfx1          | chr4:40970905-41025992    | OK     | 12.5829  | 13.215   |
| Mien1         | chr11:98412483-98438988   | OK     | 97.807   | 102.716  |
| Tmed5         | chr5:108121646-108132591  | OK     | 11.3678  | 11.9375  |
| Ccdc93        | chr1:121431066-121506460  | OK     | 6.22542  | 6.53724  |
| Rhou          | chr8:123653928-123663880  | OK     | 21.1459  | 22.2047  |
| Klhl1         | chr14:96105264-96519034   | NOTEST | 0.459794 | 0.482778 |
| Exosc8        | chr3:54728678-54735364    | OK     | 5.3274   | 5.59339  |
| Mrpl19        | chr6:81923668-81965949    | OK     | 6.83757  | 7.17891  |
| Gsto1         | chr19:47854988-47864788   | OK     | 28.0207  | 29.4184  |
| 2210018M11Rik | chr7:98590605-98656569    | OK     | 4.72064  | 4.95608  |
| Orc3          | chr4:34550614-34614942    | OK     | 7.43148  | 7.80154  |
| Fam213a       | chr14:40993739-41013775   | OK     | 34.6214  | 36.344   |
| Timm44        | chr8:4259730-4275905      | OK     | 15.2652  | 16.0245  |
| Stx12         | chr4:132854063-132884458  | OK     | 91.3475  | 95.8754  |
| Ecd           | chr14:20319858-20348121   | OK     | 16.7375  | 17.5661  |
| Alpk1         | chr3:127670309-127780527  | OK     | 1.64757  | 1.72912  |
| Mon1b         | chr8:113635585-113655533  | OK     | 10.7628  | 11.2945  |
| Med9          | chr11:59948213-59964942   | OK     | 23.9606  | 25.1426  |
| Jmjd4         | chr11:59450044-59458567   | OK     | 7.02704  | 7.37338  |
| Cnot11        | chr1:39535801-39546877    | OK     | 9.63079  | 10.1029  |
| Ybey          | chr10:76449080-76515857   | OK     | 0.865819 | 0.908167 |
| Kptn          | chr7:16119875-16127516    | OK     | 5.72601  | 6.00553  |
| Gm6682        | chr12:4782169-4783512     | OK     | 51.2888  | 53.7899  |
| Miip          | chr4:147860777-147868719  | OK     | 2.77143  | 2.90637  |
| Camsap1       | chr2:25926837-25983282    | OK     | 13.6715  | 14.3361  |
| Trim41        | chr11:48806403-48817391   | OK     | 11.0923  | 11.6309  |
| Strip2        | chr6:29917012-29959680    | OK     | 3.92944  | 4.11922  |
| AU019823      | chr9:50603900-50625000    | OK     | 2.10271  | 2.20415  |
| Tmem183a      | chr1:134346096-134361999  | OK     | 32.5347  | 34.1039  |
| Wdr60         | chr12:116207049-116263025 | OK     | 2.64535  | 2.7729   |
| Zfp759        | chr13:67128227-67141787   | OK     | 1.64763  | 1.72703  |
| Ddx60         | chr8:61928088-62037695    | OK     | 0.83176  | 0.871744 |
| Adamts15      | chr9:30899154-30922452    | OK     | 4.65633  | 4.88007  |
| Rgp1          | chr4:43562633-43587487    | OK     | 8.33591  | 8.73618  |
| Fam175b       | chr7:132859224-132885114  | OK     | 17.1455  | 17.9672  |
| Zfp790        | chr7:29816071-29832042    | OK     | 4.61841  | 4.83971  |
| Map4k1        | chr7:28982853-29003278    | NOTEST | 0.658209 | 0.689713 |
| Ing4          | chr6:125039847-125049264  | OK     | 13.5457  | 14.1919  |
| 1300002E11Rik | chr16:21794346-21809039   | OK     | 5.5275   | 5.78999  |
| Aimp2         | chr5:143871861-143909839  | OK     | 24.5179  | 25.6816  |
| Ncoa6         | chr2:155390655-155440783  | OK     | 7.52222  | 7.87925  |
| Lrp10         | chr14:54464146-54470291   | OK     | 55.2895  | 57.9019  |
| Cln5          | chr14:103070215-103077630 | OK     | 16.6882  | 17.4762  |
| Commd10       | chr18:46958875-47087994   | OK     | 12.4303  | 13.017   |
| Smyd5         | chr6:85431975-85446429    | OK     | 14.8096  | 15.5086  |
| Ccdc104       | chr11:29221535-29247272   | OK     | 52.7705  | 55.2509  |
| Ppil3         | chr1:58430992-58445486    | OK     | 19.917   | 20.8527  |
| Arf5          | chr6:28423639-28426499    | OK     | 112.163  | 117.432  |

|               |                           |        |           |           |
|---------------|---------------------------|--------|-----------|-----------|
| Ube2w         | chr1:16540787-16619338    | OK     | 20.5938   | 21.5611   |
| Gemin8        | chrX:166170479-166190512  | OK     | 1.85678   | 1.94395   |
| Dhx57         | chr17:80238303-80297476   | OK     | 20.9019   | 21.8828   |
| Dync1li2      | chr8:104417673-104443047  | OK     | 134.56    | 140.874   |
| Cmtm4         | chr8:104348192-104395807  | OK     | 12.3184   | 12.8954   |
| Zcchc10       | chr11:53324688-53333301   | OK     | 6.98127   | 7.30709   |
| Lars          | chr18:42202348-42262071   | OK     | 23.3871   | 24.4776   |
| Dynlt3        | chrX:9654269-9662983      | OK     | 217.323   | 227.447   |
| Zfp873        | chr10:82048126-82061586   | OK     | 1.04272   | 1.09127   |
| Heatr2        | chr5:139150222-139186505  | OK     | 3.17029   | 3.31742   |
| Gsk3a         | chr7:25228258-25237851    | OK     | 50.4889   | 52.8259   |
| Tomm6         | chr17:47686644-47694736   | OK     | 78.1142   | 81.7288   |
| Poglut1       | chr16:38525179-38550184   | OK     | 31.2545   | 32.7001   |
| Hars2         | chr18:36783279-36792560   | OK     | 6.61066   | 6.91623   |
| Hbs1l         | chr10:21295978-21368889   | OK     | 27.0958   | 28.3476   |
| Khsrp         | chr17:57021048-57031507   | OK     | 18.5939   | 19.4527   |
| 2700046G09Rik | chr19:32389215-32391184   | NOTEST | 0.726046  | 0.75953   |
| Trim24        | chr6:37870810-37968445    | OK     | 5.29249   | 5.53638   |
| Ndor1         | chr2:25244812-25255414    | OK     | 5.47776   | 5.73      |
| Hcfc1         | chrX:73942791-73966357    | OK     | 19.612    | 20.5139   |
| A430033K04Rik | chr5:138622858-138648905  | OK     | 1.57286   | 1.64507   |
| 1810022K09Rik | chr3:14578670-14611256    | OK     | 9.73903   | 10.1849   |
| 6030458C11Rik | chr15:12808176-12824657   | OK     | 12.6149   | 13.1912   |
| Chmp1a        | chr8:123204260-123212788  | OK     | 51.8635   | 54.2322   |
| Gm14057       | chr2:130707852-130840110  | OK     | 0.840892  | 0.879265  |
| Ndufa2        | chr18:36735069-36744587   | OK     | 86.0619   | 89.9852   |
| 1110058L19Rik | chr1:23995938-24005640    | OK     | 30.6434   | 32.0378   |
| Kbtbd11       | chr8:15011024-15033332    | OK     | 20.8381   | 21.7859   |
| Astn1         | chr1:158362303-158691786  | OK     | 23.9361   | 25.0231   |
| Arih2         | chr9:108602942-108649380  | OK     | 8.70864   | 9.10391   |
| Chordc1       | chr9:18292266-18314000    | OK     | 38.3248   | 40.0636   |
| Reep1         | chr6:71707680-71810705    | OK     | 222.398   | 232.392   |
| Shfm1         | chr6:6558274-6578658      | OK     | 164.344   | 171.723   |
| Hnrnpa0       | chr13:58125878-58128556   | OK     | 56.001    | 58.5148   |
| Lin7a         | chr10:107271830-107425143 | OK     | 12.6269   | 13.1936   |
| Fbxo46        | chr7:19119858-19138261    | OK     | 1.9601    | 2.04796   |
| Msl2          | chr9:101074761-101104799  | OK     | 9.08195   | 9.48882   |
| Zfp960        | chr17:17064102-17089631   | OK     | 0.898589  | 0.938702  |
| Asns          | chr6:7675170-7693182      | OK     | 90.8566   | 94.9059   |
| Polr2j        | chr5:136116690-136122947  | OK     | 37.5403   | 39.2096   |
| B020018J22Rik | chr12:112428283-112435338 | NOTEST | 0.0187609 | 0.0195935 |
| A230072E10Rik | chrX:151198077-151341879  | NOTEST | 0.0415962 | 0.0434403 |
| Dusp7         | chr9:106368631-106375723  | OK     | 6.78851   | 7.08912   |
| Kctd20        | chr17:28953215-28967937   | OK     | 25.6836   | 26.8167   |
| Sirt5         | chr13:43370715-43395203   | OK     | 5.5038    | 5.74654   |
| Cap1          | chr4:122859227-122885881  | OK     | 139.829   | 145.99    |
| Uba6          | chr5:86110729-86172743    | OK     | 18.4295   | 19.241    |
| Terf2ip       | chr8:112011358-112020528  | OK     | 14.4624   | 15.0987   |
| Tollip        | chr7:141881584-141902406  | OK     | 64.383    | 67.2147   |
| Clip1         | chr5:123577793-123684361  | OK     | 12.5075   | 13.0573   |
| Khdrbs1       | chr4:129703168-129742303  | OK     | 34.8129   | 36.3429   |
| Uqcr11        | chr10:80402996-80406821   | OK     | 63.8828   | 66.6859   |
| Syvn1         | chr19:6046575-6057751     | OK     | 20.4412   | 21.3372   |

|                    |                           |        |            |            |
|--------------------|---------------------------|--------|------------|------------|
| St8sia3            | chr18:64157723-64277180   | OK     | 29.5698    | 30.8641    |
| Dak                | chr19:10592196-10604258   | OK     | 5.45697    | 5.69573    |
| Larp4b             | chr13:9093904-9173090     | OK     | 27.7621    | 28.9761    |
| Aptx               | chr4:40682077-40703194    | OK     | 7.52633    | 7.85531    |
| Gars               | chr6:55038000-55079504    | OK     | 144.819    | 151.141    |
| MIxip              | chr5:123394797-123457931  | OK     | 7.2395     | 7.55543    |
| Lcmt1              | chr7:123377981-123430358  | OK     | 34.7916    | 36.3086    |
| Nmrk1              | chr19:18632015-18652184   | OK     | 4.47175    | 4.66663    |
| Cct7               | chr6:85446784-85468477    | OK     | 113.679    | 118.629    |
| Ipo7               | chr7:110018424-110055114  | OK     | 33.405     | 34.8577    |
| Tmub2              | chr11:102284960-102296629 | OK     | 36.4143    | 37.9975    |
| Ptpra              | chr2:130450277-130563749  | OK     | 51.1967    | 53.4222    |
| Rab11fip2          | chr19:59902883-59943654   | OK     | 12.3159    | 12.8513    |
| Map3k7             | chr4:31964106-32023466    | OK     | 10.0888    | 10.5274    |
| Samd4b             | chr7:28399521-28436191    | OK     | 15.6311    | 16.3098    |
| Nsun5              | chr5:135369952-135394546  | OK     | 4.08323    | 4.26046    |
| Dcaf7              | chr11:106036871-106059323 | OK     | 36.7535    | 38.3472    |
| Tada2a             | chr11:84078919-84129568   | OK     | 6.68729    | 6.97654    |
| Gabarapl2          | chr8:111940702-111952915  | OK     | 49.1482    | 51.2711    |
| Naa30              | chr14:49172226-49191031   | OK     | 12.4908    | 13.03      |
| Hoxc6              | chr15:103009561-103011881 | OK     | 3.37862    | 3.52416    |
| Ift20              | chr11:78536435-78541473   | OK     | 37.8152    | 39.4379    |
| Bub3               | chr7:131560390-131571898  | OK     | 36.14      | 37.6893    |
| Gaa                | chr11:119267966-119285698 | OK     | 98.5422    | 102.762    |
| Gnptg              | chr17:25188399-25240116   | OK     | 26.5897    | 27.728     |
| Ing2               | chr8:47667177-47675159    | OK     | 2.84227    | 2.96375    |
| Otud6b             | chr4:14809504-14826587    | OK     | 25.6834    | 26.7796    |
| Mid1ip1            | chrX:10717364-10719702    | OK     | 110.857    | 115.588    |
| Hist2h3c1,Hist2h3c | chr3:96246684-96247348    | NOTEST | 0.00110283 | 0.00114989 |
| Tnnt1              | chr7:4504569-4515975      | NOTEST | 0.170022   | 0.177266   |
| Foxk2              | chr11:121259986-121309896 | OK     | 14.7579    | 15.3848    |
| Pop7               | chr5:137501438-137502429  | OK     | 15.2449    | 15.892     |
| Sfmbt1             | chr14:30714848-30822721   | OK     | 5.42444    | 5.65454    |
| Zbtb45             | chr7:13005665-13009800    | OK     | 6.47143    | 6.74539    |
| Mprp               | chr11:59662494-59780860   | OK     | 31.2986    | 32.6181    |
| Zscan22            | chr7:12897808-12909083    | OK     | 2.17647    | 2.26805    |
| Ankrd13c           | chr3:157947465-158006837  | OK     | 15.6965    | 16.3568    |
| Mat2a              | chr6:72432798-72440615    | OK     | 66.3219    | 69.1101    |
| Arpc5l             | chr2:39008138-39015872    | OK     | 38.8881    | 40.5224    |
| Ankrd11            | chr8:122883821-123042284  | OK     | 18.2191    | 18.9829    |
| Dap3               | chr3:88920802-88950282    | OK     | 13.8414    | 14.4213    |
| Gspt2              | chrX:94636068-94638561    | OK     | 9.21155    | 9.59617    |
| Zscan25            | chr5:145283342-145291469  | OK     | 5.1798     | 5.39598    |
| Ankle2             | chr5:110231003-110256651  | OK     | 7.71143    | 8.03273    |
| Smdt1              | chr15:82346045-82349062   | OK     | 176.666    | 184.026    |
| 1810026J23Rik      | chr9:21546893-21595970    | OK     | 21.8511    | 22.7597    |
| 36219              | chr18:56761715-56925548   | OK     | 1.49183    | 1.55386    |
| Cyp4f13            | chr17:32924687-32947361   | OK     | 5.28453    | 5.50386    |
| Tmem258            | chr19:10204201-10207824   | OK     | 89.0909    | 92.7864    |
| Pfas               | chr11:68985700-69008460   | OK     | 2.82656    | 2.94327    |
| Cnot10             | chr9:114585873-114640200  | OK     | 11.0134    | 11.4661    |
| Dctn5              | chr7:122133040-122149044  | OK     | 92.4697    | 96.2662    |
| Naa15              | chr3:51416015-51475985    | OK     | 17.9816    | 18.7187    |

|               |                           |        |           |           |
|---------------|---------------------------|--------|-----------|-----------|
| Abhd17b       | chr19:21653308-21685637   | OK     | 27.9726   | 29.119    |
| Timm17b       | chrX:7899397-7907652      | OK     | 9.55045   | 9.94139   |
| Smarca4       | chr9:21616168-21704230    | OK     | 28.0319   | 29.1793   |
| Ehd1          | chr19:6276895-6300096     | OK     | 16.4662   | 17.14     |
| Nostrin       | chr2:69135799-69189329    | OK     | 1.1377    | 1.18418   |
| Commd4        | chr9:57155040-57158299    | OK     | 34.6469   | 36.0612   |
| Plaa          | chr4:94565138-94603247    | OK     | 19.0098   | 19.7854   |
| Ubqln2        | chrX:153498231-153501558  | OK     | 55.8523   | 58.1267   |
| Entpd3        | chr9:120539817-120568326  | OK     | 53.5339   | 55.7134   |
| Gm7534        | chr4:134190803-134203004  | NOTEST | 0.63337   | 0.659145  |
| Noa1          | chr5:77294168-77310086    | OK     | 10.1758   | 10.5888   |
| Snrpg         | chr6:86371539-86378902    | OK     | 1.85249   | 1.9275    |
| Ptp4a1        | chr1:30940302-30949755    | OK     | 3.94119   | 4.10066   |
| Comt          | chr16:18348181-18479073   | OK     | 30.8712   | 32.1198   |
| Tmem115       | chr9:107533944-107538656  | OK     | 15.0505   | 15.6585   |
| Atp9a         | chr2:168634437-168742136  | OK     | 192.64    | 200.419   |
| Ppp1r3f       | chrX:7558561-7605420      | OK     | 7.18783   | 7.47743   |
| Polr3f        | chr2:144527744-144541779  | OK     | 5.21096   | 5.42072   |
| Hps4          | chr5:112343094-112378424  | OK     | 5.61655   | 5.84156   |
| Mettl22       | chr16:8470812-8490197     | OK     | 11.4272   | 11.8834   |
| Socs6         | chr18:88867879-88894207   | OK     | 3.57224   | 3.71473   |
| Slc35f2       | chr9:53771534-53818161    | OK     | 4.33449   | 4.50697   |
| Asphd1        | chr7:126946007-126949581  | OK     | 11.9296   | 12.4038   |
| Tmem11        | chr11:60864451-60879038   | OK     | 16.2171   | 16.8616   |
| Cep162        | chr9:87191962-87255532    | OK     | 1.96191   | 2.03979   |
| Cdk11b        | chr4:155624868-155649932  | OK     | 22.8459   | 23.7504   |
| Sphk2         | chr7:45705246-45718002    | OK     | 16.1332   | 16.771    |
| LOC106740     | chr17:14943183-14961260   | OK     | 7.67413   | 7.97733   |
| Unc119b       | chr5:115122565-115134975  | OK     | 10.8559   | 11.2842   |
| Ankfy1        | chr11:72690001-72772146   | OK     | 15.6797   | 16.2982   |
| Adsl          | chr15:80948489-80970947   | OK     | 9.41971   | 9.79123   |
| Utp20         | chr10:88746606-88826814   | OK     | 3.95549   | 4.11129   |
| Gna12         | chr5:140759943-140830431  | OK     | 35.0703   | 36.4508   |
| Glrx2         | chr1:143739348-143749678  | OK     | 13.6987   | 14.2371   |
| Nmrk2         | chr10:81194690-81230779   | NOTEST | 0.0511358 | 0.0531374 |
| Wdr20         | chr12:110737948-110795028 | OK     | 5.32203   | 5.53011   |
| Cdk5rap3      | chr11:96907785-96916481   | OK     | 10.8639   | 11.2886   |
| Elp6          | chr9:110305191-110322102  | OK     | 5.70402   | 5.92685   |
| Nup188        | chr2:30286432-30344262    | OK     | 3.09272   | 3.21328   |
| Ccdc113       | chr8:95534099-95558888    | NOTEST | 0.20807   | 0.216165  |
| Map3k9        | chr12:81714949-81781170   | OK     | 18.6162   | 19.3391   |
| Usp46         | chr5:74000037-74068411    | OK     | 33.9137   | 35.2297   |
| H2-T10        | chr17:36115870-36121444   | NOTEST | 0.131193  | 0.136276  |
| Gm6194        | chr3:8461386-8463098      | OK     | 1.62763   | 1.69067   |
| 5730507C01Rik | chr12:18514509-18535254   | NOTEST | 0.261683  | 0.271811  |
| Crym          | chr7:120186383-120201988  | OK     | 5.17249   | 5.37266   |
| Rab4b         | chr7:27168432-27178883    | OK     | 86.7858   | 90.1436   |
| Cntn2         | chr1:132509424-132542940  | OK     | 40.2535   | 41.8108   |
| Prpf4         | chr4:62408782-62426990    | OK     | 4.1412    | 4.30131   |
| 1810044D09Rik | chr6:91440986-91441755    | OK     | 1.45      | 1.50602   |
| Nom1          | chr5:29434666-29452169    | OK     | 10.4273   | 10.83     |
| Zfp385b       | chr2:77410626-77816816    | OK     | 16.6272   | 17.2683   |
| Klhl42        | chr6:147091074-147112778  | OK     | 6.06949   | 6.30328   |

|               |                           |        |          |          |
|---------------|---------------------------|--------|----------|----------|
| Ciapi1        | chr8:94819817-94838340    | OK     | 15.1033  | 15.6843  |
| Med24         | chr11:98704590-98729435   | OK     | 16.7904  | 17.4356  |
| Tomm7         | chr5:23787743-24161231    | OK     | 39.4519  | 40.9675  |
| Prkar1a       | chr11:109650948-109669648 | OK     | 417.443  | 433.47   |
| Amd2          | chr10:40287457-40302188   | LOWDAT | 11.7133  | 12.1628  |
| Clasp2        | chr9:113741472-113919697  | OK     | 69.269   | 74.0859  |
| Dnttip2       | chr3:122274413-122285271  | OK     | 10.2752  | 10.6687  |
| Ccng2         | chr5:93267572-93276231    | OK     | 14.0618  | 14.5997  |
| Ppdf          | chr2:181187342-181188504  | OK     | 25.5886  | 26.5624  |
| Phf20         | chr2:156196646-156309953  | OK     | 23.1435  | 24.0237  |
| Bbip1         | chr19:53892230-54033278   | OK     | 10.303   | 10.6945  |
| Zfp213        | chr17:23556766-23564226   | OK     | 2.42483  | 2.5169   |
| Gm5127        | chrX:106576508-106710557  | NOTEST | 0.133578 | 0.138645 |
| Cep131        | chr11:120064429-120086827 | OK     | 3.44745  | 3.57814  |
| Poli          | chr18:70508679-70530321   | OK     | 2.59499  | 2.69308  |
| Kbtbd2        | chr6:56777524-56797813    | OK     | 34.8477  | 36.1637  |
| Kctd2         | chr11:115420125-115431274 | OK     | 44.3716  | 46.0467  |
| A330041J22Rik | chr9:86581362-86701253    | NOTEST | 0.422732 | 0.438682 |
| 4931414P19Rik | chr14:54583662-54605908   | OK     | 1.51605  | 1.5732   |
| Mon1a         | chr9:107888128-107903139  | OK     | 13.694   | 14.2101  |
| A330102I10Rik | chr13:29014413-29040336   | OK     | 4.54266  | 4.71379  |
| Panx2         | chr15:89059725-89070907   | OK     | 26.3385  | 27.33    |
| Coq10a        | chr10:128363096-128370037 | OK     | 11.8475  | 12.2934  |
| Trp53i13      | chr11:77508098-77513273   | OK     | 6.4155   | 6.65672  |
| Npy4r         | chr14:34145645-34152419   | NOTEST | 0.122311 | 0.126901 |
| Cnep1r1       | chr8:88118758-88135197    | OK     | 18.5845  | 19.2817  |
| Hmga1-rs1     | chr17:27556573-27563672   | LOWDAT | 1.99049  | 2.065    |
| Porcn         | chrX:8193849-8206525      | OK     | 17.4569  | 18.1096  |
| Wdr16         | chr11:67924805-67965642   | NOTEST | 0.58638  | 0.608297 |
| Aasdhpt       | chr9:4294792-4309494      | OK     | 13.3787  | 13.8786  |
| Dpagt1        | chr9:44326844-44333600    | OK     | 17.913   | 18.5814  |
| Amer3         | chr1:34579692-34590944    | OK     | 8.3147   | 8.62482  |
| Zfp426        | chr9:20468548-20492746    | OK     | 11.0789  | 11.4915  |
| Tspyl1        | chr10:34282189-34284885   | OK     | 94.4963  | 98.0054  |
| 1600012H06Rik | chr17:14943183-14961260   | OK     | 13.4937  | 13.9937  |
| Mief1         | chr15:80234079-80253371   | OK     | 11.8109  | 12.2474  |
| Rasl11a       | chr5:146845070-146847726  | OK     | 2.1511   | 2.23055  |
| Morf4l1       | chr9:90091668-90114820    | OK     | 19.7517  | 20.4794  |
| Lats1         | chr10:7681208-7716461     | OK     | 6.98571  | 7.24144  |
| Bmx           | chrX:164192841-164258193  | OK     | 0.911841 | 0.945199 |
| Cggbp1        | chr16:64852084-64859491   | OK     | 17.5281  | 18.1677  |
| Mcts1         | chrX:38600657-38613522    | OK     | 48.1457  | 49.8962  |
| Adal          | chr2:121137291-121156680  | OK     | 8.09156  | 8.38569  |
| Rsrc1         | chr3:66985671-67358403    | OK     | 17.0681  | 17.688   |
| Gatc          | chr5:115333241-115341161  | OK     | 12.417   | 12.8676  |
| Ngrn          | chr7:80261214-80265378    | OK     | 23.4851  | 24.3372  |
| Tmem167b      | chr3:108556424-108562466  | OK     | 29.8652  | 30.9478  |
| Ehbp1         | chr11:22005825-22286795   | OK     | 19.1789  | 19.8728  |
| Ino80e        | chr7:126847552-126861463  | OK     | 14.0747  | 14.5809  |
| Kmt2c         | chr5:25271793-25498783    | OK     | 5.49032  | 5.68781  |
| Wasl          | chr6:24613809-24664995    | OK     | 49.3581  | 51.1328  |
| A730017L22Rik | chr2:130872540-130906396  | OK     | 1.179    | 1.22131  |
| Sesn1         | chr10:41810573-41908436   | OK     | 18.3157  | 18.9721  |



|               |                           |        |          |          |
|---------------|---------------------------|--------|----------|----------|
| Wdr47         | chr3:108591277-108645719  | OK     | 37.0092  | 38.3329  |
| Tmem145       | chr7:25306107-25316195    | OK     | 3.89896  | 4.03834  |
| Tmem231       | chr8:111912017-111933791  | OK     | 8.18483  | 8.47736  |
| Zfp658        | chr7:43562369-43575461    | OK     | 1.31781  | 1.36476  |
| Dapp1         | chr3:137931005-137981549  | NOTEST | 0.208998 | 0.216435 |
| Klhl28        | chr12:64942439-64965536   | OK     | 10.202   | 10.5641  |
| 2310035C23Rik | chr1:105663860-105755131  | OK     | 20.0678  | 20.7797  |
| Pcm1          | chr8:41239758-41334087    | OK     | 16.3242  | 16.9025  |
| Zfp558        | chr9:18454053-18473559    | NOTEST | 0.757568 | 0.784379 |
| 9130019O22Rik | chr7:127382259-127387166  | OK     | 0.946624 | 0.980114 |
| Mob2          | chr7:142008552-142061034  | OK     | 29.6308  | 30.6784  |
| Hddc2         | chr10:31313404-31328086   | OK     | 15.773   | 16.3302  |
| Gemin7        | chr7:19564948-19573343    | OK     | 38.2584  | 39.6063  |
| Fbxo45        | chr16:32230111-32247025   | OK     | 27.3826  | 28.344   |
| Ccdc71l       | chr12:32378788-32382943   | OK     | 3.78235  | 3.91508  |
| Rragb         | chrX:153139957-153171943  | OK     | 25.3893  | 26.2791  |
| Cops7a        | chr6:124958410-124965529  | OK     | 55.009   | 56.9354  |
| Ahrr          | chr13:74211117-74292309   | NOTEST | 0.665325 | 0.688609 |
| Ovca2         | chr11:75175942-75190483   | OK     | 8.98266  | 9.29686  |
| Pdap1         | chr5:145128769-145140089  | OK     | 31.1639  | 32.2521  |
| Glce          | chr9:62057248-62070606    | OK     | 18.6452  | 19.2955  |
| Gpalpp1       | chr14:76086231-76110815   | OK     | 11.3743  | 11.7702  |
| 2310034O05Rik | chr5:100210691-100218049  | NOTEST | 0.338789 | 0.350581 |
| Det1          | chr7:78827473-78847211    | OK     | 2.36108  | 2.44324  |
| Ap4b1         | chr3:103193822-103854618  | OK     | 10.7455  | 11.1168  |
| Lancl2        | chr6:57702454-57739449    | OK     | 20.9627  | 21.6868  |
| AI854703      | chr6:48628166-48633688    | OK     | 5.40361  | 5.59025  |
| Vps16         | chr2:130417683-130444269  | OK     | 16.8646  | 17.4444  |
| Phf5a         | chr15:81864515-81871892   | OK     | 18.9461  | 19.5955  |
| Unc5b         | chr10:60762594-60831581   | OK     | 2.90298  | 3.00235  |
| Arhgap4       | chrX:73892101-73911298    | NOTEST | 0.466126 | 0.482043 |
| BC003965      | chr17:25184560-25187662   | OK     | 7.48632  | 7.74195  |
| Sec31b        | chr19:44516956-44545848   | NOTEST | 0.216176 | 0.223556 |
| Ppp2r1b       | chr9:50856923-51009073    | OK     | 1.49097  | 1.54187  |
| Rdx           | chr9:52002060-52088738    | OK     | 40.5286  | 41.9111  |
| Myzap         | chr9:71504346-71592360    | NOTEST | 0.56255  | 0.581725 |
| Cltb          | chr13:54592938-54611272   | OK     | 124.615  | 128.856  |
| Zpbp          | chr11:11280039-11462419   | NOTEST | 0.451398 | 0.466757 |
| Ugp2          | chr11:21239031-21371267   | OK     | 53.1163  | 54.923   |
| Bnip1         | chr17:26781078-26792521   | OK     | 13.5905  | 14.0525  |
| Golph3l       | chr3:95588933-95619247    | OK     | 9.31743  | 9.63396  |
| Clcn7         | chr17:25133393-25162099   | OK     | 13.3841  | 13.8387  |
| Tcea2         | chr2:181680309-181688051  | OK     | 18.178   | 18.7924  |
| Tmem86a       | chr7:47050639-47054776    | OK     | 12.6623  | 13.0886  |
| 9830147E19Rik | chr7:42609525-42642604    | NOTEST | 0.697862 | 0.721353 |
| A230065H16Rik | chr12:111406808-111412077 | NOTEST | 0.144882 | 0.149754 |
| Rabepk        | chr2:34778665-34799912    | OK     | 8.4969   | 8.78244  |
| Prps1         | chrX:140456602-140476140  | OK     | 25.6172  | 26.4779  |
| Mapk1ip1l     | chr14:47298313-47323091   | OK     | 17.6379  | 18.2305  |
| Lemd3         | chr10:120923410-120979330 | OK     | 7.63595  | 7.892    |
| Fabp5         | chr3:10012584-10016610    | OK     | 42.4152  | 43.8305  |
| Gde1          | chr7:118688557-118705738  | OK     | 122.807  | 126.899  |
| Cog7          | chr7:121922838-121981693  | OK     | 18.6778  | 19.2998  |

|               |                           |        |           |           |
|---------------|---------------------------|--------|-----------|-----------|
| Ncln          | chr10:81486458-81496363   | OK     | 14.7554   | 15.2462   |
| Fbf1          | chr11:116142284-116168178 | OK     | 4.76521   | 4.92361   |
| Mrpl43        | chr19:45005013-45006442   | OK     | 30.4764   | 31.4868   |
| Golga5        | chr12:102469133-102497907 | OK     | 11.544    | 11.9253   |
| Clcn1         | chr6:42286684-42314656    | NOTEST | 0.0589223 | 0.0608668 |
| Thumpd2       | chr17:81026326-81065085   | OK     | 1.09369   | 1.12974   |
| Kcmf1         | chr6:72841113-72899979    | OK     | 31.2278   | 32.2566   |
| E130309D02Rik | chr5:143301071-143315360  | OK     | 7.7798    | 8.0352    |
| Hif1a         | chr12:73907866-73947530   | OK     | 27.5926   | 28.4976   |
| Stxbp5        | chr10:9755546-9901040     | OK     | 10.3174   | 10.6551   |
| Tiprl         | chr1:165212285-165236958  | OK     | 12.8274   | 13.2471   |
| Ciao1         | chr2:127240937-127247816  | OK     | 19.5831   | 20.2238   |
| Dzip1         | chr14:118875519-118923167 | OK     | 3.07075   | 3.1707    |
| Zfp142        | chr1:74409383-74588028    | OK     | 3.33241   | 3.44071   |
| Med23         | chr10:24869985-24913529   | OK     | 5.6789    | 5.86305   |
| 4930402H24Rik | chr2:130707852-130840110  | OK     | 9.27244   | 9.57209   |
| Vva3a         | chr7:120739556-120805540  | NOTEST | 0.15275   | 0.157686  |
| D17Wsu92e     | chr17:27751231-27820542   | OK     | 62.8709   | 64.9015   |
| Timm50        | chr7:28305825-28312046    | OK     | 18.9316   | 19.5427   |
| Fkrp          | chr7:16809266-16840931    | OK     | 13.8799   | 14.3267   |
| Kcnn2         | chr18:45560153-46045260   | OK     | 5.98772   | 6.18019   |
| St7           | chr6:17693993-17943023    | OK     | 5.27364   | 5.44316   |
| Pa2g4         | chr10:128557765-128565934 | OK     | 19.2401   | 19.8584   |
| Sass6         | chr3:116562972-116630986  | OK     | 2.59173   | 2.67464   |
| Slc25a51      | chr4:45395923-45408766    | OK     | 39.5687   | 40.8341   |
| Mira          | chr6:52214491-52215288    | OK     | 21.107    | 21.7811   |
| Dbr1          | chr9:99575798-99584343    | OK     | 3.06035   | 3.15714   |
| Inpp5a        | chr7:139389108-139582797  | OK     | 8.86976   | 9.14988   |
| Mbd1          | chr18:74268287-74282684   | OK     | 9.03066   | 9.3146    |
| Mapt          | chr11:104231435-104332089 | OK     | 131.256   | 135.373   |
| Rnasek        | chr11:70238122-70239852   | OK     | 317.977   | 327.921   |
| Gtf2h2        | chr13:100468576-100492609 | OK     | 11.1822   | 11.5297   |
| Pddc1         | chr7:141408183-141414125  | OK     | 25.4789   | 26.2706   |
| Npcd          | chr15:79786350-79834333   | OK     | 27.0707   | 27.9097   |
| Map4          | chr9:109931773-110083954  | OK     | 210.197   | 216.685   |
| Slc25a40      | chr5:8422837-8454839      | OK     | 6.11835   | 6.30716   |
| Bop1          | chr15:76380512-76477269   | OK     | 17.1847   | 17.7131   |
| Ddx10         | chr9:53098453-53248112    | OK     | 11.9739   | 12.3419   |
| St3gal1       | chr15:67102874-67176882   | OK     | 3.52862   | 3.63637   |
| D930048N14Rik | chr11:51643088-51657681   | NOTEST | 0.262971  | 0.270997  |
| Ndufaf4       | chr4:24898082-24905001    | OK     | 6.49986   | 6.69801   |
| Gdi2          | chr13:3538074-3611108     | OK     | 206.248   | 212.526   |
| Baz2a         | chr10:128092782-128129303 | OK     | 9.88633   | 10.1863   |
| Tekt4         | chr17:25471589-25476594   | NOTEST | 0.146261  | 0.150693  |
| Gnl3l         | chrX:150983132-151017322  | OK     | 72.1383   | 74.3221   |
| Slc11a2       | chr15:100387899-100423055 | OK     | 10.1833   | 10.4914   |
| Mcur1         | chr13:43538405-43560191   | OK     | 5.94602   | 6.12586   |
| Ddrgk1        | chr2:130654082-130664645  | OK     | 39.2756   | 40.462    |
| Trim12c       | chr7:104338753-104353358  | OK     | 2.72681   | 2.80902   |
| Zbtb49        | chr5:38200043-38220428    | OK     | 1.34681   | 1.38732   |
| Fam49b        | chr15:63929093-64060448   | OK     | 15.5258   | 15.9928   |
| Pno1          | chr11:17203199-17211589   | OK     | 19.4771   | 20.0594   |
| Ftsj3         | chr11:106249143-106255802 | OK     | 10.0538   | 10.354    |

|               |                           |        |            |            |
|---------------|---------------------------|--------|------------|------------|
| F8            | chrX:75172714-75380041    | OK     | 1.46971    | 1.51329    |
| Peli1         | chr11:21091323-21150327   | OK     | 9.4538     | 9.73373    |
| Nmt1          | chr11:103028561-103066105 | OK     | 72.0132    | 74.1416    |
| Harbi1        | chr2:91710949-91721566    | OK     | 3.38898    | 3.4891     |
| Trrap         | chr5:144768791-144859773  | OK     | 11.5803    | 11.9209    |
| Mon2          | chr10:122992060-123076505 | OK     | 11.3419    | 11.6755    |
| Hcfc1r1       | chr17:23660522-23677449   | OK     | 68.2328    | 70.2386    |
| Mrps11        | chr7:78783130-78792988    | OK     | 16.795     | 17.2875    |
| Mboat4        | chr8:34115029-34125185    | NOTEST | 0.23067    | 0.23743    |
| Fbxl18        | chr5:142871788-142895238  | OK     | 4.05029    | 4.16896    |
| Tasp1         | chr2:139833478-140066805  | OK     | 7.77121    | 7.99809    |
| Mrpl24        | chr3:87919543-87930195    | OK     | 23.6483    | 24.3368    |
| Ttc9b         | chr7:27653923-27656207    | OK     | 45.8953    | 47.2308    |
| Hmg20b        | chr10:81346045-81350457   | OK     | 15.3399    | 15.7854    |
| Erv3          | chr2:131853677-131859747  | NOTEST | 0.0175301  | 0.0180392  |
| Imp4          | chr1:34439828-34445747    | OK     | 5.12694    | 5.27512    |
| Zw10          | chr9:49055580-49078773    | OK     | 6.51253    | 6.70072    |
| Atg2a         | chr19:6241667-6262304     | OK     | 9.45346    | 9.72623    |
| Fam13b        | chr18:34409422-34506823   | OK     | 34.5763    | 35.5729    |
| Rbm27         | chr18:42275352-42341540   | OK     | 5.70623    | 5.87054    |
| Cstf2         | chrX:134059175-134111854  | OK     | 15.6031    | 16.0521    |
| Vps53         | chr11:76046225-76179630   | OK     | 34.8932    | 35.8901    |
| Ylpm1         | chr12:84996320-85070515   | OK     | 11.234     | 11.5547    |
| Psmg2         | chr18:67641598-67654162   | OK     | 19.2211    | 19.7689    |
| Vstm2l        | chr2:157914652-157944719  | OK     | 43.6932    | 44.9365    |
| Gm10825       | chr10:22402812-22407470   | NOTEST | 0.00812477 | 0.00835593 |
| Fdxr          | chr11:115268024-115276969 | OK     | 4.7672     | 4.90246    |
| Ppp2r3c       | chr12:55280813-55492647   | OK     | 9.2019     | 9.46251    |
| Zbtb41        | chr1:139422382-139453007  | OK     | 5.6867     | 5.84772    |
| Parp1         | chr1:180568974-180601254  | OK     | 40.7463    | 41.8994    |
| Gm11747       | chr11:118428456-118454995 | NOTEST | 0.0244967  | 0.0251898  |
| Ficd          | chr5:113735781-113740607  | OK     | 5.42683    | 5.58036    |
| Ccdc15        | chr9:37275834-37348392    | NOTEST | 0.678157   | 0.697334   |
| 4930519F09Rik | chr10:28921962-28923507   | NOTEST | 0.026385   | 0.0271311  |
| Ik            | chr18:36744655-36757639   | OK     | 59.3646    | 61.0416    |
| Cops4         | chr5:100518308-100547802  | OK     | 52.4226    | 53.9009    |
| Gpr156        | chr16:37916495-38007529   | OK     | 1.85886    | 1.91105    |
| Tpd52l2       | chr2:181497141-181517962  | OK     | 23.8487    | 24.5179    |
| Rnf34         | chr5:122850187-122868945  | OK     | 20.6135    | 21.1909    |
| Ndufs6        | chr13:73319875-73328482   | OK     | 71.7485    | 73.7579    |
| Gpr98         | chr13:81095067-81633144   | NOTEST | 0.0239511  | 0.0246214  |
| Zfml          | chr6:83914352-83986871    | OK     | 16.4391    | 16.8944    |
| Slc2a6        | chr2:27021364-27027998    | OK     | 23.3918    | 24.0388    |
| Cyp46a1       | chr12:108334380-108362234 | OK     | 7.10134    | 7.29769    |
| Sugp2         | chr8:70220192-70263105    | OK     | 14.7454    | 15.1521    |
| Sirt4         | chr5:115478009-115484484  | OK     | 3.4704     | 3.56565    |
| Api5          | chr2:94411726-94438147    | OK     | 24.0287    | 24.6869    |
| Unc5a         | chr13:54949431-55021385   | OK     | 3.84241    | 3.94763    |
| Stau1         | chr2:166947548-166996299  | OK     | 26.837     | 27.5701    |
| Cyld          | chr8:88697027-88751946    | OK     | 9.92162    | 10.1921    |
| Atf1          | chr15:100227858-100261248 | OK     | 2.99507    | 3.07668    |
| Snd1          | chr6:28480347-28888832    | OK     | 32.4788    | 33.3637    |
| Pcdhb4        | chr18:36930284-37841872   | OK     | 1.48715    | 1.52754    |

|               |                           |        |           |           |
|---------------|---------------------------|--------|-----------|-----------|
| Tomm40        | chr7:19701312-19715429    | OK     | 42.3277   | 43.4762   |
| Pnrc1         | chr4:33245422-33248787    | OK     | 26.9496   | 27.6808   |
| Klhdc3        | chr17:46674550-46705002   | OK     | 51.0673   | 52.4519   |
| Rsl1          | chr13:67173181-67183498   | NOTEST | 0.801039  | 0.822743  |
| Csk           | chr9:57626645-57645180    | OK     | 42.8631   | 44.0234   |
| Ap2s1         | chr7:16738443-16749290    | OK     | 158.433   | 162.716   |
| Atp6v0d1      | chr8:105524469-105566040  | OK     | 173.158   | 177.825   |
| Pfkm          | chr15:98038743-98132447   | OK     | 117.466   | 120.623   |
| S1pr5         | chr9:21242916-21248443    | NOTEST | 0.147678  | 0.151638  |
| Cgrf1         | chr14:46832243-46854190   | OK     | 15.2922   | 15.7016   |
| Arxes2        | chrX:135993819-135995359  | OK     | 24.9756   | 25.6427   |
| Ctps2         | chrX:162407199-163352564  | OK     | 11.61     | 11.92     |
| Lig3          | chr11:82781108-82871210   | OK     | 4.75287   | 4.87949   |
| Bola3         | chr6:83349483-83358392    | OK     | 30.8978   | 31.7209   |
| Tstd3         | chr4:21727700-21767211    | OK     | 20.1045   | 20.6386   |
| Zfp866        | chr8:69761323-69774911    | OK     | 3.95366   | 4.0582    |
| Zfp568        | chr7:29983954-30028282    | OK     | 0.838881  | 0.861055  |
| B3galt6       | chr4:155989465-155992678  | OK     | 2.70552   | 2.77658   |
| Arap3         | chr18:37972622-37998969   | OK     | 1.59637   | 1.63828   |
| Rttn          | chr18:88971789-89131014   | NOTEST | 0.513332  | 0.526785  |
| Vps51         | chr19:6062820-6077187     | OK     | 21.824    | 22.3934   |
| Dnah11        | chr12:117843860-118199043 | NOTEST | 0.0125248 | 0.0128513 |
| Xpnpep1       | chr19:52991179-53038654   | OK     | 14.6359   | 15.0173   |
| 2810021J22Rik | chr11:58867239-58884338   | OK     | 1.5004    | 1.53936   |
| Slc3a2        | chr19:8706881-8723369     | OK     | 54.2583   | 55.663    |
| Wdr59         | chr8:111448783-111522107  | OK     | 8.52043   | 8.73946   |
| Dusp19        | chr2:80617213-80631661    | OK     | 4.97213   | 5.09978   |
| Nat14         | chr7:4922250-4925006      | OK     | 5.09854   | 5.22943   |
| Pcdh15        | chr10:73821866-74649732   | NOTEST | 0.327451  | 0.335853  |
| Traf3ip3      | chr1:193173468-193201546  | NOTEST | 0.563305  | 0.577754  |
| Pyroxd1       | chr6:142345696-142387087  | OK     | 6.31389   | 6.47559   |
| Prickle4      | chr17:47686644-47694736   | OK     | 2.34391   | 2.40392   |
| Zfp248        | chr6:118427318-118455506  | OK     | 4.55843   | 4.67484   |
| Exosc3        | chr4:45316629-45320603    | OK     | 5.34201   | 5.47839   |
| Kdm4a         | chr4:118137003-118180043  | OK     | 13.3143   | 13.6535   |
| Abcc12        | chr8:86504840-86566590    | NOTEST | 0.359228  | 0.36837   |
| Zfp143        | chr7:110061701-110095392  | OK     | 3.10807   | 3.18714   |
| Mmadhc        | chr2:50279880-50296677    | OK     | 35.834    | 36.743    |
| Fam149b       | chr14:20348161-20383491   | OK     | 11.7529   | 12.0503   |
| Zfp961        | chr8:71951065-71970333    | OK     | 1.90644   | 1.95467   |
| Higd2a        | chr13:54590230-54591147   | OK     | 104.46    | 107.085   |
| Aldoa         | chr7:126795233-126800447  | OK     | 1247.02   | 1278.35   |
| 1700056E22Rik | chr1:184033031-184033998  | NOTEST | 0.400728  | 0.410797  |
| Clip2         | chr5:134489382-134552434  | OK     | 49.4812   | 50.7239   |
| Ppp1r37       | chr7:19530966-19562398    | OK     | 23.604    | 24.1929   |
| Micu1         | chr10:59702562-59864134   | OK     | 61.5702   | 63.105    |
| Tmub1         | chr5:24445462-24447846    | OK     | 10.4703   | 10.7307   |
| Pglyrp1       | chr7:18884689-18890438    | OK     | 1.25343   | 1.28454   |
| Zfp637        | chr6:117841241-117845956  | OK     | 15.9115   | 16.3048   |
| Ncl           | chr1:86344718-86359455    | OK     | 32.6384   | 33.443    |
| Nop10         | chr2:112261925-112262898  | OK     | 72.0384   | 73.8107   |
| Polr2m        | chr9:71478436-71485983    | OK     | 65.218    | 66.821    |
| Cul3          | chr1:80266817-80340430    | OK     | 56.3542   | 57.7364   |

|               |                          |        |          |           |
|---------------|--------------------------|--------|----------|-----------|
| Zfp280b       | chr10:76032611-76042969  | OK     | 4.59129  | 4.70377   |
| Rfc1          | chr5:65261851-65335639   | OK     | 13.5675  | 13.8997   |
| Spint2        | chr7:29256329-29281977   | OK     | 1.93268  | 1.97991   |
| Zfp11         | chr5:129654594-129670088 | OK     | 1.65494  | 1.69532   |
| Pitpna        | chr11:75588107-75628778  | OK     | 137.642  | 140.998   |
| Zfp623        | chr15:75940951-75949400  | OK     | 3.45663  | 3.54083   |
| Gpn2          | chr4:133584372-133591735 | OK     | 5.06041  | 5.18355   |
| 3830406C13Rik | chr14:12284202-12303231  | OK     | 18.393   | 18.8395   |
| Wdr41         | chr13:94976343-95023316  | OK     | 15.095   | 15.4568   |
| Disp1         | chr1:183086263-183221529 | OK     | 4.83523  | 4.95088   |
| Brwd3         | chrX:108742207-108834355 | OK     | 0.950863 | 0.97358   |
| S1pr1         | chr3:115710432-115715055 | OK     | 8.93745  | 9.14924   |
| Tomm40l       | chr1:171213969-171222514 | OK     | 17.9317  | 18.3555   |
| Vps13b        | chr15:35371545-35931229  | OK     | 8.50247  | 8.70235   |
| Kif13b        | chr14:64652530-64806296  | OK     | 8.79136  | 8.99797   |
| Gm4925        | chr10:88729540-88731101  | NOTEST | 0.233922 | 0.239416  |
| Dhx36         | chr3:62468641-62506988   | OK     | 23.9629  | 24.5252   |
| Gm7008        | chr12:40223363-40229183  | NOTEST | 0.181546 | 0.185795  |
| Tmed3         | chr9:89699202-89705043   | OK     | 25.3338  | 25.9219   |
| Braf          | chr6:39603236-39725463   | OK     | 9.56845  | 9.78937   |
| Usp30         | chr5:114100332-114122924 | OK     | 9.71563  | 9.93992   |
| Xpnpep3       | chr15:81400187-81454888  | OK     | 3.44475  | 3.52409   |
| E130311K13Rik | chr3:63914695-63929385   | OK     | 4.42392  | 4.52566   |
| Cacnb4        | chr2:52428319-52676609   | OK     | 26.5656  | 27.1751   |
| Setd2         | chr9:110532596-110618633 | OK     | 6.67329  | 6.82627   |
| Arfip2        | chr7:105634200-105640416 | OK     | 21.924   | 22.4263   |
| Zic3          | chrX:58030627-58036630   | NOTEST | 0.055907 | 0.0571849 |
| Dctn4         | chr18:60526220-60558762  | OK     | 64.8163  | 66.2954   |
| Zfp654        | chr16:64780346-64786321  | OK     | 3.8926   | 3.98074   |
| Mrps16        | chr14:20391230-20393555  | OK     | 25.7343  | 26.3164   |
| Rras2         | chr7:114046781-114117781 | OK     | 4.809    | 4.91777   |
| Acyp1         | chr12:85272397-85280435  | OK     | 30.8275  | 31.5244   |
| Gls           | chr1:52163449-52233232   | OK     | 86.4039  | 88.352    |
| Slc22a7       | chr17:46432184-46438477  | NOTEST | 0.63129  | 0.645495  |
| Pum2          | chr12:8674133-8752583    | OK     | 28.5219  | 29.1626   |
| Cops3         | chr11:59810079-59839767  | OK     | 48.4699  | 49.5507   |
| Scfd2         | chr5:74204815-74531742   | OK     | 6.02753  | 6.16183   |
| Sugt1         | chr14:79587690-79629755  | OK     | 43.7888  | 44.764    |
| Ppie          | chr4:123127124-123139941 | OK     | 9.09356  | 9.29602   |
| Gxylt1        | chr15:93239741-93275084  | OK     | 2.10878  | 2.15561   |
| Gtf3c1        | chr7:125640953-125707688 | OK     | 20.7976  | 21.2589   |
| Avpi1         | chr19:42123274-42128993  | OK     | 11.7824  | 12.0433   |
| Pdrg1         | chr2:153008889-153015383 | OK     | 61.4359  | 62.7869   |
| Med19         | chr2:84671310-84715164   | OK     | 20.1132  | 20.5545   |
| Tnks2         | chr19:36834231-36893477  | OK     | 23.6466  | 24.1629   |
| Csde1         | chr3:103020545-103058189 | OK     | 108.2    | 110.555   |
| Ercc3         | chr18:32240330-32270147  | OK     | 18.2272  | 18.6234   |
| Nisch         | chr14:31170927-31206826  | OK     | 76.8028  | 78.4676   |
| Atf6b         | chr17:34647145-34655074  | OK     | 20.6144  | 21.0601   |
| Lrrn3         | chr12:41024089-41955588  | OK     | 13.0875  | 13.369    |
| Cdkn2d        | chr9:21288463-21291209   | OK     | 62.4862  | 63.8283   |
| Mecp2         | chrX:74026823-74085636   | OK     | 12.6452  | 12.9143   |
| Rps27l        | chr9:66946117-66949509   | OK     | 32.8152  | 33.5119   |



|                |                            |        |           |          |
|----------------|----------------------------|--------|-----------|----------|
| Rsc1a1         | chr4:141683562-141723419   | OK     | 2.60404   | 2.65925  |
| Eef1a2         | chr2:181147691-181157015   | OK     | 610.534   | 623.432  |
| 9430016H08Rik  | chr1:57388243-57415958     | OK     | 8.86269   | 9.04969  |
| Thap4          | chr1:93705390-93754838     | OK     | 7.39968   | 7.55557  |
| Acot10         | chr15:20665213-20666750    | OK     | 5.77036   | 5.89187  |
| Tcaim          | chr9:122805546-122836332   | OK     | 8.60251   | 8.78353  |
| Jkamp          | chr12:72085838-72185029    | OK     | 38.5785   | 39.3893  |
| Icam2          | chr11:106377655-106382641  | OK     | 1.63283   | 1.66711  |
| Cul4b          | chrX:38531620-38576196     | OK     | 17.4298   | 17.7957  |
| Zbed4          | chr15:88751710-88784516    | OK     | 1.04504   | 1.06698  |
| Gpaa1          | chr15:76331293-76334899    | OK     | 15.6005   | 15.9276  |
| Vapb           | chr2:173737570-173784336   | OK     | 51.7887   | 52.871   |
| Laptm4a        | chr12:8921306-8938741      | OK     | 158.369   | 161.678  |
| Prkcsh         | chr9:22003034-22014222     | OK     | 30.4948   | 31.1308  |
| Abhd17c        | chr7:84109355-84151893     | OK     | 12.8454   | 13.1122  |
| Commd3         | chr2:18672461-18676216     | OK     | 43.9278   | 44.8391  |
| Ggps1          | chr13:14052444-14063401    | OK     | 18.5802   | 18.9642  |
| Nek11          | chr9:105162466-105395287   | NOTEST | 0.315717  | 0.322234 |
| Tbc1d13        | chr2:30133870-30152013     | OK     | 29.994    | 30.6127  |
| Ctsb           | chr14:63122461-63177793    | OK     | 362.784   | 370.263  |
| Sumo2          | chr11:115523108-115536230  | OK     | 9.30594   | 9.49737  |
| Ythdf3         | chr3:16183182-16217037     | OK     | 20.8591   | 21.2881  |
| Tmlhe          | chrX_GL456233_random:15964 | OK     | 4.36757   | 4.45718  |
| Srp72          | chr5:76974700-76999935     | OK     | 41.7603   | 42.6127  |
| Exosc1         | chr19:41922979-41933314    | OK     | 6.32653   | 6.45545  |
| Gm561          | chr2:144594064-144595365   | OK     | 27.5075   | 28.0651  |
| Ccdc85b        | chr19:5447697-5457563      | OK     | 12.4232   | 12.674   |
| Ccpg1os        | chr9:72979724-72985376     | OK     | 5.4924    | 5.60314  |
| Smarcd1        | chr15:99702286-99713995    | OK     | 21.0211   | 21.4442  |
| U2surp         | chr9:95456893-95511996     | OK     | 8.83181   | 9.00866  |
| Myo9a          | chr9:59751173-59928866     | OK     | 21.136    | 21.5587  |
| Myo7b          | chr18:31959233-32036931    | NOTEST | 0.0167445 | 0.017078 |
| Mrpl36         | chr13:73331008-73332178    | OK     | 30.2577   | 30.8592  |
| Hnrnpa3        | chr2:75659258-75669407     | OK     | 12.6289   | 12.8799  |
| 2610044O15Rik8 | chr8:129216353-129234046   | OK     | 5.27      | 5.37455  |
| Creb1          | chr1:64532803-64604548     | OK     | 6.27959   | 6.40375  |
| Minpp1         | chr19:32485768-32515370    | OK     | 17.3773   | 17.7202  |
| Dguok          | chr6:83480213-83506969     | OK     | 13.8678   | 14.1403  |
| Esf1           | chr2:140119880-140170558   | OK     | 9.90139   | 10.0957  |
| Top2b          | chr14:16365205-16430787    | OK     | 16.9984   | 17.3311  |
| Xpo6           | chr7:126101718-126200408   | OK     | 20.7836   | 21.1892  |
| Nifk           | chr1:118321842-118333831   | OK     | 12.6198   | 12.8655  |
| Rabl3          | chr16:37539893-37572385    | OK     | 15.6636   | 15.9667  |
| Trmt10c        | chr16:56033719-56037774    | OK     | 8.09841   | 8.25478  |
| Sec13          | chr6:113728051-113740681   | OK     | 44.6757   | 45.5351  |
| Gstm7          | chr3:107926333-107931745   | OK     | 5.00927   | 5.10521  |
| Fam173a        | chr17:25786579-25792394    | OK     | 48.2209   | 49.1413  |
| Cd7            | chr11:121036748-121039478  | NOTEST | 0.291465  | 0.296998 |
| Get4           | chr5:139252323-139270050   | OK     | 16.7765   | 17.0944  |
| Calm2          | chr17:87433400-87446935    | OK     | 803.554   | 818.747  |
| Sdf2           | chr11:78245745-78255496    | OK     | 57.3202   | 58.3994  |
| Ccdc50         | chr16:27388955-27452218    | OK     | 11.2876   | 11.4999  |
| Men1           | chr19:6334978-6340894      | OK     | 22.2466   | 22.6635  |

|               |                           |        |           |           |
|---------------|---------------------------|--------|-----------|-----------|
| Slc37a3       | chr6:39334770-39377707    | OK     | 11.4104   | 11.6241   |
| Tlk2          | chr11:105181529-105283956 | OK     | 9.56705   | 9.74573   |
| Parg          | chr14:32201970-32297549   | OK     | 15.0992   | 15.3808   |
| Tmem194b      | chr1:52630704-52651919    | OK     | 0.805923  | 0.820855  |
| Casp8         | chr1:58795373-58847503    | OK     | 0.837435  | 0.852944  |
| Atp6v1a       | chr16:44085403-44139019   | OK     | 160.132   | 163.058   |
| Sap18         | chr14:57798188-57804980   | OK     | 12.8319   | 13.0662   |
| Aig1          | chr10:13652708-13868830   | OK     | 23.5706   | 23.9999   |
| Map3k10       | chr7:27656374-27674598    | OK     | 22.9604   | 23.3781   |
| Eif1          | chr11:100319995-100322096 | OK     | 97.4933   | 99.2635   |
| Lrnf3         | chr7:30355513-30362772    | OK     | 7.00214   | 7.12923   |
| Trub2         | chr2:29774683-29787671    | OK     | 8.4131    | 8.56517   |
| Man1a         | chr10:53906032-54075796   | OK     | 2.63461   | 2.68221   |
| Hipk1         | chr3:103193822-103854618  | OK     | 17.9287   | 18.2508   |
| Ap2m1         | chr16:20535503-20544053   | OK     | 42.1238   | 42.879    |
| Smarcc1       | chr9:110132023-110240178  | OK     | 17.5071   | 17.82     |
| Poldip3       | chr15:83125977-83149336   | OK     | 24.6989   | 25.1387   |
| Rnmtl1        | chr11:76243735-76250622   | OK     | 6.06701   | 6.17495   |
| Dus1l         | chr11:120789201-120796395 | OK     | 12.8044   | 13.0319   |
| Lamtor4       | chr5:138255481-138259395  | OK     | 44.9944   | 45.7928   |
| Pea15a        | chr1:172196728-172206781  | OK     | 184.864   | 188.112   |
| Bad           | chr19:6938069-6951905     | OK     | 23.5791   | 23.9918   |
| 1700001O22Rik | chr2:30795562-30803664    | NOTEST | 0.279165  | 0.284036  |
| Fkbp5         | chr17:28398752-28486149   | OK     | 15.2748   | 15.5398   |
| Sybu          | chr15:44671855-44805829   | OK     | 32.974    | 33.542    |
| Slc35c1       | chr2:92452764-92460518    | OK     | 12.7254   | 12.9437   |
| Ifih1         | chr2:62595792-62646255    | OK     | 2.03078   | 2.06554   |
| Igfbpl1       | chr4:45809506-45826827    | NOTEST | 0.150693  | 0.153263  |
| Zhx3          | chr2:160731309-160872990  | OK     | 5.29352   | 5.38362   |
| D11Wsu47e     | chr11:113684411-113694647 | OK     | 2.71425   | 2.75993   |
| Smyd4         | chr11:75348432-75405705   | OK     | 4.05341   | 4.1215    |
| Fez2          | chr17:78200247-78418152   | OK     | 39.6544   | 40.3201   |
| Uvssa         | chr5:33378695-33419754    | OK     | 1.24046   | 1.26129   |
| Mapre1        | chr2:153741286-153773314  | OK     | 36.3172   | 36.9267   |
| Atg10         | chr13:90935348-91223987   | OK     | 10.4491   | 10.6235   |
| Tbc1d9        | chr8:83165351-83272940    | OK     | 48.0953   | 48.8977   |
| Neu3          | chr7:99811438-99828417    | OK     | 0.802466  | 0.815821  |
| Foxf1         | chr8:121084385-121088154  | NOTEST | 0.554642  | 0.563837  |
| Bcar1         | chr8:111710474-111743849  | OK     | 15.8837   | 16.1447   |
| Tbc1d16       | chr11:119143042-119228499 | OK     | 8.16418   | 8.29789   |
| C1galt1       | chr6:7845223-7872042      | OK     | 5.59549   | 5.68691   |
| Stard7        | chr2:127270228-127298934  | OK     | 28.9926   | 29.4651   |
| Iars          | chr13:49682129-49734267   | OK     | 28.3025   | 28.7597   |
| Slc35e4       | chr11:3907021-3914664     | OK     | 10.518    | 10.6876   |
| D130043K22Rik | chr13:24845130-24901270   | OK     | 31.8594   | 32.3732   |
| Tti2          | chr8:31150315-31168724    | OK     | 7.98653   | 8.11475   |
| Cd9           | chr6:125460265-125494755  | OK     | 789.332   | 801.958   |
| Slc28a1       | chr7:81114798-81170416    | NOTEST | 0.0145591 | 0.0147917 |
| Derl2         | chr11:71007439-71027134   | OK     | 14.0734   | 14.2971   |
| Tsen15        | chr1:152370735-152386682  | OK     | 15.175    | 15.4139   |
| Cox7c         | chr13:86044797-86046795   | OK     | 16.0447   | 16.2935   |
| Wdr92         | chr11:17211892-17235200   | OK     | 2.6748    | 2.71625   |
| Mrto4         | chr4:139347439-139352576  | OK     | 7.83089   | 7.95214   |

|               |                           |        |          |          |
|---------------|---------------------------|--------|----------|----------|
| Eif3f         | chr7:108934414-108941942  | OK     | 93.536   | 94.9832  |
| AtI3          | chr19:7494039-7538609     | OK     | 46.7197  | 47.4415  |
| Bahcc1        | chr11:120232946-120292297 | OK     | 1.5156   | 1.53901  |
| Narfl         | chr17:25773775-25785586   | OK     | 7.89279  | 8.01441  |
| Acp6          | chr3:97158776-97176576    | OK     | 2.87968  | 2.92401  |
| Wdr11         | chr7:129591862-129635738  | OK     | 13.7024  | 13.9131  |
| Aifm1         | chrX:48474943-48513563    | OK     | 16.9985  | 17.2596  |
| Rbm48         | chr5:3571715-3637101      | OK     | 2.88446  | 2.92871  |
| Vegfb         | chr19:6982471-6987651     | OK     | 27.494   | 27.9153  |
| Cyth3         | chr5:143622446-143710248  | OK     | 20.7434  | 21.0596  |
| Eif2s3x       | chrX:94188708-94212651    | OK     | 6.69082  | 6.79207  |
| Dnajb2        | chr1:75236422-75245692    | OK     | 51.1379  | 51.9107  |
| Slc30a7       | chr3:115938972-116007406  | OK     | 2.69545  | 2.73609  |
| Trim33        | chr3:103193822-103854618  | OK     | 6.19163  | 6.28469  |
| Cerk          | chr15:86139100-86186141   | OK     | 36.9919  | 37.5449  |
| Sdcbp2        | chr2:151572622-151590005  | NOTEST | 0.501125 | 0.508577 |
| Ubr7          | chr12:102757974-102777701 | OK     | 11.4715  | 11.6401  |
| Hsd17b12      | chr2:94032696-94157909    | OK     | 75.1219  | 76.2225  |
| Larp1b        | chr3:40950630-40977793    | OK     | 11.8819  | 12.0534  |
| 9930021J03Rik | chr19:29714401-29806009   | OK     | 5.01428  | 5.08652  |
| Trp53         | chr11:69580358-69591873   | OK     | 10.2682  | 10.4155  |
| Ormdl3        | chr11:98581293-98587245   | OK     | 27.0919  | 27.4785  |
| Smarcal1      | chr1:72583250-72636790    | OK     | 14.3393  | 14.543   |
| Ccdc59        | chr10:105841478-105847510 | OK     | 8.81876  | 8.94348  |
| Crhbp         | chr13:95431375-95444831   | NOTEST | 0.354202 | 0.359203 |
| Ppp2r2a       | chr14:67014055-67072471   | OK     | 26.3433  | 26.7149  |
| Mob3c         | chr4:115828091-115836183  | OK     | 1.24999  | 1.26744  |
| Napa          | chr7:16098642-16117975    | OK     | 114.905  | 116.509  |
| Polr2a        | chr11:69733998-69758633   | OK     | 25.5312  | 25.8846  |
| Chchd7        | chr4:3938887-3951382      | OK     | 24.2894  | 24.6218  |
| Smox          | chr2:131127411-131604824  | OK     | 18.7926  | 19.0498  |
| Proser1       | chr3:53463816-53481755    | OK     | 6.13582  | 6.21967  |
| Arfgap1       | chr2:180967224-180982524  | OK     | 17.1999  | 17.4345  |
| Cnrip1        | chr11:17051933-17079372   | OK     | 24.16    | 24.4884  |
| Mei4          | chr9:81863743-82027491    | NOTEST | 0.258508 | 0.261988 |
| Alg11         | chr8:22060720-22071627    | OK     | 10.7823  | 10.9273  |
| Myo19         | chr11:84876312-84916356   | NOTEST | 0.430532 | 0.436286 |
| Rps28         | chr17:33823036-33824498   | OK     | 2.23672  | 2.2665   |
| Fgd1          | chrX:151047169-151096543  | OK     | 3.23897  | 3.28209  |
| Ensa          | chr3:95624979-95632117    | OK     | 111.871  | 113.34   |
| Mut           | chr17:40934684-40961989   | OK     | 18.2267  | 18.4646  |
| Rbak          | chr5:143172185-143180775  | OK     | 1.50994  | 1.52953  |
| Psmc1         | chr1:86064618-86139295    | OK     | 98.6668  | 99.946   |
| Frmd5         | chr2:121545528-121807057  | NOTEST | 0.701527 | 0.710572 |
| Ppp3cb        | chr14:20499313-20618354   | OK     | 59.9057  | 60.6749  |
| Bmi1          | chr2:18677017-18686629    | OK     | 8.60598  | 8.71547  |
| Spata2        | chr2:167481135-167516166  | OK     | 12.893   | 13.057   |
| Actg1         | chr11:120345689-120348484 | OK     | 301.219  | 305.045  |
| 6720489N17Rik | chr13:62603014-62624182   | OK     | 2.11505  | 2.14191  |
| Mlf2          | chr6:124931387-124936149  | OK     | 148.937  | 150.817  |
| Tsr3          | chr17:25240169-25256364   | OK     | 16.9372  | 17.1499  |
| Gnpda2        | chr5:69575001-69592285    | OK     | 30.2851  | 30.6601  |
| Gimap6        | chr6:48701582-48708244    | OK     | 7.0151   | 7.10196  |

|               |                           |        |         |          |
|---------------|---------------------------|--------|---------|----------|
| Rars          | chr11:35808380-35834528   | OK     | 30.3822 | 30.7583  |
| Stat1         | chr1:52119437-52161865    | OK     | 14.5811 | 14.7604  |
| Rpl15         | chr14:18267822-18270986   | OK     | 38.9234 | 39.3977  |
| 2210408I21Rik | chr13:77135535-77613679   | OK     | 3.941   | 3.98894  |
| Ddx42         | chr11:106216925-106249140 | OK     | 24.7375 | 25.0363  |
| Calr          | chr8:84842087-84846931    | OK     | 213.954 | 216.536  |
| Snx17         | chr5:30933142-31348845    | OK     | 34.3327 | 34.7446  |
| Rela          | chr19:5637489-5648130     | OK     | 12.1105 | 12.2556  |
| Prpf40b       | chr15:99295408-99317007   | OK     | 8.84972 | 8.95554  |
| Rnf144b       | chr13:47122719-47247991   | OK     | 3.28753 | 3.32683  |
| Cpsf3l        | chr4:155869566-155891762  | OK     | 10.7573 | 10.8843  |
| Polr2g        | chr19:8793128-8798557     | OK     | 63.9954 | 64.7476  |
| Appl1         | chr14:26918987-26970551   | OK     | 19.1804 | 19.4042  |
| Ccdc132       | chr6:3498392-3603531      | OK     | 20.6555 | 20.8964  |
| Sgsm1         | chr5:113243219-113310786  | OK     | 20.1402 | 20.3748  |
| Vapa          | chr17:65580052-65613555   | OK     | 105.526 | 106.75   |
| Tmed8         | chr12:87166241-87200229   | OK     | 18.4572 | 18.6689  |
| Otub1         | chr19:7198205-7206284     | OK     | 95.4812 | 96.5687  |
| Wnk1          | chr6:119923968-120038655  | OK     | 36.8163 | 37.2351  |
| Amotl1        | chr9:14541966-14615000    | OK     | 22.3489 | 22.5971  |
| Ssh1          | chr5:113942218-113993757  | OK     | 7.98868 | 8.07712  |
| Rin2          | chr2:145786115-145887616  | OK     | 6.29772 | 6.36743  |
| Csl           | chr10:99757704-99759658   | OK     | 6.30513 | 6.37472  |
| St7l          | chr3:104864505-104930063  | OK     | 6.6197  | 6.69276  |
| Coro2b        | chr9:62419491-62537044    | OK     | 69.7794 | 70.5344  |
| Zfp617        | chr8:71922824-71934630    | OK     | 6.03118 | 6.09611  |
| Atp6v0a1      | chr11:101009451-101063717 | OK     | 120.078 | 121.37   |
| Atp6v1g1      | chr4:63544764-63550701    | OK     | 91.2923 | 92.2713  |
| Cdk2ap2       | chr19:4097350-4099017     | OK     | 20.9717 | 21.194   |
| B4galt4       | chr16:38742258-38769054   | OK     | 7.37521 | 7.45333  |
| Galnt7        | chr8:57523824-57663430    | OK     | 1.96156 | 1.9823   |
| Zbtb38        | chr9:96685422-96752831    | OK     | 9.44064 | 9.54019  |
| Rbmxl1        | chr8:78505268-78508928    | OK     | 10.5354 | 10.6462  |
| Glo1          | chr17:30592861-30612659   | OK     | 50.8107 | 51.343   |
| Sec62         | chr3:30792875-30821263    | OK     | 57.1348 | 57.733   |
| Acox1         | chr11:116171882-116215318 | OK     | 56.7575 | 57.3484  |
| Vdac3         | chr8:22577074-22593813    | OK     | 47.2522 | 47.7435  |
| Ttc4          | chr4:106661807-106678944  | OK     | 11.9344 | 12.0579  |
| Psmb6         | chr11:70525356-70527858   | OK     | 107.188 | 108.292  |
| Eif4e2        | chr1:87213913-87240488    | OK     | 25.9494 | 26.214   |
| Snx3          | chr10:42502053-42535369   | OK     | 96.0617 | 97.0354  |
| St13          | chr15:81365043-81399694   | OK     | 89.3821 | 90.2846  |
| Ccnyl1        | chr1:64691344-64725642    | OK     | 2.39783 | 2.42189  |
| Hspa14        | chr2:3488853-3512814      | OK     | 16.4065 | 16.5686  |
| Tsta3         | chr15:75924682-75929730   | OK     | 17.0415 | 17.2098  |
| Dock7         | chr4:98936658-99120915    | OK     | 16.973  | 17.1398  |
| Bloc1s5       | chr13:38602705-38635109   | OK     | 16.3225 | 16.4825  |
| Fasn          | chr11:120805957-120824547 | OK     | 60.9895 | 61.5871  |
| Apol9a        | chr15:77403788-77411080   | NOTEST | 0.18316 | 0.184942 |
| Cog1          | chr11:113649528-113684151 | OK     | 23.1422 | 23.3655  |
| Wasf2         | chr4:133130632-133198330  | OK     | 13.9402 | 14.0745  |
| Asxl1         | chr2:153346138-153404007  | OK     | 9.48256 | 9.57353  |
| Zfp646        | chr7:127877700-127890970  | OK     | 3.25527 | 3.28641  |

|               |                           |        |           |           |
|---------------|---------------------------|--------|-----------|-----------|
| Pigs          | chr11:78328421-78342776   | OK     | 45.11     | 45.5389   |
| Zfp81         | chr17:33333727-33358878   | OK     | 3.28721   | 3.31807   |
| Slc7a5        | chr8:121881145-121907686  | OK     | 25.0031   | 25.2376   |
| Bicd1         | chr6:149408983-149563326  | OK     | 10.6361   | 10.7354   |
| Acad8         | chr9:26974138-26999549    | OK     | 9.97341   | 10.0654   |
| Setmar        | chr6:108065044-108077127  | OK     | 3.61109   | 3.64431   |
| Snx6          | chr12:54746356-54795662   | OK     | 72.3774   | 73.0419   |
| Myo1c         | chr11:75651508-75674634   | OK     | 9.70139   | 9.78969   |
| Pqlc1         | chr18:80255244-80292724   | OK     | 79.426    | 80.1419   |
| Txn2          | chr15:77915050-77928994   | OK     | 48.9482   | 49.3887   |
| Pigq          | chr17:25926419-25941989   | OK     | 34.9643   | 35.278    |
| Tysnd1        | chr10:61695513-61702773   | OK     | 11.2866   | 11.387    |
| Lrig2         | chr3:104453982-104511856  | OK     | 14.8926   | 15.0234   |
| Brd8          | chr18:34598614-34651736   | OK     | 9.73915   | 9.82389   |
| Gorasp2       | chr2:70661508-70691725    | OK     | 50.3983   | 50.8326   |
| Zbtb26        | chr2:37432167-37443121    | OK     | 1.70983   | 1.72452   |
| Emc3          | chr6:113514886-113531638  | OK     | 49.0259   | 49.4464   |
| Arpc4         | chr6:113378112-113414571  | OK     | 62.2676   | 62.8012   |
| Rab5b         | chr10:128677182-128696268 | OK     | 74.6332   | 75.2617   |
| Chst15        | chr7:132236254-132318291  | OK     | 22.1791   | 22.3659   |
| Usp1          | chr5:149184559-149215434  | OK     | 13.1021   | 13.2124   |
| Taf6          | chr5:138172020-138187186  | OK     | 11.0921   | 11.1844   |
| Cacfd1        | chr2:27009925-27021089    | OK     | 24.4165   | 24.6195   |
| Obfc1         | chr19:47501047-47537020   | OK     | 7.07139   | 7.1296    |
| Fbxo33        | chr12:59200654-59219483   | OK     | 7.87107   | 7.93567   |
| Polr2c        | chr8:94857449-94876312    | OK     | 3.76593   | 3.79661   |
| Rfx7          | chr9:72532239-72622949    | OK     | 3.77491   | 3.80552   |
| Actr8         | chr14:29978336-29993221   | OK     | 19.5356   | 19.6936   |
| Polr1e        | chr4:45018608-45084604    | OK     | 2.31507   | 2.33371   |
| Prmt7         | chr8:106211053-106251694  | OK     | 17.4912   | 17.6321   |
| Epn2          | chr11:61517248-61579687   | OK     | 24.0615   | 24.2548   |
| Pomt1         | chr2:32236682-32260105    | OK     | 4.89089   | 4.92995   |
| Tmem150cos    | chr5:100077872-100159808  | NOTEST | 0.0169934 | 0.0171289 |
| Edem2         | chr2:155701672-155729475  | OK     | 12.1434   | 12.2401   |
| Caprin1       | chr2:103762944-103797640  | OK     | 91.7647   | 92.4884   |
| Ift74         | chr4:94614490-94693233    | OK     | 11.4602   | 11.5498   |
| Ptbp2         | chr3:119718741-119783388  | OK     | 41.1752   | 41.4926   |
| Pla2r1        | chr2:60417542-60553308    | OK     | 1.33104   | 1.34126   |
| Ntsr2         | chr12:16653469-16660236   | OK     | 1.39828   | 1.40893   |
| Morc2a        | chr11:3649493-3690372     | OK     | 7.31727   | 7.37254   |
| AU040320      | chr4:126753554-126967923  | OK     | 20.8967   | 21.0543   |
| Neurod1       | chr2:79452640-79456636    | NOTEST | 0.293325  | 0.295487  |
| Rtn4r         | chr16:18127705-18152408   | OK     | 6.05109   | 6.09525   |
| Manbal        | chr2:157367593-157396763  | OK     | 28.5516   | 28.7592   |
| Ints2         | chr11:86210682-86257568   | OK     | 3.11916   | 3.14181   |
| Qrich1        | chr9:108517086-108560167  | OK     | 28.4776   | 28.684    |
| Rasa2         | chr9:96539299-96631503    | OK     | 6.34884   | 6.39469   |
| Trappc3       | chr4:126262404-126275883  | OK     | 43.779    | 44.0928   |
| Ctcf          | chr8:105636537-105682922  | OK     | 11.7745   | 11.8587   |
| Zfp93         | chr7:24270417-24277794    | OK     | 2.10147   | 2.11649   |
| C430002N11Rik | chr9:96765561-96774397    | OK     | 0.794323  | 0.799992  |
| 4933439C10Rik | chr11:59485520-59511067   | OK     | 2.05119   | 2.06582   |
| Hnrnpk        | chr13:58391950-58411149   | OK     | 50.767    | 51.1209   |



|               |                           |        |           |           |
|---------------|---------------------------|--------|-----------|-----------|
| Arl4a         | chr12:40033290-40037987   | OK     | 9.18422   | 9.24788   |
| Zar1          | chr5:72577113-72581084    | NOTEST | 0.0183073 | 0.0184337 |
| Nudt5         | chr2:5845033-5868736      | OK     | 14.0175   | 14.1135   |
| Flywch1       | chr17:23755422-23771591   | OK     | 80.78     | 81.3253   |
| Coq4          | chr2:29788262-29797743    | OK     | 5.08342   | 5.11688   |
| Pepd          | chr7:34912406-35044708    | OK     | 25.3633   | 25.5296   |
| Nhs           | chrX:161836429-162159441  | OK     | 1.97363   | 1.98651   |
| Ppcs          | chr4:119418532-119422420  | OK     | 11.5417   | 11.6168   |
| Sac3d1        | chr19:6116003-6118586     | OK     | 10.4999   | 10.5674   |
| Fancl         | chr11:26387083-26593920   | OK     | 1.81838   | 1.82981   |
| Mpped1        | chr15:83780022-83858474   | OK     | 1.97195   | 1.98399   |
| Snx13         | chr12:35047188-35147477   | OK     | 19.7007   | 19.8202   |
| Gm4952        | chr19:12599983-12627616   | NOTEST | 0.129014  | 0.129787  |
| Ubxn10        | chr4:138709836-138744575  | NOTEST | 0.0807846 | 0.0812669 |
| Faxc          | chr4:21931325-22001461    | OK     | 38.4732   | 38.7003   |
| Htatsf1       | chrX:57053569-57067182    | OK     | 20.1      | 20.214    |
| Rab9          | chrX:166457251-166479867  | OK     | 22.4362   | 22.5605   |
| Gosr1         | chr11:76726601-76763555   | OK     | 17.0141   | 17.1081   |
| Bbs12         | chr3:37312553-37321451    | OK     | 1.15847   | 1.16485   |
| Fam110b       | chr4:5644178-5799944      | OK     | 12.7204   | 12.7901   |
| Atp2b1        | chr10:98915151-99026143   | OK     | 60.2979   | 60.6272   |
| Zfp169        | chr13:48487659-48513436   | OK     | 2.29633   | 2.30886   |
| Creb3l1       | chr2:91982327-92024170    | OK     | 6.87085   | 6.90805   |
| Fgfbp1        | chr5:43978857-43981799    | NOTEST | 0.351201  | 0.353087  |
| Ugdh          | chr5:65413221-65435842    | OK     | 11.3661   | 11.4267   |
| Trim30a       | chr7:104409025-104465193  | OK     | 0.947828  | 0.952781  |
| Trerf1        | chr17:47140941-47359458   | OK     | 1.70006   | 1.70893   |
| Lamtor3       | chr3:137918554-137928762  | OK     | 16.9219   | 17.009    |
| Usp3          | chr9:66517880-66592980    | OK     | 4.47509   | 4.49791   |
| Tapt1         | chr5:44175161-44226606    | OK     | 11.1183   | 11.1734   |
| Lsm7          | chr10:80852824-80855209   | NOTEST | 1.2555    | 1.26162   |
| Phkg2         | chr7:127573347-127588595  | OK     | 27.5047   | 27.6372   |
| Sars          | chr3:108424863-108445259  | OK     | 55.0151   | 55.2761   |
| Dgat1         | chr15:76502014-76511818   | OK     | 7.3102    | 7.34443   |
| Strap         | chr6:137735081-137751930  | OK     | 64.105    | 64.4044   |
| R74862        | chr7:143021783-143067930  | NOTEST | 0.490355  | 0.492625  |
| Arfrp1        | chr2:181357689-181380793  | OK     | 8.38636   | 8.42488   |
| Cacul1        | chr19:60524695-60581023   | OK     | 24.0959   | 24.2059   |
| Rab18         | chr18:6765166-6791606     | OK     | 53.3007   | 53.5393   |
| Edrf1         | chr7:133637674-133673017  | OK     | 3.292     | 3.30663   |
| Cbll1         | chr12:31484828-31499616   | OK     | 5.6243    | 5.64892   |
| Arl2          | chr19:6134388-6141137     | OK     | 60.3973   | 60.6614   |
| Gm996         | chr2:25575415-25580099    | OK     | 5.12185   | 5.14413   |
| Morn2         | chr17:80238303-80297476   | OK     | 13.6676   | 13.7254   |
| Rhoh          | chr5:65863568-65896700    | NOTEST | 0.0247707 | 0.0248728 |
| Aaas          | chr15:102338246-102350759 | OK     | 7.37215   | 7.402     |
| Crip1         | chr12:113152011-113153879 | OK     | 55.3711   | 55.5926   |
| Sf3b3         | chr8:110810491-110846803  | OK     | 16.01     | 16.0729   |
| 4932435022Rik | chr11:114344525-114757886 | NOTEST | 0.143379  | 0.143939  |
| Npepl1        | chr2:174110350-174122702  | OK     | 13.128    | 13.176    |
| G3bp2         | chr5:92052145-92083735    | OK     | 131.487   | 131.951   |
| Vta1          | chr10:14655332-14705489   | OK     | 31.6563   | 31.7635   |
| Cyp2r1        | chr7:114550162-114562972  | NOTEST | 0.392005  | 0.393318  |

|               |                           |        |           |           |
|---------------|---------------------------|--------|-----------|-----------|
| Scg2          | chr1:79434668-79440090    | OK     | 169.843   | 170.41    |
| Etnk1         | chr6:143167229-143208547  | OK     | 129.881   | 130.311   |
| Abhd8         | chr8:71456699-71463657    | OK     | 53.0341   | 53.2051   |
| Vps13c        | chr9:67840395-67995634    | OK     | 9.3722    | 9.40234   |
| Pemt          | chr11:59970613-60046489   | OK     | 5.13538   | 5.15187   |
| H2-Q1         | chr17:35320557-35325099   | NOTEST | 0.203853  | 0.204502  |
| Cox6a1        | chr5:115345653-115348955  | OK     | 378.046   | 379.229   |
| Pdlim5        | chr3:142239584-142395696  | OK     | 14.3321   | 14.3766   |
| Pphln1        | chr15:93398349-93491912   | OK     | 16.6368   | 16.6882   |
| Efnb1         | chrX:99136129-99148991    | OK     | 9.67767   | 9.70725   |
| Nme7          | chr1:164307674-164458355  | OK     | 6.85549   | 6.87598   |
| Ttc21a        | chr9:119937605-119967793  | NOTEST | 0.315281  | 0.316222  |
| Bet1l         | chr7:140853383-140856383  | OK     | 15.2235   | 15.2686   |
| Clcn6         | chr4:148006483-148038767  | OK     | 36.2868   | 36.3918   |
| Cdk4          | chr10:127063602-127067282 | OK     | 23.7967   | 23.865    |
| Orai2         | chr5:136147460-136170656  | OK     | 13.1084   | 13.1445   |
| 4732471J01Rik | chr7:25376818-25566417    | OK     | 1.25939   | 1.26286   |
| Fam161b       | chr12:84345316-84361821   | OK     | 3.03671   | 3.04501   |
| Galnt11       | chr5:25222892-25265918    | OK     | 11.4937   | 11.5247   |
| Slc25a46      | chr18:31580167-31609902   | OK     | 39.3594   | 39.4612   |
| Pfkfb3        | chr2:11471430-11553929    | OK     | 22.8013   | 22.8599   |
| Dnm1l         | chr16:16312227-16359031   | OK     | 106.085   | 106.348   |
| 4933427E11Rik | chr15:74702411-74710374   | NOTEST | 0.0179911 | 0.0180312 |
| Timm17a       | chr1:135301534-135313737  | OK     | 59.8555   | 59.9874   |
| Golgb1        | chr16:36880518-36933085   | OK     | 12.572    | 12.5997   |
| Usp39         | chr6:72318675-72345175    | OK     | 11.1405   | 11.1648   |
| Sephs1        | chr2:4881563-4910556      | OK     | 5.82161   | 5.83415   |
| Yars2         | chr16:16302964-16309640   | OK     | 9.85695   | 9.87804   |
| Ubap2l        | chr3:89998759-90068347    | OK     | 36.9788   | 37.0562   |
| D1Erttd622e   | chr1:97643901-97662018    | OK     | 15.9355   | 15.9686   |
| Mrps7         | chr11:115604150-115607624 | OK     | 25.9207   | 25.9725   |
| Tinf2         | chr14:55679079-55681817   | OK     | 4.90893   | 4.91838   |
| Aasdh         | chr5:76875934-76905514    | OK     | 1.75694   | 1.7602    |
| Mcm3ap        | chr10:76449080-76515857   | OK     | 8.23812   | 8.25321   |
| Mark4         | chr7:19426074-19458494    | OK     | 25.3922   | 25.4379   |
| Zfp874a       | chr13:67440430-67451624   | OK     | 6.36488   | 6.37608   |
| Ankrd46       | chr15:36477667-36496791   | OK     | 147.952   | 148.206   |
| Cic           | chr7:25282178-25294148    | OK     | 31.6774   | 31.7306   |
| Pip5k1a       | chr3:95059595-95106858    | OK     | 8.40814   | 8.4222    |
| C030046E11Rik | chr19:29522281-29605921   | OK     | 4.79067   | 4.79857   |
| Cd300lg       | chr11:102041510-102055617 | OK     | 2.89739   | 2.90178   |
| Snapi         | chr3:90476200-90491013    | OK     | 38.2357   | 38.2928   |
| Tmem182       | chr1:40805600-40855267    | NOTEST | 0.152772  | 0.152982  |
| Fam179b       | chr12:64965741-65022573   | OK     | 15.4475   | 15.4685   |
| Eif4g1        | chr16:20672748-20692883   | OK     | 98.1017   | 98.2332   |
| Pnpla2        | chr7:141455187-141460743  | OK     | 13.977    | 13.9953   |
| Trim8         | chr19:46501647-46516455   | OK     | 18.2959   | 18.3199   |
| Syt16         | chr12:73997760-74267916   | OK     | 2.95351   | 2.95737   |
| Pnpla6        | chr8:3515383-3544267      | OK     | 21.9822   | 22.0102   |
| Tmem88        | chr11:69395790-69398234   | OK     | 2.2339    | 2.23659   |
| Gm19299       | chr9:67133560-67163788    | NOTEST | 0.0147648 | 0.0147822 |
| Fis1          | chr5:136953274-136966234  | OK     | 153.878   | 154.048   |
| Naga          | chr15:82329531-82338826   | OK     | 13.971    | 13.9858   |

|               |                           |        |           |           |
|---------------|---------------------------|--------|-----------|-----------|
| Ddx1          | chr12:13219306-13249174   | OK     | 76.4258   | 76.5002   |
| Fbxw15        | chr9:109552601-109568262  | NOTEST | 0.0140794 | 0.0140928 |
| Ube2d2a       | chr18:35771558-35807172   | OK     | 43.666    | 43.7076   |
| Polr3g        | chr13:81673836-81711013   | OK     | 37.5571   | 37.5917   |
| Gfra1         | chr19:58235580-58455398   | OK     | 42.5002   | 42.5379   |
| Sap30         | chr8:57482701-57487860    | OK     | 1.86299   | 1.86462   |
| Dnajc11       | chr4:151933719-151981959  | OK     | 21.8678   | 21.8868   |
| C1qbp         | chr11:70970199-70983026   | OK     | 62.2276   | 62.278    |
| Mfsd1         | chr3:67582767-67604231    | OK     | 25.6223   | 25.6428   |
| Ammechr1l     | chr18:31759823-31784083   | OK     | 15.5905   | 15.6013   |
| Ppp6c         | chr2:39196797-39226338    | OK     | 35.3896   | 35.4139   |
| Scfd1         | chr12:51377579-51450096   | OK     | 22.4919   | 22.5064   |
| Nubp2         | chr17:24882610-24886350   | OK     | 24.535    | 24.5498   |
| Rspry1        | chr8:94601940-94660276    | OK     | 12.7673   | 12.7745   |
| Asphd2        | chr5:112385444-112392213  | OK     | 16.2073   | 16.2165   |
| Hiat1         | chr3:116631166-116662677  | OK     | 24.6787   | 24.6908   |
| Acer3         | chr7:98213659-98309527    | OK     | 8.27723   | 8.28115   |
| Fmn1          | chr2:113220186-113716767  | OK     | 17.3321   | 17.3388   |
| Drosha        | chr15:12824814-12935291   | OK     | 23.3756   | 23.3839   |
| Zfp956        | chr6:47943174-47965299    | OK     | 2.56899   | 2.56989   |
| Acad11        | chr9:104063702-104127646  | OK     | 8.11159   | 8.11428   |
| Tusc1         | chr4:93334147-93335511    | OK     | 1.94803   | 1.94867   |
| D10Jhu81e     | chr10:78162066-78169768   | OK     | 53.1535   | 53.1691   |
| Asb14         | chr14:26894603-26915257   | NOTEST | 0.0112841 | 0.0112845 |
| 0610005C13Rik | chr7:45567794-45589710    | NOTEST | 0         | 0         |
| 0610031O16Rik | chr3:138210716-138239663  | NOTEST | 0         | 0         |
| 0610039K10Rik | chr2:163623272-163645800  | NOTEST | 0         | 0         |
| 1010001N08Rik | chr18:11042036-11085635   | NOTEST | 0         | 0         |
| 1110025L11Rik | chr16:89063409-89064002   | NOTEST | 0         | 0         |
| 1110028F11Rik | chr11:87663086-87735539   | NOTEST | 0         | 0         |
| 1110036E04Rik | chr9:64049828-64054100    | NOTEST | 0         | 0         |
| 1190003K10Rik | chr13:64481245-64497792   | NOTEST | 0         | 0         |
| 1500015L24Rik | chr19:20405287-20422785   | NOTEST | 0         | 0         |
| 1600002D24Rik | chr16:95831122-95929077   | NOTEST | 0         | 0         |
| 1600014C23Rik | chr17:45732863-45733844   | NOTEST | 0         | 0         |
| 1600014K23Rik | chrX:85249676-85270291    | NOTEST | 0         | 0         |
| 1600015I10Rik | chr6:48929895-48933687    | NOTEST | 0         | 0         |
| 1600025M17Rik | chrX:56317607-56320664    | NOTEST | 0         | 0         |
| 1700001C02Rik | chr5:30466076-30484087    | NOTEST | 0         | 0         |
| 1700001D01Rik | chr8:61224170-61396072    | NOTEST | 0         | 0         |
| 1700001F09Rik | chr14:43342383-43347811   | NOTEST | 0         | 0         |
| 1700001J03Rik | chr5:146182449-146185304  | NOTEST | 0         | 0         |
| 1700001K19Rik | chr12:110667688-110682619 | NOTEST | 0         | 0         |
| 1700001P01Rik | chr11:97771480-97775918   | NOTEST | 0         | 0         |
| 1700003C15Rik | chr5:11749832-11769308    | NOTEST | 0         | 0         |
| 1700003D09Rik | chr11:98348737-98358283   | NOTEST | 0         | 0         |
| 1700003E24Rik | chrX:93156153-93156871    | LOWDAT | 0         | 0         |
| 1700003G18Rik | chr7:116081761-116093149  | NOTEST | 0         | 0         |
| 1700003H04Rik | chr3:124565890-124581091  | NOTEST | 0         | 0         |
| 1700003L19Rik | chr16:12811389-12848653   | NOTEST | 0         | 0         |
| 1700003P14Rik | chr13:118556167-118588629 | NOTEST | 0         | 0         |
| 1700006A11Rik | chr3:124401154-124426028  | NOTEST | 0         | 0         |
| 1700006E09Rik | chr11:101987055-101992264 | NOTEST | 0         | 0         |

|               |                           |        |   |   |
|---------------|---------------------------|--------|---|---|
| 1700006F04Rik | chr14:119138264-119869815 | NOTEST | 0 | 0 |
| 1700006H21Rik | chr13:107687396-107692168 | NOTEST | 0 | 0 |
| 1700007J10Rik | chr11:59662494-59780860   | NOTEST | 0 | 0 |
| 1700008F21Rik | chr8:129067133-129183732  | NOTEST | 0 | 0 |
| 1700008K24Rik | chr17:49112263-49113533   | NOTEST | 0 | 0 |
| 1700008P02Rik | chr3:6615412-6620443      | NOTEST | 0 | 0 |
| 1700009C05Rik | chr6:81900464-81910800    | NOTEST | 0 | 0 |
| 1700009J07Rik | chr10:77893419-77896111   | NOTEST | 0 | 0 |
| 1700009N14Rik | chr4:39450292-39451778    | NOTEST | 0 | 0 |
| 1700010B08Rik | chr2:173719414-173722086  | NOTEST | 0 | 0 |
| 1700010D01Rik | chrX:95711677-95927970    | NOTEST | 0 | 0 |
| 1700010I02Rik | chr3:7925302-7954887      | NOTEST | 0 | 0 |
| 1700010J16Rik | chr10:112726925-112785599 | NOTEST | 0 | 0 |
| 1700010K23Rik | chr16:66655420-67620908   | NOTEST | 0 | 0 |
| 1700011M02Rik | chrX:102908904-102909651  | NOTEST | 0 | 0 |
| 1700012A03Rik | chr6:32050287-32058915    | NOTEST | 0 | 0 |
| 1700012B07Rik | chr11:109788290-109828046 | NOTEST | 0 | 0 |
| 1700012B09Rik | chr9:14758193-14771030    | NOTEST | 0 | 0 |
| 1700012I11Rik | chr15:67226768-67377094   | NOTEST | 0 | 0 |
| 1700012P22Rik | chr4:144418190-144438772  | NOTEST | 0 | 0 |
| 1700013D24Rik | chr6:124347593-124357086  | NOTEST | 0 | 0 |
| 1700013G24Rik | chr4:137453295-137455461  | NOTEST | 0 | 0 |
| 1700013H16Rik | chrX:53742900-53757831    | NOTEST | 0 | 0 |
| 1700015E13Rik | chr1:170308860-170312125  | NOTEST | 0 | 0 |
| 1700015G11Rik | chr7:52011679-52015716    | NOTEST | 0 | 0 |
| 1700016C15Rik | chr1:177729813-177753305  | NOTEST | 0 | 0 |
| 1700016D06Rik | chr8:11654923-11678750    | NOTEST | 0 | 0 |
| 1700016G22Rik | chr13:5855508-5858092     | NOTEST | 0 | 0 |
| 1700016H13Rik | chr5:103648586-103655732  | NOTEST | 0 | 0 |
| 1700016L04Rik | chr10:14705608-14759019   | NOTEST | 0 | 0 |
| 1700016L21Rik | chr1:80445931-80475660    | NOTEST | 0 | 0 |
| 1700016P04Rik | chr6:13413336-13415996    | NOTEST | 0 | 0 |
| 1700017D01Rik | chr19:11096815-11130878   | NOTEST | 0 | 0 |
| 1700017J07Rik | chr2:168978268-168978906  | NOTEST | 0 | 0 |
| 1700018A04Rik | chr13:31565491-31582513   | NOTEST | 0 | 0 |
| 1700018B08Rik | chr8:121530783-121541954  | NOTEST | 0 | 0 |
| 1700018B24Rik | chr3:48605730-48609100    | NOTEST | 0 | 0 |
| 1700018C11Rik | chr4:63607090-63622429    | NOTEST | 0 | 0 |
| 1700018F24Rik | chr5:145042989-145045678  | NOTEST | 0 | 0 |
| 1700018G05Rik | chrX:102928371-102929107  | NOTEST | 0 | 0 |
| 1700019A02Rik | chr1:53158576-53187617    | NOTEST | 0 | 0 |
| 1700019B21Rik | chrX:62510538-62527011    | NOTEST | 0 | 0 |
| 1700019E08Rik | chr2:45696604-45698447    | NOTEST | 0 | 0 |
| 1700019G24Rik | chr6:5725638-6028039      | NOTEST | 0 | 0 |
| 1700019M22Rik | chr12:96046620-96047222   | NOTEST | 0 | 0 |
| 1700019O17Rik | chr1:86426328-86428049    | NOTEST | 0 | 0 |
| 1700020A23Rik | chr2:130405258-130406074  | NOTEST | 0 | 0 |
| 1700020G17Rik | chr10:110801173-110896507 | NOTEST | 0 | 0 |
| 1700020M21Rik | chr9:120913773-120915250  | NOTEST | 0 | 0 |
| 1700020N01Rik | chr10:21593144-21622375   | NOTEST | 0 | 0 |
| 1700020N15Rik | chrX:69929259-70143588    | NOTEST | 0 | 0 |
| 1700021F07Rik | chr2:173522591-173528502  | NOTEST | 0 | 0 |
| 1700021N21Rik | chr4:134448764-134450171  | NOTEST | 0 | 0 |

|               |                           |        |   |   |
|---------------|---------------------------|--------|---|---|
| 1700022A21Rik | chr5:24645452-24648860    | NOTEST | 0 | 0 |
| 1700022A22Rik | chr15:46324584-46373899   | NOTEST | 0 | 0 |
| 1700022E09Rik | chr16:59466871-59469238   | NOTEST | 0 | 0 |
| 1700022H16Rik | chr12:9565235-9570585     | NOTEST | 0 | 0 |
| 1700023C21Rik | chr11:109845877-109848476 | NOTEST | 0 | 0 |
| 1700023F02Rik | chr10:66120608-66124064   | NOTEST | 0 | 0 |
| 1700024B18Rik | chr14:123978290-124677127 | NOTEST | 0 | 0 |
| 1700024G13Rik | chr14:32376501-32388373   | NOTEST | 0 | 0 |
| 1700024P04Rik | chr13:98984089-98984565   | NOTEST | 0 | 0 |
| 1700025B11Rik | chr15:77558239-77561892   | NOTEST | 0 | 0 |
| 1700025C18Rik | chr2:165078692-165090750  | NOTEST | 0 | 0 |
| 1700025F22Rik | chr19:11139682-11165320   | NOTEST | 0 | 0 |
| 1700025F24Rik | chr10:119413443-119426864 | NOTEST | 0 | 0 |
| 1700025K24Rik | chr17:54352582-54370074   | NOTEST | 0 | 0 |
| 1700025M24Rik | chr5:73268579-73284184    | NOTEST | 0 | 0 |
| 1700025N23Rik | chr6:38918985-39084579    | NOTEST | 0 | 0 |
| 1700026D11Rik | chr2:132490727-132524057  | NOTEST | 0 | 0 |
| 1700026F02Rik | chr8:71006727-71026755    | NOTEST | 0 | 0 |
| 1700027A15Rik | chr1:73016035-73025508    | NOTEST | 0 | 0 |
| 1700027F09Rik | chr5:64454812-64467942    | NOTEST | 0 | 0 |
| 1700027H10Rik | chr3:45378397-45439309    | NOTEST | 0 | 0 |
| 1700027I24Rik | chr9:36668855-36693189    | NOTEST | 0 | 0 |
| 1700028B04Rik | chr7:28496940-28497492    | NOTEST | 0 | 0 |
| 1700028D13Rik | chr5:112206762-112210002  | NOTEST | 0 | 0 |
| 1700028I16Rik | chr10:82812122-82824242   | NOTEST | 0 | 0 |
| 1700028M03Rik | chr3:83555366-83574118    | NOTEST | 0 | 0 |
| 1700028P14Rik | chr19:23558759-23652812   | NOTEST | 0 | 0 |
| 1700028P15Rik | chr2:171956878-171962799  | NOTEST | 0 | 0 |
| 1700029B22Rik | chr7:131146438-131150578  | NOTEST | 0 | 0 |
| 1700029H14Rik | chr8:13550721-13562461    | NOTEST | 0 | 0 |
| 1700029J03Rik | chr16:93396814-93458872   | NOTEST | 0 | 0 |
| 1700029N11Rik | chr13:44439726-44457567   | NOTEST | 0 | 0 |
| 1700030A11Rik | chr17:28896394-28915324   | NOTEST | 0 | 0 |
| 1700030F04Rik | chr6:117679206-117751769  | NOTEST | 0 | 0 |
| 1700030F18Rik | chr15:99918347-99931658   | NOTEST | 0 | 0 |
| 1700030M09Rik | chr8:121544387-121547652  | NOTEST | 0 | 0 |
| 1700030N03Rik | chr19:3153798-3197703     | NOTEST | 0 | 0 |
| 1700030O20Rik | chr10:116723066-116729177 | NOTEST | 0 | 0 |
| 1700031A10Rik | chr17:36923791-36933432   | NOTEST | 0 | 0 |
| 1700031F05Rik | chrX:102859186-102866353  | NOTEST | 0 | 0 |
| 1700031M16Rik | chr15:98398444-98416135   | NOTEST | 0 | 0 |
| 1700031P21Rik | chr12:52599983-52602322   | NOTEST | 0 | 0 |
| 1700034E13Rik | chr18:52646219-52663731   | NOTEST | 0 | 0 |
| 1700034G24Rik | chr5:112582935-112589996  | NOTEST | 0 | 0 |
| 1700034I23Rik | chr3:40894276-40936307    | NOTEST | 0 | 0 |
| 1700034J05Rik | chr6:146888493-147032023  | NOTEST | 0 | 0 |
| 1700034K08Rik | chr9:92979915-93005733    | NOTEST | 0 | 0 |
| 1700034O15Rik | chr6:41684430-41685717    | NOTEST | 0 | 0 |
| 1700036G14Rik | chr3:85317518-85332027    | NOTEST | 0 | 0 |
| 1700039E15Rik | chr7:45282872-45288993    | NOTEST | 0 | 0 |
| 1700039E22Rik | chr19:44757393-44837869   | NOTEST | 0 | 0 |
| 1700041C23Rik | chr9:57175274-57186110    | NOTEST | 0 | 0 |
| 1700041M19Rik | chr16:77004227-77010881   | NOTEST | 0 | 0 |



|               |                           |        |   |   |
|---------------|---------------------------|--------|---|---|
| 1700042B14Rik | chrX:155124980-155147849  | NOTEST | 0 | 0 |
| 1700042G07Rik | chr4:116173371-116174297  | NOTEST | 0 | 0 |
| 1700042O10Rik | chr11:11814100-11898144   | NOTEST | 0 | 0 |
| 1700044C05Rik | chr14:118365877-118398165 | NOTEST | 0 | 0 |
| 1700044K03Rik | chr18:49523288-49524441   | NOTEST | 0 | 0 |
| 1700045H11Rik | chr4:150828224-150854949  | NOTEST | 0 | 0 |
| 1700046C09Rik | chr11:14560335-14599225   | NOTEST | 0 | 0 |
| 1700047A11Rik | chr8:26021420-26119224    | NOTEST | 0 | 0 |
| 1700047E10Rik | chr14:44191606-44213237   | NOTEST | 0 | 0 |
| 1700047G03Rik | chr15:11967061-11970083   | NOTEST | 0 | 0 |
| 1700047L14Rik | chr5:108763841-108768917  | NOTEST | 0 | 0 |
| 1700048M11Rik | chr16:92301302-92313041   | NOTEST | 0 | 0 |
| 1700049E15Rik | chr6:147690240-147702374  | NOTEST | 0 | 0 |
| 1700049E22Rik | chr6:100527399-100533426  | NOTEST | 0 | 0 |
| 1700049L16Rik | chr10:71979884-71980690   | NOTEST | 0 | 0 |
| 1700051A21Rik | chr11:72266843-72268556   | NOTEST | 0 | 0 |
| 1700052I22Rik | chr12:80923431-80924447   | NOTEST | 0 | 0 |
| 1700054A03Rik | chr19:53076251-53084392   | NOTEST | 0 | 0 |
| 1700054K19Rik | chr6:112210707-112212518  | NOTEST | 0 | 0 |
| 1700054O13Rik | chrX:9846946-9847500      | NOTEST | 0 | 0 |
| 1700055C04Rik | chr9:64038464-64041465    | NOTEST | 0 | 0 |
| 1700055N04Rik | chr19:3958807-3970438     | NOTEST | 0 | 0 |
| 1700057G04Rik | chr9:92309376-92357876    | NOTEST | 0 | 0 |
| 1700057H15Rik | chr4:124449625-124485959  | NOTEST | 0 | 0 |
| 1700060C16Rik | chr6:143593352-143651288  | NOTEST | 0 | 0 |
| 1700061F12Rik | chr2:9189514-9197484      | NOTEST | 0 | 0 |
| 1700061I17Rik | chr3:117060521-117077765  | NOTEST | 0 | 0 |
| 1700063A18Rik | chr1:95990658-96021758    | NOTEST | 0 | 0 |
| 1700063O14Rik | chr5:91766241-91767300    | NOTEST | 0 | 0 |
| 1700064J06Rik | chr10:119092904-119103107 | NOTEST | 0 | 0 |
| 1700065D16Rik | chr9:95855417-95951644    | NOTEST | 0 | 0 |
| 1700065I16Rik | chr15:63817187-63819540   | NOTEST | 0 | 0 |
| 1700065J11Rik | chr6:35330845-35336829    | NOTEST | 0 | 0 |
| 1700065J18Rik | chr1:192841704-192842739  | NOTEST | 0 | 0 |
| 1700065L07Rik | chr6:73436964-73471021    | NOTEST | 0 | 0 |
| 1700065O20Rik | chr18:49803331-49817956   | NOTEST | 0 | 0 |
| 1700066B17Rik | chr1:39842427-39847330    | NOTEST | 0 | 0 |
| 1700066N21Rik | chr5:87908587-87979351    | NOTEST | 0 | 0 |
| 1700066O22Rik | chr18:57504421-57533752   | NOTEST | 0 | 0 |
| 1700067G17Rik | chr1:89016112-89022210    | NOTEST | 0 | 0 |
| 1700067P10Rik | chr17:48064788-48090920   | NOTEST | 0 | 0 |
| 1700069L16Rik | chr5:113692423-113724772  | NOTEST | 0 | 0 |
| 1700069P05Rik | chr6:118246694-118248454  | NOTEST | 0 | 0 |
| 1700071M16Rik | chr17:43568450-43612201   | NOTEST | 0 | 0 |
| 1700072B07Rik | chr9:58370503-58374183    | NOTEST | 0 | 0 |
| 1700073E17Rik | chr6:145387624-145392223  | NOTEST | 0 | 0 |
| 1700074H08Rik | chr13:119680041-119681582 | NOTEST | 0 | 0 |
| 1700074P13Rik | chr6:40920459-40940557    | NOTEST | 0 | 0 |
| 1700080E11Rik | chr9:105143343-105145082  | NOTEST | 0 | 0 |
| 1700080N15Rik | chr2:4132064-4141141      | NOTEST | 0 | 0 |
| 1700080O16Rik | chrX:51968694-51972772    | NOTEST | 0 | 0 |
| 1700081H04Rik | chr5:119108235-119114543  | NOTEST | 0 | 0 |
| 1700084F23Rik | chr13:70004049-70028348   | NOTEST | 0 | 0 |

|               |                           |        |   |   |
|---------------|---------------------------|--------|---|---|
| 1700084J12Rik | chr15:33083128-33653436   | NOTEST | 0 | 0 |
| 1700085C21Rik | chr12:82617037-83158813   | NOTEST | 0 | 0 |
| 1700091H14Rik | chr14:42089749-42095277   | NOTEST | 0 | 0 |
| 1700092C02Rik | chr8:77624171-77628956    | NOTEST | 0 | 0 |
| 1700092C10Rik | chr14:69164798-69175540   | NOTEST | 0 | 0 |
| 1700092E19Rik | chr13:26283158-26312406   | NOTEST | 0 | 0 |
| 1700092K14Rik | chr11:114198257-114199199 | NOTEST | 0 | 0 |
| 1700094M24Rik | chr6:52492450-52500085    | NOTEST | 0 | 0 |
| 1700095A21Rik | chr4:146501999-146546873  | NOTEST | 0 | 0 |
| 1700095B10Rik | chr5:112688875-112896362  | NOTEST | 0 | 0 |
| 1700096J18Rik | chr11:109346866-109353651 | NOTEST | 0 | 0 |
| 1700100L14Rik | chr13:70573240-70576104   | NOTEST | 0 | 0 |
| 1700101O22Rik | chr12:7372038-7380330     | NOTEST | 0 | 0 |
| 1700102H20Rik | chr17:3557823-3559863     | NOTEST | 0 | 0 |
| 1700104L18Rik | chr12:54233614-54242320   | NOTEST | 0 | 0 |
| 1700106J16Rik | chr11:88294042-88295261   | NOTEST | 0 | 0 |
| 1700108J01Rik | chr14:122181693-122451146 | NOTEST | 0 | 0 |
| 1700109G15Rik | chr11:84716975-84720432   | NOTEST | 0 | 0 |
| 1700109I08Rik | chr14:39655662-39685293   | NOTEST | 0 | 0 |
| 1700109K24Rik | chr15:77078989-77307053   | NOTEST | 0 | 0 |
| 1700110C19Rik | chr17:10324601-10329312   | NOTEST | 0 | 0 |
| 1700110I01Rik | chr14:3634511-3800987     | NOTEST | 0 | 0 |
| 1700110K17Rik | chr9:40297906-40455764    | NOTEST | 0 | 0 |
| 1700111N16Rik | chrX:69929259-70143588    | NOTEST | 0 | 0 |
| 1700112H15Rik | chr1:184527840-184557691  | NOTEST | 0 | 0 |
| 1700112J05Rik | chr5:77004054-77061522    | NOTEST | 0 | 0 |
| 1700119H24Rik | chr16:34784949-35002434   | NOTEST | 0 | 0 |
| 1700120E14Rik | chr18:74442618-74771477   | NOTEST | 0 | 0 |
| 1700120G07Rik | chr7:135191764-135196002  | NOTEST | 0 | 0 |
| 1700121L16Rik | chrX:104816775-104842455  | NOTEST | 0 | 0 |
| 1700121N20Rik | chr12:106442651-106447666 | NOTEST | 0 | 0 |
| 1700122O11Rik | chr17:48036744-48038293   | NOTEST | 0 | 0 |
| 1700123K08Rik | chr5:138561839-138564694  | NOTEST | 0 | 0 |
| 1700123L14Rik | chr6:96113153-96657198    | NOTEST | 0 | 0 |
| 1700123O12Rik | chr4:10508030-10797802    | NOTEST | 0 | 0 |
| 1700125G02Rik | chr4:124881784-124917800  | NOTEST | 0 | 0 |
| 1700125G22Rik | chr3:27154025-27157019    | NOTEST | 0 | 0 |
| 1700125H03Rik | chr8:68356780-68735146    | NOTEST | 0 | 0 |
| 1700126H18Rik | chr5:66166606-66191335    | NOTEST | 0 | 0 |
| 1700128A07Rik | chr14:106417186-106486520 | NOTEST | 0 | 0 |
| 1700128F08Rik | chr9:8221888-8241987      | NOTEST | 0 | 0 |
| 1700129C05Rik | chr14:59133039-59142893   | NOTEST | 0 | 0 |
| 1810007C17Rik | chr12:49476992-49480862   | NOTEST | 0 | 0 |
| 1810008I18Rik | chr7:65804051-65806223    | NOTEST | 0 | 0 |
| 1810009J06Rik | chr6:40964771-40968427    | NOTEST | 0 | 0 |
| 1810012K16Rik | chr8:22398720-22399591    | NOTEST | 0 | 0 |
| 1810013A23Rik | chr17:28232753-28301469   | NOTEST | 0 | 0 |
| 1810018F18Rik | chr19:58698916-58701323   | NOTEST | 0 | 0 |
| 2010009K17Rik | chr2:158028496-158091797  | NOTEST | 0 | 0 |
| 2010010A06Rik | chr18:75288659-75297329   | NOTEST | 0 | 0 |
| 2010106E10Rik | chrX:112495273-112558343  | NOTEST | 0 | 0 |
| 2010109A12Rik | chr5:93206517-93213474    | NOTEST | 0 | 0 |
| 2010310C07Rik | chr6:42349827-42380558    | NOTEST | 0 | 0 |

|               |                           |        |   |   |
|---------------|---------------------------|--------|---|---|
| 2200002J24Rik | chr7:30698925-30700534    | NOTEST | 0 | 0 |
| 2210019I11Rik | chr5:147228597-147275149  | NOTEST | 0 | 0 |
| 2210409D07Rik | chr18:57533825-57731065   | NOTEST | 0 | 0 |
| 2210409E12Rik | chr11:88972637-88973014   | NOTEST | 0 | 0 |
| 2210414B05Rik | chr4:3656505-3663108      | NOTEST | 0 | 0 |
| 2210417A02Rik | chr5:148741839-148743139  | NOTEST | 0 | 0 |
| 2210420H20Rik | chr18:82754504-82759039   | NOTEST | 0 | 0 |
| 2300003K06Rik | chr11:99837147-99838066   | NOTEST | 0 | 0 |
| 2310001K24Rik | chr2:163468702-163473003  | NOTEST | 0 | 0 |
| 2310002L09Rik | chr4:73939370-73950846    | NOTEST | 0 | 0 |
| 2310005A03Rik | chr2:155097790-155100079  | NOTEST | 0 | 0 |
| 2310005E17Rik | chr13:98424109-98435065   | NOTEST | 0 | 0 |
| 2310007L24Rik | chr11:106374825-106377114 | NOTEST | 0 | 0 |
| 2310008N11Rik | chr8:26814596-26824423    | NOTEST | 0 | 0 |
| 2310020H05Rik | chr13:99076527-99087921   | NOTEST | 0 | 0 |
| 2310034C09Rik | chr16:88758846-88759789   | NOTEST | 0 | 0 |
| 2310039L15Rik | chr10:95336275-95363216   | NOTEST | 0 | 0 |
| 2310043L19Rik | chr1:177641541-177642943  | NOTEST | 0 | 0 |
| 2310043O21Rik | chr15:38549343-38594934   | NOTEST | 0 | 0 |
| 2310050C09Rik | chr3:92868358-92870205    | NOTEST | 0 | 0 |
| 2310057N15Rik | chr16:88773180-88774206   | NOTEST | 0 | 0 |
| 2310061N02Rik | chr16:88707170-88707962   | NOTEST | 0 | 0 |
| 2310079G19Rik | chr16:88626787-88627666   | NOTEST | 0 | 0 |
| 2410003L11Rik | chr11:97598510-97622893   | NOTEST | 0 | 0 |
| 2410007B07Rik | chr3:75647440-75655731    | NOTEST | 0 | 0 |
| 2410017I17Rik | chr17:36145017-36162374   | NOTEST | 0 | 0 |
| 2410021H03Rik | chr17:69156809-69289987   | NOTEST | 0 | 0 |
| 2410088K16Rik | chr1:88754889-88755733    | NOTEST | 0 | 0 |
| 2410114N07Rik | chr4:34909788-34911481    | NOTEST | 0 | 0 |
| 2410124H12Rik | chr16:92478741-92497365   | NOTEST | 0 | 0 |
| 2410141K09Rik | chr13:66418113-66441118   | NOTEST | 0 | 0 |
| 2610016A17Rik | chr19:25671133-25672239   | NOTEST | 0 | 0 |
| 2610028H24Rik | chr10:76449080-76515857   | NOTEST | 0 | 0 |
| 2610207O16Rik | chr1:42707062-42713454    | NOTEST | 0 | 0 |
| 2610528J11Rik | chr4:118527274-118530217  | NOTEST | 0 | 0 |
| 2700089I24Rik | chr19:59493135-59559391   | NOTEST | 0 | 0 |
| 2810007J24Rik | chr7:14410685-14446587    | NOTEST | 0 | 0 |
| 2810442N19Rik | chr1:161987301-162478034  | NOTEST | 0 | 0 |
| 2900092C05Rik | chr7:12512550-12556321    | NOTEST | 0 | 0 |
| 2900092D14Rik | chr1:42700335-42703176    | NOTEST | 0 | 0 |
| 3010033K07Rik | chr8:108470104-108667190  | NOTEST | 0 | 0 |
| 3100003L05Rik | chr7:124625669-124708935  | NOTEST | 0 | 0 |
| 3110009F21Rik | chr12:110151653-110158073 | NOTEST | 0 | 0 |
| 3110039M20Rik | chr12:49389651-49407346   | NOTEST | 0 | 0 |
| 3110079O15Rik | chr1:87470263-87475459    | NOTEST | 0 | 0 |
| 3110082J24Rik | chr5:30103583-30154980    | NOTEST | 0 | 0 |
| 3200001D21Rik | chr12:88360513-88461726   | NOTEST | 0 | 0 |
| 3300005D01Rik | chr17:5798656-5803242     | NOTEST | 0 | 0 |
| 3930402G23Rik | chr8:10924426-10928457    | NOTEST | 0 | 0 |
| 4833423E24Rik | chr2:85484091-85518935    | NOTEST | 0 | 0 |
| 4833427F10Rik | chr17:35772449-35780687   | NOTEST | 0 | 0 |
| 4833427G06Rik | chr9:51081312-51102078    | NOTEST | 0 | 0 |
| 4833428L15Rik | chr9:45416625-45753713    | NOTEST | 0 | 0 |

|                  |                           |        |   |   |
|------------------|---------------------------|--------|---|---|
| 4921501E09Rik    | chr17:33064142-33068058   | NOTEST | 0 | 0 |
| 4921504E06Rik    | chr2:19462836-19553910    | NOTEST | 0 | 0 |
| 4921509C19Rik    | chr2:151470541-151476151  | NOTEST | 0 | 0 |
| 4921511C10Rik    | chr3:79212918-79253913    | NOTEST | 0 | 0 |
| 4921511C20Rik    | chrX:127394292-127395898  | NOTEST | 0 | 0 |
| 4921511H03Rik    | chr5:6769029-7344378      | NOTEST | 0 | 0 |
| 4921511M17Rik,Gr | chrX:154043985-154055041  | LOWDAT | 0 | 0 |
| 4921513I03Rik    | chr10:120765731-120778886 | NOTEST | 0 | 0 |
| 4921515E04Rik    | chr15:18078136-18369627   | NOTEST | 0 | 0 |
| 4921517D22Rik    | chr13:59687401-59694101   | NOTEST | 0 | 0 |
| 4921524L21Rik    | chr18:6603632-6638966     | NOTEST | 0 | 0 |
| 4921525O09Rik    | chr13:52096740-52124160   | NOTEST | 0 | 0 |
| 4921529L05Rik    | chr6:53978690-54017383    | NOTEST | 0 | 0 |
| 4921531P14Rik    | chr18:83292791-83325884   | NOTEST | 0 | 0 |
| 4921533I20Rik    | chr18:17234482-17235482   | NOTEST | 0 | 0 |
| 4921534H16Rik    | chr9:97444394-98033167    | NOTEST | 0 | 0 |
| 4921539E11Rik    | chr4:103230444-103290863  | NOTEST | 0 | 0 |
| 4922502D21Rik    | chr6:129322164-129331781  | NOTEST | 0 | 0 |
| 4922502H24Rik    | chr13:101391870-101397580 | NOTEST | 0 | 0 |
| 4922502N22Rik    | chr6:139315596-139322576  | NOTEST | 0 | 0 |
| 4930401C15Rik    | chr10:25779313-25837437   | NOTEST | 0 | 0 |
| 4930401O12Rik    | chr13:31213409-31241086   | NOTEST | 0 | 0 |
| 4930402F06Rik    | chr2:35375561-35397174    | NOTEST | 0 | 0 |
| 4930402F11Rik    | chr7:69496093-69499689    | NOTEST | 0 | 0 |
| 4930402K13Rik    | chrX:9104561-9106342      | NOTEST | 0 | 0 |
| 4930404A05Rik    | chr16:52799507-52815744   | NOTEST | 0 | 0 |
| 4930404A10Rik    | chr11:54370651-54426755   | NOTEST | 0 | 0 |
| 4930404H11Rik    | chr12:71540606-71556133   | NOTEST | 0 | 0 |
| 4930405A10Rik    | chr14:22019711-23094571   | NOTEST | 0 | 0 |
| 4930405D11Rik    | chr11:90804690-90895152   | NOTEST | 0 | 0 |
| 4930406D18Rik    | chr3:100426404-100437754  | NOTEST | 0 | 0 |
| 4930412B13Rik    | chr2:117821927-117909136  | NOTEST | 0 | 0 |
| 4930412D23Rik    | chrX:127721175-127736554  | NOTEST | 0 | 0 |
| 4930412O13Rik    | chr2:9881245-9889540      | NOTEST | 0 | 0 |
| 4930413E15Rik    | chr5:118952338-118961261  | NOTEST | 0 | 0 |
| 4930413M19Rik    | chr14:50503768-50520943   | NOTEST | 0 | 0 |
| 4930414N06Rik    | chr19:44931118-44984550   | NOTEST | 0 | 0 |
| 4930415L06Rik    | chrX:89930096-89932852    | NOTEST | 0 | 0 |
| 4930417O13Rik    | chr6:125265524-125273777  | NOTEST | 0 | 0 |
| 4930417O22Rik    | chr11:101952420-101960574 | NOTEST | 0 | 0 |
| 4930419G24Rik    | chr3:32949633-33143191    | NOTEST | 0 | 0 |
| 4930423M02Rik    | chr4:5632327-5642284      | NOTEST | 0 | 0 |
| 4930425K10Rik    | chr5:67933611-67977070    | NOTEST | 0 | 0 |
| 4930428D18Rik    | chrX:76393349-76397979    | NOTEST | 0 | 0 |
| 4930428E07Rik    | chr12:37880704-38633410   | NOTEST | 0 | 0 |
| 4930428O21Rik    | chr5:107698211-107703480  | NOTEST | 0 | 0 |
| 4930429F11Rik    | chr17:79475623-79477885   | NOTEST | 0 | 0 |
| 4930429F24Rik    | chr9:79793640-79803235    | NOTEST | 0 | 0 |
| 4930430A15Rik    | chr2:111193253-111229600  | NOTEST | 0 | 0 |
| 4930430D24Rik    | chrX:38038198-38043114    | NOTEST | 0 | 0 |
| 4930430F21Rik    | chr15:31039125-31043331   | NOTEST | 0 | 0 |
| 4930430J02Rik    | chr9:57391069-57400364    | NOTEST | 0 | 0 |
| 4930432M17Rik    | chr3:121670762-121682982  | NOTEST | 0 | 0 |

|               |                           |        |   |   |
|---------------|---------------------------|--------|---|---|
| 4930433B08Rik | chr3:18468284-18480477    | NOTEST | 0 | 0 |
| 4930433I11Rik | chr7:40987608-40994833    | NOTEST | 0 | 0 |
| 4930434J06Rik | chr14:71856708-71920438   | NOTEST | 0 | 0 |
| 4930435E12Rik | chr16:38812204-38828749   | NOTEST | 0 | 0 |
| 4930438E09Rik | chr14:67233291-67430952   | NOTEST | 0 | 0 |
| 4930440C22Rik | chr1:94797441-94802472    | NOTEST | 0 | 0 |
| 4930441J16Rik | chr2:74298939-74307717    | NOTEST | 0 | 0 |
| 4930442J19Rik | chr2:151302038-151316003  | NOTEST | 0 | 0 |
| 4930442L01Rik | chr3:96829825-96870926    | NOTEST | 0 | 0 |
| 4930443O20Rik | chr2:85073613-85086461    | NOTEST | 0 | 0 |
| 4930444F02Rik | chr10:18797298-18831930   | NOTEST | 0 | 0 |
| 4930444G20Rik | chr10:22066308-22068079   | NOTEST | 0 | 0 |
| 4930447A16Rik | chr15:37366174-37792428   | NOTEST | 0 | 0 |
| 4930447J18Rik | chr14:47898863-47944189   | NOTEST | 0 | 0 |
| 4930447N08Rik | chr3:122729157-122859374  | NOTEST | 0 | 0 |
| 4930448C13Rik | chr12:14996388-15050389   | NOTEST | 0 | 0 |
| 4930448F12Rik | chr13:18084946-18100202   | NOTEST | 0 | 0 |
| 4930448H16Rik | chr5:143226991-143234748  | NOTEST | 0 | 0 |
| 4930448I06Rik | chr1:41167559-41181252    | NOTEST | 0 | 0 |
| 4930448I18Rik | chr5:50151332-50156092    | NOTEST | 0 | 0 |
| 4930448K20Rik | chr4:9915964-9917397      | NOTEST | 0 | 0 |
| 4930449E01Rik | chr14:105498787-105505628 | NOTEST | 0 | 0 |
| 4930449E18Rik | chr19:57273959-57277052   | NOTEST | 0 | 0 |
| 4930449I24Rik | chr5:146502376-146516902  | NOTEST | 0 | 0 |
| 4930451C15Rik | chr16:17544464-17561247   | NOTEST | 0 | 0 |
| 4930451I11Rik | chr7:126830473-126831496  | NOTEST | 0 | 0 |
| 4930452A19Rik | chr17:9750751-9775866     | NOTEST | 0 | 0 |
| 4930452N14Rik | chr1:154241520-154270416  | NOTEST | 0 | 0 |
| 4930453H23Rik | chrX:21206579-21221665    | NOTEST | 0 | 0 |
| 4930453L07Rik | chr8:9144668-9149050      | NOTEST | 0 | 0 |
| 4930455B14Rik | chr14:8666389-8673378     | NOTEST | 0 | 0 |
| 4930455C13Rik | chr10:21295978-21368889   | NOTEST | 0 | 0 |
| 4930455D15Rik | chr18:32663641-32866420   | NOTEST | 0 | 0 |
| 4930455F16Rik | chr16:4219911-4229116     | NOTEST | 0 | 0 |
| 4930455H04Rik | chr3:116918261-116984406  | NOTEST | 0 | 0 |
| 4930455J16Rik | chr13:58741073-58762311   | NOTEST | 0 | 0 |
| 4930456L15Rik | chr4:103290958-103311832  | NOTEST | 0 | 0 |
| 4930459C07Rik | chr10:96226206-96248708   | NOTEST | 0 | 0 |
| 4930459L07Rik | chr5:58443239-58452998    | NOTEST | 0 | 0 |
| 4930461G14Rik | chr9:58455172-58469623    | NOTEST | 0 | 0 |
| 4930463O16Rik | chr10:84488292-84497676   | NOTEST | 0 | 0 |
| 4930468A15Rik | chrX:76582609-76602924    | NOTEST | 0 | 0 |
| 4930470H14Rik | chr17:4044657-4082995     | NOTEST | 0 | 0 |
| 4930470P17Rik | chr2:170579417-170602017  | NOTEST | 0 | 0 |
| 4930471G03Rik | chr18:36017657-36197160   | NOTEST | 0 | 0 |
| 4930471M09Rik | chr6:91430459-91440854    | NOTEST | 0 | 0 |
| 4930473A02Rik | chr2:130450277-130563749  | NOTEST | 0 | 0 |
| 4930473O22Rik | chr10:97590983-97596931   | NOTEST | 0 | 0 |
| 4930474H20Rik | chr14:90126890-90269760   | NOTEST | 0 | 0 |
| 4930474M22Rik | chr17:14279505-14404790   | NOTEST | 0 | 0 |
| 4930474N05Rik | chr14:36094964-36096855   | NOTEST | 0 | 0 |
| 4930478L05Rik | chr16:78540335-78576688   | NOTEST | 0 | 0 |
| 4930478P22Rik | chr5:35361552-35367677    | NOTEST | 0 | 0 |



|               |                           |        |   |   |
|---------------|---------------------------|--------|---|---|
| 4930480E11Rik | chrX:78369642-78371128    | NOTEST | 0 | 0 |
| 4930480G23Rik | chr4:19979444-20005739    | NOTEST | 0 | 0 |
| 4930480K15Rik | chr17:90033643-91092802   | NOTEST | 0 | 0 |
| 4930480M12Rik | chr12:26211266-26240707   | NOTEST | 0 | 0 |
| 4930483K19Rik | chr10:76531626-76562226   | NOTEST | 0 | 0 |
| 4930486F22Rik | chr10:86048745-86498896   | NOTEST | 0 | 0 |
| 4930486I03Rik | chr1:20057778-20618057    | NOTEST | 0 | 0 |
| 4930487D11Rik | chr5:38344388-38349197    | NOTEST | 0 | 0 |
| 4930487H11Rik | chr1:62703316-62818692    | NOTEST | 0 | 0 |
| 4930488B22Rik | chr1:184712496-184718989  | NOTEST | 0 | 0 |
| 4930500L23Rik | chr5:139523750-139541339  | NOTEST | 0 | 0 |
| 4930502E09Rik | chr11:84829177-84830868   | NOTEST | 0 | 0 |
| 4930503B20Rik | chr3:146641931-146651715  | NOTEST | 0 | 0 |
| 4930503E14Rik | chr14:44163166-44171371   | NOTEST | 0 | 0 |
| 4930503E24Rik | chr10:124469073-124524488 | NOTEST | 0 | 0 |
| 4930503H13Rik | chrX:156539482-156540117  | NOTEST | 0 | 0 |
| 4930503O07Rik | chr1:194212186-194222759  | NOTEST | 0 | 0 |
| 4930504O13Rik | chr11:58446142-58452966   | NOTEST | 0 | 0 |
| 4930505G20Rik | chr14:115092214-116525192 | NOTEST | 0 | 0 |
| 4930509J09Rik | chr3:73066350-73594830    | NOTEST | 0 | 0 |
| 4930509K18Rik | chr4:40313231-40317719    | NOTEST | 0 | 0 |
| 4930511A02Rik | chr12:11438232-11444812   | NOTEST | 0 | 0 |
| 4930511E03Rik | chr6:94943833-94951545    | NOTEST | 0 | 0 |
| 4930513D17Rik | chr5:39461748-39603574    | NOTEST | 0 | 0 |
| 4930513O06Rik | chrX:139086242-139093403  | NOTEST | 0 | 0 |
| 4930515B02Rik | chr4:140872692-140878057  | NOTEST | 0 | 0 |
| 4930515G16Rik | chr6:67565233-67565699    | NOTEST | 0 | 0 |
| 4930515L03Rik | chr2:16918677-17013726    | NOTEST | 0 | 0 |
| 4930515L19Rik | chrX:46267558-46328911    | NOTEST | 0 | 0 |
| 4930517E11Rik | chr2:124089968-124667789  | NOTEST | 0 | 0 |
| 4930518P08Rik | chr13:50753392-50765248   | NOTEST | 0 | 0 |
| 4930519D14Rik | chr13:30615042-30624258   | NOTEST | 0 | 0 |
| 4930519F16Rik | chrX:103232280-103256606  | NOTEST | 0 | 0 |
| 4930519F24Rik | chr9:100022299-100034670  | NOTEST | 0 | 0 |
| 4930519G04Rik | chr5:114853713-114883879  | NOTEST | 0 | 0 |
| 4930519H02Rik | chr5:15863927-15883766    | NOTEST | 0 | 0 |
| 4930520P13Rik | chr13:70232821-70248122   | NOTEST | 0 | 0 |
| 4930521E06Rik | chr1:44551670-44796836    | NOTEST | 0 | 0 |
| 4930522H14Rik | chr4:109505331-109531297  | NOTEST | 0 | 0 |
| 4930522O17Rik | chr4:53246195-53251120    | NOTEST | 0 | 0 |
| 4930523O13Rik | chr15:46435865-46496179   | NOTEST | 0 | 0 |
| 4930524C18Rik | chr14:114831964-114861327 | NOTEST | 0 | 0 |
| 4930524N10Rik | chrX:154339224-154343392  | NOTEST | 0 | 0 |
| 4930524O05Rik | chr19:10634232-10665210   | NOTEST | 0 | 0 |
| 4930524O08Rik | chr9:89826518-89864028    | NOTEST | 0 | 0 |
| 4930525M21Rik | chrX:38013907-38018815    | NOTEST | 0 | 0 |
| 4930527F14Rik | chr14:45543709-45562876   | NOTEST | 0 | 0 |
| 4930527G23Rik | chr18:29396715-29496416   | NOTEST | 0 | 0 |
| 4930528D03Rik | chr13:59733649-59737470   | NOTEST | 0 | 0 |
| 4930528P14Rik | chr2:115329265-115344280  | NOTEST | 0 | 0 |
| 4930529K09Rik | chr14:86245969-86262042   | NOTEST | 0 | 0 |
| 4930529L06Rik | chr16:84679788-84685147   | NOTEST | 0 | 0 |
| 4930532M18Rik | chr1:154241520-154270416  | NOTEST | 0 | 0 |

|               |                          |        |   |   |
|---------------|--------------------------|--------|---|---|
| 4930533B01Rik | chr2:113220186-113716767 | NOTEST | 0 | 0 |
| 4930533P14Rik | chr1:96612056-96662573   | NOTEST | 0 | 0 |
| 4930539C22Rik | chr3:134404142-134423635 | NOTEST | 0 | 0 |
| 4930539N22Rik | chr3:13471654-14182287   | NOTEST | 0 | 0 |
| 4930540M03Rik | chr9:15559863-15641220   | NOTEST | 0 | 0 |
| 4930542D17Rik | chr16:50589858-50654166  | NOTEST | 0 | 0 |
| 4930543E12Rik | chr7:113100235-113142015 | NOTEST | 0 | 0 |
| 4930544D05Rik | chr11:70614882-70619194  | NOTEST | 0 | 0 |
| 4930544G11Rik | chr6:65952570-65954014   | NOTEST | 0 | 0 |
| 4930545E07Rik | chr18:17568745-17580990  | NOTEST | 0 | 0 |
| 4930545H06Rik | chr10:68319064-68321142  | NOTEST | 0 | 0 |
| 4930547E08Rik | chr2:103804451-103810622 | NOTEST | 0 | 0 |
| 4930547E14Rik | chr16:59613320-60605531  | NOTEST | 0 | 0 |
| 4930548G14Rik | chr15:46623304-46639858  | NOTEST | 0 | 0 |
| 4930548H24Rik | chr5:31485858-31488262   | NOTEST | 0 | 0 |
| 4930548J01Rik | chr17:4119445-4122102    | NOTEST | 0 | 0 |
| 4930548K13Rik | chr4:26635819-26705449   | NOTEST | 0 | 0 |
| 4930549C01Rik | chr4:136610436-136613213 | NOTEST | 0 | 0 |
| 4930549G23Rik | chr18:67774875-67799943  | NOTEST | 0 | 0 |
| 4930552N02Rik | chr4:52814603-52828269   | NOTEST | 0 | 0 |
| 4930552P12Rik | chr19:55640588-55702204  | NOTEST | 0 | 0 |
| 4930553E22Rik | chr16:84371142-84375505  | NOTEST | 0 | 0 |
| 4930554C24Rik | chr9:84774397-84784351   | NOTEST | 0 | 0 |
| 4930555G01Rik | chr14:5050628-5059243    | NOTEST | 0 | 0 |
| 4930556C24Rik | chr16:85819210-85826772  | NOTEST | 0 | 0 |
| 4930556G01Rik | chr4:30664595-30855744   | NOTEST | 0 | 0 |
| 4930556J02Rik | chr14:61492687-61500382  | NOTEST | 0 | 0 |
| 4930557A04Rik | chrX:9849702-9850252     | NOTEST | 0 | 0 |
| 4930557J02Rik | chr5:34007178-34169526   | NOTEST | 0 | 0 |
| 4930558C23Rik | chr3:95386457-95402841   | NOTEST | 0 | 0 |
| 4930558G05Rik | chrX:129051523-129067146 | NOTEST | 0 | 0 |
| 4930558K02Rik | chr1:161942088-161979636 | NOTEST | 0 | 0 |
| 4930562C15Rik | chr16:4835415-4867691    | NOTEST | 0 | 0 |
| 4930562F07Rik | chr1:160044379-160078586 | NOTEST | 0 | 0 |
| 4930563D23Rik | chr16:92318762-92321441  | NOTEST | 0 | 0 |
| 4930563F08Rik | chr5:131437681-132542343 | NOTEST | 0 | 0 |
| 4930563M20Rik | chr8:116781711-116801412 | NOTEST | 0 | 0 |
| 4930564B18Rik | chr14:75642258-75667137  | NOTEST | 0 | 0 |
| 4930564C03Rik | chr17:44495986-45119284  | NOTEST | 0 | 0 |
| 4930564D02Rik | chr3:105066843-105078806 | NOTEST | 0 | 0 |
| 4930565D16Rik | chr3:84349375-84379921   | NOTEST | 0 | 0 |
| 4930565N06Rik | chr16:36880518-36933085  | NOTEST | 0 | 0 |
| 4930567H12Rik | chr8:125584637-125616670 | NOTEST | 0 | 0 |
| 4930567H17Rik | chrX:70393900-70394740   | NOTEST | 0 | 0 |
| 4930567J20Rik | chr16:71249903-71267176  | NOTEST | 0 | 0 |
| 4930567K20Rik | chr10:10686058-11082331  | NOTEST | 0 | 0 |
| 4930568D16Rik | chr2:35354217-35367729   | NOTEST | 0 | 0 |
| 4930568E12Rik | chr9:13091266-13105855   | NOTEST | 0 | 0 |
| 4930571K23Rik | chr7:125368860-125371013 | NOTEST | 0 | 0 |
| 4930571O06Rik | chr8:113517281-113550808 | NOTEST | 0 | 0 |
| 4930572K03Rik | chr5:127170564-127184356 | NOTEST | 0 | 0 |
| 4930572O03Rik | chr5:15652287-15657059   | NOTEST | 0 | 0 |
| 4930572O13Rik | chr14:25139794-25143241  | NOTEST | 0 | 0 |

|               |                          |        |   |   |
|---------------|--------------------------|--------|---|---|
| 4930573O16Rik | chr2:52136646-52338798   | NOTEST | 0 | 0 |
| 4930578E11Rik | chr18:29396715-29496416  | NOTEST | 0 | 0 |
| 4930578I06Rik | chr14:63971121-63987780  | NOTEST | 0 | 0 |
| 4930578N18Rik | chr16:76122612-76156086  | NOTEST | 0 | 0 |
| 4930583P06Rik | chr2:124089968-124667789 | NOTEST | 0 | 0 |
| 4930584F24Rik | chr5:26460069-26493314   | NOTEST | 0 | 0 |
| 4930590L20Rik | chr1:140246256-140656402 | NOTEST | 0 | 0 |
| 4930591A17Rik | chr2:179414935-179416880 | NOTEST | 0 | 0 |
| 4930592A05Rik | chr15:33083128-33653436  | NOTEST | 0 | 0 |
| 4930592I03Rik | chr18:82910878-83005314  | NOTEST | 0 | 0 |
| 4930593A02Rik | chr3:58692588-58788524   | NOTEST | 0 | 0 |
| 4930593C16Rik | chr9:120924454-120930802 | NOTEST | 0 | 0 |
| 4930596D02Rik | chr14:35809485-35811978  | NOTEST | 0 | 0 |
| 4930596I21Rik | chr1:138963708-139176042 | NOTEST | 0 | 0 |
| 4930597G03Rik | chr14:51317334-51345489  | NOTEST | 0 | 0 |
| 4930598F16Rik | chr1:95701183-95716518   | NOTEST | 0 | 0 |
| 4931402G19Rik | chr2:120355308-120504919 | NOTEST | 0 | 0 |
| 4931403E22Rik | chr19:26605159-26823907  | NOTEST | 0 | 0 |
| 4931403G20Rik | chr12:69746847-69987002  | NOTEST | 0 | 0 |
| 4931408C20Rik | chr1:26681800-26687460   | NOTEST | 0 | 0 |
| 4931412M21    | chr12:10446387-10531303  | NOTEST | 0 | 0 |
| 4931417E11Rik | chr6:73436964-73471021   | NOTEST | 0 | 0 |
| 4931419H13Rik | chr3:55055241-55084002   | NOTEST | 0 | 0 |
| 4931420L22Rik | chr16:71131075-71139029  | NOTEST | 0 | 0 |
| 4931428L18Rik | chr1:31141077-31222656   | NOTEST | 0 | 0 |
| 4931429L15Rik | chr9:46303360-46319986   | NOTEST | 0 | 0 |
| 4931430N09Rik | chr6:118587239-119221614 | NOTEST | 0 | 0 |
| 4931431B13Rik | chr7:128173945-128206366 | NOTEST | 0 | 0 |
| 4931431F19Rik | chr7:104127912-104129823 | NOTEST | 0 | 0 |
| 4931440L10Rik | chr1:134540940-134549682 | NOTEST | 0 | 0 |
| 4932411N23Rik | chrX:126812461-126834004 | NOTEST | 0 | 0 |
| 4932413F04Rik | chr9:103482935-103761837 | NOTEST | 0 | 0 |
| 4932414J04Rik | chr11:21494729-21511180  | NOTEST | 0 | 0 |
| 4932415M13Rik | chr17:53716508-53733843  | NOTEST | 0 | 0 |
| 4932416K20Rik | chr8:104795236-104798792 | NOTEST | 0 | 0 |
| 4932429P05Rik | chrX:89752267-89755491   | NOTEST | 0 | 0 |
| 4932443I19Rik | chr8:13705888-13743066   | NOTEST | 0 | 0 |
| 4933400A11Rik | chrX:169685198-169990797 | NOTEST | 0 | 0 |
| 4933400B14Rik | chr17:89320226-89327333  | NOTEST | 0 | 0 |
| 4933400F21Rik | chr1:89454810-89895282   | NOTEST | 0 | 0 |
| 4933400L20Rik | chr8:103603798-103680382 | NOTEST | 0 | 0 |
| 4933401B06Rik | chrX:107542581-107543800 | NOTEST | 0 | 0 |
| 4933401D09Rik | chr17:15631787-15641102  | NOTEST | 0 | 0 |
| 4933402E13Rik | chrX:62283498-62292078   | NOTEST | 0 | 0 |
| 4933402J07Rik | chr8:87563906-87589197   | NOTEST | 0 | 0 |
| 4933402J10Rik | chr5:59963118-59986002   | NOTEST | 0 | 0 |
| 4933402J15Rik | chr14:74355526-74369741  | NOTEST | 0 | 0 |
| 4933402N03Rik | chr7:131138346-131146283 | NOTEST | 0 | 0 |
| 4933402P03Rik | chr11:69816565-69818440  | NOTEST | 0 | 0 |
| 4933404G15Rik | chr16:16707686-16718121  | NOTEST | 0 | 0 |
| 4933404K08Rik | chr13:23278349-23282267  | NOTEST | 0 | 0 |
| 4933405E24Rik | chr11:54177771-54213288  | NOTEST | 0 | 0 |
| 4933405O20Rik | chr7:49975349-50863289   | NOTEST | 0 | 0 |

|               |                           |        |   |   |
|---------------|---------------------------|--------|---|---|
| 4933406D12Rik | chr2:146542930-146546108  | NOTEST | 0 | 0 |
| 4933406J08Rik | chr2:122186271-122206393  | NOTEST | 0 | 0 |
| 4933406J10Rik | chr7:82648613-82777852    | NOTEST | 0 | 0 |
| 4933406K04Rik | chr12:106685606-106716324 | NOTEST | 0 | 0 |
| 4933407E24Rik | chr4:124569178-124575538  | NOTEST | 0 | 0 |
| 4933407G14Rik | chr10:75449509-75463104   | NOTEST | 0 | 0 |
| 4933407I05Rik | chr9:51914428-51927003    | NOTEST | 0 | 0 |
| 4933409G03Rik | chr2:68582412-68616463    | NOTEST | 0 | 0 |
| 4933411G06Rik | chr10:51756173-51757194   | NOTEST | 0 | 0 |
| 4933412E24Rik | chr15:60014865-60016618   | NOTEST | 0 | 0 |
| 4933413L06Rik | chr13:117602319-117981028 | NOTEST | 0 | 0 |
| 4933416E03Rik | chr2:159947340-159981289  | NOTEST | 0 | 0 |
| 4933416I08Rik | chrX:53686490-53691332    | NOTEST | 0 | 0 |
| 4933416M07Rik | chr8:27138772-27174646    | NOTEST | 0 | 0 |
| 4933417A18Rik | chr13:34924408-34963809   | NOTEST | 0 | 0 |
| 4933417E11Rik | chr1:71958997-72005195    | NOTEST | 0 | 0 |
| 4933417G07Rik | chr3:55625197-56183701    | NOTEST | 0 | 0 |
| 4933417O13Rik | chr7:143107253-143427042  | NOTEST | 0 | 0 |
| 4933421I07Rik | chr7:42445461-42448080    | NOTEST | 0 | 0 |
| 4933425B07Rik | chr14:46602805-46637423   | NOTEST | 0 | 0 |
| 4933427E13Rik | chr11:25326106-25367137   | NOTEST | 0 | 0 |
| 4933428C19Rik | chr4:40482839-40525548    | NOTEST | 0 | 0 |
| 4933428G20Rik | chr11:97450159-97502400   | NOTEST | 0 | 0 |
| 4933429K18Rik | chr19:45726554-45730558   | NOTEST | 0 | 0 |
| 4933429O19Rik | chr14:48878872-48887112   | NOTEST | 0 | 0 |
| 4933430H16Rik | chr7:82937937-82971391    | NOTEST | 0 | 0 |
| 4933430N04Rik | chr8:9125411-9132288      | NOTEST | 0 | 0 |
| 4933431G14Rik | chr6:72097607-72154570    | NOTEST | 0 | 0 |
| 4933432G23Rik | chr9:118429838-118437048  | NOTEST | 0 | 0 |
| 4933432I03Rik | chr14:102987411-103033803 | NOTEST | 0 | 0 |
| 4933433C11Rik | chr2:25212558-25214630    | NOTEST | 0 | 0 |
| 4933433F19Rik | chr8:30568394-30575573    | NOTEST | 0 | 0 |
| 4933433G08Rik | chr9:61103011-61105386    | NOTEST | 0 | 0 |
| 4933433G19Rik | chr13:66912097-67032405   | NOTEST | 0 | 0 |
| 4933433H22Rik | chr17:84078659-84089875   | NOTEST | 0 | 0 |
| 4933434I20Rik | chr8:83348471-83379402    | NOTEST | 0 | 0 |
| 4933436H12Rik | chr7:68417423-68426133    | NOTEST | 0 | 0 |
| 4933436I01Rik | chrX:67919863-67921450    | NOTEST | 0 | 0 |
| 4933438B17Rik | chr5:127030788-127088529  | NOTEST | 0 | 0 |
| 4933438K21Rik | chr4:147063365-147068436  | NOTEST | 0 | 0 |
| 4933440J02Rik | chr10:111586718-111594273 | NOTEST | 0 | 0 |
| 4933440M02Rik | chr7:125331781-125349786  | NOTEST | 0 | 0 |
| 5031410I06Rik | chr5:26098667-26105314    | NOTEST | 0 | 0 |
| 5031434C07Rik | chr6:112273757-112330423  | NOTEST | 0 | 0 |
| 5033403H07Rik | chr5:52973011-52992292    | NOTEST | 0 | 0 |
| 5033404E19Rik | chr1:185497305-185498014  | NOTEST | 0 | 0 |
| 5133400J02Rik | chr11:51189832-51220418   | NOTEST | 0 | 0 |
| 5330411J11Rik | chr2:59382492-59386682    | NOTEST | 0 | 0 |
| 5330439B14Rik | chr6:142587861-142702274  | NOTEST | 0 | 0 |
| 5430401F13Rik | chr6:131543761-131553757  | NOTEST | 0 | 0 |
| 5430402E10Rik | chrX:77919785-77925062    | NOTEST | 0 | 0 |
| 5430403N17Rik | chr8:35864084-35882957    | NOTEST | 0 | 0 |
| 5430425K12Rik | chr13:80940402-80948597   | NOTEST | 0 | 0 |

|                |                           |        |   |   |
|----------------|---------------------------|--------|---|---|
| 5430427M07Rik  | chr12:90998491-91384409   | NOTEST | 0 | 0 |
| 5430428K19Rik  | chrX:6400144-6633717      | NOTEST | 0 | 0 |
| 5430434I15Rik  | chr3:38203150-38208119    | NOTEST | 0 | 0 |
| 5530400C23Rik  | chr6:133292215-133295790  | NOTEST | 0 | 0 |
| 5730412P04Rik  | chrX:136104602-136115420  | NOTEST | 0 | 0 |
| 5730416F02Rik  | chrX:109001484-109002296  | NOTEST | 0 | 0 |
| 5730457N03Rik  | chr6:52308388-52318378    | NOTEST | 0 | 0 |
| 5730488B01Rik  | chr4:44531505-44710440    | NOTEST | 0 | 0 |
| 5830411N06Rik  | chr7:140247300-140299791  | NOTEST | 0 | 0 |
| 6030440G07Rik  | chr12:110994397-111013872 | NOTEST | 0 | 0 |
| 6030469F06Rik  | chr12:31168861-31185922   | NOTEST | 0 | 0 |
| 6330407A03Rik  | chr4:3678120-3791612      | NOTEST | 0 | 0 |
| 6430503K07Rik  | chr2:147177545-147331681  | NOTEST | 0 | 0 |
| 6430584L05Rik  | chr6:55396886-55412285    | NOTEST | 0 | 0 |
| 7420426K07Rik  | chr9:98903118-98904622    | NOTEST | 0 | 0 |
| 7420461P10Rik  | chr1:162639149-162658219  | NOTEST | 0 | 0 |
| 7420700N18Rik  | chr8:31367748-31382438    | NOTEST | 0 | 0 |
| 7420701I03Rik  | chr12:11047812-11078741   | NOTEST | 0 | 0 |
| 7530416G11Rik  | chr15:85492735-85503227   | NOTEST | 0 | 0 |
| 8030411F24Rik  | chr2:148782008-148785936  | NOTEST | 0 | 0 |
| 8030442B05Rik  | chr2:11338365-11398500    | NOTEST | 0 | 0 |
| 8030443G20Rik  | chr4:108879069-108972077  | NOTEST | 0 | 0 |
| 8430423G03Rik  | chr5:148950249-148951658  | NOTEST | 0 | 0 |
| 8430436N08Rik  | chr4:7560687-7573801      | NOTEST | 0 | 0 |
| 8430437L04Rik  | chr2:72703509-72729468    | NOTEST | 0 | 0 |
| 9030204H09Rik  | chr2:35751225-35979624    | NOTEST | 0 | 0 |
| 9030625G05Rik  | chr18:74972763-74981547   | NOTEST | 0 | 0 |
| 9130015A21Rik  | chr12:35672290-35695118   | NOTEST | 0 | 0 |
| 9130015L21Rik  | chr2:160016652-160040620  | NOTEST | 0 | 0 |
| 9130209A04Rik  | chr18:47452667-47470868   | NOTEST | 0 | 0 |
| 9130221F21Rik  | chr6:72013895-72042528    | NOTEST | 0 | 0 |
| 9130230L23Rik  | chr5:65987927-66004285    | NOTEST | 0 | 0 |
| 9230009I02Rik  | chr11:51085086-51091835   | NOTEST | 0 | 0 |
| 9230102K24Rik  | chr10:110600649-110615961 | NOTEST | 0 | 0 |
| 9230102O04Rik  | chr2:9881245-9889540      | NOTEST | 0 | 0 |
| 9230104L09Rik  | chr2:148846713-148850934  | NOTEST | 0 | 0 |
| 9230110F15Rik  | chr9:35838328-35844150    | NOTEST | 0 | 0 |
| 9230112D13Rik  | chr14:34511620-34522801   | NOTEST | 0 | 0 |
| 9330162B11Rik  | chr1:187609005-188214884  | NOTEST | 0 | 0 |
| 9330178D15Rik  | chr3:155976353-156008592  | NOTEST | 0 | 0 |
| 9330182O14Rik  | chr15:40134364-40150010   | NOTEST | 0 | 0 |
| 9430007A20Rik  | chr4:144519821-144529353  | NOTEST | 0 | 0 |
| 9430014N10Rik  | chr15:93904855-93927111   | NOTEST | 0 | 0 |
| 9430019J16Rik  | chr2:75436056-75444179    | NOTEST | 0 | 0 |
| 9430069I07Rik  | chr15:34306680-34436240   | NOTEST | 0 | 0 |
| 9530002B09Rik  | chr4:122689258-122705135  | NOTEST | 0 | 0 |
| 9530003J23Rik  | chr10:117233752-117238681 | NOTEST | 0 | 0 |
| 9530026F06Rik  | chr1:61378431-61395904    | NOTEST | 0 | 0 |
| 9630028H03Rik  | chr2:135580529-135583220  | NOTEST | 0 | 0 |
| 9830166K06Rik  | chr19:8651795-8663335     | NOTEST | 0 | 0 |
| 9930111H07Rik  | chr1:85775270-85784694    | NOTEST | 0 | 0 |
| 9930111J21Rik2 | chr11:49037659-49135387   | NOTEST | 0 | 0 |
| A1bg           | chr15:60917588-60921270   | NOTEST | 0 | 0 |



|                 |                            |        |   |   |
|-----------------|----------------------------|--------|---|---|
| A230108P19Rik   | chr2:6188464-6321611       | NOTEST | 0 | 0 |
| A430088P11Rik   | chr15:80671846-80700425    | NOTEST | 0 | 0 |
| A430089I19Rik   | chr5_JH584298_random:16774 | NOTEST | 0 | 0 |
| A430107P09Rik   | chr14:53665939-53668335    | NOTEST | 0 | 0 |
| A4gnt           | chr9:99612501-99622367     | NOTEST | 0 | 0 |
| A530006G24Rik   | chr2:147710692-147717632   | NOTEST | 0 | 0 |
| A530013C23Rik   | chr2:167690758-167697413   | NOTEST | 0 | 0 |
| A530046M15Rik   | chr13:15807242-15827537    | NOTEST | 0 | 0 |
| A530053G22Rik   | chr6:60279042-60403707     | NOTEST | 0 | 0 |
| A530065N20Rik   | chr13:60029710-60116669    | NOTEST | 0 | 0 |
| A630010A05Rik   | chr16:14562316-14621284    | NOTEST | 0 | 0 |
| A630012P03Rik   | chrX:52272426-52619047     | NOTEST | 0 | 0 |
| A630019I02Rik   | chr13:93040714-93144724    | NOTEST | 0 | 0 |
| A630073D07Rik   | chr6:132625110-132627511   | NOTEST | 0 | 0 |
| A630076J17Rik   | chr3:107230613-107234031   | NOTEST | 0 | 0 |
| A630095E13Rik   | chr9:36635753-36638602     | NOTEST | 0 | 0 |
| A630095N17Rik   | chr1:75220094-75232093     | NOTEST | 0 | 0 |
| A730006G06Rik   | chr17:48064788-48090920    | NOTEST | 0 | 0 |
| A730018C14Rik   | chr12:112411022-112423198  | NOTEST | 0 | 0 |
| A730090H04Rik   | chr11:95140446-95159047    | NOTEST | 0 | 0 |
| A930018P22Rik   | chr2:104122768-104124746   | NOTEST | 0 | 0 |
| A930041C12Rik   | chr5:107534710-107661853   | NOTEST | 0 | 0 |
| AA413626        | chr11:4895342-4928865      | NOTEST | 0 | 0 |
| AA543401        | chr9:106892824-107231909   | NOTEST | 0 | 0 |
| AA545190        | chr6:10971467-10974378     | NOTEST | 0 | 0 |
| AA619741        | chr1:34633534-34636210     | NOTEST | 0 | 0 |
| AA792892        | chr5:94377339-94384334     | NOTEST | 0 | 0 |
| AF067061        | chr13:120263113-120264517  | NOTEST | 0 | 0 |
| AF067063        | chr13:119827960-119830217  | NOTEST | 0 | 0 |
| AF357355        | chr12:109603944-109661711  | NOTEST | 0 | 0 |
| AF357359        | chr12:109603944-109661711  | NOTEST | 0 | 0 |
| AF357399        | chr7:28350688-28352698     | NOTEST | 0 | 0 |
| AF357425        | chr12:109603944-109661711  | NOTEST | 0 | 0 |
| AF357426        | chr12:109603944-109661711  | NOTEST | 0 | 0 |
| AF366264        | chr8:13835230-13838089     | NOTEST | 0 | 0 |
| AI314278        | chr7:89426305-89432077     | NOTEST | 0 | 0 |
| AI507597        | chr4:141614232-141618633   | NOTEST | 0 | 0 |
| AI606473        | chr3:154330820-154334687   | NOTEST | 0 | 0 |
| AI646519        | chr2:147361542-147362793   | NOTEST | 0 | 0 |
| AI747448        | chr3:144910920-144932529   | NOTEST | 0 | 0 |
| AU015228        | chr2:130100393-130103375   | NOTEST | 0 | 0 |
| AU015791        | chr12:105513432-105515248  | NOTEST | 0 | 0 |
| AU016765        | chr17:64514088-64555590    | NOTEST | 0 | 0 |
| AU018091        | chr7:3154658-3169203       | NOTEST | 0 | 0 |
| AU018829,Gm1636 | chr5_JH584299_random:82903 | NOTEST | 0 | 0 |
| AU021063        | chr15:101221190-101232756  | NOTEST | 0 | 0 |
| AU022751        | chrX:6081217-6083420       | NOTEST | 0 | 0 |
| AV320801,Gm1502 | chrX:135494587-135504594   | NOTEST | 0 | 0 |
| AY074887        | chr9:54950256-54958030     | NOTEST | 0 | 0 |
| AY512915        | chr6:95290573-95333993     | NOTEST | 0 | 0 |
| AY512931        | chr8:45060701-45065418     | NOTEST | 0 | 0 |
| AY761184        | chr8:21702523-21703647     | NOTEST | 0 | 0 |
| AY761185        | chr8:20943693-20944748     | NOTEST | 0 | 0 |

|          |                           |        |   |   |
|----------|---------------------------|--------|---|---|
| Aadac    | chr3:60031787-60040157    | NOTEST | 0 | 0 |
| Aadacl2  | chr3:60006742-60025420    | NOTEST | 0 | 0 |
| Aadacl3  | chr4:144453770-144463756  | NOTEST | 0 | 0 |
| Abca15   | chr7:120328683-120407687  | NOTEST | 0 | 0 |
| Abca16   | chr7:120409646-120544813  | NOTEST | 0 | 0 |
| Abcb5    | chr12:118867823-118966421 | NOTEST | 0 | 0 |
| Abhd12b  | chr12:70154170-70183206   | NOTEST | 0 | 0 |
| Ace3     | chr11:105994674-106005443 | NOTEST | 0 | 0 |
| Acer1    | chr17:56953489-56982126   | NOTEST | 0 | 0 |
| Acnat1   | chr4:49443531-49451109    | NOTEST | 0 | 0 |
| Acnat2   | chr4:49379844-49408151    | NOTEST | 0 | 0 |
| Acpt     | chr7:44253086-44257204    | NOTEST | 0 | 0 |
| Acrv1    | chr9:36693219-36698837    | NOTEST | 0 | 0 |
| Acsbg2   | chr17:56843103-56874447   | NOTEST | 0 | 0 |
| Acsm1    | chr7:119617827-119662515  | NOTEST | 0 | 0 |
| Acsm2    | chr7:119554339-119600694  | NOTEST | 0 | 0 |
| Acsm4    | chr7:119690025-119714566  | NOTEST | 0 | 0 |
| Acsm5    | chr7:119526264-119543360  | NOTEST | 0 | 0 |
| Acss2os  | chr2:155518042-155562743  | NOTEST | 0 | 0 |
| Actl11   | chr9:107928468-107932461  | NOTEST | 0 | 0 |
| Actl7a   | chr4:56743421-56744925    | NOTEST | 0 | 0 |
| Actrt1   | chrX:46329006-46330345    | NOTEST | 0 | 0 |
| Actrt2   | chr4:154666427-154667867  | NOTEST | 0 | 0 |
| Adad1    | chr3:37063655-37111512    | NOTEST | 0 | 0 |
| Adad2    | chr8:119612746-119616926  | NOTEST | 0 | 0 |
| Adam1b   | chr5:121500096-121502980  | NOTEST | 0 | 0 |
| Adam20   | chr8:40793272-40797303    | NOTEST | 0 | 0 |
| Adam26a  | chr8:43568275-43576707    | NOTEST | 0 | 0 |
| Adam26b  | chr8:43519863-43528137    | NOTEST | 0 | 0 |
| Adam29   | chr8:55870911-55906964    | NOTEST | 0 | 0 |
| Adam3    | chr8:24677233-24725825    | NOTEST | 0 | 0 |
| Adam30   | chr3:98160811-98163173    | NOTEST | 0 | 0 |
| Adam34   | chr8:43650308-43665560    | NOTEST | 0 | 0 |
| Adam39   | chr8:40823008-40826861    | NOTEST | 0 | 0 |
| Adam6a   | chr12:113543907-113546414 | NOTEST | 0 | 0 |
| Adam6b   | chr12:113489564-113491835 | NOTEST | 0 | 0 |
| Adh4     | chr3:138415496-138430892  | NOTEST | 0 | 0 |
| Adh6-ps1 | chr3:138374120-138388291  | NOTEST | 0 | 0 |
| Adh6a    | chr3:138313285-138331134  | NOTEST | 0 | 0 |
| Afm      | chr5:90518948-90553544    | NOTEST | 0 | 0 |
| Agr3     | chr12:35925620-35949730   | NOTEST | 0 | 0 |
| Agxt     | chr1:93135239-93145421    | NOTEST | 0 | 0 |
| Agxt2    | chr15:10358578-10409738   | NOTEST | 0 | 0 |
| Aipl1    | chr11:72028721-72037509   | NOTEST | 0 | 0 |
| Akap4    | chrX:7067514-7078606      | NOTEST | 0 | 0 |
| Akp3     | chr1:87125007-87127912    | NOTEST | 0 | 0 |
| Akr1c12  | chr13:4268171-4279399     | NOTEST | 0 | 0 |
| Akr1c18  | chr13:4132626-4150631     | NOTEST | 0 | 0 |
| Akr1c20  | chr13:4507158-4523333     | NOTEST | 0 | 0 |
| Akr1c21  | chr13:4574074-4586543     | NOTEST | 0 | 0 |
| Akr1c6   | chr13:4434342-4457530     | NOTEST | 0 | 0 |
| Akr1cl   | chr1:65013085-65032748    | NOTEST | 0 | 0 |
| Akr1d1   | chr6:37530172-37568815    | NOTEST | 0 | 0 |

|               |                           |        |   |   |
|---------------|---------------------------|--------|---|---|
| Alb           | chr5:90460888-90476603    | NOTEST | 0 | 0 |
| Allc          | chr12:28553755-28582483   | NOTEST | 0 | 0 |
| Alms1-ps2     | chr6:85792116-85804057    | NOTEST | 0 | 0 |
| Alox12e       | chr11:70315612-70322518   | NOTEST | 0 | 0 |
| Alpi          | chr1:87098001-87101606    | NOTEST | 0 | 0 |
| Alpl2         | chr1:87086690-87089928    | NOTEST | 0 | 0 |
| Ambp          | chr4:63143278-63154142    | NOTEST | 0 | 0 |
| Amelx         | chrX:168795098-169304440  | NOTEST | 0 | 0 |
| Amtn          | chr5:88376107-88385916    | NOTEST | 0 | 0 |
| Amy2a2,Amy2a5 | chr3:113345048-113356658  | NOTEST | 0 | 0 |
| Amy2a5        | chr3:113345048-113356658  | NOTEST | 0 | 0 |
| Amy2b         | chr3:113147655-113156727  | NOTEST | 0 | 0 |
| Ang2          | chr14:51195485-51195923   | NOTEST | 0 | 0 |
| Ang3,Ang5     | chr14:43957068-43963080   | NOTEST | 0 | 0 |
| Ang4          | chr14:51763891-51773590   | NOTEST | 0 | 0 |
| Ang5          | chr14:43957068-43963080   | NOTEST | 0 | 0 |
| Ang6          | chr14:44001663-44006418   | NOTEST | 0 | 0 |
| Angptl3       | chr4:98936658-99120915    | NOTEST | 0 | 0 |
| Ankar         | chr1:72642979-72700564    | NOTEST | 0 | 0 |
| Ankrd36       | chr11:5569683-5689337     | NOTEST | 0 | 0 |
| Ankrd53       | chr6:83762645-83768326    | NOTEST | 0 | 0 |
| Anks4b        | chr7:120173857-120183716  | NOTEST | 0 | 0 |
| Antxrl        | chr14:34051129-34102754   | NOTEST | 0 | 0 |
| Anxa13        | chr15:58341463-58389274   | NOTEST | 0 | 0 |
| Apcs          | chr1:172893960-172895054  | NOTEST | 0 | 0 |
| Apoa4         | chr9:46240843-46243458    | NOTEST | 0 | 0 |
| Apoa5         | chr9:46268607-46271919    | NOTEST | 0 | 0 |
| Apobec4       | chr1:152750550-152757544  | NOTEST | 0 | 0 |
| Apoc3         | chr9:46233049-46235636    | NOTEST | 0 | 0 |
| Apoc4         | chr7:19678083-19681460    | NOTEST | 0 | 0 |
| Apol7c        | chr15:77524866-77533315   | NOTEST | 0 | 0 |
| Apom          | chr17:35128996-35131752   | NOTEST | 0 | 0 |
| Apoo-ps       | chrX:94367109-94417092    | LOWDAT | 0 | 0 |
| Aqp6          | chr15:99601399-99605477   | NOTEST | 0 | 0 |
| Arhgap20os    | chr9:51765351-51875885    | NOTEST | 0 | 0 |
| Arhgap27os3   | chr11:103331483-103363692 | NOTEST | 0 | 0 |
| Arhgef38      | chr3:133159530-133234889  | NOTEST | 0 | 0 |
| Arid3c        | chr4:41723835-41731142    | NOTEST | 0 | 0 |
| Arl13a        | chrX:134187500-134208030  | NOTEST | 0 | 0 |
| Arl14         | chr3:69222418-69223618    | NOTEST | 0 | 0 |
| Armc12        | chr17:28530860-28538975   | NOTEST | 0 | 0 |
| Arrdc5        | chr17:56294110-56300286   | NOTEST | 0 | 0 |
| Art2a-ps      | chr7:101552452-101560865  | NOTEST | 0 | 0 |
| Ascl1         | chr10:87491040-87493660   | NOTEST | 0 | 0 |
| Ascl5         | chr1:136050803-136051370  | NOTEST | 0 | 0 |
| Asic5         | chr3:81996921-82021233    | NOTEST | 0 | 0 |
| Asmt          | chrX:170672643-170678054  | NOTEST | 0 | 0 |
| Astl          | chr2:127338638-127357656  | NOTEST | 0 | 0 |
| Asz1          | chr6:18050963-18109061    | NOTEST | 0 | 0 |
| Atcayos       | chr10:81194690-81230779   | NOTEST | 0 | 0 |
| Atf7ip2       | chr16:10192905-10243051   | NOTEST | 0 | 0 |
| Atoh1         | chr6:64729145-64731235    | NOTEST | 0 | 0 |
| Atoh7         | chr10:63100155-63100605   | NOTEST | 0 | 0 |

|               |                           |        |   |   |
|---------------|---------------------------|--------|---|---|
| Atp6v0c-ps2   | chr17:24163864-24169429   | NOTEST | 0 | 0 |
| Atp6v1b1      | chr6:83743016-83758810    | NOTEST | 0 | 0 |
| Atp6v1e2      | chr17:86944108-86947887   | NOTEST | 0 | 0 |
| Atp6v1g3      | chr1:138273737-138289462  | NOTEST | 0 | 0 |
| Aurkc         | chr7:6995384-7003091      | NOTEST | 0 | 0 |
| Avp           | chr2:130580676-130582541  | NOTEST | 0 | 0 |
| Avpr2         | chrX:73892101-73911298    | NOTEST | 0 | 0 |
| Awat1         | chrX:100572246-100578206  | NOTEST | 0 | 0 |
| Aym1          | chr5:113357293-113357821  | NOTEST | 0 | 0 |
| B020004C17Rik | chr14:57015133-57018982   | NOTEST | 0 | 0 |
| B020004J07Rik | chr4:101834968-101844022  | NOTEST | 0 | 0 |
| B020014A21Rik | chr10:3125090-3133193     | NOTEST | 0 | 0 |
| B020031M17Rik | chr13:119949356-119950806 | NOTEST | 0 | 0 |
| B930025P03Rik | chr8:10870421-10882454    | NOTEST | 0 | 0 |
| BB014433      | chr8:15041445-15046078    | NOTEST | 0 | 0 |
| BB019430      | chr10:58696744-58704277   | NOTEST | 0 | 0 |
| BB031773      | chr4:102760134-103011965  | NOTEST | 0 | 0 |
| BB287469      | chr12:87816576-87820676   | NOTEST | 0 | 0 |
| BC030499      | chr11:78290840-78296805   | NOTEST | 0 | 0 |
| BC039966      | chr4:153948454-153950476  | NOTEST | 0 | 0 |
| BC048502      | chr15:103438959-103448459 | NOTEST | 0 | 0 |
| BC048507      | chr13:67863325-67863923   | NOTEST | 0 | 0 |
| BC048562      | chr9:108436481-108446083  | NOTEST | 0 | 0 |
| BC048602      | chr15:35307009-35328535   | NOTEST | 0 | 0 |
| BC048609      | chr19:6080037-6084891     | NOTEST | 0 | 0 |
| BC048671      | chr6:90301269-90305448    | NOTEST | 0 | 0 |
| BC049730      | chr7:24709258-24714535    | NOTEST | 0 | 0 |
| BC051537      | chr17:34083842-34095309   | NOTEST | 0 | 0 |
| BC051665      | chr13:60781886-60786364   | NOTEST | 0 | 0 |
| BC052688      | chr13:61771579-61787282   | NOTEST | 0 | 0 |
| BC053393      | chr11:46193848-46589232   | NOTEST | 0 | 0 |
| BC055402      | chr1:57200644-57214996    | NOTEST | 0 | 0 |
| BC061195      | chrX:93156153-93156871    | NOTEST | 0 | 0 |
| BC061212      | chr5:95732091-95736173    | NOTEST | 0 | 0 |
| BC061237      | chr14:44500121-44506345   | NOTEST | 0 | 0 |
| BC080695      | chr4:143567466-143573798  | NOTEST | 0 | 0 |
| BC100530      | chr16:36359381-36367570   | NOTEST | 0 | 0 |
| BC117090      | chr16:36321664-36334332   | NOTEST | 0 | 0 |
| Banf2         | chr2:144033101-144073979  | NOTEST | 0 | 0 |
| Bc1           | chrX:162407199-163352564  | NOTEST | 0 | 0 |
| Bcas1os2      | chr2:170346990-170427845  | NOTEST | 0 | 0 |
| Bcas3os1      | chr11:85353163-85832388   | NOTEST | 0 | 0 |
| Bcas3os2      | chr11:85353163-85832388   | NOTEST | 0 | 0 |
| Bcl2a1a       | chr9:88956919-88962416    | NOTEST | 0 | 0 |
| Bcl2a1c       | chr9:114330134-114330578  | NOTEST | 0 | 0 |
| Becn2         | chr1:175920328-175922225  | NOTEST | 0 | 0 |
| Bex6          | chr16:32179799-32186944   | NOTEST | 0 | 0 |
| Bglap3        | chr3:88368616-88369720    | NOTEST | 0 | 0 |
| Birc7         | chr2:180929022-180934010  | NOTEST | 0 | 0 |
| Bmp10         | chr6:87429001-87434512    | NOTEST | 0 | 0 |
| Boll          | chr1:55300068-55363469    | NOTEST | 0 | 0 |
| Bpi           | chr2:158258240-158284531  | NOTEST | 0 | 0 |
| Bpifa1        | chr2:154142879-154149217  | NOTEST | 0 | 0 |

|               |                           |        |   |   |
|---------------|---------------------------|--------|---|---|
| Bpifa3        | chr2:154130335-154138359  | NOTEST | 0 | 0 |
| Bpifa6        | chr2:153974944-154000495  | NOTEST | 0 | 0 |
| Bpifb2        | chr2:153875044-153895270  | NOTEST | 0 | 0 |
| Bpifb3        | chr2:153918229-153932996  | NOTEST | 0 | 0 |
| Bpifb9a       | chr2:154257878-154271243  | NOTEST | 0 | 0 |
| Bpifb9b       | chr2:154307243-154320642  | NOTEST | 0 | 0 |
| Brs3          | chrX:57043073-57048758    | NOTEST | 0 | 0 |
| Bsnd          | chr4:106483457-106492243  | NOTEST | 0 | 0 |
| Bsph1         | chr7:13450840-13473449    | NOTEST | 0 | 0 |
| Bsph2         | chr7:13554865-13571067    | NOTEST | 0 | 0 |
| Btg4          | chr9:51116000-51119700    | NOTEST | 0 | 0 |
| Btnl2         | chr17:34354821-34369492   | NOTEST | 0 | 0 |
| Btnl4         | chr17:34469041-34475937   | NOTEST | 0 | 0 |
| C030007H22Rik | chr1:89360343-89406133    | NOTEST | 0 | 0 |
| C030013G03Rik | chr17:12419973-12507704   | NOTEST | 0 | 0 |
| C030018K13Rik | chr5:64477007-64483966    | NOTEST | 0 | 0 |
| C030029H02Rik | chr7:136268323-136318511  | NOTEST | 0 | 0 |
| C130026I21Rik | chr1:85246343-85270566    | NOTEST | 0 | 0 |
| C130079G13Rik | chr3:59925213-59937949    | NOTEST | 0 | 0 |
| C1rb          | chr6:124570429-124581044  | NOTEST | 0 | 0 |
| C230024C17Rik | chr1:153721239-153737829  | NOTEST | 0 | 0 |
| C230079O03Rik | chr7:136332215-136349415  | NOTEST | 0 | 0 |
| C330011F03Rik | chr17:50733126-51613053   | NOTEST | 0 | 0 |
| C330013F16Rik | chrX:139240225-139357738  | NOTEST | 0 | 0 |
| C330022C24Rik | chr7:140835495-140846769  | NOTEST | 0 | 0 |
| C330046G13Rik | chr10:84547416-84553338   | NOTEST | 0 | 0 |
| C430002E04Rik | chr3:41487680-41493199    | NOTEST | 0 | 0 |
| C4bp          | chr1:130635920-130661618  | NOTEST | 0 | 0 |
| C630028M04Rik | chr4:51968093-52051110    | NOTEST | 0 | 0 |
| C86187        | chr7:46967746-46975911    | NOTEST | 0 | 0 |
| C86695        | chr8:21958713-21964303    | NOTEST | 0 | 0 |
| C87198        | chr12:56591058-56594554   | NOTEST | 0 | 0 |
| C87414        | chr5:93635184-93671463    | NOTEST | 0 | 0 |
| C87499        | chr4:88627319-88634186    | NOTEST | 0 | 0 |
| C87977        | chr4:144206761-144213017  | NOTEST | 0 | 0 |
| Cabp2         | chr19:4082487-4087339     | NOTEST | 0 | 0 |
| Cabs1         | chr5:87979450-87981541    | NOTEST | 0 | 0 |
| Cacng6        | chr7:3424661-3434940      | NOTEST | 0 | 0 |
| Calcr         | chr6:3685719-3764713      | NOTEST | 0 | 0 |
| Calhm1        | chr19:47141034-47144174   | NOTEST | 0 | 0 |
| Calm4         | chr13:3837756-3838671     | NOTEST | 0 | 0 |
| Calm5         | chr13:3854172-3854761     | NOTEST | 0 | 0 |
| Calml3        | chr13:3802892-3804318     | NOTEST | 0 | 0 |
| Capza3        | chr6:140041524-140042786  | NOTEST | 0 | 0 |
| Casp14        | chr10:78711994-78718293   | NOTEST | 0 | 0 |
| Catsper1      | chr19:5335740-5344153     | NOTEST | 0 | 0 |
| Catsperb      | chr12:101404672-101626009 | NOTEST | 0 | 0 |
| Catsperg2     | chr7:29697218-29727015    | NOTEST | 0 | 0 |
| Ccdc110       | chr8:45934648-45944145    | NOTEST | 0 | 0 |
| Ccdc135       | chr8:95055102-95078141    | NOTEST | 0 | 0 |
| Ccdc144b      | chr3:35959305-36053547    | NOTEST | 0 | 0 |
| Ccdc152       | chr15:3280626-3303526     | NOTEST | 0 | 0 |
| Ccdc154       | chr17:25162460-25171913   | NOTEST | 0 | 0 |



|                 |                             |        |   |   |
|-----------------|-----------------------------|--------|---|---|
| Ccdc183         | chr2:25608628-25617678      | NOTEST | 0 | 0 |
| Ccdc34os        | chr2:110017816-110050479    | NOTEST | 0 | 0 |
| Ccdc42b         | chr5:120613129-120634235    | NOTEST | 0 | 0 |
| Ccdc70          | chr8:21970595-21974041      | NOTEST | 0 | 0 |
| Ccl17           | chr8:94810452-94812036      | NOTEST | 0 | 0 |
| Ccl20           | chr1:83116765-83119167      | NOTEST | 0 | 0 |
| Ccl26           | chr5:135560447-135563569    | NOTEST | 0 | 0 |
| Ccl27b          | chr4_JH584293_random:7077-2 | NOTEST | 0 | 0 |
| Ccr1l1          | chr9:123976948-123978408    | NOTEST | 0 | 0 |
| Ccr6            | chr17:8236042-8257129       | NOTEST | 0 | 0 |
| Cd209c          | chr8:3940221-3946863        | NOTEST | 0 | 0 |
| Cd209d          | chr8:3871823-3878499        | NOTEST | 0 | 0 |
| Cd300c          | chr11:114956277-114960417   | NOTEST | 0 | 0 |
| Cd300lh,Gm11710 | chr11:115031446-115037690   | NOTEST | 0 | 0 |
| Cd40lg          | chrX:57212142-57224042      | NOTEST | 0 | 0 |
| Cdh16           | chr8:104446718-104624396    | NOTEST | 0 | 0 |
| Cdhr5           | chr7:141269084-141276786    | NOTEST | 0 | 0 |
| Cdx2            | chr5:147300899-147307249    | NOTEST | 0 | 0 |
| Cdx4            | chrX:103321397-103330224    | NOTEST | 0 | 0 |
| Ceacam-ps1      | chr7:16649029-16657478      | NOTEST | 0 | 0 |
| Ceacam11        | chr7:17972166-17978556      | NOTEST | 0 | 0 |
| Ceacam12        | chr7:18065928-18077986      | NOTEST | 0 | 0 |
| Ceacam13        | chr7:18009888-18019220      | NOTEST | 0 | 0 |
| Ceacam14        | chr7:17812681-17815627      | NOTEST | 0 | 0 |
| Ceacam18        | chr7:43634738-43649294      | NOTEST | 0 | 0 |
| Ceacam19        | chr7:19875741-19887965      | NOTEST | 0 | 0 |
| Ceacam5         | chr7:17713251-17761121      | NOTEST | 0 | 0 |
| Ceacam9         | chr7:16721928-16726110      | NOTEST | 0 | 0 |
| Cela2a          | chr4:141793611-141826003    | NOTEST | 0 | 0 |
| Cela3b          | chr4:137421007-137430520    | NOTEST | 0 | 0 |
| Celrr           | chr1:121087404-121120975    | NOTEST | 0 | 0 |
| Ces1b           | chr8:93056726-93080017      | NOTEST | 0 | 0 |
| Ces1c           | chr8:93099015-93131283      | NOTEST | 0 | 0 |
| Ces1e           | chr8:93201217-93229619      | NOTEST | 0 | 0 |
| Ces1f           | chr8:93256235-93279736      | NOTEST | 0 | 0 |
| Ces1g           | chr8:93302368-93337209      | NOTEST | 0 | 0 |
| Ces2a           | chr8:104734002-104741634    | NOTEST | 0 | 0 |
| Ces2b           | chr8:104831643-104838652    | NOTEST | 0 | 0 |
| Ces2d-ps        | chr8:104867423-104874082    | NOTEST | 0 | 0 |
| Ces2f           | chr8:104947355-104955962    | NOTEST | 0 | 0 |
| Ces2h           | chr8:105000852-105020410    | NOTEST | 0 | 0 |
| Ces3a           | chr8:105048598-105058414    | NOTEST | 0 | 0 |
| Ces3b           | chr8:105083754-105093591    | NOTEST | 0 | 0 |
| Cetn1           | chr18:9618418-9619469       | NOTEST | 0 | 0 |
| Cfc1            | chr1:34535647-34544311      | NOTEST | 0 | 0 |
| Cfhr1           | chr1:139547063-139560222    | NOTEST | 0 | 0 |
| Cga             | chr4:34893778-34907374      | NOTEST | 0 | 0 |
| Chat            | chr14:32408202-32465909     | NOTEST | 0 | 0 |
| Chil4           | chr3:106201490-106219479    | NOTEST | 0 | 0 |
| Chrna9          | chr5:65967123-65977486      | NOTEST | 0 | 0 |
| Chst13          | chr6:90308350-90325185      | NOTEST | 0 | 0 |
| Cib4            | chr5:30485583-30545836      | NOTEST | 0 | 0 |
| Cistr-act       | chr15:102746440-102746909   | NOTEST | 0 | 0 |

|          |                           |        |   |   |
|----------|---------------------------|--------|---|---|
| Cks1brt  | chr8:85151923-85173622    | NOTEST | 0 | 0 |
| Clcnka   | chr4:141384610-141398706  | NOTEST | 0 | 0 |
| Cldn17   | chr16:88505806-88506978   | NOTEST | 0 | 0 |
| Cldn18   | chr9:99690796-99717267    | NOTEST | 0 | 0 |
| Cldn24   | chr8:47822142-47822805    | NOTEST | 0 | 0 |
| Cldn4    | chr5:134945123-134946934  | NOTEST | 0 | 0 |
| Cldnd2   | chr7:43440815-43443320    | NOTEST | 0 | 0 |
| Clec2f   | chr6:129014111-129020527  | NOTEST | 0 | 0 |
| Clec2g   | chr6:128934380-128984707  | NOTEST | 0 | 0 |
| Clec4a4  | chr6:122990366-123024421  | NOTEST | 0 | 0 |
| Clec4g   | chr8:3716070-3720651      | NOTEST | 0 | 0 |
| Clps     | chr17:28558213-28560714   | NOTEST | 0 | 0 |
| Clpsl2   | chr17:28549486-28552618   | NOTEST | 0 | 0 |
| Clrn3    | chr7:135511455-135528654  | NOTEST | 0 | 0 |
| Cma2     | chr14:55971427-55973995   | NOTEST | 0 | 0 |
| Cml5     | chr6:85817217-85820972    | NOTEST | 0 | 0 |
| Cmtm1    | chr8:104293541-104310145  | NOTEST | 0 | 0 |
| Cmtm2a   | chr8:104281041-104293181  | NOTEST | 0 | 0 |
| Cmtm2b   | chr8:104322226-104330764  | NOTEST | 0 | 0 |
| Cngb3    | chr4:19280849-19510623    | NOTEST | 0 | 0 |
| Cnpy1    | chr5:28205462-28237873    | NOTEST | 0 | 0 |
| Cort     | chr4:149125190-149126741  | NOTEST | 0 | 0 |
| Cox8c    | chr12:102899305-102900534 | NOTEST | 0 | 0 |
| Cpa1     | chr6:30639220-30645361    | NOTEST | 0 | 0 |
| Cpa5     | chr6:30611009-30631521    | NOTEST | 0 | 0 |
| Cpb2     | chr14:75004109-75388146   | NOTEST | 0 | 0 |
| Cpsf4l   | chr11:113698170-113710017 | NOTEST | 0 | 0 |
| Cpxcr1   | chrX:116448943-116478783  | NOTEST | 0 | 0 |
| Crisp2   | chr17:40764733-40794146   | NOTEST | 0 | 0 |
| Crisp3   | chr17:40221776-40242258   | NOTEST | 0 | 0 |
| Crisp4   | chr1:18115190-18137051    | NOTEST | 0 | 0 |
| Crnn     | chr3:93144786-93149471    | NOTEST | 0 | 0 |
| Crxos    | chr7:15882616-15904030    | NOTEST | 0 | 0 |
| Cryaa    | chr17:31677930-31681730   | NOTEST | 0 | 0 |
| Cryba1   | chr11:77718731-77725293   | NOTEST | 0 | 0 |
| Crygb    | chr1:65080221-65082290    | NOTEST | 0 | 0 |
| Crygc    | chr1:65071524-65073532    | NOTEST | 0 | 0 |
| Crygd    | chr1:65061837-65063440    | NOTEST | 0 | 0 |
| Cryge    | chr1:65048556-65051163    | NOTEST | 0 | 0 |
| Crygf    | chr1:65926521-65928304    | NOTEST | 0 | 0 |
| Csf2     | chr11:54247269-54249899   | NOTEST | 0 | 0 |
| Csmd2os  | chr4:127988043-128567656  | NOTEST | 0 | 0 |
| Csn1s1   | chr5:87666207-87682577    | NOTEST | 0 | 0 |
| Csn1s2b  | chr5:87808121-87824421    | NOTEST | 0 | 0 |
| Csn2     | chr5:87692618-87699425    | NOTEST | 0 | 0 |
| Csn3     | chr5:87908587-87979351    | NOTEST | 0 | 0 |
| Csnka2ip | chr16:64477810-64479134   | NOTEST | 0 | 0 |
| Cst10    | chr2:149405248-149410278  | NOTEST | 0 | 0 |
| Cst11    | chr2:148768617-148771497  | NOTEST | 0 | 0 |
| Cst13    | chr2:148820098-148830410  | NOTEST | 0 | 0 |
| Cst8     | chr2:148798838-148805584  | NOTEST | 0 | 0 |
| Cst9     | chr2:148835146-148838737  | NOTEST | 0 | 0 |
| Csta1    | chr16:36119945-36131189   | NOTEST | 0 | 0 |

|            |                          |        |   |   |
|------------|--------------------------|--------|---|---|
| Ctag2      | chrX:65047643-65049017   | NOTEST | 0 | 0 |
| Ctf2       | chr7:127718959-127725616 | NOTEST | 0 | 0 |
| Ctrc       | chr4:141838239-141846990 | NOTEST | 0 | 0 |
| Ctrcos     | chr4:141838239-141846990 | NOTEST | 0 | 0 |
| Cts3       | chr13:61564629-61570127  | NOTEST | 0 | 0 |
| Cts6       | chr13:61195146-61203392  | NOTEST | 0 | 0 |
| Cts7       | chr13:61352460-61358170  | NOTEST | 0 | 0 |
| Cts8       | chr13:61246746-61255348  | NOTEST | 0 | 0 |
| Cts8-ps    | chr13:61281379-61288850  | NOTEST | 0 | 0 |
| Ctsj       | chr13:61000277-61005911  | NOTEST | 0 | 0 |
| Ctsll3     | chr13:60798249-60802844  | NOTEST | 0 | 0 |
| Ctsm       | chr13:61536443-61541839  | NOTEST | 0 | 0 |
| Ctsq       | chr13:61035037-61040597  | NOTEST | 0 | 0 |
| Ctsr       | chr13:61159214-61164188  | NOTEST | 0 | 0 |
| Cxcl15     | chr5:90794533-90803067   | NOTEST | 0 | 0 |
| Cxcl17     | chr7:25376818-25566417   | NOTEST | 0 | 0 |
| Cxcl3      | chr5:90786100-90788093   | NOTEST | 0 | 0 |
| Cylc1      | chrX:111110417-111123874 | NOTEST | 0 | 0 |
| Cylc2      | chr4:51216677-51229928   | NOTEST | 0 | 0 |
| Cym        | chr3:107211294-107221732 | NOTEST | 0 | 0 |
| Cyp11b1    | chr15:74834891-74841643  | NOTEST | 0 | 0 |
| Cyp11b2    | chr15:74851009-74856318  | NOTEST | 0 | 0 |
| Cyp19a1    | chr9:54165936-54193442   | NOTEST | 0 | 0 |
| Cyp1a2     | chr9:57676936-57683655   | NOTEST | 0 | 0 |
| Cyp21a1    | chr17:34801347-34804426  | NOTEST | 0 | 0 |
| Cyp2a12    | chr7:27029089-27036815   | NOTEST | 0 | 0 |
| Cyp2a22    | chr7:26931630-26939386   | NOTEST | 0 | 0 |
| Cyp2a4     | chr7:26307191-26315088   | NOTEST | 0 | 0 |
| Cyp2a5     | chr7:26835338-26843264   | NOTEST | 0 | 0 |
| Cyp2b13    | chr7:26061494-26096196   | NOTEST | 0 | 0 |
| Cyp2b19    | chr7:26757186-26772630   | NOTEST | 0 | 0 |
| Cyp2b23    | chr7:26665226-26686430   | NOTEST | 0 | 0 |
| Cyp2b9     | chr7:26173408-26210660   | NOTEST | 0 | 0 |
| Cyp2c29    | chr19:39287084-39330713  | NOTEST | 0 | 0 |
| Cyp2c37    | chr19:39992423-40012243  | NOTEST | 0 | 0 |
| Cyp2c38    | chr19:39389555-39463075  | NOTEST | 0 | 0 |
| Cyp2c39    | chr19:39510821-39568529  | NOTEST | 0 | 0 |
| Cyp2c40    | chr19:39767072-39812814  | NOTEST | 0 | 0 |
| Cyp2c50    | chr19:40089678-40113955  | NOTEST | 0 | 0 |
| Cyp2c53-ps | chr19:39229253-39274737  | NOTEST | 0 | 0 |
| Cyp2c54    | chr19:40037939-40073813  | NOTEST | 0 | 0 |
| Cyp2c67    | chr19:39608858-39649042  | NOTEST | 0 | 0 |
| Cyp2c68    | chr19:39688835-39741101  | NOTEST | 0 | 0 |
| Cyp2c69    | chr19:39842659-39886769  | NOTEST | 0 | 0 |
| Cyp2c70    | chr19:40153360-40187286  | NOTEST | 0 | 0 |
| Cyp2d10    | chr15:82402845-82407194  | NOTEST | 0 | 0 |
| Cyp2d11    | chr15:82389153-82394022  | NOTEST | 0 | 0 |
| Cyp2d12    | chr15:82555097-82559413  | NOTEST | 0 | 0 |
| Cyp2d13    | chr15:82636749-82642045  | NOTEST | 0 | 0 |
| Cyp2d34    | chr15:82615964-82620907  | NOTEST | 0 | 0 |
| Cyp2d37-ps | chr15:82688749-82690058  | NOTEST | 0 | 0 |
| Cyp2d40    | chr15:82759832-82764122  | NOTEST | 0 | 0 |
| Cyp2d9     | chr15:82452376-82456827  | NOTEST | 0 | 0 |

|                   |                           |        |   |   |
|-------------------|---------------------------|--------|---|---|
| Cyp2g1            | chr7:26808926-26821197    | NOTEST | 0 | 0 |
| Cyp2j11           | chr4:96294508-96348680    | NOTEST | 0 | 0 |
| Cyp2j5            | chr4:96627431-96664119    | NOTEST | 0 | 0 |
| Cyp2t4            | chr7:27153713-27158564    | NOTEST | 0 | 0 |
| Cyp2w1            | chr5:139352616-139357033  | NOTEST | 0 | 0 |
| Cyp3a11           | chr5:145854606-145879854  | NOTEST | 0 | 0 |
| Cyp3a16           | chr5:145436308-145469723  | NOTEST | 0 | 0 |
| Cyp3a25           | chr5:145977193-146009618  | NOTEST | 0 | 0 |
| Cyp3a41a          | chr5:145694048-145720136  | NOTEST | 0 | 0 |
| Cyp3a41b          | chr5:145558663-145584730  | NOTEST | 0 | 0 |
| Cyp3a44           | chr5:145773982-145805874  | NOTEST | 0 | 0 |
| Cyp3a57           | chr5:145345269-145390512  | NOTEST | 0 | 0 |
| Cyp3a59           | chr5:146079257-146113283  | NOTEST | 0 | 0 |
| Cyp4a10           | chr4:115518286-115533649  | NOTEST | 0 | 0 |
| Cyp4a12a          | chr4:115299045-115332815  | NOTEST | 0 | 0 |
| Cyp4a12b          | chr4:115411623-115439034  | NOTEST | 0 | 0 |
| Cyp4a14           | chr4:115486199-115496141  | NOTEST | 0 | 0 |
| Cyp4a29           | chr4:115242083-115254557  | NOTEST | 0 | 0 |
| Cyp4a30b          | chr4:115452603-115471062  | NOTEST | 0 | 0 |
| Cyp4a31           | chr4:115563648-115579015  | NOTEST | 0 | 0 |
| Cyp4a32           | chr4:115600937-115622366  | NOTEST | 0 | 0 |
| Cyp4f37           | chr17:32621318-32636184   | NOTEST | 0 | 0 |
| Cyp4f40           | chr17:32659482-32676480   | NOTEST | 0 | 0 |
| Cyp7a1            | chr4:6265611-6275631      | NOTEST | 0 | 0 |
| Cyp8b1            | chr9:121914355-121916305  | NOTEST | 0 | 0 |
| Cypt1,Cypt8       | chrX:16522871-16523689    | NOTEST | 0 | 0 |
| Cypt12            | chr3:17948443-17948952    | NOTEST | 0 | 0 |
| Cypt14            | chrX:39862918-39863604    | NOTEST | 0 | 0 |
| Cypt15            | chrX:39346265-39346961    | NOTEST | 0 | 0 |
| Cypt3             | chrX:153558592-153559429  | NOTEST | 0 | 0 |
| Cypt4,Cypt9       | chr9:24557047-24696293    | NOTEST | 0 | 0 |
| Cypt7             | chrX:16522871-16523689    | NOTEST | 0 | 0 |
| Cypt8             | chrX:16522871-16523689    | LOWDAT | 0 | 0 |
| Cypt9             | chr9:24557047-24696293    | LOWDAT | 0 | 0 |
| D030024E09Rik     | chr15:61699283-61774451   | NOTEST | 0 | 0 |
| D030040B21Rik     | chr1:16657551-16662278    | NOTEST | 0 | 0 |
| D130058E03        | chr6:127296185-127307967  | NOTEST | 0 | 0 |
| D14Erttd670e      | chr14:19838924-19844677   | NOTEST | 0 | 0 |
| D16Erttd519e      | chr16:70616424-70624822   | NOTEST | 0 | 0 |
| D17Erttd648e      | chr17:10840383-12063360   | NOTEST | 0 | 0 |
| D530049I02Rik     | chr1:73391384-73430779    | NOTEST | 0 | 0 |
| D5Erttd577e,Gm328 | chr5:95456805-95485589    | NOTEST | 0 | 0 |
| D630010B17Rik     | chr15:94247201-94255606   | NOTEST | 0 | 0 |
| D630013N20Rik     | chr10:70601048-70655963   | NOTEST | 0 | 0 |
| D730001G18Rik     | chr15:74770907-74778859   | NOTEST | 0 | 0 |
| D730048I06Rik     | chr9:35788049-35790112    | NOTEST | 0 | 0 |
| D730050B12Rik     | chr13:72809600-72816763   | NOTEST | 0 | 0 |
| D7Erttd143e       | chr7:3218783-3221015      | NOTEST | 0 | 0 |
| D830005E20Rik     | chr10:33083482-33476709   | NOTEST | 0 | 0 |
| D830015G02Rik     | chr14:54968786-54994549   | NOTEST | 0 | 0 |
| D930007P13Rik     | chr15:103123069-103146828 | NOTEST | 0 | 0 |
| D930032P07Rik     | chr19:28262447-28720027   | NOTEST | 0 | 0 |
| DQ267100          | chr12:109603944-109661711 | NOTEST | 0 | 0 |

|                 |                           |        |   |   |
|-----------------|---------------------------|--------|---|---|
| DQ267101        | chr12:109603944-109661711 | NOTEST | 0 | 0 |
| DQ267102        | chr12:109603944-109661711 | NOTEST | 0 | 0 |
| DXBay18,Gm14685 | chrX:73137231-73158399    | NOTEST | 0 | 0 |
| Dao             | chr5:114003734-114025676  | NOTEST | 0 | 0 |
| Dbx1            | chr7:49631498-49636835    | NOTEST | 0 | 0 |
| Dcdc2c          | chr12:28437794-28548337   | NOTEST | 0 | 0 |
| Dcpp1           | chr17:23880875-23882853   | NOTEST | 0 | 0 |
| Dcpp2           | chr17:23898721-23900787   | NOTEST | 0 | 0 |
| Dcpp3           | chr17:23917457-23919441   | NOTEST | 0 | 0 |
| Dcst1           | chr3:89350234-89365239    | NOTEST | 0 | 0 |
| Ddi1            | chr9:6168611-6377519      | NOTEST | 0 | 0 |
| Defa-ps1        | chr8:21695011-21695853    | NOTEST | 0 | 0 |
| Defa-ps12       | chr8:19210461-19212760    | NOTEST | 0 | 0 |
| Defa-ps13       | chr8:19300676-19304794    | NOTEST | 0 | 0 |
| Defa-rs1        | chr8:21325887-21327020    | NOTEST | 0 | 0 |
| Defa-rs7,Defa23 | chr8:21191572-21192550    | NOTEST | 0 | 0 |
| Defa17          | chr8:21655766-21656736    | NOTEST | 0 | 0 |
| Defa2           | chr8:21378516-21379495    | NOTEST | 0 | 0 |
| Defa20          | chr8:21509257-21510237    | NOTEST | 0 | 0 |
| Defa21          | chr8:21025544-21026517    | NOTEST | 0 | 0 |
| Defa22          | chr8:21162276-21163249    | NOTEST | 0 | 0 |
| Defa23          | chr8:21191572-21192550    | LOWDAT | 0 | 0 |
| Defa24,Defa6    | chr8:21734493-21735471    | NOTEST | 0 | 0 |
| Defa25          | chr8:21065037-21089644    | NOTEST | 0 | 0 |
| Defa26          | chr8:21618167-21618972    | NOTEST | 0 | 0 |
| Defa3           | chr8:21287408-21288377    | NOTEST | 0 | 0 |
| Defa4           | chr8:21065037-21089644    | NOTEST | 0 | 0 |
| Defa5           | chr8:21297393-21298375    | NOTEST | 0 | 0 |
| Defa6           | chr8:21734493-21735471    | LOWDAT | 0 | 0 |
| Defb1           | chr8:21776554-21795185    | NOTEST | 0 | 0 |
| Defb10          | chr8:21858900-21862010    | NOTEST | 0 | 0 |
| Defb11          | chr8:21905373-21906432    | NOTEST | 0 | 0 |
| Defb12          | chr8:19111930-19114833    | NOTEST | 0 | 0 |
| Defb13          | chr8:21946761-21948622    | NOTEST | 0 | 0 |
| Defb14          | chr8:19194327-19195309    | NOTEST | 0 | 0 |
| Defb15          | chr8:21929812-21932710    | NOTEST | 0 | 0 |
| Defb18          | chr1:18236472-18237443    | NOTEST | 0 | 0 |
| Defb19          | chr2:152576085-152580312  | NOTEST | 0 | 0 |
| Defb2           | chr8:21839925-21843481    | NOTEST | 0 | 0 |
| Defb21          | chr2:152572743-152574943  | NOTEST | 0 | 0 |
| Defb22          | chr2:152485665-152490138  | NOTEST | 0 | 0 |
| Defb23          | chr2:152459054-152464620  | NOTEST | 0 | 0 |
| Defb25          | chr2:152622355-152623053  | NOTEST | 0 | 0 |
| Defb26          | chr2:152507755-152511736  | NOTEST | 0 | 0 |
| Defb29          | chr2:152538713-152540041  | NOTEST | 0 | 0 |
| Defb3           | chr8:19293360-19295339    | NOTEST | 0 | 0 |
| Defb33          | chr8:20892666-20897723    | NOTEST | 0 | 0 |
| Defb34          | chr8:19123751-19126540    | NOTEST | 0 | 0 |
| Defb35          | chr8:21938351-21940878    | NOTEST | 0 | 0 |
| Defb36          | chr2:152604326-152612729  | NOTEST | 0 | 0 |
| Defb37          | chr8:18986232-18991055    | NOTEST | 0 | 0 |
| Defb38          | chr8:19023463-19026529    | NOTEST | 0 | 0 |
| Defb39          | chr8:19052825-19064810    | NOTEST | 0 | 0 |



|                  |                            |        |   |   |
|------------------|----------------------------|--------|---|---|
| Defb4            | chr8:19198703-19201547     | NOTEST | 0 | 0 |
| Defb40           | chr8:18974939-18978116     | NOTEST | 0 | 0 |
| Defb41           | chr1:18250977-18265138     | NOTEST | 0 | 0 |
| Defb43           | chr14:63011770-63018088    | NOTEST | 0 | 0 |
| Defb44-ps        | chr1:18210052-18223564     | NOTEST | 0 | 0 |
| Defb45           | chr2:152593190-152596485   | NOTEST | 0 | 0 |
| Defb46           | chr8:19239915-19242143     | NOTEST | 0 | 0 |
| Defb47           | chr14:62998076-63001160    | NOTEST | 0 | 0 |
| Defb48           | chr14:62977523-62984510    | NOTEST | 0 | 0 |
| Defb5            | chr8:19247591-19250828     | NOTEST | 0 | 0 |
| Defb50           | chr8:21823538-21831296     | NOTEST | 0 | 0 |
| Defb6            | chr8:19225477-19228209     | NOTEST | 0 | 0 |
| Defb7            | chr8:19495096-19497775     | NOTEST | 0 | 0 |
| Defb8            | chr8:19445769-19447606     | NOTEST | 0 | 0 |
| Defb9            | chr8:21881712-21885434     | NOTEST | 0 | 0 |
| Dgat2l6          | chrX:100524837-100546108   | NOTEST | 0 | 0 |
| Dio1             | chr4:107291464-107307143   | NOTEST | 0 | 0 |
| Dkk1             | chr19:30545884-30549496    | NOTEST | 0 | 0 |
| Dkk4             | chr8:22624042-22627546     | NOTEST | 0 | 0 |
| Dlx1as           | chr2:71529444-71537891     | NOTEST | 0 | 0 |
| Dlx6as2          | chr6:6820545-6869533       | NOTEST | 0 | 0 |
| Dlx6os1          | chr6:6820545-6869533       | NOTEST | 0 | 0 |
| Dmrt3            | chr19:25610536-25623921    | NOTEST | 0 | 0 |
| Dmrtd1b          | chrX:102707880-102715209   | NOTEST | 0 | 0 |
| Dmrtd1c2         | chrX:102847638-102854616   | NOTEST | 0 | 0 |
| Dmrtd2           | chr7:24870056-24877651     | NOTEST | 0 | 0 |
| Dnajib8          | chr6:88222267-88223256     | NOTEST | 0 | 0 |
| Dnajc5g          | chr5:30933142-31348845     | NOTEST | 0 | 0 |
| Dnase1           | chr16:4037144-4077810      | NOTEST | 0 | 0 |
| Dnmt3aos         | chr12:3806979-3914443      | NOTEST | 0 | 0 |
| Doxl2            | chr6:48975142-48978745     | NOTEST | 0 | 0 |
| Dpcr1            | chr17:35635754-35643695    | NOTEST | 0 | 0 |
| Dppa1            | chr11:46607009-46629274    | NOTEST | 0 | 0 |
| Dppa3            | chr6:122626423-122630271   | NOTEST | 0 | 0 |
| Dppa4            | chr16:48283734-48294292    | NOTEST | 0 | 0 |
| Drd4             | chr7:141292005-141295001   | NOTEST | 0 | 0 |
| Dreh             | chr17:64767110-64767931    | NOTEST | 0 | 0 |
| Dsg3             | chr18:20510303-20541310    | NOTEST | 0 | 0 |
| Dsg4             | chr18:20436174-20471821    | NOTEST | 0 | 0 |
| Dthd1            | chr5:62813822-62888318     | NOTEST | 0 | 0 |
| Dusp21           | chrX:18145869-18146692     | NOTEST | 0 | 0 |
| Dux              | chr10:58230650-58232675    | NOTEST | 0 | 0 |
| Dydc1            | chr14:41072910-41092197    | NOTEST | 0 | 0 |
| E030002O03Rik    | chr7:104153012-104164816   | NOTEST | 0 | 0 |
| E030018B13Rik    | chr7:63886350-63938915     | NOTEST | 0 | 0 |
| E030019B13Rik    | chr12:56490427-56529420    | NOTEST | 0 | 0 |
| E030025P04Rik    | chr11:109139290-109144369  | NOTEST | 0 | 0 |
| E030044B06Rik    | chr19:40868315-40882639    | NOTEST | 0 | 0 |
| E130218I03Rik    | chr4:134243305-134245873   | NOTEST | 0 | 0 |
| E230019M04Rik    | chrX:140062878-140106797   | NOTEST | 0 | 0 |
| E330012B07Rik    | chr6:147180240-147208294   | NOTEST | 0 | 0 |
| E330014E10Rik,Gn | chr5_GL456354_random:82558 | NOTEST | 0 | 0 |
| E330020D12Rik    | chr1:153404185-153414233   | NOTEST | 0 | 0 |

|               |                           |        |   |   |
|---------------|---------------------------|--------|---|---|
| E330023G01Rik | chr9:98748598-98820087    | NOTEST | 0 | 0 |
| Ear10         | chr14:43922897-43923368   | NOTEST | 0 | 0 |
| Ear14         | chr14:51203689-51204156   | LOWDAT | 0 | 0 |
| Ear4          | chr14:51203689-51204156   | NOTEST | 0 | 0 |
| Efcab8        | chr2:153780878-153795182  | NOTEST | 0 | 0 |
| Egfbp2        | chr7:44012677-44016968    | NOTEST | 0 | 0 |
| Elovl3        | chr19:46131898-46148325   | NOTEST | 0 | 0 |
| Emx1          | chr6:85187930-85204463    | NOTEST | 0 | 0 |
| Emx2          | chr19:59458689-59465357   | NOTEST | 0 | 0 |
| Emx2os        | chr19:59425103-59458635   | NOTEST | 0 | 0 |
| En2           | chr5:28165695-28172166    | NOTEST | 0 | 0 |
| Enam          | chr5:88487974-88506049    | NOTEST | 0 | 0 |
| Enpp7         | chr11:118988187-118992841 | NOTEST | 0 | 0 |
| Enthd1        | chr15:80452239-80560470   | NOTEST | 0 | 0 |
| Entpd8        | chr2:25080322-25095205    | NOTEST | 0 | 0 |
| Eras          | chrX:7919821-7928607      | NOTEST | 0 | 0 |
| Ereg          | chr5:91074616-91093649    | NOTEST | 0 | 0 |
| Erich5        | chr15:34453311-34473892   | NOTEST | 0 | 0 |
| Erp27         | chr6:136907386-136922180  | NOTEST | 0 | 0 |
| Esp1          | chr17:40727119-40731782   | NOTEST | 0 | 0 |
| Esp15         | chr17:39640956-39645667   | NOTEST | 0 | 0 |
| Esp16         | chr17:39536141-39540847   | NOTEST | 0 | 0 |
| Esp18         | chr17:39406358-39410992   | NOTEST | 0 | 0 |
| Esp23         | chr17:39073690-39077037   | NOTEST | 0 | 0 |
| Esp24         | chr17:39036694-39040227   | NOTEST | 0 | 0 |
| Esp3          | chr17:40632074-40637060   | NOTEST | 0 | 0 |
| Esp31         | chr17:38639446-38645653   | NOTEST | 0 | 0 |
| Esp34         | chr17:38554191-38560621   | NOTEST | 0 | 0 |
| Esp36         | chr17:38416473-38420185   | NOTEST | 0 | 0 |
| Esp38         | chr17:39950519-39955287   | NOTEST | 0 | 0 |
| Esp4          | chr17:40598593-40602617   | NOTEST | 0 | 0 |
| Esp5          | chr17:40561506-40579549   | NOTEST | 0 | 0 |
| Esp6          | chr17:40561506-40579549   | NOTEST | 0 | 0 |
| Esp6-esp5     | chr17:40561506-40579549   | NOTEST | 0 | 0 |
| Esx1          | chrX:137115396-137120326  | NOTEST | 0 | 0 |
| Etd           | chrX:53434917-53443576    | NOTEST | 0 | 0 |
| Etv2          | chr7:30633615-30635852    | NOTEST | 0 | 0 |
| Evx1          | chr6:52308388-52318378    | NOTEST | 0 | 0 |
| Evx2          | chr2:74655615-74659419    | NOTEST | 0 | 0 |
| F10           | chr8:13037307-13056676    | NOTEST | 0 | 0 |
| F11           | chr8:45241169-45262031    | NOTEST | 0 | 0 |
| F13b          | chr1:139501706-139523756  | NOTEST | 0 | 0 |
| F630111L10Rik | chr3:59006977-59344256    | NOTEST | 0 | 0 |
| F630206G17Rik | chr11:45808082-45842878   | NOTEST | 0 | 0 |
| F730035M05Rik | chr12:70227840-70234165   | NOTEST | 0 | 0 |
| F830045P16Rik | chr2:129458358-129536602  | NOTEST | 0 | 0 |
| Fabp12        | chr3:10244208-10301183    | NOTEST | 0 | 0 |
| Fabp2         | chr3:122882591-122924116  | NOTEST | 0 | 0 |
| Fabp6         | chr11:43596039-43601562   | NOTEST | 0 | 0 |
| Fabp9         | chr3:10193623-10197283    | NOTEST | 0 | 0 |
| Fam115e       | chr6:42587212-42597372    | NOTEST | 0 | 0 |
| Fam122c       | chrX:53273432-53301501    | NOTEST | 0 | 0 |
| Fam150a       | chr1:6359330-6394731      | NOTEST | 0 | 0 |

|          |                          |        |   |   |
|----------|--------------------------|--------|---|---|
| Fam151a  | chr4:106733914-106799831 | NOTEST | 0 | 0 |
| Fam154a  | chr4:86444697-86558303   | NOTEST | 0 | 0 |
| Fam162b  | chr10:51585449-51590460  | NOTEST | 0 | 0 |
| Fam170a  | chr18:50278368-50283019  | NOTEST | 0 | 0 |
| Fam170b  | chr14:32833961-32836788  | NOTEST | 0 | 0 |
| Fam209   | chr2:172472553-172474316 | NOTEST | 0 | 0 |
| Fam24a   | chr7:131334621-131336716 | NOTEST | 0 | 0 |
| Fam25c   | chr14:34351881-34355393  | NOTEST | 0 | 0 |
| Fam46d   | chrX:107782751-107872911 | NOTEST | 0 | 0 |
| Fam47c   | chrX:78737762-78739410   | NOTEST | 0 | 0 |
| Fam50b   | chr13:34739641-34747622  | NOTEST | 0 | 0 |
| Fam71b   | chr11:46193848-46589232  | NOTEST | 0 | 0 |
| Fam71d   | chr12:78691534-78734519  | NOTEST | 0 | 0 |
| Fam71f1  | chr6:29319139-29336022   | NOTEST | 0 | 0 |
| Fam83c   | chr2:155829182-155834854 | NOTEST | 0 | 0 |
| Fancd2os | chr6:113596761-113600715 | NOTEST | 0 | 0 |
| Fbxo39   | chr11:72314443-72319419  | NOTEST | 0 | 0 |
| Fbxw13   | chr9:109179226-109195975 | NOTEST | 0 | 0 |
| Fbxw14   | chr9:109271124-109287676 | NOTEST | 0 | 0 |
| Fbxw18   | chr9:109676733-109702700 | NOTEST | 0 | 0 |
| Fbxw19   | chr9:109478574-109495854 | NOTEST | 0 | 0 |
| Fbxw20   | chr9:109217431-109234754 | NOTEST | 0 | 0 |
| Fbxw21   | chr9:109139453-109162022 | NOTEST | 0 | 0 |
| Fbxw22   | chr9:109378408-109404294 | NOTEST | 0 | 0 |
| Fbxw24   | chr9:109601115-109626059 | NOTEST | 0 | 0 |
| Fbxw26   | chr9:109717565-109746089 | NOTEST | 0 | 0 |
| Fbxw28   | chr9:109322885-109339659 | NOTEST | 0 | 0 |
| Fcrl5    | chr3:87435781-87500678   | NOTEST | 0 | 0 |
| Fcrl6    | chr1:172596639-172602551 | NOTEST | 0 | 0 |
| Ferd3l   | chr12:33928424-33929309  | NOTEST | 0 | 0 |
| Fezf1    | chr6:23245046-23248264   | NOTEST | 0 | 0 |
| Fezf2    | chr14:12341891-12345865  | NOTEST | 0 | 0 |
| Ffar2    | chr7:30818356-30823775   | NOTEST | 0 | 0 |
| Fgb      | chr3:83042304-83049790   | NOTEST | 0 | 0 |
| Fgf15    | chr7:144896531-144900951 | NOTEST | 0 | 0 |
| Fgf20    | chr8:40279165-40286953   | NOTEST | 0 | 0 |
| Fgf6     | chr6:127015541-127024718 | NOTEST | 0 | 0 |
| Fhad1os1 | chr4:141890622-142011651 | NOTEST | 0 | 0 |
| Flg2     | chr3:93197272-93221376   | NOTEST | 0 | 0 |
| Fmo3     | chr1:162953799-162984491 | NOTEST | 0 | 0 |
| Fnd3c2   | chrX:106235245-106255372 | NOTEST | 0 | 0 |
| Fndc8    | chr11:82892144-82900737  | NOTEST | 0 | 0 |
| Foxa2    | chr2:148042876-148046969 | NOTEST | 0 | 0 |
| Foxa3    | chr7:19013282-19023539   | NOTEST | 0 | 0 |
| Foxb1    | chr9:69757709-69760940   | NOTEST | 0 | 0 |
| Foxb2    | chr19:16872315-16873830  | NOTEST | 0 | 0 |
| Foxe1    | chr4:46344193-46345309   | NOTEST | 0 | 0 |
| Foxg1    | chr12:49382882-49386867  | NOTEST | 0 | 0 |
| Foxi1    | chr11:34204340-34208089  | NOTEST | 0 | 0 |
| Foxr1    | chr9:44434233-44440868   | NOTEST | 0 | 0 |
| Fpr-rs3  | chr17:20623845-20624877  | NOTEST | 0 | 0 |
| Fpr-rs4  | chr17:18021732-18022704  | NOTEST | 0 | 0 |
| Fpr-rs6  | chr17:20182077-20183097  | NOTEST | 0 | 0 |

|               |                           |        |   |   |
|---------------|---------------------------|--------|---|---|
| Fpr3          | chr17:17970457-17971677   | NOTEST | 0 | 0 |
| Frem3         | chr8:80611038-80695557    | NOTEST | 0 | 0 |
| Frmpd1os      | chr4:45184905-45285936    | NOTEST | 0 | 0 |
| Fscb          | chr12:64471332-64474898   | NOTEST | 0 | 0 |
| Fscn3         | chr6:28427900-28438622    | NOTEST | 0 | 0 |
| Fshb          | chr2:107056140-107059651  | NOTEST | 0 | 0 |
| Ftcd          | chr10:76575647-76590338   | NOTEST | 0 | 0 |
| Fthl17        | chrX:9033485-9034333      | NOTEST | 0 | 0 |
| Ftmt          | chr18:52331535-52332996   | NOTEST | 0 | 0 |
| Fut4-ps1      | chr17:56734227-56739292   | NOTEST | 0 | 0 |
| G630055G22Rik | chr18:47922840-48107980   | NOTEST | 0 | 0 |
| G630071F17Rik | chr18:60663409-60671624   | NOTEST | 0 | 0 |
| G630093K05Rik | chr13:47910434-47934301   | NOTEST | 0 | 0 |
| G6bos         | chr17:35062692-35066184   | NOTEST | 0 | 0 |
| G6pc          | chr11:101367729-101377903 | NOTEST | 0 | 0 |
| G6pc2         | chr2:69211072-69227993    | NOTEST | 0 | 0 |
| Gabra6        | chr11:42306436-42321072   | NOTEST | 0 | 0 |
| Galntl5       | chr5:25181479-25220289    | NOTEST | 0 | 0 |
| Galp          | chr7:6197089-6216137      | NOTEST | 0 | 0 |
| Gas2l2        | chr11:83421634-83429521   | NOTEST | 0 | 0 |
| Gast          | chr11:100334411-100336996 | NOTEST | 0 | 0 |
| Gata5         | chr2:180325087-180340732  | NOTEST | 0 | 0 |
| Gata5os       | chr2:180325087-180340732  | NOTEST | 0 | 0 |
| Gbp2b         | chr3:142594846-142619176  | NOTEST | 0 | 0 |
| Gcgr          | chr11:120530726-120538984 | NOTEST | 0 | 0 |
| Gckr          | chr5:30933142-31348845    | NOTEST | 0 | 0 |
| Gcm1          | chr9:78051957-78065624    | NOTEST | 0 | 0 |
| Gcm2          | chr13:41101426-41109988   | NOTEST | 0 | 0 |
| Gcnt3         | chr9:70031495-70038088    | NOTEST | 0 | 0 |
| Gdf3          | chr6:122605402-122610071  | NOTEST | 0 | 0 |
| Gfi1          | chr5:107716654-107725805  | NOTEST | 0 | 0 |
| Gh            | chr11:106300260-106301896 | NOTEST | 0 | 0 |
| Ghrh          | chr2:157329495-157346655  | NOTEST | 0 | 0 |
| Ghrhr         | chr6:55376294-55388530    | NOTEST | 0 | 0 |
| Ghrl          | chr6:113716118-113719911  | NOTEST | 0 | 0 |
| Gif           | chr19:11747558-11763447   | NOTEST | 0 | 0 |
| Gip           | chr11:96024544-96030828   | NOTEST | 0 | 0 |
| Gipr          | chr7:19157124-19166127    | NOTEST | 0 | 0 |
| Gja8          | chr3:96913565-96926051    | NOTEST | 0 | 0 |
| Gjd3          | chr11:98982179-98983016   | NOTEST | 0 | 0 |
| Gjd4          | chr18:9278606-9282809     | NOTEST | 0 | 0 |
| Gje1          | chr10:14705608-14759019   | NOTEST | 0 | 0 |
| Gk2           | chr5:97392416-97588126    | NOTEST | 0 | 0 |
| Gkn1          | chr6:87345652-87350915    | NOTEST | 0 | 0 |
| Gkn2          | chr6:87373364-87379494    | NOTEST | 0 | 0 |
| Glipr1l1      | chr10:112060188-112078510 | NOTEST | 0 | 0 |
| Glipr1l2      | chr10:112083353-112108098 | NOTEST | 0 | 0 |
| Glrp1         | chr1:88499870-88510066    | NOTEST | 0 | 0 |
| Glt6d1        | chr2:25793966-25815836    | NOTEST | 0 | 0 |
| Glycam1       | chr15:103562759-103565081 | NOTEST | 0 | 0 |
| Gm10007       | chr19:58235580-58455398   | NOTEST | 0 | 0 |
| Gm10024       | chr10:77686568-77886769   | NOTEST | 0 | 0 |
| Gm10052       | chr15:103240396-103246698 | LOWDAT | 0 | 0 |

|                |                           |        |   |   |
|----------------|---------------------------|--------|---|---|
| Gm10057        | chrX:154043985-154055041  | NOTEST | 0 | 0 |
| Gm10058,Gm1009 | chrX:35404186-35427093    | LOWDAT | 0 | 0 |
| Gm10081        | chr7:107105911-107106859  | NOTEST | 0 | 0 |
| Gm10094,Sap18  | chr14:57798188-57804980   | LOWDAT | 0 | 0 |
| Gm10096,Gm1048 | chrX:35404186-35427093    | LOWDAT | 0 | 0 |
| Gm101          | chr1:119923518-119995210  | NOTEST | 0 | 0 |
| Gm10100        | chr10:77686568-77886769   | NOTEST | 0 | 0 |
| Gm10104        | chr8:21065037-21089644    | NOTEST | 0 | 0 |
| Gm10142        | chr10:77686568-77886769   | NOTEST | 0 | 0 |
| Gm10147,Gm1481 | chrX:35404186-35427093    | LOWDAT | 0 | 0 |
| Gm10220        | chr5:26114763-26121425    | NOTEST | 0 | 0 |
| Gm10228        | chr16:89040922-89041472   | NOTEST | 0 | 0 |
| Gm10229        | chr16:89015276-89015846   | NOTEST | 0 | 0 |
| Gm10230        | chrX:30820524-30843469    | NOTEST | 0 | 0 |
| Gm10267        | chr18:44156402-44159885   | NOTEST | 0 | 0 |
| Gm10272        | chr10:77686568-77886769   | NOTEST | 0 | 0 |
| Gm10280        | chr8:113067261-113093333  | NOTEST | 0 | 0 |
| Gm10318        | chr10:77686568-77886769   | NOTEST | 0 | 0 |
| Gm10319        | chr6:122136627-122150958  | NOTEST | 0 | 0 |
| Gm10324        | chr13:66113452-66122836   | NOTEST | 0 | 0 |
| Gm10334        | chr6:41442213-41446097    | NOTEST | 0 | 0 |
| Gm10354        | chr5:14945293-14978899    | NOTEST | 0 | 0 |
| Gm10373        | chr15:43430942-43477036   | NOTEST | 0 | 0 |
| Gm10375        | chr14:43602626-43608013   | NOTEST | 0 | 0 |
| Gm10377        | chr14:43010187-43015576   | NOTEST | 0 | 0 |
| Gm10389        | chr15:10568977-10714631   | NOTEST | 0 | 0 |
| Gm10400        | chr6:141249268-141499351  | NOTEST | 0 | 0 |
| Gm10408        | chr14:3634511-3800987     | NOTEST | 0 | 0 |
| Gm10409,Gm3020 | chr14:3634511-3800987     | NOTEST | 0 | 0 |
| Gm10413        | chr14:3634511-3800987     | NOTEST | 0 | 0 |
| Gm10415        | chr6:126286648-126328686  | NOTEST | 0 | 0 |
| Gm10421        | chr12:116485719-117337012 | NOTEST | 0 | 0 |
| Gm10436        | chr12:88175588-88181894   | NOTEST | 0 | 0 |
| Gm10439        | chrX:149594600-149636621  | NOTEST | 0 | 0 |
| Gm10445        | chr6:84412941-84423838    | NOTEST | 0 | 0 |
| Gm1045         | chr5:91987472-91995317    | NOTEST | 0 | 0 |
| Gm10466        | chr11:24721005-24730722   | NOTEST | 0 | 0 |
| Gm10471        | chr5:26082171-26089264    | NOTEST | 0 | 0 |
| Gm10486        | chrX:35404186-35427093    | NOTEST | 0 | 0 |
| Gm10487        | chrX:30329711-30352645    | LOWDAT | 0 | 0 |
| Gm10488        | chrX:35404186-35427093    | LOWDAT | 0 | 0 |
| Gm10510        | chr17:15350812-15354461   | NOTEST | 0 | 0 |
| Gm10512        | chr17:13205041-13206211   | NOTEST | 0 | 0 |
| Gm10538        | chr1:132564689-132741797  | NOTEST | 0 | 0 |
| Gm10578        | chr7:137193670-137314445  | NOTEST | 0 | 0 |
| Gm10619        | chr7:73808221-73816503    | NOTEST | 0 | 0 |
| Gm10636        | chr3:146367152-146378944  | NOTEST | 0 | 0 |
| Gm10637        | chr8:87169746-87199850    | NOTEST | 0 | 0 |
| Gm10639        | chr9:78289927-78305525    | NOTEST | 0 | 0 |
| Gm10662,Gm5891 | chr7:23132622-23144480    | LOWDAT | 0 | 0 |
| Gm10665        | chr7:22463109-22464075    | NOTEST | 0 | 0 |
| Gm10666        | chr7:22133775-22134741    | NOTEST | 0 | 0 |
| Gm10670        | chr7:20473959-20474925    | NOTEST | 0 | 0 |



|                 |                           |        |   |   |
|-----------------|---------------------------|--------|---|---|
| Gm10681,Hsd3b4  | chr3:98552543-98564038    | NOTEST | 0 | 0 |
| Gm10696         | chr3:94174411-94178193    | NOTEST | 0 | 0 |
| Gm10714         | chr2:174125037-174183918  | NOTEST | 0 | 0 |
| Gm10731         | chr3:40846998-40875609    | NOTEST | 0 | 0 |
| Gm10782         | chr13:56362899-56368857   | NOTEST | 0 | 0 |
| Gm10823         | chr16:27849929-27926128   | NOTEST | 0 | 0 |
| Gm10845         | chr14:79860520-79869176   | NOTEST | 0 | 0 |
| Gm10857         | chr2:6132868-6140570      | NOTEST | 0 | 0 |
| Gm10865         | chr15:78947723-79011041   | NOTEST | 0 | 0 |
| Gm10921         | chrX:31381958-31383918    | NOTEST | 0 | 0 |
| Gm10922         | chrX:4370635-4372595      | NOTEST | 0 | 0 |
| Gm1110          | chr9:26879566-26923081    | NOTEST | 0 | 0 |
| Gm11128         | chr6:85808050-85809877    | NOTEST | 0 | 0 |
| Gm11149         | chr9:49502145-49799069    | NOTEST | 0 | 0 |
| Gm11186         | chr11:52764705-53187347   | NOTEST | 0 | 0 |
| Gm11213         | chr4:63596900-63605261    | NOTEST | 0 | 0 |
| Gm11237,LOC1010 | chr4:73650909-73672398    | LOWDAT | 0 | 0 |
| Gm1140,Gm14692  | chrX:67695697-67706350    | NOTEST | 0 | 0 |
| Gm11468         | chr2:166273907-166294831  | NOTEST | 0 | 0 |
| Gm11487         | chr4:73401031-73405072    | NOTEST | 0 | 0 |
| Gm11529         | chr11:96446898-96464547   | NOTEST | 0 | 0 |
| Gm11538         | chr11:96203453-96205480   | NOTEST | 0 | 0 |
| Gm11544         | chr11:94844830-94849593   | NOTEST | 0 | 0 |
| Gm11548         | chr3:36499803-36506809    | NOTEST | 0 | 0 |
| Gm11559         | chr11:99864475-99865571   | NOTEST | 0 | 0 |
| Gm11562         | chr11:99619597-99620404   | NOTEST | 0 | 0 |
| Gm11563         | chr11:99657941-99658959   | NOTEST | 0 | 0 |
| Gm11564         | chr11:99814975-99815666   | NOTEST | 0 | 0 |
| Gm11565         | chr11:99914750-99915671   | NOTEST | 0 | 0 |
| Gm11567         | chr11:99879186-99880229   | NOTEST | 0 | 0 |
| Gm11568         | chr11:99857916-99859060   | NOTEST | 0 | 0 |
| Gm11569         | chr11:99798185-99809896   | NOTEST | 0 | 0 |
| Gm11570         | chr11:99984702-99986593   | NOTEST | 0 | 0 |
| Gm11595         | chr11:99771713-99772913   | NOTEST | 0 | 0 |
| Gm11596         | chr11:99792674-99793292   | NOTEST | 0 | 0 |
| Gm11651         | chr11:105965606-105989964 | NOTEST | 0 | 0 |
| Gm11757,Gm1175  | chr4:73901905-73905953    | LOWDAT | 0 | 0 |
| Gm11758         | chr4:73901905-73905953    | NOTEST | 0 | 0 |
| Gm11780         | chr4:4527773-4529458      | NOTEST | 0 | 0 |
| Gm11937         | chr11:99609793-99610189   | NOTEST | 0 | 0 |
| Gm11938         | chr11:99602645-99603308   | NOTEST | 0 | 0 |
| Gm11961         | chr11:4620274-4630011     | NOTEST | 0 | 0 |
| Gm11981         | chr11:6716000-6720037     | NOTEST | 0 | 0 |
| Gm11985         | chr11:7183156-7188569     | NOTEST | 0 | 0 |
| Gm12169         | chr11:46193848-46589232   | NOTEST | 0 | 0 |
| Gm12171         | chr11:46193848-46589232   | NOTEST | 0 | 0 |
| Gm12238         | chr11:55469751-55500887   | NOTEST | 0 | 0 |
| Gm12253         | chr11:58432558-58441622   | NOTEST | 0 | 0 |
| Gm12298         | chr11:66905631-66947086   | NOTEST | 0 | 0 |
| Gm12505         | chr4:55410442-55418842    | NOTEST | 0 | 0 |
| Gm12603         | chr4:89050306-89084610    | NOTEST | 0 | 0 |
| Gm12669         | chr7:137437647-137468594  | LOWDAT | 0 | 0 |
| Gm12695         | chr4:96723886-96785160    | NOTEST | 0 | 0 |

|                |                            |        |   |   |
|----------------|----------------------------|--------|---|---|
| Gm12789        | chr4:101986839-101990231   | NOTEST | 0 | 0 |
| Gm12794        | chr4:101940406-101943183   | NOTEST | 0 | 0 |
| Gm12830        | chr4:114821719-114856166   | NOTEST | 0 | 0 |
| Gm12886        | chr4:121414734-121423099   | NOTEST | 0 | 0 |
| Gm12887        | chr4:121614003-121622125   | NOTEST | 0 | 0 |
| Gm12888        | chr4:121316315-121324917   | NOTEST | 0 | 0 |
| Gm13003        | chr4:137159081-137165066   | NOTEST | 0 | 0 |
| Gm13011        | chr4:137401553-137409791   | NOTEST | 0 | 0 |
| Gm13023        | chr4:143789333-143795585   | NOTEST | 0 | 0 |
| Gm13040        | chr4:143551699-143558236   | NOTEST | 0 | 0 |
| Gm13043        | chr4:143511311-143517833   | NOTEST | 0 | 0 |
| Gm13051        | chr4:146097311-146126623   | NOTEST | 0 | 0 |
| Gm13057        | chr4:143535953-143542471   | NOTEST | 0 | 0 |
| Gm13078        | chr4:143719450-143729158   | NOTEST | 0 | 0 |
| Gm13083        | chr4:143615002-143618595   | NOTEST | 0 | 0 |
| Gm13084        | chr4:143809990-143816093   | NOTEST | 0 | 0 |
| Gm13088        | chr4:143653759-143657246   | NOTEST | 0 | 0 |
| Gm13102        | chr4:144099879-144110101   | NOTEST | 0 | 0 |
| Gm13103        | chr4:143846496-143853637   | NOTEST | 0 | 0 |
| Gm13119        | chr4:144357963-144364419   | NOTEST | 0 | 0 |
| Gm13124        | chr4:144554999-144565134   | NOTEST | 0 | 0 |
| Gm13125        | chr4:144372759-144377933   | NOTEST | 0 | 0 |
| Gm13128        | chr4:144330248-144333465   | NOTEST | 0 | 0 |
| Gm13177        | chr4:144613706-144623398   | NOTEST | 0 | 0 |
| Gm13178        | chr4:144703190-144721404   | NOTEST | 0 | 0 |
| Gm1322         | chr2:67173833-67186212     | NOTEST | 0 | 0 |
| Gm13242        | chr4:145670696-145704437   | NOTEST | 0 | 0 |
| Gm13271        | chr4:88754867-88755416     | NOTEST | 0 | 0 |
| Gm13272,Gm1328 | chr4:88779849-88780660     | NOTEST | 0 | 0 |
| Gm13275,Gm1328 | chr4:88799574-88801130     | NOTEST | 0 | 0 |
| Gm13276        | chr4:88785053-88786515     | NOTEST | 0 | 0 |
| Gm13277,Gm1328 | chr4:88787976-88789438     | NOTEST | 0 | 0 |
| Gm13278,Gm1327 | chr4:88796741-88798204     | NOTEST | 0 | 0 |
| Gm13279        | chr4:88796741-88798204     | NOTEST | 0 | 0 |
| Gm13285,Gm1328 | chr4:88805530-88808380     | LOWDAT | 0 | 0 |
| Gm13286        | chr4:88757843-88758392     | NOTEST | 0 | 0 |
| Gm13288        | chr4:88805530-88808380     | NOTEST | 0 | 0 |
| Gm13290        | chr4:88805530-88808380     | NOTEST | 0 | 0 |
| Gm13308,Gm2087 | chr4_GL456350_random:17325 | NOTEST | 0 | 0 |
| Gm13315        | chr2:14604305-14987908     | NOTEST | 0 | 0 |
| Gm13497        | chr2:51241830-51295945     | NOTEST | 0 | 0 |
| Gm13539        | chr2:25784616-25787022     | NOTEST | 0 | 0 |
| Gm13544        | chr2:58267452-58357758     | NOTEST | 0 | 0 |
| Gm13580        | chr2:60411524-60412574     | NOTEST | 0 | 0 |
| Gm13752        | chr2:80391363-80398216     | NOTEST | 0 | 0 |
| Gm13769        | chr2:90322221-90325126     | NOTEST | 0 | 0 |
| Gm13807        | chr2:93403546-93417830     | NOTEST | 0 | 0 |
| Gm13871        | chr4:73901905-73905953     | LOWDAT | 0 | 0 |
| Gm13944        | chr2:77410626-77816816     | NOTEST | 0 | 0 |
| Gm14092        | chr2:145242610-145641939   | NOTEST | 0 | 0 |
| Gm14137        | chr2:119172499-119217050   | NOTEST | 0 | 0 |
| Gm14139        | chr2:150181754-150193279   | NOTEST | 0 | 0 |
| Gm14151        | chr2:151098244-151103809   | NOTEST | 0 | 0 |

|                |                          |        |   |   |
|----------------|--------------------------|--------|---|---|
| Gm14204        | chr2:158595471-158610723 | NOTEST | 0 | 0 |
| Gm14288,Gm1444 | chr2:175789356-175801038 | NOTEST | 0 | 0 |
| Gm14306,Gm1443 | chr2:175470024-175483322 | NOTEST | 0 | 0 |
| Gm14327        | chr2:177897162-177927850 | NOTEST | 0 | 0 |
| Gm14345,Gm1435 | chrX:31336368-31338328   | NOTEST | 0 | 0 |
| Gm14346,Gm1435 | chrX:34159624-34161584   | NOTEST | 0 | 0 |
| Gm14347        | chrX:4196575-4198535     | NOTEST | 0 | 0 |
| Gm14351,Gm2913 | chrX:33575386-33577346   | LOWDAT | 0 | 0 |
| Gm14374        | chrX:5669066-5671026     | NOTEST | 0 | 0 |
| Gm14458        | chrX:8985939-8986672     | NOTEST | 0 | 0 |
| Gm14459        | chrX:8514051-8524954     | NOTEST | 0 | 0 |
| Gm14461        | chr2:78237546-78302230   | NOTEST | 0 | 0 |
| Gm14474        | chrX:11302431-11302921   | NOTEST | 0 | 0 |
| Gm14475,Gm1448 | chrX:11308754-11309263   | LOWDAT | 0 | 0 |
| Gm14476,Gm1448 | chrX:11315088-11315597   | LOWDAT | 0 | 0 |
| Gm14477,Gm1447 | chrX:11321422-11321931   | LOWDAT | 0 | 0 |
| Gm14478        | chrX:11321422-11321931   | LOWDAT | 0 | 0 |
| Gm14479,Gm1448 | chrX:11299256-11299757   | NOTEST | 0 | 0 |
| Gm14482        | chrX:11321422-11321931   | NOTEST | 0 | 0 |
| Gm14483        | chrX:11308754-11309263   | NOTEST | 0 | 0 |
| Gm14484        | chrX:11311933-11312427   | NOTEST | 0 | 0 |
| Gm14496        | chr2:181991225-182001087 | NOTEST | 0 | 0 |
| Gm14499        | chrX:9043550-9044410     | NOTEST | 0 | 0 |
| Gm14511        | chrX:8975717-8976589     | NOTEST | 0 | 0 |
| Gm14525        | chrX:26672779-26702638   | NOTEST | 0 | 0 |
| Gm14625        | chrX:55430234-55446892   | NOTEST | 0 | 0 |
| Gm14632        | chrX:35067383-35090316   | NOTEST | 0 | 0 |
| Gm14635        | chrX:12339778-12354996   | NOTEST | 0 | 0 |
| Gm14685        | chrX:73137231-73158399   | LOWDAT | 0 | 0 |
| Gm14692        | chrX:67695697-67706350   | LOWDAT | 0 | 0 |
| Gm14718        | chrX:57200636-57204376   | NOTEST | 0 | 0 |
| Gm14725        | chrX:70545557-70546385   | NOTEST | 0 | 0 |
| Gm14743        | chrX:78240461-78245921   | NOTEST | 0 | 0 |
| Gm14744        | chrX:77864757-77870033   | NOTEST | 0 | 0 |
| Gm14781        | chrX:91632193-91635671   | NOTEST | 0 | 0 |
| Gm14819        | chrX:35404186-35427093   | NOTEST | 0 | 0 |
| Gm14850,Gm2149 | chr8:21565385-21566350   | NOTEST | 0 | 0 |
| Gm14851        | chr8:21094970-21096050   | NOTEST | 0 | 0 |
| Gm14858        | chrX:102252650-102257689 | NOTEST | 0 | 0 |
| Gm14920        | chrX:117014756-117015104 | NOTEST | 0 | 0 |
| Gm15008        | chrX:36910833-36989695   | NOTEST | 0 | 0 |
| Gm15023        | chrX:135494587-135504594 | LOWDAT | 0 | 0 |
| Gm15056        | chr8:20900605-20901973   | NOTEST | 0 | 0 |
| Gm15091        | chrX:149784478-149984982 | NOTEST | 0 | 0 |
| Gm15093        | chrX:149088314-149305003 | NOTEST | 0 | 0 |
| Gm15097        | chrX:149784478-149984982 | NOTEST | 0 | 0 |
| Gm15104        | chrX:150312950-150313364 | NOTEST | 0 | 0 |
| Gm15107        | chrX:148180723-148521446 | NOTEST | 0 | 0 |
| Gm15114        | chrX:148180723-148521446 | NOTEST | 0 | 0 |
| Gm15127        | chrX:149784478-149984982 | NOTEST | 0 | 0 |
| Gm15133        | chr7:104299896-104324838 | NOTEST | 0 | 0 |
| Gm15140        | chrX:154109632-154120685 | NOTEST | 0 | 0 |
| Gm15179        | chr1:75360291-75375015   | NOTEST | 0 | 0 |

|         |                            |        |   |   |
|---------|----------------------------|--------|---|---|
| Gm15217 | chr14:46379523-46390599    | NOTEST | 0 | 0 |
| Gm1527  | chr3:28892616-28926724     | NOTEST | 0 | 0 |
| Gm15284 | chr8:21134649-21135598     | NOTEST | 0 | 0 |
| Gm15292 | chr8:21249761-21250461     | NOTEST | 0 | 0 |
| Gm15293 | chr8:21201603-21202446     | NOTEST | 0 | 0 |
| Gm15299 | chr8:21315545-21316387     | NOTEST | 0 | 0 |
| Gm15308 | chr8:21529029-21530012     | NOTEST | 0 | 0 |
| Gm15315 | chr8:21665796-21666733     | NOTEST | 0 | 0 |
| Gm15350 | chr8:12757015-12868728     | NOTEST | 0 | 0 |
| Gm15386 | chr1:18250977-18265138     | NOTEST | 0 | 0 |
| Gm15412 | chr7:96210636-96908554     | NOTEST | 0 | 0 |
| Gm15413 | chr7:96210636-96908554     | NOTEST | 0 | 0 |
| Gm1553  | chr10:82486532-82492618    | NOTEST | 0 | 0 |
| Gm156   | chr6:129766646-129775849   | NOTEST | 0 | 0 |
| Gm15645 | chr7:105861780-105863327   | NOTEST | 0 | 0 |
| Gm15679 | chr8:99011886-99416471     | NOTEST | 0 | 0 |
| Gm15713 | chr16:42884369-43619123    | NOTEST | 0 | 0 |
| Gm15850 | chr1:136127718-136131183   | NOTEST | 0 | 0 |
| Gm1587  | chr14:77793944-77798968    | NOTEST | 0 | 0 |
| Gm15881 | chr8:57774051-58911627     | NOTEST | 0 | 0 |
| Gm15997 | chr5:149489055-149611894   | NOTEST | 0 | 0 |
| Gm16063 | chr5:119625941-119634462   | NOTEST | 0 | 0 |
| Gm16130 | chr9:58028681-58118823     | NOTEST | 0 | 0 |
| Gm16157 | chr7:68266338-68363092     | NOTEST | 0 | 0 |
| Gm16291 | chr15:39768484-39857470    | NOTEST | 0 | 0 |
| Gm16294 | chr15:40511321-40527277    | NOTEST | 0 | 0 |
| Gm1631  | chr2:71719416-71730966     | NOTEST | 0 | 0 |
| Gm16336 | chr7:110868257-110982461   | NOTEST | 0 | 0 |
| Gm16367 | chr5_JH584299_random:82903 | LOWDAT | 0 | 0 |
| Gm16381 | chr12:87841839-87846716    | NOTEST | 0 | 0 |
| Gm16390 | chrX:154886802-154890267   | NOTEST | 0 | 0 |
| Gm16404 | chrX:55551595-55568457     | NOTEST | 0 | 0 |
| Gm16405 | chrX:54531207-54548013     | NOTEST | 0 | 0 |
| Gm16430 | chrX:54622210-54639016     | NOTEST | 0 | 0 |
| Gm16445 | chrX:154152570-154156887   | NOTEST | 0 | 0 |
| Gm16451 | chr7:22117321-22118245     | NOTEST | 0 | 0 |
| Gm1647  | chr3:69131232-69157177     | NOTEST | 0 | 0 |
| Gm16497 | chr12:14261533-14285684    | NOTEST | 0 | 0 |
| Gm16501 | chrY:2720338-2720674       | NOTEST | 0 | 0 |
| Gm16548 | chr1:164115263-164220274   | NOTEST | 0 | 0 |
| Gm16617 | chr14:51984832-52020733    | NOTEST | 0 | 0 |
| Gm16677 | chr14:69547956-69555387    | NOTEST | 0 | 0 |
| Gm16833 | chr9:8994952-9260885       | NOTEST | 0 | 0 |
| Gm16863 | chr16:21247498-21296872    | NOTEST | 0 | 0 |
| Gm16880 | chr1:136696210-136725728   | NOTEST | 0 | 0 |
| Gm16982 | chr7:141562179-141633011   | NOTEST | 0 | 0 |
| Gm17019 | chr5:15028949-15033007     | NOTEST | 0 | 0 |
| Gm17252 | chr9:35685078-35687371     | NOTEST | 0 | 0 |
| Gm17365 | chr9:35645112-35648202     | NOTEST | 0 | 0 |
| Gm17455 | chr10:60302749-60696490    | NOTEST | 0 | 0 |
| Gm17644 | chr1:12667562-12673090     | NOTEST | 0 | 0 |
| Gm17660 | chr5:104070059-104077608   | NOTEST | 0 | 0 |
| Gm17677 | chr9:35741048-35742252     | NOTEST | 0 | 0 |

|                |                             |        |   |   |
|----------------|-----------------------------|--------|---|---|
| Gm17689        | chr9:36581277-36582635      | NOTEST | 0 | 0 |
| Gm17727        | chr9:35776523-35778109      | NOTEST | 0 | 0 |
| Gm17746        | chr12:25129173-25132274     | NOTEST | 0 | 0 |
| Gm17751        | chr1:76489132-76502028      | NOTEST | 0 | 0 |
| Gm17821        | chr12:67656741-67669271     | NOTEST | 0 | 0 |
| Gm17830        | chr17:49304478-49312960     | NOTEST | 0 | 0 |
| Gm18409        | chr10:99609170-99658134     | NOTEST | 0 | 0 |
| Gm19277        | chr15:85149253-85156132     | NOTEST | 0 | 0 |
| Gm19303        | chr15:51231639-51395610     | NOTEST | 0 | 0 |
| Gm19395        | chr10:53278080-53379851     | NOTEST | 0 | 0 |
| Gm19402        | chr10:77686568-77886769     | NOTEST | 0 | 0 |
| Gm19466        | chr18:53648150-53744547     | NOTEST | 0 | 0 |
| Gm19510        | chr15:59788416-59794959     | NOTEST | 0 | 0 |
| Gm19583        | chr5:75110320-75147107      | NOTEST | 0 | 0 |
| Gm19589        | chr1:88551516-88562166      | NOTEST | 0 | 0 |
| Gm19668        | chr10:77686568-77886769     | NOTEST | 0 | 0 |
| Gm1968         | chr16:29957926-29979124     | NOTEST | 0 | 0 |
| Gm19710        | chr3:89998759-90068347      | NOTEST | 0 | 0 |
| Gm19757        | chr6:105481265-105492668    | NOTEST | 0 | 0 |
| Gm19782        | chr15:69924232-70078204     | NOTEST | 0 | 0 |
| Gm19784        | chr18:66924761-66949961     | NOTEST | 0 | 0 |
| Gm1979         | chr5:26000171-26004727      | NOTEST | 0 | 0 |
| Gm1993         | chrX:25548500-25570449      | NOTEST | 0 | 0 |
| Gm1995         | chr12:87861349-87865690     | NOTEST | 0 | 0 |
| Gm19990        | chr12:56253242-56266381     | NOTEST | 0 | 0 |
| Gm2002         | chr4_JH584293_random:7077-2 | NOTEST | 0 | 0 |
| Gm20098        | chr17:51882726-51965257     | NOTEST | 0 | 0 |
| Gm2012         | chrX:26200882-26231323      | NOTEST | 0 | 0 |
| Gm2016         | chr12:87874071-87877859     | NOTEST | 0 | 0 |
| Gm20172        | chr1:25067475-25829707      | NOTEST | 0 | 0 |
| Gm2022         | chr12:87892833-87896722     | NOTEST | 0 | 0 |
| Gm20268        | chr1:101155767-101175202    | NOTEST | 0 | 0 |
| Gm2030         | chrX:26287198-26310044      | NOTEST | 0 | 0 |
| Gm20319        | chr16:26581704-26755502     | NOTEST | 0 | 0 |
| Gm20356        | chr3:74009218-74017277      | NOTEST | 0 | 0 |
| Gm20362        | chr6:79032041-79035869      | NOTEST | 0 | 0 |
| Gm2042         | chr12:87954479-87960682     | NOTEST | 0 | 0 |
| Gm20554        | chr13:72623465-72628564     | NOTEST | 0 | 0 |
| Gm20556        | chr15:84714628-84772207     | NOTEST | 0 | 0 |
| Gm20594        | chr6:79818030-79818364      | NOTEST | 0 | 0 |
| Gm20735        | chr8:122443655-122451322    | NOTEST | 0 | 0 |
| Gm20736        | chrY:82225214-82251414      | NOTEST | 0 | 0 |
| Gm20738,Gm2081 | chrY:64301780-64786299      | LOWDAT | 0 | 0 |
| Gm20740        | chr15:63414396-63479608     | NOTEST | 0 | 0 |
| Gm20741        | chr16:88811439-88812220     | NOTEST | 0 | 0 |
| Gm20745        | chr9:68017963-68025714      | NOTEST | 0 | 0 |
| Gm20747        | chrY:81799149-81801497      | NOTEST | 0 | 0 |
| Gm20750        | chr3:52906755-52927666      | NOTEST | 0 | 0 |
| Gm20752        | chr3:159076363-159308080    | NOTEST | 0 | 0 |
| Gm20755        | chr3:37898812-37992728      | NOTEST | 0 | 0 |
| Gm20757        | chr10:92171300-92375373     | NOTEST | 0 | 0 |
| Gm20758        | chr10:111854520-111874376   | NOTEST | 0 | 0 |
| Gm20765,Gm2130 | chr10:104142986-104188000   | NOTEST | 0 | 0 |



|                |                             |        |   |   |
|----------------|-----------------------------|--------|---|---|
| Gm20767        | chr13:120140245-120155335   | NOTEST | 0 | 0 |
| Gm20806        | chrY:80756211-80757210      | NOTEST | 0 | 0 |
| Gm20809        | chrY:72819514-72820507      | NOTEST | 0 | 0 |
| Gm20815        | chrY:8832248-8835169        | NOTEST | 0 | 0 |
| Gm20816,Gm2082 | chrY:64301780-64786299      | LOWDAT | 0 | 0 |
| Gm20822        | chrY:15882558-15883245      | NOTEST | 0 | 0 |
| Gm20823        | chrY:72382444-72384781      | NOTEST | 0 | 0 |
| Gm20826        | chrY:7636215-7636973        | NOTEST | 0 | 0 |
| Gm20831        | chrY:17965159-17967598      | NOTEST | 0 | 0 |
| Gm20854        | chrY:85528524-85529519      | NOTEST | 0 | 0 |
| Gm20857        | chrY:25214873-25240906      | NOTEST | 0 | 0 |
| Gm20858        | chrY:26241091-26267093      | NOTEST | 0 | 0 |
| Gm20865        | chrY:73239169-73240030      | NOTEST | 0 | 0 |
| Gm20867        | chrY:64301780-64786299      | NOTEST | 0 | 0 |
| Gm2087         | chr9:83391354-83454574      | NOTEST | 0 | 0 |
| Gm20871        | chrY:59606709-59632758      | NOTEST | 0 | 0 |
| Gm20877        | chrY:17093878-17095887      | NOTEST | 0 | 0 |
| Gm20917        | chrY:79148794-79149787      | NOTEST | 0 | 0 |
| Gm21002        | chr8:21391810-21392792      | NOTEST | 0 | 0 |
| Gm21057        | chr7:80024813-80092751      | NOTEST | 0 | 0 |
| Gm21221        | chr5:149801989-149811751    | NOTEST | 0 | 0 |
| Gm21269        | chr7:73825923-73836549      | NOTEST | 0 | 0 |
| Gm21276        | chr7:38762405-38770304      | NOTEST | 0 | 0 |
| Gm21283        | chr8:110266976-110610253    | NOTEST | 0 | 0 |
| Gm21293,Gm2131 | chr10:104142986-104188000   | LOWDAT | 0 | 0 |
| Gm21304,Gm2131 | chr10:104142986-104188000   | LOWDAT | 0 | 0 |
| Gm21312        | chr10:104142986-104188000   | NOTEST | 0 | 0 |
| Gm21319        | chr12:87772424-87775755     | NOTEST | 0 | 0 |
| Gm21498        | chr8:21565385-21566350      | LOWDAT | 0 | 0 |
| Gm21637        | chrX:32650670-32651448      | NOTEST | 0 | 0 |
| Gm21671        | chr5:25949796-25954344      | NOTEST | 0 | 0 |
| Gm21693,Rbmy   | chrY:3294971-3306449        | NOTEST | 0 | 0 |
| Gm21708,Rbmy   | chrY:3771672-3783271        | NOTEST | 0 | 0 |
| Gm21943        | chrY:73535407-73537718      | NOTEST | 0 | 0 |
| Gm21944        | chr8:20876498-20889113      | NOTEST | 0 | 0 |
| Gm21950        | chrX:3076919-3078823        | NOTEST | 0 | 0 |
| Gm21951        | chrX:32726136-32728057      | NOTEST | 0 | 0 |
| Gm2447         | chr3:52739723-52776654      | NOTEST | 0 | 0 |
| Gm2516         | chr8:50368111-50416089      | NOTEST | 0 | 0 |
| Gm2663         | chr6:40995821-40999479      | NOTEST | 0 | 0 |
| Gm2696         | chr10:77686568-77886769     | NOTEST | 0 | 0 |
| Gm2721         | chr12:105394855-105403760   | NOTEST | 0 | 0 |
| Gm2799,Gmcl1l  | chrX:32560054-32562009      | NOTEST | 0 | 0 |
| Gm2825         | chrX:32973896-32975846      | NOTEST | 0 | 0 |
| Gm2837         | chrX:33056285-33057063      | NOTEST | 0 | 0 |
| Gm2848         | chr13:52569879-52573225     | NOTEST | 0 | 0 |
| Gm2863         | chrX:33313337-33315288      | NOTEST | 0 | 0 |
| Gm2913         | chrX:33575386-33577346      | NOTEST | 0 | 0 |
| Gm2927         | chrX:33657139-33659082      | NOTEST | 0 | 0 |
| Gm2933         | chrX:33575386-33577346      | NOTEST | 0 | 0 |
| Gm3020         | chr14:3634511-3800987       | LOWDAT | 0 | 0 |
| Gm3139         | chr5_JH584296_random:40898- | NOTEST | 0 | 0 |
| Gm3143         | chr3:34699639-34716662      | NOTEST | 0 | 0 |

|               |                            |        |   |   |
|---------------|----------------------------|--------|---|---|
| Gm3238        | chr10:77686568-77886769    | NOTEST | 0 | 0 |
| Gm3259        | chr5:95305922-95343575     | NOTEST | 0 | 0 |
| Gm3264        | chr14:4871155-4875851      | NOTEST | 0 | 0 |
| Gm3279        | chr6:55684570-55694574     | NOTEST | 0 | 0 |
| Gm3285        | chr10:77686568-77886769    | NOTEST | 0 | 0 |
| Gm3286        | chr5_GL456354_random:82558 | NOTEST | 0 | 0 |
| Gm3402        | chr5:146502376-146516902   | LOWDAT | 0 | 0 |
| Gm3404        | chr5:146525800-146528553   | NOTEST | 0 | 0 |
| Gm3409        | chr5:146537647-146540427   | NOTEST | 0 | 0 |
| Gm3415        | chr5:146502376-146516902   | NOTEST | 0 | 0 |
| Gm3428        | chr9:35848544-35849880     | NOTEST | 0 | 0 |
| Gm3434        | chr9:36134286-36135630     | NOTEST | 0 | 0 |
| Gm3458        | chr9:71211912-71215386     | NOTEST | 0 | 0 |
| Gm362         | chrX:43590988-43593530     | NOTEST | 0 | 0 |
| Gm364         | chrX:57409148-57488771     | NOTEST | 0 | 0 |
| Gm3646        | chr1:39804140-39805332     | NOTEST | 0 | 0 |
| Gm3701        | chrX:3955042-3957002       | NOTEST | 0 | 0 |
| Gm3706        | chrX:4800410-4802359       | LOWDAT | 0 | 0 |
| Gm3750        | chrX:4037673-4039622       | NOTEST | 0 | 0 |
| Gm3763        | chrX:4952134-4954077       | NOTEST | 0 | 0 |
| Gm382         | chrX:127039971-127063986   | NOTEST | 0 | 0 |
| Gm4027        | chr12:87618867-87622955    | LOWDAT | 0 | 0 |
| Gm41          | chrX:86345474-86354994     | NOTEST | 0 | 0 |
| Gm4133        | chr7:22328793-22329717     | NOTEST | 0 | 0 |
| Gm4175        | chr7:22983728-22984673     | NOTEST | 0 | 0 |
| Gm4201        | chr7:22564422-22565343     | NOTEST | 0 | 0 |
| Gm4214        | chr7:21300501-21301467     | NOTEST | 0 | 0 |
| Gm4216        | chr7:23019005-23019923     | NOTEST | 0 | 0 |
| Gm4224        | chr7:12221315-12225807     | NOTEST | 0 | 0 |
| Gm4251        | chr14:71251272-71271059    | NOTEST | 0 | 0 |
| Gm4265        | chr7:129962164-129978669   | NOTEST | 0 | 0 |
| Gm4278        | chr14:74975085-74987104    | NOTEST | 0 | 0 |
| Gm428         | chr4:73681177-73687560     | NOTEST | 0 | 0 |
| Gm4297        | chrX:24552249-24573305     | NOTEST | 0 | 0 |
| Gm4301        | chr10:100381646-100382560  | NOTEST | 0 | 0 |
| Gm4302        | chr10:100345969-100362247  | NOTEST | 0 | 0 |
| Gm4303        | chr10:100345969-100362247  | NOTEST | 0 | 0 |
| Gm4307        | chr10:100345969-100362247  | NOTEST | 0 | 0 |
| Gm4312        | chr10:100366498-100367412  | NOTEST | 0 | 0 |
| Gm4340        | chr10:104142986-104188000  | NOTEST | 0 | 0 |
| Gm436         | chr4:144669936-144686368   | NOTEST | 0 | 0 |
| Gm438         | chr4:144777203-144786583   | NOTEST | 0 | 0 |
| Gm44          | chrX:90892141-90893134     | NOTEST | 0 | 0 |
| Gm4541        | chr7:23151760-23178761     | NOTEST | 0 | 0 |
| Gm4559        | chr7:142273763-142274363   | NOTEST | 0 | 0 |
| Gm4567,Gm6902 | chr7:22713597-22900755     | NOTEST | 0 | 0 |
| Gm4598        | chr7:24661293-24663109     | NOTEST | 0 | 0 |
| Gm4710        | chr17:75861022-75889039    | NOTEST | 0 | 0 |
| Gm4719        | chr17:89379240-89384993    | NOTEST | 0 | 0 |
| Gm4736        | chr6:132114220-132364135   | NOTEST | 0 | 0 |
| Gm4745        | chr7:14659707-14665996     | NOTEST | 0 | 0 |
| Gm4763        | chr7:24722493-24724290     | NOTEST | 0 | 0 |
| Gm4776        | chr1:46020414-46030437     | NOTEST | 0 | 0 |

|        |                           |        |   |   |
|--------|---------------------------|--------|---|---|
| Gm4791 | chr9:46998740-47003860    | NOTEST | 0 | 0 |
| Gm4794 | chr10:33766423-33782115   | NOTEST | 0 | 0 |
| Gm4814 | chr13:93040714-93144724   | NOTEST | 0 | 0 |
| Gm4832 | chr17:88125511-88131116   | NOTEST | 0 | 0 |
| Gm4836 | chrX:35404186-35427093    | LOWDAT | 0 | 0 |
| Gm4850 | chr1:31264846-31268061    | NOTEST | 0 | 0 |
| Gm4858 | chr3:93068822-93075505    | NOTEST | 0 | 0 |
| Gm4871 | chr5:145029599-145032764  | NOTEST | 0 | 0 |
| Gm4872 | chr6:53221163-53226599    | NOTEST | 0 | 0 |
| Gm4884 | chr7:41032718-41045302    | NOTEST | 0 | 0 |
| Gm4894 | chr9:49250530-49280594    | NOTEST | 0 | 0 |
| Gm4906 | chrX:11327821-11328151    | NOTEST | 0 | 0 |
| Gm4907 | chrX:23892762-23907550    | NOTEST | 0 | 0 |
| Gm4922 | chr10:18779726-18786793   | NOTEST | 0 | 0 |
| Gm4926 | chr11:46636505-46645006   | NOTEST | 0 | 0 |
| Gm4937 | chrX:76264305-76267673    | NOTEST | 0 | 0 |
| Gm4971 | chr7:73685491-73686563    | NOTEST | 0 | 0 |
| Gm4981 | chr10:58234847-58236660   | NOTEST | 0 | 0 |
| Gm5039 | chr12:88320121-88321762   | NOTEST | 0 | 0 |
| Gm5065 | chr7:5298546-5360682      | NOTEST | 0 | 0 |
| Gm5071 | chrX:91931945-91932980    | NOTEST | 0 | 0 |
| Gm5072 | chrX:91480125-91481160    | NOTEST | 0 | 0 |
| Gm5082 | chr13:41649442-41656777   | NOTEST | 0 | 0 |
| Gm5087 | chr14:13157387-13284638   | NOTEST | 0 | 0 |
| Gm5091 | chr17:15231584-15240783   | NOTEST | 0 | 0 |
| Gm5095 | chr18:47537734-47718636   | NOTEST | 0 | 0 |
| Gm5108 | chr5:67933611-67977070    | NOTEST | 0 | 0 |
| Gm5114 | chr7:39407293-39413160    | NOTEST | 0 | 0 |
| Gm5129 | chr5:29735333-29786478    | NOTEST | 0 | 0 |
| Gm5132 | chrX:9571959-9572391      | NOTEST | 0 | 0 |
| Gm5134 | chr10:75954513-76009589   | NOTEST | 0 | 0 |
| Gm5142 | chr14:59158502-59178749   | NOTEST | 0 | 0 |
| Gm5150 | chr3:15948069-16006332    | NOTEST | 0 | 0 |
| Gm5166 | chrX:102791195-102798389  | NOTEST | 0 | 0 |
| Gm5168 | chrX:26028213-26051041    | NOTEST | 0 | 0 |
| Gm5169 | chrX:25277482-25301455    | NOTEST | 0 | 0 |
| Gm5177 | chr10:10605944-10616313   | NOTEST | 0 | 0 |
| Gm5294 | chr5:138820079-138821619  | NOTEST | 0 | 0 |
| Gm5334 | chr7:68618455-68620009    | NOTEST | 0 | 0 |
| Gm5346 | chr8:43624974-43627185    | NOTEST | 0 | 0 |
| Gm5347 | chr8:43673657-43699491    | NOTEST | 0 | 0 |
| Gm5382 | chrX:14211147-14211657    | NOTEST | 0 | 0 |
| Gm5409 | chr6:41415306-41419593    | NOTEST | 0 | 0 |
| Gm5414 | chr15:101624027-101628188 | NOTEST | 0 | 0 |
| Gm5416 | chr16:36210402-36217788   | NOTEST | 0 | 0 |
| Gm5420 | chr10:21690844-21693978   | NOTEST | 0 | 0 |
| Gm5441 | chr12:116485719-117337012 | NOTEST | 0 | 0 |
| Gm5458 | chr14:19594137-19602587   | NOTEST | 0 | 0 |
| Gm5460 | chr14:34041077-34046981   | NOTEST | 0 | 0 |
| Gm5476 | chr15:101587316-101588572 | NOTEST | 0 | 0 |
| Gm5477 | chr15:101608873-101610479 | NOTEST | 0 | 0 |
| Gm5478 | chr15:101643019-101647380 | NOTEST | 0 | 0 |
| Gm5483 | chr16:36184211-36188110   | NOTEST | 0 | 0 |

|        |                             |        |   |   |
|--------|-----------------------------|--------|---|---|
| Gm5485 | chr16:48399452-48412416     | NOTEST | 0 | 0 |
| Gm5538 | chr3:59729785-59752397      | NOTEST | 0 | 0 |
| Gm5549 | chr3:132630190-132644649    | NOTEST | 0 | 0 |
| Gm5591 | chr7:38518138-38528193      | NOTEST | 0 | 0 |
| Gm5592 | chr7:41284326-41290183      | NOTEST | 0 | 0 |
| Gm5615 | chr9:36532402-36541963      | NOTEST | 0 | 0 |
| Gm5622 | chr14:51552789-51662953     | NOTEST | 0 | 0 |
| Gm5627 | chr9:102739647-102756685    | NOTEST | 0 | 0 |
| Gm5634 | chrX:8962133-8962975        | NOTEST | 0 | 0 |
| Gm5635 | chrX:9063089-9063822        | NOTEST | 0 | 0 |
| Gm5662 | chr12:88270634-88274497     | NOTEST | 0 | 0 |
| Gm5712 | chr3:129433672-129434712    | NOTEST | 0 | 0 |
| Gm5725 | chr7:23066532-23067456      | NOTEST | 0 | 0 |
| Gm5726 | chr7:20544833-20545757      | NOTEST | 0 | 0 |
| Gm5728 | chr7:22370121-22371039      | NOTEST | 0 | 0 |
| Gm5766 | chr16:4229228-4231205       | NOTEST | 0 | 0 |
| Gm5771 | chr6:41392355-41397256      | NOTEST | 0 | 0 |
| Gm5779 | chr10:75352054-75352961     | NOTEST | 0 | 0 |
| Gm5795 | chr14:3634511-3800987       | NOTEST | 0 | 0 |
| Gm5796 | chr14:4023940-4041368       | NOTEST | 0 | 0 |
| Gm5797 | chr14:7323987-7323995       | NOTEST | 0 | 0 |
| Gm5800 | chr14:51711643-51717132     | NOTEST | 0 | 0 |
| Gm5862 | chr5:26018420-26022891      | NOTEST | 0 | 0 |
| Gm5885 | chr6:133529188-133532762    | NOTEST | 0 | 0 |
| Gm5891 | chr7:23132622-23144480      | NOTEST | 0 | 0 |
| Gm5893 | chr7:24818794-24840275      | NOTEST | 0 | 0 |
| Gm590  | chr9:110914738-110916861    | NOTEST | 0 | 0 |
| Gm5916 | chr9:36119933-36128779      | NOTEST | 0 | 0 |
| Gm5925 | chrX:4515588-4517543        | NOTEST | 0 | 0 |
| Gm5934 | chrX:24474307-24499163      | NOTEST | 0 | 0 |
| Gm5935 | chrX:24753161-24775164      | NOTEST | 0 | 0 |
| Gm5938 | chrX:78125466-78130403      | NOTEST | 0 | 0 |
| Gm5941 | chrX:92118878-92599572      | NOTEST | 0 | 0 |
| Gm597  | chr1:28776121-28780252      | NOTEST | 0 | 0 |
| Gm6026 | chrY:2599098-2599434        | NOTEST | 0 | 0 |
| Gm6034 | chr17:36042960-36058645     | NOTEST | 0 | 0 |
| Gm6040 | chr8:20916489-20922071      | NOTEST | 0 | 0 |
| Gm6042 | chr15:101503815-101506313   | NOTEST | 0 | 0 |
| Gm6086 | chr1:93990508-94011539      | NOTEST | 0 | 0 |
| Gm6116 | chr5:74949193-74966368      | NOTEST | 0 | 0 |
| Gm6121 | chrX:26912743-26935669      | NOTEST | 0 | 0 |
| Gm6164 | chr7:22200340-22201264      | NOTEST | 0 | 0 |
| Gm6260 | chr3:143670891-143712143    | NOTEST | 0 | 0 |
| Gm6268 | chrX:36403476-36404654      | NOTEST | 0 | 0 |
| Gm6289 | chr3:144879324-144896011    | NOTEST | 0 | 0 |
| Gm6300 | chr3:14363116-14374239      | NOTEST | 0 | 0 |
| Gm6313 | chr6:148606785-148614309    | NOTEST | 0 | 0 |
| Gm6329 | chr8:45160493-45165145      | NOTEST | 0 | 0 |
| Gm6367 | chr5_JH584299_random:587624 | NOTEST | 0 | 0 |
| Gm6370 | chr5:146491362-146494132    | NOTEST | 0 | 0 |
| Gm6406 | chr9:98856590-98857352      | NOTEST | 0 | 0 |
| Gm6432 | chr9:99229375-99237239      | NOTEST | 0 | 0 |
| Gm6455 | chr5:10865028-10870808      | NOTEST | 0 | 0 |

|               |                            |        |   |   |
|---------------|----------------------------|--------|---|---|
| Gm6460        | chr5:11594955-11599480     | NOTEST | 0 | 0 |
| Gm648         | chrX:56543873-56549606     | NOTEST | 0 | 0 |
| Gm6484        | chr9:21800179-21852635     | NOTEST | 0 | 0 |
| Gm6525        | chr3:84160438-84304775     | NOTEST | 0 | 0 |
| Gm6567        | chr7:73097751-73102068     | NOTEST | 0 | 0 |
| Gm6578        | chr6:12099520-12109580     | NOTEST | 0 | 0 |
| Gm6583        | chr5:112343094-112378424   | NOTEST | 0 | 0 |
| Gm6592        | chrX:8843993-8849607       | NOTEST | 0 | 0 |
| Gm6602        | chr3:111881902-112082001   | NOTEST | 0 | 0 |
| Gm6607        | chr9:22055459-22389206     | NOTEST | 0 | 0 |
| Gm6639        | chr3:35597151-35666163     | NOTEST | 0 | 0 |
| Gm6696        | chr8:21583026-21583867     | NOTEST | 0 | 0 |
| Gm6756        | chr18:36920304-36922207    | NOTEST | 0 | 0 |
| Gm6760        | chrX:64151404-64152198     | NOTEST | 0 | 0 |
| Gm6763        | chr10:104142986-104188000  | LOWDAT | 0 | 0 |
| Gm6792        | chr7:6252709-6281861       | NOTEST | 0 | 0 |
| Gm6793        | chr2:75659258-75669407     | NOTEST | 0 | 0 |
| Gm6812        | chrX:68892372-68893053     | NOTEST | 0 | 0 |
| Gm6815        | chr16:36194479-36197886    | NOTEST | 0 | 0 |
| Gm6878        | chr14:67233291-67430952    | NOTEST | 0 | 0 |
| Gm6880        | chrX:74480286-74481399     | NOTEST | 0 | 0 |
| Gm6890        | chrX:74740926-74742188     | NOTEST | 0 | 0 |
| Gm6902        | chr7:22713597-22900755     | LOWDAT | 0 | 0 |
| Gm6904        | chr14:59244440-59260216    | NOTEST | 0 | 0 |
| Gm6927        | chrX:77674813-77675452     | NOTEST | 0 | 0 |
| Gm7056        | chr5:89616435-89622611     | NOTEST | 0 | 0 |
| Gm7073        | chrX:60436051-60456195     | NOTEST | 0 | 0 |
| Gm7104        | chr12:88282866-88287070    | NOTEST | 0 | 0 |
| Gm7134        | chrX:110372752-110375156   | NOTEST | 0 | 0 |
| Gm7157        | chrX:152563333-152563969   | NOTEST | 0 | 0 |
| Gm7168        | chr17:13948372-13950678    | NOTEST | 0 | 0 |
| Gm7257        | chr9:36431883-36434938     | NOTEST | 0 | 0 |
| Gm732         | chrX:107945734-107948436   | NOTEST | 0 | 0 |
| Gm7337        | chr5:87850358-87853012     | NOTEST | 0 | 0 |
| Gm7550        | chr12:54387732-54391318    | NOTEST | 0 | 0 |
| Gm7616        | chr9:59951293-59959044     | NOTEST | 0 | 0 |
| Gm773         | chrX:56189826-56212881     | NOTEST | 0 | 0 |
| Gm7788        | chr18:23217595-23217818    | NOTEST | 0 | 0 |
| Gm7849,Gm7861 | chr8:21593374-21594465     | NOTEST | 0 | 0 |
| Gm7861        | chr8:21593374-21594465     | LOWDAT | 0 | 0 |
| Gm7904        | chr9:21607083-21608329     | NOTEST | 0 | 0 |
| Gm7978        | chr5_GL456354_random:15730 | NOTEST | 0 | 0 |
| Gm8096        | chr8:28083193-28084853     | NOTEST | 0 | 0 |
| Gm813         | chr16:58613685-58616978    | NOTEST | 0 | 0 |
| Gm815         | chr19:26885924-26888647    | NOTEST | 0 | 0 |
| Gm8179        | chr8:32151894-32181847     | NOTEST | 0 | 0 |
| Gm829         | chr4:45683588-45723706     | NOTEST | 0 | 0 |
| Gm8298        | chr3:59861050-59877313     | NOTEST | 0 | 0 |
| Gm8369        | chr19:11492037-11512577    | NOTEST | 0 | 0 |
| Gm839         | chr6:89212196-89216179     | NOTEST | 0 | 0 |
| Gm8580        | chr10:93641048-93745972    | NOTEST | 0 | 0 |
| Gm8633        | chr10:98299926-98351867    | NOTEST | 0 | 0 |
| Gm8677        | chr7:22533963-22534887     | NOTEST | 0 | 0 |



|          |                           |        |   |   |
|----------|---------------------------|--------|---|---|
| Gm8693   | chr7:22691396-22692317    | NOTEST | 0 | 0 |
| Gm8709   | chr10:26673445-26674651   | NOTEST | 0 | 0 |
| Gm8765   | chr13:50698328-50703409   | NOTEST | 0 | 0 |
| Gm8817   | chrX:167063448-167070370  | NOTEST | 0 | 0 |
| Gm884    | chr11:103534576-103614739 | NOTEST | 0 | 0 |
| Gm8882   | chr6:132114220-132364135  | NOTEST | 0 | 0 |
| Gm8883   | chr1:71888111-71891204    | NOTEST | 0 | 0 |
| Gm8884   | chr9:48454343-48454727    | NOTEST | 0 | 0 |
| Gm9      | chrX:37208501-37211041    | NOTEST | 0 | 0 |
| Gm904    | chr13:50643227-50645838   | NOTEST | 0 | 0 |
| Gm9047   | chr6:29471436-29473429    | NOTEST | 0 | 0 |
| Gm9112   | chrX:102706887-102707670  | NOTEST | 0 | 0 |
| Gm9125   | chr3:94047980-94054885    | NOTEST | 0 | 0 |
| Gm9159   | chrX:103545499-103547699  | NOTEST | 0 | 0 |
| Gm9268   | chr7:43018797-43048106    | NOTEST | 0 | 0 |
| Gm933    | chr16:32804887-32810446   | NOTEST | 0 | 0 |
| Gm9376   | chr14:118267157-118267770 | NOTEST | 0 | 0 |
| Gm94     | chr18:43777195-43792878   | NOTEST | 0 | 0 |
| Gm9513   | chr9:36475637-36477180    | NOTEST | 0 | 0 |
| Gm9573   | chr17:35617922-35626637   | NOTEST | 0 | 0 |
| Gm9696   | chr3:59952308-59973594    | NOTEST | 0 | 0 |
| Gm9731   | chr8:27296044-27297200    | NOTEST | 0 | 0 |
| Gm9758   | chr5:14910123-14914889    | NOTEST | 0 | 0 |
| Gm9839   | chr1:32172805-32657738    | NOTEST | 0 | 0 |
| Gm9871   | chr6:101774248-101801982  | NOTEST | 0 | 0 |
| Gm9926   | chr18:66504177-66511737   | NOTEST | 0 | 0 |
| Gm9961   | chr16:11803720-11930594   | NOTEST | 0 | 0 |
| Gm9992   | chr17:7363711-7385305     | NOTEST | 0 | 0 |
| Gm9994   | chr1:93918436-93941239    | NOTEST | 0 | 0 |
| Gm9999   | chr7:46976631-46987803    | NOTEST | 0 | 0 |
| Gmcl1l   | chrX:32560054-32562009    | NOTEST | 0 | 0 |
| Gml      | chr15:74813454-74818815   | NOTEST | 0 | 0 |
| Gnat3    | chr5:17962569-18019668    | NOTEST | 0 | 0 |
| Gnrhr    | chr5:86181997-86197870    | NOTEST | 0 | 0 |
| Gp2      | chr7:119442543-119459272  | NOTEST | 0 | 0 |
| Gpa33    | chr1:166130459-166166510  | NOTEST | 0 | 0 |
| Gpbar1   | chr1:74278599-74279589    | NOTEST | 0 | 0 |
| Gphb5    | chr12:75411719-75416781   | NOTEST | 0 | 0 |
| Gpr113   | chr5:30193430-30205722    | NOTEST | 0 | 0 |
| Gpr15    | chr16:58717434-58718724   | NOTEST | 0 | 0 |
| Gpr31b   | chr17:13051320-13052280   | NOTEST | 0 | 0 |
| Gpr33    | chr12:52023003-52028063   | NOTEST | 0 | 0 |
| Gpr50    | chrX:71663766-71668089    | NOTEST | 0 | 0 |
| Gpr82    | chrX:13517080-13846556    | NOTEST | 0 | 0 |
| Gpr87    | chr3:59006977-59344256    | NOTEST | 0 | 0 |
| Gprc6a   | chr10:51614822-51631458   | NOTEST | 0 | 0 |
| Gpx5     | chr13:21286428-21292686   | NOTEST | 0 | 0 |
| Grin1os  | chr2:25289910-25319187    | NOTEST | 0 | 0 |
| Grip1os2 | chr10:119454033-120112965 | NOTEST | 0 | 0 |
| Gsc      | chr12:104471208-104473236 | NOTEST | 0 | 0 |
| Gsc2     | chr16:17913553-17915059   | NOTEST | 0 | 0 |
| Gsdma2   | chr11:98646758-98657957   | NOTEST | 0 | 0 |
| Gsdma3   | chr11:98626359-98638089   | NOTEST | 0 | 0 |

|           |                           |        |   |   |
|-----------|---------------------------|--------|---|---|
| Gsdmc     | chr15:63775970-63808739   | NOTEST | 0 | 0 |
| Gsdmc2    | chr15:63824345-63845176   | NOTEST | 0 | 0 |
| Gsdmc3    | chr15:63857724-63878558   | NOTEST | 0 | 0 |
| Gsdmcl-ps | chr15:63914460-63925453   | NOTEST | 0 | 0 |
| Gsdmcl1   | chr15:63847308-63850942   | NOTEST | 0 | 0 |
| Gsdmcl2   | chr15:63880706-63889073   | NOTEST | 0 | 0 |
| Gstt4     | chr10:75814943-75822543   | NOTEST | 0 | 0 |
| Gsx1      | chr5:147188695-147190946  | NOTEST | 0 | 0 |
| Gsx2      | chr5:75075600-75077893    | NOTEST | 0 | 0 |
| Gtsf1     | chr15:103402458-103430427 | NOTEST | 0 | 0 |
| Gtsf1l    | chr2:163087030-163089601  | NOTEST | 0 | 0 |
| Guca2a    | chr4:119637731-119639465  | NOTEST | 0 | 0 |
| Guca2b    | chr4:119656602-119658945  | NOTEST | 0 | 0 |
| Gucy1b2   | chr14:62392669-62456289   | NOTEST | 0 | 0 |
| Gulo      | chr14:65986786-66009210   | NOTEST | 0 | 0 |
| Gykl1     | chr18:52693678-52695593   | NOTEST | 0 | 0 |
| Gzmc      | chr14:56231400-56234656   | NOTEST | 0 | 0 |
| Gzmd      | chr14:56129567-56132593   | NOTEST | 0 | 0 |
| Gzme      | chr14:56117618-56120625   | NOTEST | 0 | 0 |
| Gzmf      | chr14:56205262-56211407   | NOTEST | 0 | 0 |
| Gzmg      | chr14:56156580-56159579   | NOTEST | 0 | 0 |
| Gzmk      | chr13:113171873-113180897 | NOTEST | 0 | 0 |
| Gzmn      | chr14:56165795-56174596   | NOTEST | 0 | 0 |
| H1fnt     | chr15:98255981-98257307   | NOTEST | 0 | 0 |
| H2-BI     | chr17:36080188-36084249   | NOTEST | 0 | 0 |
| H2-Ea-ps  | chr17:34342211-34344645   | NOTEST | 0 | 0 |
| H2-L      | chr17:35263093-35267497   | NOTEST | 0 | 0 |
| H2-M10.1  | chr17:36322859-36326150   | NOTEST | 0 | 0 |
| H2-M10.3  | chr17:36365003-36368417   | NOTEST | 0 | 0 |
| H2-M10.4  | chr17:36460163-36462329   | NOTEST | 0 | 0 |
| H2-M10.6  | chr17:36812174-36815566   | NOTEST | 0 | 0 |
| H2-M2     | chr17:37480850-37483529   | NOTEST | 0 | 0 |
| H2afb1    | chr2:17996421-17996946    | NOTEST | 0 | 0 |
| H2afb2    | chrX:116681177-116681525  | NOTEST | 0 | 0 |
| H2afb3    | chrX:120290326-120910618  | NOTEST | 0 | 0 |
| H2bfm     | chrX:136927324-136928373  | NOTEST | 0 | 0 |
| H60c      | chr10:3256207-3267771     | NOTEST | 0 | 0 |
| Habp2     | chr19:56287937-56390038   | NOTEST | 0 | 0 |
| Hamp      | chr7:30942368-30944017    | NOTEST | 0 | 0 |
| Hamp2     | chr7:30922371-30924181    | NOTEST | 0 | 0 |
| Hand1     | chr11:57828712-57832147   | NOTEST | 0 | 0 |
| Hand2     | chr8:57320982-57324517    | NOTEST | 0 | 0 |
| Havcr1    | chr11:46740222-46779578   | NOTEST | 0 | 0 |
| Hba-x     | chr11:32276599-32278115   | NOTEST | 0 | 0 |
| Hbb-bh1   | chr7:103841637-103843162  | NOTEST | 0 | 0 |
| Hbb-bh2   | chr7:103839123-103840521  | NOTEST | 0 | 0 |
| Hbb-y     | chr7:103851753-103853207  | NOTEST | 0 | 0 |
| Hcrt      | chr11:100761692-100762931 | NOTEST | 0 | 0 |
| Hdgfl1    | chr13:26768171-26770165   | NOTEST | 0 | 0 |
| Hdhd1a    | chr18:50567655-50568699   | NOTEST | 0 | 0 |
| Helt      | chr8:46292047-46294671    | NOTEST | 0 | 0 |
| Hes2      | chr4:152158866-152162469  | NOTEST | 0 | 0 |
| Hfe2      | chr3:96525184-96529216    | NOTEST | 0 | 0 |

|               |                           |        |   |   |
|---------------|---------------------------|--------|---|---|
| Hist1h1t      | chr13:23695810-23696545   | NOTEST | 0 | 0 |
| Hist1h2aa     | chr13:23934461-23934913   | NOTEST | 0 | 0 |
| Hist1h2ab     | chr13:23751087-23751592   | NOTEST | 0 | 0 |
| Hist1h2ba     | chr13:23933724-23934156   | NOTEST | 0 | 0 |
| Hist1h3h      | chr13:21717627-21718115   | NOTEST | 0 | 0 |
| Hist1h4b      | chr13:23756936-23757386   | NOTEST | 0 | 0 |
| Hist1h4f      | chr13:23551285-23551643   | NOTEST | 0 | 0 |
| Hmgb1-rs17    | chr8:33484310-33485757    | NOTEST | 0 | 0 |
| Hnf1a         | chr5:114948979-114971062  | NOTEST | 0 | 0 |
| Hnf4a         | chr2:163547187-163572907  | NOTEST | 0 | 0 |
| Hnf4aos       | chr2:163492317-163541721  | NOTEST | 0 | 0 |
| Hormad1       | chr3:95559676-95587860    | NOTEST | 0 | 0 |
| Hottip        | chr6:52262774-52267603    | NOTEST | 0 | 0 |
| Hoxa13        | chr6:52258852-52260880    | NOTEST | 0 | 0 |
| Hoxb1         | chr11:96365757-96368253   | NOTEST | 0 | 0 |
| Hoxb13        | chr11:96194360-96196599   | NOTEST | 0 | 0 |
| Hoxc12        | chr15:102936852-102938517 | NOTEST | 0 | 0 |
| Hoxc13        | chr15:102921130-102928814 | NOTEST | 0 | 0 |
| Hoxd12        | chr2:74675012-74677705    | NOTEST | 0 | 0 |
| Hoxd13        | chr2:74668309-74671599    | NOTEST | 0 | 0 |
| Hpd           | chr5:123171806-123182686  | NOTEST | 0 | 0 |
| Hrh4          | chr18:13006989-13022882   | NOTEST | 0 | 0 |
| Hrnr          | chr3:93319748-93333572    | NOTEST | 0 | 0 |
| Hsd3b2        | chr3:98711106-98724543    | NOTEST | 0 | 0 |
| Hsd3b3        | chr3:98741475-98763128    | NOTEST | 0 | 0 |
| Hsd3b4        | chr3:98552543-98564038    | NOTEST | 0 | 0 |
| Hsd3b5        | chr3:98618635-98645534    | NOTEST | 0 | 0 |
| Hsfy2         | chr1:56636050-56637451    | NOTEST | 0 | 0 |
| Hspb9         | chr11:100713849-100714575 | NOTEST | 0 | 0 |
| Hyal4         | chr6:24748366-24766519    | NOTEST | 0 | 0 |
| Hyal5         | chr6:24857996-24891958    | NOTEST | 0 | 0 |
| I730028E13Rik | chr9:61138514-61145259    | NOTEST | 0 | 0 |
| Iapp          | chr6:142234226-142322981  | NOTEST | 0 | 0 |
| Idi2          | chr13:8952862-8960935     | NOTEST | 0 | 0 |
| Ido1          | chr8:24584140-24597009    | NOTEST | 0 | 0 |
| Ifi202b       | chr1:173962568-173982844  | NOTEST | 0 | 0 |
| Ifi27l2b      | chr12:103450897-103457223 | NOTEST | 0 | 0 |
| Ifna1         | chr4:88850086-88850656    | NOTEST | 0 | 0 |
| Ifna11        | chr4:88819918-88820565    | NOTEST | 0 | 0 |
| Ifna12        | chr4:88602579-88603376    | NOTEST | 0 | 0 |
| Ifna13        | chr4:88643640-88644459    | NOTEST | 0 | 0 |
| Ifna14        | chr4:88571228-88571798    | NOTEST | 0 | 0 |
| Ifna15        | chr4:88557672-88558245    | NOTEST | 0 | 0 |
| Ifna16        | chr4:88676286-88676856    | NOTEST | 0 | 0 |
| Ifna2         | chr4:88683206-88683779    | NOTEST | 0 | 0 |
| Ifna4         | chr4:88841815-88842459    | NOTEST | 0 | 0 |
| Ifna5         | chr4:88835524-88836094    | NOTEST | 0 | 0 |
| Ifna6         | chr4:88827415-88827985    | NOTEST | 0 | 0 |
| Ifna7         | chr4:88816224-88816800    | NOTEST | 0 | 0 |
| Ifna9         | chr4:88591812-88592385    | NOTEST | 0 | 0 |
| Ifnab         | chr4:88690598-88691268    | NOTEST | 0 | 0 |
| Ifnb1         | chr4:88522024-88522794    | NOTEST | 0 | 0 |
| Ifne          | chr4:88879537-88880201    | NOTEST | 0 | 0 |

|          |                           |        |   |   |
|----------|---------------------------|--------|---|---|
| Ifnk     | chr4:34949073-35157484    | NOTEST | 0 | 0 |
| Ifnl2    | chr7:28508860-28510360    | NOTEST | 0 | 0 |
| Ifnl3    | chr7:28522835-28524322    | NOTEST | 0 | 0 |
| Ifnz     | chr4:88782130-88783592    | NOTEST | 0 | 0 |
| Igbp1b   | chr6:138657091-138658444  | NOTEST | 0 | 0 |
| Igfl3    | chr7:18176493-18181862    | NOTEST | 0 | 0 |
| Igsf23   | chr7:19937304-19950743    | NOTEST | 0 | 0 |
| Il10     | chr1:131019844-131024970  | NOTEST | 0 | 0 |
| Il12b    | chr11:44400062-44414017   | NOTEST | 0 | 0 |
| Il13     | chr11:53631322-53634702   | NOTEST | 0 | 0 |
| Il17a    | chr1:20730904-20734496    | NOTEST | 0 | 0 |
| Il17c    | chr8:122422084-122423639  | NOTEST | 0 | 0 |
| Il19     | chr1:130932655-130939241  | NOTEST | 0 | 0 |
| Il1f10   | chr2:24291195-24293820    | NOTEST | 0 | 0 |
| Il1f5    | chr2:24276953-24282432    | NOTEST | 0 | 0 |
| Il1f6    | chr2:24215416-24225701    | NOTEST | 0 | 0 |
| Il1f8    | chr2:24153171-24160103    | NOTEST | 0 | 0 |
| Il2      | chr3:37120715-37125954    | NOTEST | 0 | 0 |
| Il22     | chr10:118204963-118210046 | NOTEST | 0 | 0 |
| Il23r    | chr6:67422931-67491855    | NOTEST | 0 | 0 |
| Il24     | chr1:130882073-130887411  | NOTEST | 0 | 0 |
| Il27     | chr7:126589294-126594910  | NOTEST | 0 | 0 |
| Il3      | chr11:54265084-54267279   | NOTEST | 0 | 0 |
| Il31     | chr5:123480152-123482101  | NOTEST | 0 | 0 |
| Il9      | chr13:56479276-56482246   | NOTEST | 0 | 0 |
| Itlfb    | chr10:118289629-118295038 | NOTEST | 0 | 0 |
| Inhbc    | chr10:127356325-127370544 | NOTEST | 0 | 0 |
| Inhbe    | chr10:127349401-127351772 | NOTEST | 0 | 0 |
| Ins1     | chr19:52264322-52265458   | NOTEST | 0 | 0 |
| Iqca     | chr1:90042131-90153401    | NOTEST | 0 | 0 |
| Iqcf1    | chr9:106499966-106502250  | NOTEST | 0 | 0 |
| Iqcf3    | chr9:106543388-106561625  | NOTEST | 0 | 0 |
| Iqcf4    | chr9:106568318-106570967  | NOTEST | 0 | 0 |
| Iqcf5    | chr9:106514572-106516003  | NOTEST | 0 | 0 |
| Iqcf6    | chr9:106626581-106627612  | NOTEST | 0 | 0 |
| Irs4     | chrX:141710997-141725217  | NOTEST | 0 | 0 |
| Irx1     | chr13:71958231-71963723   | NOTEST | 0 | 0 |
| Irx2     | chr13:72628977-72634194   | NOTEST | 0 | 0 |
| Isx      | chr8:74873173-74893506    | NOTEST | 0 | 0 |
| Itgb1bp2 | chrX:101449108-101453541  | NOTEST | 0 | 0 |
| Itln1    | chr1:171518123-171535294  | NOTEST | 0 | 0 |
| Ivl      | chr3:92570899-92573735    | NOTEST | 0 | 0 |
| Izumo2   | chr7:44708742-44719842    | NOTEST | 0 | 0 |
| Kap      | chr6:133849854-133853667  | NOTEST | 0 | 0 |
| Kcne1    | chr16:92346000-92359468   | NOTEST | 0 | 0 |
| Kcnj1    | chr9:32372417-32399194    | NOTEST | 0 | 0 |
| Kcnk15   | chr2:163853749-163858874  | NOTEST | 0 | 0 |
| Kdf1     | chr4:133518962-133530790  | NOTEST | 0 | 0 |
| Keg1     | chr19:12695789-12719896   | NOTEST | 0 | 0 |
| Khdc1b   | chr1:21383555-21386384    | NOTEST | 0 | 0 |
| Khdc1c   | chr1:21368330-21369743    | NOTEST | 0 | 0 |
| Kif12    | chr4:63165636-63172131    | NOTEST | 0 | 0 |
| Kif2b    | chr11:91575285-91577555   | NOTEST | 0 | 0 |

|           |                           |        |   |   |
|-----------|---------------------------|--------|---|---|
| Kif4-ps   | chr12:101145608-101149273 | NOTEST | 0 | 0 |
| Kir3dl1   | chrX:136517998-136534308  | NOTEST | 0 | 0 |
| Kir3dl2   | chrX:136448106-136469041  | NOTEST | 0 | 0 |
| Kis2      | chrX:52742502-52744593    | NOTEST | 0 | 0 |
| Klf14     | chr6:30956020-30958990    | NOTEST | 0 | 0 |
| Klhdc7b   | chr15:89386890-89388708   | NOTEST | 0 | 0 |
| Klk1      | chr7:44225436-44229617    | NOTEST | 0 | 0 |
| Klk14     | chr7:43690417-43695535    | NOTEST | 0 | 0 |
| Klk15     | chr7:43933770-43939590    | NOTEST | 0 | 0 |
| Klk1b1    | chr7:43966767-43971315    | NOTEST | 0 | 0 |
| Klk1b11   | chr7:43995878-43999875    | NOTEST | 0 | 0 |
| Klk1b16   | chr7:44136766-44141604    | NOTEST | 0 | 0 |
| Klk1b21   | chr7:44102291-44106579    | NOTEST | 0 | 0 |
| Klk1b22   | chr7:44112682-44116876    | NOTEST | 0 | 0 |
| Klk1b24   | chr7:44188262-44192451    | NOTEST | 0 | 0 |
| Klk1b26   | chr7:44012677-44016968    | NOTEST | 0 | 0 |
| Klk1b3    | chr7:44198190-44202351    | NOTEST | 0 | 0 |
| Klk1b4    | chr7:44207434-44211754    | NOTEST | 0 | 0 |
| Klk1b5    | chr7:44216474-44220703    | NOTEST | 0 | 0 |
| Klk1b7-ps | chr7:43945011-43945927    | NOTEST | 0 | 0 |
| Klk1b8    | chr7:43950671-43954938    | NOTEST | 0 | 0 |
| Klk1b9    | chr7:43976060-43980376    | NOTEST | 0 | 0 |
| Klra12    | chr6:129972081-130386874  | NOTEST | 0 | 0 |
| Klra17    | chr6:129831153-129876672  | NOTEST | 0 | 0 |
| Klra22    | chr6:129972081-130386874  | NOTEST | 0 | 0 |
| Klra23    | chr6:129972081-130386874  | NOTEST | 0 | 0 |
| Klrb1-ps1 | chr6:129116517-129129446  | NOTEST | 0 | 0 |
| Kpna7     | chr5:144983743-145009636  | NOTEST | 0 | 0 |
| Kprp      | chr3:92823073-92827247    | NOTEST | 0 | 0 |
| Krt12     | chr11:99415663-99422259   | NOTEST | 0 | 0 |
| Krt18     | chr15:102028215-102032026 | NOTEST | 0 | 0 |
| Krt24     | chr11:99280092-99285238   | NOTEST | 0 | 0 |
| Krt31     | chr11:100046645-100050551 | NOTEST | 0 | 0 |
| Krt32     | chr11:100080847-100088226 | NOTEST | 0 | 0 |
| Krt33a    | chr11:100011198-100016212 | NOTEST | 0 | 0 |
| Krt33b    | chr11:100023633-100029868 | NOTEST | 0 | 0 |
| Krt34     | chr11:100037350-100041554 | NOTEST | 0 | 0 |
| Krt35     | chr11:100092191-100096224 | NOTEST | 0 | 0 |
| Krt39     | chr11:99514623-99521258   | NOTEST | 0 | 0 |
| Krt4      | chr15:101918534-101924735 | NOTEST | 0 | 0 |
| Krt5      | chr15:101707069-101712891 | NOTEST | 0 | 0 |
| Krt6b     | chr15:101676022-101680289 | NOTEST | 0 | 0 |
| Krt71     | chr15:101733948-101743097 | NOTEST | 0 | 0 |
| Krt72     | chr15:101776559-101786458 | NOTEST | 0 | 0 |
| Krt73     | chr15:101793307-101802332 | NOTEST | 0 | 0 |
| Krt74     | chr15:101754258-101763504 | NOTEST | 0 | 0 |
| Krt76     | chr15:101884350-101892920 | NOTEST | 0 | 0 |
| Krt77     | chr15:101859855-101869618 | NOTEST | 0 | 0 |
| Krt81     | chr15:101431013-101491512 | NOTEST | 0 | 0 |
| Krt84     | chr15:101525025-101532820 | NOTEST | 0 | 0 |
| Krt86     | chr15:101431013-101491512 | NOTEST | 0 | 0 |
| Krtap1-3  | chr11:99590460-99591377   | NOTEST | 0 | 0 |
| Krtap1-4  | chr11:99582548-99583677   | NOTEST | 0 | 0 |



|              |                          |        |   |   |
|--------------|--------------------------|--------|---|---|
| Krtap1-5     | chr11:99579976-99581016  | NOTEST | 0 | 0 |
| Krtap10-10   | chr10:77686568-77886769  | NOTEST | 0 | 0 |
| Krtap10-4    | chr10:77686568-77886769  | NOTEST | 0 | 0 |
| Krtap11-1    | chr16:89570175-89571183  | NOTEST | 0 | 0 |
| Krtap12-1    | chr10:77686568-77886769  | NOTEST | 0 | 0 |
| Krtap13      | chr16:88750743-88751628  | NOTEST | 0 | 0 |
| Krtap13-1    | chr16:88728861-88729611  | NOTEST | 0 | 0 |
| Krtap14      | chr16:88825290-88826145  | NOTEST | 0 | 0 |
| Krtap15      | chr16:88829008-88829844  | NOTEST | 0 | 0 |
| Krtap16-1    | chr16:88873664-88874269  | NOTEST | 0 | 0 |
| Krtap16-3    | chr16:88962303-88962873  | NOTEST | 0 | 0 |
| Krtap17-1    | chr11:99993231-99993994  | NOTEST | 0 | 0 |
| Krtap19-1    | chr16:88868917-88869410  | NOTEST | 0 | 0 |
| Krtap19-3    | chr16:88877512-88878038  | NOTEST | 0 | 0 |
| Krtap19-4    | chr16:88884785-88885089  | NOTEST | 0 | 0 |
| Krtap19-5    | chr16:88895967-88896449  | NOTEST | 0 | 0 |
| Krtap19-9b   | chr16:88931803-88932264  | NOTEST | 0 | 0 |
| Krtap2-4     | chr11:99614016-99614846  | NOTEST | 0 | 0 |
| Krtap20-2    | chr16:89205860-89206394  | NOTEST | 0 | 0 |
| Krtap21-1    | chr16:89403026-89403774  | NOTEST | 0 | 0 |
| Krtap22-2    | chr16:89010379-89010759  | NOTEST | 0 | 0 |
| Krtap24-1    | chr16:88610708-88612279  | NOTEST | 0 | 0 |
| Krtap26-1    | chr16:88646823-88647796  | NOTEST | 0 | 0 |
| Krtap27-1    | chr16:88671045-88671654  | NOTEST | 0 | 0 |
| Krtap3-1     | chr11:99566026-99566630  | NOTEST | 0 | 0 |
| Krtap3-2     | chr11:99555822-99556853  | NOTEST | 0 | 0 |
| Krtap3-3     | chr11:99550131-99550863  | NOTEST | 0 | 0 |
| Krtap31-1    | chr11:99907919-99908890  | NOTEST | 0 | 0 |
| Krtap31-2    | chr11:99936290-99937225  | NOTEST | 0 | 0 |
| Krtap4-1     | chr11:99627228-99628239  | NOTEST | 0 | 0 |
| Krtap4-13    | chr11:99798185-99809896  | NOTEST | 0 | 0 |
| Krtap4-16    | chr11:99850654-99851605  | NOTEST | 0 | 0 |
| Krtap4-2     | chr11:99634113-99635084  | NOTEST | 0 | 0 |
| Krtap4-6     | chr11:99665042-99665960  | NOTEST | 0 | 0 |
| Krtap4-7     | chr11:99643111-99644089  | NOTEST | 0 | 0 |
| Krtap4-8     | chr11:99780013-99780643  | NOTEST | 0 | 0 |
| Krtap4-9     | chr11:99785199-99786257  | NOTEST | 0 | 0 |
| Krtap5-1     | chr7:142296376-142297069 | NOTEST | 0 | 0 |
| Krtap5-2     | chr7:142174531-142176005 | NOTEST | 0 | 0 |
| Krtap5-3     | chr7:142201363-142203015 | NOTEST | 0 | 0 |
| Krtap5-4     | chr7:142303501-142304503 | NOTEST | 0 | 0 |
| Krtap5-5     | chr7:142228794-142229971 | NOTEST | 0 | 0 |
| Krtap6-1     | chr16:89031698-89032292  | NOTEST | 0 | 0 |
| Krtap6-2     | chr16:89419322-89420111  | NOTEST | 0 | 0 |
| Krtap6-5     | chr16:89047288-89047899  | NOTEST | 0 | 0 |
| Krtap7-1     | chr16:89507702-89508323  | NOTEST | 0 | 0 |
| Krtap8-1     | chr16:89487373-89487952  | NOTEST | 0 | 0 |
| Krtap9-1     | chr11:99873388-99874000  | NOTEST | 0 | 0 |
| Krtap9-3     | chr11:99597347-99598106  | NOTEST | 0 | 0 |
| Krtap9-5     | chr11:99948474-99949551  | NOTEST | 0 | 0 |
| LOC100040786 | chrY:66739796-66742170   | NOTEST | 0 | 0 |
| LOC100048884 | chr4:61670177-61674094   | NOTEST | 0 | 0 |
| LOC100502896 | chr4:73650909-73672398   | NOTEST | 0 | 0 |

|              |                           |        |   |   |
|--------------|---------------------------|--------|---|---|
| LOC100503280 | chrX:74966843-74969125    | NOTEST | 0 | 0 |
| LOC100504039 | chrX:53686490-53691332    | LOWDAT | 0 | 0 |
| LOC100505025 | chr7:73310379-73419899    | NOTEST | 0 | 0 |
| LOC100861615 | chr14:6259746-6287250     | NOTEST | 0 | 0 |
| LOC100862015 | chr4:73635784-73642163    | NOTEST | 0 | 0 |
| LOC101055863 | chr4:73681177-73687560    | NOTEST | 0 | 0 |
| LOC101056136 | chr14:42254658-42260048   | NOTEST | 0 | 0 |
| LOC101056149 | chr13:34652922-34666774   | NOTEST | 0 | 0 |
| LOC101056236 | chr16:92377070-92382683   | NOTEST | 0 | 0 |
| LOC102308570 | chr19:8883877-8890759     | NOTEST | 0 | 0 |
| LOC102631757 | chr17:31152751-31165053   | NOTEST | 0 | 0 |
| LOC102632430 | chr16:22857844-22899451   | NOTEST | 0 | 0 |
| LOC102633315 | chr8:25518758-25575718    | NOTEST | 0 | 0 |
| LOC102634101 | chr10:67005074-67096988   | NOTEST | 0 | 0 |
| LOC102634401 | chr2:74748421-74762896    | NOTEST | 0 | 0 |
| LOC102634753 | chr3:99049821-99053742    | NOTEST | 0 | 0 |
| LOC102636514 | chr8:57304413-57320859    | NOTEST | 0 | 0 |
| LOC666331    | chr11:101610699-101615956 | NOTEST | 0 | 0 |
| Lbx1         | chr19:45233727-45235236   | NOTEST | 0 | 0 |
| Lce1a1       | chr3:92646531-92648307    | NOTEST | 0 | 0 |
| Lce1a2       | chr3:92668612-92670315    | NOTEST | 0 | 0 |
| Lce1b        | chr3:92655649-92656926    | NOTEST | 0 | 0 |
| Lce1c        | chr3:92679246-92680918    | NOTEST | 0 | 0 |
| Lce1e        | chr3:92707399-92709074    | NOTEST | 0 | 0 |
| Lce1f        | chr3:92718695-92720350    | NOTEST | 0 | 0 |
| Lce1h        | chr3:92763214-92765065    | NOTEST | 0 | 0 |
| Lce1i        | chr3:92777209-92778899    | NOTEST | 0 | 0 |
| Lce1j        | chr3:92788844-92790514    | NOTEST | 0 | 0 |
| Lce1k        | chr3:92806290-92807891    | NOTEST | 0 | 0 |
| Lce1l        | chr3:92849948-92851286    | NOTEST | 0 | 0 |
| Lce1m        | chr3:93017806-93019060    | NOTEST | 0 | 0 |
| Lce3a        | chr3:92925286-92926230    | NOTEST | 0 | 0 |
| Lce3b        | chr3:92932978-92934096    | NOTEST | 0 | 0 |
| Lce3c        | chr3:92944485-92945730    | NOTEST | 0 | 0 |
| Lce3d        | chr3:92957389-92958574    | NOTEST | 0 | 0 |
| Lce3e        | chr3:92967060-92968281    | NOTEST | 0 | 0 |
| Lce3f        | chr3:92992225-92993426    | NOTEST | 0 | 0 |
| Lcn10        | chr2:25682725-25686081    | NOTEST | 0 | 0 |
| Lcn11        | chr2:25777016-25780279    | NOTEST | 0 | 0 |
| Lcn12        | chr2:25490844-25493911    | NOTEST | 0 | 0 |
| Lcn3         | chr2:25765568-25768099    | NOTEST | 0 | 0 |
| Lcn4         | chr2:26667673-26671282    | NOTEST | 0 | 0 |
| Lcn5         | chr2:25657951-25662230    | NOTEST | 0 | 0 |
| Lcn6         | chr2:25676785-25681607    | NOTEST | 0 | 0 |
| Lcn8         | chr2:25653117-25656216    | NOTEST | 0 | 0 |
| Lcn9         | chr2:25823152-25825537    | NOTEST | 0 | 0 |
| Ldhc         | chr7:46861262-46878142    | NOTEST | 0 | 0 |
| Ldlrad2      | chr4:137570875-137575180  | NOTEST | 0 | 0 |
| Leap2        | chr11:53422180-53423136   | NOTEST | 0 | 0 |
| Lect2        | chr13:56542459-56548538   | NOTEST | 0 | 0 |
| Lefty2       | chr1:180893118-180899102  | NOTEST | 0 | 0 |
| Lelp1        | chr3:92134993-92142754    | NOTEST | 0 | 0 |
| Lep          | chr6:29060220-29073876    | NOTEST | 0 | 0 |

|             |                           |        |   |   |
|-------------|---------------------------|--------|---|---|
| Lgsn        | chr1:31141077-31222656    | NOTEST | 0 | 0 |
| Lhb         | chr7:45420945-45421854    | NOTEST | 0 | 0 |
| Lhx1        | chr11:84519378-84525534   | NOTEST | 0 | 0 |
| Lhx1os      | chr11:84525659-84535831   | NOTEST | 0 | 0 |
| Lhx2        | chr2:38339280-38369737    | NOTEST | 0 | 0 |
| Lhx5        | chr5:120431885-120441457  | NOTEST | 0 | 0 |
| Lipf        | chr19:33961247-33976813   | NOTEST | 0 | 0 |
| Lkaaeear1   | chr2:181696794-181698442  | NOTEST | 0 | 0 |
| Lmod2       | chr6:24597770-24605414    | NOTEST | 0 | 0 |
| Lmx1a       | chr1:167689557-167848733  | NOTEST | 0 | 0 |
| Lpcat2b     | chr5:107431548-107435039  | NOTEST | 0 | 0 |
| Lrcol1      | chr5:110354095-110356087  | NOTEST | 0 | 0 |
| Lrit3       | chr3:129788290-129804030  | NOTEST | 0 | 0 |
| Lrrc19      | chr4:94614490-94693233    | NOTEST | 0 | 0 |
| Lrrc43      | chr5:123489324-123508205  | NOTEST | 0 | 0 |
| Lrrc66      | chr5:73606641-73632421    | NOTEST | 0 | 0 |
| Lrrc74      | chr12:86734368-86763795   | NOTEST | 0 | 0 |
| Lrtm1       | chr14:28904942-29721864   | NOTEST | 0 | 0 |
| Luzp4       | chrX:148882575-148924139  | NOTEST | 0 | 0 |
| Ly6f        | chr15:75268420-75272234   | NOTEST | 0 | 0 |
| Ly6g5c      | chr17:35108299-35111953   | NOTEST | 0 | 0 |
| Ly6g6c      | chr17:35067324-35070048   | NOTEST | 0 | 0 |
| Lyg1        | chr1:37946737-37957759    | NOTEST | 0 | 0 |
| Lypd3       | chr7:24636569-24641118    | NOTEST | 0 | 0 |
| Lypd5       | chr7:24349223-24353833    | NOTEST | 0 | 0 |
| Lypd8       | chr11:58379031-58390541   | NOTEST | 0 | 0 |
| Lyrm7os     | chr11:54819918-54824967   | NOTEST | 0 | 0 |
| Lyzl1       | chr18:4165831-4182236     | NOTEST | 0 | 0 |
| Lyzl4os     | chr9:121577842-121641566  | NOTEST | 0 | 0 |
| Lyzl6       | chr11:103631074-103638874 | NOTEST | 0 | 0 |
| Magea1      | chrX:155088518-155089790  | NOTEST | 0 | 0 |
| Magea10     | chrX:72381869-72386858    | NOTEST | 0 | 0 |
| Magea2      | chrX:155027200-155033292  | NOTEST | 0 | 0 |
| Magea3      | chrX:154948462-154949569  | NOTEST | 0 | 0 |
| Magea4      | chrX:72222016-72222964    | NOTEST | 0 | 0 |
| Magea5      | chrX:155053060-155061553  | NOTEST | 0 | 0 |
| Magea6      | chrX:154924011-154926115  | NOTEST | 0 | 0 |
| Magea8      | chrX:154985774-154995850  | NOTEST | 0 | 0 |
| Mageb1      | chrX:92015190-92016333    | NOTEST | 0 | 0 |
| Mageb16     | chrX:79623230-79671435    | NOTEST | 0 | 0 |
| Mageb16-ps1 | chrX:144381670-144688180  | NOTEST | 0 | 0 |
| Mageb18     | chrX:92118878-92599572    | NOTEST | 0 | 0 |
| Mageb2      | chrX:92015190-92016333    | LOWDAT | 0 | 0 |
| Mageb4      | chrX:86250255-86256219    | NOTEST | 0 | 0 |
| Mageb5      | chrX:91779607-91782976    | NOTEST | 0 | 0 |
| Marco       | chr1:120474537-120505084  | NOTEST | 0 | 0 |
| Matn1       | chr4:130944384-130955476  | NOTEST | 0 | 0 |
| Mbd3l1      | chr9:18478394-18485292    | NOTEST | 0 | 0 |
| Mbd3l2      | chr9:18430614-18446316    | NOTEST | 0 | 0 |
| Mbl1        | chr14:41151455-41158959   | NOTEST | 0 | 0 |
| Mc2r        | chr18:68406898-68429320   | NOTEST | 0 | 0 |
| Mcoln3      | chr3:146121790-146140646  | NOTEST | 0 | 0 |
| Mcpt-ps1    | chr14:55949808-55952371   | NOTEST | 0 | 0 |

|           |                           |        |   |   |
|-----------|---------------------------|--------|---|---|
| Mcpt2     | chr14:56042122-56044634   | NOTEST | 0 | 0 |
| Mcpt9     | chr14:56026863-56030495   | NOTEST | 0 | 0 |
| Mepe      | chr5:104325328-104338611  | NOTEST | 0 | 0 |
| Mettl11b  | chr1:163702992-163725232  | NOTEST | 0 | 0 |
| Mettl7b   | chr10:128933812-128960988 | NOTEST | 0 | 0 |
| Mill1     | chr7:18245346-18266092    | NOTEST | 0 | 0 |
| Miox      | chr15:89334472-89337007   | NOTEST | 0 | 0 |
| Mip       | chr10:128225837-128231811 | NOTEST | 0 | 0 |
| Mir100    | chr9:41531424-41531504    | NOTEST | 0 | 0 |
| Mir101a   | chr4:101346523-101399185  | LOWDAT | 0 | 0 |
| Mir101b   | chr19:29101374-29143843   | NOTEST | 0 | 0 |
| Mir101c   | chr9:3038668-3038743      | NOTEST | 0 | 0 |
| Mir103-1  | chr11:35769494-35791285   | NOTEST | 0 | 0 |
| Mir103-2  | chr2:131127411-131604824  | NOTEST | 0 | 0 |
| Mir105    | chrX:72432675-72656246    | NOTEST | 0 | 0 |
| Mir106a   | chrX:52742502-52744593    | NOTEST | 0 | 0 |
| Mir106b   | chr5:138164588-138171862  | NOTEST | 0 | 0 |
| Mir107    | chr19:34806935-34879455   | NOTEST | 0 | 0 |
| Mir10a    | chr11:96317164-96317274   | NOTEST | 0 | 0 |
| Mir10b    | chr2:74710043-74748271    | NOTEST | 0 | 0 |
| Mir1187   | chr5:82798943-82799065    | NOTEST | 0 | 0 |
| Mir1188   | chr12:109603944-109661711 | NOTEST | 0 | 0 |
| Mir1190   | chr12:100912699-101028983 | NOTEST | 0 | 0 |
| Mir1191   | chr5:76183879-76469519    | NOTEST | 0 | 0 |
| Mir1191b  | chr10:81396190-81427173   | NOTEST | 0 | 0 |
| Mir1192   | chr19:23141225-23166911   | NOTEST | 0 | 0 |
| Mir1193   | chr12:109715670-109715791 | NOTEST | 0 | 0 |
| Mir1195   | chr16:30920553-31275697   | NOTEST | 0 | 0 |
| Mir1197   | chr12:109712316-109712436 | NOTEST | 0 | 0 |
| Mir1198   | chr12:55280813-55492647   | NOTEST | 0 | 0 |
| Mir1199   | chr8:84010227-84011720    | LOWDAT | 0 | 0 |
| Mir1224   | chr16:20589581-20605377   | NOTEST | 0 | 0 |
| Mir122a   | chr18:64887755-65751537   | NOTEST | 0 | 0 |
| Mir1231   | chr1:135434579-135585355  | NOTEST | 0 | 0 |
| Mir1247   | chr12:110275384-110278129 | NOTEST | 0 | 0 |
| Mir1249   | chr15:84945719-84987971   | NOTEST | 0 | 0 |
| Mir124a-1 | chr14:64588114-64593961   | LOWDAT | 0 | 0 |
| Mir124a-2 | chr3:17789920-17800071    | NOTEST | 0 | 0 |
| Mir124a-3 | chr2:180894039-180894107  | NOTEST | 0 | 0 |
| Mir1251   | chr10:92081745-92165178   | NOTEST | 0 | 0 |
| Mir1258   | chr18:56525735-56587712   | NOTEST | 0 | 0 |
| Mir125a   | chr17:17830811-17830879   | NOTEST | 0 | 0 |
| Mir125b-1 | chr9:41581338-41592487    | NOTEST | 0 | 0 |
| Mir125b-2 | chr16:77646272-77646343   | NOTEST | 0 | 0 |
| Mir126    | chr2:26581055-26592682    | NOTEST | 0 | 0 |
| Mir1264   | chrX:146962512-147197277  | NOTEST | 0 | 0 |
| Mir126b   | chr2:26581055-26592682    | NOTEST | 0 | 0 |
| Mir127    | chr12:109590168-109595403 | NOTEST | 0 | 0 |
| Mir128-1  | chr1:128103305-128237735  | NOTEST | 0 | 0 |
| Mir128-2  | chr9:112065090-112348925  | NOTEST | 0 | 0 |
| Mir129-1  | chr6:29022618-29022691    | NOTEST | 0 | 0 |
| Mir129-2  | chr2:94241363-94241453    | NOTEST | 0 | 0 |
| Mir1291   | chr15:98517657-98534269   | NOTEST | 0 | 0 |

|           |                           |        |   |   |
|-----------|---------------------------|--------|---|---|
| Mir1298   | chrX:146962512-147197277  | NOTEST | 0 | 0 |
| Mir129b   | chr2:94241363-94241453    | NOTEST | 0 | 0 |
| Mir1306   | chr16:18248882-18289168   | LOWDAT | 0 | 0 |
| Mir130a   | chr2:84741114-84741178    | NOTEST | 0 | 0 |
| Mir130b   | chr16:17113397-17125106   | NOTEST | 0 | 0 |
| Mir130c   | chr9:53384022-53401867    | NOTEST | 0 | 0 |
| Mir132    | chr11:75173681-75173747   | NOTEST | 0 | 0 |
| Mir133a-1 | chr18:10725624-10812217   | NOTEST | 0 | 0 |
| Mir133a-2 | chr2:180370857-180401802  | NOTEST | 0 | 0 |
| Mir133b   | chr1:20682768-20682887    | NOTEST | 0 | 0 |
| Mir133c   | chr2:29346809-29524790    | NOTEST | 0 | 0 |
| Mir134    | chr12:109734138-109734209 | NOTEST | 0 | 0 |
| Mir135a-1 | chr9:106152859-106158138  | NOTEST | 0 | 0 |
| Mir135a-2 | chr10:92072085-92072185   | NOTEST | 0 | 0 |
| Mir135b   | chr1:132191435-132257382  | NOTEST | 0 | 0 |
| Mir136    | chr12:109590168-109595403 | NOTEST | 0 | 0 |
| Mir137    | chr3:118433856-118433929  | NOTEST | 0 | 0 |
| Mir138-1  | chr9:122682875-122682974  | NOTEST | 0 | 0 |
| Mir138-2  | chr8:94324310-94324381    | NOTEST | 0 | 0 |
| Mir139    | chr7:101421690-101512829  | NOTEST | 0 | 0 |
| Mir140    | chr8:107436397-107558595  | NOTEST | 0 | 0 |
| Mir141    | chr6:124717913-124717985  | NOTEST | 0 | 0 |
| Mir142    | chr11:87756840-87756955   | NOTEST | 0 | 0 |
| Mir142b   | chr11:87756840-87756955   | NOTEST | 0 | 0 |
| Mir143    | chr18:61639652-61665538   | NOTEST | 0 | 0 |
| Mir144    | chr11:78073004-78073070   | NOTEST | 0 | 0 |
| Mir145    | chr18:61639652-61665538   | NOTEST | 0 | 0 |
| Mir145b   | chr18:69022198-69022273   | NOTEST | 0 | 0 |
| Mir146    | chr11:43374396-43374461   | NOTEST | 0 | 0 |
| Mir146b   | chr19:46342761-46342870   | NOTEST | 0 | 0 |
| Mir147    | chr2:122637886-122641076  | LOWDAT | 0 | 0 |
| Mir148a   | chr6:51269811-51269910    | NOTEST | 0 | 0 |
| Mir148b   | chr15:103272917-103299864 | NOTEST | 0 | 0 |
| Mir149    | chr1:92831685-92860196    | NOTEST | 0 | 0 |
| Mir150    | chr7:45121756-45121821    | NOTEST | 0 | 0 |
| Mir152    | chr11:96849875-96861202   | NOTEST | 0 | 0 |
| Mir153    | chr12:116485719-117337012 | NOTEST | 0 | 0 |
| Mir154    | chr12:109734980-109749457 | NOTEST | 0 | 0 |
| Mir155    | chr16:84714139-84714204   | NOTEST | 0 | 0 |
| Mir15a    | chr14:61598225-61682373   | NOTEST | 0 | 0 |
| Mir15b    | chr3:69004971-69034623    | NOTEST | 0 | 0 |
| Mir16-1   | chr14:61598225-61682373   | NOTEST | 0 | 0 |
| Mir16-2   | chr3:69004971-69034623    | NOTEST | 0 | 0 |
| Mir1668   | chr8:83715176-83741311    | NOTEST | 0 | 0 |
| Mir17     | chr14:115043670-115043754 | NOTEST | 0 | 0 |
| Mir18     | chr14:115043850-115043946 | NOTEST | 0 | 0 |
| Mir181a-1 | chr1:137966454-137966541  | NOTEST | 0 | 0 |
| Mir181a-2 | chr2:38723373-38926461    | NOTEST | 0 | 0 |
| Mir181b-1 | chr1:137966638-137966718  | NOTEST | 0 | 0 |
| Mir181b-2 | chr2:38723373-38926461    | NOTEST | 0 | 0 |
| Mir181c   | chr8:84178872-84178961    | NOTEST | 0 | 0 |
| Mir181d   | chr8:84178715-84178787    | NOTEST | 0 | 0 |
| Mir182    | chr6:30165917-30165992    | NOTEST | 0 | 0 |



|           |                           |        |   |   |
|-----------|---------------------------|--------|---|---|
| Mir183    | chr6:30169667-30169737    | NOTEST | 0 | 0 |
| Mir1839   | chr7:81523549-81531498    | NOTEST | 0 | 0 |
| Mir184    | chr9:89802259-89802328    | NOTEST | 0 | 0 |
| Mir1843   | chr12:80335846-80436601   | NOTEST | 0 | 0 |
| Mir1843b  | chr1:159232325-159347580  | LOWDAT | 0 | 0 |
| Mir185    | chr16:18300824-18343932   | NOTEST | 0 | 0 |
| Mir186    | chr3:157534396-157548339  | NOTEST | 0 | 0 |
| Mir187    | chr18:24429109-24429170   | NOTEST | 0 | 0 |
| Mir188    | chrX:7158411-7319358      | NOTEST | 0 | 0 |
| Mir1892   | chr12:54645373-54656572   | LOWDAT | 0 | 0 |
| Mir1893   | chr18:6435950-6516108     | LOWDAT | 0 | 0 |
| Mir1894   | chr17:35917195-35932283   | NOTEST | 0 | 0 |
| Mir1895   | chr3:134236494-134262089  | NOTEST | 0 | 0 |
| Mir1896   | chr13:21442174-21453727   | NOTEST | 0 | 0 |
| Mir1897   | chr3:34560380-34677993    | LOWDAT | 0 | 0 |
| Mir1898   | chr15:12117850-12185449   | NOTEST | 0 | 0 |
| Mir1899   | chr9:8246785-8246881      | NOTEST | 0 | 0 |
| Mir18b    | chrX:52742330-52742413    | NOTEST | 0 | 0 |
| Mir190    | chr9:67217084-67559703    | NOTEST | 0 | 0 |
| Mir1900   | chr9:21032037-21039036    | NOTEST | 0 | 0 |
| Mir1901   | chr18:11821087-11945627   | NOTEST | 0 | 0 |
| Mir1902   | chr2:104426481-104494489  | LOWDAT | 0 | 0 |
| Mir1903   | chr8:128359072-128505475  | LOWDAT | 0 | 0 |
| Mir1904   | chr13:108654176-109955969 | NOTEST | 0 | 0 |
| Mir1905   | chr3:88532394-88541394    | NOTEST | 0 | 0 |
| Mir1906-1 | chrX:88759473-88759553    | LOWDAT | 0 | 0 |
| Mir1907   | chr15:50654758-50890041   | NOTEST | 0 | 0 |
| Mir190b   | chr3:90070019-90070099    | NOTEST | 0 | 0 |
| Mir191    | chr9:108568318-108568392  | NOTEST | 0 | 0 |
| Mir1912   | chrX:146962512-147197277  | NOTEST | 0 | 0 |
| Mir192    | chr19:6264843-6264932     | NOTEST | 0 | 0 |
| Mir1928   | chr5:65763520-65826784    | NOTEST | 0 | 0 |
| Mir1929   | chr10:44268357-44364291   | NOTEST | 0 | 0 |
| Mir193    | chr11:79711968-79712034   | NOTEST | 0 | 0 |
| Mir1930   | chr10:77622320-77645990   | NOTEST | 0 | 0 |
| Mir1931   | chr10:93160875-93241342   | NOTEST | 0 | 0 |
| Mir1932   | chr11:119390471-119390561 | NOTEST | 0 | 0 |
| Mir1933   | chr11:21239031-21371267   | NOTEST | 0 | 0 |
| Mir1934   | chr11:69663042-69663125   | NOTEST | 0 | 0 |
| Mir1936   | chr12:102568582-102704869 | NOTEST | 0 | 0 |
| Mir1938   | chr12:40203128-40223189   | NOTEST | 0 | 0 |
| Mir193b   | chr16:13449522-13449601   | NOTEST | 0 | 0 |
| Mir194-1  | chr1:185204167-185329401  | NOTEST | 0 | 0 |
| Mir194-2  | chr19:6264642-6264728     | NOTEST | 0 | 0 |
| Mir1940   | chr13:95325236-95337841   | NOTEST | 0 | 0 |
| Mir1941   | chr15:101349570-101370125 | NOTEST | 0 | 0 |
| Mir1942   | chr15:76170973-76231378   | NOTEST | 0 | 0 |
| Mir1943   | chr15:79360683-79403303   | NOTEST | 0 | 0 |
| Mir1945   | chr16:11254367-11254445   | NOTEST | 0 | 0 |
| Mir1946a  | chr16:32267449-32267583   | NOTEST | 0 | 0 |
| Mir1946b  | chr3:96080595-96161129    | NOTEST | 0 | 0 |
| Mir1947   | chr16:33062520-33125659   | NOTEST | 0 | 0 |
| Mir1948   | chr18:12643532-12737052   | NOTEST | 0 | 0 |

|           |                           |        |   |   |
|-----------|---------------------------|--------|---|---|
| Mir1949   | chr18:35553409-35558316   | NOTEST | 0 | 0 |
| Mir195    | chr11:70235041-70235135   | NOTEST | 0 | 0 |
| Mir1950   | chr6:40529090-40910666    | NOTEST | 0 | 0 |
| Mir1951   | chr2:115581715-115778768  | NOTEST | 0 | 0 |
| Mir1952   | chr2:138819928-138820007  | NOTEST | 0 | 0 |
| Mir1953   | chr2:151967528-151967617  | NOTEST | 0 | 0 |
| Mir1954   | chr2:113220186-113716767  | NOTEST | 0 | 0 |
| Mir1955   | chr2:92184181-92364666    | NOTEST | 0 | 0 |
| Mir1956   | chr3:138526190-138557599  | NOTEST | 0 | 0 |
| Mir1957   | chr8:24484966-24484986    | NOTEST | 0 | 0 |
| Mir1957b  | chr8:111448783-111522107  | NOTEST | 0 | 0 |
| Mir1958   | chr1:63980972-63984483    | NOTEST | 0 | 0 |
| Mir195b   | chr2:56785810-56785907    | NOTEST | 0 | 0 |
| Mir1960   | chr5:30155252-30184593    | NOTEST | 0 | 0 |
| Mir1961   | chr5:92683434-92965759    | NOTEST | 0 | 0 |
| Mir1962   | chr7:135537823-135686294  | NOTEST | 0 | 0 |
| Mir1963   | chr7:29003339-29125151    | NOTEST | 0 | 0 |
| Mir1964   | chr7:29768551-29781419    | NOTEST | 0 | 0 |
| Mir1966   | chr8:105605228-105622218  | NOTEST | 0 | 0 |
| Mir1967   | chr8:124022640-124022722  | NOTEST | 0 | 0 |
| Mir1968   | chr8:13176868-13200624    | NOTEST | 0 | 0 |
| Mir1969   | chr8:70925524-70925618    | NOTEST | 0 | 0 |
| Mir196a-1 | chr11:96265163-96265265   | NOTEST | 0 | 0 |
| Mir196a-2 | chr15:102973349-102973434 | NOTEST | 0 | 0 |
| Mir196b   | chr6:52230080-52230165    | NOTEST | 0 | 0 |
| Mir1970   | chr7:107284774-107591365  | NOTEST | 0 | 0 |
| Mir1971   | chr14:78191372-78191478   | NOTEST | 0 | 0 |
| Mir1981   | chr1:184813067-184845847  | NOTEST | 0 | 0 |
| Mir1982   | chr10:80826655-80829290   | NOTEST | 0 | 0 |
| Mir1983   | chr13:21896917-21897049   | NOTEST | 0 | 0 |
| Mir199a-1 | chr9:21424907-21510186    | NOTEST | 0 | 0 |
| Mir199a-2 | chr1:161987301-162478034  | LOWDAT | 0 | 0 |
| Mir199b   | chr2:32308470-32353304    | NOTEST | 0 | 0 |
| Mir19a    | chr14:115043999-115044081 | NOTEST | 0 | 0 |
| Mir19b-1  | chr14:115044304-115046728 | NOTEST | 0 | 0 |
| Mir19b-2  | chrX:52741982-52742066    | NOTEST | 0 | 0 |
| Mir1a-1   | chr2:180370857-180401802  | NOTEST | 0 | 0 |
| Mir1a-2   | chr18:10725624-10812217   | NOTEST | 0 | 0 |
| Mir1b     | chr18:10725624-10812217   | NOTEST | 0 | 0 |
| Mir200a   | chr4:156054895-156054985  | NOTEST | 0 | 0 |
| Mir200b   | chr4:156055680-156055750  | NOTEST | 0 | 0 |
| Mir200c   | chr6:124718321-124718390  | NOTEST | 0 | 0 |
| Mir201    | chrX:67988095-67988161    | NOTEST | 0 | 0 |
| Mir202    | chr7:139957688-139957760  | NOTEST | 0 | 0 |
| Mir203    | chr12:112130879-112130955 | NOTEST | 0 | 0 |
| Mir204    | chr19:22139116-22989884   | NOTEST | 0 | 0 |
| Mir205    | chr1:193507462-193507530  | NOTEST | 0 | 0 |
| Mir206    | chr1:20679009-20679082    | NOTEST | 0 | 0 |
| Mir207    | chr4:40720153-40757885    | NOTEST | 0 | 0 |
| Mir208a   | chr14:54941920-54966607   | NOTEST | 0 | 0 |
| Mir208b   | chr14:54968786-54994549   | NOTEST | 0 | 0 |
| Mir20a    | chr14:115044156-115044263 | NOTEST | 0 | 0 |
| Mir20b    | chrX:52742112-52742192    | NOTEST | 0 | 0 |

|                   |                           |        |   |   |
|-------------------|---------------------------|--------|---|---|
| Mir21             | chr11:86583864-87555823   | LOWDAT | 0 | 0 |
| Mir210            | chr7:141221383-141221493  | NOTEST | 0 | 0 |
| Mir211            | chr7:64153834-64269759    | NOTEST | 0 | 0 |
| Mir212            | chr11:75173387-75173478   | NOTEST | 0 | 0 |
| Mir2136           | chr9:104426112-104426187  | NOTEST | 0 | 0 |
| Mir2137           | chrX:72987338-73031543    | NOTEST | 0 | 0 |
| Mir2139           | chr4:139962172-139968026  | LOWDAT | 0 | 0 |
| Mir214            | chr1:161987301-162478034  | LOWDAT | 0 | 0 |
| Mir215            | chr1:185204167-185329401  | NOTEST | 0 | 0 |
| Mir216a           | chr11:28757011-28757083   | NOTEST | 0 | 0 |
| Mir216b           | chr11:28746190-28746276   | NOTEST | 0 | 0 |
| Mir216c           | chr11:28746190-28746276   | NOTEST | 0 | 0 |
| Mir217            | chr11:28763727-28763835   | NOTEST | 0 | 0 |
| Mir218-1          | chr5:47983154-48306282    | NOTEST | 0 | 0 |
| Mir218-2          | chr11:35121455-35708507   | NOTEST | 0 | 0 |
| Mir219-1          | chr17:34024982-34025092   | NOTEST | 0 | 0 |
| Mir219-2          | chr2:29845630-29845727    | NOTEST | 0 | 0 |
| Mir219b           | chr2:29845630-29845727    | NOTEST | 0 | 0 |
| Mir219c           | chr17:34024982-34025092   | NOTEST | 0 | 0 |
| Mir21b            | chr3:29082576-29691056    | NOTEST | 0 | 0 |
| Mir21c            | chr8:128278147-128278225  | NOTEST | 0 | 0 |
| Mir22             | chr11:75461538-75466690   | LOWDAT | 0 | 0 |
| Mir221            | chrX:19146293-19146388    | NOTEST | 0 | 0 |
| Mir222            | chrX:19146892-19146971    | NOTEST | 0 | 0 |
| Mir223            | chrX:96239925-96243642    | LOWDAT | 0 | 0 |
| Mir23a            | chr8:84208517-84208592    | NOTEST | 0 | 0 |
| Mir23b            | chr13:62964892-63431745   | LOWDAT | 0 | 0 |
| Mir24-1           | chr13:62964892-63431745   | LOWDAT | 0 | 0 |
| Mir24-2           | chr8:84208814-84208921    | NOTEST | 0 | 0 |
| Mir25             | chr5:138164588-138171862  | NOTEST | 0 | 0 |
| Mir26a-1          | chr9:118926535-119044119  | NOTEST | 0 | 0 |
| Mir26a-2          | chr10:126978716-126999975 | NOTEST | 0 | 0 |
| Mir26b            | chr1:74391608-74397285    | NOTEST | 0 | 0 |
| Mir27a            | chr8:84208671-84208758    | NOTEST | 0 | 0 |
| Mir27b            | chr13:62964892-63431745   | LOWDAT | 0 | 0 |
| Mir28             | chr18:52123524-52123546   | NOTEST | 0 | 0 |
| Mir2861           | chr2:32712806-32712888    | NOTEST | 0 | 0 |
| Mir28b            | chr8:72814598-73352556    | NOTEST | 0 | 0 |
| Mir28c            | chr8:96545953-96545973    | NOTEST | 0 | 0 |
| Mir290            | chr7:3218625-3218708      | NOTEST | 0 | 0 |
| Mir290b           | chr7:3218625-3218708      | NOTEST | 0 | 0 |
| Mir291a           | chr7:3218783-3221015      | LOWDAT | 0 | 0 |
| Mir291b           | chr7:3218783-3221015      | LOWDAT | 0 | 0 |
| Mir292            | chr7:3218783-3221015      | LOWDAT | 0 | 0 |
| Mir292b           | chr7:3218783-3221015      | NOTEST | 0 | 0 |
| Mir293            | chr7:3218783-3221015      | LOWDAT | 0 | 0 |
| Mir294            | chr7:3218783-3221015      | LOWDAT | 0 | 0 |
| Mir295            | chr7:3218783-3221015      | LOWDAT | 0 | 0 |
| Mir296            | chr2:174267046-174267125  | NOTEST | 0 | 0 |
| Mir297-1          | chr14:34645143-34653574   | NOTEST | 0 | 0 |
| Mir297-2          | chr8:104446718-104624396  | NOTEST | 0 | 0 |
| Mir297a-3,Mir297a | chr2:10370450-10595253    | NOTEST | 0 | 0 |
| Mir297a-4         | chr2:10370450-10595253    | NOTEST | 0 | 0 |

|           |                           |        |   |   |
|-----------|---------------------------|--------|---|---|
| Mir297b   | chr2:10370450-10595253    | NOTEST | 0 | 0 |
| Mir297c   | chr1:185537335-185988795  | NOTEST | 0 | 0 |
| Mir298    | chr2:174267503-174267585  | NOTEST | 0 | 0 |
| Mir299    | chr12:109710637-109710700 | NOTEST | 0 | 0 |
| Mir299b   | chr12:109710637-109710700 | NOTEST | 0 | 0 |
| Mir29a    | chr6:31062659-31062747    | NOTEST | 0 | 0 |
| Mir29b-1  | chr6:31063022-31063093    | NOTEST | 0 | 0 |
| Mir29b-2  | chr1:195017398-195037908  | LOWDAT | 0 | 0 |
| Mir29c    | chr1:195017398-195037908  | LOWDAT | 0 | 0 |
| Mir300    | chr12:109724312-109724391 | NOTEST | 0 | 0 |
| Mir301    | chr11:86583864-87555823   | NOTEST | 0 | 0 |
| Mir301b   | chr16:17113397-17125106   | NOTEST | 0 | 0 |
| Mir302a   | chr3:127536713-127553349  | NOTEST | 0 | 0 |
| Mir302b   | chr3:127536713-127553349  | NOTEST | 0 | 0 |
| Mir302c   | chr3:127536713-127553349  | NOTEST | 0 | 0 |
| Mir302d   | chr3:127536713-127553349  | NOTEST | 0 | 0 |
| Mir3057   | chr10:81268171-81291581   | NOTEST | 0 | 0 |
| Mir3058   | chr10:95547006-95564167   | NOTEST | 0 | 0 |
| Mir3059   | chr10:101681486-102391468 | NOTEST | 0 | 0 |
| Mir3060   | chr11:4135159-4160293     | NOTEST | 0 | 0 |
| Mir3061   | chr11:52126745-52126836   | NOTEST | 0 | 0 |
| Mir3062   | chr11:68985700-69008460   | NOTEST | 0 | 0 |
| Mir3063   | chr11:95957163-96005944   | LOWDAT | 0 | 0 |
| Mir3064   | chr11:106780355-106788494 | NOTEST | 0 | 0 |
| Mir3065   | chr11:120007315-120047145 | NOTEST | 0 | 0 |
| Mir3066   | chr12:17348492-17430095   | NOTEST | 0 | 0 |
| Mir3067   | chr12:81026807-81186414   | NOTEST | 0 | 0 |
| Mir3068   | chr12:87428077-87472299   | NOTEST | 0 | 0 |
| Mir3069   | chr12:105030616-105032279 | LOWDAT | 0 | 0 |
| Mir3070a  | chr12:109587942-109588031 | NOTEST | 0 | 0 |
| Mir3070b  | chr12:109588591-109588680 | NOTEST | 0 | 0 |
| Mir3071   | chr12:109590168-109595403 | LOWDAT | 0 | 0 |
| Mir3072   | chr12:109734980-109749457 | NOTEST | 0 | 0 |
| Mir3073   | chr12:112106682-112127573 | NOTEST | 0 | 0 |
| Mir3073b  | chr12:112106682-112127573 | NOTEST | 0 | 0 |
| Mir3074-1 | chr13:62964892-63431745   | NOTEST | 0 | 0 |
| Mir3074-2 | chr8:84208814-84208921    | NOTEST | 0 | 0 |
| Mir3075   | chr14:25459184-25666747   | NOTEST | 0 | 0 |
| Mir3076   | chr14:30549130-30574726   | NOTEST | 0 | 0 |
| Mir3077   | chr14:57798188-57804980   | NOTEST | 0 | 0 |
| Mir3078   | chr14:64588114-64593961   | LOWDAT | 0 | 0 |
| Mir3079   | chr11:5191552-5261610     | NOTEST | 0 | 0 |
| Mir3081   | chr16:44485044-44558870   | NOTEST | 0 | 0 |
| Mir3082   | chr17:25829042-25833361   | NOTEST | 0 | 0 |
| Mir3083   | chr17:26941451-26970645   | NOTEST | 0 | 0 |
| Mir3084   | chr19:60761115-60790693   | NOTEST | 0 | 0 |
| Mir3084-2 | chr19:24919915-24961616   | NOTEST | 0 | 0 |
| Mir3085   | chr19:42280081-42280170   | NOTEST | 0 | 0 |
| Mir3086   | chr19:58911672-58911759   | NOTEST | 0 | 0 |
| Mir3087   | chr2:25428673-25448539    | NOTEST | 0 | 0 |
| Mir3088   | chr2:28700160-28813165    | NOTEST | 0 | 0 |
| Mir3089   | chr2:30721209-30721293    | NOTEST | 0 | 0 |
| Mir3091   | chr2:180257378-180258444  | NOTEST | 0 | 0 |

|           |                           |        |   |   |
|-----------|---------------------------|--------|---|---|
| Mir3092   | chr3:27416161-27710439    | NOTEST | 0 | 0 |
| Mir3093   | chr3:88215170-88215257    | NOTEST | 0 | 0 |
| Mir3094   | chr4:40970905-41025992    | NOTEST | 0 | 0 |
| Mir3095   | chr4:58435251-58553491    | NOTEST | 0 | 0 |
| Mir3097   | chr5:34949447-35033593    | NOTEST | 0 | 0 |
| Mir3098   | chr2:131127411-131604824  | NOTEST | 0 | 0 |
| Mir3099   | chr7:6730582-6976662      | NOTEST | 0 | 0 |
| Mir30a    | chr1:23272268-23272339    | NOTEST | 0 | 0 |
| Mir30b    | chr15:68337414-68337510   | NOTEST | 0 | 0 |
| Mir30c-1  | chr4:120757434-120831579  | NOTEST | 0 | 0 |
| Mir30c-2  | chr1:23291700-23291784    | NOTEST | 0 | 0 |
| Mir30d    | chr15:68341207-68341289   | NOTEST | 0 | 0 |
| Mir30f    | chr4:120757434-120831579  | NOTEST | 0 | 0 |
| Mir31     | chr4:88910556-88910662    | NOTEST | 0 | 0 |
| Mir3100   | chr7:19083848-19093820    | NOTEST | 0 | 0 |
| Mir3101   | chr7:27168432-27178883    | NOTEST | 0 | 0 |
| Mir3102   | chr7:100869745-100932161  | NOTEST | 0 | 0 |
| Mir3103   | chr7:128265696-128298131  | NOTEST | 0 | 0 |
| Mir3104   | chr7:141949750-142004243  | NOTEST | 0 | 0 |
| Mir3106   | chr8:15892544-17535385    | NOTEST | 0 | 0 |
| Mir3107   | chr8:22974835-23150497    | NOTEST | 0 | 0 |
| Mir3108   | chr8:108714643-108961636  | NOTEST | 0 | 0 |
| Mir3109   | chr9:69453682-69491785    | NOTEST | 0 | 0 |
| Mir3110   | chr8:126721780-126721800  | NOTEST | 0 | 0 |
| Mir3112   | chrX:134059175-134111854  | LOWDAT | 0 | 0 |
| Mir32     | chr4:56876012-56947429    | NOTEST | 0 | 0 |
| Mir320    | chr14:70443509-70443591   | NOTEST | 0 | 0 |
| Mir322    | chrX:53053111-53057190    | LOWDAT | 0 | 0 |
| Mir323    | chr12:109712507-109712593 | NOTEST | 0 | 0 |
| Mir324    | chr11:70010182-70015428   | NOTEST | 0 | 0 |
| Mir325    | chr13:107724616-107890064 | NOTEST | 0 | 0 |
| Mir326    | chr7:99535485-99606771    | NOTEST | 0 | 0 |
| Mir328    | chr8:105305600-105310623  | NOTEST | 0 | 0 |
| Mir329    | chr12:109713480-109713577 | NOTEST | 0 | 0 |
| Mir33     | chr15:82147268-82204960   | NOTEST | 0 | 0 |
| Mir330    | chr7:19181169-19206482    | NOTEST | 0 | 0 |
| Mir331    | chr10:93963767-93963863   | NOTEST | 0 | 0 |
| Mir335    | chr6:30733505-30896794    | NOTEST | 0 | 0 |
| Mir337    | chr12:109585788-109585885 | NOTEST | 0 | 0 |
| Mir338    | chr11:120007315-120047145 | NOTEST | 0 | 0 |
| Mir339    | chr5:139359738-139460534  | NOTEST | 0 | 0 |
| Mir340    | chr11:50025330-50125719   | NOTEST | 0 | 0 |
| Mir341    | chr12:109603944-109661711 | NOTEST | 0 | 0 |
| Mir343    | chr7:19382038-19404104    | NOTEST | 0 | 0 |
| Mir344    | chr7:61705849-61927574    | NOTEST | 0 | 0 |
| Mir344-2  | chr7:61940026-61940106    | NOTEST | 0 | 0 |
| Mir344b   | chr7:61705849-61927574    | NOTEST | 0 | 0 |
| Mir344c   | chr7:61705849-61927574    | NOTEST | 0 | 0 |
| Mir344d-1 | chr7:61683123-61683192    | NOTEST | 0 | 0 |
| Mir344d-2 | chr7:61685271-61685351    | NOTEST | 0 | 0 |
| Mir344d-3 | chr7:61705849-61927574    | NOTEST | 0 | 0 |
| Mir344e   | chr7:61705849-61927574    | NOTEST | 0 | 0 |
| Mir344f   | chr7:62046180-62046248    | NOTEST | 0 | 0 |



|           |                           |        |   |   |
|-----------|---------------------------|--------|---|---|
| Mir344g   | chr7:61943900-61982359    | NOTEST | 0 | 0 |
| Mir344h-1 | chr7:61705849-61927574    | NOTEST | 0 | 0 |
| Mir344i   | chr7:62085222-62085310    | NOTEST | 0 | 0 |
| Mir345    | chr12:108836972-108837068 | NOTEST | 0 | 0 |
| Mir346    | chr14:34820135-35581115   | NOTEST | 0 | 0 |
| Mir3470a  | chr11:3202352-3479831     | NOTEST | 0 | 0 |
| Mir3470b  | chr7:143948404-144470935  | NOTEST | 0 | 0 |
| Mir3471-1 | chr5:23787743-24161231    | NOTEST | 0 | 0 |
| Mir3473   | chr15:100038663-100219473 | NOTEST | 0 | 0 |
| Mir3473c  | chr1:191997202-192092599  | NOTEST | 0 | 0 |
| Mir3473d  | chr8:111003185-111031751  | NOTEST | 0 | 0 |
| Mir3473f  | chr3:103193822-103854618  | NOTEST | 0 | 0 |
| Mir3473g  | chr2:126890394-126933235  | NOTEST | 0 | 0 |
| Mir3474   | chr2:158624912-158639211  | NOTEST | 0 | 0 |
| Mir3475   | chrX:140310947-140311012  | NOTEST | 0 | 0 |
| Mir34a    | chr4:150068453-150068555  | NOTEST | 0 | 0 |
| Mir34b    | chr9:51103561-51103645    | NOTEST | 0 | 0 |
| Mir34c    | chr9:51103033-51103110    | NOTEST | 0 | 0 |
| Mir350    | chr1:176733652-176807124  | NOTEST | 0 | 0 |
| Mir351    | chrX:53053111-53057190    | LOWDAT | 0 | 0 |
| Mir3535   | chr1:86344718-86359455    | NOTEST | 0 | 0 |
| Mir3544   | chr12:109585788-109585885 | NOTEST | 0 | 0 |
| Mir3547   | chr17:25240169-25256364   | NOTEST | 0 | 0 |
| Mir3569   | chr7:30589379-30589437    | NOTEST | 0 | 0 |
| Mir3572   | chr7:3645268-3677553      | NOTEST | 0 | 0 |
| Mir362    | chrX:7158411-7319358      | NOTEST | 0 | 0 |
| Mir3620   | chrX:150547384-150570622  | NOTEST | 0 | 0 |
| Mir363    | chrX:52741692-52741767    | NOTEST | 0 | 0 |
| Mir365-1  | chr16:13453839-13453926   | NOTEST | 0 | 0 |
| Mir365-2  | chr11:79726399-79726511   | NOTEST | 0 | 0 |
| Mir367    | chr3:127536713-127553349  | NOTEST | 0 | 0 |
| Mir369    | chr12:109734980-109749457 | NOTEST | 0 | 0 |
| Mir370    | chr12:109603944-109661711 | NOTEST | 0 | 0 |
| Mir374    | chrX:103560909-103623754  | NOTEST | 0 | 0 |
| Mir374c   | chrX:103560909-103623754  | NOTEST | 0 | 0 |
| Mir375    | chr1:74900657-74900721    | NOTEST | 0 | 0 |
| Mir376a   | chr12:109723780-109723848 | NOTEST | 0 | 0 |
| Mir376b   | chr12:109723457-109723539 | NOTEST | 0 | 0 |
| Mir376c   | chr12:109722717-109722802 | NOTEST | 0 | 0 |
| Mir377    | chr12:109734980-109749457 | NOTEST | 0 | 0 |
| Mir378    | chr9:71844251-72111819    | NOTEST | 0 | 0 |
| Mir378b   | chr11:88339381-88718267   | NOTEST | 0 | 0 |
| Mir378c   | chr3:97309255-97411316    | NOTEST | 0 | 0 |
| Mir379    | chr12:109709059-109709125 | NOTEST | 0 | 0 |
| Mir380    | chr12:109711802-109711863 | NOTEST | 0 | 0 |
| Mir381    | chr12:109726821-109726896 | NOTEST | 0 | 0 |
| Mir382    | chr12:109733770-109733846 | NOTEST | 0 | 0 |
| Mir383    | chr8:37522553-38661508    | NOTEST | 0 | 0 |
| Mir384    | chrX:105344281-105344369  | NOTEST | 0 | 0 |
| Mir3960   | chr2:32712899-32712972    | NOTEST | 0 | 0 |
| Mir3962   | chr7:144929930-144939925  | LOWDAT | 0 | 0 |
| Mir3963   | chr2:134786163-135475258  | NOTEST | 0 | 0 |
| Mir3964   | chr14:109460229-109490814 | NOTEST | 0 | 0 |

|                   |                           |        |   |   |
|-------------------|---------------------------|--------|---|---|
| Mir3965           | chr7:99641529-99641549    | NOTEST | 0 | 0 |
| Mir3966           | chr10:97423477-97423562   | NOTEST | 0 | 0 |
| Mir3967           | chr2:22622326-22693877    | NOTEST | 0 | 0 |
| Mir3968           | chr11:115440544-115448268 | NOTEST | 0 | 0 |
| Mir3969           | chr5:87595901-87595993    | NOTEST | 0 | 0 |
| Mir3970           | chr13:27010322-27010345   | NOTEST | 0 | 0 |
| Mir3971           | chr11:75531693-75577572   | NOTEST | 0 | 0 |
| Mir409            | chr12:109734980-109749457 | NOTEST | 0 | 0 |
| Mir410            | chr12:109734980-109749457 | LOWDAT | 0 | 0 |
| Mir411            | chr12:109710174-109710256 | NOTEST | 0 | 0 |
| Mir412            | chr12:109734980-109749457 | NOTEST | 0 | 0 |
| Mir421            | chrX:77164402-77475936    | NOTEST | 0 | 0 |
| Mir423            | chr11:77044291-77078437   | NOTEST | 0 | 0 |
| Mir425            | chr9:108568776-108568861  | NOTEST | 0 | 0 |
| Mir429            | chr4:156053904-156053987  | NOTEST | 0 | 0 |
| Mir431            | chr12:109590168-109595403 | NOTEST | 0 | 0 |
| Mir432            | chr12:109590168-109595403 | NOTEST | 0 | 0 |
| Mir433            | chr12:109590168-109595403 | LOWDAT | 0 | 0 |
| Mir434            | chr12:109590168-109595403 | NOTEST | 0 | 0 |
| Mir448            | chrX:146962512-147197277  | NOTEST | 0 | 0 |
| Mir449a           | chr13:113035378-113091135 | NOTEST | 0 | 0 |
| Mir449b           | chr13:113035378-113091135 | NOTEST | 0 | 0 |
| Mir449c           | chr13:113035378-113091135 | NOTEST | 0 | 0 |
| Mir450-1          | chrX:53048153-53048244    | NOTEST | 0 | 0 |
| Mir450-2          | chrX:53048298-53048367    | NOTEST | 0 | 0 |
| Mir450b           | chrX:53047996-53048078    | NOTEST | 0 | 0 |
| Mir451            | chr11:78073169-78073241   | NOTEST | 0 | 0 |
| Mir452            | chrX:72257431-72274721    | NOTEST | 0 | 0 |
| Mir453            | chr12:109734980-109749457 | NOTEST | 0 | 0 |
| Mir455            | chr4:63215411-63334990    | NOTEST | 0 | 0 |
| Mir463            | chrX:66799222-66799297    | NOTEST | 0 | 0 |
| Mir465            | chrX:66839051-66839125    | NOTEST | 0 | 0 |
| Mir465b-1         | chrX:66835763-66835842    | NOTEST | 0 | 0 |
| Mir465c-1         | chrX:66832516-66832597    | NOTEST | 0 | 0 |
| Mir465d           | chrX:66822655-66822713    | NOTEST | 0 | 0 |
| Mir466            | chr14:112021429-112058438 | NOTEST | 0 | 0 |
| Mir4660           | chr12:70244534-70669399   | NOTEST | 0 | 0 |
| Mir466b-2,Mir466b | chr2:3513064-3526376      | LOWDAT | 0 | 0 |
| Mir466b-3         | chr2:3513064-3526376      | NOTEST | 0 | 0 |
| Mir466d           | chr2:5293456-5714762      | NOTEST | 0 | 0 |
| Mir466f-1         | chr19:12071789-12413554   | NOTEST | 0 | 0 |
| Mir466f-2         | chr7:28451984-28482345    | NOTEST | 0 | 0 |
| Mir466f-3         | chr14:75004109-75388146   | NOTEST | 0 | 0 |
| Mir466g           | chr8:108470104-108667190  | NOTEST | 0 | 0 |
| Mir466h           | chr4:81476308-81487013    | NOTEST | 0 | 0 |
| Mir466i           | chr13:17715961-17805097   | NOTEST | 0 | 0 |
| Mir466n           | chr11:114344525-114757886 | NOTEST | 0 | 0 |
| Mir466p           | chr18:64887755-65751537   | NOTEST | 0 | 0 |
| Mir467a-1         | chr2:10370450-10595253    | LOWDAT | 0 | 0 |
| Mir467a-10        | chr12:37880704-38633410   | NOTEST | 0 | 0 |
| Mir467a-2         | chr2:10370450-10595253    | NOTEST | 0 | 0 |
| Mir467a-3         | chrX:164090186-164118859  | NOTEST | 0 | 0 |
| Mir467a-5         | chr2:10370450-10595253    | NOTEST | 0 | 0 |

|           |                           |        |   |   |
|-----------|---------------------------|--------|---|---|
| Mir467a-7 | chr2:10370450-10595253    | NOTEST | 0 | 0 |
| Mir467a-9 | chr2:10370450-10595253    | NOTEST | 0 | 0 |
| Mir467b   | chr2:10370450-10595253    | NOTEST | 0 | 0 |
| Mir467c   | chr11:86415843-86544807   | NOTEST | 0 | 0 |
| Mir467d   | chr2:10370450-10595253    | NOTEST | 0 | 0 |
| Mir467e   | chr1:10324718-10865874    | NOTEST | 0 | 0 |
| Mir467f   | chr18:52767810-52915931   | NOTEST | 0 | 0 |
| Mir468    | chr6:81896598-81896676    | NOTEST | 0 | 0 |
| Mir470    | chrX:66813950-66814025    | NOTEST | 0 | 0 |
| Mir471    | chrX:66792594-66792661    | NOTEST | 0 | 0 |
| Mir483    | chr7:142650767-142670356  | NOTEST | 0 | 0 |
| Mir484    | chr16:14159625-14159692   | NOTEST | 0 | 0 |
| Mir485    | chr12:109734901-109734974 | NOTEST | 0 | 0 |
| Mir486    | chr8:22974835-23150497    | NOTEST | 0 | 0 |
| Mir487b   | chr12:109727332-109727414 | NOTEST | 0 | 0 |
| Mir488    | chr1:158362303-158691786  | NOTEST | 0 | 0 |
| Mir489    | chr6:3685719-3764713      | NOTEST | 0 | 0 |
| Mir490    | chr6:36333137-36524774    | NOTEST | 0 | 0 |
| Mir491    | chr4:88094629-88411011    | NOTEST | 0 | 0 |
| Mir493    | chr12:109580232-109580315 | NOTEST | 0 | 0 |
| Mir494    | chr12:109715317-109715402 | NOTEST | 0 | 0 |
| Mir495    | chr12:109718753-109718816 | NOTEST | 0 | 0 |
| Mir496    | chr12:109734980-109749457 | NOTEST | 0 | 0 |
| Mir496b   | chr19:16132830-16387453   | NOTEST | 0 | 0 |
| Mir497    | chr11:70234691-70234816   | NOTEST | 0 | 0 |
| Mir497b   | chr11:70234691-70234816   | NOTEST | 0 | 0 |
| Mir499    | chr2:155611242-155692384  | NOTEST | 0 | 0 |
| Mir500    | chrX:7158411-7319358      | NOTEST | 0 | 0 |
| Mir501    | chrX:7158411-7319358      | NOTEST | 0 | 0 |
| Mir503    | chrX:53053111-53057190    | LOWDAT | 0 | 0 |
| Mir504    | chrX:59062145-59585572    | NOTEST | 0 | 0 |
| Mir5046   | chr19:6829083-6840627     | LOWDAT | 0 | 0 |
| Mir505    | chrX:60223289-60403981    | NOTEST | 0 | 0 |
| Mir509    | chrX:68010104-68010179    | NOTEST | 0 | 0 |
| Mir5098   | chr5:77265493-77283697    | NOTEST | 0 | 0 |
| Mir5100   | chr11:60728397-60732951   | NOTEST | 0 | 0 |
| Mir5101   | chr12:75818317-76110928   | NOTEST | 0 | 0 |
| Mir5103   | chr1:34433120-34433199    | NOTEST | 0 | 0 |
| Mir5104   | chr10:7832469-7870397     | NOTEST | 0 | 0 |
| Mir5106   | chr4:44221194-44221267    | NOTEST | 0 | 0 |
| Mir5107   | chr18:60803848-60812652   | NOTEST | 0 | 0 |
| Mir5108   | chr10:61715262-61783864   | NOTEST | 0 | 0 |
| Mir511    | chr2:14229413-14332023    | NOTEST | 0 | 0 |
| Mir5112   | chr18:82720280-82720340   | NOTEST | 0 | 0 |
| Mir5113   | chr15:80711312-80941086   | LOWDAT | 0 | 0 |
| Mir5114   | chr19:44293675-44306862   | LOWDAT | 0 | 0 |
| Mir5116   | chrX:56585511-56597919    | LOWDAT | 0 | 0 |
| Mir5119   | chr11:98262605-98262662   | NOTEST | 0 | 0 |
| Mir5120   | chr9:107399879-107529343  | NOTEST | 0 | 0 |
| Mir5121   | chr7:45125562-45128745    | NOTEST | 0 | 0 |
| Mir5122   | chr4:133369771-133423698  | LOWDAT | 0 | 0 |
| Mir5123   | chr4:40804581-40854537    | NOTEST | 0 | 0 |
| Mir5124   | chr3:93428490-93428511    | NOTEST | 0 | 0 |

|           |                           |        |   |   |
|-----------|---------------------------|--------|---|---|
| Mir5125   | chr12:48219729-48301462   | NOTEST | 0 | 0 |
| Mir5126   | chr1:84369838-84696221    | NOTEST | 0 | 0 |
| Mir5127   | chr18:81992009-81992080   | NOTEST | 0 | 0 |
| Mir5128   | chr9:113930933-114026751  | NOTEST | 0 | 0 |
| Mir5129   | chr2:44983511-45114084    | NOTEST | 0 | 0 |
| Mir5130   | chr14:102976580-102982637 | LOWDAT | 0 | 0 |
| Mir5131   | chr14:45593170-45658143   | LOWDAT | 0 | 0 |
| Mir5132   | chrX:74013913-74023936    | NOTEST | 0 | 0 |
| Mir5133   | chr9:62122517-62122594    | NOTEST | 0 | 0 |
| Mir5134   | chr17:24223231-24251409   | NOTEST | 0 | 0 |
| Mir5135   | chr12:76533133-76533212   | NOTEST | 0 | 0 |
| Mir5136   | chr19:8883877-8890759     | NOTEST | 0 | 0 |
| Mir532    | chrX:7158411-7319358      | NOTEST | 0 | 0 |
| Mir539    | chr12:109728128-109728202 | NOTEST | 0 | 0 |
| Mir540    | chr12:109586079-109586146 | NOTEST | 0 | 0 |
| Mir541    | chr12:109734980-109749457 | NOTEST | 0 | 0 |
| Mir542    | chrX:53049402-53049487    | NOTEST | 0 | 0 |
| Mir543    | chr12:109717257-109717333 | NOTEST | 0 | 0 |
| Mir544    | chr8:110142537-110168206  | NOTEST | 0 | 0 |
| Mir547    | chrX:67988373-67988451    | NOTEST | 0 | 0 |
| Mir551b   | chr3:29082576-29691056    | NOTEST | 0 | 0 |
| Mir5615-1 | chr10:81104613-81104675   | NOTEST | 0 | 0 |
| Mir5615-2 | chr10:81104613-81104675   | NOTEST | 0 | 0 |
| Mir5616   | chr4:149518240-149566437  | NOTEST | 0 | 0 |
| Mir5617   | chrX:20848542-20920918    | NOTEST | 0 | 0 |
| Mir5618   | chr9:7764076-7794332      | NOTEST | 0 | 0 |
| Mir5619   | chr5:104047010-104065367  | NOTEST | 0 | 0 |
| Mir5620   | chr7:7282315-7299511      | NOTEST | 0 | 0 |
| Mir5621   | chr11:115765432-115799033 | NOTEST | 0 | 0 |
| Mir5622   | chr2:152847963-152895321  | NOTEST | 0 | 0 |
| Mir5623   | chr19:57611033-58133340   | NOTEST | 0 | 0 |
| Mir5624   | chr13:93771678-93943016   | NOTEST | 0 | 0 |
| Mir5625   | chr5:30647935-30659729    | NOTEST | 0 | 0 |
| Mir5626   | chr9:70405693-70405753    | NOTEST | 0 | 0 |
| Mir5627   | chr12:44210312-44210373   | NOTEST | 0 | 0 |
| Mir568    | chr16:43640654-43640737   | NOTEST | 0 | 0 |
| Mir5709   | chr17:66666847-67354459   | NOTEST | 0 | 0 |
| Mir5710   | chr9:54699558-54716317    | NOTEST | 0 | 0 |
| Mir574    | chr5:64970074-65041901    | NOTEST | 0 | 0 |
| Mir582    | chr13:108654176-109955969 | NOTEST | 0 | 0 |
| Mir592    | chr6:27275120-28134369    | NOTEST | 0 | 0 |
| Mir598    | chr14:63606529-63820410   | NOTEST | 0 | 0 |
| Mir599    | chr15:35371545-35931229   | NOTEST | 0 | 0 |
| Mir615    | chr15:103014007-103017429 | NOTEST | 0 | 0 |
| Mir6236   | chr9:110281286-110281409  | NOTEST | 0 | 0 |
| Mir6237   | chr9:9660890-10904775     | NOTEST | 0 | 0 |
| Mir6238   | chr7:53891760-53891889    | NOTEST | 0 | 0 |
| Mir6239   | chr14:116925296-117979529 | NOTEST | 0 | 0 |
| Mir6241   | chr14:118258633-118258736 | NOTEST | 0 | 0 |
| Mir6244   | chr9:52111984-52168111    | NOTEST | 0 | 0 |
| Mir6335   | chr2:67781042-67781140    | NOTEST | 0 | 0 |
| Mir6336   | chr2:40596772-42653598    | NOTEST | 0 | 0 |
| Mir6337   | chr2:65364295-65364400    | NOTEST | 0 | 0 |

|         |                           |        |   |   |
|---------|---------------------------|--------|---|---|
| Mir6338 | chr11:72388755-72388864   | NOTEST | 0 | 0 |
| Mir6339 | chr2:130012339-130050399  | NOTEST | 0 | 0 |
| Mir6340 | chr2:173659844-173702182  | NOTEST | 0 | 0 |
| Mir6341 | chr1:12425985-12426106    | NOTEST | 0 | 0 |
| Mir6342 | chr1:29421487-29421612    | NOTEST | 0 | 0 |
| Mir6343 | chr1:76509559-76509643    | NOTEST | 0 | 0 |
| Mir6344 | chr1:82131915-82132019    | NOTEST | 0 | 0 |
| Mir6345 | chr1:93343644-93367618    | NOTEST | 0 | 0 |
| Mir6348 | chr1:168490642-168490762  | NOTEST | 0 | 0 |
| Mir6349 | chr1:39186895-39186992    | NOTEST | 0 | 0 |
| Mir6350 | chr1:47467020-47467125    | NOTEST | 0 | 0 |
| Mir6352 | chr1:77367184-77515088    | NOTEST | 0 | 0 |
| Mir6353 | chr1:84036292-84284645    | NOTEST | 0 | 0 |
| Mir6354 | chr11:62951192-63386069   | NOTEST | 0 | 0 |
| Mir6355 | chr18:59579629-59579735   | NOTEST | 0 | 0 |
| Mir6356 | chr18:68739399-68739501   | NOTEST | 0 | 0 |
| Mir6357 | chr18:70508679-70530321   | NOTEST | 0 | 0 |
| Mir6358 | chr18:76170551-76170652   | NOTEST | 0 | 0 |
| Mir6359 | chr18:88971789-89131014   | NOTEST | 0 | 0 |
| Mir6360 | chr18:23752332-23893861   | NOTEST | 0 | 0 |
| Mir6361 | chr18:32880572-32880673   | NOTEST | 0 | 0 |
| Mir6362 | chr5:29789010-29970488    | NOTEST | 0 | 0 |
| Mir6363 | chr16:50726750-50732773   | NOTEST | 0 | 0 |
| Mir6364 | chr2:166566344-166722152  | NOTEST | 0 | 0 |
| Mir6365 | chr16:13471079-13471180   | NOTEST | 0 | 0 |
| Mir6366 | chr16:18165088-18165170   | NOTEST | 0 | 0 |
| Mir6367 | chr19:8989283-9076926     | LOWDAT | 0 | 0 |
| Mir6368 | chr13:28460033-28885422   | NOTEST | 0 | 0 |
| Mir6369 | chr5:30933142-31348845    | NOTEST | 0 | 0 |
| Mir6370 | chr6:19555341-19555461    | NOTEST | 0 | 0 |
| Mir6372 | chr11:25616845-26210576   | NOTEST | 0 | 0 |
| Mir6373 | chr6:102794383-102794485  | NOTEST | 0 | 0 |
| Mir6374 | chr6:83362373-83441678    | NOTEST | 0 | 0 |
| Mir6375 | chr6:85790139-85790234    | NOTEST | 0 | 0 |
| Mir6376 | chr6:88084472-88105304    | NOTEST | 0 | 0 |
| Mir6378 | chr3:34922544-34922651    | NOTEST | 0 | 0 |
| Mir6380 | chr11:47739591-48074583   | NOTEST | 0 | 0 |
| Mir6381 | chr3:142620662-142638008  | NOTEST | 0 | 0 |
| Mir6382 | chrX:106309825-106309935  | NOTEST | 0 | 0 |
| Mir6383 | chrX:136183244-136183360  | NOTEST | 0 | 0 |
| Mir6384 | chrX:52272426-52619047    | NOTEST | 0 | 0 |
| Mir6385 | chr9:58217179-58249786    | NOTEST | 0 | 0 |
| Mir6386 | chr9:92250193-92272561    | NOTEST | 0 | 0 |
| Mir6387 | chr12:15791726-15816785   | NOTEST | 0 | 0 |
| Mir6388 | chr12:115695719-115695794 | NOTEST | 0 | 0 |
| Mir6389 | chr7:57581060-57581162    | NOTEST | 0 | 0 |
| Mir6390 | chr14:105623641-105623770 | NOTEST | 0 | 0 |
| Mir6391 | chr14:118482691-118706219 | NOTEST | 0 | 0 |
| Mir6392 | chr15:84167815-84189521   | NOTEST | 0 | 0 |
| Mir6393 | chr15:87795849-87795943   | NOTEST | 0 | 0 |
| Mir6394 | chr7:96210636-96908554    | NOTEST | 0 | 0 |
| Mir6395 | chr8:34154562-34170847    | NOTEST | 0 | 0 |
| Mir6396 | chr8:122619470-122622735  | NOTEST | 0 | 0 |



|                   |                           |        |   |   |
|-------------------|---------------------------|--------|---|---|
| Mir6397           | chr4:108043829-108118547  | NOTEST | 0 | 0 |
| Mir6398           | chr4:123349632-123684360  | NOTEST | 0 | 0 |
| Mir6399           | chr4:137993455-138207079  | NOTEST | 0 | 0 |
| Mir6400           | chr4:15917239-15945507    | NOTEST | 0 | 0 |
| Mir6401           | chr7:139779017-139779126  | NOTEST | 0 | 0 |
| Mir6402           | chr4:91250766-91399984    | NOTEST | 0 | 0 |
| Mir6403           | chr4:134561689-134704290  | NOTEST | 0 | 0 |
| Mir6404           | chr7:143933114-143933208  | NOTEST | 0 | 0 |
| Mir6405           | chr19:44757393-44837869   | NOTEST | 0 | 0 |
| Mir6406           | chr11:68209363-68386826   | NOTEST | 0 | 0 |
| Mir6407           | chr19:52991179-53038654   | NOTEST | 0 | 0 |
| Mir6408           | chr10:60923022-60923113   | NOTEST | 0 | 0 |
| Mir6409           | chr10:75954513-76009589   | LOWDAT | 0 | 0 |
| Mir6410           | chr10:78434798-78434902   | NOTEST | 0 | 0 |
| Mir6411           | chr10:104287268-104287376 | NOTEST | 0 | 0 |
| Mir6412           | chr17:30215523-30576287   | NOTEST | 0 | 0 |
| Mir6413           | chr10:20297580-20297688   | NOTEST | 0 | 0 |
| Mir6414           | chr5:41891341-41891423    | NOTEST | 0 | 0 |
| Mir6415           | chr5:92443872-92505608    | NOTEST | 0 | 0 |
| Mir6416           | chr7:64153834-64269759    | NOTEST | 0 | 0 |
| Mir6417           | chr5:52135901-52136017    | NOTEST | 0 | 0 |
| Mir6418           | chr5:137528128-137533229  | NOTEST | 0 | 0 |
| Mir6419           | chr2:17346733-17731068    | NOTEST | 0 | 0 |
| Mir6420           | chr17:64440805-64440907   | NOTEST | 0 | 0 |
| Mir6481           | chr3:99141089-99220203    | NOTEST | 0 | 0 |
| Mir6516           | chr11:117076782-117078955 | NOTEST | 0 | 0 |
| Mir653            | chr6:3685719-3764713      | NOTEST | 0 | 0 |
| Mir6537           | chr7:25091114-25132460    | NOTEST | 0 | 0 |
| Mir6538           | chr12:26306793-26415262   | NOTEST | 0 | 0 |
| Mir6539           | chr14:67751927-67933572   | NOTEST | 0 | 0 |
| Mir654            | chr12:109723217-109723301 | NOTEST | 0 | 0 |
| Mir6540           | chr16:42248560-42340651   | NOTEST | 0 | 0 |
| Mir6541           | chr14:62837689-62956886   | NOTEST | 0 | 0 |
| Mir6546           | chr1:171064590-171064652  | NOTEST | 0 | 0 |
| Mir664            | chr1:185204167-185329401  | NOTEST | 0 | 0 |
| Mir665            | chr12:109586313-109586407 | NOTEST | 0 | 0 |
| Mir666            | chr12:109717084-109717183 | NOTEST | 0 | 0 |
| Mir667            | chr12:109720005-109720097 | NOTEST | 0 | 0 |
| Mir668            | chr12:109734731-109734797 | NOTEST | 0 | 0 |
| Mir669a-1         | chr17:50733126-51613053   | NOTEST | 0 | 0 |
| Mir669a-2         | chr2:10370450-10595253    | NOTEST | 0 | 0 |
| Mir669a-3         | chr2:10370450-10595253    | NOTEST | 0 | 0 |
| Mir669a-4,Mir669p | chr17:50733126-51613053   | LOWDAT | 0 | 0 |
| Mir669b           | chr3:114863252-115125764  | NOTEST | 0 | 0 |
| Mir669c           | chr12:90998491-91384409   | NOTEST | 0 | 0 |
| Mir669e           | chr8:39467447-40227787    | NOTEST | 0 | 0 |
| Mir669g           | chr2:10370450-10595253    | NOTEST | 0 | 0 |
| Mir669h           | chr10:113586577-113614774 | NOTEST | 0 | 0 |
| Mir669i           | chr2:10370450-10595253    | NOTEST | 0 | 0 |
| Mir669j           | chr2:10370450-10595253    | NOTEST | 0 | 0 |
| Mir669k           | chr2:10370450-10595253    | NOTEST | 0 | 0 |
| Mir669m-1         | chr5:78929669-79515904    | NOTEST | 0 | 0 |
| Mir669m-2         | chrX:77164402-77475936    | NOTEST | 0 | 0 |

|           |                           |        |   |   |
|-----------|---------------------------|--------|---|---|
| Mir669p-1 | chr17:50733126-51613053   | NOTEST | 0 | 0 |
| Mir670    | chr2:94261299-94261399    | NOTEST | 0 | 0 |
| Mir671    | chr5:24586749-24592486    | LOWDAT | 0 | 0 |
| Mir6715   | chr19:55180884-55196313   | NOTEST | 0 | 0 |
| Mir672    | chrX:104077434-104201117  | NOTEST | 0 | 0 |
| Mir673    | chr12:109571989-109572080 | NOTEST | 0 | 0 |
| Mir674    | chr2:117185126-117185226  | NOTEST | 0 | 0 |
| Mir675    | chr7:142575531-142578146  | LOWDAT | 0 | 0 |
| Mir676    | chrX:99975605-100400760   | NOTEST | 0 | 0 |
| Mir6769b  | chr8:71626711-71671757    | NOTEST | 0 | 0 |
| Mir677    | chr10:128083306-128090388 | NOTEST | 0 | 0 |
| Mir678    | chr10:76207221-76237865   | LOWDAT | 0 | 0 |
| Mir679    | chr12:109715576-109715650 | NOTEST | 0 | 0 |
| Mir680-2  | chr9:22055459-22389206    | NOTEST | 0 | 0 |
| Mir680-3  | chr10:25867369-25894505   | NOTEST | 0 | 0 |
| Mir681    | chr12:69746847-69987002   | NOTEST | 0 | 0 |
| Mir682    | chr13:75645045-75645141   | NOTEST | 0 | 0 |
| Mir683-1  | chr13:50544625-50544734   | NOTEST | 0 | 0 |
| Mir683-2  | chr13:50600971-50601080   | NOTEST | 0 | 0 |
| Mir684-1  | chrX:7753088-7753173      | NOTEST | 0 | 0 |
| Mir684-2  | chr4:11134096-11134182    | NOTEST | 0 | 0 |
| Mir687    | chr14:73195501-73325791   | NOTEST | 0 | 0 |
| Mir688    | chr15:102671791-102671866 | NOTEST | 0 | 0 |
| Mir6896   | chr1:33908224-34308662    | NOTEST | 0 | 0 |
| Mir6897   | chr1:36140027-36244302    | NOTEST | 0 | 0 |
| Mir6898   | chr1:36335729-36369181    | NOTEST | 0 | 0 |
| Mir6899   | chr1:64035670-64121389    | NOTEST | 0 | 0 |
| Mir690    | chr16:28158583-28753243   | NOTEST | 0 | 0 |
| Mir6900   | chr1:92439718-92473758    | NOTEST | 0 | 0 |
| Mir6901   | chr1:93235896-93296448    | NOTEST | 0 | 0 |
| Mir6902   | chr1:93343644-93367618    | NOTEST | 0 | 0 |
| Mir6903   | chr1:133702673-133753747  | NOTEST | 0 | 0 |
| Mir6904   | chr1:180568974-180601254  | NOTEST | 0 | 0 |
| Mir6905   | chr10:24869985-24913529   | NOTEST | 0 | 0 |
| Mir6906   | chr10:60106256-60133913   | NOTEST | 0 | 0 |
| Mir6907   | chr10:78400361-78413043   | NOTEST | 0 | 0 |
| Mir6908   | chr10:78436746-78464948   | NOTEST | 0 | 0 |
| Mir6909   | chr10:79526428-79533787   | NOTEST | 0 | 0 |
| Mir691    | chr16:73892305-74410912   | NOTEST | 0 | 0 |
| Mir6910   | chr10:79697304-80369637   | NOTEST | 0 | 0 |
| Mir6911   | chr10:79697304-80369637   | NOTEST | 0 | 0 |
| Mir6912   | chr10:80602879-80615783   | NOTEST | 0 | 0 |
| Mir6913   | chr10:81384427-81388352   | NOTEST | 0 | 0 |
| Mir6914   | chr10:128377123-128394006 | NOTEST | 0 | 0 |
| Mir6915   | chr10:128377123-128394006 | NOTEST | 0 | 0 |
| Mir6916   | chr10:128510249-128525859 | NOTEST | 0 | 0 |
| Mir6917   | chr10:128569367-128589501 | NOTEST | 0 | 0 |
| Mir6918   | chr11:4874002-4894200     | NOTEST | 0 | 0 |
| Mir6919   | chr11:50225334-50235103   | NOTEST | 0 | 0 |
| Mir692-1  | chr17:6895228-6895337     | NOTEST | 0 | 0 |
| Mir692-2b | chr4:125490830-125714173  | NOTEST | 0 | 0 |
| Mir6920   | chr11:53350766-53421830   | NOTEST | 0 | 0 |
| Mir6921   | chr11:60105012-60220604   | NOTEST | 0 | 0 |

|         |                           |        |   |   |
|---------|---------------------------|--------|---|---|
| Mir6922 | chr11:60105012-60220604   | NOTEST | 0 | 0 |
| Mir6923 | chr11:67078299-67102291   | NOTEST | 0 | 0 |
| Mir6924 | chr11:69881566-69895539   | NOTEST | 0 | 0 |
| Mir6925 | chr11:70700547-70731970   | NOTEST | 0 | 0 |
| Mir6926 | chr11:74849263-74897080   | NOTEST | 0 | 0 |
| Mir6927 | chr11:97663411-97685458   | NOTEST | 0 | 0 |
| Mir6928 | chr11:101009451-101063717 | NOTEST | 0 | 0 |
| Mir6929 | chr11:101418813-101435665 | NOTEST | 0 | 0 |
| Mir693  | chr17:46202854-46242299   | NOTEST | 0 | 0 |
| Mir6930 | chr11:102402975-102407517 | NOTEST | 0 | 0 |
| Mir6931 | chr11:102994055-103017147 | NOTEST | 0 | 0 |
| Mir6932 | chr11:107547959-107686943 | NOTEST | 0 | 0 |
| Mir6933 | chr11:117986856-118129219 | NOTEST | 0 | 0 |
| Mir6934 | chr11:119143042-119228499 | NOTEST | 0 | 0 |
| Mir6935 | chr11:120345689-120348484 | NOTEST | 0 | 0 |
| Mir6936 | chr11:120618371-120625002 | NOTEST | 0 | 0 |
| Mir6937 | chr12:28675206-28682174   | NOTEST | 0 | 0 |
| Mir6938 | chr12:85234519-85270564   | NOTEST | 0 | 0 |
| Mir6939 | chr12:112653820-112674276 | NOTEST | 0 | 0 |
| Mir694  | chr18:66056855-66291838   | NOTEST | 0 | 0 |
| Mir6940 | chr12:112722173-112746591 | NOTEST | 0 | 0 |
| Mir6941 | chr12:112908589-112929495 | NOTEST | 0 | 0 |
| Mir6942 | chr13:21387003-21402755   | NOTEST | 0 | 0 |
| Mir6943 | chr13:55445071-55460927   | NOTEST | 0 | 0 |
| Mir6944 | chr13:55473427-55488076   | NOTEST | 0 | 0 |
| Mir6945 | chr13:55497486-55513446   | NOTEST | 0 | 0 |
| Mir6946 | chr14:20674320-20694850   | NOTEST | 0 | 0 |
| Mir6947 | chr14:29978336-29993221   | NOTEST | 0 | 0 |
| Mir6948 | chr14:54642160-54690742   | NOTEST | 0 | 0 |
| Mir6949 | chr14:56082163-56085197   | NOTEST | 0 | 0 |
| Mir695  | chr2:155278251-155357424  | NOTEST | 0 | 0 |
| Mir6950 | chr14:69609475-69695834   | NOTEST | 0 | 0 |
| Mir6951 | chr15:38487429-38519266   | NOTEST | 0 | 0 |
| Mir6952 | chr15:76047185-76069730   | NOTEST | 0 | 0 |
| Mir6953 | chr15:76246806-76249904   | NOTEST | 0 | 0 |
| Mir6954 | chr15:76380512-76477269   | NOTEST | 0 | 0 |
| Mir6955 | chr15:78877189-78894585   | NOTEST | 0 | 0 |
| Mir6956 | chr15:78947723-79011041   | NOTEST | 0 | 0 |
| Mir6957 | chr15:80572596-80652854   | NOTEST | 0 | 0 |
| Mir6958 | chr15:89182212-89196474   | NOTEST | 0 | 0 |
| Mir6959 | chr15:89288235-89315311   | NOTEST | 0 | 0 |
| Mir6960 | chr15:99074972-99083409   | NOTEST | 0 | 0 |
| Mir6961 | chr15:100641081-100669500 | NOTEST | 0 | 0 |
| Mir6962 | chr15:101174124-101212601 | NOTEST | 0 | 0 |
| Mir6963 | chr15:103344285-103366748 | NOTEST | 0 | 0 |
| Mir6964 | chr16:97855208-97922633   | NOTEST | 0 | 0 |
| Mir6965 | chr17:24223231-24251409   | NOTEST | 0 | 0 |
| Mir6966 | chr17:25773775-25785586   | NOTEST | 0 | 0 |
| Mir6968 | chr17:26933126-26937890   | NOTEST | 0 | 0 |
| Mir6969 | chr17:28558213-28560714   | NOTEST | 0 | 0 |
| Mir697  | chr4:124714860-124732422  | NOTEST | 0 | 0 |
| Mir6970 | chr17:34839225-34850204   | NOTEST | 0 | 0 |
| Mir6971 | chr17:34839225-34850204   | NOTEST | 0 | 0 |

|          |                          |        |   |   |
|----------|--------------------------|--------|---|---|
| Mir6972  | chr17:34856373-34862514  | NOTEST | 0 | 0 |
| Mir6973a | chr17:35194506-35196305  | NOTEST | 0 | 0 |
| Mir6973b | chr2:131039631-131043088 | NOTEST | 0 | 0 |
| Mir6974  | chr17:35203164-35205351  | NOTEST | 0 | 0 |
| Mir6975  | chr17:35241745-35253707  | NOTEST | 0 | 0 |
| Mir6976  | chr17:46546838-46556162  | NOTEST | 0 | 0 |
| Mir6977  | chr17:56412425-56476480  | NOTEST | 0 | 0 |
| Mir6978  | chr17:57203972-57228136  | NOTEST | 0 | 0 |
| Mir6979  | chr18:37844824-37935411  | NOTEST | 0 | 0 |
| Mir698   | chr4:124741877-124801511 | NOTEST | 0 | 0 |
| Mir6980  | chr18:37972622-37998969  | NOTEST | 0 | 0 |
| Mir6981  | chr18:37972622-37998969  | NOTEST | 0 | 0 |
| Mir6982  | chr18:60925631-60988152  | NOTEST | 0 | 0 |
| Mir6983  | chr18:61105571-61131139  | NOTEST | 0 | 0 |
| Mir6984  | chr19:3283046-3292837    | NOTEST | 0 | 0 |
| Mir6985  | chr19:4261668-4269172    | NOTEST | 0 | 0 |
| Mir6986  | chr19:4622550-4625617    | NOTEST | 0 | 0 |
| Mir6987  | chr19:5664634-5688908    | NOTEST | 0 | 0 |
| Mir6988  | chr19:6046575-6057751    | NOTEST | 0 | 0 |
| Mir6989  | chr11:46193848-46589232  | NOTEST | 0 | 0 |
| Mir6990  | chr19:6909697-6921808    | NOTEST | 0 | 0 |
| Mir6991  | chr19:7417624-7483291    | NOTEST | 0 | 0 |
| Mir6992  | chr19:8741423-8755642    | NOTEST | 0 | 0 |
| Mir6993  | chr19:10182887-10196872  | NOTEST | 0 | 0 |
| Mir6994  | chr19:11912398-11945096  | NOTEST | 0 | 0 |
| Mir6995  | chr19:47260173-47464411  | NOTEST | 0 | 0 |
| Mir6996  | chr2:26457901-26503822   | NOTEST | 0 | 0 |
| Mir6997  | chr2:29965559-30031450   | NOTEST | 0 | 0 |
| Mir6998  | chr2:31572650-31617526   | NOTEST | 0 | 0 |
| Mir6999  | chr2:91932821-91963563   | NOTEST | 0 | 0 |
| Mir7-1   | chr13:58391950-58411149  | NOTEST | 0 | 0 |
| Mir7-2   | chr7:78888276-78888373   | NOTEST | 0 | 0 |
| Mir700   | chr4:135412308-135433805 | NOTEST | 0 | 0 |
| Mir7000  | chr2:92383675-92401263   | NOTEST | 0 | 0 |
| Mir7001  | chr2:93419101-93469874   | NOTEST | 0 | 0 |
| Mir7002  | chr2:114101160-114175339 | NOTEST | 0 | 0 |
| Mir7003  | chr2:163054634-163084687 | NOTEST | 0 | 0 |
| Mir7004  | chr2:168634437-168742136 | NOTEST | 0 | 0 |
| Mir7005  | chr2:180176372-180225859 | NOTEST | 0 | 0 |
| Mir7006  | chr2:181569152-181592461 | NOTEST | 0 | 0 |
| Mir7007  | chr3:20215615-20242181   | NOTEST | 0 | 0 |
| Mir7008  | chr3:30995770-31052740   | NOTEST | 0 | 0 |
| Mir7009  | chr3:36448923-36475887   | NOTEST | 0 | 0 |
| Mir701   | chr5:110879802-111289779 | NOTEST | 0 | 0 |
| Mir7010  | chr3:82092426-82145877   | NOTEST | 0 | 0 |
| Mir7011  | chr3:88435961-88461182   | NOTEST | 0 | 0 |
| Mir7012  | chr3:90266533-90280665   | NOTEST | 0 | 0 |
| Mir7013  | chr3:94974730-95015238   | NOTEST | 0 | 0 |
| Mir7014  | chr3:95734147-95739569   | NOTEST | 0 | 0 |
| Mir7015  | chr4:120968316-121017247 | NOTEST | 0 | 0 |
| Mir7016  | chr4:129676354-129696838 | NOTEST | 0 | 0 |
| Mir7017  | chr4:133130632-133198330 | NOTEST | 0 | 0 |
| Mir7018  | chr4:137468802-137570630 | NOTEST | 0 | 0 |

|          |                          |        |   |   |
|----------|--------------------------|--------|---|---|
| Mir7019  | chr4:138313409-138326296 | NOTEST | 0 | 0 |
| Mir702   | chr5:136982200-136996646 | NOTEST | 0 | 0 |
| Mir7020  | chr4:139622893-139649691 | NOTEST | 0 | 0 |
| Mir7021  | chr4:143107390-143212709 | NOTEST | 0 | 0 |
| Mir7022  | chr4:148145715-148152135 | NOTEST | 0 | 0 |
| Mir7023  | chr4:149649167-149701629 | NOTEST | 0 | 0 |
| Mir7024  | chr5:33898179-33936258   | NOTEST | 0 | 0 |
| Mir7025  | chr5:75152290-75198204   | NOTEST | 0 | 0 |
| Mir7026  | chr5:110664372-110770717 | NOTEST | 0 | 0 |
| Mir7027  | chr5:114380606-114421166 | NOTEST | 0 | 0 |
| Mir7028  | chr5:114707778-114722327 | NOTEST | 0 | 0 |
| Mir7029  | chr5:115565262-115622654 | NOTEST | 0 | 0 |
| Mir7030  | chr5:115631986-115647158 | NOTEST | 0 | 0 |
| Mir7031  | chr5:121817214-121836801 | NOTEST | 0 | 0 |
| Mir7032  | chr5:123973627-124003215 | NOTEST | 0 | 0 |
| Mir7033  | chr5:135369952-135394546 | NOTEST | 0 | 0 |
| Mir7034  | chr5:135735489-135744172 | NOTEST | 0 | 0 |
| Mir7035  | chr5:136083915-136111861 | NOTEST | 0 | 0 |
| Mir7036  | chr5:137295703-137307674 | NOTEST | 0 | 0 |
| Mir7036b | chr5:34573713-34632305   | NOTEST | 0 | 0 |
| Mir7037  | chr5:139751281-139775678 | NOTEST | 0 | 0 |
| Mir7038  | chr5:140419304-140443358 | NOTEST | 0 | 0 |
| Mir7039  | chr5:144876494-144965830 | NOTEST | 0 | 0 |
| Mir704   | chr6:47796140-47813512   | NOTEST | 0 | 0 |
| Mir7040  | chr6:83034223-83054571   | NOTEST | 0 | 0 |
| Mir7041  | chr6:94500313-94700145   | NOTEST | 0 | 0 |
| Mir7042  | chr6:113697498-113711068 | NOTEST | 0 | 0 |
| Mir7043  | chr6:116633007-116673836 | NOTEST | 0 | 0 |
| Mir7044  | chr6:118066384-118091546 | NOTEST | 0 | 0 |
| Mir7045  | chr6:125096162-125130501 | NOTEST | 0 | 0 |
| Mir7046  | chr7:24969749-24972728   | NOTEST | 0 | 0 |
| Mir7047  | chr7:24978168-25005937   | NOTEST | 0 | 0 |
| Mir7048  | chr7:25202839-25219859   | NOTEST | 0 | 0 |
| Mir7049  | chr7:28558818-28598184   | NOTEST | 0 | 0 |
| Mir705   | chr6:85334961-85374634   | LOWDAT | 0 | 0 |
| Mir7050  | chr7:31032722-31042331   | NOTEST | 0 | 0 |
| Mir7051  | chr7:43444071-43457800   | NOTEST | 0 | 0 |
| Mir7052  | chr7:44467979-44471658   | NOTEST | 0 | 0 |
| Mir7053  | chr7:44532743-44548815   | NOTEST | 0 | 0 |
| Mir7054  | chr7:45002949-45016249   | NOTEST | 0 | 0 |
| Mir7055  | chr7:45163920-45176139   | NOTEST | 0 | 0 |
| Mir7056  | chr7:47077799-47133684   | NOTEST | 0 | 0 |
| Mir7057  | chr7:66258746-66388341   | NOTEST | 0 | 0 |
| Mir7058  | chr7:126363827-126369534 | NOTEST | 0 | 0 |
| Mir7059  | chr7:126571399-126584280 | NOTEST | 0 | 0 |
| Mir706   | chr6:119923968-120038655 | NOTEST | 0 | 0 |
| Mir7060  | chr7:127485220-127491513 | NOTEST | 0 | 0 |
| Mir7061  | chr7:130865909-130913302 | NOTEST | 0 | 0 |
| Mir7062  | chr7:139978937-139992509 | NOTEST | 0 | 0 |
| Mir7063  | chr7:141562179-141633011 | NOTEST | 0 | 0 |
| Mir7064  | chr7:143557229-143600090 | NOTEST | 0 | 0 |
| Mir7065  | chr8:13105720-13147939   | NOTEST | 0 | 0 |
| Mir7066  | chr8:70093084-70120844   | NOTEST | 0 | 0 |



|           |                           |        |   |   |
|-----------|---------------------------|--------|---|---|
| Mir7067   | chr8:70894721-70897443    | NOTEST | 0 | 0 |
| Mir7068   | chr8:72443879-72475233    | NOTEST | 0 | 0 |
| Mir7069   | chr8:84856985-84869257    | NOTEST | 0 | 0 |
| Mir707    | chr7:44849223-44855421    | LOWDAT | 0 | 0 |
| Mir7070   | chr8:85036914-85067120    | NOTEST | 0 | 0 |
| Mir7071   | chr8:88137884-88171943    | NOTEST | 0 | 0 |
| Mir7072   | chr8:94472762-94527272    | NOTEST | 0 | 0 |
| Mir7073   | chr8:95719450-95821728    | NOTEST | 0 | 0 |
| Mir7074   | chr8:105943589-105966115  | NOTEST | 0 | 0 |
| Mir7075   | chr8:107069401-107096545  | NOTEST | 0 | 0 |
| Mir7076   | chr8:111686509-111691010  | NOTEST | 0 | 0 |
| Mir7077   | chr8:117257018-117461505  | NOTEST | 0 | 0 |
| Mir7078   | chr8:117257018-117461505  | NOTEST | 0 | 0 |
| Mir7079   | chr8:123102349-123105242  | NOTEST | 0 | 0 |
| Mir708    | chr7:96210636-96908554    | NOTEST | 0 | 0 |
| Mir7080   | chr8:123117373-123135185  | NOTEST | 0 | 0 |
| Mir7081   | chr9:20907205-20959888    | NOTEST | 0 | 0 |
| Mir7082   | chr9:21067513-21092008    | NOTEST | 0 | 0 |
| Mir7083   | chr9:21800179-21852635    | NOTEST | 0 | 0 |
| Mir7084   | chr9:22055459-22389206    | LOWDAT | 0 | 0 |
| Mir7085   | chr9:44398175-44402965    | NOTEST | 0 | 0 |
| Mir7086   | chr9:45253838-45269146    | NOTEST | 0 | 0 |
| Mir7087   | chr9:45937856-45955249    | NOTEST | 0 | 0 |
| Mir7088   | chr9:108080435-108085027  | NOTEST | 0 | 0 |
| Mir7089   | chr9:109875578-109893890  | NOTEST | 0 | 0 |
| Mir709    | chr8:84066835-84096992    | NOTEST | 0 | 0 |
| Mir7090   | chr9:120933399-120960507  | NOTEST | 0 | 0 |
| Mir7091   | chrX:74273216-74282333    | NOTEST | 0 | 0 |
| Mir7092   | chrX:74313032-74320149    | NOTEST | 0 | 0 |
| Mir7093   | chrX:134756567-134761456  | NOTEST | 0 | 0 |
| Mir7094-1 | chr12:114469406-114469466 | NOTEST | 0 | 0 |
| Mir7094-2 | chr12:114513634-114513694 | NOTEST | 0 | 0 |
| Mir710    | chr8:64514331-64514441    | NOTEST | 0 | 0 |
| Mir711    | chr9:108953744-108984875  | NOTEST | 0 | 0 |
| Mir7115   | chr11:70432579-70440828   | NOTEST | 0 | 0 |
| Mir7117   | chr15:27466676-27594907   | NOTEST | 0 | 0 |
| Mir7118   | chr15:89155545-89180788   | NOTEST | 0 | 0 |
| Mir7119   | chr4:126556979-126593903  | NOTEST | 0 | 0 |
| Mir713    | chr13:62760738-62760846   | NOTEST | 0 | 0 |
| Mir717    | chrX:52272426-52619047    | NOTEST | 0 | 0 |
| Mir718    | chrX:74013913-74023936    | NOTEST | 0 | 0 |
| Mir719    | chr14:60219467-60251378   | LOWDAT | 0 | 0 |
| Mir721    | chr5:136248134-136567490  | NOTEST | 0 | 0 |
| Mir7210   | chr14:24088876-24088930   | NOTEST | 0 | 0 |
| Mir7211   | chr10:94514856-94590954   | NOTEST | 0 | 0 |
| Mir7212   | chr15:25843297-25973696   | NOTEST | 0 | 0 |
| Mir7213   | chr15:79995875-80014808   | NOTEST | 0 | 0 |
| Mir7214   | chr17:27317034-27317095   | NOTEST | 0 | 0 |
| Mir7215   | chr10:62659421-62726099   | NOTEST | 0 | 0 |
| Mir7216   | chr17:27328384-27328460   | NOTEST | 0 | 0 |
| Mir7217   | chr17:27355737-27355799   | NOTEST | 0 | 0 |
| Mir7218   | chr17:27358096-27358155   | NOTEST | 0 | 0 |
| Mir7219   | chr18:68260184-68300333   | LOWDAT | 0 | 0 |

|         |                           |        |   |   |
|---------|---------------------------|--------|---|---|
| Mir7220 | chr18:60925631-60988152   | NOTEST | 0 | 0 |
| Mir7221 | chr2:92592205-92592277    | NOTEST | 0 | 0 |
| Mir7222 | chr2:92594601-92594676    | NOTEST | 0 | 0 |
| Mir7223 | chr11:107933386-108343888 | NOTEST | 0 | 0 |
| Mir7224 | chr2:67675456-67675516    | NOTEST | 0 | 0 |
| Mir7225 | chr3:97689828-97888707    | LOWDAT | 0 | 0 |
| Mir7226 | chr4:118208212-118291397  | NOTEST | 0 | 0 |
| Mir7227 | chr4:133679007-133753611  | NOTEST | 0 | 0 |
| Mir7228 | chr5:134572075-134572114  | NOTEST | 0 | 0 |
| Mir7229 | chr5:113324492-113324545  | NOTEST | 0 | 0 |
| Mir7230 | chr5:113337589-113337645  | NOTEST | 0 | 0 |
| Mir7231 | chr6:122820183-122845366  | NOTEST | 0 | 0 |
| Mir7232 | chr6:81895589-81895663    | NOTEST | 0 | 0 |
| Mir7233 | chr6:127788083-127788143  | NOTEST | 0 | 0 |
| Mir7234 | chr7:73819589-73819641    | NOTEST | 0 | 0 |
| Mir7235 | chr11:97136170-97149712   | NOTEST | 0 | 0 |
| Mir7236 | chr11:121356120-121388251 | NOTEST | 0 | 0 |
| Mir7237 | chr8:121950491-122029260  | NOTEST | 0 | 0 |
| Mir7238 | chr8:11611580-11635757    | LOWDAT | 0 | 0 |
| Mir7239 | chr11:46170086-46170143   | NOTEST | 0 | 0 |
| Mir7240 | chr8:70798134-70798192    | NOTEST | 0 | 0 |
| Mir7241 | chr9:67727716-67727780    | NOTEST | 0 | 0 |
| Mir7242 | chr9:67729498-67729577    | NOTEST | 0 | 0 |
| Mir7243 | chr9:101922127-102354693  | NOTEST | 0 | 0 |
| Mir741  | chrX:66796804-66796875    | NOTEST | 0 | 0 |
| Mir742  | chrX:66780372-66780437    | NOTEST | 0 | 0 |
| Mir743  | chrX:66776756-66776818    | NOTEST | 0 | 0 |
| Mir743b | chrX:66777255-66777332    | NOTEST | 0 | 0 |
| Mir744  | chr11:65688243-65788297   | NOTEST | 0 | 0 |
| Mir7578 | chr2:27445580-27475673    | NOTEST | 0 | 0 |
| Mir758  | chr12:109712809-109712890 | NOTEST | 0 | 0 |
| Mir759  | chr14:79738430-79738528   | NOTEST | 0 | 0 |
| Mir760  | chr3:122293584-122293703  | NOTEST | 0 | 0 |
| Mir761  | chr4:109000804-109202272  | NOTEST | 0 | 0 |
| Mir762  | chr7:127704977-127708766  | NOTEST | 0 | 0 |
| Mir764  | chrX:146962512-147197277  | NOTEST | 0 | 0 |
| Mir7646 | chrX:135742691-135803468  | LOWDAT | 0 | 0 |
| Mir7647 | chr5:123510459-123524164  | NOTEST | 0 | 0 |
| Mir7648 | chr15:90224310-90230554   | LOWDAT | 0 | 0 |
| Mir7649 | chr6:128934380-128984707  | NOTEST | 0 | 0 |
| Mir7650 | chr9:15283336-15357788    | NOTEST | 0 | 0 |
| Mir7652 | chr1:150024260-150052202  | NOTEST | 0 | 0 |
| Mir7653 | chr11:78178148-78180819   | LOWDAT | 0 | 0 |
| Mir7654 | chr8:8666575-8690537      | LOWDAT | 0 | 0 |
| Mir7655 | chr2:18055236-18392830    | NOTEST | 0 | 0 |
| Mir7656 | chr9:94669891-95230452    | NOTEST | 0 | 0 |
| Mir7657 | chr3:122538718-122619714  | LOWDAT | 0 | 0 |
| Mir7658 | chr4:156229043-156234857  | LOWDAT | 0 | 0 |
| Mir7661 | chr6:108213095-108551116  | NOTEST | 0 | 0 |
| Mir7662 | chr10:62185395-62231218   | NOTEST | 0 | 0 |
| Mir7663 | chr10:22645010-22731447   | NOTEST | 0 | 0 |
| Mir7665 | chr2:119972698-120027403  | NOTEST | 0 | 0 |
| Mir7666 | chr8:40307874-40307929    | NOTEST | 0 | 0 |

|           |                           |        |   |   |
|-----------|---------------------------|--------|---|---|
| Mir7667   | chr9:21165713-21226281    | NOTEST | 0 | 0 |
| Mir7668   | chr7:29893336-29906567    | NOTEST | 0 | 0 |
| Mir7669   | chr10:127265080-127265101 | NOTEST | 0 | 0 |
| Mir767    | chrX:72432675-72656246    | NOTEST | 0 | 0 |
| Mir7670   | chr6:38433924-38512763    | LOWDAT | 0 | 0 |
| Mir7671   | chr11:53763596-53763654   | NOTEST | 0 | 0 |
| Mir7672   | chr14:26664116-26669846   | LOWDAT | 0 | 0 |
| Mir7673   | chrX:94274573-94274637    | NOTEST | 0 | 0 |
| Mir7674   | chr2:31974449-32053975    | NOTEST | 0 | 0 |
| Mir7675   | chr12:11265885-11319785   | NOTEST | 0 | 0 |
| Mir7676-2 | chr15:78325989-78351001   | LOWDAT | 0 | 0 |
| Mir7677   | chr17:27057303-27122223   | NOTEST | 0 | 0 |
| Mir7678   | chr2:164354069-164356507  | NOTEST | 0 | 0 |
| Mir7679   | chr11:82980302-82991830   | NOTEST | 0 | 0 |
| Mir7680   | chr16:21247498-21296872   | NOTEST | 0 | 0 |
| Mir7681   | chr1:53806873-54195034    | NOTEST | 0 | 0 |
| Mir7682   | chr1:151428647-151458183  | NOTEST | 0 | 0 |
| Mir7684   | chr15:82389153-82394022   | LOWDAT | 0 | 0 |
| Mir7685   | chr2:158243503-158243565  | NOTEST | 0 | 0 |
| Mir7686   | chr7:139957565-139957622  | NOTEST | 0 | 0 |
| Mir7687   | chr8:120488865-120589075  | NOTEST | 0 | 0 |
| Mir770    | chr12:109540995-109571729 | LOWDAT | 0 | 0 |
| Mir7b     | chr17:56242987-56243098   | NOTEST | 0 | 0 |
| Mir802    | chr16:93369719-93369816   | NOTEST | 0 | 0 |
| Mir804    | chr11:50357784-50357879   | NOTEST | 0 | 0 |
| Mir8091   | chr19:41588650-41588789   | NOTEST | 0 | 0 |
| Mir8092   | chr19:40894702-40917947   | NOTEST | 0 | 0 |
| Mir8093   | chr2:32646594-32694175    | NOTEST | 0 | 0 |
| Mir8095   | chr16:22466568-22657231   | NOTEST | 0 | 0 |
| Mir8096   | chr1:85751947-85752074    | NOTEST | 0 | 0 |
| Mir8097   | chr15:36239933-36283147   | LOWDAT | 0 | 0 |
| Mir8099-1 | chr3:95134087-95142360    | NOTEST | 0 | 0 |
| Mir8100   | chr11:46054501-46147347   | NOTEST | 0 | 0 |
| Mir8102   | chr11:97744896-97745035   | NOTEST | 0 | 0 |
| Mir8103   | chr11:97050819-97068904   | NOTEST | 0 | 0 |
| Mir8105   | chr10:128458679-128458768 | NOTEST | 0 | 0 |
| Mir8106   | chr9:122175873-122294423  | NOTEST | 0 | 0 |
| Mir8107   | chr9:110624788-110654161  | NOTEST | 0 | 0 |
| Mir8108   | chr8:25154551-25201542    | LOWDAT | 0 | 0 |
| Mir8109   | chr8:85700904-85701021    | NOTEST | 0 | 0 |
| Mir8110   | chr8:89024734-89024831    | NOTEST | 0 | 0 |
| Mir8111   | chr8:84005627-84005764    | NOTEST | 0 | 0 |
| Mir8113   | chr6:125224211-125239934  | NOTEST | 0 | 0 |
| Mir8115   | chr11:86583864-87555823   | NOTEST | 0 | 0 |
| Mir8116   | chr5:137288253-137294466  | NOTEST | 0 | 0 |
| Mir8118   | chr4:33310310-33502610    | NOTEST | 0 | 0 |
| Mir8119   | chr4:129548343-129573641  | NOTEST | 0 | 0 |
| Mir8120   | chr3:65659287-65659426    | NOTEST | 0 | 0 |
| Mir871    | chrX:66810427-66810504    | NOTEST | 0 | 0 |
| Mir872    | chr4:94614490-94693233    | NOTEST | 0 | 0 |
| Mir873b   | chr4:35706647-36951744    | NOTEST | 0 | 0 |
| Mir874    | chr13:58004956-58102428   | NOTEST | 0 | 0 |
| Mir875    | chr15:35371545-35931229   | NOTEST | 0 | 0 |

|            |                           |        |   |   |
|------------|---------------------------|--------|---|---|
| Mir876     | chr4:35706647-36951744    | NOTEST | 0 | 0 |
| Mir877     | chr17:35956818-35969750   | NOTEST | 0 | 0 |
| Mir878     | chrX:66801507-66801585    | NOTEST | 0 | 0 |
| Mir879     | chr5:9266192-9480717      | NOTEST | 0 | 0 |
| Mir880     | chrX:66800529-66800607    | NOTEST | 0 | 0 |
| Mir881     | chrX:66801943-66802021    | NOTEST | 0 | 0 |
| Mir882     | chr12:109682196-109682273 | NOTEST | 0 | 0 |
| Mir883a    | chrX:66780757-66780833    | NOTEST | 0 | 0 |
| Mir883b    | chrX:66789889-66789967    | NOTEST | 0 | 0 |
| Mir9-1     | chr3:88215597-88215686    | NOTEST | 0 | 0 |
| Mir9-2     | chr13:83738813-83738885   | NOTEST | 0 | 0 |
| Mir9-3     | chr7:79500025-79534403    | NOTEST | 0 | 0 |
| Mir92-1    | chr14:115044304-115046728 | LOWDAT | 0 | 0 |
| Mir92-2    | chrX:52741837-52741928    | NOTEST | 0 | 0 |
| Mir92b     | chr3:89227115-89227198    | NOTEST | 0 | 0 |
| Mir93      | chr5:138164588-138171862  | NOTEST | 0 | 0 |
| Mir96      | chr6:30169445-30169551    | NOTEST | 0 | 0 |
| Mir98      | chrX:151803281-151935417  | NOTEST | 0 | 0 |
| Mir99a     | chr16:77598935-77599000   | NOTEST | 0 | 0 |
| Mir99b     | chr17:17830187-17830257   | NOTEST | 0 | 0 |
| Mirlet7a-1 | chr13:48538178-48538272   | NOTEST | 0 | 0 |
| Mirlet7a-2 | chr9:41536715-41536811    | NOTEST | 0 | 0 |
| Mirlet7b   | chr15:85703772-85707524   | LOWDAT | 0 | 0 |
| Mirlet7c-1 | chr16:77599656-77599750   | NOTEST | 0 | 0 |
| Mirlet7c-2 | chr15:85703772-85707524   | LOWDAT | 0 | 0 |
| Mirlet7d   | chr13:48536011-48536114   | NOTEST | 0 | 0 |
| Mirlet7e   | chr17:17830351-17830444   | NOTEST | 0 | 0 |
| Mirlet7f-1 | chr13:48537828-48537917   | NOTEST | 0 | 0 |
| Mirlet7f-2 | chrX:151803281-151935417  | NOTEST | 0 | 0 |
| Mirlet7g   | chr9:106170928-106191706  | NOTEST | 0 | 0 |
| Mirlet7i   | chr10:122985639-122985724 | NOTEST | 0 | 0 |
| Mirlet7j   | chr3:140028248-140028370  | NOTEST | 0 | 0 |
| Mirlet7k   | chr5:147283188-147283298  | NOTEST | 0 | 0 |
| Mixl1      | chr1:180693047-180697034  | NOTEST | 0 | 0 |
| Mmp10      | chr9:7502341-7510242      | NOTEST | 0 | 0 |
| Mmp1a      | chr9:7464140-7476869      | NOTEST | 0 | 0 |
| Mmp1b      | chr9:7367669-7388026      | NOTEST | 0 | 0 |
| Mmp20      | chr9:7628230-7674968      | NOTEST | 0 | 0 |
| Mmp21      | chr7:133674269-133680061  | NOTEST | 0 | 0 |
| Mmp27      | chr9:7571457-7581393      | NOTEST | 0 | 0 |
| Mmp7       | chr9:7692110-7699416      | NOTEST | 0 | 0 |
| Mnx1       | chr5:29473822-29478470    | NOTEST | 0 | 0 |
| Moxd2      | chr6:40529090-40910666    | NOTEST | 0 | 0 |
| Mptx1      | chr1:174330517-174332877  | NOTEST | 0 | 0 |
| Mptx2      | chr1:173274460-173277756  | NOTEST | 0 | 0 |
| Mrgpra6    | chr7:47185765-47189355    | NOTEST | 0 | 0 |
| Mrgprb3    | chr7:48642862-48643801    | NOTEST | 0 | 0 |
| Mrgprg     | chr7:143763709-143766993  | NOTEST | 0 | 0 |
| Mroh4      | chr15:74606027-74636318   | NOTEST | 0 | 0 |
| Mroh9      | chr1:163024301-163085670  | NOTEST | 0 | 0 |
| Ms4a10     | chr19:10962294-10974670   | NOTEST | 0 | 0 |
| Ms4a15     | chr19:10978306-10993250   | NOTEST | 0 | 0 |
| Ms4a18     | chr19:10997024-11017963   | NOTEST | 0 | 0 |

|           |                           |        |   |   |
|-----------|---------------------------|--------|---|---|
| Ms4a5     | chr19:11196816-11299884   | NOTEST | 0 | 0 |
| Msgn1     | chr12:11208381-11208948   | NOTEST | 0 | 0 |
| Msemb     | chr14:32142022-32158326   | NOTEST | 0 | 0 |
| Msx1os    | chr5:37820490-37824585    | NOTEST | 0 | 0 |
| Msx3      | chr7:140046156-140049088  | NOTEST | 0 | 0 |
| Mtnr1b    | chr9:15862613-15874556    | NOTEST | 0 | 0 |
| Muc19     | chr15:91838325-91934555   | NOTEST | 0 | 0 |
| Muc20     | chr16:32735885-32797435   | NOTEST | 0 | 0 |
| Muc4      | chr16:32735885-32797435   | NOTEST | 0 | 0 |
| Muc5ac    | chr7:141789010-141819135  | NOTEST | 0 | 0 |
| Muc5b     | chr7:141839071-141873085  | NOTEST | 0 | 0 |
| Muc6      | chr7:141634048-141655308  | NOTEST | 0 | 0 |
| Muc11     | chr15:103751922-103899312 | NOTEST | 0 | 0 |
| Mug-ps1   | chr6:122176052-122248566  | NOTEST | 0 | 0 |
| Mug1      | chr6:121838540-121889057  | NOTEST | 0 | 0 |
| Mug2      | chr6:122006797-122085967  | NOTEST | 0 | 0 |
| Mup1      | chr4:60498012-60501960    | NOTEST | 0 | 0 |
| Mup10     | chr4:60578240-60662395    | NOTEST | 0 | 0 |
| Mup11     | chr4:60578240-60662395    | NOTEST | 0 | 0 |
| Mup12     | chr4:60737380-60741281    | NOTEST | 0 | 0 |
| Mup13     | chr4:61224306-61228286    | NOTEST | 0 | 0 |
| Mup14     | chr4:61300018-61439704    | NOTEST | 0 | 0 |
| Mup15     | chr4:61300018-61439704    | NOTEST | 0 | 0 |
| Mup16     | chr4:61515592-61519486    | NOTEST | 0 | 0 |
| Mup17     | chr4:61591929-61595832    | NOTEST | 0 | 0 |
| Mup19     | chr4:61778324-61782224    | NOTEST | 0 | 0 |
| Mup2      | chr4:61300018-61439704    | NOTEST | 0 | 0 |
| Mup21     | chr4:62147831-62150841    | NOTEST | 0 | 0 |
| Mup4      | chr4:59956805-59960665    | NOTEST | 0 | 0 |
| Mup5      | chr4:61831318-61835180    | NOTEST | 0 | 0 |
| Mup6      | chr4:60003548-60006214    | NOTEST | 0 | 0 |
| Mup7      | chr4:60066468-60139858    | NOTEST | 0 | 0 |
| Mup8      | chr4:60218620-60222599    | NOTEST | 0 | 0 |
| Mup9      | chr4:60418045-60421952    | NOTEST | 0 | 0 |
| Mybpc3    | chr2:91118143-91136516    | NOTEST | 0 | 0 |
| Mybphl    | chr3:108364910-108383741  | NOTEST | 0 | 0 |
| Mycs      | chrX:5466903-5469265      | NOTEST | 0 | 0 |
| Myod1     | chr7:46376473-46379092    | NOTEST | 0 | 0 |
| Nags      | chr11:102145512-102149528 | NOTEST | 0 | 0 |
| Nctc1     | chr7:142544608-142558598  | NOTEST | 0 | 0 |
| Nek10     | chr14:14820814-15006693   | NOTEST | 0 | 0 |
| Nell1os   | chr7:49975349-50863289    | NOTEST | 0 | 0 |
| Neurod2   | chr11:98325416-98329645   | NOTEST | 0 | 0 |
| Neurod6   | chr6:55677818-55681263    | NOTEST | 0 | 0 |
| Nipal4    | chr11:46148154-46166359   | NOTEST | 0 | 0 |
| Nipsnap3a | chr4:52989283-53000854    | NOTEST | 0 | 0 |
| Nkx1-1    | chr5:33430733-33434090    | NOTEST | 0 | 0 |
| Nkx1-2    | chr7:132596238-132599637  | NOTEST | 0 | 0 |
| Nkx2-1    | chr12:56531934-56536908   | NOTEST | 0 | 0 |
| Nkx2-3    | chr19:43612324-43615892   | NOTEST | 0 | 0 |
| Nkx2-4    | chr2:147083875-147085345  | NOTEST | 0 | 0 |
| Nkx2-5    | chr17:26838664-26841565   | NOTEST | 0 | 0 |
| Nkx2-6    | chr14:69164798-69175540   | NOTEST | 0 | 0 |



|                 |                          |        |   |   |
|-----------------|--------------------------|--------|---|---|
| Nkx2-9          | chr12:56611396-56613284  | NOTEST | 0 | 0 |
| Nkx3-1          | chr14:69190691-69194658  | NOTEST | 0 | 0 |
| Nkx3-2          | chr5:41761482-41764220   | NOTEST | 0 | 0 |
| Nlrp14          | chr7:107166989-107198103 | NOTEST | 0 | 0 |
| Nlrp2           | chr7:5298546-5360682     | NOTEST | 0 | 0 |
| Nlrp4a          | chr7:26435112-26475458   | NOTEST | 0 | 0 |
| Nlrp4b          | chr7:10687792-10730158   | NOTEST | 0 | 0 |
| Nlrp4c          | chr7:6045160-6105149     | NOTEST | 0 | 0 |
| Nlrp4e          | chr7:23301191-23362277   | NOTEST | 0 | 0 |
| Nlrp4g          | chr9:124348830-124354483 | NOTEST | 0 | 0 |
| Nlrp5           | chr7:23385896-23441921   | NOTEST | 0 | 0 |
| Nlrp9a          | chr7:26535064-26574146   | NOTEST | 0 | 0 |
| Nlrp9b          | chr7:20008022-20062938   | NOTEST | 0 | 0 |
| Nlrp9c          | chr7:26364886-26394243   | NOTEST | 0 | 0 |
| Nme9            | chr9:99456242-99568899   | NOTEST | 0 | 0 |
| Nodal           | chr10:61417971-61425337  | NOTEST | 0 | 0 |
| Noto            | chr6:85423885-85428877   | NOTEST | 0 | 0 |
| Nox3            | chr17:3635239-3696261    | NOTEST | 0 | 0 |
| Noxa1           | chr2:25080322-25095205   | NOTEST | 0 | 0 |
| Nphs1os         | chr7:30460057-30488609   | NOTEST | 0 | 0 |
| Npsr1           | chr9:24098017-24316398   | NOTEST | 0 | 0 |
| Npvf            | chr6:50650870-50654393   | NOTEST | 0 | 0 |
| Nr0b1           | chrX:86191774-86195944   | NOTEST | 0 | 0 |
| Nr1h5           | chr3:102939657-102964133 | NOTEST | 0 | 0 |
| Nr2e1           | chr10:42561970-42583588  | NOTEST | 0 | 0 |
| Nr2e3           | chr9:59942770-59950079   | NOTEST | 0 | 0 |
| Nr5a1           | chr2:38692659-38714542   | NOTEST | 0 | 0 |
| Nrg3os          | chr14:38368950-39473088  | NOTEST | 0 | 0 |
| Nron            | chr2:33729955-33887946   | NOTEST | 0 | 0 |
| Nt5c1b          | chr12:10369970-10390174  | NOTEST | 0 | 0 |
| Ntf5            | chr7:45413694-45417179   | NOTEST | 0 | 0 |
| Nup62cl         | chrX:140007672-140062568 | NOTEST | 0 | 0 |
| Nutf2-ps1       | chr8:105860633-105880401 | LOWDAT | 0 | 0 |
| Nutm1           | chr2:112247947-112259291 | NOTEST | 0 | 0 |
| Nxf7            | chrX:135579786-135593855 | NOTEST | 0 | 0 |
| Oas1d           | chr5:120914817-120921647 | NOTEST | 0 | 0 |
| Oaz1-ps         | chr10:80826655-80829290  | LOWDAT | 0 | 0 |
| Oaz3            | chr3:94433165-94436616   | NOTEST | 0 | 0 |
| Obox1           | chr7:15547256-15556846   | NOTEST | 0 | 0 |
| Obox2           | chr7:15388850-15398543   | NOTEST | 0 | 0 |
| Obox3           | chr7:15625305-15639777   | NOTEST | 0 | 0 |
| Obox5           | chr7:15750369-15759274   | NOTEST | 0 | 0 |
| Obox6           | chr7:15833249-15839679   | NOTEST | 0 | 0 |
| Obp1a           | chrX:78085504-78091374   | NOTEST | 0 | 0 |
| Obp2a           | chr2:25700073-25703326   | NOTEST | 0 | 0 |
| Ocm             | chr5:144019806-144050609 | NOTEST | 0 | 0 |
| Odam            | chr5:87885694-87892742   | NOTEST | 0 | 0 |
| Odf3l2          | chr10:79639525-79645738  | NOTEST | 0 | 0 |
| Odf4            | chr11:68921834-68927081  | NOTEST | 0 | 0 |
| Oit1            | chr14:8348947-8378763    | NOTEST | 0 | 0 |
| Olfr1           | chr11:73395075-73399495  | NOTEST | 0 | 0 |
| Olfr10          | chr11:49317547-49318483  | NOTEST | 0 | 0 |
| Olfr100,Olfr102 | chr17:37313410-37314437  | LOWDAT | 0 | 0 |

|             |                         |        |   |   |
|-------------|-------------------------|--------|---|---|
| Olfr1000    | chr2:85607963-85608908  | NOTEST | 0 | 0 |
| Olfr1002    | chr2:85647362-85648319  | NOTEST | 0 | 0 |
| Olfr1006    | chr2:85674210-85678741  | NOTEST | 0 | 0 |
| Olfr1008    | chr2:85689430-85690372  | NOTEST | 0 | 0 |
| Olfr1009    | chr2:85721406-85722351  | NOTEST | 0 | 0 |
| Olfr101     | chr17:37299493-37300420 | NOTEST | 0 | 0 |
| Olfr1010    | chr2:85753362-85754306  | NOTEST | 0 | 0 |
| Olfr1012    | chr2:85759438-85760374  | NOTEST | 0 | 0 |
| Olfr1013    | chr2:85769802-85770720  | NOTEST | 0 | 0 |
| Olfr1014    | chr2:85776585-85777503  | NOTEST | 0 | 0 |
| Olfr1015    | chr2:85785473-85786489  | NOTEST | 0 | 0 |
| Olfr1016    | chr2:85799338-85800268  | NOTEST | 0 | 0 |
| Olfr1018    | chr2:85822972-85823908  | NOTEST | 0 | 0 |
| Olfr1019    | chr2:85840856-85841789  | NOTEST | 0 | 0 |
| Olfr102     | chr17:37313410-37314437 | NOTEST | 0 | 0 |
| Olfr1020    | chr2:85849419-85850498  | NOTEST | 0 | 0 |
| Olfr1022    | chr2:85868593-85869541  | NOTEST | 0 | 0 |
| Olfr1023    | chr2:85886801-85887737  | NOTEST | 0 | 0 |
| Olfr1024    | chr2:85904068-85905052  | NOTEST | 0 | 0 |
| Olfr1026    | chr2:85923269-85924193  | NOTEST | 0 | 0 |
| Olfr1028    | chr2:85951064-85952039  | NOTEST | 0 | 0 |
| Olfr1029    | chr2:85975212-85976273  | NOTEST | 0 | 0 |
| Olfr103     | chr17:37336288-37337230 | NOTEST | 0 | 0 |
| Olfr1030    | chr2:85979311-85984798  | NOTEST | 0 | 0 |
| Olfr1031    | chr2:85991818-85992829  | NOTEST | 0 | 0 |
| Olfr1032    | chr2:86007777-86008710  | NOTEST | 0 | 0 |
| Olfr1036    | chr2:86074703-86075718  | NOTEST | 0 | 0 |
| Olfr1037    | chr2:86084729-86085854  | NOTEST | 0 | 0 |
| Olfr1038-ps | chr2:86120223-86123037  | NOTEST | 0 | 0 |
| Olfr1039    | chr2:86130701-86131661  | NOTEST | 0 | 0 |
| Olfr1040    | chr2:86145790-86146732  | NOTEST | 0 | 0 |
| Olfr1042    | chr2:86159344-86160441  | NOTEST | 0 | 0 |
| Olfr1043    | chr2:86162002-86162947  | NOTEST | 0 | 0 |
| Olfr1044    | chr2:86170870-86171815  | NOTEST | 0 | 0 |
| Olfr1045    | chr2:86197802-86198750  | NOTEST | 0 | 0 |
| Olfr1046    | chr2:86216757-86217708  | NOTEST | 0 | 0 |
| Olfr1047    | chr2:86228009-86228969  | NOTEST | 0 | 0 |
| Olfr1048    | chr2:86235870-86236833  | NOTEST | 0 | 0 |
| Olfr1049    | chr2:86254764-86255691  | NOTEST | 0 | 0 |
| Olfr1051    | chr2:86275558-86276485  | NOTEST | 0 | 0 |
| Olfr1052    | chr2:86297817-86298756  | NOTEST | 0 | 0 |
| Olfr1053    | chr2:86314342-86315285  | NOTEST | 0 | 0 |
| Olfr1054    | chr2:86332415-86333354  | NOTEST | 0 | 0 |
| Olfr1055    | chr2:86346825-86347764  | NOTEST | 0 | 0 |
| Olfr1056    | chr2:86355358-86356437  | NOTEST | 0 | 0 |
| Olfr1057    | chr2:86374462-86375410  | NOTEST | 0 | 0 |
| Olfr1058    | chr2:86385465-86386416  | NOTEST | 0 | 0 |
| Olfr1061    | chr2:86413108-86414050  | NOTEST | 0 | 0 |
| Olfr1062    | chr2:86422718-86423674  | NOTEST | 0 | 0 |
| Olfr1065    | chr2:86445012-86446004  | NOTEST | 0 | 0 |
| Olfr1066    | chr2:86455327-86456269  | NOTEST | 0 | 0 |
| Olfr107     | chr17:37405476-37406509 | NOTEST | 0 | 0 |
| Olfr1076    | chr2:86508460-86509402  | NOTEST | 0 | 0 |

|              |                         |        |   |   |
|--------------|-------------------------|--------|---|---|
| Olfr1077-ps1 | chr2:86525661-86528427  | NOTEST | 0 | 0 |
| Olfr1079     | chr2:86537965-86538913  | NOTEST | 0 | 0 |
| Olfr108      | chr17:37445479-37446517 | NOTEST | 0 | 0 |
| Olfr1080     | chr2:86553180-86558138  | NOTEST | 0 | 0 |
| Olfr1082     | chr2:86593884-86598809  | NOTEST | 0 | 0 |
| Olfr1084     | chr2:86638764-86639718  | NOTEST | 0 | 0 |
| Olfr1085     | chr2:86657514-86658456  | NOTEST | 0 | 0 |
| Olfr1086     | chr2:86676398-86677331  | NOTEST | 0 | 0 |
| Olfr1087     | chr2:86690031-86690973  | NOTEST | 0 | 0 |
| Olfr1089     | chr2:86732674-86733610  | NOTEST | 0 | 0 |
| Olfr109      | chr17:37466207-37467152 | NOTEST | 0 | 0 |
| Olfr1090     | chr2:86753794-86754736  | NOTEST | 0 | 0 |
| Olfr1093     | chr2:86785731-86786700  | NOTEST | 0 | 0 |
| Olfr1094     | chr2:86828675-86829822  | NOTEST | 0 | 0 |
| Olfr1095     | chr2:86850769-86851696  | NOTEST | 0 | 0 |
| Olfr1097     | chr2:86890225-86892163  | NOTEST | 0 | 0 |
| Olfr1098     | chr2:86922582-86923530  | NOTEST | 0 | 0 |
| Olfr1099     | chr2:86958517-86959456  | NOTEST | 0 | 0 |
| Olfr11       | chr13:21638579-21639521 | NOTEST | 0 | 0 |
| Olfr110      | chr17:37492467-37499674 | NOTEST | 0 | 0 |
| Olfr1100     | chr2:86977828-86978794  | NOTEST | 0 | 0 |
| Olfr1101     | chr2:86988241-86989174  | NOTEST | 0 | 0 |
| Olfr1102     | chr2:87001931-87002994  | NOTEST | 0 | 0 |
| Olfr1104     | chr2:87021609-87022542  | NOTEST | 0 | 0 |
| Olfr1105     | chr2:87033280-87034219  | NOTEST | 0 | 0 |
| Olfr1106     | chr2:87048295-87049234  | NOTEST | 0 | 0 |
| Olfr1107     | chr2:87071115-87072223  | NOTEST | 0 | 0 |
| Olfr1109     | chr2:87092456-87093395  | NOTEST | 0 | 0 |
| Olfr111      | chr17:37529956-37530997 | NOTEST | 0 | 0 |
| Olfr1110     | chr2:87135380-87136319  | NOTEST | 0 | 0 |
| Olfr1111     | chr2:87149719-87150659  | NOTEST | 0 | 0 |
| Olfr1112     | chr2:87191688-87192645  | NOTEST | 0 | 0 |
| Olfr1113     | chr2:87212893-87213874  | NOTEST | 0 | 0 |
| Olfr1115     | chr2:87251839-87252941  | NOTEST | 0 | 0 |
| Olfr1116-ps  | chr2:87268845-87269769  | NOTEST | 0 | 0 |
| Olfr1118     | chr2:87308763-87309759  | NOTEST | 0 | 0 |
| Olfr112      | chr17:37563238-37569451 | NOTEST | 0 | 0 |
| Olfr1120     | chr2:87357445-87358390  | NOTEST | 0 | 0 |
| Olfr1121     | chr2:87371533-87372478  | NOTEST | 0 | 0 |
| Olfr1122     | chr2:87387706-87388687  | NOTEST | 0 | 0 |
| Olfr1123     | chr2:87418049-87419021  | NOTEST | 0 | 0 |
| Olfr1124     | chr2:87434488-87435445  | NOTEST | 0 | 0 |
| Olfr1126     | chr2:87457166-87458111  | NOTEST | 0 | 0 |
| Olfr1128     | chr2:87544606-87545542  | NOTEST | 0 | 0 |
| Olfr1129     | chr2:87575085-87576030  | NOTEST | 0 | 0 |
| Olfr113      | chr17:37574482-37575421 | NOTEST | 0 | 0 |
| Olfr1130     | chr2:87606211-87608334  | NOTEST | 0 | 0 |
| Olfr1131     | chr2:87628464-87629394  | NOTEST | 0 | 0 |
| Olfr1132     | chr2:87634818-87635745  | NOTEST | 0 | 0 |
| Olfr1133     | chr2:87645179-87646121  | NOTEST | 0 | 0 |
| Olfr1134     | chr2:87655924-87658457  | NOTEST | 0 | 0 |
| Olfr1135     | chr2:87671432-87672365  | NOTEST | 0 | 0 |
| Olfr1136     | chr2:87692880-87693947  | NOTEST | 0 | 0 |

|          |                         |        |   |   |
|----------|-------------------------|--------|---|---|
| Olfr1137 | chr2:87710971-87711904  | NOTEST | 0 | 0 |
| Olfr1138 | chr2:87737386-87738322  | NOTEST | 0 | 0 |
| Olfr114  | chr17:37589412-37590351 | NOTEST | 0 | 0 |
| Olfr1140 | chr2:87746160-87747180  | NOTEST | 0 | 0 |
| Olfr1141 | chr2:87753055-87753991  | NOTEST | 0 | 0 |
| Olfr1143 | chr2:87802390-87803335  | NOTEST | 0 | 0 |
| Olfr1145 | chr2:87809821-87810799  | NOTEST | 0 | 0 |
| Olfr1148 | chr2:87833040-87833985  | NOTEST | 0 | 0 |
| Olfr115  | chr17:37609784-37610779 | NOTEST | 0 | 0 |
| Olfr1151 | chr2:87857176-87858103  | NOTEST | 0 | 0 |
| Olfr1152 | chr2:87867992-87868925  | NOTEST | 0 | 0 |
| Olfr1153 | chr2:87896176-87897133  | NOTEST | 0 | 0 |
| Olfr1154 | chr2:87902741-87903674  | NOTEST | 0 | 0 |
| Olfr1155 | chr2:87942681-87943626  | NOTEST | 0 | 0 |
| Olfr1156 | chr2:87949189-87950265  | NOTEST | 0 | 0 |
| Olfr1157 | chr2:87961951-87968257  | NOTEST | 0 | 0 |
| Olfr1158 | chr2:87990112-87991054  | NOTEST | 0 | 0 |
| Olfr116  | chr17:37623667-37624633 | NOTEST | 0 | 0 |
| Olfr1160 | chr2:88005816-88006776  | NOTEST | 0 | 0 |
| Olfr1161 | chr2:88024701-88025713  | NOTEST | 0 | 0 |
| Olfr1162 | chr2:88049677-88050622  | NOTEST | 0 | 0 |
| Olfr1164 | chr2:88092854-88093966  | NOTEST | 0 | 0 |
| Olfr1166 | chr2:88123361-88124993  | NOTEST | 0 | 0 |
| Olfr1168 | chr2:88184878-88185817  | NOTEST | 0 | 0 |
| Olfr117  | chr17:37659377-37660331 | NOTEST | 0 | 0 |
| Olfr1170 | chr2:88224079-88225030  | NOTEST | 0 | 0 |
| Olfr1173 | chr2:88274108-88275047  | NOTEST | 0 | 0 |
| Olfr1176 | chr2:88339566-88340514  | NOTEST | 0 | 0 |
| Olfr1178 | chr2:88391248-88392220  | NOTEST | 0 | 0 |
| Olfr1179 | chr2:88402008-88402932  | NOTEST | 0 | 0 |
| Olfr118  | chr17:37672024-37672990 | NOTEST | 0 | 0 |
| Olfr1180 | chr2:88411626-88412689  | NOTEST | 0 | 0 |
| Olfr1181 | chr2:88423087-88424023  | NOTEST | 0 | 0 |
| Olfr1182 | chr2:88446018-88449121  | NOTEST | 0 | 0 |
| Olfr1183 | chr2:88461341-88462253  | NOTEST | 0 | 0 |
| Olfr1184 | chr2:88486733-88487669  | NOTEST | 0 | 0 |
| Olfr1186 | chr2:88525500-88526590  | NOTEST | 0 | 0 |
| Olfr1188 | chr2:88559450-88560418  | NOTEST | 0 | 0 |
| Olfr1189 | chr2:88591805-88592726  | NOTEST | 0 | 0 |
| Olfr119  | chr17:37696684-37701637 | NOTEST | 0 | 0 |
| Olfr1193 | chr2:88677856-88678813  | NOTEST | 0 | 0 |
| Olfr1195 | chr2:88682803-88683730  | NOTEST | 0 | 0 |
| Olfr1196 | chr2:88700382-88701327  | NOTEST | 0 | 0 |
| Olfr1197 | chr2:88728652-88729597  | NOTEST | 0 | 0 |
| Olfr1198 | chr2:88745959-88746886  | NOTEST | 0 | 0 |
| Olfr1199 | chr2:88755740-88756673  | NOTEST | 0 | 0 |
| Olfr120  | chr17:37725998-37726991 | NOTEST | 0 | 0 |
| Olfr1200 | chr2:88767302-88768313  | NOTEST | 0 | 0 |
| Olfr1201 | chr2:88794383-88795307  | NOTEST | 0 | 0 |
| Olfr1202 | chr2:88817172-88818102  | NOTEST | 0 | 0 |
| Olfr1204 | chr2:88851951-88852881  | NOTEST | 0 | 0 |
| Olfr1205 | chr2:88829756-88832042  | NOTEST | 0 | 0 |
| Olfr1206 | chr2:88864606-88865530  | NOTEST | 0 | 0 |

|          |                         |        |   |   |
|----------|-------------------------|--------|---|---|
| Olfr1208 | chr2:88896668-88897595  | NOTEST | 0 | 0 |
| Olfr1209 | chr2:88909458-88910391  | NOTEST | 0 | 0 |
| Olfr121  | chr17:37748865-37753004 | NOTEST | 0 | 0 |
| Olfr1211 | chr2:88929377-88930313  | NOTEST | 0 | 0 |
| Olfr1212 | chr2:88958467-88959403  | NOTEST | 0 | 0 |
| Olfr1213 | chr2:88972953-88980267  | NOTEST | 0 | 0 |
| Olfr1214 | chr2:88987264-88988200  | NOTEST | 0 | 0 |
| Olfr1215 | chr2:89001347-89002290  | NOTEST | 0 | 0 |
| Olfr1216 | chr2:89013126-89014062  | NOTEST | 0 | 0 |
| Olfr1217 | chr2:89022994-89024099  | NOTEST | 0 | 0 |
| Olfr1218 | chr2:89054488-89055424  | NOTEST | 0 | 0 |
| Olfr1219 | chr2:89074153-89075089  | NOTEST | 0 | 0 |
| Olfr122  | chr17:37768641-37772620 | NOTEST | 0 | 0 |
| Olfr1220 | chr2:89096937-89097963  | NOTEST | 0 | 0 |
| Olfr1221 | chr2:89111574-89112510  | NOTEST | 0 | 0 |
| Olfr1222 | chr2:89124793-89125729  | NOTEST | 0 | 0 |
| Olfr1223 | chr2:89144085-89151336  | NOTEST | 0 | 0 |
| Olfr1225 | chr2:89170218-89171245  | NOTEST | 0 | 0 |
| Olfr1226 | chr2:89193099-89194032  | NOTEST | 0 | 0 |
| Olfr1228 | chr2:89248720-89249692  | NOTEST | 0 | 0 |
| Olfr1229 | chr2:89282195-89283131  | NOTEST | 0 | 0 |
| Olfr123  | chr17:37795445-37796375 | NOTEST | 0 | 0 |
| Olfr1230 | chr2:89296350-89297268  | NOTEST | 0 | 0 |
| Olfr1231 | chr2:89302648-89303590  | NOTEST | 0 | 0 |
| Olfr1232 | chr2:89325242-89326178  | NOTEST | 0 | 0 |
| Olfr1233 | chr2:89339382-89340300  | NOTEST | 0 | 0 |
| Olfr1234 | chr2:89362482-89363427  | NOTEST | 0 | 0 |
| Olfr1238 | chr2:89406129-89407077  | NOTEST | 0 | 0 |
| Olfr1239 | chr2:89417493-89418411  | NOTEST | 0 | 0 |
| Olfr124  | chr17:37805068-37806190 | NOTEST | 0 | 0 |
| Olfr1240 | chr2:89439269-89440343  | NOTEST | 0 | 0 |
| Olfr1241 | chr2:89482188-89483133  | NOTEST | 0 | 0 |
| Olfr1242 | chr2:89493293-89494346  | NOTEST | 0 | 0 |
| Olfr1243 | chr2:89527490-89528408  | NOTEST | 0 | 0 |
| Olfr1246 | chr2:89590068-89591146  | NOTEST | 0 | 0 |
| Olfr1247 | chr2:89609088-89610153  | NOTEST | 0 | 0 |
| Olfr1248 | chr2:89617167-89618245  | NOTEST | 0 | 0 |
| Olfr125  | chr17:37834910-37836028 | NOTEST | 0 | 0 |
| Olfr1250 | chr2:89656494-89657439  | NOTEST | 0 | 0 |
| Olfr1251 | chr2:89666927-89667884  | NOTEST | 0 | 0 |
| Olfr1252 | chr2:89721164-89722109  | NOTEST | 0 | 0 |
| Olfr1253 | chr2:89751869-89752826  | NOTEST | 0 | 0 |
| Olfr1255 | chr2:89816327-89817260  | NOTEST | 0 | 0 |
| Olfr1256 | chr2:89835022-89835943  | NOTEST | 0 | 0 |
| Olfr1257 | chr2:89880827-89881757  | NOTEST | 0 | 0 |
| Olfr1258 | chr2:89929810-89930746  | NOTEST | 0 | 0 |
| Olfr126  | chr17:37850593-37851553 | NOTEST | 0 | 0 |
| Olfr1260 | chr2:89977779-89978712  | NOTEST | 0 | 0 |
| Olfr1261 | chr2:89993394-89994315  | NOTEST | 0 | 0 |
| Olfr1262 | chr2:90002407-90003322  | NOTEST | 0 | 0 |
| Olfr1263 | chr2:90014931-90015852  | NOTEST | 0 | 0 |
| Olfr1264 | chr2:90021137-90022064  | NOTEST | 0 | 0 |
| Olfr1265 | chr2:90036920-90037850  | NOTEST | 0 | 0 |



|              |                          |        |   |   |
|--------------|--------------------------|--------|---|---|
| Olfr1269     | chr2:90118666-90119596   | NOTEST | 0 | 0 |
| Olfr127      | chr17:37903547-37904519  | NOTEST | 0 | 0 |
| Olfr1270     | chr2:90149018-90150036   | NOTEST | 0 | 0 |
| Olfr1271     | chr2:90265510-90266428   | NOTEST | 0 | 0 |
| Olfr1272     | chr2:90281646-90282573   | NOTEST | 0 | 0 |
| Olfr1273-ps  | chr2:90295935-90296859   | NOTEST | 0 | 0 |
| Olfr1274-ps  | chr2:90400639-90401674   | NOTEST | 0 | 0 |
| Olfr1275     | chr2:111230852-111231791 | NOTEST | 0 | 0 |
| Olfr1276     | chr2:111257116-111258055 | NOTEST | 0 | 0 |
| Olfr1277     | chr2:111269453-111270365 | NOTEST | 0 | 0 |
| Olfr1278     | chr2:111292269-111293211 | NOTEST | 0 | 0 |
| Olfr1279     | chr2:111306200-111307142 | NOTEST | 0 | 0 |
| Olfr128      | chr17:37923567-37924494  | NOTEST | 0 | 0 |
| Olfr1280     | chr2:111315480-111316398 | NOTEST | 0 | 0 |
| Olfr1281     | chr2:111328420-111329338 | NOTEST | 0 | 0 |
| Olfr1282     | chr2:111335158-111336076 | NOTEST | 0 | 0 |
| Olfr1283     | chr2:111368633-111369551 | NOTEST | 0 | 0 |
| Olfr1284     | chr2:111379001-111379937 | NOTEST | 0 | 0 |
| Olfr1286     | chr2:111420031-111420949 | NOTEST | 0 | 0 |
| Olfr1287     | chr2:111449141-111450059 | NOTEST | 0 | 0 |
| Olfr1288     | chr2:111478785-111479724 | NOTEST | 0 | 0 |
| Olfr1289     | chr2:111483431-111484328 | NOTEST | 0 | 0 |
| Olfr129      | chr17:38054598-38059784  | NOTEST | 0 | 0 |
| Olfr1290     | chr2:111489217-111493815 | NOTEST | 0 | 0 |
| Olfr1294     | chr2:111537348-111538287 | NOTEST | 0 | 0 |
| Olfr1295     | chr2:111564503-111565442 | NOTEST | 0 | 0 |
| Olfr1297     | chr2:111621133-111622072 | NOTEST | 0 | 0 |
| Olfr1298     | chr2:111645056-111645995 | NOTEST | 0 | 0 |
| Olfr1299     | chr2:111661452-111665166 | NOTEST | 0 | 0 |
| Olfr13       | chr6:43173987-43174920   | NOTEST | 0 | 0 |
| Olfr130      | chr17:38067172-38068126  | NOTEST | 0 | 0 |
| Olfr1300-ps1 | chr2:111667436-111693319 | NOTEST | 0 | 0 |
| Olfr1301     | chr2:111754250-111755189 | NOTEST | 0 | 0 |
| Olfr1302     | chr2:111780312-111781260 | NOTEST | 0 | 0 |
| Olfr1303     | chr2:111813785-111814724 | NOTEST | 0 | 0 |
| Olfr1305     | chr2:111872914-111873853 | NOTEST | 0 | 0 |
| Olfr1306     | chr2:111911989-111912928 | NOTEST | 0 | 0 |
| Olfr1307     | chr2:111944515-111945454 | NOTEST | 0 | 0 |
| Olfr1308     | chr2:111960108-111961071 | NOTEST | 0 | 0 |
| Olfr1309     | chr2:111983133-111984096 | NOTEST | 0 | 0 |
| Olfr131      | chr17:38082031-38082976  | NOTEST | 0 | 0 |
| Olfr1310     | chr2:112008245-112009184 | NOTEST | 0 | 0 |
| Olfr1311     | chr2:112020913-112021852 | NOTEST | 0 | 0 |
| Olfr1312     | chr2:112042076-112043030 | NOTEST | 0 | 0 |
| Olfr1313     | chr2:112071645-112072581 | NOTEST | 0 | 0 |
| Olfr1314     | chr2:112091760-112092699 | NOTEST | 0 | 0 |
| Olfr1316     | chr2:112129870-112130815 | NOTEST | 0 | 0 |
| Olfr1317     | chr2:112141946-112142897 | NOTEST | 0 | 0 |
| Olfr1318     | chr2:112155897-112157007 | NOTEST | 0 | 0 |
| Olfr132      | chr17:38130248-38131190  | NOTEST | 0 | 0 |
| Olfr1320     | chrX:49683503-49684463   | NOTEST | 0 | 0 |
| Olfr1321     | chrX:49726972-49727932   | NOTEST | 0 | 0 |
| Olfr1322     | chrX:49885468-49886401   | NOTEST | 0 | 0 |

|                   |                          |        |   |   |
|-------------------|--------------------------|--------|---|---|
| Olfr1323          | chrX:50009305-50010235   | NOTEST | 0 | 0 |
| Olfr1324          | chrX:50425495-50426494   | NOTEST | 0 | 0 |
| Olfr1325          | chrX:74594327-74595275   | NOTEST | 0 | 0 |
| Olfr1328          | chr4:118933898-118934840 | NOTEST | 0 | 0 |
| Olfr1329          | chr4:118916523-118917465 | NOTEST | 0 | 0 |
| Olfr133           | chr17:38148589-38149528  | NOTEST | 0 | 0 |
| Olfr1330          | chr4:118893084-118894032 | NOTEST | 0 | 0 |
| Olfr1331          | chr4:118868782-118869736 | NOTEST | 0 | 0 |
| Olfr1333          | chr4:118829484-118830438 | NOTEST | 0 | 0 |
| Olfr1335          | chr4:118808854-118809862 | NOTEST | 0 | 0 |
| Olfr1336          | chr7:6460510-6461455     | NOTEST | 0 | 0 |
| Olfr1337          | chr4:118781635-118782586 | NOTEST | 0 | 0 |
| Olfr1338          | chr4:118753594-118754536 | NOTEST | 0 | 0 |
| Olfr1339          | chr4:118734530-118735478 | NOTEST | 0 | 0 |
| Olfr134           | chr17:38175085-38176024  | NOTEST | 0 | 0 |
| Olfr1340          | chr4:118726248-118727196 | NOTEST | 0 | 0 |
| Olfr1341          | chr4:118709408-118710347 | NOTEST | 0 | 0 |
| Olfr1342          | chr4:118689502-118690450 | NOTEST | 0 | 0 |
| Olfr1346          | chr7:6474111-6475053     | NOTEST | 0 | 0 |
| Olfr1347          | chr7:6487912-6488872     | NOTEST | 0 | 0 |
| Olfr1348          | chr7:6501285-6502224     | NOTEST | 0 | 0 |
| Olfr1349          | chr7:6514473-6515427     | NOTEST | 0 | 0 |
| Olfr135           | chr17:38208246-38209185  | NOTEST | 0 | 0 |
| Olfr1350          | chr7:6569992-6570919     | NOTEST | 0 | 0 |
| Olfr1351          | chr10:79017323-79018283  | NOTEST | 0 | 0 |
| Olfr1352          | chr10:78981049-78984721  | NOTEST | 0 | 0 |
| Olfr1353          | chr10:78963308-78970612  | NOTEST | 0 | 0 |
| Olfr1354          | chr10:78916841-78917936  | NOTEST | 0 | 0 |
| Olfr1355          | chr10:78875548-78880106  | NOTEST | 0 | 0 |
| Olfr1356          | chr10:78846950-78847913  | NOTEST | 0 | 0 |
| Olfr1357          | chr10:78611668-78618074  | NOTEST | 0 | 0 |
| Olfr1359,Olfr1360 | chr13:21674000-21674980  | NOTEST | 0 | 0 |
| Olfr136           | chr17:38335158-38336097  | NOTEST | 0 | 0 |
| Olfr1360          | chr13:21674000-21674980  | NOTEST | 0 | 0 |
| Olfr1362          | chr13:21611019-21612004  | NOTEST | 0 | 0 |
| Olfr1364          | chr13:21573509-21574454  | NOTEST | 0 | 0 |
| Olfr1366          | chr13:21536973-21538027  | NOTEST | 0 | 0 |
| Olfr1367          | chr13:21346929-21347880  | NOTEST | 0 | 0 |
| Olfr1368          | chr13:21142110-21143055  | NOTEST | 0 | 0 |
| Olfr137           | chr17:38304520-38305459  | NOTEST | 0 | 0 |
| Olfr1370          | chr13:21072348-21073299  | NOTEST | 0 | 0 |
| Olfr1373          | chr11:52144592-52145528  | NOTEST | 0 | 0 |
| Olfr1377          | chr11:50984702-50985626  | NOTEST | 0 | 0 |
| Olfr1378          | chr11:50969019-50969967  | NOTEST | 0 | 0 |
| Olfr138           | chr17:38274772-38275711  | NOTEST | 0 | 0 |
| Olfr1380          | chr11:49563922-49564858  | NOTEST | 0 | 0 |
| Olfr1381          | chr11:49551748-49552684  | NOTEST | 0 | 0 |
| Olfr1382          | chr11:49535186-49536122  | NOTEST | 0 | 0 |
| Olfr1383          | chr11:49523724-49524660  | NOTEST | 0 | 0 |
| Olfr1384          | chr11:49513617-49514651  | NOTEST | 0 | 0 |
| Olfr1385          | chr11:49494534-49495464  | NOTEST | 0 | 0 |
| Olfr1386          | chr11:49470053-49471181  | NOTEST | 0 | 0 |
| Olfr1387          | chr11:49459680-49460616  | NOTEST | 0 | 0 |

|                   |                          |        |   |   |
|-------------------|--------------------------|--------|---|---|
| Olfr1388          | chr11:49443852-49444788  | NOTEST | 0 | 0 |
| Olfr1389          | chr11:49430426-49431499  | NOTEST | 0 | 0 |
| Olfr139           | chr11:74044324-74045272  | NOTEST | 0 | 0 |
| Olfr1390          | chr11:49340533-49341469  | NOTEST | 0 | 0 |
| Olfr1391          | chr11:49327412-49328348  | NOTEST | 0 | 0 |
| Olfr1394          | chr11:49160015-49160954  | NOTEST | 0 | 0 |
| Olfr1395          | chr11:49148258-49149212  | NOTEST | 0 | 0 |
| Olfr140           | chr2:90051413-90052322   | NOTEST | 0 | 0 |
| Olfr1402          | chr3:97309255-97411316   | NOTEST | 0 | 0 |
| Olfr1404          | chr1:173215606-173216640 | NOTEST | 0 | 0 |
| Olfr1406          | chr1:173183441-173184504 | NOTEST | 0 | 0 |
| Olfr1408          | chr1:173130282-173131215 | NOTEST | 0 | 0 |
| Olfr141           | chr2:86806020-86806997   | NOTEST | 0 | 0 |
| Olfr1410          | chr1:92607838-92608807   | NOTEST | 0 | 0 |
| Olfr1411          | chr1:92596520-92597492   | NOTEST | 0 | 0 |
| Olfr1412          | chr1:92588331-92589297   | NOTEST | 0 | 0 |
| Olfr1413          | chr1:92573124-92574206   | NOTEST | 0 | 0 |
| Olfr1414          | chr1:92511047-92518515   | NOTEST | 0 | 0 |
| Olfr1415          | chr1:92490817-92491753   | NOTEST | 0 | 0 |
| Olfr1416          | chr1:92479680-92480619   | NOTEST | 0 | 0 |
| Olfr1417          | chr19:11828076-11829024  | NOTEST | 0 | 0 |
| Olfr1418          | chr19:11854994-11855951  | NOTEST | 0 | 0 |
| Olfr1419          | chr19:11870182-11871214  | NOTEST | 0 | 0 |
| Olfr142           | chr2:90252068-90252986   | NOTEST | 0 | 0 |
| Olfr1420          | chr19:11896022-11896952  | NOTEST | 0 | 0 |
| Olfr1423          | chr19:12035807-12036740  | NOTEST | 0 | 0 |
| Olfr1424          | chr19:12058808-12059750  | NOTEST | 0 | 0 |
| Olfr1425          | chr19:12071789-12413554  | NOTEST | 0 | 0 |
| Olfr1426          | chr19:12071789-12413554  | NOTEST | 0 | 0 |
| Olfr1427          | chr19:12071789-12413554  | NOTEST | 0 | 0 |
| Olfr1428          | chr19:12071789-12413554  | NOTEST | 0 | 0 |
| Olfr143           | chr9:38253418-38254360   | NOTEST | 0 | 0 |
| Olfr1431          | chr19:12071789-12413554  | NOTEST | 0 | 0 |
| Olfr1433,Olfr1434 | chr19:12071789-12413554  | NOTEST | 0 | 0 |
| Olfr1434          | chr19:12071789-12413554  | LOWDAT | 0 | 0 |
| Olfr1436          | chr19:12071789-12413554  | NOTEST | 0 | 0 |
| Olfr1437          | chr19:12071789-12413554  | NOTEST | 0 | 0 |
| Olfr1440          | chr19:12071789-12413554  | NOTEST | 0 | 0 |
| Olfr1441          | chr19:12422310-12423267  | NOTEST | 0 | 0 |
| Olfr1442          | chr19:12674178-12675243  | NOTEST | 0 | 0 |
| Olfr1443          | chr19:12678165-12683845  | NOTEST | 0 | 0 |
| Olfr1444          | chr19:12861776-12862736  | NOTEST | 0 | 0 |
| Olfr1445          | chr19:12883882-12884827  | NOTEST | 0 | 0 |
| Olfr1446          | chr19:12889648-12890575  | NOTEST | 0 | 0 |
| Olfr1447          | chr19:12900848-12901778  | NOTEST | 0 | 0 |
| Olfr1448          | chr19:12919362-12920307  | NOTEST | 0 | 0 |
| Olfr1449          | chr19:12934739-12935684  | NOTEST | 0 | 0 |
| Olfr145           | chr9:37897405-37898338   | NOTEST | 0 | 0 |
| Olfr1450          | chr19:12953590-12954568  | NOTEST | 0 | 0 |
| Olfr1451          | chr19:12998987-12999920  | NOTEST | 0 | 0 |
| Olfr1453          | chr19:13027403-13028327  | NOTEST | 0 | 0 |
| Olfr1454          | chr19:13063412-13064336  | NOTEST | 0 | 0 |
| Olfr1457          | chr19:13094692-13095646  | NOTEST | 0 | 0 |

|              |                          |        |   |   |
|--------------|--------------------------|--------|---|---|
| Olfr1459     | chr19:13145733-13146657  | NOTEST | 0 | 0 |
| Olfr146      | chr9:39018618-39019539   | NOTEST | 0 | 0 |
| Olfr1461     | chr19:13165015-13165954  | NOTEST | 0 | 0 |
| Olfr1462     | chr19:13190668-13191592  | NOTEST | 0 | 0 |
| Olfr1463     | chr19:13234251-13235184  | NOTEST | 0 | 0 |
| Olfr1465     | chr19:13313359-13314283  | NOTEST | 0 | 0 |
| Olfr1466     | chr19:13341759-13342692  | NOTEST | 0 | 0 |
| Olfr1467     | chr19:13364629-13365556  | NOTEST | 0 | 0 |
| Olfr1469     | chr19:13410570-13411500  | NOTEST | 0 | 0 |
| Olfr147      | chr9:38401710-38403829   | NOTEST | 0 | 0 |
| Olfr1471     | chr19:13445013-13445958  | NOTEST | 0 | 0 |
| Olfr1472     | chr19:13453570-13454515  | NOTEST | 0 | 0 |
| Olfr1474     | chr19:13470971-13471916  | NOTEST | 0 | 0 |
| Olfr1475     | chr19:13479251-13480196  | NOTEST | 0 | 0 |
| Olfr1477     | chr19:13500545-13503292  | NOTEST | 0 | 0 |
| Olfr148      | chr9:39613568-39614501   | NOTEST | 0 | 0 |
| Olfr1480     | chr19:13529674-13530622  | NOTEST | 0 | 0 |
| Olfr1484     | chr19:13585305-13586253  | NOTEST | 0 | 0 |
| Olfr1487     | chr19:13619163-13620111  | NOTEST | 0 | 0 |
| Olfr1489     | chr19:13633112-13634054  | NOTEST | 0 | 0 |
| Olfr149      | chr9:39701831-39702767   | NOTEST | 0 | 0 |
| Olfr1490     | chr19:13654445-13655396  | NOTEST | 0 | 0 |
| Olfr1491     | chr19:13704828-13705788  | NOTEST | 0 | 0 |
| Olfr1494     | chr19:13749107-13750055  | NOTEST | 0 | 0 |
| Olfr1495     | chr19:13768343-13769303  | NOTEST | 0 | 0 |
| Olfr1496     | chr19:13780547-13781614  | NOTEST | 0 | 0 |
| Olfr1497     | chr19:13794664-13795609  | NOTEST | 0 | 0 |
| Olfr1499     | chr19:13814643-13815588  | NOTEST | 0 | 0 |
| Olfr15       | chr16:3838974-3839913    | NOTEST | 0 | 0 |
| Olfr150      | chr9:39736816-39737755   | NOTEST | 0 | 0 |
| Olfr1500     | chr19:13827458-13828394  | NOTEST | 0 | 0 |
| Olfr1501     | chr19:13838223-13839171  | NOTEST | 0 | 0 |
| Olfr1502     | chr19:13861794-13862745  | NOTEST | 0 | 0 |
| Olfr1504     | chr19:13887260-13888208  | NOTEST | 0 | 0 |
| Olfr1505     | chr19:13919021-13919972  | NOTEST | 0 | 0 |
| Olfr1506     | chr2:90221566-90224471   | NOTEST | 0 | 0 |
| Olfr1507     | chr14:52489934-52495695  | NOTEST | 0 | 0 |
| Olfr1508     | chr14:52462720-52467461  | NOTEST | 0 | 0 |
| Olfr1509     | chr14:52450392-52451402  | NOTEST | 0 | 0 |
| Olfr151      | chr9:37729976-37731061   | NOTEST | 0 | 0 |
| Olfr1510     | chr14:52409888-52410927  | NOTEST | 0 | 0 |
| Olfr1511     | chr14:52389814-52390771  | NOTEST | 0 | 0 |
| Olfr1512     | chr14:52372109-52373051  | NOTEST | 0 | 0 |
| Olfr1513     | chr14:52349102-52350044  | NOTEST | 0 | 0 |
| Olfr152      | chr2:87782535-87783486   | NOTEST | 0 | 0 |
| Olfr1532-ps1 | chr7:106914199-106915123 | NOTEST | 0 | 0 |
| Olfr1535     | chr13:21555039-21556020  | NOTEST | 0 | 0 |
| Olfr1537     | chr9:39237486-39238431   | NOTEST | 0 | 0 |
| Olfr154      | chr2:85663376-85664455   | NOTEST | 0 | 0 |
| Olfr155      | chr4:43854291-43855463   | NOTEST | 0 | 0 |
| Olfr156      | chr4:43820334-43821433   | NOTEST | 0 | 0 |
| Olfr157      | chr4:43834751-43836517   | NOTEST | 0 | 0 |
| Olfr159      | chr4:43770049-43771009   | NOTEST | 0 | 0 |

|             |                          |        |   |   |
|-------------|--------------------------|--------|---|---|
| Olfr16      | chr1:172956767-172957817 | NOTEST | 0 | 0 |
| Olfr160     | chr9:37711347-37712280   | NOTEST | 0 | 0 |
| Olfr161     | chr16:3592397-3593339    | NOTEST | 0 | 0 |
| Olfr164     | chr16:19285793-19286741  | NOTEST | 0 | 0 |
| Olfr165     | chr16:19407075-19408017  | NOTEST | 0 | 0 |
| Olfr166     | chr16:19486839-19487778  | NOTEST | 0 | 0 |
| Olfr167     | chr16:19514695-19515634  | NOTEST | 0 | 0 |
| Olfr168     | chr16:19529979-19530918  | NOTEST | 0 | 0 |
| Olfr169     | chr16:19565939-19566881  | NOTEST | 0 | 0 |
| Olfr17      | chr7:107097466-107098414 | NOTEST | 0 | 0 |
| Olfr170     | chr16:19605724-19606666  | NOTEST | 0 | 0 |
| Olfr171     | chr16:19624156-19625101  | NOTEST | 0 | 0 |
| Olfr172     | chr16:58760152-58761240  | NOTEST | 0 | 0 |
| Olfr173     | chr16:58796778-58797942  | NOTEST | 0 | 0 |
| Olfr175-ps1 | chr16:58823780-58826761  | NOTEST | 0 | 0 |
| Olfr176     | chr16:58872214-58873148  | NOTEST | 0 | 0 |
| Olfr177     | chr16:58872214-58873148  | LOWDAT | 0 | 0 |
| Olfr178     | chr16:58889258-58890218  | NOTEST | 0 | 0 |
| Olfr180     | chr16:58915685-58918486  | NOTEST | 0 | 0 |
| Olfr181     | chr16:58925556-58928644  | NOTEST | 0 | 0 |
| Olfr183     | chr16:58995403-59000616  | NOTEST | 0 | 0 |
| Olfr186     | chr16:59026975-59027905  | NOTEST | 0 | 0 |
| Olfr187     | chr16:59035779-59039749  | NOTEST | 0 | 0 |
| Olfr19      | chr16:16673049-16673979  | NOTEST | 0 | 0 |
| Olfr190     | chr16:59074154-59075078  | NOTEST | 0 | 0 |
| Olfr191     | chr16:59085551-59086481  | NOTEST | 0 | 0 |
| Olfr192     | chr16:59098065-59098990  | NOTEST | 0 | 0 |
| Olfr193     | chr16:59109678-59110608  | NOTEST | 0 | 0 |
| Olfr194     | chr16:59119147-59120068  | NOTEST | 0 | 0 |
| Olfr195     | chr16:59148851-59149778  | NOTEST | 0 | 0 |
| Olfr196     | chr16:59167211-59168141  | NOTEST | 0 | 0 |
| Olfr197     | chr16:59185555-59186481  | NOTEST | 0 | 0 |
| Olfr198     | chr16:59201503-59202424  | NOTEST | 0 | 0 |
| Olfr199     | chr16:59215684-59216611  | NOTEST | 0 | 0 |
| Olfr2       | chr7:107000874-107002605 | NOTEST | 0 | 0 |
| Olfr20      | chr11:73350858-73354699  | NOTEST | 0 | 0 |
| Olfr201     | chr16:59268738-59269665  | NOTEST | 0 | 0 |
| Olfr202     | chr16:59283571-59284495  | NOTEST | 0 | 0 |
| Olfr203     | chr16:59303154-59304075  | NOTEST | 0 | 0 |
| Olfr204     | chr16:59314487-59315405  | NOTEST | 0 | 0 |
| Olfr205     | chr16:59328589-59329507  | NOTEST | 0 | 0 |
| Olfr206     | chr16:59344778-59345699  | NOTEST | 0 | 0 |
| Olfr209     | chr16:59361298-59362216  | NOTEST | 0 | 0 |
| Olfr211     | chr6:116493610-116494540 | NOTEST | 0 | 0 |
| Olfr213     | chr6:116540454-116541438 | NOTEST | 0 | 0 |
| Olfr214     | chr6:116556426-116557389 | NOTEST | 0 | 0 |
| Olfr215     | chr6:116582011-116582944 | NOTEST | 0 | 0 |
| Olfr218     | chr1:173203357-173204299 | NOTEST | 0 | 0 |
| Olfr220     | chr1:174448624-174449602 | NOTEST | 0 | 0 |
| Olfr223     | chr11:59589127-59590087  | NOTEST | 0 | 0 |
| Olfr224     | chr11:58566398-58567343  | NOTEST | 0 | 0 |
| Olfr225     | chr11:59612965-59614225  | NOTEST | 0 | 0 |
| Olfr228     | chr2:86482798-86483740   | NOTEST | 0 | 0 |



|             |                           |        |   |   |
|-------------|---------------------------|--------|---|---|
| Olfr229     | chr9:39909804-39910728    | NOTEST | 0 | 0 |
| Olfr23      | chr11:73940247-73941225   | NOTEST | 0 | 0 |
| Olfr231     | chr1:174117090-174118014  | NOTEST | 0 | 0 |
| Olfr235     | chr19:12071789-12413554   | NOTEST | 0 | 0 |
| Olfr237-ps1 | chr6:43153306-43154239    | NOTEST | 0 | 0 |
| Olfr24      | chr9:18754691-18755633    | NOTEST | 0 | 0 |
| Olfr242     | chr9:39128166-39145070    | LOWDAT | 0 | 0 |
| Olfr243     | chr7:103716595-103717546  | NOTEST | 0 | 0 |
| Olfr247     | chr10:129974604-129975549 | NOTEST | 0 | 0 |
| Olfr248     | chr1:174391045-174392055  | NOTEST | 0 | 0 |
| Olfr25      | chr9:38329491-38330559    | NOTEST | 0 | 0 |
| Olfr259     | chr2:87107446-87108385    | NOTEST | 0 | 0 |
| Olfr26      | chr9:38855059-38855990    | NOTEST | 0 | 0 |
| Olfr262     | chr19:12071789-12413554   | NOTEST | 0 | 0 |
| Olfr263     | chr13:21132776-21133730   | NOTEST | 0 | 0 |
| Olfr266     | chr3:106821606-106822557  | NOTEST | 0 | 0 |
| Olfr267     | chr4:58784778-58785720    | NOTEST | 0 | 0 |
| Olfr27      | chr9:39128166-39145070    | NOTEST | 0 | 0 |
| Olfr270     | chr4:52970628-52971567    | NOTEST | 0 | 0 |
| Olfr272     | chr4:52910832-52911792    | NOTEST | 0 | 0 |
| Olfr273     | chr4:52855557-52856511    | NOTEST | 0 | 0 |
| Olfr275     | chr4:52814603-52828269    | NOTEST | 0 | 0 |
| Olfr279     | chr15:98497473-98498406   | NOTEST | 0 | 0 |
| Olfr281     | chr15:98456311-98457247   | NOTEST | 0 | 0 |
| Olfr282     | chr15:98437469-98438397   | NOTEST | 0 | 0 |
| Olfr283     | chr15:98378178-98379108   | NOTEST | 0 | 0 |
| Olfr285     | chr15:98312588-98313548   | NOTEST | 0 | 0 |
| Olfr286     | chr15:98226674-98234450   | NOTEST | 0 | 0 |
| Olfr287     | chr15:98206970-98221056   | NOTEST | 0 | 0 |
| Olfr288     | chr15:98186012-98195542   | NOTEST | 0 | 0 |
| Olfr29-ps1  | chr4:43781364-43782327    | NOTEST | 0 | 0 |
| Olfr290     | chr7:84915780-84916728    | NOTEST | 0 | 0 |
| Olfr291     | chr7:84853570-84857318    | NOTEST | 0 | 0 |
| Olfr292     | chr7:86688340-86695384    | NOTEST | 0 | 0 |
| Olfr293     | chr7:86663663-86664674    | NOTEST | 0 | 0 |
| Olfr294     | chr7:86615635-86616643    | NOTEST | 0 | 0 |
| Olfr295     | chr7:86585276-86586206    | NOTEST | 0 | 0 |
| Olfr297     | chr7:86526758-86527691    | NOTEST | 0 | 0 |
| Olfr298     | chr7:86488550-86489549    | NOTEST | 0 | 0 |
| Olfr299     | chr7:86465412-86466405    | NOTEST | 0 | 0 |
| Olfr3       | chr2:36812148-36813090    | NOTEST | 0 | 0 |
| Olfr30      | chr11:58454914-58455980   | NOTEST | 0 | 0 |
| Olfr301     | chr7:86403848-86413299    | NOTEST | 0 | 0 |
| Olfr303     | chr7:86394536-86395496    | NOTEST | 0 | 0 |
| Olfr304     | chr7:86385656-86386658    | NOTEST | 0 | 0 |
| Olfr305     | chr7:86363375-86364335    | NOTEST | 0 | 0 |
| Olfr307     | chr7:86335452-86336394    | NOTEST | 0 | 0 |
| Olfr308     | chr7:86321023-86321950    | NOTEST | 0 | 0 |
| Olfr309     | chr7:86306184-86307111    | NOTEST | 0 | 0 |
| Olfr31      | chr14:14328112-14329066   | NOTEST | 0 | 0 |
| Olfr310     | chr7:86268729-86269811    | NOTEST | 0 | 0 |
| Olfr311     | chr11:58841115-58842042   | NOTEST | 0 | 0 |
| Olfr312     | chr11:58831155-58832082   | NOTEST | 0 | 0 |

|            |                          |        |   |   |
|------------|--------------------------|--------|---|---|
| Olfr313    | chr11:58816927-58818001  | NOTEST | 0 | 0 |
| Olfr314    | chr11:58786138-58787269  | NOTEST | 0 | 0 |
| Olfr315    | chr11:58778088-58779086  | NOTEST | 0 | 0 |
| Olfr316    | chr11:58757666-58758587  | NOTEST | 0 | 0 |
| Olfr317    | chr11:58732095-58733223  | NOTEST | 0 | 0 |
| Olfr318    | chr11:58720068-58721094  | NOTEST | 0 | 0 |
| Olfr319    | chr11:58701702-58702623  | NOTEST | 0 | 0 |
| Olfr32     | chr2:90138179-90142293   | NOTEST | 0 | 0 |
| Olfr320    | chr11:58683874-58684795  | NOTEST | 0 | 0 |
| Olfr322    | chr11:58665560-58666544  | NOTEST | 0 | 0 |
| Olfr323    | chr11:58625072-58626044  | NOTEST | 0 | 0 |
| Olfr324    | chr11:58597344-58598466  | NOTEST | 0 | 0 |
| Olfr325    | chr11:58580836-58581877  | NOTEST | 0 | 0 |
| Olfr328    | chr11:58551304-58552237  | NOTEST | 0 | 0 |
| Olfr329-ps | chr11:58542446-58544938  | NOTEST | 0 | 0 |
| Olfr33     | chr7:102713454-102714411 | NOTEST | 0 | 0 |
| Olfr330    | chr11:58528928-58534825  | NOTEST | 0 | 0 |
| Olfr331    | chr11:58501597-58502554  | NOTEST | 0 | 0 |
| Olfr332    | chr11:58489718-58492499  | NOTEST | 0 | 0 |
| Olfr338    | chr2:36376777-36377698   | NOTEST | 0 | 0 |
| Olfr339    | chr2:36421399-36422329   | NOTEST | 0 | 0 |
| Olfr340    | chr2:36452586-36453525   | NOTEST | 0 | 0 |
| Olfr341    | chr2:36479186-36480128   | NOTEST | 0 | 0 |
| Olfr342    | chr2:36527413-36528352   | NOTEST | 0 | 0 |
| Olfr344    | chr2:36568599-36569529   | NOTEST | 0 | 0 |
| Olfr345    | chr2:36640040-36640976   | NOTEST | 0 | 0 |
| Olfr346    | chr2:36688003-36688933   | NOTEST | 0 | 0 |
| Olfr347    | chr2:36734322-36735261   | NOTEST | 0 | 0 |
| Olfr348    | chr2:36786526-36787468   | NOTEST | 0 | 0 |
| Olfr350    | chr2:36850047-36850986   | NOTEST | 0 | 0 |
| Olfr351    | chr2:36859413-36860346   | NOTEST | 0 | 0 |
| Olfr352    | chr2:36869567-36870515   | NOTEST | 0 | 0 |
| Olfr353    | chr2:36889910-36890846   | NOTEST | 0 | 0 |
| Olfr354    | chr2:36906947-36907901   | NOTEST | 0 | 0 |
| Olfr355    | chr2:36927179-36928112   | NOTEST | 0 | 0 |
| Olfr356    | chr2:36937120-36938068   | NOTEST | 0 | 0 |
| Olfr357    | chr2:36996811-36997738   | NOTEST | 0 | 0 |
| Olfr358    | chr2:37004619-37005612   | NOTEST | 0 | 0 |
| Olfr360    | chr2:37068306-37069260   | NOTEST | 0 | 0 |
| Olfr361    | chr2:37084777-37085746   | NOTEST | 0 | 0 |
| Olfr362    | chr2:37104694-37105648   | NOTEST | 0 | 0 |
| Olfr365    | chr2:37201242-37202181   | NOTEST | 0 | 0 |
| Olfr366    | chr2:37219490-37220420   | NOTEST | 0 | 0 |
| Olfr367-ps | chr2:37266950-37271387   | NOTEST | 0 | 0 |
| Olfr368    | chr2:37331748-37332732   | NOTEST | 0 | 0 |
| Olfr370    | chr8:83541092-83542188   | NOTEST | 0 | 0 |
| Olfr371    | chr8:85230496-85231435   | NOTEST | 0 | 0 |
| Olfr372    | chr8:72057659-72058675   | NOTEST | 0 | 0 |
| Olfr373    | chr8:72099761-72100706   | NOTEST | 0 | 0 |
| Olfr374    | chr8:72107039-72110509   | NOTEST | 0 | 0 |
| Olfr376    | chr11:73371245-73375704  | NOTEST | 0 | 0 |
| Olfr378    | chr11:73425036-73428477  | NOTEST | 0 | 0 |
| Olfr38     | chr6:42762053-42763007   | NOTEST | 0 | 0 |

|             |                          |        |   |   |
|-------------|--------------------------|--------|---|---|
| Olfr380     | chr11:73453274-73454210  | NOTEST | 0 | 0 |
| Olfr381     | chr11:73485886-73486822  | NOTEST | 0 | 0 |
| Olfr382     | chr11:73516258-73517197  | NOTEST | 0 | 0 |
| Olfr384     | chr11:73602581-73603520  | NOTEST | 0 | 0 |
| Olfr385     | chr11:73588797-73589736  | NOTEST | 0 | 0 |
| Olfr389     | chr11:73776386-73780589  | NOTEST | 0 | 0 |
| Olfr39      | chr9:20282350-20286648   | NOTEST | 0 | 0 |
| Olfr390     | chr11:73786939-73787875  | NOTEST | 0 | 0 |
| Olfr391-ps  | chr11:73798752-73802984  | NOTEST | 0 | 0 |
| Olfr392     | chr11:73814141-73816877  | NOTEST | 0 | 0 |
| Olfr393     | chr11:73847184-73848123  | NOTEST | 0 | 0 |
| Olfr394     | chr11:73887437-73888370  | NOTEST | 0 | 0 |
| Olfr395     | chr11:73906551-73907490  | NOTEST | 0 | 0 |
| Olfr397     | chr11:73964609-73965557  | NOTEST | 0 | 0 |
| Olfr398     | chr11:73983661-73984606  | NOTEST | 0 | 0 |
| Olfr399     | chr11:74053775-74054778  | NOTEST | 0 | 0 |
| Olfr401     | chr11:74121290-74122238  | NOTEST | 0 | 0 |
| Olfr402     | chr11:74155155-74156103  | NOTEST | 0 | 0 |
| Olfr403     | chr11:74195504-74196446  | NOTEST | 0 | 0 |
| Olfr406     | chr11:74269390-74270362  | NOTEST | 0 | 0 |
| Olfr410     | chr11:74334281-74335229  | NOTEST | 0 | 0 |
| Olfr411     | chr11:74346623-74347672  | NOTEST | 0 | 0 |
| Olfr412     | chr11:74364670-74365609  | NOTEST | 0 | 0 |
| Olfr414     | chr1:174430429-174431384 | NOTEST | 0 | 0 |
| Olfr417     | chr1:174368918-174369848 | NOTEST | 0 | 0 |
| Olfr418-ps1 | chr1:173270146-173271137 | NOTEST | 0 | 0 |
| Olfr420     | chr1:174158721-174159767 | NOTEST | 0 | 0 |
| Olfr426     | chr1:174099459-174100410 | NOTEST | 0 | 0 |
| Olfr427     | chr1:174099459-174100410 | LOWDAT | 0 | 0 |
| Olfr429     | chr1:174089037-174089980 | NOTEST | 0 | 0 |
| Olfr43      | chr11:74206197-74207289  | NOTEST | 0 | 0 |
| Olfr430     | chr1:174069299-174070253 | NOTEST | 0 | 0 |
| Olfr432     | chr1:174050374-174051313 | NOTEST | 0 | 0 |
| Olfr433     | chr1:174041932-174042936 | NOTEST | 0 | 0 |
| Olfr434     | chr6:43216914-43217880   | NOTEST | 0 | 0 |
| Olfr435     | chr6:43201645-43202587   | NOTEST | 0 | 0 |
| Olfr437     | chr6:43167059-43167992   | NOTEST | 0 | 0 |
| Olfr44      | chr9:39484203-39493988   | NOTEST | 0 | 0 |
| Olfr441     | chr6:43115743-43116676   | NOTEST | 0 | 0 |
| Olfr444     | chr6:42955499-42956432   | NOTEST | 0 | 0 |
| Olfr446     | chr6:42927232-42928159   | NOTEST | 0 | 0 |
| Olfr447     | chr6:42911524-42912457   | NOTEST | 0 | 0 |
| Olfr448     | chr6:42896452-42897385   | NOTEST | 0 | 0 |
| Olfr449     | chr6:42837882-42838818   | NOTEST | 0 | 0 |
| Olfr45      | chr7:140690906-140691842 | NOTEST | 0 | 0 |
| Olfr450     | chr6:42817472-42818405   | NOTEST | 0 | 0 |
| Olfr452     | chr6:42790040-42790994   | NOTEST | 0 | 0 |
| Olfr453     | chr6:42744038-42744992   | NOTEST | 0 | 0 |
| Olfr455     | chr6:42538066-42539020   | NOTEST | 0 | 0 |
| Olfr456     | chr6:42486162-42487214   | NOTEST | 0 | 0 |
| Olfr457     | chr6:42471234-42472176   | NOTEST | 0 | 0 |
| Olfr458     | chr6:42460075-42461017   | NOTEST | 0 | 0 |
| Olfr459     | chr6:41771352-41772297   | NOTEST | 0 | 0 |

|         |                          |        |   |   |
|---------|--------------------------|--------|---|---|
| Olfr46  | chr7:140601339-140611124 | NOTEST | 0 | 0 |
| Olfr460 | chr6:40529090-40910666   | NOTEST | 0 | 0 |
| Olfr461 | chr6:40529090-40910666   | NOTEST | 0 | 0 |
| Olfr462 | chr11:87888958-87889894  | NOTEST | 0 | 0 |
| Olfr463 | chr11:87892986-87893922  | NOTEST | 0 | 0 |
| Olfr464 | chr11:87913919-87915003  | NOTEST | 0 | 0 |
| Olfr466 | chr13:65152225-65153152  | NOTEST | 0 | 0 |
| Olfr467 | chr7:107814585-107815506 | NOTEST | 0 | 0 |
| Olfr469 | chr7:107822522-107823467 | NOTEST | 0 | 0 |
| Olfr47  | chr6:43235609-43236575   | NOTEST | 0 | 0 |
| Olfr470 | chr7:107844786-107845731 | NOTEST | 0 | 0 |
| Olfr472 | chr7:107902718-107903651 | NOTEST | 0 | 0 |
| Olfr473 | chr7:107933521-107934454 | NOTEST | 0 | 0 |
| Olfr474 | chr7:107954642-107955575 | NOTEST | 0 | 0 |
| Olfr476 | chr7:107967398-107968331 | NOTEST | 0 | 0 |
| Olfr477 | chr7:107990366-107991299 | NOTEST | 0 | 0 |
| Olfr478 | chr7:108031396-108032341 | NOTEST | 0 | 0 |
| Olfr479 | chr7:108054983-108055967 | NOTEST | 0 | 0 |
| Olfr480 | chr7:108065767-108066796 | NOTEST | 0 | 0 |
| Olfr481 | chr7:108080795-108081734 | NOTEST | 0 | 0 |
| Olfr482 | chr7:108094596-108095568 | NOTEST | 0 | 0 |
| Olfr483 | chr7:108103310-108104258 | NOTEST | 0 | 0 |
| Olfr484 | chr7:108124295-108125261 | NOTEST | 0 | 0 |
| Olfr485 | chr7:108158917-108159871 | NOTEST | 0 | 0 |
| Olfr486 | chr7:108171797-108172742 | NOTEST | 0 | 0 |
| Olfr487 | chr7:108211582-108212527 | NOTEST | 0 | 0 |
| Olfr488 | chr7:108255191-108256136 | NOTEST | 0 | 0 |
| Olfr49  | chr14:54281895-54282925  | NOTEST | 0 | 0 |
| Olfr490 | chr7:108286179-108287124 | NOTEST | 0 | 0 |
| Olfr491 | chr7:108316895-108317828 | NOTEST | 0 | 0 |
| Olfr492 | chr7:108322729-108323674 | NOTEST | 0 | 0 |
| Olfr493 | chr7:108346034-108346979 | NOTEST | 0 | 0 |
| Olfr494 | chr7:108367491-108368436 | NOTEST | 0 | 0 |
| Olfr495 | chr7:108395121-108396114 | NOTEST | 0 | 0 |
| Olfr497 | chr7:108422572-108423517 | NOTEST | 0 | 0 |
| Olfr498 | chr7:108465325-108466318 | NOTEST | 0 | 0 |
| Olfr5   | chr7:6480215-6486813     | NOTEST | 0 | 0 |
| Olfr50  | chr2:36793237-36794176   | NOTEST | 0 | 0 |
| Olfr502 | chr7:108523003-108523948 | NOTEST | 0 | 0 |
| Olfr504 | chr7:108564836-108565793 | NOTEST | 0 | 0 |
| Olfr506 | chr7:108612308-108613253 | NOTEST | 0 | 0 |
| Olfr507 | chr7:108621813-108622764 | NOTEST | 0 | 0 |
| Olfr508 | chr7:108629993-108630926 | NOTEST | 0 | 0 |
| Olfr509 | chr7:108645608-108646574 | NOTEST | 0 | 0 |
| Olfr51  | chr11:51006973-51007897  | NOTEST | 0 | 0 |
| Olfr510 | chr7:108667417-108668362 | NOTEST | 0 | 0 |
| Olfr512 | chr7:108713354-108714335 | NOTEST | 0 | 0 |
| Olfr513 | chr7:108754857-108755787 | NOTEST | 0 | 0 |
| Olfr514 | chr7:108825064-108825997 | NOTEST | 0 | 0 |
| Olfr516 | chr7:108845063-108846008 | NOTEST | 0 | 0 |
| Olfr517 | chr7:108868207-108869152 | NOTEST | 0 | 0 |
| Olfr518 | chr7:108880602-108881604 | NOTEST | 0 | 0 |
| Olfr519 | chr7:108893460-108894405 | NOTEST | 0 | 0 |

|         |                          |        |   |   |
|---------|--------------------------|--------|---|---|
| Olfr52  | chr2:86181149-86182109   | NOTEST | 0 | 0 |
| Olfr520 | chr7:99735144-99736095   | NOTEST | 0 | 0 |
| Olfr521 | chr7:99767163-99768129   | NOTEST | 0 | 0 |
| Olfr522 | chr7:140162009-140162948 | NOTEST | 0 | 0 |
| Olfr523 | chr7:140176103-140177057 | NOTEST | 0 | 0 |
| Olfr524 | chr7:140201811-140202768 | NOTEST | 0 | 0 |
| Olfr525 | chr7:140322700-140323630 | NOTEST | 0 | 0 |
| Olfr527 | chr7:140335863-140336781 | NOTEST | 0 | 0 |
| Olfr53  | chr7:140646451-140652919 | NOTEST | 0 | 0 |
| Olfr530 | chr7:140372684-140373608 | NOTEST | 0 | 0 |
| Olfr531 | chr7:140400129-140401044 | NOTEST | 0 | 0 |
| Olfr532 | chr7:140418841-140419771 | NOTEST | 0 | 0 |
| Olfr533 | chr7:140466202-140467165 | NOTEST | 0 | 0 |
| Olfr535 | chr7:140492639-140493578 | NOTEST | 0 | 0 |
| Olfr536 | chr7:140500852-140507318 | NOTEST | 0 | 0 |
| Olfr538 | chr7:140574154-140575087 | NOTEST | 0 | 0 |
| Olfr539 | chr7:140667288-140668248 | NOTEST | 0 | 0 |
| Olfr54  | chr11:51027003-51027945  | NOTEST | 0 | 0 |
| Olfr541 | chr7:140704252-140705191 | NOTEST | 0 | 0 |
| Olfr543 | chr7:102476772-102477902 | NOTEST | 0 | 0 |
| Olfr544 | chr7:102484113-102488307 | NOTEST | 0 | 0 |
| Olfr545 | chr7:102493822-102494773 | NOTEST | 0 | 0 |
| Olfr547 | chr7:102534748-102535688 | NOTEST | 0 | 0 |
| Olfr549 | chr7:102554285-102555236 | NOTEST | 0 | 0 |
| Olfr55  | chr17:33176415-33177363  | NOTEST | 0 | 0 |
| Olfr551 | chr7:102587740-102588819 | NOTEST | 0 | 0 |
| Olfr553 | chr7:102614006-102614987 | NOTEST | 0 | 0 |
| Olfr554 | chr7:102640247-102641201 | NOTEST | 0 | 0 |
| Olfr555 | chr7:102658822-102659770 | NOTEST | 0 | 0 |
| Olfr556 | chr7:102669900-102670923 | NOTEST | 0 | 0 |
| Olfr557 | chr7:102698215-102699272 | NOTEST | 0 | 0 |
| Olfr559 | chr7:102723531-102724488 | NOTEST | 0 | 0 |
| Olfr56  | chr11:49037659-49135387  | NOTEST | 0 | 0 |
| Olfr564 | chr7:102803479-102804430 | NOTEST | 0 | 0 |
| Olfr566 | chr7:102856320-102857271 | NOTEST | 0 | 0 |
| Olfr568 | chr7:102877121-102878063 | NOTEST | 0 | 0 |
| Olfr569 | chr7:102887206-102888151 | NOTEST | 0 | 0 |
| Olfr57  | chr10:79034722-79035802  | NOTEST | 0 | 0 |
| Olfr571 | chr7:102908868-102909837 | NOTEST | 0 | 0 |
| Olfr572 | chr7:102927629-102928586 | NOTEST | 0 | 0 |
| Olfr574 | chr7:102948466-102949507 | NOTEST | 0 | 0 |
| Olfr575 | chr7:102954663-102955620 | NOTEST | 0 | 0 |
| Olfr576 | chr7:102965101-102966040 | NOTEST | 0 | 0 |
| Olfr577 | chr7:102973051-102973990 | NOTEST | 0 | 0 |
| Olfr578 | chr7:102984220-102985162 | NOTEST | 0 | 0 |
| Olfr58  | chr9:19780282-19784064   | NOTEST | 0 | 0 |
| Olfr582 | chr7:103041480-103042440 | NOTEST | 0 | 0 |
| Olfr583 | chr7:103051299-103052259 | NOTEST | 0 | 0 |
| Olfr584 | chr7:103085519-103086479 | NOTEST | 0 | 0 |
| Olfr585 | chr7:103097742-103098699 | NOTEST | 0 | 0 |
| Olfr586 | chr7:103121828-103122782 | NOTEST | 0 | 0 |
| Olfr589 | chr7:103154791-103155745 | NOTEST | 0 | 0 |
| Olfr59  | chr11:74283808-74289646  | NOTEST | 0 | 0 |



|         |                          |        |   |   |
|---------|--------------------------|--------|---|---|
| Olfr591 | chr7:103172690-103173635 | NOTEST | 0 | 0 |
| Olfr592 | chr7:103186602-103187541 | NOTEST | 0 | 0 |
| Olfr593 | chr7:103211861-103212845 | NOTEST | 0 | 0 |
| Olfr594 | chr7:103219719-103220655 | NOTEST | 0 | 0 |
| Olfr596 | chr7:103309722-103310661 | NOTEST | 0 | 0 |
| Olfr597 | chr7:103320412-103321360 | NOTEST | 0 | 0 |
| Olfr598 | chr7:103328487-103329447 | NOTEST | 0 | 0 |
| Olfr599 | chr7:103338055-103339003 | NOTEST | 0 | 0 |
| Olfr6   | chr7:106955983-106956934 | NOTEST | 0 | 0 |
| Olfr60  | chr7:140345051-140345987 | NOTEST | 0 | 0 |
| Olfr600 | chr7:103345981-103346926 | NOTEST | 0 | 0 |
| Olfr601 | chr7:103358223-103359213 | NOTEST | 0 | 0 |
| Olfr603 | chr7:103383061-103384000 | NOTEST | 0 | 0 |
| Olfr605 | chr7:103442139-103443150 | NOTEST | 0 | 0 |
| Olfr606 | chr7:103451338-103452298 | NOTEST | 0 | 0 |
| Olfr608 | chr7:103470040-103470991 | NOTEST | 0 | 0 |
| Olfr609 | chr7:103491916-103492876 | NOTEST | 0 | 0 |
| Olfr61  | chr7:140637702-140638638 | NOTEST | 0 | 0 |
| Olfr610 | chr7:103505996-103506944 | NOTEST | 0 | 0 |
| Olfr611 | chr7:103517410-103518382 | NOTEST | 0 | 0 |
| Olfr612 | chr7:103538260-103539232 | NOTEST | 0 | 0 |
| Olfr613 | chr7:103550367-103555504 | NOTEST | 0 | 0 |
| Olfr615 | chr7:103560478-103561420 | NOTEST | 0 | 0 |
| Olfr616 | chr7:103564323-103565277 | NOTEST | 0 | 0 |
| Olfr617 | chr7:103584023-103584980 | NOTEST | 0 | 0 |
| Olfr618 | chr7:103597317-103598274 | NOTEST | 0 | 0 |
| Olfr619 | chr7:103603588-103604711 | NOTEST | 0 | 0 |
| Olfr62  | chr4:118665518-118666466 | NOTEST | 0 | 0 |
| Olfr620 | chr7:103611409-103612351 | NOTEST | 0 | 0 |
| Olfr622 | chr7:103639184-103640138 | NOTEST | 0 | 0 |
| Olfr623 | chr7:103660243-103661318 | NOTEST | 0 | 0 |
| Olfr624 | chr7:103670102-103671029 | NOTEST | 0 | 0 |
| Olfr628 | chr7:103731927-103732878 | NOTEST | 0 | 0 |
| Olfr629 | chr7:103740200-103741322 | NOTEST | 0 | 0 |
| Olfr63  | chr17:33268725-33269676  | NOTEST | 0 | 0 |
| Olfr630 | chr7:103754149-103757350 | NOTEST | 0 | 0 |
| Olfr631 | chr7:103915061-103929911 | NOTEST | 0 | 0 |
| Olfr633 | chr7:103946567-103947506 | NOTEST | 0 | 0 |
| Olfr635 | chr7:103979175-103980141 | NOTEST | 0 | 0 |
| Olfr638 | chr7:104003258-104004224 | NOTEST | 0 | 0 |
| Olfr639 | chr7:104011749-104012700 | NOTEST | 0 | 0 |
| Olfr64  | chr7:103892809-103894471 | NOTEST | 0 | 0 |
| Olfr640 | chr7:104021371-104022316 | NOTEST | 0 | 0 |
| Olfr641 | chr7:104039797-104040736 | NOTEST | 0 | 0 |
| Olfr642 | chr7:104049407-104050352 | NOTEST | 0 | 0 |
| Olfr643 | chr7:104058655-104059600 | NOTEST | 0 | 0 |
| Olfr644 | chr7:104068084-104069029 | NOTEST | 0 | 0 |
| Olfr645 | chr7:104084130-104085078 | NOTEST | 0 | 0 |
| Olfr646 | chr7:104106280-104107219 | NOTEST | 0 | 0 |
| Olfr648 | chr7:104179455-104180406 | NOTEST | 0 | 0 |
| Olfr649 | chr7:104189266-104190205 | NOTEST | 0 | 0 |
| Olfr65  | chr7:103906341-103907447 | NOTEST | 0 | 0 |
| Olfr651 | chr7:104552883-104553952 | NOTEST | 0 | 0 |

|         |                          |        |   |   |
|---------|--------------------------|--------|---|---|
| Olfr652 | chr7:104564151-104565212 | NOTEST | 0 | 0 |
| Olfr653 | chr7:104579623-104580669 | NOTEST | 0 | 0 |
| Olfr654 | chr7:104587754-104588780 | NOTEST | 0 | 0 |
| Olfr655 | chr7:104596252-104597179 | NOTEST | 0 | 0 |
| Olfr656 | chr7:104617656-104618646 | NOTEST | 0 | 0 |
| Olfr657 | chr7:104635675-104636635 | NOTEST | 0 | 0 |
| Olfr659 | chr7:104670703-104671672 | NOTEST | 0 | 0 |
| Olfr66  | chr7:103881305-103882241 | NOTEST | 0 | 0 |
| Olfr661 | chr7:104688016-104688976 | NOTEST | 0 | 0 |
| Olfr663 | chr7:104703568-104704603 | NOTEST | 0 | 0 |
| Olfr665 | chr7:104880708-104881659 | NOTEST | 0 | 0 |
| Olfr666 | chr7:104892669-104893626 | NOTEST | 0 | 0 |
| Olfr667 | chr7:104916313-104917294 | NOTEST | 0 | 0 |
| Olfr668 | chr7:104924805-104925762 | NOTEST | 0 | 0 |
| Olfr669 | chr7:104938527-104939481 | NOTEST | 0 | 0 |
| Olfr67  | chr7:103787211-103791830 | NOTEST | 0 | 0 |
| Olfr670 | chr7:104959791-104960730 | NOTEST | 0 | 0 |
| Olfr671 | chr7:104975041-104975983 | NOTEST | 0 | 0 |
| Olfr672 | chr7:104995963-104996902 | NOTEST | 0 | 0 |
| Olfr675 | chr7:105024024-105024966 | NOTEST | 0 | 0 |
| Olfr676 | chr7:105035199-105036153 | NOTEST | 0 | 0 |
| Olfr677 | chr7:105056247-105057186 | NOTEST | 0 | 0 |
| Olfr678 | chr7:105069468-105070410 | NOTEST | 0 | 0 |
| Olfr679 | chr7:105085717-105086665 | NOTEST | 0 | 0 |
| Olfr68  | chr7:103777395-103778343 | NOTEST | 0 | 0 |
| Olfr681 | chr7:105121458-105122406 | NOTEST | 0 | 0 |
| Olfr683 | chr7:105143349-105144309 | NOTEST | 0 | 0 |
| Olfr684 | chr7:105156741-105157680 | NOTEST | 0 | 0 |
| Olfr685 | chr7:105180360-105181311 | NOTEST | 0 | 0 |
| Olfr686 | chr7:105203387-105204341 | NOTEST | 0 | 0 |
| Olfr688 | chr7:105288094-105289060 | NOTEST | 0 | 0 |
| Olfr689 | chr7:105314005-105314968 | NOTEST | 0 | 0 |
| Olfr69  | chr7:103767276-103771594 | NOTEST | 0 | 0 |
| Olfr690 | chr7:105329216-105330278 | NOTEST | 0 | 0 |
| Olfr691 | chr7:105336745-105337714 | NOTEST | 0 | 0 |
| Olfr692 | chr7:105368327-105369317 | NOTEST | 0 | 0 |
| Olfr693 | chr7:106677533-106678485 | NOTEST | 0 | 0 |
| Olfr694 | chr7:106688781-106689729 | NOTEST | 0 | 0 |
| Olfr695 | chr7:106713731-106716345 | NOTEST | 0 | 0 |
| Olfr697 | chr7:106740907-106741956 | NOTEST | 0 | 0 |
| Olfr698 | chr7:106752450-106753386 | NOTEST | 0 | 0 |
| Olfr699 | chr7:106790048-106790999 | NOTEST | 0 | 0 |
| Olfr70  | chr4:43694999-43700807   | NOTEST | 0 | 0 |
| Olfr701 | chr7:106814143-106820709 | NOTEST | 0 | 0 |
| Olfr702 | chr7:106823488-106826743 | NOTEST | 0 | 0 |
| Olfr703 | chr7:106844612-106845572 | NOTEST | 0 | 0 |
| Olfr704 | chr7:106864981-106865929 | NOTEST | 0 | 0 |
| Olfr705 | chr7:106873292-106874243 | NOTEST | 0 | 0 |
| Olfr706 | chr7:106885864-106886815 | NOTEST | 0 | 0 |
| Olfr707 | chr7:106891183-106892107 | NOTEST | 0 | 0 |
| Olfr71  | chr4:43705627-43706566   | NOTEST | 0 | 0 |
| Olfr710 | chr7:106944066-106948312 | NOTEST | 0 | 0 |
| Olfr711 | chr7:106971367-106975451 | NOTEST | 0 | 0 |

|            |                           |        |   |   |
|------------|---------------------------|--------|---|---|
| Olfr713    | chr7:107036135-107037110  | NOTEST | 0 | 0 |
| Olfr714    | chr7:107073829-107074783  | NOTEST | 0 | 0 |
| Olfr715    | chr7:107128351-107129482  | NOTEST | 0 | 0 |
| Olfr716    | chr7:107147317-107148262  | NOTEST | 0 | 0 |
| Olfr720    | chr14:14175129-14176080   | NOTEST | 0 | 0 |
| Olfr722    | chr14:49894257-49901941   | NOTEST | 0 | 0 |
| Olfr723    | chr14:49928562-49929568   | NOTEST | 0 | 0 |
| Olfr724    | chr14:49960090-49961096   | NOTEST | 0 | 0 |
| Olfr725    | chr14:50034390-50035500   | NOTEST | 0 | 0 |
| Olfr726    | chr14:50083713-50084679   | NOTEST | 0 | 0 |
| Olfr727    | chr14:50126552-50127587   | NOTEST | 0 | 0 |
| Olfr728    | chr14:50139701-50140637   | NOTEST | 0 | 0 |
| Olfr729    | chr14:50147900-50148872   | NOTEST | 0 | 0 |
| Olfr73     | chr2:88034195-88035137    | NOTEST | 0 | 0 |
| Olfr730    | chr14:50186261-50187218   | NOTEST | 0 | 0 |
| Olfr731    | chr14:50237902-50238883   | NOTEST | 0 | 0 |
| Olfr732    | chr14:50281227-50282271   | NOTEST | 0 | 0 |
| Olfr733    | chr14:50298336-50299330   | NOTEST | 0 | 0 |
| Olfr734    | chr14:50319891-50320833   | NOTEST | 0 | 0 |
| Olfr735    | chr14:50345375-50346440   | NOTEST | 0 | 0 |
| Olfr736    | chr14:50392757-50393696   | NOTEST | 0 | 0 |
| Olfr738    | chr14:50413545-50414481   | NOTEST | 0 | 0 |
| Olfr739    | chr14:50424520-50425450   | NOTEST | 0 | 0 |
| Olfr74     | chr2:87973706-87974663    | NOTEST | 0 | 0 |
| Olfr740    | chr14:50453053-50453989   | NOTEST | 0 | 0 |
| Olfr741    | chr14:50473056-50486395   | NOTEST | 0 | 0 |
| Olfr742    | chr14:50503768-50520943   | NOTEST | 0 | 0 |
| Olfr743    | chr14:50533413-50534349   | NOTEST | 0 | 0 |
| Olfr744    | chr14:50618223-50619195   | NOTEST | 0 | 0 |
| Olfr745    | chr14:50642194-50643369   | NOTEST | 0 | 0 |
| Olfr746    | chr14:50653238-50654183   | NOTEST | 0 | 0 |
| Olfr747    | chr14:50680690-50681645   | NOTEST | 0 | 0 |
| Olfr748    | chr14:50710331-50711255   | NOTEST | 0 | 0 |
| Olfr749    | chr14:50736218-50744324   | NOTEST | 0 | 0 |
| Olfr75-ps1 | chr11:73405449-73409858   | NOTEST | 0 | 0 |
| Olfr750    | chr14:51070310-51071442   | NOTEST | 0 | 0 |
| Olfr76     | chr19:12071789-12413554   | NOTEST | 0 | 0 |
| Olfr763    | chr10:129011286-129012216 | NOTEST | 0 | 0 |
| Olfr765    | chr10:129046131-129047061 | NOTEST | 0 | 0 |
| Olfr767    | chr10:129079031-129079961 | NOTEST | 0 | 0 |
| Olfr768    | chr10:129093033-129093972 | NOTEST | 0 | 0 |
| Olfr769    | chr10:129111484-129112423 | NOTEST | 0 | 0 |
| Olfr77     | chr9:19917228-19922510    | NOTEST | 0 | 0 |
| Olfr770    | chr10:129132830-129133766 | NOTEST | 0 | 0 |
| Olfr771    | chr10:129160028-129160982 | NOTEST | 0 | 0 |
| Olfr772    | chr10:129174050-129175054 | NOTEST | 0 | 0 |
| Olfr773    | chr10:129186483-129187419 | NOTEST | 0 | 0 |
| Olfr774    | chr10:129238150-129239089 | NOTEST | 0 | 0 |
| Olfr775    | chr10:129250535-129251474 | NOTEST | 0 | 0 |
| Olfr776    | chr10:129260962-129261901 | NOTEST | 0 | 0 |
| Olfr777    | chr10:129268385-129269321 | NOTEST | 0 | 0 |
| Olfr780    | chr10:129321624-129322563 | NOTEST | 0 | 0 |
| Olfr781    | chr10:129332882-129333818 | NOTEST | 0 | 0 |

|         |                           |        |   |   |
|---------|---------------------------|--------|---|---|
| Olfr782 | chr10:129350564-129351509 | NOTEST | 0 | 0 |
| Olfr784 | chr10:129387634-129388594 | NOTEST | 0 | 0 |
| Olfr786 | chr10:129436813-129437752 | NOTEST | 0 | 0 |
| Olfr787 | chr10:129462677-129463616 | NOTEST | 0 | 0 |
| Olfr788 | chr10:129472693-129473629 | NOTEST | 0 | 0 |
| Olfr790 | chr10:129500885-129501854 | NOTEST | 0 | 0 |
| Olfr791 | chr10:129526228-129527167 | NOTEST | 0 | 0 |
| Olfr792 | chr10:129540538-129541474 | NOTEST | 0 | 0 |
| Olfr794 | chr10:129570656-129571619 | NOTEST | 0 | 0 |
| Olfr796 | chr10:129607546-129608479 | NOTEST | 0 | 0 |
| Olfr798 | chr10:129625123-129626059 | NOTEST | 0 | 0 |
| Olfr799 | chr10:129647129-129648065 | NOTEST | 0 | 0 |
| Olfr8   | chr10:78955206-78956139   | NOTEST | 0 | 0 |
| Olfr800 | chr10:129659807-129660743 | NOTEST | 0 | 0 |
| Olfr801 | chr10:129669560-129670517 | NOTEST | 0 | 0 |
| Olfr802 | chr10:129681798-129682737 | NOTEST | 0 | 0 |
| Olfr803 | chr10:129691112-129692039 | NOTEST | 0 | 0 |
| Olfr804 | chr10:129704879-129705824 | NOTEST | 0 | 0 |
| Olfr805 | chr10:129722582-129723542 | NOTEST | 0 | 0 |
| Olfr806 | chr10:129737973-129738915 | NOTEST | 0 | 0 |
| Olfr807 | chr10:129754512-129755448 | NOTEST | 0 | 0 |
| Olfr808 | chr10:129767497-129768436 | NOTEST | 0 | 0 |
| Olfr809 | chr10:129775870-129776857 | NOTEST | 0 | 0 |
| Olfr810 | chr10:129790648-129791587 | NOTEST | 0 | 0 |
| Olfr811 | chr10:129801563-129802523 | NOTEST | 0 | 0 |
| Olfr812 | chr10:129842107-129843040 | NOTEST | 0 | 0 |
| Olfr813 | chr10:129856519-129857452 | NOTEST | 0 | 0 |
| Olfr814 | chr10:129873822-129874755 | NOTEST | 0 | 0 |
| Olfr815 | chr10:129901775-129902726 | NOTEST | 0 | 0 |
| Olfr816 | chr10:129911337-129912276 | NOTEST | 0 | 0 |
| Olfr818 | chr10:129945103-129946060 | NOTEST | 0 | 0 |
| Olfr819 | chr10:129965735-129966698 | NOTEST | 0 | 0 |
| Olfr820 | chr10:130017362-130018301 | NOTEST | 0 | 0 |
| Olfr821 | chr10:130033627-130034560 | NOTEST | 0 | 0 |
| Olfr822 | chr10:130074411-130075350 | NOTEST | 0 | 0 |
| Olfr823 | chr10:130111840-130112788 | NOTEST | 0 | 0 |
| Olfr824 | chr10:130126107-130127055 | NOTEST | 0 | 0 |
| Olfr825 | chr10:130162361-130163324 | NOTEST | 0 | 0 |
| Olfr826 | chr10:130179936-130180878 | NOTEST | 0 | 0 |
| Olfr827 | chr10:130210159-130211128 | NOTEST | 0 | 0 |
| Olfr828 | chr9:18815353-18816292    | NOTEST | 0 | 0 |
| Olfr829 | chr9:18856626-18857592    | NOTEST | 0 | 0 |
| Olfr830 | chr9:18875328-18876276    | NOTEST | 0 | 0 |
| Olfr832 | chr9:18944649-18945588    | NOTEST | 0 | 0 |
| Olfr834 | chr9:18987989-18988928    | NOTEST | 0 | 0 |
| Olfr835 | chr9:19035124-19036060    | NOTEST | 0 | 0 |
| Olfr836 | chr9:19120956-19121911    | NOTEST | 0 | 0 |
| Olfr837 | chr9:19136927-19137967    | NOTEST | 0 | 0 |
| Olfr843 | chr9:19248356-19249463    | NOTEST | 0 | 0 |
| Olfr845 | chr9:19338458-19339400    | NOTEST | 0 | 0 |
| Olfr846 | chr9:19360414-19361356    | NOTEST | 0 | 0 |
| Olfr847 | chr9:19374940-19375879    | NOTEST | 0 | 0 |
| Olfr849 | chr9:19440914-19441853    | NOTEST | 0 | 0 |

|             |                           |        |   |   |
|-------------|---------------------------|--------|---|---|
| Olfr850     | chr9:19477300-19478248    | NOTEST | 0 | 0 |
| Olfr851     | chr9:19496749-19497688    | NOTEST | 0 | 0 |
| Olfr853     | chr9:19537010-19537928    | NOTEST | 0 | 0 |
| Olfr854     | chr9:19566434-19567382    | NOTEST | 0 | 0 |
| Olfr855     | chr9:19584510-19585502    | NOTEST | 0 | 0 |
| Olfr856-ps1 | chr9:19657038-19658680    | NOTEST | 0 | 0 |
| Olfr857     | chr9:19712828-19713758    | NOTEST | 0 | 0 |
| Olfr860     | chr9:19845622-19849747    | NOTEST | 0 | 0 |
| Olfr862     | chr9:19883382-19884303    | NOTEST | 0 | 0 |
| Olfr866     | chr9:20026958-20028035    | NOTEST | 0 | 0 |
| Olfr867     | chr9:20054465-20055461    | NOTEST | 0 | 0 |
| Olfr868     | chr9:20098625-20101690    | NOTEST | 0 | 0 |
| Olfr869     | chr9:20129119-20138089    | NOTEST | 0 | 0 |
| Olfr870     | chr9:20170633-20171569    | NOTEST | 0 | 0 |
| Olfr871     | chr9:20212206-20213353    | NOTEST | 0 | 0 |
| Olfr872     | chr9:20237161-20260913    | NOTEST | 0 | 0 |
| Olfr873     | chr9:20300210-20301170    | NOTEST | 0 | 0 |
| Olfr874     | chr9:37746135-37747068    | NOTEST | 0 | 0 |
| Olfr875     | chr9:37772636-37773640    | NOTEST | 0 | 0 |
| Olfr876     | chr9:37803888-37804936    | NOTEST | 0 | 0 |
| Olfr877     | chr9:37854819-37855755    | NOTEST | 0 | 0 |
| Olfr878     | chr9:37918547-37919612    | NOTEST | 0 | 0 |
| Olfr881     | chr9:37992491-37993439    | NOTEST | 0 | 0 |
| Olfr883     | chr9:38025807-38026737    | NOTEST | 0 | 0 |
| Olfr884     | chr9:38047223-38048153    | NOTEST | 0 | 0 |
| Olfr885     | chr9:38061321-38062251    | NOTEST | 0 | 0 |
| Olfr887     | chr9:38084837-38085767    | NOTEST | 0 | 0 |
| Olfr888     | chr9:38108687-38109632    | NOTEST | 0 | 0 |
| Olfr889     | chr9:38115797-38116727    | NOTEST | 0 | 0 |
| Olfr890     | chr9:38143136-38144081    | NOTEST | 0 | 0 |
| Olfr891     | chr9:38179870-38180821    | NOTEST | 0 | 0 |
| Olfr893     | chr9:38209051-38209993    | NOTEST | 0 | 0 |
| Olfr894     | chr9:38218817-38219766    | NOTEST | 0 | 0 |
| Olfr895     | chr9:38268514-38269465    | NOTEST | 0 | 0 |
| Olfr899     | chr9:38367547-38368543    | NOTEST | 0 | 0 |
| Olfr9       | chr10:128989913-128990852 | NOTEST | 0 | 0 |
| Olfr90      | chr17:37085190-37086236   | NOTEST | 0 | 0 |
| Olfr900     | chr9:38377882-38378833    | NOTEST | 0 | 0 |
| Olfr901     | chr9:38430283-38431219    | NOTEST | 0 | 0 |
| Olfr902     | chr9:38448791-38449847    | NOTEST | 0 | 0 |
| Olfr904     | chr9:38464042-38464975    | NOTEST | 0 | 0 |
| Olfr905     | chr9:38472748-38473681    | NOTEST | 0 | 0 |
| Olfr906     | chr9:38488030-38488966    | NOTEST | 0 | 0 |
| Olfr907     | chr9:38498670-38499603    | NOTEST | 0 | 0 |
| Olfr908     | chr9:38516033-38516965    | NOTEST | 0 | 0 |
| Olfr91      | chr17:37092933-37093872   | NOTEST | 0 | 0 |
| Olfr910     | chr9:38537881-38539829    | NOTEST | 0 | 0 |
| Olfr911-ps1 | chr9:38523729-38524669    | NOTEST | 0 | 0 |
| Olfr912     | chr9:38580243-38582211    | NOTEST | 0 | 0 |
| Olfr913     | chr9:38592802-38595161    | NOTEST | 0 | 0 |
| Olfr914     | chr9:38606466-38607417    | NOTEST | 0 | 0 |
| Olfr915     | chr9:38646589-38647522    | NOTEST | 0 | 0 |
| Olfr916     | chr9:38657457-38658390    | NOTEST | 0 | 0 |



|             |                         |        |   |   |
|-------------|-------------------------|--------|---|---|
| Olfr918     | chr9:38672503-38673481  | NOTEST | 0 | 0 |
| Olfr919     | chr9:38697428-38698376  | NOTEST | 0 | 0 |
| Olfr92      | chr17:37111041-37111980 | NOTEST | 0 | 0 |
| Olfr921     | chr9:38773087-38776354  | NOTEST | 0 | 0 |
| Olfr922     | chr9:38815407-38816539  | NOTEST | 0 | 0 |
| Olfr923     | chr9:38827614-38828682  | NOTEST | 0 | 0 |
| Olfr924     | chr9:38848115-38849042  | NOTEST | 0 | 0 |
| Olfr926     | chr9:38877177-38878104  | NOTEST | 0 | 0 |
| Olfr93      | chr17:37151031-37151970 | NOTEST | 0 | 0 |
| Olfr930     | chr9:38930172-38931099  | NOTEST | 0 | 0 |
| Olfr933     | chr9:38975677-38976604  | NOTEST | 0 | 0 |
| Olfr934     | chr9:38982109-38983042  | NOTEST | 0 | 0 |
| Olfr935     | chr9:38994506-38995433  | NOTEST | 0 | 0 |
| Olfr936     | chr9:39046613-39047549  | NOTEST | 0 | 0 |
| Olfr937     | chr9:39059728-39060664  | NOTEST | 0 | 0 |
| Olfr938     | chr9:39077795-39078743  | NOTEST | 0 | 0 |
| Olfr94      | chr17:37196805-37197966 | NOTEST | 0 | 0 |
| Olfr943     | chr9:39166309-39185124  | NOTEST | 0 | 0 |
| Olfr944     | chr9:39217358-39218294  | NOTEST | 0 | 0 |
| Olfr945     | chr9:39257719-39258679  | NOTEST | 0 | 0 |
| Olfr947-ps1 | chr9:39287923-39299481  | NOTEST | 0 | 0 |
| Olfr948     | chr9:39318646-39319612  | NOTEST | 0 | 0 |
| Olfr95      | chr17:37210912-37211851 | NOTEST | 0 | 0 |
| Olfr951     | chr9:39393792-39394737  | NOTEST | 0 | 0 |
| Olfr952     | chr9:39426124-39427069  | NOTEST | 0 | 0 |
| Olfr954     | chr9:39461432-39462377  | NOTEST | 0 | 0 |
| Olfr955     | chr9:39469779-39470724  | NOTEST | 0 | 0 |
| Olfr957     | chr9:39510782-39511718  | NOTEST | 0 | 0 |
| Olfr958     | chr9:39549930-39550869  | NOTEST | 0 | 0 |
| Olfr959     | chr9:39572321-39573257  | NOTEST | 0 | 0 |
| Olfr96      | chr17:37225126-37226068 | NOTEST | 0 | 0 |
| Olfr960     | chr9:39623124-39624075  | NOTEST | 0 | 0 |
| Olfr961     | chr9:39646727-39647672  | NOTEST | 0 | 0 |
| Olfr963     | chr9:39669058-39669994  | NOTEST | 0 | 0 |
| Olfr965     | chr9:39719228-39720167  | NOTEST | 0 | 0 |
| Olfr967     | chr9:39750387-39751320  | NOTEST | 0 | 0 |
| Olfr968     | chr9:39771771-39772798  | NOTEST | 0 | 0 |
| Olfr969     | chr9:39795376-39796312  | NOTEST | 0 | 0 |
| Olfr97      | chr17:37231435-37232368 | NOTEST | 0 | 0 |
| Olfr970     | chr9:39819640-39820576  | NOTEST | 0 | 0 |
| Olfr971     | chr9:39839435-39840359  | NOTEST | 0 | 0 |
| Olfr972     | chr9:39873276-39874221  | NOTEST | 0 | 0 |
| Olfr974     | chr9:39942261-39943194  | NOTEST | 0 | 0 |
| Olfr975     | chr9:39949836-39950769  | NOTEST | 0 | 0 |
| Olfr976     | chr9:39954256-39957069  | NOTEST | 0 | 0 |
| Olfr978     | chr9:39993811-39994747  | NOTEST | 0 | 0 |
| Olfr979     | chr9:40000205-40001250  | NOTEST | 0 | 0 |
| Olfr98      | chr17:37262732-37263662 | NOTEST | 0 | 0 |
| Olfr980     | chr9:40005993-40007029  | NOTEST | 0 | 0 |
| Olfr981     | chr9:40022394-40023327  | NOTEST | 0 | 0 |
| Olfr982     | chr9:40074296-40075262  | NOTEST | 0 | 0 |
| Olfr983     | chr9:40092016-40093558  | NOTEST | 0 | 0 |
| Olfr984     | chr9:40100543-40101488  | NOTEST | 0 | 0 |

|          |                          |         |   |   |
|----------|--------------------------|---------|---|---|
| Olfr985  | chr9:40126923-40128039   | NOTEST  | 0 | 0 |
| Olfr986  | chr9:40187078-40188094   | NOTEST  | 0 | 0 |
| Olfr987  | chr2:85330966-85331896   | NOTEST  | 0 | 0 |
| Olfr988  | chr2:85352994-85353924   | NOTEST  | 0 | 0 |
| Olfr99   | chr17:37279500-37280418  | NOTEST  | 0 | 0 |
| Olfr992  | chr2:85399601-85400531   | NOTEST  | 0 | 0 |
| Olfr993  | chr2:85413932-85414877   | NOTEST  | 0 | 0 |
| Olfr994  | chr2:85429882-85430827   | NOTEST  | 0 | 0 |
| Olfr995  | chr2:85438208-85439156   | NOTEST  | 0 | 0 |
| Olfr996  | chr2:85579214-85580282   | NOTEST  | 0 | 0 |
| Olfr998  | chr2:85590509-85591521   | NOTEST  | 0 | 0 |
| Omt2a    | chr9:78311971-78314797   | NOTEST  | 0 | 0 |
| Omt2b    | chr9:78328029-78329620   | NOTEST  | 0 | 0 |
| Oog1     | chr12:87602664-87608850  | LOWDATA | 0 | 0 |
| Oog2     | chr4:144190716-144196934 | NOTEST  | 0 | 0 |
| Oog3     | chr4:144157555-144162651 | NOTEST  | 0 | 0 |
| Oog4     | chr4:143437163-143450302 | NOTEST  | 0 | 0 |
| Oosp1    | chr19:11667459-11691051  | NOTEST  | 0 | 0 |
| Oosp2    | chr19:11647283-11660559  | NOTEST  | 0 | 0 |
| Oosp3    | chr19:11697054-11711858  | NOTEST  | 0 | 0 |
| Opalin   | chr19:41063419-41077113  | NOTEST  | 0 | 0 |
| Orm1     | chr4:63344565-63348162   | NOTEST  | 0 | 0 |
| Orm2     | chr4:63362448-63365877   | NOTEST  | 0 | 0 |
| Otc      | chrX:10252358-10321024   | NOTEST  | 0 | 0 |
| Otor     | chr2:143078491-143081699 | NOTEST  | 0 | 0 |
| Ott      | chrX:149088314-149305003 | NOTEST  | 0 | 0 |
| Otud6a   | chrX:100402221-100442717 | NOTEST  | 0 | 0 |
| Otx1     | chr11:21994763-22001651  | NOTEST  | 0 | 0 |
| Otx2     | chr14:48657676-48667644  | NOTEST  | 0 | 0 |
| Otx2os1  | chr14:48669287-48793348  | NOTEST  | 0 | 0 |
| Ovch2    | chr7:107781543-107801179 | NOTEST  | 0 | 0 |
| Ovol1    | chr19:5549136-5560575    | NOTEST  | 0 | 0 |
| Oxct2b   | chr4:123105164-123126091 | NOTEST  | 0 | 0 |
| Oxt      | chr2:130576168-130577053 | NOTEST  | 0 | 0 |
| P2ry4    | chrX:100590153-100594869 | NOTEST  | 0 | 0 |
| Pabpc2   | chr18:39773496-39776082  | NOTEST  | 0 | 0 |
| Pabpc6   | chr17:9666496-9669704    | NOTEST  | 0 | 0 |
| Pabpn1l  | chr8:122619470-122622735 | NOTEST  | 0 | 0 |
| Padi6    | chr4:140727354-140742643 | NOTEST  | 0 | 0 |
| Pate4    | chr9:35607092-35611885   | NOTEST  | 0 | 0 |
| Paupar   | chr2:105536079-105697364 | NOTEST  | 0 | 0 |
| Pax4     | chr6:28442333-28449340   | NOTEST  | 0 | 0 |
| Pax6     | chr2:105536079-105697364 | NOTEST  | 0 | 0 |
| Pax6os1  | chr2:105536079-105697364 | NOTEST  | 0 | 0 |
| Pbp2     | chr6:135309128-135310384 | NOTEST  | 0 | 0 |
| Pbsn     | chrX:77837897-77853500   | NOTEST  | 0 | 0 |
| Pcdha4-g | chr18:36930284-37841872  | NOTEST  | 0 | 0 |
| Pcdhb1   | chr18:36930284-37841872  | NOTEST  | 0 | 0 |
| Pcp2     | chr8:3621550-3625545     | NOTEST  | 0 | 0 |
| Pcsk2os2 | chr2:143535475-143816282 | NOTEST  | 0 | 0 |
| Pdc      | chr1:150319416-150346771 | NOTEST  | 0 | 0 |
| Pdcd1    | chr1:94038304-94052553   | NOTEST  | 0 | 0 |
| Pdcl2    | chr5:76183879-76469519   | NOTEST  | 0 | 0 |

|            |                           |        |   |   |
|------------|---------------------------|--------|---|---|
| Pdha2      | chr3:141210003-141212355  | NOTEST | 0 | 0 |
| Pdx1       | chr5:147228597-147275149  | NOTEST | 0 | 0 |
| Pea15b     | chr5:77511194-77511748    | NOTEST | 0 | 0 |
| Pebp4      | chr14:69840406-70059918   | NOTEST | 0 | 0 |
| Peril      | chr3:34772074-34782346    | NOTEST | 0 | 0 |
| Pet2       | chrX:89403847-89409689    | NOTEST | 0 | 0 |
| Pfn3       | chr13:55399647-55415232   | NOTEST | 0 | 0 |
| Pfpl       | chr19:12427904-12432110   | NOTEST | 0 | 0 |
| Pga5       | chr19:10668956-10678071   | NOTEST | 0 | 0 |
| Pgc        | chr17:47726841-47734478   | NOTEST | 0 | 0 |
| Pgk2       | chr17:40207017-40208609   | NOTEST | 0 | 0 |
| Pglyrp3    | chr3:92014582-92031584    | NOTEST | 0 | 0 |
| Phgr1      | chr2:118772768-118778164  | NOTEST | 0 | 0 |
| Phox2a     | chr7:101818312-101838226  | NOTEST | 0 | 0 |
| Phox2b     | chr5:67094396-67099126    | NOTEST | 0 | 0 |
| Pih1d3     | chr1:31222838-31224287    | NOTEST | 0 | 0 |
| Pinc       | chr1:73391384-73430779    | NOTEST | 0 | 0 |
| Pinlyp     | chr7:24541657-24546005    | NOTEST | 0 | 0 |
| Pip        | chr6:41847548-41852062    | NOTEST | 0 | 0 |
| Pitpnm2os1 | chr5:124118688-124249760  | NOTEST | 0 | 0 |
| Pitx1      | chr13:55825053-55831425   | NOTEST | 0 | 0 |
| Pitx2      | chr3:129199877-129219594  | NOTEST | 0 | 0 |
| Pla2g10    | chr16:13715056-13739471   | NOTEST | 0 | 0 |
| Pla2g10os  | chr16:13715056-13739471   | NOTEST | 0 | 0 |
| Pla2g1b    | chr5:115466265-115474717  | NOTEST | 0 | 0 |
| Pla2g2a    | chr4:138799246-138863469  | NOTEST | 0 | 0 |
| Pla2g2e    | chr4:138877941-138882814  | NOTEST | 0 | 0 |
| Pla2g2f    | chr4:138750532-138757598  | NOTEST | 0 | 0 |
| Pldi       | chr10:60928225-60938132   | NOTEST | 0 | 0 |
| Plet1os    | chr9:50488798-50505639    | NOTEST | 0 | 0 |
| Plin5      | chr17:56111600-56117548   | NOTEST | 0 | 0 |
| Pmch       | chr10:88091071-88146941   | NOTEST | 0 | 0 |
| Pmis2      | chr7:30670721-30671605    | NOTEST | 0 | 0 |
| Pnliprp1   | chr19:58728886-58744169   | NOTEST | 0 | 0 |
| Pnmt       | chr11:98386631-98388097   | NOTEST | 0 | 0 |
| Pnpla1     | chr17:28858410-28890308   | NOTEST | 0 | 0 |
| Pom121l12  | chr11:14599239-14600316   | NOTEST | 0 | 0 |
| Pom121l2   | chr13:21981180-21988734   | NOTEST | 0 | 0 |
| Poteg      | chr8:27447669-27495172    | NOTEST | 0 | 0 |
| Pou5f1     | chr17:35506031-35510777   | NOTEST | 0 | 0 |
| Ppp1r17    | chr6:56017514-56032688    | NOTEST | 0 | 0 |
| Ppp1r2-ps7 | chrX:22461595-22463543    | NOTEST | 0 | 0 |
| Ppp1r2-ps9 | chrX:15110585-15111489    | NOTEST | 0 | 0 |
| Ppp1r27    | chr11:120549974-120551132 | NOTEST | 0 | 0 |
| Ppp2r2cos  | chr5:36868569-36955078    | NOTEST | 0 | 0 |
| Ppy        | chr11:102099930-102101300 | NOTEST | 0 | 0 |
| Prame      | chrX:135613001-135627705  | NOTEST | 0 | 0 |
| Pramef12   | chr4:144391673-144408464  | NOTEST | 0 | 0 |
| Pramef17   | chr4:143991126-143994369  | NOTEST | 0 | 0 |
| Pramef25   | chr4:143948182-143951016  | NOTEST | 0 | 0 |
| Pramef6    | chr4:143894236-143900380  | NOTEST | 0 | 0 |
| Pramel1    | chr4:143394440-143399819  | NOTEST | 0 | 0 |
| Pramel3    | chrX:135302315-135312636  | NOTEST | 0 | 0 |

|               |                           |        |   |   |
|---------------|---------------------------|--------|---|---|
| Pramel4       | chr4:144059125-144069318  | NOTEST | 0 | 0 |
| Pramel5       | chr4:144270632-144280466  | NOTEST | 0 | 0 |
| Pramel6       | chr2:87508457-87510865    | NOTEST | 0 | 0 |
| Prap1         | chr7:140093395-140097203  | NOTEST | 0 | 0 |
| Prb1          | chr6:132114220-132364135  | NOTEST | 0 | 0 |
| Prdm13        | chr4:21677479-21685963    | NOTEST | 0 | 0 |
| Prdm14        | chr1:13113427-13127163    | NOTEST | 0 | 0 |
| Prdx6b        | chr2:80292469-80295358    | NOTEST | 0 | 0 |
| Prh1          | chr6:132569841-132572401  | NOTEST | 0 | 0 |
| Prkag2os1     | chr5:24862734-25100642    | NOTEST | 0 | 0 |
| Prl           | chr13:27057569-27065203   | NOTEST | 0 | 0 |
| Prl2a1        | chr13:27801654-27808716   | NOTEST | 0 | 0 |
| Prl2b1        | chr13:27383344-27390846   | NOTEST | 0 | 0 |
| Prl2c1        | chr13:27849341-27857708   | NOTEST | 0 | 0 |
| Prl2c2        | chr13:12996123-13005330   | NOTEST | 0 | 0 |
| Prl2c3,Prl2c4 | chr13:12790817-12800079   | NOTEST | 0 | 0 |
| Prl2c4        | chr13:12790817-12800079   | NOTEST | 0 | 0 |
| Prl2c5        | chr13:13182781-13191840   | NOTEST | 0 | 0 |
| Prl3a1        | chr13:27259488-27276660   | NOTEST | 0 | 0 |
| Prl3b1        | chr13:27242429-27249740   | NOTEST | 0 | 0 |
| Prl3c1        | chr13:27196659-27203750   | NOTEST | 0 | 0 |
| Prl3d1        | chr13:27094188-27100260   | NOTEST | 0 | 0 |
| Prl3d2        | chr13:27121703-27127482   | NOTEST | 0 | 0 |
| Prl3d3        | chr13:27156798-27162520   | NOTEST | 0 | 0 |
| Prl4a1        | chr13:28016222-28023546   | NOTEST | 0 | 0 |
| Prl5a1        | chr13:28142483-28151595   | NOTEST | 0 | 0 |
| Prl6a1        | chr13:27312626-27319252   | NOTEST | 0 | 0 |
| Prl7a2        | chr13:27658583-27668036   | NOTEST | 0 | 0 |
| Prl7b1        | chr13:27601818-27610582   | NOTEST | 0 | 0 |
| Prl7c1        | chr13:27773494-27780804   | NOTEST | 0 | 0 |
| Prl7d1        | chr13:27708997-27716737   | NOTEST | 0 | 0 |
| Prl8a1        | chr13:27573921-27582171   | NOTEST | 0 | 0 |
| Prl8a2        | chr13:27345672-27354215   | NOTEST | 0 | 0 |
| Prl8a6        | chr13:27432680-27438688   | NOTEST | 0 | 0 |
| Prl8a8        | chr13:27507071-27513213   | NOTEST | 0 | 0 |
| Prl8a9        | chr13:27558000-27564604   | NOTEST | 0 | 0 |
| Prlh          | chr1:90953107-90954012    | NOTEST | 0 | 0 |
| Prlhr         | chr19:60466732-60468304   | NOTEST | 0 | 0 |
| Prm1          | chr16:10796331-10796823   | NOTEST | 0 | 0 |
| Prm2          | chr16:10791380-10792097   | NOTEST | 0 | 0 |
| Prm3          | chr16:10790507-10790914   | NOTEST | 0 | 0 |
| Prn           | chr2:131909927-131956131  | NOTEST | 0 | 0 |
| Prodh2        | chr7:30493657-30513402    | NOTEST | 0 | 0 |
| Prok1         | chr3:107235530-107239707  | NOTEST | 0 | 0 |
| Prol1         | chr5:88317311-88328817    | NOTEST | 0 | 0 |
| Prop1         | chr11:50950805-50953632   | NOTEST | 0 | 0 |
| Prp2          | chr6:132595945-132600702  | NOTEST | 0 | 0 |
| Prpmp5        | chr6:132114220-132364135  | NOTEST | 0 | 0 |
| Prps1l1       | chr12:34984760-34986436   | NOTEST | 0 | 0 |
| Prr23a        | chr9:98842586-98843645    | NOTEST | 0 | 0 |
| Prr27         | chr5:87825696-87846386    | NOTEST | 0 | 0 |
| Prr30         | chr14:101197689-101200069 | NOTEST | 0 | 0 |
| Prr9          | chr3:92122203-92123947    | NOTEST | 0 | 0 |

|               |                           |        |   |   |
|---------------|---------------------------|--------|---|---|
| Prss1         | chr6:41458929-41463786    | NOTEST | 0 | 0 |
| Prss16        | chr13:22002175-22009741   | NOTEST | 0 | 0 |
| Prss2         | chr6:41521775-41525079    | NOTEST | 0 | 0 |
| Prss21        | chr17:23868071-23873113   | NOTEST | 0 | 0 |
| Prss22        | chr17:23993533-23998100   | NOTEST | 0 | 0 |
| Prss28        | chr17:25308645-25311876   | NOTEST | 0 | 0 |
| Prss29        | chr17:25318653-25322684   | NOTEST | 0 | 0 |
| Prss3         | chr6:41373758-41377613    | NOTEST | 0 | 0 |
| Prss30        | chr17:23972126-23975230   | NOTEST | 0 | 0 |
| Prss33        | chr17:23833360-23835767   | NOTEST | 0 | 0 |
| Prss37        | chr6:40514823-40519508    | NOTEST | 0 | 0 |
| Prss39        | chr1:34498429-34503062    | NOTEST | 0 | 0 |
| Prss40        | chr1:34552330-34560943    | NOTEST | 0 | 0 |
| Prss42        | chr9:110798184-110803744  | NOTEST | 0 | 0 |
| Prss43        | chr9:110826689-110831504  | NOTEST | 0 | 0 |
| Prss46        | chr9:110844505-110856522  | NOTEST | 0 | 0 |
| Prss48        | chr3:85993809-86002491    | NOTEST | 0 | 0 |
| Prss51        | chr14:64093695-64097672   | NOTEST | 0 | 0 |
| Prss52        | chr14:64104322-64113751   | NOTEST | 0 | 0 |
| Prss54        | chr8:95559291-95575197    | NOTEST | 0 | 0 |
| Prss55        | chr14:64075442-64085389   | NOTEST | 0 | 0 |
| Prss56        | chr1:87183492-87188404    | NOTEST | 0 | 0 |
| Prss58        | chr6:40529090-40910666    | NOTEST | 0 | 0 |
| Prss8         | chr7:127912516-127930113  | NOTEST | 0 | 0 |
| Pzca          | chr15:74714838-74717065   | NOTEST | 0 | 0 |
| Psg-ps1       | chr7:17672312-17682060    | NOTEST | 0 | 0 |
| Psg18         | chr7:18345807-18355007    | NOTEST | 0 | 0 |
| Psg20         | chr7:18674365-18685992    | NOTEST | 0 | 0 |
| Psg21         | chr7:18646653-18656725    | NOTEST | 0 | 0 |
| Psg22         | chr7:18718089-18727248    | NOTEST | 0 | 0 |
| Psg23         | chr7:18606342-18616501    | NOTEST | 0 | 0 |
| Psg25         | chr7:18519701-18532227    | NOTEST | 0 | 0 |
| Psg26         | chr7:18474581-18484149    | NOTEST | 0 | 0 |
| Psg27         | chr7:18556513-18567305    | NOTEST | 0 | 0 |
| Psg28         | chr7:18422535-18432055    | NOTEST | 0 | 0 |
| Psg29         | chr7:17203476-17215756    | NOTEST | 0 | 0 |
| Psors1c2      | chr17:35533200-35534648   | NOTEST | 0 | 0 |
| Ptchd3        | chr11:121830217-121843436 | NOTEST | 0 | 0 |
| Ptf1a         | chr2:19445662-19447501    | NOTEST | 0 | 0 |
| Pth           | chr7:113385575-113388573  | NOTEST | 0 | 0 |
| Pth2          | chr7:45180994-45181838    | NOTEST | 0 | 0 |
| Ptprt0s       | chr2:161521987-162661147  | NOTEST | 0 | 0 |
| Ptx4          | chr17:25120759-25125268   | NOTEST | 0 | 0 |
| Pxt1          | chr17:28933985-28942262   | NOTEST | 0 | 0 |
| Pyy           | chr11:102106675-102107776 | NOTEST | 0 | 0 |
| R3hdml        | chr2:163492317-163541721  | NOTEST | 0 | 0 |
| Rab11fip4os1  | chr11:79591211-79694012   | NOTEST | 0 | 0 |
| Rab11fip4os2  | chr11:79591211-79694012   | NOTEST | 0 | 0 |
| Raet1a,Raet1b | chr10:22158608-22374139   | NOTEST | 0 | 0 |
| Rag2          | chr2:101560780-101632528  | NOTEST | 0 | 0 |
| Rax           | chr18:65934638-65939089   | NOTEST | 0 | 0 |
| Rbakdn        | chr5:143164778-143165751  | NOTEST | 0 | 0 |
| Rbbp8nl       | chr2:180277645-180289879  | NOTEST | 0 | 0 |



|               |                           |        |   |   |
|---------------|---------------------------|--------|---|---|
| Rbm31y        | chrY:17400760-17402718    | NOTEST | 0 | 0 |
| Rbm46os       | chr3:82876704-82943638    | NOTEST | 0 | 0 |
| Rbmx12        | chr7:107209444-107210916  | NOTEST | 0 | 0 |
| Rbmy          | chrY:3771672-3783271      | NOTEST | 0 | 0 |
| Rbp3          | chr14:33954021-33964216   | NOTEST | 0 | 0 |
| Rcvrn         | chr11:67695325-67703355   | NOTEST | 0 | 0 |
| Rd3l          | chr12:111971558-112068854 | NOTEST | 0 | 0 |
| Rdh16         | chr10:127801152-127815839 | NOTEST | 0 | 0 |
| Rdh19         | chr10:127849927-127861176 | NOTEST | 0 | 0 |
| Rdh8          | chr9:20818503-20826163    | NOTEST | 0 | 0 |
| Reg1          | chr6:78425982-78428666    | NOTEST | 0 | 0 |
| Reg2          | chr6:78405154-78408097    | NOTEST | 0 | 0 |
| Reg3a         | chr6:78380708-78383839    | NOTEST | 0 | 0 |
| Reg3d         | chr6:78375873-78378865    | NOTEST | 0 | 0 |
| Reg3g         | chr6:78466267-78468874    | NOTEST | 0 | 0 |
| Retn          | chr8:3655769-3659818      | NOTEST | 0 | 0 |
| Retnlb        | chr16:48816855-48818892   | NOTEST | 0 | 0 |
| Rfpl3s        | chr9:55962588-55980932    | NOTEST | 0 | 0 |
| Rfpl4         | chr7:5109786-5116911      | NOTEST | 0 | 0 |
| Rfpl4b        | chr10:38820540-38821779   | NOTEST | 0 | 0 |
| Rfx6          | chr10:51677759-51730429   | NOTEST | 0 | 0 |
| Rgr           | chr14:37037489-37048964   | NOTEST | 0 | 0 |
| Rgs21         | chr1:144519689-144567667  | NOTEST | 0 | 0 |
| Rhbd12        | chr4:123787874-123829904  | NOTEST | 0 | 0 |
| Rhbg          | chr3:88242873-88254684    | NOTEST | 0 | 0 |
| Rhox1         | chrX:37213804-37222258    | NOTEST | 0 | 0 |
| Rhox10        | chrX:38066474-38071688    | NOTEST | 0 | 0 |
| Rhox11        | chrX:38076597-38085139    | NOTEST | 0 | 0 |
| Rhox12        | chrX:38104061-38110907    | NOTEST | 0 | 0 |
| Rhox13        | chrX:38120839-38129966    | NOTEST | 0 | 0 |
| Rhox2a        | chrX:37244991-37249690    | NOTEST | 0 | 0 |
| Rhox2b        | chrX:37412104-37416806    | NOTEST | 0 | 0 |
| Rhox2c        | chrX:37453658-37458375    | NOTEST | 0 | 0 |
| Rhox2d        | chrX:37493409-37497715    | NOTEST | 0 | 0 |
| Rhox2e        | chrX:37530467-37541809    | NOTEST | 0 | 0 |
| Rhox2f        | chrX:37571420-37576159    | NOTEST | 0 | 0 |
| Rhox2g        | chrX:37639111-37643470    | NOTEST | 0 | 0 |
| Rhox2h        | chrX:37668996-37673277    | NOTEST | 0 | 0 |
| Rhox3a,Rhox3e | chrX:37249918-37258978    | NOTEST | 0 | 0 |
| Rhox3c        | chrX:37469867-37473961    | NOTEST | 0 | 0 |
| Rhox3e        | chrX:37546974-37550897    | NOTEST | 0 | 0 |
| Rhox3f        | chrX:37581351-37585496    | NOTEST | 0 | 0 |
| Rhox3g        | chrX:37623430-37628139    | NOTEST | 0 | 0 |
| Rhox3h        | chrX:37657687-37668764    | NOTEST | 0 | 0 |
| Rhox4a        | chrX:37390863-37395620    | NOTEST | 0 | 0 |
| Rhox4b        | chrX:37432493-37437278    | NOTEST | 0 | 0 |
| Rhox4c        | chrX:37480336-37485124    | NOTEST | 0 | 0 |
| Rhox4d        | chrX:37514534-37519175    | NOTEST | 0 | 0 |
| Rhox4e        | chrX:37557411-37562282    | NOTEST | 0 | 0 |
| Rhox4f        | chrX:37602894-37607686    | NOTEST | 0 | 0 |
| Rhox4g        | chrX:37646500-37651327    | NOTEST | 0 | 0 |
| Rhox6         | chrX:37827054-37829857    | NOTEST | 0 | 0 |
| Rhox7         | chrX:37831685-37841171    | NOTEST | 0 | 0 |

|            |                           |        |   |   |
|------------|---------------------------|--------|---|---|
| Rhox9      | chrX:37899096-37901770    | NOTEST | 0 | 0 |
| Rln3       | chr8:84043066-84044979    | NOTEST | 0 | 0 |
| Rmst       | chr10:92081745-92165178   | NOTEST | 0 | 0 |
| Rn4.5s     | chr6:47752751-47752925    | NOTEST | 0 | 0 |
| Rnase1     | chr14:51145001-51146767   | NOTEST | 0 | 0 |
| Rnase11    | chr14:51049450-51050163   | NOTEST | 0 | 0 |
| Rnase12    | chr14:51056697-51057242   | NOTEST | 0 | 0 |
| Rnase13    | chr14:51922159-51922773   | NOTEST | 0 | 0 |
| Rnase2a    | chr14:51255261-51256112   | NOTEST | 0 | 0 |
| Rnase2b    | chr14:51162259-51163018   | NOTEST | 0 | 0 |
| Rnase9     | chr14:51038458-51041867   | NOTEST | 0 | 0 |
| Rnf133     | chr6:23262773-23839421    | NOTEST | 0 | 0 |
| Rnf148     | chr6:23262773-23839421    | NOTEST | 0 | 0 |
| Rnf151     | chr17:24715839-24718057   | NOTEST | 0 | 0 |
| Rnf183     | chr4:62427541-62434726    | NOTEST | 0 | 0 |
| Rnf186     | chr4:138967111-138968366  | NOTEST | 0 | 0 |
| Rnf224     | chr2:25234475-25236787    | NOTEST | 0 | 0 |
| Rnu11      | chr4:132270078-132270186  | NOTEST | 0 | 0 |
| Rnu6       | chr19:14438479-14438506   | NOTEST | 0 | 0 |
| Rnu7       | chr5:53698484-53707704    | LOWDAT | 0 | 0 |
| Rnu73b     | chr3:86137939-86142668    | NOTEST | 0 | 0 |
| Rp11l      | chr14:63992430-64033506   | NOTEST | 0 | 0 |
| Rpl10l     | chr12:66283378-66284401   | NOTEST | 0 | 0 |
| Rpl34-ps1  | chr3:130726826-130730398  | LOWDAT | 0 | 0 |
| Rpr1       | chr6:69326936-69327174    | NOTEST | 0 | 0 |
| Rpr2       | chr3:22251369-22251607    | NOTEST | 0 | 0 |
| Rpr3       | chr8:3803124-3803361      | NOTEST | 0 | 0 |
| Rps27rt    | chr3:90212666-90213648    | LOWDAT | 0 | 0 |
| Rptn       | chr3:93393698-93399442    | NOTEST | 0 | 0 |
| Rptoros    | chr11:119602994-119899591 | NOTEST | 0 | 0 |
| Rsph6a     | chr7:19054686-19074447    | NOTEST | 0 | 0 |
| Rxfp4      | chr3:88651897-88653142    | NOTEST | 0 | 0 |
| S100a2     | chr3:90590246-90591508    | NOTEST | 0 | 0 |
| Saa3       | chr7:46711997-46715676    | NOTEST | 0 | 0 |
| Saa4       | chr7:46727998-46732543    | NOTEST | 0 | 0 |
| Sall3      | chr18:80966373-80986578   | NOTEST | 0 | 0 |
| Samd7      | chr3:30746292-30767174    | NOTEST | 0 | 0 |
| Samt2      | chrX:154575227-154579330  | NOTEST | 0 | 0 |
| Samt3      | chrX:86044198-86047313    | NOTEST | 0 | 0 |
| Samt4      | chrX:154482001-154484682  | NOTEST | 0 | 0 |
| Satl1      | chrX:112384304-112406779  | NOTEST | 0 | 0 |
| Sbp        | chr17:23941995-23945607   | NOTEST | 0 | 0 |
| Sbpl       | chr17:23953084-23955273   | NOTEST | 0 | 0 |
| Scarletltr | chr9:64080760-64088045    | NOTEST | 0 | 0 |
| Scarna10   | chr6:125168006-125191586  | NOTEST | 0 | 0 |
| Scarna17   | chr18:74778393-74778455   | NOTEST | 0 | 0 |
| Scarna2    | chr3:108554341-108554402  | NOTEST | 0 | 0 |
| Scarna3a   | chr1:159232325-159347580  | NOTEST | 0 | 0 |
| Scarna3b   | chr12:80335846-80436601   | NOTEST | 0 | 0 |
| Scarna6    | chr1:87756010-87792428    | NOTEST | 0 | 0 |
| Scarna8    | chr4:86581284-86612022    | NOTEST | 0 | 0 |
| Scarna9    | chr9:15283336-15357788    | NOTEST | 0 | 0 |
| Scgb1b19   | chr7:33287306-33288491    | NOTEST | 0 | 0 |

|              |                           |        |   |   |
|--------------|---------------------------|--------|---|---|
| Scgb1b2      | chr7:31290518-31291816    | NOTEST | 0 | 0 |
| Scgb1b20     | chr7:33373233-33374558    | NOTEST | 0 | 0 |
| Scgb1b24     | chr7:33743798-33745103    | NOTEST | 0 | 0 |
| Scgb1b27     | chr7:34021566-34022881    | NOTEST | 0 | 0 |
| Scgb1b29     | chr7:32441540-32442844    | NOTEST | 0 | 0 |
| Scgb1b3      | chr7:31375591-31376916    | NOTEST | 0 | 0 |
| Scgb1b30     | chr7:34095430-34100837    | NOTEST | 0 | 0 |
| Scgb1b7      | chr7:31712664-31713980    | NOTEST | 0 | 0 |
| Scgb1c1      | chr7:140835495-140846769  | NOTEST | 0 | 0 |
| Scgb2b12     | chr7:32325285-32327245    | NOTEST | 0 | 0 |
| Scgb2b15     | chr7:32827682-32829653    | NOTEST | 0 | 0 |
| Scgb2b17     | chr7:33054581-33056552    | NOTEST | 0 | 0 |
| Scgb2b19     | chr7:33278365-33280341    | NOTEST | 0 | 0 |
| Scgb2b2      | chr7:31302768-31304977    | NOTEST | 0 | 0 |
| Scgb2b20     | chr7:33364342-33366319    | NOTEST | 0 | 0 |
| Scgb2b23-ps  | chr7:33625144-33653281    | NOTEST | 0 | 0 |
| Scgb2b24     | chr7:33737192-33739295    | NOTEST | 0 | 0 |
| Scgb2b26     | chr7:33942996-33944985    | NOTEST | 0 | 0 |
| Scgb2b27     | chr7:34011918-34013942    | NOTEST | 0 | 0 |
| Scgb2b3      | chr7:31359037-31362072    | NOTEST | 0 | 0 |
| Scgb2b7      | chr7:31703778-31705754    | NOTEST | 0 | 0 |
| Scgb3a2      | chr18:43764300-43767399   | NOTEST | 0 | 0 |
| Scp2d1       | chr2:144823665-144824415  | NOTEST | 0 | 0 |
| Scpep1os     | chr11:88905927-88955442   | NOTEST | 0 | 0 |
| Sctr         | chr1:120006979-120063532  | NOTEST | 0 | 0 |
| Sdr16c5      | chr4:3995941-4019663      | NOTEST | 0 | 0 |
| Sdr16c6      | chr4:4056665-4077514      | NOTEST | 0 | 0 |
| Sds          | chr5:120476546-120503623  | NOTEST | 0 | 0 |
| Sec14i3      | chr11:4064852-4078990     | NOTEST | 0 | 0 |
| 39691        | chr16:4986857-4997852     | NOTEST | 0 | 0 |
| 40421        | chr5:129683390-129708511  | NOTEST | 0 | 0 |
| Serpina1f    | chr12:103688043-103695529 | NOTEST | 0 | 0 |
| Serpina3a    | chr12:104112723-104121896 | NOTEST | 0 | 0 |
| Serpina3b    | chr12:104127995-104139545 | NOTEST | 0 | 0 |
| Serpina3j    | chr12:104314569-104320586 | NOTEST | 0 | 0 |
| Serpina4-ps1 | chr12:104077958-104086920 | NOTEST | 0 | 0 |
| Serpina6     | chr12:103646631-103657071 | NOTEST | 0 | 0 |
| Serpina7     | chrX:139079249-139085236  | NOTEST | 0 | 0 |
| Serpina11    | chr1:107362313-107380475  | NOTEST | 0 | 0 |
| Serpina13    | chr1:106980983-107001195  | NOTEST | 0 | 0 |
| Serpina3b    | chr1:107153960-107161114  | NOTEST | 0 | 0 |
| Serpina3c    | chr1:107271200-107278371  | NOTEST | 0 | 0 |
| Serpina3d    | chr1:107078192-107083480  | NOTEST | 0 | 0 |
| Serpina6d    | chr13:33661404-33671585   | NOTEST | 0 | 0 |
| Serpina9c    | chr13:33149274-33159754   | NOTEST | 0 | 0 |
| Serpina9d    | chr13:33192958-33203980   | NOTEST | 0 | 0 |
| Serpina9e    | chr13:33249609-33260846   | NOTEST | 0 | 0 |
| Serpina9f    | chr13:33324076-33335366   | NOTEST | 0 | 0 |
| Serpina9g    | chr13:33484789-33496000   | NOTEST | 0 | 0 |
| Serpini2     | chr3:75242356-75270078    | NOTEST | 0 | 0 |
| Sftpd        | chr14:41172211-41185198   | NOTEST | 0 | 0 |
| Sh2d1b2      | chr1:170232870-170251587  | NOTEST | 0 | 0 |
| Shbg         | chr11:69614815-69617905   | NOTEST | 0 | 0 |

|           |                           |        |   |   |
|-----------|---------------------------|--------|---|---|
| Siglec15  | chr18:78043613-78057268   | NOTEST | 0 | 0 |
| Sim1      | chr10:50895650-50989152   | NOTEST | 0 | 0 |
| Sim2      | chr16:94085259-94127032   | NOTEST | 0 | 0 |
| Skint1    | chr4:112006268-112029538  | NOTEST | 0 | 0 |
| Skint10   | chr4:112710829-112774861  | NOTEST | 0 | 0 |
| Skint11   | chr4:114163383-114245028  | NOTEST | 0 | 0 |
| Skint2    | chr4:112613739-112652248  | NOTEST | 0 | 0 |
| Skint4    | chr4:112081469-112168076  | NOTEST | 0 | 0 |
| Skint5    | chr4:113477890-113999503  | NOTEST | 0 | 0 |
| Skint6    | chr4:112804615-113286973  | NOTEST | 0 | 0 |
| Skint7    | chr4:111972926-111988221  | NOTEST | 0 | 0 |
| Skint9    | chr4:112385968-112433985  | NOTEST | 0 | 0 |
| Slain1os  | chr14:103650242-103704799 | NOTEST | 0 | 0 |
| Slc10a1   | chr12:80953184-80968079   | NOTEST | 0 | 0 |
| Slc13a2os | chr11:78394484-78422185   | NOTEST | 0 | 0 |
| Slc16a8   | chr15:79251015-79254748   | NOTEST | 0 | 0 |
| Slc17a1   | chr13:23870272-23895730   | NOTEST | 0 | 0 |
| Slc17a2   | chr13:23807026-23823525   | NOTEST | 0 | 0 |
| Slc17a3   | chr13:23839433-23860714   | NOTEST | 0 | 0 |
| Slc22a14  | chr9:119169455-119190393  | NOTEST | 0 | 0 |
| Slc22a16  | chr10:40570361-40604132   | NOTEST | 0 | 0 |
| Slc22a19  | chr19:7673075-7711310     | NOTEST | 0 | 0 |
| Slc22a20  | chr19:5970233-5986143     | NOTEST | 0 | 0 |
| Slc22a26  | chr19:7781980-7802667     | NOTEST | 0 | 0 |
| Slc22a27  | chr19:7864388-7966027     | NOTEST | 0 | 0 |
| Slc22a28  | chr19:8062208-8131982     | NOTEST | 0 | 0 |
| Slc22a30  | chr19:8335622-8405105     | NOTEST | 0 | 0 |
| Slc23a1   | chr18:35598666-35627227   | NOTEST | 0 | 0 |
| Slc25a41  | chr17:57032771-57041654   | NOTEST | 0 | 0 |
| Slc25a54  | chr3:109080498-109116582  | NOTEST | 0 | 0 |
| Slc26a9   | chr1:131744021-131770405  | NOTEST | 0 | 0 |
| Slc28a3   | chr13:58553307-58610877   | NOTEST | 0 | 0 |
| Slc2a7    | chr4:150148971-150168482  | NOTEST | 0 | 0 |
| Slc30a3   | chr5:30933142-31348845    | NOTEST | 0 | 0 |
| Slc34a1   | chr13:55399647-55415232   | NOTEST | 0 | 0 |
| Slc34a3   | chr2:25228896-25234234    | NOTEST | 0 | 0 |
| Slc35g3   | chr11:69759885-69761844   | NOTEST | 0 | 0 |
| Slc36a3   | chr11:55124822-55151706   | NOTEST | 0 | 0 |
| Slc51b    | chr9:65398487-65422773    | NOTEST | 0 | 0 |
| Slc5a12   | chr2:110597298-110649345  | NOTEST | 0 | 0 |
| Slc6a14   | chrX:21714899-21742357    | NOTEST | 0 | 0 |
| Slc6a19os | chr13:73681156-73709856   | NOTEST | 0 | 0 |
| Slc6a3    | chr13:73536746-73578672   | NOTEST | 0 | 0 |
| Slc7a12   | chr3:14480698-14505818    | NOTEST | 0 | 0 |
| Slc7a9    | chr7:35449091-35466034    | NOTEST | 0 | 0 |
| Slc9c1    | chr16:45535265-45607001   | NOTEST | 0 | 0 |
| Slco1a1   | chr6:141907280-141946962  | NOTEST | 0 | 0 |
| Slco1b2   | chr6:141629517-141686635  | NOTEST | 0 | 0 |
| Slco6b1   | chr1:96906175-96997560    | NOTEST | 0 | 0 |
| Slco6d1   | chr1:98421123-98509380    | NOTEST | 0 | 0 |
| Sln       | chr9:53850250-53853849    | NOTEST | 0 | 0 |
| Slx       | chrX:26522656-26545565    | NOTEST | 0 | 0 |

|            |                           |        |   |   |
|------------|---------------------------|--------|---|---|
| Slxl1      | chrX:55226875-55243736    | NOTEST | 0 | 0 |
| Sly        | chrY:75195855-75222053    | NOTEST | 0 | 0 |
| Smc1b      | chr15:85064688-85131957   | NOTEST | 0 | 0 |
| Smcp       | chr3:92583865-92589024    | NOTEST | 0 | 0 |
| Smgc       | chr15:91838325-91934555   | NOTEST | 0 | 0 |
| Smim23     | chr11:32820375-32824594   | NOTEST | 0 | 0 |
| Smlr1      | chr10:25527942-25536272   | NOTEST | 0 | 0 |
| Smok2a     | chr17:13221187-13227658   | NOTEST | 0 | 0 |
| Smok2b     | chr17:13230262-13237189   | NOTEST | 0 | 0 |
| Smok3a     | chr5:138021275-138034665  | NOTEST | 0 | 0 |
| Smok3b     | chr5:138037223-138050633  | NOTEST | 0 | 0 |
| Smok4a     | chr17:13487020-13554094   | NOTEST | 0 | 0 |
| Smr3a      | chr5:88002524-88008534    | NOTEST | 0 | 0 |
| Snora15    | chr5:129787355-129846443  | NOTEST | 0 | 0 |
| Snora17    | chr2:26637175-26640244    | NOTEST | 0 | 0 |
| Snora19    | chr19:60761115-60790693   | LOWDAT | 0 | 0 |
| Snora20    | chr17:12916328-12940396   | NOTEST | 0 | 0 |
| Snora21    | chr11:97777525-97782439   | NOTEST | 0 | 0 |
| Snora24    | chr3:123507551-123508336  | LOWDAT | 0 | 0 |
| Snora26    | chr5:74093082-74094336    | LOWDAT | 0 | 0 |
| Snora2b    | chr15:98517657-98534269   | NOTEST | 0 | 0 |
| Snora3     | chr7:109519194-109522369  | NOTEST | 0 | 0 |
| Snora30    | chr7:127527896-127528003  | NOTEST | 0 | 0 |
| Snora31    | chr14:75845255-75848303   | NOTEST | 0 | 0 |
| Snora33    | chr10:23785182-23787209   | NOTEST | 0 | 0 |
| Snora34    | chr15:98517657-98534269   | NOTEST | 0 | 0 |
| Snora35    | chrX:146962512-147197277  | NOTEST | 0 | 0 |
| Snora36b   | chr1:185204167-185329401  | NOTEST | 0 | 0 |
| Snora41    | chr1:63176830-63180486    | NOTEST | 0 | 0 |
| Snora43    | chr2:26637175-26640244    | NOTEST | 0 | 0 |
| Snora44    | chr4:132308677-132311024  | NOTEST | 0 | 0 |
| Snora47    | chr13:95325236-95337841   | NOTEST | 0 | 0 |
| Snora52    | chr7:141447649-141451342  | NOTEST | 0 | 0 |
| Snora5c    | chr11:6615597-6626067     | NOTEST | 0 | 0 |
| Snora61    | chr4:132308677-132311024  | NOTEST | 0 | 0 |
| Snora62    | chr9:120127765-120132369  | NOTEST | 0 | 0 |
| Snora68    | chr8:70894721-70897443    | NOTEST | 0 | 0 |
| Snora69    | chrX:37082519-37085184    | NOTEST | 0 | 0 |
| Snora75    | chr1:86344718-86359455    | NOTEST | 0 | 0 |
| Snora78    | chr17:24719530-24719965   | NOTEST | 0 | 0 |
| Snora81    | chr16:23107467-23127730   | NOTEST | 0 | 0 |
| Snord100   | chr10:23785182-23787209   | NOTEST | 0 | 0 |
| Snord104   | chr11:106500990-106501063 | NOTEST | 0 | 0 |
| Snord11    | chr1:59685005-59711510    | NOTEST | 0 | 0 |
| Snord110   | chr2:130274411-130284451  | NOTEST | 0 | 0 |
| Snord111   | chr8:110810491-110846803  | NOTEST | 0 | 0 |
| Snord116   | chr7:59716060-59716150    | NOTEST | 0 | 0 |
| Snord116i1 | chr7:59700879-59700969    | NOTEST | 0 | 0 |
| Snord116i2 | chr7:59619157-59678878    | NOTEST | 0 | 0 |
| Snord118   | chr19:7417624-7483291     | NOTEST | 0 | 0 |
| Snord12    | chr2:167035795-167065862  | NOTEST | 0 | 0 |
| Snord123   | chr15:32240567-32244662   | NOTEST | 0 | 0 |
| Snord14a   | chr2:32775820-32784405    | NOTEST | 0 | 0 |



|          |                           |        |   |   |
|----------|---------------------------|--------|---|---|
| Snord14c | chr10:46244747-46244770   | LOWDAT | 0 | 0 |
| Snord14d | chr10:46244747-46244770   | NOTEST | 0 | 0 |
| Snord15a | chr7:99477896-99483709    | NOTEST | 0 | 0 |
| Snord16a | chr9:64173386-64178562    | NOTEST | 0 | 0 |
| Snord17  | chr2:144250123-144270902  | NOTEST | 0 | 0 |
| Snord19  | chr14:30999825-31019131   | NOTEST | 0 | 0 |
| Snord1a  | chr11:116671659-116675798 | LOWDAT | 0 | 0 |
| Snord1b  | chr11:116671659-116675798 | NOTEST | 0 | 0 |
| Snord1c  | chr11:116671659-116675798 | NOTEST | 0 | 0 |
| Snord2   | chr16:23107467-23127730   | NOTEST | 0 | 0 |
| Snord23  | chr7:15937835-15946108    | NOTEST | 0 | 0 |
| Snord32a | chr7:45125562-45128745    | NOTEST | 0 | 0 |
| Snord33  | chr7:45125562-45128745    | NOTEST | 0 | 0 |
| Snord34  | chr7:45125562-45128745    | NOTEST | 0 | 0 |
| Snord35a | chr7:45125562-45128745    | NOTEST | 0 | 0 |
| Snord35b | chr7:45122387-45124389    | NOTEST | 0 | 0 |
| Snord37  | chr10:81176630-81182509   | NOTEST | 0 | 0 |
| Snord38a | chr4:117153835-117156132  | NOTEST | 0 | 0 |
| Snord42a | chr11:78180935-78183584   | NOTEST | 0 | 0 |
| Snord42b | chr11:78180935-78183584   | NOTEST | 0 | 0 |
| Snord43  | chr15:80077780-80083406   | NOTEST | 0 | 0 |
| Snord45b | chr3:153907288-153912966  | NOTEST | 0 | 0 |
| Snord45c | chr3:153907288-153912966  | LOWDAT | 0 | 0 |
| Snord47  | chr1:161035165-161038537  | NOTEST | 0 | 0 |
| Snord49a | chr11:62602876-62604806   | NOTEST | 0 | 0 |
| Snord49b | chr11:62602876-62604806   | NOTEST | 0 | 0 |
| Snord4a  | chr11:78180935-78183584   | NOTEST | 0 | 0 |
| Snord52  | chr17:34950235-34952471   | NOTEST | 0 | 0 |
| Snord53  | chr7:110848295-110848315  | NOTEST | 0 | 0 |
| Snord55  | chr4:117153835-117156132  | NOTEST | 0 | 0 |
| Snord57  | chr2:130274411-130284451  | NOTEST | 0 | 0 |
| Snord58b | chr18:75000476-75003381   | NOTEST | 0 | 0 |
| Snord61  | chrX:57383347-57393036    | NOTEST | 0 | 0 |
| Snord64  | chr7:59978810-59978856    | NOTEST | 0 | 0 |
| Snord65  | chr11:62602876-62604806   | NOTEST | 0 | 0 |
| Snord66  | chr16:20672748-20692883   | NOTEST | 0 | 0 |
| Snord67  | chr2:91546321-91620665    | NOTEST | 0 | 0 |
| Snord68  | chr8:123102349-123105242  | NOTEST | 0 | 0 |
| Snord69  | chr14:30999825-31019131   | NOTEST | 0 | 0 |
| Snord7   | chr11:83291698-83298977   | LOWDAT | 0 | 0 |
| Snord70  | chr1:59685005-59711510    | NOTEST | 0 | 0 |
| Snord71  | chr8:109778639-109864208  | NOTEST | 0 | 0 |
| Snord72  | chr15:5116612-5119140     | NOTEST | 0 | 0 |
| Snord73a | chr3:86137939-86142668    | NOTEST | 0 | 0 |
| Snord8   | chr14:52198150-52237572   | NOTEST | 0 | 0 |
| Snord82  | chr1:86344718-86359455    | NOTEST | 0 | 0 |
| Snord83b | chr15:80077780-80083406   | NOTEST | 0 | 0 |
| Snord85  | chr4:130663358-130781565  | NOTEST | 0 | 0 |
| Snord87  | chr1:9942024-9944118      | NOTEST | 0 | 0 |
| Snord88a | chr7:44246721-44252319    | NOTEST | 0 | 0 |
| Snord88c | chr7:44246721-44252319    | NOTEST | 0 | 0 |
| Snord89  | chr1:39548746-39548840    | NOTEST | 0 | 0 |
| Snord90  | chr2:37370070-37422903    | NOTEST | 0 | 0 |

|            |                           |        |   |   |
|------------|---------------------------|--------|---|---|
| Snord91a   | chr11:74898079-74925798   | NOTEST | 0 | 0 |
| Snord92    | chr17:71616214-71659031   | NOTEST | 0 | 0 |
| Snord93    | chr5:23787743-24161231    | NOTEST | 0 | 0 |
| Snord95    | chr11:48800359-48806241   | NOTEST | 0 | 0 |
| Snord96a   | chr11:48800359-48806241   | NOTEST | 0 | 0 |
| Snord98    | chr10:62743927-62792368   | NOTEST | 0 | 0 |
| Snord99    | chr4:132308677-132311024  | NOTEST | 0 | 0 |
| Sntn       | chr14:13670875-13683148   | NOTEST | 0 | 0 |
| Sohlh1     | chr2:25842996-25847248    | NOTEST | 0 | 0 |
| Sohlh2     | chr3:55182043-55209957    | NOTEST | 0 | 0 |
| Sox14      | chr9:99874105-99876170    | NOTEST | 0 | 0 |
| Sox15      | chr11:69655036-69662642   | NOTEST | 0 | 0 |
| Sox21      | chr14:118233233-118237030 | NOTEST | 0 | 0 |
| Sox5os3    | chr6:144672867-144693832  | NOTEST | 0 | 0 |
| Sp8        | chr12:118846328-118852578 | NOTEST | 0 | 0 |
| Spaca3     | chr11:80858388-80867814   | NOTEST | 0 | 0 |
| Spaca4     | chr7:45721219-45729492    | NOTEST | 0 | 0 |
| Spaca5     | chrX:21068487-21077959    | NOTEST | 0 | 0 |
| Spaca7     | chr8:12573048-12600738    | NOTEST | 0 | 0 |
| Spag11a    | chr8:19157886-19159578    | NOTEST | 0 | 0 |
| Spag11b    | chr8:19140758-19143010    | NOTEST | 0 | 0 |
| Spam1      | chr6:24791187-24801048    | NOTEST | 0 | 0 |
| Spata16    | chr3:26637630-26983212    | NOTEST | 0 | 0 |
| Spata21    | chr4:141088344-141112759  | NOTEST | 0 | 0 |
| Spata3     | chr1:86021941-86029958    | NOTEST | 0 | 0 |
| Spata31d1b | chr13:59712283-59719289   | NOTEST | 0 | 0 |
| Spata45    | chr1:191036821-191042941  | NOTEST | 0 | 0 |
| Spatc1     | chr15:76266786-76292572   | NOTEST | 0 | 0 |
| Speer1-ps1 | chr5:11340407-11346273    | NOTEST | 0 | 0 |
| Speer2     | chr16:69856873-69863744   | NOTEST | 0 | 0 |
| Speer3     | chr5:13791618-13796819    | NOTEST | 0 | 0 |
| Speer4b    | chr5:26817356-27727500    | NOTEST | 0 | 0 |
| Speer4c    | chr5:15680709-15714596    | NOTEST | 0 | 0 |
| Speer4d    | chr5:15619098-15623864    | NOTEST | 0 | 0 |
| Speer4e    | chr5:14933630-14938475    | NOTEST | 0 | 0 |
| Speer4f    | chr5:17476121-17480936    | NOTEST | 0 | 0 |
| Speer5-ps1 | chr10:44170446-44219585   | NOTEST | 0 | 0 |
| Speer6-ps1 | chr13:3149474-3189678     | NOTEST | 0 | 0 |
| Speer7-ps1 | chr5:15680709-15714596    | NOTEST | 0 | 0 |
| Speer8-ps1 | chr5:14945293-14978899    | NOTEST | 0 | 0 |
| Speer9-ps1 | chr7:3128145-3144992      | NOTEST | 0 | 0 |
| Spert      | chr14:75582833-75593116   | NOTEST | 0 | 0 |
| Spic       | chr10:88675269-88683023   | NOTEST | 0 | 0 |
| Spin2-ps1  | chrX:3835878-3836656      | NOTEST | 0 | 0 |
| Spin2d     | chrX:73175301-73176989    | NOTEST | 0 | 0 |
| Spink11    | chr18:44190044-44196177   | NOTEST | 0 | 0 |
| Spink12    | chr18:44104522-44108543   | NOTEST | 0 | 0 |
| Spink13    | chr18:62548910-62741387   | NOTEST | 0 | 0 |
| Spink14    | chr18:44027868-44032208   | NOTEST | 0 | 0 |
| Spink3     | chr18:43728068-43737237   | NOTEST | 0 | 0 |
| Spink4     | chr4:40920055-40931395    | NOTEST | 0 | 0 |
| Spink6     | chr18:44071392-44083610   | NOTEST | 0 | 0 |
| Spink7     | chr18:62548910-62741387   | NOTEST | 0 | 0 |

|            |                           |        |   |   |
|------------|---------------------------|--------|---|---|
| Spink8     | chr9:109816626-109826627  | NOTEST | 0 | 0 |
| Spinkl     | chr18:44166357-44175073   | NOTEST | 0 | 0 |
| Spint3     | chr2:164569694-164573456  | NOTEST | 0 | 0 |
| Spint4     | chr2:164698500-164702448  | NOTEST | 0 | 0 |
| Spn-ps     | chr15:90891395-90898476   | NOTEST | 0 | 0 |
| Sppl2c     | chr11:104186326-104191166 | NOTEST | 0 | 0 |
| Sprr1b     | chr3:92436808-92438779    | NOTEST | 0 | 0 |
| Sprr2a1    | chr3:92250646-92257304    | NOTEST | 0 | 0 |
| Sprr2a2    | chr3:92215834-92222491    | NOTEST | 0 | 0 |
| Sprr2b     | chr3:92316704-92318085    | NOTEST | 0 | 0 |
| Sprr2d     | chr3:92339139-92340873    | NOTEST | 0 | 0 |
| Sprr2e     | chr3:92352142-92353449    | NOTEST | 0 | 0 |
| Sprr2f     | chr3:92365186-92366442    | NOTEST | 0 | 0 |
| Sprr2g     | chr3:92373914-92375229    | NOTEST | 0 | 0 |
| Sprr2h     | chr3:92385684-92387319    | NOTEST | 0 | 0 |
| Sprr2i     | chr3:92407990-92409271    | NOTEST | 0 | 0 |
| Sprr2j-ps  | chr3:92418086-92419396    | NOTEST | 0 | 0 |
| Sprr2k     | chr3:92432581-92433927    | NOTEST | 0 | 0 |
| Sprr3      | chr3:92456501-92458720    | NOTEST | 0 | 0 |
| Sprr4      | chr3:92500262-92500493    | NOTEST | 0 | 0 |
| Spt1       | chr15:103751922-103899312 | NOTEST | 0 | 0 |
| Sptlc3     | chr2:139493919-139637674  | NOTEST | 0 | 0 |
| Spz1       | chr13:92574631-92576232   | NOTEST | 0 | 0 |
| Sry        | chrY:2662470-2663658      | NOTEST | 0 | 0 |
| Ssty1      | chrY:18089166-18091551    | NOTEST | 0 | 0 |
| Ssty2      | chrY:80463105-80465434    | NOTEST | 0 | 0 |
| Ssx9       | chrX:8748429-8754587      | NOTEST | 0 | 0 |
| Ssxb1      | chrX:8413304-8422157      | NOTEST | 0 | 0 |
| Ssxb10     | chrX:8327423-8336235      | NOTEST | 0 | 0 |
| Ssxb2      | chrX:8454342-8461726      | NOTEST | 0 | 0 |
| Ssxb3      | chrX:8583543-8589246      | NOTEST | 0 | 0 |
| Ssxb5      | chrX:8803690-8809386      | NOTEST | 0 | 0 |
| Ssxb6      | chrX:8542603-8548255      | NOTEST | 0 | 0 |
| Ssxb8      | chrX:8685330-8690844      | NOTEST | 0 | 0 |
| Ssxb9      | chrX:8366977-8375388      | NOTEST | 0 | 0 |
| St6galnac1 | chr11:116765024-116775507 | NOTEST | 0 | 0 |
| Stfa2      | chr16:36403945-36408363   | NOTEST | 0 | 0 |
| Stfa2l1    | chr16:36156810-36161948   | NOTEST | 0 | 0 |
| Stfa3      | chr16:36450536-36455392   | NOTEST | 0 | 0 |
| Stra8      | chr6:34920959-34939342    | NOTEST | 0 | 0 |
| Stx19      | chr16:62793688-62847040   | NOTEST | 0 | 0 |
| Sult1b1    | chr5:87513338-87538195    | NOTEST | 0 | 0 |
| Sult1c1    | chr17:53961614-53990631   | NOTEST | 0 | 0 |
| Sult1c2    | chr17:53829636-53845958   | NOTEST | 0 | 0 |
| Sult1d1    | chr5:87554649-87569006    | NOTEST | 0 | 0 |
| Sult1e1    | chr5:87575967-87591611    | NOTEST | 0 | 0 |
| Sult2a1    | chr7:13796245-13837410    | NOTEST | 0 | 0 |
| Sult2a2    | chr7:13733505-13779637    | NOTEST | 0 | 0 |
| Sult2a3    | chr7:14067554-14122993    | NOTEST | 0 | 0 |
| Sult2a4    | chr7:13909676-13989588    | NOTEST | 0 | 0 |
| Sult2a5    | chr7:13623966-13670807    | NOTEST | 0 | 0 |
| Sult2a6    | chr7:14222402-14254870    | NOTEST | 0 | 0 |
| Sult2a7    | chr7:14465158-14492926    | NOTEST | 0 | 0 |

|           |                          |        |   |   |
|-----------|--------------------------|--------|---|---|
| Sult3a1   | chr10:33857721-33879475  | NOTEST | 0 | 0 |
| Sun5      | chr2:153856189-153871084 | NOTEST | 0 | 0 |
| Sva       | chr6:42038393-42042851   | NOTEST | 0 | 0 |
| Sval1     | chr6:41951627-41956098   | NOTEST | 0 | 0 |
| Sval2     | chr6:41860338-41864322   | NOTEST | 0 | 0 |
| Sval3     | chr6:41968139-41973090   | NOTEST | 0 | 0 |
| Svs1      | chr6:48986860-48991724   | NOTEST | 0 | 0 |
| Svs2      | chr2:164235928-164238341 | NOTEST | 0 | 0 |
| Svs3b     | chr2:164254362-164256643 | NOTEST | 0 | 0 |
| Svs4      | chr2:164275955-164278307 | NOTEST | 0 | 0 |
| Svs5      | chr2:164332764-164334394 | NOTEST | 0 | 0 |
| Svs6      | chr2:164316750-164318450 | NOTEST | 0 | 0 |
| Syce3     | chr15:89390173-89410503  | NOTEST | 0 | 0 |
| Sycn      | chr7:28540884-28542210   | NOTEST | 0 | 0 |
| Sycp1     | chr3:102818498-102936100 | NOTEST | 0 | 0 |
| Sycp1-ps1 | chr7:18786301-18798510   | NOTEST | 0 | 0 |
| Synb      | chr14:69508647-69512549  | NOTEST | 0 | 0 |
| Syt8      | chr7:142434976-142440396 | NOTEST | 0 | 0 |
| Taar1     | chr10:23920405-23921404  | NOTEST | 0 | 0 |
| Taar2     | chr10:23938571-23941583  | NOTEST | 0 | 0 |
| Taar3     | chr10:23949557-23950589  | NOTEST | 0 | 0 |
| Taar4     | chr10:23960493-23961537  | NOTEST | 0 | 0 |
| Taar5     | chr10:23970705-23971719  | NOTEST | 0 | 0 |
| Taar6     | chr10:23984608-23985646  | NOTEST | 0 | 0 |
| Taar7a    | chr10:23992404-23993481  | NOTEST | 0 | 0 |
| Taar7b    | chr10:23999938-24001015  | NOTEST | 0 | 0 |
| Taar7d    | chr10:24027221-24028298  | NOTEST | 0 | 0 |
| Taar7e    | chr10:24037613-24038690  | NOTEST | 0 | 0 |
| Taar7f    | chr10:24049509-24050586  | NOTEST | 0 | 0 |
| Taar8a    | chr10:24076499-24077534  | NOTEST | 0 | 0 |
| Taar8b    | chr10:24091259-24092294  | NOTEST | 0 | 0 |
| Taar8c    | chr10:24100842-24101951  | NOTEST | 0 | 0 |
| Taar9     | chr10:24108487-24109534  | NOTEST | 0 | 0 |
| Tac4      | chr11:95261528-95269261  | NOTEST | 0 | 0 |
| Taf7l     | chrX:134460115-134476490 | NOTEST | 0 | 0 |
| Tas1r2    | chr4:139653537-139670279 | NOTEST | 0 | 0 |
| Tas2r102  | chr6:132762130-132763174 | NOTEST | 0 | 0 |
| Tas2r103  | chr6:133036162-133037101 | NOTEST | 0 | 0 |
| Tas2r104  | chr6:131684835-131685744 | NOTEST | 0 | 0 |
| Tas2r105  | chr6:131686560-131687463 | NOTEST | 0 | 0 |
| Tas2r106  | chr6:131677959-131678886 | NOTEST | 0 | 0 |
| Tas2r107  | chr6:131659157-131660084 | NOTEST | 0 | 0 |
| Tas2r108  | chr6:40493591-40494485   | NOTEST | 0 | 0 |
| Tas2r109  | chr6:132980014-132980965 | NOTEST | 0 | 0 |
| Tas2r110  | chr6:132868007-132869009 | NOTEST | 0 | 0 |
| Tas2r113  | chr6:132893010-132893940 | NOTEST | 0 | 0 |
| Tas2r114  | chr6:131689133-131690063 | NOTEST | 0 | 0 |
| Tas2r115  | chr6:132737053-132737986 | NOTEST | 0 | 0 |
| Tas2r116  | chr6:132855437-132856355 | NOTEST | 0 | 0 |
| Tas2r117  | chr6:132802900-132803893 | NOTEST | 0 | 0 |
| Tas2r118  | chr6:23969160-23970060   | NOTEST | 0 | 0 |
| Tas2r119  | chr15:32177288-32178294  | NOTEST | 0 | 0 |
| Tas2r120  | chr6:132656956-132657844 | NOTEST | 0 | 0 |

|            |                           |        |   |   |
|------------|---------------------------|--------|---|---|
| Tas2r121   | chr6:132700089-132701007  | NOTEST | 0 | 0 |
| Tas2r122   | chr6:132710998-132711928  | NOTEST | 0 | 0 |
| Tas2r123   | chr6:132847141-132848143  | NOTEST | 0 | 0 |
| Tas2r124   | chr6:132754729-132755659  | NOTEST | 0 | 0 |
| Tas2r125   | chr6:132909650-132910586  | NOTEST | 0 | 0 |
| Tas2r126   | chr6:42434534-42435461    | NOTEST | 0 | 0 |
| Tas2r129   | chr6:132951101-132952064  | NOTEST | 0 | 0 |
| Tas2r130   | chr6:131629891-131630830  | NOTEST | 0 | 0 |
| Tas2r131   | chr6:132956911-132957844  | NOTEST | 0 | 0 |
| Tas2r134   | chr2:51627510-51628407    | NOTEST | 0 | 0 |
| Tas2r135   | chr6:42405528-42406494    | NOTEST | 0 | 0 |
| Tas2r136   | chr6:132777178-132778162  | NOTEST | 0 | 0 |
| Tas2r137   | chr6:40491237-40492239    | NOTEST | 0 | 0 |
| Tas2r138   | chr6:40529090-40910666    | NOTEST | 0 | 0 |
| Tas2r139   | chr6:42140935-42141895    | NOTEST | 0 | 0 |
| Tas2r140   | chr6:133054854-133055793  | NOTEST | 0 | 0 |
| Tas2r143   | chr6:42400237-42401119    | NOTEST | 0 | 0 |
| Tas2r144   | chr6:42215327-42216287    | NOTEST | 0 | 0 |
| Tbata      | chr10:61171963-61188841   | NOTEST | 0 | 0 |
| Tbc1d21    | chr9:58359803-58370369    | NOTEST | 0 | 0 |
| Tbc1d22bos | chr17:29549801-29606808   | NOTEST | 0 | 0 |
| Tbr1       | chr2:61804452-61814113    | NOTEST | 0 | 0 |
| Tbx10      | chr19:3992751-3999512     | NOTEST | 0 | 0 |
| Tbx22      | chrX:107667963-107688980  | NOTEST | 0 | 0 |
| Tchhl1     | chr3:93468753-93471980    | NOTEST | 0 | 0 |
| Tcl1b1     | chr12:105159703-105166625 | NOTEST | 0 | 0 |
| Tcl1b2     | chr12:105147032-105155225 | NOTEST | 0 | 0 |
| Tcl1b3     | chr12:105191044-105195399 | NOTEST | 0 | 0 |
| Tcl1b4     | chr12:105202421-105206993 | NOTEST | 0 | 0 |
| Tcl1b5     | chr12:105176357-105181145 | NOTEST | 0 | 0 |
| Tcstv1     | chr13:119893386-119894785 | NOTEST | 0 | 0 |
| Tcstv3     | chr13:120316861-120318261 | NOTEST | 0 | 0 |
| Tdgf1      | chr9:110939607-110946158  | NOTEST | 0 | 0 |
| Tdh        | chr14:63492346-63509092   | NOTEST | 0 | 0 |
| Tdo2       | chr3:81958413-81975728    | NOTEST | 0 | 0 |
| Tdpoz1     | chr3:93669332-93676283    | NOTEST | 0 | 0 |
| Tdpoz2     | chr3:93651541-93652686    | NOTEST | 0 | 0 |
| Tdpoz3     | chr3:93826019-93827117    | NOTEST | 0 | 0 |
| Tdpoz4     | chr3:93796397-93797510    | NOTEST | 0 | 0 |
| Tdpoz5     | chr3:94071621-94072644    | NOTEST | 0 | 0 |
| Teddm1     | chr1:153891645-153893060  | NOTEST | 0 | 0 |
| Tepp       | chr8:95311597-95321329    | NOTEST | 0 | 0 |
| Tex101     | chr7:24668011-24672050    | NOTEST | 0 | 0 |
| Tex12      | chr9:50557147-50561268    | NOTEST | 0 | 0 |
| Tex13a     | chrX:137571548-138846955  | NOTEST | 0 | 0 |
| Tex16      | chrX:112093519-112127326  | NOTEST | 0 | 0 |
| Tex19.2    | chr11:121116214-121118677 | NOTEST | 0 | 0 |
| Tex24      | chr8:27344393-27349188    | NOTEST | 0 | 0 |
| Tex26      | chr5:149439705-149470620  | NOTEST | 0 | 0 |
| Tex28      | chrX:74150943-74167838    | NOTEST | 0 | 0 |
| Tex29      | chr8:11840520-11855761    | NOTEST | 0 | 0 |
| Tex33      | chr15:78378399-78395912   | NOTEST | 0 | 0 |
| Tex36      | chr7:133587023-133602115  | NOTEST | 0 | 0 |



|                   |                           |        |   |   |
|-------------------|---------------------------|--------|---|---|
| Tex43             | chr18:56588347-56594779   | NOTEST | 0 | 0 |
| Tfap2c            | chr2:172549592-172558621  | NOTEST | 0 | 0 |
| Tfap2e            | chr4:126716002-126736269  | NOTEST | 0 | 0 |
| Tfec              | chr6:16833380-16898441    | NOTEST | 0 | 0 |
| Tff1              | chr17:31152751-31165053   | NOTEST | 0 | 0 |
| Tff2              | chr17:31141061-31144282   | NOTEST | 0 | 0 |
| Tff3              | chr17:31125305-31129611   | NOTEST | 0 | 0 |
| Tgif2lx1,Tgif2lx2 | chrX:118427226-118428258  | LOWDAT | 0 | 0 |
| Tgif2lx2          | chrX:118427226-118428258  | NOTEST | 0 | 0 |
| Themis3           | chr17:66555251-66594622   | NOTEST | 0 | 0 |
| Timd2             | chr11:46668959-46707104   | NOTEST | 0 | 0 |
| Tinag             | chr9:76951697-77045781    | NOTEST | 0 | 0 |
| Tlx1              | chr19:45150714-45156943   | NOTEST | 0 | 0 |
| Tm4sf5            | chr11:70505273-70511183   | NOTEST | 0 | 0 |
| Tmco5b            | chr2:113220186-113716767  | NOTEST | 0 | 0 |
| Tmed11            | chr5:108777234-108795363  | NOTEST | 0 | 0 |
| Tmed6             | chr8:107061483-107065644  | NOTEST | 0 | 0 |
| Tmem132cos        | chr5:127241825-127565790  | NOTEST | 0 | 0 |
| Tmem171           | chr13:98686237-98694831   | NOTEST | 0 | 0 |
| Tmem174           | chr13:98634977-98637410   | NOTEST | 0 | 0 |
| Tmem190           | chr7:4782939-4784340      | NOTEST | 0 | 0 |
| Tmem210           | chr2:25288144-25289187    | NOTEST | 0 | 0 |
| Tmem212           | chr3:27866064-27896368    | NOTEST | 0 | 0 |
| Tmem225           | chr9:40148121-40150878    | NOTEST | 0 | 0 |
| Tmem247           | chr17:86917347-86922367   | NOTEST | 0 | 0 |
| Tmem52            | chr4:155469113-155470858  | NOTEST | 0 | 0 |
| Tmem52b           | chr6:129512556-129519227  | NOTEST | 0 | 0 |
| Tmem89            | chr9:108914618-108915563  | NOTEST | 0 | 0 |
| Tmem92            | chr11:94777216-94782703   | NOTEST | 0 | 0 |
| Tmem95            | chr11:69876683-69878018   | NOTEST | 0 | 0 |
| Tmprss11g         | chr5:86485876-86518600    | NOTEST | 0 | 0 |
| Tmprss12          | chr15:100280836-100293053 | NOTEST | 0 | 0 |
| Tmprss15          | chr16:78953007-79091097   | NOTEST | 0 | 0 |
| Tmprss4           | chr9:45172725-45249985    | NOTEST | 0 | 0 |
| Tnfsf18           | chr1:161494656-161505290  | NOTEST | 0 | 0 |
| Tnk2os            | chr16:32644642-32683493   | NOTEST | 0 | 0 |
| Tnp2              | chr16:10787934-10788655   | NOTEST | 0 | 0 |
| Tomm20l           | chr12:71111427-71136675   | NOTEST | 0 | 0 |
| Toporsl           | chr4:52596273-52612163    | NOTEST | 0 | 0 |
| Tpbpa             | chr13:60938691-60941935   | NOTEST | 0 | 0 |
| Tpbpb             | chr13:60901294-60904847   | NOTEST | 0 | 0 |
| Tppp2             | chr14:51918760-51920700   | NOTEST | 0 | 0 |
| Tpte              | chr8:22283440-22371418    | NOTEST | 0 | 0 |
| Trap1a            | chrX:139240225-139357738  | NOTEST | 0 | 0 |
| Trat1             | chr16:48734689-48771956   | NOTEST | 0 | 0 |
| Trcg1             | chr9:57236555-57249864    | NOTEST | 0 | 0 |
| Treh              | chr9:44673232-44686305    | NOTEST | 0 | 0 |
| Trem1l1           | chr17:48359915-48367176   | NOTEST | 0 | 0 |
| Trex2             | chrX:73433704-73435343    | NOTEST | 0 | 0 |
| Trhr2             | chr8:122356966-122360746  | NOTEST | 0 | 0 |
| Trim31            | chr17:36898129-36910217   | NOTEST | 0 | 0 |
| Trim42            | chr9:97349561-97369958    | NOTEST | 0 | 0 |
| Trim43b           | chr9:89084623-89092835    | NOTEST | 0 | 0 |

|          |                           |        |   |   |
|----------|---------------------------|--------|---|---|
| Trim50   | chr5:135353295-135367654  | NOTEST | 0 | 0 |
| Trim52   | chr14:106106197-106135862 | NOTEST | 0 | 0 |
| Trim54   | chr5:30933142-31348845    | NOTEST | 0 | 0 |
| Trim60   | chr8:64998447-65018688    | NOTEST | 0 | 0 |
| Trim75   | chr8:64981650-64987644    | NOTEST | 0 | 0 |
| Triml1   | chr8:43129806-43141486    | NOTEST | 0 | 0 |
| Triml2   | chr8:43183121-43193884    | NOTEST | 0 | 0 |
| Trp53tg5 | chr2:164470303-164473724  | NOTEST | 0 | 0 |
| Trpc5os  | chrX:144381670-144688180  | NOTEST | 0 | 0 |
| Trpd52l3 | chr19:30003789-30006020   | NOTEST | 0 | 0 |
| Trpv6    | chr6:41620618-41636405    | NOTEST | 0 | 0 |
| Try10    | chr6:41354104-41357944    | NOTEST | 0 | 0 |
| Try4     | chr6:41302271-41305533    | NOTEST | 0 | 0 |
| Try5     | chr6:41311231-41314710    | NOTEST | 0 | 0 |
| Tsga8    | chrX:82948869-85205050    | NOTEST | 0 | 0 |
| Tshb     | chr3:102777397-102782714  | NOTEST | 0 | 0 |
| Tsix     | chrX:103431516-103484957  | NOTEST | 0 | 0 |
| Tspan10  | chr11:120442630-120447321 | NOTEST | 0 | 0 |
| Tspy-ps  | chrY:1055763-1058868      | NOTEST | 0 | 0 |
| Tssk2    | chr16:17898636-17900024   | NOTEST | 0 | 0 |
| Tssk3    | chr4:129489007-129490770  | NOTEST | 0 | 0 |
| Tssk5    | chr15:76371957-76374938   | NOTEST | 0 | 0 |
| Ttc23l   | chr15:10503946-10558668   | NOTEST | 0 | 0 |
| Ttc24    | chr3:88069409-88078304    | NOTEST | 0 | 0 |
| Ttl10    | chr4:156034836-156050817  | NOTEST | 0 | 0 |
| Tuba3b   | chr6:145615962-145621477  | NOTEST | 0 | 0 |
| Tunar    | chr12:105336593-105383932 | NOTEST | 0 | 0 |
| Txndc8   | chr4:57984028-58009124    | NOTEST | 0 | 0 |
| Tyr      | chr7:87427404-87493411    | NOTEST | 0 | 0 |
| U90926   | chr5:92209894-92215408    | NOTEST | 0 | 0 |
| Ube2d2b  | chr5:107744794-107875107  | NOTEST | 0 | 0 |
| Ube2dnl1 | chrX:114905011-114905941  | NOTEST | 0 | 0 |
| Ube2dnl2 | chrX:114907581-114908510  | NOTEST | 0 | 0 |
| Ubqln3   | chr7:104140622-104143272  | NOTEST | 0 | 0 |
| Ubqlnl   | chr7:104148258-104150556  | NOTEST | 0 | 0 |
| Ubtfl1   | chr9:18404417-18411502    | NOTEST | 0 | 0 |
| Ucn3     | chr13:3940687-3945349     | NOTEST | 0 | 0 |
| Ugt1a10  | chr1:88055410-88220002    | NOTEST | 0 | 0 |
| Ugt1a2   | chr1:88055410-88220002    | NOTEST | 0 | 0 |
| Ugt1a9   | chr1:88055410-88220002    | NOTEST | 0 | 0 |
| Ugt2a3   | chr5:87324971-87337195    | NOTEST | 0 | 0 |
| Ugt2b1   | chr5:86916638-86926503    | NOTEST | 0 | 0 |
| Ugt2b34  | chr5:86889769-86906937    | NOTEST | 0 | 0 |
| Ugt2b35  | chr5:87000859-87013274    | NOTEST | 0 | 0 |
| Ugt2b36  | chr5:87065926-87092555    | NOTEST | 0 | 0 |
| Ugt2b37  | chr5:87240491-87254788    | NOTEST | 0 | 0 |
| Ugt2b38  | chr5:87409939-87424203    | NOTEST | 0 | 0 |
| Ugt2b5   | chr5:87124946-87140340    | NOTEST | 0 | 0 |
| Ugt3a1   | chr15:9279828-9315036     | NOTEST | 0 | 0 |
| Ugt3a2   | chr15:9335597-9370870     | NOTEST | 0 | 0 |
| Umod     | chr7:119462707-119479262  | NOTEST | 0 | 0 |
| Umodl1   | chr17:30954682-31010710   | NOTEST | 0 | 0 |
| Uncx     | chr5:139543897-139548178  | NOTEST | 0 | 0 |

|                 |                          |        |   |   |
|-----------------|--------------------------|--------|---|---|
| Upk2            | chr9:44452714-44454767   | NOTEST | 0 | 0 |
| Upk3a           | chr15:85017140-85022560  | NOTEST | 0 | 0 |
| Upk3b           | chr5:136038495-136044993 | NOTEST | 0 | 0 |
| Upk3bl          | chr5:136057266-136064324 | NOTEST | 0 | 0 |
| Urad            | chr5:147314983-147322440 | NOTEST | 0 | 0 |
| Ush1c           | chr7:46195350-46238490   | NOTEST | 0 | 0 |
| Usp17la         | chr7:104857015-104862667 | NOTEST | 0 | 0 |
| Usp17lb         | chr7:104840311-104842504 | NOTEST | 0 | 0 |
| Usp17lc         | chr7:103416695-103419174 | NOTEST | 0 | 0 |
| Usp17ld         | chr7:103250085-103252505 | NOTEST | 0 | 0 |
| Usp17le         | chr7:104768048-104777470 | NOTEST | 0 | 0 |
| Usp26           | chrX:51753958-51801233   | NOTEST | 0 | 0 |
| Usp9y           | chrY:1298960-1459782     | NOTEST | 0 | 0 |
| V1ra8           | chr6:90202816-90203656   | NOTEST | 0 | 0 |
| Vax1            | chr19:59166186-59170029  | NOTEST | 0 | 0 |
| Vax2            | chr6:83692805-83738304   | NOTEST | 0 | 0 |
| Vax2os          | chr6:83692805-83738304   | NOTEST | 0 | 0 |
| Vgll1           | chrX:57088105-57105446   | NOTEST | 0 | 0 |
| Vmn1r-ps103     | chr13:22441271-22442243  | NOTEST | 0 | 0 |
| Vmn1r-ps79      | chr7:22352262-22354555   | NOTEST | 0 | 0 |
| Vmn1r1          | chr1:182157177-182158098 | NOTEST | 0 | 0 |
| Vmn1r10         | chr6:57113424-57114360   | NOTEST | 0 | 0 |
| Vmn1r100,Vmn1r1 | chr7:22412230-22414668   | NOTEST | 0 | 0 |
| Vmn1r101        | chr7:22437305-22438229   | NOTEST | 0 | 0 |
| Vmn1r103        | chr7:20509616-20510534   | NOTEST | 0 | 0 |
| Vmn1r104        | chr7:20533836-20534760   | NOTEST | 0 | 0 |
| Vmn1r107        | chr7:20668917-20669841   | NOTEST | 0 | 0 |
| Vmn1r11         | chr6:57137352-57138252   | NOTEST | 0 | 0 |
| Vmn1r112        | chr7:20771184-20772078   | NOTEST | 0 | 0 |
| Vmn1r113        | chr7:20787284-20788208   | NOTEST | 0 | 0 |
| Vmn1r114        | chr7:20811220-20812186   | NOTEST | 0 | 0 |
| Vmn1r115        | chr7:20844097-20844985   | NOTEST | 0 | 0 |
| Vmn1r116        | chr7:20872255-20873179   | NOTEST | 0 | 0 |
| Vmn1r117        | chr7:20883197-20884121   | NOTEST | 0 | 0 |
| Vmn1r118        | chr7:22228563-22229484   | NOTEST | 0 | 0 |
| Vmn1r119        | chr7:21011531-21012455   | NOTEST | 0 | 0 |
| Vmn1r12         | chr6:57158919-57159843   | NOTEST | 0 | 0 |
| Vmn1r120        | chr7:21052866-21053784   | NOTEST | 0 | 0 |
| Vmn1r121        | chr7:21097568-21098513   | NOTEST | 0 | 0 |
| Vmn1r122        | chr7:21133210-21134128   | NOTEST | 0 | 0 |
| Vmn1r123        | chr7:21162184-21163108   | NOTEST | 0 | 0 |
| Vmn1r124        | chr7:21259693-21260617   | NOTEST | 0 | 0 |
| Vmn1r125        | chr7:21272178-21273102   | NOTEST | 0 | 0 |
| Vmn1r126        | chr7:21300501-21301467   | NOTEST | 0 | 0 |
| Vmn1r127        | chr7:21318943-21319861   | NOTEST | 0 | 0 |
| Vmn1r128        | chr7:21349372-21350296   | NOTEST | 0 | 0 |
| Vmn1r129        | chr7:21360367-21361291   | NOTEST | 0 | 0 |
| Vmn1r13         | chr6:57209857-57210760   | NOTEST | 0 | 0 |
| Vmn1r130        | chr7:21994586-21995510   | NOTEST | 0 | 0 |
| Vmn1r132,Vmn1r1 | chr7:22095519-22097921   | NOTEST | 0 | 0 |
| Vmn1r135        | chr7:21832350-21833274   | NOTEST | 0 | 0 |
| Vmn1r137        | chr7:23217331-23218255   | NOTEST | 0 | 0 |
| Vmn1r138        | chr7:22027976-22028897   | NOTEST | 0 | 0 |

|                 |                            |        |   |   |
|-----------------|----------------------------|--------|---|---|
| Vmn1r139        | chr7:22095519-22097921     | LOWDAT | 0 | 0 |
| Vmn1r14         | chr6:57233438-57234350     | NOTEST | 0 | 0 |
| Vmn1r142        | chr7:22163117-22164035     | NOTEST | 0 | 0 |
| Vmn1r148        | chr7:22412230-22414668     | NOTEST | 0 | 0 |
| Vmn1r15         | chr6:57258148-57259048     | NOTEST | 0 | 0 |
| Vmn1r151        | chr7:22498760-22499678     | NOTEST | 0 | 0 |
| Vmn1r152        | chr7:22522966-22523890     | NOTEST | 0 | 0 |
| Vmn1r157        | chr7:22713597-22900755     | NOTEST | 0 | 0 |
| Vmn1r158        | chr7:22713597-22900755     | NOTEST | 0 | 0 |
| Vmn1r159        | chr7:22713597-22900755     | NOTEST | 0 | 0 |
| Vmn1r16         | chr6:57322723-57323635     | NOTEST | 0 | 0 |
| Vmn1r160        | chr7:22713597-22900755     | NOTEST | 0 | 0 |
| Vmn1r163        | chr7:23055539-23056463     | NOTEST | 0 | 0 |
| Vmn1r165        | chr7:22658017-22658941     | NOTEST | 0 | 0 |
| Vmn1r166        | chr7:23250761-23251682     | NOTEST | 0 | 0 |
| Vmn1r167        | chr7:23504641-23505589     | NOTEST | 0 | 0 |
| Vmn1r168        | chr7:23540719-23541649     | NOTEST | 0 | 0 |
| Vmn1r169        | chr7:23577184-23578099     | NOTEST | 0 | 0 |
| Vmn1r17         | chr6:57360466-57361378     | NOTEST | 0 | 0 |
| Vmn1r170        | chr7:23606174-23607089     | NOTEST | 0 | 0 |
| Vmn1r171        | chr7:23631987-23633568     | NOTEST | 0 | 0 |
| Vmn1r172        | chr7:23658315-23660663     | NOTEST | 0 | 0 |
| Vmn1r173        | chr7:23702341-23703283     | NOTEST | 0 | 0 |
| Vmn1r174        | chr7:23753910-23754852     | NOTEST | 0 | 0 |
| Vmn1r175        | chr7:23808285-23809200     | NOTEST | 0 | 0 |
| Vmn1r176        | chr7:23834811-23835726     | NOTEST | 0 | 0 |
| Vmn1r177        | chr7:23865519-23866449     | NOTEST | 0 | 0 |
| Vmn1r178        | chr7:23893528-23894443     | NOTEST | 0 | 0 |
| Vmn1r179        | chr7:23928385-23929357     | NOTEST | 0 | 0 |
| Vmn1r18         | chr6:57389667-57390567     | NOTEST | 0 | 0 |
| Vmn1r180        | chr7:23952386-23953356     | NOTEST | 0 | 0 |
| Vmn1r183        | chr7:24054773-24055691     | NOTEST | 0 | 0 |
| Vmn1r184        | chr7:26266830-26267775     | NOTEST | 0 | 0 |
| Vmn1r185        | chr7:26611118-26612078     | NOTEST | 0 | 0 |
| Vmn1r186,Vmn1r6 | chr7_GL456219_random:93810 | LOWDAT | 0 | 0 |
| Vmn1r187,Vmn1r6 | chr7_GL456219_random:14888 | LOWDAT | 0 | 0 |
| Vmn1r188        | chr13:22087877-22088804    | NOTEST | 0 | 0 |
| Vmn1r189        | chr13:22101726-22102665    | NOTEST | 0 | 0 |
| Vmn1r19         | chr6:57404463-57405390     | NOTEST | 0 | 0 |
| Vmn1r191        | chr13:22178685-22179582    | NOTEST | 0 | 0 |
| Vmn1r192        | chr13:22187145-22188048    | NOTEST | 0 | 0 |
| Vmn1r193        | chr13:22218860-22219820    | NOTEST | 0 | 0 |
| Vmn1r194        | chr13:22244214-22245105    | NOTEST | 0 | 0 |
| Vmn1r195        | chr13:22278316-22279404    | NOTEST | 0 | 0 |
| Vmn1r196        | chr13:22293192-22294098    | NOTEST | 0 | 0 |
| Vmn1r197        | chr13:22327910-22328807    | NOTEST | 0 | 0 |
| Vmn1r198        | chr13:22354345-22355248    | NOTEST | 0 | 0 |
| Vmn1r199        | chr13:22382537-22383641    | NOTEST | 0 | 0 |
| Vmn1r2          | chr4:3172082-3173003       | NOTEST | 0 | 0 |
| Vmn1r20         | chr6:57431690-57432602     | NOTEST | 0 | 0 |
| Vmn1r200        | chr13:22395028-22395967    | NOTEST | 0 | 0 |
| Vmn1r201        | chr13:22474617-22475520    | NOTEST | 0 | 0 |
| Vmn1r202        | chr13:22501336-22502245    | NOTEST | 0 | 0 |

|             |                         |        |   |   |
|-------------|-------------------------|--------|---|---|
| Vmn1r203    | chr13:22524050-22524986 | NOTEST | 0 | 0 |
| Vmn1r204    | chr13:22556200-22557109 | NOTEST | 0 | 0 |
| Vmn1r205    | chr13:22591979-22592930 | NOTEST | 0 | 0 |
| Vmn1r206    | chr13:22620096-22621035 | NOTEST | 0 | 0 |
| Vmn1r207-ps | chr13:22725683-22726622 | NOTEST | 0 | 0 |
| Vmn1r208    | chr13:22772398-22773325 | NOTEST | 0 | 0 |
| Vmn1r209    | chr13:22805579-22806518 | NOTEST | 0 | 0 |
| Vmn1r21     | chr6:57843563-57844457  | NOTEST | 0 | 0 |
| Vmn1r210    | chr13:22827193-22828114 | NOTEST | 0 | 0 |
| Vmn1r211    | chr13:22851598-22852495 | NOTEST | 0 | 0 |
| Vmn1r213    | chr13:23011248-23012403 | NOTEST | 0 | 0 |
| Vmn1r214    | chr13:23034337-23035441 | NOTEST | 0 | 0 |
| Vmn1r215    | chr13:23075791-23076694 | NOTEST | 0 | 0 |
| Vmn1r216    | chr13:23099148-23100045 | NOTEST | 0 | 0 |
| Vmn1r217    | chr13:23113833-23114730 | NOTEST | 0 | 0 |
| Vmn1r218    | chr13:23136484-23137381 | NOTEST | 0 | 0 |
| Vmn1r219    | chr13:23162642-23163581 | NOTEST | 0 | 0 |
| Vmn1r22     | chr6:57900081-57900990  | NOTEST | 0 | 0 |
| Vmn1r220    | chr13:23183627-23184524 | NOTEST | 0 | 0 |
| Vmn1r221    | chr13:23217372-23218311 | NOTEST | 0 | 0 |
| Vmn1r222    | chr13:23232114-23233041 | NOTEST | 0 | 0 |
| Vmn1r223    | chr13:23249237-23250323 | NOTEST | 0 | 0 |
| Vmn1r224    | chr17:20419162-20420059 | NOTEST | 0 | 0 |
| Vmn1r225    | chr17:20502298-20503195 | NOTEST | 0 | 0 |
| Vmn1r226    | chr17:20687507-20688404 | NOTEST | 0 | 0 |
| Vmn1r227    | chr17:20735099-20736126 | NOTEST | 0 | 0 |
| Vmn1r229    | chr17:20814494-20815415 | NOTEST | 0 | 0 |
| Vmn1r23     | chr6:57925882-57926791  | NOTEST | 0 | 0 |
| Vmn1r230    | chr17:20846550-20847501 | NOTEST | 0 | 0 |
| Vmn1r231    | chr17:20889715-20890651 | NOTEST | 0 | 0 |
| Vmn1r232    | chr17:20913204-20914363 | NOTEST | 0 | 0 |
| Vmn1r233    | chr17:20993726-20994686 | NOTEST | 0 | 0 |
| Vmn1r234    | chr17:21228825-21229815 | NOTEST | 0 | 0 |
| Vmn1r235    | chr17:21260426-21262863 | NOTEST | 0 | 0 |
| Vmn1r236    | chr17:21286532-21287653 | NOTEST | 0 | 0 |
| Vmn1r237    | chr17:21314016-21314886 | NOTEST | 0 | 0 |
| Vmn1r238    | chr18:3122491-3123412   | NOTEST | 0 | 0 |
| Vmn1r24     | chr6:57955640-57956531  | NOTEST | 0 | 0 |
| Vmn1r25     | chr6:57978393-57979302  | NOTEST | 0 | 0 |
| Vmn1r26     | chr6:58008182-58009202  | NOTEST | 0 | 0 |
| Vmn1r27     | chr6:58215105-58216017  | NOTEST | 0 | 0 |
| Vmn1r28     | chr6:58265173-58266082  | NOTEST | 0 | 0 |
| Vmn1r29     | chr6:58307296-58308208  | NOTEST | 0 | 0 |
| Vmn1r3      | chr4:3184384-3185305    | NOTEST | 0 | 0 |
| Vmn1r30     | chr6:58434936-58435845  | NOTEST | 0 | 0 |
| Vmn1r31     | chr6:58471966-58472878  | NOTEST | 0 | 0 |
| Vmn1r32     | chr6:66552182-66559708  | NOTEST | 0 | 0 |
| Vmn1r33     | chr6:66611650-66612568  | NOTEST | 0 | 0 |
| Vmn1r34     | chr6:66636822-66637752  | NOTEST | 0 | 0 |
| Vmn1r35     | chr6:66678793-66679684  | NOTEST | 0 | 0 |
| Vmn1r36     | chr6:66715971-66716889  | NOTEST | 0 | 0 |
| Vmn1r37     | chr6:66731391-66732300  | NOTEST | 0 | 0 |
| Vmn1r38     | chr6:66776221-66777130  | NOTEST | 0 | 0 |



|         |                            |        |   |   |
|---------|----------------------------|--------|---|---|
| Vmn1r39 | chr6:66804414-66805332     | NOTEST | 0 | 0 |
| Vmn1r4  | chr6:56956512-56957406     | NOTEST | 0 | 0 |
| Vmn1r40 | chr6:89714202-89715135     | NOTEST | 0 | 0 |
| Vmn1r41 | chr6:89740887-89747414     | NOTEST | 0 | 0 |
| Vmn1r42 | chr6:89844517-89845615     | NOTEST | 0 | 0 |
| Vmn1r43 | chr6:89869460-89870529     | NOTEST | 0 | 0 |
| Vmn1r44 | chr6:89893273-89894206     | NOTEST | 0 | 0 |
| Vmn1r45 | chr6:89931649-89940507     | NOTEST | 0 | 0 |
| Vmn1r46 | chr6:89976170-89977100     | NOTEST | 0 | 0 |
| Vmn1r47 | chr6:90021887-90022820     | NOTEST | 0 | 0 |
| Vmn1r48 | chr6:90035932-90036841     | NOTEST | 0 | 0 |
| Vmn1r49 | chr6:90072085-90073018     | NOTEST | 0 | 0 |
| Vmn1r50 | chr6:90107274-90108207     | NOTEST | 0 | 0 |
| Vmn1r51 | chr6:90122642-90130645     | NOTEST | 0 | 0 |
| Vmn1r52 | chr6:90178715-90179645     | NOTEST | 0 | 0 |
| Vmn1r54 | chr6:90269105-90270053     | NOTEST | 0 | 0 |
| Vmn1r55 | chr7:5146489-5147422       | NOTEST | 0 | 0 |
| Vmn1r56 | chr7:5194915-5196747       | NOTEST | 0 | 0 |
| Vmn1r57 | chr7:5220477-5221410       | NOTEST | 0 | 0 |
| Vmn1r58 | chr7:5408889-5413145       | NOTEST | 0 | 0 |
| Vmn1r59 | chr7:5453826-5454759       | NOTEST | 0 | 0 |
| Vmn1r6  | chr6:57002354-57003266     | NOTEST | 0 | 0 |
| Vmn1r60 | chr7:5544196-5545099       | NOTEST | 0 | 0 |
| Vmn1r61 | chr7:5610410-5611313       | NOTEST | 0 | 0 |
| Vmn1r62 | chr7_GL456219_random:93810 | NOTEST | 0 | 0 |
| Vmn1r63 | chr7_GL456219_random:14888 | NOTEST | 0 | 0 |
| Vmn1r64 | chr7:5883579-5884542       | NOTEST | 0 | 0 |
| Vmn1r65 | chr7:6007749-6011010       | NOTEST | 0 | 0 |
| Vmn1r66 | chr7:10273827-10275351     | NOTEST | 0 | 0 |
| Vmn1r67 | chr7:10446788-10447787     | NOTEST | 0 | 0 |
| Vmn1r68 | chr7:10527209-10528169     | NOTEST | 0 | 0 |
| Vmn1r69 | chr7:10579755-10581487     | NOTEST | 0 | 0 |
| Vmn1r7  | chr6:57024337-57025273     | NOTEST | 0 | 0 |
| Vmn1r70 | chr7:10633586-10634483     | NOTEST | 0 | 0 |
| Vmn1r71 | chr7:10747501-10749538     | NOTEST | 0 | 0 |
| Vmn1r72 | chr7:11669598-11670519     | NOTEST | 0 | 0 |
| Vmn1r73 | chr7:11756256-11757168     | NOTEST | 0 | 0 |
| Vmn1r74 | chr7:11846774-11847689     | NOTEST | 0 | 0 |
| Vmn1r75 | chr7:11880342-11881260     | NOTEST | 0 | 0 |
| Vmn1r76 | chr7:11930310-11931285     | NOTEST | 0 | 0 |
| Vmn1r77 | chr7:12041298-12042219     | NOTEST | 0 | 0 |
| Vmn1r78 | chr7:12152463-12153405     | NOTEST | 0 | 0 |
| Vmn1r79 | chr7:12176192-12177113     | NOTEST | 0 | 0 |
| Vmn1r8  | chr6:57035912-57037125     | NOTEST | 0 | 0 |
| Vmn1r80 | chr7:12192964-12193891     | NOTEST | 0 | 0 |
| Vmn1r81 | chr7:12259758-12260679     | NOTEST | 0 | 0 |
| Vmn1r82 | chr7:12304804-12305719     | NOTEST | 0 | 0 |
| Vmn1r83 | chr7:12321207-12322128     | NOTEST | 0 | 0 |
| Vmn1r84 | chr7:12361807-12362764     | NOTEST | 0 | 0 |
| Vmn1r86 | chr7:13101996-13102947     | NOTEST | 0 | 0 |
| Vmn1r87 | chr7:13131470-13132358     | NOTEST | 0 | 0 |
| Vmn1r88 | chr7:13177718-13178669     | NOTEST | 0 | 0 |
| Vmn1r9  | chr6:57070894-57071945     | NOTEST | 0 | 0 |

|             |                             |        |   |   |
|-------------|-----------------------------|--------|---|---|
| Vmn1r91     | chr7:20101157-20102081      | NOTEST | 0 | 0 |
| Vmn1r94     | chr7:20167459-20168377      | NOTEST | 0 | 0 |
| Vmn1r95     | chr7:22189376-22190300      | NOTEST | 0 | 0 |
| Vmn2r-ps129 | chr17:23004970-23006659     | NOTEST | 0 | 0 |
| Vmn2r-ps159 | chr4:156331102-156339499    | NOTEST | 0 | 0 |
| Vmn2r-ps54  | chr7:41668013-41727193      | NOTEST | 0 | 0 |
| Vmn2r-ps60  | chr7:42430104-42430369      | NOTEST | 0 | 0 |
| Vmn2r10     | chr5:108995538-109006436    | NOTEST | 0 | 0 |
| Vmn2r100    | chr17:19504810-19532060     | NOTEST | 0 | 0 |
| Vmn2r101    | chr17:19577230-19612317     | NOTEST | 0 | 0 |
| Vmn2r102    | chr17:19660398-19694748     | NOTEST | 0 | 0 |
| Vmn2r103    | chr17:19773362-19812536     | NOTEST | 0 | 0 |
| Vmn2r104    | chr17:20029424-20048205     | NOTEST | 0 | 0 |
| Vmn2r105    | chr17:20208229-20234872     | NOTEST | 0 | 0 |
| Vmn2r106    | chr17:20267546-20285430     | NOTEST | 0 | 0 |
| Vmn2r107    | chr17:20345424-20375772     | NOTEST | 0 | 0 |
| Vmn2r108    | chr17:20462372-20481236     | NOTEST | 0 | 0 |
| Vmn2r109    | chr17:20540516-20564756     | NOTEST | 0 | 0 |
| Vmn2r11     | chr5:109046872-109059452    | NOTEST | 0 | 0 |
| Vmn2r110    | chr17:20573828-20596259     | NOTEST | 0 | 0 |
| Vmn2r111    | chr17:22547940-22573273     | NOTEST | 0 | 0 |
| Vmn2r112    | chr17:22601147-22619133     | NOTEST | 0 | 0 |
| Vmn2r114    | chr17:23290933-23312313     | NOTEST | 0 | 0 |
| Vmn2r115    | chr17:23343976-23360128     | NOTEST | 0 | 0 |
| Vmn2r116    | chr17:23384802-23401864     | NOTEST | 0 | 0 |
| Vmn2r117    | chr17:23459674-23479597     | NOTEST | 0 | 0 |
| Vmn2r12     | chr5:109085848-109097864    | NOTEST | 0 | 0 |
| Vmn2r120    | chr17:57508782-57545314     | NOTEST | 0 | 0 |
| Vmn2r121    | chrX:124127338-124135910    | NOTEST | 0 | 0 |
| Vmn2r122    | chr4_JH584292_random:3535-1 | NOTEST | 0 | 0 |
| Vmn2r123    | chr4:156331102-156339499    | NOTEST | 0 | 0 |
| Vmn2r124    | chr17:18049483-18074220     | NOTEST | 0 | 0 |
| Vmn2r13     | chr5:109156067-109192107    | NOTEST | 0 | 0 |
| Vmn2r14     | chr5:109215501-109224622    | NOTEST | 0 | 0 |
| Vmn2r15     | chr5:109286268-109297556    | NOTEST | 0 | 0 |
| Vmn2r16     | chr5:109330380-109364481    | NOTEST | 0 | 0 |
| Vmn2r17     | chr5:109420012-109453387    | NOTEST | 0 | 0 |
| Vmn2r18     | chr5:151561660-151586924    | NOTEST | 0 | 0 |
| Vmn2r19     | chr6:123308332-123336537    | NOTEST | 0 | 0 |
| Vmn2r2      | chr3:64116431-64137480      | NOTEST | 0 | 0 |
| Vmn2r21     | chr6:123492507-123533406    | NOTEST | 0 | 0 |
| Vmn2r22     | chr6:123609757-123650635    | NOTEST | 0 | 0 |
| Vmn2r23     | chr6:123702820-123742239    | NOTEST | 0 | 0 |
| Vmn2r24     | chr6:123778970-123816280    | NOTEST | 0 | 0 |
| Vmn2r25     | chr6:123822813-123853190    | NOTEST | 0 | 0 |
| Vmn2r26     | chr6:124024757-124062035    | NOTEST | 0 | 0 |
| Vmn2r27     | chr6:124191595-124231784    | NOTEST | 0 | 0 |
| Vmn2r28     | chr7:5480455-5493851        | NOTEST | 0 | 0 |
| Vmn2r3      | chr3:64258960-64287417      | NOTEST | 0 | 0 |
| Vmn2r30     | chr7:7312273-7337493        | NOTEST | 0 | 0 |
| Vmn2r31     | chr7:7383984-7399627        | NOTEST | 0 | 0 |
| Vmn2r32     | chr7:7463968-7479973        | NOTEST | 0 | 0 |
| Vmn2r33     | chr7:7550966-7566786        | NOTEST | 0 | 0 |

|         |                          |        |   |   |
|---------|--------------------------|--------|---|---|
| Vmn2r34 | chr7:7671828-7689398     | NOTEST | 0 | 0 |
| Vmn2r35 | chr7:7786150-7819867     | NOTEST | 0 | 0 |
| Vmn2r36 | chr7:7876652-7902462     | NOTEST | 0 | 0 |
| Vmn2r37 | chr7:9205548-9223653     | NOTEST | 0 | 0 |
| Vmn2r38 | chr7:9074795-9097765     | NOTEST | 0 | 0 |
| Vmn2r39 | chr7:9014749-9030682     | NOTEST | 0 | 0 |
| Vmn2r4  | chr3:64388620-64410057   | NOTEST | 0 | 0 |
| Vmn2r40 | chr7:8907733-8931402     | NOTEST | 0 | 0 |
| Vmn2r41 | chr7:8137904-8161551     | NOTEST | 0 | 0 |
| Vmn2r42 | chr7:8183268-8200320     | NOTEST | 0 | 0 |
| Vmn2r43 | chr7:8244350-8260599     | NOTEST | 0 | 0 |
| Vmn2r44 | chr7:8367459-8383238     | NOTEST | 0 | 0 |
| Vmn2r45 | chr7:8471468-8488959     | NOTEST | 0 | 0 |
| Vmn2r48 | chr7:9927623-9953585     | NOTEST | 0 | 0 |
| Vmn2r49 | chr7:9976244-9992139     | NOTEST | 0 | 0 |
| Vmn2r5  | chr3:64490820-64507685   | NOTEST | 0 | 0 |
| Vmn2r50 | chr7:10037234-10053178   | NOTEST | 0 | 0 |
| Vmn2r51 | chr7:10087197-10105659   | NOTEST | 0 | 0 |
| Vmn2r52 | chr7:10158651-10176286   | NOTEST | 0 | 0 |
| Vmn2r53 | chr7:12581469-12606544   | NOTEST | 0 | 0 |
| Vmn2r54 | chr7:12615232-12636134   | NOTEST | 0 | 0 |
| Vmn2r55 | chr7:12651705-12684991   | NOTEST | 0 | 0 |
| Vmn2r56 | chr7:12693997-12733105   | NOTEST | 0 | 0 |
| Vmn2r58 | chr7:41836880-41872670   | NOTEST | 0 | 0 |
| Vmn2r59 | chr7:42011791-42058981   | NOTEST | 0 | 0 |
| Vmn2r6  | chr3:64537560-64559818   | NOTEST | 0 | 0 |
| Vmn2r60 | chr7:42116470-42195776   | NOTEST | 0 | 0 |
| Vmn2r61 | chr7:42260052-42300755   | NOTEST | 0 | 0 |
| Vmn2r62 | chr7:42764437-42793496   | NOTEST | 0 | 0 |
| Vmn2r63 | chr7:42903250-42933789   | NOTEST | 0 | 0 |
| Vmn2r65 | chr7:84940168-84964009   | NOTEST | 0 | 0 |
| Vmn2r66 | chr7:84994644-85012020   | NOTEST | 0 | 0 |
| Vmn2r67 | chr7:85136239-85155902   | NOTEST | 0 | 0 |
| Vmn2r68 | chr7:85221517-85237704   | NOTEST | 0 | 0 |
| Vmn2r69 | chr7:85406375-85415676   | NOTEST | 0 | 0 |
| Vmn2r70 | chr7:85558702-85569088   | NOTEST | 0 | 0 |
| Vmn2r71 | chr7:85615461-85624547   | NOTEST | 0 | 0 |
| Vmn2r72 | chr7:85737783-85754981   | NOTEST | 0 | 0 |
| Vmn2r73 | chr7:85857546-85875938   | NOTEST | 0 | 0 |
| Vmn2r74 | chr7:85951866-85961482   | NOTEST | 0 | 0 |
| Vmn2r75 | chr7:86148041-86171724   | NOTEST | 0 | 0 |
| Vmn2r76 | chr7:86225205-86246201   | NOTEST | 0 | 0 |
| Vmn2r77 | chr7:86795140-86812032   | NOTEST | 0 | 0 |
| Vmn2r78 | chr7:86915348-86955177   | NOTEST | 0 | 0 |
| Vmn2r79 | chr7:86996464-87037968   | NOTEST | 0 | 0 |
| Vmn2r8  | chr5:108797192-108808754 | NOTEST | 0 | 0 |
| Vmn2r80 | chr10:79148815-79194933  | NOTEST | 0 | 0 |
| Vmn2r81 | chr10:79247776-79294535  | NOTEST | 0 | 0 |
| Vmn2r82 | chr10:79356590-79396766  | NOTEST | 0 | 0 |
| Vmn2r83 | chr10:79468957-79492154  | NOTEST | 0 | 0 |
| Vmn2r88 | chr14:51411000-51418882  | NOTEST | 0 | 0 |
| Vmn2r89 | chr14:51451961-51461293  | NOTEST | 0 | 0 |
| Vmn2r9  | chr5:108842946-108852510 | NOTEST | 0 | 0 |

|           |                          |        |   |   |
|-----------|--------------------------|--------|---|---|
| Vmn2r91   | chr17:18085056-18136643  | NOTEST | 0 | 0 |
| Vmn2r92   | chr17:18151929-18185178  | NOTEST | 0 | 0 |
| Vmn2r93   | chr17:18298280-18326441  | NOTEST | 0 | 0 |
| Vmn2r94   | chr17:18243569-18277566  | NOTEST | 0 | 0 |
| Vmn2r95   | chr17:18424103-18452324  | NOTEST | 0 | 0 |
| Vmn2r96   | chr17:18581726-18598157  | NOTEST | 0 | 0 |
| Vmn2r97   | chr17:18914321-18948071  | NOTEST | 0 | 0 |
| Vmn2r98   | chr17:19053492-19081311  | NOTEST | 0 | 0 |
| Vmn2r99   | chr17:19362134-19394590  | NOTEST | 0 | 0 |
| Vpreb2    | chr16:17980564-17981080  | NOTEST | 0 | 0 |
| Vsig1     | chrX:140907607-140939472 | NOTEST | 0 | 0 |
| Vsx2      | chr12:84569851-84595457  | NOTEST | 0 | 0 |
| Vwa2      | chr19:56874415-56912078  | NOTEST | 0 | 0 |
| Wap       | chr11:6635482-6638649    | NOTEST | 0 | 0 |
| Wbscr28   | chr5:134901592-134906733 | NOTEST | 0 | 0 |
| Wdr20rt   | chr12:65225516-65228454  | NOTEST | 0 | 0 |
| Wfdc11    | chr2:164662893-164674087 | NOTEST | 0 | 0 |
| Wfdc15b   | chr2:164214453-164221663 | NOTEST | 0 | 0 |
| Wfdc16    | chr2:164634707-164638802 | NOTEST | 0 | 0 |
| Wfdc9     | chr2:164649624-164654966 | NOTEST | 0 | 0 |
| Wnt1      | chr15:98789856-98793830  | NOTEST | 0 | 0 |
| Wnt8a     | chr18:34542327-34548061  | NOTEST | 0 | 0 |
| Xkr9      | chr1:13668770-13701723   | NOTEST | 0 | 0 |
| Xlr5a     | chrX:73107634-73129260   | NOTEST | 0 | 0 |
| Xlr5b     | chrX:73137231-73158399   | NOTEST | 0 | 0 |
| Xlr5c     | chrX:73285196-73290515   | NOTEST | 0 | 0 |
| Zar1l     | chr5:150507068-150518159 | NOTEST | 0 | 0 |
| Zc2hc1b   | chr10:13149643-13178023  | NOTEST | 0 | 0 |
| Zcchc13   | chrX:103630585-103631664 | NOTEST | 0 | 0 |
| Zdhhc11   | chr13:73963861-73992840  | NOTEST | 0 | 0 |
| Zdhhc25   | chr15:88600301-88601669  | NOTEST | 0 | 0 |
| Zfp352    | chr4:90218819-90225687   | NOTEST | 0 | 0 |
| Zfp42     | chr8:43295066-43307009   | NOTEST | 0 | 0 |
| Zfp474    | chr18:52615914-52639830  | NOTEST | 0 | 0 |
| Zfp488    | chr14:33967069-33978764  | NOTEST | 0 | 0 |
| Zfp534    | chr4:147674224-147702631 | NOTEST | 0 | 0 |
| Zfp572    | chr15:59306947-59312013  | NOTEST | 0 | 0 |
| Zfp600    | chr4:146156826-146198756 | NOTEST | 0 | 0 |
| Zfp616    | chr11:74070169-74087301  | NOTEST | 0 | 0 |
| Zfp735    | chr11:73688777-73713808  | NOTEST | 0 | 0 |
| Zfp91Cntf | chr19:12763527-12796123  | NOTEST | 0 | 0 |
| Zfp936    | chr7:43177587-43192109   | NOTEST | 0 | 0 |
| Zfp957    | chr14:79212354-79247367  | NOTEST | 0 | 0 |
| Zfy1      | chrY:725206-797409       | NOTEST | 0 | 0 |
| Zfy2      | chrY:2106174-2170409     | NOTEST | 0 | 0 |
| Znrf4     | chr17:56511247-56512483  | NOTEST | 0 | 0 |
| Zp1       | chr19:10914295-10920601  | NOTEST | 0 | 0 |
| Zp2       | chr7:120132360-120145290 | NOTEST | 0 | 0 |
| Zp3r      | chr1:130576705-130629606 | NOTEST | 0 | 0 |
| Zp4-ps    | chr13:11522051-11525682  | NOTEST | 0 | 0 |
| Zscan10   | chr17:23600825-23611019  | NOTEST | 0 | 0 |
| Zscan4a   | chr7:10794240-10799065   | NOTEST | 0 | 0 |
| Zscan4b   | chr7:10900739-10905050   | NOTEST | 0 | 0 |

|               |                           |        |            |            |
|---------------|---------------------------|--------|------------|------------|
| Zscan4c       | chr7:11005744-11010547    | NOTEST | 0          | 0          |
| Zscan4d       | chr7:11161642-11166148    | NOTEST | 0          | 0          |
| Zscan4e       | chr7:11306377-11310682    | NOTEST | 0          | 0          |
| Zscan4f       | chr7:11397914-11402318    | NOTEST | 0          | 0          |
| Zscan5b       | chr7:6222277-6239412      | NOTEST | 0          | 0          |
| Zyg11a        | chr4:108181933-108217922  | NOTEST | 0          | 0          |
| a             | chr2:155013569-155051012  | NOTEST | 0          | 0          |
| Osbp11        | chr16:33185070-33243312   | OK     | 7.93112    | 7.931      |
| Lmbr1         | chr5:29229801-29378390    | OK     | 12.1647    | 12.1636    |
| Wdpcp         | chr11:21572280-21898686   | OK     | 4.24653    | 4.24581    |
| 35854         | chr1:184813067-184845847  | OK     | 21.9663    | 21.9614    |
| Fkbp8         | chr8:70527742-70535328    | OK     | 171.186    | 171.14     |
| Eri2          | chr7:119760922-119794058  | OK     | 1.83489    | 1.83404    |
| Acad9         | chr3:36065999-36092857    | OK     | 11.9398    | 11.9331    |
| Utp14b        | chr1:78657824-78707743    | OK     | 2.8015     | 2.79987    |
| Golga4        | chr9:118506317-118582519  | OK     | 17.7938    | 17.7824    |
| Zzef1         | chr11:72796225-72927120   | OK     | 12.2312    | 12.2226    |
| Pigb          | chr9:72985503-73039699    | OK     | 3.54572    | 3.54308    |
| Prps1l3       | chr12:57230411-57457241   | OK     | 8.78301    | 8.77646    |
| Rsf1          | chr7:97579895-97692782    | OK     | 4.35986    | 4.35632    |
| Mrps14        | chr1:160195259-160201186  | OK     | 12.4717    | 12.4606    |
| Slc25a22      | chr7:141429748-141437874  | OK     | 44.3411    | 44.3005    |
| Fxr2          | chr11:69632970-69653297   | OK     | 78.6157    | 78.54      |
| Rwdd2b        | chr16:87433330-87440592   | OK     | 5.55648    | 5.55068    |
| Katnbl1       | chr2:112379210-112414237  | OK     | 4.51608    | 4.51133    |
| Crebl2        | chr6:134830198-134857883  | OK     | 19.7545    | 19.7318    |
| Gm10549       | chr18:33464162-33474710   | NOTEST | 0.00725115 | 0.00724199 |
| Mrps18a       | chr17:46111003-46128908   | OK     | 49.4483    | 49.3837    |
| Slx1b         | chr7:126688926-126695783  | OK     | 4.38755    | 4.3816     |
| Tatdn1        | chr15:58889228-58933730   | OK     | 4.47654    | 4.47043    |
| Kif13a        | chr13:46749087-46929718   | OK     | 6.48163    | 6.47277    |
| Eif3j1,Eif3j2 | chr2:122028579-122118386  | NOTEST | 0.106494   | 0.106346   |
| Ppme1         | chr7:100326736-100371896  | OK     | 91.5387    | 91.407     |
| Acaca         | chr11:84195437-84401651   | OK     | 8.2986     | 8.286      |
| Ndufa8        | chr2:36036333-36049292    | OK     | 99.3045    | 99.1504    |
| B3gat3        | chr19:8920392-8927236     | OK     | 77.8508    | 77.7233    |
| Polr3c        | chr3:96711894-96727439    | OK     | 9.35927    | 9.34297    |
| Fbxl5         | chr5:43744617-43782149    | OK     | 24.766     | 24.7228    |
| Gpr137b       | chr13:13357619-13393624   | OK     | 12.0264    | 12.0051    |
| Klc2          | chr19:5107745-5118408     | OK     | 124.961    | 124.74     |
| Zfp410        | chr12:84316858-84344439   | OK     | 11.859     | 11.8374    |
| Dclre1a       | chr19:56529160-56548222   | OK     | 1.59558    | 1.59265    |
| Fam120a       | chr13:48879216-48967828   | OK     | 39.2788    | 39.1962    |
| G6pc3         | chr11:102189698-102194081 | OK     | 45.6718    | 45.5758    |
| Uxs1          | chr1:43750230-43827708    | OK     | 15.4251    | 15.3918    |
| Rufy3         | chr5:88565039-88651417    | OK     | 204.978    | 204.531    |
| Mfap3         | chr11:57518664-57533817   | OK     | 8.43036    | 8.41055    |
| Synj2bp       | chr12:81492193-81532907   | OK     | 8.46261    | 8.4427     |
| 0610010F05Rik | chr11:23573775-23633631   | OK     | 34.2648    | 34.1824    |
| 9330159M07Rik | chr9:88839163-88858870    | OK     | 0.805254   | 0.803298   |
| Pdp1          | chr4:11958182-11966450    | OK     | 15.5749    | 15.5365    |
| Tmem97        | chr11:78541816-78550735   | OK     | 7.08764    | 7.0693     |
| Mlh3          | chr12:85234519-85270564   | OK     | 4.45679    | 4.44509    |



|               |                           |        |           |           |
|---------------|---------------------------|--------|-----------|-----------|
| Fars2         | chr13:36117642-36537595   | OK     | 10.7353   | 10.7061   |
| Nxn12         | chr13:51171024-51175187   | OK     | 1.05731   | 1.0544    |
| Stmnd1        | chr13:46273720-46300115   | NOTEST | 0.0314952 | 0.0314082 |
| Ccdc47        | chr11:106199355-106216367 | OK     | 56.0546   | 55.8995   |
| Atg12         | chr18:46732416-46741579   | OK     | 42.1578   | 42.0409   |
| Pdlim7        | chr13:55497486-55513446   | OK     | 54.4265   | 54.2729   |
| Wdtdc1        | chr4:133292465-133339315  | OK     | 27.2977   | 27.2206   |
| Pidd1         | chr7:141438514-141443355  | OK     | 1.6584    | 1.65371   |
| Fuz           | chr7:44896078-44929490    | OK     | 5.57111   | 5.555     |
| Rgs1          | chr1:153779386-153844141  | NOTEST | 0.214033  | 0.213409  |
| Fuca2         | chr10:13501027-13517275   | OK     | 21.0184   | 20.9571   |
| Tmem167       | chr13:90089666-90114921   | OK     | 7.68862   | 7.66574   |
| Abcf2         | chr5:24565340-24577467    | OK     | 40.2961   | 40.1747   |
| Ranbp2        | chr10:58446851-58494154   | OK     | 20.5162   | 20.4537   |
| Ak5           | chr3:152396002-152681432  | OK     | 30.8668   | 30.7719   |
| Dtx2          | chr5:135994799-136032881  | OK     | 5.97595   | 5.95693   |
| Sdhaf2        | chr19:10500511-10525209   | OK     | 17.4649   | 17.409    |
| Gbp7          | chr3:142530335-142550151  | OK     | 4.1593    | 4.14593   |
| Rbm22         | chr18:60560785-60572729   | OK     | 10.0188   | 9.98633   |
| Fam96a        | chr9:66126610-66138968    | OK     | 14.6414   | 14.5934   |
| Bcl7b         | chr5:135168371-135181852  | OK     | 20.2976   | 20.2305   |
| Rpl22         | chr4:152324435-152334082  | OK     | 47.221    | 47.063    |
| Vti1a         | chr19:55316350-55626561   | OK     | 18.5663   | 18.5027   |
| Rcor2         | chr19:7269763-7275225     | OK     | 3.67148   | 3.65841   |
| Zfp459        | chr13:67405712-67421418   | NOTEST | 0.150188  | 0.149645  |
| Mast1         | chr8:84911852-84937353    | OK     | 62.9245   | 62.6946   |
| 2010015L04Rik | chr4:155400968-155443110  | OK     | 1.20252   | 1.19809   |
| Mrpl21        | chr19:3283046-3292837     | OK     | 11.6259   | 11.582    |
| Rabl6         | chr2:25583017-25608446    | OK     | 33.4285   | 33.2994   |
| Jpx           | chrX:103493575-103506425  | NOTEST | 0.221373  | 0.220516  |
| Spin2c        | chrX:153832292-153834240  | OK     | 0.970495  | 0.966734  |
| Tbc1d22a      | chr15:86214458-86498503   | OK     | 17.2231   | 17.1556   |
| Fosl2         | chr5:32136471-32157839    | OK     | 4.11639   | 4.10025   |
| Mettl13       | chr1:162533671-162548345  | OK     | 5.26523   | 5.24376   |
| Rap1gds1      | chr3:138925896-139075201  | OK     | 218.149   | 217.256   |
| Eif4b         | chr15:102073772-102097173 | OK     | 60.2001   | 59.946    |
| Cul5          | chr9:53614581-53667507    | OK     | 13.4424   | 13.3854   |
| Map1lc3b      | chr8:121590467-121598047  | OK     | 224.269   | 223.299   |
| 4930427A07Rik | chr12:113156420-113165458 | OK     | 1.30981   | 1.30413   |
| Eftud2        | chr11:102838471-102880975 | OK     | 22.1454   | 22.0467   |
| Aurkaip1      | chr4:155831268-155833098  | OK     | 41.5834   | 41.3978   |
| Arl14ep       | chr2:106962528-106974397  | OK     | 9.13702   | 9.09565   |
| Arsa          | chr15:89472475-89484850   | OK     | 16.7992   | 16.7228   |
| Snrpa1        | chr7:66060335-66074587    | OK     | 10.7486   | 10.6996   |
| Dysf          | chr6:84008597-84211059    | OK     | 21.8196   | 21.7195   |
| Aqr           | chr2:114101160-114175339  | OK     | 11.1719   | 11.1198   |
| Brf2          | chr8:27123831-27128632    | OK     | 9.44024   | 9.39588   |
| Vav2          | chr2:27263634-27426825    | OK     | 14.1184   | 14.0516   |
| Galnt13       | chr2:54436386-55117744    | OK     | 10.0221   | 9.97411   |
| Kcna6         | chr6:126708328-126740674  | OK     | 48.0116   | 47.7804   |
| Zfyve16       | chr13:92487748-92530810   | OK     | 5.20604   | 5.1806    |
| Zfp644        | chr5:106616740-106696830  | OK     | 8.72435   | 8.68124   |
| Rala          | chr13:17880574-17944217   | OK     | 38.9889   | 38.7945   |

|          |                           |        |           |           |
|----------|---------------------------|--------|-----------|-----------|
| Zfp780b  | chr7:27959799-27979157    | OK     | 2.61087   | 2.59747   |
| Bace1    | chr9:45838528-45862484    | OK     | 45.1324   | 44.8999   |
| Bod1l    | chr5:41787539-41844315    | OK     | 10.7419   | 10.6859   |
| Zcrb1    | chr15:93386112-93398290   | OK     | 32.3372   | 32.1651   |
| Rogdi    | chr16:5008728-5013553     | OK     | 35.89     | 35.6976   |
| Fibp     | chr19:5460606-5465052     | OK     | 23.3463   | 23.2207   |
| Dlg4     | chr11:70018604-70045531   | OK     | 57.9851   | 57.6703   |
| Bzw1     | chr1:58393135-58406548    | OK     | 56.1768   | 55.8699   |
| Kansl1   | chr11:104333228-104442291 | OK     | 15.0386   | 14.9552   |
| Metap1d  | chr2:71453337-71525191    | OK     | 8.76006   | 8.71138   |
| Mark3    | chr12:111574509-111656227 | OK     | 16.3141   | 16.2228   |
| Zfp189   | chr4:49521175-49531558    | OK     | 2.49407   | 2.47934   |
| Aplp1    | chr7:30434979-30445582    | OK     | 111.746   | 111.079   |
| Smap1    | chr1:23761925-23922381    | OK     | 48.2952   | 48.0034   |
| Dnm3     | chr1:161987301-162478034  | OK     | 85.4362   | 84.915    |
| Nsmaf    | chr4:6396207-6454271      | OK     | 10.6079   | 10.5429   |
| Tbx6     | chr7:126781482-126785548  | NOTEST | 0.128342  | 0.127554  |
| Notch4   | chr17:34564294-34588543   | OK     | 1.12205   | 1.11511   |
| Senp3    | chr11:69673109-69682084   | OK     | 17.9617   | 17.8488   |
| Aplp2    | chr9:31149556-31211815    | OK     | 299.696   | 297.769   |
| Fstl4    | chr11:52764705-53187347   | OK     | 0.91845   | 0.912451  |
| Cep41    | chr6:30653456-30693682    | OK     | 2.63971   | 2.62236   |
| Ppp2r4   | chr2:30416049-30447807    | OK     | 92.1582   | 91.5445   |
| Noc2l    | chr4:156236009-156255338  | OK     | 10.4786   | 10.4087   |
| Aox1     | chr1:58029968-58106410    | OK     | 18.1954   | 18.074    |
| Ttll5    | chr12:85824949-86053760   | OK     | 14.0228   | 13.9278   |
| Ddx58    | chr4:40203776-40239825    | OK     | 6.59534   | 6.55057   |
| Atp5s    | chr12:69724961-69744658   | OK     | 13.1834   | 13.092    |
| Eps15    | chr4:109280274-109387816  | OK     | 75.0787   | 74.5564   |
| Vps4a    | chr8:107031325-107045756  | OK     | 60.0852   | 59.6666   |
| Sf3b2    | chr19:5273920-5295455     | OK     | 60.2823   | 59.8584   |
| Rabif    | chr1:134494659-134507884  | OK     | 28.8131   | 28.6105   |
| Gm7977   | chr3:48026011-48026759    | NOTEST | 0.0357415 | 0.0354874 |
| Kcnj4    | chr15:79483713-79505241   | OK     | 3.27562   | 3.25226   |
| Nt5dc1   | chr10:34303611-34418528   | OK     | 1.35774   | 1.34805   |
| Pgbd1    | chr13:21421274-21441053   | NOTEST | 0.357476  | 0.354914  |
| Slc35g2  | chr9:100552187-100571085  | OK     | 17.2351   | 17.1101   |
| Mrrf     | chr2:36116078-36190283    | OK     | 11.7904   | 11.7046   |
| Git2     | chr5:114727407-114773492  | OK     | 8.34881   | 8.28715   |
| Gapvd1   | chr2:34676982-34755232    | OK     | 15.6797   | 15.5637   |
| Prkag1   | chr15:98812796-98831508   | OK     | 30.0893   | 29.8633   |
| Ywhaq    | chr12:21390328-21417436   | OK     | 66.2155   | 65.7147   |
| AI837181 | chr19:5425143-5427316     | OK     | 30.9887   | 30.7532   |
| Wdr82    | chr9:106170928-106191706  | OK     | 16.9168   | 16.788    |
| Tcte2    | chr17:13716435-13905794   | NOTEST | 0.560595  | 0.556322  |
| Ube2e2   | chr14:18573576-18893627   | OK     | 51.113    | 50.7214   |
| Rab6b    | chr9:103112073-103185270  | OK     | 348.151   | 345.472   |
| Tram1l1  | chr3:124321036-124323260  | OK     | 14.6899   | 14.5764   |
| Nol10    | chr12:17348492-17430095   | OK     | 11.5875   | 11.4978   |
| Rad54l2  | chr9:106688079-106789213  | OK     | 5.5087    | 5.4656    |
| Gm2382   | chr9:88688604-88719798    | OK     | 3.54395   | 3.516     |
| Pop1     | chr15:34495310-34530653   | OK     | 2.23232   | 2.21462   |
| Btbd10   | chr7:113315643-113369339  | OK     | 20.1232   | 19.9635   |

|               |                           |        |          |          |
|---------------|---------------------------|--------|----------|----------|
| Rbx1          | chr15:81466315-81476369   | OK     | 57.1049  | 56.6514  |
| Bag6          | chr17:35135177-35147322   | OK     | 47.0228  | 46.6402  |
| 1700021F05Rik | chr10:43525120-43540994   | OK     | 21.3157  | 21.1418  |
| Ptpdc1        | chr13:48577871-48625573   | OK     | 16.1557  | 16.0215  |
| Parp10        | chr15:76232994-76243440   | OK     | 2.21752  | 2.19899  |
| Gpn3          | chr5:122372507-122382769  | OK     | 14.4976  | 14.3761  |
| Tex38         | chr4:115779833-115781034  | NOTEST | 0.317844 | 0.315158 |
| Slc25a44      | chr3:88410493-88425141    | OK     | 11.8841  | 11.7833  |
| Mtpap         | chr18:4375591-4397330     | OK     | 8.49455  | 8.4215   |
| Nup153        | chr13:46679901-46727849   | OK     | 9.73784  | 9.65407  |
| Cecr5         | chr6:120509493-120531299  | OK     | 6.01739  | 5.96478  |
| Knop1         | chr7:118842217-118995211  | OK     | 5.5184   | 5.47009  |
| Eef1d         | chr15:75894795-75909556   | OK     | 21.9606  | 21.7677  |
| Rdh11         | chr12:79175550-79191819   | OK     | 26.4779  | 26.2434  |
| Lztr1         | chr16:17508970-17526330   | OK     | 71.5519  | 70.9167  |
| Atn1          | chr6:124742543-124756487  | OK     | 21.3602  | 21.1695  |
| Cwh43         | chr5:73406077-73453425    | NOTEST | 0.137995 | 0.136758 |
| Pmpca         | chr2:26389347-26409219    | OK     | 37.4374  | 37.1008  |
| Lysmd4        | chr7:67222543-67228468    | OK     | 4.75054  | 4.70755  |
| Rxfp1         | chr3:79644715-79737794    | NOTEST | 0.154587 | 0.153186 |
| Ngb           | chr12:87097530-87102539   | OK     | 3.53489  | 3.50277  |
| Traf7         | chr17:24488782-24527938   | OK     | 10.6276  | 10.5308  |
| 1810026B05Rik | chr7:73426651-73558395    | OK     | 1.90868  | 1.89126  |
| Iqsec2        | chrX:152144267-152225237  | OK     | 9.78769  | 9.69812  |
| P4ha3         | chr7:100285519-100319699  | OK     | 8.04442  | 7.97023  |
| Sh2d3c        | chr2:32721054-32755007    | OK     | 10.5829  | 10.4852  |
| Trim62        | chr4:128884139-128911326  | OK     | 9.16525  | 9.0801   |
| Tnpo3         | chr6:29540826-29609607    | OK     | 22.6094  | 22.3991  |
| Ints7         | chr1:191575733-191621691  | OK     | 7.84404  | 7.77083  |
| Pced1a        | chr2:130417683-130444269  | OK     | 3.87697  | 3.84065  |
| Dynlt1f       | chr17:6646605-6655939     | NOTEST | 2.68E-05 | 2.65E-05 |
| Pcdhga1       | chr18:36930284-37841872   | OK     | 2.11057  | 2.09062  |
| Dus2          | chr8:106011506-106053819  | OK     | 2.71799  | 2.69214  |
| Aida          | chr1:183297059-183324501  | OK     | 14.3885  | 14.2509  |
| Mrpl11        | chr19:4962305-4966995     | OK     | 10.5784  | 10.4768  |
| Relb          | chr7:19606221-19629438    | OK     | 3.00231  | 2.97328  |
| Immpl1        | chr2:105904637-105965558  | OK     | 2.05849  | 2.03825  |
| Tmem144       | chr3:79813152-79842662    | NOTEST | 0.73906  | 0.731793 |
| Ulk2          | chr11:61775597-61855092   | OK     | 23.116   | 22.8872  |
| Hid1          | chr11:115347708-115367719 | OK     | 31.8472  | 31.5316  |
| Kif24         | chr4:41390747-41464848    | NOTEST | 0.241828 | 0.239425 |
| Lrrc16a       | chr13:24012483-24280790   | OK     | 3.60652  | 3.57051  |
| Rad1          | chr15:10486017-10499063   | OK     | 8.96298  | 8.87309  |
| Mrpl46        | chr7:78775340-78783089    | OK     | 20.7381  | 20.5273  |
| Bod1          | chr11:31665149-31671862   | OK     | 41.5887  | 41.1624  |
| Purg          | chr8:33386324-33417469    | OK     | 11.2617  | 11.1462  |
| Ctc1          | chr11:69015910-69036473   | OK     | 7.45314  | 7.37643  |
| Usp22         | chr11:61151780-61175059   | OK     | 68.963   | 68.2441  |
| Cav1          | chr6:17306334-17341328    | OK     | 37.5898  | 37.1974  |
| Nqo2          | chr13:33917917-34002794   | OK     | 17.4199  | 17.2374  |
| Inpp5b        | chr4:124741877-124801511  | OK     | 8.05981  | 7.97451  |
| Actb          | chr5:142903115-142906724  | OK     | 768.573  | 760.39   |
| Coa7          | chr4:108328151-108340718  | OK     | 3.37675  | 3.34079  |

|          |                           |        |           |           |
|----------|---------------------------|--------|-----------|-----------|
| Ism2     | chr12:87278637-87299705   | NOTEST | 0.327322  | 0.323829  |
| Ppapdc2  | chr19:28923063-28966801   | OK     | 7.48577   | 7.40571   |
| Pfdn4    | chr2:170482964-170519070  | OK     | 24.035    | 23.7744   |
| Zfp319   | chr8:95326135-95331950    | OK     | 4.4301    | 4.38176   |
| Snrnp25  | chr11:32205414-32208995   | OK     | 23.9408   | 23.6778   |
| Dhx38    | chr8:109548023-109565601  | OK     | 8.41717   | 8.32457   |
| Prkar1b  | chr5:139017303-139130386  | OK     | 271.603   | 268.605   |
| Gsk3b    | chr16:38085063-38246079   | OK     | 62.2114   | 61.524    |
| Gm1976   | chr17:94750099-94834799   | OK     | 11.618    | 11.4894   |
| Ube2e3   | chr2:78869046-78920583    | OK     | 36.199    | 35.7972   |
| Pitpnm1  | chr19:4099997-4125858     | OK     | 16.5699   | 16.3848   |
| Rps6kl1  | chr12:85135595-85151264   | OK     | 7.57717   | 7.49168   |
| Wdr91    | chr6:34880425-34910831    | OK     | 8.44057   | 8.34366   |
| Sec24b   | chr3:129983184-130060907  | OK     | 14.1581   | 13.9951   |
| Nub1     | chr5:24685814-24710555    | OK     | 34.6185   | 34.2188   |
| Zc3hc1   | chr6:30366387-30391010    | OK     | 8.96409   | 8.86042   |
| Actr3    | chr1:125392904-125435727  | OK     | 67.497    | 66.7127   |
| Rabgef1  | chr5:130171818-130214337  | OK     | 17.479    | 17.2725   |
| Raly     | chr2:154791109-154867261  | OK     | 107.073   | 105.795   |
| Znfx1    | chr2:167035795-167065862  | OK     | 24.9909   | 24.6924   |
| Rcl1     | chr19:29101374-29143843   | OK     | 7.0127    | 6.92887   |
| Sgk3     | chr1:9798129-9902568      | OK     | 2.57619   | 2.54516   |
| BC031181 | chr18:75005899-75009933   | OK     | 112.822   | 111.447   |
| Zfp939   | chr7:39449517-39477416    | OK     | 1.32432   | 1.30814   |
| Rhpn2    | chr7:35334236-35396767    | OK     | 1.42405   | 1.40662   |
| Dsg2     | chr18:20558115-20604526   | NOTEST | 0.0275424 | 0.0272017 |
| Pcnxl4   | chr12:72536356-72580213   | OK     | 6.85248   | 6.76727   |
| Clpx     | chr9:65294259-65330658    | OK     | 13.3663   | 13.1995   |
| Atp6ap1  | chrX:74297096-74304721    | OK     | 173.748   | 171.565   |
| Agpat1   | chr17:34605860-34615971   | OK     | 44.5735   | 44.0133   |
| Spa17    | chr9:37603293-37613720    | OK     | 7.64841   | 7.5522    |
| Abhd11   | chr5:135009151-135013157  | OK     | 21.5911   | 21.3194   |
| Fus      | chr7:127967478-127982031  | OK     | 53.4382   | 52.7648   |
| Dvl3     | chr16:20517063-20532187   | OK     | 11.1902   | 11.0479   |
| Psmc5    | chr11:106256184-106263112 | OK     | 153.678   | 151.721   |
| Ppcdc    | chr9:57412659-57440114    | OK     | 4.5655    | 4.50691   |
| Ndufa7   | chr17:33824571-33838316   | OK     | 118.734   | 117.2     |
| Kif1a    | chr1:93015455-93101865    | OK     | 230.437   | 227.451   |
| Psme2    | chr14:55587439-55591101   | OK     | 1.62503   | 1.60388   |
| Isca1    | chr13:59755414-59769789   | OK     | 42.7614   | 42.1981   |
| Zfyve26  | chr12:79232346-79296282   | OK     | 3.01018   | 2.97028   |
| Carkd    | chr8:11497505-11513286    | OK     | 28.7623   | 28.3805   |
| Pik3r1   | chr13:101680760-101768217 | OK     | 47.6806   | 47.0463   |
| Oxnad1   | chr14:32085727-32103203   | OK     | 3.98942   | 3.9361    |
| Gpn1     | chr5:31494760-31511627    | OK     | 13.1173   | 12.941    |
| Wdr45    | chrX:7722219-7728201      | OK     | 21.2752   | 20.9887   |
| Lrrc47   | chr4:154011802-154026044  | OK     | 22.9396   | 22.6291   |
| Fam217b  | chr2:178414533-178422161  | OK     | 10.5672   | 10.4239   |
| Cntln    | chr4:84884308-85131921    | OK     | 4.46956   | 4.40885   |
| Vps35    | chr8:85260391-85299497    | OK     | 103.411   | 102.004   |
| Lrrc57   | chr2:120604237-120621559  | OK     | 16.3059   | 16.0827   |
| Lsg1     | chr16:30561368-30587589   | OK     | 8.48527   | 8.36904   |
| Txnl4b   | chr8:109565985-109574051  | OK     | 10.9339   | 10.7832   |

|               |                           |        |           |           |
|---------------|---------------------------|--------|-----------|-----------|
| Spn           | chr4:141444672-141538597  | OK     | 3.7403    | 3.68864   |
| Pfdn1         | chr18:36403678-36454495   | OK     | 46.6494   | 46.0035   |
| Zzz3          | chr3:152396002-152681432  | OK     | 7.14957   | 7.05049   |
| Taf3          | chr2:9914551-10048609     | OK     | 3.87041   | 3.81672   |
| Hspa4         | chr11:53259813-53300479   | OK     | 87.0457   | 85.8364   |
| Pigo          | chr4:43017637-43025756    | OK     | 3.14667   | 3.10293   |
| Trappc13      | chr13:104142152-104178466 | OK     | 23.9589   | 23.6254   |
| Tnrc6b        | chr15:80711312-80941086   | OK     | 7.26713   | 7.16534   |
| Sin3a         | chr9:57072039-57128368    | OK     | 6.63474   | 6.54135   |
| Cdc27         | chr11:104502525-104550620 | OK     | 19.9629   | 19.6785   |
| Riok2         | chr17:17374331-17394899   | OK     | 7.97191   | 7.8581    |
| Atg5          | chr10:44268357-44364291   | OK     | 24.321    | 23.9677   |
| Psmb9         | chr17:34182098-34187330   | OK     | 3.09237   | 3.04736   |
| Stoml2        | chr4:43027689-43031384    | OK     | 19.3905   | 19.1071   |
| 8430422H06Rik | chr18:14232305-14278542   | NOTEST | 0.381862  | 0.376274  |
| Sos2          | chr12:69583760-69681852   | OK     | 9.15146   | 9.01663   |
| Sigmar1       | chr4:41738492-41741359    | OK     | 53.6465   | 52.8504   |
| 2810474O19Rik | chr6:149309413-149335663  | OK     | 3.03687   | 2.9914    |
| Efhc1         | chr1:20951625-20990841    | OK     | 2.0184    | 1.98813   |
| Serpina10     | chr12:103616674-103631405 | NOTEST | 0.192366  | 0.189473  |
| Hars          | chr18:36766527-36783205   | OK     | 80.2912   | 79.0827   |
| Tkt           | chr14:30549130-30574726   | OK     | 87.9417   | 86.6149   |
| 2310057M21Rik | chr7:131342717-131362698  | OK     | 11.8147   | 11.6357   |
| Ascc2         | chr11:4637792-4683386     | OK     | 4.12288   | 4.06019   |
| Gm16897       | chr1:194938820-194976959  | NOTEST | 0.187876  | 0.184995  |
| Scyl2         | chr10:89640106-89686285   | OK     | 13.1779   | 12.9749   |
| Sgtb          | chr13:104109789-104141441 | OK     | 29.1072   | 28.6563   |
| Dcun1d1       | chr3:35892104-35932966    | OK     | 9.14161   | 8.999     |
| Gpr157        | chr4:150087502-150105927  | OK     | 3.74375   | 3.68515   |
| Gpr137b-ps    | chr13:12614064-12650395   | OK     | 9.3182    | 9.17162   |
| Bud13         | chr9:46283011-46298783    | OK     | 2.70335   | 2.66073   |
| Cog3          | chr14:75702350-75754493   | OK     | 10.6884   | 10.5189   |
| Hprt          | chrX:52988077-53021660    | OK     | 146.846   | 144.511   |
| Nudt12        | chr17:59001400-59013322   | OK     | 8.25916   | 8.12745   |
| Tfcp2         | chr15:100502747-100552008 | OK     | 6.59075   | 6.48558   |
| Skiv2l        | chr17:34839225-34850204   | OK     | 23.0672   | 22.6985   |
| Ogfr          | chr2:180589406-180595837  | OK     | 10.1858   | 10.0229   |
| Ppp6r3        | chr19:3454928-3575749     | OK     | 17.5917   | 17.3093   |
| Tpst1         | chr5:130073325-130135733  | OK     | 24.0343   | 23.6467   |
| Plk2          | chr13:110395043-110400843 | OK     | 15.9526   | 15.6947   |
| Sirt3         | chr7:140857396-140882309  | OK     | 21.7224   | 21.3711   |
| Sgcg          | chr14:61138456-61258490   | NOTEST | 0.0200671 | 0.0197424 |
| Nudt14        | chr12:112934732-112942118 | OK     | 9.04022   | 8.89365   |
| Map3k11       | chr19:5689130-5702864     | OK     | 10.9076   | 10.7307   |
| Rpp14         | chr14:8080312-8091846     | OK     | 20.4919   | 20.1584   |
| Pofut1        | chr2:153241531-153270249  | OK     | 8.80846   | 8.66425   |
| Dnah6         | chr6:73017606-73221631    | NOTEST | 0.176384  | 0.173453  |
| Pafah1b1      | chr11:74673948-74724384   | OK     | 291.523   | 286.671   |
| Elavl1        | chr8:4284781-4325100      | OK     | 13.6138   | 13.3868   |
| Tulp4         | chr17:6106829-6240637     | OK     | 11.7805   | 11.5841   |
| Fam53a        | chr5:33600352-33629635    | OK     | 3.35057   | 3.29442   |
| Limk1         | chr5:134656038-134688590  | OK     | 79.1871   | 77.8579   |
| Sms           | chrX:157443953-157492046  | OK     | 26.4575   | 26.0116   |



|               |                           |        |          |          |
|---------------|---------------------------|--------|----------|----------|
| Rrp12         | chr19:41862850-41896153   | OK     | 11.7062  | 11.5087  |
| Aldh3a2       | chr11:61244754-61267127   | OK     | 28.2501  | 27.7727  |
| Ptcd1         | chr5:145140396-145167104  | OK     | 6.16337  | 6.059    |
| Fahd1         | chr17:24848895-24850302   | OK     | 7.88156  | 7.74798  |
| Actr1a        | chr19:46376813-46395735   | OK     | 192.617  | 189.34   |
| Sbk1          | chr7:126272618-126294999  | OK     | 21.0898  | 20.7278  |
| Rab11fip3     | chr17:25989035-26069177   | OK     | 19.1918  | 18.8623  |
| Flad1         | chr3:89402672-89411863    | OK     | 12.6883  | 12.4704  |
| Jtb           | chr3:90231596-90235840    | OK     | 17.5273  | 17.2257  |
| Pced1b        | chr15:97244073-97385691   | OK     | 3.18638  | 3.13148  |
| Sin3b         | chr8:72723269-72758203    | OK     | 31.9638  | 31.4092  |
| AI462493      | chr19:8880013-8880933     | OK     | 19.5254  | 19.1863  |
| Chtf18        | chr17:25717171-25727415   | OK     | 0.888524 | 0.873041 |
| Khdrbs2       | chr1:32172805-32657738    | OK     | 2.64822  | 2.60207  |
| Srf           | chr17:46546838-46556162   | OK     | 6.07081  | 5.96491  |
| Naa25         | chr5:121397981-121440113  | OK     | 21.7347  | 21.3554  |
| Dctpp1        | chr7:127256958-127260667  | OK     | 9.40289  | 9.23797  |
| Pdxdc1        | chr16:13819276-13903145   | OK     | 40.6048  | 39.8914  |
| N4bp3         | chr11:51643088-51657681   | OK     | 1.21281  | 1.1913   |
| Dnajc16       | chr4:141761997-141790644  | OK     | 8.66444  | 8.51043  |
| 4933427D14Rik | chr11:72154096-72203371   | OK     | 1.47717  | 1.4509   |
| Brk1          | chr6:113604771-113616951  | OK     | 101.961  | 100.144  |
| Inpp1         | chr1:52789419-52817688    | OK     | 16.9562  | 16.6534  |
| Krt19         | chr11:100140810-100145919 | NOTEST | 0.484437 | 0.475769 |
| Samm50        | chr15:84192232-84214303   | OK     | 56.2741  | 55.2614  |
| Cast          | chr13:74694285-74807921   | OK     | 51.3898  | 50.4633  |
| Sar1a         | chr10:61680320-61693297   | OK     | 62.9425  | 61.8059  |
| Tmpo          | chr10:91147570-91171619   | OK     | 11.08    | 10.8796  |
| Fbxo10        | chr4:45018608-45084604    | OK     | 4.52417  | 4.44199  |
| Eif1ax        | chrX:159372194-159385699  | OK     | 87.9329  | 86.3285  |
| Tmcc1         | chr6:116018617-116193374  | OK     | 8.61663  | 8.45854  |
| Ddx47         | chr6:135011611-135023776  | OK     | 26.5991  | 26.1091  |
| Slc35a1       | chr4:34663256-34687438    | OK     | 8.23395  | 8.08217  |
| Tsc2          | chr17:24549949-24632627   | OK     | 17.3383  | 17.0181  |
| Plekhb2       | chr1:34849958-34879585    | OK     | 103.535  | 101.604  |
| Lipt1         | chr1:37872205-37876298    | OK     | 1.62199  | 1.59163  |
| Cryzl1        | chr16:91688897-91728802   | OK     | 14.9775  | 14.6971  |
| Hiatl1        | chr13:65065029-65112982   | OK     | 21.3654  | 20.9647  |
| A930005H10Rik | chr3:115881578-115888130  | OK     | 8.54125  | 8.38044  |
| Zufsp         | chr10:33926935-33951212   | OK     | 3.29929  | 3.23716  |
| Acn9          | chr6:6956017-7039220      | OK     | 20.6777  | 20.2875  |
| Tsr2          | chrX:151047169-151096543  | OK     | 13.6651  | 13.4045  |
| Dpysl2        | chr14:66802863-66868600   | OK     | 192.881  | 189.179  |
| Dedd          | chr1:171329144-171345645  | OK     | 9.01801  | 8.8446   |
| Eif4a3        | chr11:119288362-119300043 | OK     | 15.788   | 15.4843  |
| Chmp2b        | chr16:65539132-65562697   | OK     | 44.1766  | 43.3234  |
| Dpp6          | chr5:26817356-27727500    | OK     | 134.763  | 132.158  |
| Fam214a       | chr9:74953052-75032468    | OK     | 5.5154   | 5.40857  |
| Dopey2        | chr16:93711906-93810588   | OK     | 26.7067  | 26.189   |
| Polr3k        | chr2:181864359-181870826  | OK     | 14.2864  | 14.0094  |
| Hk2           | chr6:82725026-82774454    | OK     | 0.978027 | 0.95904  |
| D130020L05Rik | chr12:101039408-101088927 | NOTEST | 0.574902 | 0.563737 |
| Sv2c          | chr13:95959442-96132577   | OK     | 125.087  | 122.656  |

|               |                           |        |           |           |
|---------------|---------------------------|--------|-----------|-----------|
| Fbxo11        | chr17:87975049-88065285   | OK     | 29.858    | 29.2768   |
| Gnptab        | chr10:88379411-88447329   | OK     | 17.8129   | 17.4631   |
| Hspd1         | chr1:55077833-55087932    | OK     | 50.7433   | 49.7424   |
| Zbtb6         | chr2:37425499-37430919    | OK     | 5.15519   | 5.05328   |
| Ppia          | chr11:6415869-6419810     | OK     | 162.886   | 159.664   |
| Rab36         | chr10:75037088-75054100   | OK     | 4.73141   | 4.63736   |
| Eya3          | chr4:132639045-132724765  | OK     | 16.9325   | 16.5959   |
| Scaf11        | chr15:96411697-96460843   | OK     | 12.9931   | 12.7341   |
| Fastkd3       | chr13:68582247-68592279   | OK     | 4.74167   | 4.64705   |
| Tmem33        | chr5:67260564-67291461    | OK     | 26.3217   | 25.7954   |
| Gtf2i         | chr5:134237831-134314760  | OK     | 58.6727   | 57.4934   |
| Zfp740        | chr15:102203644-102215610 | OK     | 15.8035   | 15.4859   |
| Klf11         | chr12:24651370-24662782   | OK     | 4.48861   | 4.39787   |
| Ddx59         | chr1:136411915-136440220  | OK     | 3.93919   | 3.8595    |
| Coprs         | chr8:13884787-13890271    | OK     | 32.6379   | 31.9766   |
| Fut4          | chr9:14748458-14752122    | OK     | 0.902042  | 0.883752  |
| Gm1821        | chr14:46084026-46084957   | NOTEST | 0.0675592 | 0.0661835 |
| 1110012L19Rik | chrX:70385912-70389416    | OK     | 13.4644   | 13.1895   |
| Hectd2        | chr19:36554638-36689479   | OK     | 1.40868   | 1.37988   |
| Atp5j         | chr16:84827870-84863778   | OK     | 123.208   | 120.675   |
| 0610009O20Rik | chr18:38238404-38262629   | OK     | 16.0825   | 15.7515   |
| Slco1a4       | chr6:141805439-141856171  | OK     | 11.836    | 11.5914   |
| Asph          | chr4:9269316-9669344      | OK     | 46.5824   | 45.6168   |
| Phf6          | chrX:52912213-52956961    | OK     | 7.68534   | 7.52588   |
| Naa20         | chr2:145903240-145916425  | OK     | 18.2796   | 17.9002   |
| 2610305D13Rik | chr4:147611935-147642508  | OK     | 1.94305   | 1.9027    |
| Gcdh          | chr8:84872110-84893921    | OK     | 8.26307   | 8.09139   |
| Med18         | chr4:132458728-132463921  | OK     | 3.81987   | 3.74026   |
| Cpeb2         | chr5:43151685-43289724    | OK     | 31.553    | 30.8954   |
| Ddx3x         | chrX:13281021-13293983    | OK     | 118.229   | 115.763   |
| Tusc2         | chr9:107563254-107566108  | OK     | 67.5225   | 66.1081   |
| Ehmt2         | chr17:34898491-34914050   | OK     | 18.173    | 17.7887   |
| Tmem189       | chr2:167643224-167661544  | OK     | 70.8695   | 69.3677   |
| Fkbp2         | chr19:6977738-6980461     | OK     | 95.7323   | 93.7015   |
| Adamtsl2      | chr2:27079380-27108613    | OK     | 0.867319  | 0.848909  |
| Fry           | chr5:150259929-150497753  | OK     | 19.8445   | 19.4213   |
| Ccar2         | chr14:70100144-70153791   | OK     | 15.9068   | 15.5672   |
| Nf2           | chr11:4765844-4849544     | OK     | 20.296    | 19.8621   |
| Als2          | chr1:59120934-59237231    | OK     | 8.95917   | 8.76764   |
| Ppp2r5c       | chr12:110447178-110583074 | OK     | 53.1739   | 52.0353   |
| Was           | chrX:8081465-8090491      | NOTEST | 0.305014  | 0.298475  |
| Shisa6        | chr11:66211724-66526126   | OK     | 1.00487   | 0.983269  |
| Smim18        | chr8:33731913-33777173    | OK     | 7.544     | 7.38177   |
| Slc35b1       | chr11:95384921-95391652   | OK     | 30.0716   | 29.4241   |
| Ipo5          | chr14:120911193-120948044 | OK     | 34.9143   | 34.1607   |
| Hyal2         | chr9:107569162-107572778  | OK     | 6.1184    | 5.98594   |
| Gak           | chr5:108569106-108629777  | OK     | 30.9602   | 30.2874   |
| Kalrn         | chr16:33969072-34514027   | OK     | 5.3625    | 5.24568   |
| Meaf6         | chr4:125085133-125110070  | OK     | 13.7286   | 13.4295   |
| Mrgpra2a      | chr7:47426328-47452139    | OK     | 2.14727   | 2.10044   |
| 1700021K19Rik | chr16:32821701-32868366   | OK     | 19.7943   | 19.3625   |
| Elovl6        | chr3:129532385-129638493  | OK     | 33.9742   | 33.233    |
| Bscl2         | chr19:8836928-8848683     | OK     | 66.7883   | 65.329    |

|               |                           |        |          |          |
|---------------|---------------------------|--------|----------|----------|
| Puf60         | chr15:76070181-76080946   | OK     | 68.7278  | 67.2249  |
| Slco4c1       | chr1:96818783-96872171    | NOTEST | 0.139006 | 0.135951 |
| Fam219a       | chr4:41517436-41569527    | OK     | 81.1043  | 79.3196  |
| Zfp868        | chr8:69610653-69625548    | OK     | 5.65832  | 5.53371  |
| Hsp90b1       | chr10:86690840-86705444   | OK     | 143.851  | 140.673  |
| Mrpl35        | chr6:71812996-71823784    | OK     | 13.6651  | 13.3629  |
| Plekhn2       | chr4:141625733-141664115  | OK     | 20.5408  | 20.0863  |
| Gpr56         | chr8:94977108-95014208    | OK     | 63.9174  | 62.5028  |
| Ddx52         | chr11:83942089-83963086   | OK     | 7.68383  | 7.51371  |
| Pigm          | chr1:172376530-172384099  | OK     | 6.00591  | 5.87292  |
| Spata6        | chr4:111720009-111829140  | OK     | 7.5195   | 7.35273  |
| Gpr119        | chrX:48667978-48674478    | NOTEST | 0.77508  | 0.757876 |
| Pole4         | chr6:82646711-82652865    | OK     | 12.086   | 11.8171  |
| Nprl3         | chr11:32226504-32267707   | OK     | 12.297   | 12.0232  |
| D17Wsu104e    | chr17:56176540-56183920   | OK     | 22.5057  | 22.002   |
| Lig4          | chr8:9970019-9976323      | OK     | 4.8354   | 4.72705  |
| Klhdc2        | chr12:69296680-69310687   | OK     | 94.5079  | 92.3819  |
| Nalcn         | chr14:123276640-123627144 | OK     | 13.5244  | 13.2167  |
| Mrpl20        | chr4:155803617-155808829  | OK     | 73.7606  | 72.0819  |
| Pcbp2         | chr15:102470631-102517004 | OK     | 86.2079  | 84.243   |
| Naa10         | chrX:73916869-73921944    | OK     | 15.4152  | 15.0637  |
| Slc25a26      | chr6:94500313-94700145    | OK     | 8.77671  | 8.57577  |
| Gstz1         | chr12:87106865-87164723   | OK     | 18.2998  | 17.8808  |
| Mybbp1a       | chr11:72441377-72451550   | OK     | 15.2061  | 14.8564  |
| Rpn2          | chr2:157208547-157326318  | OK     | 58.9681  | 57.6104  |
| Chst11        | chr10:82985496-83195891   | OK     | 13.5635  | 13.2512  |
| Sgsh          | chr11:119314786-119355510 | OK     | 3.68514  | 3.60001  |
| Eif4g2        | chr7:111067984-111083030  | OK     | 156.003  | 152.372  |
| Timmdc1       | chr16:38497842-38522663   | OK     | 18.0062  | 17.5865  |
| Dusp8         | chr7:142079486-142095284  | OK     | 13.4596  | 13.1456  |
| Rhoc          | chr3:104789033-104794459  | OK     | 43.093   | 42.0867  |
| Zbtb21        | chr16:97947434-97962621   | OK     | 2.51661  | 2.45744  |
| Srpk2         | chr5:23434428-23616571    | OK     | 21.4185  | 20.9147  |
| Zfp397        | chr18:23954687-23964670   | OK     | 8.01264  | 7.82324  |
| Ripk3         | chr14:55784994-55788857   | NOTEST | 0.188824 | 0.184349 |
| Pou6f1        | chr15:100575317-100586365 | OK     | 9.82065  | 9.58773  |
| Usp47         | chr7:112023505-112111386  | OK     | 20.5319  | 20.0439  |
| Zfp318        | chr17:46383765-46420918   | OK     | 10.2811  | 10.0356  |
| Acadm         | chr3:153922352-153944643  | OK     | 29.8178  | 29.1049  |
| Tex14         | chr11:86583864-87555823   | NOTEST | 0.387375 | 0.378112 |
| Plin2         | chr4:86656564-86670059    | OK     | 19.8924  | 19.416   |
| Mmrn2         | chr14:34375503-34404286   | OK     | 5.59193  | 5.45778  |
| Hook3         | chr8:26021420-26119224    | OK     | 7.08265  | 6.91269  |
| Ptpn2         | chr18:67665500-67724621   | OK     | 4.33594  | 4.23175  |
| Pitrm1        | chr13:6548156-6648771     | OK     | 13.56    | 13.2331  |
| Phb2          | chr6:124712288-124716945  | OK     | 44.1175  | 43.0514  |
| Hmgcr         | chr13:96648961-96670936   | OK     | 63.7157  | 62.1747  |
| H2-T23        | chr17:35994503-36038174   | OK     | 7.69435  | 7.50812  |
| Ogfod1        | chr8:94037197-94067922    | OK     | 16.0113  | 15.6217  |
| Rnf115        | chr3:96727610-96791155    | OK     | 30.219   | 29.4837  |
| Pla2g7        | chr17:43568450-43612201   | OK     | 188.265  | 183.678  |
| 2410016O06Rik | chr12:83950607-83952953   | OK     | 2.35461  | 2.29717  |
| Mast2         | chr4:116306759-116464181  | OK     | 23.4108  | 22.8371  |

|               |                           |        |          |          |
|---------------|---------------------------|--------|----------|----------|
| Lsm10         | chr4:126096652-126098584  | OK     | 6.42538  | 6.26762  |
| Pnpt1         | chr11:29130750-29161828   | OK     | 15.5137  | 15.1314  |
| E2f1          | chr2:154559399-154569892  | OK     | 12.6593  | 12.3472  |
| Gm3219        | chr14:34345054-34345658   | OK     | 11.9908  | 11.6932  |
| Fhl4          | chr10:85097018-85102495   | NOTEST | 0.300615 | 0.293152 |
| Dnajb6        | chr5:29735333-29786478    | OK     | 16.4782  | 16.0686  |
| Mfsd5         | chr15:102279455-102281744 | OK     | 27.8293  | 27.137   |
| Ndfip1        | chr18:38418974-38464406   | OK     | 669.676  | 653.017  |
| Fbxw17        | chr13:50417876-50433769   | OK     | 17.9042  | 17.4581  |
| Fam160b1      | chr19:57361008-57389594   | OK     | 13.6237  | 13.2836  |
| Psmb1         | chr17:15475720-15498276   | OK     | 176.522  | 172.1    |
| Pgm3          | chr9:86467153-86571842    | OK     | 3.41856  | 3.33288  |
| Rph3al        | chr11:75830991-75925891   | NOTEST | 0.424374 | 0.413712 |
| Mroh8         | chr2:157208547-157326318  | NOTEST | 0.133791 | 0.130406 |
| Zfp266        | chr9:20495068-20521419    | OK     | 8.5556   | 8.33825  |
| Myct1         | chr10:5593727-5606791     | NOTEST | 0.795774 | 0.775483 |
| Kat6b         | chr14:21499769-21672478   | OK     | 2.96558  | 2.88938  |
| Polr2l        | chr7:141471859-141475153  | OK     | 1.6129   | 1.57144  |
| Dnajc6        | chr4:101496647-101642799  | OK     | 59.6827  | 58.1472  |
| Eif4ebp1      | chr8:27260326-27275656    | OK     | 3.19451  | 3.11219  |
| 40786         | chr3:144570426-144597676  | OK     | 177.981  | 173.383  |
| Tbcd          | chr11:121451948-121673151 | OK     | 53.9061  | 52.5132  |
| Fam134a       | chr1:75142785-75147909    | OK     | 50.0297  | 48.7361  |
| BC017643      | chr11:121177592-121229309 | OK     | 20.0732  | 19.5538  |
| 2610002M06Rik | chrX:107782751-107872911  | OK     | 11.9459  | 11.6363  |
| Hap1          | chr11:100347326-100356141 | OK     | 3.45743  | 3.36755  |
| Frzb          | chr2:80411969-80447396    | OK     | 19.6586  | 19.1472  |
| Diap1         | chr18:37844824-37935411   | OK     | 6.80702  | 6.62979  |
| Ambra1        | chr2:91730137-91918849    | OK     | 13.7073  | 13.3503  |
| Hoxa9         | chr6:52223096-52227370    | OK     | 8.93431  | 8.7015   |
| Pag1          | chr3:9687481-9833679      | OK     | 4.71239  | 4.58924  |
| Hist1h2be     | chr13:23583669-23621124   | OK     | 4.23941  | 4.12847  |
| Dab1          | chr4:104367537-104744844  | NOTEST | 0.697293 | 0.679039 |
| Hecw2         | chr1:53806873-54195034    | OK     | 2.99073  | 2.91235  |
| Cse1l         | chr2:166906095-166946389  | OK     | 22.5862  | 21.9924  |
| Stmn3         | chr2:181306458-181314500  | OK     | 705.89   | 687.188  |
| Snora23       | chr7:110018424-110055114  | NOTEST | 0.954663 | 0.929354 |
| Ssbp2         | chr13:91461096-91786148   | OK     | 11.5554  | 11.2482  |
| Sav1          | chr12:69746847-69987002   | OK     | 10.2451  | 9.97222  |
| Pgrmc2        | chr3:41066325-41083046    | OK     | 34.7977  | 33.8702  |
| Mtif2         | chr11:29526396-29545447   | OK     | 10.6472  | 10.3634  |
| Zc3h4         | chr7:16401195-16437696    | OK     | 6.84407  | 6.66158  |
| Kcnb1         | chr2:167095968-167188818  | OK     | 28.2875  | 27.532   |
| Kcnh3         | chr15:99224975-99262041   | NOTEST | 0.492626 | 0.479446 |
| Grap          | chr11:61653320-61672777   | OK     | 2.00515  | 1.95149  |
| Zfyve9        | chr4:108639258-108781904  | OK     | 35.3498  | 34.3955  |
| N4bp1         | chr8:86841138-86885258    | OK     | 7.14524  | 6.95201  |
| Ddi2          | chr4:141683562-141723419  | OK     | 11.7066  | 11.3885  |
| Spr           | chr6:85133679-85137764    | OK     | 52.0346  | 50.6196  |
| Trpt1         | chr19:6996130-7019469     | OK     | 5.99591  | 5.83218  |
| Car4          | chr11:84957753-84966054   | OK     | 2.61632  | 2.5448   |
| Msrb1         | chr17:24736641-24742778   | OK     | 57.8761  | 56.2936  |
| Timm10        | chr2:84827020-84830213    | OK     | 37.0133  | 35.9977  |

|               |                           |        |           |           |
|---------------|---------------------------|--------|-----------|-----------|
| Nup133        | chr8:123897122-123949265  | OK     | 5.19386   | 5.05106   |
| Mrpl15        | chr1:4773199-4785726      | OK     | 7.16284   | 6.96558   |
| Senp2         | chr16:22009483-22049269   | OK     | 20.9967   | 20.4175   |
| Ankhd1        | chr18:36560602-36658908   | OK     | 8.38076   | 8.14949   |
| Pdpk1         | chr17:24073679-24150922   | OK     | 36.6687   | 35.653    |
| Cul1          | chr6:47454323-47526139    | OK     | 49.8011   | 48.4178   |
| Serpinb5      | chr1:106861179-106883348  | NOTEST | 0.449202  | 0.436725  |
| Kras          | chr6:145216698-145250231  | OK     | 26.5438   | 25.8055   |
| Gpr52         | chr1:160219173-160792938  | OK     | 0.810581  | 0.787913  |
| Nek5          | chr8:22073615-22125053    | NOTEST | 0.0463402 | 0.0450396 |
| Tab1          | chr15:80133153-80161702   | OK     | 6.13036   | 5.95801   |
| Cope          | chr8:70302784-70312990    | OK     | 70.3076   | 68.3278   |
| Dnal1         | chr12:84114327-84143510   | OK     | 7.51448   | 7.30276   |
| Tmem68        | chr4:3549040-3574768      | OK     | 8.46829   | 8.22852   |
| Tm2d1         | chr4:98355369-98383265    | OK     | 10.9633   | 10.6524   |
| Churc1        | chr12:76765572-76783178   | OK     | 30.8357   | 29.9588   |
| Pgam1         | chr19:41911870-41918665   | OK     | 43.3166   | 42.079    |
| Nudt15        | chr14:73519863-73548242   | NOTEST | 0.7028    | 0.682717  |
| Snip1         | chr4:125066692-125074043  | OK     | 5.23095   | 5.08108   |
| Pld2          | chr11:70540163-70558110   | OK     | 4.50093   | 4.37167   |
| Spcs3         | chr8:54520432-54529998    | OK     | 17.8936   | 17.3796   |
| Mlx           | chr11:101087289-101095435 | OK     | 12.7509   | 12.3839   |
| Kng2          | chr16:22985851-23029101   | NOTEST | 0.0952783 | 0.0925343 |
| Brpf1         | chr6:113307136-113324862  | OK     | 4.84758   | 4.70796   |
| Usp33         | chr3:152346477-152393614  | OK     | 45.7793   | 44.4606   |
| Azin1         | chr15:38487429-38519266   | OK     | 65.0775   | 63.1948   |
| Tfg           | chr16:56690328-56717450   | OK     | 57.781    | 56.1084   |
| 4933415F23Rik | chr1:23100473-23102253    | NOTEST | 0.0237622 | 0.0230739 |
| Tomm5         | chr4:45105209-45108113    | OK     | 42.7125   | 41.4695   |
| 2510003E04Rik | chr10:62558469-62578457   | OK     | 51.607    | 50.0993   |
| Mapkap1       | chr2:34406770-34624958    | OK     | 20.5986   | 19.9963   |
| Pcdhb21       | chr18:36930284-37841872   | OK     | 1.30293   | 1.26482   |
| Mrfap1        | chr5:36794866-36796754    | OK     | 150.147   | 145.754   |
| Kctd17        | chr15:78428563-78439303   | OK     | 61.3289   | 59.5237   |
| Lrrc14        | chr15:76710739-76715091   | OK     | 10.8134   | 10.4943   |
| Tomm70a       | chr16:57121713-57154530   | OK     | 87.222    | 84.6478   |
| BC027231      | chr16:44724300-44737284   | OK     | 2.9382    | 2.85147   |
| 4930444P10Rik | chr1:16065978-16093041    | NOTEST | 0.398026  | 0.386248  |
| Cdc123        | chr2:5794293-5844960      | OK     | 33.4656   | 32.4737   |
| G3bp1         | chr11:55469751-55500887   | OK     | 18.2405   | 17.6976   |
| Emc10         | chr7:44489937-44496513    | OK     | 112.483   | 109.133   |
| Bphl          | chr13:34037640-34074074   | OK     | 11.6826   | 11.334    |
| Radil         | chr5:142484838-142551098  | OK     | 3.22327   | 3.12694   |
| Pex2          | chr3:5560187-5576248      | OK     | 11.1889   | 10.854    |
| Fam208b       | chr13:3538074-3611108     | OK     | 3.55812   | 3.45131   |
| Faf2          | chr13:54621783-54664063   | OK     | 21.328    | 20.6861   |
| Gm9855        | chr10:82629837-82690650   | LOWDAT | 2.34276   | 2.27224   |
| Scrt2         | chr2:152081528-152095802  | OK     | 23.0991   | 22.3993   |
| Acer2         | chr4:86874413-86932490    | OK     | 2.03741   | 1.97568   |
| Dennd1b       | chr1:138963708-139176042  | OK     | 5.90452   | 5.72549   |
| Nit1          | chr1:171329144-171345645  | OK     | 15.9118   | 15.4282   |
| A130010J15Rik | chr1:193173468-193201546  | OK     | 2.94508   | 2.85551   |
| Ube2o         | chr11:116537752-116581447 | OK     | 66.0031   | 63.994    |



|               |                           |        |           |           |
|---------------|---------------------------|--------|-----------|-----------|
| Nr2c2         | chr6:92091417-92184023    | OK     | 16.8053   | 16.2928   |
| Srp9          | chr1:182124736-182132415  | OK     | 36.4134   | 35.3028   |
| Rnf145        | chr11:44518963-44565520   | OK     | 28.6869   | 27.812    |
| Leng1         | chr7:3645268-3677553      | OK     | 3.55113   | 3.44247   |
| Cox7a2l       | chr17:83501916-83514333   | OK     | 107.474   | 104.18    |
| Chm           | chrX:113040591-113185515  | OK     | 11.5832   | 11.2267   |
| Rab14         | chr2:35180204-35201120    | OK     | 103.366   | 100.183   |
| Dtnb          | chr12:3572390-3781398     | OK     | 14.6389   | 14.186    |
| Rab11fip1     | chr8:27138772-27174646    | NOTEST | 0.11376   | 0.110221  |
| Slc6a7        | chr18:60995379-61014199   | OK     | 1.27898   | 1.23917   |
| Mrpl44        | chr1:79776017-79781445    | OK     | 21.1225   | 20.4609   |
| Prkdc         | chr16:15637865-15842239   | OK     | 4.08978   | 3.96131   |
| Kif16b        | chr2:142618344-142901464  | OK     | 11.3078   | 10.9505   |
| Gtf2a2        | chr9:70012547-70022866    | OK     | 30.3108   | 29.3515   |
| 1700048O20Rik | chr9:121937274-121947016  | OK     | 1.03001   | 0.997247  |
| Coq10b        | chr1:55052769-55072702    | OK     | 15.7289   | 15.2278   |
| Rbbp7         | chrX:162407199-163352564  | OK     | 53.557    | 51.849    |
| Nat6          | chr9:107580169-107587359  | OK     | 7.20929   | 6.97885   |
| Abcc10        | chr17:46297482-46328023   | OK     | 1.51191   | 1.46346   |
| Canx          | chr11:50293956-50325673   | OK     | 187.677   | 181.658   |
| Cwf19l1       | chr19:44108636-44135876   | OK     | 3.02914   | 2.93187   |
| Tmem184b      | chr15:79360683-79403303   | OK     | 39.0781   | 37.8229   |
| Asf1a         | chr10:53537323-53630439   | OK     | 6.06487   | 5.87003   |
| Hnrnpd        | chr5:99955934-99978938    | OK     | 13.1695   | 12.7445   |
| Brd2          | chr17:34112018-34122607   | OK     | 45.1946   | 43.73     |
| Trmt5         | chr12:73280409-73286711   | OK     | 8.60438   | 8.32531   |
| Fbxw2         | chr2:34804363-34826235    | OK     | 29.5849   | 28.6203   |
| Gp49a         | chr10:51480611-51486329   | NOTEST | 0.0710713 | 0.0687517 |
| Rtcb          | chr10:85938636-85957793   | OK     | 79.6592   | 77.0549   |
| Zfp418        | chr7:7171352-7183560      | OK     | 1.37897   | 1.3338    |
| Rnf14         | chr18:38296634-38317849   | OK     | 127.23    | 123.038   |
| Pet112        | chr3:85574128-85654470    | OK     | 4.30222   | 4.16046   |
| Yipf6         | chrX:98937780-98949020    | OK     | 18.5838   | 17.9706   |
| Ufc1          | chr1:171288563-171294982  | OK     | 92.4105   | 89.3605   |
| Me2           | chr18:73770039-73815392   | OK     | 22.7574   | 22.0061   |
| Pus1          | chr5:110773666-110780615  | OK     | 12.007    | 11.6103   |
| Neur11b       | chr17:26414964-26446342   | NOTEST | 0.573581  | 0.554568  |
| Usp38         | chr8:80980732-81014906    | OK     | 8.60795   | 8.32187   |
| Pip4k2c       | chr10:127190377-127211622 | OK     | 27.838    | 26.9067   |
| Rps23         | chr13:90923121-90924732   | OK     | 5.89183   | 5.6943    |
| Nudt2         | chr4:41465147-41480926    | OK     | 17.3206   | 16.7393   |
| Spin1         | chr13:51100879-51152562   | OK     | 55.6342   | 53.7626   |
| Gm7030        | chr17:36127608-36129425   | NOTEST | 0.178007  | 0.172014  |
| Prkch         | chr12:73585040-73778184   | OK     | 3.56603   | 3.44565   |
| Nap1l3        | chrX:122394560-122397385  | OK     | 31.3697   | 30.3102   |
| Zfp239        | chr6:117863076-117872766  | OK     | 3.21361   | 3.10479   |
| Slc4a9        | chr18:36528151-36556272   | NOTEST | 0.0375942 | 0.0363199 |
| Tln2          | chr9:67217084-67559703    | OK     | 39.4502   | 38.1121   |
| Sap130        | chr18:31634382-31723061   | OK     | 10.0085   | 9.6688    |
| Plod3         | chr5:136982200-136996646  | OK     | 15.4917   | 14.9655   |
| Mccc2         | chr13:99948531-100015639  | OK     | 7.98363   | 7.7121    |
| 1700088E04Rik | chr15:79108982-79141251   | OK     | 0.949439  | 0.917098  |
| Specc1l       | chr10:75212072-75312400   | OK     | 27.0741   | 26.151    |

|               |                           |        |          |          |
|---------------|---------------------------|--------|----------|----------|
| Tceb3         | chr4:136003369-136021649  | OK     | 9.29134  | 8.97423  |
| Pnpla8        | chr12:44269153-44313435   | OK     | 18.1378  | 17.5182  |
| Nabl          | chr2:17346733-17731068    | OK     | 23.5217  | 22.7162  |
| Sc5d          | chr9:42254176-42264300    | OK     | 70.9743  | 68.5435  |
| 6030443J06Rik | chr5:22550412-22558171    | NOTEST | 0.15152  | 0.14633  |
| 5031439G07Rik | chr15:84945719-84987971   | OK     | 12.2838  | 11.8624  |
| Mpp1          | chrX:75095853-75130949    | OK     | 31.4877  | 30.407   |
| Ctf1          | chr7:127712735-127718185  | NOTEST | 0.872751 | 0.84278  |
| Abl1          | chr2:31688536-31804362    | OK     | 5.99132  | 5.78419  |
| Vrk3          | chr7:44748628-44777514    | OK     | 11.3799  | 10.9859  |
| Crebbp        | chr16:4084047-4213404     | OK     | 8.89468  | 8.58659  |
| Suv39h2       | chr2:3424130-3474986      | OK     | 0.859486 | 0.829583 |
| Rnf11         | chr4:109452856-109476505  | OK     | 116.561  | 112.503  |
| Pom121        | chr5:135369952-135394546  | OK     | 9.97024  | 9.62297  |
| Lyn           | chr4:3678120-3791612      | OK     | 2.54997  | 2.46111  |
| Kdm5b         | chr1:134560177-134632878  | OK     | 7.6052   | 7.33968  |
| Faf1          | chr4:109676626-109963960  | OK     | 20.8421  | 20.1135  |
| Cd69          | chr6:129267324-129275369  | NOTEST | 0.108449 | 0.104652 |
| Ptpmt1        | chr2:90910712-90918050    | OK     | 13.108   | 12.6474  |
| Taf7          | chr18:36930284-37841872   | OK     | 5.01935  | 4.84223  |
| Mrpl38        | chr11:116131816-116138868 | OK     | 19.8422  | 19.1401  |
| Ddhd1         | chr14:45593170-45658143   | OK     | 20.2686  | 19.5512  |
| Tnfrsf19      | chr14:60963833-61046855   | OK     | 1.89632  | 1.82909  |
| Ecsit         | chr9:22055459-22389206    | OK     | 15.9065  | 15.342   |
| Chn1          | chr2:73596525-73775346    | OK     | 46.2503  | 44.6071  |
| Epm2a         | chr10:11343444-11457477   | OK     | 13.1137  | 12.6474  |
| Lrrc58        | chr16:37868399-37888857   | OK     | 30.5185  | 29.433   |
| Fhl1          | chrX:56731760-56793346    | OK     | 77.1561  | 74.4106  |
| Arl6ip6       | chr2:53192083-53219221    | OK     | 2.61295  | 2.51986  |
| Rbbp5         | chr1:132477366-132505665  | OK     | 14.1427  | 13.6383  |
| H2-DMb2       | chr17:34145415-34151095   | NOTEST | 0.234541 | 0.226174 |
| Pde2a         | chr7:101421690-101512829  | OK     | 32.1119  | 30.9661  |
| Ccl27a        | chr4:41760442-41774176    | OK     | 9.20475  | 8.87578  |
| Pim3          | chr15:88862193-88865726   | OK     | 21.824   | 21.044   |
| Psmc6         | chr12:55280813-55492647   | OK     | 134.294  | 129.494  |
| Letmd1        | chr15:100469033-100479252 | OK     | 24.0911  | 23.2292  |
| Stard3        | chr11:98358367-98381112   | OK     | 11.987   | 11.5572  |
| Crtc1         | chr8:70382357-70439573    | OK     | 11.7272  | 11.3038  |
| Pcdhga4       | chr18:36930284-37841872   | OK     | 3.10434  | 2.99217  |
| Vdac2         | chr14:21831560-21848910   | OK     | 90.7262  | 87.4464  |
| Cep350        | chr1:155844963-155973255  | OK     | 5.97819  | 5.76144  |
| Il13ra2       | chrX:147383477-147403832  | NOTEST | 0.112903 | 0.108802 |
| Lrrc41        | chr4:116075464-116123690  | OK     | 23.5232  | 22.6609  |
| Haus6         | chr4:86581284-86612022    | OK     | 4.40007  | 4.23851  |
| Usp34         | chr11:23306894-23498039   | OK     | 20.5185  | 19.7645  |
| Zbtb39        | chr10:127739537-127747339 | OK     | 2.75188  | 2.65073  |
| Swsap1        | chr9:21955752-21958270    | OK     | 7.22081  | 6.95537  |
| Usp9x         | chrX:13071497-13173327    | OK     | 45.8607  | 44.1744  |
| 1500009L16Rik | chr10:83722864-83762762   | OK     | 3.04354  | 2.93156  |
| 1700101I11Rik | chr6:129532183-129542331  | OK     | 1.12865  | 1.08704  |
| Kcnb2         | chr1:15312451-15714214    | OK     | 12.5698  | 12.1061  |
| Tmem252       | chr19:24674007-24861842   | NOTEST | 0.711851 | 0.685562 |
| Tdp2          | chr13:24831658-24842153   | OK     | 10.3988  | 10.0146  |

|                |                           |        |           |           |
|----------------|---------------------------|--------|-----------|-----------|
| Nucb2          | chr7:116504368-116540588  | OK     | 5.56202   | 5.35637   |
| Gm4724,OTTMUSG | chr2:176619932-176636319  | NOTEST | 0.449312  | 0.432697  |
| Mapk1          | chr16:16983381-17047453   | OK     | 103.639   | 99.796    |
| Nol11          | chr11:107166660-107189381 | OK     | 7.491     | 7.21316   |
| Dnlz           | chr2:26315532-26352110    | OK     | 17.4031   | 16.7552   |
| Pspc1          | chr14:56722448-56778316   | OK     | 15.7353   | 15.1491   |
| Trpm3          | chr19:22139116-22989884   | OK     | 9.80285   | 9.43739   |
| Kctd11         | chr11:69878263-69880985   | OK     | 4.40736   | 4.24216   |
| Zfp174         | chr16:3847222-3858880     | OK     | 1.18073   | 1.13644   |
| Gstm4          | chr3:108040407-108044859  | OK     | 6.1059    | 5.87672   |
| Mtx1           | chr3:89209080-89214335    | OK     | 11.8605   | 11.4146   |
| Mycbp2         | chr14:103113410-103346800 | OK     | 30.0018   | 28.8697   |
| Ackr2          | chr9:121898354-121911071  | NOTEST | 0.0790088 | 0.076024  |
| Usp8           | chr2:126707327-126759314  | OK     | 38.5402   | 37.0822   |
| Scgb3a1        | chr11:49663594-49665118   | NOTEST | 0.145201  | 0.139689  |
| 2310022A10Rik  | chr7:27553289-27582098    | OK     | 3.99166   | 3.83998   |
| Npm3           | chr19:45747733-45749563   | NOTEST | 0.940716  | 0.904947  |
| Alkbh7         | chr17:56997338-56999336   | OK     | 12.4222   | 11.9492   |
| Fbxl12os       | chr9:20607474-20617271    | NOTEST | 0.459676  | 0.442169  |
| Ywhaz          | chr15:36770261-36796929   | OK     | 308.313   | 296.569   |
| Kctd19         | chr8:105375380-105413487  | NOTEST | 0.424489  | 0.408309  |
| Prkaa1         | chr15:5143860-5181899     | OK     | 35.4795   | 34.1264   |
| Acp1           | chr12:30884323-30911612   | OK     | 13.7044   | 13.1805   |
| Zmym4          | chr4:126753554-126967923  | OK     | 10.5299   | 10.1271   |
| Dicer1         | chr12:104687741-104751952 | OK     | 7.52044   | 7.2322    |
| Rtca           | chr3:116488963-116508175  | OK     | 58.7535   | 56.4968   |
| Cant1          | chr11:118406288-118419118 | OK     | 23.1513   | 22.2612   |
| Ppt2           | chr17:34616661-34627097   | OK     | 16.957    | 16.3046   |
| Ubc            | chr5:125385964-125390017  | OK     | 179.525   | 172.6     |
| Phf8           | chrX:151520671-151633857  | OK     | 5.86427   | 5.63798   |
| Dcp1a          | chr14:30008999-30527056   | OK     | 2.81187   | 2.7032    |
| Hist2h2be      | chr3:96221120-96223738    | OK     | 2.39659   | 2.30382   |
| Tmem168        | chr6:13580688-13608063    | OK     | 9.48268   | 9.11528   |
| Mapre3         | chr5:30814755-30866106    | OK     | 105.63    | 101.531   |
| Prdm9          | chr17:15543078-15563323   | NOTEST | 0.476006  | 0.457531  |
| Tmem9b         | chr7:109735835-109752263  | OK     | 48.8236   | 46.9277   |
| Mfap1b         | chr2:121461665-121474023  | OK     | 3.41481   | 3.28212   |
| Ppp1r7         | chr1:93343644-93367618    | OK     | 24.5674   | 23.6124   |
| Preb           | chr5:30933142-31348845    | OK     | 16.2137   | 15.5829   |
| Ankrd42        | chr7:92584182-92637142    | OK     | 4.96972   | 4.77634   |
| Stxbp1         | chr2:32787606-32847237    | OK     | 271.516   | 260.939   |
| Mbd2           | chr18:70568291-70626131   | OK     | 29.7163   | 28.5573   |
| Gmps           | chr3:63976142-64019078    | OK     | 13.8111   | 13.2725   |
| Pdhx           | chr2:103021056-103073513  | OK     | 16.3145   | 15.678    |
| Rab3c          | chr13:110054186-110280206 | OK     | 87.0667   | 83.6635   |
| Zfp647         | chr15:76910369-76925448   | OK     | 0.960191  | 0.92261   |
| Cdc73          | chr1:143607498-143702684  | OK     | 8.93288   | 8.58325   |
| Cox8a          | chr19:7215157-7217616     | OK     | 393.063   | 377.672   |
| Sf3b4          | chr3:96172549-96177564    | OK     | 7.97668   | 7.66395   |
| Gm9079         | chr10:122078111-122079879 | OK     | 1.14565   | 1.10073   |
| Mios           | chr6:8209226-8236273      | OK     | 7.12747   | 6.84738   |
| Abhd14a        | chr9:106440050-106447678  | OK     | 19.3785   | 18.6165   |
| Hist1h4a       | chr13:23760794-23761249   | NOTEST | 0.0783882 | 0.0753014 |

|               |                           |        |          |          |
|---------------|---------------------------|--------|----------|----------|
| Haus2         | chr2:120604237-120621559  | OK     | 11.7529  | 11.2901  |
| Spire2        | chr8:123332712-123369518  | OK     | 46.569   | 44.725   |
| Tmem8         | chr17:26113315-26123253   | OK     | 12.4836  | 11.9891  |
| Sgcd          | chr11:46978782-47379302   | OK     | 12.4922  | 11.9973  |
| Hoxa2         | chr6:52162416-52164831    | NOTEST | 0.334514 | 0.321234 |
| Smc2os        | chr4:52430283-52438964    | NOTEST | 0.747826 | 0.718136 |
| Smarca5-ps    | chr4:145464209-145467961  | OK     | 0.884916 | 0.849763 |
| Micu3         | chr8:40308050-40386304    | OK     | 46.6294  | 44.7768  |
| Unc50         | chr1:37430171-37439124    | OK     | 29.6001  | 28.4232  |
| Wbscr22       | chr5:135052956-135065365  | OK     | 8.78032  | 8.43096  |
| Abca1         | chr4:53030788-53159895    | OK     | 15.1829  | 14.5784  |
| Trip4         | chr9:65828925-65908794    | OK     | 6.96928  | 6.69182  |
| Fam193a       | chr5:34369932-34486458    | OK     | 8.90546  | 8.55063  |
| Cep44         | chr8:56531521-56550566    | OK     | 2.54104  | 2.43977  |
| Gm13034       | chr4:146067523-146068718  | OK     | 1.83327  | 1.76012  |
| Snx29         | chr16:11322903-11755473   | OK     | 7.18061  | 6.89397  |
| Dnase1l1      | chrX:74273216-74282333    | OK     | 5.01391  | 4.81376  |
| Cacng2        | chr15:77993622-78119280   | OK     | 7.82516  | 7.51179  |
| Ebpl          | chr14:61339762-61360445   | OK     | 6.2842   | 6.0322   |
| Sbno1         | chr5:124368701-124425914  | OK     | 17.7442  | 17.0321  |
| Lta4h         | chr10:93453395-93484896   | OK     | 23.7346  | 22.782   |
| Dcakd         | chr11:102994055-103017147 | OK     | 9.52242  | 9.13902  |
| Pold2         | chr11:5861865-5878256     | OK     | 8.17211  | 7.84134  |
| Tpp2          | chr1:43934006-44002971    | OK     | 28.3104  | 27.1621  |
| BC024978      | chr7:27187005-27205386    | OK     | 4.42669  | 4.24706  |
| 1110051M20Rik | chr2:91277827-91444642    | OK     | 45.9366  | 44.0691  |
| Efhc2         | chrX:17132048-17319368    | OK     | 1.65884  | 1.59115  |
| Slc39a10      | chr1:46807543-46853509    | OK     | 19.1155  | 18.3328  |
| Taok1         | chr11:77529161-77607815   | OK     | 26.6684  | 25.5735  |
| Ppip5k1       | chr2:121289601-121351013  | OK     | 19.555   | 18.7499  |
| Golga1        | chr2:39016155-39065541    | OK     | 12.3498  | 11.8412  |
| Mark1         | chr1:184896423-184999549  | OK     | 17.5854  | 16.8605  |
| Golga3        | chr5:110176700-110223155  | OK     | 19.2905  | 18.4946  |
| A730098P11Rik | chr16:24392555-24992578   | OK     | 23.7915  | 22.8097  |
| Osbpl2        | chr2:180119365-180162680  | OK     | 25.0218  | 23.9867  |
| Rnf216        | chr5:142990892-143113020  | OK     | 8.92068  | 8.55109  |
| Ap1s2         | chrX:163909016-163933666  | OK     | 64.6222  | 61.9436  |
| Mkx           | chr18:6934965-7004779     | OK     | 4.74797  | 4.55085  |
| Ostc          | chr3:130695916-130709444  | OK     | 50.5902  | 48.4882  |
| Ttf1          | chr2:29060262-29087650    | OK     | 1.86043  | 1.78308  |
| Slc6a15       | chr10:103367807-103419379 | OK     | 61.8007  | 59.2305  |
| Chtop         | chr3:90498957-90509443    | OK     | 38.4933  | 36.8922  |
| Frmpd1        | chr4:45184905-45285936    | OK     | 36.2208  | 34.7096  |
| E2f7          | chr10:110745464-110787384 | NOTEST | 0.126323 | 0.121043 |
| Ptar1         | chr19:23687399-23721129   | OK     | 3.85356  | 3.69246  |
| Lrrc40        | chr3:158036681-158067090  | OK     | 8.8372   | 8.46746  |
| Fam169b       | chr7:68266338-68363092    | NOTEST | 0.577513 | 0.553334 |
| Copg2         | chr6:30733505-30896794    | OK     | 43.8066  | 41.9702  |
| Siva1         | chr12:112644827-112649152 | OK     | 4.495    | 4.30655  |
| Helb          | chr10:119454033-120112965 | OK     | 1.59763  | 1.53064  |
| Ddx56         | chr11:6257544-6267729     | OK     | 13.822   | 13.2425  |
| 5730455P16Rik | chr11:80360491-80378015   | OK     | 26.8844  | 25.756   |
| Xiap          | chrX:42067835-42109664    | OK     | 24.937   | 23.8852  |

|               |                           |        |          |          |
|---------------|---------------------------|--------|----------|----------|
| Glyr1         | chr16:5013901-5049910     | OK     | 52.019   | 49.8242  |
| Cblc          | chr7:19779717-19796809    | NOTEST | 0.105979 | 0.101507 |
| Eif2d         | chr1:131153206-131173471  | OK     | 10.2182  | 9.78684  |
| Pelp1         | chr11:70392880-70410031   | OK     | 12.5485  | 12.0179  |
| Prmt5         | chr14:54507181-54517470   | OK     | 23.3435  | 22.3551  |
| Tmem59        | chr4:107178629-107200996  | OK     | 185.778  | 177.908  |
| Atg4c         | chr4:99193933-99259787    | OK     | 10.8368  | 10.3777  |
| Mthfsd        | chr8:121097556-121108379  | OK     | 12.8969  | 12.3504  |
| Whamm         | chr7:81571291-81596836    | OK     | 3.25484  | 3.11673  |
| Trmt12        | chr15:58872648-58876781   | OK     | 2.15801  | 2.06643  |
| Calca         | chr7:114631477-114636357  | OK     | 1247.97  | 1195     |
| Iffo1         | chr6:125145240-125161782  | OK     | 23.058   | 22.076   |
| Mrpl42        | chr10:95480805-95501927   | OK     | 39.4224  | 37.7366  |
| Clns1a        | chr7:97696656-97720793    | OK     | 13.0582  | 12.4965  |
| Nrde2         | chr12:100125449-100159653 | OK     | 3.72202  | 3.5619   |
| Cnih1         | chr14:46775567-46788357   | OK     | 117.583  | 112.498  |
| Hat1          | chr2:71389259-71441622    | OK     | 11.1021  | 10.6219  |
| Rwdd3         | chr3:121155401-121171695  | OK     | 1.97341  | 1.88792  |
| Trappc2       | chrX:166440824-166452543  | OK     | 50.1695  | 47.9834  |
| Daam1         | chr12:71831067-71992376   | OK     | 21.9909  | 21.0299  |
| Lrsam1        | chr2:32876133-32961255    | OK     | 48.8774  | 46.7412  |
| Brox          | chr1:183276341-183297008  | OK     | 31.0744  | 29.7157  |
| Ubxn7         | chr16:32332251-32393747   | OK     | 10.1496  | 9.70553  |
| Mtmr7         | chr8:40492537-40634792    | OK     | 49.5211  | 47.3544  |
| Rnf217        | chr10:31501886-31609725   | OK     | 4.397    | 4.20413  |
| Ift43         | chr12:86082560-86162459   | OK     | 10.327   | 9.87344  |
| Pomgnt1       | chr4:116150517-116159844  | OK     | 22.7219  | 21.7237  |
| Fam120b       | chr17:15396201-15433581   | OK     | 18.5861  | 17.7669  |
| Plekho2       | chr9:65552576-65580087    | OK     | 3.5963   | 3.43769  |
| Smg9          | chr7:24399627-24422777    | OK     | 12.3828  | 11.8348  |
| Mib2          | chr4:155654469-155669254  | OK     | 11.9248  | 11.3969  |
| BC029722      | chr2:155775343-155819203  | OK     | 22.5982  | 21.5965  |
| Sidt2         | chr9:45937856-45955249    | OK     | 19.3846  | 18.5252  |
| Eif1b         | chr9:120492605-120495327  | OK     | 151.531  | 144.805  |
| Sec22a        | chr16:35311130-35363918   | OK     | 3.86118  | 3.68979  |
| Rbfa          | chr18:80192263-80200619   | OK     | 14.4666  | 13.8238  |
| Abhd13        | chr8:9977716-9992154      | OK     | 5.33142  | 5.09438  |
| Alkbh5        | chr11:60537682-60558512   | OK     | 14.3514  | 13.7128  |
| Qars          | chr9:108508004-108515941  | OK     | 21.3356  | 20.3849  |
| Sumf2         | chr5:129846989-129879083  | OK     | 4.75505  | 4.54297  |
| Gbe1          | chr16:70313948-70569720   | OK     | 15.869   | 15.1601  |
| Cdk5rap1      | chr2:154335385-154372719  | OK     | 3.72892  | 3.5623   |
| Rft1          | chr14:30654374-30691313   | OK     | 7.88448  | 7.53216  |
| 4933434E20Rik | chr3:89998759-90068347    | OK     | 13.4397  | 12.834   |
| Rps6kc1       | chr1:190772878-190911770  | OK     | 16.466   | 15.7224  |
| Proser2       | chr2:6098499-6130185      | OK     | 1.10309  | 1.05317  |
| Opa3          | chr7:19228388-19246817    | OK     | 22.2051  | 21.1946  |
| 2310061I04Rik | chr17:35892676-35897378   | OK     | 46.8203  | 44.6888  |
| Stambpl1      | chr19:34192269-34240328   | OK     | 11.22    | 10.709   |
| Slc19a1       | chr10:77032738-77050432   | OK     | 11.7656  | 11.2296  |
| Gnas          | chr2:174281236-174346742  | OK     | 1188.5   | 1134.3   |
| Gabarapl1     | chr6:129532183-129542331  | OK     | 433.931  | 414.131  |
| St6galnac4    | chr2:32587077-32599696    | OK     | 2.73028  | 2.60566  |



|               |                           |        |           |           |
|---------------|---------------------------|--------|-----------|-----------|
| Sh3bp5l       | chr11:58330717-58347728   | OK     | 44.8037   | 42.7574   |
| BC051226      | chr17:33908181-33909178   | OK     | 1.82731   | 1.74371   |
| Zcchc12       | chrX:36195903-36199158    | OK     | 6.8724    | 6.55771   |
| Clcn4-2       | chr7:7282315-7299511      | OK     | 50.4307   | 48.1156   |
| Il17rd        | chr14:27039000-27107286   | OK     | 1.72506   | 1.64586   |
| Nsdhl         | chrX:72918520-72958528    | OK     | 42.1236   | 40.187    |
| Tsks          | chr7:44943239-44958037    | NOTEST | 0.0851439 | 0.0812218 |
| Wdr24         | chr17:25823626-25828730   | OK     | 7.63285   | 7.2809    |
| Tor1aip2      | chr1:156004598-156068859  | OK     | 33.9805   | 32.4132   |
| 2210015D19Rik | chr11:5713416-5784710     | OK     | 5.12908   | 4.89184   |
| Prrc2c        | chr1:162671784-162740556  | OK     | 21.8689   | 20.8567   |
| Slc6a19       | chr13:73681156-73709856   | OK     | 7.19701   | 6.86371   |
| Wbp2          | chr11:116078572-116086964 | OK     | 220.769   | 210.54    |
| Lphn3         | chr5:81021592-81795730    | OK     | 11.2574   | 10.7358   |
| Rnf111        | chr9:70425428-70503725    | OK     | 9.87094   | 9.41195   |
| Klhl21        | chr4:152008890-152017677  | OK     | 12.4983   | 11.9143   |
| Tor1b         | chr2:30953000-30959015    | OK     | 11.4263   | 10.8923   |
| Fam111a       | chr19:12573524-12596566   | OK     | 2.31135   | 2.20331   |
| Zfp783        | chr6:47943174-47965299    | OK     | 0.800517  | 0.763081  |
| B3gnt1        | chr19:5038825-5041134     | OK     | 51.2467   | 48.8493   |
| Nfyc          | chr4:120757434-120831579  | OK     | 3.00894   | 2.86816   |
| Fbxo17        | chr7:28716789-28738140    | NOTEST | 0.589806  | 0.562206  |
| Flrt2         | chr12:95692225-95785213   | OK     | 2.38437   | 2.27277   |
| Clptm1l       | chr13:73604001-73620639   | OK     | 41.0688   | 39.1418   |
| Mrpl4         | chr9:21002736-21008837    | OK     | 16.8654   | 16.0735   |
| Gatad2b       | chr3:90341653-90358120    | OK     | 11.984    | 11.4199   |
| Bin1          | chr18:32359056-32435740   | OK     | 58.4744   | 55.7183   |
| Mfn2          | chr4:147873585-147904909  | OK     | 84.2123   | 80.2225   |
| Gm8979        | chr7:106075730-106079148  | NOTEST | 0.0590023 | 0.0562068 |
| Trmt11        | chr10:30534224-30600749   | OK     | 2.85396   | 2.71864   |
| Rnf185        | chr11:3202352-3479831     | OK     | 9.50666   | 9.05444   |
| Oxct1         | chr15:4020110-4155344     | OK     | 86.8921   | 82.7578   |
| Plagl2        | chr2:153227768-153241358  | OK     | 1.31604   | 1.25339   |
| Nt5c3b        | chr11:100415693-100441089 | OK     | 15.6651   | 14.9189   |
| Zfp940        | chr7:29843935-29853648    | OK     | 1.49736   | 1.42596   |
| BC030336      | chr7:120677619-120734854  | OK     | 16.8136   | 16.0117   |
| Tspan7        | chrX:10485115-10596604    | OK     | 219.612   | 209.133   |
| Zfp84         | chr7:29768551-29781419    | OK     | 3.29652   | 3.13917   |
| Hnf1b         | chr11:83850868-83905917   | NOTEST | 0.167494  | 0.159498  |
| Lsm8          | chr6:18848634-18854052    | OK     | 17.4346   | 16.6021   |
| Wars2         | chr3:99141089-99220203    | OK     | 2.0183    | 1.92191   |
| Dopey1        | chr9:86467153-86571842    | OK     | 7.35892   | 7.00748   |
| Erlin2        | chr8:27023798-27039435    | OK     | 12.4715   | 11.8755   |
| 2700046A07Rik | chr18:62751673-62756347   | NOTEST | 0.116259  | 0.110701  |
| Txndc9        | chr1:37983866-37997208    | OK     | 5.31535   | 5.06106   |
| Sap30bp       | chr11:115933658-115965534 | OK     | 12.0621   | 11.4844   |
| Zfp160        | chr17:21008940-21028856   | OK     | 3.15559   | 3.00435   |
| Iars2         | chr1:185204167-185329401  | OK     | 31.3852   | 29.8802   |
| Clp1          | chr2:84723121-84727268    | OK     | 3.45481   | 3.28894   |
| 2900009J06Rik | chr1:127729412-127774054  | NOTEST | 0.607626  | 0.578198  |
| Nr2c1         | chr10:94147930-94197214   | OK     | 4.13268   | 3.93234   |
| Hmces         | chr6:87913975-87936613    | OK     | 5.22625   | 4.97264   |
| Fkbp3         | chr12:65036333-65073938   | OK     | 119.491   | 113.689   |

|               |                           |        |          |          |
|---------------|---------------------------|--------|----------|----------|
| Ubox5         | chr2:130589995-130630038  | OK     | 4.07594  | 3.87795  |
| G6pdx         | chrX:74393290-74453778    | OK     | 20.642   | 19.6367  |
| Lrp12         | chr15:39870602-39943757   | OK     | 13.6804  | 13.0137  |
| Ppp2r2b       | chr18:42645220-43059471   | OK     | 77.1138  | 73.3506  |
| Tomm34        | chr2:164053539-164071169  | OK     | 60.2542  | 57.31    |
| Abat          | chr16:8513428-8621567     | OK     | 18.7762  | 17.8558  |
| Nup98         | chr7:102119399-102210166  | OK     | 10.6069  | 10.0868  |
| Dhx29         | chr13:112927792-112969187 | OK     | 11.0221  | 10.4809  |
| B4galnt4      | chr7:141061273-141072119  | OK     | 7.15318  | 6.8009   |
| Dll3          | chr7:28293554-28301785    | NOTEST | 0.243904 | 0.231822 |
| Reep5         | chr18:34344885-34373415   | OK     | 890.424  | 846.289  |
| Snrpc         | chr17:27840086-27851967   | OK     | 3.52712  | 3.35211  |
| Cct8          | chr16:87454984-87495869   | OK     | 144.2    | 137.036  |
| Mtfmt         | chr9:65435781-65453054    | OK     | 4.83132  | 4.59105  |
| Cdhr1         | chr14:37077848-37098311   | OK     | 18.2599  | 17.3512  |
| Cbx8          | chr11:119038435-119040913 | OK     | 4.36665  | 4.14891  |
| Fem1a         | chr17:56256792-56263608   | OK     | 10.9466  | 10.4007  |
| Iscu          | chr5:113772811-113778282  | OK     | 41.5677  | 39.4939  |
| Dpcd          | chr19:45560614-45660193   | OK     | 30.9467  | 29.4024  |
| Mta2          | chr19:8941919-8952300     | OK     | 12.817   | 12.1769  |
| Pigg          | chr5:108312924-108348779  | OK     | 4.96566  | 4.71687  |
| Ints3         | chr3:90391379-90433636    | OK     | 15.3472  | 14.5781  |
| Scyl1         | chr19:5740903-5771401     | OK     | 27.7511  | 26.3595  |
| Zfp709        | chr8:71882067-71892565    | OK     | 1.4748   | 1.4008   |
| Sumo3         | chr10:77606233-77618331   | OK     | 42.4718  | 40.3349  |
| Prpf6         | chr2:181601318-181655661  | OK     | 23.4357  | 22.2528  |
| 2310015A10Rik | chr12:80120545-80132844   | OK     | 4.46118  | 4.23595  |
| Setdb1        | chr3:95315251-95357202    | OK     | 8.80423  | 8.35962  |
| Syt11         | chr3:88744700-88772599    | OK     | 397.339  | 377.241  |
| Pfdn2         | chr1:171345698-171358170  | OK     | 115.218  | 109.388  |
| Tmf1          | chr6:97151949-97179124    | OK     | 13.6708  | 12.9786  |
| Gspt1         | chr16:11203382-11254325   | OK     | 25.528   | 24.2338  |
| Nme1          | chr11:93958924-93968521   | OK     | 101.94   | 96.7715  |
| Psmc8         | chr7:29174186-29180673    | OK     | 61.8305  | 58.695   |
| Ptprn2        | chr12:116485719-117337012 | OK     | 27.8471  | 26.4345  |
| Nfe2l2        | chr2:75675518-75704641    | OK     | 21.5077  | 20.4149  |
| Itpkc         | chr7:27207169-27228597    | OK     | 2.64697  | 2.51243  |
| Afg3l2        | chr18:67404763-67449136   | OK     | 36.2465  | 34.4032  |
| Marf1         | chr16:14109165-14159274   | OK     | 25.8427  | 24.528   |
| Tmem201       | chr4:149715374-149738068  | OK     | 10.6537  | 10.1115  |
| Tmem243       | chr5:9100736-9161776      | OK     | 8.98719  | 8.52909  |
| Helq          | chr5:100762147-100798600  | OK     | 1.78444  | 1.69337  |
| Bloc1s1       | chr10:128919913-128923524 | OK     | 37.5772  | 35.6558  |
| Atmin         | chr8:116943392-116960445  | OK     | 23.034   | 21.8538  |
| Fmr1nb        | chrX:68761838-68804560    | NOTEST | 0.257135 | 0.243953 |
| Cops6         | chr5:138161101-138163984  | OK     | 103.567  | 98.2448  |
| Rab10         | chr12:3235790-3309969     | OK     | 80.0846  | 75.9615  |
| Car12         | chr9:66713685-66766845    | NOTEST | 0.222642 | 0.211131 |
| Zfp746        | chr6:48062394-48086593    | OK     | 4.47653  | 4.24467  |
| Tsnax         | chr8:125012996-125034192  | OK     | 60.2255  | 57.1056  |
| Coq3          | chr4:21879674-21912126    | OK     | 9.92136  | 9.40678  |
| Nos3          | chr5:24364818-24392143    | OK     | 1.49434  | 1.4168   |
| Fbxo18        | chr2:11742572-11777527    | OK     | 20.771   | 19.6916  |

|               |                           |        |           |           |
|---------------|---------------------------|--------|-----------|-----------|
| Lrp3          | chr7:35186384-35215345    | OK     | 24.4896   | 23.2163   |
| Tmem5         | chr10:122081259-122097102 | OK     | 17.212    | 16.3149   |
| Smg8          | chr11:86583864-87555823   | OK     | 7.97302   | 7.55674   |
| Dtwd2         | chr18:49696144-49755601   | OK     | 1.90747   | 1.8078    |
| Cxcl2         | chr5:90903898-90905938    | NOTEST | 0.428822  | 0.406405  |
| Rab1          | chr11:20201601-20226856   | OK     | 117.211   | 111.077   |
| Zcchc17       | chr4:130316084-130359943  | OK     | 28.1089   | 26.6376   |
| Pcdha4        | chr18:36930284-37841872   | OK     | 3.88481   | 3.68102   |
| Tmem19        | chr10:115340739-115362262 | OK     | 21.7252   | 20.5853   |
| Pogk          | chr1:166379166-166409828  | OK     | 11.6136   | 11.0039   |
| Birc2         | chr9:7818225-7835255      | OK     | 9.15146   | 8.6706    |
| Ldhd          | chr8:111626270-111630322  | OK     | 8.21788   | 7.78577   |
| Tap2          | chr17:34204478-34216321   | OK     | 12.6999   | 12.032    |
| Dync1i1       | chr6:5725638-6028039      | OK     | 86.2154   | 81.6638   |
| Zfp518b       | chr5:38668483-38684826    | OK     | 6.00618   | 5.68883   |
| Cep290        | chr10:100488288-100589259 | OK     | 2.82535   | 2.67596   |
| Snrk          | chr9:122117265-122169702  | OK     | 18.4948   | 17.5163   |
| Nuggc         | chr14:65605266-65648443   | NOTEST | 0.073047  | 0.0691822 |
| Atxn10        | chr15:85336380-85463836   | OK     | 135       | 127.832   |
| Cops8         | chr1:90603424-90613341    | OK     | 48.1572   | 45.5993   |
| Ccnj          | chr19:40831278-40848570   | OK     | 1.92053   | 1.81848   |
| Fancb         | chrX:164980591-164997272  | OK     | 1.28952   | 1.22096   |
| Gstm5         | chr3:107877229-107898685  | OK     | 93.9995   | 88.9813   |
| 4930481A15Rik | chr19:5406814-5424979     | OK     | 1.19922   | 1.13475   |
| Mocs2         | chr13:114818236-114829420 | OK     | 34.4684   | 32.6152   |
| Plcx2         | chr16:45959260-46010413   | OK     | 21.8484   | 20.6706   |
| Cpa6          | chr1:10324718-10865874    | NOTEST | 0.0974785 | 0.092219  |
| Zc3h3         | chr15:75754446-75841908   | NOTEST | 0.438205  | 0.414495  |
| Kynu          | chr2:43555324-43683048    | NOTEST | 0.180242  | 0.170467  |
| Agpat6        | chr8:23172945-23208453    | OK     | 32.2557   | 30.4989   |
| Agbl3         | chr6:34780431-34859459    | OK     | 3.38376   | 3.19933   |
| Sbsn          | chr7:30751470-30756134    | OK     | 1.14164   | 1.07937   |
| Lpin2         | chr17:71183977-71249818   | OK     | 8.58374   | 8.11545   |
| Fn3krp        | chr11:121421372-121430768 | OK     | 15.0306   | 14.2087   |
| C230037L18Rik | chr15:89472475-89484850   | OK     | 1.11402   | 1.05311   |
| Usp40         | chr1:87945120-88008551    | OK     | 4.06153   | 3.83887   |
| Zfp712        | chr13:67038593-67061170   | OK     | 2.00275   | 1.89278   |
| Sec23ip       | chr7:128744869-128784835  | OK     | 9.21918   | 8.71289   |
| Ccdc173       | chr2:69758056-69789486    | OK     | 1.14775   | 1.08469   |
| Srbd1         | chr17:85984664-86145175   | OK     | 5.02369   | 4.74762   |
| Ddx6          | chr9:44604891-44640731    | OK     | 52.962    | 50.0499   |
| Gpr65         | chr12:98268634-98276722   | NOTEST | 0.36008   | 0.340272  |
| Exoc8         | chr8:124890298-124897705  | OK     | 6.27347   | 5.92812   |
| Prdx1         | chr4:116684964-116700000  | OK     | 36.5601   | 34.5442   |
| Hcrtr1        | chr4:130130216-130139162  | OK     | 2.45481   | 2.31939   |
| Mrpl49        | chr19:6046575-6057751     | OK     | 22.7271   | 21.4726   |
| Dgcr2         | chr16:17840355-17891728   | OK     | 32.6722   | 30.8674   |
| Ppp1r13l      | chr7:19361215-19378533    | OK     | 1.70701   | 1.61271   |
| Pdcd10        | chr3:75516489-75556852    | OK     | 10.5203   | 9.93869   |
| Kmt2e         | chr5:23434428-23616571    | OK     | 8.89407   | 8.40011   |
| Mcidas        | chr13:112993867-113000394 | NOTEST | 0.0403736 | 0.0381305 |
| 9130011E15Rik | chr19:45818143-45998488   | OK     | 12.679    | 11.9745   |
| Osbp          | chr19:11965843-11994114   | OK     | 24.086    | 22.7455   |

|               |                           |        |            |            |
|---------------|---------------------------|--------|------------|------------|
| Zfp667        | chr7:6286579-6307883      | OK     | 2.49922    | 2.36008    |
| Tom22         | chr15:79670867-79672862   | OK     | 56.6835    | 53.5259    |
| Ofcc1         | chr13:40001881-40288011   | NOTEST | 0.00736339 | 0.00695314 |
| Fam199x       | chrX:137049593-137082501  | OK     | 6.54215    | 6.17753    |
| Osbpl9        | chr4:109000804-109202272  | OK     | 40.1544    | 37.9155    |
| Gm4788        | chr1:139697918-139781239  | NOTEST | 0.00767468 | 0.00724663 |
| Lrrc28        | chr7:67513409-67645236    | OK     | 9.17137    | 8.65949    |
| Tmem204       | chr17:25016085-25099497   | OK     | 3.21844    | 3.03869    |
| Strn4         | chr7:16809266-16840931    | OK     | 12.7328    | 12.0214    |
| Vmn2r-ps11    | chr3:64632862-64844743    | NOTEST | 0.00935729 | 0.00883329 |
| Ints5         | chr19:8892986-8897890     | OK     | 7.51456    | 7.09286    |
| Bag3          | chr7:128523582-128546979  | OK     | 122.319    | 115.45     |
| Klf3          | chr5:64803522-64830129    | OK     | 6.09005    | 5.7478     |
| Gabpb2        | chr3:95181765-95236424    | OK     | 2.38603    | 2.25188    |
| Nme6          | chr9:109832793-109842961  | OK     | 3.78666    | 3.57349    |
| Gab1          | chr8:80764433-80880479    | OK     | 15.9281    | 15.0301    |
| Cypr1         | chr16:85456243-85550373   | OK     | 3.13386    | 2.95685    |
| Mtx2          | chr2:74825811-74876748    | OK     | 40.4374    | 38.1526    |
| Nploc4        | chr11:120379797-120437700 | OK     | 40.9586    | 38.6411    |
| Gm7609        | chr1:85199610-85213762    | NOTEST | 0.013703   | 0.0129272  |
| Ppm1d         | chr11:85311253-85347071   | OK     | 2.95746    | 2.78977    |
| Itfg1         | chr8:85717556-85840949    | OK     | 132.186    | 124.691    |
| 1700025G04Rik | chr1:151884523-152090320  | OK     | 9.28579    | 8.75904    |
| Tram1         | chr1:13564701-13589864    | OK     | 22.3631    | 21.0917    |
| Wdfy3         | chr5:101832952-102069921  | OK     | 24.8698    | 23.4521    |
| 2410012E07Rik | chr14:70852932-70873954   | NOTEST | 0.0502237  | 0.0473585  |
| Wbp11         | chr6:136813653-136828216  | OK     | 24.2111    | 22.8281    |
| Map2k5        | chr9:63163769-63377852    | OK     | 15.849     | 14.9433    |
| Fam159b       | chr13:104845282-104863893 | NOTEST | 0.0174575  | 0.0164597  |
| Znhit6        | chr3:145576207-145605245  | OK     | 6.06262    | 5.71463    |
| Ccdc97        | chr7:25711116-25719053    | OK     | 16.5891    | 15.6359    |
| Taf6l         | chr19:8772521-8786417     | OK     | 3.61788    | 3.40974    |
| Rbmx          | chrX:57383347-57393036    | OK     | 9.99179    | 9.41546    |
| Mrpl48        | chr7:100549116-100641268  | OK     | 12.6172    | 11.8894    |
| Nt5m          | chr11:59848072-59876533   | OK     | 23.6348    | 22.2707    |
| Ruvbl1        | chr6:88465422-88497566    | OK     | 3.10017    | 2.92071    |
| Mrpl47        | chr3:32727496-32736755    | OK     | 14.5355    | 13.6927    |
| Ift52         | chr2:163017471-163046135  | OK     | 21.0333    | 19.8128    |
| Phtf2         | chr5:20758663-20882124    | OK     | 6.14192    | 5.78525    |
| Chd1          | chr17:15704966-15772612   | OK     | 3.85108    | 3.62729    |
| Ampd3         | chr7:110768205-110812408  | OK     | 16.317     | 15.3686    |
| Psen1         | chr12:83688562-83735199   | OK     | 25.6988    | 24.2041    |
| AW146154      | chr7:41478873-41499890    | NOTEST | 0.597643   | 0.562882   |
| Galr1         | chr18:82392495-82406777   | OK     | 4.86499    | 4.58195    |
| Dcun1d2       | chr8:13255962-13322924    | OK     | 19.8396    | 18.6853    |
| Tmem242       | chr17:5410863-5440260     | OK     | 70.0142    | 65.9384    |
| Rprd2         | chr3:95759872-95818953    | OK     | 5.28072    | 4.97316    |
| Fbxo8         | chr8:56551133-56593939    | OK     | 4.40978    | 4.15214    |
| Tyw3          | chr3:154576519-154623182  | OK     | 2.12163    | 1.99767    |
| Slc39a13      | chr2:91061780-91070315    | OK     | 12.1428    | 11.4329    |
| Arhgap31      | chr16:38598342-38713035   | OK     | 13.3326    | 12.5519    |
| Tmem263       | chr10:85102626-85117747   | OK     | 11.3041    | 10.6417    |
| Commd8        | chr5:72156999-72168183    | OK     | 7.97201    | 7.50358    |

|               |                           |        |           |           |
|---------------|---------------------------|--------|-----------|-----------|
| Pomt2         | chr12:87106865-87164723   | OK     | 7.93042   | 7.46256   |
| Atrx          | chrX:105797614-105929372  | OK     | 8.78209   | 8.26384   |
| Msx1          | chr5:37820490-37824585    | NOTEST | 0.301134  | 0.283352  |
| Znrf2         | chr6:54816915-54890224    | OK     | 8.23631   | 7.74991   |
| Trove2        | chr1:143750790-143777051  | OK     | 9.32223   | 8.77152   |
| Map6          | chr7:99267446-99337137    | OK     | 76.3732   | 71.849    |
| Rac1          | chr5:143505480-143527993  | OK     | 162.799   | 153.141   |
| Zfp574        | chr7:25077204-25083492    | OK     | 4.15049   | 3.90407   |
| Parp16        | chr9:65214689-65239219    | OK     | 1.80615   | 1.69886   |
| Dis3l         | chr9:64306755-64341257    | OK     | 12.7391   | 11.9819   |
| Dgcr14        | chr16:17900708-17911348   | OK     | 7.37499   | 6.93601   |
| Plac8l1       | chr18:42178674-42196709   | NOTEST | 0.0347696 | 0.0326971 |
| Dennd3        | chr15:73512559-73572242   | NOTEST | 0.611308  | 0.574834  |
| Slc22a15      | chr3:101855770-101924453  | OK     | 2.48204   | 2.3338    |
| Cep19         | chr16:32099801-32108054   | OK     | 25.2782   | 23.7677   |
| Slc10a7       | chr8:78509327-78734012    | OK     | 6.22654   | 5.85445   |
| Tmx4          | chr2:134594501-134644121  | OK     | 63.2066   | 59.4243   |
| Eif3c         | chr7:126546910-126566366  | OK     | 69.6795   | 65.5099   |
| 0610030E20Rik | chr6:72347316-72353160    | OK     | 2.70985   | 2.54765   |
| Hk1           | chr10:62268854-62379908   | OK     | 123.925   | 116.496   |
| Mrps18b       | chr17:35910384-35916369   | OK     | 8.47921   | 7.96893   |
| Pcdhb11       | chr18:36930284-37841872   | OK     | 0.799939  | 0.751769  |
| Osbpl5        | chr7:143688761-143741963  | OK     | 14.1768   | 13.3229   |
| Etf1          | chr18:34902784-34932003   | OK     | 35.5814   | 33.4381   |
| Zmat3         | chr3:32334793-32367438    | OK     | 30.4622   | 28.6271   |
| Csnk1d        | chr11:120961740-120991333 | OK     | 83.2914   | 78.2714   |
| Csgalnact2    | chr6:118107451-118139140  | OK     | 4.58522   | 4.30862   |
| Vars          | chr17:35000906-35016329   | OK     | 16.3673   | 15.3799   |
| Lonp1         | chr17:56614297-56626903   | OK     | 25.8888   | 24.3268   |
| Hps5          | chr7:46760465-46795881    | OK     | 11.4769   | 10.783    |
| Ttc33         | chr15:5185559-5218332     | OK     | 35.2058   | 33.0741   |
| Arfgef1       | chr1:10137506-10232670    | OK     | 37.3536   | 35.0908   |
| Psmb7         | chr2:38588045-38643906    | OK     | 187.514   | 176.133   |
| Adam9         | chr8:24949610-25016922    | OK     | 39.5288   | 37.1202   |
| Gigyf2        | chr1:87326997-87450810    | OK     | 10.5917   | 9.94625   |
| Trmt6         | chr2:132804214-132816054  | OK     | 7.89727   | 7.41567   |
| Cep68         | chr11:20227036-20249424   | OK     | 5.62644   | 5.28324   |
| Gpkow         | chrX:7697133-7710259      | OK     | 9.36834   | 8.79453   |
| Coa4          | chr7:100537099-100539812  | OK     | 5.14797   | 4.8324    |
| Pfkip         | chr13:6548156-6648771     | OK     | 136.399   | 128.02    |
| Ube2e1        | chr14:18271141-18331844   | OK     | 46.2466   | 43.4055   |
| 2610507I01Rik | chr11:59197792-59202431   | OK     | 5.68455   | 5.33525   |
| Lipa          | chr19:34492315-34527474   | OK     | 44.1875   | 41.4696   |
| Lgals6        | chr7:28833793-28841703    | NOTEST | 0.202527  | 0.190065  |
| Stx8          | chr11:67966482-68207148   | OK     | 5.7426    | 5.38909   |
| Mccc1os       | chr3:35959305-36053547    | NOTEST | 0.515461  | 0.483692  |
| Triap1        | chr5:115341246-115343552  | OK     | 43.3175   | 40.6464   |
| Ptplb         | chr16:35022420-35109175   | OK     | 8.81942   | 8.27468   |
| Ei24          | chr9:36779152-36797393    | OK     | 53.3067   | 50.0128   |
| Gtf2e1        | chr16:37509795-37539769   | OK     | 10.5603   | 9.9077    |
| Pcdhb13       | chr18:36930284-37841872   | OK     | 1.26039   | 1.18249   |
| Atp6v1h       | chr1:5083172-5162549      | OK     | 123.092   | 115.475   |
| Scel          | chr14:103513340-103613346 | NOTEST | 0.356401  | 0.334339  |



|               |                           |        |           |           |
|---------------|---------------------------|--------|-----------|-----------|
| Mfap1a        | chr2:121492680-121506656  | OK     | 5.80018   | 5.4398    |
| Med16         | chr10:79697304-80369637   | OK     | 16.9125   | 15.8609   |
| Zfp846        | chr9:20581327-20595193    | OK     | 3.82103   | 3.58304   |
| Prr14l        | chr5:32789206-32854230    | OK     | 6.05532   | 5.67745   |
| Grpel1        | chr5:36465184-36484285    | OK     | 11.3817   | 10.6703   |
| 4930500J02Rik | chr2:104559183-104571429  | NOTEST | 0.70995   | 0.665499  |
| Pds5a         | chr5:65615259-65697856    | OK     | 14.8584   | 13.9276   |
| Capza2        | chr6:17637097-17666536    | OK     | 119.631   | 112.127   |
| Dnajb11       | chr16:22857844-22899451   | OK     | 27.3342   | 25.615    |
| Ncam1         | chr9:49502145-49799069    | OK     | 51.6381   | 48.39     |
| Mre11a        | chr9:14784706-14834417    | OK     | 5.32351   | 4.98852   |
| Ube2d1        | chr10:71254979-71285262   | OK     | 44.8018   | 41.9794   |
| Wnt10a        | chr1:74792018-74804175    | NOTEST | 0.17551   | 0.164446  |
| Hs3st3b1      | chr11:63884692-63922284   | OK     | 0.923354  | 0.865121  |
| Apmap         | chr2:150583080-150608523  | OK     | 34.9077   | 32.7048   |
| Kdm5d         | chrY:897787-943811        | OK     | 3.04893   | 2.85641   |
| Usp10         | chr8:119910851-119957557  | OK     | 15.1457   | 14.1892   |
| Foxn2         | chr17:88440711-88490533   | OK     | 3.74866   | 3.51176   |
| Zdhhc4        | chr5:143316488-143329238  | OK     | 14.9945   | 14.0468   |
| Trmt2a        | chr16:18248882-18289168   | OK     | 6.36583   | 5.96315   |
| Slfm3         | chr11:83191329-83215154   | NOTEST | 0.383217  | 0.358969  |
| Lypla1        | chr1:4807892-4846735      | OK     | 24.0251   | 22.5029   |
| Rnpepl1       | chr1:92910824-92920585    | OK     | 5.22406   | 4.89223   |
| Ero1l         | chr14:45283086-45318572   | OK     | 12.941    | 12.1186   |
| 1810010H24Rik | chr11:107028222-107030442 | OK     | 1.03006   | 0.96458   |
| Kat2a         | chr11:100704745-100712467 | OK     | 18.7352   | 17.5439   |
| Ap2b1         | chr11:83302696-83405033   | OK     | 100.991   | 94.5656   |
| Sdf4          | chr4:155992913-156013610  | OK     | 69.7061   | 65.2666   |
| Hn1l          | chr17:24942469-24960623   | OK     | 5.50848   | 5.15761   |
| Cln8          | chr8:14888535-14901719    | OK     | 6.29611   | 5.89502   |
| Fbxo34        | chr14:47472560-47531962   | OK     | 12.288    | 11.505    |
| Scd1          | chr19:44394449-44407709   | OK     | 272.293   | 254.934   |
| Cbx6          | chr15:79786350-79834333   | OK     | 63.7387   | 59.675    |
| Gm9776        | chr13:94356748-94358923   | OK     | 1.87709   | 1.75716   |
| 2810029C07Rik | chr12:111572316-111574402 | NOTEST | 0.630246  | 0.58996   |
| Ccs           | chr19:4825365-4839322     | OK     | 15.9161   | 14.8978   |
| Parn          | chr16:13537963-13668170   | OK     | 10.9629   | 10.2614   |
| Fastkd1       | chr2:69686823-69712606    | OK     | 8.37734   | 7.84115   |
| Gtf2b         | chr3:142765246-142783605  | OK     | 36.5679   | 34.2214   |
| Hoxa10        | chr6:52231196-52240854    | OK     | 8.00982   | 7.49567   |
| Csnk2b        | chr17:35116194-35121447   | OK     | 54.2567   | 50.7722   |
| Ubac2         | chr14:121878605-122021035 | OK     | 17.8044   | 16.6609   |
| Ifnar2        | chr16:91372782-91405587   | OK     | 13.9512   | 13.055    |
| Hist1h3a      | chr13:23761884-23762386   | NOTEST | 0.0658728 | 0.0616372 |
| Prpf38a       | chr4:108564866-108579336  | OK     | 11.44     | 10.7039   |
| Arf1          | chr11:59211411-59228267   | OK     | 145.724   | 136.347   |
| Nanos1        | chr19:60755986-60759914   | OK     | 2.01434   | 1.88434   |
| Eif3j2        | chr2:122028579-122118386  | LOWDAT | 7.86271   | 7.35496   |
| Mlh1          | chr9:111228227-111271608  | OK     | 4.65431   | 4.35343   |
| Sec63         | chr10:42761495-42832514   | OK     | 18.1574   | 16.9824   |
| Akna          | chr4:63367127-63403445    | NOTEST | 0.556458  | 0.520404  |
| Spop          | chr11:95414082-95493410   | OK     | 61.7183   | 57.7107   |
| Pebp1         | chr5:117282650-117287564  | OK     | 158.706   | 148.393   |

|               |                           |        |          |           |
|---------------|---------------------------|--------|----------|-----------|
| Chrn2         | chr3:89715021-89764632    | OK     | 29.1125  | 27.2191   |
| Gpsm2         | chr3:108653912-108722299  | OK     | 6.65794  | 6.22452   |
| Naa50         | chr16:44139808-44163364   | OK     | 19.3054  | 18.0478   |
| Mpdu1         | chr11:69655036-69662642   | OK     | 28.0637  | 26.2337   |
| Ntmt1         | chr2:30807976-30823014    | OK     | 14.109   | 13.1887   |
| Agps          | chr2:75832176-75931350    | OK     | 12.3847  | 11.5769   |
| Il5           | chr11:53720793-53725103   | NOTEST | 0.163575 | 0.152903  |
| Nudcd3        | chr11:6105691-6200451     | OK     | 28.2275  | 26.385    |
| Xdh           | chr17:73883894-73950196   | OK     | 1.49796  | 1.40015   |
| Kars          | chr8:111993438-112011354  | OK     | 41.6355  | 38.914    |
| Slc10a3       | chrX:74365717-74373349    | OK     | 3.98413  | 3.72349   |
| Gm15545       | chr7:44986899-44997579    | NOTEST | 0.284694 | 0.26604   |
| Smg6          | chr11:74925871-75164448   | OK     | 8.35738  | 7.80972   |
| Ipo11         | chr13:106794438-106936915 | OK     | 18.4304  | 17.2213   |
| Nup160        | chr2:90677214-90736328    | OK     | 2.97903  | 2.78332   |
| Ttl4          | chr1:74661753-74697973    | OK     | 1.15391  | 1.07803   |
| Ttbk1         | chr17:46442447-46487675   | OK     | 20.1015  | 18.7785   |
| Socs5         | chr17:87107678-87137588   | OK     | 22.6829  | 21.1896   |
| Hps3          | chr3:19957053-20035310    | OK     | 20.4923  | 19.1427   |
| Yars          | chr4:129189794-129261404  | OK     | 41.4152  | 38.6826   |
| Atxn2         | chr5:121711608-121814950  | OK     | 24.793   | 23.1566   |
| Emc8          | chr8:120653913-120668112  | OK     | 16.2809  | 15.2057   |
| Sco1          | chr11:67052669-67067440   | OK     | 3.74308  | 3.49556   |
| Gm17296       | chr8:126426651-126475065  | NOTEST | 0.47256  | 0.441295  |
| Zfp959        | chr17:55892092-55898930   | OK     | 1.69355  | 1.58149   |
| Hist1h3b      | chr13:23752379-23752840   | NOTEST | 0.076538 | 0.0714733 |
| Snap23        | chr2:120567670-120600722  | OK     | 3.36234  | 3.13978   |
| Cnot4         | chr6:35022064-35133737    | OK     | 10.7408  | 10.0296   |
| Abca6         | chr11:110176820-110251776 | OK     | 26.5993  | 24.8374   |
| Tcta          | chr9:108302957-108305951  | OK     | 39.1016  | 36.5109   |
| Fam115a       | chr6:42672546-42693059    | OK     | 52.2636  | 48.7989   |
| Btbd7         | chr12:102784647-102878406 | OK     | 5.00568  | 4.67352   |
| Lrp11         | chr10:7589799-7625477     | OK     | 96.7773  | 90.3487   |
| Babam1        | chr8:71396854-71404772    | OK     | 34.512   | 32.2194   |
| Ephx4         | chr5:107403512-107430031  | OK     | 8.90244  | 8.31098   |
| Zfp68         | chr5:138603651-138619743  | OK     | 6.77947  | 6.32905   |
| Cend1         | chr7:141426450-141429420  | OK     | 266.638  | 248.899   |
| Pip5k1c       | chr10:81292971-81319974   | OK     | 53.8979  | 50.3022   |
| Gtf2h4        | chr17:35667738-35673682   | OK     | 8.35494  | 7.79714   |
| Emc4          | chr2:112266313-112368027  | OK     | 82.7538  | 77.2245   |
| Polr3h        | chr15:81872462-81926213   | OK     | 7.99741  | 7.46287   |
| C130046K22Rik | chr11:103697723-103725573 | OK     | 2.9089   | 2.71415   |
| Ppp4r1        | chr17:65783354-65841926   | OK     | 10.8553  | 10.1276   |
| Gtf3c2        | chr5:30933142-31348845    | OK     | 12.6113  | 11.7655   |
| Nup54         | chr5:92415539-92435199    | OK     | 5.2142   | 4.8642    |
| Cadps         | chr14:12372562-12823079   | OK     | 141.394  | 131.865   |
| Gm5801        | chr4:155943812-155959604  | OK     | 11.0545  | 10.3083   |
| Atad1         | chr19:32672562-32712298   | OK     | 57.9421  | 54.0307   |
| Ppp2ca        | chr11:52098823-52122749   | OK     | 168.747  | 157.348   |
| Tln1          | chr4:43531512-43562583    | OK     | 37.1114  | 34.6      |
| Hist1h1b      | chr13:21779831-21780625   | NOTEST | 0.211207 | 0.196879  |
| Zscan21       | chr5:138116904-138134265  | OK     | 9.80489  | 9.13948   |
| Pard6a        | chr8:105701147-105703494  | OK     | 11.6128  | 10.8247   |

|               |                           |        |          |         |
|---------------|---------------------------|--------|----------|---------|
| Cox15         | chr19:43689688-43753000   | OK     | 8.4219   | 7.84987 |
| Rpap3         | chr15:97675104-97705822   | OK     | 10.0393  | 9.35656 |
| Ktn1          | chr14:47663755-47736564   | OK     | 22.5769  | 21.041  |
| Nbn           | chr4:15957966-15992589    | OK     | 8.75228  | 8.15572 |
| St6galnac6    | chr2:32599708-32620809    | OK     | 26.0093  | 24.2362 |
| Etfdh         | chr3:79603787-79628767    | OK     | 24.3771  | 22.7142 |
| Homez         | chr14:54852736-54864158   | OK     | 2.68457  | 2.50099 |
| Txk           | chr5:72695977-72752777    | NOTEST | 0.129826 | 0.12094 |
| Golph3        | chr15:12321495-12351267   | OK     | 57.22    | 53.3015 |
| Zxdc          | chr6:90369493-90403486    | OK     | 5.34511  | 4.97887 |
| Pfn4          | chr12:4769294-4778266     | OK     | 1.35675  | 1.26378 |
| Trmt61b       | chr17:71552060-71598761   | OK     | 6.30128  | 5.86933 |
| Vps52         | chr17:33955881-33966488   | OK     | 22.2934  | 20.7645 |
| Gm14325       | chr2:177828990-177840318  | OK     | 5.12281  | 4.77133 |
| Akr7a5        | chr4:139310743-139318786  | OK     | 12.3657  | 11.517  |
| Tob1          | chr11:94211453-94215492   | OK     | 15.1824  | 14.1352 |
| Nhlrc2        | chr19:56548260-56598846   | OK     | 3.60324  | 3.35462 |
| Bnip3         | chr7:138890835-138909506  | OK     | 57.8248  | 53.8345 |
| Pcdhgc3       | chr18:36930284-37841872   | OK     | 24.4794  | 22.7898 |
| R3hdm2        | chr10:127390310-127499384 | OK     | 17.8462  | 16.6144 |
| Eif2b4        | chr5:30933142-31348845    | OK     | 19.2108  | 17.884  |
| Slc31a1       | chr4:62360700-62391769    | OK     | 15.9799  | 14.8729 |
| Slc41a2       | chr10:83231138-83337817   | OK     | 15.0601  | 14.0162 |
| Selo          | chr15:89089106-89123150   | OK     | 15.2361  | 14.1787 |
| BC023829      | chrX:70460055-70477043    | OK     | 14.6358  | 13.6195 |
| Mrpl55        | chr11:59202516-59206002   | OK     | 23.2242  | 21.6106 |
| Fstl1         | chr16:37777054-37836516   | OK     | 871.161  | 810.597 |
| Aftph         | chr11:20685084-20741556   | OK     | 21.2771  | 19.7976 |
| 4930453N24Rik | chr16:64766104-64770939   | OK     | 13.0147  | 12.1097 |
| Scap          | chr9:110333287-110384949  | OK     | 22.7079  | 21.128  |
| Ddx19a        | chr8:110974990-110997823  | OK     | 5.53563  | 5.15045 |
| Ndufa1        | chrX:37187588-37191238    | OK     | 105.91   | 98.5294 |
| Utp6          | chr11:79933955-79962387   | OK     | 16.4598  | 15.3117 |
| Repin1        | chr6:48593882-48599082    | OK     | 5.28037  | 4.91066 |
| Psmc5         | chr2:34852088-34870962    | OK     | 36.9534  | 34.3631 |
| Ndufb7        | chr8:83566757-83571623    | OK     | 128.168  | 119.179 |
| Neurl4        | chr11:69901815-69913824   | OK     | 19.5776  | 18.2034 |
| Kctd7         | chr5:130144887-130155808  | OK     | 8.31264  | 7.7283  |
| Usp42         | chr5:143710325-143732280  | OK     | 3.37573  | 3.13833 |
| Napg          | chr18:62977915-62999451   | OK     | 62.6115  | 58.2005 |
| 1700003E16Rik | chr6:83156403-83162975    | OK     | 2.45934  | 2.28604 |
| Tnfaip3       | chr10:19000909-19015410   | OK     | 1.55295  | 1.44348 |
| Drg2          | chr11:60454616-60468705   | OK     | 31.7719  | 29.5303 |
| Jag2          | chr12:112908589-112929495 | OK     | 16.8313  | 15.6406 |
| Gpx4          | chr10:79697304-80369637   | OK     | 36.3283  | 33.7579 |
| Rufy1         | chr11:50389302-50431111   | OK     | 6.55702  | 6.09299 |
| Chmp3         | chr6:71543853-71581574    | OK     | 94.7664  | 88.059  |
| Pdp2          | chr8:104446718-104624396  | OK     | 2.42075  | 2.24935 |
| Nudcd1        | chr15:44375226-44437685   | OK     | 6.4747   | 6.01626 |
| Inpp5e        | chr2:26389347-26409219    | OK     | 9.52923  | 8.85127 |
| Pdcd4         | chr19:53892230-54033278   | OK     | 23.0767  | 21.4328 |
| Pcdhga9       | chr18:36930284-37841872   | OK     | 1.85381  | 1.72169 |
| Aamp          | chr1:74279839-74284738    | OK     | 61.2917  | 56.9231 |

|               |                           |        |          |          |
|---------------|---------------------------|--------|----------|----------|
| Sympk         | chr7:19024376-19054622    | OK     | 29.3568  | 27.2637  |
| Yipf3         | chr17:46248079-46252537   | OK     | 35.6401  | 33.0987  |
| Tnks1bp1      | chr2:85050459-85073048    | OK     | 21.1297  | 19.6212  |
| Cpsf2         | chr12:101975973-102005993 | OK     | 15.9295  | 14.7919  |
| 2810006K23Rik | chr5:124328088-124341852  | OK     | 6.23051  | 5.78445  |
| 2310067B10Rik | chr11:115765432-115799033 | OK     | 11.9756  | 11.1179  |
| Phc3          | chr3:30899294-30969415    | OK     | 6.76805  | 6.28322  |
| 4930429B21Rik | chr3:32334793-32367438    | OK     | 1.59659  | 1.48219  |
| Cask          | chrX:13517080-13846556    | OK     | 13.2777  | 12.3253  |
| Armcx2        | chrX:134804141-134809221  | OK     | 51.8518  | 48.1316  |
| Abhd17a       | chr10:80583648-80590341   | OK     | 59.104   | 54.8575  |
| Insig2        | chr1:121304352-121332589  | OK     | 19.0401  | 17.6708  |
| Wdr37         | chr13:8802965-8871736     | OK     | 28.8778  | 26.7989  |
| Rsl24d1       | chr9:73113468-73123333    | OK     | 20.0762  | 18.6259  |
| Adprhl2       | chr4:126316350-126321703  | OK     | 8.35293  | 7.74944  |
| Ccrn4l        | chr3:51224446-51251654    | OK     | 6.70811  | 6.22338  |
| Armc9         | chr1:86154779-86278284    | OK     | 5.93238  | 5.50316  |
| Zfp346        | chr13:55105308-55135071   | OK     | 6.62234  | 6.14318  |
| Spcs1         | chr14:30999825-31019131   | OK     | 107.153  | 99.3891  |
| Wbp1          | chr6:83119043-83121461    | OK     | 17.3874  | 16.1252  |
| Sdhb          | chr4:140961270-140979192  | OK     | 111.564  | 103.463  |
| Tma7          | chr9:109077987-109082381  | OK     | 30.2979  | 28.0942  |
| Mga           | chr2:119897227-119969581  | OK     | 4.53661  | 4.20602  |
| Nod2          | chr8:88647346-88688474    | NOTEST | 0.635053 | 0.588746 |
| Sh3bp2        | chr5:34525783-34563639    | NOTEST | 0.651237 | 0.603738 |
| Pms2          | chr5:143910000-143931756  | OK     | 3.54942  | 3.29049  |
| Rnaseh2a      | chr8:84956609-84966011    | OK     | 8.90313  | 8.25279  |
| Anks1         | chr17:27909305-28062779   | OK     | 9.75897  | 9.04419  |
| Mtg2          | chr2:180070592-180085902  | OK     | 5.67256  | 5.25697  |
| Etv5          | chr16:22381312-22439570   | OK     | 31.2057  | 28.9169  |
| Snrpb2        | chr2:143063068-143072052  | OK     | 27.6349  | 25.6056  |
| Maged1        | chrX:94535473-94542074    | OK     | 226.144  | 209.53   |
| Rnmt          | chr18:68300354-68324852   | OK     | 15.4316  | 14.2972  |
| Atp8b2        | chr3:89939480-89963332    | OK     | 27.4345  | 25.416   |
| Dcaf5         | chr12:80335846-80436601   | OK     | 20.384   | 18.8836  |
| 1700052N19Rik | chr10:4432604-4455140     | OK     | 8.63949  | 8.00133  |
| Urm1          | chr2:29827388-29844996    | OK     | 29.2615  | 27.0997  |
| Rps6ka3       | chrX:159255781-159368244  | OK     | 37.0186  | 34.2809  |
| Ski           | chr4:155154074-155222535  | OK     | 19.1563  | 17.7387  |
| Tmem69        | chr4:116551527-116555943  | OK     | 5.4732   | 5.06792  |
| Hmx1          | chr5:35389116-35392872    | OK     | 2.67929  | 2.48088  |
| A330035P11Rik | chr14:122097938-122106974 | NOTEST | 0.199717 | 0.184924 |
| Gm11696       | chr11:109354777-109401369 | OK     | 1.22708  | 1.13611  |
| Cln3          | chr7:126571399-126584280  | OK     | 6.94954  | 6.43353  |
| Tmem120a      | chr5:135735489-135744172  | OK     | 14.1256  | 13.0764  |
| Raf1          | chr6:115601937-115676635  | OK     | 37.7445  | 34.9392  |
| Tmem117       | chr15:94629184-95096097   | OK     | 30.0633  | 27.8256  |
| Iigp1         | chr18:60376028-60392629   | OK     | 3.01302  | 2.78868  |
| Mtpn          | chr6:35508823-35539888    | OK     | 70.695   | 65.4236  |
| Cenpb         | chr2:131127411-131604824  | OK     | 48.5075  | 44.8871  |
| Scly          | chr1:91298337-91321080    | OK     | 9.32179  | 8.62487  |
| Strada        | chr11:106162973-106193603 | OK     | 11.0158  | 10.1919  |
| Apold1        | chr6:134982000-134986836  | OK     | 1.89699  | 1.75496  |

|          |                           |        |           |           |
|----------|---------------------------|--------|-----------|-----------|
| Txndc15  | chr13:55714649-55726228   | OK     | 31.8966   | 29.508    |
| Gpr107   | chr2:31152315-31216567    | OK     | 19.8711   | 18.3826   |
| Trip11   | chr12:101837371-101913171 | OK     | 8.02058   | 7.4192    |
| Mcm9     | chr10:53537323-53630439   | OK     | 1.35504   | 1.25336   |
| Zfp454   | chr11:50872722-50887443   | OK     | 1.46282   | 1.35305   |
| Sar1b    | chr11:51763662-51791953   | OK     | 32.58     | 30.1345   |
| Gtpbp4   | chr13:8972477-8996012     | OK     | 14.9693   | 13.8457   |
| Pparg    | chr6:115361220-115490401  | OK     | 0.824458  | 0.762537  |
| H1f0     | chr15:79028211-79030500   | OK     | 38.3281   | 35.4491   |
| Gm608    | chr16:44173396-44227466   | OK     | 2.65627   | 2.45675   |
| Acbd6    | chr1:155558119-155687233  | OK     | 20.8831   | 19.3128   |
| Tbl1xr1  | chr3:22076651-22216594    | OK     | 14.1064   | 13.0449   |
| Syngap1  | chr17:26941451-26970645   | OK     | 3.06474   | 2.83396   |
| Lnp      | chr2:74514836-74578948    | OK     | 23.434    | 21.6657   |
| Rptor    | chr11:119602994-119899591 | OK     | 12.5553   | 11.6079   |
| Cdk12    | chr11:98203304-98253540   | OK     | 6.4299    | 5.94447   |
| Son      | chr16:91647823-91679192   | OK     | 47.0546   | 43.5007   |
| Rmnd1    | chr10:4403168-4432352     | OK     | 2.87846   | 2.66102   |
| Blvra    | chr2:127070656-127097084  | OK     | 18.8608   | 17.4315   |
| D2Wsu81e | chr2:30171523-30178459    | OK     | 10.6518   | 9.84375   |
| Amigo3   | chr9:108049289-108079375  | OK     | 36.2604   | 33.5089   |
| Bcl6     | chr16:23965051-23988612   | OK     | 9.61179   | 8.88109   |
| Supt6    | chr11:78206748-78245703   | OK     | 32.9555   | 30.449    |
| Pou2f1   | chr1:165788680-166002634  | OK     | 1.81265   | 1.6747    |
| Scrib    | chr15:76047185-76069730   | OK     | 4.34482   | 4.01376   |
| Sh2b1    | chr7:126466992-126475130  | OK     | 16.8166   | 15.5352   |
| Gm13251  | chr4:146270384-146469440  | NOTEST | 0.322531  | 0.297946  |
| Cers2    | chr3:95315251-95357202    | OK     | 48.625    | 44.916    |
| Fem1c    | chr18:46504605-46525971   | OK     | 9.25039   | 8.54479   |
| Oard1    | chr17:48409999-48417270   | OK     | 9.81298   | 9.06393   |
| Rbm12    | chr2:156071840-156111965  | OK     | 6.96465   | 6.43281   |
| Slc30a9  | chr5:67306956-67356145    | OK     | 80.3372   | 74.1991   |
| Mtmr9    | chr14:63523609-63543953   | OK     | 61.2755   | 56.5906   |
| Isg20l2  | chr3:87930313-87940686    | OK     | 4.98942   | 4.60706   |
| Hdac6    | chrX:7930121-7947889      | OK     | 8.09396   | 7.47251   |
| Ap1b1    | chr11:4938755-5042794     | OK     | 60.9556   | 56.27     |
| Pdcd6    | chr13:74303120-74317326   | OK     | 28.3738   | 26.1923   |
| Ddx3y    | chrY:1260714-1286613      | OK     | 16.8977   | 15.5934   |
| Ncoa3    | chr2:165992636-166073242  | OK     | 5.99267   | 5.52984   |
| Syncrip  | chr9:88449363-88482397    | OK     | 13.4956   | 12.4524   |
| Tbl3     | chr17:24700652-24707653   | OK     | 13.2708   | 12.2434   |
| Pdgfa    | chr5:138976971-138994953  | OK     | 30.5855   | 28.2175   |
| Lace1    | chr10:42312584-42478565   | OK     | 6.05598   | 5.58673   |
| Nus1     | chr10:52417546-52440192   | OK     | 26.6755   | 24.6059   |
| Ears2    | chr7:122038820-122067063  | OK     | 2.27703   | 2.10025   |
| Vac14    | chr8:110618637-110720398  | OK     | 10.6658   | 9.83763   |
| Naf1     | chr8:66860216-66890564    | OK     | 3.62534   | 3.34366   |
| Degs1    | chr1:182275769-182282759  | OK     | 150.767   | 139.047   |
| Man2b2   | chr5:36806812-36830649    | OK     | 11.06     | 10.1997   |
| Hkdc1    | chr10:62383136-62422457   | NOTEST | 0.0812916 | 0.0749633 |
| Sncaip   | chr18:52767810-52915931   | OK     | 0.845859  | 0.78001   |
| Serinc1  | chr10:57515774-57532529   | OK     | 445.666   | 410.967   |
| Ndel1    | chr11:68821445-68853131   | OK     | 68.7472   | 63.3938   |



|               |                           |        |           |           |
|---------------|---------------------------|--------|-----------|-----------|
| S100a11       | chr3:93520495-93526288    | OK     | 27.0381   | 24.9312   |
| Coa3          | chr11:101277969-101278948 | OK     | 99.4551   | 91.7021   |
| Mturn         | chr6:54681623-54703855    | OK     | 58.6502   | 54.0781   |
| Hlcs          | chr16:94129305-94287856   | OK     | 10.4645   | 9.64824   |
| Emcn          | chr3:137341077-137431069  | OK     | 11.6797   | 10.7686   |
| Rnf167        | chr11:70647588-70651414   | OK     | 31.6244   | 29.1567   |
| Dhrs7b        | chr11:60830630-60858423   | OK     | 13.4829   | 12.4301   |
| Nbr1          | chr11:101552106-101581951 | OK     | 40.3203   | 37.1704   |
| Hectd1        | chr12:51743721-51829536   | OK     | 25.2524   | 23.2781   |
| Abca17        | chr17:24264278-24347252   | NOTEST | 0.126958  | 0.117032  |
| Gabpa         | chr16:84827870-84863778   | OK     | 6.88878   | 6.34946   |
| Zfp110        | chr7:12834809-12850584    | OK     | 7.39343   | 6.81331   |
| Ttl           | chr2:129065946-129096283  | OK     | 105.413   | 97.1377   |
| Usp14         | chr18:9958179-10030149    | OK     | 65.4902   | 60.3407   |
| Cnot6l        | chr5:96070332-96161990    | OK     | 4.71639   | 4.34419   |
| Nlk           | chr11:78567167-78697425   | OK     | 20.3418   | 18.7358   |
| Chd2          | chr7:73426651-73558395    | OK     | 5.39952   | 4.97312   |
| Ulk1          | chr5:110784488-110810081  | OK     | 16.7641   | 15.4402   |
| C230004F18Rik | chrX:61116377-61139460    | OK     | 3.18297   | 2.93102   |
| Gltp          | chr5:114669499-114690935  | OK     | 12.509    | 11.5177   |
| Anln          | chr9:22055459-22389206    | OK     | 2.30073   | 2.11837   |
| Snrpn         | chr7:59982500-60140219    | OK     | 328.315   | 302.284   |
| Gpr89         | chr3:96871065-96905298    | OK     | 19.406    | 17.8657   |
| Tor2a         | chr2:32757025-32775633    | OK     | 4.09785   | 3.77251   |
| Ganc          | chr2:120355308-120504919  | OK     | 3.52682   | 3.24678   |
| Ddost         | chr4:138304737-138312611  | OK     | 42.0277   | 38.6873   |
| Frmd3         | chr4:74013602-74202214    | OK     | 44.3733   | 40.8435   |
| Rab22a        | chr2:173659844-173702182  | OK     | 20.0517   | 18.4558   |
| Senp1         | chr15:98038743-98132447   | OK     | 1.72619   | 1.5888    |
| Cept1         | chr3:106481985-106547761  | OK     | 23.1459   | 21.3019   |
| Fam151b       | chr13:92449619-92484031   | OK     | 2.31142   | 2.12721   |
| AF529169      | chr9:89590034-89622986    | OK     | 10.6195   | 9.77246   |
| Golga7        | chr8:23241325-23257080    | OK     | 38.0894   | 35.0501   |
| Prune2        | chr19:16956117-17223932   | OK     | 267.7     | 246.3     |
| Mrpl17        | chr7:105803781-105811087  | OK     | 5.67967   | 5.22543   |
| Pacs2         | chr12:113014507-113074401 | OK     | 41.5004   | 38.1806   |
| Park7         | chr4:150897132-150909921  | OK     | 156.285   | 143.78    |
| Ago3          | chr4:126340677-126429542  | OK     | 4.50042   | 4.13984   |
| Asb7          | chr7:66644566-66689561    | OK     | 4.8246    | 4.438     |
| Pafah1b2      | chr9:45965310-45984871    | OK     | 112.152   | 103.139   |
| Fbxl14        | chr6:119432530-119544347  | OK     | 6.38387   | 5.87061   |
| A4galt        | chr15:83226721-83251774   | OK     | 22.0205   | 20.2485   |
| Macf1         | chr4:123349632-123684360  | OK     | 17.5885   | 16.1727   |
| 1700007G11Rik | chr5:98329303-98802019    | NOTEST | 0.692631  | 0.636822  |
| Ulk4          | chr9:120964453-121277172  | NOTEST | 0.323992  | 0.29788   |
| Pgpep1        | chr8:70646435-70659738    | OK     | 4.32861   | 3.97971   |
| Rfc4          | chr16:23107467-23127730   | OK     | 3.06267   | 2.81581   |
| Arhgap20      | chr9:51765351-51875885    | OK     | 4.72863   | 4.34737   |
| Myh13         | chr11:67327102-67371502   | NOTEST | 0.0775103 | 0.0712603 |
| Alkbh6        | chr7:30308752-30314303    | OK     | 19.0094   | 17.4756   |
| Tanc1         | chr2:59612041-59846213    | OK     | 18.6077   | 17.1042   |
| Fam50a        | chrX:74313032-74320149    | OK     | 16.7783   | 15.4167   |
| Gpr26         | chr7:131966459-131985633  | OK     | 1.35071   | 1.2411    |

|          |                           |        |           |           |
|----------|---------------------------|--------|-----------|-----------|
| Trim44   | chr2:102300118-102400900  | OK     | 49.0071   | 45.0299   |
| Kctd6    | chr14:8214147-8223569     | OK     | 23.6592   | 21.7359   |
| Tmem82   | chr4:141614232-141618633  | NOTEST | 0.0546913 | 0.0502421 |
| Itgb3bp  | chr4:99765401-99829118    | OK     | 1.93439   | 1.77697   |
| Echdc1   | chr10:29313165-29362442   | OK     | 17.6226   | 16.1864   |
| Hccs     | chrX:169311530-169320343  | OK     | 13.3597   | 12.2701   |
| Ubl3     | chr5:148504630-148552788  | OK     | 70.3481   | 64.6085   |
| Mrps31   | chr8:22411339-22429665    | OK     | 12.1712   | 11.1771   |
| Wdr19    | chr5:65199695-65260415    | OK     | 5.05695   | 4.6431    |
| Vdac1    | chr11:52361114-52389396   | OK     | 339.001   | 311.258   |
| Clcn3    | chr8:60910388-60983311    | OK     | 47.145    | 43.2867   |
| Prkab2   | chr3:97658211-97673067    | OK     | 25.0422   | 22.9926   |
| Furin    | chr7:80389193-80405431    | OK     | 12.9157   | 11.8553   |
| Copa     | chr1:172066012-172122332  | OK     | 83.019    | 76.2      |
| Fam221b  | chr4:43659621-43668859    | NOTEST | 0.528767  | 0.485319  |
| Picalm   | chr7:90130231-90209447    | OK     | 62.1964   | 57.0847   |
| Lsm14a   | chr7:34344719-34389540    | OK     | 22.6855   | 20.8205   |
| Adap1    | chr5:139271875-139325464  | OK     | 85.2141   | 78.2086   |
| Ufsp2    | chr8:45975527-45999850    | OK     | 31.2736   | 28.702    |
| Uqcrb    | chr13:66900620-66905350   | OK     | 36.5603   | 33.5531   |
| Txndc17  | chr11:72207553-72210487   | OK     | 39.3982   | 36.157    |
| Parl     | chr16:20279820-20302362   | OK     | 24.7862   | 22.746    |
| Ints12   | chr3:133091952-133110985  | OK     | 4.14983   | 3.80665   |
| Zfp747   | chr7:127372536-127376050  | OK     | 2.43221   | 2.23103   |
| Rtn4     | chr11:29692897-30026033   | OK     | 270.371   | 247.988   |
| Chac1    | chr2:119351241-119354327  | OK     | 3.1028    | 2.84557   |
| Atg4b    | chr1:93755032-93789529    | OK     | 42.1735   | 38.6773   |
| Mtch2    | chr2:90847154-90866634    | OK     | 46.6066   | 42.7408   |
| Tmem170  | chr8:111864897-111876675  | OK     | 3.57655   | 3.27978   |
| Tbc1d19  | chr5:53809626-53904380    | OK     | 30.9194   | 28.3528   |
| Slc35e3  | chr10:117733677-117746358 | OK     | 13.9582   | 12.7952   |
| Zxda     | chrX:94791284-94798289    | OK     | 1.30905   | 1.19992   |
| Fastkd2  | chr1:63730624-63753385    | OK     | 9.0572    | 8.30017   |
| Atg13    | chr2:91674611-91710592    | OK     | 29.3174   | 26.865    |
| Saal1    | chr7:46686107-46710651    | OK     | 1.54866   | 1.41903   |
| Cd2ap    | chr17:42792950-42876424   | OK     | 22.7661   | 20.8596   |
| Adnp     | chr2:168180964-168207062  | OK     | 27.9918   | 25.6446   |
| Tmem184c | chr8:77595977-77610653    | OK     | 68.2989   | 62.571    |
| Mcmbp    | chr7:128696458-128740429  | OK     | 5.56331   | 5.09674   |
| Pnck     | chrX:73655991-73660070    | OK     | 7.95354   | 7.28647   |
| 38230    | chr11:53519735-53544096   | OK     | 28.1581   | 25.7955   |
| Atp5f1   | chr3:105942862-105969760  | OK     | 51.9218   | 47.5601   |
| Nipbl    | chr15:8289823-8444463     | OK     | 5.31762   | 4.87039   |
| Msrp3    | chr10:120781100-120898971 | OK     | 4.15776   | 3.80772   |
| Zfp691   | chr4:119169517-119174195  | OK     | 2.64742   | 2.42452   |
| Pelo     | chr13:114958080-115101964 | OK     | 10.6948   | 9.7915    |
| Zscan2   | chr7:80862107-80876513    | OK     | 2.00789   | 1.83823   |
| Fam104a  | chr11:113649528-113684151 | OK     | 11.9377   | 10.929    |
| Pcdhga5  | chr18:36930284-37841872   | OK     | 3.00544   | 2.75124   |
| Nup214   | chr2:31974449-32053975    | OK     | 6.85317   | 6.27317   |
| Gid8     | chr2:180710225-180721599  | OK     | 16.4011   | 15.0112   |
| Tnrc18   | chr5:142724604-142817387  | OK     | 8.14999   | 7.45925   |
| Tmem41b  | chr7:109972186-109986230  | OK     | 14.0623   | 12.8695   |

|               |                           |        |          |           |
|---------------|---------------------------|--------|----------|-----------|
| Pgm2          | chr4:99929450-99987294    | OK     | 59.8389  | 54.7576   |
| Asic4         | chr1:75450509-75474340    | NOTEST | 0.030599 | 0.0279993 |
| Trdmt1        | chr2:13510160-13544664    | OK     | 2.17549  | 1.99049   |
| Ppp6r2        | chr15:89211558-89286261   | OK     | 25.6931  | 23.508    |
| Phf2          | chr13:48801749-48870885   | OK     | 6.35394  | 5.8134    |
| Samd9l        | chr6:3372257-3399571      | OK     | 3.62134  | 3.31315   |
| Ints4         | chr7:97480955-97541398    | OK     | 16.1333  | 14.7598   |
| Vrk1          | chr12:106010262-106077410 | OK     | 4.39673  | 4.02237   |
| P4ha1         | chr10:59323295-59373304   | OK     | 14.2054  | 12.9945   |
| E130317F20Rik | chr10:79697304-80369637   | OK     | 0.868161 | 0.794152  |
| Elp2          | chr18:24603960-24638830   | OK     | 39.6609  | 36.2785   |
| Clpb          | chr7:101663767-101790168  | OK     | 11.7709  | 10.7665   |
| Nckipsd       | chr9:108808379-108818366  | OK     | 19.918   | 18.2174   |
| Sptssa        | chr12:54645373-54656572   | OK     | 32.0593  | 29.3187   |
| Sumf1         | chr6:108107020-108185583  | OK     | 19.8247  | 18.1291   |
| Nr2f6         | chr8:71374118-71381952    | OK     | 9.08482  | 8.30753   |
| Gemin5        | chr11:58120000-58168539   | OK     | 6.44124  | 5.8897    |
| Zfp952        | chr17:32993138-33005457   | OK     | 4.00665  | 3.66355   |
| Sox6          | chr7:115470871-116038744  | OK     | 1.61625  | 1.47742   |
| Adpgk         | chr9:59291571-59316200    | OK     | 10.3101  | 9.42366   |
| Cnot1         | chr8:95719450-95821728    | OK     | 14.9776  | 13.6887   |
| Mrpl12        | chr11:120484668-120488754 | OK     | 45.2533  | 41.3567   |
| Cdk5r1        | chr11:80477045-80481179   | OK     | 21.2776  | 19.4453   |
| Ccdc127       | chr13:74350316-74365783   | OK     | 25.9113  | 23.6786   |
| Gpatch2l      | chr12:86241877-86291368   | OK     | 8.06012  | 7.36559   |
| Rnf187        | chr11:58932287-58938906   | OK     | 215.53   | 196.956   |
| BC004004      | chr17:29268787-29302887   | OK     | 25.6704  | 23.4569   |
| Oxsm          | chr14:16238658-16311926   | OK     | 4.01728  | 3.67081   |
| Zfp516        | chr18:82910878-83005314   | OK     | 7.13062  | 6.51552   |
| Cpsf1         | chr15:76576358-76607591   | OK     | 8.47002  | 7.73925   |
| Ly75          | chr2:60293759-60383231    | OK     | 1.94993  | 1.7817    |
| Trim45        | chr3:100922492-100936925  | OK     | 4.08478  | 3.73173   |
| Pex5l         | chr3:32949633-33143191    | OK     | 53.5443  | 48.915    |
| Chmp7         | chr14:69716978-69732570   | OK     | 36.0481  | 32.9298   |
| Dlgap1        | chr17:70424791-70821413   | OK     | 14.6749  | 13.403    |
| Fancm         | chr12:65075605-65132058   | OK     | 1.95684  | 1.78708   |
| Nfya          | chr17:48386884-48409820   | OK     | 6.73111  | 6.14684   |
| Dpp9          | chr17:56186681-56218889   | OK     | 26.4732  | 24.175    |
| Zfp532        | chr18:64887755-65751537   | OK     | 4.30053  | 3.92684   |
| Heatr1        | chr13:12395374-12438893   | OK     | 3.87757  | 3.54043   |
| Tyw1          | chr5:130255618-130341567  | OK     | 3.83165  | 3.49845   |
| Ddx4          | chr13:112598332-112652310 | OK     | 1.14457  | 1.04485   |
| Tmem8c        | chr2:27061635-27072161    | NOTEST | 0.64165  | 0.585675  |
| Ube4b         | chr4:149328415-149426631  | OK     | 43.2191  | 39.4486   |
| Nif3l1        | chr1:58447632-58462276    | OK     | 12.2067  | 11.1413   |
| Ncstn         | chr1:172066012-172122332  | OK     | 36.8327  | 33.6157   |
| Chrn3         | chr8:27368710-27399730    | OK     | 4.60149  | 4.19937   |
| Kdm3a         | chr6:71588969-71632917    | OK     | 4.88886  | 4.46141   |
| Mrps9         | chr1:42851232-42905683    | OK     | 23.5451  | 21.4854   |
| Wdr45b        | chr11:121327202-121354447 | OK     | 24.7847  | 22.615    |
| Mex3a         | chr3:88532394-88541394    | NOTEST | 0.323512 | 0.295191  |
| Actr10        | chr12:70937856-70964717   | OK     | 38.7342  | 35.3431   |
| 0610010K14Rik | chr11:70235203-70237914   | OK     | 13.9363  | 12.7162   |

|               |                           |        |           |           |
|---------------|---------------------------|--------|-----------|-----------|
| Klhl17        | chr4:156229043-156234857  | OK     | 12.426    | 11.3372   |
| Nup107        | chr10:117750642-117792705 | OK     | 8.96685   | 8.18102   |
| Tmem70        | chr1:16665190-16678275    | OK     | 21.0844   | 19.2365   |
| Apoa1bp       | chr3:88056522-88058495    | OK     | 58.4603   | 53.3309   |
| Zbtb33        | chrX:38189792-38252481    | OK     | 5.87104   | 5.35544   |
| Zfp938        | chr10:82224855-82241275   | OK     | 12.306    | 11.2245   |
| Ssr4          | chrX:73787027-73790828    | OK     | 42.7931   | 39.0305   |
| Alg12         | chr15:88805242-88819318   | OK     | 6.94549   | 6.3338    |
| Cirh1a        | chr8:106893639-106923094  | OK     | 11.0062   | 10.0354   |
| Rims1         | chr1:22288421-22432843    | OK     | 8.01933   | 7.31129   |
| Emc6          | chr11:73175502-73177042   | OK     | 21.1078   | 19.2419   |
| Ppapdc3       | chr2:32095650-32110820    | OK     | 8.86898   | 8.08458   |
| Tatdn2        | chr6:113697498-113711068  | OK     | 12.6023   | 11.4863   |
| Btrc          | chr19:45363733-45533343   | OK     | 17.1866   | 15.6643   |
| Alyref2       | chr1:171503477-171504750  | OK     | 1.71712   | 1.56469   |
| Akr1c14       | chr13:4059590-4090422     | OK     | 3.18211   | 2.89931   |
| Eif4ebp2      | chr10:61432496-61452669   | OK     | 7.87133   | 7.17172   |
| Snrnp200      | chr2:127208403-127240451  | OK     | 25.517    | 23.246    |
| Aqp11         | chr7:97726378-97738247    | OK     | 5.4632    | 4.97641   |
| Zfp91         | chr19:12763527-12796123   | OK     | 28.0563   | 25.5556   |
| Trpc1         | chr9:95706628-95750358    | OK     | 11.4667   | 10.4444   |
| Ttc38         | chr15:85832303-85858822   | OK     | 6.18803   | 5.63611   |
| Asna1         | chr8:85017930-85025278    | OK     | 63.1809   | 57.545    |
| Herc6         | chr6:57580991-57665136    | OK     | 1.24288   | 1.13197   |
| Top1mt        | chr15:75657032-75678790   | OK     | 6.02102   | 5.48329   |
| Kdm5a         | chr6:120324321-120444574  | OK     | 5.80029   | 5.28199   |
| Rdh12         | chr12:79208913-79222661   | NOTEST | 0.811649  | 0.739094  |
| Jup           | chr11:100368855-100397790 | OK     | 54.6737   | 49.7859   |
| Wdr90         | chr17:25838837-25861515   | NOTEST | 0.645088  | 0.587408  |
| Zfp748        | chr13:67538640-67553152   | OK     | 2.27593   | 2.07239   |
| Tbl1x         | chrX:77511226-77660265    | OK     | 17.5377   | 15.9685   |
| Krt83         | chr15:101431013-101491512 | NOTEST | 0.0417305 | 0.0379961 |
| Fat3          | chr9:15910192-16378231    | OK     | 4.07559   | 3.70985   |
| Cenpq         | chr17:40923054-40934551   | OK     | 4.10887   | 3.74009   |
| Cd300a        | chr11:114890040-114904651 | NOTEST | 0.206307  | 0.187787  |
| Dnajc9        | chr14:20384637-20388910   | OK     | 12.8856   | 11.7287   |
| Tvp23a        | chr16:10411937-10447350   | OK     | 34.183    | 31.1093   |
| Psmc6         | chr14:45329823-45349071   | OK     | 103.893   | 94.5498   |
| Zdhhc17       | chr10:110941779-111010066 | OK     | 44.1132   | 40.146    |
| Slc16a7       | chr10:125227484-125328535 | OK     | 4.99235   | 4.54293   |
| Mrpl28        | chr17:26123502-26126613   | OK     | 35.7899   | 32.5636   |
| Dazap2        | chr15:100615661-100620761 | OK     | 69.6562   | 63.3768   |
| Sf3b6         | chr12:4817607-4827659     | OK     | 23.6492   | 21.5138   |
| Nrxn2         | chr19:6418737-6533217     | OK     | 46.2241   | 42.0434   |
| Mtmr3         | chr11:4480867-4594815     | OK     | 19.8438   | 18.0488   |
| Ptrhd1        | chr12:4133396-4240123     | OK     | 4.98387   | 4.53299   |
| Gm5           | chr5:150499746-150502219  | OK     | 1.64004   | 1.49157   |
| Klhl22        | chr16:17759620-17793382   | OK     | 19.637    | 17.859    |
| Zfp612        | chr8:110079733-110092752  | OK     | 5.99448   | 5.45155   |
| Spag9         | chr11:93996090-94126082   | OK     | 71.1027   | 64.6626   |
| 4632415L05Rik | chr3:19894870-19898984    | OK     | 6.40125   | 5.82093   |
| Spock3        | chr8:62951231-63357096    | OK     | 48.8951   | 44.461    |
| Ppat          | chr5:76913248-76967505    | OK     | 6.70926   | 6.10061   |

|               |                           |        |           |           |
|---------------|---------------------------|--------|-----------|-----------|
| Ccne1         | chr7:38097983-38107490    | OK     | 7.00212   | 6.36646   |
| Dnajc30       | chr5:135052956-135065365  | OK     | 13.3734   | 12.1592   |
| Setx          | chr2:29124991-29182471    | OK     | 8.84977   | 8.04533   |
| Tmem80        | chr7:141297175-141338783  | OK     | 11.6      | 10.5431   |
| 2810025M15Rik | chr1:157135182-157420236  | OK     | 6.48373   | 5.89277   |
| Ica1          | chr6:8630526-8778484      | OK     | 23.1468   | 21.034    |
| Fndc3a        | chr14:72537952-72710003   | OK     | 9.72627   | 8.83829   |
| Golga2        | chr2:32288252-32307921    | OK     | 32.5648   | 29.5851   |
| Pggt1b        | chr18:46239948-46280850   | OK     | 6.19299   | 5.62617   |
| Pik3c2a       | chr7:116337275-116443458  | OK     | 6.88168   | 6.2517    |
| 1110037F02Rik | chr4:11485957-11551143    | OK     | 6.90022   | 6.26807   |
| Htt           | chr5:34761739-34912534    | OK     | 17.9848   | 16.3364   |
| Aggf1         | chr13:95350682-95375357   | OK     | 15.4373   | 14.0203   |
| Nsun3         | chr16:62734851-62786716   | OK     | 2.99017   | 2.71561   |
| Ankrd27       | chr7:35586246-35639237    | OK     | 24.1329   | 21.9133   |
| Ap5m1         | chr14:49012143-49087723   | OK     | 7.25365   | 6.58629   |
| Samhd1        | chr2:157097528-157135222  | OK     | 10.5532   | 9.58198   |
| Epg5          | chr18:77938466-78035027   | OK     | 7.23139   | 6.56537   |
| Tnfrsf26      | chr7:143607684-143627845  | NOTEST | 0.0884214 | 0.0802712 |
| Rtn4ip1       | chr10:43901806-43947862   | OK     | 15.194    | 13.7914   |
| Fgf12         | chr16:28158583-28753243   | OK     | 95.9599   | 87.0974   |
| Cdv3          | chr9:103353101-103365780  | OK     | 28.9677   | 26.2884   |
| 6430562O15Rik | chr13:99344785-99415561   | NOTEST | 0.334891  | 0.303901  |
| L3mbtl1       | chr2:162943464-162974522  | OK     | 2.86888   | 2.60332   |
| Mgat1         | chr11:49244190-49263024   | OK     | 17.2867   | 15.6855   |
| Atxn1l        | chr8:109726450-109737739  | OK     | 8.27541   | 7.50879   |
| Cox6c         | chr15:35931975-35938246   | OK     | 251.122   | 227.847   |
| Rbm19         | chr5:120116512-120198971  | OK     | 3.39168   | 3.07727   |
| Akap1         | chr11:88830791-88864586   | OK     | 8.35161   | 7.57716   |
| Degs2         | chr12:108371152-108702306 | OK     | 0.888192  | 0.805667  |
| Mto1          | chr9:78448209-78474152    | OK     | 7.73593   | 7.017     |
| Olig1         | chr16:91269768-91271939   | NOTEST | 0.0467634 | 0.0424134 |
| Cdkl3         | chr11:52004220-52084667   | OK     | 3.44722   | 3.12645   |
| Tmem8b        | chr4:43668970-43692667    | OK     | 16.3965   | 14.8698   |
| Derl1         | chr15:57869501-57892418   | OK     | 31.7428   | 28.786    |
| Cnih4         | chr1:181150930-181168994  | OK     | 14.5698   | 13.2114   |
| Herc2         | chr7:56050154-56231798    | OK     | 32.1133   | 29.118    |
| Ttc19         | chr11:62281472-62457332   | OK     | 16.9621   | 15.3797   |
| Nmd3          | chr3:69722054-69749046    | OK     | 15.6547   | 14.1942   |
| Foxk1         | chr5:142401496-142462015  | OK     | 7.60638   | 6.89656   |
| Gltscr1       | chr7:15971261-15999495    | OK     | 2.48216   | 2.25047   |
| Tmem230       | chr2:132239491-132247788  | OK     | 24.6013   | 22.3044   |
| Prr12         | chr7:45027706-45052881    | OK     | 6.58155   | 5.96688   |
| Myg1          | chr15:102331708-102338138 | OK     | 16.0268   | 14.5232   |
| Tdrd3         | chr14:87416582-87545508   | OK     | 11.1173   | 10.0729   |
| AU021092      | chr16:5211818-5222299     | OK     | 1.05865   | 0.959185  |
| Zfp429        | chr13:67389327-67399767   | NOTEST | 0.756932  | 0.685715  |
| Pi4k2a        | chr19:42090434-42122218   | OK     | 49.4282   | 44.7736   |
| Elk1          | chrX:20933394-20950608    | OK     | 4.37038   | 3.95716   |
| Tmem66        | chr8:34154562-34170847    | OK     | 150.911   | 136.641   |
| Tmem106b      | chr6:13069758-13089269    | OK     | 29.0479   | 26.3012   |
| Tmem129       | chr5:33653215-33657832    | OK     | 14.037    | 12.7094   |
| Dcaf17        | chr2:71055743-71099142    | OK     | 1.81833   | 1.64601   |



|               |                           |        |           |           |
|---------------|---------------------------|--------|-----------|-----------|
| Cdk16         | chrX:20688492-20699877    | OK     | 95.6374   | 86.5716   |
| Elac2         | chr11:64979034-65162961   | OK     | 11.0119   | 9.96668   |
| Gtpbp8        | chr16:44738878-44746363   | OK     | 12.4791   | 11.2936   |
| Trim32        | chr4:65380802-66404483    | OK     | 33.366    | 30.1956   |
| Eif2b1        | chr5:124570213-124579057  | OK     | 14.9168   | 13.4986   |
| Pld3          | chr7:27532017-27553112    | OK     | 77.6648   | 70.2794   |
| Qser1         | chr2:104754792-104816696  | OK     | 3.31919   | 3.00343   |
| Zfp273        | chr13:67796593-67830985   | OK     | 1.49576   | 1.35331   |
| Herc1         | chr9:66350449-66514593    | OK     | 30.4366   | 27.5377   |
| Tubb4b        | chr2:25218744-25224702    | OK     | 445.965   | 403.487   |
| Klhl3         | chr13:58004956-58102428   | OK     | 2.24195   | 2.02839   |
| Eltd1         | chr3:151437881-151545081  | OK     | 5.52991   | 5.00293   |
| Tpp1          | chr7:105744846-105752207  | OK     | 16.193    | 14.6474   |
| Patl1         | chr19:11912398-11945096   | OK     | 5.76077   | 5.2107    |
| A830082N09Rik | chr10:33987215-33995055   | OK     | 2.70867   | 2.44997   |
| Nsun2         | chr13:69612015-69635779   | OK     | 23.3769   | 21.1433   |
| Ddx19b        | chr8:111003185-111031751  | OK     | 5.9948    | 5.42189   |
| BC049762      | chr11:51253650-51262951   | NOTEST | 0.433444  | 0.392018  |
| Acot6         | chr12:84100653-84109783   | OK     | 2.58795   | 2.34022   |
| Tdrp          | chr8:13952007-13974777    | OK     | 17.0787   | 15.443    |
| Zfp281        | chr1:136624900-136630391  | OK     | 6.42809   | 5.81244   |
| Zfp526        | chr7:25221450-25227505    | OK     | 2.26279   | 2.04603   |
| Lias          | chr5:65391496-65409207    | OK     | 22.528    | 20.3696   |
| Ttc17         | chr2:94300765-94406689    | OK     | 8.88633   | 8.03468   |
| Cdk7          | chr13:100669480-100730942 | OK     | 13.0895   | 11.8329   |
| Ankrd45       | chr1:161142711-161170507  | OK     | 7.33554   | 6.63128   |
| Wnt3a         | chr11:59248041-59290751   | NOTEST | 0.0475546 | 0.0429859 |
| Selt          | chr3:58576657-58593546    | OK     | 113.32    | 102.413   |
| Dcaf10        | chr4:45342100-45379722    | OK     | 5.68812   | 5.14011   |
| Senp8         | chr9:59734258-59750649    | OK     | 5.46427   | 4.93782   |
| Cdc42se1      | chr3:95181765-95236424    | OK     | 25.3501   | 22.9066   |
| Insr          | chr8:3150921-3279617      | OK     | 6.73199   | 6.08293   |
| Timm8b        | chr9:50603900-50625000    | OK     | 78.9626   | 71.3467   |
| Def8          | chr8:123442955-123463899  | OK     | 28.0677   | 25.3604   |
| Mllt4         | chr17:13716435-13905794   | OK     | 9.98801   | 9.02277   |
| Tcp111        | chr2:104679979-104712162  | OK     | 29.1479   | 26.33     |
| Wipf2         | chr11:98863597-98905578   | OK     | 8.95808   | 8.09036   |
| Zfp27         | chr7:29893336-29906567    | OK     | 3.07762   | 2.77941   |
| Btbd6         | chr12:112959861-113000621 | OK     | 11.9731   | 10.812    |
| Tpd52l1       | chr10:31332379-31445921   | OK     | 3.37785   | 3.05012   |
| Ipo9          | chr1:135382314-135430491  | OK     | 19.1368   | 17.2792   |
| Uso1          | chr5:92137937-92202795    | OK     | 38.0048   | 34.3065   |
| Slc45a4       | chr15:73580290-73624744   | OK     | 23.2557   | 20.9916   |
| Anxa6         | chr11:54978961-55033471   | OK     | 273.269   | 246.653   |
| Dhrs7         | chr12:72650352-72664828   | OK     | 33.7367   | 30.4483   |
| Ppp2r5e       | chr12:75450880-75596200   | OK     | 23.0649   | 20.8165   |
| Erich6        | chr3:58616299-58637207    | OK     | 0.913449  | 0.824304  |
| Abcf3         | chr16:20548602-20561603   | OK     | 26.1238   | 23.5742   |
| Ndst2         | chr14:20723729-20734562   | OK     | 2.65639   | 2.39706   |
| Acvr2a        | chr2:48814108-48949267    | OK     | 8.5808    | 7.74301   |
| Dusp2         | chr2:127336158-127338377  | NOTEST | 0.266198  | 0.240202  |
| Smurf2        | chr11:106820063-106920715 | OK     | 9.27665   | 8.37048   |
| Xrcc4         | chr13:89848913-90089608   | OK     | 5.43874   | 4.9074    |

|               |                           |        |          |          |
|---------------|---------------------------|--------|----------|----------|
| Oprk1         | chr1:5588492-5606133      | OK     | 0.923384 | 0.833171 |
| Gtf2h3        | chr5:124579147-124597680  | OK     | 4.18491  | 3.77589  |
| Thbs3         | chr3:89215186-89226837    | OK     | 1.53584  | 1.38563  |
| Cpd           | chr11:76777207-76847008   | OK     | 26.9856  | 24.3453  |
| Eps8l1        | chr7:4464734-4480487      | OK     | 1.11211  | 1.0033   |
| Suv420h1      | chr19:3767420-3818303     | OK     | 8.04648  | 7.2583   |
| Fam175a       | chr5:100804801-100820935  | OK     | 1.57764  | 1.42282  |
| Prrc2b        | chr2:32151147-32234537    | OK     | 42.5344  | 38.3572  |
| Neur13        | chr1:36264601-36273425    | NOTEST | 0.427809 | 0.385726 |
| 1700001G17Rik | chr1:33669823-33670712    | NOTEST | 0.484043 | 0.436376 |
| Emg1          | chr6:124663103-124712178  | OK     | 20.009   | 18.0376  |
| B3gnt11       | chr11:121451948-121673151 | OK     | 1.08542  | 0.978411 |
| Thbd          | chr2:148404470-148408188  | OK     | 13.1298  | 11.8331  |
| Erap1         | chr13:74639871-74691875   | OK     | 4.98742  | 4.49442  |
| Adck5         | chr15:76576358-76607591   | OK     | 3.71386  | 3.34644  |
| BC031361      | chr16:38085063-38246079   | OK     | 0.932586 | 0.840136 |
| Pcmt1         | chr10:7630235-7664623     | OK     | 121.07   | 109.058  |
| Ikbkap        | chr4:56749679-56809605    | OK     | 17.1339  | 15.4333  |
| Cirbp         | chr10:79697304-80369637   | OK     | 40.2849  | 36.2865  |
| Tctn1         | chr5:122209728-122264460  | OK     | 5.34367  | 4.81316  |
| Zfp113        | chr5:138139701-138155744  | OK     | 1.67363  | 1.50735  |
| Phf11b        | chr14:59320963-59341330   | OK     | 1.02185  | 0.920276 |
| Aff1          | chr5:103754161-103855322  | OK     | 7.26724  | 6.5446   |
| Dnm1          | chr2:32308470-32353304    | OK     | 180.496  | 162.528  |
| Nipa1         | chr7:55962530-56019573    | OK     | 38.5539  | 34.7141  |
| Ssr3          | chr3:65379656-65392553    | OK     | 66.2326  | 59.6348  |
| Leprot        | chr4:101647782-101659358  | OK     | 24.2307  | 21.8156  |
| Ube2v1        | chr2:167607638-167632005  | OK     | 21.4693  | 19.3294  |
| Actr3b        | chr5:25760025-25850341    | OK     | 34.5972  | 31.1485  |
| Glt8d1        | chr14:30999825-31019131   | OK     | 12.4222  | 11.1829  |
| Pcid2         | chr8:13077524-13105343    | OK     | 11.5308  | 10.3796  |
| Igfbp3        | chr11:7206090-7213923     | OK     | 6.70453  | 6.03491  |
| Upp2          | chr2:58567333-58792971    | OK     | 5.6781   | 5.11083  |
| Rlim          | chrX:103957166-103981284  | OK     | 17.4013  | 15.6608  |
| Dbn1          | chr13:55473427-55488076   | OK     | 52.3355  | 47.0938  |
| Psmc2         | chr16:20651651-20663414   | OK     | 94.9439  | 85.4336  |
| Pdk1          | chr2:71873223-71903858    | OK     | 12.2325  | 11.0052  |
| Ing3          | chr6:21949614-21976037    | OK     | 3.47032  | 3.12202  |
| Zbtb18        | chr1:177444660-177450764  | OK     | 20.7048  | 18.6237  |
| Zfyve28       | chr5:34194893-34288324    | OK     | 30.1622  | 27.1282  |
| Hddc3         | chr7:80343136-80346097    | OK     | 1.88266  | 1.69317  |
| Mtf1          | chr4:124802548-124850730  | OK     | 3.28867  | 2.95766  |
| 4933408B17Rik | chr18:34579845-34597468   | NOTEST | 0.132523 | 0.119184 |
| Thsd7b        | chr1:129273303-130219278  | OK     | 4.21816  | 3.79351  |
| Galnt14       | chr17:73493750-73710451   | OK     | 33.5063  | 30.1252  |
| Sod2          | chr17:13007838-13018119   | OK     | 40.318   | 36.2494  |
| Gcc2          | chr10:58255525-58305592   | OK     | 13.5523  | 12.1832  |
| Cdc16         | chr8:13757689-13781882    | OK     | 18.959   | 17.0421  |
| Tmco1         | chr1:167308669-167333978  | OK     | 10.1723  | 9.14337  |
| Mrps5         | chr2:127587425-127603986  | OK     | 14.2948  | 12.8479  |
| Zfp354c       | chr11:50811084-50827731   | OK     | 7.12442  | 6.40275  |
| Kdm2a         | chr19:4316146-4397077     | OK     | 16.7091  | 15.0162  |
| Rint1         | chr5:23787743-24161231    | OK     | 9.05095  | 8.13141  |

|               |                          |        |           |           |
|---------------|--------------------------|--------|-----------|-----------|
| Coq5          | chr5:115279701-115296972 | OK     | 10.7419   | 9.64984   |
| Exoc6b        | chr6:84618485-85069513   | OK     | 20.0741   | 18.0328   |
| Tgoln1,Tgoln2 | chr6:72608420-72617000   | OK     | 87.594    | 78.6761   |
| Cwf1912       | chr9:3404084-3479236     | OK     | 7.89695   | 7.09218   |
| Ank           | chr15:27466676-27594907  | OK     | 48.0256   | 43.1305   |
| Man2a1        | chr17:64601648-64755110  | OK     | 2.57488   | 2.31243   |
| Katnal1       | chr5:148871583-148928647 | OK     | 21.0354   | 18.888    |
| Hecw1         | chr13:14226437-14523226  | OK     | 26.4977   | 23.7911   |
| Cd59a         | chr2:104095800-104115410 | OK     | 59.2093   | 53.1577   |
| Pcdhga3       | chr18:36930284-37841872  | OK     | 5.85936   | 5.26042   |
| Elp4          | chr2:105700108-105904500 | OK     | 5.90166   | 5.29817   |
| Tubgcp6       | chr15:89089106-89123150  | OK     | 7.04683   | 6.32623   |
| Nck1          | chr9:100495002-100546053 | OK     | 14.4647   | 12.9852   |
| Rpe           | chr1:66700892-66817595   | OK     | 13.9061   | 12.4834   |
| Rhobtb2       | chr14:69784989-69805545  | OK     | 17.0962   | 15.3466   |
| Impa1         | chr3:10313539-10331439   | OK     | 39.6516   | 35.5907   |
| 3110001I22Rik | chr16:13671857-13703612  | OK     | 0.910525  | 0.817188  |
| Med29         | chr7:28385246-28392690   | OK     | 2.16458   | 1.94259   |
| Pccb          | chr9:100982037-101034875 | OK     | 27.6725   | 24.8318   |
| Aldh18a1      | chr19:40550256-40588463  | OK     | 9.12505   | 8.18796   |
| Prep          | chr10:45067213-45158995  | OK     | 30.4616   | 27.3282   |
| Prss57        | chr10:79697304-80369637  | NOTEST | 0.0439249 | 0.0394051 |
| Rbpms         | chr8:33782643-33929863   | OK     | 2.42382   | 2.1744    |
| Psm13         | chr7:140882393-140898642 | OK     | 74.4044   | 66.7478   |
| Atcay         | chr10:81194690-81230779  | OK     | 36.6414   | 32.8707   |
| Chp1          | chr2:119547706-119587022 | OK     | 158.619   | 142.295   |
| B3gnt7        | chr1:86303220-86307305   | NOTEST | 0.070843  | 0.0635514 |
| Slc22a5       | chr11:53864541-53891703  | OK     | 6.13769   | 5.50591   |
| Ebag9         | chr15:44619640-44641026  | OK     | 13.1453   | 11.7909   |
| Pcdha2        | chr18:36930284-37841872  | OK     | 3.3864    | 3.03718   |
| Ipo13         | chr4:117894492-117914999 | OK     | 20.0339   | 17.9671   |
| Ccdc160       | chrX:52791199-52799468   | OK     | 4.01019   | 3.59646   |
| E2f3          | chr13:29906574-29986063  | OK     | 8.84659   | 7.93281   |
| Nup43         | chr10:7667503-7678886    | OK     | 4.87456   | 4.37102   |
| Zfp87         | chr13:67515781-67526231  | OK     | 4.09093   | 3.66817   |
| Ttc37         | chr13:76098733-76187983  | OK     | 7.18516   | 6.44216   |
| Rab2a         | chr4:8535643-8607702     | OK     | 135.288   | 121.228   |
| Tm9sf4        | chr2:153161300-153210463 | OK     | 18.1469   | 16.2606   |
| Rab44         | chr17:29135055-29148976  | NOTEST | 0.0656949 | 0.0588582 |
| Ptk7          | chr17:46564450-46629504  | OK     | 10.8008   | 9.67616   |
| Ppip5k2       | chr1:97706042-97770092   | OK     | 20.5796   | 18.4354   |
| Zfp369        | chr13:65278853-65297795  | OK     | 4.14599   | 3.71374   |
| Ppp1r12b      | chr1:134765942-134955940 | OK     | 7.1831    | 6.43379   |
| Inpp5f        | chr7:128611364-128696436 | OK     | 23.7653   | 21.2858   |
| Zbtb43        | chr2:33450287-33468532   | OK     | 3.45994   | 3.09894   |
| Pikfyve       | chr1:65186684-65278696   | OK     | 5.55488   | 4.97522   |
| Scarf1        | chr11:75513540-75526580  | OK     | 0.880231  | 0.788281  |
| Sgcb          | chr5:73632748-73647731   | OK     | 35.3726   | 31.6766   |
| Myo1d         | chr11:80482126-80780025  | OK     | 12.4928   | 11.1872   |
| Mrpl13        | chr15:55534094-55557312  | OK     | 41.316    | 36.9979   |
| Taf12         | chr4:132274374-132293330 | OK     | 8.17565   | 7.32109   |
| Rcn2          | chr9:56041844-56059083   | OK     | 25.3986   | 22.7431   |
| Crem          | chr18:3266353-3366863    | OK     | 3.51079   | 3.14317   |

|               |                           |        |          |          |
|---------------|---------------------------|--------|----------|----------|
| Heatr3        | chr8:88137884-88171943    | OK     | 10.8567  | 9.71974  |
| Ghdc          | chr11:100766331-100770957 | OK     | 6.10966  | 5.46849  |
| Pcnx12        | chr8:125751507-125898317  | OK     | 12.9657  | 11.6044  |
| Utp11l        | chr4:124678763-124693554  | OK     | 13.4382  | 12.0259  |
| Atf7ip        | chr6:136518850-136607379  | OK     | 9.44276  | 8.45029  |
| Man2a2        | chr7:80349096-80371375    | OK     | 21.6222  | 19.3455  |
| Rbbp4         | chr4:129287620-129335370  | OK     | 28.0324  | 25.0797  |
| Ikbkg         | chrX:74393290-74453778    | OK     | 8.9128   | 7.97357  |
| Rhbdd1        | chr1:82316578-82445367    | OK     | 6.79282  | 6.07687  |
| Papss1        | chr3:131564767-131643671  | OK     | 37.5167  | 33.5553  |
| Slc25a4       | chr8:46207340-46211009    | OK     | 723.098  | 646.743  |
| Mob1b         | chr5:88720870-88758455    | OK     | 5.34843  | 4.78347  |
| Kif3a         | chr11:53567368-53604246   | OK     | 72.9081  | 65.2038  |
| Klhl12        | chr1:134455554-134490873  | OK     | 18.0506  | 16.143   |
| Ep400         | chr5:110664372-110770717  | OK     | 6.40452  | 5.7271   |
| Ube2j1        | chr4:33031424-33052364    | OK     | 81.199   | 72.6021  |
| Gca           | chr2:62664326-62694109    | OK     | 6.49808  | 5.80977  |
| Zdhhc7        | chr8:120081094-120101472  | OK     | 17.0952  | 15.2819  |
| Gcfc2         | chr6:81923668-81965949    | NOTEST | 0.691647 | 0.618204 |
| Eif2ak4       | chr2:118388616-118475234  | OK     | 3.33929  | 2.98445  |
| Gla           | chrX:134588168-134601005  | OK     | 11.6123  | 10.3781  |
| Rbl2          | chr8:91070056-91135496    | OK     | 9.51299  | 8.501    |
| Gm15417       | chr3:89377645-89398779    | OK     | 1.81617  | 1.62297  |
| Akt2          | chr7:27591559-27639453    | OK     | 9.58228  | 8.56242  |
| Lonrf2        | chr1:38794508-38821215    | OK     | 33.3925  | 29.8362  |
| Kif3c         | chr12:3365131-3426747     | OK     | 72.6965  | 64.9529  |
| 4732491K20Rik | chr17:12318852-12327250   | OK     | 1.92696  | 1.72134  |
| Eprs          | chr1:185363094-185428355  | OK     | 45.7723  | 40.8811  |
| Pgk1          | chrX:106187099-106203699  | OK     | 14.3932  | 12.855   |
| Trappc12      | chr12:28690627-28750453   | OK     | 25.7822  | 23.0202  |
| Arhgef33      | chr17:80307406-80388689   | NOTEST | 0.189942 | 0.169573 |
| Mrpl10        | chr11:97041585-97049213   | OK     | 32.5637  | 29.0698  |
| Dnajb14       | chr3:137867674-137908931  | OK     | 20.9788  | 18.7245  |
| Ifi47         | chr11:49037659-49135387   | OK     | 2.04867  | 1.82822  |
| Slc9a5        | chr8:105348257-105369881  | OK     | 2.83572  | 2.53058  |
| Taf1          | chrX:101532734-101601789  | OK     | 13.5741  | 12.1122  |
| Usp37         | chr1:74409383-74588028    | OK     | 5.13485  | 4.5812   |
| Zfp35         | chr18:23989633-24005371   | OK     | 10.2482  | 9.14246  |
| C2cd3         | chr7:100372232-100470159  | OK     | 2.38591  | 2.12844  |
| Slc39a11      | chr11:113244854-113565815 | OK     | 8.48422  | 7.56811  |
| Gpcpd1        | chr2:132529081-132578248  | OK     | 30.9269  | 27.5873  |
| Slc12a5       | chr2:164967987-164999731  | NOTEST | 0.1865   | 0.166358 |
| Tsr1          | chr11:74898079-74925798   | OK     | 9.91271  | 8.84184  |
| Eif3i         | chr4:129591973-129600648  | OK     | 57.2247  | 51.0418  |
| Papd7         | chr13:69497958-69533864   | OK     | 6.57052  | 5.86027  |
| Twf2          | chr9:106203107-106215387  | OK     | 11.8353  | 10.5541  |
| Gm20597       | chr10:53498442-53518989   | NOTEST | 0.526606 | 0.469574 |
| Ano10         | chr9:122175873-122294423  | OK     | 28.4491  | 25.367   |
| Phtf1         | chr3:103914119-104007491  | OK     | 29.4054  | 26.2181  |
| Slc16a11      | chr11:70213909-70216414   | NOTEST | 0.30694  | 0.273668 |
| Itgb1         | chr8:128685653-128733579  | OK     | 127.029  | 113.247  |
| Spcs2         | chr7:99837568-99858883    | OK     | 21.2809  | 18.9715  |
| Ubr4          | chr4:139380658-139489532  | OK     | 30.8577  | 27.5038  |

|               |                           |        |          |          |
|---------------|---------------------------|--------|----------|----------|
| Eif2b5        | chr16:20498816-20509325   | OK     | 30.5899  | 27.2589  |
| Spag1         | chr15:36179529-36235177   | OK     | 1.1878   | 1.05833  |
| Rnls          | chr19:33137744-33392295   | OK     | 0.86978  | 0.774969 |
| Rasl11b       | chr5:74195325-74199477    | OK     | 7.00338  | 6.23997  |
| Mesdc2        | chr7:83891999-83901532    | OK     | 11.2973  | 10.0657  |
| Necap1        | chr6:122874556-122888941  | OK     | 101.553  | 90.4646  |
| Ccni          | chr5:93181932-93206495    | OK     | 121.829  | 108.522  |
| Kifap3        | chr1:163779678-163917100  | OK     | 123.163  | 109.704  |
| Elmsan1       | chr12:84149173-84218881   | OK     | 3.24234  | 2.88795  |
| Tmem205       | chr9:21921008-21935872    | OK     | 28.7433  | 25.5956  |
| Rps6kb1       | chr11:86415843-86544807   | OK     | 12.5007  | 11.1304  |
| Spty2d1       | chr7:46990395-47008414    | OK     | 9.86232  | 8.78076  |
| Dock3         | chr9:106892824-107231909  | OK     | 18.1836  | 16.1868  |
| Ggt7          | chr2:155490379-155514846  | OK     | 53.581   | 47.6962  |
| Ubqln1        | chr13:58176155-58215653   | OK     | 89.0525  | 79.2701  |
| Smim3         | chr18:60474190-60501983   | OK     | 3.44839  | 3.06948  |
| Prpf40a       | chr2:53138475-53191187    | OK     | 10.0342  | 8.93149  |
| Pgap2         | chr7:102210334-102238564  | OK     | 6.12116  | 5.44846  |
| Npas4         | chr19:4984354-4989971     | NOTEST | 0.238249 | 0.212056 |
| Dpf1          | chr7:29304004-29317586    | OK     | 1.72809  | 1.53808  |
| Tmem126a      | chr7:90450711-90457208    | OK     | 15.2486  | 13.5719  |
| Ermard        | chr17:15041611-15064232   | OK     | 3.63736  | 3.23732  |
| Pltp          | chr2:164830729-164857708  | OK     | 21.4477  | 19.0876  |
| Kxd1          | chr8:70513395-70523180    | OK     | 14.5584  | 12.9559  |
| Atrip         | chr9:109059746-109074124  | OK     | 6.2441   | 5.55667  |
| Mcl1          | chr3:95658720-95663178    | OK     | 37.0292  | 32.9515  |
| Disc1         | chr8:125054194-125261151  | NOTEST | 0.29103  | 0.258979 |
| Xlr4b         | chrX:73214364-73222453    | NOTEST | 0.187125 | 0.166509 |
| Nox4          | chr7:87246648-87398708    | OK     | 0.786027 | 0.699347 |
| Smu1          | chr4:40720153-40757885    | OK     | 20.1771  | 17.9494  |
| Vsig10        | chr5:117319265-117355006  | OK     | 2.60623  | 2.31827  |
| Trank1        | chr9:111311738-111395775  | NOTEST | 0.455465 | 0.405106 |
| Cd37          | chr7:45233631-45239115    | NOTEST | 0.74987  | 0.666894 |
| Ythdf1        | chr2:180904376-180920936  | OK     | 25.4593  | 22.6401  |
| Lemd1         | chr1:132191435-132257382  | NOTEST | 0.361793 | 0.321724 |
| Apbb3         | chr18:36671158-36683862   | OK     | 34.9824  | 31.1028  |
| Sec24c        | chr14:20674320-20694850   | OK     | 27.5598  | 24.5015  |
| Mapk8ip2      | chr15:89453910-89462447   | OK     | 122.634  | 109.017  |
| Atxn7l3       | chr11:102284960-102296629 | OK     | 67.221   | 59.7562  |
| Gys1          | chr7:45434838-45456617    | OK     | 17.3194  | 15.3958  |
| Mpg           | chr11:32226504-32267707   | OK     | 4.87831  | 4.33592  |
| Gm21949       | chr3:67892219-68626482    | OK     | 2.48639  | 2.20986  |
| Noc4l         | chr5:110648418-110653382  | OK     | 7.03535  | 6.25258  |
| Chtf8         | chr8:106883862-106893593  | OK     | 19.924   | 17.7066  |
| Zcchc2        | chr1:105990405-106034079  | OK     | 3.74628  | 3.32906  |
| Gmppa         | chr1:75435942-75443176    | OK     | 11.2543  | 10.0005  |
| Hspa4l        | chr3:40745612-40790365    | OK     | 60.7972  | 54.0202  |
| 3110045C21Rik | chr1:169969408-170088944  | OK     | 1.00337  | 0.89151  |
| Lamp2         | chrX:38401356-38456460    | OK     | 202.594  | 180.002  |
| Shprh         | chr10:11149429-11215273   | OK     | 4.96515  | 4.41056  |
| 2210016F16Rik | chr13:58380045-58385225   | OK     | 5.00942  | 4.44987  |
| Mid2          | chrX:140678027-140767715  | OK     | 10.1316  | 8.99951  |
| Ran           | chr5:129020155-129024321  | OK     | 65.0796  | 57.8014  |



|               |                           |        |          |           |
|---------------|---------------------------|--------|----------|-----------|
| Rdh14         | chr12:10390779-10395562   | OK     | 19.0537  | 16.922    |
| Gorab         | chr1:163384908-163403641  | OK     | 3.89191  | 3.45631   |
| Lgals8        | chr13:12439401-12461738   | OK     | 66.3197  | 58.8906   |
| Megf8         | chr7:25317163-25365917    | OK     | 35.0785  | 31.1487   |
| Nsmf          | chr2:25054378-25062881    | OK     | 24.686   | 21.9192   |
| Pmpcb         | chr5:21737159-21757152    | OK     | 27.5832  | 24.4904   |
| Zfp697        | chr3:98382480-98431949    | OK     | 0.844627 | 0.749906  |
| Uevld         | chr7:46923215-46958518    | OK     | 6.24113  | 5.54117   |
| AW046200      | chr8:57523824-57663430    | NOTEST | 0.121908 | 0.108229  |
| Lrprrc        | chr17:84705246-84790786   | OK     | 29.7375  | 26.4001   |
| 5430405H02Rik | chr2:156840006-156862945  | OK     | 2.20639  | 1.95861   |
| Vmp1          | chr11:86583864-87555823   | OK     | 30.0946  | 26.7118   |
| Vps13d        | chr4:144972621-145195005  | OK     | 14.4485  | 12.8242   |
| Srm           | chr4:148591512-148594619  | OK     | 26.8975  | 23.8719   |
| Vps25         | chr11:101253706-101259547 | OK     | 73.0785  | 64.8458   |
| 2610301B20Rik | chr4:10874497-10899423    | OK     | 10.9525  | 9.71848   |
| Slc36a4       | chr9:15709768-15738789    | OK     | 14.0855  | 12.4984   |
| Blnk          | chr19:40928926-40994535   | NOTEST | 0.278571 | 0.247113  |
| Zfp825        | chr13:74480056-74493950   | OK     | 5.68885  | 5.04642   |
| Ddx20         | chr3:105678461-105687571  | OK     | 4.04397  | 3.58701   |
| Tle3          | chr9:61372365-61418497    | OK     | 8.76896  | 7.7771    |
| Dync1h1       | chr12:110601394-110666944 | OK     | 161.426  | 143.166   |
| 2700097O09Rik | chr12:55045660-55080110   | OK     | 2.24481  | 1.99063   |
| Mocs1         | chr17:49428363-49455430   | OK     | 4.26139  | 3.77869   |
| Gabrg2        | chr11:41910189-42000714   | OK     | 34.32    | 30.4313   |
| Sptan1        | chr2:29965559-30031450    | OK     | 271.648  | 240.866   |
| Abt1          | chr13:23418360-23423866   | OK     | 2.53393  | 2.24672   |
| Pdk2          | chr11:95026257-95041371   | OK     | 18.9846  | 16.8326   |
| Rhobtb1       | chr10:69208551-69291784   | OK     | 1.24111  | 1.1004    |
| Gm10190       | chr17:80307406-80388689   | NOTEST | 0.110632 | 0.0980851 |
| Fam98a        | chr17:75537085-75551946   | OK     | 35.6337  | 31.5923   |
| Zc3h7b        | chr15:81744847-81796269   | OK     | 19.9722  | 17.7068   |
| Pvt1          | chr15:62037986-62250975   | OK     | 3.34265  | 2.96335   |
| Tecpr2        | chr12:110889263-110972396 | OK     | 13.0286  | 11.55     |
| Pole3         | chr4:62523800-62525014    | OK     | 15.3929  | 13.6452   |
| Zscan12       | chr13:21362819-21372302   | OK     | 1.29464  | 1.14762   |
| Nfxl1         | chr5:72513303-72559645    | OK     | 1.8381   | 1.62931   |
| Neo1          | chr9:58874679-59036441    | OK     | 7.5274   | 6.67213   |
| Tspan15       | chr10:62185395-62231218   | OK     | 19.0778  | 16.9094   |
| Dhx34         | chr7:16197220-16222032    | OK     | 2.81888  | 2.49845   |
| Magoh         | chr4:107879754-107887424  | OK     | 36.2721  | 32.1477   |
| Gins4         | chr8:23226609-23237668    | OK     | 10.549   | 9.34856   |
| Coa5          | chr1:37417084-37430103    | OK     | 39.4267  | 34.9391   |
| Acp2          | chr2:91202911-91237066    | OK     | 25.0566  | 22.2029   |
| Bivm          | chr1:44119967-44144771    | OK     | 7.38223  | 6.54118   |
| Arf4          | chr14:26638196-26657258   | OK     | 61.9863  | 54.9233   |
| Snx30         | chr4:59805649-59904740    | OK     | 1.74282  | 1.54416   |
| Erp44         | chr4:48193330-48279589    | OK     | 16.6492  | 14.7507   |
| Dll1          | chr17:15367353-15375823   | NOTEST | 0.526596 | 0.466515  |
| Got2          | chr8:95864136-95888365    | OK     | 72.6868  | 64.3897   |
| Srprb         | chr9:103188032-103202065  | OK     | 14.8416  | 13.1473   |
| Hspb1         | chr5:135887918-135889563  | OK     | 88.8597  | 78.7145   |
| Btla          | chr16:45224336-45252895   | NOTEST | 0.164853 | 0.146031  |

|               |                           |        |           |           |
|---------------|---------------------------|--------|-----------|-----------|
| Cuta          | chr17:26937971-26939538   | OK     | 51.4919   | 45.6042   |
| Baalc         | chr15:38933908-38952916   | OK     | 4.50743   | 3.99093   |
| P2rx4         | chr5:122707556-122729042  | OK     | 15.9805   | 14.1492   |
| Mical3        | chr6:120931545-121131022  | OK     | 7.80848   | 6.91266   |
| Dnajc15       | chr14:77826216-77874917   | OK     | 33.992    | 30.0873   |
| Rab12         | chr17:66494511-66519670   | OK     | 12.5133   | 11.0755   |
| Prph2         | chr17:46910484-46924926   | NOTEST | 0.0212456 | 0.0188043 |
| Nsf           | chr11:103821782-103954056 | OK     | 183.762   | 162.643   |
| AI115009      | chr3:152396002-152681432  | NOTEST | 0.334213  | 0.295772  |
| Cacna1d       | chr14:30008999-30527056   | OK     | 1.37397   | 1.21581   |
| Bag5          | chr12:111709489-111713256 | OK     | 21.0089   | 18.5902   |
| Arfgap2       | chr2:91265114-91277371    | OK     | 12.711    | 11.2474   |
| Larp6         | chr9:60713120-60738801    | OK     | 12.5985   | 11.1477   |
| Gna15         | chr10:81502313-81524225   | NOTEST | 0.104944  | 0.0928514 |
| Pip4k2b       | chr11:97715156-97744704   | OK     | 35.6863   | 31.5723   |
| Med31         | chr11:72211723-72218450   | OK     | 12.6288   | 11.1729   |
| Slk           | chr19:47580018-47645246   | OK     | 20.8537   | 18.4488   |
| Meis1         | chr11:18880427-19018969   | OK     | 2.1064    | 1.86343   |
| Vwa9          | chr9:64960831-64986981    | OK     | 4.92414   | 4.35593   |
| Tipin         | chr9:64281606-64304792    | OK     | 8.06991   | 7.13839   |
| Nicn1         | chr9:108290456-108296496  | OK     | 60.0108   | 53.0816   |
| Copb2         | chr9:98563730-98588375    | OK     | 51.0086   | 45.1185   |
| 0610031J06Rik | chr3:88325022-88328631    | OK     | 27.9165   | 24.6908   |
| Cntnap5c      | chr17:57769569-58410342   | OK     | 1.54502   | 1.36623   |
| Alg13         | chrX:144317965-144374448  | OK     | 3.30588   | 2.92308   |
| 1110032A03Rik | chr9:50762827-50768152    | OK     | 15.0227   | 13.2816   |
| Ginm1         | chr10:7767946-7780917     | OK     | 10.6867   | 9.44794   |
| 5430417L22Rik | chr2:118745761-118748807  | OK     | 3.91147   | 3.45805   |
| Fam78b        | chr1:167001416-167091302  | OK     | 11.2685   | 9.96227   |
| Apobr         | chr7:126585007-126589092  | NOTEST | 0.333201  | 0.294533  |
| Rtp3          | chr9:110984942-110989713  | NOTEST | 0.0709345 | 0.062701  |
| Tug1          | chr11:3639784-3648814     | OK     | 15.4469   | 13.6538   |
| BC037032      | chr15:4020110-4155344     | NOTEST | 0.26891   | 0.237666  |
| Kcp           | chr6:29482035-29507952    | NOTEST | 0.0857853 | 0.0758099 |
| Mgat5b        | chr11:116918862-116986944 | OK     | 1.3402    | 1.18434   |
| B3gat2        | chr1:23761925-23922381    | OK     | 1.2337    | 1.09013   |
| Kdm3b         | chr18:34777007-34839370   | OK     | 7.08639   | 6.26113   |
| Skor2         | chr18:76856404-76900342   | OK     | 4.265     | 3.76803   |
| Ppp1cb        | chr5:32458969-32493712    | OK     | 78.6899   | 69.5175   |
| Hibch         | chr1:52845045-52920860    | OK     | 17.7745   | 15.701    |
| Zdhhc1        | chr8:105472424-105496870  | OK     | 11.6304   | 10.2715   |
| Lrrn1         | chr6:107529725-107570228  | OK     | 115.479   | 101.986   |
| Sf3a1         | chr11:4160353-4182541     | OK     | 16.5398   | 14.6072   |
| Gm13212       | chr4:145617145-145624394  | NOTEST | 0.129682  | 0.11451   |
| Tspyl3        | chr2:153222369-153225441  | OK     | 6.82737   | 6.02824   |
| Purb          | chr11:6467598-6476076     | OK     | 33.7295   | 29.7813   |
| 4833412C05Rik | chr7:67784537-67803496    | NOTEST | 0.394732  | 0.348526  |
| Crtc3         | chr7:80586631-80688877    | OK     | 4.89344   | 4.32059   |
| Cab39         | chr1:85793446-85851577    | OK     | 103.262   | 91.1733   |
| Wbp1l         | chr19:46599105-46657389   | OK     | 10.0252   | 8.85045   |
| Rrp8          | chr7:105731729-105744338  | OK     | 6.84523   | 6.04273   |
| Calm1         | chr12:100199540-100209806 | OK     | 827.618   | 730.567   |
| Wrb           | chr16:96145418-96157852   | OK     | 31.7484   | 28.0231   |

|               |                           |        |          |          |
|---------------|---------------------------|--------|----------|----------|
| Pdcd6ip       | chr9:113651743-113708259  | OK     | 42.7664  | 37.7451  |
| Psap          | chr10:60277627-60302600   | OK     | 785.058  | 692.856  |
| Orc5          | chr5:22486488-22550331    | OK     | 15.705   | 13.8599  |
| Pacrg         | chr17:10403011-10840191   | OK     | 7.34108  | 6.47858  |
| Yif1b         | chr7:29238322-29248467    | OK     | 36.2399  | 31.9811  |
| Cacna1a       | chr8:84415363-84640249    | OK     | 19.0221  | 16.7822  |
| Nanos2        | chr7:18987523-18988962    | NOTEST | 0.15728  | 0.138747 |
| BC052040      | chr2:115581715-115778768  | OK     | 2.11927  | 1.86944  |
| Gm4070,Gvin1  | chr7:106156535-106215340  | LOWDAT | 0.146621 | 0.129329 |
| 2310001H17Rik | chr6:129232622-129238482  | NOTEST | 0.745708 | 0.65776  |
| Galns         | chr8:122578236-122611487  | OK     | 1.34397  | 1.18542  |
| Pi4kb         | chr3:94974730-95015238    | OK     | 12.2678  | 10.8191  |
| Lsm3          | chr6:91516034-91522620    | OK     | 15.9149  | 14.0326  |
| Fkbp1         | chr17:34644882-34646327   | OK     | 8.11539  | 7.15392  |
| Slc25a11      | chr11:70644026-70647039   | OK     | 48.7523  | 42.9745  |
| Slc25a32      | chr15:39094190-39112716   | OK     | 7.04387  | 6.20845  |
| Acvr1         | chr2:58446437-58566828    | OK     | 9.14279  | 8.05757  |
| Samd8         | chr14:21750530-21798725   | OK     | 15.9617  | 14.0649  |
| Pms1          | chr1:53189188-53296996    | OK     | 1.90783  | 1.6811   |
| Osgin2        | chr4:15997120-16013877    | OK     | 6.70757  | 5.91028  |
| Uhmk1         | chr1:170199255-170215393  | OK     | 81.7946  | 72.0675  |
| Arl2bp        | chr8:94666599-94674457    | OK     | 67.3786  | 59.3623  |
| Cetn2         | chrX:72913564-72918344    | OK     | 30.0216  | 26.4494  |
| Tlk1          | chr2:70712407-70825480    | OK     | 30.8473  | 27.1725  |
| Rab39b        | chrX:75572044-75578231    | OK     | 28.2187  | 24.8563  |
| Slc46a1       | chr11:78465700-78471945   | OK     | 3.805    | 3.35137  |
| Srp54c        | chr12:55230167-55263480   | LOWDAT | 1.98964  | 1.75235  |
| Timm23        | chr14:32180165-32201891   | OK     | 3.502    | 3.08406  |
| Gvin1         | chr7:106156535-106215340  | NOTEST | 0.130288 | 0.114735 |
| Pak3          | chrX:143518590-143797796  | OK     | 12.2726  | 10.8069  |
| Sult4a1       | chr15:84076096-84105754   | OK     | 420.895  | 370.598  |
| Apc           | chr18:34207774-34322190   | OK     | 31.8322  | 28.0275  |
| Mast3         | chr8:70778116-70792433    | OK     | 5.61778  | 4.9457   |
| Pcyox1        | chr6:86386005-86397150    | OK     | 53.5566  | 47.1474  |
| Atxn7l1       | chr12:33302514-33368277   | OK     | 6.79774  | 5.9841   |
| Gatad2a       | chr8:69907068-69996384    | OK     | 14.1362  | 12.4438  |
| Pomp          | chr5:147860627-147875778  | OK     | 170.341  | 149.937  |
| Gnpat         | chr8:124863032-124890057  | OK     | 18.3815  | 16.1765  |
| Dcaf8         | chr1:172148014-172196393  | OK     | 38.8622  | 34.1986  |
| Bmp2k         | chr5:96997688-97111596    | OK     | 1.64514  | 1.44767  |
| Gm15663       | chr10:105574550-105583870 | OK     | 3.34477  | 2.94303  |
| Uchl5         | chr1:143777277-143807466  | OK     | 24.3957  | 21.4631  |
| Krt26         | chr11:99328483-99337965   | NOTEST | 0.199391 | 0.17542  |
| Atp7a         | chrX:106027223-106128160  | OK     | 4.51828  | 3.97497  |
| Arl8b         | chr6:108783058-108823723  | OK     | 84.3582  | 74.1997  |
| Cog8          | chr8:107048708-107056737  | OK     | 15.0873  | 13.2685  |
| Atp5g3        | chr2:73908449-73911294    | OK     | 496.065  | 436.244  |
| Micall1       | chr15:79108982-79141251   | OK     | 7.31251  | 6.43019  |
| Dnajc19       | chr3:34020078-34081354    | OK     | 1.72748  | 1.51901  |
| Rsg1          | chr4:141213955-141220114  | OK     | 1.72533  | 1.51709  |
| Smco4         | chr9:15505494-15545259    | OK     | 3.02957  | 2.66347  |
| Cnnm4         | chr1:36471596-36508776    | OK     | 6.01921  | 5.29159  |
| Cacng7        | chr7:3336584-3366948      | OK     | 50.4469  | 44.3479  |

|                |                           |        |          |          |
|----------------|---------------------------|--------|----------|----------|
| Dhx30          | chr9:110084318-110117616  | OK     | 29.2781  | 25.7368  |
| BC017158       | chr7:128265696-128298131  | OK     | 8.27933  | 7.27786  |
| Commd6         | chr14:101633765-101640471 | OK     | 21.3771  | 18.7857  |
| Commd5         | chr15:76899940-76901297   | OK     | 12.8134  | 11.2601  |
| Tie1           | chr4:118471190-118489849  | OK     | 6.3422   | 5.57321  |
| Mrps21         | chr3:95862651-95870619    | OK     | 81.001   | 71.1789  |
| Atp13a3        | chr16:30312423-30388530   | OK     | 13.54    | 11.8976  |
| Kif2a          | chr13:106960584-107022114 | OK     | 36.5874  | 32.1433  |
| Nrros          | chr16:32142824-32165476   | OK     | 0.868103 | 0.762615 |
| Dnajc21        | chr15:10446762-10470516   | OK     | 12.4086  | 10.8982  |
| Mbd5           | chr2:48949507-49317069    | OK     | 6.53928  | 5.74285  |
| Fam134b        | chr15:25843297-25973696   | OK     | 60.1133  | 52.7894  |
| Gpm6a          | chr8:54779433-55060878    | OK     | 25.9981  | 22.8294  |
| Shank3         | chr15:89499856-89560260   | OK     | 3.82541  | 3.35844  |
| 2700049A03Rik  | chr12:71136847-71243303   | OK     | 2.02671  | 1.77917  |
| Hoxc10         | chr15:102966795-102971897 | OK     | 3.6637   | 3.2161   |
| Gm14308,OTTMUS | chr2:176470368-176486749  | NOTEST | 0.582422 | 0.511257 |
| Nell2          | chr15:95219439-95528252   | OK     | 7.63826  | 6.70491  |
| Tha1           | chr11:117867948-117873526 | OK     | 1.84821  | 1.62177  |
| Zfp276         | chr8:123254194-123318576  | OK     | 4.35547  | 3.82146  |
| Zfp518a        | chr19:40894702-40917947   | OK     | 2.36309  | 2.07334  |
| Palld          | chr8:61515020-61902690    | OK     | 1.47962  | 1.29796  |
| Tfip11         | chr5:112326368-112343040  | OK     | 17.4389  | 15.2957  |
| Bcl11a         | chr11:24078055-24173558   | OK     | 1.67157  | 1.46613  |
| Cbx4           | chr11:119077570-119086237 | OK     | 5.03251  | 4.4139   |
| Pcmdt1         | chr1:7088919-7173628      | OK     | 19.2517  | 16.8847  |
| Helz           | chr11:107547959-107686943 | OK     | 6.70183  | 5.87782  |
| Commd2         | chr3:57644348-57651684    | OK     | 4.65101  | 4.07888  |
| Apool          | chrX:112311407-112372430  | OK     | 5.99374  | 5.25566  |
| Kpna4          | chr3:69072220-69127092    | OK     | 34.0747  | 29.878   |
| Bap1           | chr14:31251488-31259929   | OK     | 39.8968  | 34.9808  |
| Umps           | chr16:33955011-33967003   | OK     | 5.56963  | 4.88332  |
| Atp5h          | chr11:115415696-115419919 | OK     | 25.5504  | 22.4018  |
| Atp6ap2        | chrX:12587758-12617051    | OK     | 133.695  | 117.198  |
| AI314180       | chr4:58800030-58912725    | OK     | 43.2091  | 37.8733  |
| 2310009A05Rik  | chr9:73039717-73042775    | OK     | 10.2929  | 9.0217   |
| Dyrk1a         | chr16:94570205-94695519   | OK     | 14.9927  | 13.1396  |
| Sgpp1          | chr12:75714247-75735729   | OK     | 35.9607  | 31.5138  |
| Alkbh4         | chr5:136138780-136141614  | OK     | 3.17225  | 2.77977  |
| Rab2b          | chr14:52261758-52305124   | OK     | 30.5097  | 26.7339  |
| Klhl9          | chr4:88718291-88722508    | OK     | 47.0969  | 41.2617  |
| Rph3a          | chr5:120940499-121009518  | OK     | 142.717  | 125.022  |
| Spata33        | chr8:123212857-123222045  | NOTEST | 1.04843  | 0.918394 |
| Pdcd11         | chr19:47090765-47131145   | OK     | 4.3569   | 3.81638  |
| Rapgef1        | chr2:29619719-29740363    | OK     | 17.2466  | 15.1062  |
| Adck2          | chr6:39573875-39588769    | OK     | 6.63836  | 5.81369  |
| Wasf1          | chr10:40883533-40938569   | OK     | 26.9916  | 23.6382  |
| Arf3           | chr15:98737625-98763118   | OK     | 178.869  | 156.64   |
| Dym            | chr18:75018771-75286966   | OK     | 65.5153  | 57.368   |
| Zfp341         | chr2:154613367-154646817  | OK     | 1.88328  | 1.649    |
| Stx11          | chr10:12939982-12964259   | OK     | 1.94758  | 1.70524  |
| Immt           | chr6:71831319-71875266    | OK     | 79.9123  | 69.9582  |
| Bckdha         | chr7:25629851-25658761    | OK     | 26.2793  | 23.0012  |

|                  |                           |        |           |           |
|------------------|---------------------------|--------|-----------|-----------|
| LOC100503676     | chr8:84911852-84937353    | NOTEST | 0.0686773 | 0.0601058 |
| Ccdc91           | chr6:147475870-147632612  | OK     | 26.2092   | 22.9364   |
| Msn              | chrX:96096044-96168553    | OK     | 170.011   | 148.78    |
| Anapc13          | chr9:102626295-102634244  | OK     | 52.6614   | 46.0836   |
| Trpm7            | chr2:126791557-126876261  | OK     | 10.24     | 8.96015   |
| Mgll             | chr6:88724411-88828360    | OK     | 31.9331   | 27.9392   |
| Arcn1            | chr9:44742143-44767808    | OK     | 47.8761   | 41.8769   |
| 4930405A21Rik    | chr2:156613696-156764363  | OK     | 1.21666   | 1.064     |
| Uqcr10           | chr11:4701967-4704344     | OK     | 169.407   | 148.135   |
| 0610010B08Rik,Gr | chr2:175185164-175338212  | NOTEST | 0.565393  | 0.494394  |
| Gap43            | chr16:42248560-42340651   | OK     | 145.737   | 127.431   |
| Tmed4            | chr11:6270713-6274837     | OK     | 45.2111   | 39.5321   |
| Trpc4ap          | chr2:155611242-155692384  | OK     | 66.0996   | 57.7944   |
| Mthfd1           | chr12:76255231-76319820   | OK     | 12.0086   | 10.4992   |
| Mkl1             | chr15:80977764-81190757   | OK     | 8.92512   | 7.80197   |
| 37315            | chr15:31455898-31531037   | OK     | 66.6544   | 58.2639   |
| Usp1             | chr4:98923809-98935533    | OK     | 3.40299   | 2.97427   |
| Senp5            | chr16:31959669-32003287   | OK     | 23.6904   | 20.7052   |
| Clint1           | chr11:45851963-45910625   | OK     | 25.0673   | 21.9055   |
| Ccdc79           | chr8:104446718-104624396  | NOTEST | 0.210698  | 0.184119  |
| Usp13            | chr3:32817625-32935257    | OK     | 21.6168   | 18.8899   |
| Vps45            | chr3:95999831-96058455    | OK     | 12.6926   | 11.0889   |
| Nacc2            | chr2:26055535-26122811    | OK     | 111.923   | 97.7564   |
| Smim15           | chr13:108044473-108049146 | OK     | 23.5945   | 20.6039   |
| Erlec1           | chr11:30929783-30954131   | OK     | 14.0097   | 12.2339   |
| Acyp2            | chr11:30505991-30649396   | OK     | 56.582    | 49.4095   |
| Plekhh3          | chr11:101162679-101171302 | OK     | 6.6935    | 5.84486   |
| Cib2             | chr9:54545351-54560079    | OK     | 19.7414   | 17.238    |
| Sec16a           | chr2:26409430-26445216    | OK     | 9.36117   | 8.17279   |
| Krtcap2          | chr3:89246437-89249722    | OK     | 60.9566   | 53.2111   |
| Pcdhb22          | chr18:36930284-37841872   | OK     | 2.88813   | 2.52103   |
| Phka1            | chrX:102513974-102644246  | OK     | 7.57303   | 6.60988   |
| Ube2n            | chr10:95515161-95545658   | OK     | 49.7104   | 43.3853   |
| Tuba1b           | chr15:98931430-98934390   | OK     | 346.703   | 302.574   |
| Lipe             | chr7:25376818-25566417    | OK     | 2.20994   | 1.92852   |
| Tubb4a           | chr17:57080065-57087782   | OK     | 323.86    | 282.608   |
| Pars2            | chr4:106651068-106655282  | OK     | 2.00678   | 1.75068   |
| Cers3            | chr7:66743503-66823692    | NOTEST | 0.156388  | 0.136424  |
| Ralgapa1         | chr12:55602889-55821516   | OK     | 38.8347   | 33.8763   |
| AW209491         | chr13:14630244-14638202   | OK     | 11.5387   | 10.0648   |
| Pecam1           | chr11:106654217-106715281 | OK     | 9.42147   | 8.21734   |
| Brsk1            | chr7:4690927-4725251      | OK     | 62.6726   | 54.6594   |
| Sptlc2           | chr12:87307888-87388230   | OK     | 20.1221   | 17.5444   |
| Atp5j2           | chr5:145183705-145191592  | OK     | 278.565   | 242.858   |
| Msh3             | chr13:92211880-92389053   | OK     | 5.316     | 4.6341    |
| Mul1             | chr4:138434671-138442265  | OK     | 15.7448   | 13.7242   |
| Eny2             | chr15:44375226-44437685   | OK     | 14.1253   | 12.3125   |
| Ngly1            | chr14:16238658-16311926   | OK     | 23.0291   | 20.0735   |
| Tmem128          | chr5:38260374-38269618    | OK     | 28.773    | 25.0776   |
| Klhdc10          | chr6:30401908-30455174    | OK     | 21.6013   | 18.8248   |
| Ndufa3           | chr7:3617372-3620161      | OK     | 216.585   | 188.689   |
| 1700001L05Rik    | chr15:83353846-83367297   | OK     | 12.0159   | 10.4675   |
| Bsg              | chr10:79697304-80369637   | OK     | 287.318   | 250.287   |



|               |                           |        |          |          |
|---------------|---------------------------|--------|----------|----------|
| Zbtb7b        | chr3:89377645-89398779    | OK     | 5.39434  | 4.69901  |
| Pdzd8         | chr19:59296083-59345780   | OK     | 31.932   | 27.8128  |
| St3gal4       | chr9:35046578-35175987    | OK     | 11.7526  | 10.2362  |
| Pcsk2         | chr2:143535475-143816282  | OK     | 76.9709  | 67.0351  |
| Nucks1        | chr1:131910457-131936321  | OK     | 30.9757  | 26.9763  |
| Gdap1         | chr1:17145372-17164270    | OK     | 57.5861  | 50.1499  |
| Mycbp         | chr4:123905012-123912250  | OK     | 14.1525  | 12.3225  |
| Slc39a8       | chr3:135825278-135888572  | OK     | 2.43533  | 2.12019  |
| Tmem222       | chr4:133266044-133277790  | OK     | 27.761   | 24.1679  |
| Asb8          | chr15:98134639-98165578   | OK     | 27.4779  | 23.9183  |
| Vimp          | chr7:66079648-66089405    | OK     | 27.023   | 23.5215  |
| Slc35g1       | chr19:38395979-38405607   | OK     | 1.18285  | 1.02958  |
| Gm5176        | chr10:111500787-111501345 | NOTEST | 0.253004 | 0.220219 |
| Hsd17b4       | chr18:50128200-50196270   | OK     | 30.2732  | 26.35    |
| Snappc2       | chr8:4253101-4256220      | OK     | 13.6324  | 11.8635  |
| Tpst2         | chr5:112276706-112315356  | OK     | 11.8284  | 10.293   |
| Copz1         | chr15:103272917-103299864 | OK     | 45.9091  | 39.9488  |
| H2-T22,H2-T9  | chr17:36038408-36042702   | OK     | 7.19851  | 6.26307  |
| Ddt           | chr10:75771232-75773374   | OK     | 72.8638  | 63.393   |
| Gpatch3       | chr4:133574744-133584242  | OK     | 2.58149  | 2.24593  |
| Irgq          | chr7:24530647-24538600    | OK     | 41.4114  | 36.0272  |
| Pcdhgc4       | chr18:36930284-37841872   | OK     | 2.79563  | 2.43204  |
| Pnpla7        | chr2:24976032-25054072    | OK     | 1.54687  | 1.34564  |
| Psmc12        | chr11:107479527-107498036 | OK     | 73.9357  | 64.3102  |
| Jph3          | chr8:121730558-121791083  | OK     | 45.3416  | 39.4282  |
| Rnf138        | chr18:21001340-21028223   | OK     | 2.96414  | 2.57707  |
| Uqcrg         | chr11:53428947-53430831   | OK     | 222.832  | 193.687  |
| Ccdc57        | chr11:120826541-120932872 | NOTEST | 0.424328 | 0.368818 |
| Gm15706       | chr6:145250551-145251856  | OK     | 1.84855  | 1.6066   |
| Tbxas1        | chr6:38918985-39084579    | NOTEST | 0.215236 | 0.18704  |
| Rab3gap1      | chr1:127868772-127943876  | OK     | 19.4775  | 16.9232  |
| Fam168b       | chr1:34813217-34843050    | OK     | 66.7858  | 58.0194  |
| Smarcd3       | chr5:24592621-24602002    | OK     | 11.0142  | 9.56728  |
| Lix1l         | chr3:96601132-96629819    | OK     | 12.0157  | 10.4362  |
| Gm20257       | chr1:58652640-58655831    | NOTEST | 0.309269 | 0.26861  |
| Daglb         | chr5:143464492-143504442  | OK     | 8.06451  | 7.00408  |
| Prkd2         | chr7:16842901-16870461    | OK     | 1.2921   | 1.12213  |
| Cyb561d2      | chr9:107539010-107541865  | OK     | 11.9861  | 10.4068  |
| Mdga2         | chr12:66466058-67222549   | OK     | 5.04087  | 4.37661  |
| Aldh9a1       | chr1:167349990-167368530  | OK     | 22.585   | 19.6078  |
| Thsd1         | chr8:22227302-22261332    | OK     | 1.54956  | 1.34502  |
| Ash1l         | chr3:88965811-89079375    | OK     | 8.75872  | 7.60254  |
| Slc35a2       | chrX:7884243-7894492      | OK     | 14.725   | 12.7784  |
| 8430429K09Rik | chr11:3202352-3479831     | OK     | 2.30895  | 2.00347  |
| Msantd4       | chr9:4383536-4386869      | OK     | 31.6244  | 27.4382  |
| Tmem177       | chr1:119907898-119913168  | OK     | 4.58125  | 3.97456  |
| Tmem202       | chr9:59518684-59525501    | OK     | 1.57972  | 1.37051  |
| Pcyox1l       | chr18:61696836-61707635   | OK     | 39.3388  | 34.1276  |
| Tbl2          | chr5:135149710-135162662  | OK     | 8.35985  | 7.25234  |
| Nt5c2         | chr19:46886830-47024346   | OK     | 16.237   | 14.0846  |
| Lnpep         | chr17:17527722-17624489   | OK     | 39.9787  | 34.6788  |
| Tmem179       | chr12:112500183-112511160 | OK     | 44.8796  | 38.9288  |
| Cops2         | chr2:125830301-125859082  | OK     | 65.5741  | 56.8766  |

|               |                          |        |          |          |
|---------------|--------------------------|--------|----------|----------|
| Arhgef12      | chr9:42963841-43105718   | OK     | 33.0218  | 28.6419  |
| 4930451G09Rik | chr16:4964287-4978962    | OK     | 1.67697  | 1.45439  |
| Sap30l        | chr11:57801636-57810615  | OK     | 61.9584  | 53.7293  |
| Slc15a2       | chr16:36750163-36784962  | OK     | 2.45041  | 2.12484  |
| Gtpbp10       | chr5:5537456-5559501     | OK     | 1.58205  | 1.37177  |
| Efna5         | chr17:62602956-62881317  | OK     | 11.597   | 10.0535  |
| Ubxn11        | chr4:134102582-134126780 | NOTEST | 0.539513 | 0.467617 |
| Tmem209       | chr6:30481232-30509706   | OK     | 13.1841  | 11.4271  |
| Mmab          | chr5:114431033-114444027 | OK     | 9.81991  | 8.51072  |
| Fbxo41        | chr6:85469575-85502994   | OK     | 7.73926  | 6.70742  |
| Cdc40         | chr10:40831621-40883143  | OK     | 6.74965  | 5.84962  |
| 9330162012Rik | chr13:24905599-24939049  | NOTEST | 0.639651 | 0.5543   |
| Cbr4          | chr8:61487733-61503500   | OK     | 12.0439  | 10.4367  |
| Tars2         | chr3:95739973-95754977   | OK     | 10.5852  | 9.17247  |
| Mfsd8         | chr3:40818171-40846854   | OK     | 4.94     | 4.28032  |
| Kpnb1         | chr11:97159709-97187892  | OK     | 53.8949  | 46.6965  |
| Kif5c         | chr2:49619313-49774778   | OK     | 184.162  | 159.564  |
| Pla2g12a      | chr3:129878605-129895825 | OK     | 11.8057  | 10.2263  |
| Mlec          | chr5:115142980-115158176 | OK     | 58.947   | 51.0604  |
| Prrx2         | chr2:30845366-30881247   | NOTEST | 0.770692 | 0.667546 |
| Grin2d        | chr7:45832482-45866681   | NOTEST | 0.620436 | 0.537389 |
| Nacc1         | chr8:84670478-84687862   | OK     | 29.614   | 25.6494  |
| Pank4         | chr4:154964132-154980938 | OK     | 11.0721  | 9.58974  |
| 4933402D24Rik | chr1:63754908-63769267   | NOTEST | 0.310095 | 0.268534 |
| Gimap1        | chr6:48739046-48743795   | OK     | 1.31145  | 1.13566  |
| Mkl2          | chr16:13256480-13417529  | OK     | 6.48087  | 5.61174  |
| Zbtb9         | chr17:26973178-26976203  | OK     | 5.56635  | 4.81944  |
| Scaf8         | chr17:3114971-3198859    | OK     | 12.8372  | 11.1123  |
| Eng           | chr2:32646594-32694175   | OK     | 7.37185  | 6.38123  |
| Gstcd         | chr3:132982550-133091740 | OK     | 1.84208  | 1.59441  |
| Pex11b        | chr3:96635356-96645381   | OK     | 20.0285  | 17.3347  |
| Map4k2        | chr19:6341159-6355619    | OK     | 12.2604  | 10.6112  |
| Spg7          | chr8:123065507-123097751 | OK     | 25.0928  | 21.7157  |
| Lman2l        | chr1:36423185-36445239   | OK     | 21.4558  | 18.5657  |
| Cyp4f17       | chr17:32506461-32528894  | NOTEST | 0.867686 | 0.750789 |
| Dhx9          | chr1:153455757-153487660 | OK     | 48.2583  | 41.7532  |
| Spata24       | chr18:35656688-35662186  | OK     | 3.92452  | 3.39509  |
| Rnf40         | chr7:127588697-127603605 | OK     | 15.0429  | 13.013   |
| Klhl20        | chr1:161088377-161131479 | OK     | 20.504   | 17.7367  |
| Idnk          | chr13:58157648-58164693  | OK     | 18.0614  | 15.6227  |
| Clcn5         | chrX:7158411-7319358     | OK     | 10.0017  | 8.65034  |
| Tapbp         | chr17:33919477-33929290  | OK     | 42.1463  | 36.4511  |
| Tm9sf1        | chr14:55635965-55643806  | OK     | 18.8606  | 16.3116  |
| Paqr4         | chr17:23726335-23740330  | OK     | 66.5293  | 57.536   |
| Tcf25         | chr8:123373710-123404174 | OK     | 196.57   | 169.994  |
| Csnk1a1       | chr18:61555581-61588299  | OK     | 119.859  | 103.65   |
| Spry4         | chr18:38586264-38601268  | OK     | 10.2575  | 8.86752  |
| Foxn3         | chr12:99195093-99450074  | OK     | 11.6466  | 10.068   |
| Heatr5b       | chr17:78752905-78835381  | OK     | 16.7717  | 14.496   |
| Ndufc1        | chr3:51405478-51408955   | OK     | 72.8344  | 62.944   |
| Mdn1          | chr4:32657118-32775217   | OK     | 4.15883  | 3.59403  |
| Mapk8ip3      | chr17:24896499-24936977  | OK     | 117.982  | 99.7284  |
| Col18a1       | chr10:77052178-77166530  | OK     | 5.49448  | 4.7477   |

|               |                           |        |           |           |
|---------------|---------------------------|--------|-----------|-----------|
| Thtpa         | chr14:55094783-55106593   | OK     | 9.26773   | 8.00779   |
| Seh1l         | chr18:67774875-67799943   | OK     | 19.1979   | 16.5864   |
| Phkb          | chr8:85841001-86060642    | OK     | 11.2899   | 9.75358   |
| Tm4sf1        | chr3:57287063-57301919    | OK     | 9.81598   | 8.4794    |
| Fam86         | chr16:5233620-5255956     | OK     | 2.80867   | 2.42603   |
| Rap2b         | chr3:61364506-61368703    | OK     | 4.46594   | 3.85728   |
| Ltn1          | chr16:87376650-87432606   | OK     | 16.6519   | 14.3822   |
| Ier3ip1       | chr18:76930026-76941614   | OK     | 42.549    | 36.7488   |
| Gm5086        | chr13:97559999-97583994   | NOTEST | 0.0618285 | 0.0533931 |
| Nudt19        | chr7:35547184-35555928    | OK     | 15.5805   | 13.4545   |
| Zfp180        | chr7:24081896-24107708    | OK     | 14.8101   | 12.784    |
| Serpinb9      | chr13:33004540-33017955   | OK     | 4.91383   | 4.24129   |
| Dnaja3        | chr16:4684069-4707693     | OK     | 28.9166   | 24.9584   |
| Ttc39d        | chr17:80215913-80217936   | NOTEST | 0.109     | 0.0940552 |
| Id1           | chr2:152736250-152737410  | OK     | 12.2919   | 10.6066   |
| Desi2         | chr1:178187416-178252597  | OK     | 5.12527   | 4.42253   |
| Pqlc2         | chr4:139298004-139310700  | OK     | 7.04483   | 6.07865   |
| 2810001G20Rik | chr11:64079483-64083259   | OK     | 5.60845   | 4.83859   |
| Mib1          | chr18:10725624-10812217   | OK     | 20.7721   | 17.9204   |
| C130074G19Rik | chr1:184871925-184883036  | OK     | 16.9739   | 14.6406   |
| Rasgrp3       | chr17:75435904-75529053   | OK     | 1.22548   | 1.05686   |
| Atp6v1b2      | chr8:69037707-69113717    | OK     | 294.434   | 253.913   |
| Guca1b        | chr17:47385392-47392967   | NOTEST | 0.423937  | 0.365588  |
| Cmtr1         | chr17:29660600-29717017   | OK     | 27.9888   | 24.1362   |
| Ints1         | chr5:139751281-139775678  | OK     | 12.954    | 11.1691   |
| Dtx3l         | chr16:35926514-35972621   | OK     | 4.5873    | 3.95508   |
| Xpo5          | chr17:46202854-46242299   | OK     | 14.3647   | 12.3839   |
| Hspa13        | chr16:75755190-75766818   | OK     | 11.3013   | 9.74251   |
| Fyttd1        | chr16:32877783-32908963   | OK     | 22.791    | 19.6447   |
| Mrpl45        | chr11:97315715-97329920   | OK     | 13.0135   | 11.2167   |
| Uqcc1         | chr2:155846885-155930310  | OK     | 29.1609   | 25.1345   |
| Scrn3         | chr2:73312651-73337807    | OK     | 23.1739   | 19.9738   |
| Ctnnd1        | chr2:84600780-84650740    | OK     | 31.3212   | 26.9959   |
| Pex3          | chr10:13523841-13563376   | OK     | 13.2623   | 11.43     |
| Sgms2         | chr3:131318985-131344923  | OK     | 10.8457   | 9.34697   |
| Gnl1          | chr17:35979954-35989462   | OK     | 34.7148   | 29.9107   |
| Pik3r4        | chr9:105642994-105687655  | OK     | 13.0135   | 11.2121   |
| Ftsj1         | chrX:8238667-8252406      | OK     | 6.13501   | 5.28576   |
| Cog6          | chr3:52982122-53017223    | OK     | 19.9363   | 17.1733   |
| Cmc1          | chr9:118040521-118150196  | OK     | 12.4824   | 10.7518   |
| Urgcp         | chr11:5713416-5784710     | OK     | 14.8521   | 12.7897   |
| Bfar          | chr16:13671857-13703612   | OK     | 18.9416   | 16.3096   |
| Thoc3         | chr13:54458836-54468840   | OK     | 16.1065   | 13.8682   |
| Tmem248       | chr5:130219743-130243765  | OK     | 22.3089   | 19.2041   |
| Cand1         | chr10:119198811-119240055 | OK     | 42.1341   | 36.2675   |
| Bbs1          | chr19:4886881-4906627     | OK     | 3.59672   | 3.09565   |
| D330023K18Rik | chr2:31151048-31152291    | OK     | 1.98807   | 1.71044   |
| Zfp217        | chr2:170108642-170142675  | OK     | 1.26432   | 1.0877    |
| Fzd1          | chr5:4753838-4758216      | OK     | 7.25358   | 6.24029   |
| Hadhb         | chr5:30155252-30184593    | OK     | 9.71813   | 8.35913   |
| Ercc6         | chr14:32513520-32580989   | OK     | 2.09596   | 1.80276   |
| Tbc1d7        | chr13:43151741-43171501   | OK     | 23.5745   | 20.2761   |
| Myh7b         | chr2:155611242-155692384  | NOTEST | 0.328295  | 0.282278  |

|               |                           |        |           |           |
|---------------|---------------------------|--------|-----------|-----------|
| Ndufa4        | chr6:11900372-11907446    | OK     | 704.884   | 606.043   |
| Ftsj2         | chr5:140327673-140331898  | OK     | 5.05877   | 4.34864   |
| Pigk          | chr3:152714099-152789013  | OK     | 29.925    | 25.7234   |
| Hacl1         | chr14:31607225-31640965   | OK     | 3.51234   | 3.01872   |
| Gtf3c4        | chr2:28822299-28840360    | OK     | 6.8074    | 5.85038   |
| Exoc6         | chr19:37550417-37683249   | OK     | 13.345    | 11.4684   |
| Pdpx          | chr15:78913918-78919517   | OK     | 11.274    | 9.68859   |
| Msh6          | chr17:87975049-88065285   | OK     | 5.54312   | 4.76343   |
| Tsn           | chr1:118298517-118311132  | OK     | 35.3142   | 30.3436   |
| Trex1         | chr9:109057931-109059723  | OK     | 8.8821    | 7.63183   |
| Mrps27        | chr13:99344785-99415561   | OK     | 15.7123   | 13.5003   |
| Msl3          | chrX:168653098-168673902  | OK     | 9.10182   | 7.81791   |
| Tspan31       | chr10:127067289-127070261 | OK     | 63.275    | 54.3458   |
| 2410015M20Rik | chr17:56607451-56609771   | OK     | 36.3037   | 31.178    |
| Nop56         | chr2:130274411-130284451  | OK     | 24.1793   | 20.7644   |
| Gnpda1        | chr18:38327536-38338993   | OK     | 6.02736   | 5.17574   |
| Tab2          | chr10:7905647-7956123     | OK     | 17.2722   | 14.8293   |
| Arl5a         | chr2:52397950-52424874    | OK     | 25.7231   | 22.0839   |
| Fbxl4         | chr4:22357542-22434091    | OK     | 12.132    | 10.4143   |
| Gm3893        | chr4:41889794-42462993    | NOTEST | 0.0943591 | 0.0809725 |
| Med7          | chr11:46193848-46589232   | OK     | 8.37316   | 7.18472   |
| Rnf4          | chr5:34336389-34353430    | OK     | 25.4168   | 21.8078   |
| Mbtps1        | chr8:119508151-119558761  | OK     | 24.0669   | 20.6488   |
| Brcc3         | chrX:75416627-75455701    | OK     | 30.0589   | 25.787    |
| Tgfb3         | chr12:86056742-86079041   | OK     | 9.01404   | 7.73249   |
| Lims1         | chr10:58323465-58424691   | OK     | 30.076    | 25.7988   |
| Tbp           | chr17:15499887-15517427   | OK     | 5.68519   | 4.87646   |
| Rfwd2         | chr1:159232325-159347580  | OK     | 2.98301   | 2.55853   |
| Tmem30a       | chr9:79768940-79793430    | OK     | 233.557   | 200.307   |
| Btbd9         | chr17:30215523-30576287   | OK     | 9.90709   | 8.49624   |
| Tmppe         | chr9:114401077-114474379  | OK     | 5.1469    | 4.41375   |
| Pvr13         | chr16:46394857-46496967   | OK     | 16.0119   | 13.7309   |
| Elovl7        | chr13:108214403-108287107 | OK     | 56.5891   | 48.5265   |
| Usb1          | chr8:95332283-95347513    | OK     | 4.5372    | 3.89066   |
| Dusp12        | chr1:170874187-170885540  | OK     | 6.91924   | 5.93308   |
| Ctps          | chr4:120539867-120570276  | OK     | 18.4421   | 15.8129   |
| Wdr70         | chr15:7873054-8099209     | OK     | 6.951     | 5.95979   |
| Haus7         | chrX:73437314-73459029    | OK     | 5.72523   | 4.90814   |
| Rap1b         | chr10:117814596-117845974 | OK     | 72.9134   | 62.507    |
| Poll          | chr19:45552275-45560543   | OK     | 6.67845   | 5.72506   |
| Lman2         | chr13:55343832-55362783   | OK     | 19.8963   | 17.0553   |
| Ccdc96        | chr5:36484587-36488171    | NOTEST | 0.68204   | 0.58463   |
| Gna13         | chr11:109354777-109401369 | OK     | 21.0633   | 18.0542   |
| Slc29a3       | chr10:60712071-60752782   | OK     | 7.64034   | 6.54783   |
| 8030462N17Rik | chr18:77633280-77714010   | OK     | 6.25383   | 5.35942   |
| Tecpr1        | chr5:144195346-144223578  | OK     | 20.257    | 17.359    |
| Tpi1          | chr6:124808940-124814296  | OK     | 260.932   | 223.601   |
| Kdelr1        | chr7:45872839-45883726    | OK     | 35.5099   | 30.4276   |
| Cacna1g       | chr11:94408390-94474198   | NOTEST | 0.339359  | 0.290763  |
| Trim13        | chr14:61598225-61682373   | OK     | 6.99096   | 5.98941   |
| Xrcc3         | chr12:111758848-111813841 | NOTEST | 0.424619  | 0.363761  |
| C330006A16Rik | chr2:26136806-26140506    | OK     | 49.4397   | 42.3535   |
| Med13         | chr11:86265714-86357525   | OK     | 7.23541   | 6.19835   |

|               |                           |        |          |           |
|---------------|---------------------------|--------|----------|-----------|
| Entpd5        | chr12:84373875-84409029   | OK     | 12.8857  | 11.0377   |
| 4930452B06Rik | chr14:8431171-8666290     | OK     | 5.27162  | 4.51537   |
| Gm10336       | chr13:12182716-12186488   | OK     | 6.87576  | 5.88924   |
| Ahdc1         | chr4:133011505-133078110  | OK     | 4.60693  | 3.94585   |
| Anapc1        | chr2:128610082-128687395  | OK     | 14.7028  | 12.5927   |
| Rbm46         | chr3:82836522-82876483    | NOTEST | 0.661815 | 0.566749  |
| Sstr1         | chr12:58211803-58216036   | OK     | 1.35802  | 1.1629    |
| Sptbn1        | chr11:30099394-30219772   | OK     | 291.887  | 249.931   |
| Icam5         | chr9:21032037-21039036    | NOTEST | 0.070204 | 0.0601118 |
| Pcnx13        | chr19:5664634-5688908     | OK     | 8.04648  | 6.8896    |
| Ctsa          | chr2:164830729-164857708  | OK     | 32.5231  | 27.8457   |
| Enho          | chr4:41569793-41640302    | OK     | 18.4143  | 15.7643   |
| Tbc1d30       | chr10:121263819-121311189 | OK     | 11.6188  | 9.94601   |
| 5930438M14Rik | chr13:101232126-101247551 | NOTEST | 0.117877 | 0.100893  |
| AA415398      | chr4:119530314-119538769  | OK     | 1.17134  | 1.00246   |
| Trappc11      | chr8:47490127-47533470    | OK     | 23.1159  | 19.7828   |
| Zfat          | chr15:68083737-68258856   | OK     | 1.22833  | 1.05114   |
| Slirp         | chr12:87428077-87472299   | OK     | 87.3141  | 74.7145   |
| Ndufb10       | chr17:24722066-24724388   | OK     | 171.192  | 146.486   |
| C630043F03Rik | chr4:72201243-72203930    | OK     | 2.47646  | 2.11901   |
| Spns1         | chr7:126370059-126377934  | OK     | 13.0727  | 11.1855   |
| Rsad1         | chr11:94539797-94549207   | OK     | 3.68901  | 3.15495   |
| Pigp          | chr16:94358762-94469221   | OK     | 26.4653  | 22.6333   |
| Lipo1         | chr19:33555280-33590311   | OK     | 3.80751  | 3.25601   |
| Cisd2         | chr3:135406411-135423433  | OK     | 18.6362  | 15.9366   |
| Pank3         | chr11:35769494-35791285   | OK     | 27.9506  | 23.9006   |
| Zc3h12b       | chrX:95711677-95927970    | OK     | 0.860543 | 0.735816  |
| Mdm1          | chr10:118141786-118168999 | OK     | 0.976022 | 0.834539  |
| Ube4a         | chr9:44923126-44965600    | OK     | 38.951   | 33.304    |
| Grsf1         | chr5:88659232-88676171    | OK     | 70.9531  | 60.6495   |
| 6430573F11Rik | chr8:36489190-36513013    | OK     | 3.74204  | 3.19783   |
| Acaa1b        | chr9:119148042-119157093  | NOTEST | 0.669541 | 0.572096  |
| Bend5         | chr4:110397697-111663024  | OK     | 2.32726  | 1.98812   |
| Cdh5          | chr8:104101624-104144502  | OK     | 9.61013  | 8.20916   |
| Tmem261       | chr4:75277353-75278286    | OK     | 27.6299  | 23.6018   |
| Rhot1         | chr11:80209054-80267907   | OK     | 27.3025  | 23.3213   |
| Gdpgp1        | chr7:80232892-80241420    | OK     | 3.40632  | 2.90935   |
| Eea1          | chr10:95940662-96045518   | OK     | 22.4404  | 19.1657   |
| Tango2        | chr16:18300824-18343932   | OK     | 57.6984  | 49.2763   |
| Stk3          | chr15:34875498-35155806   | OK     | 5.64795  | 4.82339   |
| Aven          | chr2:112492963-112631253  | OK     | 15.1977  | 12.9783   |
| Tmem18        | chr12:30584442-30591219   | OK     | 17.8014  | 15.2017   |
| Pex10         | chr4:155067029-155072406  | OK     | 4.59224  | 3.9214    |
| Ctdnep1       | chr11:69968225-69990600   | OK     | 26.0481  | 22.2429   |
| Snx16         | chr3:10417816-10440130    | OK     | 18.7487  | 16.0067   |
| Acadsb        | chr7:131410600-131446211  | OK     | 17.6363  | 15.0564   |
| Rpp38         | chr2:3328948-3332628      | OK     | 3.34385  | 2.85406   |
| Mthfd2        | chr6:83305703-83317604    | OK     | 16.6944  | 14.249    |
| Homer1        | chr13:93304494-93405129   | OK     | 6.24418  | 5.32933   |
| Acadl         | chr1:66830838-66863309    | OK     | 87.5895  | 74.7505   |
| Pex7          | chr10:19860089-19907674   | OK     | 15.8794  | 13.5431   |
| Recql5        | chr11:115892594-115933492 | OK     | 4.98837  | 4.25413   |
| Cstf2t        | chr19:30564486-31765033   | OK     | 11.5711  | 9.86744   |



|               |                           |        |          |          |
|---------------|---------------------------|--------|----------|----------|
| Gm14305       | chr2:176708352-176721813  | OK     | 2.33285  | 1.98919  |
| Alg3          | chr16:20605457-20610749   | OK     | 10.4251  | 8.88921  |
| Smurf1        | chr5:144876494-144965830  | OK     | 9.4791   | 8.08246  |
| Gbas          | chr5:129725074-129758325  | OK     | 46.4299  | 39.5793  |
| Ece1          | chr4:137862236-137965229  | OK     | 25.5668  | 21.7916  |
| Tubg1         | chr11:101120130-101126419 | OK     | 18.0928  | 15.4212  |
| Tagap         | chr17:7925999-7934897     | NOTEST | 0.145011 | 0.123563 |
| Aagab         | chr9:63602654-63641889    | OK     | 20.8542  | 17.7696  |
| Gosr2         | chr11:103676848-103697710 | OK     | 28.9462  | 24.6626  |
| D2hgdh        | chr1:93825239-93852174    | OK     | 3.44784  | 2.93751  |
| Usp53         | chr3:122933600-122984447  | OK     | 2.97245  | 2.53178  |
| Tns1          | chr1:73910230-74124449    | OK     | 58.638   | 49.9394  |
| Tfb2m         | chr1:179528055-179546267  | OK     | 3.94157  | 3.35683  |
| Wrap53        | chr11:69561753-69579324   | OK     | 3.49892  | 2.97958  |
| Pgs1          | chr11:117986856-118129219 | OK     | 46.9531  | 39.9824  |
| Ndufa13       | chr8:69894181-69903518    | OK     | 52.8673  | 45.0177  |
| Vcl           | chr14:20929432-21033673   | OK     | 31.8704  | 27.1334  |
| Cbx3          | chr6:51470615-51483704    | OK     | 7.10313  | 6.04729  |
| Psd2          | chr18:35964829-36014716   | NOTEST | 0.3393   | 0.288835 |
| Kpna1         | chr16:35983362-36036162   | OK     | 37.1626  | 31.6345  |
| Dtd2          | chr12:51997506-52006501   | OK     | 4.29779  | 3.65759  |
| Rab11a        | chr9:64715299-64737756    | OK     | 140.703  | 119.741  |
| Ntan1         | chr16:13819276-13903145   | OK     | 32.9104  | 28.007   |
| Napb          | chr2:148694656-148732420  | OK     | 140.269  | 119.366  |
| Zdhhc6        | chr19:55298295-55316032   | OK     | 11.883   | 10.1109  |
| Ap2a1         | chr7:44896078-44929490    | OK     | 100.316  | 85.3529  |
| E130308A19Rik | chr4:59626210-59754303    | OK     | 1.73865  | 1.4792   |
| Atp2b4        | chr1:133702673-133753747  | OK     | 18.4149  | 15.6661  |
| Ndufa11       | chr17:56717761-56724248   | OK     | 21.6001  | 18.373   |
| Pias3         | chr3:96696374-96708560    | OK     | 7.26938  | 6.18229  |
| Ankrd17       | chr5:90227165-90366185    | OK     | 25.9364  | 22.0564  |
| Fam19a3       | chr3:104767404-104777547  | OK     | 5.59169  | 4.75428  |
| Fmnl2         | chr2:52857867-53134202    | OK     | 18.6054  | 15.8169  |
| Adam22        | chr5:8072351-8368081      | OK     | 44.0321  | 37.4287  |
| Dnajc24       | chr2:105966707-106003549  | OK     | 5.19504  | 4.4152   |
| Tubgcp5       | chr7:55794147-55831447    | OK     | 10.3688  | 8.81222  |
| Dhdh          | chr7:45473562-45522603    | OK     | 6.52745  | 5.5471   |
| Wbscr27       | chr5:134932372-134942637  | OK     | 7.3419   | 6.23762  |
| Ndufb8        | chr19:44550253-44555415   | OK     | 265.214  | 225.323  |
| Rnf146        | chr10:29313165-29362442   | OK     | 14.871   | 12.6342  |
| Ctsf          | chr19:4855128-4860912     | OK     | 26.1115  | 22.1826  |
| Cdc42ep3      | chr17:79334024-79355091   | OK     | 6.23095  | 5.29289  |
| Tmem63b       | chr17:45660176-45686218   | OK     | 66.7822  | 56.7277  |
| Sec31a        | chr5:100361648-100416234  | OK     | 35.8889  | 30.4848  |
| 4933411K20Rik | chr8:46169555-46195590    | OK     | 11.665   | 9.90733  |
| Aste1         | chr9:105395391-105405756  | OK     | 1.94844  | 1.65475  |
| Lrrc8a        | chr2:30237768-30263790    | OK     | 33.1871  | 28.1847  |
| Gfm2          | chr13:97137936-97198357   | OK     | 9.44512  | 8.02138  |
| Slc25a16      | chr10:62920632-62946494   | OK     | 15.7179  | 13.3475  |
| Taco1         | chr11:106066106-106073612 | OK     | 13.0192  | 11.053   |
| Gdap2         | chr3:100162462-100206989  | OK     | 14.3468  | 12.1794  |
| Tmem241       | chr18:11981302-12121537   | OK     | 3.26225  | 2.76907  |
| Ddx31         | chr2:28840405-28905575    | OK     | 4.31577  | 3.66324  |

|               |                           |        |           |           |
|---------------|---------------------------|--------|-----------|-----------|
| Adam11        | chr11:102761438-102780262 | OK     | 64.5549   | 54.7899   |
| Gm14326       | chr2:177935992-177957288  | OK     | 3.43557   | 2.9158    |
| Fam120aos     | chr13:48968111-48969905   | OK     | 3.63045   | 3.08099   |
| Traf6         | chr2:101678439-101700974  | OK     | 4.07568   | 3.45794   |
| Bbs10         | chr10:111298678-111301736 | OK     | 2.498     | 2.11933   |
| Hsdl1         | chr8:119561977-119575200  | OK     | 50.4003   | 42.759    |
| Eml2          | chr7:19181169-19206482    | OK     | 91.2603   | 77.4206   |
| Sfxn2         | chr19:46573364-46596900   | OK     | 1.06128   | 0.900183  |
| Acox2         | chr14:8225510-8259019     | NOTEST | 0.0396087 | 0.0335936 |
| Tmem185b      | chr1:119526153-119528983  | OK     | 4.44253   | 3.76753   |
| Trim37        | chr11:86583864-87555823   | OK     | 54.3457   | 46.0811   |
| Tmem126b      | chr7:90468828-90475995    | OK     | 29.1753   | 24.7384   |
| Nelfcd        | chr2:174415803-174438992  | OK     | 20.1559   | 17.0899   |
| Mrps2         | chr2:28468065-28471177    | OK     | 12.5503   | 10.6387   |
| Gatad1        | chr5:3639960-3647936      | OK     | 31.6224   | 26.8049   |
| Pptc7         | chr5:122284397-122324281  | OK     | 18.4994   | 15.6797   |
| Nmnat3        | chr9:98296582-98411428    | NOTEST | 0.338904  | 0.287242  |
| Mms19         | chr19:41933471-41981136   | OK     | 15.1848   | 12.8699   |
| Pde4d         | chr13:108654176-109955969 | OK     | 13.1877   | 11.1759   |
| Zbtb5         | chr4:44991242-45012412    | OK     | 2.5179    | 2.1338    |
| Mpnd          | chr17:56009200-56036637   | OK     | 60.7227   | 51.457    |
| Mstn          | chr1:53061662-53068079    | NOTEST | 0.252704  | 0.214124  |
| Herpud2       | chr9:25108129-25151781    | OK     | 11.0762   | 9.38412   |
| Arl6ip1       | chr7:118118889-118129625  | OK     | 276.184   | 233.951   |
| Txndc12       | chr4:108834677-108862119  | OK     | 14.445    | 12.2346   |
| Rassf5        | chr1:131176409-131245178  | OK     | 39.6252   | 33.5615   |
| Ubxn2a        | chr12:4879031-4907520     | OK     | 28.8421   | 24.4222   |
| Rpp30         | chr19:36083715-36104773   | OK     | 12.7391   | 10.7859   |
| Tmem175       | chr5:108629809-108685446  | OK     | 12.8369   | 10.8669   |
| Abhd15        | chr11:77515116-77520628   | OK     | 1.19819   | 1.01413   |
| Ralgapb       | chr2:158409852-158499253  | OK     | 30.5037   | 25.8172   |
| Hps1          | chr19:42755195-42779976   | OK     | 2.05948   | 1.74304   |
| Cdkal1        | chr13:29325305-29855588   | OK     | 3.92135   | 3.31859   |
| Ubap1         | chr4:41348995-41389766    | OK     | 28.9715   | 24.5165   |
| Gm12060       | chr11:23558059-23558842   | NOTEST | 0.612736  | 0.518514  |
| Kpna6         | chr4:129643978-129672767  | OK     | 22.4529   | 18.9979   |
| Cad           | chr5:30933142-31348845    | OK     | 5.06976   | 4.2887    |
| Ndufab1       | chr7:122088043-122101848  | OK     | 16.1393   | 13.6529   |
| Usp28         | chr9:48985384-49042517    | OK     | 3.21116   | 2.71636   |
| Syngn2        | chr11:117809666-117814286 | OK     | 7.18589   | 6.07861   |
| Tbc1d23       | chr16:57168863-57231466   | OK     | 10.1318   | 8.57017   |
| Rora          | chr9:68653785-69388246    | OK     | 2.63584   | 2.22921   |
| A430005L14Rik | chr4:153957236-153961924  | OK     | 6.20354   | 5.24617   |
| Syngn1        | chr15:80091333-80119501   | OK     | 126.921   | 107.321   |
| Dnajc5        | chr2:181520484-181552880  | OK     | 85.8372   | 72.5729   |
| Prpsap1       | chr11:116470815-116490346 | OK     | 34.4778   | 29.149    |
| Timm10b       | chr7:105640539-105641845  | OK     | 13.7931   | 11.6603   |
| C330007P06Rik | chrX:36848543-36864246    | OK     | 15.0339   | 12.7081   |
| Zfp687        | chr3:94974730-95015238    | OK     | 6.15952   | 5.20643   |
| Wars          | chr12:108860029-108894174 | OK     | 53.6272   | 45.3273   |
| Mtif3         | chr5:146948656-146963797  | OK     | 2.98322   | 2.52123   |
| Tmem110       | chr14:30825593-30877210   | OK     | 8.42063   | 7.11637   |
| Slc25a35      | chr11:68968130-68975185   | OK     | 3.70099   | 3.12772   |

|               |                           |        |           |           |
|---------------|---------------------------|--------|-----------|-----------|
| Vps26b        | chr9:26999676-27030094    | OK     | 20.955    | 17.7075   |
| Galnt16       | chr8:57774051-58911627    | NOTEST | 0.278512  | 0.23533   |
| Nudt4         | chr10:95547006-95564167   | OK     | 82.4222   | 69.6184   |
| Ppp3r1        | chr11:17159297-17200380   | OK     | 139.823   | 118.074   |
| Slc12a6       | chr2:112266313-112368027  | OK     | 28.0142   | 23.6567   |
| Fam3c         | chr6:22306521-22356081    | OK     | 30.5363   | 25.786    |
| Fth1          | chr19:9980599-9985111     | OK     | 1488.94   | 1257.19   |
| Dmrtb1        | chr4:107676289-107684162  | NOTEST | 0.0323518 | 0.0273162 |
| 2410006H16Rik | chr11:62602876-62604806   | OK     | 46.7214   | 39.4467   |
| Spryd4        | chr10:128194634-128211794 | OK     | 7.76832   | 6.55837   |
| Fbxo16        | chr14:65266700-65321502   | OK     | 3.61632   | 3.05292   |
| Stim2         | chr5:53998522-54121057    | OK     | 10.4086   | 8.78622   |
| Impdh2        | chr9:108560500-108565566  | NOTEST | 0.194767  | 0.164386  |
| Gm13483       | chr2:50296809-50433967    | NOTEST | 0.665662  | 0.561827  |
| Ly6e          | chr15:74955050-74959905   | OK     | 27.0568   | 22.834    |
| Zfp472        | chr17:32965830-32979211   | OK     | 1.42667   | 1.20393   |
| Xrcc5         | chr1:72307420-72394953    | OK     | 16.0637   | 13.5546   |
| Ncs1          | chr2:31245922-31295471    | OK     | 52.2934   | 44.1158   |
| Gm6377        | chrX:109196755-109200445  | NOTEST | 0.109323  | 0.0922272 |
| Gm15910       | chr10:120781100-120898971 | NOTEST | 0.260074  | 0.219353  |
| Mtrf1         | chr14:79397771-79423650   | OK     | 3.32781   | 2.80651   |
| Mtmr12        | chr15:12205093-12272240   | OK     | 4.52499   | 3.81608   |
| Exoc4         | chr6:33249149-33972930    | OK     | 34.5899   | 29.1697   |
| Impdh1        | chr6:29200439-29212271    | OK     | 94.104    | 79.3489   |
| Eral1         | chr11:78073375-78080383   | OK     | 11.9397   | 10.0675   |
| Ube2v2        | chr16:15550985-15594518   | OK     | 8.25054   | 6.95602   |
| Zfyve19       | chr2:119172499-119217050  | OK     | 11.3864   | 9.59923   |
| Sufu          | chr19:46396895-46488804   | OK     | 2.93505   | 2.47411   |
| Yipf1         | chr4:107314362-107359823  | OK     | 42.5282   | 35.8461   |
| Znrd1as       | chr17:36958591-36965623   | OK     | 3.45753   | 2.91419   |
| Ccdc90b       | chr7:92561148-92582294    | OK     | 8.13592   | 6.857     |
| Rap1a         | chr3:105727259-105801381  | OK     | 12.8314   | 10.8122   |
| Sec61a2       | chr2:5870986-5895353      | OK     | 26.9224   | 22.684    |
| Stxbp4        | chr11:90476492-90638108   | OK     | 2.33769   | 1.96938   |
| Adnp2         | chr18:80127134-80151482   | OK     | 5.2668    | 4.43675   |
| Nudt9         | chr5:104047010-104065367  | OK     | 29.0406   | 24.4603   |
| Ube2g1        | chr11:72607260-72686481   | OK     | 16.7097   | 14.0742   |
| Ndufb9        | chr15:58933809-58939489   | OK     | 162.087   | 136.52    |
| Kif26a        | chr12:112146207-112181747 | OK     | 1.08734   | 0.915603  |
| Ttf2          | chr3:100938859-100969663  | OK     | 4.0453    | 3.40594   |
| Tbck          | chr3:132684143-132838506  | OK     | 6.83839   | 5.75678   |
| Kbtbd7        | chr14:79426510-79431038   | OK     | 7.47659   | 6.29393   |
| Nars          | chr18:64499646-64516557   | OK     | 183.353   | 154.332   |
| Zfp438        | chr18:5210030-5334439     | OK     | 1.38443   | 1.1653    |
| Smndc1        | chr19:53379213-53390573   | OK     | 15.6951   | 13.2081   |
| Lmbrd2        | chr15:9111981-9197450     | OK     | 22.2614   | 18.7312   |
| Pcdhga2       | chr18:36930284-37841872   | OK     | 2.88587   | 2.42809   |
| Sdpr          | chr1:51218385-51333779    | OK     | 5.7894    | 4.87049   |
| Cdk2ap1       | chr5:124345438-124354628  | OK     | 11.4111   | 9.59986   |
| Fundc1        | chrX:17556568-17572297    | OK     | 56.433    | 47.4649   |
| Opa1          | chr16:29579333-29654602   | OK     | 46.7483   | 39.3077   |
| Acr           | chr15:89568325-89574585   | NOTEST | 0.228552  | 0.192157  |
| Pcdhgb2       | chr18:36930284-37841872   | OK     | 2.86963   | 2.41256   |

|               |                           |        |           |           |
|---------------|---------------------------|--------|-----------|-----------|
| Galc          | chr12:98202299-98259337   | OK     | 15.0146   | 12.6228   |
| Atg2b         | chr12:105613539-105685241 | OK     | 7.87588   | 6.62116   |
| Fanca         | chr8:123254194-123318576  | NOTEST | 0.420585  | 0.35358   |
| Apba2         | chr7:64501705-64753876    | OK     | 26.0316   | 21.8785   |
| Traip         | chr9:107950962-107972268  | NOTEST | 0.724495  | 0.608888  |
| 9230110C19Rik | chr9:8021671-8042823      | OK     | 7.11667   | 5.98043   |
| Zdhhc3        | chr9:123072309-123113205  | OK     | 16.1535   | 13.5739   |
| Ganab         | chr19:8898110-8916665     | OK     | 44.3904   | 37.301    |
| Slc33a1       | chr3:63942323-63964733    | OK     | 13.252    | 11.1342   |
| Osbpl1a       | chr18:12755311-12941841   | OK     | 47.6461   | 40.0304   |
| Cda           | chr4:138338527-138367955  | OK     | 52.0569   | 43.7347   |
| Aif1          | chr17:35170991-35176001   | NOTEST | 0.659652  | 0.554167  |
| Paip2b        | chr6:83806058-83831741    | OK     | 41.7233   | 35.0475   |
| Wdr8          | chr4:154142371-154156818  | OK     | 12.0704   | 10.1391   |
| Rab11b        | chr17:33742483-33760486   | OK     | 17.7219   | 14.8859   |
| Ech1          | chr7:28825337-28832239    | OK     | 47.5647   | 39.9491   |
| Dennd4b       | chr3:90266533-90280665    | OK     | 6.07579   | 5.1019    |
| Iah1          | chr12:21316391-21373632   | OK     | 19.6512   | 16.4995   |
| Zfp608        | chr18:54888044-54990180   | OK     | 3.33106   | 2.79673   |
| Sec16b        | chr1:157506795-157568424  | NOTEST | 0.263634  | 0.221343  |
| Zfp37         | chr4:62189536-62208546    | OK     | 3.38508   | 2.84204   |
| Fam160b2      | chr14:70583294-70599835   | OK     | 9.07796   | 7.6209    |
| Fbxo3         | chr2:104027798-104063237  | OK     | 47.8539   | 40.1728   |
| Prpf8         | chr11:75486776-75509447   | OK     | 35.6146   | 29.8964   |
| Gm12992       | chr4:131873638-131920029  | OK     | 0.848285  | 0.712007  |
| Mcc           | chr18:44425059-44812182   | OK     | 3.3744    | 2.83228   |
| Npm2          | chr14:70647301-70653084   | NOTEST | 0.114828  | 0.0963754 |
| Tigd2         | chr6:59208869-59212033    | OK     | 5.12845   | 4.30309   |
| AI118078      | chr9:55326948-55438344    | OK     | 1.35395   | 1.13596   |
| Fam98c        | chr7:29134932-29156210    | OK     | 11.1992   | 9.39338   |
| Gm14436       | chr2:175470024-175483322  | OK     | 1.28988   | 1.08172   |
| Rhob          | chr12:8497758-8499985     | OK     | 74.5475   | 62.5138   |
| Ppfbp2        | chr7:107595050-107758032  | OK     | 2.18204   | 1.8297    |
| Pdha1         | chrX:159988432-160138336  | OK     | 132.849   | 111.391   |
| Nos2          | chr11:78920858-78960124   | NOTEST | 0.0498199 | 0.0417668 |
| Slc39a7       | chr17:34028265-34031690   | OK     | 50.8922   | 42.6557   |
| Jagn1         | chr6:113442516-113448229  | OK     | 35.0538   | 29.3769   |
| Bcl10         | chr3:145924261-145934364  | OK     | 10.3695   | 8.68995   |
| Cldn25        | chr16:58727909-58734247   | OK     | 43.9452   | 36.827    |
| Lrrc56        | chr7:141194129-141214080  | OK     | 1.76277   | 1.47712   |
| D3Erttd254e   | chr3:36151079-36170341    | OK     | 4.67603   | 3.91763   |
| Zfp811        | chr17:32795675-32809931   | OK     | 1.1547    | 0.96739   |
| Slc37a4       | chr9:44398175-44402965    | OK     | 9.95102   | 8.33614   |
| Parp9         | chr16:35926514-35972621   | OK     | 2.0012    | 1.67628   |
| Atp5k         | chr5:108433252-108434378  | OK     | 367.298   | 307.663   |
| Ripply3       | chr16:94328421-94336935   | NOTEST | 0.232986  | 0.195156  |
| Sppl3         | chr5:115011523-115098790  | OK     | 30.2264   | 25.3171   |
| Dst           | chr1:33908224-34308662    | OK     | 130.984   | 109.697   |
| Casd1         | chr6:4601065-4643381      | OK     | 16.1039   | 13.4855   |
| Gpr182        | chr10:127749601-127751798 | NOTEST | 0.345432  | 0.289251  |
| Abca3         | chr17:24352022-24414513   | OK     | 45.9513   | 38.469    |
| Cmtr2         | chr8:110217959-110224489  | OK     | 2.72788   | 2.28352   |
| Pyurf         | chr6:57684738-57692078    | OK     | 3.73694   | 3.12815   |

|               |                           |        |           |           |
|---------------|---------------------------|--------|-----------|-----------|
| Usp54         | chr14:20499313-20618354   | OK     | 3.20749   | 2.68492   |
| Snx14         | chr9:88376746-88438951    | OK     | 17.3      | 14.4813   |
| Taf13         | chr3:108571698-108582068  | OK     | 41.3273   | 34.5923   |
| Fbxo21        | chr5:117976769-118010191  | OK     | 34.8726   | 29.1868   |
| Cs            | chr10:128337831-128362479 | OK     | 121.377   | 101.582   |
| Gtpbp3        | chr8:71488102-71493400    | OK     | 7.02187   | 5.87644   |
| Psmc4         | chr7:28041701-28050092    | OK     | 93.6538   | 78.371    |
| Ppfia4        | chr1:134296782-134332928  | OK     | 14.3467   | 12.0046   |
| Myl12a        | chr17:70993792-71002533   | OK     | 16.2253   | 13.5761   |
| Myo1b         | chr1:51749757-51915978    | OK     | 11.4827   | 9.60673   |
| Tfeb          | chr17:47737036-47792416   | OK     | 4.02083   | 3.36379   |
| Gmppb         | chr9:108049289-108079375  | OK     | 7.51121   | 6.2834    |
| Kctd15        | chr7:34639015-34652841    | OK     | 11.1486   | 9.32612   |
| Pex12         | chr11:83291698-83298977   | OK     | 2.812     | 2.35232   |
| Arhgef7       | chr8:11728104-11835217    | OK     | 19.0828   | 15.9607   |
| Mgat2         | chr12:69184157-69186773   | OK     | 20.5344   | 17.1739   |
| Etfb          | chr7:43444071-43457800    | OK     | 81.4997   | 68.1527   |
| Lmf1          | chr17:25579173-25662826   | OK     | 11.9385   | 9.98302   |
| Zmpste24      | chr4:121059237-121098243  | OK     | 29.833    | 24.9447   |
| Dfna5         | chr6:50207402-50261769    | OK     | 5.55096   | 4.64139   |
| Ndfip2        | chr14:105258672-105309298 | OK     | 137.379   | 114.86    |
| 1700028E10Rik | chr5:151368674-151414083  | NOTEST | 0.142494  | 0.119113  |
| Mrpl1         | chr5:96210114-96266727    | OK     | 5.75665   | 4.81201   |
| Ank1          | chr8:22974835-23150497    | OK     | 70.6365   | 59.0421   |
| Hspa9         | chr18:34937414-34954351   | OK     | 103.539   | 86.5433   |
| Tox4          | chr14:52261758-52305124   | OK     | 15.0349   | 12.5666   |
| Dhdds         | chr4:133969056-134000864  | OK     | 34.603    | 28.9215   |
| Nkd2          | chr13:73819327-73847631   | OK     | 0.954074  | 0.797347  |
| Cadm2         | chr16:66655420-67620908   | OK     | 4.55947   | 3.81038   |
| Gm16596       | chr12:108371152-108702306 | NOTEST | 0.138202  | 0.115494  |
| Alms1         | chr6:85587530-85702751    | NOTEST | 0.732735  | 0.612218  |
| Atm           | chr9:53437121-53536671    | OK     | 4.54893   | 3.80045   |
| Tbc1d14       | chr5:36490603-36586226    | OK     | 18.8905   | 15.7807   |
| Cnbp          | chr6:87842614-87851106    | OK     | 109.577   | 91.5002   |
| Hist1h1c      | chr13:23738806-23739531   | OK     | 40.2079   | 33.5728   |
| Mat1a         | chr14:41105032-41124428   | NOTEST | 0.0965845 | 0.0806427 |
| Akap10        | chr11:61871306-61930257   | OK     | 9.92702   | 8.28842   |
| Spg20         | chr3:55112107-55137332    | OK     | 22.567    | 18.8415   |
| Dmxl2         | chr9:54365157-54501626    | OK     | 39.844    | 33.264    |
| Pcsk4         | chr10:79697304-80369637   | NOTEST | 0.165754  | 0.138371  |
| Ago1          | chr4:126435012-126468421  | OK     | 6.00391   | 5.01196   |
| Poc1b         | chr10:99107170-99197988   | OK     | 3.38174   | 2.82291   |
| Tctn2         | chr5:124598748-124627738  | OK     | 3.96837   | 3.31212   |
| Sp3os         | chr2:72936431-72989249    | OK     | 3.61422   | 3.01563   |
| Hip1          | chr5:135406518-135545122  | OK     | 15.3981   | 12.8451   |
| Abhd10        | chr16:45729724-45742955   | OK     | 21.9735   | 18.3299   |
| Cdh26         | chr2:178430514-178487366  | NOTEST | 0.159012  | 0.1326    |
| Zmynd10       | chr9:107547309-107551319  | NOTEST | 0.0477206 | 0.0397916 |
| Amigo1        | chr3:108186288-108192286  | OK     | 51.2776   | 42.7568   |
| Cyb5r3        | chr15:83153500-83172208   | OK     | 139.713   | 116.494   |
| Sertad1       | chr7:27486952-27490314    | OK     | 8.81148   | 7.34597   |
| Doc2b         | chr11:75769089-75796057   | NOTEST | 0.538902  | 0.449271  |
| Hmgcs1        | chr13:119690350-119708260 | OK     | 323.013   | 269.274   |



|               |                           |        |           |           |
|---------------|---------------------------|--------|-----------|-----------|
| Zbtb37        | chr1:161017755-161034259  | OK     | 1.14019   | 0.950379  |
| Xxylt1        | chr16:30920553-31275697   | OK     | 5.927     | 4.9402    |
| Ubqln4        | chr3:88553715-88569725    | OK     | 22.292    | 18.5805   |
| Zkscan16      | chr4:58943627-58958355    | NOTEST | 0.583382  | 0.486247  |
| Eri3          | chr4:117550323-117674297  | OK     | 67.059    | 55.8852   |
| Cebpzoz       | chr17:78916498-78937070   | OK     | 12.8382   | 10.6971   |
| Sh3gl3        | chr7:82259907-82307420    | OK     | 4.32156   | 3.60067   |
| Pja2          | chr17:64281005-64331883   | OK     | 166.567   | 138.764   |
| Egfl7         | chr2:26581055-26592682    | OK     | 26.8951   | 22.4043   |
| Adam15        | chr3:89339639-89350010    | OK     | 39.5441   | 32.9395   |
| Map4k4        | chr1:39900912-40026310    | OK     | 31.8134   | 26.4957   |
| Rprd1a        | chr18:24484961-24530204   | OK     | 15.8282   | 13.182    |
| Fundc2        | chrX:75382398-75397158    | OK     | 17.4319   | 14.5166   |
| Nphp1         | chr2:127740731-127788891  | OK     | 3.45373   | 2.87586   |
| Gba2          | chr4:43562633-43587487    | OK     | 11.3367   | 9.43963   |
| 2810408M09Rik | chr2:165490111-165493314  | OK     | 5.89478   | 4.90825   |
| Spire1        | chr18:67488208-67552721   | OK     | 16.1638   | 13.4539   |
| Ndufa5        | chr6:24518665-24527687    | OK     | 113.283   | 94.2859   |
| Gm14322       | chr2:177759287-177773275  | NOTEST | 0.653875  | 0.544219  |
| Dctd          | chr8:48099091-48141667    | OK     | 0.934989  | 0.77802   |
| Fbxw5         | chr2:25498649-25505470    | OK     | 29.1256   | 24.2347   |
| Cog2          | chr8:124520766-124552007  | OK     | 10.2784   | 8.55135   |
| Mkrn2         | chr6:115601937-115676635  | OK     | 15.7965   | 13.1388   |
| Sec11c        | chr18:65800577-65817657   | OK     | 56.142    | 46.6859   |
| Atf7          | chr15:102536643-102625421 | OK     | 4.47094   | 3.7176    |
| 4933427G17Rik | chr7:120982508-121014787  | NOTEST | 0.164824  | 0.137033  |
| Tmtc1         | chr6:148047415-148444352  | OK     | 47.0671   | 39.1275   |
| Npy1r         | chr8:66697421-66706798    | OK     | 8.35338   | 6.94382   |
| Sntg1         | chr1:8359738-9299877      | OK     | 1.14733   | 0.953386  |
| Dip2b         | chr15:100038663-100219473 | OK     | 11.664    | 9.69194   |
| Sil1          | chr18:35266395-35498925   | OK     | 21.7052   | 18.035    |
| 2900026A02Rik | chr5:113086322-113163313  | OK     | 12.2383   | 10.1659   |
| Ogdh          | chr11:6291596-6359094     | OK     | 72.1357   | 59.9177   |
| Gprasp2       | chrX:135839033-135844730  | OK     | 22.3265   | 18.542    |
| Tnni3         | chr7:4518307-4522443      | NOTEST | 0.141879  | 0.117826  |
| Sos1          | chr17:80393751-80480453   | OK     | 25.3923   | 21.0831   |
| Aldh7a1       | chr18:56525735-56587712   | OK     | 21.5235   | 17.8698   |
| Ext2          | chr2:93695630-93822568    | OK     | 17.8944   | 14.8567   |
| Tnpo1         | chr13:98842080-98926384   | OK     | 11.7646   | 9.76623   |
| Ppp3ca        | chr3:136670769-136935779  | OK     | 314.102   | 260.725   |
| Comtd1        | chr14:21831560-21848910   | OK     | 5.35817   | 4.44754   |
| Ndrg4         | chr8:95703036-95715119    | OK     | 1102.86   | 915.366   |
| Amfr          | chr8:93971587-94012640    | OK     | 70.9461   | 58.8817   |
| Cox7b         | chrX:106015699-106022450  | OK     | 86.2841   | 71.6048   |
| Abi2          | chr1:60409618-60481163    | OK     | 21.9942   | 18.2518   |
| Nbas          | chr12:13269126-13583811   | OK     | 15.3055   | 12.7008   |
| Dbt           | chr3:116513078-116549981  | OK     | 8.15511   | 6.76724   |
| Nuak1         | chr10:84371318-84440471   | OK     | 18.336    | 15.2151   |
| Mtbp          | chr15:55557407-55626423   | NOTEST | 0.728948  | 0.604859  |
| Supt7l        | chr5:31514568-31526762    | OK     | 5.81963   | 4.82763   |
| Mbnl1         | chr3:60472829-60629748    | OK     | 70.0452   | 58.0935   |
| Itga7         | chr10:128933812-128960988 | OK     | 48.7406   | 40.4122   |
| Ctla4         | chr1:60909024-60915832    | NOTEST | 0.0323836 | 0.0268444 |

|               |                            |        |          |          |
|---------------|----------------------------|--------|----------|----------|
| Svip          | chr7:51997160-52006018     | OK     | 40.5484  | 33.6123  |
| 8430419L09Rik | chr6:135197986-135236240   | OK     | 43.7673  | 36.279   |
| Ankrd40       | chr11:94328000-94341847    | OK     | 55.1968  | 45.752   |
| Acvr1b        | chr15:101174124-101212601  | OK     | 17.7656  | 14.7255  |
| Foxred1       | chr9:35204220-35211055     | OK     | 10.4779  | 8.68363  |
| Fam122a       | chr19:24294795-24555827    | OK     | 6.24302  | 5.17258  |
| Ghitm         | chr14:37120444-37135322    | OK     | 272.363  | 225.642  |
| 4933409K07Rik | chr4_JH584293_random:12055 | NOTEST | 0.335542 | 0.277976 |
| Atp5d         | chr10:79697304-80369637    | OK     | 235.454  | 195.041  |
| Sppl2b        | chr10:80855274-80868708    | OK     | 8.67431  | 7.18491  |
| Zfp300        | chrX:21079149-21089229     | NOTEST | 0.700452 | 0.579959 |
| Tbc1d9b       | chr11:50131359-50172785    | OK     | 62.1258  | 51.4369  |
| Card6         | chr15:5097438-5108533      | NOTEST | 0.757002 | 0.626749 |
| 2410002F23Rik | chr7:44246721-44252319     | OK     | 13.8457  | 11.4628  |
| Srr           | chr11:74898079-74925798    | OK     | 14.9919  | 12.4111  |
| Esam          | chr9:37528088-37538319     | OK     | 15.209   | 12.5888  |
| Tmed9         | chr13:55593134-55597694    | OK     | 76.7586  | 63.5336  |
| Cycs          | chr6:50562562-50566474     | OK     | 12.5952  | 10.4245  |
| Rab33b        | chr3:51483965-51496212     | OK     | 13.3471  | 11.0465  |
| Dclre1b       | chr3:103193822-103854618   | OK     | 1.59187  | 1.31743  |
| Crot          | chr5:8966047-8997146       | OK     | 40.8175  | 33.7769  |
| D430020J02Rik | chr12:116401946-116405161  | NOTEST | 0.272647 | 0.225616 |
| Mrpl16        | chr19:11770414-11774946    | OK     | 20.6481  | 17.0852  |
| Sec23a        | chr12:58958383-59012017    | OK     | 55.4528  | 45.8815  |
| Irf1          | chr11:53770013-53778374    | OK     | 10.2183  | 8.45287  |
| Rnft1         | chr11:86415843-86544807    | OK     | 1.70539  | 1.41065  |
| Slc25a17      | chr15:81318920-81360765    | OK     | 28.1156  | 23.2563  |
| Gtf3c3        | chr1:54397580-54438971     | OK     | 16.1928  | 13.3909  |
| Tmem165       | chr5:76183879-76469519     | OK     | 21.1816  | 17.5162  |
| Akap2         | chr4:57845247-57896984     | OK     | 21.7092  | 17.9521  |
| Chd1l         | chr3:97560747-97610190     | OK     | 3.4213   | 2.82843  |
| Myo18a        | chr11:7777234-77865988     | OK     | 42.8648  | 35.4347  |
| Atp5a1        | chr18:7773767-77782868     | OK     | 420.55   | 347.648  |
| Sema6d        | chr2:124089968-124667789   | OK     | 25.7513  | 21.2872  |
| Haus3         | chr5:34007178-34169526     | OK     | 6.46471  | 5.34215  |
| Nedd9         | chr13:41309915-41487360    | OK     | 5.83587  | 4.8222   |
| Kbtbd4        | chr2:90904785-90910560     | OK     | 6.45143  | 5.3293   |
| Tmem104       | chr11:115187486-115247025  | OK     | 12.1229  | 10.0141  |
| Commd9        | chr2:101886261-101901639   | OK     | 25.2237  | 20.8359  |
| Lyrm1         | chr7:119895860-119916756   | OK     | 9.77657  | 8.07527  |
| Gm19276       | chr15:10829050-10832713    | NOTEST | 0.240338 | 0.198493 |
| Slc25a3       | chr10:91116577-91123963    | OK     | 286.127  | 236.308  |
| Rer1          | chr4:155074111-155086297   | OK     | 44.0965  | 36.416   |
| Rprd1b        | chr2:158028496-158091797   | OK     | 6.32636  | 5.22442  |
| Tbc1d5        | chr17:50733126-51613053    | OK     | 10.5671  | 8.72584  |
| Gns           | chr10:121365089-121397245  | OK     | 31.3839  | 25.9151  |
| Mrps22        | chr9:98588729-98601679     | OK     | 15.9729  | 13.1879  |
| Stard10       | chr7:101321318-101346312   | OK     | 57.8731  | 47.7779  |
| Ccdc172       | chr19:58512001-58553085    | OK     | 4.66832  | 3.8538   |
| Zfp609        | chr9:65691582-65827564     | OK     | 5.17901  | 4.27526  |
| Zfp184        | chr13:21945093-21960485    | NOTEST | 0.189536 | 0.15646  |
| Cidea         | chr18:67321208-67367794    | OK     | 1.80156  | 1.48715  |
| Mageh1        | chrX:153036165-153037563   | OK     | 14.2109  | 11.7303  |

|               |                           |        |           |           |
|---------------|---------------------------|--------|-----------|-----------|
| Nomo1         | chr7:46033695-46084212    | OK     | 40.3009   | 33.256    |
| Dnah7a        | chr1:53397001-53706784    | NOTEST | 0.0438759 | 0.0362001 |
| 9430083A17Rik | chr13:51097737-51100727   | NOTEST | 0.531796  | 0.438661  |
| Nckap1        | chr2:80500511-80581182    | OK     | 129.551   | 106.853   |
| Ddx41         | chr13:55530409-55536658   | OK     | 5.27466   | 4.35042   |
| 2310014L17Rik | chr7:12927415-12931072    | NOTEST | 0.0978375 | 0.0806905 |
| Itga2b        | chr11:102453296-102469883 | OK     | 0.868238  | 0.716047  |
| 9130023H24Rik | chr7:128234450-128245100  | OK     | 1.46334   | 1.20677   |
| Lipt2         | chr7:100159276-100160931  | OK     | 3.65056   | 3.01034   |
| Creg1         | chr1:165763779-165775304  | OK     | 10.6191   | 8.75326   |
| Ccnh          | chr13:85189476-85213723   | OK     | 14.9176   | 12.296    |
| Zfp3          | chr11:70764446-70772928   | OK     | 3.00335   | 2.4755    |
| Eif4g3        | chr4:137993455-138207079  | OK     | 43.7521   | 36.053    |
| Mtdh          | chr15:34082718-34142385   | OK     | 20.6683   | 17.0291   |
| Mief2         | chr11:60728397-60732951   | OK     | 6.86881   | 5.65916   |
| Sema6c        | chr3:95160419-95174050    | OK     | 7.30828   | 6.02049   |
| Stk38l        | chr6:146724929-146778814  | OK     | 9.60062   | 7.90863   |
| Fank1         | chr7:133709332-133881532  | OK     | 0.85876   | 0.707397  |
| Cyp20a1       | chr1:60343371-60387387    | OK     | 11.4271   | 9.4127    |
| Zfyve20       | chr6:92186711-92214811    | OK     | 13.5166   | 11.1337   |
| 2310081J21Rik | chr13:50679169-50680224   | NOTEST | 0.203846  | 0.167896  |
| Cox14         | chr15:99725617-99728136   | OK     | 70.5268   | 58.0888   |
| Setd7         | chr3:51515317-51567116    | OK     | 45.355    | 37.3535   |
| 2610035D17Rik | chr11:113043905-113201838 | OK     | 7.74257   | 6.37484   |
| Ccbl1         | chr2:30185130-30205699    | OK     | 4.43376   | 3.65024   |
| Usp4          | chr9:108347830-108392529  | OK     | 19.7611   | 16.266    |
| Pigl          | chr11:62458459-62513900   | OK     | 2.64662   | 2.1785    |
| Tmem101       | chr11:102152546-102156407 | OK     | 16.3153   | 13.4294   |
| Cnpy3         | chr17:46735712-46752212   | OK     | 22.0416   | 18.1406   |
| Mutyh         | chr4:116807733-116819431  | NOTEST | 0.729502  | 0.600392  |
| Mikl          | chr8:111311799-111337903  | OK     | 0.964091  | 0.793413  |
| Nudt3         | chr17:27579381-27623452   | OK     | 137.665   | 113.286   |
| Cpsf3         | chr12:21286296-21315056   | OK     | 16.0124   | 13.176    |
| Tef           | chr15:81802672-81826863   | OK     | 30.1579   | 24.8108   |
| Zfp148        | chr16:33380774-33503903   | OK     | 6.94866   | 5.71657   |
| Deb1          | chr9:121710388-121712921  | OK     | 32.5945   | 26.8086   |
| Gba           | chr3:89202927-89208681    | OK     | 23.6832   | 19.478    |
| Ifi30         | chr8:70762772-70766663    | OK     | 7.36115   | 6.0527    |
| Fan1          | chr7:64346757-64374095    | OK     | 2.585     | 2.12531   |
| Igbp1         | chrX:100494290-100516125  | OK     | 17.9002   | 14.7153   |
| Rhbdl1        | chr17:25834464-25837127   | OK     | 5.6706    | 4.66164   |
| Dnah9         | chr11:65831323-66168551   | NOTEST | 0.19103   | 0.157019  |
| Ctdspl2       | chr2:121953770-122015326  | OK     | 2.33799   | 1.92171   |
| Tvp23b        | chr11:62879489-62895184   | OK     | 14.4966   | 11.914    |
| D4Erttd617e   | chr4:118620798-118631915  | NOTEST | 0.237679  | 0.195278  |
| Zfp60         | chr7:27731408-27751689    | OK     | 7.74248   | 6.36093   |
| Naif1         | chr2:32414486-32455476    | NOTEST | 0.684972  | 0.562739  |
| Smim12        | chr4:127243783-127247809  | OK     | 55.7337   | 45.7853   |
| Atrn          | chr2:130906495-131030326  | OK     | 21.9492   | 18.0307   |
| Zkscan7       | chr9:122888470-122896124  | OK     | 1.16354   | 0.955695  |
| Map3k15       | chrX:159988432-160138336  | NOTEST | 0.202047  | 0.165947  |
| Hmbox1        | chr14:64822217-64949847   | OK     | 44.1792   | 36.2838   |
| Cd320         | chr17:33843090-33849774   | OK     | 5.63547   | 4.62813   |

|               |                           |        |           |           |
|---------------|---------------------------|--------|-----------|-----------|
| Zranb3        | chr1:127954178-128103047  | OK     | 1.83732   | 1.50888   |
| Pkn3          | chr2:30078765-30093635    | NOTEST | 0.746095  | 0.612622  |
| Ccl25         | chr8:4325209-4360020      | OK     | 1.72506   | 1.41639   |
| Lims2         | chr18:31931506-31958619   | OK     | 5.43067   | 4.45846   |
| Wdr7          | chr18:63708694-63989759   | OK     | 45.1588   | 37.065    |
| 1110008L16Rik | chr12:55280813-55492647   | OK     | 3.30714   | 2.71393   |
| Cpne7         | chr8:123117373-123135185  | NOTEST | 0.11005   | 0.0903093 |
| Myo10         | chr15:25622549-25813671   | OK     | 9.21895   | 7.56512   |
| Cib1          | chr7:80227155-80232805    | OK     | 10.6202   | 8.71293   |
| Bet1          | chr6:4076903-4086927      | OK     | 18.9311   | 15.5295   |
| Tdrd7         | chr4:45965334-46034765    | OK     | 26.8871   | 22.0513   |
| Pcdhb20       | chr18:36930284-37841872   | OK     | 2.84229   | 2.33101   |
| Vps39         | chr2:120316460-120353133  | OK     | 22.8436   | 18.7343   |
| Zfp85os       | chr13:67729261-67756838   | NOTEST | 0.311402  | 0.25535   |
| Alad          | chr4:62505983-62520063    | OK     | 4.92305   | 4.0364    |
| Prmt10        | chr8:77549396-77581338    | OK     | 15.6287   | 12.8136   |
| Nrg4          | chr9:55208934-55283625    | NOTEST | 0.48115   | 0.394466  |
| 1110008F13Rik | chr2:156863121-156887078  | OK     | 45.6849   | 37.4516   |
| Amdhd2        | chr17:24155832-24163733   | OK     | 8.24553   | 6.75864   |
| Slc9a8        | chr2:167421720-167476998  | OK     | 15.2406   | 12.4923   |
| Klc3          | chr7:19382038-19404104    | NOTEST | 0.512676  | 0.420052  |
| Fam222b       | chr11:78094672-78157339   | OK     | 13.9238   | 11.4074   |
| Trp53bp2      | chr1:182409166-182462436  | OK     | 4.90902   | 4.02153   |
| Eml3          | chr19:8929693-8941582     | OK     | 7.62506   | 6.24504   |
| Asb1          | chr1:91540564-91559590    | OK     | 21.5512   | 17.6478   |
| Duox2         | chr2:122280436-122298165  | NOTEST | 0.0305719 | 0.0250332 |
| Mmgt1         | chrX:56585511-56597919    | OK     | 24.7904   | 20.2979   |
| Mipep         | chr14:60784565-60905480   | OK     | 13.2276   | 10.8305   |
| Flt1          | chr5:147562195-147725988  | OK     | 7.8133    | 6.39617   |
| Jrk           | chr15:74702411-74710374   | OK     | 1.90724   | 1.5613    |
| Atp10d        | chr5:72203328-72298771    | OK     | 0.801771  | 0.656196  |
| Rpl27         | chr11:101442244-101445596 | OK     | 1.85173   | 1.51547   |
| Mkks          | chr2:136873780-137069778  | OK     | 11.9199   | 9.75428   |
| Vprbp         | chr9:106821975-106880992  | OK     | 7.10566   | 5.81364   |
| Dsg1b         | chr18:20376834-20409741   | NOTEST | 0.137926  | 0.112835  |
| Tm9sf3        | chr19:41210841-41264004   | OK     | 60.4328   | 49.4372   |
| Sirpa         | chr2:129592838-129632228  | OK     | 17.5551   | 14.3604   |
| Tbrg4         | chr11:6615597-6626067     | OK     | 14.8373   | 12.1369   |
| Galnt9        | chr5:110544354-110621383  | OK     | 13.7906   | 11.276    |
| Naalad2       | chr9:18323020-18385928    | OK     | 1.02769   | 0.840236  |
| Fam171b       | chr2:83812727-83881358    | OK     | 36.0356   | 29.4591   |
| Epdr1         | chr13:19591707-19619830   | OK     | 171.71    | 140.361   |
| Ppp1r10       | chr17:35917195-35932283   | OK     | 9.66719   | 7.90205   |
| Gngt2         | chr11:95824499-95845731   | NOTEST | 0.650911  | 0.532055  |
| Atp6v0e2      | chr6:48537568-48541800    | OK     | 208.468   | 170.39    |
| Elac1         | chr18:73735037-73754479   | OK     | 8.1287    | 6.64381   |
| Tmem135       | chr7:89139720-89338787    | OK     | 23.6863   | 19.3588   |
| Traf2         | chr2:25517981-25546940    | OK     | 4.42537   | 3.61669   |
| Rgs12         | chr5:34949447-35033593    | OK     | 5.17797   | 4.23139   |
| 4632428C04Rik | chr16:30008666-30021430   | OK     | 4.90281   | 4.00598   |
| Zfp422        | chr6:116624015-116628977  | OK     | 7.14848   | 5.84025   |
| Strn          | chr17:78653963-78736560   | OK     | 11.5457   | 9.43265   |
| Are11         | chr12:84918148-84970886   | OK     | 25.8444   | 21.1139   |

|               |                           |        |           |           |
|---------------|---------------------------|--------|-----------|-----------|
| Lcmt2         | chr2:121137291-121156680  | OK     | 2.76204   | 2.25613   |
| Zxdb          | chrX:94724568-94730191    | OK     | 1.46897   | 1.19979   |
| Gm3604        | chr13:62367715-62383174   | NOTEST | 0.74462   | 0.608148  |
| Spock2        | chr10:60106256-60133913   | OK     | 534.845   | 436.741   |
| Slc25a36      | chr9:97077010-97111041    | OK     | 14.2189   | 11.6105   |
| Fam134c       | chr11:101096321-101119843 | OK     | 18.9042   | 15.4355   |
| H1fx          | chr6:87980420-87981482    | OK     | 14.8544   | 12.1284   |
| Tmem208       | chr8:105326363-105329057  | OK     | 40.6327   | 33.1727   |
| Zbtb8os       | chr4:129336025-129347029  | OK     | 2.74011   | 2.23689   |
| Hif1an        | chr19:44562853-44576274   | OK     | 17.9425   | 14.646    |
| Pla2g4f       | chr2:120299956-120314165  | NOTEST | 0.0404061 | 0.0329822 |
| Lym7          | chr11:54839288-54860591   | OK     | 3.87684   | 3.164     |
| Fkbp4         | chr6:128430106-128438631  | OK     | 184.543   | 150.593   |
| 2310045N01Rik | chr8:70139712-70147260    | OK     | 18.8421   | 15.3719   |
| Ankrd55       | chr13:112288450-112384002 | OK     | 5.91103   | 4.82228   |
| Gm6710        | chr2:175869237-175988574  | NOTEST | 0.506937  | 0.413558  |
| Cltc          | chr11:86583864-87555823   | OK     | 252.482   | 205.897   |
| B630005N14Rik | chr6:13625674-13677966    | OK     | 4.66075   | 3.8006    |
| Kdelr2        | chr5:143403819-143421904  | OK     | 27.6193   | 22.5211   |
| Epm2aip1      | chr9:111271844-111279091  | OK     | 40.4546   | 32.9867   |
| Huwe1         | chrX:151803281-151935417  | OK     | 39.8433   | 32.4862   |
| Polg2         | chr11:106751225-106779537 | OK     | 2.03507   | 1.65906   |
| Birc6         | chr17:74528294-74703356   | OK     | 14.1346   | 11.5218   |
| Pex13         | chr11:23646478-23732876   | OK     | 10.4787   | 8.5412    |
| Ogfrl1        | chr1:23366423-23383175    | OK     | 47.1201   | 38.4063   |
| Gppb1l1       | chr4:116557726-116600266  | OK     | 11.1486   | 9.08518   |
| Wfikkn2       | chr11:94235951-94242579   | NOTEST | 0.27149   | 0.221217  |
| Adprhl1       | chr8:13235661-13254162    | OK     | 1.66846   | 1.35919   |
| Prss23        | chr7:89507784-89517586    | OK     | 7.57789   | 6.17264   |
| Cdip1         | chr16:4726360-4789935     | OK     | 30.4218   | 24.7798   |
| Itch          | chr2:155133480-155226855  | OK     | 23.3445   | 19.011    |
| Mrpl30        | chr1:37890552-37898333    | OK     | 39.4921   | 32.1598   |
| Ccz1          | chr5:143987908-144014853  | OK     | 19.0603   | 15.5197   |
| Pfn2          | chr3:57841894-57847757    | OK     | 275.848   | 224.572   |
| 4933417D19Rik | chr8:123232257-123254175  | NOTEST | 0.102508  | 0.083453  |
| Gfpt1         | chr6:87042845-87092207    | OK     | 17.4359   | 14.1905   |
| Tm2d2         | chr8:25017210-25023260    | OK     | 40.6765   | 33.1003   |
| Xpo4          | chr14:57582270-57664956   | OK     | 3.47286   | 2.82569   |
| Gpr137        | chr19:6938069-6951905     | OK     | 51.134    | 41.5974   |
| Sucla2        | chr14:73552785-73596142   | OK     | 136.652   | 111.163   |
| Mpc2          | chr1:165461207-165481214  | OK     | 60.7329   | 49.4016   |
| 3110002H16Rik | chr18:12168729-12236386   | OK     | 19.5439   | 15.8966   |
| Nek9          | chr12:85299513-85339362   | OK     | 31.8657   | 25.9177   |
| Wnt5a         | chr14:28505472-28525515   | OK     | 7.36235   | 5.98801   |
| Srxn1         | chr2:152105523-152111376  | OK     | 111.036   | 90.2993   |
| Urb2          | chr8:124023472-124048504  | OK     | 4.68214   | 3.80556   |
| E430018J23Rik | chr7:127390835-127393621  | OK     | 2.07724   | 1.68822   |
| Ndufb6        | chr4:40270662-40279368    | OK     | 155.596   | 126.421   |
| Nol9          | chr4:152039326-152061494  | OK     | 4.52317   | 3.67491   |
| Csf3r         | chr4:126024658-126044975  | NOTEST | 0.214832  | 0.174542  |
| Zfp592        | chr7:80993683-81045162    | OK     | 5.57487   | 4.52931   |
| 1700052K11Rik | chr11:105179020-105181433 | OK     | 1.7504    | 1.42196   |
| Uap1          | chr1:170142002-170174946  | OK     | 30.9238   | 25.1207   |



|               |                           |        |           |           |
|---------------|---------------------------|--------|-----------|-----------|
| Nlgn2         | chr11:69823122-69834849   | OK     | 39.1689   | 31.8156   |
| Pcdhb3        | chr18:36930284-37841872   | OK     | 1.13463   | 0.921405  |
| Kdelc1        | chr1:44106545-44118773    | OK     | 2.77154   | 2.25066   |
| Ino80c        | chr18:24104760-24121819   | OK     | 11.7158   | 9.51336   |
| Ppp1cc        | chr5:122158278-122175269  | OK     | 6.50563   | 5.28233   |
| Srpr          | chr9:35211202-35267805    | OK     | 26.8849   | 21.8287   |
| 9030617O03Rik | chr12:100779122-100872610 | OK     | 4.07822   | 3.3111    |
| Cnm2          | chr19:46761608-46878580   | OK     | 6.03917   | 4.9031    |
| Nrxn3         | chr12:88794503-90334933   | OK     | 19.5735   | 15.8912   |
| Poldip2       | chr11:78512295-78522736   | OK     | 27.6118   | 22.4166   |
| Smap2         | chr4:120968316-121017247  | OK     | 52.8001   | 42.8652   |
| Agrn          | chr4:156165289-156197488  | OK     | 10.1175   | 8.21129   |
| Fndc7         | chr3:108853677-108890008  | NOTEST | 0.0285383 | 0.0231565 |
| Tmbim4        | chr10:120208825-120224897 | OK     | 76.2088   | 61.8364   |
| Xrcc2         | chr5:25689815-25705797    | OK     | 3.0096    | 2.44202   |
| 5330434G04Rik | chrX:105372993-105391754  | OK     | 4.60722   | 3.73827   |
| Bre           | chr5:31698049-32084739    | OK     | 49.6393   | 40.2637   |
| Ube2k         | chr5:65537260-65598989    | OK     | 22.1488   | 17.9616   |
| Ppa1          | chr10:61648620-61674165   | OK     | 72.6459   | 58.8912   |
| Eif5a2        | chr3:28781310-28798846    | OK     | 82.2001   | 66.6269   |
| Itgb1bp1      | chr12:21111755-21286237   | OK     | 15.6615   | 12.6937   |
| Arnt2         | chr7:84246274-84410038    | OK     | 13.8697   | 11.2414   |
| Tmem9         | chr1:136008218-136035030  | OK     | 41.9382   | 33.9898   |
| Sec22b        | chr3:97901226-97922318    | OK     | 42.7223   | 34.6242   |
| Ndufb11       | chrX:20615325-20650905    | OK     | 49.1373   | 39.8168   |
| Usp6nl        | chr2:6322756-6443820      | OK     | 12.3159   | 9.97921   |
| Rps6ka5       | chr12:100549777-100725028 | OK     | 6.69057   | 5.42048   |
| Tnfrsf10b     | chr14:69767471-69784411   | NOTEST | 0.351181  | 0.284486  |
| Trim3         | chr7:105604462-105633571  | OK     | 24.8441   | 20.124    |
| Dusp1         | chr17:26505590-26508472   | OK     | 37.4403   | 30.3263   |
| Zfand5        | chr19:21272277-21286840   | OK     | 37.4399   | 30.321    |
| Gm13157       | chr4:147753973-147809788  | OK     | 1.69106   | 1.36949   |
| Acta1         | chr8:123891757-123894775  | OK     | 1.06078   | 0.859004  |
| Cdh23         | chr10:60302749-60696490   | NOTEST | 0.0370038 | 0.0299651 |
| Il17rc        | chr6:113471454-113483163  | OK     | 2.83682   | 2.29708   |
| Tom1l2        | chr11:60226713-60352905   | OK     | 92.9298   | 75.2453   |
| Llgl1         | chr11:60699689-60727221   | OK     | 7.28657   | 5.89966   |
| Zfp770        | chr2:114193460-114201432  | OK     | 6.91139   | 5.59472   |
| Psd3          | chr8:67689081-67974574    | OK     | 21.474    | 17.3797   |
| Pomk          | chr8:25980603-25994121    | OK     | 12.1587   | 9.84014   |
| Ephb6         | chr6:41605481-41620507    | OK     | 14.1345   | 11.4358   |
| Tada2b        | chr5:36465184-36484285    | OK     | 12.9285   | 10.4598   |
| Ptpn11        | chr5:121130532-121191397  | OK     | 39.0182   | 31.5583   |
| Aldh1a1       | chr19:20601981-20643462   | OK     | 7.32922   | 5.92562   |
| Tmem14a       | chr1:21218574-21230167    | OK     | 22.9076   | 18.5201   |
| Draxin        | chr4:148098436-148130698  | NOTEST | 0.518631  | 0.419211  |
| Cpt2          | chr4:107903981-107923589  | OK     | 16.0047   | 12.9328   |
| Lrrc51        | chr7:101912988-101933857  | OK     | 3.7319    | 3.01539   |
| Rasd1         | chr11:59948213-59964942   | OK     | 4.91977   | 3.97446   |
| Bmpr2         | chr1:59764278-59878081    | OK     | 45.6163   | 36.8512   |
| Dpy19l4       | chr4:11265078-11322131    | OK     | 9.94369   | 8.03154   |
| Dhfr          | chr13:92211880-92389053   | OK     | 1.37142   | 1.1077    |
| P4hb          | chr11:120560303-120572936 | OK     | 73.3184   | 59.2173   |

|               |                           |        |           |           |
|---------------|---------------------------|--------|-----------|-----------|
| Psme4         | chr11:30771774-30880361   | OK     | 28.1656   | 22.7467   |
| Dad1          | chr14:54235484-54253929   | OK     | 152.745   | 123.34    |
| Cfd           | chr10:79697304-80369637   | NOTEST | 0.100168  | 0.0808826 |
| Aldh16a1      | chr7:45141839-45160064    | OK     | 4.85463   | 3.91968   |
| Stk33         | chr7:109279215-109439053  | OK     | 0.906637  | 0.732016  |
| Cpeb3         | chr19:37021290-37207471   | OK     | 12.0373   | 9.71622   |
| Ttc39a        | chr4:109407099-109444745  | OK     | 8.83622   | 7.13181   |
| Ccdc136       | chr6:29398925-29426995    | OK     | 22.2523   | 17.9589   |
| Tmco3         | chr8:13255962-13322924    | OK     | 13.6668   | 11.0292   |
| Poc1a         | chr9:106281060-106349891  | OK     | 1.47208   | 1.18781   |
| Vipas39       | chr12:87238874-87266286   | OK     | 23.324    | 18.8166   |
| Mpv17         | chr5:30933142-31348845    | OK     | 24.1228   | 19.4592   |
| Irgm1         | chr11:48865248-48871346   | OK     | 3.23472   | 2.60932   |
| Klhl11        | chr11:100462611-100472782 | OK     | 15.0837   | 12.1673   |
| Ubfd1         | chr7:122067197-122082199  | OK     | 32.9749   | 26.5959   |
| Atp5e         | chr2:174461074-174464101  | OK     | 289.527   | 233.493   |
| Thns12        | chr6:71128165-71144380    | OK     | 4.82939   | 3.8947    |
| Ptdss1        | chr13:66912097-67032405   | OK     | 29.2746   | 23.6041   |
| D3Ert751e     | chr3:41742614-41758941    | OK     | 5.11811   | 4.12651   |
| Hmgn3         | chr9:83109941-83146607    | OK     | 17.7396   | 14.3001   |
| Acadv1        | chr11:70010182-70015428   | OK     | 48.7325   | 39.2826   |
| Mthfd1l       | chr10:3973074-4167081     | OK     | 10.3007   | 8.30217   |
| Pou3f3        | chr1:42697145-42700209    | NOTEST | 0.0378011 | 0.0304621 |
| Fuk           | chr8:110882455-110902488  | OK     | 3.03433   | 2.44511   |
| 1700001G11Rik | chr14:66295328-66311424   | NOTEST | 0.407056  | 0.327957  |
| Clptm1        | chr7:19631579-19665030    | OK     | 39.632    | 31.9284   |
| Ndufa9        | chr6:126821862-126849144  | OK     | 115.228   | 92.8255   |
| Lsm11         | chr11:45928268-45944935   | OK     | 5.11505   | 4.12016   |
| Dlec1         | chr9:119102477-119147694  | NOTEST | 0.343511  | 0.276686  |
| Dzank1        | chr2:144470556-144527398  | OK     | 30.0723   | 24.2217   |
| Pla2g3        | chr11:3488226-3494166     | OK     | 8.88042   | 7.15257   |
| Tufm          | chr7:126487354-126490731  | OK     | 3.69013   | 2.97203   |
| 2010107E04Rik | chr12:111961375-111966977 | OK     | 517.218   | 416.497   |
| Alg14         | chr3:121291816-121362011  | OK     | 23.3788   | 18.826    |
| Rp2h          | chrX:20364480-20405653    | OK     | 4.41973   | 3.5587    |
| Mpc1          | chr17:8283812-8327442     | OK     | 4.0845    | 3.2886    |
| Glb1          | chr9:114401077-114474379  | OK     | 16.9475   | 13.645    |
| Lsamp         | chr16:41533341-42146213   | OK     | 16.3158   | 13.135    |
| Dcaf11        | chr14:55560028-55570065   | OK     | 28.1624   | 22.6666   |
| Aco1          | chr4:40143264-40199009    | OK     | 10.3891   | 8.36157   |
| Pofut2        | chr10:77259299-77269586   | OK     | 11.4378   | 9.20559   |
| D17H6S53E     | chr17:35126401-35128855   | OK     | 3.02391   | 2.43335   |
| Mtr           | chr13:12186539-12258113   | OK     | 6.81928   | 5.4873    |
| Med14         | chrX:12675370-12761973    | OK     | 18.0475   | 14.5213   |
| Zfp119b       | chr17:55938372-55945259   | OK     | 0.921794  | 0.741653  |
| Scarb2        | chr5:92443872-92505608    | OK     | 71.9737   | 57.9031   |
| Thada         | chr17:84190055-84466208   | OK     | 2.2762    | 1.83097   |
| Bmpr1a        | chr14:34411067-34502546   | OK     | 19.9985   | 16.0866   |
| Tmem138       | chr19:10570884-10577097   | OK     | 3.84629   | 3.09332   |
| Slc45a1       | chr4:150629395-150652174  | OK     | 31.2339   | 25.1095   |
| Ndufb3        | chr1:58586598-58595948    | OK     | 214.378   | 172.28    |
| Cox7a2        | chr9:79755240-79759853    | OK     | 204.426   | 164.281   |
| Tubb3         | chr8:123411563-123422010  | OK     | 1312.99   | 1055.09   |

|               |                           |        |           |          |
|---------------|---------------------------|--------|-----------|----------|
| Cd83          | chr13:43785111-43803133   | OK     | 2.21045   | 1.77593  |
| Scd4          | chr19:44333325-44346743   | NOTEST | 0.383631  | 0.308192 |
| Apeh          | chr9:108085413-108094480  | OK     | 19.7275   | 15.8477  |
| MacroD2       | chr2:140395429-142390050  | OK     | 13.6042   | 10.9282  |
| Pkd1          | chr17:24549949-24632627   | OK     | 8.14239   | 6.54065  |
| Lpar6         | chr14:73195501-73325791   | OK     | 1.67546   | 1.34579  |
| Glod4         | chr11:76220394-76243699   | OK     | 29.415    | 23.6261  |
| Alg2          | chr4:47469832-47474367    | OK     | 74.2831   | 59.663   |
| Akap13        | chr7:75455533-75754609    | OK     | 6.84987   | 5.5003   |
| Dnajc22       | chr15:99099483-99104707   | NOTEST | 0.588116  | 0.472218 |
| Dse           | chr10:34151392-34207551   | OK     | 4.61232   | 3.70335  |
| Pdxk          | chr10:78436746-78464948   | OK     | 10.5732   | 8.48938  |
| Hsd3b7        | chr7:127800608-127803802  | OK     | 5.2028    | 4.17721  |
| Nme5          | chr18:34562640-34579106   | OK     | 1.99117   | 1.5986   |
| Tpmt          | chr13:47023542-47043217   | OK     | 3.55719   | 2.85575  |
| Frmd8         | chr19:5850973-5875208     | OK     | 12.0715   | 9.69087  |
| Tmem132a      | chr19:10842543-10869779   | OK     | 7.81657   | 6.27446  |
| Cdh8          | chr8:99011886-99416471    | OK     | 5.98561   | 4.80419  |
| Rnf150        | chr8:82863355-83091271    | OK     | 6.35408   | 5.09957  |
| Trap1         | chr16:4037144-4077810     | OK     | 43.3051   | 34.7412  |
| 1810055G02Rik | chr19:3708332-3717881     | OK     | 5.47786   | 4.39292  |
| Smim8         | chr4:34768671-34778337    | OK     | 13.4057   | 10.7452  |
| Plec          | chr15:76170973-76231378   | OK     | 69.1079   | 55.389   |
| Vkorc1l1      | chr5:129942108-129986692  | OK     | 24.0316   | 19.2605  |
| Bcs1l         | chr1:74588360-74592443    | OK     | 7.06259   | 5.65996  |
| Slc4a8        | chr15:100761746-100823971 | OK     | 3.56666   | 2.85829  |
| Dmxl1         | chr18:49832996-49965473   | OK     | 8.2782    | 6.63185  |
| Taf4b         | chr18:14783244-14900359   | OK     | 3.34562   | 2.67965  |
| Dyrk2         | chr10:118859348-118868903 | OK     | 4.26562   | 3.41639  |
| Ogfod3        | chr11:121177592-121229309 | OK     | 9.61058   | 7.6936   |
| Dhtkd1        | chr2:5898059-5942792      | NOTEST | 0.442876  | 0.354501 |
| Sspl2a        | chr2:126890394-126933235  | OK     | 9.77002   | 7.81995  |
| Ublcp1        | chr11:44454570-44470548   | OK     | 26.4493   | 21.168   |
| Pcdhgb6       | chr18:36930284-37841872   | OK     | 3.0996    | 2.48068  |
| Copg1         | chr6:87887939-87913594    | OK     | 96.9019   | 77.525   |
| Cog4          | chr8:110847023-110882234  | OK     | 38.6852   | 30.9475  |
| Pcdhb18       | chr18:36930284-37841872   | OK     | 1.5556    | 1.24437  |
| Ccrl2         | chr9:111054834-111057270  | NOTEST | 0.718083  | 0.574387 |
| Lzic          | chr4:149485332-149496667  | OK     | 8.02996   | 6.42286  |
| Nkrf          | chrX:36887541-36902899    | OK     | 13.9657   | 11.1702  |
| Cd19          | chr7:126408447-126414870  | NOTEST | 0.283596  | 0.226825 |
| Acat1         | chr9:53580521-53610350    | OK     | 29.7383   | 23.7812  |
| Dhodh         | chr8:109593247-109608673  | OK     | 4.56704   | 3.65205  |
| Btf3l4        | chr4:108814294-108833584  | OK     | 6.9586    | 5.56434  |
| 1700030C10Rik | chr12:20804391-20815779   | OK     | 3.26945   | 2.61404  |
| Lmf2          | chr15:89351003-89355659   | OK     | 9.83974   | 7.86607  |
| Nudt22        | chr19:6993018-6996037     | OK     | 9.09661   | 7.27151  |
| Col4a3        | chr1:82586920-82722059    | NOTEST | 0.264023  | 0.211044 |
| Nkx2-2os      | chr2:147177545-147331681  | NOTEST | 0.0173088 | 0.013831 |
| Slc9a9        | chr9:94669891-95230452    | OK     | 101.025   | 80.7185  |
| Bcap31        | chrX:73686182-73716175    | OK     | 138.446   | 110.615  |
| Stx6          | chr1:155158702-155203517  | OK     | 17.5944   | 14.0574  |
| Mrpl39        | chr16:84717579-84735302   | OK     | 16.1527   | 12.9047  |

|               |                           |        |           |           |
|---------------|---------------------------|--------|-----------|-----------|
| Ergic3        | chr2:156008124-156018279  | OK     | 56.1505   | 44.8541   |
| Fam172a       | chr13:77708689-78166240   | OK     | 11.2037   | 8.94965   |
| Ralb          | chr1:119470304-119504782  | OK     | 10.6173   | 8.4808    |
| Ctsd          | chr7:142375915-142387870  | OK     | 513.414   | 410.054   |
| Lman1         | chr18:65980738-66002635   | OK     | 14.8352   | 11.8466   |
| Wdfy4         | chr14:32959546-33185066   | NOTEST | 0.356984  | 0.285064  |
| Camta2        | chr11:70669462-70688105   | OK     | 27.3928   | 21.8723   |
| Cxx1b         | chrX:53669176-53670408    | OK     | 42.6038   | 34.01     |
| Smad7         | chr18:75367364-75395934   | OK     | 2.2026    | 1.75826   |
| 2410004I01Rik | chr11:102958299-102964154 | NOTEST | 0.0914032 | 0.0729597 |
| Rit2          | chr18:30974313-31317128   | OK     | 62.3441   | 49.7446   |
| Mgea5         | chr19:45750258-45783291   | OK     | 49.0442   | 39.1288   |
| Afap1l1       | chr18:61730261-61786662   | OK     | 3.6311    | 2.89652   |
| Sel1l         | chr12:91806042-91849157   | OK     | 28.3569   | 22.62     |
| Ndufs8        | chr19:3908862-3912774     | OK     | 90.4034   | 72.1087   |
| Phpt1         | chr2:25573430-25574871    | OK     | 32.1577   | 25.6471   |
| Usp21         | chr1:171281952-171287961  | OK     | 5.05061   | 4.02775   |
| Cd52          | chr4:134093537-134095073  | OK     | 3.79094   | 3.0231    |
| Nudt21        | chr8:94019402-94037039    | OK     | 2.88856   | 2.30349   |
| Msra          | chr14:64122620-64455903   | OK     | 10.5414   | 8.40586   |
| Tlhc1         | chr8:119760586-119778416  | OK     | 5.7776    | 4.60667   |
| Jmy           | chr13:93430096-93499808   | OK     | 10.5121   | 8.38093   |
| Bckdk         | chr7:127904072-127909664  | OK     | 10.2623   | 8.18097   |
| Dscr3         | chr16:94497723-94526629   | OK     | 16.5745   | 13.2098   |
| Lpcat4        | chr2:112239840-112247111  | OK     | 38.3705   | 30.5687   |
| Btg1          | chr10:96617000-96622811   | OK     | 10.4794   | 8.34814   |
| Pirb          | chr7:3712504-3720382      | NOTEST | 0.402354  | 0.320438  |
| Armc1         | chr3:19132143-19163065    | OK     | 34.6128   | 27.5654   |
| Kdm6b         | chr11:69398517-69413675   | OK     | 4.87052   | 3.87851   |
| Vegfa         | chr17:46016992-46032377   | OK     | 12.1893   | 9.70504   |
| Timm22        | chr11:76406924-76416313   | OK     | 12.697    | 10.1092   |
| 1700027J07Rik | chr10:43746157-43765836   | NOTEST | 0.0802407 | 0.0638771 |
| Tmem41a       | chr16:21934326-21947552   | OK     | 27.381    | 21.7969   |
| Bri3bp        | chr5:125441567-125460885  | OK     | 8.26841   | 6.58181   |
| Tanc2         | chr11:105589985-105929303 | OK     | 16.1816   | 12.8784   |
| Gclm          | chr3:122245556-122267215  | OK     | 53.6984   | 42.7352   |
| Anp32e        | chr3:95929256-95947387    | OK     | 33.9684   | 27.0304   |
| Zfp334        | chr2:165377435-165388259  | OK     | 4.90328   | 3.90126   |
| Zbtb2         | chr10:4367073-4388108     | OK     | 1.75709   | 1.39795   |
| Rnf169        | chr7:99920253-99980458    | OK     | 2.96406   | 2.35821   |
| Ppp2r1a       | chr17:20945453-20965905   | OK     | 259.783   | 206.668   |
| H2-Q9         | chr17:35439154-35443773   | LOWDAT | 6.32E-05  | 5.02E-05  |
| Ppp5c         | chr7:17004640-17027914    | OK     | 43.7532   | 34.8015   |
| Slc7a1        | chr5:148327409-148399904  | OK     | 29.7184   | 23.6359   |
| Usp5          | chr6:124815018-124829447  | OK     | 113.725   | 90.4451   |
| Sfxn4         | chr19:60837276-60861430   | OK     | 6.28186   | 4.99534   |
| 6820408C15Rik | chr2:152415586-152444330  | NOTEST | 0.357286  | 0.284106  |
| Glud1         | chr14:34310726-34345033   | OK     | 79.5648   | 63.2612   |
| Pde3b         | chr7:114415253-114537937  | OK     | 5.73431   | 4.55855   |
| Pkdrej        | chr15:85814675-85821733   | NOTEST | 0.390391  | 0.310203  |
| Egln1         | chr8:124908586-124949254  | OK     | 16.8254   | 13.3687   |
| Znf41-ps      | chr4:145781542-145831978  | OK     | 0.789963  | 0.627579  |
| Cacna1e       | chr1:154392518-154725920  | OK     | 1.57584   | 1.25172   |

|               |                           |        |           |           |
|---------------|---------------------------|--------|-----------|-----------|
| Champ1        | chr8:13869640-13881639    | OK     | 9.04047   | 7.181     |
| St6gal1       | chr16:23224739-23360350   | OK     | 26.3743   | 20.9487   |
| Serpinb7      | chr1:107422688-107452689  | NOTEST | 0.0408012 | 0.0324046 |
| 5730409E04Rik | chr4:126609853-126614371  | OK     | 61.4965   | 48.8402   |
| Mdh2          | chr5:135778648-135790386  | OK     | 255.98    | 203.276   |
| Nrip3         | chr7:109758055-109781545  | OK     | 57.4883   | 45.6484   |
| Zfp202        | chr9:40192315-40213604    | OK     | 0.815802  | 0.647679  |
| Cyp51         | chr5:4080673-4104697      | OK     | 41.1596   | 32.6766   |
| 0610009L18Rik | chr11:120348677-120351190 | OK     | 2.40438   | 1.9082    |
| Hlx           | chr1:184727144-184732493  | NOTEST | 0.696294  | 0.552574  |
| Supv3l1       | chr10:62429377-62451353   | OK     | 8.98105   | 7.12712   |
| Tmc3          | chr7:83584930-83623709    | NOTEST | 0.424967  | 0.337227  |
| Scn7a         | chr2:66673425-66784910    | OK     | 110.745   | 87.8667   |
| Pcdhb19       | chr18:36930284-37841872   | OK     | 1.30727   | 1.03714   |
| Pi4ka         | chr16:17280350-17430826   | OK     | 45.8941   | 36.4101   |
| Tub           | chr7:109010879-109083324  | OK     | 2.29664   | 1.82195   |
| Sp6           | chr11:97013568-97024738   | NOTEST | 0.719541  | 0.570797  |
| Itgb2         | chr10:77530347-77565674   | NOTEST | 0.812422  | 0.644437  |
| Tek           | chr4:94739288-94874976    | OK     | 3.72348   | 2.95325   |
| Yipf5         | chr18:40204864-40219399   | OK     | 18.458    | 14.6395   |
| Phykpl        | chr11:51584756-51606881   | OK     | 1.3767    | 1.09172   |
| Ikzf2         | chr1:69531209-69685960    | OK     | 0.864262  | 0.685336  |
| Myo5a         | chr9:75071205-75223687    | OK     | 72.1936   | 57.245    |
| Lym9          | chr11:78826594-78843899   | OK     | 10.9768   | 8.70362   |
| C030034L19Rik | chr3:9403077-9413903      | NOTEST | 0.042057  | 0.0333433 |
| Vcpip1        | chr1:9723195-9771256      | OK     | 21.8407   | 17.314    |
| Mtor          | chr4:148448581-148557685  | OK     | 19.7392   | 15.6453   |
| Higd1c        | chr15:100353199-100384435 | NOTEST | 0.0370727 | 0.0293728 |
| Dcp2          | chr18:44380499-44424969   | OK     | 17.7525   | 14.0653   |
| Ighmbp2       | chr19:3259075-3283010     | OK     | 3.52567   | 2.7927    |
| Cat           | chr2:103453903-103485153  | OK     | 76.8818   | 60.8732   |
| Uqcrc2        | chr7:120635188-120670343  | OK     | 104.966   | 83.108    |
| Rom1          | chr19:8927381-8929356     | OK     | 12.0578   | 9.54642   |
| M6pr          | chr6:122309009-122317677  | OK     | 42.4739   | 33.6242   |
| Cep83         | chr10:94688789-94790336   | OK     | 9.05425   | 7.16665   |
| 4930529C04Rik | chr3:91071661-91075192    | NOTEST | 0.0161016 | 0.0127425 |
| Prdx6         | chr1:161240111-161251166  | OK     | 40.4598   | 32.0168   |
| Gyk           | chrX:85701936-85776819    | OK     | 9.90841   | 7.84066   |
| Pias2         | chr18:77065207-77155708   | OK     | 9.02678   | 7.14299   |
| Acads         | chr5:115110298-115119346  | OK     | 8.24489   | 6.52382   |
| Ube3b         | chr5:114380606-114421166  | OK     | 47.1841   | 37.3335   |
| Axin1         | chr17:26138685-26195811   | OK     | 6.12789   | 4.84654   |
| Gdpd1         | chr11:86583864-87555823   | OK     | 22.3829   | 17.7002   |
| Mus81         | chr19:5482839-5488336     | OK     | 4.84664   | 3.83072   |
| Fyn           | chr10:39369798-39565374   | OK     | 30.7234   | 24.279    |
| Dynll2        | chr11:87979524-87998298   | OK     | 580.89    | 458.934   |
| Cux1          | chr5:136248134-136567490  | OK     | 17.8037   | 14.0651   |
| Ngf           | chr3:102469918-102521013  | NOTEST | 0.340229  | 0.268758  |
| 1700019G17Rik | chr6:85899049-85904938    | OK     | 1.35971   | 1.07404   |
| Npm3-ps1      | chr6:85076140-85077126    | OK     | 2.01723   | 1.59256   |
| Dbil5         | chr11:76217612-76218665   | NOTEST | 0.333706  | 0.26345   |
| Mnd1          | chr3:84087933-84155786    | NOTEST | 0.847951  | 0.668875  |
| Lrrfip1       | chr1:90998726-91128944    | OK     | 9.27167   | 7.31326   |



|               |                           |        |           |           |
|---------------|---------------------------|--------|-----------|-----------|
| Chpf          | chr1:75474568-75479471    | OK     | 36.3753   | 28.6883   |
| Polg          | chr7:79392337-79466273    | OK     | 10.4917   | 8.27388   |
| Atad2         | chr15:58094046-58135082   | OK     | 3.80188   | 2.99799   |
| H3f3b         | chr11:116021960-116024504 | OK     | 67.6332   | 53.3111   |
| Usp32         | chr11:84984487-85139955   | OK     | 42.6688   | 33.6327   |
| Sergef        | chr7:46443158-46639807    | OK     | 6.58897   | 5.19322   |
| Tmprss6       | chr15:78439666-78468634   | NOTEST | 0.101721  | 0.0801699 |
| Trim65        | chr11:116124707-116131128 | NOTEST | 0.771322  | 0.607895  |
| Pola1         | chrX:93304765-93632155    | OK     | 2.03933   | 1.60693   |
| Accsl         | chr2:93855359-93869157    | NOTEST | 0.201503  | 0.158734  |
| Fgl1          | chr8:41191433-41215156    | NOTEST | 0.911348  | 0.717895  |
| Tsen54        | chr11:115814738-115823102 | OK     | 4.82959   | 3.80383   |
| Scrn2         | chr11:97029951-97033960   | OK     | 2.46467   | 1.94118   |
| Rtn1          | chr12:72211748-72409054   | OK     | 444.979   | 350.451   |
| Crkl          | chr16:17451984-17487440   | OK     | 16.5104   | 13.0024   |
| Trim34a       | chr7:104244456-104262236  | OK     | 1.12362   | 0.884866  |
| Sdr39u1       | chr14:55897284-55900232   | OK     | 36.2696   | 28.5608   |
| Ssr2          | chr3:88579670-88588413    | OK     | 44.1465   | 34.7632   |
| BC022687      | chr12:112808974-112816245 | OK     | 4.44493   | 3.50012   |
| Trappc10      | chr10:78186725-78244642   | OK     | 28.648    | 22.5571   |
| Rpgrip1l      | chr8:91217029-91313222    | OK     | 3.56036   | 2.80333   |
| Chchd3        | chr6:32792226-33060152    | OK     | 39.154    | 30.8287   |
| Stk40         | chr4:126103956-126141029  | OK     | 8.72334   | 6.86841   |
| Chid1         | chr7:141475235-141539857  | OK     | 10.9884   | 8.65073   |
| B3galnt1      | chr3:69573918-69598960    | OK     | 17.7923   | 14.0064   |
| Uprt          | chrX:104482781-104506262  | OK     | 7.23587   | 5.6959    |
| Atp5g1        | chr11:96072792-96075694   | OK     | 74.3984   | 58.563    |
| Zfp955b       | chr17:33289543-33304689   | OK     | 5.30855   | 4.17865   |
| Zmynd15       | chr11:70454233-70466199   | NOTEST | 0.11316   | 0.0890686 |
| Onecut2       | chr18:64340363-64398488   | OK     | 7.07353   | 5.5664    |
| Dars          | chr1:128363706-128417416  | OK     | 38.7523   | 30.4946   |
| Paox          | chr7:140125684-140134334  | OK     | 0.892155  | 0.701905  |
| Ttc30b        | chr2:75935849-75938462    | OK     | 3.67768   | 2.89336   |
| Adcy4         | chr14:55769091-55784019   | OK     | 1.12593   | 0.885671  |
| Stk36         | chr1:74601454-74636893    | NOTEST | 0.607186  | 0.47744   |
| 2700070H01Rik | chr14:63055072-63058149   | OK     | 3.35323   | 2.63662   |
| Acaa2         | chr18:74779211-74806207   | OK     | 45.2961   | 35.6157   |
| Tspan12       | chr6:21771394-21852515    | OK     | 17.2949   | 13.5984   |
| Syp           | chrX:7638579-7653256      | OK     | 335.35    | 263.67    |
| Pigf          | chr17:86963110-87025401   | OK     | 8.54708   | 6.71985   |
| Ly96          | chr1:16688455-16709605    | OK     | 3.23257   | 2.54149   |
| Slc23a2       | chr2:132052495-132145108  | OK     | 17.2287   | 13.5451   |
| Ube3c         | chr5:29569241-29676077    | OK     | 39.5726   | 31.1107   |
| Loh12cr1      | chr6:134639511-134711184  | OK     | 17.3882   | 13.6691   |
| Kcnv1         | chr15:45106283-45114934   | OK     | 12.3381   | 9.69829   |
| Isca2         | chr12:84773269-84775089   | OK     | 34.5357   | 27.1458   |
| 9430015G10Rik | chr4:156109997-156127263  | OK     | 2.88583   | 2.26798   |
| AU022252      | chr4:119225137-119232724  | OK     | 12.2067   | 9.59315   |
| Maml2         | chr9:13619988-13709533    | OK     | 2.83684   | 2.22926   |
| Cnga4         | chr7:105404567-105408738  | NOTEST | 0.0612069 | 0.048096  |
| Inpp5d        | chr1:87620311-87720508    | OK     | 0.79222   | 0.622519  |
| Chpf2         | chr5:24586749-24592486    | OK     | 31.8939   | 25.0613   |
| Gata2         | chr6:88198663-88207032    | OK     | 1.10511   | 0.868331  |

|               |                           |        |          |          |
|---------------|---------------------------|--------|----------|----------|
| Agpat5        | chr8:18846278-18884413    | OK     | 15.6726  | 12.3131  |
| Lrrc8c        | chr5:105519470-105608954  | OK     | 21.3882  | 16.8023  |
| Prdx5         | chr19:6906818-6909645     | OK     | 234.032  | 183.847  |
| Rnf121        | chr7:102019871-102065132  | OK     | 10.9105  | 8.56671  |
| Pcdhgc5       | chr18:36930284-37841872   | NOTEST | 0.258346 | 0.20284  |
| Rab3a         | chr8:70754678-70760921    | OK     | 313.316  | 245.963  |
| Mrpl3         | chr9:105053267-105077476  | OK     | 29.5729  | 23.2156  |
| Dpm1          | chr2:168209047-168230379  | OK     | 12.9613  | 10.175   |
| Xpr1          | chr1:155275656-155417444  | OK     | 14.2454  | 11.183   |
| Ap5s1         | chr2:131127411-131604824  | OK     | 10.8539  | 8.51993  |
| Edem3         | chr1:151755373-151822328  | OK     | 12.0159  | 9.42927  |
| Tmbim1        | chr1:74285033-74353692    | OK     | 24.3599  | 19.1123  |
| Myoz2         | chr3:123006205-123034987  | NOTEST | 0.28461  | 0.223268 |
| Fbxo28        | chr1:182313101-182341606  | OK     | 18.3766  | 14.414   |
| 1700037C18Rik | chr16:3905797-3908689     | OK     | 2.06223  | 1.61723  |
| Aph1b         | chr9:66775486-66795423    | OK     | 8.85878  | 6.94682  |
| Dusp15        | chr2:152940994-152951582  | OK     | 20.6969  | 16.2296  |
| Alas1         | chr9:106233454-106247954  | OK     | 19.7102  | 15.4549  |
| Mrpl18        | chr17:12911354-12916091   | OK     | 38.5215  | 30.2033  |
| Arhgef10l     | chr4:140514484-140665905  | OK     | 27.3248  | 21.4242  |
| Dhx40         | chr11:86583864-87555823   | OK     | 13.2876  | 10.4179  |
| Mapre2        | chr18:23752332-23893861   | OK     | 135.679  | 106.35   |
| Impad1        | chr4:4764350-4793306      | OK     | 25.8697  | 20.2742  |
| Spg21         | chr9:65460936-65488470    | OK     | 12.8656  | 10.079   |
| Cd93          | chr2:148436650-148443535  | OK     | 5.21129  | 4.08242  |
| Mapk9         | chr11:49846750-49886421   | OK     | 63.1559  | 49.4725  |
| Serf2         | chr2:121449197-121456764  | OK     | 33.087   | 25.9169  |
| Uqcrrs1       | chr13:30540311-30545316   | OK     | 92.7937  | 72.6837  |
| Mrpl22        | chr11:58171653-58179581   | OK     | 11.3632  | 8.89992  |
| Uqcrc1        | chr9:108936647-108949641  | OK     | 162.79   | 127.501  |
| 3830408C21Rik | chr13:107022569-107033518 | NOTEST | 0.794888 | 0.622547 |
| Scamp1        | chr13:94201432-94285281   | OK     | 95.3504  | 74.6576  |
| Coasy         | chr11:101082624-101086619 | OK     | 17.0131  | 13.3197  |
| Gpr149        | chr3:62529962-62605140    | OK     | 6.82965  | 5.347    |
| Zfp879        | chr11:50832030-50841552   | NOTEST | 0.409518 | 0.320511 |
| Phospho2      | chr2:69789736-69797168    | OK     | 14.3331  | 11.2137  |
| Aars          | chr8:111033841-111055569  | OK     | 64.7791  | 50.6756  |
| Pigt          | chr2:164497524-164508301  | OK     | 16.4794  | 12.8873  |
| Ndufs7        | chr10:79697304-80369637   | OK     | 84.8856  | 66.3592  |
| Map3k4        | chr17:12227620-12318660   | OK     | 9.06381  | 7.0827   |
| Chchd2        | chr5:129881160-129887470  | OK     | 88.342   | 69.0088  |
| Zkscan1       | chr5:138085083-138107822  | OK     | 11.6261  | 9.08128  |
| Eci2          | chr13:34977747-34994144   | OK     | 30.1046  | 23.5135  |
| Gpr132        | chr12:112850875-112860916 | NOTEST | 0.166089 | 0.129724 |
| Kdm7a         | chr6:39118472-39206773    | OK     | 7.41673  | 5.7927   |
| Lrrc55        | chr2:85188070-85196699    | OK     | 1.44511  | 1.12855  |
| Dera          | chr6:137754576-137837872  | OK     | 3.13124  | 2.44491  |
| Nrg3          | chr14:38368950-39473088   | OK     | 9.92929  | 7.75147  |
| Zfp882        | chr8:71908605-71918851    | OK     | 1.11429  | 0.869852 |
| B3galt4       | chr17:33949911-33951488   | OK     | 2.57538  | 2.01043  |
| Tmem240       | chr4:155734803-155740564  | OK     | 2.10369  | 1.64202  |
| Atp10a        | chr7:58658201-58829426    | OK     | 1.62976  | 1.27184  |
| Chd6          | chr2:160946977-161109056  | OK     | 12.3579  | 9.64312  |

|               |                           |        |           |           |
|---------------|---------------------------|--------|-----------|-----------|
| Speg          | chr1:75375296-75432306    | OK     | 6.4915    | 5.06411   |
| Galnt15       | chr14:32029102-32058326   | OK     | 0.991761  | 0.773663  |
| Polr2b        | chr5:77310483-77408045    | OK     | 25.4745   | 19.8713   |
| Ranbp6        | chr19:29808107-29812974   | OK     | 20.5043   | 15.9933   |
| Lyp1a1        | chr1:186087731-186117310  | OK     | 6.55645   | 5.1131    |
| Wdr18         | chr10:79697304-80369637   | OK     | 16.2171   | 12.6435   |
| D5Ert579e     | chr5:36600485-36696021    | OK     | 19.8648   | 15.4869   |
| Lrrc61        | chr6:48554798-48572670    | OK     | 7.51674   | 5.85788   |
| Hmgcl         | chr4:135946452-135962617  | OK     | 9.18474   | 7.15727   |
| Mfsd12        | chr10:81357569-81365820   | OK     | 11.2329   | 8.75135   |
| Jdp2          | chr12:85599104-85639878   | OK     | 5.75482   | 4.48328   |
| Map3k13       | chr16:21891968-21931877   | OK     | 3.7147    | 2.89368   |
| Ap1g1         | chr8:109778639-109864208  | OK     | 31.6017   | 24.6162   |
| Themis        | chr10:28668394-28882749   | NOTEST | 0.0419795 | 0.0326945 |
| Fgd5          | chr6:91987109-92076005    | OK     | 1.78506   | 1.39024   |
| Abcb7         | chrX:104280564-104413846  | OK     | 10.6673   | 8.30736   |
| Kiss1r        | chr10:79697304-80369637   | OK     | 1.80051   | 1.40217   |
| Fitm2         | chr2:163468702-163473003  | OK     | 22.7065   | 17.6802   |
| Map2k4        | chr11:65688243-65788297   | OK     | 75.5965   | 58.849    |
| Helz2         | chr2:181227614-181242027  | OK     | 1.0489    | 0.816463  |
| Tm9sf2        | chr14:122107081-122159603 | OK     | 106.838   | 83.125    |
| Zfp367        | chr13:64133056-64153199   | OK     | 9.14081   | 7.11058   |
| Mtus2         | chr5:147957319-148316065  | OK     | 4.80609   | 3.73856   |
| Dnajb12       | chr10:59879590-59898016   | OK     | 16.2607   | 12.6468   |
| Cxcl16        | chr11:70454233-70466199   | OK     | 1.11418   | 0.866464  |
| Ppp1r16b      | chr2:158666732-158766334  | OK     | 3.63419   | 2.82516   |
| Dcbld2        | chr16:58408534-58469745   | OK     | 11.9658   | 9.29856   |
| Pcdhb8        | chr18:36930284-37841872   | NOTEST | 0.659293  | 0.512227  |
| Lage3         | chrX:74352161-74353618    | OK     | 8.7401    | 6.78985   |
| 36038         | chr1:93478992-93509732    | OK     | 28.2732   | 21.9643   |
| Zfp719        | chr7:43579585-43593710    | OK     | 3.22746   | 2.50724   |
| Itgad         | chr7:128173945-128206366  | NOTEST | 0.0133927 | 0.0104033 |
| Pdss2         | chr10:43221485-43464882   | OK     | 6.3867    | 4.96095   |
| Ubr3          | chr2:69897245-70024013    | OK     | 50.542    | 39.2568   |
| Cxx1a         | chrX:53642488-53643763    | OK     | 52.6594   | 40.8935   |
| E2f5          | chr3:14578670-14611256    | OK     | 4.77804   | 3.70997   |
| Nsmce2        | chr15:59374197-59601684   | OK     | 10.0653   | 7.81273   |
| Tmem229a      | chr6:24951140-24956125    | OK     | 25.262    | 19.6071   |
| Cacng3        | chr7:122671743-122769394  | OK     | 1.56099   | 1.21135   |
| Hhat          | chr1:192512827-192771219  | OK     | 1.64706   | 1.27799   |
| Erg           | chr16:95360203-95530365   | OK     | 1.66159   | 1.28919   |
| 1700010I14Rik | chr17:8988332-9008319     | NOTEST | 0.629294  | 0.488166  |
| Rangrf        | chr11:68968130-68975185   | NOTEST | 0.520145  | 0.403485  |
| Mast4         | chr13:102732488-103334492 | OK     | 2.92747   | 2.27052   |
| Wscd1         | chr11:71750702-71789646   | NOTEST | 0.769264  | 0.596536  |
| Dhx8          | chr11:101732955-101767357 | OK     | 12.1904   | 9.45142   |
| Zfp106        | chr2:120506829-120563831  | OK     | 19.8677   | 15.4026   |
| Magee1        | chrX:105120395-105123911  | OK     | 96.1811   | 74.5579   |
| AA414768      | chrX:12936872-12938541    | OK     | 3.7135    | 2.87826   |
| Cox10         | chr11:63962626-64079472   | OK     | 8.46249   | 6.55875   |
| Mettl8        | chr2:70964561-71055606    | OK     | 4.87324   | 3.77684   |
| Gzfl          | chr2:148681119-148692949  | OK     | 7.94851   | 6.1601    |
| Wdr54         | chr6:83152709-83156379    | OK     | 8.43005   | 6.53061   |

|               |                           |        |           |           |
|---------------|---------------------------|--------|-----------|-----------|
| Csrnp2        | chr15:100479569-100495239 | OK     | 5.43282   | 4.20859   |
| Adi1          | chr12:28675206-28682174   | OK     | 9.75417   | 7.556     |
| Ldlrap1       | chr4:134745411-134768004  | OK     | 0.902186  | 0.698841  |
| Lrrc63        | chr14:75004109-75388146   | NOTEST | 0.0514148 | 0.0398245 |
| Ppm1f         | chr16:16896468-16927375   | OK     | 20.1279   | 15.5899   |
| Cox6b1        | chr7:30616973-30626151    | OK     | 544.792   | 421.922   |
| Pstk          | chr7:131371145-131387838  | OK     | 9.64507   | 7.46924   |
| Cbx5          | chr15:103191545-103239816 | OK     | 24.7216   | 19.1445   |
| Atraid        | chr5:30933142-31348845    | OK     | 29.0708   | 22.5117   |
| Pcyt1a        | chr16:32430920-32475065   | OK     | 25.0403   | 19.3888   |
| Cpne4         | chr9:104569787-105034544  | OK     | 35.028    | 27.1177   |
| Gpc5          | chr14:115092214-116525192 | OK     | 5.60108   | 4.33509   |
| Lgals7        | chr7:28864385-28866284    | NOTEST | 0.717261  | 0.555091  |
| Paics         | chr5:76913248-76967505    | OK     | 58.5312   | 45.2922   |
| Slc25a5       | chrX:36795651-36798806    | OK     | 109.286   | 84.5613   |
| Sdhc          | chr1:171129156-171150603  | OK     | 88.9878   | 68.8438   |
| Irf2bp2       | chr8:126588295-126593436  | OK     | 13.0503   | 10.0959   |
| Apoo          | chrX:94367109-94417092    | OK     | 3.03079   | 2.34454   |
| Tmem44        | chr16:30511854-30550578   | OK     | 0.802167  | 0.620423  |
| Zfp383        | chr7:29908516-29916813    | OK     | 2.29379   | 1.77404   |
| Cerkl         | chr2:79255425-79428988    | NOTEST | 0.344659  | 0.266559  |
| Fam83g        | chr11:61672781-61720799   | NOTEST | 0.0233491 | 0.0180577 |
| Alg6          | chr4:99715629-99763460    | OK     | 3.89857   | 3.0144    |
| Pcdhb9        | chr18:36930284-37841872   | OK     | 4.90368   | 3.79154   |
| Arf2          | chr11:103966870-103985336 | OK     | 8.51384   | 6.5825    |
| Tspyl5        | chr15:33683874-33687883   | OK     | 7.62556   | 5.89447   |
| Isy1          | chr6:87818447-87838759    | OK     | 10.26     | 7.93048   |
| Srcin1        | chr11:97509339-97575126   | OK     | 7.58865   | 5.86511   |
| Gm14440       | chr2:175789356-175801038  | OK     | 1.77052   | 1.36837   |
| Gm16576       | chr15:79742697-79757394   | NOTEST | 0.411252  | 0.317796  |
| Klf9          | chr19:23141225-23166911   | OK     | 35.5902   | 27.5003   |
| Sgpl1         | chr10:61098641-61147665   | OK     | 16.9873   | 13.1256   |
| 9430020K01Rik | chr18:4634928-4682869     | OK     | 8.86211   | 6.84502   |
| Zfp146        | chr7:30161267-30169727    | OK     | 10.7953   | 8.33744   |
| Ppib          | chr9:66060168-66069731    | OK     | 111.015   | 85.7375   |
| Slc25a12      | chr2:71274294-71367554    | OK     | 66.9047   | 51.6657   |
| Adss          | chr1:177763177-177796509  | OK     | 49.4875   | 38.214    |
| Arl4c         | chr1:88698225-88702191    | OK     | 17.7926   | 13.735    |
| Nmt2          | chr2:3284211-3328877      | OK     | 21.0628   | 16.2593   |
| Wdr33         | chr18:31804056-31908987   | OK     | 16.7694   | 12.9435   |
| Exoc3         | chr13:74169804-74208700   | OK     | 35.1608   | 27.1388   |
| Rtn3          | chr19:7417624-7483291     | OK     | 809.515   | 624.822   |
| Yae1d1        | chr13:17986639-17993351   | OK     | 3.1926    | 2.46393   |
| Golt1b        | chr6:142387242-142403858  | OK     | 22.1876   | 17.1216   |
| Ywhag         | chr5:135908378-135934641  | OK     | 1051.02   | 810.788   |
| Pign          | chr1:105518421-105663676  | OK     | 2.46018   | 1.8977    |
| Plk5          | chr10:79697304-80369637   | NOTEST | 0.659219  | 0.5085    |
| Xlr3c         | chrX:73254539-73265390    | NOTEST | 0.180072  | 0.138894  |
| Ebi3          | chr17:55952622-55967951   | NOTEST | 0.128653  | 0.0992244 |
| Tacc2         | chr7:130577483-130764784  | OK     | 21.2084   | 16.3544   |
| Plekha8       | chr6:54595110-54645822    | OK     | 3.02488   | 2.33188   |
| Ppm1e         | chr11:86583864-87555823   | OK     | 22.5106   | 17.3453   |
| Tmem147       | chr7:30727700-30729534    | OK     | 69.4218   | 53.4697   |

|               |                           |        |           |           |
|---------------|---------------------------|--------|-----------|-----------|
| Ipo4          | chr14:55625628-55635678   | OK     | 29.0959   | 22.4086   |
| Ptpn          | chr1:75247040-75264208    | OK     | 94.209    | 72.5457   |
| Coq9          | chr8:94838416-94854895    | OK     | 14.379    | 11.0725   |
| Rps15a-ps4    | chr4:132219892-132220589  | OK     | 5.10658   | 3.93216   |
| Sele          | chr1:164048233-164057677  | NOTEST | 0.10193   | 0.0784791 |
| Mvb12b        | chr2:33729955-33887946    | OK     | 21.3416   | 16.4279   |
| Lrch3         | chr16:32914099-33056186   | OK     | 8.4354    | 6.49162   |
| A630001G21Rik | chr1:85717082-85736606    | NOTEST | 0.0978612 | 0.0753093 |
| Fam105a       | chr15:27655070-27681542   | OK     | 2.37773   | 1.82954   |
| 4833439L19Rik | chr13:54503804-54565382   | OK     | 51.115    | 39.3273   |
| Vamp8         | chr6:72385220-72390667    | OK     | 14.9646   | 11.5125   |
| Ergic1        | chr17:26561511-26656933   | OK     | 37.1994   | 28.6051   |
| Nol6          | chr4:41114426-41124339    | OK     | 20.7394   | 15.9409   |
| Aamdc         | chr7:97550330-97579497    | OK     | 24.8585   | 19.0992   |
| Arl3          | chr19:46531108-46573085   | OK     | 80.5724   | 61.9031   |
| Serinc4       | chr2:121449197-121456764  | NOTEST | 0.0441565 | 0.0339251 |
| Blmh          | chr11:76945655-76987389   | OK     | 31.4138   | 24.1312   |
| Suclg1        | chr6:73248504-73276907    | OK     | 57.5444   | 44.2      |
| Hgsnat        | chr8:25944458-25976744    | OK     | 52.8497   | 40.5869   |
| Grk4          | chr5:34660378-34755303    | OK     | 1.11171   | 0.853573  |
| Ap3m2         | chr8:22787353-22805654    | OK     | 11.6825   | 8.96767   |
| Zc3hav1l      | chr6:38287393-38299259    | OK     | 1.00617   | 0.772304  |
| Mmachc        | chr4:116702433-116708385  | OK     | 12.025    | 9.22901   |
| Mastl         | chr2:23116543-23156024    | NOTEST | 0.748652  | 0.574574  |
| Elf4          | chrX:48411048-48463132    | NOTEST | 0.383269  | 0.294147  |
| Mgme1         | chr2:144270903-144281227  | OK     | 2.45531   | 1.88413   |
| Desi1         | chr15:81992522-82016140   | OK     | 16.9773   | 13.027    |
| Tbc1d24       | chr17:24175430-24209387   | OK     | 3.94874   | 3.02953   |
| Fam184a       | chr10:53633144-53750909   | OK     | 3.70764   | 2.84341   |
| Trim9         | chr12:70244534-70669399   | OK     | 13.529    | 10.3735   |
| Stra13        | chr11:120710940-120713767 | OK     | 6.02995   | 4.62179   |
| Rec8          | chr14:55618165-55625395   | NOTEST | 0.40995   | 0.314209  |
| Dars2         | chr1:161040612-161070632  | OK     | 7.51028   | 5.75612   |
| Tenm4         | chr7:96210636-96908554    | OK     | 2.97891   | 2.28305   |
| Gm5113        | chr7:30169921-30180209    | OK     | 5.65873   | 4.33655   |
| Ift22         | chr5:136908149-136913244  | OK     | 24.8684   | 19.057    |
| Tmprss13      | chr9:45318265-45347580    | NOTEST | 0.0175982 | 0.0134854 |
| Sdhd          | chr9:50596339-50603849    | OK     | 99.991    | 76.6222   |
| Dnaic1        | chr4:41569793-41640302    | NOTEST | 0.188185  | 0.144168  |
| Dlst          | chr12:85110832-85134091   | OK     | 86.5555   | 66.3079   |
| Moap1         | chr12:102739829-102757810 | OK     | 6.16263   | 4.72048   |
| 3110043O21Rik | chr4:35191281-35225880    | OK     | 45.9011   | 35.1502   |
| Ggh           | chr4:20042051-20066111    | OK     | 13.8949   | 10.6366   |
| Pik3cb        | chr9:99038401-99140211    | OK     | 7.93185   | 6.07103   |
| Gfy           | chr7:45176348-45179597    | NOTEST | 0.0640149 | 0.0489962 |
| Hdhd3         | chr4:62499053-62502200    | OK     | 3.57503   | 2.73478   |
| Maneal        | chr4:124850758-124862171  | OK     | 35.8648   | 27.4305   |
| Pcdha1        | chr18:36930284-37841872   | OK     | 1.07441   | 0.821723  |
| Cyp4v3        | chr8:45305801-45333196    | OK     | 5.94027   | 4.54264   |
| Szrd1         | chr4:141112977-141139796  | OK     | 14.1065   | 10.7873   |
| Cdc42se2      | chr11:54717414-54787703   | OK     | 28.0848   | 21.4754   |
| Sepn1         | chr4:134537891-134552166  | OK     | 8.67685   | 6.63383   |
| Marveld1      | chr19:42147388-42151703   | OK     | 12.2604   | 9.37266   |



|               |                           |        |          |           |
|---------------|---------------------------|--------|----------|-----------|
| 2700054A10Rik | chr17:13487020-13554094   | NOTEST | 0.509955 | 0.389843  |
| Atp5o         | chr16:91925222-91931630   | OK     | 133.586  | 102.12    |
| Ppp1r13b      | chr12:111828457-111908055 | OK     | 13.9051  | 10.6274   |
| Sbf2          | chr7:110308012-110614920  | OK     | 8.45636  | 6.4628    |
| Vcpkmt        | chr12:69577627-69583028   | OK     | 11.1806  | 8.54451   |
| B9d2          | chr7:25681157-25686558    | OK     | 4.40022  | 3.3623    |
| Il1r1         | chr1:40225079-40316177    | OK     | 2.65386  | 2.0275    |
| Rps16         | chr7:28350688-28352698    | OK     | 1.85552  | 1.41733   |
| 38960         | chr10:59141626-59221847   | OK     | 5.73328  | 4.3787    |
| Cfl2          | chr12:54858818-54862877   | OK     | 101.185  | 77.273    |
| Fzd6          | chr15:39006279-39038190   | OK     | 2.02685  | 1.54784   |
| Tmc5          | chr7:118597296-118675085  | NOTEST | 0.753153 | 0.575019  |
| Mpp7          | chr18:7347961-7626863     | OK     | 2.4555   | 1.87472   |
| Wdr25         | chr12:108894271-109028452 | OK     | 4.85202  | 3.70392   |
| Echs1         | chr7:140105722-140116423  | OK     | 34.2523  | 26.1473   |
| Slc30a5       | chr13:100802647-100833427 | OK     | 17.5222  | 13.3756   |
| Ppp1r15b      | chr1:133131165-133139800  | OK     | 17.3661  | 13.2555   |
| Zkscan5       | chr5:145204558-145221750  | OK     | 3.87851  | 2.9601    |
| H2afv         | chr11:6427225-6444443     | OK     | 8.62626  | 6.58155   |
| Slc35f3       | chr8:126298578-126395977  | OK     | 6.3953   | 4.8793    |
| G6pd2         | chr5:61808842-61810477    | NOTEST | 0.184466 | 0.140701  |
| Scpep1        | chr11:88905927-88955442   | OK     | 18.2113  | 13.887    |
| Spats2        | chr15:99126844-99212466   | OK     | 14.8655  | 11.3341   |
| Ndufs2        | chr1:171234859-171247112  | OK     | 120.302  | 91.7031   |
| Paqr7         | chr4:134496760-134510237  | OK     | 24.9837  | 19.0432   |
| Polr3a        | chr14:24448693-24487046   | OK     | 8.07098  | 6.15182   |
| Smcr8         | chr11:60777524-60788287   | OK     | 6.77121  | 5.16065   |
| Pap1          | chr7:28607636-28631015    | OK     | 0.961853 | 0.732949  |
| Arhgap24      | chr5:102481390-102897937  | OK     | 12.756   | 9.71885   |
| Pip5k1b       | chr19:24294795-24555827   | OK     | 4.46636  | 3.40284   |
| Frat1         | chr19:41829969-41832583   | OK     | 2.39663  | 1.82587   |
| Saa1          | chr7:46740498-46742980    | NOTEST | 0.125106 | 0.0952823 |
| Tmed10        | chr12:85340613-85374717   | OK     | 45.6211  | 34.7422   |
| Sec1          | chr7:45677685-45694556    | NOTEST | 0.261013 | 0.198728  |
| Gata3         | chr2:9857077-9878600      | NOTEST | 0.017423 | 0.013265  |
| Shd           | chr17:55970481-55976619   | OK     | 6.75771  | 5.14368   |
| Apbb1         | chr7:105558464-105581653  | OK     | 123.292  | 93.8445   |
| 5430416O09Rik | chr4:43730033-43734534    | NOTEST | 0.199933 | 0.152125  |
| Eftud1        | chr7:82648613-82777852    | OK     | 3.87296  | 2.94673   |
| Podxl         | chr6:31519492-31563937    | OK     | 8.57223  | 6.52134   |
| Gpr37         | chr6:25668522-25689980    | OK     | 5.53229  | 4.2085    |
| Bloc1s6       | chr2:122738504-122749487  | OK     | 8.22512  | 6.25662   |
| Hoxc11        | chr15:102954525-102956701 | NOTEST | 0.571413 | 0.43459   |
| Crbn          | chr6:106769137-106800087  | OK     | 64.6495  | 49.1679   |
| Ly6g6d        | chr17:35071347-35074464   | NOTEST | 0.140369 | 0.106707  |
| Slc50a1       | chr3:89268245-89270570    | OK     | 19.4243  | 14.7605   |
| D130040H23Rik | chr8:69271079-69303375    | NOTEST | 0.844648 | 0.641792  |
| Trmt10a       | chr3:138143537-138159820  | OK     | 4.98554  | 3.78797   |
| Grb14         | chr2:64912481-65022766    | OK     | 22.3915  | 17.0117   |
| Etohi1        | chr2:178023283-178035859  | OK     | 15.1577  | 11.5104   |
| Ndufaf5       | chr2:140170645-140205252  | OK     | 12.1992  | 9.26021   |
| Rbbp9         | chr2:144542264-144550859  | OK     | 6.31452  | 4.79313   |
| Tirap         | chr9:35184390-35200291    | OK     | 2.73214  | 2.0736    |

|          |                           |        |           |           |
|----------|---------------------------|--------|-----------|-----------|
| Vcan     | chr13:89655309-89742512   | OK     | 1.09354   | 0.829951  |
| Zfp955a  | chr17:33239506-33255145   | OK     | 2.30389   | 1.7483    |
| Alkbh3   | chr2:93980033-94010730    | OK     | 20.2606   | 15.3731   |
| Mrps35   | chr6:147042769-147070902  | OK     | 12.0789   | 9.16196   |
| Zbed5    | chr5:129895722-129903622  | OK     | 1.53118   | 1.16126   |
| Snx27    | chr3:94497541-94582716    | OK     | 25.2246   | 19.1207   |
| Slc25a23 | chr17:57043710-57059863   | OK     | 15.4872   | 11.7345   |
| Adck1    | chr12:88360513-88461726   | OK     | 9.45491   | 7.16274   |
| Acox3    | chr5:35581226-35613801    | OK     | 17.9194   | 13.5733   |
| Abca2    | chr2:25428673-25448539    | OK     | 40.6609   | 30.7937   |
| Coq6     | chr12:84361967-84373796   | OK     | 8.48254   | 6.42284   |
| Ccdc92   | chr5:124834431-124862221  | OK     | 157.621   | 119.321   |
| Osgepl1  | chr1:53313623-53326342    | OK     | 6.79199   | 5.13963   |
| Yaf2     | chr15:93283832-93336935   | OK     | 24.0633   | 18.2075   |
| Kcnab2   | chr4:152390739-152477549  | OK     | 344.546   | 260.699   |
| Kctd9    | chr14:67716097-67742310   | OK     | 39.7224   | 30.0473   |
| Wwox     | chr8:114439651-115352712  | OK     | 8.1464    | 6.16179   |
| Lhfpl2   | chr13:94057795-94195409   | OK     | 18.3835   | 13.9042   |
| Vrk2     | chr11:26387083-26593920   | OK     | 1.02772   | 0.777003  |
| Slc2a9   | chr5:38349272-38502152    | OK     | 1.24503   | 0.940734  |
| Prdx3    | chr19:60864065-60874538   | OK     | 69.0412   | 52.1639   |
| Zfp799   | chr17:32817203-32830248   | OK     | 3.91756   | 2.95894   |
| Pilra    | chr5:137787801-137836278  | NOTEST | 0.0597331 | 0.0451127 |
| Snx5     | chr2:144250123-144270902  | OK     | 18.5964   | 14.0444   |
| Stk24    | chr14:121286340-121379230 | OK     | 68.0405   | 51.373    |
| Abcc8    | chr7:46104522-46180033    | OK     | 3.28135   | 2.4769    |
| Snph     | chr2:151590548-151632593  | OK     | 29.3231   | 22.1338   |
| Akap6    | chr12:52699382-53151015   | OK     | 68.7023   | 51.8365   |
| Ntn3     | chr17:24175430-24209387   | OK     | 1.05591   | 0.796679  |
| Dgkd     | chr1:87853286-87944489    | OK     | 8.20005   | 6.18639   |
| Mpp5     | chr12:78748946-78840713   | OK     | 9.77636   | 7.37552   |
| Sypl     | chr12:32953944-32979502   | OK     | 13.0001   | 9.80711   |
| Pcif1    | chr2:164879367-164891437  | OK     | 6.01779   | 4.53948   |
| Anxa3    | chr5:96793384-96845968    | OK     | 4.24509   | 3.2022    |
| Raly1    | chr3:13471654-14182287    | OK     | 34.018    | 25.6586   |
| Ptp4a2   | chr4:129820478-129850003  | OK     | 51.0713   | 38.5173   |
| Arsj     | chr3:126363851-126440374  | NOTEST | 0.371349  | 0.280056  |
| Katnal2  | chr18:76993199-77047296   | NOTEST | 0.284556  | 0.214598  |
| Scrn1    | chr6:54508815-54566382    | OK     | 66.2211   | 49.9393   |
| Btnl9    | chr11:49168324-49187089   | NOTEST | 0.158047  | 0.119185  |
| Mettl15  | chr2:109092299-109278290  | OK     | 2.26009   | 1.70319   |
| Rhof     | chr5:123118179-123132629  | OK     | 12.5565   | 9.45912   |
| Ttbk2    | chr2:120732816-120850584  | OK     | 36.8292   | 27.7386   |
| Ackr4    | chr9:104063702-104127646  | NOTEST | 0.109697  | 0.0826008 |
| Rfk      | chr19:17394042-17401349   | OK     | 55.5049   | 41.7896   |
| Tnfsf8   | chr4:63832823-63861284    | NOTEST | 0.0238489 | 0.0179553 |
| Necap2   | chr4:141066511-141078345  | OK     | 9.26264   | 6.97283   |
| Lrguk    | chr6:34029447-34134034    | OK     | 1.11861   | 0.842052  |
| Pdyn     | chr2:129686548-129699938  | NOTEST | 0.124793  | 0.0939156 |
| Tshr     | chr12:91400992-91540509   | NOTEST | 0.607316  | 0.457022  |
| Mthfd2l  | chr5:90931195-91021370    | OK     | 3.39812   | 2.55714   |
| Dffa     | chr4:149104141-149120653  | OK     | 98.0513   | 73.7843   |
| Fastkd5  | chr2:130589995-130630038  | OK     | 3.8824    | 2.92114   |

|               |                           |        |           |           |
|---------------|---------------------------|--------|-----------|-----------|
| Ero1lb        | chr13:12565882-12609528   | OK     | 5.18539   | 3.90018   |
| Enpp4         | chr17:44096309-44105808   | OK     | 13.7327   | 10.3272   |
| Slc4a7        | chr14:14703024-14799943   | OK     | 2.11834   | 1.59256   |
| Rcor1         | chr12:111039797-111113386 | OK     | 10.5627   | 7.94078   |
| Kat6a         | chr8:22859538-22943262    | OK     | 5.03457   | 3.78446   |
| Bmf           | chr2:118528756-118549678  | OK     | 1.73653   | 1.30509   |
| Tmem54        | chr4:129105529-129121925  | OK     | 4.54921   | 3.41851   |
| Nfkbia        | chr12:55280813-55492647   | OK     | 18.794    | 14.1225   |
| Scamp5        | chr9:57441326-57468024    | OK     | 77.0217   | 57.8751   |
| Slmap         | chr14:26413174-26533740   | OK     | 25.1009   | 18.8578   |
| Pak7          | chr2:136081087-136387967  | NOTEST | 0.68231   | 0.512555  |
| Sntb1         | chr15:55639153-55906949   | OK     | 7.79264   | 5.8533    |
| Gls2          | chr10:128194634-128211794 | OK     | 5.53707   | 4.1587    |
| Tmem106c      | chr15:97964228-97970286   | OK     | 15.5994   | 11.7115   |
| Pak2          | chr16:32016289-32079342   | OK     | 11.2995   | 8.48061   |
| Hsd17b10      | chrX:152001895-152004442  | OK     | 38.1759   | 28.6517   |
| Sgol2         | chr1:57985339-58026277    | OK     | 1.52687   | 1.14566   |
| D630045J12Rik | chr6:38048482-38254009    | OK     | 3.15531   | 2.36653   |
| Csrp2         | chr10:110920175-110939514 | OK     | 16.5197   | 12.3896   |
| Pacsin2       | chr15:83375606-83464606   | OK     | 38.2158   | 28.6605   |
| Hibadh        | chr6:52546229-52640300    | OK     | 42.3094   | 31.7178   |
| Hdlbp         | chr1:93405939-93478808    | OK     | 95.8121   | 71.826    |
| Ssh2          | chr11:77216424-77460219   | OK     | 6.18423   | 4.63568   |
| Fam174b       | chr7:73740306-73776919    | OK     | 9.31411   | 6.98109   |
| Zhx1          | chr15:58047002-58076508   | OK     | 18.3568   | 13.7553   |
| Gpr55         | chr1:85939536-85961055    | NOTEST | 0.0635567 | 0.0476235 |
| Rnf24         | chr2:131127411-131604824  | OK     | 9.08692   | 6.80835   |
| Atp2c2        | chr8:119700008-119757718  | NOTEST | 0.069988  | 0.0524281 |
| Penk          | chr4:4133535-4138445      | OK     | 3.56188   | 2.66685   |
| Fam126a       | chr5:23787743-24161231    | OK     | 5.91933   | 4.43185   |
| Eefsec        | chr6:88257333-88446539    | OK     | 3.96621   | 2.96754   |
| Lpin1         | chr12:16535668-16589770   | OK     | 35.4458   | 26.5134   |
| Jmjd8         | chr17:25829042-25833361   | OK     | 12.3807   | 9.25873   |
| Adamtsl3      | chr7:82335693-82614448    | OK     | 1.39983   | 1.04678   |
| Tbc1d12       | chr19:38836578-38919923   | OK     | 4.42107   | 3.306     |
| Slc25a47      | chr12:108851128-108856815 | NOTEST | 0.583201  | 0.436021  |
| 9630033F20Rik | chr6:127085115-127109552  | OK     | 21.702    | 16.2235   |
| Clstn2        | chr9:97444394-98033167    | OK     | 16.0179   | 11.9706   |
| Idh3b         | chr2:130274411-130284451  | OK     | 131.95    | 98.5982   |
| Ablim1        | chr19:57033263-57216032   | OK     | 51.1559   | 38.2216   |
| Sdr42e1       | chr8:117661398-117671515  | OK     | 1.63275   | 1.21991   |
| Trio          | chr15:27730648-28025848   | OK     | 13.1277   | 9.80791   |
| Isoc2a        | chr7:4877052-4895716      | OK     | 20.2982   | 15.1643   |
| Peg13         | chr15:72589619-73061204   | OK     | 89.1977   | 66.631    |
| C330013E15Rik | chr15:100614139-100615110 | OK     | 1.19691   | 0.894019  |
| Calhm2        | chr19:47132231-47138294   | OK     | 1.50681   | 1.12528   |
| Ehd4          | chr2:120089486-120154575  | OK     | 23.5482   | 17.584    |
| Vps11         | chr9:44348104-44361670    | OK     | 26.0268   | 19.4345   |
| Mbtps2        | chrX:157547821-157598715  | OK     | 7.90823   | 5.9049    |
| Ube2l3        | chr16:17152014-17201492   | OK     | 58.6407   | 43.7759   |
| Kcnh8         | chr17:52602708-52979194   | OK     | 1.60125   | 1.19533   |
| Ahcy1l        | chr3:107663119-107696548  | OK     | 74.5736   | 55.6669   |
| Polr1a        | chr6:71909052-71979360    | OK     | 7.92946   | 5.91899   |

|               |                           |        |           |           |
|---------------|---------------------------|--------|-----------|-----------|
| Rai2          | chrX:161717035-161779494  | OK     | 4.34289   | 3.24166   |
| Ptger4        | chr15:5233398-5244187     | OK     | 3.86264   | 2.88304   |
| Susd5         | chr9:114057353-114098733  | OK     | 1.08193   | 0.807518  |
| Aldh5a1       | chr13:24905599-24939049   | OK     | 5.82598   | 4.34775   |
| Pcdhga6       | chr18:36930284-37841872   | OK     | 3.3689    | 2.51405   |
| Capn2         | chr1:182467258-182517483  | OK     | 132.039   | 98.5264   |
| Ctbs          | chr3:146450492-146499753  | OK     | 2.41529   | 1.80218   |
| Nedd1         | chr10:92684744-92722418   | OK     | 1.63144   | 1.21727   |
| Camk2n2       | chr16:20611600-20645915   | OK     | 61.8464   | 46.1433   |
| Sgms1         | chr19:32122726-32388454   | OK     | 12.9626   | 9.67071   |
| Ppa2          | chr3:133310115-133378069  | OK     | 35.0169   | 26.1219   |
| Zfp953        | chr13:67339308-67360572   | NOTEST | 0.359896  | 0.268465  |
| Aar2          | chr2:156547575-156568972  | OK     | 13.718    | 10.2329   |
| Hs3st5        | chr10:36506806-36834394   | OK     | 10.8482   | 8.08915   |
| Cluh          | chr11:74649494-74670847   | OK     | 30.3961   | 22.6625   |
| Adipor2       | chr6:119353149-119417483  | OK     | 26.37     | 19.6598   |
| Hoxb6         | chr11:96299170-96301569   | OK     | 4.95257   | 3.69213   |
| Ap3s2         | chr7:79875324-79920640    | OK     | 43.4538   | 32.3892   |
| Uqcrh         | chr4:116066964-116075070  | OK     | 293.461   | 218.695   |
| Mapk10        | chr5:102907947-103211334  | OK     | 50.5465   | 37.668    |
| Rhbdd2        | chr5:135632653-135646376  | OK     | 14.0776   | 10.489    |
| Gamt          | chr10:79697304-80369637   | OK     | 38.1496   | 28.4174   |
| Mgat3         | chr15:80173720-80215519   | OK     | 50.1439   | 37.3445   |
| Ccny          | chr18:9314043-9450150     | OK     | 17.3168   | 12.8897   |
| Cstf1         | chr2:172371002-172381086  | OK     | 11.3871   | 8.47494   |
| Accs          | chr2:93833466-93849943    | OK     | 2.18896   | 1.62881   |
| Tm2d3         | chr7:65693416-65701913    | OK     | 25.1757   | 18.7323   |
| Gm10474       | chrX:68667513-68678399    | NOTEST | 0.0206839 | 0.0153898 |
| Sspn          | chr6:145934146-145965225  | OK     | 6.7865    | 5.0494    |
| Tmem216       | chr19:10550460-10556238   | OK     | 3.49299   | 2.59853   |
| Abcb8         | chr5:24394155-24409947    | OK     | 16.3377   | 12.1537   |
| Dync2h1       | chr9:6928502-7177046      | OK     | 2.64651   | 1.96868   |
| Malsu1        | chr6:49073794-49084717    | OK     | 14.5288   | 10.8065   |
| Lysmd1        | chr3:95134087-95142360    | OK     | 2.26817   | 1.68694   |
| Exog          | chr9:119444922-119465518  | OK     | 6.52248   | 4.8507    |
| She           | chr3:89831369-89858846    | OK     | 1.38845   | 1.03245   |
| Cetn4         | chr3:37308626-37312446    | OK     | 1.67566   | 1.24586   |
| Prokr1        | chr6:87578591-87590701    | OK     | 10.9504   | 8.14148   |
| Dnpep         | chr1:75308564-75317637    | OK     | 27.3876   | 20.3609   |
| Fn3k          | chr11:121434952-121450490 | OK     | 8.4303    | 6.26661   |
| Gria2         | chr3:80684935-80802791    | OK     | 6.6928    | 4.97369   |
| Rmrp          | chr4:43492784-43493059    | OK     | 3.68336   | 2.73645   |
| Ndufc2        | chr7:97400002-97407800    | OK     | 158.757   | 117.94    |
| Pcyt1b        | chrX:93654862-93749948    | OK     | 25.2739   | 18.7746   |
| Yif1a         | chr19:5088537-5098418     | OK     | 20.767    | 15.4263   |
| Zfp629        | chr7:127607034-127614433  | OK     | 2.34201   | 1.73967   |
| Dkk2          | chr3:132085291-132180304  | NOTEST | 0.369859  | 0.274715  |
| Snx19         | chr9:30427328-30466726    | OK     | 27.6181   | 20.5094   |
| Lrrc73        | chr17:46254164-46257316   | OK     | 6.40422   | 4.75526   |
| Obsl1         | chr1:75485824-75506452    | OK     | 2.23031   | 1.65583   |
| A330049N07Rik | chr10:72973302-73086705   | NOTEST | 0.0294541 | 0.0218602 |
| Ptcd2         | chr13:99319648-99344678   | OK     | 24.7547   | 18.3678   |
| Abcd1         | chrX:73716596-73738287    | OK     | 3.26784   | 2.42461   |

|               |                           |        |           |           |
|---------------|---------------------------|--------|-----------|-----------|
| Plcg2         | chr8:117498290-117635142  | OK     | 1.21299   | 0.899908  |
| Htr2b         | chr1:86064618-86139295    | NOTEST | 0.0470848 | 0.0349254 |
| Samd5         | chr10:9627258-9675208     | OK     | 2.02471   | 1.50177   |
| Gm13238       | chr4:145837218-145837992  | NOTEST | 0.150471  | 0.111598  |
| Dnajc27       | chr12:4082573-4110612     | OK     | 19.5456   | 14.4958   |
| Smyd2         | chr1:189880491-189922288  | OK     | 41.5455   | 30.8108   |
| C030039L03Rik | chr7:27674660-27706482    | OK     | 1.94629   | 1.44337   |
| Emc1          | chr4:139352586-139378735  | OK     | 27.6783   | 20.5217   |
| Phactr2       | chr10:13207716-13474396   | OK     | 23.0537   | 17.0916   |
| Tsc22d1       | chr14:76415820-76507766   | OK     | 209.358   | 155.171   |
| Epha5         | chr5:84054764-84417382    | OK     | 3.00246   | 2.22523   |
| Sema4c        | chr1:36548639-36558381    | OK     | 8.44605   | 6.25928   |
| Pak1ip1       | chr13:41001009-41013033   | OK     | 51.1421   | 37.8794   |
| E130112N10Rik | chr6:125224211-125239934  | OK     | 0.999268  | 0.739984  |
| Gbf1          | chr19:46152557-46286510   | OK     | 36.4265   | 26.9743   |
| Prrt1         | chr17:34629685-34632260   | OK     | 2.89864   | 2.14605   |
| Rps29         | chr12:69157721-69159186   | OK     | 4.61478   | 3.41647   |
| Dld           | chr12:31331561-31351471   | OK     | 82.0675   | 60.7549   |
| Ankrd9        | chr12:110975352-110979021 | OK     | 4.52351   | 3.34835   |
| Fh1           | chr1:175601377-175625635  | OK     | 48.5065   | 35.9017   |
| Abhd6         | chr14:8002901-8056555     | OK     | 13.3323   | 9.86533   |
| Hivep1        | chr13:42052020-42185026   | OK     | 10.1609   | 7.51845   |
| Hpcal4        | chr4:123183503-123194699  | NOTEST | 0.435902  | 0.322512  |
| Tmem200c      | chr17:68837135-68843138   | OK     | 3.41612   | 2.52718   |
| Igfbp7        | chr5:77310483-77408045    | OK     | 54.9251   | 40.628    |
| Ssc5d         | chr7:4925843-4944797      | OK     | 0.872958  | 0.645688  |
| Rnf2          | chr1:151469405-151500823  | OK     | 5.6854    | 4.20503   |
| Glg1          | chr8:111157557-111259202  | OK     | 76.3142   | 56.4426   |
| Pfkfb1        | chrX:150589920-150643878  | NOTEST | 0.716432  | 0.529785  |
| Ndufa10       | chr1:92439718-92473758    | OK     | 139.144   | 102.846   |
| Glis2         | chr16:4594712-4615957     | OK     | 4.79435   | 3.5436    |
| A730017C20Rik | chr18:59062380-59076960   | OK     | 16.7614   | 12.3873   |
| Scd2          | chr19:44293675-44306862   | OK     | 547.949   | 404.92    |
| Tfpi          | chr2:84432859-84476775    | OK     | 2.49503   | 1.84358   |
| Xlr4c         | chrX:73234075-73243130    | NOTEST | 0.0516442 | 0.0381593 |
| Fto           | chr8:91313524-91668433    | OK     | 48.1802   | 35.596    |
| Stau2         | chr1:16228809-16519302    | OK     | 35.4162   | 26.1595   |
| Manea         | chr4:26324505-26346652    | OK     | 13.9485   | 10.2977   |
| Ext1          | chr15:53068260-53346183   | OK     | 11.2261   | 8.28349   |
| Dhx33         | chr11:70984090-71004432   | OK     | 7.82833   | 5.77545   |
| Adamts4       | chr1:171250421-171259922  | NOTEST | 0.307146  | 0.22658   |
| Aebp2         | chr6:140622662-140677418  | OK     | 13.5873   | 10.0213   |
| Ide           | chr19:37268740-37330613   | OK     | 20.3695   | 15.0217   |
| B230118H07Rik | chr2:101560780-101632528  | OK     | 8.99156   | 6.62951   |
| Cdc42ep4      | chr11:113726849-113751815 | OK     | 15.661    | 11.5445   |
| Ly6c2         | chr15:75108160-75111949   | NOTEST | 0.756118  | 0.557329  |
| Zfp366        | chr13:99184822-99247032   | OK     | 0.894366  | 0.659202  |
| Uvrag         | chr7:98886742-99141144    | OK     | 17.24     | 12.7057   |
| Fibcd1        | chr2:31813289-31846005    | NOTEST | 0.219189  | 0.161524  |
| Kbtbd3        | chr9:4309742-4331732      | OK     | 9.32338   | 6.86909   |
| Gpsm1         | chr2:26315532-26352110    | OK     | 9.69519   | 7.14243   |
| Rwdd4a        | chr8:47533644-47552837    | OK     | 9.8182    | 7.232     |
| Hdhd2         | chr18:76944114-76972171   | OK     | 33.9393   | 24.9901   |



|               |                           |        |           |           |
|---------------|---------------------------|--------|-----------|-----------|
| Sncb          | chr13:54758859-54766440   | OK     | 83.3667   | 61.3716   |
| Dpm3          | chr3:89266460-89267079    | OK     | 18.6171   | 13.7035   |
| Nck2          | chr1:43445750-43570518    | OK     | 2.30131   | 1.69387   |
| Enc1          | chr13:97241104-97253040   | OK     | 4.01032   | 2.95174   |
| Dnah10        | chr5:124725084-124834308  | NOTEST | 0.0380584 | 0.0280123 |
| Suox          | chr10:128669886-128673918 | OK     | 9.38854   | 6.90917   |
| Pet100        | chr8:3621550-3625545      | OK     | 14.7517   | 10.8559   |
| Med1          | chr11:98152154-98193293   | OK     | 10.7775   | 7.92651   |
| Dennd6a       | chr14:26573857-26634322   | OK     | 12.96     | 9.52916   |
| Tmem223       | chr19:8770995-8772475     | OK     | 36.5043   | 26.8391   |
| Snap91        | chr9:86765926-86880449    | OK     | 92.9483   | 68.3295   |
| Dynlt1b       | chr17:6430111-6436295     | NOTEST | 0.873309  | 0.641992  |
| Mad1l1        | chr5:140008688-140321552  | OK     | 10.6057   | 7.79639   |
| 4833422C13Rik | chr13:91461096-91786148   | OK     | 1.11407   | 0.818696  |
| Tmem143       | chr7:45897068-45917413    | OK     | 16.5062   | 12.1281   |
| Insig1        | chr5:28071411-28078662    | OK     | 44.4193   | 32.6349   |
| Usp29         | chr7:6730582-6976662      | NOTEST | 0.599786  | 0.440537  |
| Nutf2         | chr8:105860633-105880401  | OK     | 10.5295   | 7.73289   |
| Fam167b       | chr4:129576814-129578580  | OK     | 2.15658   | 1.58339   |
| Vps41         | chr13:18717291-18866811   | OK     | 89.1371   | 65.432    |
| Grk1          | chr8:13405080-13421949    | NOTEST | 0.0139536 | 0.0102427 |
| Gm5617        | chr9:48495342-48495975    | OK     | 2.30926   | 1.6946    |
| Pcdhb6        | chr18:36930284-37841872   | NOTEST | 0.587868  | 0.431224  |
| Liph          | chr16:21953817-21995542   | NOTEST | 0.117812  | 0.0864019 |
| Tnnc2         | chr2:164777161-164779734  | NOTEST | 0.340077  | 0.249258  |
| Herc3         | chr6:58833699-58920396    | OK     | 37.841    | 27.7343   |
| Flt4          | chr11:49609678-49652739   | NOTEST | 0.677333  | 0.496377  |
| Usp51         | chrX:153006468-153009459  | NOTEST | 0.234483  | 0.171829  |
| Batf2         | chr19:6164457-6172475     | NOTEST | 0.118663  | 0.0869479 |
| Pcnx          | chr12:81860029-82000924   | OK     | 11.1899   | 8.19699   |
| Sh3bp4        | chr1:89070461-89153793    | OK     | 8.61994   | 6.31325   |
| Slc39a9       | chr12:80644214-80683342   | OK     | 13.9574   | 10.222    |
| Atf6          | chr1:170704456-170867771  | OK     | 11.0565   | 8.09716   |
| Tmed2         | chr5:124540790-124550503  | OK     | 19.1046   | 13.99     |
| A730008H23Rik | chr1:88227019-88277579    | OK     | 3.13777   | 2.29762   |
| Srebf1        | chr11:60105012-60220604   | OK     | 19.2552   | 14.0943   |
| Gphn          | chr12:78226654-78684769   | OK     | 19.5495   | 14.3077   |
| Smim11        | chr16:92301302-92313041   | OK     | 15.7391   | 11.5184   |
| Idh3a         | chr9:54586510-54604662    | OK     | 73.1214   | 53.4873   |
| Dchs1         | chr7:105752988-105787550  | OK     | 0.895817  | 0.655228  |
| Cipc          | chr12:86947040-86965366   | OK     | 24.5551   | 17.9544   |
| Jazf1         | chr6:52768067-53068624    | OK     | 5.89164   | 4.30708   |
| Tmem39a       | chr16:38558697-38592162   | OK     | 2.52819   | 1.84772   |
| Ndufs1        | chr1:63114470-63176822    | OK     | 78.2737   | 57.1999   |
| Txndc5        | chr13:38500270-38528824   | OK     | 40.1997   | 29.3636   |
| Dusp10        | chr1:184034460-184075636  | OK     | 1.94326   | 1.41936   |
| Tfam          | chr10:71225476-71238044   | OK     | 7.32976   | 5.35332   |
| Ppp1r26       | chr2:28447940-28455508    | OK     | 1.80392   | 1.31709   |
| Gprc5a        | chr6:135065661-135084708  | NOTEST | 0.152612  | 0.111404  |
| LOC100503496  | chr11:109440077-109573329 | NOTEST | 0.558741  | 0.407861  |
| Slc5a7        | chr17:54273589-54299034   | OK     | 0.973996  | 0.710909  |
| Ggact         | chr14:122890859-122913165 | OK     | 22.002    | 16.058    |
| Elovl4        | chr9:83778691-83806305    | OK     | 36.4265   | 26.584    |

|                |                           |        |           |           |
|----------------|---------------------------|--------|-----------|-----------|
| Acsf3          | chr8:122775504-122817881  | OK     | 9.26137   | 6.75785   |
| Fgf14          | chr14:123978290-124677127 | NOTEST | 0.668182  | 0.487502  |
| Gm694          | chr4:141432671-141436105  | NOTEST | 0.696811  | 0.508298  |
| Gm13139,Gm1325 | chr4:146270384-146469440  | OK     | 0.764284  | 0.557493  |
| Gm8615         | chr5:149119564-149182036  | OK     | 1.12229   | 0.818623  |
| Fgfbp3         | chr19:36917549-36919599   | NOTEST | 0.751716  | 0.548315  |
| Cmtm6          | chr9:114731202-114749343  | OK     | 15.6209   | 11.3932   |
| Lamp1          | chr8:13159134-13175338    | OK     | 253.326   | 184.717   |
| Arhgap32       | chr9:32116135-32265511    | OK     | 7.17258   | 5.22942   |
| Ociad1         | chr5:73292793-73314077    | OK     | 213.106   | 155.36    |
| Ctsz           | chr2:174415803-174438992  | OK     | 53.3966   | 38.9247   |
| Slc35a4        | chr18:36671158-36683862   | OK     | 18.1337   | 13.2122   |
| Nr1h4          | chr10:89454233-89533622   | NOTEST | 0.0756635 | 0.0551251 |
| Nedd4          | chr9:72662346-72749848    | OK     | 183.497   | 133.67    |
| Zfp931         | chr2:178066877-178078425  | OK     | 1.31901   | 0.960728  |
| Gm14124        | chr2:150257516-150270300  | NOTEST | 0.0301163 | 0.0219325 |
| Gfra4          | chr2:131039631-131043088  | OK     | 9.03214   | 6.57491   |
| Ncoa1          | chr12:4247361-4477182     | OK     | 16.3484   | 11.9      |
| Dvl2           | chr11:70000625-70010109   | OK     | 2.13782   | 1.55612   |
| Ddx24          | chr12:103407975-103425867 | OK     | 68.0804   | 49.5549   |
| Gypc           | chr18:32528319-32560034   | OK     | 6.11387   | 4.44844   |
| Clcc1          | chr3:108653912-108722299  | OK     | 7.08361   | 5.15348   |
| Lysmd2         | chr9:75625731-75637773    | OK     | 32.8644   | 23.9086   |
| Zp3            | chr5:135980104-135988624  | NOTEST | 0.399856  | 0.290859  |
| Ncdn           | chr4:126743749-126753429  | OK     | 240.259   | 174.762   |
| Acsl3          | chr1:78657824-78707743    | OK     | 22.8349   | 16.6094   |
| Ltk            | chr2:119751325-119760431  | NOTEST | 0.139453  | 0.101431  |
| Trim2          | chr3:84160438-84304775    | OK     | 71.7658   | 52.1801   |
| Zfp706         | chr15:36997026-37007402   | OK     | 33.6648   | 24.4756   |
| Ubttd1         | chr19:41981762-42034641   | OK     | 14.6609   | 10.6587   |
| Rad51c         | chr11:86583864-87555823   | OK     | 1.60914   | 1.16983   |
| Gm12338        | chr11:75588107-75628778   | OK     | 197.37    | 143.458   |
| Myeov2         | chr1:92637144-92641985    | OK     | 203.522   | 147.903   |
| Kif1b          | chr4:149176318-149307733  | OK     | 235.821   | 171.342   |
| Zfp119a        | chr17:55864891-55878953   | OK     | 1.74004   | 1.26417   |
| Lrmp           | chr6:145115635-145210970  | NOTEST | 0.366028  | 0.265922  |
| Fgd3           | chr13:49263109-49309208   | NOTEST | 0.470401  | 0.341741  |
| Fbxw11         | chr11:32642554-32746814   | OK     | 68.007    | 49.4044   |
| BC030307       | chr10:86705810-86776843   | NOTEST | 0.408585  | 0.296575  |
| Rmnd5a         | chr6:71388633-71440637    | OK     | 24.6276   | 17.8702   |
| Hdac8          | chrX:102284639-102505148  | OK     | 5.48759   | 3.98173   |
| Rbm4b          | chr19:4756524-4765941     | OK     | 2.7192    | 1.97288   |
| Hist1h4k       | chr13:21750144-21750553   | NOTEST | 0.263166  | 0.190926  |
| Btd            | chr14:31641056-31668197   | OK     | 11.1313   | 8.07351   |
| Dap            | chr15:31224384-31274338   | OK     | 10.5974   | 7.68431   |
| Fam20c         | chr5:138755080-138810063  | OK     | 13.6221   | 9.87544   |
| Tsc22d2        | chr3:58415688-58466787    | OK     | 5.50728   | 3.99221   |
| Smg7           | chr1:152836994-152902646  | OK     | 16.3354   | 11.8413   |
| Acvrl1         | chr15:101128521-101145336 | OK     | 3.87696   | 2.8101    |
| Rims4          | chr2:163863880-163918683  | OK     | 1.91243   | 1.38616   |
| Zfp503         | chr14:21983961-21989601   | OK     | 5.31634   | 3.85295   |
| Kctd4          | chr14:75896936-76010865   | NOTEST | 0.472375  | 0.342338  |
| Ern2           | chr7:122169892-122186216  | NOTEST | 0.219619  | 0.159116  |

|               |                           |        |           |           |
|---------------|---------------------------|--------|-----------|-----------|
| Slc27a3       | chr3:90385232-90389927    | OK     | 3.08077   | 2.23173   |
| Cdk14         | chr5:4803384-5380251      | OK     | 61.0159   | 44.2      |
| Cmc2          | chr8:116888684-116921436  | OK     | 10.9188   | 7.90636   |
| Ccdc81        | chr7:89866147-89903629    | NOTEST | 0.0741312 | 0.0536773 |
| Dnaja4        | chr9:54699558-54716317    | OK     | 33.0387   | 23.9167   |
| Phc1          | chr6:122317730-122340227  | OK     | 2.27953   | 1.65005   |
| Sptbn4        | chr7:27356382-27446589    | OK     | 14.1858   | 10.2629   |
| Cdc25a        | chr9:109875578-109893890  | OK     | 3.72563   | 2.69495   |
| Slfn2         | chr11:83065111-83070678   | OK     | 1.34981   | 0.976161  |
| Gabrb3        | chr7:57590517-57828801    | OK     | 21.6861   | 15.6808   |
| Lin52         | chr12:84451507-84531533   | OK     | 4.2428    | 3.06683   |
| Itga10        | chr3:96645583-96664519    | NOTEST | 0.331294  | 0.239439  |
| Cep104        | chr4:153975560-154007225  | OK     | 12.3248   | 8.90575   |
| Adamts14      | chr10:61197111-61273438   | NOTEST | 0.254949  | 0.184176  |
| Nabp1         | chr1:51469487-51478399    | OK     | 2.42251   | 1.74999   |
| Dpp8          | chr9:65032457-65082651    | OK     | 63.2881   | 45.7121   |
| Kdr           | chr5:75933269-75978428    | OK     | 4.35134   | 3.1414    |
| Gbp9          | chr5:105078393-105110292  | OK     | 1.1994    | 0.865856  |
| Dlk2          | chr17:46297482-46328023   | NOTEST | 0.127801  | 0.0922573 |
| Fam71e1       | chr7:44496587-44501134    | OK     | 1.66679   | 1.20314   |
| Slc41a3       | chr6:90604879-90646412    | OK     | 11.6556   | 8.41243   |
| Abcb9         | chr5:124061856-124095798  | OK     | 19.378    | 13.986    |
| Psmb2         | chr4:126677642-126709715  | OK     | 123.722   | 89.2943   |
| Fdxacb1       | chr9:50768237-50772670    | OK     | 2.32141   | 1.67529   |
| Cbl           | chr9:44149261-44234046    | OK     | 11.8138   | 8.52329   |
| Mest          | chr6:30733505-30896794    | OK     | 41.3768   | 29.8502   |
| Rbpj          | chr5:53555778-53657445    | OK     | 4.48942   | 3.23874   |
| Scp2          | chr4:108043829-108118547  | OK     | 22.058    | 15.9069   |
| Xlr4a         | chrX:73074344-73082507    | NOTEST | 0.0575662 | 0.0415094 |
| Tob2          | chr15:81848269-81858326   | OK     | 6.52611   | 4.70495   |
| Foxred2       | chr15:77940521-77956722   | OK     | 1.56117   | 1.12549   |
| Grin1         | chr2:25289910-25319187    | OK     | 42.6687   | 30.76     |
| Pcdhgb5       | chr18:36930284-37841872   | OK     | 1.77688   | 1.2809    |
| Lhfpl4        | chr6:113168086-113195384  | OK     | 129.726   | 93.5089   |
| Rfx5          | chr3:94955014-94961561    | OK     | 1.67187   | 1.20505   |
| Ndufb2        | chr6:39592582-39599471    | OK     | 181.9     | 131.108   |
| Ptchd1        | chrX:155569735-155623327  | OK     | 1.07808   | 0.776977  |
| Tmed1         | chr9:21424907-21510186    | OK     | 4.90916   | 3.53679   |
| Rnf103        | chr6:71493893-71510881    | OK     | 28.7258   | 20.6877   |
| Myo1g         | chr11:6506547-6520958     | NOTEST | 0.262518  | 0.188979  |
| Zfp947        | chr17:22144358-22165977   | NOTEST | 0.298589  | 0.21492   |
| Amz2          | chr11:109425945-109438148 | OK     | 22.6281   | 16.2869   |
| 4921509O07Rik | chr13:113446287-113502844 | NOTEST | 0.0213618 | 0.0153744 |
| Hspa12b       | chr2:131127411-131604824  | OK     | 2.36799   | 1.70422   |
| Por           | chr5:135689213-135735325  | OK     | 20.4022   | 14.6815   |
| Rdh9          | chr10:127776404-127792697 | NOTEST | 0.184658  | 0.132861  |
| Ssr1          | chr13:37971400-37994190   | OK     | 24.6389   | 17.7273   |
| Tmem42        | chr9:123021325-123023491  | OK     | 11.9074   | 8.56582   |
| Esrp1         | chr4:11331932-11386783    | NOTEST | 0.0241599 | 0.017374  |
| Dnajc10       | chr2:80315465-80354055    | OK     | 34.3165   | 24.6765   |
| Atp2a3        | chr11:72961168-72993043   | OK     | 2.05815   | 1.47987   |
| Dpy19l1       | chr9:24411778-24503140    | OK     | 9.17942   | 6.59991   |
| Fam168a       | chr7:100706701-100841630  | OK     | 36.6913   | 26.3762   |

|               |                           |        |           |           |
|---------------|---------------------------|--------|-----------|-----------|
| Man2b1        | chr8:85083268-85098739    | OK     | 10.2255   | 7.34851   |
| Idh2          | chr7:80094846-80115350    | OK     | 9.71604   | 6.98161   |
| Smpdl3a       | chr10:57794543-57811830   | OK     | 26.5518   | 19.0769   |
| Nt5dc3        | chr10:86779004-86838389   | OK     | 20.95     | 15.0496   |
| Lrpap1        | chr5:35091505-35105697    | OK     | 70.1992   | 50.4188   |
| Necab3        | chr2:154544404-154558853  | OK     | 57.6898   | 41.4339   |
| Esd           | chr14:74732296-74750765   | OK     | 17.5766   | 12.6205   |
| Mrs2          | chr13:24992294-25020317   | OK     | 21.5163   | 15.4486   |
| Grin3a        | chr4:49661610-49845769    | OK     | 5.17524   | 3.71452   |
| Arhgap15      | chr2:43748823-44387623    | OK     | 4.68873   | 3.36518   |
| Cyp4f41-ps    | chr17:32950960-32965716   | NOTEST | 0.134244  | 0.0963312 |
| Gmpr          | chr13:45507468-45546381   | OK     | 31.6586   | 22.7133   |
| Mapk8ip1      | chr2:92383675-92401263    | OK     | 169.301   | 121.413   |
| Gm1966        | chr7:106595548-106644645  | NOTEST | 0.194296  | 0.139332  |
| Stt3a         | chr9:36732412-36767578    | OK     | 34.9117   | 25.0352   |
| Slc25a45      | chr19:5878465-5885768     | OK     | 2.05175   | 1.4713    |
| Slc25a30      | chr14:75761998-75787037   | OK     | 15.8252   | 11.345    |
| Srek1ip1      | chr13:104817238-104838659 | OK     | 5.08344   | 3.64429   |
| Gpr146        | chr5:139359738-139460534  | OK     | 4.42288   | 3.16916   |
| Ssfa2         | chr2:79635424-79672964    | OK     | 15.2636   | 10.9364   |
| Hexim2        | chr11:103133338-103139908 | OK     | 2.09482   | 1.50042   |
| Dnah8         | chr17:30626935-30875264   | NOTEST | 0.139262  | 0.0997439 |
| Zfp862-ps     | chr6:48504338-48534832    | OK     | 2.32895   | 1.66799   |
| Rnd1          | chr15:98669204-98677461   | NOTEST | 0.7874    | 0.563901  |
| 4930550C14Rik | chr9:53405285-53432803    | NOTEST | 0.466657  | 0.334184  |
| Ccdc6         | chr10:70097120-70193200   | OK     | 16.8323   | 12.0535   |
| Pbx3          | chr2:34171456-34372045    | OK     | 7.63214   | 5.46487   |
| Abcd3         | chr3:121758909-121815215  | OK     | 34.7238   | 24.8615   |
| Npc2          | chr12:84754558-84773112   | OK     | 35.8586   | 25.6635   |
| Gk5           | chr9:96119428-96182953    | OK     | 1.084     | 0.775761  |
| Pou2af1       | chr9:51213689-51240079    | NOTEST | 0.230418  | 0.164894  |
| Efcab6        | chr15:83866711-84065349   | NOTEST | 0.245343  | 0.175569  |
| Ndufs3        | chr2:90894635-90904721    | OK     | 17.3263   | 12.3958   |
| Otof          | chr5:30367065-30461932    | NOTEST | 0.0394196 | 0.0281944 |
| Cdk19         | chr10:40349307-40483818   | OK     | 9.61179   | 6.87412   |
| Ptpn3         | chr4:57190840-57301837    | OK     | 22.5557   | 16.1312   |
| Ift27         | chr15:78159462-78174108   | OK     | 12.15     | 8.6893    |
| Car9          | chr4:43507025-43513725    | NOTEST | 0.1576    | 0.1127    |
| Cited2        | chr10:17723227-17725674   | OK     | 8.12243   | 5.80804   |
| Calcr1        | chr2:84330626-84425266    | OK     | 3.84375   | 2.7484    |
| Peak1         | chr9:56201128-56418050    | OK     | 5.89963   | 4.21818   |
| Ahcy          | chr2:155059311-155074497  | OK     | 5.15912   | 3.68809   |
| Clasp1        | chr1:118389057-118609462  | OK     | 34.9844   | 25.0028   |
| Mtmr6         | chr14:60265204-60302371   | OK     | 181.893   | 129.995   |
| Ehhadh        | chr16:21761284-21787834   | OK     | 2.63523   | 1.88301   |
| Atp5b         | chr10:128083306-128090388 | OK     | 776.134   | 554.565   |
| Kcnh1         | chr1:192190871-192510158  | OK     | 12.722    | 9.08995   |
| 1810006J02Rik | chr1:98131466-98144655    | NOTEST | 0.246571  | 0.176107  |
| Actrt3        | chr3:30597072-30599870    | NOTEST | 0.125045  | 0.0892982 |
| Tmtc2         | chr10:105187663-105574479 | OK     | 9.99235   | 7.13546   |
| Gm15800       | chr5:121220218-121368577  | OK     | 29.3377   | 20.9478   |
| Lif           | chr11:4257567-4272514     | NOTEST | 0.0677688 | 0.0483797 |
| Sh2b3         | chr5:121817214-121836801  | OK     | 3.1589    | 2.25509   |

|               |                           |        |           |           |
|---------------|---------------------------|--------|-----------|-----------|
| Dstyk         | chr1:132417452-132466959  | OK     | 11.3349   | 8.08966   |
| Etv1          | chr12:38780257-38868215   | OK     | 30.5369   | 21.7919   |
| Serpinf1      | chr11:75410028-75422623   | OK     | 54.6016   | 38.9579   |
| Nab1          | chr1:52455848-52500448    | OK     | 11.1268   | 7.93848   |
| Pcdhb2        | chr18:36930284-37841872   | NOTEST | 0.61087   | 0.435717  |
| Prmt6         | chr3:110246103-110250999  | OK     | 9.01633   | 6.43073   |
| CstI1         | chr2:148750360-148755378  | NOTEST | 0.474463  | 0.338352  |
| Slc38a2       | chr15:96687391-96699698   | OK     | 91.5966   | 65.3017   |
| Cnn3          | chr3:121426540-121458205  | OK     | 119.111   | 84.891    |
| Ift81         | chr5:122550203-122614518  | OK     | 5.57359   | 3.9718    |
| Gm13582       | chr2:60964375-60975151    | NOTEST | 0.22374   | 0.159386  |
| Appbp2        | chr11:85191309-85235120   | OK     | 18.6593   | 13.2841   |
| Emc7          | chr2:112455024-112467436  | OK     | 74.5103   | 53.0444   |
| Unc45b        | chr11:82911252-82964850   | NOTEST | 0.73912   | 0.525806  |
| Ndufaf1       | chr2:119655450-119662798  | OK     | 20.9615   | 14.9094   |
| Tmem81        | chr1:132506229-132508639  | OK     | 1.49199   | 1.06099   |
| Cd99l2        | chrX:71420059-71492849    | OK     | 68.8336   | 48.9379   |
| Yipf2         | chr9:21546893-21595970    | OK     | 10.8937   | 7.74157   |
| Pycr1         | chr11:120635711-120643670 | NOTEST | 0.405822  | 0.288355  |
| Gm5878        | chr6:85111415-85126094    | NOTEST | 0.014492  | 0.0102955 |
| AV039307      | chr2:120850655-120970715  | NOTEST | 0.872704  | 0.619861  |
| Tmem176b      | chr6:48833810-48841374    | OK     | 88.7552   | 63.0362   |
| Ptcd3         | chr6:71880637-71908762    | OK     | 17.3633   | 12.3318   |
| Pin1          | chr9:20652129-20666584    | OK     | 17.226    | 12.2335   |
| Zc3h12a       | chr4:125118413-125127881  | NOTEST | 0.444505  | 0.315581  |
| Pramef8       | chr4:143412425-143421087  | OK     | 4.97086   | 3.52877   |
| Tll2          | chr19:41083980-41206774   | NOTEST | 0.203822  | 0.144691  |
| Trpm2         | chr10:77907721-77969872   | OK     | 6.03547   | 4.28372   |
| Rilpl1        | chr5:124493079-124531391  | OK     | 8.09676   | 5.746     |
| Klhdc9        | chr1:171358448-171360798  | OK     | 1.47433   | 1.04593   |
| Dnajb9        | chr12:44205896-44210068   | OK     | 33.4387   | 23.7195   |
| Gper1         | chr5:139359738-139460534  | OK     | 0.77613   | 0.550503  |
| Efhb          | chr17:53398888-53463321   | NOTEST | 0.0740418 | 0.052509  |
| Lilra6        | chr7:3731632-3915501      | NOTEST | 0.0154918 | 0.0109856 |
| Mt3           | chr8:94152606-94154148    | OK     | 317.882   | 225.379   |
| Mir703        | chr5:98329303-98802019    | OK     | 259.546   | 183.98    |
| C2cd4d        | chr3:94362443-94364567    | NOTEST | 0.359732  | 0.254949  |
| D130017N08Rik | chr5:143758353-143764942  | OK     | 5.30033   | 3.75644   |
| Calm3         | chr7:16915378-16924032    | OK     | 537.061   | 380.624   |
| Glcci1        | chr6:8509599-8597549      | OK     | 8.18013   | 5.79682   |
| Slc2a8        | chr2:32972988-32982056    | OK     | 11.8591   | 8.40036   |
| Sys1          | chr2:164460970-164465510  | OK     | 8.1614    | 5.78073   |
| Usp43         | chr11:67854522-67922153   | NOTEST | 0.0420922 | 0.0298056 |
| AI506816      | chr5:23692260-23712667    | NOTEST | 0.416739  | 0.295037  |
| Ccdc121       | chr1:181509632-181511451  | NOTEST | 0.0570231 | 0.0403686 |
| B830017H08Rik | chr16:17833118-17835019   | NOTEST | 0.0562618 | 0.0398252 |
| Prnp          | chr2:131909927-131956131  | OK     | 268.264   | 189.852   |
| Sdha          | chr13:74322254-74350240   | OK     | 135.814   | 96.0929   |
| Adat1         | chr8:111966907-111992302  | OK     | 3.29778   | 2.33322   |
| Aldh6a1       | chr12:84409067-84450950   | OK     | 18.3309   | 12.9671   |
| Tmem178b      | chr6:40110252-40248353    | OK     | 10.2043   | 7.21798   |
| Pdia4         | chr6:47796140-47813512    | OK     | 30.2086   | 21.3658   |
| Ttc7b         | chr12:100276608-100520822 | OK     | 26.9654   | 19.0681   |



|               |                          |        |           |           |
|---------------|--------------------------|--------|-----------|-----------|
| Tgoln2        | chr6:72608420-72617000   | LOWDAT | 3.51385   | 2.48357   |
| Btbd3         | chr2:138256583-138287422 | OK     | 37.379    | 26.4082   |
| Fads1         | chr19:10182887-10196872  | OK     | 58.6483   | 41.4211   |
| Atp6v0a2      | chr5:124629051-124724455 | OK     | 16.825    | 11.8827   |
| Xlr3a         | chrX:73086292-73097095   | NOTEST | 0.779384  | 0.55037   |
| Tarsl2        | chr7:65644897-65692093   | OK     | 13.7974   | 9.74284   |
| Pkm           | chr9:59656367-59679375   | OK     | 387.279   | 273.435   |
| Il22ra1       | chr4:135728158-135755383 | NOTEST | 0.0411329 | 0.0290247 |
| Plxna4        | chr6:32144556-32588192   | OK     | 17.5563   | 12.3846   |
| Tti1          | chr2:157981802-158009360 | OK     | 7.56739   | 5.33752   |
| Prss53        | chr7:127877700-127890970 | NOTEST | 0.1267    | 0.0893503 |
| Mall          | chr2:127704389-127729897 | NOTEST | 0.556861  | 0.39269   |
| 2610507B11Rik | chr11:78261753-78290625  | OK     | 52.9664   | 37.3482   |
| Fahd2a        | chr2:127436214-127444565 | OK     | 8.51238   | 6.00127   |
| Cd53          | chr3:106758860-106790149 | OK     | 0.920328  | 0.648713  |
| Lrriq3        | chr3:155093433-155194278 | NOTEST | 0.450684  | 0.317637  |
| Cnksr2        | chrX:157821572-158043110 | OK     | 5.95116   | 4.19418   |
| Ntsr1         | chr2:180499975-180544979 | NOTEST | 0.266926  | 0.188063  |
| Epha7         | chr4:28813130-28967503   | OK     | 1.39147   | 0.980179  |
| 6720416L17Rik | chr2:74748421-74762896   | OK     | 2.57102   | 1.81099   |
| Fv1           | chr4:147868978-147870358 | OK     | 3.64608   | 2.56782   |
| Sez6          | chr11:77930838-77979052  | OK     | 11.0899   | 7.80982   |
| Ropn1l        | chr15:31441209-31453689  | NOTEST | 0.60227   | 0.424028  |
| Trpm8         | chr1:88306711-88388851   | OK     | 10.3879   | 7.30955   |
| Git1          | chr11:77493411-77507774  | OK     | 28.2066   | 19.8448   |
| Decr1         | chr4:15917239-15945507   | OK     | 17.6117   | 12.3883   |
| Gbp5          | chr3:142496933-142522344 | OK     | 1.50451   | 1.05814   |
| Hus1          | chr11:8993141-9011137    | OK     | 3.88857   | 2.73406   |
| Pdgfra        | chr5:75152290-75198204   | OK     | 2.33022   | 1.63827   |
| Clec16a       | chr16:10545338-10744878  | OK     | 11.213    | 7.88297   |
| Nap1l2        | chrX:103184058-103186664 | OK     | 69.0614   | 48.5467   |
| Dok6          | chr18:89301134-89769136  | OK     | 6.837     | 4.8059    |
| Sacm1l        | chr9:123529881-123592598 | OK     | 77.0732   | 54.1738   |
| Abcb6         | chr1:75171640-75180283   | OK     | 10.19     | 7.16204   |
| Nr5a2         | chr1:136843583-136960448 | NOTEST | 0.594796  | 0.417998  |
| Tnni1         | chr1:135799420-135810989 | NOTEST | 0.631817  | 0.443963  |
| Trps1         | chr15:50654758-50890041  | OK     | 1.08784   | 0.764363  |
| Nrip2         | chr6:128399765-128408935 | OK     | 11.5447   | 8.10926   |
| Pdgfrb        | chr18:61045149-61085067  | OK     | 7.40603   | 5.20186   |
| Zfp111        | chr7:24193214-24208149   | OK     | 1.26561   | 0.888362  |
| Slc30a4       | chr2:122681232-122702663 | OK     | 5.49336   | 3.85581   |
| Ccdc28a       | chr10:18213684-18234981  | OK     | 33.897    | 23.7889   |
| Gp5           | chr16:30307684-30310781  | NOTEST | 0.26425   | 0.185301  |
| Rgs20         | chr1:4909575-5070285     | OK     | 1.31526   | 0.922269  |
| Map1a         | chr2:121289601-121351013 | OK     | 268.672   | 188.366   |
| Tmem260       | chr14:48446351-48515159  | OK     | 6.3774    | 4.47072   |
| Pcdhb16       | chr18:36930284-37841872  | OK     | 1.66064   | 1.164     |
| Med27         | chr2:29346809-29524790   | OK     | 22.6894   | 15.9019   |
| Mtmr4         | chr11:87592216-87616296  | OK     | 34.7532   | 24.3377   |
| Trmu          | chr15:85879326-85897393  | OK     | 4.80179   | 3.36218   |
| Pon1          | chr6:5168089-5193946     | NOTEST | 0.0425067 | 0.029759  |
| Pcdhga8       | chr18:36930284-37841872  | OK     | 2.14405   | 1.50102   |
| Ptbp1         | chr10:79697304-80369637  | OK     | 7.94989   | 5.56468   |

|               |                           |        |          |           |
|---------------|---------------------------|--------|----------|-----------|
| Ms4a6b        | chr19:11518558-11530403   | NOTEST | 0.509197 | 0.356169  |
| Ccdc176       | chr12:84409067-84450950   | NOTEST | 0.835505 | 0.584305  |
| Tmem43        | chr6:91473750-91488458    | OK     | 16.8325  | 11.7716   |
| 6330418K02Rik | chr5:138259657-138272754  | OK     | 1.63924  | 1.14569   |
| Egf           | chr3:129677574-129763882  | NOTEST | 0.323478 | 0.226077  |
| Ascl2         | chr7:142966821-142969264  | NOTEST | 0.088286 | 0.0616914 |
| Man1a2        | chr3:100562204-100685473  | OK     | 30.7139  | 21.4603   |
| Ispd          | chr12:36381449-36689503   | OK     | 9.98731  | 6.97808   |
| Gm4371        | chr15:96182799-96203470   | NOTEST | 0.613836 | 0.428793  |
| Hadha         | chr5:30103583-30154980    | OK     | 52.6842  | 36.7935   |
| Fermt2        | chr14:45458791-45530065   | OK     | 51.3794  | 35.8817   |
| Dtna          | chr18:23310019-23659719   | OK     | 20.6163  | 14.3975   |
| Aldh1b1       | chr4:45799021-45804608    | OK     | 2.30731  | 1.61121   |
| Dnajc18       | chr18:35671104-35703144   | OK     | 25.1411  | 17.555    |
| P2ry2         | chr7:100996571-101011991  | OK     | 6.72379  | 4.69388   |
| Ctnna1        | chr18:35118911-35254775   | OK     | 62.2549  | 43.4584   |
| Frpm3         | chrX:140367493-140394520  | OK     | 1.32805  | 0.92697   |
| Mtmt2         | chr9:13749180-13806481    | OK     | 27.5695  | 19.2386   |
| Wnt4          | chr4:137277634-137299501  | NOTEST | 0.578283 | 0.403491  |
| Rab3ip        | chr10:116905783-116950380 | OK     | 12.9405  | 9.02886   |
| Ccdc30        | chr4:119322892-119415521  | OK     | 1.11612  | 0.778635  |
| Cdc37l1       | chr19:28990493-29017569   | OK     | 23.4074  | 16.3292   |
| Hcar2         | chr5:123863569-123865516  | NOTEST | 0.112577 | 0.0785161 |
| Sytl3         | chr17:6673609-6738044     | OK     | 11.0127  | 7.67817   |
| Sephs2        | chr7:127271878-127274059  | OK     | 14.4423  | 10.0691   |
| Susd2         | chr10:75636618-75644008   | OK     | 190.225  | 132.566   |
| Glul          | chr1:153899925-153909723  | OK     | 184.154  | 128.328   |
| Tbc1d2b       | chr9:90202048-90270769    | OK     | 4.65054  | 3.24051   |
| Atr           | chr9:95855417-95951644    | OK     | 6.54209  | 4.55676   |
| Sowahc        | chr10:59221921-59226433   | OK     | 5.98799  | 4.16918   |
| Zmynd12       | chr4:119422683-119453899  | NOTEST | 0.083188 | 0.057909  |
| Il1rn         | chr2:24336859-24351491    | NOTEST | 0.101724 | 0.0707966 |
| 2300009A05Rik | chr9:63394446-63399244    | OK     | 4.22205  | 2.93826   |
| Fcrla         | chr1:170917593-170927583  | NOTEST | 0.165028 | 0.114834  |
| Hoxd9         | chr2:74697762-74700208    | OK     | 6.73288  | 4.68468   |
| Nceh1         | chr3:27183003-27244911    | OK     | 27.9406  | 19.4389   |
| Nhlrc3        | chr3:53451995-53463258    | OK     | 2.09452  | 1.45714   |
| Zscan29       | chr2:121157426-121171149  | OK     | 5.38252  | 3.74359   |
| Fmnl3         | chr15:99317222-99370466   | OK     | 2.90227  | 2.01855   |
| Fabp3         | chr4:130308777-130315463  | OK     | 5.43246  | 3.77652   |
| Tubgcp2       | chr7:139995954-140040605  | OK     | 15.1377  | 10.5221   |
| 4930578C19Rik | chrX:18418426-18461274    | NOTEST | 0.743476 | 0.516758  |
| Grm3          | chr5:9485235-9725352      | NOTEST | 0.262505 | 0.182401  |
| Dcbld1        | chr10:52233618-52321377   | OK     | 12.2888  | 8.53758   |
| Tspan13       | chr12:36014554-36042478   | OK     | 82.4341  | 57.253    |
| Carns1        | chr19:4164323-4175479     | OK     | 7.74094  | 5.37457   |
| Clvs1         | chr4:9269316-9669344      | OK     | 12.3706  | 8.5862    |
| Ggt1          | chr10:75573592-75586182   | NOTEST | 0.28668  | 0.198977  |
| Idh3g         | chrX:73778962-73786897    | OK     | 65.4726  | 45.4393   |
| Spidr         | chr16:15887285-16146851   | OK     | 2.06912  | 1.43593   |
| Grxcr2        | chr18:41986200-41999049   | OK     | 2.55177  | 1.77088   |
| Prepl         | chr17:85028346-85090274   | OK     | 160.696  | 111.518   |
| Slco1c1       | chr6:141524385-141570177  | OK     | 1.57789  | 1.0948    |

|               |                           |        |           |           |
|---------------|---------------------------|--------|-----------|-----------|
| Lrba          | chr3:86224689-86782694    | OK     | 2.6104    | 1.81089   |
| Qpctl         | chr7:19140216-19149196    | OK     | 6.63313   | 4.60118   |
| Rnf13         | chr3:57736065-57835233    | OK     | 69.1345   | 47.9546   |
| Magi2         | chr5:19227045-20704792    | OK     | 4.95016   | 3.43314   |
| Tap1          | chr17:34187555-34197225   | OK     | 3.82294   | 2.6506    |
| Tgm2          | chr2:158116404-158146392  | OK     | 6.1696    | 4.27727   |
| BC030500      | chr8:58911754-58914298    | NOTEST | 0.583262  | 0.404336  |
| Rab8b         | chr9:66843663-66919705    | OK     | 13.0181   | 9.02294   |
| Ak3           | chr19:29020831-29048729   | OK     | 31.9998   | 22.1793   |
| Elovl1        | chr4:118428092-118437343  | OK     | 28.3939   | 19.6799   |
| Pdpr          | chr8:111094744-111145498  | OK     | 9.3104    | 6.45118   |
| Slain1        | chr14:103650242-103704799 | OK     | 2.14392   | 1.4852    |
| Mgat4c        | chr10:101681486-102391468 | OK     | 1.81775   | 1.25921   |
| Cyc1          | chr15:76343522-76345934   | OK     | 138.732   | 96.0945   |
| Pnkd          | chr1:74285033-74353692    | OK     | 59.5857   | 41.2636   |
| Sirt2         | chr7:28766751-28788665    | OK     | 79.2319   | 54.8598   |
| Lrrc27        | chr7:139103637-139242973  | OK     | 3.74729   | 2.59443   |
| Efcab2        | chr1:178405880-178483249  | OK     | 4.00379   | 2.77196   |
| 2810408A11Rik | chr11:69897357-69900986   | NOTEST | 0.318194  | 0.220279  |
| Eme2          | chr17:24892151-24895087   | OK     | 9.92718   | 6.87117   |
| BC037704      | chr19:43675177-43677170   | NOTEST | 0.394801  | 0.27324   |
| Rab19         | chr6:39381427-39390379    | NOTEST | 0.0470989 | 0.032594  |
| Dlat          | chr9:50634632-50659780    | OK     | 43.8391   | 30.3344   |
| Tbx4          | chr11:85890062-85916097   | NOTEST | 0.0190341 | 0.01317   |
| Sat1          | chrX:155213125-155216449  | OK     | 42.5894   | 29.4634   |
| Tmem30b       | chr12:73543113-73546395   | OK     | 0.846741  | 0.585465  |
| Serp1         | chr3:58521970-58557501    | OK     | 24.5648   | 16.9842   |
| Nrep          | chr18:33437018-33464029   | OK     | 17.8527   | 12.3433   |
| Mblac1        | chr5:138194313-138195621  | OK     | 2.27657   | 1.574     |
| Slco2b1       | chr7:99657803-99711340    | OK     | 1.8052    | 1.24798   |
| Hmgn2         | chr4:133964738-133967991  | OK     | 7.68199   | 5.31024   |
| Ptpre         | chr7:135537823-135686294  | OK     | 11.8362   | 8.18006   |
| Gm7367        | chr11:116434093-116439077 | OK     | 1.73967   | 1.20136   |
| St3gal2       | chr8:110919864-110972497  | OK     | 23.3668   | 16.135    |
| Gstm1         | chr3:108012249-108017973  | OK     | 8.64769   | 5.97058   |
| 2900097C17Rik | chr2:156388062-156392979  | OK     | 216.672   | 149.593   |
| Atp1a3        | chr7:24978168-25005937    | OK     | 293.01    | 202.277   |
| Zdhhc15       | chrX:104536969-104671064  | OK     | 8.83487   | 6.09895   |
| Tlr4          | chr4:66827810-66842796    | OK     | 1.54879   | 1.06906   |
| Prkcdbp       | chr7:105480615-105482197  | OK     | 20.0317   | 13.8268   |
| Mks1          | chr11:87853224-87863679   | OK     | 1.26126   | 0.870427  |
| Tmed7         | chr18:46585927-46597535   | OK     | 39.6771   | 27.3708   |
| Mettl20       | chr6:149141512-149151170  | OK     | 1.19513   | 0.824428  |
| Ubiad1        | chr4:148434496-148444751  | OK     | 2.01157   | 1.38702   |
| Gipc2         | chr3:152093840-152165900  | OK     | 1.0041    | 0.69212   |
| 2310039H08Rik | chr17:46772634-46773407   | OK     | 2.31752   | 1.59729   |
| Sugct         | chr13:16857474-17694765   | OK     | 1.18751   | 0.817719  |
| Zfp652        | chr11:95749066-95764713   | OK     | 3.1254    | 2.15182   |
| Gm12429       | chr4:42848070-42853888    | NOTEST | 0.0942644 | 0.0648978 |
| Flnb          | chr14:7817956-7951587     | OK     | 10.7251   | 7.3815    |
| Ttpa          | chr4:20008427-20030785    | NOTEST | 0.0698762 | 0.048092  |
| Rdh10         | chr1:16105881-16132550    | OK     | 3.75094   | 2.58099   |
| Fhit          | chr14:9550093-11162032    | OK     | 5.87288   | 4.04018   |

|               |                           |        |           |           |
|---------------|---------------------------|--------|-----------|-----------|
| Gucy1a2       | chr9:3532348-3905787      | OK     | 5.98262   | 4.11532   |
| Hpse          | chr5:100679485-100719683  | OK     | 1.57936   | 1.08634   |
| Syn2          | chr6:115134901-115282626  | OK     | 80.7326   | 55.5231   |
| Dscam         | chr16:96592078-97170735   | OK     | 4.44226   | 3.05472   |
| Tcap          | chr11:98383810-98384953   | NOTEST | 0.118022  | 0.0811422 |
| Snx18         | chr13:113592178-113618564 | OK     | 14.9721   | 10.29     |
| Tmem59l       | chr8:70483866-70487358    | OK     | 111.521   | 76.6435   |
| Zfp108        | chr7:24254793-24262444    | NOTEST | 0.75114   | 0.515998  |
| Cxx1c         | chrX:53607921-53609134    | OK     | 93.0441   | 63.9132   |
| Ttc1          | chr11:43730005-43747973   | OK     | 57.6576   | 39.5968   |
| Zyg11b        | chr4:108227754-108301090  | OK     | 32.6128   | 22.3792   |
| Ttc3          | chr16:94358762-94469221   | OK     | 92.6197   | 63.5145   |
| Plcb2         | chr2:118707516-118728438  | NOTEST | 0.110107  | 0.075483  |
| Tifab         | chr13:56173702-56178885   | OK     | 1.2906    | 0.884187  |
| Lmbrd1        | chr1:24678543-24766301    | OK     | 37.9998   | 26.0272   |
| Celf2         | chr2:6539698-7396198      | OK     | 11.987    | 8.20925   |
| Tspyl4        | chr10:34297420-34301320   | OK     | 179.051   | 122.564   |
| Cox4i1        | chr8:120668289-120674209  | OK     | 684.653   | 468.625   |
| Slc27a5       | chr7:12988345-12998192    | NOTEST | 0.0393242 | 0.0269137 |
| Itsn1         | chr16:91729370-91920579   | OK     | 12.3569   | 8.4532    |
| Itpripl1      | chr2:127138768-127143457  | OK     | 4.26915   | 2.91995   |
| 9030624G23Rik | chr12:24043201-24097269   | NOTEST | 0.809812  | 0.553795  |
| Maml1         | chr11:50255634-50292336   | OK     | 2.01782   | 1.37985   |
| Sgsm2         | chr11:74849263-74897080   | OK     | 9.71681   | 6.64108   |
| Wnt3          | chr11:103774174-103818021 | NOTEST | 0.274146  | 0.187337  |
| Kcnc4         | chr3:107438302-107458898  | OK     | 33.5738   | 22.9424   |
| Hp            | chr8:109575127-109579172  | NOTEST | 0.520992  | 0.355979  |
| Aim2          | chr1:173420603-173466036  | NOTEST | 0.184651  | 0.126162  |
| Pcdhga7       | chr18:36930284-37841872   | OK     | 4.21615   | 2.8796    |
| Cnksr3        | chr10:7119061-7212237     | OK     | 1.23189   | 0.841046  |
| Traf5         | chr1:191997202-192092599  | NOTEST | 0.543941  | 0.371336  |
| Pde8b         | chr13:95024104-95250304   | OK     | 5.42048   | 3.70014   |
| Btg2          | chr1:134074864-134079155  | OK     | 22.0734   | 15.0649   |
| Inpp1         | chr7:101818312-101838226  | OK     | 6.17904   | 4.2163    |
| Arl16         | chr11:120458128-120467600 | OK     | 18.1966   | 12.4139   |
| Mob1a         | chr6:83326038-83340949    | OK     | 11.1937   | 7.63602   |
| Dolk          | chr2:30284228-30286354    | OK     | 20.5084   | 13.9815   |
| Ppp4r4        | chr12:103532564-103613832 | OK     | 9.18531   | 6.26191   |
| Skil          | chr3:31095057-31122923    | OK     | 3.45935   | 2.35821   |
| Adat2         | chr10:13523841-13563376   | OK     | 2.68981   | 1.83362   |
| Slc16a4       | chr3:107291291-107312116  | OK     | 2.84893   | 1.94197   |
| Ptgr2         | chr12:84285295-84315832   | OK     | 16.463    | 11.2199   |
| Aak1          | chr6:86849516-87003227    | OK     | 20.7214   | 14.1215   |
| Dnase2a       | chr8:84908623-84911461    | OK     | 1.16839   | 0.796238  |
| Pisd          | chr5:32736313-32785626    | OK     | 10.9821   | 7.484     |
| A830018L16Rik | chr1:11414104-11975902    | OK     | 20.0764   | 13.6792   |
| Oxr1          | chr15:41447481-41861047   | OK     | 88.3703   | 60.209    |
| Lrat          | chr3:82876704-82943638    | NOTEST | 0.341678  | 0.232761  |
| Hvcn1         | chr5:122209728-122264460  | NOTEST | 0.219626  | 0.149585  |
| Hdac3         | chr18:37936970-37954988   | OK     | 36.4644   | 24.8352   |
| Etl4          | chr2:20289912-20810535    | OK     | 18.7246   | 12.7491   |
| Dhrs4         | chr14:55478757-55490340   | OK     | 13.148    | 8.95125   |
| Ush1g         | chr11:115307162-115332303 | OK     | 2.85582   | 1.94411   |

|               |                           |        |            |            |
|---------------|---------------------------|--------|------------|------------|
| Atat1         | chr17:35897597-35910068   | OK     | 5.34623    | 3.63858    |
| 1700066B19Rik | chr18:35726988-35730869   | NOTEST | 0.0838638  | 0.0570675  |
| Nek7          | chr1:138484713-138619696  | OK     | 100.536    | 68.4092    |
| Itpr1         | chr6:108213095-108551116  | OK     | 2.43472    | 1.65534    |
| Emb           | chr13:117220572-117274415 | OK     | 114.349    | 77.7107    |
| Tmem141       | chr2:25620065-25622005    | OK     | 13.4485    | 9.13356    |
| Adcy7         | chr8:88272402-88329962    | OK     | 2.86208    | 1.94207    |
| Fam73b        | chr2:30364232-30385519    | OK     | 20.9865    | 14.238     |
| Pigh          | chr12:79029162-79103939   | OK     | 6.07676    | 4.12102    |
| Gad2          | chr2:22622326-22693877    | NOTEST | 0.00593298 | 0.00402331 |
| Aldh4a1       | chr4:139622893-139649691  | OK     | 9.99589    | 6.7778     |
| Lmln          | chr16:33062520-33125659   | OK     | 6.30438    | 4.27432    |
| Hmgn5         | chrX:109004536-109013380  | OK     | 1.45955    | 0.989137   |
| Dnajb4        | chr3:152183870-152210083  | OK     | 28.1628    | 19.085     |
| Ccdc126       | chr6:49319352-49341581    | OK     | 9.65084    | 6.53898    |
| Nlrp3         | chr11:59542685-59566956   | NOTEST | 0.136888   | 0.0927047  |
| Nek8          | chr11:78166105-78176666   | OK     | 3.42843    | 2.32082    |
| Siglec5       | chr7:43351340-43359470    | NOTEST | 0.0383971  | 0.0259594  |
| Marcks        | chr10:37133242-37138926   | OK     | 39.9127    | 26.9838    |
| Morc4         | chrX:139821634-139871654  | OK     | 2.41859    | 1.63497    |
| Lrrc48        | chr11:60353379-60394333   | OK     | 2.03778    | 1.37754    |
| Elmod3        | chr6:72565921-72598413    | OK     | 3.72567    | 2.51804    |
| Slc35f6       | chr5:30647935-30659729    | OK     | 17.3947    | 11.7529    |
| Zkscan4       | chr13:21478848-21485505   | OK     | 1.01819    | 0.687811   |
| Racgap1       | chr15:99620495-99651656   | OK     | 3.79806    | 2.56522    |
| Pecr          | chr1:72259172-72284314    | OK     | 4.86726    | 3.28735    |
| Rcbtb2        | chr14:73142509-73184054   | OK     | 10.5322    | 7.11229    |
| Gm14420       | chr2:177464741-177479194  | OK     | 4.78402    | 3.23041    |
| Twsg1         | chr17:65923064-65951187   | OK     | 12.8331    | 8.6628     |
| BC048546      | chr6:128539821-128581606  | OK     | 7.64434    | 5.15991    |
| Gpr174        | chrX:107255877-107296769  | NOTEST | 0.22187    | 0.149755   |
| Ppm1k         | chr6:57506501-57535426    | OK     | 4.67465    | 3.15335    |
| Mocos         | chr18:24653690-24701556   | OK     | 2.6581     | 1.79182    |
| Dock6         | chr9:21800179-21852635    | OK     | 2.39394    | 1.61366    |
| Nhej1         | chr1:74967345-75046639    | OK     | 3.95102    | 2.66255    |
| Fggy          | chr4:95557506-95926939    | OK     | 6.89183    | 4.64293    |
| Cnpy2         | chr10:128322458-128327187 | OK     | 22.2934    | 15.0171    |
| Tmem127       | chr2:127247974-127260764  | OK     | 40.1654    | 27.0553    |
| Kcnh7         | chr2:62702945-63184287    | OK     | 13.5821    | 9.14499    |
| Fadd          | chr7:144578322-144582436  | OK     | 1.21036    | 0.814785   |
| Foxf2         | chr13:31625815-31631406   | NOTEST | 0.45337    | 0.30518    |
| Slc9a2        | chr1:40681711-40768885    | OK     | 0.909318   | 0.611956   |
| Plvap         | chr8:71497752-71511769    | OK     | 7.88902    | 5.30882    |
| Stk39         | chr2:68210446-68471981    | OK     | 93.4277    | 62.869     |
| Tomm20        | chr8:126930663-126945921  | OK     | 41.7953    | 28.1187    |
| Pde4dip       | chr3:97689828-97888707    | OK     | 43.7654    | 29.4373    |
| Smad5         | chr13:56703009-56742378   | OK     | 6.24693    | 4.20071    |
| Rilpl2        | chr5:124463264-124478235  | OK     | 5.21698    | 3.50686    |
| Satb2         | chr1:56793980-56971334    | NOTEST | 0.144426   | 0.0970682  |
| Usp24         | chr4:106316212-106441327  | OK     | 6.23875    | 4.19254    |
| Syne4         | chr7:30314815-30319045    | OK     | 3.77251    | 2.53295    |
| Sesn3         | chr9:14276300-14326134    | OK     | 12.8192    | 8.60546    |
| Chd3os        | chr11:69340768-69342647   | OK     | 3.92502    | 2.63439    |



|               |                           |        |           |           |
|---------------|---------------------------|--------|-----------|-----------|
| Diras1        | chr10:81019589-81025377   | OK     | 97.2451   | 65.2627   |
| Trpc7         | chr13:56773107-56895588   | NOTEST | 0.669215  | 0.449095  |
| Gjc2          | chr11:59175563-59183213   | NOTEST | 0.269947  | 0.180971  |
| 1700020I14Rik | chr2:119594295-119600744  | OK     | 38.972    | 26.1184   |
| 2200002D01Rik | chr7:29238322-29248467    | OK     | 0.822427  | 0.55103   |
| Sarm1         | chr11:78472329-78497754   | OK     | 14.9983   | 10.0469   |
| Primpol       | chr8:46552068-46617200    | OK     | 2.44055   | 1.63472   |
| Klhl32        | chr4:24617272-24851086    | OK     | 2.57709   | 1.72588   |
| Aph1a         | chr3:95893920-95904639    | OK     | 4.70459   | 3.1506    |
| Sh3tc1        | chr5:35697179-35729276    | NOTEST | 0.41306   | 0.276517  |
| Tab3          | chrX:85574021-85634469    | OK     | 9.44081   | 6.3198    |
| Nhsl2         | chrX:101849384-102092055  | OK     | 0.775765  | 0.519282  |
| Kdm8          | chr7:125444619-125462268  | OK     | 4.44179   | 2.97077   |
| 6330403A02Rik | chr1:180432372-180483504  | OK     | 0.919204  | 0.614604  |
| Ralgapa2      | chr2:146241298-146512004  | OK     | 6.00242   | 4.01106   |
| Gnmt          | chr17:46725663-46729165   | NOTEST | 0.446866  | 0.298595  |
| Fyco1         | chr9:123789499-123851899  | OK     | 2.38371   | 1.59258   |
| Mef2c         | chr13:83504033-83667079   | OK     | 7.08589   | 4.73346   |
| Cyb561a3      | chr19:10577156-10590041   | OK     | 4.16923   | 2.78284   |
| Zfp809        | chr9:22055459-22389206    | OK     | 5.2844    | 3.52653   |
| Gpr111        | chr17:42708936-42742179   | NOTEST | 0.0448617 | 0.029937  |
| Pde3a         | chr6:141249268-141499351  | NOTEST | 0.585963  | 0.391003  |
| Abhd12        | chr2:150832514-150904731  | OK     | 141.321   | 94.2797   |
| Stard5        | chr7:83632016-83642328    | OK     | 4.33865   | 2.89377   |
| 5730522E02Rik | chr11:25616845-26210576   | NOTEST | 0.251021  | 0.167422  |
| Ak1           | chr2:32621757-32635058    | OK     | 73.1079   | 48.7398   |
| Stxbp3a       | chr3:108793179-108840502  | OK     | 5.10722   | 3.40463   |
| B2m           | chr2:122120107-122186189  | OK     | 192.558   | 128.337   |
| Nit2          | chr16:57156664-57167332   | OK     | 6.97139   | 4.64573   |
| Pik3r3        | chr4:116221913-116303056  | OK     | 16.5461   | 11.0231   |
| Entpd7        | chr19:43689688-43753000   | OK     | 5.11133   | 3.40501   |
| Tacc1         | chr8:25154551-25201542    | OK     | 20.1257   | 13.4051   |
| Gm6213        | chr8:39297979-39368268    | NOTEST | 0.678269  | 0.451672  |
| Ankrd52       | chr10:128377123-128394006 | OK     | 51.9278   | 34.5769   |
| Slc1a4        | chr11:20302179-20332713   | OK     | 26.7883   | 17.837    |
| Arhgdib       | chr6:136923708-136941717  | OK     | 3.3816    | 2.2516    |
| Tmem246       | chr4:49584505-49597870    | OK     | 34.445    | 22.931    |
| Vhl           | chr6:113624020-113631633  | OK     | 8.422     | 5.60599   |
| Hsd17b14      | chr7:45554927-45567321    | NOTEST | 0.373938  | 0.248842  |
| 2210416O15Rik | chr11:88098057-88211507   | NOTEST | 0.0702005 | 0.0467056 |
| Tnfsf10       | chr3:27317076-27339665    | OK     | 1.50453   | 1.00091   |
| 5830417I10Rik | chr3:88777056-88832487    | OK     | 0.779577  | 0.518408  |
| Amph          | chr13:18948350-19150919   | OK     | 76.6253   | 50.9397   |
| Rsph4a        | chr10:33905110-33916021   | NOTEST | 0.223155  | 0.148324  |
| Pcca          | chr14:122534327-122889944 | OK     | 9.27045   | 6.16169   |
| Ets2          | chr16:95702406-95721049   | OK     | 10.655    | 7.0794    |
| Ltbp3         | chr19:5740903-5771401     | OK     | 18.6844   | 12.4131   |
| Gng12         | chr6:66896396-67021361    | OK     | 9.77698   | 6.49491   |
| 9430037G07Rik | chr9:88595324-88599243    | OK     | 1.94496   | 1.292     |
| Tmem219       | chr7:126886218-126898278  | OK     | 12.2472   | 8.13506   |
| Dnajc1        | chr2:18055236-18392830    | OK     | 4.37786   | 2.90738   |
| Pcdhgb4       | chr18:36930284-37841872   | OK     | 1.64518   | 1.09255   |
| Maml3         | chr3:51687612-52105006    | OK     | 1.44189   | 0.957496  |

|               |                          |        |           |           |
|---------------|--------------------------|--------|-----------|-----------|
| Gm166         | chr7:127573347-127588595 | NOTEST | 0.668157  | 0.443692  |
| Klf4          | chr4:55527136-55532475   | OK     | 8.9856    | 5.96665   |
| Dyx1c1        | chr9:72958784-72973067   | OK     | 0.822589  | 0.545865  |
| Hist1h2bc     | chr13:23684198-23692480  | OK     | 60.1998   | 39.9442   |
| Fam35a        | chr14:34237034-34310503  | OK     | 2.43608   | 1.61639   |
| Coq7          | chr7:118525061-118533313 | OK     | 30.1207   | 19.9853   |
| Tnfrsf1b      | chr4:145212367-145246870 | OK     | 0.989635  | 0.656389  |
| Mcam          | chr9:44134657-44142726   | OK     | 78.077    | 51.7849   |
| 0610007P14Rik | chr12:85815454-85824545  | OK     | 22.8406   | 15.1484   |
| Sesn2         | chr4:132492806-132510456 | OK     | 1.76927   | 1.17301   |
| Tacstd2       | chr6:67534058-67535822   | NOTEST | 0.0220486 | 0.0146159 |
| Hspa12a       | chr19:58795750-58860984  | OK     | 162.817   | 107.902   |
| Cyb5rl        | chr4:107070167-107084805 | OK     | 1.69253   | 1.12113   |
| Vmn1r85       | chr7:13084288-13085215   | NOTEST | 0.427597  | 0.283238  |
| Enpp6         | chr8:46986924-47094895   | NOTEST | 0.365176  | 0.241876  |
| Serpini1      | chr3:75557532-75642523   | OK     | 59.4663   | 39.3836   |
| Asb17os       | chr3:153844246-153853615 | NOTEST | 0.440054  | 0.291412  |
| Znrf1         | chr8:111536639-111626030 | OK     | 10.8414   | 7.17898   |
| Ndufv2        | chr17:66078794-66101559  | OK     | 91.3647   | 60.4757   |
| Stap1         | chr5:86071827-86103993   | NOTEST | 0.143998  | 0.0952778 |
| Srcrb4d       | chr5:135960222-135974476 | OK     | 1.26447   | 0.836459  |
| Prpf19        | chr19:10895230-10909559  | OK     | 31.7512   | 21.0033   |
| Smim13        | chr13:41249843-41276577  | OK     | 53.6957   | 35.5028   |
| Errfi1        | chr4:150855090-150868880 | OK     | 15.2377   | 10.0749   |
| Gm13446       | chr2:35549533-35730994   | OK     | 1.96646   | 1.30015   |
| Pttg1ip       | chr10:77581766-77598732  | OK     | 39.1539   | 25.8832   |
| Utrn          | chr10:12382187-12861735  | OK     | 45.861    | 30.3118   |
| Med9os        | chr11:59946891-59948147  | NOTEST | 0.885383  | 0.58514   |
| Cx3cl1        | chr8:94772179-94782426   | OK     | 3.30343   | 2.18206   |
| B630019K06Rik | chrX:8892352-8894964     | OK     | 17.0521   | 11.2598   |
| Atp9b         | chr18:80734140-80934058  | OK     | 22.5713   | 14.9039   |
| Grwd1         | chr7:45825222-45830789   | OK     | 7.85998   | 5.18957   |
| Mia3          | chr1:183326235-183369565 | OK     | 27.8047   | 18.3554   |
| Mknk1         | chr4:115839197-115879256 | OK     | 14.229    | 9.39198   |
| Lsp1          | chr7:142460811-142516009 | OK     | 1.7581    | 1.16042   |
| Myh14         | chr7:44605802-44670843   | OK     | 22.6266   | 14.927    |
| Dennd5a       | chr7:109893780-109960422 | OK     | 31.4773   | 20.7651   |
| Foxr2         | chrX:153118787-153132861 | NOTEST | 0.0898075 | 0.0592281 |
| Lphn1         | chr8:83900097-83941954   | OK     | 32.2575   | 21.2708   |
| Rel           | chr11:23741728-23770970  | NOTEST | 0.77774   | 0.512792  |
| Vma21         | chrX:71816079-71824706   | OK     | 21.7937   | 14.368    |
| Bcl6b         | chr11:70224126-70229798  | NOTEST | 0.742729  | 0.489624  |
| Sun2          | chr15:79724067-79742536  | OK     | 21.9395   | 14.4618   |
| Fntb          | chr12:76837466-76921412  | OK     | 19.0711   | 12.5689   |
| Klf6          | chr13:5861488-5870393    | OK     | 28.4809   | 18.7655   |
| Ndufb5        | chr3:32737062-32751559   | OK     | 80.6226   | 53.1183   |
| Pxmp4         | chr2:154587043-154603673 | OK     | 10.9999   | 7.2467    |
| Slc25a25      | chr2:32414486-32455476   | OK     | 38.9412   | 25.6496   |
| 1700049G17Rik | chr7:27907391-27929430   | OK     | 1.10686   | 0.728893  |
| Camk2b        | chr11:5969665-6065748    | OK     | 20.2585   | 13.3374   |
| Acot11        | chr4:106733914-106799831 | OK     | 3.62463   | 2.38576   |
| Rock2         | chr12:16894977-16988274  | OK     | 13.5122   | 8.89384   |
| Hadh          | chr3:131233419-131272101 | OK     | 27.3365   | 17.9873   |

|          |                           |        |           |           |
|----------|---------------------------|--------|-----------|-----------|
| Fau      | chr19:6057887-6059524     | OK     | 3.65091   | 2.40224   |
| Kcnj3    | chr2:55437155-55595525    | OK     | 9.24897   | 6.08465   |
| Tet1     | chr10:62804569-62880014   | OK     | 0.790194  | 0.519798  |
| Kremen2  | chr17:23741198-23745829   | NOTEST | 0.173069  | 0.113844  |
| Stox2    | chr8:47180047-47352348    | OK     | 6.01264   | 3.95491   |
| Plekhd1  | chr12:80692600-80724216   | OK     | 30.4667   | 20.0382   |
| Fbxo47   | chr11:97854306-97884154   | NOTEST | 0.593853  | 0.390482  |
| Junb     | chr8:84976908-84978748    | OK     | 66.8822   | 43.9769   |
| Olfir920 | chr9:38752795-38756863    | OK     | 1.32937   | 0.874051  |
| Tm6sf1   | chr7:81859000-81934459    | OK     | 22.3593   | 14.6977   |
| Slc16a1  | chr3:104638663-104658462  | OK     | 23.9102   | 15.716    |
| H2afy3   | chr15:62037986-62250975   | NOTEST | 0.210756  | 0.138513  |
| Vps26a   | chr10:62454842-62486805   | OK     | 22.9627   | 15.0901   |
| Cd63     | chr10:128908918-128912818 | OK     | 14.6256   | 9.60944   |
| Pcdhgb7  | chr18:36930284-37841872   | OK     | 1.4601    | 0.959062  |
| Oscp1    | chr4:126058564-126089334  | OK     | 9.18925   | 6.03461   |
| Zfp951   | chr5:104813167-104860068  | NOTEST | 0.502029  | 0.329656  |
| Ptgir    | chr7:16906489-16910905    | OK     | 24.0398   | 15.7851   |
| Slc25a33 | chr4:149744035-149774267  | OK     | 26.6901   | 17.5187   |
| Elp3     | chr14:65530445-65593112   | OK     | 42.1544   | 27.6473   |
| Nkiras1  | chr14:18271141-18331844   | OK     | 25.119    | 16.4707   |
| Notum    | chr11:120653788-120660837 | NOTEST | 0.231589  | 0.15181   |
| Alpk2    | chr18:64887755-65751537   | NOTEST | 0.0448192 | 0.0293743 |
| Tbc1d4   | chr14:101442359-101609191 | OK     | 4.81611   | 3.1557    |
| Gltpd1   | chr4:155864722-155869440  | OK     | 29.5401   | 19.3458   |
| Gramd1b  | chr9:40297906-40455764    | OK     | 36.149    | 23.6728   |
| Atp5l    | chr9:44913247-44920742    | OK     | 2.67666   | 1.75202   |
| Slc22a21 | chr11:53950823-53980027   | NOTEST | 0.469946  | 0.307601  |
| Dusp6    | chr10:99263230-99267489   | OK     | 16.0694   | 10.518    |
| Slc35e1  | chr8:72477994-72492614    | OK     | 16.5632   | 10.8411   |
| Gm10432  | chr12:100276608-100520822 | NOTEST | 0.410255  | 0.268429  |
| Fhdc1    | chr3:84442195-84480439    | OK     | 4.95857   | 3.24172   |
| Cacna2d3 | chr14:28904942-29721864   | OK     | 21.5163   | 14.0648   |
| Samd15   | chr12:87200542-87213538   | NOTEST | 0.515395  | 0.336728  |
| Selp     | chr1:164115263-164220274  | NOTEST | 0.282914  | 0.18478   |
| Galr2    | chr11:116280938-116283938 | NOTEST | 0.0191759 | 0.0125228 |
| Ckap4    | chr10:84526304-84533888   | OK     | 15.6878   | 10.2433   |
| Nde1     | chr16:14163274-14192923   | OK     | 7.37786   | 4.81533   |
| Neurod4  | chr10:130268151-130280240 | NOTEST | 0.0177146 | 0.0115608 |
| VeZF1    | chr11:88068278-88084729   | OK     | 8.94114   | 5.83454   |
| Ankrd33b | chr15:31291478-31367759   | OK     | 2.2353    | 1.45861   |
| Svil     | chr18:5046588-5119293     | OK     | 3.19899   | 2.08729   |
| Cyb5d2   | chr11:72777231-72795839   | OK     | 14.2958   | 9.3277    |
| Ric3     | chr7:109010879-109083324  | OK     | 25.6948   | 16.7616   |
| Galnt1   | chr18:24205343-24286816   | OK     | 17.493    | 11.4103   |
| Aco2     | chr15:81872462-81926213   | OK     | 97.7651   | 63.7674   |
| Birc3    | chr9:7848700-7873170      | OK     | 1.32441   | 0.863812  |
| Rfxank   | chr8:70130805-70139197    | OK     | 4.18963   | 2.73248   |
| Slc43a2  | chr11:75531693-75577572   | OK     | 17.9158   | 11.6819   |
| Adam10   | chr9:70679000-70780229    | OK     | 38.4709   | 25.0717   |
| Slc10a4  | chr5:73006903-73012955    | NOTEST | 0.168591  | 0.109844  |
| Cdon     | chr9:35452075-35507652    | OK     | 1.70211   | 1.10858   |
| Sik1     | chr17:31844249-31855792   | OK     | 3.46304   | 2.25536   |

|               |                           |        |           |           |
|---------------|---------------------------|--------|-----------|-----------|
| Triobp        | chr15:78947723-79011041   | OK     | 4.79782   | 3.12441   |
| Jade1         | chr3:41555733-41616864    | OK     | 3.54919   | 2.31114   |
| Pcdhb14       | chr18:36930284-37841872   | OK     | 1.62221   | 1.05627   |
| Tpgs2         | chr18:24708622-25168877   | OK     | 24.1828   | 15.7445   |
| Cbfa2t2       | chr2:154436483-154539356  | OK     | 4.78789   | 3.11669   |
| Syne2         | chr12:75818317-76110928   | OK     | 2.55649   | 1.66302   |
| Msi2          | chr11:88339381-88718267   | OK     | 16.9945   | 11.0541   |
| Shroom3       | chr5:92683434-92965759    | OK     | 5.13066   | 3.33686   |
| Csf1          | chr3:107741047-107760469  | OK     | 4.79939   | 3.12084   |
| Efnb2         | chr8:8617438-8660773      | OK     | 12.8403   | 8.33992   |
| Mgst3         | chr1:167372383-167393797  | OK     | 116.609   | 75.7295   |
| Tmem176a      | chr6:48841482-48845364    | OK     | 67.6069   | 43.904    |
| Znrf3         | chr11:5276328-5444847     | OK     | 1.28149   | 0.831991  |
| Gm14295       | chr2:176798599-176808704  | OK     | 4.80528   | 3.11971   |
| Cartpt        | chr13:99898482-99900683   | OK     | 21.4776   | 13.9415   |
| Pus3          | chr9:35559465-35570069    | OK     | 4.66754   | 3.02835   |
| Rnf149        | chr1:39551295-39577347    | OK     | 13.4471   | 8.72289   |
| Nek4          | chr14:30951487-30987401   | OK     | 4.82789   | 3.13067   |
| Tmem25        | chr9:44793778-44799216    | OK     | 52.4986   | 34.0387   |
| Fam53b        | chr7:132712083-132813196  | OK     | 7.14852   | 4.63477   |
| Tdrd6         | chr17:43615334-43630299   | NOTEST | 0.14281   | 0.0925838 |
| Supt16        | chr14:52110902-52197239   | OK     | 20.9472   | 13.5736   |
| Sec14l1       | chr11:117115171-117159268 | OK     | 25.2558   | 16.3651   |
| Nrm           | chr17:35861317-35865400   | OK     | 2.41938   | 1.56701   |
| Sh3kbp1       | chrX:159627271-159975920  | OK     | 7.30191   | 4.72829   |
| Slc25a20      | chr9:108662097-108684641  | OK     | 15.7893   | 10.2223   |
| Farp1         | chr14:121035573-121283726 | OK     | 5.91269   | 3.82475   |
| Plscr1        | chr9:92250193-92272561    | OK     | 0.886966  | 0.573673  |
| 1110006O24Rik | chr5:115631048-115631816  | NOTEST | 0.495486  | 0.320452  |
| Fndc4         | chr5:30933142-31348845    | OK     | 14.5223   | 9.38984   |
| Tmem17        | chr11:22512282-22519231   | OK     | 4.85208   | 3.1367    |
| Clstn1        | chr4:149586467-149648899  | OK     | 205.565   | 132.837   |
| Sgpp2         | chr1:78310345-78488897    | OK     | 75.2303   | 48.6069   |
| Plxna1        | chr6:89316313-89362613    | OK     | 10.3714   | 6.69875   |
| Bfsp1         | chr2:143826527-143863173  | OK     | 1.06654   | 0.688843  |
| Me1           | chr9:86581362-86701253    | OK     | 31.4796   | 20.3274   |
| Scn4a         | chr11:106318592-106349390 | OK     | 1.67915   | 1.0842    |
| Fam110a       | chr2:151969395-151980219  | OK     | 1.80163   | 1.16203   |
| AI593442      | chr9:52673031-52679780    | OK     | 30.1856   | 19.4658   |
| Lypd6         | chr2:50066428-50193569    | OK     | 2.75753   | 1.77767   |
| Tnfrsf13c     | chr15:82221743-82224336   | NOTEST | 0.214881  | 0.138441  |
| Creb3l2       | chr6:37331020-37442148    | OK     | 5.12868   | 3.30326   |
| Abca4         | chr3:122044459-122180061  | NOTEST | 0.0529131 | 0.0340714 |
| Fas           | chr19:34290658-34327770   | OK     | 1.55894   | 1.00373   |
| E430016F16Rik | chr7:78581065-78718220    | NOTEST | 0.199397  | 0.128376  |
| Clec14a       | chr12:58264719-58269258   | OK     | 2.02909   | 1.30617   |
| Syt12         | chr7:90302354-90410719    | OK     | 48.0606   | 30.9326   |
| Has3          | chr8:106870241-106882902  | OK     | 0.832025  | 0.535355  |
| Zfyve21       | chr12:111814169-111828388 | OK     | 8.94175   | 5.75149   |
| Timp4         | chr6:115134901-115282626  | NOTEST | 0.376204  | 0.241944  |
| Ascl3         | chr7:109727464-109731732  | NOTEST | 0.176119  | 0.113257  |
| Fam58b        | chr11:78750505-78751729   | OK     | 9.22222   | 5.92714   |
| Slc12a2       | chr18:57878677-57946821   | OK     | 45.4556   | 29.2053   |

|               |                           |        |           |           |
|---------------|---------------------------|--------|-----------|-----------|
| Kctd21        | chr7:97332322-97350216    | OK     | 4.27792   | 2.74835   |
| Sh3pxd2a      | chr19:47260173-47464411   | OK     | 20.2646   | 13.0146   |
| Sfxn5         | chr6:85213050-85333422    | OK     | 11.593    | 7.44398   |
| Lpp           | chr16:24392555-24992578   | OK     | 2.07056   | 1.32946   |
| Slc27a4       | chr2:29802679-29817522    | OK     | 47.4651   | 30.4739   |
| F830016B08Rik | chr18:60293379-60303016   | NOTEST | 0.0931665 | 0.0597878 |
| Shb           | chr4:45423275-45530828    | OK     | 0.88567   | 0.56823   |
| Zfa-ps        | chr10:52542319-52545739   | NOTEST | 0.110546  | 0.0708974 |
| Xkr5          | chr8:18932728-18950975    | NOTEST | 0.0513131 | 0.0328987 |
| Eno2          | chr6:124760054-124769509  | OK     | 310.035   | 198.734   |
| Cyp2u1        | chr3:131290490-131303227  | OK     | 5.00679   | 3.20913   |
| Podxl2        | chr6:88842557-88874044    | OK     | 22.4889   | 14.4133   |
| Phactr4       | chr4:132355924-132422446  | OK     | 2.90235   | 1.85925   |
| Slc25a42      | chr8:70184339-70212281    | OK     | 4.53757   | 2.90617   |
| Prr32         | chrX:45090903-45092790    | OK     | 0.951865  | 0.609356  |
| Ankrd28       | chr14:31700014-31830415   | OK     | 5.95258   | 3.80952   |
| Fnta          | chr8:25998721-26015601    | OK     | 63.4169   | 40.5642   |
| Large         | chr8:72814598-73352556    | OK     | 39.8424   | 25.4809   |
| Chl1          | chr6:103510875-103733035  | OK     | 18.7375   | 11.9756   |
| 6030408B16Rik | chr15:101293211-101297426 | NOTEST | 0.416466  | 0.265936  |
| Iqcj          | chr3:67892219-68626482    | NOTEST | 0.143983  | 0.091918  |
| Capn3         | chr2:120355308-120504919  | NOTEST | 0.106729  | 0.0681126 |
| St18          | chr1:6487230-6860940      | NOTEST | 0.0162974 | 0.0103982 |
| Rasl2-9       | chr7:5124941-5125950      | NOTEST | 0.22676   | 0.144598  |
| Cldn9         | chr17:23682583-23684026   | OK     | 2.72102   | 1.73466   |
| H6pd          | chr4:149979473-150009023  | OK     | 2.2985    | 1.46513   |
| Selenbp1      | chr3:94933082-94944758    | NOTEST | 0.765939  | 0.488225  |
| Procr         | chr2:155751216-155755478  | OK     | 2.20556   | 1.40557   |
| Eva1c         | chr16:90830858-90904885   | OK     | 7.07297   | 4.50647   |
| Amer1         | chrX:95420313-95444840    | OK     | 7.46344   | 4.75313   |
| B9d1          | chr11:61505171-61512927   | OK     | 4.84824   | 3.08591   |
| Glyctk        | chr9:106152859-106158138  | OK     | 1.70178   | 1.08297   |
| Etnk2         | chr1:133363571-133380319  | NOTEST | 0.4686    | 0.298102  |
| Ubt2          | chr11:32455371-32518709   | OK     | 15.1997   | 9.66815   |
| Uhrf1bp1      | chr17:27856506-27900040   | OK     | 3.67698   | 2.33867   |
| Zfp85         | chr13:67729261-67756838   | OK     | 1.02905   | 0.654346  |
| Cntn6         | chr6:104493043-104863405  | OK     | 2.43882   | 1.5507    |
| Cass4         | chr2:172393793-172433757  | NOTEST | 0.079125  | 0.0502986 |
| Slc12a9       | chr5:137314557-137333582  | OK     | 7.51979   | 4.77961   |
| Krt222        | chr11:99233097-99244067   | OK     | 18.339    | 11.6541   |
| Klf2          | chr8:72319061-72321654    | OK     | 13.3409   | 8.4774    |
| Drd1a         | chr13:54051182-54055658   | NOTEST | 0.0992538 | 0.0630456 |
| Tmem255b      | chr8:13435458-13461451    | NOTEST | 0.580012  | 0.368288  |
| Slc44a1       | chr4:53440412-53622478    | OK     | 71.2694   | 45.2475   |
| Got1          | chr19:43499752-43524605   | OK     | 120.935   | 76.7778   |
| Tmbim6        | chr15:99392946-99410049   | OK     | 151.87    | 96.3716   |
| Raet1c,Raet1e | chr10:22158608-22374139   | NOTEST | 0.131789  | 0.0836129 |
| Syk           | chr13:52583436-52648792   | NOTEST | 0.709739  | 0.450254  |
| Opn4          | chr14:34590617-34600142   | NOTEST | 0.282912  | 0.179444  |
| Acss2         | chr2:155518042-155562743  | OK     | 37.9424   | 24.0612   |
| Flrt1         | chr19:7056767-7198062     | OK     | 3.05657   | 1.93802   |
| Ifitm1        | chr7:140967428-140969827  | OK     | 2.16911   | 1.37479   |
| Enpp2         | chr15:54838678-54920146   | OK     | 7.59616   | 4.81336   |



|               |                           |        |           |           |
|---------------|---------------------------|--------|-----------|-----------|
| Ccdc122       | chr14:77036771-77112204   | OK     | 3.50887   | 2.22234   |
| Adam2         | chr14:66027328-66077733   | NOTEST | 0.0293055 | 0.0185484 |
| 4930413G21Rik | chr7:122969057-122970459  | NOTEST | 0.0286099 | 0.0181077 |
| Srgap2        | chr1:131285250-131527361  | OK     | 7.73484   | 4.89411   |
| Sox7          | chr14:63943705-63950732   | NOTEST | 0.691329  | 0.437423  |
| Ifi44         | chr3:151730922-151749959  | OK     | 0.948988  | 0.600242  |
| Pcdhga10      | chr18:36930284-37841872   | OK     | 2.23425   | 1.41309   |
| Kcng1         | chr2:168261697-168269331  | OK     | 1.23824   | 0.783142  |
| Fgf5          | chr5:98254183-98277033    | OK     | 0.974626  | 0.616411  |
| Tecr          | chr8:83571697-83594491    | OK     | 329.347   | 208.213   |
| Vkorc1        | chr7:127893062-127895617  | OK     | 32.3424   | 20.4388   |
| Mettl21a      | chr1:64606479-64617168    | OK     | 7.01645   | 4.43401   |
| Lancl1        | chr1:67000516-67038872    | OK     | 38.3511   | 24.2304   |
| Abcg1         | chr17:31057693-31117981   | OK     | 17.8968   | 11.3032   |
| Atp5c1        | chr2:10056030-10080510    | OK     | 150.965   | 95.3177   |
| Slc12a1       | chr2:125152599-125230001  | NOTEST | 0.0702116 | 0.0443162 |
| Inca1         | chr11:70688360-70700155   | NOTEST | 0.596483  | 0.37645   |
| Tmem181b-ps   | chr17:6439001-6450994     | OK     | 3.12704   | 1.9733    |
| Atp6v1g2      | chr17:35236595-35238768   | OK     | 78.4557   | 49.4754   |
| Gm16675       | chr8:46730969-46739515    | NOTEST | 0.170372  | 0.107418  |
| Sntg2         | chr12:30174556-30373375   | NOTEST | 0.187895  | 0.118447  |
| Ndufa12       | chr10:94199008-94220948   | OK     | 23.8771   | 15.0495   |
| Bhlhb9        | chrX:135885850-135891081  | OK     | 17.3999   | 10.9644   |
| Fam195a       | chr17:25863697-25868738   | OK     | 3.18007   | 2.00264   |
| Mtx3          | chr13:92844786-92858230   | OK     | 12.1656   | 7.66098   |
| Abl2          | chr1:156558786-156649619  | OK     | 7.1971    | 4.53197   |
| Grtp1         | chr8:13176868-13200624    | OK     | 1.39033   | 0.875297  |
| Il1rapl1      | chrX:86747241-88115623    | OK     | 0.978861  | 0.616182  |
| Six4          | chr12:73100258-73113245   | OK     | 12.0783   | 7.59412   |
| Pcdhgb1       | chr18:36930284-37841872   | OK     | 2.34056   | 1.47152   |
| Fam20b        | chr1:156678570-156718910  | OK     | 35.7371   | 22.4571   |
| Ctgf          | chr10:24595441-24598682   | OK     | 8.67083   | 5.44751   |
| Engase        | chr11:118476959-118489198 | OK     | 3.57058   | 2.2431    |
| Xlr3b         | chrX:73192178-73202930    | OK     | 3.20402   | 2.01268   |
| Mpi           | chr9:57544267-57552752    | OK     | 32.6716   | 20.5216   |
| Gm12250       | chr11:58183842-58190198   | NOTEST | 0.258448  | 0.162311  |
| Gm16712       | chr17:55952622-55967951   | NOTEST | 0.0699675 | 0.043941  |
| Tgtp2         | chr11:49037659-49135387   | OK     | 0.850938  | 0.534053  |
| Dip2a         | chr10:76263048-76345291   | OK     | 10.9985   | 6.90161   |
| Casp7         | chr19:56397128-56442343   | OK     | 1.44521   | 0.906552  |
| Itga5         | chr15:103344285-103366748 | OK     | 1.25518   | 0.787304  |
| Gm7120        | chr13:119487256-119610459 | OK     | 6.58435   | 4.1295    |
| Cxcl1         | chr5:90891244-90893115    | OK     | 1.86222   | 1.16771   |
| Wisp3         | chr10:39134022-39163794   | NOTEST | 0.102303  | 0.0641437 |
| Atg9b         | chr5:24364818-24392143    | OK     | 0.880804  | 0.552085  |
| Pdgfb         | chr15:79995875-80014808   | OK     | 4.50659   | 2.8228    |
| Agap1         | chr1:89454810-89895282    | OK     | 11.4998   | 7.20264   |
| Ccdc78        | chr17:25786579-25792394   | NOTEST | 0.0718223 | 0.0449842 |
| Zfp30         | chr7:29784789-29794540    | OK     | 1.7264    | 1.08106   |
| Txndc16       | chr14:45134447-45219394   | OK     | 15.854    | 9.92351   |
| Gm1653        | chr3:149274736-149279980  | NOTEST | 0.43393   | 0.271582  |
| Foxo4         | chrX:101254527-101260873  | OK     | 6.57925   | 4.11678   |
| Syne3         | chr12:104929932-105009809 | OK     | 2.08671   | 1.30525   |

|                |                           |        |            |            |
|----------------|---------------------------|--------|------------|------------|
| Sorl1          | chr9:41968488-42124289    | OK     | 57.6161    | 36.0249    |
| 4632428N05Rik  | chr10:60302749-60696490   | OK     | 1.30312    | 0.814197   |
| Siae           | chr9:37613846-37648318    | OK     | 10.9902    | 6.8647     |
| Habp4          | chr13:64161865-64186537   | OK     | 61.4006    | 38.3502    |
| Gm17757,Gm1885 | chr7:106156535-106215340  | LOWDAT | 0.00582669 | 0.00363915 |
| Tubgcp4        | chr2:121171167-121271407  | OK     | 22.2198    | 13.874     |
| Rgag1          | chrX:143099593-143104335  | OK     | 1.79328    | 1.11922    |
| Pdhb           | chr14:8165990-8172992     | OK     | 73.899     | 46.1105    |
| S100a13        | chr3:90514434-90524581    | OK     | 83.3079    | 51.97      |
| Clic5          | chr17:44188571-44280168   | OK     | 2.18507    | 1.36264    |
| Lcp1           | chr14:75004109-75388146   | OK     | 61.0843    | 38.0893    |
| Trip10         | chr17:57249450-57263697   | OK     | 12.473     | 7.77463    |
| Gm5141         | chr13:62772199-62785808   | NOTEST | 0.704014   | 0.438801   |
| Lrrn4cl        | chr19:8850784-8853909     | OK     | 1.48541    | 0.925596   |
| Dsel           | chr1:111858701-111864918  | OK     | 7.22615    | 4.50265    |
| Rgl3           | chr9:21971526-21989453    | OK     | 1.02596    | 0.639266   |
| Asah1          | chr8:41340642-41374697    | OK     | 41.777     | 26.023     |
| Ninj1          | chr13:49187546-49196251   | OK     | 19.7469    | 12.2986    |
| Rnf208         | chr2:25242928-25244261    | OK     | 46.5738    | 28.995     |
| Xk             | chrX:9272783-9313245      | OK     | 6.70342    | 4.17202    |
| Chga           | chr12:102554968-102565027 | OK     | 106.543    | 66.2938    |
| Tube1          | chr10:39134022-39163794   | OK     | 1.37322    | 0.854406   |
| Slc26a10       | chr10:127172425-127180645 | NOTEST | 0.210958   | 0.131227   |
| Hyal3          | chr9:107580169-107587359  | OK     | 1.43722    | 0.89401    |
| Rspo3          | chr10:29453106-29535867   | NOTEST | 0.336744   | 0.209438   |
| Dner           | chr1:84369838-84696221    | OK     | 58.4211    | 36.311     |
| Xylb           | chr9:119357380-119393797  | OK     | 0.781048   | 0.485356   |
| Tmem184a       | chr5:139804951-139814283  | NOTEST | 0.0842051  | 0.0523214  |
| Cdh18          | chr15:23036462-23474418   | OK     | 12.0425    | 7.48182    |
| Nrg1           | chr8:31818027-31918203    | OK     | 34.8248    | 21.6349    |
| Slc46a3        | chr5:147878440-147894802  | OK     | 1.66897    | 1.03624    |
| Cadm3          | chr1:173334253-173367695  | OK     | 197.342    | 122.513    |
| Zfp870         | chr17:32879220-32891603   | OK     | 1.55298    | 0.964087   |
| Dnah1          | chr14:31260374-31323896   | NOTEST | 0.0442144  | 0.0274474  |
| Cox5a          | chr9:57521231-57532426    | OK     | 325.444    | 202.015    |
| 4921531C22Rik  | chr2:179976852-179979013  | OK     | 0.865207   | 0.53699    |
| Lrrc24         | chr15:76715275-76723845   | OK     | 7.00572    | 4.34691    |
| Gm12185        | chr11:48904655-48927182   | NOTEST | 0.058771   | 0.0364524  |
| Tlr2           | chr3:83836271-83841608    | NOTEST | 0.455063   | 0.282232   |
| Ccbl2          | chr3:142701079-142744910  | OK     | 3.49626    | 2.16795    |
| Zfp398         | chr6:47835660-47868257    | OK     | 3.06709    | 1.90181    |
| Osbp2          | chr11:3703730-3863903     | OK     | 6.32977    | 3.9247     |
| Mboat1         | chr13:30136489-30246694   | OK     | 4.19507    | 2.60097    |
| Gsg1l          | chr7:125878418-126082411  | OK     | 1.6347     | 1.01314    |
| Enpp3          | chr10:24773813-24836195   | NOTEST | 0.56069    | 0.347405   |
| Rnf26          | chr9:44110780-44113051    | OK     | 15.9474    | 9.87585    |
| Dok5           | chr2:170731806-170879775  | OK     | 5.38984    | 3.33751    |
| Dnajc25        | chr4:59003192-59023398    | OK     | 1.78429    | 1.10472    |
| Elk4           | chr1:132007604-132025684  | OK     | 4.57537    | 2.83204    |
| Hsd17b7        | chr1:169949536-169969205  | OK     | 24.0389    | 14.8747    |
| Art4           | chr6:136848450-136857600  | OK     | 2.03346    | 1.25796    |
| Npr1           | chr3:90450591-90465866    | OK     | 1.60388    | 0.991315   |
| Abcg4          | chr9:44273189-44288244    | OK     | 19.2357    | 11.8843    |

|               |                           |        |           |           |
|---------------|---------------------------|--------|-----------|-----------|
| Lrrc1         | chr9:77430822-77544852    | OK     | 1.93975   | 1.19825   |
| Ang           | chr14:51091076-51106151   | OK     | 1.2453    | 0.769198  |
| Hapln3        | chr7:79117026-79131018    | OK     | 1.65113   | 1.01945   |
| Pram1         | chr17:33638055-33645706   | NOTEST | 0.137405  | 0.0848371 |
| E2f6          | chr12:16810964-16826752   | OK     | 25.8778   | 15.9733   |
| Fat4          | chr3:38886939-39011983    | OK     | 1.35499   | 0.836092  |
| Prkaca        | chr8:83972977-83996442    | OK     | 168.203   | 103.766   |
| Epb4.1l3      | chr17:69156809-69289987   | OK     | 255.603   | 157.643   |
| Slc25a10      | chr11:120491836-120501161 | OK     | 7.3031    | 4.5037    |
| Gm6537        | chr7:28756173-28766524    | NOTEST | 0.70102   | 0.432273  |
| Ldb3          | chr14:34526698-34588681   | OK     | 5.23159   | 3.22543   |
| Hist1h3d      | chr13:23575762-23576266   | NOTEST | 0.412702  | 0.254419  |
| Ggcx          | chr6:72414307-72431106    | OK     | 5.16515   | 3.1829    |
| Caps2         | chr10:112165675-112216555 | NOTEST | 0.026042  | 0.016038  |
| Sez6l2        | chr7:126950534-126970606  | OK     | 58.778    | 36.1963   |
| Hist1h3f      | chr13:23544051-23544954   | NOTEST | 0.0951495 | 0.0585932 |
| Arhgap42      | chr9:8994952-9260885      | OK     | 4.14299   | 2.55097   |
| Gm4980        | chr7:99624066-99627103    | OK     | 24.5778   | 15.1287   |
| Cd200         | chr16:45382134-45409053   | OK     | 43.6974   | 26.8961   |
| Gm7173        | chrX:79482567-79517285    | NOTEST | 0.0769604 | 0.0473666 |
| Fam49a        | chr12:12262138-12392475   | OK     | 4.02478   | 2.47622   |
| Mog           | chr17:37010739-37023398   | NOTEST | 0.0469943 | 0.0289068 |
| Npy           | chr6:49822728-49829505    | NOTEST | 0.316341  | 0.194525  |
| Cabp1         | chr5:115168690-115186121  | OK     | 127.522   | 78.4129   |
| Smpd1         | chr7:105554359-105558389  | OK     | 43.019    | 26.4507   |
| Flna          | chrX:74223460-74246534    | OK     | 16.7307   | 10.2864   |
| Rgag4         | chrX:101849384-102092055  | OK     | 2.43687   | 1.49806   |
| Card9         | chr2:26352311-26359547    | NOTEST | 0.271837  | 0.167105  |
| Zc2hc1c       | chr12:85288590-85299358   | NOTEST | 0.302624  | 0.185913  |
| Nradd         | chr9:110621134-110624393  | OK     | 1.42811   | 0.877296  |
| Ccdc85c       | chr12:108206344-108275417 | OK     | 2.94842   | 1.81104   |
| Wfikkn1       | chr17:25877627-25880858   | NOTEST | 0.291114  | 0.178779  |
| Pgm5          | chr19:24674007-24861842   | OK     | 0.773506  | 0.474926  |
| Bak1          | chr17:27018034-27036378   | OK     | 6.86878   | 4.21565   |
| Tbx3          | chr5:119670861-119684724  | OK     | 7.61028   | 4.67042   |
| Fam101b       | chr11:76019194-76027782   | OK     | 7.94659   | 4.87682   |
| Smim24        | chr10:81393063-81395079   | NOTEST | 0.241793  | 0.148323  |
| Ihh           | chr1:74945317-74951651    | NOTEST | 0.0396856 | 0.0243306 |
| Phf11d        | chr14:59347406-59365490   | NOTEST | 0.533876  | 0.3273    |
| Napepld       | chr5:21662902-21701345    | OK     | 2.97883   | 1.82576   |
| Lym5          | chr6:145211133-145216542  | OK     | 20.8659   | 12.7887   |
| Muc1          | chr3:89229055-89233381    | NOTEST | 0.139293  | 0.0853554 |
| Pard6b        | chr2:168081003-168101203  | OK     | 2.12      | 1.29901   |
| Iglon5        | chr7:43472906-43490023    | OK     | 13.3418   | 8.17354   |
| Mmgt2         | chr11:62648663-62666359   | OK     | 3.87859   | 2.37556   |
| Lyve1         | chr7:110850606-110862953  | OK     | 2.20297   | 1.34807   |
| 4930528A17Rik | chr4:21846326-21876475    | NOTEST | 0.371881  | 0.227493  |
| Gm20753       | chr1:106152624-106171524  | NOTEST | 0.107934  | 0.066018  |
| Sorbs1        | chr19:40292039-40513812   | OK     | 58.1062   | 35.54     |
| Ptpn4         | chr1:119658092-119837071  | OK     | 2.36712   | 1.44718   |
| Dpf3          | chr12:83213750-83487736   | OK     | 3.46624   | 2.11808   |
| Klhl6         | chr16:19946491-19983049   | NOTEST | 0.792914  | 0.484376  |
| Sh3d19        | chr3:86084433-86130521    | OK     | 9.43115   | 5.76029   |

|               |                            |        |           |           |
|---------------|----------------------------|--------|-----------|-----------|
| Sptbn2        | chr19:4711222-4752352      | OK     | 30.0605   | 18.359    |
| 5730480H06Rik | chr5:48389502-49285659     | NOTEST | 0.264716  | 0.161598  |
| Klhl33        | chr14:50891388-50893255    | OK     | 2.55992   | 1.56255   |
| Prkrir        | chr7:98703362-98718061     | OK     | 14.7396   | 8.99514   |
| Napsa         | chr7:44572444-44586846     | NOTEST | 0.403192  | 0.245932  |
| Fes           | chr7:80377757-80387946     | OK     | 0.838665  | 0.511122  |
| Shroom4       | chrX:6400144-6633717       | OK     | 1.06622   | 0.649699  |
| Pip4k2a       | chr2:18842255-18998121     | OK     | 37.8318   | 23.0483   |
| Cbfb          | chr8:105170673-105217988   | OK     | 125.799   | 76.6224   |
| Bambi         | chr18:3507956-3516404      | OK     | 2.78276   | 1.69487   |
| Entpd6        | chr2:150749080-150771674   | OK     | 11.6602   | 7.10156   |
| Tc2n          | chr12:101645445-101718523  | NOTEST | 0.471727  | 0.287282  |
| Rapgef2       | chr3:79062528-79145875     | OK     | 9.24585   | 5.63009   |
| Dusp16        | chr6:134715467-134792628   | OK     | 4.09703   | 2.49413   |
| Atp1a1        | chr3:101576218-101604707   | OK     | 1087.2    | 661.802   |
| Epb4.1l1      | chr2:156420908-156543214   | OK     | 42.155    | 25.6242   |
| Ppp2r5a       | chr1:191325964-191397041   | OK     | 4.15978   | 2.52837   |
| Klhl40        | chr9:121777606-121783819   | NOTEST | 0.291317  | 0.176988  |
| Gm2115        | chr7:84528953-84578339     | OK     | 26.0376   | 15.8175   |
| 4931406P16Rik | chr7:34236713-34285609     | OK     | 7.54893   | 4.58514   |
| Hrsp12        | chr15:34484021-34495246    | OK     | 32.3336   | 19.6369   |
| Prlr          | chr15:10177237-10349180    | OK     | 0.88371   | 0.536528  |
| Itm2b         | chr14:73362231-73385271    | OK     | 451.969   | 274.34    |
| Tmem123       | chr9:7764076-7794332       | OK     | 8.12963   | 4.93359   |
| Gtdc1         | chr2:44564411-44861622     | OK     | 8.96559   | 5.44      |
| Kbtbd12       | chr6:88547721-88627448     | NOTEST | 0.311984  | 0.189295  |
| Kcnt2         | chr1:140246256-140656402   | OK     | 3.03262   | 1.83976   |
| St3gal5       | chr6:72097607-72154570     | OK     | 24.3513   | 14.7637   |
| Alg9          | chr9:50775224-50843639     | OK     | 6.00503   | 3.64045   |
| Mid1          | chrX:169685198-169990797   | NOTEST | 0.764447  | 0.463401  |
| Ss18          | chr18:14625628-14682914    | OK     | 4.94417   | 2.99701   |
| Ripk1         | chr13:34002873-34035170    | OK     | 1.80715   | 1.09542   |
| Dsp           | chr13:38151293-38198577    | NOTEST | 0.0503071 | 0.0304924 |
| Cth           | chr3:157894247-157925063   | NOTEST | 0.2563    | 0.155341  |
| Fbxo7         | chr10:86021928-86048328    | OK     | 17.5642   | 10.6414   |
| Cdkl5         | chrX:160768012-160994681   | OK     | 1.45188   | 0.879135  |
| Dscaml1       | chr9:45416625-45753713     | NOTEST | 0.434226  | 0.262925  |
| Lgalsl        | chr11:20823354-20831108    | OK     | 14.9075   | 9.02621   |
| Cyp2c44       | chr19:44005021-44029247    | NOTEST | 0.0408156 | 0.0247056 |
| Efhd2         | chr4:141858141-141874920   | OK     | 19.4762   | 11.7867   |
| Fblim1        | chr4:141576061-141606052   | NOTEST | 0.749901  | 0.453267  |
| A730056A06Rik | chr7:73310379-73419899     | NOTEST | 0.283987  | 0.171605  |
| Eid1          | chr2:125627446-125724148   | OK     | 37.715    | 22.7892   |
| Tsc22d4       | chr5:137745968-137768453   | OK     | 23.3848   | 14.1259   |
| Fkbp14        | chr6:54577604-54593128     | OK     | 9.9556    | 6.01105   |
| Art5          | chr7:102096878-102100229   | NOTEST | 0.160868  | 0.0970709 |
| Ttc16         | chr2:32757025-32775633     | NOTEST | 0.103271  | 0.062298  |
| Fbxl7         | chr15:26540458-26895564    | OK     | 1.34038   | 0.808481  |
| Gm13298       | chr4_GL456350_random:14407 | NOTEST | 0.189058  | 0.114012  |
| Rgs2          | chr1:143999337-144004149   | OK     | 6.10268   | 3.68023   |
| Tspan3        | chr9:56135883-56161070     | OK     | 188.015   | 113.339   |
| Igf2r         | chr17:12682405-12868143    | OK     | 8.23682   | 4.9649    |
| Zfp473        | chr7:44731481-44748617     | NOTEST | 0.223363  | 0.134352  |

|               |                           |        |            |            |
|---------------|---------------------------|--------|------------|------------|
| Cdk2          | chr10:128697938-128705051 | OK     | 1.39416    | 0.8384     |
| Gfm1          | chr3:67430114-67475068    | OK     | 34.3056    | 20.6186    |
| Vwa8          | chr14:78849177-79202310   | OK     | 15.2364    | 9.15432    |
| Mapkbp1       | chr2:119972698-120027403  | OK     | 2.49575    | 1.4991     |
| Arhgef5       | chr6:43265643-43289320    | NOTEST | 0.550309   | 0.330539   |
| Mir8112       | chr6:71271670-71271801    | NOTEST | 11.7759    | 7.07252    |
| Vmn1r181      | chr7:23983960-23985048    | NOTEST | 0.203899   | 0.122398   |
| Ppargc1b      | chr18:61298135-61400431   | OK     | 1.99899    | 1.19919    |
| Srgn          | chr10:62494427-62507755   | OK     | 14.8104    | 8.88452    |
| Phb           | chr11:95666956-95680773   | OK     | 16.2794    | 9.75431    |
| Cdc26         | chr4:62394588-62408623    | OK     | 17.6594    | 10.5806    |
| Bcas1         | chr2:170346990-170427845  | OK     | 11.0806    | 6.63673    |
| Ptgr1         | chr4:58965589-58987078    | OK     | 5.85155    | 3.50473    |
| Il20rb        | chr9:100457718-100486473  | NOTEST | 0.219457   | 0.131406   |
| Slitrk5       | chr14:111675114-111683135 | OK     | 9.40817    | 5.63184    |
| Slnf5         | chr11:82911252-82964850   | OK     | 3.91073    | 2.34054    |
| Atp8b4        | chr2:126320972-126491553  | NOTEST | 0.0993148  | 0.059431   |
| Gm18853       | chr7:106156535-106215340  | NOTEST | 0.00270563 | 0.00161797 |
| Itga11        | chr9:62677854-62783979    | OK     | 1.34075    | 0.801752   |
| Kcnq2         | chr2:181075578-181135225  | OK     | 24.9988    | 14.9445    |
| Net1          | chr13:3882017-3918220     | OK     | 8.17102    | 4.88365    |
| Unc93b1       | chr19:3935185-3949340     | OK     | 4.15282    | 2.48003    |
| Cdh24         | chr14:54631991-54641364   | OK     | 0.833831   | 0.497937   |
| Pigx          | chr16:32084415-32099727   | OK     | 7.38508    | 4.4101     |
| Kctd12b       | chrX:153685153-153696280  | OK     | 1.24751    | 0.744813   |
| Oasl1         | chr5:114923239-114937911  | OK     | 1.07112    | 0.63949    |
| Agt           | chr8:124556586-124569707  | OK     | 4.02663    | 2.40063    |
| Fxyd5         | chr7:31032722-31042331    | OK     | 10.7294    | 6.39515    |
| Tmx2          | chr2:84671310-84715164    | OK     | 82.0674    | 48.9136    |
| Rnft2         | chr5:118190735-118245025  | OK     | 10.6657    | 6.34802    |
| Auh           | chr13:52835109-52929677   | OK     | 62.2905    | 37.0661    |
| Vamp3         | chr4:151047304-151057953  | OK     | 16.1245    | 9.59193    |
| Ccdc125       | chr13:100669480-100730942 | NOTEST | 0.129575   | 0.0770602  |
| Nxpe3         | chr16:55839952-55895279   | OK     | 12.4913    | 7.42637    |
| Col6a4        | chr9:105990317-106096691  | NOTEST | 0.0330663  | 0.0196517  |
| Cdc42ep2      | chr19:5917555-5924816     | OK     | 19.2858    | 11.4586    |
| H60b          | chr10:22158608-22374139   | NOTEST | 0.460024   | 0.273196   |
| Gsdmd         | chr15:75862338-75867404   | OK     | 1.09738    | 0.651535   |
| Aldh1l2       | chr10:83487446-83534140   | OK     | 1.01015    | 0.5995     |
| Galk1         | chr11:115974724-116012719 | OK     | 5.84342    | 3.46745    |
| Gid4          | chr11:60417144-60445277   | OK     | 12.5474    | 7.44505    |
| Mgrn1         | chr16:4886099-4941020     | OK     | 18.4536    | 10.9463    |
| Ntrk1         | chr3:87778243-87795162    | OK     | 146.787    | 87.0517    |
| A630033H2ORik | chrX:107148926-107173661  | NOTEST | 0.115755   | 0.0686232  |
| Foxo6         | chr4:120267077-120287261  | OK     | 1.57701    | 0.934881   |
| Hhip          | chr8:79965850-80058008    | NOTEST | 0.359245   | 0.212947   |
| Slc6a6        | chr6:91684066-91759063    | OK     | 7.65895    | 4.53823    |
| Dact2         | chr17:14195229-14203831   | OK     | 1.42197    | 0.842195   |
| Rcbtb1        | chr14:59201227-59237265   | OK     | 23.8342    | 14.0994    |
| Rab11fip4     | chr11:79591211-79694012   | OK     | 24.1487    | 14.2842    |
| Kat2b         | chr17:53566970-53672721   | OK     | 9.92688    | 5.87114    |
| Prdx4         | chrX:155323919-155338454  | OK     | 28.1236    | 16.6331    |
| Lrrc20        | chr10:61475832-61582228   | OK     | 11.9572    | 7.0714     |



|               |                           |        |           |           |
|---------------|---------------------------|--------|-----------|-----------|
| Mfsd2a        | chr4:122946850-122961188  | OK     | 18.5486   | 10.9672   |
| A630007B06Rik | chr19:56790962-56813683   | OK     | 13.1814   | 7.7913    |
| Pbx4          | chr8:69832703-69872292    | OK     | 2.08364   | 1.23129   |
| Cnst          | chr1:179546528-179627473  | OK     | 56.9871   | 33.674    |
| Myof          | chr19:37899035-38043577   | OK     | 1.21363   | 0.717102  |
| 4930425010Rik | chr3:138711534-138726984  | NOTEST | 0.0556791 | 0.0328606 |
| Prps2         | chrX:167346332-167382699  | OK     | 10.5887   | 6.24918   |
| Tcf4          | chr18:69344491-69687967   | OK     | 7.52204   | 4.43862   |
| Kctd14        | chr7:97451333-97459557    | NOTEST | 0.646555  | 0.3815    |
| Ptges3l       | chr11:101418813-101435665 | NOTEST | 0.314078  | 0.185286  |
| Smad6         | chr9:63953075-64022059    | OK     | 1.02416   | 0.603985  |
| Zbp1          | chr2:173206611-173218922  | NOTEST | 0.605196  | 0.356848  |
| Ppif          | chr14:25694169-25701282   | OK     | 13.5474   | 7.98546   |
| Cd79a         | chr7:24897510-24902197    | NOTEST | 0.577315  | 0.340246  |
| Ufsp1         | chr5:137294668-137295664  | OK     | 8.24736   | 4.86008   |
| Fgfr3         | chr5:33721723-33737068    | NOTEST | 0.506458  | 0.298168  |
| Crtap         | chr9:114368323-114390712  | OK     | 8.13491   | 4.78603   |
| Agtr2         | chrX:21484623-21488833    | NOTEST | 0.203579  | 0.119718  |
| Cyba          | chr8:122424770-122432940  | OK     | 4.8382    | 2.8442    |
| Otop3         | chr11:115334733-115346926 | NOTEST | 0.147762  | 0.0868163 |
| 4930570G19Rik | chr3:156546752-156561746  | NOTEST | 0.429377  | 0.252244  |
| Lrrk1         | chr7:66258746-66388341    | OK     | 1.81779   | 1.06739   |
| Hsd12         | chr4:59581562-59618694    | OK     | 41.6312   | 24.444    |
| 2310010J17Rik | chr7:90124835-90129936    | OK     | 1.03063   | 0.604978  |
| Rftn1         | chr17:49993306-50190497   | NOTEST | 0.691445  | 0.405679  |
| Gpr125        | chr5:49959950-50058996    | OK     | 10.3094   | 6.0478    |
| 0610043K17Rik | chr4:101346523-101399185  | NOTEST | 0.176352  | 0.103428  |
| Arhgap44      | chr11:64979034-65162961   | OK     | 37.2689   | 21.8575   |
| Anp32a        | chr9:62341342-62378805    | OK     | 26.8296   | 15.731    |
| Arhgap25      | chr6:87458544-87533259    | OK     | 1.54062   | 0.902852  |
| 1500009C09Rik | chr15:82252396-82260753   | NOTEST | 0.212319  | 0.124419  |
| Ms4a4c        | chr19:11407660-11427246   | NOTEST | 0.0438353 | 0.0256674 |
| Sptb          | chr12:76580487-76710547   | OK     | 18.7372   | 10.9672   |
| Gprin3        | chr6:59352460-59426290    | NOTEST | 0.614014  | 0.359359  |
| Ndc1          | chr4:107367783-107414338  | OK     | 9.29572   | 5.44035   |
| Tcam1         | chr11:106276671-106288143 | NOTEST | 0.241935  | 0.141559  |
| Lepre1        | chr4:119232914-119248977  | OK     | 3.0119    | 1.7621    |
| Tmem64        | chr4:15265819-15286753    | OK     | 16.6794   | 9.75631   |
| Mfsd7c        | chr12:85746538-85813585   | OK     | 1.30506   | 0.763051  |
| Nsun4         | chr4:116031769-116053876  | OK     | 7.53558   | 4.40541   |
| Pcdhb15       | chr18:36930284-37841872   | OK     | 1.00201   | 0.58543   |
| 9130008F23Rik | chr17:40875481-40880558   | NOTEST | 0.281208  | 0.164292  |
| Nxt2          | chrX:142226769-142239700  | OK     | 16.0641   | 9.38502   |
| Rho           | chr6:115931926-115938830  | OK     | 0.969397  | 0.566092  |
| Myo15         | chr11:60469338-60528368   | NOTEST | 0.311764  | 0.182049  |
| Ttyh2         | chr11:114344525-114757886 | OK     | 5.57206   | 3.25361   |
| Atp2a2        | chr5:122453512-122502225  | OK     | 120.303   | 70.233    |
| Plcd1         | chr9:119071527-119093496  | OK     | 4.43446   | 2.58797   |
| Phldb1        | chr9:44686307-44735198    | OK     | 10.6933   | 6.23837   |
| Rapgef4       | chr2:71981214-72257474    | OK     | 50.5687   | 29.5007   |
| Endog         | chr2:30171523-30178459    | OK     | 9.71398   | 5.66607   |
| Ttc21b        | chr2:66184326-66256617    | OK     | 3.91734   | 2.28445   |
| Inf2          | chr12:112588783-112615557 | OK     | 14.5271   | 8.47031   |

|               |                           |        |           |            |
|---------------|---------------------------|--------|-----------|------------|
| Rprml         | chr11:103649508-103650580 | NOTEST | 0.0383797 | 0.0223672  |
| Chrm3         | chr13:9876612-10360803    | OK     | 1.04432   | 0.60859    |
| Fut10         | chr8:31187330-31261924    | OK     | 2.6276    | 1.53113    |
| Fut8          | chr12:77238103-77475996   | OK     | 28.7673   | 16.7629    |
| Dnah7b        | chr1:46066737-46373550    | NOTEST | 0.376811  | 0.219516   |
| C1qtnf9       | chr14:60768133-60780869   | NOTEST | 0.529276  | 0.308283   |
| Tango6        | chr8:106683067-106851439  | OK     | 2.15604   | 1.25571    |
| Arhgef2       | chr3:88616206-88648052    | OK     | 4.18902   | 2.43951    |
| Klhl36        | chr8:119862304-119876989  | OK     | 1.85002   | 1.07719    |
| A430035B10Rik | chr6:8507058-8509161      | OK     | 0.901089  | 0.524533   |
| Lrrd1         | chr5:3845172-3866596      | NOTEST | 0.0136211 | 0.00792785 |
| Rhbd2         | chr11:116598165-116627019 | OK     | 2.4551    | 1.42833    |
| Rap1gap       | chr4:137664725-137729861  | OK     | 34.8279   | 20.2535    |
| Zbtb12        | chr17:34894558-34896844   | OK     | 1.2053    | 0.70086    |
| Vamp5         | chr6:72368048-72380468    | OK     | 2.87296   | 1.67022    |
| Ghsr          | chr3:27371350-27378010    | NOTEST | 0.042517  | 0.0247171  |
| Sp1           | chr15:102406315-102436404 | OK     | 5.90861   | 3.43487    |
| Nr3c1         | chr18:39410544-39487245   | OK     | 12.1163   | 7.04338    |
| Arhgap5       | chr12:52516076-52567851   | OK     | 14.6771   | 8.52884    |
| Ube2cbp       | chr9:86307233-86464916    | NOTEST | 0.666094  | 0.38704    |
| Dlg1          | chr16:31663442-31873356   | OK     | 6.56169   | 3.81057    |
| Kcnp3         | chr2:127456497-127522094  | OK     | 85.5713   | 49.6871    |
| Hist1h4i      | chr13:22040959-22041362   | OK     | 1.84839   | 1.07297    |
| Slc8b1        | chr5:120511191-120534024  | OK     | 4.71667   | 2.73705    |
| Etv6          | chr6:134035706-134270147  | OK     | 5.58357   | 3.23961    |
| Spsb4         | chr9:96943481-97018355    | OK     | 5.25271   | 3.04721    |
| Mpp3          | chr11:101999652-102026955 | OK     | 1.78284   | 1.03425    |
| Ephx1         | chr1:180989555-181017495  | OK     | 66.9222   | 38.8092    |
| Zfp219        | chr14:51984832-52020733   | OK     | 10.7308   | 6.22287    |
| Endou         | chr15:97711018-97731405   | NOTEST | 0.238139  | 0.138079   |
| Mamstr        | chr7:45639976-45645768    | NOTEST | 0.708295  | 0.410268   |
| Als2cr12      | chr1:58658119-58695989    | NOTEST | 0.525126  | 0.30414    |
| Mirlet7bhg    | chr15:85703772-85707524   | NOTEST | 0.323519  | 0.187262   |
| Mgat5         | chr1:127204985-127482972  | OK     | 9.21118   | 5.32755    |
| Diap2         | chrX:129749741-130465833  | OK     | 4.16941   | 2.41141    |
| Mbp           | chr18:82475122-82585637   | OK     | 593.438   | 343.218    |
| Rmdn2         | chr17:79614899-79682152   | OK     | 8.13346   | 4.69736    |
| Pyhin1        | chr1:173630858-173647928  | NOTEST | 0.193375  | 0.111681   |
| Fam210a       | chr18:68260184-68300333   | OK     | 6.29907   | 3.63618    |
| Gm10033       | chr8:69371024-69395544    | OK     | 3.93236   | 2.265      |
| Klhl25        | chr7:75848337-75874130    | OK     | 4.57344   | 2.63157    |
| Cd59b         | chr2:104071009-104084957  | NOTEST | 0.38321   | 0.220462   |
| Micall2       | chr5:139706692-139736333  | OK     | 2.87261   | 1.65245    |
| Cd38          | chr5:43868826-43912374    | OK     | 2.19819   | 1.26429    |
| Serpine1      | chr5:137061505-137072272  | NOTEST | 0.655405  | 0.376843   |
| Dagla         | chr19:10245264-10304877   | OK     | 6.91777   | 3.97607    |
| Depdc5        | chr5:32863720-32994233    | OK     | 17.2622   | 9.91511    |
| Fzd3          | chr14:65192440-65262463   | OK     | 7.08949   | 4.07173    |
| Prob1         | chr18:35650350-35655199   | NOTEST | 0.755238  | 0.433752   |
| Sccpdh        | chr1:179668230-179687184  | OK     | 47.5252   | 27.279     |
| Rbm24         | chr13:46418299-46431099   | NOTEST | 0.141951  | 0.0814395  |
| 9530068E07Rik | chr11:52396427-52408723   | OK     | 79.2449   | 45.4378    |
| Pnlip         | chr19:58670364-58681788   | OK     | 1.64273   | 0.941331   |

|               |                           |        |           |            |
|---------------|---------------------------|--------|-----------|------------|
| Hist1h2af     | chr13:23533910-23534378   | NOTEST | 0.139625  | 0.0799904  |
| Vmn2r57       | chr7:41399731-41448641    | NOTEST | 0.0583886 | 0.0334443  |
| Agpat2        | chr2:26593056-26604417    | OK     | 2.18231   | 1.24848    |
| Trim30d       | chr7:104470013-104507849  | NOTEST | 0.354873  | 0.20301    |
| Neat1         | chr19:5842301-5845478     | OK     | 26.3253   | 15.0584    |
| Cflar         | chr1:58711507-58759203    | OK     | 8.27585   | 4.73366    |
| Mdh1          | chr11:21556691-21571934   | OK     | 321.438   | 183.767    |
| Cdh2          | chr18:16588876-16809049   | OK     | 22.6199   | 12.9288    |
| Gpt2          | chr8:85492616-85527558    | OK     | 26.2042   | 14.975     |
| Scamp2        | chr9:57560943-57588798    | OK     | 9.95445   | 5.68866    |
| Prodh         | chr16:18071725-18089190   | OK     | 1.49457   | 0.853965   |
| Syne1         | chr10:5020195-5194707     | OK     | 3.24228   | 1.85249    |
| Phyh          | chr2:4918995-4938743      | OK     | 48.1998   | 27.5324    |
| Bmp3          | chr5:98854438-98880960    | NOTEST | 0.369292  | 0.21064    |
| Mrap2         | chr9:87144305-87184045    | OK     | 4.00614   | 2.28491    |
| Shh           | chr5:28456839-28719209    | OK     | 10.9404   | 6.23915    |
| Sntb2         | chr8:106935749-107014192  | OK     | 4.92385   | 2.80745    |
| Zfp934        | chr13:62516796-62558599   | OK     | 1.23878   | 0.706246   |
| Sh3bp1        | chr15:78899785-78912052   | NOTEST | 0.476671  | 0.271657   |
| Smim19        | chr8:22462613-22569616    | OK     | 15.2035   | 8.66286    |
| Shank1        | chr7:44310263-44358353    | OK     | 2.89959   | 1.65191    |
| 0610040J01Rik | chr5:63812494-63899619    | OK     | 3.32022   | 1.89146    |
| E130008D07Rik | chr17:43146040-43158291   | NOTEST | 0.572881  | 0.326336   |
| Fam186b       | chr15:99271017-99287180   | NOTEST | 0.273909  | 0.156027   |
| Them6         | chr15:74721233-74724373   | OK     | 151.154   | 86.0645    |
| Efcab14       | chr4:115738072-115777327  | OK     | 14.0038   | 7.97253    |
| Tmem245       | chr4:56876012-56947429    | OK     | 7.72542   | 4.39698    |
| Cdr2l         | chr11:115381915-115396132 | OK     | 40.4617   | 23.0282    |
| Ggt6          | chr11:72435525-72438404   | NOTEST | 0.0423658 | 0.0241049  |
| 1700018L02Rik | chr19:29020831-29048729   | NOTEST | 0.196658  | 0.111865   |
| Slnf4         | chr11:83175185-83190216   | NOTEST | 0.161495  | 0.0917933  |
| Sstr4         | chr2:148395376-148396764  | OK     | 1.51309   | 0.859453   |
| Cfhr2         | chr1:139810291-139858699  | NOTEST | 0.192153  | 0.109129   |
| Tubb1         | chr2:174450594-174458380  | NOTEST | 0.124514  | 0.0706836  |
| Esrp2         | chr8:106131182-106138722  | NOTEST | 0.0629423 | 0.0357132  |
| Plekhh1       | chr12:79029162-79103939   | OK     | 5.90942   | 3.35297    |
| Lima1         | chr15:99778467-99875456   | OK     | 5.60807   | 3.1818     |
| Fxyd4         | chr6:117933558-117937335  | NOTEST | 0.0930142 | 0.0527562  |
| Sphkap        | chr1:83255780-83408200    | OK     | 9.18719   | 5.20773    |
| Tenm3         | chr8:48225664-48674690    | OK     | 10.087    | 5.71656    |
| Tlcd2         | chr11:75468049-75470899   | OK     | 0.869968  | 0.492732   |
| Ttc30a1       | chr2:75979105-75981967    | OK     | 1.22763   | 0.695268   |
| Zcwpw1        | chr5:137787801-137836278  | OK     | 4.21418   | 2.38538    |
| Ttc28         | chr5:110879802-111289779  | OK     | 2.85052   | 1.61329    |
| Arhgap35      | chr7:16494472-16614993    | OK     | 49.5237   | 28.0281    |
| Ptprs         | chr17:56412425-56476480   | OK     | 86.8029   | 49.1145    |
| Zfp423        | chr8:87661809-87959595    | OK     | 6.0219    | 3.40552    |
| D630045M09Rik | chr13:73344664-73347384   | NOTEST | 0.0292227 | 0.0165197  |
| Ccnb1ip1      | chr14:50789248-50795728   | NOTEST | 0.0246898 | 0.0139518  |
| Myo6          | chr9:80165033-80311729    | OK     | 4.85531   | 2.74068    |
| Scnn1b        | chr7:121865037-121918728  | NOTEST | 0.0129133 | 0.00728905 |
| Foxc1         | chr13:31806645-31810635   | OK     | 1.21499   | 0.685556   |
| Tsx           | chrX:103414466-103424583  | NOTEST | 0.0561002 | 0.0316484  |

|               |                           |        |           |           |
|---------------|---------------------------|--------|-----------|-----------|
| Matk          | chr10:81252934-81262981   | OK     | 1.29379   | 0.729751  |
| Efr3a         | chr15:65787040-65873812   | OK     | 27.406    | 15.4579   |
| Il15ra        | chr2:11705292-11733985    | OK     | 2.51823   | 1.4203    |
| Abhd2         | chr7:79273265-79361601    | OK     | 53.6986   | 30.2841   |
| Slc19a2       | chr1:164249045-164265385  | OK     | 9.14569   | 5.15714   |
| Sacs          | chr14:61138456-61258490   | OK     | 7.59747   | 4.28367   |
| Nfkbiz        | chr16:55811376-55838641   | OK     | 3.33983   | 1.88292   |
| Sipa1l3       | chr7:29320377-29505460    | OK     | 2.67309   | 1.50691   |
| Fam69b        | chr2:26628456-26636497    | OK     | 30.9107   | 17.4236   |
| Qsox1         | chr1:155778154-155812899  | OK     | 23.6847   | 13.3431   |
| Irak4         | chr15:94543659-94568316   | OK     | 1.17982   | 0.664553  |
| Arntl         | chr7:113207464-113314126  | OK     | 0.8227    | 0.463352  |
| Kcns3         | chr12:11090201-11150842   | OK     | 23.3065   | 13.1257   |
| Synpo         | chr18:60593989-60624305   | OK     | 11.3266   | 6.37661   |
| Myrf          | chr19:10208270-10240748   | OK     | 1.05078   | 0.591419  |
| Uxt           | chrX:20951664-20987349    | NOTEST | 0.6076    | 0.341969  |
| Cyfip1        | chr7:55842070-55962493    | OK     | 20.1487   | 11.3352   |
| Cldn10        | chr14:118787870-118874525 | NOTEST | 0.327325  | 0.183946  |
| 1110008P14Rik | chr2:32379100-32381915    | OK     | 170.361   | 95.7207   |
| Ccdc184       | chr15:98167805-98170134   | OK     | 8.86138   | 4.97842   |
| Mpp6          | chr6:50110240-50198598    | OK     | 7.39065   | 4.15047   |
| Traf3         | chr12:111166369-111267155 | OK     | 9.81435   | 5.50877   |
| Tmem26        | chr10:68723745-68782654   | NOTEST | 0.147707  | 0.0828767 |
| Cplx1         | chr5:108518553-108550027  | OK     | 533.362   | 299.185   |
| Kcnk4         | chr19:6925689-6934515     | OK     | 5.19385   | 2.91195   |
| Aph1c         | chr9:66814993-66834706    | OK     | 1.27076   | 0.712148  |
| Ifnlr1        | chr4:135686456-135708180  | NOTEST | 0.294613  | 0.165002  |
| Bcl9          | chr3:97203661-97227364    | OK     | 4.64941   | 2.60083   |
| Ahcyl2        | chr6:29768442-29912310    | OK     | 31.6014   | 17.6745   |
| Ehd3          | chr17:73804840-73832093   | OK     | 81.9319   | 45.8059   |
| Lrrc72        | chr12:36208344-36253398   | NOTEST | 0.0755189 | 0.04221   |
| Slc22a17      | chr14:54906726-54913132   | OK     | 76.319    | 42.6558   |
| Duoxa1        | chr2:122303548-122313730  | NOTEST | 0.328376  | 0.18347   |
| Fancc         | chr13:62964892-63431745   | OK     | 4.445     | 2.48312   |
| Arhgdig       | chr17:26199182-26201350   | OK     | 84.2727   | 47.0452   |
| Hmcn1         | chr1:150562501-150993435  | OK     | 0.787963  | 0.439678  |
| Rapsn         | chr2:91035626-91045729    | OK     | 1.96097   | 1.09408   |
| Fam228a       | chr12:4593007-4738383     | NOTEST | 0.106461  | 0.0593882 |
| Elovl5        | chr9:77917364-77984519    | OK     | 122.516   | 68.3282   |
| Gpr137c       | chr14:45219716-45280976   | OK     | 9.53005   | 5.31066   |
| Pnmal1        | chr7:16959794-16962320    | OK     | 4.4747    | 2.49221   |
| Bcar3         | chr3:122419779-122530182  | OK     | 7.88578   | 4.39193   |
| Maged2        | chrX:150806420-150814339  | OK     | 29.8403   | 16.6176   |
| Actn3         | chr19:4861215-4877909     | NOTEST | 0.581753  | 0.323641  |
| Pdzk1         | chr3:96829825-96870926    | NOTEST | 0.0331081 | 0.0184165 |
| Itm2c         | chr1:85894509-85908698    | OK     | 180.56    | 100.408   |
| Rpgrip1       | chr14:52110902-52197239   | NOTEST | 0.123612  | 0.0687163 |
| Dmpk          | chr7:19083848-19093820    | OK     | 3.17166   | 1.76313   |
| Olr1          | chr6:129485246-129507165  | NOTEST | 0.0563192 | 0.0312969 |
| BC055111      | chr4:106590908-106617238  | NOTEST | 0.121336  | 0.0673973 |
| Hey1          | chr3:8663358-8667038      | OK     | 13.761    | 7.63872   |
| Gm13293       | chr2:11338365-11398500    | NOTEST | 0.277579  | 0.154078  |
| Dact3         | chr7:16875316-16887301    | OK     | 12.3512   | 6.85561   |

|               |                           |        |           |            |
|---------------|---------------------------|--------|-----------|------------|
| Ezr           | chr17:6738130-6782780     | OK     | 19.0796   | 10.5882    |
| Chml          | chr1:175662420-175692632  | OK     | 8.37109   | 4.64512    |
| Bcl11b        | chr12:107910402-108003414 | OK     | 2.85788   | 1.58491    |
| Ivd           | chr2:118861999-118881357  | OK     | 12.1922   | 6.76126    |
| H2-Q4         | chr17:35379616-35384674   | OK     | 6.10836   | 3.38525    |
| Pnoc          | chr14:65400672-65425472   | NOTEST | 0.134384  | 0.0743658  |
| Hunk          | chr16:90386396-90499553   | OK     | 3.39394   | 1.87709    |
| Tacr2         | chr10:62252437-62265990   | NOTEST | 0.134662  | 0.0744687  |
| Raver1-fdx1l  | chr9:21067513-21092008    | NOTEST | 0.530681  | 0.293276   |
| 1110046J04Rik | chr13:33917917-34002794   | OK     | 12.4647   | 6.88564    |
| Il23a         | chr10:128296139-128298084 | NOTEST | 0.118078  | 0.0652158  |
| Tmem53        | chr4:117251950-117268588  | OK     | 10.358    | 5.71627    |
| Skida1        | chr2:18044086-18048449    | OK     | 2.52813   | 1.39448    |
| Dock10        | chr1:80501067-80758553    | OK     | 5.97374   | 3.29425    |
| Edil3         | chr13:88821471-89323225   | OK     | 110.021   | 60.6635    |
| Nphp4         | chr4:152478141-152563184  | OK     | 1.53465   | 0.846017   |
| Cst3          | chr2:148871731-148875468  | OK     | 413.606   | 227.914    |
| 4833424O15Rik | chr3:117575460-117689506  | OK     | 1.64005   | 0.903535   |
| Gm711         | chr2:26934068-26953496    | NOTEST | 0.110686  | 0.060952   |
| Amigo2        | chr15:97244073-97385691   | OK     | 21.8272   | 12.0172    |
| Afap1         | chr5:35893318-36003922    | OK     | 4.06615   | 2.23816    |
| Dpp4          | chr2:62330072-62412231    | NOTEST | 0.514392  | 0.283087   |
| Plbd2         | chr5:120476546-120503623  | OK     | 69.4885   | 38.2412    |
| Nfic          | chr10:81396190-81427173   | OK     | 77.4962   | 42.6293    |
| Grb10         | chr11:11930498-12037420   | OK     | 10.8128   | 5.94393    |
| Ankmy1        | chr1:92870128-92902906    | NOTEST | 0.143853  | 0.0790634  |
| Arhgef9       | chrX:95048934-95166539    | OK     | 14.8642   | 8.16937    |
| Jsrp1         | chr10:80808495-80813498   | NOTEST | 0.404915  | 0.222524   |
| Pik3r6        | chr11:68503018-68552698   | NOTEST | 0.54654   | 0.300301   |
| Ctdsp2        | chr10:126978716-126999975 | OK     | 17.113    | 9.39949    |
| Gemin4        | chr11:76210570-76217572   | OK     | 2.63352   | 1.4464     |
| Efcc1         | chr6:87730868-87755911    | OK     | 1.58105   | 0.868274   |
| Lgmn          | chr12:102394097-102439697 | OK     | 188.024   | 103.17     |
| Lingo3        | chr10:80832800-80844039   | OK     | 1.79824   | 0.986549   |
| Enpp5         | chr17:44078845-44086561   | OK     | 71.2358   | 39.0576    |
| E530011L22Rik | chr9:121719180-121759943  | OK     | 1.14318   | 0.626076   |
| 9330102E08Rik | chr6:128169699-128183803  | OK     | 5.78629   | 3.16707    |
| Grem1         | chr2:113748674-113758648  | NOTEST | 0.0829536 | 0.045403   |
| Oc90          | chr15:65876052-65912287   | NOTEST | 0.0873939 | 0.0478215  |
| Frmd7         | chrX:50892644-50942710    | OK     | 1.52925   | 0.836686   |
| Il17f         | chr1:20777145-20784270    | NOTEST | 0.0341975 | 0.0187008  |
| Cnn2          | chr10:79697304-80369637   | OK     | 6.54487   | 3.57861    |
| Rxrg          | chr1:167598361-167639623  | OK     | 5.54938   | 3.03327    |
| Apcdd1        | chr18:62922326-62953195   | OK     | 5.39474   | 2.94826    |
| Gm15408       | chr5:149006961-149012776  | NOTEST | 0.131556  | 0.071896   |
| Calu          | chr6:29348105-29380513    | OK     | 54.2177   | 29.6218    |
| Phf21b        | chr15:84785375-84856129   | NOTEST | 0.479608  | 0.262008   |
| 2410012M07Rik | chr9:98864766-98866580    | NOTEST | 0.0206778 | 0.0112927  |
| Cebpe         | chr14:54710362-54712174   | NOTEST | 0.234583  | 0.128053   |
| Amt           | chr9:108296921-108301597  | OK     | 2.09799   | 1.14515    |
| Dusp14        | chr11:84048044-84068357   | OK     | 3.45473   | 1.88562    |
| Chgb          | chr2:132781277-132795072  | OK     | 51.5181   | 28.1173    |
| Tbx19         | chr1:165137852-165160773  | NOTEST | 0.0135404 | 0.00738957 |



|               |                           |        |            |            |
|---------------|---------------------------|--------|------------|------------|
| Mpl           | chr4:118442414-118457513  | NOTEST | 0.0266528  | 0.0145455  |
| Gcsh          | chr8:116981827-116993449  | OK     | 53.1941    | 29.0117    |
| Fam102a       | chr2:32535358-32569750    | OK     | 26.5366    | 14.471     |
| 2810049E08Rik | chr13:83891207-83928710   | NOTEST | 0.176883   | 0.0964056  |
| Pmp22         | chr11:62951192-63386069   | OK     | 875.285    | 476.72     |
| Cnga3         | chr1:37218277-37263384    | NOTEST | 0.0849939  | 0.0462689  |
| Tmem132d      | chr5:127783490-128433077  | NOTEST | 0.769699   | 0.41887    |
| Focad         | chr4:88094629-88411011    | OK     | 6.14994    | 3.34627    |
| Ptprb         | chr10:116301373-116389538 | OK     | 4.56605    | 2.48336    |
| Slc24a2       | chr4:86983125-87230540    | OK     | 63.3139    | 34.4208    |
| Chic1         | chrX:103356475-103396118  | OK     | 2.81505    | 1.53031    |
| Glipr1        | chr10:111972694-111997264 | NOTEST | 0.143143   | 0.0777917  |
| Wwp1          | chr4:19608299-19709004    | OK     | 12.2852    | 6.67441    |
| Ttc30a2       | chr2:75976171-75978179    | NOTEST | 0.212216   | 0.115283   |
| Gpr83         | chr9:14860253-14869499    | OK     | 1.40791    | 0.764635   |
| F11r          | chr1:171437560-171464593  | OK     | 4.21769    | 2.28974    |
| Susd4         | chr1:182764905-182895654  | OK     | 37.9244    | 20.5801    |
| Farp2         | chr1:93512103-93635727    | OK     | 5.84425    | 3.16787    |
| Synj1         | chr16:90936096-91044379   | OK     | 51.9966    | 28.1823    |
| Galnt2        | chr8:124231393-124345723  | OK     | 10.3342    | 5.59986    |
| Prdm11        | chr2:92974905-93046144    | NOTEST | 0.298944   | 0.161948   |
| Dbpht2        | chr12:74297473-74300468   | OK     | 3.33474    | 1.8064     |
| Six5          | chr7:19094543-19098345    | OK     | 1.24553    | 0.674653   |
| Mctp1         | chr13:76384960-77031810   | OK     | 13.3755    | 7.24454    |
| Jun           | chr4:95049035-95052222    | OK     | 118.207    | 64.0068    |
| Cnksr1        | chr4:134228041-134238399  | NOTEST | 0.0326175  | 0.0176448  |
| Nynrin        | chr14:55854114-55874736   | OK     | 2.29563    | 1.2417     |
| Sdc3          | chr4:130792536-130826318  | OK     | 64.1488    | 34.694     |
| Tm7sf3        | chr6:146602275-146634592  | OK     | 22.0922    | 11.9474    |
| Fam131c       | chr4:141368191-141384174  | OK     | 1.26785    | 0.685634   |
| Slc30a1       | chr1:191894071-191913247  | OK     | 6.8155     | 3.68552    |
| Cd14          | chr18:36725066-36726654   | OK     | 1.42143    | 0.76826    |
| Irs2          | chr8:10986963-11054541    | OK     | 10.3221    | 5.57399    |
| Lzts2         | chr19:45015175-45045772   | OK     | 9.42414    | 5.08573    |
| E130012A19Rik | chr11:97627386-97629716   | NOTEST | 0.49247    | 0.265689   |
| Acot2         | chr12:83987860-83993875   | OK     | 2.80065    | 1.51095    |
| Tor1aip1      | chr1:156004598-156068859  | OK     | 8.1805     | 4.41029    |
| Ackr1         | chr1:173331885-173333503  | OK     | 114.735    | 61.8528    |
| A830052D11Rik | chr18:32359056-32435740   | NOTEST | 0.67789    | 0.365423   |
| Snap25        | chr2:136713449-136782428  | OK     | 744.637    | 401.372    |
| Lefty1        | chr1:180935038-180938401  | NOTEST | 0.270439   | 0.145751   |
| Smad9         | chr3:54755581-54801269    | OK     | 17.909     | 9.65131    |
| Ptpn13        | chr5:103425191-103598361  | OK     | 7.20173    | 3.88003    |
| Slc39a12      | chr2:14388397-14494977    | NOTEST | 0.0342841  | 0.0184703  |
| AV051173      | chr4:116684964-116700000  | NOTEST | 0.243038   | 0.130879   |
| Paqr8         | chr1:20890621-20938756    | OK     | 22.2662    | 11.989     |
| Abcg8         | chr17:84658233-84700333   | NOTEST | 0.0934003  | 0.0502868  |
| D8Ert82e      | chr8:36094827-36147787    | OK     | 1.81893    | 0.979273   |
| Rxfp3         | chr15:11033716-11037968   | NOTEST | 0.16416    | 0.0883686  |
| Vstm2a        | chr11:16257723-16284551   | OK     | 11.385     | 6.12494    |
| Gpr17         | chr18:31931506-31958619   | NOTEST | 0.00729239 | 0.00392239 |
| Paqr9         | chr9:95559816-95562121    | OK     | 30.5211    | 16.4079    |
| Mreg          | chr1:72159232-72212307    | OK     | 3.0102     | 1.61771    |

|         |                           |        |           |           |
|---------|---------------------------|--------|-----------|-----------|
| Ano4    | chr10:88948993-89257790   | OK     | 14.9185   | 8.01579   |
| Pcdhb10 | chr18:36930284-37841872   | OK     | 1.80327   | 0.968675  |
| Gpr64   | chrX:160390689-160498076  | OK     | 16.4661   | 8.84449   |
| Shf     | chr2:122348891-122368918  | OK     | 14.3839   | 7.72607   |
| Cd84    | chr1:171839696-171890718  | NOTEST | 0.257978  | 0.138479  |
| Dennd4c | chr4:86748554-86850602    | OK     | 2.10708   | 1.13105   |
| Caly    | chr7:140069879-140082548  | OK     | 8.6109    | 4.62119   |
| Cd40    | chr2:165055635-165071654  | NOTEST | 0.204256  | 0.109593  |
| Camkk1  | chr11:73019007-73042065   | OK     | 12.8457   | 6.89116   |
| Nanog   | chr6:122707488-122714633  | NOTEST | 0.124553  | 0.0667725 |
| Aga     | chr8:53511701-53523422    | OK     | 12.4625   | 6.6807    |
| Heatr5a | chr12:51875872-51971321   | OK     | 15.5287   | 8.31561   |
| Slc26a7 | chr4:14505196-14621778    | OK     | 0.868067  | 0.464733  |
| Spatc1l | chr10:76562271-76570200   | NOTEST | 0.0322513 | 0.0172647 |
| Gria4   | chr9:4417892-4796234      | OK     | 29.0596   | 15.5532   |
| Kcnk2   | chr1:189207929-189402273  | OK     | 6.61575   | 3.53945   |
| St8sia1 | chr6:142814230-142964452  | OK     | 18.9406   | 10.1307   |
| Gbp3    | chr3:142560051-142573212  | OK     | 4.23989   | 2.2677    |
| Wdfy2   | chr14:62837689-62956886   | OK     | 13.5815   | 7.26086   |
| Tas1r1  | chr4:152027913-152038490  | NOTEST | 0.18387   | 0.0982962 |
| Cbln4   | chr2:172036335-172043466  | NOTEST | 0.380179  | 0.203155  |
| Xkr8    | chr4:132724903-132732546  | OK     | 2.01538   | 1.0767    |
| Prtg    | chr9:72807273-72917307    | NOTEST | 0.0802769 | 0.0428871 |
| Pdk3    | chrX:93764615-93832095    | OK     | 27.5094   | 14.6859   |
| Cdrt4   | chr11:62951192-63386069   | NOTEST | 0.205272  | 0.109578  |
| Sirpb1b | chr3:15495753-15575065    | NOTEST | 0.0282423 | 0.015074  |
| L3mbtl4 | chr17:68273796-68780086   | OK     | 1.45982   | 0.778998  |
| Zdhhc22 | chr12:86983380-86988676   | OK     | 10.2419   | 5.46437   |
| Galnt6  | chr15:100689914-100729376 | OK     | 0.883603  | 0.470669  |
| Zfp41   | chr15:75616683-75625300   | OK     | 1.56      | 0.830519  |
| Lss     | chr10:76531626-76562226   | OK     | 13.2072   | 7.02835   |
| Fgd4    | chr16:16421977-16560196   | OK     | 3.48315   | 1.8526    |
| Zfp651  | chr9:121760032-121771742  | OK     | 9.34925   | 4.9723    |
| Vps37b  | chr5:124004640-124032260  | OK     | 4.67992   | 2.48897   |
| Olf1r18 | chr9:20313891-20336094    | NOTEST | 0.0360035 | 0.019135  |
| Mfsd7a  | chr5:108441053-108448891  | OK     | 1.01244   | 0.538052  |
| Trhr    | chr15:44196134-44235912   | NOTEST | 0.0921216 | 0.0489081 |
| Cxxc5   | chr18:35829817-35861688   | OK     | 15.0501   | 7.98991   |
| Fkbp7   | chr2:76663033-76673098    | OK     | 6.20035   | 3.29075   |
| Pak6    | chr2:118663576-118698020  | NOTEST | 0.0626704 | 0.0332589 |
| Nhlh2   | chr3:102010144-102015492  | OK     | 0.940022  | 0.498442  |
| Scgn    | chr13:23953456-23991214   | OK     | 1.31318   | 0.696208  |
| Lrrc23  | chr6:124769862-124779718  | NOTEST | 0.193994  | 0.102849  |
| Prss32  | chr17:23853771-23859776   | NOTEST | 0.171336  | 0.0907279 |
| Meox1   | chr11:101877509-101894354 | NOTEST | 0.477004  | 0.252554  |
| Gpihbp1 | chr15:75596657-75598213   | OK     | 1.9781    | 1.04727   |
| Ier5    | chr1:155096366-155099636  | OK     | 2.07185   | 1.0967    |
| Eddm3b  | chr14:51116552-51117791   | NOTEST | 0.0332414 | 0.0175938 |
| Bend6   | chr1:33852051-33907621    | OK     | 56.9043   | 30.1094   |
| Lmtk2   | chr5:144100435-144188204  | OK     | 8.53348   | 4.51441   |
| Irf8    | chr8:120736375-120756692  | NOTEST | 0.622277  | 0.329185  |
| Cers6   | chr2:68861556-69111290    | OK     | 3.73984   | 1.9781    |
| Zfp704  | chr3:9427009-9610085      | OK     | 2.09286   | 1.10671   |

|                |                           |        |           |           |
|----------------|---------------------------|--------|-----------|-----------|
| Gadd45b        | chr10:80930090-80932204   | OK     | 9.23552   | 4.88345   |
| Nkd1           | chr8:88521343-88594887    | OK     | 2.28544   | 1.20828   |
| Gm3317         | chr14:5163641-5170292     | NOTEST | 0.0223497 | 0.0118152 |
| Irgc1          | chr7:24431925-24445682    | NOTEST | 0.0211402 | 0.0111743 |
| 9930111J21Rik1 | chr11:48945351-48979398   | NOTEST | 0.230172  | 0.121661  |
| Tmem254a,Tmem2 | chr14:26202666-26207041   | NOTEST | 0.599959  | 0.317074  |
| Slc44a3        | chr3:121459527-121532344  | NOTEST | 0.185073  | 0.0977444 |
| Haghl          | chr17:25773775-25785586   | OK     | 56.8316   | 30.0128   |
| Pdghd          | chr9:6168611-6377519      | OK     | 1.35957   | 0.717838  |
| Rdm1           | chr11:101627948-101636081 | OK     | 4.88847   | 2.58068   |
| Sash3          | chrX:48146526-48161563    | NOTEST | 0.60648   | 0.320081  |
| C8g            | chr2:25498649-25505470    | OK     | 1.00931   | 0.532654  |
| Ttc39b         | chr4:83220300-83324189    | OK     | 12.6052   | 6.65157   |
| Kcnk10         | chr12:98433993-98577940   | OK     | 3.3404    | 1.76252   |
| Cstad          | chr2:30595043-30608945    | NOTEST | 0.752191  | 0.396811  |
| Slc29a4        | chr5:142702100-142722490  | OK     | 21.1664   | 11.1627   |
| Gm5544         | chr3:97930172-97967018    | NOTEST | 0.251865  | 0.132824  |
| Ppt1           | chr4:122836226-122859175  | OK     | 34.5838   | 18.2331   |
| Dpy19l3        | chr7:35685499-35754454    | OK     | 1.60756   | 0.847228  |
| Nyx            | chrX:13467671-13489313    | NOTEST | 0.172048  | 0.0906568 |
| Xpnp2          | chrX:48108724-48136981    | NOTEST | 0.255305  | 0.134509  |
| Cyp2e1         | chr7:140763831-140774977  | NOTEST | 0.477278  | 0.251454  |
| Fbxo32         | chr15:58175878-58214892   | OK     | 2.7693    | 1.4589    |
| 1700007L15Rik  | chr16:33379853-33380736   | NOTEST | 0.556635  | 0.293155  |
| H2-DMa         | chr17:34122831-34139101   | OK     | 6.23419   | 3.28031   |
| Gm6644         | chr6:34303929-34317489    | LOWDAT | 1.01954   | 0.536367  |
| Rgl1           | chr1:152517529-152625111  | OK     | 22.3681   | 11.7663   |
| St8sia4        | chr1:95587681-95667594    | OK     | 2.912     | 1.53101   |
| 1700063D05Rik  | chr9:41206154-41217627    | NOTEST | 0.0726336 | 0.0381829 |
| Slc25a29       | chr12:108825877-108835876 | OK     | 5.94745   | 3.12521   |
| Camk2g         | chr14:20734872-20794088   | OK     | 127.027   | 66.7463   |
| Npc1           | chr18:12168729-12236386   | OK     | 16.4243   | 8.6294    |
| Slc26a2        | chr18:61196853-61211596   | OK     | 1.69457   | 0.890049  |
| Wfdc6a         | chr2:164579518-164585447  | NOTEST | 0.115752  | 0.0607897 |
| Gm1604b        | chr17:8038509-8101228     | NOTEST | 0.255056  | 0.133947  |
| Iqgap1         | chr7:80711582-80803331    | OK     | 10.0614   | 5.28366   |
| Shroom1        | chr11:53457204-53467766   | NOTEST | 0.361308  | 0.189681  |
| L3mbtl3        | chr10:26275451-26375185   | OK     | 1.9808    | 1.03921   |
| Epha10         | chr4:124881784-124917800  | OK     | 1.06752   | 0.559946  |
| Pank1          | chr19:34806935-34879455   | OK     | 3.64282   | 1.91009   |
| Tal2           | chr4:53779704-53786885    | NOTEST | 0.198844  | 0.104209  |
| Gpr153         | chr4:152274361-152285337  | OK     | 21.3428   | 11.1727   |
| Fbxo31         | chr8:121549442-121578806  | OK     | 61.5806   | 32.2298   |
| Pigz           | chr16:31933850-31946046   | OK     | 15.0259   | 7.85891   |
| Hipk2          | chr6:38697839-38876190    | OK     | 3.22725   | 1.68793   |
| Ppm1m          | chr9:106194952-106199233  | OK     | 3.66948   | 1.91867   |
| 1810011O10Rik  | chr8:24437615-24438946    | OK     | 9.19387   | 4.80675   |
| Mtss1l         | chr8:110721483-110741400  | OK     | 18.9029   | 9.8827    |
| Mfsd3          | chr15:76701541-76710559   | OK     | 4.75944   | 2.48781   |
| Tsc22d3        | chrX:140539528-140600522  | OK     | 132.738   | 69.3709   |
| Slc7a15        | chr12:8528482-8599066     | NOTEST | 0.569028  | 0.29737   |
| Arhgef17       | chr7:100869745-100932161  | OK     | 18.6709   | 9.74366   |
| Fam26e         | chr10:34037596-34109815   | OK     | 4.50829   | 2.3526    |

|               |                           |        |            |            |
|---------------|---------------------------|--------|------------|------------|
| Kctd1         | chr18:14968684-15151446   | OK     | 7.46294    | 3.89244    |
| 2810055G20Rik | chr16:77329327-77558428   | NOTEST | 0.153567   | 0.0800749  |
| Lmo1          | chr7:109138571-109170308  | OK     | 9.31748    | 4.85653    |
| Nnmt          | chr9:48591889-48605077    | NOTEST | 0.276341   | 0.144026   |
| Dclk1         | chr3:55242525-55539068    | OK     | 48.4825    | 25.2572    |
| Ilvbl         | chr10:78574499-78584502   | OK     | 14.6343    | 7.62261    |
| Ckb           | chr12:111669354-111672338 | OK     | 344.38     | 179.287    |
| Ggct          | chr6:54985094-54992867    | OK     | 7.93236    | 4.12915    |
| Six6          | chr12:72939944-72944899   | NOTEST | 0.0185948  | 0.00967594 |
| Serpinb6b     | chr13:32965512-32979037   | OK     | 1.03548    | 0.538755   |
| Slc1a2        | chr2:102658682-102790784  | NOTEST | 0.69671    | 0.362482   |
| Lamc2         | chr1:153122755-153186447  | NOTEST | 0.585929   | 0.304578   |
| Pxdn          | chr12:29938035-30017658   | OK     | 7.20376    | 3.74416    |
| Fuca1         | chr4:135920725-135940300  | OK     | 15.8614    | 8.2363     |
| Lfng          | chr5:140607340-140615545  | OK     | 2.94209    | 1.5274     |
| Gm766         | chr6:142785780-142804466  | NOTEST | 0.0827422  | 0.042946   |
| Zfp711        | chrX:112600525-112635062  | OK     | 0.886938   | 0.460103   |
| Kansl1l       | chr1:66700892-66817595    | OK     | 3.3707     | 1.74799    |
| Ndufaf2       | chr13:108052588-108158625 | OK     | 42.405     | 21.9887    |
| Slc18a1       | chr8:69037707-69113717    | OK     | 1.26865    | 0.656628   |
| Rnf215        | chr11:4135159-4160293     | OK     | 14.1334    | 7.31497    |
| Dcstamp       | chr15:39745929-39760938   | NOTEST | 0.101162   | 0.052305   |
| 1810007D17Rik | chr19:58606328-58629753   | NOTEST | 0.781608   | 0.404083   |
| Pygb          | chr2:150786795-150831748  | OK     | 331.909    | 171.42     |
| Gpr63         | chr4:24973418-25009233    | OK     | 1.12994    | 0.58341    |
| Pcdhac2       | chr18:36930284-37841872   | OK     | 44.557     | 23.0055    |
| Tmem150a      | chr6:72355482-72362381    | OK     | 1.98518    | 1.02446    |
| Gm16432       | chr1:177991434-178048291  | NOTEST | 0.248918   | 0.128449   |
| Mmp15         | chr8:95352336-95374293    | OK     | 46.7876    | 24.1396    |
| Gm6277        | chr18:11821087-11945627   | OK     | 0.94835    | 0.488939   |
| Pcdhb7        | chr18:36930284-37841872   | OK     | 1.37506    | 0.708875   |
| Prrt3         | chr6:113493638-113501931  | OK     | 16.4018    | 8.45517    |
| Adam32        | chr8:24836142-24948804    | NOTEST | 0.202606   | 0.104381   |
| Per1          | chr11:69098955-69109957   | OK     | 8.33332    | 4.29207    |
| Gpr18         | chr14:121878605-122021035 | NOTEST | 0.0319844  | 0.0164597  |
| Ier2          | chr8:84661330-84662852    | OK     | 24.7225    | 12.7226    |
| Lgals1        | chr15:78926724-78930465   | OK     | 173.94     | 89.4927    |
| Tfap2d        | chr1:19103021-19166332    | NOTEST | 0.02292    | 0.0117844  |
| Pcolce2       | chr9:95637627-95695551    | OK     | 20.6551    | 10.6191    |
| Oxa1l         | chr14:54360840-54417702   | OK     | 15.1702    | 7.79896    |
| Lrp6          | chr6:134446477-134566913  | OK     | 9.23492    | 4.74724    |
| Guca1a        | chr17:47394557-47400584   | NOTEST | 0.0530817  | 0.0272844  |
| Ctnnd2        | chr15:30172592-31029343   | OK     | 21.1986    | 10.877     |
| Kcnh4         | chr11:100740377-100759778 | NOTEST | 0.0197664  | 0.0101414  |
| Rex2          | chr4:147021849-147060799  | NOTEST | 0.00932579 | 0.00478435 |
| Fam69a        | chr5:107900527-107987077  | OK     | 4.63609    | 2.37736    |
| Prkg2         | chr5:98929772-99037079    | OK     | 3.86257    | 1.97923    |
| Cds1          | chr5:101765129-101823852  | OK     | 28.9997    | 14.8583    |
| Map6d1        | chr16:20233308-20241358   | OK     | 1.39476    | 0.714153   |
| Grin3b        | chr10:79697304-80369637   | NOTEST | 0.0809714  | 0.0414588  |
| Oxtr          | chr6:112473683-112489808  | NOTEST | 0.47804    | 0.244674   |
| Nfatc1        | chr18:80606204-80713071   | OK     | 1.50117    | 0.767806   |
| 4930515G01Rik | chr5:114773732-114774983  | NOTEST | 0.381104   | 0.194851   |

|               |                           |        |           |           |
|---------------|---------------------------|--------|-----------|-----------|
| Slc16a9       | chr10:70245275-70285951   | OK     | 4.9077    | 2.50814   |
| Zhx2          | chr15:57694666-57839832   | OK     | 3.46251   | 1.76924   |
| Rpph1         | chr14:50807446-50807771   | OK     | 3.63895   | 1.85927   |
| Laptm5        | chr4:130913333-130936148  | OK     | 2.95711   | 1.51025   |
| 3010001F23Rik | chrX:152368571-152416702  | OK     | 0.974795  | 0.497839  |
| Nmnat1        | chr4:149468786-149485142  | OK     | 5.62547   | 2.87247   |
| Tmem254b      | chr14:26202666-26207041   | LOWDAT | 7.84776   | 4.00661   |
| Slc26a5       | chr5:21809000-21865604    | NOTEST | 0.1008    | 0.0514593 |
| Mylk4         | chr13:32700826-32781779   | NOTEST | 0.0685035 | 0.0349629 |
| Ndr3          | chr2:156927341-156992111  | OK     | 61.122    | 31.1575   |
| Tenc1         | chr15:102102987-102116401 | OK     | 6.80555   | 3.46767   |
| Plxnb2        | chr15:89155545-89180788   | OK     | 7.08937   | 3.61166   |
| Oit3          | chr10:59422959-59441779   | NOTEST | 0.0924907 | 0.0470985 |
| Cntnap5a      | chr1:115685136-116580674  | OK     | 4.16028   | 2.11804   |
| Atpaf1        | chr4:115784813-115812314  | OK     | 6.55136   | 3.335     |
| Rgs22         | chr15:36009476-36140400   | NOTEST | 0.0281224 | 0.0143153 |
| Lrrc49        | chr9:60587234-60688134    | OK     | 84.8574   | 43.1855   |
| C530008M17Rik | chr5:76840598-76873554    | OK     | 14.0471   | 7.14613   |
| Naip2         | chr13:100144062-100202122 | NOTEST | 0.184589  | 0.0938999 |
| Fbxl21        | chr13:56522507-56537786   | OK     | 2.76008   | 1.40314   |
| Eya1          | chr1:14168957-14310199    | NOTEST | 0.137684  | 0.0699591 |
| Actn2         | chr13:12269426-12340732   | NOTEST | 0.221834  | 0.112685  |
| Timp2         | chr11:118301060-118355411 | OK     | 368.712   | 187.25    |
| Cenpm         | chr15:82233775-82244747   | OK     | 1.43694   | 0.729307  |
| Gm6981        | chr9:52002060-52088738    | OK     | 2.01743   | 1.02391   |
| Kit           | chr5:75574986-75656721    | OK     | 23.8542   | 12.1066   |
| Hipk4         | chr7:27523260-27531174    | NOTEST | 0.227702  | 0.115526  |
| Gpr3          | chr4:133209339-133212536  | OK     | 2.15405   | 1.09286   |
| Ces1a         | chr8:93020214-93048192    | NOTEST | 0.0217003 | 0.0109914 |
| Ado           | chr10:67544510-67548955   | OK     | 10.8193   | 5.4738    |
| Echdc2        | chr4:108165436-108179308  | OK     | 1.51578   | 0.76619   |
| Nrgn          | chr9:37544492-37552745    | OK     | 0.9608    | 0.485649  |
| Il21r         | chr7:125603428-125633570  | NOTEST | 0.17266   | 0.0872286 |
| Rnf157        | chr11:116336344-116413032 | OK     | 118.216   | 59.7213   |
| Smim4         | chr14:31124504-31128930   | OK     | 11.8872   | 6.00473   |
| Arl5b         | chr2:15055361-15079191    | OK     | 6.57365   | 3.31669   |
| Adgb          | chr10:10335702-10472314   | NOTEST | 0.654435  | 0.330105  |
| Selm          | chr11:3514701-3517351     | OK     | 88.1792   | 44.4575   |
| Phldb2        | chr16:45746230-45844378   | OK     | 2.85451   | 1.43854   |
| Ccdc102a      | chr8:94902868-94918098    | OK     | 2.98231   | 1.50224   |
| Ankdd1b       | chr13:96416133-96471160   | NOTEST | 0.809806  | 0.407849  |
| Myrip         | chr9:120304072-120474834  | OK     | 2.4143    | 1.21515   |
| C1qtnf7       | chr5:43515568-43616586    | OK     | 3.81157   | 1.91798   |
| Ssmem1        | chr6:30509848-30520253    | NOTEST | 0.117398  | 0.0590601 |
| Adcy2         | chr13:68620042-68999541   | OK     | 11.7739   | 5.9228    |
| Agpat3        | chr10:78271562-78351700   | OK     | 48.7026   | 24.4961   |
| Hes1          | chr16:30065356-30067796   | OK     | 6.37874   | 3.20511   |
| Sema7a        | chr9:57940134-57962865    | OK     | 43.3853   | 21.7957   |
| Phlda1        | chr10:111506285-111508649 | OK     | 11.7005   | 5.87795   |
| Glb1l         | chr1:75192159-75210778    | OK     | 1.73198   | 0.869809  |
| Slc11a1       | chr1:74375202-74386051    | NOTEST | 0.513676  | 0.257964  |
| Masp1         | chr16:23451784-23520590   | OK     | 2.10985   | 1.0595    |
| Stxbp3b       | chr19:9557605-9559248     | OK     | 3.10244   | 1.55779   |



|               |                           |        |            |            |
|---------------|---------------------------|--------|------------|------------|
| Ugt1a6b       | chr1:88055410-88220002    | NOTEST | 0.599624   | 0.301037   |
| Kcnj2         | chr11:111066163-111076825 | OK     | 1.60602    | 0.806217   |
| 4930568G15Rik | chr1:165066616-165091930  | NOTEST | 0.0457539  | 0.0229645  |
| Psat1         | chr19:15905122-15925059   | OK     | 32.4496    | 16.2831    |
| Bckdhb        | chr9:83948780-84124240    | OK     | 15.851     | 7.9522     |
| Zfp191        | chr18:24012266-24020771   | OK     | 16.377     | 8.21567    |
| Tcf12         | chr9:71844251-72111819    | OK     | 9.35937    | 4.6949     |
| Mical2        | chr7:112225835-112355194  | OK     | 8.48064    | 4.25317    |
| Adcy9         | chr16:4284885-4420498     | OK     | 11.9706    | 5.99053    |
| Palm3         | chr8:84021473-84042575    | OK     | 28.1291    | 14.0748    |
| BC035044      | chr6:128848043-128898167  | NOTEST | 0.136112   | 0.068092   |
| Pld1          | chr3:27938679-28133362    | OK     | 2.72421    | 1.36116    |
| Rasal2        | chr1:157135182-157420236  | OK     | 11.599     | 5.79522    |
| Aldh2         | chr5:121567686-121593824  | OK     | 66.1298    | 33.0229    |
| 4930590J08Rik | chr6:91904232-91950725    | NOTEST | 0.0113996  | 0.00568972 |
| Tert          | chr13:73627000-73649041   | NOTEST | 0.0990252  | 0.0493926  |
| Tjp2          | chr19:24094501-24225026   | OK     | 5.10703    | 2.54718    |
| 4932418E24Rik | chr2:26271646-26294557    | NOTEST | 0.0123754  | 0.00616992 |
| Zfp286        | chr11:62778386-62789417   | OK     | 1.71015    | 0.852608   |
| Dnm3os        | chr1:161987301-162478034  | NOTEST | 0.00471103 | 0.00234863 |
| Tgfb2         | chr1:186623185-186705992  | OK     | 3.26363    | 1.62489    |
| Mab21l2       | chr3:86224689-86782694    | OK     | 7.09614    | 3.53258    |
| Fyb           | chr15:6579846-6665608     | NOTEST | 0.459319   | 0.228407   |
| Zswim2        | chr2:83915078-83941226    | NOTEST | 0.0640645  | 0.0318417  |
| Hcn1          | chr13:117602319-117981028 | OK     | 23.6555    | 11.7425    |
| Casc1         | chr6:145115635-145210970  | NOTEST | 0.209701   | 0.103944   |
| Ggt5          | chr10:75589380-75616968   | OK     | 1.38932    | 0.688294   |
| Prr15l        | chr11:96929323-96935647   | NOTEST | 0.413808   | 0.204859   |
| Gpr22         | chr12:31654868-31950535   | OK     | 2.6859     | 1.32963    |
| Reep3         | chr10:67005074-67096988   | OK     | 10.6478    | 5.26767    |
| Klhl41        | chr2:69670119-69684239    | NOTEST | 0.147706   | 0.0730628  |
| Gcnt4         | chr13:96924688-96950914   | NOTEST | 0.79248    | 0.391876   |
| Chst7         | chrX:20059569-20097520    | NOTEST | 0.31112    | 0.153833   |
| Abra          | chr15:41865292-41869720   | NOTEST | 0.0564528  | 0.0278917  |
| Gm6938        | chrX:21312209-21334727    | NOTEST | 0.825066   | 0.407612   |
| Hlf           | chr11:90336534-90390917   | OK     | 2.72783    | 1.34725    |
| Nthl1         | chr17:24632681-24638838   | OK     | 2.15153    | 1.06241    |
| Tmem198b      | chr10:128790909-128804370 | OK     | 3.97419    | 1.96154    |
| Fam126b       | chr1:58522805-58586333    | OK     | 16.4941    | 8.14049    |
| Sord          | chr2:122234838-122265337  | OK     | 16.0903    | 7.94071    |
| Naip1         | chr13:100407769-100452864 | OK     | 0.899991   | 0.443893   |
| Gdf11         | chr10:128884545-128891718 | OK     | 11.0703    | 5.4599     |
| Kif27         | chr13:58287515-58354862   | NOTEST | 0.138686   | 0.0683606  |
| Ccr10         | chr11:101172997-101175443 | NOTEST | 0.818688   | 0.403398   |
| Krt23         | chr11:99477972-99493110   | NOTEST | 0.0553916  | 0.0272535  |
| Nckap5        | chr1:125913635-126830632  | NOTEST | 0.198436   | 0.0976306  |
| Figl2         | chr15:101050191-101054399 | OK     | 1.82006    | 0.895161   |
| Scx           | chr15:76380512-76477269   | OK     | 5.99756    | 2.94977    |
| Cd80          | chr16:38458932-38486932   | NOTEST | 0.163471   | 0.0803885  |
| Vegfc         | chr8:54077531-54186454    | NOTEST | 0.831025   | 0.407958   |
| Ccdc155       | chr7:45183675-45204892    | NOTEST | 0.307669   | 0.150964   |
| Styk1         | chr6:131299143-131313827  | NOTEST | 0.0279789  | 0.0137282  |
| Vav1          | chr17:57279099-57329236   | NOTEST | 0.209515   | 0.102725   |

|               |                           |        |           |           |
|---------------|---------------------------|--------|-----------|-----------|
| Hsd11b1       | chr1:193221640-193264045  | NOTEST | 0.401561  | 0.196832  |
| Lama5         | chr2:180176372-180225859  | OK     | 1.61045   | 0.788946  |
| Ces2e         | chr8:104926259-104934672  | NOTEST | 0.348919  | 0.170798  |
| Luzp1         | chr4:136469760-136549318  | OK     | 22.9614   | 11.2342   |
| Ctbp2         | chr7:132987010-133123483  | OK     | 4.45705   | 2.17959   |
| Nudt7         | chr8:114133573-114152312  | OK     | 16.1364   | 7.8814    |
| Rnaset2b      | chr17:8128590-8147832     | OK     | 5.2354    | 2.55628   |
| Rab11fip5     | chr6:85334961-85374634    | OK     | 44.1667   | 21.5502   |
| Atp2b2        | chr6:113745667-114042080  | OK     | 41.2503   | 20.1219   |
| Rab40b        | chr11:121356120-121388251 | OK     | 1.70202   | 0.829244  |
| Fzd4          | chr7:89404365-89410110    | OK     | 3.7421    | 1.82302   |
| Cecr6         | chr6:120488938-120493807  | NOTEST | 0.067455  | 0.0328331 |
| 4930523C07Rik | chr1:160044379-160078586  | NOTEST | 0.725356  | 0.353014  |
| Ar            | chrX:98149749-98317147    | OK     | 4.84678   | 2.35785   |
| Acss1         | chr2:150618110-150668932  | OK     | 2.98293   | 1.45065   |
| Dlc1          | chr8:36567738-36952442    | OK     | 13.9867   | 6.79585   |
| Itpka         | chr2:119742336-119751253  | NOTEST | 0.158309  | 0.076862  |
| AA536875      | chr14:123168502-123176176 | NOTEST | 0.0221518 | 0.0107548 |
| Gm1141        | chrX:71932437-71940871    | NOTEST | 0.0385133 | 0.0186959 |
| Atp2b3        | chrX:73503085-73573270    | OK     | 21.0347   | 10.2092   |
| 5830416P10Rik | chr19:53441211-53464796   | NOTEST | 0.0688499 | 0.0334095 |
| Plod1         | chr4:147909752-147936776  | OK     | 11.7884   | 5.7197    |
| Lamb2         | chr9:108479861-108490530  | OK     | 9.51887   | 4.61646   |
| Fam171a1      | chr2:3118387-3227809      | OK     | 20.8079   | 10.0873   |
| Inhba         | chr13:16014474-16027211   | NOTEST | 0.414345  | 0.20084   |
| Bcl2l12       | chr7:44986899-44997579    | OK     | 1.45419   | 0.704748  |
| Myo7a         | chr7:98051053-98119493    | OK     | 3.8692    | 1.87452   |
| Bmp6          | chr13:38345715-38499728   | OK     | 1.28493   | 0.622084  |
| Bambi-ps1     | chr2:122466582-122467797  | NOTEST | 0.302452  | 0.14642   |
| Slc2a13       | chr15:91267690-91573261   | OK     | 2.64464   | 1.27951   |
| Parp14        | chr16:35832877-35871382   | OK     | 3.05105   | 1.47596   |
| Atp8a2        | chr14:59647740-60086834   | OK     | 67.7877   | 32.7494   |
| 1700096K18Rik | chr5:25530017-25531466    | OK     | 1.08007   | 0.521776  |
| D630032N06Rik | chr11:85235165-85238304   | NOTEST | 0.281331  | 0.135862  |
| Gabre         | chrX:72257431-72274721    | NOTEST | 0.0749139 | 0.0361665 |
| Ifitm3        | chr7:141009589-141010744  | OK     | 50.5241   | 24.3859   |
| Npnt          | chr3:132881744-132950291  | OK     | 0.951896  | 0.459351  |
| Hist1h2bh     | chr13:23542922-23543444   | NOTEST | 0.382572  | 0.184609  |
| Ifngr1        | chr10:19591957-19610225   | OK     | 16.0809   | 7.75901   |
| Peli2         | chr14:48120868-48260883   | OK     | 9.09826   | 4.38897   |
| Kcnk3         | chr5:30573986-30625270    | OK     | 6.80124   | 3.2793    |
| Irf4          | chr13:30749257-30766927   | NOTEST | 0.135234  | 0.0651749 |
| Pde4b         | chr4:102254741-102607262  | OK     | 6.73167   | 3.24255   |
| 2810403D21Rik | chrX:108834477-108886896  | NOTEST | 0.667457  | 0.321488  |
| Lrrc32        | chr7:98494221-98501830    | OK     | 1.4091    | 0.678458  |
| 1700112E06Rik | chr14:22019711-23094571   | OK     | 2.58525   | 1.2446    |
| Cep85l        | chr10:53278080-53379851   | OK     | 4.28932   | 2.06369   |
| Begain        | chr12:109032181-109068217 | OK     | 2.96248   | 1.42524   |
| Eps8          | chr6:137477244-137649285  | OK     | 1.96644   | 0.945921  |
| Snn           | chr16:11066297-11134532   | OK     | 47.9723   | 23.0761   |
| Pacs1         | chr19:5133684-5273119     | OK     | 9.13783   | 4.3951    |
| Vwf           | chr6:125552947-125686679  | OK     | 7.63825   | 3.67308   |
| Slc15a3       | chr19:10842543-10869779   | NOTEST | 0.228341  | 0.10974   |

|               |                           |        |           |            |
|---------------|---------------------------|--------|-----------|------------|
| Inpp5j        | chr11:3494271-3504821     | OK     | 19.1604   | 9.20597    |
| Bmpr1b        | chr3:141837135-142169228  | OK     | 1.49324   | 0.717317   |
| Hs3st6        | chr17:24753002-24758684   | OK     | 1.56562   | 0.751268   |
| Fmo2          | chr1:162875046-162898712  | OK     | 4.33327   | 2.07751    |
| Gyg           | chr3:20122083-20155116    | OK     | 94.5626   | 45.331     |
| 39325         | chr5:93093456-93174958    | OK     | 16.7801   | 8.04127    |
| Slc30a8       | chr15:52295552-52335733   | NOTEST | 0.219705  | 0.105262   |
| Egr4          | chr6:85511121-85513542    | NOTEST | 0.123208  | 0.0589267  |
| Rem2          | chr14:54476099-54480434   | OK     | 10.7027   | 5.11437    |
| Cd180         | chr13:102693557-102706631 | NOTEST | 0.445     | 0.212572   |
| Rnd3          | chr2:51130438-51149111    | OK     | 9.61164   | 4.59127    |
| Manba         | chr3:135485610-135571403  | OK     | 2.95734   | 1.41111    |
| Bach1         | chr16:87698953-87733346   | OK     | 5.14557   | 2.44816    |
| Neto1         | chr18:86394951-86501897   | OK     | 3.54697   | 1.68753    |
| Itfg3         | chr17:26212691-26244242   | OK     | 19.8154   | 9.42624    |
| Slc39a14      | chr14:70303466-70351424   | OK     | 6.43985   | 3.0627     |
| Tnfrsf21      | chr17:43016554-43089188   | OK     | 107.557   | 51.1507    |
| Wfs1          | chr5:36966103-36988982    | OK     | 28.4161   | 13.5051    |
| Ly6d          | chr15:74762055-74763567   | NOTEST | 0.912429  | 0.433284   |
| Myliip        | chr13:45389741-45411940   | OK     | 4.26616   | 2.02332    |
| Rapgef5       | chr12:117516478-117756978 | OK     | 11.0949   | 5.26012    |
| Gas2          | chr7:51879144-51994458    | OK     | 7.49744   | 3.54963    |
| Apbb2         | chr5:66298724-66618817    | OK     | 21.9977   | 10.4003    |
| 3110070M22Rik | chr13:119487256-119610459 | NOTEST | 0.420138  | 0.198603   |
| Slc12a8       | chr16:33518328-33664135   | NOTEST | 0.232415  | 0.109822   |
| G630025P09Rik | chr11:69803594-69806038   | NOTEST | 0.229583  | 0.108476   |
| Gdf6          | chr4:9844371-9862345      | NOTEST | 0.0115513 | 0.00545518 |
| Zfp652os      | chr11:95700105-95712754   | OK     | 2.57394   | 1.2149     |
| Adcy8         | chr15:64699034-64922296   | OK     | 3.25042   | 1.53348    |
| Plxna2        | chr1:194619828-194816868  | OK     | 21.5376   | 10.1588    |
| Ncan          | chr8:70093084-70120844    | OK     | 3.29796   | 1.55536    |
| Ppm1h         | chr10:122678761-122945793 | OK     | 29.6762   | 13.9937    |
| Aldh3a1       | chr11:61208741-61218416   | NOTEST | 0.231536  | 0.109161   |
| Hebp2         | chr10:18540122-18546076   | OK     | 29.7194   | 14.006     |
| Rab30         | chr7:92741713-92837117    | OK     | 9.25727   | 4.36239    |
| Unc5c         | chr3:141465563-141834922  | OK     | 3.0689    | 1.44576    |
| Dsg1a         | chr18:20310872-20343353   | NOTEST | 0.0345673 | 0.0162801  |
| Comp          | chr8:70373547-70382066    | OK     | 6.39873   | 3.01342    |
| Rpl3l         | chr17:24727828-24736149   | NOTEST | 0.110018  | 0.0518032  |
| Rxfp2         | chr5:150018674-150082186  | NOTEST | 0.0311896 | 0.0146692  |
| Cryz          | chr3:154576519-154623182  | OK     | 3.69307   | 1.73686    |
| B230208H11Rik | chr10:12916645-12923127   | NOTEST | 0.213266  | 0.100297   |
| Grpr          | chrX:163513903-163549647  | NOTEST | 0.36158   | 0.16986    |
| Bcl9l         | chr9:44499135-44510412    | OK     | 4.00613   | 1.88083    |
| Opcml         | chr9:27791268-28925048    | OK     | 23.5295   | 11.0465    |
| Kif1c         | chr11:70700547-70731970   | OK     | 7.19399   | 3.37544    |
| Zyx           | chr6:42349827-42380558    | OK     | 31.3461   | 14.7074    |
| Dennd5b       | chr6:148988068-149101680  | OK     | 4.88425   | 2.28987    |
| Rgs9          | chr11:109225354-109298181 | OK     | 2.74358   | 1.28485    |
| Spdya         | chr17:71552060-71598761   | NOTEST | 0.283513  | 0.132729   |
| Kifc3         | chr8:95081200-95142540    | OK     | 8.78105   | 4.11033    |
| Fndc1         | chr17:7738567-7804974     | OK     | 1.88294   | 0.880934   |
| Plcb4         | chr2:135741829-136013068  | OK     | 12.9215   | 6.04479    |

|               |                           |        |           |            |
|---------------|---------------------------|--------|-----------|------------|
| Foxj1         | chr11:116330703-116335354 | OK     | 9.39115   | 4.39158    |
| Nfkb1         | chr3:135584654-135691547  | OK     | 7.86843   | 3.67912    |
| A330009N23Rik | chr15:101221190-101232756 | NOTEST | 0.739816  | 0.34579    |
| Cnih3         | chr1:181352627-181460641  | OK     | 2.04386   | 0.955163   |
| Ptrf          | chr11:100956735-100970617 | OK     | 27.973    | 13.0721    |
| 6430548M08Rik | chr8:120114151-120165307  | OK     | 53.167    | 24.8385    |
| Psmc3ip       | chr11:101087289-101095435 | OK     | 1.0239    | 0.478283   |
| AA986860      | chr1:130731975-130744622  | OK     | 1.98308   | 0.926226   |
| Tmem38b       | chr4:53826044-53862018    | OK     | 3.59047   | 1.67622    |
| Gm4461        | chr17:33215260-33216351   | NOTEST | 0.137796  | 0.0643295  |
| Spry1         | chr3:37639949-37644599    | OK     | 1.65206   | 0.771225   |
| Col6a5        | chr9:105856069-105960643  | NOTEST | 0.27816   | 0.129801   |
| Dlg3          | chrX:100767721-100818410  | OK     | 2.73294   | 1.2751     |
| Gm16062       | chr11:59810079-59839767   | OK     | 1.77172   | 0.826625   |
| Npb           | chr11:120608476-120609100 | NOTEST | 0.456184  | 0.212788   |
| 1810062O18Rik | chr14:20499313-20618354   | NOTEST | 0.471979  | 0.220141   |
| 2610316D01Rik | chr3:45280438-45378260    | OK     | 2.22962   | 1.0382     |
| Il11ra1       | chr4:41760442-41774176    | OK     | 6.17228   | 2.87143    |
| Csdc2         | chr15:81936758-81950941   | OK     | 34.772    | 16.1715    |
| Agl           | chr3:116739998-116808166  | OK     | 25.1387   | 11.6845    |
| Tjp1          | chr7:65296164-65371244    | OK     | 12.7833   | 5.94156    |
| Rab26         | chr17:24529053-24533747   | NOTEST | 0.377589  | 0.175411   |
| D430036J16Rik | chr9:81631391-81645156    | OK     | 1.51128   | 0.70182    |
| Tax1bp3       | chr11:73177082-73182046   | OK     | 4.08288   | 1.89568    |
| Slc6a12       | chr6:121346696-121365773  | NOTEST | 0.104525  | 0.0485204  |
| Cadps2        | chr6:23262773-23839421    | OK     | 12.6614   | 5.87663    |
| Csmd2         | chr4:127988043-128567656  | OK     | 2.46209   | 1.14054    |
| Tmprss2       | chr16:97564681-97611195   | NOTEST | 0.0166943 | 0.00772311 |
| Gm16740       | chr3:95181765-95236424    | NOTEST | 0.294719  | 0.136341   |
| Vgll4         | chr6:114862091-114921752  | OK     | 11.1172   | 5.14184    |
| 1700086L19Rik | chr12:74284275-74295950   | OK     | 8.62843   | 3.98937    |
| C77370        | chrX:104077434-104201117  | NOTEST | 0.570601  | 0.263796   |
| Shisa4        | chr1:135371455-135375063  | OK     | 47.1132   | 21.7808    |
| Dennd1a       | chr2:37776248-38287384    | OK     | 4.58072   | 2.11701    |
| 4930513N10Rik | chr8:95719450-95821728    | NOTEST | 0.292427  | 0.135063   |
| Gprc5c        | chr11:114851531-114872617 | OK     | 15.9249   | 7.35424    |
| Mmp11         | chr10:75923223-75932463   | OK     | 1.09928   | 0.507606   |
| Slc35b2       | chr17:45564151-45567669   | OK     | 13.9649   | 6.44717    |
| Plekhd1os     | chr12:80686374-80692466   | NOTEST | 0.483866  | 0.223373   |
| Tpbp          | chr9:85842379-85847055    | NOTEST | 0.481509  | 0.222285   |
| Hmgn1         | chr16:96121587-96127725   | OK     | 23.3538   | 10.7806    |
| Nptn          | chr9:58582239-58741559    | OK     | 226.019   | 104.322    |
| Wtip          | chr7:34109549-34133268    | OK     | 3.52014   | 1.624      |
| Arhgap30      | chr1:171388959-171410239  | NOTEST | 0.395346  | 0.182138   |
| Rtp1          | chr16:23429132-23433960   | NOTEST | 0.0426302 | 0.0196329  |
| Nln           | chr13:104023438-104109614 | OK     | 3.83862   | 1.76716    |
| 1700008J07Rik | chr7:127510437-127512869  | NOTEST | 0.567615  | 0.261267   |
| Crtac1        | chr19:42283036-42431783   | OK     | 15.4585   | 7.11016    |
| Spink10       | chr18:62548910-62741387   | OK     | 1.9253    | 0.885094   |
| Oprd1         | chr4:132110725-132144486  | OK     | 4.83553   | 2.22282    |
| Cdk17         | chr10:93160875-93241342   | OK     | 11.7422   | 5.39181    |
| Bend7         | chr2:4717830-4802146      | OK     | 1.27216   | 0.584116   |
| Abo           | chr2:26842502-26864995    | NOTEST | 0.1332    | 0.0611442  |

|               |                           |        |          |           |
|---------------|---------------------------|--------|----------|-----------|
| Zfp365        | chr10:67886104-67912662   | OK     | 27.0487  | 12.4159   |
| Stx17         | chr4:48124918-48186506    | OK     | 4.44223  | 2.03872   |
| R3hcc1        | chr14:69697303-69707580   | OK     | 13.3636  | 6.13156   |
| Casc4         | chr2:121866969-121936207  | OK     | 24.4771  | 11.2218   |
| Hcn2          | chr10:79697304-80369637   | OK     | 56.2079  | 25.7498   |
| Zfp456        | chr13:67363583-67375763   | NOTEST | 0.190403 | 0.0872151 |
| Nyap2         | chr1:81077316-81271651    | OK     | 1.826    | 0.83595   |
| Slc4a4        | chr5:88887259-89239656    | OK     | 22.3113  | 10.213    |
| Casr          | chr16:36493695-36562134   | NOTEST | 0.726919 | 0.332513  |
| Pck1          | chr2:173153072-173159253  | NOTEST | 0.105825 | 0.0483826 |
| Cd276         | chr9:58524299-58540940    | OK     | 2.20904  | 1.00934   |
| Kcnn4         | chr7:24370262-24385212    | OK     | 7.90658  | 3.61177   |
| Cys1          | chr12:24665837-24681795   | OK     | 1.48655  | 0.679012  |
| Fuom          | chr7:140097814-140102441  | OK     | 2.51471  | 1.1486    |
| Slc16a13      | chr11:70216791-70220994   | OK     | 1.16674  | 0.532165  |
| Rps6ka1       | chr4:133847290-133887797  | OK     | 5.09872  | 2.32523   |
| Asb13         | chr13:3634031-3651779     | OK     | 28.4598  | 12.9675   |
| Myl6b         | chr10:128494156-128498685 | OK     | 9.81871  | 4.47341   |
| B3gnt9        | chr8:105225187-105255153  | OK     | 0.934343 | 0.425653  |
| Col5a3        | chr9:20770049-20815034    | OK     | 15.2275  | 6.93316   |
| Nefl          | chr14:68083883-68087737   | OK     | 2464.02  | 1121.4    |
| Cyp2f2        | chr7:27119954-27133660    | NOTEST | 0.10626  | 0.0482692 |
| Has1          | chr17:17843325-17855188   | NOTEST | 0.217912 | 0.0989225 |
| Nlrp4f        | chr13:65177110-65205716   | NOTEST | 0.117054 | 0.0530403 |
| Kitl          | chr10:100015823-100100412 | OK     | 23.8046  | 10.7671   |
| Map1b         | chr13:99421463-99516602   | OK     | 752.194  | 340.085   |
| Spred1        | chr2:117121070-117182277  | OK     | 21.1438  | 9.54993   |
| Bzrap1        | chr11:87760540-87785928   | OK     | 2.96488  | 1.33859   |
| Simc1         | chr13:54503804-54565382   | OK     | 1.54184  | 0.695783  |
| Oprl1         | chr2:181715015-181720985  | OK     | 8.79847  | 3.96903   |
| Ablim2        | chr5:35757879-35884979    | OK     | 13.1203  | 5.91776   |
| Leprel2       | chr6:124841094-124857687  | OK     | 2.98217  | 1.34481   |
| Adck3         | chr1:179961088-180196020  | OK     | 7.32722  | 3.30407   |
| Ccdc37        | chr6:90403735-90428480    | OK     | 3.75328  | 1.69215   |
| D830031N03Rik | chr4:123349632-123684360  | OK     | 1.9583   | 0.882411  |
| Fgfr11        | chr5:108694228-108706950  | OK     | 1.95175  | 0.878642  |
| 6330409D20Rik | chr2:32721054-32755007    | OK     | 3.13933  | 1.41307   |
| Otud7b        | chr3:96080595-96161129    | OK     | 12.9196  | 5.81468   |
| Pilrb1        | chr5:137852146-137858049  | NOTEST | 0.061915 | 0.0278565 |
| Trim66        | chr7:109449000-109508134  | OK     | 0.920344 | 0.41351   |
| Zfp493        | chr13:67779692-67789080   | NOTEST | 0.51196  | 0.229993  |
| Dnaaf3        | chr7:4522956-4532442      | NOTEST | 0.603453 | 0.271074  |
| Reck          | chr4:43875529-43944806    | OK     | 3.10622  | 1.39531   |
| Rwdd2a        | chr9:86571987-86574899    | OK     | 4.19345  | 1.88324   |
| Slc1a5        | chr7:16781345-16798274    | OK     | 13.2701  | 5.95676   |
| Ryk           | chr9:102834919-102908307  | OK     | 7.60275  | 3.41213   |
| Nfib          | chr4:82290172-82505779    | OK     | 10.7334  | 4.81675   |
| Rnf165        | chr18:77456109-77565136   | OK     | 1.29519  | 0.580987  |
| Hsd17b11      | chr5:103989764-104021796  | OK     | 62.2216  | 27.8939   |
| Rara          | chr11:98937695-98974942   | OK     | 2.25803  | 1.01202   |
| Echdc3        | chr2:6188464-6321611      | NOTEST | 0.145942 | 0.0653646 |
| Klhl4         | chrX:114474332-114561129  | NOTEST | 0.704263 | 0.315203  |
| Clybl         | chr14:122181693-122451146 | OK     | 18.9167  | 8.45687   |



|               |                           |        |           |           |
|---------------|---------------------------|--------|-----------|-----------|
| Dnmt3b        | chr2:153649448-153687730  | NOTEST | 0.151173  | 0.0674808 |
| Zak           | chr2:72285636-72442610    | OK     | 8.6358    | 3.85058   |
| Dmkn          | chr7:30763755-30781066    | NOTEST | 0.135902  | 0.0605944 |
| Ddah2         | chr17:35059034-35062099   | OK     | 16.5143   | 7.35969   |
| Aldh1a3       | chr7:66390892-66427477    | OK     | 1.01282   | 0.451308  |
| Alpk3         | chr7:81057599-81105612    | NOTEST | 0.0315986 | 0.0140663 |
| Limd1         | chr9:123478700-123521552  | OK     | 5.81346   | 2.58579   |
| Tbx18         | chr9:87702799-87731260    | NOTEST | 0.160646  | 0.0714502 |
| Adcy3         | chr12:4133396-4240123     | OK     | 7.76877   | 3.45525   |
| Map10         | chr8:125669817-125673365  | OK     | 0.879692  | 0.391151  |
| F5            | chr1:164115263-164220274  | NOTEST | 0.15287   | 0.0679711 |
| Hhipl2        | chr1:183418502-183437053  | NOTEST | 0.316301  | 0.14063   |
| Catip         | chr1:74362107-74369321    | NOTEST | 0.197151  | 0.0876359 |
| Serpib6c      | chr13:33879815-33905708   | NOTEST | 0.420064  | 0.186718  |
| 4833419F23Rik | chr18:4353546-4368945     | NOTEST | 0.204133  | 0.0907331 |
| Gm8898        | chr2:176521003-176533821  | NOTEST | 0.281265  | 0.124967  |
| Cyp1b1        | chr17:79706952-79715041   | OK     | 6.99411   | 3.10691   |
| Muc15         | chr2:110655200-110950244  | NOTEST | 0.0761635 | 0.0338185 |
| Cc2d2a        | chr5:43662378-43740970    | OK     | 2.75383   | 1.22185   |
| Soga1         | chr2:157010441-157079265  | OK     | 5.06129   | 2.24445   |
| Aplnr         | chr2:85136359-85139923    | OK     | 1.60359   | 0.711033  |
| Oat           | chr7:132557474-132576398  | OK     | 52.5569   | 23.2978   |
| Fbxo27        | chr7:28692848-28699337    | OK     | 3.51377   | 1.55608   |
| Cables1       | chr18:11821087-11945627   | OK     | 2.28416   | 1.01132   |
| Myom1         | chr17:71019556-71126856   | NOTEST | 0.601711  | 0.266411  |
| Ybx2          | chr11:69935898-69941599   | NOTEST | 0.320027  | 0.14167   |
| Tubb6         | chr18:67390730-67402749   | OK     | 3.79037   | 1.67723   |
| Cd96          | chr16:46035656-46120248   | OK     | 0.875812  | 0.38731   |
| Pkd1l3        | chr8:109614516-109693294  | NOTEST | 0.0776152 | 0.0343218 |
| Extl2         | chr3:116007448-116029016  | OK     | 37.6849   | 16.6537   |
| Dexi          | chr16:10530206-10543054   | OK     | 32.5904   | 14.3993   |
| Tnfrsf8       | chr4:145268975-145315147  | NOTEST | 0.0376349 | 0.0166231 |
| Pcdh19        | chrX:133582860-133688993  | OK     | 1.27419   | 0.562756  |
| Nhsl1         | chr10:18407674-18533891   | OK     | 2.39766   | 1.05752   |
| Trabd2b       | chr4:114406723-114615098  | NOTEST | 0.598553  | 0.263894  |
| Fgf1          | chr18:38838672-38971274   | OK     | 223.184   | 98.2757   |
| Fam213b       | chr4:154896429-154899043  | OK     | 47.9384   | 21.0977   |
| Atp1b1        | chr1:164307674-164458355  | OK     | 730.843   | 321.556   |
| Secisbp2l     | chr2:125736985-125782870  | OK     | 49.5331   | 21.7868   |
| Asah2         | chr19:31984650-32103140   | OK     | 10.2727   | 4.51344   |
| 1700009P17Rik | chr1:171121660-171126967  | OK     | 1.19087   | 0.523099  |
| Ifi204        | chr1:173747293-173766919  | NOTEST | 0.34394   | 0.151054  |
| Dgat2         | chr7:99153662-99182713    | OK     | 7.94136   | 3.48702   |
| Lin7b         | chr7:45339125-45370564    | OK     | 18.0444   | 7.91307   |
| Toporsos      | chr4:40259605-40270221    | OK     | 6.85363   | 3.00439   |
| Resp18        | chr1:75272201-75278380    | OK     | 105.52    | 46.2174   |
| Rab13         | chr3:90220816-90225963    | OK     | 4.00949   | 1.75596   |
| Krt1          | chr15:101845425-101850786 | NOTEST | 0.469528  | 0.205629  |
| Col16a1       | chr4:130047839-130099277  | OK     | 5.88578   | 2.57723   |
| Gm6787        | chrX:8097086-8106701      | NOTEST | 0.0832531 | 0.0364509 |
| Cables2       | chr2:180258538-180273465  | OK     | 11.0985   | 4.85462   |
| Gm14403       | chr2:177498225-177512311  | OK     | 1.82438   | 0.797756  |
| Sh3rf1        | chr8:61224170-61396072    | OK     | 3.24142   | 1.41659   |

|               |                           |        |           |           |
|---------------|---------------------------|--------|-----------|-----------|
| 2310065F04Rik | chr11:67112460-67120080   | NOTEST | 0.12023   | 0.0525054 |
| Ppard         | chr17:28232753-28301469   | OK     | 4.88331   | 2.13129   |
| Gm19705       | chr1:136683395-136690805  | OK     | 2.40827   | 1.05078   |
| Arhgef37      | chr18:61493793-61536536   | OK     | 1.66115   | 0.724391  |
| 4933412E12Rik | chr10:116950561-116963279 | OK     | 0.892747  | 0.389265  |
| 2610037D02Rik | chr15:96182799-96203470   | NOTEST | 0.44169   | 0.192526  |
| Fbxo2         | chr4:148160667-148166417  | OK     | 204.747   | 89.2248   |
| Zfp114        | chr7:24175044-24182318    | NOTEST | 0.225564  | 0.0982787 |
| Scarb1        | chr5:125277086-125341094  | OK     | 11.3725   | 4.95366   |
| Tmprss9       | chr10:80879815-80900969   | NOTEST | 0.498021  | 0.216922  |
| Adam21        | chr12:81558583-81568474   | NOTEST | 0.216711  | 0.0943578 |
| Ly9           | chr1:171588612-171607410  | NOTEST | 0.559223  | 0.243245  |
| Aox3          | chr1:58113135-58200452    | NOTEST | 0.124317  | 0.054042  |
| Mansc1        | chr6:134609206-134632488  | OK     | 5.38926   | 2.34268   |
| BC021767      | chr3:94660588-94667152    | NOTEST | 0.139799  | 0.0607548 |
| Fbll1         | chr11:35797379-35798884   | OK     | 3.31943   | 1.442     |
| Megf6         | chr4:154170712-154275721  | NOTEST | 0.371036  | 0.161123  |
| Mpp2          | chr11:102057016-102088515 | OK     | 7.66258   | 3.3273    |
| Nrsn2         | chr2:152345668-152376566  | OK     | 5.17561   | 2.24538   |
| Aldoc         | chr11:78324197-78326760   | OK     | 92.7866   | 40.2529   |
| Tmem121       | chr12:113185902-113189522 | OK     | 3.25731   | 1.41264   |
| Tlr6          | chr5:64953094-64960034    | NOTEST | 0.166841  | 0.0723268 |
| 4930556M19Rik | chr15:10714835-10790123   | NOTEST | 0.511721  | 0.221808  |
| Zfp773        | chr7:7130677-7136755      | NOTEST | 0.17658   | 0.0765091 |
| Socs3         | chr11:117966086-117969366 | OK     | 36.5794   | 15.8162   |
| Slc38a1       | chr15:96571417-96642913   | OK     | 15.4975   | 6.69967   |
| 2610100L16Rik | chr3:17789920-17800071    | NOTEST | 0.325462  | 0.140676  |
| BC033916      | chr17:33905134-33906675   | NOTEST | 0.144327  | 0.0623559 |
| Plcb1         | chr2:134786163-135475258  | OK     | 8.63125   | 3.72633   |
| Prickle1      | chr15:93499113-93595891   | OK     | 2.52812   | 1.09028   |
| Gm6498        | chr14:48120868-48260883   | NOTEST | 0.0361079 | 0.0155657 |
| Plxdc1        | chr11:97923236-97986446   | OK     | 2.16412   | 0.932622  |
| Bmp4          | chr14:46379523-46390599   | OK     | 0.872484  | 0.375822  |
| 1810062G17Rik | chr3:36475936-36482299    | NOTEST | 0.729082  | 0.313866  |
| Grm5          | chr7:87584167-88135063    | NOTEST | 0.311132  | 0.133837  |
| Tigd4         | chr3:84593573-84597032    | NOTEST | 0.0819021 | 0.0351817 |
| Sqrdl         | chr2:122765358-122809551  | OK     | 3.52168   | 1.51198   |
| Eli2          | chr13:75707483-75772358   | OK     | 11.3074   | 4.85331   |
| Gsto2         | chr19:47865544-47886305   | NOTEST | 0.698543  | 0.29971   |
| Sost          | chr11:101962457-101967015 | NOTEST | 0.0455025 | 0.0195212 |
| Ntn5          | chr7:45677685-45694556    | OK     | 1.62515   | 0.697036  |
| Nav2          | chr7:48959072-49610088    | OK     | 2.05533   | 0.880985  |
| Higd1b        | chr11:102836295-102838039 | NOTEST | 0.663298  | 0.284038  |
| Cobll1        | chr2:65088338-65238626    | OK     | 4.16761   | 1.78416   |
| Npffr2        | chr5:89527428-89583740    | NOTEST | 0.133337  | 0.0569585 |
| 6030498E09Rik | chrX:38772779-38962688    | NOTEST | 0.232325  | 0.0991628 |
| Dock5         | chr14:67751927-67933572   | OK     | 13.8497   | 5.90966   |
| Rbm20         | chr19:53677305-53867080   | NOTEST | 0.34237   | 0.146009  |
| Ms4a4d        | chr19:11536848-11558466   | NOTEST | 0.135458  | 0.0577631 |
| Zfhx2os       | chr14:55061658-55092048   | NOTEST | 0.241245  | 0.102852  |
| Slc4a10       | chr2:62046514-62326743    | OK     | 2.06749   | 0.881393  |
| Ltb4r1        | chr14:55765961-55768492   | NOTEST | 0.143754  | 0.0612772 |
| Lmo4          | chr3:144188529-144205255  | OK     | 22.557    | 9.60908   |

|               |                             |        |           |            |
|---------------|-----------------------------|--------|-----------|------------|
| Dcun1d4       | chr5:73481054-73560794      | OK     | 19.5436   | 8.32429    |
| Pycard        | chr7:127991372-127993867    | NOTEST | 0.310056  | 0.131957   |
| LOC100861978  | chr4_JH584293_random:7077-2 | NOTEST | 0.383008  | 0.162925   |
| Stk32c        | chr7:139103637-139242973    | OK     | 23.0583   | 9.8032     |
| Pcgf5         | chr19:36379066-36456204     | OK     | 2.15629   | 0.916391   |
| Gbp11         | chr5:105323025-105346472    | NOTEST | 0.153519  | 0.065234   |
| Slc6a17       | chr3:107467547-107518018    | OK     | 57.9275   | 24.5995    |
| Spsb1         | chr4:149896283-149955006    | OK     | 12.1764   | 5.16616    |
| Zfp467        | chr6:48427691-48445825      | OK     | 4.76792   | 2.01922    |
| Nr3c2         | chr8:76902507-77243639      | OK     | 5.54409   | 2.34776    |
| Marcksl1      | chr4:129513580-129515981    | OK     | 11.1254   | 4.70922    |
| Btbd11        | chr10:85386813-85660292     | OK     | 5.72653   | 2.42337    |
| Mdk           | chr2:91922188-91932297      | OK     | 7.55847   | 3.19784    |
| Prox2         | chr12:85086813-85106431     | NOTEST | 0.5691    | 0.24075    |
| Crispld1      | chr1:17727416-17766207      | OK     | 3.01222   | 1.27348    |
| Slco3a1       | chr7:74275417-74554780      | OK     | 18.7021   | 7.89807    |
| Ngfr          | chr11:95568820-95587698     | OK     | 254.907   | 107.554    |
| Cd1d1         | chr3:86995835-86999340      | OK     | 2.04562   | 0.862985   |
| Sik2          | chr9:50856923-51009073      | OK     | 1.91271   | 0.806881   |
| Cdh13         | chr8:118283754-119323448    | OK     | 4.00808   | 1.69026    |
| Gstt1         | chr10:75783812-75798584     | OK     | 11.9991   | 5.05486    |
| Ttc23         | chr7:67647409-67726576      | OK     | 2.18912   | 0.921863   |
| Abcg2         | chr6:58596671-58692451      | OK     | 39.9816   | 16.8365    |
| Tnni2         | chr7:142442467-142444405    | NOTEST | 0.429006  | 0.180612   |
| Slc9a1        | chr4:133369771-133423698    | OK     | 17.4539   | 7.3448     |
| Gli1          | chr10:127321963-127341579   | NOTEST | 0.7522    | 0.316282   |
| Cnr1          | chr4:33924631-33948831      | OK     | 12.0143   | 5.04595    |
| Eda2r         | chrX:97333840-97377209      | NOTEST | 0.217053  | 0.0910379  |
| Tlcd1         | chr11:78178148-78180819     | OK     | 7.00038   | 2.93449    |
| Pik3cg        | chr12:32173396-32208649     | NOTEST | 0.246285  | 0.1032     |
| 4930539E08Rik | chr17:28896394-28915324     | NOTEST | 0.0544524 | 0.0228127  |
| 4930579F01Rik | chr3:138164134-138186713    | NOTEST | 0.0622984 | 0.0260944  |
| Gnai1         | chr5:18265134-18360413      | OK     | 59.7728   | 25.0302    |
| Stc2          | chr11:31359440-31370061     | NOTEST | 0.0546568 | 0.0228846  |
| Hoxb7         | chr11:96286645-96290163     | OK     | 6.16815   | 2.58246    |
| Fam83e        | chr7:45721219-45729492      | NOTEST | 0.0202335 | 0.00846932 |
| Adamts13      | chr2:26973415-27009625      | NOTEST | 0.0202048 | 0.00845491 |
| Cndp1         | chr18:84610508-84650095     | NOTEST | 0.103956  | 0.0434897  |
| Maob          | chrX:16709280-16817366      | OK     | 1.59088   | 0.66534    |
| Nos1ap        | chr1:170317495-170589849    | OK     | 3.24548   | 1.35431    |
| 1700007B14Rik | chr8:75448693-75984507      | NOTEST | 0.142823  | 0.0594989  |
| Angptl2       | chr2:33133418-33371494      | OK     | 8.0046    | 3.33435    |
| Ephb2         | chr4:136653609-136836011    | OK     | 1.47959   | 0.61625    |
| Map7d2        | chrX:159414577-159498947    | OK     | 189.067   | 78.678     |
| Mettl9        | chr7:121034444-121076835    | OK     | 12.8391   | 5.3408     |
| Gm10789       | chr16:90142236-90146827     | NOTEST | 0.0752216 | 0.0312521  |
| Nf1           | chr11:79339891-79581609     | OK     | 21.407    | 8.8908     |
| Evi2b         | chr11:79339891-79581609     | NOTEST | 0.207259  | 0.0860537  |
| Rbp2          | chr9:98490536-98509771      | OK     | 3.48717   | 1.44735    |
| Pde4a         | chr9:21165713-21226281      | OK     | 2.34539   | 0.973043   |
| 2410131K14Rik | chr5:118245226-118263114    | OK     | 7.50736   | 3.11353    |
| Edaradd       | chr13:12471208-12520450     | NOTEST | 0.045761  | 0.0189704  |
| Kcnrg         | chr14:61598225-61682373     | NOTEST | 0.224482  | 0.0930433  |

|               |                          |        |           |           |
|---------------|--------------------------|--------|-----------|-----------|
| Bfsp2         | chr9:103423577-103480328 | NOTEST | 0.264469  | 0.109522  |
| Gem           | chr4:11704446-11714993   | OK     | 1.46647   | 0.606581  |
| Fbxo44        | chr4:148152798-148160094 | OK     | 38.0899   | 15.7522   |
| Adamtsl4      | chr3:95676203-95687858   | OK     | 2.47141   | 1.02195   |
| Greb1l        | chr18:10325178-10562941  | OK     | 1.41416   | 0.584216  |
| Pkdcc         | chr17:83215282-83225069  | OK     | 3.92672   | 1.62219   |
| Nr4a2         | chr2:57107225-57124003   | OK     | 4.39484   | 1.81495   |
| Trp53i11      | chr2:93187583-93201757   | OK     | 2.24739   | 0.927168  |
| Plat          | chr8:22757743-22782848   | OK     | 7.65492   | 3.15578   |
| Kcnq5         | chr1:21398402-21961942   | OK     | 6.93256   | 2.85743   |
| 2310005G13Rik | chr16:57036966-57071346  | NOTEST | 0.0706717 | 0.0291216 |
| Gm20063       | chr12:61499659-61521820  | NOTEST | 0.590651  | 0.243382  |
| E330009J07Rik | chr6:40407497-40436133   | OK     | 2.2031    | 0.906407  |
| Prickle2      | chr6:92370891-92706184   | OK     | 9.82021   | 4.03931   |
| Tgif1         | chr17:70844204-70853532  | OK     | 1.86188   | 0.765835  |
| Abi3bp        | chr16:56477845-56690135  | OK     | 2.84211   | 1.16791   |
| Pros1         | chr16:62854333-62929340  | OK     | 6.38568   | 2.62319   |
| Gm4890        | chr8:79295077-79307774   | NOTEST | 0.152761  | 0.062738  |
| Slc20a2       | chr8:22462613-22569616   | OK     | 7.21514   | 2.96192   |
| Cyp27a1       | chr1:74713573-74737890   | OK     | 0.886839  | 0.364058  |
| Fam189a1      | chr7:64756095-65156528   | OK     | 1.51837   | 0.622241  |
| Htr3b         | chr9:48935007-48964990   | OK     | 11.7577   | 4.81663   |
| Nkain2        | chr10:31689318-32889915  | OK     | 12.7566   | 5.22559   |
| Ermp1         | chr19:29609882-29648420  | OK     | 48.227    | 19.7498   |
| Mtfp1         | chr11:4091480-4095431    | OK     | 10.1266   | 4.1458    |
| Mpzl1         | chr1:165592180-165634541 | OK     | 14.4805   | 5.92511   |
| Cfh           | chr1:140085854-140183411 | OK     | 9.70794   | 3.96591   |
| Slc35d2       | chr13:64096309-64129330  | OK     | 1.74969   | 0.714007  |
| Gabra4        | chr5:71569733-71658308   | NOTEST | 0.397022  | 0.162005  |
| Golim4        | chr3:75876182-75956949   | OK     | 17.9355   | 7.31659   |
| Aifm2         | chr10:61715262-61783864  | OK     | 2.12272   | 0.865855  |
| Pou4f3        | chr18:42394596-42396093  | OK     | 8.7204    | 3.55514   |
| Susd1         | chr4:59314682-59438633   | OK     | 1.19925   | 0.488882  |
| Henmt1        | chr3:108940083-108960776 | NOTEST | 0.119147  | 0.0485596 |
| Elmo1         | chr13:20090506-20608356  | OK     | 26.8146   | 10.9256   |
| Acsl6         | chr11:54303823-54361539  | OK     | 48.3725   | 19.7084   |
| Lurap1        | chr4:116136727-116144616 | OK     | 6.01706   | 2.44896   |
| Rel2          | chr18:37955558-37969731  | OK     | 71.0642   | 28.9049   |
| Nod1          | chr6:54923941-54972612   | OK     | 4.40517   | 1.79139   |
| Tiam1         | chr16:89787110-89974699  | OK     | 2.53203   | 1.0272    |
| Espnl         | chr1:91322074-91348303   | NOTEST | 0.0853837 | 0.0346363 |
| 6430710C18Rik | chr2:72745845-72813717   | NOTEST | 0.0387795 | 0.0157226 |
| Laptm4b       | chr15:34238025-34284295  | OK     | 59.0952   | 23.9561   |
| Ttc34         | chr4:154856199-154867127 | NOTEST | 0.281831  | 0.114199  |
| Ceacam1       | chr7:25376818-25566417   | OK     | 2.01814   | 0.817547  |
| Sifn8         | chr11:83002157-83020810  | NOTEST | 0.332353  | 0.134635  |
| Gm2a          | chr11:55097984-55113028  | OK     | 10.9721   | 4.44262   |
| Gbp2          | chr3:142620662-142638008 | OK     | 4.56311   | 1.84721   |
| Gas6          | chr8:13465373-13494535   | OK     | 78.763    | 31.8719   |
| C1qtnf2       | chr11:43474305-43491525  | OK     | 2.40452   | 0.972596  |
| 1700047M11Rik | chr1:182300833-182303289 | NOTEST | 0.330407  | 0.133644  |
| Lrrk2         | chr15:91673223-91816124  | OK     | 10.8543   | 4.38769   |
| Mx1           | chr16:97447034-97462906  | NOTEST | 0.251186  | 0.101532  |

|               |                           |        |           |            |
|---------------|---------------------------|--------|-----------|------------|
| Gm12504       | chr4:44121892-44124123    | NOTEST | 0.0887121 | 0.0358573  |
| Cttnbp2nl     | chr3:105001914-105053146  | OK     | 12.5393   | 5.06693    |
| Yes1          | chr5:32611170-32687066    | OK     | 5.56137   | 2.24703    |
| Kazn          | chr4:142102389-142239401  | OK     | 15.8538   | 6.40483    |
| AW549542      | chr5:119570128-119580358  | NOTEST | 0.639077  | 0.257864   |
| Cpt1a         | chr19:3323300-3385733     | OK     | 54.1929   | 21.8541    |
| Mum1l1        | chrX:139210043-139238335  | OK     | 0.766845  | 0.308988   |
| Pik3c2b       | chr1:133046011-133108688  | OK     | 1.55275   | 0.625613   |
| Fndc3b        | chr3:27416161-27710439    | OK     | 5.1013    | 2.05428    |
| Tmc7          | chr7:118535843-118584686  | OK     | 6.78059   | 2.73036    |
| Tdrd5         | chr1:156255295-156303606  | NOTEST | 0.0912291 | 0.0367264  |
| Itga6         | chr2:71786938-71858427    | OK     | 20.0813   | 8.08349    |
| 36769         | chr11:87578388-87590539   | OK     | 28.005    | 11.2672    |
| Slc24a3       | chr2:145242610-145641939  | OK     | 11.8614   | 4.76739    |
| Zic2          | chr14:122475383-122480328 | OK     | 0.996757  | 0.400484   |
| Scd3          | chr19:44203287-44244016   | NOTEST | 0.32161   | 0.129192   |
| Pyroxd2       | chr19:42725857-42752775   | NOTEST | 0.255704  | 0.102692   |
| Lipk          | chr19:34008253-34047903   | OK     | 0.843618  | 0.338637   |
| Ephb4         | chr5:137350108-137374522  | OK     | 3.23139   | 1.29651    |
| Cd27          | chr6:125224211-125239934  | NOTEST | 0.0789149 | 0.0316502  |
| Plekhh2       | chr17:84511894-84622142   | NOTEST | 0.782953  | 0.313916   |
| Foxs1         | chr2:152931897-152933208  | NOTEST | 0.432153  | 0.172936   |
| Slc29a2       | chr19:5024005-5031972     | OK     | 3.62131   | 1.44857    |
| Mtap          | chr4:89137369-89181090    | OK     | 11.6586   | 4.65551    |
| Hrk           | chr5:118169763-118189478  | NOTEST | 0.143658  | 0.0573392  |
| A230009B12Rik | chr17:10403011-10840191   | NOTEST | 0.115297  | 0.046018   |
| Pkp1          | chr1:135871394-135919024  | NOTEST | 0.0594595 | 0.0237183  |
| Robo3         | chr9:37416044-37433175    | NOTEST | 0.022762  | 0.00906671 |
| Zdbf2         | chr1:63182570-63314575    | NOTEST | 0.446501  | 0.177682   |
| Ggnbp1        | chr17:27018034-27036378   | OK     | 0.777758  | 0.309483   |
| Fbxo15        | chr18:84935024-84981392   | NOTEST | 0.0992928 | 0.0394854  |
| Ppap2a        | chr13:112800776-112927380 | OK     | 54.0447   | 21.4821    |
| Stk10         | chr11:32533265-32624595   | OK     | 2.50371   | 0.995126   |
| Gm11762       | chr11:119548629-119569046 | NOTEST | 0.831884  | 0.330422   |
| Htr1b         | chr9:81631391-81645156    | OK     | 6.60054   | 2.62054    |
| Srd5a2        | chr17:74017705-74047916   | OK     | 2.67789   | 1.062      |
| Tcirg1        | chr19:3896049-3907133     | OK     | 3.85464   | 1.52737    |
| Hoxd1         | chr2:74762979-74765142    | OK     | 16.6988   | 6.61489    |
| Plekhg1       | chr10:3740376-3967302     | OK     | 6.82457   | 2.70296    |
| Ccdc69        | chr11:55049737-55078131   | NOTEST | 0.211078  | 0.0835233  |
| Ccl3          | chr11:83647842-83649378   | NOTEST | 0.333981  | 0.132091   |
| Aatk          | chr11:120007315-120047145 | OK     | 60.6649   | 23.9899    |
| Adamts18      | chr8:113698136-113848839  | NOTEST | 0.117941  | 0.0466287  |
| Ccdc24        | chr4:117835257-117872470  | NOTEST | 0.0936707 | 0.0370312  |
| Tgfa          | chr6:86195250-86275449    | OK     | 4.23818   | 1.67489    |
| Calcoco2      | chr11:96098915-96111962   | NOTEST | 0.0541149 | 0.0213833  |
| Epha4         | chr1:77367184-77515088    | OK     | 1.94869   | 0.769856   |
| Dtx4          | chr19:12466335-12501996   | OK     | 5.4597    | 2.15665    |
| Smpd3         | chr8:106252547-106337988  | OK     | 12.1851   | 4.81322    |
| Csrnp1        | chr9:119971165-119984658  | OK     | 5.14864   | 2.03128    |
| Cilp2         | chr8:69880365-69887392    | NOTEST | 0.163973  | 0.0646876  |
| Gpr123        | chr7:139834173-139878088  | OK     | 1.77156   | 0.698736   |
| 4931406C07Rik | chr9:15283336-15357788    | OK     | 10.8699   | 4.28656    |



|               |                          |        |           |           |
|---------------|--------------------------|--------|-----------|-----------|
| Ifitm10       | chr7:142326109-142372259 | OK     | 1.40258   | 0.552639  |
| Dact1         | chr12:71309883-71320107  | OK     | 3.5317    | 1.39121   |
| Magix         | chrX:7673165-7681251     | OK     | 0.940253  | 0.370323  |
| Phyhip        | chr14:70457516-70468824  | OK     | 2.98881   | 1.1765    |
| Gal3st3       | chr19:5298330-5308739    | OK     | 1.70913   | 0.671613  |
| Ckmt1         | chr2:121358640-121380940 | OK     | 213.358   | 83.8295   |
| Txnip         | chr3:96555767-96566801   | OK     | 37.6929   | 14.8018   |
| Sall2         | chr14:52311176-52328670  | OK     | 8.74472   | 3.42676   |
| 4931408D14Rik | chr19:37258425-37264095  | NOTEST | 0.16241   | 0.0636106 |
| Slc25a34      | chr4:141618824-141623834 | NOTEST | 0.246822  | 0.0966414 |
| Gm9899        | chr5:30573986-30625270   | NOTEST | 0.588972  | 0.230542  |
| Cers1         | chr8:70315774-70353273   | LOWDAT | 14.4819   | 5.6679    |
| Cd226         | chr18:89197426-89270327  | NOTEST | 0.0744473 | 0.029106  |
| Nos1          | chr5:117867118-117953813 | OK     | 2.4925    | 0.97374   |
| Gm14169       | chr2:156609197-156613422 | NOTEST | 0.260286  | 0.10167   |
| Ripply2       | chr9:87015536-87019916   | NOTEST | 0.701557  | 0.273895  |
| Hykk          | chr9:54917289-54949924   | OK     | 1.34699   | 0.525717  |
| Ikbip         | chr10:91083038-91102613  | OK     | 10.3041   | 4.01849   |
| 9330117012Rik | chr18:54611743-54639870  | NOTEST | 0.122428  | 0.0476821 |
| Trim12a       | chr7:104299896-104324838 | OK     | 1.37067   | 0.5336    |
| Tbx3os2       | chr5:119685087-119691218 | OK     | 3.71424   | 1.44594   |
| P2rx5         | chr11:73160529-73172687  | OK     | 6.04563   | 2.35216   |
| Gm14379       | chrX:7375924-7378042     | NOTEST | 0.181214  | 0.0704491 |
| Pcdh17        | chr14:84443562-84537060  | OK     | 7.00822   | 2.72374   |
| Zfp36         | chr7:28376783-28379228   | OK     | 58.0225   | 22.5454   |
| Psph          | chr5:129765557-129787253 | OK     | 9.1155    | 3.5406    |
| Msi1          | chr5:115429684-115454202 | OK     | 3.99671   | 1.55217   |
| Msln          | chr17:25748612-25754327  | NOTEST | 0.596286  | 0.231516  |
| Tcf23         | chr5:30933142-31348845   | NOTEST | 0.0129355 | 0.0050201 |
| Rassf10       | chr7:112953961-112957458 | OK     | 1.13021   | 0.438428  |
| Ctns          | chr11:73183132-73199019  | OK     | 11.6342   | 4.51044   |
| Cttnbp2       | chr6:18366476-18514825   | OK     | 2.76259   | 1.0703    |
| Hspa1l        | chr17:34972702-34979228  | NOTEST | 0.16142   | 0.0624798 |
| Wscd2         | chr5:113550419-113589725 | OK     | 1.46231   | 0.566001  |
| Glr3          | chr3:80843598-80913660   | OK     | 76.1778   | 29.4547   |
| Plin1         | chr7:79721163-79732776   | NOTEST | 0.030481  | 0.0117746 |
| Gipc3         | chr10:81337761-81343266  | NOTEST | 0.553864  | 0.213931  |
| Fam13a        | chr6:58933535-59024502   | OK     | 7.30391   | 2.8205    |
| Ccnd2         | chr6:127125708-127212419 | OK     | 3.40109   | 1.3129    |
| Airn          | chr17:12682405-12868143  | OK     | 3.29328   | 1.27076   |
| Ptprd         | chr4:75941236-78211895   | OK     | 5.41246   | 2.08741   |
| Crim1         | chr17:78200247-78418152  | OK     | 6.92804   | 2.67145   |
| Klrg2         | chr6:38626659-38637239   | OK     | 1.55126   | 0.597917  |
| Slc4a2        | chr5:24425231-24440947   | OK     | 24.6259   | 9.48744   |
| Gdnf          | chr15:7811010-7837575    | NOTEST | 0.0965937 | 0.0372132 |
| Jam2          | chr16:84774122-84826375  | OK     | 16.866    | 6.49747   |
| Adamts1       | chr16:85793827-85803115  | OK     | 5.9316    | 2.28407   |
| Exd1          | chr2:119519403-119547627 | NOTEST | 0.619571  | 0.238516  |
| Ksr1          | chr11:79014800-79146354  | OK     | 5.23715   | 2.01611   |
| Rest          | chr5:77265493-77283697   | OK     | 1.86859   | 0.718315  |
| 4921508D12Rik | chr2:132424740-132452499 | NOTEST | 0.0580004 | 0.0222909 |
| Pwwp2b        | chr7:139248481-139267253 | OK     | 5.20483   | 1.99934   |
| Kcna10        | chr3:107183142-107195721 | NOTEST | 0.118882  | 0.0456495 |

|               |                           |        |           |            |
|---------------|---------------------------|--------|-----------|------------|
| Csad          | chr15:102176997-102189043 | OK     | 6.66299   | 2.55594    |
| Magee2        | chrX:104854951-104857267  | OK     | 2.91156   | 1.11671    |
| Cit           | chr5:115845655-116006341  | OK     | 2.52211   | 0.967165   |
| Cntnap2       | chr6:45060060-47301371    | OK     | 53.0097   | 20.3186    |
| Igfn1         | chr1:135953577-136006342  | NOTEST | 0.0170099 | 0.00651791 |
| Atp11a        | chr8:12757015-12868728    | OK     | 105.764   | 40.517     |
| Rapgef3       | chr15:97744769-97767666   | OK     | 1.87126   | 0.715954   |
| Hc            | chr2:34983330-35061441    | NOTEST | 0.247928  | 0.0948544  |
| Atp8b1        | chr18:64528978-64661000   | NOTEST | 0.456586  | 0.174619   |
| Rnd2          | chr11:101468337-101471306 | OK     | 31.1892   | 11.9276    |
| Gpr1          | chr1:63182570-63314575    | NOTEST | 0.443166  | 0.169423   |
| Zfp536        | chr7:37479108-37769752    | OK     | 3.30428   | 1.2628     |
| Cdkn2c        | chr4:109660875-109665372  | OK     | 2.91469   | 1.11357    |
| Il1rap        | chr16:26581704-26755502   | OK     | 3.20212   | 1.2233     |
| Fam184b       | chr5:45529704-45645469    | OK     | 1.76865   | 0.675601   |
| Il12rb1       | chr8:70808448-70821423    | NOTEST | 0.0605552 | 0.0231307  |
| Lrp1          | chr10:127538157-127621148 | OK     | 13.0741   | 4.99233    |
| Cd81          | chr7:143021783-143067930  | OK     | 105.319   | 40.1968    |
| Slc44a5       | chr3:153973435-154271720  | NOTEST | 0.0996514 | 0.0380336  |
| Zfp599        | chr9:22055459-22389206    | NOTEST | 0.245188  | 0.0935634  |
| Chchd10       | chr10:75935572-75940672   | OK     | 79.5787   | 30.335     |
| Ccdc157       | chr11:4135159-4160293     | OK     | 7.93645   | 3.02455    |
| Megf9         | chr4:70431926-70534928    | OK     | 40.8033   | 15.5433    |
| Cryba4        | chr5:112246532-112252502  | NOTEST | 0.413314  | 0.157408   |
| Celsr2        | chr3:108390847-108415494  | OK     | 9.02004   | 3.43379    |
| Dmbx1         | chr4:115915118-115939926  | NOTEST | 0.0600304 | 0.0228489  |
| Fzd9          | chr5:135248937-135251047  | NOTEST | 0.330178  | 0.125673   |
| Tdrd1         | chr19:56826208-56870012   | NOTEST | 0.0256258 | 0.00975105 |
| Tmem71        | chr15:66526211-66561046   | NOTEST | 0.289556  | 0.110174   |
| Kcnd2         | chr6:21216108-21729805    | OK     | 1.00037   | 0.380627   |
| Dlx4          | chr11:95140446-95159047   | NOTEST | 0.0887639 | 0.0337518  |
| Nmbr          | chr10:14760288-14770556   | NOTEST | 0.148407  | 0.0563932  |
| Tmem56        | chr3:121202009-121263316  | OK     | 34.9266   | 13.2718    |
| C2cd4c        | chr10:79606853-79614025   | OK     | 2.14081   | 0.812901   |
| Sox13         | chr1:133382299-133424212  | OK     | 3.21712   | 1.22109    |
| Cdkl4         | chr17:80523549-80563834   | OK     | 1.25423   | 0.475276   |
| Ache          | chr5:137288253-137294466  | OK     | 62.0343   | 23.4999    |
| Ctso          | chr3:81932615-81956725    | OK     | 5.43632   | 2.0592     |
| Sulf1         | chr1:12692429-12860372    | OK     | 10.002    | 3.7886     |
| C130030K03Rik | chr10:49093680-49095843   | NOTEST | 0.736827  | 0.279095   |
| Iqub          | chr6:24444864-24515067    | NOTEST | 0.109051  | 0.0412504  |
| Myh3          | chr11:67078299-67102291   | NOTEST | 0.069746  | 0.02638    |
| 9030025P20Rik | chr17:14964188-15022449   | NOTEST | 0.347973  | 0.131563   |
| Fam65c        | chr2:167980785-168010593  | NOTEST | 0.767948  | 0.290261   |
| Sema4g        | chr19:44989343-45003395   | OK     | 3.1535    | 1.19179    |
| 5031414D18Rik | chr14:75004109-75388146   | NOTEST | 0.178677  | 0.0675188  |
| Igsf6         | chr7:121034444-121076835  | NOTEST | 0.268553  | 0.101477   |
| BC064078      | chr6:128993019-129006649  | OK     | 1.17244   | 0.442561   |
| Elf3          | chr1:135253573-135258472  | NOTEST | 0.12917   | 0.0487448  |
| Abcb1b        | chr5:8798146-8866314      | NOTEST | 0.665642  | 0.251129   |
| Itgae         | chr11:73090594-73147449   | NOTEST | 0.117656  | 0.044366   |
| Mtmr10        | chr7:64287669-64340806    | OK     | 4.26284   | 1.60731    |
| Espn          | chr4:152120875-152152207  | NOTEST | 0.502488  | 0.18944    |

|               |                           |        |           |            |
|---------------|---------------------------|--------|-----------|------------|
| Vat1l         | chr8:114205639-114374070  | OK     | 115.437   | 43.5114    |
| Gm4951        | chr18:60212076-60247820   | NOTEST | 0.430726  | 0.162249   |
| Scnn1a        | chr6:125321339-125344942  | NOTEST | 0.211739  | 0.0797103  |
| Soat1         | chr1:156428107-156474328  | OK     | 8.62368   | 3.24481    |
| B930018H19Rik | chr8:34589419-34640316    | NOTEST | 0.346912  | 0.130474   |
| Sphk1         | chr11:116531910-116536675 | OK     | 3.12588   | 1.17501    |
| Adamts2       | chr11:50602084-50807573   | OK     | 4.08387   | 1.53487    |
| Hgf           | chr5:16553494-16619439    | OK     | 4.1966    | 1.57637    |
| Vash2         | chr1:190947645-190979296  | OK     | 1.38312   | 0.519481   |
| Entpd1        | chr19:40659793-40741602   | OK     | 6.35125   | 2.38472    |
| B130024G19Rik | chr7:70351949-70411146    | NOTEST | 0.51266   | 0.192484   |
| Rimk1a        | chr4:119465284-119492598  | OK     | 56.1137   | 21.0567    |
| E230025N22Rik | chr18:36684922-36695925   | NOTEST | 0.106949  | 0.0401225  |
| Btbd17        | chr11:114790668-114795892 | NOTEST | 0.0506426 | 0.0189905  |
| Ntrk3         | chr7:78192113-78577838    | OK     | 29.22     | 10.957     |
| Akr1c19       | chr13:4233739-4248359     | NOTEST | 0.152087  | 0.0570144  |
| Dpyd          | chr3:118562177-119432918  | OK     | 4.6563    | 1.74479    |
| 2010300C02Rik | chr1:37611675-37719811    | OK     | 1.09705   | 0.411066   |
| Fam57b        | chr7:126816884-126830219  | OK     | 111.33    | 41.7024    |
| Myo1f         | chr17:33555706-33607764   | NOTEST | 0.28517   | 0.106776   |
| Dydc2         | chr14:41049208-41069074   | OK     | 2.03304   | 0.760731   |
| Fam20a        | chr11:109672925-109722256 | OK     | 3.92008   | 1.46536    |
| Sec24d        | chr3:123267495-123365636  | OK     | 5.9026    | 2.20543    |
| Cfb           | chr17:34856373-34862514   | NOTEST | 0.638896  | 0.238679   |
| Nkx6-2        | chr7:139389108-139582797  | NOTEST | 0.463218  | 0.172879   |
| Gm16023       | chr4:155601415-155624755  | NOTEST | 0.0763958 | 0.0284758  |
| 6030419C18Rik | chr9:58488602-58499742    | OK     | 67.4093   | 25.1221    |
| Fosb          | chr7:19302695-19310045    | OK     | 38.4316   | 14.3224    |
| Psemb11       | chr14:54625309-54629556   | NOTEST | 0.0259656 | 0.00967655 |
| Cd164         | chr10:41519499-41531042   | OK     | 145.748   | 54.3047    |
| Cd79b         | chr11:106311340-106314529 | OK     | 0.966679  | 0.360036   |
| Tmie          | chr9:110866045-110880083  | NOTEST | 0.641278  | 0.238618   |
| B3galt1       | chr2:68104671-68122882    | OK     | 14.8136   | 5.51171    |
| Cldn14        | chr16:93919030-94008837   | NOTEST | 0.43011   | 0.160002   |
| Srl           | chr16:4480227-4523053     | OK     | 2.49268   | 0.927194   |
| Lpin3         | chr2:160880669-160906000  | NOTEST | 0.157198  | 0.0584461  |
| Lrig1         | chr6:94500313-94700145    | OK     | 4.96306   | 1.845      |
| Cyp26a1       | chr19:37697807-37701536   | NOTEST | 0.0332619 | 0.0123642  |
| Gm2762        | chr13:53393688-53455630   | NOTEST | 0.0822541 | 0.0305746  |
| G730013B05Rik | chr16:50526244-50559459   | NOTEST | 0.045119  | 0.0167681  |
| Sdc2          | chr15:32920722-33034721   | OK     | 12.5715   | 4.67019    |
| Chd7          | chr4:8690405-8868449      | OK     | 0.907774  | 0.337219   |
| Itgam         | chr7:128062639-128118491  | NOTEST | 0.693028  | 0.257421   |
| Adssl1        | chr12:112620046-112641355 | OK     | 1.22163   | 0.453686   |
| Ly6h          | chr15:75564744-75567182   | OK     | 33.713    | 12.5092    |
| Nab2          | chr10:127642985-127666703 | OK     | 4.95069   | 1.83661    |
| Iqcd          | chr5:120589022-120607113  | NOTEST | 0.204289  | 0.0756505  |
| AW011738      | chr4:156203283-156206028  | OK     | 1.5497    | 0.573866   |
| Hydin         | chr8:110266976-110610253  | NOTEST | 0.0566283 | 0.0209611  |
| Faah          | chr4:115996655-116017902  | OK     | 7.21931   | 2.67178    |
| Cilp          | chr9:65265179-65280605    | OK     | 1.43947   | 0.532296   |
| Clec1b        | chr6:129397296-129405413  | NOTEST | 0.13762   | 0.0508213  |
| Gm2897        | chr14:3049284-3076838     | NOTEST | 0.0907319 | 0.0334994  |

|               |                           |        |           |           |
|---------------|---------------------------|--------|-----------|-----------|
| Col6a2        | chr10:76595755-76623404   | OK     | 9.60968   | 3.54669   |
| Scrt1         | chr15:76516202-76522129   | OK     | 30.2916   | 11.1636   |
| Gm5535        | chr2:144173149-144189290  | NOTEST | 0.076631  | 0.0282342 |
| Esrra         | chr19:6909697-6921808     | OK     | 25.207    | 9.28727   |
| A930017M01Rik | chr15:44881393-44884743   | OK     | 1.02202   | 0.376267  |
| Clvs2         | chr10:33512333-33624600   | OK     | 5.01973   | 1.84539   |
| Ppp1r3a       | chr6:14713821-14755274    | NOTEST | 0.188637  | 0.0692401 |
| Map2k6        | chr11:110399121-110513637 | OK     | 4.82506   | 1.77102   |
| Ifitm2        | chr7:140954838-140955961  | OK     | 28.6905   | 10.5216   |
| Cebpd         | chr16:15887285-16146851   | OK     | 6.82274   | 2.50178   |
| Swap70        | chr7:110221702-110283506  | OK     | 4.79387   | 1.75768   |
| Tgfb1         | chr7:25687001-25704996    | OK     | 2.37831   | 0.871353  |
| Dixdc1        | chr9:50662752-50727984    | OK     | 2.20378   | 0.807096  |
| Tmem140       | chr6:34863145-34878065    | OK     | 2.03059   | 0.74304   |
| Ppp1r3c       | chr19:36731730-36736604   | OK     | 0.882275  | 0.322752  |
| Doc2a         | chr7:126847552-126861463  | NOTEST | 0.0738737 | 0.0270197 |
| Tgfb1         | chr4:47353304-47414924    | OK     | 6.26922   | 2.29209   |
| Rbp7          | chr4:149449701-149454968  | OK     | 1.33616   | 0.488205  |
| Casp4         | chr9:5308859-5336791      | NOTEST | 0.731171  | 0.267155  |
| Ppp1r14a      | chr7:29289319-29293390    | OK     | 1.72031   | 0.628528  |
| Cnp           | chr11:100574938-100581739 | OK     | 94.8766   | 34.6607   |
| C920025E04Rik | chr17:36109029-36111676   | NOTEST | 0.147232  | 0.0537838 |
| Krt28         | chr11:99365006-99374903   | NOTEST | 0.413678  | 0.151012  |
| Mdfi          | chr17:47815327-47834691   | NOTEST | 0.256951  | 0.0937873 |
| Fam163b       | chr2:27110378-27142477    | OK     | 1.40155   | 0.511464  |
| Myl2          | chr5:122100979-122106854  | NOTEST | 0.491215  | 0.179253  |
| Uckl1os       | chr2:181569152-181592461  | NOTEST | 0.450647  | 0.164308  |
| Lingo2        | chr4:35706647-36951744    | OK     | 5.6638    | 2.0646    |
| Gja4          | chr4:127311419-127314039  | OK     | 2.23904   | 0.815737  |
| Lacc1         | chr14:77024200-77036617   | OK     | 2.56969   | 0.936081  |
| Zfp618        | chr4:62965573-63134030    | NOTEST | 0.525243  | 0.191282  |
| Vasn          | chr16:4626883-4679720     | OK     | 3.53033   | 1.28515   |
| Erbp2ip       | chr13:103818785-103920586 | OK     | 7.24944   | 2.63632   |
| Cntnap3       | chr13:64737590-64903888   | OK     | 2.51425   | 0.913857  |
| Agap2         | chr10:127078906-127093169 | OK     | 6.54103   | 2.37693   |
| Htr1d         | chr4:136423523-136444401  | OK     | 18.5369   | 6.73259   |
| Mesp2         | chr7:79810726-79813431    | NOTEST | 0.0867406 | 0.0314854 |
| 1810024B03Rik | chr2:127186354-127208280  | NOTEST | 0.10092   | 0.0366263 |
| Tagln3        | chr16:45711229-45724531   | OK     | 230.343   | 83.5932   |
| Sgcx          | chr8:37522553-38661508    | OK     | 2.23835   | 0.812159  |
| Prr5l         | chr2:101714284-101838980  | NOTEST | 0.251079  | 0.0910406 |
| Tspan9        | chr6:127961399-128143578  | OK     | 4.86722   | 1.7644    |
| Wwc2          | chr8:47827605-47990551    | OK     | 5.31608   | 1.92591   |
| Klf12         | chr14:99870639-100149796  | OK     | 2.11081   | 0.764212  |
| Cdc14a        | chr3:116272552-116424032  | OK     | 1.68551   | 0.610184  |
| Zfp804b       | chr5:6769029-7344378      | NOTEST | 0.265235  | 0.0960116 |
| Mapkapk2      | chr1:131053703-131097543  | OK     | 14.2798   | 5.16772   |
| Tnfaip8l2     | chr3:95134087-95142360    | NOTEST | 0.306093  | 0.110642  |
| Stpg2         | chr3:139205892-139710299  | NOTEST | 0.041362  | 0.0149496 |
| Nat8l         | chr5:33995983-34005916    | OK     | 105.018   | 37.9505   |
| Gm11710       | chr11:115031446-115037690 | NOTEST | 0.0831349 | 0.0300423 |
| Mos           | chr4:3870657-3872105      | NOTEST | 0.040493  | 0.0146272 |
| Stbd1         | chr5:92603050-92606579    | OK     | 50.1852   | 18.1272   |

|               |                           |        |           |            |
|---------------|---------------------------|--------|-----------|------------|
| Abcd2         | chr15:91145870-91191807   | OK     | 8.68106   | 3.13521    |
| Itga8         | chr2:12106659-12312315    | NOTEST | 0.443633  | 0.160182   |
| BC147527      | chr13:120300391-120308841 | NOTEST | 0.034666  | 0.0125166  |
| Cbs           | chr17:31612622-31637205   | NOTEST | 0.0802213 | 0.0289461  |
| Olf1033       | chr2:86020639-86044808    | NOTEST | 0.111027  | 0.0400199  |
| Arid5b        | chr10:68095592-68278726   | OK     | 4.14694   | 1.49465    |
| Syt4          | chrX:133936384-133981812  | NOTEST | 0.23305   | 0.0839436  |
| 4930507D05Rik | chr10:62429377-62451353   | NOTEST | 0.168987  | 0.0608647  |
| Nkain3        | chr4:20118873-20778668    | OK     | 0.77157   | 0.277799   |
| Tmem211       | chr5:113226908-113239263  | NOTEST | 0.107767  | 0.0387959  |
| S1pr3         | chr13:51408617-51422797   | OK     | 50.9584   | 18.3313    |
| Nrk           | chrX:138914429-139009090  | NOTEST | 0.023662  | 0.00850721 |
| Tceal6        | chrX:135208685-135210687  | OK     | 9.04678   | 3.25228    |
| Dach1         | chr14:97786845-98169765   | OK     | 3.66613   | 1.31736    |
| Mxra7         | chr11:116803399-116828046 | OK     | 16.5252   | 5.93019    |
| Fads2         | chr19:10064163-10101503   | OK     | 74.7192   | 26.8055    |
| Bche          | chr3:73635808-73708415    | OK     | 4.78584   | 1.71333    |
| 4933427I22Rik | chr4:139926110-139943519  | NOTEST | 0.0949328 | 0.0339779  |
| Serpinb1b     | chr13:33084102-33094380   | OK     | 8.6381    | 3.09122    |
| Xrra1         | chr7:99859217-99917824    | NOTEST | 0.239692  | 0.0857081  |
| Lrrc75a       | chr11:62604883-62648523   | OK     | 2.4301    | 0.868875   |
| Dnah5         | chr15:28203765-28472045   | NOTEST | 0.027665  | 0.00988589 |
| Npas3         | chr12:53248676-54072175   | NOTEST | 0.727271  | 0.259873   |
| Stab1         | chr14:31134852-31168641   | OK     | 2.28706   | 0.816894   |
| Glis3         | chr19:28262447-28720027   | NOTEST | 0.177483  | 0.0633638  |
| Abhd1         | chr5:30933142-31348845    | NOTEST | 0.493827  | 0.176201   |
| Bhlhe40       | chr6:108577035-108666925  | OK     | 12.3953   | 4.41993    |
| Pcx           | chr19:4510471-4621752     | OK     | 17.8705   | 6.37091    |
| A730085K08Rik | chr9:122382021-122398801  | NOTEST | 0.14223   | 0.0506802  |
| Chrna1        | chr2:73563280-73580338    | NOTEST | 0.23879   | 0.0850867  |
| Id3           | chr4:136143821-136145392  | OK     | 71.5407   | 25.4703    |
| Nptx1         | chr11:119538718-119547820 | OK     | 62.0886   | 22.0872    |
| Wnk2          | chr13:49036301-49148328   | OK     | 5.0459    | 1.79009    |
| C2cd2         | chr16:97855208-97922633   | OK     | 9.48226   | 3.3614     |
| Ppbp          | chr5:90768517-90770060    | NOTEST | 0.469617  | 0.16643    |
| Nt5dc2        | chr14:31134852-31168641   | OK     | 2.84416   | 1.00783    |
| Adam12        | chr7:133883198-134225097  | NOTEST | 0.261601  | 0.0926621  |
| Acy3          | chr19:3986660-3990005     | OK     | 1.18359   | 0.419198   |
| Sh3tc2        | chr18:61953074-62015719   | OK     | 2.37311   | 0.840366   |
| Itgax         | chr7:128129567-128150657  | NOTEST | 0.121767  | 0.0431056  |
| Slc24a5       | chr2:125068126-125123660  | NOTEST | 0.221398  | 0.0783368  |
| Slc6a8        | chrX:73673132-73682500    | OK     | 15.5398   | 5.49319    |
| 1700123I01Rik | chr19:6184409-6224219     | NOTEST | 0.0365317 | 0.0129088  |
| Gm3383        | chr14:5790560-5807939     | NOTEST | 0.0354933 | 0.0125417  |
| Klhl38        | chr15:58314572-58324169   | NOTEST | 0.700866  | 0.24759    |
| Igsf5         | chr16:96361756-96422121   | NOTEST | 0.0790177 | 0.0279033  |
| 4930599N23Rik | chr6:39118472-39206773    | NOTEST | 0.157584  | 0.0556425  |
| Wdr93         | chr7:79743162-79785950    | NOTEST | 0.0247329 | 0.0087312  |
| Mxi1          | chr19:53310505-53375810   | OK     | 10.1103   | 3.56674    |
| Rimbp2        | chr5:128760400-128953362  | OK     | 5.77428   | 2.03486    |
| Col9a3        | chr2:180598221-180642691  | NOTEST | 0.664658  | 0.23412    |
| Adcy1         | chr11:7063488-7178505     | OK     | 10.097    | 3.55615    |
| Col6a6        | chr9:105689416-105828085  | NOTEST | 0.135355  | 0.0476631  |



|               |                           |        |           |            |
|---------------|---------------------------|--------|-----------|------------|
| 3110039I08Rik | chr9:41376560-41432079    | NOTEST | 0.104612  | 0.0368204  |
| Snai1         | chr2:167538226-167542811  | NOTEST | 0.499129  | 0.175525   |
| Rhbdf1        | chr11:32209584-32222293   | OK     | 6.98968   | 2.45757    |
| Mavs          | chr2:131127411-131604824  | OK     | 3.04227   | 1.06917    |
| Snx20         | chr8:88626827-88636128    | NOTEST | 0.195395  | 0.0685943  |
| Slitrk4       | chrX:64269443-64276996    | OK     | 9.45339   | 3.31734    |
| Ctxn2         | chr2:125136691-125147841  | NOTEST | 0.724784  | 0.254155   |
| Casp6         | chr3:129901424-129914102  | OK     | 2.92932   | 1.02672    |
| 6330416G13Rik | chr4:63560359-63586353    | OK     | 3.2741    | 1.14741    |
| Cplx2         | chr13:54371348-54383917   | OK     | 91.5765   | 32.083     |
| Arhgap29      | chr3:121953325-122016153  | OK     | 5.07345   | 1.77595    |
| Stc1          | chr14:69029288-69041401   | NOTEST | 0.431422  | 0.150895   |
| Car3          | chr3:14863537-14872373    | OK     | 1.13678   | 0.397449   |
| Gm15441       | chr3:96555767-96566801    | NOTEST | 0.0708294 | 0.0247598  |
| Slc13a5       | chr11:72241993-72266604   | NOTEST | 0.229632  | 0.0802464  |
| Foxp2         | chr6:14901348-15441977    | OK     | 0.769817  | 0.268837   |
| Cyp2j8        | chr4:96444587-96507386    | NOTEST | 0.0944702 | 0.0329885  |
| 9230112J17Rik | chr9:60523966-60545882    | NOTEST | 0.708283  | 0.247307   |
| Dusp18        | chr11:3895239-3901296     | OK     | 3.33664   | 1.16477    |
| Odf1          | chr15:38219202-38226735   | NOTEST | 0.061791  | 0.0215555  |
| 1810034E14Rik | chr13:64192544-64274988   | NOTEST | 0.137596  | 0.0479853  |
| Rab3b         | chr4:108879069-108972077  | OK     | 3.55639   | 1.23952    |
| Efcab12       | chr6:115810728-115838412  | OK     | 0.894439  | 0.311667   |
| Kcna2         | chr3:107101566-107115005  | OK     | 69.7651   | 24.3011    |
| 2310069B03Rik | chr6:82877865-82881853    | NOTEST | 0.0402446 | 0.014016   |
| Serhl         | chr15:83100204-83122801   | OK     | 6.29104   | 2.18976    |
| Hcls1         | chr16:36934982-36963214   | OK     | 0.947911  | 0.329845   |
| Kdm4d         | chr9:14462580-14500482    | OK     | 1.14174   | 0.396847   |
| Gria3         | chrX:41401300-41678601    | OK     | 5.90801   | 2.05337    |
| Pou6f2        | chr13:18124959-18382039   | NOTEST | 0.525046  | 0.182448   |
| Fcrlb         | chr1:170907272-170912941  | NOTEST | 0.289025  | 0.100355   |
| Tnfsf12       | chr11:69682576-69696098   | OK     | 9.13249   | 3.17063    |
| Slc6a13       | chr6:121300295-121337718  | OK     | 0.881448  | 0.305929   |
| Trim16        | chr11:62820252-62842948   | OK     | 7.65988   | 2.65816    |
| Sema3f        | chr9:107681501-107710475  | OK     | 12.2461   | 4.24658    |
| Igsf10        | chr3:59006977-59344256    | NOTEST | 0.657742  | 0.228082   |
| St5           | chr7:109523910-109617147  | OK     | 6.23564   | 2.16089    |
| Cish          | chr9:107296688-107301961  | OK     | 7.53431   | 2.61018    |
| BC051628      | chr2:181220015-181222851  | NOTEST | 0.0446907 | 0.015463   |
| Zfp385a       | chr15:103313894-103340086 | OK     | 18.6448   | 6.44735    |
| Dclk2         | chr3:86786149-86920884    | OK     | 17.4125   | 6.0082     |
| Prokr2        | chr2:132370328-132385447  | OK     | 3.4486    | 1.18969    |
| Mab21i3       | chr3:101813075-101836223  | NOTEST | 0.154195  | 0.0531782  |
| Tcea3         | chr4:136247956-136274899  | NOTEST | 0.598555  | 0.20637    |
| Ptgs1         | chr2:36230425-36252271    | OK     | 1.13174   | 0.389956   |
| Tead4         | chr6:128227142-128300813  | NOTEST | 0.49905   | 0.17184    |
| Kcnk6         | chr7:29221927-29232522    | NOTEST | 0.333319  | 0.114658   |
| Adamtsl1      | chr4:86053914-86428382    | OK     | 0.868025  | 0.298342   |
| Dsg1c         | chr18:20247339-20283923   | NOTEST | 0.0239358 | 0.00822571 |
| Calr3         | chr8:72424182-72443778    | OK     | 3.4243    | 1.17562    |
| Ptpn21        | chr12:98676740-98737405   | OK     | 4.22075   | 1.4452     |
| A830019L24Rik | chr3:143243054-143257996  | NOTEST | 0.0733743 | 0.02512    |
| Ccdc177       | chr12:80755446-80760715   | NOTEST | 0.683113  | 0.233524   |

|               |                           |        |            |            |
|---------------|---------------------------|--------|------------|------------|
| Hoxc5         | chr15:103014007-103017429 | NOTEST | 0.436118   | 0.149075   |
| Prss41        | chr17:23836784-23844156   | NOTEST | 0.0626003  | 0.0213908  |
| Cpa3          | chr3:20215615-20242181    | OK     | 1.02006    | 0.348308   |
| Slc5a8        | chr10:88885991-88929515   | NOTEST | 0.0310977  | 0.010618   |
| Scn1b         | chr7:31116523-31126945    | OK     | 193.692    | 66.127     |
| Pip5kl1       | chr2:32575818-32583779    | OK     | 3.10668    | 1.05981    |
| Pkd2          | chr5:104459456-104505819  | OK     | 6.21872    | 2.12099    |
| Per3          | chr4:151003654-151044665  | OK     | 2.6061     | 0.888841   |
| Mob3b         | chr4:34949073-35157484    | OK     | 6.38812    | 2.17823    |
| Mitf          | chr6:97807057-98021358    | OK     | 1.33453    | 0.454975   |
| C5ar2         | chr7:16234584-16244154    | NOTEST | 0.0660471  | 0.0225165  |
| S100a1        | chr3:90511033-90514330    | OK     | 27.8945    | 9.50313    |
| Riiad1        | chr3:94464984-94473591    | NOTEST | 0.126869   | 0.0432111  |
| Rab711        | chr1:131867276-131872889  | OK     | 2.64015    | 0.898767   |
| Fgfr2         | chr7:130162450-130266808  | NOTEST | 0.481417   | 0.163836   |
| Insl6         | chr19:29321353-29325318   | OK     | 1.51558    | 0.515557   |
| Gm13710       | chr2:84500747-84506873    | NOTEST | 0.0857594  | 0.0291722  |
| Wipi1         | chr11:109573520-109611389 | OK     | 11.3462    | 3.85929    |
| Gdpd2         | chrX:100729846-100738899  | OK     | 1.48788    | 0.505205   |
| 9530036011Rik | chr5:28456839-28719209    | NOTEST | 0.32069    | 0.10887    |
| Slc41a1       | chr1:131828011-131848864  | OK     | 7.79671    | 2.64652    |
| Tgfr2         | chr9:116087694-116175363  | OK     | 10.3232    | 3.50313    |
| Spata9        | chr13:75967738-75998968   | NOTEST | 0.0633193  | 0.0214689  |
| Gm5468        | chr15:25414191-25452418   | NOTEST | 0.0200027  | 0.00678149 |
| Agbl1         | chr7:76229886-77124698    | NOTEST | 0.18889    | 0.0640069  |
| Cacna1f       | chrX:7607102-7635196      | NOTEST | 0.00912532 | 0.00309048 |
| Slc5a5        | chr8:70882888-70892757    | OK     | 7.22275    | 2.4456     |
| Cyb5r2        | chr7:107595050-107758032  | NOTEST | 0.224033   | 0.0758408  |
| Rilp          | chr11:75510093-75513166   | OK     | 1.42229    | 0.481306   |
| Trip6         | chr5:137309898-137314241  | OK     | 3.41163    | 1.15396    |
| Tchh          | chr3:93442329-93449077    | NOTEST | 0.113706   | 0.0384603  |
| Efna4         | chr3:89333392-89338028    | NOTEST | 0.19364    | 0.065493   |
| Glrx          | chr13:75839885-75850151   | OK     | 18.6786    | 6.31517    |
| Apln          | chrX:48025145-48034852    | NOTEST | 0.802967   | 0.270417   |
| Them5         | chr3:94342098-94347352    | OK     | 2.72346    | 0.916642   |
| Ctnna1        | chr4:56810934-56865211    | OK     | 18.6752    | 6.28447    |
| Cntfr         | chr4:41657497-41697091    | OK     | 40.8066    | 13.7286    |
| Cxcl11        | chr5:92331840-92414627    | NOTEST | 0.45499    | 0.153027   |
| Rimklb        | chr6:122453608-122486305  | OK     | 3.21804    | 1.08206    |
| Clic6         | chr16:92498146-92541241   | NOTEST | 0.219084   | 0.073646   |
| Kif21b        | chr1:136131400-136178014  | OK     | 2.25168    | 0.756008   |
| Map2          | chr1:66175328-66442583    | OK     | 29.2416    | 9.80663    |
| Eno4          | chr19:58943424-58971421   | NOTEST | 0.277098   | 0.0929236  |
| Sult5a1       | chr8:123142846-123158280  | NOTEST | 0.28413    | 0.0952729  |
| Satb1         | chr17:51736186-51833290   | OK     | 10.4825    | 3.51308    |
| Fam81a        | chr9:70089309-70141557    | OK     | 12.1227    | 4.06269    |
| 4430402I18Rik | chr19:28923063-28966801   | NOTEST | 0.5793     | 0.194129   |
| Ung           | chr5:114130434-114139321  | OK     | 1.02438    | 0.343187   |
| Gpx7          | chr4:108400216-108406713  | OK     | 4.3312     | 1.44871    |
| Nsun7         | chr5:66260124-66298016    | NOTEST | 0.241701   | 0.0808163  |
| Ptchd2        | chr4:148236856-148287965  | OK     | 6.06519    | 2.02698    |
| Pmaip1        | chr18:66458603-66465558   | NOTEST | 0.822119   | 0.274747   |
| Sh3gl2        | chr4:85205455-85389379    | OK     | 60.5803    | 20.2411    |

|               |                           |        |            |            |
|---------------|---------------------------|--------|------------|------------|
| Efhd1         | chr1:87264363-87310791    | OK     | 10.5939    | 3.53432    |
| Spock1        | chr13:57421194-57908332   | OK     | 100.11     | 33.3959    |
| Rimbp3        | chr16:17208134-17213982   | NOTEST | 0.0364214  | 0.0121492  |
| AF251705      | chr11:114996768-115001880 | NOTEST | 0.277775   | 0.0926243  |
| Anxa8         | chr14:34051129-34102754   | NOTEST | 0.273336   | 0.0910902  |
| Phospho1      | chr11:95824499-95845731   | OK     | 26.4106    | 8.79936    |
| Sft2d2        | chr1:165174340-165194433  | OK     | 9.31092    | 3.10164    |
| Akr1b8        | chr6:34354163-34368454    | OK     | 2.4074     | 0.801817   |
| Hoxc8         | chr15:102990538-102994254 | OK     | 2.3387     | 0.77891    |
| Ddit4         | chr10:59949674-59951770   | OK     | 61.7588    | 20.5583    |
| Syndig1l      | chr12:84677277-84698807   | OK     | 7.08531    | 2.35805    |
| Adarb2        | chr13:8202865-8768762     | NOTEST | 0.219846   | 0.0731572  |
| Camkv         | chr9:107935919-107949691  | NOTEST | 0.646255   | 0.215027   |
| Fermt1        | chr2:132904178-132946036  | NOTEST | 0.0108044  | 0.00359264 |
| Xirp2         | chr2:67446001-67526606    | NOTEST | 0.00928357 | 0.00308509 |
| Bcl2l11       | chr2:128126037-128162547  | OK     | 1.59144    | 0.527846   |
| Stx1b         | chr7:127806843-127824531  | OK     | 64.7792    | 21.4625    |
| B230209E15Rik | chr7:61529409-61615327    | NOTEST | 0.152526   | 0.0504588  |
| Arl5c         | chr11:97989579-97996173   | NOTEST | 0.368187   | 0.1218     |
| Gjc1          | chr11:102799477-102819686 | OK     | 2.53393    | 0.837687   |
| Ndp           | chrX:16885521-16911764    | OK     | 9.56626    | 3.16237    |
| Hrasls        | chr16:29209694-29230530   | OK     | 3.64567    | 1.2051     |
| Serpine3      | chr14:62663666-62830126   | NOTEST | 0.340894   | 0.112683   |
| Col11a2       | chr17:34039436-34066242   | NOTEST | 0.667864   | 0.22073    |
| Nlrp10        | chr7:108921852-108930158  | NOTEST | 0.0854005  | 0.0281997  |
| Tmprss7       | chr16:45656316-45693658   | OK     | 1.44221    | 0.476191   |
| Ahr           | chr12:35497978-35534989   | OK     | 4.53881    | 1.49671    |
| Lepr          | chr4:101717406-101815354  | OK     | 1.82478    | 0.600869   |
| Gabrg3        | chr7:56724241-57386871    | NOTEST | 0.348611   | 0.11473    |
| Mapkapk3      | chr9:107254926-107289877  | OK     | 0.931421   | 0.306446   |
| Edar          | chr10:58600787-58675696   | NOTEST | 0.0647312  | 0.0212934  |
| Plod2         | chr9:92538800-92608427    | OK     | 3.86564    | 1.2709     |
| Strbp         | chr2:37569867-37647285    | OK     | 8.92605    | 2.9326     |
| Hpgd          | chr8:56294551-56321046    | OK     | 1.37779    | 0.452456   |
| Kcnp1         | chr11:33629340-33993193   | OK     | 17.4521    | 5.72824    |
| B930041F14Rik | chr4:155694341-155696483  | OK     | 15.1733    | 4.97769    |
| Elfn2         | chr15:78670006-78718113   | OK     | 1.13852    | 0.37348    |
| Kcnh2         | chr5:24319588-24351604    | OK     | 33.348     | 10.9381    |
| Zfp804a       | chr2:82053657-82259878    | OK     | 7.15236    | 2.34298    |
| Cd101         | chr3:100993528-101029495  | NOTEST | 0.0563443  | 0.0184488  |
| Tor3a         | chr1:156653616-156674339  | OK     | 2.50029    | 0.817637   |
| Frem1         | chr4:82897919-83052167    | OK     | 0.800165   | 0.261626   |
| Tmem132b      | chr5:125532417-125792583  | OK     | 1.7445     | 0.570276   |
| Zfp964        | chr8:69654555-69664453    | OK     | 0.983626   | 0.321012   |
| Cox6a2        | chr7:128173945-128206366  | NOTEST | 0.275627   | 0.0899431  |
| Abhd3         | chr18:10644410-10706696   | OK     | 15.5885    | 5.08519    |
| Amn           | chr12:111271110-111276426 | NOTEST | 0.0376425  | 0.0122793  |
| Epas1         | chr17:86753863-86833410   | OK     | 48.9765    | 15.9707    |
| Mafb          | chr2:160363676-160367065  | OK     | 1.28661    | 0.419494   |
| Rxra          | chr2:27677200-27763319    | OK     | 7.63767    | 2.48884    |
| Cpq           | chr15:33083128-33653436   | OK     | 14.2881    | 4.65382    |
| Rnf17         | chr14:56402696-56525031   | NOTEST | 0.293604   | 0.0955947  |
| Cyp2j6        | chr4:96516137-96553651    | OK     | 22.0422    | 7.1634     |

|               |                           |        |           |            |
|---------------|---------------------------|--------|-----------|------------|
| Fzd7          | chr1:59482146-59486955    | OK     | 4.47468   | 1.45379    |
| Nrp2          | chr1:62703316-62818692    | OK     | 15.6997   | 5.10068    |
| 1700028J19Rik | chr7:44229929-44236122    | NOTEST | 0.311163  | 0.100996   |
| Rcn1          | chr2:105385947-105399319  | OK     | 16.5798   | 5.38031    |
| Sec14l2       | chr11:4097039-4118729     | OK     | 9.00618   | 2.92173    |
| Eva1b         | chr4:126148002-126149874  | OK     | 2.40625   | 0.779941   |
| Vcam1         | chr3:116110019-116129688  | OK     | 2.85617   | 0.924991   |
| Gpc2          | chr5:138273659-138279937  | NOTEST | 0.287963  | 0.0932063  |
| Slc22a8       | chr19:8591253-8611835     | NOTEST | 0.355941  | 0.115183   |
| 2310022B05Rik | chr8:124635755-124663369  | OK     | 24.661    | 7.97955    |
| Ror1          | chr4:100095790-100442545  | NOTEST | 0.40734   | 0.131429   |
| Slitrk3       | chr3:73048124-73056943    | OK     | 22.912    | 7.39193    |
| Pole2         | chr12:69201778-69228190   | NOTEST | 0.519229  | 0.167502   |
| Tnn           | chr1:160085031-160153575  | NOTEST | 0.0686682 | 0.0221236  |
| Cldn15        | chr5:136967868-136975845  | NOTEST | 0.301835  | 0.0971887  |
| Clrn2         | chr5:45453750-45464149    | OK     | 3.11605   | 1.00276    |
| S100a14       | chr3:90526848-90528835    | NOTEST | 0.0971077 | 0.0312406  |
| Ciita         | chr16:10480071-10527564   | NOTEST | 0.140929  | 0.0453374  |
| 38776         | chr11:105360797-105456735 | NOTEST | 0.0755032 | 0.0242879  |
| Prrg3         | chrX:71963020-71972728    | OK     | 9.49706   | 3.05496    |
| Cyp3a13       | chr5:137892932-137921619  | NOTEST | 0.188733  | 0.0607006  |
| Parva         | chr7:112427705-112591688  | OK     | 61.7935   | 19.8662    |
| Zfp36l1       | chr12:80107759-80113013   | OK     | 13.2581   | 4.25874    |
| Tesc          | chr5:118027823-118061870  | OK     | 46.8229   | 15.0287    |
| Xylt1         | chr7:117380978-117667630  | NOTEST | 0.586731  | 0.18825    |
| Tmem37        | chr1:120067376-120073780  | NOTEST | 0.554317  | 0.177828   |
| Lhx6          | chr2:36081952-36105408    | NOTEST | 0.312065  | 0.100074   |
| St3gal3       | chr4:117932152-118134946  | OK     | 11.7656   | 3.77258    |
| AU022754      | chr15:85535436-85593708   | NOTEST | 0.0204354 | 0.00655115 |
| Retnlg        | chr16:48872607-48874498   | OK     | 4.37548   | 1.40208    |
| 2310069G16Rik | chr15:44671855-44805829   | OK     | 4.43029   | 1.41844    |
| Pitpnm3       | chr11:72047527-72135889   | OK     | 1.2112    | 0.387786   |
| Prdm5         | chr6:65778961-65936377    | OK     | 0.966323  | 0.309291   |
| Cdh4          | chr2:179442477-179899375  | OK     | 3.87778   | 1.23994    |
| Ryr3          | chr2:112631381-113030331  | OK     | 0.892796  | 0.285351   |
| Nxf2          | chrX:134944525-134964754  | NOTEST | 0.057814  | 0.0184596  |
| Ky            | chr9:102506137-102546239  | NOTEST | 0.2585    | 0.0825192  |
| D7Ert443e     | chr7:134266261-134376828  | OK     | 2.07759   | 0.661876   |
| Nr1d2         | chr14:18204055-18239106   | OK     | 18.4947   | 5.89195    |
| Endod1        | chr9:14353989-14381242    | OK     | 186.025   | 59.1903    |
| Thsd4         | chr9:59966930-60511035    | OK     | 1.55589   | 0.494664   |
| Cnm1          | chr19:43440435-43497213   | OK     | 9.20314   | 2.92519    |
| Tdrd9         | chr12:111971558-112068854 | NOTEST | 0.02674   | 0.00849775 |
| Stox1         | chr10:62659421-62726099   | NOTEST | 0.269209  | 0.0855119  |
| Adam17        | chr12:21316391-21373632   | OK     | 8.34927   | 2.65196    |
| Rab20         | chr8:11453976-11478499    | OK     | 1.47064   | 0.46705    |
| 4931409K22Rik | chr5:24543433-24555469    | NOTEST | 0.0278198 | 0.00882788 |
| Abhd4         | chr14:54254128-54269169   | OK     | 66.4998   | 21.0835    |
| Dppa2         | chr16:48310273-48319513   | NOTEST | 0.2783    | 0.0881168  |
| Slc22a23      | chr13:34179157-34345182   | OK     | 12.6591   | 4.00598    |
| Psma8         | chr18:14706150-14762299   | NOTEST | 0.198803  | 0.0628209  |
| Gm4013        | chr18:42274379-42275197   | NOTEST | 0.838713  | 0.264887   |
| Galnt4        | chr10:99107170-99197988   | OK     | 1.22519   | 0.386171   |

|               |                           |        |           |           |
|---------------|---------------------------|--------|-----------|-----------|
| 1190002N15Rik | chr9:94517863-94538081    | OK     | 19.8782   | 6.26193   |
| Tead1         | chr7:112679319-112906805  | OK     | 5.66077   | 1.78061   |
| Etv4          | chr11:101769741-101785310 | OK     | 1.23146   | 0.387277  |
| Fbxo40        | chr16:36966072-36979136   | OK     | 1.01419   | 0.318771  |
| 4930525G20Rik | chr13:67796593-67830985   | NOTEST | 0.0900057 | 0.0282777 |
| Qpct          | chr17:79051905-79090243   | OK     | 2.66798   | 0.837775  |
| Siglecg       | chr7:43408279-43418349    | NOTEST | 0.142095  | 0.0445231 |
| Mt2           | chr8:94172617-94173567    | OK     | 76.9997   | 24.1133   |
| Smim1         | chr4:154011802-154026044  | OK     | 1.73524   | 0.543331  |
| Col11a1       | chr3:114030539-114220326  | OK     | 3.58033   | 1.12025   |
| B230206H07Rik | chr7:141339001-141365110  | OK     | 3.09965   | 0.969423  |
| Sort1         | chr3:108284063-108361519  | OK     | 16.5974   | 5.18997   |
| Dleu7         | chr14:62276228-62292979   | NOTEST | 0.778561  | 0.243299  |
| Arhgef19      | chr4:141242883-141257562  | OK     | 3.93943   | 1.23051   |
| Lhpp          | chr7:132610642-132706419  | OK     | 4.082     | 1.27472   |
| Chn2          | chr6:54039931-54430221    | OK     | 15.8871   | 4.958     |
| Arsk          | chr13:76060421-76098660   | OK     | 2.57108   | 0.802363  |
| Cxcr2         | chr1:74153993-74161246    | NOTEST | 0.0996006 | 0.0310586 |
| Cyp2d26       | chr15:82790106-82794245   | NOTEST | 0.0483354 | 0.0150717 |
| Srd5a1        | chr13:69573448-69611463   | OK     | 7.49961   | 2.3374    |
| Fam212a       | chr9:107984223-107985916  | OK     | 3.99066   | 1.24364   |
| Pard3b        | chr1:61638823-62642284    | OK     | 1.14165   | 0.355547  |
| Fscn1         | chr5:142960354-142973189  | OK     | 15.0379   | 4.68152   |
| Clcn2         | chr16:20695056-20716636   | OK     | 4.46083   | 1.38817   |
| Robo1         | chr16:72663148-73046100   | OK     | 4.13297   | 1.28519   |
| Sgce          | chr6:4674349-4747204      | OK     | 15.1228   | 4.69474   |
| Zpbp2         | chr11:98551096-98558665   | NOTEST | 0.0479687 | 0.0148648 |
| Nuak2         | chr1:132316124-132333488  | NOTEST | 0.386835  | 0.119838  |
| Lmcd1         | chr6:112273757-112330423  | OK     | 2.92669   | 0.906558  |
| Usp27x        | chrX:7372590-7375830      | OK     | 0.873736  | 0.270644  |
| Fam65b        | chr13:24582188-24733806   | OK     | 1.23321   | 0.38171   |
| Cysltr1       | chrX:106576508-106710557  | NOTEST | 0.165252  | 0.0510982 |
| Nup62-il4i1   | chr7:44812255-44849079    | NOTEST | 0.395218  | 0.122049  |
| Opn3          | chr1:175662420-175692632  | OK     | 5.81988   | 1.79446   |
| Dab2          | chr15:6299788-6440709     | OK     | 3.03523   | 0.93452   |
| Sall4         | chr2:168748331-168767201  | NOTEST | 0.0997042 | 0.030684  |
| Fam101a       | chr5:125003474-125012547  | OK     | 2.50729   | 0.771378  |
| Myl1          | chr1:66924295-66945056    | NOTEST | 0.194379  | 0.0597078 |
| Sema6a        | chr18:47245253-47368868   | OK     | 4.31093   | 1.32402   |
| Pde6b         | chr5:108388372-108431742  | NOTEST | 0.175148  | 0.0537537 |
| B230319C09Rik | chr6:83441754-83448322    | NOTEST | 0.376027  | 0.115255  |
| Itm2a         | chrX:107397194-107403360  | OK     | 41.8335   | 12.8126   |
| Spata18       | chr5:73651379-73679484    | NOTEST | 0.170738  | 0.0522842 |
| Ear3          | chr14:44102653-44103531   | LOWDAT | 0.258624  | 0.0791291 |
| Gng8          | chr7:16891785-16895435    | OK     | 9.25247   | 2.8291    |
| C1qtnf1       | chr11:118428456-118454995 | OK     | 22.6804   | 6.9306    |
| Tcf24         | chr1:9960162-9967485      | NOTEST | 0.206896  | 0.0631702 |
| Sema6b        | chr17:56123084-56140343   | OK     | 2.55819   | 0.780807  |
| 6430571L13Rik | chr9:107340639-107349683  | OK     | 5.64271   | 1.71922   |
| Camk1d        | chr2:5293456-5714762      | OK     | 16.9505   | 5.16418   |
| Gm53          | chr11:96251659-96264484   | OK     | 1.41883   | 0.432057  |
| Fhl2          | chr1:43123070-43196761    | OK     | 1.49756   | 0.455779  |
| 4930539J05Rik | chr3:135436220-135438665  | NOTEST | 0.236329  | 0.0719007 |



|               |                             |        |           |           |
|---------------|-----------------------------|--------|-----------|-----------|
| Smad3         | chr9:63646766-63757994      | OK     | 1.29494   | 0.393904  |
| Iqck          | chr7:118842217-118995211    | NOTEST | 0.423062  | 0.128483  |
| Arpp21        | chr9:112065090-112348925    | OK     | 7.2922    | 2.2136    |
| Gm13306       | chr4_JH584293_random:7077-2 | NOTEST | 0.139589  | 0.0423054 |
| Garem         | chr18:21127341-21300139     | OK     | 4.63854   | 1.40526   |
| Grasp         | chr15:101221190-101232756   | OK     | 3.62441   | 1.09716   |
| Morn5         | chr2:36049472-36079709      | NOTEST | 0.635384  | 0.192259  |
| AB124611      | chr9:21526176-21545331      | OK     | 0.845024  | 0.255362  |
| Sdk1          | chr5:141241533-142213791    | OK     | 3.53444   | 1.06758   |
| Vmn2r87       | chr10:130471820-130497379   | NOTEST | 0.21682   | 0.0654824 |
| Prr15         | chr6:54039931-54430221      | OK     | 1.02053   | 0.308101  |
| Nav3          | chr10:109683438-110000219   | OK     | 1.7448    | 0.526542  |
| Grik2         | chr10:49099462-49788754     | OK     | 3.66269   | 1.10529   |
| Bcl2          | chr1:106538177-106714290    | OK     | 12.0971   | 3.64418   |
| Ptch1         | chr13:63511532-63565520     | OK     | 7.75943   | 2.33709   |
| Ankrd66       | chr17:43534173-43543639     | NOTEST | 0.60221   | 0.181134  |
| 3425401B19Rik | chr14:32659118-32685272     | OK     | 1.22917   | 0.369528  |
| Il15          | chr8:82331623-82402586      | NOTEST | 0.583305  | 0.17533   |
| Cacng5        | chr11:107874604-107915055   | OK     | 9.00442   | 2.70511   |
| Olfml3        | chr3:103193822-103854618    | OK     | 17.6392   | 5.2957    |
| Ltbr          | chr6:125306570-125313870    | OK     | 7.581     | 2.27541   |
| 9430076C15Rik | chr6:53287294-53397216      | NOTEST | 0.0808338 | 0.0242499 |
| Fhad1         | chr4:141890622-142011651    | NOTEST | 0.145505  | 0.0435131 |
| Ntm           | chr9:28995963-29963129      | OK     | 6.23039   | 1.86285   |
| Wls           | chr3:159839694-159935175    | OK     | 25.1833   | 7.52547   |
| Cd300lb       | chr11:114922780-114934386   | NOTEST | 0.0908684 | 0.0271463 |
| Pak1          | chr7:97842938-97912381      | OK     | 44.4698   | 13.2773   |
| Cux2          | chr5:121860215-122047825    | OK     | 3.57506   | 1.06721   |
| Elovl2        | chr13:41182381-41220403     | OK     | 4.42185   | 1.31909   |
| Tbc1d10a      | chr11:4186832-4215505       | OK     | 12.5814   | 3.75128   |
| Arsg          | chr11:109440077-109573329   | OK     | 3.31776   | 0.989193  |
| Pctp          | chr11:89983416-90002894     | OK     | 18.0005   | 5.3615    |
| Gpc3          | chrX:52272426-52619047      | OK     | 15.4852   | 4.60658   |
| Pla1a         | chr16:38396116-38433145     | NOTEST | 0.318227  | 0.094639  |
| Asap3         | chr4:136206364-136246573    | OK     | 2.37712   | 0.706439  |
| Mycl          | chr4:122996098-123002480    | NOTEST | 0.445478  | 0.13237   |
| Slc2a5        | chr4:150119343-150144168    | NOTEST | 0.394699  | 0.117084  |
| Tmem220       | chr11:67025153-67035312     | NOTEST | 0.659803  | 0.195518  |
| Ramp2         | chr11:101246333-101248250   | OK     | 17.9183   | 5.30928   |
| Gm16532       | chr7:6415174-6431086        | OK     | 3.39185   | 1.00192   |
| Fam155a       | chr8:9206009-9771023        | OK     | 9.68929   | 2.86198   |
| Snx24         | chr18:53245661-53390825     | OK     | 3.88028   | 1.14511   |
| Gm17769       | chr10:77418375-77420939     | NOTEST | 0.235752  | 0.0694778 |
| Clec1a        | chr6:129426683-129452000    | OK     | 1.10273   | 0.324946  |
| Dusp23        | chr1:172630768-172632974    | OK     | 3.09353   | 0.911043  |
| Asic1         | chr15:99670717-99701130     | OK     | 31.4513   | 9.23602   |
| Tmem200b      | chr4:131921770-131923140    | OK     | 1.13867   | 0.334373  |
| G530011O06Rik | chrX:169685198-169990797    | NOTEST | 0.135799  | 0.0398143 |
| Slc39a1       | chr3:90248191-90253612      | OK     | 14.351    | 4.20698   |
| Cd68          | chr11:69664212-69666170     | OK     | 1.3104    | 0.383835  |
| Tnfrsf1a      | chr6:125349722-125362483    | OK     | 13.2894   | 3.88691   |
| Itpr2         | chr6:146108298-146502223    | NOTEST | 0.691879  | 0.20225   |
| 2310040G24Rik | chr6:86483375-86488227      | OK     | 1.9153    | 0.559587  |

|               |                           |        |           |            |
|---------------|---------------------------|--------|-----------|------------|
| Hnmt          | chr2:24002912-24049379    | OK     | 8.03238   | 2.34519    |
| Peg10         | chr6:4747305-4760516      | OK     | 4.88197   | 1.42223    |
| Tns3          | chr11:8431651-8664535     | OK     | 17.3398   | 5.04336    |
| Cped1         | chr6:21985909-22255606    | OK     | 1.55001   | 0.450663   |
| Gm6568        | chrX:157540803-157541750  | NOTEST | 0.105187  | 0.0305794  |
| Nek6          | chr2:38511696-38587490    | OK     | 7.63141   | 2.21761    |
| B430319G15Rik | chr9:92538800-92608427    | NOTEST | 0.293181  | 0.085174   |
| Ccr1          | chr9:123962125-123968692  | NOTEST | 0.23108   | 0.0671157  |
| Ecm1          | chr3:95734147-95739569    | OK     | 5.34965   | 1.55312    |
| Klhdc7a       | chr4:139962172-139968026  | NOTEST | 0.0221494 | 0.00642291 |
| Lgr6          | chr1:134986352-135105276  | NOTEST | 0.248627  | 0.0720683  |
| Ace           | chr11:105965606-105989964 | OK     | 2.09463   | 0.606747   |
| Cacnb2        | chr2:14604305-14987908    | OK     | 1.39285   | 0.403425   |
| Fgf7          | chr2:125859108-126152004  | OK     | 1.84083   | 0.531474   |
| Zfp36l2       | chr17:84183927-84187947   | OK     | 10.0283   | 2.89361    |
| Clca2         | chr3:144796558-144819494  | NOTEST | 0.0547201 | 0.0157861  |
| Rin3          | chr12:102283073-102390854 | OK     | 1.70608   | 0.491663   |
| Pcdh10        | chr3:45378397-45439309    | OK     | 16.9015   | 4.86973    |
| Mmp23         | chr4:155650654-155653384  | OK     | 1.43899   | 0.414515   |
| S100a3        | chr3:90600214-90602702    | NOTEST | 0.396879  | 0.114322   |
| Lrrc25        | chr8:70616843-70620850    | NOTEST | 0.443698  | 0.127777   |
| Gabra5        | chr7:57387271-57510009    | OK     | 3.4077    | 0.980823   |
| Il16          | chr7:83643062-83735490    | OK     | 4.09407   | 1.17801    |
| Tas1r3        | chr4:155847411-155863353  | NOTEST | 0.060158  | 0.0173094  |
| D630023F18Rik | chr1:65105284-65123214    | OK     | 0.765607  | 0.219851   |
| Tpm2          | chr4:43513725-43523554    | OK     | 4.21839   | 1.21078    |
| Fam84b        | chr15:60818995-60831400   | OK     | 0.917166  | 0.263018   |
| C030006K11Rik | chr15:76715275-76723845   | OK     | 6.16515   | 1.7665     |
| Dapl1         | chr2:59484652-59505020    | OK     | 1.58746   | 0.454784   |
| Vwa7          | chr17:35016578-35028016   | OK     | 34.4356   | 9.85386    |
| 9630001P10Rik | chr5:45529704-45645469    | NOTEST | 0.365075  | 0.104413   |
| Pcp4l1        | chr1:171173263-171196268  | OK     | 189.449   | 54.1665    |
| Ankrd29       | chr18:12252356-12305720   | OK     | 16.5674   | 4.73012    |
| 2810454H06Rik | chr6:134897960-134900785  | NOTEST | 0.0874842 | 0.0249233  |
| Slc25a2       | chr18:36930284-37841872   | NOTEST | 0.368853  | 0.105037   |
| Loxl2         | chr14:69609475-69695834   | OK     | 0.859452  | 0.244613   |
| Hepacam2      | chr6:3457088-3494498      | NOTEST | 0.189246  | 0.0536533  |
| Fzd10         | chr5:128601105-128604093  | NOTEST | 0.254887  | 0.0722252  |
| Zfp607        | chr7:27860584-27880825    | NOTEST | 0.303862  | 0.0860962  |
| Il17re        | chr6:113458483-113470751  | NOTEST | 0.312798  | 0.0886246  |
| Tpcn1         | chr5:120534156-120588613  | OK     | 22.6167   | 6.40217    |
| Fabp4         | chr3:10204342-10208576    | OK     | 4.44452   | 1.25741    |
| Ccr5          | chr9:124121542-124127183  | NOTEST | 0.387922  | 0.109737   |
| Tnfrsf11b     | chr15:54250618-54278484   | NOTEST | 0.438305  | 0.123971   |
| Pde1a         | chr2:79834452-80129412    | OK     | 2.12789   | 0.601753   |
| Kcnab3        | chr11:69326257-69333041   | OK     | 1.24643   | 0.352134   |
| Ncf1          | chr5:134220052-134229625  | OK     | 1.21549   | 0.34307    |
| Pou2f3        | chr9:43123938-43205755    | NOTEST | 0.0698083 | 0.0196946  |
| Lama1         | chr17:67697264-67822645   | NOTEST | 0.527174  | 0.14866    |
| Mn1           | chr5:111418165-111457025  | NOTEST | 0.272129  | 0.0766676  |
| Serpib1a      | chr13:32842091-32851185   | OK     | 36.3579   | 10.2389    |
| Igf2bp2       | chr16:22059008-22163299   | OK     | 0.822292  | 0.23113    |
| Tcf15         | chr2:152143608-152149096  | NOTEST | 0.17857   | 0.0501882  |

|                |                           |        |           |            |
|----------------|---------------------------|--------|-----------|------------|
| Rab42          | chr4:132302193-132303356  | NOTEST | 0.367695  | 0.103307   |
| Shc3           | chr13:51431041-51567084   | OK     | 3.14003   | 0.882212   |
| Bicc1          | chr10:70925095-71159634   | OK     | 2.08817   | 0.585787   |
| Greb1          | chr12:16670614-16800886   | OK     | 2.52742   | 0.708634   |
| Nckap1l        | chr15:103453824-103498800 | NOTEST | 0.60094   | 0.168414   |
| Dhh            | chr15:98893026-98898540   | OK     | 27.9354   | 7.82425    |
| Prkd3          | chr17:78949404-79020816   | OK     | 3.05571   | 0.855341   |
| Rnf152         | chr1:105276916-105356710  | NOTEST | 0.551486  | 0.154352   |
| Rreb1          | chr13:37826037-37952005   | OK     | 1.0548    | 0.29513    |
| Cd164l2        | chr4:133220808-133224554  | OK     | 1.84823   | 0.516992   |
| Snta1          | chr2:154376313-154408084  | OK     | 9.5487    | 2.67081    |
| Fgf18          | chr11:33116977-33147400   | OK     | 8.89955   | 2.48733    |
| Pcdh11x        | chrX:120290326-120910618  | OK     | 0.85607   | 0.239218   |
| AI427809       | chr4:53261355-53270232    | OK     | 0.826553  | 0.230822   |
| Tlr12          | chr4:128615445-128618619  | NOTEST | 0.0656801 | 0.0183412  |
| Nsg1           | chr5:38039229-38159467    | OK     | 58.9809   | 16.4636    |
| Heph           | chrX:96455435-96574484    | NOTEST | 0.331847  | 0.0925896  |
| A2m            | chr6:121636172-121679238  | OK     | 3.72577   | 1.0389     |
| Edn2           | chr4:120161423-120167360  | NOTEST | 0.268386  | 0.0747899  |
| Slc7a11        | chr3:50364935-50443613    | NOTEST | 0.258113  | 0.0719121  |
| Slc25a15       | chr8:22375549-22398621    | OK     | 4.57014   | 1.27307    |
| Cdhr2          | chr13:54701462-54736662   | NOTEST | 0.0358011 | 0.00997192 |
| Ypel2          | chr11:86583864-87555823   | OK     | 5.82415   | 1.6215     |
| Gm11744        | chr11:116657107-116668389 | NOTEST | 1.00288   | 0.278961   |
| Col2a1         | chr15:97975601-98004724   | NOTEST | 0.354986  | 0.0987034  |
| Mgmt           | chr7:136894610-137128188  | OK     | 3.43165   | 0.953222   |
| Slco2a1        | chr9:103008488-103087849  | OK     | 2.88058   | 0.800053   |
| Gpr88          | chr3:116249653-116253484  | NOTEST | 0.0966901 | 0.026849   |
| Acox1          | chr2:127854627-128123892  | NOTEST | 0.0246348 | 0.00683518 |
| Csrp1          | chr1:135729196-135752229  | OK     | 69.4418   | 19.2635    |
| BC100451       | chr11:118301060-118355411 | NOTEST | 0.20864   | 0.0578616  |
| Gpr62          | chr9:106453837-106465940  | NOTEST | 0.231439  | 0.0641819  |
| Nefm           | chr14:68119544-68131371   | OK     | 1526.75   | 423.19     |
| Hopx           | chr5:77086985-77115123    | OK     | 146.112   | 40.489     |
| Ctdsp1         | chr1:74391608-74397285    | OK     | 9.97583   | 2.76338    |
| Tyro3          | chr2:119797739-119818103  | OK     | 14.9379   | 4.13663    |
| Zbtb8b         | chr4:129425764-129440818  | NOTEST | 0.266585  | 0.0738081  |
| Ngef           | chr1:87476828-87573870    | OK     | 3.48494   | 0.962345   |
| Sorbs3         | chr14:70180467-70207671   | OK     | 12.6557   | 3.49379    |
| Amot           | chrX:145446423-145487639  | OK     | 2.92432   | 0.80707    |
| Bai1           | chr15:74516195-74589464   | OK     | 8.98018   | 2.47432    |
| Agpat9         | chr5:100846228-100899102  | OK     | 1.76337   | 0.485774   |
| Lphn2          | chr3:148815585-148954635  | OK     | 6.64403   | 1.82821    |
| Tbxa2r         | chr10:81328702-81335174   | OK     | 1.8432    | 0.506954   |
| Tnfsf12Tnfsf13 | chr11:69682576-69696098   | OK     | 2.11704   | 0.58216    |
| Myh10          | chr11:68691914-68816624   | OK     | 39.81     | 10.9343    |
| Enah           | chr1:181896385-182019980  | OK     | 31.6686   | 8.68309    |
| Lrrc14b        | chr13:74350316-74365783   | NOTEST | 0.408173  | 0.111875   |
| Plekhg5        | chr4:152086862-152115404  | OK     | 5.12584   | 1.40349    |
| Itrip          | chr19:47894595-47919299   | OK     | 0.998109  | 0.272332   |
| Slc8a3         | chr12:81197914-81333180   | OK     | 6.45292   | 1.76048    |
| Entpd4         | chr14:69555400-69584992   | NOTEST | 0.144008  | 0.0392745  |
| Ebf2           | chr14:67233291-67430952   | OK     | 1.0386    | 0.28315    |

|               |                           |        |           |            |
|---------------|---------------------------|--------|-----------|------------|
| Filip1l       | chr16:57301999-57606867   | OK     | 1.49912   | 0.4085     |
| Sorcs3        | chr19:48206024-48805505   | OK     | 4.74733   | 1.29297    |
| C6            | chr15:4727209-4804045     | NOTEST | 0.0272076 | 0.00740981 |
| Zkscan17      | chr11:59485520-59511067   | OK     | 2.34243   | 0.637244   |
| Cdh6          | chr15:13034199-13173639   | OK     | 4.23384   | 1.14953    |
| Ntn4          | chr10:93641048-93745972   | OK     | 1.99245   | 0.540724   |
| Pappa         | chr4:65124173-65357509    | OK     | 1.72055   | 0.466546   |
| Gucy2e        | chr11:69218116-69237022   | NOTEST | 0.0388847 | 0.0105436  |
| Tril          | chr6:53815467-53820825    | OK     | 2.63353   | 0.713113   |
| Impa2         | chr18:67289222-67318841   | OK     | 5.18496   | 1.4039     |
| Lao1          | chr4:118961966-118968910  | NOTEST | 0.089142  | 0.0241266  |
| Lpl           | chr8:68880554-68906932    | OK     | 2.60145   | 0.702769   |
| Srpk3         | chrX:73774421-73778924    | NOTEST | 0.627449  | 0.169433   |
| Mgp           | chr6:136872434-136875805  | OK     | 56.1066   | 15.1364    |
| Slc14a2       | chr18:78146143-78596950   | NOTEST | 0.0785829 | 0.0211929  |
| Chrn4         | chr9:55028155-55048544    | OK     | 4.87883   | 1.31558    |
| Cntnap1       | chr11:101176116-101190720 | OK     | 52.6172   | 14.1763    |
| Dok7          | chr5:35057083-35087831    | OK     | 2.01137   | 0.54143    |
| Clstn3        | chr6:124430755-124464784  | OK     | 32.4001   | 8.71812    |
| Tead2         | chr7:45215752-45233619    | OK     | 1.51303   | 0.406897   |
| Nrarp         | chr2:25180757-25183332    | OK     | 12.7331   | 3.42075    |
| Ccdc60        | chr5:116125580-116288985  | NOTEST | 0.485053  | 0.130306   |
| 2900079G21Rik | chr9:112065090-112348925  | OK     | 4.57521   | 1.22702    |
| Pdlim3        | chr8:45885484-45919546    | NOTEST | 0.468318  | 0.12558    |
| Colq          | chr14:31523083-31577383   | OK     | 2.16829   | 0.581134   |
| Gbp6          | chr5:105270701-105293699  | NOTEST | 0.542249  | 0.145231   |
| Arhgef3       | chr14:27143992-27403911   | OK     | 10.427    | 2.79184    |
| Pik3ap1       | chr19:41274217-41385070   | NOTEST | 0.376888  | 0.100898   |
| Anxa4         | chr6:86736839-86793584    | OK     | 10.8054   | 2.89267    |
| C1ql2         | chr1:120340581-120343174  | NOTEST | 0.0405956 | 0.0108635  |
| Prrg1         | chrX:78449609-78583897    | OK     | 4.3237    | 1.15702    |
| Ndnf          | chr6:65671610-65706930    | OK     | 3.38642   | 0.906201   |
| Anxa9         | chr3:95282934-95307176    | NOTEST | 0.32051   | 0.0857334  |
| Pcsk1         | chr13:75089986-75132498   | OK     | 30.7619   | 8.22708    |
| Slc22a6       | chr19:8617995-8628299     | NOTEST | 0.0639928 | 0.0171086  |
| Ogdhl         | chr14:32322018-32347820   | OK     | 14.345    | 3.83162    |
| Plekha2       | chr8:25039143-25101811    | OK     | 8.07817   | 2.15742    |
| Iqgap2        | chr13:95627176-95891922   | OK     | 2.51558   | 0.671599   |
| Sema4a        | chr3:88435961-88461182    | OK     | 2.52521   | 0.674142   |
| Amotl2        | chr9:102717803-102733417  | OK     | 6.86292   | 1.82937    |
| Arhgef10      | chr8:14911662-15001085    | OK     | 11.166    | 2.97605    |
| Tex15         | chr8:33570543-33585585    | NOTEST | 0.08625   | 0.0229736  |
| Kctd12        | chr14:102976580-102982637 | OK     | 5.7537    | 1.52623    |
| Fos           | chr12:85473900-85477270   | OK     | 191.273   | 50.7324    |
| Prima1        | chr12:103196907-103242146 | OK     | 7.77854   | 2.06296    |
| Trem1         | chr17:48232738-48246924   | NOTEST | 0.21096   | 0.0559147  |
| Nfatc2        | chr2:168476409-168601657  | NOTEST | 0.596226  | 0.157997   |
| Hsh2d         | chr8:72189667-72200958    | NOTEST | 0.0673153 | 0.0178361  |
| Whrn          | chr4:63414909-63495991    | OK     | 7.89266   | 2.08958    |
| Slc22a22      | chr15:57243770-57477625   | NOTEST | 0.0317303 | 0.00839561 |
| Vipr1         | chr9:121642715-121672954  | NOTEST | 0.0438227 | 0.0115885  |
| Brinp1        | chr4:68761371-68954397    | OK     | 10.9991   | 2.90759    |
| Ldlrad3       | chr2:101950200-102186460  | OK     | 5.39257   | 1.42451    |

|               |                           |        |           |            |
|---------------|---------------------------|--------|-----------|------------|
| Tst           | chr15:78399555-78405859   | OK     | 5.06021   | 1.33651    |
| Tlr1          | chr5:64924679-64933558    | NOTEST | 0.133502  | 0.0352447  |
| Bai3          | chr1:25067475-25829707    | OK     | 6.62058   | 1.74704    |
| Ido2          | chr8:24531891-24576333    | NOTEST | 0.267066  | 0.070463   |
| Hist1h4h      | chr13:23531043-23531478   | OK     | 2.87069   | 0.757208   |
| Pde6a         | chr18:61220498-61289718   | NOTEST | 0.109221  | 0.028796   |
| Irx3          | chr8:91798510-91801654    | OK     | 0.8824    | 0.232642   |
| Kcns1         | chr2:164163618-164171113  | OK     | 34.1256   | 8.99663    |
| S100a8        | chr3:90669070-90670034    | OK     | 39.4618   | 10.4023    |
| 4631405J19Rik | chr2:92974905-93046144    | NOTEST | 0.0718913 | 0.0189322  |
| Insc          | chr7:114745765-114850380  | OK     | 6.10612   | 1.6062     |
| Sag           | chr1:87803679-87845157    | NOTEST | 0.217431  | 0.0571862  |
| Efemp2        | chr19:5474689-5481854     | OK     | 7.48938   | 1.96899    |
| Cdkn1c        | chr7:143458338-143461050  | OK     | 1.83832   | 0.483019   |
| Cma1          | chr14:55941450-55944661   | NOTEST | 0.656477  | 0.17241    |
| Cacng8        | chr7:3394116-3415605      | OK     | 1.03587   | 0.272039   |
| Padi4         | chr4:140745507-140774203  | NOTEST | 0.185038  | 0.0485684  |
| Adra2c        | chr5:35278565-35281763    | OK     | 7.28412   | 1.91107    |
| Fam46a        | chr9:85320438-85327150    | OK     | 1.11811   | 0.29335    |
| Asb9          | chrX:164497902-164539752  | NOTEST | 0.080203  | 0.0210238  |
| Tnfrsf12a     | chr17:23660522-23677449   | OK     | 9.18984   | 2.40858    |
| Aifm3         | chr16:17489676-17507485   | OK     | 8.1168    | 2.12729    |
| Klhl30        | chr1:91351072-91362404    | NOTEST | 0.111129  | 0.0291154  |
| Cyr61         | chr3:145646970-145649985  | OK     | 28.9348   | 7.57396    |
| Enpep         | chr3:129269176-129332749  | OK     | 1.88335   | 0.492279   |
| Rnf130        | chr11:50025330-50125719   | OK     | 35.5496   | 9.29208    |
| Rorc          | chr3:94372825-94398239    | OK     | 1.25828   | 0.328728   |
| Gm6524        | chr8:11692981-11694514    | NOTEST | 0.0524137 | 0.0136885  |
| Atp2a1        | chr7:126428766-126463073  | NOTEST | 0.174227  | 0.045496   |
| Dennd1c       | chr17:57066054-57078510   | NOTEST | 0.102364  | 0.0267105  |
| Vmn2r85       | chr10:130418260-130429612 | NOTEST | 0.0296524 | 0.00773313 |
| Gm4841        | chr18:60268300-60273267   | NOTEST | 0.0528857 | 0.0137899  |
| Gdpd4         | chr7:97919957-98049663    | NOTEST | 0.0244744 | 0.00638054 |
| Kcnj9         | chr1:172321032-172329263  | NOTEST | 0.623483  | 0.162522   |
| Sorbs2os      | chr8:45507787-45827906    | NOTEST | 0.0307138 | 0.00800279 |
| Ptn           | chr6:36715662-36811361    | OK     | 58.8375   | 15.3287    |
| Elf1          | chr5:139907942-139974724  | OK     | 13.2786   | 3.45912    |
| Aard          | chr15:52040106-52045722   | OK     | 3.95929   | 1.03132    |
| Scarf2        | chr16:17797281-17808287   | OK     | 1.05412   | 0.274432   |
| Nrcam         | chr12:44328884-44601846   | OK     | 20.6487   | 5.35426    |
| Trhde         | chr10:114398820-114801370 | OK     | 1.56675   | 0.406182   |
| Ltbp4         | chr7:27305140-27337612    | OK     | 9.97981   | 2.58437    |
| 5830444B04Rik | chr4:155400968-155443110  | NOTEST | 0.457699  | 0.118474   |
| Pvrl4         | chr1:171370172-171388287  | OK     | 9.71545   | 2.51441    |
| Ctsh          | chr9:90054266-90076095    | OK     | 4.18449   | 1.08242    |
| Mfge8         | chr7:79133767-79149060    | OK     | 8.88372   | 2.29791    |
| Plin4         | chr17:56079656-56109802   | NOTEST | 0.210423  | 0.0543907  |
| Col4a2        | chr8:11312828-11449287    | OK     | 16.5672   | 4.27547    |
| Calml4        | chr9:62838786-62875917    | OK     | 11.9283   | 3.07677    |
| Ano5          | chr7:51511028-51598707    | NOTEST | 0.182677  | 0.0470554  |
| Gm19461       | chr1:133246096-133303435  | OK     | 4.74301   | 1.22086    |
| Slc27a1       | chr8:71568926-71586708    | OK     | 24.9366   | 6.41419    |
| Gpr143        | chrX:152781920-152808646  | NOTEST | 0.0488943 | 0.0125687  |



|               |                           |        |           |            |
|---------------|---------------------------|--------|-----------|------------|
| Klhl23        | chr2:69822369-69836651    | OK     | 1.85952   | 0.47775    |
| Atoh8         | chr6:72206176-72235577    | NOTEST | 0.495126  | 0.127179   |
| Vil1          | chr1:74409383-74588028    | NOTEST | 0.024308  | 0.00623356 |
| Frmpd4        | chrX:167471305-168577233  | OK     | 8.94312   | 2.29317    |
| Il6ra         | chr3:89869323-89913162    | OK     | 0.953508  | 0.244438   |
| Palld1        | chr10:61319656-61383523   | OK     | 4.83466   | 1.23856    |
| Slc12a4       | chr8:105943589-105966115  | OK     | 8.20358   | 2.10118    |
| Glb1l2        | chr9:26763043-26806417    | OK     | 4.0927    | 1.047      |
| Asrgl1        | chr19:9111718-9135566     | OK     | 21.2845   | 5.43817    |
| Tfcp2l1       | chr1:118627944-118685168  | NOTEST | 0.124079  | 0.0316736  |
| Cntn4         | chr6:105677744-106699305  | OK     | 5.95131   | 1.51905    |
| 9230116L04Rik | chr12:79029162-79103939   | NOTEST | 0.108288  | 0.0276344  |
| Itga9         | chr9:118606708-118901003  | OK     | 1.8467    | 0.471102   |
| Spib          | chr7:44525994-44532071    | NOTEST | 0.379562  | 0.096659   |
| Thbs1         | chr2:118111921-118127133  | OK     | 3.84115   | 0.977304   |
| Loxl4         | chr19:42592278-42612806   | OK     | 1.60977   | 0.409503   |
| Ttc36         | chr9:44799399-44802951    | NOTEST | 0.12833   | 0.0326383  |
| Pcdh8         | chr14:79766771-79771312   | OK     | 2.07183   | 0.526896   |
| Leprel4       | chr11:100408749-100414819 | OK     | 4.29372   | 1.0915     |
| Duxbl3        | chr14:25983004-25990166   | NOTEST | 0.08042   | 0.0204368  |
| Tph1          | chr7:46644640-46672537    | NOTEST | 0.114135  | 0.0290005  |
| Col13a1       | chr10:61838497-61979108   | NOTEST | 0.539935  | 0.13718    |
| Layn          | chr9:51056779-51077094    | OK     | 0.978692  | 0.248524   |
| Ltbp1         | chr17:75005528-75392967   | OK     | 1.15277   | 0.292689   |
| Itga1         | chr13:114958080-115101964 | OK     | 2.01908   | 0.511481   |
| Egr1          | chr18:34861206-34864956   | OK     | 78.8381   | 19.9715    |
| Gm5820        | chr18:38838672-38971274   | NOTEST | 0.168589  | 0.0426995  |
| Ptk2b         | chr14:66153256-66281052   | OK     | 10.8918   | 2.75609    |
| Dzip1l        | chr9:99629594-99669256    | NOTEST | 0.746077  | 0.188708   |
| 1700017B05Rik | chr9:57252321-57262599    | OK     | 1.01228   | 0.255851   |
| Plch1         | chr3:63696233-63850991    | NOTEST | 0.39872   | 0.100593   |
| Phlda3        | chr1:135766084-135769134  | OK     | 21.5701   | 5.43806    |
| Cps1          | chr1:67123026-67231267    | NOTEST | 0.0403229 | 0.0101599  |
| Gstm6         | chr3:107938847-107943749  | OK     | 2.52689   | 0.636475   |
| Mfap3l        | chr8:60632859-60676731    | OK     | 21.4545   | 5.40374    |
| Tpo           | chr12:30054660-30132609   | NOTEST | 0.0758291 | 0.0190531  |
| Ehd2          | chr7:15948986-15967535    | OK     | 19.0004   | 4.77005    |
| Pbx1          | chr1:168119363-168432169  | OK     | 11.5731   | 2.90488    |
| Zeb2          | chr2:44983511-45114084    | OK     | 12.8427   | 3.22343    |
| Figf          | chr2:63971507-64098038    | OK     | 2.14423   | 0.538002   |
| Dpysl4        | chr7:139086000-139101791  | OK     | 6.52482   | 1.63442    |
| Arhgap10      | chr8:77250365-77518578    | OK     | 2.55727   | 0.64033    |
| D930028M14Rik | chr7:25152456-25156630    | OK     | 31.5562   | 7.89256    |
| Gm684         | chr9:51270257-51278554    | NOTEST | 0.301829  | 0.0753184  |
| D1Pas1        | chr1:186967415-186970627  | NOTEST | 0.0725928 | 0.0181092  |
| Pi16          | chr17:29318881-29328902   | OK     | 5.60092   | 1.39668    |
| Fam19a5       | chr15:87544298-87759364   | OK     | 19.4303   | 4.84334    |
| Cdsn          | chr17:35552127-35557180   | NOTEST | 0.100391  | 0.0250204  |
| Slc2a12       | chr10:22645010-22731447   | NOTEST | 0.24517   | 0.0610639  |
| Lpar4         | chrX:106920624-106933899  | NOTEST | 0.731964  | 0.182253   |
| Vamp1         | chr6:125215580-125222306  | OK     | 294.394   | 73.1802    |
| Chrm2         | chr6:36333137-36524774    | OK     | 5.13508   | 1.27531    |
| Iqch          | chr9:63421619-63602448    | NOTEST | 0.0290311 | 0.00720277 |

|               |                           |        |           |            |
|---------------|---------------------------|--------|-----------|------------|
| Arhgef4       | chr1:34801721-34812754    | OK     | 33.2762   | 8.25592    |
| Tnfsf9        | chr17:57092022-57107757   | NOTEST | 0.174543  | 0.0433029  |
| Adra2a        | chr19:54045181-54048982   | OK     | 2.85221   | 0.707192   |
| Hs3st4        | chr7:123983180-124398989  | OK     | 2.83      | 0.700755   |
| Arhgef40      | chr14:51984832-52020733   | OK     | 10.9518   | 2.709      |
| Rasgrf1       | chr9:89909774-90026979    | OK     | 3.60867   | 0.891838   |
| Tgfbr3        | chr5:107106569-107289595  | OK     | 15.8089   | 3.90405    |
| Arhgef6       | chrX:57231484-57338729    | OK     | 9.2474    | 2.28345    |
| Cygb          | chr11:116645594-116654313 | OK     | 24.0753   | 5.9422     |
| Adtrp         | chr13:41763147-41847616   | NOTEST | 0.495858  | 0.122359   |
| Asic3         | chr5:24413450-24417834    | OK     | 55.5911   | 13.7055    |
| Zic5          | chr14:122459159-122465658 | NOTEST | 0.0810765 | 0.0199731  |
| Lipi          | chr16:75540513-75586061   | NOTEST | 0.0392983 | 0.00967726 |
| B3gat1        | chr9:26751561-26761338    | OK     | 1.32278   | 0.325651   |
| Epha2         | chr4:141301220-141329384  | OK     | 1.25831   | 0.309414   |
| Prkcb         | chr7:122289124-122634401  | OK     | 17.6231   | 4.33283    |
| Epb4.1l2      | chr10:25359797-25523518   | OK     | 28.3289   | 6.96479    |
| Met           | chr6:17463956-17573980    | NOTEST | 0.752983  | 0.185031   |
| Grm8          | chr6:27275120-28134369    | OK     | 9.36516   | 2.30104    |
| Tex40         | chr19:6922425-6925380     | OK     | 5.96139   | 1.46459    |
| Ajap1         | chr4:153373220-153482830  | NOTEST | 0.0568757 | 0.0139502  |
| Emilin1       | chr5:30913785-30921273    | OK     | 1.05908   | 0.259726   |
| Ndrg2         | chr14:51905270-51913488   | OK     | 82.4777   | 20.2232    |
| Emilin3       | chr2:160906437-160912339  | NOTEST | 0.0976558 | 0.0239026  |
| Phf19         | chr2:34893754-34913976    | NOTEST | 0.230128  | 0.0562997  |
| Cntn1         | chr15:92051164-92341967   | OK     | 133.551   | 32.5727    |
| Ccdc65        | chr15:98708226-98723333   | OK     | 1.54746   | 0.376376   |
| Stxbp5l       | chr16:37107309-37384958   | OK     | 6.71742   | 1.63294    |
| Kndc1         | chr7:139894695-139941540  | OK     | 3.98169   | 0.967615   |
| Traf1         | chr2:34943257-34961772    | NOTEST | 0.789065  | 0.191722   |
| Copz2         | chr11:96849875-96861202   | OK     | 6.33057   | 1.53671    |
| Il34          | chr8:110741828-110805924  | OK     | 13.4723   | 3.26259    |
| Dlgap2        | chr8:14095874-14847686    | NOTEST | 0.3294    | 0.0797293  |
| Nr1d1         | chr11:98767931-98775377   | OK     | 13.1252   | 3.1715     |
| L3hypdh       | chr12:72073427-72085313   | NOTEST | 0.852746  | 0.205909   |
| Lrtm2         | chr6:119236525-119352407  | NOTEST | 0.290885  | 0.0701948  |
| Rhobtb3       | chr13:75869536-75943824   | OK     | 12.1141   | 2.92217    |
| Vdr           | chr15:97854426-97908296   | NOTEST | 0.207993  | 0.0500868  |
| Gm7854        | chr5:43151685-43289724    | NOTEST | 0.21572   | 0.0519196  |
| Sla           | chr15:66670769-66850720   | NOTEST | 0.439717  | 0.105731   |
| Ikzf4         | chr10:128632414-128645993 | NOTEST | 0.167963  | 0.0403767  |
| Hspb6         | chr7:30553301-30555439    | OK     | 8.55716   | 2.05686    |
| Tuba4a        | chr1:75210828-75219253    | OK     | 179.361   | 43.1094    |
| Tlr5          | chr1:182954787-182976044  | OK     | 1.50935   | 0.362619   |
| Asb2          | chr12:103321141-103356001 | OK     | 1.34389   | 0.322594   |
| Spin4         | chrX:95022506-95026682    | NOTEST | 0.312583  | 0.0749948  |
| Syt15         | chrX:9885620-9998864      | NOTEST | 0.0357136 | 0.00856447 |
| Slc16a14      | chr1:84906704-84935083    | OK     | 1.27668   | 0.305832   |
| Phyhipl       | chr10:70440667-70599291   | OK     | 44.8915   | 10.736     |
| 5930430L01Rik | chr5:148990055-148995215  | NOTEST | 0.41562   | 0.0993441  |
| Itih5         | chr2:10153542-10256529    | OK     | 20.6955   | 4.92855    |
| S100a4        | chr3:90603769-90606045    | OK     | 35.8161   | 8.52247    |
| Slc16a6       | chr11:109440077-109573329 | OK     | 6.19415   | 1.4735     |

|          |                          |        |           |           |
|----------|--------------------------|--------|-----------|-----------|
| Shroom2  | chrX:152609508-152769486 | OK     | 7.06751   | 1.6791    |
| P2rx1    | chr11:72999144-73015197  | NOTEST | 0.0771528 | 0.0183241 |
| Cspg5    | chr9:110243782-110262576 | OK     | 2.76725   | 0.656556  |
| Lamb1    | chr12:31265293-31329639  | OK     | 28.5008   | 6.75975   |
| Plch2    | chr4:154983114-155010984 | OK     | 0.878891  | 0.208433  |
| Chst1    | chr2:92599706-92615252   | OK     | 3.91574   | 0.928149  |
| Ccl6     | chr11:83582060-83623693  | OK     | 1.26575   | 0.299766  |
| Mep1a    | chr17:43474328-43502773  | NOTEST | 0.0676704 | 0.0160185 |
| Col25a1  | chr3:130180844-130599883 | OK     | 2.16886   | 0.513354  |
| Col19a1  | chr1:24257682-24587437   | OK     | 0.886915  | 0.209812  |
| Adam23   | chr1:63445903-63596515   | OK     | 117.114   | 27.7044   |
| Jam3     | chr9:27097383-27155421   | OK     | 30.5318   | 7.22031   |
| Ecsr     | chr18:35713088-35721491  | OK     | 5.80319   | 1.36988   |
| Gja1     | chr10:56377299-56390419  | OK     | 19.1208   | 4.50863   |
| Shmt1    | chr11:60788896-60811265  | NOTEST | 0.145856  | 0.0342831 |
| Raver2   | chr4:101069037-101265282 | OK     | 1.39296   | 0.327277  |
| Rab31    | chr17:65651725-65772752  | OK     | 13.1244   | 3.08167   |
| Hrct1    | chr4:43727197-43728110   | NOTEST | 0.21939   | 0.0514705 |
| Hbegf    | chr18:36504926-36515805  | OK     | 5.92081   | 1.38657   |
| Styx11   | chr5:135747219-135778385 | NOTEST | 0.139948  | 0.0327332 |
| Pde9a    | chr17:31386233-31476309  | NOTEST | 0.694861  | 0.162373  |
| Gng11    | chr6:4003986-4008446     | OK     | 9.10329   | 2.12484   |
| Apobec2  | chr17:48419230-48432728  | NOTEST | 0.443514  | 0.103427  |
| Sez6l    | chr5:112419150-112577198 | OK     | 3.55      | 0.827231  |
| Btnl6    | chr17:34507934-34517352  | NOTEST | 0.450477  | 0.104912  |
| Rasd2    | chr8:75213943-75224113   | OK     | 4.11835   | 0.958579  |
| Syt3     | chr7:44384125-44400030   | OK     | 18.671    | 4.34501   |
| Naprt1   | chr15:75890963-75894481  | OK     | 1.32391   | 0.307858  |
| Ucp3     | chr7:100472990-100486432 | NOTEST | 0.284385  | 0.0661018 |
| Kank4    | chr4:98754891-98817537   | OK     | 30.1532   | 7.00402   |
| Tnfrsf22 | chr7:143636724-143649638 | OK     | 0.937721  | 0.217703  |
| Cthrc1   | chr15:39076931-39087119  | OK     | 6.18176   | 1.43252   |
| Lama4    | chr10:38965514-39110188  | OK     | 13.0669   | 3.02725   |
| Setbp1   | chr18:78750377-79109391  | OK     | 1.30437   | 0.301951  |
| Cpxm1    | chr2:130390774-130397629 | OK     | 4.87184   | 1.12764   |
| Mdga1    | chr17:29827957-29887882  | OK     | 6.92624   | 1.60106   |
| Bace2    | chr16:97356727-97439012  | OK     | 5.10275   | 1.17761   |
| Sspo     | chr6:48448228-48501250   | NOTEST | 0.0973208 | 0.0224463 |
| Nfam1    | chr15:82996735-83033397  | NOTEST | 0.399955  | 0.0922356 |
| Tcn2     | chr11:3917077-3932078    | OK     | 17.4188   | 4.01677   |
| Creb3l4  | chr3:90237499-90243512   | NOTEST | 0.175557  | 0.0404545 |
| S100a9   | chr3:90692629-90695721   | OK     | 28.9284   | 6.66451   |
| Retsat   | chr6:72598627-72607488   | OK     | 3.43704   | 0.791459  |
| Lhfpl1   | chrX:145290358-145348894 | OK     | 20.1078   | 4.62982   |
| Ddit4l   | chr3:137623671-137628332 | NOTEST | 0.746623  | 0.171846  |
| Slc1a1   | chr19:28835165-28913960  | OK     | 2.52289   | 0.580441  |
| Mal      | chr2:127633225-127656695 | OK     | 70.8689   | 16.299    |
| Abi3     | chr11:95824499-95845731  | NOTEST | 0.368164  | 0.0845168 |
| Abhd11os | chr5:135009151-135013157 | OK     | 1.37119   | 0.314762  |
| F2r      | chr13:95601788-95618433  | OK     | 10.0867   | 2.31431   |
| Lrrtm4   | chr6:80018876-80810143   | OK     | 1.39732   | 0.320527  |
| Cyp2s1   | chr7:25802475-25816530   | OK     | 1.47461   | 0.338191  |
| Kcnq3    | chr15:65994914-66286224  | OK     | 5.03976   | 1.15566   |

|               |                           |        |             |            |
|---------------|---------------------------|--------|-------------|------------|
| Ptprq         | chr10:107517359-107720027 | NOTEST | 0.183359    | 0.0420353  |
| Gm6249        | chr7:136667954-136710604  | NOTEST | 0.0882858   | 0.0201869  |
| Rassf4        | chr6:116633007-116673836  | OK     | 17.2808     | 3.94627    |
| Prg2          | chr2:84980460-84983632    | OK     | 1.19169     | 0.272057   |
| D430041D05Rik | chr2:104143074-104410334  | OK     | 3.604       | 0.822667   |
| Xkrx          | chrX:134149044-134161928  | NOTEST | 0.158065    | 0.0360759  |
| Nova1         | chr12:46694516-46818775   | OK     | 1.12948     | 0.25767    |
| Cntnap5b      | chr1:99772764-100485942   | OK     | 1.71747     | 0.391724   |
| Tspan6        | chrX:133891069-133898429  | OK     | 6.16762     | 1.40517    |
| Scn8a         | chr15:100870644-101045938 | OK     | 36.3577     | 8.27855    |
| Ppp2r3a       | chr9:101104988-101251832  | OK     | 4.8287      | 1.09947    |
| Adh1          | chr3:138277644-138290691  | OK     | 1.31011     | 0.297698   |
| Dusp4         | chr8:34807609-34819894    | OK     | 2.96115     | 0.672792   |
| Tyrobp        | chr7:30413787-30417579    | OK     | 4.32743     | 0.982974   |
| Cyp4f18       | chr8:71988481-72009626    | NOTEST | 0.238555    | 0.0541548  |
| Prtn3         | chr10:79697304-80369637   | NOTEST | 0.602551    | 0.136711   |
| Gatsl3        | chr11:4218250-4222409     | OK     | 2.71103     | 0.612653   |
| Tbx15         | chr3:99253759-99354260    | NOTEST | 0.616421    | 0.1393     |
| Sapcd2        | chr2:25372034-25378213    | NOTEST | 0.112392    | 0.0253735  |
| Tesk2         | chr4:116720954-116807559  | OK     | 3.4214      | 0.770836   |
| Sult1a1       | chr7:126672869-126676357  | OK     | 8.35574     | 1.88139    |
| Sash1         | chr10:8722218-8886070     | OK     | 8.57433     | 1.9301     |
| 5930412G12Rik | chr5:128579129-128600687  | NOTEST | 0.270532    | 0.0608688  |
| Nrtn          | chr17:56751324-56757530   | NOTEST | 0.914771    | 0.205794   |
| Fap           | chr2:62500935-62574021    | OK     | 0.962799    | 0.216569   |
| Hck           | chr2:153108467-153151441  | NOTEST | 0.423493    | 0.094976   |
| Clmp          | chr9:40685963-40784046    | OK     | 18.2657     | 4.09623    |
| Gramd3        | chr18:56432131-56503792   | OK     | 1.11781     | 0.250582   |
| Gpr141        | chr13:19749681-19824257   | NOTEST | 0.15794     | 0.035368   |
| Skor1         | chr9:63138163-63148961    | NOTEST | 0.0955346   | 0.0213891  |
| Ephx3         | chr17:32183769-32189463   | NOTEST | 0.300343    | 0.0672417  |
| Mertk         | chr2:128698996-128802188  | OK     | 3.98807     | 0.892289   |
| Cyp1a1        | chr9:57687927-57703824    | NOTEST | 0.105958    | 0.0236742  |
| Shpk          | chr11:73199481-73224506   | OK     | 7.39158     | 1.64957    |
| Sall1         | chr8:89027242-89044162    | NOTEST | 0.0173663   | 0.00387279 |
| Gm5860        | chr4:82065379-82102807    | NOTEST | 0.116703    | 0.026019   |
| Klra21        | chr6:129972081-130386874  | NOTEST | 0.000207869 | 4.62E-05   |
| Myh4          | chr11:67237811-67260447   | NOTEST | 0.1315      | 0.029236   |
| Clic4         | chr4:135213969-135272760  | OK     | 34.2337     | 7.60614    |
| Gpr171        | chr3:59006977-59344256    | NOTEST | 0.0890167   | 0.0197636  |
| Arap2         | chr5:62602445-62766177    | OK     | 9.42169     | 2.08957    |
| Apobec1       | chr6:122577791-122602444  | OK     | 1.82366     | 0.404181   |
| Ptpn14        | chr1:189728267-189876693  | OK     | 2.80783     | 0.621153   |
| Capg          | chr6:72544390-72562983    | OK     | 19.8828     | 4.39084    |
| Ankrd33       | chr15:101115754-101120024 | NOTEST | 0.213601    | 0.0471058  |
| Lrrc4c        | chr2:96318168-97631664    | OK     | 11.5447     | 2.54119    |
| Fhod1         | chr8:105329159-105347970  | NOTEST | 0.79291     | 0.174521   |
| Scn4b         | chr9:45139041-45154061    | OK     | 144.293     | 31.7115    |
| Chst9         | chr18:15452174-15718046   | OK     | 1.23407     | 0.271167   |
| AI464131      | chr4:41495600-41503075    | OK     | 8.40502     | 1.84435    |
| Pcp4          | chr16:96467605-96525793   | OK     | 419.103     | 91.9509    |
| Plxnb1        | chr9:109095435-109119915  | OK     | 4.01821     | 0.881493   |
| Plet1         | chr9:50488798-50505639    | NOTEST | 0.126623    | 0.0277767  |

|               |                           |        |           |            |
|---------------|---------------------------|--------|-----------|------------|
| Iqsec1        | chr6:90659597-90810123    | OK     | 33.9261   | 7.43489    |
| Clu           | chr14:65968482-65981545   | OK     | 251.457   | 55.0709    |
| Nr1h3         | chr2:91184060-91195116    | OK     | 1.72301   | 0.377305   |
| Gm3086        | chr12:69746847-69987002   | NOTEST | 0.441206  | 0.0964977  |
| Gm11837       | chr4:14930640-15149131    | OK     | 1.42025   | 0.310364   |
| Spaca1        | chr4:34024871-34050067    | NOTEST | 0.102648  | 0.0223396  |
| Reep6         | chr10:79697304-80369637   | OK     | 1.1234    | 0.244476   |
| Vangl1        | chr3:102155899-102204693  | OK     | 2.33675   | 0.508316   |
| Phlpp1        | chr1:106171868-106394245  | OK     | 6.60745   | 1.43626    |
| Twist2        | chr1:91801476-91848027    | NOTEST | 0.0756388 | 0.0164299  |
| Sgk2          | chr2:162987480-163014139  | NOTEST | 0.0805972 | 0.017497   |
| 35489         | chr8:65618039-66471637    | NOTEST | 0.575842  | 0.124959   |
| Slc27a6       | chr18:58556239-58612869   | NOTEST | 0.202017  | 0.0437811  |
| 1700023E05Rik | chr5:77004054-77061522    | NOTEST | 0.0594244 | 0.0128674  |
| AI197445      | chr13:107469821-107479188 | NOTEST | 0.202855  | 0.0438822  |
| Zcchc5        | chrX:106837081-106840643  | NOTEST | 0.0734372 | 0.0158788  |
| Rgma          | chr7:73310379-73419899    | OK     | 5.0141    | 1.08349    |
| Bmp1          | chr14:70474554-70520260   | OK     | 4.7784    | 1.03235    |
| Pon3          | chr6:5220851-5256233      | OK     | 1.13127   | 0.243999   |
| Grem2         | chr1:174833784-174921819  | OK     | 1.47119   | 0.317258   |
| Cdh15         | chr8:122848373-122867397  | OK     | 4.25402   | 0.915757   |
| Tgm4          | chr9:123034740-123067558  | OK     | 1.03067   | 0.221726   |
| Hapln2        | chr3:88021749-88027511    | NOTEST | 0.103629  | 0.0222904  |
| Wif1          | chr10:121034003-121100642 | NOTEST | 0.127436  | 0.0274104  |
| Tenm2         | chr11:36006655-36944241   | OK     | 4.27471   | 0.919225   |
| Prdm16        | chr4:154316124-154636873  | OK     | 2.18934   | 0.470713   |
| C1rl          | chr6:124493112-124510643  | NOTEST | 0.196335  | 0.0421624  |
| Mchr1         | chr15:81235498-81238964   | OK     | 1.36398   | 0.292875   |
| Ifitm6        | chr7:141015811-141016892  | NOTEST | 0.622247  | 0.133571   |
| Syce1         | chr7:140777228-140787854  | NOTEST | 0.067399  | 0.0144638  |
| Gm3985        | chr8:32888504-32950026    | NOTEST | 0.039401  | 0.00845131 |
| Tmem47        | chrX:81070643-81097875    | OK     | 52.8972   | 11.3417    |
| Gja5          | chr3:97032401-97053634    | NOTEST | 0.121839  | 0.0261173  |
| Mt1           | chr8:94179088-94180327    | OK     | 128.34    | 27.4935    |
| Rcn3          | chr7:45082913-45092213    | OK     | 14.1017   | 3.01871    |
| Sorcs1        | chr19:50143300-50678646   | OK     | 11.2034   | 2.39639    |
| Scube3        | chr17:28142525-28171345   | NOTEST | 0.200655  | 0.0428962  |
| Heg1          | chr16:33684465-33768195   | OK     | 7.07451   | 1.51188    |
| Col4a4        | chr1:82450722-82586849    | NOTEST | 0.388258  | 0.0829218  |
| 2310030G06Rik | chr9:50739690-50746521    | OK     | 1.01324   | 0.216307   |
| Mmp8          | chr9:7558428-7568486      | NOTEST | 0.652237  | 0.139151   |
| Gal3st1       | chr11:3983635-3999328     | OK     | 9.11073   | 1.94251    |
| Tnfaip8l1     | chr17:56162490-56173955   | OK     | 1.34831   | 0.287366   |
| Qprt          | chr7:127107769-127122029  | OK     | 1.92992   | 0.411268   |
| 1700012D01Rik | chr10:127667122-127668851 | NOTEST | 0.391561  | 0.0833642  |
| Ramp3         | chr11:6650147-6677475     | OK     | 1.74773   | 0.372014   |
| Chrna7        | chr7:63098691-63212526    | OK     | 34.4394   | 7.32868    |
| Igfals        | chr17:24878769-24882008   | NOTEST | 0.19271   | 0.0409357  |
| Shisa7        | chr7:4825551-4844696      | OK     | 1.30072   | 0.276287   |
| Mmp9          | chr2:164948218-164955849  | NOTEST | 0.678942  | 0.144161   |
| Ust           | chr10:8204752-8518825     | OK     | 22.1575   | 4.70093    |
| Tnxb          | chr17:34670534-34719815   | OK     | 3.11951   | 0.661595   |
| E330011O21Rik | chr16:78250862-78255454   | NOTEST | 0.137114  | 0.0290349  |



|               |                           |        |           |            |
|---------------|---------------------------|--------|-----------|------------|
| Atp6ap1l      | chr13:90883448-90905355   | OK     | 4.43748   | 0.938798   |
| Lrp5          | chr19:3584824-3686564     | OK     | 3.47242   | 0.734585   |
| Aoc3          | chr11:101330605-101339430 | OK     | 1.36377   | 0.288415   |
| Klhl14        | chr18:21550376-21656107   | NOTEST | 0.0225095 | 0.00475923 |
| Nr4a3         | chr4:48051247-48083352    | NOTEST | 0.219872  | 0.0464395  |
| Negr1         | chr3:156561793-157316464  | OK     | 8.87115   | 1.8731     |
| Tnnt3         | chr7:142460811-142516009  | NOTEST | 0.523941  | 0.110556   |
| Rassf6        | chr5:90603075-90640487    | OK     | 1.31403   | 0.277257   |
| Tctex1d1      | chr4:102760134-103011965  | OK     | 1.10398   | 0.232699   |
| Foxd2os       | chr4:114909288-114921118  | NOTEST | 0.154807  | 0.0325987  |
| Itpripl2      | chr7:118485111-118491975  | OK     | 4.99057   | 1.04909    |
| BC049352      | chr9:45172725-45249985    | OK     | 0.868771  | 0.182337   |
| Rrad          | chr8:104628065-104631321  | NOTEST | 0.377472  | 0.0791828  |
| Arl11         | chr14:61309752-61311936   | NOTEST | 0.153616  | 0.0322196  |
| Esr1          | chr10:4612045-5003761     | OK     | 3.95623   | 0.829595   |
| Kank2         | chr9:21766772-21798546    | OK     | 4.9814    | 1.04326    |
| 4930447K03Rik | chr13:34084154-34113272   | NOTEST | 0.130973  | 0.0274225  |
| Dbp           | chr7:45705246-45718002    | OK     | 17.1149   | 3.57876    |
| Sgk1          | chr10:21882183-21999902   | OK     | 24.1679   | 5.05052    |
| Slc2a10       | chr2:165503896-165519917  | NOTEST | 0.398407  | 0.0831924  |
| Igsf21        | chr4:140026851-140246811  | OK     | 13.4824   | 2.81361    |
| Suclg2        | chr6:95473008-95718846    | OK     | 2.07922   | 0.433759   |
| 1700008O03Rik | chr7:44360044-44375030    | NOTEST | 0.54082   | 0.11273    |
| Wnk3          | chrX:151198077-151341879  | OK     | 1.6299    | 0.339483   |
| 1110017D15Rik | chr4:41505008-41517333    | NOTEST | 0.649168  | 0.135189   |
| 6330410L21Rik | chr3:129677574-129763882  | NOTEST | 0.0537413 | 0.0111863  |
| Nfix          | chr8:84701456-84800338    | OK     | 5.1714    | 1.07596    |
| Kank1         | chr19:25237201-25434496   | OK     | 6.58474   | 1.37       |
| AI848285      | chr15:82206951-82212815   | NOTEST | 0.250557  | 0.0521085  |
| Gm10658       | chr9:56994967-57071966    | NOTEST | 0.11208   | 0.0233043  |
| St8sia2       | chr7:73939119-74013682    | NOTEST | 0.361564  | 0.0751461  |
| Coch          | chr12:51593340-51605773   | NOTEST | 0.396825  | 0.0824052  |
| Lrfn2         | chr17:48932581-49097590   | OK     | 4.35346   | 0.90399    |
| Plekhg2       | chr7:28359603-28372662    | OK     | 4.15593   | 0.862766   |
| 2210039B01Rik | chr12:73548482-73551986   | NOTEST | 0.124833  | 0.0259019  |
| Tmem181c-ps   | chr17:6610102-6620925     | OK     | 1.77975   | 0.369025   |
| Htr3a         | chr9:48899212-48911099    | OK     | 70.9188   | 14.6301    |
| Gm9866        | chr12:27140795-27160516   | OK     | 4.18936   | 0.862335   |
| Rhoj          | chr12:75308312-75401455   | OK     | 5.24169   | 1.07774    |
| Aoah          | chr13:20794112-21024254   | NOTEST | 0.186732  | 0.0383567  |
| Mybph         | chr1:134193447-134235457  | NOTEST | 0.0546959 | 0.0111881  |
| Cyp26c1       | chr19:37685679-37693307   | NOTEST | 0.0657352 | 0.0134448  |
| Athl1         | chr7:140941580-140947658  | OK     | 2.13019   | 0.435613   |
| Hfe           | chr13:23703840-23710811   | OK     | 3.53069   | 0.721839   |
| Unc80         | chr1:66468446-66699148    | OK     | 19.8359   | 4.05141    |
| Pcdha8        | chr18:36930284-37841872   | NOTEST | 0.195985  | 0.0400264  |
| Olfm2         | chr9:20667985-20728214    | OK     | 6.72234   | 1.37158    |
| Vsx1          | chr2:150680701-150689137  | NOTEST | 0.0264534 | 0.00539672 |
| Grid2ip       | chr5:143357337-143391798  | OK     | 1.95074   | 0.397538   |
| Lrp4          | chr2:91457530-91513901    | OK     | 2.3599    | 0.480693   |
| Adamts6       | chr13:104287872-104494763 | NOTEST | 0.276554  | 0.0563214  |
| Ptch2         | chr4:117096355-117114831  | NOTEST | 0.225582  | 0.0459131  |
| Npy5r         | chr8:66679964-66688094    | NOTEST | 0.337365  | 0.0685914  |

|               |                           |        |           |            |
|---------------|---------------------------|--------|-----------|------------|
| Mylk          | chr16:34784949-35002434   | OK     | 2.46145   | 0.499887   |
| F630028O10Rik | chrX:96239925-96243642    | NOTEST | 0.0875092 | 0.0177467  |
| Acss3         | chr10:106936163-107123664 | NOTEST | 0.730751  | 0.147859   |
| Gsta4         | chr9:78191965-78209349    | OK     | 16.0367   | 3.24334    |
| Slco5a1       | chr1:12866549-12991135    | OK     | 8.62223   | 1.74367    |
| Ninj2         | chr6:120093379-120200338  | NOTEST | 0.146404  | 0.0295526  |
| Ldhb          | chr6:142490248-142507943  | OK     | 130.996   | 26.4035    |
| Fgr           | chr4:132974094-133001882  | NOTEST | 0.143121  | 0.0287778  |
| Dnah2         | chr11:69420808-69549108   | NOTEST | 0.135388  | 0.0272103  |
| Kcne4         | chr1:78816948-78820025    | OK     | 1.90745   | 0.383316   |
| Amhr2         | chr15:102445366-102454639 | NOTEST | 0.525725  | 0.105648   |
| Grp           | chr18:65873478-65886596   | NOTEST | 0.155525  | 0.0312353  |
| Plscr2        | chr9:92275601-92297752    | OK     | 5.28177   | 1.0595     |
| Scn1a         | chr2:66270781-66440837    | OK     | 28.2254   | 5.6526     |
| Chrm1         | chr19:8664004-8683602     | NOTEST | 0.450797  | 0.0902721  |
| Tmigd1        | chr11:76904544-76916586   | NOTEST | 0.558372  | 0.111814   |
| Lgr4          | chr2:109917646-110014257  | OK     | 20.1066   | 4.02562    |
| Rbp1          | chr9:98422960-98446550    | OK     | 3.33355   | 0.667219   |
| Gpr158        | chr2:21367566-21830542    | OK     | 40.6674   | 8.13834    |
| Chrna3        | chr9:55011342-55026559    | OK     | 9.20085   | 1.84125    |
| Cadm4         | chr7:24482022-24504533    | OK     | 70.3086   | 14.0618    |
| Emp1          | chr6:135362930-135383173  | OK     | 6.46847   | 1.29207    |
| Pxn           | chr5:115506675-115555987  | OK     | 12.3559   | 2.46504    |
| Chpt1         | chr10:88459586-88503970   | OK     | 12.9387   | 2.57725    |
| Gsap          | chr5:21186266-21291701    | OK     | 2.86524   | 0.570227   |
| Il18          | chr9:50565367-50581837    | OK     | 3.13902   | 0.624334   |
| Ccdc170       | chr10:4509871-4561111     | NOTEST | 0.281694  | 0.056001   |
| Col26a1       | chr5:136741763-136883107  | OK     | 2.30723   | 0.458186   |
| Hoxb9         | chr11:96271329-96276593   | OK     | 4.00658   | 0.795543   |
| Fam198b       | chr3:79885929-79946278    | OK     | 9.73123   | 1.92898    |
| Dcc           | chr18:71253631-72351069   | NOTEST | 0.255821  | 0.0506179  |
| Glra3         | chr8:55940824-56125352    | NOTEST | 0.0726562 | 0.0143267  |
| Mboat2        | chr12:24831598-24960299   | OK     | 22.7847   | 4.49233    |
| Dennd2a       | chr6:39462377-39557834    | OK     | 4.40751   | 0.868543   |
| Flt3          | chr5:147330741-147400489  | OK     | 8.79299   | 1.73178    |
| Dpep1         | chr8:123186234-123201813  | NOTEST | 0.760773  | 0.149821   |
| Nfasc         | chr1:132564689-132741797  | OK     | 36.9147   | 7.26481    |
| Fam115c       | chr6:42623042-42645041    | OK     | 2.1663    | 0.425781   |
| Hs3st1        | chr5:39613934-39644631    | OK     | 8.11326   | 1.59272    |
| Il17rb        | chr14:29996167-30008896   | NOTEST | 0.701209  | 0.137627   |
| Fxyd7         | chr7:31042514-31051454    | OK     | 231.684   | 45.2761    |
| Cyp7b1        | chr3:18071949-18243338    | OK     | 3.73685   | 0.728872   |
| Grm1          | chr10:10686058-11082331   | NOTEST | 0.0501363 | 0.00976496 |
| Kcnj15        | chr16:95257557-95300258   | NOTEST | 0.153356  | 0.0298449  |
| D330050G23Rik | chr2:116900151-116912791  | OK     | 0.784557  | 0.152429   |
| Pla2g4e       | chr2:120166411-120245335  | NOTEST | 0.602141  | 0.116964   |
| Abca12        | chr1:71243089-71414910    | NOTEST | 0.0902223 | 0.0175135  |
| Relt          | chr7:100845847-100863413  | OK     | 8.56521   | 1.66179    |
| Rapgef11      | chr11:98836784-98853005   | NOTEST | 0.541182  | 0.104968   |
| Ntf3          | chr6:126101411-126166744  | NOTEST | 0.602961  | 0.116822   |
| Cdc42ep1      | chr15:78842646-78855529   | OK     | 7.0332    | 1.36037    |
| Tmco4         | chr4:138972904-139059171  | OK     | 1.75742   | 0.337895   |
| Alox5ap       | chr5:149265057-149288047  | OK     | 2.05909   | 0.395708   |

|               |                          |        |           |            |
|---------------|--------------------------|--------|-----------|------------|
| Tmem163       | chr1:127490341-127678021 | OK     | 17.5376   | 3.37005    |
| Pygm          | chr19:6384428-6398459    | NOTEST | 0.789066  | 0.151437   |
| Pgr           | chr9:8899832-8968611     | OK     | 1.72309   | 0.330448   |
| Olfm3         | chr3:114863252-115125764 | OK     | 1.549     | 0.296801   |
| Rcsd1         | chr1:165648944-165708094 | OK     | 6.5528    | 1.25387    |
| Lrrc8e        | chr8:4226826-4237470     | NOTEST | 0.151858  | 0.0290514  |
| Clec4d        | chr6:123262106-123275268 | NOTEST | 0.0901094 | 0.0172118  |
| Cbln2         | chr18:86713047-86718283  | OK     | 20.4512   | 3.90535    |
| Eln           | chr5:134702595-134747254 | OK     | 7.15667   | 1.36641    |
| Akr1c13       | chr13:4191186-4205603    | NOTEST | 0.430097  | 0.0820114  |
| Syt13         | chr2:92915100-92956051   | OK     | 1.34343   | 0.25557    |
| Perm1         | chr4:156215926-156221307 | NOTEST | 0.620066  | 0.117891   |
| Meox2         | chr12:37108545-37179528  | OK     | 1.15115   | 0.218352   |
| Fgf11         | chr11:69796067-69801716  | OK     | 6.27778   | 1.19037    |
| Ciart         | chr3:95871521-95891930   | OK     | 2.00513   | 0.380134   |
| Cpxm2         | chr7:132042809-132154741 | OK     | 2.0229    | 0.381765   |
| Rad21l        | chr2:151645403-151668533 | NOTEST | 0.14949   | 0.0281663  |
| Wnt5b         | chr6:119432530-119544347 | NOTEST | 0.651838  | 0.122621   |
| Smoc1         | chr12:81026807-81186414  | OK     | 4.36098   | 0.819292   |
| Sowahb        | chr5:93041122-93045022   | NOTEST | 0.573182  | 0.107681   |
| Kazald1       | chr19:45076138-45079289  | OK     | 5.16113   | 0.969525   |
| Fzd8          | chr18:9212855-9216201    | OK     | 3.87034   | 0.726799   |
| Ociad2        | chr5:73322198-73338639   | OK     | 3.00614   | 0.564106   |
| Anxa1         | chr19:20373433-20390671  | OK     | 5.86754   | 1.10015    |
| Gabrb2        | chr11:42419756-42632591  | OK     | 5.35282   | 1.0025     |
| Acot4         | chr12:84038378-84044723  | NOTEST | 0.343966  | 0.0643502  |
| Ppap2b        | chr4:105157346-105232767 | OK     | 35.0753   | 6.55448    |
| Lbp           | chr2:158306492-158332852 | OK     | 5.45301   | 1.01787    |
| Cacna2d4      | chr6:119236525-119352407 | NOTEST | 0.0348338 | 0.00648146 |
| Kcnc3         | chr7:44590885-44604751   | OK     | 32.2655   | 5.99438    |
| Fgfr1         | chr8:25518758-25575718   | OK     | 58.6167   | 10.8813    |
| Cpne6         | chr14:55510447-55517431  | OK     | 176.898   | 32.8155    |
| Fam178b       | chr1:36562695-36683183   | OK     | 27.914    | 5.17682    |
| Akr1b10       | chr6:34384246-34396949   | OK     | 3.15946   | 0.58537    |
| Pik3r5        | chr11:68432124-68497846  | OK     | 0.902504  | 0.167192   |
| Capn6         | chrX:143802236-143827412 | OK     | 0.821202  | 0.151982   |
| Cox4i2        | chr2:152754172-152831728 | OK     | 1.06765   | 0.197388   |
| Ppargc1a      | chr5:51454248-51553921   | OK     | 5.94364   | 1.09743    |
| Batf          | chr12:85686719-85709087  | NOTEST | 0.141262  | 0.0260683  |
| Plbd1         | chr6:136612070-136661893 | OK     | 0.91435   | 0.168638   |
| Rab34         | chr11:78188426-78192193  | OK     | 7.62756   | 1.40459    |
| Fn1           | chr1:71585472-71653234   | OK     | 9.59686   | 1.76716    |
| Adra1b        | chr11:43774604-43901237  | NOTEST | 0.736553  | 0.135563   |
| Pcdh9         | chr14:93013699-93890669  | OK     | 22.4547   | 4.13015    |
| Gatm          | chr2:122594472-122611277 | OK     | 101.873   | 18.6685    |
| C130060K24Rik | chr6:65381293-65458150   | NOTEST | 0.751241  | 0.137462   |
| Gpr124        | chr8:27085840-27123436   | OK     | 4.3787    | 0.801014   |
| Samd4         | chr14:46882964-47105817  | OK     | 2.72749   | 0.498406   |
| Lynx1         | chr15:74747855-74752979  | OK     | 157.363   | 28.7309    |
| Mcf2          | chrX:60055955-60179089   | OK     | 1.63544   | 0.298412   |
| Tlr3          | chr8:45395664-45410539   | OK     | 2.29908   | 0.418941   |
| Kcnc1         | chr7:46396467-46438704   | OK     | 21.3975   | 3.89842    |
| Ankrd35       | chr3:96670130-96691034   | OK     | 3.29198   | 0.599192   |

|               |                           |        |           |            |
|---------------|---------------------------|--------|-----------|------------|
| Zfp750        | chr11:121451948-121673151 | NOTEST | 0.245938  | 0.0447436  |
| 9430041J12Rik | chr7:4074124-4136926      | NOTEST | 0.394432  | 0.0716956  |
| Chst2         | chr9:95400925-95407270    | OK     | 12.5514   | 2.28038    |
| Sec14I5       | chr16:5147108-5183934     | OK     | 1.50689   | 0.273368   |
| Lamc3         | chr2:31887280-31946535    | OK     | 1.6197    | 0.293551   |
| Lcp2          | chr11:34047200-34092280   | OK     | 1.11982   | 0.202886   |
| 2410018L13Rik | chr12:22953996-23010243   | OK     | 1.09859   | 0.199018   |
| Inpp4b        | chr8:81715199-82122561    | NOTEST | 0.285725  | 0.0516794  |
| Fam181b       | chr7:93079878-93081721    | OK     | 8.09885   | 1.4638     |
| Fads6         | chr11:115283365-115297546 | OK     | 11.3872   | 2.05714    |
| Efna3         | chr3:89314950-89322879    | OK     | 1.75984   | 0.317814   |
| BC026585      | chr1:157458581-157488733  | OK     | 2.27773   | 0.410968   |
| Ddc           | chr11:11814100-11898144   | NOTEST | 0.678675  | 0.122453   |
| Il5ra         | chr6:106710378-106749037  | NOTEST | 0.0902013 | 0.0162628  |
| Rfx8          | chr1:39665300-39720989    | NOTEST | 0.261404  | 0.0471289  |
| Dcaf12l2      | chrX:44365456-44368337    | NOTEST | 0.0376672 | 0.00678403 |
| Slc22a3       | chr17:12419973-12507704   | NOTEST | 0.542956  | 0.0976881  |
| Nr2f2         | chr7:70351949-70411146    | OK     | 12.2439   | 2.20149    |
| Creb5         | chr6:53573373-53695832    | OK     | 1.33715   | 0.240276   |
| Mfap2         | chr4:141010423-141015984  | OK     | 1.33656   | 0.240096   |
| Wfdc6b        | chr2:164613699-164618213  | NOTEST | 0.178622  | 0.0320626  |
| Ptprj         | chr2:90429755-90580647    | OK     | 3.23047   | 0.579648   |
| Gm5607        | chr8:12385770-12436732    | NOTEST | 0.0224323 | 0.00402384 |
| Asb18         | chr1:89952677-90014577    | NOTEST | 0.100832  | 0.0180777  |
| Trib1         | chr15:59648653-59657099   | OK     | 4.06921   | 0.729153   |
| Klhl13        | chrX:23219270-23365082    | OK     | 11.152    | 1.99697    |
| Wfdc1         | chr8:119666364-119688020  | OK     | 2.61248   | 0.467725   |
| Fbn1          | chr2:125300593-125506438  | OK     | 4.693     | 0.839319   |
| Syndig1       | chr2:149830782-150004392  | OK     | 3.65527   | 0.651889   |
| Prex2         | chr1:10993464-11303682    | OK     | 5.36132   | 0.95525    |
| Pard3         | chr8:127064055-127612286  | OK     | 5.50679   | 0.980545   |
| Clec11a       | chr7:44303765-44306959    | OK     | 0.998314  | 0.177485   |
| Gstk1         | chr6:42245934-42250441    | OK     | 7.84202   | 1.39367    |
| Gfpt2         | chr11:49794154-49838620   | OK     | 0.859664  | 0.152748   |
| AA467197      | chr2:122637886-122641076  | NOTEST | 0.236887  | 0.0420114  |
| Vwc2l         | chr1:70725714-70885397    | OK     | 3.66059   | 0.648615   |
| Lrrc17        | chr5:21483846-21645605    | OK     | 1.03864   | 0.183803   |
| Alox15        | chr11:70344146-70352031   | NOTEST | 0.099967  | 0.0176722  |
| Hpd1          | chr4:116819906-116821508  | OK     | 1.45786   | 0.257668   |
| Fam69c        | chr18:84720241-84740436   | NOTEST | 0.0528166 | 0.00932391 |
| Epb4.1l4b     | chr4:57061725-57143156    | OK     | 7.25299   | 1.27878    |
| 4930502E18Rik | chrX:53724830-53738222    | OK     | 1.30586   | 0.230226   |
| Sulf2         | chr2:166073898-166155683  | OK     | 19.6662   | 3.46445    |
| Glyat         | chr19:12633307-12651737   | NOTEST | 0.867955  | 0.152796   |
| Vit           | chr17:78508062-78627409   | OK     | 3.63922   | 0.640144   |
| Fhod3         | chr18:24708622-25168877   | OK     | 4.37547   | 0.768342   |
| Fam83f        | chr15:80671846-80700425   | OK     | 1.39601   | 0.245026   |
| G0s2          | chr1:193272159-193273188  | OK     | 9.52087   | 1.67021    |
| Gsn           | chr2:35256358-35307902    | OK     | 116.688   | 20.4571    |
| Parp3         | chr9:106470352-106476651  | OK     | 5.87475   | 1.02965    |
| Fam196a       | chr7:134670686-135173647  | NOTEST | 0.39435   | 0.0690989  |
| Astn2         | chr4:65380802-66404483    | OK     | 12.683    | 2.22068    |
| Lctl          | chr9:64117146-64172931    | OK     | 1.36919   | 0.239643   |

|               |                           |        |           |            |
|---------------|---------------------------|--------|-----------|------------|
| Cd33          | chr7:43527455-43533171    | NOTEST | 0.363205  | 0.0635481  |
| Corin         | chr5:72300024-72504540    | NOTEST | 0.09397   | 0.0164371  |
| B3galt5       | chr16:96235800-96319858   | OK     | 8.93456   | 1.56191    |
| 2010107G12Rik | chr6:34945294-34977999    | NOTEST | 0.0532891 | 0.00929999 |
| Cgnl1         | chr9:71626508-71771602    | OK     | 26.7935   | 4.65777    |
| Ptgis         | chr2:167203195-167240537  | OK     | 2.51951   | 0.437644   |
| Fstl5         | chr3:76074560-76710005    | OK     | 12.9749   | 2.25151    |
| Gucy1a3       | chr3:82092426-82145877    | OK     | 1.75121   | 0.303875   |
| Nr4a1         | chr15:101266845-101274794 | OK     | 41.0628   | 7.11489    |
| Fkbp11        | chr15:98724367-98728198   | NOTEST | 0.68988   | 0.119533   |
| Lct           | chr1:128284763-128328318  | NOTEST | 0.774527  | 0.134142   |
| Smtnl1        | chr2:84811175-84822652    | NOTEST | 0.0674394 | 0.0116782  |
| Pacsin3       | chr2:91256164-91264680    | OK     | 5.56057   | 0.962771   |
| Gal3st4       | chr5:138259657-138272754  | NOTEST | 0.0808397 | 0.0139719  |
| Col4a1        | chr8:11198422-11312826    | OK     | 29.4197   | 5.08217    |
| Gm1715        | chr9:52679862-52798772    | NOTEST | 0.154518  | 0.0266281  |
| Thrsp         | chr7:97412956-97417510    | OK     | 13.3788   | 2.30316    |
| Cxcr4         | chr1:128588198-128592299  | OK     | 14.2569   | 2.45109    |
| 4930505A04Rik | chr11:30426005-30471829   | NOTEST | 0.29485   | 0.0506085  |
| Dock1         | chr7:134670686-135173647  | OK     | 4.74467   | 0.814108   |
| C1qtnf3       | chr15:10952331-10980162   | NOTEST | 0.186119  | 0.0319029  |
| Wisp1         | chr15:66891392-66923199   | OK     | 1.7375    | 0.297767   |
| Kcng4         | chr8:119623853-119635680  | OK     | 5.17658   | 0.887003   |
| Ces4a         | chr8:105131799-105150109  | NOTEST | 0.0475959 | 0.00815029 |
| Glb1l3        | chr9:26817952-26860823    | NOTEST | 0.0469218 | 0.00803471 |
| Kbtbd13       | chr9:65388683-65391652    | NOTEST | 0.0460326 | 0.0078764  |
| Gprc5b        | chr7:118842217-118995211  | OK     | 30.3309   | 5.17323    |
| Tomt          | chr7:101899807-101911903  | NOTEST | 0.199218  | 0.0339653  |
| Lhfp          | chr3:53041546-53261679    | OK     | 22.9137   | 3.90496    |
| Plekha7       | chr7:116124117-116189841  | OK     | 2.70538   | 0.460698   |
| CK137956      | chr4:127927591-127970841  | OK     | 0.997387  | 0.169837   |
| Mc4r          | chr18:66857704-66860487   | NOTEST | 0.549644  | 0.0935597  |
| Pygo1         | chr9:72925649-72946015    | OK     | 2.12042   | 0.360667   |
| Kcnk1         | chr8:125995101-126030688  | OK     | 43.7343   | 7.42451    |
| Smpd2         | chr10:41487171-41490340   | OK     | 5.52525   | 0.936956   |
| Rbpjl         | chr2:164389392-164415448  | NOTEST | 0.0475789 | 0.00806688 |
| Caskin2       | chr11:115799351-115813592 | OK     | 9.45282   | 1.60161    |
| Sema3g        | chr14:31217872-31229511   | OK     | 11.1768   | 1.88807    |
| Ddn           | chr15:98803781-98807925   | OK     | 5.69686   | 0.961112   |
| Pld6          | chr11:59783892-59787657   | NOTEST | 0.221365  | 0.0373282  |
| Sox5          | chr6:143828424-144209568  | OK     | 0.792971  | 0.133365   |
| Igdcc4        | chr9:65101485-65137947    | OK     | 3.10854   | 0.522671   |
| Dhrs3         | chr4:144892826-144927645  | OK     | 5.89778   | 0.991389   |
| Slmo1         | chr18:67464848-67480581   | OK     | 3.75096   | 0.630507   |
| Dio2          | chr12:90724551-90738438   | NOTEST | 0.318093  | 0.0534608  |
| S100a16       | chr3:90541222-90543151    | OK     | 35.2284   | 5.91706    |
| Renbp         | chrX:73922120-73930850    | OK     | 1.62865   | 0.273481   |
| Asb15         | chr6:24528143-24573164    | NOTEST | 0.0601104 | 0.0100883  |
| Cp            | chr3:19957053-20035310    | OK     | 14.3095   | 2.40115    |
| Ccr2          | chr9:124102182-124109140  | OK     | 1.00814   | 0.168874   |
| Gpx8          | chr13:113035378-113091135 | OK     | 15.4392   | 2.58409    |
| Asb5          | chr8:54550330-54587836    | NOTEST | 0.188691  | 0.0315815  |
| Stk32b        | chr5:37446824-37717153    | NOTEST | 0.0671059 | 0.011221   |



|               |                           |        |           |           |
|---------------|---------------------------|--------|-----------|-----------|
| Ttc18         | chr14:20394189-20452225   | NOTEST | 0.459122  | 0.0765063 |
| Sipa1l2       | chr8:125418062-125492710  | OK     | 6.54748   | 1.0909    |
| Fhl3          | chr4:124700698-124708611  | OK     | 2.33016   | 0.386119  |
| Sik3          | chr9:46012819-46224194    | OK     | 4.95651   | 0.82123   |
| Nfkb2         | chr19:46304736-46327156   | OK     | 2.3182    | 0.382746  |
| Gng7          | chr10:80948623-81014925   | OK     | 5.5715    | 0.918     |
| Pth1r         | chr9:110722084-110747145  | OK     | 12.5398   | 2.06236   |
| Lrrc7         | chr3:158082894-158562221  | NOTEST | 0.296366  | 0.0486909 |
| Pon2          | chr6:5264623-5298373      | OK     | 18.5683   | 3.04864   |
| Lamc1         | chr1:153218921-153332786  | OK     | 18.01     | 2.9482    |
| Gm10941       | chr10:77257772-77259223   | NOTEST | 0.545916  | 0.0893175 |
| Mdh1b         | chr1:63698826-63730318    | NOTEST | 0.620817  | 0.101488  |
| Cdh3          | chr8:106510851-106556911  | OK     | 1.03562   | 0.169296  |
| Mael          | chr1:166201384-166238744  | NOTEST | 0.171821  | 0.0280713 |
| Htra1         | chr7:130936202-130985658  | OK     | 73.7341   | 12.0408   |
| Pcdhac1       | chr18:36930284-37841872   | OK     | 19.8747   | 3.2426    |
| Csmd3         | chr15:47580637-48791989   | NOTEST | 0.430231  | 0.0701608 |
| Ednra         | chr8:77663028-77724452    | OK     | 2.98788   | 0.484983  |
| Chp2          | chr7:122219495-122222539  | OK     | 32.192    | 5.22032   |
| Caln1         | chr5:130369457-130840645  | OK     | 4.8418    | 0.785143  |
| Sema5b        | chr16:35541361-35664258   | OK     | 1.80224   | 0.292109  |
| Mmp28         | chr11:83441875-83462961   | OK     | 3.02106   | 0.489598  |
| Slc43a3       | chr2:84936645-84958509    | OK     | 19.8969   | 3.21972   |
| Tox           | chr4:6687385-6990723      | OK     | 1.89335   | 0.30626   |
| Mir143hg      | chr18:61639652-61665538   | NOTEST | 0.116374  | 0.0188093 |
| Tmem196       | chr12:119945961-120018706 | OK     | 3.41982   | 0.549797  |
| Dag1          | chr9:108204860-108263958  | OK     | 61.8579   | 9.94435   |
| Rsph9         | chr17:46129276-46144198   | OK     | 6.75744   | 1.08564   |
| 4933424G06Rik | chr1:36714537-36757960    | NOTEST | 0.153441  | 0.0246456 |
| Btnl5-ps      | chr17:34487405-34497429   | NOTEST | 0.101864  | 0.0163595 |
| Alox5         | chr6:116410070-116461178  | NOTEST | 0.245564  | 0.0393537 |
| Atp10b        | chr11:43149876-43262286   | NOTEST | 0.209794  | 0.0335999 |
| Cd86          | chr16:36603868-36666077   | NOTEST | 0.232815  | 0.0372868 |
| Angpt1        | chr15:42424666-42676977   | OK     | 1.43968   | 0.230401  |
| Tnfsf13       | chr11:69682576-69696098   | OK     | 1.76117   | 0.281737  |
| Bmp7          | chr2:172868011-172940321  | OK     | 2.01634   | 0.322144  |
| Sepp1         | chr15:3270766-3280508     | OK     | 179.046   | 28.5544   |
| Il1f9         | chr2:24186475-24193567    | NOTEST | 0.0847008 | 0.0135057 |
| Lonrf3        | chrX:36328408-36366856    | NOTEST | 0.423942  | 0.067544  |
| Rhod          | chr19:4425456-4477143     | NOTEST | 0.582671  | 0.0925404 |
| 1810014B01Rik | chr10:86685526-86689954   | NOTEST | 0.729696  | 0.115766  |
| Rbms2         | chr10:128129469-128180297 | OK     | 4.63083   | 0.734032  |
| Foxo1         | chr3:52268336-52350109    | OK     | 6.60329   | 1.04655   |
| Baiap2l1      | chr5:144244436-144361005  | OK     | 13.8361   | 2.19214   |
| Epn3          | chr11:94489598-94499974   | OK     | 18.2142   | 2.88252   |
| D630003M21Rik | chr2:158182532-158229224  | OK     | 1.79903   | 0.284695  |
| Slc25a13      | chr6:6041217-6217173      | OK     | 1.46299   | 0.231256  |
| Syt1l         | chr4:133253089-133263087  | NOTEST | 0.071719  | 0.0113346 |
| Myadml2       | chr11:120646030-120648337 | OK     | 3.32932   | 0.525706  |
| 38595         | chr11:117199660-117362325 | OK     | 23.0594   | 3.64082   |
| Crybb1        | chr5:112255820-112269582  | OK     | 3.17542   | 0.501223  |
| Zfp395        | chr14:65358675-65398930   | OK     | 2.08511   | 0.328877  |
| Asgr1         | chr11:70054123-70057895   | NOTEST | 0.290383  | 0.045769  |

|               |                           |        |           |            |
|---------------|---------------------------|--------|-----------|------------|
| Sec1414       | chr11:4031781-4048009     | NOTEST | 0.0453435 | 0.00713731 |
| Fbxw10        | chr11:62847122-62877462   | NOTEST | 0.188482  | 0.0296247  |
| 6530402F18Rik | chr2:29194820-29252993    | OK     | 6.46804   | 1.01626    |
| Cuzd1         | chr7:131308553-131322292  | NOTEST | 0.0605656 | 0.00951369 |
| Pxdc1         | chr13:34627840-34652681   | OK     | 4.75736   | 0.747281   |
| 2810468N07Rik | chr17:25570810-25575043   | OK     | 3.59622   | 0.564849   |
| Gas2l3        | chr10:89408822-89443967   | OK     | 7.86012   | 1.23414    |
| Pcdh18        | chr3:49743295-49757316    | OK     | 2.67415   | 0.419775   |
| Fam160a1      | chr3:85660062-85746209    | NOTEST | 0.271375  | 0.0425313  |
| Epha3         | chr16:63545217-63864157   | NOTEST | 0.564331  | 0.0884377  |
| Zbtb16        | chr9:48654296-48835945    | OK     | 2.2518    | 0.352825   |
| Snai2         | chr16:14705858-14709382   | NOTEST | 0.427905  | 0.06696    |
| Trappc3l      | chr10:34037596-34109815   | OK     | 51.4782   | 8.05384    |
| Opn1mw        | chrX:74127465-74150755    | NOTEST | 0.122482  | 0.0191356  |
| Lingo4        | chr3:94399218-94404501    | OK     | 3.09527   | 0.482977   |
| Nfatc4        | chr14:55824794-55833943   | NOTEST | 0.373004  | 0.0580939  |
| Gm5643        | chrX:142297504-142299237  | OK     | 4.91697   | 0.765784   |
| Plac9b        | chr14:26167317-26182351   | NOTEST | 0.462538  | 0.0718247  |
| Vim           | chr2:13574310-13582826    | OK     | 312.036   | 48.3967    |
| Atp6v0a4      | chr6:38048482-38254009    | NOTEST | 0.354133  | 0.054917   |
| Ncam2         | chr16:81200696-81624287   | OK     | 10.6048   | 1.64412    |
| Syt12         | chr19:4425456-4477143     | OK     | 6.1837    | 0.957147   |
| Gc            | chr5:89417510-89457898    | NOTEST | 0.175237  | 0.0270289  |
| Cmtm3         | chr8:104340593-104347672  | OK     | 4.96563   | 0.765517   |
| Rell1         | chr5:63908897-63968897    | OK     | 7.78305   | 1.19794    |
| Lrrn2         | chr1:132880354-132940005  | OK     | 10.1737   | 1.56312    |
| Mrc1          | chr2:14229413-14332023    | OK     | 2.10412   | 0.323252   |
| Osgin1        | chr8:119437161-119446256  | OK     | 0.926444  | 0.142092   |
| Tmem229b      | chr12:78961794-79007277   | OK     | 70.3215   | 10.7757    |
| Fcer1g        | chr1:171229571-171234349  | OK     | 2.09895   | 0.321285   |
| Me3           | chr7:89632817-89854359    | OK     | 1.75763   | 0.268656   |
| Gm13749       | chr1:63964726-63968999    | NOTEST | 0.461733  | 0.0704701  |
| Pxylp1        | chr9:96823342-96889474    | OK     | 1.213     | 0.185067   |
| 4933425L06Rik | chr13:105082121-105121782 | NOTEST | 0.0730084 | 0.0111373  |
| Mlip          | chr9:77102083-77347870    | OK     | 11.6836   | 1.77668    |
| Rgcc          | chr14:79288749-79301635   | OK     | 34.1231   | 5.18032    |
| Etnppl        | chr3:130617447-130635750  | NOTEST | 0.0525121 | 0.00797199 |
| Dmgdh         | chr13:93674435-93752823   | NOTEST | 0.129376  | 0.0196322  |
| Wee1          | chr7:110122058-110143299  | OK     | 4.50619   | 0.682869   |
| Rhbdl3        | chr11:80300911-80355986   | OK     | 6.35879   | 0.963506   |
| E030011005Rik | chr9:96685422-96752831    | OK     | 1.38344   | 0.209585   |
| Dlg2          | chr7:91090785-92449246    | OK     | 15.8526   | 2.40128    |
| Macc1         | chr12:119443409-119466932 | NOTEST | 0.033235  | 0.00502572 |
| Adamtsl5      | chr10:79697304-80369637   | OK     | 3.39329   | 0.511472   |
| Clmn          | chr12:104763113-104865076 | OK     | 1.89899   | 0.28524    |
| Yipf7         | chr5:69516669-69542647    | NOTEST | 0.119514  | 0.017942   |
| Irs1          | chr1:82233104-82291439    | OK     | 2.23399   | 0.335214   |
| Tmem98        | chr11:80810414-80822033   | OK     | 4.19086   | 0.628522   |
| Add3          | chr19:53140442-53247326   | OK     | 19.041    | 2.85555    |
| Myo5c         | chr9:75232013-75305450    | NOTEST | 0.0185393 | 0.00277922 |
| Drp2          | chrX:134404779-134456573  | OK     | 36.09     | 5.40295    |
| Smr2          | chr5:88086555-88109053    | OK     | 9.52474   | 1.42168    |
| Wwtr1         | chr3:57455643-57575910    | OK     | 8.61247   | 1.28484    |

|               |                           |        |           |            |
|---------------|---------------------------|--------|-----------|------------|
| Casq1         | chr1:172209893-172219895  | NOTEST | 0.666734  | 0.09932    |
| Fat1          | chr8:44950207-45052257    | OK     | 6.67431   | 0.993606   |
| Tlr13         | chrX:106143274-106160493  | NOTEST | 0.24902   | 0.0370462  |
| Ppic          | chr18:53406340-53418007   | OK     | 4.98387   | 0.741333   |
| Mas1          | chr17:12682405-12868143   | NOTEST | 0.122256  | 0.0181835  |
| Sp9           | chr2:73271925-73275771    | NOTEST | 0.0468469 | 0.00696115 |
| Cdc42bpg      | chr19:6306456-6325652     | OK     | 1.08301   | 0.160824   |
| Kank4os       | chr4:98754891-98817537    | NOTEST | 0.201956  | 0.0298913  |
| Iffo2         | chr4:139530547-139620382  | OK     | 3.72046   | 0.549987   |
| Klhl34        | chrX:157818434-157821060  | NOTEST | 0.105388  | 0.0155649  |
| Aqp3          | chr4:41092723-41098183    | NOTEST | 0.158106  | 0.0233263  |
| Arc           | chr15:74669080-74672570   | OK     | 3.34442   | 0.493166   |
| Nfia          | chr4:97567874-98118876    | OK     | 15.63     | 2.29993    |
| Fam212b       | chr3:105704598-105720842  | OK     | 8.14496   | 1.1957     |
| Gm11413       | chr4:83378316-83390668    | NOTEST | 0.229498  | 0.0336153  |
| Hyal1         | chr9:107576951-107580133  | OK     | 1.04927   | 0.153599   |
| F9            | chrX:59999463-60030758    | OK     | 1.59264   | 0.233056   |
| Sucnr1        | chr3:60081868-60087566    | NOTEST | 0.217202  | 0.0317652  |
| Cbln3         | chr14:55878919-55884256   | NOTEST | 0.109888  | 0.016064   |
| Slc5a9        | chr4:111875376-111902796  | NOTEST | 0.0298966 | 0.00436717 |
| Fgf10         | chr13:118714698-118792573 | NOTEST | 0.0284709 | 0.00415499 |
| Pla2g4a       | chr1:149829621-149961284  | OK     | 0.892383  | 0.130213   |
| Proca1        | chr11:78193391-78205763   | NOTEST | 0.591365  | 0.0862109  |
| Ppp1r9a       | chr6:4903319-5165661      | OK     | 8.44914   | 1.23132    |
| Hoxb8         | chr11:96281904-96285325   | OK     | 5.38421   | 0.784156   |
| Runx3         | chr4:135120644-135177990  | OK     | 3.53286   | 0.514397   |
| Fam19a1       | chr6:96113153-96657198    | OK     | 10.6261   | 1.54535    |
| Sipa1l1       | chr12:82170015-82451784   | OK     | 7.33265   | 1.06506    |
| Clec4a1       | chr6:122921847-122934619  | NOTEST | 0.632208  | 0.0917507  |
| Cxcl14        | chr13:56288642-56296551   | NOTEST | 0.340922  | 0.0494368  |
| Mpzl2         | chr9:45042343-45054043    | NOTEST | 0.698815  | 0.101252   |
| Susd3         | chr13:49230830-49248706   | NOTEST | 0.451834  | 0.0654463  |
| Pla2g16       | chr19:7557458-7588545     | OK     | 19.8942   | 2.88128    |
| Glt8d2        | chr10:82629837-82690650   | OK     | 1.34364   | 0.194524   |
| Hic1          | chr11:75164564-75170255   | OK     | 0.898914  | 0.130121   |
| Thy1          | chr9:44043383-44048579    | OK     | 508.722   | 73.6375    |
| Dbi           | chr1:120113279-120121096  | OK     | 279.419   | 40.2192    |
| B430212C06Rik | chr18:67321208-67367794   | NOTEST | 0.174074  | 0.0250212  |
| Edn3          | chr2:174760757-174784042  | NOTEST | 0.595502  | 0.0854602  |
| Nipal1        | chr5:72647795-72671078    | NOTEST | 0.639386  | 0.0916866  |
| S100b         | chr10:76253835-76261319   | OK     | 416.322   | 59.6898    |
| Cmklr1        | chr5:113612354-113650390  | NOTEST | 0.751778  | 0.107586   |
| Frem2         | chr3:53513937-53657355    | OK     | 0.899078  | 0.128423   |
| Ptchd4        | chr17:42315946-42507741   | NOTEST | 0.603282  | 0.0861523  |
| Htr6          | chr4:139061408-139074789  | NOTEST | 0.110129  | 0.0157177  |
| Calb1         | chr4:15881263-15906709    | OK     | 27.6068   | 3.93815    |
| 9130019P16Rik | chr6:54039931-54430221    | NOTEST | 0.0297474 | 0.00423852 |
| Has2          | chr15:56665626-56694546   | NOTEST | 0.12665   | 0.0179708  |
| Smtn          | chr11:3517521-3539292     | OK     | 12.9367   | 1.83056    |
| Snx33         | chr9:56917199-56928371    | OK     | 1.83034   | 0.258752   |
| Hspb2         | chr9:50751071-50756635    | OK     | 5.04117   | 0.707618   |
| Nkpd1         | chr7:19518730-19525050    | NOTEST | 0.558544  | 0.0784016  |
| Grik3         | chr4:125490830-125714173  | OK     | 4.39468   | 0.616767   |

|               |                           |        |           |            |
|---------------|---------------------------|--------|-----------|------------|
| Esrrb         | chr12:86361116-86521628   | OK     | 2.30179   | 0.322308   |
| Rad51ap2      | chr12:11456078-11462928   | NOTEST | 0.131169  | 0.018335   |
| Ramp1         | chr1:91179821-91225196    | NOTEST | 0.440333  | 0.0615332  |
| Yap1          | chr9:7932000-8004596      | OK     | 8.8971    | 1.24152    |
| Galm          | chr17:80127470-80185032   | OK     | 9.95351   | 1.38781    |
| Sox9          | chr11:112782209-112787757 | NOTEST | 0.32409   | 0.0451758  |
| Myrf1         | chr10:116776544-116896879 | NOTEST | 0.435845  | 0.0607416  |
| Col6a1        | chr10:76708791-76726044   | OK     | 8.95657   | 1.24659    |
| Tnfrsf23      | chr7:143665806-143685872  | NOTEST | 0.649154  | 0.0902654  |
| Fam135b       | chr15:71445677-71727838   | NOTEST | 0.0591099 | 0.00821397 |
| Tspan11       | chr6:127887621-127953031  | OK     | 1.0911    | 0.151598   |
| Tcf7l2        | chr19:55741809-55933655   | OK     | 2.01663   | 0.279589   |
| Cdh22         | chr2:165111506-165234737  | NOTEST | 0.499627  | 0.0692033  |
| Grm4          | chr17:27422387-27503533   | OK     | 10.1537   | 1.40604    |
| Mrv1          | chr7:110868257-110982461  | OK     | 1.6965    | 0.234577   |
| Plcx1         | chr5:110099968-110108197  | NOTEST | 0.0453839 | 0.00626591 |
| Tnfrsf6       | chr2:52038112-52056681    | OK     | 1.29934   | 0.178952   |
| 1700007K13Rik | chr2:28462000-28466324    | NOTEST | 0.717954  | 0.0986892  |
| 4930520004Rik | chr9:114368323-114390712  | NOTEST | 0.297935  | 0.0409442  |
| Arhgap19      | chr19:41766587-41802084   | OK     | 13.974    | 1.91887    |
| Sfrp4         | chr13:19623174-19632823   | OK     | 14.5396   | 1.99556    |
| Ptx3          | chr3:66053557-66296837    | NOTEST | 0.169577  | 0.0232342  |
| Ntng2         | chr2:29194820-29252993    | OK     | 25.9492   | 3.54405    |
| Sparcl1       | chr5:104079108-104114088  | OK     | 183.564   | 25.0465    |
| Col5a1        | chr2:27886424-28039510    | OK     | 5.27863   | 0.717108   |
| Cabp7         | chr11:4738820-4746778     | OK     | 12.9625   | 1.75968    |
| Foxc2         | chr8:121116170-121118894  | OK     | 0.943541  | 0.12799    |
| Faim2         | chr15:99497004-99528165   | OK     | 54.0537   | 7.32331    |
| Padi2         | chr4:140906359-140957902  | OK     | 1.53102   | 0.207054   |
| Glit2d2       | chr3:85869845-85887518    | NOTEST | 0.159099  | 0.0215111  |
| Ndufa4l2      | chr10:127514938-127522444 | OK     | 1.28436   | 0.173473   |
| Iyd           | chr10:3540278-3554877     | NOTEST | 0.479884  | 0.0647871  |
| Clec2l        | chr6:38663068-38680865    | OK     | 128.219   | 17.277     |
| Loxl3         | chr6:83034223-83054571    | OK     | 1.33449   | 0.179782   |
| Cdc42ep5      | chr7:4151259-4164699      | OK     | 2.12379   | 0.285864   |
| Cxcl9         | chr5:92321330-92328079    | NOTEST | 0.0499982 | 0.00672365 |
| 1500012K07Rik | chr7:75114894-75331419    | OK     | 2.41272   | 0.324368   |
| Zpld1         | chr16:55225174-55283237   | NOTEST | 0.0566509 | 0.00761618 |
| Pabpc4l       | chr3:46442196-46447941    | NOTEST | 0.163666  | 0.0219988  |
| Cela1         | chr15:100674421-100687920 | OK     | 9.88513   | 1.32847    |
| Chdh          | chr14:30008999-30527056   | OK     | 2.19954   | 0.294051   |
| Scube1        | chr15:83602582-83725039   | OK     | 1.29659   | 0.173277   |
| Syde1         | chr10:78584502-78591964   | OK     | 5.36622   | 0.716861   |
| Sfmbt2        | chr2:10370450-10595253    | NOTEST | 0.646727  | 0.0863519  |
| Col23a1       | chr11:51289919-51583925   | OK     | 7.21712   | 0.961263   |
| Olfml2b       | chr1:170644531-170682789  | OK     | 11.3565   | 1.51112    |
| Plip          | chr8:94674894-94696242    | OK     | 31.3727   | 4.17334    |
| Rasgrp2       | chr19:6400582-6415216     | OK     | 2.01098   | 0.267427   |
| Celsr1        | chr15:85898757-86033777   | OK     | 1.8511    | 0.246066   |
| Rhpn1         | chr15:75704287-75714419   | OK     | 3.41513   | 0.452364   |
| Rasgrf2       | chr13:91880406-91988042   | OK     | 9.99967   | 1.32437    |
| 2610027K06Rik | chr11:85353163-85832388   | NOTEST | 0.391039  | 0.0517889  |
| C1ql3         | chr2:12924040-13010864    | OK     | 2.83026   | 0.374695   |

|               |                           |        |           |            |
|---------------|---------------------------|--------|-----------|------------|
| Frrs1l        | chr4:56960135-56990391    | OK     | 13.1994   | 1.7441     |
| Stard8        | chrX:99042580-99074728    | OK     | 4.55623   | 0.601238   |
| Plxdc2        | chr2:16356303-16755839    | OK     | 8.00547   | 1.05369    |
| Bmp2          | chr2:133552158-133562896  | NOTEST | 0.471425  | 0.0619778  |
| Tmem108       | chr9:103482935-103761837  | OK     | 4.23005   | 0.556117   |
| C1ra          | chr6:124512620-124523440  | OK     | 1.22589   | 0.161138   |
| Dnali1        | chr4:125030013-125065657  | NOTEST | 0.0734781 | 0.00965664 |
| Fbn2          | chr18:58008622-58209926   | NOTEST | 0.312674  | 0.0410474  |
| Adm           | chr7:110627668-110629819  | OK     | 1.16006   | 0.151951   |
| Impg1         | chr9:80313329-80465438    | NOTEST | 0.0516262 | 0.0067521  |
| Ckm           | chr7:19411093-19421583    | NOTEST | 0.518801  | 0.0678271  |
| Bdh2          | chr3:135281220-135304425  | OK     | 0.821377  | 0.107383   |
| Rufy4         | chr1:74125540-74148230    | NOTEST | 0.0662605 | 0.00863658 |
| Grid2         | chr6:63256856-64666279    | OK     | 2.65638   | 0.346099   |
| Hoga1         | chr19:42045850-42070939   | NOTEST | 0.319151  | 0.0415044  |
| Rassf8        | chr6:145808382-145817584  | OK     | 5.27543   | 0.684644   |
| Ly6g6f        | chr17:35080537-35085595   | NOTEST | 0.162678  | 0.0210942  |
| Serpinh1      | chr7:99345374-99353239    | OK     | 37.6943   | 4.88711    |
| Tacr3         | chr3:134829006-134934581  | NOTEST | 0.404257  | 0.0524086  |
| Dmd           | chrX:82948869-85205050    | OK     | 6.39557   | 0.828573   |
| E130310I04Rik | chr16:34784949-35002434   | NOTEST | 0.0921684 | 0.01194    |
| Dusp27        | chr1:166098147-166127898  | NOTEST | 0.540058  | 0.0699377  |
| Usp2          | chr9:44067020-44095627    | OK     | 4.59081   | 0.594376   |
| Myl3          | chr9:110763680-110769794  | NOTEST | 0.610973  | 0.0788854  |
| Slc36a2       | chr11:55158467-55185077   | OK     | 8.5043    | 1.09738    |
| Cyp2j9        | chr4:96568428-96591485    | OK     | 16.0874   | 2.07284    |
| Prg4          | chr1:150361310-150466165  | OK     | 2.08111   | 0.267922   |
| Onecut1       | chr9:74861920-74889647    | OK     | 1.7454    | 0.224676   |
| Ajuba         | chr14:54567468-54577661   | OK     | 1.47094   | 0.189289   |
| A730043L09Rik | chr9:62242595-62244100    | NOTEST | 0.301853  | 0.0388399  |
| Cmya5         | chr13:93040714-93144724   | NOTEST | 0.242311  | 0.0311332  |
| Cdk6          | chr5:3344311-3522225      | OK     | 2.02911   | 0.260421   |
| Gm3716        | chr5:64593862-64610699    | NOTEST | 0.0530414 | 0.00680695 |
| Tram2         | chr1:21001396-21079225    | NOTEST | 0.867193  | 0.111276   |
| Lrrc9         | chr12:72441865-72510565   | NOTEST | 0.546802  | 0.0701447  |
| Inhbb         | chr1:119415464-119422248  | OK     | 3.09501   | 0.396234   |
| 5430421F17Rik | chr8:25302649-25306270    | NOTEST | 0.135765  | 0.0173787  |
| Hspg2         | chr4:137468802-137570630  | OK     | 17.5662   | 2.24802    |
| Fam64a        | chr11:72042501-72047370   | NOTEST | 0.112912  | 0.0144178  |
| BC049715      | chr6:136828842-136840557  | NOTEST | 0.304767  | 0.0388856  |
| Casp12        | chr9:5345475-5373034      | OK     | 5.16157   | 0.657605   |
| Egln3         | chr12:54178980-54203874   | OK     | 3.27114   | 0.416551   |
| Krt9          | chr11:100186780-100193246 | NOTEST | 0.495643  | 0.0630112  |
| Nefh          | chr11:4938755-5042794     | OK     | 757.806   | 96.2175    |
| Tmem178       | chr17:80944631-81001816   | OK     | 2.23742   | 0.283396   |
| Meis2         | chr2:115861263-116065058  | OK     | 7.48913   | 0.946096   |
| Hspb7         | chr4:141420778-141425310  | NOTEST | 0.270133  | 0.0339674  |
| Pde5a         | chr3:122729157-122859374  | OK     | 1.27349   | 0.159932   |
| Chadl         | chr15:81663888-81697287   | OK     | 9.21761   | 1.15722    |
| Slitrk1       | chr14:108909988-108914239 | OK     | 12.6511   | 1.57583    |
| Sh3pxd2b      | chr11:32347810-32428183   | OK     | 13.2238   | 1.63924    |
| Cyp39a1       | chr17:43667371-43751431   | OK     | 6.07857   | 0.753067   |
| Alox8         | chr11:69183884-69197843   | NOTEST | 0.0477763 | 0.00591623 |



|         |                           |        |           |            |
|---------|---------------------------|--------|-----------|------------|
| Anpep   | chr7:79821802-79842352    | OK     | 1.91654   | 0.23727    |
| Ecm2    | chr13:49464058-49652731   | OK     | 3.63182   | 0.449618   |
| Abcc3   | chr11:94343294-94392976   | NOTEST | 0.572717  | 0.0708375  |
| Timp3   | chr10:86048745-86498896   | OK     | 93.0543   | 11.5094    |
| Angptl4 | chr17:33774899-33781575   | OK     | 9.28338   | 1.14799    |
| Gjb6    | chr14:57123300-57133611   | OK     | 0.908971  | 0.112403   |
| Vwa1    | chr4:155768494-155774561  | OK     | 36.1144   | 4.46135    |
| Itgb4   | chr11:115974724-116012719 | OK     | 7.85818   | 0.970158   |
| Efnb3   | chr11:69554091-69560237   | OK     | 1.1769    | 0.145121   |
| Fcgr3   | chr1:171051168-171059403  | OK     | 1.76623   | 0.217599   |
| Calr4   | chr4:109218412-109254577  | OK     | 0.868559  | 0.106879   |
| Rab38   | chr7:88430272-88491572    | OK     | 1.28915   | 0.158503   |
| Mpo     | chr11:87793783-87804412   | NOTEST | 0.25736   | 0.0316087  |
| Eda     | chrX:99975605-100400760   | OK     | 2.22889   | 0.272835   |
| H2-M11  | chr17:36547074-36549252   | NOTEST | 0.370989  | 0.0453545  |
| Asap2   | chr12:21111755-21286237   | OK     | 3.72782   | 0.454417   |
| Matn2   | chr15:34306680-34436240   | OK     | 34.3979   | 4.18158    |
| Chodl   | chr16:78930947-78951728   | OK     | 0.936165  | 0.11375    |
| Pik3c2g | chr6:139715858-139969283  | NOTEST | 0.107254  | 0.0130318  |
| Kcna1   | chr6:126636462-126645801  | OK     | 99.1854   | 12.0506    |
| Npr3    | chr15:11839895-11907371   | NOTEST | 0.675761  | 0.0820987  |
| Lilrb4  | chr10:51490897-51496611   | NOTEST | 0.436051  | 0.0528993  |
| Nms     | chr1:38939148-38950276    | NOTEST | 0.200809  | 0.0243391  |
| Abca8b  | chr11:109933405-109995816 | OK     | 14.0633   | 1.70236    |
| Pnmal2  | chr7:16944681-16948828    | OK     | 12.1941   | 1.47324    |
| C5ar1   | chr7:16246742-16259540    | NOTEST | 0.544542  | 0.0657841  |
| Zeb2os  | chr2:44983511-45114084    | OK     | 1.55261   | 0.187251   |
| Crhr1   | chr11:104132881-104175518 | OK     | 1.0944    | 0.131481   |
| Rerg    | chr6:137054824-137170496  | OK     | 1.20886   | 0.14521    |
| Exoc3l4 | chr12:111417429-111431680 | NOTEST | 0.119508  | 0.0142913  |
| Bhlhe22 | chr3:18054324-18057514    | NOTEST | 0.264456  | 0.0316188  |
| Grhpr   | chr4:44981410-44990696    | OK     | 7.21735   | 0.860097   |
| Hao1    | chr2:134497360-134554352  | NOTEST | 0.0897631 | 0.0106916  |
| Acacb   | chr5:114165517-114250758  | OK     | 1.862     | 0.221662   |
| Fcgrt   | chr7:45092992-45103822    | OK     | 18.6433   | 2.21879    |
| P2ry13  | chr3:59006977-59344256    | NOTEST | 0.165237  | 0.0196607  |
| Mdfic   | chr6:15720660-15802169    | OK     | 3.66978   | 0.436409   |
| Rarb    | chr14:16430839-17082331   | OK     | 2.28877   | 0.272033   |
| Slc38a4 | chr15:96994822-97055956   | NOTEST | 0.103205  | 0.0122563  |
| Tbc1d8b | chrX:139684995-139754218  | OK     | 2.97646   | 0.353366   |
| Bai2    | chr4:129984869-130022633  | OK     | 3.85885   | 0.457983   |
| Ccl22   | chr8:94745683-94751388    | NOTEST | 0.0954565 | 0.0113138  |
| Sema3d  | chr5:12383165-12588943    | OK     | 2.82758   | 0.335038   |
| Cap2    | chr13:46501902-46650281   | OK     | 3.62647   | 0.42841    |
| Egr3    | chr14:70077444-70082613   | OK     | 4.80659   | 0.567556   |
| Aqp4    | chr18:15389393-15403684   | OK     | 3.30264   | 0.389582   |
| P2rx7   | chr5:122643910-122691432  | OK     | 5.55197   | 0.654403   |
| Fgf4    | chr7:144861385-144865243  | NOTEST | 0.489541  | 0.0576513  |
| Nes     | chr3:87971092-87980451    | OK     | 8.04752   | 0.947718   |
| Aldh1l1 | chr6:90550847-90599171    | OK     | 3.18472   | 0.374763   |
| Neb     | chr2:52136646-52338798    | NOTEST | 0.165518  | 0.0194338  |
| Prkag3  | chr1:74738921-74748955    | NOTEST | 0.0591951 | 0.00691073 |
| Rasl10b | chr11:83410071-83421038   | OK     | 21.9423   | 2.56074    |

|               |                           |        |            |            |
|---------------|---------------------------|--------|------------|------------|
| Ankrd34c      | chr9:89728248-89738475    | OK     | 4.76783    | 0.555018   |
| Coro6         | chr11:77463912-77469501   | OK     | 11.7761    | 1.36956    |
| Gulp1         | chr1:44551670-44796836    | OK     | 8.49719    | 0.987825   |
| Ankrd34b      | chr13:92425968-92441658   | OK     | 1.77822    | 0.205895   |
| Dleu2         | chr14:61598225-61682373   | NOTEST | 0.602489   | 0.0697447  |
| C3            | chr17:57203972-57228136   | OK     | 1.24476    | 0.143868   |
| Akap3         | chr6:126853097-126874308  | NOTEST | 0.11069    | 0.0127854  |
| Mgst1         | chr6:138140536-138156752  | OK     | 17.1533    | 1.9763     |
| Fbxo24        | chr5:137612504-137625078  | NOTEST | 0.101364   | 0.0116708  |
| 4932412D23Rik | chr16:42725701-42875762   | NOTEST | 0.177902   | 0.0204812  |
| Nrl           | chr14:55518977-55524981   | NOTEST | 0.150866   | 0.0173433  |
| Tmem232       | chr17:65256004-65540782   | NOTEST | 0.282326   | 0.0324517  |
| Ryr2          | chr13:11553102-12106945   | OK     | 8.46634    | 0.972755   |
| Serpib3a      | chr1:107045586-107052303  | NOTEST | 0.111369   | 0.0127634  |
| Aox4          | chr1:58210396-58268596    | OK     | 1.54633    | 0.177192   |
| Lgi2          | chr5:52537863-52566280    | OK     | 19.917     | 2.28186    |
| 3632454L22Rik | chrX:135022421-135060336  | NOTEST | 0.0516798  | 0.00589473 |
| Fam26d        | chr10:34037596-34109815   | OK     | 1.98482    | 0.225865   |
| Ntn1          | chr11:68209363-68386826   | OK     | 2.66781    | 0.303094   |
| Gm19522       | chr16:42884369-43619123   | NOTEST | 0.0824274  | 0.00935765 |
| Shox2         | chr3:66973265-66981771    | OK     | 5.12968    | 0.579471   |
| Vsnl1         | chr12:11325244-11436649   | OK     | 98.6559    | 11.1329    |
| Mrc2          | chr11:105292645-105351145 | OK     | 2.08928    | 0.23574    |
| Cyp2d22       | chr15:82370526-82380260   | OK     | 6.86665    | 0.773666   |
| Scara3        | chr14:65919394-65953744   | OK     | 5.3096     | 0.598083   |
| Gpc4          | chrX:52053017-52164923    | OK     | 3.9457     | 0.444387   |
| Chad          | chr11:94557101-94601786   | OK     | 2.57978    | 0.289657   |
| Myo3b         | chr2:70039125-70429195    | NOTEST | 0.0534805  | 0.00599596 |
| Syna          | chr5:134557253-134560171  | OK     | 0.822038   | 0.0918553  |
| H2-Ab1        | chr17:34263226-34269418   | OK     | 11.3641    | 1.26749    |
| E130114P18Rik | chr4:97567874-98118876    | OK     | 1.86502    | 0.207505   |
| Itgb2l        | chr16:96422297-96443614   | NOTEST | 0.16214    | 0.0180354  |
| Tagln         | chr9:45863690-45936058    | OK     | 15.4728    | 1.7199     |
| Trp53cor1     | chr17:29057473-29079126   | NOTEST | 0.176968   | 0.0196262  |
| Fut9          | chr4:25609332-25800003    | NOTEST | 0.0779222  | 0.00863394 |
| Gpr152        | chr19:4139798-4145740     | NOTEST | 0.0440398  | 0.00487964 |
| Dnaic2        | chr11:114344525-114757886 | OK     | 1.18971    | 0.131809   |
| Syt17         | chr7:118381855-118443552  | NOTEST | 0.743462   | 0.0823287  |
| Sh3rf3        | chr10:58813358-59138916   | OK     | 0.855601   | 0.0946744  |
| Ppara         | chr15:85735563-85806851   | OK     | 0.781264   | 0.0864213  |
| Pls1          | chr9:95752641-95845279    | OK     | 10.8785    | 1.20103    |
| Jag1          | chr2:137081450-137116520  | OK     | 7.52089    | 0.829902   |
| Gm6416        | chr13:117130024-117135884 | NOTEST | 0.116324   | 0.0128266  |
| P2rx6         | chr16:17561884-17572012   | OK     | 14.4395    | 1.59217    |
| E130006D01Rik | chr5:111734283-111761728  | NOTEST | 0.484134   | 0.053312   |
| Xntrpc        | chr7:102065490-102096864  | NOTEST | 0.00746022 | 0.00082146 |
| 8030423F21Rik | chr5:52607549-52619011    | NOTEST | 0.0671623  | 0.00738469 |
| Col22a1       | chr15:71798475-72034227   | NOTEST | 0.100522   | 0.0110465  |
| Cntf          | chr19:12763527-12796123   | OK     | 22.6159    | 2.48451    |
| Sh3bgr        | chr16:96200469-96228933   | OK     | 18.6019    | 2.03652    |
| Myh1          | chr11:67200113-67224575   | NOTEST | 0.0307489  | 0.00336603 |
| Metrn1        | chr11:121702426-121717389 | OK     | 5.73036    | 0.62558    |
| Cdkn2a        | chr4:89274472-89294619    | NOTEST | 0.613142   | 0.0667641  |

|               |                           |        |           |            |
|---------------|---------------------------|--------|-----------|------------|
| Pdzd2         | chr15:12357053-12592556   | OK     | 9.68724   | 1.05433    |
| Plscr4        | chr9:92457377-92492516    | OK     | 5.84289   | 0.635708   |
| Ctsk          | chr3:95499209-95509387    | OK     | 6.35636   | 0.687518   |
| Zic4          | chr9:91368971-91389348    | NOTEST | 0.198917  | 0.0215094  |
| Ddr2          | chr1:169969408-170088944  | OK     | 3.1148    | 0.336758   |
| Mmp19         | chr10:128790909-128804370 | NOTEST | 0.396406  | 0.0427431  |
| Pbxip1        | chr3:89436703-89450952    | OK     | 7.41001   | 0.796887   |
| Gpam          | chr19:55069733-55099447   | OK     | 21.8238   | 2.34424    |
| Pthlh         | chr6:147252109-147264085  | OK     | 2.63084   | 0.282588   |
| Fam19a2       | chr10:123264075-123741204 | OK     | 22.5623   | 2.41491    |
| Mr1           | chr1:155127877-155146780  | OK     | 3.16819   | 0.339021   |
| Antxr1        | chr6:87133852-87335775    | OK     | 7.72148   | 0.825728   |
| Aebp1         | chr11:5861865-5878256     | OK     | 3.99005   | 0.425926   |
| Ston1         | chr17:88626554-88645724   | OK     | 8.04137   | 0.857758   |
| Duxbl2        | chr14:26262257-26269434   | NOTEST | 0.191732  | 0.0204307  |
| Ccbe1         | chr18:66056855-66291838   | NOTEST | 0.394242  | 0.0419988  |
| Krt79         | chr15:101929331-101940324 | NOTEST | 0.193607  | 0.0206185  |
| Rassf2        | chr2:131992849-132029988  | OK     | 3.81081   | 0.405644   |
| Tcf7l1        | chr6:72626370-72789045    | OK     | 2.97506   | 0.31643    |
| Bcat1         | chr6:144993834-145076157  | OK     | 16.0024   | 1.69719    |
| Piwil4        | chr9:14702357-14740733    | NOTEST | 0.0885001 | 0.00938285 |
| Fgf9          | chr14:58072685-58112720   | OK     | 7.38422   | 0.782698   |
| Gm12522       | chr3:108364910-108383741  | NOTEST | 0.0963471 | 0.0102121  |
| Stra6         | chr9:58129087-58153997    | OK     | 1.26036   | 0.133101   |
| Serpinb1c     | chr13:32881396-32898140   | NOTEST | 0.147594  | 0.0155657  |
| St8sia5       | chr18:77185846-77255450   | OK     | 4.13031   | 0.434624   |
| Crabp2        | chr3:87948692-87953372    | OK     | 2.88167   | 0.302793   |
| Fgl2          | chr5:21292960-21424677    | OK     | 8.14094   | 0.855365   |
| Qk            | chr17:10206470-10319361   | OK     | 61.5446   | 6.43838    |
| Hcar1         | chr5:123876735-123880020  | NOTEST | 0.141831  | 0.0148256  |
| Cald1         | chr6:34709443-34775469    | OK     | 12.9579   | 1.35248    |
| Fam107a       | chr14:8296277-8309776     | OK     | 5.78171   | 0.602355   |
| Lrig3         | chr10:125966218-126015359 | NOTEST | 0.711571  | 0.0740929  |
| A230077H06Rik | chr7:40849152-40898324    | NOTEST | 0.514399  | 0.0535025  |
| Gabrg1        | chr5:70751046-70842617    | OK     | 7.45254   | 0.774671   |
| Phldb3        | chr7:24611327-24629297    | NOTEST | 0.0845556 | 0.00874383 |
| Htr7          | chr19:35958728-36057360   | OK     | 6.60622   | 0.683087   |
| Epha6         | chr16:59613320-60605531   | OK     | 5.67428   | 0.586697   |
| Cfi           | chr3:129836738-129875328  | NOTEST | 0.290717  | 0.029889   |
| Creg2         | chr1:39618405-39651182    | OK     | 6.97584   | 0.716755   |
| A130077B15Rik | chr10:122565022-122569891 | NOTEST | 0.0754844 | 0.00775297 |
| Fpr1          | chr17:17876470-17883939   | NOTEST | 0.158992  | 0.0162677  |
| Colec12       | chr18:9707647-9877995     | OK     | 1.67467   | 0.171169   |
| Gm12530       | chr4:57172070-57176554    | NOTEST | 0.122677  | 0.0125382  |
| Rtkn2         | chr10:67979597-68043864   | NOTEST | 0.190651  | 0.0194766  |
| Tbx2          | chr11:85832614-85841948   | OK     | 9.8292    | 1.00398    |
| Igdcc3        | chr9:65141188-65185870    | NOTEST | 0.411328  | 0.041988   |
| Ctsc          | chr7:88278092-88310875    | OK     | 7.84143   | 0.797797   |
| Gstm2         | chr3:107981701-107986436  | OK     | 1.96574   | 0.19995    |
| B3galt2       | chr1:143607498-143702684  | OK     | 2.37511   | 0.241152   |
| Medag         | chr5:149411805-149431703  | OK     | 4.29961   | 0.436328   |
| Rasal1        | chr5:120648811-120679610  | NOTEST | 0.0589643 | 0.00597969 |
| Smtnl2        | chr11:72390113-72411713   | OK     | 1.69766   | 0.17206    |

|               |                           |        |           |            |
|---------------|---------------------------|--------|-----------|------------|
| Ltf           | chr9:111019291-111042766  | OK     | 2.09395   | 0.212213   |
| Angpt4        | chr2:151911331-151944654  | NOTEST | 0.169726  | 0.017185   |
| 2300005B03Rik | chr15:74742838-74746687   | OK     | 1.41873   | 0.143467   |
| Mxra8         | chr4:155839679-155844102  | OK     | 14.8885   | 1.50534    |
| Crispld2      | chr8:119992469-120052793  | OK     | 4.3182    | 0.435894   |
| Zic1          | chr9:91360344-91365799    | OK     | 1.54731   | 0.156149   |
| Hs3st2        | chr7:121392295-121501768  | OK     | 27.4816   | 2.77199    |
| Ccl7          | chr11:82045711-82047523   | NOTEST | 0.971127  | 0.0976128  |
| Sox8          | chr17:25565892-25570686   | OK     | 1.73247   | 0.174039   |
| Slitrk2       | chrX:66649317-66661402    | OK     | 2.3339    | 0.234343   |
| Lgi3          | chr14:70530820-70538324   | OK     | 66.7493   | 6.69236    |
| Htra4         | chr8:25024927-25038962    | OK     | 1.30566   | 0.130655   |
| Rnf128        | chrX:139563339-139673145  | OK     | 5.7481    | 0.573888   |
| Serpina3c     | chr12:104146906-104153872 | OK     | 1.94865   | 0.193419   |
| Fam196b       | chr11:34226820-34783905   | OK     | 2.83301   | 0.281097   |
| Col8a1        | chr16:57624255-57754737   | OK     | 4.72219   | 0.467848   |
| Omd           | chr13:49464058-49652731   | OK     | 1.23163   | 0.121819   |
| Cdkn2b        | chr4:89306288-89311032    | OK     | 3.19815   | 0.315441   |
| Pvalb         | chr15:78191117-78206351   | OK     | 101.564   | 10.0061    |
| Fibin         | chr2:110360924-110362993  | OK     | 2.96837   | 0.292404   |
| Piwil1        | chr5:128736245-128755474  | NOTEST | 0.0987654 | 0.00970702 |
| Omg           | chr11:79339891-79581609   | OK     | 10.5255   | 1.03362    |
| Sdc4          | chr2:164424246-164443188  | OK     | 31.4659   | 3.07479    |
| Sv2b          | chr7:75114894-75331419    | OK     | 81.7942   | 7.99197    |
| Ephb1         | chr9:101922127-102354693  | OK     | 1.81829   | 0.177584   |
| Evi2a         | chr11:79339891-79581609   | NOTEST | 0.730361  | 0.0712578  |
| Notch1        | chr2:26457901-26503822    | OK     | 6.86269   | 0.66804    |
| Gldc          | chr19:30098440-30175441   | OK     | 0.825537  | 0.0802139  |
| F13a1         | chr13:36867177-37050244   | OK     | 1.66861   | 0.161802   |
| Fa2h          | chr8:111345137-111393821  | OK     | 15.5782   | 1.50761    |
| Spint1        | chr2:119237359-119249513  | OK     | 1.76501   | 0.170474   |
| Sbspon        | chr1:15853861-15892722    | OK     | 5.23768   | 0.505002   |
| Lpar1         | chr4:58435251-58553491    | OK     | 44.2857   | 4.26764    |
| Vangl2        | chr1:172004370-172027268  | OK     | 1.11557   | 0.107486   |
| Ndst4         | chr3:125404090-125724986  | OK     | 16.6083   | 1.58038    |
| Eya2          | chr2:165595027-165771727  | OK     | 2.48726   | 0.236651   |
| Uts2b         | chr16:27353321-27370239   | OK     | 4.78999   | 0.455      |
| Mag           | chr7:30899182-30914832    | OK     | 10.9632   | 1.04016    |
| Syt2          | chr1:134646680-134749417  | OK     | 80.1341   | 7.5725     |
| Dcn           | chr10:97479499-97518162   | OK     | 111.308   | 10.5119    |
| Ntrk2         | chr13:58806568-59133970   | OK     | 46.2385   | 4.36039    |
| Drd5          | chr5:38319508-38322310    | NOTEST | 0.074261  | 0.00699067 |
| Bcl2a1d       | chr9:88723287-88731850    | NOTEST | 0.347903  | 0.0326501  |
| Gpc6          | chr14:116925296-117979529 | OK     | 4.3977    | 0.412252   |
| Col9a2        | chr4:121039565-121055325  | OK     | 2.665     | 0.249761   |
| Ankef1        | chr2:136532320-136555854  | NOTEST | 0.153945  | 0.0144206  |
| Col4a5        | chrX:141475418-141689235  | OK     | 0.932018  | 0.0871783  |
| B230312C02Rik | chr2:180370857-180401802  | OK     | 2.08203   | 0.193092   |
| Plac8         | chr5:100553732-100572205  | OK     | 1.22521   | 0.113554   |
| Spon2         | chr5:33213517-33218238    | OK     | 1.53571   | 0.141991   |
| Serpina12     | chr1:106934448-106957080  | NOTEST | 0.174218  | 0.0161052  |
| Lancl3        | chrX:9199972-9268085      | OK     | 9.46441   | 0.87436    |
| Afp           | chr5:90490713-90508907    | NOTEST | 0.104722  | 0.00965664 |

|               |                           |        |           |            |
|---------------|---------------------------|--------|-----------|------------|
| Syde2         | chr3:145987869-146021720  | OK     | 0.944084  | 0.0867693  |
| Sptssb        | chr3:69819538-69859894    | OK     | 1.6567    | 0.152209   |
| H2-Eb1        | chr17:34305866-34316674   | OK     | 9.79743   | 0.900041   |
| Derl3         | chr10:75893397-75895941   | NOTEST | 0.175049  | 0.0160802  |
| Crif1         | chr8:70493155-70504081    | NOTEST | 0.594028  | 0.0545475  |
| Podnl1        | chr8:84125988-84132517    | NOTEST | 0.105619  | 0.0096876  |
| Clrn1         | chr3:58844027-58885212    | OK     | 6.78095   | 0.621293   |
| Itgb6         | chr2:60598291-60722603    | OK     | 0.998258  | 0.0913791  |
| Pcdh7         | chr5:57718020-58132240    | OK     | 16.6081   | 1.51855    |
| Il17b         | chr18:61687934-61692537   | NOTEST | 0.41025   | 0.0374973  |
| A330050F15Rik | chr17:69439325-69489233   | OK     | 3.86399   | 0.353121   |
| Kif19a        | chr11:114765388-114790575 | OK     | 7.03806   | 0.642715   |
| Ip6k3         | chr17:27143970-27167764   | NOTEST | 0.298338  | 0.0272333  |
| Lyz1          | chr10:117287794-117292868 | NOTEST | 0.376308  | 0.0343216  |
| Wnk4          | chr11:101260566-101277409 | OK     | 0.915684  | 0.0832947  |
| Hhatl         | chr9:121784015-121792507  | OK     | 17.1002   | 1.55341    |
| Slc22a2       | chr17:12584188-12628488   | NOTEST | 0.337351  | 0.0305899  |
| Cd22          | chr7:30865403-30880342    | NOTEST | 0.120136  | 0.0108778  |
| Prss12        | chr3:123446912-123506602  | OK     | 11.6342   | 1.05308    |
| Foxd2         | chr4:114906279-114908898  | NOTEST | 0.370253  | 0.0335094  |
| Ephx2         | chr14:66084371-66124522   | OK     | 2.69591   | 0.243848   |
| Slit2         | chr5:47983154-48306282    | OK     | 6.95541   | 0.628728   |
| Plekhb1       | chr7:100643895-100662394  | OK     | 106.665   | 9.63659    |
| Plekhf1       | chr7:38220653-38227994    | OK     | 2.25421   | 0.203096   |
| Bpifb5        | chr2:154223741-154240902  | NOTEST | 0.168232  | 0.0151553  |
| Slc9a3r1      | chr11:115163340-115181178 | OK     | 45.1303   | 4.05773    |
| Peg12         | chr7:62461870-62464510    | NOTEST | 0.0995179 | 0.00893654 |
| Cgn           | chr3:94760069-94786515    | NOTEST | 0.700331  | 0.0628499  |
| Trem2         | chr17:48346400-48352276   | NOTEST | 0.458119  | 0.0410888  |
| Fkbp9         | chr6:56832058-56879360    | OK     | 28.0435   | 2.50325    |
| Gdf10         | chr14:33923586-33935282   | OK     | 1.28344   | 0.114437   |
| Klrb1a        | chr6:128609226-128622934  | OK     | 1.00304   | 0.0892175  |
| F730043M19Rik | chr12:33111710-33147586   | OK     | 2.58895   | 0.229911   |
| Atp8b3        | chr10:80519584-80539124   | NOTEST | 0.254288  | 0.0225785  |
| Slamf9        | chr1:172475359-172478409  | OK     | 1.03809   | 0.0920389  |
| Afap1l2       | chr19:56912353-57008575   | OK     | 9.9244    | 0.879094   |
| Cntn5         | chr9:9660890-10904775     | NOTEST | 0.71216   | 0.0628337  |
| Slc13a4       | chr6:35267952-35308126    | OK     | 0.9219    | 0.0811453  |
| Agmo          | chr12:37241638-37581932   | OK     | 2.89753   | 0.254833   |
| Mme           | chr3:63295434-63383713    | OK     | 7.49425   | 0.658162   |
| Wwc1          | chr11:35839177-35980089   | NOTEST | 0.563532  | 0.0493756  |
| Fcgr2b        | chr1:170960558-170976071  | OK     | 1.53072   | 0.134018   |
| Ccdc80        | chr16:45094052-45127924   | OK     | 3.86158   | 0.337333   |
| Pde7b         | chr10:20398003-20725068   | OK     | 4.31804   | 0.376891   |
| Wisp2         | chr2:163820833-163833147  | OK     | 1.3834    | 0.120648   |
| Ccdc3         | chr2:5137775-5230866      | OK     | 1.9494    | 0.169321   |
| Pid1          | chr1:84036292-84284645    | OK     | 6.98671   | 0.605778   |
| Foxd1         | chr13:98354244-98356705   | OK     | 0.947639  | 0.082003   |
| Chil1         | chr1:134182403-134190031  | OK     | 1.35022   | 0.116601   |
| Itgb5         | chr16:33829664-33949338   | OK     | 9.74407   | 0.838363   |
| Gm16796       | chr2:170482964-170519070  | NOTEST | 0.0711694 | 0.00611894 |
| Cd302         | chr2:60251992-60284484    | OK     | 2.30952   | 0.198531   |
| Mfap4         | chr11:61485443-61488704   | OK     | 7.10272   | 0.610132   |



|               |                           |        |          |            |
|---------------|---------------------------|--------|----------|------------|
| Gpr34         | chrX:13517080-13846556    | NOTEST | 0.409493 | 0.0350773  |
| Papss2        | chr19:32595714-32667187   | NOTEST | 0.573191 | 0.0489407  |
| Fmod          | chr1:134037514-134048277  | OK     | 2.31255  | 0.19734    |
| Shc4          | chr2:125627446-125724148  | OK     | 10.1574  | 0.866664   |
| Sfrp1         | chr8:23411501-23449632    | OK     | 14.7879  | 1.25957    |
| Evc2          | chr5:37338477-37425054    | OK     | 2.31591  | 0.197072   |
| Esrrg         | chr1:187609005-188214884  | OK     | 12.0086  | 1.02165    |
| Cox7a1        | chr7:30184170-30186030    | OK     | 8.40184  | 0.713997   |
| Slc17a7       | chr7:45163920-45176139    | OK     | 99.4313  | 8.43941    |
| Mrgprf        | chr7:145300908-145309557  | OK     | 1.43747  | 0.121847   |
| Il33          | chr19:299251113-29960715  | OK     | 1.31502  | 0.111288   |
| Mettl24       | chr10:40683281-40811083   | NOTEST | 0.683479 | 0.0578328  |
| Slitrk6       | chr14:110748577-110755149 | NOTEST | 0.253804 | 0.0214698  |
| Acsf2         | chr11:94557101-94601786   | OK     | 1.2649   | 0.106933   |
| Sema5a        | chr15:32244812-32696341   | OK     | 16.8652  | 1.42085    |
| Tmem28        | chrX:99821068-99846345    | OK     | 5.94622  | 0.500392   |
| Ccl24         | chr5:135569936-135573043  | NOTEST | 0.199695 | 0.0167796  |
| Kcnh5         | chr12:74897216-75177332   | OK     | 3.06574  | 0.255359   |
| Slc35d3       | chr10:19847916-19851459   | OK     | 1.13748  | 0.0946273  |
| Themis2       | chr4:132782356-132796364  | NOTEST | 0.235204 | 0.0195265  |
| 4932411E22Rik | chr11:89390222-89418948   | OK     | 1.06181  | 0.0881112  |
| Egr2          | chr10:67537868-67542188   | OK     | 17.3605  | 1.43991    |
| Zcchc24       | chr14:25711639-25768856   | OK     | 11.8036  | 0.977873   |
| Kcne1l        | chrX:142304752-142306198  | OK     | 1.37612  | 0.11363    |
| Myocd         | chr11:65176570-65269989   | NOTEST | 0.184656 | 0.0152198  |
| Tmprss5       | chr9:49102778-49117587    | OK     | 3.04042  | 0.250346   |
| Clec7a        | chr6:129461590-129472777  | NOTEST | 0.491048 | 0.0403387  |
| Ndrg1         | chr15:66929317-66969641   | OK     | 169.853  | 13.9414    |
| Plekha4       | chr7:45526329-45554229    | OK     | 40.6349  | 3.33491    |
| Ntn1          | chr3:109780049-110143472  | OK     | 14.5793  | 1.19496    |
| Gstt3         | chr10:75774121-75781414   | OK     | 1.25302  | 0.102695   |
| Kcnj14        | chr7:45816466-45824747    | NOTEST | 0.436899 | 0.035585   |
| Cspg4         | chr9:56865103-56899870    | OK     | 2.47691  | 0.201533   |
| Slc35f1       | chr10:52690500-53111622   | OK     | 18.9917  | 1.53496    |
| Smpx          | chrX:157698972-157752591  | OK     | 4.7422   | 0.383232   |
| Bgn           | chrX:73483634-73495936    | OK     | 38.635   | 3.11384    |
| Tlr9          | chr9:106222597-106226876  | NOTEST | 0.161113 | 0.012976   |
| Lrrc4         | chr6:28480347-28888832    | OK     | 5.20926  | 0.419421   |
| Vstm4         | chr14:32856755-32939489   | OK     | 3.01078  | 0.241947   |
| Sparc         | chr11:55394158-55420080   | OK     | 449.942  | 35.8506    |
| Ngp           | chr9:110419807-110423012  | OK     | 8.23148  | 0.655285   |
| Klf15         | chr6:90462625-90475209    | OK     | 3.41076  | 0.271319   |
| Col5a2        | chr1:45374330-45503282    | OK     | 8.25474  | 0.656611   |
| Aldh1a7       | chr19:20692952-20727556   | OK     | 2.77616  | 0.220516   |
| A330074K22Rik | chr8:120204433-120228230  | OK     | 4.42193  | 0.350973   |
| Vwc2          | chr11:11114015-11263526   | OK     | 2.01869  | 0.160218   |
| Mup3          | chr4:62083475-62087312    | NOTEST | 0.326806 | 0.0259192  |
| Kcnk5         | chr14:20140057-20181782   | OK     | 2.75495  | 0.218176   |
| Bhmt2         | chr13:93656096-93674302   | NOTEST | 0.130735 | 0.0103474  |
| Limch1        | chr5:66745839-67057159    | OK     | 22.8104  | 1.80414    |
| Fam198a       | chr9:121950987-121980208  | OK     | 1.41615  | 0.111968   |
| Frk           | chr10:34483399-34611230   | NOTEST | 0.113821 | 0.00898956 |
| Ripk4         | chr16:97741941-97763755   | OK     | 1.44194  | 0.11327    |

|               |                           |        |           |            |
|---------------|---------------------------|--------|-----------|------------|
| Pipox         | chr11:77880614-77893872   | OK     | 1.25265   | 0.0981912  |
| Cdh12         | chr15:21111451-21589533   | OK     | 2.41421   | 0.188701   |
| Kcnq4         | chr4:120697472-120747176  | OK     | 16.7859   | 1.31109    |
| Pice1         | chr19:38524196-38785100   | OK     | 5.16373   | 0.402951   |
| Brinp3        | chr1:146495665-146902472  | OK     | 1.05646   | 0.0824     |
| Epyc          | chr10:97644067-97967090   | NOTEST | 0.183562  | 0.014302   |
| Pld4          | chr12:112760654-112768986 | OK     | 0.946251  | 0.0735347  |
| Snhg18        | chr15:32240567-32244662   | OK     | 4.2848    | 0.332599   |
| Fbln7         | chr2:128863931-128897034  | OK     | 1.55239   | 0.119932   |
| Gm16551       | chr9:74848436-74852872    | OK     | 7.9737    | 0.612927   |
| Sardh         | chr2:27188392-27247303    | OK     | 2.58684   | 0.198753   |
| Itga2         | chr13:114835911-114932041 | OK     | 0.986556  | 0.075733   |
| Gm10684       | chr9:45079182-45135606    | OK     | 0.899772  | 0.0690068  |
| Dgkb          | chr12:37880704-38633410   | OK     | 4.15396   | 0.31751    |
| Pmel          | chr10:128706257-128744056 | NOTEST | 0.147947  | 0.0112927  |
| Fpr2          | chr17:17887823-17893952   | NOTEST | 0.273415  | 0.0208498  |
| Col15a1       | chr4:47208011-47313165    | OK     | 11.4195   | 0.868457   |
| Ano1          | chr7:144588548-144738592  | OK     | 5.62826   | 0.427588   |
| Bco2          | chr9:50533086-50555138    | NOTEST | 0.127939  | 0.00971355 |
| Ncmap         | chr4:135369576-135398227  | OK     | 40.9055   | 3.0946     |
| Tll1          | chr8:64014769-64205993    | OK     | 1.90866   | 0.14424    |
| Spp1          | chr5:104435110-104441053  | OK     | 96.3289   | 7.25024    |
| Six2          | chr17:85684267-85688254   | NOTEST | 0.13635   | 0.01025    |
| Lmod1         | chr1:135324812-135368065  | NOTEST | 0.67379   | 0.0505689  |
| Rasl12        | chr9:65398487-65422773    | OK     | 2.27661   | 0.170666   |
| B3gnt5        | chr16:19760233-19772753   | OK     | 2.36977   | 0.177276   |
| Serpind1      | chr16:17280350-17430826   | OK     | 3.44372   | 0.256729   |
| Cotl1         | chr8:119809213-119840579  | OK     | 24.2518   | 1.80734    |
| Chrna5        | chr9:54980879-55007779    | NOTEST | 0.096425  | 0.00716755 |
| Notch2        | chr3:98013537-98150367    | OK     | 3.92591   | 0.28822    |
| Leprel1       | chr16:25960322-26105784   | OK     | 1.88762   | 0.138293   |
| Hapln4        | chr8:70083528-70090862    | OK     | 26.2265   | 1.91961    |
| Drd2          | chr9:49340661-49407214    | NOTEST | 0.603434  | 0.0441496  |
| Gm10790       | chr13:41865914-41913092   | NOTEST | 0.345713  | 0.0252531  |
| H2-DMb1       | chr17:34153190-34160229   | OK     | 3.16598   | 0.231212   |
| Rasa3         | chr8:13567217-13677587    | OK     | 8.21679   | 0.595607   |
| Gldn          | chr9:54268579-54341777    | OK     | 8.78097   | 0.635351   |
| Ackr3         | chr1:90203979-90215722    | OK     | 4.87421   | 0.351852   |
| Rasgef1c      | chr11:49901834-49980223   | OK     | 4.66861   | 0.334544   |
| Lrrc6         | chr15:66379857-66500910   | NOTEST | 0.406775  | 0.0290008  |
| Igsf11        | chr16:38902344-39027157   | OK     | 9.93646   | 0.703359   |
| Abcc9         | chr6:142587861-142702274  | OK     | 1.08342   | 0.0766778  |
| Pdk4          | chr6:5483350-5496278      | OK     | 2.96717   | 0.209958   |
| Prox1         | chr1:190121776-190170680  | NOTEST | 0.0702991 | 0.00497331 |
| Pard6g        | chr18:80046894-80119640   | OK     | 4.29298   | 0.302945   |
| Sult2b1       | chr7:45729982-45759555    | NOTEST | 0.277353  | 0.0195476  |
| Gjd2          | chr2:114009600-114032292  | OK     | 1.95215   | 0.137374   |
| Rab32         | chr10:10545038-10558207   | OK     | 1.18258   | 0.0831773  |
| Ogn           | chr13:49464058-49652731   | OK     | 46.9717   | 3.29179    |
| Egfl8         | chr17:34605860-34615971   | OK     | 27.7101   | 1.93696    |
| A830082K12Rik | chr13:78188972-78236564   | NOTEST | 0.742433  | 0.0517791  |
| Dtx1          | chr5:120680263-120711669  | NOTEST | 0.252212  | 0.0175841  |
| Grid1         | chr14:34820135-35581115   | OK     | 5.46416   | 0.380906   |

|          |                           |        |           |            |
|----------|---------------------------|--------|-----------|------------|
| Pappa2   | chr1:158711730-158957438  | OK     | 1.12856   | 0.07865    |
| Rgs18    | chr1:144752840-144775421  | NOTEST | 0.15805   | 0.0109848  |
| Lrrtm1   | chr6:76881636-77979667    | OK     | 8.68468   | 0.601438   |
| Gjb1     | chrX:101377336-101385624  | OK     | 4.98418   | 0.343683   |
| Ccnd1    | chr7:144929930-144939925  | OK     | 12.6538   | 0.87194    |
| Gmnc     | chr16:26957234-26991652   | NOTEST | 0.0666849 | 0.0045941  |
| Apod     | chr16:31296191-31314596   | OK     | 116.26    | 7.97112    |
| Cideb    | chr14:55745692-55758424   | NOTEST | 0.274783  | 0.0187977  |
| P2ry14   | chr3:59006977-59344256    | OK     | 1.24012   | 0.0846804  |
| Chrdl1   | chrX:143285673-143394262  | OK     | 3.45702   | 0.235594   |
| C1s1     | chr6:124530343-124542359  | OK     | 3.09744   | 0.210593   |
| Slnf9    | chr11:82980302-82991830   | NOTEST | 0.175949  | 0.0119355  |
| Gbgt1    | chr2:28496890-28505415    | NOTEST | 0.593831  | 0.0402683  |
| Pcdh20   | chr14:88464746-88471396   | NOTEST | 0.106343  | 0.00721101 |
| Ephb3    | chr16:21204794-21223304   | OK     | 2.90517   | 0.196838   |
| Wnt7b    | chr15:85535436-85593708   | NOTEST | 0.0847628 | 0.00572382 |
| Stk31    | chr6:49395603-49469502    | NOTEST | 0.0889479 | 0.00598459 |
| Ptgds    | chr2:25466711-25469749    | OK     | 73.402    | 4.93235    |
| Bpifb1   | chr2:154190817-154220343  | NOTEST | 0.567224  | 0.0380969  |
| Gm10754  | chr10:97644067-97967090   | OK     | 3.05566   | 0.205101   |
| Sh3bp5   | chr14:31373963-31436033   | OK     | 16.6056   | 1.11319    |
| Pcolce   | chr5:137605106-137611404  | OK     | 14.4317   | 0.967401   |
| Ppp1r14c | chr10:3366149-3464975     | OK     | 9.61387   | 0.641843   |
| Cyth4    | chr15:78597046-78622019   | OK     | 1.15971   | 0.0771852  |
| Ptgfr    | chr3:151798609-151837528  | OK     | 14.1675   | 0.942385   |
| Pcsk5    | chr19:17432831-17837632   | OK     | 3.04282   | 0.202378   |
| Itpr3    | chr17:27057303-27122223   | OK     | 14.6661   | 0.973976   |
| Cubn     | chr2:13276337-13491876    | NOTEST | 0.472587  | 0.0312865  |
| Wnt7a    | chr6:91363982-91411369    | OK     | 2.75486   | 0.182321   |
| Aif1l    | chr2:31950302-31973442    | OK     | 11.5161   | 0.76034    |
| Maf      | chr8:115703252-115706894  | OK     | 25.6127   | 1.69089    |
| Cybb     | chrX:9435253-9469324      | OK     | 1.18758   | 0.0781943  |
| Pgf      | chr12:85166638-85177313   | OK     | 6.83809   | 0.449826   |
| Igfbp5   | chr1:72858064-72874865    | OK     | 42.8562   | 2.79181    |
| Arg2     | chr12:79130787-79172458   | OK     | 2.62372   | 0.170896   |
| Cd177    | chr7:24743982-24760311    | NOTEST | 0.420137  | 0.0272868  |
| Cdh20    | chr1:104768818-104995481  | OK     | 2.60706   | 0.168972   |
| Oaf      | chr9:43221277-43239816    | OK     | 4.60573   | 0.298154   |
| Igf1     | chr10:87859055-87937047   | OK     | 1.95058   | 0.125059   |
| Smco3    | chr6:136828842-136840557  | OK     | 10.6301   | 0.680909   |
| Shisa3   | chr5:67607882-67613987    | OK     | 2.11877   | 0.13535    |
| Erbb2    | chr11:98412483-98438988   | OK     | 3.00707   | 0.191746   |
| Tnc      | chr4:63959784-64047015    | NOTEST | 0.572296  | 0.0363666  |
| Them7    | chr2:105224341-105379860  | NOTEST | 0.438194  | 0.0277943  |
| Ccdc13   | chr9:121797626-121839461  | OK     | 1.24621   | 0.0789487  |
| Gm13629  | chr2:66440879-66634962    | OK     | 2.91493   | 0.184329   |
| Steap4   | chr5:7960471-7982213      | OK     | 2.89764   | 0.182615   |
| Adhfe1   | chr1:9548045-9631092      | NOTEST | 0.358749  | 0.0225741  |
| Acot1    | chr12:84009501-84017669   | OK     | 4.10146   | 0.257344   |
| Bcan     | chr3:87987530-88000356    | OK     | 38.949    | 2.44179    |
| Fkbp10   | chr11:100415693-100441089 | OK     | 4.73126   | 0.296      |
| Lcat     | chr8:105939550-105943402  | OK     | 3.51258   | 0.219385   |
| Pmepa1   | chr2:173224464-173276533  | OK     | 18.2138   | 1.12624    |

|               |                           |        |            |            |
|---------------|---------------------------|--------|------------|------------|
| Svep1         | chr4:58042795-58206596    | NOTEST | 0.559274   | 0.0345079  |
| Cldn11        | chr3:31149919-31164326    | OK     | 5.18246    | 0.319319   |
| Dach2         | chrX:113297509-113836386  | NOTEST | 0.17453    | 0.0107447  |
| Tead3         | chr17:28331672-28350805   | OK     | 1.32154    | 0.0808002  |
| Twist1        | chr12:33957670-33959831   | NOTEST | 0.75067    | 0.0456879  |
| C1qtnf6       | chr15:78523345-78529651   | OK     | 2.16056    | 0.131466   |
| Trf           | chr9:103208875-103230286  | OK     | 12.1067    | 0.73474    |
| Fjx1          | chr2:102449365-102451792  | OK     | 2.97245    | 0.180339   |
| Mamdc2        | chr19:23302608-23448322   | OK     | 4.13671    | 0.250807   |
| Clec3b        | chr9:123150945-123157432  | OK     | 5.70519    | 0.342192   |
| Clec4a2       | chr6:123122689-123143999  | NOTEST | 0.275917   | 0.0165362  |
| Tekt5         | chr16:10357951-10395465   | OK     | 0.852329   | 0.0506038  |
| Slc15a5       | chr6:137983589-138079916  | NOTEST | 0.325372   | 0.0192854  |
| Plin3         | chr17:56278961-56290511   | OK     | 10.6008    | 0.627396   |
| Rdh5          | chr10:128913590-128919297 | OK     | 8.30093    | 0.488886   |
| Kirrel        | chr3:87078591-87174747    | OK     | 6.49831    | 0.382193   |
| Itih2         | chr2:10094590-10130683    | OK     | 0.826424   | 0.0485269  |
| Igfbp4        | chr11:99041259-99052643   | OK     | 74.3154    | 4.35705    |
| Cxcl10        | chr5:92331840-92414627    | OK     | 3.88794    | 0.227571   |
| Folr2         | chr7:101839987-101845331  | NOTEST | 0.42506    | 0.0246731  |
| Mmp13         | chr9:7272513-7283333      | NOTEST | 0.127122   | 0.00735062 |
| Mmp2          | chr8:92827327-92853420    | OK     | 5.32526    | 0.307919   |
| Rgs6          | chr12:82617037-83158813   | OK     | 9.02694    | 0.521426   |
| Ugt8a         | chr3:125865342-125938550  | OK     | 34.004     | 1.96259    |
| Tgfb1         | chr13:56609602-56639339   | OK     | 13.0564    | 0.752411   |
| Efemp1        | chr11:28853204-28926743   | OK     | 12.2345    | 0.704853   |
| Cx3cr1        | chr9:120048682-120068296  | OK     | 0.854793   | 0.0491241  |
| Pmfbp1        | chr8:109494026-109542642  | OK     | 1.06729    | 0.0609138  |
| Car14         | chr3:95893920-95904639    | OK     | 2.56015    | 0.146019   |
| Ptplad2       | chr4:88412929-88438926    | OK     | 1.06469    | 0.0605149  |
| Itgav         | chr2:83724396-83806917    | OK     | 12.931     | 0.728384   |
| Ttn           | chr2:76703983-76982547    | NOTEST | 0.00498245 | 0.0002799  |
| Tspan18       | chr2:93201759-93334487    | OK     | 17.1885    | 0.961535   |
| Fmo1          | chr1:162829560-162866548  | OK     | 14.1248    | 0.784276   |
| C4b           | chr17:34728380-34743897   | OK     | 4.90634    | 0.269094   |
| Kcnj8         | chr6:142564938-142571356  | NOTEST | 0.799705   | 0.0438559  |
| Frmd6         | chr12:70825513-70902234   | OK     | 6.60218    | 0.36171    |
| Ptprz1        | chr6:22875501-23052916    | OK     | 14.7545    | 0.80686    |
| 2010204K13Rik | chrX:7411816-7422988      | OK     | 0.976648   | 0.0531964  |
| Folh1         | chr7:86718975-86775864    | OK     | 11.0373    | 0.600043   |
| Smo           | chr6:29735496-29761366    | OK     | 4.79815    | 0.260362   |
| Mfap5         | chr6:122513675-122529287  | OK     | 21.0542    | 1.12948    |
| Gas7          | chr11:67532997-67688992   | OK     | 10.1283    | 0.543217   |
| Myo5b         | chr18:74442618-74771477   | NOTEST | 0.662176   | 0.0354128  |
| Ccl9          | chr11:83572916-83578636   | NOTEST | 0.609424   | 0.0325749  |
| Chst3         | chr10:60181527-60219260   | OK     | 2.4785     | 0.131867   |
| Emid1         | chr11:5106265-5152222     | OK     | 5.4516     | 0.289518   |
| Hrc           | chr7:45335268-45338972    | NOTEST | 0.153691   | 0.0081613  |
| Slc38a11      | chr2:65316632-65364026    | OK     | 4.03049    | 0.213744   |
| Hey2          | chr10:30832358-30842783   | OK     | 18.6154    | 0.986342   |
| Shank2        | chr7:143948404-144470935  | OK     | 1.07202    | 0.0566938  |
| Slc47a1       | chr11:61343399-61378075   | OK     | 2.9283     | 0.154223   |
| Nid2          | chr14:19751256-19823823   | OK     | 7.33907    | 0.383951   |

|               |                          |        |           |            |
|---------------|--------------------------|--------|-----------|------------|
| Pln           | chr10:53278080-53379851  | OK     | 3.10505   | 0.162104   |
| Wdr72         | chr9:74110333-74283203   | OK     | 1.54516   | 0.0800306  |
| Pcsk6         | chr7:65862135-66050386   | OK     | 3.05834   | 0.158363   |
| Nlgn1         | chr3:25431840-26331909   | OK     | 2.91274   | 0.15075    |
| Col6a3        | chr1:90766859-90843971   | OK     | 4.37525   | 0.225518   |
| Prelp         | chr1:133910303-133921401 | OK     | 4.36755   | 0.22507    |
| Sp140         | chr1:85576898-85645036   | NOTEST | 0.191379  | 0.00983811 |
| Vldlr         | chr19:27217019-27254231  | OK     | 8.83414   | 0.453293   |
| Lpcat2        | chr8:92855349-92919279   | OK     | 1.95094   | 0.0998279  |
| Camp          | chr9:109847376-109849456 | OK     | 2.73118   | 0.139237   |
| 2210011C24Rik | chr8:84010227-84011720   | OK     | 2.67226   | 0.136133   |
| Phyhd1        | chr2:30266202-30282149   | OK     | 1.10491   | 0.0562265  |
| Col4a6        | chrX:141165402-141474076 | NOTEST | 0.0555436 | 0.00281548 |
| AA387883      | chr19:52923180-52926931  | NOTEST | 0.304928  | 0.0154552  |
| Rbp4          | chr19:38116619-38125321  | OK     | 2.34994   | 0.118986   |
| Podn          | chr4:108014792-108032090 | OK     | 0.879029  | 0.044476   |
| Reln          | chr5:21884453-22344705   | OK     | 9.58975   | 0.483958   |
| Adra1a        | chr14:66635250-66771168  | NOTEST | 0.399133  | 0.0201134  |
| Myl9          | chr2:156775463-156781657 | OK     | 17.8889   | 0.901042   |
| Shisa2        | chr14:59625280-59631660  | OK     | 2.40773   | 0.121275   |
| Mpz           | chr1:171150712-171161123 | OK     | 1585.64   | 79.5886    |
| Evc           | chr5:37299170-37336881   | OK     | 1.99101   | 0.0993929  |
| Stxbp6        | chr12:44852485-45074483  | OK     | 9.77266   | 0.487413   |
| Mmp14         | chr14:54431603-54441258  | OK     | 17.0109   | 0.840333   |
| Chrd          | chr16:20724453-20742384  | NOTEST | 0.384672  | 0.0189123  |
| Pmp2          | chr3:10179850-10183885   | OK     | 24.5919   | 1.20624    |
| Entpd2        | chr2:25395873-25401323   | OK     | 13.1568   | 0.645193   |
| Lox           | chr18:52516059-52529867  | OK     | 6.21158   | 0.304594   |
| Fxyd3         | chr7:31059934-31076697   | OK     | 20.1397   | 0.978795   |
| C1qtnf5       | chr9:44101769-44109187   | OK     | 6.84385   | 0.332178   |
| Thbs2         | chr17:14665499-14694262  | OK     | 2.66347   | 0.12856    |
| Lrp2          | chr2:69424334-69586067   | NOTEST | 0.263231  | 0.0126525  |
| Gpd1          | chr15:99717592-99725007  | OK     | 12.8563   | 0.617883   |
| Gucy1b3       | chr3:82032003-82074711   | OK     | 2.11486   | 0.101552   |
| Cd74          | chr18:60803848-60812652  | OK     | 28.3717   | 1.35495    |
| Clec18a       | chr8:111069496-111081708 | OK     | 1.30139   | 0.0620124  |
| Hapln1        | chr13:89540635-89611832  | OK     | 12.3731   | 0.588749   |
| Ehf           | chr2:103263432-103303196 | NOTEST | 0.495866  | 0.0235806  |
| Cdo1          | chr18:46713204-46728342  | OK     | 10.6261   | 0.50393    |
| Sema3b        | chr9:107597673-107609241 | OK     | 50.442    | 2.3835     |
| Fgd2          | chr17:29360913-29379535  | NOTEST | 0.318685  | 0.0150148  |
| Slco1a5       | chr6:142234226-142322981 | NOTEST | 0.652586  | 0.0306802  |
| Art3          | chr5:92331840-92414627   | OK     | 40.1301   | 1.88399    |
| H2-Ob         | chr17:34238904-34245908  | NOTEST | 0.157941  | 0.00736556 |
| P2ry6         | chr7:100937633-100964366 | NOTEST | 0.455181  | 0.0212237  |
| Metrn         | chr17:25794570-25797045  | OK     | 21.6256   | 1.00627    |
| Lmo3          | chr6:138364480-138581968 | NOTEST | 0.412997  | 0.0191602  |
| Ankfn1        | chr11:89421085-89538555  | OK     | 1.01834   | 0.0471146  |
| A530058N18Rik | chr2:114009600-114032292 | NOTEST | 0.697441  | 0.0322578  |
| Pou3f1        | chr4:124657645-124660655 | OK     | 3.94909   | 0.18167    |
| Heyl          | chr4:123233555-123249870 | OK     | 3.26411   | 0.149388   |
| Adamts5       | chr16:85858156-85901125  | OK     | 10.7471   | 0.491002   |
| Dmp1          | chr5:104202616-104214102 | NOTEST | 0.312436  | 0.0142115  |



|               |                           |        |          |            |
|---------------|---------------------------|--------|----------|------------|
| Srpx2         | chrX:133908424-133932446  | OK     | 0.864245 | 0.0392951  |
| Prx           | chr7:27499323-27520041    | OK     | 96.1528  | 4.33405    |
| Cd248         | chr19:5068077-5070639     | OK     | 1.88199  | 0.0843055  |
| Col27a1       | chr4:63215411-63334990    | OK     | 2.2087   | 0.0988553  |
| Emp2          | chr16:10281748-10313968   | OK     | 24.8144  | 1.10581    |
| Fras1         | chr5:96373954-96784728    | NOTEST | 0.694633 | 0.0307093  |
| Gxylt2        | chr6:100704733-100805081  | NOTEST | 0.50722  | 0.0224177  |
| Vstm2b        | chr7:40899277-40929968    | OK     | 7.28504  | 0.321825   |
| Mmrn1         | chr6:60944316-60989378    | NOTEST | 0.371008 | 0.0163853  |
| Ccdc158       | chr5:92608294-92675127    | NOTEST | 0.144196 | 0.00634935 |
| Col1a1        | chr11:94936269-94951856   | OK     | 48.0789  | 2.11365    |
| Apoc1         | chr7:19689479-19692659    | OK     | 3.76247  | 0.164945   |
| Slit3         | chr11:35121455-35708507   | OK     | 1.69292  | 0.0737292  |
| Adamts12      | chr15:11064789-11346867   | NOTEST | 0.37372  | 0.0162618  |
| Plxnb3        | chrX:73757102-73772510    | OK     | 5.46038  | 0.237569   |
| Arhgef16      | chr4:154278469-154299895  | NOTEST | 0.601599 | 0.0259909  |
| Lama2         | chr10:26981284-27616942   | OK     | 7.47464  | 0.32226    |
| Lamp5         | chr2:136057926-136069917  | NOTEST | 0.241304 | 0.010381   |
| Olfm4         | chr14:80000301-80021930   | NOTEST | 0.298603 | 0.0126653  |
| Pex11a        | chr7:79737263-79743025    | OK     | 4.52351  | 0.190181   |
| Kif7          | chr7:79660195-79714186    | NOTEST | 0.582495 | 0.0243909  |
| Prrx1         | chr1:163245118-163313650  | OK     | 2.08573  | 0.0865857  |
| Myh8          | chr11:67277123-67308633   | NOTEST | 0.709483 | 0.0290672  |
| 1500015010Rik | chr1:43730601-43742564    | OK     | 4.64104  | 0.189307   |
| C1qb          | chr4:136880144-136886177  | OK     | 5.82643  | 0.237638   |
| Ranbp3l       | chr15:8967948-9067333     | NOTEST | 0.223609 | 0.00905948 |
| Ibsp          | chr5:104299286-104311472  | OK     | 2.97092  | 0.120296   |
| Cand2         | chr6:115774556-115808743  | OK     | 1.21097  | 0.0488733  |
| Pdgfc         | chr3:81036415-81214031    | OK     | 2.5106   | 0.101168   |
| Lgi4          | chr7:31059934-31076697    | OK     | 24.2186  | 0.972627   |
| Gm7714        | chr5:88268918-88282835    | NOTEST | 0.948591 | 0.0380478  |
| Cryab         | chr9:50751071-50756635    | OK     | 119.196  | 4.74589    |
| Rbpms2        | chr9:65630581-65660518    | NOTEST | 0.521243 | 0.02075    |
| Col1a2        | chr6:4505696-4541543      | OK     | 88.9173  | 3.5199     |
| Ptgfrn        | chr3:101040235-101110166  | OK     | 15.7544  | 0.62322    |
| 9930014A18Rik | chr15:60818995-60831400   | NOTEST | 0.299261 | 0.0117947  |
| Ace2          | chrX:164139341-164188418  | OK     | 0.802732 | 0.031632   |
| Kcnj13        | chr1:87326997-87450810    | NOTEST | 0.40511  | 0.0158969  |
| Cd163         | chr6:124304650-124330527  | OK     | 0.931335 | 0.036289   |
| Dlk1          | chr12:109452822-109463336 | NOTEST | 0.121564 | 0.00471182 |
| Adamts20      | chr15:94270162-94404350   | OK     | 2.71829  | 0.105291   |
| Ccdc8         | chr7:16994587-16996645    | OK     | 1.41575  | 0.0547936  |
| Lmx1b         | chr2:33564535-33640511    | NOTEST | 0.465426 | 0.017942   |
| Egflam        | chr15:7206119-7398395     | OK     | 3.97287  | 0.153079   |
| Phgdh         | chr3:98313170-98339969    | OK     | 4.50216  | 0.172462   |
| Mrap          | chr16:90738323-90749776   | NOTEST | 0.614345 | 0.0231404  |
| Notch3        | chr17:32120892-32166852   | OK     | 3.22713  | 0.120967   |
| Calb2         | chr8:110142537-110168206  | OK     | 11.9156  | 0.438182   |
| Foxd3         | chr4:99656298-99658671    | OK     | 7.39769  | 0.270783   |
| Otop1         | chr5:38277403-38304217    | OK     | 2.21761  | 0.080925   |
| Tgif2         | chr2:156840006-156862945  | OK     | 2.07157  | 0.0750182  |
| Plp1          | chrX:136822745-136838582  | OK     | 191.808  | 6.93454    |
| Fam163a       | chr1:156075955-156205026  | OK     | 0.874451 | 0.0315665  |

|          |                           |        |           |            |
|----------|---------------------------|--------|-----------|------------|
| Ctnna3   | chr10:63430097-65003667   | OK     | 1.79723   | 0.0642653  |
| Col8a2   | chr4:126286793-126314330  | OK     | 1.61785   | 0.0574746  |
| Smoc2    | chr17:14279505-14404790   | OK     | 10.6943   | 0.378917   |
| Ccl11    | chr11:82057831-82062955   | OK     | 2.9829    | 0.104861   |
| Cnn1     | chr9:22055459-22389206    | OK     | 0.871538  | 0.0305857  |
| Fbln1    | chr15:85206007-85286294   | OK     | 2.16555   | 0.0759604  |
| Fam84a   | chr12:14147597-14152038   | NOTEST | 0.326581  | 0.0114333  |
| Trp63    | chr16:25683764-25892088   | NOTEST | 0.236059  | 0.00826411 |
| Sox3     | chrX:60891365-60893430    | NOTEST | 0.578655  | 0.0202516  |
| Islr     | chr9:58156263-58159221    | OK     | 16.8173   | 0.583136   |
| Angpt2   | chr8:18595172-18803188    | OK     | 7.446     | 0.256793   |
| Adamts7  | chr9:90162977-90200102    | OK     | 0.954437  | 0.032709   |
| F3       | chr3:121723536-121735052  | OK     | 9.85746   | 0.336104   |
| Cdh19    | chr1:110889194-110977372  | OK     | 22.623    | 0.770168   |
| Acta2    | chr19:34240335-34255373   | OK     | 9.69859   | 0.327343   |
| Gli3     | chr13:15463722-15730025   | NOTEST | 0.2364    | 0.00796221 |
| Pdpn     | chr4:143267408-143299564  | OK     | 15.3054   | 0.513838   |
| Chrna10  | chr7:102111265-102116713  | NOTEST | 0.765105  | 0.0256203  |
| Igfbp6   | chr15:102144185-102149512 | OK     | 19.8049   | 0.661733   |
| Cldn19   | chr4:119255440-119262438  | OK     | 32.0812   | 1.07181    |
| Abca13   | chr11:9191941-9684259     | NOTEST | 0.0434104 | 0.00144685 |
| Slc6a1   | chr6:114282634-114317525  | OK     | 2.27808   | 0.0757555  |
| Tmc1     | chr19:20783457-20954202   | NOTEST | 0.144104  | 0.0046915  |
| Nkain4   | chr2:180934771-180954699  | OK     | 9.42345   | 0.303027   |
| Fzd2     | chr11:102604430-102608058 | OK     | 2.68297   | 0.0859117  |
| Hk3      | chr13:54949431-55021385   | NOTEST | 0.213219  | 0.00674924 |
| Matn4    | chr2:164389392-164415448  | OK     | 11.0272   | 0.348619   |
| Rbm47    | chr5:66016548-66151954    | NOTEST | 0.127963  | 0.00404386 |
| Nr2f1    | chr13:78188972-78236564   | OK     | 7.0682    | 0.221892   |
| Rftn2    | chr1:55170159-55226782    | OK     | 3.48772   | 0.10948    |
| Mgl2     | chr11:70130356-70137542   | OK     | 1.61984   | 0.0507919  |
| Nxph1    | chr6:8950018-9248578      | OK     | 4.51047   | 0.140768   |
| Myh11    | chr16:14194526-14291408   | OK     | 4.79411   | 0.149392   |
| Sox10    | chr15:79154912-79164490   | OK     | 32.1017   | 0.999371   |
| Lyz2     | chr10:117277540-117282272 | OK     | 19.0984   | 0.590848   |
| Adap2    | chr11:80154161-80178827   | OK     | 1.00909   | 0.0311759  |
| Gjb2     | chr14:57098601-57104702   | OK     | 1.41774   | 0.0435415  |
| Aspa     | chr11:73304987-73324637   | OK     | 25.0348   | 0.7685     |
| Gjc3     | chr5:137953808-137962959  | OK     | 20.1718   | 0.617458   |
| Slc9a3   | chr13:74121514-74166064   | OK     | 0.88735   | 0.0269883  |
| Col3a1   | chr1:45311537-45349706    | OK     | 58.3065   | 1.76569    |
| Paqr6    | chr3:88364588-88368541    | OK     | 11.0556   | 0.334148   |
| Nid1     | chr13:13437601-13512275   | OK     | 27.793    | 0.824093   |
| Angptl7  | chr4:148448581-148557685  | OK     | 2.66913   | 0.0786584  |
| Veph1    | chr3:66053557-66296837    | NOTEST | 0.239787  | 0.00700648 |
| Mcpt4    | chr14:56059743-56062310   | NOTEST | 0.950415  | 0.0274997  |
| Fam129a  | chr1:151571372-151719347  | OK     | 10.7947   | 0.311801   |
| Pou3f2   | chr4:22482094-22488366    | OK     | 2.0534    | 0.0592989  |
| Crabp1   | chr9:54764747-54773110    | OK     | 3.94882   | 0.113428   |
| Cmtm5    | chr14:54936469-54939277   | OK     | 32.7856   | 0.927592   |
| Map3k7cl | chr16:87553329-87595336   | NOTEST | 0.476048  | 0.0134593  |
| Ctss     | chr3:95526785-95556405    | OK     | 4.79818   | 0.135184   |
| Olfml2a  | chr2:38931979-38960585    | OK     | 11.5974   | 0.326215   |

|               |                           |        |          |            |
|---------------|---------------------------|--------|----------|------------|
| Arhgef26      | chr3:62338776-62462221    | OK     | 2.81948  | 0.0789994  |
| Col14a1       | chr15:55307749-55520803   | OK     | 6.97519  | 0.194136   |
| Tmem40        | chr6:115729136-115762466  | OK     | 2.26187  | 0.0617929  |
| Pamr1         | chr2:102550020-102643040  | OK     | 1.00766  | 0.0274131  |
| Igf2          | chr7:142650767-142670356  | OK     | 13.7769  | 0.372469   |
| Col12a1       | chr9:79598986-79718722    | OK     | 5.36985  | 0.144592   |
| Erbp3         | chr10:128569367-128589501 | OK     | 16.3533  | 0.433455   |
| Myo16         | chr8:10153922-10633950    | OK     | 1.08603  | 0.0287834  |
| Hmgcs2        | chr3:98280430-98310738    | OK     | 30.4608  | 0.806659   |
| Lum           | chr10:97565500-97572703   | OK     | 15.4158  | 0.406812   |
| Galnt16       | chr12:80518989-80603896   | OK     | 7.17047  | 0.189165   |
| Prrg4         | chr2:104830740-104849850  | OK     | 1.69837  | 0.0447804  |
| Gm10046       | chr7:27765672-27770972    | OK     | 5.75543  | 0.150171   |
| Papln         | chr12:83763633-83792384   | OK     | 4.27954  | 0.110552   |
| Pm20d1        | chr1:131797394-131818115  | NOTEST | 0.253774 | 0.00653161 |
| Gpr126        | chr10:14402584-14545036   | OK     | 8.69059  | 0.223022   |
| Aspn          | chr13:49464058-49652731   | OK     | 3.60699  | 0.0924118  |
| Axl           | chr7:25756499-25788733    | OK     | 9.43099  | 0.241007   |
| Cybrd1        | chr2:71118053-71142926    | OK     | 3.6994   | 0.0940431  |
| Sorcs2        | chr5:36017180-36398139    | OK     | 4.70965  | 0.119697   |
| Nwd1          | chr8:72646710-72714748    | OK     | 2.73355  | 0.0692404  |
| Itgb3         | chr11:104607999-104670471 | OK     | 6.89186  | 0.174023   |
| Ppp1r1b       | chr11:98348737-98358283   | OK     | 3.6645   | 0.0920813  |
| Myoc          | chr1:162639149-162658219  | OK     | 4.96803  | 0.123706   |
| Atp1b2        | chr11:69599749-69605960   | OK     | 40.6936  | 0.994554   |
| Tsku          | chr7:98350667-98361328    | NOTEST | 0.708723 | 0.0172991  |
| Csf1r         | chr18:61105571-61131139   | OK     | 3.75415  | 0.0904129  |
| Sox2ot        | chr3:34560380-34677993    | OK     | 4.43133  | 0.10657    |
| Gpm6b         | chrX:166238942-166389033  | OK     | 110.609  | 2.65574    |
| Atp1a2        | chr1:172271708-172298064  | OK     | 68.4787  | 1.64184    |
| Sfrp5         | chr19:42197970-42202252   | OK     | 78.3842  | 1.83902    |
| Ltbp2         | chr12:84783211-84879755   | OK     | 1.02548  | 0.0239429  |
| Phex          | chrX:157162074-157415286  | NOTEST | 0.128732 | 0.00299352 |
| Htra3         | chr5:35652025-35679780    | OK     | 2.87609  | 0.0661227  |
| Cldn1         | chr16:26356645-26371839   | OK     | 4.74383  | 0.108864   |
| Cyp4f14       | chr17:32905069-32917342   | OK     | 2.72185  | 0.0622217  |
| Egfl6         | chrX:166523006-166585716  | NOTEST | 0.382913 | 0.00872243 |
| Vgll3         | chr16:65815632-65863066   | OK     | 2.81308  | 0.0640424  |
| Zfpm2         | chr15:40655041-41104592   | OK     | 0.985811 | 0.0223097  |
| Spon1         | chr7:113765997-114043375  | OK     | 4.80178  | 0.108636   |
| Extl1         | chr4:134356372-134372547  | NOTEST | 0.742309 | 0.0167244  |
| Adamts17      | chr7:66839734-67152625    | OK     | 0.852055 | 0.0191801  |
| Pdgfrl        | chr8:40926232-40990770    | OK     | 1.46398  | 0.0326678  |
| Slc13a3       | chr2:165405294-165473197  | OK     | 2.96652  | 0.0661277  |
| Pla2g5        | chr4:138799246-138863469  | NOTEST | 0.46373  | 0.0102622  |
| Hepacam       | chr9:37367605-37386571    | OK     | 9.27856  | 0.203929   |
| Daam2         | chr17:49456021-49564337   | OK     | 15.142   | 0.329591   |
| 2900052N01Rik | chr9:46913602-46927366    | OK     | 5.43881  | 0.116746   |
| Clec12a       | chr6:129350243-129365303  | NOTEST | 0.422063 | 0.00900439 |
| Vipr2         | chr12:116077725-116146261 | NOTEST | 0.321262 | 0.00684904 |
| Alpl          | chr4:137741730-137796384  | OK     | 6.06153  | 0.128618   |
| Itgbl1        | chr14:123660139-123974079 | OK     | 2.76481  | 0.0573039  |
| Loxl1         | chr9:58287722-58313212    | OK     | 1.48218  | 0.0303003  |

|               |                           |        |          |            |
|---------------|---------------------------|--------|----------|------------|
| Lipg          | chr18:74939321-74961263   | NOTEST | 0.550266 | 0.0111488  |
| Gm14005       | chr2:128298662-128429351  | OK     | 1.6733   | 0.0335887  |
| Slc7a2        | chr8:40862366-40922070    | OK     | 18.812   | 0.374503   |
| Tuba8         | chr6:121210769-121226097  | OK     | 2.44342  | 0.0481875  |
| Fbln5         | chr12:101746564-101819119 | OK     | 21.2586  | 0.412582   |
| Egfr          | chr11:16752202-16913907   | NOTEST | 0.751482 | 0.0145081  |
| Kdelr3        | chr15:79516407-79546741   | OK     | 6.01846  | 0.116045   |
| Fxyd1         | chr7:31051677-31055656    | OK     | 65.3426  | 1.25831    |
| Sod3          | chr5:52363803-52369738    | OK     | 12.9546  | 0.248172   |
| C1qc          | chr4:136889801-136892914  | OK     | 5.34704  | 0.101797   |
| Mpeg1         | chr19:12460778-12465285   | OK     | 1.87093  | 0.0353063  |
| Col28a1       | chr6:7997807-8192617      | OK     | 33.1054  | 0.614241   |
| 5930403L14Rik | chr4:154316124-154636873  | OK     | 11.4213  | 0.208707   |
| Kcnj16        | chr11:110968032-111027967 | OK     | 1.83467  | 0.0332279  |
| Myom3         | chr4:135759714-135815567  | NOTEST | 0.187504 | 0.00337653 |
| B4galnt3      | chr6:120203809-120294559  | NOTEST | 0.73258  | 0.0131737  |
| Rarres2       | chr6:48554798-48572670    | OK     | 27.779   | 0.494932   |
| Vtn           | chr11:78499119-78502325   | OK     | 6.82521  | 0.120689   |
| Des           | chr1:75360291-75375015    | OK     | 0.90427  | 0.0159636  |
| Thbs4         | chr13:92751585-92794818   | OK     | 1.56246  | 0.027572   |
| Pf4           | chr5:90772434-90773383    | OK     | 3.35784  | 0.0587507  |
| Enpp1         | chr10:24641410-24712102   | OK     | 6.59106  | 0.114287   |
| Cryba2        | chr1:74889933-74893143    | OK     | 2.4222   | 0.0416601  |
| Gpr3711       | chr1:135160249-135167681  | OK     | 43.5701  | 0.746391   |
| Fbln2         | chr6:91212763-91272540    | OK     | 48.9744  | 0.834781   |
| Hba-a1,Hba-a2 | chr11:32283671-32284493   | NOTEST | 0.124188 | 0.00211035 |
| Postn         | chr3:54361106-54391041    | OK     | 13.1227  | 0.220847   |
| Tlr7          | chrX:167304925-167330571  | NOTEST | 0.301281 | 0.00505178 |
| Mafa          | chr15:75746842-75747922   | OK     | 4.00761  | 0.0663084  |
| Srpx          | chrX:10037976-10117661    | OK     | 4.25971  | 0.0704753  |
| Lrrc4b        | chr7:44442486-44463344    | OK     | 6.80041  | 0.111772   |
| Pi15          | chr1:17601900-17630939    | NOTEST | 0.400396 | 0.00649406 |
| Fabp7         | chr10:57784922-57788450   | OK     | 322.961  | 5.21266    |
| Amd1,Amd2     | chr10:40287457-40302188   | OK     | 1.73878  | 0.0280636  |
| Efs           | chr14:54916542-54926788   | OK     | 2.11337  | 0.0334312  |
| Fcrls         | chr3:87250964-87263524    | OK     | 1.54666  | 0.0243341  |
| Lect1         | chr14:79637689-79662170   | OK     | 14.1165  | 0.218615   |
| Gas1          | chr13:60174404-60177535   | OK     | 3.79549  | 0.058656   |
| Hes5          | chr4:154960922-154962371  | OK     | 1.11193  | 0.0170319  |
| Car5b         | chrX:163976821-164028010  | OK     | 4.34179  | 0.0660237  |
| Serpine2      | chr1:79794320-79858665    | OK     | 62.9212  | 0.949496   |
| Adcyap1r1     | chr6:55451977-55501455    | OK     | 1.35991  | 0.0201182  |
| Ttyh1         | chr7:4074124-4136926      | OK     | 38.9537  | 0.572892   |
| Abca9         | chr11:110100821-110168153 | OK     | 4.26774  | 0.0625023  |
| Mfrp          | chr9:44101769-44109187    | NOTEST | 0.336296 | 0.00486401 |
| Tyrp1         | chr4:80834212-80851736    | OK     | 7.49912  | 0.106108   |
| Cacng4        | chr11:107734779-107794464 | OK     | 4.06298  | 0.0539975  |
| Olfr558       | chr7:102702322-102712054  | NOTEST | 0.611417 | 0.00800924 |
| 2610034M16Rik | chr17:58878807-58991375   | NOTEST | 0.351618 | 0.00457201 |
| Apoe          | chr7:19696243-19699166    | OK     | 2422.41  | 31.0456    |
| Pdlim4        | chr11:54054927-54069017   | OK     | 8.68026  | 0.110235   |
| Sostdc1       | chr12:36314168-36318452   | OK     | 32.9999  | 0.402764   |
| Megf10        | chr18:57133089-57297467   | OK     | 8.55432  | 0.103723   |

|                   |                            |        |           |            |
|-------------------|----------------------------|--------|-----------|------------|
| Scara5            | chr14:65666402-65764826    | OK     | 3.6886    | 0.0427867  |
| Wnt6              | chr1:74771891-74785319     | OK     | 7.69204   | 0.0863859  |
| Lgr5              | chr10:115450313-115587780  | OK     | 5.94859   | 0.0649489  |
| Abca8a            | chr11:110025633-110095937  | OK     | 64.7776   | 0.685194   |
| P2ry12            | chr3:59006977-59344256     | OK     | 3.04175   | 0.0310901  |
| H2-Aa             | chr17:34282750-34287771    | OK     | 15.3354   | 0.155553   |
| Angptl1           | chr1:156804165-156939626   | OK     | 2.7069    | 0.0274356  |
| Hif3a             | chr7:17030992-17062427     | NOTEST | 0.32307   | 0.003243   |
| Ptges             | chr2:30889470-30903297     | OK     | 3.48049   | 0.0340547  |
| 5430435G22Rik     | chr1:131688694-131713464   | OK     | 1.01169   | 0.00984305 |
| Aldh1a2           | chr9:71215788-71296243     | OK     | 1.09454   | 0.0105611  |
| C1qa              | chr4:136895915-136898844   | OK     | 4.98884   | 0.0480161  |
| Acsbg1            | chr9:54604996-54661885     | OK     | 30.7905   | 0.274382   |
| Nfe2l3            | chr6:51432669-51458768     | OK     | 1.99188   | 0.0175178  |
| Megf11            | chr9:64385625-64709205     | OK     | 1.20925   | 0.00999333 |
| Tfap2a            | chr13:40715674-40733823    | OK     | 1.017     | 0.00818867 |
| Slc1a3            | chr15:8634123-8710807      | OK     | 5.94844   | 0.0466953  |
| Prss35            | chr9:86743632-86757506     | OK     | 29.8687   | 0.222888   |
| H2-Q8             | chr17:35424846-35428361    | NOTEST | 0.100363  | 0.00074798 |
| Emr1              | chr17:57358685-57483529    | OK     | 0.988031  | 0.00716349 |
| Mmd2              | chr5:142563480-142608752   | OK     | 58.5913   | 0.421553   |
| Sox2              | chr3:34560380-34677993     | OK     | 9.37962   | 0.0660509  |
| Ednrb             | chr14:103814614-103844476  | OK     | 63.0298   | 0.435286   |
| Itgb8             | chr12:119162802-119238276  | OK     | 25.5496   | 0.175833   |
| Olfml1            | chr7:107284774-107591365   | OK     | 4.78641   | 0.0308952  |
| H19               | chr7:142575531-142578146   | OK     | 4.44094   | 0.0270866  |
| Car13             | chr3:14641726-14663002     | OK     | 5.00113   | 0.0304584  |
| Kcnj10            | chr1:172341209-172374085   | OK     | 25.1946   | 0.152984   |
| Ugt1a6a           | chr1:88055410-88220002     | OK     | 8.37113   | 0.0437058  |
| Bmp5              | chr9:75775364-75899017     | OK     | 1.57251   | 0.00781648 |
| Gm10591           | chr4:41889794-42462993     | NOTEST | 0.0519635 | 0.00010799 |
| Gm13304           | chr4_JH584293_random:59768 | NOTEST | 0.103898  | 0.00019234 |
| Gm21541           | chr4:41889794-42462993     | NOTEST | 0.162496  | 0.00029243 |
| Fsbp              | chr4:11558919-11615808     | NOTEST | 0.183591  | 0.00031447 |
| Slc6a11           | chr6:114131240-114249886   | OK     | 2.76041   | 0.00470001 |
| Gm12191           | chr15:34440505-34443276    | NOTEST | 0.107175  | 8.50E-05   |
| Rbm14-rbm4        | chr19:4784292-4811634      | NOTEST | 0.253214  | 7.48E-05   |
| Krt85             | chr15:101431013-101491512  | NOTEST | 0.0299533 | 8.53E-06   |
| Hist1h4m,Hist1h4n | chr13:21811745-21812150    | NOTEST | 0.257987  | 2.38E-05   |
| Pira1             | chr7:3731632-3915501       | NOTEST | 0.0118789 | 2.87E-07   |
| Ear2,Ear3         | chr14:44102653-44103531    | NOTEST | 0.379708  | 6.75E-07   |



| gene          | log2 fold change | test stat | p value  | q value  | significant |
|---------------|------------------|-----------|----------|----------|-------------|
| Cbr2          | #NAME?           | #NAME?    | 5.00E-05 | 0.00022  | yes         |
| Chil3         | #NAME?           | #NAME?    | 5.00E-05 | 0.00022  | yes         |
| Cyp4f15       | #NAME?           | #NAME?    | 5.00E-05 | 0.00022  | yes         |
| Cyt11         | #NAME?           | #NAME?    | 5.00E-05 | 0.00022  | yes         |
| Dhrs2         | #NAME?           | #NAME?    | 5.00E-05 | 0.00022  | yes         |
| Dpt           | #NAME?           | #NAME?    | 5.00E-05 | 0.00022  | yes         |
| Fam180a       | #NAME?           | #NAME?    | 5.00E-05 | 0.00022  | yes         |
| Fgf2          | #NAME?           | #NAME?    | 5.00E-05 | 0.00022  | yes         |
| Gkn3          | #NAME?           | #NAME?    | 5.00E-05 | 0.00022  | yes         |
| Gm266         | #NAME?           | #NAME?    | 5.00E-05 | 0.00022  | yes         |
| Gpnmb         | #NAME?           | #NAME?    | 5.00E-05 | 0.00022  | yes         |
| I730030J21Rik | #NAME?           | #NAME?    | 5.00E-05 | 0.00022  | yes         |
| Inmt          | #NAME?           | #NAME?    | 5.00E-05 | 0.00022  | yes         |
| Lypd2         | #NAME?           | #NAME?    | 5.00E-05 | 0.00022  | yes         |
| Ms4a6c        | #NAME?           | #NAME?    | 5.00E-05 | 0.00022  | yes         |
| Musk          | #NAME?           | #NAME?    | 5.00E-05 | 0.00022  | yes         |
| Retnla        | #NAME?           | #NAME?    | 5.00E-05 | 0.00022  | yes         |
| Rlbp1         | #NAME?           | #NAME?    | 5.00E-05 | 0.00022  | yes         |
| Slc25a18      | #NAME?           | #NAME?    | 5.00E-05 | 0.00022  | yes         |
| Tmem119       | #NAME?           | #NAME?    | 5.00E-05 | 0.00022  | yes         |
| Tpsb2         | #NAME?           | #NAME?    | 5.00E-05 | 0.00022  | yes         |
| Snhg9         | #NAME?           | #NAME?    | 0.01035  | 0.026762 | yes         |
| Snord22       | #NAME?           | #NAME?    | 0.19805  | 0.311319 | no          |
| Snord15b      | #NAME?           | #NAME?    | 0.20385  | 0.318624 | no          |
| 0610038B21Rik | #NAME?           | 0         | 1        | 1        | no          |
| 1100001G20Rik | #NAME?           | 0         | 1        | 1        | no          |
| 1110015O18Rik | #NAME?           | 0         | 1        | 1        | no          |
| 1300002K09Rik | #NAME?           | 0         | 1        | 1        | no          |
| 1600010M07Rik | #NAME?           | 0         | 1        | 1        | no          |
| 1600019K03Rik | #NAME?           | 0         | 1        | 1        | no          |
| 1700001J11Rik | #NAME?           | 0         | 1        | 1        | no          |
| 1700001K23Rik | #NAME?           | 0         | 1        | 1        | no          |
| 1700003G13Rik | #NAME?           | 0         | 1        | 1        | no          |
| 1700003M07Rik | #NAME?           | 0         | 1        | 1        | no          |
| 1700007F19Rik | #NAME?           | 0         | 1        | 1        | no          |
| 1700007P06Rik | #NAME?           | 0         | 1        | 1        | no          |
| 1700008I05Rik | #NAME?           | 0         | 1        | 1        | no          |
| 1700011E24Rik | #NAME?           | 0         | 1        | 1        | no          |
| 1700013F07Rik | #NAME?           | 0         | 1        | 1        | no          |
| 1700015F17Rik | #NAME?           | 0         | 1        | 1        | no          |
| 1700017G19Rik | #NAME?           | 0         | 1        | 1        | no          |
| 1700017N19Rik | #NAME?           | 0         | 1        | 1        | no          |
| 1700019B03Rik | #NAME?           | 0         | 1        | 1        | no          |
| 1700020L24Rik | #NAME?           | 0         | 1        | 1        | no          |
| 1700020N18Rik | #NAME?           | 0         | 1        | 1        | no          |
| 1700029F12Rik | #NAME?           | 0         | 1        | 1        | no          |
| 1700029M20Rik | #NAME?           | 0         | 1        | 1        | no          |

|               |        |   |   |   |    |
|---------------|--------|---|---|---|----|
| 1700040L02Rik | #NAME? | 0 | 1 | 1 | no |
| 1700042G15Rik | #NAME? | 0 | 1 | 1 | no |
| 1700060C20Rik | #NAME? | 0 | 1 | 1 | no |
| 1700064M15Rik | #NAME? | 0 | 1 | 1 | no |
| 1700067K01Rik | #NAME? | 0 | 1 | 1 | no |
| 1700084C01Rik | #NAME? | 0 | 1 | 1 | no |
| 1700092M07Rik | #NAME? | 0 | 1 | 1 | no |
| 1700094J05Rik | #NAME? | 0 | 1 | 1 | no |
| 1700101E01Rik | #NAME? | 0 | 1 | 1 | no |
| 1700105P06Rik | #NAME? | 0 | 1 | 1 | no |
| 1700108F19Rik | #NAME? | 0 | 1 | 1 | no |
| 1700109G14Rik | #NAME? | 0 | 1 | 1 | no |
| 1700109H08Rik | #NAME? | 0 | 1 | 1 | no |
| 1700113H08Rik | #NAME? | 0 | 1 | 1 | no |
| 1700120C14Rik | #NAME? | 0 | 1 | 1 | no |
| 1700120K04Rik | #NAME? | 0 | 1 | 1 | no |
| 1700123O21Rik | #NAME? | 0 | 1 | 1 | no |
| 1700124L16Rik | #NAME? | 0 | 1 | 1 | no |
| 1700125H20Rik | #NAME? | 0 | 1 | 1 | no |
| 1810019D21Rik | #NAME? | 0 | 1 | 1 | no |
| 1810021B22Rik | #NAME? | 0 | 1 | 1 | no |
| 1810064F22Rik | #NAME? | 0 | 1 | 1 | no |
| 1810065E05Rik | #NAME? | 0 | 1 | 1 | no |
| 2010001E11Rik | #NAME? | 0 | 1 | 1 | no |
| 2010005H15Rik | #NAME? | 0 | 1 | 1 | no |
| 2010106C02Rik | #NAME? | 0 | 1 | 1 | no |
| 2010109I03Rik | #NAME? | 0 | 1 | 1 | no |
| 2010308F09Rik | #NAME? | 0 | 1 | 1 | no |
| 2210010C04Rik | #NAME? | 0 | 1 | 1 | no |
| 2210407C18Rik | #NAME? | 0 | 1 | 1 | no |
| 2300002M23Rik | #NAME? | 0 | 1 | 1 | no |
| 2310002D06Rik | #NAME? | 0 | 1 | 1 | no |
| 2310002J15Rik | #NAME? | 0 | 1 | 1 | no |
| 2310015B20Rik | #NAME? | 0 | 1 | 1 | no |
| 2310015D24Rik | #NAME? | 0 | 1 | 1 | no |
| 2310016D03Rik | #NAME? | 0 | 1 | 1 | no |
| 2310042E22Rik | #NAME? | 0 | 1 | 1 | no |
| 2310057J18Rik | #NAME? | 0 | 1 | 1 | no |
| 2410137M14Rik | #NAME? | 0 | 1 | 1 | no |
| 2610528A11Rik | #NAME? | 0 | 1 | 1 | no |
| 2810404M03Rik | #NAME? | 0 | 1 | 1 | no |
| 2810405F15Rik | #NAME? | 0 | 1 | 1 | no |
| 2810433D01Rik | #NAME? | 0 | 1 | 1 | no |
| 2810459M11Rik | #NAME? | 0 | 1 | 1 | no |
| 2810471M01Rik | #NAME? | 0 | 1 | 1 | no |
| 2900057B20Rik | #NAME? | 0 | 1 | 1 | no |
| 3110015C05Rik | #NAME? | 0 | 1 | 1 | no |
| 3110035E14Rik | #NAME? | 0 | 1 | 1 | no |
| 3830403N18Rik | #NAME? | 0 | 1 | 1 | no |
| 3830417A13Rik | #NAME? | 0 | 1 | 1 | no |
| 4732490B19Rik | #NAME? | 0 | 1 | 1 | no |
| 4833403I15Rik | #NAME? | 0 | 1 | 1 | no |
| 4833411C07Rik | #NAME? | 0 | 1 | 1 | no |

|               |        |   |   |   |    |
|---------------|--------|---|---|---|----|
| 4833417C18Rik | #NAME? | 0 | 1 | 1 | no |
| 4921507L20Rik | #NAME? | 0 | 1 | 1 | no |
| 4921530L21Rik | #NAME? | 0 | 1 | 1 | no |
| 4930401O10Rik | #NAME? | 0 | 1 | 1 | no |
| 4930405J17Rik | #NAME? | 0 | 1 | 1 | no |
| 4930415O20Rik | #NAME? | 0 | 1 | 1 | no |
| 4930426D05Rik | #NAME? | 0 | 1 | 1 | no |
| 4930431P03Rik | #NAME? | 0 | 1 | 1 | no |
| 4930432J09Rik | #NAME? | 0 | 1 | 1 | no |
| 4930433N12Rik | #NAME? | 0 | 1 | 1 | no |
| 4930444M15Rik | #NAME? | 0 | 1 | 1 | no |
| 4930452G13Rik | #NAME? | 0 | 1 | 1 | no |
| 4930465K10Rik | #NAME? | 0 | 1 | 1 | no |
| 4930465M20Rik | #NAME? | 0 | 1 | 1 | no |
| 4930467D21Rik | #NAME? | 0 | 1 | 1 | no |
| 4930471C04Rik | #NAME? | 0 | 1 | 1 | no |
| 4930479D17Rik | #NAME? | 0 | 1 | 1 | no |
| 4930483J18Rik | #NAME? | 0 | 1 | 1 | no |
| 4930483O08Rik | #NAME? | 0 | 1 | 1 | no |
| 4930502A04Rik | #NAME? | 0 | 1 | 1 | no |
| 4930509E16Rik | #NAME? | 0 | 1 | 1 | no |
| 4930524B15Rik | #NAME? | 0 | 1 | 1 | no |
| 4930525D18Rik | #NAME? | 0 | 1 | 1 | no |
| 4930542C21Rik | #NAME? | 0 | 1 | 1 | no |
| 4930544M13Rik | #NAME? | 0 | 1 | 1 | no |
| 4930545L23Rik | #NAME? | 0 | 1 | 1 | no |
| 4930546K05Rik | #NAME? | 0 | 1 | 1 | no |
| 4930555B11Rik | #NAME? | 0 | 1 | 1 | no |
| 4930556N09Rik | #NAME? | 0 | 1 | 1 | no |
| 4930563E18Rik | #NAME? | 0 | 1 | 1 | no |
| 4930579G18Rik | #NAME? | 0 | 1 | 1 | no |
| 4930583K01Rik | #NAME? | 0 | 1 | 1 | no |
| 4930595M18Rik | #NAME? | 0 | 1 | 1 | no |
| 4931406B18Rik | #NAME? | 0 | 1 | 1 | no |
| 4931423N10Rik | #NAME? | 0 | 1 | 1 | no |
| 4931429P17Rik | #NAME? | 0 | 1 | 1 | no |
| 4931440F15Rik | #NAME? | 0 | 1 | 1 | no |
| 4931440J10Rik | #NAME? | 0 | 1 | 1 | no |
| 4932414N04Rik | #NAME? | 0 | 1 | 1 | no |
| 4932441J04Rik | #NAME? | 0 | 1 | 1 | no |
| 4933400C23Rik | #NAME? | 0 | 1 | 1 | no |
| 4933401H06Rik | #NAME? | 0 | 1 | 1 | no |
| 4933402C06Rik | #NAME? | 0 | 1 | 1 | no |
| 4933405L10Rik | #NAME? | 0 | 1 | 1 | no |
| 4933406F09Rik | #NAME? | 0 | 1 | 1 | no |
| 4933406G16Rik | #NAME? | 0 | 1 | 1 | no |
| 4933407L21Rik | #NAME? | 0 | 1 | 1 | no |
| 4933408N05Rik | #NAME? | 0 | 1 | 1 | no |
| 4933411E08Rik | #NAME? | 0 | 1 | 1 | no |
| 4933411G11Rik | #NAME? | 0 | 1 | 1 | no |
| 4933411K16Rik | #NAME? | 0 | 1 | 1 | no |
| 4933412O06Rik | #NAME? | 0 | 1 | 1 | no |
| 4933413J09Rik | #NAME? | 0 | 1 | 1 | no |

|               |        |   |   |   |    |
|---------------|--------|---|---|---|----|
| 4933416C03Rik | #NAME? | 0 | 1 | 1 | no |
| 4933416M06Rik | #NAME? | 0 | 1 | 1 | no |
| 4933422A05Rik | #NAME? | 0 | 1 | 1 | no |
| 4933422H20Rik | #NAME? | 0 | 1 | 1 | no |
| 4933427D06Rik | #NAME? | 0 | 1 | 1 | no |
| 4933430M04Rik | #NAME? | 0 | 1 | 1 | no |
| 4933432K03Rik | #NAME? | 0 | 1 | 1 | no |
| 4933433G15Rik | #NAME? | 0 | 1 | 1 | no |
| 4933439K11Rik | #NAME? | 0 | 1 | 1 | no |
| 5031425F14Rik | #NAME? | 0 | 1 | 1 | no |
| 5330413P13Rik | #NAME? | 0 | 1 | 1 | no |
| 5430402O13Rik | #NAME? | 0 | 1 | 1 | no |
| 5430419D17Rik | #NAME? | 0 | 1 | 1 | no |
| 5430421N21Rik | #NAME? | 0 | 1 | 1 | no |
| 5530401A14Rik | #NAME? | 0 | 1 | 1 | no |
| 5730435O14Rik | #NAME? | 0 | 1 | 1 | no |
| 5730559C18Rik | #NAME? | 0 | 1 | 1 | no |
| 5830416I19Rik | #NAME? | 0 | 1 | 1 | no |
| 5830418P13Rik | #NAME? | 0 | 1 | 1 | no |
| 6030407O03Rik | #NAME? | 0 | 1 | 1 | no |
| 6030466F02Rik | #NAME? | 0 | 1 | 1 | no |
| 6430531B16Rik | #NAME? | 0 | 1 | 1 | no |
| 6530411M01Rik | #NAME? | 0 | 1 | 1 | no |
| 7630403G23Rik | #NAME? | 0 | 1 | 1 | no |
| 9030619P08Rik | #NAME? | 0 | 1 | 1 | no |
| 9130227L01Rik | #NAME? | 0 | 1 | 1 | no |
| 9130409I23Rik | #NAME? | 0 | 1 | 1 | no |
| 9330158H04Rik | #NAME? | 0 | 1 | 1 | no |
| 9330175E14Rik | #NAME? | 0 | 1 | 1 | no |
| 9330179D12Rik | #NAME? | 0 | 1 | 1 | no |
| 9430018G01Rik | #NAME? | 0 | 1 | 1 | no |
| 9530027J09Rik | #NAME? | 0 | 1 | 1 | no |
| 9630013A20Rik | #NAME? | 0 | 1 | 1 | no |
| 9630028B13Rik | #NAME? | 0 | 1 | 1 | no |
| A1cf          | #NAME? | 0 | 1 | 1 | no |
| A230020J21Rik | #NAME? | 0 | 1 | 1 | no |
| A330048O09Rik | #NAME? | 0 | 1 | 1 | no |
| A330070K13Rik | #NAME? | 0 | 1 | 1 | no |
| A330076C08Rik | #NAME? | 0 | 1 | 1 | no |
| A430078G23Rik | #NAME? | 0 | 1 | 1 | no |
| A530016L24Rik | #NAME? | 0 | 1 | 1 | no |
| A530064D06Rik | #NAME? | 0 | 1 | 1 | no |
| A530099J19Rik | #NAME? | 0 | 1 | 1 | no |
| A630020A06    | #NAME? | 0 | 1 | 1 | no |
| A630077J23Rik | #NAME? | 0 | 1 | 1 | no |
| A730020M07Rik | #NAME? | 0 | 1 | 1 | no |
| A730090N16Rik | #NAME? | 0 | 1 | 1 | no |
| A830009L08Rik | #NAME? | 0 | 1 | 1 | no |
| A930001A20Rik | #NAME? | 0 | 1 | 1 | no |
| A930001C03Rik | #NAME? | 0 | 1 | 1 | no |
| A930003A15Rik | #NAME? | 0 | 1 | 1 | no |
| A930006I01Rik | #NAME? | 0 | 1 | 1 | no |
| A930009A15Rik | #NAME? | 0 | 1 | 1 | no |

|          |        |   |   |   |    |
|----------|--------|---|---|---|----|
| AI607873 | #NAME? | 0 | 1 | 1 | no |
| AU019990 | #NAME? | 0 | 1 | 1 | no |
| AU022793 | #NAME? | 0 | 1 | 1 | no |
| AU040972 | #NAME? | 0 | 1 | 1 | no |
| AW495222 | #NAME? | 0 | 1 | 1 | no |
| AW822252 | #NAME? | 0 | 1 | 1 | no |
| Aass     | #NAME? | 0 | 1 | 1 | no |
| Abcb11   | #NAME? | 0 | 1 | 1 | no |
| Abcc2    | #NAME? | 0 | 1 | 1 | no |
| Abcg5    | #NAME? | 0 | 1 | 1 | no |
| Acan     | #NAME? | 0 | 1 | 1 | no |
| Acot3    | #NAME? | 0 | 1 | 1 | no |
| Acot5    | #NAME? | 0 | 1 | 1 | no |
| Actbl2   | #NAME? | 0 | 1 | 1 | no |
| Actc1    | #NAME? | 0 | 1 | 1 | no |
| Actg2    | #NAME? | 0 | 1 | 1 | no |
| Actl7b   | #NAME? | 0 | 1 | 1 | no |
| Adam18   | #NAME? | 0 | 1 | 1 | no |
| Adam28   | #NAME? | 0 | 1 | 1 | no |
| Adam7    | #NAME? | 0 | 1 | 1 | no |
| Adamdec1 | #NAME? | 0 | 1 | 1 | no |
| Adig     | #NAME? | 0 | 1 | 1 | no |
| Adora3   | #NAME? | 0 | 1 | 1 | no |
| Adrb3    | #NAME? | 0 | 1 | 1 | no |
| Agbl2    | #NAME? | 0 | 1 | 1 | no |
| Agmat    | #NAME? | 0 | 1 | 1 | no |
| Agr2     | #NAME? | 0 | 1 | 1 | no |
| Ahsg     | #NAME? | 0 | 1 | 1 | no |
| Aicda    | #NAME? | 0 | 1 | 1 | no |
| Akr1b7   | #NAME? | 0 | 1 | 1 | no |
| Aldh8a1  | #NAME? | 0 | 1 | 1 | no |
| Alx1     | #NAME? | 0 | 1 | 1 | no |
| Alx3     | #NAME? | 0 | 1 | 1 | no |
| Alx4     | #NAME? | 0 | 1 | 1 | no |
| Amdhd1   | #NAME? | 0 | 1 | 1 | no |
| Ampd1    | #NAME? | 0 | 1 | 1 | no |
| Ankrd1   | #NAME? | 0 | 1 | 1 | no |
| Ankrd22  | #NAME? | 0 | 1 | 1 | no |
| Ankrd63  | #NAME? | 0 | 1 | 1 | no |
| Ankrd7   | #NAME? | 0 | 1 | 1 | no |
| Ankub1   | #NAME? | 0 | 1 | 1 | no |
| Ano9     | #NAME? | 0 | 1 | 1 | no |
| Anxa10   | #NAME? | 0 | 1 | 1 | no |
| Aox2     | #NAME? | 0 | 1 | 1 | no |
| Apela    | #NAME? | 0 | 1 | 1 | no |
| Apoa1    | #NAME? | 0 | 1 | 1 | no |
| Apoc2    | #NAME? | 0 | 1 | 1 | no |
| Apof     | #NAME? | 0 | 1 | 1 | no |
| Apol6    | #NAME? | 0 | 1 | 1 | no |
| Apol7b   | #NAME? | 0 | 1 | 1 | no |
| Apol7d   | #NAME? | 0 | 1 | 1 | no |
| Aqp12    | #NAME? | 0 | 1 | 1 | no |
| Aqp2     | #NAME? | 0 | 1 | 1 | no |



|               |        |   |   |   |    |
|---------------|--------|---|---|---|----|
| Aqp5          | #NAME? | 0 | 1 | 1 | no |
| Aqp7          | #NAME? | 0 | 1 | 1 | no |
| Aqp8          | #NAME? | 0 | 1 | 1 | no |
| Arhgap15os    | #NAME? | 0 | 1 | 1 | no |
| Arhgap40      | #NAME? | 0 | 1 | 1 | no |
| Arhgap8       | #NAME? | 0 | 1 | 1 | no |
| Arl14epl      | #NAME? | 0 | 1 | 1 | no |
| Arl9          | #NAME? | 0 | 1 | 1 | no |
| Armc4         | #NAME? | 0 | 1 | 1 | no |
| Arr3          | #NAME? | 0 | 1 | 1 | no |
| Arsi          | #NAME? | 0 | 1 | 1 | no |
| Art1          | #NAME? | 0 | 1 | 1 | no |
| Art2b         | #NAME? | 0 | 1 | 1 | no |
| Asb10         | #NAME? | 0 | 1 | 1 | no |
| Asb11         | #NAME? | 0 | 1 | 1 | no |
| Asb16         | #NAME? | 0 | 1 | 1 | no |
| Asgr2         | #NAME? | 0 | 1 | 1 | no |
| Aspdh         | #NAME? | 0 | 1 | 1 | no |
| Atp12a        | #NAME? | 0 | 1 | 1 | no |
| Atp1a4        | #NAME? | 0 | 1 | 1 | no |
| Atp4b         | #NAME? | 0 | 1 | 1 | no |
| Atp6v0d2      | #NAME? | 0 | 1 | 1 | no |
| Avpr1b        | #NAME? | 0 | 1 | 1 | no |
| Azgp1         | #NAME? | 0 | 1 | 1 | no |
| B230119M05Rik | #NAME? | 0 | 1 | 1 | no |
| B230214G05Rik | #NAME? | 0 | 1 | 1 | no |
| B430010I23Rik | #NAME? | 0 | 1 | 1 | no |
| B430306N03Rik | #NAME? | 0 | 1 | 1 | no |
| BB123696      | #NAME? | 0 | 1 | 1 | no |
| BB557941      | #NAME? | 0 | 1 | 1 | no |
| BC021785      | #NAME? | 0 | 1 | 1 | no |
| BC024139      | #NAME? | 0 | 1 | 1 | no |
| BC027072      | #NAME? | 0 | 1 | 1 | no |
| BC030870      | #NAME? | 0 | 1 | 1 | no |
| BC039771      | #NAME? | 0 | 1 | 1 | no |
| BC089597      | #NAME? | 0 | 1 | 1 | no |
| Bach2os       | #NAME? | 0 | 1 | 1 | no |
| Barhl1        | #NAME? | 0 | 1 | 1 | no |
| Barx1         | #NAME? | 0 | 1 | 1 | no |
| Bbox1         | #NAME? | 0 | 1 | 1 | no |
| Bcl2a1b       | #NAME? | 0 | 1 | 1 | no |
| Bcl2l10       | #NAME? | 0 | 1 | 1 | no |
| Bdkrb1        | #NAME? | 0 | 1 | 1 | no |
| Best3         | #NAME? | 0 | 1 | 1 | no |
| Bglap2        | #NAME? | 0 | 1 | 1 | no |
| Bhlha15       | #NAME? | 0 | 1 | 1 | no |
| Bpifa2        | #NAME? | 0 | 1 | 1 | no |
| Bpifa5        | #NAME? | 0 | 1 | 1 | no |
| Bpifb4        | #NAME? | 0 | 1 | 1 | no |
| Bpifc         | #NAME? | 0 | 1 | 1 | no |
| Bricd5        | #NAME? | 0 | 1 | 1 | no |
| Btbd16        | #NAME? | 0 | 1 | 1 | no |
| Btbd18        | #NAME? | 0 | 1 | 1 | no |

|               |        |   |   |   |    |
|---------------|--------|---|---|---|----|
| Btn2a2        | #NAME? | 0 | 1 | 1 | no |
| C130021I20Rik | #NAME? | 0 | 1 | 1 | no |
| C130026L21Rik | #NAME? | 0 | 1 | 1 | no |
| C130080G10Rik | #NAME? | 0 | 1 | 1 | no |
| C1ql1         | #NAME? | 0 | 1 | 1 | no |
| C230035I16Rik | #NAME? | 0 | 1 | 1 | no |
| C330021F23Rik | #NAME? | 0 | 1 | 1 | no |
| C3ar1         | #NAME? | 0 | 1 | 1 | no |
| C730002L08Rik | #NAME? | 0 | 1 | 1 | no |
| C8a           | #NAME? | 0 | 1 | 1 | no |
| C9            | #NAME? | 0 | 1 | 1 | no |
| C920009B18Rik | #NAME? | 0 | 1 | 1 | no |
| Cacng1        | #NAME? | 0 | 1 | 1 | no |
| Capn12        | #NAME? | 0 | 1 | 1 | no |
| Capn13        | #NAME? | 0 | 1 | 1 | no |
| Capns2        | #NAME? | 0 | 1 | 1 | no |
| Capsl         | #NAME? | 0 | 1 | 1 | no |
| Car5a         | #NAME? | 0 | 1 | 1 | no |
| Casq2         | #NAME? | 0 | 1 | 1 | no |
| Catsper4      | #NAME? | 0 | 1 | 1 | no |
| Cav3          | #NAME? | 0 | 1 | 1 | no |
| Ccdc108       | #NAME? | 0 | 1 | 1 | no |
| Ccdc129       | #NAME? | 0 | 1 | 1 | no |
| Ccdc146       | #NAME? | 0 | 1 | 1 | no |
| Ccdc153       | #NAME? | 0 | 1 | 1 | no |
| Ccdc185       | #NAME? | 0 | 1 | 1 | no |
| Ccdc19        | #NAME? | 0 | 1 | 1 | no |
| Ccdc33        | #NAME? | 0 | 1 | 1 | no |
| Ccdc36        | #NAME? | 0 | 1 | 1 | no |
| Ccdc38        | #NAME? | 0 | 1 | 1 | no |
| Ccdc42        | #NAME? | 0 | 1 | 1 | no |
| Ccdc63        | #NAME? | 0 | 1 | 1 | no |
| Ccdc7         | #NAME? | 0 | 1 | 1 | no |
| Ccer1         | #NAME? | 0 | 1 | 1 | no |
| Cck           | #NAME? | 0 | 1 | 1 | no |
| Ccl12         | #NAME? | 0 | 1 | 1 | no |
| Ccl19         | #NAME? | 0 | 1 | 1 | no |
| Ccl21a,Gm1987 | #NAME? | 0 | 1 | 1 | no |
| Ccl21c        | #NAME? | 0 | 1 | 1 | no |
| Ccl8          | #NAME? | 0 | 1 | 1 | no |
| Ccna1         | #NAME? | 0 | 1 | 1 | no |
| Ccr4          | #NAME? | 0 | 1 | 1 | no |
| Ccr8          | #NAME? | 0 | 1 | 1 | no |
| Cd163l1       | #NAME? | 0 | 1 | 1 | no |
| Cd1d2         | #NAME? | 0 | 1 | 1 | no |
| Cd200r1       | #NAME? | 0 | 1 | 1 | no |
| Cd200r2       | #NAME? | 0 | 1 | 1 | no |
| Cd200r3       | #NAME? | 0 | 1 | 1 | no |
| Cd209a        | #NAME? | 0 | 1 | 1 | no |
| Cd209b        | #NAME? | 0 | 1 | 1 | no |
| Cd209e        | #NAME? | 0 | 1 | 1 | no |
| Cd209g        | #NAME? | 0 | 1 | 1 | no |
| Cd300e        | #NAME? | 0 | 1 | 1 | no |

|             |        |   |   |   |    |
|-------------|--------|---|---|---|----|
| Cd300ld     | #NAME? | 0 | 1 | 1 | no |
| Cd5l        | #NAME? | 0 | 1 | 1 | no |
| Cdh17       | #NAME? | 0 | 1 | 1 | no |
| Cdr1        | #NAME? | 0 | 1 | 1 | no |
| Ceacam16    | #NAME? | 0 | 1 | 1 | no |
| Ceacam20    | #NAME? | 0 | 1 | 1 | no |
| Ceacam3     | #NAME? | 0 | 1 | 1 | no |
| Ces1d       | #NAME? | 0 | 1 | 1 | no |
| Ces2c       | #NAME? | 0 | 1 | 1 | no |
| Cftr        | #NAME? | 0 | 1 | 1 | no |
| Chmp4c      | #NAME? | 0 | 1 | 1 | no |
| Chn1os3     | #NAME? | 0 | 1 | 1 | no |
| Chrdl2      | #NAME? | 0 | 1 | 1 | no |
| Chrm5       | #NAME? | 0 | 1 | 1 | no |
| Chrna2      | #NAME? | 0 | 1 | 1 | no |
| Chrnd       | #NAME? | 0 | 1 | 1 | no |
| Chrng       | #NAME? | 0 | 1 | 1 | no |
| Chst4       | #NAME? | 0 | 1 | 1 | no |
| Clca6       | #NAME? | 0 | 1 | 1 | no |
| Cldn16      | #NAME? | 0 | 1 | 1 | no |
| Cldn2       | #NAME? | 0 | 1 | 1 | no |
| Cldn22      | #NAME? | 0 | 1 | 1 | no |
| Cldn3       | #NAME? | 0 | 1 | 1 | no |
| Cldn7       | #NAME? | 0 | 1 | 1 | no |
| Clec10a     | #NAME? | 0 | 1 | 1 | no |
| Clec12b     | #NAME? | 0 | 1 | 1 | no |
| Clec2h      | #NAME? | 0 | 1 | 1 | no |
| Clec2i      | #NAME? | 0 | 1 | 1 | no |
| Clec3a      | #NAME? | 0 | 1 | 1 | no |
| Clec4a3     | #NAME? | 0 | 1 | 1 | no |
| Clec4b1     | #NAME? | 0 | 1 | 1 | no |
| Clec4n      | #NAME? | 0 | 1 | 1 | no |
| Clec5a      | #NAME? | 0 | 1 | 1 | no |
| Cml3        | #NAME? | 0 | 1 | 1 | no |
| Cnfn        | #NAME? | 0 | 1 | 1 | no |
| Cnga1       | #NAME? | 0 | 1 | 1 | no |
| Col9a1      | #NAME? | 0 | 1 | 1 | no |
| Cox8b       | #NAME? | 0 | 1 | 1 | no |
| Cpa2        | #NAME? | 0 | 1 | 1 | no |
| Cpa4        | #NAME? | 0 | 1 | 1 | no |
| Cphx1,Cphx2 | #NAME? | 0 | 1 | 1 | no |
| Cphx2       | #NAME? | 0 | 1 | 1 | no |
| Cplx4       | #NAME? | 0 | 1 | 1 | no |
| Cpn2        | #NAME? | 0 | 1 | 1 | no |
| Cpvl        | #NAME? | 0 | 1 | 1 | no |
| Cpz         | #NAME? | 0 | 1 | 1 | no |
| Crb2        | #NAME? | 0 | 1 | 1 | no |
| Crb3        | #NAME? | 0 | 1 | 1 | no |
| Creb3l3     | #NAME? | 0 | 1 | 1 | no |
| Crisp1      | #NAME? | 0 | 1 | 1 | no |
| Crnde       | #NAME? | 0 | 1 | 1 | no |
| Crp         | #NAME? | 0 | 1 | 1 | no |
| Crx         | #NAME? | 0 | 1 | 1 | no |

|               |        |   |   |   |    |
|---------------|--------|---|---|---|----|
| Crybb2        | #NAME? | 0 | 1 | 1 | no |
| Cryga         | #NAME? | 0 | 1 | 1 | no |
| Crygn         | #NAME? | 0 | 1 | 1 | no |
| Crygs         | #NAME? | 0 | 1 | 1 | no |
| Csn1s2a       | #NAME? | 0 | 1 | 1 | no |
| Csprs         | #NAME? | 0 | 1 | 1 | no |
| Csrp3         | #NAME? | 0 | 1 | 1 | no |
| Cst12         | #NAME? | 0 | 1 | 1 | no |
| Ctrb1         | #NAME? | 0 | 1 | 1 | no |
| Ctsg          | #NAME? | 0 | 1 | 1 | no |
| Cxcl13        | #NAME? | 0 | 1 | 1 | no |
| Cxcr5         | #NAME? | 0 | 1 | 1 | no |
| Cyct          | #NAME? | 0 | 1 | 1 | no |
| Cyp11a1       | #NAME? | 0 | 1 | 1 | no |
| Cyp24a1       | #NAME? | 0 | 1 | 1 | no |
| Cyp27b1       | #NAME? | 0 | 1 | 1 | no |
| Cyp2b10       | #NAME? | 0 | 1 | 1 | no |
| Cyp2c66       | #NAME? | 0 | 1 | 1 | no |
| Cypt2         | #NAME? | 0 | 1 | 1 | no |
| D030018L15Rik | #NAME? | 0 | 1 | 1 | no |
| D030025P21Rik | #NAME? | 0 | 1 | 1 | no |
| D330045A20Rik | #NAME? | 0 | 1 | 1 | no |
| D630024D03Rik | #NAME? | 0 | 1 | 1 | no |
| D630029K05Rik | #NAME? | 0 | 1 | 1 | no |
| D630033O11Rik | #NAME? | 0 | 1 | 1 | no |
| D630039A03Rik | #NAME? | 0 | 1 | 1 | no |
| D6Ert527e     | #NAME? | 0 | 1 | 1 | no |
| D830013O20Rik | #NAME? | 0 | 1 | 1 | no |
| D830030K20Rik | #NAME? | 0 | 1 | 1 | no |
| D830032E09Rik | #NAME? | 0 | 1 | 1 | no |
| D830046C22Rik | #NAME? | 0 | 1 | 1 | no |
| D930015M05Rik | #NAME? | 0 | 1 | 1 | no |
| Dcdc2b        | #NAME? | 0 | 1 | 1 | no |
| Dct           | #NAME? | 0 | 1 | 1 | no |
| Ddo           | #NAME? | 0 | 1 | 1 | no |
| Defb20        | #NAME? | 0 | 1 | 1 | no |
| Defb28        | #NAME? | 0 | 1 | 1 | no |
| Defb30        | #NAME? | 0 | 1 | 1 | no |
| Dhrs7c        | #NAME? | 0 | 1 | 1 | no |
| Dhrs9         | #NAME? | 0 | 1 | 1 | no |
| Dio3          | #NAME? | 0 | 1 | 1 | no |
| Dio3os        | #NAME? | 0 | 1 | 1 | no |
| Dlx2          | #NAME? | 0 | 1 | 1 | no |
| Dlx5          | #NAME? | 0 | 1 | 1 | no |
| Dlx6          | #NAME? | 0 | 1 | 1 | no |
| Dmr           | #NAME? | 0 | 1 | 1 | no |
| Dmrt2         | #NAME? | 0 | 1 | 1 | no |
| Dmrta1        | #NAME? | 0 | 1 | 1 | no |
| Dnajb13       | #NAME? | 0 | 1 | 1 | no |
| Dnajb7        | #NAME? | 0 | 1 | 1 | no |
| Dnase2b       | #NAME? | 0 | 1 | 1 | no |
| Dpep2         | #NAME? | 0 | 1 | 1 | no |
| Dpep3         | #NAME? | 0 | 1 | 1 | no |

|                   |        |   |   |   |    |
|-------------------|--------|---|---|---|----|
| Dpy19l2           | #NAME? | 0 | 1 | 1 | no |
| Dsc3              | #NAME? | 0 | 1 | 1 | no |
| Dspp              | #NAME? | 0 | 1 | 1 | no |
| Duoxa2            | #NAME? | 0 | 1 | 1 | no |
| Dynap             | #NAME? | 0 | 1 | 1 | no |
| E030003E18Rik     | #NAME? | 0 | 1 | 1 | no |
| E030019B06Rik     | #NAME? | 0 | 1 | 1 | no |
| E130018N17Rik     | #NAME? | 0 | 1 | 1 | no |
| E130215H24Rik     | #NAME? | 0 | 1 | 1 | no |
| E130304I02Rik     | #NAME? | 0 | 1 | 1 | no |
| E230016K23Rik     | #NAME? | 0 | 1 | 1 | no |
| E230029C05Rik     | #NAME? | 0 | 1 | 1 | no |
| E330013P04Rik     | #NAME? | 0 | 1 | 1 | no |
| E330017A01Rik     | #NAME? | 0 | 1 | 1 | no |
| E330017L17Rik     | #NAME? | 0 | 1 | 1 | no |
| E330021D16Rik     | #NAME? | 0 | 1 | 1 | no |
| E330034G19Rik     | #NAME? | 0 | 1 | 1 | no |
| Ear1              | #NAME? | 0 | 1 | 1 | no |
| Ear6,Ear7         | #NAME? | 0 | 1 | 1 | no |
| Ear7              | #NAME? | 0 | 1 | 1 | no |
| Eci3              | #NAME? | 0 | 1 | 1 | no |
| Ect2l             | #NAME? | 0 | 1 | 1 | no |
| Efcab9            | #NAME? | 0 | 1 | 1 | no |
| Eif4e1b           | #NAME? | 0 | 1 | 1 | no |
| Elane             | #NAME? | 0 | 1 | 1 | no |
| Elf5              | #NAME? | 0 | 1 | 1 | no |
| Ell3              | #NAME? | 0 | 1 | 1 | no |
| Emr4              | #NAME? | 0 | 1 | 1 | no |
| Epgn              | #NAME? | 0 | 1 | 1 | no |
| Epha1             | #NAME? | 0 | 1 | 1 | no |
| Epo               | #NAME? | 0 | 1 | 1 | no |
| Eppk1             | #NAME? | 0 | 1 | 1 | no |
| Epx               | #NAME? | 0 | 1 | 1 | no |
| Erbb4             | #NAME? | 0 | 1 | 1 | no |
| Erich4            | #NAME? | 0 | 1 | 1 | no |
| Esp8              | #NAME? | 0 | 1 | 1 | no |
| Eva1a             | #NAME? | 0 | 1 | 1 | no |
| Evi2a-evi2b,Evi2b | #NAME? | 0 | 1 | 1 | no |
| Eya4              | #NAME? | 0 | 1 | 1 | no |
| F7                | #NAME? | 0 | 1 | 1 | no |
| Faim3             | #NAME? | 0 | 1 | 1 | no |
| Fam181a           | #NAME? | 0 | 1 | 1 | no |
| Fam187a           | #NAME? | 0 | 1 | 1 | no |
| Fam187b           | #NAME? | 0 | 1 | 1 | no |
| Fam227b           | #NAME? | 0 | 1 | 1 | no |
| Fam229a           | #NAME? | 0 | 1 | 1 | no |
| Fam26f            | #NAME? | 0 | 1 | 1 | no |
| Fam3b             | #NAME? | 0 | 1 | 1 | no |
| Fam47e            | #NAME? | 0 | 1 | 1 | no |
| Fam71a            | #NAME? | 0 | 1 | 1 | no |
| Fam71e2           | #NAME? | 0 | 1 | 1 | no |
| Fam83a            | #NAME? | 0 | 1 | 1 | no |
| Fat2              | #NAME? | 0 | 1 | 1 | no |



|               |        |   |   |   |    |
|---------------|--------|---|---|---|----|
| Fate1         | #NAME? | 0 | 1 | 1 | no |
| Fbxo43        | #NAME? | 0 | 1 | 1 | no |
| Fbxw16        | #NAME? | 0 | 1 | 1 | no |
| Fcer1a        | #NAME? | 0 | 1 | 1 | no |
| Fcer2a        | #NAME? | 0 | 1 | 1 | no |
| Fcgbp         | #NAME? | 0 | 1 | 1 | no |
| Fcgr1         | #NAME? | 0 | 1 | 1 | no |
| Fcgr4         | #NAME? | 0 | 1 | 1 | no |
| Fcna          | #NAME? | 0 | 1 | 1 | no |
| Fcnb          | #NAME? | 0 | 1 | 1 | no |
| Fcrl1         | #NAME? | 0 | 1 | 1 | no |
| Fer1l4        | #NAME? | 0 | 1 | 1 | no |
| Fev           | #NAME? | 0 | 1 | 1 | no |
| Ffar4         | #NAME? | 0 | 1 | 1 | no |
| Fga           | #NAME? | 0 | 1 | 1 | no |
| Fgf16         | #NAME? | 0 | 1 | 1 | no |
| Fgf21         | #NAME? | 0 | 1 | 1 | no |
| Fgf8          | #NAME? | 0 | 1 | 1 | no |
| Fgfr4         | #NAME? | 0 | 1 | 1 | no |
| Fhl5          | #NAME? | 0 | 1 | 1 | no |
| Fitm1         | #NAME? | 0 | 1 | 1 | no |
| Fkbp6         | #NAME? | 0 | 1 | 1 | no |
| Fmo4          | #NAME? | 0 | 1 | 1 | no |
| Folr4         | #NAME? | 0 | 1 | 1 | no |
| Foxa1         | #NAME? | 0 | 1 | 1 | no |
| Foxd4         | #NAME? | 0 | 1 | 1 | no |
| Foxh1         | #NAME? | 0 | 1 | 1 | no |
| Foxi2         | #NAME? | 0 | 1 | 1 | no |
| Foxl1         | #NAME? | 0 | 1 | 1 | no |
| Foxn1         | #NAME? | 0 | 1 | 1 | no |
| G630090E17Rik | #NAME? | 0 | 1 | 1 | no |
| G6b           | #NAME? | 0 | 1 | 1 | no |
| Gabrp         | #NAME? | 0 | 1 | 1 | no |
| Gad1os        | #NAME? | 0 | 1 | 1 | no |
| Gal3st2       | #NAME? | 0 | 1 | 1 | no |
| Gapdhs        | #NAME? | 0 | 1 | 1 | no |
| Gapt          | #NAME? | 0 | 1 | 1 | no |
| Gareml        | #NAME? | 0 | 1 | 1 | no |
| Gata4         | #NAME? | 0 | 1 | 1 | no |
| Gata6         | #NAME? | 0 | 1 | 1 | no |
| Gbx2          | #NAME? | 0 | 1 | 1 | no |
| Gcg           | #NAME? | 0 | 1 | 1 | no |
| Gchfr         | #NAME? | 0 | 1 | 1 | no |
| Gcsam         | #NAME? | 0 | 1 | 1 | no |
| Gdf5          | #NAME? | 0 | 1 | 1 | no |
| Gfral         | #NAME? | 0 | 1 | 1 | no |
| Gja10         | #NAME? | 0 | 1 | 1 | no |
| Gja3          | #NAME? | 0 | 1 | 1 | no |
| Gja6          | #NAME? | 0 | 1 | 1 | no |
| Gjb3          | #NAME? | 0 | 1 | 1 | no |
| Gjb4          | #NAME? | 0 | 1 | 1 | no |
| Gjb5          | #NAME? | 0 | 1 | 1 | no |
| Gldnos        | #NAME? | 0 | 1 | 1 | no |

|         |        |   |   |   |    |
|---------|--------|---|---|---|----|
| Gli2    | #NAME? | 0 | 1 | 1 | no |
| Glp1r   | #NAME? | 0 | 1 | 1 | no |
| Glr4    | #NAME? | 0 | 1 | 1 | no |
| Gltpd2  | #NAME? | 0 | 1 | 1 | no |
| Glyat13 | #NAME? | 0 | 1 | 1 | no |
| Gm10364 | #NAME? | 0 | 1 | 1 | no |
| Gm10390 | #NAME? | 0 | 1 | 1 | no |
| Gm10406 | #NAME? | 0 | 1 | 1 | no |
| Gm10416 | #NAME? | 0 | 1 | 1 | no |
| Gm10433 | #NAME? | 0 | 1 | 1 | no |
| Gm10440 | #NAME? | 0 | 1 | 1 | no |
| Gm10536 | #NAME? | 0 | 1 | 1 | no |
| Gm10556 | #NAME? | 0 | 1 | 1 | no |
| Gm10635 | #NAME? | 0 | 1 | 1 | no |
| Gm10649 | #NAME? | 0 | 1 | 1 | no |
| Gm10653 | #NAME? | 0 | 1 | 1 | no |
| Gm10745 | #NAME? | 0 | 1 | 1 | no |
| Gm10768 | #NAME? | 0 | 1 | 1 | no |
| Gm10787 | #NAME? | 0 | 1 | 1 | no |
| Gm10804 | #NAME? | 0 | 1 | 1 | no |
| Gm10863 | #NAME? | 0 | 1 | 1 | no |
| Gm11190 | #NAME? | 0 | 1 | 1 | no |
| Gm11201 | #NAME? | 0 | 1 | 1 | no |
| Gm11346 | #NAME? | 0 | 1 | 1 | no |
| Gm11351 | #NAME? | 0 | 1 | 1 | no |
| Gm11517 | #NAME? | 0 | 1 | 1 | no |
| Gm11541 | #NAME? | 0 | 1 | 1 | no |
| Gm11627 | #NAME? | 0 | 1 | 1 | no |
| Gm11978 | #NAME? | 0 | 1 | 1 | no |
| Gm12    | #NAME? | 0 | 1 | 1 | no |
| Gm12130 | #NAME? | 0 | 1 | 1 | no |
| Gm12159 | #NAME? | 0 | 1 | 1 | no |
| Gm12633 | #NAME? | 0 | 1 | 1 | no |
| Gm12709 | #NAME? | 0 | 1 | 1 | no |
| Gm13031 | #NAME? | 0 | 1 | 1 | no |
| Gm13154 | #NAME? | 0 | 1 | 1 | no |
| Gm13546 | #NAME? | 0 | 1 | 1 | no |
| Gm13547 | #NAME? | 0 | 1 | 1 | no |
| Gm13939 | #NAME? | 0 | 1 | 1 | no |
| Gm14015 | #NAME? | 0 | 1 | 1 | no |
| Gm14207 | #NAME? | 0 | 1 | 1 | no |
| Gm14548 | #NAME? | 0 | 1 | 1 | no |
| Gm14812 | #NAME? | 0 | 1 | 1 | no |
| Gm15055 | #NAME? | 0 | 1 | 1 | no |
| Gm15348 | #NAME? | 0 | 1 | 1 | no |
| Gm15401 | #NAME? | 0 | 1 | 1 | no |
| Gm15471 | #NAME? | 0 | 1 | 1 | no |
| Gm1564  | #NAME? | 0 | 1 | 1 | no |
| Gm15880 | #NAME? | 0 | 1 | 1 | no |
| Gm15941 | #NAME? | 0 | 1 | 1 | no |
| Gm15987 | #NAME? | 0 | 1 | 1 | no |
| Gm16325 | #NAME? | 0 | 1 | 1 | no |
| Gm16523 | #NAME? | 0 | 1 | 1 | no |

|              |        |   |   |   |    |
|--------------|--------|---|---|---|----|
| Gm16907      | #NAME? | 0 | 1 | 1 | no |
| Gm17359      | #NAME? | 0 | 1 | 1 | no |
| Gm19557      | #NAME? | 0 | 1 | 1 | no |
| Gm1965       | #NAME? | 0 | 1 | 1 | no |
| Gm19689      | #NAME? | 0 | 1 | 1 | no |
| Gm1987       | #NAME? | 0 | 1 | 1 | no |
| Gm19897      | #NAME? | 0 | 1 | 1 | no |
| Gm20110      | #NAME? | 0 | 1 | 1 | no |
| Gm20125      | #NAME? | 0 | 1 | 1 | no |
| Gm20187      | #NAME? | 0 | 1 | 1 | no |
| Gm20743      | #NAME? | 0 | 1 | 1 | no |
| Gm20744      | #NAME? | 0 | 1 | 1 | no |
| Gm20754      | #NAME? | 0 | 1 | 1 | no |
| Gm20756      | #NAME? | 0 | 1 | 1 | no |
| Gm2083,Mup19 | #NAME? | 0 | 1 | 1 | no |
| Gm3002       | #NAME? | 0 | 1 | 1 | no |
| Gm3776       | #NAME? | 0 | 1 | 1 | no |
| Gm4432       | #NAME? | 0 | 1 | 1 | no |
| Gm4477       | #NAME? | 0 | 1 | 1 | no |
| Gm4489       | #NAME? | 0 | 1 | 1 | no |
| Gm4792       | #NAME? | 0 | 1 | 1 | no |
| Gm4861       | #NAME? | 0 | 1 | 1 | no |
| Gm4961       | #NAME? | 0 | 1 | 1 | no |
| Gm4975       | #NAME? | 0 | 1 | 1 | no |
| Gm4984       | #NAME? | 0 | 1 | 1 | no |
| Gm5084       | #NAME? | 0 | 1 | 1 | no |
| Gm5105       | #NAME? | 0 | 1 | 1 | no |
| Gm5111       | #NAME? | 0 | 1 | 1 | no |
| Gm5431       | #NAME? | 0 | 1 | 1 | no |
| Gm5475       | #NAME? | 0 | 1 | 1 | no |
| Gm5523       | #NAME? | 0 | 1 | 1 | no |
| Gm5640       | #NAME? | 0 | 1 | 1 | no |
| Gm572        | #NAME? | 0 | 1 | 1 | no |
| Gm5741       | #NAME? | 0 | 1 | 1 | no |
| Gm5833       | #NAME? | 0 | 1 | 1 | no |
| Gm5936       | #NAME? | 0 | 1 | 1 | no |
| Gm595        | #NAME? | 0 | 1 | 1 | no |
| Gm6083       | #NAME? | 0 | 1 | 1 | no |
| Gm614        | #NAME? | 0 | 1 | 1 | no |
| Gm6150       | #NAME? | 0 | 1 | 1 | no |
| Gm6307       | #NAME? | 0 | 1 | 1 | no |
| Gm6408       | #NAME? | 0 | 1 | 1 | no |
| Gm6588       | #NAME? | 0 | 1 | 1 | no |
| Gm6614       | #NAME? | 0 | 1 | 1 | no |
| Gm6634       | #NAME? | 0 | 1 | 1 | no |
| Gm6642       | #NAME? | 0 | 1 | 1 | no |
| Gm6936       | #NAME? | 0 | 1 | 1 | no |
| Gm7361       | #NAME? | 0 | 1 | 1 | no |
| Gm7538       | #NAME? | 0 | 1 | 1 | no |
| Gm7903       | #NAME? | 0 | 1 | 1 | no |
| Gm805        | #NAME? | 0 | 1 | 1 | no |
| Gm806        | #NAME? | 0 | 1 | 1 | no |
| Gm8300       | #NAME? | 0 | 1 | 1 | no |

|           |        |   |   |   |    |
|-----------|--------|---|---|---|----|
| Gm833     | #NAME? | 0 | 1 | 1 | no |
| Gm8439    | #NAME? | 0 | 1 | 1 | no |
| Gm8579    | #NAME? | 0 | 1 | 1 | no |
| Gm8787    | #NAME? | 0 | 1 | 1 | no |
| Gm8801    | #NAME? | 0 | 1 | 1 | no |
| Gm9054    | #NAME? | 0 | 1 | 1 | no |
| Gm906     | #NAME? | 0 | 1 | 1 | no |
| Gm973     | #NAME? | 0 | 1 | 1 | no |
| Gm9733    | #NAME? | 0 | 1 | 1 | no |
| Gmfg      | #NAME? | 0 | 1 | 1 | no |
| Gnat1     | #NAME? | 0 | 1 | 1 | no |
| Gng13     | #NAME? | 0 | 1 | 1 | no |
| Gngt1     | #NAME? | 0 | 1 | 1 | no |
| Golt1a    | #NAME? | 0 | 1 | 1 | no |
| Got1l1    | #NAME? | 0 | 1 | 1 | no |
| Gpr101    | #NAME? | 0 | 1 | 1 | no |
| Gpr110    | #NAME? | 0 | 1 | 1 | no |
| Gpr12     | #NAME? | 0 | 1 | 1 | no |
| Gpr183    | #NAME? | 0 | 1 | 1 | no |
| Gpr20     | #NAME? | 0 | 1 | 1 | no |
| Gpr25     | #NAME? | 0 | 1 | 1 | no |
| Gpr84     | #NAME? | 0 | 1 | 1 | no |
| Gpx6      | #NAME? | 0 | 1 | 1 | no |
| Grifin    | #NAME? | 0 | 1 | 1 | no |
| Grin2a    | #NAME? | 0 | 1 | 1 | no |
| Grin2b    | #NAME? | 0 | 1 | 1 | no |
| Grm6      | #NAME? | 0 | 1 | 1 | no |
| Gsg1      | #NAME? | 0 | 1 | 1 | no |
| Gsta1     | #NAME? | 0 | 1 | 1 | no |
| Gsta2     | #NAME? | 0 | 1 | 1 | no |
| Gstm3     | #NAME? | 0 | 1 | 1 | no |
| Gucy2f    | #NAME? | 0 | 1 | 1 | no |
| Gys2      | #NAME? | 0 | 1 | 1 | no |
| H2-Eb2    | #NAME? | 0 | 1 | 1 | no |
| H2-M9     | #NAME? | 0 | 1 | 1 | no |
| H2-Oa     | #NAME? | 0 | 1 | 1 | no |
| H2-Q2     | #NAME? | 0 | 1 | 1 | no |
| H2-T3     | #NAME? | 0 | 1 | 1 | no |
| Haao      | #NAME? | 0 | 1 | 1 | no |
| Hao2      | #NAME? | 0 | 1 | 1 | no |
| Has2os    | #NAME? | 0 | 1 | 1 | no |
| Havcr2    | #NAME? | 0 | 1 | 1 | no |
| Hcst      | #NAME? | 0 | 1 | 1 | no |
| Hes7      | #NAME? | 0 | 1 | 1 | no |
| Hgd       | #NAME? | 0 | 1 | 1 | no |
| Hhla1     | #NAME? | 0 | 1 | 1 | no |
| Hils1     | #NAME? | 0 | 1 | 1 | no |
| Hist1h2ap | #NAME? | 0 | 1 | 1 | no |
| Hist1h4j  | #NAME? | 0 | 1 | 1 | no |
| Hist2h2ab | #NAME? | 0 | 1 | 1 | no |
| Hist4h4   | #NAME? | 0 | 1 | 1 | no |
| Hmgb4     | #NAME? | 0 | 1 | 1 | no |
| Hormad2   | #NAME? | 0 | 1 | 1 | no |

|               |        |   |   |   |    |
|---------------|--------|---|---|---|----|
| Hoxa11        | #NAME? | 0 | 1 | 1 | no |
| Hoxa11os      | #NAME? | 0 | 1 | 1 | no |
| Hpgds         | #NAME? | 0 | 1 | 1 | no |
| Hrasls5       | #NAME? | 0 | 1 | 1 | no |
| Hsd11b2       | #NAME? | 0 | 1 | 1 | no |
| Hsd17b13      | #NAME? | 0 | 1 | 1 | no |
| Hsd17b2       | #NAME? | 0 | 1 | 1 | no |
| Hsd17b3       | #NAME? | 0 | 1 | 1 | no |
| Hsd17b6       | #NAME? | 0 | 1 | 1 | no |
| Hsd3b1        | #NAME? | 0 | 1 | 1 | no |
| Hsf3          | #NAME? | 0 | 1 | 1 | no |
| Hspb3         | #NAME? | 0 | 1 | 1 | no |
| Htr2c         | #NAME? | 0 | 1 | 1 | no |
| I830077J02Rik | #NAME? | 0 | 1 | 1 | no |
| Ifi44l        | #NAME? | 0 | 1 | 1 | no |
| Ifltd1        | #NAME? | 0 | 1 | 1 | no |
| Igf2bp1       | #NAME? | 0 | 1 | 1 | no |
| Igf2bp3       | #NAME? | 0 | 1 | 1 | no |
| Igf2os        | #NAME? | 0 | 1 | 1 | no |
| Igfbp1        | #NAME? | 0 | 1 | 1 | no |
| Igsf1         | #NAME? | 0 | 1 | 1 | no |
| Il12a         | #NAME? | 0 | 1 | 1 | no |
| Il1a          | #NAME? | 0 | 1 | 1 | no |
| Il1rapl2      | #NAME? | 0 | 1 | 1 | no |
| Il1rl2        | #NAME? | 0 | 1 | 1 | no |
| Il20          | #NAME? | 0 | 1 | 1 | no |
| Il20ra        | #NAME? | 0 | 1 | 1 | no |
| Il21          | #NAME? | 0 | 1 | 1 | no |
| Il22ra2       | #NAME? | 0 | 1 | 1 | no |
| Il25          | #NAME? | 0 | 1 | 1 | no |
| Il2ra         | #NAME? | 0 | 1 | 1 | no |
| Il4           | #NAME? | 0 | 1 | 1 | no |
| Ins2          | #NAME? | 0 | 1 | 1 | no |
| Irx4          | #NAME? | 0 | 1 | 1 | no |
| Itih1         | #NAME? | 0 | 1 | 1 | no |
| Itih3         | #NAME? | 0 | 1 | 1 | no |
| Izumo1        | #NAME? | 0 | 1 | 1 | no |
| Izumo3        | #NAME? | 0 | 1 | 1 | no |
| Kcne2         | #NAME? | 0 | 1 | 1 | no |
| Kcnj5         | #NAME? | 0 | 1 | 1 | no |
| Kcnv2         | #NAME? | 0 | 1 | 1 | no |
| Kera          | #NAME? | 0 | 1 | 1 | no |
| Kif6          | #NAME? | 0 | 1 | 1 | no |
| Kirrel2       | #NAME? | 0 | 1 | 1 | no |
| Kiss1         | #NAME? | 0 | 1 | 1 | no |
| Klb           | #NAME? | 0 | 1 | 1 | no |
| Klk13         | #NAME? | 0 | 1 | 1 | no |
| Klk1b27       | #NAME? | 0 | 1 | 1 | no |
| Klra1         | #NAME? | 0 | 1 | 1 | no |
| Klra15        | #NAME? | 0 | 1 | 1 | no |
| Klra19,Klra6  | #NAME? | 0 | 1 | 1 | no |
| Klra2         | #NAME? | 0 | 1 | 1 | no |
| Klra4         | #NAME? | 0 | 1 | 1 | no |



|              |        |   |   |   |    |
|--------------|--------|---|---|---|----|
| Klra6        | #NAME? | 0 | 1 | 1 | no |
| Klrb1        | #NAME? | 0 | 1 | 1 | no |
| Klrb1f       | #NAME? | 0 | 1 | 1 | no |
| Klri1        | #NAME? | 0 | 1 | 1 | no |
| Kmo          | #NAME? | 0 | 1 | 1 | no |
| Kng1         | #NAME? | 0 | 1 | 1 | no |
| Krt14        | #NAME? | 0 | 1 | 1 | no |
| Krt15        | #NAME? | 0 | 1 | 1 | no |
| Krt17        | #NAME? | 0 | 1 | 1 | no |
| Krt2         | #NAME? | 0 | 1 | 1 | no |
| Krt20        | #NAME? | 0 | 1 | 1 | no |
| Krt36        | #NAME? | 0 | 1 | 1 | no |
| Krt40        | #NAME? | 0 | 1 | 1 | no |
| Krt42        | #NAME? | 0 | 1 | 1 | no |
| Krt7         | #NAME? | 0 | 1 | 1 | no |
| Krt78        | #NAME? | 0 | 1 | 1 | no |
| Krt8         | #NAME? | 0 | 1 | 1 | no |
| Krt80        | #NAME? | 0 | 1 | 1 | no |
| Krt82        | #NAME? | 0 | 1 | 1 | no |
| Krtdap       | #NAME? | 0 | 1 | 1 | no |
| LOC100043315 | #NAME? | 0 | 1 | 1 | no |
| LOC100504608 | #NAME? | 0 | 1 | 1 | no |
| LOC100862268 | #NAME? | 0 | 1 | 1 | no |
| LOC101243624 | #NAME? | 0 | 1 | 1 | no |
| LOC102632423 | #NAME? | 0 | 1 | 1 | no |
| LOC102633035 | #NAME? | 0 | 1 | 1 | no |
| Lair1        | #NAME? | 0 | 1 | 1 | no |
| Lalba        | #NAME? | 0 | 1 | 1 | no |
| Lce1d        | #NAME? | 0 | 1 | 1 | no |
| Lce1g        | #NAME? | 0 | 1 | 1 | no |
| Lce6a        | #NAME? | 0 | 1 | 1 | no |
| Ldlrad1      | #NAME? | 0 | 1 | 1 | no |
| Ldoc1        | #NAME? | 0 | 1 | 1 | no |
| Lgals12      | #NAME? | 0 | 1 | 1 | no |
| Lhx3         | #NAME? | 0 | 1 | 1 | no |
| Lhx4         | #NAME? | 0 | 1 | 1 | no |
| Lhx8         | #NAME? | 0 | 1 | 1 | no |
| Lhx9         | #NAME? | 0 | 1 | 1 | no |
| Lilra5       | #NAME? | 0 | 1 | 1 | no |
| Lincrna-cox2 | #NAME? | 0 | 1 | 1 | no |
| Lipc         | #NAME? | 0 | 1 | 1 | no |
| Lipn         | #NAME? | 0 | 1 | 1 | no |
| Lman1l       | #NAME? | 0 | 1 | 1 | no |
| Loxhd1       | #NAME? | 0 | 1 | 1 | no |
| Lpo          | #NAME? | 0 | 1 | 1 | no |
| Lrp2bp       | #NAME? | 0 | 1 | 1 | no |
| Lrrc10       | #NAME? | 0 | 1 | 1 | no |
| Lrrc26       | #NAME? | 0 | 1 | 1 | no |
| Lrrc30       | #NAME? | 0 | 1 | 1 | no |
| Lrrc38       | #NAME? | 0 | 1 | 1 | no |
| Lrrc52       | #NAME? | 0 | 1 | 1 | no |
| Lta          | #NAME? | 0 | 1 | 1 | no |
| Ltb4r2       | #NAME? | 0 | 1 | 1 | no |

|              |        |   |   |   |    |
|--------------|--------|---|---|---|----|
| Ltc4s        | #NAME? | 0 | 1 | 1 | no |
| Ly6g6e       | #NAME? | 0 | 1 | 1 | no |
| Ly6k         | #NAME? | 0 | 1 | 1 | no |
| Lyg2         | #NAME? | 0 | 1 | 1 | no |
| Lypd4        | #NAME? | 0 | 1 | 1 | no |
| Lyzl4        | #NAME? | 0 | 1 | 1 | no |
| Madcam1      | #NAME? | 0 | 1 | 1 | no |
| Mansc4       | #NAME? | 0 | 1 | 1 | no |
| Mapk15       | #NAME? | 0 | 1 | 1 | no |
| 35489        | #NAME? | 0 | 1 | 1 | no |
| Marcksl1-ps4 | #NAME? | 0 | 1 | 1 | no |
| Matn3        | #NAME? | 0 | 1 | 1 | no |
| Mb           | #NAME? | 0 | 1 | 1 | no |
| Mcemp1       | #NAME? | 0 | 1 | 1 | no |
| Mcpt8        | #NAME? | 0 | 1 | 1 | no |
| Meiob        | #NAME? | 0 | 1 | 1 | no |
| Mep1b        | #NAME? | 0 | 1 | 1 | no |
| Mesp1        | #NAME? | 0 | 1 | 1 | no |
| Mettl21c     | #NAME? | 0 | 1 | 1 | no |
| Mfsd6l       | #NAME? | 0 | 1 | 1 | no |
| Mia          | #NAME? | 0 | 1 | 1 | no |
| Micalcl      | #NAME? | 0 | 1 | 1 | no |
| Milr1        | #NAME? | 0 | 1 | 1 | no |
| Mir3473e     | #NAME? | 0 | 1 | 1 | no |
| Mir546       | #NAME? | 0 | 1 | 1 | no |
| Mir8101      | #NAME? | 0 | 1 | 1 | no |
| Mlana        | #NAME? | 0 | 1 | 1 | no |
| Mlxipl       | #NAME? | 0 | 1 | 1 | no |
| Mmp12        | #NAME? | 0 | 1 | 1 | no |
| Mmp3         | #NAME? | 0 | 1 | 1 | no |
| Mogat1       | #NAME? | 0 | 1 | 1 | no |
| Mrgprb1      | #NAME? | 0 | 1 | 1 | no |
| Mrgprb2      | #NAME? | 0 | 1 | 1 | no |
| Mrgprh       | #NAME? | 0 | 1 | 1 | no |
| Mrgprx2      | #NAME? | 0 | 1 | 1 | no |
| Mro          | #NAME? | 0 | 1 | 1 | no |
| Mroh5        | #NAME? | 0 | 1 | 1 | no |
| Ms4a1        | #NAME? | 0 | 1 | 1 | no |
| Ms4a6d       | #NAME? | 0 | 1 | 1 | no |
| Ms4a7        | #NAME? | 0 | 1 | 1 | no |
| Ms4a8a       | #NAME? | 0 | 1 | 1 | no |
| Msr1         | #NAME? | 0 | 1 | 1 | no |
| Msx2         | #NAME? | 0 | 1 | 1 | no |
| Mt4          | #NAME? | 0 | 1 | 1 | no |
| Mtl5         | #NAME? | 0 | 1 | 1 | no |
| Mtnr1a       | #NAME? | 0 | 1 | 1 | no |
| Mup20        | #NAME? | 0 | 1 | 1 | no |
| Mybpc1       | #NAME? | 0 | 1 | 1 | no |
| Myh15        | #NAME? | 0 | 1 | 1 | no |
| Myh2         | #NAME? | 0 | 1 | 1 | no |
| Myh6         | #NAME? | 0 | 1 | 1 | no |
| Myh7         | #NAME? | 0 | 1 | 1 | no |
| Mylk2        | #NAME? | 0 | 1 | 1 | no |

|           |        |   |   |   |    |
|-----------|--------|---|---|---|----|
| Myo3a     | #NAME? | 0 | 1 | 1 | no |
| Myot      | #NAME? | 0 | 1 | 1 | no |
| Myoz1     | #NAME? | 0 | 1 | 1 | no |
| Naa11     | #NAME? | 0 | 1 | 1 | no |
| Nanos3    | #NAME? | 0 | 1 | 1 | no |
| Nanp      | #NAME? | 0 | 1 | 1 | no |
| Nat3      | #NAME? | 0 | 1 | 1 | no |
| Nat8      | #NAME? | 0 | 1 | 1 | no |
| Nepn      | #NAME? | 0 | 1 | 1 | no |
| Nespas    | #NAME? | 0 | 1 | 1 | no |
| Neu2      | #NAME? | 0 | 1 | 1 | no |
| Neu4      | #NAME? | 0 | 1 | 1 | no |
| Nkx2-2    | #NAME? | 0 | 1 | 1 | no |
| Nkx6-1    | #NAME? | 0 | 1 | 1 | no |
| Nlrc4     | #NAME? | 0 | 1 | 1 | no |
| Nlrp1a    | #NAME? | 0 | 1 | 1 | no |
| Nlrp1b    | #NAME? | 0 | 1 | 1 | no |
| Nlrp1c-ps | #NAME? | 0 | 1 | 1 | no |
| Nlrp6     | #NAME? | 0 | 1 | 1 | no |
| Nme8      | #NAME? | 0 | 1 | 1 | no |
| Nobox     | #NAME? | 0 | 1 | 1 | no |
| Npbwr1    | #NAME? | 0 | 1 | 1 | no |
| Npffr1    | #NAME? | 0 | 1 | 1 | no |
| Nphs1     | #NAME? | 0 | 1 | 1 | no |
| Nphs2     | #NAME? | 0 | 1 | 1 | no |
| Nppa      | #NAME? | 0 | 1 | 1 | no |
| Nppc      | #NAME? | 0 | 1 | 1 | no |
| Nps       | #NAME? | 0 | 1 | 1 | no |
| Npy6r     | #NAME? | 0 | 1 | 1 | no |
| Nr0b2     | #NAME? | 0 | 1 | 1 | no |
| Nr1i2     | #NAME? | 0 | 1 | 1 | no |
| Nt5c1a    | #NAME? | 0 | 1 | 1 | no |
| Nxph2     | #NAME? | 0 | 1 | 1 | no |
| Oas1f     | #NAME? | 0 | 1 | 1 | no |
| Oas1h     | #NAME? | 0 | 1 | 1 | no |
| Obp2b     | #NAME? | 0 | 1 | 1 | no |
| Ocstamp   | #NAME? | 0 | 1 | 1 | no |
| Odf3      | #NAME? | 0 | 1 | 1 | no |
| Odf3l1    | #NAME? | 0 | 1 | 1 | no |
| Olah      | #NAME? | 0 | 1 | 1 | no |
| Olfr1245  | #NAME? | 0 | 1 | 1 | no |
| Olfr1249  | #NAME? | 0 | 1 | 1 | no |
| Olfr1254  | #NAME? | 0 | 1 | 1 | no |
| Olfr1259  | #NAME? | 0 | 1 | 1 | no |
| Olfr1344  | #NAME? | 0 | 1 | 1 | no |
| Olfr1361  | #NAME? | 0 | 1 | 1 | no |
| Olfr1371  | #NAME? | 0 | 1 | 1 | no |
| Olfr1393  | #NAME? | 0 | 1 | 1 | no |
| Olfr212   | #NAME? | 0 | 1 | 1 | no |
| Olfr221   | #NAME? | 0 | 1 | 1 | no |
| Olfr222   | #NAME? | 0 | 1 | 1 | no |
| Olfr284   | #NAME? | 0 | 1 | 1 | no |
| Olfr419   | #NAME? | 0 | 1 | 1 | no |

|               |        |   |   |   |    |
|---------------|--------|---|---|---|----|
| Olfr48        | #NAME? | 0 | 1 | 1 | no |
| Olfr503       | #NAME? | 0 | 1 | 1 | no |
| Olfr550       | #NAME? | 0 | 1 | 1 | no |
| Olfr561       | #NAME? | 0 | 1 | 1 | no |
| Olfr761       | #NAME? | 0 | 1 | 1 | no |
| Olfr859       | #NAME? | 0 | 1 | 1 | no |
| Olfr898       | #NAME? | 0 | 1 | 1 | no |
| Olig2         | #NAME? | 0 | 1 | 1 | no |
| Onecut3       | #NAME? | 0 | 1 | 1 | no |
| Opn5          | #NAME? | 0 | 1 | 1 | no |
| Optc          | #NAME? | 0 | 1 | 1 | no |
| Osr1          | #NAME? | 0 | 1 | 1 | no |
| Osr2          | #NAME? | 0 | 1 | 1 | no |
| Ostn          | #NAME? | 0 | 1 | 1 | no |
| Otogl         | #NAME? | 0 | 1 | 1 | no |
| Otol1         | #NAME? | 0 | 1 | 1 | no |
| Otos          | #NAME? | 0 | 1 | 1 | no |
| Ovol3         | #NAME? | 0 | 1 | 1 | no |
| Pah           | #NAME? | 0 | 1 | 1 | no |
| Pax1          | #NAME? | 0 | 1 | 1 | no |
| Pax3          | #NAME? | 0 | 1 | 1 | no |
| Pax5          | #NAME? | 0 | 1 | 1 | no |
| Pax7          | #NAME? | 0 | 1 | 1 | no |
| Pax9          | #NAME? | 0 | 1 | 1 | no |
| Pdcd1lg2      | #NAME? | 0 | 1 | 1 | no |
| Pde6c         | #NAME? | 0 | 1 | 1 | no |
| Pdilt         | #NAME? | 0 | 1 | 1 | no |
| Pdxk-ps       | #NAME? | 0 | 1 | 1 | no |
| Pdzd9         | #NAME? | 0 | 1 | 1 | no |
| Pgam2         | #NAME? | 0 | 1 | 1 | no |
| Pgr15l        | #NAME? | 0 | 1 | 1 | no |
| Pigr          | #NAME? | 0 | 1 | 1 | no |
| Pilrb2        | #NAME? | 0 | 1 | 1 | no |
| Pin1rt1       | #NAME? | 0 | 1 | 1 | no |
| Pira11        | #NAME? | 0 | 1 | 1 | no |
| Pira4,Pira7   | #NAME? | 0 | 1 | 1 | no |
| Pira6         | #NAME? | 0 | 1 | 1 | no |
| Pira7         | #NAME? | 0 | 1 | 1 | no |
| Pitx3         | #NAME? | 0 | 1 | 1 | no |
| Pkhd1         | #NAME? | 0 | 1 | 1 | no |
| Pla2g2c       | #NAME? | 0 | 1 | 1 | no |
| Pla2g4d       | #NAME? | 0 | 1 | 1 | no |
| Plac1         | #NAME? | 0 | 1 | 1 | no |
| Plac9a,Plac9b | #NAME? | 0 | 1 | 1 | no |
| Plb1          | #NAME? | 0 | 1 | 1 | no |
| Plekhg6       | #NAME? | 0 | 1 | 1 | no |
| Plscr5        | #NAME? | 0 | 1 | 1 | no |
| Pnma5         | #NAME? | 0 | 1 | 1 | no |
| Pof1b         | #NAME? | 0 | 1 | 1 | no |
| Pou1f1        | #NAME? | 0 | 1 | 1 | no |
| Pou3f3os      | #NAME? | 0 | 1 | 1 | no |
| Pou3f4        | #NAME? | 0 | 1 | 1 | no |
| Ppp1r14d      | #NAME? | 0 | 1 | 1 | no |

|         |        |   |   |   |    |
|---------|--------|---|---|---|----|
| Ppp1r3g | #NAME? | 0 | 1 | 1 | no |
| Pramel7 | #NAME? | 0 | 1 | 1 | no |
| Prdm6   | #NAME? | 0 | 1 | 1 | no |
| Prg3    | #NAME? | 0 | 1 | 1 | no |
| Prl7a1  | #NAME? | 0 | 1 | 1 | no |
| Prnd    | #NAME? | 0 | 1 | 1 | no |
| Prok2   | #NAME? | 0 | 1 | 1 | no |
| Prom2   | #NAME? | 0 | 1 | 1 | no |
| Prr19   | #NAME? | 0 | 1 | 1 | no |
| Prss34  | #NAME? | 0 | 1 | 1 | no |
| Prss44  | #NAME? | 0 | 1 | 1 | no |
| Psapl1  | #NAME? | 0 | 1 | 1 | no |
| Psg17   | #NAME? | 0 | 1 | 1 | no |
| Psg19   | #NAME? | 0 | 1 | 1 | no |
| Pter    | #NAME? | 0 | 1 | 1 | no |
| Ptgdr2  | #NAME? | 0 | 1 | 1 | no |
| Ptgs2os | #NAME? | 0 | 1 | 1 | no |
| Ptprh   | #NAME? | 0 | 1 | 1 | no |
| Ptprv   | #NAME? | 0 | 1 | 1 | no |
| Pzp     | #NAME? | 0 | 1 | 1 | no |
| Qrfp    | #NAME? | 0 | 1 | 1 | no |
| Qrich2  | #NAME? | 0 | 1 | 1 | no |
| Rab17   | #NAME? | 0 | 1 | 1 | no |
| Rad51b  | #NAME? | 0 | 1 | 1 | no |
| Raet1b  | #NAME? | 0 | 1 | 1 | no |
| Raet1d  | #NAME? | 0 | 1 | 1 | no |
| Rem1    | #NAME? | 0 | 1 | 1 | no |
| Ren1    | #NAME? | 0 | 1 | 1 | no |
| Ren2    | #NAME? | 0 | 1 | 1 | no |
| Rergl   | #NAME? | 0 | 1 | 1 | no |
| Rfx4    | #NAME? | 0 | 1 | 1 | no |
| Rgn     | #NAME? | 0 | 1 | 1 | no |
| Rgs13   | #NAME? | 0 | 1 | 1 | no |
| Ribc2   | #NAME? | 0 | 1 | 1 | no |
| Ripply1 | #NAME? | 0 | 1 | 1 | no |
| Rln1    | #NAME? | 0 | 1 | 1 | no |
| Rnase10 | #NAME? | 0 | 1 | 1 | no |
| Rnase6  | #NAME? | 0 | 1 | 1 | no |
| Rnf222  | #NAME? | 0 | 1 | 1 | no |
| Rorb    | #NAME? | 0 | 1 | 1 | no |
| Ros1    | #NAME? | 0 | 1 | 1 | no |
| Rpe65   | #NAME? | 0 | 1 | 1 | no |
| Rpl39l  | #NAME? | 0 | 1 | 1 | no |
| Rubie   | #NAME? | 0 | 1 | 1 | no |
| S100z   | #NAME? | 0 | 1 | 1 | no |
| Sbk2    | #NAME? | 0 | 1 | 1 | no |
| Scgb1a1 | #NAME? | 0 | 1 | 1 | no |
| Scimp   | #NAME? | 0 | 1 | 1 | no |
| Scnn1g  | #NAME? | 0 | 1 | 1 | no |
| Scrg1   | #NAME? | 0 | 1 | 1 | no |
| Sct     | #NAME? | 0 | 1 | 1 | no |
| Sebox   | #NAME? | 0 | 1 | 1 | no |
| Sel1l2  | #NAME? | 0 | 1 | 1 | no |



|           |        |   |   |   |    |
|-----------|--------|---|---|---|----|
| Selenbp2  | #NAME? | 0 | 1 | 1 | no |
| Serpina3k | #NAME? | 0 | 1 | 1 | no |
| Serpina5  | #NAME? | 0 | 1 | 1 | no |
| Serpinb10 | #NAME? | 0 | 1 | 1 | no |
| Serpinb6e | #NAME? | 0 | 1 | 1 | no |
| Sfrp2     | #NAME? | 0 | 1 | 1 | no |
| Sfta2     | #NAME? | 0 | 1 | 1 | no |
| Sftpc     | #NAME? | 0 | 1 | 1 | no |
| Sgca      | #NAME? | 0 | 1 | 1 | no |
| Sh2d7     | #NAME? | 0 | 1 | 1 | no |
| Siglec1   | #NAME? | 0 | 1 | 1 | no |
| Siglece   | #NAME? | 0 | 1 | 1 | no |
| Siglech   | #NAME? | 0 | 1 | 1 | no |
| Sirpb1a   | #NAME? | 0 | 1 | 1 | no |
| Sit1      | #NAME? | 0 | 1 | 1 | no |
| Six3      | #NAME? | 0 | 1 | 1 | no |
| Six3os1   | #NAME? | 0 | 1 | 1 | no |
| Skint3    | #NAME? | 0 | 1 | 1 | no |
| Slamf6    | #NAME? | 0 | 1 | 1 | no |
| Slamf8    | #NAME? | 0 | 1 | 1 | no |
| Slc10a5   | #NAME? | 0 | 1 | 1 | no |
| Slc13a2   | #NAME? | 0 | 1 | 1 | no |
| Slc15a1   | #NAME? | 0 | 1 | 1 | no |
| Slc16a5   | #NAME? | 0 | 1 | 1 | no |
| Slc18a3   | #NAME? | 0 | 1 | 1 | no |
| Slc22a1   | #NAME? | 0 | 1 | 1 | no |
| Slc22a12  | #NAME? | 0 | 1 | 1 | no |
| Slc24a1   | #NAME? | 0 | 1 | 1 | no |
| Slc25a31  | #NAME? | 0 | 1 | 1 | no |
| Slc26a3   | #NAME? | 0 | 1 | 1 | no |
| Slc26a4   | #NAME? | 0 | 1 | 1 | no |
| Slc27a2   | #NAME? | 0 | 1 | 1 | no |
| Slc32a1   | #NAME? | 0 | 1 | 1 | no |
| Slc36a1os | #NAME? | 0 | 1 | 1 | no |
| Slc39a4   | #NAME? | 0 | 1 | 1 | no |
| Slc46a2   | #NAME? | 0 | 1 | 1 | no |
| Slc5a10   | #NAME? | 0 | 1 | 1 | no |
| Slc6a18   | #NAME? | 0 | 1 | 1 | no |
| Slc6a2    | #NAME? | 0 | 1 | 1 | no |
| Slc7a10   | #NAME? | 0 | 1 | 1 | no |
| Slc7a13   | #NAME? | 0 | 1 | 1 | no |
| Slco1a6   | #NAME? | 0 | 1 | 1 | no |
| Slco6c1   | #NAME? | 0 | 1 | 1 | no |
| Slurp1    | #NAME? | 0 | 1 | 1 | no |
| Smco2     | #NAME? | 0 | 1 | 1 | no |
| Smim9     | #NAME? | 0 | 1 | 1 | no |
| Smpdl3b   | #NAME? | 0 | 1 | 1 | no |
| Snora74a  | #NAME? | 0 | 1 | 1 | no |
| Snora7a   | #NAME? | 0 | 1 | 1 | no |
| Sox1      | #NAME? | 0 | 1 | 1 | no |
| Sox30     | #NAME? | 0 | 1 | 1 | no |
| Sp7       | #NAME? | 0 | 1 | 1 | no |
| Spag17    | #NAME? | 0 | 1 | 1 | no |

|            |        |   |   |   |    |
|------------|--------|---|---|---|----|
| Spata17    | #NAME? | 0 | 1 | 1 | no |
| Spata20    | #NAME? | 0 | 1 | 1 | no |
| Spata22    | #NAME? | 0 | 1 | 1 | no |
| Spata31    | #NAME? | 0 | 1 | 1 | no |
| Spata31d1a | #NAME? | 0 | 1 | 1 | no |
| Spata31d1c | #NAME? | 0 | 1 | 1 | no |
| Spata4     | #NAME? | 0 | 1 | 1 | no |
| Speer4a    | #NAME? | 0 | 1 | 1 | no |
| Spesp1     | #NAME? | 0 | 1 | 1 | no |
| Spi1       | #NAME? | 0 | 1 | 1 | no |
| Spink5     | #NAME? | 0 | 1 | 1 | no |
| Spns3      | #NAME? | 0 | 1 | 1 | no |
| Spo11      | #NAME? | 0 | 1 | 1 | no |
| Spp2       | #NAME? | 0 | 1 | 1 | no |
| Sstr3      | #NAME? | 0 | 1 | 1 | no |
| Sstr5      | #NAME? | 0 | 1 | 1 | no |
| Ssu2       | #NAME? | 0 | 1 | 1 | no |
| Stab2      | #NAME? | 0 | 1 | 1 | no |
| Stfa1      | #NAME? | 0 | 1 | 1 | no |
| Strc       | #NAME? | 0 | 1 | 1 | no |
| Sult6b1    | #NAME? | 0 | 1 | 1 | no |
| Sycp3      | #NAME? | 0 | 1 | 1 | no |
| Syngr4     | #NAME? | 0 | 1 | 1 | no |
| Sypl2      | #NAME? | 0 | 1 | 1 | no |
| T          | #NAME? | 0 | 1 | 1 | no |
| Tarm1      | #NAME? | 0 | 1 | 1 | no |
| Tbpl2      | #NAME? | 0 | 1 | 1 | no |
| Tbx20      | #NAME? | 0 | 1 | 1 | no |
| Tceal7     | #NAME? | 0 | 1 | 1 | no |
| Tcf21      | #NAME? | 0 | 1 | 1 | no |
| Tcl1       | #NAME? | 0 | 1 | 1 | no |
| Tctex1d4   | #NAME? | 0 | 1 | 1 | no |
| Tdrd12     | #NAME? | 0 | 1 | 1 | no |
| Tectb      | #NAME? | 0 | 1 | 1 | no |
| Tekt1      | #NAME? | 0 | 1 | 1 | no |
| Tex11      | #NAME? | 0 | 1 | 1 | no |
| Tex13      | #NAME? | 0 | 1 | 1 | no |
| Tex19.1    | #NAME? | 0 | 1 | 1 | no |
| Tex35      | #NAME? | 0 | 1 | 1 | no |
| Tex37      | #NAME? | 0 | 1 | 1 | no |
| Tfap2b     | #NAME? | 0 | 1 | 1 | no |
| Tfpi2      | #NAME? | 0 | 1 | 1 | no |
| Tgm1       | #NAME? | 0 | 1 | 1 | no |
| Theg       | #NAME? | 0 | 1 | 1 | no |
| Thpo       | #NAME? | 0 | 1 | 1 | no |
| Ticam2     | #NAME? | 0 | 1 | 1 | no |
| Timd4      | #NAME? | 0 | 1 | 1 | no |
| Timm8a2    | #NAME? | 0 | 1 | 1 | no |
| Tldc2      | #NAME? | 0 | 1 | 1 | no |
| Tlr11      | #NAME? | 0 | 1 | 1 | no |
| Tlr8       | #NAME? | 0 | 1 | 1 | no |
| Tm4sf19    | #NAME? | 0 | 1 | 1 | no |
| Tm4sf20    | #NAME? | 0 | 1 | 1 | no |

|             |        |   |   |   |    |
|-------------|--------|---|---|---|----|
| Tm4sf4      | #NAME? | 0 | 1 | 1 | no |
| Tmbim7      | #NAME? | 0 | 1 | 1 | no |
| Tmc2        | #NAME? | 0 | 1 | 1 | no |
| Tmco2       | #NAME? | 0 | 1 | 1 | no |
| Tmco5       | #NAME? | 0 | 1 | 1 | no |
| Tmem125     | #NAME? | 0 | 1 | 1 | no |
| Tmem139     | #NAME? | 0 | 1 | 1 | no |
| Tmem213     | #NAME? | 0 | 1 | 1 | no |
| Tmem215     | #NAME? | 0 | 1 | 1 | no |
| Tmem217     | #NAME? | 0 | 1 | 1 | no |
| Tmem235     | #NAME? | 0 | 1 | 1 | no |
| Tmem27      | #NAME? | 0 | 1 | 1 | no |
| Tmem45a     | #NAME? | 0 | 1 | 1 | no |
| Tmevpg1     | #NAME? | 0 | 1 | 1 | no |
| Tmprss11f   | #NAME? | 0 | 1 | 1 | no |
| Tnfrsf17    | #NAME? | 0 | 1 | 1 | no |
| Tnfsf4      | #NAME? | 0 | 1 | 1 | no |
| Tnip3       | #NAME? | 0 | 1 | 1 | no |
| Tnmd        | #NAME? | 0 | 1 | 1 | no |
| Tnni3k      | #NAME? | 0 | 1 | 1 | no |
| Tnp1        | #NAME? | 0 | 1 | 1 | no |
| Tns4        | #NAME? | 0 | 1 | 1 | no |
| Tpsab1      | #NAME? | 0 | 1 | 1 | no |
| Tpsg1       | #NAME? | 0 | 1 | 1 | no |
| Trdn        | #NAME? | 0 | 1 | 1 | no |
| Trem3       | #NAME? | 0 | 1 | 1 | no |
| Treml4      | #NAME? | 0 | 1 | 1 | no |
| Trh         | #NAME? | 0 | 1 | 1 | no |
| Trim30b     | #NAME? | 0 | 1 | 1 | no |
| Trim30e-ps1 | #NAME? | 0 | 1 | 1 | no |
| Trim34b     | #NAME? | 0 | 1 | 1 | no |
| Trim55      | #NAME? | 0 | 1 | 1 | no |
| Trim63      | #NAME? | 0 | 1 | 1 | no |
| Trp73       | #NAME? | 0 | 1 | 1 | no |
| Trpm5       | #NAME? | 0 | 1 | 1 | no |
| Trpv3       | #NAME? | 0 | 1 | 1 | no |
| Tsga13      | #NAME? | 0 | 1 | 1 | no |
| Tsnaxip1    | #NAME? | 0 | 1 | 1 | no |
| Tssk6       | #NAME? | 0 | 1 | 1 | no |
| Tuba3a      | #NAME? | 0 | 1 | 1 | no |
| Tulp1       | #NAME? | 0 | 1 | 1 | no |
| Txndc2      | #NAME? | 0 | 1 | 1 | no |
| Ube2u       | #NAME? | 0 | 1 | 1 | no |
| Ucma        | #NAME? | 0 | 1 | 1 | no |
| Ucn2        | #NAME? | 0 | 1 | 1 | no |
| Ugt1a1      | #NAME? | 0 | 1 | 1 | no |
| Ugt1a5      | #NAME? | 0 | 1 | 1 | no |
| Ugt1a7c     | #NAME? | 0 | 1 | 1 | no |
| Unc93a      | #NAME? | 0 | 1 | 1 | no |
| Urah        | #NAME? | 0 | 1 | 1 | no |
| Usp50       | #NAME? | 0 | 1 | 1 | no |
| Utf1        | #NAME? | 0 | 1 | 1 | no |
| Uts2        | #NAME? | 0 | 1 | 1 | no |

|               |        |        |          |          |     |
|---------------|--------|--------|----------|----------|-----|
| V1rd18,V1rd19 | #NAME? | 0      | 1        | 1        | no  |
| V1rd19        | #NAME? | 0      | 1        | 1        | no  |
| Vgll2         | #NAME? | 0      | 1        | 1        | no  |
| Vip           | #NAME? | 0      | 1        | 1        | no  |
| Vmn1r212      | #NAME? | 0      | 1        | 1        | no  |
| Vmn1r228      | #NAME? | 0      | 1        | 1        | no  |
| Vmn1r5        | #NAME? | 0      | 1        | 1        | no  |
| Vmn2r20       | #NAME? | 0      | 1        | 1        | no  |
| Vmn2r47       | #NAME? | 0      | 1        | 1        | no  |
| Vmn2r84       | #NAME? | 0      | 1        | 1        | no  |
| Vmn2r86       | #NAME? | 0      | 1        | 1        | no  |
| Vmn2r90       | #NAME? | 0      | 1        | 1        | no  |
| Vnn1          | #NAME? | 0      | 1        | 1        | no  |
| Vnn3          | #NAME? | 0      | 1        | 1        | no  |
| Vrtn          | #NAME? | 0      | 1        | 1        | no  |
| Vsig4         | #NAME? | 0      | 1        | 1        | no  |
| Vsig8         | #NAME? | 0      | 1        | 1        | no  |
| Wbp2nl        | #NAME? | 0      | 1        | 1        | no  |
| Wdr64         | #NAME? | 0      | 1        | 1        | no  |
| Wdr86         | #NAME? | 0      | 1        | 1        | no  |
| Wdr96         | #NAME? | 0      | 1        | 1        | no  |
| Wee2          | #NAME? | 0      | 1        | 1        | no  |
| Wfdc12        | #NAME? | 0      | 1        | 1        | no  |
| Wfdc13        | #NAME? | 0      | 1        | 1        | no  |
| Wfdc15a       | #NAME? | 0      | 1        | 1        | no  |
| Wfdc18        | #NAME? | 0      | 1        | 1        | no  |
| Wnt10b        | #NAME? | 0      | 1        | 1        | no  |
| Wnt2          | #NAME? | 0      | 1        | 1        | no  |
| Wnt8b         | #NAME? | 0      | 1        | 1        | no  |
| Wt1           | #NAME? | 0      | 1        | 1        | no  |
| Xcr1          | #NAME? | 0      | 1        | 1        | no  |
| Xirp1         | #NAME? | 0      | 1        | 1        | no  |
| Zan           | #NAME? | 0      | 1        | 1        | no  |
| Zbbx          | #NAME? | 0      | 1        | 1        | no  |
| Zfp345        | #NAME? | 0      | 1        | 1        | no  |
| Zfp36l3       | #NAME? | 0      | 1        | 1        | no  |
| Zfp648        | #NAME? | 0      | 1        | 1        | no  |
| Zfp663        | #NAME? | 0      | 1        | 1        | no  |
| Zfp819        | #NAME? | 0      | 1        | 1        | no  |
| Zglp1         | #NAME? | 0      | 1        | 1        | no  |
| Zim3          | #NAME? | 0      | 1        | 1        | no  |
| Cyp4b1-ps2    | inf    | #NAME? | 5.00E-05 | 0.00022  | yes |
| Scarna13      | inf    | #NAME? | 0.09925  | 0.178349 | no  |
| Snora16a      | inf    | #NAME? | 0.13485  | 0.229778 | no  |
| Snora65       | inf    | #NAME? | 0.1876   | 0.298643 | no  |
| Snora70       | inf    | #NAME? | 0.20665  | 0.322127 | no  |
| 1110028F18Rik | inf    | 0      | 1        | 1        | no  |
| 1600029I14Rik | inf    | 0      | 1        | 1        | no  |
| 1700007K09Rik | inf    | 0      | 1        | 1        | no  |
| 1700011H14Rik | inf    | 0      | 1        | 1        | no  |
| 1700012L04Rik | inf    | 0      | 1        | 1        | no  |
| 1700022I11Rik | inf    | 0      | 1        | 1        | no  |
| 1700029P11Rik | inf    | 0      | 1        | 1        | no  |

|               |     |   |   |   |    |
|---------------|-----|---|---|---|----|
| 1700030L20Rik | inf | 0 | 1 | 1 | no |
| 1700054M17Rik | inf | 0 | 1 | 1 | no |
| 1700071K01Rik | inf | 0 | 1 | 1 | no |
| 1700072O05Rik | inf | 0 | 1 | 1 | no |
| 1700084E18Rik | inf | 0 | 1 | 1 | no |
| 1700097N02Rik | inf | 0 | 1 | 1 | no |
| 1810046K07Rik | inf | 0 | 1 | 1 | no |
| 2310007B03Rik | inf | 0 | 1 | 1 | no |
| 2310030A07Rik | inf | 0 | 1 | 1 | no |
| 2610028E06Rik | inf | 0 | 1 | 1 | no |
| 2610318N02Rik | inf | 0 | 1 | 1 | no |
| 2700086A05Rik | inf | 0 | 1 | 1 | no |
| 3110099E03Rik | inf | 0 | 1 | 1 | no |
| 4732416N19Rik | inf | 0 | 1 | 1 | no |
| 4921506M07Rik | inf | 0 | 1 | 1 | no |
| 4930404I05Rik | inf | 0 | 1 | 1 | no |
| 4930405L22Rik | inf | 0 | 1 | 1 | no |
| 4930428G15Rik | inf | 0 | 1 | 1 | no |
| 4930440I19Rik | inf | 0 | 1 | 1 | no |
| 4930469G21Rik | inf | 0 | 1 | 1 | no |
| 4930482G09Rik | inf | 0 | 1 | 1 | no |
| 4930500F04Rik | inf | 0 | 1 | 1 | no |
| 4930507D10Rik | inf | 0 | 1 | 1 | no |
| 4930546C10Rik | inf | 0 | 1 | 1 | no |
| 4930594C11Rik | inf | 0 | 1 | 1 | no |
| 4931406H21Rik | inf | 0 | 1 | 1 | no |
| 4932702P03Rik | inf | 0 | 1 | 1 | no |
| 4933402N22Rik | inf | 0 | 1 | 1 | no |
| 4933403O08Rik | inf | 0 | 1 | 1 | no |
| 4933406M09Rik | inf | 0 | 1 | 1 | no |
| 4933413G19Rik | inf | 0 | 1 | 1 | no |
| 4933424G05Rik | inf | 0 | 1 | 1 | no |
| 4933436E23Rik | inf | 0 | 1 | 1 | no |
| 5430437J10Rik | inf | 0 | 1 | 1 | no |
| 5730460C07Rik | inf | 0 | 1 | 1 | no |
| 5830428M24Rik | inf | 0 | 1 | 1 | no |
| 8030423J24Rik | inf | 0 | 1 | 1 | no |
| 9130024F11Rik | inf | 0 | 1 | 1 | no |
| 9830107B12Rik | inf | 0 | 1 | 1 | no |
| A430090L17Rik | inf | 0 | 1 | 1 | no |
| A630023P12Rik | inf | 0 | 1 | 1 | no |
| A630075F10Rik | inf | 0 | 1 | 1 | no |
| A730082K24Rik | inf | 0 | 1 | 1 | no |
| A930019D19Rik | inf | 0 | 1 | 1 | no |
| AI463170      | inf | 0 | 1 | 1 | no |
| Abca14        | inf | 0 | 1 | 1 | no |
| Abhd16b       | inf | 0 | 1 | 1 | no |
| Actl10        | inf | 0 | 1 | 1 | no |
| Adam24        | inf | 0 | 1 | 1 | no |
| Aim1l         | inf | 0 | 1 | 1 | no |
| Akap14        | inf | 0 | 1 | 1 | no |
| Ankk1         | inf | 0 | 1 | 1 | no |
| Ankrd60       | inf | 0 | 1 | 1 | no |



|               |     |   |   |   |    |
|---------------|-----|---|---|---|----|
| Apol11a       | inf | 0 | 1 | 1 | no |
| Apon          | inf | 0 | 1 | 1 | no |
| Arhgap33os    | inf | 0 | 1 | 1 | no |
| B230323A14Rik | inf | 0 | 1 | 1 | no |
| B930092H01Rik | inf | 0 | 1 | 1 | no |
| BC021614      | inf | 0 | 1 | 1 | no |
| BC024386      | inf | 0 | 1 | 1 | no |
| BC051019      | inf | 0 | 1 | 1 | no |
| BC094916      | inf | 0 | 1 | 1 | no |
| Bhmt          | inf | 0 | 1 | 1 | no |
| Bmp8b         | inf | 0 | 1 | 1 | no |
| Bpifb6        | inf | 0 | 1 | 1 | no |
| Bsx           | inf | 0 | 1 | 1 | no |
| Btn1a1        | inf | 0 | 1 | 1 | no |
| C130083M11Rik | inf | 0 | 1 | 1 | no |
| C330024C12Rik | inf | 0 | 1 | 1 | no |
| C730027H18Rik | inf | 0 | 1 | 1 | no |
| C8b           | inf | 0 | 1 | 1 | no |
| Cabp4         | inf | 0 | 1 | 1 | no |
| Car6          | inf | 0 | 1 | 1 | no |
| Ccdc27        | inf | 0 | 1 | 1 | no |
| Ccdc54        | inf | 0 | 1 | 1 | no |
| Ccdc73        | inf | 0 | 1 | 1 | no |
| Cdhr3         | inf | 0 | 1 | 1 | no |
| Cdx1          | inf | 0 | 1 | 1 | no |
| Ceacam15      | inf | 0 | 1 | 1 | no |
| Chil6         | inf | 0 | 1 | 1 | no |
| Cidec         | inf | 0 | 1 | 1 | no |
| Clcnkb        | inf | 0 | 1 | 1 | no |
| Cldn20        | inf | 0 | 1 | 1 | no |
| Cldn6         | inf | 0 | 1 | 1 | no |
| Clec4b2       | inf | 0 | 1 | 1 | no |
| Cplx3         | inf | 0 | 1 | 1 | no |
| Csf3          | inf | 0 | 1 | 1 | no |
| Cxcr1         | inf | 0 | 1 | 1 | no |
| Cyp17a1       | inf | 0 | 1 | 1 | no |
| D030025E07Rik | inf | 0 | 1 | 1 | no |
| D230030E09Rik | inf | 0 | 1 | 1 | no |
| D730045A05Rik | inf | 0 | 1 | 1 | no |
| Daw1          | inf | 0 | 1 | 1 | no |
| Dbh           | inf | 0 | 1 | 1 | no |
| Dbhos         | inf | 0 | 1 | 1 | no |
| Dear1         | inf | 0 | 1 | 1 | no |
| Dmbt1         | inf | 0 | 1 | 1 | no |
| Dnmt3l        | inf | 0 | 1 | 1 | no |
| Dupd1         | inf | 0 | 1 | 1 | no |
| E130201H02Rik | inf | 0 | 1 | 1 | no |
| E230008N13Rik | inf | 0 | 1 | 1 | no |
| En1           | inf | 0 | 1 | 1 | no |
| F12           | inf | 0 | 1 | 1 | no |
| Fabp1         | inf | 0 | 1 | 1 | no |
| Fam166a       | inf | 0 | 1 | 1 | no |
| Fam166b       | inf | 0 | 1 | 1 | no |

|         |     |   |   |   |    |
|---------|-----|---|---|---|----|
| Fam216b | inf | 0 | 1 | 1 | no |
| Fam83b  | inf | 0 | 1 | 1 | no |
| Fer1l5  | inf | 0 | 1 | 1 | no |
| Ffar3   | inf | 0 | 1 | 1 | no |
| Fmo9    | inf | 0 | 1 | 1 | no |
| Foxi3   | inf | 0 | 1 | 1 | no |
| Foxn4   | inf | 0 | 1 | 1 | no |
| Frs3os  | inf | 0 | 1 | 1 | no |
| Gm10012 | inf | 0 | 1 | 1 | no |
| Gm11166 | inf | 0 | 1 | 1 | no |
| Gm11437 | inf | 0 | 1 | 1 | no |
| Gm11554 | inf | 0 | 1 | 1 | no |
| Gm12295 | inf | 0 | 1 | 1 | no |
| Gm12409 | inf | 0 | 1 | 1 | no |
| Gm12718 | inf | 0 | 1 | 1 | no |
| Gm13283 | inf | 0 | 1 | 1 | no |
| Gm13490 | inf | 0 | 1 | 1 | no |
| Gm136   | inf | 0 | 1 | 1 | no |
| Gm14085 | inf | 0 | 1 | 1 | no |
| Gm14164 | inf | 0 | 1 | 1 | no |
| Gm14501 | inf | 0 | 1 | 1 | no |
| Gm15319 | inf | 0 | 1 | 1 | no |
| Gm15698 | inf | 0 | 1 | 1 | no |
| Gm1720  | inf | 0 | 1 | 1 | no |
| Gm17745 | inf | 0 | 1 | 1 | no |
| Gm20878 | inf | 0 | 1 | 1 | no |
| Gm21586 | inf | 0 | 1 | 1 | no |
| Gm2176  | inf | 0 | 1 | 1 | no |
| Gm2381  | inf | 0 | 1 | 1 | no |
| Gm3336  | inf | 0 | 1 | 1 | no |
| Gm3417  | inf | 0 | 1 | 1 | no |
| Gm4566  | inf | 0 | 1 | 1 | no |
| Gm4846  | inf | 0 | 1 | 1 | no |
| Gm4956  | inf | 0 | 1 | 1 | no |
| Gm5083  | inf | 0 | 1 | 1 | no |
| Gm5122  | inf | 0 | 1 | 1 | no |
| Gm5136  | inf | 0 | 1 | 1 | no |
| Gm5415  | inf | 0 | 1 | 1 | no |
| Gm5424  | inf | 0 | 1 | 1 | no |
| Gm5464  | inf | 0 | 1 | 1 | no |
| Gm5512  | inf | 0 | 1 | 1 | no |
| Gm5531  | inf | 0 | 1 | 1 | no |
| Gm5547  | inf | 0 | 1 | 1 | no |
| Gm5901  | inf | 0 | 1 | 1 | no |
| Gm7457  | inf | 0 | 1 | 1 | no |
| Gm8267  | inf | 0 | 1 | 1 | no |
| Gm8363  | inf | 0 | 1 | 1 | no |
| Gm853   | inf | 0 | 1 | 1 | no |
| Gm8989  | inf | 0 | 1 | 1 | no |
| Gnrh1   | inf | 0 | 1 | 1 | no |
| Gp6     | inf | 0 | 1 | 1 | no |
| Gpr142  | inf | 0 | 1 | 1 | no |
| Gsdmc4  | inf | 0 | 1 | 1 | no |

|              |     |   |   |   |    |
|--------------|-----|---|---|---|----|
| Gtf2a1l      | inf | 0 | 1 | 1 | no |
| Gzmb         | inf | 0 | 1 | 1 | no |
| H2-M1        | inf | 0 | 1 | 1 | no |
| H2-M10.5     | inf | 0 | 1 | 1 | no |
| Heatr9       | inf | 0 | 1 | 1 | no |
| Hemt1        | inf | 0 | 1 | 1 | no |
| Heph1l       | inf | 0 | 1 | 1 | no |
| Hesx1        | inf | 0 | 1 | 1 | no |
| Hgfac        | inf | 0 | 1 | 1 | no |
| Hist1h2ae    | inf | 0 | 1 | 1 | no |
| Hist1h2ag    | inf | 0 | 1 | 1 | no |
| Hist1h2ai    | inf | 0 | 1 | 1 | no |
| Hist1h2ak    | inf | 0 | 1 | 1 | no |
| Hist1h2bm    | inf | 0 | 1 | 1 | no |
| Hist1h3c     | inf | 0 | 1 | 1 | no |
| Hist1h4d     | inf | 0 | 1 | 1 | no |
| Hist1h4n     | inf | 0 | 1 | 1 | no |
| Hist2h2ac    | inf | 0 | 1 | 1 | no |
| Hist2h2bb    | inf | 0 | 1 | 1 | no |
| Hmx2         | inf | 0 | 1 | 1 | no |
| Hmx3         | inf | 0 | 1 | 1 | no |
| Hsd3b6       | inf | 0 | 1 | 1 | no |
| Hyal6        | inf | 0 | 1 | 1 | no |
| Ifitm5       | inf | 0 | 1 | 1 | no |
| Ifng         | inf | 0 | 1 | 1 | no |
| Kcnmb3       | inf | 0 | 1 | 1 | no |
| Kcnmb4os1    | inf | 0 | 1 | 1 | no |
| Klk12        | inf | 0 | 1 | 1 | no |
| Klra10       | inf | 0 | 1 | 1 | no |
| Klra14-ps    | inf | 0 | 1 | 1 | no |
| Klra3        | inf | 0 | 1 | 1 | no |
| Klra33       | inf | 0 | 1 | 1 | no |
| Klra5        | inf | 0 | 1 | 1 | no |
| Klra9        | inf | 0 | 1 | 1 | no |
| Klrc2        | inf | 0 | 1 | 1 | no |
| Klrc3        | inf | 0 | 1 | 1 | no |
| Krt13        | inf | 0 | 1 | 1 | no |
| Krt16        | inf | 0 | 1 | 1 | no |
| Krt6a        | inf | 0 | 1 | 1 | no |
| LOC102634431 | inf | 0 | 1 | 1 | no |
| LOC102635087 | inf | 0 | 1 | 1 | no |
| LOC381967    | inf | 0 | 1 | 1 | no |
| Lactbl1      | inf | 0 | 1 | 1 | no |
| Lgals2       | inf | 0 | 1 | 1 | no |
| Lipm         | inf | 0 | 1 | 1 | no |
| Mc5r         | inf | 0 | 1 | 1 | no |
| Mcpt1        | inf | 0 | 1 | 1 | no |
| Mir686       | inf | 0 | 1 | 1 | no |
| Mir8094      | inf | 0 | 1 | 1 | no |
| Mir8098      | inf | 0 | 1 | 1 | no |
| Mir8114      | inf | 0 | 1 | 1 | no |
| Mogat2       | inf | 0 | 1 | 1 | no |
| Mrpl23       | inf | 0 | 1 | 1 | no |

|             |     |   |   |   |    |
|-------------|-----|---|---|---|----|
| Ms4a13      | inf | 0 | 1 | 1 | no |
| Mst1        | inf | 0 | 1 | 1 | no |
| Myf6        | inf | 0 | 1 | 1 | no |
| Myl10       | inf | 0 | 1 | 1 | no |
| Myog        | inf | 0 | 1 | 1 | no |
| Naaladl1    | inf | 0 | 1 | 1 | no |
| Nhlrc4      | inf | 0 | 1 | 1 | no |
| Olfr1034    | inf | 0 | 1 | 1 | no |
| Olfr1163    | inf | 0 | 1 | 1 | no |
| Olfr1392    | inf | 0 | 1 | 1 | no |
| Olfr1396    | inf | 0 | 1 | 1 | no |
| Olfr153     | inf | 0 | 1 | 1 | no |
| Olfr421-ps1 | inf | 0 | 1 | 1 | no |
| Olfr552     | inf | 0 | 1 | 1 | no |
| Olfr700     | inf | 0 | 1 | 1 | no |
| Oxct2a      | inf | 0 | 1 | 1 | no |
| Oxgr1       | inf | 0 | 1 | 1 | no |
| Pam16       | inf | 0 | 1 | 1 | no |
| Pglyrp4     | inf | 0 | 1 | 1 | no |
| Phxr4       | inf | 0 | 1 | 1 | no |
| Pklr        | inf | 0 | 1 | 1 | no |
| Plg         | inf | 0 | 1 | 1 | no |
| Pou5f2      | inf | 0 | 1 | 1 | no |
| Ppifos      | inf | 0 | 1 | 1 | no |
| Proz        | inf | 0 | 1 | 1 | no |
| Prss27      | inf | 0 | 1 | 1 | no |
| Prss50      | inf | 0 | 1 | 1 | no |
| Pspn        | inf | 0 | 1 | 1 | no |
| Rab25       | inf | 0 | 1 | 1 | no |
| Rbm44       | inf | 0 | 1 | 1 | no |
| Reg3b       | inf | 0 | 1 | 1 | no |
| Rhox8       | inf | 0 | 1 | 1 | no |
| Rnu12       | inf | 0 | 1 | 1 | no |
| Rrh         | inf | 0 | 1 | 1 | no |
| Serpina1a   | inf | 0 | 1 | 1 | no |
| Serpina1c   | inf | 0 | 1 | 1 | no |
| Serpinb9b   | inf | 0 | 1 | 1 | no |
| Serpinc1    | inf | 0 | 1 | 1 | no |
| Sftpb       | inf | 0 | 1 | 1 | no |
| Sh2d1b1     | inf | 0 | 1 | 1 | no |
| Skint8      | inf | 0 | 1 | 1 | no |
| Sla2        | inf | 0 | 1 | 1 | no |
| Slc17a4     | inf | 0 | 1 | 1 | no |
| Slc23a3     | inf | 0 | 1 | 1 | no |
| Spata31d1d  | inf | 0 | 1 | 1 | no |
| Spdyb       | inf | 0 | 1 | 1 | no |
| Spint5      | inf | 0 | 1 | 1 | no |
| Srrm4os     | inf | 0 | 1 | 1 | no |
| St8sia3os   | inf | 0 | 1 | 1 | no |
| Stmn1-rs1   | inf | 0 | 1 | 1 | no |
| Svs3a       | inf | 0 | 1 | 1 | no |
| Tac2        | inf | 0 | 1 | 1 | no |
| Tbx5        | inf | 0 | 1 | 1 | no |

|           |         |           |   |          |          |     |
|-----------|---------|-----------|---|----------|----------|-----|
| Tcp10a    | inf     |           | 0 | 1        | 1        | no  |
| Tcte3     | inf     |           | 0 | 1        | 1        | no  |
| Terc      | inf     |           | 0 | 1        | 1        | no  |
| Tktl1     | inf     |           | 0 | 1        | 1        | no  |
| Tktl2     | inf     |           | 0 | 1        | 1        | no  |
| Tmem239   | inf     |           | 0 | 1        | 1        | no  |
| Tmprss11a | inf     |           | 0 | 1        | 1        | no  |
| Tmprss11d | inf     |           | 0 | 1        | 1        | no  |
| Tmprss11e | inf     |           | 0 | 1        | 1        | no  |
| Tmsb15a   | inf     |           | 0 | 1        | 1        | no  |
| Tnnt2     | inf     |           | 0 | 1        | 1        | no  |
| Trim61    | inf     |           | 0 | 1        | 1        | no  |
| Trpv5     | inf     |           | 0 | 1        | 1        | no  |
| Ttll2     | inf     |           | 0 | 1        | 1        | no  |
| Tubal3    | inf     |           | 0 | 1        | 1        | no  |
| Ubd       | inf     |           | 0 | 1        | 1        | no  |
| Ugt2a1    | inf     |           | 0 | 1        | 1        | no  |
| Ugt2a2    | inf     |           | 0 | 1        | 1        | no  |
| Vmn1r53   | inf     |           | 0 | 1        | 1        | no  |
| Vmn1r89   | inf     |           | 0 | 1        | 1        | no  |
| Vmn2r118  | inf     |           | 0 | 1        | 1        | no  |
| Vmn2r46   | inf     |           | 0 | 1        | 1        | no  |
| Vmn2r7    | inf     |           | 0 | 1        | 1        | no  |
| Vpreb1    | inf     |           | 0 | 1        | 1        | no  |
| Vwa5b1    | inf     |           | 0 | 1        | 1        | no  |
| Wdr38     | inf     |           | 0 | 1        | 1        | no  |
| Wfdc8     | inf     |           | 0 | 1        | 1        | no  |
| Wt1os     | inf     |           | 0 | 1        | 1        | no  |
| Zdhhc19   | inf     |           | 0 | 1        | 1        | no  |
| Zf12      | inf     |           | 0 | 1        | 1        | no  |
| Zg16      | inf     |           | 0 | 1        | 1        | no  |
| Ndufs5    | 12.0646 | 0.0155968 |   | 0.3972   | 0.528922 | no  |
| Naip7     | 10.1077 |           | 0 | 1        | 1        | no  |
| Gata1     | 8.15335 | 1.33371   |   | 0.05525  | 0.111027 | no  |
| Rhag      | 7.91774 | 3.80107   |   | 0.0699   | 0.13485  | no  |
| Kel       | 7.51483 | 3.47311   |   | 0.0719   | 0.137926 | no  |
| Btnl10    | 7.30274 | 1.33051   |   | 0.05525  | 0.111027 | no  |
| Gfi1b     | 7.09481 | 0.753259  |   | 0.2183   | 0.336297 | no  |
| Gypa      | 6.99328 | 7.26854   |   | 5.00E-05 | 0.00022  | yes |
| Hemgn     | 6.777   | 6.30724   |   | 0.0001   | 0.000422 | yes |
| Gm867     | 6.68627 | 0.635951  |   | 0.2228   | 0.341721 | no  |
| Apol11b   | 6.67173 | 5.10426   |   | 0.0009   | 0.003139 | yes |
| Cldn13    | 6.572   | 3.44319   |   | 0.0476   | 0.098121 | no  |
| Sfn14     | 6.50966 | 4.40185   |   | 0.011    | 0.0282   | yes |
| Ermap     | 6.45473 | 5.78074   |   | 5.00E-05 | 0.00022  | yes |
| Rhd       | 6.34054 | 5.53543   |   | 0.0007   | 0.002506 | yes |
| Slc4a1    | 6.316   | 12.5827   |   | 5.00E-05 | 0.00022  | yes |
| Icam4     | 6.24716 | 1.25448   |   | 0.06055  | 0.119702 | no  |
| Ctse      | 6.02537 | 6.51679   |   | 5.00E-05 | 0.00022  | yes |
| Klf1      | 6.02444 | 4.28419   |   | 0.0106   | 0.027323 | yes |
| Spta1     | 5.93566 | 6.47794   |   | 5.00E-05 | 0.00022  | yes |
| Trim10    | 5.74939 | 6.37695   |   | 5.00E-05 | 0.00022  | yes |
| Ankle1    | 5.62111 | 2.07582   |   | 0.16165  | 0.265455 | no  |



|                    |         |         |          |          |     |
|--------------------|---------|---------|----------|----------|-----|
| Epb4.2             | 5.51325 | 5.76174 | 5.00E-05 | 0.00022  | yes |
| Cd8a               | 5.37424 | 0       | 1        | 1        | no  |
| Hbb-bs             | 5.36002 | 9.72443 | 5.00E-05 | 0.00022  | yes |
| Masp2              | 5.31474 | 0       | 1        | 1        | no  |
| Tspo2              | 5.28919 | 3.56145 | 0.02235  | 0.051739 | no  |
| Kif18b             | 5.24698 | 2.88203 | 0.0443   | 0.092396 | no  |
| Pdzk1ip1           | 5.11057 | 2.18443 | 0.03145  | 0.069104 | no  |
| Hist1h2ao,Hist1h2a | 5.06469 | 0.72189 | 0.2242   | 0.343551 | no  |
| Crct1              | 5.04853 | 1.15209 | 0.06395  | 0.125192 | no  |
| 1300017J02Rik      | 5.04669 | 2.99117 | 0.01395  | 0.034626 | yes |
| Alas2              | 4.95163 | 14.0025 | 5.00E-05 | 0.00022  | yes |
| Hba-a2             | 4.94383 | 15.4305 | 5.00E-05 | 0.00022  | yes |
| 1700028K03Rik      | 4.90514 | 0       | 1        | 1        | no  |
| Cyp2c55            | 4.90144 | 0       | 1        | 1        | no  |
| Ube2c              | 4.82006 | 5.617   | 5.00E-05 | 0.00022  | yes |
| Nfe2               | 4.81906 | 4.26356 | 0.00015  | 0.000615 | yes |
| 6330415B21Rik      | 4.81035 | 0       | 1        | 1        | no  |
| Epor               | 4.78921 | 3.28787 | 0.0044   | 0.012685 | yes |
| Mki67              | 4.76549 | 10.2192 | 5.00E-05 | 0.00022  | yes |
| Prf1               | 4.52892 | 0       | 1        | 1        | no  |
| Car1               | 4.49826 | 4.11854 | 5.00E-05 | 0.00022  | yes |
| Grap2              | 4.46498 | 3.00061 | 0.02845  | 0.063522 | no  |
| Klre1              | 4.44848 | 0       | 1        | 1        | no  |
| Daf2               | 4.44741 | 0       | 1        | 1        | no  |
| Hbb-b1,Hbb-bs      | 4.4448  | 8.88419 | 5.00E-05 | 0.00022  | yes |
| Hbb-bt             | 4.33707 | 20.3392 | 5.00E-05 | 0.00022  | yes |
| Fgf3               | 4.33685 | 0       | 1        | 1        | no  |
| Slc43a1            | 4.30438 | 4.45271 | 5.00E-05 | 0.00022  | yes |
| Mybl2              | 4.29193 | 0       | 1        | 1        | no  |
| Nusap1             | 4.23715 | 3.78271 | 5.00E-05 | 0.00022  | yes |
| Gpr128             | 4.19509 | 0       | 1        | 1        | no  |
| Neil3              | 4.193   | 2.73669 | 0.0039   | 0.011392 | yes |
| Gm11426            | 4.16571 | 0       | 1        | 1        | no  |
| LOC171588          | 4.14338 | 0       | 1        | 1        | no  |
| Mobp               | 4.11599 | 4.38453 | 5.00E-05 | 0.00022  | yes |
| Sap25              | 4.08945 | 0       | 1        | 1        | no  |
| Unc5cl             | 4.088   | 0       | 1        | 1        | no  |
| Ccna2              | 4.07594 | 3.05866 | 5.00E-05 | 0.00022  | yes |
| Isg20              | 4.07277 | 6.01027 | 5.00E-05 | 0.00022  | yes |
| Aurkb              | 4.06834 | 2.69912 | 0.0122   | 0.030789 | yes |
| Fasl               | 4.04267 | 0       | 1        | 1        | no  |
| Pif1               | 4.03692 | 0       | 1        | 1        | no  |
| Hist1h3e           | 4.03284 | 0       | 1        | 1        | no  |
| 6030468B19Rik      | 4.00773 | 0       | 1        | 1        | no  |
| Gzma               | 3.96122 | 3.00117 | 0.00655  | 0.017992 | yes |
| Pnp2               | 3.96011 | 0       | 1        | 1        | no  |
| Ncr1               | 3.94274 | 0       | 1        | 1        | no  |
| Cenpf              | 3.92346 | 5.02715 | 5.00E-05 | 0.00022  | yes |
| Adm2               | 3.89581 | 0       | 1        | 1        | no  |
| 1190002F15Rik      | 3.89259 | 2.20774 | 0.0022   | 0.006933 | yes |
| Klri2              | 3.88216 | 0       | 1        | 1        | no  |
| Ccnb2              | 3.86727 | 4.01867 | 5.00E-05 | 0.00022  | yes |
| Hist1h2ad          | 3.84987 | 0       | 1        | 1        | no  |

|               |         |         |          |          |     |
|---------------|---------|---------|----------|----------|-----|
| Ptpn20        | 3.8141  | 0       | 1        | 1        | no  |
| Xcl1          | 3.7977  | 0       | 1        | 1        | no  |
| AI662270      | 3.78905 | 4.14338 | 5.00E-05 | 0.00022  | yes |
| Slc39a2       | 3.73343 | 0       | 1        | 1        | no  |
| Oas3          | 3.73006 | 3.61068 | 5.00E-05 | 0.00022  | yes |
| Mme11         | 3.72899 | 0       | 1        | 1        | no  |
| Gdf1          | 3.72666 | 1.12169 | 0.0573   | 0.114471 | no  |
| 9830132P13Rik | 3.72255 | 0       | 1        | 1        | no  |
| Klk7          | 3.71596 | 0       | 1        | 1        | no  |
| Gp9           | 3.70436 | 0       | 1        | 1        | no  |
| C730036E19Rik | 3.69705 | 0       | 1        | 1        | no  |
| Esco2         | 3.67176 | 3.17192 | 0.0007   | 0.002506 | yes |
| Top2a         | 3.62628 | 5.98135 | 5.00E-05 | 0.00022  | yes |
| Kif14         | 3.6112  | 0       | 1        | 1        | no  |
| Mylk3         | 3.61062 | 2.77991 | 0.00155  | 0.005095 | yes |
| C630031E19Rik | 3.60183 | 0       | 1        | 1        | no  |
| 8430431K14Rik | 3.60014 | 0       | 1        | 1        | no  |
| Ppp1r42       | 3.59696 | 0       | 1        | 1        | no  |
| Il7r          | 3.56201 | 0       | 1        | 1        | no  |
| Cdc6          | 3.54215 | 3.02138 | 5.00E-05 | 0.00022  | yes |
| Mageb3        | 3.53515 | 0       | 1        | 1        | no  |
| Cckbr         | 3.53405 | 2.44477 | 0.00555  | 0.015544 | yes |
| A530088E08Rik | 3.52608 | 0       | 1        | 1        | no  |
| Fam46c        | 3.51773 | 7.37246 | 5.00E-05 | 0.00022  | yes |
| 1810053B23Rik | 3.50182 | 0       | 1        | 1        | no  |
| Ms4a4b        | 3.4997  | 2.32535 | 0.0161   | 0.039164 | yes |
| Cldn8         | 3.4994  | 0       | 1        | 1        | no  |
| Nkg7          | 3.47249 | 2.29651 | 0.0458   | 0.095105 | no  |
| Trim58        | 3.46049 | 3.43087 | 5.00E-05 | 0.00022  | yes |
| Apol10a       | 3.4567  | 0       | 1        | 1        | no  |
| Rrm2          | 3.44987 | 5.85472 | 5.00E-05 | 0.00022  | yes |
| Il1bos        | 3.43012 | 0       | 1        | 1        | no  |
| Dtl           | 3.39985 | 0       | 1        | 1        | no  |
| Casc5         | 3.39601 | 3.60706 | 5.00E-05 | 0.00022  | yes |
| Eqtn          | 3.39129 | 0       | 1        | 1        | no  |
| Klrc1         | 3.38711 | 0       | 1        | 1        | no  |
| Lax1          | 3.38174 | 0       | 1        | 1        | no  |
| Tal1          | 3.37772 | 5.17852 | 5.00E-05 | 0.00022  | yes |
| Pdia2         | 3.37179 | 0       | 1        | 1        | no  |
| Dlgap5        | 3.36619 | 3.28856 | 5.00E-05 | 0.00022  | yes |
| Dntt          | 3.36407 | 0       | 1        | 1        | no  |
| Xist          | 3.3639  | 0       | 1        | 1        | no  |
| Olig3         | 3.33135 | 0       | 1        | 1        | no  |
| Rbm38         | 3.32749 | 5.96522 | 5.00E-05 | 0.00022  | yes |
| Ccdc169       | 3.31988 | 0       | 1        | 1        | no  |
| BC016579      | 3.30845 | 0       | 1        | 1        | no  |
| Cxcr3         | 3.30527 | 0       | 1        | 1        | no  |
| Cd8b1         | 3.29165 | 0       | 1        | 1        | no  |
| E2f8          | 3.22722 | 3.92583 | 5.00E-05 | 0.00022  | yes |
| Vmn1r90       | 3.22457 | 0       | 1        | 1        | no  |
| Depdc1a       | 3.22305 | 0       | 1        | 1        | no  |
| A330093E20Rik | 3.20026 | 0       | 1        | 1        | no  |
| Tnk1          | 3.19012 | 0       | 1        | 1        | no  |

|               |         |         |          |          |     |
|---------------|---------|---------|----------|----------|-----|
| Sgol1         | 3.18883 | 0       | 1        | 1        | no  |
| Bmp8a         | 3.15823 | 0       | 1        | 1        | no  |
| Pbk           | 3.14956 | 2.26473 | 0.00705  | 0.019182 | yes |
| Fam132b       | 3.12451 | 0       | 1        | 1        | no  |
| Cnga2         | 3.11377 | 0       | 1        | 1        | no  |
| Hist1h2ah     | 3.11208 | 0       | 1        | 1        | no  |
| Ccdc64b       | 3.10621 | 0       | 1        | 1        | no  |
| Sprr1a        | 3.09858 | 3.91064 | 0.0001   | 0.000422 | yes |
| Gm14393       | 3.09613 | 0       | 1        | 1        | no  |
| Mc1r          | 3.07839 | 0       | 1        | 1        | no  |
| Il18r1        | 3.07651 | 0       | 1        | 1        | no  |
| Lrr1          | 3.06364 | 0       | 1        | 1        | no  |
| Samd3         | 3.05711 | 0       | 1        | 1        | no  |
| Myb           | 3.03544 | 0       | 1        | 1        | no  |
| Tbrg3         | 3.02788 | 0       | 1        | 1        | no  |
| Tspan33       | 3.02575 | 5.37828 | 5.00E-05 | 0.00022  | yes |
| Ecel1         | 3.01673 | 3.50776 | 5.00E-05 | 0.00022  | yes |
| 2810417H13Rik | 3.01569 | 1.07362 | 0.0882   | 0.161981 | no  |
| Aspm          | 3.01375 | 0       | 1        | 1        | no  |
| Xlr           | 3.00955 | 0       | 1        | 1        | no  |
| Hist1h3g      | 3.00928 | 0       | 1        | 1        | no  |
| Il2rb         | 3.00866 | 2.558   | 0.0013   | 0.004375 | yes |
| Gm21119       | 2.99825 | 0       | 1        | 1        | no  |
| Tnfaip2       | 2.9963  | 4.31131 | 5.00E-05 | 0.00022  | yes |
| Gpr115        | 2.99045 | 0       | 1        | 1        | no  |
| 1700012D14Rik | 2.97578 | 0       | 1        | 1        | no  |
| Ccnb1         | 2.96997 | 0       | 1        | 1        | no  |
| Khdc1a        | 2.93791 | 0       | 1        | 1        | no  |
| Rpl12         | 2.91876 | 0       | 1        | 1        | no  |
| Acp5          | 2.90881 | 1.11032 | 0.0508   | 0.103512 | no  |
| Erdr1         | 2.90781 | 0       | 1        | 1        | no  |
| Trim59        | 2.88089 | 5.1777  | 5.00E-05 | 0.00022  | yes |
| Slc25a37      | 2.88078 | 9.53304 | 5.00E-05 | 0.00022  | yes |
| 1700093K21Rik | 2.87614 | 0       | 1        | 1        | no  |
| 4931431C16Rik | 2.86526 | 0       | 1        | 1        | no  |
| Aqp9          | 2.85694 | 0       | 1        | 1        | no  |
| Klrg1         | 2.84802 | 0       | 1        | 1        | no  |
| Tnfrsf14      | 2.84531 | 2.80439 | 0.00225  | 0.007062 | yes |
| Usp44         | 2.83999 | 0       | 1        | 1        | no  |
| Gm4847        | 2.82717 | 0       | 1        | 1        | no  |
| C030023E24Rik | 2.82664 | 4.75246 | 5.00E-05 | 0.00022  | yes |
| Grb7          | 2.81476 | 0       | 1        | 1        | no  |
| Apob          | 2.80778 | 0       | 1        | 1        | no  |
| Olf1372-ps1   | 2.79652 | 2.57597 | 0.0011   | 0.00376  | yes |
| Cd3d          | 2.78533 | 0       | 1        | 1        | no  |
| Kif15         | 2.78514 | 0       | 1        | 1        | no  |
| 4930467E23Rik | 2.77313 | 0       | 1        | 1        | no  |
| Mfsd2b        | 2.76967 | 3.69059 | 5.00E-05 | 0.00022  | yes |
| 4930474G06Rik | 2.76006 | 0       | 1        | 1        | no  |
| Klrb1c        | 2.76004 | 0       | 1        | 1        | no  |
| BC049635      | 2.75873 | 0       | 1        | 1        | no  |
| 4732456N10Rik | 2.75754 | 0       | 1        | 1        | no  |
| Cdk1          | 2.75644 | 3.06657 | 5.00E-05 | 0.00022  | yes |

|               |         |          |          |          |     |
|---------------|---------|----------|----------|----------|-----|
| Snai3         | 2.7563  | 0        | 1        | 1        | no  |
| 1700011A15Rik | 2.75565 | 0        | 1        | 1        | no  |
| Pkhd11l       | 2.74633 | 0        | 1        | 1        | no  |
| Klra7         | 2.73805 | 0        | 1        | 1        | no  |
| Mrgpra4       | 2.73764 | 0        | 1        | 1        | no  |
| Kif4          | 2.73725 | 2.91122  | 0.0001   | 0.000422 | yes |
| Trpm1         | 2.73166 | 0        | 1        | 1        | no  |
| Ubap1l        | 2.72994 | 0        | 1        | 1        | no  |
| Slc22a29      | 2.72887 | 0        | 1        | 1        | no  |
| Hes3          | 2.72647 | 2.60156  | 0.0012   | 0.004068 | yes |
| Fam110c       | 2.72597 | 0        | 1        | 1        | no  |
| Ccdc175       | 2.71795 | 0        | 1        | 1        | no  |
| Nmur2         | 2.71506 | 0        | 1        | 1        | no  |
| Tmem91        | 2.69002 | 0.783966 | 0.3713   | 0.502708 | no  |
| Ceacam2       | 2.68972 | 0        | 1        | 1        | no  |
| Fam219aos     | 2.68601 | 0        | 1        | 1        | no  |
| Hnf4g         | 2.68383 | 0        | 1        | 1        | no  |
| Kcnk16        | 2.67752 | 0        | 1        | 1        | no  |
| Serpina9      | 2.66346 | 0        | 1        | 1        | no  |
| Ddx43         | 2.6611  | 0        | 1        | 1        | no  |
| Sp5           | 2.66071 | 0        | 1        | 1        | no  |
| Rsad2         | 2.65768 | 8.99385  | 5.00E-05 | 0.00022  | yes |
| Hist1h4c      | 2.64821 | 0        | 1        | 1        | no  |
| Slc14a1       | 2.64725 | 3.805    | 5.00E-05 | 0.00022  | yes |
| Hist1h3i      | 2.64469 | 0        | 1        | 1        | no  |
| Syce1l        | 2.64251 | 0        | 1        | 1        | no  |
| Hmnr          | 2.63845 | 3.39933  | 5.00E-05 | 0.00022  | yes |
| Neurog1       | 2.63735 | 0        | 1        | 1        | no  |
| C030016D13Rik | 2.63557 | 0        | 1        | 1        | no  |
| Cenpa         | 2.63456 | 3.45769  | 5.00E-05 | 0.00022  | yes |
| F830002L21Rik | 2.63432 | 2.38111  | 0.002    | 0.006363 | yes |
| Uhrf1         | 2.6341  | 2.78823  | 5.00E-05 | 0.00022  | yes |
| Ctcf1         | 2.6305  | 0        | 1        | 1        | no  |
| Lat           | 2.61796 | 0        | 1        | 1        | no  |
| D930020B18Rik | 2.60424 | 0        | 1        | 1        | no  |
| Ctsw          | 2.60286 | 0        | 1        | 1        | no  |
| Otp           | 2.59312 | 0        | 1        | 1        | no  |
| Clspn         | 2.59275 | 0        | 1        | 1        | no  |
| Cst7          | 2.58156 | 0        | 1        | 1        | no  |
| Gm15612       | 2.57843 | 0        | 1        | 1        | no  |
| Ubash3a       | 2.56914 | 0        | 1        | 1        | no  |
| Slc22a13      | 2.56622 | 0        | 1        | 1        | no  |
| C2cd4a        | 2.5652  | 0        | 1        | 1        | no  |
| D6Ert474e     | 2.56349 | 0        | 1        | 1        | no  |
| Hmgb2         | 2.54894 | 2.72206  | 0.00035  | 0.001342 | yes |
| Gm14827       | 2.53939 | 0        | 1        | 1        | no  |
| C1ql4         | 2.53924 | 6.04213  | 5.00E-05 | 0.00022  | yes |
| Trim29        | 2.53921 | 0        | 1        | 1        | no  |
| Snhg11        | 2.53514 | 10.238   | 5.00E-05 | 0.00022  | yes |
| Hbq1a         | 2.52838 | 0        | 1        | 1        | no  |
| Pglyrp2       | 2.52719 | 0        | 1        | 1        | no  |
| Eomes         | 2.52141 | 0        | 1        | 1        | no  |
| Ccl5          | 2.51833 | 3.44952  | 0.00195  | 0.006219 | yes |

|               |         |         |          |          |     |
|---------------|---------|---------|----------|----------|-----|
| Adcy10        | 2.50876 | 0       | 1        | 1        | no  |
| A230028O05Rik | 2.50631 | 0       | 1        | 1        | no  |
| Tgm6          | 2.50548 | 0       | 1        | 1        | no  |
| Bpgm          | 2.50427 | 9.50717 | 5.00E-05 | 0.00022  | yes |
| Lrrc2         | 2.50274 | 0       | 1        | 1        | no  |
| Cenpe         | 2.50127 | 3.80937 | 5.00E-05 | 0.00022  | yes |
| Ovol2         | 2.496   | 2.37795 | 0.0002   | 0.000803 | yes |
| Gm128         | 2.49173 | 0       | 1        | 1        | no  |
| Aldh3b2       | 2.48939 | 0       | 1        | 1        | no  |
| Nccrp1        | 2.4859  | 2.43362 | 0.00205  | 0.006503 | yes |
| Slc12a3       | 2.4797  | 0       | 1        | 1        | no  |
| Hbq1b         | 2.47847 | 2.54773 | 0.00635  | 0.017515 | yes |
| Cdca8         | 2.47499 | 3.91816 | 5.00E-05 | 0.00022  | yes |
| C330024D21Rik | 2.47325 | 0       | 1        | 1        | no  |
| Sdr9c7        | 2.47114 | 0       | 1        | 1        | no  |
| Trim71        | 2.47097 | 0       | 1        | 1        | no  |
| Cdc25c        | 2.46849 | 0       | 1        | 1        | no  |
| Meg3          | 2.44047 | 6.24309 | 5.00E-05 | 0.00022  | yes |
| Mcm10         | 2.43834 | 0       | 1        | 1        | no  |
| Cd200r4       | 2.4326  | 0       | 1        | 1        | no  |
| Plk1          | 2.42937 | 2.76744 | 0.00025  | 0.000985 | yes |
| 1600023N17Rik | 2.42174 | 0       | 1        | 1        | no  |
| Cldn26        | 2.41576 | 0       | 1        | 1        | no  |
| Kif23         | 2.41374 | 4.50069 | 5.00E-05 | 0.00022  | yes |
| B230216G23Rik | 2.4123  | 2.33707 | 0.0021   | 0.006649 | yes |
| Slc51a        | 2.40996 | 3.8725  | 5.00E-05 | 0.00022  | yes |
| Ttll8         | 2.4093  | 0       | 1        | 1        | no  |
| Gm7244        | 2.40927 | 0       | 1        | 1        | no  |
| 5830432E09Rik | 2.40921 | 0       | 1        | 1        | no  |
| Arhgef39      | 2.40726 | 2.28044 | 0.0025   | 0.007739 | yes |
| Crh           | 2.40672 | 0       | 1        | 1        | no  |
| 4921511I17Rik | 2.40065 | 0       | 1        | 1        | no  |
| Ncapg         | 2.40017 | 1.67739 | 0.006    | 0.016674 | yes |
| Pde4c         | 2.40012 | 6.49692 | 5.00E-05 | 0.00022  | yes |
| Gm7325        | 2.3996  | 1.57856 | 0.00295  | 0.008927 | yes |
| 4930467K11Rik | 2.39564 | 0       | 1        | 1        | no  |
| Serpina1d     | 2.38294 | 0       | 1        | 1        | no  |
| Slc16a10      | 2.37889 | 4.0372  | 5.00E-05 | 0.00022  | yes |
| Ticrr         | 2.3721  | 0       | 1        | 1        | no  |
| 2610203C22Rik | 2.36693 | 0       | 1        | 1        | no  |
| Cel           | 2.36476 | 0       | 1        | 1        | no  |
| Peg3os        | 2.36277 | 0       | 1        | 1        | no  |
| Ube2l6        | 2.35707 | 9.20453 | 5.00E-05 | 0.00022  | yes |
| Slc30a2       | 2.35122 | 0       | 1        | 1        | no  |
| 9230105E05Rik | 2.3439  | 0       | 1        | 1        | no  |
| Gm10248       | 2.34052 | 0       | 1        | 1        | no  |
| Odf3b         | 2.32676 | 0       | 1        | 1        | no  |
| Slc1a7        | 2.32155 | 0       | 1        | 1        | no  |
| Adamts19      | 2.316   | 0       | 1        | 1        | no  |
| Kcna3         | 2.30761 | 2.63574 | 5.00E-05 | 0.00022  | yes |
| Mettl21e      | 2.30428 | 0       | 1        | 1        | no  |
| Slc25a21      | 2.30295 | 0       | 1        | 1        | no  |
| Ccdc83        | 2.29833 | 0       | 1        | 1        | no  |



|               |         |          |          |          |     |
|---------------|---------|----------|----------|----------|-----|
| Wfdc2         | 2.29108 | 5.59497  | 5.00E-05 | 0.00022  | yes |
| Gm6402        | 2.28313 | 0.888285 | 0.11775  | 0.205173 | no  |
| Kcnq1ot1      | 2.28275 | 0        | 1        | 1        | no  |
| AI854517      | 2.28265 | 0        | 1        | 1        | no  |
| BC048644      | 2.28193 | 0        | 1        | 1        | no  |
| H2-T24        | 2.27753 | 1.82451  | 0.0051   | 0.014464 | yes |
| Prss38        | 2.27139 | 0        | 1        | 1        | no  |
| E2f2          | 2.26953 | 5.64347  | 5.00E-05 | 0.00022  | yes |
| Stil          | 2.26633 | 0        | 1        | 1        | no  |
| 6430411K18Rik | 2.26303 | 1.85535  | 0.0037   | 0.010879 | yes |
| 4930431F12Rik | 2.26268 | 0        | 1        | 1        | no  |
| Cdh9          | 2.26207 | 6.23943  | 5.00E-05 | 0.00022  | yes |
| Cdcp1         | 2.26182 | 0        | 1        | 1        | no  |
| Bhlha9        | 2.25835 | 6.32683  | 5.00E-05 | 0.00022  | yes |
| Pnliprp2      | 2.25629 | 0        | 1        | 1        | no  |
| Cd160         | 2.25614 | 0        | 1        | 1        | no  |
| 9430060I03Rik | 2.2429  | 0        | 1        | 1        | no  |
| Rdh7          | 2.24017 | 0        | 1        | 1        | no  |
| Cd247         | 2.2345  | 0        | 1        | 1        | no  |
| Ckap2l        | 2.23339 | 2.99668  | 5.00E-05 | 0.00022  | yes |
| Gpat2         | 2.23154 | 0        | 1        | 1        | no  |
| 2410076I21Rik | 2.23069 | 0.444321 | 0.35435  | 0.48626  | no  |
| Gm15915       | 2.22842 | 0        | 1        | 1        | no  |
| Kifc1         | 2.22507 | 2.84693  | 5.00E-05 | 0.00022  | yes |
| Smim6         | 2.21814 | 0        | 1        | 1        | no  |
| Th            | 2.21577 | 10.6178  | 5.00E-05 | 0.00022  | yes |
| Zfp457        | 2.21381 | 0        | 1        | 1        | no  |
| Igll1         | 2.21029 | 0        | 1        | 1        | no  |
| Gm11240       | 2.20997 | 0        | 1        | 1        | no  |
| Gimap3        | 2.20777 | 0        | 1        | 1        | no  |
| Depdc1b       | 2.20776 | 2.42409  | 0.00055  | 0.002016 | yes |
| Dmc1          | 2.20626 | 0        | 1        | 1        | no  |
| Ctcflos       | 2.19744 | 0        | 1        | 1        | no  |
| Dyrk4         | 2.19633 | 2.35156  | 0.001    | 0.003451 | yes |
| Rps12         | 2.19625 | 0        | 1        | 1        | no  |
| Ccl1          | 2.19283 | 2.33137  | 0.02425  | 0.05547  | no  |
| Slc6a9        | 2.18688 | 4.33533  | 5.00E-05 | 0.00022  | yes |
| Mfi2          | 2.18017 | 0        | 1        | 1        | no  |
| Fam92b        | 2.17745 | 0        | 1        | 1        | no  |
| Apol7e        | 2.17614 | 0        | 1        | 1        | no  |
| Smco1         | 2.16638 | 0        | 1        | 1        | no  |
| Eppin         | 2.16366 | 2.3725   | 0.00595  | 0.016553 | yes |
| Acmsd         | 2.14663 | 0        | 1        | 1        | no  |
| Mrgpra3       | 2.14438 | 8.33276  | 5.00E-05 | 0.00022  | yes |
| Mis18bp1      | 2.13851 | 0        | 1        | 1        | no  |
| Cdca5         | 2.13707 | 0        | 1        | 1        | no  |
| Ceacam10      | 2.13696 | 5.47505  | 5.00E-05 | 0.00022  | yes |
| Trim40        | 2.13408 | 0        | 1        | 1        | no  |
| Gm20199       | 2.12695 | 0        | 1        | 1        | no  |
| Slc38a5       | 2.12468 | 2.89928  | 5.00E-05 | 0.00022  | yes |
| Birc5         | 2.12198 | 2.96868  | 5.00E-05 | 0.00022  | yes |
| Amy1          | 2.11924 | 4.68074  | 5.00E-05 | 0.00022  | yes |
| Orc1          | 2.11799 | 0        | 1        | 1        | no  |

|                     |         |          |          |          |     |
|---------------------|---------|----------|----------|----------|-----|
| Gdf15               | 2.1179  | 0        | 1        | 1        | no  |
| Lrrc10b             | 2.11619 | 3.15595  | 5.00E-05 | 0.00022  | yes |
| A730046J19Rik       | 2.11574 | 0        | 1        | 1        | no  |
| Tnfrsf4             | 2.11503 | 0        | 1        | 1        | no  |
| Gm6994              | 2.1056  | 0        | 1        | 1        | no  |
| Prr22               | 2.10261 | 1.91887  | 0.00825  | 0.02204  | yes |
| Dmrt1               | 2.10245 | 0        | 1        | 1        | no  |
| Gm7444              | 2.09968 | 0        | 1        | 1        | no  |
| A930011O12Rik       | 2.09856 | 6.53931  | 5.00E-05 | 0.00022  | yes |
| Dbx2                | 2.09417 | 0        | 1        | 1        | no  |
| Cacna1i             | 2.09244 | 7.52557  | 5.00E-05 | 0.00022  | yes |
| 4933408J17Rik       | 2.09193 | 0        | 1        | 1        | no  |
| Pnpla5              | 2.09163 | 0        | 1        | 1        | no  |
| Nxn1                | 2.08983 | 0        | 1        | 1        | no  |
| Gm15328             | 2.08784 | 0        | 1        | 1        | no  |
| Agrp                | 2.08531 | 1.27132  | 0.01405  | 0.034848 | yes |
| Nup210l             | 2.08439 | 0        | 1        | 1        | no  |
| H1foo               | 2.08288 | 0        | 1        | 1        | no  |
| Klhl31              | 2.07909 | 0        | 1        | 1        | no  |
| Klra18,Klra33,Klra4 | 2.07851 | 0        | 1        | 1        | no  |
| Mbnl3               | 2.06602 | 0        | 1        | 1        | no  |
| Hrg                 | 2.062   | 0        | 1        | 1        | no  |
| Bub1                | 2.05981 | 2.29364  | 0.0001   | 0.000422 | yes |
| Gm15816             | 2.05963 | 0        | 1        | 1        | no  |
| Wfdc10              | 2.05747 | 0        | 1        | 1        | no  |
| Kcna7               | 2.05555 | 0        | 1        | 1        | no  |
| 4930581F22Rik       | 2.05503 | 0        | 1        | 1        | no  |
| Slc17a8             | 2.04982 | 7.14966  | 5.00E-05 | 0.00022  | yes |
| Gm20139             | 2.04635 | 3.35537  | 5.00E-05 | 0.00022  | yes |
| Gm9767              | 2.0448  | 0.663504 | 0.216    | 0.333722 | no  |
| Epha8               | 2.04269 | 2.56984  | 5.00E-05 | 0.00022  | yes |
| Gm16853             | 2.03813 | 0        | 1        | 1        | no  |
| Bcl2l15             | 2.03405 | 0        | 1        | 1        | no  |
| Cdca3               | 2.02266 | 2.81688  | 5.00E-05 | 0.00022  | yes |
| Oas1e               | 2.01766 | 0        | 1        | 1        | no  |
| Mlph                | 2.01708 | 0        | 1        | 1        | no  |
| Tm6sf2              | 2.01584 | 0        | 1        | 1        | no  |
| Col7a1              | 2.00907 | 0        | 1        | 1        | no  |
| Tekt2               | 2.00677 | 0        | 1        | 1        | no  |
| Ly6i                | 2.00579 | 0        | 1        | 1        | no  |
| Unc13d              | 1.99917 | 3.68676  | 5.00E-05 | 0.00022  | yes |
| Myf5                | 1.99026 | 0        | 1        | 1        | no  |
| Nxpe2               | 1.98815 | 5.89911  | 5.00E-05 | 0.00022  | yes |
| Sbk3                | 1.98241 | 2.53543  | 0.0001   | 0.000422 | yes |
| Kif2c               | 1.98239 | 0        | 1        | 1        | no  |
| A930016O22Rik       | 1.98185 | 0        | 1        | 1        | no  |
| Msmg                | 1.97931 | 0        | 1        | 1        | no  |
| Stac3               | 1.97906 | 0        | 1        | 1        | no  |
| St14                | 1.97796 | 0        | 1        | 1        | no  |
| Tmprss11c           | 1.97715 | 3.85218  | 5.00E-05 | 0.00022  | yes |
| Ppef2               | 1.97569 | 0        | 1        | 1        | no  |
| Pet117              | 1.97549 | 0.587684 | 0.24785  | 0.370129 | no  |
| Cct8l1              | 1.97292 | 0        | 1        | 1        | no  |

|               |         |         |          |          |     |
|---------------|---------|---------|----------|----------|-----|
| Ndc80         | 1.95681 | 0       | 1        | 1        | no  |
| Ildr1         | 1.95322 | 0       | 1        | 1        | no  |
| A930013F10Rik | 1.94972 | 1.14596 | 0.04985  | 0.10192  | no  |
| BC107364      | 1.94886 | 0       | 1        | 1        | no  |
| Fbxl13        | 1.94572 | 0       | 1        | 1        | no  |
| Il4i1         | 1.94402 | 0       | 1        | 1        | no  |
| Serpina1b     | 1.94043 | 0       | 1        | 1        | no  |
| E530001F21Rik | 1.93794 | 1.86918 | 0.0113   | 0.028847 | yes |
| 5730508B09Rik | 1.93782 | 6.36404 | 5.00E-05 | 0.00022  | yes |
| Btg3          | 1.93764 | 0       | 1        | 1        | no  |
| Spag5         | 1.93193 | 2.97865 | 5.00E-05 | 0.00022  | yes |
| Gm20751       | 1.93127 | 0       | 1        | 1        | no  |
| Baiap2l2      | 1.92703 | 0       | 1        | 1        | no  |
| Tnfsf14       | 1.92534 | 0       | 1        | 1        | no  |
| Clca3         | 1.92161 | 0       | 1        | 1        | no  |
| Wnt11         | 1.92002 | 2.60769 | 5.00E-05 | 0.00022  | yes |
| 9530052E02Rik | 1.91927 | 0       | 1        | 1        | no  |
| Muc2          | 1.9157  | 0       | 1        | 1        | no  |
| Aknad1        | 1.91297 | 0       | 1        | 1        | no  |
| Opn1sw        | 1.91282 | 0       | 1        | 1        | no  |
| Dgkk          | 1.91064 | 5.6649  | 5.00E-05 | 0.00022  | yes |
| E030024N20Rik | 1.90612 | 0       | 1        | 1        | no  |
| Fut1          | 1.90453 | 0       | 1        | 1        | no  |
| Zfp57         | 1.90187 | 2.50381 | 5.00E-05 | 0.00022  | yes |
| Gm1123        | 1.89777 | 0       | 1        | 1        | no  |
| Gm7271        | 1.88867 | 9.5164  | 5.00E-05 | 0.00022  | yes |
| E330033B04Rik | 1.887   | 0       | 1        | 1        | no  |
| Gm10677       | 1.8848  | 0       | 1        | 1        | no  |
| Gm4787        | 1.88235 | 0       | 1        | 1        | no  |
| C1s2          | 1.87368 | 0       | 1        | 1        | no  |
| Itih4         | 1.87354 | 0       | 1        | 1        | no  |
| Ska1          | 1.87169 | 0       | 1        | 1        | no  |
| Nmur1         | 1.87005 | 2.63428 | 0.00035  | 0.001342 | yes |
| Grxcr1        | 1.86485 | 0       | 1        | 1        | no  |
| Klrk1         | 1.85443 | 0       | 1        | 1        | no  |
| Prss45        | 1.85344 | 0       | 1        | 1        | no  |
| Olfir239      | 1.8515  | 0       | 1        | 1        | no  |
| Prc1          | 1.84846 | 3.3513  | 5.00E-05 | 0.00022  | yes |
| Nek2          | 1.84832 | 0       | 1        | 1        | no  |
| Sh2d4b        | 1.84571 | 2.93573 | 0.0001   | 0.000422 | yes |
| Mirg          | 1.84563 | 3.86618 | 5.00E-05 | 0.00022  | yes |
| Nkx6-3        | 1.84365 | 0       | 1        | 1        | no  |
| Plcz1         | 1.84352 | 0       | 1        | 1        | no  |
| Myoz3         | 1.84257 | 0       | 1        | 1        | no  |
| Gm6559        | 1.84159 | 0       | 1        | 1        | no  |
| Duxbl1,Duxbl2 | 1.84036 | 0       | 1        | 1        | no  |
| Sis           | 1.8362  | 0       | 1        | 1        | no  |
| BC018473      | 1.83344 | 0       | 1        | 1        | no  |
| Klra13-ps     | 1.83229 | 0       | 1        | 1        | no  |
| Ryr1          | 1.82939 | 0       | 1        | 1        | no  |
| Ect2          | 1.82838 | 2.69626 | 5.00E-05 | 0.00022  | yes |
| Fbp2          | 1.8227  | 3.26921 | 5.00E-05 | 0.00022  | yes |
| Lgals3        | 1.82115 | 3.91272 | 5.00E-05 | 0.00022  | yes |

|               |         |          |          |          |     |
|---------------|---------|----------|----------|----------|-----|
| Tdg           | 1.8182  | 1.01989  | 0.0685   | 0.132709 | no  |
| Cenph         | 1.81361 | 1.76678  | 0.00965  | 0.025197 | yes |
| Tulp2         | 1.81348 | 0        | 1        | 1        | no  |
| Tespa1        | 1.8124  | 0        | 1        | 1        | no  |
| 4930578M01Rik | 1.81219 | 0        | 1        | 1        | no  |
| Itk           | 1.81218 | 0.625393 | 0.22265  | 0.34157  | no  |
| 4930488L21Rik | 1.81093 | 0        | 1        | 1        | no  |
| Gm20324       | 1.80717 | 0        | 1        | 1        | no  |
| Cenpu         | 1.80698 | 0        | 1        | 1        | no  |
| Misp          | 1.80591 | 0.19264  | 0.6943   | 0.790803 | no  |
| Kif11         | 1.80167 | 3.36232  | 5.00E-05 | 0.00022  | yes |
| Dppa5a        | 1.8004  | 0        | 1        | 1        | no  |
| Klk11         | 1.79962 | 0        | 1        | 1        | no  |
| Ccdc68        | 1.79839 | 6.78787  | 5.00E-05 | 0.00022  | yes |
| Rtdr1         | 1.79543 | 0        | 1        | 1        | no  |
| Dhrs11        | 1.79349 | 4.08052  | 5.00E-05 | 0.00022  | yes |
| Galr3         | 1.79247 | 0        | 1        | 1        | no  |
| Doc2g         | 1.79086 | 1.78611  | 0.00865  | 0.022947 | yes |
| Tgm5          | 1.79007 | 2.19702  | 0.0005   | 0.00185  | yes |
| Tecrl         | 1.78949 | 0        | 1        | 1        | no  |
| 1810010D01Rik | 1.78754 | 0        | 1        | 1        | no  |
| 5033406O09Rik | 1.78713 | 0        | 1        | 1        | no  |
| Bmp15         | 1.78544 | 4.30622  | 5.00E-05 | 0.00022  | yes |
| Hrh1          | 1.78362 | 3.44795  | 5.00E-05 | 0.00022  | yes |
| D730005E14Rik | 1.78315 | 0        | 1        | 1        | no  |
| Serpinf2      | 1.78255 | 0        | 1        | 1        | no  |
| Fcamr         | 1.78198 | 0        | 1        | 1        | no  |
| Epb4.1        | 1.78191 | 6.87719  | 5.00E-05 | 0.00022  | yes |
| Snx22         | 1.77892 | 0.84157  | 0.1103   | 0.194388 | no  |
| Samd11        | 1.77777 | 1.77345  | 0.0033   | 0.009856 | yes |
| Gm5088        | 1.77598 | 0        | 1        | 1        | no  |
| Kcne3         | 1.77144 | 0.930645 | 0.0097   | 0.025313 | yes |
| Cd3g          | 1.77037 | 0        | 1        | 1        | no  |
| Orm3          | 1.77028 | 0        | 1        | 1        | no  |
| Card11        | 1.76927 | 5.12756  | 5.00E-05 | 0.00022  | yes |
| Cib3          | 1.76851 | 0        | 1        | 1        | no  |
| Gpr151        | 1.76814 | 2.57903  | 5.00E-05 | 0.00022  | yes |
| Pkd2l1        | 1.76784 | 0        | 1        | 1        | no  |
| 4930407I10Rik | 1.76761 | 0        | 1        | 1        | no  |
| Prrt4         | 1.76623 | 3.29795  | 5.00E-05 | 0.00022  | yes |
| 4930550L24Rik | 1.76622 | 0        | 1        | 1        | no  |
| Hus1b         | 1.76451 | 0        | 1        | 1        | no  |
| Espl1         | 1.76395 | 0        | 1        | 1        | no  |
| Fscn2         | 1.7632  | 0        | 1        | 1        | no  |
| Gm4349        | 1.7628  | 0        | 1        | 1        | no  |
| Asf1b         | 1.76103 | 2.34616  | 0.0007   | 0.002506 | yes |
| Slc39a5       | 1.76092 | 0        | 1        | 1        | no  |
| Hoxd3         | 1.75956 | 3.084    | 5.00E-05 | 0.00022  | yes |
| A330032B11Rik | 1.75945 | 0        | 1        | 1        | no  |
| 1600029O15Rik | 1.75591 | 0.918418 | 0.0885   | 0.162374 | no  |
| Serpib2       | 1.75352 | 0        | 1        | 1        | no  |
| Gm4532        | 1.75177 | 1.44617  | 0.0602   | 0.119081 | no  |
| Trim72        | 1.75174 | 0        | 1        | 1        | no  |

|               |         |         |          |          |     |
|---------------|---------|---------|----------|----------|-----|
| P2rx2         | 1.74848 | 3.27805 | 5.00E-05 | 0.00022  | yes |
| 1700024F13Rik | 1.74626 | 0       | 1        | 1        | no  |
| Tacr1         | 1.74573 | 0       | 1        | 1        | no  |
| Cox7b2        | 1.74572 | 0       | 1        | 1        | no  |
| Hmbs          | 1.74523 | 4.52393 | 5.00E-05 | 0.00022  | yes |
| Fxyd2         | 1.74475 | 7.8005  | 5.00E-05 | 0.00022  | yes |
| Slc10a2       | 1.74475 | 0       | 1        | 1        | no  |
| Chrna4        | 1.73754 | 4.10636 | 5.00E-05 | 0.00022  | yes |
| Krt27         | 1.73445 | 2.99356 | 5.00E-05 | 0.00022  | yes |
| Gm2518        | 1.7338  | 0       | 1        | 1        | no  |
| Soat2         | 1.73185 | 2.09552 | 0.0017   | 0.005514 | yes |
| Nts           | 1.72789 | 4.56246 | 5.00E-05 | 0.00022  | yes |
| Rasa13        | 1.72747 | 0       | 1        | 1        | no  |
| Spata19       | 1.72659 | 0       | 1        | 1        | no  |
| Wfdc17        | 1.7243  | 1.73597 | 0.08435  | 0.15647  | no  |
| Dna2          | 1.72064 | 0       | 1        | 1        | no  |
| Cd3e          | 1.71862 | 0       | 1        | 1        | no  |
| Cdc20         | 1.7185  | 1.11562 | 0.04605  | 0.095535 | no  |
| 4831440E17Rik | 1.71564 | 2.25257 | 0.00055  | 0.002016 | yes |
| Wnt16         | 1.71376 | 2.42488 | 0.0003   | 0.001164 | yes |
| Hsd17b1       | 1.70878 | 0       | 1        | 1        | no  |
| Gsg2          | 1.70836 | 0       | 1        | 1        | no  |
| Tnnc1         | 1.70821 | 1.51641 | 0.05855  | 0.116582 | no  |
| Tmem102       | 1.70779 | 0       | 1        | 1        | no  |
| Ttll6         | 1.70658 | 2.28811 | 0.00045  | 0.001682 | yes |
| Miat          | 1.70653 | 7.65706 | 5.00E-05 | 0.00022  | yes |
| Cd6           | 1.70511 | 0       | 1        | 1        | no  |
| Rhox5         | 1.70478 | 0       | 1        | 1        | no  |
| Neurog3       | 1.70305 | 1.96961 | 0.00365  | 0.010754 | yes |
| Mrgprb5       | 1.70222 | 4.5454  | 5.00E-05 | 0.00022  | yes |
| 5830473C10Rik | 1.69828 | 2.43312 | 0.00025  | 0.000985 | yes |
| Hist1h2bk     | 1.69617 | 0       | 1        | 1        | no  |
| Fancd2        | 1.6958  | 2.44301 | 0.00015  | 0.000615 | yes |
| Wdfy1         | 1.69509 | 5.32296 | 5.00E-05 | 0.00022  | yes |
| Gpx2-ps1      | 1.69466 | 0       | 1        | 1        | no  |
| Mei1          | 1.69397 | 0       | 1        | 1        | no  |
| Mtap7d3       | 1.69249 | 0       | 1        | 1        | no  |
| Glp2r         | 1.69017 | 0       | 1        | 1        | no  |
| Tex21         | 1.6868  | 0       | 1        | 1        | no  |
| AW551984      | 1.68572 | 4.04576 | 5.00E-05 | 0.00022  | yes |
| Rpl36a        | 1.68429 | 0       | 1        | 1        | no  |
| Cd36          | 1.68236 | 3.29179 | 5.00E-05 | 0.00022  | yes |
| AU015836      | 1.67913 | 0       | 1        | 1        | no  |
| Spc25         | 1.67912 | 1.58425 | 0.0032   | 0.009592 | yes |
| 2310002F09Rik | 1.67863 | 2.0793  | 0.00085  | 0.002983 | yes |
| Fshr          | 1.67658 | 0       | 1        | 1        | no  |
| Gabbr3        | 1.67629 | 0       | 1        | 1        | no  |
| Kif20a        | 1.67582 | 1.17086 | 0.03555  | 0.076528 | no  |
| Cdca2         | 1.67463 | 0       | 1        | 1        | no  |
| Mrgprx1       | 1.67324 | 6.32514 | 5.00E-05 | 0.00022  | yes |
| Tnfsf11       | 1.67198 | 0       | 1        | 1        | no  |
| Gm20611       | 1.67189 | 0       | 1        | 1        | no  |
| Crip3         | 1.67009 | 0       | 1        | 1        | no  |



|               |         |          |          |          |     |
|---------------|---------|----------|----------|----------|-----|
| Il31ra        | 1.66922 | 6.07722  | 5.00E-05 | 0.00022  | yes |
| Sowahd        | 1.66915 | 0        | 1        | 1        | no  |
| Fam19a4       | 1.66846 | 7.635    | 5.00E-05 | 0.00022  | yes |
| Ucp1          | 1.66729 | 0        | 1        | 1        | no  |
| Ptpn7         | 1.66571 | 0        | 1        | 1        | no  |
| Nrp           | 1.66566 | 0        | 1        | 1        | no  |
| Ambn          | 1.66512 | 0        | 1        | 1        | no  |
| Slamf1        | 1.6646  | 0        | 1        | 1        | no  |
| Slc2a4rg-ps   | 1.66452 | 2.05232  | 0.0006   | 0.002181 | yes |
| Ptk6          | 1.6634  | 0        | 1        | 1        | no  |
| Ftx           | 1.66104 | 3.49842  | 5.00E-05 | 0.00022  | yes |
| Slc44a4       | 1.66027 | 0        | 1        | 1        | no  |
| Tspan32       | 1.65812 | 0        | 1        | 1        | no  |
| Dapk2         | 1.65721 | 5.44889  | 5.00E-05 | 0.00022  | yes |
| Gch1          | 1.65672 | 3.34445  | 5.00E-05 | 0.00022  | yes |
| Erich2        | 1.65597 | 0        | 1        | 1        | no  |
| Dlx1          | 1.6544  | 0        | 1        | 1        | no  |
| 4932438H23Rik | 1.65394 | 0        | 1        | 1        | no  |
| Ppm1n         | 1.65371 | 1.6766   | 0.01015  | 0.026321 | yes |
| Gabrd         | 1.65267 | 0        | 1        | 1        | no  |
| 9530059O14Rik | 1.64955 | 0        | 1        | 1        | no  |
| Plekhg4       | 1.64307 | 0        | 1        | 1        | no  |
| Rad54l        | 1.64216 | 0        | 1        | 1        | no  |
| Klk9          | 1.64114 | 0        | 1        | 1        | no  |
| 2010003K11Rik | 1.63989 | 0        | 1        | 1        | no  |
| Kcnj6         | 1.63984 | 2.2812   | 5.00E-05 | 0.00022  | yes |
| Mcoln2        | 1.63811 | 0        | 1        | 1        | no  |
| C230029M16    | 1.63767 | 0        | 1        | 1        | no  |
| Rag1          | 1.63671 | 0        | 1        | 1        | no  |
| Rdh18-ps      | 1.63625 | 0        | 1        | 1        | no  |
| Gm7102        | 1.63592 | 0        | 1        | 1        | no  |
| Snurf         | 1.63561 | 0.962874 | 0.1289   | 0.22146  | no  |
| H2-Q7,H2-Q9   | 1.63312 | 1.60537  | 0.00215  | 0.006796 | yes |
| Gm19619       | 1.63258 | 0        | 1        | 1        | no  |
| 2810008D09Rik | 1.62841 | 2.82217  | 5.00E-05 | 0.00022  | yes |
| Ctrl          | 1.62777 | 0        | 1        | 1        | no  |
| Insm1         | 1.62554 | 4.80637  | 5.00E-05 | 0.00022  | yes |
| Ccdc18        | 1.62316 | 0        | 1        | 1        | no  |
| Ncaph         | 1.62141 | 2.12867  | 0.00065  | 0.002343 | yes |
| Scin          | 1.62044 | 4.85064  | 5.00E-05 | 0.00022  | yes |
| Cdk3-ps       | 1.6202  | 0        | 1        | 1        | no  |
| Ccdc147       | 1.61958 | 0        | 1        | 1        | no  |
| Grin2c        | 1.61773 | 0        | 1        | 1        | no  |
| Klf5          | 1.61698 | 6.49484  | 5.00E-05 | 0.00022  | yes |
| Fgg           | 1.61608 | 2.0771   | 0.00205  | 0.006503 | yes |
| Foxl2os       | 1.61563 | 0        | 1        | 1        | no  |
| Nlrp12        | 1.61349 | 0        | 1        | 1        | no  |
| BC089491      | 1.6112  | 0        | 1        | 1        | no  |
| Kcnk7         | 1.6105  | 0        | 1        | 1        | no  |
| Lrrc36        | 1.60908 | 0        | 1        | 1        | no  |
| Gm3696        | 1.60862 | 0        | 1        | 1        | no  |
| Mxd3          | 1.60656 | 0.426827 | 0.4239   | 0.55539  | no  |
| Slc5a11       | 1.60561 | 2.26281  | 0.0007   | 0.002506 | yes |

|               |         |          |          |          |     |
|---------------|---------|----------|----------|----------|-----|
| 5031426D15Rik | 1.60401 | 0        | 1        | 1        | no  |
| Nppb          | 1.59883 | 3.7954   | 5.00E-05 | 0.00022  | yes |
| Ddx26b        | 1.5978  | 5.25821  | 5.00E-05 | 0.00022  | yes |
| Fgf23         | 1.59718 | 0        | 1        | 1        | no  |
| Ubl4b         | 1.59704 | 0        | 1        | 1        | no  |
| Adam8         | 1.59694 | 3.71511  | 5.00E-05 | 0.00022  | yes |
| Nlrc3         | 1.59669 | 0        | 1        | 1        | no  |
| Ly86          | 1.5963  | 8.36651  | 5.00E-05 | 0.00022  | yes |
| Gm16998       | 1.59428 | 0        | 1        | 1        | no  |
| Rnf112        | 1.59377 | 7.14877  | 5.00E-05 | 0.00022  | yes |
| Plaur         | 1.58864 | 3.5892   | 5.00E-05 | 0.00022  | yes |
| Mslnl         | 1.58679 | 0        | 1        | 1        | no  |
| Ovgp1         | 1.58565 | 1.8445   | 0.00195  | 0.006219 | yes |
| 0610040F04Rik | 1.5853  | 0        | 1        | 1        | no  |
| Ulbp1         | 1.58432 | 0        | 1        | 1        | no  |
| Smyd1         | 1.58253 | 2.98595  | 5.00E-05 | 0.00022  | yes |
| Foxe3         | 1.58216 | 0        | 1        | 1        | no  |
| Murc          | 1.58194 | 0        | 1        | 1        | no  |
| Tmem158       | 1.58007 | 7.91404  | 5.00E-05 | 0.00022  | yes |
| Ada           | 1.57979 | 2.61562  | 5.00E-05 | 0.00022  | yes |
| Wfdc5         | 1.57961 | 0        | 1        | 1        | no  |
| Sectm1b       | 1.57862 | 2.10617  | 0.0014   | 0.004657 | yes |
| Gcnt1         | 1.57849 | 2.32566  | 0.0001   | 0.000422 | yes |
| Rtp2          | 1.57748 | 0        | 1        | 1        | no  |
| Ldhal6b       | 1.5773  | 0        | 1        | 1        | no  |
| Sh2d2a        | 1.57653 | 0        | 1        | 1        | no  |
| Celf3         | 1.57407 | 4.52965  | 5.00E-05 | 0.00022  | yes |
| 1700023L04Rik | 1.57371 | 0.776297 | 0.1091   | 0.192734 | no  |
| Smim5         | 1.57001 | 2.89378  | 5.00E-05 | 0.00022  | yes |
| Dnase1l2      | 1.56938 | 1.48749  | 0.02355  | 0.054046 | no  |
| Spn           | 1.56919 | 1.48879  | 0.0035   | 0.01036  | yes |
| Slc5a4a       | 1.56881 | 0        | 1        | 1        | no  |
| Gm10494       | 1.56869 | 0        | 1        | 1        | no  |
| Eid3          | 1.56814 | 0        | 1        | 1        | no  |
| 2010016I18Rik | 1.56753 | 0        | 1        | 1        | no  |
| 1700011L22Rik | 1.56537 | 2.27358  | 0.0015   | 0.004953 | yes |
| Irs3          | 1.56466 | 2.61032  | 5.00E-05 | 0.00022  | yes |
| A630023A22Rik | 1.56353 | 0        | 1        | 1        | no  |
| AI504432      | 1.5631  | 3.3676   | 5.00E-05 | 0.00022  | yes |
| Ppl           | 1.56147 | 2.57519  | 5.00E-05 | 0.00022  | yes |
| Nuf2          | 1.5597  | 2.17306  | 0.0002   | 0.000803 | yes |
| Gm14378       | 1.5573  | 0        | 1        | 1        | no  |
| Fam167a       | 1.55646 | 4.42213  | 5.00E-05 | 0.00022  | yes |
| Nmu           | 1.5563  | 0        | 1        | 1        | no  |
| Bspry         | 1.55609 | 0        | 1        | 1        | no  |
| Phtf1os       | 1.55595 | 0        | 1        | 1        | no  |
| Gm5886        | 1.55069 | 0        | 1        | 1        | no  |
| H2-Q6,H2-Q8   | 1.55024 | 0        | 1        | 1        | no  |
| Nptxr         | 1.54638 | 3.41949  | 5.00E-05 | 0.00022  | yes |
| AI661453      | 1.5451  | 0        | 1        | 1        | no  |
| 1500017E21Rik | 1.54498 | 0        | 1        | 1        | no  |
| Mrgpra9       | 1.54199 | 1.57174  | 0.02325  | 0.053468 | no  |
| Lmtk3         | 1.54087 | 3.50775  | 5.00E-05 | 0.00022  | yes |

|                   |         |          |          |          |     |
|-------------------|---------|----------|----------|----------|-----|
| Dnase1l3          | 1.53922 | 5.10834  | 5.00E-05 | 0.00022  | yes |
| Cpn1              | 1.53861 | 3.39029  | 5.00E-05 | 0.00022  | yes |
| Casp1             | 1.53836 | 3.73927  | 5.00E-05 | 0.00022  | yes |
| Rgs8              | 1.53777 | 7.03573  | 5.00E-05 | 0.00022  | yes |
| Tnfrsf13b         | 1.53727 | 0        | 1        | 1        | no  |
| Ckap2             | 1.53717 | 2.28746  | 5.00E-05 | 0.00022  | yes |
| Ppp1r32           | 1.53708 | 0        | 1        | 1        | no  |
| F420014N23Rik     | 1.53463 | 0        | 1        | 1        | no  |
| Gas5              | 1.53439 | 4.51513  | 5.00E-05 | 0.00022  | yes |
| Bub1b             | 1.53384 | 3.18641  | 5.00E-05 | 0.00022  | yes |
| Ifrd2             | 1.53359 | 3.06816  | 5.00E-05 | 0.00022  | yes |
| Gm5803            | 1.53215 | 0        | 1        | 1        | no  |
| Cabp5             | 1.53122 | 0        | 1        | 1        | no  |
| Dkk1              | 1.52937 | 2.05869  | 0.00505  | 0.014344 | yes |
| Lck               | 1.52779 | 1.80258  | 0.001    | 0.003451 | yes |
| Sell              | 1.52529 | 0        | 1        | 1        | no  |
| Gpr6              | 1.52503 | 0        | 1        | 1        | no  |
| Zdhhc23           | 1.52308 | 3.10395  | 5.00E-05 | 0.00022  | yes |
| Npc1l1            | 1.52273 | 0        | 1        | 1        | no  |
| Fetub             | 1.52145 | 0        | 1        | 1        | no  |
| Als2cr11          | 1.52064 | 0        | 1        | 1        | no  |
| Ercc6l            | 1.52031 | 0        | 1        | 1        | no  |
| Clca4             | 1.51514 | 0        | 1        | 1        | no  |
| Knstrn            | 1.51192 | 0        | 1        | 1        | no  |
| Gm609             | 1.51167 | 0        | 1        | 1        | no  |
| 9330111N05Rik     | 1.51007 | 0        | 1        | 1        | no  |
| Mns1              | 1.5084  | 1.87294  | 0.00335  | 0.009985 | yes |
| Scn2b             | 1.5074  | 6.54708  | 5.00E-05 | 0.00022  | yes |
| Serpina11         | 1.50676 | 2.21915  | 0.00015  | 0.000615 | yes |
| Kcnh6             | 1.50654 | 6.19778  | 5.00E-05 | 0.00022  | yes |
| Acad10            | 1.50618 | 3.10286  | 5.00E-05 | 0.00022  | yes |
| Exph5             | 1.50521 | 0        | 1        | 1        | no  |
| Gp1ba             | 1.50503 | 0        | 1        | 1        | no  |
| Dfnb59            | 1.50397 | 0        | 1        | 1        | no  |
| Cpne5             | 1.50304 | 2.87417  | 5.00E-05 | 0.00022  | yes |
| Papolb            | 1.50112 | 0        | 1        | 1        | no  |
| Slc17a9           | 1.50003 | 0        | 1        | 1        | no  |
| Igj               | 1.4996  | 0        | 1        | 1        | no  |
| Cd4               | 1.49851 | 0        | 1        | 1        | no  |
| Atp7b             | 1.49771 | 0        | 1        | 1        | no  |
| Kif22             | 1.49559 | 2.62551  | 5.00E-05 | 0.00022  | yes |
| Slc10a3-ubl4,Ubl4 | 1.49459 | 0.564095 | 0.2832   | 0.409015 | no  |
| C130060C02Rik     | 1.4945  | 0        | 1        | 1        | no  |
| Pax8              | 1.49091 | 1.84226  | 0.0026   | 0.008011 | yes |
| Patl2             | 1.48973 | 0        | 1        | 1        | no  |
| Cdc25b            | 1.48791 | 1.08536  | 0.0383   | 0.081444 | no  |
| Adat3             | 1.4872  | 1.09118  | 0.0642   | 0.125496 | no  |
| 1700024P16Rik     | 1.48562 | 1.88751  | 0.00055  | 0.002016 | yes |
| Cd244             | 1.48381 | 0        | 1        | 1        | no  |
| Stx3              | 1.48268 | 3.73147  | 5.00E-05 | 0.00022  | yes |
| D7Ert715e         | 1.48037 | 5.7782   | 5.00E-05 | 0.00022  | yes |
| Ankrd37           | 1.47928 | 0.932649 | 0.0699   | 0.13485  | no  |
| Efcab3            | 1.47794 | 0        | 1        | 1        | no  |

|               |         |         |          |          |     |
|---------------|---------|---------|----------|----------|-----|
| Lin28b        | 1.47785 | 2.63507 | 5.00E-05 | 0.00022  | yes |
| Tmem221       | 1.47664 | 1.60172 | 0.01025  | 0.026534 | yes |
| Figl1         | 1.47633 | 1.93816 | 0.0007   | 0.002506 | yes |
| Myo1a         | 1.47612 | 6.12162 | 5.00E-05 | 0.00022  | yes |
| Cyp4f39       | 1.47331 | 5.18886 | 5.00E-05 | 0.00022  | yes |
| Nxpe5         | 1.4728  | 1.82884 | 0.0031   | 0.009315 | yes |
| 1700034F02Rik | 1.47007 | 0       | 1        | 1        | no  |
| Rarres1       | 1.46949 | 6.94437 | 5.00E-05 | 0.00022  | yes |
| Tpx2          | 1.46931 | 2.7489  | 5.00E-05 | 0.00022  | yes |
| Mroh6         | 1.46923 | 0       | 1        | 1        | no  |
| Tbx21         | 1.46823 | 0       | 1        | 1        | no  |
| Ccdc150       | 1.46754 | 0       | 1        | 1        | no  |
| Ppp1r1a       | 1.46649 | 6.27298 | 5.00E-05 | 0.00022  | yes |
| Paqr5         | 1.46561 | 6.28357 | 5.00E-05 | 0.00022  | yes |
| 4933406C10Rik | 1.46443 | 0       | 1        | 1        | no  |
| Zfp831        | 1.46372 | 0       | 1        | 1        | no  |
| Fbxo5         | 1.45379 | 2.15891 | 0.00075  | 0.00267  | yes |
| Btk           | 1.45152 | 0       | 1        | 1        | no  |
| Cysltr2       | 1.45139 | 3.58757 | 5.00E-05 | 0.00022  | yes |
| Rhcg          | 1.4488  | 0       | 1        | 1        | no  |
| 9330175M20Rik | 1.44661 | 0       | 1        | 1        | no  |
| Pask          | 1.44615 | 2.30816 | 0.00015  | 0.000615 | yes |
| Gm19424       | 1.4461  | 0       | 1        | 1        | no  |
| Lpar5         | 1.44257 | 3.91424 | 5.00E-05 | 0.00022  | yes |
| Osmr          | 1.44233 | 6.18155 | 5.00E-05 | 0.00022  | yes |
| Gzmm          | 1.4415  | 0       | 1        | 1        | no  |
| Rasgrp1       | 1.43954 | 6.81041 | 5.00E-05 | 0.00022  | yes |
| Rnf223        | 1.43937 | 0       | 1        | 1        | no  |
| Dynlt1a       | 1.43799 | 1.01069 | 0.05605  | 0.112346 | no  |
| Tmem86b       | 1.43746 | 2.14417 | 0.0014   | 0.004657 | yes |
| Nxph3         | 1.43653 | 4.47315 | 5.00E-05 | 0.00022  | yes |
| Tmc8          | 1.43632 | 1.56642 | 0.00285  | 0.008668 | yes |
| Gm10560       | 1.43424 | 1.94278 | 0.00865  | 0.022947 | yes |
| Il18rap       | 1.43291 | 0       | 1        | 1        | no  |
| Kcnk12        | 1.431   | 4.79764 | 5.00E-05 | 0.00022  | yes |
| Hrh2          | 1.43088 | 1.65284 | 0.0029   | 0.008796 | yes |
| Zfpm1         | 1.42969 | 3.67944 | 5.00E-05 | 0.00022  | yes |
| Setd4         | 1.42922 | 1.84816 | 0.00225  | 0.007062 | yes |
| Lrrn4         | 1.42859 | 2.73701 | 5.00E-05 | 0.00022  | yes |
| Fam124b       | 1.42729 | 0       | 1        | 1        | no  |
| Serpina1e     | 1.42416 | 2.156   | 0.0014   | 0.004657 | yes |
| Celf6         | 1.42326 | 6.46748 | 5.00E-05 | 0.00022  | yes |
| Tbc1d2        | 1.42169 | 2.1431  | 0.00025  | 0.000985 | yes |
| Adam1a        | 1.4195  | 2.99295 | 5.00E-05 | 0.00022  | yes |
| Sh2d1a        | 1.41878 | 0       | 1        | 1        | no  |
| Avpr1a        | 1.41322 | 1.77421 | 0.0029   | 0.008796 | yes |
| Oas1a         | 1.40689 | 1.79444 | 0.0034   | 0.010109 | yes |
| 1700019N19Rik | 1.40619 | 0       | 1        | 1        | no  |
| Fam117a       | 1.40398 | 3.45433 | 5.00E-05 | 0.00022  | yes |
| Capn9         | 1.40375 | 3.48541 | 5.00E-05 | 0.00022  | yes |
| Rspo4         | 1.40198 | 3.08559 | 5.00E-05 | 0.00022  | yes |
| 2810442I21Rik | 1.40154 | 0       | 1        | 1        | no  |
| T2            | 1.40057 | 1.49696 | 0.016    | 0.038963 | yes |

|               |         |          |          |          |     |
|---------------|---------|----------|----------|----------|-----|
| Gm9920        | 1.39974 | 0        | 1        | 1        | no  |
| Ptafr         | 1.39929 | 1.93458  | 0.0027   | 0.008273 | yes |
| Slc9b2        | 1.39831 | 1.96483  | 0.0014   | 0.004657 | yes |
| Proc          | 1.39826 | 0        | 1        | 1        | no  |
| 4933405D12Rik | 1.39698 | 0        | 1        | 1        | no  |
| Hist1h1d      | 1.39667 | 1.37123  | 0.0596   | 0.118193 | no  |
| Gm8909        | 1.39521 | 0        | 1        | 1        | no  |
| Gm4759        | 1.39234 | 0        | 1        | 1        | no  |
| Pthr1         | 1.392   | 3.63793  | 5.00E-05 | 0.00022  | yes |
| Saa2          | 1.39095 | 0        | 1        | 1        | no  |
| Atp4a         | 1.38748 | 0        | 1        | 1        | no  |
| 2510049J12Rik | 1.38729 | 0        | 1        | 1        | no  |
| Gm13498       | 1.3871  | 3.26755  | 5.00E-05 | 0.00022  | yes |
| Smpd5         | 1.38619 | 1.11848  | 0.0614   | 0.121021 | no  |
| A430093F15Rik | 1.38598 | 0        | 1        | 1        | no  |
| Obscn         | 1.38389 | 0        | 1        | 1        | no  |
| 1700003M02Rik | 1.38382 | 3.39741  | 5.00E-05 | 0.00022  | yes |
| Arhgap33      | 1.38376 | 4.12046  | 5.00E-05 | 0.00022  | yes |
| 1700020D05Rik | 1.38275 | 0        | 1        | 1        | no  |
| Kifc5b        | 1.38029 | 1.77743  | 0.0028   | 0.008532 | yes |
| Ctnx3         | 1.37828 | 6.91706  | 5.00E-05 | 0.00022  | yes |
| Ppp1r2-ps3    | 1.37725 | 2.6057   | 0.00065  | 0.002343 | yes |
| AB041803      | 1.37668 | 0        | 1        | 1        | no  |
| E030030I06Rik | 1.37479 | 0        | 1        | 1        | no  |
| Gfra2         | 1.37395 | 6.65803  | 5.00E-05 | 0.00022  | yes |
| A3galt2       | 1.37301 | 6.23347  | 5.00E-05 | 0.00022  | yes |
| Aspg          | 1.37183 | 0        | 1        | 1        | no  |
| Fsip1         | 1.37072 | 0        | 1        | 1        | no  |
| Zfp296        | 1.36963 | 1.50527  | 0.0168   | 0.040613 | yes |
| Hist2h4       | 1.3688  | 0        | 1        | 1        | no  |
| Gpr35         | 1.36645 | 5.39971  | 5.00E-05 | 0.00022  | yes |
| Rgs10         | 1.36611 | 8.01432  | 5.00E-05 | 0.00022  | yes |
| Fut2          | 1.36575 | 0        | 1        | 1        | no  |
| Olf570        | 1.36469 | 0        | 1        | 1        | no  |
| Spc24         | 1.36466 | 1.57769  | 0.01295  | 0.032429 | yes |
| Lxn           | 1.36446 | 5.47027  | 5.00E-05 | 0.00022  | yes |
| Qrfpr         | 1.36441 | 0        | 1        | 1        | no  |
| Mak           | 1.3639  | 0        | 1        | 1        | no  |
| Acpp          | 1.36139 | 5.54803  | 5.00E-05 | 0.00022  | yes |
| 1700003F12Rik | 1.35958 | 0        | 1        | 1        | no  |
| Atp13a4       | 1.35543 | 0        | 1        | 1        | no  |
| Barhl2        | 1.35384 | 0        | 1        | 1        | no  |
| Card14        | 1.34903 | 1.92769  | 0.00025  | 0.000985 | yes |
| Ttc22         | 1.34849 | 1.73558  | 0.0038   | 0.011141 | yes |
| Cmtm8         | 1.3483  | 2.49449  | 0.0002   | 0.000803 | yes |
| Ms4a3         | 1.34558 | 3.3274   | 5.00E-05 | 0.00022  | yes |
| Wfdc3         | 1.34548 | 0        | 1        | 1        | no  |
| Tmem150b      | 1.34525 | 0.407501 | 0.4536   | 0.583527 | no  |
| 9530091C08Rik | 1.34404 | 0        | 1        | 1        | no  |
| Cd5           | 1.34296 | 0        | 1        | 1        | no  |
| Arx           | 1.34052 | 0        | 1        | 1        | no  |
| Gm11549       | 1.34048 | 3.71912  | 5.00E-05 | 0.00022  | yes |
| Ldb2          | 1.33967 | 6.14685  | 5.00E-05 | 0.00022  | yes |



|               |         |          |          |          |     |
|---------------|---------|----------|----------|----------|-----|
| Otog          | 1.33958 | 0        | 1        | 1        | no  |
| AA465934      | 1.3394  | 0        | 1        | 1        | no  |
| Uba1y         | 1.33922 | 0        | 1        | 1        | no  |
| Pnpla3        | 1.33699 | 4.40569  | 5.00E-05 | 0.00022  | yes |
| Nrn1l         | 1.33695 | 4.92163  | 5.00E-05 | 0.00022  | yes |
| 1700034P13Rik | 1.33637 | 0        | 1        | 1        | no  |
| Esyt3         | 1.33299 | 2.93836  | 5.00E-05 | 0.00022  | yes |
| Bag2          | 1.33265 | 4.98476  | 5.00E-05 | 0.00022  | yes |
| Nt5e          | 1.33251 | 5.99445  | 5.00E-05 | 0.00022  | yes |
| Ptger2        | 1.33159 | 1.91539  | 0.00105  | 0.003607 | yes |
| Melk          | 1.33018 | 0        | 1        | 1        | no  |
| P2ry1         | 1.32987 | 5.78179  | 5.00E-05 | 0.00022  | yes |
| Ms4a2         | 1.32954 | 0        | 1        | 1        | no  |
| Gm1661        | 1.32937 | 0        | 1        | 1        | no  |
| Fndc9         | 1.32818 | 0        | 1        | 1        | no  |
| Irx5          | 1.32724 | 0        | 1        | 1        | no  |
| Tslp          | 1.3272  | 0        | 1        | 1        | no  |
| Wdr27         | 1.32599 | 0        | 1        | 1        | no  |
| Btnl1         | 1.32533 | 0        | 1        | 1        | no  |
| Trim14        | 1.3253  | 3.78512  | 5.00E-05 | 0.00022  | yes |
| Tmprss3       | 1.32463 | 0        | 1        | 1        | no  |
| Mrgpra1       | 1.32434 | 1.35385  | 0.03455  | 0.074739 | no  |
| Bbc3          | 1.32323 | 3.04518  | 5.00E-05 | 0.00022  | yes |
| Hist1h2bn     | 1.32156 | 0        | 1        | 1        | no  |
| Insm2         | 1.32122 | 4.70674  | 5.00E-05 | 0.00022  | yes |
| Isg15         | 1.32118 | 3.48697  | 5.00E-05 | 0.00022  | yes |
| Pkp3          | 1.32087 | 1.98347  | 0.0005   | 0.00185  | yes |
| Gdf2          | 1.31977 | 0        | 1        | 1        | no  |
| Rad54b        | 1.31821 | 0        | 1        | 1        | no  |
| Troap         | 1.31681 | 0        | 1        | 1        | no  |
| Kntc1         | 1.31607 | 3.14729  | 5.00E-05 | 0.00022  | yes |
| Lor           | 1.31575 | 0        | 1        | 1        | no  |
| Nnat          | 1.31501 | 2.65341  | 5.00E-05 | 0.00022  | yes |
| Mss51         | 1.31477 | 0        | 1        | 1        | no  |
| Dffb          | 1.31297 | 1.93585  | 0.00185  | 0.005939 | yes |
| Rsrp1         | 1.31191 | 6.74329  | 5.00E-05 | 0.00022  | yes |
| Nptx2         | 1.31141 | 6.4733   | 5.00E-05 | 0.00022  | yes |
| Rasa4         | 1.309   | 4.40186  | 5.00E-05 | 0.00022  | yes |
| Gnb3          | 1.30886 | 2.02342  | 0.00135  | 0.004516 | yes |
| Eaf2          | 1.30865 | 0        | 1        | 1        | no  |
| Cntd1         | 1.30786 | 0        | 1        | 1        | no  |
| Irx6          | 1.30771 | 0        | 1        | 1        | no  |
| E230016M11Rik | 1.30742 | 0.716622 | 0.1723   | 0.279211 | no  |
| Efcab7        | 1.30611 | 1.91371  | 0.00165  | 0.00538  | yes |
| Pla2g2d       | 1.30547 | 0        | 1        | 1        | no  |
| Slc6a4        | 1.30531 | 0        | 1        | 1        | no  |
| Adam5         | 1.30484 | 1.71846  | 0.00125  | 0.00422  | yes |
| Fanci         | 1.30319 | 0        | 1        | 1        | no  |
| Cckar         | 1.30113 | 4.92882  | 5.00E-05 | 0.00022  | yes |
| Dnd1          | 1.30049 | 0        | 1        | 1        | no  |
| Runx1         | 1.29969 | 5.9872   | 5.00E-05 | 0.00022  | yes |
| Hist1h2ac     | 1.29963 | 0        | 1        | 1        | no  |
| Oscar         | 1.29954 | 0        | 1        | 1        | no  |

|               |         |          |          |          |     |
|---------------|---------|----------|----------|----------|-----|
| Car8          | 1.29921 | 4.84239  | 5.00E-05 | 0.00022  | yes |
| Apoa2         | 1.29899 | 1.31392  | 0.13545  | 0.230564 | no  |
| Lmod3         | 1.29843 | 0        | 1        | 1        | no  |
| Figf          | 1.29794 | 1.91923  | 0.0017   | 0.005514 | yes |
| Pate2         | 1.2961  | 0        | 1        | 1        | no  |
| Dok1          | 1.29518 | 3.55616  | 5.00E-05 | 0.00022  | yes |
| Cenpk         | 1.29493 | 0.956704 | 0.0641   | 0.125374 | no  |
| Dusp26        | 1.29482 | 6.73999  | 5.00E-05 | 0.00022  | yes |
| Mms22l        | 1.29449 | 0        | 1        | 1        | no  |
| 6720483E21Rik | 1.2926  | 0        | 1        | 1        | no  |
| Rnpc3         | 1.29056 | 3.68314  | 5.00E-05 | 0.00022  | yes |
| Gm9962        | 1.29052 | 0        | 1        | 1        | no  |
| 9530053A07Rik | 1.28887 | 2.16345  | 0.0002   | 0.000803 | yes |
| Adam4         | 1.28729 | 0        | 1        | 1        | no  |
| Lrrc39        | 1.28604 | 0        | 1        | 1        | no  |
| Mcm7          | 1.2859  | 2.101    | 0.0001   | 0.000422 | yes |
| Ccnb3         | 1.2827  | 0        | 1        | 1        | no  |
| Syt5          | 1.27989 | 6.08952  | 5.00E-05 | 0.00022  | yes |
| Col20a1       | 1.27986 | 0        | 1        | 1        | no  |
| 4933432I09Rik | 1.27925 | 0        | 1        | 1        | no  |
| Fendrr        | 1.27797 | 0        | 1        | 1        | no  |
| Msantd2       | 1.27689 | 2.77497  | 5.00E-05 | 0.00022  | yes |
| Mal2          | 1.2759  | 6.29581  | 5.00E-05 | 0.00022  | yes |
| Oas1b         | 1.27535 | 1.55308  | 0.00375  | 0.011009 | yes |
| AI450353      | 1.27401 | 0        | 1        | 1        | no  |
| Sox11         | 1.27376 | 4.34885  | 5.00E-05 | 0.00022  | yes |
| A230056P14Rik | 1.27341 | 0.823859 | 0.1683   | 0.274102 | no  |
| Carhsp1       | 1.27295 | 6.21795  | 5.00E-05 | 0.00022  | yes |
| Gadl1         | 1.27276 | 3.23919  | 5.00E-05 | 0.00022  | yes |
| Recql4        | 1.27269 | 1.32798  | 0.0155   | 0.037857 | yes |
| Lrrc69        | 1.27161 | 0        | 1        | 1        | no  |
| Ankrd2        | 1.27107 | 0        | 1        | 1        | no  |
| Nol4          | 1.27101 | 2.79426  | 5.00E-05 | 0.00022  | yes |
| Dok2          | 1.26946 | 0        | 1        | 1        | no  |
| Marveld2      | 1.26882 | 1.88524  | 0.0004   | 0.001513 | yes |
| Ptcra         | 1.26842 | 0        | 1        | 1        | no  |
| Galnt3        | 1.26836 | 2.94584  | 5.00E-05 | 0.00022  | yes |
| Reg4          | 1.26828 | 0        | 1        | 1        | no  |
| Pou4f2        | 1.26754 | 4.72936  | 5.00E-05 | 0.00022  | yes |
| 4930447C04Rik | 1.26735 | 1.98054  | 0.0013   | 0.004375 | yes |
| Sst           | 1.26711 | 4.32384  | 5.00E-05 | 0.00022  | yes |
| Il1b          | 1.26697 | 1.23538  | 0.2346   | 0.355261 | no  |
| Pomc          | 1.26682 | 1.04873  | 0.0182   | 0.043483 | yes |
| Stxbp2        | 1.26573 | 2.56893  | 5.00E-05 | 0.00022  | yes |
| Hist3h2bb-ps  | 1.26482 | 0        | 1        | 1        | no  |
| Grm2          | 1.26408 | 0        | 1        | 1        | no  |
| AI839979      | 1.26404 | 0        | 1        | 1        | no  |
| Fndc3c1       | 1.26144 | 0        | 1        | 1        | no  |
| Gm6225        | 1.26143 | 0        | 1        | 1        | no  |
| Smc2          | 1.26084 | 3.35523  | 5.00E-05 | 0.00022  | yes |
| Pdlim1        | 1.26014 | 3.72369  | 5.00E-05 | 0.00022  | yes |
| Mir17hg       | 1.25998 | 0        | 1        | 1        | no  |
| Nbl1          | 1.25974 | 6.55826  | 5.00E-05 | 0.00022  | yes |

|               |         |          |          |          |     |
|---------------|---------|----------|----------|----------|-----|
| Ngfrap1       | 1.25947 | 5.67323  | 5.00E-05 | 0.00022  | yes |
| Ass1          | 1.25851 | 3.03737  | 5.00E-05 | 0.00022  | yes |
| Gpx2          | 1.25838 | 2.24429  | 0.00085  | 0.002983 | yes |
| 9230116N13Rik | 1.25667 | 0        | 1        | 1        | no  |
| Tmem207       | 1.25612 | 0        | 1        | 1        | no  |
| Gm14391       | 1.25597 | 0        | 1        | 1        | no  |
| Wnt9b         | 1.25383 | 0        | 1        | 1        | no  |
| Zbtb32        | 1.25225 | 0        | 1        | 1        | no  |
| Prr11         | 1.25056 | 0.145031 | 0.7465   | 0.832001 | no  |
| Dgkz          | 1.25039 | 5.24533  | 5.00E-05 | 0.00022  | yes |
| Kcng2         | 1.25039 | 3.90227  | 5.00E-05 | 0.00022  | yes |
| Firre         | 1.25027 | 4.60944  | 5.00E-05 | 0.00022  | yes |
| Grik1         | 1.25005 | 5.65729  | 5.00E-05 | 0.00022  | yes |
| Kcnp2         | 1.24997 | 5.63544  | 5.00E-05 | 0.00022  | yes |
| Bnc1          | 1.24903 | 0        | 1        | 1        | no  |
| Rps17         | 1.24891 | 3.26418  | 0.0004   | 0.001513 | yes |
| Ccr3          | 1.24854 | 0        | 1        | 1        | no  |
| Zfp40         | 1.24829 | 4.54733  | 5.00E-05 | 0.00022  | yes |
| Gm16702       | 1.24742 | 2.9151   | 5.00E-05 | 0.00022  | yes |
| Bhlhe23       | 1.24705 | 0        | 1        | 1        | no  |
| Pax2          | 1.24671 | 1.55413  | 0.0039   | 0.011392 | yes |
| Artn          | 1.24644 | 0        | 1        | 1        | no  |
| Rpl37         | 1.2461  | 1.11388  | 0.03575  | 0.076921 | no  |
| AW112010      | 1.24469 | 1.78361  | 0.01305  | 0.032667 | yes |
| Hoxd4         | 1.24465 | 1.84141  | 0.00065  | 0.002343 | yes |
| Anks6         | 1.24331 | 3.01572  | 5.00E-05 | 0.00022  | yes |
| 0610040B10Rik | 1.24208 | 1.63119  | 0.091    | 0.166134 | no  |
| Phf11a        | 1.24159 | 0        | 1        | 1        | no  |
| Arid3a        | 1.24122 | 0.277247 | 0.60365  | 0.71639  | no  |
| Arglu1        | 1.23973 | 4.57255  | 5.00E-05 | 0.00022  | yes |
| Baat          | 1.23764 | 0        | 1        | 1        | no  |
| Rnf138rt1     | 1.23715 | 0        | 1        | 1        | no  |
| Chek1         | 1.23574 | 1.70089  | 0.0033   | 0.009856 | yes |
| Rad51ap1      | 1.23514 | 1.51104  | 0.0113   | 0.028847 | yes |
| Zbtb48        | 1.23477 | 2.7542   | 5.00E-05 | 0.00022  | yes |
| Ptprcap       | 1.23432 | 0        | 1        | 1        | no  |
| Atf5          | 1.22919 | 4.33765  | 5.00E-05 | 0.00022  | yes |
| Synpr         | 1.22904 | 5.47864  | 5.00E-05 | 0.00022  | yes |
| Gpr162        | 1.22902 | 4.79319  | 5.00E-05 | 0.00022  | yes |
| Rps26         | 1.22897 | 4.71217  | 5.00E-05 | 0.00022  | yes |
| 4930511M06Rik | 1.22889 | 0        | 1        | 1        | no  |
| Il12rb2       | 1.2288  | 0        | 1        | 1        | no  |
| Celf5         | 1.22863 | 2.9485   | 5.00E-05 | 0.00022  | yes |
| 1810020O05Rik | 1.22855 | 1.30036  | 0.04635  | 0.096007 | no  |
| Leng8         | 1.22708 | 5.17187  | 5.00E-05 | 0.00022  | yes |
| Mst1r         | 1.22653 | 2.64108  | 5.00E-05 | 0.00022  | yes |
| Prkcd         | 1.22549 | 5.94148  | 5.00E-05 | 0.00022  | yes |
| Isl2          | 1.2247  | 6.35089  | 5.00E-05 | 0.00022  | yes |
| Cct6b         | 1.22469 | 1.31724  | 0.0111   | 0.028407 | yes |
| Tk1           | 1.22285 | 1.2814   | 0.0374   | 0.079824 | no  |
| Tmsb15b2      | 1.22277 | 1.67247  | 0.02525  | 0.057371 | no  |
| Tmem45b       | 1.22178 | 6.49273  | 5.00E-05 | 0.00022  | yes |
| Slc10a6       | 1.22035 | 3.26742  | 5.00E-05 | 0.00022  | yes |

|               |         |          |          |          |     |
|---------------|---------|----------|----------|----------|-----|
| Syt7          | 1.21843 | 5.52147  | 5.00E-05 | 0.00022  | yes |
| Sectm1a       | 1.21804 | 0        | 1        | 1        | no  |
| Atp6v1c2      | 1.21703 | 0.531145 | 0.3005   | 0.428681 | no  |
| Socs2         | 1.2166  | 4.6567   | 5.00E-05 | 0.00022  | yes |
| Plxnc1        | 1.21607 | 5.44712  | 5.00E-05 | 0.00022  | yes |
| Dgki          | 1.21545 | 5.82112  | 5.00E-05 | 0.00022  | yes |
| Arntl2        | 1.21255 | 1.96933  | 0.0003   | 0.001164 | yes |
| Gm527         | 1.21116 | 3.39283  | 5.00E-05 | 0.00022  | yes |
| Mnd1-ps       | 1.20993 | 0        | 1        | 1        | no  |
| Fam122b       | 1.20912 | 4.13631  | 5.00E-05 | 0.00022  | yes |
| Hspa1b        | 1.20776 | 4.32738  | 5.00E-05 | 0.00022  | yes |
| Mroh2b        | 1.20682 | 1.81797  | 0.00155  | 0.005095 | yes |
| Ypel1         | 1.20671 | 2.04552  | 0.00025  | 0.000985 | yes |
| Adamts9       | 1.20593 | 3.71065  | 5.00E-05 | 0.00022  | yes |
| Slc45a3       | 1.20561 | 4.61804  | 5.00E-05 | 0.00022  | yes |
| Ssh3          | 1.20514 | 3.42853  | 5.00E-05 | 0.00022  | yes |
| Gpr179        | 1.20461 | 2.97073  | 5.00E-05 | 0.00022  | yes |
| Asb17         | 1.20416 | 0        | 1        | 1        | no  |
| AI182371      | 1.20388 | 0        | 1        | 1        | no  |
| Ccnf          | 1.20324 | 1.63319  | 0.0024   | 0.00748  | yes |
| Snora28       | 1.20297 | 0.116392 | 0.626    | 0.734383 | no  |
| Parvg         | 1.20039 | 0        | 1        | 1        | no  |
| Vsig2         | 1.19976 | 0        | 1        | 1        | no  |
| Ptgdr         | 1.1985  | 5.37516  | 5.00E-05 | 0.00022  | yes |
| Snhg7         | 1.19836 | 1.56184  | 0.00335  | 0.009985 | yes |
| Pbld1         | 1.19824 | 0        | 1        | 1        | no  |
| Fam222a       | 1.19715 | 3.26896  | 5.00E-05 | 0.00022  | yes |
| Gna14         | 1.19605 | 5.79254  | 5.00E-05 | 0.00022  | yes |
| Ccdc106       | 1.1952  | 1.87193  | 0.0004   | 0.001513 | yes |
| Cldn23        | 1.19439 | 0        | 1        | 1        | no  |
| Gm2694        | 1.19135 | 1.2879   | 0.08335  | 0.155005 | no  |
| Far2          | 1.19135 | 0.934192 | 0.0875   | 0.160963 | no  |
| Trpc3         | 1.19094 | 5.79394  | 5.00E-05 | 0.00022  | yes |
| Rnf207        | 1.1905  | 0.538864 | 0.30345  | 0.432007 | no  |
| Serinc2       | 1.18999 | 4.31478  | 5.00E-05 | 0.00022  | yes |
| Gpr160        | 1.1886  | 2.09064  | 0.00015  | 0.000615 | yes |
| Gm9895        | 1.18798 | 0        | 1        | 1        | no  |
| 2700038G22Rik | 1.18604 | 0        | 1        | 1        | no  |
| Foxp3         | 1.1851  | 0        | 1        | 1        | no  |
| Slc37a1       | 1.18463 | 4.02141  | 5.00E-05 | 0.00022  | yes |
| Rfx2          | 1.18428 | 0        | 1        | 1        | no  |
| Ttc29         | 1.18416 | 1.74507  | 0.00285  | 0.008668 | yes |
| Samd14        | 1.18398 | 5.84225  | 5.00E-05 | 0.00022  | yes |
| Slc6a5        | 1.18391 | 0        | 1        | 1        | no  |
| Kif20b        | 1.18352 | 0        | 1        | 1        | no  |
| C030034I22Rik | 1.18323 | 1.50436  | 0.0086   | 0.022847 | yes |
| Gm4262        | 1.18207 | 0        | 1        | 1        | no  |
| Grhl1         | 1.18116 | 0        | 1        | 1        | no  |
| Luc7l3        | 1.18101 | 5.17738  | 5.00E-05 | 0.00022  | yes |
| Spata25       | 1.18039 | 0        | 1        | 1        | no  |
| Dbf4          | 1.18003 | 1.48986  | 0.0051   | 0.014464 | yes |
| 4930413F20Rik | 1.17796 | 0        | 1        | 1        | no  |
| Fam179a       | 1.1771  | 2.37392  | 0.0001   | 0.000422 | yes |

|               |         |         |          |          |     |
|---------------|---------|---------|----------|----------|-----|
| Klk4          | 1.17674 | 0       | 1        | 1        | no  |
| Ccno          | 1.17617 | 0       | 1        | 1        | no  |
| N4bp2l1       | 1.17605 | 3.23228 | 5.00E-05 | 0.00022  | yes |
| BC006965      | 1.17576 | 0       | 1        | 1        | no  |
| Apol7a        | 1.17554 | 0       | 1        | 1        | no  |
| Aoc1          | 1.17553 | 0       | 1        | 1        | no  |
| Nog           | 1.17507 | 2.76103 | 5.00E-05 | 0.00022  | yes |
| Rpl9          | 1.17496 | 0       | 1        | 1        | no  |
| Snhg5         | 1.17454 | 2.71797 | 5.00E-05 | 0.00022  | yes |
| D5Erttd605e   | 1.17415 | 0       | 1        | 1        | no  |
| Wbp5          | 1.17355 | 5.93609 | 5.00E-05 | 0.00022  | yes |
| Txn1          | 1.17295 | 6.64906 | 5.00E-05 | 0.00022  | yes |
| Cyp4b1        | 1.1725  | 1.78086 | 0.00315  | 0.009455 | yes |
| Rpl28         | 1.17218 | 1.51137 | 0.0868   | 0.159985 | no  |
| Myom2         | 1.17147 | 0       | 1        | 1        | no  |
| Zfp521        | 1.17078 | 5.05481 | 5.00E-05 | 0.00022  | yes |
| Slc38a8       | 1.17073 | 1.46907 | 0.0122   | 0.030789 | yes |
| Kcnip4        | 1.1703  | 5.9389  | 5.00E-05 | 0.00022  | yes |
| 2700099C18Rik | 1.16907 | 0       | 1        | 1        | no  |
| Tnfrsf9       | 1.16674 | 0       | 1        | 1        | no  |
| Stom          | 1.1666  | 4.77151 | 5.00E-05 | 0.00022  | yes |
| Mzb1          | 1.16653 | 0       | 1        | 1        | no  |
| Slc16a12      | 1.1664  | 4.27421 | 5.00E-05 | 0.00022  | yes |
| Tnr           | 1.1647  | 3.69847 | 5.00E-05 | 0.00022  | yes |
| Rgs4          | 1.16453 | 4.19476 | 5.00E-05 | 0.00022  | yes |
| Iqgap3        | 1.16391 | 2.90744 | 5.00E-05 | 0.00022  | yes |
| Ccdc88c       | 1.16266 | 0       | 1        | 1        | no  |
| Cyp2j12       | 1.16249 | 3.13658 | 5.00E-05 | 0.00022  | yes |
| Pkmyt1        | 1.16187 | 1.34429 | 0.02285  | 0.052694 | no  |
| Actl9         | 1.16022 | 0       | 1        | 1        | no  |
| Tlx3          | 1.15891 | 5.61156 | 5.00E-05 | 0.00022  | yes |
| Atg16l2       | 1.15886 | 2.58866 | 5.00E-05 | 0.00022  | yes |
| 5830454E08Rik | 1.15871 | 1.1747  | 0.0992   | 0.178331 | no  |
| Ccdc171       | 1.15685 | 2.25339 | 0.00015  | 0.000615 | yes |
| Myt1          | 1.15683 | 5.124   | 5.00E-05 | 0.00022  | yes |
| Tubb2b        | 1.15662 | 5.87006 | 5.00E-05 | 0.00022  | yes |
| Plcl2         | 1.15591 | 4.00792 | 5.00E-05 | 0.00022  | yes |
| Gabrb1        | 1.15503 | 1.75772 | 0.00405  | 0.011765 | yes |
| Ces2g         | 1.155   | 1.94948 | 0.0008   | 0.002828 | yes |
| Gimap7        | 1.15391 | 0       | 1        | 1        | no  |
| Plekha5       | 1.15386 | 4.54548 | 5.00E-05 | 0.00022  | yes |
| Cdk15         | 1.15312 | 5.0114  | 5.00E-05 | 0.00022  | yes |
| Hyls1         | 1.15249 | 2.05101 | 0.00045  | 0.001682 | yes |
| Gabrq         | 1.15165 | 0       | 1        | 1        | no  |
| Nkain1        | 1.1516  | 3.73081 | 5.00E-05 | 0.00022  | yes |
| Tyms-ps       | 1.15087 | 0       | 1        | 1        | no  |
| C7            | 1.14893 | 0       | 1        | 1        | no  |
| Rgs14         | 1.14883 | 2.47978 | 5.00E-05 | 0.00022  | yes |
| Dimt1         | 1.14874 | 1.46629 | 0.01     | 0.025958 | yes |
| Tia1          | 1.1471  | 3.50298 | 5.00E-05 | 0.00022  | yes |
| Tubb2a-ps2    | 1.14705 | 5.78924 | 5.00E-05 | 0.00022  | yes |
| Grhl3         | 1.14661 | 3.27013 | 5.00E-05 | 0.00022  | yes |
| Casz1         | 1.1464  | 4.96817 | 5.00E-05 | 0.00022  | yes |



|               |         |          |          |          |     |
|---------------|---------|----------|----------|----------|-----|
| Cdt1          | 1.14528 | 1.48438  | 0.0108   | 0.027763 | yes |
| Mef2b         | 1.14513 | 0        | 1        | 1        | no  |
| Crb1          | 1.14439 | 0        | 1        | 1        | no  |
| Rasgef1a      | 1.14434 | 4.90612  | 5.00E-05 | 0.00022  | yes |
| Clk4          | 1.14357 | 4.10895  | 5.00E-05 | 0.00022  | yes |
| 4931429I11Rik | 1.1428  | 3.97766  | 5.00E-05 | 0.00022  | yes |
| Kcnn1         | 1.1417  | 4.66867  | 5.00E-05 | 0.00022  | yes |
| Prdm12        | 1.14039 | 5.74552  | 5.00E-05 | 0.00022  | yes |
| Gpr150        | 1.13982 | 1.44507  | 0.0124   | 0.031187 | yes |
| Cd24a         | 1.13978 | 4.69964  | 5.00E-05 | 0.00022  | yes |
| Kcnt1         | 1.13957 | 5.29958  | 5.00E-05 | 0.00022  | yes |
| Klrd1         | 1.13898 | 0        | 1        | 1        | no  |
| Zfp575        | 1.13835 | 1.63334  | 0.00685  | 0.018707 | yes |
| Malat1        | 1.13795 | 5.14927  | 5.00E-05 | 0.00022  | yes |
| Marveld3      | 1.1374  | 1.61376  | 0.0035   | 0.01036  | yes |
| Tmem233       | 1.13703 | 7.24597  | 5.00E-05 | 0.00022  | yes |
| Vstm5         | 1.13564 | 5.4179   | 5.00E-05 | 0.00022  | yes |
| Aff2          | 1.13492 | 3.4494   | 5.00E-05 | 0.00022  | yes |
| Khdc3         | 1.13486 | 0        | 1        | 1        | no  |
| Mmp25         | 1.13469 | 5.12849  | 5.00E-05 | 0.00022  | yes |
| Neurog2       | 1.13466 | 0        | 1        | 1        | no  |
| Rnasel        | 1.13408 | 3.8978   | 5.00E-05 | 0.00022  | yes |
| Blvrb         | 1.13399 | 3.33146  | 5.00E-05 | 0.00022  | yes |
| Gcnt7         | 1.13313 | 0.527715 | 0.31145  | 0.440889 | no  |
| Mcm5          | 1.13175 | 2.41322  | 5.00E-05 | 0.00022  | yes |
| Gnat2         | 1.13158 | 0        | 1        | 1        | no  |
| Col10a1       | 1.13084 | 0        | 1        | 1        | no  |
| 9430021M05Rik | 1.13016 | 3.62568  | 5.00E-05 | 0.00022  | yes |
| Fosl1         | 1.12925 | 0        | 1        | 1        | no  |
| Camk2a        | 1.12827 | 5.21509  | 5.00E-05 | 0.00022  | yes |
| Rpp25         | 1.12777 | 1.77765  | 0.00415  | 0.012021 | yes |
| Serpina12     | 1.1268  | 0        | 1        | 1        | no  |
| Slc35b3       | 1.12669 | 3.06113  | 5.00E-05 | 0.00022  | yes |
| 1700016K19Rik | 1.12667 | 0        | 1        | 1        | no  |
| Cspp1         | 1.12618 | 2.89143  | 5.00E-05 | 0.00022  | yes |
| 5730408K05Rik | 1.12502 | 0.838123 | 0.48595  | 0.614009 | no  |
| Lmnb1         | 1.12412 | 2.54378  | 5.00E-05 | 0.00022  | yes |
| Trpc6         | 1.12376 | 3.88465  | 5.00E-05 | 0.00022  | yes |
| Cxcr6         | 1.12365 | 0        | 1        | 1        | no  |
| Zap70         | 1.12293 | 0        | 1        | 1        | no  |
| Gbx1          | 1.12144 | 1.50182  | 0.0143   | 0.035369 | yes |
| Stamos        | 1.12114 | 0        | 1        | 1        | no  |
| Drc1          | 1.12079 | 1.93324  | 0.00115  | 0.00391  | yes |
| Setd6         | 1.12078 | 3.08336  | 5.00E-05 | 0.00022  | yes |
| Ttr           | 1.11958 | 0        | 1        | 1        | no  |
| Lyl1          | 1.11957 | 0.94513  | 0.10955  | 0.193246 | no  |
| Gm16386       | 1.11893 | 2.04344  | 0.0005   | 0.00185  | yes |
| Slc4a11       | 1.11793 | 4.14473  | 5.00E-05 | 0.00022  | yes |
| Gfap          | 1.11721 | 0        | 1        | 1        | no  |
| Slc24a4       | 1.11599 | 1.48855  | 0.0117   | 0.029708 | yes |
| Spdef         | 1.11517 | 0        | 1        | 1        | no  |
| Chaf1a        | 1.11461 | 2.29095  | 0.00015  | 0.000615 | yes |
| Prpf39        | 1.11448 | 1.96186  | 0.0004   | 0.001513 | yes |

|               |         |          |          |          |     |
|---------------|---------|----------|----------|----------|-----|
| Dcx           | 1.11443 | 3.15366  | 5.00E-05 | 0.00022  | yes |
| Fbp1          | 1.11386 | 1.67234  | 0.00595  | 0.016553 | yes |
| Moxd1         | 1.11195 | 4.82652  | 5.00E-05 | 0.00022  | yes |
| Pla2g4b       | 1.11183 | 0        | 1        | 1        | no  |
| Morc1         | 1.11037 | 0        | 1        | 1        | no  |
| 5830403L16Rik | 1.10865 | 0        | 1        | 1        | no  |
| Slc47a2       | 1.10675 | 2.40805  | 0.0001   | 0.000422 | yes |
| Morn3         | 1.10665 | 0        | 1        | 1        | no  |
| Cpne2         | 1.10577 | 5.08561  | 5.00E-05 | 0.00022  | yes |
| Gm7694        | 1.10548 | 2.05424  | 0.0004   | 0.001513 | yes |
| Hmga2-ps1     | 1.10445 | 2.02927  | 0.0001   | 0.000422 | yes |
| Actn1         | 1.10387 | 5.01576  | 5.00E-05 | 0.00022  | yes |
| D930016D06Rik | 1.10368 | 2.90329  | 5.00E-05 | 0.00022  | yes |
| Hmox1         | 1.10292 | 4.24467  | 5.00E-05 | 0.00022  | yes |
| Adora2b       | 1.10208 | 2.18921  | 0.0003   | 0.001164 | yes |
| Zfp7          | 1.10151 | 2.54829  | 5.00E-05 | 0.00022  | yes |
| Uox           | 1.10124 | 0        | 1        | 1        | no  |
| Cnih2         | 1.10122 | 2.29693  | 5.00E-05 | 0.00022  | yes |
| Kcnk13        | 1.10098 | 3.22755  | 5.00E-05 | 0.00022  | yes |
| Fnbp1l        | 1.10081 | 4.34015  | 5.00E-05 | 0.00022  | yes |
| Adrb1         | 1.10048 | 1.65567  | 0.004    | 0.011645 | yes |
| 4930429D17Rik | 1.1003  | 0        | 1        | 1        | no  |
| 5430440P10Rik | 1.09959 | 0        | 1        | 1        | no  |
| Gm3558        | 1.09774 | 0        | 1        | 1        | no  |
| Fmnl1         | 1.09619 | 4.88927  | 5.00E-05 | 0.00022  | yes |
| Lamp3         | 1.09572 | 0        | 1        | 1        | no  |
| Scn11a        | 1.09512 | 4.37152  | 5.00E-05 | 0.00022  | yes |
| Gm9958        | 1.09361 | 0        | 1        | 1        | no  |
| Psd4          | 1.09333 | 2.4936   | 5.00E-05 | 0.00022  | yes |
| A230073K19Rik | 1.09225 | 0        | 1        | 1        | no  |
| Clec4e        | 1.09194 | 0        | 1        | 1        | no  |
| Rnf43         | 1.09169 | 0        | 1        | 1        | no  |
| Ltb           | 1.0908  | 0.88827  | 0.08135  | 0.152096 | no  |
| Sbno2         | 1.08953 | 0.521739 | 0.3048   | 0.433557 | no  |
| A930003O13Rik | 1.08913 | 0.589214 | 0.30735  | 0.436295 | no  |
| Efna2         | 1.08909 | 0.12685  | 0.80925  | 0.876649 | no  |
| Rtbdn         | 1.08801 | 0        | 1        | 1        | no  |
| 4930563E22Rik | 1.0873  | 0.828754 | 0.1123   | 0.197231 | no  |
| Padi1         | 1.0871  | 0        | 1        | 1        | no  |
| Ccne2         | 1.08649 | 1.26278  | 0.0267   | 0.060141 | no  |
| Gadd45a       | 1.08602 | 4.18401  | 5.00E-05 | 0.00022  | yes |
| Eml5          | 1.08599 | 2.40406  | 5.00E-05 | 0.00022  | yes |
| Kcng3         | 1.08445 | 3.24335  | 5.00E-05 | 0.00022  | yes |
| Olf1r560      | 1.08411 | 0        | 1        | 1        | no  |
| Gpr133        | 1.08377 | 2.87597  | 5.00E-05 | 0.00022  | yes |
| Tiam2         | 1.08296 | 2.92055  | 5.00E-05 | 0.00022  | yes |
| 4930474N09Rik | 1.08243 | 0        | 1        | 1        | no  |
| Il18bp        | 1.08226 | 1.24353  | 0.0387   | 0.082189 | no  |
| Panx3         | 1.08193 | 0        | 1        | 1        | no  |
| Gm525         | 1.08013 | 1.95822  | 0.0134   | 0.033404 | yes |
| E130309F12Rik | 1.08005 | 1.54368  | 0.0065   | 0.017869 | yes |
| Best2         | 1.07999 | 0        | 1        | 1        | no  |
| LOC100504703  | 1.07998 | 0        | 1        | 1        | no  |

|               |         |          |          |          |     |
|---------------|---------|----------|----------|----------|-----|
| Clec2e        | 1.07964 | 0        | 1        | 1        | no  |
| Pcgf1         | 1.07876 | 3.24834  | 5.00E-05 | 0.00022  | yes |
| F2            | 1.07826 | 0        | 1        | 1        | no  |
| Rian          | 1.07789 | 4.80563  | 5.00E-05 | 0.00022  | yes |
| Tmc4          | 1.07782 | 0.881146 | 0.0857   | 0.158575 | no  |
| Gng5          | 1.07769 | 2.21774  | 0.0089   | 0.023488 | yes |
| Brca1         | 1.07758 | 1.97783  | 0.0005   | 0.00185  | yes |
| Ager          | 1.07702 | 0        | 1        | 1        | no  |
| Hook1         | 1.07463 | 2.67749  | 5.00E-05 | 0.00022  | yes |
| Pnir          | 1.07372 | 4.14359  | 5.00E-05 | 0.00022  | yes |
| Kif18a        | 1.07322 | 1.41035  | 0.0128   | 0.032102 | yes |
| Lrrc3         | 1.07296 | 4.16255  | 5.00E-05 | 0.00022  | yes |
| Rnf39         | 1.07286 | 0        | 1        | 1        | no  |
| 8430426J06Rik | 1.07226 | 0        | 1        | 1        | no  |
| Ppox          | 1.07137 | 2.62993  | 5.00E-05 | 0.00022  | yes |
| Rmi2          | 1.07125 | 0        | 1        | 1        | no  |
| Fam220a       | 1.07093 | 4.13335  | 5.00E-05 | 0.00022  | yes |
| Ube2t         | 1.06913 | 1.11278  | 0.02975  | 0.065991 | no  |
| Mab21l1       | 1.0691  | 1.72943  | 0.001    | 0.003451 | yes |
| Hist2h3b      | 1.06891 | 0        | 1        | 1        | no  |
| 1110019D14Rik | 1.06852 | 1.60479  | 0.00865  | 0.022947 | yes |
| Ttk           | 1.06769 | 0        | 1        | 1        | no  |
| Nhlh1         | 1.06672 | 0        | 1        | 1        | no  |
| Ddit3         | 1.06598 | 2.81068  | 5.00E-05 | 0.00022  | yes |
| Tfr2          | 1.06471 | 1.61934  | 0.00115  | 0.00391  | yes |
| Zcchc7        | 1.06436 | 3.18293  | 5.00E-05 | 0.00022  | yes |
| Pcgf6         | 1.06313 | 2.51461  | 5.00E-05 | 0.00022  | yes |
| Plcb3         | 1.06138 | 4.59492  | 5.00E-05 | 0.00022  | yes |
| Shisa9        | 1.06073 | 0        | 1        | 1        | no  |
| Acvr1c        | 1.05981 | 0        | 1        | 1        | no  |
| Gm10451       | 1.05902 | 0        | 1        | 1        | no  |
| Slc5a1        | 1.05899 | 0        | 1        | 1        | no  |
| A430105I19Rik | 1.05863 | 3.25582  | 5.00E-05 | 0.00022  | yes |
| Tmcc2         | 1.05729 | 4.88166  | 5.00E-05 | 0.00022  | yes |
| 2010107G23Rik | 1.05718 | 4.16845  | 5.00E-05 | 0.00022  | yes |
| Ror2          | 1.05715 | 3.27594  | 5.00E-05 | 0.00022  | yes |
| Fbxl19        | 1.05713 | 4.54063  | 5.00E-05 | 0.00022  | yes |
| Sned1         | 1.05698 | 2.64748  | 5.00E-05 | 0.00022  | yes |
| Pdzd3         | 1.0555  | 0        | 1        | 1        | no  |
| Kcnd3         | 1.05509 | 4.20377  | 5.00E-05 | 0.00022  | yes |
| Jak3          | 1.0538  | 1.96246  | 0.00025  | 0.000985 | yes |
| A330069E16Rik | 1.05248 | 0        | 1        | 1        | no  |
| 2900005J15Rik | 1.05217 | 1.31478  | 0.02085  | 0.048838 | yes |
| Rbm3os        | 1.05069 | 0        | 1        | 1        | no  |
| Eme1          | 1.04955 | 0        | 1        | 1        | no  |
| Ccnl2         | 1.04902 | 3.50389  | 5.00E-05 | 0.00022  | yes |
| Msc           | 1.04776 | 1.95488  | 0.0013   | 0.004375 | yes |
| Tmem200a      | 1.04759 | 4.52668  | 5.00E-05 | 0.00022  | yes |
| Stx1a         | 1.04708 | 4.45333  | 5.00E-05 | 0.00022  | yes |
| St6galnac3    | 1.04589 | 3.04782  | 5.00E-05 | 0.00022  | yes |
| Cd209f        | 1.04517 | 0        | 1        | 1        | no  |
| Kncn          | 1.04461 | 0        | 1        | 1        | no  |
| Mrgprb8       | 1.04403 | 0        | 1        | 1        | no  |

|               |         |          |          |          |     |
|---------------|---------|----------|----------|----------|-----|
| N28178        | 1.04367 | 4.31645  | 5.00E-05 | 0.00022  | yes |
| Dscc1         | 1.04308 | 0        | 1        | 1        | no  |
| Hebp1         | 1.04293 | 2.43228  | 0.00035  | 0.001342 | yes |
| B3gnt6        | 1.04292 | 0        | 1        | 1        | no  |
| Ooep          | 1.04287 | 1.85508  | 0.0036   | 0.010628 | yes |
| Slc28a2       | 1.04222 | 0        | 1        | 1        | no  |
| Fam89a        | 1.04079 | 4.91967  | 5.00E-05 | 0.00022  | yes |
| Pabpc4        | 1.04072 | 2.66689  | 5.00E-05 | 0.00022  | yes |
| Nrg2          | 1.04011 | 2.53792  | 5.00E-05 | 0.00022  | yes |
| Vaultrc5      | 1.03998 | 0        | 1        | 1        | no  |
| Pi4k2b        | 1.03919 | 2.6622   | 5.00E-05 | 0.00022  | yes |
| Fam193b       | 1.03911 | 3.45064  | 5.00E-05 | 0.00022  | yes |
| Tox2          | 1.03887 | 3.19723  | 5.00E-05 | 0.00022  | yes |
| Cd46          | 1.03821 | 0        | 1        | 1        | no  |
| Dgkh          | 1.03742 | 4.68945  | 5.00E-05 | 0.00022  | yes |
| A730036I17Rik | 1.03742 | 0        | 1        | 1        | no  |
| Gpr39         | 1.03677 | 0        | 1        | 1        | no  |
| Syt9          | 1.03647 | 4.87866  | 5.00E-05 | 0.00022  | yes |
| Hs3st3a1      | 1.03625 | 0        | 1        | 1        | no  |
| Gm17801       | 1.03547 | 0        | 1        | 1        | no  |
| Asb4          | 1.03537 | 0        | 1        | 1        | no  |
| Npy2r         | 1.03426 | 3.62417  | 5.00E-05 | 0.00022  | yes |
| Nbeal2        | 1.03399 | 2.50212  | 5.00E-05 | 0.00022  | yes |
| Gm7334        | 1.03253 | 0        | 1        | 1        | no  |
| Hpca          | 1.03175 | 3.50774  | 5.00E-05 | 0.00022  | yes |
| Tcerg1l       | 1.03145 | 3.58723  | 5.00E-05 | 0.00022  | yes |
| Rab33a        | 1.03138 | 3.01869  | 5.00E-05 | 0.00022  | yes |
| Tmem30c       | 1.03127 | 0        | 1        | 1        | no  |
| Samsn1        | 1.03043 | 3.1195   | 5.00E-05 | 0.00022  | yes |
| Spink2        | 1.02977 | 1.2583   | 0.0086   | 0.022847 | yes |
| Gm12359       | 1.02976 | 0        | 1        | 1        | no  |
| Hs6st2        | 1.02967 | 4.68446  | 5.00E-05 | 0.00022  | yes |
| Ttc14         | 1.02864 | 4.08148  | 5.00E-05 | 0.00022  | yes |
| Scg3          | 1.02815 | 3.98403  | 5.00E-05 | 0.00022  | yes |
| Dennd2d       | 1.02808 | 0        | 1        | 1        | no  |
| Eps8l3        | 1.02739 | 0        | 1        | 1        | no  |
| Gpr27         | 1.0272  | 2.17344  | 0.00075  | 0.00267  | yes |
| Clk1          | 1.02718 | 3.72319  | 5.00E-05 | 0.00022  | yes |
| Glod5         | 1.02701 | 0        | 1        | 1        | no  |
| Cpox          | 1.02686 | 4.37385  | 5.00E-05 | 0.00022  | yes |
| Rs1           | 1.02548 | 0        | 1        | 1        | no  |
| 1500015A07Rik | 1.02477 | 1.30595  | 0.02505  | 0.057005 | no  |
| Pcmdt2        | 1.02469 | 4.02267  | 5.00E-05 | 0.00022  | yes |
| S100a7a       | 1.02198 | 1.47709  | 0.0381   | 0.081096 | no  |
| Scn2a1        | 1.02195 | 2.99838  | 5.00E-05 | 0.00022  | yes |
| Vmn2r113      | 1.02186 | 0        | 1        | 1        | no  |
| Eml1          | 1.02172 | 4.15818  | 5.00E-05 | 0.00022  | yes |
| St6galnac5    | 1.02122 | 3.08056  | 5.00E-05 | 0.00022  | yes |
| Zfhx2         | 1.02037 | 4.43437  | 5.00E-05 | 0.00022  | yes |
| Rab27b        | 1.01991 | 4.7413   | 5.00E-05 | 0.00022  | yes |
| Gm13032       | 1.01919 | 0        | 1        | 1        | no  |
| Rpl35         | 1.01794 | 0.724848 | 0.1379   | 0.233775 | no  |
| Cd2           | 1.01789 | 0        | 1        | 1        | no  |

|               |          |         |          |          |     |
|---------------|----------|---------|----------|----------|-----|
| Btbd19        | 1.0173   | 1.50017 | 0.00895  | 0.023578 | yes |
| Pak4          | 1.01675  | 2.79607 | 5.00E-05 | 0.00022  | yes |
| Cd44          | 1.01558  | 4.57424 | 5.00E-05 | 0.00022  | yes |
| Stac          | 1.01551  | 4.78999 | 5.00E-05 | 0.00022  | yes |
| Snrpf         | 1.01533  | 1.83743 | 0.0032   | 0.009592 | yes |
| Trmt13        | 1.01504  | 1.08306 | 0.0524   | 0.106152 | no  |
| Zfp692        | 1.01452  | 2.04161 | 0.0001   | 0.000422 | yes |
| Brpf3         | 1.01337  | 2.99402 | 5.00E-05 | 0.00022  | yes |
| Iqcg          | 1.01237  | 1.96749 | 5.00E-05 | 0.00022  | yes |
| Fam109b       | 1.01194  | 1.34772 | 0.0177   | 0.042472 | yes |
| Sh2d4a        | 1.01163  | 1.97316 | 0.00065  | 0.002343 | yes |
| Ppp1r14b      | 1.0116   | 2.86693 | 5.00E-05 | 0.00022  | yes |
| Ifit1         | 1.01082  | 3.78242 | 5.00E-05 | 0.00022  | yes |
| Csf2rb2       | 1.00915  | 0       | 1        | 1        | no  |
| Tmem132c      | 1.0087   | 3.20521 | 5.00E-05 | 0.00022  | yes |
| Synpo2l       | 1.00816  | 0       | 1        | 1        | no  |
| Lef1          | 1.00738  | 1.88708 | 0.00045  | 0.001682 | yes |
| Slc38a6       | 1.00692  | 1.86033 | 0.0011   | 0.00376  | yes |
| Ces5a         | 1.00637  | 0       | 1        | 1        | no  |
| 4930558J18Rik | 1.00627  | 0       | 1        | 1        | no  |
| Olf632        | 1.00614  | 0       | 1        | 1        | no  |
| Mrgprd        | 1.0061   | 4.92443 | 5.00E-05 | 0.00022  | yes |
| Redrum        | 1.0056   | 2.39581 | 5.00E-05 | 0.00022  | yes |
| Syce2         | 1.00521  | 0       | 1        | 1        | no  |
| Naip5         | 1.00497  | 0       | 1        | 1        | no  |
| 39141         | 1.00374  | 3.45728 | 5.00E-05 | 0.00022  | yes |
| Tmem154       | 1.00362  | 2.00603 | 0.00055  | 0.002016 | yes |
| Fam46b        | 1.0033   | 1.51954 | 0.00765  | 0.020612 | yes |
| Kcnc2         | 1.00295  | 4.05289 | 5.00E-05 | 0.00022  | yes |
| Asb12         | 1.00284  | 0       | 1        | 1        | no  |
| Flt3l         | 1.00165  | 1.2967  | 0.0105   | 0.027102 | yes |
| 1700019L03Rik | 1.00057  | 0       | 1        | 1        | no  |
| Cd28          | 1.00018  | 0       | 1        | 1        | no  |
| 2700069I18Rik | 0.999981 | 0       | 1        | 1        | no  |
| Cd55          | 0.999941 | 4.92957 | 5.00E-05 | 0.00022  | yes |
| 1500012F01Rik | 0.998929 | 1.14697 | 0.02645  | 0.059669 | no  |
| Rspo1         | 0.998861 | 2.58289 | 5.00E-05 | 0.00022  | yes |
| Fam159a       | 0.998773 | 0       | 1        | 1        | no  |
| Trpm6         | 0.998699 | 0       | 1        | 1        | no  |
| Timeless      | 0.998597 | 3.29021 | 5.00E-05 | 0.00022  | yes |
| Apobec3       | 0.997542 | 1.5901  | 0.00265  | 0.008146 | yes |
| Gbp8          | 0.996512 | 0       | 1        | 1        | no  |
| Nfil3         | 0.994894 | 2.29656 | 0.0001   | 0.000422 | yes |
| D330041H03Rik | 0.994622 | 0       | 1        | 1        | no  |
| Gabra2        | 0.994558 | 3.84684 | 5.00E-05 | 0.00022  | yes |
| Lbr           | 0.994419 | 3.48928 | 5.00E-05 | 0.00022  | yes |
| Clasrp        | 0.994181 | 3.13119 | 5.00E-05 | 0.00022  | yes |
| Fam150b       | 0.993426 | 1.91481 | 0.0016   | 0.005236 | yes |
| Ap1m2         | 0.992965 | 0       | 1        | 1        | no  |
| Nxpe4         | 0.992373 | 2.90621 | 5.00E-05 | 0.00022  | yes |
| Olf78         | 0.992126 | 0       | 1        | 1        | no  |
| Hes6          | 0.991645 | 3.56367 | 5.00E-05 | 0.00022  | yes |
| Tyms          | 0.991639 | 1.27487 | 0.0116   | 0.029488 | yes |



|                |          |          |          |          |     |
|----------------|----------|----------|----------|----------|-----|
| Mesdc1         | 0.991104 | 4.42359  | 5.00E-05 | 0.00022  | yes |
| Elf1           | 0.990123 | 2.24014  | 5.00E-05 | 0.00022  | yes |
| Tspear         | 0.988492 | 0        | 1        | 1        | no  |
| Pabpc1l        | 0.987322 | 0        | 1        | 1        | no  |
| Rgs5           | 0.98609  | 4.87279  | 5.00E-05 | 0.00022  | yes |
| Insl3          | 0.983926 | 0        | 1        | 1        | no  |
| 6720468P15Rik  | 0.982799 | 1.92426  | 0.00045  | 0.001682 | yes |
| Klhdc8b        | 0.982552 | 3.36248  | 5.00E-05 | 0.00022  | yes |
| Klhl29         | 0.982427 | 4.26364  | 5.00E-05 | 0.00022  | yes |
| Ptma           | 0.982124 | 5.28125  | 5.00E-05 | 0.00022  | yes |
| 9430008C03Rik  | 0.981985 | 1.61047  | 0.00295  | 0.008927 | yes |
| Clgn           | 0.981559 | 4.92797  | 5.00E-05 | 0.00022  | yes |
| Pstpip2        | 0.979703 | 4.18044  | 5.00E-05 | 0.00022  | yes |
| Dpp10          | 0.979191 | 4.74674  | 5.00E-05 | 0.00022  | yes |
| Mpp4           | 0.978821 | 0        | 1        | 1        | no  |
| Ipw            | 0.978593 | 0.732724 | 0.4486   | 0.579172 | no  |
| Spag16         | 0.978154 | 0        | 1        | 1        | no  |
| Catsper3       | 0.977652 | 0        | 1        | 1        | no  |
| Nfkbid         | 0.977615 | 0        | 1        | 1        | no  |
| 2210408F21Rik  | 0.977227 | 1.82271  | 0.00035  | 0.001342 | yes |
| Ak7            | 0.976824 | 0        | 1        | 1        | no  |
| Stx2           | 0.976756 | 4.43867  | 5.00E-05 | 0.00022  | yes |
| A330076H08Rik  | 0.975015 | 1.27416  | 0.01275  | 0.032    | yes |
| B130006D01Rik  | 0.974513 | 0        | 1        | 1        | no  |
| Gm5868         | 0.974289 | 0        | 1        | 1        | no  |
| 1110020A21Rik  | 0.973585 | 0.404642 | 0.599    | 0.712602 | no  |
| Cgref1         | 0.973542 | 0.85879  | 0.092    | 0.16766  | no  |
| Lrp8           | 0.973143 | 3.77311  | 5.00E-05 | 0.00022  | yes |
| Zfp54          | 0.972977 | 1.49984  | 0.0092   | 0.024131 | yes |
| Tmem79         | 0.972328 | 4.79774  | 5.00E-05 | 0.00022  | yes |
| Rps19-ps3      | 0.9715   | 1.36621  | 0.1576   | 0.259963 | no  |
| Sdc1           | 0.971419 | 3.8487   | 5.00E-05 | 0.00022  | yes |
| 9130204L05Rik  | 0.970786 | 1.216    | 0.16175  | 0.265586 | no  |
| Ak4            | 0.970551 | 2.00216  | 0.00015  | 0.000615 | yes |
| Raet1e         | 0.970523 | 0        | 1        | 1        | no  |
| Amer2          | 0.970311 | 3.19437  | 5.00E-05 | 0.00022  | yes |
| Npas2          | 0.970233 | 1.89265  | 0.00105  | 0.003607 | yes |
| Palm2          | 0.969474 | 4.5509   | 5.00E-05 | 0.00022  | yes |
| Mical1         | 0.969254 | 4.28055  | 5.00E-05 | 0.00022  | yes |
| Mtag2          | 0.968654 | 0.736444 | 0.2937   | 0.421382 | no  |
| Rgs11          | 0.967432 | 2.70189  | 5.00E-05 | 0.00022  | yes |
| Sowaha         | 0.967129 | 1.728    | 0.0011   | 0.00376  | yes |
| Sdsl           | 0.966992 | 2.07134  | 0.0022   | 0.006933 | yes |
| Ankrd10        | 0.966879 | 3.29524  | 5.00E-05 | 0.00022  | yes |
| Pkig           | 0.965818 | 3.15052  | 5.00E-05 | 0.00022  | yes |
| Mettl7a2Higd1c | 0.96538  | 0.874147 | 0.09825  | 0.177056 | no  |
| Mapk7          | 0.965026 | 3.28315  | 5.00E-05 | 0.00022  | yes |
| Lpar3          | 0.96435  | 4.53646  | 5.00E-05 | 0.00022  | yes |
| Unc79          | 0.96426  | 2.78705  | 5.00E-05 | 0.00022  | yes |
| Eno3           | 0.962181 | 1.95611  | 0.0002   | 0.000803 | yes |
| 5730420D15Rik  | 0.96185  | 0        | 1        | 1        | no  |
| Foxm1          | 0.961102 | 1.32616  | 0.01095  | 0.028083 | yes |
| Cabyr          | 0.960976 | 0        | 1        | 1        | no  |

|                |          |         |          |          |     |
|----------------|----------|---------|----------|----------|-----|
| Mex3d          | 0.960591 | 3.31518 | 5.00E-05 | 0.00022  | yes |
| Htr4           | 0.960346 | 2.98374 | 5.00E-05 | 0.00022  | yes |
| Zdhhc12        | 0.960132 | 2.25668 | 5.00E-05 | 0.00022  | yes |
| Tbx1           | 0.959503 | 0       | 1        | 1        | no  |
| Haus4          | 0.959076 | 3.18094 | 5.00E-05 | 0.00022  | yes |
| Arhgap26       | 0.958479 | 4.54684 | 5.00E-05 | 0.00022  | yes |
| Ubald2         | 0.958063 | 1.36728 | 0.01905  | 0.045164 | yes |
| Serpina3f      | 0.958017 | 0       | 1        | 1        | no  |
| 3000002C10Rik  | 0.957305 | 1.0638  | 0.082    | 0.153009 | no  |
| Ccdc39         | 0.95726  | 1.11121 | 0.02515  | 0.057193 | no  |
| Rpl24          | 0.956307 | 0       | 1        | 1        | no  |
| Catsperd       | 0.955369 | 0       | 1        | 1        | no  |
| P2ry10         | 0.954857 | 0       | 1        | 1        | no  |
| Mgam           | 0.954646 | 0       | 1        | 1        | no  |
| Cks2           | 0.954617 | 1.25418 | 0.08585  | 0.158808 | no  |
| Dapk1          | 0.954022 | 4.38776 | 5.00E-05 | 0.00022  | yes |
| Gsdma          | 0.953936 | 0       | 1        | 1        | no  |
| Trim6          | 0.9534   | 0       | 1        | 1        | no  |
| Bcl2l14        | 0.953389 | 2.08041 | 0.00045  | 0.001682 | yes |
| Wbscr25        | 0.953309 | 0       | 1        | 1        | no  |
| Kcnn3          | 0.953168 | 1.72324 | 0.00145  | 0.004804 | yes |
| Zcchc16        | 0.952467 | 1.29448 | 0.0181   | 0.043291 | yes |
| Drd3           | 0.952061 | 0       | 1        | 1        | no  |
| Zc3hav1        | 0.952046 | 2.91502 | 5.00E-05 | 0.00022  | yes |
| E130102H24Rik  | 0.951903 | 1.29063 | 0.06745  | 0.131038 | no  |
| Rhebl1         | 0.951161 | 3.17433 | 5.00E-05 | 0.00022  | yes |
| Ago4           | 0.948974 | 2.37673 | 5.00E-05 | 0.00022  | yes |
| Cpne3          | 0.946978 | 4.36103 | 5.00E-05 | 0.00022  | yes |
| Alk            | 0.946625 | 1.62602 | 0.0038   | 0.011141 | yes |
| Bach2          | 0.945192 | 3.38317 | 5.00E-05 | 0.00022  | yes |
| Oca2           | 0.943716 | 0       | 1        | 1        | no  |
| Gm13247        | 0.9437   | 0       | 1        | 1        | no  |
| Magi1          | 0.94339  | 4.25005 | 5.00E-05 | 0.00022  | yes |
| Frmd4b         | 0.943343 | 3.67183 | 5.00E-05 | 0.00022  | yes |
| Ccdc120        | 0.942144 | 2.2467  | 0.00025  | 0.000985 | yes |
| Grhl2          | 0.942026 | 0       | 1        | 1        | no  |
| Lca5           | 0.941957 | 1.92997 | 5.00E-05 | 0.00022  | yes |
| Rgs3           | 0.941783 | 3.92955 | 5.00E-05 | 0.00022  | yes |
| St6gal2        | 0.940764 | 2.04673 | 0.0006   | 0.002181 | yes |
| Nlrp5-ps       | 0.939757 | 0       | 1        | 1        | no  |
| Lime1          | 0.93813  | 2.62893 | 5.00E-05 | 0.00022  | yes |
| Aldob          | 0.93799  | 0       | 1        | 1        | no  |
| Gm10785        | 0.937531 | 0       | 1        | 1        | no  |
| Gpha2          | 0.936773 | 0       | 1        | 1        | no  |
| Klk5           | 0.936186 | 1.57183 | 0.0104   | 0.02687  | yes |
| Med10          | 0.935808 | 4.0102  | 5.00E-05 | 0.00022  | yes |
| Jmjd7-pla2g4b  | 0.935077 | 0       | 1        | 1        | no  |
| Zbtb42         | 0.935029 | 2.06383 | 0.0001   | 0.000422 | yes |
| Otoa           | 0.934874 | 2.17793 | 5.00E-05 | 0.00022  | yes |
| AI413582       | 0.934051 | 4.98748 | 5.00E-05 | 0.00022  | yes |
| F2rl3          | 0.933491 | 1.49554 | 0.012    | 0.030371 | yes |
| Trim39         | 0.93335  | 2.68059 | 5.00E-05 | 0.00022  | yes |
| 1700047I17Rik2 | 0.932556 | 2.23088 | 0.0001   | 0.000422 | yes |

|               |          |         |          |          |     |
|---------------|----------|---------|----------|----------|-----|
| Itgal         | 0.931223 | 0       | 1        | 1        | no  |
| Dgkg          | 0.931182 | 4.10936 | 5.00E-05 | 0.00022  | yes |
| Pafah1b3      | 0.930965 | 3.39607 | 5.00E-05 | 0.00022  | yes |
| Bex4          | 0.930812 | 1.92638 | 0.00555  | 0.015544 | yes |
| Ssbp3         | 0.930368 | 4.36933 | 5.00E-05 | 0.00022  | yes |
| Cks1b         | 0.928878 | 1.98275 | 0.0058   | 0.016179 | yes |
| Ttll13        | 0.928756 | 0       | 1        | 1        | no  |
| Ccdc141       | 0.928736 | 4.34867 | 5.00E-05 | 0.00022  | yes |
| Cenpn         | 0.928575 | 1.52753 | 0.009    | 0.023696 | yes |
| Bglap         | 0.926572 | 0       | 1        | 1        | no  |
| Rgs17         | 0.926539 | 4.17153 | 5.00E-05 | 0.00022  | yes |
| Esr2          | 0.926067 | 0       | 1        | 1        | no  |
| Gm15760       | 0.925775 | 0       | 1        | 1        | no  |
| Dennd2c       | 0.925234 | 0       | 1        | 1        | no  |
| BC021891      | 0.924937 | 2.20789 | 0.00025  | 0.000985 | yes |
| Cd82          | 0.92384  | 4.05128 | 5.00E-05 | 0.00022  | yes |
| P2rx3         | 0.923227 | 4.24444 | 5.00E-05 | 0.00022  | yes |
| Tfap4         | 0.922756 | 1.85943 | 0.00145  | 0.004804 | yes |
| Rhov          | 0.922088 | 3.87875 | 5.00E-05 | 0.00022  | yes |
| Gm2011        | 0.92196  | 0       | 1        | 1        | no  |
| Gm14634       | 0.921521 | 1.10936 | 0.056    | 0.112279 | no  |
| Hook2         | 0.921372 | 1.66019 | 0.002    | 0.006363 | yes |
| Pisd-ps3      | 0.92052  | 3.58796 | 5.00E-05 | 0.00022  | yes |
| Ptbp3         | 0.920444 | 4.22162 | 5.00E-05 | 0.00022  | yes |
| Zfp945        | 0.920409 | 3.12228 | 5.00E-05 | 0.00022  | yes |
| Bahd1         | 0.919878 | 4.19354 | 5.00E-05 | 0.00022  | yes |
| Eps8l2        | 0.918688 | 1.43387 | 0.00675  | 0.018468 | yes |
| Dnttip1       | 0.918443 | 3.42159 | 5.00E-05 | 0.00022  | yes |
| Ndst3         | 0.91767  | 3.11698 | 5.00E-05 | 0.00022  | yes |
| Wdr95         | 0.917059 | 0       | 1        | 1        | no  |
| 5730403I07Rik | 0.916603 | 0       | 1        | 1        | no  |
| Prkcq         | 0.916479 | 4.40404 | 5.00E-05 | 0.00022  | yes |
| Rps20         | 0.915847 | 4.51901 | 5.00E-05 | 0.00022  | yes |
| Rpl11         | 0.912478 | 1.43731 | 0.06185  | 0.121763 | no  |
| Dtwd1         | 0.912104 | 1.63558 | 0.00735  | 0.019896 | yes |
| Mb21d1        | 0.911782 | 0       | 1        | 1        | no  |
| Gnb4          | 0.911112 | 4.41902 | 5.00E-05 | 0.00022  | yes |
| Rbm12b1       | 0.910723 | 1.74803 | 0.00135  | 0.004516 | yes |
| Btc           | 0.910514 | 0       | 1        | 1        | no  |
| Tnf           | 0.909147 | 0       | 1        | 1        | no  |
| Exo1          | 0.909004 | 0       | 1        | 1        | no  |
| Cdc7          | 0.908821 | 1.76268 | 0.00075  | 0.00267  | yes |
| Gm10767       | 0.908283 | 1.37216 | 0.02065  | 0.048455 | yes |
| Slc25a43      | 0.907292 | 1.11571 | 0.0273   | 0.061315 | no  |
| Neur11a       | 0.906746 | 3.56302 | 5.00E-05 | 0.00022  | yes |
| Hist1h1e      | 0.906593 | 1.00404 | 0.14765  | 0.246896 | no  |
| Pdlim2        | 0.906507 | 2.63431 | 5.00E-05 | 0.00022  | yes |
| Tg            | 0.904501 | 0       | 1        | 1        | no  |
| Sh2d5         | 0.904317 | 2.59481 | 5.00E-05 | 0.00022  | yes |
| Fam183b       | 0.903641 | 0       | 1        | 1        | no  |
| 4632427E13Rik | 0.90364  | 0       | 1        | 1        | no  |
| Ccdc40        | 0.903346 | 2.25109 | 5.00E-05 | 0.00022  | yes |
| Cblb          | 0.902884 | 3.83928 | 5.00E-05 | 0.00022  | yes |

|                 |          |          |          |          |     |
|-----------------|----------|----------|----------|----------|-----|
| Rps2            | 0.902454 | 2.81815  | 5.00E-05 | 0.00022  | yes |
| 1700037H04Rik   | 0.901956 | 1.90189  | 0.00025  | 0.000985 | yes |
| Cercam          | 0.901951 | 1.43807  | 0.0096   | 0.025081 | yes |
| Nktr            | 0.901595 | 3.79111  | 5.00E-05 | 0.00022  | yes |
| 4930503L19Rik   | 0.901145 | 2.12349  | 0.00035  | 0.001342 | yes |
| Prkca           | 0.901112 | 3.88593  | 5.00E-05 | 0.00022  | yes |
| Cxadr           | 0.900983 | 1.08736  | 0.02125  | 0.049643 | yes |
| Izumo4          | 0.900891 | 3.03166  | 5.00E-05 | 0.00022  | yes |
| Arhgap28        | 0.900852 | 4.34683  | 5.00E-05 | 0.00022  | yes |
| A230103J11Rik   | 0.900828 | 0.322185 | 0.57785  | 0.695041 | no  |
| Mrgpra2b        | 0.899409 | 2.34181  | 0.00025  | 0.000985 | yes |
| Ptger3          | 0.898234 | 2.92595  | 5.00E-05 | 0.00022  | yes |
| Rassf7          | 0.897835 | 1.51894  | 0.0101   | 0.026207 | yes |
| Tle1            | 0.897296 | 2.95989  | 5.00E-05 | 0.00022  | yes |
| Mrm1            | 0.89701  | 3.18968  | 5.00E-05 | 0.00022  | yes |
| Klhl2           | 0.896767 | 4.09469  | 5.00E-05 | 0.00022  | yes |
| Gpr45           | 0.896517 | 0        | 1        | 1        | no  |
| Mrgprb4         | 0.895306 | 3.01687  | 5.00E-05 | 0.00022  | yes |
| Tox3            | 0.894929 | 3.18418  | 5.00E-05 | 0.00022  | yes |
| Spata32         | 0.894863 | 0        | 1        | 1        | no  |
| Efcab11         | 0.894605 | 0        | 1        | 1        | no  |
| Actl6b          | 0.894446 | 3.50468  | 5.00E-05 | 0.00022  | yes |
| Smarca1         | 0.893923 | 3.43756  | 5.00E-05 | 0.00022  | yes |
| Cep135          | 0.89335  | 1.96804  | 0.0002   | 0.000803 | yes |
| Rpl7a           | 0.893218 | 1.75257  | 0.00875  | 0.023162 | yes |
| Rpl35a          | 0.892896 | 0.891161 | 0.0665   | 0.12942  | no  |
| 2900041M22Rik   | 0.891675 | 1.76424  | 0.00445  | 0.012807 | yes |
| 2610005L07Rik   | 0.890594 | 2.03518  | 0.0001   | 0.000422 | yes |
| Bex2            | 0.890265 | 5.31425  | 5.00E-05 | 0.00022  | yes |
| Irf2            | 0.890161 | 3.54437  | 5.00E-05 | 0.00022  | yes |
| Slfm10-ps       | 0.889819 | 0        | 1        | 1        | no  |
| Zfp821          | 0.889783 | 2.68676  | 5.00E-05 | 0.00022  | yes |
| Car7            | 0.889752 | 0.738372 | 0.2207   | 0.339088 | no  |
| Dancr           | 0.889309 | 0.875532 | 0.0843   | 0.156464 | no  |
| Rpl34,Rpl34-ps1 | 0.888755 | 1.34578  | 0.00695  | 0.018933 | yes |
| Plcx3           | 0.888216 | 3.79552  | 5.00E-05 | 0.00022  | yes |
| Zfp560          | 0.888172 | 2.23312  | 0.0001   | 0.000422 | yes |
| Ccnjl           | 0.888064 | 1.50663  | 0.008    | 0.021468 | yes |
| Exosc6          | 0.887919 | 2.30145  | 0.0004   | 0.001513 | yes |
| Tmem164         | 0.887713 | 3.83616  | 5.00E-05 | 0.00022  | yes |
| Nsg2            | 0.887617 | 4.13739  | 5.00E-05 | 0.00022  | yes |
| Ptpru           | 0.887033 | 1.96546  | 0.0001   | 0.000422 | yes |
| Fam83h          | 0.886341 | 2.58617  | 5.00E-05 | 0.00022  | yes |
| Crebzf          | 0.886108 | 3.61472  | 5.00E-05 | 0.00022  | yes |
| Prr18           | 0.886103 | 0        | 1        | 1        | no  |
| Celsr3          | 0.885876 | 3.77364  | 5.00E-05 | 0.00022  | yes |
| 5031425E22Rik   | 0.884959 | 2.3547   | 0.0001   | 0.000422 | yes |
| Abcb4           | 0.884341 | 2.43015  | 5.00E-05 | 0.00022  | yes |
| Fam71f2         | 0.883965 | 0        | 1        | 1        | no  |
| Agpat4          | 0.883875 | 4.05475  | 5.00E-05 | 0.00022  | yes |
| Lcn2            | 0.883735 | 1.54517  | 0.02205  | 0.051206 | no  |
| Bnpl            | 0.882762 | 0        | 1        | 1        | no  |
| Sox4            | 0.882706 | 3.55045  | 5.00E-05 | 0.00022  | yes |

|               |          |          |          |          |     |
|---------------|----------|----------|----------|----------|-----|
| Fads3         | 0.881449 | 4.0741   | 5.00E-05 | 0.00022  | yes |
| Bora          | 0.880656 | 1.18238  | 0.0355   | 0.076445 | no  |
| Ankrd23       | 0.880464 | 1.15928  | 0.04115  | 0.086684 | no  |
| Rps6ka6       | 0.880326 | 2.51004  | 5.00E-05 | 0.00022  | yes |
| Gucy2g        | 0.880032 | 0        | 1        | 1        | no  |
| Wdr65         | 0.879867 | 1.33738  | 0.0142   | 0.035181 | yes |
| Rsph1         | 0.879708 | 1.48994  | 0.0183   | 0.043682 | yes |
| Fdx1          | 0.879212 | 2.61351  | 0.00015  | 0.000615 | yes |
| Rasef         | 0.879007 | 1.71725  | 0.00085  | 0.002983 | yes |
| Smyd3         | 0.878824 | 3.40704  | 5.00E-05 | 0.00022  | yes |
| Neurl2        | 0.878594 | 0        | 1        | 1        | no  |
| A930006K02Rik | 0.87814  | 1.18339  | 0.086    | 0.158953 | no  |
| Ccdc138       | 0.877396 | 1.7215   | 0.00225  | 0.007062 | yes |
| Uaca          | 0.876011 | 4.13515  | 5.00E-05 | 0.00022  | yes |
| Pitpnc1       | 0.876006 | 4.07121  | 5.00E-05 | 0.00022  | yes |
| Ap1ar         | 0.87597  | 4.44071  | 5.00E-05 | 0.00022  | yes |
| Npff          | 0.875521 | 0        | 1        | 1        | no  |
| Nat2          | 0.875135 | 1.22689  | 0.015    | 0.036839 | yes |
| Dytn          | 0.875135 | 0        | 1        | 1        | no  |
| Amica1        | 0.875    | 0        | 1        | 1        | no  |
| Trpa1         | 0.874976 | 4.029    | 5.00E-05 | 0.00022  | yes |
| Basp1         | 0.874956 | 4.55199  | 5.00E-05 | 0.00022  | yes |
| Ccdc112       | 0.874916 | 2.17535  | 0.00015  | 0.000615 | yes |
| Hcn3          | 0.874528 | 3.57752  | 5.00E-05 | 0.00022  | yes |
| Lcorl         | 0.87423  | 3.10363  | 5.00E-05 | 0.00022  | yes |
| Pabpc1        | 0.874186 | 4.21348  | 5.00E-05 | 0.00022  | yes |
| Pnn           | 0.873588 | 3.61668  | 5.00E-05 | 0.00022  | yes |
| Lgals9        | 0.873543 | 3.79525  | 5.00E-05 | 0.00022  | yes |
| Prrxl1        | 0.873476 | 3.3662   | 5.00E-05 | 0.00022  | yes |
| Prr13         | 0.872874 | 4.00815  | 5.00E-05 | 0.00022  | yes |
| Slc2a4        | 0.872576 | 0        | 1        | 1        | no  |
| Ica1l         | 0.87247  | 2.77238  | 5.00E-05 | 0.00022  | yes |
| Gen1          | 0.871768 | 1.30801  | 0.01675  | 0.040507 | yes |
| Lrrc34        | 0.871419 | 0        | 1        | 1        | no  |
| Gsta3         | 0.870883 | 0        | 1        | 1        | no  |
| Fam227a       | 0.870818 | 0        | 1        | 1        | no  |
| Arid5a        | 0.870484 | 2.43556  | 5.00E-05 | 0.00022  | yes |
| Dedd2         | 0.869869 | 2.54659  | 5.00E-05 | 0.00022  | yes |
| Fam161a       | 0.869121 | 1.65326  | 0.0051   | 0.014464 | yes |
| 1600002K03Rik | 0.868925 | 0.106561 | 0.8489   | 0.904389 | no  |
| Gnao1         | 0.868235 | 3.40322  | 5.00E-05 | 0.00022  | yes |
| 2610206C17Rik | 0.868116 | 0        | 1        | 1        | no  |
| Stk32a        | 0.867502 | 2.28065  | 5.00E-05 | 0.00022  | yes |
| Thoc1         | 0.867436 | 1.0431   | 0.0482   | 0.099127 | no  |
| Sycp2         | 0.867289 | 0        | 1        | 1        | no  |
| Hrh3          | 0.866527 | 1.46376  | 0.00445  | 0.012807 | yes |
| Pira2         | 0.86652  | 0        | 1        | 1        | no  |
| A230057D06Rik | 0.866347 | 1.09337  | 0.03345  | 0.07268  | no  |
| Tpt1          | 0.866207 | 1.99172  | 0.00015  | 0.000615 | yes |
| Fbxo9         | 0.864575 | 3.91131  | 5.00E-05 | 0.00022  | yes |
| Tes           | 0.863096 | 2.54726  | 5.00E-05 | 0.00022  | yes |
| Nup210        | 0.862413 | 1.95382  | 0.0004   | 0.001513 | yes |
| Dmrtc1a       | 0.862218 | 1.10102  | 0.0263   | 0.059381 | no  |



|               |          |          |          |          |     |
|---------------|----------|----------|----------|----------|-----|
| Lap3          | 0.862155 | 3.94274  | 5.00E-05 | 0.00022  | yes |
| Rasl10a       | 0.861513 | 0.686265 | 0.2756   | 0.400788 | no  |
| Tagln2        | 0.860479 | 4.68516  | 5.00E-05 | 0.00022  | yes |
| Efcab4b       | 0.860275 | 1.12862  | 0.0688   | 0.133212 | no  |
| Nyap1         | 0.859902 | 4.14325  | 5.00E-05 | 0.00022  | yes |
| Hsf5          | 0.859787 | 0        | 1        | 1        | no  |
| Ino80dos      | 0.85961  | 0.44081  | 0.43595  | 0.567814 | no  |
| Unc13c        | 0.859118 | 3.67235  | 5.00E-05 | 0.00022  | yes |
| Tescl         | 0.859049 | 0        | 1        | 1        | no  |
| Lrrc45        | 0.859036 | 2.51694  | 5.00E-05 | 0.00022  | yes |
| Arap1         | 0.858541 | 3.37348  | 5.00E-05 | 0.00022  | yes |
| Irak3         | 0.858112 | 1.67624  | 0.00265  | 0.008146 | yes |
| Tmem159       | 0.858078 | 2.52136  | 5.00E-05 | 0.00022  | yes |
| Adrbk1        | 0.85767  | 3.98893  | 5.00E-05 | 0.00022  | yes |
| Srek1         | 0.857016 | 3.06412  | 5.00E-05 | 0.00022  | yes |
| Cep72         | 0.856875 | 0        | 1        | 1        | no  |
| BC005764      | 0.855948 | 0.249501 | 0.64295  | 0.748575 | no  |
| Trim25        | 0.854812 | 3.431    | 5.00E-05 | 0.00022  | yes |
| Slc9b1        | 0.854474 | 0        | 1        | 1        | no  |
| Trmt10b       | 0.854222 | 2.44894  | 5.00E-05 | 0.00022  | yes |
| Gm16845       | 0.853987 | 0.434063 | 0.4497   | 0.580085 | no  |
| Hyi           | 0.853384 | 2.15465  | 0.00055  | 0.002016 | yes |
| Trim11        | 0.852681 | 2.2848   | 5.00E-05 | 0.00022  | yes |
| Gm16861       | 0.852474 | 0        | 1        | 1        | no  |
| Rpl39         | 0.852436 | 1.61716  | 0.0017   | 0.005514 | yes |
| Tshz2         | 0.852255 | 4.13322  | 5.00E-05 | 0.00022  | yes |
| Ano2          | 0.852248 | 0        | 1        | 1        | no  |
| Aire          | 0.851546 | 0        | 1        | 1        | no  |
| Impg2         | 0.851249 | 0        | 1        | 1        | no  |
| Akap5         | 0.851223 | 0        | 1        | 1        | no  |
| Ehbp11        | 0.850761 | 2.97581  | 5.00E-05 | 0.00022  | yes |
| Irf6          | 0.85011  | 2.40472  | 5.00E-05 | 0.00022  | yes |
| Magel2        | 0.849546 | 0        | 1        | 1        | no  |
| Slc12a7       | 0.849087 | 3.34439  | 5.00E-05 | 0.00022  | yes |
| Prph          | 0.848962 | 2.69757  | 5.00E-05 | 0.00022  | yes |
| Fech          | 0.84798  | 3.84551  | 5.00E-05 | 0.00022  | yes |
| Ctxn1         | 0.84783  | 3.96202  | 5.00E-05 | 0.00022  | yes |
| Unc13b        | 0.847778 | 2.91098  | 5.00E-05 | 0.00022  | yes |
| Pcna          | 0.847129 | 2.79031  | 5.00E-05 | 0.00022  | yes |
| Rpl13a        | 0.847127 | 3.47626  | 5.00E-05 | 0.00022  | yes |
| Preli2        | 0.846937 | 1.22215  | 0.0881   | 0.16182  | no  |
| Hells         | 0.846539 | 2.10021  | 0.0003   | 0.001164 | yes |
| 4931440P22Rik | 0.846172 | 0        | 1        | 1        | no  |
| Plek2         | 0.846016 | 1.66402  | 0.0052   | 0.014691 | yes |
| Sncg          | 0.845806 | 4.18779  | 5.00E-05 | 0.00022  | yes |
| Ppfia2        | 0.84576  | 3.5852   | 5.00E-05 | 0.00022  | yes |
| Scn3a         | 0.845212 | 2.17807  | 0.0001   | 0.000422 | yes |
| Efna1         | 0.84518  | 2.98447  | 5.00E-05 | 0.00022  | yes |
| Snrnp70       | 0.843656 | 3.93276  | 5.00E-05 | 0.00022  | yes |
| Rpl23a        | 0.843076 | 1.05064  | 0.0369   | 0.078998 | no  |
| Etohd2        | 0.842994 | 0        | 1        | 1        | no  |
| Slc4a3        | 0.842984 | 2.87836  | 5.00E-05 | 0.00022  | yes |
| Rpl29         | 0.842965 | 3.60862  | 5.00E-05 | 0.00022  | yes |

|               |          |          |          |          |     |
|---------------|----------|----------|----------|----------|-----|
| Zc3h12d       | 0.842829 | 0        | 1        | 1        | no  |
| Ptpn5         | 0.842256 | 1.75894  | 0.0006   | 0.002181 | yes |
| Wdhd1         | 0.84132  | 2.04568  | 0.0003   | 0.001164 | yes |
| Arid3b        | 0.841287 | 1.69874  | 0.0022   | 0.006933 | yes |
| Timp1         | 0.84099  | 0.112829 | 0.8315   | 0.891796 | no  |
| Smpd4         | 0.840919 | 2.93987  | 5.00E-05 | 0.00022  | yes |
| ChkbCpt1b     | 0.840637 | 0        | 1        | 1        | no  |
| Manr          | 0.840463 | 0        | 1        | 1        | no  |
| 2810410L24Rik | 0.84015  | 1.01598  | 0.0776   | 0.146655 | no  |
| Pou2f2        | 0.839603 | 1.17335  | 0.01655  | 0.040097 | yes |
| Psd           | 0.838515 | 2.23061  | 0.0001   | 0.000422 | yes |
| Zfp760        | 0.837568 | 2.49183  | 5.00E-05 | 0.00022  | yes |
| Adrb2         | 0.837365 | 1.27279  | 0.02245  | 0.051907 | no  |
| Bok           | 0.837302 | 2.04227  | 0.00055  | 0.002016 | yes |
| Gmip          | 0.836307 | 2.07768  | 0.00025  | 0.000985 | yes |
| Gm14405       | 0.835841 | 0        | 1        | 1        | no  |
| Magi3         | 0.835586 | 3.81975  | 5.00E-05 | 0.00022  | yes |
| Gucy2c        | 0.83553  | 0        | 1        | 1        | no  |
| Plekhn1       | 0.835464 | 1.0746   | 0.053    | 0.10709  | no  |
| 2810032G03Rik | 0.835029 | 1.82259  | 0.00305  | 0.009188 | yes |
| Il2rg         | 0.834736 | 1.2575   | 0.0312   | 0.068657 | no  |
| Vgf           | 0.833867 | 4.07526  | 5.00E-05 | 0.00022  | yes |
| Agtr1a        | 0.833843 | 3.08165  | 5.00E-05 | 0.00022  | yes |
| Gpx1          | 0.833397 | 4.59223  | 5.00E-05 | 0.00022  | yes |
| Tmem151b      | 0.832947 | 3.7561   | 5.00E-05 | 0.00022  | yes |
| Hsbp1l1       | 0.832488 | 3.39999  | 5.00E-05 | 0.00022  | yes |
| Phactr3       | 0.831805 | 3.05301  | 5.00E-05 | 0.00022  | yes |
| Mylpf         | 0.83167  | 0.808082 | 0.2416   | 0.36329  | no  |
| D930015E06Rik | 0.831553 | 3.68653  | 5.00E-05 | 0.00022  | yes |
| Hal           | 0.831098 | 2.22922  | 5.00E-05 | 0.00022  | yes |
| Tyw5          | 0.83107  | 1.73171  | 0.0033   | 0.009856 | yes |
| Kbtbd8        | 0.830896 | 2.05116  | 5.00E-05 | 0.00022  | yes |
| AA543186      | 0.830695 | 0        | 1        | 1        | no  |
| Ccdc134       | 0.83055  | 1.87408  | 0.0012   | 0.004068 | yes |
| Grip1         | 0.830099 | 3.29421  | 5.00E-05 | 0.00022  | yes |
| Rps10         | 0.82965  | 0        | 1        | 1        | no  |
| Sh3yl1        | 0.829323 | 2.57376  | 5.00E-05 | 0.00022  | yes |
| Fam83d        | 0.82902  | 1.7056   | 0.0028   | 0.008532 | yes |
| Apol9b        | 0.828514 | 0        | 1        | 1        | no  |
| 1700023F06Rik | 0.828469 | 0.966134 | 0.10705  | 0.189795 | no  |
| Atad5         | 0.828168 | 1.58513  | 0.00255  | 0.007875 | yes |
| Trip13        | 0.827308 | 0        | 1        | 1        | no  |
| Tapbpl        | 0.826969 | 2.73895  | 5.00E-05 | 0.00022  | yes |
| Lmbr1l        | 0.826782 | 2.51194  | 5.00E-05 | 0.00022  | yes |
| A330033J07Rik | 0.826026 | 0.530184 | 0.36805  | 0.499634 | no  |
| Ano7          | 0.826009 | 0        | 1        | 1        | no  |
| Spaca6        | 0.825441 | 0        | 1        | 1        | no  |
| Abhd14b       | 0.825341 | 2.76485  | 5.00E-05 | 0.00022  | yes |
| Ammecl1       | 0.824915 | 1.38956  | 0.01205  | 0.030463 | yes |
| Gnaq          | 0.824113 | 3.65529  | 5.00E-05 | 0.00022  | yes |
| E4f1          | 0.824077 | 2.26429  | 5.00E-05 | 0.00022  | yes |
| Bex1          | 0.823989 | 2.13634  | 0.00155  | 0.005095 | yes |
| Mrgbp         | 0.823766 | 1.41207  | 0.0213   | 0.049734 | yes |

|               |          |          |          |          |     |
|---------------|----------|----------|----------|----------|-----|
| Pcsk9         | 0.823482 | 1.51362  | 0.0045   | 0.012942 | yes |
| Dhx58         | 0.823426 | 1.33712  | 0.0163   | 0.039607 | yes |
| Gm10872       | 0.823206 | 0        | 1        | 1        | no  |
| Prkd1         | 0.823005 | 3.24258  | 5.00E-05 | 0.00022  | yes |
| 9330188P03Rik | 0.822943 | 0        | 1        | 1        | no  |
| Mapk13        | 0.822586 | 0.884535 | 0.13635  | 0.231798 | no  |
| Ncapd3        | 0.822342 | 2.4318   | 5.00E-05 | 0.00022  | yes |
| Sigirr        | 0.822043 | 0.952007 | 0.08865  | 0.162582 | no  |
| Cpne8         | 0.82153  | 2.02343  | 5.00E-05 | 0.00022  | yes |
| Plekhs1       | 0.82143  | 0        | 1        | 1        | no  |
| Zfp579        | 0.821356 | 2.02328  | 0.00065  | 0.002343 | yes |
| Schip1        | 0.82082  | 3.20148  | 5.00E-05 | 0.00022  | yes |
| Chia1         | 0.820294 | 1.89058  | 0.0015   | 0.004953 | yes |
| Cadm1         | 0.820138 | 3.64106  | 5.00E-05 | 0.00022  | yes |
| Mkrn3         | 0.819525 | 0        | 1        | 1        | no  |
| D3Bwg0562e    | 0.819392 | 2.33357  | 5.00E-05 | 0.00022  | yes |
| Lpcat3        | 0.818121 | 2.94982  | 5.00E-05 | 0.00022  | yes |
| Gpr114        | 0.817989 | 0        | 1        | 1        | no  |
| Ptms          | 0.817949 | 4.60629  | 5.00E-05 | 0.00022  | yes |
| Gm16701       | 0.817865 | 0.927685 | 0.147    | 0.246181 | no  |
| Mycbpap       | 0.817847 | 1.49346  | 0.00735  | 0.019896 | yes |
| Serpina3m     | 0.816796 | 0        | 1        | 1        | no  |
| Pde1b         | 0.81639  | 1.87782  | 0.00015  | 0.000615 | yes |
| Slc29a1       | 0.81638  | 3.14427  | 5.00E-05 | 0.00022  | yes |
| Tstd1         | 0.815374 | 1.9339   | 0.01855  | 0.044184 | yes |
| Trib3         | 0.815017 | 1.41802  | 0.0128   | 0.032102 | yes |
| Snx15         | 0.815014 | 3.09889  | 5.00E-05 | 0.00022  | yes |
| Fam132a       | 0.81494  | 2.61822  | 0.0001   | 0.000422 | yes |
| Arhgap22      | 0.814851 | 2.92577  | 5.00E-05 | 0.00022  | yes |
| Bhlhe41       | 0.81484  | 3.47798  | 5.00E-05 | 0.00022  | yes |
| Atp1b3        | 0.814378 | 4.16788  | 5.00E-05 | 0.00022  | yes |
| Hist1h2bb     | 0.814123 | 0        | 1        | 1        | no  |
| Odf2l         | 0.813876 | 2.04628  | 0.00015  | 0.000615 | yes |
| Ppih          | 0.813675 | 0.907682 | 0.05305  | 0.107158 | no  |
| M1ap          | 0.813568 | 0        | 1        | 1        | no  |
| 5330417C22Rik | 0.813191 | 2.49714  | 5.00E-05 | 0.00022  | yes |
| Pde11a        | 0.812893 | 3.38778  | 5.00E-05 | 0.00022  | yes |
| Tmem72        | 0.812511 | 3.41821  | 5.00E-05 | 0.00022  | yes |
| Zfp948        | 0.812226 | 2.66089  | 5.00E-05 | 0.00022  | yes |
| Syt1          | 0.81198  | 3.69092  | 5.00E-05 | 0.00022  | yes |
| Mterf1b       | 0.811116 | 0.86301  | 0.14435  | 0.242755 | no  |
| 4930415F15Rik | 0.810797 | 0        | 1        | 1        | no  |
| Shkbp1        | 0.81067  | 2.34758  | 0.00015  | 0.000615 | yes |
| Camk4         | 0.809609 | 3.39502  | 5.00E-05 | 0.00022  | yes |
| Gm14446       | 0.80943  | 1.3279   | 0.00895  | 0.023578 | yes |
| Mex3b         | 0.809349 | 2.39842  | 5.00E-05 | 0.00022  | yes |
| Slc26a1       | 0.808798 | 0        | 1        | 1        | no  |
| 9430091E24Rik | 0.808646 | 0.79216  | 0.1123   | 0.197231 | no  |
| Agtr1b        | 0.80827  | 2.07813  | 0.00055  | 0.002016 | yes |
| Ptprt         | 0.80815  | 3.68538  | 5.00E-05 | 0.00022  | yes |
| Ebf3          | 0.806901 | 3.66649  | 5.00E-05 | 0.00022  | yes |
| Rpl30         | 0.806576 | 1.25874  | 0.01255  | 0.03154  | yes |
| Krt25         | 0.805883 | 1.28783  | 0.0262   | 0.059195 | no  |

|               |          |          |          |          |     |
|---------------|----------|----------|----------|----------|-----|
| Shc1          | 0.805788 | 3.726    | 5.00E-05 | 0.00022  | yes |
| Rarg          | 0.805166 | 3.08725  | 5.00E-05 | 0.00022  | yes |
| Rpl10         | 0.805035 | 1.09649  | 0.04745  | 0.097873 | no  |
| Defb42        | 0.805034 | 1.46655  | 0.0558   | 0.11198  | no  |
| Rgs19         | 0.804971 | 1.82205  | 0.00035  | 0.001342 | yes |
| Fermt3        | 0.804171 | 0.567791 | 0.2817   | 0.407737 | no  |
| Fam129b       | 0.803919 | 2.63416  | 5.00E-05 | 0.00022  | yes |
| Inha          | 0.803797 | 1.79075  | 0.00255  | 0.007875 | yes |
| Rnh1          | 0.80378  | 3.4723   | 5.00E-05 | 0.00022  | yes |
| Pde6d         | 0.803164 | 3.92388  | 5.00E-05 | 0.00022  | yes |
| Sft2d1        | 0.802788 | 1.4682   | 0.00465  | 0.013316 | yes |
| Hpn           | 0.80251  | 0        | 1        | 1        | no  |
| C330027C09Rik | 0.801844 | 1.77433  | 0.00135  | 0.004516 | yes |
| Klhl5         | 0.801345 | 3.90709  | 5.00E-05 | 0.00022  | yes |
| Gm15446       | 0.801047 | 0.99333  | 0.08395  | 0.155924 | no  |
| 1600016N20Rik | 0.800969 | 0        | 1        | 1        | no  |
| Mpped2        | 0.80095  | 3.24273  | 5.00E-05 | 0.00022  | yes |
| Chka          | 0.800685 | 3.44483  | 5.00E-05 | 0.00022  | yes |
| Pld5          | 0.799603 | 3.46795  | 5.00E-05 | 0.00022  | yes |
| Rnf182        | 0.799059 | 2.04257  | 0.0003   | 0.001164 | yes |
| Fgf17         | 0.798992 | 0        | 1        | 1        | no  |
| Clhc1         | 0.798908 | 0        | 1        | 1        | no  |
| Egfem1        | 0.798858 | 1.61688  | 0.00155  | 0.005095 | yes |
| Kdm2b         | 0.798787 | 1.9389   | 0.00025  | 0.000985 | yes |
| Srrm3         | 0.798719 | 2.91521  | 5.00E-05 | 0.00022  | yes |
| Nrsn1         | 0.798452 | 3.9419   | 5.00E-05 | 0.00022  | yes |
| 2010002M12Rik | 0.797938 | 1.09305  | 0.042    | 0.088139 | no  |
| Tle2          | 0.797448 | 1.79061  | 0.00055  | 0.002016 | yes |
| S100a6        | 0.797389 | 5.12352  | 5.00E-05 | 0.00022  | yes |
| Hivep3        | 0.797285 | 2.90267  | 5.00E-05 | 0.00022  | yes |
| Arpc1b        | 0.796728 | 4.18876  | 5.00E-05 | 0.00022  | yes |
| Ivns1abp      | 0.796394 | 3.6673   | 5.00E-05 | 0.00022  | yes |
| Tpd52         | 0.796132 | 3.67556  | 5.00E-05 | 0.00022  | yes |
| Mycn          | 0.795249 | 1.92898  | 0.0009   | 0.003139 | yes |
| Ret           | 0.794943 | 2.95121  | 5.00E-05 | 0.00022  | yes |
| Pde6g         | 0.794829 | 0        | 1        | 1        | no  |
| Vmn2r1        | 0.794582 | 0        | 1        | 1        | no  |
| Acbd4         | 0.794346 | 3.46345  | 5.00E-05 | 0.00022  | yes |
| Xkr7          | 0.794089 | 1.55442  | 0.0055   | 0.015427 | yes |
| Rbms1         | 0.79355  | 3.63717  | 5.00E-05 | 0.00022  | yes |
| Mefv          | 0.793298 | 0        | 1        | 1        | no  |
| Pabpn1        | 0.793107 | 3.92657  | 5.00E-05 | 0.00022  | yes |
| Tacc3         | 0.792476 | 1.68745  | 0.00205  | 0.006503 | yes |
| Rpgr          | 0.79231  | 1.78546  | 0.00075  | 0.00267  | yes |
| Col17a1       | 0.792134 | 0        | 1        | 1        | no  |
| Sapcd1        | 0.792029 | 0        | 1        | 1        | no  |
| Scn3b         | 0.791872 | 3.63177  | 5.00E-05 | 0.00022  | yes |
| H2afy         | 0.791849 | 3.16401  | 5.00E-05 | 0.00022  | yes |
| Hist1h2bq     | 0.791766 | 0        | 1        | 1        | no  |
| Slc7a7        | 0.791676 | 3.18353  | 5.00E-05 | 0.00022  | yes |
| 4933406I18Rik | 0.791147 | 0        | 1        | 1        | no  |
| C530044C16Rik | 0.790852 | 1.07275  | 0.079    | 0.148813 | no  |
| Rnf144a       | 0.790476 | 3.55008  | 5.00E-05 | 0.00022  | yes |

|                |          |         |          |          |     |
|----------------|----------|---------|----------|----------|-----|
| Bcat2          | 0.78978  | 2.74608 | 5.00E-05 | 0.00022  | yes |
| Nedd4l         | 0.789728 | 3.51141 | 5.00E-05 | 0.00022  | yes |
| Hk1os          | 0.789489 | 0       | 1        | 1        | no  |
| Dok4           | 0.789211 | 3.59712 | 5.00E-05 | 0.00022  | yes |
| Il4ra          | 0.788915 | 3.27733 | 5.00E-05 | 0.00022  | yes |
| Il9r           | 0.788764 | 0       | 1        | 1        | no  |
| Tprg           | 0.788761 | 0       | 1        | 1        | no  |
| Rbks           | 0.788667 | 1.17341 | 0.0202   | 0.047517 | yes |
| Gmn            | 0.788582 | 1.86388 | 0.0046   | 0.013192 | yes |
| Ppil4          | 0.787884 | 2.56735 | 5.00E-05 | 0.00022  | yes |
| Hic2           | 0.787444 | 1.57311 | 0.00275  | 0.008412 | yes |
| Ccl21b,Gm13304 | 0.787293 | 0       | 1        | 1        | no  |
| Sftpa1         | 0.786999 | 0       | 1        | 1        | no  |
| Ppil6          | 0.7866   | 0.81573 | 0.1947   | 0.307218 | no  |
| Wipf3          | 0.786034 | 3.618   | 5.00E-05 | 0.00022  | yes |
| F2rl1          | 0.785626 | 0       | 1        | 1        | no  |
| Maff           | 0.784969 | 1.70059 | 0.0035   | 0.01036  | yes |
| Mapk4          | 0.784404 | 2.92219 | 5.00E-05 | 0.00022  | yes |
| Adrbk2         | 0.784311 | 2.99254 | 5.00E-05 | 0.00022  | yes |
| Bri3           | 0.783711 | 2.29347 | 0.00125  | 0.00422  | yes |
| Map2k3os       | 0.783487 | 1.23679 | 0.0416   | 0.087438 | no  |
| Ube2ql1        | 0.783288 | 3.73312 | 5.00E-05 | 0.00022  | yes |
| Asic2          | 0.783102 | 3.70737 | 5.00E-05 | 0.00022  | yes |
| Oser1          | 0.78303  | 1.54947 | 0.0091   | 0.023921 | yes |
| Kpna2          | 0.782422 | 1.40561 | 0.0147   | 0.03621  | yes |
| Tmem116        | 0.781343 | 0       | 1        | 1        | no  |
| Dclk3          | 0.781116 | 3.35629 | 5.00E-05 | 0.00022  | yes |
| Mgat4b         | 0.781016 | 3.47393 | 5.00E-05 | 0.00022  | yes |
| Slc3a1         | 0.780856 | 0       | 1        | 1        | no  |
| Tmem173        | 0.780635 | 1.34841 | 0.0089   | 0.023488 | yes |
| Mvp            | 0.78058  | 3.50915 | 5.00E-05 | 0.00022  | yes |
| Gprin1         | 0.780035 | 2.50155 | 5.00E-05 | 0.00022  | yes |
| Fam76b         | 0.779332 | 2.24973 | 5.00E-05 | 0.00022  | yes |
| Ppef1          | 0.779235 | 3.79607 | 5.00E-05 | 0.00022  | yes |
| Flot1          | 0.778988 | 4.10681 | 5.00E-05 | 0.00022  | yes |
| Abcb10         | 0.778468 | 3.02591 | 5.00E-05 | 0.00022  | yes |
| Mb21d2         | 0.777918 | 2.77064 | 5.00E-05 | 0.00022  | yes |
| Pusl1          | 0.777802 | 1.47152 | 0.00535  | 0.015044 | yes |
| A930024E05Rik  | 0.77712  | 1.03514 | 0.06825  | 0.132302 | no  |
| Msh4           | 0.776829 | 0       | 1        | 1        | no  |
| Kcnk18         | 0.776706 | 2.405   | 5.00E-05 | 0.00022  | yes |
| Tusc5          | 0.776488 | 3.37028 | 5.00E-05 | 0.00022  | yes |
| Cenpv          | 0.776248 | 1.85898 | 0.00395  | 0.011515 | yes |
| Hnrnmp         | 0.776134 | 3.46445 | 5.00E-05 | 0.00022  | yes |
| Sri            | 0.775726 | 3.60045 | 5.00E-05 | 0.00022  | yes |
| Arhgef1        | 0.775425 | 3.0664  | 5.00E-05 | 0.00022  | yes |
| Gm13826        | 0.775217 | 2.94337 | 5.00E-05 | 0.00022  | yes |
| Tuft1          | 0.774988 | 1.41937 | 0.0112   | 0.02863  | yes |
| Ccm2l          | 0.774923 | 1.20435 | 0.0337   | 0.073163 | no  |
| 9930104L06Rik  | 0.774666 | 2.01864 | 0.0003   | 0.001164 | yes |
| Uroc1          | 0.774648 | 0       | 1        | 1        | no  |
| Tbc1d1         | 0.773948 | 3.18399 | 5.00E-05 | 0.00022  | yes |
| Trmt112        | 0.773612 | 1.26139 | 0.0451   | 0.093843 | no  |



|               |          |          |          |          |     |
|---------------|----------|----------|----------|----------|-----|
| Kcnf1         | 0.773365 | 1.7122   | 0.0014   | 0.004657 | yes |
| Slc5a2        | 0.772984 | 0        | 1        | 1        | no  |
| Mmp17         | 0.772581 | 2.40414  | 5.00E-05 | 0.00022  | yes |
| Rab27a        | 0.772288 | 3.07258  | 5.00E-05 | 0.00022  | yes |
| Tnfaip8l3     | 0.771622 | 1.49173  | 0.0099   | 0.025759 | yes |
| Scn10a        | 0.771271 | 2.72376  | 5.00E-05 | 0.00022  | yes |
| Fam135a       | 0.771142 | 3.07858  | 5.00E-05 | 0.00022  | yes |
| Mum1          | 0.770803 | 0.368718 | 0.4684   | 0.59764  | no  |
| A330023F24Rik | 0.770323 | 1.2881   | 0.00995  | 0.025858 | yes |
| 6820431F20Rik | 0.769602 | 2.33534  | 5.00E-05 | 0.00022  | yes |
| 1700086O06Rik | 0.769574 | 0.821005 | 0.1804   | 0.289964 | no  |
| Rad52         | 0.769165 | 1.35694  | 0.00705  | 0.019182 | yes |
| Chfr          | 0.766466 | 2.66089  | 5.00E-05 | 0.00022  | yes |
| Slc22a13b-ps  | 0.766362 | 0        | 1        | 1        | no  |
| Cpt1b         | 0.766168 | 0        | 1        | 1        | no  |
| Oas1g         | 0.766145 | 0        | 1        | 1        | no  |
| 5830415F09Rik | 0.765821 | 1.24167  | 0.03425  | 0.074199 | no  |
| Gpd1l         | 0.765413 | 3.73376  | 5.00E-05 | 0.00022  | yes |
| Wnt2b         | 0.765306 | 2.97079  | 5.00E-05 | 0.00022  | yes |
| Scml2         | 0.765246 | 0        | 1        | 1        | no  |
| Ccdc43        | 0.765153 | 3.24626  | 5.00E-05 | 0.00022  | yes |
| Il3ra         | 0.765027 | 1.19327  | 0.04745  | 0.097873 | no  |
| Bcl3          | 0.764716 | 1.76955  | 0.0027   | 0.008273 | yes |
| Cdh10         | 0.763995 | 2.55238  | 5.00E-05 | 0.00022  | yes |
| Taf1d         | 0.763528 | 1.14491  | 0.0573   | 0.114471 | no  |
| Suv420h2      | 0.763487 | 1.69455  | 0.00145  | 0.004804 | yes |
| Ska3          | 0.763061 | 0        | 1        | 1        | no  |
| Scube2        | 0.762895 | 1.15625  | 0.0329   | 0.071743 | no  |
| B930059L03Rik | 0.762809 | 0        | 1        | 1        | no  |
| 1700019D03Rik | 0.762605 | 1.74088  | 0.00995  | 0.025858 | yes |
| Arhgap39      | 0.762521 | 3.44092  | 5.00E-05 | 0.00022  | yes |
| Arl4d         | 0.762496 | 2.6344   | 5.00E-05 | 0.00022  | yes |
| Lat2          | 0.761948 | 0        | 1        | 1        | no  |
| LOC101055769  | 0.761784 | 0        | 1        | 1        | no  |
| Ptprc         | 0.761368 | 1.38716  | 0.0066   | 0.01811  | yes |
| 2900076A07Rik | 0.761311 | 0.663278 | 0.1819   | 0.291704 | no  |
| Serpina3g     | 0.761137 | 3.62124  | 5.00E-05 | 0.00022  | yes |
| Gng2          | 0.761068 | 3.43842  | 5.00E-05 | 0.00022  | yes |
| Plagl1        | 0.760513 | 3.49701  | 5.00E-05 | 0.00022  | yes |
| Gnal          | 0.759407 | 3.18679  | 5.00E-05 | 0.00022  | yes |
| Fbxl2         | 0.759098 | 2.58411  | 5.00E-05 | 0.00022  | yes |
| Gm6548        | 0.758807 | 2.84667  | 5.00E-05 | 0.00022  | yes |
| Def6          | 0.758316 | 2.85057  | 5.00E-05 | 0.00022  | yes |
| Zfp14         | 0.756952 | 1.90346  | 0.0004   | 0.001513 | yes |
| Slc18a2       | 0.756795 | 0        | 1        | 1        | no  |
| Klk8          | 0.756635 | 0.979227 | 0.10475  | 0.186715 | no  |
| Gm13363       | 0.756566 | 0.709222 | 0.16435  | 0.26889  | no  |
| Ppp1r2        | 0.755754 | 3.05042  | 5.00E-05 | 0.00022  | yes |
| Ccnl1         | 0.755095 | 2.47128  | 5.00E-05 | 0.00022  | yes |
| H2afj         | 0.755092 | 2.27207  | 0.0001   | 0.000422 | yes |
| Klhl35        | 0.754689 | 0        | 1        | 1        | no  |
| 9030612E09Rik | 0.754339 | 0        | 1        | 1        | no  |
| Sun3          | 0.753013 | 0        | 1        | 1        | no  |

|               |          |          |          |          |     |
|---------------|----------|----------|----------|----------|-----|
| Mbd6          | 0.75246  | 0.803476 | 0.10915  | 0.192771 | no  |
| Usmg5         | 0.752143 | 0.591559 | 0.2517   | 0.374403 | no  |
| F2rl2         | 0.752074 | 3.25091  | 5.00E-05 | 0.00022  | yes |
| Gm8234        | 0.751968 | 0        | 1        | 1        | no  |
| Scand1        | 0.751952 | 2.3192   | 0.00115  | 0.00391  | yes |
| Serac1        | 0.751836 | 1.57442  | 0.0016   | 0.005236 | yes |
| Apba1         | 0.751205 | 3.3156   | 5.00E-05 | 0.00022  | yes |
| Kcnq1         | 0.751165 | 0        | 1        | 1        | no  |
| Eif4ebp3      | 0.750893 | 1.2555   | 0.04125  | 0.086867 | no  |
| Snx11         | 0.7503   | 3.11276  | 5.00E-05 | 0.00022  | yes |
| 2610018G03Rik | 0.750172 | 1.50507  | 0.0071   | 0.019306 | yes |
| Ncapd2        | 0.749861 | 2.10532  | 0.00015  | 0.000615 | yes |
| Golga7b       | 0.749662 | 3.21907  | 5.00E-05 | 0.00022  | yes |
| Apol10b       | 0.748961 | 0        | 1        | 1        | no  |
| Itpkb         | 0.748735 | 3.36006  | 5.00E-05 | 0.00022  | yes |
| Zfp593        | 0.748705 | 1.73228  | 0.0007   | 0.002506 | yes |
| Trpv4         | 0.748664 | 1.05719  | 0.05275  | 0.106715 | no  |
| Gm14023       | 0.748624 | 0        | 1        | 1        | no  |
| Sfi1          | 0.748281 | 1.37029  | 0.0088   | 0.023271 | yes |
| Hist2h3c2     | 0.748076 | 0        | 1        | 1        | no  |
| Hoxb4         | 0.746262 | 1.66604  | 0.0031   | 0.009315 | yes |
| Htr5b         | 0.746107 | 1.80119  | 0.002    | 0.006363 | yes |
| Camk1g        | 0.746007 | 2.85673  | 5.00E-05 | 0.00022  | yes |
| Naa16         | 0.745913 | 1.62314  | 0.0028   | 0.008532 | yes |
| Csf2ra        | 0.745904 | 1.61456  | 0.0053   | 0.014929 | yes |
| Nudt8         | 0.745875 | 1.73829  | 0.01175  | 0.029824 | yes |
| Cep152        | 0.745794 | 0        | 1        | 1        | no  |
| C130036L24Rik | 0.745284 | 0        | 1        | 1        | no  |
| Sdcbp         | 0.744931 | 3.16971  | 5.00E-05 | 0.00022  | yes |
| Tmeff1        | 0.743895 | 3.04446  | 5.00E-05 | 0.00022  | yes |
| Cenpi         | 0.743867 | 0        | 1        | 1        | no  |
| Letm2         | 0.743729 | 1.85099  | 0.0012   | 0.004068 | yes |
| Col24a1       | 0.743482 | 1.7138   | 0.00115  | 0.00391  | yes |
| Gm5069        | 0.743407 | 0.883155 | 0.0957   | 0.173166 | no  |
| Atp1b4        | 0.743127 | 0        | 1        | 1        | no  |
| Cklf          | 0.742675 | 0.840904 | 0.07915  | 0.149011 | no  |
| Wdr62         | 0.74267  | 1.54477  | 0.00415  | 0.012021 | yes |
| Gm5577        | 0.742571 | 0        | 1        | 1        | no  |
| Tmem63a       | 0.742035 | 2.86735  | 5.00E-05 | 0.00022  | yes |
| Ptger1        | 0.74201  | 1.39195  | 0.01745  | 0.041986 | yes |
| Pde1c         | 0.74181  | 3.11551  | 5.00E-05 | 0.00022  | yes |
| Folr1         | 0.741364 | 0        | 1        | 1        | no  |
| Krit1         | 0.741128 | 2.76634  | 5.00E-05 | 0.00022  | yes |
| Ccin          | 0.741005 | 0        | 1        | 1        | no  |
| Zfp949        | 0.740995 | 2.13538  | 5.00E-05 | 0.00022  | yes |
| AI847159      | 0.740816 | 0.786275 | 0.21695  | 0.334565 | no  |
| Dock4         | 0.740675 | 3.23467  | 5.00E-05 | 0.00022  | yes |
| Prkar2b       | 0.740276 | 3.59245  | 5.00E-05 | 0.00022  | yes |
| Kcnmb1        | 0.740134 | 2.51923  | 5.00E-05 | 0.00022  | yes |
| Fam43a        | 0.740078 | 1.98858  | 0.00035  | 0.001342 | yes |
| Mybpc2        | 0.739752 | 0        | 1        | 1        | no  |
| 5730422E09Rik | 0.739678 | 0        | 1        | 1        | no  |
| Mroh7         | 0.739166 | 0        | 1        | 1        | no  |

|               |          |          |          |          |     |
|---------------|----------|----------|----------|----------|-----|
| Gm16973       | 0.738384 | 0.486272 | 0.33555  | 0.466884 | no  |
| Map7          | 0.738335 | 3.09378  | 5.00E-05 | 0.00022  | yes |
| 1600027J07Rik | 0.737868 | 0        | 1        | 1        | no  |
| Pcdh12        | 0.737775 | 1.30535  | 0.0132   | 0.032999 | yes |
| Nipsnap3b     | 0.737709 | 3.10542  | 5.00E-05 | 0.00022  | yes |
| Htr1f         | 0.737022 | 1.66581  | 0.0036   | 0.010628 | yes |
| Kctd16        | 0.736729 | 2.81224  | 5.00E-05 | 0.00022  | yes |
| Prim2         | 0.736686 | 1.45987  | 0.0114   | 0.029069 | yes |
| Trim56        | 0.736612 | 1.95984  | 0.0002   | 0.000803 | yes |
| Samd12        | 0.73598  | 2.51733  | 0.00025  | 0.000985 | yes |
| Anxa11        | 0.735732 | 3.10088  | 5.00E-05 | 0.00022  | yes |
| 1700001L19Rik | 0.735535 | 1.28155  | 0.02565  | 0.058101 | no  |
| Kcnd3os       | 0.735411 | 0        | 1        | 1        | no  |
| Gm11974       | 0.734442 | 0.865111 | 0.2669   | 0.39118  | no  |
| Trnp1         | 0.734005 | 3.77196  | 5.00E-05 | 0.00022  | yes |
| 4930414L22Rik | 0.733883 | 0.594943 | 0.22915  | 0.349348 | no  |
| Impact        | 0.733719 | 3.59082  | 5.00E-05 | 0.00022  | yes |
| Tspan14       | 0.733694 | 3.43063  | 5.00E-05 | 0.00022  | yes |
| Atp13a5       | 0.733394 | 0        | 1        | 1        | no  |
| 9530077C05Rik | 0.733121 | 2.37558  | 5.00E-05 | 0.00022  | yes |
| Mafk          | 0.732853 | 2.35785  | 5.00E-05 | 0.00022  | yes |
| Grip2         | 0.732787 | 1.71159  | 0.00125  | 0.00422  | yes |
| Tradd         | 0.732785 | 2.20983  | 0.0004   | 0.001513 | yes |
| Adamts3       | 0.732733 | 2.51256  | 5.00E-05 | 0.00022  | yes |
| Ocel1         | 0.732665 | 1.51244  | 0.0116   | 0.029488 | yes |
| Ifit2         | 0.732655 | 2.98524  | 5.00E-05 | 0.00022  | yes |
| Chek2         | 0.732048 | 0.953414 | 0.08615  | 0.159163 | no  |
| Gtpbp6        | 0.731737 | 2.29596  | 5.00E-05 | 0.00022  | yes |
| Baz1a         | 0.731656 | 1.69317  | 0.0015   | 0.004953 | yes |
| BC068157      | 0.731488 | 1.49497  | 0.0051   | 0.014464 | yes |
| Tspo          | 0.7311   | 2.32096  | 0.00075  | 0.00267  | yes |
| H13           | 0.73088  | 2.83576  | 5.00E-05 | 0.00022  | yes |
| Rras          | 0.730854 | 3.227    | 5.00E-05 | 0.00022  | yes |
| BC065397      | 0.730668 | 0        | 1        | 1        | no  |
| Crtam         | 0.730584 | 0        | 1        | 1        | no  |
| Txndc11       | 0.730442 | 1.16197  | 0.02075  | 0.048621 | yes |
| Cd300lf       | 0.730042 | 0        | 1        | 1        | no  |
| Gm14431       | 0.729609 | 0        | 1        | 1        | no  |
| A930007I19Rik | 0.729118 | 0        | 1        | 1        | no  |
| Il17d         | 0.72823  | 1.37868  | 0.0224   | 0.051828 | no  |
| 36585         | 0.728201 | 2.5692   | 5.00E-05 | 0.00022  | yes |
| Klk10         | 0.727985 | 0        | 1        | 1        | no  |
| Srsf5         | 0.727851 | 3.01849  | 5.00E-05 | 0.00022  | yes |
| Gad1          | 0.727826 | 0        | 1        | 1        | no  |
| 2700094K13Rik | 0.727477 | 1.99669  | 0.00015  | 0.000615 | yes |
| Rffl          | 0.727179 | 2.03359  | 5.00E-05 | 0.00022  | yes |
| Jph2          | 0.726969 | 1.45372  | 0.00455  | 0.013069 | yes |
| Odf2          | 0.726938 | 2.57782  | 5.00E-05 | 0.00022  | yes |
| Serf1         | 0.726915 | 3.01827  | 0.00015  | 0.000615 | yes |
| Rspo2         | 0.726408 | 3.37442  | 5.00E-05 | 0.00022  | yes |
| 4930579K19Rik | 0.726301 | 0        | 1        | 1        | no  |
| Nek1          | 0.725918 | 3.41955  | 5.00E-05 | 0.00022  | yes |
| Hnrnpa1       | 0.725907 | 1.68137  | 0.00245  | 0.007605 | yes |

|               |          |          |          |          |     |
|---------------|----------|----------|----------|----------|-----|
| Unc5d         | 0.725423 | 1.71411  | 0.00085  | 0.002983 | yes |
| Hmgcll1       | 0.725263 | 2.19352  | 0.0001   | 0.000422 | yes |
| Trpc5         | 0.725181 | 0        | 1        | 1        | no  |
| Chd5          | 0.724765 | 3.29071  | 5.00E-05 | 0.00022  | yes |
| Snx9          | 0.724288 | 2.87723  | 5.00E-05 | 0.00022  | yes |
| Mov10l1       | 0.723805 | 0        | 1        | 1        | no  |
| Tcp10b        | 0.722643 | 0        | 1        | 1        | no  |
| Zfp872        | 0.722632 | 0        | 1        | 1        | no  |
| Snhg6         | 0.721716 | 1.15879  | 0.02125  | 0.049643 | yes |
| Rnase4        | 0.721621 | 2.24442  | 0.0001   | 0.000422 | yes |
| Msantd1       | 0.721524 | 0.984701 | 0.07215  | 0.138226 | no  |
| Gm5595        | 0.721441 | 1.28537  | 0.0212   | 0.049553 | yes |
| Pla2g12b      | 0.721405 | 0        | 1        | 1        | no  |
| Palm          | 0.721318 | 0.596474 | 0.2341   | 0.354868 | no  |
| Diras2        | 0.720862 | 3.11713  | 5.00E-05 | 0.00022  | yes |
| Sema3e        | 0.720197 | 2.71079  | 5.00E-05 | 0.00022  | yes |
| Mcm2          | 0.720182 | 1.80202  | 0.00095  | 0.003299 | yes |
| Bin2          | 0.720145 | 0        | 1        | 1        | no  |
| Zmat4         | 0.72013  | 2.91528  | 5.00E-05 | 0.00022  | yes |
| Rplp2         | 0.719365 | 0.753651 | 0.12665  | 0.21833  | no  |
| Slpi          | 0.71886  | 0        | 1        | 1        | no  |
| Kcna4         | 0.718513 | 2.86414  | 5.00E-05 | 0.00022  | yes |
| Zfhx3         | 0.717773 | 3.35863  | 5.00E-05 | 0.00022  | yes |
| Kctd8         | 0.717717 | 3.30751  | 5.00E-05 | 0.00022  | yes |
| 4921536K21Rik | 0.716824 | 0        | 1        | 1        | no  |
| Tssk4         | 0.71669  | 0        | 1        | 1        | no  |
| A330021E22Rik | 0.716669 | 1.92763  | 0.00055  | 0.002016 | yes |
| Epsti1        | 0.716389 | 0        | 1        | 1        | no  |
| Gm10638       | 0.715712 | 0.633385 | 0.21215  | 0.328846 | no  |
| Srsf11        | 0.715267 | 2.89559  | 5.00E-05 | 0.00022  | yes |
| Lekr1         | 0.715105 | 1.09153  | 0.03405  | 0.073814 | no  |
| Zfhx4         | 0.715035 | 2.52158  | 5.00E-05 | 0.00022  | yes |
| Eri1          | 0.714657 | 2.01554  | 0.00035  | 0.001342 | yes |
| Yy2           | 0.714185 | 0.565561 | 0.26235  | 0.385961 | no  |
| Nlrc5         | 0.71404  | 0        | 1        | 1        | no  |
| Plag1         | 0.713946 | 1.18038  | 0.02615  | 0.059093 | no  |
| Ier3          | 0.713899 | 2.7187   | 5.00E-05 | 0.00022  | yes |
| Stat4         | 0.713812 | 0        | 1        | 1        | no  |
| Awat2         | 0.713262 | 0        | 1        | 1        | no  |
| 5530601H04Rik | 0.713106 | 1.2323   | 0.02105  | 0.049263 | yes |
| Zfp580        | 0.71289  | 2.1879   | 0.0006   | 0.002181 | yes |
| Card10        | 0.712739 | 2.32277  | 5.00E-05 | 0.00022  | yes |
| Akap7         | 0.712536 | 2.07221  | 0.00015  | 0.000615 | yes |
| Cenpj         | 0.712424 | 1.75673  | 0.0012   | 0.004068 | yes |
| Car11         | 0.711584 | 3.23167  | 5.00E-05 | 0.00022  | yes |
| Kri1          | 0.710418 | 1.74747  | 0.0004   | 0.001513 | yes |
| U2af1         | 0.710035 | 1.04575  | 0.03645  | 0.078186 | no  |
| Rpl10a        | 0.709906 | 0.822105 | 0.21975  | 0.337981 | no  |
| Ankrd6        | 0.709721 | 2.63386  | 5.00E-05 | 0.00022  | yes |
| Mxd1          | 0.709666 | 2.12947  | 5.00E-05 | 0.00022  | yes |
| Nek3          | 0.708921 | 1.62042  | 0.0015   | 0.004953 | yes |
| Tgm3          | 0.708841 | 0        | 1        | 1        | no  |
| Pcdha6        | 0.708284 | 0.41544  | 0.3911   | 0.522688 | no  |

|                   |          |          |          |          |     |
|-------------------|----------|----------|----------|----------|-----|
| Lbh               | 0.708249 | 3.42603  | 5.00E-05 | 0.00022  | yes |
| Rims2             | 0.707845 | 2.63416  | 5.00E-05 | 0.00022  | yes |
| 1700011I03Rik     | 0.707627 | 0.944131 | 0.10095  | 0.180767 | no  |
| Dsc2              | 0.706748 | 0        | 1        | 1        | no  |
| Zim1              | 0.706566 | 0        | 1        | 1        | no  |
| Sae1              | 0.706425 | 3.13152  | 5.00E-05 | 0.00022  | yes |
| Arhgap21          | 0.706368 | 3.18929  | 5.00E-05 | 0.00022  | yes |
| Rin1              | 0.705834 | 0        | 1        | 1        | no  |
| Ctsl              | 0.705558 | 3.2532   | 5.00E-05 | 0.00022  | yes |
| Ccr9              | 0.705312 | 0        | 1        | 1        | no  |
| Cacna2d2          | 0.705115 | 2.83919  | 5.00E-05 | 0.00022  | yes |
| Bnip2             | 0.704927 | 2.77338  | 5.00E-05 | 0.00022  | yes |
| Dek               | 0.704849 | 2.31609  | 5.00E-05 | 0.00022  | yes |
| Emilin2           | 0.704759 | 0        | 1        | 1        | no  |
| Trim21            | 0.703329 | 1.4144   | 0.00555  | 0.015544 | yes |
| Tlx2              | 0.702962 | 3.35824  | 5.00E-05 | 0.00022  | yes |
| Sh3glb1           | 0.702876 | 3.07169  | 5.00E-05 | 0.00022  | yes |
| 4930577N17Rik     | 0.702452 | 0        | 1        | 1        | no  |
| 2900060B14Rik     | 0.702043 | 0        | 1        | 1        | no  |
| Ddx55             | 0.701812 | 1.88695  | 0.00015  | 0.000615 | yes |
| Zcchc9            | 0.701686 | 2.04573  | 0.00105  | 0.003607 | yes |
| LOC101669761      | 0.701476 | 0        | 1        | 1        | no  |
| Dazl              | 0.700458 | 0        | 1        | 1        | no  |
| Ano3              | 0.700337 | 3.24929  | 5.00E-05 | 0.00022  | yes |
| A930015D03Rik     | 0.700311 | 0        | 1        | 1        | no  |
| Ccdc105           | 0.700087 | 0        | 1        | 1        | no  |
| Tspan2os          | 0.700015 | 0        | 1        | 1        | no  |
| Rab15             | 0.699768 | 3.48633  | 5.00E-05 | 0.00022  | yes |
| Zfp92             | 0.69971  | 0        | 1        | 1        | no  |
| Rnaset2a,Rnaset2b | 0.699569 | 0        | 1        | 1        | no  |
| Ccr7              | 0.699491 | 0        | 1        | 1        | no  |
| Cacnb3            | 0.699369 | 3.22792  | 5.00E-05 | 0.00022  | yes |
| Tnfrsf11a         | 0.69936  | 2.8972   | 5.00E-05 | 0.00022  | yes |
| Cdkn1a            | 0.69921  | 2.91288  | 5.00E-05 | 0.00022  | yes |
| Ebf1              | 0.699027 | 3.2748   | 5.00E-05 | 0.00022  | yes |
| Klf8              | 0.697906 | 2.33359  | 5.00E-05 | 0.00022  | yes |
| Tomm6os           | 0.697832 | 0.444937 | 0.41045  | 0.542321 | no  |
| Anks1b            | 0.69779  | 2.79949  | 5.00E-05 | 0.00022  | yes |
| Slc35f4           | 0.697668 | 2.14855  | 0.00025  | 0.000985 | yes |
| Nup93             | 0.697394 | 3.4033   | 5.00E-05 | 0.00022  | yes |
| Catsper2          | 0.696719 | 0.97354  | 0.0773   | 0.146192 | no  |
| Tmem132e          | 0.695747 | 3.39159  | 5.00E-05 | 0.00022  | yes |
| Crip2             | 0.695534 | 3.74416  | 5.00E-05 | 0.00022  | yes |
| Pcbd1             | 0.69492  | 2.92907  | 5.00E-05 | 0.00022  | yes |
| Adk               | 0.694423 | 3.229    | 5.00E-05 | 0.00022  | yes |
| Thra              | 0.694382 | 3.54522  | 5.00E-05 | 0.00022  | yes |
| Cbln1             | 0.694355 | 1.38592  | 0.0131   | 0.032767 | yes |
| Mfsd10            | 0.694081 | 2.27411  | 0.0001   | 0.000422 | yes |
| Zfp389            | 0.693834 | 0        | 1        | 1        | no  |
| Ptpro             | 0.693657 | 2.14189  | 5.00E-05 | 0.00022  | yes |
| 1700001C19Rik     | 0.693513 | 0        | 1        | 1        | no  |
| Lrrc71            | 0.693422 | 0        | 1        | 1        | no  |
| Arpc5             | 0.692896 | 3.60908  | 5.00E-05 | 0.00022  | yes |



|               |          |          |          |          |     |
|---------------|----------|----------|----------|----------|-----|
| Htr1a         | 0.692148 | 1.9812   | 0.00025  | 0.000985 | yes |
| Syt14         | 0.692116 | 1.50019  | 0.0099   | 0.025759 | yes |
| S1pr2         | 0.691682 | 1.63095  | 0.0033   | 0.009856 | yes |
| Auts2         | 0.691412 | 2.95741  | 5.00E-05 | 0.00022  | yes |
| Kif9          | 0.691355 | 1.15709  | 0.02235  | 0.051739 | no  |
| Pde10a        | 0.691278 | 2.82134  | 5.00E-05 | 0.00022  | yes |
| Lcor          | 0.691121 | 1.19034  | 0.0237   | 0.054324 | no  |
| Nt5c          | 0.690981 | 2.30388  | 5.00E-05 | 0.00022  | yes |
| Amz1          | 0.690933 | 1.08707  | 0.04545  | 0.094497 | no  |
| Dpys          | 0.690522 | 0        | 1        | 1        | no  |
| Olf424        | 0.690464 | 0        | 1        | 1        | no  |
| Olf12         | 0.690075 | 0        | 1        | 1        | no  |
| Tmem198       | 0.689472 | 1.67856  | 0.0031   | 0.009315 | yes |
| Hypk          | 0.68895  | 4.03584  | 5.00E-05 | 0.00022  | yes |
| Slc25a27      | 0.68851  | 2.70477  | 5.00E-05 | 0.00022  | yes |
| B230216N24Rik | 0.688019 | 0.189166 | 0.7406   | 0.827762 | no  |
| Syt4          | 0.688007 | 3.21724  | 5.00E-05 | 0.00022  | yes |
| Nckap5l       | 0.687977 | 2.7706   | 5.00E-05 | 0.00022  | yes |
| Dynll1        | 0.687517 | 3.52126  | 5.00E-05 | 0.00022  | yes |
| Tmsb4x        | 0.687495 | 4.09588  | 5.00E-05 | 0.00022  | yes |
| Cebpa         | 0.687181 | 1.39156  | 0.00485  | 0.01382  | yes |
| Srms          | 0.686945 | 0.947286 | 0.08275  | 0.154083 | no  |
| BC048679      | 0.68648  | 0        | 1        | 1        | no  |
| Dock11        | 0.686158 | 3.31562  | 5.00E-05 | 0.00022  | yes |
| Pou4f1        | 0.685703 | 3.38645  | 5.00E-05 | 0.00022  | yes |
| Plau          | 0.68524  | 1.90796  | 0.0007   | 0.002506 | yes |
| Ncapg2        | 0.685108 | 1.62275  | 0.00235  | 0.007346 | yes |
| 3110062M04Rik | 0.684862 | 0.934333 | 0.06215  | 0.122227 | no  |
| Fgd6          | 0.684836 | 1.87528  | 0.00045  | 0.001682 | yes |
| Amh           | 0.68482  | 0        | 1        | 1        | no  |
| Klf10         | 0.684381 | 2.4076   | 5.00E-05 | 0.00022  | yes |
| Sidt1         | 0.684324 | 0        | 1        | 1        | no  |
| Pura          | 0.683741 | 2.46686  | 5.00E-05 | 0.00022  | yes |
| Hcrtr2        | 0.68337  | 2.08356  | 0.0002   | 0.000803 | yes |
| Arhgap17      | 0.683049 | 2.96277  | 5.00E-05 | 0.00022  | yes |
| Rgmb          | 0.682487 | 3.46361  | 5.00E-05 | 0.00022  | yes |
| Zfp946        | 0.682487 | 2.37486  | 5.00E-05 | 0.00022  | yes |
| Serp2         | 0.682333 | 2.23183  | 5.00E-05 | 0.00022  | yes |
| Ccdc23        | 0.682221 | 1.42409  | 0.0056   | 0.015668 | yes |
| Xylt2         | 0.682123 | 2.78616  | 5.00E-05 | 0.00022  | yes |
| Rps21         | 0.682104 | 2.36147  | 5.00E-05 | 0.00022  | yes |
| Acin1         | 0.681949 | 2.64387  | 5.00E-05 | 0.00022  | yes |
| Nrn1          | 0.681784 | 3.47735  | 5.00E-05 | 0.00022  | yes |
| Zfp524        | 0.681587 | 1.47514  | 0.0181   | 0.043291 | yes |
| Stoml3        | 0.68109  | 0        | 1        | 1        | no  |
| Zfp78         | 0.680334 | 1.12801  | 0.02395  | 0.054869 | no  |
| Myt1l         | 0.680273 | 3.24274  | 5.00E-05 | 0.00022  | yes |
| Hpcal1        | 0.679955 | 3.54189  | 5.00E-05 | 0.00022  | yes |
| Slit1         | 0.679789 | 3.25522  | 5.00E-05 | 0.00022  | yes |
| C2cd5         | 0.679725 | 2.80463  | 5.00E-05 | 0.00022  | yes |
| Xkr6          | 0.679502 | 0.865431 | 0.0806   | 0.151013 | no  |
| Myo18b        | 0.678994 | 0        | 1        | 1        | no  |
| Stpg1         | 0.678708 | 1.20661  | 0.0314   | 0.069017 | no  |

|               |          |          |          |          |     |
|---------------|----------|----------|----------|----------|-----|
| Slc22a4       | 0.678469 | 1.39195  | 0.012    | 0.030371 | yes |
| 4921524J17Rik | 0.678322 | 1.5896   | 0.0022   | 0.006933 | yes |
| Acot12        | 0.678233 | 0        | 1        | 1        | no  |
| Cd47          | 0.678227 | 3.43163  | 5.00E-05 | 0.00022  | yes |
| Fam124a       | 0.678052 | 2.22783  | 5.00E-05 | 0.00022  | yes |
| Zfp182        | 0.677939 | 1.72293  | 0.0007   | 0.002506 | yes |
| Gpr19         | 0.677516 | 1.60997  | 0.00145  | 0.004804 | yes |
| A730020E08Rik | 0.676523 | 0.627387 | 0.27335  | 0.39817  | no  |
| Ndn           | 0.67651  | 3.56672  | 5.00E-05 | 0.00022  | yes |
| Fgf13         | 0.67624  | 2.84065  | 5.00E-05 | 0.00022  | yes |
| Upk1a         | 0.676221 | 0        | 1        | 1        | no  |
| Rgl2          | 0.67619  | 2.31787  | 5.00E-05 | 0.00022  | yes |
| Taf1c         | 0.676114 | 1.5166   | 0.0032   | 0.009592 | yes |
| Eogt          | 0.675925 | 2.37983  | 5.00E-05 | 0.00022  | yes |
| Zfand2b       | 0.675593 | 2.04167  | 5.00E-05 | 0.00022  | yes |
| 4930526I15Rik | 0.675502 | 0.855382 | 0.08365  | 0.155497 | no  |
| 1700011B04Rik | 0.675127 | 0        | 1        | 1        | no  |
| Dcdc2a        | 0.674589 | 0        | 1        | 1        | no  |
| Sema4d        | 0.67428  | 3.04842  | 5.00E-05 | 0.00022  | yes |
| Prr14         | 0.674199 | 2.20216  | 5.00E-05 | 0.00022  | yes |
| Sfn           | 0.673612 | 1.51956  | 0.00895  | 0.023578 | yes |
| Dusp11        | 0.6728   | 2.88289  | 5.00E-05 | 0.00022  | yes |
| Mpzl3         | 0.672464 | 1.23875  | 0.04825  | 0.099215 | no  |
| Tsen34        | 0.671825 | 2.51525  | 5.00E-05 | 0.00022  | yes |
| Lrrc18        | 0.671606 | 0        | 1        | 1        | no  |
| 9230114K14Rik | 0.671046 | 1.21586  | 0.03135  | 0.068918 | no  |
| Ccdc11        | 0.670221 | 0        | 1        | 1        | no  |
| Cds2          | 0.66929  | 2.22987  | 5.00E-05 | 0.00022  | yes |
| Popdc2        | 0.669089 | 0        | 1        | 1        | no  |
| Cdkl1         | 0.668726 | 0.490988 | 0.4011   | 0.532885 | no  |
| Rd3           | 0.668553 | 0        | 1        | 1        | no  |
| 2310061J03Rik | 0.668416 | 0.562547 | 0.35415  | 0.486086 | no  |
| Rinl          | 0.668232 | 0.894253 | 0.09875  | 0.177691 | no  |
| Tpm4          | 0.667808 | 3.18331  | 5.00E-05 | 0.00022  | yes |
| Psme1         | 0.666729 | 1.85215  | 0.0035   | 0.01036  | yes |
| Ankrd13b      | 0.66665  | 3.12667  | 5.00E-05 | 0.00022  | yes |
| Agfg2         | 0.666188 | 2.61171  | 5.00E-05 | 0.00022  | yes |
| Myd88         | 0.665892 | 1.73676  | 0.0021   | 0.006649 | yes |
| Il1r2         | 0.665683 | 0        | 1        | 1        | no  |
| Fst           | 0.665379 | 1.04467  | 0.05535  | 0.111211 | no  |
| Ptgs2         | 0.665087 | 1.03528  | 0.0507   | 0.103403 | no  |
| Trim17        | 0.665038 | 0.782153 | 0.17005  | 0.276477 | no  |
| Ubald1        | 0.664861 | 3.09725  | 5.00E-05 | 0.00022  | yes |
| Avil          | 0.664688 | 2.91086  | 5.00E-05 | 0.00022  | yes |
| Gm3435        | 0.6643   | 0        | 1        | 1        | no  |
| A630089N07Rik | 0.66412  | 0        | 1        | 1        | no  |
| Zdhhc14       | 0.664114 | 2.67158  | 5.00E-05 | 0.00022  | yes |
| Rpl13         | 0.663627 | 1.19957  | 0.0174   | 0.041888 | yes |
| Slc15a4       | 0.663555 | 2.56347  | 5.00E-05 | 0.00022  | yes |
| Akap17b       | 0.663542 | 2.59361  | 5.00E-05 | 0.00022  | yes |
| Chac2         | 0.663509 | 1.56626  | 0.0017   | 0.005514 | yes |
| Csnk1e        | 0.663294 | 2.78626  | 5.00E-05 | 0.00022  | yes |
| Ftl1          | 0.663142 | 3.72691  | 5.00E-05 | 0.00022  | yes |

|               |          |          |          |          |     |
|---------------|----------|----------|----------|----------|-----|
| Lst1          | 0.662947 | 1.04523  | 0.2884   | 0.41508  | no  |
| Lrrc16b       | 0.662858 | 2.93094  | 5.00E-05 | 0.00022  | yes |
| Deaf1         | 0.662482 | 2.36311  | 5.00E-05 | 0.00022  | yes |
| Cystm1        | 0.662129 | 3.61293  | 5.00E-05 | 0.00022  | yes |
| Myadm         | 0.661964 | 3.09879  | 5.00E-05 | 0.00022  | yes |
| Gnb2          | 0.661371 | 3.08896  | 5.00E-05 | 0.00022  | yes |
| Gm8773        | 0.66127  | 1.0478   | 0.07855  | 0.148092 | no  |
| Rnaseh1       | 0.660284 | 1.56429  | 0.0017   | 0.005514 | yes |
| Psg16         | 0.660253 | 0        | 1        | 1        | no  |
| Cbr3          | 0.660214 | 1.6423   | 0.008    | 0.021468 | yes |
| Ina           | 0.66005  | 1.85314  | 0.00025  | 0.000985 | yes |
| Gimap9        | 0.660037 | 0        | 1        | 1        | no  |
| Tnfsf13b      | 0.659962 | 0.945156 | 0.09595  | 0.173595 | no  |
| Bax           | 0.659487 | 2.70261  | 0.0001   | 0.000422 | yes |
| Mtcl1         | 0.659085 | 3.09052  | 5.00E-05 | 0.00022  | yes |
| Tppp3         | 0.658356 | 3.22826  | 5.00E-05 | 0.00022  | yes |
| Samd1         | 0.657734 | 2.04097  | 0.0005   | 0.00185  | yes |
| Trpc4         | 0.657701 | 1.43042  | 0.0052   | 0.014691 | yes |
| D030028A08Rik | 0.65546  | 0.610452 | 0.25335  | 0.37593  | no  |
| Ralgs1        | 0.655029 | 1.79559  | 0.00085  | 0.002983 | yes |
| Terf1         | 0.654535 | 1.70865  | 0.0005   | 0.00185  | yes |
| Bst2          | 0.654402 | 1.93367  | 0.0058   | 0.016179 | yes |
| Unc119        | 0.654346 | 2.97516  | 5.00E-05 | 0.00022  | yes |
| Pvrl1         | 0.654295 | 2.96766  | 5.00E-05 | 0.00022  | yes |
| Dok3          | 0.653978 | 0.835603 | 0.14925  | 0.249038 | no  |
| Pinx1         | 0.653856 | 1.23383  | 0.0361   | 0.077536 | no  |
| Aqp1          | 0.653751 | 3.21299  | 5.00E-05 | 0.00022  | yes |
| Fez1          | 0.653674 | 3.60124  | 5.00E-05 | 0.00022  | yes |
| Tbrg1         | 0.653601 | 2.99332  | 5.00E-05 | 0.00022  | yes |
| Crocc         | 0.653412 | 1.47666  | 0.0034   | 0.010109 | yes |
| Pgpep1l       | 0.653293 | 0        | 1        | 1        | no  |
| Lsm5          | 0.653001 | 0        | 1        | 1        | no  |
| Klf7          | 0.652943 | 2.81297  | 5.00E-05 | 0.00022  | yes |
| Star          | 0.652855 | 0        | 1        | 1        | no  |
| Hoxc9         | 0.652724 | 1.14389  | 0.04515  | 0.093932 | no  |
| Ccdc89        | 0.652344 | 0        | 1        | 1        | no  |
| Ctu1          | 0.652219 | 1.44372  | 0.00885  | 0.02338  | yes |
| Npas1         | 0.652195 | 0        | 1        | 1        | no  |
| Stmn1         | 0.652125 | 3.69026  | 5.00E-05 | 0.00022  | yes |
| Sh3bgrl3      | 0.651914 | 4.26845  | 5.00E-05 | 0.00022  | yes |
| Rpf1          | 0.651773 | 1.48965  | 0.00355  | 0.010494 | yes |
| Slc52a3       | 0.651718 | 1.45155  | 0.00455  | 0.013069 | yes |
| Efcab4a       | 0.650757 | 1.06387  | 0.05985  | 0.118565 | no  |
| Kcnk9         | 0.650563 | 0        | 1        | 1        | no  |
| Edf1          | 0.650393 | 3.72349  | 5.00E-05 | 0.00022  | yes |
| Tspan2        | 0.650038 | 2.99585  | 5.00E-05 | 0.00022  | yes |
| Tcp11         | 0.650009 | 0        | 1        | 1        | no  |
| Rab10os       | 0.649847 | 0.289108 | 0.65115  | 0.754877 | no  |
| Mgat4a        | 0.6497   | 2.89907  | 5.00E-05 | 0.00022  | yes |
| Cdca7         | 0.649365 | 0.856971 | 0.1177   | 0.205113 | no  |
| Pqlc3         | 0.649263 | 2.712    | 5.00E-05 | 0.00022  | yes |
| Ptpn22        | 0.649244 | 0        | 1        | 1        | no  |
| Ccdc109b      | 0.649129 | 2.49398  | 0.00015  | 0.000615 | yes |

|               |          |          |          |          |     |
|---------------|----------|----------|----------|----------|-----|
| Sfswap        | 0.648044 | 2.41585  | 5.00E-05 | 0.00022  | yes |
| Gm20337       | 0.647952 | 0        | 1        | 1        | no  |
| H2-D1         | 0.647916 | 3.002    | 5.00E-05 | 0.00022  | yes |
| Coro1a        | 0.647613 | 3.33403  | 5.00E-05 | 0.00022  | yes |
| Snx10         | 0.647472 | 3.02244  | 5.00E-05 | 0.00022  | yes |
| Rps15a-ps6    | 0.647468 | 0.353994 | 0.4817   | 0.610267 | no  |
| Faim          | 0.647367 | 2.00077  | 5.00E-05 | 0.00022  | yes |
| Znf512b       | 0.647047 | 2.20934  | 5.00E-05 | 0.00022  | yes |
| Tmem206       | 0.646806 | 2.02762  | 0.0003   | 0.001164 | yes |
| Gm15708       | 0.64662  | 0        | 1        | 1        | no  |
| Popdc3        | 0.646535 | 2.54598  | 5.00E-05 | 0.00022  | yes |
| Fam189b       | 0.646151 | 3.03852  | 5.00E-05 | 0.00022  | yes |
| Ttll9         | 0.646102 | 0.734735 | 0.134    | 0.228683 | no  |
| Tom1          | 0.646018 | 0        | 1        | 1        | no  |
| Lig1          | 0.64601  | 1.61936  | 0.00145  | 0.004804 | yes |
| Cdyl          | 0.645714 | 1.89926  | 0.00025  | 0.000985 | yes |
| Mis18a        | 0.645689 | 1.24916  | 0.03775  | 0.080455 | no  |
| Ankrd13d      | 0.645628 | 2.98977  | 5.00E-05 | 0.00022  | yes |
| Gm2373        | 0.645404 | 0        | 1        | 1        | no  |
| Rps11         | 0.645301 | 2.4466   | 5.00E-05 | 0.00022  | yes |
| Snhg10        | 0.645242 | 0.683804 | 0.17295  | 0.280025 | no  |
| Ptpla         | 0.645031 | 1.14227  | 0.02485  | 0.056589 | no  |
| Spice1        | 0.644761 | 1.77237  | 0.0008   | 0.002828 | yes |
| Hdac9         | 0.64474  | 2.43997  | 5.00E-05 | 0.00022  | yes |
| Tmsb10        | 0.64463  | 2.55583  | 5.00E-05 | 0.00022  | yes |
| F8a           | 0.644182 | 2.06294  | 0.0004   | 0.001513 | yes |
| Lrrc75b       | 0.643895 | 3.14472  | 5.00E-05 | 0.00022  | yes |
| Cnbd2         | 0.643658 | 0.503603 | 0.3155   | 0.445339 | no  |
| Gm13889       | 0.64349  | 3.38604  | 5.00E-05 | 0.00022  | yes |
| Rad23a        | 0.643453 | 2.40132  | 5.00E-05 | 0.00022  | yes |
| 6430550D23Rik | 0.643202 | 0        | 1        | 1        | no  |
| Rpl31         | 0.642783 | 1.11581  | 0.06475  | 0.126459 | no  |
| Zgrf1         | 0.642602 | 1.18126  | 0.0212   | 0.049553 | yes |
| Med11         | 0.641716 | 2.03492  | 0.0027   | 0.008273 | yes |
| Pfkl          | 0.641621 | 3.0241   | 5.00E-05 | 0.00022  | yes |
| Psma5         | 0.641398 | 1.6739   | 0.0062   | 0.017151 | yes |
| Rbm43         | 0.640654 | 2.09703  | 5.00E-05 | 0.00022  | yes |
| Mtrr          | 0.64062  | 1.72368  | 0.00135  | 0.004516 | yes |
| Gemin2        | 0.640529 | 1.33613  | 0.03195  | 0.070005 | no  |
| Magohb        | 0.640525 | 1.43137  | 0.037    | 0.079136 | no  |
| Ttc8          | 0.640405 | 1.58418  | 0.0018   | 0.005802 | yes |
| Ggta1         | 0.639297 | 2.31873  | 5.00E-05 | 0.00022  | yes |
| Vpreb3        | 0.639128 | 0        | 1        | 1        | no  |
| Lrwd1         | 0.638741 | 1.73117  | 0.0019   | 0.00608  | yes |
| Trpv2         | 0.638706 | 2.99167  | 5.00E-05 | 0.00022  | yes |
| Gm15772       | 0.638622 | 0        | 1        | 1        | no  |
| Ap3b1         | 0.638422 | 2.34103  | 5.00E-05 | 0.00022  | yes |
| Cstf3         | 0.638028 | 1.55384  | 0.002    | 0.006363 | yes |
| Rpl32         | 0.6379   | 1.84577  | 0.00045  | 0.001682 | yes |
| Mcm3          | 0.637691 | 1.04187  | 0.05115  | 0.104097 | no  |
| 1500004A13Rik | 0.637212 | 1.93576  | 5.00E-05 | 0.00022  | yes |
| AY358078      | 0.637169 | 0        | 1        | 1        | no  |
| 1500011B03Rik | 0.636876 | 2.60263  | 5.00E-05 | 0.00022  | yes |

|               |          |          |          |          |     |
|---------------|----------|----------|----------|----------|-----|
| Ptpn9         | 0.636729 | 3.02542  | 5.00E-05 | 0.00022  | yes |
| Srsf4         | 0.635594 | 2.38203  | 5.00E-05 | 0.00022  | yes |
| Tmem169       | 0.635424 | 2.04029  | 0.0002   | 0.000803 | yes |
| Lmnb2         | 0.635202 | 1.84779  | 0.0008   | 0.002828 | yes |
| Gm17066       | 0.634873 | 1.46939  | 0.007    | 0.019066 | yes |
| Fcho2         | 0.634859 | 2.41237  | 5.00E-05 | 0.00022  | yes |
| Ccdc166       | 0.634813 | 0.953307 | 0.05685  | 0.113691 | no  |
| Duox1         | 0.634649 | 0        | 1        | 1        | no  |
| Rmnd5b        | 0.634172 | 1.97957  | 5.00E-05 | 0.00022  | yes |
| Cmah          | 0.633981 | 0        | 1        | 1        | no  |
| Atxn2l        | 0.63392  | 2.97627  | 5.00E-05 | 0.00022  | yes |
| Chrna6        | 0.633864 | 2.84926  | 5.00E-05 | 0.00022  | yes |
| Znhit1        | 0.633785 | 1.97116  | 0.00215  | 0.006796 | yes |
| Six1          | 0.633389 | 2.92513  | 5.00E-05 | 0.00022  | yes |
| Abca5         | 0.633075 | 3.03898  | 5.00E-05 | 0.00022  | yes |
| Klrb1b        | 0.632877 | 0        | 1        | 1        | no  |
| 4933430I17Rik | 0.63247  | 0        | 1        | 1        | no  |
| Oxld1         | 0.632452 | 1.24169  | 0.062    | 0.121986 | no  |
| Rassf9        | 0.632265 | 1.22052  | 0.027    | 0.060703 | no  |
| 1700026D08Rik | 0.631997 | 0        | 1        | 1        | no  |
| Prr16         | 0.631814 | 0.961551 | 0.0795   | 0.149543 | no  |
| Ddx17         | 0.631795 | 2.82222  | 5.00E-05 | 0.00022  | yes |
| Ltv1          | 0.631579 | 2.34307  | 5.00E-05 | 0.00022  | yes |
| F930015N05Rik | 0.631508 | 0        | 1        | 1        | no  |
| Btbd8         | 0.63116  | 1.22711  | 0.0456   | 0.094735 | no  |
| Gstp1         | 0.631021 | 2.70103  | 0.0001   | 0.000422 | yes |
| Phkg1         | 0.630782 | 0        | 1        | 1        | no  |
| Xpo7          | 0.630321 | 2.84007  | 5.00E-05 | 0.00022  | yes |
| Tfdp1         | 0.629905 | 1.88675  | 0.0002   | 0.000803 | yes |
| Sox18         | 0.629802 | 1.13904  | 0.04645  | 0.096139 | no  |
| Lrrc8d        | 0.629029 | 2.9075   | 5.00E-05 | 0.00022  | yes |
| Agk           | 0.628854 | 1.65273  | 0.0028   | 0.008532 | yes |
| Sertad4       | 0.628812 | 2.37666  | 5.00E-05 | 0.00022  | yes |
| Pgm2l1        | 0.628158 | 2.75075  | 5.00E-05 | 0.00022  | yes |
| Pold1         | 0.627945 | 1.39353  | 0.00605  | 0.016792 | yes |
| 4930486L24Rik | 0.627912 | 0        | 1        | 1        | no  |
| 1700026L06Rik | 0.627751 | 0        | 1        | 1        | no  |
| Zfp128        | 0.627713 | 1.40138  | 0.00895  | 0.023578 | yes |
| Ranbp10       | 0.62732  | 2.65825  | 5.00E-05 | 0.00022  | yes |
| Skap2         | 0.626919 | 2.4568   | 5.00E-05 | 0.00022  | yes |
| Arhgef28      | 0.626447 | 2.45891  | 5.00E-05 | 0.00022  | yes |
| Gpr97         | 0.626355 | 0        | 1        | 1        | no  |
| Brdt          | 0.625741 | 1.57725  | 0.0021   | 0.006649 | yes |
| Enox1         | 0.625716 | 2.7575   | 5.00E-05 | 0.00022  | yes |
| Incenp        | 0.625608 | 1.65261  | 0.00225  | 0.007062 | yes |
| Lamb3         | 0.625521 | 0        | 1        | 1        | no  |
| Rcan3         | 0.625364 | 2.89272  | 5.00E-05 | 0.00022  | yes |
| Rmdn1         | 0.624846 | 1.5468   | 0.0069   | 0.018824 | yes |
| Coro2a        | 0.624664 | 2.91704  | 5.00E-05 | 0.00022  | yes |
| Cntn3         | 0.624144 | 2.08832  | 5.00E-05 | 0.00022  | yes |
| E2f4          | 0.623643 | 2.02334  | 0.00045  | 0.001682 | yes |
| Pcdha5        | 0.623439 | 0.257149 | 0.59015  | 0.705235 | no  |
| Snhg3         | 0.623264 | 1.89748  | 0.04125  | 0.086867 | no  |



|               |          |          |          |          |     |
|---------------|----------|----------|----------|----------|-----|
| 4930430F08Rik | 0.622893 | 1.62709  | 0.0012   | 0.004068 | yes |
| 4931428F04Rik | 0.622786 | 1.34102  | 0.00655  | 0.017992 | yes |
| Ap1s3         | 0.622738 | 0        | 1        | 1        | no  |
| Rufy2         | 0.622351 | 2.53566  | 5.00E-05 | 0.00022  | yes |
| Barx2         | 0.622296 | 1.25584  | 0.0261   | 0.059    | no  |
| Btf3          | 0.621727 | 1.52115  | 0.0029   | 0.008796 | yes |
| Rplp2-ps1     | 0.62158  | 0        | 1        | 1        | no  |
| Brinp2        | 0.621298 | 2.71588  | 5.00E-05 | 0.00022  | yes |
| Smc4          | 0.621187 | 2.41114  | 5.00E-05 | 0.00022  | yes |
| Erlin1        | 0.621002 | 2.0178   | 5.00E-05 | 0.00022  | yes |
| Osbpl8        | 0.620892 | 2.82909  | 5.00E-05 | 0.00022  | yes |
| Gm826         | 0.620775 | 0        | 1        | 1        | no  |
| Brd9          | 0.62068  | 2.53036  | 5.00E-05 | 0.00022  | yes |
| Cacna2d1      | 0.620578 | 2.85976  | 5.00E-05 | 0.00022  | yes |
| Stk11ip       | 0.62027  | 2.46125  | 5.00E-05 | 0.00022  | yes |
| Rac3          | 0.619956 | 2.63041  | 5.00E-05 | 0.00022  | yes |
| Acrbp         | 0.619744 | 0.593909 | 0.2373   | 0.358612 | no  |
| Myh9          | 0.619648 | 2.90463  | 5.00E-05 | 0.00022  | yes |
| Crybb3        | 0.619394 | 0.628732 | 0.2024   | 0.31673  | no  |
| Adrm1         | 0.619366 | 1.28691  | 0.028    | 0.062644 | no  |
| Uri1          | 0.619356 | 2.45421  | 5.00E-05 | 0.00022  | yes |
| Polr2i        | 0.619301 | 1.31475  | 0.0288   | 0.064206 | no  |
| Slc25a24      | 0.61913  | 1.94401  | 0.0003   | 0.001164 | yes |
| Zfp112        | 0.618904 | 1.39652  | 0.0104   | 0.02687  | yes |
| Zc3h7a        | 0.618673 | 2.26779  | 5.00E-05 | 0.00022  | yes |
| Cxxc4         | 0.618618 | 2.16656  | 5.00E-05 | 0.00022  | yes |
| Foxo3         | 0.618276 | 2.59343  | 5.00E-05 | 0.00022  | yes |
| Icmt          | 0.61816  | 2.98059  | 5.00E-05 | 0.00022  | yes |
| Steap1        | 0.617925 | 0.9626   | 0.1113   | 0.195812 | no  |
| Bbs5          | 0.617895 | 1.74713  | 0.0024   | 0.00748  | yes |
| Gramd4        | 0.617888 | 2.53386  | 5.00E-05 | 0.00022  | yes |
| Armcx6        | 0.617878 | 1.76157  | 0.0018   | 0.005802 | yes |
| Rsph3a        | 0.617804 | 1.66455  | 0.00295  | 0.008927 | yes |
| Cpne9         | 0.61777  | 1.29374  | 0.01745  | 0.041986 | yes |
| Atad2b        | 0.617354 | 1.92188  | 0.0002   | 0.000803 | yes |
| Snx7          | 0.617089 | 2.87871  | 5.00E-05 | 0.00022  | yes |
| Gt(ROSA)26Sor | 0.617001 | 0.919815 | 0.07255  | 0.138752 | no  |
| Tac1          | 0.616566 | 3.51128  | 5.00E-05 | 0.00022  | yes |
| Dqx1          | 0.616273 | 0        | 1        | 1        | no  |
| B3glct        | 0.615927 | 2.67767  | 5.00E-05 | 0.00022  | yes |
| Vmo1          | 0.615908 | 0        | 1        | 1        | no  |
| Boc           | 0.615624 | 2.17351  | 5.00E-05 | 0.00022  | yes |
| C130071C03Rik | 0.615583 | 0        | 1        | 1        | no  |
| Styx          | 0.615228 | 0.965315 | 0.069    | 0.133502 | no  |
| Cpsf4         | 0.615217 | 1.21932  | 0.01545  | 0.037763 | yes |
| Apitd1        | 0.615105 | 1.15386  | 0.07315  | 0.139678 | no  |
| Vezt          | 0.615007 | 2.74108  | 5.00E-05 | 0.00022  | yes |
| Aacs          | 0.614848 | 3.05537  | 5.00E-05 | 0.00022  | yes |
| Ccdc12        | 0.614831 | 1.59765  | 0.0165   | 0.03999  | yes |
| Asprv1        | 0.614742 | 0        | 1        | 1        | no  |
| Slc25a38      | 0.614424 | 2.70476  | 5.00E-05 | 0.00022  | yes |
| Bdnf          | 0.614372 | 2.31539  | 5.00E-05 | 0.00022  | yes |
| Pop5          | 0.613978 | 2.98515  | 5.00E-05 | 0.00022  | yes |

|               |          |          |          |          |     |
|---------------|----------|----------|----------|----------|-----|
| Nol3          | 0.613878 | 2.65211  | 5.00E-05 | 0.00022  | yes |
| Tor4a         | 0.613513 | 0.852158 | 0.11095  | 0.1953   | no  |
| Tyk2          | 0.613511 | 1.76413  | 0.00025  | 0.000985 | yes |
| B4galt5       | 0.613009 | 2.96749  | 5.00E-05 | 0.00022  | yes |
| Hilpda        | 0.612894 | 1.19415  | 0.0178   | 0.04265  | yes |
| Abr           | 0.612719 | 2.82351  | 5.00E-05 | 0.00022  | yes |
| Taf10         | 0.612542 | 0.716531 | 0.1528   | 0.253908 | no  |
| Kifc2         | 0.61252  | 2.55549  | 5.00E-05 | 0.00022  | yes |
| Parpbp        | 0.612277 | 0        | 1        | 1        | no  |
| Bend4         | 0.612225 | 2.22984  | 5.00E-05 | 0.00022  | yes |
| Fbxl22        | 0.612212 | 0        | 1        | 1        | no  |
| Cep70         | 0.61214  | 1.42042  | 0.00965  | 0.025197 | yes |
| Lmo7          | 0.612034 | 1.41327  | 0.0076   | 0.02049  | yes |
| Prdm8         | 0.611842 | 2.19548  | 5.00E-05 | 0.00022  | yes |
| G2e3          | 0.611756 | 1.58947  | 0.0016   | 0.005236 | yes |
| Snx21         | 0.611574 | 2.72833  | 5.00E-05 | 0.00022  | yes |
| Supt20        | 0.611537 | 2.21264  | 5.00E-05 | 0.00022  | yes |
| Safb2         | 0.611476 | 2.01273  | 0.0001   | 0.000422 | yes |
| Zdhhc13       | 0.611472 | 2.57696  | 5.00E-05 | 0.00022  | yes |
| Rab40c        | 0.611315 | 2.36218  | 5.00E-05 | 0.00022  | yes |
| 4930526L06Rik | 0.611238 | 0        | 1        | 1        | no  |
| Sp110         | 0.61091  | 0        | 1        | 1        | no  |
| Wipf1         | 0.610847 | 2.56307  | 5.00E-05 | 0.00022  | yes |
| Upf3b         | 0.610797 | 2.20528  | 0.0001   | 0.000422 | yes |
| Cited1        | 0.61077  | 0.677273 | 0.16075  | 0.264304 | no  |
| Jph1          | 0.610768 | 1.27236  | 0.0153   | 0.037465 | yes |
| Lnx1          | 0.61044  | 1.03588  | 0.03845  | 0.081723 | no  |
| 1110007C09Rik | 0.610384 | 2.85962  | 5.00E-05 | 0.00022  | yes |
| BC020402      | 0.609954 | 0.932821 | 0.09375  | 0.170218 | no  |
| Plcl1         | 0.609804 | 2.09361  | 5.00E-05 | 0.00022  | yes |
| Rgs9bp        | 0.609758 | 0        | 1        | 1        | no  |
| Utp18         | 0.609368 | 1.82306  | 0.001    | 0.003451 | yes |
| 2700081O15Rik | 0.60905  | 0.406692 | 0.42195  | 0.553491 | no  |
| Zkscan2       | 0.608634 | 1.13031  | 0.03245  | 0.070925 | no  |
| Asl           | 0.60849  | 2.24684  | 5.00E-05 | 0.00022  | yes |
| Uimc1         | 0.608464 | 1.57609  | 0.0037   | 0.010879 | yes |
| Paxbp1        | 0.608407 | 0.595033 | 0.2292   | 0.349348 | no  |
| Ralgds        | 0.608018 | 2.63338  | 5.00E-05 | 0.00022  | yes |
| Ino80b        | 0.607903 | 1.74361  | 0.0062   | 0.017151 | yes |
| 8430408G22Rik | 0.607789 | 0.468365 | 0.3823   | 0.513618 | no  |
| Creld1        | 0.607723 | 3.15337  | 5.00E-05 | 0.00022  | yes |
| 8430427H17Rik | 0.607339 | 2.76403  | 5.00E-05 | 0.00022  | yes |
| 2010111I01Rik | 0.607146 | 1.99827  | 0.00055  | 0.002016 | yes |
| A230072C01Rik | 0.606616 | 1.06383  | 0.03435  | 0.074391 | no  |
| Glipr2        | 0.606523 | 1.9004   | 0.0006   | 0.002181 | yes |
| Ankrd12       | 0.606069 | 2.75435  | 5.00E-05 | 0.00022  | yes |
| Tmem238       | 0.606019 | 0.759036 | 0.22295  | 0.341833 | no  |
| Rp9           | 0.605071 | 2.39591  | 0.0003   | 0.001164 | yes |
| Xpa           | 0.605034 | 1.46533  | 0.0217   | 0.05049  | no  |
| Bcl7c         | 0.604752 | 1.10184  | 0.0282   | 0.063027 | no  |
| Zmat5         | 0.604631 | 2.15105  | 0.0016   | 0.005236 | yes |
| Pla2g6        | 0.604385 | 2.31175  | 5.00E-05 | 0.00022  | yes |
| Ost4          | 0.604369 | 1.64011  | 0.00135  | 0.004516 | yes |

|               |          |           |          |          |     |
|---------------|----------|-----------|----------|----------|-----|
| Ydjc          | 0.604208 | 1.85982   | 0.00205  | 0.006503 | yes |
| Mroh2a        | 0.604076 | 0         | 1        | 1        | no  |
| Rassf1        | 0.60406  | 1.48272   | 0.0037   | 0.010879 | yes |
| Rpusd1        | 0.603912 | 1.9964    | 0.0005   | 0.00185  | yes |
| Gpatch4       | 0.603461 | 1.66079   | 0.00155  | 0.005095 | yes |
| Fbxo36        | 0.603458 | 1.5751    | 0.01545  | 0.037763 | yes |
| 2310036O22Rik | 0.603419 | 3.01015   | 5.00E-05 | 0.00022  | yes |
| Fgf22         | 0.603122 | 0.0241917 | 0.31095  | 0.440463 | no  |
| Rsrc2         | 0.602769 | 2.6346    | 5.00E-05 | 0.00022  | yes |
| Flot2         | 0.60275  | 2.77722   | 5.00E-05 | 0.00022  | yes |
| Cbr1          | 0.602712 | 2.86226   | 5.00E-05 | 0.00022  | yes |
| Cep78         | 0.602536 | 1.6688    | 0.00215  | 0.006796 | yes |
| Kin           | 0.601953 | 1.48245   | 0.0116   | 0.029488 | yes |
| Wbscr17       | 0.601868 | 2.95737   | 5.00E-05 | 0.00022  | yes |
| Rbm39         | 0.601859 | 2.72096   | 5.00E-05 | 0.00022  | yes |
| Tec           | 0.601445 | 1.46834   | 0.0037   | 0.010879 | yes |
| Noxo1         | 0.601357 | 0         | 1        | 1        | no  |
| Jph4          | 0.60079  | 2.94451   | 5.00E-05 | 0.00022  | yes |
| Gucd1         | 0.600559 | 2.36923   | 5.00E-05 | 0.00022  | yes |
| Msl3l2        | 0.60044  | 0.825242  | 0.10485  | 0.186843 | no  |
| Gabrr1        | 0.59997  | 0         | 1        | 1        | no  |
| Zfp827        | 0.599891 | 2.4176    | 5.00E-05 | 0.00022  | yes |
| Cyp2j13       | 0.599832 | 0         | 1        | 1        | no  |
| Rab26os       | 0.599769 | 1.66975   | 0.25185  | 0.374543 | no  |
| Fam178a       | 0.599642 | 2.08121   | 5.00E-05 | 0.00022  | yes |
| Hhipl1        | 0.599631 | 0.889997  | 0.1025   | 0.183221 | no  |
| Zcchc18       | 0.599343 | 2.63908   | 5.00E-05 | 0.00022  | yes |
| AW549877      | 0.599109 | 2.86439   | 5.00E-05 | 0.00022  | yes |
| Lgals4        | 0.598583 | 0.468096  | 0.4252   | 0.556434 | no  |
| B230112J18Rik | 0.598528 | 0         | 1        | 1        | no  |
| Nagk          | 0.598501 | 2.43121   | 5.00E-05 | 0.00022  | yes |
| Grk5          | 0.598386 | 1.93503   | 0.00065  | 0.002343 | yes |
| Pknos2        | 0.598329 | 2.57136   | 5.00E-05 | 0.00022  | yes |
| Igflr1        | 0.597978 | 0.780397  | 0.20115  | 0.315221 | no  |
| Rps19bp1      | 0.597887 | 1.76758   | 0.0084   | 0.022392 | yes |
| Pygl          | 0.597707 | 2.33532   | 5.00E-05 | 0.00022  | yes |
| 2510002D24Rik | 0.597586 | 1.384     | 0.022    | 0.051098 | no  |
| Socs7         | 0.597566 | 2.84695   | 5.00E-05 | 0.00022  | yes |
| Dennd6b       | 0.59743  | 1.88585   | 0.0001   | 0.000422 | yes |
| Mkrn1         | 0.596565 | 2.86401   | 5.00E-05 | 0.00022  | yes |
| Anxa5         | 0.596172 | 2.34897   | 5.00E-05 | 0.00022  | yes |
| Erich3        | 0.596018 | 1.42627   | 0.01085  | 0.02787  | yes |
| Prex1         | 0.595985 | 2.52221   | 5.00E-05 | 0.00022  | yes |
| Cenpw         | 0.595328 | 0.709728  | 0.22185  | 0.34054  | no  |
| Slc25a1       | 0.594863 | 3.03223   | 5.00E-05 | 0.00022  | yes |
| Rnf219        | 0.594611 | 2.33488   | 5.00E-05 | 0.00022  | yes |
| Mypn          | 0.594603 | 0         | 1        | 1        | no  |
| Klhl10        | 0.594246 | 0         | 1        | 1        | no  |
| Map2k3        | 0.594173 | 2.03635   | 0.0003   | 0.001164 | yes |
| Efcab5        | 0.594026 | 0         | 1        | 1        | no  |
| Fah           | 0.593912 | 2.17189   | 0.0003   | 0.001164 | yes |
| Id4           | 0.593846 | 2.26565   | 5.00E-05 | 0.00022  | yes |
| Tmem74        | 0.593179 | 2.2197    | 0.00015  | 0.000615 | yes |

|               |          |          |          |          |     |
|---------------|----------|----------|----------|----------|-----|
| Anapc15       | 0.59309  | 0.862771 | 0.07925  | 0.149157 | no  |
| Pkd2l2        | 0.592822 | 0        | 1        | 1        | no  |
| Plp2          | 0.592713 | 0.518765 | 0.3111   | 0.440487 | no  |
| Gstt2         | 0.592636 | 1.08943  | 0.0641   | 0.125374 | no  |
| Pcdhb5        | 0.592346 | 0.181271 | 0.7244   | 0.815426 | no  |
| 5730405O15Rik | 0.592236 | 0.669347 | 0.3025   | 0.430747 | no  |
| Pin4          | 0.592024 | 0.850809 | 0.32805  | 0.458855 | no  |
| Ccdc84        | 0.591716 | 0.605744 | 0.2426   | 0.36425  | no  |
| Brca2         | 0.591611 | 0        | 1        | 1        | no  |
| Rtn4rl1       | 0.59137  | 2.88147  | 5.00E-05 | 0.00022  | yes |
| 1110002L01Rik | 0.590605 | 0.378123 | 0.4466   | 0.577748 | no  |
| Gcnt2         | 0.590487 | 2.6378   | 5.00E-05 | 0.00022  | yes |
| Kl            | 0.590406 | 0        | 1        | 1        | no  |
| Gm2109        | 0.590349 | 0        | 1        | 1        | no  |
| 4930538K18Rik | 0.590115 | 0        | 1        | 1        | no  |
| Myl6          | 0.590081 | 2.42869  | 0.0014   | 0.004657 | yes |
| Sirt7         | 0.589859 | 1.76956  | 0.00025  | 0.000985 | yes |
| Pde8a         | 0.589857 | 1.51714  | 0.00515  | 0.014587 | yes |
| Ugcg          | 0.589664 | 2.90579  | 5.00E-05 | 0.00022  | yes |
| Ankzf1        | 0.58966  | 1.37119  | 0.0145   | 0.03579  | yes |
| Pdcd5         | 0.589341 | 1.32     | 0.0705   | 0.135869 | no  |
| 9530026P05Rik | 0.589006 | 0.790172 | 0.2136   | 0.330707 | no  |
| Rps19         | 0.588991 | 1.35272  | 0.0646   | 0.126222 | no  |
| Piga          | 0.588679 | 1.18663  | 0.02535  | 0.057579 | no  |
| Rtl1          | 0.588483 | 0        | 1        | 1        | no  |
| Zfp941        | 0.588459 | 2.05208  | 0.00015  | 0.000615 | yes |
| Atg4a         | 0.587288 | 0.42271  | 0.44825  | 0.578777 | no  |
| Chuk          | 0.586854 | 2.18241  | 5.00E-05 | 0.00022  | yes |
| Cdh1          | 0.586691 | 2.87864  | 5.00E-05 | 0.00022  | yes |
| Arfgap3       | 0.586629 | 2.76183  | 5.00E-05 | 0.00022  | yes |
| 2510009E07Rik | 0.586527 | 2.8613   | 5.00E-05 | 0.00022  | yes |
| Cacna1b       | 0.586341 | 2.72584  | 5.00E-05 | 0.00022  | yes |
| Rps18         | 0.585806 | 1.95158  | 0.01905  | 0.045164 | yes |
| Ppp1r1c       | 0.585756 | 2.66216  | 5.00E-05 | 0.00022  | yes |
| Nkiras2       | 0.584677 | 2.24067  | 0.00015  | 0.000615 | yes |
| Fam189a2      | 0.583951 | 2.31036  | 5.00E-05 | 0.00022  | yes |
| Slc8a1        | 0.583455 | 1.93272  | 5.00E-05 | 0.00022  | yes |
| A930012L18Rik | 0.583319 | 0        | 1        | 1        | no  |
| Emp3          | 0.582727 | 1.74095  | 0.00085  | 0.002983 | yes |
| Ermn          | 0.582453 | 0        | 1        | 1        | no  |
| Rrp36         | 0.582413 | 1.69321  | 0.00535  | 0.015044 | yes |
| Frat2         | 0.582351 | 1.69507  | 0.0034   | 0.010109 | yes |
| Skp1a         | 0.58234  | 2.7161   | 5.00E-05 | 0.00022  | yes |
| Gm17762       | 0.582317 | 0        | 1        | 1        | no  |
| Fzd5          | 0.582035 | 1.13726  | 0.0241   | 0.055165 | no  |
| Dbndd2        | 0.581578 | 2.09636  | 5.00E-05 | 0.00022  | yes |
| Yeats4        | 0.581222 | 2.37326  | 0.0001   | 0.000422 | yes |
| Dda1          | 0.58121  | 2.00373  | 0.00025  | 0.000985 | yes |
| Gm10516       | 0.581131 | 0.925408 | 0.06315  | 0.123882 | no  |
| Nipal2        | 0.58107  | 2.22235  | 5.00E-05 | 0.00022  | yes |
| Grk6          | 0.581058 | 2.43583  | 5.00E-05 | 0.00022  | yes |
| Cfp           | 0.580561 | 0.799821 | 0.16275  | 0.266799 | no  |
| Fam102b       | 0.580411 | 2.78099  | 5.00E-05 | 0.00022  | yes |

|               |          |          |          |          |     |
|---------------|----------|----------|----------|----------|-----|
| Rps27,Rps27rt | 0.580229 | 0.628343 | 0.2731   | 0.397981 | no  |
| Tspan5        | 0.579594 | 2.85989  | 5.00E-05 | 0.00022  | yes |
| Zfp28         | 0.579527 | 1.22094  | 0.0222   | 0.0515   | no  |
| Ssna1         | 0.579477 | 2.21519  | 0.0009   | 0.003139 | yes |
| C77080        | 0.579467 | 2.18325  | 5.00E-05 | 0.00022  | yes |
| Rbm25         | 0.578775 | 2.72728  | 5.00E-05 | 0.00022  | yes |
| Fbxo22        | 0.578546 | 2.60938  | 5.00E-05 | 0.00022  | yes |
| Lclat1        | 0.578095 | 2.58285  | 5.00E-05 | 0.00022  | yes |
| Rnf7          | 0.578093 | 3.10224  | 5.00E-05 | 0.00022  | yes |
| Eef1g         | 0.577869 | 2.2327   | 0.0001   | 0.000422 | yes |
| Bbs9          | 0.577496 | 1.88218  | 0.0002   | 0.000803 | yes |
| Myc           | 0.576965 | 1.47883  | 0.00455  | 0.013069 | yes |
| Ccdc85a       | 0.576798 | 2.50848  | 5.00E-05 | 0.00022  | yes |
| Taf4a         | 0.576539 | 1.63999  | 0.0019   | 0.00608  | yes |
| Lypd6b        | 0.576289 | 1.52985  | 0.0051   | 0.014464 | yes |
| Irf7          | 0.575883 | 1.18201  | 0.01995  | 0.046987 | yes |
| Pten          | 0.575826 | 2.7083   | 5.00E-05 | 0.00022  | yes |
| Tmem256       | 0.575684 | 3.20695  | 0.0005   | 0.00185  | yes |
| Tcof1         | 0.575671 | 1.91611  | 0.0003   | 0.001164 | yes |
| Raph1         | 0.575653 | 2.74091  | 5.00E-05 | 0.00022  | yes |
| Rnps1         | 0.575491 | 1.88158  | 0.00015  | 0.000615 | yes |
| 37499         | 0.575316 | 2.63512  | 5.00E-05 | 0.00022  | yes |
| Taf9b         | 0.575073 | 2.18474  | 5.00E-05 | 0.00022  | yes |
| Vav3          | 0.574986 | 1.99119  | 5.00E-05 | 0.00022  | yes |
| Clk2          | 0.574803 | 1.43503  | 0.0041   | 0.011903 | yes |
| 3110009E18Rik | 0.574216 | 0.432051 | 0.39865  | 0.530374 | no  |
| Tmem106a      | 0.573767 | 1.49741  | 0.0081   | 0.021701 | yes |
| Arrdc2        | 0.573562 | 1.62707  | 0.00295  | 0.008927 | yes |
| Xaf1          | 0.573542 | 1.19508  | 0.01655  | 0.040097 | yes |
| Kdsr          | 0.573182 | 2.50515  | 5.00E-05 | 0.00022  | yes |
| Trim46        | 0.572864 | 2.20538  | 5.00E-05 | 0.00022  | yes |
| Zadh2         | 0.572727 | 2.59405  | 5.00E-05 | 0.00022  | yes |
| Plekha6       | 0.572717 | 2.66581  | 5.00E-05 | 0.00022  | yes |
| Slc9a3r2      | 0.572706 | 2.52281  | 5.00E-05 | 0.00022  | yes |
| Arl10         | 0.571952 | 1.7158   | 0.0055   | 0.015427 | yes |
| Pwwp2a        | 0.571673 | 1.60014  | 0.0014   | 0.004657 | yes |
| Palb2         | 0.571155 | 0        | 1        | 1        | no  |
| 2900056M20Rik | 0.570238 | 1.94197  | 5.00E-05 | 0.00022  | yes |
| Ak8           | 0.570018 | 0.7291   | 0.14125  | 0.238387 | no  |
| Rabgap1l      | 0.569961 | 2.61904  | 5.00E-05 | 0.00022  | yes |
| Gtf3a         | 0.569858 | 1.65637  | 0.00535  | 0.015044 | yes |
| Mrgpre        | 0.569352 | 2.24607  | 0.0001   | 0.000422 | yes |
| Tmem29        | 0.569189 | 1.57845  | 0.00195  | 0.006219 | yes |
| Ccdc62        | 0.56883  | 0        | 1        | 1        | no  |
| Gadd45g       | 0.568768 | 2.11373  | 0.0004   | 0.001513 | yes |
| Fam63a        | 0.568256 | 2.70315  | 5.00E-05 | 0.00022  | yes |
| Leo1          | 0.568172 | 2.24396  | 5.00E-05 | 0.00022  | yes |
| Rbm5          | 0.568148 | 2.61689  | 5.00E-05 | 0.00022  | yes |
| Ankrd24       | 0.568032 | 1.8013   | 0.00095  | 0.003299 | yes |
| Lrch4         | 0.567225 | 1.8387   | 0.00065  | 0.002343 | yes |
| Zmym6         | 0.567157 | 1.67011  | 0.0009   | 0.003139 | yes |
| Rep15         | 0.567072 | 0        | 1        | 1        | no  |
| Jade3         | 0.566928 | 1.22081  | 0.01705  | 0.041135 | yes |



|               |          |          |          |          |     |
|---------------|----------|----------|----------|----------|-----|
| Gtpbp2        | 0.566597 | 2.23986  | 5.00E-05 | 0.00022  | yes |
| Spag7         | 0.566485 | 2.15372  | 5.00E-05 | 0.00022  | yes |
| Apol8         | 0.566339 | 0.985395 | 0.07685  | 0.145466 | no  |
| Luc7l2        | 0.565993 | 2.37288  | 5.00E-05 | 0.00022  | yes |
| Mbnl2         | 0.565373 | 2.43605  | 5.00E-05 | 0.00022  | yes |
| Atp8b5        | 0.56529  | 0        | 1        | 1        | no  |
| Pkp4          | 0.565151 | 2.24329  | 5.00E-05 | 0.00022  | yes |
| Angptl6       | 0.564899 | 0.768226 | 0.12335  | 0.213612 | no  |
| Adipoq        | 0.564876 | 0        | 1        | 1        | no  |
| Tifa          | 0.564829 | 2.00702  | 0.0003   | 0.001164 | yes |
| Banp          | 0.564802 | 1.57459  | 0.0018   | 0.005802 | yes |
| Cisd3         | 0.564712 | 2.74177  | 5.00E-05 | 0.00022  | yes |
| Zfp185        | 0.564535 | 0        | 1        | 1        | no  |
| Tex9          | 0.564528 | 1.38138  | 0.0056   | 0.015668 | yes |
| Pgls          | 0.564397 | 2.25645  | 0.00035  | 0.001342 | yes |
| 6230400D17Rik | 0.564178 | 0        | 1        | 1        | no  |
| Supt4a        | 0.564069 | 1.66943  | 0.01975  | 0.046599 | yes |
| Insl5         | 0.56396  | 0        | 1        | 1        | no  |
| Abcg3         | 0.563864 | 0        | 1        | 1        | no  |
| Stk38         | 0.5632   | 1.7403   | 0.00115  | 0.00391  | yes |
| Cngb1         | 0.562901 | 0        | 1        | 1        | no  |
| Zfp738        | 0.562828 | 1.9454   | 0.0002   | 0.000803 | yes |
| Stat2         | 0.562665 | 2.545    | 5.00E-05 | 0.00022  | yes |
| Cnr2          | 0.56262  | 0        | 1        | 1        | no  |
| Lyar          | 0.562108 | 1.42551  | 0.01365  | 0.033938 | yes |
| Cml2          | 0.561946 | 0        | 1        | 1        | no  |
| Tmem51os1     | 0.561849 | 0        | 1        | 1        | no  |
| H2-Q5         | 0.561666 | 0        | 1        | 1        | no  |
| Sh2b2         | 0.561487 | 0.970088 | 0.07005  | 0.13508  | no  |
| Smim22        | 0.561441 | 0        | 1        | 1        | no  |
| Gp1bb         | 0.56126  | 0.411264 | 0.4027   | 0.534155 | no  |
| AK010878      | 0.56122  | 0.558015 | 0.26685  | 0.39118  | no  |
| Hdac10        | 0.560906 | 1.62131  | 0.00125  | 0.00422  | yes |
| Camkk2        | 0.560455 | 2.16342  | 5.00E-05 | 0.00022  | yes |
| Igsf9         | 0.560102 | 0        | 1        | 1        | no  |
| Rbfox1        | 0.560077 | 2.62088  | 5.00E-05 | 0.00022  | yes |
| Wdr81         | 0.559757 | 2.1608   | 5.00E-05 | 0.00022  | yes |
| Fam107b       | 0.55974  | 2.60049  | 5.00E-05 | 0.00022  | yes |
| Tpcn2         | 0.558778 | 1.1744   | 0.02755  | 0.061783 | no  |
| Zfp354a       | 0.558463 | 1.09699  | 0.0377   | 0.080374 | no  |
| A230050P20Rik | 0.558418 | 1.42067  | 0.0143   | 0.035369 | yes |
| Hspb11        | 0.558379 | 1.57946  | 0.0448   | 0.093321 | no  |
| Lpar2         | 0.55816  | 0        | 1        | 1        | no  |
| Dnajc17       | 0.558092 | 0.655607 | 0.29275  | 0.420246 | no  |
| Cd34          | 0.558058 | 2.42805  | 5.00E-05 | 0.00022  | yes |
| Nin           | 0.557185 | 1.77396  | 0.0005   | 0.00185  | yes |
| Cobl          | 0.556886 | 2.50691  | 5.00E-05 | 0.00022  | yes |
| Rnf44         | 0.556502 | 2.48747  | 5.00E-05 | 0.00022  | yes |
| Abcc6         | 0.556348 | 0        | 1        | 1        | no  |
| St6galnac2    | 0.556242 | 0.919535 | 0.0983   | 0.177122 | no  |
| 9930012K11Rik | 0.556145 | 0.877884 | 0.08245  | 0.153654 | no  |
| Ccdc151       | 0.555607 | 0        | 1        | 1        | no  |
| Pitpnm2       | 0.555205 | 2.5693   | 5.00E-05 | 0.00022  | yes |

|               |          |          |          |          |     |
|---------------|----------|----------|----------|----------|-----|
| Trpv1         | 0.555155 | 2.6973   | 5.00E-05 | 0.00022  | yes |
| Scn9a         | 0.554972 | 2.40597  | 5.00E-05 | 0.00022  | yes |
| Fbxl12        | 0.55478  | 0.643463 | 0.24335  | 0.365086 | no  |
| Ckap5         | 0.554742 | 2.52795  | 5.00E-05 | 0.00022  | yes |
| Rtel1         | 0.5546   | 1.47967  | 0.0035   | 0.01036  | yes |
| Plekho1       | 0.55456  | 2.00987  | 0.00065  | 0.002343 | yes |
| 9330159F19Rik | 0.55447  | 2.54816  | 5.00E-05 | 0.00022  | yes |
| Ppp1r35       | 0.554264 | 1.68283  | 0.00975  | 0.025413 | yes |
| Cyb5          | 0.554173 | 2.86071  | 5.00E-05 | 0.00022  | yes |
| Zbtb44        | 0.554134 | 1.9971   | 0.0001   | 0.000422 | yes |
| Qdpr          | 0.554112 | 2.95246  | 5.00E-05 | 0.00022  | yes |
| Ptpr          | 0.554033 | 2.26936  | 5.00E-05 | 0.00022  | yes |
| BC029214      | 0.553959 | 1.69283  | 0.00725  | 0.019654 | yes |
| Lonrf1        | 0.553948 | 2.26129  | 5.00E-05 | 0.00022  | yes |
| Dync1i2       | 0.553589 | 2.49201  | 5.00E-05 | 0.00022  | yes |
| Arhgef18      | 0.553243 | 2.38777  | 5.00E-05 | 0.00022  | yes |
| Trmt1         | 0.55324  | 1.90785  | 0.00035  | 0.001342 | yes |
| Chrm4         | 0.553097 | 1.365    | 0.01285  | 0.032203 | yes |
| Nox1          | 0.55301  | 0        | 1        | 1        | no  |
| Nubpl         | 0.552539 | 1.12034  | 0.06365  | 0.124733 | no  |
| Dapk3         | 0.552273 | 1.97679  | 0.0003   | 0.001164 | yes |
| Snhg4         | 0.552055 | 0.836007 | 0.09345  | 0.169813 | no  |
| Ankra2        | 0.551951 | 1.82863  | 0.0002   | 0.000803 | yes |
| Kdelc2        | 0.551767 | 1.94843  | 0.00015  | 0.000615 | yes |
| Dolpp1        | 0.551756 | 1.83508  | 0.0011   | 0.00376  | yes |
| Gpr176        | 0.551675 | 1.69347  | 0.0011   | 0.00376  | yes |
| Lats2         | 0.55165  | 2.31177  | 5.00E-05 | 0.00022  | yes |
| Ppp1r3fos     | 0.551389 | 0        | 1        | 1        | no  |
| Nme4          | 0.550515 | 0.786368 | 0.22975  | 0.349993 | no  |
| Sec61g        | 0.550319 | 0        | 1        | 1        | no  |
| Srsf9         | 0.550198 | 1.63807  | 0.00095  | 0.003299 | yes |
| A530050N04Rik | 0.549777 | 0        | 1        | 1        | no  |
| Ypel3         | 0.549773 | 2.52432  | 5.00E-05 | 0.00022  | yes |
| Rfc5          | 0.549167 | 0.793047 | 0.1634   | 0.267732 | no  |
| Snx8          | 0.549028 | 1.8838   | 0.00015  | 0.000615 | yes |
| Parp11        | 0.548998 | 1.99496  | 0.0003   | 0.001164 | yes |
| Gramd1c       | 0.548782 | 0.803617 | 0.1057   | 0.187942 | no  |
| Slc35f5       | 0.548576 | 2.31642  | 5.00E-05 | 0.00022  | yes |
| Apex2         | 0.548559 | 1.01415  | 0.0686   | 0.132883 | no  |
| Calcb         | 0.548547 | 3.15644  | 5.00E-05 | 0.00022  | yes |
| Pola2         | 0.548115 | 1.2492   | 0.0135   | 0.033622 | yes |
| Agfg1         | 0.548095 | 2.64197  | 5.00E-05 | 0.00022  | yes |
| Mrps6         | 0.547856 | 1.34819  | 0.00705  | 0.019182 | yes |
| Ezh2          | 0.547769 | 0.902852 | 0.06965  | 0.134465 | no  |
| Sema4b        | 0.547765 | 2.36195  | 5.00E-05 | 0.00022  | yes |
| Mtmr14        | 0.547207 | 2.17261  | 0.0001   | 0.000422 | yes |
| 2610203C20Rik | 0.547113 | 1.32694  | 0.0076   | 0.02049  | yes |
| BC030867      | 0.546994 | 0.780943 | 0.15205  | 0.252883 | no  |
| Kcnab1        | 0.546908 | 2.62896  | 5.00E-05 | 0.00022  | yes |
| Trappc5       | 0.546847 | 2.23359  | 5.00E-05 | 0.00022  | yes |
| Tspan1        | 0.546268 | 0        | 1        | 1        | no  |
| Epb4.1I5      | 0.546068 | 1.27815  | 0.0106   | 0.027323 | yes |
| Zbtbd6        | 0.546067 | 0        | 1        | 1        | no  |

|               |          |           |          |          |     |
|---------------|----------|-----------|----------|----------|-----|
| Nfkbil1       | 0.546035 | 1.32629   | 0.02215  | 0.051402 | no  |
| Smad1         | 0.545506 | 2.41333   | 5.00E-05 | 0.00022  | yes |
| Stk19         | 0.545269 | 1.77274   | 0.0044   | 0.012685 | yes |
| AI414108      | 0.544937 | 1.85131   | 0.0007   | 0.002506 | yes |
| Gigyf1        | 0.544541 | 2.03485   | 0.0002   | 0.000803 | yes |
| Spag8         | 0.544459 | 0         | 1        | 1        | no  |
| Pcdha9        | 0.544457 | 0.351358  | 0.4758   | 0.604756 | no  |
| Cyp26b1       | 0.544091 | 0.93071   | 0.06315  | 0.123882 | no  |
| Osbpl3        | 0.543907 | 2.4391    | 5.00E-05 | 0.00022  | yes |
| Mafg          | 0.543569 | 2.49217   | 5.00E-05 | 0.00022  | yes |
| Gpr61         | 0.543357 | 1.55575   | 0.00385  | 0.011268 | yes |
| Lactb         | 0.543335 | 1.53523   | 0.00605  | 0.016792 | yes |
| Nr6a1         | 0.543299 | 1.38193   | 0.0072   | 0.01953  | yes |
| Map4k5        | 0.543191 | 0.953614  | 0.07295  | 0.139396 | no  |
| Usp49         | 0.543082 | 1.67851   | 0.00135  | 0.004516 | yes |
| Prkx          | 0.542586 | 2.60869   | 5.00E-05 | 0.00022  | yes |
| A230001M10Rik | 0.542498 | 0         | 1        | 1        | no  |
| Fkbp1b        | 0.542428 | 3.10762   | 5.00E-05 | 0.00022  | yes |
| Tada1         | 0.542389 | 0.981185  | 0.0738   | 0.140696 | no  |
| AI846148      | 0.542294 | 1.51355   | 0.00295  | 0.008927 | yes |
| Dvl1          | 0.541826 | 2.36161   | 5.00E-05 | 0.00022  | yes |
| Tfrc          | 0.541763 | 2.57427   | 5.00E-05 | 0.00022  | yes |
| Eif1a         | 0.541644 | 2.53326   | 5.00E-05 | 0.00022  | yes |
| Cacna1c       | 0.541053 | 2.45656   | 5.00E-05 | 0.00022  | yes |
| Zbtb10        | 0.540952 | 2.13626   | 0.0001   | 0.000422 | yes |
| Tom1l1        | 0.540933 | 1.24657   | 0.01445  | 0.0357   | yes |
| Lsr           | 0.540892 | 0.822427  | 0.1011   | 0.181011 | no  |
| Uchl4         | 0.540774 | 0.318281  | 0.53505  | 0.658061 | no  |
| Hcn4          | 0.540771 | 1.48929   | 0.0062   | 0.017151 | yes |
| Cd97          | 0.540769 | 1.32766   | 0.009    | 0.023696 | yes |
| Batf3         | 0.540716 | 0         | 1        | 1        | no  |
| Nmi           | 0.540498 | 1.1737    | 0.01985  | 0.046793 | yes |
| Ppapdc1b      | 0.540333 | 1.54162   | 0.00815  | 0.021826 | yes |
| Pkd1l2        | 0.540259 | 0         | 1        | 1        | no  |
| Pcdhgb8       | 0.539837 | 0         | 1        | 1        | no  |
| Stt3b         | 0.53979  | 2.529     | 5.00E-05 | 0.00022  | yes |
| Snhg8         | 0.539696 | 0.847808  | 0.08865  | 0.162582 | no  |
| Mrpl57        | 0.539452 | 1.65322   | 0.0028   | 0.008532 | yes |
| 9430038I01Rik | 0.539272 | 0.756589  | 0.2195   | 0.337714 | no  |
| Prorsd1       | 0.538967 | 0.871757  | 0.08165  | 0.152528 | no  |
| Hoxa1         | 0.538941 | 0         | 1        | 1        | no  |
| Gin1          | 0.538839 | 1.16105   | 0.0375   | 0.079986 | no  |
| Ift140        | 0.538794 | 2.15903   | 5.00E-05 | 0.00022  | yes |
| A230070E04Rik | 0.538704 | 0.0716906 | 0.8141   | 0.879963 | no  |
| Man1c1        | 0.538532 | 2.21585   | 5.00E-05 | 0.00022  | yes |
| Mocs3         | 0.538345 | 1.2714    | 0.02785  | 0.062371 | no  |
| Slco4a1       | 0.538282 | 0.774062  | 0.14335  | 0.241287 | no  |
| 2010320M18Rik | 0.538214 | 1.20846   | 0.0785   | 0.14804  | no  |
| Acap3         | 0.538178 | 2.45053   | 5.00E-05 | 0.00022  | yes |
| 9030404E10Rik | 0.53804  | 0         | 1        | 1        | no  |
| Enkur         | 0.537762 | 0         | 1        | 1        | no  |
| Lmo2          | 0.537719 | 1.33777   | 0.0085   | 0.022613 | yes |
| Cenpl         | 0.537538 | 0.916229  | 0.0668   | 0.129889 | no  |

|               |          |          |          |          |     |
|---------------|----------|----------|----------|----------|-----|
| Mob3a         | 0.537393 | 2.07405  | 0.0001   | 0.000422 | yes |
| Pkp2          | 0.537167 | 0.764917 | 0.1603   | 0.26363  | no  |
| B230217O12Rik | 0.536686 | 1.67906  | 0.0027   | 0.008273 | yes |
| 2610001J05Rik | 0.536188 | 2.33612  | 5.00E-05 | 0.00022  | yes |
| Acy1          | 0.536159 | 0.905306 | 0.07215  | 0.138226 | no  |
| Zfp672        | 0.535553 | 0.747575 | 0.12395  | 0.2144   | no  |
| Ctla2b        | 0.535552 | 0.437674 | 0.49895  | 0.625727 | no  |
| Slc22a18      | 0.535531 | 1.43003  | 0.0045   | 0.012942 | yes |
| Clk3          | 0.535503 | 2.20875  | 5.00E-05 | 0.00022  | yes |
| Kcnj12        | 0.535037 | 2.29899  | 5.00E-05 | 0.00022  | yes |
| Armcx4        | 0.534971 | 2.26082  | 5.00E-05 | 0.00022  | yes |
| Manf          | 0.534473 | 2.39728  | 5.00E-05 | 0.00022  | yes |
| Syn3          | 0.534212 | 0.474196 | 0.3161   | 0.445901 | no  |
| Fbl           | 0.53421  | 0.801711 | 0.18145  | 0.291229 | no  |
| Elavl3        | 0.534005 | 2.6095   | 5.00E-05 | 0.00022  | yes |
| Cdcp2         | 0.533703 | 0        | 1        | 1        | no  |
| Rad17         | 0.533512 | 1.56459  | 0.00175  | 0.00566  | yes |
| Macrodl       | 0.533424 | 0.996903 | 0.09815  | 0.176947 | no  |
| Arrdc1        | 0.533323 | 1.73489  | 0.0006   | 0.002181 | yes |
| Gale          | 0.533068 | 1.99971  | 0.0005   | 0.00185  | yes |
| Sdk2          | 0.533022 | 1.57847  | 0.00295  | 0.008927 | yes |
| BC018507      | 0.53264  | 2.42717  | 5.00E-05 | 0.00022  | yes |
| Gps2          | 0.532466 | 1.40143  | 0.0175   | 0.042076 | yes |
| Wsb1          | 0.532038 | 2.00195  | 5.00E-05 | 0.00022  | yes |
| Stard6        | 0.532025 | 0        | 1        | 1        | no  |
| Wdr63         | 0.532017 | 0        | 1        | 1        | no  |
| Stat6         | 0.531574 | 2.49893  | 5.00E-05 | 0.00022  | yes |
| Mettl7a1      | 0.531573 | 2.31117  | 0.0001   | 0.000422 | yes |
| Dcaf15        | 0.531453 | 1.54089  | 0.0054   | 0.015172 | yes |
| Sdccag8       | 0.531299 | 1.3907   | 0.0107   | 0.027543 | yes |
| Otop2         | 0.531117 | 0        | 1        | 1        | no  |
| Zfp830        | 0.53105  | 1.40169  | 0.0083   | 0.022156 | yes |
| Hagh          | 0.530897 | 2.33833  | 5.00E-05 | 0.00022  | yes |
| Rrnad1        | 0.530709 | 0.998511 | 0.04355  | 0.091046 | no  |
| Mllt10        | 0.530591 | 1.363    | 0.00835  | 0.022272 | yes |
| Dnajc5b       | 0.530103 | 0.406636 | 0.37545  | 0.50693  | no  |
| Ppwd1         | 0.529964 | 1.02202  | 0.0606   | 0.119783 | no  |
| Frrs1         | 0.529653 | 0        | 1        | 1        | no  |
| Pik3cd        | 0.528992 | 2.28553  | 5.00E-05 | 0.00022  | yes |
| Mink1         | 0.528686 | 2.47335  | 5.00E-05 | 0.00022  | yes |
| Tnfsf15       | 0.528659 | 0        | 1        | 1        | no  |
| Piezo2        | 0.528435 | 2.26789  | 5.00E-05 | 0.00022  | yes |
| Syng3         | 0.527727 | 2.74801  | 5.00E-05 | 0.00022  | yes |
| S100g         | 0.527683 | 0        | 1        | 1        | no  |
| Rslcan18      | 0.527668 | 0        | 1        | 1        | no  |
| Ikzf1         | 0.52731  | 0.918668 | 0.06415  | 0.125417 | no  |
| Wdr34         | 0.527296 | 1.43029  | 0.012    | 0.030371 | yes |
| Tmem191c      | 0.527283 | 0.887783 | 0.12445  | 0.215124 | no  |
| Atxn7l2       | 0.526573 | 0.896373 | 0.06955  | 0.134331 | no  |
| Adc           | 0.526552 | 2.60132  | 5.00E-05 | 0.00022  | yes |
| Rbm4          | 0.525634 | 0.899147 | 0.0962   | 0.173905 | no  |
| 4933407K13Rik | 0.525615 | 0        | 1        | 1        | no  |
| Mtmr1         | 0.525045 | 1.92913  | 0.00045  | 0.001682 | yes |

|               |          |          |          |          |     |
|---------------|----------|----------|----------|----------|-----|
| Chd3          | 0.524471 | 2.50447  | 5.00E-05 | 0.00022  | yes |
| Ism1          | 0.524442 | 1.03871  | 0.05305  | 0.107158 | no  |
| Crmp1         | 0.524306 | 2.4265   | 5.00E-05 | 0.00022  | yes |
| Zfp292        | 0.524223 | 1.94797  | 0.0001   | 0.000422 | yes |
| Lifr          | 0.524095 | 1.9426   | 5.00E-05 | 0.00022  | yes |
| Paqr3         | 0.524089 | 0.798568 | 0.10575  | 0.187942 | no  |
| Vps4b         | 0.523895 | 2.56366  | 5.00E-05 | 0.00022  | yes |
| Vamp4         | 0.523782 | 2.5817   | 5.00E-05 | 0.00022  | yes |
| Fam89b        | 0.523695 | 2.33997  | 5.00E-05 | 0.00022  | yes |
| Plekha3       | 0.523484 | 2.13413  | 5.00E-05 | 0.00022  | yes |
| Csrnp3        | 0.523468 | 2.42055  | 5.00E-05 | 0.00022  | yes |
| Mtss1         | 0.523443 | 2.2903   | 5.00E-05 | 0.00022  | yes |
| Rnf38         | 0.523292 | 2.2448   | 5.00E-05 | 0.00022  | yes |
| Tpgs1         | 0.523282 | 2.35974  | 0.0001   | 0.000422 | yes |
| Irg1          | 0.523219 | 0        | 1        | 1        | no  |
| 1810043H04Rik | 0.523139 | 1.65472  | 0.05165  | 0.104905 | no  |
| Ap4m1         | 0.523052 | 1.32689  | 0.01905  | 0.045164 | yes |
| Prmt2         | 0.523016 | 2.34941  | 5.00E-05 | 0.00022  | yes |
| Atxn7         | 0.523013 | 1.74826  | 0.0007   | 0.002506 | yes |
| Fbxl8         | 0.522811 | 1.02878  | 0.0638   | 0.124935 | no  |
| Pnp           | 0.522604 | 1.27262  | 0.01845  | 0.043993 | yes |
| Mef2a         | 0.522374 | 2.45203  | 5.00E-05 | 0.00022  | yes |
| 5031434O11Rik | 0.522079 | 0        | 1        | 1        | no  |
| Cpm           | 0.52187  | 0        | 1        | 1        | no  |
| Meig1         | 0.521533 | 0        | 1        | 1        | no  |
| Irf9          | 0.521424 | 1.56265  | 0.0022   | 0.006933 | yes |
| Mcf2l         | 0.521381 | 2.34523  | 5.00E-05 | 0.00022  | yes |
| Fbrs          | 0.521346 | 1.68741  | 0.00065  | 0.002343 | yes |
| Hras          | 0.521161 | 2.24286  | 5.00E-05 | 0.00022  | yes |
| Gm10548       | 0.520917 | 0        | 1        | 1        | no  |
| Ralbp1        | 0.520898 | 2.43905  | 5.00E-05 | 0.00022  | yes |
| Cdyl2         | 0.520635 | 2.04257  | 0.00015  | 0.000615 | yes |
| Gprin2        | 0.520528 | 0.922172 | 0.10375  | 0.185156 | no  |
| Acly          | 0.5202   | 2.17093  | 0.0001   | 0.000422 | yes |
| Parp8         | 0.520186 | 2.03683  | 0.00015  | 0.000615 | yes |
| Adamts16      | 0.519417 | 0        | 1        | 1        | no  |
| Efcab1        | 0.519353 | 1.11968  | 0.06635  | 0.129185 | no  |
| Osbpl6        | 0.519334 | 2.25134  | 5.00E-05 | 0.00022  | yes |
| Rbm15b        | 0.519304 | 2.06715  | 0.00015  | 0.000615 | yes |
| Krt10         | 0.519251 | 0.738468 | 0.18525  | 0.295789 | no  |
| Pdcd2         | 0.518792 | 1.79929  | 0.00345  | 0.010237 | yes |
| Zmym5         | 0.51877  | 1.8836   | 0.00025  | 0.000985 | yes |
| Bid           | 0.518716 | 2.00032  | 0.0003   | 0.001164 | yes |
| Klc4          | 0.518195 | 2.0423   | 0.00025  | 0.000985 | yes |
| Pdcl3         | 0.518132 | 2.13421  | 0.0002   | 0.000803 | yes |
| Mapkapk5      | 0.517958 | 1.86122  | 0.001    | 0.003451 | yes |
| Rab39         | 0.517895 | 2.12962  | 5.00E-05 | 0.00022  | yes |
| 2610034B18Rik | 0.517728 | 2.00064  | 0.0004   | 0.001513 | yes |
| Swt1          | 0.516646 | 1.41078  | 0.008    | 0.021468 | yes |
| Gylt1b        | 0.516511 | 0        | 1        | 1        | no  |
| Hirip3        | 0.516383 | 1.10859  | 0.0397   | 0.084043 | no  |
| Mapk11        | 0.51627  | 2.54355  | 5.00E-05 | 0.00022  | yes |
| Abrac1        | 0.516127 | 1.4001   | 0.03705  | 0.079204 | no  |



|               |          |          |          |          |     |
|---------------|----------|----------|----------|----------|-----|
| Ccdc163       | 0.516057 | 0.794862 | 0.1872   | 0.298185 | no  |
| Epcam         | 0.515984 | 0        | 1        | 1        | no  |
| Lag3          | 0.515311 | 0        | 1        | 1        | no  |
| Rplp1         | 0.515082 | 3.54713  | 5.00E-05 | 0.00022  | yes |
| Map3k14       | 0.514862 | 1.17316  | 0.0249   | 0.056683 | no  |
| Bag1          | 0.514619 | 2.74912  | 5.00E-05 | 0.00022  | yes |
| Vamp2         | 0.514262 | 2.48538  | 5.00E-05 | 0.00022  | yes |
| Actr5         | 0.513745 | 0.936877 | 0.0592   | 0.117629 | no  |
| Hn1           | 0.513663 | 2.69893  | 5.00E-05 | 0.00022  | yes |
| Fam72a        | 0.513443 | 0        | 1        | 1        | no  |
| Mnt           | 0.51341  | 2.21824  | 5.00E-05 | 0.00022  | yes |
| Usp12         | 0.513238 | 2.47967  | 5.00E-05 | 0.00022  | yes |
| Mnda          | 0.513137 | 0        | 1        | 1        | no  |
| Slc1a6        | 0.513069 | 1.2202   | 0.02785  | 0.062371 | no  |
| Aff3          | 0.512598 | 2.31132  | 5.00E-05 | 0.00022  | yes |
| Nxf1          | 0.512536 | 1.67402  | 0.00075  | 0.00267  | yes |
| Hist3h2a      | 0.512515 | 1.95314  | 0.01955  | 0.046159 | yes |
| Syt10         | 0.51222  | 0        | 1        | 1        | no  |
| Gpatch11      | 0.511949 | 2.11764  | 5.00E-05 | 0.00022  | yes |
| H2-Ke2        | 0.511846 | 1.75612  | 0.0004   | 0.001513 | yes |
| Usp18         | 0.511813 | 0.904567 | 0.1049   | 0.186907 | no  |
| Gm10640       | 0.511802 | 0        | 1        | 1        | no  |
| Lsmem1        | 0.51177  | 0        | 1        | 1        | no  |
| Ank3          | 0.511751 | 2.29901  | 5.00E-05 | 0.00022  | yes |
| Nvl           | 0.511689 | 1.92758  | 0.0006   | 0.002181 | yes |
| Dazap1        | 0.510928 | 0.22563  | 0.6622   | 0.763948 | no  |
| Fbxw4         | 0.510643 | 1.07411  | 0.03315  | 0.07217  | no  |
| Abhd5         | 0.510529 | 2.10235  | 0.00015  | 0.000615 | yes |
| Vti1b         | 0.510455 | 2.27158  | 5.00E-05 | 0.00022  | yes |
| Disp2         | 0.50993  | 2.36565  | 5.00E-05 | 0.00022  | yes |
| Zfp428        | 0.509617 | 1.33174  | 0.0067   | 0.018343 | yes |
| Tmcc3         | 0.509426 | 2.1284   | 5.00E-05 | 0.00022  | yes |
| Lrriq4        | 0.509212 | 0        | 1        | 1        | no  |
| Zkscan6       | 0.508975 | 1.23449  | 0.0232   | 0.053381 | no  |
| Atg16l1       | 0.508887 | 2.12389  | 5.00E-05 | 0.00022  | yes |
| Grrp1         | 0.50874  | 0.73885  | 0.21555  | 0.333299 | no  |
| Polk          | 0.508732 | 1.4506   | 0.00635  | 0.017515 | yes |
| 4921504A21Rik | 0.508662 | 0.665532 | 0.17955  | 0.288948 | no  |
| 2610015P09Rik | 0.507962 | 0.929821 | 0.0822   | 0.153339 | no  |
| Rnf31         | 0.507931 | 1.75754  | 0.0008   | 0.002828 | yes |
| Mcmdc2        | 0.507729 | 0        | 1        | 1        | no  |
| D630041G03Rik | 0.507694 | 0.68133  | 0.16335  | 0.267683 | no  |
| Mtm1          | 0.507218 | 1.55749  | 0.00185  | 0.005939 | yes |
| Eif4e3        | 0.507167 | 2.20468  | 0.0001   | 0.000422 | yes |
| Prkrip1       | 0.507151 | 1.60826  | 0.0047   | 0.013433 | yes |
| Tmem236       | 0.507077 | 0        | 1        | 1        | no  |
| Gm6654        | 0.507075 | 0.275693 | 0.58655  | 0.702061 | no  |
| Filip1        | 0.507021 | 2.07234  | 5.00E-05 | 0.00022  | yes |
| Rps8          | 0.50701  | 1.12392  | 0.02295  | 0.05287  | no  |
| Ubn2          | 0.506979 | 1.85831  | 0.00025  | 0.000985 | yes |
| Ccp110        | 0.506693 | 2.4203   | 5.00E-05 | 0.00022  | yes |
| Zfp954        | 0.506634 | 1.55548  | 0.0054   | 0.015172 | yes |
| Erich1        | 0.50663  | 1.26504  | 0.02805  | 0.062745 | no  |

|               |          |          |          |          |     |
|---------------|----------|----------|----------|----------|-----|
| Galk2         | 0.506162 | 1.67352  | 0.0026   | 0.008011 | yes |
| Zfp703        | 0.506058 | 1.9495   | 0.00015  | 0.000615 | yes |
| Tubb5         | 0.506023 | 2.08748  | 0.0003   | 0.001164 | yes |
| Crhr2         | 0.506    | 0.623874 | 0.1941   | 0.306526 | no  |
| Slc6a20b      | 0.505752 | 0        | 1        | 1        | no  |
| Mettl7a2      | 0.505557 | 0        | 1        | 1        | no  |
| Cmss1         | 0.505518 | 1.1609   | 0.057    | 0.11394  | no  |
| Slc45a2       | 0.505392 | 0        | 1        | 1        | no  |
| Gm3414        | 0.505051 | 0.601402 | 0.242    | 0.363678 | no  |
| Atg9a         | 0.504857 | 2.33112  | 5.00E-05 | 0.00022  | yes |
| Ahsa2         | 0.504601 | 1.02216  | 0.0415   | 0.087255 | no  |
| Ppp3cc        | 0.504282 | 2.1739   | 5.00E-05 | 0.00022  | yes |
| Gm13152       | 0.504176 | 1.07509  | 0.07445  | 0.141691 | no  |
| 5330426P16Rik | 0.504105 | 1.4523   | 0.0034   | 0.010109 | yes |
| Luzp2         | 0.504099 | 2.44944  | 5.00E-05 | 0.00022  | yes |
| Ccdc82        | 0.504078 | 1.64555  | 0.0018   | 0.005802 | yes |
| Vbp1          | 0.503905 | 2.56294  | 5.00E-05 | 0.00022  | yes |
| Ccdc34        | 0.503732 | 1.08657  | 0.0267   | 0.060141 | no  |
| Arhgap6       | 0.503707 | 0.823127 | 0.09505  | 0.172201 | no  |
| Tmem254c      | 0.50353  | 0        | 1        | 1        | no  |
| Lrrc8b        | 0.50348  | 2.28111  | 5.00E-05 | 0.00022  | yes |
| Oraov1        | 0.503426 | 2.03264  | 0.00045  | 0.001682 | yes |
| Rbck1         | 0.503262 | 2.04926  | 0.0001   | 0.000422 | yes |
| Mvd           | 0.50291  | 1.96003  | 0.0001   | 0.000422 | yes |
| Map3k19       | 0.502739 | 0        | 1        | 1        | no  |
| Elk3          | 0.502735 | 1.33925  | 0.00735  | 0.019896 | yes |
| Zfp583        | 0.502648 | 0.933979 | 0.0807   | 0.151072 | no  |
| A530032D15Rik | 0.502529 | 0        | 1        | 1        | no  |
| Xkr4          | 0.502441 | 1.11964  | 0.03375  | 0.073247 | no  |
| Nup62         | 0.502041 | 1.07656  | 0.0494   | 0.10114  | no  |
| Chit1         | 0.501877 | 0        | 1        | 1        | no  |
| AI317395      | 0.501702 | 0        | 1        | 1        | no  |
| Dnajc12       | 0.501697 | 1.40038  | 0.0062   | 0.017151 | yes |
| A630066F11Rik | 0.501445 | 0.186104 | 0.7242   | 0.815426 | no  |
| 9530080O11Rik | 0.50126  | 0        | 1        | 1        | no  |
| Zfp72         | 0.501024 | 0.960598 | 0.0916   | 0.167023 | no  |
| Zfp280d       | 0.500493 | 1.67607  | 0.0016   | 0.005236 | yes |
| Ston2         | 0.50025  | 2.06886  | 0.00015  | 0.000615 | yes |
| Slc7a6os      | 0.50025  | 1.42098  | 0.0158   | 0.038533 | yes |
| Fgfr1op       | 0.50003  | 1.73615  | 0.00045  | 0.001682 | yes |
| Uros          | 0.500026 | 2.00717  | 0.0006   | 0.002181 | yes |
| Id2           | 0.499721 | 1.94444  | 0.0011   | 0.00376  | yes |
| Gm16039       | 0.499592 | 1.33118  | 0.0152   | 0.037255 | yes |
| Tial1         | 0.499578 | 2.1372   | 5.00E-05 | 0.00022  | yes |
| Asun          | 0.499518 | 1.44902  | 0.0082   | 0.02192  | yes |
| Fxyd6         | 0.499503 | 2.3938   | 5.00E-05 | 0.00022  | yes |
| BC005561      | 0.499319 | 1.2697   | 0.0154   | 0.037682 | yes |
| 9330151L19Rik | 0.498797 | 0.891432 | 0.0807   | 0.151072 | no  |
| Wiz           | 0.498441 | 1.98235  | 5.00E-05 | 0.00022  | yes |
| Phactr1       | 0.498369 | 2.31897  | 5.00E-05 | 0.00022  | yes |
| Sync          | 0.498192 | 1.06647  | 0.05575  | 0.111896 | no  |
| Pxmp2         | 0.498181 | 1.04368  | 0.09255  | 0.168454 | no  |
| Eil           | 0.497982 | 1.39216  | 0.01     | 0.025958 | yes |

|               |          |          |          |          |     |
|---------------|----------|----------|----------|----------|-----|
| Ppp1r3d       | 0.49796  | 1.22932  | 0.0232   | 0.053381 | no  |
| Slc40a1       | 0.497331 | 0.973371 | 0.0687   | 0.133057 | no  |
| Trak2         | 0.496591 | 2.30304  | 5.00E-05 | 0.00022  | yes |
| Trub1         | 0.496502 | 1.52148  | 0.0028   | 0.008532 | yes |
| Spats1        | 0.496255 | 0.557102 | 0.36145  | 0.493689 | no  |
| Gas8          | 0.496097 | 1.78144  | 0.0017   | 0.005514 | yes |
| 1110004E09Rik | 0.495898 | 1.62522  | 0.0082   | 0.02192  | yes |
| Rpl6          | 0.495643 | 1.56847  | 0.00975  | 0.025413 | yes |
| Il17ra        | 0.495629 | 0.823715 | 0.11785  | 0.205321 | no  |
| Pcdha12       | 0.495475 | 0.382525 | 0.43855  | 0.570136 | no  |
| Tpk1          | 0.495428 | 1.32255  | 0.01335  | 0.033305 | yes |
| 1700034H15Rik | 0.495405 | 0        | 1        | 1        | no  |
| Mapk1ip1      | 0.495201 | 1.48331  | 0.00265  | 0.008146 | yes |
| 3110052M02Rik | 0.495057 | 1.47606  | 0.0058   | 0.016179 | yes |
| Mfsd4         | 0.494706 | 1.13803  | 0.02345  | 0.053881 | no  |
| Zswim3        | 0.49469  | 1.26642  | 0.0176   | 0.042247 | yes |
| Camta1        | 0.494348 | 2.23191  | 5.00E-05 | 0.00022  | yes |
| Snopc3        | 0.494222 | 1.25424  | 0.0318   | 0.069746 | no  |
| Abi1          | 0.494103 | 2.21311  | 5.00E-05 | 0.00022  | yes |
| Aaed1         | 0.493859 | 1.41891  | 0.02475  | 0.056429 | no  |
| Fam53c        | 0.493754 | 2.35334  | 5.00E-05 | 0.00022  | yes |
| Appl2         | 0.493476 | 1.9396   | 0.0003   | 0.001164 | yes |
| Caskin1       | 0.493336 | 2.2755   | 5.00E-05 | 0.00022  | yes |
| Wbp4          | 0.492866 | 2.03597  | 0.0003   | 0.001164 | yes |
| Cr2           | 0.492655 | 0        | 1        | 1        | no  |
| Anapc11       | 0.492626 | 2.08282  | 0.0001   | 0.000422 | yes |
| Hoxa4         | 0.492471 | 0.627499 | 0.28605  | 0.412279 | no  |
| Xbp1          | 0.492163 | 2.04217  | 5.00E-05 | 0.00022  | yes |
| Zfp551        | 0.49204  | 0.806343 | 0.1403   | 0.237056 | no  |
| Nle1          | 0.491841 | 1.10045  | 0.0517   | 0.104975 | no  |
| Prpf38b       | 0.491699 | 1.93231  | 0.0002   | 0.000803 | yes |
| Dalrd3        | 0.491646 | 1.00816  | 0.0755   | 0.143401 | no  |
| Pmm1          | 0.491573 | 2.23867  | 5.00E-05 | 0.00022  | yes |
| Stx4a         | 0.49148  | 2.26729  | 5.00E-05 | 0.00022  | yes |
| Tmem51        | 0.491435 | 1.48949  | 0.00865  | 0.022947 | yes |
| Fbxl16        | 0.491131 | 2.38025  | 5.00E-05 | 0.00022  | yes |
| Pydc3         | 0.490928 | 0        | 1        | 1        | no  |
| Mospd1        | 0.489619 | 1.58855  | 0.00185  | 0.005939 | yes |
| Mrpl27        | 0.489335 | 1.95655  | 0.00465  | 0.013316 | yes |
| Hexim1        | 0.48929  | 2.2133   | 5.00E-05 | 0.00022  | yes |
| Mtfr1l        | 0.4891   | 2.1966   | 5.00E-05 | 0.00022  | yes |
| Parp12        | 0.488947 | 1.58311  | 0.00305  | 0.009188 | yes |
| Rbm17         | 0.488909 | 2.068    | 0.0004   | 0.001513 | yes |
| Brap          | 0.48884  | 2.2942   | 5.00E-05 | 0.00022  | yes |
| Mcf2          | 0.48874  | 2.05747  | 5.00E-05 | 0.00022  | yes |
| Uhrf1bp1l     | 0.488592 | 2.35725  | 5.00E-05 | 0.00022  | yes |
| Rac2          | 0.488389 | 0        | 1        | 1        | no  |
| Pagr1a        | 0.488239 | 1.98849  | 0.00065  | 0.002343 | yes |
| Psip1         | 0.488218 | 2.11295  | 0.0001   | 0.000422 | yes |
| Srrt          | 0.488117 | 2.00928  | 5.00E-05 | 0.00022  | yes |
| Meis3         | 0.487954 | 1.57993  | 0.00115  | 0.00391  | yes |
| Zfp541        | 0.487712 | 0        | 1        | 1        | no  |
| Wdsub1        | 0.487695 | 1.39933  | 0.00595  | 0.016553 | yes |

|               |          |          |          |          |     |
|---------------|----------|----------|----------|----------|-----|
| B4galnt2      | 0.487241 | 0        | 1        | 1        | no  |
| Grik4         | 0.486821 | 2.21953  | 5.00E-05 | 0.00022  | yes |
| H2-M10.2      | 0.486799 | 0        | 1        | 1        | no  |
| Trappc6a      | 0.486732 | 1.46465  | 0.03155  | 0.069266 | no  |
| Rpl14         | 0.48658  | 2.16113  | 0.0006   | 0.002181 | yes |
| Hspb8         | 0.486452 | 2.55061  | 5.00E-05 | 0.00022  | yes |
| AA987161      | 0.486265 | 1.42979  | 0.0052   | 0.014691 | yes |
| Dis3          | 0.486207 | 1.08101  | 0.0406   | 0.085621 | no  |
| Ino80d        | 0.485918 | 2.01187  | 0.0001   | 0.000422 | yes |
| Rad9a         | 0.485839 | 0.520033 | 0.30075  | 0.428899 | no  |
| 2310003H01Rik | 0.485411 | 1.5666   | 0.00255  | 0.007875 | yes |
| Tubb2a        | 0.485304 | 2.42639  | 5.00E-05 | 0.00022  | yes |
| PnlDC1        | 0.485282 | 0        | 1        | 1        | no  |
| Fam109a       | 0.484981 | 1.30063  | 0.01845  | 0.043993 | yes |
| Fbrsl1        | 0.484759 | 1.4036   | 0.00635  | 0.017515 | yes |
| Tprgl         | 0.484481 | 2.57076  | 5.00E-05 | 0.00022  | yes |
| Cbwd1         | 0.484367 | 1.43885  | 0.00365  | 0.010754 | yes |
| Il10rb        | 0.484197 | 2.27049  | 5.00E-05 | 0.00022  | yes |
| Hoxb5         | 0.484163 | 1.78124  | 0.0012   | 0.004068 | yes |
| Pdzd4         | 0.483679 | 2.14233  | 5.00E-05 | 0.00022  | yes |
| Zmynd8        | 0.483633 | 1.92572  | 0.00015  | 0.000615 | yes |
| Sltm          | 0.483407 | 1.9346   | 5.00E-05 | 0.00022  | yes |
| Igsf3         | 0.48339  | 2.30212  | 5.00E-05 | 0.00022  | yes |
| Xrcc1         | 0.483335 | 1.32115  | 0.0176   | 0.042247 | yes |
| Bloc1s3       | 0.483123 | 1.59037  | 0.00345  | 0.010237 | yes |
| C920006O11Rik | 0.483    | 0.631139 | 0.28085  | 0.406873 | no  |
| Hs1bp3        | 0.482981 | 1.60525  | 0.00205  | 0.006503 | yes |
| Samd10        | 0.482775 | 1.86477  | 0.0007   | 0.002506 | yes |
| Chkb          | 0.482771 | 1.59285  | 0.00115  | 0.00391  | yes |
| Trim36        | 0.48266  | 2.18486  | 5.00E-05 | 0.00022  | yes |
| Rps9          | 0.482634 | 3.11251  | 5.00E-05 | 0.00022  | yes |
| H2afy2        | 0.482617 | 1.19299  | 0.01645  | 0.039913 | yes |
| Med20         | 0.48239  | 1.76418  | 0.00165  | 0.00538  | yes |
| Icosl         | 0.482146 | 0.859182 | 0.1092   | 0.192782 | no  |
| Ahnak         | 0.482019 | 0.946222 | 0.0513   | 0.104322 | no  |
| Tceal8        | 0.481904 | 1.85712  | 0.00025  | 0.000985 | yes |
| Dpp3          | 0.481799 | 2.32094  | 5.00E-05 | 0.00022  | yes |
| Rdh1          | 0.48088  | 0        | 1        | 1        | no  |
| Evi5l         | 0.480827 | 2.137    | 0.00035  | 0.001342 | yes |
| B3gnt2        | 0.480799 | 2.04574  | 5.00E-05 | 0.00022  | yes |
| Pex6          | 0.480673 | 1.99669  | 0.0001   | 0.000422 | yes |
| Gm20748       | 0.480672 | 0.670364 | 0.23345  | 0.354206 | no  |
| Mllt3         | 0.48035  | 1.89762  | 0.0002   | 0.000803 | yes |
| Pde6h         | 0.48035  | 0        | 1        | 1        | no  |
| Eepd1         | 0.480338 | 2.42877  | 5.00E-05 | 0.00022  | yes |
| Pifo          | 0.4802   | 0.337014 | 0.5862   | 0.701716 | no  |
| Hist1h2bl     | 0.480108 | 0        | 1        | 1        | no  |
| Lrrc42        | 0.480088 | 1.81745  | 0.00145  | 0.004804 | yes |
| Tcte1         | 0.479569 | 0        | 1        | 1        | no  |
| Gm16793       | 0.47917  | 0.258623 | 0.66265  | 0.764202 | no  |
| Tmtc4         | 0.479036 | 1.93158  | 0.0003   | 0.001164 | yes |
| Nol12         | 0.478986 | 1.30729  | 0.01865  | 0.044374 | yes |
| Wnt9a         | 0.478913 | 1.45767  | 0.00665  | 0.018232 | yes |

|               |          |          |          |          |     |
|---------------|----------|----------|----------|----------|-----|
| Rab43         | 0.478735 | 1.45546  | 0.0046   | 0.013192 | yes |
| Zfp605        | 0.478489 | 1.2059   | 0.02355  | 0.054046 | no  |
| Esm1          | 0.478362 | 0.587743 | 0.2899   | 0.416786 | no  |
| Gm6297        | 0.478094 | 0        | 1        | 1        | no  |
| Tgm7          | 0.477984 | 0        | 1        | 1        | no  |
| 3110082I17Rik | 0.477969 | 0.688477 | 0.2261   | 0.345983 | no  |
| Rpl38         | 0.477566 | 0.666234 | 0.5642   | 0.683022 | no  |
| Gtf2f1        | 0.477036 | 2.14144  | 0.0003   | 0.001164 | yes |
| Lin54         | 0.476928 | 1.53603  | 0.00245  | 0.007605 | yes |
| Itga3         | 0.476892 | 2.24359  | 5.00E-05 | 0.00022  | yes |
| Armc7         | 0.476811 | 0.755282 | 0.172    | 0.278793 | no  |
| Atp6v1f       | 0.476716 | 2.87998  | 5.00E-05 | 0.00022  | yes |
| Nob1          | 0.476644 | 1.57844  | 0.00555  | 0.015544 | yes |
| Donson        | 0.476441 | 1.31801  | 0.01665  | 0.040309 | yes |
| Cdca4         | 0.475726 | 0.99244  | 0.06885  | 0.13329  | no  |
| Chrne         | 0.475607 | 0        | 1        | 1        | no  |
| Mia2          | 0.475528 | 0        | 1        | 1        | no  |
| Rpl31-ps12    | 0.475425 | 0.802923 | 0.1061   | 0.188362 | no  |
| Soga3         | 0.475031 | 2.34894  | 5.00E-05 | 0.00022  | yes |
| Galnt5        | 0.474949 | 1.87917  | 0.0006   | 0.002181 | yes |
| Coil          | 0.474882 | 1.52139  | 0.00485  | 0.01382  | yes |
| Gtse1         | 0.474882 | 0        | 1        | 1        | no  |
| Rnf141        | 0.474862 | 1.55495  | 0.0149   | 0.036627 | yes |
| Deptor        | 0.474717 | 2.20328  | 5.00E-05 | 0.00022  | yes |
| 2210404O09Rik | 0.474712 | 0.925212 | 0.09285  | 0.16893  | no  |
| Isl1          | 0.474682 | 2.27887  | 5.00E-05 | 0.00022  | yes |
| Nav1          | 0.474638 | 2.21853  | 5.00E-05 | 0.00022  | yes |
| Yeats2        | 0.474607 | 1.52567  | 0.0022   | 0.006933 | yes |
| Pvrl2         | 0.4746   | 1.77112  | 0.0005   | 0.00185  | yes |
| Nexn          | 0.474156 | 1.62101  | 0.003    | 0.009064 | yes |
| Zfp791        | 0.474147 | 0.663692 | 0.22325  | 0.342253 | no  |
| Ttc25         | 0.474127 | 0        | 1        | 1        | no  |
| Tonsl         | 0.474126 | 1.20794  | 0.0234   | 0.053776 | no  |
| Mllt11        | 0.474103 | 2.10299  | 0.0002   | 0.000803 | yes |
| Pik3ip1       | 0.473945 | 1.07854  | 0.05365  | 0.108189 | no  |
| Ap5z1         | 0.473906 | 1.67555  | 0.0016   | 0.005236 | yes |
| Lrnf4         | 0.473637 | 1.23126  | 0.019    | 0.045077 | yes |
| Mphosph6      | 0.473448 | 1.12853  | 0.0664   | 0.129263 | no  |
| Cdk5r2        | 0.473301 | 2.39874  | 5.00E-05 | 0.00022  | yes |
| Anxa2         | 0.473175 | 1.94522  | 0.00015  | 0.000615 | yes |
| Mfn1          | 0.472998 | 2.16309  | 5.00E-05 | 0.00022  | yes |
| Psme2b        | 0.472935 | 1.94561  | 0.0016   | 0.005236 | yes |
| Runx2         | 0.472867 | 0.755221 | 0.1416   | 0.238796 | no  |
| Ric8          | 0.472745 | 2.03317  | 0.0002   | 0.000803 | yes |
| Ewsr1         | 0.472743 | 1.85678  | 0.0001   | 0.000422 | yes |
| Nfkbie        | 0.472727 | 1.18155  | 0.0343   | 0.074295 | no  |
| Hist1h1a      | 0.472658 | 0        | 1        | 1        | no  |
| Ahctf1        | 0.472479 | 1.85328  | 0.0003   | 0.001164 | yes |
| Tmem50a       | 0.472257 | 2.69416  | 5.00E-05 | 0.00022  | yes |
| Thop1         | 0.472188 | 2.0302   | 0.00015  | 0.000615 | yes |
| Zfp1          | 0.472174 | 1.12597  | 0.02335  | 0.05368  | no  |
| Prkab1        | 0.472056 | 1.20004  | 0.03095  | 0.068254 | no  |
| Pot1b         | 0.472031 | 1.0458   | 0.0481   | 0.098968 | no  |



|               |          |          |          |          |     |
|---------------|----------|----------|----------|----------|-----|
| Cndp2         | 0.471947 | 2.10468  | 5.00E-05 | 0.00022  | yes |
| Il13ra1       | 0.471784 | 1.32158  | 0.0136   | 0.033839 | yes |
| Wdr52         | 0.47177  | 0        | 1        | 1        | no  |
| Bnc2          | 0.4717   | 1.71416  | 0.001    | 0.003451 | yes |
| Cenpc1        | 0.471618 | 1.73923  | 0.0015   | 0.004953 | yes |
| Rnf125        | 0.471535 | 1.73406  | 0.0037   | 0.010879 | yes |
| Rab3d         | 0.471361 | 2.30987  | 5.00E-05 | 0.00022  | yes |
| Tfpt          | 0.470824 | 1.19688  | 0.01645  | 0.039913 | yes |
| Rcan1         | 0.470611 | 2.04342  | 0.0001   | 0.000422 | yes |
| Ube2j2        | 0.470601 | 0.994821 | 0.0503   | 0.102698 | no  |
| Ablim3        | 0.470466 | 1.95578  | 0.00015  | 0.000615 | yes |
| Slc36a1       | 0.470181 | 2.21349  | 5.00E-05 | 0.00022  | yes |
| Uck2          | 0.47018  | 1.9983   | 0.0007   | 0.002506 | yes |
| Ccdc77        | 0.470121 | 0.498124 | 0.3686   | 0.500176 | no  |
| Map3k3        | 0.469239 | 1.63202  | 0.00155  | 0.005095 | yes |
| Siah3         | 0.469209 | 1.18915  | 0.06365  | 0.124733 | no  |
| Sertm1        | 0.469152 | 1.34267  | 0.01325  | 0.033111 | yes |
| Myef2         | 0.468235 | 1.87931  | 0.0002   | 0.000803 | yes |
| Lama3         | 0.467958 | 0        | 1        | 1        | no  |
| D6Wsu163e     | 0.467841 | 1.87503  | 0.0008   | 0.002828 | yes |
| Rnf113a2      | 0.467677 | 0.616519 | 0.2972   | 0.425025 | no  |
| Mppe1         | 0.467653 | 0.301125 | 0.54145  | 0.663656 | no  |
| Dpm2          | 0.467619 | 1.89969  | 0.0029   | 0.008796 | yes |
| Casp2         | 0.467617 | 1.14713  | 0.03075  | 0.067846 | no  |
| Phip          | 0.467248 | 1.92746  | 0.0003   | 0.001164 | yes |
| Gm16938       | 0.467194 | 0        | 1        | 1        | no  |
| 4933421O10Rik | 0.467081 | 1.00179  | 0.05615  | 0.112495 | no  |
| Lrrc59        | 0.467009 | 2.34879  | 5.00E-05 | 0.00022  | yes |
| Polr3d        | 0.466993 | 1.39003  | 0.00515  | 0.014587 | yes |
| Ncoa4         | 0.466823 | 1.59549  | 0.0014   | 0.004657 | yes |
| Pm20d2        | 0.466721 | 1.08623  | 0.0339   | 0.073549 | no  |
| Shisa5        | 0.46663  | 1.9455   | 5.00E-05 | 0.00022  | yes |
| Aurka         | 0.466515 | 0.860701 | 0.08645  | 0.159518 | no  |
| Vps36         | 0.466425 | 1.76543  | 0.0027   | 0.008273 | yes |
| Sh3gl1        | 0.466396 | 0.943318 | 0.05975  | 0.118455 | no  |
| Acsf5         | 0.466289 | 2.1807   | 5.00E-05 | 0.00022  | yes |
| Srsf12        | 0.466233 | 1.22711  | 0.02485  | 0.056589 | no  |
| Islr2         | 0.466078 | 1.32757  | 0.0114   | 0.029069 | yes |
| Pcf11         | 0.466071 | 1.60298  | 0.00135  | 0.004516 | yes |
| Slc26a6       | 0.46587  | 0.933276 | 0.0814   | 0.152146 | no  |
| Pdcd7         | 0.465746 | 1.71388  | 0.0016   | 0.005236 | yes |
| Unc13a        | 0.465714 | 2.18437  | 5.00E-05 | 0.00022  | yes |
| Nxf3          | 0.46547  | 0        | 1        | 1        | no  |
| Ddx54         | 0.465444 | 1.96204  | 0.0001   | 0.000422 | yes |
| Tpm1          | 0.465058 | 2.1753   | 5.00E-05 | 0.00022  | yes |
| Phf20l1       | 0.464839 | 1.68085  | 0.0012   | 0.004068 | yes |
| Dnm2          | 0.46469  | 1.90214  | 0.0004   | 0.001513 | yes |
| Smc5          | 0.464645 | 1.63808  | 0.0014   | 0.004657 | yes |
| Gm10814       | 0.464635 | 0.155067 | 0.76815  | 0.847629 | no  |
| Arid4a        | 0.464565 | 1.67913  | 0.00095  | 0.003299 | yes |
| Ush2a         | 0.464454 | 0        | 1        | 1        | no  |
| Arhgap18      | 0.464441 | 0.889878 | 0.09415  | 0.170757 | no  |
| Mlf1          | 0.464318 | 0.700934 | 0.15735  | 0.259744 | no  |

|                    |          |          |          |          |     |
|--------------------|----------|----------|----------|----------|-----|
| Snap29             | 0.464236 | 0.852117 | 0.09035  | 0.165038 | no  |
| Dock8              | 0.464234 | 1.33716  | 0.0097   | 0.025313 | yes |
| Map1s              | 0.464104 | 2.04329  | 5.00E-05 | 0.00022  | yes |
| Thoc7              | 0.463998 | 1.60072  | 0.00135  | 0.004516 | yes |
| Jakmip3            | 0.463933 | 1.62678  | 0.0014   | 0.004657 | yes |
| Fxn                | 0.463919 | 0.840031 | 0.1711   | 0.277606 | no  |
| 2900008C10Rik      | 0.46344  | 0.838218 | 0.10005  | 0.179568 | no  |
| Ipmk               | 0.463383 | 1.90602  | 0.0001   | 0.000422 | yes |
| Pcdha3             | 0.463145 | 0.272278 | 0.57585  | 0.693201 | no  |
| Erp29              | 0.462925 | 2.29097  | 5.00E-05 | 0.00022  | yes |
| Socs1              | 0.462675 | 0.582201 | 0.2333   | 0.3541   | no  |
| Ccdc74a            | 0.462656 | 1.55312  | 0.0096   | 0.025081 | yes |
| Pnma1              | 0.462638 | 0.90389  | 0.096    | 0.173661 | no  |
| Slc6a20a           | 0.462405 | 0        | 1        | 1        | no  |
| Fam169a            | 0.462114 | 1.8497   | 0.00045  | 0.001682 | yes |
| Ifnar1             | 0.461948 | 2.15614  | 5.00E-05 | 0.00022  | yes |
| Asxl3              | 0.461944 | 1.50989  | 0.0031   | 0.009315 | yes |
| Cers4              | 0.461581 | 2.20187  | 5.00E-05 | 0.00022  | yes |
| Spem1              | 0.461244 | 0        | 1        | 1        | no  |
| Rrm1               | 0.461132 | 1.53086  | 0.0034   | 0.010109 | yes |
| Hist2h2aa1,Hist2h2 | 0.461061 | 0        | 1        | 1        | no  |
| Tbce               | 0.461058 | 1.41699  | 0.00435  | 0.012551 | yes |
| Rhbdd3             | 0.461015 | 0.99734  | 0.0474   | 0.097816 | no  |
| Ribc1              | 0.460736 | 0        | 1        | 1        | no  |
| 1600020E01Rik      | 0.460699 | 0.469265 | 0.32705  | 0.457794 | no  |
| Synj2              | 0.460591 | 1.62613  | 0.00195  | 0.006219 | yes |
| Atg7               | 0.460409 | 1.75161  | 0.0004   | 0.001513 | yes |
| S1pr4              | 0.460377 | 0        | 1        | 1        | no  |
| Dcaf6              | 0.46034  | 2.1656   | 5.00E-05 | 0.00022  | yes |
| Trp53rk            | 0.460264 | 0.764169 | 0.1452   | 0.243999 | no  |
| Pacsin1            | 0.460261 | 2.13427  | 5.00E-05 | 0.00022  | yes |
| Exosc2             | 0.460004 | 1.60034  | 0.00545  | 0.015306 | yes |
| Ccdc87             | 0.459871 | 0        | 1        | 1        | no  |
| Atp13a2            | 0.459655 | 2.13832  | 5.00E-05 | 0.00022  | yes |
| Rpp40              | 0.459631 | 1.04903  | 0.05245  | 0.106172 | no  |
| Ccdc167            | 0.45962  | 0.480916 | 0.33175  | 0.462713 | no  |
| Cbx2               | 0.459464 | 0.945582 | 0.07215  | 0.138226 | no  |
| Arhgdia            | 0.45944  | 2.25269  | 5.00E-05 | 0.00022  | yes |
| Prr7               | 0.459376 | 1.04113  | 0.073    | 0.139452 | no  |
| Dsc1               | 0.45936  | 0        | 1        | 1        | no  |
| Endov              | 0.459317 | 1.49156  | 0.0036   | 0.010628 | yes |
| Rai1               | 0.459281 | 1.44971  | 0.0046   | 0.013192 | yes |
| Vps13a             | 0.458751 | 2.06854  | 5.00E-05 | 0.00022  | yes |
| Serpina3h          | 0.458471 | 0.580497 | 0.2976   | 0.425505 | no  |
| Ets1               | 0.458315 | 1.62887  | 0.00135  | 0.004516 | yes |
| Camk2n1            | 0.458241 | 2.00282  | 0.0002   | 0.000803 | yes |
| Rps5               | 0.45822  | 2.80786  | 5.00E-05 | 0.00022  | yes |
| Ubxn2b             | 0.458118 | 1.38214  | 0.0085   | 0.022613 | yes |
| Snapc5             | 0.45801  | 2.06078  | 0.00295  | 0.008927 | yes |
| Ccdc66             | 0.457869 | 0.84257  | 0.0917   | 0.167182 | no  |
| Psmb8              | 0.457653 | 1.35677  | 0.022    | 0.051098 | no  |
| Tenm1              | 0.457297 | 1.37871  | 0.0073   | 0.019785 | yes |
| 2810013P06Rik      | 0.456909 | 1.23877  | 0.02555  | 0.057954 | no  |

|               |          |          |          |          |     |
|---------------|----------|----------|----------|----------|-----|
| Rpsa          | 0.456767 | 1.4816   | 0.00225  | 0.007062 | yes |
| Aars2         | 0.456142 | 1.61822  | 0.00255  | 0.007875 | yes |
| Actl6a        | 0.455871 | 1.48097  | 0.00755  | 0.020384 | yes |
| Igsf8         | 0.454975 | 2.23288  | 5.00E-05 | 0.00022  | yes |
| Fubp1         | 0.454636 | 2.01226  | 0.0001   | 0.000422 | yes |
| Pcbd2         | 0.454386 | 1.63363  | 0.0419   | 0.087943 | no  |
| Cntrl         | 0.453991 | 0.935707 | 0.0638   | 0.124935 | no  |
| Pml           | 0.453833 | 1.24451  | 0.01335  | 0.033305 | yes |
| Aph           | 0.453326 | 0.685595 | 0.2555   | 0.378433 | no  |
| Pqbp1         | 0.453215 | 1.61067  | 0.0015   | 0.004953 | yes |
| Gm10125       | 0.453103 | 0        | 1        | 1        | no  |
| Zfp449        | 0.452939 | 1.0959   | 0.0354   | 0.076267 | no  |
| Rbbp8         | 0.452937 | 1.03545  | 0.0375   | 0.079986 | no  |
| Lpcat1        | 0.452907 | 1.65859  | 0.0035   | 0.01036  | yes |
| Polb          | 0.452713 | 1.71553  | 0.00335  | 0.009985 | yes |
| Cir1          | 0.4527   | 1.29543  | 0.01955  | 0.046159 | yes |
| Nelfe         | 0.452355 | 1.2743   | 0.0113   | 0.028847 | yes |
| Morc3         | 0.452325 | 1.59363  | 0.0022   | 0.006933 | yes |
| Acat3         | 0.452291 | 0        | 1        | 1        | no  |
| Tsacc         | 0.452272 | 0.57184  | 0.5161   | 0.641715 | no  |
| Gm2027        | 0.452106 | 0        | 1        | 1        | no  |
| Mpst          | 0.451933 | 1.28617  | 0.0108   | 0.027763 | yes |
| Prkra         | 0.451559 | 1.6483   | 0.0046   | 0.013192 | yes |
| Nudc          | 0.451535 | 2.09895  | 0.0004   | 0.001513 | yes |
| Prkcg         | 0.451399 | 0        | 1        | 1        | no  |
| 1190005I06Rik | 0.450966 | 0.775385 | 0.26145  | 0.384893 | no  |
| Homer2        | 0.450849 | 1.99217  | 5.00E-05 | 0.00022  | yes |
| Zfp513        | 0.450748 | 0.226472 | 0.65745  | 0.759724 | no  |
| Tspan8        | 0.450692 | 1.93045  | 5.00E-05 | 0.00022  | yes |
| Wdr48         | 0.450641 | 1.82972  | 0.0006   | 0.002181 | yes |
| Zc3h18        | 0.450473 | 1.44484  | 0.0039   | 0.011392 | yes |
| Pkia          | 0.450404 | 2.19401  | 5.00E-05 | 0.00022  | yes |
| Gm11944       | 0.450394 | 0        | 1        | 1        | no  |
| Pan3          | 0.450372 | 1.67524  | 0.0013   | 0.004375 | yes |
| Heca          | 0.450362 | 1.6913   | 0.0014   | 0.004657 | yes |
| Pcyt2         | 0.450351 | 2.11694  | 0.00015  | 0.000615 | yes |
| Sf3a2         | 0.450294 | 1.5503   | 0.00635  | 0.017515 | yes |
| Zfp867        | 0.450148 | 0.841011 | 0.1177   | 0.205113 | no  |
| Fbxo30        | 0.450136 | 1.67412  | 0.00095  | 0.003299 | yes |
| Rps3a1        | 0.450032 | 1.19949  | 0.01685  | 0.040719 | yes |
| Rgs1          | 0.44991  | 0        | 1        | 1        | no  |
| Armc2         | 0.449789 | 0        | 1        | 1        | no  |
| Bnip3l        | 0.44975  | 2.12501  | 5.00E-05 | 0.00022  | yes |
| Prdm15        | 0.449625 | 1.13519  | 0.0285   | 0.063623 | no  |
| Lbx2          | 0.449412 | 0        | 1        | 1        | no  |
| Dus3l         | 0.449328 | 1.75634  | 0.0016   | 0.005236 | yes |
| Mbip          | 0.449073 | 1.11565  | 0.0513   | 0.104322 | no  |
| Zfp771        | 0.449021 | 1.53311  | 0.0113   | 0.028847 | yes |
| Zbtb46        | 0.448817 | 1.01618  | 0.04315  | 0.090324 | no  |
| Sc1t1         | 0.448798 | 0.967503 | 0.06945  | 0.134196 | no  |
| 35673         | 0.448416 | 0.667332 | 0.25165  | 0.374403 | no  |
| Fcho1         | 0.448384 | 1.43881  | 0.0038   | 0.011141 | yes |
| Tmem194       | 0.448194 | 0.770137 | 0.1216   | 0.211078 | no  |

|               |          |          |          |          |     |
|---------------|----------|----------|----------|----------|-----|
| Serpinb6a     | 0.448151 | 2.18239  | 0.00015  | 0.000615 | yes |
| Cdkn3         | 0.448109 | 0.976752 | 0.146    | 0.245095 | no  |
| Spsb2         | 0.448058 | 0.34869  | 0.5695   | 0.688118 | no  |
| Bloc1s4       | 0.447898 | 1.09375  | 0.0632   | 0.123961 | no  |
| Rps6ka2       | 0.447854 | 2.18061  | 5.00E-05 | 0.00022  | yes |
| Sec11a        | 0.447826 | 1.90303  | 0.0017   | 0.005514 | yes |
| Pir           | 0.447547 | 1.74888  | 0.00255  | 0.007875 | yes |
| Atf4          | 0.447486 | 2.05155  | 5.00E-05 | 0.00022  | yes |
| Ap3s1         | 0.447317 | 1.89823  | 0.00095  | 0.003299 | yes |
| Cep57         | 0.446569 | 1.08184  | 0.02915  | 0.064877 | no  |
| Msantd3       | 0.446547 | 1.05744  | 0.03285  | 0.071646 | no  |
| Map9          | 0.446543 | 2.05841  | 5.00E-05 | 0.00022  | yes |
| Carf          | 0.446369 | 0.897486 | 0.0736   | 0.140396 | no  |
| L1cam         | 0.446256 | 1.98858  | 0.0001   | 0.000422 | yes |
| Zfp566        | 0.446218 | 0.677042 | 0.22735  | 0.347615 | no  |
| Cmpk1         | 0.446143 | 2.30759  | 5.00E-05 | 0.00022  | yes |
| Otub2         | 0.446043 | 1.24774  | 0.0127   | 0.031887 | yes |
| Elmo3         | 0.445852 | 0        | 1        | 1        | no  |
| Acvr2b        | 0.445747 | 0.627191 | 0.272    | 0.396857 | no  |
| Ankrd39       | 0.445743 | 1.16793  | 0.04135  | 0.087023 | no  |
| Zfp282        | 0.44568  | 1.36022  | 0.00935  | 0.024486 | yes |
| Sprn          | 0.445657 | 1.73928  | 0.0004   | 0.001513 | yes |
| Fam210b       | 0.445623 | 1.5521   | 0.00335  | 0.009985 | yes |
| Dlx3          | 0.4456   | 0.655045 | 0.2259   | 0.345716 | no  |
| Nme3          | 0.445466 | 0.355966 | 0.6026   | 0.715409 | no  |
| Sifn1         | 0.445263 | 0        | 1        | 1        | no  |
| Tbcb          | 0.445129 | 2.34868  | 5.00E-05 | 0.00022  | yes |
| Crif2         | 0.445023 | 0.962177 | 0.05395  | 0.108711 | no  |
| Rsu1          | 0.444834 | 2.21153  | 0.00015  | 0.000615 | yes |
| Spata2l       | 0.444804 | 0.515243 | 0.35635  | 0.488297 | no  |
| Lyst          | 0.444752 | 2.03263  | 5.00E-05 | 0.00022  | yes |
| Lrfn1         | 0.444673 | 1.58731  | 0.00095  | 0.003299 | yes |
| Mettl25       | 0.444655 | 0.948741 | 0.08625  | 0.159259 | no  |
| Tmem88b       | 0.444527 | 0        | 1        | 1        | no  |
| Uchl1os       | 0.444139 | 0        | 1        | 1        | no  |
| Msh5          | 0.444105 | 0        | 1        | 1        | no  |
| Lars2         | 0.44392  | 1.965    | 0.00025  | 0.000985 | yes |
| Lysmd3        | 0.443629 | 1.29585  | 0.01425  | 0.035265 | yes |
| Enoph1        | 0.44344  | 1.58317  | 0.0016   | 0.005236 | yes |
| Frg1          | 0.443217 | 1.63488  | 0.0084   | 0.022392 | yes |
| Gm4285        | 0.443205 | 0.550958 | 0.35035  | 0.482568 | no  |
| Pth2r         | 0.443073 | 0        | 1        | 1        | no  |
| Rps6kb2       | 0.443047 | 1.2922   | 0.024    | 0.054955 | no  |
| Zfp354b       | 0.442776 | 0.704302 | 0.19195  | 0.303999 | no  |
| Pja1          | 0.442519 | 2.0352   | 0.0002   | 0.000803 | yes |
| Wdr76         | 0.442259 | 0.738325 | 0.1353   | 0.230368 | no  |
| Ift46         | 0.442188 | 1.84521  | 0.00035  | 0.001342 | yes |
| Ifi35         | 0.442179 | 1.39457  | 0.0168   | 0.040613 | yes |
| Xpo1          | 0.442046 | 2.00629  | 5.00E-05 | 0.00022  | yes |
| D130009I18Rik | 0.441976 | 1.41533  | 0.0076   | 0.02049  | yes |
| Eef1a1        | 0.4419   | 2.15264  | 5.00E-05 | 0.00022  | yes |
| Flnc          | 0.44184  | 0.896727 | 0.0764   | 0.144841 | no  |
| Spopl         | 0.441711 | 1.35181  | 0.0067   | 0.018343 | yes |

|               |          |          |          |          |     |
|---------------|----------|----------|----------|----------|-----|
| Arhgap1       | 0.441701 | 1.89568  | 0.0001   | 0.000422 | yes |
| Dnajc2        | 0.441596 | 1.75497  | 0.0015   | 0.004953 | yes |
| Trim68        | 0.441574 | 1.04888  | 0.0531   | 0.10721  | no  |
| Rpl18         | 0.44156  | 0.896425 | 0.2032   | 0.317757 | no  |
| Gstp2         | 0.44155  | 0.873043 | 0.193    | 0.305261 | no  |
| Spns2         | 0.441494 | 1.4612   | 0.00325  | 0.009727 | yes |
| Kti12         | 0.44146  | 0.811274 | 0.10305  | 0.18408  | no  |
| Taf5          | 0.441372 | 1.01986  | 0.05715  | 0.114223 | no  |
| Smарcb1       | 0.441299 | 1.69396  | 0.0009   | 0.003139 | yes |
| Tex30         | 0.441241 | 0.924543 | 0.1235   | 0.213788 | no  |
| C920021L13Rik | 0.441068 | 0        | 1        | 1        | no  |
| Cdc5l         | 0.440925 | 1.71925  | 0.00125  | 0.00422  | yes |
| Zfp511        | 0.440482 | 0.635137 | 0.20235  | 0.31669  | no  |
| Rasgrp4       | 0.440442 | 0        | 1        | 1        | no  |
| Dos           | 0.440356 | 0.343089 | 0.4971   | 0.623938 | no  |
| Fert2         | 0.440081 | 1.49115  | 0.00385  | 0.011268 | yes |
| Rnf126        | 0.440034 | 0.156452 | 0.7658   | 0.846408 | no  |
| Chst14        | 0.4398   | 1.33714  | 0.01595  | 0.038863 | yes |
| Rsph3b        | 0.439684 | 1.18782  | 0.03755  | 0.080067 | no  |
| Capzb         | 0.439558 | 2.04973  | 5.00E-05 | 0.00022  | yes |
| Dctn6         | 0.439467 | 2.25745  | 0.00055  | 0.002016 | yes |
| Topaz1        | 0.439256 | 0        | 1        | 1        | no  |
| Arhgap11a     | 0.439079 | 1.02174  | 0.0495   | 0.101283 | no  |
| Vmn2r29       | 0.438745 | 0.547933 | 0.27005  | 0.394881 | no  |
| Cab39l        | 0.438694 | 2.17008  | 5.00E-05 | 0.00022  | yes |
| Gpr165        | 0.438693 | 0.908397 | 0.08765  | 0.161127 | no  |
| Ikzf3         | 0.438634 | 0        | 1        | 1        | no  |
| Nudt16l1      | 0.438606 | 1.26803  | 0.0123   | 0.031006 | yes |
| Ppfia3        | 0.438333 | 1.95754  | 0.0001   | 0.000422 | yes |
| Uhrf2         | 0.438204 | 1.80002  | 0.0007   | 0.002506 | yes |
| Ppm1b         | 0.43816  | 1.93079  | 5.00E-05 | 0.00022  | yes |
| Mpv17l        | 0.438121 | 1.59787  | 0.00105  | 0.003607 | yes |
| Flrt3         | 0.438112 | 1.20239  | 0.0165   | 0.03999  | yes |
| Zfp963        | 0.437978 | 0.757253 | 0.16545  | 0.270357 | no  |
| Epc1          | 0.43755  | 1.34211  | 0.0095   | 0.024845 | yes |
| Dyrk1b        | 0.437441 | 1.38758  | 0.0059   | 0.016438 | yes |
| Mbl2          | 0.43744  | 0        | 1        | 1        | no  |
| Fmo5          | 0.437413 | 1.14419  | 0.02185  | 0.050786 | no  |
| Jund          | 0.437274 | 2.16942  | 0.0001   | 0.000422 | yes |
| Clic1         | 0.437232 | 2.34118  | 0.0002   | 0.000803 | yes |
| Lrif1         | 0.437173 | 1.05055  | 0.03475  | 0.075098 | no  |
| Muc13         | 0.437052 | 0        | 1        | 1        | no  |
| Rps4l         | 0.437034 | 0.461388 | 0.35025  | 0.48248  | no  |
| Nudt17        | 0.437032 | 0.302687 | 0.54185  | 0.663963 | no  |
| 9330182L06Rik | 0.436986 | 1.98982  | 5.00E-05 | 0.00022  | yes |
| Hs6st3        | 0.43686  | 0.987849 | 0.0484   | 0.099477 | no  |
| H2-Q10        | 0.4367   | 0        | 1        | 1        | no  |
| Spata5l1      | 0.436544 | 0.756473 | 0.20035  | 0.31419  | no  |
| Spata1        | 0.436488 | 0.384394 | 0.4597   | 0.589203 | no  |
| Fam78a        | 0.436141 | 0        | 1        | 1        | no  |
| Adamts10      | 0.436001 | 0.975174 | 0.05155  | 0.104718 | no  |
| Ccdc162       | 0.435857 | 0        | 1        | 1        | no  |
| Tmsb15b1      | 0.435564 | 0.309634 | 0.54535  | 0.667265 | no  |



|                |          |          |          |          |     |
|----------------|----------|----------|----------|----------|-----|
| Tmod4          | 0.435549 | 0        | 1        | 1        | no  |
| Iba57          | 0.435324 | 1.01931  | 0.03955  | 0.083779 | no  |
| Zcchc3         | 0.435247 | 1.05718  | 0.04875  | 0.100103 | no  |
| Rngtt          | 0.435197 | 1.61735  | 0.0014   | 0.004657 | yes |
| Rad51d         | 0.434944 | 1.10266  | 0.0261   | 0.059    | no  |
| Stk4           | 0.43492  | 1.78617  | 0.00035  | 0.001342 | yes |
| Vat1           | 0.434783 | 2.1916   | 5.00E-05 | 0.00022  | yes |
| Gnai2          | 0.434761 | 2.25095  | 5.00E-05 | 0.00022  | yes |
| Wdr17          | 0.434691 | 1.45118  | 0.0038   | 0.011141 | yes |
| Plscr3         | 0.434598 | 1.8963   | 0.00035  | 0.001342 | yes |
| Ostf1          | 0.434583 | 2.28693  | 5.00E-05 | 0.00022  | yes |
| Rpa3           | 0.434517 | 0.878635 | 0.22755  | 0.34772  | no  |
| Zfp82          | 0.434432 | 0.720984 | 0.1465   | 0.245654 | no  |
| Tmem120b       | 0.434385 | 1.42869  | 0.01105  | 0.02829  | yes |
| Tefm           | 0.434245 | 0.891412 | 0.13435  | 0.229074 | no  |
| Ctdspl         | 0.434192 | 1.42485  | 0.00495  | 0.014084 | yes |
| Guf1           | 0.434183 | 1.36489  | 0.00985  | 0.025654 | yes |
| Gm20604        | 0.434181 | 0.691591 | 0.1639   | 0.268286 | no  |
| Ccdc103        | 0.434121 | 0.442514 | 0.37515  | 0.506783 | no  |
| Hoxa5          | 0.434052 | 0.933848 | 0.0974   | 0.175762 | no  |
| Gm13305,Gm2002 | 0.434015 | 0        | 1        | 1        | no  |
| Hsf1           | 0.433982 | 1.53527  | 0.0048   | 0.013695 | yes |
| Cacnb1         | 0.433797 | 1.7116   | 0.0009   | 0.003139 | yes |
| Palmd          | 0.433352 | 1.7989   | 0.00035  | 0.001342 | yes |
| Adcy5          | 0.433123 | 1.95515  | 5.00E-05 | 0.00022  | yes |
| Saysd1         | 0.433054 | 0.899384 | 0.09955  | 0.178767 | no  |
| Pck2           | 0.432837 | 1.95708  | 0.00025  | 0.000985 | yes |
| 1810037I17Rik  | 0.432834 | 1.57221  | 0.01205  | 0.030463 | yes |
| Rps25          | 0.432709 | 1.07521  | 0.1332   | 0.227522 | no  |
| Scai           | 0.432537 | 1.63426  | 0.00115  | 0.00391  | yes |
| Sobp           | 0.432212 | 1.79498  | 0.00055  | 0.002016 | yes |
| Nova2          | 0.432066 | 1.33259  | 0.0088   | 0.023271 | yes |
| Prpsap2        | 0.431665 | 0.977828 | 0.04945  | 0.101196 | no  |
| Fpgs           | 0.431623 | 0.543533 | 0.23985  | 0.361396 | no  |
| Ilkap          | 0.431613 | 1.72529  | 0.0031   | 0.009315 | yes |
| Gramd2         | 0.431481 | 0.62864  | 0.2924   | 0.419789 | no  |
| Nudt13         | 0.431071 | 1.02111  | 0.0599   | 0.118646 | no  |
| LOC100038947   | 0.430719 | 0        | 1        | 1        | no  |
| 1700123M08Rik  | 0.430716 | 0.550446 | 0.3701   | 0.501561 | no  |
| Dck            | 0.430594 | 1.79998  | 0.00085  | 0.002983 | yes |
| E030013I19Rik  | 0.430454 | 0        | 1        | 1        | no  |
| Nudt6          | 0.43041  | 0.614311 | 0.20985  | 0.326196 | no  |
| 4930512B01Rik  | 0.430386 | 0        | 1        | 1        | no  |
| Nlrx1          | 0.430354 | 1.26867  | 0.01205  | 0.030463 | yes |
| Tfdp2          | 0.430172 | 1.74384  | 0.00025  | 0.000985 | yes |
| A530054K11Rik  | 0.429933 | 1.29129  | 0.01295  | 0.032429 | yes |
| Taldo1         | 0.429814 | 2.24297  | 0.0001   | 0.000422 | yes |
| Slc5a3         | 0.429693 | 1.36592  | 0.00645  | 0.017754 | yes |
| Tceal5         | 0.429655 | 1.11005  | 0.07605  | 0.144322 | no  |
| Far1           | 0.429564 | 2.00031  | 5.00E-05 | 0.00022  | yes |
| Gdpd5          | 0.42903  | 1.95101  | 0.00025  | 0.000985 | yes |
| Aldoart1       | 0.42895  | 1.03183  | 0.06045  | 0.119522 | no  |
| Spag4          | 0.428938 | 0.553103 | 0.33375  | 0.464916 | no  |

|               |          |          |          |          |     |
|---------------|----------|----------|----------|----------|-----|
| Tex22         | 0.428665 | 0        | 1        | 1        | no  |
| Nr2c2ap       | 0.428597 | 1.2816   | 0.0123   | 0.031006 | yes |
| Gria1         | 0.428255 | 1.52538  | 0.002    | 0.006363 | yes |
| Phf23         | 0.428163 | 1.65651  | 0.0008   | 0.002828 | yes |
| Rgs16         | 0.42815  | 0.890185 | 0.1001   | 0.179584 | no  |
| Cep170b       | 0.428077 | 1.99486  | 5.00E-05 | 0.00022  | yes |
| Reps2         | 0.427787 | 1.2031   | 0.0201   | 0.047298 | yes |
| Chmp6         | 0.427577 | 1.76931  | 0.0025   | 0.007739 | yes |
| Glt25d1       | 0.427168 | 1.93607  | 0.00025  | 0.000985 | yes |
| Rcor3         | 0.427144 | 1.37009  | 0.0102   | 0.026436 | yes |
| Nadsyn1       | 0.427018 | 0.721775 | 0.1808   | 0.290502 | no  |
| Lypla2        | 0.426999 | 2.1929   | 0.00015  | 0.000615 | yes |
| Zfp442        | 0.426877 | 0.590851 | 0.27225  | 0.397004 | no  |
| Gimap8        | 0.42676  | 0.660222 | 0.1818   | 0.291579 | no  |
| Imp3          | 0.426592 | 1.64491  | 0.01105  | 0.02829  | yes |
| Ube2s         | 0.426499 | 0.568301 | 0.3631   | 0.495143 | no  |
| Plxna3        | 0.426461 | 1.539    | 0.00225  | 0.007062 | yes |
| Bbx           | 0.426258 | 1.9129   | 0.0002   | 0.000803 | yes |
| Ythdf2        | 0.426057 | 1.88062  | 0.00035  | 0.001342 | yes |
| Llph          | 0.425772 | 0.988907 | 0.1007   | 0.180466 | no  |
| Txlna         | 0.425705 | 1.84472  | 0.0004   | 0.001513 | yes |
| Kctd3         | 0.425481 | 1.87884  | 0.00035  | 0.001342 | yes |
| Asb6          | 0.42533  | 1.76184  | 0.00135  | 0.004516 | yes |
| Npl           | 0.425237 | 0.721718 | 0.21405  | 0.331172 | no  |
| Ccdc55        | 0.425147 | 1.17885  | 0.01775  | 0.042546 | yes |
| Sun1          | 0.425035 | 1.80148  | 0.0005   | 0.00185  | yes |
| Orc6          | 0.425011 | 1.03157  | 0.0391   | 0.082906 | no  |
| Rita1         | 0.424875 | 0.984839 | 0.0456   | 0.094735 | no  |
| Tra2a         | 0.424749 | 1.86372  | 0.0004   | 0.001513 | yes |
| Tro           | 0.424723 | 1.98284  | 5.00E-05 | 0.00022  | yes |
| Ccdc174       | 0.424608 | 1.22121  | 0.03035  | 0.067109 | no  |
| Rpl19         | 0.424556 | 0.621686 | 0.2061   | 0.321497 | no  |
| Ift122        | 0.424545 | 1.75564  | 0.0004   | 0.001513 | yes |
| Trappc6b      | 0.424536 | 2.07205  | 0.00075  | 0.00267  | yes |
| Zfp329        | 0.424182 | 1.45662  | 0.00345  | 0.010237 | yes |
| Rpain         | 0.424167 | 0.699464 | 0.23925  | 0.360656 | no  |
| Park2         | 0.424043 | 1.02984  | 0.03705  | 0.079204 | no  |
| Slamf7        | 0.423926 | 0        | 1        | 1        | no  |
| Taok3         | 0.423893 | 1.63209  | 0.001    | 0.003451 | yes |
| Icam1         | 0.423776 | 0.670353 | 0.217    | 0.334565 | no  |
| B330016D10Rik | 0.423752 | 0        | 1        | 1        | no  |
| Phf3          | 0.423433 | 1.78503  | 0.0008   | 0.002828 | yes |
| Tbca          | 0.423418 | 2.65893  | 0.00195  | 0.006219 | yes |
| Ints6         | 0.423168 | 1.08954  | 0.02835  | 0.063341 | no  |
| Jakmip1       | 0.423068 | 2.02172  | 0.00035  | 0.001342 | yes |
| Snrpd2        | 0.423044 | 1.82663  | 0.03115  | 0.068581 | no  |
| Zdhhc2        | 0.423003 | 2.14568  | 5.00E-05 | 0.00022  | yes |
| Otud7a        | 0.423001 | 1.57775  | 0.00315  | 0.009455 | yes |
| Tbcc          | 0.422954 | 1.76127  | 0.00185  | 0.005939 | yes |
| Aatf          | 0.422781 | 1.36433  | 0.0161   | 0.039164 | yes |
| AA388235      | 0.422615 | 0.919078 | 0.08195  | 0.152937 | no  |
| Pcsk1n        | 0.422303 | 1.95134  | 0.0001   | 0.000422 | yes |
| Lrrc15        | 0.422292 | 0        | 1        | 1        | no  |

|               |          |          |          |          |     |
|---------------|----------|----------|----------|----------|-----|
| Ldlrad4       | 0.421982 | 1.14224  | 0.0353   | 0.076064 | no  |
| Ruvbl2        | 0.421809 | 1.48163  | 0.0083   | 0.022156 | yes |
| 4930506M07Rik | 0.421789 | 1.40639  | 0.00535  | 0.015044 | yes |
| Ppan          | 0.421386 | 1.06384  | 0.0616   | 0.121343 | no  |
| Mef2d         | 0.42135  | 1.71363  | 0.00135  | 0.004516 | yes |
| Zfp444        | 0.421276 | 1.27515  | 0.0117   | 0.029708 | yes |
| Ift80         | 0.420778 | 1.83743  | 0.0003   | 0.001164 | yes |
| Zranb2        | 0.420672 | 1.8592   | 0.00015  | 0.000615 | yes |
| Ctnna2        | 0.420527 | 2.01518  | 0.00015  | 0.000615 | yes |
| Srsf2         | 0.420506 | 2.08713  | 0.0002   | 0.000803 | yes |
| Zfp64         | 0.420347 | 1.21744  | 0.0248   | 0.056514 | no  |
| Commd7        | 0.420345 | 1.5713   | 0.0012   | 0.004068 | yes |
| Rbm12b2       | 0.419991 | 0.94893  | 0.073    | 0.139452 | no  |
| Itsn2         | 0.419465 | 1.87091  | 0.00025  | 0.000985 | yes |
| Rpl23         | 0.419459 | 0.83967  | 0.0878   | 0.161358 | no  |
| Pold4         | 0.419133 | 1.46852  | 0.0215   | 0.050104 | no  |
| Hjurp         | 0.418974 | 0.931768 | 0.0608   | 0.120053 | no  |
| Dusp13        | 0.418919 | 0        | 1        | 1        | no  |
| Kiz           | 0.418491 | 1.45249  | 0.0086   | 0.022847 | yes |
| Tmem2         | 0.418458 | 1.73738  | 0.00045  | 0.001682 | yes |
| Celf1         | 0.41808  | 1.79739  | 0.0004   | 0.001513 | yes |
| Oaz1          | 0.418063 | 1.42101  | 0.00525  | 0.014813 | yes |
| Nt5c3         | 0.417852 | 1.47514  | 0.00415  | 0.012021 | yes |
| Zc3h11a       | 0.417791 | 1.67521  | 0.0008   | 0.002828 | yes |
| Ccdc94        | 0.417358 | 0.720349 | 0.1475   | 0.24677  | no  |
| Slc44a2       | 0.417269 | 1.95852  | 5.00E-05 | 0.00022  | yes |
| Cwc27         | 0.417225 | 1.33488  | 0.016    | 0.038963 | yes |
| Crcp          | 0.417219 | 1.74837  | 0.00235  | 0.007346 | yes |
| Coro7         | 0.416987 | 1.94375  | 0.0005   | 0.00185  | yes |
| Cstb          | 0.416679 | 2.10571  | 0.0052   | 0.014691 | yes |
| Elavl4        | 0.416678 | 1.92958  | 0.0001   | 0.000422 | yes |
| Pfkfb2        | 0.41654  | 1.49767  | 0.0035   | 0.01036  | yes |
| Ano6          | 0.41647  | 1.90525  | 0.00015  | 0.000615 | yes |
| Atp11b        | 0.416362 | 1.85193  | 0.00045  | 0.001682 | yes |
| U2af2         | 0.416284 | 1.6767   | 0.00095  | 0.003299 | yes |
| Fbxo48        | 0.416227 | 0        | 1        | 1        | no  |
| Upf3a         | 0.416219 | 1.39442  | 0.0163   | 0.039607 | yes |
| Ormdl2        | 0.41609  | 0.535246 | 0.28265  | 0.408399 | no  |
| Camk2d        | 0.416082 | 1.94427  | 0.00015  | 0.000615 | yes |
| Clca1         | 0.416074 | 0        | 1        | 1        | no  |
| Wdr55         | 0.415936 | 1.27714  | 0.0255   | 0.05786  | no  |
| Gabrr2        | 0.415775 | 0        | 1        | 1        | no  |
| Med6          | 0.415739 | 1.32845  | 0.0342   | 0.074115 | no  |
| Mta3          | 0.415677 | 1.65745  | 0.0005   | 0.00185  | yes |
| Dcaf12        | 0.415626 | 1.94585  | 0.0004   | 0.001513 | yes |
| Eml6          | 0.415579 | 0.211451 | 0.68245  | 0.780927 | no  |
| Ebna1bp2      | 0.415543 | 1.57439  | 0.0016   | 0.005236 | yes |
| Arfgef2       | 0.415521 | 1.97756  | 0.0001   | 0.000422 | yes |
| Fam114a1      | 0.415404 | 1.49905  | 0.00245  | 0.007605 | yes |
| Pgp           | 0.415323 | 1.94178  | 0.00185  | 0.005939 | yes |
| Rasip1        | 0.415148 | 1.18168  | 0.0257   | 0.058195 | no  |
| Dcaf12l1      | 0.414864 | 1.37675  | 0.00675  | 0.018468 | yes |
| Sec61b        | 0.414695 | 1.17588  | 0.1332   | 0.227522 | no  |

|               |          |          |         |          |     |
|---------------|----------|----------|---------|----------|-----|
| Morc2b        | 0.414197 | 0        | 1       | 1        | no  |
| Gdf7          | 0.414129 | 0        | 1       | 1        | no  |
| Cited4        | 0.414123 | 0        | 1       | 1        | no  |
| C530005A16Rik | 0.414099 | 0.392307 | 0.4639  | 0.593554 | no  |
| Hdx           | 0.413761 | 0.648323 | 0.1927  | 0.304859 | no  |
| Sbds          | 0.412724 | 2.03509  | 0.0004  | 0.001513 | yes |
| Sqstm1        | 0.412715 | 1.83188  | 0.0003  | 0.001164 | yes |
| Pex26         | 0.412594 | 1.42744  | 0.006   | 0.016674 | yes |
| Lpxn          | 0.412577 | 0        | 1       | 1        | no  |
| Polr2f        | 0.412464 | 1.67772  | 0.039   | 0.082733 | no  |
| Nap1l1        | 0.412457 | 1.84046  | 0.00025 | 0.000985 | yes |
| Ick           | 0.412372 | 1.51133  | 0.0027  | 0.008273 | yes |
| C2cd4b        | 0.412369 | 0        | 1       | 1        | no  |
| Gfra3         | 0.412232 | 1.82831  | 0.0006  | 0.002181 | yes |
| Tshz3         | 0.41205  | 1.61703  | 0.0019  | 0.00608  | yes |
| Spdl1         | 0.411961 | 0        | 1       | 1        | no  |
| Kctd10        | 0.411916 | 1.92313  | 0.00025 | 0.000985 | yes |
| Dnajb5        | 0.411883 | 1.30694  | 0.01545 | 0.037763 | yes |
| Asap1         | 0.411782 | 1.86414  | 0.0004  | 0.001513 | yes |
| Cer1          | 0.411775 | 0        | 1       | 1        | no  |
| Ift172        | 0.411748 | 0.719799 | 0.15135 | 0.251908 | no  |
| Nop9          | 0.411385 | 1.26756  | 0.0126  | 0.031654 | yes |
| Snopc4        | 0.410842 | 1.09458  | 0.02775 | 0.062189 | no  |
| Mrpl54        | 0.41071  | 1.73732  | 0.0226  | 0.052209 | no  |
| Dhx37         | 0.410647 | 1.29266  | 0.013   | 0.032548 | yes |
| Zfp46         | 0.410438 | 1.56483  | 0.00255 | 0.007875 | yes |
| Chmp2a        | 0.410187 | 2.06479  | 0.00145 | 0.004804 | yes |
| Hoxd11        | 0.410015 | 0.592865 | 0.2328  | 0.353584 | no  |
| Bves          | 0.40997  | 1.39123  | 0.01465 | 0.0361   | yes |
| Smn1          | 0.409874 | 1.01664  | 0.041   | 0.086396 | no  |
| Morf4l2       | 0.409825 | 2.16137  | 0.0002  | 0.000803 | yes |
| Milt6         | 0.409685 | 1.79115  | 0.00025 | 0.000985 | yes |
| Gpr155        | 0.409644 | 1.80617  | 0.0005  | 0.00185  | yes |
| Gm8994        | 0.409457 | 0.523871 | 0.3535  | 0.485495 | no  |
| Rps15         | 0.409447 | 0.136643 | 0.79855 | 0.868943 | no  |
| Thg1l         | 0.40942  | 0.948525 | 0.0587  | 0.116845 | no  |
| Pfkfb4        | 0.409102 | 1.34348  | 0.0116  | 0.029488 | yes |
| A930004D18Rik | 0.40905  | 1.05797  | 0.0434  | 0.090775 | no  |
| 4833418N02Rik | 0.409033 | 0        | 1       | 1        | no  |
| C230091D08Rik | 0.408876 | 0        | 1       | 1        | no  |
| Sfpq          | 0.408631 | 1.77387  | 0.00025 | 0.000985 | yes |
| Clec4f        | 0.408475 | 0        | 1       | 1        | no  |
| Dtx3          | 0.40847  | 1.28713  | 0.0212  | 0.049553 | yes |
| Rbm45         | 0.408258 | 1.44128  | 0.0085  | 0.022613 | yes |
| Nnt           | 0.408249 | 1.23483  | 0.0132  | 0.032999 | yes |
| Ln timer      | 0.408243 | 1.20805  | 0.0213  | 0.049734 | yes |
| Gpr180        | 0.408215 | 1.37226  | 0.00925 | 0.024243 | yes |
| Myl4          | 0.408121 | 0.586369 | 0.36205 | 0.494168 | no  |
| 2210016L21Rik | 0.408085 | 2.01602  | 0.0009  | 0.003139 | yes |
| Arpc2         | 0.407886 | 2.16155  | 0.0002  | 0.000803 | yes |
| Zfp772        | 0.407804 | 0.938793 | 0.07955 | 0.149595 | no  |
| Hexb          | 0.407698 | 1.69887  | 0.0004  | 0.001513 | yes |
| Atp11c        | 0.407697 | 1.54955  | 0.0016  | 0.005236 | yes |

|               |          |          |          |          |     |
|---------------|----------|----------|----------|----------|-----|
| 2810002D19Rik | 0.407687 | 0.821375 | 0.14965  | 0.249517 | no  |
| Evl           | 0.40755  | 0.640895 | 0.24355  | 0.36527  | no  |
| Rpl41         | 0.407203 | 3.14287  | 0.0006   | 0.002181 | yes |
| Rpl36a1       | 0.407068 | 1.98057  | 0.0169   | 0.040833 | yes |
| Rpl14-ps1     | 0.407015 | 1.62757  | 0.00115  | 0.00391  | yes |
| Pan2          | 0.406767 | 1.23762  | 0.0124   | 0.031187 | yes |
| Ikbkb         | 0.406717 | 1.45985  | 0.0033   | 0.009856 | yes |
| Lhfpl3        | 0.406431 | 1.67167  | 0.00085  | 0.002983 | yes |
| Npw           | 0.406382 | 0        | 1        | 1        | no  |
| Actr1b        | 0.406253 | 2.11187  | 5.00E-05 | 0.00022  | yes |
| Hnrnpab       | 0.406245 | 1.86872  | 0.0002   | 0.000803 | yes |
| U2af114       | 0.406045 | 1.49694  | 0.0225   | 0.052005 | no  |
| Fam57a        | 0.406015 | 1.03272  | 0.1062   | 0.188489 | no  |
| Polq          | 0.406007 | 0        | 1        | 1        | no  |
| Crybg3        | 0.405852 | 0.922628 | 0.06935  | 0.134081 | no  |
| Fmo6          | 0.405772 | 0        | 1        | 1        | no  |
| Cntnap4       | 0.405762 | 1.70488  | 0.00155  | 0.005095 | yes |
| Slc25a48      | 0.4057   | 0        | 1        | 1        | no  |
| Upb1          | 0.405505 | 0        | 1        | 1        | no  |
| Pgbd5         | 0.405061 | 1.80941  | 0.0007   | 0.002506 | yes |
| Lenep         | 0.404955 | 0.587234 | 0.4153   | 0.547257 | no  |
| Ccdc88a       | 0.404937 | 1.67824  | 0.0014   | 0.004657 | yes |
| Ccm2          | 0.404816 | 1.56486  | 0.00185  | 0.005939 | yes |
| Prkag2        | 0.404712 | 1.80402  | 0.0003   | 0.001164 | yes |
| Vwa5a         | 0.404607 | 1.82041  | 0.00025  | 0.000985 | yes |
| Sra1          | 0.404557 | 1.25923  | 0.01155  | 0.029395 | yes |
| 38046         | 0.404343 | 1.69639  | 0.001    | 0.003451 | yes |
| Cacna1h       | 0.404235 | 1.73261  | 0.0006   | 0.002181 | yes |
| Zfp787        | 0.403821 | 1.01994  | 0.0654   | 0.127522 | no  |
| Nfkbib        | 0.403714 | 1.14658  | 0.0214   | 0.049915 | yes |
| Pdia6         | 0.403605 | 1.9858   | 0.0001   | 0.000422 | yes |
| Nfu1          | 0.403593 | 1.2836   | 0.0109   | 0.027982 | yes |
| Sf3b5         | 0.403265 | 1.63066  | 0.0188   | 0.044675 | yes |
| Mamld1        | 0.403235 | 1.26423  | 0.0119   | 0.030181 | yes |
| 2610035F20Rik | 0.403208 | 0        | 1        | 1        | no  |
| Stat3         | 0.403203 | 1.82088  | 0.0004   | 0.001513 | yes |
| Cebpg         | 0.402601 | 1.69204  | 0.00125  | 0.00422  | yes |
| Cnot3         | 0.402425 | 1.12353  | 0.0382   | 0.081257 | no  |
| Naa40         | 0.402379 | 1.09845  | 0.03915  | 0.082985 | no  |
| Ttc32         | 0.402216 | 0.487957 | 0.44525  | 0.576587 | no  |
| Car10         | 0.402053 | 1.91707  | 5.00E-05 | 0.00022  | yes |
| Snca          | 0.402052 | 0.687732 | 0.41995  | 0.551522 | no  |
| Ept1          | 0.402003 | 1.93749  | 0.00015  | 0.000615 | yes |
| Rccd1         | 0.401949 | 0.708001 | 0.195    | 0.307545 | no  |
| Akap12        | 0.401904 | 1.66792  | 0.00145  | 0.004804 | yes |
| Stat5b        | 0.401872 | 1.6698   | 0.0008   | 0.002828 | yes |
| Srpk1         | 0.401791 | 1.76491  | 0.001    | 0.003451 | yes |
| Man2c1        | 0.401566 | 1.63638  | 0.00085  | 0.002983 | yes |
| Mphosph9      | 0.40146  | 1.18356  | 0.0183   | 0.043682 | yes |
| 2310033P09Rik | 0.401425 | 1.11796  | 0.06335  | 0.124237 | no  |
| Nol8          | 0.401187 | 1.32558  | 0.00795  | 0.021355 | yes |
| 0610012G03Rik | 0.400799 | 1.36475  | 0.01885  | 0.044778 | yes |
| 2310068J16Rik | 0.400718 | 0        | 1        | 1        | no  |



|               |          |          |          |          |     |
|---------------|----------|----------|----------|----------|-----|
| Fbxw9         | 0.400526 | 0.393365 | 0.4249   | 0.556206 | no  |
| Trim27        | 0.400522 | 1.32995  | 0.0112   | 0.02863  | yes |
| Traf3ip2      | 0.400519 | 0.834285 | 0.1237   | 0.214079 | no  |
| Tctex1d2      | 0.400489 | 1.14993  | 0.11655  | 0.203456 | no  |
| 2310034G01Rik | 0.40039  | 0        | 1        | 1        | no  |
| Tmod1         | 0.400368 | 1.93112  | 0.00035  | 0.001342 | yes |
| Dusp5         | 0.400354 | 1.27188  | 0.03665  | 0.078514 | no  |
| Rpa1          | 0.400326 | 1.79315  | 0.0002   | 0.000803 | yes |
| Rock1         | 0.400179 | 1.49927  | 0.00335  | 0.009985 | yes |
| Bbs7          | 0.400116 | 1.41504  | 0.0086   | 0.022847 | yes |
| Ppp1r18       | 0.39996  | 1.33845  | 0.0072   | 0.01953  | yes |
| Gm3230        | 0.399833 | 0.546535 | 0.3199   | 0.449874 | no  |
| Arl6          | 0.399797 | 1.29643  | 0.0313   | 0.068831 | no  |
| Acsm3         | 0.399784 | 0        | 1        | 1        | no  |
| Akap8l        | 0.399448 | 1.53879  | 0.00635  | 0.017515 | yes |
| Plxnd1        | 0.399397 | 1.9154   | 0.00015  | 0.000615 | yes |
| Pole          | 0.399046 | 0.786348 | 0.12605  | 0.217493 | no  |
| Trpm4         | 0.398569 | 0.785729 | 0.1337   | 0.228259 | no  |
| 1700030K09Rik | 0.398219 | 0.569341 | 0.29945  | 0.427367 | no  |
| Slc2a2        | 0.398186 | 0        | 1        | 1        | no  |
| Msh2          | 0.398034 | 1.79774  | 0.00085  | 0.002983 | yes |
| Zfp382        | 0.397948 | 1.15902  | 0.03645  | 0.078186 | no  |
| Rwdd1         | 0.397876 | 1.08549  | 0.07445  | 0.141691 | no  |
| Gdap1l1       | 0.397866 | 1.80977  | 0.00095  | 0.003299 | yes |
| Rrbp1         | 0.397677 | 1.77969  | 0.0006   | 0.002181 | yes |
| Dnajc28       | 0.397455 | 0.858319 | 0.0859   | 0.158856 | no  |
| 4833420G17Rik | 0.397377 | 1.22819  | 0.0146   | 0.035997 | yes |
| Dpy30         | 0.397239 | 1.31511  | 0.00875  | 0.023162 | yes |
| Pkib          | 0.397237 | 1.27467  | 0.01055  | 0.027215 | yes |
| Dtd1          | 0.397056 | 1.65989  | 0.00485  | 0.01382  | yes |
| Eif5b         | 0.396939 | 1.68901  | 0.00075  | 0.00267  | yes |
| Zfp641        | 0.396927 | 0.975011 | 0.06225  | 0.122387 | no  |
| B4galt7       | 0.396924 | 1.10585  | 0.05595  | 0.112213 | no  |
| 5830418K08Rik | 0.39686  | 0.936293 | 0.06065  | 0.119846 | no  |
| Vash1         | 0.396576 | 1.91777  | 5.00E-05 | 0.00022  | yes |
| Nmral1        | 0.39649  | 0.50396  | 0.28385  | 0.409642 | no  |
| Pigv          | 0.396212 | 0.823702 | 0.09875  | 0.177691 | no  |
| Stam2         | 0.396019 | 1.67637  | 0.00105  | 0.003607 | yes |
| Rgs7          | 0.39597  | 1.70188  | 0.00055  | 0.002016 | yes |
| Igf1r         | 0.395912 | 1.85224  | 0.0002   | 0.000803 | yes |
| Itfg2         | 0.395801 | 1.52675  | 0.0052   | 0.014691 | yes |
| Mterfd2       | 0.395624 | 1.02887  | 0.05365  | 0.108189 | no  |
| Epc2          | 0.395505 | 1.38524  | 0.00775  | 0.020864 | yes |
| Rap2c         | 0.395352 | 1.83806  | 0.0007   | 0.002506 | yes |
| Mvk           | 0.39528  | 1.76351  | 0.0024   | 0.00748  | yes |
| Abcd4         | 0.395097 | 1.24023  | 0.02255  | 0.052111 | no  |
| Slc2a3        | 0.395057 | 1.88055  | 0.00055  | 0.002016 | yes |
| Fnbp1         | 0.394914 | 1.8442   | 0.0003   | 0.001164 | yes |
| Cep55         | 0.394723 | 0        | 1        | 1        | no  |
| Ciz1          | 0.394716 | 1.32842  | 0.00755  | 0.020384 | yes |
| I7Rn6         | 0.394144 | 1.31883  | 0.00875  | 0.023162 | yes |
| Gmeb1         | 0.394097 | 1.15173  | 0.0216   | 0.050301 | no  |
| Nmb           | 0.394052 | 1.73086  | 0.0004   | 0.001513 | yes |

|          |          |          |         |          |     |
|----------|----------|----------|---------|----------|-----|
| Zfp235   | 0.394022 | 0.890028 | 0.09215 | 0.167887 | no  |
| Snupn    | 0.39383  | 1.23446  | 0.0359  | 0.077156 | no  |
| Cenpo    | 0.393745 | 0.461269 | 0.3813  | 0.512534 | no  |
| Iqcc     | 0.393619 | 0.99014  | 0.07145 | 0.137361 | no  |
| Il6      | 0.39343  | 0        | 1       | 1        | no  |
| Ppil1    | 0.393387 | 1.30216  | 0.0289  | 0.064364 | no  |
| Fam229b  | 0.392804 | 0.986628 | 0.15145 | 0.252011 | no  |
| Leng9    | 0.392494 | 0.775449 | 0.1694  | 0.275589 | no  |
| Rps4x    | 0.39248  | 1.61466  | 0.0127  | 0.031887 | yes |
| Gpld1    | 0.392314 | 1.15656  | 0.02585 | 0.058504 | no  |
| Rbmx2    | 0.392219 | 0.877117 | 0.1229  | 0.213    | no  |
| Adamts8  | 0.391984 | 0.951486 | 0.0681  | 0.132107 | no  |
| Glr3     | 0.391844 | 1.09354  | 0.026   | 0.058814 | no  |
| Gpr75    | 0.391792 | 1.09058  | 0.0439  | 0.091677 | no  |
| Ptprk    | 0.391781 | 1.34382  | 0.00885 | 0.02338  | yes |
| Pmvk     | 0.391593 | 1.60742  | 0.0011  | 0.00376  | yes |
| Mina     | 0.391537 | 0.899407 | 0.10075 | 0.180506 | no  |
| Gpr135   | 0.39152  | 0.893135 | 0.124   | 0.214458 | no  |
| Nrf1     | 0.391302 | 0.969029 | 0.0485  | 0.099652 | no  |
| Esco1    | 0.391274 | 1.14624  | 0.027   | 0.060703 | no  |
| Snx2     | 0.391091 | 1.81364  | 0.0009  | 0.003139 | yes |
| Tsfm     | 0.390989 | 1.24371  | 0.03785 | 0.080629 | no  |
| Riok1    | 0.390937 | 1.05932  | 0.0462  | 0.095771 | no  |
| Rnf166   | 0.390905 | 1.11674  | 0.04885 | 0.100277 | no  |
| Tsga10   | 0.390821 | 0.848945 | 0.08705 | 0.160379 | no  |
| Anp32b   | 0.390819 | 1.74193  | 0.00305 | 0.009188 | yes |
| Hs6st1   | 0.390722 | 1.88573  | 0.0003  | 0.001164 | yes |
| Tprn     | 0.390684 | 1.08443  | 0.045   | 0.093694 | no  |
| Diablo   | 0.390585 | 1.80559  | 0.0007  | 0.002506 | yes |
| Mospd2   | 0.390465 | 1.4803   | 0.0026  | 0.008011 | yes |
| Map2k1   | 0.390195 | 1.96452  | 0.0003  | 0.001164 | yes |
| Gan      | 0.390159 | 1.38776  | 0.00915 | 0.024038 | yes |
| Tshz1    | 0.389609 | 1.42154  | 0.00605 | 0.016792 | yes |
| Glr5     | 0.389452 | 1.9118   | 0.00265 | 0.008146 | yes |
| Rps6     | 0.389371 | 1.27475  | 0.02925 | 0.065056 | no  |
| Pdia5    | 0.388909 | 1.02183  | 0.06655 | 0.129498 | no  |
| Poln     | 0.388616 | 0        | 1       | 1        | no  |
| Slc26a8  | 0.388228 | 0        | 1       | 1        | no  |
| Trabd    | 0.387943 | 1.51628  | 0.0059  | 0.016438 | yes |
| Gpr21    | 0.387852 | 0.225179 | 0.6572  | 0.759625 | no  |
| Clcf1    | 0.38776  | 0        | 1       | 1        | no  |
| Ubp1     | 0.387708 | 0.730151 | 0.1618  | 0.265636 | no  |
| Ppm1g    | 0.387584 | 0.557394 | 0.26775 | 0.392253 | no  |
| Unk      | 0.387498 | 1.04368  | 0.0381  | 0.081096 | no  |
| Thap3    | 0.387325 | 0.752904 | 0.12885 | 0.22146  | no  |
| Arrdc4   | 0.3873   | 0.904737 | 0.06805 | 0.132049 | no  |
| Slc25a53 | 0.386938 | 0.613663 | 0.2531  | 0.37577  | no  |
| Ptpn1    | 0.386917 | 1.52782  | 0.00395 | 0.011515 | yes |
| Gng3     | 0.38677  | 1.7731   | 0.0015  | 0.004953 | yes |
| Ubl4     | 0.386674 | 1.79085  | 0.0009  | 0.003139 | yes |
| Garnl3   | 0.386384 | 1.80154  | 0.0007  | 0.002506 | yes |
| Lzts1    | 0.386351 | 1.26462  | 0.02475 | 0.056429 | no  |
| Top1     | 0.386321 | 1.73922  | 0.00095 | 0.003299 | yes |

|               |          |          |         |          |     |
|---------------|----------|----------|---------|----------|-----|
| Tamm41        | 0.386267 | 0.92161  | 0.1247  | 0.215472 | no  |
| Iqce          | 0.386231 | 1.24936  | 0.01575 | 0.038432 | yes |
| Ttc13         | 0.386175 | 1.46419  | 0.0062  | 0.017151 | yes |
| Cep63         | 0.386153 | 1.24107  | 0.02045 | 0.048037 | yes |
| Ncor1         | 0.385875 | 1.4156   | 0.00395 | 0.011515 | yes |
| Nme2          | 0.385744 | 1.18449  | 0.0176  | 0.042247 | yes |
| Tardbp        | 0.385561 | 1.76728  | 0.00045 | 0.001682 | yes |
| Ethe1         | 0.385558 | 0.864702 | 0.08435 | 0.15647  | no  |
| Hmgxb4        | 0.385478 | 1.13323  | 0.02995 | 0.066379 | no  |
| 2610524H06Rik | 0.385027 | 1.22571  | 0.05685 | 0.113691 | no  |
| Ctdp1         | 0.384919 | 1.1721   | 0.0256  | 0.058038 | no  |
| Smug1         | 0.384872 | 1.28385  | 0.01565 | 0.038195 | yes |
| Josd1         | 0.384762 | 1.64214  | 0.00205 | 0.006503 | yes |
| Zmiz2         | 0.384751 | 1.76177  | 0.00035 | 0.001342 | yes |
| Ubac1         | 0.38464  | 1.68814  | 0.00135 | 0.004516 | yes |
| Cdca7l        | 0.384207 | 0        | 1       | 1        | no  |
| Morn4         | 0.384106 | 1.78358  | 0.0015  | 0.004953 | yes |
| Zfp408        | 0.383999 | 0.838202 | 0.1081  | 0.191349 | no  |
| Pigyl         | 0.383651 | 0.80634  | 0.2566  | 0.379607 | no  |
| Cdh7          | 0.383631 | 0        | 1       | 1        | no  |
| Cdkl2         | 0.383622 | 1.73544  | 0.0005  | 0.00185  | yes |
| Rabggtb       | 0.383538 | 1.45634  | 0.00325 | 0.009727 | yes |
| Ifi27         | 0.383396 | 2.14503  | 0.00075 | 0.00267  | yes |
| Qtrtd1        | 0.383062 | 1.06489  | 0.0473  | 0.097655 | no  |
| Myo1h         | 0.38274  | 0        | 1       | 1        | no  |
| Ten1          | 0.382723 | 0.485044 | 0.33065 | 0.461713 | no  |
| Fubp3         | 0.382663 | 1.50651  | 0.00245 | 0.007605 | yes |
| Ring1         | 0.382412 | 1.25348  | 0.0223  | 0.05166  | no  |
| Tceanc        | 0.382368 | 0.699498 | 0.18395 | 0.294209 | no  |
| Zfp9          | 0.382345 | 1.33683  | 0.0096  | 0.025081 | yes |
| Mrps26        | 0.382296 | 1.55673  | 0.0141  | 0.034959 | yes |
| Mrpl34        | 0.382216 | 1.44028  | 0.0502  | 0.102541 | no  |
| Gm10532       | 0.382103 | 0        | 1       | 1        | no  |
| Prrc1         | 0.38207  | 1.62793  | 0.00245 | 0.007605 | yes |
| Usp35         | 0.38194  | 1.75938  | 0.00065 | 0.002343 | yes |
| N6amt1        | 0.381883 | 1.20816  | 0.01465 | 0.0361   | yes |
| Dmtn          | 0.381367 | 1.78244  | 0.00035 | 0.001342 | yes |
| Htr2a         | 0.381241 | 0.922086 | 0.0837  | 0.155568 | no  |
| Numb1         | 0.381213 | 1.80338  | 0.00055 | 0.002016 | yes |
| Slc30a10      | 0.381193 | 0        | 1       | 1        | no  |
| Trit1         | 0.381147 | 0.836703 | 0.12835 | 0.22083  | no  |
| Coa6          | 0.380885 | 1.29919  | 0.054   | 0.108779 | no  |
| Zfp69         | 0.380851 | 0        | 1       | 1        | no  |
| Acs14         | 0.380822 | 1.74381  | 0.0004  | 0.001513 | yes |
| Trmt44        | 0.380787 | 0.835921 | 0.11165 | 0.196297 | no  |
| Ccdc101       | 0.38047  | 1.14315  | 0.0603  | 0.119261 | no  |
| Sestd1        | 0.379632 | 1.81848  | 0.0004  | 0.001513 | yes |
| Ccdc14        | 0.379617 | 0.613053 | 0.2416  | 0.36329  | no  |
| Sh3rf2        | 0.379583 | 0        | 1       | 1        | no  |
| Tceal3        | 0.379422 | 1.65004  | 0.0072  | 0.01953  | yes |
| 5430416N02Rik | 0.379363 | 0.594914 | 0.42235 | 0.553852 | no  |
| Uckl1         | 0.379297 | 0.735747 | 0.1827  | 0.292598 | no  |
| Midn          | 0.379272 | 0.220202 | 0.6645  | 0.766002 | no  |

|               |          |          |         |          |     |
|---------------|----------|----------|---------|----------|-----|
| Adra1d        | 0.379264 | 0.207087 | 0.68695 | 0.784577 | no  |
| Zfp563        | 0.37918  | 0.907204 | 0.074   | 0.141017 | no  |
| Cmtm7         | 0.37893  | 0.582168 | 0.24315 | 0.364835 | no  |
| Cemip         | 0.378898 | 0.923291 | 0.0697  | 0.134542 | no  |
| Max           | 0.378836 | 1.46417  | 0.00315 | 0.009455 | yes |
| Nfat5         | 0.37881  | 1.6933   | 0.0008  | 0.002828 | yes |
| Tmem150c      | 0.378655 | 1.76072  | 0.00065 | 0.002343 | yes |
| Siah1a        | 0.378566 | 1.49109  | 0.00585 | 0.016305 | yes |
| Arrb2         | 0.378369 | 1.37523  | 0.0064  | 0.017627 | yes |
| Gpt           | 0.37815  | 0.584804 | 0.2953  | 0.422946 | no  |
| Ngdn          | 0.378016 | 1.24794  | 0.03815 | 0.08119  | no  |
| A830080D01Rik | 0.377879 | 0.957098 | 0.07005 | 0.13508  | no  |
| Larp7         | 0.377858 | 1.22447  | 0.0148  | 0.036422 | yes |
| Prr3          | 0.37777  | 0.852538 | 0.09405 | 0.170669 | no  |
| Sdccag3       | 0.377753 | 1.3845   | 0.00525 | 0.014813 | yes |
| Ahi1          | 0.377631 | 1.3376   | 0.0081  | 0.021701 | yes |
| Fam228b       | 0.377509 | 0        | 1       | 1        | no  |
| Mcm6          | 0.377483 | 1.02385  | 0.05795 | 0.115543 | no  |
| Ccdc116       | 0.377476 | 0        | 1       | 1        | no  |
| Fam131b       | 0.377444 | 1.75501  | 0.00025 | 0.000985 | yes |
| Mterfd3       | 0.377422 | 1.11298  | 0.05075 | 0.103473 | no  |
| Cramp1l       | 0.377408 | 1.48339  | 0.00425 | 0.01229  | yes |
| Unc45a        | 0.376905 | 1.72798  | 0.0012  | 0.004068 | yes |
| Ldha          | 0.376822 | 1.76207  | 0.0002  | 0.000803 | yes |
| Ccdc71        | 0.3768   | 0.915477 | 0.0682  | 0.132243 | no  |
| Setd3         | 0.376795 | 1.83866  | 0.001   | 0.003451 | yes |
| Dhrs13        | 0.376561 | 1.01208  | 0.07635 | 0.144767 | no  |
| Ppig          | 0.376404 | 1.66912  | 0.00125 | 0.00422  | yes |
| Flywch2       | 0.37634  | 0.935074 | 0.1858  | 0.29656  | no  |
| Phf11c        | 0.376314 | 0        | 1       | 1        | no  |
| Ube2r2        | 0.376148 | 1.79284  | 0.001   | 0.003451 | yes |
| 1810058I24Rik | 0.375992 | 1.49715  | 0.0028  | 0.008532 | yes |
| B3galnt2      | 0.375708 | 0.65315  | 0.22755 | 0.34772  | no  |
| Pex16         | 0.37547  | 1.19595  | 0.0165  | 0.03999  | yes |
| Wdr46         | 0.375381 | 0.945525 | 0.0791  | 0.14896  | no  |
| Pfn1          | 0.375301 | 2.28922  | 0.0004  | 0.001513 | yes |
| Msrb2         | 0.375135 | 1.53117  | 0.0103  | 0.026643 | yes |
| Tusc3         | 0.374747 | 1.99837  | 0.00105 | 0.003607 | yes |
| 1700066M21Rik | 0.37448  | 1.61697  | 0.0028  | 0.008532 | yes |
| Oxsr1         | 0.374026 | 1.64156  | 0.0005  | 0.00185  | yes |
| Zik1          | 0.374002 | 0.859446 | 0.099   | 0.17802  | no  |
| Rexo2         | 0.373995 | 1.97827  | 0.00155 | 0.005095 | yes |
| Zfp597        | 0.373687 | 1.20854  | 0.0167  | 0.040408 | yes |
| Rpl4          | 0.373631 | 1.74858  | 0.0005  | 0.00185  | yes |
| Arl15         | 0.373558 | 1.38078  | 0.00565 | 0.015794 | yes |
| Serpina3i     | 0.37338  | 0.674306 | 0.21905 | 0.337217 | no  |
| Haus8         | 0.372881 | 0.994237 | 0.0464  | 0.096066 | no  |
| Cd274         | 0.372758 | 0.995605 | 0.0583  | 0.116171 | no  |
| Igsf9b        | 0.372691 | 0.815951 | 0.09675 | 0.174804 | no  |
| Dnajb3        | 0.372394 | 0.341946 | 0.5605  | 0.680095 | no  |
| Pawr          | 0.372327 | 0.734477 | 0.19355 | 0.305985 | no  |
| Nacad         | 0.372077 | 1.81283  | 0.00035 | 0.001342 | yes |
| Cln6          | 0.371965 | 1.41694  | 0.01105 | 0.02829  | yes |

|               |          |          |         |          |     |
|---------------|----------|----------|---------|----------|-----|
| 1110038B12Rik | 0.371488 | 0.63123  | 0.19945 | 0.313222 | no  |
| Arpc1a        | 0.37143  | 1.97668  | 0.00055 | 0.002016 | yes |
| Pdcl          | 0.371421 | 1.68298  | 0.00225 | 0.007062 | yes |
| Krtcap3       | 0.371287 | 0        | 1       | 1        | no  |
| Gm20300       | 0.370884 | 1.77219  | 0.0006  | 0.002181 | yes |
| L1td1         | 0.370816 | 0        | 1       | 1        | no  |
| Armc8         | 0.370701 | 1.60925  | 0.00115 | 0.00391  | yes |
| Ccdc28b       | 0.370667 | 1.09032  | 0.09825 | 0.177056 | no  |
| Lrrc46        | 0.370589 | 0.511153 | 0.3928  | 0.524432 | no  |
| Xrn2          | 0.370574 | 1.50282  | 0.0052  | 0.014691 | yes |
| Prpf4b        | 0.370475 | 1.60252  | 0.0022  | 0.006933 | yes |
| Ints10        | 0.37023  | 1.43276  | 0.00895 | 0.023578 | yes |
| C4a           | 0.370147 | 0        | 1       | 1        | no  |
| Pprc1         | 0.370043 | 1.25767  | 0.01455 | 0.035893 | yes |
| Dctn2         | 0.36978  | 1.8204   | 0.00135 | 0.004516 | yes |
| Hsp90aa1      | 0.369759 | 1.80048  | 0.00075 | 0.00267  | yes |
| Gipc1         | 0.369576 | 1.69946  | 0.0029  | 0.008796 | yes |
| Dgcr6         | 0.369482 | 1.37422  | 0.0065  | 0.017869 | yes |
| Gltscr2       | 0.369407 | 1.44103  | 0.00295 | 0.008927 | yes |
| Blk           | 0.369192 | 0        | 1       | 1        | no  |
| Scamp3        | 0.368825 | 1.80648  | 0.00175 | 0.00566  | yes |
| Rbm33         | 0.368817 | 1.40928  | 0.00565 | 0.015794 | yes |
| Ifi2712a      | 0.368784 | 0.253709 | 0.61635 | 0.726462 | no  |
| Pear1         | 0.368688 | 0.984866 | 0.0464  | 0.096066 | no  |
| Ccdc53        | 0.368592 | 1.06614  | 0.032   | 0.070103 | no  |
| Atf3          | 0.36853  | 1.37726  | 0.0151  | 0.037064 | yes |
| Cactin        | 0.368462 | 1.13581  | 0.03295 | 0.071817 | no  |
| Ccdc88b       | 0.368216 | 0        | 1       | 1        | no  |
| Map3k6        | 0.368054 | 0.762067 | 0.1426  | 0.240116 | no  |
| Atg4d         | 0.368003 | 1.2029   | 0.02335 | 0.05368  | no  |
| Fli1          | 0.367852 | 0.883356 | 0.09565 | 0.173099 | no  |
| Zfp65         | 0.367543 | 0.882077 | 0.0923  | 0.168068 | no  |
| Prdm10        | 0.367418 | 0.685107 | 0.1913  | 0.303259 | no  |
| Spryd3        | 0.367138 | 1.87131  | 0.0006  | 0.002181 | yes |
| Cry1          | 0.367122 | 1.09167  | 0.041   | 0.086396 | no  |
| Tnfrsf25      | 0.367072 | 0        | 1       | 1        | no  |
| Nfatc2ip      | 0.367057 | 0.884336 | 0.09235 | 0.168136 | no  |
| Prkce         | 0.366908 | 1.67095  | 0.00065 | 0.002343 | yes |
| Smarcad1      | 0.36687  | 1.17171  | 0.02005 | 0.047189 | yes |
| Upp1          | 0.36682  | 0.356956 | 0.45275 | 0.582772 | no  |
| Rps3          | 0.366683 | 1.81205  | 0.00055 | 0.002016 | yes |
| Ophn1         | 0.366675 | 1.51634  | 0.00425 | 0.01229  | yes |
| Alyref        | 0.366658 | 1.32793  | 0.028   | 0.062644 | no  |
| C87436        | 0.366657 | 1.09154  | 0.0282  | 0.063027 | no  |
| Cep170        | 0.366504 | 1.69899  | 0.00045 | 0.001682 | yes |
| Chst10        | 0.366449 | 0.990491 | 0.06255 | 0.122904 | no  |
| Tph2          | 0.366382 | 0        | 1       | 1        | no  |
| 1810041L15Rik | 0.366274 | 1.7075   | 0.00075 | 0.00267  | yes |
| Gdf9          | 0.366224 | 0        | 1       | 1        | no  |
| Exoc3l        | 0.366004 | 0        | 1       | 1        | no  |
| Bdkrb2        | 0.365959 | 0.580244 | 0.3037  | 0.432316 | no  |
| Lca5l         | 0.365748 | 0        | 1       | 1        | no  |
| Best1         | 0.365637 | 0.502522 | 0.3671  | 0.498701 | no  |



|               |          |          |         |          |     |
|---------------|----------|----------|---------|----------|-----|
| Nop14         | 0.365592 | 1.3602   | 0.0123  | 0.031006 | yes |
| Metap1        | 0.36556  | 1.63989  | 0.0025  | 0.007739 | yes |
| Tmem179b      | 0.365437 | 0.670288 | 0.29935 | 0.427362 | no  |
| Rsb1l1        | 0.365394 | 1.27747  | 0.0154  | 0.037682 | yes |
| Dnph1         | 0.365381 | 0.510811 | 0.4015  | 0.533043 | no  |
| Otd5          | 0.365212 | 1.52044  | 0.00245 | 0.007605 | yes |
| Tnrc6a        | 0.365149 | 1.65774  | 0.00145 | 0.004804 | yes |
| Caprin2       | 0.365106 | 1.29847  | 0.0136  | 0.033839 | yes |
| Mtfr1         | 0.365085 | 1.15807  | 0.0207  | 0.048529 | yes |
| Hsp90ab1      | 0.365061 | 1.15021  | 0.0345  | 0.07468  | no  |
| Jarid2        | 0.365057 | 1.31285  | 0.0092  | 0.024131 | yes |
| Nfrkb         | 0.36463  | 1.27448  | 0.0145  | 0.03579  | yes |
| Eef1b2        | 0.364477 | 1.62864  | 0.00125 | 0.00422  | yes |
| Zbtb7a        | 0.364288 | 1.75121  | 0.0004  | 0.001513 | yes |
| Akirin2       | 0.364041 | 1.4833   | 0.00825 | 0.02204  | yes |
| Atad3aos      | 0.364014 | 0        | 1       | 1        | no  |
| 2610020C07Rik | 0.364012 | 0        | 1       | 1        | no  |
| P4htm         | 0.363971 | 1.6317   | 0.00365 | 0.010754 | yes |
| Dnah17        | 0.36385  | 0        | 1       | 1        | no  |
| Grpel2        | 0.36371  | 1.23194  | 0.0191  | 0.045266 | yes |
| Bola1         | 0.363104 | 0.926875 | 0.1768  | 0.285145 | no  |
| Grik5         | 0.362927 | 1.56529  | 0.0035  | 0.01036  | yes |
| Maoa          | 0.362806 | 1.69878  | 0.0011  | 0.00376  | yes |
| Ap3m1         | 0.362779 | 1.58735  | 0.00315 | 0.009455 | yes |
| Ifrd1         | 0.362777 | 1.09251  | 0.02835 | 0.063341 | no  |
| Pus7l         | 0.362725 | 0.668832 | 0.2087  | 0.324751 | no  |
| Nup35         | 0.362501 | 0.550363 | 0.269   | 0.393693 | no  |
| Catsperg1     | 0.362475 | 0        | 1       | 1        | no  |
| Kif5b         | 0.362146 | 1.56868  | 0.00245 | 0.007605 | yes |
| Zmym1         | 0.362044 | 1.19531  | 0.0207  | 0.048529 | yes |
| 2410004N09Rik | 0.362015 | 0.384396 | 0.4196  | 0.551226 | no  |
| Gm10584       | 0.361867 | 0        | 1       | 1        | no  |
| Vill          | 0.361753 | 0        | 1       | 1        | no  |
| Kctd18        | 0.361702 | 0.948776 | 0.05655 | 0.113228 | no  |
| Ccdc142       | 0.361417 | 0.466229 | 0.39245 | 0.524137 | no  |
| Gdpd3         | 0.361411 | 0.718903 | 0.2377  | 0.358994 | no  |
| Mtfr1l        | 0.36134  | 0.737459 | 0.16365 | 0.268009 | no  |
| Tbkbp1        | 0.361246 | 1.19947  | 0.0158  | 0.038533 | yes |
| Sub1          | 0.361225 | 1.713    | 0.00165 | 0.00538  | yes |
| Yy1           | 0.361169 | 1.51519  | 0.0053  | 0.014929 | yes |
| Gm1943        | 0.361149 | 0.785393 | 0.19955 | 0.313305 | no  |
| Zc2hc1a       | 0.361136 | 1.77168  | 0.00085 | 0.002983 | yes |
| Snx4          | 0.361063 | 1.6213   | 0.00305 | 0.009188 | yes |
| Cmpk2         | 0.361063 | 1.47398  | 0.0063  | 0.017413 | yes |
| Gpr116        | 0.360834 | 1.59401  | 0.00245 | 0.007605 | yes |
| Ing5          | 0.360644 | 0.984328 | 0.0608  | 0.120053 | no  |
| Clta          | 0.360516 | 1.6785   | 0.0005  | 0.00185  | yes |
| Exo5          | 0.360495 | 0.766105 | 0.12475 | 0.21553  | no  |
| Fryl          | 0.360318 | 1.71764  | 0.00065 | 0.002343 | yes |
| Rpf2          | 0.360311 | 0.96328  | 0.0559  | 0.112147 | no  |
| Glt1d1        | 0.360299 | 0.746541 | 0.1914  | 0.303309 | no  |
| Hnrnph1       | 0.360081 | 1.7825   | 0.00155 | 0.005095 | yes |
| Dram2         | 0.359572 | 1.51598  | 0.0028  | 0.008532 | yes |

|               |          |           |         |          |     |
|---------------|----------|-----------|---------|----------|-----|
| Ncoa7         | 0.359449 | 1.63256   | 0.00085 | 0.002983 | yes |
| Shcbp1        | 0.359079 | 0         | 1       | 1        | no  |
| Ska2          | 0.359024 | 0.0745678 | 0.91285 | 0.945933 | no  |
| Cdk8          | 0.358824 | 1.19196   | 0.0235  | 0.053987 | no  |
| Sirt6         | 0.358765 | 0.94511   | 0.06115 | 0.1206   | no  |
| Rhoq          | 0.358645 | 1.70954   | 0.0008  | 0.002828 | yes |
| Car2          | 0.358526 | 1.62115   | 0.00385 | 0.011268 | yes |
| Zdhhc18       | 0.358427 | 1.68823   | 0.001   | 0.003451 | yes |
| Abtb2         | 0.358384 | 1.64985   | 0.00155 | 0.005095 | yes |
| Pdss1         | 0.357989 | 0.290129  | 0.60785 | 0.71971  | no  |
| Atg3          | 0.357787 | 1.66802   | 0.0029  | 0.008796 | yes |
| Oasl2         | 0.357748 | 1.49475   | 0.0047  | 0.013433 | yes |
| Zfp462        | 0.357574 | 1.53044   | 0.0028  | 0.008532 | yes |
| Zmynd11       | 0.357546 | 1.54997   | 0.00145 | 0.004804 | yes |
| Srp54a        | 0.357329 | 1.12026   | 0.03155 | 0.069266 | no  |
| Cnot2         | 0.357233 | 1.29753   | 0.00955 | 0.024966 | yes |
| Gnl3          | 0.357171 | 0.626671  | 0.21235 | 0.329079 | no  |
| Scml4         | 0.356935 | 0.976532  | 0.06015 | 0.119017 | no  |
| Orai3         | 0.356839 | 1.23827   | 0.02265 | 0.052306 | no  |
| Rundc3a       | 0.35672  | 1.66291   | 0.0011  | 0.00376  | yes |
| Scnm1         | 0.356623 | 0.857975  | 0.0872  | 0.160567 | no  |
| Zcchc8        | 0.35654  | 0.973195  | 0.06275 | 0.123206 | no  |
| Ppp2cb        | 0.356511 | 1.66176   | 0.0036  | 0.010628 | yes |
| Tchp          | 0.356488 | 0.739233  | 0.1389  | 0.235139 | no  |
| Gpatch8       | 0.356477 | 1.58969   | 0.0019  | 0.00608  | yes |
| Pafah2        | 0.356398 | 1.10336   | 0.02745 | 0.0616   | no  |
| Zbtb24        | 0.356329 | 0.890342  | 0.0752  | 0.142893 | no  |
| Aadat         | 0.356173 | 0         | 1       | 1        | no  |
| Lmna          | 0.355937 | 1.51017   | 0.00205 | 0.006503 | yes |
| Tarbp2        | 0.355817 | 0.65632   | 0.18145 | 0.291229 | no  |
| 9130401M01Rik | 0.355791 | 1.19492   | 0.04225 | 0.088622 | no  |
| Ap1g2         | 0.355775 | 0.217342  | 0.63845 | 0.744774 | no  |
| Fdps          | 0.355755 | 1.16031   | 0.01985 | 0.046793 | yes |
| Idi1          | 0.355735 | 1.3723    | 0.00995 | 0.025858 | yes |
| Zfp61         | 0.355426 | 0.780836  | 0.1531  | 0.254342 | no  |
| Zc3h6         | 0.355358 | 0.867521  | 0.09785 | 0.176479 | no  |
| Zfp157        | 0.355307 | 0.947555  | 0.06345 | 0.124397 | no  |
| Prrt2         | 0.355294 | 1.75971   | 0.0011  | 0.00376  | yes |
| Rpl8          | 0.355104 | 2.13171   | 0.00095 | 0.003299 | yes |
| Thrb          | 0.355097 | 0.787224  | 0.10865 | 0.192118 | no  |
| Mgst2         | 0.355081 | 0         | 1       | 1        | no  |
| Chst12        | 0.354834 | 1.6019    | 0.0044  | 0.012685 | yes |
| Fip1l1        | 0.354785 | 1.27542   | 0.0175  | 0.042076 | yes |
| Slc39a6       | 0.354777 | 1.72986   | 0.00095 | 0.003299 | yes |
| Nelfa         | 0.354734 | 0.888232  | 0.06705 | 0.130337 | no  |
| Egln2         | 0.354595 | 1.73239   | 0.00215 | 0.006796 | yes |
| Tmem74b       | 0.354571 | 0.496447  | 0.3881  | 0.519411 | no  |
| Hax1          | 0.354503 | 0.778781  | 0.11625 | 0.203066 | no  |
| Srsf7         | 0.354421 | 1.48508   | 0.00345 | 0.010237 | yes |
| Nbea          | 0.354291 | 1.3266    | 0.00845 | 0.022507 | yes |
| Ipcef1        | 0.354276 | 0         | 1       | 1        | no  |
| Unkl          | 0.353951 | 0.985906  | 0.05915 | 0.117565 | no  |
| 4930412C18Rik | 0.353922 | 0.784961  | 0.13745 | 0.233101 | no  |

|               |          |          |         |          |     |
|---------------|----------|----------|---------|----------|-----|
| Siah2         | 0.353902 | 1.13318  | 0.0351  | 0.075719 | no  |
| Nufip2        | 0.3537   | 1.65641  | 0.00095 | 0.003299 | yes |
| Adh7          | 0.353689 | 0        | 1       | 1        | no  |
| Mphosph8      | 0.353685 | 1.6313   | 0.00235 | 0.007346 | yes |
| Eif2ak3       | 0.35354  | 1.54424  | 0.00355 | 0.010494 | yes |
| Ccdc9         | 0.35347  | 1.06946  | 0.03285 | 0.071646 | no  |
| Plcd3         | 0.353007 | 0.691865 | 0.1959  | 0.30867  | no  |
| Ift88         | 0.352778 | 1.2673   | 0.0161  | 0.039164 | yes |
| Rragd         | 0.352254 | 1.64249  | 0.0014  | 0.004657 | yes |
| Kctd5         | 0.352211 | 1.48896  | 0.0057  | 0.015927 | yes |
| Trnau1ap      | 0.351979 | 0.93671  | 0.12125 | 0.210636 | no  |
| Uchl3         | 0.351931 | 0.895034 | 0.1597  | 0.262806 | no  |
| Dnmt1         | 0.351696 | 1.39541  | 0.0062  | 0.017151 | yes |
| Atp8a1        | 0.351582 | 1.56445  | 0.00155 | 0.005095 | yes |
| Dpysl5        | 0.351557 | 1.71595  | 0.0013  | 0.004375 | yes |
| Cecr2         | 0.351519 | 0        | 1       | 1        | no  |
| Hist2h2aa2    | 0.351507 | 0        | 1       | 1        | no  |
| Pacrgl        | 0.3513   | 0.94737  | 0.10005 | 0.179568 | no  |
| Nop58         | 0.350788 | 1.20821  | 0.01535 | 0.03758  | yes |
| Slc9a6        | 0.350779 | 1.71534  | 0.0007  | 0.002506 | yes |
| Mapk14        | 0.350678 | 1.48851  | 0.003   | 0.009064 | yes |
| Cep85         | 0.350671 | 1.06     | 0.0419  | 0.087943 | no  |
| Zfp52         | 0.35066  | 0.930399 | 0.08055 | 0.151004 | no  |
| Gfod2         | 0.350546 | 1.33578  | 0.0162  | 0.039385 | yes |
| Fen1          | 0.350527 | 0.953006 | 0.0598  | 0.118501 | no  |
| Ddah1         | 0.350443 | 1.55952  | 0.0035  | 0.01036  | yes |
| Runx1t1       | 0.350412 | 1.24092  | 0.0128  | 0.032102 | yes |
| 2810004N23Rik | 0.350377 | 1.13028  | 0.05255 | 0.106359 | no  |
| Fam3a         | 0.350362 | 1.2851   | 0.02135 | 0.049824 | yes |
| Mtfr2         | 0.350362 | 0        | 1       | 1        | no  |
| Arl13b        | 0.350055 | 0.902543 | 0.0705  | 0.135869 | no  |
| Nphp3         | 0.349801 | 0.728773 | 0.13145 | 0.224967 | no  |
| Lrch2         | 0.349719 | 0.823978 | 0.1197  | 0.20827  | no  |
| Drap1         | 0.349349 | 1.35403  | 0.00725 | 0.019654 | yes |
| Eif3h         | 0.349143 | 1.61019  | 0.00765 | 0.020612 | yes |
| Baiap3        | 0.349098 | 0        | 1       | 1        | no  |
| Kcnd1         | 0.348941 | 1.79803  | 0.00125 | 0.00422  | yes |
| H2-T9         | 0.348817 | 0.322017 | 0.52385 | 0.648676 | no  |
| Zfp13         | 0.348699 | 0.719337 | 0.19655 | 0.309401 | no  |
| Praf2         | 0.348684 | 1.85141  | 0.0026  | 0.008011 | yes |
| Hint3         | 0.348339 | 1.54368  | 0.02665 | 0.060049 | no  |
| Traf3ip1      | 0.348251 | 0.939296 | 0.07755 | 0.146582 | no  |
| Gm960         | 0.348106 | 0        | 1       | 1        | no  |
| Rbfox3        | 0.348077 | 1.6073   | 0.0013  | 0.004375 | yes |
| Med8          | 0.348035 | 1.15188  | 0.0203  | 0.04771  | yes |
| Ropn1         | 0.347997 | 0        | 1       | 1        | no  |
| Eed           | 0.347978 | 0.995015 | 0.0695  | 0.134274 | no  |
| Fxr1          | 0.34795  | 1.76249  | 0.00145 | 0.004804 | yes |
| Prkaa2        | 0.347789 | 1.59405  | 0.00195 | 0.006219 | yes |
| Kirrel3       | 0.347713 | 1.36775  | 0.0062  | 0.017151 | yes |
| Med15         | 0.347505 | 1.44146  | 0.0033  | 0.009856 | yes |
| Gfer          | 0.347494 | 0.905259 | 0.10535 | 0.187457 | no  |
| Cutal         | 0.347243 | 0        | 1       | 1        | no  |

|               |          |          |         |          |     |
|---------------|----------|----------|---------|----------|-----|
| Upk1b         | 0.34723  | 0        | 1       | 1        | no  |
| 2700062C07Rik | 0.347114 | 0.700208 | 0.2533  | 0.37593  | no  |
| Ankrd49       | 0.347052 | 0.960835 | 0.0883  | 0.16212  | no  |
| Gltscr1l      | 0.347045 | 1.37215  | 0.0075  | 0.020274 | yes |
| Wdr35         | 0.346964 | 1.33682  | 0.0072  | 0.01953  | yes |
| Rab3il1       | 0.346889 | 0.719693 | 0.1841  | 0.294414 | no  |
| AI429214      | 0.346822 | 0.444595 | 0.4245  | 0.555847 | no  |
| Uba7          | 0.346806 | 0.758655 | 0.1535  | 0.254911 | no  |
| Zfp455        | 0.346677 | 0.490115 | 0.36075 | 0.492952 | no  |
| Shoc2         | 0.34649  | 1.33464  | 0.0068  | 0.018594 | yes |
| Srsf1         | 0.346454 | 1.60936  | 0.001   | 0.003451 | yes |
| Caap1         | 0.346448 | 0.815073 | 0.1367  | 0.232274 | no  |
| Gmds          | 0.346292 | 1.04322  | 0.07075 | 0.136173 | no  |
| Utp14a        | 0.346276 | 0.961433 | 0.0523  | 0.105982 | no  |
| Ipo8          | 0.346227 | 1.60303  | 0.0017  | 0.005514 | yes |
| Pnkp          | 0.346167 | 1.07483  | 0.03065 | 0.067671 | no  |
| Ubb           | 0.34598  | 1.47276  | 0.00285 | 0.008668 | yes |
| Tgfbrap1      | 0.34549  | 1.51938  | 0.004   | 0.011645 | yes |
| Fam60a        | 0.345431 | 0        | 1       | 1        | no  |
| 2900055J20Rik | 0.345205 | 0.790782 | 0.25335 | 0.37593  | no  |
| Adora1        | 0.345016 | 1.58492  | 0.0016  | 0.005236 | yes |
| Acaa1a        | 0.345003 | 1.40423  | 0.0138  | 0.034286 | yes |
| Jmjd6         | 0.34493  | 1.0269   | 0.07175 | 0.137798 | no  |
| Phf1          | 0.344911 | 1.30102  | 0.0083  | 0.022156 | yes |
| Gpr68         | 0.344893 | 0.65209  | 0.1943  | 0.306805 | no  |
| Cwc22         | 0.344887 | 0.62605  | 0.20925 | 0.325492 | no  |
| Wdr78         | 0.34448  | 0.723515 | 0.17175 | 0.278456 | no  |
| Dgcr8         | 0.34441  | 1.04278  | 0.0382  | 0.081257 | no  |
| Tle4          | 0.344341 | 1.55376  | 0.00205 | 0.006503 | yes |
| Nufip1        | 0.344276 | 0.964014 | 0.06925 | 0.133927 | no  |
| E130309D14Rik | 0.344244 | 1.4349   | 0.0067  | 0.018343 | yes |
| Yod1          | 0.344241 | 0.667492 | 0.1821  | 0.291954 | no  |
| Fkbp1a        | 0.34412  | 1.8235   | 0.0016  | 0.005236 | yes |
| Gtf2h1        | 0.34398  | 1.33638  | 0.008   | 0.021468 | yes |
| Ip6k2         | 0.343959 | 1.45327  | 0.009   | 0.023696 | yes |
| Specc1        | 0.343911 | 0.956772 | 0.054   | 0.108779 | no  |
| Stip1         | 0.343351 | 1.77637  | 0.00105 | 0.003607 | yes |
| Commd1        | 0.343196 | 0.946625 | 0.15535 | 0.257275 | no  |
| 3110056K07Rik | 0.343073 | 0.34832  | 0.48605 | 0.614077 | no  |
| Crebrf        | 0.342967 | 1.53327  | 0.00245 | 0.007605 | yes |
| Mcm4          | 0.342757 | 1.08127  | 0.03715 | 0.079405 | no  |
| Rmdn3         | 0.342556 | 1.16344  | 0.0327  | 0.071377 | no  |
| Pkn1          | 0.342484 | 0.914633 | 0.0707  | 0.136116 | no  |
| Ankrd54       | 0.342416 | 0.909857 | 0.10405 | 0.185592 | no  |
| Sepw1         | 0.342408 | 2.24476  | 0.0009  | 0.003139 | yes |
| Crat          | 0.342034 | 1.00236  | 0.04355 | 0.091046 | no  |
| Hdgf          | 0.341957 | 1.73769  | 0.00125 | 0.00422  | yes |
| Pwp2          | 0.341933 | 1.28809  | 0.01345 | 0.03351  | yes |
| Mmp24         | 0.341917 | 1.2491   | 0.0182  | 0.043483 | yes |
| Zfp74         | 0.34165  | 0.923113 | 0.07985 | 0.150031 | no  |
| Lgals3bp      | 0.341561 | 1.58052  | 0.00415 | 0.012021 | yes |
| BB283400      | 0.341548 | 0        | 1       | 1        | no  |
| Zfp26         | 0.341495 | 1.23304  | 0.0172  | 0.041459 | yes |

|               |          |          |         |          |     |
|---------------|----------|----------|---------|----------|-----|
| Arl8a         | 0.341321 | 1.80673  | 0.00135 | 0.004516 | yes |
| Agap3         | 0.341294 | 1.52012  | 0.00225 | 0.007062 | yes |
| Sat2          | 0.341266 | 0.648382 | 0.31705 | 0.446861 | no  |
| Gm765         | 0.341107 | 1.83352  | 0.0055  | 0.015427 | yes |
| Tnfaip8       | 0.34109  | 0.604078 | 0.21705 | 0.334565 | no  |
| Gas2l1        | 0.341068 | 1.4315   | 0.00385 | 0.011268 | yes |
| Agbl4         | 0.340936 | 0.371531 | 0.4982  | 0.625023 | no  |
| Zfp869        | 0.340913 | 1.00972  | 0.0443  | 0.092396 | no  |
| Uba3          | 0.34075  | 1.53047  | 0.00205 | 0.006503 | yes |
| Cnppd1        | 0.340746 | 1.38921  | 0.01    | 0.025958 | yes |
| Armc3         | 0.340733 | 0        | 1       | 1        | no  |
| Rpl21         | 0.340695 | 0.875741 | 0.11685 | 0.2039   | no  |
| Suv39h1       | 0.340679 | 1.06969  | 0.0296  | 0.065724 | no  |
| Clock         | 0.340659 | 1.34441  | 0.0078  | 0.020982 | yes |
| Mrpl14        | 0.340629 | 1.26512  | 0.09355 | 0.169901 | no  |
| Ptpn12        | 0.34059  | 1.39492  | 0.00875 | 0.023162 | yes |
| Polh          | 0.340548 | 0.858225 | 0.10855 | 0.191967 | no  |
| Maz           | 0.340396 | 1.64251  | 0.0023  | 0.007205 | yes |
| Plekhf2       | 0.340312 | 0.916599 | 0.08725 | 0.160614 | no  |
| Hdgfrp3       | 0.340281 | 1.19818  | 0.0167  | 0.040408 | yes |
| Trmt61a       | 0.34025  | 0.821165 | 0.09895 | 0.178003 | no  |
| Mx2           | 0.340069 | 0.488468 | 0.3221  | 0.452632 | no  |
| Smim14        | 0.340021 | 1.69885  | 0.00195 | 0.006219 | yes |
| Eif2s2        | 0.340007 | 1.2707   | 0.0192  | 0.045454 | yes |
| Pp2d1         | 0.339942 | 0        | 1       | 1        | no  |
| Gck           | 0.339595 | 0        | 1       | 1        | no  |
| Mfng          | 0.339445 | 0.47932  | 0.4013  | 0.532897 | no  |
| Tcf3          | 0.339203 | 1.04583  | 0.03575 | 0.076921 | no  |
| Ddx18         | 0.339033 | 0.63283  | 0.2479  | 0.370162 | no  |
| Irf5          | 0.338952 | 0.61795  | 0.21025 | 0.326741 | no  |
| Foxl2         | 0.338925 | 0        | 1       | 1        | no  |
| Rtfdc1        | 0.338884 | 1.64666  | 0.0025  | 0.007739 | yes |
| Dctn1         | 0.338759 | 1.44977  | 0.0039  | 0.011392 | yes |
| Ago2          | 0.338554 | 1.52657  | 0.0029  | 0.008796 | yes |
| Mblac2        | 0.338546 | 1.42023  | 0.00715 | 0.019434 | yes |
| 3110057012Rik | 0.338513 | 0.464617 | 0.3482  | 0.480305 | no  |
| Hspbap1       | 0.338418 | 0.798402 | 0.1294  | 0.222118 | no  |
| Mcrs1         | 0.338396 | 0.710101 | 0.18355 | 0.293711 | no  |
| Ccnt2         | 0.338363 | 1.32514  | 0.01205 | 0.030463 | yes |
| Fsd1l         | 0.338322 | 1.54577  | 0.0021  | 0.006649 | yes |
| Pcbp4         | 0.338204 | 1.66842  | 0.00175 | 0.00566  | yes |
| Akap8         | 0.337983 | 1.42999  | 0.00665 | 0.018232 | yes |
| Tjap1         | 0.337904 | 0.754825 | 0.1286  | 0.221203 | no  |
| Blzf1         | 0.337869 | 1.19051  | 0.01685 | 0.040719 | yes |
| Gse1          | 0.33786  | 1.30521  | 0.0099  | 0.025759 | yes |
| Glis1         | 0.337606 | 0        | 1       | 1        | no  |
| Pibf1         | 0.337592 | 0.708197 | 0.15335 | 0.254726 | no  |
| Ezh1          | 0.337387 | 1.55236  | 0.0026  | 0.008011 | yes |
| BC048403      | 0.337307 | 1.13544  | 0.03235 | 0.070741 | no  |
| Cradd         | 0.337298 | 0.820399 | 0.1511  | 0.251618 | no  |
| Tcf7          | 0.337201 | 0.529471 | 0.32975 | 0.460796 | no  |
| Gm3488        | 0.337192 | 0        | 1       | 1        | no  |
| Aup1          | 0.337112 | 1.49598  | 0.0092  | 0.024131 | yes |

|               |          |          |         |          |     |
|---------------|----------|----------|---------|----------|-----|
| Tmeff2        | 0.337098 | 1.6365   | 0.00195 | 0.006219 | yes |
| Il6st         | 0.336805 | 1.49472  | 0.0039  | 0.011392 | yes |
| Usp15         | 0.336737 | 1.61851  | 0.0023  | 0.007205 | yes |
| Rfxap         | 0.336693 | 1.03011  | 0.05845 | 0.116417 | no  |
| Rev3l         | 0.336603 | 1.31209  | 0.0088  | 0.023271 | yes |
| Mettl18       | 0.336452 | 0.588769 | 0.3063  | 0.435177 | no  |
| Dph5          | 0.336314 | 0.973236 | 0.08845 | 0.162305 | no  |
| Zfp944        | 0.336253 | 0.938413 | 0.08155 | 0.152362 | no  |
| Dcps          | 0.336252 | 0.57231  | 0.24655 | 0.368727 | no  |
| Txlng         | 0.335991 | 0.323372 | 0.5454  | 0.667265 | no  |
| Ccdc148       | 0.335949 | 0.745326 | 0.15755 | 0.259945 | no  |
| 1110065P20Rik | 0.335939 | 0.701584 | 0.1583  | 0.26089  | no  |
| Ccdc67        | 0.335767 | 0        | 1       | 1        | no  |
| Zfp414        | 0.335609 | 0.936561 | 0.0596  | 0.118193 | no  |
| Cdkn2aipnl    | 0.335562 | 1.38174  | 0.01505 | 0.036948 | yes |
| Trim67        | 0.335543 | 1.58507  | 0.0016  | 0.005236 | yes |
| Cdpf1         | 0.335333 | 0.736854 | 0.1354  | 0.230508 | no  |
| Zfp935        | 0.335203 | 0.773275 | 0.1165  | 0.203396 | no  |
| Bean1         | 0.335086 | 1.51936  | 0.0027  | 0.008273 | yes |
| Zfp207        | 0.335    | 1.40749  | 0.0043  | 0.012421 | yes |
| Nxph4         | 0.33465  | 0.449279 | 0.4336  | 0.565252 | no  |
| Gpr161        | 0.33461  | 0.968872 | 0.0806  | 0.151013 | no  |
| Nras          | 0.334251 | 1.58786  | 0.0024  | 0.00748  | yes |
| Fam171a2      | 0.334216 | 1.41555  | 0.00795 | 0.021355 | yes |
| Ghr           | 0.333986 | 1.18219  | 0.0187  | 0.044477 | yes |
| Cinp          | 0.333777 | 1.1514   | 0.01865 | 0.044374 | yes |
| S100a10       | 0.333748 | 2.26705  | 0.0014  | 0.004657 | yes |
| Ddx27         | 0.333728 | 1.13308  | 0.0331  | 0.072073 | no  |
| Plekhj1       | 0.33368  | 1.26777  | 0.03165 | 0.069451 | no  |
| Src           | 0.33363  | 1.388    | 0.0053  | 0.014929 | yes |
| Wdr44         | 0.333622 | 1.39079  | 0.0076  | 0.02049  | yes |
| Mc3r          | 0.333246 | 0        | 1       | 1        | no  |
| Gsr           | 0.333243 | 1.60944  | 0.0026  | 0.008011 | yes |
| Trp53bp1      | 0.333229 | 1.28649  | 0.01025 | 0.026534 | yes |
| Timm13        | 0.332856 | 1.33061  | 0.00855 | 0.022737 | yes |
| Dpf2          | 0.332794 | 1.46613  | 0.00275 | 0.008412 | yes |
| Rqcd1         | 0.332694 | 0.722209 | 0.17475 | 0.282148 | no  |
| Ranbp1        | 0.332684 | 1.53948  | 0.01815 | 0.043387 | yes |
| Cox5b         | 0.332653 | 0.919476 | 0.22905 | 0.349348 | no  |
| Polm          | 0.332607 | 0.632617 | 0.2342  | 0.354898 | no  |
| Mthfs         | 0.332481 | 0.635467 | 0.34695 | 0.478929 | no  |
| Rexo1         | 0.332403 | 1.20927  | 0.01835 | 0.043778 | yes |
| Fbxl3         | 0.332335 | 1.52165  | 0.00395 | 0.011515 | yes |
| Qtrt1         | 0.332332 | 0.659489 | 0.2628  | 0.38658  | no  |
| Rgs7bp        | 0.332152 | 1.49549  | 0.00385 | 0.011268 | yes |
| Ppp1r36       | 0.332068 | 0        | 1       | 1        | no  |
| Atf2          | 0.332063 | 1.46526  | 0.00345 | 0.010237 | yes |
| Phf7          | 0.331962 | 0.554498 | 0.3176  | 0.447446 | no  |
| Plek          | 0.331896 | 0.831814 | 0.11185 | 0.196545 | no  |
| Bend3         | 0.331741 | 0.86958  | 0.08935 | 0.163527 | no  |
| Glmn          | 0.331597 | 0.726702 | 0.1898  | 0.301494 | no  |
| Etaa1         | 0.331533 | 0.929316 | 0.07815 | 0.147526 | no  |
| Rnf113a1      | 0.331485 | 0.51146  | 0.39485 | 0.52648  | no  |



|                |          |          |         |          |     |
|----------------|----------|----------|---------|----------|-----|
| Dtymk          | 0.331367 | 0.831463 | 0.09525 | 0.172516 | no  |
| Mfhas1         | 0.331341 | 1.50789  | 0.00265 | 0.008146 | yes |
| Mark2          | 0.33128  | 1.47295  | 0.00295 | 0.008927 | yes |
| Pwp1           | 0.331273 | 1.22336  | 0.0234  | 0.053776 | no  |
| Cdr2           | 0.331226 | 1.49303  | 0.0062  | 0.017151 | yes |
| Pcdha10        | 0.331162 | 0.182489 | 0.7113  | 0.804914 | no  |
| Rp1            | 0.331143 | 0        | 1       | 1        | no  |
| Txnrd2         | 0.331048 | 0.439327 | 0.3805  | 0.511977 | no  |
| Srsf6          | 0.331007 | 1.59154  | 0.00275 | 0.008412 | yes |
| Cabin1         | 0.330976 | 1.39803  | 0.0058  | 0.016179 | yes |
| Safb           | 0.330957 | 1.47945  | 0.0052  | 0.014691 | yes |
| Aplf           | 0.330819 | 0.673736 | 0.17755 | 0.286251 | no  |
| Adora2a        | 0.330711 | 0.744806 | 0.16835 | 0.27415  | no  |
| Gbp10          | 0.330523 | 0        | 1       | 1        | no  |
| Coro1b         | 0.330467 | 1.58912  | 0.0043  | 0.012421 | yes |
| Top3a          | 0.330388 | 0.757673 | 0.1469  | 0.246076 | no  |
| Ccar1          | 0.330364 | 1.36747  | 0.0056  | 0.015668 | yes |
| Mcts2          | 0.330284 | 0.263731 | 0.5942  | 0.708225 | no  |
| Piwil2         | 0.330265 | 0        | 1       | 1        | no  |
| Rheb           | 0.330056 | 1.71743  | 0.0022  | 0.006933 | yes |
| Kdm1a          | 0.329953 | 1.46428  | 0.0076  | 0.02049  | yes |
| Rims3          | 0.329429 | 1.58669  | 0.01215 | 0.030692 | yes |
| Ptov1          | 0.329226 | 1.65702  | 0.0027  | 0.008273 | yes |
| Riok3          | 0.3292   | 1.52455  | 0.00375 | 0.011009 | yes |
| Ube3a          | 0.329182 | 1.56545  | 0.00305 | 0.009188 | yes |
| Hnrnpf         | 0.329136 | 1.22904  | 0.0131  | 0.032767 | yes |
| Ids            | 0.328977 | 1.49589  | 0.00405 | 0.011765 | yes |
| Bik            | 0.328964 | 0        | 1       | 1        | no  |
| Tmem234        | 0.328699 | 1.54001  | 0.02225 | 0.051589 | no  |
| B230219D22Rik  | 0.328691 | 1.59394  | 0.00195 | 0.006219 | yes |
| Mtus1          | 0.32868  | 1.45468  | 0.0041  | 0.011903 | yes |
| Tet2           | 0.328644 | 0.966767 | 0.0568  | 0.11366  | no  |
| Evpl           | 0.328566 | 0        | 1       | 1        | no  |
| Snrnp48        | 0.328545 | 0.961313 | 0.0856  | 0.158412 | no  |
| Reep4          | 0.328453 | 0.665815 | 0.23055 | 0.35093  | no  |
| H2-M3          | 0.328248 | 0.82021  | 0.15485 | 0.256607 | no  |
| Hdac4          | 0.328217 | 1.22679  | 0.02075 | 0.048621 | yes |
| Nsl1           | 0.328215 | 0.505676 | 0.3463  | 0.47838  | no  |
| Mir8104        | 0.328134 | 0        | 1       | 1        | no  |
| Ufd1l          | 0.328087 | 1.39763  | 0.00475 | 0.013561 | yes |
| Uap1l1         | 0.328036 | 1.03477  | 0.0681  | 0.132107 | no  |
| 6330403K07Rik  | 0.328009 | 1.64955  | 0.00345 | 0.010237 | yes |
| Nup85          | 0.327987 | 1.1953   | 0.02845 | 0.063522 | no  |
| Tmem131        | 0.327801 | 1.51731  | 0.0029  | 0.008796 | yes |
| Lrrc29         | 0.327783 | 0        | 1       | 1        | no  |
| Fam217a        | 0.327175 | 0        | 1       | 1        | no  |
| 2810047C21Rik1 | 0.32707  | 0        | 1       | 1        | no  |
| Sart3          | 0.327045 | 1.2449   | 0.01865 | 0.044374 | yes |
| Rpl27a         | 0.326978 | 1.0807   | 0.0284  | 0.063442 | no  |
| Exoc5          | 0.326928 | 1.40583  | 0.0071  | 0.019306 | yes |
| B4galt6        | 0.326919 | 1.58277  | 0.0019  | 0.00608  | yes |
| Lymr2          | 0.326588 | 1.18381  | 0.04025 | 0.085004 | no  |
| Bcap29         | 0.326528 | 1.34203  | 0.0072  | 0.01953  | yes |

|               |          |          |         |          |     |
|---------------|----------|----------|---------|----------|-----|
| Mcoln1        | 0.3262   | 1.48106  | 0.0072  | 0.01953  | yes |
| Snrpa         | 0.326124 | 1.04801  | 0.07355 | 0.14032  | no  |
| Pigu          | 0.326    | 1.17901  | 0.0178  | 0.04265  | yes |
| Inadl         | 0.325935 | 1.46057  | 0.0032  | 0.009592 | yes |
| Rtkn          | 0.325831 | 1.34245  | 0.00805 | 0.021589 | yes |
| B930003M22Rik | 0.325772 | 0        | 1       | 1        | no  |
| Rpl18a        | 0.325735 | 0.648806 | 0.1921  | 0.304128 | no  |
| Grm7          | 0.325691 | 1.52636  | 0.00355 | 0.010494 | yes |
| Setd1a        | 0.32564  | 1.32954  | 0.01    | 0.025958 | yes |
| Mettl17       | 0.325603 | 0.692521 | 0.2212  | 0.339778 | no  |
| Galt          | 0.325418 | 0.910741 | 0.09925 | 0.178349 | no  |
| Rb1           | 0.325227 | 1.28076  | 0.0139  | 0.034515 | yes |
| Cttn          | 0.32515  | 1.45551  | 0.00365 | 0.010754 | yes |
| Fam154b       | 0.325038 | 0        | 1       | 1        | no  |
| Gimap4        | 0.324732 | 0.455021 | 0.31325 | 0.44287  | no  |
| Zkscan14      | 0.324707 | 0.75532  | 0.1725  | 0.279433 | no  |
| Caml          | 0.324579 | 1.4616   | 0.0124  | 0.031187 | yes |
| Srp19         | 0.324455 | 1.53365  | 0.0165  | 0.03999  | yes |
| Rev1          | 0.324427 | 0.397476 | 0.41015 | 0.542032 | no  |
| Nagpa         | 0.3244   | 0.764389 | 0.1274  | 0.219338 | no  |
| Rabl2         | 0.324188 | 0.994484 | 0.08125 | 0.151973 | no  |
| Atox1         | 0.324076 | 2.02045  | 0.0269  | 0.06053  | no  |
| Zfp131        | 0.32404  | 1.15311  | 0.02935 | 0.065257 | no  |
| Hoxd10        | 0.324022 | 0.625577 | 0.25975 | 0.383198 | no  |
| Prkar2a       | 0.323963 | 1.60011  | 0.00235 | 0.007346 | yes |
| Arrdc3        | 0.32377  | 1.28605  | 0.0144  | 0.035596 | yes |
| Mrps25        | 0.323677 | 0.722415 | 0.14565 | 0.244693 | no  |
| Cldn5         | 0.323414 | 1.26348  | 0.0287  | 0.063994 | no  |
| Sox12         | 0.323378 | 1.08307  | 0.03545 | 0.076362 | no  |
| Arid4b        | 0.323324 | 1.24625  | 0.01085 | 0.02787  | yes |
| Rundc3b       | 0.323309 | 1.20411  | 0.02295 | 0.05287  | no  |
| Arhgap23      | 0.323067 | 1.34319  | 0.0066  | 0.01811  | yes |
| Neil1         | 0.323028 | 0.47927  | 0.4341  | 0.565793 | no  |
| Brf1          | 0.322965 | 1.12915  | 0.03665 | 0.078514 | no  |
| Cd207         | 0.322847 | 0        | 1       | 1        | no  |
| Pirt          | 0.322822 | 1.36667  | 0.006   | 0.016674 | yes |
| Hectd3        | 0.322684 | 1.49046  | 0.0043  | 0.012421 | yes |
| Adcyap1       | 0.322643 | 1.54258  | 0.00485 | 0.01382  | yes |
| Ccdc124       | 0.322253 | 1.71415  | 0.00735 | 0.019896 | yes |
| C4bp-ps1      | 0.321945 | 0        | 1       | 1        | no  |
| Ccdc181       | 0.321837 | 1.26414  | 0.02355 | 0.054046 | no  |
| Prr24         | 0.321736 | 1.1921   | 0.03255 | 0.071097 | no  |
| Nsa2          | 0.321674 | 0.53279  | 0.28335 | 0.409143 | no  |
| Wdr1          | 0.321633 | 1.61704  | 0.0025  | 0.007739 | yes |
| Fbxl6         | 0.321554 | 0.957376 | 0.08775 | 0.161288 | no  |
| Dcun1d3       | 0.321419 | 1.19352  | 0.016   | 0.038963 | yes |
| Cdc14b        | 0.321409 | 1.11661  | 0.0282  | 0.063027 | no  |
| Limk2         | 0.321322 | 0.869913 | 0.09835 | 0.177188 | no  |
| 2410089E03Rik | 0.321226 | 1.29423  | 0.0114  | 0.029069 | yes |
| Senp6         | 0.321174 | 1.48148  | 0.0041  | 0.011903 | yes |
| Set           | 0.320892 | 1.38969  | 0.00395 | 0.011515 | yes |
| Vps37d        | 0.320716 | 0.644752 | 0.1897  | 0.301407 | no  |
| Strip1        | 0.320678 | 1.36888  | 0.00875 | 0.023162 | yes |

|               |          |          |         |          |     |
|---------------|----------|----------|---------|----------|-----|
| 1500011K16Rik | 0.320652 | 1.28508  | 0.04815 | 0.099055 | no  |
| Trim7         | 0.320637 | 0.45397  | 0.43465 | 0.566398 | no  |
| Pycr2         | 0.32053  | 1.21904  | 0.0298  | 0.066091 | no  |
| Rbm28         | 0.320477 | 1.19915  | 0.02325 | 0.053468 | no  |
| Cml1          | 0.320423 | 0.621588 | 0.3161  | 0.445901 | no  |
| Hnrnpa2b1     | 0.320126 | 1.4928   | 0.0021  | 0.006649 | yes |
| Dcaf4         | 0.320126 | 1.00777  | 0.0432  | 0.090414 | no  |
| Ikzf5         | 0.320121 | 0.972274 | 0.0626  | 0.122966 | no  |
| Rbl1          | 0.320096 | 0.487743 | 0.3174  | 0.447212 | no  |
| Smagp         | 0.319934 | 0.297808 | 0.4906  | 0.61806  | no  |
| Capn10        | 0.319885 | 1.10949  | 0.0236  | 0.054132 | no  |
| Nfyb          | 0.319831 | 1.10491  | 0.03895 | 0.082654 | no  |
| Ube2f         | 0.319831 | 1.09618  | 0.05885 | 0.117091 | no  |
| Arv1          | 0.319762 | 0.589372 | 0.3249  | 0.455698 | no  |
| 1810009A15Rik | 0.319686 | 0.664553 | 0.18245 | 0.292339 | no  |
| Hnrnph3       | 0.319573 | 0.589583 | 0.23775 | 0.358994 | no  |
| Otud1         | 0.319412 | 0.904915 | 0.09345 | 0.169813 | no  |
| Rfng          | 0.319245 | 1.27345  | 0.0199  | 0.046886 | yes |
| D10Bwg1379e   | 0.319204 | 1.4915   | 0.0032  | 0.009592 | yes |
| Plgrkt        | 0.31872  | 0.840162 | 0.19335 | 0.305705 | no  |
| Lasp1         | 0.318657 | 1.54707  | 0.0039  | 0.011392 | yes |
| Siah1b        | 0.318655 | 0.544146 | 0.333   | 0.464213 | no  |
| Rab21         | 0.318638 | 1.62104  | 0.00405 | 0.011765 | yes |
| Use1          | 0.318615 | 1.2178   | 0.01355 | 0.03374  | yes |
| 9330133O14Rik | 0.31854  | 0.522195 | 0.2887  | 0.415376 | no  |
| Ncor2         | 0.318528 | 1.46291  | 0.00295 | 0.008927 | yes |
| Ube2b         | 0.318524 | 1.64792  | 0.0031  | 0.009315 | yes |
| Pes1          | 0.318441 | 1.09078  | 0.03935 | 0.083396 | no  |
| Ccsap         | 0.318364 | 0.576864 | 0.27855 | 0.404236 | no  |
| Tceb2         | 0.318331 | 0.524311 | 0.295   | 0.422562 | no  |
| Peli3         | 0.318309 | 1.05275  | 0.0584  | 0.116335 | no  |
| Trappc9       | 0.318213 | 0.751035 | 0.1303  | 0.223287 | no  |
| Fzr1          | 0.318168 | 1.4033   | 0.01    | 0.025958 | yes |
| Rap1gap2      | 0.31813  | 1.53339  | 0.0028  | 0.008532 | yes |
| Cers5         | 0.318126 | 1.40995  | 0.0103  | 0.026643 | yes |
| Afmid         | 0.318094 | 0.474552 | 0.33775 | 0.469306 | no  |
| Fdft1         | 0.317964 | 0.401897 | 0.41755 | 0.549295 | no  |
| Akt1s1        | 0.317527 | 1.21655  | 0.0144  | 0.035596 | yes |
| Nudt1         | 0.317166 | 0.696107 | 0.2711  | 0.39598  | no  |
| Alg8          | 0.316876 | 0.69295  | 0.2071  | 0.322677 | no  |
| Nipal3        | 0.316829 | 1.40317  | 0.00615 | 0.017052 | yes |
| Tut1          | 0.316714 | 0.986562 | 0.065   | 0.126929 | no  |
| Rpap1         | 0.316701 | 1.00047  | 0.04755 | 0.098049 | no  |
| Nr1i3         | 0.316624 | 0        | 1       | 1        | no  |
| Ogfod2        | 0.316279 | 1.14024  | 0.0436  | 0.091122 | no  |
| 3632451O06Rik | 0.316264 | 1.57925  | 0.00335 | 0.009985 | yes |
| Rmi1          | 0.316103 | 0.44865  | 0.37005 | 0.501561 | no  |
| Scyl3         | 0.316092 | 1.02351  | 0.0507  | 0.103403 | no  |
| Hnrnpdl       | 0.316067 | 1.43564  | 0.0087  | 0.023066 | yes |
| Naca          | 0.31606  | 0.57482  | 0.2411  | 0.362908 | no  |
| Mak16         | 0.316029 | 0.687144 | 0.166   | 0.271122 | no  |
| Ssbp4         | 0.315969 | 1.05764  | 0.0625  | 0.122843 | no  |
| Parp2         | 0.315921 | 0.885088 | 0.113   | 0.198224 | no  |

|               |          |           |         |          |     |
|---------------|----------|-----------|---------|----------|-----|
| Dnaja7        | 0.315897 | 1.60418   | 0.0032  | 0.009592 | yes |
| B4galt1       | 0.315804 | 1.18193   | 0.01865 | 0.044374 | yes |
| Rbm34         | 0.315729 | 1.12536   | 0.03205 | 0.070178 | no  |
| Slc38a7       | 0.315621 | 1.33568   | 0.0109  | 0.027982 | yes |
| Zwilch        | 0.315505 | 0.531194  | 0.28195 | 0.407915 | no  |
| Polr3e        | 0.315398 | 1.07714   | 0.0302  | 0.066822 | no  |
| Gpank1        | 0.315366 | 0.672598  | 0.17985 | 0.289256 | no  |
| Trim38        | 0.315249 | 0         | 1       | 1        | no  |
| Zfp287        | 0.315047 | 0.917168  | 0.0762  | 0.144524 | no  |
| Tmem181a      | 0.314875 | 1.28104   | 0.01335 | 0.033305 | yes |
| Med12l        | 0.314856 | 1.30434   | 0.01165 | 0.029609 | yes |
| Ormdl1        | 0.314694 | 0.950692  | 0.08685 | 0.160055 | no  |
| Zfp553        | 0.314665 | 0.886022  | 0.1023  | 0.182962 | no  |
| Aldh3b1       | 0.314588 | 0.83759   | 0.13575 | 0.230956 | no  |
| Rps24         | 0.314536 | 0.732606  | 0.1371  | 0.232686 | no  |
| Ccnc          | 0.314531 | 1.15506   | 0.0479  | 0.098648 | no  |
| Ythdc1        | 0.314494 | 1.30264   | 0.01425 | 0.035265 | yes |
| Cpsf7         | 0.314445 | 1.26237   | 0.01075 | 0.027656 | yes |
| Lurap1l       | 0.314311 | 1.06056   | 0.0583  | 0.116171 | no  |
| Mrps12        | 0.314309 | 1.38099   | 0.0469  | 0.096965 | no  |
| Thap7         | 0.314202 | 0.948384  | 0.1164  | 0.203248 | no  |
| Cdkn1b        | 0.314104 | 1.50455   | 0.00525 | 0.014813 | yes |
| Cdnf          | 0.313906 | 0.745754  | 0.129   | 0.221603 | no  |
| Pthr2         | 0.313687 | 0.0891851 | 0.87505 | 0.92269  | no  |
| Rexo4         | 0.313465 | 1.1748    | 0.03165 | 0.069451 | no  |
| Evi5          | 0.313448 | 1.45828   | 0.00305 | 0.009188 | yes |
| Tcea1         | 0.313379 | 1.01379   | 0.0414  | 0.0871   | no  |
| Add2          | 0.313228 | 1.3727    | 0.00575 | 0.016057 | yes |
| Dcaf13        | 0.31296  | 1.21741   | 0.0369  | 0.078998 | no  |
| Chic2         | 0.312904 | 0.899054  | 0.139   | 0.235279 | no  |
| Hist3h2ba     | 0.312864 | 0.961189  | 0.2848  | 0.410834 | no  |
| Rassf3        | 0.312831 | 1.4367    | 0.00665 | 0.018232 | yes |
| Spsb3         | 0.312818 | 1.11372   | 0.0248  | 0.056514 | no  |
| Zfp688        | 0.312677 | 0.737873  | 0.2326  | 0.353442 | no  |
| Wdr83os       | 0.31262  | 1.09878   | 0.1169  | 0.20396  | no  |
| Lgi1          | 0.312518 | 1.40959   | 0.00695 | 0.018933 | yes |
| Erh           | 0.312516 | 0.956987  | 0.14925 | 0.249038 | no  |
| Igfbp2        | 0.312374 | 0.86375   | 0.13845 | 0.234557 | no  |
| Mif4gd        | 0.312319 | 0.723318  | 0.14735 | 0.246612 | no  |
| Gimap5        | 0.312118 | 0.44073   | 0.4323  | 0.563834 | no  |
| Zfp653        | 0.311793 | 0.377689  | 0.4888  | 0.616378 | no  |
| Azi2          | 0.311544 | 1.30896   | 0.0129  | 0.032322 | yes |
| Hdac7         | 0.31153  | 0.345987  | 0.48175 | 0.610272 | no  |
| Cpeb4         | 0.311503 | 1.43439   | 0.00415 | 0.012021 | yes |
| Trafd1        | 0.311438 | 1.18936   | 0.0186  | 0.044295 | yes |
| Krba1         | 0.311428 | 0.863859  | 0.09255 | 0.168454 | no  |
| Ppp1r3e       | 0.31138  | 1.02024   | 0.0709  | 0.136442 | no  |
| Acat2         | 0.311042 | 1.5286    | 0.00515 | 0.014587 | yes |
| Thumpd1       | 0.310887 | 1.31129   | 0.0146  | 0.035997 | yes |
| Pdcd2l        | 0.310828 | 0.899877  | 0.12385 | 0.214255 | no  |
| 4932438A13Rik | 0.310506 | 1.46359   | 0.0036  | 0.010628 | yes |
| Dgkq          | 0.310468 | 1.01053   | 0.05335 | 0.107633 | no  |
| Gm16894       | 0.310411 | 0         | 1       | 1        | no  |

|               |          |          |         |          |     |
|---------------|----------|----------|---------|----------|-----|
| Whsc1l1       | 0.310198 | 1.12232  | 0.024   | 0.054955 | no  |
| Dand5         | 0.310166 | 0.627871 | 0.2021  | 0.316373 | no  |
| Mogs          | 0.310161 | 1.1376   | 0.03665 | 0.078514 | no  |
| Mad2l1        | 0.309968 | 0.734763 | 0.1892  | 0.300685 | no  |
| Aloxe3        | 0.309945 | 0        | 1       | 1        | no  |
| Mdp1          | 0.309893 | 1.08671  | 0.0292  | 0.064967 | no  |
| Ubash3b       | 0.309833 | 1.5527   | 0.0029  | 0.008796 | yes |
| Noxred1       | 0.309684 | 0        | 1       | 1        | no  |
| Rbm10         | 0.309606 | 0.507783 | 0.3134  | 0.442893 | no  |
| Dcxr          | 0.309453 | 0.482609 | 0.45245 | 0.582556 | no  |
| Brat1         | 0.309157 | 1.04516  | 0.0365  | 0.078281 | no  |
| Syt15         | 0.308904 | 0.528431 | 0.284   | 0.409814 | no  |
| Xpc           | 0.308886 | 0.893458 | 0.0909  | 0.165974 | no  |
| Mrps33        | 0.308715 | 0.638035 | 0.2008  | 0.314784 | no  |
| Nwd2          | 0.308585 | 1.41008  | 0.00535 | 0.015044 | yes |
| Scmh1         | 0.308558 | 1.04026  | 0.0375  | 0.079986 | no  |
| Gpsm3         | 0.308526 | 0.625203 | 0.28255 | 0.408299 | no  |
| Rbm7          | 0.308513 | 0.986838 | 0.0501  | 0.102368 | no  |
| Gtpbp1        | 0.308356 | 1.0556   | 0.0458  | 0.095105 | no  |
| Pus7          | 0.308299 | 0.805021 | 0.1093  | 0.192907 | no  |
| Cpsf6         | 0.308289 | 1.36603  | 0.00825 | 0.02204  | yes |
| Nubp1         | 0.307767 | 0.525872 | 0.3385  | 0.470052 | no  |
| Atp6v0b       | 0.307766 | 1.78855  | 0.00385 | 0.011268 | yes |
| Wdyhv1        | 0.30761  | 0.983065 | 0.0946  | 0.171503 | no  |
| Fnbp4         | 0.307283 | 1.08227  | 0.0374  | 0.079824 | no  |
| 1110032F04Rik | 0.307275 | 1.38504  | 0.01025 | 0.026534 | yes |
| Zscan26       | 0.307096 | 1.22438  | 0.01425 | 0.035265 | yes |
| Mrpl33        | 0.306803 | 1.32961  | 0.1251  | 0.216051 | no  |
| Dpysl3        | 0.306735 | 1.24487  | 0.0116  | 0.029488 | yes |
| Il11ra2       | 0.306702 | 0        | 1       | 1        | no  |
| Slc20a1       | 0.306605 | 1.37332  | 0.0056  | 0.015668 | yes |
| Armcx1        | 0.306429 | 1.42289  | 0.00445 | 0.012807 | yes |
| Exosc9        | 0.306257 | 0.823602 | 0.1346  | 0.229411 | no  |
| Cep83os       | 0.306148 | 1.17946  | 0.02465 | 0.056249 | no  |
| Gpi1          | 0.306139 | 1.54454  | 0.0034  | 0.010109 | yes |
| Hspa1a        | 0.306068 | 0.937142 | 0.0768  | 0.145392 | no  |
| Prpf3         | 0.306039 | 0.85695  | 0.1131  | 0.198321 | no  |
| Eif3g         | 0.305995 | 1.55088  | 0.0124  | 0.031187 | yes |
| AI467606      | 0.305941 | 0.390885 | 0.484   | 0.612362 | no  |
| Ube2a         | 0.305658 | 1.45374  | 0.0089  | 0.023488 | yes |
| Arcp3         | 0.305605 | 1.7861   | 0.00555 | 0.015544 | yes |
| Zfp865        | 0.305544 | 0.90786  | 0.06715 | 0.130513 | no  |
| Gab2          | 0.305538 | 1.25947  | 0.0111  | 0.028407 | yes |
| C230052I12Rik | 0.305522 | 0.478667 | 0.34035 | 0.472374 | no  |
| Uba5          | 0.305489 | 1.29805  | 0.01545 | 0.037763 | yes |
| Nxn           | 0.305478 | 1.14213  | 0.03265 | 0.07128  | no  |
| Steap3        | 0.305436 | 1.2697   | 0.0098  | 0.025539 | yes |
| Sertad2       | 0.305232 | 1.25267  | 0.0118  | 0.029945 | yes |
| Snpc1         | 0.30521  | 1.22527  | 0.0256  | 0.058038 | no  |
| Shc2          | 0.305091 | 1.49563  | 0.00465 | 0.013316 | yes |
| Vsig10l       | 0.304939 | 0.522514 | 0.3246  | 0.455422 | no  |
| Nipsnap1      | 0.304924 | 1.32801  | 0.00845 | 0.022507 | yes |
| Bcl2l2        | 0.304875 | 1.51998  | 0.0049  | 0.013947 | yes |

|               |          |          |         |          |     |
|---------------|----------|----------|---------|----------|-----|
| 9530051G07Rik | 0.304567 | 0        | 1       | 1        | no  |
| Cryl1         | 0.304522 | 0.811741 | 0.16115 | 0.264863 | no  |
| Mmp16         | 0.304478 | 0.769531 | 0.1376  | 0.233296 | no  |
| Metap2        | 0.304268 | 1.45883  | 0.0048  | 0.013695 | yes |
| Msl1          | 0.303985 | 1.12195  | 0.0315  | 0.069179 | no  |
| Lsm6          | 0.303926 | 1.05328  | 0.0358  | 0.077004 | no  |
| Pmm2          | 0.303711 | 1.03671  | 0.0602  | 0.119081 | no  |
| Ddb2          | 0.303546 | 0.228696 | 0.64925 | 0.753332 | no  |
| Slc16a3       | 0.30349  | 0.40964  | 0.407   | 0.538782 | no  |
| Selk          | 0.303405 | 1.55979  | 0.0126  | 0.031654 | yes |
| Gmcl1         | 0.303218 | 1.3636   | 0.0124  | 0.031187 | yes |
| 1190007I07Rik | 0.302907 | 0.307608 | 0.51745 | 0.642912 | no  |
| Serping1      | 0.302602 | 1.50917  | 0.00685 | 0.018707 | yes |
| Gga2          | 0.302569 | 1.44941  | 0.00565 | 0.015794 | yes |
| Cpb1          | 0.302389 | 0.736569 | 0.2016  | 0.315814 | no  |
| Cc2d1b        | 0.301935 | 1.35313  | 0.00985 | 0.025654 | yes |
| Plk4          | 0.301935 | 0.639737 | 0.19595 | 0.308713 | no  |
| Cyp2ab1       | 0.301911 | 0        | 1       | 1        | no  |
| H2afz         | 0.30171  | 0.768718 | 0.2112  | 0.32768  | no  |
| Rrs1          | 0.301573 | 0.982691 | 0.07235 | 0.138509 | no  |
| Zfp263        | 0.301418 | 0.840773 | 0.11865 | 0.20666  | no  |
| F630042J09Rik | 0.301361 | 0        | 1       | 1        | no  |
| Slc7a4        | 0.30108  | 0.987841 | 0.06385 | 0.125014 | no  |
| Tubgcp3       | 0.301    | 1.21867  | 0.0215  | 0.050104 | no  |
| Tmem186       | 0.300944 | 0.978066 | 0.0653  | 0.127402 | no  |
| Dph6          | 0.300941 | 1.19094  | 0.02785 | 0.062371 | no  |
| Taf5l         | 0.300667 | 0.952023 | 0.0752  | 0.142893 | no  |
| Klhl18        | 0.300506 | 1.02015  | 0.0474  | 0.097816 | no  |
| Aip           | 0.300268 | 1.01051  | 0.04105 | 0.086487 | no  |
| Dyrk3         | 0.300203 | 0.661327 | 0.23035 | 0.350706 | no  |
| Klhdc4        | 0.30002  | 0.967133 | 0.0786  | 0.148123 | no  |
| Wash          | 0.300005 | 1.11546  | 0.02745 | 0.0616   | no  |
| Rab4a         | 0.299723 | 1.3837   | 0.01755 | 0.042165 | yes |
| H2-K1         | 0.29968  | 1.43009  | 0.01175 | 0.029824 | yes |
| Kif26b        | 0.299602 | 1.15233  | 0.023   | 0.052958 | no  |
| Zfp775        | 0.299569 | 0.645791 | 0.21645 | 0.334223 | no  |
| Pcbp3         | 0.299442 | 1.54542  | 0.00475 | 0.013561 | yes |
| Slc48a1       | 0.299435 | 1.44372  | 0.00695 | 0.018933 | yes |
| Sema3a        | 0.29942  | 0        | 1       | 1        | no  |
| Ifngr2        | 0.29936  | 1.38938  | 0.0123  | 0.031006 | yes |
| Kansl3        | 0.299354 | 1.31085  | 0.0082  | 0.02192  | yes |
| Trpc2         | 0.29926  | 0        | 1       | 1        | no  |
| 2700089E24Rik | 0.299164 | 1.26314  | 0.00945 | 0.024728 | yes |
| Ccdc149       | 0.299159 | 1.20228  | 0.0245  | 0.055974 | no  |
| Mccc1         | 0.29912  | 1.04143  | 0.0528  | 0.106799 | no  |
| Man2c1os      | 0.299102 | 0        | 1       | 1        | no  |
| Trib2         | 0.298707 | 1.38466  | 0.0053  | 0.014929 | yes |
| Tmem100       | 0.298421 | 1.25171  | 0.0254  | 0.057673 | no  |
| Tmem109       | 0.298336 | 1.34585  | 0.01515 | 0.037166 | yes |
| Ptpn6         | 0.298132 | 0.445328 | 0.36675 | 0.498532 | no  |
| Ankrd16       | 0.29807  | 0.693267 | 0.1995  | 0.313264 | no  |
| Toe1          | 0.297967 | 0.657014 | 0.1864  | 0.297268 | no  |
| Bicd2         | 0.297857 | 1.30717  | 0.0092  | 0.024131 | yes |



|               |          |          |         |          |     |
|---------------|----------|----------|---------|----------|-----|
| Tmem63c       | 0.297785 | 1.41247  | 0.0072  | 0.01953  | yes |
| Fam98b        | 0.297677 | 1.26092  | 0.0259  | 0.058607 | no  |
| Rcc2          | 0.297637 | 1.44397  | 0.00595 | 0.016553 | yes |
| Mbtd1         | 0.297577 | 0.836931 | 0.10305 | 0.18408  | no  |
| Stard4        | 0.297424 | 1.33201  | 0.01255 | 0.03154  | yes |
| Fbxw7         | 0.297276 | 1.34182  | 0.00755 | 0.020384 | yes |
| Mospd4        | 0.297274 | 0        | 1       | 1        | no  |
| Tatdn3        | 0.297224 | 0.550431 | 0.2658  | 0.390128 | no  |
| Akr1b3        | 0.297106 | 0        | 1       | 1        | no  |
| Cdk18         | 0.296921 | 0.625828 | 0.242   | 0.363678 | no  |
| Dennd4a       | 0.296825 | 1.35365  | 0.0074  | 0.02002  | yes |
| Zfp758        | 0.296682 | 0.921869 | 0.08155 | 0.152362 | no  |
| Robo4         | 0.296556 | 0.740756 | 0.1582  | 0.260823 | no  |
| Snrpd1        | 0.296551 | 1.01965  | 0.13    | 0.222888 | no  |
| Rtn4rl2       | 0.29629  | 0.995067 | 0.0956  | 0.173032 | no  |
| Malt1         | 0.296145 | 0.110882 | 0.8333  | 0.893148 | no  |
| Hscb          | 0.296111 | 0.755378 | 0.2606  | 0.384025 | no  |
| Eif4enif1     | 0.296057 | 0.47634  | 0.36915 | 0.500768 | no  |
| Smarca5       | 0.296036 | 1.11812  | 0.03205 | 0.070178 | no  |
| Akap9         | 0.295995 | 1.33782  | 0.00775 | 0.020864 | yes |
| Ccdc130       | 0.295926 | 0.676151 | 0.21705 | 0.334565 | no  |
| Dusp22        | 0.295899 | 1.02601  | 0.036   | 0.077359 | no  |
| B130034C11Rik | 0.295883 | 0        | 1       | 1        | no  |
| Ttll3         | 0.295864 | 0.225835 | 0.6473  | 0.751777 | no  |
| Zdhhc20       | 0.295801 | 1.20874  | 0.02015 | 0.047407 | yes |
| 2810408I11Rik | 0.295754 | 0        | 1       | 1        | no  |
| S100a5        | 0.295476 | 0        | 1       | 1        | no  |
| Rps13         | 0.29527  | 0.362427 | 0.64245 | 0.74819  | no  |
| Chsy3         | 0.295245 | 0        | 1       | 1        | no  |
| Zfp384        | 0.295072 | 0.844756 | 0.086   | 0.158953 | no  |
| Mysm1         | 0.294857 | 0.995209 | 0.0489  | 0.100365 | no  |
| N4bp2         | 0.294753 | 0        | 1       | 1        | no  |
| Thoc6         | 0.29448  | 0.520813 | 0.37585 | 0.507367 | no  |
| Slc2a1        | 0.294333 | 1.33471  | 0.014   | 0.034743 | yes |
| Arhgef11      | 0.293692 | 1.42802  | 0.006   | 0.016674 | yes |
| Pttg1         | 0.293682 | 0.889786 | 0.07595 | 0.144153 | no  |
| Trp53inp1     | 0.293481 | 1.09014  | 0.0294  | 0.065346 | no  |
| Fbxl15        | 0.293339 | 0.531399 | 0.36375 | 0.495826 | no  |
| Psmb10        | 0.293325 | 1.10964  | 0.05625 | 0.112678 | no  |
| Zfp715        | 0.293308 | 0.995448 | 0.05555 | 0.111562 | no  |
| Zfp810        | 0.29312  | 0.440412 | 0.40835 | 0.540299 | no  |
| Pla2g15       | 0.293073 | 1.05029  | 0.04895 | 0.100452 | no  |
| Ccdc64        | 0.292841 | 1.07503  | 0.0544  | 0.109518 | no  |
| Car15         | 0.292459 | 0.398303 | 0.5125  | 0.638495 | no  |
| Spry2         | 0.292355 | 1.15714  | 0.03285 | 0.071646 | no  |
| Figla         | 0.292202 | 0        | 1       | 1        | no  |
| Cox18         | 0.292178 | 0.758306 | 0.1265  | 0.218185 | no  |
| 2310009B15Rik | 0.292142 | 0.564298 | 0.4601  | 0.589545 | no  |
| Mipol1        | 0.292127 | 0.363124 | 0.46855 | 0.597774 | no  |
| Fsd2          | 0.292112 | 0        | 1       | 1        | no  |
| Snrnp35       | 0.292102 | 0.801712 | 0.18625 | 0.2971   | no  |
| 3110007F17Rik | 0.292043 | 0.391157 | 0.5388  | 0.661202 | no  |
| Pcbp1         | 0.291995 | 1.53671  | 0.0065  | 0.017869 | yes |

|          |          |          |         |          |     |
|----------|----------|----------|---------|----------|-----|
| Ctnnbip1 | 0.29195  | 1.23474  | 0.0134  | 0.033404 | yes |
| Irak1bp1 | 0.291892 | 0.651489 | 0.1908  | 0.302611 | no  |
| Fancf    | 0.291871 | 0.557828 | 0.3235  | 0.454119 | no  |
| Zfp58    | 0.291749 | 0.591768 | 0.27915 | 0.404974 | no  |
| Nasp     | 0.29174  | 0.735951 | 0.1427  | 0.240254 | no  |
| Zfand2a  | 0.29173  | 1.22285  | 0.0148  | 0.036422 | yes |
| Nenf     | 0.291722 | 1.30688  | 0.0675  | 0.131116 | no  |
| Zfand4   | 0.291714 | 0        | 1       | 1        | no  |
| Lpgat1   | 0.291592 | 1.35998  | 0.0063  | 0.017413 | yes |
| Klkb1    | 0.291322 | 0        | 1       | 1        | no  |
| Ppp1ca   | 0.291315 | 1.54749  | 0.00875 | 0.023162 | yes |
| Usp20    | 0.291229 | 1.43441  | 0.0065  | 0.017869 | yes |
| Clca5    | 0.291134 | 0        | 1       | 1        | no  |
| Ptprm    | 0.291042 | 1.197    | 0.01635 | 0.039706 | yes |
| Nedd8    | 0.291013 | 1.91718  | 0.00995 | 0.025858 | yes |
| Pcnp     | 0.290891 | 1.33462  | 0.01495 | 0.036744 | yes |
| Naip6    | 0.290712 | 0        | 1       | 1        | no  |
| Prss36   | 0.290667 | 0.632403 | 0.22875 | 0.349192 | no  |
| Ttc39c   | 0.290596 | 1.20844  | 0.0147  | 0.03621  | yes |
| Phrf1    | 0.290447 | 1.17317  | 0.02355 | 0.054046 | no  |
| Rpl5     | 0.290386 | 0.817521 | 0.1372  | 0.232826 | no  |
| Lrriq1   | 0.290269 | 0.428386 | 0.38305 | 0.514261 | no  |
| Bard1    | 0.290257 | 0        | 1       | 1        | no  |
| Nrbp2    | 0.290208 | 1.40924  | 0.0092  | 0.024131 | yes |
| St8sia6  | 0.290124 | 0        | 1       | 1        | no  |
| Rpl17    | 0.289955 | 0.236401 | 0.6329  | 0.740057 | no  |
| Pbrm1    | 0.289813 | 1.34324  | 0.0089  | 0.023488 | yes |
| Phf13    | 0.289788 | 0.944037 | 0.07255 | 0.138752 | no  |
| P4ha2    | 0.289777 | 0.800566 | 0.10985 | 0.193723 | no  |
| Mcu      | 0.289587 | 1.27705  | 0.01725 | 0.041565 | yes |
| Cops7b   | 0.289421 | 1.02476  | 0.05665 | 0.113411 | no  |
| Kif5a    | 0.289348 | 0.997146 | 0.0419  | 0.087943 | no  |
| Gfod1    | 0.289318 | 1.38037  | 0.0069  | 0.018824 | yes |
| Kdm6a    | 0.289281 | 1.00016  | 0.04915 | 0.100769 | no  |
| Dhrsx    | 0.289116 | 0.750628 | 0.1717  | 0.278409 | no  |
| Ppm1a    | 0.289012 | 1.46565  | 0.00455 | 0.013069 | yes |
| Naaa     | 0.288964 | 1.12342  | 0.02365 | 0.054228 | no  |
| Sart1    | 0.288786 | 1.2439   | 0.01485 | 0.036518 | yes |
| Snhg1    | 0.288748 | 0.534579 | 0.3921  | 0.523761 | no  |
| Pcdha11  | 0.288568 | 0.163465 | 0.7508  | 0.835082 | no  |
| Mrps23   | 0.288561 | 0.856841 | 0.0874  | 0.160868 | no  |
| Dhx16    | 0.28853  | 1.04055  | 0.05105 | 0.103925 | no  |
| Slc25a19 | 0.288261 | 0.995474 | 0.0442  | 0.092245 | no  |
| Arl6ip4  | 0.28822  | 1.17305  | 0.0494  | 0.10114  | no  |
| Hp1bp3   | 0.288016 | 1.34346  | 0.00785 | 0.021108 | yes |
| Katna1   | 0.287971 | 0.768606 | 0.16615 | 0.271333 | no  |
| Psme3    | 0.287945 | 1.37988  | 0.00895 | 0.023578 | yes |
| Zc4h2    | 0.287939 | 0.886188 | 0.07065 | 0.136099 | no  |
| Mettl7a3 | 0.287712 | 1.12948  | 0.0508  | 0.103512 | no  |
| Oplah    | 0.287492 | 0.993027 | 0.0443  | 0.092396 | no  |
| Slc37a2  | 0.287001 | 0.53026  | 0.2899  | 0.416786 | no  |
| Zfand6   | 0.28687  | 1.36859  | 0.0165  | 0.03999  | yes |
| Mypop    | 0.286602 | 1.18817  | 0.0301  | 0.066634 | no  |

|               |          |          |         |          |     |
|---------------|----------|----------|---------|----------|-----|
| Slc9a4        | 0.286535 | 0        | 1       | 1        | no  |
| Gnb1l         | 0.286478 | 0.504563 | 0.29555 | 0.423258 | no  |
| Pbx2          | 0.286467 | 1.255    | 0.01755 | 0.042165 | yes |
| Slbp          | 0.286317 | 0.936545 | 0.05915 | 0.117564 | no  |
| Eno1b         | 0.286309 | 1.19401  | 0.0155  | 0.037857 | yes |
| Ttll11        | 0.286062 | 0.803203 | 0.1081  | 0.191349 | no  |
| Nxt1          | 0.285948 | 0.508394 | 0.30675 | 0.435723 | no  |
| Zfc3h1        | 0.285905 | 1.19772  | 0.02065 | 0.048455 | yes |
| Alox12b       | 0.28589  | 0        | 1       | 1        | no  |
| Dhps          | 0.285877 | 1.03226  | 0.08085 | 0.151289 | no  |
| Hdgfrp2       | 0.285866 | 1.07815  | 0.04775 | 0.098385 | no  |
| Pgap1         | 0.285764 | 1.19902  | 0.02    | 0.047096 | yes |
| C2cd2l        | 0.285615 | 1.26332  | 0.01595 | 0.038863 | yes |
| Cdc34         | 0.285533 | 1.24085  | 0.0349  | 0.075361 | no  |
| 3110040N11Rik | 0.28523  | 0.714924 | 0.2709  | 0.395775 | no  |
| Trim43c       | 0.285109 | 0        | 1       | 1        | no  |
| Mtch1         | 0.285108 | 1.48945  | 0.0072  | 0.01953  | yes |
| Rrp9          | 0.284907 | 0.752795 | 0.1844  | 0.294787 | no  |
| Eapp          | 0.284652 | 1.07235  | 0.07985 | 0.150031 | no  |
| Gm11992       | 0.284479 | 0.351886 | 0.48305 | 0.611568 | no  |
| Dusp9         | 0.284477 | 0        | 1       | 1        | no  |
| Tmem62        | 0.284248 | 1.16638  | 0.0293  | 0.065156 | no  |
| Ncbp2         | 0.284219 | 1.27728  | 0.0215  | 0.050104 | no  |
| Fam207a       | 0.28417  | 1.07754  | 0.04805 | 0.09888  | no  |
| 2610008E11Rik | 0.284148 | 0.916656 | 0.0771  | 0.145876 | no  |
| Ino80         | 0.284078 | 0.963192 | 0.05745 | 0.114718 | no  |
| Tspan17       | 0.284024 | 1.51238  | 0.00705 | 0.019182 | yes |
| Coro1c        | 0.284022 | 1.36819  | 0.00795 | 0.021355 | yes |
| Gabarap       | 0.283872 | 1.62504  | 0.0072  | 0.01953  | yes |
| Tnrc6c        | 0.28385  | 1.19264  | 0.0214  | 0.049915 | yes |
| Gm1673        | 0.28384  | 1.06653  | 0.25545 | 0.378412 | no  |
| Fam76a        | 0.283681 | 1.01686  | 0.04075 | 0.085923 | no  |
| Nae1          | 0.283501 | 1.19235  | 0.03335 | 0.07251  | no  |
| Mier3         | 0.283479 | 0.970505 | 0.0573  | 0.114471 | no  |
| Bmyc          | 0.28345  | 1.11489  | 0.08745 | 0.160893 | no  |
| Hip1r         | 0.283371 | 1.18533  | 0.01675 | 0.040507 | yes |
| Npat          | 0.28337  | 0.930132 | 0.0673  | 0.130766 | no  |
| Suco          | 0.283009 | 1.25604  | 0.01365 | 0.033938 | yes |
| Vmac          | 0.282923 | 0.630479 | 0.20185 | 0.316131 | no  |
| Cxxc1         | 0.282876 | 0.981121 | 0.0707  | 0.136116 | no  |
| Tmem237       | 0.282809 | 0.968045 | 0.0503  | 0.102698 | no  |
| Irak2         | 0.282641 | 0.67228  | 0.17385 | 0.281071 | no  |
| Fam214b       | 0.282626 | 1.08044  | 0.02915 | 0.064877 | no  |
| Med17         | 0.28256  | 1.03437  | 0.0501  | 0.102368 | no  |
| Alcam         | 0.282466 | 1.36786  | 0.0081  | 0.021701 | yes |
| Thoc5         | 0.282332 | 0.957206 | 0.0531  | 0.10721  | no  |
| Ube2g2        | 0.282291 | 1.13061  | 0.02285 | 0.052694 | no  |
| Ier5l         | 0.282207 | 0.519893 | 0.3625  | 0.494477 | no  |
| Micu2         | 0.282005 | 1.07766  | 0.0477  | 0.098297 | no  |
| Klhl7         | 0.281827 | 0.882702 | 0.0772  | 0.146045 | no  |
| Nemf          | 0.281759 | 1.18967  | 0.0242  | 0.055365 | no  |
| Trmt1l        | 0.28161  | 1.0516   | 0.03455 | 0.074739 | no  |
| Zer1          | 0.281428 | 1.1894   | 0.0158  | 0.038533 | yes |

|               |          |          |         |          |     |
|---------------|----------|----------|---------|----------|-----|
| Usp19         | 0.281363 | 1.30365  | 0.00865 | 0.022947 | yes |
| Krt75         | 0.281295 | 0        | 1       | 1        | no  |
| Scaper        | 0.281156 | 1.20722  | 0.01815 | 0.043387 | yes |
| Luc7l         | 0.28104  | 1.07259  | 0.03025 | 0.066899 | no  |
| Cfl1          | 0.281018 | 1.54843  | 0.0093  | 0.024365 | yes |
| Wasf3         | 0.280982 | 1.11225  | 0.0399  | 0.084373 | no  |
| Dgka          | 0.280906 | 0.787053 | 0.11065 | 0.194823 | no  |
| Ttpal         | 0.280879 | 1.16587  | 0.0192  | 0.045454 | yes |
| Rchy1         | 0.280823 | 1.03487  | 0.06155 | 0.121299 | no  |
| Aim1          | 0.280807 | 0        | 1       | 1        | no  |
| Avl9          | 0.280761 | 1.27075  | 0.01345 | 0.03351  | yes |
| 1810030007Rik | 0.280691 | 1.09143  | 0.0425  | 0.08909  | no  |
| Olf658        | 0.280671 | 0        | 1       | 1        | no  |
| Sprtn         | 0.280634 | 0.627331 | 0.25385 | 0.376588 | no  |
| Apip          | 0.280526 | 0.86788  | 0.1698  | 0.276104 | no  |
| Ebp           | 0.280474 | 1.12415  | 0.0457  | 0.094928 | no  |
| Ttll1         | 0.280472 | 1.30601  | 0.01735 | 0.041791 | yes |
| Ddx49         | 0.28037  | 0.863355 | 0.08235 | 0.153576 | no  |
| AU041133      | 0.280254 | 0.576257 | 0.2785  | 0.404207 | no  |
| Fut11         | 0.280246 | 1.09624  | 0.0391  | 0.082906 | no  |
| Fam136a       | 0.280133 | 0.918689 | 0.1039  | 0.185374 | no  |
| Tmsb15l       | 0.280066 | 0.623091 | 0.207   | 0.322559 | no  |
| Ddx50         | 0.279969 | 1.09398  | 0.04205 | 0.088216 | no  |
| Casp3         | 0.279903 | 0.799676 | 0.11055 | 0.194751 | no  |
| Zfp788        | 0.279873 | 1.03747  | 0.0494  | 0.10114  | no  |
| Inpp5k        | 0.27984  | 1.24129  | 0.02185 | 0.050786 | no  |
| Tcf20         | 0.27973  | 1.23747  | 0.01595 | 0.038863 | yes |
| 37134         | 0.279718 | 1.28022  | 0.01025 | 0.026534 | yes |
| Pick1         | 0.279676 | 0.997007 | 0.04645 | 0.096139 | no  |
| Abce1         | 0.279081 | 1.36189  | 0.00975 | 0.025413 | yes |
| Ccdc107       | 0.279053 | 1.03072  | 0.119   | 0.207134 | no  |
| Htatip2       | 0.27901  | 1.13299  | 0.0224  | 0.051828 | no  |
| Sh3glb2       | 0.278977 | 1.27876  | 0.01005 | 0.026082 | yes |
| Tmem251       | 0.278852 | 0.46764  | 0.4409  | 0.572462 | no  |
| Hpse2         | 0.278664 | 0        | 1       | 1        | no  |
| Ercc6l2       | 0.278646 | 0.887964 | 0.0742  | 0.141296 | no  |
| Adprm         | 0.278645 | 0.865451 | 0.13    | 0.222888 | no  |
| Gm9833        | 0.278587 | 1.09478  | 0.05285 | 0.106884 | no  |
| Polr2d        | 0.278345 | 0.699688 | 0.15475 | 0.256505 | no  |
| Ascc3         | 0.278327 | 1.06286  | 0.03665 | 0.078514 | no  |
| Ifi203        | 0.278308 | 0.511832 | 0.3048  | 0.433557 | no  |
| Rbm6          | 0.2782   | 0.983638 | 0.04995 | 0.102109 | no  |
| Spag6         | 0.278166 | 0        | 1       | 1        | no  |
| Scamp4        | 0.277852 | 0.961976 | 0.0519  | 0.1053   | no  |
| Ddhd2         | 0.277338 | 1.24356  | 0.01825 | 0.043587 | yes |
| Mta1          | 0.277223 | 1.18603  | 0.0265  | 0.059771 | no  |
| Zscan18       | 0.277046 | 0.747573 | 0.15515 | 0.257008 | no  |
| Mitd1         | 0.276923 | 0.672815 | 0.2564  | 0.379353 | no  |
| Eif4a1        | 0.276918 | 1.05393  | 0.0348  | 0.075182 | no  |
| Cpne1         | 0.27686  | 1.12596  | 0.02285 | 0.052694 | no  |
| Hpx           | 0.27681  | 0        | 1       | 1        | no  |
| Rasgef1b      | 0.276806 | 0.75627  | 0.12665 | 0.21833  | no  |
| Ap1m1         | 0.276764 | 1.40111  | 0.01115 | 0.02853  | yes |

|               |          |          |         |          |     |
|---------------|----------|----------|---------|----------|-----|
| Invs          | 0.276719 | 0.362646 | 0.46685 | 0.596236 | no  |
| Ireb2         | 0.276697 | 1.30833  | 0.0107  | 0.027543 | yes |
| Mex3c         | 0.276548 | 1.21524  | 0.02165 | 0.0504   | no  |
| Kcnma1        | 0.276509 | 1.05006  | 0.0302  | 0.066822 | no  |
| Zfp386        | 0.276484 | 0.825296 | 0.09665 | 0.17467  | no  |
| Zfp94         | 0.27644  | 0.480802 | 0.3356  | 0.466905 | no  |
| Gpatch1       | 0.276416 | 0.864364 | 0.10365 | 0.185003 | no  |
| Nim1k         | 0.276404 | 0.689157 | 0.18455 | 0.294955 | no  |
| Uts2r         | 0.276345 | 0        | 1       | 1        | no  |
| Tsg101        | 0.276321 | 1.20553  | 0.03195 | 0.070005 | no  |
| Ndst1         | 0.276266 | 1.2785   | 0.01095 | 0.028083 | yes |
| Coq2          | 0.275988 | 1.1813   | 0.03505 | 0.075623 | no  |
| Orc2          | 0.275844 | 1.01691  | 0.04285 | 0.089752 | no  |
| Ifi205        | 0.275726 | 0        | 1       | 1        | no  |
| Cep57l1       | 0.275663 | 0.455319 | 0.35555 | 0.487453 | no  |
| Gm15421       | 0.275652 | 0.702309 | 0.16025 | 0.263613 | no  |
| Als2cl        | 0.275549 | 0.463544 | 0.3507  | 0.482799 | no  |
| Aarsd1        | 0.275318 | 1.12071  | 0.05495 | 0.110491 | no  |
| Fra10ac1      | 0.27518  | 0.791957 | 0.1729  | 0.280013 | no  |
| Stk11         | 0.275119 | 0.144856 | 0.781   | 0.857529 | no  |
| Mrps24        | 0.274835 | 0.92613  | 0.1352  | 0.230257 | no  |
| BC005537      | 0.274823 | 1.40211  | 0.0091  | 0.023921 | yes |
| Ankrd61       | 0.274794 | 0        | 1       | 1        | no  |
| Zfp236        | 0.274629 | 1.06016  | 0.03785 | 0.080629 | no  |
| Rltpr         | 0.274615 | 1.10514  | 0.0413  | 0.086959 | no  |
| Igip          | 0.274567 | 1.23707  | 0.0333  | 0.072437 | no  |
| Lin37         | 0.274544 | 0.581646 | 0.24205 | 0.363678 | no  |
| Nlgn3         | 0.27454  | 1.20913  | 0.0223  | 0.05166  | no  |
| Zfp710        | 0.274334 | 0.873952 | 0.0791  | 0.14896  | no  |
| Acbd5         | 0.274272 | 1.26652  | 0.01085 | 0.02787  | yes |
| Arvcf         | 0.274007 | 0.911589 | 0.08115 | 0.151807 | no  |
| Usp7          | 0.273908 | 1.33241  | 0.0092  | 0.024131 | yes |
| Ccdc117       | 0.273877 | 0.91126  | 0.08015 | 0.150488 | no  |
| Prr5          | 0.273833 | 0.937366 | 0.0898  | 0.164169 | no  |
| Oip5          | 0.273748 | 0.218391 | 0.63505 | 0.74146  | no  |
| 2610020H08Rik | 0.273725 | 0        | 1       | 1        | no  |
| Anapc5        | 0.273634 | 1.27188  | 0.0103  | 0.026643 | yes |
| Zfp874b       | 0.273468 | 0.92357  | 0.0759  | 0.144079 | no  |
| Slc38a9       | 0.27325  | 1.21479  | 0.01775 | 0.042546 | yes |
| Lrrcc1        | 0.273248 | 0.789065 | 0.10825 | 0.191564 | no  |
| Kctd13        | 0.273233 | 1.07974  | 0.0527  | 0.10663  | no  |
| Zmynd19       | 0.273192 | 0.819122 | 0.16415 | 0.268629 | no  |
| Brwd1         | 0.273178 | 0.815666 | 0.10205 | 0.18254  | no  |
| Brd1          | 0.273135 | 1.11994  | 0.02955 | 0.065646 | no  |
| Smarcd2       | 0.273047 | 0.978197 | 0.05095 | 0.103753 | no  |
| Icos          | 0.273006 | 0        | 1       | 1        | no  |
| Acot7         | 0.27285  | 1.2577   | 0.0099  | 0.025759 | yes |
| Gprc5d        | 0.27278  | 0        | 1       | 1        | no  |
| Taf1a         | 0.272698 | 0.783157 | 0.11405 | 0.19967  | no  |
| 4932416H05Rik | 0.272635 | 0.321019 | 0.54775 | 0.669276 | no  |
| Chsy1         | 0.272406 | 0.981372 | 0.0594  | 0.117885 | no  |
| Fam219b       | 0.272265 | 1.06016  | 0.037   | 0.079136 | no  |
| Myo9b         | 0.272252 | 1.06132  | 0.033   | 0.071902 | no  |

|               |          |          |         |          |     |
|---------------|----------|----------|---------|----------|-----|
| Setd1b        | 0.272139 | 1.08363  | 0.03125 | 0.068732 | no  |
| Ogt           | 0.272088 | 1.24045  | 0.01135 | 0.028969 | yes |
| Gbp4          | 0.272067 | 0.447678 | 0.36965 | 0.501344 | no  |
| Eif3e         | 0.272013 | 1.19265  | 0.0373  | 0.079688 | no  |
| Rrp15         | 0.271999 | 0.554229 | 0.34785 | 0.479922 | no  |
| Psma3         | 0.271968 | 0.842858 | 0.15205 | 0.252883 | no  |
| Hoxb2         | 0.271827 | 0.545612 | 0.33495 | 0.466294 | no  |
| Hnrnpu        | 0.271785 | 1.35183  | 0.01045 | 0.026983 | yes |
| Hnrnpr        | 0.271775 | 1.0888   | 0.02885 | 0.064274 | no  |
| Zdhhc16       | 0.271733 | 0.651376 | 0.24785 | 0.370129 | no  |
| Scaf4         | 0.271732 | 0.960791 | 0.06695 | 0.130162 | no  |
| Capn8         | 0.271602 | 0        | 1       | 1        | no  |
| Zfp768        | 0.271542 | 0.621073 | 0.2561  | 0.379036 | no  |
| Pih1d1        | 0.271356 | 0.774157 | 0.12145 | 0.210873 | no  |
| Mpv17l2       | 0.271228 | 0.265146 | 0.58565 | 0.701184 | no  |
| Med25         | 0.271204 | 1.11679  | 0.0404  | 0.085267 | no  |
| Slmo2         | 0.271201 | 1.15494  | 0.04525 | 0.094111 | no  |
| Zrsr2         | 0.271089 | 1.05014  | 0.0353  | 0.076064 | no  |
| Pde7a         | 0.271067 | 0.895802 | 0.0719  | 0.137926 | no  |
| Cyb561        | 0.270883 | 1.26489  | 0.02095 | 0.049046 | yes |
| Efcab10       | 0.270823 | 0.48285  | 0.49445 | 0.621671 | no  |
| Zbtb20        | 0.270787 | 0.67505  | 0.1817  | 0.291524 | no  |
| Klf13         | 0.270696 | 1.26217  | 0.0114  | 0.029069 | yes |
| Pdzrn3        | 0.270651 | 0.532211 | 0.3061  | 0.434986 | no  |
| Tmem107       | 0.270442 | 0.449465 | 0.36505 | 0.497002 | no  |
| Xndc1         | 0.270373 | 0.636337 | 0.22985 | 0.350106 | no  |
| Adam19        | 0.27037  | 1.22428  | 0.0139  | 0.034515 | yes |
| Alox12        | 0.270229 | 0.382015 | 0.47315 | 0.602311 | no  |
| Rhno1         | 0.270088 | 0.593071 | 0.22645 | 0.346438 | no  |
| H2-M5         | 0.270067 | 0        | 1       | 1        | no  |
| Acap1         | 0.270033 | 0        | 1       | 1        | no  |
| Stradb        | 0.269794 | 0.783632 | 0.1477  | 0.246948 | no  |
| Gabbr2        | 0.269764 | 1.3219   | 0.01205 | 0.030463 | yes |
| Wrnip1        | 0.269755 | 1.1836   | 0.02675 | 0.060243 | no  |
| H2afx         | 0.269733 | 0.879752 | 0.1298  | 0.222661 | no  |
| Edc3          | 0.269646 | 0.984082 | 0.06225 | 0.122387 | no  |
| Robo2         | 0.269609 | 1.2669   | 0.0102  | 0.026436 | yes |
| Eif5a         | 0.269345 | 1.26437  | 0.011   | 0.0282   | yes |
| Cdan1         | 0.268998 | 0.726258 | 0.15865 | 0.261402 | no  |
| McpH1         | 0.268828 | 0.719576 | 0.1645  | 0.269036 | no  |
| Exosc7        | 0.268436 | 0.86222  | 0.16795 | 0.2737   | no  |
| 6330408A02Rik | 0.268418 | 0.713371 | 0.17955 | 0.288948 | no  |
| 3300002I08Rik | 0.268371 | 0.381668 | 0.6021  | 0.714879 | no  |
| Ctu2          | 0.268279 | 0.557049 | 0.2945  | 0.42221  | no  |
| Chmp4b        | 0.268273 | 1.43896  | 0.0102  | 0.026436 | yes |
| Fam45a        | 0.268193 | 1.0237   | 0.037   | 0.079136 | no  |
| Mcat          | 0.268065 | 0.762876 | 0.17135 | 0.277978 | no  |
| DbnDD1        | 0.268016 | 0.827374 | 0.09395 | 0.170511 | no  |
| Abca7         | 0.267997 | 0.290409 | 0.5634  | 0.682488 | no  |
| Adcy6         | 0.267856 | 0.975113 | 0.05785 | 0.11543  | no  |
| Trappc8       | 0.267732 | 1.22237  | 0.0134  | 0.033404 | yes |
| Pgm1          | 0.267293 | 0.555213 | 0.3113  | 0.440723 | no  |
| Lix1          | 0.267147 | 1.34145  | 0.01145 | 0.029174 | yes |



|                 |          |          |         |          |     |
|-----------------|----------|----------|---------|----------|-----|
| 1700094D03Rik   | 0.267063 | 0        | 1       | 1        | no  |
| AK129341        | 0.267003 | 0.786301 | 0.13515 | 0.230201 | no  |
| Mphosph10       | 0.266938 | 0.866103 | 0.10925 | 0.192845 | no  |
| 1700061G19Rik   | 0.26682  | 0        | 1       | 1        | no  |
| Stac2           | 0.266739 | 1.21026  | 0.02355 | 0.054046 | no  |
| Mplkip          | 0.266703 | 0.560312 | 0.3025  | 0.430747 | no  |
| Prcp            | 0.266561 | 1.0391   | 0.0539  | 0.108627 | no  |
| Zfp212          | 0.266542 | 0.712198 | 0.15555 | 0.257477 | no  |
| Srrm1           | 0.26631  | 1.11416  | 0.0249  | 0.056683 | no  |
| Wdr4            | 0.26623  | 0.878585 | 0.08895 | 0.16302  | no  |
| Mzf1            | 0.266168 | 0        | 1       | 1        | no  |
| D430042O09Rik   | 0.266009 | 0.850139 | 0.09755 | 0.175985 | no  |
| Ccdc115         | 0.265975 | 0.898577 | 0.10955 | 0.193246 | no  |
| Klra8           | 0.26597  | 0        | 1       | 1        | no  |
| Atp5g2          | 0.265862 | 0.503294 | 0.48085 | 0.609597 | no  |
| Ubxn6           | 0.265859 | 1.26165  | 0.0247  | 0.056353 | no  |
| Topbp1          | 0.265823 | 0.978758 | 0.06    | 0.118738 | no  |
| Setd8           | 0.265791 | 1.25666  | 0.01965 | 0.046379 | yes |
| Txn14a          | 0.265739 | 1.2051   | 0.01485 | 0.036518 | yes |
| Dido1           | 0.265677 | 1        | 0.0431  | 0.090233 | no  |
| Arf6            | 0.265665 | 1.22382  | 0.02095 | 0.049046 | yes |
| Dph7            | 0.265611 | 0.428214 | 0.42675 | 0.558032 | no  |
| Ptprg           | 0.265557 | 1.24802  | 0.01235 | 0.031108 | yes |
| Pih1d2          | 0.265467 | 0        | 1       | 1        | no  |
| Atpaf2          | 0.265311 | 0.862527 | 0.12075 | 0.209904 | no  |
| Ffar1           | 0.265292 | 0        | 1       | 1        | no  |
| Tbk1            | 0.265227 | 1.1862   | 0.02555 | 0.057954 | no  |
| Snrnp27         | 0.26506  | 0.959453 | 0.1406  | 0.237441 | no  |
| Las1l           | 0.265018 | 1.1251   | 0.03735 | 0.079756 | no  |
| Dmrta2          | 0.264959 | 0        | 1       | 1        | no  |
| Ddx39           | 0.264888 | 0.454669 | 0.42505 | 0.556348 | no  |
| Ninl            | 0.264685 | 0.490368 | 0.3408  | 0.472702 | no  |
| Stk16           | 0.264369 | 0.49888  | 0.3168  | 0.446604 | no  |
| Cul4a           | 0.264224 | 1.15091  | 0.0185  | 0.044088 | yes |
| Wdr36           | 0.264156 | 1.01175  | 0.04055 | 0.085556 | no  |
| Erc1            | 0.263635 | 1.03715  | 0.03585 | 0.077099 | no  |
| Armc6           | 0.263562 | 0.78972  | 0.1469  | 0.246076 | no  |
| Rbm42           | 0.26347  | 1.16329  | 0.03865 | 0.082096 | no  |
| Osbpl10         | 0.263445 | 1.13955  | 0.04025 | 0.085004 | no  |
| Smarcc2         | 0.263323 | 1.19744  | 0.0152  | 0.037255 | yes |
| Cd70            | 0.263317 | 0        | 1       | 1        | no  |
| Spef1           | 0.263186 | 0.132183 | 0.79895 | 0.86911  | no  |
| Slc16a2         | 0.263131 | 1.03404  | 0.0484  | 0.099477 | no  |
| Gcn1l1          | 0.262989 | 1.14514  | 0.018   | 0.043098 | yes |
| Creld2          | 0.262888 | 0.626718 | 0.2797  | 0.405638 | no  |
| Taok2           | 0.26277  | 1.18031  | 0.01805 | 0.043202 | yes |
| Elmod1          | 0.262711 | 0.797359 | 0.13555 | 0.230675 | no  |
| Dynlt1c,Dynlt1f | 0.262647 | 0        | 1       | 1        | no  |
| Mapk3           | 0.262636 | 1.23638  | 0.0263  | 0.059381 | no  |
| Eif2s3y         | 0.262632 | 0.963297 | 0.08435 | 0.15647  | no  |
| Zfp2            | 0.262507 | 0.7643   | 0.1249  | 0.215733 | no  |
| Senp7           | 0.26249  | 0.772492 | 0.1159  | 0.202508 | no  |
| Usp16           | 0.262461 | 0.408369 | 0.44875 | 0.579253 | no  |

|               |          |           |         |          |     |
|---------------|----------|-----------|---------|----------|-----|
| Zwint         | 0.262334 | 1.33233   | 0.012   | 0.030371 | yes |
| Crlf3         | 0.26231  | 0.905826  | 0.0653  | 0.127402 | no  |
| Pold3         | 0.262235 | 0.714706  | 0.18035 | 0.289919 | no  |
| Pde12         | 0.262194 | 0.876324  | 0.0797  | 0.149834 | no  |
| Whsc1         | 0.26213  | 1.18277   | 0.01935 | 0.045761 | yes |
| Parp4         | 0.261971 | 1.13737   | 0.02685 | 0.060427 | no  |
| Hint1         | 0.261857 | 1.83935   | 0.0164  | 0.039806 | yes |
| Bcor          | 0.261705 | 0.693001  | 0.1759  | 0.283832 | no  |
| Mdm4          | 0.26161  | 0.868825  | 0.0935  | 0.169857 | no  |
| Tmem259       | 0.261535 | 0.169094  | 0.7367  | 0.824654 | no  |
| Rraga         | 0.261531 | 1.36573   | 0.0153  | 0.037465 | yes |
| Recql         | 0.261503 | 0.711893  | 0.1534  | 0.254777 | no  |
| Cenpp         | 0.261482 | 0         | 1       | 1        | no  |
| Rce1          | 0.261318 | 0.68257   | 0.17105 | 0.277593 | no  |
| Ppp2r2c       | 0.261182 | 1.18846   | 0.01455 | 0.035893 | yes |
| Svop          | 0.261137 | 1.26005   | 0.01605 | 0.039064 | yes |
| Ywhab         | 0.261002 | 1.17373   | 0.0287  | 0.063994 | no  |
| BC025920      | 0.260995 | 0         | 1       | 1        | no  |
| Denr          | 0.26099  | 1.16153   | 0.03415 | 0.074019 | no  |
| Mknk2         | 0.260967 | 1.08812   | 0.0417  | 0.087634 | no  |
| Idua          | 0.260943 | 0.418239  | 0.42565 | 0.556858 | no  |
| Smad4         | 0.26091  | 1.14939   | 0.0306  | 0.067572 | no  |
| Acad12        | 0.260874 | 0.469673  | 0.39075 | 0.522273 | no  |
| Rpp21         | 0.260699 | 0.746692  | 0.3764  | 0.507851 | no  |
| Fam21         | 0.260655 | 1.24113   | 0.0176  | 0.042247 | yes |
| Mthfr         | 0.260655 | 0.9747    | 0.0508  | 0.103512 | no  |
| Hoxb3         | 0.260534 | 0.563857  | 0.2572  | 0.380282 | no  |
| Colec10       | 0.260437 | 0         | 1       | 1        | no  |
| Thyn1         | 0.260433 | 0.498497  | 0.4346  | 0.566389 | no  |
| Apba3         | 0.259987 | 0.755276  | 0.14975 | 0.249621 | no  |
| Nat1          | 0.259944 | 0         | 1       | 1        | no  |
| Dph3          | 0.259813 | 0.933196  | 0.05915 | 0.117564 | no  |
| Dnaaf1        | 0.25979  | 0         | 1       | 1        | no  |
| Capns1        | 0.259711 | 1.36128   | 0.0181  | 0.043291 | yes |
| Ythdc2        | 0.259292 | 0.993541  | 0.05585 | 0.112063 | no  |
| Pim2          | 0.259261 | 0.946606  | 0.0838  | 0.155711 | no  |
| Hmha1         | 0.259107 | 0.0286511 | 0.92135 | 0.952138 | no  |
| 4933431E20Rik | 0.259026 | 0.85953   | 0.0968  | 0.174846 | no  |
| Cdipt         | 0.259024 | 1.32628   | 0.015   | 0.036839 | yes |
| Ash2l         | 0.259012 | 1.00263   | 0.045   | 0.093694 | no  |
| Tat           | 0.25901  | 0         | 1       | 1        | no  |
| Tcp10c        | 0.258968 | 0         | 1       | 1        | no  |
| Ccdc51        | 0.258948 | 0.558584  | 0.3082  | 0.437314 | no  |
| S100pbp       | 0.258884 | 0.742035  | 0.19375 | 0.306192 | no  |
| Tstd2         | 0.258812 | 0.35286   | 0.48315 | 0.611578 | no  |
| Prim1         | 0.258701 | 0.580776  | 0.30715 | 0.436104 | no  |
| Hist1h2bp     | 0.258583 | 0         | 1       | 1        | no  |
| B3gnt4        | 0.258562 | 0         | 1       | 1        | no  |
| AW554918      | 0.258544 | 0.707337  | 0.1732  | 0.280293 | no  |
| Fam129c       | 0.258485 | 0         | 1       | 1        | no  |
| Rab23         | 0.258469 | 0.848407  | 0.0886  | 0.162535 | no  |
| Tmem57        | 0.258404 | 1.15632   | 0.0296  | 0.065724 | no  |
| Rnf214        | 0.258341 | 0.95591   | 0.06945 | 0.134196 | no  |

|               |          |          |         |          |     |
|---------------|----------|----------|---------|----------|-----|
| Gnaz          | 0.258196 | 1.05481  | 0.035   | 0.075528 | no  |
| Zfp385c       | 0.258125 | 0        | 1       | 1        | no  |
| Ssb           | 0.258067 | 1.24133  | 0.0236  | 0.054132 | no  |
| B3gnt3        | 0.257768 | 0        | 1       | 1        | no  |
| Surf2         | 0.25764  | 0.366822 | 0.5486  | 0.670068 | no  |
| Szt2          | 0.25746  | 0.823849 | 0.09805 | 0.176815 | no  |
| Ern1          | 0.257327 | 0.609723 | 0.2418  | 0.363467 | no  |
| Gapdh         | 0.257306 | 0.652698 | 0.18775 | 0.29881  | no  |
| Sifnl1        | 0.257198 | 0        | 1       | 1        | no  |
| Hgs           | 0.257107 | 1.14923  | 0.01985 | 0.046793 | yes |
| Zswim8        | 0.257015 | 1.18266  | 0.017   | 0.04103  | yes |
| Mill2         | 0.256971 | 0.318102 | 0.5204  | 0.645368 | no  |
| Bloc1s2       | 0.256924 | 0.659834 | 0.306   | 0.434937 | no  |
| Uggt2         | 0.256869 | 0.737455 | 0.14785 | 0.247075 | no  |
| Rps27a        | 0.256821 | 0.424421 | 0.4412  | 0.572684 | no  |
| Zfp133-ps     | 0.256719 | 0.298545 | 0.57155 | 0.689969 | no  |
| Wibg          | 0.256653 | 0.591009 | 0.23755 | 0.358909 | no  |
| Fcf1          | 0.256507 | 0.546681 | 0.4237  | 0.555183 | no  |
| Fam117b       | 0.256464 | 1.20132  | 0.0192  | 0.045454 | yes |
| 1600014C10Rik | 0.256411 | 1.03066  | 0.0399  | 0.084373 | no  |
| Ppp1r16a      | 0.256326 | 1.00735  | 0.06405 | 0.125314 | no  |
| Ift57         | 0.256257 | 0.873366 | 0.10315 | 0.184234 | no  |
| Kif3b         | 0.256226 | 1.21969  | 0.01915 | 0.045377 | yes |
| Oma1          | 0.256182 | 0.598726 | 0.27715 | 0.402689 | no  |
| Gtf2ird2      | 0.256175 | 0.776381 | 0.1414  | 0.238519 | no  |
| Ercc8         | 0.256066 | 0.532609 | 0.33075 | 0.461804 | no  |
| Capn11        | 0.255798 | 0.355482 | 0.5091  | 0.635393 | no  |
| Zscan20       | 0.255725 | 0.466371 | 0.36545 | 0.497359 | no  |
| Smc3          | 0.255555 | 1.07563  | 0.03705 | 0.079204 | no  |
| Rangap1       | 0.255521 | 1.20037  | 0.01545 | 0.037763 | yes |
| Ppid          | 0.255433 | 1.01372  | 0.0743  | 0.141466 | no  |
| Agtppb1       | 0.255405 | 1.18019  | 0.0174  | 0.041888 | yes |
| Srp68         | 0.255366 | 1.16211  | 0.03115 | 0.068581 | no  |
| Pcnt          | 0.255319 | 0.869881 | 0.08055 | 0.151004 | no  |
| Telo2         | 0.255166 | 0.73587  | 0.13705 | 0.232661 | no  |
| Elmod2        | 0.255082 | 0.970598 | 0.0518  | 0.105129 | no  |
| R3hcc1l       | 0.254928 | 0.729295 | 0.1637  | 0.268058 | no  |
| Usp11         | 0.2546   | 0.974301 | 0.06405 | 0.125314 | no  |
| Cbx1          | 0.254524 | 0.724095 | 0.18295 | 0.292892 | no  |
| Fam174a       | 0.254502 | 1.15663  | 0.03405 | 0.073814 | no  |
| Snx1          | 0.254314 | 1.20314  | 0.02915 | 0.064877 | no  |
| Lsm4          | 0.254313 | 1.01426  | 0.1097  | 0.193484 | no  |
| Csnk1g2       | 0.254244 | 1.14213  | 0.0218  | 0.050705 | no  |
| Ccdc61        | 0.254155 | 0.603379 | 0.2786  | 0.404264 | no  |
| C2            | 0.254127 | 0.477237 | 0.36755 | 0.499006 | no  |
| Bcdin3d       | 0.254076 | 0.46135  | 0.4381  | 0.569719 | no  |
| Chrb1         | 0.25406  | 0        | 1       | 1        | no  |
| Tbcel         | 0.253741 | 1.17881  | 0.02365 | 0.054228 | no  |
| Os9           | 0.253731 | 1.16013  | 0.0192  | 0.045454 | yes |
| Gpr139        | 0.25371  | 0.534288 | 0.39125 | 0.522783 | no  |
| Rpl3          | 0.253641 | 0.785602 | 0.1129  | 0.198101 | no  |
| Prrg2         | 0.253557 | 0.5662   | 0.32575 | 0.456456 | no  |
| Stk25         | 0.25352  | 1.1064   | 0.02525 | 0.057371 | no  |

|               |          |          |         |          |     |
|---------------|----------|----------|---------|----------|-----|
| Fam63b        | 0.253482 | 1.2097   | 0.0172  | 0.041459 | yes |
| Prdm1         | 0.253473 | 0        | 1       | 1        | no  |
| Pithd1        | 0.253461 | 1.16811  | 0.0436  | 0.091122 | no  |
| Cage1         | 0.253442 | 0.423241 | 0.4368  | 0.568586 | no  |
| Elmo2         | 0.253364 | 1.12046  | 0.0227  | 0.052403 | no  |
| Arl1          | 0.253308 | 1.03662  | 0.11155 | 0.1962   | no  |
| Cdk20         | 0.253294 | 0.737156 | 0.19335 | 0.305705 | no  |
| Rb1cc1        | 0.253231 | 1.20759  | 0.0164  | 0.039806 | yes |
| Csnk2a1       | 0.2531   | 1.22619  | 0.01805 | 0.043202 | yes |
| Capn5         | 0.253049 | 1.2236   | 0.01875 | 0.04458  | yes |
| Vps33a        | 0.252824 | 1.22544  | 0.01835 | 0.043778 | yes |
| Ap1s1         | 0.252767 | 1.31333  | 0.02655 | 0.059874 | no  |
| 2700060E02Rik | 0.252754 | 0.544175 | 0.2681  | 0.392592 | no  |
| Dkk3          | 0.252621 | 1.24081  | 0.01745 | 0.041986 | yes |
| Zfp59         | 0.252607 | 0.555184 | 0.291   | 0.418096 | no  |
| Gdi1          | 0.252589 | 1.21719  | 0.0228  | 0.052607 | no  |
| Eif2b3        | 0.252547 | 0.706707 | 0.1539  | 0.255415 | no  |
| Gm10509       | 0.252331 | 0.537043 | 0.32705 | 0.457794 | no  |
| Srsf10        | 0.252325 | 1.01641  | 0.04145 | 0.087178 | no  |
| Dus4l         | 0.252292 | 0.406133 | 0.4716  | 0.600856 | no  |
| Erc2          | 0.252242 | 1.18668  | 0.0211  | 0.049362 | yes |
| Nsmce1        | 0.252185 | 0.822847 | 0.1826  | 0.292508 | no  |
| Pop4          | 0.252119 | 0.940779 | 0.11115 | 0.195574 | no  |
| Map4k3        | 0.252079 | 1.0664   | 0.0385  | 0.081803 | no  |
| Klk6          | 0.251973 | 0        | 1       | 1        | no  |
| Zrsr1         | 0.25195  | 0.967597 | 0.05085 | 0.103582 | no  |
| Ly6g5b        | 0.251884 | 0        | 1       | 1        | no  |
| Nov           | 0.251809 | 0.915159 | 0.0947  | 0.171637 | no  |
| Fig4          | 0.251805 | 1.17717  | 0.02635 | 0.059484 | no  |
| Akr1a1        | 0.251761 | 1.34906  | 0.02065 | 0.048455 | yes |
| Rpl22l1       | 0.251734 | 0.804726 | 0.34905 | 0.481227 | no  |
| B3gnt8        | 0.251657 | 0.809154 | 0.1074  | 0.190262 | no  |
| Cct4          | 0.251543 | 1.29474  | 0.01835 | 0.043778 | yes |
| Snrpd3        | 0.251427 | 1.32295  | 0.07495 | 0.14252  | no  |
| Eif3a         | 0.251163 | 1.1793   | 0.017   | 0.04103  | yes |
| Gm20605,Lrch4 | 0.251062 | 0.266435 | 0.56685 | 0.685353 | no  |
| Med21         | 0.25101  | 1.18687  | 0.07805 | 0.147401 | no  |
| Dctn3         | 0.250806 | 1.11918  | 0.0241  | 0.055165 | no  |
| Urod          | 0.25047  | 1.17058  | 0.04975 | 0.101747 | no  |
| Zfp251        | 0.250439 | 0.91037  | 0.08135 | 0.152096 | no  |
| Gm11110       | 0.250433 | 0        | 1       | 1        | no  |
| Mtcp1         | 0.250256 | 0.445033 | 0.3645  | 0.496644 | no  |
| Rpl37a        | 0.25023  | 0.518679 | 0.496   | 0.623029 | no  |
| Frs3          | 0.250197 | 0.702159 | 0.15545 | 0.257344 | no  |
| Tpm3          | 0.250053 | 0.964906 | 0.04905 | 0.10061  | no  |
| Colgalt2      | 0.250015 | 1.1057   | 0.037   | 0.079136 | no  |
| Daxx          | 0.249971 | 0.748441 | 0.1318  | 0.22545  | no  |
| Mrps18c       | 0.249939 | 1.21146  | 0.1492  | 0.249017 | no  |
| Lsm2          | 0.249884 | 0.486313 | 0.3164  | 0.446134 | no  |
| Kif21a        | 0.249865 | 0.940658 | 0.0598  | 0.118501 | no  |
| Ppp6r1        | 0.249846 | 1.22556  | 0.0183  | 0.043682 | yes |
| Ppp1r9b       | 0.249771 | 1.22945  | 0.01665 | 0.040309 | yes |
| Phf14         | 0.249608 | 0.849265 | 0.0905  | 0.165267 | no  |

|               |          |          |         |          |     |
|---------------|----------|----------|---------|----------|-----|
| Taz           | 0.249602 | 0.745442 | 0.1345  | 0.22927  | no  |
| Mettl5        | 0.249515 | 0.264012 | 0.5987  | 0.712432 | no  |
| Snx12         | 0.249406 | 1.02499  | 0.03635 | 0.077997 | no  |
| 2410127L17Rik | 0.249217 | 0.33481  | 0.54215 | 0.664269 | no  |
| Acot13        | 0.248777 | 1.18065  | 0.0912  | 0.166385 | no  |
| Baz2b         | 0.24861  | 0.942372 | 0.06375 | 0.124874 | no  |
| Pam           | 0.248582 | 1.2281   | 0.019   | 0.045077 | yes |
| Myl7          | 0.248521 | 0        | 1       | 1        | no  |
| Cc2d1a        | 0.248476 | 0.937737 | 0.07365 | 0.140451 | no  |
| Zgpat         | 0.248445 | 0.530771 | 0.29625 | 0.424032 | no  |
| Gnpnat1       | 0.248365 | 0.430064 | 0.3895  | 0.520917 | no  |
| Lrp1b         | 0.248244 | 0.653392 | 0.18745 | 0.298476 | no  |
| Ldb1          | 0.248164 | 1.01436  | 0.0388  | 0.082348 | no  |
| Tpra1         | 0.2481   | 0.931481 | 0.0943  | 0.171006 | no  |
| Mars2         | 0.247864 | 0.628877 | 0.23815 | 0.359283 | no  |
| Phf10         | 0.247832 | 0.520755 | 0.35425 | 0.486173 | no  |
| Rybp          | 0.247765 | 0.730309 | 0.15755 | 0.259945 | no  |
| Mybl1         | 0.247649 | 0.517467 | 0.3019  | 0.430216 | no  |
| Gnl2          | 0.247538 | 1.04208  | 0.04385 | 0.091587 | no  |
| Snw1          | 0.247524 | 0.896267 | 0.0733  | 0.139884 | no  |
| Osm           | 0.24735  | 0        | 1       | 1        | no  |
| Lin7c         | 0.247282 | 1.11838  | 0.03405 | 0.073814 | no  |
| Ppil2         | 0.247124 | 0.84785  | 0.0892  | 0.16332  | no  |
| Dhcr24        | 0.246995 | 1.14086  | 0.0281  | 0.062846 | no  |
| Vps54         | 0.246892 | 0.521421 | 0.31855 | 0.448356 | no  |
| Cep128        | 0.246874 | 0.48919  | 0.3257  | 0.456434 | no  |
| Vasp          | 0.246847 | 1.06173  | 0.0336  | 0.07297  | no  |
| Arnt          | 0.246745 | 0.830236 | 0.0984  | 0.177254 | no  |
| 36950         | 0.24656  | 0.797779 | 0.1052  | 0.187316 | no  |
| Vps37c        | 0.246431 | 1.07754  | 0.0455  | 0.094571 | no  |
| Xrcc6bp1      | 0.246292 | 0.353752 | 0.47895 | 0.607769 | no  |
| Sf1           | 0.246244 | 1.08522  | 0.0294  | 0.065346 | no  |
| Ints8         | 0.246164 | 0.784417 | 0.1164  | 0.203248 | no  |
| D030045P18Rik | 0.246155 | 0        | 1       | 1        | no  |
| Wdr89         | 0.246154 | 0.228989 | 0.64595 | 0.750875 | no  |
| C78339        | 0.246101 | 1.04383  | 0.0718  | 0.137854 | no  |
| Usp48         | 0.246001 | 1.14072  | 0.02455 | 0.056069 | no  |
| Golm1         | 0.245993 | 0.693164 | 0.1627  | 0.26675  | no  |
| Sugp1         | 0.245936 | 0.975881 | 0.07305 | 0.139527 | no  |
| Mier1         | 0.245887 | 0.864547 | 0.0824  | 0.153626 | no  |
| Mzt2          | 0.245876 | 0.848304 | 0.1692  | 0.275365 | no  |
| Gcat          | 0.245767 | 0.55816  | 0.27735 | 0.402891 | no  |
| Hace1         | 0.245692 | 1.03164  | 0.05135 | 0.104392 | no  |
| Rpp25l        | 0.245638 | 0.653265 | 0.31895 | 0.448871 | no  |
| Gdap10        | 0.245509 | 0        | 1       | 1        | no  |
| Tmem55a       | 0.245463 | 1.17497  | 0.03105 | 0.068417 | no  |
| Mettl3        | 0.245378 | 0.419958 | 0.40405 | 0.535678 | no  |
| Gm12942       | 0.245233 | 0.36321  | 0.54935 | 0.670428 | no  |
| Mff           | 0.245177 | 1.25687  | 0.0242  | 0.055365 | no  |
| Sh3bgrl2      | 0.245158 | 1.20948  | 0.0231  | 0.053179 | no  |
| Banf1         | 0.245102 | 0.84232  | 0.19335 | 0.305705 | no  |
| Gda           | 0.245097 | 1.10354  | 0.0331  | 0.072073 | no  |
| B4galnt1      | 0.245054 | 0.828618 | 0.09885 | 0.177847 | no  |

|               |          |          |         |          |     |
|---------------|----------|----------|---------|----------|-----|
| Ddx11         | 0.244624 | 0        | 1       | 1        | no  |
| Peo1          | 0.244621 | 0.666743 | 0.20325 | 0.317798 | no  |
| Slc25a28      | 0.244393 | 0.756963 | 0.18525 | 0.295789 | no  |
| 38411         | 0.244266 | 0.777442 | 0.1614  | 0.265176 | no  |
| Slc4a5        | 0.244139 | 0        | 1       | 1        | no  |
| 1810011H11Rik | 0.244072 | 0        | 1       | 1        | no  |
| Klhl24        | 0.243956 | 1.07933  | 0.035   | 0.075528 | no  |
| 0610009B22Rik | 0.243783 | 1.00663  | 0.12715 | 0.218992 | no  |
| Cbx7          | 0.243723 | 0.933463 | 0.08065 | 0.151072 | no  |
| Tmem65        | 0.243709 | 1.20417  | 0.02005 | 0.047189 | yes |
| Lactb2        | 0.243458 | 0.948356 | 0.0884  | 0.162281 | no  |
| Gtf2f2        | 0.243456 | 0.716794 | 0.2093  | 0.325493 | no  |
| Tbc1d10c      | 0.243435 | 0        | 1       | 1        | no  |
| Gskip         | 0.243374 | 1.0906   | 0.0425  | 0.08909  | no  |
| Trp53inp2     | 0.243357 | 1.19966  | 0.0194  | 0.045862 | yes |
| Thap2         | 0.243298 | 0.686484 | 0.19765 | 0.310874 | no  |
| Thrap3        | 0.243294 | 1.07986  | 0.03975 | 0.084136 | no  |
| Ywhah         | 0.24322  | 0.998555 | 0.0766  | 0.145096 | no  |
| Zfp668        | 0.243122 | 0.612901 | 0.24295 | 0.364617 | no  |
| Smarca2       | 0.243111 | 0.846534 | 0.0876  | 0.161057 | no  |
| Ralgs2        | 0.243047 | 1.01252  | 0.04385 | 0.091587 | no  |
| Dcun1d5       | 0.243014 | 1.11099  | 0.06255 | 0.122904 | no  |
| Gm10778       | 0.242798 | 0        | 1       | 1        | no  |
| Nudt10        | 0.242595 | 0.745435 | 0.18235 | 0.292214 | no  |
| Raver1        | 0.242593 | 0.816104 | 0.1028  | 0.183708 | no  |
| Mtmr11        | 0.242229 | 0.608402 | 0.25095 | 0.373665 | no  |
| Cdc20b        | 0.242133 | 0        | 1       | 1        | no  |
| Fam133b       | 0.242117 | 0.825275 | 0.1316  | 0.225166 | no  |
| Lsm12         | 0.242056 | 0.860177 | 0.14775 | 0.247001 | no  |
| Polr2h        | 0.241945 | 0.707178 | 0.2884  | 0.415079 | no  |
| Chrac1        | 0.241928 | 0.699436 | 0.2869  | 0.413324 | no  |
| Gm10791       | 0.241829 | 0        | 1       | 1        | no  |
| Tbpl1         | 0.2418   | 0.997847 | 0.0449  | 0.093515 | no  |
| Dhx15         | 0.241715 | 1.10744  | 0.0279  | 0.062451 | no  |
| Mfsd7b        | 0.241678 | 0.922924 | 0.0612  | 0.120681 | no  |
| Hltf          | 0.24136  | 0.810715 | 0.10175 | 0.182126 | no  |
| Perp          | 0.241327 | 0.6362   | 0.252   | 0.37464  | no  |
| Tigd5         | 0.241298 | 0.39993  | 0.44505 | 0.57644  | no  |
| Gadd45gip1    | 0.241199 | 0.584345 | 0.3012  | 0.429356 | no  |
| Dnaaf2        | 0.241132 | 0.330752 | 0.52625 | 0.65001  | no  |
| Tmem199       | 0.241122 | 1.00874  | 0.085   | 0.157499 | no  |
| Gclc          | 0.241103 | 1.05862  | 0.0478  | 0.098473 | no  |
| Mier2         | 0.24108  | 0.749233 | 0.16485 | 0.269509 | no  |
| Lrrc3b        | 0.241015 | 0.731892 | 0.19515 | 0.307671 | no  |
| Lztfl1        | 0.240971 | 0.889365 | 0.0902  | 0.164787 | no  |
| Zfp707        | 0.240773 | 0.421161 | 0.4575  | 0.587348 | no  |
| Rnf220        | 0.240751 | 1.06282  | 0.04805 | 0.09888  | no  |
| Znhit2        | 0.240682 | 0.890659 | 0.1316  | 0.225166 | no  |
| Pstpip1       | 0.240652 | 0.607154 | 0.27365 | 0.39852  | no  |
| Ppp4r1l-ps    | 0.240576 | 0.483048 | 0.35285 | 0.485054 | no  |
| Camkmt        | 0.240572 | 0.68755  | 0.23425 | 0.354933 | no  |
| Nupl2         | 0.240497 | 0.60464  | 0.2524  | 0.375066 | no  |
| Qrs1          | 0.240453 | 0.849357 | 0.12285 | 0.212969 | no  |



|               |          |          |         |          |    |
|---------------|----------|----------|---------|----------|----|
| Rnf5          | 0.240295 | 1.04626  | 0.0881  | 0.16182  | no |
| Hspa2         | 0.24025  | 0.858999 | 0.08335 | 0.155005 | no |
| Yrdc          | 0.24025  | 0.421887 | 0.463   | 0.592745 | no |
| Lzts3         | 0.240116 | 0.938232 | 0.0594  | 0.117885 | no |
| Eif2s1        | 0.239886 | 0.989304 | 0.06205 | 0.122067 | no |
| Ksr2          | 0.239644 | 0.788711 | 0.1214  | 0.210813 | no |
| Sp2           | 0.239625 | 0.637661 | 0.20025 | 0.31407  | no |
| Uba1          | 0.239434 | 1.02329  | 0.04185 | 0.087894 | no |
| Parvb         | 0.239419 | 1.17287  | 0.02465 | 0.056249 | no |
| Aimp1         | 0.23923  | 1.08108  | 0.07365 | 0.140451 | no |
| 6430706D22Rik | 0.239227 | 0.82804  | 0.0954  | 0.172741 | no |
| Hspbp1        | 0.239202 | 1.10549  | 0.05575 | 0.111896 | no |
| Snrnp40       | 0.23918  | 0.752401 | 0.18715 | 0.298141 | no |
| Zdhhc5        | 0.239179 | 0.63393  | 0.20085 | 0.314788 | no |
| Cpped1        | 0.23911  | 0.955089 | 0.05075 | 0.103473 | no |
| Mad2l1bp      | 0.239006 | 0.733955 | 0.21805 | 0.335989 | no |
| Sertad3       | 0.239003 | 0.555355 | 0.3463  | 0.47838  | no |
| Dohh          | 0.238927 | 0.942261 | 0.05685 | 0.113691 | no |
| Cfdp1         | 0.238851 | 1.16413  | 0.05155 | 0.104718 | no |
| Arxes1        | 0.238769 | 0.732617 | 0.1968  | 0.309721 | no |
| Gabpb1        | 0.238698 | 0.607345 | 0.2155  | 0.33326  | no |
| Ptprf         | 0.238697 | 1.09357  | 0.0272  | 0.061122 | no |
| 2310047M10Rik | 0.238678 | 0.97703  | 0.0808  | 0.151216 | no |
| Armc10        | 0.238605 | 0.779756 | 0.15545 | 0.257344 | no |
| Polr1c        | 0.238605 | 0.800249 | 0.1705  | 0.277039 | no |
| Cdc37         | 0.238554 | 1.18532  | 0.0275  | 0.061691 | no |
| Tnks          | 0.238481 | 1.14204  | 0.0248  | 0.056514 | no |
| Uchl1         | 0.238346 | 0.817174 | 0.09825 | 0.177056 | no |
| Arl6ip5       | 0.238314 | 1.31392  | 0.0238  | 0.054535 | no |
| Ankrd32       | 0.238294 | 0.740029 | 0.15885 | 0.261634 | no |
| BC055324      | 0.238273 | 0        | 1       | 1        | no |
| Kcns2         | 0.238228 | 0.41368  | 0.4012  | 0.532897 | no |
| Hoxd3os1      | 0.238091 | 0        | 1       | 1        | no |
| Pdzd7         | 0.237966 | 0.292031 | 0.55345 | 0.674124 | no |
| Rps6ka4       | 0.237857 | 0.87228  | 0.07825 | 0.147652 | no |
| Ak6           | 0.237752 | 0.389899 | 0.5319  | 0.655402 | no |
| Mdm2          | 0.237748 | 0.854665 | 0.0863  | 0.15933  | no |
| Tgtp1         | 0.237736 | 0        | 1       | 1        | no |
| Gm15455       | 0.237482 | 0.425833 | 0.4228  | 0.554223 | no |
| Hdac2         | 0.237436 | 1.18138  | 0.03125 | 0.068732 | no |
| Stard13       | 0.237424 | 1.05251  | 0.03385 | 0.073452 | no |
| Xab2          | 0.237334 | 0.923931 | 0.0853  | 0.157989 | no |
| Gm13375       | 0.237235 | 0.6009   | 0.2994  | 0.427367 | no |
| Plk3          | 0.237228 | 0.643919 | 0.1918  | 0.303834 | no |
| Psmc9         | 0.237085 | 0.800265 | 0.1357  | 0.230901 | no |
| Myo1e         | 0.237004 | 1.15319  | 0.02415 | 0.05527  | no |
| Rnf19a        | 0.236851 | 1.0954   | 0.02525 | 0.057371 | no |
| Nhlrc1        | 0.236774 | 0.674561 | 0.22    | 0.338207 | no |
| Araf          | 0.236771 | 0.499262 | 0.38105 | 0.512457 | no |
| As3mt         | 0.236686 | 0.648564 | 0.25135 | 0.374134 | no |
| 1110004F10Rik | 0.236661 | 1.15876  | 0.0467  | 0.096627 | no |
| Eif5          | 0.236646 | 1.1428   | 0.0243  | 0.055565 | no |
| Slc25a39      | 0.236614 | 1.03959  | 0.03345 | 0.07268  | no |

|               |          |           |         |          |    |
|---------------|----------|-----------|---------|----------|----|
| Wdr13         | 0.23655  | 1.08246   | 0.0304  | 0.067208 | no |
| Pot1a         | 0.236424 | 0.820843  | 0.12135 | 0.210754 | no |
| Rps15a        | 0.236325 | 0.88483   | 0.08645 | 0.159518 | no |
| Ano8          | 0.23599  | 0.760187  | 0.1266  | 0.218329 | no |
| Gabbr1        | 0.235972 | 1.08709   | 0.03785 | 0.080629 | no |
| Pim1          | 0.23596  | 0.720199  | 0.19715 | 0.310198 | no |
| Nrbf2         | 0.235951 | 0.746656  | 0.1857  | 0.296436 | no |
| Grb2          | 0.235866 | 1.17208   | 0.02865 | 0.063915 | no |
| Zc3h13        | 0.235778 | 0.445466  | 0.36385 | 0.49586  | no |
| Zmiz1         | 0.235705 | 1.05921   | 0.031   | 0.06833  | no |
| Ncoa2         | 0.235572 | 1.05251   | 0.0359  | 0.077156 | no |
| Ict1          | 0.235546 | 0.930873  | 0.1731  | 0.2802   | no |
| Cdc45         | 0.235527 | 0.347415  | 0.4843  | 0.612625 | no |
| Dmwd          | 0.235365 | 1.07347   | 0.0485  | 0.099652 | no |
| Gm12657       | 0.235357 | 0.0970285 | 0.84915 | 0.904583 | no |
| Fam188b       | 0.235195 | 0.396274  | 0.4214  | 0.552934 | no |
| Bcor1         | 0.235083 | 0.7475    | 0.1457  | 0.244746 | no |
| Zfp943        | 0.234856 | 0.763535  | 0.15365 | 0.255096 | no |
| Oas1c         | 0.234808 | 0.636164  | 0.2422  | 0.363821 | no |
| Trim28        | 0.234755 | 1.07048   | 0.0459  | 0.095283 | no |
| Ap5b1         | 0.23455  | 0.63969   | 0.22835 | 0.348742 | no |
| Cdc42bpb      | 0.234536 | 1.12128   | 0.02855 | 0.063713 | no |
| Rfx3          | 0.234357 | 0.566847  | 0.25475 | 0.377586 | no |
| 1700123020Rik | 0.234342 | 0.465212  | 0.35345 | 0.485477 | no |
| Bank1         | 0.234281 | 0.345933  | 0.51585 | 0.641585 | no |
| Fam162a       | 0.234111 | 1.05259   | 0.14365 | 0.241761 | no |
| Mrpl9         | 0.234102 | 1.01089   | 0.07865 | 0.148196 | no |
| Neil2         | 0.234076 | 0.411941  | 0.45715 | 0.587069 | no |
| Sft2d3        | 0.234048 | 0.416537  | 0.4347  | 0.566408 | no |
| Arih1         | 0.233776 | 1.12468   | 0.02815 | 0.062947 | no |
| Chst5         | 0.233776 | 0.401447  | 0.46895 | 0.597997 | no |
| Myl12b        | 0.233699 | 1.38304   | 0.0276  | 0.061884 | no |
| Kdm5c         | 0.233527 | 1.03541   | 0.0423  | 0.088712 | no |
| Kcna5         | 0.233515 | 0.354498  | 0.5012  | 0.627837 | no |
| Cntrob        | 0.233469 | 0.546028  | 0.30475 | 0.433557 | no |
| Ctnnb1        | 0.233385 | 1.02725   | 0.0381  | 0.081096 | no |
| Ranbp17       | 0.233335 | 0.634926  | 0.2057  | 0.320948 | no |
| Ndufaf7       | 0.233136 | 0.951444  | 0.0826  | 0.153912 | no |
| Mndal         | 0.233118 | 0.360153  | 0.51805 | 0.643416 | no |
| Hps6          | 0.232947 | 0.65739   | 0.22095 | 0.339433 | no |
| Efr3b         | 0.232781 | 1.08395   | 0.0362  | 0.077738 | no |
| Taf15         | 0.232775 | 0.962055  | 0.07995 | 0.150198 | no |
| Rpusd3        | 0.232771 | 0.464362  | 0.4286  | 0.56001  | no |
| Exoc1         | 0.232621 | 1.00043   | 0.0429  | 0.089843 | no |
| Zmym3         | 0.232418 | 0.856656  | 0.0819  | 0.152908 | no |
| Mrpl2         | 0.232402 | 0.913994  | 0.1345  | 0.22927  | no |
| Pisd-ps2      | 0.23233  | 0.483099  | 0.4011  | 0.532885 | no |
| Rdh13         | 0.23219  | 0.73636   | 0.1383  | 0.234393 | no |
| Hdac1         | 0.232181 | 0.465751  | 0.3929  | 0.52446  | no |
| Rfc2          | 0.232168 | 0.854572  | 0.13735 | 0.232991 | no |
| Stmn2         | 0.232032 | 0.954571  | 0.0855  | 0.158293 | no |
| Ppp2r5b       | 0.232009 | 1.07904   | 0.02625 | 0.059298 | no |
| Panx1         | 0.231998 | 1.09679   | 0.0479  | 0.098648 | no |

|             |          |          |         |          |    |
|-------------|----------|----------|---------|----------|----|
| Map1lc3a    | 0.231843 | 1.08241  | 0.0277  | 0.062088 | no |
| Rrp1b       | 0.231762 | 0.535247 | 0.2808  | 0.406873 | no |
| Zfp628      | 0.231601 | 0.621042 | 0.24015 | 0.361766 | no |
| Rpusd4      | 0.231494 | 0.638094 | 0.25255 | 0.375247 | no |
| Kdm4b       | 0.231472 | 0.936606 | 0.06965 | 0.134465 | no |
| Rnf10       | 0.231228 | 1.16174  | 0.02685 | 0.060427 | no |
| Ece2        | 0.231224 | 0.840052 | 0.08975 | 0.164101 | no |
| Setd5       | 0.231085 | 1.037    | 0.04265 | 0.089376 | no |
| Rnf168      | 0.231083 | 0.997856 | 0.0531  | 0.10721  | no |
| Chmp5       | 0.230742 | 1.21276  | 0.0366  | 0.078483 | no |
| Sh3d21      | 0.230663 | 0        | 1       | 1        | no |
| Hoxd8       | 0.230408 | 0.780055 | 0.11625 | 0.203066 | no |
| Cutc        | 0.230358 | 0.336512 | 0.4963  | 0.623347 | no |
| Rad21       | 0.230344 | 1.12081  | 0.0319  | 0.069919 | no |
| Tmtc3       | 0.229754 | 0.794675 | 0.10605 | 0.188298 | no |
| Mir22hg     | 0.229727 | 0.750117 | 0.1301  | 0.223031 | no |
| Rnf25       | 0.229634 | 0.745654 | 0.1921  | 0.304128 | no |
| Edem1       | 0.229579 | 0.972257 | 0.05755 | 0.114901 | no |
| BC028528    | 0.229481 | 0.192306 | 0.70675 | 0.801612 | no |
| Zfp90       | 0.229182 | 0.634906 | 0.23745 | 0.358798 | no |
| Rbm14       | 0.229175 | 0.65153  | 0.18675 | 0.297575 | no |
| Mettl4      | 0.229124 | 0.650578 | 0.23325 | 0.3541   | no |
| Tank        | 0.229115 | 0.714597 | 0.156   | 0.258061 | no |
| Pus10       | 0.22905  | 0.289599 | 0.55175 | 0.672491 | no |
| Lrch1       | 0.229033 | 0.71193  | 0.15365 | 0.255096 | no |
| Gtf2ird1    | 0.228981 | 0.733217 | 0.1401  | 0.236778 | no |
| Zfp808      | 0.228963 | 0        | 1       | 1        | no |
| Tymp        | 0.228887 | 0.144013 | 0.77495 | 0.852792 | no |
| Esyt1       | 0.228852 | 1.06244  | 0.03015 | 0.066733 | no |
| Rxbp        | 0.228771 | 0.876696 | 0.07915 | 0.149011 | no |
| Nrap        | 0.22866  | 0        | 1       | 1        | no |
| Ppp1r21     | 0.228623 | 1.00506  | 0.0591  | 0.117518 | no |
| Cebpz       | 0.228549 | 0.761586 | 0.12905 | 0.221661 | no |
| Rbm18       | 0.228503 | 0.901514 | 0.0971  | 0.175269 | no |
| Syt6        | 0.228408 | 0.545141 | 0.2986  | 0.426659 | no |
| Armcx5      | 0.228366 | 0.227178 | 0.64775 | 0.75211  | no |
| Slx4ip      | 0.228361 | 0.294714 | 0.54855 | 0.670068 | no |
| Dbnl        | 0.228329 | 1.02685  | 0.0406  | 0.085621 | no |
| Pdzrn4      | 0.228258 | 0        | 1       | 1        | no |
| Ikbke       | 0.228244 | 0        | 1       | 1        | no |
| Narf        | 0.228218 | 0.940214 | 0.07165 | 0.137646 | no |
| Srp14       | 0.228114 | 1.34162  | 0.04555 | 0.09466  | no |
| Jmjd7       | 0.228101 | 0.324629 | 0.59875 | 0.712432 | no |
| Eid2        | 0.227908 | 0.894171 | 0.12245 | 0.212359 | no |
| Frmd4a      | 0.227899 | 0.975733 | 0.0508  | 0.103512 | no |
| Crnk11      | 0.227882 | 0.814967 | 0.1223  | 0.212126 | no |
| Phka2       | 0.227759 | 0.73931  | 0.1399  | 0.23653  | no |
| Tmprss11bnl | 0.227755 | 0        | 1       | 1        | no |
| Rps7        | 0.2277   | 0.265012 | 0.68155 | 0.780166 | no |
| Txnrd1      | 0.227558 | 1.09372  | 0.03335 | 0.07251  | no |
| Terf2       | 0.227544 | 0.764949 | 0.12545 | 0.216571 | no |
| Rnf135      | 0.227459 | 0.466257 | 0.3877  | 0.519138 | no |
| Tet3        | 0.227365 | 0.878086 | 0.0795  | 0.149543 | no |

|             |          |          |         |          |    |
|-------------|----------|----------|---------|----------|----|
| Zbtb17      | 0.227356 | 0.479142 | 0.3739  | 0.505455 | no |
| Vps72       | 0.227287 | 0.767287 | 0.1818  | 0.291579 | no |
| Llgl2       | 0.226855 | 0        | 1       | 1        | no |
| Ppp2r2d     | 0.226797 | 1.04307  | 0.0587  | 0.116845 | no |
| Zfp595      | 0.226767 | 0.375489 | 0.4766  | 0.60554  | no |
| Mcee        | 0.226713 | 0.807138 | 0.2487  | 0.371148 | no |
| Srrm2       | 0.226691 | 1.00831  | 0.04695 | 0.097053 | no |
| Ankrd34a    | 0.226612 | 0.414152 | 0.44205 | 0.573394 | no |
| Gar1        | 0.226556 | 0.661458 | 0.2591  | 0.382665 | no |
| Fbxo4       | 0.226503 | 0.485277 | 0.34955 | 0.481816 | no |
| Gins1       | 0.22647  | 0.263804 | 0.5939  | 0.707995 | no |
| D8Erttd738e | 0.226434 | 1.23407  | 0.0829  | 0.154341 | no |
| Galnt12     | 0.22638  | 0        | 1       | 1        | no |
| Gabra3      | 0.226244 | 0.643903 | 0.1983  | 0.311638 | no |
| Rab37       | 0.226157 | 0.8753   | 0.0786  | 0.148123 | no |
| Gpr4        | 0.225966 | 0        | 1       | 1        | no |
| Rbm3        | 0.225937 | 0.712851 | 0.22895 | 0.349336 | no |
| Ttc9        | 0.225847 | 1.17823  | 0.03295 | 0.071817 | no |
| Cript       | 0.225671 | 1.12758  | 0.0631  | 0.12382  | no |
| Med13l      | 0.225479 | 0.955141 | 0.0618  | 0.121719 | no |
| Mettl1      | 0.225462 | 0.674769 | 0.29565 | 0.423355 | no |
| Rlf         | 0.225384 | 0.807834 | 0.1114  | 0.195962 | no |
| Limd2       | 0.225271 | 0.818873 | 0.12745 | 0.219395 | no |
| Cmb1        | 0.225266 | 0.737646 | 0.2333  | 0.3541   | no |
| Ankmy2      | 0.225102 | 0.867493 | 0.106   | 0.18826  | no |
| Ncald       | 0.225054 | 1.09829  | 0.0336  | 0.07297  | no |
| Otud4       | 0.225048 | 0.995349 | 0.04505 | 0.093768 | no |
| Acap2       | 0.225045 | 0.300451 | 0.53205 | 0.655526 | no |
| Plekha1     | 0.225019 | 0.996401 | 0.04395 | 0.091767 | no |
| Zfp420      | 0.22487  | 0.542722 | 0.3055  | 0.434459 | no |
| Ppfbp1      | 0.224482 | 0.925854 | 0.06595 | 0.128519 | no |
| Mtf2        | 0.224452 | 0.625818 | 0.20605 | 0.321456 | no |
| Zfp664      | 0.224392 | 1.09703  | 0.03495 | 0.075457 | no |
| Sstr2       | 0.224324 | 0.362072 | 0.46795 | 0.597302 | no |
| Sars2       | 0.22427  | 0.619394 | 0.26625 | 0.390702 | no |
| Ibtk        | 0.224166 | 0.811372 | 0.11275 | 0.197864 | no |
| Rasa1       | 0.223946 | 1.02686  | 0.04725 | 0.097597 | no |
| Wrn         | 0.223946 | 0.65005  | 0.19035 | 0.302078 | no |
| Mzt1        | 0.223776 | 1.01313  | 0.0637  | 0.124813 | no |
| Slc52a2     | 0.2236   | 0.703039 | 0.18835 | 0.299549 | no |
| Trnt1       | 0.223491 | 0.478709 | 0.37845 | 0.510046 | no |
| Selplg      | 0.223471 | 0        | 1       | 1        | no |
| Omp         | 0.223469 | 0.161984 | 0.766   | 0.846408 | no |
| Hfm1        | 0.223438 | 0.332465 | 0.47895 | 0.607769 | no |
| Aanat       | 0.223341 | 0        | 1       | 1        | no |
| Spats2l     | 0.223339 | 0.767494 | 0.12285 | 0.212969 | no |
| Kank3       | 0.223328 | 0.594001 | 0.27215 | 0.396902 | no |
| Enkd1       | 0.223288 | 0.284703 | 0.63105 | 0.738538 | no |
| Gnb1        | 0.223061 | 0.887995 | 0.07405 | 0.141071 | no |
| Cyfip2      | 0.223024 | 0.973435 | 0.05935 | 0.117821 | no |
| Sel1l3      | 0.223012 | 0.971562 | 0.06085 | 0.120133 | no |
| Tbccd1      | 0.223006 | 0.761659 | 0.15455 | 0.25627  | no |
| Rfx1        | 0.222946 | 0.516485 | 0.2984  | 0.426419 | no |

|               |          |           |         |          |    |
|---------------|----------|-----------|---------|----------|----|
| Snora64       | 0.222838 | 0.0381063 | 0.82525 | 0.887604 | no |
| Ncoa5         | 0.222787 | 0.859241  | 0.10735 | 0.190199 | no |
| Dxo           | 0.222642 | 0.442253  | 0.375   | 0.506735 | no |
| Psmb5         | 0.222406 | 0.882701  | 0.07235 | 0.138509 | no |
| Cars2         | 0.222352 | 0.628118  | 0.2595  | 0.383085 | no |
| Pcgf2         | 0.222351 | 0.523438  | 0.2948  | 0.422458 | no |
| Ppp4r2        | 0.222161 | 0.713667  | 0.16875 | 0.274734 | no |
| Ttc5          | 0.222101 | 0.617159  | 0.21405 | 0.331172 | no |
| Dhrs1         | 0.221729 | 1.16708   | 0.0442  | 0.092245 | no |
| Alg5          | 0.221679 | 0.781424  | 0.1675  | 0.273101 | no |
| Syap1         | 0.22167  | 0.361293  | 0.5068  | 0.633357 | no |
| Sepsecs       | 0.22148  | 0.532998  | 0.3347  | 0.466044 | no |
| Map3k12       | 0.221249 | 0.564524  | 0.25665 | 0.379638 | no |
| Tmem161b      | 0.221222 | 0.550526  | 0.27025 | 0.395086 | no |
| Flii          | 0.221009 | 0.961027  | 0.05175 | 0.105044 | no |
| Bccip         | 0.220918 | 0.567283  | 0.3428  | 0.474583 | no |
| Npdc1         | 0.22091  | 1.19708   | 0.0349  | 0.075361 | no |
| Fam118b       | 0.220908 | 0.29296   | 0.55435 | 0.674669 | no |
| Sike1         | 0.220758 | 0.790711  | 0.14115 | 0.238249 | no |
| Ncbp1         | 0.220616 | 0.977183  | 0.0668  | 0.129889 | no |
| Bmper         | 0.220557 | 0.73707   | 0.1575  | 0.259927 | no |
| 1700029J07Rik | 0.220458 | 0         | 1       | 1        | no |
| H2-K2         | 0.220326 | 0.292556  | 0.6198  | 0.729303 | no |
| Hnrnpul2      | 0.220291 | 1.07442   | 0.03305 | 0.071987 | no |
| Chchd5        | 0.220184 | 0.540089  | 0.3624  | 0.494392 | no |
| Fam173b       | 0.220018 | 0.547976  | 0.3607  | 0.492952 | no |
| Cct3          | 0.220016 | 1.15409   | 0.0382  | 0.081257 | no |
| 2410004B18Rik | 0.219975 | 0.728155  | 0.2428  | 0.364433 | no |
| Ncaph2        | 0.219948 | 0.929273  | 0.0803  | 0.150663 | no |
| Gm3500        | 0.219946 | 0         | 1       | 1        | no |
| Cytip         | 0.219846 | 0         | 1       | 1        | no |
| C1galt1c1     | 0.219749 | 0.873174  | 0.12885 | 0.22146  | no |
| Nosip         | 0.21949  | 0.881981  | 0.0773  | 0.146192 | no |
| Nip7          | 0.219225 | 0.573932  | 0.2468  | 0.368976 | no |
| Plekhm1       | 0.219038 | 0.710519  | 0.1632  | 0.267471 | no |
| Nup37         | 0.218985 | 0.374189  | 0.4514  | 0.581655 | no |
| Elavl2        | 0.218983 | 1.00752   | 0.0447  | 0.093142 | no |
| Zfp229        | 0.218853 | 0.62692   | 0.22695 | 0.347123 | no |
| Gm4944        | 0.218707 | 0.562688  | 0.2809  | 0.406873 | no |
| Hdac5         | 0.218626 | 0.894613  | 0.0727  | 0.138979 | no |
| Dnajc4        | 0.218618 | 0.489086  | 0.45975 | 0.58921  | no |
| Mgarp         | 0.2186   | 0         | 1       | 1        | no |
| Cyb5r4        | 0.218498 | 0.804085  | 0.1326  | 0.226643 | no |
| Fam103a1      | 0.218474 | 1.01431   | 0.0798  | 0.14998  | no |
| Dnal4         | 0.218449 | 0.688521  | 0.2301  | 0.350446 | no |
| Idh1          | 0.218373 | 1.01359   | 0.0403  | 0.085096 | no |
| Ing1          | 0.218263 | 0.67734   | 0.19995 | 0.313748 | no |
| Kcnu1         | 0.218252 | 0.423356  | 0.41945 | 0.551084 | no |
| Wbscr16       | 0.217987 | 0.616185  | 0.26115 | 0.384641 | no |
| Cacybp        | 0.217985 | 1.07359   | 0.0511  | 0.104011 | no |
| Map2k7        | 0.217969 | 0.915136  | 0.0654  | 0.127522 | no |
| Ndufv3        | 0.2177   | 0.768327  | 0.11885 | 0.206927 | no |
| Atxn3         | 0.217649 | 0.817179  | 0.0941  | 0.17069  | no |

|               |          |          |         |          |    |
|---------------|----------|----------|---------|----------|----|
| Snhg12        | 0.217588 | 0.478977 | 0.4044  | 0.535981 | no |
| Narg2         | 0.21752  | 0.478042 | 0.3649  | 0.496985 | no |
| Vwde          | 0.217469 | 0        | 1       | 1        | no |
| Zcchc6        | 0.217391 | 0.908024 | 0.06635 | 0.129185 | no |
| Zfyve27       | 0.217354 | 0.978069 | 0.0498  | 0.101834 | no |
| Zfp512        | 0.21724  | 0.890477 | 0.0923  | 0.168068 | no |
| Adck4         | 0.216909 | 0.595112 | 0.27555 | 0.400788 | no |
| Clec9a        | 0.216867 | 0        | 1       | 1        | no |
| 4933404O12Rik | 0.216764 | 0.451161 | 0.38665 | 0.518269 | no |
| Cuedc2        | 0.216742 | 0.88507  | 0.0742  | 0.141296 | no |
| Atl2          | 0.216404 | 0.899214 | 0.0706  | 0.136022 | no |
| Bst1          | 0.216373 | 0        | 1       | 1        | no |
| Exd2          | 0.216348 | 0.765124 | 0.14695 | 0.246129 | no |
| Ndn12         | 0.216297 | 0.494762 | 0.3119  | 0.441337 | no |
| Sipa1         | 0.216262 | 0.546911 | 0.2705  | 0.395364 | no |
| Prcc          | 0.216062 | 0.932759 | 0.0922  | 0.167955 | no |
| Cdc23         | 0.216049 | 0.587118 | 0.2371  | 0.358351 | no |
| Csf2rb        | 0.216024 | 0.338981 | 0.48565 | 0.613806 | no |
| Psmc3         | 0.216003 | 1.08729  | 0.0473  | 0.097655 | no |
| Oaz2          | 0.215998 | 1.1106   | 0.0452  | 0.094021 | no |
| Paip2         | 0.21586  | 1.00422  | 0.0414  | 0.0871   | no |
| Mrps10        | 0.215783 | 0.586635 | 0.2349  | 0.355674 | no |
| Ppp1r15a      | 0.215637 | 0.879305 | 0.10575 | 0.187942 | no |
| Rbm41         | 0.215611 | 0.48436  | 0.3282  | 0.458968 | no |
| Eif1ad        | 0.215559 | 0.607447 | 0.2244  | 0.343738 | no |
| Hoxa7         | 0.215504 | 0.647757 | 0.23785 | 0.358994 | no |
| Slx4          | 0.21549  | 0.480224 | 0.3486  | 0.480756 | no |
| Tbc1d17       | 0.215465 | 0.431654 | 0.3807  | 0.51209  | no |
| Kmt2b         | 0.215401 | 0.806009 | 0.10645 | 0.188832 | no |
| Ankrd44       | 0.215377 | 0.663314 | 0.1878  | 0.298854 | no |
| Ttll12        | 0.215286 | 0.786213 | 0.1343  | 0.229018 | no |
| Hspe1         | 0.215156 | 0.829508 | 0.2177  | 0.335528 | no |
| Tjp3          | 0.215092 | 0        | 1       | 1        | no |
| Stam          | 0.214993 | 1.02335  | 0.05225 | 0.105913 | no |
| Cox16         | 0.214903 | 0.671321 | 0.2241  | 0.343437 | no |
| Capn1         | 0.214889 | 1.07044  | 0.04145 | 0.087178 | no |
| Galnt18       | 0.214874 | 0.874886 | 0.10645 | 0.188832 | no |
| Fgfr1op2      | 0.214849 | 1.02075  | 0.056   | 0.112279 | no |
| Ppp1r11       | 0.214807 | 0.9847   | 0.08025 | 0.150591 | no |
| Inpp4a        | 0.214734 | 0.956028 | 0.05675 | 0.113577 | no |
| Tex2          | 0.214674 | 1.04866  | 0.04015 | 0.084847 | no |
| Ankrd26       | 0.21461  | 0.677522 | 0.1855  | 0.296153 | no |
| Gramd1a       | 0.214585 | 0.939227 | 0.07785 | 0.147086 | no |
| 1810043G02Rik | 0.214342 | 0.772145 | 0.16195 | 0.265816 | no |
| Cachd1        | 0.214338 | 0.856255 | 0.09925 | 0.178349 | no |
| Pknx1         | 0.214314 | 0.61034  | 0.21365 | 0.330746 | no |
| Spry3         | 0.214001 | 0.778347 | 0.13845 | 0.234557 | no |
| Slc31a2       | 0.213981 | 0.601089 | 0.2275  | 0.34772  | no |
| Ptpn18        | 0.21372  | 0        | 1       | 1        | no |
| Mustn1        | 0.213602 | 0.41661  | 0.482   | 0.610472 | no |
| Ntpcr         | 0.213567 | 0.679714 | 0.2597  | 0.383167 | no |
| Romo1         | 0.213474 | 0.547359 | 0.2715  | 0.396389 | no |
| Leprotil1     | 0.213431 | 1.08354  | 0.0397  | 0.084043 | no |



|                |          |          |         |          |    |
|----------------|----------|----------|---------|----------|----|
| 1700030J22Rik  | 0.213279 | 0.419763 | 0.4321  | 0.563684 | no |
| Nabp2          | 0.213187 | 0.918074 | 0.1313  | 0.224769 | no |
| Edc4           | 0.213122 | 0.847615 | 0.10245 | 0.183206 | no |
| Ppm1j          | 0.213103 | 1.08414  | 0.0513  | 0.104322 | no |
| OTTMUSG0000001 | 0.212862 | 0        | 1       | 1        | no |
| 4930426L09Rik  | 0.212753 | 0        | 1       | 1        | no |
| Mkln1          | 0.212742 | 0.986447 | 0.05675 | 0.113577 | no |
| Uck1           | 0.212595 | 0.610127 | 0.2179  | 0.335797 | no |
| Axin2          | 0.212438 | 0.570558 | 0.27415 | 0.39916  | no |
| Ap3d1          | 0.212406 | 1.04165  | 0.0434  | 0.090775 | no |
| Dnajb1         | 0.212323 | 0.958858 | 0.0806  | 0.151013 | no |
| Ppfia1         | 0.21201  | 0.810904 | 0.108   | 0.191249 | no |
| Tnip2          | 0.211995 | 0.356624 | 0.51755 | 0.642915 | no |
| Gga1           | 0.211991 | 0.886378 | 0.07655 | 0.145043 | no |
| Rnf19b         | 0.211733 | 0.956847 | 0.0768  | 0.145392 | no |
| Fut7           | 0.211601 | 0        | 1       | 1        | no |
| Fam118a        | 0.211579 | 0.639599 | 0.237   | 0.358322 | no |
| Rpl36          | 0.211471 | 0.292862 | 0.7747  | 0.852643 | no |
| Eef1e1         | 0.211467 | 0.892432 | 0.1446  | 0.243083 | no |
| Pitpnb         | 0.211352 | 0.942848 | 0.08015 | 0.150488 | no |
| Rnpep          | 0.211247 | 0.724186 | 0.14565 | 0.244693 | no |
| Ddx46          | 0.211117 | 0.927186 | 0.074   | 0.141017 | no |
| Gng4           | 0.211106 | 0.581868 | 0.2717  | 0.396507 | no |
| Cldn12         | 0.211069 | 0.711875 | 0.1571  | 0.259428 | no |
| Zfp12          | 0.211061 | 0.640033 | 0.19965 | 0.313425 | no |
| Rc3h2          | 0.210965 | 0.97368  | 0.05015 | 0.102455 | no |
| Pbdc1          | 0.210708 | 0.458928 | 0.3558  | 0.487663 | no |
| Znrd1          | 0.210624 | 0.547932 | 0.43115 | 0.562556 | no |
| Cep76          | 0.210606 | 0.508603 | 0.32125 | 0.451486 | no |
| 4930529M08Rik  | 0.210584 | 0        | 1       | 1        | no |
| Tmem255a       | 0.210452 | 0.917162 | 0.0676  | 0.131272 | no |
| Map7d1         | 0.210392 | 0.976499 | 0.0521  | 0.105657 | no |
| Nhp2l1         | 0.210365 | 0.929309 | 0.11515 | 0.201383 | no |
| Otulin         | 0.210353 | 0.621334 | 0.2821  | 0.407915 | no |
| Gm10069        | 0.210311 | 0.206375 | 0.68855 | 0.785795 | no |
| Rcc1           | 0.209969 | 0.466777 | 0.3512  | 0.483287 | no |
| Gm19345        | 0.209785 | 0.32056  | 0.56135 | 0.680752 | no |
| Ranbp9         | 0.209556 | 0.78571  | 0.1094  | 0.193032 | no |
| Atpif1         | 0.209228 | 1.52004  | 0.0561  | 0.112429 | no |
| Tex10          | 0.209147 | 0.56395  | 0.2464  | 0.368544 | no |
| Gpr108         | 0.209081 | 0.877409 | 0.11185 | 0.196545 | no |
| Isyna1         | 0.208868 | 0.765632 | 0.16805 | 0.273796 | no |
| Snf8           | 0.208852 | 0.736031 | 0.2487  | 0.371148 | no |
| Nell1          | 0.208846 | 0.464294 | 0.3461  | 0.478203 | no |
| Hexa           | 0.208702 | 1.00002  | 0.07255 | 0.138752 | no |
| Mri1           | 0.208692 | 0.57209  | 0.3006  | 0.428731 | no |
| Arhgap27       | 0.208682 | 0.78303  | 0.12405 | 0.214489 | no |
| Arid1a         | 0.208623 | 0.93431  | 0.0593  | 0.117792 | no |
| Ccdc17         | 0.208548 | 0        | 1       | 1        | no |
| Stag3          | 0.208515 | 0        | 1       | 1        | no |
| Pik3r2         | 0.208511 | 0.915081 | 0.0848  | 0.157151 | no |
| Irf3           | 0.208504 | 0.599877 | 0.22915 | 0.349348 | no |
| Hnrnpul1       | 0.208471 | 0.877182 | 0.07615 | 0.14445  | no |

|               |          |          |         |          |    |
|---------------|----------|----------|---------|----------|----|
| Phc2          | 0.20846  | 0.893958 | 0.07115 | 0.136863 | no |
| Nrd1          | 0.20837  | 0.782472 | 0.1369  | 0.232555 | no |
| Iws1          | 0.208304 | 0.825172 | 0.1029  | 0.183862 | no |
| Numb          | 0.208289 | 0.832197 | 0.095   | 0.172134 | no |
| Higd1a        | 0.208096 | 0.867379 | 0.1206  | 0.209699 | no |
| Slc35e2       | 0.208004 | 0.839124 | 0.0971  | 0.175269 | no |
| Lrrtm2        | 0.208001 | 0.437507 | 0.37735 | 0.508822 | no |
| Ccl28         | 0.207999 | 0        | 1       | 1        | no |
| Aldoart2      | 0.207842 | 0        | 1       | 1        | no |
| Xpot          | 0.20784  | 0.914442 | 0.07515 | 0.142859 | no |
| Acbd3         | 0.207761 | 0.961725 | 0.069   | 0.133502 | no |
| Ap3b2         | 0.207753 | 1.02868  | 0.0475  | 0.097961 | no |
| Ogg1          | 0.207748 | 0.359758 | 0.53525 | 0.658185 | no |
| Zdhhc24       | 0.207663 | 0.736029 | 0.14005 | 0.236724 | no |
| Mterf1a       | 0.207597 | 0.271016 | 0.58665 | 0.702061 | no |
| Wdr53         | 0.207589 | 0.485242 | 0.32485 | 0.455676 | no |
| Med28         | 0.207502 | 0.897393 | 0.08655 | 0.159658 | no |
| Dcp1b         | 0.207478 | 0.15922  | 0.73715 | 0.824713 | no |
| Klhl8         | 0.207349 | 0.624896 | 0.2354  | 0.35635  | no |
| Kat7          | 0.207302 | 0.946047 | 0.05885 | 0.117091 | no |
| Zfr           | 0.207255 | 0.973497 | 0.05245 | 0.106172 | no |
| Rabep2        | 0.207201 | 0.621817 | 0.2346  | 0.355261 | no |
| Gnb2l1        | 0.206884 | 0.93045  | 0.0582  | 0.116007 | no |
| Wapal         | 0.206609 | 0.851119 | 0.10185 | 0.182231 | no |
| Poc5          | 0.206497 | 0.784237 | 0.1403  | 0.237056 | no |
| Ppp1r12c      | 0.20648  | 0.9514   | 0.07165 | 0.137646 | no |
| Dnajc3        | 0.206381 | 0.967768 | 0.0549  | 0.110441 | no |
| Emc2          | 0.206372 | 1.03248  | 0.0819  | 0.152908 | no |
| Ints9         | 0.206292 | 0.673942 | 0.17355 | 0.28062  | no |
| Sde2          | 0.206225 | 0.678333 | 0.1941  | 0.306526 | no |
| Celf4         | 0.206158 | 0.938566 | 0.05925 | 0.11771  | no |
| Crls1         | 0.206109 | 0.67183  | 0.17805 | 0.286917 | no |
| Uqcc2         | 0.205998 | 1.18759  | 0.16265 | 0.266701 | no |
| 1110054M08Rik | 0.205928 | 0.137519 | 0.83955 | 0.897238 | no |
| Fndc5         | 0.205773 | 0.896079 | 0.09555 | 0.172965 | no |
| Steap2        | 0.20576  | 0.707942 | 0.15275 | 0.253856 | no |
| Ssrp1         | 0.205759 | 0.873324 | 0.0794  | 0.149418 | no |
| Nbeal1        | 0.205596 | 0.877712 | 0.0846  | 0.156824 | no |
| Cpeb1         | 0.205441 | 0.966921 | 0.05065 | 0.103333 | no |
| Gripap1       | 0.205439 | 0.918821 | 0.0644  | 0.12585  | no |
| Emd           | 0.205418 | 0.833238 | 0.1442  | 0.242533 | no |
| Mettl6        | 0.205368 | 0.534333 | 0.3447  | 0.476865 | no |
| Psrc1         | 0.205204 | 0        | 1       | 1        | no |
| Cisd1         | 0.205161 | 1.14189  | 0.0696  | 0.134408 | no |
| Irak1         | 0.205117 | 0.805152 | 0.10655 | 0.188959 | no |
| Serinc5       | 0.204487 | 0.992852 | 0.055   | 0.110575 | no |
| Alg10b        | 0.204349 | 0.765317 | 0.1235  | 0.213788 | no |
| Zbtb1         | 0.204341 | 0.725694 | 0.16725 | 0.272861 | no |
| Hmg20a        | 0.204015 | 0.910895 | 0.0859  | 0.158856 | no |
| Reps1         | 0.203766 | 0.732343 | 0.1394  | 0.235865 | no |
| Dock2         | 0.20366  | 0        | 1       | 1        | no |
| Nfatc3        | 0.203479 | 0.818763 | 0.109   | 0.192634 | no |
| Srrm4         | 0.203444 | 0.613875 | 0.2164  | 0.334223 | no |

|               |          |          |         |          |    |
|---------------|----------|----------|---------|----------|----|
| Tbc1d10b      | 0.203404 | 0.956065 | 0.0712  | 0.13692  | no |
| Cdh11         | 0.203331 | 0.989638 | 0.05785 | 0.11543  | no |
| Rit1          | 0.203331 | 0.837874 | 0.0913  | 0.166544 | no |
| Usf2          | 0.203311 | 0.766729 | 0.1567  | 0.258961 | no |
| Mrps28        | 0.202934 | 0.579035 | 0.4074  | 0.539257 | no |
| Eif2ak2       | 0.202812 | 0.792723 | 0.1289  | 0.22146  | no |
| Etfa          | 0.202643 | 0.956726 | 0.09815 | 0.176947 | no |
| Oprm1         | 0.202541 | 0.53828  | 0.314   | 0.443457 | no |
| C1d           | 0.202274 | 0.8723   | 0.10275 | 0.183643 | no |
| Il10ra        | 0.202251 | 0.333435 | 0.50015 | 0.626936 | no |
| Tprkb         | 0.201805 | 0.729036 | 0.1408  | 0.237719 | no |
| Elof1         | 0.201748 | 0.370277 | 0.54695 | 0.668483 | no |
| Prkcz         | 0.201725 | 0.842035 | 0.0897  | 0.164032 | no |
| Fam188a       | 0.201661 | 1.02249  | 0.0592  | 0.117629 | no |
| Aoc2          | 0.201657 | 0        | 1       | 1        | no |
| 4930579G24Rik | 0.201651 | 0.353898 | 0.5207  | 0.645499 | no |
| Taf2          | 0.20153  | 0.77716  | 0.1312  | 0.224626 | no |
| Kpna3         | 0.201524 | 0.943723 | 0.06895 | 0.133444 | no |
| Kdm1b         | 0.201476 | 0.327792 | 0.512   | 0.638112 | no |
| Haus1         | 0.201475 | 0.575321 | 0.35235 | 0.484618 | no |
| Zfp358        | 0.20147  | 0.654318 | 0.2311  | 0.351566 | no |
| Ddx28         | 0.201195 | 0.564494 | 0.3074  | 0.436319 | no |
| Pex11g        | 0.201146 | 0.314388 | 0.60495 | 0.717428 | no |
| Ssx2ip        | 0.201131 | 0.898251 | 0.06895 | 0.133444 | no |
| A230056J06Rik | 0.201034 | 0        | 1       | 1        | no |
| Pxk           | 0.200755 | 0.785789 | 0.11325 | 0.198558 | no |
| Timm21        | 0.200631 | 0.397725 | 0.42775 | 0.559109 | no |
| Twf1          | 0.20062  | 0.851238 | 0.11045 | 0.194626 | no |
| Bzw2          | 0.20057  | 0.686254 | 0.21375 | 0.330862 | no |
| A330040F15Rik | 0.200538 | 0        | 1       | 1        | no |
| Uba2          | 0.200468 | 0.965211 | 0.0707  | 0.136116 | no |
| Zbtb34        | 0.200428 | 0.478756 | 0.3368  | 0.468133 | no |
| Brsk2         | 0.200371 | 0.904251 | 0.07185 | 0.13791  | no |
| Mrpl53        | 0.200336 | 0.560551 | 0.2585  | 0.381991 | no |
| Cul7          | 0.200154 | 0.885597 | 0.08755 | 0.161032 | no |
| Eci1          | 0.200124 | 0.668669 | 0.27265 | 0.397456 | no |
| Naglu         | 0.200067 | 0.588816 | 0.28215 | 0.407943 | no |
| Nupr1l        | 0.200052 | 0        | 1       | 1        | no |
| Bud31         | 0.199997 | 0.652146 | 0.3516  | 0.483787 | no |
| Psmc2         | 0.199985 | 1.03974  | 0.06345 | 0.124397 | no |
| Ddx23         | 0.199929 | 0.867002 | 0.1058  | 0.18798  | no |
| Gna11         | 0.199911 | 0.933424 | 0.07675 | 0.145339 | no |
| Ofd1          | 0.199794 | 0.517839 | 0.3166  | 0.446369 | no |
| Mvb12a        | 0.199685 | 0.780263 | 0.20025 | 0.31407  | no |
| Hmgb3         | 0.199646 | 0.5735   | 0.3058  | 0.434746 | no |
| Zfp850        | 0.199603 | 0.46431  | 0.3605  | 0.492813 | no |
| Csgalnact1    | 0.199346 | 0.682929 | 0.16975 | 0.276091 | no |
| 2610306M01Rik | 0.199198 | 0.343512 | 0.57535 | 0.692788 | no |
| Srp54b,Srp54c | 0.199119 | 0.588453 | 0.26125 | 0.384641 | no |
| Klf16         | 0.199014 | 0.699966 | 0.189   | 0.300403 | no |
| Fam13c        | 0.19888  | 0.436425 | 0.4067  | 0.538492 | no |
| Zfp622        | 0.19865  | 0.783032 | 0.14815 | 0.24742  | no |
| Rtp4          | 0.19861  | 0.399606 | 0.47515 | 0.604219 | no |

|               |          |          |         |          |    |
|---------------|----------|----------|---------|----------|----|
| Usf1          | 0.198533 | 0.721639 | 0.19785 | 0.311115 | no |
| 1700029I15Rik | 0.198257 | 0        | 1       | 1        | no |
| Gpc1          | 0.198176 | 0.929647 | 0.061   | 0.12034  | no |
| Rusc2         | 0.198139 | 0.925358 | 0.06285 | 0.123366 | no |
| Gtl3          | 0.197953 | 0.751914 | 0.19865 | 0.312077 | no |
| Hexdc         | 0.197931 | 0.303357 | 0.5775  | 0.694746 | no |
| Zbtb40        | 0.197886 | 0.526335 | 0.30495 | 0.433723 | no |
| Ggnbp2        | 0.197876 | 0.927749 | 0.0841  | 0.156137 | no |
| Adarb1        | 0.197875 | 0.852977 | 0.0868  | 0.159985 | no |
| Psma1         | 0.197853 | 1.06266  | 0.07205 | 0.138094 | no |
| Vps8          | 0.197835 | 0.81612  | 0.1035  | 0.18476  | no |
| Tspan4        | 0.197752 | 0.57324  | 0.3244  | 0.455189 | no |
| Setdb2        | 0.197701 | 0.416016 | 0.4387  | 0.57022  | no |
| Cmas          | 0.19753  | 1.02253  | 0.0685  | 0.132709 | no |
| Mapk6         | 0.197416 | 0.729506 | 0.14245 | 0.239985 | no |
| Upf1          | 0.1974   | 0.763858 | 0.12345 | 0.213758 | no |
| Prosc         | 0.197104 | 0.657677 | 0.1808  | 0.290502 | no |
| St3gal6       | 0.197087 | 0.752554 | 0.1832  | 0.293222 | no |
| Hira          | 0.197001 | 0.770036 | 0.14135 | 0.238496 | no |
| Enthd2        | 0.196999 | 0.529754 | 0.3231  | 0.453749 | no |
| Sssca1        | 0.196997 | 0.713528 | 0.3107  | 0.440297 | no |
| Atg14         | 0.196736 | 0.597043 | 0.25095 | 0.373665 | no |
| Zfp942        | 0.196629 | 0.573582 | 0.2821  | 0.407915 | no |
| Fam32a        | 0.196427 | 0.935892 | 0.0931  | 0.169292 | no |
| Twistnb       | 0.196318 | 0.565117 | 0.3021  | 0.430362 | no |
| Apbb1ip       | 0.196318 | 0        | 1       | 1        | no |
| Ubtf          | 0.196301 | 0.837328 | 0.09105 | 0.166203 | no |
| Snx31         | 0.196101 | 0        | 1       | 1        | no |
| Mroh1         | 0.195753 | 0.738311 | 0.1526  | 0.25367  | no |
| Oas2          | 0.19554  | 0        | 1       | 1        | no |
| Nudt16        | 0.195404 | 0.666707 | 0.2456  | 0.367638 | no |
| A230046K03Rik | 0.195351 | 0.927886 | 0.0682  | 0.132243 | no |
| Rapgef6       | 0.195337 | 0.765631 | 0.12135 | 0.210754 | no |
| Nqo1          | 0.195189 | 0.49121  | 0.3875  | 0.518975 | no |
| Dot1l         | 0.195148 | 0.553473 | 0.28035 | 0.406359 | no |
| Cyp4f16       | 0.195134 | 0.396203 | 0.468   | 0.597302 | no |
| Plcg1         | 0.195047 | 0.649885 | 0.211   | 0.327446 | no |
| Stoml1        | 0.194943 | 0.890511 | 0.07485 | 0.142371 | no |
| Tfe3          | 0.194786 | 0.752491 | 0.1302  | 0.223145 | no |
| Zfp661        | 0.194759 | 0.310653 | 0.5252  | 0.64944  | no |
| Tgfb1i1       | 0.194707 | 0.782676 | 0.1146  | 0.200554 | no |
| Eif6          | 0.194646 | 0.894613 | 0.11765 | 0.20508  | no |
| Ppp2r3d       | 0.194607 | 0.468336 | 0.3894  | 0.520836 | no |
| Sdad1         | 0.194605 | 0.715934 | 0.1735  | 0.280573 | no |
| Bcl2l13       | 0.194599 | 0.897964 | 0.07645 | 0.144895 | no |
| Prickle3      | 0.194573 | 0        | 1       | 1        | no |
| Rab9b         | 0.194559 | 0.847471 | 0.1092  | 0.192782 | no |
| Ptpn23        | 0.194544 | 0.867836 | 0.0935  | 0.169857 | no |
| Ndufs4        | 0.194467 | 0.912898 | 0.1136  | 0.199014 | no |
| Srrd          | 0.194404 | 0.22222  | 0.6478  | 0.75211  | no |
| Gpd2          | 0.194381 | 0.845478 | 0.092   | 0.16766  | no |
| Ccndbp1       | 0.194282 | 0.935005 | 0.1019  | 0.182296 | no |
| Psmg1         | 0.194258 | 0.526097 | 0.4045  | 0.53606  | no |

|               |          |          |         |          |    |
|---------------|----------|----------|---------|----------|----|
| Ist1          | 0.194205 | 0.849474 | 0.0872  | 0.160567 | no |
| 3110021N24Rik | 0.194187 | 0        | 1       | 1        | no |
| Scaf1         | 0.193989 | 0.879889 | 0.07405 | 0.141071 | no |
| Aen           | 0.193916 | 0.629758 | 0.2013  | 0.315418 | no |
| Cyp2c65       | 0.193753 | 0        | 1       | 1        | no |
| Bms1          | 0.193631 | 0.713003 | 0.1711  | 0.277606 | no |
| Wsb2          | 0.193521 | 0.972146 | 0.0694  | 0.134159 | no |
| Pank2         | 0.193421 | 0.28708  | 0.56545 | 0.683974 | no |
| Btbd1         | 0.193406 | 0.805579 | 0.1264  | 0.21804  | no |
| Usp45         | 0.193079 | 0.849964 | 0.0864  | 0.15947  | no |
| Dab2ip        | 0.193006 | 0.876759 | 0.07645 | 0.144895 | no |
| Suds3         | 0.193003 | 0.85359  | 0.0856  | 0.158412 | no |
| Rpl7          | 0.192939 | 0.794986 | 0.20505 | 0.32016  | no |
| Arrb1         | 0.192926 | 0.883061 | 0.0778  | 0.147012 | no |
| Ldoc1l        | 0.1927   | 0.806455 | 0.11705 | 0.204141 | no |
| 9330020H09Rik | 0.192646 | 0        | 1       | 1        | no |
| Mepce         | 0.192528 | 0.751464 | 0.1599  | 0.263102 | no |
| Tuba1a        | 0.192506 | 0.791344 | 0.16205 | 0.265947 | no |
| Cpe           | 0.192477 | 0.870745 | 0.11335 | 0.198654 | no |
| Cby1          | 0.192425 | 0.765853 | 0.2023  | 0.316649 | no |
| Lrg1          | 0.192388 | 0.299683 | 0.60365 | 0.71639  | no |
| Scn5a         | 0.192372 | 0.521483 | 0.29575 | 0.423453 | no |
| Nfs1          | 0.192326 | 0.66967  | 0.2274  | 0.347651 | no |
| Ccdc137       | 0.192293 | 0.584436 | 0.27435 | 0.399276 | no |
| Qsox2         | 0.192117 | 0.631059 | 0.2414  | 0.363113 | no |
| Tmem203       | 0.192034 | 0.485224 | 0.44715 | 0.577919 | no |
| Zfp764        | 0.191948 | 0.351949 | 0.4788  | 0.607695 | no |
| Osbpl7        | 0.191929 | 0.525297 | 0.29    | 0.416885 | no |
| Herc4         | 0.191834 | 0.684299 | 0.1714  | 0.278025 | no |
| Hoxa3         | 0.191814 | 0.198421 | 0.71655 | 0.809425 | no |
| Ptk2          | 0.191781 | 0.742915 | 0.1336  | 0.228117 | no |
| Rabac1        | 0.191682 | 0.89563  | 0.0707  | 0.136116 | no |
| Pisd-ps1      | 0.191672 | 0.252138 | 0.63775 | 0.744088 | no |
| Nrxn1         | 0.191577 | 0.889309 | 0.072   | 0.138078 | no |
| Rnf32         | 0.191542 | 0.326759 | 0.51385 | 0.639817 | no |
| Rnf180        | 0.191444 | 0.469563 | 0.3753  | 0.506831 | no |
| Gm20939       | 0.191223 | 0.306204 | 0.5692  | 0.68782  | no |
| Serinc3       | 0.191206 | 0.848717 | 0.0883  | 0.16212  | no |
| Gppb1         | 0.191118 | 0.824357 | 0.0995  | 0.17875  | no |
| Erf           | 0.191048 | 0.735113 | 0.1646  | 0.269167 | no |
| 35854         | 0.191045 | 0.791373 | 0.11175 | 0.196447 | no |
| Sirt1         | 0.191024 | 0.513979 | 0.29765 | 0.42553  | no |
| Rpusd2        | 0.190918 | 0.458699 | 0.3789  | 0.510445 | no |
| Preli1        | 0.190809 | 1.02665  | 0.0916  | 0.167023 | no |
| Psma4         | 0.190788 | 0.675099 | 0.17045 | 0.276992 | no |
| Eif2a         | 0.190736 | 0.581668 | 0.23785 | 0.358994 | no |
| Dkc1          | 0.19057  | 0.422751 | 0.43835 | 0.569932 | no |
| Zfp316        | 0.190482 | 0.650125 | 0.2018  | 0.31609  | no |
| Rad50         | 0.190456 | 0.686216 | 0.18025 | 0.289829 | no |
| Zfp445        | 0.190433 | 0.891202 | 0.0801  | 0.150458 | no |
| Nkap          | 0.190431 | 0.600162 | 0.2287  | 0.349156 | no |
| Dut           | 0.190376 | 0.575831 | 0.24725 | 0.369483 | no |
| Mynn          | 0.19026  | 0.56551  | 0.2557  | 0.378571 | no |

|               |          |          |         |          |    |
|---------------|----------|----------|---------|----------|----|
| Cops5         | 0.189999 | 0.872561 | 0.07825 | 0.147652 | no |
| E130307A14Rik | 0.189909 | 0.296923 | 0.556   | 0.675995 | no |
| Zc3h10        | 0.189861 | 0.514197 | 0.3466  | 0.478545 | no |
| Tmem134       | 0.189821 | 0.567251 | 0.255   | 0.377872 | no |
| Rad18         | 0.189796 | 0.40301  | 0.42395 | 0.555401 | no |
| Trak1         | 0.189465 | 0.922811 | 0.06985 | 0.134793 | no |
| Psmc1         | 0.189287 | 0.981097 | 0.0872  | 0.160567 | no |
| Srsf3         | 0.189269 | 0.773798 | 0.1223  | 0.212126 | no |
| Stag1         | 0.189241 | 0.68427  | 0.1827  | 0.292598 | no |
| Plrg1         | 0.18886  | 0.817767 | 0.14785 | 0.247075 | no |
| Gusb          | 0.188836 | 0.623517 | 0.24405 | 0.365978 | no |
| Fdx1l         | 0.188789 | 0.457015 | 0.4939  | 0.621215 | no |
| Ercc4         | 0.188531 | 0.664996 | 0.19045 | 0.302165 | no |
| Secisbp2      | 0.188482 | 0.461729 | 0.38755 | 0.518989 | no |
| Lsm14b        | 0.188468 | 0.875759 | 0.10575 | 0.187942 | no |
| Acot9         | 0.188303 | 0.69264  | 0.22265 | 0.34157  | no |
| Dynlrb2       | 0.188276 | 0        | 1       | 1        | no |
| Ywhae         | 0.188259 | 0.880001 | 0.1083  | 0.191601 | no |
| Esyt2         | 0.188235 | 0.876435 | 0.08635 | 0.1594   | no |
| D19Bwg1357e   | 0.188219 | 0.783239 | 0.14055 | 0.237387 | no |
| Camsap3       | 0.188161 | 0.703325 | 0.16145 | 0.265192 | no |
| Zmat2         | 0.187808 | 0.928926 | 0.0876  | 0.161057 | no |
| Igtp          | 0.187794 | 0.650326 | 0.23675 | 0.358026 | no |
| Shcbp1l       | 0.18777  | 0        | 1       | 1        | no |
| Mrpl52        | 0.187604 | 0.927424 | 0.3306  | 0.461692 | no |
| Fam216a       | 0.18759  | 0.62662  | 0.3184  | 0.44824  | no |
| D15Ert621e    | 0.187519 | 0.902022 | 0.0823  | 0.153504 | no |
| Phf21a        | 0.187264 | 0.601495 | 0.2241  | 0.343437 | no |
| Atp2c1        | 0.187193 | 0.816539 | 0.1     | 0.179526 | no |
| Sfxn1         | 0.187079 | 0.748638 | 0.1638  | 0.268156 | no |
| Nat10         | 0.187049 | 0.634363 | 0.22295 | 0.341833 | no |
| Arhgap36      | 0.186951 | 0.714838 | 0.18105 | 0.290798 | no |
| Atp13a1       | 0.18673  | 0.735309 | 0.1589  | 0.261652 | no |
| Psmg4         | 0.186715 | 0.307619 | 0.53695 | 0.659848 | no |
| Isoc2b        | 0.186277 | 0.361883 | 0.5641  | 0.683022 | no |
| Zfr2          | 0.18618  | 0.708002 | 0.1755  | 0.283324 | no |
| Prpf18        | 0.186161 | 0.793714 | 0.1336  | 0.228117 | no |
| Sharpin       | 0.186159 | 0.766455 | 0.179   | 0.288238 | no |
| Zmym2         | 0.186119 | 0.851101 | 0.0945  | 0.171345 | no |
| Mrpl51        | 0.186024 | 0.735204 | 0.1947  | 0.307218 | no |
| Cherp         | 0.185927 | 0.659898 | 0.18595 | 0.296728 | no |
| Dph1          | 0.185764 | 0.410736 | 0.4068  | 0.538571 | no |
| Kif17         | 0.185675 | 0.296985 | 0.5583  | 0.678231 | no |
| Zfp677        | 0.185495 | 0.335553 | 0.5161  | 0.641715 | no |
| Csrp2bp       | 0.185411 | 0.650679 | 0.1956  | 0.308234 | no |
| Ccdc25        | 0.185403 | 0.79397  | 0.1485  | 0.247974 | no |
| Vars2         | 0.185308 | 0.635278 | 0.2195  | 0.337714 | no |
| Slc4a1ap      | 0.18528  | 0.722973 | 0.1792  | 0.288525 | no |
| Pex14         | 0.185029 | 0.818619 | 0.13945 | 0.23592  | no |
| Acd           | 0.184986 | 0.324092 | 0.51465 | 0.640452 | no |
| Ly6c1         | 0.184956 | 0.520312 | 0.2948  | 0.422458 | no |
| Gm19434       | 0.18487  | 0        | 1       | 1        | no |
| Padi3         | 0.184867 | 0        | 1       | 1        | no |



|               |          |           |         |          |    |
|---------------|----------|-----------|---------|----------|----|
| Dph2          | 0.18465  | 0.509342  | 0.3475  | 0.479588 | no |
| Tdp1          | 0.184519 | 0.45242   | 0.40865 | 0.540588 | no |
| Ddx25         | 0.184403 | 0.734679  | 0.1905  | 0.302208 | no |
| Ly6a          | 0.184403 | 0.49188   | 0.3134  | 0.442893 | no |
| Uba52         | 0.18435  | 0.660963  | 0.4294  | 0.560769 | no |
| Actn4         | 0.184157 | 0.862213  | 0.081   | 0.151548 | no |
| Diexf         | 0.184122 | 0.53952   | 0.29335 | 0.420925 | no |
| Tmem38a       | 0.184012 | 0.879376  | 0.10855 | 0.191967 | no |
| Dync1li1      | 0.184003 | 0.956569  | 0.0818  | 0.152765 | no |
| Med22         | 0.183953 | 0.569064  | 0.25235 | 0.375066 | no |
| Snrpe         | 0.183908 | 0.573967  | 0.49355 | 0.62101  | no |
| Mboat7        | 0.183897 | 0.804683  | 0.1299  | 0.222774 | no |
| Foxj2         | 0.183824 | 0.670809  | 0.17095 | 0.277532 | no |
| Zfp606        | 0.183784 | 0.392534  | 0.438   | 0.569645 | no |
| Apopt1        | 0.183357 | 0.469726  | 0.3459  | 0.478076 | no |
| Zfp280c       | 0.183072 | 0.503817  | 0.31095 | 0.440463 | no |
| 4921507P07Rik | 0.182977 | 0         | 1       | 1        | no |
| Kat5          | 0.18279  | 0.731105  | 0.1414  | 0.238519 | no |
| Rpia          | 0.182775 | 0.469979  | 0.4027  | 0.534155 | no |
| Lsm1          | 0.182708 | 0.52034   | 0.34285 | 0.474603 | no |
| Zfp689        | 0.182509 | 0.314039  | 0.55485 | 0.675029 | no |
| Plcd4         | 0.182441 | 0.507055  | 0.34445 | 0.476569 | no |
| Zfp619        | 0.182341 | 0         | 1       | 1        | no |
| Ubl7          | 0.182254 | 0.687733  | 0.16625 | 0.27143  | no |
| Pycl          | 0.182145 | 0.523449  | 0.3697  | 0.501361 | no |
| Calcoco1      | 0.182141 | 0.74583   | 0.16195 | 0.265816 | no |
| Dlgap3        | 0.182136 | 0.820585  | 0.11735 | 0.204638 | no |
| Tmem214       | 0.182028 | 0.714895  | 0.1849  | 0.295408 | no |
| Polr2e        | 0.182017 | 0.0573443 | 0.91595 | 0.948035 | no |
| Zfp105        | 0.18192  | 0.338323  | 0.5373  | 0.660033 | no |
| Tsc1          | 0.181884 | 0.753752  | 0.12955 | 0.222318 | no |
| Clip4         | 0.181875 | 0.808928  | 0.106   | 0.18826  | no |
| Snap47        | 0.181677 | 0.945468  | 0.0881  | 0.16182  | no |
| Pnp0          | 0.181565 | 0.694951  | 0.2093  | 0.325493 | no |
| Them4         | 0.181531 | 0.712198  | 0.19985 | 0.313665 | no |
| Zfp458        | 0.181247 | 0.355457  | 0.50115 | 0.627834 | no |
| Nars2         | 0.181111 | 0.543646  | 0.2993  | 0.427337 | no |
| Akirin1       | 0.181033 | 0.878455  | 0.1053  | 0.187393 | no |
| Trim69        | 0.180996 | 0         | 1       | 1        | no |
| Rbm15         | 0.180735 | 0.428337  | 0.4171  | 0.54892  | no |
| Ypel5         | 0.180718 | 0.906868  | 0.08985 | 0.164238 | no |
| Acot8         | 0.180617 | 0.231488  | 0.64495 | 0.750048 | no |
| Mctp2         | 0.180599 | 0.721729  | 0.15915 | 0.261998 | no |
| Mlc1          | 0.180594 | 0.705809  | 0.1945  | 0.307048 | no |
| Clpp          | 0.180508 | 0.647213  | 0.27465 | 0.399625 | no |
| Stk35         | 0.180265 | 0.642229  | 0.19655 | 0.309401 | no |
| Tiparp        | 0.180255 | 0.688657  | 0.16245 | 0.266472 | no |
| Kdm4c         | 0.179958 | 0.584814  | 0.23815 | 0.359283 | no |
| Eef2k         | 0.179935 | 0.68831   | 0.16535 | 0.27026  | no |
| Ushbp1        | 0.179903 | 0.37193   | 0.4878  | 0.615585 | no |
| Ubn1          | 0.179813 | 0.751965  | 0.145   | 0.243693 | no |
| Tmem55b       | 0.179798 | 0.720035  | 0.1521  | 0.252903 | no |
| D230025D16Rik | 0.179631 | 0.691855  | 0.20195 | 0.316213 | no |

|               |          |          |         |          |    |
|---------------|----------|----------|---------|----------|----|
| 6330549D23Rik | 0.179596 | 0.142891 | 0.7744  | 0.85247  | no |
| Gm715         | 0.179558 | 0.253249 | 0.6681  | 0.76855  | no |
| Prdx2         | 0.179345 | 1.05845  | 0.0951  | 0.172268 | no |
| Zbtb8a        | 0.178868 | 0.360564 | 0.50675 | 0.633354 | no |
| Ifit3         | 0.178833 | 0.537157 | 0.3325  | 0.463662 | no |
| L2hgdh        | 0.17864  | 0.368442 | 0.49275 | 0.620121 | no |
| Pydc4         | 0.178614 | 0        | 1       | 1        | no |
| 37680         | 0.178557 | 0.709799 | 0.1901  | 0.301826 | no |
| Maf1          | 0.178299 | 0.650202 | 0.19485 | 0.307345 | no |
| Ddx5          | 0.178275 | 0.814542 | 0.09865 | 0.177583 | no |
| Pdf           | 0.178188 | 0.646937 | 0.2612  | 0.384641 | no |
| Kat8          | 0.177994 | 0.472257 | 0.3406  | 0.472474 | no |
| Naa35         | 0.177962 | 0.755042 | 0.1678  | 0.273489 | no |
| Aff4          | 0.177546 | 0.834205 | 0.0856  | 0.158412 | no |
| Smg1          | 0.177533 | 0.809576 | 0.10805 | 0.191312 | no |
| Gpr85         | 0.177459 | 0.511283 | 0.34125 | 0.473128 | no |
| Gm5126        | 0.177446 | 0        | 1       | 1        | no |
| Nsfl1c        | 0.177332 | 0.675154 | 0.17425 | 0.28158  | no |
| Ilf3          | 0.177294 | 0.770714 | 0.14395 | 0.242174 | no |
| Ppp1r12a      | 0.177236 | 0.739731 | 0.157   | 0.259328 | no |
| Gm9199        | 0.17716  | 0        | 1       | 1        | no |
| Add1          | 0.176985 | 0.820566 | 0.10075 | 0.180506 | no |
| Tulp3         | 0.176982 | 0.650029 | 0.21705 | 0.334565 | no |
| Skap1         | 0.176922 | 0        | 1       | 1        | no |
| Mettl2        | 0.176881 | 0.501241 | 0.3549  | 0.486813 | no |
| Srd5a3        | 0.176817 | 0.709056 | 0.2078  | 0.323578 | no |
| Nup155        | 0.176816 | 0.692356 | 0.17955 | 0.288948 | no |
| Rai14         | 0.176696 | 0.523758 | 0.2875  | 0.414054 | no |
| Prr33         | 0.176607 | 0        | 1       | 1        | no |
| Thoc2         | 0.176427 | 0.700411 | 0.16925 | 0.275413 | no |
| Hnrnpl        | 0.176418 | 0.876348 | 0.11305 | 0.198286 | no |
| Ric8b         | 0.17625  | 0.72424  | 0.1493  | 0.24909  | no |
| Mettl16       | 0.176217 | 0.63715  | 0.2292  | 0.349348 | no |
| Cebpb         | 0.176185 | 0.414151 | 0.4734  | 0.602455 | no |
| Ola1          | 0.176157 | 0.78498  | 0.1108  | 0.195062 | no |
| 3010026O09Rik | 0.176153 | 0.488935 | 0.4139  | 0.545955 | no |
| Immnp2l       | 0.176088 | 0.20116  | 0.7483  | 0.833    | no |
| Ybx3          | 0.175883 | 0.576809 | 0.24685 | 0.369009 | no |
| Rbm8a         | 0.175832 | 0.642877 | 0.20085 | 0.314788 | no |
| Bcam          | 0.175684 | 0.843295 | 0.11875 | 0.20678  | no |
| Lim2          | 0.175647 | 0        | 1       | 1        | no |
| Rrm2b         | 0.175608 | 0.771624 | 0.13865 | 0.234866 | no |
| Zmat1         | 0.175572 | 0.449918 | 0.39075 | 0.522273 | no |
| Dnajc8        | 0.175539 | 0.802245 | 0.1645  | 0.269036 | no |
| Cyth1         | 0.175435 | 0.721853 | 0.1468  | 0.246033 | no |
| Stat5a        | 0.175428 | 0.385446 | 0.44065 | 0.572194 | no |
| Dll4          | 0.175313 | 0.298845 | 0.5503  | 0.671279 | no |
| Wipi2         | 0.17518  | 0.853436 | 0.1008  | 0.180523 | no |
| Adam25        | 0.175126 | 0        | 1       | 1        | no |
| Diap3         | 0.175087 | 0.448834 | 0.3945  | 0.526225 | no |
| Tbc1d32       | 0.175086 | 0.576956 | 0.25995 | 0.383366 | no |
| Pdia3         | 0.175054 | 0.878049 | 0.1008  | 0.180523 | no |
| Sp100         | 0.174952 | 0.323559 | 0.5585  | 0.678349 | no |

|               |          |          |         |          |    |
|---------------|----------|----------|---------|----------|----|
| Psma7         | 0.174915 | 0.780214 | 0.1155  | 0.201889 | no |
| Rfesd         | 0.174727 | 0.505471 | 0.3091  | 0.438451 | no |
| Pik3c3        | 0.174723 | 0.811874 | 0.1216  | 0.211078 | no |
| Chd9          | 0.174711 | 0.757056 | 0.13415 | 0.22885  | no |
| Gira1         | 0.174694 | 0        | 1       | 1        | no |
| Tmem160       | 0.174688 | 0.780164 | 0.23395 | 0.354722 | no |
| Gucy2d        | 0.174639 | 0        | 1       | 1        | no |
| Cep89         | 0.174597 | 0.394591 | 0.4585  | 0.588119 | no |
| Chchd6        | 0.17457  | 0.587028 | 0.23635 | 0.357584 | no |
| Lrit1         | 0.174445 | 0        | 1       | 1        | no |
| Zswim7        | 0.174387 | 0.473901 | 0.4826  | 0.611057 | no |
| Matr3         | 0.174346 | 0.85643  | 0.1001  | 0.179584 | no |
| Tmem180       | 0.17433  | 0.607326 | 0.25815 | 0.381517 | no |
| Eef2          | 0.174266 | 0.700163 | 0.1573  | 0.259726 | no |
| Zbtb4         | 0.174237 | 0.841216 | 0.0926  | 0.168522 | no |
| A630072M18Rik | 0.174178 | 0.270838 | 0.58835 | 0.703591 | no |
| Zfp639        | 0.174123 | 0.526301 | 0.29415 | 0.421891 | no |
| Hipk3         | 0.174061 | 0.803079 | 0.10575 | 0.187942 | no |
| Msmo1         | 0.173917 | 0.914515 | 0.10345 | 0.184695 | no |
| Cox11         | 0.173883 | 0.469429 | 0.3936  | 0.52513  | no |
| Gm4827        | 0.173869 | 0        | 1       | 1        | no |
| Lrrtm3        | 0.173786 | 0.417164 | 0.39285 | 0.524446 | no |
| Irf2bpl       | 0.173785 | 0.80294  | 0.127   | 0.218763 | no |
| Ggn           | 0.17377  | 0        | 1       | 1        | no |
| Keap1         | 0.173734 | 0.729582 | 0.144   | 0.242227 | no |
| Jmjd1c        | 0.173577 | 0.686176 | 0.1706  | 0.2771   | no |
| Taf8          | 0.173533 | 0.496161 | 0.36205 | 0.494168 | no |
| Fam149a       | 0.173428 | 0.677509 | 0.191   | 0.30282  | no |
| Trim26        | 0.173345 | 0.647485 | 0.19375 | 0.306192 | no |
| Chchd1        | 0.173256 | 0.457697 | 0.35455 | 0.486383 | no |
| Slc17a5       | 0.17316  | 0.653455 | 0.18455 | 0.294955 | no |
| D10Wsu102e    | 0.172982 | 0.690683 | 0.19195 | 0.303999 | no |
| Sarnp         | 0.172966 | 0.304558 | 0.6189  | 0.728631 | no |
| Syn1          | 0.172949 | 0.730412 | 0.1709  | 0.277485 | no |
| H3f3a         | 0.172944 | 0.600508 | 0.32615 | 0.45692  | no |
| Apaf1         | 0.172783 | 0.467768 | 0.34655 | 0.478545 | no |
| Ipp           | 0.17262  | 0.448037 | 0.41015 | 0.542032 | no |
| Katnb1        | 0.172578 | 0.603212 | 0.2512  | 0.373995 | no |
| Sdf2l1        | 0.17256  | 0.489299 | 0.41855 | 0.550174 | no |
| Amacr         | 0.172223 | 0.518506 | 0.3362  | 0.467446 | no |
| Phlda2        | 0.172217 | 0.187298 | 0.7882  | 0.862011 | no |
| Tmem192       | 0.172214 | 0.499572 | 0.31385 | 0.44334  | no |
| Mecr          | 0.172088 | 0.635789 | 0.2728  | 0.397631 | no |
| Pink1         | 0.172014 | 0.803586 | 0.10715 | 0.189896 | no |
| Anapc16       | 0.172    | 0.673852 | 0.25415 | 0.376897 | no |
| Nup88         | 0.171955 | 0.393983 | 0.4308  | 0.562154 | no |
| Slc35a5       | 0.17193  | 0.812811 | 0.12    | 0.208765 | no |
| Sec22c        | 0.171863 | 0.696954 | 0.15825 | 0.260873 | no |
| Ldlr          | 0.171732 | 0.803069 | 0.1058  | 0.18798  | no |
| D16Ert472e    | 0.171689 | 0        | 1       | 1        | no |
| Clnk          | 0.171303 | 0        | 1       | 1        | no |
| Triqk         | 0.171294 | 0.578712 | 0.2411  | 0.362908 | no |
| Bpnt1         | 0.17108  | 0.800706 | 0.1407  | 0.23758  | no |

|               |          |          |         |          |    |
|---------------|----------|----------|---------|----------|----|
| Vwce          | 0.17099  | 0        | 1       | 1        | no |
| Sqle          | 0.170908 | 0.861043 | 0.1065  | 0.188895 | no |
| Tada3         | 0.170811 | 0.649639 | 0.24745 | 0.369698 | no |
| Tcerg1        | 0.170746 | 0.728842 | 0.1463  | 0.245443 | no |
| Npr2          | 0.170658 | 0.831014 | 0.1105  | 0.194688 | no |
| Ttc7          | 0.170641 | 0.378663 | 0.4657  | 0.595283 | no |
| Vps33b        | 0.17058  | 0.597439 | 0.2646  | 0.38884  | no |
| Prune         | 0.170534 | 0.758705 | 0.15375 | 0.255198 | no |
| Hhex          | 0.170505 | 0        | 1       | 1        | no |
| Gopc          | 0.170504 | 0.746542 | 0.132   | 0.225705 | no |
| Ppp1r3b       | 0.170347 | 0.348469 | 0.50785 | 0.63431  | no |
| Bcl2l1        | 0.170275 | 0.700469 | 0.15675 | 0.259011 | no |
| Necab2        | 0.170272 | 0.515511 | 0.35195 | 0.484118 | no |
| Cep192        | 0.169929 | 0.355454 | 0.48635 | 0.614398 | no |
| 1810013L24Rik | 0.169889 | 0.803312 | 0.1209  | 0.21011  | no |
| Atg101        | 0.169848 | 0.688471 | 0.24205 | 0.363678 | no |
| Blm           | 0.169746 | 0.382035 | 0.44705 | 0.577846 | no |
| Zfp655        | 0.169639 | 0.567895 | 0.2554  | 0.378412 | no |
| Rnaseh2b      | 0.169601 | 0.435393 | 0.4466  | 0.577748 | no |
| Ccser2        | 0.169528 | 0.732486 | 0.1405  | 0.237333 | no |
| Col4a3bp      | 0.169482 | 0.797979 | 0.11165 | 0.196297 | no |
| Rragc         | 0.169449 | 0.841104 | 0.1133  | 0.198619 | no |
| Ncf4          | 0.169387 | 0        | 1       | 1        | no |
| Nudt18        | 0.169339 | 0.629207 | 0.22885 | 0.349224 | no |
| Tmem50b       | 0.169325 | 0.86961  | 0.11375 | 0.19925  | no |
| Topors        | 0.169136 | 0.555895 | 0.28855 | 0.415205 | no |
| 2610307P16Rik | 0.169128 | 0.288651 | 0.5588  | 0.67859  | no |
| Zfp933        | 0.169058 | 0.458837 | 0.37865 | 0.510212 | no |
| Cd72          | 0.168976 | 0        | 1       | 1        | no |
| Gprasp1       | 0.168829 | 0.766035 | 0.1229  | 0.213    | no |
| Tep1          | 0.168507 | 0.693177 | 0.17085 | 0.277438 | no |
| Baiap2        | 0.168476 | 0.462191 | 0.3537  | 0.485669 | no |
| Mfsd9         | 0.168451 | 0.527217 | 0.3182  | 0.448101 | no |
| Zeb1          | 0.168429 | 0.727835 | 0.14145 | 0.238573 | no |
| Map3k5        | 0.16833  | 0.695829 | 0.17425 | 0.28158  | no |
| 3110021A11Rik | 0.168307 | 0        | 1       | 1        | no |
| Zfp781        | 0.168269 | 0        | 1       | 1        | no |
| Ippk          | 0.168219 | 0.471986 | 0.3384  | 0.469963 | no |
| Stap2         | 0.168208 | 0        | 1       | 1        | no |
| Xrn1          | 0.168048 | 0.495026 | 0.33615 | 0.467425 | no |
| Tax1bp1       | 0.168031 | 0.841091 | 0.1056  | 0.187826 | no |
| Tmem14c       | 0.168005 | 0.832303 | 0.18965 | 0.301364 | no |
| Adprh         | 0.167829 | 0.867799 | 0.12955 | 0.222318 | no |
| Tbc1d25       | 0.167773 | 0.517358 | 0.2967  | 0.424492 | no |
| Clip3         | 0.16772  | 0.807012 | 0.12355 | 0.213847 | no |
| 5430427O19Rik | 0.167603 | 0        | 1       | 1        | no |
| 2510039O18Rik | 0.167457 | 0.686405 | 0.20275 | 0.317166 | no |
| Smchd1        | 0.167415 | 0.65808  | 0.2045  | 0.319414 | no |
| Tnip1         | 0.167341 | 0.656341 | 0.1831  | 0.293097 | no |
| Csnk1g1       | 0.167258 | 0.683149 | 0.18105 | 0.290798 | no |
| Tra2b         | 0.16719  | 0.653963 | 0.2332  | 0.3541   | no |
| Ascc1         | 0.167098 | 0.378344 | 0.4457  | 0.577057 | no |
| Zcchc14       | 0.167074 | 0.598719 | 0.2413  | 0.363003 | no |

|               |          |          |         |          |    |
|---------------|----------|----------|---------|----------|----|
| Psmf1         | 0.167052 | 0.740693 | 0.1589  | 0.261652 | no |
| Bin3          | 0.166873 | 0.36814  | 0.5219  | 0.646624 | no |
| AU023762      | 0.16674  | 0        | 1       | 1        | no |
| Ubr1          | 0.166693 | 0.745528 | 0.1287  | 0.221317 | no |
| Gm21284       | 0.166596 | 0        | 1       | 1        | no |
| Rc3h1         | 0.166515 | 0.789415 | 0.1179  | 0.205381 | no |
| D030047H15Rik | 0.166504 | 0        | 1       | 1        | no |
| Il7           | 0.166472 | 0.326367 | 0.5432  | 0.665433 | no |
| Serpina3n     | 0.166266 | 0.852481 | 0.1195  | 0.207977 | no |
| Hsf2          | 0.166169 | 0.653381 | 0.2282  | 0.348553 | no |
| B230217C12Rik | 0.166139 | 0.495281 | 0.4083  | 0.540287 | no |
| Lypd1         | 0.166048 | 0.440611 | 0.3793  | 0.510829 | no |
| Taf11         | 0.166003 | 0.632619 | 0.2834  | 0.409171 | no |
| Brms1l        | 0.165995 | 0.774701 | 0.14975 | 0.249621 | no |
| Mmaa          | 0.165661 | 0.439761 | 0.41075 | 0.542555 | no |
| Wtap          | 0.165649 | 0.576287 | 0.24945 | 0.372016 | no |
| Zbtb7c        | 0.165549 | 0.306023 | 0.53885 | 0.661203 | no |
| Kidins220     | 0.16529  | 0.778394 | 0.1267  | 0.218359 | no |
| Suz12         | 0.165187 | 0.70602  | 0.15705 | 0.259378 | no |
| Fpgt          | 0.165173 | 0.601672 | 0.2517  | 0.374403 | no |
| Ppp2r5d       | 0.164984 | 0.428416 | 0.39195 | 0.523613 | no |
| Pcgf3         | 0.16492  | 0.699903 | 0.1838  | 0.29404  | no |
| Zfp335        | 0.164612 | 0.512691 | 0.3178  | 0.44768  | no |
| Rictor        | 0.164534 | 0.706067 | 0.17105 | 0.277593 | no |
| Rsl1d1        | 0.164501 | 0.676061 | 0.2328  | 0.353584 | no |
| Exosc5        | 0.164454 | 0.409025 | 0.41235 | 0.544289 | no |
| N6amt2        | 0.16441  | 0.573672 | 0.383   | 0.514246 | no |
| 37864         | 0.164389 | 0.770527 | 0.11875 | 0.20678  | no |
| Brd3          | 0.163995 | 0.609472 | 0.21705 | 0.334565 | no |
| Gnai3         | 0.163873 | 0.770995 | 0.146   | 0.245095 | no |
| Cdk5          | 0.16381  | 0.800257 | 0.1417  | 0.238904 | no |
| BC051142      | 0.163549 | 0        | 1       | 1        | no |
| Cnpy4         | 0.163456 | 0.491435 | 0.3822  | 0.513535 | no |
| Cdk9          | 0.163426 | 0.645734 | 0.2221  | 0.340884 | no |
| Paxip1        | 0.16332  | 0.574275 | 0.26    | 0.383397 | no |
| Brd4          | 0.163318 | 0.676635 | 0.1732  | 0.280293 | no |
| Tmod2         | 0.163255 | 0.722317 | 0.14615 | 0.245284 | no |
| Slc18b1       | 0.163093 | 0.482801 | 0.365   | 0.497002 | no |
| Ubl5          | 0.162922 | 0.646028 | 0.1947  | 0.307218 | no |
| Thap1         | 0.162855 | 0.412302 | 0.44685 | 0.577756 | no |
| Zfx           | 0.162849 | 0.531873 | 0.2818  | 0.407748 | no |
| Nucb1         | 0.162728 | 0.717776 | 0.14805 | 0.247347 | no |
| Ptp4a3        | 0.162687 | 0.56167  | 0.25935 | 0.382992 | no |
| Csnk2a2       | 0.162566 | 0.599381 | 0.26045 | 0.383932 | no |
| Stx7          | 0.162436 | 0.825883 | 0.12225 | 0.212095 | no |
| Snx32         | 0.16238  | 0.741873 | 0.19135 | 0.303302 | no |
| Cd2bp2        | 0.162313 | 0.688804 | 0.17145 | 0.278072 | no |
| Morn1         | 0.162247 | 0.230044 | 0.68065 | 0.779587 | no |
| Farsa         | 0.162201 | 0.551108 | 0.2599  | 0.383334 | no |
| Fam92a        | 0.162136 | 0.572972 | 0.32    | 0.449967 | no |
| Thsd7a        | 0.161982 | 0.757482 | 0.12815 | 0.220543 | no |
| A930011G23Rik | 0.161908 | 0        | 1       | 1        | no |
| Dis3l2        | 0.161886 | 0.540521 | 0.28175 | 0.407748 | no |

|          |          |          |         |          |    |
|----------|----------|----------|---------|----------|----|
| Tctn3    | 0.161682 | 0.393515 | 0.4646  | 0.59422  | no |
| Dpp7     | 0.161563 | 0.644664 | 0.2545  | 0.377299 | no |
| Papd5    | 0.161503 | 0.577683 | 0.2504  | 0.373013 | no |
| Mat2b    | 0.161496 | 0.714046 | 0.14965 | 0.249517 | no |
| Thumpd3  | 0.161483 | 0.514845 | 0.3426  | 0.474405 | no |
| Dr1      | 0.161467 | 0.675993 | 0.20195 | 0.316213 | no |
| Kmt2a    | 0.161456 | 0.737793 | 0.1394  | 0.235865 | no |
| Rnf41    | 0.161288 | 0.744916 | 0.1291  | 0.221718 | no |
| Tceal1   | 0.161209 | 0.626366 | 0.2912  | 0.418338 | no |
| Skp2     | 0.161116 | 0        | 1       | 1        | no |
| Cox6b2   | 0.160988 | 0.111005 | 0.8172  | 0.882218 | no |
| Jakmip2  | 0.160942 | 0.709686 | 0.1784  | 0.287411 | no |
| Maats1   | 0.160911 | 0        | 1       | 1        | no |
| Brd7     | 0.160862 | 0.584552 | 0.2809  | 0.406873 | no |
| Zfp324   | 0.160839 | 0.431141 | 0.41265 | 0.544576 | no |
| Zswim4   | 0.160595 | 0.592652 | 0.25635 | 0.379321 | no |
| Utp23    | 0.160451 | 0.331856 | 0.5358  | 0.658617 | no |
| Depdc7   | 0.160446 | 0.357989 | 0.5307  | 0.654288 | no |
| Slc35d1  | 0.160381 | 0.389106 | 0.465   | 0.59456  | no |
| Brix1    | 0.16021  | 0.483857 | 0.37435 | 0.506011 | no |
| Josd2    | 0.159959 | 0.46066  | 0.35245 | 0.484706 | no |
| Arfip1   | 0.159919 | 0.695277 | 0.19395 | 0.306399 | no |
| Psmd10   | 0.159886 | 0.472042 | 0.35065 | 0.482799 | no |
| Cep164   | 0.159629 | 0.531362 | 0.2949  | 0.42251  | no |
| Sod1     | 0.15949  | 0.926774 | 0.2049  | 0.320001 | no |
| Foxq1    | 0.159422 | 0        | 1       | 1        | no |
| BC053749 | 0.159305 | 0        | 1       | 1        | no |
| Ergic2   | 0.1593   | 0.233757 | 0.65735 | 0.759674 | no |
| Rnf8     | 0.159198 | 0.582384 | 0.2944  | 0.422158 | no |
| Dnajc13  | 0.159094 | 0.765201 | 0.13315 | 0.227495 | no |
| BC002163 | 0.158952 | 0.738324 | 0.38055 | 0.511992 | no |
| Gmfb     | 0.15891  | 0.754969 | 0.1498  | 0.249673 | no |
| Pds5b    | 0.158791 | 0.706255 | 0.1654  | 0.270308 | no |
| Map3k1   | 0.158773 | 0.607123 | 0.23095 | 0.351378 | no |
| Gle1     | 0.158697 | 0.663538 | 0.20825 | 0.324164 | no |
| Slc13a1  | 0.15836  | 0        | 1       | 1        | no |
| Rtn2     | 0.158266 | 0.697747 | 0.15575 | 0.25768  | no |
| Cox17    | 0.158248 | 1.01029  | 0.275   | 0.40009  | no |
| Ercc5    | 0.15806  | 0.543023 | 0.29825 | 0.42625  | no |
| Adipor1  | 0.157966 | 0.823776 | 0.1347  | 0.229552 | no |
| Cct6a    | 0.15787  | 0.742111 | 0.13875 | 0.234945 | no |
| Xrcc6    | 0.157643 | 0.448163 | 0.42    | 0.551533 | no |
| Hoxc4    | 0.157601 | 0.267164 | 0.63475 | 0.74135  | no |
| Shmt2    | 0.157596 | 0.488822 | 0.32515 | 0.455952 | no |
| Smad2    | 0.157588 | 0.693535 | 0.15945 | 0.262427 | no |
| Map3k2   | 0.157454 | 0.62469  | 0.2188  | 0.33691  | no |
| Slc7a8   | 0.157409 | 0.613545 | 0.2413  | 0.363003 | no |
| Nudcd2   | 0.157408 | 0.382254 | 0.4382  | 0.569793 | no |
| Pclo     | 0.157317 | 0.733937 | 0.1425  | 0.240009 | no |
| Cep120   | 0.157258 | 0.72781  | 0.14105 | 0.23811  | no |
| Dusp3    | 0.157107 | 0.7756   | 0.13655 | 0.232109 | no |
| Inip     | 0.157042 | 0.465582 | 0.37775 | 0.50931  | no |
| Cxcl12   | 0.156823 | 0.528953 | 0.2809  | 0.406873 | no |



|               |          |          |         |          |    |
|---------------|----------|----------|---------|----------|----|
| Serbp1        | 0.156777 | 0.717368 | 0.15275 | 0.253856 | no |
| Hist1h2bj     | 0.156767 | 0.223378 | 0.8215  | 0.885365 | no |
| Cyp4x1        | 0.156682 | 0.490665 | 0.3902  | 0.521748 | no |
| Gpr173        | 0.156546 | 0.496037 | 0.3478  | 0.479903 | no |
| Rbm11         | 0.156515 | 0.665781 | 0.21085 | 0.32729  | no |
| 1810032O08Rik | 0.156446 | 0.166554 | 0.73265 | 0.821646 | no |
| Gtf2h5        | 0.15615  | 0.752423 | 0.2113  | 0.327758 | no |
| Sp4           | 0.155982 | 0.516614 | 0.29415 | 0.421891 | no |
| Tbc1d22b      | 0.155964 | 0.542428 | 0.27335 | 0.39817  | no |
| Cdk5rap2      | 0.155922 | 0.56376  | 0.27435 | 0.399276 | no |
| Cul2          | 0.155896 | 0.737302 | 0.15685 | 0.259144 | no |
| Necab1        | 0.15579  | 0.717884 | 0.1475  | 0.24677  | no |
| Mrps15        | 0.15564  | 0.628243 | 0.3116  | 0.441007 | no |
| Vopp1         | 0.155611 | 0.727489 | 0.1716  | 0.278281 | no |
| Rnf20         | 0.155447 | 0.667007 | 0.1782  | 0.287124 | no |
| Rap2a         | 0.155435 | 0.733903 | 0.1583  | 0.26089  | no |
| Cpt1c         | 0.155418 | 0.642947 | 0.19645 | 0.309353 | no |
| Cr1l          | 0.155309 | 0.523342 | 0.3502  | 0.482461 | no |
| Prmt3         | 0.155248 | 0.658419 | 0.2272  | 0.347425 | no |
| Peg3          | 0.154896 | 0.746698 | 0.1353  | 0.230368 | no |
| Noc3l         | 0.154873 | 0.564511 | 0.2816  | 0.407636 | no |
| Jak1          | 0.154805 | 0.667962 | 0.17985 | 0.289256 | no |
| Zfp275        | 0.15473  | 0.609131 | 0.2183  | 0.336297 | no |
| Tnk2          | 0.154716 | 0.714348 | 0.1541  | 0.255715 | no |
| Tex261        | 0.154621 | 0.697814 | 0.2314  | 0.351901 | no |
| Cnot7         | 0.154451 | 0.397418 | 0.4651  | 0.594631 | no |
| Sorbs2        | 0.154426 | 0.582906 | 0.2503  | 0.373013 | no |
| Mlycd         | 0.154416 | 0.520075 | 0.34385 | 0.475788 | no |
| Heatr6        | 0.154347 | 0.614511 | 0.23885 | 0.360134 | no |
| Mrps36        | 0.154296 | 0.192875 | 0.689   | 0.786117 | no |
| Pmf1          | 0.154292 | 0.29373  | 0.6445  | 0.749591 | no |
| Fam120c       | 0.154251 | 0.645235 | 0.2054  | 0.320593 | no |
| Tpr           | 0.154229 | 0.549551 | 0.2818  | 0.407748 | no |
| Khdrbs3       | 0.154179 | 0.664574 | 0.23265 | 0.353478 | no |
| Rnf6          | 0.154138 | 0.660657 | 0.18625 | 0.2971   | no |
| Ttyh3         | 0.154081 | 0.696628 | 0.18145 | 0.291229 | no |
| Mrpl50        | 0.154036 | 0.629989 | 0.25225 | 0.374969 | no |
| Jak2          | 0.154033 | 0.545799 | 0.27345 | 0.398272 | no |
| Nat9          | 0.153949 | 0.475056 | 0.4376  | 0.569292 | no |
| Ctage5        | 0.153931 | 0.650006 | 0.1953  | 0.307835 | no |
| Ddx39b        | 0.153542 | 0.682852 | 0.1662  | 0.271382 | no |
| Zfp120        | 0.153517 | 0.401613 | 0.42015 | 0.551621 | no |
| Fam185a       | 0.153445 | 0.486379 | 0.3589  | 0.491183 | no |
| Flcn          | 0.153444 | 0.497535 | 0.3164  | 0.446134 | no |
| Tk2           | 0.153237 | 0.546446 | 0.278   | 0.40357  | no |
| Rab1b         | 0.152992 | 0.793774 | 0.1548  | 0.256556 | no |
| 2010315B03Rik | 0.152958 | 0.398539 | 0.41715 | 0.548932 | no |
| Bcas2         | 0.15295  | 0.679402 | 0.2415  | 0.363222 | no |
| Tagap1        | 0.152811 | 0.561567 | 0.30085 | 0.428996 | no |
| Vcp           | 0.152807 | 0.763809 | 0.145   | 0.243693 | no |
| Rpn1          | 0.152798 | 0.688915 | 0.16345 | 0.267781 | no |
| Bag4          | 0.152787 | 0.610613 | 0.2346  | 0.355261 | no |
| Il11          | 0.152785 | 0        | 1       | 1        | no |

|               |          |          |         |          |    |
|---------------|----------|----------|---------|----------|----|
| Atp6v1e1      | 0.152769 | 0.862591 | 0.14595 | 0.245073 | no |
| Nrp1          | 0.152714 | 0.703824 | 0.15235 | 0.253287 | no |
| Mov10         | 0.152635 | 0.284444 | 0.5689  | 0.68752  | no |
| Brip1         | 0.152622 | 0        | 1       | 1        | no |
| Tcp11l2       | 0.152612 | 0.599256 | 0.26805 | 0.392562 | no |
| Rrp7a         | 0.152599 | 0.603496 | 0.22715 | 0.347389 | no |
| Cenpt         | 0.152568 | 0.333379 | 0.5418  | 0.663963 | no |
| Zfyve1        | 0.152521 | 0.668499 | 0.198   | 0.311314 | no |
| Zfp523        | 0.15247  | 0.532193 | 0.31835 | 0.448217 | no |
| Afg3l1        | 0.152457 | 0.543091 | 0.273   | 0.397879 | no |
| Rnf122        | 0.152393 | 0.381883 | 0.46895 | 0.597997 | no |
| Hcfc2         | 0.152275 | 0.444953 | 0.41575 | 0.547578 | no |
| Sgsm3         | 0.152249 | 0.48583  | 0.35655 | 0.488471 | no |
| Ppapdc1a      | 0.152195 | 0.318426 | 0.59795 | 0.711863 | no |
| Ripk2         | 0.152189 | 0.345708 | 0.534   | 0.657196 | no |
| Klhdc8a       | 0.15215  | 0.611278 | 0.2413  | 0.363003 | no |
| Psmd4         | 0.152064 | 0.669562 | 0.1769  | 0.285272 | no |
| Lins          | 0.152047 | 0.459957 | 0.35345 | 0.485477 | no |
| Rere          | 0.152039 | 0.703352 | 0.16745 | 0.273053 | no |
| Wdr77         | 0.1519   | 0.501346 | 0.31335 | 0.442893 | no |
| Cars          | 0.151859 | 0.496543 | 0.32105 | 0.4513   | no |
| Mrpl40        | 0.151852 | 0.556638 | 0.361   | 0.493243 | no |
| Phax          | 0.151847 | 0.3339   | 0.49675 | 0.623676 | no |
| Fmn2          | 0.151836 | 0.619856 | 0.21975 | 0.337981 | no |
| Nupr1         | 0.151812 | 0.32927  | 0.65035 | 0.754147 | no |
| Chmp1b        | 0.151472 | 0.141988 | 0.7798  | 0.856637 | no |
| 1110034G24Rik | 0.151457 | 0.377624 | 0.5081  | 0.634384 | no |
| Mcm8          | 0.15141  | 0.302237 | 0.53975 | 0.662185 | no |
| Klhdc1        | 0.151263 | 0.357511 | 0.5253  | 0.649441 | no |
| Rab28         | 0.151214 | 0.629886 | 0.27    | 0.394851 | no |
| Rsbn1         | 0.151155 | 0.306611 | 0.5484  | 0.669947 | no |
| Fbxo6         | 0.151116 | 0.35533  | 0.4781  | 0.606923 | no |
| Ptdss2        | 0.151068 | 0.631154 | 0.2472  | 0.369449 | no |
| Pdik1l        | 0.150967 | 0.376315 | 0.4505  | 0.580778 | no |
| Vps37a        | 0.15082  | 0.294521 | 0.5663  | 0.684815 | no |
| Ascl4         | 0.15074  | 0        | 1       | 1        | no |
| Crk           | 0.150674 | 0.705664 | 0.157   | 0.259328 | no |
| Rif1          | 0.150632 | 0.472346 | 0.3448  | 0.476954 | no |
| Polr1d        | 0.150499 | 0.51879  | 0.29695 | 0.424759 | no |
| Lhfp15        | 0.150392 | 0.461627 | 0.43555 | 0.567348 | no |
| 2900011O08Rik | 0.150329 | 0.685416 | 0.16575 | 0.270747 | no |
| Nhp2          | 0.150293 | 0.43219  | 0.48695 | 0.614922 | no |
| Mis12         | 0.150276 | 0.38043  | 0.44135 | 0.572766 | no |
| Eif3m         | 0.150263 | 0.37303  | 0.45165 | 0.581864 | no |
| 1110038F14Rik | 0.150218 | 0.455773 | 0.45625 | 0.586197 | no |
| Fnip2         | 0.150177 | 0.414328 | 0.40645 | 0.538268 | no |
| Ctla2a        | 0.150154 | 0.27604  | 0.58285 | 0.69908  | no |
| Smg5          | 0.150067 | 0.696839 | 0.1799  | 0.289301 | no |
| Pnma2         | 0.150055 | 0.704506 | 0.1742  | 0.281568 | no |
| N4bp2l2       | 0.149901 | 0.55286  | 0.28415 | 0.409986 | no |
| Dlg5          | 0.14974  | 0.59062  | 0.23395 | 0.354722 | no |
| Gm3258        | 0.149685 | 0.402321 | 0.4217  | 0.553218 | no |
| Phlpp2        | 0.149677 | 0.625759 | 0.21645 | 0.334223 | no |

|               |          |           |         |          |    |
|---------------|----------|-----------|---------|----------|----|
| Gss           | 0.149517 | 0.482983  | 0.33115 | 0.462168 | no |
| Rpl26         | 0.149442 | 0         | 1       | 1        | no |
| Synrg         | 0.149353 | 0.70936   | 0.1638  | 0.268156 | no |
| Mospd3        | 0.149128 | 0.396883  | 0.4241  | 0.555543 | no |
| Top3b         | 0.149039 | 0.509643  | 0.3333  | 0.464533 | no |
| Cnot6         | 0.148979 | 0.590656  | 0.2385  | 0.359729 | no |
| Cct2          | 0.148779 | 0.777443  | 0.15835 | 0.26094  | no |
| Rrn3          | 0.148646 | 0.719575  | 0.1698  | 0.276105 | no |
| Thnsl1        | 0.148623 | 0.474515  | 0.3411  | 0.473069 | no |
| Tars          | 0.148519 | 0.593721  | 0.27375 | 0.398622 | no |
| Pfdn5         | 0.148488 | 0.693361  | 0.31635 | 0.446134 | no |
| Homer3        | 0.148474 | 0.26737   | 0.62225 | 0.731077 | no |
| C030037D09Rik | 0.148389 | 0.17945   | 0.7709  | 0.849588 | no |
| Capza1        | 0.148367 | 0.630246  | 0.2316  | 0.352124 | no |
| Slc7a6        | 0.14836  | 0.591125  | 0.259   | 0.38256  | no |
| 9030624J02Rik | 0.148287 | 0.690463  | 0.1847  | 0.29516  | no |
| Ampd2         | 0.14824  | 0.622722  | 0.21215 | 0.328846 | no |
| Lin9          | 0.148119 | 0.203255  | 0.67515 | 0.774578 | no |
| Tspyl2        | 0.148118 | 0.644635  | 0.23115 | 0.351601 | no |
| Zbtb25        | 0.148108 | 0.329505  | 0.50335 | 0.629995 | no |
| Acbd7         | 0.148025 | 0         | 1       | 1        | no |
| Decr2         | 0.14795  | 0.569123  | 0.2987  | 0.426756 | no |
| Cd151         | 0.147934 | 0.684087  | 0.173   | 0.280072 | no |
| Zswim5        | 0.147889 | 0.572534  | 0.26665 | 0.391073 | no |
| Eif3b         | 0.14783  | 0.681211  | 0.16745 | 0.273053 | no |
| Ddx21         | 0.147778 | 0.565537  | 0.2776  | 0.403122 | no |
| Aes           | 0.147774 | 0.689989  | 0.1645  | 0.269036 | no |
| Adam33        | 0.147689 | 0         | 1       | 1        | no |
| Osgp          | 0.147641 | 0.377104  | 0.50945 | 0.63571  | no |
| Casp9         | 0.147526 | 0.591573  | 0.232   | 0.352571 | no |
| Hinfp         | 0.147512 | 0.341885  | 0.53565 | 0.658555 | no |
| Pcdha7        | 0.147482 | 0.0803905 | 0.86905 | 0.918407 | no |
| Arhgef25      | 0.147455 | 0.644847  | 0.1939  | 0.306392 | no |
| Zfp598        | 0.14743  | 0.515589  | 0.33135 | 0.462398 | no |
| Apc2          | 0.147328 | 0.158046  | 0.75105 | 0.83515  | no |
| Srebf2        | 0.147258 | 0.690127  | 0.16435 | 0.26889  | no |
| Ocr1          | 0.147233 | 0.681529  | 0.18415 | 0.294458 | no |
| Mrps17        | 0.147054 | 0.530874  | 0.36295 | 0.494989 | no |
| Sf3b1         | 0.146427 | 0.702654  | 0.16775 | 0.273441 | no |
| 2310011J03Rik | 0.146104 | 0.0547384 | 0.9164  | 0.948426 | no |
| 0610037L13Rik | 0.146036 | 0.529005  | 0.35095 | 0.483043 | no |
| Slc38a3       | 0.145852 | 0         | 1       | 1        | no |
| Abtb1         | 0.145797 | 0.626015  | 0.2597  | 0.383167 | no |
| Cnm3          | 0.145778 | 0.503797  | 0.3111  | 0.440487 | no |
| 1110059G10Rik | 0.145535 | 0.401816  | 0.45045 | 0.580778 | no |
| Nelfb         | 0.145534 | 0.675278  | 0.21075 | 0.327211 | no |
| 4632434I11Rik | 0.14546  | 0         | 1       | 1        | no |
| Grn           | 0.145403 | 0.684565  | 0.2079  | 0.323695 | no |
| Hsbp1         | 0.145324 | 0.771539  | 0.19615 | 0.308991 | no |
| Actr6         | 0.14517  | 0.438967  | 0.44115 | 0.572675 | no |
| Zbed3         | 0.145151 | 0.260777  | 0.59325 | 0.707601 | no |
| Tle6          | 0.145027 | 0.207571  | 0.7035  | 0.79895  | no |
| Numa1         | 0.144989 | 0.678362  | 0.18325 | 0.293266 | no |

|               |          |          |         |          |    |
|---------------|----------|----------|---------|----------|----|
| Zc3h14        | 0.144747 | 0.57729  | 0.27565 | 0.400816 | no |
| Oacyl         | 0.144673 | 0        | 1       | 1        | no |
| Ip6k1         | 0.144492 | 0.710172 | 0.16685 | 0.272342 | no |
| Tmem161a      | 0.144426 | 0.521572 | 0.327   | 0.457794 | no |
| Wdr73         | 0.144422 | 0.391845 | 0.42865 | 0.56001  | no |
| Uty           | 0.144201 | 0.502583 | 0.32585 | 0.456548 | no |
| Swi5          | 0.144025 | 0.617865 | 0.21225 | 0.328963 | no |
| Ttll7         | 0.143999 | 0.576898 | 0.26065 | 0.384056 | no |
| Spata5        | 0.143923 | 0.380031 | 0.44635 | 0.577729 | no |
| Rars2         | 0.143856 | 0.460757 | 0.4024  | 0.533971 | no |
| Trmt2b        | 0.143849 | 0.446782 | 0.36665 | 0.498498 | no |
| AA474331      | 0.143837 | 0.220446 | 0.7414  | 0.828238 | no |
| Nop16         | 0.14376  | 0.471471 | 0.39685 | 0.528562 | no |
| Cxcl5         | 0.143638 | 0        | 1       | 1        | no |
| Pgrmc1        | 0.143599 | 0.748305 | 0.1786  | 0.287699 | no |
| Itpk1         | 0.143548 | 0.583689 | 0.2377  | 0.358994 | no |
| Slc38a10      | 0.14349  | 0.652299 | 0.1875  | 0.298519 | no |
| Cep97         | 0.143301 | 0.323055 | 0.4853  | 0.61348  | no |
| Gorasp1       | 0.143232 | 0.315412 | 0.52605 | 0.649945 | no |
| Ankrd13a      | 0.143141 | 0.589717 | 0.2633  | 0.387273 | no |
| D430019H16Rik | 0.143112 | 0.60368  | 0.24025 | 0.361875 | no |
| Pomgnt2       | 0.142964 | 0.571087 | 0.24905 | 0.371545 | no |
| Irgm2         | 0.142879 | 0.434786 | 0.40585 | 0.537635 | no |
| Gga3          | 0.142847 | 0.618949 | 0.2138  | 0.330901 | no |
| Atp6v0e       | 0.142704 | 0.598049 | 0.3668  | 0.498549 | no |
| Armcx3        | 0.142657 | 0.601116 | 0.22585 | 0.34568  | no |
| BC037034      | 0.142604 | 0.662936 | 0.22185 | 0.34054  | no |
| Prom1         | 0.142579 | 0.469703 | 0.3401  | 0.472076 | no |
| Zfp277        | 0.142541 | 0.368887 | 0.4533  | 0.583254 | no |
| Cdkn2aip      | 0.142402 | 0.392806 | 0.4573  | 0.587148 | no |
| Supt5         | 0.142396 | 0.7011   | 0.1776  | 0.286296 | no |
| Stim1         | 0.14228  | 0.651574 | 0.21545 | 0.333222 | no |
| Krcc1         | 0.142019 | 0.438727 | 0.43695 | 0.568725 | no |
| Zfp433        | 0.141998 | 0.190073 | 0.72665 | 0.81753  | no |
| Prmt8         | 0.141927 | 0.607073 | 0.25965 | 0.383167 | no |
| Nap1l4        | 0.141907 | 0.658462 | 0.18475 | 0.295204 | no |
| Tssc1         | 0.141818 | 0.548943 | 0.32535 | 0.456088 | no |
| Zdhhc21       | 0.141726 | 0.675565 | 0.18035 | 0.289919 | no |
| Gm20759       | 0.141649 | 0        | 1       | 1        | no |
| Tmem87b       | 0.141433 | 0.642589 | 0.21345 | 0.330552 | no |
| Gm12070       | 0.141253 | 0.43616  | 0.4366  | 0.568437 | no |
| Utp3          | 0.141087 | 0.603777 | 0.28665 | 0.413009 | no |
| Fam192a       | 0.141072 | 0.568466 | 0.31095 | 0.440463 | no |
| Zfp317        | 0.140953 | 0.498694 | 0.3352  | 0.466593 | no |
| Cd3eap        | 0.140949 | 0.280565 | 0.5824  | 0.698806 | no |
| Cdadcl        | 0.140914 | 0.565846 | 0.2528  | 0.375525 | no |
| Rprm          | 0.140851 | 0.66662  | 0.24625 | 0.368403 | no |
| Hs2st1        | 0.140684 | 0.632128 | 0.2193  | 0.337524 | no |
| Mau2          | 0.140652 | 0.604493 | 0.2293  | 0.349348 | no |
| Vamp7         | 0.140589 | 0.634311 | 0.2409  | 0.362731 | no |
| Dnaja2        | 0.140559 | 0.707937 | 0.17975 | 0.2892   | no |
| Vps18         | 0.140467 | 0.639834 | 0.2201  | 0.338245 | no |
| Ubr5          | 0.140414 | 0.659208 | 0.1815  | 0.291239 | no |

|           |          |          |         |          |    |
|-----------|----------|----------|---------|----------|----|
| Cdc42     | 0.140409 | 0.634831 | 0.2025  | 0.31685  | no |
| Hnrnp2    | 0.140365 | 0.682936 | 0.21085 | 0.32729  | no |
| Tmx3      | 0.140348 | 0.685795 | 0.18745 | 0.298476 | no |
| Cyb5r1    | 0.140233 | 0.718525 | 0.20365 | 0.318386 | no |
| Tuba1c    | 0.140213 | 0.733713 | 0.1745  | 0.281881 | no |
| Colec11   | 0.14007  | 0        | 1       | 1        | no |
| Zfp53     | 0.14005  | 0.284678 | 0.5913  | 0.706101 | no |
| Casc3     | 0.139952 | 0.415221 | 0.3984  | 0.530148 | no |
| Cyb5d1    | 0.13985  | 0.425146 | 0.53595 | 0.658741 | no |
| Ccnt1     | 0.139809 | 0.400395 | 0.46975 | 0.598787 | no |
| Ifitm7    | 0.139799 | 0        | 1       | 1        | no |
| Ate1      | 0.139795 | 0.610695 | 0.2199  | 0.338172 | no |
| Slc19a3   | 0.139748 | 0        | 1       | 1        | no |
| Arsb      | 0.139739 | 0.587063 | 0.23285 | 0.35362  | no |
| Fktn      | 0.139664 | 0.540936 | 0.31615 | 0.445924 | no |
| Slc25a14  | 0.139595 | 0.487219 | 0.32385 | 0.454536 | no |
| Zkscan8   | 0.139587 | 0.313346 | 0.4401  | 0.571647 | no |
| Eps15l1   | 0.139552 | 0.576275 | 0.24215 | 0.363787 | no |
| Asnsd1    | 0.139542 | 0.513952 | 0.29885 | 0.426878 | no |
| Hist1h2bf | 0.139518 | 0        | 1       | 1        | no |
| Rfc3      | 0.139266 | 0.28185  | 0.6399  | 0.746006 | no |
| Cep112    | 0.139041 | 0.213971 | 0.64585 | 0.750875 | no |
| Fam160a2  | 0.13904  | 0.572749 | 0.2458  | 0.367896 | no |
| Hmga1     | 0.139015 | 0.31623  | 0.51115 | 0.637412 | no |
| Khk       | 0.138955 | 0.471119 | 0.4329  | 0.564506 | no |
| Slc17a6   | 0.138913 | 0.682251 | 0.19075 | 0.302568 | no |
| Tbc1d31   | 0.138686 | 0.238012 | 0.6337  | 0.740796 | no |
| Dram1     | 0.138621 | 0        | 1       | 1        | no |
| Madd      | 0.138545 | 0.644822 | 0.1936  | 0.306028 | no |
| Mif       | 0.138472 | 0.643434 | 0.4075  | 0.539336 | no |
| Gps1      | 0.138454 | 0.278483 | 0.5728  | 0.690975 | no |
| Adar      | 0.138451 | 0.392809 | 0.44345 | 0.574873 | no |
| Eif3l     | 0.138446 | 0.681314 | 0.22295 | 0.341833 | no |
| Txnrd3    | 0.138329 | 0.41043  | 0.4125  | 0.544433 | no |
| Pabpc5    | 0.138248 | 0        | 1       | 1        | no |
| Chd4      | 0.138177 | 0.647986 | 0.18395 | 0.294209 | no |
| Iqsec3    | 0.138153 | 0.5661   | 0.25185 | 0.374543 | no |
| Aspcr1    | 0.138117 | 0.519077 | 0.2947  | 0.422405 | no |
| Zswim6    | 0.138086 | 0.555615 | 0.25945 | 0.383054 | no |
| Wdr5      | 0.138033 | 0.490128 | 0.3579  | 0.490067 | no |
| Nr1h2     | 0.137862 | 0.539425 | 0.2801  | 0.40613  | no |
| Camk1     | 0.137793 | 0.454421 | 0.3591  | 0.491406 | no |
| Plekhg3   | 0.137627 | 0.480464 | 0.3466  | 0.478545 | no |
| Atp6v1d   | 0.137561 | 0.725946 | 0.2078  | 0.323578 | no |
| Tmem60    | 0.137533 | 0.555817 | 0.39035 | 0.521896 | no |
| Tmco6     | 0.137528 | 0.244366 | 0.66115 | 0.763069 | no |
| Ap4e1     | 0.137478 | 0.501288 | 0.3272  | 0.457956 | no |
| Wdr26     | 0.137443 | 0.648826 | 0.19675 | 0.309679 | no |
| Psen2     | 0.137255 | 0.53827  | 0.2772  | 0.402717 | no |
| Rab5c     | 0.137155 | 0.704675 | 0.2125  | 0.329235 | no |
| Eid2b     | 0.137093 | 0.367915 | 0.49485 | 0.621879 | no |
| Tubd1     | 0.137031 | 0.233052 | 0.63455 | 0.74135  | no |
| Mkln1os   | 0.136874 | 0.203667 | 0.7505  | 0.834959 | no |

|               |          |          |         |          |    |
|---------------|----------|----------|---------|----------|----|
| R3hdm4        | 0.136872 | 0.071698 | 0.8842  | 0.928333 | no |
| Cox20         | 0.136842 | 0.461093 | 0.609   | 0.72075  | no |
| Pnma3         | 0.136824 | 0.225309 | 0.6658  | 0.766968 | no |
| Atrnl1        | 0.136788 | 0.624342 | 0.2042  | 0.31902  | no |
| Tecta         | 0.136662 | 0.375733 | 0.4633  | 0.593072 | no |
| Zfp326        | 0.136508 | 0.397311 | 0.42625 | 0.557533 | no |
| Gm16515       | 0.136367 | 0.344116 | 0.5119  | 0.638047 | no |
| Zc3h8         | 0.13618  | 0.293779 | 0.60735 | 0.719374 | no |
| Zfp958        | 0.136174 | 0.341073 | 0.52425 | 0.648869 | no |
| Gm6251        | 0.135896 | 0.165288 | 0.7395  | 0.826728 | no |
| 2610002J02Rik | 0.135811 | 0.483213 | 0.33565 | 0.466926 | no |
| Ykt6          | 0.135667 | 0.665585 | 0.2117  | 0.32834  | no |
| Pex5          | 0.135665 | 0.541322 | 0.27335 | 0.39817  | no |
| Tmem218       | 0.135643 | 0.416283 | 0.50485 | 0.631515 | no |
| Farsb         | 0.135611 | 0.302738 | 0.53455 | 0.65763  | no |
| Clec2d        | 0.135345 | 0.306283 | 0.6056  | 0.717814 | no |
| Tssc4         | 0.135291 | 0.372879 | 0.4551  | 0.585059 | no |
| Hdc           | 0.135167 | 0        | 1       | 1        | no |
| Hotair        | 0.135126 | 0        | 1       | 1        | no |
| Bdp1          | 0.13495  | 0.523567 | 0.2978  | 0.425653 | no |
| Rbms3         | 0.134905 | 0.600737 | 0.22255 | 0.341496 | no |
| Nkapl         | 0.134905 | 0        | 1       | 1        | no |
| Svopl         | 0.134842 | 0        | 1       | 1        | no |
| 1110001J03Rik | 0.134675 | 0.437827 | 0.63035 | 0.737986 | no |
| Bsn           | 0.134619 | 0.637155 | 0.20255 | 0.31689  | no |
| Rhog          | 0.134563 | 0.436884 | 0.4505  | 0.580778 | no |
| Jrkl          | 0.13456  | 0.402279 | 0.45565 | 0.585539 | no |
| Ulk3          | 0.134553 | 0.451428 | 0.3931  | 0.524621 | no |
| Cst6          | 0.134481 | 0.305749 | 0.56075 | 0.680273 | no |
| Paf1          | 0.134394 | 0.515177 | 0.35015 | 0.482461 | no |
| Adra2b        | 0.134384 | 0        | 1       | 1        | no |
| Smek1         | 0.134349 | 0.455929 | 0.37895 | 0.510461 | no |
| Eif4e         | 0.134303 | 0.551559 | 0.2651  | 0.389402 | no |
| Itga4         | 0.134181 | 0.385874 | 0.44595 | 0.577268 | no |
| Ostm1         | 0.1341   | 0.608683 | 0.25285 | 0.375525 | no |
| Fem1b         | 0.134064 | 0.649856 | 0.20955 | 0.325806 | no |
| Mtg1          | 0.133833 | 0.265472 | 0.63885 | 0.745175 | no |
| Hmox2         | 0.133824 | 0.485598 | 0.41815 | 0.549702 | no |
| Tex264        | 0.133725 | 0.549374 | 0.2716  | 0.396478 | no |
| Dgkeos        | 0.133706 | 0        | 1       | 1        | no |
| E430025E21Rik | 0.133542 | 0.628818 | 0.22545 | 0.345267 | no |
| Sv2a          | 0.133466 | 0.622084 | 0.23165 | 0.35216  | no |
| Urb1          | 0.133404 | 0.352884 | 0.48545 | 0.613611 | no |
| Atxn1         | 0.133311 | 0.556177 | 0.2639  | 0.388026 | no |
| Nadk2         | 0.133222 | 0.311605 | 0.5284  | 0.652059 | no |
| Ubxn1         | 0.133074 | 0.676305 | 0.2687  | 0.39334  | no |
| Per2          | 0.132875 | 0.349321 | 0.5071  | 0.633612 | no |
| Foxp1         | 0.132813 | 0.476036 | 0.3395  | 0.471293 | no |
| Ndufa6        | 0.132809 | 0.767409 | 0.32505 | 0.45586  | no |
| Synpo2        | 0.132712 | 0.274582 | 0.59205 | 0.706678 | no |
| Rundc1        | 0.132677 | 0.41049  | 0.40965 | 0.541533 | no |
| Kcnmb4        | 0.132621 | 0.378625 | 0.45235 | 0.58254  | no |
| Sec61a1       | 0.132585 | 0.653838 | 0.2144  | 0.331675 | no |



|               |          |           |         |          |    |
|---------------|----------|-----------|---------|----------|----|
| Wdr6          | 0.132581 | 0.533254  | 0.2821  | 0.407915 | no |
| 36403         | 0.132416 | 0.638811  | 0.216   | 0.333722 | no |
| Exoc2         | 0.132362 | 0.589399  | 0.24555 | 0.367605 | no |
| Becn1         | 0.132125 | 0.59916   | 0.2291  | 0.349348 | no |
| Ppap2c        | 0.132098 | 0.381903  | 0.4465  | 0.577748 | no |
| 6330419J24Rik | 0.132    | 0.379309  | 0.47555 | 0.604554 | no |
| Ap4s1         | 0.131982 | 0.229004  | 0.6473  | 0.751777 | no |
| Mrpl41        | 0.131973 | 0.441237  | 0.3761  | 0.507633 | no |
| Fnip1         | 0.131905 | 0.453008  | 0.3762  | 0.507633 | no |
| Pradc1        | 0.131855 | 0.0999669 | 0.87395 | 0.92219  | no |
| Ndufaf3       | 0.131829 | 0.488093  | 0.4222  | 0.55371  | no |
| Amn1          | 0.131805 | 0.452836  | 0.4635  | 0.593214 | no |
| Anxa7         | 0.131762 | 0.621793  | 0.211   | 0.327446 | no |
| Ccdc32        | 0.131672 | 0.511429  | 0.35305 | 0.485179 | no |
| Gm6623        | 0.131436 | 0.238147  | 0.6563  | 0.759056 | no |
| Cox19         | 0.131178 | 0.556004  | 0.40625 | 0.538057 | no |
| Nadk          | 0.131099 | 0.514642  | 0.30245 | 0.430747 | no |
| Zfp322a       | 0.130879 | 0.454571  | 0.36075 | 0.492952 | no |
| Ank2          | 0.130662 | 0.527798  | 0.29495 | 0.422536 | no |
| Ankrd50       | 0.130371 | 0.586097  | 0.2556  | 0.378465 | no |
| Abcc5         | 0.13018  | 0.517759  | 0.29305 | 0.420586 | no |
| Gtf3c6        | 0.130121 | 0.43987   | 0.48155 | 0.610193 | no |
| Eif3k         | 0.130107 | 0.543145  | 0.27015 | 0.394983 | no |
| Shq1          | 0.130068 | 0.225597  | 0.6869  | 0.784577 | no |
| Polr1b        | 0.129999 | 0.359773  | 0.49195 | 0.619349 | no |
| Nono          | 0.129991 | 0.574277  | 0.2481  | 0.370377 | no |
| Tmem67        | 0.129949 | 0.260318  | 0.60755 | 0.719542 | no |
| Gm5124        | 0.129933 | 0.421088  | 0.43965 | 0.571231 | no |
| Rbm26         | 0.12986  | 0.303989  | 0.51475 | 0.640517 | no |
| Gm15787       | 0.129797 | 0         | 1       | 1        | no |
| Tceb1         | 0.129599 | 0.700206  | 0.27065 | 0.395497 | no |
| Zfp97         | 0.129562 | 0.216316  | 0.687   | 0.784577 | no |
| Zfp446        | 0.129419 | 0.286392  | 0.566   | 0.684577 | no |
| Agtrap        | 0.129323 | 0.539884  | 0.304   | 0.432651 | no |
| D830026I12Rik | 0.129265 | 0         | 1       | 1        | no |
| Eml4          | 0.129213 | 0.481312  | 0.3311  | 0.462147 | no |
| Taf1b         | 0.129203 | 0.355906  | 0.47545 | 0.604484 | no |
| Dlgap4        | 0.129197 | 0.55305   | 0.2683  | 0.392841 | no |
| Rad51         | 0.129166 | 0.179858  | 0.7428  | 0.829523 | no |
| Ppm1l         | 0.129073 | 0.604949  | 0.24825 | 0.370559 | no |
| Stx16         | 0.129017 | 0.530295  | 0.281   | 0.406901 | no |
| Stard3nl      | 0.128795 | 0.667159  | 0.25555 | 0.378433 | no |
| Smim20        | 0.128593 | 0.532665  | 0.3969  | 0.528576 | no |
| Nup205        | 0.128533 | 0.447725  | 0.3753  | 0.506831 | no |
| Pgap3         | 0.128245 | 0.33301   | 0.5443  | 0.666411 | no |
| Trim23        | 0.128221 | 0.510545  | 0.3274  | 0.458139 | no |
| 1110057K04Rik | 0.128218 | 0.480716  | 0.33525 | 0.466614 | no |
| Ilf2          | 0.128197 | 0.411258  | 0.45875 | 0.58827  | no |
| App           | 0.128101 | 0.521523  | 0.3125  | 0.44195  | no |
| Spata7        | 0.12792  | 0.316975  | 0.5246  | 0.64912  | no |
| Trappc1       | 0.127888 | 0.699711  | 0.3012  | 0.429356 | no |
| Mecom         | 0.127852 | 0         | 1       | 1        | no |
| Carm1         | 0.127664 | 0.380942  | 0.47545 | 0.604484 | no |

|               |          |          |         |          |    |
|---------------|----------|----------|---------|----------|----|
| 4930506C21Rik | 0.12762  | 0        | 1       | 1        | no |
| Hbp1          | 0.127571 | 0.387431 | 0.44255 | 0.573987 | no |
| 2700029M09Rik | 0.127354 | 0.496958 | 0.40205 | 0.533667 | no |
| Mok           | 0.127197 | 0.187354 | 0.7389  | 0.82628  | no |
| Zfp101        | 0.126896 | 0.277367 | 0.6066  | 0.718807 | no |
| Tbc1d15       | 0.126326 | 0.509445 | 0.3282  | 0.458968 | no |
| Parm1         | 0.126274 | 0.654756 | 0.22915 | 0.349348 | no |
| Glra2         | 0.126273 | 0        | 1       | 1        | no |
| Slain2        | 0.126269 | 0.496441 | 0.3211  | 0.451323 | no |
| Alkbh1        | 0.126211 | 0.116258 | 0.83455 | 0.893766 | no |
| Ttc9c         | 0.126159 | 0.527138 | 0.31345 | 0.442916 | no |
| Pts           | 0.126064 | 0.457013 | 0.4583  | 0.588033 | no |
| Zfp932        | 0.125906 | 0.338991 | 0.53845 | 0.660956 | no |
| Mpdz          | 0.125799 | 0.591145 | 0.2423  | 0.36393  | no |
| R3hdm1        | 0.12578  | 0.517938 | 0.29595 | 0.423694 | no |
| Ccdc58        | 0.12575  | 0.178085 | 0.71665 | 0.809425 | no |
| Nans          | 0.125661 | 0.492913 | 0.37345 | 0.505001 | no |
| Zfp820        | 0.125625 | 0.252277 | 0.63465 | 0.74135  | no |
| Tmc6          | 0.125366 | 0.452775 | 0.35795 | 0.490085 | no |
| Yipf4         | 0.125293 | 0.592854 | 0.28935 | 0.416131 | no |
| Grcc10        | 0.12524  | 0.77271  | 0.3136  | 0.443081 | no |
| Prdm4         | 0.124993 | 0.512488 | 0.323   | 0.453705 | no |
| Hspa5         | 0.124978 | 0.584702 | 0.2344  | 0.35512  | no |
| Vwa5b2        | 0.124921 | 0.473558 | 0.3404  | 0.472394 | no |
| Sh3bgrl       | 0.124886 | 0.600938 | 0.26055 | 0.383994 | no |
| A830010M20Rik | 0.124815 | 0.464982 | 0.3449  | 0.477042 | no |
| Zfp109        | 0.124607 | 0.235526 | 0.6546  | 0.7578   | no |
| Pigw          | 0.124587 | 0.191559 | 0.72295 | 0.814416 | no |
| Phf12         | 0.124447 | 0.4057   | 0.4302  | 0.561648 | no |
| Zfp800        | 0.124414 | 0.325255 | 0.53135 | 0.654968 | no |
| Ilk           | 0.124323 | 0.548869 | 0.3257  | 0.456434 | no |
| Rpa2          | 0.12424  | 0.311266 | 0.5781  | 0.695219 | no |
| Cbfa2t3       | 0.124238 | 0.296978 | 0.55205 | 0.672795 | no |
| Atp6v1c1      | 0.124216 | 0.639609 | 0.2397  | 0.361211 | no |
| Rpap2         | 0.124079 | 0.338493 | 0.4885  | 0.616117 | no |
| Tcf19         | 0.123716 | 0.222426 | 0.64985 | 0.753765 | no |
| Exosc4        | 0.123668 | 0.406291 | 0.46795 | 0.597302 | no |
| Znhit3        | 0.123628 | 0.284695 | 0.5709  | 0.68943  | no |
| Ubr2          | 0.123456 | 0.562415 | 0.2619  | 0.385385 | no |
| Srfbp1        | 0.123417 | 0.300946 | 0.6028  | 0.715582 | no |
| Elp5          | 0.123261 | 0.460638 | 0.4226  | 0.554015 | no |
| Gkap1         | 0.123189 | 0.318644 | 0.5754  | 0.692788 | no |
| Kcnj11        | 0.12301  | 0.309374 | 0.52575 | 0.649695 | no |
| Abcc1         | 0.122863 | 0.440643 | 0.38775 | 0.519152 | no |
| Slc26a11      | 0.122837 | 0.278055 | 0.59855 | 0.712381 | no |
| Mrpl37        | 0.122809 | 0.512642 | 0.3738  | 0.505371 | no |
| Crtc2         | 0.122719 | 0.470278 | 0.388   | 0.51933  | no |
| Orc4          | 0.122718 | 0.290734 | 0.5594  | 0.679132 | no |
| Tmem35        | 0.122577 | 0.568045 | 0.3082  | 0.437314 | no |
| Camsap2       | 0.122275 | 0.590291 | 0.24445 | 0.366454 | no |
| Litaf         | 0.122271 | 0.447383 | 0.4094  | 0.541257 | no |
| Zkscan3       | 0.122171 | 0.345446 | 0.488   | 0.615661 | no |
| Trim35        | 0.12213  | 0.571626 | 0.24915 | 0.371652 | no |

|               |          |           |         |          |    |
|---------------|----------|-----------|---------|----------|----|
| Slc8a2        | 0.122113 | 0.2764    | 0.5917  | 0.706451 | no |
| Usp31         | 0.122105 | 0.583473  | 0.24255 | 0.364223 | no |
| 0610011F06Rik | 0.122103 | 0.395935  | 0.5492  | 0.670368 | no |
| Fam195b       | 0.121967 | 0.575608  | 0.3316  | 0.462553 | no |
| Ddx51         | 0.121965 | 0.352891  | 0.4942  | 0.621474 | no |
| Fance         | 0.121825 | 0.270912  | 0.58555 | 0.701184 | no |
| Hint2         | 0.121746 | 0.465965  | 0.5439  | 0.666044 | no |
| Mbd4          | 0.121736 | 0.246739  | 0.6322  | 0.739564 | no |
| Eif2ak1       | 0.121598 | 0.501276  | 0.3498  | 0.482111 | no |
| Ttc27         | 0.121467 | 0.432529  | 0.41755 | 0.549295 | no |
| Capn7         | 0.121349 | 0.549283  | 0.29315 | 0.420684 | no |
| Cav2          | 0.121292 | 0.517199  | 0.2908  | 0.417944 | no |
| Abcb1a        | 0.12113  | 0.469542  | 0.36755 | 0.499006 | no |
| Stk17b        | 0.121111 | 0.256043  | 0.6264  | 0.734723 | no |
| 9130221H12Rik | 0.121099 | 0.100392  | 0.8407  | 0.898033 | no |
| Arhgef15      | 0.12097  | 0.299866  | 0.5654  | 0.683974 | no |
| Rabggta       | 0.120801 | 0.454093  | 0.3995  | 0.531345 | no |
| Dgke          | 0.120678 | 0.520666  | 0.31065 | 0.440297 | no |
| Ubp2          | 0.120613 | 0.582886  | 0.254   | 0.376726 | no |
| Smc6          | 0.120539 | 0.475802  | 0.33305 | 0.464233 | no |
| Pias1         | 0.120493 | 0.471166  | 0.37535 | 0.506847 | no |
| Exosc10       | 0.120315 | 0.424158  | 0.4199  | 0.551511 | no |
| Gon4l         | 0.120254 | 0.328703  | 0.52525 | 0.64944  | no |
| Edn1          | 0.120133 | 0.166537  | 0.761   | 0.84295  | no |
| Gng10         | 0.120123 | 0.427296  | 0.47645 | 0.605408 | no |
| Ercc2         | 0.12009  | 0.392951  | 0.4576  | 0.587419 | no |
| Cmip          | 0.120043 | 0.55381   | 0.26355 | 0.387555 | no |
| Sgta          | 0.119889 | 0.53351   | 0.3326  | 0.463752 | no |
| Psmb4         | 0.119874 | 0.705103  | 0.2598  | 0.38323  | no |
| Zfp362        | 0.119805 | 0.369373  | 0.4858  | 0.613937 | no |
| Zbtb3         | 0.119755 | 0.176173  | 0.71675 | 0.809425 | no |
| Bcr           | 0.119717 | 0.56576   | 0.27135 | 0.396258 | no |
| Cwc25         | 0.119622 | 0.438319  | 0.4042  | 0.53577  | no |
| BC018242      | 0.119589 | 0.46349   | 0.35585 | 0.487663 | no |
| Ube2q1        | 0.119494 | 0.547997  | 0.30165 | 0.429906 | no |
| Htra2         | 0.119341 | 0.377679  | 0.4479  | 0.578607 | no |
| Cyth2         | 0.119268 | 0.463099  | 0.34655 | 0.478545 | no |
| Mea1          | 0.119267 | 0.336738  | 0.58455 | 0.700373 | no |
| Epb4.1l4a     | 0.119252 | 0.325602  | 0.5306  | 0.654288 | no |
| Klc1          | 0.119211 | 0.475578  | 0.3751  | 0.506767 | no |
| Bsdc1         | 0.119093 | 0.512712  | 0.33815 | 0.469714 | no |
| B4galt3       | 0.119028 | 0.445822  | 0.4177  | 0.549383 | no |
| Ccser1        | 0.118998 | 0.24757   | 0.62225 | 0.731077 | no |
| Rbfox2        | 0.118984 | 0.549214  | 0.2657  | 0.390025 | no |
| Ddb1          | 0.118813 | 0.579556  | 0.2618  | 0.38528  | no |
| Prkg1         | 0.118812 | 0.509721  | 0.32475 | 0.455584 | no |
| Dynlrb1       | 0.118774 | 0.537876  | 0.2755  | 0.400774 | no |
| Intu          | 0.118677 | 0.229162  | 0.65255 | 0.756103 | no |
| Atp5sl        | 0.118628 | 0.345054  | 0.4948  | 0.621875 | no |
| Tppp          | 0.118507 | 0.45532   | 0.3792  | 0.510746 | no |
| Ube2z         | 0.118501 | 0.582982  | 0.25585 | 0.37875  | no |
| Eno1,Eno1b    | 0.118411 | 0.0439834 | 0.93555 | 0.960082 | no |
| Alkbh2        | 0.118275 | 0.196545  | 0.7508  | 0.835082 | no |

|               |          |          |         |          |    |
|---------------|----------|----------|---------|----------|----|
| Sf3a3         | 0.118186 | 0.376514 | 0.4516  | 0.581857 | no |
| Fam96b        | 0.11817  | 0.43989  | 0.5399  | 0.662246 | no |
| Cep250        | 0.118012 | 0.492741 | 0.31925 | 0.449198 | no |
| Polr3b        | 0.118001 | 0.492485 | 0.34525 | 0.477427 | no |
| Chd8          | 0.117945 | 0.528334 | 0.2809  | 0.406873 | no |
| Dzip3         | 0.117768 | 0.479664 | 0.33415 | 0.465327 | no |
| Extl3         | 0.117715 | 0.573216 | 0.26505 | 0.389372 | no |
| Arid2         | 0.11771  | 0.446288 | 0.38145 | 0.512631 | no |
| Srgap1        | 0.117538 | 0.526253 | 0.28565 | 0.411881 | no |
| C330018D20Rik | 0.117409 | 0.2607   | 0.6347  | 0.74135  | no |
| 2810428I15Rik | 0.117276 | 0.582625 | 0.41525 | 0.547257 | no |
| Lingo1        | 0.117214 | 0.535856 | 0.31595 | 0.445832 | no |
| Baz1b         | 0.117211 | 0.511289 | 0.3174  | 0.447212 | no |
| Fam208a       | 0.117158 | 0.391295 | 0.4404  | 0.571981 | no |
| Rabgap1       | 0.117041 | 0.551051 | 0.2858  | 0.412008 | no |
| Asxl2         | 0.11696  | 0.414338 | 0.4022  | 0.533812 | no |
| Rab5a         | 0.11694  | 0.554819 | 0.283   | 0.408771 | no |
| Hsf2bp        | 0.116827 | 0        | 1       | 1        | no |
| Gpatch2       | 0.116653 | 0.357202 | 0.49035 | 0.617804 | no |
| Sbf1          | 0.116545 | 0.54167  | 0.2776  | 0.403122 | no |
| Spred2        | 0.116536 | 0.531107 | 0.3231  | 0.453749 | no |
| Hemk1         | 0.116451 | 0.238414 | 0.6688  | 0.769155 | no |
| Adh5          | 0.11645  | 0.476398 | 0.3375  | 0.469056 | no |
| Gm5148        | 0.116348 | 0        | 1       | 1        | no |
| Wdr43         | 0.116307 | 0.378176 | 0.4431  | 0.574475 | no |
| Fiz1          | 0.116012 | 0.310178 | 0.5295  | 0.653295 | no |
| Grina         | 0.116008 | 0.531346 | 0.28385 | 0.409642 | no |
| Cdk13         | 0.115988 | 0.441849 | 0.37615 | 0.507633 | no |
| Tmod3         | 0.115953 | 0.451864 | 0.3869  | 0.518447 | no |
| Elf2          | 0.115937 | 0.381602 | 0.44555 | 0.576919 | no |
| Ptges3        | 0.115919 | 0.58755  | 0.28385 | 0.409642 | no |
| Zfp871        | 0.11582  | 0.544563 | 0.2833  | 0.409115 | no |
| Neu1          | 0.115768 | 0.46618  | 0.37355 | 0.505084 | no |
| Herpud1       | 0.115766 | 0.514567 | 0.35395 | 0.485862 | no |
| Fam131a       | 0.115712 | 0.450562 | 0.41105 | 0.542897 | no |
| Ankib1        | 0.115655 | 0.503188 | 0.3134  | 0.442893 | no |
| Ildr2         | 0.115653 | 0.323364 | 0.52975 | 0.653481 | no |
| Kremen1       | 0.115633 | 0.406165 | 0.41685 | 0.548755 | no |
| Hivep2        | 0.115613 | 0.528031 | 0.29655 | 0.424369 | no |
| Nolc1         | 0.115589 | 0.450281 | 0.35915 | 0.491424 | no |
| Mttp          | 0.115543 | 0.223508 | 0.6532  | 0.756584 | no |
| Tmem151a      | 0.115533 | 0.56673  | 0.26845 | 0.393018 | no |
| Tcp1          | 0.115442 | 0.588406 | 0.2796  | 0.405538 | no |
| Tubg2         | 0.115315 | 0.417434 | 0.4488  | 0.579262 | no |
| Anapc10       | 0.115284 | 0.28962  | 0.59255 | 0.707076 | no |
| Spred3        | 0.115245 | 0.339536 | 0.51485 | 0.640521 | no |
| Stx5a         | 0.115174 | 0.403692 | 0.41805 | 0.549625 | no |
| Spata13       | 0.11502  | 0.545535 | 0.2803  | 0.406359 | no |
| Tsen2         | 0.11497  | 0.329165 | 0.56035 | 0.680037 | no |
| Tgs1          | 0.114805 | 0.410304 | 0.4292  | 0.560563 | no |
| Mettl14       | 0.114725 | 0.434804 | 0.4188  | 0.550339 | no |
| Slc7a14       | 0.114404 | 0.54931  | 0.2711  | 0.39598  | no |
| Ccl4          | 0.113868 | 0        | 1       | 1        | no |

|               |          |           |         |          |    |
|---------------|----------|-----------|---------|----------|----|
| Surf4         | 0.113831 | 0.448173  | 0.37015 | 0.501561 | no |
| Synm          | 0.113823 | 0.499637  | 0.311   | 0.440486 | no |
| Cnot8         | 0.113532 | 0.450342  | 0.4198  | 0.551434 | no |
| Pygo2         | 0.113468 | 0.466988  | 0.3866  | 0.518269 | no |
| Akip1         | 0.113407 | 0.179715  | 0.71615 | 0.809092 | no |
| Med30         | 0.113065 | 0.398823  | 0.538   | 0.660526 | no |
| Mfsd11        | 0.113059 | 0.494548  | 0.3529  | 0.485073 | no |
| A530072M11Rik | 0.113058 | 0         | 1       | 1        | no |
| Areg          | 0.11301  | 0         | 1       | 1        | no |
| Fam206a       | 0.112945 | 0.163522  | 0.74485 | 0.830805 | no |
| Nmnat2        | 0.112853 | 0.554578  | 0.2816  | 0.407636 | no |
| Cacna1s       | 0.112799 | 0         | 1       | 1        | no |
| Msto1         | 0.112511 | 0.297436  | 0.5489  | 0.670311 | no |
| Rab7          | 0.11239  | 0.560973  | 0.4467  | 0.577748 | no |
| Ccng1         | 0.112364 | 0.54339   | 0.2944  | 0.422158 | no |
| Hnrnp11       | 0.112341 | 0.467852  | 0.3803  | 0.511812 | no |
| Bcas3         | 0.112297 | 0.504446  | 0.3412  | 0.473128 | no |
| Parp6         | 0.112261 | 0.502482  | 0.31595 | 0.445832 | no |
| Tma16         | 0.112154 | 0.200727  | 0.742   | 0.828769 | no |
| Atxn7l3b      | 0.112013 | 0.556878  | 0.28895 | 0.415691 | no |
| Ssu72         | 0.111949 | 0.539972  | 0.35805 | 0.490171 | no |
| Pcdhb17       | 0.111834 | 0.0550607 | 0.91115 | 0.944718 | no |
| Stub1         | 0.111741 | 0.453631  | 0.35655 | 0.488471 | no |
| Pex19         | 0.111666 | 0.499912  | 0.31275 | 0.44221  | no |
| Rtf1          | 0.111619 | 0.467517  | 0.36735 | 0.498939 | no |
| Vtcn1         | 0.11153  | 0         | 1       | 1        | no |
| Lamtor5       | 0.111498 | 0.487539  | 0.44505 | 0.57644  | no |
| Bbs4          | 0.111422 | 0.466979  | 0.38615 | 0.517951 | no |
| Surf6         | 0.111393 | 0.344255  | 0.52185 | 0.646622 | no |
| Rhot2         | 0.11136  | 0.491957  | 0.36215 | 0.494203 | no |
| Nampt         | 0.111319 | 0.4634    | 0.37005 | 0.501561 | no |
| Cuedc1        | 0.111269 | 0.327435  | 0.54405 | 0.666166 | no |
| Mapk8         | 0.111265 | 0.502648  | 0.3284  | 0.459199 | no |
| Zfp763        | 0.111195 | 0.326624  | 0.53355 | 0.656765 | no |
| Gmpr2         | 0.111101 | 0.439888  | 0.4418  | 0.573294 | no |
| Pkn2          | 0.111008 | 0.409468  | 0.42565 | 0.556858 | no |
| Pex1          | 0.110944 | 0.256641  | 0.6053  | 0.717651 | no |
| Ap2a2         | 0.110927 | 0.503658  | 0.3122  | 0.441667 | no |
| Psm11         | 0.110909 | 0.458107  | 0.418   | 0.549625 | no |
| Tmx1          | 0.110907 | 0.349156  | 0.47425 | 0.603479 | no |
| Cdk10         | 0.110871 | 0.330149  | 0.5058  | 0.632524 | no |
| Tm7sf2        | 0.110769 | 0.416299  | 0.47325 | 0.60238  | no |
| Strn3         | 0.110765 | 0.460288  | 0.37985 | 0.511414 | no |
| Atl1          | 0.110744 | 0.477005  | 0.37225 | 0.503686 | no |
| Tceanc2       | 0.110735 | 0.400397  | 0.43315 | 0.564777 | no |
| Zdhhc8        | 0.110685 | 0.528275  | 0.29905 | 0.427026 | no |
| Papalg        | 0.110481 | 0.352303  | 0.5004  | 0.627131 | no |
| Zcchc11       | 0.110282 | 0.333192  | 0.51425 | 0.640255 | no |
| Mrps34        | 0.110265 | 0.47251   | 0.45905 | 0.58854  | no |
| Gab3          | 0.110213 | 0         | 1       | 1        | no |
| Zfp930        | 0.110095 | 0.312494  | 0.5617  | 0.681052 | no |
| Stmn4         | 0.109834 | 0.347332  | 0.5603  | 0.680037 | no |
| Yme1l1        | 0.109814 | 0.529583  | 0.30565 | 0.434626 | no |

|               |          |           |         |          |    |
|---------------|----------|-----------|---------|----------|----|
| Trim43a       | 0.109683 | 0         | 1       | 1        | no |
| Gal           | 0.109581 | 0.382207  | 0.58445 | 0.700316 | no |
| D330050I16Rik | 0.10946  | 0         | 1       | 1        | no |
| Slc5a6        | 0.109331 | 0.0707873 | 0.8887  | 0.930795 | no |
| Rae1          | 0.109318 | 0.39793   | 0.47245 | 0.601708 | no |
| Zfand3        | 0.109281 | 0.54728   | 0.30575 | 0.434721 | no |
| Zfp51         | 0.109227 | 0.21885   | 0.6823  | 0.780822 | no |
| Psemb3        | 0.108957 | 0.341678  | 0.6115  | 0.722929 | no |
| Vps28         | 0.108892 | 0.606519  | 0.34265 | 0.474425 | no |
| Pskh1         | 0.108885 | 0.334074  | 0.52475 | 0.649185 | no |
| Ndufb4        | 0.108822 | 0.294548  | 0.7439  | 0.830387 | no |
| Tesk1         | 0.108695 | 0.445639  | 0.40135 | 0.532897 | no |
| Zc3h15        | 0.108615 | 0.517635  | 0.3507  | 0.482799 | no |
| Htr5a         | 0.108552 | 0.22714   | 0.65615 | 0.758949 | no |
| Alkbh8        | 0.108496 | 0.276227  | 0.61485 | 0.725408 | no |
| Npm1          | 0.108208 | 0.366431  | 0.4584  | 0.588048 | no |
| Tekt3         | 0.108174 | 0         | 1       | 1        | no |
| Atic          | 0.108122 | 0.490497  | 0.3651  | 0.497002 | no |
| Trappc2l      | 0.108083 | 0.525017  | 0.48025 | 0.609011 | no |
| Ddr1          | 0.107852 | 0.450812  | 0.36215 | 0.494203 | no |
| Dhx35         | 0.107753 | 0.344923  | 0.4883  | 0.615981 | no |
| Guk1          | 0.107729 | 0.433686  | 0.38    | 0.511564 | no |
| Slc35b4       | 0.107713 | 0.477629  | 0.3699  | 0.501561 | no |
| Kcnmb2        | 0.107707 | 0.22776   | 0.6731  | 0.772818 | no |
| C430049B03Rik | 0.107702 | 0         | 1       | 1        | no |
| Ppp1r8        | 0.1077   | 0.347509  | 0.4811  | 0.609798 | no |
| Tcf15         | 0.107606 | 0         | 1       | 1        | no |
| Tmem87a       | 0.107557 | 0.413565  | 0.44125 | 0.572693 | no |
| Antxr2        | 0.107491 | 0.477759  | 0.3687  | 0.50026  | no |
| 1700113A16Rik | 0.107473 | 0         | 1       | 1        | no |
| Rbbp6         | 0.107331 | 0.379388  | 0.44665 | 0.577748 | no |
| Csnk1g3       | 0.107297 | 0.482852  | 0.35085 | 0.482956 | no |
| Olfm1         | 0.107212 | 0.425261  | 0.39565 | 0.527335 | no |
| Timm8a1       | 0.107208 | 0.246319  | 0.6836  | 0.781703 | no |
| Lrfn5         | 0.10712  | 0.473711  | 0.36655 | 0.498464 | no |
| Papd4         | 0.107059 | 0.186306  | 0.73035 | 0.820176 | no |
| Nupl1         | 0.107057 | 0.426852  | 0.38665 | 0.518269 | no |
| Ube2h         | 0.106994 | 0.480757  | 0.33015 | 0.461209 | no |
| Cd109         | 0.106931 | 0.255942  | 0.61455 | 0.725178 | no |
| Gm12216       | 0.106929 | 0         | 1       | 1        | no |
| Npepps        | 0.10691  | 0.526489  | 0.31035 | 0.439942 | no |
| Etv3          | 0.106851 | 0.396957  | 0.42155 | 0.553076 | no |
| Rplp0         | 0.106711 | 0.492288  | 0.39645 | 0.528136 | no |
| Chaf1b        | 0.106711 | 0.13987   | 0.8055  | 0.873925 | no |
| Utp15         | 0.106702 | 0.378357  | 0.46885 | 0.597984 | no |
| Ccdc86        | 0.106683 | 0.229635  | 0.6445  | 0.749591 | no |
| Cyb561d1      | 0.106682 | 0.375993  | 0.44195 | 0.573377 | no |
| Mras          | 0.106581 | 0.49384   | 0.3405  | 0.472434 | no |
| Dnajc14       | 0.10655  | 0.474026  | 0.36705 | 0.498701 | no |
| Zfp330        | 0.106523 | 0.297626  | 0.6008  | 0.713842 | no |
| Hoxa6         | 0.106521 | 0.0490577 | 0.9295  | 0.956463 | no |
| Psmd7         | 0.106506 | 0.551766  | 0.3266  | 0.457357 | no |
| Txn1l         | 0.106493 | 0.527886  | 0.32625 | 0.457012 | no |



|          |          |          |         |          |    |
|----------|----------|----------|---------|----------|----|
| Spast    | 0.106445 | 0.43767  | 0.37975 | 0.511331 | no |
| Patz1    | 0.106378 | 0.106834 | 0.83675 | 0.895183 | no |
| Hdac11   | 0.106264 | 0.5081   | 0.3435  | 0.475403 | no |
| Wdr3     | 0.106255 | 0.306661 | 0.5372  | 0.660033 | no |
| Pik3ca   | 0.106234 | 0.492861 | 0.3298  | 0.460817 | no |
| Fam43b   | 0.106233 | 0.482422 | 0.37505 | 0.506751 | no |
| Rab24    | 0.106224 | 0.454888 | 0.4094  | 0.541257 | no |
| Agbl5    | 0.106188 | 0.122434 | 0.8227  | 0.885848 | no |
| Fchsd2   | 0.106163 | 0.448552 | 0.3648  | 0.4969   | no |
| Psenen   | 0.1061   | 0.207459 | 0.7756  | 0.85335  | no |
| Fam65a   | 0.106083 | 0.443848 | 0.36395 | 0.495945 | no |
| Nrbp1    | 0.106036 | 0.177428 | 0.72115 | 0.813217 | no |
| Rab6a    | 0.106019 | 0.456149 | 0.35945 | 0.4917   | no |
| Fbxl17   | 0.105998 | 0.466442 | 0.3584  | 0.490549 | no |
| Prpf31   | 0.1057   | 0.405214 | 0.4091  | 0.540968 | no |
| Mrpl32   | 0.105649 | 0.37781  | 0.5812  | 0.697805 | no |
| Btaf1    | 0.105597 | 0.406953 | 0.4257  | 0.556869 | no |
| Enox2    | 0.105545 | 0.334597 | 0.50145 | 0.628031 | no |
| Fam221a  | 0.10543  | 0.128625 | 0.79065 | 0.863622 | no |
| Rnf114   | 0.105306 | 0.325864 | 0.50965 | 0.635843 | no |
| Cd48     | 0.105294 | 0        | 1       | 1        | no |
| BC003331 | 0.105244 | 0.290267 | 0.5828  | 0.69908  | no |
| Scoc     | 0.105243 | 0.480997 | 0.3292  | 0.460172 | no |
| Ttc12    | 0.105227 | 0.25091  | 0.62895 | 0.736997 | no |
| Ucp2     | 0.105108 | 0.42524  | 0.40905 | 0.540956 | no |
| Isoc1    | 0.105084 | 0.4683   | 0.37875 | 0.510295 | no |
| Pcdh1    | 0.105068 | 0.475826 | 0.36755 | 0.499006 | no |
| Stx18    | 0.105037 | 0.237171 | 0.6578  | 0.760062 | no |
| Itgb7    | 0.104976 | 0.152346 | 0.77565 | 0.85335  | no |
| Mbd3     | 0.10496  | 0.436924 | 0.44935 | 0.579802 | no |
| Cetn3    | 0.104936 | 0.470582 | 0.44355 | 0.574947 | no |
| Ss18l1   | 0.104822 | 0.324084 | 0.52455 | 0.649119 | no |
| Bptf     | 0.104715 | 0.478415 | 0.33785 | 0.469395 | no |
| Gins3    | 0.104687 | 0.255433 | 0.6391  | 0.745401 | no |
| Smc1a    | 0.104609 | 0.499451 | 0.34195 | 0.473653 | no |
| Nap1l5   | 0.104606 | 0.383987 | 0.4362  | 0.568028 | no |
| Sema4f   | 0.104539 | 0.478713 | 0.3334  | 0.464575 | no |
| Hspa8    | 0.10438  | 0.526836 | 0.3315  | 0.462462 | no |
| Eaf1     | 0.104306 | 0.477937 | 0.35825 | 0.490394 | no |
| Bcl7a    | 0.104165 | 0.406342 | 0.4431  | 0.574475 | no |
| Naa38    | 0.104107 | 0.468977 | 0.5651  | 0.6838   | no |
| Akr1e1   | 0.104056 | 0.352538 | 0.52485 | 0.649248 | no |
| Psmc14   | 0.104027 | 0.549019 | 0.33635 | 0.467605 | no |
| Snrpb    | 0.103929 | 0.49677  | 0.4186  | 0.550185 | no |
| Cyb5b    | 0.10389  | 0.512641 | 0.3233  | 0.453934 | no |
| Aktip    | 0.103804 | 0.413358 | 0.4029  | 0.534367 | no |
| Alg1     | 0.103711 | 0.378901 | 0.5026  | 0.629115 | no |
| Slc35c2  | 0.103703 | 0.378232 | 0.4497  | 0.580085 | no |
| Psmc3    | 0.103637 | 0.554512 | 0.3252  | 0.455974 | no |
| Mad2l2   | 0.103609 | 0.235223 | 0.6916  | 0.788337 | no |
| Wac      | 0.103493 | 0.440315 | 0.3886  | 0.519871 | no |
| Rad23b   | 0.103469 | 0.513362 | 0.3229  | 0.45366  | no |
| Kansl2   | 0.10341  | 0.29149  | 0.5565  | 0.676478 | no |

|               |           |           |         |          |    |
|---------------|-----------|-----------|---------|----------|----|
| Gm11545       | 0.103322  | 0         | 1       | 1        | no |
| Stambp        | 0.103312  | 0.416851  | 0.4465  | 0.577748 | no |
| Csmd1         | 0.103298  | 0.454047  | 0.3616  | 0.493707 | no |
| Arg1          | 0.10292   | 0         | 1       | 1        | no |
| Ep300         | 0.102873  | 0.419012  | 0.40475 | 0.536338 | no |
| 1110059E24Rik | 0.102829  | 0.353167  | 0.53725 | 0.660033 | no |
| Fkbp15        | 0.10278   | 0.452863  | 0.38715 | 0.518611 | no |
| Mapk12        | 0.10271   | 0.376812  | 0.4971  | 0.623938 | no |
| Aprt          | 0.102673  | 0.430538  | 0.5086  | 0.634889 | no |
| Ak2           | 0.102667  | 0.31438   | 0.52725 | 0.651124 | no |
| Haus5         | 0.102356  | 0.143471  | 0.7958  | 0.867034 | no |
| Tigd3         | 0.102241  | 0         | 1       | 1        | no |
| Irf2bp1       | 0.102198  | 0.368967  | 0.4891  | 0.616697 | no |
| Bbs2          | 0.102191  | 0.358925  | 0.49855 | 0.625403 | no |
| Cog5          | 0.102186  | 0.272287  | 0.61135 | 0.722822 | no |
| Rfwd3         | 0.10218   | 0.327083  | 0.5182  | 0.643482 | no |
| Magt1         | 0.102166  | 0.422677  | 0.4007  | 0.532567 | no |
| Rabep1        | 0.102141  | 0.421206  | 0.41285 | 0.544786 | no |
| Lemd2         | 0.102132  | 0.370677  | 0.4866  | 0.614655 | no |
| Ranbp3        | 0.102117  | 0.385882  | 0.43605 | 0.567888 | no |
| Lamtor2       | 0.102065  | 0.560994  | 0.46405 | 0.593689 | no |
| Rnaseh2c      | 0.102019  | 0.346908  | 0.6295  | 0.737381 | no |
| Dock9         | 0.101971  | 0.452102  | 0.3598  | 0.492009 | no |
| Dclre1c       | 0.101879  | 0.237217  | 0.6555  | 0.758329 | no |
| 2010012005Rik | 0.101877  | 0.353178  | 0.51585 | 0.641585 | no |
| Gtf3c5        | 0.101848  | 0.338637  | 0.4934  | 0.62088  | no |
| Ssbp1         | 0.10148   | 0.188977  | 0.7041  | 0.799346 | no |
| Cwc15         | 0.101355  | 0.475606  | 0.42435 | 0.55576  | no |
| Med4          | 0.101351  | 0.320492  | 0.58755 | 0.702884 | no |
| Akt1          | 0.101234  | 0.475608  | 0.33545 | 0.466794 | no |
| Rn45s         | 0.101212  | 0.364951  | 0.4734  | 0.602455 | no |
| Trim15        | 0.101025  | 0         | 1       | 1        | no |
| Bysl          | 0.100861  | 0.2648    | 0.60085 | 0.713842 | no |
| Srgap3        | 0.100853  | 0.481815  | 0.3358  | 0.467085 | no |
| Pcdhga11      | 0.100834  | 0.0699362 | 0.88955 | 0.93137  | no |
| Gtf2a1        | 0.100717  | 0.439459  | 0.3753  | 0.506831 | no |
| Uggt1         | 0.100666  | 0.46628   | 0.3502  | 0.482461 | no |
| Sptlc1        | 0.100641  | 0.406818  | 0.4509  | 0.58118  | no |
| Man1b1        | 0.10063   | 0.484805  | 0.3567  | 0.488575 | no |
| Sgip1         | 0.100545  | 0.439529  | 0.3982  | 0.529988 | no |
| Angel2        | 0.100321  | 0.322038  | 0.5172  | 0.642781 | no |
| Ehmt1         | 0.100287  | 0.324259  | 0.51975 | 0.644984 | no |
| Sp3           | 0.100255  | 0.397285  | 0.44375 | 0.57515  | no |
| Prmt1         | 0.100111  | 0.383562  | 0.43715 | 0.568874 | no |
| Tmem39b       | 0.0999612 | 0.181068  | 0.71575 | 0.808777 | no |
| Pnrc2         | 0.0999397 | 0.377227  | 0.4919  | 0.619345 | no |
| Ube2m         | 0.099737  | 0.448078  | 0.37285 | 0.504292 | no |
| Wdr31         | 0.0996558 | 0.134015  | 0.7794  | 0.856481 | no |
| Mfsd6         | 0.0996328 | 0.468227  | 0.3489  | 0.48112  | no |
| Fbxw8         | 0.0995486 | 0.44762   | 0.3872  | 0.518625 | no |
| LOC101056043  | 0.0994559 | 0.102274  | 0.83175 | 0.891992 | no |
| Foxp4         | 0.0994181 | 0.253185  | 0.60705 | 0.719147 | no |
| Eif2b2        | 0.0992446 | 0.399699  | 0.48165 | 0.610262 | no |

|               |           |           |         |          |    |
|---------------|-----------|-----------|---------|----------|----|
| Exoc7         | 0.0990885 | 0.407628  | 0.41615 | 0.547996 | no |
| Lyrn4         | 0.0990504 | 0.383027  | 0.50155 | 0.628097 | no |
| Ctnnbl1       | 0.0990212 | 0.399387  | 0.4587  | 0.588262 | no |
| Akt3          | 0.0989433 | 0.48568   | 0.34545 | 0.477653 | no |
| Syf2          | 0.0989325 | 0.410185  | 0.48225 | 0.610672 | no |
| Rnf139        | 0.098874  | 0.382163  | 0.4637  | 0.593355 | no |
| Epn1          | 0.0988686 | 0.449958  | 0.3615  | 0.493689 | no |
| 2500004C02Rik | 0.0987252 | 0.142589  | 0.7971  | 0.867935 | no |
| Nsun6         | 0.0987206 | 0.236007  | 0.63595 | 0.742445 | no |
| Wdr74         | 0.098663  | 0.336916  | 0.5699  | 0.688352 | no |
| Armc5         | 0.0985485 | 0.330763  | 0.506   | 0.632655 | no |
| Mrps30        | 0.0984924 | 0.362355  | 0.52065 | 0.645497 | no |
| Traf4         | 0.0984669 | 0.180854  | 0.7354  | 0.823685 | no |
| Lrrfip2       | 0.098462  | 0.357186  | 0.4692  | 0.598258 | no |
| 2410004P03Rik | 0.0984319 | 0         | 1       | 1        | no |
| Dip2c         | 0.0983925 | 0.472767  | 0.35395 | 0.485862 | no |
| Txlnb         | 0.0983557 | 0         | 1       | 1        | no |
| Cul9          | 0.0982616 | 0.428448  | 0.39825 | 0.530001 | no |
| Pcsk7         | 0.0982406 | 0.211923  | 0.6945  | 0.790963 | no |
| Med26         | 0.0980421 | 0.200598  | 0.7097  | 0.803721 | no |
| Pgam5         | 0.0979831 | 0.338592  | 0.49865 | 0.625469 | no |
| Fam73a        | 0.0979102 | 0.459963  | 0.3533  | 0.485422 | no |
| Orai1         | 0.0978972 | 0.272547  | 0.6328  | 0.740005 | no |
| Pcdhga12      | 0.0977495 | 0.0456394 | 0.9321  | 0.95795  | no |
| Fam203a       | 0.09765   | 0.224764  | 0.6858  | 0.783611 | no |
| Ptplad1       | 0.0975616 | 0.492305  | 0.35555 | 0.487453 | no |
| Slc7a3        | 0.0974572 | 0.213636  | 0.69895 | 0.794667 | no |
| D030056L22Rik | 0.0973771 | 0.321078  | 0.57265 | 0.690975 | no |
| Gnb5          | 0.097324  | 0.428937  | 0.38695 | 0.518447 | no |
| Dnmt3a        | 0.0972686 | 0.365728  | 0.45995 | 0.58941  | no |
| Ufm1          | 0.097239  | 0.435585  | 0.40905 | 0.540956 | no |
| Ubxn4         | 0.0972261 | 0.457145  | 0.38405 | 0.515499 | no |
| Tmem136       | 0.0970248 | 0.224423  | 0.67095 | 0.770692 | no |
| AI597479      | 0.0969509 | 0.374704  | 0.47785 | 0.606664 | no |
| Ctif          | 0.0967072 | 0.462507  | 0.35265 | 0.48488  | no |
| Spef2         | 0.0962892 | 0         | 1       | 1        | no |
| Zranb1        | 0.0962736 | 0.379236  | 0.49145 | 0.619013 | no |
| Dstn          | 0.0962473 | 0.506066  | 0.35535 | 0.48733  | no |
| Slc30a6       | 0.0961528 | 0.253797  | 0.61155 | 0.722929 | no |
| Drg1          | 0.0960477 | 0.220782  | 0.6993  | 0.794929 | no |
| Abhd16a       | 0.0959967 | 0.461423  | 0.40395 | 0.535653 | no |
| Spg11         | 0.0959692 | 0.309077  | 0.53305 | 0.656332 | no |
| Neto2         | 0.0959615 | 0.377716  | 0.4659  | 0.595424 | no |
| Hist1h2an     | 0.0959131 | 0         | 1       | 1        | no |
| Zbtb14        | 0.0958622 | 0.309286  | 0.55325 | 0.673948 | no |
| Brms1         | 0.0957121 | 0.35304   | 0.5396  | 0.662062 | no |
| Rnf170        | 0.0956033 | 0.339832  | 0.52145 | 0.646187 | no |
| Rab35         | 0.0954112 | 0.394471  | 0.4242  | 0.555619 | no |
| Bcmo1         | 0.0953927 | 0         | 1       | 1        | no |
| Larp1         | 0.0952969 | 0.456407  | 0.3651  | 0.497002 | no |
| Memo1         | 0.0952395 | 0.409289  | 0.4712  | 0.600462 | no |
| Chchd4        | 0.0951356 | 0.295918  | 0.6211  | 0.730508 | no |
| Polr2k        | 0.0950569 | 0.180574  | 0.80945 | 0.876777 | no |

|               |           |           |         |          |    |
|---------------|-----------|-----------|---------|----------|----|
| 9530082P21Rik | 0.0949561 | 0         | 1       | 1        | no |
| Lamtor1       | 0.0948335 | 0.346478  | 0.48695 | 0.614922 | no |
| Ctbp1         | 0.0947735 | 0.444547  | 0.3721  | 0.503586 | no |
| L3mbtl2       | 0.0945204 | 0.311742  | 0.54995 | 0.670914 | no |
| Ppp4c         | 0.0944744 | 0.382316  | 0.51135 | 0.637542 | no |
| Cct5          | 0.0940254 | 0.498068  | 0.36745 | 0.499006 | no |
| Gm2061        | 0.0940182 | 0         | 1       | 1        | no |
| Creb3         | 0.0939327 | 0.290944  | 0.6083  | 0.720114 | no |
| Odc1          | 0.093356  | 0.301779  | 0.58025 | 0.697043 | no |
| C1qtnf4       | 0.093333  | 0.12918   | 0.8273  | 0.889016 | no |
| Trem12        | 0.0930123 | 0         | 1       | 1        | no |
| Ufl1          | 0.0930008 | 0.340387  | 0.5044  | 0.631071 | no |
| Tor1a         | 0.0928613 | 0.319183  | 0.5761  | 0.693379 | no |
| Sema3c        | 0.0927175 | 0.352182  | 0.4957  | 0.62277  | no |
| Zfp451        | 0.0925823 | 0.29334   | 0.5514  | 0.672188 | no |
| Cep95         | 0.0924879 | 0.145369  | 0.76935 | 0.84853  | no |
| 4930432K21Rik | 0.0924151 | 0         | 1       | 1        | no |
| Minos1        | 0.0920402 | 0.38382   | 0.438   | 0.569645 | no |
| Ctr9          | 0.0919104 | 0.41208   | 0.43025 | 0.561658 | no |
| 4930539M17Rik | 0.0918534 | 0         | 1       | 1        | no |
| Capn15        | 0.0917184 | 0.291123  | 0.58105 | 0.697754 | no |
| Klhl15        | 0.0916855 | 0.194206  | 0.6928  | 0.789366 | no |
| Pcsk2os1      | 0.0916436 | 0.0446529 | 0.93455 | 0.959404 | no |
| Wdr12         | 0.091623  | 0.252558  | 0.6318  | 0.739227 | no |
| Dmap1         | 0.0916002 | 0.292384  | 0.6106  | 0.722063 | no |
| Chst8         | 0.0915144 | 0.348945  | 0.5171  | 0.642717 | no |
| Tnfrsf18      | 0.0914982 | 0         | 1       | 1        | no |
| Abcf1         | 0.0914924 | 0.391282  | 0.4268  | 0.558032 | no |
| Actr2         | 0.0913995 | 0.444154  | 0.39555 | 0.527254 | no |
| Wdr5b         | 0.0912803 | 0.147457  | 0.7898  | 0.863049 | no |
| Zfp784        | 0.0912718 | 0.14694   | 0.7886  | 0.862235 | no |
| Pls3          | 0.0910422 | 0.428053  | 0.39145 | 0.522998 | no |
| Ttc26         | 0.091014  | 0.195254  | 0.70785 | 0.802448 | no |
| Mnat1         | 0.0909922 | 0.33169   | 0.54585 | 0.667507 | no |
| Polr3gl       | 0.0909374 | 0.258079  | 0.6595  | 0.761545 | no |
| 2210013021Rik | 0.0908634 | 0.451245  | 0.49105 | 0.618568 | no |
| Tdrkh         | 0.0908026 | 0.365144  | 0.50165 | 0.628163 | no |
| Dhx32         | 0.0907937 | 0.282533  | 0.59915 | 0.712716 | no |
| Zswim1        | 0.0907671 | 0.293758  | 0.5787  | 0.695751 | no |
| Dnaja1        | 0.09074   | 0.374935  | 0.47235 | 0.601639 | no |
| Il1r1         | 0.0906598 | 0         | 1       | 1        | no |
| Psmc6         | 0.0906485 | 0.466699  | 0.42915 | 0.560553 | no |
| Ptges2        | 0.0906433 | 0.326808  | 0.549   | 0.670368 | no |
| Klf17         | 0.0906145 | 0         | 1       | 1        | no |
| Dhcr7         | 0.0905319 | 0.44159   | 0.4058  | 0.537622 | no |
| AI987944      | 0.0905181 | 0.208645  | 0.6724  | 0.772291 | no |
| Gm5089        | 0.0903844 | 0         | 1       | 1        | no |
| Anks3         | 0.0903213 | 0.292433  | 0.58465 | 0.700429 | no |
| Tnik          | 0.0902867 | 0.381446  | 0.44455 | 0.575961 | no |
| Insrr         | 0.090267  | 0.156885  | 0.76195 | 0.843665 | no |
| Zfand1        | 0.0902401 | 0.216633  | 0.6977  | 0.793518 | no |
| Ppp3r2        | 0.0902236 | 0         | 1       | 1        | no |
| Ndufv1        | 0.0902138 | 0.474118  | 0.4013  | 0.532897 | no |

|               |           |          |         |          |    |
|---------------|-----------|----------|---------|----------|----|
| Bclaf1        | 0.0901615 | 0.401104 | 0.42015 | 0.551621 | no |
| Atad3a        | 0.0897887 | 0.263255 | 0.62985 | 0.737726 | no |
| Prkci         | 0.0895348 | 0.379406 | 0.4373  | 0.568957 | no |
| Ube2i         | 0.0895265 | 0.379659 | 0.482   | 0.610472 | no |
| Rrp1          | 0.0893712 | 0.416461 | 0.40125 | 0.532897 | no |
| 1700102P08Rik | 0.0893019 | 0        | 1       | 1        | no |
| Abcc4         | 0.0891281 | 0.330941 | 0.5131  | 0.639183 | no |
| Spryd7        | 0.0891079 | 0.424368 | 0.4573  | 0.587148 | no |
| Arpp19        | 0.0889481 | 0.404631 | 0.4146  | 0.546606 | no |
| Tmem253       | 0.0888587 | 0        | 1       | 1        | no |
| Ercc1         | 0.0888547 | 0.236017 | 0.6955  | 0.791854 | no |
| Ube2q2        | 0.0888166 | 0.407979 | 0.44985 | 0.580222 | no |
| Zfp62         | 0.0887869 | 0.292905 | 0.56245 | 0.68165  | no |
| Mlst8         | 0.0887307 | 0.337274 | 0.4899  | 0.617295 | no |
| Nop2          | 0.0886794 | 0.295987 | 0.58025 | 0.697043 | no |
| Anapc7        | 0.0886478 | 0.36139  | 0.4944  | 0.621667 | no |
| Ucn           | 0.0886003 | 0        | 1       | 1        | no |
| Fam114a2      | 0.0885379 | 0.36931  | 0.46055 | 0.58995  | no |
| Piezo1        | 0.088485  | 0.157275 | 0.74775 | 0.832667 | no |
| BC061194      | 0.0882383 | 0        | 1       | 1        | no |
| Otud3         | 0.0880282 | 0.20767  | 0.71575 | 0.808777 | no |
| Kmt2d         | 0.0879352 | 0.39479  | 0.42775 | 0.559109 | no |
| 4930404N11Rik | 0.087845  | 0        | 1       | 1        | no |
| Pef1          | 0.0875599 | 0.443198 | 0.4367  | 0.568511 | no |
| Il27ra        | 0.0875457 | 0        | 1       | 1        | no |
| Bola2         | 0.0874632 | 0.531327 | 0.6571  | 0.759625 | no |
| Jade2         | 0.0874527 | 0.348376 | 0.4959  | 0.622962 | no |
| Eif3d         | 0.087398  | 0.418755 | 0.4531  | 0.58311  | no |
| Mob4          | 0.0873793 | 0.422019 | 0.42835 | 0.559838 | no |
| Sumo1         | 0.0871209 | 0.370593 | 0.5307  | 0.654288 | no |
| Pgd           | 0.0869764 | 0.415477 | 0.44825 | 0.578777 | no |
| Scg5          | 0.0869147 | 0.428111 | 0.4731  | 0.602305 | no |
| Gm5434        | 0.0869015 | 0        | 1       | 1        | no |
| Wdr75         | 0.0868881 | 0.337422 | 0.52835 | 0.652058 | no |
| Pblid2        | 0.0868559 | 0.16394  | 0.7638  | 0.845008 | no |
| Tnfaip1       | 0.0868261 | 0.36407  | 0.4663  | 0.59582  | no |
| Foxj3         | 0.0867133 | 0.354534 | 0.48765 | 0.615513 | no |
| Gm11127       | 0.0866749 | 0        | 1       | 1        | no |
| Vps29         | 0.0865949 | 0.465891 | 0.46125 | 0.590676 | no |
| Hr            | 0.086558  | 0.3177   | 0.5333  | 0.656518 | no |
| Hsf4          | 0.0864978 | 0.302625 | 0.5436  | 0.6658   | no |
| Arhgap12      | 0.0862633 | 0.379363 | 0.44515 | 0.576514 | no |
| Zdhhc9        | 0.0860107 | 0.404366 | 0.4472  | 0.577927 | no |
| Gtf2e2        | 0.0860087 | 0.27826  | 0.62935 | 0.737335 | no |
| Plekhm3       | 0.0859654 | 0.411849 | 0.4171  | 0.54892  | no |
| Ndufaf6       | 0.0859615 | 0.20067  | 0.7433  | 0.830011 | no |
| Slc35a3       | 0.0859614 | 0.348471 | 0.50205 | 0.628605 | no |
| Galnt10       | 0.085671  | 0.323943 | 0.5327  | 0.656023 | no |
| Prdm2         | 0.0855259 | 0.380615 | 0.447   | 0.577846 | no |
| Nol7          | 0.0854645 | 0.198866 | 0.7237  | 0.815192 | no |
| Snx25         | 0.0854432 | 0.36903  | 0.47775 | 0.606653 | no |
| Akap11        | 0.085402  | 0.403117 | 0.42765 | 0.559089 | no |
| Timm9         | 0.0853951 | 0.217139 | 0.6551  | 0.758131 | no |

|               |           |           |         |          |    |
|---------------|-----------|-----------|---------|----------|----|
| Psmg3         | 0.0853711 | 0.28607   | 0.66665 | 0.767414 | no |
| Pum1          | 0.0852437 | 0.362972  | 0.468   | 0.597302 | no |
| Smarce1       | 0.0852261 | 0.267029  | 0.6146  | 0.725178 | no |
| Hnrnpc        | 0.0851773 | 0.384388  | 0.4388  | 0.570294 | no |
| Sfr1          | 0.0851186 | 0.425062  | 0.4542  | 0.584185 | no |
| Rps14         | 0.0849622 | 0.453828  | 0.5388  | 0.661202 | no |
| Ube2d3        | 0.0849413 | 0.432068  | 0.41785 | 0.549526 | no |
| Gm16287       | 0.0849136 | 0         | 1       | 1        | no |
| Ybx1          | 0.0849001 | 0.35464   | 0.5146  | 0.64045  | no |
| Ccnd3         | 0.0848865 | 0.170772  | 0.7631  | 0.844586 | no |
| Emc9          | 0.0848737 | 0.263932  | 0.59325 | 0.707601 | no |
| Nrip1         | 0.0847976 | 0.333482  | 0.52815 | 0.651871 | no |
| Trip12        | 0.0847937 | 0.407437  | 0.4141  | 0.546164 | no |
| Hmgb1         | 0.0845464 | 0.30386   | 0.57405 | 0.691979 | no |
| Mettl23       | 0.0845377 | 0.184743  | 0.76555 | 0.846408 | no |
| Olf917        | 0.0843045 | 0         | 1       | 1        | no |
| Larp4         | 0.0843009 | 0.371116  | 0.4564  | 0.586276 | no |
| Zfp777        | 0.0841491 | 0.27229   | 0.60005 | 0.713403 | no |
| Tnpo2         | 0.0841369 | 0.395146  | 0.4497  | 0.580085 | no |
| Sec23b        | 0.0840685 | 0.350892  | 0.4815  | 0.610188 | no |
| Supt3         | 0.0840027 | 0.250428  | 0.6128  | 0.72395  | no |
| Tigit         | 0.0839814 | 0         | 1       | 1        | no |
| C130050O18Rik | 0.0838904 | 0         | 1       | 1        | no |
| Fbxo38        | 0.0837643 | 0.343138  | 0.50395 | 0.630567 | no |
| Thap6         | 0.0837199 | 0.0957852 | 0.84175 | 0.898774 | no |
| Reep2         | 0.0836129 | 0.39159   | 0.42905 | 0.560477 | no |
| 1600002H07Rik | 0.0835028 | 0.193292  | 0.72775 | 0.818212 | no |
| Smim7         | 0.0834398 | 0.393905  | 0.4586  | 0.588191 | no |
| Rad9b         | 0.0833441 | 0         | 1       | 1        | no |
| Nprl2         | 0.083335  | 0.29586   | 0.60375 | 0.71639  | no |
| Frs2          | 0.0832199 | 0.331629  | 0.5175  | 0.642913 | no |
| Dirc2         | 0.0831296 | 0.384612  | 0.45315 | 0.583117 | no |
| Hist1h2bg     | 0.0830399 | 0.149757  | 0.86575 | 0.915722 | no |
| Ccdc159       | 0.0829621 | 0.113141  | 0.81855 | 0.883334 | no |
| Olf1167       | 0.0828953 | 0         | 1       | 1        | no |
| Surf1         | 0.0828011 | 0.207842  | 0.73105 | 0.820462 | no |
| Ckmt2         | 0.0826842 | 0         | 1       | 1        | no |
| Sec24a        | 0.0826078 | 0.291269  | 0.56255 | 0.681709 | no |
| Rab3gap2      | 0.0826038 | 0.309572  | 0.54475 | 0.666716 | no |
| Fchsd1        | 0.0824645 | 0.166692  | 0.7363  | 0.824345 | no |
| Nudt11        | 0.0822874 | 0.29913   | 0.5793  | 0.696157 | no |
| Hmgxb3        | 0.0822729 | 0.317665  | 0.5241  | 0.648806 | no |
| Hsph1         | 0.082253  | 0.40742   | 0.4322  | 0.563759 | no |
| Rcan2         | 0.0821471 | 0.379578  | 0.44405 | 0.575426 | no |
| Ahsa1         | 0.0821399 | 0.442427  | 0.4518  | 0.582001 | no |
| Tinagl1       | 0.0821343 | 0.206163  | 0.67445 | 0.774042 | no |
| Pdzd11        | 0.0821147 | 0.371542  | 0.54925 | 0.670368 | no |
| Slc9a7        | 0.0820807 | 0.302845  | 0.5751  | 0.692736 | no |
| Psma2         | 0.0820505 | 0.450066  | 0.47485 | 0.604011 | no |
| H2-Ke6        | 0.0819626 | 0.252187  | 0.68455 | 0.78252  | no |
| Rusc1         | 0.0818746 | 0.36263   | 0.4668  | 0.596229 | no |
| Slc34a2       | 0.0815604 | 0         | 1       | 1        | no |
| Zbtb22        | 0.0815021 | 0.315374  | 0.55685 | 0.67678  | no |



|           |           |           |         |          |    |
|-----------|-----------|-----------|---------|----------|----|
| Lonp2     | 0.0814723 | 0.353248  | 0.48315 | 0.611578 | no |
| Map2k2    | 0.0813369 | 0.372176  | 0.4938  | 0.621148 | no |
| Optn      | 0.0812341 | 0.346566  | 0.5146  | 0.64045  | no |
| Arid1b    | 0.0811981 | 0.358901  | 0.47745 | 0.606504 | no |
| Dnmbp     | 0.081027  | 0.222505  | 0.66725 | 0.767905 | no |
| Prkacb    | 0.0809341 | 0.374531  | 0.4513  | 0.581583 | no |
| Slu7      | 0.0808701 | 0.330685  | 0.50525 | 0.631955 | no |
| BC005624  | 0.0808574 | 0.331331  | 0.57475 | 0.692506 | no |
| Arhgap9   | 0.0808554 | 0         | 1       | 1        | no |
| Tmem130   | 0.0806797 | 0.405059  | 0.45205 | 0.58221  | no |
| Ccl2      | 0.0806622 | 0.119579  | 0.8573  | 0.910487 | no |
| Zfp39     | 0.0806462 | 0.14463   | 0.78415 | 0.859407 | no |
| Fbxo42    | 0.0806147 | 0.340086  | 0.51325 | 0.63919  | no |
| BC068281  | 0.0805607 | 0.169397  | 0.7311  | 0.820462 | no |
| Dusp28    | 0.080546  | 0.224215  | 0.6914  | 0.788177 | no |
| Cdc42bpa  | 0.0805426 | 0.373747  | 0.4637  | 0.593355 | no |
| Skiv2l2   | 0.0804968 | 0.294142  | 0.55115 | 0.671945 | no |
| Anapc2    | 0.0804878 | 0.397354  | 0.4529  | 0.582909 | no |
| Gmeb2     | 0.0804708 | 0.241192  | 0.6375  | 0.743862 | no |
| Klhl26    | 0.0804045 | 0.30564   | 0.53155 | 0.655154 | no |
| EU599041  | 0.0804043 | 0         | 1       | 1        | no |
| Fsd1      | 0.080296  | 0.347416  | 0.52625 | 0.65001  | no |
| Pvr       | 0.0802168 | 0.226582  | 0.6697  | 0.769895 | no |
| Ticam1    | 0.0801118 | 0.182987  | 0.73505 | 0.823432 | no |
| Sox17     | 0.080111  | 0.159549  | 0.7508  | 0.835082 | no |
| Gpx3      | 0.0800991 | 0.362263  | 0.5275  | 0.651372 | no |
| Pigc      | 0.0800707 | 0.247222  | 0.62205 | 0.731042 | no |
| Plxna4os1 | 0.0800459 | 0         | 1       | 1        | no |
| Tbc1d8    | 0.0799743 | 0.25079   | 0.61535 | 0.725863 | no |
| Blcap     | 0.0799691 | 0.320871  | 0.561   | 0.680452 | no |
| Dync2li1  | 0.0799543 | 0.248864  | 0.67675 | 0.775876 | no |
| Sfxn3     | 0.0799055 | 0.36401   | 0.46935 | 0.598392 | no |
| Slc5a4b   | 0.0796815 | 0         | 1       | 1        | no |
| Ubxn8     | 0.0796424 | 0.144385  | 0.77275 | 0.851077 | no |
| Trim47    | 0.0792516 | 0.134507  | 0.79345 | 0.865042 | no |
| Fastk     | 0.0792361 | 0.352496  | 0.52775 | 0.65156  | no |
| Polrmt    | 0.0792347 | 0.0244508 | 0.9638  | 0.977953 | no |
| Nsmce4a   | 0.0790378 | 0.29993   | 0.5964  | 0.7104   | no |
| Lrit2     | 0.0789801 | 0         | 1       | 1        | no |
| Fstl3     | 0.0788729 | 0.0139232 | 0.98055 | 0.988498 | no |
| Lad1      | 0.0788225 | 0         | 1       | 1        | no |
| Eif4a2    | 0.0787848 | 0.378936  | 0.47945 | 0.608229 | no |
| Btbd2     | 0.0787353 | 0.382917  | 0.46625 | 0.595814 | no |
| Papola    | 0.0785912 | 0.363085  | 0.4871  | 0.614994 | no |
| Lin28a    | 0.0785358 | 0         | 1       | 1        | no |
| Mettl10   | 0.0784178 | 0.206887  | 0.7267  | 0.81753  | no |
| Ch25h     | 0.0783956 | 0.111269  | 0.85335 | 0.907745 | no |
| Khynyn    | 0.0783523 | 0.277261  | 0.59255 | 0.707076 | no |
| Cluap1    | 0.078327  | 0.243375  | 0.6672  | 0.767905 | no |
| Hmga2     | 0.0782489 | 0         | 1       | 1        | no |
| Anapc4    | 0.0782225 | 0.375316  | 0.4798  | 0.608615 | no |
| Pogz      | 0.078124  | 0.298271  | 0.5516  | 0.67237  | no |
| Rpl7l1    | 0.078005  | 0.307512  | 0.5726  | 0.690975 | no |

|               |           |           |         |          |    |
|---------------|-----------|-----------|---------|----------|----|
| Itpa          | 0.0779631 | 0.272748  | 0.65655 | 0.759147 | no |
| Wwp2          | 0.0779574 | 0.325193  | 0.51435 | 0.640319 | no |
| Sco2          | 0.0779527 | 0.104444  | 0.83725 | 0.895357 | no |
| Zfp839        | 0.0778131 | 0.166607  | 0.73855 | 0.825958 | no |
| B4galt2       | 0.0777228 | 0.227981  | 0.6409  | 0.746779 | no |
| Smek2         | 0.0776624 | 0.309561  | 0.54565 | 0.667325 | no |
| Gm8221        | 0.0775507 | 0         | 1       | 1        | no |
| Zbtb11        | 0.0775218 | 0.302267  | 0.53835 | 0.660895 | no |
| Pcdhb12       | 0.0774459 | 0.0217609 | 0.9658  | 0.97926  | no |
| Rhoa          | 0.0774248 | 0.401224  | 0.4618  | 0.591323 | no |
| Zfp937        | 0.077409  | 0.181635  | 0.7174  | 0.810021 | no |
| Tbc1d20       | 0.0773796 | 0.28256   | 0.60675 | 0.718856 | no |
| Cyhr1         | 0.0773431 | 0.300272  | 0.54965 | 0.670671 | no |
| Casp8ap2      | 0.0773269 | 0.218171  | 0.6622  | 0.763948 | no |
| Zfp786        | 0.077242  | 0         | 1       | 1        | no |
| Usp25         | 0.0771463 | 0.359798  | 0.48345 | 0.611841 | no |
| Nup50         | 0.0771128 | 0.325187  | 0.53    | 0.653729 | no |
| Apex1         | 0.0770398 | 0.171512  | 0.7707  | 0.849509 | no |
| Maea          | 0.0768455 | 0.387478  | 0.4771  | 0.606118 | no |
| Wdr83         | 0.0768264 | 0.152023  | 0.7606  | 0.842803 | no |
| Lhcgr         | 0.0767922 | 0.126124  | 0.8185  | 0.883334 | no |
| Wdr61         | 0.0767494 | 0.241268  | 0.63465 | 0.74135  | no |
| Ccnk          | 0.0767477 | 0.245196  | 0.64625 | 0.751099 | no |
| Paip1         | 0.0766263 | 0.325872  | 0.5148  | 0.640519 | no |
| Socs4         | 0.0765632 | 0.229906  | 0.6766  | 0.775876 | no |
| Asb3          | 0.0765116 | 0.184378  | 0.7243  | 0.815426 | no |
| Slc39a3       | 0.0765102 | 0.337018  | 0.52535 | 0.649443 | no |
| Ncf2          | 0.0764964 | 0         | 1       | 1        | no |
| Bdh1          | 0.0764125 | 0.258116  | 0.6005  | 0.713618 | no |
| Mxd4          | 0.0763283 | 0.280316  | 0.63625 | 0.742723 | no |
| Sdhaf1        | 0.0762187 | 0.196147  | 0.7514  | 0.8354   | no |
| I830012O16Rik | 0.0761097 | 0.170034  | 0.7526  | 0.836313 | no |
| Gins2         | 0.0759707 | 0.0546969 | 0.9139  | 0.946504 | no |
| Thap11        | 0.0759543 | 0.230617  | 0.67615 | 0.775524 | no |
| Acsl1         | 0.0759468 | 0.328245  | 0.53255 | 0.656021 | no |
| Mdc1          | 0.0758966 | 0.256757  | 0.6123  | 0.723493 | no |
| Gcc1          | 0.0758424 | 0.282391  | 0.59255 | 0.707076 | no |
| Iqcb1         | 0.0758269 | 0.217161  | 0.6547  | 0.7578   | no |
| Dtnbp1        | 0.0757406 | 0.297065  | 0.6158  | 0.726066 | no |
| 2810403A07Rik | 0.075548  | 0.266189  | 0.6214  | 0.730714 | no |
| Cchr1         | 0.0754782 | 0         | 1       | 1        | no |
| Prrc2a        | 0.0754223 | 0.353631  | 0.48395 | 0.612357 | no |
| Fancg         | 0.0754099 | 0.200706  | 0.692   | 0.788658 | no |
| Ccdc178       | 0.0753946 | 0         | 1       | 1        | no |
| Dmtf1         | 0.0753375 | 0.271617  | 0.58115 | 0.697805 | no |
| Trappc4       | 0.0752026 | 0.388321  | 0.52455 | 0.649119 | no |
| Rnf123        | 0.0751343 | 0.23787   | 0.64985 | 0.753765 | no |
| Angel1        | 0.0750679 | 0.355481  | 0.49255 | 0.619987 | no |
| Serpinb8      | 0.0750011 | 0.190291  | 0.70075 | 0.796236 | no |
| Gemin6        | 0.0749876 | 0.125995  | 0.82945 | 0.890386 | no |
| Fbxl20        | 0.0748994 | 0.34321   | 0.4937  | 0.621081 | no |
| Ebf4          | 0.074868  | 0.199912  | 0.7091  | 0.803384 | no |
| Zpr1          | 0.074709  | 0.294808  | 0.577   | 0.69421  | no |

|               |           |          |         |          |    |
|---------------|-----------|----------|---------|----------|----|
| Usp36         | 0.0746004 | 0.248636 | 0.63035 | 0.737986 | no |
| Stag2         | 0.0744312 | 0.321668 | 0.5144  | 0.640321 | no |
| Krr1          | 0.0743713 | 0.246204 | 0.6315  | 0.738941 | no |
| Nipa2         | 0.0743666 | 0.196202 | 0.69015 | 0.78709  | no |
| Fbxo25        | 0.074327  | 0.326348 | 0.54915 | 0.670368 | no |
| Milt1         | 0.0742433 | 0.253849 | 0.62945 | 0.737381 | no |
| Clic3         | 0.0741122 | 0        | 1       | 1        | no |
| Tmem170b      | 0.0741108 | 0.266737 | 0.5962  | 0.710226 | no |
| Zfp708        | 0.0740776 | 0.115856 | 0.82545 | 0.887675 | no |
| Ypel4         | 0.0740689 | 0.219691 | 0.74135 | 0.828238 | no |
| Mterfd1       | 0.0739993 | 0.11512  | 0.8429  | 0.899422 | no |
| Pias4         | 0.0739641 | 0.263106 | 0.6411  | 0.74688  | no |
| Mmd           | 0.0739491 | 0.252773 | 0.6261  | 0.734436 | no |
| Nsd1          | 0.0739079 | 0.350273 | 0.4847  | 0.613014 | no |
| Fmr1          | 0.0738989 | 0.312713 | 0.53275 | 0.656023 | no |
| Ccdc22        | 0.0738936 | 0.162728 | 0.74665 | 0.832001 | no |
| Zfp260        | 0.0738311 | 0.32737  | 0.5301  | 0.653792 | no |
| Ocln          | 0.0738275 | 0.115357 | 0.8304  | 0.890832 | no |
| Ccdc114       | 0.0737792 | 0        | 1       | 1        | no |
| Atp6v0c       | 0.0737503 | 0.293435 | 0.54955 | 0.670611 | no |
| Cry2          | 0.0735499 | 0.336743 | 0.50765 | 0.63418  | no |
| Tgds          | 0.0735447 | 0.132818 | 0.8113  | 0.877795 | no |
| Tssk1         | 0.0733609 | 0        | 1       | 1        | no |
| Upf2          | 0.0732909 | 0.269025 | 0.6006  | 0.713673 | no |
| Eif4h         | 0.0731987 | 0.373428 | 0.48585 | 0.613942 | no |
| Naa60         | 0.07311   | 0.308034 | 0.5327  | 0.656023 | no |
| Nfe2l1        | 0.0730987 | 0.309783 | 0.5346  | 0.65763  | no |
| Zfp11         | 0.0730014 | 0.19027  | 0.70595 | 0.800841 | no |
| Zfp407        | 0.0727973 | 0.241994 | 0.6363  | 0.742723 | no |
| Pla2g4c       | 0.0727824 | 0        | 1       | 1        | no |
| Mamdc4        | 0.0727504 | 0        | 1       | 1        | no |
| Pianp         | 0.072581  | 0.220818 | 0.65645 | 0.759147 | no |
| 1200014J11Rik | 0.0725215 | 0.260508 | 0.61295 | 0.723998 | no |
| Fam204a       | 0.0722339 | 0.238146 | 0.6596  | 0.761545 | no |
| Dsn1          | 0.072154  | 0.109542 | 0.84205 | 0.898896 | no |
| Zfp507        | 0.072107  | 0.251423 | 0.6123  | 0.723493 | no |
| Zc3h12c       | 0.0721067 | 0.205787 | 0.683   | 0.781287 | no |
| Gart          | 0.0720521 | 0.301949 | 0.5642  | 0.683022 | no |
| Letm1         | 0.0720385 | 0.335835 | 0.52495 | 0.649311 | no |
| Gatsl2        | 0.0719884 | 0.304128 | 0.559   | 0.678709 | no |
| Copb1         | 0.0719866 | 0.339652 | 0.5221  | 0.646811 | no |
| Rnf181        | 0.0719748 | 0.297302 | 0.5479  | 0.669398 | no |
| Taf9          | 0.0718371 | 0.260162 | 0.6004  | 0.713563 | no |
| Hyou1         | 0.071764  | 0.338612 | 0.5159  | 0.641587 | no |
| Mars          | 0.071757  | 0.232986 | 0.6349  | 0.74135  | no |
| Zcchc4        | 0.071548  | 0.16277  | 0.76495 | 0.845927 | no |
| Med12         | 0.0715015 | 0.269202 | 0.60305 | 0.715815 | no |
| 4933426M11Rik | 0.0714838 | 0.334289 | 0.4971  | 0.623938 | no |
| Fopnl         | 0.07147   | 0.306955 | 0.5951  | 0.709234 | no |
| Tfb1m         | 0.0712202 | 0.157304 | 0.76855 | 0.847859 | no |
| Rab8a         | 0.0712191 | 0.280242 | 0.6099  | 0.721557 | no |
| Vps9d1        | 0.0711959 | 0.231898 | 0.64315 | 0.748611 | no |
| 2810429I04Rik | 0.0711138 | 0        | 1       | 1        | no |

|               |           |           |         |          |    |
|---------------|-----------|-----------|---------|----------|----|
| Gne           | 0.070968  | 0.278249  | 0.5803  | 0.697043 | no |
| Gabra1        | 0.0709089 | 0.326408  | 0.52415 | 0.648806 | no |
| Map3k8        | 0.0708313 | 0         | 1       | 1        | no |
| CcpG1         | 0.0707887 | 0.348165  | 0.50605 | 0.632658 | no |
| Zbed6         | 0.0707534 | 0.135446  | 0.7848  | 0.85978  | no |
| Nfx1          | 0.0707173 | 0.282337  | 0.57065 | 0.689196 | no |
| Mien1         | 0.0706545 | 0.270595  | 0.5807  | 0.697397 | no |
| Tmed5         | 0.0705429 | 0.281025  | 0.5994  | 0.71295  | no |
| Ccdc93        | 0.0705108 | 0.272411  | 0.5794  | 0.696214 | no |
| Rhou          | 0.0704852 | 0.313535  | 0.55095 | 0.671825 | no |
| Klhl1         | 0.0703724 | 0         | 1       | 1        | no |
| Exosc8        | 0.0702919 | 0.136804  | 0.7824  | 0.858356 | no |
| Mrpl19        | 0.070281  | 0.247646  | 0.6247  | 0.733118 | no |
| Gsto1         | 0.0702257 | 0.287943  | 0.62285 | 0.731658 | no |
| 2210018M11Rik | 0.0702157 | 0.220252  | 0.66665 | 0.767414 | no |
| Orc3          | 0.0701095 | 0.181364  | 0.72035 | 0.812591 | no |
| Fam213a       | 0.0700551 | 0.314325  | 0.5807  | 0.697397 | no |
| Timm44        | 0.0700345 | 0.258864  | 0.6433  | 0.748713 | no |
| Stx12         | 0.0697947 | 0.357214  | 0.51315 | 0.639185 | no |
| Ecd           | 0.0697107 | 0.293639  | 0.58135 | 0.697862 | no |
| Alpk1         | 0.069701  | 0.157936  | 0.76095 | 0.84295  | no |
| Mon1b         | 0.0695617 | 0.274353  | 0.5767  | 0.693973 | no |
| Med9          | 0.0694688 | 0.290501  | 0.5876  | 0.702884 | no |
| Jmjd4         | 0.0694103 | 0.23939   | 0.63455 | 0.74135  | no |
| Cnot11        | 0.0690385 | 0.254333  | 0.631   | 0.738538 | no |
| Ybey          | 0.0688913 | 0.0694086 | 0.89405 | 0.934481 | no |
| Kptn          | 0.0687612 | 0.175812  | 0.7514  | 0.8354   | no |
| Gm6682        | 0.0686913 | 0.330242  | 0.5724  | 0.690806 | no |
| Miip          | 0.0685913 | 0.136035  | 0.8095  | 0.876777 | no |
| Camsap1       | 0.068478  | 0.305084  | 0.53785 | 0.660464 | no |
| Trim41        | 0.0684012 | 0.267187  | 0.61205 | 0.723391 | no |
| Strip2        | 0.0680487 | 0.210876  | 0.6778  | 0.776745 | no |
| AU019823      | 0.0679722 | 0.107529  | 0.8397  | 0.897254 | no |
| Tmem183a      | 0.067954  | 0.298992  | 0.5492  | 0.670368 | no |
| Wdr60         | 0.067938  | 0.168756  | 0.7481  | 0.832917 | no |
| Zfp759        | 0.0679045 | 0.137689  | 0.79295 | 0.864907 | no |
| Ddx60         | 0.0677371 | 0.128241  | 0.80125 | 0.870542 | no |
| Adamts15      | 0.0677084 | 0.236623  | 0.6423  | 0.748081 | no |
| Rgp1          | 0.0676625 | 0.184044  | 0.71485 | 0.808036 | no |
| Fam175b       | 0.067541  | 0.282808  | 0.5962  | 0.710226 | no |
| Zfp790        | 0.0675267 | 0.20777   | 0.67465 | 0.774128 | no |
| Map4k1        | 0.0674508 | 0         | 1       | 1        | no |
| Ing4          | 0.0672379 | 0.233963  | 0.68075 | 0.779587 | no |
| 1300002E11Rik | 0.0669337 | 0.076072  | 0.87375 | 0.922052 | no |
| Aimp2         | 0.066903  | 0.135085  | 0.78885 | 0.862437 | no |
| Ncoa6         | 0.0669013 | 0.265024  | 0.59035 | 0.705347 | no |
| Lrp10         | 0.0666047 | 0.329653  | 0.5319  | 0.655402 | no |
| Cln5          | 0.0665687 | 0.269413  | 0.6244  | 0.732954 | no |
| Commd10       | 0.06654   | 0.221976  | 0.6977  | 0.793518 | no |
| Smyd5         | 0.0665346 | 0.261801  | 0.62495 | 0.733281 | no |
| Ccdc104       | 0.0662649 | 0.321685  | 0.57475 | 0.692506 | no |
| Ppil3         | 0.0662341 | 0.188     | 0.70875 | 0.803056 | no |
| Arf5          | 0.0662339 | 0.365417  | 0.5623  | 0.68165  | no |

|               |           |           |         |          |    |
|---------------|-----------|-----------|---------|----------|----|
| Ube2w         | 0.0662228 | 0.269029  | 0.59405 | 0.70811  | no |
| Gemin8        | 0.0661854 | 0.113398  | 0.84005 | 0.897555 | no |
| Dhx57         | 0.0661587 | 0.298508  | 0.57505 | 0.692736 | no |
| Dync1li2      | 0.0661508 | 0.309377  | 0.559   | 0.678709 | no |
| Cmtm4         | 0.0660444 | 0.296964  | 0.56235 | 0.68165  | no |
| Zcchc10       | 0.0658073 | 0.167822  | 0.7746  | 0.852619 | no |
| Lars          | 0.0657509 | 0.301091  | 0.56115 | 0.680572 | no |
| Dynlt3        | 0.0656908 | 0.33482   | 0.5354  | 0.658309 | no |
| Zfp873        | 0.0656655 | 0.0974574 | 0.8564  | 0.909948 | no |
| Heatr2        | 0.0654474 | 0.168822  | 0.74695 | 0.832126 | no |
| Gsk3a         | 0.0652809 | 0.31476   | 0.56085 | 0.680333 | no |
| Tomm6         | 0.0652606 | 0.328084  | 0.60475 | 0.717255 | no |
| Poglut1       | 0.0652333 | 0.30196   | 0.57225 | 0.690688 | no |
| Hars2         | 0.0651916 | 0.210992  | 0.6891  | 0.786163 | no |
| Hbs1l         | 0.0651601 | 0.285868  | 0.5825  | 0.698863 | no |
| Khsrp         | 0.0651432 | 0.289857  | 0.5827  | 0.69904  | no |
| 2700046G09Rik | 0.0650461 | 0         | 1       | 1        | no |
| Trim24        | 0.0649957 | 0.228849  | 0.64665 | 0.751367 | no |
| Ndor1         | 0.0649493 | 0.207866  | 0.67745 | 0.776468 | no |
| Hcfc1         | 0.0648655 | 0.307184  | 0.5433  | 0.665494 | no |
| A430033K04Rik | 0.0647647 | 0.124244  | 0.81705 | 0.882217 | no |
| 1810022K09Rik | 0.0645773 | 0.0665492 | 0.8938  | 0.934366 | no |
| 6030458C11Rik | 0.0644522 | 0.250661  | 0.61045 | 0.72201  | no |
| Chmp1a        | 0.0644289 | 0.315199  | 0.5661  | 0.684635 | no |
| Gm14057       | 0.0643763 | 0.0452405 | 0.9318  | 0.95779  | no |
| Ndufa2        | 0.0643141 | 0.210021  | 0.67375 | 0.773306 | no |
| 1110058L19Rik | 0.0642004 | 0.251933  | 0.7221  | 0.813804 | no |
| Kbtbd11       | 0.0641732 | 0.303043  | 0.54975 | 0.670731 | no |
| Astn1         | 0.0640722 | 0.296632  | 0.55275 | 0.673463 | no |
| Arih2         | 0.0640398 | 0.241205  | 0.64805 | 0.752335 | no |
| Chordc1       | 0.0640139 | 0.300872  | 0.582   | 0.698453 | no |
| Reep1         | 0.0634149 | 0.286844  | 0.5838  | 0.699853 | no |
| Shfm1         | 0.0633666 | 0.421891  | 0.61555 | 0.725911 | no |
| Hnrnpa0       | 0.0633483 | 0.314103  | 0.5554  | 0.675389 | no |
| Lin7a         | 0.0633318 | 0.265651  | 0.58485 | 0.700542 | no |
| Fbxo46        | 0.0632611 | 0.129588  | 0.8142  | 0.879999 | no |
| Msl2          | 0.0632267 | 0.251834  | 0.6248  | 0.73317  | no |
| Zfp960        | 0.063007  | 0.0838727 | 0.8586  | 0.911211 | no |
| Asns          | 0.0629071 | 0.324652  | 0.5559  | 0.675935 | no |
| Polr2j        | 0.0627675 | 0.262709  | 0.72525 | 0.816245 | no |
| B020018J22Rik | 0.062646  | 0         | 1       | 1        | no |
| A230072E10Rik | 0.0625845 | 0         | 1       | 1        | no |
| Dusp7         | 0.062512  | 0.207049  | 0.6946  | 0.791009 | no |
| Kctd20        | 0.0622795 | 0.276018  | 0.61005 | 0.721606 | no |
| Sirt5         | 0.0622669 | 0.148931  | 0.79955 | 0.869407 | no |
| Cap1          | 0.0622015 | 0.318528  | 0.55475 | 0.675029 | no |
| Uba6          | 0.0621616 | 0.282384  | 0.58165 | 0.698159 | no |
| Terf2ip       | 0.062123  | 0.259757  | 0.6165  | 0.726504 | no |
| Tollip        | 0.0620969 | 0.30853   | 0.55215 | 0.672855 | no |
| Clip1         | 0.0620615 | 0.259844  | 0.6002  | 0.713453 | no |
| Khdrbs1       | 0.062048  | 0.279422  | 0.57195 | 0.690389 | no |
| Uqcr11        | 0.0619547 | 0.320144  | 0.72285 | 0.814373 | no |
| Syvn1         | 0.0618907 | 0.225788  | 0.67085 | 0.770644 | no |

|                    |           |           |         |          |    |
|--------------------|-----------|-----------|---------|----------|----|
| St8sia3            | 0.0618057 | 0.286882  | 0.5576  | 0.677567 | no |
| Dak                | 0.0617818 | 0.16989   | 0.76185 | 0.843624 | no |
| Larp4b             | 0.0617483 | 0.292471  | 0.5669  | 0.685353 | no |
| Aptx               | 0.0617234 | 0.231411  | 0.6431  | 0.748611 | no |
| Gars               | 0.06164   | 0.315133  | 0.5553  | 0.675329 | no |
| Mlxip              | 0.0616245 | 0.244319  | 0.6175  | 0.727306 | no |
| Lcmt1              | 0.0615721 | 0.272792  | 0.63925 | 0.745503 | no |
| Nmrk1              | 0.0615397 | 0.142845  | 0.7993  | 0.869332 | no |
| Cct7               | 0.061492  | 0.285726  | 0.5648  | 0.683624 | no |
| Ipo7               | 0.0614134 | 0.271306  | 0.58435 | 0.700259 | no |
| Tmub2              | 0.0613988 | 0.154208  | 0.7824  | 0.858356 | no |
| Ptpra              | 0.06139   | 0.284917  | 0.56285 | 0.681886 | no |
| Rab11fip2          | 0.0613895 | 0.252954  | 0.6058  | 0.717987 | no |
| Map3k7             | 0.0613874 | 0.247686  | 0.6166  | 0.726504 | no |
| Samd4b             | 0.061319  | 0.267532  | 0.6095  | 0.721213 | no |
| Nsun5              | 0.0612976 | 0.094702  | 0.8615  | 0.912788 | no |
| Dcaf7              | 0.0612375 | 0.297642  | 0.5561  | 0.676054 | no |
| Tada2a             | 0.0610908 | 0.178002  | 0.74395 | 0.830387 | no |
| Gabarapl2          | 0.0610079 | 0.286748  | 0.6459  | 0.750875 | no |
| Naa30              | 0.0609691 | 0.256965  | 0.622   | 0.731042 | no |
| Hoxc6              | 0.0608453 | 0.126318  | 0.82    | 0.884395 | no |
| Ift20              | 0.0606141 | 0.26011   | 0.689   | 0.786117 | no |
| Bub3               | 0.0605614 | 0.280952  | 0.61795 | 0.727771 | no |
| Gaa                | 0.0604959 | 0.283961  | 0.5624  | 0.68165  | no |
| Gnptg              | 0.0604765 | 0.163468  | 0.7447  | 0.830805 | no |
| Ing2               | 0.0603781 | 0.140068  | 0.7952  | 0.866523 | no |
| Otud6b             | 0.0603009 | 0.276154  | 0.60095 | 0.713897 | no |
| Mid1ip1            | 0.0602891 | 0.28139   | 0.5735  | 0.691565 | no |
| Hist2h3c1,Hist2h3c | 0.0602813 | 0         | 1       | 1        | no |
| Tnnt1              | 0.0601887 | 0         | 1       | 1        | no |
| Foxk2              | 0.0600246 | 0.264344  | 0.6131  | 0.724052 | no |
| Pop7               | 0.0599705 | 0.18576   | 0.7842  | 0.859407 | no |
| Sfmbt1             | 0.0599357 | 0.225731  | 0.6529  | 0.756311 | no |
| Zbtb45             | 0.0598182 | 0.17222   | 0.7547  | 0.838436 | no |
| Mprp               | 0.0595732 | 0.280043  | 0.57675 | 0.693973 | no |
| Zscan22            | 0.0594629 | 0.118169  | 0.81195 | 0.878283 | no |
| Ankrd13c           | 0.0594473 | 0.240392  | 0.65345 | 0.756683 | no |
| Mat2a              | 0.0594103 | 0.290162  | 0.5906  | 0.705519 | no |
| Arpc5l             | 0.0593891 | 0.26884   | 0.64995 | 0.753815 | no |
| Ankrd11            | 0.0592526 | 0.273928  | 0.5779  | 0.695041 | no |
| Dap3               | 0.0592122 | 0.24526   | 0.6154  | 0.725863 | no |
| Gspt2              | 0.0590146 | 0.201466  | 0.70545 | 0.800411 | no |
| Zscan25            | 0.058988  | 0.153477  | 0.78125 | 0.857575 | no |
| Ankle2             | 0.0588923 | 0.220483  | 0.6551  | 0.758131 | no |
| Smdt1              | 0.0588804 | 0.376783  | 0.6236  | 0.732345 | no |
| 1810026J23Rik      | 0.058775  | 0.180806  | 0.7218  | 0.813742 | no |
| 36219              | 0.0587719 | 0.0921149 | 0.87115 | 0.920114 | no |
| Cyp4f13            | 0.0586703 | 0.146531  | 0.7913  | 0.863823 | no |
| Tmem258            | 0.0586349 | 0.177474  | 0.7192  | 0.811695 | no |
| Pfas               | 0.0583712 | 0.17144   | 0.72945 | 0.819304 | no |
| Cnot10             | 0.0581127 | 0.219183  | 0.6828  | 0.781192 | no |
| Dctn5              | 0.0580483 | 0.303099  | 0.59265 | 0.707076 | no |
| Naa15              | 0.057955  | 0.26752   | 0.5986  | 0.712381 | no |



|               |           |           |         |          |    |
|---------------|-----------|-----------|---------|----------|----|
| Abhd17b       | 0.0579446 | 0.261083  | 0.6327  | 0.739953 | no |
| Timm17b       | 0.0578786 | 0.17804   | 0.75865 | 0.841626 | no |
| Smarca4       | 0.0578773 | 0.268182  | 0.58685 | 0.702177 | no |
| Ehd1          | 0.0578547 | 0.243309  | 0.6421  | 0.747914 | no |
| Nostrin       | 0.0577597 | 0.0814634 | 0.88495 | 0.928648 | no |
| Commd4        | 0.0577227 | 0.241151  | 0.70695 | 0.80177  | no |
| Plaa          | 0.0576931 | 0.268481  | 0.60555 | 0.717814 | no |
| Ubqln2        | 0.0575823 | 0.28428   | 0.5917  | 0.706451 | no |
| Entpd3        | 0.0575703 | 0.284253  | 0.58295 | 0.69908  | no |
| Gm7534        | 0.057547  | 0         | 1       | 1        | no |
| Noa1          | 0.0573866 | 0.198464  | 0.72025 | 0.812547 | no |
| Snrpg         | 0.0572708 | 0.0790264 | 0.95015 | 0.969292 | no |
| Ptp4a1        | 0.0572233 | 0.132137  | 0.79485 | 0.866284 | no |
| Comt          | 0.0572003 | 0.183754  | 0.73695 | 0.824711 | no |
| Tmem115       | 0.0571358 | 0.219329  | 0.68185 | 0.780375 | no |
| Atp9a         | 0.0571138 | 0.253023  | 0.61495 | 0.725462 | no |
| Ppp1r3f       | 0.0569866 | 0.165039  | 0.75895 | 0.841818 | no |
| Polr3f        | 0.0569353 | 0.186173  | 0.71315 | 0.806664 | no |
| Hps4          | 0.0566681 | 0.157112  | 0.74745 | 0.832473 | no |
| Mettl22       | 0.0564708 | 0.174891  | 0.75975 | 0.842213 | no |
| Socs6         | 0.0564288 | 0.148384  | 0.7795  | 0.85652  | no |
| Slc35f2       | 0.0562964 | 0.14764   | 0.7861  | 0.860636 | no |
| Asphd1        | 0.0562346 | 0.152781  | 0.85315 | 0.907605 | no |
| Tmem11        | 0.0562276 | 0.162868  | 0.74875 | 0.833291 | no |
| Cep162        | 0.0561608 | 0.140224  | 0.78625 | 0.860642 | no |
| Cdk11b        | 0.0560162 | 0.244948  | 0.646   | 0.750875 | no |
| Sphk2         | 0.0559325 | 0.207131  | 0.6812  | 0.7799   | no |
| LOC106740     | 0.0559014 | 0.079682  | 0.8716  | 0.920516 | no |
| Unc119b       | 0.0558288 | 0.219266  | 0.6805  | 0.779587 | no |
| Ankfy1        | 0.055812  | 0.259323  | 0.613   | 0.723998 | no |
| Adsl          | 0.055808  | 0.211937  | 0.68715 | 0.784613 | no |
| Utp20         | 0.055735  | 0.206223  | 0.683   | 0.781287 | no |
| Gna12         | 0.0557035 | 0.255029  | 0.6474  | 0.751777 | no |
| Glrx2         | 0.0556163 | 0.217107  | 0.66665 | 0.767414 | no |
| Nmrk2         | 0.0553925 | 0         | 1       | 1        | no |
| Wdr20         | 0.0553309 | 0.153808  | 0.77835 | 0.855682 | no |
| Cdk5rap3      | 0.055326  | 0.184816  | 0.73855 | 0.825958 | no |
| Elp6          | 0.0552855 | 0.150307  | 0.78715 | 0.861272 | no |
| Nup188        | 0.055169  | 0.166249  | 0.7459  | 0.831584 | no |
| Ccdc113       | 0.0550691 | 0         | 1       | 1        | no |
| Map3k9        | 0.0549647 | 0.251132  | 0.61745 | 0.727306 | no |
| Usp46         | 0.0549223 | 0.260181  | 0.62375 | 0.732456 | no |
| H2-T10        | 0.054834  | 0         | 1       | 1        | no |
| Gm6194        | 0.054819  | 0.0881373 | 0.87335 | 0.921809 | no |
| 5730507C01Rik | 0.0547823 | 0         | 1       | 1        | no |
| Crym          | 0.0547767 | 0.124669  | 0.8298  | 0.890386 | no |
| Rab4b         | 0.0547654 | 0.23662   | 0.6341  | 0.741133 | no |
| Cntn2         | 0.0547621 | 0.259998  | 0.60435 | 0.716973 | no |
| Prpf4         | 0.0547275 | 0.177755  | 0.7308  | 0.820377 | no |
| 1810044D09Rik | 0.0546848 | 0.0687382 | 0.9479  | 0.967741 | no |
| Nom1          | 0.0546593 | 0.210995  | 0.6856  | 0.78345  | no |
| Zfp385b       | 0.0545838 | 0.208852  | 0.6775  | 0.776468 | no |
| Klhl42        | 0.0545273 | 0.210211  | 0.68515 | 0.783071 | no |

|               |           |           |         |          |    |
|---------------|-----------|-----------|---------|----------|----|
| Ciapin1       | 0.0544582 | 0.235477  | 0.6517  | 0.75525  | no |
| Med24         | 0.0543978 | 0.231947  | 0.65945 | 0.761545 | no |
| Tomm7         | 0.0543864 | 0.130602  | 0.8313  | 0.891653 | no |
| Prkar1a       | 0.0543514 | 0.224794  | 0.67315 | 0.772818 | no |
| Amd2          | 0.054325  | 0         | 1       | 1        | no |
| Clasp2        | 0.0542792 | 0.430394  | 0.62445 | 0.732954 | no |
| Dnrtip2       | 0.0542219 | 0.189836  | 0.72855 | 0.81857  | no |
| Ccng2         | 0.0541606 | 0.209974  | 0.69555 | 0.791854 | no |
| Pdpf          | 0.0538846 | 0.202387  | 0.75935 | 0.84198  | no |
| Phf20         | 0.0538522 | 0.253591  | 0.6198  | 0.729303 | no |
| Bbip1         | 0.0537996 | 0.0847193 | 0.8741  | 0.922254 | no |
| Zfp213        | 0.0537608 | 0.115479  | 0.8295  | 0.890386 | no |
| Gm5127        | 0.0537124 | 0         | 1       | 1        | no |
| Cep131        | 0.0536819 | 0.144293  | 0.7836  | 0.859104 | no |
| Poli          | 0.0535278 | 0.106526  | 0.82985 | 0.890386 | no |
| Kbtbd2        | 0.0534783 | 0.256647  | 0.61945 | 0.729079 | no |
| Kctd2         | 0.0534612 | 0.253917  | 0.6565  | 0.759147 | no |
| A330041J22Rik | 0.0534353 | 0         | 1       | 1        | no |
| 4931414P19Rik | 0.0533891 | 0.0946773 | 0.86045 | 0.912259 | no |
| Mon1a         | 0.0533799 | 0.197628  | 0.727   | 0.817659 | no |
| A330102I10Rik | 0.0533501 | 0.0758287 | 0.88985 | 0.931558 | no |
| Panx2         | 0.0533074 | 0.244927  | 0.6464  | 0.751208 | no |
| Coq10a        | 0.0533069 | 0.196852  | 0.717   | 0.809638 | no |
| Trp53i13      | 0.0532503 | 0.134941  | 0.813   | 0.879114 | no |
| Npy4r         | 0.0531492 | 0         | 1       | 1        | no |
| Cnep1r1       | 0.0531346 | 0.208625  | 0.70405 | 0.799346 | no |
| Hmga1-rs1     | 0.053017  | 0         | 1       | 1        | no |
| Porcn         | 0.0529564 | 0.183096  | 0.71325 | 0.806708 | no |
| Wdr16         | 0.0529402 | 0         | 1       | 1        | no |
| Aasdhpt       | 0.0529246 | 0.208039  | 0.6911  | 0.78797  | no |
| Dpagt1        | 0.0528496 | 0.207253  | 0.70785 | 0.802448 | no |
| Amer3         | 0.0528301 | 0.201091  | 0.6998  | 0.795361 | no |
| Zfp426        | 0.0527513 | 0.193295  | 0.7011  | 0.796554 | no |
| Tspyl1        | 0.0526041 | 0.267689  | 0.6166  | 0.726504 | no |
| 1600012H06Rik | 0.0524871 | 0.174027  | 0.74435 | 0.830596 | no |
| Mief1         | 0.0523571 | 0.222498  | 0.6678  | 0.768338 | no |
| Rasl11a       | 0.0523257 | 0.0831703 | 0.89225 | 0.933408 | no |
| Morf4l1       | 0.0521986 | 0.19      | 0.6961  | 0.792241 | no |
| Lats1         | 0.0518699 | 0.210083  | 0.68415 | 0.782197 | no |
| Bmx           | 0.0518351 | 0.0790324 | 0.88335 | 0.927755 | no |
| Cggbp1        | 0.0517037 | 0.229164  | 0.65905 | 0.761175 | no |
| Mcts1         | 0.0515229 | 0.239281  | 0.71065 | 0.804522 | no |
| Adal          | 0.0515117 | 0.132273  | 0.79025 | 0.863256 | no |
| Rsrc1         | 0.0514661 | 0.2189    | 0.6804  | 0.779587 | no |
| Gatc          | 0.0514346 | 0.177365  | 0.7518  | 0.835634 | no |
| Ngrn          | 0.0514205 | 0.177808  | 0.722   | 0.813804 | no |
| Tmem167b      | 0.0513721 | 0.237657  | 0.6502  | 0.754039 | no |
| Ehbp1         | 0.0512752 | 0.225772  | 0.6466  | 0.751367 | no |
| Ino80e        | 0.0509828 | 0.132482  | 0.7895  | 0.863005 | no |
| Kmt2c         | 0.0509817 | 0.225852  | 0.65325 | 0.756584 | no |
| Wasl          | 0.0509609 | 0.237713  | 0.6311  | 0.738538 | no |
| A730017L22Rik | 0.0508711 | 0.0799356 | 0.88235 | 0.927271 | no |
| Sesn1         | 0.0508019 | 0.194125  | 0.69555 | 0.791854 | no |

|               |           |           |         |          |    |
|---------------|-----------|-----------|---------|----------|----|
| Wdr47         | 0.0506987 | 0.245002  | 0.63465 | 0.74135  | no |
| Tmem145       | 0.0506717 | 0.123834  | 0.819   | 0.883604 | no |
| Tmem231       | 0.0506635 | 0.172758  | 0.74755 | 0.832515 | no |
| Zfp658        | 0.0505003 | 0.093198  | 0.86005 | 0.912093 | no |
| Dapp1         | 0.0504478 | 0         | 1       | 1        | no |
| Klhl28        | 0.0503145 | 0.183155  | 0.7244  | 0.815426 | no |
| 2310035C23Rik | 0.0502945 | 0.223832  | 0.6555  | 0.758329 | no |
| Pcm1          | 0.0502254 | 0.234889  | 0.64305 | 0.748611 | no |
| Zfp558        | 0.0501753 | 0         | 1       | 1        | no |
| 9130019O22Rik | 0.0501586 | 0.0851798 | 0.8701  | 0.919371 | no |
| Mob2          | 0.0501237 | 0.215627  | 0.70845 | 0.802854 | no |
| Hddc2         | 0.0500822 | 0.1549    | 0.82395 | 0.886709 | no |
| Gemin7        | 0.0499534 | 0.213262  | 0.74575 | 0.831487 | no |
| Fbxo45        | 0.0497842 | 0.233437  | 0.65095 | 0.754711 | no |
| Ccdc71l       | 0.0497578 | 0.145064  | 0.7771  | 0.854717 | no |
| Rragb         | 0.049694  | 0.218298  | 0.68635 | 0.784104 | no |
| Cops7a        | 0.0496577 | 0.210547  | 0.673   | 0.772779 | no |
| Ahrr          | 0.0496257 | 0         | 1       | 1        | no |
| Ovca2         | 0.0496013 | 0.131589  | 0.7915  | 0.863823 | no |
| Pdap1         | 0.0495171 | 0.225081  | 0.68455 | 0.78252  | no |
| Glce          | 0.0494662 | 0.22331   | 0.66555 | 0.766813 | no |
| Gpalpp1       | 0.0493711 | 0.210239  | 0.68775 | 0.785231 | no |
| 2310034O05Rik | 0.0493608 | 0         | 1       | 1        | no |
| Det1          | 0.0493491 | 0.098618  | 0.85185 | 0.906513 | no |
| Ap4b1         | 0.0490105 | 0.0666694 | 0.9039  | 0.940457 | no |
| Lancl2        | 0.0489969 | 0.219437  | 0.6708  | 0.770644 | no |
| AI854703      | 0.048991  | 0.154307  | 0.76395 | 0.845103 | no |
| Vps16         | 0.048765  | 0.178479  | 0.7218  | 0.813742 | no |
| Phf5a         | 0.0486273 | 0.18846   | 0.7343  | 0.822801 | no |
| Unc5b         | 0.0485589 | 0.144303  | 0.7771  | 0.854717 | no |
| Arhgap4       | 0.0484436 | 0         | 1       | 1        | no |
| BC003965      | 0.0484418 | 0.162426  | 0.75735 | 0.840747 | no |
| Sec31b        | 0.0484333 | 0         | 1       | 1        | no |
| Ppp2r1b       | 0.0484242 | 0.0858184 | 0.87345 | 0.921809 | no |
| Rdx           | 0.0483906 | 0.223914  | 0.65265 | 0.756153 | no |
| Myzap         | 0.048357  | 0         | 1       | 1        | no |
| Cltb          | 0.0482872 | 0.256894  | 0.64565 | 0.750797 | no |
| Zpbp          | 0.0482705 | 0         | 1       | 1        | no |
| Ugp2          | 0.0482575 | 0.195856  | 0.6992  | 0.794883 | no |
| Bnip1         | 0.048236  | 0.152166  | 0.8014  | 0.870545 | no |
| Golph3l       | 0.0481962 | 0.158485  | 0.7462  | 0.831849 | no |
| Clcn7         | 0.0481827 | 0.202159  | 0.6956  | 0.791854 | no |
| Tcea2         | 0.0479518 | 0.169606  | 0.7718  | 0.850172 | no |
| Tmem86a       | 0.0477754 | 0.165746  | 0.75835 | 0.841505 | no |
| 9830147E19Rik | 0.0477623 | 0         | 1       | 1        | no |
| A230065H16Rik | 0.0477235 | 0         | 1       | 1        | no |
| Rabepk        | 0.0476855 | 0.145365  | 0.79715 | 0.867935 | no |
| Prps1         | 0.0476772 | 0.205954  | 0.7081  | 0.802651 | no |
| Mapk1ip1l     | 0.047673  | 0.213081  | 0.67675 | 0.775876 | no |
| Lemd3         | 0.0475824 | 0.180499  | 0.7337  | 0.822337 | no |
| Fabp5         | 0.047353  | 0.167845  | 0.7287  | 0.818669 | no |
| Gde1          | 0.0472959 | 0.252185  | 0.65725 | 0.759625 | no |
| Cog7          | 0.0472611 | 0.201157  | 0.7047  | 0.799765 | no |

|               |           |           |         |          |    |
|---------------|-----------|-----------|---------|----------|----|
| Ncln          | 0.0472064 | 0.189718  | 0.72205 | 0.813804 | no |
| Fbf1          | 0.0471742 | 0.161278  | 0.7555  | 0.838974 | no |
| Mrpl43        | 0.0470558 | 0.198556  | 0.7392  | 0.826532 | no |
| Golga5        | 0.0468855 | 0.161652  | 0.74855 | 0.833139 | no |
| Clcn1         | 0.0468432 | 0         | 1       | 1        | no |
| Thumpd2       | 0.0467883 | 0.0661562 | 0.90515 | 0.941262 | no |
| Kcmf1         | 0.0467602 | 0.219705  | 0.68115 | 0.7799   | no |
| E130309D02Rik | 0.046602  | 0.147242  | 0.7824  | 0.858356 | no |
| Hif1a         | 0.0465593 | 0.219785  | 0.6747  | 0.774128 | no |
| Stxbp5        | 0.0464581 | 0.208025  | 0.67345 | 0.773095 | no |
| Tiprl         | 0.0464498 | 0.195757  | 0.71175 | 0.805355 | no |
| Ciao1         | 0.0464463 | 0.201684  | 0.70415 | 0.799346 | no |
| Dzip1         | 0.0462139 | 0.126727  | 0.80525 | 0.873797 | no |
| Zfp142        | 0.0461414 | 0.0842285 | 0.86285 | 0.913602 | no |
| Med23         | 0.0460407 | 0.155432  | 0.75175 | 0.835634 | no |
| 4930402H24Rik | 0.0458846 | 0.182073  | 0.72745 | 0.818027 | no |
| Vwa3a         | 0.0458811 | 0         | 1       | 1        | no |
| D17Wsu92e     | 0.0458577 | 0.21455   | 0.66475 | 0.766224 | no |
| Timm50        | 0.045832  | 0.165567  | 0.783   | 0.858714 | no |
| Fkrp          | 0.0457028 | 0.124859  | 0.8164  | 0.881731 | no |
| Kcnn2         | 0.0456453 | 0.125004  | 0.8215  | 0.885365 | no |
| St7           | 0.0456442 | 0.108815  | 0.82575 | 0.887889 | no |
| Pa2g4         | 0.0456383 | 0.190545  | 0.727   | 0.817659 | no |
| Sass6         | 0.0454286 | 0.094275  | 0.8417  | 0.898774 | no |
| Slc25a51      | 0.0454157 | 0.220767  | 0.6681  | 0.76855  | no |
| Mira          | 0.0453578 | 0.158317  | 0.8099  | 0.876923 | no |
| Dbr1          | 0.0449189 | 0.0976154 | 0.8576  | 0.910659 | no |
| Inpp5a        | 0.044858  | 0.154345  | 0.77845 | 0.855721 | no |
| Mbd1          | 0.0446629 | 0.153948  | 0.7711  | 0.849683 | no |
| Mapt          | 0.0445578 | 0.197077  | 0.6886  | 0.785795 | no |
| Rnasek        | 0.0444291 | 0.300817  | 0.68085 | 0.779634 | no |
| Gtf2h2        | 0.0441455 | 0.145227  | 0.7934  | 0.865042 | no |
| Pddc1         | 0.0441426 | 0.183054  | 0.74735 | 0.832432 | no |
| Npcd          | 0.0440301 | 0.0765487 | 0.87415 | 0.922254 | no |
| Map4          | 0.0438528 | 0.180698  | 0.7185  | 0.811056 | no |
| Slc25a40      | 0.0438486 | 0.123949  | 0.80695 | 0.875123 | no |
| Bop1          | 0.0436945 | 0.111871  | 0.83695 | 0.895252 | no |
| Ddx10         | 0.0436641 | 0.172529  | 0.74485 | 0.830805 | no |
| St3gal1       | 0.0433921 | 0.137447  | 0.7915  | 0.863823 | no |
| D930048N14Rik | 0.0433708 | 0         | 1       | 1        | no |
| Ndufaf4       | 0.043325  | 0.1459    | 0.77885 | 0.85609  | no |
| Gdi2          | 0.0432641 | 0.206616  | 0.69705 | 0.793119 | no |
| Baz2a         | 0.0431292 | 0.18945   | 0.7092  | 0.803429 | no |
| Tekt4         | 0.0430643 | 0         | 1       | 1        | no |
| Gnl3l         | 0.0430261 | 0.200459  | 0.68935 | 0.786313 | no |
| Slc11a2       | 0.0430141 | 0.153341  | 0.76095 | 0.84295  | no |
| Mcur1         | 0.0429861 | 0.14749   | 0.78015 | 0.856951 | no |
| Ddrk1         | 0.0429338 | 0.191252  | 0.74985 | 0.834446 | no |
| Trim12c       | 0.0428556 | 0.100298  | 0.8403  | 0.897678 | no |
| Zbtb49        | 0.0427573 | 0.0760534 | 0.8862  | 0.929057 | no |
| Fam49b        | 0.0427566 | 0.18272   | 0.7255  | 0.816318 | no |
| Pno1          | 0.0425035 | 0.164269  | 0.7697  | 0.848775 | no |
| Ftsj3         | 0.0424468 | 0.154139  | 0.7671  | 0.847175 | no |

|               |           |           |         |          |    |
|---------------|-----------|-----------|---------|----------|----|
| F8            | 0.0421511 | 0.103408  | 0.8337  | 0.893216 | no |
| Peli1         | 0.0420983 | 0.156915  | 0.76255 | 0.844259 | no |
| Nmt1          | 0.0420218 | 0.212839  | 0.70365 | 0.798984 | no |
| Harbi1        | 0.0420005 | 0.0974682 | 0.85615 | 0.909775 | no |
| Trrap         | 0.0418279 | 0.194489  | 0.7044  | 0.79955  | no |
| Mon2          | 0.041818  | 0.185292  | 0.70585 | 0.800796 | no |
| Hcfc1r1       | 0.0417992 | 0.1926    | 0.74695 | 0.832126 | no |
| Mrps11        | 0.0416961 | 0.140954  | 0.82085 | 0.885096 | no |
| Mboat4        | 0.0416708 | 0         | 1       | 1        | no |
| Fbxl18        | 0.0416619 | 0.109989  | 0.8411  | 0.898388 | no |
| Tasp1         | 0.0415167 | 0.117633  | 0.81025 | 0.877231 | no |
| Mrpl24        | 0.0414062 | 0.131805  | 0.83505 | 0.894085 | no |
| Ttc9b         | 0.0413828 | 0.189334  | 0.76165 | 0.843473 | no |
| Hmg20b        | 0.0413061 | 0.125797  | 0.80345 | 0.872218 | no |
| Erv3          | 0.0412994 | 0         | 1       | 1        | no |
| Imp4          | 0.0411059 | 0.110154  | 0.84395 | 0.9002   | no |
| Zw10          | 0.0410987 | 0.129337  | 0.80975 | 0.876904 | no |
| Atg2a         | 0.0410383 | 0.172306  | 0.7372  | 0.824713 | no |
| Fam13b        | 0.0409949 | 0.182526  | 0.70845 | 0.802854 | no |
| Rbm27         | 0.0409537 | 0.153506  | 0.7661  | 0.846408 | no |
| Cstf2         | 0.0409289 | 0.16993   | 0.7362  | 0.824303 | no |
| Vps53         | 0.0406405 | 0.191097  | 0.71555 | 0.808689 | no |
| Ylpm1         | 0.0406174 | 0.178779  | 0.7278  | 0.818212 | no |
| Psmg2         | 0.0405469 | 0.144056  | 0.8099  | 0.876924 | no |
| Vstm2l        | 0.0404806 | 0.187973  | 0.74355 | 0.830206 | no |
| Gm10825       | 0.0404733 | 0         | 1       | 1        | no |
| Fdxr          | 0.0403645 | 0.0996419 | 0.8589  | 0.911383 | no |
| Ppp2r3c       | 0.0402909 | 0.071484  | 0.8924  | 0.933491 | no |
| Zbtb41        | 0.0402835 | 0.160502  | 0.7483  | 0.833    | no |
| Parp1         | 0.0402622 | 0.184679  | 0.70955 | 0.80362  | no |
| Gm11747       | 0.0402553 | 0         | 1       | 1        | no |
| Ficd          | 0.0402496 | 0.12247   | 0.81445 | 0.880198 | no |
| Ccdc15        | 0.0402318 | 0         | 1       | 1        | no |
| 4930519F09Rik | 0.0402295 | 0         | 1       | 1        | no |
| Ik            | 0.0401902 | 0.199437  | 0.7167  | 0.809425 | no |
| Cops4         | 0.0401203 | 0.195526  | 0.72695 | 0.817659 | no |
| Gpr156        | 0.0399523 | 0.092931  | 0.8616  | 0.912788 | no |
| Tpd52l2       | 0.0399293 | 0.171578  | 0.72725 | 0.817871 | no |
| Rnf34         | 0.0398532 | 0.163203  | 0.7676  | 0.847586 | no |
| Ndufs6        | 0.0398481 | 0.126187  | 0.79905 | 0.869148 | no |
| Gpr98         | 0.0398217 | 0         | 1       | 1        | no |
| Zfml          | 0.0394125 | 0.172828  | 0.72915 | 0.819036 | no |
| Slc2a6        | 0.0393612 | 0.15172   | 0.7631  | 0.844586 | no |
| Cyp46a1       | 0.0393484 | 0.116566  | 0.83575 | 0.894474 | no |
| Sugp2         | 0.0392544 | 0.128928  | 0.79645 | 0.867529 | no |
| Sirt4         | 0.0390638 | 0.0702844 | 0.8854  | 0.928732 | no |
| Api5          | 0.0389871 | 0.178356  | 0.7324  | 0.821504 | no |
| Unc5a         | 0.0389757 | 0.108216  | 0.8356  | 0.894457 | no |
| Stau1         | 0.0388785 | 0.169654  | 0.73235 | 0.821504 | no |
| Cyld          | 0.038802  | 0.165528  | 0.7372  | 0.824713 | no |
| Atf1          | 0.0387833 | 0.0855739 | 0.875   | 0.92269  | no |
| Snd1          | 0.0387789 | 0.176934  | 0.737   | 0.824711 | no |
| Pcdhb4        | 0.0386675 | 0.0123454 | 0.98135 | 0.988803 | no |

|               |           |           |         |          |    |
|---------------|-----------|-----------|---------|----------|----|
| Tomm40        | 0.0386261 | 0.156434  | 0.7454  | 0.831222 | no |
| Pnrc1         | 0.0386207 | 0.168079  | 0.7648  | 0.845927 | no |
| Klhdc3        | 0.0385939 | 0.1328    | 0.8081  | 0.875958 | no |
| Rsl1          | 0.0385704 | 0         | 1       | 1        | no |
| Csk           | 0.0385348 | 0.184472  | 0.7361  | 0.824261 | no |
| Ap2s1         | 0.0384822 | 0.22622   | 0.73335 | 0.822222 | no |
| Atp6v0d1      | 0.0383686 | 0.206294  | 0.7098  | 0.803766 | no |
| Pfkm          | 0.0382614 | 0.175249  | 0.7282  | 0.818385 | no |
| S1pr5         | 0.0381701 | 0         | 1       | 1        | no |
| Cgrf1         | 0.0381203 | 0.128374  | 0.8233  | 0.886153 | no |
| Arxes2        | 0.0380276 | 0.156787  | 0.7829  | 0.858692 | no |
| Ctps2         | 0.0380203 | 0.0716546 | 0.8918  | 0.933084 | no |
| Lig3          | 0.0379331 | 0.100381  | 0.84315 | 0.899563 | no |
| Bola3         | 0.0379329 | 0.147582  | 0.856   | 0.909775 | no |
| Tstd3         | 0.0378252 | 0.0883155 | 0.8579  | 0.910832 | no |
| Zfp866        | 0.037651  | 0.123501  | 0.80915 | 0.876612 | no |
| Zfp568        | 0.0376384 | 0.0736009 | 0.8824  | 0.927271 | no |
| B3galt6       | 0.0374057 | 0.0884354 | 0.8708  | 0.91989  | no |
| Arap3         | 0.0373849 | 0.0816037 | 0.86445 | 0.914838 | no |
| Rttn          | 0.037323  | 0         | 1       | 1        | no |
| Vps51         | 0.0371563 | 0.10403   | 0.83365 | 0.893216 | no |
| Dnah11        | 0.0371272 | 0         | 1       | 1        | no |
| Xpnpep1       | 0.0371188 | 0.134012  | 0.7901  | 0.863256 | no |
| 2810021J22Rik | 0.0369874 | 0.0809017 | 0.8767  | 0.923769 | no |
| Slc3a2        | 0.0368772 | 0.168021  | 0.7337  | 0.822337 | no |
| Wdr59         | 0.0366182 | 0.138934  | 0.7777  | 0.855164 | no |
| Dusp19        | 0.0365713 | 0.0734639 | 0.88555 | 0.928816 | no |
| Nat14         | 0.036569  | 0.0887259 | 0.87875 | 0.924974 | no |
| Pcdh15        | 0.0365509 | 0         | 1       | 1        | no |
| Traf3ip3      | 0.03654   | 0         | 1       | 1        | no |
| Pyroxd1       | 0.0364838 | 0.0834774 | 0.8773  | 0.924181 | no |
| Prickle4      | 0.0364712 | 0.027626  | 0.95745 | 0.974416 | no |
| Zfp248        | 0.0363795 | 0.109066  | 0.8372  | 0.895357 | no |
| Exosc3        | 0.0363699 | 0.0799718 | 0.89805 | 0.936669 | no |
| Kdm4a         | 0.0362902 | 0.148436  | 0.7659  | 0.846408 | no |
| Abcc12        | 0.0362562 | 0         | 1       | 1        | no |
| Zfp143        | 0.0362428 | 0.0884919 | 0.865   | 0.915148 | no |
| Mmadhc        | 0.0361393 | 0.160497  | 0.78405 | 0.859407 | no |
| Fam149b       | 0.036049  | 0.110834  | 0.81945 | 0.884017 | no |
| Zfp961        | 0.0360442 | 0.0707297 | 0.8953  | 0.93505  | no |
| Higd2a        | 0.0358062 | 0.204334  | 0.78585 | 0.860433 | no |
| Aldoa         | 0.035801  | 0.130588  | 0.78855 | 0.862235 | no |
| 1700056E22Rik | 0.0358007 | 0         | 1       | 1        | no |
| Clip2         | 0.0357855 | 0.168788  | 0.73515 | 0.823475 | no |
| Ppp1r37       | 0.0355535 | 0.158343  | 0.77005 | 0.848949 | no |
| Micu1         | 0.0355221 | 0.161724  | 0.74135 | 0.828238 | no |
| Tmub1         | 0.0354387 | 0.106232  | 0.85845 | 0.911197 | no |
| Pglyrp1       | 0.0353674 | 0.0414238 | 0.96475 | 0.978692 | no |
| Zfp637        | 0.0352295 | 0.117769  | 0.84635 | 0.902397 | no |
| Ncl           | 0.0351327 | 0.165292  | 0.73315 | 0.822137 | no |
| Nop10         | 0.0350634 | 0.180266  | 0.7934  | 0.865042 | no |
| Polr2m        | 0.0350308 | 0.160804  | 0.74445 | 0.830596 | no |
| Cul3          | 0.0349576 | 0.173398  | 0.741   | 0.828    | no |



|               |           |           |         |          |    |
|---------------|-----------|-----------|---------|----------|----|
| Zfp280b       | 0.0349185 | 0.114247  | 0.82255 | 0.885848 | no |
| Rfc1          | 0.0349048 | 0.150217  | 0.77145 | 0.849998 | no |
| Spint2        | 0.0348349 | 0.0463493 | 0.9238  | 0.953704 | no |
| Zfp11         | 0.0347757 | 0.0731906 | 0.89065 | 0.932249 | no |
| Pitpna        | 0.0347474 | 0.156199  | 0.76645 | 0.846669 | no |
| Zfp623        | 0.0347227 | 0.082534  | 0.87525 | 0.922807 | no |
| Gpn2          | 0.0346872 | 0.0676696 | 0.8886  | 0.930795 | no |
| 3830406C13Rik | 0.034606  | 0.129184  | 0.7969  | 0.867877 | no |
| Wdr41         | 0.034172  | 0.14028   | 0.793   | 0.864907 | no |
| Disp1         | 0.0341001 | 0.108503  | 0.83125 | 0.891653 | no |
| Brwd3         | 0.0340629 | 0.0692695 | 0.8939  | 0.934397 | no |
| S1pr1         | 0.0337874 | 0.118968  | 0.8221  | 0.885669 | no |
| Tomm40l       | 0.0337001 | 0.13169   | 0.7944  | 0.865865 | no |
| Vps13b        | 0.033522  | 0.149936  | 0.7638  | 0.845008 | no |
| Kif13b        | 0.0335138 | 0.13581   | 0.79155 | 0.863823 | no |
| Gm4925        | 0.0334901 | 0         | 1       | 1        | no |
| Dhx36         | 0.033463  | 0.156613  | 0.76485 | 0.845927 | no |
| Gm7008        | 0.0333734 | 0         | 1       | 1        | no |
| Tmed3         | 0.0331066 | 0.134116  | 0.82275 | 0.885848 | no |
| Braf          | 0.0329306 | 0.146804  | 0.7737  | 0.851911 | no |
| Usp30         | 0.032926  | 0.117436  | 0.82405 | 0.886744 | no |
| Xpnpep3       | 0.0328547 | 0.0824846 | 0.8725  | 0.921173 | no |
| E130311K13Rik | 0.0328052 | 0.0744057 | 0.8997  | 0.937579 | no |
| Cacnb4        | 0.0327238 | 0.152636  | 0.7543  | 0.838062 | no |
| Setd2         | 0.0327    | 0.1349    | 0.78935 | 0.862913 | no |
| Arfip2        | 0.0326839 | 0.145505  | 0.7879  | 0.861863 | no |
| Zic3          | 0.0326053 | 0         | 1       | 1        | no |
| Dctn4         | 0.0325536 | 0.162152  | 0.7585  | 0.84153  | no |
| Zfp654        | 0.0323032 | 0.0990642 | 0.84155 | 0.898774 | no |
| Mrps16        | 0.0322733 | 0.117255  | 0.87835 | 0.924627 | no |
| Rras2         | 0.032267  | 0.084595  | 0.87475 | 0.922667 | no |
| Acyp1         | 0.0322497 | 0.126121  | 0.8612  | 0.912729 | no |
| Gls           | 0.0321661 | 0.149817  | 0.76495 | 0.845927 | no |
| Slc22a7       | 0.032103  | 0         | 1       | 1        | no |
| Pum2          | 0.0320506 | 0.147873  | 0.7671  | 0.847175 | no |
| Cops3         | 0.0318163 | 0.132009  | 0.7863  | 0.860642 | no |
| Scfd2         | 0.0317911 | 0.0987286 | 0.84585 | 0.901936 | no |
| Sugt1         | 0.0317771 | 0.151523  | 0.7851  | 0.859896 | no |
| Ppie          | 0.0317679 | 0.087555  | 0.8851  | 0.928648 | no |
| Gxy1t1        | 0.0316889 | 0.0870471 | 0.8652  | 0.915287 | no |
| Gtf3c1        | 0.0316458 | 0.149027  | 0.77025 | 0.849099 | no |
| Avpi1         | 0.0315985 | 0.0921826 | 0.88195 | 0.927166 | no |
| Pdrg1         | 0.0313837 | 0.155389  | 0.79555 | 0.866833 | no |
| Med19         | 0.0313091 | 0.0640158 | 0.9071  | 0.942256 | no |
| Tnks2         | 0.0311624 | 0.147636  | 0.77    | 0.848949 | no |
| Csde1         | 0.0310588 | 0.142574  | 0.78055 | 0.857248 | no |
| Ercc3         | 0.0310267 | 0.129828  | 0.8066  | 0.874921 | no |
| Nisch         | 0.0309369 | 0.14858   | 0.7716  | 0.850022 | no |
| Atf6b         | 0.0308597 | 0.131637  | 0.80815 | 0.875958 | no |
| Lrrn3         | 0.0306972 | 0.113595  | 0.8147  | 0.880253 | no |
| Cdkn2d        | 0.0306595 | 0.152373  | 0.79215 | 0.864264 | no |
| Mecp2         | 0.0303786 | 0.136775  | 0.78665 | 0.860954 | no |
| Rps27l        | 0.0303121 | 0.121425  | 0.8909  | 0.932363 | no |

|                |           |           |         |          |    |
|----------------|-----------|-----------|---------|----------|----|
| Rsc1a1         | 0.0302671 | 0.0249405 | 0.9631  | 0.977691 | no |
| Eef1a2         | 0.0301621 | 0.133888  | 0.811   | 0.877613 | no |
| 9430016H08Rik  | 0.0301225 | 0.0549955 | 0.9045  | 0.940933 | no |
| Thap4          | 0.0300766 | 0.0910296 | 0.8706  | 0.919752 | no |
| Acot10         | 0.0300642 | 0.075169  | 0.89875 | 0.936957 | no |
| Tcaim          | 0.0300437 | 0.10531   | 0.8397  | 0.897254 | no |
| Jkamp          | 0.0300066 | 0.132547  | 0.80185 | 0.870766 | no |
| Icam2          | 0.0299786 | 0.041817  | 0.9479  | 0.967741 | no |
| Cul4b          | 0.0299726 | 0.129205  | 0.79395 | 0.865445 | no |
| Zbed4          | 0.0299663 | 0.0591588 | 0.9077  | 0.942562 | no |
| Gpaa1          | 0.0299365 | 0.114321  | 0.8301  | 0.890582 | no |
| Vapb           | 0.0298381 | 0.143419  | 0.78125 | 0.857575 | no |
| Laptm4a        | 0.0298331 | 0.15249   | 0.7827  | 0.858614 | no |
| Prkcsh         | 0.0297776 | 0.133489  | 0.8106  | 0.87736  | no |
| Abhd17c        | 0.029655  | 0.109062  | 0.83845 | 0.896423 | no |
| Commd3         | 0.0296223 | 0.133923  | 0.83485 | 0.894015 | no |
| Ggps1          | 0.0295106 | 0.121262  | 0.82475 | 0.88721  | no |
| Nek11          | 0.02948   | 0         | 1       | 1        | no |
| Tbc1d13        | 0.0294555 | 0.137662  | 0.7928  | 0.864831 | no |
| Ctsb           | 0.029441  | 0.0989203 | 0.848   | 0.90372  | no |
| Sumo2          | 0.0293755 | 0.0626092 | 0.9005  | 0.938044 | no |
| Ythdf3         | 0.0293736 | 0.129875  | 0.79355 | 0.86508  | no |
| Tmlhe          | 0.0293018 | 0.0738865 | 0.89105 | 0.932447 | no |
| Srp72          | 0.02915   | 0.141927  | 0.7857  | 0.860411 | no |
| Exosc1         | 0.0291025 | 0.0666286 | 0.8953  | 0.93505  | no |
| Gm561          | 0.0289487 | 0.108919  | 0.8996  | 0.937549 | no |
| Ccdc85b        | 0.0288383 | 0.114744  | 0.8141  | 0.879963 | no |
| Ccpg1os        | 0.0287978 | 0.0596759 | 0.93405 | 0.959136 | no |
| Smarcd1        | 0.0287444 | 0.12664   | 0.80845 | 0.876051 | no |
| U2surp         | 0.0286031 | 0.119103  | 0.81305 | 0.879114 | no |
| Myo9a          | 0.0285664 | 0.136603  | 0.78555 | 0.860318 | no |
| Myo7b          | 0.0284535 | 0         | 1       | 1        | no |
| Mrpl36         | 0.0283987 | 0.114566  | 0.8561  | 0.909775 | no |
| Hnrnpa3        | 0.0283936 | 0.11667   | 0.81605 | 0.881424 | no |
| 2610044O15Rik8 | 0.0283408 | 0.0714165 | 0.89785 | 0.936669 | no |
| Creb1          | 0.0282468 | 0.111886  | 0.81725 | 0.882218 | no |
| Minpp1         | 0.0281855 | 0.116327  | 0.82875 | 0.890069 | no |
| Dguok          | 0.0280742 | 0.0728581 | 0.88305 | 0.92766  | no |
| Esf1           | 0.0280387 | 0.105222  | 0.84295 | 0.899422 | no |
| Top2b          | 0.0279585 | 0.12712   | 0.80235 | 0.871237 | no |
| Xpo6           | 0.027884  | 0.127258  | 0.8018  | 0.870766 | no |
| Nifk           | 0.027821  | 0.097765  | 0.8589  | 0.911383 | no |
| Rabl3          | 0.0276445 | 0.105531  | 0.8428  | 0.899422 | no |
| Trmt10c        | 0.0275907 | 0.0823857 | 0.88205 | 0.927176 | no |
| Sec13          | 0.0274902 | 0.128229  | 0.82705 | 0.888819 | no |
| Gstm7          | 0.0273725 | 0.0616054 | 0.9154  | 0.947591 | no |
| Fam173a        | 0.027278  | 0.0979219 | 0.845   | 0.901156 | no |
| Cd7            | 0.027129  | 0         | 1       | 1        | no |
| Get4           | 0.0270746 | 0.095494  | 0.84995 | 0.905197 | no |
| Calm2          | 0.0270228 | 0.139472  | 0.81355 | 0.879512 | no |
| Sdf2           | 0.0269105 | 0.131688  | 0.81955 | 0.884053 | no |
| Ccdc50         | 0.0268874 | 0.115006  | 0.8227  | 0.885848 | no |
| Men1           | 0.026789  | 0.108789  | 0.8293  | 0.890372 | no |

|               |           |           |         |          |    |
|---------------|-----------|-----------|---------|----------|----|
| Slc37a3       | 0.0267728 | 0.108209  | 0.8319  | 0.892008 | no |
| Tlk2          | 0.0266965 | 0.105285  | 0.8291  | 0.890229 | no |
| Parg          | 0.0266612 | 0.11525   | 0.826   | 0.887978 | no |
| Tmem194b      | 0.0264841 | 0.0376784 | 0.938   | 0.961286 | no |
| Casp8         | 0.0264741 | 0.0340172 | 0.94605 | 0.96667  | no |
| Atp6v1a       | 0.0261212 | 0.123242  | 0.81295 | 0.879114 | no |
| Sap18         | 0.0261133 | 0.101613  | 0.84195 | 0.898861 | no |
| Aig1          | 0.0260431 | 0.0987418 | 0.87185 | 0.920686 | no |
| Map3k10       | 0.0260087 | 0.111863  | 0.82135 | 0.885365 | no |
| Eif1          | 0.0259592 | 0.137433  | 0.8219  | 0.885669 | no |
| Lrnf3         | 0.0259509 | 0.0836202 | 0.8719  | 0.920686 | no |
| Trub2         | 0.0258439 | 0.0800822 | 0.872   | 0.920718 | no |
| Man1a         | 0.0258325 | 0.0643172 | 0.8978  | 0.936669 | no |
| Hipk1         | 0.0256952 | 0.0682669 | 0.89625 | 0.935726 | no |
| Ap2m1         | 0.0256354 | 0.121613  | 0.82815 | 0.889713 | no |
| Smarcc1       | 0.0255505 | 0.116464  | 0.8175  | 0.882344 | no |
| Poldip3       | 0.0254654 | 0.115668  | 0.8279  | 0.889516 | no |
| Rnmtl1        | 0.0254405 | 0.0642464 | 0.90845 | 0.942846 | no |
| Dus1l         | 0.0254078 | 0.0898446 | 0.86775 | 0.91718  | no |
| Lamtor4       | 0.0253767 | 0.11499   | 0.85805 | 0.910919 | no |
| Pea15a        | 0.0251336 | 0.126017  | 0.81655 | 0.881803 | no |
| Bad           | 0.0250348 | 0.0437581 | 0.9295  | 0.956463 | no |
| 1700001O22Rik | 0.024954  | 0         | 1       | 1        | no |
| Fkbp5         | 0.0248122 | 0.105912  | 0.83915 | 0.896883 | no |
| Sybu          | 0.0246396 | 0.112461  | 0.8335  | 0.8932   | no |
| Slc35c1       | 0.0245328 | 0.0869946 | 0.8631  | 0.913794 | no |
| Ifih1         | 0.0244845 | 0.0599361 | 0.90655 | 0.941832 | no |
| Igfbpl1       | 0.024393  | 0         | 1       | 1        | no |
| Zhx3          | 0.0243477 | 0.0517722 | 0.9167  | 0.948589 | no |
| D11Wsu47e     | 0.024081  | 0.0504259 | 0.9262  | 0.95477  | no |
| Smyd4         | 0.0240356 | 0.0678882 | 0.8972  | 0.936255 | no |
| Fez2          | 0.024019  | 0.0886789 | 0.86015 | 0.912126 | no |
| Uvssa         | 0.0240177 | 0.0563053 | 0.90775 | 0.942562 | no |
| Mapre1        | 0.0240092 | 0.116105  | 0.81895 | 0.883604 | no |
| Atg10         | 0.023878  | 0.0752176 | 0.89545 | 0.935112 | no |
| Tbc1d9        | 0.0238693 | 0.112941  | 0.81735 | 0.882254 | no |
| Neu3          | 0.0238118 | 0.0358172 | 0.94345 | 0.964831 | no |
| Foxf1         | 0.0237226 | 0         | 1       | 1        | no |
| Bcar1         | 0.0235124 | 0.091789  | 0.8547  | 0.908744 | no |
| Tbc1d16       | 0.0234367 | 0.0943669 | 0.84875 | 0.904302 | no |
| C1galt1       | 0.0233798 | 0.0628931 | 0.90765 | 0.942562 | no |
| Stard7        | 0.0233217 | 0.107972  | 0.83575 | 0.894474 | no |
| Iars          | 0.0231171 | 0.109177  | 0.83185 | 0.892008 | no |
| Slc35e4       | 0.0230891 | 0.0860183 | 0.8711  | 0.920114 | no |
| D130043K22Rik | 0.0230817 | 0.110739  | 0.82975 | 0.890386 | no |
| Tti2          | 0.0229772 | 0.0626283 | 0.909   | 0.943196 | no |
| Cd9           | 0.0228949 | 0.117993  | 0.83885 | 0.896741 | no |
| Slc28a1       | 0.0228646 | 0         | 1       | 1        | no |
| Derl2         | 0.0227556 | 0.0797363 | 0.8775  | 0.924288 | no |
| Tsen15        | 0.02254   | 0.0743123 | 0.90295 | 0.939859 | no |
| Cox7c         | 0.0221991 | 0.0681044 | 0.9403  | 0.962723 | no |
| Wdr92         | 0.0221865 | 0.0534081 | 0.91925 | 0.950634 | no |
| Mrto4         | 0.0221659 | 0.0484355 | 0.9235  | 0.953624 | no |

|               |           |           |         |          |    |
|---------------|-----------|-----------|---------|----------|----|
| Eif3f         | 0.0221497 | 0.115575  | 0.8365  | 0.89506  | no |
| Atl3          | 0.0221198 | 0.104112  | 0.8341  | 0.893501 | no |
| Bahcc1        | 0.0221101 | 0.0638764 | 0.90195 | 0.939186 | no |
| Narfl         | 0.0220616 | 0.0499445 | 0.9267  | 0.955063 | no |
| Acp6          | 0.0220428 | 0.0439863 | 0.93785 | 0.961286 | no |
| Wdr11         | 0.0220075 | 0.0943338 | 0.85745 | 0.910573 | no |
| Aifm1         | 0.0219968 | 0.0792992 | 0.8757  | 0.923082 | no |
| Rbm48         | 0.0219624 | 0.0335325 | 0.95155 | 0.970272 | no |
| Vegfb         | 0.0219378 | 0.0741556 | 0.87945 | 0.925564 | no |
| Cyth3         | 0.0218228 | 0.0925395 | 0.85275 | 0.907398 | no |
| Eif2s3x       | 0.0216682 | 0.0733735 | 0.88865 | 0.930795 | no |
| Dnajb2        | 0.0216389 | 0.0929434 | 0.8529  | 0.907412 | no |
| Slc30a7       | 0.0215919 | 0.0717221 | 0.88755 | 0.930031 | no |
| Trim33        | 0.0215232 | 0.0374356 | 0.9427  | 0.96451  | no |
| Cerk          | 0.0214086 | 0.103493  | 0.84015 | 0.89759  | no |
| Sdcbp2        | 0.0212962 | 0         | 1       | 1        | no |
| Ubr7          | 0.0210462 | 0.0815109 | 0.87785 | 0.92432  | no |
| Hsd17b12      | 0.0209828 | 0.106652  | 0.85115 | 0.905986 | no |
| Larp1b        | 0.0206713 | 0.0692447 | 0.90335 | 0.940127 | no |
| 9930021J03Rik | 0.0206372 | 0.0790502 | 0.8753  | 0.922807 | no |
| Trp53         | 0.0205566 | 0.0586105 | 0.90755 | 0.942562 | no |
| Ormdl3        | 0.0204423 | 0.0893349 | 0.8676  | 0.917167 | no |
| Smarcal1      | 0.0203553 | 0.0920579 | 0.8592  | 0.91141  | no |
| Ccdc59        | 0.0202611 | 0.0542707 | 0.92885 | 0.956239 | no |
| Crhbp         | 0.0202272 | 0         | 1       | 1        | no |
| Ppp2r2a       | 0.0202061 | 0.0893725 | 0.8541  | 0.908324 | no |
| Mob3c         | 0.0200013 | 0.0340646 | 0.94695 | 0.967068 | no |
| Napa          | 0.0199964 | 0.102709  | 0.8485  | 0.904181 | no |
| Polr2a        | 0.0198302 | 0.0922082 | 0.85    | 0.905197 | no |
| Chchd7        | 0.0196119 | 0.0430672 | 0.92705 | 0.95535  | no |
| Smox          | 0.0196088 | 0.0207262 | 0.96285 | 0.977512 | no |
| Proser1       | 0.0195822 | 0.0678426 | 0.89805 | 0.936669 | no |
| Arfgap1       | 0.0195457 | 0.0730092 | 0.8821  | 0.927176 | no |
| Cnrip1        | 0.0194746 | 0.0797342 | 0.88945 | 0.93136  | no |
| Mei4          | 0.0192924 | 0         | 1       | 1        | no |
| Alg11         | 0.0192663 | 0.0762759 | 0.8759  | 0.923199 | no |
| Myo19         | 0.019152  | 0         | 1       | 1        | no |
| Rps28         | 0.0190809 | 0.0300158 | 0.9517  | 0.970351 | no |
| Fgd1          | 0.0190755 | 0.0352711 | 0.9454  | 0.966304 | no |
| Ensa          | 0.0188125 | 0.0850892 | 0.8637  | 0.914316 | no |
| Mut           | 0.0187057 | 0.0816946 | 0.88345 | 0.927787 | no |
| Rbak          | 0.0185962 | 0.0336566 | 0.94185 | 0.963938 | no |
| Psm1          | 0.0185845 | 0.0898421 | 0.85715 | 0.9104   | no |
| Frd5          | 0.0184804 | 0         | 1       | 1        | no |
| Ppp3cb        | 0.0184061 | 0.086986  | 0.8684  | 0.917794 | no |
| Bmi1          | 0.0182404 | 0.0667665 | 0.8951  | 0.935041 | no |
| Spata2        | 0.0182403 | 0.0596384 | 0.90835 | 0.942846 | no |
| Actg1         | 0.0182119 | 0.0827564 | 0.8676  | 0.917167 | no |
| 6720489N17Rik | 0.0182071 | 0.0366272 | 0.94385 | 0.965166 | no |
| Mlf2          | 0.018101  | 0.0847246 | 0.86145 | 0.912788 | no |
| Tsr3          | 0.0180006 | 0.0624186 | 0.9151  | 0.947451 | no |
| Gnpda2        | 0.0177551 | 0.0787218 | 0.88285 | 0.927597 | no |
| Gimap6        | 0.0177544 | 0.0478923 | 0.933   | 0.958577 | no |

|               |           |           |         |          |    |
|---------------|-----------|-----------|---------|----------|----|
| Rars          | 0.0177516 | 0.0800029 | 0.8828  | 0.927597 | no |
| Stat1         | 0.0176333 | 0.0738797 | 0.8805  | 0.926375 | no |
| Rpl15         | 0.0174736 | 0.0811583 | 0.886   | 0.928921 | no |
| 2210408I21Rik | 0.0174432 | 0.0350872 | 0.94045 | 0.962802 | no |
| Ddx42         | 0.0173192 | 0.0801108 | 0.8782  | 0.924542 | no |
| Calr          | 0.0173075 | 0.0900141 | 0.86985 | 0.91918  | no |
| Snx17         | 0.0172053 | 0.0225348 | 0.96485 | 0.978719 | no |
| Rela          | 0.0171869 | 0.0647928 | 0.9057  | 0.941392 | no |
| Prpf40b       | 0.0171493 | 0.0611136 | 0.9086  | 0.942928 | no |
| Rnf144b       | 0.0171441 | 0.0465833 | 0.9248  | 0.954291 | no |
| Cpsf3l        | 0.0169402 | 0.0533221 | 0.9236  | 0.953624 | no |
| Polr2g        | 0.0168571 | 0.0839307 | 0.89825 | 0.93673  | no |
| Appl1         | 0.016739  | 0.0783463 | 0.8761  | 0.923284 | no |
| Ccdc132       | 0.0167307 | 0.0710957 | 0.88425 | 0.928333 | no |
| Sgsm1         | 0.0167072 | 0.0732697 | 0.8836  | 0.927871 | no |
| Vapa          | 0.0166472 | 0.0874255 | 0.87345 | 0.921809 | no |
| Tmed8         | 0.0164515 | 0.0768613 | 0.87595 | 0.923199 | no |
| Otub1         | 0.0163389 | 0.0849252 | 0.87765 | 0.924288 | no |
| Wnk1          | 0.0163201 | 0.0755561 | 0.8777  | 0.924288 | no |
| Amotl1        | 0.0159337 | 0.0761354 | 0.8833  | 0.927755 | no |
| Ssh1          | 0.0158837 | 0.0549455 | 0.9165  | 0.948456 | no |
| Rin2          | 0.0158819 | 0.0565554 | 0.91545 | 0.947591 | no |
| Csl           | 0.0158351 | 0.0437209 | 0.93955 | 0.962229 | no |
| St7l          | 0.015835  | 0.0583168 | 0.90465 | 0.940942 | no |
| Coro2b        | 0.0155246 | 0.0773284 | 0.87995 | 0.926017 | no |
| Zfp617        | 0.0154477 | 0.0476652 | 0.9287  | 0.956239 | no |
| Atp6v0a1      | 0.0154459 | 0.0711205 | 0.8873  | 0.929916 | no |
| Atp6v1g1      | 0.0153887 | 0.0813847 | 0.8896  | 0.93137  | no |
| Cdk2ap2       | 0.0152123 | 0.0539546 | 0.9309  | 0.95731  | no |
| B4galt4       | 0.0152004 | 0.0425662 | 0.9343  | 0.959319 | no |
| Galnt7        | 0.0151715 | 0.0349879 | 0.94625 | 0.966707 | no |
| Zbtb38        | 0.0151322 | 0.056838  | 0.91375 | 0.946504 | no |
| Rbmxl1        | 0.0150877 | 0.0426601 | 0.92875 | 0.956239 | no |
| Glo1          | 0.0150346 | 0.0647475 | 0.8938  | 0.934366 | no |
| Sec62         | 0.0150259 | 0.0741994 | 0.88855 | 0.930795 | no |
| Acox1         | 0.0149427 | 0.0702698 | 0.89515 | 0.935041 | no |
| Vdac3         | 0.0149228 | 0.0605959 | 0.90455 | 0.940933 | no |
| Ttc4          | 0.0148573 | 0.0506715 | 0.9192  | 0.950634 | no |
| Psmb6         | 0.0147825 | 0.0799744 | 0.89925 | 0.937405 | no |
| Eif4e2        | 0.0146345 | 0.0599559 | 0.90395 | 0.940457 | no |
| Snx3          | 0.0145498 | 0.0764683 | 0.8934  | 0.934221 | no |
| St13          | 0.0144934 | 0.0751424 | 0.8982  | 0.93673  | no |
| Ccnyl1        | 0.0144018 | 0.0312036 | 0.9521  | 0.970511 | no |
| Hspa14        | 0.0141827 | 0.0471158 | 0.92335 | 0.953611 | no |
| Tsta3         | 0.0141774 | 0.0504755 | 0.93015 | 0.956738 | no |
| Dock7         | 0.0141098 | 0.0634657 | 0.8994  | 0.937487 | no |
| Bloc1s5       | 0.0140752 | 0.0526645 | 0.9264  | 0.954902 | no |
| Fasn          | 0.0140664 | 0.0641224 | 0.89835 | 0.936761 | no |
| Apol9a        | 0.0139709 | 0         | 1       | 1        | no |
| Cog1          | 0.013854  | 0.052357  | 0.9229  | 0.953324 | no |
| Wasf2         | 0.0138335 | 0.0555742 | 0.9084  | 0.942846 | no |
| Asxl1         | 0.0137742 | 0.0583275 | 0.9103  | 0.944176 | no |
| Zfp646        | 0.013734  | 0.0432019 | 0.9332  | 0.958634 | no |

|               |           |            |         |          |    |
|---------------|-----------|------------|---------|----------|----|
| Pigs          | 0.013653  | 0.0658836  | 0.90565 | 0.941392 | no |
| Zfp81         | 0.0134807 | 0.0305687  | 0.952   | 0.970511 | no |
| Slc7a5        | 0.0134695 | 0.0614881  | 0.9058  | 0.9414   | no |
| Bicd1         | 0.0134012 | 0.05924    | 0.9002  | 0.937879 | no |
| Acad8         | 0.013246  | 0.047757   | 0.92965 | 0.956469 | no |
| Setmar        | 0.0132114 | 0.0245214  | 0.95865 | 0.975039 | no |
| Snx6          | 0.0131834 | 0.0667258  | 0.90275 | 0.939724 | no |
| Myo1c         | 0.0130722 | 0.0512202  | 0.91955 | 0.950796 | no |
| Pqlc1         | 0.0129454 | 0.0588211  | 0.90395 | 0.940457 | no |
| Txn2          | 0.012924  | 0.0613656  | 0.9143  | 0.94677  | no |
| Pigq          | 0.0128823 | 0.0571226  | 0.90945 | 0.943589 | no |
| Tysnd1        | 0.0127656 | 0.0293446  | 0.9499  | 0.969162 | no |
| Lrig2         | 0.0126103 | 0.057602   | 0.9087  | 0.942958 | no |
| Brd8          | 0.0124987 | 0.0398427  | 0.93615 | 0.960401 | no |
| Gorasp2       | 0.0123784 | 0.0549564  | 0.91295 | 0.945963 | no |
| Zbtb26        | 0.0123431 | 0.0289747  | 0.95465 | 0.972611 | no |
| Emc3          | 0.012323  | 0.0595922  | 0.9143  | 0.94677  | no |
| Arpc4         | 0.0123102 | 0.0605713  | 0.90785 | 0.942571 | no |
| Rab5b         | 0.0120973 | 0.0607037  | 0.9104  | 0.944206 | no |
| Chst15        | 0.0120969 | 0.0549698  | 0.90995 | 0.943938 | no |
| Usp1          | 0.0120937 | 0.0457429  | 0.9251  | 0.954459 | no |
| Taf6          | 0.0119522 | 0.0341857  | 0.94645 | 0.966707 | no |
| Cacfd1        | 0.0119483 | 0.0426004  | 0.93165 | 0.957761 | no |
| Obfc1         | 0.011826  | 0.0317428  | 0.95045 | 0.969449 | no |
| Fbxo33        | 0.0117914 | 0.041556   | 0.93655 | 0.960662 | no |
| Polr2c        | 0.0117046 | 0.00657629 | 0.99125 | 0.994624 | no |
| Rfx7          | 0.0116512 | 0.0411955  | 0.93445 | 0.959399 | no |
| Actr8         | 0.0116186 | 0.0428641  | 0.9322  | 0.957978 | no |
| Polr1e        | 0.0115736 | 0.0193787  | 0.96925 | 0.981756 | no |
| Prmt7         | 0.0115701 | 0.0462456  | 0.9331  | 0.958606 | no |
| Epn2          | 0.0115452 | 0.0505627  | 0.92015 | 0.95132  | no |
| Pomt1         | 0.0114767 | 0.0266523  | 0.9602  | 0.975772 | no |
| Tmem150cos    | 0.0114612 | 0          | 1       | 1        | no |
| Edem2         | 0.0114509 | 0.0415438  | 0.9371  | 0.960981 | no |
| Caprin1       | 0.0113341 | 0.0500445  | 0.92195 | 0.95261  | no |
| Ift74         | 0.011236  | 0.0355979  | 0.9426  | 0.964482 | no |
| Ptbp2         | 0.0110792 | 0.0535485  | 0.91835 | 0.949852 | no |
| Pla2r1        | 0.0110412 | 0.0262647  | 0.95855 | 0.975012 | no |
| Ntsr2         | 0.0109502 | 0.01598    | 0.98435 | 0.990672 | no |
| Morc2a        | 0.0108549 | 0.0391367  | 0.9381  | 0.961286 | no |
| AU040320      | 0.0108389 | 0.0360544  | 0.9433  | 0.964752 | no |
| Neurod1       | 0.0105954 | 0          | 1       | 1        | no |
| Rtn4r         | 0.0104893 | 0.0281737  | 0.9593  | 0.975326 | no |
| Manbal        | 0.0104476 | 0.0425303  | 0.943   | 0.964594 | no |
| Ints2         | 0.0104406 | 0.0317701  | 0.94925 | 0.968746 | no |
| Qrich1        | 0.010417  | 0.0451317  | 0.9294  | 0.956463 | no |
| Rasa2         | 0.0103809 | 0.0389995  | 0.9396  | 0.962229 | no |
| Trappc3       | 0.0103049 | 0.0476064  | 0.9346  | 0.959404 | no |
| Ctcf          | 0.0102846 | 0.0413123  | 0.93735 | 0.961112 | no |
| Zfp93         | 0.0102696 | 0.0227489  | 0.96505 | 0.978847 | no |
| C430002N11Rik | 0.0102584 | 0.0100489  | 0.98275 | 0.989612 | no |
| 4933439C10Rik | 0.0102551 | 0.0141506  | 0.9747  | 0.98487  | no |
| Hnrnpk        | 0.0100217 | 0.0464207  | 0.9348  | 0.959461 | no |



|               |            |            |         |          |    |
|---------------|------------|------------|---------|----------|----|
| Arl4a         | 0.00996466 | 0.0351789  | 0.9442  | 0.9653   | no |
| Zar1          | 0.00992562 | 0          | 1       | 1        | no |
| Nudt5         | 0.00984775 | 0.0341917  | 0.9524  | 0.970617 | no |
| Flywch1       | 0.00970739 | 0.0491331  | 0.92865 | 0.956239 | no |
| Coq4          | 0.00946365 | 0.0242759  | 0.9645  | 0.978588 | no |
| Pepd          | 0.00943083 | 0.0401095  | 0.93935 | 0.962196 | no |
| Nhs           | 0.00938451 | 0.0225931  | 0.9646  | 0.978615 | no |
| Ppcs          | 0.0093493  | 0.0296037  | 0.9604  | 0.975772 | no |
| Sac3d1        | 0.00924655 | 0.0279054  | 0.95975 | 0.97556  | no |
| Fancl         | 0.00903759 | 0.0127354  | 0.9817  | 0.989056 | no |
| Mpped1        | 0.00877948 | 0.0185193  | 0.9747  | 0.98487  | no |
| Snx13         | 0.00872195 | 0.0405396  | 0.93675 | 0.960719 | no |
| Gm4952        | 0.00861636 | 0          | 1       | 1        | no |
| Ubxn10        | 0.00858711 | 0          | 1       | 1        | no |
| Faxc          | 0.00849104 | 0.0405591  | 0.93605 | 0.960372 | no |
| Htatsf1       | 0.0081647  | 0.0323759  | 0.9477  | 0.967741 | no |
| Rab9          | 0.00796945 | 0.0315447  | 0.9554  | 0.973076 | no |
| Gosr1         | 0.00794966 | 0.0350097  | 0.9489  | 0.968515 | no |
| Bbs12         | 0.00792019 | 0.0113116  | 0.98475 | 0.990774 | no |
| Fam110b       | 0.0078847  | 0.0280534  | 0.9577  | 0.974521 | no |
| Atp2b1        | 0.00785718 | 0.03747    | 0.9422  | 0.964147 | no |
| Zfp169        | 0.00785467 | 0.0169596  | 0.9715  | 0.983059 | no |
| Creb3l1       | 0.0077912  | 0.0231943  | 0.9668  | 0.979849 | no |
| Fgfbp1        | 0.00772872 | 0          | 1       | 1        | no |
| Ugdh          | 0.00766216 | 0.027647   | 0.95915 | 0.975323 | no |
| Trim30a       | 0.00751964 | 0.0125481  | 0.98515 | 0.991002 | no |
| Trerf1        | 0.0075128  | 0.0157714  | 0.9734  | 0.984231 | no |
| Lamtor3       | 0.00740796 | 0.0260623  | 0.9659  | 0.97926  | no |
| Usp3          | 0.00734118 | 0.0184649  | 0.9722  | 0.983394 | no |
| Tapt1         | 0.00713272 | 0.0277082  | 0.95515 | 0.972971 | no |
| Lsm7          | 0.00701667 | 0          | 1       | 1        | no |
| Phkg2         | 0.00693229 | 0.029236   | 0.96035 | 0.975772 | no |
| Sars          | 0.00682806 | 0.0318623  | 0.95075 | 0.96968  | no |
| Dgat1         | 0.00673989 | 0.0190327  | 0.9757  | 0.985505 | no |
| Strap         | 0.00672299 | 0.0335813  | 0.94995 | 0.969162 | no |
| R74862        | 0.00666422 | 0          | 1       | 1        | no |
| Arfrp1        | 0.00661054 | 0.0157948  | 0.97685 | 0.986216 | no |
| Cacul1        | 0.00657299 | 0.0297485  | 0.95235 | 0.970617 | no |
| Rab18         | 0.00644405 | 0.0300199  | 0.95035 | 0.969421 | no |
| Edrf1         | 0.00639736 | 0.0192344  | 0.9708  | 0.982851 | no |
| Cbll1         | 0.00629947 | 0.0196332  | 0.96735 | 0.980206 | no |
| Arl2          | 0.00629466 | 0.0307775  | 0.9624  | 0.977205 | no |
| Gm996         | 0.00626391 | 0.0209384  | 0.9656  | 0.979231 | no |
| Morn2         | 0.00608706 | 0.00623742 | 0.9893  | 0.993393 | no |
| Rhoh          | 0.00593434 | 0          | 1       | 1        | no |
| Aaas          | 0.0058282  | 0.0166662  | 0.9757  | 0.985505 | no |
| Crip1         | 0.00576025 | 0.0279332  | 0.97755 | 0.986423 | no |
| Sf3b3         | 0.00566086 | 0.0234993  | 0.9619  | 0.976847 | no |
| 4932435022Rik | 0.00563214 | 0          | 1       | 1        | no |
| Npepl1        | 0.00526808 | 0.0191738  | 0.96985 | 0.982139 | no |
| G3bp2         | 0.00508063 | 0.0230662  | 0.96175 | 0.976769 | no |
| Vta1          | 0.0048764  | 0.0209174  | 0.97145 | 0.983059 | no |
| Cyp2r1        | 0.00482187 | 0          | 1       | 1        | no |

|               |            |            |         |          |    |
|---------------|------------|------------|---------|----------|----|
| Scg2          | 0.00480536 | 0.0237685  | 0.96565 | 0.979231 | no |
| Etnk1         | 0.00477087 | 0.0211481  | 0.9679  | 0.980613 | no |
| Abhd8         | 0.00464395 | 0.0226012  | 0.9679  | 0.980613 | no |
| Vps13c        | 0.00463104 | 0.0209638  | 0.9665  | 0.979718 | no |
| Pemt          | 0.00462551 | 0.00763937 | 0.9879  | 0.992764 | no |
| H2-Q1         | 0.00458278 | 0          | 1       | 1        | no |
| Cox6a1        | 0.0045072  | 0.03282    | 0.96285 | 0.977512 | no |
| Pdlim5        | 0.00447409 | 0.0165713  | 0.9739  | 0.984437 | no |
| Pphln1        | 0.00444677 | 0.018189   | 0.97095 | 0.982878 | no |
| Efnb1         | 0.00440216 | 0.0161749  | 0.97515 | 0.9851   | no |
| Nme7          | 0.00430453 | 0.00166713 | 0.99705 | 0.997576 | no |
| Ttc21a        | 0.00429672 | 0          | 1       | 1        | no |
| Bet1l         | 0.00426973 | 0.0151679  | 0.9779  | 0.986601 | no |
| Clcn6         | 0.00417078 | 0.0197621  | 0.97135 | 0.983059 | no |
| Cdk4          | 0.00413601 | 0.0164394  | 0.9772  | 0.986345 | no |
| Orai2         | 0.00396966 | 0.0163871  | 0.97695 | 0.986218 | no |
| 4732471J01Rik | 0.00396646 | 0.00459361 | 0.99335 | 0.995526 | no |
| Fam161b       | 0.00394074 | 0.00984504 | 0.9838  | 0.990294 | no |
| Galnt11       | 0.00389228 | 0.0142338  | 0.9776  | 0.986423 | no |
| Slc25a46      | 0.00372468 | 0.0180576  | 0.97425 | 0.98464  | no |
| Pfkfb3        | 0.00370059 | 0.0164502  | 0.97425 | 0.98464  | no |
| Dnm1l         | 0.00357405 | 0.0166307  | 0.9749  | 0.984997 | no |
| 4933427E11Rik | 0.00321231 | 0          | 1       | 1        | no |
| Timm17a       | 0.00317652 | 0.0155476  | 0.981   | 0.988751 | no |
| Golgb1        | 0.0031735  | 0.014478   | 0.977   | 0.986218 | no |
| Usp39         | 0.00314329 | 0.0110115  | 0.9852  | 0.991002 | no |
| Sephs1        | 0.00310485 | 0.0111984  | 0.98175 | 0.989056 | no |
| Yars2         | 0.00308355 | 0.00827048 | 0.98805 | 0.992839 | no |
| Ubap2l        | 0.00301446 | 0.0130991  | 0.9795  | 0.98799  | no |
| D1Erttd622e   | 0.00299255 | 0.0121596  | 0.98045 | 0.988498 | no |
| Mrps7         | 0.00288131 | 0.011684   | 0.9831  | 0.989815 | no |
| Tinf2         | 0.00277312 | 0.00674204 | 0.9921  | 0.9951   | no |
| Aasdh         | 0.00267585 | 0.00562969 | 0.993   | 0.995401 | no |
| Mcm3ap        | 0.00264053 | 0.0102134  | 0.9835  | 0.990067 | no |
| Mark4         | 0.00259281 | 0.0113002  | 0.98415 | 0.990571 | no |
| Zfp874a       | 0.00253555 | 0.00813835 | 0.98825 | 0.992965 | no |
| Ankrd46       | 0.00247494 | 0.0125887  | 0.9807  | 0.988524 | no |
| Cic           | 0.00242404 | 0.0112824  | 0.9811  | 0.988776 | no |
| Pip5k1a       | 0.00241133 | 0.00795736 | 0.98955 | 0.993419 | no |
| C030046E11Rik | 0.0023777  | 0.00846709 | 0.9884  | 0.992966 | no |
| Cd300lg       | 0.0021843  | 0.00429907 | 0.9935  | 0.995526 | no |
| Snapi         | 0.0021517  | 0.00686821 | 0.98835 | 0.992966 | no |
| Tmem182       | 0.00198885 | 0          | 1       | 1        | no |
| Fam179b       | 0.00195909 | 0.00890111 | 0.9859  | 0.99128  | no |
| Eif4g1        | 0.0019325  | 0.00885356 | 0.9856  | 0.991279 | no |
| Pnpla2        | 0.00189391 | 0.00682728 | 0.99005 | 0.993795 | no |
| Trim8         | 0.00188851 | 0.00812296 | 0.98875 | 0.993167 | no |
| Syt16         | 0.00188331 | 0.00432641 | 0.9937  | 0.995601 | no |
| Pnpla6        | 0.0018353  | 0.0080234  | 0.9867  | 0.991759 | no |
| Tmem88        | 0.00173078 | 0.00144594 | 0.9943  | 0.995876 | no |
| Gm19299       | 0.00169743 | 0          | 1       | 1        | no |
| Fis1          | 0.00159588 | 0.00694476 | 0.98935 | 0.993393 | no |
| Naga          | 0.00153206 | 0.00555971 | 0.9903  | 0.993971 | no |

|               |            |            |         |          |    |
|---------------|------------|------------|---------|----------|----|
| Ddx1          | 0.00140409 | 0.00710633 | 0.9892  | 0.993393 | no |
| Fbxw15        | 0.00137578 | 0          | 1       | 1        | no |
| Ube2d2a       | 0.00137515 | 0.00660669 | 0.9906  | 0.994197 | no |
| Polr3g        | 0.00132861 | 0.00634112 | 0.9896  | 0.993419 | no |
| Gfra1         | 0.0012762  | 0.00594339 | 0.99135 | 0.994649 | no |
| Sap30         | 0.00125786 | 0.00190603 | 0.9847  | 0.990774 | no |
| Dnajc11       | 0.00125234 | 0.00550223 | 0.99235 | 0.995125 | no |
| C1qbp         | 0.00116778 | 0.00450233 | 0.99375 | 0.995601 | no |
| Mfsd1         | 0.00115597 | 0.0052282  | 0.9916  | 0.994824 | no |
| Ammechr1l     | 0.00100602 | 0.00424745 | 0.9926  | 0.995301 | no |
| Ppp6c         | 0.00098953 | 0.00445092 | 0.9939  | 0.995626 | no |
| Scfd1         | 0.00093104 | 0.00393139 | 0.9938  | 0.995601 | no |
| Nubp2         | 0.00087278 | 0.00352781 | 0.99685 | 0.997527 | no |
| Rspry1        | 0.00082045 | 0.00336814 | 0.99415 | 0.995801 | no |
| Asphd2        | 0.00081597 | 0.00297455 | 0.9968  | 0.997527 | no |
| Hiat1         | 0.00070944 | 0.00315784 | 0.99545 | 0.996502 | no |
| Acer3         | 0.00068203 | 0.00252943 | 0.99735 | 0.997651 | no |
| Fmn1          | 0.00055617 | 0.00247041 | 0.99615 | 0.997127 | no |
| Drosha        | 0.00051456 | 0.00227478 | 0.9975  | 0.997726 | no |
| Zfp956        | 0.00050679 | 0.00093478 | 0.99275 | 0.995301 | no |
| Acad11        | 0.00047848 | 0.00163117 | 0.99695 | 0.997552 | no |
| Tusc1         | 0.00047054 | 0.0007529  | 0.9859  | 0.99128  | no |
| D10Jhu81e     | 0.00042222 | 0.0020339  | 0.99845 | 0.99845  | no |
| Asb14         | 5.61E-05   | 0          | 1       | 1        | no |
| 0610005C13Rik | 0          | 0          | 1       | 1        | no |
| 0610031O16Rik | 0          | 0          | 1       | 1        | no |
| 0610039K10Rik | 0          | 0          | 1       | 1        | no |
| 1010001N08Rik | 0          | 0          | 1       | 1        | no |
| 1110025L11Rik | 0          | 0          | 1       | 1        | no |
| 1110028F11Rik | 0          | 0          | 1       | 1        | no |
| 1110036E04Rik | 0          | 0          | 1       | 1        | no |
| 1190003K10Rik | 0          | 0          | 1       | 1        | no |
| 1500015L24Rik | 0          | 0          | 1       | 1        | no |
| 1600002D24Rik | 0          | 0          | 1       | 1        | no |
| 1600014C23Rik | 0          | 0          | 1       | 1        | no |
| 1600014K23Rik | 0          | 0          | 1       | 1        | no |
| 1600015I10Rik | 0          | 0          | 1       | 1        | no |
| 1600025M17Rik | 0          | 0          | 1       | 1        | no |
| 1700001C02Rik | 0          | 0          | 1       | 1        | no |
| 1700001D01Rik | 0          | 0          | 1       | 1        | no |
| 1700001F09Rik | 0          | 0          | 1       | 1        | no |
| 1700001J03Rik | 0          | 0          | 1       | 1        | no |
| 1700001K19Rik | 0          | 0          | 1       | 1        | no |
| 1700001P01Rik | 0          | 0          | 1       | 1        | no |
| 1700003C15Rik | 0          | 0          | 1       | 1        | no |
| 1700003D09Rik | 0          | 0          | 1       | 1        | no |
| 1700003E24Rik | 0          | 0          | 1       | 1        | no |
| 1700003G18Rik | 0          | 0          | 1       | 1        | no |
| 1700003H04Rik | 0          | 0          | 1       | 1        | no |
| 1700003L19Rik | 0          | 0          | 1       | 1        | no |
| 1700003P14Rik | 0          | 0          | 1       | 1        | no |
| 1700006A11Rik | 0          | 0          | 1       | 1        | no |
| 1700006E09Rik | 0          | 0          | 1       | 1        | no |

|               |   |   |   |   |    |
|---------------|---|---|---|---|----|
| 1700006F04Rik | 0 | 0 | 1 | 1 | no |
| 1700006H21Rik | 0 | 0 | 1 | 1 | no |
| 1700007J10Rik | 0 | 0 | 1 | 1 | no |
| 1700008F21Rik | 0 | 0 | 1 | 1 | no |
| 1700008K24Rik | 0 | 0 | 1 | 1 | no |
| 1700008P02Rik | 0 | 0 | 1 | 1 | no |
| 1700009C05Rik | 0 | 0 | 1 | 1 | no |
| 1700009J07Rik | 0 | 0 | 1 | 1 | no |
| 1700009N14Rik | 0 | 0 | 1 | 1 | no |
| 1700010B08Rik | 0 | 0 | 1 | 1 | no |
| 1700010D01Rik | 0 | 0 | 1 | 1 | no |
| 1700010I02Rik | 0 | 0 | 1 | 1 | no |
| 1700010J16Rik | 0 | 0 | 1 | 1 | no |
| 1700010K23Rik | 0 | 0 | 1 | 1 | no |
| 1700011M02Rik | 0 | 0 | 1 | 1 | no |
| 1700012A03Rik | 0 | 0 | 1 | 1 | no |
| 1700012B07Rik | 0 | 0 | 1 | 1 | no |
| 1700012B09Rik | 0 | 0 | 1 | 1 | no |
| 1700012I11Rik | 0 | 0 | 1 | 1 | no |
| 1700012P22Rik | 0 | 0 | 1 | 1 | no |
| 1700013D24Rik | 0 | 0 | 1 | 1 | no |
| 1700013G24Rik | 0 | 0 | 1 | 1 | no |
| 1700013H16Rik | 0 | 0 | 1 | 1 | no |
| 1700015E13Rik | 0 | 0 | 1 | 1 | no |
| 1700015G11Rik | 0 | 0 | 1 | 1 | no |
| 1700016C15Rik | 0 | 0 | 1 | 1 | no |
| 1700016D06Rik | 0 | 0 | 1 | 1 | no |
| 1700016G22Rik | 0 | 0 | 1 | 1 | no |
| 1700016H13Rik | 0 | 0 | 1 | 1 | no |
| 1700016L04Rik | 0 | 0 | 1 | 1 | no |
| 1700016L21Rik | 0 | 0 | 1 | 1 | no |
| 1700016P04Rik | 0 | 0 | 1 | 1 | no |
| 1700017D01Rik | 0 | 0 | 1 | 1 | no |
| 1700017J07Rik | 0 | 0 | 1 | 1 | no |
| 1700018A04Rik | 0 | 0 | 1 | 1 | no |
| 1700018B08Rik | 0 | 0 | 1 | 1 | no |
| 1700018B24Rik | 0 | 0 | 1 | 1 | no |
| 1700018C11Rik | 0 | 0 | 1 | 1 | no |
| 1700018F24Rik | 0 | 0 | 1 | 1 | no |
| 1700018G05Rik | 0 | 0 | 1 | 1 | no |
| 1700019A02Rik | 0 | 0 | 1 | 1 | no |
| 1700019B21Rik | 0 | 0 | 1 | 1 | no |
| 1700019E08Rik | 0 | 0 | 1 | 1 | no |
| 1700019G24Rik | 0 | 0 | 1 | 1 | no |
| 1700019M22Rik | 0 | 0 | 1 | 1 | no |
| 1700019O17Rik | 0 | 0 | 1 | 1 | no |
| 1700020A23Rik | 0 | 0 | 1 | 1 | no |
| 1700020G17Rik | 0 | 0 | 1 | 1 | no |
| 1700020M21Rik | 0 | 0 | 1 | 1 | no |
| 1700020N01Rik | 0 | 0 | 1 | 1 | no |
| 1700020N15Rik | 0 | 0 | 1 | 1 | no |
| 1700021F07Rik | 0 | 0 | 1 | 1 | no |
| 1700021N21Rik | 0 | 0 | 1 | 1 | no |

|               |   |   |   |   |    |
|---------------|---|---|---|---|----|
| 1700022A21Rik | 0 | 0 | 1 | 1 | no |
| 1700022A22Rik | 0 | 0 | 1 | 1 | no |
| 1700022E09Rik | 0 | 0 | 1 | 1 | no |
| 1700022H16Rik | 0 | 0 | 1 | 1 | no |
| 1700023C21Rik | 0 | 0 | 1 | 1 | no |
| 1700023F02Rik | 0 | 0 | 1 | 1 | no |
| 1700024B18Rik | 0 | 0 | 1 | 1 | no |
| 1700024G13Rik | 0 | 0 | 1 | 1 | no |
| 1700024P04Rik | 0 | 0 | 1 | 1 | no |
| 1700025B11Rik | 0 | 0 | 1 | 1 | no |
| 1700025C18Rik | 0 | 0 | 1 | 1 | no |
| 1700025F22Rik | 0 | 0 | 1 | 1 | no |
| 1700025F24Rik | 0 | 0 | 1 | 1 | no |
| 1700025K24Rik | 0 | 0 | 1 | 1 | no |
| 1700025M24Rik | 0 | 0 | 1 | 1 | no |
| 1700025N23Rik | 0 | 0 | 1 | 1 | no |
| 1700026D11Rik | 0 | 0 | 1 | 1 | no |
| 1700026F02Rik | 0 | 0 | 1 | 1 | no |
| 1700027A15Rik | 0 | 0 | 1 | 1 | no |
| 1700027F09Rik | 0 | 0 | 1 | 1 | no |
| 1700027H10Rik | 0 | 0 | 1 | 1 | no |
| 1700027I24Rik | 0 | 0 | 1 | 1 | no |
| 1700028B04Rik | 0 | 0 | 1 | 1 | no |
| 1700028D13Rik | 0 | 0 | 1 | 1 | no |
| 1700028I16Rik | 0 | 0 | 1 | 1 | no |
| 1700028M03Rik | 0 | 0 | 1 | 1 | no |
| 1700028P14Rik | 0 | 0 | 1 | 1 | no |
| 1700028P15Rik | 0 | 0 | 1 | 1 | no |
| 1700029B22Rik | 0 | 0 | 1 | 1 | no |
| 1700029H14Rik | 0 | 0 | 1 | 1 | no |
| 1700029J03Rik | 0 | 0 | 1 | 1 | no |
| 1700029N11Rik | 0 | 0 | 1 | 1 | no |
| 1700030A11Rik | 0 | 0 | 1 | 1 | no |
| 1700030F04Rik | 0 | 0 | 1 | 1 | no |
| 1700030F18Rik | 0 | 0 | 1 | 1 | no |
| 1700030M09Rik | 0 | 0 | 1 | 1 | no |
| 1700030N03Rik | 0 | 0 | 1 | 1 | no |
| 1700030O20Rik | 0 | 0 | 1 | 1 | no |
| 1700031A10Rik | 0 | 0 | 1 | 1 | no |
| 1700031F05Rik | 0 | 0 | 1 | 1 | no |
| 1700031M16Rik | 0 | 0 | 1 | 1 | no |
| 1700031P21Rik | 0 | 0 | 1 | 1 | no |
| 1700034E13Rik | 0 | 0 | 1 | 1 | no |
| 1700034G24Rik | 0 | 0 | 1 | 1 | no |
| 1700034I23Rik | 0 | 0 | 1 | 1 | no |
| 1700034J05Rik | 0 | 0 | 1 | 1 | no |
| 1700034K08Rik | 0 | 0 | 1 | 1 | no |
| 1700034O15Rik | 0 | 0 | 1 | 1 | no |
| 1700036G14Rik | 0 | 0 | 1 | 1 | no |
| 1700039E15Rik | 0 | 0 | 1 | 1 | no |
| 1700039E22Rik | 0 | 0 | 1 | 1 | no |
| 1700041C23Rik | 0 | 0 | 1 | 1 | no |
| 1700041M19Rik | 0 | 0 | 1 | 1 | no |

|               |   |   |   |   |    |
|---------------|---|---|---|---|----|
| 1700042B14Rik | 0 | 0 | 1 | 1 | no |
| 1700042G07Rik | 0 | 0 | 1 | 1 | no |
| 1700042O10Rik | 0 | 0 | 1 | 1 | no |
| 1700044C05Rik | 0 | 0 | 1 | 1 | no |
| 1700044K03Rik | 0 | 0 | 1 | 1 | no |
| 1700045H11Rik | 0 | 0 | 1 | 1 | no |
| 1700046C09Rik | 0 | 0 | 1 | 1 | no |
| 1700047A11Rik | 0 | 0 | 1 | 1 | no |
| 1700047E10Rik | 0 | 0 | 1 | 1 | no |
| 1700047G03Rik | 0 | 0 | 1 | 1 | no |
| 1700047L14Rik | 0 | 0 | 1 | 1 | no |
| 1700048M11Rik | 0 | 0 | 1 | 1 | no |
| 1700049E15Rik | 0 | 0 | 1 | 1 | no |
| 1700049E22Rik | 0 | 0 | 1 | 1 | no |
| 1700049L16Rik | 0 | 0 | 1 | 1 | no |
| 1700051A21Rik | 0 | 0 | 1 | 1 | no |
| 1700052I22Rik | 0 | 0 | 1 | 1 | no |
| 1700054A03Rik | 0 | 0 | 1 | 1 | no |
| 1700054K19Rik | 0 | 0 | 1 | 1 | no |
| 1700054O13Rik | 0 | 0 | 1 | 1 | no |
| 1700055C04Rik | 0 | 0 | 1 | 1 | no |
| 1700055N04Rik | 0 | 0 | 1 | 1 | no |
| 1700057G04Rik | 0 | 0 | 1 | 1 | no |
| 1700057H15Rik | 0 | 0 | 1 | 1 | no |
| 1700060C16Rik | 0 | 0 | 1 | 1 | no |
| 1700061F12Rik | 0 | 0 | 1 | 1 | no |
| 1700061I17Rik | 0 | 0 | 1 | 1 | no |
| 1700063A18Rik | 0 | 0 | 1 | 1 | no |
| 1700063O14Rik | 0 | 0 | 1 | 1 | no |
| 1700064J06Rik | 0 | 0 | 1 | 1 | no |
| 1700065D16Rik | 0 | 0 | 1 | 1 | no |
| 1700065I16Rik | 0 | 0 | 1 | 1 | no |
| 1700065J11Rik | 0 | 0 | 1 | 1 | no |
| 1700065J18Rik | 0 | 0 | 1 | 1 | no |
| 1700065L07Rik | 0 | 0 | 1 | 1 | no |
| 1700065O20Rik | 0 | 0 | 1 | 1 | no |
| 1700066B17Rik | 0 | 0 | 1 | 1 | no |
| 1700066N21Rik | 0 | 0 | 1 | 1 | no |
| 1700066O22Rik | 0 | 0 | 1 | 1 | no |
| 1700067G17Rik | 0 | 0 | 1 | 1 | no |
| 1700067P10Rik | 0 | 0 | 1 | 1 | no |
| 1700069L16Rik | 0 | 0 | 1 | 1 | no |
| 1700069P05Rik | 0 | 0 | 1 | 1 | no |
| 1700071M16Rik | 0 | 0 | 1 | 1 | no |
| 1700072B07Rik | 0 | 0 | 1 | 1 | no |
| 1700073E17Rik | 0 | 0 | 1 | 1 | no |
| 1700074H08Rik | 0 | 0 | 1 | 1 | no |
| 1700074P13Rik | 0 | 0 | 1 | 1 | no |
| 1700080E11Rik | 0 | 0 | 1 | 1 | no |
| 1700080N15Rik | 0 | 0 | 1 | 1 | no |
| 1700080O16Rik | 0 | 0 | 1 | 1 | no |
| 1700081H04Rik | 0 | 0 | 1 | 1 | no |
| 1700084F23Rik | 0 | 0 | 1 | 1 | no |



|               |   |   |   |   |    |
|---------------|---|---|---|---|----|
| 1700084J12Rik | 0 | 0 | 1 | 1 | no |
| 1700085C21Rik | 0 | 0 | 1 | 1 | no |
| 1700091H14Rik | 0 | 0 | 1 | 1 | no |
| 1700092C02Rik | 0 | 0 | 1 | 1 | no |
| 1700092C10Rik | 0 | 0 | 1 | 1 | no |
| 1700092E19Rik | 0 | 0 | 1 | 1 | no |
| 1700092K14Rik | 0 | 0 | 1 | 1 | no |
| 1700094M24Rik | 0 | 0 | 1 | 1 | no |
| 1700095A21Rik | 0 | 0 | 1 | 1 | no |
| 1700095B10Rik | 0 | 0 | 1 | 1 | no |
| 1700096J18Rik | 0 | 0 | 1 | 1 | no |
| 1700100L14Rik | 0 | 0 | 1 | 1 | no |
| 1700101O22Rik | 0 | 0 | 1 | 1 | no |
| 1700102H20Rik | 0 | 0 | 1 | 1 | no |
| 1700104L18Rik | 0 | 0 | 1 | 1 | no |
| 1700106J16Rik | 0 | 0 | 1 | 1 | no |
| 1700108J01Rik | 0 | 0 | 1 | 1 | no |
| 1700109G15Rik | 0 | 0 | 1 | 1 | no |
| 1700109I08Rik | 0 | 0 | 1 | 1 | no |
| 1700109K24Rik | 0 | 0 | 1 | 1 | no |
| 1700110C19Rik | 0 | 0 | 1 | 1 | no |
| 1700110I01Rik | 0 | 0 | 1 | 1 | no |
| 1700110K17Rik | 0 | 0 | 1 | 1 | no |
| 1700111N16Rik | 0 | 0 | 1 | 1 | no |
| 1700112H15Rik | 0 | 0 | 1 | 1 | no |
| 1700112J05Rik | 0 | 0 | 1 | 1 | no |
| 1700119H24Rik | 0 | 0 | 1 | 1 | no |
| 1700120E14Rik | 0 | 0 | 1 | 1 | no |
| 1700120G07Rik | 0 | 0 | 1 | 1 | no |
| 1700121L16Rik | 0 | 0 | 1 | 1 | no |
| 1700121N20Rik | 0 | 0 | 1 | 1 | no |
| 1700122O11Rik | 0 | 0 | 1 | 1 | no |
| 1700123K08Rik | 0 | 0 | 1 | 1 | no |
| 1700123L14Rik | 0 | 0 | 1 | 1 | no |
| 1700123O12Rik | 0 | 0 | 1 | 1 | no |
| 1700125G02Rik | 0 | 0 | 1 | 1 | no |
| 1700125G22Rik | 0 | 0 | 1 | 1 | no |
| 1700125H03Rik | 0 | 0 | 1 | 1 | no |
| 1700126H18Rik | 0 | 0 | 1 | 1 | no |
| 1700128A07Rik | 0 | 0 | 1 | 1 | no |
| 1700128F08Rik | 0 | 0 | 1 | 1 | no |
| 1700129C05Rik | 0 | 0 | 1 | 1 | no |
| 1810007C17Rik | 0 | 0 | 1 | 1 | no |
| 1810008I18Rik | 0 | 0 | 1 | 1 | no |
| 1810009J06Rik | 0 | 0 | 1 | 1 | no |
| 1810012K16Rik | 0 | 0 | 1 | 1 | no |
| 1810013A23Rik | 0 | 0 | 1 | 1 | no |
| 1810018F18Rik | 0 | 0 | 1 | 1 | no |
| 2010009K17Rik | 0 | 0 | 1 | 1 | no |
| 2010010A06Rik | 0 | 0 | 1 | 1 | no |
| 2010106E10Rik | 0 | 0 | 1 | 1 | no |
| 2010109A12Rik | 0 | 0 | 1 | 1 | no |
| 2010310C07Rik | 0 | 0 | 1 | 1 | no |

|               |   |   |   |   |    |
|---------------|---|---|---|---|----|
| 2200002J24Rik | 0 | 0 | 1 | 1 | no |
| 2210019I11Rik | 0 | 0 | 1 | 1 | no |
| 2210409D07Rik | 0 | 0 | 1 | 1 | no |
| 2210409E12Rik | 0 | 0 | 1 | 1 | no |
| 2210414B05Rik | 0 | 0 | 1 | 1 | no |
| 2210417A02Rik | 0 | 0 | 1 | 1 | no |
| 2210420H20Rik | 0 | 0 | 1 | 1 | no |
| 2300003K06Rik | 0 | 0 | 1 | 1 | no |
| 2310001K24Rik | 0 | 0 | 1 | 1 | no |
| 2310002L09Rik | 0 | 0 | 1 | 1 | no |
| 2310005A03Rik | 0 | 0 | 1 | 1 | no |
| 2310005E17Rik | 0 | 0 | 1 | 1 | no |
| 2310007L24Rik | 0 | 0 | 1 | 1 | no |
| 2310008N11Rik | 0 | 0 | 1 | 1 | no |
| 2310020H05Rik | 0 | 0 | 1 | 1 | no |
| 2310034C09Rik | 0 | 0 | 1 | 1 | no |
| 2310039L15Rik | 0 | 0 | 1 | 1 | no |
| 2310043L19Rik | 0 | 0 | 1 | 1 | no |
| 2310043O21Rik | 0 | 0 | 1 | 1 | no |
| 2310050C09Rik | 0 | 0 | 1 | 1 | no |
| 2310057N15Rik | 0 | 0 | 1 | 1 | no |
| 2310061N02Rik | 0 | 0 | 1 | 1 | no |
| 2310079G19Rik | 0 | 0 | 1 | 1 | no |
| 2410003L11Rik | 0 | 0 | 1 | 1 | no |
| 2410007B07Rik | 0 | 0 | 1 | 1 | no |
| 2410017I17Rik | 0 | 0 | 1 | 1 | no |
| 2410021H03Rik | 0 | 0 | 1 | 1 | no |
| 2410088K16Rik | 0 | 0 | 1 | 1 | no |
| 2410114N07Rik | 0 | 0 | 1 | 1 | no |
| 2410124H12Rik | 0 | 0 | 1 | 1 | no |
| 2410141K09Rik | 0 | 0 | 1 | 1 | no |
| 2610016A17Rik | 0 | 0 | 1 | 1 | no |
| 2610028H24Rik | 0 | 0 | 1 | 1 | no |
| 2610207O16Rik | 0 | 0 | 1 | 1 | no |
| 2610528J11Rik | 0 | 0 | 1 | 1 | no |
| 2700089I24Rik | 0 | 0 | 1 | 1 | no |
| 2810007J24Rik | 0 | 0 | 1 | 1 | no |
| 2810442N19Rik | 0 | 0 | 1 | 1 | no |
| 2900092C05Rik | 0 | 0 | 1 | 1 | no |
| 2900092D14Rik | 0 | 0 | 1 | 1 | no |
| 3010033K07Rik | 0 | 0 | 1 | 1 | no |
| 3100003L05Rik | 0 | 0 | 1 | 1 | no |
| 3110009F21Rik | 0 | 0 | 1 | 1 | no |
| 3110039M20Rik | 0 | 0 | 1 | 1 | no |
| 3110079O15Rik | 0 | 0 | 1 | 1 | no |
| 3110082J24Rik | 0 | 0 | 1 | 1 | no |
| 3200001D21Rik | 0 | 0 | 1 | 1 | no |
| 3300005D01Rik | 0 | 0 | 1 | 1 | no |
| 3930402G23Rik | 0 | 0 | 1 | 1 | no |
| 4833423E24Rik | 0 | 0 | 1 | 1 | no |
| 4833427F10Rik | 0 | 0 | 1 | 1 | no |
| 4833427G06Rik | 0 | 0 | 1 | 1 | no |
| 4833428L15Rik | 0 | 0 | 1 | 1 | no |

|                  |   |   |   |   |    |
|------------------|---|---|---|---|----|
| 4921501E09Rik    | 0 | 0 | 1 | 1 | no |
| 4921504E06Rik    | 0 | 0 | 1 | 1 | no |
| 4921509C19Rik    | 0 | 0 | 1 | 1 | no |
| 4921511C10Rik    | 0 | 0 | 1 | 1 | no |
| 4921511C20Rik    | 0 | 0 | 1 | 1 | no |
| 4921511H03Rik    | 0 | 0 | 1 | 1 | no |
| 4921511M17Rik,Gr | 0 | 0 | 1 | 1 | no |
| 4921513I03Rik    | 0 | 0 | 1 | 1 | no |
| 4921515E04Rik    | 0 | 0 | 1 | 1 | no |
| 4921517D22Rik    | 0 | 0 | 1 | 1 | no |
| 4921524L21Rik    | 0 | 0 | 1 | 1 | no |
| 4921525O09Rik    | 0 | 0 | 1 | 1 | no |
| 4921529L05Rik    | 0 | 0 | 1 | 1 | no |
| 4921531P14Rik    | 0 | 0 | 1 | 1 | no |
| 4921533I20Rik    | 0 | 0 | 1 | 1 | no |
| 4921534H16Rik    | 0 | 0 | 1 | 1 | no |
| 4921539E11Rik    | 0 | 0 | 1 | 1 | no |
| 4922502D21Rik    | 0 | 0 | 1 | 1 | no |
| 4922502H24Rik    | 0 | 0 | 1 | 1 | no |
| 4922502N22Rik    | 0 | 0 | 1 | 1 | no |
| 4930401C15Rik    | 0 | 0 | 1 | 1 | no |
| 4930401O12Rik    | 0 | 0 | 1 | 1 | no |
| 4930402F06Rik    | 0 | 0 | 1 | 1 | no |
| 4930402F11Rik    | 0 | 0 | 1 | 1 | no |
| 4930402K13Rik    | 0 | 0 | 1 | 1 | no |
| 4930404A05Rik    | 0 | 0 | 1 | 1 | no |
| 4930404A10Rik    | 0 | 0 | 1 | 1 | no |
| 4930404H11Rik    | 0 | 0 | 1 | 1 | no |
| 4930405A10Rik    | 0 | 0 | 1 | 1 | no |
| 4930405D11Rik    | 0 | 0 | 1 | 1 | no |
| 4930406D18Rik    | 0 | 0 | 1 | 1 | no |
| 4930412B13Rik    | 0 | 0 | 1 | 1 | no |
| 4930412D23Rik    | 0 | 0 | 1 | 1 | no |
| 4930412O13Rik    | 0 | 0 | 1 | 1 | no |
| 4930413E15Rik    | 0 | 0 | 1 | 1 | no |
| 4930413M19Rik    | 0 | 0 | 1 | 1 | no |
| 4930414N06Rik    | 0 | 0 | 1 | 1 | no |
| 4930415L06Rik    | 0 | 0 | 1 | 1 | no |
| 4930417O13Rik    | 0 | 0 | 1 | 1 | no |
| 4930417O22Rik    | 0 | 0 | 1 | 1 | no |
| 4930419G24Rik    | 0 | 0 | 1 | 1 | no |
| 4930423M02Rik    | 0 | 0 | 1 | 1 | no |
| 4930425K10Rik    | 0 | 0 | 1 | 1 | no |
| 4930428D18Rik    | 0 | 0 | 1 | 1 | no |
| 4930428E07Rik    | 0 | 0 | 1 | 1 | no |
| 4930428O21Rik    | 0 | 0 | 1 | 1 | no |
| 4930429F11Rik    | 0 | 0 | 1 | 1 | no |
| 4930429F24Rik    | 0 | 0 | 1 | 1 | no |
| 4930430A15Rik    | 0 | 0 | 1 | 1 | no |
| 4930430D24Rik    | 0 | 0 | 1 | 1 | no |
| 4930430F21Rik    | 0 | 0 | 1 | 1 | no |
| 4930430J02Rik    | 0 | 0 | 1 | 1 | no |
| 4930432M17Rik    | 0 | 0 | 1 | 1 | no |

|               |   |   |   |   |    |
|---------------|---|---|---|---|----|
| 4930433B08Rik | 0 | 0 | 1 | 1 | no |
| 4930433I11Rik | 0 | 0 | 1 | 1 | no |
| 4930434J06Rik | 0 | 0 | 1 | 1 | no |
| 4930435E12Rik | 0 | 0 | 1 | 1 | no |
| 4930438E09Rik | 0 | 0 | 1 | 1 | no |
| 4930440C22Rik | 0 | 0 | 1 | 1 | no |
| 4930441J16Rik | 0 | 0 | 1 | 1 | no |
| 4930442J19Rik | 0 | 0 | 1 | 1 | no |
| 4930442L01Rik | 0 | 0 | 1 | 1 | no |
| 4930443O20Rik | 0 | 0 | 1 | 1 | no |
| 4930444F02Rik | 0 | 0 | 1 | 1 | no |
| 4930444G20Rik | 0 | 0 | 1 | 1 | no |
| 4930447A16Rik | 0 | 0 | 1 | 1 | no |
| 4930447J18Rik | 0 | 0 | 1 | 1 | no |
| 4930447N08Rik | 0 | 0 | 1 | 1 | no |
| 4930448C13Rik | 0 | 0 | 1 | 1 | no |
| 4930448F12Rik | 0 | 0 | 1 | 1 | no |
| 4930448H16Rik | 0 | 0 | 1 | 1 | no |
| 4930448I06Rik | 0 | 0 | 1 | 1 | no |
| 4930448I18Rik | 0 | 0 | 1 | 1 | no |
| 4930448K20Rik | 0 | 0 | 1 | 1 | no |
| 4930449E01Rik | 0 | 0 | 1 | 1 | no |
| 4930449E18Rik | 0 | 0 | 1 | 1 | no |
| 4930449I24Rik | 0 | 0 | 1 | 1 | no |
| 4930451C15Rik | 0 | 0 | 1 | 1 | no |
| 4930451I11Rik | 0 | 0 | 1 | 1 | no |
| 4930452A19Rik | 0 | 0 | 1 | 1 | no |
| 4930452N14Rik | 0 | 0 | 1 | 1 | no |
| 4930453H23Rik | 0 | 0 | 1 | 1 | no |
| 4930453L07Rik | 0 | 0 | 1 | 1 | no |
| 4930455B14Rik | 0 | 0 | 1 | 1 | no |
| 4930455C13Rik | 0 | 0 | 1 | 1 | no |
| 4930455D15Rik | 0 | 0 | 1 | 1 | no |
| 4930455F16Rik | 0 | 0 | 1 | 1 | no |
| 4930455H04Rik | 0 | 0 | 1 | 1 | no |
| 4930455J16Rik | 0 | 0 | 1 | 1 | no |
| 4930456L15Rik | 0 | 0 | 1 | 1 | no |
| 4930459C07Rik | 0 | 0 | 1 | 1 | no |
| 4930459L07Rik | 0 | 0 | 1 | 1 | no |
| 4930461G14Rik | 0 | 0 | 1 | 1 | no |
| 4930463O16Rik | 0 | 0 | 1 | 1 | no |
| 4930468A15Rik | 0 | 0 | 1 | 1 | no |
| 4930470H14Rik | 0 | 0 | 1 | 1 | no |
| 4930470P17Rik | 0 | 0 | 1 | 1 | no |
| 4930471G03Rik | 0 | 0 | 1 | 1 | no |
| 4930471M09Rik | 0 | 0 | 1 | 1 | no |
| 4930473A02Rik | 0 | 0 | 1 | 1 | no |
| 4930473O22Rik | 0 | 0 | 1 | 1 | no |
| 4930474H20Rik | 0 | 0 | 1 | 1 | no |
| 4930474M22Rik | 0 | 0 | 1 | 1 | no |
| 4930474N05Rik | 0 | 0 | 1 | 1 | no |
| 4930478L05Rik | 0 | 0 | 1 | 1 | no |
| 4930478P22Rik | 0 | 0 | 1 | 1 | no |

|               |   |   |   |   |    |
|---------------|---|---|---|---|----|
| 4930480E11Rik | 0 | 0 | 1 | 1 | no |
| 4930480G23Rik | 0 | 0 | 1 | 1 | no |
| 4930480K15Rik | 0 | 0 | 1 | 1 | no |
| 4930480M12Rik | 0 | 0 | 1 | 1 | no |
| 4930483K19Rik | 0 | 0 | 1 | 1 | no |
| 4930486F22Rik | 0 | 0 | 1 | 1 | no |
| 4930486I03Rik | 0 | 0 | 1 | 1 | no |
| 4930487D11Rik | 0 | 0 | 1 | 1 | no |
| 4930487H11Rik | 0 | 0 | 1 | 1 | no |
| 4930488B22Rik | 0 | 0 | 1 | 1 | no |
| 4930500L23Rik | 0 | 0 | 1 | 1 | no |
| 4930502E09Rik | 0 | 0 | 1 | 1 | no |
| 4930503B20Rik | 0 | 0 | 1 | 1 | no |
| 4930503E14Rik | 0 | 0 | 1 | 1 | no |
| 4930503E24Rik | 0 | 0 | 1 | 1 | no |
| 4930503H13Rik | 0 | 0 | 1 | 1 | no |
| 4930503O07Rik | 0 | 0 | 1 | 1 | no |
| 4930504O13Rik | 0 | 0 | 1 | 1 | no |
| 4930505G20Rik | 0 | 0 | 1 | 1 | no |
| 4930509J09Rik | 0 | 0 | 1 | 1 | no |
| 4930509K18Rik | 0 | 0 | 1 | 1 | no |
| 4930511A02Rik | 0 | 0 | 1 | 1 | no |
| 4930511E03Rik | 0 | 0 | 1 | 1 | no |
| 4930513D17Rik | 0 | 0 | 1 | 1 | no |
| 4930513O06Rik | 0 | 0 | 1 | 1 | no |
| 4930515B02Rik | 0 | 0 | 1 | 1 | no |
| 4930515G16Rik | 0 | 0 | 1 | 1 | no |
| 4930515L03Rik | 0 | 0 | 1 | 1 | no |
| 4930515L19Rik | 0 | 0 | 1 | 1 | no |
| 4930517E11Rik | 0 | 0 | 1 | 1 | no |
| 4930518P08Rik | 0 | 0 | 1 | 1 | no |
| 4930519D14Rik | 0 | 0 | 1 | 1 | no |
| 4930519F16Rik | 0 | 0 | 1 | 1 | no |
| 4930519F24Rik | 0 | 0 | 1 | 1 | no |
| 4930519G04Rik | 0 | 0 | 1 | 1 | no |
| 4930519H02Rik | 0 | 0 | 1 | 1 | no |
| 4930520P13Rik | 0 | 0 | 1 | 1 | no |
| 4930521E06Rik | 0 | 0 | 1 | 1 | no |
| 4930522H14Rik | 0 | 0 | 1 | 1 | no |
| 4930522O17Rik | 0 | 0 | 1 | 1 | no |
| 4930523O13Rik | 0 | 0 | 1 | 1 | no |
| 4930524C18Rik | 0 | 0 | 1 | 1 | no |
| 4930524N10Rik | 0 | 0 | 1 | 1 | no |
| 4930524O05Rik | 0 | 0 | 1 | 1 | no |
| 4930524O08Rik | 0 | 0 | 1 | 1 | no |
| 4930525M21Rik | 0 | 0 | 1 | 1 | no |
| 4930527F14Rik | 0 | 0 | 1 | 1 | no |
| 4930527G23Rik | 0 | 0 | 1 | 1 | no |
| 4930528D03Rik | 0 | 0 | 1 | 1 | no |
| 4930528P14Rik | 0 | 0 | 1 | 1 | no |
| 4930529K09Rik | 0 | 0 | 1 | 1 | no |
| 4930529L06Rik | 0 | 0 | 1 | 1 | no |
| 4930532M18Rik | 0 | 0 | 1 | 1 | no |

|               |   |   |   |   |    |
|---------------|---|---|---|---|----|
| 4930533B01Rik | 0 | 0 | 1 | 1 | no |
| 4930533P14Rik | 0 | 0 | 1 | 1 | no |
| 4930539C22Rik | 0 | 0 | 1 | 1 | no |
| 4930539N22Rik | 0 | 0 | 1 | 1 | no |
| 4930540M03Rik | 0 | 0 | 1 | 1 | no |
| 4930542D17Rik | 0 | 0 | 1 | 1 | no |
| 4930543E12Rik | 0 | 0 | 1 | 1 | no |
| 4930544D05Rik | 0 | 0 | 1 | 1 | no |
| 4930544G11Rik | 0 | 0 | 1 | 1 | no |
| 4930545E07Rik | 0 | 0 | 1 | 1 | no |
| 4930545H06Rik | 0 | 0 | 1 | 1 | no |
| 4930547E08Rik | 0 | 0 | 1 | 1 | no |
| 4930547E14Rik | 0 | 0 | 1 | 1 | no |
| 4930548G14Rik | 0 | 0 | 1 | 1 | no |
| 4930548H24Rik | 0 | 0 | 1 | 1 | no |
| 4930548J01Rik | 0 | 0 | 1 | 1 | no |
| 4930548K13Rik | 0 | 0 | 1 | 1 | no |
| 4930549C01Rik | 0 | 0 | 1 | 1 | no |
| 4930549G23Rik | 0 | 0 | 1 | 1 | no |
| 4930552N02Rik | 0 | 0 | 1 | 1 | no |
| 4930552P12Rik | 0 | 0 | 1 | 1 | no |
| 4930553E22Rik | 0 | 0 | 1 | 1 | no |
| 4930554C24Rik | 0 | 0 | 1 | 1 | no |
| 4930555G01Rik | 0 | 0 | 1 | 1 | no |
| 4930556C24Rik | 0 | 0 | 1 | 1 | no |
| 4930556G01Rik | 0 | 0 | 1 | 1 | no |
| 4930556J02Rik | 0 | 0 | 1 | 1 | no |
| 4930557A04Rik | 0 | 0 | 1 | 1 | no |
| 4930557J02Rik | 0 | 0 | 1 | 1 | no |
| 4930558C23Rik | 0 | 0 | 1 | 1 | no |
| 4930558G05Rik | 0 | 0 | 1 | 1 | no |
| 4930558K02Rik | 0 | 0 | 1 | 1 | no |
| 4930562C15Rik | 0 | 0 | 1 | 1 | no |
| 4930562F07Rik | 0 | 0 | 1 | 1 | no |
| 4930563D23Rik | 0 | 0 | 1 | 1 | no |
| 4930563F08Rik | 0 | 0 | 1 | 1 | no |
| 4930563M20Rik | 0 | 0 | 1 | 1 | no |
| 4930564B18Rik | 0 | 0 | 1 | 1 | no |
| 4930564C03Rik | 0 | 0 | 1 | 1 | no |
| 4930564D02Rik | 0 | 0 | 1 | 1 | no |
| 4930565D16Rik | 0 | 0 | 1 | 1 | no |
| 4930565N06Rik | 0 | 0 | 1 | 1 | no |
| 4930567H12Rik | 0 | 0 | 1 | 1 | no |
| 4930567H17Rik | 0 | 0 | 1 | 1 | no |
| 4930567J20Rik | 0 | 0 | 1 | 1 | no |
| 4930567K20Rik | 0 | 0 | 1 | 1 | no |
| 4930568D16Rik | 0 | 0 | 1 | 1 | no |
| 4930568E12Rik | 0 | 0 | 1 | 1 | no |
| 4930571K23Rik | 0 | 0 | 1 | 1 | no |
| 4930571O06Rik | 0 | 0 | 1 | 1 | no |
| 4930572K03Rik | 0 | 0 | 1 | 1 | no |
| 4930572O03Rik | 0 | 0 | 1 | 1 | no |
| 4930572O13Rik | 0 | 0 | 1 | 1 | no |



|               |   |   |   |   |    |
|---------------|---|---|---|---|----|
| 4930573O16Rik | 0 | 0 | 1 | 1 | no |
| 4930578E11Rik | 0 | 0 | 1 | 1 | no |
| 4930578I06Rik | 0 | 0 | 1 | 1 | no |
| 4930578N18Rik | 0 | 0 | 1 | 1 | no |
| 4930583P06Rik | 0 | 0 | 1 | 1 | no |
| 4930584F24Rik | 0 | 0 | 1 | 1 | no |
| 4930590L20Rik | 0 | 0 | 1 | 1 | no |
| 4930591A17Rik | 0 | 0 | 1 | 1 | no |
| 4930592A05Rik | 0 | 0 | 1 | 1 | no |
| 4930592I03Rik | 0 | 0 | 1 | 1 | no |
| 4930593A02Rik | 0 | 0 | 1 | 1 | no |
| 4930593C16Rik | 0 | 0 | 1 | 1 | no |
| 4930596D02Rik | 0 | 0 | 1 | 1 | no |
| 4930596I21Rik | 0 | 0 | 1 | 1 | no |
| 4930597G03Rik | 0 | 0 | 1 | 1 | no |
| 4930598F16Rik | 0 | 0 | 1 | 1 | no |
| 4931402G19Rik | 0 | 0 | 1 | 1 | no |
| 4931403E22Rik | 0 | 0 | 1 | 1 | no |
| 4931403G20Rik | 0 | 0 | 1 | 1 | no |
| 4931408C20Rik | 0 | 0 | 1 | 1 | no |
| 4931412M21    | 0 | 0 | 1 | 1 | no |
| 4931417E11Rik | 0 | 0 | 1 | 1 | no |
| 4931419H13Rik | 0 | 0 | 1 | 1 | no |
| 4931420L22Rik | 0 | 0 | 1 | 1 | no |
| 4931428L18Rik | 0 | 0 | 1 | 1 | no |
| 4931429L15Rik | 0 | 0 | 1 | 1 | no |
| 4931430N09Rik | 0 | 0 | 1 | 1 | no |
| 4931431B13Rik | 0 | 0 | 1 | 1 | no |
| 4931431F19Rik | 0 | 0 | 1 | 1 | no |
| 4931440L10Rik | 0 | 0 | 1 | 1 | no |
| 4932411N23Rik | 0 | 0 | 1 | 1 | no |
| 4932413F04Rik | 0 | 0 | 1 | 1 | no |
| 4932414J04Rik | 0 | 0 | 1 | 1 | no |
| 4932415M13Rik | 0 | 0 | 1 | 1 | no |
| 4932416K20Rik | 0 | 0 | 1 | 1 | no |
| 4932429P05Rik | 0 | 0 | 1 | 1 | no |
| 4932443I19Rik | 0 | 0 | 1 | 1 | no |
| 4933400A11Rik | 0 | 0 | 1 | 1 | no |
| 4933400B14Rik | 0 | 0 | 1 | 1 | no |
| 4933400F21Rik | 0 | 0 | 1 | 1 | no |
| 4933400L20Rik | 0 | 0 | 1 | 1 | no |
| 4933401B06Rik | 0 | 0 | 1 | 1 | no |
| 4933401D09Rik | 0 | 0 | 1 | 1 | no |
| 4933402E13Rik | 0 | 0 | 1 | 1 | no |
| 4933402J07Rik | 0 | 0 | 1 | 1 | no |
| 4933402J10Rik | 0 | 0 | 1 | 1 | no |
| 4933402J15Rik | 0 | 0 | 1 | 1 | no |
| 4933402N03Rik | 0 | 0 | 1 | 1 | no |
| 4933402P03Rik | 0 | 0 | 1 | 1 | no |
| 4933404G15Rik | 0 | 0 | 1 | 1 | no |
| 4933404K08Rik | 0 | 0 | 1 | 1 | no |
| 4933405E24Rik | 0 | 0 | 1 | 1 | no |
| 4933405O20Rik | 0 | 0 | 1 | 1 | no |

|               |   |   |   |   |    |
|---------------|---|---|---|---|----|
| 4933406D12Rik | 0 | 0 | 1 | 1 | no |
| 4933406J08Rik | 0 | 0 | 1 | 1 | no |
| 4933406J10Rik | 0 | 0 | 1 | 1 | no |
| 4933406K04Rik | 0 | 0 | 1 | 1 | no |
| 4933407E24Rik | 0 | 0 | 1 | 1 | no |
| 4933407G14Rik | 0 | 0 | 1 | 1 | no |
| 4933407I05Rik | 0 | 0 | 1 | 1 | no |
| 4933409G03Rik | 0 | 0 | 1 | 1 | no |
| 4933411G06Rik | 0 | 0 | 1 | 1 | no |
| 4933412E24Rik | 0 | 0 | 1 | 1 | no |
| 4933413L06Rik | 0 | 0 | 1 | 1 | no |
| 4933416E03Rik | 0 | 0 | 1 | 1 | no |
| 4933416I08Rik | 0 | 0 | 1 | 1 | no |
| 4933416M07Rik | 0 | 0 | 1 | 1 | no |
| 4933417A18Rik | 0 | 0 | 1 | 1 | no |
| 4933417E11Rik | 0 | 0 | 1 | 1 | no |
| 4933417G07Rik | 0 | 0 | 1 | 1 | no |
| 4933417O13Rik | 0 | 0 | 1 | 1 | no |
| 4933421I07Rik | 0 | 0 | 1 | 1 | no |
| 4933425B07Rik | 0 | 0 | 1 | 1 | no |
| 4933427E13Rik | 0 | 0 | 1 | 1 | no |
| 4933428C19Rik | 0 | 0 | 1 | 1 | no |
| 4933428G20Rik | 0 | 0 | 1 | 1 | no |
| 4933429K18Rik | 0 | 0 | 1 | 1 | no |
| 4933429O19Rik | 0 | 0 | 1 | 1 | no |
| 4933430H16Rik | 0 | 0 | 1 | 1 | no |
| 4933430N04Rik | 0 | 0 | 1 | 1 | no |
| 4933431G14Rik | 0 | 0 | 1 | 1 | no |
| 4933432G23Rik | 0 | 0 | 1 | 1 | no |
| 4933432I03Rik | 0 | 0 | 1 | 1 | no |
| 4933433C11Rik | 0 | 0 | 1 | 1 | no |
| 4933433F19Rik | 0 | 0 | 1 | 1 | no |
| 4933433G08Rik | 0 | 0 | 1 | 1 | no |
| 4933433G19Rik | 0 | 0 | 1 | 1 | no |
| 4933433H22Rik | 0 | 0 | 1 | 1 | no |
| 4933434I20Rik | 0 | 0 | 1 | 1 | no |
| 4933436H12Rik | 0 | 0 | 1 | 1 | no |
| 4933436I01Rik | 0 | 0 | 1 | 1 | no |
| 4933438B17Rik | 0 | 0 | 1 | 1 | no |
| 4933438K21Rik | 0 | 0 | 1 | 1 | no |
| 4933440J02Rik | 0 | 0 | 1 | 1 | no |
| 4933440M02Rik | 0 | 0 | 1 | 1 | no |
| 5031410I06Rik | 0 | 0 | 1 | 1 | no |
| 5031434C07Rik | 0 | 0 | 1 | 1 | no |
| 5033403H07Rik | 0 | 0 | 1 | 1 | no |
| 5033404E19Rik | 0 | 0 | 1 | 1 | no |
| 5133400J02Rik | 0 | 0 | 1 | 1 | no |
| 5330411J11Rik | 0 | 0 | 1 | 1 | no |
| 5330439B14Rik | 0 | 0 | 1 | 1 | no |
| 5430401F13Rik | 0 | 0 | 1 | 1 | no |
| 5430402E10Rik | 0 | 0 | 1 | 1 | no |
| 5430403N17Rik | 0 | 0 | 1 | 1 | no |
| 5430425K12Rik | 0 | 0 | 1 | 1 | no |

|                |   |   |   |   |    |
|----------------|---|---|---|---|----|
| 5430427M07Rik  | 0 | 0 | 1 | 1 | no |
| 5430428K19Rik  | 0 | 0 | 1 | 1 | no |
| 5430434I15Rik  | 0 | 0 | 1 | 1 | no |
| 5530400C23Rik  | 0 | 0 | 1 | 1 | no |
| 5730412P04Rik  | 0 | 0 | 1 | 1 | no |
| 5730416F02Rik  | 0 | 0 | 1 | 1 | no |
| 5730457N03Rik  | 0 | 0 | 1 | 1 | no |
| 5730488B01Rik  | 0 | 0 | 1 | 1 | no |
| 5830411N06Rik  | 0 | 0 | 1 | 1 | no |
| 6030440G07Rik  | 0 | 0 | 1 | 1 | no |
| 6030469F06Rik  | 0 | 0 | 1 | 1 | no |
| 6330407A03Rik  | 0 | 0 | 1 | 1 | no |
| 6430503K07Rik  | 0 | 0 | 1 | 1 | no |
| 6430584L05Rik  | 0 | 0 | 1 | 1 | no |
| 7420426K07Rik  | 0 | 0 | 1 | 1 | no |
| 7420461P10Rik  | 0 | 0 | 1 | 1 | no |
| 7420700N18Rik  | 0 | 0 | 1 | 1 | no |
| 7420701I03Rik  | 0 | 0 | 1 | 1 | no |
| 7530416G11Rik  | 0 | 0 | 1 | 1 | no |
| 8030411F24Rik  | 0 | 0 | 1 | 1 | no |
| 8030442B05Rik  | 0 | 0 | 1 | 1 | no |
| 8030443G20Rik  | 0 | 0 | 1 | 1 | no |
| 8430423G03Rik  | 0 | 0 | 1 | 1 | no |
| 8430436N08Rik  | 0 | 0 | 1 | 1 | no |
| 8430437L04Rik  | 0 | 0 | 1 | 1 | no |
| 9030204H09Rik  | 0 | 0 | 1 | 1 | no |
| 9030625G05Rik  | 0 | 0 | 1 | 1 | no |
| 9130015A21Rik  | 0 | 0 | 1 | 1 | no |
| 9130015L21Rik  | 0 | 0 | 1 | 1 | no |
| 9130209A04Rik  | 0 | 0 | 1 | 1 | no |
| 9130221F21Rik  | 0 | 0 | 1 | 1 | no |
| 9130230L23Rik  | 0 | 0 | 1 | 1 | no |
| 9230009I02Rik  | 0 | 0 | 1 | 1 | no |
| 9230102K24Rik  | 0 | 0 | 1 | 1 | no |
| 9230102O04Rik  | 0 | 0 | 1 | 1 | no |
| 9230104L09Rik  | 0 | 0 | 1 | 1 | no |
| 9230110F15Rik  | 0 | 0 | 1 | 1 | no |
| 9230112D13Rik  | 0 | 0 | 1 | 1 | no |
| 9330162B11Rik  | 0 | 0 | 1 | 1 | no |
| 9330178D15Rik  | 0 | 0 | 1 | 1 | no |
| 9330182O14Rik  | 0 | 0 | 1 | 1 | no |
| 9430007A20Rik  | 0 | 0 | 1 | 1 | no |
| 9430014N10Rik  | 0 | 0 | 1 | 1 | no |
| 9430019J16Rik  | 0 | 0 | 1 | 1 | no |
| 9430069I07Rik  | 0 | 0 | 1 | 1 | no |
| 9530002B09Rik  | 0 | 0 | 1 | 1 | no |
| 9530003J23Rik  | 0 | 0 | 1 | 1 | no |
| 9530026F06Rik  | 0 | 0 | 1 | 1 | no |
| 9630028H03Rik  | 0 | 0 | 1 | 1 | no |
| 9830166K06Rik  | 0 | 0 | 1 | 1 | no |
| 9930111H07Rik  | 0 | 0 | 1 | 1 | no |
| 9930111J21Rik2 | 0 | 0 | 1 | 1 | no |
| A1bg           | 0 | 0 | 1 | 1 | no |

|                 |   |   |   |   |    |
|-----------------|---|---|---|---|----|
| A230108P19Rik   | 0 | 0 | 1 | 1 | no |
| A430088P11Rik   | 0 | 0 | 1 | 1 | no |
| A430089I19Rik   | 0 | 0 | 1 | 1 | no |
| A430107P09Rik   | 0 | 0 | 1 | 1 | no |
| A4gnt           | 0 | 0 | 1 | 1 | no |
| A530006G24Rik   | 0 | 0 | 1 | 1 | no |
| A530013C23Rik   | 0 | 0 | 1 | 1 | no |
| A530046M15Rik   | 0 | 0 | 1 | 1 | no |
| A530053G22Rik   | 0 | 0 | 1 | 1 | no |
| A530065N20Rik   | 0 | 0 | 1 | 1 | no |
| A630010A05Rik   | 0 | 0 | 1 | 1 | no |
| A630012P03Rik   | 0 | 0 | 1 | 1 | no |
| A630019I02Rik   | 0 | 0 | 1 | 1 | no |
| A630073D07Rik   | 0 | 0 | 1 | 1 | no |
| A630076J17Rik   | 0 | 0 | 1 | 1 | no |
| A630095E13Rik   | 0 | 0 | 1 | 1 | no |
| A630095N17Rik   | 0 | 0 | 1 | 1 | no |
| A730006G06Rik   | 0 | 0 | 1 | 1 | no |
| A730018C14Rik   | 0 | 0 | 1 | 1 | no |
| A730090H04Rik   | 0 | 0 | 1 | 1 | no |
| A930018P22Rik   | 0 | 0 | 1 | 1 | no |
| A930041C12Rik   | 0 | 0 | 1 | 1 | no |
| AA413626        | 0 | 0 | 1 | 1 | no |
| AA543401        | 0 | 0 | 1 | 1 | no |
| AA545190        | 0 | 0 | 1 | 1 | no |
| AA619741        | 0 | 0 | 1 | 1 | no |
| AA792892        | 0 | 0 | 1 | 1 | no |
| AF067061        | 0 | 0 | 1 | 1 | no |
| AF067063        | 0 | 0 | 1 | 1 | no |
| AF357355        | 0 | 0 | 1 | 1 | no |
| AF357359        | 0 | 0 | 1 | 1 | no |
| AF357399        | 0 | 0 | 1 | 1 | no |
| AF357425        | 0 | 0 | 1 | 1 | no |
| AF357426        | 0 | 0 | 1 | 1 | no |
| AF366264        | 0 | 0 | 1 | 1 | no |
| AI314278        | 0 | 0 | 1 | 1 | no |
| AI507597        | 0 | 0 | 1 | 1 | no |
| AI606473        | 0 | 0 | 1 | 1 | no |
| AI646519        | 0 | 0 | 1 | 1 | no |
| AI747448        | 0 | 0 | 1 | 1 | no |
| AU015228        | 0 | 0 | 1 | 1 | no |
| AU015791        | 0 | 0 | 1 | 1 | no |
| AU016765        | 0 | 0 | 1 | 1 | no |
| AU018091        | 0 | 0 | 1 | 1 | no |
| AU018829,Gm1636 | 0 | 0 | 1 | 1 | no |
| AU021063        | 0 | 0 | 1 | 1 | no |
| AU022751        | 0 | 0 | 1 | 1 | no |
| AV320801,Gm1502 | 0 | 0 | 1 | 1 | no |
| AY074887        | 0 | 0 | 1 | 1 | no |
| AY512915        | 0 | 0 | 1 | 1 | no |
| AY512931        | 0 | 0 | 1 | 1 | no |
| AY761184        | 0 | 0 | 1 | 1 | no |
| AY761185        | 0 | 0 | 1 | 1 | no |

|          |   |   |   |   |    |
|----------|---|---|---|---|----|
| Aadac    | 0 | 0 | 1 | 1 | no |
| Aadacl2  | 0 | 0 | 1 | 1 | no |
| Aadacl3  | 0 | 0 | 1 | 1 | no |
| Abca15   | 0 | 0 | 1 | 1 | no |
| Abca16   | 0 | 0 | 1 | 1 | no |
| Abcb5    | 0 | 0 | 1 | 1 | no |
| Abhd12b  | 0 | 0 | 1 | 1 | no |
| Ace3     | 0 | 0 | 1 | 1 | no |
| Acer1    | 0 | 0 | 1 | 1 | no |
| Acnat1   | 0 | 0 | 1 | 1 | no |
| Acnat2   | 0 | 0 | 1 | 1 | no |
| Acpt     | 0 | 0 | 1 | 1 | no |
| Acrv1    | 0 | 0 | 1 | 1 | no |
| Acsbg2   | 0 | 0 | 1 | 1 | no |
| Acsm1    | 0 | 0 | 1 | 1 | no |
| Acsm2    | 0 | 0 | 1 | 1 | no |
| Acsm4    | 0 | 0 | 1 | 1 | no |
| Acsm5    | 0 | 0 | 1 | 1 | no |
| Acss2os  | 0 | 0 | 1 | 1 | no |
| Actl11   | 0 | 0 | 1 | 1 | no |
| Actl7a   | 0 | 0 | 1 | 1 | no |
| Actrt1   | 0 | 0 | 1 | 1 | no |
| Actrt2   | 0 | 0 | 1 | 1 | no |
| Adad1    | 0 | 0 | 1 | 1 | no |
| Adad2    | 0 | 0 | 1 | 1 | no |
| Adam1b   | 0 | 0 | 1 | 1 | no |
| Adam20   | 0 | 0 | 1 | 1 | no |
| Adam26a  | 0 | 0 | 1 | 1 | no |
| Adam26b  | 0 | 0 | 1 | 1 | no |
| Adam29   | 0 | 0 | 1 | 1 | no |
| Adam3    | 0 | 0 | 1 | 1 | no |
| Adam30   | 0 | 0 | 1 | 1 | no |
| Adam34   | 0 | 0 | 1 | 1 | no |
| Adam39   | 0 | 0 | 1 | 1 | no |
| Adam6a   | 0 | 0 | 1 | 1 | no |
| Adam6b   | 0 | 0 | 1 | 1 | no |
| Adh4     | 0 | 0 | 1 | 1 | no |
| Adh6-ps1 | 0 | 0 | 1 | 1 | no |
| Adh6a    | 0 | 0 | 1 | 1 | no |
| Afm      | 0 | 0 | 1 | 1 | no |
| Agr3     | 0 | 0 | 1 | 1 | no |
| Agxt     | 0 | 0 | 1 | 1 | no |
| Agxt2    | 0 | 0 | 1 | 1 | no |
| Aipl1    | 0 | 0 | 1 | 1 | no |
| Akap4    | 0 | 0 | 1 | 1 | no |
| Akp3     | 0 | 0 | 1 | 1 | no |
| Akr1c12  | 0 | 0 | 1 | 1 | no |
| Akr1c18  | 0 | 0 | 1 | 1 | no |
| Akr1c20  | 0 | 0 | 1 | 1 | no |
| Akr1c21  | 0 | 0 | 1 | 1 | no |
| Akr1c6   | 0 | 0 | 1 | 1 | no |
| Akr1cl   | 0 | 0 | 1 | 1 | no |
| Akr1d1   | 0 | 0 | 1 | 1 | no |

|               |   |   |   |   |    |
|---------------|---|---|---|---|----|
| Alb           | 0 | 0 | 1 | 1 | no |
| Allc          | 0 | 0 | 1 | 1 | no |
| Alms1-ps2     | 0 | 0 | 1 | 1 | no |
| Alox12e       | 0 | 0 | 1 | 1 | no |
| Alpi          | 0 | 0 | 1 | 1 | no |
| Alpl2         | 0 | 0 | 1 | 1 | no |
| Ambp          | 0 | 0 | 1 | 1 | no |
| Amelx         | 0 | 0 | 1 | 1 | no |
| Amtn          | 0 | 0 | 1 | 1 | no |
| Amy2a2,Amy2a5 | 0 | 0 | 1 | 1 | no |
| Amy2a5        | 0 | 0 | 1 | 1 | no |
| Amy2b         | 0 | 0 | 1 | 1 | no |
| Ang2          | 0 | 0 | 1 | 1 | no |
| Ang3,Ang5     | 0 | 0 | 1 | 1 | no |
| Ang4          | 0 | 0 | 1 | 1 | no |
| Ang5          | 0 | 0 | 1 | 1 | no |
| Ang6          | 0 | 0 | 1 | 1 | no |
| Angptl3       | 0 | 0 | 1 | 1 | no |
| Ankar         | 0 | 0 | 1 | 1 | no |
| Ankrd36       | 0 | 0 | 1 | 1 | no |
| Ankrd53       | 0 | 0 | 1 | 1 | no |
| Anks4b        | 0 | 0 | 1 | 1 | no |
| Antxrl        | 0 | 0 | 1 | 1 | no |
| Anxa13        | 0 | 0 | 1 | 1 | no |
| Apcs          | 0 | 0 | 1 | 1 | no |
| Apoa4         | 0 | 0 | 1 | 1 | no |
| Apoa5         | 0 | 0 | 1 | 1 | no |
| Apobec4       | 0 | 0 | 1 | 1 | no |
| Apoc3         | 0 | 0 | 1 | 1 | no |
| Apoc4         | 0 | 0 | 1 | 1 | no |
| Apol7c        | 0 | 0 | 1 | 1 | no |
| Apom          | 0 | 0 | 1 | 1 | no |
| Apoo-ps       | 0 | 0 | 1 | 1 | no |
| Aqp6          | 0 | 0 | 1 | 1 | no |
| Arhgap20os    | 0 | 0 | 1 | 1 | no |
| Arhgap27os3   | 0 | 0 | 1 | 1 | no |
| Arhgef38      | 0 | 0 | 1 | 1 | no |
| Arid3c        | 0 | 0 | 1 | 1 | no |
| Arl13a        | 0 | 0 | 1 | 1 | no |
| Arl14         | 0 | 0 | 1 | 1 | no |
| Armc12        | 0 | 0 | 1 | 1 | no |
| Arrdc5        | 0 | 0 | 1 | 1 | no |
| Art2a-ps      | 0 | 0 | 1 | 1 | no |
| Ascl1         | 0 | 0 | 1 | 1 | no |
| Ascl5         | 0 | 0 | 1 | 1 | no |
| Asic5         | 0 | 0 | 1 | 1 | no |
| Asmt          | 0 | 0 | 1 | 1 | no |
| Astl          | 0 | 0 | 1 | 1 | no |
| Asz1          | 0 | 0 | 1 | 1 | no |
| Atcayos       | 0 | 0 | 1 | 1 | no |
| Atf7ip2       | 0 | 0 | 1 | 1 | no |
| Atoh1         | 0 | 0 | 1 | 1 | no |
| Atoh7         | 0 | 0 | 1 | 1 | no |



|               |   |   |   |   |    |
|---------------|---|---|---|---|----|
| Atp6v0c-ps2   | 0 | 0 | 1 | 1 | no |
| Atp6v1b1      | 0 | 0 | 1 | 1 | no |
| Atp6v1e2      | 0 | 0 | 1 | 1 | no |
| Atp6v1g3      | 0 | 0 | 1 | 1 | no |
| Aurkc         | 0 | 0 | 1 | 1 | no |
| Avp           | 0 | 0 | 1 | 1 | no |
| Avpr2         | 0 | 0 | 1 | 1 | no |
| Awat1         | 0 | 0 | 1 | 1 | no |
| Aym1          | 0 | 0 | 1 | 1 | no |
| B020004C17Rik | 0 | 0 | 1 | 1 | no |
| B020004J07Rik | 0 | 0 | 1 | 1 | no |
| B020014A21Rik | 0 | 0 | 1 | 1 | no |
| B020031M17Rik | 0 | 0 | 1 | 1 | no |
| B930025P03Rik | 0 | 0 | 1 | 1 | no |
| BB014433      | 0 | 0 | 1 | 1 | no |
| BB019430      | 0 | 0 | 1 | 1 | no |
| BB031773      | 0 | 0 | 1 | 1 | no |
| BB287469      | 0 | 0 | 1 | 1 | no |
| BC030499      | 0 | 0 | 1 | 1 | no |
| BC039966      | 0 | 0 | 1 | 1 | no |
| BC048502      | 0 | 0 | 1 | 1 | no |
| BC048507      | 0 | 0 | 1 | 1 | no |
| BC048562      | 0 | 0 | 1 | 1 | no |
| BC048602      | 0 | 0 | 1 | 1 | no |
| BC048609      | 0 | 0 | 1 | 1 | no |
| BC048671      | 0 | 0 | 1 | 1 | no |
| BC049730      | 0 | 0 | 1 | 1 | no |
| BC051537      | 0 | 0 | 1 | 1 | no |
| BC051665      | 0 | 0 | 1 | 1 | no |
| BC052688      | 0 | 0 | 1 | 1 | no |
| BC053393      | 0 | 0 | 1 | 1 | no |
| BC055402      | 0 | 0 | 1 | 1 | no |
| BC061195      | 0 | 0 | 1 | 1 | no |
| BC061212      | 0 | 0 | 1 | 1 | no |
| BC061237      | 0 | 0 | 1 | 1 | no |
| BC080695      | 0 | 0 | 1 | 1 | no |
| BC100530      | 0 | 0 | 1 | 1 | no |
| BC117090      | 0 | 0 | 1 | 1 | no |
| Banf2         | 0 | 0 | 1 | 1 | no |
| Bc1           | 0 | 0 | 1 | 1 | no |
| Bcas1os2      | 0 | 0 | 1 | 1 | no |
| Bcas3os1      | 0 | 0 | 1 | 1 | no |
| Bcas3os2      | 0 | 0 | 1 | 1 | no |
| Bcl2a1a       | 0 | 0 | 1 | 1 | no |
| Bcl2a1c       | 0 | 0 | 1 | 1 | no |
| Becn2         | 0 | 0 | 1 | 1 | no |
| Bex6          | 0 | 0 | 1 | 1 | no |
| Bglap3        | 0 | 0 | 1 | 1 | no |
| Birc7         | 0 | 0 | 1 | 1 | no |
| Bmp10         | 0 | 0 | 1 | 1 | no |
| Boll          | 0 | 0 | 1 | 1 | no |
| Bpi           | 0 | 0 | 1 | 1 | no |
| Bpifa1        | 0 | 0 | 1 | 1 | no |

|               |   |   |   |   |    |
|---------------|---|---|---|---|----|
| Bpifa3        | 0 | 0 | 1 | 1 | no |
| Bpifa6        | 0 | 0 | 1 | 1 | no |
| Bpifb2        | 0 | 0 | 1 | 1 | no |
| Bpifb3        | 0 | 0 | 1 | 1 | no |
| Bpifb9a       | 0 | 0 | 1 | 1 | no |
| Bpifb9b       | 0 | 0 | 1 | 1 | no |
| Brs3          | 0 | 0 | 1 | 1 | no |
| Bsnd          | 0 | 0 | 1 | 1 | no |
| Bsph1         | 0 | 0 | 1 | 1 | no |
| Bsph2         | 0 | 0 | 1 | 1 | no |
| Btg4          | 0 | 0 | 1 | 1 | no |
| Btnl2         | 0 | 0 | 1 | 1 | no |
| Btnl4         | 0 | 0 | 1 | 1 | no |
| C030007H22Rik | 0 | 0 | 1 | 1 | no |
| C030013G03Rik | 0 | 0 | 1 | 1 | no |
| C030018K13Rik | 0 | 0 | 1 | 1 | no |
| C030029H02Rik | 0 | 0 | 1 | 1 | no |
| C130026I21Rik | 0 | 0 | 1 | 1 | no |
| C130079G13Rik | 0 | 0 | 1 | 1 | no |
| C1rb          | 0 | 0 | 1 | 1 | no |
| C230024C17Rik | 0 | 0 | 1 | 1 | no |
| C230079O03Rik | 0 | 0 | 1 | 1 | no |
| C330011F03Rik | 0 | 0 | 1 | 1 | no |
| C330013F16Rik | 0 | 0 | 1 | 1 | no |
| C330022C24Rik | 0 | 0 | 1 | 1 | no |
| C330046G13Rik | 0 | 0 | 1 | 1 | no |
| C430002E04Rik | 0 | 0 | 1 | 1 | no |
| C4bp          | 0 | 0 | 1 | 1 | no |
| C630028M04Rik | 0 | 0 | 1 | 1 | no |
| C86187        | 0 | 0 | 1 | 1 | no |
| C86695        | 0 | 0 | 1 | 1 | no |
| C87198        | 0 | 0 | 1 | 1 | no |
| C87414        | 0 | 0 | 1 | 1 | no |
| C87499        | 0 | 0 | 1 | 1 | no |
| C87977        | 0 | 0 | 1 | 1 | no |
| Cabp2         | 0 | 0 | 1 | 1 | no |
| Cabs1         | 0 | 0 | 1 | 1 | no |
| Cacng6        | 0 | 0 | 1 | 1 | no |
| Calcr         | 0 | 0 | 1 | 1 | no |
| Calhm1        | 0 | 0 | 1 | 1 | no |
| Calm4         | 0 | 0 | 1 | 1 | no |
| Calm5         | 0 | 0 | 1 | 1 | no |
| Calml3        | 0 | 0 | 1 | 1 | no |
| Capza3        | 0 | 0 | 1 | 1 | no |
| Casp14        | 0 | 0 | 1 | 1 | no |
| Catsper1      | 0 | 0 | 1 | 1 | no |
| Catsperb      | 0 | 0 | 1 | 1 | no |
| Catsperg2     | 0 | 0 | 1 | 1 | no |
| Ccdc110       | 0 | 0 | 1 | 1 | no |
| Ccdc135       | 0 | 0 | 1 | 1 | no |
| Ccdc144b      | 0 | 0 | 1 | 1 | no |
| Ccdc152       | 0 | 0 | 1 | 1 | no |
| Ccdc154       | 0 | 0 | 1 | 1 | no |

|                 |   |   |   |   |    |
|-----------------|---|---|---|---|----|
| Ccdc183         | 0 | 0 | 1 | 1 | no |
| Ccdc34os        | 0 | 0 | 1 | 1 | no |
| Ccdc42b         | 0 | 0 | 1 | 1 | no |
| Ccdc70          | 0 | 0 | 1 | 1 | no |
| Ccl17           | 0 | 0 | 1 | 1 | no |
| Ccl20           | 0 | 0 | 1 | 1 | no |
| Ccl26           | 0 | 0 | 1 | 1 | no |
| Ccl27b          | 0 | 0 | 1 | 1 | no |
| Ccr11l          | 0 | 0 | 1 | 1 | no |
| Ccr6            | 0 | 0 | 1 | 1 | no |
| Cd209c          | 0 | 0 | 1 | 1 | no |
| Cd209d          | 0 | 0 | 1 | 1 | no |
| Cd300c          | 0 | 0 | 1 | 1 | no |
| Cd300lh,Gm11710 | 0 | 0 | 1 | 1 | no |
| Cd40lg          | 0 | 0 | 1 | 1 | no |
| Cdh16           | 0 | 0 | 1 | 1 | no |
| Cdhr5           | 0 | 0 | 1 | 1 | no |
| Cdx2            | 0 | 0 | 1 | 1 | no |
| Cdx4            | 0 | 0 | 1 | 1 | no |
| Ceacam-ps1      | 0 | 0 | 1 | 1 | no |
| Ceacam11        | 0 | 0 | 1 | 1 | no |
| Ceacam12        | 0 | 0 | 1 | 1 | no |
| Ceacam13        | 0 | 0 | 1 | 1 | no |
| Ceacam14        | 0 | 0 | 1 | 1 | no |
| Ceacam18        | 0 | 0 | 1 | 1 | no |
| Ceacam19        | 0 | 0 | 1 | 1 | no |
| Ceacam5         | 0 | 0 | 1 | 1 | no |
| Ceacam9         | 0 | 0 | 1 | 1 | no |
| Cela2a          | 0 | 0 | 1 | 1 | no |
| Cela3b          | 0 | 0 | 1 | 1 | no |
| Celrr           | 0 | 0 | 1 | 1 | no |
| Ces1b           | 0 | 0 | 1 | 1 | no |
| Ces1c           | 0 | 0 | 1 | 1 | no |
| Ces1e           | 0 | 0 | 1 | 1 | no |
| Ces1f           | 0 | 0 | 1 | 1 | no |
| Ces1g           | 0 | 0 | 1 | 1 | no |
| Ces2a           | 0 | 0 | 1 | 1 | no |
| Ces2b           | 0 | 0 | 1 | 1 | no |
| Ces2d-ps        | 0 | 0 | 1 | 1 | no |
| Ces2f           | 0 | 0 | 1 | 1 | no |
| Ces2h           | 0 | 0 | 1 | 1 | no |
| Ces3a           | 0 | 0 | 1 | 1 | no |
| Ces3b           | 0 | 0 | 1 | 1 | no |
| Cetn1           | 0 | 0 | 1 | 1 | no |
| Cfc1            | 0 | 0 | 1 | 1 | no |
| Cfhr1           | 0 | 0 | 1 | 1 | no |
| Cga             | 0 | 0 | 1 | 1 | no |
| Chat            | 0 | 0 | 1 | 1 | no |
| Chil4           | 0 | 0 | 1 | 1 | no |
| Chrna9          | 0 | 0 | 1 | 1 | no |
| Chst13          | 0 | 0 | 1 | 1 | no |
| Cib4            | 0 | 0 | 1 | 1 | no |
| Cistr-act       | 0 | 0 | 1 | 1 | no |

|          |   |   |   |   |    |
|----------|---|---|---|---|----|
| Cks1brt  | 0 | 0 | 1 | 1 | no |
| Clcnka   | 0 | 0 | 1 | 1 | no |
| Cldn17   | 0 | 0 | 1 | 1 | no |
| Cldn18   | 0 | 0 | 1 | 1 | no |
| Cldn24   | 0 | 0 | 1 | 1 | no |
| Cldn4    | 0 | 0 | 1 | 1 | no |
| Cldnd2   | 0 | 0 | 1 | 1 | no |
| Clec2f   | 0 | 0 | 1 | 1 | no |
| Clec2g   | 0 | 0 | 1 | 1 | no |
| Clec4a4  | 0 | 0 | 1 | 1 | no |
| Clec4g   | 0 | 0 | 1 | 1 | no |
| Clps     | 0 | 0 | 1 | 1 | no |
| Clpsl2   | 0 | 0 | 1 | 1 | no |
| Clrn3    | 0 | 0 | 1 | 1 | no |
| Cma2     | 0 | 0 | 1 | 1 | no |
| Cml5     | 0 | 0 | 1 | 1 | no |
| Cmtm1    | 0 | 0 | 1 | 1 | no |
| Cmtm2a   | 0 | 0 | 1 | 1 | no |
| Cmtm2b   | 0 | 0 | 1 | 1 | no |
| Cngb3    | 0 | 0 | 1 | 1 | no |
| Cnpy1    | 0 | 0 | 1 | 1 | no |
| Cort     | 0 | 0 | 1 | 1 | no |
| Cox8c    | 0 | 0 | 1 | 1 | no |
| Cpa1     | 0 | 0 | 1 | 1 | no |
| Cpa5     | 0 | 0 | 1 | 1 | no |
| Cpb2     | 0 | 0 | 1 | 1 | no |
| Cpsf4l   | 0 | 0 | 1 | 1 | no |
| Cpxcr1   | 0 | 0 | 1 | 1 | no |
| Crisp2   | 0 | 0 | 1 | 1 | no |
| Crisp3   | 0 | 0 | 1 | 1 | no |
| Crisp4   | 0 | 0 | 1 | 1 | no |
| Crnn     | 0 | 0 | 1 | 1 | no |
| Crxos    | 0 | 0 | 1 | 1 | no |
| Cryaa    | 0 | 0 | 1 | 1 | no |
| Cryba1   | 0 | 0 | 1 | 1 | no |
| Crygb    | 0 | 0 | 1 | 1 | no |
| Crygc    | 0 | 0 | 1 | 1 | no |
| Crygd    | 0 | 0 | 1 | 1 | no |
| Cryge    | 0 | 0 | 1 | 1 | no |
| Crygf    | 0 | 0 | 1 | 1 | no |
| Csf2     | 0 | 0 | 1 | 1 | no |
| Csmd2os  | 0 | 0 | 1 | 1 | no |
| Csn1s1   | 0 | 0 | 1 | 1 | no |
| Csn1s2b  | 0 | 0 | 1 | 1 | no |
| Csn2     | 0 | 0 | 1 | 1 | no |
| Csn3     | 0 | 0 | 1 | 1 | no |
| Csnka2ip | 0 | 0 | 1 | 1 | no |
| Cst10    | 0 | 0 | 1 | 1 | no |
| Cst11    | 0 | 0 | 1 | 1 | no |
| Cst13    | 0 | 0 | 1 | 1 | no |
| Cst8     | 0 | 0 | 1 | 1 | no |
| Cst9     | 0 | 0 | 1 | 1 | no |
| Csta1    | 0 | 0 | 1 | 1 | no |

|            |   |   |   |   |    |
|------------|---|---|---|---|----|
| Ctag2      | 0 | 0 | 1 | 1 | no |
| Ctf2       | 0 | 0 | 1 | 1 | no |
| Ctrc       | 0 | 0 | 1 | 1 | no |
| Ctrcos     | 0 | 0 | 1 | 1 | no |
| Cts3       | 0 | 0 | 1 | 1 | no |
| Cts6       | 0 | 0 | 1 | 1 | no |
| Cts7       | 0 | 0 | 1 | 1 | no |
| Cts8       | 0 | 0 | 1 | 1 | no |
| Cts8-ps    | 0 | 0 | 1 | 1 | no |
| Ctsj       | 0 | 0 | 1 | 1 | no |
| Ctsll3     | 0 | 0 | 1 | 1 | no |
| Ctsm       | 0 | 0 | 1 | 1 | no |
| Ctsq       | 0 | 0 | 1 | 1 | no |
| Ctsr       | 0 | 0 | 1 | 1 | no |
| Cxcl15     | 0 | 0 | 1 | 1 | no |
| Cxcl17     | 0 | 0 | 1 | 1 | no |
| Cxcl3      | 0 | 0 | 1 | 1 | no |
| Cylc1      | 0 | 0 | 1 | 1 | no |
| Cylc2      | 0 | 0 | 1 | 1 | no |
| Cym        | 0 | 0 | 1 | 1 | no |
| Cyp11b1    | 0 | 0 | 1 | 1 | no |
| Cyp11b2    | 0 | 0 | 1 | 1 | no |
| Cyp19a1    | 0 | 0 | 1 | 1 | no |
| Cyp1a2     | 0 | 0 | 1 | 1 | no |
| Cyp21a1    | 0 | 0 | 1 | 1 | no |
| Cyp2a12    | 0 | 0 | 1 | 1 | no |
| Cyp2a22    | 0 | 0 | 1 | 1 | no |
| Cyp2a4     | 0 | 0 | 1 | 1 | no |
| Cyp2a5     | 0 | 0 | 1 | 1 | no |
| Cyp2b13    | 0 | 0 | 1 | 1 | no |
| Cyp2b19    | 0 | 0 | 1 | 1 | no |
| Cyp2b23    | 0 | 0 | 1 | 1 | no |
| Cyp2b9     | 0 | 0 | 1 | 1 | no |
| Cyp2c29    | 0 | 0 | 1 | 1 | no |
| Cyp2c37    | 0 | 0 | 1 | 1 | no |
| Cyp2c38    | 0 | 0 | 1 | 1 | no |
| Cyp2c39    | 0 | 0 | 1 | 1 | no |
| Cyp2c40    | 0 | 0 | 1 | 1 | no |
| Cyp2c50    | 0 | 0 | 1 | 1 | no |
| Cyp2c53-ps | 0 | 0 | 1 | 1 | no |
| Cyp2c54    | 0 | 0 | 1 | 1 | no |
| Cyp2c67    | 0 | 0 | 1 | 1 | no |
| Cyp2c68    | 0 | 0 | 1 | 1 | no |
| Cyp2c69    | 0 | 0 | 1 | 1 | no |
| Cyp2c70    | 0 | 0 | 1 | 1 | no |
| Cyp2d10    | 0 | 0 | 1 | 1 | no |
| Cyp2d11    | 0 | 0 | 1 | 1 | no |
| Cyp2d12    | 0 | 0 | 1 | 1 | no |
| Cyp2d13    | 0 | 0 | 1 | 1 | no |
| Cyp2d34    | 0 | 0 | 1 | 1 | no |
| Cyp2d37-ps | 0 | 0 | 1 | 1 | no |
| Cyp2d40    | 0 | 0 | 1 | 1 | no |
| Cyp2d9     | 0 | 0 | 1 | 1 | no |

|                   |   |   |   |   |    |
|-------------------|---|---|---|---|----|
| Cyp2g1            | 0 | 0 | 1 | 1 | no |
| Cyp2j11           | 0 | 0 | 1 | 1 | no |
| Cyp2j5            | 0 | 0 | 1 | 1 | no |
| Cyp2t4            | 0 | 0 | 1 | 1 | no |
| Cyp2w1            | 0 | 0 | 1 | 1 | no |
| Cyp3a11           | 0 | 0 | 1 | 1 | no |
| Cyp3a16           | 0 | 0 | 1 | 1 | no |
| Cyp3a25           | 0 | 0 | 1 | 1 | no |
| Cyp3a41a          | 0 | 0 | 1 | 1 | no |
| Cyp3a41b          | 0 | 0 | 1 | 1 | no |
| Cyp3a44           | 0 | 0 | 1 | 1 | no |
| Cyp3a57           | 0 | 0 | 1 | 1 | no |
| Cyp3a59           | 0 | 0 | 1 | 1 | no |
| Cyp4a10           | 0 | 0 | 1 | 1 | no |
| Cyp4a12a          | 0 | 0 | 1 | 1 | no |
| Cyp4a12b          | 0 | 0 | 1 | 1 | no |
| Cyp4a14           | 0 | 0 | 1 | 1 | no |
| Cyp4a29           | 0 | 0 | 1 | 1 | no |
| Cyp4a30b          | 0 | 0 | 1 | 1 | no |
| Cyp4a31           | 0 | 0 | 1 | 1 | no |
| Cyp4a32           | 0 | 0 | 1 | 1 | no |
| Cyp4f37           | 0 | 0 | 1 | 1 | no |
| Cyp4f40           | 0 | 0 | 1 | 1 | no |
| Cyp7a1            | 0 | 0 | 1 | 1 | no |
| Cyp8b1            | 0 | 0 | 1 | 1 | no |
| Cypt1,Cypt8       | 0 | 0 | 1 | 1 | no |
| Cypt12            | 0 | 0 | 1 | 1 | no |
| Cypt14            | 0 | 0 | 1 | 1 | no |
| Cypt15            | 0 | 0 | 1 | 1 | no |
| Cypt3             | 0 | 0 | 1 | 1 | no |
| Cypt4,Cypt9       | 0 | 0 | 1 | 1 | no |
| Cypt7             | 0 | 0 | 1 | 1 | no |
| Cypt8             | 0 | 0 | 1 | 1 | no |
| Cypt9             | 0 | 0 | 1 | 1 | no |
| D030024E09Rik     | 0 | 0 | 1 | 1 | no |
| D030040B21Rik     | 0 | 0 | 1 | 1 | no |
| D130058E03        | 0 | 0 | 1 | 1 | no |
| D14Erttd670e      | 0 | 0 | 1 | 1 | no |
| D16Erttd519e      | 0 | 0 | 1 | 1 | no |
| D17Erttd648e      | 0 | 0 | 1 | 1 | no |
| D530049I02Rik     | 0 | 0 | 1 | 1 | no |
| D5Erttd577e,Gm328 | 0 | 0 | 1 | 1 | no |
| D630010B17Rik     | 0 | 0 | 1 | 1 | no |
| D630013N20Rik     | 0 | 0 | 1 | 1 | no |
| D730001G18Rik     | 0 | 0 | 1 | 1 | no |
| D730048I06Rik     | 0 | 0 | 1 | 1 | no |
| D730050B12Rik     | 0 | 0 | 1 | 1 | no |
| D7Erttd143e       | 0 | 0 | 1 | 1 | no |
| D830005E20Rik     | 0 | 0 | 1 | 1 | no |
| D830015G02Rik     | 0 | 0 | 1 | 1 | no |
| D930007P13Rik     | 0 | 0 | 1 | 1 | no |
| D930032P07Rik     | 0 | 0 | 1 | 1 | no |
| DQ267100          | 0 | 0 | 1 | 1 | no |



|                 |   |   |   |   |    |
|-----------------|---|---|---|---|----|
| DQ267101        | 0 | 0 | 1 | 1 | no |
| DQ267102        | 0 | 0 | 1 | 1 | no |
| DXBay18,Gm14685 | 0 | 0 | 1 | 1 | no |
| Dao             | 0 | 0 | 1 | 1 | no |
| Dbx1            | 0 | 0 | 1 | 1 | no |
| Dcdc2c          | 0 | 0 | 1 | 1 | no |
| Dcpp1           | 0 | 0 | 1 | 1 | no |
| Dcpp2           | 0 | 0 | 1 | 1 | no |
| Dcpp3           | 0 | 0 | 1 | 1 | no |
| Dcst1           | 0 | 0 | 1 | 1 | no |
| Ddi1            | 0 | 0 | 1 | 1 | no |
| Defa-ps1        | 0 | 0 | 1 | 1 | no |
| Defa-ps12       | 0 | 0 | 1 | 1 | no |
| Defa-ps13       | 0 | 0 | 1 | 1 | no |
| Defa-rs1        | 0 | 0 | 1 | 1 | no |
| Defa-rs7,Defa23 | 0 | 0 | 1 | 1 | no |
| Defa17          | 0 | 0 | 1 | 1 | no |
| Defa2           | 0 | 0 | 1 | 1 | no |
| Defa20          | 0 | 0 | 1 | 1 | no |
| Defa21          | 0 | 0 | 1 | 1 | no |
| Defa22          | 0 | 0 | 1 | 1 | no |
| Defa23          | 0 | 0 | 1 | 1 | no |
| Defa24,Defa6    | 0 | 0 | 1 | 1 | no |
| Defa25          | 0 | 0 | 1 | 1 | no |
| Defa26          | 0 | 0 | 1 | 1 | no |
| Defa3           | 0 | 0 | 1 | 1 | no |
| Defa4           | 0 | 0 | 1 | 1 | no |
| Defa5           | 0 | 0 | 1 | 1 | no |
| Defa6           | 0 | 0 | 1 | 1 | no |
| Defb1           | 0 | 0 | 1 | 1 | no |
| Defb10          | 0 | 0 | 1 | 1 | no |
| Defb11          | 0 | 0 | 1 | 1 | no |
| Defb12          | 0 | 0 | 1 | 1 | no |
| Defb13          | 0 | 0 | 1 | 1 | no |
| Defb14          | 0 | 0 | 1 | 1 | no |
| Defb15          | 0 | 0 | 1 | 1 | no |
| Defb18          | 0 | 0 | 1 | 1 | no |
| Defb19          | 0 | 0 | 1 | 1 | no |
| Defb2           | 0 | 0 | 1 | 1 | no |
| Defb21          | 0 | 0 | 1 | 1 | no |
| Defb22          | 0 | 0 | 1 | 1 | no |
| Defb23          | 0 | 0 | 1 | 1 | no |
| Defb25          | 0 | 0 | 1 | 1 | no |
| Defb26          | 0 | 0 | 1 | 1 | no |
| Defb29          | 0 | 0 | 1 | 1 | no |
| Defb3           | 0 | 0 | 1 | 1 | no |
| Defb33          | 0 | 0 | 1 | 1 | no |
| Defb34          | 0 | 0 | 1 | 1 | no |
| Defb35          | 0 | 0 | 1 | 1 | no |
| Defb36          | 0 | 0 | 1 | 1 | no |
| Defb37          | 0 | 0 | 1 | 1 | no |
| Defb38          | 0 | 0 | 1 | 1 | no |
| Defb39          | 0 | 0 | 1 | 1 | no |

|                  |   |   |   |   |    |
|------------------|---|---|---|---|----|
| Defb4            | 0 | 0 | 1 | 1 | no |
| Defb40           | 0 | 0 | 1 | 1 | no |
| Defb41           | 0 | 0 | 1 | 1 | no |
| Defb43           | 0 | 0 | 1 | 1 | no |
| Defb44-ps        | 0 | 0 | 1 | 1 | no |
| Defb45           | 0 | 0 | 1 | 1 | no |
| Defb46           | 0 | 0 | 1 | 1 | no |
| Defb47           | 0 | 0 | 1 | 1 | no |
| Defb48           | 0 | 0 | 1 | 1 | no |
| Defb5            | 0 | 0 | 1 | 1 | no |
| Defb50           | 0 | 0 | 1 | 1 | no |
| Defb6            | 0 | 0 | 1 | 1 | no |
| Defb7            | 0 | 0 | 1 | 1 | no |
| Defb8            | 0 | 0 | 1 | 1 | no |
| Defb9            | 0 | 0 | 1 | 1 | no |
| Dgat2l6          | 0 | 0 | 1 | 1 | no |
| Dio1             | 0 | 0 | 1 | 1 | no |
| Dkk1             | 0 | 0 | 1 | 1 | no |
| Dkk4             | 0 | 0 | 1 | 1 | no |
| Dlx1as           | 0 | 0 | 1 | 1 | no |
| Dlx6as2          | 0 | 0 | 1 | 1 | no |
| Dlx6os1          | 0 | 0 | 1 | 1 | no |
| Dmrt3            | 0 | 0 | 1 | 1 | no |
| Dmrta1b          | 0 | 0 | 1 | 1 | no |
| Dmrta1c2         | 0 | 0 | 1 | 1 | no |
| Dmrta2           | 0 | 0 | 1 | 1 | no |
| Dnajb8           | 0 | 0 | 1 | 1 | no |
| Dnajc5g          | 0 | 0 | 1 | 1 | no |
| Dnase1           | 0 | 0 | 1 | 1 | no |
| Dnmt3aos         | 0 | 0 | 1 | 1 | no |
| Doxl2            | 0 | 0 | 1 | 1 | no |
| Dpcr1            | 0 | 0 | 1 | 1 | no |
| Dppa1            | 0 | 0 | 1 | 1 | no |
| Dppa3            | 0 | 0 | 1 | 1 | no |
| Dppa4            | 0 | 0 | 1 | 1 | no |
| Drd4             | 0 | 0 | 1 | 1 | no |
| Dreh             | 0 | 0 | 1 | 1 | no |
| Dsg3             | 0 | 0 | 1 | 1 | no |
| Dsg4             | 0 | 0 | 1 | 1 | no |
| Dthd1            | 0 | 0 | 1 | 1 | no |
| Dusp21           | 0 | 0 | 1 | 1 | no |
| Dux              | 0 | 0 | 1 | 1 | no |
| Dydc1            | 0 | 0 | 1 | 1 | no |
| E030002O03Rik    | 0 | 0 | 1 | 1 | no |
| E030018B13Rik    | 0 | 0 | 1 | 1 | no |
| E030019B13Rik    | 0 | 0 | 1 | 1 | no |
| E030025P04Rik    | 0 | 0 | 1 | 1 | no |
| E030044B06Rik    | 0 | 0 | 1 | 1 | no |
| E130218I03Rik    | 0 | 0 | 1 | 1 | no |
| E230019M04Rik    | 0 | 0 | 1 | 1 | no |
| E330012B07Rik    | 0 | 0 | 1 | 1 | no |
| E330014E10Rik,Gn | 0 | 0 | 1 | 1 | no |
| E330020D12Rik    | 0 | 0 | 1 | 1 | no |

|               |   |   |   |   |    |
|---------------|---|---|---|---|----|
| E330023G01Rik | 0 | 0 | 1 | 1 | no |
| Ear10         | 0 | 0 | 1 | 1 | no |
| Ear14         | 0 | 0 | 1 | 1 | no |
| Ear4          | 0 | 0 | 1 | 1 | no |
| Efcab8        | 0 | 0 | 1 | 1 | no |
| Egfbp2        | 0 | 0 | 1 | 1 | no |
| Elovl3        | 0 | 0 | 1 | 1 | no |
| Emx1          | 0 | 0 | 1 | 1 | no |
| Emx2          | 0 | 0 | 1 | 1 | no |
| Emx2os        | 0 | 0 | 1 | 1 | no |
| En2           | 0 | 0 | 1 | 1 | no |
| Enam          | 0 | 0 | 1 | 1 | no |
| Enpp7         | 0 | 0 | 1 | 1 | no |
| Enthd1        | 0 | 0 | 1 | 1 | no |
| Entpd8        | 0 | 0 | 1 | 1 | no |
| Eras          | 0 | 0 | 1 | 1 | no |
| Ereg          | 0 | 0 | 1 | 1 | no |
| Erich5        | 0 | 0 | 1 | 1 | no |
| Erp27         | 0 | 0 | 1 | 1 | no |
| Esp1          | 0 | 0 | 1 | 1 | no |
| Esp15         | 0 | 0 | 1 | 1 | no |
| Esp16         | 0 | 0 | 1 | 1 | no |
| Esp18         | 0 | 0 | 1 | 1 | no |
| Esp23         | 0 | 0 | 1 | 1 | no |
| Esp24         | 0 | 0 | 1 | 1 | no |
| Esp3          | 0 | 0 | 1 | 1 | no |
| Esp31         | 0 | 0 | 1 | 1 | no |
| Esp34         | 0 | 0 | 1 | 1 | no |
| Esp36         | 0 | 0 | 1 | 1 | no |
| Esp38         | 0 | 0 | 1 | 1 | no |
| Esp4          | 0 | 0 | 1 | 1 | no |
| Esp5          | 0 | 0 | 1 | 1 | no |
| Esp6          | 0 | 0 | 1 | 1 | no |
| Esp6-esp5     | 0 | 0 | 1 | 1 | no |
| Esx1          | 0 | 0 | 1 | 1 | no |
| Etd           | 0 | 0 | 1 | 1 | no |
| Etv2          | 0 | 0 | 1 | 1 | no |
| Evx1          | 0 | 0 | 1 | 1 | no |
| Evx2          | 0 | 0 | 1 | 1 | no |
| F10           | 0 | 0 | 1 | 1 | no |
| F11           | 0 | 0 | 1 | 1 | no |
| F13b          | 0 | 0 | 1 | 1 | no |
| F630111L10Rik | 0 | 0 | 1 | 1 | no |
| F630206G17Rik | 0 | 0 | 1 | 1 | no |
| F730035M05Rik | 0 | 0 | 1 | 1 | no |
| F830045P16Rik | 0 | 0 | 1 | 1 | no |
| Fabp12        | 0 | 0 | 1 | 1 | no |
| Fabp2         | 0 | 0 | 1 | 1 | no |
| Fabp6         | 0 | 0 | 1 | 1 | no |
| Fabp9         | 0 | 0 | 1 | 1 | no |
| Fam115e       | 0 | 0 | 1 | 1 | no |
| Fam122c       | 0 | 0 | 1 | 1 | no |
| Fam150a       | 0 | 0 | 1 | 1 | no |

|          |   |   |   |   |    |
|----------|---|---|---|---|----|
| Fam151a  | 0 | 0 | 1 | 1 | no |
| Fam154a  | 0 | 0 | 1 | 1 | no |
| Fam162b  | 0 | 0 | 1 | 1 | no |
| Fam170a  | 0 | 0 | 1 | 1 | no |
| Fam170b  | 0 | 0 | 1 | 1 | no |
| Fam209   | 0 | 0 | 1 | 1 | no |
| Fam24a   | 0 | 0 | 1 | 1 | no |
| Fam25c   | 0 | 0 | 1 | 1 | no |
| Fam46d   | 0 | 0 | 1 | 1 | no |
| Fam47c   | 0 | 0 | 1 | 1 | no |
| Fam50b   | 0 | 0 | 1 | 1 | no |
| Fam71b   | 0 | 0 | 1 | 1 | no |
| Fam71d   | 0 | 0 | 1 | 1 | no |
| Fam71f1  | 0 | 0 | 1 | 1 | no |
| Fam83c   | 0 | 0 | 1 | 1 | no |
| Fancd2os | 0 | 0 | 1 | 1 | no |
| Fbxo39   | 0 | 0 | 1 | 1 | no |
| Fbxw13   | 0 | 0 | 1 | 1 | no |
| Fbxw14   | 0 | 0 | 1 | 1 | no |
| Fbxw18   | 0 | 0 | 1 | 1 | no |
| Fbxw19   | 0 | 0 | 1 | 1 | no |
| Fbxw20   | 0 | 0 | 1 | 1 | no |
| Fbxw21   | 0 | 0 | 1 | 1 | no |
| Fbxw22   | 0 | 0 | 1 | 1 | no |
| Fbxw24   | 0 | 0 | 1 | 1 | no |
| Fbxw26   | 0 | 0 | 1 | 1 | no |
| Fbxw28   | 0 | 0 | 1 | 1 | no |
| Fcrl5    | 0 | 0 | 1 | 1 | no |
| Fcrl6    | 0 | 0 | 1 | 1 | no |
| Ferd3l   | 0 | 0 | 1 | 1 | no |
| Fezf1    | 0 | 0 | 1 | 1 | no |
| Fezf2    | 0 | 0 | 1 | 1 | no |
| Ffar2    | 0 | 0 | 1 | 1 | no |
| Fgb      | 0 | 0 | 1 | 1 | no |
| Fgf15    | 0 | 0 | 1 | 1 | no |
| Fgf20    | 0 | 0 | 1 | 1 | no |
| Fgf6     | 0 | 0 | 1 | 1 | no |
| Fhad1os1 | 0 | 0 | 1 | 1 | no |
| Flg2     | 0 | 0 | 1 | 1 | no |
| Fmo3     | 0 | 0 | 1 | 1 | no |
| Fnd3c2   | 0 | 0 | 1 | 1 | no |
| Fndc8    | 0 | 0 | 1 | 1 | no |
| Foxa2    | 0 | 0 | 1 | 1 | no |
| Foxa3    | 0 | 0 | 1 | 1 | no |
| Foxb1    | 0 | 0 | 1 | 1 | no |
| Foxb2    | 0 | 0 | 1 | 1 | no |
| Foxe1    | 0 | 0 | 1 | 1 | no |
| Foxg1    | 0 | 0 | 1 | 1 | no |
| Foxi1    | 0 | 0 | 1 | 1 | no |
| Foxr1    | 0 | 0 | 1 | 1 | no |
| Fpr-rs3  | 0 | 0 | 1 | 1 | no |
| Fpr-rs4  | 0 | 0 | 1 | 1 | no |
| Fpr-rs6  | 0 | 0 | 1 | 1 | no |

|               |   |   |   |   |    |
|---------------|---|---|---|---|----|
| Fpr3          | 0 | 0 | 1 | 1 | no |
| Frem3         | 0 | 0 | 1 | 1 | no |
| Frmpd1os      | 0 | 0 | 1 | 1 | no |
| Fscb          | 0 | 0 | 1 | 1 | no |
| Fscn3         | 0 | 0 | 1 | 1 | no |
| Fshb          | 0 | 0 | 1 | 1 | no |
| Ftcd          | 0 | 0 | 1 | 1 | no |
| Fthl17        | 0 | 0 | 1 | 1 | no |
| Ftmt          | 0 | 0 | 1 | 1 | no |
| Fut4-ps1      | 0 | 0 | 1 | 1 | no |
| G630055G22Rik | 0 | 0 | 1 | 1 | no |
| G630071F17Rik | 0 | 0 | 1 | 1 | no |
| G630093K05Rik | 0 | 0 | 1 | 1 | no |
| G6bos         | 0 | 0 | 1 | 1 | no |
| G6pc          | 0 | 0 | 1 | 1 | no |
| G6pc2         | 0 | 0 | 1 | 1 | no |
| Gabra6        | 0 | 0 | 1 | 1 | no |
| Galnt15       | 0 | 0 | 1 | 1 | no |
| Galp          | 0 | 0 | 1 | 1 | no |
| Gas2l2        | 0 | 0 | 1 | 1 | no |
| Gast          | 0 | 0 | 1 | 1 | no |
| Gata5         | 0 | 0 | 1 | 1 | no |
| Gata5os       | 0 | 0 | 1 | 1 | no |
| Gbp2b         | 0 | 0 | 1 | 1 | no |
| Gcgr          | 0 | 0 | 1 | 1 | no |
| Gckr          | 0 | 0 | 1 | 1 | no |
| Gcm1          | 0 | 0 | 1 | 1 | no |
| Gcm2          | 0 | 0 | 1 | 1 | no |
| Gcnt3         | 0 | 0 | 1 | 1 | no |
| Gdf3          | 0 | 0 | 1 | 1 | no |
| Gfi1          | 0 | 0 | 1 | 1 | no |
| Gh            | 0 | 0 | 1 | 1 | no |
| Ghrh          | 0 | 0 | 1 | 1 | no |
| Ghrhr         | 0 | 0 | 1 | 1 | no |
| Ghrl          | 0 | 0 | 1 | 1 | no |
| Gif           | 0 | 0 | 1 | 1 | no |
| Gip           | 0 | 0 | 1 | 1 | no |
| Gipr          | 0 | 0 | 1 | 1 | no |
| Gja8          | 0 | 0 | 1 | 1 | no |
| Gjd3          | 0 | 0 | 1 | 1 | no |
| Gjd4          | 0 | 0 | 1 | 1 | no |
| Gje1          | 0 | 0 | 1 | 1 | no |
| Gk2           | 0 | 0 | 1 | 1 | no |
| Gkn1          | 0 | 0 | 1 | 1 | no |
| Gkn2          | 0 | 0 | 1 | 1 | no |
| Glipr1l1      | 0 | 0 | 1 | 1 | no |
| Glipr1l2      | 0 | 0 | 1 | 1 | no |
| Glrp1         | 0 | 0 | 1 | 1 | no |
| Glt6d1        | 0 | 0 | 1 | 1 | no |
| Glycam1       | 0 | 0 | 1 | 1 | no |
| Gm10007       | 0 | 0 | 1 | 1 | no |
| Gm10024       | 0 | 0 | 1 | 1 | no |
| Gm10052       | 0 | 0 | 1 | 1 | no |

|                |   |   |   |   |    |
|----------------|---|---|---|---|----|
| Gm10057        | 0 | 0 | 1 | 1 | no |
| Gm10058,Gm1009 | 0 | 0 | 1 | 1 | no |
| Gm10081        | 0 | 0 | 1 | 1 | no |
| Gm10094,Sap18  | 0 | 0 | 1 | 1 | no |
| Gm10096,Gm1048 | 0 | 0 | 1 | 1 | no |
| Gm101          | 0 | 0 | 1 | 1 | no |
| Gm10100        | 0 | 0 | 1 | 1 | no |
| Gm10104        | 0 | 0 | 1 | 1 | no |
| Gm10142        | 0 | 0 | 1 | 1 | no |
| Gm10147,Gm1481 | 0 | 0 | 1 | 1 | no |
| Gm10220        | 0 | 0 | 1 | 1 | no |
| Gm10228        | 0 | 0 | 1 | 1 | no |
| Gm10229        | 0 | 0 | 1 | 1 | no |
| Gm10230        | 0 | 0 | 1 | 1 | no |
| Gm10267        | 0 | 0 | 1 | 1 | no |
| Gm10272        | 0 | 0 | 1 | 1 | no |
| Gm10280        | 0 | 0 | 1 | 1 | no |
| Gm10318        | 0 | 0 | 1 | 1 | no |
| Gm10319        | 0 | 0 | 1 | 1 | no |
| Gm10324        | 0 | 0 | 1 | 1 | no |
| Gm10334        | 0 | 0 | 1 | 1 | no |
| Gm10354        | 0 | 0 | 1 | 1 | no |
| Gm10373        | 0 | 0 | 1 | 1 | no |
| Gm10375        | 0 | 0 | 1 | 1 | no |
| Gm10377        | 0 | 0 | 1 | 1 | no |
| Gm10389        | 0 | 0 | 1 | 1 | no |
| Gm10400        | 0 | 0 | 1 | 1 | no |
| Gm10408        | 0 | 0 | 1 | 1 | no |
| Gm10409,Gm3020 | 0 | 0 | 1 | 1 | no |
| Gm10413        | 0 | 0 | 1 | 1 | no |
| Gm10415        | 0 | 0 | 1 | 1 | no |
| Gm10421        | 0 | 0 | 1 | 1 | no |
| Gm10436        | 0 | 0 | 1 | 1 | no |
| Gm10439        | 0 | 0 | 1 | 1 | no |
| Gm10445        | 0 | 0 | 1 | 1 | no |
| Gm1045         | 0 | 0 | 1 | 1 | no |
| Gm10466        | 0 | 0 | 1 | 1 | no |
| Gm10471        | 0 | 0 | 1 | 1 | no |
| Gm10486        | 0 | 0 | 1 | 1 | no |
| Gm10487        | 0 | 0 | 1 | 1 | no |
| Gm10488        | 0 | 0 | 1 | 1 | no |
| Gm10510        | 0 | 0 | 1 | 1 | no |
| Gm10512        | 0 | 0 | 1 | 1 | no |
| Gm10538        | 0 | 0 | 1 | 1 | no |
| Gm10578        | 0 | 0 | 1 | 1 | no |
| Gm10619        | 0 | 0 | 1 | 1 | no |
| Gm10636        | 0 | 0 | 1 | 1 | no |
| Gm10637        | 0 | 0 | 1 | 1 | no |
| Gm10639        | 0 | 0 | 1 | 1 | no |
| Gm10662,Gm5891 | 0 | 0 | 1 | 1 | no |
| Gm10665        | 0 | 0 | 1 | 1 | no |
| Gm10666        | 0 | 0 | 1 | 1 | no |
| Gm10670        | 0 | 0 | 1 | 1 | no |



|                 |   |   |   |   |    |
|-----------------|---|---|---|---|----|
| Gm10681,Hsd3b4  | 0 | 0 | 1 | 1 | no |
| Gm10696         | 0 | 0 | 1 | 1 | no |
| Gm10714         | 0 | 0 | 1 | 1 | no |
| Gm10731         | 0 | 0 | 1 | 1 | no |
| Gm10782         | 0 | 0 | 1 | 1 | no |
| Gm10823         | 0 | 0 | 1 | 1 | no |
| Gm10845         | 0 | 0 | 1 | 1 | no |
| Gm10857         | 0 | 0 | 1 | 1 | no |
| Gm10865         | 0 | 0 | 1 | 1 | no |
| Gm10921         | 0 | 0 | 1 | 1 | no |
| Gm10922         | 0 | 0 | 1 | 1 | no |
| Gm1110          | 0 | 0 | 1 | 1 | no |
| Gm11128         | 0 | 0 | 1 | 1 | no |
| Gm11149         | 0 | 0 | 1 | 1 | no |
| Gm11186         | 0 | 0 | 1 | 1 | no |
| Gm11213         | 0 | 0 | 1 | 1 | no |
| Gm11237,LOC1010 | 0 | 0 | 1 | 1 | no |
| Gm1140,Gm14692  | 0 | 0 | 1 | 1 | no |
| Gm11468         | 0 | 0 | 1 | 1 | no |
| Gm11487         | 0 | 0 | 1 | 1 | no |
| Gm11529         | 0 | 0 | 1 | 1 | no |
| Gm11538         | 0 | 0 | 1 | 1 | no |
| Gm11544         | 0 | 0 | 1 | 1 | no |
| Gm11548         | 0 | 0 | 1 | 1 | no |
| Gm11559         | 0 | 0 | 1 | 1 | no |
| Gm11562         | 0 | 0 | 1 | 1 | no |
| Gm11563         | 0 | 0 | 1 | 1 | no |
| Gm11564         | 0 | 0 | 1 | 1 | no |
| Gm11565         | 0 | 0 | 1 | 1 | no |
| Gm11567         | 0 | 0 | 1 | 1 | no |
| Gm11568         | 0 | 0 | 1 | 1 | no |
| Gm11569         | 0 | 0 | 1 | 1 | no |
| Gm11570         | 0 | 0 | 1 | 1 | no |
| Gm11595         | 0 | 0 | 1 | 1 | no |
| Gm11596         | 0 | 0 | 1 | 1 | no |
| Gm11651         | 0 | 0 | 1 | 1 | no |
| Gm11757,Gm1175  | 0 | 0 | 1 | 1 | no |
| Gm11758         | 0 | 0 | 1 | 1 | no |
| Gm11780         | 0 | 0 | 1 | 1 | no |
| Gm11937         | 0 | 0 | 1 | 1 | no |
| Gm11938         | 0 | 0 | 1 | 1 | no |
| Gm11961         | 0 | 0 | 1 | 1 | no |
| Gm11981         | 0 | 0 | 1 | 1 | no |
| Gm11985         | 0 | 0 | 1 | 1 | no |
| Gm12169         | 0 | 0 | 1 | 1 | no |
| Gm12171         | 0 | 0 | 1 | 1 | no |
| Gm12238         | 0 | 0 | 1 | 1 | no |
| Gm12253         | 0 | 0 | 1 | 1 | no |
| Gm12298         | 0 | 0 | 1 | 1 | no |
| Gm12505         | 0 | 0 | 1 | 1 | no |
| Gm12603         | 0 | 0 | 1 | 1 | no |
| Gm12669         | 0 | 0 | 1 | 1 | no |
| Gm12695         | 0 | 0 | 1 | 1 | no |

|                |   |   |   |   |    |
|----------------|---|---|---|---|----|
| Gm12789        | 0 | 0 | 1 | 1 | no |
| Gm12794        | 0 | 0 | 1 | 1 | no |
| Gm12830        | 0 | 0 | 1 | 1 | no |
| Gm12886        | 0 | 0 | 1 | 1 | no |
| Gm12887        | 0 | 0 | 1 | 1 | no |
| Gm12888        | 0 | 0 | 1 | 1 | no |
| Gm13003        | 0 | 0 | 1 | 1 | no |
| Gm13011        | 0 | 0 | 1 | 1 | no |
| Gm13023        | 0 | 0 | 1 | 1 | no |
| Gm13040        | 0 | 0 | 1 | 1 | no |
| Gm13043        | 0 | 0 | 1 | 1 | no |
| Gm13051        | 0 | 0 | 1 | 1 | no |
| Gm13057        | 0 | 0 | 1 | 1 | no |
| Gm13078        | 0 | 0 | 1 | 1 | no |
| Gm13083        | 0 | 0 | 1 | 1 | no |
| Gm13084        | 0 | 0 | 1 | 1 | no |
| Gm13088        | 0 | 0 | 1 | 1 | no |
| Gm13102        | 0 | 0 | 1 | 1 | no |
| Gm13103        | 0 | 0 | 1 | 1 | no |
| Gm13119        | 0 | 0 | 1 | 1 | no |
| Gm13124        | 0 | 0 | 1 | 1 | no |
| Gm13125        | 0 | 0 | 1 | 1 | no |
| Gm13128        | 0 | 0 | 1 | 1 | no |
| Gm13177        | 0 | 0 | 1 | 1 | no |
| Gm13178        | 0 | 0 | 1 | 1 | no |
| Gm1322         | 0 | 0 | 1 | 1 | no |
| Gm13242        | 0 | 0 | 1 | 1 | no |
| Gm13271        | 0 | 0 | 1 | 1 | no |
| Gm13272,Gm1328 | 0 | 0 | 1 | 1 | no |
| Gm13275,Gm1328 | 0 | 0 | 1 | 1 | no |
| Gm13276        | 0 | 0 | 1 | 1 | no |
| Gm13277,Gm1328 | 0 | 0 | 1 | 1 | no |
| Gm13278,Gm1327 | 0 | 0 | 1 | 1 | no |
| Gm13279        | 0 | 0 | 1 | 1 | no |
| Gm13285,Gm1328 | 0 | 0 | 1 | 1 | no |
| Gm13286        | 0 | 0 | 1 | 1 | no |
| Gm13288        | 0 | 0 | 1 | 1 | no |
| Gm13290        | 0 | 0 | 1 | 1 | no |
| Gm13308,Gm2087 | 0 | 0 | 1 | 1 | no |
| Gm13315        | 0 | 0 | 1 | 1 | no |
| Gm13497        | 0 | 0 | 1 | 1 | no |
| Gm13539        | 0 | 0 | 1 | 1 | no |
| Gm13544        | 0 | 0 | 1 | 1 | no |
| Gm13580        | 0 | 0 | 1 | 1 | no |
| Gm13752        | 0 | 0 | 1 | 1 | no |
| Gm13769        | 0 | 0 | 1 | 1 | no |
| Gm13807        | 0 | 0 | 1 | 1 | no |
| Gm13871        | 0 | 0 | 1 | 1 | no |
| Gm13944        | 0 | 0 | 1 | 1 | no |
| Gm14092        | 0 | 0 | 1 | 1 | no |
| Gm14137        | 0 | 0 | 1 | 1 | no |
| Gm14139        | 0 | 0 | 1 | 1 | no |
| Gm14151        | 0 | 0 | 1 | 1 | no |

|                |   |   |   |   |    |
|----------------|---|---|---|---|----|
| Gm14204        | 0 | 0 | 1 | 1 | no |
| Gm14288,Gm1444 | 0 | 0 | 1 | 1 | no |
| Gm14306,Gm1443 | 0 | 0 | 1 | 1 | no |
| Gm14327        | 0 | 0 | 1 | 1 | no |
| Gm14345,Gm1435 | 0 | 0 | 1 | 1 | no |
| Gm14346,Gm1435 | 0 | 0 | 1 | 1 | no |
| Gm14347        | 0 | 0 | 1 | 1 | no |
| Gm14351,Gm2913 | 0 | 0 | 1 | 1 | no |
| Gm14374        | 0 | 0 | 1 | 1 | no |
| Gm14458        | 0 | 0 | 1 | 1 | no |
| Gm14459        | 0 | 0 | 1 | 1 | no |
| Gm14461        | 0 | 0 | 1 | 1 | no |
| Gm14474        | 0 | 0 | 1 | 1 | no |
| Gm14475,Gm1448 | 0 | 0 | 1 | 1 | no |
| Gm14476,Gm1448 | 0 | 0 | 1 | 1 | no |
| Gm14477,Gm1447 | 0 | 0 | 1 | 1 | no |
| Gm14478        | 0 | 0 | 1 | 1 | no |
| Gm14479,Gm1448 | 0 | 0 | 1 | 1 | no |
| Gm14482        | 0 | 0 | 1 | 1 | no |
| Gm14483        | 0 | 0 | 1 | 1 | no |
| Gm14484        | 0 | 0 | 1 | 1 | no |
| Gm14496        | 0 | 0 | 1 | 1 | no |
| Gm14499        | 0 | 0 | 1 | 1 | no |
| Gm14511        | 0 | 0 | 1 | 1 | no |
| Gm14525        | 0 | 0 | 1 | 1 | no |
| Gm14625        | 0 | 0 | 1 | 1 | no |
| Gm14632        | 0 | 0 | 1 | 1 | no |
| Gm14635        | 0 | 0 | 1 | 1 | no |
| Gm14685        | 0 | 0 | 1 | 1 | no |
| Gm14692        | 0 | 0 | 1 | 1 | no |
| Gm14718        | 0 | 0 | 1 | 1 | no |
| Gm14725        | 0 | 0 | 1 | 1 | no |
| Gm14743        | 0 | 0 | 1 | 1 | no |
| Gm14744        | 0 | 0 | 1 | 1 | no |
| Gm14781        | 0 | 0 | 1 | 1 | no |
| Gm14819        | 0 | 0 | 1 | 1 | no |
| Gm14850,Gm2149 | 0 | 0 | 1 | 1 | no |
| Gm14851        | 0 | 0 | 1 | 1 | no |
| Gm14858        | 0 | 0 | 1 | 1 | no |
| Gm14920        | 0 | 0 | 1 | 1 | no |
| Gm15008        | 0 | 0 | 1 | 1 | no |
| Gm15023        | 0 | 0 | 1 | 1 | no |
| Gm15056        | 0 | 0 | 1 | 1 | no |
| Gm15091        | 0 | 0 | 1 | 1 | no |
| Gm15093        | 0 | 0 | 1 | 1 | no |
| Gm15097        | 0 | 0 | 1 | 1 | no |
| Gm15104        | 0 | 0 | 1 | 1 | no |
| Gm15107        | 0 | 0 | 1 | 1 | no |
| Gm15114        | 0 | 0 | 1 | 1 | no |
| Gm15127        | 0 | 0 | 1 | 1 | no |
| Gm15133        | 0 | 0 | 1 | 1 | no |
| Gm15140        | 0 | 0 | 1 | 1 | no |
| Gm15179        | 0 | 0 | 1 | 1 | no |

|         |   |   |   |   |    |
|---------|---|---|---|---|----|
| Gm15217 | 0 | 0 | 1 | 1 | no |
| Gm1527  | 0 | 0 | 1 | 1 | no |
| Gm15284 | 0 | 0 | 1 | 1 | no |
| Gm15292 | 0 | 0 | 1 | 1 | no |
| Gm15293 | 0 | 0 | 1 | 1 | no |
| Gm15299 | 0 | 0 | 1 | 1 | no |
| Gm15308 | 0 | 0 | 1 | 1 | no |
| Gm15315 | 0 | 0 | 1 | 1 | no |
| Gm15350 | 0 | 0 | 1 | 1 | no |
| Gm15386 | 0 | 0 | 1 | 1 | no |
| Gm15412 | 0 | 0 | 1 | 1 | no |
| Gm15413 | 0 | 0 | 1 | 1 | no |
| Gm1553  | 0 | 0 | 1 | 1 | no |
| Gm156   | 0 | 0 | 1 | 1 | no |
| Gm15645 | 0 | 0 | 1 | 1 | no |
| Gm15679 | 0 | 0 | 1 | 1 | no |
| Gm15713 | 0 | 0 | 1 | 1 | no |
| Gm15850 | 0 | 0 | 1 | 1 | no |
| Gm1587  | 0 | 0 | 1 | 1 | no |
| Gm15881 | 0 | 0 | 1 | 1 | no |
| Gm15997 | 0 | 0 | 1 | 1 | no |
| Gm16063 | 0 | 0 | 1 | 1 | no |
| Gm16130 | 0 | 0 | 1 | 1 | no |
| Gm16157 | 0 | 0 | 1 | 1 | no |
| Gm16291 | 0 | 0 | 1 | 1 | no |
| Gm16294 | 0 | 0 | 1 | 1 | no |
| Gm1631  | 0 | 0 | 1 | 1 | no |
| Gm16336 | 0 | 0 | 1 | 1 | no |
| Gm16367 | 0 | 0 | 1 | 1 | no |
| Gm16381 | 0 | 0 | 1 | 1 | no |
| Gm16390 | 0 | 0 | 1 | 1 | no |
| Gm16404 | 0 | 0 | 1 | 1 | no |
| Gm16405 | 0 | 0 | 1 | 1 | no |
| Gm16430 | 0 | 0 | 1 | 1 | no |
| Gm16445 | 0 | 0 | 1 | 1 | no |
| Gm16451 | 0 | 0 | 1 | 1 | no |
| Gm1647  | 0 | 0 | 1 | 1 | no |
| Gm16497 | 0 | 0 | 1 | 1 | no |
| Gm16501 | 0 | 0 | 1 | 1 | no |
| Gm16548 | 0 | 0 | 1 | 1 | no |
| Gm16617 | 0 | 0 | 1 | 1 | no |
| Gm16677 | 0 | 0 | 1 | 1 | no |
| Gm16833 | 0 | 0 | 1 | 1 | no |
| Gm16863 | 0 | 0 | 1 | 1 | no |
| Gm16880 | 0 | 0 | 1 | 1 | no |
| Gm16982 | 0 | 0 | 1 | 1 | no |
| Gm17019 | 0 | 0 | 1 | 1 | no |
| Gm17252 | 0 | 0 | 1 | 1 | no |
| Gm17365 | 0 | 0 | 1 | 1 | no |
| Gm17455 | 0 | 0 | 1 | 1 | no |
| Gm17644 | 0 | 0 | 1 | 1 | no |
| Gm17660 | 0 | 0 | 1 | 1 | no |
| Gm17677 | 0 | 0 | 1 | 1 | no |

|                |   |   |   |   |    |
|----------------|---|---|---|---|----|
| Gm17689        | 0 | 0 | 1 | 1 | no |
| Gm17727        | 0 | 0 | 1 | 1 | no |
| Gm17746        | 0 | 0 | 1 | 1 | no |
| Gm17751        | 0 | 0 | 1 | 1 | no |
| Gm17821        | 0 | 0 | 1 | 1 | no |
| Gm17830        | 0 | 0 | 1 | 1 | no |
| Gm18409        | 0 | 0 | 1 | 1 | no |
| Gm19277        | 0 | 0 | 1 | 1 | no |
| Gm19303        | 0 | 0 | 1 | 1 | no |
| Gm19395        | 0 | 0 | 1 | 1 | no |
| Gm19402        | 0 | 0 | 1 | 1 | no |
| Gm19466        | 0 | 0 | 1 | 1 | no |
| Gm19510        | 0 | 0 | 1 | 1 | no |
| Gm19583        | 0 | 0 | 1 | 1 | no |
| Gm19589        | 0 | 0 | 1 | 1 | no |
| Gm19668        | 0 | 0 | 1 | 1 | no |
| Gm1968         | 0 | 0 | 1 | 1 | no |
| Gm19710        | 0 | 0 | 1 | 1 | no |
| Gm19757        | 0 | 0 | 1 | 1 | no |
| Gm19782        | 0 | 0 | 1 | 1 | no |
| Gm19784        | 0 | 0 | 1 | 1 | no |
| Gm1979         | 0 | 0 | 1 | 1 | no |
| Gm1993         | 0 | 0 | 1 | 1 | no |
| Gm1995         | 0 | 0 | 1 | 1 | no |
| Gm19990        | 0 | 0 | 1 | 1 | no |
| Gm2002         | 0 | 0 | 1 | 1 | no |
| Gm20098        | 0 | 0 | 1 | 1 | no |
| Gm2012         | 0 | 0 | 1 | 1 | no |
| Gm2016         | 0 | 0 | 1 | 1 | no |
| Gm20172        | 0 | 0 | 1 | 1 | no |
| Gm2022         | 0 | 0 | 1 | 1 | no |
| Gm20268        | 0 | 0 | 1 | 1 | no |
| Gm2030         | 0 | 0 | 1 | 1 | no |
| Gm20319        | 0 | 0 | 1 | 1 | no |
| Gm20356        | 0 | 0 | 1 | 1 | no |
| Gm20362        | 0 | 0 | 1 | 1 | no |
| Gm2042         | 0 | 0 | 1 | 1 | no |
| Gm20554        | 0 | 0 | 1 | 1 | no |
| Gm20556        | 0 | 0 | 1 | 1 | no |
| Gm20594        | 0 | 0 | 1 | 1 | no |
| Gm20735        | 0 | 0 | 1 | 1 | no |
| Gm20736        | 0 | 0 | 1 | 1 | no |
| Gm20738,Gm2081 | 0 | 0 | 1 | 1 | no |
| Gm20740        | 0 | 0 | 1 | 1 | no |
| Gm20741        | 0 | 0 | 1 | 1 | no |
| Gm20745        | 0 | 0 | 1 | 1 | no |
| Gm20747        | 0 | 0 | 1 | 1 | no |
| Gm20750        | 0 | 0 | 1 | 1 | no |
| Gm20752        | 0 | 0 | 1 | 1 | no |
| Gm20755        | 0 | 0 | 1 | 1 | no |
| Gm20757        | 0 | 0 | 1 | 1 | no |
| Gm20758        | 0 | 0 | 1 | 1 | no |
| Gm20765,Gm2130 | 0 | 0 | 1 | 1 | no |

|                |   |   |   |   |    |
|----------------|---|---|---|---|----|
| Gm20767        | 0 | 0 | 1 | 1 | no |
| Gm20806        | 0 | 0 | 1 | 1 | no |
| Gm20809        | 0 | 0 | 1 | 1 | no |
| Gm20815        | 0 | 0 | 1 | 1 | no |
| Gm20816,Gm2082 | 0 | 0 | 1 | 1 | no |
| Gm20822        | 0 | 0 | 1 | 1 | no |
| Gm20823        | 0 | 0 | 1 | 1 | no |
| Gm20826        | 0 | 0 | 1 | 1 | no |
| Gm20831        | 0 | 0 | 1 | 1 | no |
| Gm20854        | 0 | 0 | 1 | 1 | no |
| Gm20857        | 0 | 0 | 1 | 1 | no |
| Gm20858        | 0 | 0 | 1 | 1 | no |
| Gm20865        | 0 | 0 | 1 | 1 | no |
| Gm20867        | 0 | 0 | 1 | 1 | no |
| Gm2087         | 0 | 0 | 1 | 1 | no |
| Gm20871        | 0 | 0 | 1 | 1 | no |
| Gm20877        | 0 | 0 | 1 | 1 | no |
| Gm20917        | 0 | 0 | 1 | 1 | no |
| Gm21002        | 0 | 0 | 1 | 1 | no |
| Gm21057        | 0 | 0 | 1 | 1 | no |
| Gm21221        | 0 | 0 | 1 | 1 | no |
| Gm21269        | 0 | 0 | 1 | 1 | no |
| Gm21276        | 0 | 0 | 1 | 1 | no |
| Gm21283        | 0 | 0 | 1 | 1 | no |
| Gm21293,Gm2131 | 0 | 0 | 1 | 1 | no |
| Gm21304,Gm2131 | 0 | 0 | 1 | 1 | no |
| Gm21312        | 0 | 0 | 1 | 1 | no |
| Gm21319        | 0 | 0 | 1 | 1 | no |
| Gm21498        | 0 | 0 | 1 | 1 | no |
| Gm21637        | 0 | 0 | 1 | 1 | no |
| Gm21671        | 0 | 0 | 1 | 1 | no |
| Gm21693,Rbmy   | 0 | 0 | 1 | 1 | no |
| Gm21708,Rbmy   | 0 | 0 | 1 | 1 | no |
| Gm21943        | 0 | 0 | 1 | 1 | no |
| Gm21944        | 0 | 0 | 1 | 1 | no |
| Gm21950        | 0 | 0 | 1 | 1 | no |
| Gm21951        | 0 | 0 | 1 | 1 | no |
| Gm2447         | 0 | 0 | 1 | 1 | no |
| Gm2516         | 0 | 0 | 1 | 1 | no |
| Gm2663         | 0 | 0 | 1 | 1 | no |
| Gm2696         | 0 | 0 | 1 | 1 | no |
| Gm2721         | 0 | 0 | 1 | 1 | no |
| Gm2799,Gmcl1l  | 0 | 0 | 1 | 1 | no |
| Gm2825         | 0 | 0 | 1 | 1 | no |
| Gm2837         | 0 | 0 | 1 | 1 | no |
| Gm2848         | 0 | 0 | 1 | 1 | no |
| Gm2863         | 0 | 0 | 1 | 1 | no |
| Gm2913         | 0 | 0 | 1 | 1 | no |
| Gm2927         | 0 | 0 | 1 | 1 | no |
| Gm2933         | 0 | 0 | 1 | 1 | no |
| Gm3020         | 0 | 0 | 1 | 1 | no |
| Gm3139         | 0 | 0 | 1 | 1 | no |
| Gm3143         | 0 | 0 | 1 | 1 | no |



|               |   |   |   |   |    |
|---------------|---|---|---|---|----|
| Gm3238        | 0 | 0 | 1 | 1 | no |
| Gm3259        | 0 | 0 | 1 | 1 | no |
| Gm3264        | 0 | 0 | 1 | 1 | no |
| Gm3279        | 0 | 0 | 1 | 1 | no |
| Gm3285        | 0 | 0 | 1 | 1 | no |
| Gm3286        | 0 | 0 | 1 | 1 | no |
| Gm3402        | 0 | 0 | 1 | 1 | no |
| Gm3404        | 0 | 0 | 1 | 1 | no |
| Gm3409        | 0 | 0 | 1 | 1 | no |
| Gm3415        | 0 | 0 | 1 | 1 | no |
| Gm3428        | 0 | 0 | 1 | 1 | no |
| Gm3434        | 0 | 0 | 1 | 1 | no |
| Gm3458        | 0 | 0 | 1 | 1 | no |
| Gm362         | 0 | 0 | 1 | 1 | no |
| Gm364         | 0 | 0 | 1 | 1 | no |
| Gm3646        | 0 | 0 | 1 | 1 | no |
| Gm3701        | 0 | 0 | 1 | 1 | no |
| Gm3706        | 0 | 0 | 1 | 1 | no |
| Gm3750        | 0 | 0 | 1 | 1 | no |
| Gm3763        | 0 | 0 | 1 | 1 | no |
| Gm382         | 0 | 0 | 1 | 1 | no |
| Gm4027        | 0 | 0 | 1 | 1 | no |
| Gm41          | 0 | 0 | 1 | 1 | no |
| Gm4133        | 0 | 0 | 1 | 1 | no |
| Gm4175        | 0 | 0 | 1 | 1 | no |
| Gm4201        | 0 | 0 | 1 | 1 | no |
| Gm4214        | 0 | 0 | 1 | 1 | no |
| Gm4216        | 0 | 0 | 1 | 1 | no |
| Gm4224        | 0 | 0 | 1 | 1 | no |
| Gm4251        | 0 | 0 | 1 | 1 | no |
| Gm4265        | 0 | 0 | 1 | 1 | no |
| Gm4278        | 0 | 0 | 1 | 1 | no |
| Gm428         | 0 | 0 | 1 | 1 | no |
| Gm4297        | 0 | 0 | 1 | 1 | no |
| Gm4301        | 0 | 0 | 1 | 1 | no |
| Gm4302        | 0 | 0 | 1 | 1 | no |
| Gm4303        | 0 | 0 | 1 | 1 | no |
| Gm4307        | 0 | 0 | 1 | 1 | no |
| Gm4312        | 0 | 0 | 1 | 1 | no |
| Gm4340        | 0 | 0 | 1 | 1 | no |
| Gm436         | 0 | 0 | 1 | 1 | no |
| Gm438         | 0 | 0 | 1 | 1 | no |
| Gm44          | 0 | 0 | 1 | 1 | no |
| Gm4541        | 0 | 0 | 1 | 1 | no |
| Gm4559        | 0 | 0 | 1 | 1 | no |
| Gm4567,Gm6902 | 0 | 0 | 1 | 1 | no |
| Gm4598        | 0 | 0 | 1 | 1 | no |
| Gm4710        | 0 | 0 | 1 | 1 | no |
| Gm4719        | 0 | 0 | 1 | 1 | no |
| Gm4736        | 0 | 0 | 1 | 1 | no |
| Gm4745        | 0 | 0 | 1 | 1 | no |
| Gm4763        | 0 | 0 | 1 | 1 | no |
| Gm4776        | 0 | 0 | 1 | 1 | no |

|        |   |   |   |   |    |
|--------|---|---|---|---|----|
| Gm4791 | 0 | 0 | 1 | 1 | no |
| Gm4794 | 0 | 0 | 1 | 1 | no |
| Gm4814 | 0 | 0 | 1 | 1 | no |
| Gm4832 | 0 | 0 | 1 | 1 | no |
| Gm4836 | 0 | 0 | 1 | 1 | no |
| Gm4850 | 0 | 0 | 1 | 1 | no |
| Gm4858 | 0 | 0 | 1 | 1 | no |
| Gm4871 | 0 | 0 | 1 | 1 | no |
| Gm4872 | 0 | 0 | 1 | 1 | no |
| Gm4884 | 0 | 0 | 1 | 1 | no |
| Gm4894 | 0 | 0 | 1 | 1 | no |
| Gm4906 | 0 | 0 | 1 | 1 | no |
| Gm4907 | 0 | 0 | 1 | 1 | no |
| Gm4922 | 0 | 0 | 1 | 1 | no |
| Gm4926 | 0 | 0 | 1 | 1 | no |
| Gm4937 | 0 | 0 | 1 | 1 | no |
| Gm4971 | 0 | 0 | 1 | 1 | no |
| Gm4981 | 0 | 0 | 1 | 1 | no |
| Gm5039 | 0 | 0 | 1 | 1 | no |
| Gm5065 | 0 | 0 | 1 | 1 | no |
| Gm5071 | 0 | 0 | 1 | 1 | no |
| Gm5072 | 0 | 0 | 1 | 1 | no |
| Gm5082 | 0 | 0 | 1 | 1 | no |
| Gm5087 | 0 | 0 | 1 | 1 | no |
| Gm5091 | 0 | 0 | 1 | 1 | no |
| Gm5095 | 0 | 0 | 1 | 1 | no |
| Gm5108 | 0 | 0 | 1 | 1 | no |
| Gm5114 | 0 | 0 | 1 | 1 | no |
| Gm5129 | 0 | 0 | 1 | 1 | no |
| Gm5132 | 0 | 0 | 1 | 1 | no |
| Gm5134 | 0 | 0 | 1 | 1 | no |
| Gm5142 | 0 | 0 | 1 | 1 | no |
| Gm5150 | 0 | 0 | 1 | 1 | no |
| Gm5166 | 0 | 0 | 1 | 1 | no |
| Gm5168 | 0 | 0 | 1 | 1 | no |
| Gm5169 | 0 | 0 | 1 | 1 | no |
| Gm5177 | 0 | 0 | 1 | 1 | no |
| Gm5294 | 0 | 0 | 1 | 1 | no |
| Gm5334 | 0 | 0 | 1 | 1 | no |
| Gm5346 | 0 | 0 | 1 | 1 | no |
| Gm5347 | 0 | 0 | 1 | 1 | no |
| Gm5382 | 0 | 0 | 1 | 1 | no |
| Gm5409 | 0 | 0 | 1 | 1 | no |
| Gm5414 | 0 | 0 | 1 | 1 | no |
| Gm5416 | 0 | 0 | 1 | 1 | no |
| Gm5420 | 0 | 0 | 1 | 1 | no |
| Gm5441 | 0 | 0 | 1 | 1 | no |
| Gm5458 | 0 | 0 | 1 | 1 | no |
| Gm5460 | 0 | 0 | 1 | 1 | no |
| Gm5476 | 0 | 0 | 1 | 1 | no |
| Gm5477 | 0 | 0 | 1 | 1 | no |
| Gm5478 | 0 | 0 | 1 | 1 | no |
| Gm5483 | 0 | 0 | 1 | 1 | no |

|        |   |   |   |   |    |
|--------|---|---|---|---|----|
| Gm5485 | 0 | 0 | 1 | 1 | no |
| Gm5538 | 0 | 0 | 1 | 1 | no |
| Gm5549 | 0 | 0 | 1 | 1 | no |
| Gm5591 | 0 | 0 | 1 | 1 | no |
| Gm5592 | 0 | 0 | 1 | 1 | no |
| Gm5615 | 0 | 0 | 1 | 1 | no |
| Gm5622 | 0 | 0 | 1 | 1 | no |
| Gm5627 | 0 | 0 | 1 | 1 | no |
| Gm5634 | 0 | 0 | 1 | 1 | no |
| Gm5635 | 0 | 0 | 1 | 1 | no |
| Gm5662 | 0 | 0 | 1 | 1 | no |
| Gm5712 | 0 | 0 | 1 | 1 | no |
| Gm5725 | 0 | 0 | 1 | 1 | no |
| Gm5726 | 0 | 0 | 1 | 1 | no |
| Gm5728 | 0 | 0 | 1 | 1 | no |
| Gm5766 | 0 | 0 | 1 | 1 | no |
| Gm5771 | 0 | 0 | 1 | 1 | no |
| Gm5779 | 0 | 0 | 1 | 1 | no |
| Gm5795 | 0 | 0 | 1 | 1 | no |
| Gm5796 | 0 | 0 | 1 | 1 | no |
| Gm5797 | 0 | 0 | 1 | 1 | no |
| Gm5800 | 0 | 0 | 1 | 1 | no |
| Gm5862 | 0 | 0 | 1 | 1 | no |
| Gm5885 | 0 | 0 | 1 | 1 | no |
| Gm5891 | 0 | 0 | 1 | 1 | no |
| Gm5893 | 0 | 0 | 1 | 1 | no |
| Gm590  | 0 | 0 | 1 | 1 | no |
| Gm5916 | 0 | 0 | 1 | 1 | no |
| Gm5925 | 0 | 0 | 1 | 1 | no |
| Gm5934 | 0 | 0 | 1 | 1 | no |
| Gm5935 | 0 | 0 | 1 | 1 | no |
| Gm5938 | 0 | 0 | 1 | 1 | no |
| Gm5941 | 0 | 0 | 1 | 1 | no |
| Gm597  | 0 | 0 | 1 | 1 | no |
| Gm6026 | 0 | 0 | 1 | 1 | no |
| Gm6034 | 0 | 0 | 1 | 1 | no |
| Gm6040 | 0 | 0 | 1 | 1 | no |
| Gm6042 | 0 | 0 | 1 | 1 | no |
| Gm6086 | 0 | 0 | 1 | 1 | no |
| Gm6116 | 0 | 0 | 1 | 1 | no |
| Gm6121 | 0 | 0 | 1 | 1 | no |
| Gm6164 | 0 | 0 | 1 | 1 | no |
| Gm6260 | 0 | 0 | 1 | 1 | no |
| Gm6268 | 0 | 0 | 1 | 1 | no |
| Gm6289 | 0 | 0 | 1 | 1 | no |
| Gm6300 | 0 | 0 | 1 | 1 | no |
| Gm6313 | 0 | 0 | 1 | 1 | no |
| Gm6329 | 0 | 0 | 1 | 1 | no |
| Gm6367 | 0 | 0 | 1 | 1 | no |
| Gm6370 | 0 | 0 | 1 | 1 | no |
| Gm6406 | 0 | 0 | 1 | 1 | no |
| Gm6432 | 0 | 0 | 1 | 1 | no |
| Gm6455 | 0 | 0 | 1 | 1 | no |

|               |   |   |   |   |    |
|---------------|---|---|---|---|----|
| Gm6460        | 0 | 0 | 1 | 1 | no |
| Gm648         | 0 | 0 | 1 | 1 | no |
| Gm6484        | 0 | 0 | 1 | 1 | no |
| Gm6525        | 0 | 0 | 1 | 1 | no |
| Gm6567        | 0 | 0 | 1 | 1 | no |
| Gm6578        | 0 | 0 | 1 | 1 | no |
| Gm6583        | 0 | 0 | 1 | 1 | no |
| Gm6592        | 0 | 0 | 1 | 1 | no |
| Gm6602        | 0 | 0 | 1 | 1 | no |
| Gm6607        | 0 | 0 | 1 | 1 | no |
| Gm6639        | 0 | 0 | 1 | 1 | no |
| Gm6696        | 0 | 0 | 1 | 1 | no |
| Gm6756        | 0 | 0 | 1 | 1 | no |
| Gm6760        | 0 | 0 | 1 | 1 | no |
| Gm6763        | 0 | 0 | 1 | 1 | no |
| Gm6792        | 0 | 0 | 1 | 1 | no |
| Gm6793        | 0 | 0 | 1 | 1 | no |
| Gm6812        | 0 | 0 | 1 | 1 | no |
| Gm6815        | 0 | 0 | 1 | 1 | no |
| Gm6878        | 0 | 0 | 1 | 1 | no |
| Gm6880        | 0 | 0 | 1 | 1 | no |
| Gm6890        | 0 | 0 | 1 | 1 | no |
| Gm6902        | 0 | 0 | 1 | 1 | no |
| Gm6904        | 0 | 0 | 1 | 1 | no |
| Gm6927        | 0 | 0 | 1 | 1 | no |
| Gm7056        | 0 | 0 | 1 | 1 | no |
| Gm7073        | 0 | 0 | 1 | 1 | no |
| Gm7104        | 0 | 0 | 1 | 1 | no |
| Gm7134        | 0 | 0 | 1 | 1 | no |
| Gm7157        | 0 | 0 | 1 | 1 | no |
| Gm7168        | 0 | 0 | 1 | 1 | no |
| Gm7257        | 0 | 0 | 1 | 1 | no |
| Gm732         | 0 | 0 | 1 | 1 | no |
| Gm7337        | 0 | 0 | 1 | 1 | no |
| Gm7550        | 0 | 0 | 1 | 1 | no |
| Gm7616        | 0 | 0 | 1 | 1 | no |
| Gm773         | 0 | 0 | 1 | 1 | no |
| Gm7788        | 0 | 0 | 1 | 1 | no |
| Gm7849,Gm7861 | 0 | 0 | 1 | 1 | no |
| Gm7861        | 0 | 0 | 1 | 1 | no |
| Gm7904        | 0 | 0 | 1 | 1 | no |
| Gm7978        | 0 | 0 | 1 | 1 | no |
| Gm8096        | 0 | 0 | 1 | 1 | no |
| Gm813         | 0 | 0 | 1 | 1 | no |
| Gm815         | 0 | 0 | 1 | 1 | no |
| Gm8179        | 0 | 0 | 1 | 1 | no |
| Gm829         | 0 | 0 | 1 | 1 | no |
| Gm8298        | 0 | 0 | 1 | 1 | no |
| Gm8369        | 0 | 0 | 1 | 1 | no |
| Gm839         | 0 | 0 | 1 | 1 | no |
| Gm8580        | 0 | 0 | 1 | 1 | no |
| Gm8633        | 0 | 0 | 1 | 1 | no |
| Gm8677        | 0 | 0 | 1 | 1 | no |

|          |   |   |   |   |    |
|----------|---|---|---|---|----|
| Gm8693   | 0 | 0 | 1 | 1 | no |
| Gm8709   | 0 | 0 | 1 | 1 | no |
| Gm8765   | 0 | 0 | 1 | 1 | no |
| Gm8817   | 0 | 0 | 1 | 1 | no |
| Gm884    | 0 | 0 | 1 | 1 | no |
| Gm8882   | 0 | 0 | 1 | 1 | no |
| Gm8883   | 0 | 0 | 1 | 1 | no |
| Gm8884   | 0 | 0 | 1 | 1 | no |
| Gm9      | 0 | 0 | 1 | 1 | no |
| Gm904    | 0 | 0 | 1 | 1 | no |
| Gm9047   | 0 | 0 | 1 | 1 | no |
| Gm9112   | 0 | 0 | 1 | 1 | no |
| Gm9125   | 0 | 0 | 1 | 1 | no |
| Gm9159   | 0 | 0 | 1 | 1 | no |
| Gm9268   | 0 | 0 | 1 | 1 | no |
| Gm933    | 0 | 0 | 1 | 1 | no |
| Gm9376   | 0 | 0 | 1 | 1 | no |
| Gm94     | 0 | 0 | 1 | 1 | no |
| Gm9513   | 0 | 0 | 1 | 1 | no |
| Gm9573   | 0 | 0 | 1 | 1 | no |
| Gm9696   | 0 | 0 | 1 | 1 | no |
| Gm9731   | 0 | 0 | 1 | 1 | no |
| Gm9758   | 0 | 0 | 1 | 1 | no |
| Gm9839   | 0 | 0 | 1 | 1 | no |
| Gm9871   | 0 | 0 | 1 | 1 | no |
| Gm9926   | 0 | 0 | 1 | 1 | no |
| Gm9961   | 0 | 0 | 1 | 1 | no |
| Gm9992   | 0 | 0 | 1 | 1 | no |
| Gm9994   | 0 | 0 | 1 | 1 | no |
| Gm9999   | 0 | 0 | 1 | 1 | no |
| Gmcl1l   | 0 | 0 | 1 | 1 | no |
| Gml      | 0 | 0 | 1 | 1 | no |
| Gnat3    | 0 | 0 | 1 | 1 | no |
| Gnrhr    | 0 | 0 | 1 | 1 | no |
| Gp2      | 0 | 0 | 1 | 1 | no |
| Gpa33    | 0 | 0 | 1 | 1 | no |
| Gpbar1   | 0 | 0 | 1 | 1 | no |
| Gphb5    | 0 | 0 | 1 | 1 | no |
| Gpr113   | 0 | 0 | 1 | 1 | no |
| Gpr15    | 0 | 0 | 1 | 1 | no |
| Gpr31b   | 0 | 0 | 1 | 1 | no |
| Gpr33    | 0 | 0 | 1 | 1 | no |
| Gpr50    | 0 | 0 | 1 | 1 | no |
| Gpr82    | 0 | 0 | 1 | 1 | no |
| Gpr87    | 0 | 0 | 1 | 1 | no |
| Gprc6a   | 0 | 0 | 1 | 1 | no |
| Gpx5     | 0 | 0 | 1 | 1 | no |
| Grin1os  | 0 | 0 | 1 | 1 | no |
| Grip1os2 | 0 | 0 | 1 | 1 | no |
| Gsc      | 0 | 0 | 1 | 1 | no |
| Gsc2     | 0 | 0 | 1 | 1 | no |
| Gsdma2   | 0 | 0 | 1 | 1 | no |
| Gsdma3   | 0 | 0 | 1 | 1 | no |

|           |   |   |   |   |    |
|-----------|---|---|---|---|----|
| Gsdmc     | 0 | 0 | 1 | 1 | no |
| Gsdmc2    | 0 | 0 | 1 | 1 | no |
| Gsdmc3    | 0 | 0 | 1 | 1 | no |
| Gsdmcl-ps | 0 | 0 | 1 | 1 | no |
| Gsdmcl1   | 0 | 0 | 1 | 1 | no |
| Gsdmcl2   | 0 | 0 | 1 | 1 | no |
| Gstt4     | 0 | 0 | 1 | 1 | no |
| Gsx1      | 0 | 0 | 1 | 1 | no |
| Gsx2      | 0 | 0 | 1 | 1 | no |
| Gtsf1     | 0 | 0 | 1 | 1 | no |
| Gtsf1l    | 0 | 0 | 1 | 1 | no |
| Guca2a    | 0 | 0 | 1 | 1 | no |
| Guca2b    | 0 | 0 | 1 | 1 | no |
| Gucy1b2   | 0 | 0 | 1 | 1 | no |
| Gulo      | 0 | 0 | 1 | 1 | no |
| Gykl1     | 0 | 0 | 1 | 1 | no |
| Gzmc      | 0 | 0 | 1 | 1 | no |
| Gzmd      | 0 | 0 | 1 | 1 | no |
| Gzme      | 0 | 0 | 1 | 1 | no |
| Gzmf      | 0 | 0 | 1 | 1 | no |
| Gzmg      | 0 | 0 | 1 | 1 | no |
| Gzmk      | 0 | 0 | 1 | 1 | no |
| Gzmn      | 0 | 0 | 1 | 1 | no |
| H1fnt     | 0 | 0 | 1 | 1 | no |
| H2-B1     | 0 | 0 | 1 | 1 | no |
| H2-Ea-ps  | 0 | 0 | 1 | 1 | no |
| H2-L      | 0 | 0 | 1 | 1 | no |
| H2-M10.1  | 0 | 0 | 1 | 1 | no |
| H2-M10.3  | 0 | 0 | 1 | 1 | no |
| H2-M10.4  | 0 | 0 | 1 | 1 | no |
| H2-M10.6  | 0 | 0 | 1 | 1 | no |
| H2-M2     | 0 | 0 | 1 | 1 | no |
| H2afb1    | 0 | 0 | 1 | 1 | no |
| H2afb2    | 0 | 0 | 1 | 1 | no |
| H2afb3    | 0 | 0 | 1 | 1 | no |
| H2bfm     | 0 | 0 | 1 | 1 | no |
| H60c      | 0 | 0 | 1 | 1 | no |
| Habp2     | 0 | 0 | 1 | 1 | no |
| Hamp      | 0 | 0 | 1 | 1 | no |
| Hamp2     | 0 | 0 | 1 | 1 | no |
| Hand1     | 0 | 0 | 1 | 1 | no |
| Hand2     | 0 | 0 | 1 | 1 | no |
| Havcr1    | 0 | 0 | 1 | 1 | no |
| Hba-x     | 0 | 0 | 1 | 1 | no |
| Hbb-bh1   | 0 | 0 | 1 | 1 | no |
| Hbb-bh2   | 0 | 0 | 1 | 1 | no |
| Hbb-y     | 0 | 0 | 1 | 1 | no |
| Hcrt      | 0 | 0 | 1 | 1 | no |
| Hdgfl1    | 0 | 0 | 1 | 1 | no |
| Hdhd1a    | 0 | 0 | 1 | 1 | no |
| Helt      | 0 | 0 | 1 | 1 | no |
| Hes2      | 0 | 0 | 1 | 1 | no |
| Hfe2      | 0 | 0 | 1 | 1 | no |



|               |   |   |   |   |    |
|---------------|---|---|---|---|----|
| Hist1h1t      | 0 | 0 | 1 | 1 | no |
| Hist1h2aa     | 0 | 0 | 1 | 1 | no |
| Hist1h2ab     | 0 | 0 | 1 | 1 | no |
| Hist1h2ba     | 0 | 0 | 1 | 1 | no |
| Hist1h3h      | 0 | 0 | 1 | 1 | no |
| Hist1h4b      | 0 | 0 | 1 | 1 | no |
| Hist1h4f      | 0 | 0 | 1 | 1 | no |
| Hmgb1-rs17    | 0 | 0 | 1 | 1 | no |
| Hnf1a         | 0 | 0 | 1 | 1 | no |
| Hnf4a         | 0 | 0 | 1 | 1 | no |
| Hnf4aos       | 0 | 0 | 1 | 1 | no |
| Hormad1       | 0 | 0 | 1 | 1 | no |
| Hottip        | 0 | 0 | 1 | 1 | no |
| Hoxa13        | 0 | 0 | 1 | 1 | no |
| Hoxb1         | 0 | 0 | 1 | 1 | no |
| Hoxb13        | 0 | 0 | 1 | 1 | no |
| Hoxc12        | 0 | 0 | 1 | 1 | no |
| Hoxc13        | 0 | 0 | 1 | 1 | no |
| Hoxd12        | 0 | 0 | 1 | 1 | no |
| Hoxd13        | 0 | 0 | 1 | 1 | no |
| Hpd           | 0 | 0 | 1 | 1 | no |
| Hrh4          | 0 | 0 | 1 | 1 | no |
| Hrnr          | 0 | 0 | 1 | 1 | no |
| Hsd3b2        | 0 | 0 | 1 | 1 | no |
| Hsd3b3        | 0 | 0 | 1 | 1 | no |
| Hsd3b4        | 0 | 0 | 1 | 1 | no |
| Hsd3b5        | 0 | 0 | 1 | 1 | no |
| Hsfy2         | 0 | 0 | 1 | 1 | no |
| Hspb9         | 0 | 0 | 1 | 1 | no |
| Hyal4         | 0 | 0 | 1 | 1 | no |
| Hyal5         | 0 | 0 | 1 | 1 | no |
| I730028E13Rik | 0 | 0 | 1 | 1 | no |
| Iapp          | 0 | 0 | 1 | 1 | no |
| Idi2          | 0 | 0 | 1 | 1 | no |
| Ido1          | 0 | 0 | 1 | 1 | no |
| Ifi202b       | 0 | 0 | 1 | 1 | no |
| Ifi2712b      | 0 | 0 | 1 | 1 | no |
| Ifna1         | 0 | 0 | 1 | 1 | no |
| Ifna11        | 0 | 0 | 1 | 1 | no |
| Ifna12        | 0 | 0 | 1 | 1 | no |
| Ifna13        | 0 | 0 | 1 | 1 | no |
| Ifna14        | 0 | 0 | 1 | 1 | no |
| Ifna15        | 0 | 0 | 1 | 1 | no |
| Ifna16        | 0 | 0 | 1 | 1 | no |
| Ifna2         | 0 | 0 | 1 | 1 | no |
| Ifna4         | 0 | 0 | 1 | 1 | no |
| Ifna5         | 0 | 0 | 1 | 1 | no |
| Ifna6         | 0 | 0 | 1 | 1 | no |
| Ifna7         | 0 | 0 | 1 | 1 | no |
| Ifna9         | 0 | 0 | 1 | 1 | no |
| Ifnab         | 0 | 0 | 1 | 1 | no |
| Ifnb1         | 0 | 0 | 1 | 1 | no |
| Ifne          | 0 | 0 | 1 | 1 | no |

|          |   |   |   |   |    |
|----------|---|---|---|---|----|
| Ifnk     | 0 | 0 | 1 | 1 | no |
| Ifnl2    | 0 | 0 | 1 | 1 | no |
| Ifnl3    | 0 | 0 | 1 | 1 | no |
| Ifnz     | 0 | 0 | 1 | 1 | no |
| Igbp1b   | 0 | 0 | 1 | 1 | no |
| Igfl3    | 0 | 0 | 1 | 1 | no |
| Igsf23   | 0 | 0 | 1 | 1 | no |
| Il10     | 0 | 0 | 1 | 1 | no |
| Il12b    | 0 | 0 | 1 | 1 | no |
| Il13     | 0 | 0 | 1 | 1 | no |
| Il17a    | 0 | 0 | 1 | 1 | no |
| Il17c    | 0 | 0 | 1 | 1 | no |
| Il19     | 0 | 0 | 1 | 1 | no |
| Il1f10   | 0 | 0 | 1 | 1 | no |
| Il1f5    | 0 | 0 | 1 | 1 | no |
| Il1f6    | 0 | 0 | 1 | 1 | no |
| Il1f8    | 0 | 0 | 1 | 1 | no |
| Il2      | 0 | 0 | 1 | 1 | no |
| Il22     | 0 | 0 | 1 | 1 | no |
| Il23r    | 0 | 0 | 1 | 1 | no |
| Il24     | 0 | 0 | 1 | 1 | no |
| Il27     | 0 | 0 | 1 | 1 | no |
| Il3      | 0 | 0 | 1 | 1 | no |
| Il31     | 0 | 0 | 1 | 1 | no |
| Il9      | 0 | 0 | 1 | 1 | no |
| Itifb    | 0 | 0 | 1 | 1 | no |
| Inhbc    | 0 | 0 | 1 | 1 | no |
| Inhbe    | 0 | 0 | 1 | 1 | no |
| Ins1     | 0 | 0 | 1 | 1 | no |
| Iqca     | 0 | 0 | 1 | 1 | no |
| Iqcf1    | 0 | 0 | 1 | 1 | no |
| Iqcf3    | 0 | 0 | 1 | 1 | no |
| Iqcf4    | 0 | 0 | 1 | 1 | no |
| Iqcf5    | 0 | 0 | 1 | 1 | no |
| Iqcf6    | 0 | 0 | 1 | 1 | no |
| Irs4     | 0 | 0 | 1 | 1 | no |
| Irx1     | 0 | 0 | 1 | 1 | no |
| Irx2     | 0 | 0 | 1 | 1 | no |
| Isx      | 0 | 0 | 1 | 1 | no |
| Itgb1bp2 | 0 | 0 | 1 | 1 | no |
| Itln1    | 0 | 0 | 1 | 1 | no |
| Ivl      | 0 | 0 | 1 | 1 | no |
| Izumo2   | 0 | 0 | 1 | 1 | no |
| Kap      | 0 | 0 | 1 | 1 | no |
| Kcne1    | 0 | 0 | 1 | 1 | no |
| Kcnj1    | 0 | 0 | 1 | 1 | no |
| Kcnk15   | 0 | 0 | 1 | 1 | no |
| Kdf1     | 0 | 0 | 1 | 1 | no |
| Keg1     | 0 | 0 | 1 | 1 | no |
| Khdc1b   | 0 | 0 | 1 | 1 | no |
| Khdc1c   | 0 | 0 | 1 | 1 | no |
| Kif12    | 0 | 0 | 1 | 1 | no |
| Kif2b    | 0 | 0 | 1 | 1 | no |

|           |   |   |   |   |    |
|-----------|---|---|---|---|----|
| Kif4-ps   | 0 | 0 | 1 | 1 | no |
| Kir3dl1   | 0 | 0 | 1 | 1 | no |
| Kir3dl2   | 0 | 0 | 1 | 1 | no |
| Kis2      | 0 | 0 | 1 | 1 | no |
| Klf14     | 0 | 0 | 1 | 1 | no |
| Klhdc7b   | 0 | 0 | 1 | 1 | no |
| Klk1      | 0 | 0 | 1 | 1 | no |
| Klk14     | 0 | 0 | 1 | 1 | no |
| Klk15     | 0 | 0 | 1 | 1 | no |
| Klk1b1    | 0 | 0 | 1 | 1 | no |
| Klk1b11   | 0 | 0 | 1 | 1 | no |
| Klk1b16   | 0 | 0 | 1 | 1 | no |
| Klk1b21   | 0 | 0 | 1 | 1 | no |
| Klk1b22   | 0 | 0 | 1 | 1 | no |
| Klk1b24   | 0 | 0 | 1 | 1 | no |
| Klk1b26   | 0 | 0 | 1 | 1 | no |
| Klk1b3    | 0 | 0 | 1 | 1 | no |
| Klk1b4    | 0 | 0 | 1 | 1 | no |
| Klk1b5    | 0 | 0 | 1 | 1 | no |
| Klk1b7-ps | 0 | 0 | 1 | 1 | no |
| Klk1b8    | 0 | 0 | 1 | 1 | no |
| Klk1b9    | 0 | 0 | 1 | 1 | no |
| Klra12    | 0 | 0 | 1 | 1 | no |
| Klra17    | 0 | 0 | 1 | 1 | no |
| Klra22    | 0 | 0 | 1 | 1 | no |
| Klra23    | 0 | 0 | 1 | 1 | no |
| Klrb1-ps1 | 0 | 0 | 1 | 1 | no |
| Kpna7     | 0 | 0 | 1 | 1 | no |
| Kprp      | 0 | 0 | 1 | 1 | no |
| Krt12     | 0 | 0 | 1 | 1 | no |
| Krt18     | 0 | 0 | 1 | 1 | no |
| Krt24     | 0 | 0 | 1 | 1 | no |
| Krt31     | 0 | 0 | 1 | 1 | no |
| Krt32     | 0 | 0 | 1 | 1 | no |
| Krt33a    | 0 | 0 | 1 | 1 | no |
| Krt33b    | 0 | 0 | 1 | 1 | no |
| Krt34     | 0 | 0 | 1 | 1 | no |
| Krt35     | 0 | 0 | 1 | 1 | no |
| Krt39     | 0 | 0 | 1 | 1 | no |
| Krt4      | 0 | 0 | 1 | 1 | no |
| Krt5      | 0 | 0 | 1 | 1 | no |
| Krt6b     | 0 | 0 | 1 | 1 | no |
| Krt71     | 0 | 0 | 1 | 1 | no |
| Krt72     | 0 | 0 | 1 | 1 | no |
| Krt73     | 0 | 0 | 1 | 1 | no |
| Krt74     | 0 | 0 | 1 | 1 | no |
| Krt76     | 0 | 0 | 1 | 1 | no |
| Krt77     | 0 | 0 | 1 | 1 | no |
| Krt81     | 0 | 0 | 1 | 1 | no |
| Krt84     | 0 | 0 | 1 | 1 | no |
| Krt86     | 0 | 0 | 1 | 1 | no |
| Krtap1-3  | 0 | 0 | 1 | 1 | no |
| Krtap1-4  | 0 | 0 | 1 | 1 | no |

|              |   |   |   |   |    |
|--------------|---|---|---|---|----|
| Krtap1-5     | 0 | 0 | 1 | 1 | no |
| Krtap10-10   | 0 | 0 | 1 | 1 | no |
| Krtap10-4    | 0 | 0 | 1 | 1 | no |
| Krtap11-1    | 0 | 0 | 1 | 1 | no |
| Krtap12-1    | 0 | 0 | 1 | 1 | no |
| Krtap13      | 0 | 0 | 1 | 1 | no |
| Krtap13-1    | 0 | 0 | 1 | 1 | no |
| Krtap14      | 0 | 0 | 1 | 1 | no |
| Krtap15      | 0 | 0 | 1 | 1 | no |
| Krtap16-1    | 0 | 0 | 1 | 1 | no |
| Krtap16-3    | 0 | 0 | 1 | 1 | no |
| Krtap17-1    | 0 | 0 | 1 | 1 | no |
| Krtap19-1    | 0 | 0 | 1 | 1 | no |
| Krtap19-3    | 0 | 0 | 1 | 1 | no |
| Krtap19-4    | 0 | 0 | 1 | 1 | no |
| Krtap19-5    | 0 | 0 | 1 | 1 | no |
| Krtap19-9b   | 0 | 0 | 1 | 1 | no |
| Krtap2-4     | 0 | 0 | 1 | 1 | no |
| Krtap20-2    | 0 | 0 | 1 | 1 | no |
| Krtap21-1    | 0 | 0 | 1 | 1 | no |
| Krtap22-2    | 0 | 0 | 1 | 1 | no |
| Krtap24-1    | 0 | 0 | 1 | 1 | no |
| Krtap26-1    | 0 | 0 | 1 | 1 | no |
| Krtap27-1    | 0 | 0 | 1 | 1 | no |
| Krtap3-1     | 0 | 0 | 1 | 1 | no |
| Krtap3-2     | 0 | 0 | 1 | 1 | no |
| Krtap3-3     | 0 | 0 | 1 | 1 | no |
| Krtap31-1    | 0 | 0 | 1 | 1 | no |
| Krtap31-2    | 0 | 0 | 1 | 1 | no |
| Krtap4-1     | 0 | 0 | 1 | 1 | no |
| Krtap4-13    | 0 | 0 | 1 | 1 | no |
| Krtap4-16    | 0 | 0 | 1 | 1 | no |
| Krtap4-2     | 0 | 0 | 1 | 1 | no |
| Krtap4-6     | 0 | 0 | 1 | 1 | no |
| Krtap4-7     | 0 | 0 | 1 | 1 | no |
| Krtap4-8     | 0 | 0 | 1 | 1 | no |
| Krtap4-9     | 0 | 0 | 1 | 1 | no |
| Krtap5-1     | 0 | 0 | 1 | 1 | no |
| Krtap5-2     | 0 | 0 | 1 | 1 | no |
| Krtap5-3     | 0 | 0 | 1 | 1 | no |
| Krtap5-4     | 0 | 0 | 1 | 1 | no |
| Krtap5-5     | 0 | 0 | 1 | 1 | no |
| Krtap6-1     | 0 | 0 | 1 | 1 | no |
| Krtap6-2     | 0 | 0 | 1 | 1 | no |
| Krtap6-5     | 0 | 0 | 1 | 1 | no |
| Krtap7-1     | 0 | 0 | 1 | 1 | no |
| Krtap8-1     | 0 | 0 | 1 | 1 | no |
| Krtap9-1     | 0 | 0 | 1 | 1 | no |
| Krtap9-3     | 0 | 0 | 1 | 1 | no |
| Krtap9-5     | 0 | 0 | 1 | 1 | no |
| LOC100040786 | 0 | 0 | 1 | 1 | no |
| LOC100048884 | 0 | 0 | 1 | 1 | no |
| LOC100502896 | 0 | 0 | 1 | 1 | no |

|              |   |   |   |   |    |
|--------------|---|---|---|---|----|
| LOC100503280 | 0 | 0 | 1 | 1 | no |
| LOC100504039 | 0 | 0 | 1 | 1 | no |
| LOC100505025 | 0 | 0 | 1 | 1 | no |
| LOC100861615 | 0 | 0 | 1 | 1 | no |
| LOC100862015 | 0 | 0 | 1 | 1 | no |
| LOC101055863 | 0 | 0 | 1 | 1 | no |
| LOC101056136 | 0 | 0 | 1 | 1 | no |
| LOC101056149 | 0 | 0 | 1 | 1 | no |
| LOC101056236 | 0 | 0 | 1 | 1 | no |
| LOC102308570 | 0 | 0 | 1 | 1 | no |
| LOC102631757 | 0 | 0 | 1 | 1 | no |
| LOC102632430 | 0 | 0 | 1 | 1 | no |
| LOC102633315 | 0 | 0 | 1 | 1 | no |
| LOC102634101 | 0 | 0 | 1 | 1 | no |
| LOC102634401 | 0 | 0 | 1 | 1 | no |
| LOC102634753 | 0 | 0 | 1 | 1 | no |
| LOC102636514 | 0 | 0 | 1 | 1 | no |
| LOC666331    | 0 | 0 | 1 | 1 | no |
| Lbx1         | 0 | 0 | 1 | 1 | no |
| Lce1a1       | 0 | 0 | 1 | 1 | no |
| Lce1a2       | 0 | 0 | 1 | 1 | no |
| Lce1b        | 0 | 0 | 1 | 1 | no |
| Lce1c        | 0 | 0 | 1 | 1 | no |
| Lce1e        | 0 | 0 | 1 | 1 | no |
| Lce1f        | 0 | 0 | 1 | 1 | no |
| Lce1h        | 0 | 0 | 1 | 1 | no |
| Lce1i        | 0 | 0 | 1 | 1 | no |
| Lce1j        | 0 | 0 | 1 | 1 | no |
| Lce1k        | 0 | 0 | 1 | 1 | no |
| Lce1l        | 0 | 0 | 1 | 1 | no |
| Lce1m        | 0 | 0 | 1 | 1 | no |
| Lce3a        | 0 | 0 | 1 | 1 | no |
| Lce3b        | 0 | 0 | 1 | 1 | no |
| Lce3c        | 0 | 0 | 1 | 1 | no |
| Lce3d        | 0 | 0 | 1 | 1 | no |
| Lce3e        | 0 | 0 | 1 | 1 | no |
| Lce3f        | 0 | 0 | 1 | 1 | no |
| Lcn10        | 0 | 0 | 1 | 1 | no |
| Lcn11        | 0 | 0 | 1 | 1 | no |
| Lcn12        | 0 | 0 | 1 | 1 | no |
| Lcn3         | 0 | 0 | 1 | 1 | no |
| Lcn4         | 0 | 0 | 1 | 1 | no |
| Lcn5         | 0 | 0 | 1 | 1 | no |
| Lcn6         | 0 | 0 | 1 | 1 | no |
| Lcn8         | 0 | 0 | 1 | 1 | no |
| Lcn9         | 0 | 0 | 1 | 1 | no |
| Ldhc         | 0 | 0 | 1 | 1 | no |
| Ldlrad2      | 0 | 0 | 1 | 1 | no |
| Leap2        | 0 | 0 | 1 | 1 | no |
| Lect2        | 0 | 0 | 1 | 1 | no |
| Lefty2       | 0 | 0 | 1 | 1 | no |
| Lelp1        | 0 | 0 | 1 | 1 | no |
| Lep          | 0 | 0 | 1 | 1 | no |

|             |   |   |   |   |    |
|-------------|---|---|---|---|----|
| Lgsn        | 0 | 0 | 1 | 1 | no |
| Lhb         | 0 | 0 | 1 | 1 | no |
| Lhx1        | 0 | 0 | 1 | 1 | no |
| Lhx1os      | 0 | 0 | 1 | 1 | no |
| Lhx2        | 0 | 0 | 1 | 1 | no |
| Lhx5        | 0 | 0 | 1 | 1 | no |
| Lipf        | 0 | 0 | 1 | 1 | no |
| Lkaaear1    | 0 | 0 | 1 | 1 | no |
| Lmod2       | 0 | 0 | 1 | 1 | no |
| Lmx1a       | 0 | 0 | 1 | 1 | no |
| Lpcat2b     | 0 | 0 | 1 | 1 | no |
| Lrcol1      | 0 | 0 | 1 | 1 | no |
| Lrit3       | 0 | 0 | 1 | 1 | no |
| Lrrc19      | 0 | 0 | 1 | 1 | no |
| Lrrc43      | 0 | 0 | 1 | 1 | no |
| Lrrc66      | 0 | 0 | 1 | 1 | no |
| Lrrc74      | 0 | 0 | 1 | 1 | no |
| Lrtm1       | 0 | 0 | 1 | 1 | no |
| Luzp4       | 0 | 0 | 1 | 1 | no |
| Ly6f        | 0 | 0 | 1 | 1 | no |
| Ly6g5c      | 0 | 0 | 1 | 1 | no |
| Ly6g6c      | 0 | 0 | 1 | 1 | no |
| Lyg1        | 0 | 0 | 1 | 1 | no |
| Lypd3       | 0 | 0 | 1 | 1 | no |
| Lypd5       | 0 | 0 | 1 | 1 | no |
| Lypd8       | 0 | 0 | 1 | 1 | no |
| Lym7os      | 0 | 0 | 1 | 1 | no |
| Lyzl1       | 0 | 0 | 1 | 1 | no |
| Lyzl4os     | 0 | 0 | 1 | 1 | no |
| Lyzl6       | 0 | 0 | 1 | 1 | no |
| Magea1      | 0 | 0 | 1 | 1 | no |
| Magea10     | 0 | 0 | 1 | 1 | no |
| Magea2      | 0 | 0 | 1 | 1 | no |
| Magea3      | 0 | 0 | 1 | 1 | no |
| Magea4      | 0 | 0 | 1 | 1 | no |
| Magea5      | 0 | 0 | 1 | 1 | no |
| Magea6      | 0 | 0 | 1 | 1 | no |
| Magea8      | 0 | 0 | 1 | 1 | no |
| Mageb1      | 0 | 0 | 1 | 1 | no |
| Mageb16     | 0 | 0 | 1 | 1 | no |
| Mageb16-ps1 | 0 | 0 | 1 | 1 | no |
| Mageb18     | 0 | 0 | 1 | 1 | no |
| Mageb2      | 0 | 0 | 1 | 1 | no |
| Mageb4      | 0 | 0 | 1 | 1 | no |
| Mageb5      | 0 | 0 | 1 | 1 | no |
| Marco       | 0 | 0 | 1 | 1 | no |
| Matn1       | 0 | 0 | 1 | 1 | no |
| Mbd3l1      | 0 | 0 | 1 | 1 | no |
| Mbd3l2      | 0 | 0 | 1 | 1 | no |
| Mbl1        | 0 | 0 | 1 | 1 | no |
| Mc2r        | 0 | 0 | 1 | 1 | no |
| Mcoln3      | 0 | 0 | 1 | 1 | no |
| Mcpt-ps1    | 0 | 0 | 1 | 1 | no |



|           |   |   |   |   |    |
|-----------|---|---|---|---|----|
| Mcpt2     | 0 | 0 | 1 | 1 | no |
| Mcpt9     | 0 | 0 | 1 | 1 | no |
| Mepe      | 0 | 0 | 1 | 1 | no |
| Mettl11b  | 0 | 0 | 1 | 1 | no |
| Mettl7b   | 0 | 0 | 1 | 1 | no |
| Mill1     | 0 | 0 | 1 | 1 | no |
| Miox      | 0 | 0 | 1 | 1 | no |
| Mip       | 0 | 0 | 1 | 1 | no |
| Mir100    | 0 | 0 | 1 | 1 | no |
| Mir101a   | 0 | 0 | 1 | 1 | no |
| Mir101b   | 0 | 0 | 1 | 1 | no |
| Mir101c   | 0 | 0 | 1 | 1 | no |
| Mir103-1  | 0 | 0 | 1 | 1 | no |
| Mir103-2  | 0 | 0 | 1 | 1 | no |
| Mir105    | 0 | 0 | 1 | 1 | no |
| Mir106a   | 0 | 0 | 1 | 1 | no |
| Mir106b   | 0 | 0 | 1 | 1 | no |
| Mir107    | 0 | 0 | 1 | 1 | no |
| Mir10a    | 0 | 0 | 1 | 1 | no |
| Mir10b    | 0 | 0 | 1 | 1 | no |
| Mir1187   | 0 | 0 | 1 | 1 | no |
| Mir1188   | 0 | 0 | 1 | 1 | no |
| Mir1190   | 0 | 0 | 1 | 1 | no |
| Mir1191   | 0 | 0 | 1 | 1 | no |
| Mir1191b  | 0 | 0 | 1 | 1 | no |
| Mir1192   | 0 | 0 | 1 | 1 | no |
| Mir1193   | 0 | 0 | 1 | 1 | no |
| Mir1195   | 0 | 0 | 1 | 1 | no |
| Mir1197   | 0 | 0 | 1 | 1 | no |
| Mir1198   | 0 | 0 | 1 | 1 | no |
| Mir1199   | 0 | 0 | 1 | 1 | no |
| Mir1224   | 0 | 0 | 1 | 1 | no |
| Mir122a   | 0 | 0 | 1 | 1 | no |
| Mir1231   | 0 | 0 | 1 | 1 | no |
| Mir1247   | 0 | 0 | 1 | 1 | no |
| Mir1249   | 0 | 0 | 1 | 1 | no |
| Mir124a-1 | 0 | 0 | 1 | 1 | no |
| Mir124a-2 | 0 | 0 | 1 | 1 | no |
| Mir124a-3 | 0 | 0 | 1 | 1 | no |
| Mir1251   | 0 | 0 | 1 | 1 | no |
| Mir1258   | 0 | 0 | 1 | 1 | no |
| Mir125a   | 0 | 0 | 1 | 1 | no |
| Mir125b-1 | 0 | 0 | 1 | 1 | no |
| Mir125b-2 | 0 | 0 | 1 | 1 | no |
| Mir126    | 0 | 0 | 1 | 1 | no |
| Mir1264   | 0 | 0 | 1 | 1 | no |
| Mir126b   | 0 | 0 | 1 | 1 | no |
| Mir127    | 0 | 0 | 1 | 1 | no |
| Mir128-1  | 0 | 0 | 1 | 1 | no |
| Mir128-2  | 0 | 0 | 1 | 1 | no |
| Mir129-1  | 0 | 0 | 1 | 1 | no |
| Mir129-2  | 0 | 0 | 1 | 1 | no |
| Mir1291   | 0 | 0 | 1 | 1 | no |

|           |   |   |   |   |    |
|-----------|---|---|---|---|----|
| Mir1298   | 0 | 0 | 1 | 1 | no |
| Mir129b   | 0 | 0 | 1 | 1 | no |
| Mir1306   | 0 | 0 | 1 | 1 | no |
| Mir130a   | 0 | 0 | 1 | 1 | no |
| Mir130b   | 0 | 0 | 1 | 1 | no |
| Mir130c   | 0 | 0 | 1 | 1 | no |
| Mir132    | 0 | 0 | 1 | 1 | no |
| Mir133a-1 | 0 | 0 | 1 | 1 | no |
| Mir133a-2 | 0 | 0 | 1 | 1 | no |
| Mir133b   | 0 | 0 | 1 | 1 | no |
| Mir133c   | 0 | 0 | 1 | 1 | no |
| Mir134    | 0 | 0 | 1 | 1 | no |
| Mir135a-1 | 0 | 0 | 1 | 1 | no |
| Mir135a-2 | 0 | 0 | 1 | 1 | no |
| Mir135b   | 0 | 0 | 1 | 1 | no |
| Mir136    | 0 | 0 | 1 | 1 | no |
| Mir137    | 0 | 0 | 1 | 1 | no |
| Mir138-1  | 0 | 0 | 1 | 1 | no |
| Mir138-2  | 0 | 0 | 1 | 1 | no |
| Mir139    | 0 | 0 | 1 | 1 | no |
| Mir140    | 0 | 0 | 1 | 1 | no |
| Mir141    | 0 | 0 | 1 | 1 | no |
| Mir142    | 0 | 0 | 1 | 1 | no |
| Mir142b   | 0 | 0 | 1 | 1 | no |
| Mir143    | 0 | 0 | 1 | 1 | no |
| Mir144    | 0 | 0 | 1 | 1 | no |
| Mir145    | 0 | 0 | 1 | 1 | no |
| Mir145b   | 0 | 0 | 1 | 1 | no |
| Mir146    | 0 | 0 | 1 | 1 | no |
| Mir146b   | 0 | 0 | 1 | 1 | no |
| Mir147    | 0 | 0 | 1 | 1 | no |
| Mir148a   | 0 | 0 | 1 | 1 | no |
| Mir148b   | 0 | 0 | 1 | 1 | no |
| Mir149    | 0 | 0 | 1 | 1 | no |
| Mir150    | 0 | 0 | 1 | 1 | no |
| Mir152    | 0 | 0 | 1 | 1 | no |
| Mir153    | 0 | 0 | 1 | 1 | no |
| Mir154    | 0 | 0 | 1 | 1 | no |
| Mir155    | 0 | 0 | 1 | 1 | no |
| Mir15a    | 0 | 0 | 1 | 1 | no |
| Mir15b    | 0 | 0 | 1 | 1 | no |
| Mir16-1   | 0 | 0 | 1 | 1 | no |
| Mir16-2   | 0 | 0 | 1 | 1 | no |
| Mir1668   | 0 | 0 | 1 | 1 | no |
| Mir17     | 0 | 0 | 1 | 1 | no |
| Mir18     | 0 | 0 | 1 | 1 | no |
| Mir181a-1 | 0 | 0 | 1 | 1 | no |
| Mir181a-2 | 0 | 0 | 1 | 1 | no |
| Mir181b-1 | 0 | 0 | 1 | 1 | no |
| Mir181b-2 | 0 | 0 | 1 | 1 | no |
| Mir181c   | 0 | 0 | 1 | 1 | no |
| Mir181d   | 0 | 0 | 1 | 1 | no |
| Mir182    | 0 | 0 | 1 | 1 | no |

|           |   |   |   |   |    |
|-----------|---|---|---|---|----|
| Mir183    | 0 | 0 | 1 | 1 | no |
| Mir1839   | 0 | 0 | 1 | 1 | no |
| Mir184    | 0 | 0 | 1 | 1 | no |
| Mir1843   | 0 | 0 | 1 | 1 | no |
| Mir1843b  | 0 | 0 | 1 | 1 | no |
| Mir185    | 0 | 0 | 1 | 1 | no |
| Mir186    | 0 | 0 | 1 | 1 | no |
| Mir187    | 0 | 0 | 1 | 1 | no |
| Mir188    | 0 | 0 | 1 | 1 | no |
| Mir1892   | 0 | 0 | 1 | 1 | no |
| Mir1893   | 0 | 0 | 1 | 1 | no |
| Mir1894   | 0 | 0 | 1 | 1 | no |
| Mir1895   | 0 | 0 | 1 | 1 | no |
| Mir1896   | 0 | 0 | 1 | 1 | no |
| Mir1897   | 0 | 0 | 1 | 1 | no |
| Mir1898   | 0 | 0 | 1 | 1 | no |
| Mir1899   | 0 | 0 | 1 | 1 | no |
| Mir18b    | 0 | 0 | 1 | 1 | no |
| Mir190    | 0 | 0 | 1 | 1 | no |
| Mir1900   | 0 | 0 | 1 | 1 | no |
| Mir1901   | 0 | 0 | 1 | 1 | no |
| Mir1902   | 0 | 0 | 1 | 1 | no |
| Mir1903   | 0 | 0 | 1 | 1 | no |
| Mir1904   | 0 | 0 | 1 | 1 | no |
| Mir1905   | 0 | 0 | 1 | 1 | no |
| Mir1906-1 | 0 | 0 | 1 | 1 | no |
| Mir1907   | 0 | 0 | 1 | 1 | no |
| Mir190b   | 0 | 0 | 1 | 1 | no |
| Mir191    | 0 | 0 | 1 | 1 | no |
| Mir1912   | 0 | 0 | 1 | 1 | no |
| Mir192    | 0 | 0 | 1 | 1 | no |
| Mir1928   | 0 | 0 | 1 | 1 | no |
| Mir1929   | 0 | 0 | 1 | 1 | no |
| Mir193    | 0 | 0 | 1 | 1 | no |
| Mir1930   | 0 | 0 | 1 | 1 | no |
| Mir1931   | 0 | 0 | 1 | 1 | no |
| Mir1932   | 0 | 0 | 1 | 1 | no |
| Mir1933   | 0 | 0 | 1 | 1 | no |
| Mir1934   | 0 | 0 | 1 | 1 | no |
| Mir1936   | 0 | 0 | 1 | 1 | no |
| Mir1938   | 0 | 0 | 1 | 1 | no |
| Mir193b   | 0 | 0 | 1 | 1 | no |
| Mir194-1  | 0 | 0 | 1 | 1 | no |
| Mir194-2  | 0 | 0 | 1 | 1 | no |
| Mir1940   | 0 | 0 | 1 | 1 | no |
| Mir1941   | 0 | 0 | 1 | 1 | no |
| Mir1942   | 0 | 0 | 1 | 1 | no |
| Mir1943   | 0 | 0 | 1 | 1 | no |
| Mir1945   | 0 | 0 | 1 | 1 | no |
| Mir1946a  | 0 | 0 | 1 | 1 | no |
| Mir1946b  | 0 | 0 | 1 | 1 | no |
| Mir1947   | 0 | 0 | 1 | 1 | no |
| Mir1948   | 0 | 0 | 1 | 1 | no |

|           |   |   |   |   |    |
|-----------|---|---|---|---|----|
| Mir1949   | 0 | 0 | 1 | 1 | no |
| Mir195    | 0 | 0 | 1 | 1 | no |
| Mir1950   | 0 | 0 | 1 | 1 | no |
| Mir1951   | 0 | 0 | 1 | 1 | no |
| Mir1952   | 0 | 0 | 1 | 1 | no |
| Mir1953   | 0 | 0 | 1 | 1 | no |
| Mir1954   | 0 | 0 | 1 | 1 | no |
| Mir1955   | 0 | 0 | 1 | 1 | no |
| Mir1956   | 0 | 0 | 1 | 1 | no |
| Mir1957   | 0 | 0 | 1 | 1 | no |
| Mir1957b  | 0 | 0 | 1 | 1 | no |
| Mir1958   | 0 | 0 | 1 | 1 | no |
| Mir195b   | 0 | 0 | 1 | 1 | no |
| Mir1960   | 0 | 0 | 1 | 1 | no |
| Mir1961   | 0 | 0 | 1 | 1 | no |
| Mir1962   | 0 | 0 | 1 | 1 | no |
| Mir1963   | 0 | 0 | 1 | 1 | no |
| Mir1964   | 0 | 0 | 1 | 1 | no |
| Mir1966   | 0 | 0 | 1 | 1 | no |
| Mir1967   | 0 | 0 | 1 | 1 | no |
| Mir1968   | 0 | 0 | 1 | 1 | no |
| Mir1969   | 0 | 0 | 1 | 1 | no |
| Mir196a-1 | 0 | 0 | 1 | 1 | no |
| Mir196a-2 | 0 | 0 | 1 | 1 | no |
| Mir196b   | 0 | 0 | 1 | 1 | no |
| Mir1970   | 0 | 0 | 1 | 1 | no |
| Mir1971   | 0 | 0 | 1 | 1 | no |
| Mir1981   | 0 | 0 | 1 | 1 | no |
| Mir1982   | 0 | 0 | 1 | 1 | no |
| Mir1983   | 0 | 0 | 1 | 1 | no |
| Mir199a-1 | 0 | 0 | 1 | 1 | no |
| Mir199a-2 | 0 | 0 | 1 | 1 | no |
| Mir199b   | 0 | 0 | 1 | 1 | no |
| Mir19a    | 0 | 0 | 1 | 1 | no |
| Mir19b-1  | 0 | 0 | 1 | 1 | no |
| Mir19b-2  | 0 | 0 | 1 | 1 | no |
| Mir1a-1   | 0 | 0 | 1 | 1 | no |
| Mir1a-2   | 0 | 0 | 1 | 1 | no |
| Mir1b     | 0 | 0 | 1 | 1 | no |
| Mir200a   | 0 | 0 | 1 | 1 | no |
| Mir200b   | 0 | 0 | 1 | 1 | no |
| Mir200c   | 0 | 0 | 1 | 1 | no |
| Mir201    | 0 | 0 | 1 | 1 | no |
| Mir202    | 0 | 0 | 1 | 1 | no |
| Mir203    | 0 | 0 | 1 | 1 | no |
| Mir204    | 0 | 0 | 1 | 1 | no |
| Mir205    | 0 | 0 | 1 | 1 | no |
| Mir206    | 0 | 0 | 1 | 1 | no |
| Mir207    | 0 | 0 | 1 | 1 | no |
| Mir208a   | 0 | 0 | 1 | 1 | no |
| Mir208b   | 0 | 0 | 1 | 1 | no |
| Mir20a    | 0 | 0 | 1 | 1 | no |
| Mir20b    | 0 | 0 | 1 | 1 | no |

|                   |   |   |   |   |    |
|-------------------|---|---|---|---|----|
| Mir21             | 0 | 0 | 1 | 1 | no |
| Mir210            | 0 | 0 | 1 | 1 | no |
| Mir211            | 0 | 0 | 1 | 1 | no |
| Mir212            | 0 | 0 | 1 | 1 | no |
| Mir2136           | 0 | 0 | 1 | 1 | no |
| Mir2137           | 0 | 0 | 1 | 1 | no |
| Mir2139           | 0 | 0 | 1 | 1 | no |
| Mir214            | 0 | 0 | 1 | 1 | no |
| Mir215            | 0 | 0 | 1 | 1 | no |
| Mir216a           | 0 | 0 | 1 | 1 | no |
| Mir216b           | 0 | 0 | 1 | 1 | no |
| Mir216c           | 0 | 0 | 1 | 1 | no |
| Mir217            | 0 | 0 | 1 | 1 | no |
| Mir218-1          | 0 | 0 | 1 | 1 | no |
| Mir218-2          | 0 | 0 | 1 | 1 | no |
| Mir219-1          | 0 | 0 | 1 | 1 | no |
| Mir219-2          | 0 | 0 | 1 | 1 | no |
| Mir219b           | 0 | 0 | 1 | 1 | no |
| Mir219c           | 0 | 0 | 1 | 1 | no |
| Mir21b            | 0 | 0 | 1 | 1 | no |
| Mir21c            | 0 | 0 | 1 | 1 | no |
| Mir22             | 0 | 0 | 1 | 1 | no |
| Mir221            | 0 | 0 | 1 | 1 | no |
| Mir222            | 0 | 0 | 1 | 1 | no |
| Mir223            | 0 | 0 | 1 | 1 | no |
| Mir23a            | 0 | 0 | 1 | 1 | no |
| Mir23b            | 0 | 0 | 1 | 1 | no |
| Mir24-1           | 0 | 0 | 1 | 1 | no |
| Mir24-2           | 0 | 0 | 1 | 1 | no |
| Mir25             | 0 | 0 | 1 | 1 | no |
| Mir26a-1          | 0 | 0 | 1 | 1 | no |
| Mir26a-2          | 0 | 0 | 1 | 1 | no |
| Mir26b            | 0 | 0 | 1 | 1 | no |
| Mir27a            | 0 | 0 | 1 | 1 | no |
| Mir27b            | 0 | 0 | 1 | 1 | no |
| Mir28             | 0 | 0 | 1 | 1 | no |
| Mir2861           | 0 | 0 | 1 | 1 | no |
| Mir28b            | 0 | 0 | 1 | 1 | no |
| Mir28c            | 0 | 0 | 1 | 1 | no |
| Mir290            | 0 | 0 | 1 | 1 | no |
| Mir290b           | 0 | 0 | 1 | 1 | no |
| Mir291a           | 0 | 0 | 1 | 1 | no |
| Mir291b           | 0 | 0 | 1 | 1 | no |
| Mir292            | 0 | 0 | 1 | 1 | no |
| Mir292b           | 0 | 0 | 1 | 1 | no |
| Mir293            | 0 | 0 | 1 | 1 | no |
| Mir294            | 0 | 0 | 1 | 1 | no |
| Mir295            | 0 | 0 | 1 | 1 | no |
| Mir296            | 0 | 0 | 1 | 1 | no |
| Mir297-1          | 0 | 0 | 1 | 1 | no |
| Mir297-2          | 0 | 0 | 1 | 1 | no |
| Mir297a-3,Mir297a | 0 | 0 | 1 | 1 | no |
| Mir297a-4         | 0 | 0 | 1 | 1 | no |

|           |   |   |   |   |    |
|-----------|---|---|---|---|----|
| Mir297b   | 0 | 0 | 1 | 1 | no |
| Mir297c   | 0 | 0 | 1 | 1 | no |
| Mir298    | 0 | 0 | 1 | 1 | no |
| Mir299    | 0 | 0 | 1 | 1 | no |
| Mir299b   | 0 | 0 | 1 | 1 | no |
| Mir29a    | 0 | 0 | 1 | 1 | no |
| Mir29b-1  | 0 | 0 | 1 | 1 | no |
| Mir29b-2  | 0 | 0 | 1 | 1 | no |
| Mir29c    | 0 | 0 | 1 | 1 | no |
| Mir300    | 0 | 0 | 1 | 1 | no |
| Mir301    | 0 | 0 | 1 | 1 | no |
| Mir301b   | 0 | 0 | 1 | 1 | no |
| Mir302a   | 0 | 0 | 1 | 1 | no |
| Mir302b   | 0 | 0 | 1 | 1 | no |
| Mir302c   | 0 | 0 | 1 | 1 | no |
| Mir302d   | 0 | 0 | 1 | 1 | no |
| Mir3057   | 0 | 0 | 1 | 1 | no |
| Mir3058   | 0 | 0 | 1 | 1 | no |
| Mir3059   | 0 | 0 | 1 | 1 | no |
| Mir3060   | 0 | 0 | 1 | 1 | no |
| Mir3061   | 0 | 0 | 1 | 1 | no |
| Mir3062   | 0 | 0 | 1 | 1 | no |
| Mir3063   | 0 | 0 | 1 | 1 | no |
| Mir3064   | 0 | 0 | 1 | 1 | no |
| Mir3065   | 0 | 0 | 1 | 1 | no |
| Mir3066   | 0 | 0 | 1 | 1 | no |
| Mir3067   | 0 | 0 | 1 | 1 | no |
| Mir3068   | 0 | 0 | 1 | 1 | no |
| Mir3069   | 0 | 0 | 1 | 1 | no |
| Mir3070a  | 0 | 0 | 1 | 1 | no |
| Mir3070b  | 0 | 0 | 1 | 1 | no |
| Mir3071   | 0 | 0 | 1 | 1 | no |
| Mir3072   | 0 | 0 | 1 | 1 | no |
| Mir3073   | 0 | 0 | 1 | 1 | no |
| Mir3073b  | 0 | 0 | 1 | 1 | no |
| Mir3074-1 | 0 | 0 | 1 | 1 | no |
| Mir3074-2 | 0 | 0 | 1 | 1 | no |
| Mir3075   | 0 | 0 | 1 | 1 | no |
| Mir3076   | 0 | 0 | 1 | 1 | no |
| Mir3077   | 0 | 0 | 1 | 1 | no |
| Mir3078   | 0 | 0 | 1 | 1 | no |
| Mir3079   | 0 | 0 | 1 | 1 | no |
| Mir3081   | 0 | 0 | 1 | 1 | no |
| Mir3082   | 0 | 0 | 1 | 1 | no |
| Mir3083   | 0 | 0 | 1 | 1 | no |
| Mir3084   | 0 | 0 | 1 | 1 | no |
| Mir3084-2 | 0 | 0 | 1 | 1 | no |
| Mir3085   | 0 | 0 | 1 | 1 | no |
| Mir3086   | 0 | 0 | 1 | 1 | no |
| Mir3087   | 0 | 0 | 1 | 1 | no |
| Mir3088   | 0 | 0 | 1 | 1 | no |
| Mir3089   | 0 | 0 | 1 | 1 | no |
| Mir3091   | 0 | 0 | 1 | 1 | no |



|           |   |   |   |   |    |
|-----------|---|---|---|---|----|
| Mir3092   | 0 | 0 | 1 | 1 | no |
| Mir3093   | 0 | 0 | 1 | 1 | no |
| Mir3094   | 0 | 0 | 1 | 1 | no |
| Mir3095   | 0 | 0 | 1 | 1 | no |
| Mir3097   | 0 | 0 | 1 | 1 | no |
| Mir3098   | 0 | 0 | 1 | 1 | no |
| Mir3099   | 0 | 0 | 1 | 1 | no |
| Mir30a    | 0 | 0 | 1 | 1 | no |
| Mir30b    | 0 | 0 | 1 | 1 | no |
| Mir30c-1  | 0 | 0 | 1 | 1 | no |
| Mir30c-2  | 0 | 0 | 1 | 1 | no |
| Mir30d    | 0 | 0 | 1 | 1 | no |
| Mir30f    | 0 | 0 | 1 | 1 | no |
| Mir31     | 0 | 0 | 1 | 1 | no |
| Mir3100   | 0 | 0 | 1 | 1 | no |
| Mir3101   | 0 | 0 | 1 | 1 | no |
| Mir3102   | 0 | 0 | 1 | 1 | no |
| Mir3103   | 0 | 0 | 1 | 1 | no |
| Mir3104   | 0 | 0 | 1 | 1 | no |
| Mir3106   | 0 | 0 | 1 | 1 | no |
| Mir3107   | 0 | 0 | 1 | 1 | no |
| Mir3108   | 0 | 0 | 1 | 1 | no |
| Mir3109   | 0 | 0 | 1 | 1 | no |
| Mir3110   | 0 | 0 | 1 | 1 | no |
| Mir3112   | 0 | 0 | 1 | 1 | no |
| Mir32     | 0 | 0 | 1 | 1 | no |
| Mir320    | 0 | 0 | 1 | 1 | no |
| Mir322    | 0 | 0 | 1 | 1 | no |
| Mir323    | 0 | 0 | 1 | 1 | no |
| Mir324    | 0 | 0 | 1 | 1 | no |
| Mir325    | 0 | 0 | 1 | 1 | no |
| Mir326    | 0 | 0 | 1 | 1 | no |
| Mir328    | 0 | 0 | 1 | 1 | no |
| Mir329    | 0 | 0 | 1 | 1 | no |
| Mir33     | 0 | 0 | 1 | 1 | no |
| Mir330    | 0 | 0 | 1 | 1 | no |
| Mir331    | 0 | 0 | 1 | 1 | no |
| Mir335    | 0 | 0 | 1 | 1 | no |
| Mir337    | 0 | 0 | 1 | 1 | no |
| Mir338    | 0 | 0 | 1 | 1 | no |
| Mir339    | 0 | 0 | 1 | 1 | no |
| Mir340    | 0 | 0 | 1 | 1 | no |
| Mir341    | 0 | 0 | 1 | 1 | no |
| Mir343    | 0 | 0 | 1 | 1 | no |
| Mir344    | 0 | 0 | 1 | 1 | no |
| Mir344-2  | 0 | 0 | 1 | 1 | no |
| Mir344b   | 0 | 0 | 1 | 1 | no |
| Mir344c   | 0 | 0 | 1 | 1 | no |
| Mir344d-1 | 0 | 0 | 1 | 1 | no |
| Mir344d-2 | 0 | 0 | 1 | 1 | no |
| Mir344d-3 | 0 | 0 | 1 | 1 | no |
| Mir344e   | 0 | 0 | 1 | 1 | no |
| Mir344f   | 0 | 0 | 1 | 1 | no |

|           |   |   |   |   |    |
|-----------|---|---|---|---|----|
| Mir344g   | 0 | 0 | 1 | 1 | no |
| Mir344h-1 | 0 | 0 | 1 | 1 | no |
| Mir344i   | 0 | 0 | 1 | 1 | no |
| Mir345    | 0 | 0 | 1 | 1 | no |
| Mir346    | 0 | 0 | 1 | 1 | no |
| Mir3470a  | 0 | 0 | 1 | 1 | no |
| Mir3470b  | 0 | 0 | 1 | 1 | no |
| Mir3471-1 | 0 | 0 | 1 | 1 | no |
| Mir3473   | 0 | 0 | 1 | 1 | no |
| Mir3473c  | 0 | 0 | 1 | 1 | no |
| Mir3473d  | 0 | 0 | 1 | 1 | no |
| Mir3473f  | 0 | 0 | 1 | 1 | no |
| Mir3473g  | 0 | 0 | 1 | 1 | no |
| Mir3474   | 0 | 0 | 1 | 1 | no |
| Mir3475   | 0 | 0 | 1 | 1 | no |
| Mir34a    | 0 | 0 | 1 | 1 | no |
| Mir34b    | 0 | 0 | 1 | 1 | no |
| Mir34c    | 0 | 0 | 1 | 1 | no |
| Mir350    | 0 | 0 | 1 | 1 | no |
| Mir351    | 0 | 0 | 1 | 1 | no |
| Mir3535   | 0 | 0 | 1 | 1 | no |
| Mir3544   | 0 | 0 | 1 | 1 | no |
| Mir3547   | 0 | 0 | 1 | 1 | no |
| Mir3569   | 0 | 0 | 1 | 1 | no |
| Mir3572   | 0 | 0 | 1 | 1 | no |
| Mir362    | 0 | 0 | 1 | 1 | no |
| Mir3620   | 0 | 0 | 1 | 1 | no |
| Mir363    | 0 | 0 | 1 | 1 | no |
| Mir365-1  | 0 | 0 | 1 | 1 | no |
| Mir365-2  | 0 | 0 | 1 | 1 | no |
| Mir367    | 0 | 0 | 1 | 1 | no |
| Mir369    | 0 | 0 | 1 | 1 | no |
| Mir370    | 0 | 0 | 1 | 1 | no |
| Mir374    | 0 | 0 | 1 | 1 | no |
| Mir374c   | 0 | 0 | 1 | 1 | no |
| Mir375    | 0 | 0 | 1 | 1 | no |
| Mir376a   | 0 | 0 | 1 | 1 | no |
| Mir376b   | 0 | 0 | 1 | 1 | no |
| Mir376c   | 0 | 0 | 1 | 1 | no |
| Mir377    | 0 | 0 | 1 | 1 | no |
| Mir378    | 0 | 0 | 1 | 1 | no |
| Mir378b   | 0 | 0 | 1 | 1 | no |
| Mir378c   | 0 | 0 | 1 | 1 | no |
| Mir379    | 0 | 0 | 1 | 1 | no |
| Mir380    | 0 | 0 | 1 | 1 | no |
| Mir381    | 0 | 0 | 1 | 1 | no |
| Mir382    | 0 | 0 | 1 | 1 | no |
| Mir383    | 0 | 0 | 1 | 1 | no |
| Mir384    | 0 | 0 | 1 | 1 | no |
| Mir3960   | 0 | 0 | 1 | 1 | no |
| Mir3962   | 0 | 0 | 1 | 1 | no |
| Mir3963   | 0 | 0 | 1 | 1 | no |
| Mir3964   | 0 | 0 | 1 | 1 | no |

|                   |   |   |   |   |    |
|-------------------|---|---|---|---|----|
| Mir3965           | 0 | 0 | 1 | 1 | no |
| Mir3966           | 0 | 0 | 1 | 1 | no |
| Mir3967           | 0 | 0 | 1 | 1 | no |
| Mir3968           | 0 | 0 | 1 | 1 | no |
| Mir3969           | 0 | 0 | 1 | 1 | no |
| Mir3970           | 0 | 0 | 1 | 1 | no |
| Mir3971           | 0 | 0 | 1 | 1 | no |
| Mir409            | 0 | 0 | 1 | 1 | no |
| Mir410            | 0 | 0 | 1 | 1 | no |
| Mir411            | 0 | 0 | 1 | 1 | no |
| Mir412            | 0 | 0 | 1 | 1 | no |
| Mir421            | 0 | 0 | 1 | 1 | no |
| Mir423            | 0 | 0 | 1 | 1 | no |
| Mir425            | 0 | 0 | 1 | 1 | no |
| Mir429            | 0 | 0 | 1 | 1 | no |
| Mir431            | 0 | 0 | 1 | 1 | no |
| Mir432            | 0 | 0 | 1 | 1 | no |
| Mir433            | 0 | 0 | 1 | 1 | no |
| Mir434            | 0 | 0 | 1 | 1 | no |
| Mir448            | 0 | 0 | 1 | 1 | no |
| Mir449a           | 0 | 0 | 1 | 1 | no |
| Mir449b           | 0 | 0 | 1 | 1 | no |
| Mir449c           | 0 | 0 | 1 | 1 | no |
| Mir450-1          | 0 | 0 | 1 | 1 | no |
| Mir450-2          | 0 | 0 | 1 | 1 | no |
| Mir450b           | 0 | 0 | 1 | 1 | no |
| Mir451            | 0 | 0 | 1 | 1 | no |
| Mir452            | 0 | 0 | 1 | 1 | no |
| Mir453            | 0 | 0 | 1 | 1 | no |
| Mir455            | 0 | 0 | 1 | 1 | no |
| Mir463            | 0 | 0 | 1 | 1 | no |
| Mir465            | 0 | 0 | 1 | 1 | no |
| Mir465b-1         | 0 | 0 | 1 | 1 | no |
| Mir465c-1         | 0 | 0 | 1 | 1 | no |
| Mir465d           | 0 | 0 | 1 | 1 | no |
| Mir466            | 0 | 0 | 1 | 1 | no |
| Mir4660           | 0 | 0 | 1 | 1 | no |
| Mir466b-2,Mir466b | 0 | 0 | 1 | 1 | no |
| Mir466b-3         | 0 | 0 | 1 | 1 | no |
| Mir466d           | 0 | 0 | 1 | 1 | no |
| Mir466f-1         | 0 | 0 | 1 | 1 | no |
| Mir466f-2         | 0 | 0 | 1 | 1 | no |
| Mir466f-3         | 0 | 0 | 1 | 1 | no |
| Mir466g           | 0 | 0 | 1 | 1 | no |
| Mir466h           | 0 | 0 | 1 | 1 | no |
| Mir466i           | 0 | 0 | 1 | 1 | no |
| Mir466n           | 0 | 0 | 1 | 1 | no |
| Mir466p           | 0 | 0 | 1 | 1 | no |
| Mir467a-1         | 0 | 0 | 1 | 1 | no |
| Mir467a-10        | 0 | 0 | 1 | 1 | no |
| Mir467a-2         | 0 | 0 | 1 | 1 | no |
| Mir467a-3         | 0 | 0 | 1 | 1 | no |
| Mir467a-5         | 0 | 0 | 1 | 1 | no |

|           |   |   |   |   |    |
|-----------|---|---|---|---|----|
| Mir467a-7 | 0 | 0 | 1 | 1 | no |
| Mir467a-9 | 0 | 0 | 1 | 1 | no |
| Mir467b   | 0 | 0 | 1 | 1 | no |
| Mir467c   | 0 | 0 | 1 | 1 | no |
| Mir467d   | 0 | 0 | 1 | 1 | no |
| Mir467e   | 0 | 0 | 1 | 1 | no |
| Mir467f   | 0 | 0 | 1 | 1 | no |
| Mir468    | 0 | 0 | 1 | 1 | no |
| Mir470    | 0 | 0 | 1 | 1 | no |
| Mir471    | 0 | 0 | 1 | 1 | no |
| Mir483    | 0 | 0 | 1 | 1 | no |
| Mir484    | 0 | 0 | 1 | 1 | no |
| Mir485    | 0 | 0 | 1 | 1 | no |
| Mir486    | 0 | 0 | 1 | 1 | no |
| Mir487b   | 0 | 0 | 1 | 1 | no |
| Mir488    | 0 | 0 | 1 | 1 | no |
| Mir489    | 0 | 0 | 1 | 1 | no |
| Mir490    | 0 | 0 | 1 | 1 | no |
| Mir491    | 0 | 0 | 1 | 1 | no |
| Mir493    | 0 | 0 | 1 | 1 | no |
| Mir494    | 0 | 0 | 1 | 1 | no |
| Mir495    | 0 | 0 | 1 | 1 | no |
| Mir496    | 0 | 0 | 1 | 1 | no |
| Mir496b   | 0 | 0 | 1 | 1 | no |
| Mir497    | 0 | 0 | 1 | 1 | no |
| Mir497b   | 0 | 0 | 1 | 1 | no |
| Mir499    | 0 | 0 | 1 | 1 | no |
| Mir500    | 0 | 0 | 1 | 1 | no |
| Mir501    | 0 | 0 | 1 | 1 | no |
| Mir503    | 0 | 0 | 1 | 1 | no |
| Mir504    | 0 | 0 | 1 | 1 | no |
| Mir5046   | 0 | 0 | 1 | 1 | no |
| Mir505    | 0 | 0 | 1 | 1 | no |
| Mir509    | 0 | 0 | 1 | 1 | no |
| Mir5098   | 0 | 0 | 1 | 1 | no |
| Mir5100   | 0 | 0 | 1 | 1 | no |
| Mir5101   | 0 | 0 | 1 | 1 | no |
| Mir5103   | 0 | 0 | 1 | 1 | no |
| Mir5104   | 0 | 0 | 1 | 1 | no |
| Mir5106   | 0 | 0 | 1 | 1 | no |
| Mir5107   | 0 | 0 | 1 | 1 | no |
| Mir5108   | 0 | 0 | 1 | 1 | no |
| Mir511    | 0 | 0 | 1 | 1 | no |
| Mir5112   | 0 | 0 | 1 | 1 | no |
| Mir5113   | 0 | 0 | 1 | 1 | no |
| Mir5114   | 0 | 0 | 1 | 1 | no |
| Mir5116   | 0 | 0 | 1 | 1 | no |
| Mir5119   | 0 | 0 | 1 | 1 | no |
| Mir5120   | 0 | 0 | 1 | 1 | no |
| Mir5121   | 0 | 0 | 1 | 1 | no |
| Mir5122   | 0 | 0 | 1 | 1 | no |
| Mir5123   | 0 | 0 | 1 | 1 | no |
| Mir5124   | 0 | 0 | 1 | 1 | no |

|           |   |   |   |   |    |
|-----------|---|---|---|---|----|
| Mir5125   | 0 | 0 | 1 | 1 | no |
| Mir5126   | 0 | 0 | 1 | 1 | no |
| Mir5127   | 0 | 0 | 1 | 1 | no |
| Mir5128   | 0 | 0 | 1 | 1 | no |
| Mir5129   | 0 | 0 | 1 | 1 | no |
| Mir5130   | 0 | 0 | 1 | 1 | no |
| Mir5131   | 0 | 0 | 1 | 1 | no |
| Mir5132   | 0 | 0 | 1 | 1 | no |
| Mir5133   | 0 | 0 | 1 | 1 | no |
| Mir5134   | 0 | 0 | 1 | 1 | no |
| Mir5135   | 0 | 0 | 1 | 1 | no |
| Mir5136   | 0 | 0 | 1 | 1 | no |
| Mir532    | 0 | 0 | 1 | 1 | no |
| Mir539    | 0 | 0 | 1 | 1 | no |
| Mir540    | 0 | 0 | 1 | 1 | no |
| Mir541    | 0 | 0 | 1 | 1 | no |
| Mir542    | 0 | 0 | 1 | 1 | no |
| Mir543    | 0 | 0 | 1 | 1 | no |
| Mir544    | 0 | 0 | 1 | 1 | no |
| Mir547    | 0 | 0 | 1 | 1 | no |
| Mir551b   | 0 | 0 | 1 | 1 | no |
| Mir5615-1 | 0 | 0 | 1 | 1 | no |
| Mir5615-2 | 0 | 0 | 1 | 1 | no |
| Mir5616   | 0 | 0 | 1 | 1 | no |
| Mir5617   | 0 | 0 | 1 | 1 | no |
| Mir5618   | 0 | 0 | 1 | 1 | no |
| Mir5619   | 0 | 0 | 1 | 1 | no |
| Mir5620   | 0 | 0 | 1 | 1 | no |
| Mir5621   | 0 | 0 | 1 | 1 | no |
| Mir5622   | 0 | 0 | 1 | 1 | no |
| Mir5623   | 0 | 0 | 1 | 1 | no |
| Mir5624   | 0 | 0 | 1 | 1 | no |
| Mir5625   | 0 | 0 | 1 | 1 | no |
| Mir5626   | 0 | 0 | 1 | 1 | no |
| Mir5627   | 0 | 0 | 1 | 1 | no |
| Mir568    | 0 | 0 | 1 | 1 | no |
| Mir5709   | 0 | 0 | 1 | 1 | no |
| Mir5710   | 0 | 0 | 1 | 1 | no |
| Mir574    | 0 | 0 | 1 | 1 | no |
| Mir582    | 0 | 0 | 1 | 1 | no |
| Mir592    | 0 | 0 | 1 | 1 | no |
| Mir598    | 0 | 0 | 1 | 1 | no |
| Mir599    | 0 | 0 | 1 | 1 | no |
| Mir615    | 0 | 0 | 1 | 1 | no |
| Mir6236   | 0 | 0 | 1 | 1 | no |
| Mir6237   | 0 | 0 | 1 | 1 | no |
| Mir6238   | 0 | 0 | 1 | 1 | no |
| Mir6239   | 0 | 0 | 1 | 1 | no |
| Mir6241   | 0 | 0 | 1 | 1 | no |
| Mir6244   | 0 | 0 | 1 | 1 | no |
| Mir6335   | 0 | 0 | 1 | 1 | no |
| Mir6336   | 0 | 0 | 1 | 1 | no |
| Mir6337   | 0 | 0 | 1 | 1 | no |

|         |   |   |   |   |    |
|---------|---|---|---|---|----|
| Mir6338 | 0 | 0 | 1 | 1 | no |
| Mir6339 | 0 | 0 | 1 | 1 | no |
| Mir6340 | 0 | 0 | 1 | 1 | no |
| Mir6341 | 0 | 0 | 1 | 1 | no |
| Mir6342 | 0 | 0 | 1 | 1 | no |
| Mir6343 | 0 | 0 | 1 | 1 | no |
| Mir6344 | 0 | 0 | 1 | 1 | no |
| Mir6345 | 0 | 0 | 1 | 1 | no |
| Mir6348 | 0 | 0 | 1 | 1 | no |
| Mir6349 | 0 | 0 | 1 | 1 | no |
| Mir6350 | 0 | 0 | 1 | 1 | no |
| Mir6352 | 0 | 0 | 1 | 1 | no |
| Mir6353 | 0 | 0 | 1 | 1 | no |
| Mir6354 | 0 | 0 | 1 | 1 | no |
| Mir6355 | 0 | 0 | 1 | 1 | no |
| Mir6356 | 0 | 0 | 1 | 1 | no |
| Mir6357 | 0 | 0 | 1 | 1 | no |
| Mir6358 | 0 | 0 | 1 | 1 | no |
| Mir6359 | 0 | 0 | 1 | 1 | no |
| Mir6360 | 0 | 0 | 1 | 1 | no |
| Mir6361 | 0 | 0 | 1 | 1 | no |
| Mir6362 | 0 | 0 | 1 | 1 | no |
| Mir6363 | 0 | 0 | 1 | 1 | no |
| Mir6364 | 0 | 0 | 1 | 1 | no |
| Mir6365 | 0 | 0 | 1 | 1 | no |
| Mir6366 | 0 | 0 | 1 | 1 | no |
| Mir6367 | 0 | 0 | 1 | 1 | no |
| Mir6368 | 0 | 0 | 1 | 1 | no |
| Mir6369 | 0 | 0 | 1 | 1 | no |
| Mir6370 | 0 | 0 | 1 | 1 | no |
| Mir6372 | 0 | 0 | 1 | 1 | no |
| Mir6373 | 0 | 0 | 1 | 1 | no |
| Mir6374 | 0 | 0 | 1 | 1 | no |
| Mir6375 | 0 | 0 | 1 | 1 | no |
| Mir6376 | 0 | 0 | 1 | 1 | no |
| Mir6378 | 0 | 0 | 1 | 1 | no |
| Mir6380 | 0 | 0 | 1 | 1 | no |
| Mir6381 | 0 | 0 | 1 | 1 | no |
| Mir6382 | 0 | 0 | 1 | 1 | no |
| Mir6383 | 0 | 0 | 1 | 1 | no |
| Mir6384 | 0 | 0 | 1 | 1 | no |
| Mir6385 | 0 | 0 | 1 | 1 | no |
| Mir6386 | 0 | 0 | 1 | 1 | no |
| Mir6387 | 0 | 0 | 1 | 1 | no |
| Mir6388 | 0 | 0 | 1 | 1 | no |
| Mir6389 | 0 | 0 | 1 | 1 | no |
| Mir6390 | 0 | 0 | 1 | 1 | no |
| Mir6391 | 0 | 0 | 1 | 1 | no |
| Mir6392 | 0 | 0 | 1 | 1 | no |
| Mir6393 | 0 | 0 | 1 | 1 | no |
| Mir6394 | 0 | 0 | 1 | 1 | no |
| Mir6395 | 0 | 0 | 1 | 1 | no |
| Mir6396 | 0 | 0 | 1 | 1 | no |



|                   |   |   |   |   |    |
|-------------------|---|---|---|---|----|
| Mir6397           | 0 | 0 | 1 | 1 | no |
| Mir6398           | 0 | 0 | 1 | 1 | no |
| Mir6399           | 0 | 0 | 1 | 1 | no |
| Mir6400           | 0 | 0 | 1 | 1 | no |
| Mir6401           | 0 | 0 | 1 | 1 | no |
| Mir6402           | 0 | 0 | 1 | 1 | no |
| Mir6403           | 0 | 0 | 1 | 1 | no |
| Mir6404           | 0 | 0 | 1 | 1 | no |
| Mir6405           | 0 | 0 | 1 | 1 | no |
| Mir6406           | 0 | 0 | 1 | 1 | no |
| Mir6407           | 0 | 0 | 1 | 1 | no |
| Mir6408           | 0 | 0 | 1 | 1 | no |
| Mir6409           | 0 | 0 | 1 | 1 | no |
| Mir6410           | 0 | 0 | 1 | 1 | no |
| Mir6411           | 0 | 0 | 1 | 1 | no |
| Mir6412           | 0 | 0 | 1 | 1 | no |
| Mir6413           | 0 | 0 | 1 | 1 | no |
| Mir6414           | 0 | 0 | 1 | 1 | no |
| Mir6415           | 0 | 0 | 1 | 1 | no |
| Mir6416           | 0 | 0 | 1 | 1 | no |
| Mir6417           | 0 | 0 | 1 | 1 | no |
| Mir6418           | 0 | 0 | 1 | 1 | no |
| Mir6419           | 0 | 0 | 1 | 1 | no |
| Mir6420           | 0 | 0 | 1 | 1 | no |
| Mir6481           | 0 | 0 | 1 | 1 | no |
| Mir6516           | 0 | 0 | 1 | 1 | no |
| Mir653            | 0 | 0 | 1 | 1 | no |
| Mir6537           | 0 | 0 | 1 | 1 | no |
| Mir6538           | 0 | 0 | 1 | 1 | no |
| Mir6539           | 0 | 0 | 1 | 1 | no |
| Mir654            | 0 | 0 | 1 | 1 | no |
| Mir6540           | 0 | 0 | 1 | 1 | no |
| Mir6541           | 0 | 0 | 1 | 1 | no |
| Mir6546           | 0 | 0 | 1 | 1 | no |
| Mir664            | 0 | 0 | 1 | 1 | no |
| Mir665            | 0 | 0 | 1 | 1 | no |
| Mir666            | 0 | 0 | 1 | 1 | no |
| Mir667            | 0 | 0 | 1 | 1 | no |
| Mir668            | 0 | 0 | 1 | 1 | no |
| Mir669a-1         | 0 | 0 | 1 | 1 | no |
| Mir669a-2         | 0 | 0 | 1 | 1 | no |
| Mir669a-3         | 0 | 0 | 1 | 1 | no |
| Mir669a-4,Mir669p | 0 | 0 | 1 | 1 | no |
| Mir669b           | 0 | 0 | 1 | 1 | no |
| Mir669c           | 0 | 0 | 1 | 1 | no |
| Mir669e           | 0 | 0 | 1 | 1 | no |
| Mir669g           | 0 | 0 | 1 | 1 | no |
| Mir669h           | 0 | 0 | 1 | 1 | no |
| Mir669i           | 0 | 0 | 1 | 1 | no |
| Mir669j           | 0 | 0 | 1 | 1 | no |
| Mir669k           | 0 | 0 | 1 | 1 | no |
| Mir669m-1         | 0 | 0 | 1 | 1 | no |
| Mir669m-2         | 0 | 0 | 1 | 1 | no |

|           |   |   |   |   |    |
|-----------|---|---|---|---|----|
| Mir669p-1 | 0 | 0 | 1 | 1 | no |
| Mir670    | 0 | 0 | 1 | 1 | no |
| Mir671    | 0 | 0 | 1 | 1 | no |
| Mir6715   | 0 | 0 | 1 | 1 | no |
| Mir672    | 0 | 0 | 1 | 1 | no |
| Mir673    | 0 | 0 | 1 | 1 | no |
| Mir674    | 0 | 0 | 1 | 1 | no |
| Mir675    | 0 | 0 | 1 | 1 | no |
| Mir676    | 0 | 0 | 1 | 1 | no |
| Mir6769b  | 0 | 0 | 1 | 1 | no |
| Mir677    | 0 | 0 | 1 | 1 | no |
| Mir678    | 0 | 0 | 1 | 1 | no |
| Mir679    | 0 | 0 | 1 | 1 | no |
| Mir680-2  | 0 | 0 | 1 | 1 | no |
| Mir680-3  | 0 | 0 | 1 | 1 | no |
| Mir681    | 0 | 0 | 1 | 1 | no |
| Mir682    | 0 | 0 | 1 | 1 | no |
| Mir683-1  | 0 | 0 | 1 | 1 | no |
| Mir683-2  | 0 | 0 | 1 | 1 | no |
| Mir684-1  | 0 | 0 | 1 | 1 | no |
| Mir684-2  | 0 | 0 | 1 | 1 | no |
| Mir687    | 0 | 0 | 1 | 1 | no |
| Mir688    | 0 | 0 | 1 | 1 | no |
| Mir6896   | 0 | 0 | 1 | 1 | no |
| Mir6897   | 0 | 0 | 1 | 1 | no |
| Mir6898   | 0 | 0 | 1 | 1 | no |
| Mir6899   | 0 | 0 | 1 | 1 | no |
| Mir690    | 0 | 0 | 1 | 1 | no |
| Mir6900   | 0 | 0 | 1 | 1 | no |
| Mir6901   | 0 | 0 | 1 | 1 | no |
| Mir6902   | 0 | 0 | 1 | 1 | no |
| Mir6903   | 0 | 0 | 1 | 1 | no |
| Mir6904   | 0 | 0 | 1 | 1 | no |
| Mir6905   | 0 | 0 | 1 | 1 | no |
| Mir6906   | 0 | 0 | 1 | 1 | no |
| Mir6907   | 0 | 0 | 1 | 1 | no |
| Mir6908   | 0 | 0 | 1 | 1 | no |
| Mir6909   | 0 | 0 | 1 | 1 | no |
| Mir691    | 0 | 0 | 1 | 1 | no |
| Mir6910   | 0 | 0 | 1 | 1 | no |
| Mir6911   | 0 | 0 | 1 | 1 | no |
| Mir6912   | 0 | 0 | 1 | 1 | no |
| Mir6913   | 0 | 0 | 1 | 1 | no |
| Mir6914   | 0 | 0 | 1 | 1 | no |
| Mir6915   | 0 | 0 | 1 | 1 | no |
| Mir6916   | 0 | 0 | 1 | 1 | no |
| Mir6917   | 0 | 0 | 1 | 1 | no |
| Mir6918   | 0 | 0 | 1 | 1 | no |
| Mir6919   | 0 | 0 | 1 | 1 | no |
| Mir692-1  | 0 | 0 | 1 | 1 | no |
| Mir692-2b | 0 | 0 | 1 | 1 | no |
| Mir6920   | 0 | 0 | 1 | 1 | no |
| Mir6921   | 0 | 0 | 1 | 1 | no |

|         |   |   |   |   |    |
|---------|---|---|---|---|----|
| Mir6922 | 0 | 0 | 1 | 1 | no |
| Mir6923 | 0 | 0 | 1 | 1 | no |
| Mir6924 | 0 | 0 | 1 | 1 | no |
| Mir6925 | 0 | 0 | 1 | 1 | no |
| Mir6926 | 0 | 0 | 1 | 1 | no |
| Mir6927 | 0 | 0 | 1 | 1 | no |
| Mir6928 | 0 | 0 | 1 | 1 | no |
| Mir6929 | 0 | 0 | 1 | 1 | no |
| Mir693  | 0 | 0 | 1 | 1 | no |
| Mir6930 | 0 | 0 | 1 | 1 | no |
| Mir6931 | 0 | 0 | 1 | 1 | no |
| Mir6932 | 0 | 0 | 1 | 1 | no |
| Mir6933 | 0 | 0 | 1 | 1 | no |
| Mir6934 | 0 | 0 | 1 | 1 | no |
| Mir6935 | 0 | 0 | 1 | 1 | no |
| Mir6936 | 0 | 0 | 1 | 1 | no |
| Mir6937 | 0 | 0 | 1 | 1 | no |
| Mir6938 | 0 | 0 | 1 | 1 | no |
| Mir6939 | 0 | 0 | 1 | 1 | no |
| Mir694  | 0 | 0 | 1 | 1 | no |
| Mir6940 | 0 | 0 | 1 | 1 | no |
| Mir6941 | 0 | 0 | 1 | 1 | no |
| Mir6942 | 0 | 0 | 1 | 1 | no |
| Mir6943 | 0 | 0 | 1 | 1 | no |
| Mir6944 | 0 | 0 | 1 | 1 | no |
| Mir6945 | 0 | 0 | 1 | 1 | no |
| Mir6946 | 0 | 0 | 1 | 1 | no |
| Mir6947 | 0 | 0 | 1 | 1 | no |
| Mir6948 | 0 | 0 | 1 | 1 | no |
| Mir6949 | 0 | 0 | 1 | 1 | no |
| Mir695  | 0 | 0 | 1 | 1 | no |
| Mir6950 | 0 | 0 | 1 | 1 | no |
| Mir6951 | 0 | 0 | 1 | 1 | no |
| Mir6952 | 0 | 0 | 1 | 1 | no |
| Mir6953 | 0 | 0 | 1 | 1 | no |
| Mir6954 | 0 | 0 | 1 | 1 | no |
| Mir6955 | 0 | 0 | 1 | 1 | no |
| Mir6956 | 0 | 0 | 1 | 1 | no |
| Mir6957 | 0 | 0 | 1 | 1 | no |
| Mir6958 | 0 | 0 | 1 | 1 | no |
| Mir6959 | 0 | 0 | 1 | 1 | no |
| Mir6960 | 0 | 0 | 1 | 1 | no |
| Mir6961 | 0 | 0 | 1 | 1 | no |
| Mir6962 | 0 | 0 | 1 | 1 | no |
| Mir6963 | 0 | 0 | 1 | 1 | no |
| Mir6964 | 0 | 0 | 1 | 1 | no |
| Mir6965 | 0 | 0 | 1 | 1 | no |
| Mir6966 | 0 | 0 | 1 | 1 | no |
| Mir6968 | 0 | 0 | 1 | 1 | no |
| Mir6969 | 0 | 0 | 1 | 1 | no |
| Mir697  | 0 | 0 | 1 | 1 | no |
| Mir6970 | 0 | 0 | 1 | 1 | no |
| Mir6971 | 0 | 0 | 1 | 1 | no |

|          |   |   |   |   |    |
|----------|---|---|---|---|----|
| Mir6972  | 0 | 0 | 1 | 1 | no |
| Mir6973a | 0 | 0 | 1 | 1 | no |
| Mir6973b | 0 | 0 | 1 | 1 | no |
| Mir6974  | 0 | 0 | 1 | 1 | no |
| Mir6975  | 0 | 0 | 1 | 1 | no |
| Mir6976  | 0 | 0 | 1 | 1 | no |
| Mir6977  | 0 | 0 | 1 | 1 | no |
| Mir6978  | 0 | 0 | 1 | 1 | no |
| Mir6979  | 0 | 0 | 1 | 1 | no |
| Mir698   | 0 | 0 | 1 | 1 | no |
| Mir6980  | 0 | 0 | 1 | 1 | no |
| Mir6981  | 0 | 0 | 1 | 1 | no |
| Mir6982  | 0 | 0 | 1 | 1 | no |
| Mir6983  | 0 | 0 | 1 | 1 | no |
| Mir6984  | 0 | 0 | 1 | 1 | no |
| Mir6985  | 0 | 0 | 1 | 1 | no |
| Mir6986  | 0 | 0 | 1 | 1 | no |
| Mir6987  | 0 | 0 | 1 | 1 | no |
| Mir6988  | 0 | 0 | 1 | 1 | no |
| Mir6989  | 0 | 0 | 1 | 1 | no |
| Mir6990  | 0 | 0 | 1 | 1 | no |
| Mir6991  | 0 | 0 | 1 | 1 | no |
| Mir6992  | 0 | 0 | 1 | 1 | no |
| Mir6993  | 0 | 0 | 1 | 1 | no |
| Mir6994  | 0 | 0 | 1 | 1 | no |
| Mir6995  | 0 | 0 | 1 | 1 | no |
| Mir6996  | 0 | 0 | 1 | 1 | no |
| Mir6997  | 0 | 0 | 1 | 1 | no |
| Mir6998  | 0 | 0 | 1 | 1 | no |
| Mir6999  | 0 | 0 | 1 | 1 | no |
| Mir7-1   | 0 | 0 | 1 | 1 | no |
| Mir7-2   | 0 | 0 | 1 | 1 | no |
| Mir700   | 0 | 0 | 1 | 1 | no |
| Mir7000  | 0 | 0 | 1 | 1 | no |
| Mir7001  | 0 | 0 | 1 | 1 | no |
| Mir7002  | 0 | 0 | 1 | 1 | no |
| Mir7003  | 0 | 0 | 1 | 1 | no |
| Mir7004  | 0 | 0 | 1 | 1 | no |
| Mir7005  | 0 | 0 | 1 | 1 | no |
| Mir7006  | 0 | 0 | 1 | 1 | no |
| Mir7007  | 0 | 0 | 1 | 1 | no |
| Mir7008  | 0 | 0 | 1 | 1 | no |
| Mir7009  | 0 | 0 | 1 | 1 | no |
| Mir701   | 0 | 0 | 1 | 1 | no |
| Mir7010  | 0 | 0 | 1 | 1 | no |
| Mir7011  | 0 | 0 | 1 | 1 | no |
| Mir7012  | 0 | 0 | 1 | 1 | no |
| Mir7013  | 0 | 0 | 1 | 1 | no |
| Mir7014  | 0 | 0 | 1 | 1 | no |
| Mir7015  | 0 | 0 | 1 | 1 | no |
| Mir7016  | 0 | 0 | 1 | 1 | no |
| Mir7017  | 0 | 0 | 1 | 1 | no |
| Mir7018  | 0 | 0 | 1 | 1 | no |

|          |   |   |   |   |    |
|----------|---|---|---|---|----|
| Mir7019  | 0 | 0 | 1 | 1 | no |
| Mir702   | 0 | 0 | 1 | 1 | no |
| Mir7020  | 0 | 0 | 1 | 1 | no |
| Mir7021  | 0 | 0 | 1 | 1 | no |
| Mir7022  | 0 | 0 | 1 | 1 | no |
| Mir7023  | 0 | 0 | 1 | 1 | no |
| Mir7024  | 0 | 0 | 1 | 1 | no |
| Mir7025  | 0 | 0 | 1 | 1 | no |
| Mir7026  | 0 | 0 | 1 | 1 | no |
| Mir7027  | 0 | 0 | 1 | 1 | no |
| Mir7028  | 0 | 0 | 1 | 1 | no |
| Mir7029  | 0 | 0 | 1 | 1 | no |
| Mir7030  | 0 | 0 | 1 | 1 | no |
| Mir7031  | 0 | 0 | 1 | 1 | no |
| Mir7032  | 0 | 0 | 1 | 1 | no |
| Mir7033  | 0 | 0 | 1 | 1 | no |
| Mir7034  | 0 | 0 | 1 | 1 | no |
| Mir7035  | 0 | 0 | 1 | 1 | no |
| Mir7036  | 0 | 0 | 1 | 1 | no |
| Mir7036b | 0 | 0 | 1 | 1 | no |
| Mir7037  | 0 | 0 | 1 | 1 | no |
| Mir7038  | 0 | 0 | 1 | 1 | no |
| Mir7039  | 0 | 0 | 1 | 1 | no |
| Mir704   | 0 | 0 | 1 | 1 | no |
| Mir7040  | 0 | 0 | 1 | 1 | no |
| Mir7041  | 0 | 0 | 1 | 1 | no |
| Mir7042  | 0 | 0 | 1 | 1 | no |
| Mir7043  | 0 | 0 | 1 | 1 | no |
| Mir7044  | 0 | 0 | 1 | 1 | no |
| Mir7045  | 0 | 0 | 1 | 1 | no |
| Mir7046  | 0 | 0 | 1 | 1 | no |
| Mir7047  | 0 | 0 | 1 | 1 | no |
| Mir7048  | 0 | 0 | 1 | 1 | no |
| Mir7049  | 0 | 0 | 1 | 1 | no |
| Mir705   | 0 | 0 | 1 | 1 | no |
| Mir7050  | 0 | 0 | 1 | 1 | no |
| Mir7051  | 0 | 0 | 1 | 1 | no |
| Mir7052  | 0 | 0 | 1 | 1 | no |
| Mir7053  | 0 | 0 | 1 | 1 | no |
| Mir7054  | 0 | 0 | 1 | 1 | no |
| Mir7055  | 0 | 0 | 1 | 1 | no |
| Mir7056  | 0 | 0 | 1 | 1 | no |
| Mir7057  | 0 | 0 | 1 | 1 | no |
| Mir7058  | 0 | 0 | 1 | 1 | no |
| Mir7059  | 0 | 0 | 1 | 1 | no |
| Mir706   | 0 | 0 | 1 | 1 | no |
| Mir7060  | 0 | 0 | 1 | 1 | no |
| Mir7061  | 0 | 0 | 1 | 1 | no |
| Mir7062  | 0 | 0 | 1 | 1 | no |
| Mir7063  | 0 | 0 | 1 | 1 | no |
| Mir7064  | 0 | 0 | 1 | 1 | no |
| Mir7065  | 0 | 0 | 1 | 1 | no |
| Mir7066  | 0 | 0 | 1 | 1 | no |

|           |   |   |   |   |    |
|-----------|---|---|---|---|----|
| Mir7067   | 0 | 0 | 1 | 1 | no |
| Mir7068   | 0 | 0 | 1 | 1 | no |
| Mir7069   | 0 | 0 | 1 | 1 | no |
| Mir707    | 0 | 0 | 1 | 1 | no |
| Mir7070   | 0 | 0 | 1 | 1 | no |
| Mir7071   | 0 | 0 | 1 | 1 | no |
| Mir7072   | 0 | 0 | 1 | 1 | no |
| Mir7073   | 0 | 0 | 1 | 1 | no |
| Mir7074   | 0 | 0 | 1 | 1 | no |
| Mir7075   | 0 | 0 | 1 | 1 | no |
| Mir7076   | 0 | 0 | 1 | 1 | no |
| Mir7077   | 0 | 0 | 1 | 1 | no |
| Mir7078   | 0 | 0 | 1 | 1 | no |
| Mir7079   | 0 | 0 | 1 | 1 | no |
| Mir708    | 0 | 0 | 1 | 1 | no |
| Mir7080   | 0 | 0 | 1 | 1 | no |
| Mir7081   | 0 | 0 | 1 | 1 | no |
| Mir7082   | 0 | 0 | 1 | 1 | no |
| Mir7083   | 0 | 0 | 1 | 1 | no |
| Mir7084   | 0 | 0 | 1 | 1 | no |
| Mir7085   | 0 | 0 | 1 | 1 | no |
| Mir7086   | 0 | 0 | 1 | 1 | no |
| Mir7087   | 0 | 0 | 1 | 1 | no |
| Mir7088   | 0 | 0 | 1 | 1 | no |
| Mir7089   | 0 | 0 | 1 | 1 | no |
| Mir709    | 0 | 0 | 1 | 1 | no |
| Mir7090   | 0 | 0 | 1 | 1 | no |
| Mir7091   | 0 | 0 | 1 | 1 | no |
| Mir7092   | 0 | 0 | 1 | 1 | no |
| Mir7093   | 0 | 0 | 1 | 1 | no |
| Mir7094-1 | 0 | 0 | 1 | 1 | no |
| Mir7094-2 | 0 | 0 | 1 | 1 | no |
| Mir710    | 0 | 0 | 1 | 1 | no |
| Mir711    | 0 | 0 | 1 | 1 | no |
| Mir7115   | 0 | 0 | 1 | 1 | no |
| Mir7117   | 0 | 0 | 1 | 1 | no |
| Mir7118   | 0 | 0 | 1 | 1 | no |
| Mir7119   | 0 | 0 | 1 | 1 | no |
| Mir713    | 0 | 0 | 1 | 1 | no |
| Mir717    | 0 | 0 | 1 | 1 | no |
| Mir718    | 0 | 0 | 1 | 1 | no |
| Mir719    | 0 | 0 | 1 | 1 | no |
| Mir721    | 0 | 0 | 1 | 1 | no |
| Mir7210   | 0 | 0 | 1 | 1 | no |
| Mir7211   | 0 | 0 | 1 | 1 | no |
| Mir7212   | 0 | 0 | 1 | 1 | no |
| Mir7213   | 0 | 0 | 1 | 1 | no |
| Mir7214   | 0 | 0 | 1 | 1 | no |
| Mir7215   | 0 | 0 | 1 | 1 | no |
| Mir7216   | 0 | 0 | 1 | 1 | no |
| Mir7217   | 0 | 0 | 1 | 1 | no |
| Mir7218   | 0 | 0 | 1 | 1 | no |
| Mir7219   | 0 | 0 | 1 | 1 | no |



|         |   |   |   |   |    |
|---------|---|---|---|---|----|
| Mir7220 | 0 | 0 | 1 | 1 | no |
| Mir7221 | 0 | 0 | 1 | 1 | no |
| Mir7222 | 0 | 0 | 1 | 1 | no |
| Mir7223 | 0 | 0 | 1 | 1 | no |
| Mir7224 | 0 | 0 | 1 | 1 | no |
| Mir7225 | 0 | 0 | 1 | 1 | no |
| Mir7226 | 0 | 0 | 1 | 1 | no |
| Mir7227 | 0 | 0 | 1 | 1 | no |
| Mir7228 | 0 | 0 | 1 | 1 | no |
| Mir7229 | 0 | 0 | 1 | 1 | no |
| Mir7230 | 0 | 0 | 1 | 1 | no |
| Mir7231 | 0 | 0 | 1 | 1 | no |
| Mir7232 | 0 | 0 | 1 | 1 | no |
| Mir7233 | 0 | 0 | 1 | 1 | no |
| Mir7234 | 0 | 0 | 1 | 1 | no |
| Mir7235 | 0 | 0 | 1 | 1 | no |
| Mir7236 | 0 | 0 | 1 | 1 | no |
| Mir7237 | 0 | 0 | 1 | 1 | no |
| Mir7238 | 0 | 0 | 1 | 1 | no |
| Mir7239 | 0 | 0 | 1 | 1 | no |
| Mir7240 | 0 | 0 | 1 | 1 | no |
| Mir7241 | 0 | 0 | 1 | 1 | no |
| Mir7242 | 0 | 0 | 1 | 1 | no |
| Mir7243 | 0 | 0 | 1 | 1 | no |
| Mir741  | 0 | 0 | 1 | 1 | no |
| Mir742  | 0 | 0 | 1 | 1 | no |
| Mir743  | 0 | 0 | 1 | 1 | no |
| Mir743b | 0 | 0 | 1 | 1 | no |
| Mir744  | 0 | 0 | 1 | 1 | no |
| Mir7578 | 0 | 0 | 1 | 1 | no |
| Mir758  | 0 | 0 | 1 | 1 | no |
| Mir759  | 0 | 0 | 1 | 1 | no |
| Mir760  | 0 | 0 | 1 | 1 | no |
| Mir761  | 0 | 0 | 1 | 1 | no |
| Mir762  | 0 | 0 | 1 | 1 | no |
| Mir764  | 0 | 0 | 1 | 1 | no |
| Mir7646 | 0 | 0 | 1 | 1 | no |
| Mir7647 | 0 | 0 | 1 | 1 | no |
| Mir7648 | 0 | 0 | 1 | 1 | no |
| Mir7649 | 0 | 0 | 1 | 1 | no |
| Mir7650 | 0 | 0 | 1 | 1 | no |
| Mir7652 | 0 | 0 | 1 | 1 | no |
| Mir7653 | 0 | 0 | 1 | 1 | no |
| Mir7654 | 0 | 0 | 1 | 1 | no |
| Mir7655 | 0 | 0 | 1 | 1 | no |
| Mir7656 | 0 | 0 | 1 | 1 | no |
| Mir7657 | 0 | 0 | 1 | 1 | no |
| Mir7658 | 0 | 0 | 1 | 1 | no |
| Mir7661 | 0 | 0 | 1 | 1 | no |
| Mir7662 | 0 | 0 | 1 | 1 | no |
| Mir7663 | 0 | 0 | 1 | 1 | no |
| Mir7665 | 0 | 0 | 1 | 1 | no |
| Mir7666 | 0 | 0 | 1 | 1 | no |

|           |   |   |   |   |    |
|-----------|---|---|---|---|----|
| Mir7667   | 0 | 0 | 1 | 1 | no |
| Mir7668   | 0 | 0 | 1 | 1 | no |
| Mir7669   | 0 | 0 | 1 | 1 | no |
| Mir767    | 0 | 0 | 1 | 1 | no |
| Mir7670   | 0 | 0 | 1 | 1 | no |
| Mir7671   | 0 | 0 | 1 | 1 | no |
| Mir7672   | 0 | 0 | 1 | 1 | no |
| Mir7673   | 0 | 0 | 1 | 1 | no |
| Mir7674   | 0 | 0 | 1 | 1 | no |
| Mir7675   | 0 | 0 | 1 | 1 | no |
| Mir7676-2 | 0 | 0 | 1 | 1 | no |
| Mir7677   | 0 | 0 | 1 | 1 | no |
| Mir7678   | 0 | 0 | 1 | 1 | no |
| Mir7679   | 0 | 0 | 1 | 1 | no |
| Mir7680   | 0 | 0 | 1 | 1 | no |
| Mir7681   | 0 | 0 | 1 | 1 | no |
| Mir7682   | 0 | 0 | 1 | 1 | no |
| Mir7684   | 0 | 0 | 1 | 1 | no |
| Mir7685   | 0 | 0 | 1 | 1 | no |
| Mir7686   | 0 | 0 | 1 | 1 | no |
| Mir7687   | 0 | 0 | 1 | 1 | no |
| Mir770    | 0 | 0 | 1 | 1 | no |
| Mir7b     | 0 | 0 | 1 | 1 | no |
| Mir802    | 0 | 0 | 1 | 1 | no |
| Mir804    | 0 | 0 | 1 | 1 | no |
| Mir8091   | 0 | 0 | 1 | 1 | no |
| Mir8092   | 0 | 0 | 1 | 1 | no |
| Mir8093   | 0 | 0 | 1 | 1 | no |
| Mir8095   | 0 | 0 | 1 | 1 | no |
| Mir8096   | 0 | 0 | 1 | 1 | no |
| Mir8097   | 0 | 0 | 1 | 1 | no |
| Mir8099-1 | 0 | 0 | 1 | 1 | no |
| Mir8100   | 0 | 0 | 1 | 1 | no |
| Mir8102   | 0 | 0 | 1 | 1 | no |
| Mir8103   | 0 | 0 | 1 | 1 | no |
| Mir8105   | 0 | 0 | 1 | 1 | no |
| Mir8106   | 0 | 0 | 1 | 1 | no |
| Mir8107   | 0 | 0 | 1 | 1 | no |
| Mir8108   | 0 | 0 | 1 | 1 | no |
| Mir8109   | 0 | 0 | 1 | 1 | no |
| Mir8110   | 0 | 0 | 1 | 1 | no |
| Mir8111   | 0 | 0 | 1 | 1 | no |
| Mir8113   | 0 | 0 | 1 | 1 | no |
| Mir8115   | 0 | 0 | 1 | 1 | no |
| Mir8116   | 0 | 0 | 1 | 1 | no |
| Mir8118   | 0 | 0 | 1 | 1 | no |
| Mir8119   | 0 | 0 | 1 | 1 | no |
| Mir8120   | 0 | 0 | 1 | 1 | no |
| Mir871    | 0 | 0 | 1 | 1 | no |
| Mir872    | 0 | 0 | 1 | 1 | no |
| Mir873b   | 0 | 0 | 1 | 1 | no |
| Mir874    | 0 | 0 | 1 | 1 | no |
| Mir875    | 0 | 0 | 1 | 1 | no |

|            |   |   |   |   |    |
|------------|---|---|---|---|----|
| Mir876     | 0 | 0 | 1 | 1 | no |
| Mir877     | 0 | 0 | 1 | 1 | no |
| Mir878     | 0 | 0 | 1 | 1 | no |
| Mir879     | 0 | 0 | 1 | 1 | no |
| Mir880     | 0 | 0 | 1 | 1 | no |
| Mir881     | 0 | 0 | 1 | 1 | no |
| Mir882     | 0 | 0 | 1 | 1 | no |
| Mir883a    | 0 | 0 | 1 | 1 | no |
| Mir883b    | 0 | 0 | 1 | 1 | no |
| Mir9-1     | 0 | 0 | 1 | 1 | no |
| Mir9-2     | 0 | 0 | 1 | 1 | no |
| Mir9-3     | 0 | 0 | 1 | 1 | no |
| Mir92-1    | 0 | 0 | 1 | 1 | no |
| Mir92-2    | 0 | 0 | 1 | 1 | no |
| Mir92b     | 0 | 0 | 1 | 1 | no |
| Mir93      | 0 | 0 | 1 | 1 | no |
| Mir96      | 0 | 0 | 1 | 1 | no |
| Mir98      | 0 | 0 | 1 | 1 | no |
| Mir99a     | 0 | 0 | 1 | 1 | no |
| Mir99b     | 0 | 0 | 1 | 1 | no |
| Mirlet7a-1 | 0 | 0 | 1 | 1 | no |
| Mirlet7a-2 | 0 | 0 | 1 | 1 | no |
| Mirlet7b   | 0 | 0 | 1 | 1 | no |
| Mirlet7c-1 | 0 | 0 | 1 | 1 | no |
| Mirlet7c-2 | 0 | 0 | 1 | 1 | no |
| Mirlet7d   | 0 | 0 | 1 | 1 | no |
| Mirlet7e   | 0 | 0 | 1 | 1 | no |
| Mirlet7f-1 | 0 | 0 | 1 | 1 | no |
| Mirlet7f-2 | 0 | 0 | 1 | 1 | no |
| Mirlet7g   | 0 | 0 | 1 | 1 | no |
| Mirlet7i   | 0 | 0 | 1 | 1 | no |
| Mirlet7j   | 0 | 0 | 1 | 1 | no |
| Mirlet7k   | 0 | 0 | 1 | 1 | no |
| Mixl1      | 0 | 0 | 1 | 1 | no |
| Mmp10      | 0 | 0 | 1 | 1 | no |
| Mmp1a      | 0 | 0 | 1 | 1 | no |
| Mmp1b      | 0 | 0 | 1 | 1 | no |
| Mmp20      | 0 | 0 | 1 | 1 | no |
| Mmp21      | 0 | 0 | 1 | 1 | no |
| Mmp27      | 0 | 0 | 1 | 1 | no |
| Mmp7       | 0 | 0 | 1 | 1 | no |
| Mnx1       | 0 | 0 | 1 | 1 | no |
| Moxd2      | 0 | 0 | 1 | 1 | no |
| Mptx1      | 0 | 0 | 1 | 1 | no |
| Mptx2      | 0 | 0 | 1 | 1 | no |
| Mrgpra6    | 0 | 0 | 1 | 1 | no |
| Mrgprb3    | 0 | 0 | 1 | 1 | no |
| Mrgprg     | 0 | 0 | 1 | 1 | no |
| Mroh4      | 0 | 0 | 1 | 1 | no |
| Mroh9      | 0 | 0 | 1 | 1 | no |
| Ms4a10     | 0 | 0 | 1 | 1 | no |
| Ms4a15     | 0 | 0 | 1 | 1 | no |
| Ms4a18     | 0 | 0 | 1 | 1 | no |

|           |   |   |   |   |    |
|-----------|---|---|---|---|----|
| Ms4a5     | 0 | 0 | 1 | 1 | no |
| Msgn1     | 0 | 0 | 1 | 1 | no |
| Msemb     | 0 | 0 | 1 | 1 | no |
| Msx1os    | 0 | 0 | 1 | 1 | no |
| Msx3      | 0 | 0 | 1 | 1 | no |
| Mtnr1b    | 0 | 0 | 1 | 1 | no |
| Muc19     | 0 | 0 | 1 | 1 | no |
| Muc20     | 0 | 0 | 1 | 1 | no |
| Muc4      | 0 | 0 | 1 | 1 | no |
| Muc5ac    | 0 | 0 | 1 | 1 | no |
| Muc5b     | 0 | 0 | 1 | 1 | no |
| Muc6      | 0 | 0 | 1 | 1 | no |
| Muc11     | 0 | 0 | 1 | 1 | no |
| Mug-ps1   | 0 | 0 | 1 | 1 | no |
| Mug1      | 0 | 0 | 1 | 1 | no |
| Mug2      | 0 | 0 | 1 | 1 | no |
| Mup1      | 0 | 0 | 1 | 1 | no |
| Mup10     | 0 | 0 | 1 | 1 | no |
| Mup11     | 0 | 0 | 1 | 1 | no |
| Mup12     | 0 | 0 | 1 | 1 | no |
| Mup13     | 0 | 0 | 1 | 1 | no |
| Mup14     | 0 | 0 | 1 | 1 | no |
| Mup15     | 0 | 0 | 1 | 1 | no |
| Mup16     | 0 | 0 | 1 | 1 | no |
| Mup17     | 0 | 0 | 1 | 1 | no |
| Mup19     | 0 | 0 | 1 | 1 | no |
| Mup2      | 0 | 0 | 1 | 1 | no |
| Mup21     | 0 | 0 | 1 | 1 | no |
| Mup4      | 0 | 0 | 1 | 1 | no |
| Mup5      | 0 | 0 | 1 | 1 | no |
| Mup6      | 0 | 0 | 1 | 1 | no |
| Mup7      | 0 | 0 | 1 | 1 | no |
| Mup8      | 0 | 0 | 1 | 1 | no |
| Mup9      | 0 | 0 | 1 | 1 | no |
| Mybpc3    | 0 | 0 | 1 | 1 | no |
| Mybphl    | 0 | 0 | 1 | 1 | no |
| Mycs      | 0 | 0 | 1 | 1 | no |
| Myod1     | 0 | 0 | 1 | 1 | no |
| Nags      | 0 | 0 | 1 | 1 | no |
| Nctc1     | 0 | 0 | 1 | 1 | no |
| Nek10     | 0 | 0 | 1 | 1 | no |
| Nell1os   | 0 | 0 | 1 | 1 | no |
| Neurod2   | 0 | 0 | 1 | 1 | no |
| Neurod6   | 0 | 0 | 1 | 1 | no |
| Nipal4    | 0 | 0 | 1 | 1 | no |
| Nipsnap3a | 0 | 0 | 1 | 1 | no |
| Nkx1-1    | 0 | 0 | 1 | 1 | no |
| Nkx1-2    | 0 | 0 | 1 | 1 | no |
| Nkx2-1    | 0 | 0 | 1 | 1 | no |
| Nkx2-3    | 0 | 0 | 1 | 1 | no |
| Nkx2-4    | 0 | 0 | 1 | 1 | no |
| Nkx2-5    | 0 | 0 | 1 | 1 | no |
| Nkx2-6    | 0 | 0 | 1 | 1 | no |

|                 |   |   |   |   |    |
|-----------------|---|---|---|---|----|
| Nkx2-9          | 0 | 0 | 1 | 1 | no |
| Nkx3-1          | 0 | 0 | 1 | 1 | no |
| Nkx3-2          | 0 | 0 | 1 | 1 | no |
| Nlrp14          | 0 | 0 | 1 | 1 | no |
| Nlrp2           | 0 | 0 | 1 | 1 | no |
| Nlrp4a          | 0 | 0 | 1 | 1 | no |
| Nlrp4b          | 0 | 0 | 1 | 1 | no |
| Nlrp4c          | 0 | 0 | 1 | 1 | no |
| Nlrp4e          | 0 | 0 | 1 | 1 | no |
| Nlrp4g          | 0 | 0 | 1 | 1 | no |
| Nlrp5           | 0 | 0 | 1 | 1 | no |
| Nlrp9a          | 0 | 0 | 1 | 1 | no |
| Nlrp9b          | 0 | 0 | 1 | 1 | no |
| Nlrp9c          | 0 | 0 | 1 | 1 | no |
| Nme9            | 0 | 0 | 1 | 1 | no |
| Nodal           | 0 | 0 | 1 | 1 | no |
| Noto            | 0 | 0 | 1 | 1 | no |
| Nox3            | 0 | 0 | 1 | 1 | no |
| Noxa1           | 0 | 0 | 1 | 1 | no |
| Nphs1os         | 0 | 0 | 1 | 1 | no |
| Npsr1           | 0 | 0 | 1 | 1 | no |
| Npvf            | 0 | 0 | 1 | 1 | no |
| Nr0b1           | 0 | 0 | 1 | 1 | no |
| Nr1h5           | 0 | 0 | 1 | 1 | no |
| Nr2e1           | 0 | 0 | 1 | 1 | no |
| Nr2e3           | 0 | 0 | 1 | 1 | no |
| Nr5a1           | 0 | 0 | 1 | 1 | no |
| Nrg3os          | 0 | 0 | 1 | 1 | no |
| Nron            | 0 | 0 | 1 | 1 | no |
| Nt5c1b          | 0 | 0 | 1 | 1 | no |
| Ntf5            | 0 | 0 | 1 | 1 | no |
| Nup62cl         | 0 | 0 | 1 | 1 | no |
| Nutf2-ps1       | 0 | 0 | 1 | 1 | no |
| Nutm1           | 0 | 0 | 1 | 1 | no |
| Nxf7            | 0 | 0 | 1 | 1 | no |
| Oas1d           | 0 | 0 | 1 | 1 | no |
| Oaz1-ps         | 0 | 0 | 1 | 1 | no |
| Oaz3            | 0 | 0 | 1 | 1 | no |
| Obox1           | 0 | 0 | 1 | 1 | no |
| Obox2           | 0 | 0 | 1 | 1 | no |
| Obox3           | 0 | 0 | 1 | 1 | no |
| Obox5           | 0 | 0 | 1 | 1 | no |
| Obox6           | 0 | 0 | 1 | 1 | no |
| Obp1a           | 0 | 0 | 1 | 1 | no |
| Obp2a           | 0 | 0 | 1 | 1 | no |
| Ocm             | 0 | 0 | 1 | 1 | no |
| Odam            | 0 | 0 | 1 | 1 | no |
| Odf3l2          | 0 | 0 | 1 | 1 | no |
| Odf4            | 0 | 0 | 1 | 1 | no |
| Oit1            | 0 | 0 | 1 | 1 | no |
| Olfr1           | 0 | 0 | 1 | 1 | no |
| Olfr10          | 0 | 0 | 1 | 1 | no |
| Olfr100,Olfr102 | 0 | 0 | 1 | 1 | no |

|             |   |   |   |   |    |
|-------------|---|---|---|---|----|
| Olfr1000    | 0 | 0 | 1 | 1 | no |
| Olfr1002    | 0 | 0 | 1 | 1 | no |
| Olfr1006    | 0 | 0 | 1 | 1 | no |
| Olfr1008    | 0 | 0 | 1 | 1 | no |
| Olfr1009    | 0 | 0 | 1 | 1 | no |
| Olfr101     | 0 | 0 | 1 | 1 | no |
| Olfr1010    | 0 | 0 | 1 | 1 | no |
| Olfr1012    | 0 | 0 | 1 | 1 | no |
| Olfr1013    | 0 | 0 | 1 | 1 | no |
| Olfr1014    | 0 | 0 | 1 | 1 | no |
| Olfr1015    | 0 | 0 | 1 | 1 | no |
| Olfr1016    | 0 | 0 | 1 | 1 | no |
| Olfr1018    | 0 | 0 | 1 | 1 | no |
| Olfr1019    | 0 | 0 | 1 | 1 | no |
| Olfr102     | 0 | 0 | 1 | 1 | no |
| Olfr1020    | 0 | 0 | 1 | 1 | no |
| Olfr1022    | 0 | 0 | 1 | 1 | no |
| Olfr1023    | 0 | 0 | 1 | 1 | no |
| Olfr1024    | 0 | 0 | 1 | 1 | no |
| Olfr1026    | 0 | 0 | 1 | 1 | no |
| Olfr1028    | 0 | 0 | 1 | 1 | no |
| Olfr1029    | 0 | 0 | 1 | 1 | no |
| Olfr103     | 0 | 0 | 1 | 1 | no |
| Olfr1030    | 0 | 0 | 1 | 1 | no |
| Olfr1031    | 0 | 0 | 1 | 1 | no |
| Olfr1032    | 0 | 0 | 1 | 1 | no |
| Olfr1036    | 0 | 0 | 1 | 1 | no |
| Olfr1037    | 0 | 0 | 1 | 1 | no |
| Olfr1038-ps | 0 | 0 | 1 | 1 | no |
| Olfr1039    | 0 | 0 | 1 | 1 | no |
| Olfr1040    | 0 | 0 | 1 | 1 | no |
| Olfr1042    | 0 | 0 | 1 | 1 | no |
| Olfr1043    | 0 | 0 | 1 | 1 | no |
| Olfr1044    | 0 | 0 | 1 | 1 | no |
| Olfr1045    | 0 | 0 | 1 | 1 | no |
| Olfr1046    | 0 | 0 | 1 | 1 | no |
| Olfr1047    | 0 | 0 | 1 | 1 | no |
| Olfr1048    | 0 | 0 | 1 | 1 | no |
| Olfr1049    | 0 | 0 | 1 | 1 | no |
| Olfr1051    | 0 | 0 | 1 | 1 | no |
| Olfr1052    | 0 | 0 | 1 | 1 | no |
| Olfr1053    | 0 | 0 | 1 | 1 | no |
| Olfr1054    | 0 | 0 | 1 | 1 | no |
| Olfr1055    | 0 | 0 | 1 | 1 | no |
| Olfr1056    | 0 | 0 | 1 | 1 | no |
| Olfr1057    | 0 | 0 | 1 | 1 | no |
| Olfr1058    | 0 | 0 | 1 | 1 | no |
| Olfr1061    | 0 | 0 | 1 | 1 | no |
| Olfr1062    | 0 | 0 | 1 | 1 | no |
| Olfr1065    | 0 | 0 | 1 | 1 | no |
| Olfr1066    | 0 | 0 | 1 | 1 | no |
| Olfr107     | 0 | 0 | 1 | 1 | no |
| Olfr1076    | 0 | 0 | 1 | 1 | no |



|              |   |   |   |   |    |
|--------------|---|---|---|---|----|
| Olfr1077-ps1 | 0 | 0 | 1 | 1 | no |
| Olfr1079     | 0 | 0 | 1 | 1 | no |
| Olfr108      | 0 | 0 | 1 | 1 | no |
| Olfr1080     | 0 | 0 | 1 | 1 | no |
| Olfr1082     | 0 | 0 | 1 | 1 | no |
| Olfr1084     | 0 | 0 | 1 | 1 | no |
| Olfr1085     | 0 | 0 | 1 | 1 | no |
| Olfr1086     | 0 | 0 | 1 | 1 | no |
| Olfr1087     | 0 | 0 | 1 | 1 | no |
| Olfr1089     | 0 | 0 | 1 | 1 | no |
| Olfr109      | 0 | 0 | 1 | 1 | no |
| Olfr1090     | 0 | 0 | 1 | 1 | no |
| Olfr1093     | 0 | 0 | 1 | 1 | no |
| Olfr1094     | 0 | 0 | 1 | 1 | no |
| Olfr1095     | 0 | 0 | 1 | 1 | no |
| Olfr1097     | 0 | 0 | 1 | 1 | no |
| Olfr1098     | 0 | 0 | 1 | 1 | no |
| Olfr1099     | 0 | 0 | 1 | 1 | no |
| Olfr11       | 0 | 0 | 1 | 1 | no |
| Olfr110      | 0 | 0 | 1 | 1 | no |
| Olfr1100     | 0 | 0 | 1 | 1 | no |
| Olfr1101     | 0 | 0 | 1 | 1 | no |
| Olfr1102     | 0 | 0 | 1 | 1 | no |
| Olfr1104     | 0 | 0 | 1 | 1 | no |
| Olfr1105     | 0 | 0 | 1 | 1 | no |
| Olfr1106     | 0 | 0 | 1 | 1 | no |
| Olfr1107     | 0 | 0 | 1 | 1 | no |
| Olfr1109     | 0 | 0 | 1 | 1 | no |
| Olfr111      | 0 | 0 | 1 | 1 | no |
| Olfr1110     | 0 | 0 | 1 | 1 | no |
| Olfr1111     | 0 | 0 | 1 | 1 | no |
| Olfr1112     | 0 | 0 | 1 | 1 | no |
| Olfr1113     | 0 | 0 | 1 | 1 | no |
| Olfr1115     | 0 | 0 | 1 | 1 | no |
| Olfr1116-ps  | 0 | 0 | 1 | 1 | no |
| Olfr1118     | 0 | 0 | 1 | 1 | no |
| Olfr112      | 0 | 0 | 1 | 1 | no |
| Olfr1120     | 0 | 0 | 1 | 1 | no |
| Olfr1121     | 0 | 0 | 1 | 1 | no |
| Olfr1122     | 0 | 0 | 1 | 1 | no |
| Olfr1123     | 0 | 0 | 1 | 1 | no |
| Olfr1124     | 0 | 0 | 1 | 1 | no |
| Olfr1126     | 0 | 0 | 1 | 1 | no |
| Olfr1128     | 0 | 0 | 1 | 1 | no |
| Olfr1129     | 0 | 0 | 1 | 1 | no |
| Olfr113      | 0 | 0 | 1 | 1 | no |
| Olfr1130     | 0 | 0 | 1 | 1 | no |
| Olfr1131     | 0 | 0 | 1 | 1 | no |
| Olfr1132     | 0 | 0 | 1 | 1 | no |
| Olfr1133     | 0 | 0 | 1 | 1 | no |
| Olfr1134     | 0 | 0 | 1 | 1 | no |
| Olfr1135     | 0 | 0 | 1 | 1 | no |
| Olfr1136     | 0 | 0 | 1 | 1 | no |

|          |   |   |   |   |    |
|----------|---|---|---|---|----|
| Olfr1137 | 0 | 0 | 1 | 1 | no |
| Olfr1138 | 0 | 0 | 1 | 1 | no |
| Olfr114  | 0 | 0 | 1 | 1 | no |
| Olfr1140 | 0 | 0 | 1 | 1 | no |
| Olfr1141 | 0 | 0 | 1 | 1 | no |
| Olfr1143 | 0 | 0 | 1 | 1 | no |
| Olfr1145 | 0 | 0 | 1 | 1 | no |
| Olfr1148 | 0 | 0 | 1 | 1 | no |
| Olfr115  | 0 | 0 | 1 | 1 | no |
| Olfr1151 | 0 | 0 | 1 | 1 | no |
| Olfr1152 | 0 | 0 | 1 | 1 | no |
| Olfr1153 | 0 | 0 | 1 | 1 | no |
| Olfr1154 | 0 | 0 | 1 | 1 | no |
| Olfr1155 | 0 | 0 | 1 | 1 | no |
| Olfr1156 | 0 | 0 | 1 | 1 | no |
| Olfr1157 | 0 | 0 | 1 | 1 | no |
| Olfr1158 | 0 | 0 | 1 | 1 | no |
| Olfr116  | 0 | 0 | 1 | 1 | no |
| Olfr1160 | 0 | 0 | 1 | 1 | no |
| Olfr1161 | 0 | 0 | 1 | 1 | no |
| Olfr1162 | 0 | 0 | 1 | 1 | no |
| Olfr1164 | 0 | 0 | 1 | 1 | no |
| Olfr1166 | 0 | 0 | 1 | 1 | no |
| Olfr1168 | 0 | 0 | 1 | 1 | no |
| Olfr117  | 0 | 0 | 1 | 1 | no |
| Olfr1170 | 0 | 0 | 1 | 1 | no |
| Olfr1173 | 0 | 0 | 1 | 1 | no |
| Olfr1176 | 0 | 0 | 1 | 1 | no |
| Olfr1178 | 0 | 0 | 1 | 1 | no |
| Olfr1179 | 0 | 0 | 1 | 1 | no |
| Olfr118  | 0 | 0 | 1 | 1 | no |
| Olfr1180 | 0 | 0 | 1 | 1 | no |
| Olfr1181 | 0 | 0 | 1 | 1 | no |
| Olfr1182 | 0 | 0 | 1 | 1 | no |
| Olfr1183 | 0 | 0 | 1 | 1 | no |
| Olfr1184 | 0 | 0 | 1 | 1 | no |
| Olfr1186 | 0 | 0 | 1 | 1 | no |
| Olfr1188 | 0 | 0 | 1 | 1 | no |
| Olfr1189 | 0 | 0 | 1 | 1 | no |
| Olfr119  | 0 | 0 | 1 | 1 | no |
| Olfr1193 | 0 | 0 | 1 | 1 | no |
| Olfr1195 | 0 | 0 | 1 | 1 | no |
| Olfr1196 | 0 | 0 | 1 | 1 | no |
| Olfr1197 | 0 | 0 | 1 | 1 | no |
| Olfr1198 | 0 | 0 | 1 | 1 | no |
| Olfr1199 | 0 | 0 | 1 | 1 | no |
| Olfr120  | 0 | 0 | 1 | 1 | no |
| Olfr1200 | 0 | 0 | 1 | 1 | no |
| Olfr1201 | 0 | 0 | 1 | 1 | no |
| Olfr1202 | 0 | 0 | 1 | 1 | no |
| Olfr1204 | 0 | 0 | 1 | 1 | no |
| Olfr1205 | 0 | 0 | 1 | 1 | no |
| Olfr1206 | 0 | 0 | 1 | 1 | no |

|          |   |   |   |   |    |
|----------|---|---|---|---|----|
| Olfr1208 | 0 | 0 | 1 | 1 | no |
| Olfr1209 | 0 | 0 | 1 | 1 | no |
| Olfr121  | 0 | 0 | 1 | 1 | no |
| Olfr1211 | 0 | 0 | 1 | 1 | no |
| Olfr1212 | 0 | 0 | 1 | 1 | no |
| Olfr1213 | 0 | 0 | 1 | 1 | no |
| Olfr1214 | 0 | 0 | 1 | 1 | no |
| Olfr1215 | 0 | 0 | 1 | 1 | no |
| Olfr1216 | 0 | 0 | 1 | 1 | no |
| Olfr1217 | 0 | 0 | 1 | 1 | no |
| Olfr1218 | 0 | 0 | 1 | 1 | no |
| Olfr1219 | 0 | 0 | 1 | 1 | no |
| Olfr122  | 0 | 0 | 1 | 1 | no |
| Olfr1220 | 0 | 0 | 1 | 1 | no |
| Olfr1221 | 0 | 0 | 1 | 1 | no |
| Olfr1222 | 0 | 0 | 1 | 1 | no |
| Olfr1223 | 0 | 0 | 1 | 1 | no |
| Olfr1225 | 0 | 0 | 1 | 1 | no |
| Olfr1226 | 0 | 0 | 1 | 1 | no |
| Olfr1228 | 0 | 0 | 1 | 1 | no |
| Olfr1229 | 0 | 0 | 1 | 1 | no |
| Olfr123  | 0 | 0 | 1 | 1 | no |
| Olfr1230 | 0 | 0 | 1 | 1 | no |
| Olfr1231 | 0 | 0 | 1 | 1 | no |
| Olfr1232 | 0 | 0 | 1 | 1 | no |
| Olfr1233 | 0 | 0 | 1 | 1 | no |
| Olfr1234 | 0 | 0 | 1 | 1 | no |
| Olfr1238 | 0 | 0 | 1 | 1 | no |
| Olfr1239 | 0 | 0 | 1 | 1 | no |
| Olfr124  | 0 | 0 | 1 | 1 | no |
| Olfr1240 | 0 | 0 | 1 | 1 | no |
| Olfr1241 | 0 | 0 | 1 | 1 | no |
| Olfr1242 | 0 | 0 | 1 | 1 | no |
| Olfr1243 | 0 | 0 | 1 | 1 | no |
| Olfr1246 | 0 | 0 | 1 | 1 | no |
| Olfr1247 | 0 | 0 | 1 | 1 | no |
| Olfr1248 | 0 | 0 | 1 | 1 | no |
| Olfr125  | 0 | 0 | 1 | 1 | no |
| Olfr1250 | 0 | 0 | 1 | 1 | no |
| Olfr1251 | 0 | 0 | 1 | 1 | no |
| Olfr1252 | 0 | 0 | 1 | 1 | no |
| Olfr1253 | 0 | 0 | 1 | 1 | no |
| Olfr1255 | 0 | 0 | 1 | 1 | no |
| Olfr1256 | 0 | 0 | 1 | 1 | no |
| Olfr1257 | 0 | 0 | 1 | 1 | no |
| Olfr1258 | 0 | 0 | 1 | 1 | no |
| Olfr126  | 0 | 0 | 1 | 1 | no |
| Olfr1260 | 0 | 0 | 1 | 1 | no |
| Olfr1261 | 0 | 0 | 1 | 1 | no |
| Olfr1262 | 0 | 0 | 1 | 1 | no |
| Olfr1263 | 0 | 0 | 1 | 1 | no |
| Olfr1264 | 0 | 0 | 1 | 1 | no |
| Olfr1265 | 0 | 0 | 1 | 1 | no |

|              |   |   |   |   |    |
|--------------|---|---|---|---|----|
| Olfr1269     | 0 | 0 | 1 | 1 | no |
| Olfr127      | 0 | 0 | 1 | 1 | no |
| Olfr1270     | 0 | 0 | 1 | 1 | no |
| Olfr1271     | 0 | 0 | 1 | 1 | no |
| Olfr1272     | 0 | 0 | 1 | 1 | no |
| Olfr1273-ps  | 0 | 0 | 1 | 1 | no |
| Olfr1274-ps  | 0 | 0 | 1 | 1 | no |
| Olfr1275     | 0 | 0 | 1 | 1 | no |
| Olfr1276     | 0 | 0 | 1 | 1 | no |
| Olfr1277     | 0 | 0 | 1 | 1 | no |
| Olfr1278     | 0 | 0 | 1 | 1 | no |
| Olfr1279     | 0 | 0 | 1 | 1 | no |
| Olfr128      | 0 | 0 | 1 | 1 | no |
| Olfr1280     | 0 | 0 | 1 | 1 | no |
| Olfr1281     | 0 | 0 | 1 | 1 | no |
| Olfr1282     | 0 | 0 | 1 | 1 | no |
| Olfr1283     | 0 | 0 | 1 | 1 | no |
| Olfr1284     | 0 | 0 | 1 | 1 | no |
| Olfr1286     | 0 | 0 | 1 | 1 | no |
| Olfr1287     | 0 | 0 | 1 | 1 | no |
| Olfr1288     | 0 | 0 | 1 | 1 | no |
| Olfr1289     | 0 | 0 | 1 | 1 | no |
| Olfr129      | 0 | 0 | 1 | 1 | no |
| Olfr1290     | 0 | 0 | 1 | 1 | no |
| Olfr1294     | 0 | 0 | 1 | 1 | no |
| Olfr1295     | 0 | 0 | 1 | 1 | no |
| Olfr1297     | 0 | 0 | 1 | 1 | no |
| Olfr1298     | 0 | 0 | 1 | 1 | no |
| Olfr1299     | 0 | 0 | 1 | 1 | no |
| Olfr13       | 0 | 0 | 1 | 1 | no |
| Olfr130      | 0 | 0 | 1 | 1 | no |
| Olfr1300-ps1 | 0 | 0 | 1 | 1 | no |
| Olfr1301     | 0 | 0 | 1 | 1 | no |
| Olfr1302     | 0 | 0 | 1 | 1 | no |
| Olfr1303     | 0 | 0 | 1 | 1 | no |
| Olfr1305     | 0 | 0 | 1 | 1 | no |
| Olfr1306     | 0 | 0 | 1 | 1 | no |
| Olfr1307     | 0 | 0 | 1 | 1 | no |
| Olfr1308     | 0 | 0 | 1 | 1 | no |
| Olfr1309     | 0 | 0 | 1 | 1 | no |
| Olfr131      | 0 | 0 | 1 | 1 | no |
| Olfr1310     | 0 | 0 | 1 | 1 | no |
| Olfr1311     | 0 | 0 | 1 | 1 | no |
| Olfr1312     | 0 | 0 | 1 | 1 | no |
| Olfr1313     | 0 | 0 | 1 | 1 | no |
| Olfr1314     | 0 | 0 | 1 | 1 | no |
| Olfr1316     | 0 | 0 | 1 | 1 | no |
| Olfr1317     | 0 | 0 | 1 | 1 | no |
| Olfr1318     | 0 | 0 | 1 | 1 | no |
| Olfr132      | 0 | 0 | 1 | 1 | no |
| Olfr1320     | 0 | 0 | 1 | 1 | no |
| Olfr1321     | 0 | 0 | 1 | 1 | no |
| Olfr1322     | 0 | 0 | 1 | 1 | no |

|                   |   |   |   |   |    |
|-------------------|---|---|---|---|----|
| Olfr1323          | 0 | 0 | 1 | 1 | no |
| Olfr1324          | 0 | 0 | 1 | 1 | no |
| Olfr1325          | 0 | 0 | 1 | 1 | no |
| Olfr1328          | 0 | 0 | 1 | 1 | no |
| Olfr1329          | 0 | 0 | 1 | 1 | no |
| Olfr133           | 0 | 0 | 1 | 1 | no |
| Olfr1330          | 0 | 0 | 1 | 1 | no |
| Olfr1331          | 0 | 0 | 1 | 1 | no |
| Olfr1333          | 0 | 0 | 1 | 1 | no |
| Olfr1335          | 0 | 0 | 1 | 1 | no |
| Olfr1336          | 0 | 0 | 1 | 1 | no |
| Olfr1337          | 0 | 0 | 1 | 1 | no |
| Olfr1338          | 0 | 0 | 1 | 1 | no |
| Olfr1339          | 0 | 0 | 1 | 1 | no |
| Olfr134           | 0 | 0 | 1 | 1 | no |
| Olfr1340          | 0 | 0 | 1 | 1 | no |
| Olfr1341          | 0 | 0 | 1 | 1 | no |
| Olfr1342          | 0 | 0 | 1 | 1 | no |
| Olfr1346          | 0 | 0 | 1 | 1 | no |
| Olfr1347          | 0 | 0 | 1 | 1 | no |
| Olfr1348          | 0 | 0 | 1 | 1 | no |
| Olfr1349          | 0 | 0 | 1 | 1 | no |
| Olfr135           | 0 | 0 | 1 | 1 | no |
| Olfr1350          | 0 | 0 | 1 | 1 | no |
| Olfr1351          | 0 | 0 | 1 | 1 | no |
| Olfr1352          | 0 | 0 | 1 | 1 | no |
| Olfr1353          | 0 | 0 | 1 | 1 | no |
| Olfr1354          | 0 | 0 | 1 | 1 | no |
| Olfr1355          | 0 | 0 | 1 | 1 | no |
| Olfr1356          | 0 | 0 | 1 | 1 | no |
| Olfr1357          | 0 | 0 | 1 | 1 | no |
| Olfr1359,Olfr1360 | 0 | 0 | 1 | 1 | no |
| Olfr136           | 0 | 0 | 1 | 1 | no |
| Olfr1360          | 0 | 0 | 1 | 1 | no |
| Olfr1362          | 0 | 0 | 1 | 1 | no |
| Olfr1364          | 0 | 0 | 1 | 1 | no |
| Olfr1366          | 0 | 0 | 1 | 1 | no |
| Olfr1367          | 0 | 0 | 1 | 1 | no |
| Olfr1368          | 0 | 0 | 1 | 1 | no |
| Olfr137           | 0 | 0 | 1 | 1 | no |
| Olfr1370          | 0 | 0 | 1 | 1 | no |
| Olfr1373          | 0 | 0 | 1 | 1 | no |
| Olfr1377          | 0 | 0 | 1 | 1 | no |
| Olfr1378          | 0 | 0 | 1 | 1 | no |
| Olfr138           | 0 | 0 | 1 | 1 | no |
| Olfr1380          | 0 | 0 | 1 | 1 | no |
| Olfr1381          | 0 | 0 | 1 | 1 | no |
| Olfr1382          | 0 | 0 | 1 | 1 | no |
| Olfr1383          | 0 | 0 | 1 | 1 | no |
| Olfr1384          | 0 | 0 | 1 | 1 | no |
| Olfr1385          | 0 | 0 | 1 | 1 | no |
| Olfr1386          | 0 | 0 | 1 | 1 | no |
| Olfr1387          | 0 | 0 | 1 | 1 | no |

|                   |   |   |   |   |    |
|-------------------|---|---|---|---|----|
| Olfr1388          | 0 | 0 | 1 | 1 | no |
| Olfr1389          | 0 | 0 | 1 | 1 | no |
| Olfr139           | 0 | 0 | 1 | 1 | no |
| Olfr1390          | 0 | 0 | 1 | 1 | no |
| Olfr1391          | 0 | 0 | 1 | 1 | no |
| Olfr1394          | 0 | 0 | 1 | 1 | no |
| Olfr1395          | 0 | 0 | 1 | 1 | no |
| Olfr140           | 0 | 0 | 1 | 1 | no |
| Olfr1402          | 0 | 0 | 1 | 1 | no |
| Olfr1404          | 0 | 0 | 1 | 1 | no |
| Olfr1406          | 0 | 0 | 1 | 1 | no |
| Olfr1408          | 0 | 0 | 1 | 1 | no |
| Olfr141           | 0 | 0 | 1 | 1 | no |
| Olfr1410          | 0 | 0 | 1 | 1 | no |
| Olfr1411          | 0 | 0 | 1 | 1 | no |
| Olfr1412          | 0 | 0 | 1 | 1 | no |
| Olfr1413          | 0 | 0 | 1 | 1 | no |
| Olfr1414          | 0 | 0 | 1 | 1 | no |
| Olfr1415          | 0 | 0 | 1 | 1 | no |
| Olfr1416          | 0 | 0 | 1 | 1 | no |
| Olfr1417          | 0 | 0 | 1 | 1 | no |
| Olfr1418          | 0 | 0 | 1 | 1 | no |
| Olfr1419          | 0 | 0 | 1 | 1 | no |
| Olfr142           | 0 | 0 | 1 | 1 | no |
| Olfr1420          | 0 | 0 | 1 | 1 | no |
| Olfr1423          | 0 | 0 | 1 | 1 | no |
| Olfr1424          | 0 | 0 | 1 | 1 | no |
| Olfr1425          | 0 | 0 | 1 | 1 | no |
| Olfr1426          | 0 | 0 | 1 | 1 | no |
| Olfr1427          | 0 | 0 | 1 | 1 | no |
| Olfr1428          | 0 | 0 | 1 | 1 | no |
| Olfr143           | 0 | 0 | 1 | 1 | no |
| Olfr1431          | 0 | 0 | 1 | 1 | no |
| Olfr1433,Olfr1434 | 0 | 0 | 1 | 1 | no |
| Olfr1434          | 0 | 0 | 1 | 1 | no |
| Olfr1436          | 0 | 0 | 1 | 1 | no |
| Olfr1437          | 0 | 0 | 1 | 1 | no |
| Olfr1440          | 0 | 0 | 1 | 1 | no |
| Olfr1441          | 0 | 0 | 1 | 1 | no |
| Olfr1442          | 0 | 0 | 1 | 1 | no |
| Olfr1443          | 0 | 0 | 1 | 1 | no |
| Olfr1444          | 0 | 0 | 1 | 1 | no |
| Olfr1445          | 0 | 0 | 1 | 1 | no |
| Olfr1446          | 0 | 0 | 1 | 1 | no |
| Olfr1447          | 0 | 0 | 1 | 1 | no |
| Olfr1448          | 0 | 0 | 1 | 1 | no |
| Olfr1449          | 0 | 0 | 1 | 1 | no |
| Olfr145           | 0 | 0 | 1 | 1 | no |
| Olfr1450          | 0 | 0 | 1 | 1 | no |
| Olfr1451          | 0 | 0 | 1 | 1 | no |
| Olfr1453          | 0 | 0 | 1 | 1 | no |
| Olfr1454          | 0 | 0 | 1 | 1 | no |
| Olfr1457          | 0 | 0 | 1 | 1 | no |



|              |   |   |   |   |    |
|--------------|---|---|---|---|----|
| Olfr1459     | 0 | 0 | 1 | 1 | no |
| Olfr146      | 0 | 0 | 1 | 1 | no |
| Olfr1461     | 0 | 0 | 1 | 1 | no |
| Olfr1462     | 0 | 0 | 1 | 1 | no |
| Olfr1463     | 0 | 0 | 1 | 1 | no |
| Olfr1465     | 0 | 0 | 1 | 1 | no |
| Olfr1466     | 0 | 0 | 1 | 1 | no |
| Olfr1467     | 0 | 0 | 1 | 1 | no |
| Olfr1469     | 0 | 0 | 1 | 1 | no |
| Olfr147      | 0 | 0 | 1 | 1 | no |
| Olfr1471     | 0 | 0 | 1 | 1 | no |
| Olfr1472     | 0 | 0 | 1 | 1 | no |
| Olfr1474     | 0 | 0 | 1 | 1 | no |
| Olfr1475     | 0 | 0 | 1 | 1 | no |
| Olfr1477     | 0 | 0 | 1 | 1 | no |
| Olfr148      | 0 | 0 | 1 | 1 | no |
| Olfr1480     | 0 | 0 | 1 | 1 | no |
| Olfr1484     | 0 | 0 | 1 | 1 | no |
| Olfr1487     | 0 | 0 | 1 | 1 | no |
| Olfr1489     | 0 | 0 | 1 | 1 | no |
| Olfr149      | 0 | 0 | 1 | 1 | no |
| Olfr1490     | 0 | 0 | 1 | 1 | no |
| Olfr1491     | 0 | 0 | 1 | 1 | no |
| Olfr1494     | 0 | 0 | 1 | 1 | no |
| Olfr1495     | 0 | 0 | 1 | 1 | no |
| Olfr1496     | 0 | 0 | 1 | 1 | no |
| Olfr1497     | 0 | 0 | 1 | 1 | no |
| Olfr1499     | 0 | 0 | 1 | 1 | no |
| Olfr15       | 0 | 0 | 1 | 1 | no |
| Olfr150      | 0 | 0 | 1 | 1 | no |
| Olfr1500     | 0 | 0 | 1 | 1 | no |
| Olfr1501     | 0 | 0 | 1 | 1 | no |
| Olfr1502     | 0 | 0 | 1 | 1 | no |
| Olfr1504     | 0 | 0 | 1 | 1 | no |
| Olfr1505     | 0 | 0 | 1 | 1 | no |
| Olfr1506     | 0 | 0 | 1 | 1 | no |
| Olfr1507     | 0 | 0 | 1 | 1 | no |
| Olfr1508     | 0 | 0 | 1 | 1 | no |
| Olfr1509     | 0 | 0 | 1 | 1 | no |
| Olfr151      | 0 | 0 | 1 | 1 | no |
| Olfr1510     | 0 | 0 | 1 | 1 | no |
| Olfr1511     | 0 | 0 | 1 | 1 | no |
| Olfr1512     | 0 | 0 | 1 | 1 | no |
| Olfr1513     | 0 | 0 | 1 | 1 | no |
| Olfr152      | 0 | 0 | 1 | 1 | no |
| Olfr1532-ps1 | 0 | 0 | 1 | 1 | no |
| Olfr1535     | 0 | 0 | 1 | 1 | no |
| Olfr1537     | 0 | 0 | 1 | 1 | no |
| Olfr154      | 0 | 0 | 1 | 1 | no |
| Olfr155      | 0 | 0 | 1 | 1 | no |
| Olfr156      | 0 | 0 | 1 | 1 | no |
| Olfr157      | 0 | 0 | 1 | 1 | no |
| Olfr159      | 0 | 0 | 1 | 1 | no |

|             |   |   |   |   |    |
|-------------|---|---|---|---|----|
| Olfr16      | 0 | 0 | 1 | 1 | no |
| Olfr160     | 0 | 0 | 1 | 1 | no |
| Olfr161     | 0 | 0 | 1 | 1 | no |
| Olfr164     | 0 | 0 | 1 | 1 | no |
| Olfr165     | 0 | 0 | 1 | 1 | no |
| Olfr166     | 0 | 0 | 1 | 1 | no |
| Olfr167     | 0 | 0 | 1 | 1 | no |
| Olfr168     | 0 | 0 | 1 | 1 | no |
| Olfr169     | 0 | 0 | 1 | 1 | no |
| Olfr17      | 0 | 0 | 1 | 1 | no |
| Olfr170     | 0 | 0 | 1 | 1 | no |
| Olfr171     | 0 | 0 | 1 | 1 | no |
| Olfr172     | 0 | 0 | 1 | 1 | no |
| Olfr173     | 0 | 0 | 1 | 1 | no |
| Olfr175-ps1 | 0 | 0 | 1 | 1 | no |
| Olfr176     | 0 | 0 | 1 | 1 | no |
| Olfr177     | 0 | 0 | 1 | 1 | no |
| Olfr178     | 0 | 0 | 1 | 1 | no |
| Olfr180     | 0 | 0 | 1 | 1 | no |
| Olfr181     | 0 | 0 | 1 | 1 | no |
| Olfr183     | 0 | 0 | 1 | 1 | no |
| Olfr186     | 0 | 0 | 1 | 1 | no |
| Olfr187     | 0 | 0 | 1 | 1 | no |
| Olfr19      | 0 | 0 | 1 | 1 | no |
| Olfr190     | 0 | 0 | 1 | 1 | no |
| Olfr191     | 0 | 0 | 1 | 1 | no |
| Olfr192     | 0 | 0 | 1 | 1 | no |
| Olfr193     | 0 | 0 | 1 | 1 | no |
| Olfr194     | 0 | 0 | 1 | 1 | no |
| Olfr195     | 0 | 0 | 1 | 1 | no |
| Olfr196     | 0 | 0 | 1 | 1 | no |
| Olfr197     | 0 | 0 | 1 | 1 | no |
| Olfr198     | 0 | 0 | 1 | 1 | no |
| Olfr199     | 0 | 0 | 1 | 1 | no |
| Olfr2       | 0 | 0 | 1 | 1 | no |
| Olfr20      | 0 | 0 | 1 | 1 | no |
| Olfr201     | 0 | 0 | 1 | 1 | no |
| Olfr202     | 0 | 0 | 1 | 1 | no |
| Olfr203     | 0 | 0 | 1 | 1 | no |
| Olfr204     | 0 | 0 | 1 | 1 | no |
| Olfr205     | 0 | 0 | 1 | 1 | no |
| Olfr206     | 0 | 0 | 1 | 1 | no |
| Olfr209     | 0 | 0 | 1 | 1 | no |
| Olfr211     | 0 | 0 | 1 | 1 | no |
| Olfr213     | 0 | 0 | 1 | 1 | no |
| Olfr214     | 0 | 0 | 1 | 1 | no |
| Olfr215     | 0 | 0 | 1 | 1 | no |
| Olfr218     | 0 | 0 | 1 | 1 | no |
| Olfr220     | 0 | 0 | 1 | 1 | no |
| Olfr223     | 0 | 0 | 1 | 1 | no |
| Olfr224     | 0 | 0 | 1 | 1 | no |
| Olfr225     | 0 | 0 | 1 | 1 | no |
| Olfr228     | 0 | 0 | 1 | 1 | no |

|             |   |   |   |   |    |
|-------------|---|---|---|---|----|
| Olfr229     | 0 | 0 | 1 | 1 | no |
| Olfr23      | 0 | 0 | 1 | 1 | no |
| Olfr231     | 0 | 0 | 1 | 1 | no |
| Olfr235     | 0 | 0 | 1 | 1 | no |
| Olfr237-ps1 | 0 | 0 | 1 | 1 | no |
| Olfr24      | 0 | 0 | 1 | 1 | no |
| Olfr242     | 0 | 0 | 1 | 1 | no |
| Olfr243     | 0 | 0 | 1 | 1 | no |
| Olfr247     | 0 | 0 | 1 | 1 | no |
| Olfr248     | 0 | 0 | 1 | 1 | no |
| Olfr25      | 0 | 0 | 1 | 1 | no |
| Olfr259     | 0 | 0 | 1 | 1 | no |
| Olfr26      | 0 | 0 | 1 | 1 | no |
| Olfr262     | 0 | 0 | 1 | 1 | no |
| Olfr263     | 0 | 0 | 1 | 1 | no |
| Olfr266     | 0 | 0 | 1 | 1 | no |
| Olfr267     | 0 | 0 | 1 | 1 | no |
| Olfr27      | 0 | 0 | 1 | 1 | no |
| Olfr270     | 0 | 0 | 1 | 1 | no |
| Olfr272     | 0 | 0 | 1 | 1 | no |
| Olfr273     | 0 | 0 | 1 | 1 | no |
| Olfr275     | 0 | 0 | 1 | 1 | no |
| Olfr279     | 0 | 0 | 1 | 1 | no |
| Olfr281     | 0 | 0 | 1 | 1 | no |
| Olfr282     | 0 | 0 | 1 | 1 | no |
| Olfr283     | 0 | 0 | 1 | 1 | no |
| Olfr285     | 0 | 0 | 1 | 1 | no |
| Olfr286     | 0 | 0 | 1 | 1 | no |
| Olfr287     | 0 | 0 | 1 | 1 | no |
| Olfr288     | 0 | 0 | 1 | 1 | no |
| Olfr29-ps1  | 0 | 0 | 1 | 1 | no |
| Olfr290     | 0 | 0 | 1 | 1 | no |
| Olfr291     | 0 | 0 | 1 | 1 | no |
| Olfr292     | 0 | 0 | 1 | 1 | no |
| Olfr293     | 0 | 0 | 1 | 1 | no |
| Olfr294     | 0 | 0 | 1 | 1 | no |
| Olfr295     | 0 | 0 | 1 | 1 | no |
| Olfr297     | 0 | 0 | 1 | 1 | no |
| Olfr298     | 0 | 0 | 1 | 1 | no |
| Olfr299     | 0 | 0 | 1 | 1 | no |
| Olfr3       | 0 | 0 | 1 | 1 | no |
| Olfr30      | 0 | 0 | 1 | 1 | no |
| Olfr301     | 0 | 0 | 1 | 1 | no |
| Olfr303     | 0 | 0 | 1 | 1 | no |
| Olfr304     | 0 | 0 | 1 | 1 | no |
| Olfr305     | 0 | 0 | 1 | 1 | no |
| Olfr307     | 0 | 0 | 1 | 1 | no |
| Olfr308     | 0 | 0 | 1 | 1 | no |
| Olfr309     | 0 | 0 | 1 | 1 | no |
| Olfr31      | 0 | 0 | 1 | 1 | no |
| Olfr310     | 0 | 0 | 1 | 1 | no |
| Olfr311     | 0 | 0 | 1 | 1 | no |
| Olfr312     | 0 | 0 | 1 | 1 | no |

|            |   |   |   |   |    |
|------------|---|---|---|---|----|
| Olfr313    | 0 | 0 | 1 | 1 | no |
| Olfr314    | 0 | 0 | 1 | 1 | no |
| Olfr315    | 0 | 0 | 1 | 1 | no |
| Olfr316    | 0 | 0 | 1 | 1 | no |
| Olfr317    | 0 | 0 | 1 | 1 | no |
| Olfr318    | 0 | 0 | 1 | 1 | no |
| Olfr319    | 0 | 0 | 1 | 1 | no |
| Olfr32     | 0 | 0 | 1 | 1 | no |
| Olfr320    | 0 | 0 | 1 | 1 | no |
| Olfr322    | 0 | 0 | 1 | 1 | no |
| Olfr323    | 0 | 0 | 1 | 1 | no |
| Olfr324    | 0 | 0 | 1 | 1 | no |
| Olfr325    | 0 | 0 | 1 | 1 | no |
| Olfr328    | 0 | 0 | 1 | 1 | no |
| Olfr329-ps | 0 | 0 | 1 | 1 | no |
| Olfr33     | 0 | 0 | 1 | 1 | no |
| Olfr330    | 0 | 0 | 1 | 1 | no |
| Olfr331    | 0 | 0 | 1 | 1 | no |
| Olfr332    | 0 | 0 | 1 | 1 | no |
| Olfr338    | 0 | 0 | 1 | 1 | no |
| Olfr339    | 0 | 0 | 1 | 1 | no |
| Olfr340    | 0 | 0 | 1 | 1 | no |
| Olfr341    | 0 | 0 | 1 | 1 | no |
| Olfr342    | 0 | 0 | 1 | 1 | no |
| Olfr344    | 0 | 0 | 1 | 1 | no |
| Olfr345    | 0 | 0 | 1 | 1 | no |
| Olfr346    | 0 | 0 | 1 | 1 | no |
| Olfr347    | 0 | 0 | 1 | 1 | no |
| Olfr348    | 0 | 0 | 1 | 1 | no |
| Olfr350    | 0 | 0 | 1 | 1 | no |
| Olfr351    | 0 | 0 | 1 | 1 | no |
| Olfr352    | 0 | 0 | 1 | 1 | no |
| Olfr353    | 0 | 0 | 1 | 1 | no |
| Olfr354    | 0 | 0 | 1 | 1 | no |
| Olfr355    | 0 | 0 | 1 | 1 | no |
| Olfr356    | 0 | 0 | 1 | 1 | no |
| Olfr357    | 0 | 0 | 1 | 1 | no |
| Olfr358    | 0 | 0 | 1 | 1 | no |
| Olfr360    | 0 | 0 | 1 | 1 | no |
| Olfr361    | 0 | 0 | 1 | 1 | no |
| Olfr362    | 0 | 0 | 1 | 1 | no |
| Olfr365    | 0 | 0 | 1 | 1 | no |
| Olfr366    | 0 | 0 | 1 | 1 | no |
| Olfr367-ps | 0 | 0 | 1 | 1 | no |
| Olfr368    | 0 | 0 | 1 | 1 | no |
| Olfr370    | 0 | 0 | 1 | 1 | no |
| Olfr371    | 0 | 0 | 1 | 1 | no |
| Olfr372    | 0 | 0 | 1 | 1 | no |
| Olfr373    | 0 | 0 | 1 | 1 | no |
| Olfr374    | 0 | 0 | 1 | 1 | no |
| Olfr376    | 0 | 0 | 1 | 1 | no |
| Olfr378    | 0 | 0 | 1 | 1 | no |
| Olfr38     | 0 | 0 | 1 | 1 | no |

|             |   |   |   |   |    |
|-------------|---|---|---|---|----|
| Olfr380     | 0 | 0 | 1 | 1 | no |
| Olfr381     | 0 | 0 | 1 | 1 | no |
| Olfr382     | 0 | 0 | 1 | 1 | no |
| Olfr384     | 0 | 0 | 1 | 1 | no |
| Olfr385     | 0 | 0 | 1 | 1 | no |
| Olfr389     | 0 | 0 | 1 | 1 | no |
| Olfr39      | 0 | 0 | 1 | 1 | no |
| Olfr390     | 0 | 0 | 1 | 1 | no |
| Olfr391-ps  | 0 | 0 | 1 | 1 | no |
| Olfr392     | 0 | 0 | 1 | 1 | no |
| Olfr393     | 0 | 0 | 1 | 1 | no |
| Olfr394     | 0 | 0 | 1 | 1 | no |
| Olfr395     | 0 | 0 | 1 | 1 | no |
| Olfr397     | 0 | 0 | 1 | 1 | no |
| Olfr398     | 0 | 0 | 1 | 1 | no |
| Olfr399     | 0 | 0 | 1 | 1 | no |
| Olfr401     | 0 | 0 | 1 | 1 | no |
| Olfr402     | 0 | 0 | 1 | 1 | no |
| Olfr403     | 0 | 0 | 1 | 1 | no |
| Olfr406     | 0 | 0 | 1 | 1 | no |
| Olfr410     | 0 | 0 | 1 | 1 | no |
| Olfr411     | 0 | 0 | 1 | 1 | no |
| Olfr412     | 0 | 0 | 1 | 1 | no |
| Olfr414     | 0 | 0 | 1 | 1 | no |
| Olfr417     | 0 | 0 | 1 | 1 | no |
| Olfr418-ps1 | 0 | 0 | 1 | 1 | no |
| Olfr420     | 0 | 0 | 1 | 1 | no |
| Olfr426     | 0 | 0 | 1 | 1 | no |
| Olfr427     | 0 | 0 | 1 | 1 | no |
| Olfr429     | 0 | 0 | 1 | 1 | no |
| Olfr43      | 0 | 0 | 1 | 1 | no |
| Olfr430     | 0 | 0 | 1 | 1 | no |
| Olfr432     | 0 | 0 | 1 | 1 | no |
| Olfr433     | 0 | 0 | 1 | 1 | no |
| Olfr434     | 0 | 0 | 1 | 1 | no |
| Olfr435     | 0 | 0 | 1 | 1 | no |
| Olfr437     | 0 | 0 | 1 | 1 | no |
| Olfr44      | 0 | 0 | 1 | 1 | no |
| Olfr441     | 0 | 0 | 1 | 1 | no |
| Olfr444     | 0 | 0 | 1 | 1 | no |
| Olfr446     | 0 | 0 | 1 | 1 | no |
| Olfr447     | 0 | 0 | 1 | 1 | no |
| Olfr448     | 0 | 0 | 1 | 1 | no |
| Olfr449     | 0 | 0 | 1 | 1 | no |
| Olfr45      | 0 | 0 | 1 | 1 | no |
| Olfr450     | 0 | 0 | 1 | 1 | no |
| Olfr452     | 0 | 0 | 1 | 1 | no |
| Olfr453     | 0 | 0 | 1 | 1 | no |
| Olfr455     | 0 | 0 | 1 | 1 | no |
| Olfr456     | 0 | 0 | 1 | 1 | no |
| Olfr457     | 0 | 0 | 1 | 1 | no |
| Olfr458     | 0 | 0 | 1 | 1 | no |
| Olfr459     | 0 | 0 | 1 | 1 | no |

|         |   |   |   |   |    |
|---------|---|---|---|---|----|
| Olfr46  | 0 | 0 | 1 | 1 | no |
| Olfr460 | 0 | 0 | 1 | 1 | no |
| Olfr461 | 0 | 0 | 1 | 1 | no |
| Olfr462 | 0 | 0 | 1 | 1 | no |
| Olfr463 | 0 | 0 | 1 | 1 | no |
| Olfr464 | 0 | 0 | 1 | 1 | no |
| Olfr466 | 0 | 0 | 1 | 1 | no |
| Olfr467 | 0 | 0 | 1 | 1 | no |
| Olfr469 | 0 | 0 | 1 | 1 | no |
| Olfr47  | 0 | 0 | 1 | 1 | no |
| Olfr470 | 0 | 0 | 1 | 1 | no |
| Olfr472 | 0 | 0 | 1 | 1 | no |
| Olfr473 | 0 | 0 | 1 | 1 | no |
| Olfr474 | 0 | 0 | 1 | 1 | no |
| Olfr476 | 0 | 0 | 1 | 1 | no |
| Olfr477 | 0 | 0 | 1 | 1 | no |
| Olfr478 | 0 | 0 | 1 | 1 | no |
| Olfr479 | 0 | 0 | 1 | 1 | no |
| Olfr480 | 0 | 0 | 1 | 1 | no |
| Olfr481 | 0 | 0 | 1 | 1 | no |
| Olfr482 | 0 | 0 | 1 | 1 | no |
| Olfr483 | 0 | 0 | 1 | 1 | no |
| Olfr484 | 0 | 0 | 1 | 1 | no |
| Olfr485 | 0 | 0 | 1 | 1 | no |
| Olfr486 | 0 | 0 | 1 | 1 | no |
| Olfr487 | 0 | 0 | 1 | 1 | no |
| Olfr488 | 0 | 0 | 1 | 1 | no |
| Olfr49  | 0 | 0 | 1 | 1 | no |
| Olfr490 | 0 | 0 | 1 | 1 | no |
| Olfr491 | 0 | 0 | 1 | 1 | no |
| Olfr492 | 0 | 0 | 1 | 1 | no |
| Olfr493 | 0 | 0 | 1 | 1 | no |
| Olfr494 | 0 | 0 | 1 | 1 | no |
| Olfr495 | 0 | 0 | 1 | 1 | no |
| Olfr497 | 0 | 0 | 1 | 1 | no |
| Olfr498 | 0 | 0 | 1 | 1 | no |
| Olfr5   | 0 | 0 | 1 | 1 | no |
| Olfr50  | 0 | 0 | 1 | 1 | no |
| Olfr502 | 0 | 0 | 1 | 1 | no |
| Olfr504 | 0 | 0 | 1 | 1 | no |
| Olfr506 | 0 | 0 | 1 | 1 | no |
| Olfr507 | 0 | 0 | 1 | 1 | no |
| Olfr508 | 0 | 0 | 1 | 1 | no |
| Olfr509 | 0 | 0 | 1 | 1 | no |
| Olfr51  | 0 | 0 | 1 | 1 | no |
| Olfr510 | 0 | 0 | 1 | 1 | no |
| Olfr512 | 0 | 0 | 1 | 1 | no |
| Olfr513 | 0 | 0 | 1 | 1 | no |
| Olfr514 | 0 | 0 | 1 | 1 | no |
| Olfr516 | 0 | 0 | 1 | 1 | no |
| Olfr517 | 0 | 0 | 1 | 1 | no |
| Olfr518 | 0 | 0 | 1 | 1 | no |
| Olfr519 | 0 | 0 | 1 | 1 | no |



|         |   |   |   |   |    |
|---------|---|---|---|---|----|
| Olfr52  | 0 | 0 | 1 | 1 | no |
| Olfr520 | 0 | 0 | 1 | 1 | no |
| Olfr521 | 0 | 0 | 1 | 1 | no |
| Olfr522 | 0 | 0 | 1 | 1 | no |
| Olfr523 | 0 | 0 | 1 | 1 | no |
| Olfr524 | 0 | 0 | 1 | 1 | no |
| Olfr525 | 0 | 0 | 1 | 1 | no |
| Olfr527 | 0 | 0 | 1 | 1 | no |
| Olfr53  | 0 | 0 | 1 | 1 | no |
| Olfr530 | 0 | 0 | 1 | 1 | no |
| Olfr531 | 0 | 0 | 1 | 1 | no |
| Olfr532 | 0 | 0 | 1 | 1 | no |
| Olfr533 | 0 | 0 | 1 | 1 | no |
| Olfr535 | 0 | 0 | 1 | 1 | no |
| Olfr536 | 0 | 0 | 1 | 1 | no |
| Olfr538 | 0 | 0 | 1 | 1 | no |
| Olfr539 | 0 | 0 | 1 | 1 | no |
| Olfr54  | 0 | 0 | 1 | 1 | no |
| Olfr541 | 0 | 0 | 1 | 1 | no |
| Olfr543 | 0 | 0 | 1 | 1 | no |
| Olfr544 | 0 | 0 | 1 | 1 | no |
| Olfr545 | 0 | 0 | 1 | 1 | no |
| Olfr547 | 0 | 0 | 1 | 1 | no |
| Olfr549 | 0 | 0 | 1 | 1 | no |
| Olfr55  | 0 | 0 | 1 | 1 | no |
| Olfr551 | 0 | 0 | 1 | 1 | no |
| Olfr553 | 0 | 0 | 1 | 1 | no |
| Olfr554 | 0 | 0 | 1 | 1 | no |
| Olfr555 | 0 | 0 | 1 | 1 | no |
| Olfr556 | 0 | 0 | 1 | 1 | no |
| Olfr557 | 0 | 0 | 1 | 1 | no |
| Olfr559 | 0 | 0 | 1 | 1 | no |
| Olfr56  | 0 | 0 | 1 | 1 | no |
| Olfr564 | 0 | 0 | 1 | 1 | no |
| Olfr566 | 0 | 0 | 1 | 1 | no |
| Olfr568 | 0 | 0 | 1 | 1 | no |
| Olfr569 | 0 | 0 | 1 | 1 | no |
| Olfr57  | 0 | 0 | 1 | 1 | no |
| Olfr571 | 0 | 0 | 1 | 1 | no |
| Olfr572 | 0 | 0 | 1 | 1 | no |
| Olfr574 | 0 | 0 | 1 | 1 | no |
| Olfr575 | 0 | 0 | 1 | 1 | no |
| Olfr576 | 0 | 0 | 1 | 1 | no |
| Olfr577 | 0 | 0 | 1 | 1 | no |
| Olfr578 | 0 | 0 | 1 | 1 | no |
| Olfr58  | 0 | 0 | 1 | 1 | no |
| Olfr582 | 0 | 0 | 1 | 1 | no |
| Olfr583 | 0 | 0 | 1 | 1 | no |
| Olfr584 | 0 | 0 | 1 | 1 | no |
| Olfr585 | 0 | 0 | 1 | 1 | no |
| Olfr586 | 0 | 0 | 1 | 1 | no |
| Olfr589 | 0 | 0 | 1 | 1 | no |
| Olfr59  | 0 | 0 | 1 | 1 | no |

|         |   |   |   |   |    |
|---------|---|---|---|---|----|
| Olfr591 | 0 | 0 | 1 | 1 | no |
| Olfr592 | 0 | 0 | 1 | 1 | no |
| Olfr593 | 0 | 0 | 1 | 1 | no |
| Olfr594 | 0 | 0 | 1 | 1 | no |
| Olfr596 | 0 | 0 | 1 | 1 | no |
| Olfr597 | 0 | 0 | 1 | 1 | no |
| Olfr598 | 0 | 0 | 1 | 1 | no |
| Olfr599 | 0 | 0 | 1 | 1 | no |
| Olfr6   | 0 | 0 | 1 | 1 | no |
| Olfr60  | 0 | 0 | 1 | 1 | no |
| Olfr600 | 0 | 0 | 1 | 1 | no |
| Olfr601 | 0 | 0 | 1 | 1 | no |
| Olfr603 | 0 | 0 | 1 | 1 | no |
| Olfr605 | 0 | 0 | 1 | 1 | no |
| Olfr606 | 0 | 0 | 1 | 1 | no |
| Olfr608 | 0 | 0 | 1 | 1 | no |
| Olfr609 | 0 | 0 | 1 | 1 | no |
| Olfr61  | 0 | 0 | 1 | 1 | no |
| Olfr610 | 0 | 0 | 1 | 1 | no |
| Olfr611 | 0 | 0 | 1 | 1 | no |
| Olfr612 | 0 | 0 | 1 | 1 | no |
| Olfr613 | 0 | 0 | 1 | 1 | no |
| Olfr615 | 0 | 0 | 1 | 1 | no |
| Olfr616 | 0 | 0 | 1 | 1 | no |
| Olfr617 | 0 | 0 | 1 | 1 | no |
| Olfr618 | 0 | 0 | 1 | 1 | no |
| Olfr619 | 0 | 0 | 1 | 1 | no |
| Olfr62  | 0 | 0 | 1 | 1 | no |
| Olfr620 | 0 | 0 | 1 | 1 | no |
| Olfr622 | 0 | 0 | 1 | 1 | no |
| Olfr623 | 0 | 0 | 1 | 1 | no |
| Olfr624 | 0 | 0 | 1 | 1 | no |
| Olfr628 | 0 | 0 | 1 | 1 | no |
| Olfr629 | 0 | 0 | 1 | 1 | no |
| Olfr63  | 0 | 0 | 1 | 1 | no |
| Olfr630 | 0 | 0 | 1 | 1 | no |
| Olfr631 | 0 | 0 | 1 | 1 | no |
| Olfr633 | 0 | 0 | 1 | 1 | no |
| Olfr635 | 0 | 0 | 1 | 1 | no |
| Olfr638 | 0 | 0 | 1 | 1 | no |
| Olfr639 | 0 | 0 | 1 | 1 | no |
| Olfr64  | 0 | 0 | 1 | 1 | no |
| Olfr640 | 0 | 0 | 1 | 1 | no |
| Olfr641 | 0 | 0 | 1 | 1 | no |
| Olfr642 | 0 | 0 | 1 | 1 | no |
| Olfr643 | 0 | 0 | 1 | 1 | no |
| Olfr644 | 0 | 0 | 1 | 1 | no |
| Olfr645 | 0 | 0 | 1 | 1 | no |
| Olfr646 | 0 | 0 | 1 | 1 | no |
| Olfr648 | 0 | 0 | 1 | 1 | no |
| Olfr649 | 0 | 0 | 1 | 1 | no |
| Olfr65  | 0 | 0 | 1 | 1 | no |
| Olfr651 | 0 | 0 | 1 | 1 | no |

|         |   |   |   |   |    |
|---------|---|---|---|---|----|
| Olfr652 | 0 | 0 | 1 | 1 | no |
| Olfr653 | 0 | 0 | 1 | 1 | no |
| Olfr654 | 0 | 0 | 1 | 1 | no |
| Olfr655 | 0 | 0 | 1 | 1 | no |
| Olfr656 | 0 | 0 | 1 | 1 | no |
| Olfr657 | 0 | 0 | 1 | 1 | no |
| Olfr659 | 0 | 0 | 1 | 1 | no |
| Olfr66  | 0 | 0 | 1 | 1 | no |
| Olfr661 | 0 | 0 | 1 | 1 | no |
| Olfr663 | 0 | 0 | 1 | 1 | no |
| Olfr665 | 0 | 0 | 1 | 1 | no |
| Olfr666 | 0 | 0 | 1 | 1 | no |
| Olfr667 | 0 | 0 | 1 | 1 | no |
| Olfr668 | 0 | 0 | 1 | 1 | no |
| Olfr669 | 0 | 0 | 1 | 1 | no |
| Olfr67  | 0 | 0 | 1 | 1 | no |
| Olfr670 | 0 | 0 | 1 | 1 | no |
| Olfr671 | 0 | 0 | 1 | 1 | no |
| Olfr672 | 0 | 0 | 1 | 1 | no |
| Olfr675 | 0 | 0 | 1 | 1 | no |
| Olfr676 | 0 | 0 | 1 | 1 | no |
| Olfr677 | 0 | 0 | 1 | 1 | no |
| Olfr678 | 0 | 0 | 1 | 1 | no |
| Olfr679 | 0 | 0 | 1 | 1 | no |
| Olfr68  | 0 | 0 | 1 | 1 | no |
| Olfr681 | 0 | 0 | 1 | 1 | no |
| Olfr683 | 0 | 0 | 1 | 1 | no |
| Olfr684 | 0 | 0 | 1 | 1 | no |
| Olfr685 | 0 | 0 | 1 | 1 | no |
| Olfr686 | 0 | 0 | 1 | 1 | no |
| Olfr688 | 0 | 0 | 1 | 1 | no |
| Olfr689 | 0 | 0 | 1 | 1 | no |
| Olfr69  | 0 | 0 | 1 | 1 | no |
| Olfr690 | 0 | 0 | 1 | 1 | no |
| Olfr691 | 0 | 0 | 1 | 1 | no |
| Olfr692 | 0 | 0 | 1 | 1 | no |
| Olfr693 | 0 | 0 | 1 | 1 | no |
| Olfr694 | 0 | 0 | 1 | 1 | no |
| Olfr695 | 0 | 0 | 1 | 1 | no |
| Olfr697 | 0 | 0 | 1 | 1 | no |
| Olfr698 | 0 | 0 | 1 | 1 | no |
| Olfr699 | 0 | 0 | 1 | 1 | no |
| Olfr70  | 0 | 0 | 1 | 1 | no |
| Olfr701 | 0 | 0 | 1 | 1 | no |
| Olfr702 | 0 | 0 | 1 | 1 | no |
| Olfr703 | 0 | 0 | 1 | 1 | no |
| Olfr704 | 0 | 0 | 1 | 1 | no |
| Olfr705 | 0 | 0 | 1 | 1 | no |
| Olfr706 | 0 | 0 | 1 | 1 | no |
| Olfr707 | 0 | 0 | 1 | 1 | no |
| Olfr71  | 0 | 0 | 1 | 1 | no |
| Olfr710 | 0 | 0 | 1 | 1 | no |
| Olfr711 | 0 | 0 | 1 | 1 | no |

|            |   |   |   |   |    |
|------------|---|---|---|---|----|
| Olfr713    | 0 | 0 | 1 | 1 | no |
| Olfr714    | 0 | 0 | 1 | 1 | no |
| Olfr715    | 0 | 0 | 1 | 1 | no |
| Olfr716    | 0 | 0 | 1 | 1 | no |
| Olfr720    | 0 | 0 | 1 | 1 | no |
| Olfr722    | 0 | 0 | 1 | 1 | no |
| Olfr723    | 0 | 0 | 1 | 1 | no |
| Olfr724    | 0 | 0 | 1 | 1 | no |
| Olfr725    | 0 | 0 | 1 | 1 | no |
| Olfr726    | 0 | 0 | 1 | 1 | no |
| Olfr727    | 0 | 0 | 1 | 1 | no |
| Olfr728    | 0 | 0 | 1 | 1 | no |
| Olfr729    | 0 | 0 | 1 | 1 | no |
| Olfr73     | 0 | 0 | 1 | 1 | no |
| Olfr730    | 0 | 0 | 1 | 1 | no |
| Olfr731    | 0 | 0 | 1 | 1 | no |
| Olfr732    | 0 | 0 | 1 | 1 | no |
| Olfr733    | 0 | 0 | 1 | 1 | no |
| Olfr734    | 0 | 0 | 1 | 1 | no |
| Olfr735    | 0 | 0 | 1 | 1 | no |
| Olfr736    | 0 | 0 | 1 | 1 | no |
| Olfr738    | 0 | 0 | 1 | 1 | no |
| Olfr739    | 0 | 0 | 1 | 1 | no |
| Olfr74     | 0 | 0 | 1 | 1 | no |
| Olfr740    | 0 | 0 | 1 | 1 | no |
| Olfr741    | 0 | 0 | 1 | 1 | no |
| Olfr742    | 0 | 0 | 1 | 1 | no |
| Olfr743    | 0 | 0 | 1 | 1 | no |
| Olfr744    | 0 | 0 | 1 | 1 | no |
| Olfr745    | 0 | 0 | 1 | 1 | no |
| Olfr746    | 0 | 0 | 1 | 1 | no |
| Olfr747    | 0 | 0 | 1 | 1 | no |
| Olfr748    | 0 | 0 | 1 | 1 | no |
| Olfr749    | 0 | 0 | 1 | 1 | no |
| Olfr75-ps1 | 0 | 0 | 1 | 1 | no |
| Olfr750    | 0 | 0 | 1 | 1 | no |
| Olfr76     | 0 | 0 | 1 | 1 | no |
| Olfr763    | 0 | 0 | 1 | 1 | no |
| Olfr765    | 0 | 0 | 1 | 1 | no |
| Olfr767    | 0 | 0 | 1 | 1 | no |
| Olfr768    | 0 | 0 | 1 | 1 | no |
| Olfr769    | 0 | 0 | 1 | 1 | no |
| Olfr77     | 0 | 0 | 1 | 1 | no |
| Olfr770    | 0 | 0 | 1 | 1 | no |
| Olfr771    | 0 | 0 | 1 | 1 | no |
| Olfr772    | 0 | 0 | 1 | 1 | no |
| Olfr773    | 0 | 0 | 1 | 1 | no |
| Olfr774    | 0 | 0 | 1 | 1 | no |
| Olfr775    | 0 | 0 | 1 | 1 | no |
| Olfr776    | 0 | 0 | 1 | 1 | no |
| Olfr777    | 0 | 0 | 1 | 1 | no |
| Olfr780    | 0 | 0 | 1 | 1 | no |
| Olfr781    | 0 | 0 | 1 | 1 | no |

|         |   |   |   |   |    |
|---------|---|---|---|---|----|
| Olfr782 | 0 | 0 | 1 | 1 | no |
| Olfr784 | 0 | 0 | 1 | 1 | no |
| Olfr786 | 0 | 0 | 1 | 1 | no |
| Olfr787 | 0 | 0 | 1 | 1 | no |
| Olfr788 | 0 | 0 | 1 | 1 | no |
| Olfr790 | 0 | 0 | 1 | 1 | no |
| Olfr791 | 0 | 0 | 1 | 1 | no |
| Olfr792 | 0 | 0 | 1 | 1 | no |
| Olfr794 | 0 | 0 | 1 | 1 | no |
| Olfr796 | 0 | 0 | 1 | 1 | no |
| Olfr798 | 0 | 0 | 1 | 1 | no |
| Olfr799 | 0 | 0 | 1 | 1 | no |
| Olfr8   | 0 | 0 | 1 | 1 | no |
| Olfr800 | 0 | 0 | 1 | 1 | no |
| Olfr801 | 0 | 0 | 1 | 1 | no |
| Olfr802 | 0 | 0 | 1 | 1 | no |
| Olfr803 | 0 | 0 | 1 | 1 | no |
| Olfr804 | 0 | 0 | 1 | 1 | no |
| Olfr805 | 0 | 0 | 1 | 1 | no |
| Olfr806 | 0 | 0 | 1 | 1 | no |
| Olfr807 | 0 | 0 | 1 | 1 | no |
| Olfr808 | 0 | 0 | 1 | 1 | no |
| Olfr809 | 0 | 0 | 1 | 1 | no |
| Olfr810 | 0 | 0 | 1 | 1 | no |
| Olfr811 | 0 | 0 | 1 | 1 | no |
| Olfr812 | 0 | 0 | 1 | 1 | no |
| Olfr813 | 0 | 0 | 1 | 1 | no |
| Olfr814 | 0 | 0 | 1 | 1 | no |
| Olfr815 | 0 | 0 | 1 | 1 | no |
| Olfr816 | 0 | 0 | 1 | 1 | no |
| Olfr818 | 0 | 0 | 1 | 1 | no |
| Olfr819 | 0 | 0 | 1 | 1 | no |
| Olfr820 | 0 | 0 | 1 | 1 | no |
| Olfr821 | 0 | 0 | 1 | 1 | no |
| Olfr822 | 0 | 0 | 1 | 1 | no |
| Olfr823 | 0 | 0 | 1 | 1 | no |
| Olfr824 | 0 | 0 | 1 | 1 | no |
| Olfr825 | 0 | 0 | 1 | 1 | no |
| Olfr826 | 0 | 0 | 1 | 1 | no |
| Olfr827 | 0 | 0 | 1 | 1 | no |
| Olfr828 | 0 | 0 | 1 | 1 | no |
| Olfr829 | 0 | 0 | 1 | 1 | no |
| Olfr830 | 0 | 0 | 1 | 1 | no |
| Olfr832 | 0 | 0 | 1 | 1 | no |
| Olfr834 | 0 | 0 | 1 | 1 | no |
| Olfr835 | 0 | 0 | 1 | 1 | no |
| Olfr836 | 0 | 0 | 1 | 1 | no |
| Olfr837 | 0 | 0 | 1 | 1 | no |
| Olfr843 | 0 | 0 | 1 | 1 | no |
| Olfr845 | 0 | 0 | 1 | 1 | no |
| Olfr846 | 0 | 0 | 1 | 1 | no |
| Olfr847 | 0 | 0 | 1 | 1 | no |
| Olfr849 | 0 | 0 | 1 | 1 | no |

|             |   |   |   |   |    |
|-------------|---|---|---|---|----|
| Olfr850     | 0 | 0 | 1 | 1 | no |
| Olfr851     | 0 | 0 | 1 | 1 | no |
| Olfr853     | 0 | 0 | 1 | 1 | no |
| Olfr854     | 0 | 0 | 1 | 1 | no |
| Olfr855     | 0 | 0 | 1 | 1 | no |
| Olfr856-ps1 | 0 | 0 | 1 | 1 | no |
| Olfr857     | 0 | 0 | 1 | 1 | no |
| Olfr860     | 0 | 0 | 1 | 1 | no |
| Olfr862     | 0 | 0 | 1 | 1 | no |
| Olfr866     | 0 | 0 | 1 | 1 | no |
| Olfr867     | 0 | 0 | 1 | 1 | no |
| Olfr868     | 0 | 0 | 1 | 1 | no |
| Olfr869     | 0 | 0 | 1 | 1 | no |
| Olfr870     | 0 | 0 | 1 | 1 | no |
| Olfr871     | 0 | 0 | 1 | 1 | no |
| Olfr872     | 0 | 0 | 1 | 1 | no |
| Olfr873     | 0 | 0 | 1 | 1 | no |
| Olfr874     | 0 | 0 | 1 | 1 | no |
| Olfr875     | 0 | 0 | 1 | 1 | no |
| Olfr876     | 0 | 0 | 1 | 1 | no |
| Olfr877     | 0 | 0 | 1 | 1 | no |
| Olfr878     | 0 | 0 | 1 | 1 | no |
| Olfr881     | 0 | 0 | 1 | 1 | no |
| Olfr883     | 0 | 0 | 1 | 1 | no |
| Olfr884     | 0 | 0 | 1 | 1 | no |
| Olfr885     | 0 | 0 | 1 | 1 | no |
| Olfr887     | 0 | 0 | 1 | 1 | no |
| Olfr888     | 0 | 0 | 1 | 1 | no |
| Olfr889     | 0 | 0 | 1 | 1 | no |
| Olfr890     | 0 | 0 | 1 | 1 | no |
| Olfr891     | 0 | 0 | 1 | 1 | no |
| Olfr893     | 0 | 0 | 1 | 1 | no |
| Olfr894     | 0 | 0 | 1 | 1 | no |
| Olfr895     | 0 | 0 | 1 | 1 | no |
| Olfr899     | 0 | 0 | 1 | 1 | no |
| Olfr9       | 0 | 0 | 1 | 1 | no |
| Olfr90      | 0 | 0 | 1 | 1 | no |
| Olfr900     | 0 | 0 | 1 | 1 | no |
| Olfr901     | 0 | 0 | 1 | 1 | no |
| Olfr902     | 0 | 0 | 1 | 1 | no |
| Olfr904     | 0 | 0 | 1 | 1 | no |
| Olfr905     | 0 | 0 | 1 | 1 | no |
| Olfr906     | 0 | 0 | 1 | 1 | no |
| Olfr907     | 0 | 0 | 1 | 1 | no |
| Olfr908     | 0 | 0 | 1 | 1 | no |
| Olfr91      | 0 | 0 | 1 | 1 | no |
| Olfr910     | 0 | 0 | 1 | 1 | no |
| Olfr911-ps1 | 0 | 0 | 1 | 1 | no |
| Olfr912     | 0 | 0 | 1 | 1 | no |
| Olfr913     | 0 | 0 | 1 | 1 | no |
| Olfr914     | 0 | 0 | 1 | 1 | no |
| Olfr915     | 0 | 0 | 1 | 1 | no |
| Olfr916     | 0 | 0 | 1 | 1 | no |



|             |   |   |   |   |    |
|-------------|---|---|---|---|----|
| Olfr918     | 0 | 0 | 1 | 1 | no |
| Olfr919     | 0 | 0 | 1 | 1 | no |
| Olfr92      | 0 | 0 | 1 | 1 | no |
| Olfr921     | 0 | 0 | 1 | 1 | no |
| Olfr922     | 0 | 0 | 1 | 1 | no |
| Olfr923     | 0 | 0 | 1 | 1 | no |
| Olfr924     | 0 | 0 | 1 | 1 | no |
| Olfr926     | 0 | 0 | 1 | 1 | no |
| Olfr93      | 0 | 0 | 1 | 1 | no |
| Olfr930     | 0 | 0 | 1 | 1 | no |
| Olfr933     | 0 | 0 | 1 | 1 | no |
| Olfr934     | 0 | 0 | 1 | 1 | no |
| Olfr935     | 0 | 0 | 1 | 1 | no |
| Olfr936     | 0 | 0 | 1 | 1 | no |
| Olfr937     | 0 | 0 | 1 | 1 | no |
| Olfr938     | 0 | 0 | 1 | 1 | no |
| Olfr94      | 0 | 0 | 1 | 1 | no |
| Olfr943     | 0 | 0 | 1 | 1 | no |
| Olfr944     | 0 | 0 | 1 | 1 | no |
| Olfr945     | 0 | 0 | 1 | 1 | no |
| Olfr947-ps1 | 0 | 0 | 1 | 1 | no |
| Olfr948     | 0 | 0 | 1 | 1 | no |
| Olfr95      | 0 | 0 | 1 | 1 | no |
| Olfr951     | 0 | 0 | 1 | 1 | no |
| Olfr952     | 0 | 0 | 1 | 1 | no |
| Olfr954     | 0 | 0 | 1 | 1 | no |
| Olfr955     | 0 | 0 | 1 | 1 | no |
| Olfr957     | 0 | 0 | 1 | 1 | no |
| Olfr958     | 0 | 0 | 1 | 1 | no |
| Olfr959     | 0 | 0 | 1 | 1 | no |
| Olfr96      | 0 | 0 | 1 | 1 | no |
| Olfr960     | 0 | 0 | 1 | 1 | no |
| Olfr961     | 0 | 0 | 1 | 1 | no |
| Olfr963     | 0 | 0 | 1 | 1 | no |
| Olfr965     | 0 | 0 | 1 | 1 | no |
| Olfr967     | 0 | 0 | 1 | 1 | no |
| Olfr968     | 0 | 0 | 1 | 1 | no |
| Olfr969     | 0 | 0 | 1 | 1 | no |
| Olfr97      | 0 | 0 | 1 | 1 | no |
| Olfr970     | 0 | 0 | 1 | 1 | no |
| Olfr971     | 0 | 0 | 1 | 1 | no |
| Olfr972     | 0 | 0 | 1 | 1 | no |
| Olfr974     | 0 | 0 | 1 | 1 | no |
| Olfr975     | 0 | 0 | 1 | 1 | no |
| Olfr976     | 0 | 0 | 1 | 1 | no |
| Olfr978     | 0 | 0 | 1 | 1 | no |
| Olfr979     | 0 | 0 | 1 | 1 | no |
| Olfr98      | 0 | 0 | 1 | 1 | no |
| Olfr980     | 0 | 0 | 1 | 1 | no |
| Olfr981     | 0 | 0 | 1 | 1 | no |
| Olfr982     | 0 | 0 | 1 | 1 | no |
| Olfr983     | 0 | 0 | 1 | 1 | no |
| Olfr984     | 0 | 0 | 1 | 1 | no |

|          |   |   |   |   |    |
|----------|---|---|---|---|----|
| Olfr985  | 0 | 0 | 1 | 1 | no |
| Olfr986  | 0 | 0 | 1 | 1 | no |
| Olfr987  | 0 | 0 | 1 | 1 | no |
| Olfr988  | 0 | 0 | 1 | 1 | no |
| Olfr99   | 0 | 0 | 1 | 1 | no |
| Olfr992  | 0 | 0 | 1 | 1 | no |
| Olfr993  | 0 | 0 | 1 | 1 | no |
| Olfr994  | 0 | 0 | 1 | 1 | no |
| Olfr995  | 0 | 0 | 1 | 1 | no |
| Olfr996  | 0 | 0 | 1 | 1 | no |
| Olfr998  | 0 | 0 | 1 | 1 | no |
| Omt2a    | 0 | 0 | 1 | 1 | no |
| Omt2b    | 0 | 0 | 1 | 1 | no |
| Oog1     | 0 | 0 | 1 | 1 | no |
| Oog2     | 0 | 0 | 1 | 1 | no |
| Oog3     | 0 | 0 | 1 | 1 | no |
| Oog4     | 0 | 0 | 1 | 1 | no |
| Oosp1    | 0 | 0 | 1 | 1 | no |
| Oosp2    | 0 | 0 | 1 | 1 | no |
| Oosp3    | 0 | 0 | 1 | 1 | no |
| Opalin   | 0 | 0 | 1 | 1 | no |
| Orm1     | 0 | 0 | 1 | 1 | no |
| Orm2     | 0 | 0 | 1 | 1 | no |
| Otc      | 0 | 0 | 1 | 1 | no |
| Otor     | 0 | 0 | 1 | 1 | no |
| Ott      | 0 | 0 | 1 | 1 | no |
| Otud6a   | 0 | 0 | 1 | 1 | no |
| Otx1     | 0 | 0 | 1 | 1 | no |
| Otx2     | 0 | 0 | 1 | 1 | no |
| Otx2os1  | 0 | 0 | 1 | 1 | no |
| Ovch2    | 0 | 0 | 1 | 1 | no |
| Ovol1    | 0 | 0 | 1 | 1 | no |
| Oxct2b   | 0 | 0 | 1 | 1 | no |
| Oxt      | 0 | 0 | 1 | 1 | no |
| P2ry4    | 0 | 0 | 1 | 1 | no |
| Pabpc2   | 0 | 0 | 1 | 1 | no |
| Pabpc6   | 0 | 0 | 1 | 1 | no |
| Pabpn1l  | 0 | 0 | 1 | 1 | no |
| Padi6    | 0 | 0 | 1 | 1 | no |
| Pate4    | 0 | 0 | 1 | 1 | no |
| Paupar   | 0 | 0 | 1 | 1 | no |
| Pax4     | 0 | 0 | 1 | 1 | no |
| Pax6     | 0 | 0 | 1 | 1 | no |
| Pax6os1  | 0 | 0 | 1 | 1 | no |
| Pbp2     | 0 | 0 | 1 | 1 | no |
| Pbsn     | 0 | 0 | 1 | 1 | no |
| Pcdha4-g | 0 | 0 | 1 | 1 | no |
| Pcdhb1   | 0 | 0 | 1 | 1 | no |
| Pcp2     | 0 | 0 | 1 | 1 | no |
| Pcsk2os2 | 0 | 0 | 1 | 1 | no |
| Pdc      | 0 | 0 | 1 | 1 | no |
| Pdcd1    | 0 | 0 | 1 | 1 | no |
| Pdcl2    | 0 | 0 | 1 | 1 | no |

|            |   |   |   |   |    |
|------------|---|---|---|---|----|
| Pdha2      | 0 | 0 | 1 | 1 | no |
| Pdx1       | 0 | 0 | 1 | 1 | no |
| Pea15b     | 0 | 0 | 1 | 1 | no |
| Pebp4      | 0 | 0 | 1 | 1 | no |
| Peril      | 0 | 0 | 1 | 1 | no |
| Pet2       | 0 | 0 | 1 | 1 | no |
| Pfn3       | 0 | 0 | 1 | 1 | no |
| Pfpl       | 0 | 0 | 1 | 1 | no |
| Pga5       | 0 | 0 | 1 | 1 | no |
| Pgc        | 0 | 0 | 1 | 1 | no |
| Pgk2       | 0 | 0 | 1 | 1 | no |
| Pglyrp3    | 0 | 0 | 1 | 1 | no |
| Phgr1      | 0 | 0 | 1 | 1 | no |
| Phox2a     | 0 | 0 | 1 | 1 | no |
| Phox2b     | 0 | 0 | 1 | 1 | no |
| Pih1d3     | 0 | 0 | 1 | 1 | no |
| Pinc       | 0 | 0 | 1 | 1 | no |
| Pinlyp     | 0 | 0 | 1 | 1 | no |
| Pip        | 0 | 0 | 1 | 1 | no |
| Pitpnm2os1 | 0 | 0 | 1 | 1 | no |
| Pitx1      | 0 | 0 | 1 | 1 | no |
| Pitx2      | 0 | 0 | 1 | 1 | no |
| Pla2g10    | 0 | 0 | 1 | 1 | no |
| Pla2g10os  | 0 | 0 | 1 | 1 | no |
| Pla2g1b    | 0 | 0 | 1 | 1 | no |
| Pla2g2a    | 0 | 0 | 1 | 1 | no |
| Pla2g2e    | 0 | 0 | 1 | 1 | no |
| Pla2g2f    | 0 | 0 | 1 | 1 | no |
| Pldi       | 0 | 0 | 1 | 1 | no |
| Plet1os    | 0 | 0 | 1 | 1 | no |
| Plin5      | 0 | 0 | 1 | 1 | no |
| Pmch       | 0 | 0 | 1 | 1 | no |
| Pmis2      | 0 | 0 | 1 | 1 | no |
| Pnliprp1   | 0 | 0 | 1 | 1 | no |
| Pnmt       | 0 | 0 | 1 | 1 | no |
| Pnpla1     | 0 | 0 | 1 | 1 | no |
| Pom121l12  | 0 | 0 | 1 | 1 | no |
| Pom121l2   | 0 | 0 | 1 | 1 | no |
| Poteg      | 0 | 0 | 1 | 1 | no |
| Pou5f1     | 0 | 0 | 1 | 1 | no |
| Ppp1r17    | 0 | 0 | 1 | 1 | no |
| Ppp1r2-ps7 | 0 | 0 | 1 | 1 | no |
| Ppp1r2-ps9 | 0 | 0 | 1 | 1 | no |
| Ppp1r27    | 0 | 0 | 1 | 1 | no |
| Ppp2r2cos  | 0 | 0 | 1 | 1 | no |
| Ppy        | 0 | 0 | 1 | 1 | no |
| Prame      | 0 | 0 | 1 | 1 | no |
| Pramef12   | 0 | 0 | 1 | 1 | no |
| Pramef17   | 0 | 0 | 1 | 1 | no |
| Pramef25   | 0 | 0 | 1 | 1 | no |
| Pramef6    | 0 | 0 | 1 | 1 | no |
| Pramel1    | 0 | 0 | 1 | 1 | no |
| Pramel3    | 0 | 0 | 1 | 1 | no |

|               |   |   |   |   |    |
|---------------|---|---|---|---|----|
| Pramel4       | 0 | 0 | 1 | 1 | no |
| Pramel5       | 0 | 0 | 1 | 1 | no |
| Pramel6       | 0 | 0 | 1 | 1 | no |
| Prap1         | 0 | 0 | 1 | 1 | no |
| Prb1          | 0 | 0 | 1 | 1 | no |
| Prdm13        | 0 | 0 | 1 | 1 | no |
| Prdm14        | 0 | 0 | 1 | 1 | no |
| Prdx6b        | 0 | 0 | 1 | 1 | no |
| Prh1          | 0 | 0 | 1 | 1 | no |
| Prkag2os1     | 0 | 0 | 1 | 1 | no |
| Prl           | 0 | 0 | 1 | 1 | no |
| Prl2a1        | 0 | 0 | 1 | 1 | no |
| Prl2b1        | 0 | 0 | 1 | 1 | no |
| Prl2c1        | 0 | 0 | 1 | 1 | no |
| Prl2c2        | 0 | 0 | 1 | 1 | no |
| Prl2c3,Prl2c4 | 0 | 0 | 1 | 1 | no |
| Prl2c4        | 0 | 0 | 1 | 1 | no |
| Prl2c5        | 0 | 0 | 1 | 1 | no |
| Prl3a1        | 0 | 0 | 1 | 1 | no |
| Prl3b1        | 0 | 0 | 1 | 1 | no |
| Prl3c1        | 0 | 0 | 1 | 1 | no |
| Prl3d1        | 0 | 0 | 1 | 1 | no |
| Prl3d2        | 0 | 0 | 1 | 1 | no |
| Prl3d3        | 0 | 0 | 1 | 1 | no |
| Prl4a1        | 0 | 0 | 1 | 1 | no |
| Prl5a1        | 0 | 0 | 1 | 1 | no |
| Prl6a1        | 0 | 0 | 1 | 1 | no |
| Prl7a2        | 0 | 0 | 1 | 1 | no |
| Prl7b1        | 0 | 0 | 1 | 1 | no |
| Prl7c1        | 0 | 0 | 1 | 1 | no |
| Prl7d1        | 0 | 0 | 1 | 1 | no |
| Prl8a1        | 0 | 0 | 1 | 1 | no |
| Prl8a2        | 0 | 0 | 1 | 1 | no |
| Prl8a6        | 0 | 0 | 1 | 1 | no |
| Prl8a8        | 0 | 0 | 1 | 1 | no |
| Prl8a9        | 0 | 0 | 1 | 1 | no |
| Prlh          | 0 | 0 | 1 | 1 | no |
| Prlhr         | 0 | 0 | 1 | 1 | no |
| Prm1          | 0 | 0 | 1 | 1 | no |
| Prm2          | 0 | 0 | 1 | 1 | no |
| Prm3          | 0 | 0 | 1 | 1 | no |
| Prn           | 0 | 0 | 1 | 1 | no |
| Prodh2        | 0 | 0 | 1 | 1 | no |
| Prok1         | 0 | 0 | 1 | 1 | no |
| Prol1         | 0 | 0 | 1 | 1 | no |
| Prop1         | 0 | 0 | 1 | 1 | no |
| Prp2          | 0 | 0 | 1 | 1 | no |
| Prpmp5        | 0 | 0 | 1 | 1 | no |
| Prps1l1       | 0 | 0 | 1 | 1 | no |
| Prr23a        | 0 | 0 | 1 | 1 | no |
| Prr27         | 0 | 0 | 1 | 1 | no |
| Prr30         | 0 | 0 | 1 | 1 | no |
| Prr9          | 0 | 0 | 1 | 1 | no |

|               |   |   |   |   |    |
|---------------|---|---|---|---|----|
| Prss1         | 0 | 0 | 1 | 1 | no |
| Prss16        | 0 | 0 | 1 | 1 | no |
| Prss2         | 0 | 0 | 1 | 1 | no |
| Prss21        | 0 | 0 | 1 | 1 | no |
| Prss22        | 0 | 0 | 1 | 1 | no |
| Prss28        | 0 | 0 | 1 | 1 | no |
| Prss29        | 0 | 0 | 1 | 1 | no |
| Prss3         | 0 | 0 | 1 | 1 | no |
| Prss30        | 0 | 0 | 1 | 1 | no |
| Prss33        | 0 | 0 | 1 | 1 | no |
| Prss37        | 0 | 0 | 1 | 1 | no |
| Prss39        | 0 | 0 | 1 | 1 | no |
| Prss40        | 0 | 0 | 1 | 1 | no |
| Prss42        | 0 | 0 | 1 | 1 | no |
| Prss43        | 0 | 0 | 1 | 1 | no |
| Prss46        | 0 | 0 | 1 | 1 | no |
| Prss48        | 0 | 0 | 1 | 1 | no |
| Prss51        | 0 | 0 | 1 | 1 | no |
| Prss52        | 0 | 0 | 1 | 1 | no |
| Prss54        | 0 | 0 | 1 | 1 | no |
| Prss55        | 0 | 0 | 1 | 1 | no |
| Prss56        | 0 | 0 | 1 | 1 | no |
| Prss58        | 0 | 0 | 1 | 1 | no |
| Prss8         | 0 | 0 | 1 | 1 | no |
| Pzca          | 0 | 0 | 1 | 1 | no |
| Psg-ps1       | 0 | 0 | 1 | 1 | no |
| Psg18         | 0 | 0 | 1 | 1 | no |
| Psg20         | 0 | 0 | 1 | 1 | no |
| Psg21         | 0 | 0 | 1 | 1 | no |
| Psg22         | 0 | 0 | 1 | 1 | no |
| Psg23         | 0 | 0 | 1 | 1 | no |
| Psg25         | 0 | 0 | 1 | 1 | no |
| Psg26         | 0 | 0 | 1 | 1 | no |
| Psg27         | 0 | 0 | 1 | 1 | no |
| Psg28         | 0 | 0 | 1 | 1 | no |
| Psg29         | 0 | 0 | 1 | 1 | no |
| Psors1c2      | 0 | 0 | 1 | 1 | no |
| Ptchd3        | 0 | 0 | 1 | 1 | no |
| Ptf1a         | 0 | 0 | 1 | 1 | no |
| Pth           | 0 | 0 | 1 | 1 | no |
| Pth2          | 0 | 0 | 1 | 1 | no |
| Ptprt0s       | 0 | 0 | 1 | 1 | no |
| Ptx4          | 0 | 0 | 1 | 1 | no |
| Pxt1          | 0 | 0 | 1 | 1 | no |
| Pyy           | 0 | 0 | 1 | 1 | no |
| R3hdml        | 0 | 0 | 1 | 1 | no |
| Rab11fip4os1  | 0 | 0 | 1 | 1 | no |
| Rab11fip4os2  | 0 | 0 | 1 | 1 | no |
| Raet1a,Raet1b | 0 | 0 | 1 | 1 | no |
| Rag2          | 0 | 0 | 1 | 1 | no |
| Rax           | 0 | 0 | 1 | 1 | no |
| Rbakdn        | 0 | 0 | 1 | 1 | no |
| Rbbp8nl       | 0 | 0 | 1 | 1 | no |

|               |   |   |   |   |    |
|---------------|---|---|---|---|----|
| Rbm31y        | 0 | 0 | 1 | 1 | no |
| Rbm46os       | 0 | 0 | 1 | 1 | no |
| Rbmx12        | 0 | 0 | 1 | 1 | no |
| Rbmy          | 0 | 0 | 1 | 1 | no |
| Rbp3          | 0 | 0 | 1 | 1 | no |
| Rcvrn         | 0 | 0 | 1 | 1 | no |
| Rd3l          | 0 | 0 | 1 | 1 | no |
| Rdh16         | 0 | 0 | 1 | 1 | no |
| Rdh19         | 0 | 0 | 1 | 1 | no |
| Rdh8          | 0 | 0 | 1 | 1 | no |
| Reg1          | 0 | 0 | 1 | 1 | no |
| Reg2          | 0 | 0 | 1 | 1 | no |
| Reg3a         | 0 | 0 | 1 | 1 | no |
| Reg3d         | 0 | 0 | 1 | 1 | no |
| Reg3g         | 0 | 0 | 1 | 1 | no |
| Retn          | 0 | 0 | 1 | 1 | no |
| Retnb         | 0 | 0 | 1 | 1 | no |
| Rfp13s        | 0 | 0 | 1 | 1 | no |
| Rfp14         | 0 | 0 | 1 | 1 | no |
| Rfp14b        | 0 | 0 | 1 | 1 | no |
| Rfx6          | 0 | 0 | 1 | 1 | no |
| Rgr           | 0 | 0 | 1 | 1 | no |
| Rgs21         | 0 | 0 | 1 | 1 | no |
| Rhbd12        | 0 | 0 | 1 | 1 | no |
| Rhbg          | 0 | 0 | 1 | 1 | no |
| Rhox1         | 0 | 0 | 1 | 1 | no |
| Rhox10        | 0 | 0 | 1 | 1 | no |
| Rhox11        | 0 | 0 | 1 | 1 | no |
| Rhox12        | 0 | 0 | 1 | 1 | no |
| Rhox13        | 0 | 0 | 1 | 1 | no |
| Rhox2a        | 0 | 0 | 1 | 1 | no |
| Rhox2b        | 0 | 0 | 1 | 1 | no |
| Rhox2c        | 0 | 0 | 1 | 1 | no |
| Rhox2d        | 0 | 0 | 1 | 1 | no |
| Rhox2e        | 0 | 0 | 1 | 1 | no |
| Rhox2f        | 0 | 0 | 1 | 1 | no |
| Rhox2g        | 0 | 0 | 1 | 1 | no |
| Rhox2h        | 0 | 0 | 1 | 1 | no |
| Rhox3a,Rhox3e | 0 | 0 | 1 | 1 | no |
| Rhox3c        | 0 | 0 | 1 | 1 | no |
| Rhox3e        | 0 | 0 | 1 | 1 | no |
| Rhox3f        | 0 | 0 | 1 | 1 | no |
| Rhox3g        | 0 | 0 | 1 | 1 | no |
| Rhox3h        | 0 | 0 | 1 | 1 | no |
| Rhox4a        | 0 | 0 | 1 | 1 | no |
| Rhox4b        | 0 | 0 | 1 | 1 | no |
| Rhox4c        | 0 | 0 | 1 | 1 | no |
| Rhox4d        | 0 | 0 | 1 | 1 | no |
| Rhox4e        | 0 | 0 | 1 | 1 | no |
| Rhox4f        | 0 | 0 | 1 | 1 | no |
| Rhox4g        | 0 | 0 | 1 | 1 | no |
| Rhox6         | 0 | 0 | 1 | 1 | no |
| Rhox7         | 0 | 0 | 1 | 1 | no |



|            |   |   |   |   |    |
|------------|---|---|---|---|----|
| Rhox9      | 0 | 0 | 1 | 1 | no |
| Rln3       | 0 | 0 | 1 | 1 | no |
| Rmst       | 0 | 0 | 1 | 1 | no |
| Rn4.5s     | 0 | 0 | 1 | 1 | no |
| Rnase1     | 0 | 0 | 1 | 1 | no |
| Rnase11    | 0 | 0 | 1 | 1 | no |
| Rnase12    | 0 | 0 | 1 | 1 | no |
| Rnase13    | 0 | 0 | 1 | 1 | no |
| Rnase2a    | 0 | 0 | 1 | 1 | no |
| Rnase2b    | 0 | 0 | 1 | 1 | no |
| Rnase9     | 0 | 0 | 1 | 1 | no |
| Rnf133     | 0 | 0 | 1 | 1 | no |
| Rnf148     | 0 | 0 | 1 | 1 | no |
| Rnf151     | 0 | 0 | 1 | 1 | no |
| Rnf183     | 0 | 0 | 1 | 1 | no |
| Rnf186     | 0 | 0 | 1 | 1 | no |
| Rnf224     | 0 | 0 | 1 | 1 | no |
| Rnu11      | 0 | 0 | 1 | 1 | no |
| Rnu6       | 0 | 0 | 1 | 1 | no |
| Rnu7       | 0 | 0 | 1 | 1 | no |
| Rnu73b     | 0 | 0 | 1 | 1 | no |
| Rp11       | 0 | 0 | 1 | 1 | no |
| Rpl10l     | 0 | 0 | 1 | 1 | no |
| Rpl34-ps1  | 0 | 0 | 1 | 1 | no |
| Rpr1       | 0 | 0 | 1 | 1 | no |
| Rpr2       | 0 | 0 | 1 | 1 | no |
| Rpr3       | 0 | 0 | 1 | 1 | no |
| Rps27rt    | 0 | 0 | 1 | 1 | no |
| Rptn       | 0 | 0 | 1 | 1 | no |
| Rptoros    | 0 | 0 | 1 | 1 | no |
| Rsph6a     | 0 | 0 | 1 | 1 | no |
| Rxfp4      | 0 | 0 | 1 | 1 | no |
| S100a2     | 0 | 0 | 1 | 1 | no |
| Saa3       | 0 | 0 | 1 | 1 | no |
| Saa4       | 0 | 0 | 1 | 1 | no |
| Sall3      | 0 | 0 | 1 | 1 | no |
| Samd7      | 0 | 0 | 1 | 1 | no |
| Samt2      | 0 | 0 | 1 | 1 | no |
| Samt3      | 0 | 0 | 1 | 1 | no |
| Samt4      | 0 | 0 | 1 | 1 | no |
| Satl1      | 0 | 0 | 1 | 1 | no |
| Sbp        | 0 | 0 | 1 | 1 | no |
| Sbpl       | 0 | 0 | 1 | 1 | no |
| Scarletltr | 0 | 0 | 1 | 1 | no |
| Scarna10   | 0 | 0 | 1 | 1 | no |
| Scarna17   | 0 | 0 | 1 | 1 | no |
| Scarna2    | 0 | 0 | 1 | 1 | no |
| Scarna3a   | 0 | 0 | 1 | 1 | no |
| Scarna3b   | 0 | 0 | 1 | 1 | no |
| Scarna6    | 0 | 0 | 1 | 1 | no |
| Scarna8    | 0 | 0 | 1 | 1 | no |
| Scarna9    | 0 | 0 | 1 | 1 | no |
| Scgb1b19   | 0 | 0 | 1 | 1 | no |

|              |   |   |   |   |    |
|--------------|---|---|---|---|----|
| Scgb1b2      | 0 | 0 | 1 | 1 | no |
| Scgb1b20     | 0 | 0 | 1 | 1 | no |
| Scgb1b24     | 0 | 0 | 1 | 1 | no |
| Scgb1b27     | 0 | 0 | 1 | 1 | no |
| Scgb1b29     | 0 | 0 | 1 | 1 | no |
| Scgb1b3      | 0 | 0 | 1 | 1 | no |
| Scgb1b30     | 0 | 0 | 1 | 1 | no |
| Scgb1b7      | 0 | 0 | 1 | 1 | no |
| Scgb1c1      | 0 | 0 | 1 | 1 | no |
| Scgb2b12     | 0 | 0 | 1 | 1 | no |
| Scgb2b15     | 0 | 0 | 1 | 1 | no |
| Scgb2b17     | 0 | 0 | 1 | 1 | no |
| Scgb2b19     | 0 | 0 | 1 | 1 | no |
| Scgb2b2      | 0 | 0 | 1 | 1 | no |
| Scgb2b20     | 0 | 0 | 1 | 1 | no |
| Scgb2b23-ps  | 0 | 0 | 1 | 1 | no |
| Scgb2b24     | 0 | 0 | 1 | 1 | no |
| Scgb2b26     | 0 | 0 | 1 | 1 | no |
| Scgb2b27     | 0 | 0 | 1 | 1 | no |
| Scgb2b3      | 0 | 0 | 1 | 1 | no |
| Scgb2b7      | 0 | 0 | 1 | 1 | no |
| Scgb3a2      | 0 | 0 | 1 | 1 | no |
| Scp2d1       | 0 | 0 | 1 | 1 | no |
| Scpep1os     | 0 | 0 | 1 | 1 | no |
| Sctr         | 0 | 0 | 1 | 1 | no |
| Sdr16c5      | 0 | 0 | 1 | 1 | no |
| Sdr16c6      | 0 | 0 | 1 | 1 | no |
| Sds          | 0 | 0 | 1 | 1 | no |
| Sec14I3      | 0 | 0 | 1 | 1 | no |
| 39691        | 0 | 0 | 1 | 1 | no |
| 40421        | 0 | 0 | 1 | 1 | no |
| Serpina1f    | 0 | 0 | 1 | 1 | no |
| Serpina3a    | 0 | 0 | 1 | 1 | no |
| Serpina3b    | 0 | 0 | 1 | 1 | no |
| Serpina3j    | 0 | 0 | 1 | 1 | no |
| Serpina4-ps1 | 0 | 0 | 1 | 1 | no |
| Serpina6     | 0 | 0 | 1 | 1 | no |
| Serpina7     | 0 | 0 | 1 | 1 | no |
| Serpinb11    | 0 | 0 | 1 | 1 | no |
| Serpinb13    | 0 | 0 | 1 | 1 | no |
| Serpinb3b    | 0 | 0 | 1 | 1 | no |
| Serpinb3c    | 0 | 0 | 1 | 1 | no |
| Serpinb3d    | 0 | 0 | 1 | 1 | no |
| Serpinb6d    | 0 | 0 | 1 | 1 | no |
| Serpinb9c    | 0 | 0 | 1 | 1 | no |
| Serpinb9d    | 0 | 0 | 1 | 1 | no |
| Serpinb9e    | 0 | 0 | 1 | 1 | no |
| Serpinb9f    | 0 | 0 | 1 | 1 | no |
| Serpinb9g    | 0 | 0 | 1 | 1 | no |
| Serpini2     | 0 | 0 | 1 | 1 | no |
| Sftpd        | 0 | 0 | 1 | 1 | no |
| Sh2d1b2      | 0 | 0 | 1 | 1 | no |
| Shbg         | 0 | 0 | 1 | 1 | no |

|           |   |   |   |   |    |
|-----------|---|---|---|---|----|
| Siglec15  | 0 | 0 | 1 | 1 | no |
| Sim1      | 0 | 0 | 1 | 1 | no |
| Sim2      | 0 | 0 | 1 | 1 | no |
| Skint1    | 0 | 0 | 1 | 1 | no |
| Skint10   | 0 | 0 | 1 | 1 | no |
| Skint11   | 0 | 0 | 1 | 1 | no |
| Skint2    | 0 | 0 | 1 | 1 | no |
| Skint4    | 0 | 0 | 1 | 1 | no |
| Skint5    | 0 | 0 | 1 | 1 | no |
| Skint6    | 0 | 0 | 1 | 1 | no |
| Skint7    | 0 | 0 | 1 | 1 | no |
| Skint9    | 0 | 0 | 1 | 1 | no |
| Slain1os  | 0 | 0 | 1 | 1 | no |
| Slc10a1   | 0 | 0 | 1 | 1 | no |
| Slc13a2os | 0 | 0 | 1 | 1 | no |
| Slc16a8   | 0 | 0 | 1 | 1 | no |
| Slc17a1   | 0 | 0 | 1 | 1 | no |
| Slc17a2   | 0 | 0 | 1 | 1 | no |
| Slc17a3   | 0 | 0 | 1 | 1 | no |
| Slc22a14  | 0 | 0 | 1 | 1 | no |
| Slc22a16  | 0 | 0 | 1 | 1 | no |
| Slc22a19  | 0 | 0 | 1 | 1 | no |
| Slc22a20  | 0 | 0 | 1 | 1 | no |
| Slc22a26  | 0 | 0 | 1 | 1 | no |
| Slc22a27  | 0 | 0 | 1 | 1 | no |
| Slc22a28  | 0 | 0 | 1 | 1 | no |
| Slc22a30  | 0 | 0 | 1 | 1 | no |
| Slc23a1   | 0 | 0 | 1 | 1 | no |
| Slc25a41  | 0 | 0 | 1 | 1 | no |
| Slc25a54  | 0 | 0 | 1 | 1 | no |
| Slc26a9   | 0 | 0 | 1 | 1 | no |
| Slc28a3   | 0 | 0 | 1 | 1 | no |
| Slc2a7    | 0 | 0 | 1 | 1 | no |
| Slc30a3   | 0 | 0 | 1 | 1 | no |
| Slc34a1   | 0 | 0 | 1 | 1 | no |
| Slc34a3   | 0 | 0 | 1 | 1 | no |
| Slc35g3   | 0 | 0 | 1 | 1 | no |
| Slc36a3   | 0 | 0 | 1 | 1 | no |
| Slc51b    | 0 | 0 | 1 | 1 | no |
| Slc5a12   | 0 | 0 | 1 | 1 | no |
| Slc6a14   | 0 | 0 | 1 | 1 | no |
| Slc6a19os | 0 | 0 | 1 | 1 | no |
| Slc6a3    | 0 | 0 | 1 | 1 | no |
| Slc7a12   | 0 | 0 | 1 | 1 | no |
| Slc7a9    | 0 | 0 | 1 | 1 | no |
| Slc9c1    | 0 | 0 | 1 | 1 | no |
| Slco1a1   | 0 | 0 | 1 | 1 | no |
| Slco1b2   | 0 | 0 | 1 | 1 | no |
| Slco6b1   | 0 | 0 | 1 | 1 | no |
| Slco6d1   | 0 | 0 | 1 | 1 | no |
| Sln       | 0 | 0 | 1 | 1 | no |
| Slx       | 0 | 0 | 1 | 1 | no |

|            |   |   |   |   |    |
|------------|---|---|---|---|----|
| Slx1l      | 0 | 0 | 1 | 1 | no |
| Sly        | 0 | 0 | 1 | 1 | no |
| Smc1b      | 0 | 0 | 1 | 1 | no |
| Smcp       | 0 | 0 | 1 | 1 | no |
| Smgc       | 0 | 0 | 1 | 1 | no |
| Smim23     | 0 | 0 | 1 | 1 | no |
| Smlr1      | 0 | 0 | 1 | 1 | no |
| Smok2a     | 0 | 0 | 1 | 1 | no |
| Smok2b     | 0 | 0 | 1 | 1 | no |
| Smok3a     | 0 | 0 | 1 | 1 | no |
| Smok3b     | 0 | 0 | 1 | 1 | no |
| Smok4a     | 0 | 0 | 1 | 1 | no |
| Smr3a      | 0 | 0 | 1 | 1 | no |
| Snora15    | 0 | 0 | 1 | 1 | no |
| Snora17    | 0 | 0 | 1 | 1 | no |
| Snora19    | 0 | 0 | 1 | 1 | no |
| Snora20    | 0 | 0 | 1 | 1 | no |
| Snora21    | 0 | 0 | 1 | 1 | no |
| Snora24    | 0 | 0 | 1 | 1 | no |
| Snora26    | 0 | 0 | 1 | 1 | no |
| Snora2b    | 0 | 0 | 1 | 1 | no |
| Snora3     | 0 | 0 | 1 | 1 | no |
| Snora30    | 0 | 0 | 1 | 1 | no |
| Snora31    | 0 | 0 | 1 | 1 | no |
| Snora33    | 0 | 0 | 1 | 1 | no |
| Snora34    | 0 | 0 | 1 | 1 | no |
| Snora35    | 0 | 0 | 1 | 1 | no |
| Snora36b   | 0 | 0 | 1 | 1 | no |
| Snora41    | 0 | 0 | 1 | 1 | no |
| Snora43    | 0 | 0 | 1 | 1 | no |
| Snora44    | 0 | 0 | 1 | 1 | no |
| Snora47    | 0 | 0 | 1 | 1 | no |
| Snora52    | 0 | 0 | 1 | 1 | no |
| Snora5c    | 0 | 0 | 1 | 1 | no |
| Snora61    | 0 | 0 | 1 | 1 | no |
| Snora62    | 0 | 0 | 1 | 1 | no |
| Snora68    | 0 | 0 | 1 | 1 | no |
| Snora69    | 0 | 0 | 1 | 1 | no |
| Snora75    | 0 | 0 | 1 | 1 | no |
| Snora78    | 0 | 0 | 1 | 1 | no |
| Snora81    | 0 | 0 | 1 | 1 | no |
| Snord100   | 0 | 0 | 1 | 1 | no |
| Snord104   | 0 | 0 | 1 | 1 | no |
| Snord11    | 0 | 0 | 1 | 1 | no |
| Snord110   | 0 | 0 | 1 | 1 | no |
| Snord111   | 0 | 0 | 1 | 1 | no |
| Snord116   | 0 | 0 | 1 | 1 | no |
| Snord11611 | 0 | 0 | 1 | 1 | no |
| Snord11612 | 0 | 0 | 1 | 1 | no |
| Snord118   | 0 | 0 | 1 | 1 | no |
| Snord12    | 0 | 0 | 1 | 1 | no |
| Snord123   | 0 | 0 | 1 | 1 | no |
| Snord14a   | 0 | 0 | 1 | 1 | no |

|          |   |   |   |   |    |
|----------|---|---|---|---|----|
| Snord14c | 0 | 0 | 1 | 1 | no |
| Snord14d | 0 | 0 | 1 | 1 | no |
| Snord15a | 0 | 0 | 1 | 1 | no |
| Snord16a | 0 | 0 | 1 | 1 | no |
| Snord17  | 0 | 0 | 1 | 1 | no |
| Snord19  | 0 | 0 | 1 | 1 | no |
| Snord1a  | 0 | 0 | 1 | 1 | no |
| Snord1b  | 0 | 0 | 1 | 1 | no |
| Snord1c  | 0 | 0 | 1 | 1 | no |
| Snord2   | 0 | 0 | 1 | 1 | no |
| Snord23  | 0 | 0 | 1 | 1 | no |
| Snord32a | 0 | 0 | 1 | 1 | no |
| Snord33  | 0 | 0 | 1 | 1 | no |
| Snord34  | 0 | 0 | 1 | 1 | no |
| Snord35a | 0 | 0 | 1 | 1 | no |
| Snord35b | 0 | 0 | 1 | 1 | no |
| Snord37  | 0 | 0 | 1 | 1 | no |
| Snord38a | 0 | 0 | 1 | 1 | no |
| Snord42a | 0 | 0 | 1 | 1 | no |
| Snord42b | 0 | 0 | 1 | 1 | no |
| Snord43  | 0 | 0 | 1 | 1 | no |
| Snord45b | 0 | 0 | 1 | 1 | no |
| Snord45c | 0 | 0 | 1 | 1 | no |
| Snord47  | 0 | 0 | 1 | 1 | no |
| Snord49a | 0 | 0 | 1 | 1 | no |
| Snord49b | 0 | 0 | 1 | 1 | no |
| Snord4a  | 0 | 0 | 1 | 1 | no |
| Snord52  | 0 | 0 | 1 | 1 | no |
| Snord53  | 0 | 0 | 1 | 1 | no |
| Snord55  | 0 | 0 | 1 | 1 | no |
| Snord57  | 0 | 0 | 1 | 1 | no |
| Snord58b | 0 | 0 | 1 | 1 | no |
| Snord61  | 0 | 0 | 1 | 1 | no |
| Snord64  | 0 | 0 | 1 | 1 | no |
| Snord65  | 0 | 0 | 1 | 1 | no |
| Snord66  | 0 | 0 | 1 | 1 | no |
| Snord67  | 0 | 0 | 1 | 1 | no |
| Snord68  | 0 | 0 | 1 | 1 | no |
| Snord69  | 0 | 0 | 1 | 1 | no |
| Snord7   | 0 | 0 | 1 | 1 | no |
| Snord70  | 0 | 0 | 1 | 1 | no |
| Snord71  | 0 | 0 | 1 | 1 | no |
| Snord72  | 0 | 0 | 1 | 1 | no |
| Snord73a | 0 | 0 | 1 | 1 | no |
| Snord8   | 0 | 0 | 1 | 1 | no |
| Snord82  | 0 | 0 | 1 | 1 | no |
| Snord83b | 0 | 0 | 1 | 1 | no |
| Snord85  | 0 | 0 | 1 | 1 | no |
| Snord87  | 0 | 0 | 1 | 1 | no |
| Snord88a | 0 | 0 | 1 | 1 | no |
| Snord88c | 0 | 0 | 1 | 1 | no |
| Snord89  | 0 | 0 | 1 | 1 | no |
| Snord90  | 0 | 0 | 1 | 1 | no |

|            |   |   |   |   |    |
|------------|---|---|---|---|----|
| Snord91a   | 0 | 0 | 1 | 1 | no |
| Snord92    | 0 | 0 | 1 | 1 | no |
| Snord93    | 0 | 0 | 1 | 1 | no |
| Snord95    | 0 | 0 | 1 | 1 | no |
| Snord96a   | 0 | 0 | 1 | 1 | no |
| Snord98    | 0 | 0 | 1 | 1 | no |
| Snord99    | 0 | 0 | 1 | 1 | no |
| Sntn       | 0 | 0 | 1 | 1 | no |
| Sohlh1     | 0 | 0 | 1 | 1 | no |
| Sohlh2     | 0 | 0 | 1 | 1 | no |
| Sox14      | 0 | 0 | 1 | 1 | no |
| Sox15      | 0 | 0 | 1 | 1 | no |
| Sox21      | 0 | 0 | 1 | 1 | no |
| Sox5os3    | 0 | 0 | 1 | 1 | no |
| Sp8        | 0 | 0 | 1 | 1 | no |
| Spaca3     | 0 | 0 | 1 | 1 | no |
| Spaca4     | 0 | 0 | 1 | 1 | no |
| Spaca5     | 0 | 0 | 1 | 1 | no |
| Spaca7     | 0 | 0 | 1 | 1 | no |
| Spag11a    | 0 | 0 | 1 | 1 | no |
| Spag11b    | 0 | 0 | 1 | 1 | no |
| Spam1      | 0 | 0 | 1 | 1 | no |
| Spata16    | 0 | 0 | 1 | 1 | no |
| Spata21    | 0 | 0 | 1 | 1 | no |
| Spata3     | 0 | 0 | 1 | 1 | no |
| Spata31d1b | 0 | 0 | 1 | 1 | no |
| Spata45    | 0 | 0 | 1 | 1 | no |
| Spatc1     | 0 | 0 | 1 | 1 | no |
| Speer1-ps1 | 0 | 0 | 1 | 1 | no |
| Speer2     | 0 | 0 | 1 | 1 | no |
| Speer3     | 0 | 0 | 1 | 1 | no |
| Speer4b    | 0 | 0 | 1 | 1 | no |
| Speer4c    | 0 | 0 | 1 | 1 | no |
| Speer4d    | 0 | 0 | 1 | 1 | no |
| Speer4e    | 0 | 0 | 1 | 1 | no |
| Speer4f    | 0 | 0 | 1 | 1 | no |
| Speer5-ps1 | 0 | 0 | 1 | 1 | no |
| Speer6-ps1 | 0 | 0 | 1 | 1 | no |
| Speer7-ps1 | 0 | 0 | 1 | 1 | no |
| Speer8-ps1 | 0 | 0 | 1 | 1 | no |
| Speer9-ps1 | 0 | 0 | 1 | 1 | no |
| Spert      | 0 | 0 | 1 | 1 | no |
| Spic       | 0 | 0 | 1 | 1 | no |
| Spin2-ps1  | 0 | 0 | 1 | 1 | no |
| Spin2d     | 0 | 0 | 1 | 1 | no |
| Spink11    | 0 | 0 | 1 | 1 | no |
| Spink12    | 0 | 0 | 1 | 1 | no |
| Spink13    | 0 | 0 | 1 | 1 | no |
| Spink14    | 0 | 0 | 1 | 1 | no |
| Spink3     | 0 | 0 | 1 | 1 | no |
| Spink4     | 0 | 0 | 1 | 1 | no |
| Spink6     | 0 | 0 | 1 | 1 | no |
| Spink7     | 0 | 0 | 1 | 1 | no |



|            |   |   |   |   |    |
|------------|---|---|---|---|----|
| Spink8     | 0 | 0 | 1 | 1 | no |
| Spinkl     | 0 | 0 | 1 | 1 | no |
| Spint3     | 0 | 0 | 1 | 1 | no |
| Spint4     | 0 | 0 | 1 | 1 | no |
| Spn-ps     | 0 | 0 | 1 | 1 | no |
| Sppl2c     | 0 | 0 | 1 | 1 | no |
| Sprr1b     | 0 | 0 | 1 | 1 | no |
| Sprr2a1    | 0 | 0 | 1 | 1 | no |
| Sprr2a2    | 0 | 0 | 1 | 1 | no |
| Sprr2b     | 0 | 0 | 1 | 1 | no |
| Sprr2d     | 0 | 0 | 1 | 1 | no |
| Sprr2e     | 0 | 0 | 1 | 1 | no |
| Sprr2f     | 0 | 0 | 1 | 1 | no |
| Sprr2g     | 0 | 0 | 1 | 1 | no |
| Sprr2h     | 0 | 0 | 1 | 1 | no |
| Sprr2i     | 0 | 0 | 1 | 1 | no |
| Sprr2j-ps  | 0 | 0 | 1 | 1 | no |
| Sprr2k     | 0 | 0 | 1 | 1 | no |
| Sprr3      | 0 | 0 | 1 | 1 | no |
| Sprr4      | 0 | 0 | 1 | 1 | no |
| Spt1       | 0 | 0 | 1 | 1 | no |
| Sptlc3     | 0 | 0 | 1 | 1 | no |
| Spz1       | 0 | 0 | 1 | 1 | no |
| Sry        | 0 | 0 | 1 | 1 | no |
| Ssty1      | 0 | 0 | 1 | 1 | no |
| Ssty2      | 0 | 0 | 1 | 1 | no |
| Ssx9       | 0 | 0 | 1 | 1 | no |
| Ssxb1      | 0 | 0 | 1 | 1 | no |
| Ssxb10     | 0 | 0 | 1 | 1 | no |
| Ssxb2      | 0 | 0 | 1 | 1 | no |
| Ssxb3      | 0 | 0 | 1 | 1 | no |
| Ssxb5      | 0 | 0 | 1 | 1 | no |
| Ssxb6      | 0 | 0 | 1 | 1 | no |
| Ssxb8      | 0 | 0 | 1 | 1 | no |
| Ssxb9      | 0 | 0 | 1 | 1 | no |
| St6galnac1 | 0 | 0 | 1 | 1 | no |
| Stfa2      | 0 | 0 | 1 | 1 | no |
| Stfa2l1    | 0 | 0 | 1 | 1 | no |
| Stfa3      | 0 | 0 | 1 | 1 | no |
| Stra8      | 0 | 0 | 1 | 1 | no |
| Stx19      | 0 | 0 | 1 | 1 | no |
| Sult1b1    | 0 | 0 | 1 | 1 | no |
| Sult1c1    | 0 | 0 | 1 | 1 | no |
| Sult1c2    | 0 | 0 | 1 | 1 | no |
| Sult1d1    | 0 | 0 | 1 | 1 | no |
| Sult1e1    | 0 | 0 | 1 | 1 | no |
| Sult2a1    | 0 | 0 | 1 | 1 | no |
| Sult2a2    | 0 | 0 | 1 | 1 | no |
| Sult2a3    | 0 | 0 | 1 | 1 | no |
| Sult2a4    | 0 | 0 | 1 | 1 | no |
| Sult2a5    | 0 | 0 | 1 | 1 | no |
| Sult2a6    | 0 | 0 | 1 | 1 | no |
| Sult2a7    | 0 | 0 | 1 | 1 | no |

|           |   |   |   |   |    |
|-----------|---|---|---|---|----|
| Sult3a1   | 0 | 0 | 1 | 1 | no |
| Sun5      | 0 | 0 | 1 | 1 | no |
| Sva       | 0 | 0 | 1 | 1 | no |
| Sval1     | 0 | 0 | 1 | 1 | no |
| Sval2     | 0 | 0 | 1 | 1 | no |
| Sval3     | 0 | 0 | 1 | 1 | no |
| Svs1      | 0 | 0 | 1 | 1 | no |
| Svs2      | 0 | 0 | 1 | 1 | no |
| Svs3b     | 0 | 0 | 1 | 1 | no |
| Svs4      | 0 | 0 | 1 | 1 | no |
| Svs5      | 0 | 0 | 1 | 1 | no |
| Svs6      | 0 | 0 | 1 | 1 | no |
| Syce3     | 0 | 0 | 1 | 1 | no |
| Sycn      | 0 | 0 | 1 | 1 | no |
| Sycp1     | 0 | 0 | 1 | 1 | no |
| Sycp1-ps1 | 0 | 0 | 1 | 1 | no |
| Synb      | 0 | 0 | 1 | 1 | no |
| Syt8      | 0 | 0 | 1 | 1 | no |
| Taar1     | 0 | 0 | 1 | 1 | no |
| Taar2     | 0 | 0 | 1 | 1 | no |
| Taar3     | 0 | 0 | 1 | 1 | no |
| Taar4     | 0 | 0 | 1 | 1 | no |
| Taar5     | 0 | 0 | 1 | 1 | no |
| Taar6     | 0 | 0 | 1 | 1 | no |
| Taar7a    | 0 | 0 | 1 | 1 | no |
| Taar7b    | 0 | 0 | 1 | 1 | no |
| Taar7d    | 0 | 0 | 1 | 1 | no |
| Taar7e    | 0 | 0 | 1 | 1 | no |
| Taar7f    | 0 | 0 | 1 | 1 | no |
| Taar8a    | 0 | 0 | 1 | 1 | no |
| Taar8b    | 0 | 0 | 1 | 1 | no |
| Taar8c    | 0 | 0 | 1 | 1 | no |
| Taar9     | 0 | 0 | 1 | 1 | no |
| Tac4      | 0 | 0 | 1 | 1 | no |
| Taf7l     | 0 | 0 | 1 | 1 | no |
| Tas1r2    | 0 | 0 | 1 | 1 | no |
| Tas2r102  | 0 | 0 | 1 | 1 | no |
| Tas2r103  | 0 | 0 | 1 | 1 | no |
| Tas2r104  | 0 | 0 | 1 | 1 | no |
| Tas2r105  | 0 | 0 | 1 | 1 | no |
| Tas2r106  | 0 | 0 | 1 | 1 | no |
| Tas2r107  | 0 | 0 | 1 | 1 | no |
| Tas2r108  | 0 | 0 | 1 | 1 | no |
| Tas2r109  | 0 | 0 | 1 | 1 | no |
| Tas2r110  | 0 | 0 | 1 | 1 | no |
| Tas2r113  | 0 | 0 | 1 | 1 | no |
| Tas2r114  | 0 | 0 | 1 | 1 | no |
| Tas2r115  | 0 | 0 | 1 | 1 | no |
| Tas2r116  | 0 | 0 | 1 | 1 | no |
| Tas2r117  | 0 | 0 | 1 | 1 | no |
| Tas2r118  | 0 | 0 | 1 | 1 | no |
| Tas2r119  | 0 | 0 | 1 | 1 | no |
| Tas2r120  | 0 | 0 | 1 | 1 | no |

|            |   |   |   |   |    |
|------------|---|---|---|---|----|
| Tas2r121   | 0 | 0 | 1 | 1 | no |
| Tas2r122   | 0 | 0 | 1 | 1 | no |
| Tas2r123   | 0 | 0 | 1 | 1 | no |
| Tas2r124   | 0 | 0 | 1 | 1 | no |
| Tas2r125   | 0 | 0 | 1 | 1 | no |
| Tas2r126   | 0 | 0 | 1 | 1 | no |
| Tas2r129   | 0 | 0 | 1 | 1 | no |
| Tas2r130   | 0 | 0 | 1 | 1 | no |
| Tas2r131   | 0 | 0 | 1 | 1 | no |
| Tas2r134   | 0 | 0 | 1 | 1 | no |
| Tas2r135   | 0 | 0 | 1 | 1 | no |
| Tas2r136   | 0 | 0 | 1 | 1 | no |
| Tas2r137   | 0 | 0 | 1 | 1 | no |
| Tas2r138   | 0 | 0 | 1 | 1 | no |
| Tas2r139   | 0 | 0 | 1 | 1 | no |
| Tas2r140   | 0 | 0 | 1 | 1 | no |
| Tas2r143   | 0 | 0 | 1 | 1 | no |
| Tas2r144   | 0 | 0 | 1 | 1 | no |
| Tbata      | 0 | 0 | 1 | 1 | no |
| Tbc1d21    | 0 | 0 | 1 | 1 | no |
| Tbc1d22bos | 0 | 0 | 1 | 1 | no |
| Tbr1       | 0 | 0 | 1 | 1 | no |
| Tbx10      | 0 | 0 | 1 | 1 | no |
| Tbx22      | 0 | 0 | 1 | 1 | no |
| Tchh11     | 0 | 0 | 1 | 1 | no |
| Tcl1b1     | 0 | 0 | 1 | 1 | no |
| Tcl1b2     | 0 | 0 | 1 | 1 | no |
| Tcl1b3     | 0 | 0 | 1 | 1 | no |
| Tcl1b4     | 0 | 0 | 1 | 1 | no |
| Tcl1b5     | 0 | 0 | 1 | 1 | no |
| Tcstv1     | 0 | 0 | 1 | 1 | no |
| Tcstv3     | 0 | 0 | 1 | 1 | no |
| Tdgf1      | 0 | 0 | 1 | 1 | no |
| Tdh        | 0 | 0 | 1 | 1 | no |
| Tdo2       | 0 | 0 | 1 | 1 | no |
| Tdpoz1     | 0 | 0 | 1 | 1 | no |
| Tdpoz2     | 0 | 0 | 1 | 1 | no |
| Tdpoz3     | 0 | 0 | 1 | 1 | no |
| Tdpoz4     | 0 | 0 | 1 | 1 | no |
| Tdpoz5     | 0 | 0 | 1 | 1 | no |
| Teddm1     | 0 | 0 | 1 | 1 | no |
| Tepp       | 0 | 0 | 1 | 1 | no |
| Tex101     | 0 | 0 | 1 | 1 | no |
| Tex12      | 0 | 0 | 1 | 1 | no |
| Tex13a     | 0 | 0 | 1 | 1 | no |
| Tex16      | 0 | 0 | 1 | 1 | no |
| Tex19.2    | 0 | 0 | 1 | 1 | no |
| Tex24      | 0 | 0 | 1 | 1 | no |
| Tex26      | 0 | 0 | 1 | 1 | no |
| Tex28      | 0 | 0 | 1 | 1 | no |
| Tex29      | 0 | 0 | 1 | 1 | no |
| Tex33      | 0 | 0 | 1 | 1 | no |
| Tex36      | 0 | 0 | 1 | 1 | no |

|                   |   |   |   |   |    |
|-------------------|---|---|---|---|----|
| Tex43             | 0 | 0 | 1 | 1 | no |
| Tfap2c            | 0 | 0 | 1 | 1 | no |
| Tfap2e            | 0 | 0 | 1 | 1 | no |
| Tfec              | 0 | 0 | 1 | 1 | no |
| Tff1              | 0 | 0 | 1 | 1 | no |
| Tff2              | 0 | 0 | 1 | 1 | no |
| Tff3              | 0 | 0 | 1 | 1 | no |
| Tgif2lx1,Tgif2lx2 | 0 | 0 | 1 | 1 | no |
| Tgif2lx2          | 0 | 0 | 1 | 1 | no |
| Themis3           | 0 | 0 | 1 | 1 | no |
| Timd2             | 0 | 0 | 1 | 1 | no |
| Tinag             | 0 | 0 | 1 | 1 | no |
| Tlx1              | 0 | 0 | 1 | 1 | no |
| Tm4sf5            | 0 | 0 | 1 | 1 | no |
| Tmco5b            | 0 | 0 | 1 | 1 | no |
| Tmed11            | 0 | 0 | 1 | 1 | no |
| Tmed6             | 0 | 0 | 1 | 1 | no |
| Tmem132cos        | 0 | 0 | 1 | 1 | no |
| Tmem171           | 0 | 0 | 1 | 1 | no |
| Tmem174           | 0 | 0 | 1 | 1 | no |
| Tmem190           | 0 | 0 | 1 | 1 | no |
| Tmem210           | 0 | 0 | 1 | 1 | no |
| Tmem212           | 0 | 0 | 1 | 1 | no |
| Tmem225           | 0 | 0 | 1 | 1 | no |
| Tmem247           | 0 | 0 | 1 | 1 | no |
| Tmem52            | 0 | 0 | 1 | 1 | no |
| Tmem52b           | 0 | 0 | 1 | 1 | no |
| Tmem89            | 0 | 0 | 1 | 1 | no |
| Tmem92            | 0 | 0 | 1 | 1 | no |
| Tmem95            | 0 | 0 | 1 | 1 | no |
| Tmprss11g         | 0 | 0 | 1 | 1 | no |
| Tmprss12          | 0 | 0 | 1 | 1 | no |
| Tmprss15          | 0 | 0 | 1 | 1 | no |
| Tmprss4           | 0 | 0 | 1 | 1 | no |
| Tnfsf18           | 0 | 0 | 1 | 1 | no |
| Tnk2os            | 0 | 0 | 1 | 1 | no |
| Tnp2              | 0 | 0 | 1 | 1 | no |
| Tomm20l           | 0 | 0 | 1 | 1 | no |
| Toporsl           | 0 | 0 | 1 | 1 | no |
| Tpbpa             | 0 | 0 | 1 | 1 | no |
| Tpbpb             | 0 | 0 | 1 | 1 | no |
| Tppp2             | 0 | 0 | 1 | 1 | no |
| Tpte              | 0 | 0 | 1 | 1 | no |
| Trap1a            | 0 | 0 | 1 | 1 | no |
| Trat1             | 0 | 0 | 1 | 1 | no |
| Trcg1             | 0 | 0 | 1 | 1 | no |
| Treh              | 0 | 0 | 1 | 1 | no |
| Trem1l1           | 0 | 0 | 1 | 1 | no |
| Trex2             | 0 | 0 | 1 | 1 | no |
| Trhr2             | 0 | 0 | 1 | 1 | no |
| Trim31            | 0 | 0 | 1 | 1 | no |
| Trim42            | 0 | 0 | 1 | 1 | no |
| Trim43b           | 0 | 0 | 1 | 1 | no |

|          |   |   |   |   |    |
|----------|---|---|---|---|----|
| Trim50   | 0 | 0 | 1 | 1 | no |
| Trim52   | 0 | 0 | 1 | 1 | no |
| Trim54   | 0 | 0 | 1 | 1 | no |
| Trim60   | 0 | 0 | 1 | 1 | no |
| Trim75   | 0 | 0 | 1 | 1 | no |
| Triml1   | 0 | 0 | 1 | 1 | no |
| Triml2   | 0 | 0 | 1 | 1 | no |
| Trp53tg5 | 0 | 0 | 1 | 1 | no |
| Trpc5os  | 0 | 0 | 1 | 1 | no |
| Trpd52l3 | 0 | 0 | 1 | 1 | no |
| Trpv6    | 0 | 0 | 1 | 1 | no |
| Try10    | 0 | 0 | 1 | 1 | no |
| Try4     | 0 | 0 | 1 | 1 | no |
| Try5     | 0 | 0 | 1 | 1 | no |
| Tsga8    | 0 | 0 | 1 | 1 | no |
| Tshb     | 0 | 0 | 1 | 1 | no |
| Tsix     | 0 | 0 | 1 | 1 | no |
| Tspan10  | 0 | 0 | 1 | 1 | no |
| Tspy-ps  | 0 | 0 | 1 | 1 | no |
| Tssk2    | 0 | 0 | 1 | 1 | no |
| Tssk3    | 0 | 0 | 1 | 1 | no |
| Tssk5    | 0 | 0 | 1 | 1 | no |
| Ttc23l   | 0 | 0 | 1 | 1 | no |
| Ttc24    | 0 | 0 | 1 | 1 | no |
| Ttll10   | 0 | 0 | 1 | 1 | no |
| Tuba3b   | 0 | 0 | 1 | 1 | no |
| Tunar    | 0 | 0 | 1 | 1 | no |
| Txndc8   | 0 | 0 | 1 | 1 | no |
| Tyr      | 0 | 0 | 1 | 1 | no |
| U90926   | 0 | 0 | 1 | 1 | no |
| Ube2d2b  | 0 | 0 | 1 | 1 | no |
| Ube2dnl1 | 0 | 0 | 1 | 1 | no |
| Ube2dnl2 | 0 | 0 | 1 | 1 | no |
| Ubqln3   | 0 | 0 | 1 | 1 | no |
| Ubqlnl   | 0 | 0 | 1 | 1 | no |
| Ubtfl1   | 0 | 0 | 1 | 1 | no |
| Ucn3     | 0 | 0 | 1 | 1 | no |
| Ugt1a10  | 0 | 0 | 1 | 1 | no |
| Ugt1a2   | 0 | 0 | 1 | 1 | no |
| Ugt1a9   | 0 | 0 | 1 | 1 | no |
| Ugt2a3   | 0 | 0 | 1 | 1 | no |
| Ugt2b1   | 0 | 0 | 1 | 1 | no |
| Ugt2b34  | 0 | 0 | 1 | 1 | no |
| Ugt2b35  | 0 | 0 | 1 | 1 | no |
| Ugt2b36  | 0 | 0 | 1 | 1 | no |
| Ugt2b37  | 0 | 0 | 1 | 1 | no |
| Ugt2b38  | 0 | 0 | 1 | 1 | no |
| Ugt2b5   | 0 | 0 | 1 | 1 | no |
| Ugt3a1   | 0 | 0 | 1 | 1 | no |
| Ugt3a2   | 0 | 0 | 1 | 1 | no |
| Umod     | 0 | 0 | 1 | 1 | no |
| Umodl1   | 0 | 0 | 1 | 1 | no |
| Uncx     | 0 | 0 | 1 | 1 | no |

|                 |   |   |   |   |    |
|-----------------|---|---|---|---|----|
| Upk2            | 0 | 0 | 1 | 1 | no |
| Upk3a           | 0 | 0 | 1 | 1 | no |
| Upk3b           | 0 | 0 | 1 | 1 | no |
| Upk3bl          | 0 | 0 | 1 | 1 | no |
| Urad            | 0 | 0 | 1 | 1 | no |
| Ush1c           | 0 | 0 | 1 | 1 | no |
| Usp17la         | 0 | 0 | 1 | 1 | no |
| Usp17lb         | 0 | 0 | 1 | 1 | no |
| Usp17lc         | 0 | 0 | 1 | 1 | no |
| Usp17ld         | 0 | 0 | 1 | 1 | no |
| Usp17le         | 0 | 0 | 1 | 1 | no |
| Usp26           | 0 | 0 | 1 | 1 | no |
| Usp9y           | 0 | 0 | 1 | 1 | no |
| V1ra8           | 0 | 0 | 1 | 1 | no |
| Vax1            | 0 | 0 | 1 | 1 | no |
| Vax2            | 0 | 0 | 1 | 1 | no |
| Vax2os          | 0 | 0 | 1 | 1 | no |
| Vgll1           | 0 | 0 | 1 | 1 | no |
| Vmn1r-ps103     | 0 | 0 | 1 | 1 | no |
| Vmn1r-ps79      | 0 | 0 | 1 | 1 | no |
| Vmn1r1          | 0 | 0 | 1 | 1 | no |
| Vmn1r10         | 0 | 0 | 1 | 1 | no |
| Vmn1r100,Vmn1r1 | 0 | 0 | 1 | 1 | no |
| Vmn1r101        | 0 | 0 | 1 | 1 | no |
| Vmn1r103        | 0 | 0 | 1 | 1 | no |
| Vmn1r104        | 0 | 0 | 1 | 1 | no |
| Vmn1r107        | 0 | 0 | 1 | 1 | no |
| Vmn1r11         | 0 | 0 | 1 | 1 | no |
| Vmn1r112        | 0 | 0 | 1 | 1 | no |
| Vmn1r113        | 0 | 0 | 1 | 1 | no |
| Vmn1r114        | 0 | 0 | 1 | 1 | no |
| Vmn1r115        | 0 | 0 | 1 | 1 | no |
| Vmn1r116        | 0 | 0 | 1 | 1 | no |
| Vmn1r117        | 0 | 0 | 1 | 1 | no |
| Vmn1r118        | 0 | 0 | 1 | 1 | no |
| Vmn1r119        | 0 | 0 | 1 | 1 | no |
| Vmn1r12         | 0 | 0 | 1 | 1 | no |
| Vmn1r120        | 0 | 0 | 1 | 1 | no |
| Vmn1r121        | 0 | 0 | 1 | 1 | no |
| Vmn1r122        | 0 | 0 | 1 | 1 | no |
| Vmn1r123        | 0 | 0 | 1 | 1 | no |
| Vmn1r124        | 0 | 0 | 1 | 1 | no |
| Vmn1r125        | 0 | 0 | 1 | 1 | no |
| Vmn1r126        | 0 | 0 | 1 | 1 | no |
| Vmn1r127        | 0 | 0 | 1 | 1 | no |
| Vmn1r128        | 0 | 0 | 1 | 1 | no |
| Vmn1r129        | 0 | 0 | 1 | 1 | no |
| Vmn1r13         | 0 | 0 | 1 | 1 | no |
| Vmn1r130        | 0 | 0 | 1 | 1 | no |
| Vmn1r132,Vmn1r1 | 0 | 0 | 1 | 1 | no |
| Vmn1r135        | 0 | 0 | 1 | 1 | no |
| Vmn1r137        | 0 | 0 | 1 | 1 | no |
| Vmn1r138        | 0 | 0 | 1 | 1 | no |



|                 |   |   |   |   |    |
|-----------------|---|---|---|---|----|
| Vmn1r139        | 0 | 0 | 1 | 1 | no |
| Vmn1r14         | 0 | 0 | 1 | 1 | no |
| Vmn1r142        | 0 | 0 | 1 | 1 | no |
| Vmn1r148        | 0 | 0 | 1 | 1 | no |
| Vmn1r15         | 0 | 0 | 1 | 1 | no |
| Vmn1r151        | 0 | 0 | 1 | 1 | no |
| Vmn1r152        | 0 | 0 | 1 | 1 | no |
| Vmn1r157        | 0 | 0 | 1 | 1 | no |
| Vmn1r158        | 0 | 0 | 1 | 1 | no |
| Vmn1r159        | 0 | 0 | 1 | 1 | no |
| Vmn1r16         | 0 | 0 | 1 | 1 | no |
| Vmn1r160        | 0 | 0 | 1 | 1 | no |
| Vmn1r163        | 0 | 0 | 1 | 1 | no |
| Vmn1r165        | 0 | 0 | 1 | 1 | no |
| Vmn1r166        | 0 | 0 | 1 | 1 | no |
| Vmn1r167        | 0 | 0 | 1 | 1 | no |
| Vmn1r168        | 0 | 0 | 1 | 1 | no |
| Vmn1r169        | 0 | 0 | 1 | 1 | no |
| Vmn1r17         | 0 | 0 | 1 | 1 | no |
| Vmn1r170        | 0 | 0 | 1 | 1 | no |
| Vmn1r171        | 0 | 0 | 1 | 1 | no |
| Vmn1r172        | 0 | 0 | 1 | 1 | no |
| Vmn1r173        | 0 | 0 | 1 | 1 | no |
| Vmn1r174        | 0 | 0 | 1 | 1 | no |
| Vmn1r175        | 0 | 0 | 1 | 1 | no |
| Vmn1r176        | 0 | 0 | 1 | 1 | no |
| Vmn1r177        | 0 | 0 | 1 | 1 | no |
| Vmn1r178        | 0 | 0 | 1 | 1 | no |
| Vmn1r179        | 0 | 0 | 1 | 1 | no |
| Vmn1r18         | 0 | 0 | 1 | 1 | no |
| Vmn1r180        | 0 | 0 | 1 | 1 | no |
| Vmn1r183        | 0 | 0 | 1 | 1 | no |
| Vmn1r184        | 0 | 0 | 1 | 1 | no |
| Vmn1r185        | 0 | 0 | 1 | 1 | no |
| Vmn1r186,Vmn1r6 | 0 | 0 | 1 | 1 | no |
| Vmn1r187,Vmn1r6 | 0 | 0 | 1 | 1 | no |
| Vmn1r188        | 0 | 0 | 1 | 1 | no |
| Vmn1r189        | 0 | 0 | 1 | 1 | no |
| Vmn1r19         | 0 | 0 | 1 | 1 | no |
| Vmn1r191        | 0 | 0 | 1 | 1 | no |
| Vmn1r192        | 0 | 0 | 1 | 1 | no |
| Vmn1r193        | 0 | 0 | 1 | 1 | no |
| Vmn1r194        | 0 | 0 | 1 | 1 | no |
| Vmn1r195        | 0 | 0 | 1 | 1 | no |
| Vmn1r196        | 0 | 0 | 1 | 1 | no |
| Vmn1r197        | 0 | 0 | 1 | 1 | no |
| Vmn1r198        | 0 | 0 | 1 | 1 | no |
| Vmn1r199        | 0 | 0 | 1 | 1 | no |
| Vmn1r2          | 0 | 0 | 1 | 1 | no |
| Vmn1r20         | 0 | 0 | 1 | 1 | no |
| Vmn1r200        | 0 | 0 | 1 | 1 | no |
| Vmn1r201        | 0 | 0 | 1 | 1 | no |
| Vmn1r202        | 0 | 0 | 1 | 1 | no |

|             |   |   |   |   |    |
|-------------|---|---|---|---|----|
| Vmn1r203    | 0 | 0 | 1 | 1 | no |
| Vmn1r204    | 0 | 0 | 1 | 1 | no |
| Vmn1r205    | 0 | 0 | 1 | 1 | no |
| Vmn1r206    | 0 | 0 | 1 | 1 | no |
| Vmn1r207-ps | 0 | 0 | 1 | 1 | no |
| Vmn1r208    | 0 | 0 | 1 | 1 | no |
| Vmn1r209    | 0 | 0 | 1 | 1 | no |
| Vmn1r21     | 0 | 0 | 1 | 1 | no |
| Vmn1r210    | 0 | 0 | 1 | 1 | no |
| Vmn1r211    | 0 | 0 | 1 | 1 | no |
| Vmn1r213    | 0 | 0 | 1 | 1 | no |
| Vmn1r214    | 0 | 0 | 1 | 1 | no |
| Vmn1r215    | 0 | 0 | 1 | 1 | no |
| Vmn1r216    | 0 | 0 | 1 | 1 | no |
| Vmn1r217    | 0 | 0 | 1 | 1 | no |
| Vmn1r218    | 0 | 0 | 1 | 1 | no |
| Vmn1r219    | 0 | 0 | 1 | 1 | no |
| Vmn1r22     | 0 | 0 | 1 | 1 | no |
| Vmn1r220    | 0 | 0 | 1 | 1 | no |
| Vmn1r221    | 0 | 0 | 1 | 1 | no |
| Vmn1r222    | 0 | 0 | 1 | 1 | no |
| Vmn1r223    | 0 | 0 | 1 | 1 | no |
| Vmn1r224    | 0 | 0 | 1 | 1 | no |
| Vmn1r225    | 0 | 0 | 1 | 1 | no |
| Vmn1r226    | 0 | 0 | 1 | 1 | no |
| Vmn1r227    | 0 | 0 | 1 | 1 | no |
| Vmn1r229    | 0 | 0 | 1 | 1 | no |
| Vmn1r23     | 0 | 0 | 1 | 1 | no |
| Vmn1r230    | 0 | 0 | 1 | 1 | no |
| Vmn1r231    | 0 | 0 | 1 | 1 | no |
| Vmn1r232    | 0 | 0 | 1 | 1 | no |
| Vmn1r233    | 0 | 0 | 1 | 1 | no |
| Vmn1r234    | 0 | 0 | 1 | 1 | no |
| Vmn1r235    | 0 | 0 | 1 | 1 | no |
| Vmn1r236    | 0 | 0 | 1 | 1 | no |
| Vmn1r237    | 0 | 0 | 1 | 1 | no |
| Vmn1r238    | 0 | 0 | 1 | 1 | no |
| Vmn1r24     | 0 | 0 | 1 | 1 | no |
| Vmn1r25     | 0 | 0 | 1 | 1 | no |
| Vmn1r26     | 0 | 0 | 1 | 1 | no |
| Vmn1r27     | 0 | 0 | 1 | 1 | no |
| Vmn1r28     | 0 | 0 | 1 | 1 | no |
| Vmn1r29     | 0 | 0 | 1 | 1 | no |
| Vmn1r3      | 0 | 0 | 1 | 1 | no |
| Vmn1r30     | 0 | 0 | 1 | 1 | no |
| Vmn1r31     | 0 | 0 | 1 | 1 | no |
| Vmn1r32     | 0 | 0 | 1 | 1 | no |
| Vmn1r33     | 0 | 0 | 1 | 1 | no |
| Vmn1r34     | 0 | 0 | 1 | 1 | no |
| Vmn1r35     | 0 | 0 | 1 | 1 | no |
| Vmn1r36     | 0 | 0 | 1 | 1 | no |
| Vmn1r37     | 0 | 0 | 1 | 1 | no |
| Vmn1r38     | 0 | 0 | 1 | 1 | no |

|         |   |   |   |   |    |
|---------|---|---|---|---|----|
| Vmn1r39 | 0 | 0 | 1 | 1 | no |
| Vmn1r4  | 0 | 0 | 1 | 1 | no |
| Vmn1r40 | 0 | 0 | 1 | 1 | no |
| Vmn1r41 | 0 | 0 | 1 | 1 | no |
| Vmn1r42 | 0 | 0 | 1 | 1 | no |
| Vmn1r43 | 0 | 0 | 1 | 1 | no |
| Vmn1r44 | 0 | 0 | 1 | 1 | no |
| Vmn1r45 | 0 | 0 | 1 | 1 | no |
| Vmn1r46 | 0 | 0 | 1 | 1 | no |
| Vmn1r47 | 0 | 0 | 1 | 1 | no |
| Vmn1r48 | 0 | 0 | 1 | 1 | no |
| Vmn1r49 | 0 | 0 | 1 | 1 | no |
| Vmn1r50 | 0 | 0 | 1 | 1 | no |
| Vmn1r51 | 0 | 0 | 1 | 1 | no |
| Vmn1r52 | 0 | 0 | 1 | 1 | no |
| Vmn1r54 | 0 | 0 | 1 | 1 | no |
| Vmn1r55 | 0 | 0 | 1 | 1 | no |
| Vmn1r56 | 0 | 0 | 1 | 1 | no |
| Vmn1r57 | 0 | 0 | 1 | 1 | no |
| Vmn1r58 | 0 | 0 | 1 | 1 | no |
| Vmn1r59 | 0 | 0 | 1 | 1 | no |
| Vmn1r6  | 0 | 0 | 1 | 1 | no |
| Vmn1r60 | 0 | 0 | 1 | 1 | no |
| Vmn1r61 | 0 | 0 | 1 | 1 | no |
| Vmn1r62 | 0 | 0 | 1 | 1 | no |
| Vmn1r63 | 0 | 0 | 1 | 1 | no |
| Vmn1r64 | 0 | 0 | 1 | 1 | no |
| Vmn1r65 | 0 | 0 | 1 | 1 | no |
| Vmn1r66 | 0 | 0 | 1 | 1 | no |
| Vmn1r67 | 0 | 0 | 1 | 1 | no |
| Vmn1r68 | 0 | 0 | 1 | 1 | no |
| Vmn1r69 | 0 | 0 | 1 | 1 | no |
| Vmn1r7  | 0 | 0 | 1 | 1 | no |
| Vmn1r70 | 0 | 0 | 1 | 1 | no |
| Vmn1r71 | 0 | 0 | 1 | 1 | no |
| Vmn1r72 | 0 | 0 | 1 | 1 | no |
| Vmn1r73 | 0 | 0 | 1 | 1 | no |
| Vmn1r74 | 0 | 0 | 1 | 1 | no |
| Vmn1r75 | 0 | 0 | 1 | 1 | no |
| Vmn1r76 | 0 | 0 | 1 | 1 | no |
| Vmn1r77 | 0 | 0 | 1 | 1 | no |
| Vmn1r78 | 0 | 0 | 1 | 1 | no |
| Vmn1r79 | 0 | 0 | 1 | 1 | no |
| Vmn1r8  | 0 | 0 | 1 | 1 | no |
| Vmn1r80 | 0 | 0 | 1 | 1 | no |
| Vmn1r81 | 0 | 0 | 1 | 1 | no |
| Vmn1r82 | 0 | 0 | 1 | 1 | no |
| Vmn1r83 | 0 | 0 | 1 | 1 | no |
| Vmn1r84 | 0 | 0 | 1 | 1 | no |
| Vmn1r86 | 0 | 0 | 1 | 1 | no |
| Vmn1r87 | 0 | 0 | 1 | 1 | no |
| Vmn1r88 | 0 | 0 | 1 | 1 | no |
| Vmn1r9  | 0 | 0 | 1 | 1 | no |

|             |   |   |   |   |    |
|-------------|---|---|---|---|----|
| Vmn1r91     | 0 | 0 | 1 | 1 | no |
| Vmn1r94     | 0 | 0 | 1 | 1 | no |
| Vmn1r95     | 0 | 0 | 1 | 1 | no |
| Vmn2r-ps129 | 0 | 0 | 1 | 1 | no |
| Vmn2r-ps159 | 0 | 0 | 1 | 1 | no |
| Vmn2r-ps54  | 0 | 0 | 1 | 1 | no |
| Vmn2r-ps60  | 0 | 0 | 1 | 1 | no |
| Vmn2r10     | 0 | 0 | 1 | 1 | no |
| Vmn2r100    | 0 | 0 | 1 | 1 | no |
| Vmn2r101    | 0 | 0 | 1 | 1 | no |
| Vmn2r102    | 0 | 0 | 1 | 1 | no |
| Vmn2r103    | 0 | 0 | 1 | 1 | no |
| Vmn2r104    | 0 | 0 | 1 | 1 | no |
| Vmn2r105    | 0 | 0 | 1 | 1 | no |
| Vmn2r106    | 0 | 0 | 1 | 1 | no |
| Vmn2r107    | 0 | 0 | 1 | 1 | no |
| Vmn2r108    | 0 | 0 | 1 | 1 | no |
| Vmn2r109    | 0 | 0 | 1 | 1 | no |
| Vmn2r11     | 0 | 0 | 1 | 1 | no |
| Vmn2r110    | 0 | 0 | 1 | 1 | no |
| Vmn2r111    | 0 | 0 | 1 | 1 | no |
| Vmn2r112    | 0 | 0 | 1 | 1 | no |
| Vmn2r114    | 0 | 0 | 1 | 1 | no |
| Vmn2r115    | 0 | 0 | 1 | 1 | no |
| Vmn2r116    | 0 | 0 | 1 | 1 | no |
| Vmn2r117    | 0 | 0 | 1 | 1 | no |
| Vmn2r12     | 0 | 0 | 1 | 1 | no |
| Vmn2r120    | 0 | 0 | 1 | 1 | no |
| Vmn2r121    | 0 | 0 | 1 | 1 | no |
| Vmn2r122    | 0 | 0 | 1 | 1 | no |
| Vmn2r123    | 0 | 0 | 1 | 1 | no |
| Vmn2r124    | 0 | 0 | 1 | 1 | no |
| Vmn2r13     | 0 | 0 | 1 | 1 | no |
| Vmn2r14     | 0 | 0 | 1 | 1 | no |
| Vmn2r15     | 0 | 0 | 1 | 1 | no |
| Vmn2r16     | 0 | 0 | 1 | 1 | no |
| Vmn2r17     | 0 | 0 | 1 | 1 | no |
| Vmn2r18     | 0 | 0 | 1 | 1 | no |
| Vmn2r19     | 0 | 0 | 1 | 1 | no |
| Vmn2r2      | 0 | 0 | 1 | 1 | no |
| Vmn2r21     | 0 | 0 | 1 | 1 | no |
| Vmn2r22     | 0 | 0 | 1 | 1 | no |
| Vmn2r23     | 0 | 0 | 1 | 1 | no |
| Vmn2r24     | 0 | 0 | 1 | 1 | no |
| Vmn2r25     | 0 | 0 | 1 | 1 | no |
| Vmn2r26     | 0 | 0 | 1 | 1 | no |
| Vmn2r27     | 0 | 0 | 1 | 1 | no |
| Vmn2r28     | 0 | 0 | 1 | 1 | no |
| Vmn2r3      | 0 | 0 | 1 | 1 | no |
| Vmn2r30     | 0 | 0 | 1 | 1 | no |
| Vmn2r31     | 0 | 0 | 1 | 1 | no |
| Vmn2r32     | 0 | 0 | 1 | 1 | no |
| Vmn2r33     | 0 | 0 | 1 | 1 | no |

|         |   |   |   |   |    |
|---------|---|---|---|---|----|
| Vmn2r34 | 0 | 0 | 1 | 1 | no |
| Vmn2r35 | 0 | 0 | 1 | 1 | no |
| Vmn2r36 | 0 | 0 | 1 | 1 | no |
| Vmn2r37 | 0 | 0 | 1 | 1 | no |
| Vmn2r38 | 0 | 0 | 1 | 1 | no |
| Vmn2r39 | 0 | 0 | 1 | 1 | no |
| Vmn2r4  | 0 | 0 | 1 | 1 | no |
| Vmn2r40 | 0 | 0 | 1 | 1 | no |
| Vmn2r41 | 0 | 0 | 1 | 1 | no |
| Vmn2r42 | 0 | 0 | 1 | 1 | no |
| Vmn2r43 | 0 | 0 | 1 | 1 | no |
| Vmn2r44 | 0 | 0 | 1 | 1 | no |
| Vmn2r45 | 0 | 0 | 1 | 1 | no |
| Vmn2r48 | 0 | 0 | 1 | 1 | no |
| Vmn2r49 | 0 | 0 | 1 | 1 | no |
| Vmn2r5  | 0 | 0 | 1 | 1 | no |
| Vmn2r50 | 0 | 0 | 1 | 1 | no |
| Vmn2r51 | 0 | 0 | 1 | 1 | no |
| Vmn2r52 | 0 | 0 | 1 | 1 | no |
| Vmn2r53 | 0 | 0 | 1 | 1 | no |
| Vmn2r54 | 0 | 0 | 1 | 1 | no |
| Vmn2r55 | 0 | 0 | 1 | 1 | no |
| Vmn2r56 | 0 | 0 | 1 | 1 | no |
| Vmn2r58 | 0 | 0 | 1 | 1 | no |
| Vmn2r59 | 0 | 0 | 1 | 1 | no |
| Vmn2r6  | 0 | 0 | 1 | 1 | no |
| Vmn2r60 | 0 | 0 | 1 | 1 | no |
| Vmn2r61 | 0 | 0 | 1 | 1 | no |
| Vmn2r62 | 0 | 0 | 1 | 1 | no |
| Vmn2r63 | 0 | 0 | 1 | 1 | no |
| Vmn2r65 | 0 | 0 | 1 | 1 | no |
| Vmn2r66 | 0 | 0 | 1 | 1 | no |
| Vmn2r67 | 0 | 0 | 1 | 1 | no |
| Vmn2r68 | 0 | 0 | 1 | 1 | no |
| Vmn2r69 | 0 | 0 | 1 | 1 | no |
| Vmn2r70 | 0 | 0 | 1 | 1 | no |
| Vmn2r71 | 0 | 0 | 1 | 1 | no |
| Vmn2r72 | 0 | 0 | 1 | 1 | no |
| Vmn2r73 | 0 | 0 | 1 | 1 | no |
| Vmn2r74 | 0 | 0 | 1 | 1 | no |
| Vmn2r75 | 0 | 0 | 1 | 1 | no |
| Vmn2r76 | 0 | 0 | 1 | 1 | no |
| Vmn2r77 | 0 | 0 | 1 | 1 | no |
| Vmn2r78 | 0 | 0 | 1 | 1 | no |
| Vmn2r79 | 0 | 0 | 1 | 1 | no |
| Vmn2r8  | 0 | 0 | 1 | 1 | no |
| Vmn2r80 | 0 | 0 | 1 | 1 | no |
| Vmn2r81 | 0 | 0 | 1 | 1 | no |
| Vmn2r82 | 0 | 0 | 1 | 1 | no |
| Vmn2r83 | 0 | 0 | 1 | 1 | no |
| Vmn2r88 | 0 | 0 | 1 | 1 | no |
| Vmn2r89 | 0 | 0 | 1 | 1 | no |
| Vmn2r9  | 0 | 0 | 1 | 1 | no |

|           |   |   |   |   |    |
|-----------|---|---|---|---|----|
| Vmn2r91   | 0 | 0 | 1 | 1 | no |
| Vmn2r92   | 0 | 0 | 1 | 1 | no |
| Vmn2r93   | 0 | 0 | 1 | 1 | no |
| Vmn2r94   | 0 | 0 | 1 | 1 | no |
| Vmn2r95   | 0 | 0 | 1 | 1 | no |
| Vmn2r96   | 0 | 0 | 1 | 1 | no |
| Vmn2r97   | 0 | 0 | 1 | 1 | no |
| Vmn2r98   | 0 | 0 | 1 | 1 | no |
| Vmn2r99   | 0 | 0 | 1 | 1 | no |
| Vpreb2    | 0 | 0 | 1 | 1 | no |
| Vsig1     | 0 | 0 | 1 | 1 | no |
| Vsx2      | 0 | 0 | 1 | 1 | no |
| Vwa2      | 0 | 0 | 1 | 1 | no |
| Wap       | 0 | 0 | 1 | 1 | no |
| Wbscr28   | 0 | 0 | 1 | 1 | no |
| Wdr20rt   | 0 | 0 | 1 | 1 | no |
| Wfdc11    | 0 | 0 | 1 | 1 | no |
| Wfdc15b   | 0 | 0 | 1 | 1 | no |
| Wfdc16    | 0 | 0 | 1 | 1 | no |
| Wfdc9     | 0 | 0 | 1 | 1 | no |
| Wnt1      | 0 | 0 | 1 | 1 | no |
| Wnt8a     | 0 | 0 | 1 | 1 | no |
| Xkr9      | 0 | 0 | 1 | 1 | no |
| Xlr5a     | 0 | 0 | 1 | 1 | no |
| Xlr5b     | 0 | 0 | 1 | 1 | no |
| Xlr5c     | 0 | 0 | 1 | 1 | no |
| Zar1l     | 0 | 0 | 1 | 1 | no |
| Zc2hc1b   | 0 | 0 | 1 | 1 | no |
| Zcchc13   | 0 | 0 | 1 | 1 | no |
| Zdhhc11   | 0 | 0 | 1 | 1 | no |
| Zdhhc25   | 0 | 0 | 1 | 1 | no |
| Zfp352    | 0 | 0 | 1 | 1 | no |
| Zfp42     | 0 | 0 | 1 | 1 | no |
| Zfp474    | 0 | 0 | 1 | 1 | no |
| Zfp488    | 0 | 0 | 1 | 1 | no |
| Zfp534    | 0 | 0 | 1 | 1 | no |
| Zfp572    | 0 | 0 | 1 | 1 | no |
| Zfp600    | 0 | 0 | 1 | 1 | no |
| Zfp616    | 0 | 0 | 1 | 1 | no |
| Zfp735    | 0 | 0 | 1 | 1 | no |
| Zfp91Cntf | 0 | 0 | 1 | 1 | no |
| Zfp936    | 0 | 0 | 1 | 1 | no |
| Zfp957    | 0 | 0 | 1 | 1 | no |
| Zfy1      | 0 | 0 | 1 | 1 | no |
| Zfy2      | 0 | 0 | 1 | 1 | no |
| Znrf4     | 0 | 0 | 1 | 1 | no |
| Zp1       | 0 | 0 | 1 | 1 | no |
| Zp2       | 0 | 0 | 1 | 1 | no |
| Zp3r      | 0 | 0 | 1 | 1 | no |
| Zp4-ps    | 0 | 0 | 1 | 1 | no |
| Zscan10   | 0 | 0 | 1 | 1 | no |
| Zscan4a   | 0 | 0 | 1 | 1 | no |
| Zscan4b   | 0 | 0 | 1 | 1 | no |



|               |            |            |         |          |    |
|---------------|------------|------------|---------|----------|----|
| Zscan4c       | 0          | 0          | 1       | 1        | no |
| Zscan4d       | 0          | 0          | 1       | 1        | no |
| Zscan4e       | 0          | 0          | 1       | 1        | no |
| Zscan4f       | 0          | 0          | 1       | 1        | no |
| Zscan5b       | 0          | 0          | 1       | 1        | no |
| Zyg11a        | 0          | 0          | 1       | 1        | no |
| a             | 0          | 0          | 1       | 1        | no |
| Osbpl11       | -2.20E-05  | -8.29E-05  | 0.9982  | 0.998351 | no |
| Lmbr1         | -0.0001225 | -0.0005189 | 0.99845 | 0.99845  | no |
| Wdpcp         | -0.000247  | -0.0006289 | 0.9954  | 0.996502 | no |
| 35854         | -0.0003216 | -0.0011819 | 0.9973  | 0.997651 | no |
| Fkbp8         | -0.00039   | -0.0018168 | 0.99685 | 0.997527 | no |
| Eri2          | -0.0006684 | -0.001318  | 0.9931  | 0.995426 | no |
| Acad9         | -0.0008145 | -0.0032993 | 0.99455 | 0.995976 | no |
| Utp14b        | -0.0008432 | -0.0011759 | 0.99655 | 0.997452 | no |
| Golga4        | -0.0009318 | -0.0043534 | 0.99235 | 0.995125 | no |
| Zzef1         | -0.0010253 | -0.004761  | 0.99325 | 0.995501 | no |
| Pigb          | -0.0010743 | -0.0009194 | 0.99735 | 0.997651 | no |
| Prps1l3       | -0.0010767 | -0.0036265 | 0.9927  | 0.995301 | no |
| Rsf1          | -0.0011706 | -0.0046519 | 0.9922  | 0.995125 | no |
| Mrps14        | -0.0012948 | -0.0045509 | 0.9935  | 0.995526 | no |
| Slc25a22      | -0.001322  | -0.0058964 | 0.98955 | 0.993419 | no |
| Fxr2          | -0.0013889 | -0.0069939 | 0.98935 | 0.993393 | no |
| Rwdd2b        | -0.0015057 | -0.0040537 | 0.9948  | 0.996152 | no |
| Katnbl1       | -0.0015198 | -0.0041814 | 0.995   | 0.996277 | no |
| Crebl2        | -0.0016574 | -0.0069636 | 0.99115 | 0.994599 | no |
| Gm10549       | -0.0018244 | 0          | 1       | 1        | no |
| Mrps18a       | -0.0018837 | -0.0087491 | 0.98745 | 0.992387 | no |
| Slx1b         | -0.0019562 | -0.0054192 | 0.99205 | 0.9951   | no |
| Tatdn1        | -0.0019732 | -0.0023445 | 0.99455 | 0.995976 | no |
| Kif13a        | -0.0019735 | -0.007778  | 0.98855 | 0.993041 | no |
| Eif3j1,Eif3j2 | -0.0020075 | 0          | 1       | 1        | no |
| Ppme1         | -0.0020782 | -0.010625  | 0.9835  | 0.990067 | no |
| Acaca         | -0.0021914 | -0.0094764 | 0.98585 | 0.99128  | no |
| Ndufa8        | -0.0022401 | -0.0123199 | 0.9848  | 0.990774 | no |
| B3gat3        | -0.0023643 | -0.0120508 | 0.98285 | 0.989638 | no |
| Polr3c        | -0.0025135 | -0.0078224 | 0.98675 | 0.991759 | no |
| Fbxl5         | -0.002519  | -0.0104902 | 0.9821  | 0.989258 | no |
| Gpr137b       | -0.0025488 | -0.0097817 | 0.9848  | 0.990774 | no |
| Klc2          | -0.0025576 | -0.0120424 | 0.98125 | 0.988777 | no |
| Zfp410        | -0.0026347 | -0.009098  | 0.98665 | 0.991759 | no |
| Dclre1a       | -0.002648  | -0.0055415 | 0.99285 | 0.995326 | no |
| Fam120a       | -0.003035  | -0.0147633 | 0.97685 | 0.986216 | no |
| G6pc3         | -0.0030355 | -0.0143441 | 0.9812  | 0.988777 | no |
| Uxs1          | -0.0031145 | -0.0105948 | 0.9864  | 0.991632 | no |
| Rufy3         | -0.0031513 | -0.0137291 | 0.978   | 0.986627 | no |
| Mfap3         | -0.0033949 | -0.0126785 | 0.9804  | 0.988498 | no |
| Synj2bp       | -0.003398  | -0.015008  | 0.97515 | 0.9851   | no |
| 0610010F05Rik | -0.0034714 | -0.0166518 | 0.9739  | 0.984437 | no |
| 9330159M07Rik | -0.003509  | -0.0045417 | 0.9858  | 0.99128  | no |
| Pdp1          | -0.0035612 | -0.0146221 | 0.9767  | 0.986216 | no |
| Tmem97        | -0.0037399 | -0.0096686 | 0.9844  | 0.990672 | no |
| Mlh3          | -0.0037928 | -0.0121686 | 0.9805  | 0.988498 | no |

|               |            |            |         |          |    |
|---------------|------------|------------|---------|----------|----|
| Fars2         | -0.0039319 | -0.0111865 | 0.9796  | 0.988015 | no |
| Nxn12         | -0.003969  | -0.0048635 | 0.97765 | 0.986423 | no |
| Stmnd1        | -0.0039916 | 0          | 1       | 1        | no |
| Ccdc47        | -0.0039967 | -0.0197718 | 0.9707  | 0.982849 | no |
| Atg12         | -0.0040062 | -0.0191986 | 0.9725  | 0.983471 | no |
| Pdlim7        | -0.0040755 | -0.0147356 | 0.97605 | 0.985759 | no |
| Wdte1         | -0.0040775 | -0.0190785 | 0.97225 | 0.983394 | no |
| Pidd1         | -0.0040844 | -0.0077389 | 0.992   | 0.9951   | no |
| Fuz           | -0.0041795 | -0.0035706 | 0.99535 | 0.996502 | no |
| Rgs1          | -0.004213  | 0          | 1       | 1        | no |
| Fuca2         | -0.0042146 | -0.0190168 | 0.9714  | 0.983059 | no |
| Tmem167       | -0.0042999 | -0.0188341 | 0.9717  | 0.983187 | no |
| Abcf2         | -0.0043499 | -0.0191704 | 0.96985 | 0.982139 | no |
| Ranbp2        | -0.0044057 | -0.0210086 | 0.96685 | 0.979849 | no |
| Ak5           | -0.0044449 | -0.0154835 | 0.9774  | 0.986423 | no |
| Dtx2          | -0.0045985 | -0.0124378 | 0.98015 | 0.988495 | no |
| Sdhaf2        | -0.0046302 | -0.0195466 | 0.9707  | 0.982849 | no |
| Gbp7          | -0.004645  | -0.0147044 | 0.9761  | 0.985759 | no |
| Rbm22         | -0.0046848 | -0.0155386 | 0.97675 | 0.986216 | no |
| Fam96a        | -0.0047405 | -0.0157933 | 0.98035 | 0.988498 | no |
| Bcl7b         | -0.0047756 | -0.0188192 | 0.9723  | 0.983394 | no |
| Rpl22         | -0.0048358 | -0.021214  | 0.9666  | 0.979745 | no |
| Vti1a         | -0.0049481 | -0.0215046 | 0.9661  | 0.979388 | no |
| Rcor2         | -0.0051428 | -0.0117069 | 0.9791  | 0.987661 | no |
| Zfp459        | -0.0052325 | 0          | 1       | 1        | no |
| Mast1         | -0.0052812 | -0.0247503 | 0.95875 | 0.975066 | no |
| 2010015L04Rik | -0.0053182 | -0.0073085 | 0.98885 | 0.993192 | no |
| Mrpl21        | -0.0054554 | -0.0125368 | 0.98225 | 0.989334 | no |
| Rabl6         | -0.0055846 | -0.0263206 | 0.9557  | 0.973232 | no |
| Jpx           | -0.0055909 | 0          | 1       | 1        | no |
| Spin2c        | -0.0056023 | -0.0067536 | 0.97765 | 0.986423 | no |
| Tbc1d22a      | -0.0056636 | -0.0240144 | 0.96345 | 0.977723 | no |
| Fosl2         | -0.0056669 | -0.0187363 | 0.97285 | 0.98375  | no |
| Mettl13       | -0.0058936 | -0.0169523 | 0.97365 | 0.984409 | no |
| Rap1gds1      | -0.0059155 | -0.0259655 | 0.9594  | 0.975353 | no |
| Eif4b         | -0.0061032 | -0.0302921 | 0.95685 | 0.97403  | no |
| Cul5          | -0.0061329 | -0.0262156 | 0.96035 | 0.975772 | no |
| Map1lc3b      | -0.0062508 | -0.0331651 | 0.95315 | 0.971307 | no |
| 4930427A07Rik | -0.0062757 | -0.0114069 | 0.98605 | 0.991355 | no |
| Eftud2        | -0.0064429 | -0.0270943 | 0.9563  | 0.973694 | no |
| Aurkaip1      | -0.0064533 | -0.0293007 | 0.961   | 0.976157 | no |
| Arl14ep       | -0.0065464 | -0.022357  | 0.9634  | 0.977723 | no |
| Arsa          | -0.0065789 | -0.0270757 | 0.958   | 0.974677 | no |
| Snrpa1        | -0.0066008 | -0.0195911 | 0.97375 | 0.984435 | no |
| Dysf          | -0.0066355 | -0.030483  | 0.94975 | 0.969158 | no |
| Aqr           | -0.0067472 | -0.0267941 | 0.95795 | 0.974677 | no |
| Brf2          | -0.0067939 | -0.0197219 | 0.97455 | 0.984869 | no |
| Vav2          | -0.0068459 | -0.0281114 | 0.95535 | 0.973076 | no |
| Galnt13       | -0.0069305 | -0.0297725 | 0.95205 | 0.970511 | no |
| Kcna6         | -0.0069658 | -0.0339241 | 0.94635 | 0.966707 | no |
| Zfyve16       | -0.0070678 | -0.0248016 | 0.9608  | 0.976103 | no |
| Zfp644        | -0.0071462 | -0.0289283 | 0.956   | 0.973463 | no |
| Rala          | -0.0072142 | -0.0343219 | 0.9483  | 0.968074 | no |

|          |            |            |         |          |    |
|----------|------------|------------|---------|----------|----|
| Zfp780b  | -0.0074244 | -0.0206951 | 0.96885 | 0.981501 | no |
| Bace1    | -0.0074525 | -0.034749  | 0.94495 | 0.965918 | no |
| Bod1l    | -0.0075431 | -0.0344229 | 0.9441  | 0.9653   | no |
| Zcrb1    | -0.0077007 | -0.0313145 | 0.96335 | 0.977723 | no |
| Rogdi    | -0.0077587 | -0.0345087 | 0.951   | 0.969786 | no |
| Fibp     | -0.007782  | -0.0253626 | 0.96125 | 0.976336 | no |
| Dlg4     | -0.0078549 | -0.0366599 | 0.9411  | 0.963319 | no |
| Bzw1     | -0.0079029 | -0.039028  | 0.94155 | 0.963705 | no |
| Kansl1   | -0.0080309 | -0.0357593 | 0.9444  | 0.96543  | no |
| Metap1d  | -0.0080382 | -0.0220631 | 0.97235 | 0.983394 | no |
| Mark3    | -0.0080907 | -0.032357  | 0.9456  | 0.966434 | no |
| Zfp189   | -0.0085475 | -0.0177897 | 0.96915 | 0.98173  | no |
| Aplp1    | -0.0086357 | -0.0442783 | 0.934   | 0.959136 | no |
| Smap1    | -0.0087437 | -0.0377432 | 0.941   | 0.963291 | no |
| Dnm3     | -0.0088285 | -0.0397994 | 0.93715 | 0.960981 | no |
| Nsmaf    | -0.0088594 | -0.033957  | 0.94895 | 0.968514 | no |
| Tbx6     | -0.0088828 | 0          | 1       | 1        | no |
| Notch4   | -0.008961  | -0.0192918 | 0.9659  | 0.97926  | no |
| Senp3    | -0.0090922 | -0.0341613 | 0.94415 | 0.9653   | no |
| Aplp2    | -0.0093077 | -0.0380992 | 0.93655 | 0.960663 | no |
| Fstl4    | -0.0094535 | -0.0135779 | 0.98195 | 0.989182 | no |
| Cep41    | -0.0095134 | -0.0225439 | 0.96725 | 0.980179 | no |
| Ppp2r4   | -0.0096383 | -0.0490219 | 0.9274  | 0.955636 | no |
| Noc2l    | -0.0096477 | -0.0334552 | 0.95095 | 0.969786 | no |
| Aox1     | -0.0096568 | -0.0431058 | 0.9357  | 0.960088 | no |
| Ttll5    | -0.0098061 | -0.0423805 | 0.9349  | 0.959489 | no |
| Ddx58    | -0.0098265 | -0.0359353 | 0.9464  | 0.966707 | no |
| Atp5s    | -0.0100368 | -0.0335288 | 0.95215 | 0.970511 | no |
| Eps15    | -0.0100711 | -0.0471025 | 0.9252  | 0.954459 | no |
| Vps4a    | -0.0100856 | -0.0500712 | 0.9256  | 0.954523 | no |
| Sf3b2    | -0.0101793 | -0.0505605 | 0.92455 | 0.954107 | no |
| Rabif    | -0.0101812 | -0.0448426 | 0.93795 | 0.961286 | no |
| Gm7977   | -0.0102946 | 0          | 1       | 1        | no |
| Kcnj4    | -0.0103267 | -0.0230002 | 0.96545 | 0.979178 | no |
| Nt5dc1   | -0.0103423 | -0.0168922 | 0.97185 | 0.983263 | no |
| Pgbd1    | -0.0103747 | 0          | 1       | 1        | no |
| Slc35g2  | -0.0105018 | -0.0389292 | 0.94285 | 0.964515 | no |
| Mrrf     | -0.0105473 | -0.0239749 | 0.96095 | 0.976157 | no |
| Git2     | -0.0106941 | -0.0398174 | 0.93565 | 0.960088 | no |
| Gapvd1   | -0.0107184 | -0.0483547 | 0.9241  | 0.953843 | no |
| Prkag1   | -0.0108772 | -0.047459  | 0.933   | 0.958577 | no |
| Ywhaq    | -0.010952  | -0.0548857 | 0.9216  | 0.952322 | no |
| AI837181 | -0.0110047 | -0.0416268 | 0.9317  | 0.957761 | no |
| Wdr82    | -0.0110234 | -0.0462485 | 0.92525 | 0.954459 | no |
| Tcte2    | -0.011037  | 0          | 1       | 1        | no |
| Ube2e2   | -0.0110951 | -0.0530255 | 0.92755 | 0.955717 | no |
| Rab6b    | -0.0111453 | -0.0429676 | 0.93355 | 0.95892  | no |
| Tram1l1  | -0.0111898 | -0.0426093 | 0.9389  | 0.96186  | no |
| Nol10    | -0.0112182 | -0.0397598 | 0.93745 | 0.96114  | no |
| Rad54l2  | -0.011333  | -0.0457498 | 0.92665 | 0.955063 | no |
| Gm2382   | -0.0114244 | -0.0200973 | 0.98235 | 0.98936  | no |
| Pop1     | -0.0114889 | -0.0238491 | 0.96025 | 0.975772 | no |
| Btbd10   | -0.0114934 | -0.0486452 | 0.92815 | 0.955964 | no |

|               |            |            |         |          |    |
|---------------|------------|------------|---------|----------|----|
| Rbx1          | -0.0115026 | -0.0565556 | 0.91695 | 0.948774 | no |
| Bag6          | -0.0117885 | -0.0546195 | 0.9118  | 0.94514  | no |
| 1700021F05Rik | -0.0118182 | -0.041966  | 0.9458  | 0.966489 | no |
| Ptpdc1        | -0.0120382 | -0.0524667 | 0.91705 | 0.948781 | no |
| Parp10        | -0.0121065 | -0.0251459 | 0.96215 | 0.977026 | no |
| Gpn3          | -0.012143  | -0.0412577 | 0.9433  | 0.964752 | no |
| Tex38         | -0.0122441 | 0          | 1       | 1        | no |
| Slc25a44      | -0.0122838 | -0.0455444 | 0.9281  | 0.955963 | no |
| Mtpap         | -0.012461  | -0.0417702 | 0.9377  | 0.961248 | no |
| Nup153        | -0.012464  | -0.0521253 | 0.921   | 0.951925 | no |
| Cecr5         | -0.0126702 | -0.0340086 | 0.9498  | 0.969158 | no |
| Knop1         | -0.0126844 | -0.0265943 | 0.95985 | 0.975586 | no |
| Eef1d         | -0.0127234 | -0.047264  | 0.92365 | 0.953624 | no |
| Rdh11         | -0.0128305 | -0.0538351 | 0.9279  | 0.955906 | no |
| Lztr1         | -0.0128656 | -0.0643781 | 0.9024  | 0.939434 | no |
| Atn1          | -0.012942  | -0.0590922 | 0.90725 | 0.942338 | no |
| Cwh43         | -0.0129876 | 0          | 1       | 1        | no |
| Pmpca         | -0.0130306 | -0.0549214 | 0.91955 | 0.950796 | no |
| Lysmd4        | -0.0131179 | -0.0353661 | 0.9428  | 0.964515 | no |
| Rxfp1         | -0.0131371 | 0          | 1       | 1        | no |
| Ngb           | -0.0131675 | -0.0275613 | 0.9584  | 0.974934 | no |
| Traf7         | -0.0132073 | -0.0168064 | 0.9721  | 0.983394 | no |
| 1810026B05Rik | -0.0132237 | -0.0177067 | 0.9711  | 0.982954 | no |
| Iqsec2        | -0.0132623 | -0.0525009 | 0.9122  | 0.945333 | no |
| P4ha3         | -0.0133668 | -0.0423682 | 0.93875 | 0.961804 | no |
| Sh2d3c        | -0.0133772 | -0.0465579 | 0.9315  | 0.957761 | no |
| Trim62        | -0.013467  | -0.0485758 | 0.923   | 0.953324 | no |
| Tnpo3         | -0.0134866 | -0.061483  | 0.90995 | 0.943938 | no |
| Ints7         | -0.0135274 | -0.0466716 | 0.9302  | 0.956738 | no |
| Pced1a        | -0.0135801 | -0.0251216 | 0.9635  | 0.977723 | no |
| Dynlt1f       | -0.0136254 | 0          | 1       | 1        | no |
| Pcdhga1       | -0.0137031 | -0.0058973 | 0.9908  | 0.994323 | no |
| Dus2          | -0.0137852 | -0.0272349 | 0.9571  | 0.974209 | no |
| Aida          | -0.0138619 | -0.0566971 | 0.9139  | 0.946504 | no |
| Mrpl11        | -0.0139206 | -0.0509965 | 0.92395 | 0.953785 | no |
| Relb          | -0.0140151 | -0.0275336 | 0.95515 | 0.972971 | no |
| Immnp1l       | -0.0142501 | -0.021117  | 0.98265 | 0.989587 | no |
| Tmem144       | -0.0142556 | 0          | 1       | 1        | no |
| Ulk2          | -0.0143519 | -0.0675228 | 0.8967  | 0.935975 | no |
| Hid1          | -0.01437   | -0.0674125 | 0.9016  | 0.938969 | no |
| Kif24         | -0.0144019 | 0          | 1       | 1        | no |
| Lrrc16a       | -0.0144777 | -0.0443395 | 0.92845 | 0.956198 | no |
| Rad1          | -0.014543  | -0.0365261 | 0.93955 | 0.962229 | no |
| Mrpl46        | -0.01474   | -0.0530974 | 0.92945 | 0.956463 | no |
| Bod1          | -0.014865  | -0.0683296 | 0.9047  | 0.940942 | no |
| Purg          | -0.0148765 | -0.0393102 | 0.9347  | 0.959432 | no |
| Ctc1          | -0.0149263 | -0.0513559 | 0.9176  | 0.949224 | no |
| Usp22         | -0.015117  | -0.0744032 | 0.88415 | 0.928333 | no |
| Cav1          | -0.0151409 | -0.0651165 | 0.89855 | 0.936822 | no |
| Nqo2          | -0.0151954 | -0.0228331 | 0.95965 | 0.975533 | no |
| Inpp5b        | -0.0153488 | -0.0526239 | 0.91545 | 0.947591 | no |
| Actb          | -0.015443  | -0.0675802 | 0.9005  | 0.938044 | no |
| Coa7          | -0.0154452 | -0.0380608 | 0.94575 | 0.966489 | no |

|          |            |            |         |          |    |
|----------|------------|------------|---------|----------|----|
| Ism2     | -0.015475  | 0          | 1       | 1        | no |
| Ppapdc2  | -0.0155128 | -0.0471623 | 0.92785 | 0.955906 | no |
| Pfdn4    | -0.0157283 | -0.0427146 | 0.93165 | 0.957761 | no |
| Zfp319   | -0.0158279 | -0.048418  | 0.9256  | 0.954523 | no |
| Snrnp25  | -0.0159404 | -0.0581483 | 0.9296  | 0.956469 | no |
| Dhx38    | -0.0159586 | -0.0599787 | 0.91    | 0.943938 | no |
| Prkar1b  | -0.0160124 | -0.0708394 | 0.88665 | 0.929455 | no |
| Gsk3b    | -0.0160285 | -0.0727746 | 0.8832  | 0.927745 | no |
| Gm1976   | -0.0160585 | -0.0481482 | 0.9261  | 0.95477  | no |
| Ube2e3   | -0.0161033 | -0.0724951 | 0.898   | 0.936669 | no |
| Pitpnm1  | -0.016208  | -0.0492264 | 0.92115 | 0.952006 | no |
| Rps6kl1  | -0.0163698 | -0.052058  | 0.92085 | 0.951844 | no |
| Wdr91    | -0.0166601 | -0.0556934 | 0.9202  | 0.95132  | no |
| Sec24b   | -0.0167078 | -0.0720737 | 0.8909  | 0.932363 | no |
| Nub1     | -0.0167537 | -0.0795791 | 0.88095 | 0.926702 | no |
| Zc3hc1   | -0.0167817 | -0.0517281 | 0.92995 | 0.956629 | no |
| Actr3    | -0.0168609 | -0.0773601 | 0.8789  | 0.925059 | no |
| Rabgef1  | -0.0171492 | -0.0656665 | 0.89315 | 0.934129 | no |
| Raly     | -0.0173259 | -0.0782812 | 0.8781  | 0.92451  | no |
| Znfx1    | -0.0173354 | -0.074824  | 0.8812  | 0.926818 | no |
| Rcl1     | -0.0173496 | -0.0430075 | 0.9313  | 0.957647 | no |
| Sgk3     | -0.0174823 | -0.046553  | 0.9255  | 0.954523 | no |
| BC031181 | -0.0177005 | -0.0963931 | 0.87545 | 0.922892 | no |
| Zfp939   | -0.0177378 | -0.027128  | 0.9584  | 0.974934 | no |
| Rhpn2    | -0.0177608 | -0.027994  | 0.95925 | 0.975326 | no |
| Dsg2     | -0.0179607 | 0          | 1       | 1        | no |
| Pcnxl4   | -0.018053  | -0.064945  | 0.90185 | 0.939156 | no |
| Clpx     | -0.0181143 | -0.0659316 | 0.89495 | 0.935041 | no |
| Atp6ap1  | -0.0182424 | -0.093924  | 0.8624  | 0.913324 | no |
| Agpat1   | -0.0182493 | -0.0817897 | 0.88005 | 0.926049 | no |
| Spa17    | -0.0182616 | -0.0424814 | 0.9534  | 0.971412 | no |
| Abhd11   | -0.0182721 | -0.0612179 | 0.9134  | 0.946355 | no |
| Fus      | -0.0182944 | -0.0889191 | 0.87505 | 0.92269  | no |
| Dvl3     | -0.0184585 | -0.0690811 | 0.89675 | 0.935975 | no |
| Psmc5    | -0.0184866 | -0.10145   | 0.859   | 0.91141  | no |
| Ppcdc    | -0.0186329 | -0.0506046 | 0.923   | 0.953324 | no |
| Ndufa7   | -0.0187645 | -0.112164  | 0.89355 | 0.934252 | no |
| Kif1a    | -0.0188185 | -0.0660124 | 0.8959  | 0.935456 | no |
| Psme2    | -0.0189011 | -0.018948  | 0.9695  | 0.981934 | no |
| Isca1    | -0.0191326 | -0.088586  | 0.8773  | 0.924181 | no |
| Zfyve26  | -0.0192524 | -0.0665866 | 0.89665 | 0.935975 | no |
| Carkd    | -0.0192829 | -0.0678271 | 0.89715 | 0.936255 | no |
| Pik3r1   | -0.0193206 | -0.089931  | 0.8595  | 0.911583 | no |
| Oxnad1   | -0.0194092 | -0.0458475 | 0.93395 | 0.959136 | no |
| Gpn1     | -0.019516  | -0.0685177 | 0.8995  | 0.937518 | no |
| Wdr45    | -0.0195588 | -0.0664266 | 0.89475 | 0.934991 | no |
| Lrrc47   | -0.0196608 | -0.0868778 | 0.8645  | 0.914838 | no |
| Fam217b  | -0.0196875 | -0.0678762 | 0.90095 | 0.938366 | no |
| Cntln    | -0.0197325 | -0.0630102 | 0.8985  | 0.936822 | no |
| Vps35    | -0.0197578 | -0.0990931 | 0.84755 | 0.903386 | no |
| Lrrc57   | -0.0198869 | -0.0603326 | 0.91175 | 0.94514  | no |
| Lsg1     | -0.0198984 | -0.0638777 | 0.9055  | 0.941392 | no |
| Txnl4b   | -0.0200324 | -0.0657588 | 0.9051  | 0.941262 | no |

|               |            |            |         |          |    |
|---------------|------------|------------|---------|----------|----|
| Spn           | -0.0200647 | -0.0681557 | 0.8883  | 0.93067  | no |
| Pfdn1         | -0.0201155 | -0.0930646 | 0.8776  | 0.924288 | no |
| Zzz3          | -0.0201316 | -0.0475266 | 0.92255 | 0.953156 | no |
| Taf3          | -0.0201517 | -0.061743  | 0.9063  | 0.941772 | no |
| Hspa4         | -0.020184  | -0.0985523 | 0.8427  | 0.899422 | no |
| Pigo          | -0.0201973 | -0.0550524 | 0.91125 | 0.944718 | no |
| Trappc13      | -0.0202254 | -0.084575  | 0.86475 | 0.914956 | no |
| Tnrc6b        | -0.0203492 | -0.0914367 | 0.85365 | 0.907918 | no |
| Sin3a         | -0.0204513 | -0.071938  | 0.88525 | 0.928648 | no |
| Cdc27         | -0.0207036 | -0.0925765 | 0.85055 | 0.905565 | no |
| Riok2         | -0.0207449 | -0.0717326 | 0.89    | 0.931642 | no |
| Atg5          | -0.0211149 | -0.0838584 | 0.86665 | 0.916455 | no |
| Psmb9         | -0.0211496 | -0.0358586 | 0.9567  | 0.973952 | no |
| Stoml2        | -0.0212401 | -0.0811916 | 0.88755 | 0.930031 | no |
| 8430422H06Rik | -0.0212702 | 0          | 1       | 1        | no |
| Sos2          | -0.0214133 | -0.0871601 | 0.86705 | 0.916805 | no |
| Sigmar1       | -0.0215702 | -0.0917194 | 0.85355 | 0.907885 | no |
| 2810474O19Rik | -0.0217665 | -0.0634497 | 0.8998  | 0.93761  | no |
| Efhc1         | -0.0217998 | -0.040696  | 0.942   | 0.964017 | no |
| Serpina10     | -0.0218566 | 0          | 1       | 1        | no |
| Hars          | -0.0218795 | -0.111789  | 0.8356  | 0.894457 | no |
| Tkt           | -0.0219335 | -0.102711  | 0.83595 | 0.894597 | no |
| 2310057M21Rik | -0.0220272 | -0.0782632 | 0.8824  | 0.927271 | no |
| Ascc2         | -0.0221056 | -0.056782  | 0.9151  | 0.947451 | no |
| Gm16897       | -0.0222945 | 0          | 1       | 1        | no |
| Scyl2         | -0.0223927 | -0.0905378 | 0.86035 | 0.912259 | no |
| Sgtb          | -0.0225245 | -0.102857  | 0.8444  | 0.900607 | no |
| Dcun1d1       | -0.0226841 | -0.0837926 | 0.8647  | 0.914956 | no |
| Gpr157        | -0.0227607 | -0.0687516 | 0.89345 | 0.934221 | no |
| Gpr137b-ps    | -0.022874  | -0.081179  | 0.8818  | 0.927166 | no |
| Bud13         | -0.0229246 | -0.04768   | 0.92795 | 0.955906 | no |
| Cog3          | -0.0230719 | -0.092196  | 0.8608  | 0.912378 | no |
| Hprt          | -0.0231205 | -0.125978  | 0.82865 | 0.890034 | no |
| Nudt12        | -0.0231931 | -0.0735993 | 0.89205 | 0.933272 | no |
| Tfcp2         | -0.0232057 | -0.071244  | 0.886   | 0.928921 | no |
| Skiv2l        | -0.0232444 | -0.100845  | 0.83685 | 0.895218 | no |
| Ogfr          | -0.0232643 | -0.0793298 | 0.88025 | 0.926186 | no |
| Ppp6r3        | -0.0233419 | -0.0999408 | 0.83825 | 0.896282 | no |
| Tpst1         | -0.0234598 | -0.0885284 | 0.85565 | 0.909535 | no |
| Plk2          | -0.0235197 | -0.0942409 | 0.86055 | 0.912259 | no |
| Sirt3         | -0.0235201 | -0.0460919 | 0.92615 | 0.95477  | no |
| Sgcg          | -0.0235366 | 0          | 1       | 1        | no |
| Nudt14        | -0.0235812 | -0.0593302 | 0.9288  | 0.956239 | no |
| Map3k11       | -0.0235938 | -0.09288   | 0.86155 | 0.912788 | no |
| Rpp14         | -0.0236764 | -0.099909  | 0.85125 | 0.90602  | no |
| Pofut1        | -0.0238149 | -0.0963007 | 0.8545  | 0.908677 | no |
| Dnah6         | -0.0241747 | 0          | 1       | 1        | no |
| Pafah1b1      | -0.0242167 | -0.0901149 | 0.857   | 0.910314 | no |
| Elavl1        | -0.0242592 | -0.107417  | 0.8332  | 0.893148 | no |
| Tulp4         | -0.0242666 | -0.109205  | 0.8234  | 0.886189 | no |
| Fam53a        | -0.0243784 | -0.0533245 | 0.92355 | 0.953624 | no |
| Limk1         | -0.0244218 | -0.121955  | 0.81555 | 0.880956 | no |
| Sms           | -0.0245216 | -0.112625  | 0.83355 | 0.8932   | no |



|               |            |            |         |          |    |
|---------------|------------|------------|---------|----------|----|
| Rrp12         | -0.024547  | -0.100525  | 0.84865 | 0.904268 | no |
| Aldh3a2       | -0.0245856 | -0.113147  | 0.836   | 0.894597 | no |
| Ptcd1         | -0.0246387 | -0.0593045 | 0.90365 | 0.940366 | no |
| Fahd1         | -0.0246614 | -0.0669652 | 0.90585 | 0.9414   | no |
| Actr1a        | -0.0247575 | -0.122237  | 0.8222  | 0.885669 | no |
| Sbk1          | -0.0249779 | -0.113122  | 0.82885 | 0.890105 | no |
| Rab11fip3     | -0.0249904 | -0.107289  | 0.82965 | 0.890386 | no |
| Flad1         | -0.0249908 | -0.0904919 | 0.86595 | 0.915861 | no |
| Jtb           | -0.0250409 | -0.0862834 | 0.88435 | 0.928365 | no |
| Pced1b        | -0.0250704 | -0.0288589 | 0.9534  | 0.971412 | no |
| Sin3b         | -0.0252541 | -0.0727464 | 0.88455 | 0.928428 | no |
| AI462493      | -0.0252824 | -0.0856716 | 0.8973  | 0.936255 | no |
| Chtf18        | -0.0253607 | -0.0362075 | 0.9401  | 0.962592 | no |
| Khdrbs2       | -0.0253623 | -0.0409258 | 0.9376  | 0.961219 | no |
| Srf           | -0.0253881 | -0.0816859 | 0.8677  | 0.91718  | no |
| Naa25         | -0.025399  | -0.11191   | 0.8321  | 0.892132 | no |
| Dctpp1        | -0.0255287 | -0.063386  | 0.9299  | 0.956629 | no |
| Pdxdc1        | -0.0255752 | -0.107214  | 0.8296  | 0.890386 | no |
| N4bp3         | -0.0258123 | -0.0357479 | 0.94865 | 0.968357 | no |
| Dnajc16       | -0.0258744 | -0.096234  | 0.8546  | 0.90871  | no |
| 4933427D14Rik | -0.0258956 | -0.0535258 | 0.9205  | 0.951556 | no |
| Brk1          | -0.0259514 | -0.138952  | 0.8201  | 0.884431 | no |
| Inpp1         | -0.0259989 | -0.0981283 | 0.85645 | 0.909948 | no |
| Krt19         | -0.0260478 | 0          | 1       | 1        | no |
| Samm50        | -0.0262005 | -0.128268  | 0.82585 | 0.887889 | no |
| Cast          | -0.026248  | -0.129268  | 0.80715 | 0.87516  | no |
| Sar1a         | -0.0262916 | -0.131216  | 0.8012  | 0.870542 | no |
| Tmpo          | -0.0263328 | -0.0950233 | 0.84505 | 0.901156 | no |
| Fbxo10        | -0.0264477 | -0.0720469 | 0.88475 | 0.928564 | no |
| Eif1ax        | -0.0265662 | -0.140345  | 0.82635 | 0.888283 | no |
| Tmcc1         | -0.0267151 | -0.107898  | 0.8343  | 0.893571 | no |
| Ddx47         | -0.0268225 | -0.11454   | 0.83675 | 0.895183 | no |
| Slc35a1       | -0.0268427 | -0.0824974 | 0.88195 | 0.927166 | no |
| Tsc2          | -0.0268988 | -0.0753281 | 0.87505 | 0.92269  | no |
| Plekhb2       | -0.0271634 | -0.12717   | 0.7984  | 0.868868 | no |
| Lipt1         | -0.0272594 | -0.0421303 | 0.93805 | 0.961286 | no |
| Cryzl1        | -0.0272722 | -0.0870945 | 0.8613  | 0.912762 | no |
| Hiatl1        | -0.0273167 | -0.114783  | 0.8166  | 0.881803 | no |
| A930005H10Rik | -0.0274222 | -0.0451917 | 0.92615 | 0.95477  | no |
| Zufsp         | -0.0274292 | -0.0626645 | 0.9084  | 0.942846 | no |
| Acn9          | -0.02749   | -0.0914264 | 0.9079  | 0.942571 | no |
| Tsr2          | -0.0277767 | -0.0996926 | 0.83895 | 0.896741 | no |
| Dpysl2        | -0.0279601 | -0.126037  | 0.80875 | 0.87625  | no |
| Dedd          | -0.028012  | -0.0770282 | 0.8879  | 0.930325 | no |
| Eif4a3        | -0.0280204 | -0.0986892 | 0.86185 | 0.91298  | no |
| Chmp2b        | -0.0281355 | -0.133054  | 0.8122  | 0.878482 | no |
| Dpp6          | -0.0281644 | -0.125977  | 0.8048  | 0.873452 | no |
| Fam214a       | -0.0282185 | -0.0896608 | 0.8593  | 0.911443 | no |
| Dopey2        | -0.0282395 | -0.12732   | 0.79075 | 0.86366  | no |
| Polr3k        | -0.0282499 | -0.11253   | 0.8371  | 0.895341 | no |
| Hk2           | -0.0282831 | -0.0544609 | 0.9171  | 0.948781 | no |
| D130020L05Rik | -0.0282926 | 0          | 1       | 1        | no |
| Sv2c          | -0.0283213 | -0.13548   | 0.7897  | 0.863011 | no |

|               |            |            |         |          |    |
|---------------|------------|------------|---------|----------|----|
| Fbxo11        | -0.0283585 | -0.118787  | 0.80825 | 0.875995 | no |
| Gnptab        | -0.0286072 | -0.129401  | 0.7963  | 0.867437 | no |
| Hspd1         | -0.0287403 | -0.140197  | 0.7983  | 0.868868 | no |
| Zbtb6         | -0.028807  | -0.0950777 | 0.8577  | 0.910693 | no |
| Ppia          | -0.0288216 | -0.172223  | 0.79705 | 0.867935 | no |
| Rab36         | -0.0289669 | -0.0783629 | 0.88525 | 0.928648 | no |
| Eya3          | -0.0289701 | -0.125012  | 0.80455 | 0.873269 | no |
| Scaf11        | -0.029049  | -0.131458  | 0.79315 | 0.864983 | no |
| Fastkd3       | -0.0290777 | -0.0760074 | 0.8928  | 0.933836 | no |
| Tmem33        | -0.0291399 | -0.13435   | 0.79195 | 0.864188 | no |
| Gtf2i         | -0.029293  | -0.136784  | 0.7834  | 0.858956 | no |
| Zfp740        | -0.0292943 | -0.118791  | 0.8107  | 0.87736  | no |
| Klf11         | -0.0294641 | -0.0894006 | 0.8653  | 0.915319 | no |
| Ddx59         | -0.0294855 | -0.0640893 | 0.9     | 0.937744 | no |
| Coprs         | -0.0295315 | -0.119535  | 0.85495 | 0.908937 | no |
| Fut4          | -0.0295542 | -0.0478837 | 0.9243  | 0.953924 | no |
| Gm1821        | -0.0296806 | 0          | 1       | 1        | no |
| 1110012L19Rik | -0.0297543 | -0.091956  | 0.8845  | 0.928428 | no |
| Hectd2        | -0.029806  | -0.0618925 | 0.90565 | 0.941392 | no |
| Atp5j         | -0.0299786 | -0.141966  | 0.83505 | 0.894085 | no |
| 0610009O20Rik | -0.0299996 | -0.104285  | 0.83425 | 0.893571 | no |
| Slco1a4       | -0.0301262 | -0.117006  | 0.82695 | 0.888819 | no |
| Asph          | -0.0302182 | -0.119861  | 0.8066  | 0.874921 | no |
| Phf6          | -0.0302488 | -0.10689   | 0.82895 | 0.89014  | no |
| Naa20         | -0.0302518 | -0.0877374 | 0.8592  | 0.91141  | no |
| 2610305D13Rik | -0.0302741 | -0.0582156 | 0.9119  | 0.94517  | no |
| Gcdh          | -0.0302887 | -0.0852194 | 0.86615 | 0.915999 | no |
| Med18         | -0.0303873 | -0.0662353 | 0.9055  | 0.941392 | no |
| Cpeb2         | -0.0303876 | -0.142277  | 0.77715 | 0.854717 | no |
| Ddx3x         | -0.0304059 | -0.145013  | 0.7807  | 0.857271 | no |
| Tusc2         | -0.0305418 | -0.15324   | 0.78285 | 0.858692 | no |
| Ehmt2         | -0.0308366 | -0.127736  | 0.7932  | 0.864983 | no |
| Tmem189       | -0.0309005 | -0.155977  | 0.7844  | 0.859539 | no |
| Fkbp2         | -0.030933  | -0.116545  | 0.81545 | 0.88092  | no |
| Adamtsl2      | -0.0309529 | -0.0474638 | 0.93295 | 0.958577 | no |
| Fry           | -0.031103  | -0.147941  | 0.76325 | 0.844681 | no |
| Ccar2         | -0.0311374 | -0.111398  | 0.82135 | 0.885365 | no |
| Nf2           | -0.0311752 | -0.134601  | 0.7921  | 0.864264 | no |
| Als2          | -0.0311769 | -0.120491  | 0.81055 | 0.87736  | no |
| Ppp2r5c       | -0.0312273 | -0.137646  | 0.78125 | 0.857575 | no |
| Was           | -0.0312656 | 0          | 1       | 1        | no |
| Shisa6        | -0.0313516 | -0.0673308 | 0.8963  | 0.935726 | no |
| Smim18        | -0.031363  | -0.03184   | 0.9468  | 0.96699  | no |
| Slc35b1       | -0.0314001 | -0.130384  | 0.82865 | 0.890034 | no |
| Ipo5          | -0.0314819 | -0.151636  | 0.7659  | 0.846408 | no |
| Hyal2         | -0.0315768 | -0.084448  | 0.8771  | 0.924117 | no |
| Gak           | -0.0316973 | -0.14577   | 0.7716  | 0.850022 | no |
| Kalrn         | -0.0317744 | -0.125565  | 0.80135 | 0.870545 | no |
| Meaf6         | -0.0317875 | -0.0879578 | 0.8607  | 0.912345 | no |
| Mrgpra2a      | -0.0318143 | -0.051191  | 0.93205 | 0.95795  | no |
| 1700021K19Rik | -0.0318172 | -0.14127   | 0.77395 | 0.852116 | no |
| Elovl6        | -0.0318227 | -0.153409  | 0.76655 | 0.846709 | no |
| Bscl2         | -0.0318726 | -0.0673899 | 0.8933  | 0.934212 | no |

|               |            |            |         |          |    |
|---------------|------------|------------|---------|----------|----|
| Puf60         | -0.0318985 | -0.143545  | 0.7741  | 0.85221  | no |
| Slco4c1       | -0.0320654 | 0          | 1       | 1        | no |
| Fam219a       | -0.032101  | -0.148107  | 0.7657  | 0.846408 | no |
| Zfp868        | -0.0321283 | -0.0835456 | 0.86415 | 0.914613 | no |
| Hsp90b1       | -0.0322343 | -0.162568  | 0.7583  | 0.841505 | no |
| Mrpl35        | -0.0322603 | -0.133058  | 0.80305 | 0.871855 | no |
| Plekhm2       | -0.032283  | -0.145539  | 0.7832  | 0.858808 | no |
| Gpr56         | -0.0322879 | -0.151466  | 0.75725 | 0.840706 | no |
| Ddx52         | -0.0323001 | -0.109664  | 0.83215 | 0.892132 | no |
| Pigm          | -0.0323042 | -0.127229  | 0.79735 | 0.868082 | no |
| Spata6        | -0.0323563 | -0.101339  | 0.85055 | 0.905565 | no |
| Gpr119        | -0.0323823 | 0          | 1       | 1        | no |
| Pole4         | -0.0324644 | -0.108352  | 0.84795 | 0.90372  | no |
| Nprl3         | -0.0324923 | -0.108662  | 0.83345 | 0.8932   | no |
| D17Wsu104e    | -0.032657  | -0.11824   | 0.85615 | 0.909775 | no |
| Lig4          | -0.0326933 | -0.102499  | 0.83755 | 0.895605 | no |
| Klhdc2        | -0.0328233 | -0.169568  | 0.7589  | 0.841818 | no |
| Nalcn         | -0.0332119 | -0.14967   | 0.76855 | 0.847859 | no |
| Mrpl20        | -0.0332136 | -0.171606  | 0.8147  | 0.880253 | no |
| Pcbp2         | -0.0332632 | -0.138443  | 0.79835 | 0.868868 | no |
| Naa10         | -0.0332703 | -0.0858611 | 0.86375 | 0.914316 | no |
| Slc25a26      | -0.0334143 | -0.0809698 | 0.88165 | 0.927166 | no |
| Gstz1         | -0.0334163 | -0.0869978 | 0.8638  | 0.914316 | no |
| Mybbp1a       | -0.0335739 | -0.144138  | 0.78305 | 0.858714 | no |
| Rpn2          | -0.0336052 | -0.154007  | 0.76045 | 0.842778 | no |
| Chst11        | -0.0336087 | -0.147077  | 0.7792  | 0.856333 | no |
| Sgsh          | -0.0337188 | -0.0642096 | 0.8869  | 0.929623 | no |
| Eif4g2        | -0.0339761 | -0.136333  | 0.7821  | 0.858311 | no |
| Timmdc1       | -0.0340238 | -0.134718  | 0.8085  | 0.876051 | no |
| Dusp8         | -0.0340572 | -0.146001  | 0.7824  | 0.858356 | no |
| Rhoc          | -0.0340897 | -0.123789  | 0.80125 | 0.870542 | no |
| Zbtb21        | -0.0343262 | -0.0913829 | 0.8591  | 0.91141  | no |
| Srpk2         | -0.0343408 | -0.127416  | 0.79805 | 0.868772 | no |
| Zfp397        | -0.0345108 | -0.135595  | 0.79225 | 0.864302 | no |
| Ripk3         | -0.0345994 | 0          | 1       | 1        | no |
| Pou6f1        | -0.0346288 | -0.137983  | 0.78835 | 0.862103 | no |
| Usp47         | -0.034708  | -0.156187  | 0.75105 | 0.83515  | no |
| Zfp318        | -0.0348707 | -0.116963  | 0.8149  | 0.880397 | no |
| Acadm         | -0.0349131 | -0.155881  | 0.77915 | 0.856333 | no |
| Tex14         | -0.0349171 | 0          | 1       | 1        | no |
| Plin2         | -0.0349697 | -0.140027  | 0.79835 | 0.868868 | no |
| Mmrn2         | -0.0350323 | -0.112748  | 0.8298  | 0.890386 | no |
| Hook3         | -0.0350425 | -0.151764  | 0.7615  | 0.843378 | no |
| Ptpn2         | -0.0350923 | -0.0524813 | 0.907   | 0.942226 | no |
| Pitrm1        | -0.0352124 | -0.0469804 | 0.92925 | 0.956463 | no |
| Phb2          | -0.0352902 | -0.1637    | 0.7796  | 0.856559 | no |
| Hmgcr         | -0.0353206 | -0.174067  | 0.73555 | 0.823784 | no |
| H2-T23        | -0.0353465 | -0.0653846 | 0.8915  | 0.932844 | no |
| Ogfod1        | -0.0355334 | -0.152504  | 0.7595  | 0.842076 | no |
| Rnf115        | -0.0355366 | -0.160244  | 0.766   | 0.846408 | no |
| Pla2g7        | -0.035592  | -0.166763  | 0.7347  | 0.82311  | no |
| 2410016O06Rik | -0.0356253 | -0.071665  | 0.8973  | 0.936255 | no |
| Mast2         | -0.0357967 | -0.161939  | 0.74845 | 0.833097 | no |

|               |            |            |         |          |    |
|---------------|------------|------------|---------|----------|----|
| Lsm10         | -0.0358634 | -0.0619073 | 0.90305 | 0.939889 | no |
| Pnpt1         | -0.0359982 | -0.14455   | 0.7868  | 0.861047 | no |
| E2f1          | -0.0360096 | -0.125515  | 0.8005  | 0.870154 | no |
| Gm3219        | -0.0362618 | -0.0981428 | 0.89445 | 0.934751 | no |
| Fhl4          | -0.0362675 | 0          | 1       | 1        | no |
| Dnajb6        | -0.0363171 | -0.11618   | 0.8115  | 0.877939 | no |
| Mfsd5         | -0.0363419 | -0.156359  | 0.7839  | 0.859362 | no |
| Ndfip1        | -0.0363431 | -0.211881  | 0.7306  | 0.820317 | no |
| Fbxw17        | -0.0364001 | -0.139656  | 0.8     | 0.869825 | no |
| Fam160b1      | -0.0364732 | -0.160052  | 0.758   | 0.841327 | no |
| Psmb1         | -0.0366012 | -0.208741  | 0.7316  | 0.820954 | no |
| Pgm3          | -0.0366182 | -0.0649751 | 0.8955  | 0.935112 | no |
| Rph3al        | -0.0367125 | 0          | 1       | 1        | no |
| Mroh8         | -0.036969  | 0          | 1       | 1        | no |
| Zfp266        | -0.0371233 | -0.147914  | 0.77075 | 0.849509 | no |
| Myct1         | -0.0372633 | 0          | 1       | 1        | no |
| Kat6b         | -0.0375578 | -0.115691  | 0.81305 | 0.879114 | no |
| Polr2l        | -0.0375756 | -0.0589046 | 0.91385 | 0.946504 | no |
| Dnajc6        | -0.0376024 | -0.176191  | 0.72195 | 0.813804 | no |
| Eif4ebp1      | -0.0376632 | -0.0664446 | 0.9138  | 0.946504 | no |
| 40786         | -0.0377561 | -0.204932  | 0.71925 | 0.811695 | no |
| Tbcd          | -0.0377703 | -0.184438  | 0.71895 | 0.811495 | no |
| Fam134a       | -0.0377957 | -0.184202  | 0.73175 | 0.821053 | no |
| BC017643      | -0.0378178 | -0.117681  | 0.80555 | 0.873925 | no |
| 2610002M06Rik | -0.0378908 | -0.157502  | 0.7466  | 0.832001 | no |
| Hap1          | -0.0380019 | -0.0933125 | 0.8507  | 0.905652 | no |
| Frzb          | -0.038025  | -0.161652  | 0.7637  | 0.845008 | no |
| Diap1         | -0.03806   | -0.129761  | 0.79095 | 0.863736 | no |
| Ambra1        | -0.038073  | -0.157355  | 0.75095 | 0.83515  | no |
| Hoxa9         | -0.0380917 | -0.12599   | 0.8006  | 0.870192 | no |
| Pag1          | -0.0382054 | -0.140955  | 0.7769  | 0.854654 | no |
| Hist1h2be     | -0.0382567 | -0.0528049 | 0.8889  | 0.930931 | no |
| Dab1          | -0.0382704 | 0          | 1       | 1        | no |
| Hecw2         | -0.0383168 | -0.0550898 | 0.90645 | 0.941802 | no |
| Cse1l         | -0.0384343 | -0.173514  | 0.7427  | 0.829481 | no |
| Stmn3         | -0.0387386 | -0.209169  | 0.72985 | 0.819683 | no |
| Snora23       | -0.0387634 | 0          | 1       | 1        | no |
| Ssbp2         | -0.0388762 | -0.166662  | 0.7449  | 0.830805 | no |
| Sav1          | -0.0389503 | -0.04663   | 0.92415 | 0.953843 | no |
| Pgrmc2        | -0.0389769 | -0.183879  | 0.7325  | 0.821547 | no |
| Mtif2         | -0.0389779 | -0.132717  | 0.7915  | 0.863823 | no |
| Zc3h4         | -0.0389916 | -0.150873  | 0.7657  | 0.846408 | no |
| Kcnb1         | -0.0390533 | -0.186121  | 0.71355 | 0.806772 | no |
| Kcnh3         | -0.0391251 | 0          | 1       | 1        | no |
| Grap          | -0.0391316 | -0.0652807 | 0.911   | 0.94468  | no |
| Zfyve9        | -0.0394808 | -0.173207  | 0.7369  | 0.824711 | no |
| N4bp1         | -0.0395528 | -0.15645   | 0.7602  | 0.842571 | no |
| Ddi2          | -0.0397447 | -0.129479  | 0.7989  | 0.86911  | no |
| Spr           | -0.0397764 | -0.189399  | 0.74715 | 0.832279 | no |
| Trpt1         | -0.0399438 | -0.0807434 | 0.89445 | 0.934751 | no |
| Car4          | -0.0399889 | -0.0695782 | 0.9055  | 0.941392 | no |
| Msrbl         | -0.0399959 | -0.19324   | 0.7631  | 0.844586 | no |
| Timm10        | -0.0401402 | -0.166198  | 0.8133  | 0.879313 | no |

|               |            |            |         |          |    |
|---------------|------------|------------|---------|----------|----|
| Nup133        | -0.0402217 | -0.142688  | 0.7862  | 0.860642 | no |
| Mrpl15        | -0.0402872 | -0.120533  | 0.80725 | 0.875197 | no |
| Senp2         | -0.0403539 | -0.175731  | 0.72065 | 0.81286  | no |
| Ankhd1        | -0.0403708 | -0.172135  | 0.7341  | 0.822715 | no |
| Pdpk1         | -0.0405255 | -0.190382  | 0.69795 | 0.793734 | no |
| Cul1          | -0.0406396 | -0.19944   | 0.7076  | 0.802301 | no |
| Serpinb5      | -0.0406405 | 0          | 1       | 1        | no |
| Kras          | -0.0406977 | -0.191014  | 0.71285 | 0.806393 | no |
| Gpr52         | -0.0409192 | -0.0104704 | 0.9806  | 0.988498 | no |
| Nek5          | -0.0410714 | 0          | 1       | 1        | no |
| Tab1          | -0.0411422 | -0.126366  | 0.807   | 0.875123 | no |
| Cope          | -0.0412079 | -0.20753   | 0.73725 | 0.824713 | no |
| Dnal1         | -0.0412311 | -0.161512  | 0.75485 | 0.838533 | no |
| Tmem68        | -0.0414378 | -0.136948  | 0.8005  | 0.870154 | no |
| Tm2d1         | -0.0415012 | -0.116885  | 0.8514  | 0.906107 | no |
| Churc1        | -0.0416203 | -0.160966  | 0.8277  | 0.889374 | no |
| Pgam1         | -0.0418204 | -0.196888  | 0.7243  | 0.815426 | no |
| Nudt15        | -0.0418268 | 0          | 1       | 1        | no |
| Snip1         | -0.041938  | -0.113088  | 0.8341  | 0.893501 | no |
| Pld2          | -0.0420391 | -0.125679  | 0.80835 | 0.876032 | no |
| Spcs3         | -0.0420476 | -0.181356  | 0.7335  | 0.822321 | no |
| Mlx           | -0.0421356 | -0.136498  | 0.79105 | 0.863775 | no |
| Kng2          | -0.0421597 | 0          | 1       | 1        | no |
| Brpf1         | -0.0421621 | -0.131984  | 0.7896  | 0.863011 | no |
| Usp33         | -0.0421685 | -0.19541   | 0.6984  | 0.794178 | no |
| Azin1         | -0.0423526 | -0.199216  | 0.6988  | 0.794565 | no |
| Tfg           | -0.0423804 | -0.187304  | 0.70115 | 0.796554 | no |
| 4933415F23Rik | -0.0424013 | 0          | 1       | 1        | no |
| Tomm5         | -0.0426067 | -0.125936  | 0.80485 | 0.873452 | no |
| 2510003E04Rik | -0.0427757 | -0.208947  | 0.6974  | 0.793313 | no |
| Mapkap1       | -0.0428142 | -0.173684  | 0.7279  | 0.818255 | no |
| Pcdhb21       | -0.0428252 | -0.0108501 | 0.98525 | 0.991002 | no |
| Mrfap1        | -0.0428361 | -0.229428  | 0.68355 | 0.781703 | no |
| Kctd17        | -0.0431024 | -0.183878  | 0.70755 | 0.802301 | no |
| Lrrc14        | -0.0432105 | -0.149979  | 0.7797  | 0.856598 | no |
| Tomm70a       | -0.0432186 | -0.213703  | 0.6832  | 0.781448 | no |
| BC027231      | -0.0432259 | -0.100899  | 0.8466  | 0.902591 | no |
| 4930444P10Rik | -0.0433353 | 0          | 1       | 1        | no |
| Cdc123        | -0.0434062 | -0.192673  | 0.73195 | 0.821208 | no |
| G3bp1         | -0.0435911 | -0.167804  | 0.73575 | 0.823938 | no |
| Emc10         | -0.0436168 | -0.227966  | 0.68065 | 0.779587 | no |
| Bphl          | -0.0437129 | -0.132086  | 0.82845 | 0.889963 | no |
| Radil         | -0.0437725 | -0.113856  | 0.82505 | 0.887461 | no |
| Pex2          | -0.0438457 | -0.133629  | 0.7871  | 0.861272 | no |
| Fam208b       | -0.0439722 | -0.0447198 | 0.9293  | 0.956463 | no |
| Faf2          | -0.0440893 | -0.200548  | 0.694   | 0.79053  | no |
| Gm9855        | -0.0440919 | 0          | 1       | 1        | no |
| Scrt2         | -0.0443799 | -0.198829  | 0.70865 | 0.803012 | no |
| Acer2         | -0.0443832 | -0.0638668 | 0.88525 | 0.928648 | no |
| Dennd1b       | -0.044419  | -0.170941  | 0.7284  | 0.818471 | no |
| Nit1          | -0.0445243 | -0.0982115 | 0.8418  | 0.898774 | no |
| A130010J15Rik | -0.0445541 | -0.108605  | 0.83535 | 0.894334 | no |
| Ube2o         | -0.0445967 | -0.216834  | 0.6767  | 0.775876 | no |

|               |            |            |         |          |    |
|---------------|------------|------------|---------|----------|----|
| Nr2c2         | -0.0446796 | -0.181545  | 0.7246  | 0.815582 | no |
| Srp9          | -0.0446866 | -0.199103  | 0.7309  | 0.820377 | no |
| Rnf145        | -0.044688  | -0.196615  | 0.6929  | 0.789412 | no |
| Leng1         | -0.0448379 | -0.07812   | 0.8817  | 0.927166 | no |
| Cox7a2l       | -0.0449076 | -0.196679  | 0.6886  | 0.785795 | no |
| Chm           | -0.045104  | -0.188184  | 0.7144  | 0.807665 | no |
| Rab14         | -0.0451245 | -0.226927  | 0.66525 | 0.766601 | no |
| Dtnb          | -0.0453446 | -0.160281  | 0.74445 | 0.830596 | no |
| Rab11fip1     | -0.045592  | 0          | 1       | 1        | no |
| Slc6a7        | -0.0456154 | -0.0813666 | 0.87775 | 0.924288 | no |
| Mrpl44        | -0.0459126 | -0.176767  | 0.7568  | 0.840277 | no |
| Prkdc         | -0.0460448 | -0.184007  | 0.7161  | 0.809092 | no |
| Kif16b        | -0.0463157 | -0.196004  | 0.71105 | 0.804769 | no |
| Gtf2a2        | -0.046401  | -0.142085  | 0.7698  | 0.848815 | no |
| 1700048O20Rik | -0.0466347 | -0.0635736 | 0.9106  | 0.944339 | no |
| Coq10b        | -0.0467111 | -0.150944  | 0.76795 | 0.84762  | no |
| Rbbp7         | -0.0467577 | -0.120054  | 0.82295 | 0.885992 | no |
| Nat6          | -0.046867  | -0.132148  | 0.8097  | 0.876904 | no |
| Abcc10        | -0.046987  | -0.0970766 | 0.8472  | 0.903158 | no |
| Canx          | -0.0470273 | -0.205737  | 0.67695 | 0.776039 | no |
| Cwf19l1       | -0.0470871 | -0.119238  | 0.8243  | 0.886941 | no |
| Tmem184b      | -0.0471011 | -0.209867  | 0.67895 | 0.777995 | no |
| Asf1a         | -0.0471103 | -0.110821  | 0.8226  | 0.885848 | no |
| Hnrnpd        | -0.0473239 | -0.203155  | 0.68665 | 0.78438  | no |
| Brd2          | -0.0475253 | -0.219268  | 0.6587  | 0.760837 | no |
| Trmt5         | -0.0475669 | -0.13952   | 0.80075 | 0.870283 | no |
| Fbxw2         | -0.0478251 | -0.202379  | 0.6863  | 0.784104 | no |
| Gp49a         | -0.0478734 | 0          | 1       | 1        | no |
| Rtcb          | -0.0479542 | -0.244544  | 0.65525 | 0.75823  | no |
| Zfp418        | -0.0480483 | -0.0821509 | 0.8808  | 0.926618 | no |
| Rnf14         | -0.0483335 | -0.225912  | 0.65185 | 0.755358 | no |
| Pet112        | -0.0483406 | -0.121083  | 0.8247  | 0.88721  | no |
| Yipf6         | -0.0484135 | -0.220015  | 0.66985 | 0.769895 | no |
| Ufc1          | -0.0484187 | -0.257121  | 0.685   | 0.782967 | no |
| Me2           | -0.0484343 | -0.208667  | 0.69725 | 0.79321  | no |
| Pus1          | -0.0484703 | -0.140891  | 0.78065 | 0.857271 | no |
| Neur11b       | -0.0486316 | 0          | 1       | 1        | no |
| Usp38         | -0.0487626 | -0.188549  | 0.7181  | 0.810673 | no |
| Pip4k2c       | -0.0490892 | -0.165166  | 0.73695 | 0.824711 | no |
| Rps23         | -0.0491982 | -0.10166   | 0.8951  | 0.935041 | no |
| Nudt2         | -0.0492494 | -0.159779  | 0.808   | 0.875939 | no |
| Spin1         | -0.0493694 | -0.232515  | 0.6429  | 0.748576 | no |
| Gm7030        | -0.049412  | 0          | 1       | 1        | no |
| Prkch         | -0.0495419 | -0.129531  | 0.81035 | 0.877268 | no |
| Nap1l3        | -0.049569  | -0.229712  | 0.6661  | 0.76718  | no |
| Zfp239        | -0.0496961 | -0.109135  | 0.8258  | 0.887889 | no |
| Slc4a9        | -0.0497519 | 0          | 1       | 1        | no |
| Tln2          | -0.0497816 | -0.228286  | 0.6459  | 0.750875 | no |
| Sap130        | -0.0498159 | -0.1935    | 0.70945 | 0.803575 | no |
| Plod3         | -0.0498596 | -0.16095   | 0.74395 | 0.830387 | no |
| Mccc2         | -0.0499214 | -0.153037  | 0.78035 | 0.857099 | no |
| 1700088E04Rik | -0.0499991 | -0.0233094 | 0.9632  | 0.977718 | no |
| Specc1l       | -0.0500481 | -0.23054   | 0.63975 | 0.745897 | no |



|               |            |            |         |          |    |
|---------------|------------|------------|---------|----------|----|
| Tceb3         | -0.0500984 | -0.196754  | 0.70245 | 0.797826 | no |
| Pnpla8        | -0.0501458 | -0.223214  | 0.66645 | 0.767414 | no |
| Nebi          | -0.0502688 | -0.207618  | 0.67285 | 0.772741 | no |
| Sc5d          | -0.0502778 | -0.253022  | 0.63475 | 0.74135  | no |
| 6030443J06Rik | -0.0502811 | 0          | 1       | 1        | no |
| 5031439G07Rik | -0.0503643 | -0.204672  | 0.67745 | 0.776468 | no |
| Mpp1          | -0.0503845 | -0.186238  | 0.7108  | 0.804555 | no |
| Ctf1          | -0.0504145 | 0          | 1       | 1        | no |
| Abl1          | -0.0507585 | -0.184897  | 0.70615 | 0.801    | no |
| Vrk3          | -0.0508352 | -0.16741   | 0.75765 | 0.841009 | no |
| Crebbp        | -0.0508586 | -0.215825  | 0.66945 | 0.769702 | no |
| Suv39h2       | -0.0510871 | -0.060328  | 0.90095 | 0.938366 | no |
| Rnf11         | -0.0511226 | -0.264773  | 0.62665 | 0.734951 | no |
| Pom121        | -0.0511466 | -0.191748  | 0.7006  | 0.796134 | no |
| Lyn           | -0.0511709 | -0.112057  | 0.82035 | 0.884628 | no |
| Kdm5b         | -0.051269  | -0.204899  | 0.6871  | 0.784613 | no |
| Faf1          | -0.0513362 | -0.2332    | 0.65125 | 0.754926 | no |
| Cd69          | -0.0514088 | 0          | 1       | 1        | no |
| Ptpmt1        | -0.051608  | -0.16603   | 0.7752  | 0.852996 | no |
| Taf7          | -0.0518295 | -0.0281791 | 0.95725 | 0.974287 | no |
| Mrpl38        | -0.0519687 | -0.195584  | 0.7309  | 0.820377 | no |
| Ddhd1         | -0.0519895 | -0.227849  | 0.6483  | 0.752493 | no |
| Tnfrsf19      | -0.0520754 | -0.111214  | 0.8214  | 0.885365 | no |
| Ecsit         | -0.0521375 | -0.097824  | 0.85555 | 0.909502 | no |
| Chn1          | -0.0521884 | -0.240292  | 0.62895 | 0.736997 | no |
| Epm2a         | -0.0522366 | -0.160287  | 0.78965 | 0.863011 | no |
| Lrrc58        | -0.052248  | -0.250705  | 0.6157  | 0.726024 | no |
| Fhl1          | -0.0522718 | -0.24241   | 0.62845 | 0.736671 | no |
| Arl6ip6       | -0.0523352 | -0.111673  | 0.83325 | 0.893148 | no |
| Rbbp5         | -0.0523895 | -0.21658   | 0.68065 | 0.779587 | no |
| H2-DMb2       | -0.0524027 | 0          | 1       | 1        | no |
| Pde2a         | -0.0524201 | -0.236646  | 0.6364  | 0.742775 | no |
| Ccl27a        | -0.0525039 | -0.0956048 | 0.895   | 0.935041 | no |
| Pim3          | -0.0525047 | -0.222966  | 0.6807  | 0.779587 | no |
| Psmc6         | -0.0525166 | -0.240688  | 0.7049  | 0.799912 | no |
| Letmd1        | -0.0525612 | -0.230298  | 0.66855 | 0.768934 | no |
| Stard3        | -0.0526849 | -0.184508  | 0.7343  | 0.822801 | no |
| Crtc1         | -0.0530508 | -0.226968  | 0.65805 | 0.760285 | no |
| Pcdhga4       | -0.0530926 | -0.0270846 | 0.9577  | 0.974521 | no |
| Vdac2         | -0.05312   | -0.266702  | 0.6397  | 0.745897 | no |
| Cep350        | -0.0532786 | -0.230908  | 0.64825 | 0.752493 | no |
| Il13ra2       | -0.0533776 | 0          | 1       | 1        | no |
| Lrrc41        | -0.0538777 | -0.236636  | 0.65715 | 0.759625 | no |
| Haus6         | -0.0539708 | -0.149387  | 0.7553  | 0.838892 | no |
| Usp34         | -0.0540147 | -0.225437  | 0.65825 | 0.76045  | no |
| Zbtb39        | -0.0540281 | -0.156815  | 0.7596  | 0.842117 | no |
| Swsap1        | -0.054033  | -0.153103  | 0.78195 | 0.858217 | no |
| Usp9x         | -0.0540466 | -0.249376  | 0.6122  | 0.723493 | no |
| 1500009L16Rik | -0.0540775 | -0.0978498 | 0.87465 | 0.922635 | no |
| 1700101I11Rik | -0.0541908 | -0.0101004 | 0.93895 | 0.96186  | no |
| Kcnb2         | -0.0542271 | -0.230254  | 0.6553  | 0.75823  | no |
| Tmem252       | -0.0542874 | 0          | 1       | 1        | no |
| Tdp2          | -0.054314  | -0.178528  | 0.7466  | 0.832001 | no |

|                |            |            |         |          |    |
|----------------|------------|------------|---------|----------|----|
| Nucb2          | -0.0543517 | -0.136432  | 0.8119  | 0.878283 | no |
| Gm4724,OTTMUSG | -0.0543621 | 0          | 1       | 1        | no |
| Mapk1          | -0.0545071 | -0.223996  | 0.6547  | 0.7578   | no |
| Nol11          | -0.0545272 | -0.17198   | 0.7322  | 0.821419 | no |
| Dnlz           | -0.0547387 | -0.181856  | 0.71945 | 0.811827 | no |
| Pspc1          | -0.0547753 | -0.21457   | 0.6967  | 0.792788 | no |
| Trpm3          | -0.0548124 | -0.209929  | 0.6658  | 0.766968 | no |
| Kctd11         | -0.0551169 | -0.146178  | 0.7914  | 0.863823 | no |
| Zfp174         | -0.0551481 | -0.117007  | 0.81965 | 0.884089 | no |
| Gstm4          | -0.055193  | -0.122587  | 0.80355 | 0.872255 | no |
| Mtx1           | -0.0552818 | -0.153555  | 0.75525 | 0.838892 | no |
| Mycbp2         | -0.0554919 | -0.258979  | 0.6076  | 0.719542 | no |
| Ackr2          | -0.0555596 | 0          | 1       | 1        | no |
| Usp8           | -0.0556374 | -0.256509  | 0.60985 | 0.721557 | no |
| Scgb3a1        | -0.0558298 | 0          | 1       | 1        | no |
| 2310022A10Rik  | -0.0558929 | -0.128185  | 0.7986  | 0.868943 | no |
| Npm3           | -0.0559256 | 0          | 1       | 1        | no |
| Alkbh7         | -0.0560083 | -0.127303  | 0.79945 | 0.869369 | no |
| Fbxl12os       | -0.0560191 | 0          | 1       | 1        | no |
| Ywhaz          | -0.0560271 | -0.234559  | 0.63785 | 0.74414  | no |
| Kctd19         | -0.0560689 | 0          | 1       | 1        | no |
| Prkaa1         | -0.0560952 | -0.270258  | 0.5998  | 0.713293 | no |
| Acp1           | -0.0562359 | -0.181103  | 0.7134  | 0.80674  | no |
| Zmym4          | -0.0562611 | -0.154916  | 0.76055 | 0.842803 | no |
| Dicer1         | -0.0563819 | -0.242447  | 0.63065 | 0.738207 | no |
| Rtca           | -0.0565049 | -0.277754  | 0.6289  | 0.736997 | no |
| Cant1          | -0.0565653 | -0.232104  | 0.6407  | 0.746677 | no |
| Ppt2           | -0.0565968 | -0.210507  | 0.7093  | 0.803474 | no |
| Ubc            | -0.056755  | -0.28678   | 0.59605 | 0.710175 | no |
| Phf8           | -0.056772  | -0.204166  | 0.6856  | 0.78345  | no |
| Dcp1a          | -0.0568632 | -0.130672  | 0.79145 | 0.863823 | no |
| Hist2h2be      | -0.0569555 | -0.118186  | 0.8233  | 0.886153 | no |
| Tmem168        | -0.0570077 | -0.224355  | 0.67035 | 0.77027  | no |
| Mapre3         | -0.0571082 | -0.297034  | 0.59265 | 0.707076 | no |
| Prdm9          | -0.0571091 | 0          | 1       | 1        | no |
| Tmem9b         | -0.0571404 | -0.27354   | 0.62305 | 0.731829 | no |
| Mfap1b         | -0.0571755 | -0.123043  | 0.82215 | 0.885669 | no |
| Ppp1r7         | -0.0571987 | -0.247     | 0.6142  | 0.724964 | no |
| Preb           | -0.0572539 | -0.087921  | 0.8626  | 0.91341  | no |
| Ankrd42        | -0.0572609 | -0.159884  | 0.76815 | 0.847629 | no |
| Stxbp1         | -0.0573222 | -0.238803  | 0.6284  | 0.736671 | no |
| Mbd2           | -0.0573925 | -0.25176   | 0.6505  | 0.754255 | no |
| Gmps           | -0.0573977 | -0.245241  | 0.6369  | 0.743227 | no |
| Pdhx           | -0.0574147 | -0.229867  | 0.66945 | 0.769702 | no |
| Rab3c          | -0.0575226 | -0.258366  | 0.6013  | 0.714249 | no |
| Zfp647         | -0.0576007 | -0.0729754 | 0.88185 | 0.927166 | no |
| Cdc73          | -0.0576019 | -0.186884  | 0.72885 | 0.818768 | no |
| Cox8a          | -0.0576274 | -0.41544   | 0.59    | 0.705119 | no |
| Sf3b4          | -0.0577001 | -0.165448  | 0.76955 | 0.84868  | no |
| Gm9079         | -0.0577048 | -0.0805961 | 0.8858  | 0.928921 | no |
| Mios           | -0.0578388 | -0.199661  | 0.70495 | 0.799912 | no |
| Abhd14a        | -0.0578749 | -0.174455  | 0.72235 | 0.813947 | no |
| Hist1h4a       | -0.0579597 | 0          | 1       | 1        | no |

|               |            |            |         |          |    |
|---------------|------------|------------|---------|----------|----|
| Haus2         | -0.0579618 | -0.174008  | 0.7242  | 0.815426 | no |
| Spire2        | -0.0582879 | -0.280723  | 0.6067  | 0.718856 | no |
| Tmem8         | -0.0583133 | -0.232142  | 0.66335 | 0.764876 | no |
| Sgcd          | -0.0583179 | -0.186797  | 0.7466  | 0.832001 | no |
| Hoxa2         | -0.058442  | 0          | 1       | 1        | no |
| Smc2os        | -0.0584462 | 0          | 1       | 1        | no |
| Smarca5-ps    | -0.0584804 | -0.0946475 | 0.8586  | 0.911211 | no |
| Micu3         | -0.0584885 | -0.284772  | 0.58905 | 0.704174 | no |
| Unc50         | -0.0585314 | -0.247961  | 0.6684  | 0.768828 | no |
| Wbscr22       | -0.0585753 | -0.136845  | 0.8107  | 0.87736  | no |
| Abca1         | -0.0586107 | -0.275222  | 0.583   | 0.69908  | no |
| Trip4         | -0.0586108 | -0.225908  | 0.6678  | 0.768338 | no |
| Fam193a       | -0.05866   | -0.23649   | 0.644   | 0.749272 | no |
| Cep44         | -0.0586758 | -0.103716  | 0.86055 | 0.912259 | no |
| Gm13034       | -0.0587398 | -0.0883512 | 0.8859  | 0.928921 | no |
| Snx29         | -0.0587719 | -0.169726  | 0.7337  | 0.822337 | no |
| Dnase1l1      | -0.0587726 | -0.122503  | 0.8069  | 0.875123 | no |
| Cacng2        | -0.0589641 | -0.195769  | 0.71075 | 0.804555 | no |
| Ebpl          | -0.0590433 | -0.164263  | 0.76605 | 0.846408 | no |
| Sbno1         | -0.0590927 | -0.279972  | 0.58305 | 0.69908  | no |
| Lta4h         | -0.0590945 | -0.250755  | 0.64685 | 0.751402 | no |
| Dcakd         | -0.0592881 | -0.160063  | 0.7481  | 0.832917 | no |
| Pold2         | -0.0596089 | -0.12217   | 0.80145 | 0.870545 | no |
| Tpp2          | -0.059737  | -0.282298  | 0.5793  | 0.696157 | no |
| BC024978      | -0.0597625 | -0.100321  | 0.84215 | 0.89893  | no |
| 1110051M20Rik | -0.0598762 | -0.285469  | 0.61165 | 0.722983 | no |
| Efhc2         | -0.0601088 | -0.107827  | 0.83895 | 0.896741 | no |
| Slc39a10      | -0.0603199 | -0.273296  | 0.60515 | 0.717537 | no |
| Taok1         | -0.0604774 | -0.287424  | 0.56345 | 0.682488 | no |
| Ppip5k1       | -0.0606561 | -0.0345742 | 0.93995 | 0.962513 | no |
| Golga1        | -0.0606663 | -0.246169  | 0.6236  | 0.732345 | no |
| Mark1         | -0.0607293 | -0.269505  | 0.60505 | 0.717483 | no |
| Golga3        | -0.0607829 | -0.275635  | 0.59185 | 0.706567 | no |
| A730098P11Rik | -0.0608003 | -0.25876   | 0.6159  | 0.726066 | no |
| Osbpl2        | -0.0609537 | -0.270803  | 0.6184  | 0.728107 | no |
| Rnf216        | -0.061045  | -0.225703  | 0.6495  | 0.75349  | no |
| Ap1s2         | -0.0610734 | -0.27063   | 0.58215 | 0.698569 | no |
| Mkx           | -0.0611764 | -0.17507   | 0.73925 | 0.826532 | no |
| Ostc          | -0.0612233 | -0.288118  | 0.6437  | 0.749054 | no |
| Ttf1          | -0.0612608 | -0.135474  | 0.795   | 0.866376 | no |
| Slc6a15       | -0.0612828 | -0.28709   | 0.56495 | 0.683741 | no |
| Chtop         | -0.0612921 | -0.293264  | 0.5742  | 0.692032 | no |
| Frmpd1        | -0.061487  | -0.284041  | 0.56235 | 0.68165  | no |
| E2f7          | -0.0615905 | 0          | 1       | 1        | no |
| Ptar1         | -0.0616101 | -0.142934  | 0.7967  | 0.86773  | no |
| Lrrc40        | -0.0616606 | -0.192534  | 0.691   | 0.78797  | no |
| Fam169b       | -0.061701  | 0          | 1       | 1        | no |
| Copg2         | -0.0617852 | -0.232079  | 0.6411  | 0.74688  | no |
| Siva1         | -0.0617872 | -0.0864971 | 0.8584  | 0.911197 | no |
| Helb          | -0.0617926 | -0.0765696 | 0.8745  | 0.92255  | no |
| Ddx56         | -0.0617964 | -0.249748  | 0.64015 | 0.746232 | no |
| 5730455P16Rik | -0.0618615 | -0.290413  | 0.57415 | 0.692032 | no |
| Xiap          | -0.0621686 | -0.29572   | 0.56525 | 0.683857 | no |

|               |            |           |         |          |    |
|---------------|------------|-----------|---------|----------|----|
| Glyr1         | -0.0621923 | -0.28609  | 0.56785 | 0.686376 | no |
| Cblc          | -0.0622027 | 0         | 1       | 1        | no |
| Eif2d         | -0.0622259 | -0.183051 | 0.71675 | 0.809425 | no |
| Pelp1         | -0.0623286 | -0.247652 | 0.64275 | 0.748474 | no |
| Prmt5         | -0.0624168 | -0.272485 | 0.61285 | 0.72395  | no |
| Tmem59        | -0.0624508 | -0.338321 | 0.55065 | 0.671644 | no |
| Atg4c         | -0.0624596 | -0.213757 | 0.66495 | 0.766388 | no |
| Mthfsd        | -0.0624639 | -0.181978 | 0.71285 | 0.806393 | no |
| Whamm         | -0.0625522 | -0.154417 | 0.76775 | 0.847611 | no |
| Trmt12        | -0.0625565 | -0.146109 | 0.7774  | 0.854921 | no |
| Calca         | -0.0625649 | -0.257663 | 0.6086  | 0.72034  | no |
| Iffo1         | -0.0627863 | -0.256712 | 0.60425 | 0.716919 | no |
| Mrpl42        | -0.0630537 | -0.265898 | 0.7135  | 0.806772 | no |
| Clns1a        | -0.0634326 | -0.254033 | 0.62895 | 0.736997 | no |
| Nrde2         | -0.0634367 | -0.166331 | 0.7344  | 0.822843 | no |
| Cnih1         | -0.0637782 | -0.338295 | 0.55405 | 0.674427 | no |
| Hat1          | -0.0637868 | -0.201947 | 0.7281  | 0.818341 | no |
| Rwdd3         | -0.0638921 | -0.090138 | 0.8529  | 0.907412 | no |
| Trappc2       | -0.064275  | -0.296378 | 0.6568  | 0.75937  | no |
| Daam1         | -0.0644616 | -0.291654 | 0.56065 | 0.680214 | no |
| Lrsam1        | -0.0644719 | -0.217988 | 0.6559  | 0.758726 | no |
| Brox          | -0.0645024 | -0.302024 | 0.56975 | 0.688294 | no |
| Ubxn7         | -0.0645382 | -0.290929 | 0.56385 | 0.68291  | no |
| Mtmr7         | -0.064545  | -0.211424 | 0.66755 | 0.768183 | no |
| Rnf217        | -0.0647104 | -0.174033 | 0.7416  | 0.828392 | no |
| Ift43         | -0.0648013 | -0.127791 | 0.7962  | 0.867399 | no |
| Pomgnt1       | -0.0648142 | -0.261314 | 0.6021  | 0.714879 | no |
| Fam120b       | -0.0650329 | -0.276314 | 0.5731  | 0.691211 | no |
| Plekho2       | -0.0650749 | -0.196576 | 0.70225 | 0.797667 | no |
| Smg9          | -0.0653078 | -0.235141 | 0.66545 | 0.766764 | no |
| Mib2          | -0.0653257 | -0.249635 | 0.6195  | 0.729079 | no |
| BC029722      | -0.0654069 | -0.152518 | 0.75995 | 0.842364 | no |
| Sidt2         | -0.0654197 | -0.278901 | 0.5731  | 0.691211 | no |
| Eif1b         | -0.0654958 | -0.374421 | 0.55505 | 0.675149 | no |
| Sec22a        | -0.0655049 | -0.187495 | 0.724   | 0.815426 | no |
| Rbfa          | -0.0655741 | -0.21917  | 0.71285 | 0.806393 | no |
| Abhd13        | -0.065612  | -0.216918 | 0.6603  | 0.762154 | no |
| Alkbh5        | -0.0656703 | -0.292931 | 0.5676  | 0.686137 | no |
| Qars          | -0.0657677 | -0.257406 | 0.60465 | 0.717255 | no |
| Sumf2         | -0.0658259 | -0.15718  | 0.76355 | 0.844943 | no |
| Gbe1          | -0.0659274 | -0.270015 | 0.6161  | 0.726237 | no |
| Cdk5rap1      | -0.0659495 | -0.148436 | 0.78445 | 0.859539 | no |
| Rft1          | -0.0659533 | -0.206973 | 0.70045 | 0.796031 | no |
| 4933434E20Rik | -0.0665387 | -0.135459 | 0.79935 | 0.869332 | no |
| Rps6kc1       | -0.0666678 | -0.287947 | 0.57535 | 0.692788 | no |
| Proser2       | -0.0668192 | -0.107922 | 0.82705 | 0.888819 | no |
| Opa3          | -0.067197  | -0.284137 | 0.6064  | 0.718634 | no |
| 2310061I04Rik | -0.0672237 | -0.313939 | 0.59665 | 0.710507 | no |
| Stambpl1      | -0.0672457 | -0.226652 | 0.67565 | 0.775084 | no |
| Slc19a1       | -0.067266  | -0.219783 | 0.6663  | 0.767344 | no |
| Gnas          | -0.067338  | -0.242688 | 0.62735 | 0.735642 | no |
| Gabarapl1     | -0.0673758 | -0.297803 | 0.55355 | 0.674124 | no |
| St6galnac4    | -0.0673955 | -0.158846 | 0.7505  | 0.834959 | no |

|               |            |            |         |          |    |
|---------------|------------|------------|---------|----------|----|
| Sh3bp5l       | -0.0674437 | -0.304443  | 0.54155 | 0.663718 | no |
| BC051226      | -0.0675652 | -0.0934878 | 0.8894  | 0.93136  | no |
| Zcchc12       | -0.0676206 | -0.19662   | 0.7152  | 0.808362 | no |
| Cln4-2        | -0.067798  | -0.318003  | 0.51575 | 0.64158  | no |
| Il17rd        | -0.0678066 | -0.184681  | 0.71465 | 0.807878 | no |
| Nsdhl         | -0.0679014 | -0.321467  | 0.55725 | 0.677204 | no |
| Tsks          | -0.0680363 | 0          | 1       | 1        | no |
| Wdr24         | -0.0681055 | -0.228913  | 0.6599  | 0.761759 | no |
| Tor1aip2      | -0.0681258 | -0.252289  | 0.6128  | 0.72395  | no |
| 2210015D19Rik | -0.0683237 | -0.0894675 | 0.85685 | 0.910227 | no |
| Prrc2c        | -0.06837   | -0.327284  | 0.5118  | 0.638043 | no |
| Slc6a19       | -0.0684096 | -0.192206  | 0.69565 | 0.791854 | no |
| Wbp2          | -0.068445  | -0.360156  | 0.51815 | 0.64348  | no |
| Lphn3         | -0.0684492 | -0.291788  | 0.5728  | 0.690975 | no |
| Rnf111        | -0.0686952 | -0.276607  | 0.5981  | 0.711978 | no |
| Klhl21        | -0.0690336 | -0.280475  | 0.59275 | 0.707132 | no |
| Tor1b         | -0.0690472 | -0.260424  | 0.6217  | 0.730825 | no |
| Fam111a       | -0.0690636 | -0.150052  | 0.77775 | 0.855164 | no |
| Zfp783        | -0.0690956 | -0.0874089 | 0.86245 | 0.913324 | no |
| B3gnt1        | -0.0691191 | -0.334877  | 0.54065 | 0.66286  | no |
| Nfyc          | -0.0691322 | -0.12499   | 0.79875 | 0.869035 | no |
| Fbxo17        | -0.0691422 | 0          | 1       | 1        | no |
| Flrt2         | -0.0691539 | -0.201336  | 0.69175 | 0.78844  | no |
| Clptm1l       | -0.0693324 | -0.328895  | 0.5405  | 0.662798 | no |
| Mrpl4         | -0.0693841 | -0.242128  | 0.67635 | 0.775686 | no |
| Gatad2b       | -0.0695649 | -0.237784  | 0.66205 | 0.763908 | no |
| Bin1          | -0.069655  | -0.313852  | 0.52775 | 0.65156  | no |
| Mfn2          | -0.0700256 | -0.32667   | 0.51865 | 0.64386  | no |
| Gm8979        | -0.0700265 | 0          | 1       | 1        | no |
| Trmt11        | -0.070079  | -0.150151  | 0.7842  | 0.859407 | no |
| Rnf185        | -0.0703136 | -0.0835676 | 0.87335 | 0.921809 | no |
| Oxct1         | -0.0703303 | -0.329959  | 0.5034  | 0.629998 | no |
| Plagl2        | -0.0703713 | -0.150128  | 0.7661  | 0.846408 | no |
| Nt5c3b        | -0.0704154 | -0.19463   | 0.69385 | 0.790427 | no |
| Zfp940        | -0.0704839 | -0.125096  | 0.81725 | 0.882218 | no |
| BC030336      | -0.0705049 | -0.313084  | 0.5525  | 0.67322  | no |
| Tspan7        | -0.0705338 | -0.371187  | 0.50065 | 0.627385 | no |
| Zfp84         | -0.0705583 | -0.206525  | 0.6818  | 0.780375 | no |
| Hnf1b         | -0.0705755 | 0          | 1       | 1        | no |
| Lsm8          | -0.0705911 | -0.224197  | 0.7436  | 0.830206 | no |
| Wars2         | -0.070595  | -0.156676  | 0.75165 | 0.835608 | no |
| Dopey1        | -0.0705989 | -0.276327  | 0.58985 | 0.705004 | no |
| Erlin2        | -0.0706462 | -0.287851  | 0.58825 | 0.703535 | no |
| 2700046A07Rik | -0.0706826 | 0          | 1       | 1        | no |
| Txndc9        | -0.0707257 | -0.23644   | 0.6494  | 0.75344  | no |
| Sap30bp       | -0.0708117 | -0.248312  | 0.64915 | 0.753282 | no |
| Zfp160        | -0.0708549 | -0.183705  | 0.72775 | 0.818212 | no |
| Iars2         | -0.070896  | -0.198112  | 0.68935 | 0.786313 | no |
| Clp1          | -0.0709834 | -0.151985  | 0.78585 | 0.860433 | no |
| 2900009J06Rik | -0.0716193 | 0          | 1       | 1        | no |
| Nr2c1         | -0.0716877 | -0.207235  | 0.6898  | 0.786759 | no |
| Hmces         | -0.0717651 | -0.166712  | 0.7725  | 0.850872 | no |
| Fkbp3         | -0.0718164 | -0.227395  | 0.6215  | 0.730714 | no |

|               |            |           |         |          |    |
|---------------|------------|-----------|---------|----------|----|
| Ubox5         | -0.0718369 | -0.186252 | 0.72155 | 0.813599 | no |
| G6pdx         | -0.0720351 | -0.22613  | 0.67365 | 0.773258 | no |
| Lrp12         | -0.0720813 | -0.301284 | 0.5652  | 0.683857 | no |
| Ppp2r2b       | -0.0721785 | -0.334396 | 0.4997  | 0.626431 | no |
| Tomm34        | -0.0722741 | -0.321916 | 0.52095 | 0.645748 | no |
| Abat          | -0.072513  | -0.309881 | 0.53525 | 0.658185 | no |
| Nup98         | -0.0725374 | -0.286059 | 0.55805 | 0.67799  | no |
| Dhx29         | -0.0726366 | -0.289368 | 0.57585 | 0.693201 | no |
| B4galnt4      | -0.0728584 | -0.239145 | 0.6484  | 0.752543 | no |
| Dll3          | -0.0732951 | 0         | 1       | 1        | no |
| Reep5         | -0.0733431 | -0.254688 | 0.62765 | 0.735929 | no |
| Snrpc         | -0.0734204 | -0.128251 | 0.85085 | 0.905739 | no |
| Cct8          | -0.0735137 | -0.326045 | 0.5124  | 0.638431 | no |
| Mtfmt         | -0.0735924 | -0.184762 | 0.74015 | 0.827329 | no |
| Cdhr1         | -0.0736484 | -0.326414 | 0.53065 | 0.654288 | no |
| Cbx8          | -0.0737941 | -0.158839 | 0.78455 | 0.859578 | no |
| Fem1a         | -0.073811  | -0.320056 | 0.53415 | 0.657259 | no |
| Iscu          | -0.0738351 | -0.325075 | 0.6132  | 0.7241   | no |
| Dpcd          | -0.0738477 | -0.276587 | 0.6393  | 0.745503 | no |
| Mta2          | -0.0739073 | -0.288971 | 0.59655 | 0.710451 | no |
| Pigg          | -0.0741554 | -0.225255 | 0.67    | 0.770001 | no |
| Ints3         | -0.0741722 | -0.30538  | 0.53605 | 0.658803 | no |
| Scyl1         | -0.0742226 | -0.216459 | 0.6619  | 0.763802 | no |
| Zfp709        | -0.0742687 | -0.148607 | 0.7735  | 0.851762 | no |
| Sumo3         | -0.0744774 | -0.356183 | 0.5083  | 0.634574 | no |
| Prpf6         | -0.0747216 | -0.332061 | 0.5404  | 0.662737 | no |
| 2310015A10Rik | -0.0747388 | -0.239289 | 0.6419  | 0.747747 | no |
| Setdb1        | -0.07476   | -0.181601 | 0.7209  | 0.813004 | no |
| Syt11         | -0.0748824 | -0.282883 | 0.57995 | 0.696812 | no |
| Pfdn2         | -0.0749141 | -0.431517 | 0.55845 | 0.678349 | no |
| Tmf1          | -0.0749643 | -0.335007 | 0.5097  | 0.635843 | no |
| Gspt1         | -0.0750614 | -0.346567 | 0.4875  | 0.61544  | no |
| Nme1          | -0.0750642 | -0.398185 | 0.498   | 0.62489  | no |
| Psmd8         | -0.0750802 | -0.370798 | 0.51855 | 0.643796 | no |
| Ptprn2        | -0.0751057 | -0.338883 | 0.4876  | 0.615508 | no |
| Nfe2l2        | -0.0752297 | -0.31941  | 0.5545  | 0.674789 | no |
| Itpkc         | -0.0752585 | -0.17432  | 0.74085 | 0.827902 | no |
| Afg3l2        | -0.0752989 | -0.356945 | 0.49785 | 0.624761 | no |
| Marf1         | -0.0753262 | -0.360887 | 0.47055 | 0.599691 | no |
| Tmem201       | -0.0753622 | -0.274767 | 0.5752  | 0.692736 | no |
| Tmem243       | -0.0754779 | -0.124319 | 0.8429  | 0.899422 | no |
| Helq          | -0.0755721 | -0.158029 | 0.7679  | 0.84762  | no |
| Bloc1s1       | -0.0757217 | -0.311315 | 0.69105 | 0.78797  | no |
| Atmin         | -0.0758798 | -0.35183  | 0.4877  | 0.615517 | no |
| Fmr1nb        | -0.0759244 | 0         | 1       | 1        | no |
| Cops6         | -0.076112  | -0.406743 | 0.5121  | 0.638117 | no |
| Rab10         | -0.0762564 | -0.356338 | 0.47515 | 0.604219 | no |
| Car12         | -0.0765879 | 0         | 1       | 1        | no |
| Zfp746        | -0.0767279 | -0.225021 | 0.6708  | 0.770644 | no |
| Tsnax         | -0.0767427 | -0.380477 | 0.4807  | 0.609465 | no |
| Coq3          | -0.0768363 | -0.267701 | 0.6138  | 0.724685 | no |
| Nos3          | -0.0768752 | -0.141242 | 0.79015 | 0.863256 | no |
| Fbxo18        | -0.0769919 | -0.340233 | 0.52315 | 0.648051 | no |



|               |            |            |         |          |    |
|---------------|------------|------------|---------|----------|----|
| Lrp3          | -0.0770294 | -0.335735  | 0.5045  | 0.631136 | no |
| Tmem5         | -0.0772259 | -0.27549   | 0.63055 | 0.738155 | no |
| Smg8          | -0.0773621 | -0.0306742 | 0.95665 | 0.973952 | no |
| Dtwd2         | -0.0774287 | -0.146208  | 0.7684  | 0.847835 | no |
| Cxcl2         | -0.0774602 | 0          | 1       | 1        | no |
| Rab1          | -0.0775455 | -0.394462  | 0.4553  | 0.585203 | no |
| Zcchc17       | -0.0775595 | -0.32266   | 0.5748  | 0.692506 | no |
| Pcdha4        | -0.0777373 | -0.0481259 | 0.9258  | 0.954655 | no |
| Tmem19        | -0.0777566 | -0.340317  | 0.52465 | 0.649122 | no |
| Pogk          | -0.0777991 | -0.29504   | 0.55505 | 0.675149 | no |
| Birc2         | -0.0778712 | -0.277691  | 0.59975 | 0.713293 | no |
| Ldhd          | -0.0779272 | -0.243797  | 0.6517  | 0.75525  | no |
| Tap2          | -0.0779484 | -0.289276  | 0.59205 | 0.706678 | no |
| Dync1i1       | -0.078248  | -0.367931  | 0.455   | 0.585044 | no |
| Zfp518b       | -0.0783161 | -0.290733  | 0.56395 | 0.682967 | no |
| Cep290        | -0.0783777 | -0.201416  | 0.6972  | 0.79321  | no |
| Snrk          | -0.0784199 | -0.335951  | 0.50215 | 0.628671 | no |
| Nuggc         | -0.0784244 | 0          | 1       | 1        | no |
| Atxn10        | -0.0787154 | -0.402923  | 0.45255 | 0.582571 | no |
| Cops8         | -0.0787381 | -0.377263  | 0.4942  | 0.621474 | no |
| Ccnj          | -0.0787727 | -0.171551  | 0.75025 | 0.834821 | no |
| Fancb         | -0.0788246 | -0.124753  | 0.8002  | 0.869971 | no |
| Gstm5         | -0.0791521 | -0.247238  | 0.6193  | 0.728973 | no |
| 4930481A15Rik | -0.0797263 | -0.0567143 | 0.92525 | 0.954459 | no |
| Mocs2         | -0.0797305 | -0.324433  | 0.52035 | 0.645368 | no |
| Plcx2         | -0.0799504 | -0.375659  | 0.4589  | 0.588405 | no |
| Cpa6          | -0.0800212 | 0          | 1       | 1        | no |
| Zc3h3         | -0.080249  | 0          | 1       | 1        | no |
| Kynu          | -0.0804477 | 0          | 1       | 1        | no |
| Agpat6        | -0.0807972 | -0.382446  | 0.46425 | 0.593887 | no |
| Agbl3         | -0.0808563 | -0.129924  | 0.78795 | 0.861863 | no |
| Sbsn          | -0.080925  | -0.0594886 | 0.9023  | 0.939403 | no |
| Lpin2         | -0.0809354 | -0.311254  | 0.5296  | 0.653357 | no |
| Fn3krp        | -0.0811203 | -0.301787  | 0.579   | 0.695923 | no |
| C230037L18Rik | -0.0811276 | -0.0349769 | 0.95565 | 0.973232 | no |
| Usp40         | -0.0813414 | -0.249312  | 0.61415 | 0.724964 | no |
| Zfp712        | -0.0814731 | -0.182812  | 0.7254  | 0.816318 | no |
| Sec23ip       | -0.081487  | -0.318167  | 0.5377  | 0.660463 | no |
| Ccdc173       | -0.081529  | -0.113527  | 0.8434  | 0.899758 | no |
| Srbd1         | -0.0815432 | -0.246493  | 0.63485 | 0.74135  | no |
| Ddx6          | -0.0815898 | -0.381834  | 0.4406  | 0.572185 | no |
| Gpr65         | -0.0816291 | 0          | 1       | 1        | no |
| Exoc8         | -0.0816904 | -0.321998  | 0.5262  | 0.65001  | no |
| Prdx1         | -0.0818272 | -0.311087  | 0.52555 | 0.649629 | no |
| Hcrtr1        | -0.0818665 | -0.146846  | 0.77095 | 0.849588 | no |
| Mrpl49        | -0.0819119 | -0.194051  | 0.69275 | 0.789366 | no |
| Dgcr2         | -0.0819806 | -0.371456  | 0.45495 | 0.585037 | no |
| Ppp1r13l      | -0.0819837 | -0.159367  | 0.7681  | 0.847629 | no |
| Pdcd10        | -0.0820504 | -0.267719  | 0.6365  | 0.742826 | no |
| Kmt2e         | -0.082436  | -0.203289  | 0.68845 | 0.785795 | no |
| Mcidas        | -0.0824647 | 0          | 1       | 1        | no |
| 9130011E15Rik | -0.0824806 | -0.316642  | 0.55095 | 0.671825 | no |
| Osbp          | -0.0826161 | -0.38332   | 0.4556  | 0.585532 | no |

|               |            |            |         |          |    |
|---------------|------------|------------|---------|----------|----|
| Zfp667        | -0.0826417 | -0.195491  | 0.7134  | 0.80674  | no |
| Tom22         | -0.0826909 | -0.397515  | 0.5204  | 0.645368 | no |
| Ofcc1         | -0.0827055 | 0          | 1       | 1        | no |
| Fam199x       | -0.0827339 | -0.336424  | 0.50395 | 0.630567 | no |
| Osbpl9        | -0.0827702 | -0.246039  | 0.62035 | 0.729756 | no |
| Gm4788        | -0.0827974 | 0          | 1       | 1        | no |
| Lrrc28        | -0.0828558 | -0.264011  | 0.60015 | 0.713453 | no |
| Tmem204       | -0.0829163 | -0.0633877 | 0.88695 | 0.929623 | no |
| Strn4         | -0.0829435 | -0.222601  | 0.6474  | 0.751777 | no |
| Vmn2r-ps11    | -0.0831396 | 0          | 1       | 1        | no |
| Ints5         | -0.0833199 | -0.282914  | 0.58725 | 0.702592 | no |
| Bag3          | -0.0833852 | -0.424437  | 0.42295 | 0.554365 | no |
| Klf3          | -0.0834441 | -0.236485  | 0.6669  | 0.767635 | no |
| Gabpb2        | -0.0834816 | -0.0856186 | 0.86735 | 0.917049 | no |
| Nme6          | -0.0835899 | -0.158706  | 0.8011  | 0.870542 | no |
| Gab1          | -0.083715  | -0.368078  | 0.4777  | 0.606647 | no |
| Cypr1         | -0.0838799 | -0.176118  | 0.752   | 0.835787 | no |
| Mtx2          | -0.0839104 | -0.378763  | 0.5237  | 0.648551 | no |
| Nploc4        | -0.0840296 | -0.392731  | 0.42095 | 0.552453 | no |
| Gm7609        | -0.0840855 | 0          | 1       | 1        | no |
| Ppm1d         | -0.08421   | -0.19644   | 0.7102  | 0.804081 | no |
| Itfg1         | -0.0842146 | -0.415502  | 0.4299  | 0.561366 | no |
| 1700025G04Rik | -0.0842519 | -0.372868  | 0.47305 | 0.602299 | no |
| Tram1         | -0.0844434 | -0.368839  | 0.48945 | 0.616846 | no |
| Wdfy3         | -0.0846771 | -0.400855  | 0.4154  | 0.547335 | no |
| 2410012E07Rik | -0.0847464 | 0          | 1       | 1        | no |
| Wbp11         | -0.0848585 | -0.374273  | 0.4803  | 0.609017 | no |
| Map2k5        | -0.0848952 | -0.329205  | 0.53995 | 0.662246 | no |
| Fam159b       | -0.0849022 | 0          | 1       | 1        | no |
| Znhit6        | -0.0852821 | -0.256467  | 0.62805 | 0.736333 | no |
| Ccdc97        | -0.085375  | -0.352485  | 0.50795 | 0.634376 | no |
| Taf6l         | -0.0854827 | -0.162224  | 0.76075 | 0.842899 | no |
| Rbmx          | -0.0857124 | -0.266622  | 0.59105 | 0.705929 | no |
| Mrpl48        | -0.0857164 | -0.049968  | 0.93665 | 0.960691 | no |
| Nt5m          | -0.0857657 | -0.335274  | 0.5597  | 0.679435 | no |
| Ruvbl1        | -0.0860285 | -0.171162  | 0.76305 | 0.844586 | no |
| Mrpl47        | -0.0861772 | -0.262227  | 0.68835 | 0.78578  | no |
| Ift52         | -0.0862427 | -0.355644  | 0.52005 | 0.645296 | no |
| Phtf2         | -0.0863108 | -0.305444  | 0.5536  | 0.674124 | no |
| Chd1          | -0.0863703 | -0.304115  | 0.5471  | 0.668605 | no |
| Ampd3         | -0.0863892 | -0.35235   | 0.4762  | 0.605148 | no |
| Psen1         | -0.0864457 | -0.389403  | 0.4674  | 0.596881 | no |
| AW146154      | -0.0864512 | 0          | 1       | 1        | no |
| Galr1         | -0.0864743 | -0.239489  | 0.65455 | 0.7578   | no |
| Dcun1d2       | -0.0864801 | -0.2875    | 0.5856  | 0.701184 | no |
| Tmem242       | -0.0865303 | -0.380264  | 0.47755 | 0.606573 | no |
| Rprd2         | -0.0865726 | -0.337268  | 0.5064  | 0.633036 | no |
| Fbxo8         | -0.0868496 | -0.249898  | 0.63355 | 0.740752 | no |
| Tyw3          | -0.0868533 | -0.184969  | 0.7222  | 0.813848 | no |
| Slc39a13      | -0.0869095 | -0.286102  | 0.571   | 0.68943  | no |
| Arhgap31      | -0.0870494 | -0.391091  | 0.43935 | 0.570897 | no |
| Tmem263       | -0.0871195 | -0.342977  | 0.51205 | 0.638115 | no |
| Commd8        | -0.0873644 | -0.305998  | 0.56165 | 0.681052 | no |

|               |            |            |         |          |    |
|---------------|------------|------------|---------|----------|----|
| Pomt2         | -0.0877266 | -0.282289  | 0.5895  | 0.704649 | no |
| Atrx          | -0.0877518 | -0.384821  | 0.4524  | 0.582548 | no |
| Msx1          | -0.0878125 | 0          | 1       | 1        | no |
| Znrf2         | -0.0878186 | -0.286981  | 0.5887  | 0.703819 | no |
| Trove2        | -0.0878474 | -0.38292   | 0.448   | 0.578679 | no |
| Map6          | -0.0880971 | -0.399511  | 0.415   | 0.547025 | no |
| Rac1          | -0.0882385 | -0.453591  | 0.40405 | 0.535678 | no |
| Zfp574        | -0.0883023 | -0.249208  | 0.61435 | 0.725076 | no |
| Parp16        | -0.0883527 | -0.162748  | 0.7679  | 0.84762  | no |
| Dis3l         | -0.0884046 | -0.335158  | 0.4899  | 0.617295 | no |
| Dgcr14        | -0.0885344 | -0.265026  | 0.5939  | 0.707995 | no |
| Plac8l1       | -0.0886623 | 0          | 1       | 1        | no |
| Dennd3        | -0.0887527 | 0          | 1       | 1        | no |
| Slc22a15      | -0.0888457 | -0.256725  | 0.6145  | 0.725178 | no |
| Cep19         | -0.0888929 | -0.37017   | 0.5202  | 0.645301 | no |
| Slc10a7       | -0.0888976 | -0.274281  | 0.58365 | 0.699737 | no |
| Tmx4          | -0.0890212 | -0.434881  | 0.4003  | 0.532196 | no |
| Eif3c         | -0.0890222 | -0.445012  | 0.40205 | 0.533667 | no |
| 0610030E20Rik | -0.089043  | -0.233978  | 0.65335 | 0.756634 | no |
| Hk1           | -0.089192  | -0.430318  | 0.4085  | 0.540444 | no |
| Mrps18b       | -0.089544  | -0.231189  | 0.71115 | 0.804813 | no |
| Pcdhb11       | -0.0896002 | -0.020539  | 0.97085 | 0.982851 | no |
| Osbpl5        | -0.0896306 | -0.351841  | 0.47205 | 0.601314 | no |
| Etf1          | -0.0896322 | -0.427825  | 0.41595 | 0.547787 | no |
| Zmat3         | -0.0896381 | -0.429588  | 0.4025  | 0.533997 | no |
| Csnk1d        | -0.0896817 | -0.422151  | 0.396   | 0.527695 | no |
| Csgalnact2    | -0.0897629 | -0.263998  | 0.6164  | 0.726462 | no |
| Vars          | -0.0897748 | -0.389352  | 0.4577  | 0.587491 | no |
| Lonp1         | -0.0897788 | -0.404123  | 0.44805 | 0.578688 | no |
| Hps5          | -0.0899758 | -0.354922  | 0.47515 | 0.604219 | no |
| Ttc33         | -0.0901093 | -0.407833  | 0.46435 | 0.593958 | no |
| Arfgef1       | -0.0901546 | -0.436222  | 0.3878  | 0.519167 | no |
| Psmb7         | -0.090337  | -0.523272  | 0.4035  | 0.535109 | no |
| Adam9         | -0.0907004 | -0.420012  | 0.39115 | 0.522702 | no |
| Gigyf2        | -0.0907113 | -0.372855  | 0.46745 | 0.596887 | no |
| Trmt6         | -0.0907763 | -0.299132  | 0.5733  | 0.691389 | no |
| Cep68         | -0.0907989 | -0.3124    | 0.5373  | 0.660033 | no |
| Gpkow         | -0.0911864 | -0.337976  | 0.52525 | 0.64944  | no |
| Coa4          | -0.0912646 | -0.18582   | 0.7781  | 0.855478 | no |
| Pfkip         | -0.0914658 | -0.395527  | 0.4306  | 0.561949 | no |
| Ube2e1        | -0.091469  | -0.240645  | 0.62915 | 0.737166 | no |
| 2610507I01Rik | -0.091492  | -0.271281  | 0.60935 | 0.721099 | no |
| Lipa          | -0.091583  | -0.412085  | 0.40785 | 0.539745 | no |
| Lgals6        | -0.0916238 | 0          | 1       | 1        | no |
| Stx8          | -0.0916627 | -0.303015  | 0.55855 | 0.678349 | no |
| Mccc1os       | -0.0917728 | 0          | 1       | 1        | no |
| Triap1        | -0.0918234 | -0.414087  | 0.49945 | 0.626295 | no |
| Ptplb         | -0.0919811 | -0.334275  | 0.5206  | 0.645495 | no |
| Ei24          | -0.0920188 | -0.405208  | 0.4173  | 0.549075 | no |
| Gtf2e1        | -0.0920357 | -0.339857  | 0.527   | 0.650876 | no |
| Pcdhb13       | -0.0920472 | -0.0271238 | 0.95895 | 0.975195 | no |
| Atp6v1h       | -0.0921525 | -0.481784  | 0.37785 | 0.509393 | no |
| Scel          | -0.0921901 | 0          | 1       | 1        | no |

|               |            |            |         |          |    |
|---------------|------------|------------|---------|----------|----|
| Mfap1a        | -0.0925436 | -0.291052  | 0.57515 | 0.692736 | no |
| Med16         | -0.092615  | -0.0433314 | 0.9384  | 0.961519 | no |
| Zfp846        | -0.0927795 | -0.233651  | 0.66175 | 0.763695 | no |
| Prr14l        | -0.0929594 | -0.388218  | 0.44705 | 0.577846 | no |
| Grpel1        | -0.0931188 | -0.270416  | 0.61325 | 0.7241   | no |
| 4930500J02Rik | -0.0932797 | 0          | 1       | 1        | no |
| Pds5a         | -0.0933344 | -0.396306  | 0.4445  | 0.575953 | no |
| Capza2        | -0.0934633 | -0.487682  | 0.3762  | 0.507633 | no |
| Dnajb11       | -0.0937171 | -0.383878  | 0.46585 | 0.595417 | no |
| Ncam1         | -0.0937288 | -0.434067  | 0.38695 | 0.518447 | no |
| Mre11a        | -0.0937653 | -0.274072  | 0.60375 | 0.71639  | no |
| Ube2d1        | -0.0938754 | -0.437384  | 0.4492  | 0.579665 | no |
| Wnt10a        | -0.093938  | 0          | 1       | 1        | no |
| Hs3st3b1      | -0.0939817 | -0.180514  | 0.71955 | 0.811827 | no |
| Apmap         | -0.0940445 | -0.432058  | 0.42865 | 0.56001  | no |
| Kdm5d         | -0.0940986 | -0.273067  | 0.59545 | 0.709587 | no |
| Usp10         | -0.09411   | -0.386104  | 0.4716  | 0.600856 | no |
| Foxn2         | -0.0941783 | -0.285919  | 0.57375 | 0.691741 | no |
| Zdhhc4        | -0.0941988 | -0.318425  | 0.583   | 0.69908  | no |
| Trmt2a        | -0.094274  | -0.232532  | 0.6529  | 0.756311 | no |
| Sifn3         | -0.0943034 | 0          | 1       | 1        | no |
| Lypla1        | -0.0944255 | -0.409753  | 0.44595 | 0.577268 | no |
| Rnpepl1       | -0.0946794 | -0.27538   | 0.6055  | 0.717814 | no |
| Ero1l         | -0.0947214 | -0.394979  | 0.4468  | 0.577748 | no |
| 1810010H24Rik | -0.0947484 | -0.112022  | 0.85665 | 0.910088 | no |
| Kat2a         | -0.0947772 | -0.375506  | 0.45185 | 0.582009 | no |
| Ap2b1         | -0.0948346 | -0.433675  | 0.3867  | 0.518269 | no |
| Sdf4          | -0.0949396 | -0.462515  | 0.36545 | 0.497359 | no |
| Hn1l          | -0.0949524 | -0.268671  | 0.62035 | 0.729756 | no |
| Cln8          | -0.0949633 | -0.362335  | 0.4746  | 0.603809 | no |
| Fbxo34        | -0.0949909 | -0.339014  | 0.49635 | 0.623351 | no |
| Scd1          | -0.0950394 | -0.38707   | 0.4501  | 0.580431 | no |
| Cbx6          | -0.0950416 | -0.290572  | 0.54915 | 0.670368 | no |
| Gm9776        | -0.0952552 | -0.170425  | 0.75235 | 0.836105 | no |
| 2810029C07Rik | -0.0952987 | 0          | 1       | 1        | no |
| Ccs           | -0.0953865 | -0.310862  | 0.61555 | 0.725911 | no |
| Parn          | -0.0953967 | -0.351693  | 0.5065  | 0.633101 | no |
| Fastkd1       | -0.0954272 | -0.321441  | 0.54475 | 0.666716 | no |
| Gtf2b         | -0.0956816 | -0.419891  | 0.4717  | 0.600926 | no |
| Hoxa10        | -0.0957123 | -0.270093  | 0.59105 | 0.705929 | no |
| Csnk2b        | -0.0957626 | -0.457415  | 0.4446  | 0.57597  | no |
| Ubac2         | -0.0957702 | -0.360392  | 0.4879  | 0.615594 | no |
| Ifnar2        | -0.0957875 | -0.24251   | 0.62215 | 0.731077 | no |
| Hist1h3a      | -0.0958815 | 0          | 1       | 1        | no |
| Prpf38a       | -0.0959534 | -0.301794  | 0.59655 | 0.710451 | no |
| Arf1          | -0.0959536 | -0.452249  | 0.36075 | 0.492952 | no |
| Nanos1        | -0.096254  | -0.215077  | 0.67575 | 0.775132 | no |
| Eif3j2        | -0.0963099 | 0          | 1       | 1        | no |
| Mlh1          | -0.0964129 | -0.25632   | 0.6338  | 0.740848 | no |
| Sec63         | -0.0965133 | -0.442856  | 0.37645 | 0.507867 | no |
| Akna          | -0.0966398 | 0          | 1       | 1        | no |
| Spop          | -0.0968588 | -0.481665  | 0.3711  | 0.502489 | no |
| Pebp1         | -0.0969317 | -0.53757   | 0.37265 | 0.504073 | no |

|               |            |           |         |          |    |
|---------------|------------|-----------|---------|----------|----|
| Chrn2         | -0.0970234 | -0.334058 | 0.5056  | 0.632334 | no |
| Gpsm2         | -0.0971123 | -0.273224 | 0.5842  | 0.700206 | no |
| Naa50         | -0.0971799 | -0.435933 | 0.40135 | 0.532897 | no |
| Mpdu1         | -0.0972861 | -0.338093 | 0.495   | 0.622008 | no |
| Ntmt1         | -0.0973119 | -0.313177 | 0.60855 | 0.72034  | no |
| Agps          | -0.0973177 | -0.432867 | 0.3977  | 0.529482 | no |
| Ii5           | -0.0973374 | 0         | 1       | 1        | no |
| Nudcd3        | -0.097383  | -0.452324 | 0.38295 | 0.514231 | no |
| Xdh           | -0.0974121 | -0.204114 | 0.6957  | 0.791854 | no |
| Kars          | -0.097524  | -0.413685 | 0.4065  | 0.538281 | no |
| Slc10a3       | -0.0976085 | -0.109474 | 0.8247  | 0.88721  | no |
| Gm15545       | -0.0977711 | 0         | 1       | 1        | no |
| Smg6          | -0.0977793 | -0.377177 | 0.4501  | 0.580431 | no |
| Ipo11         | -0.097894  | -0.434261 | 0.4107  | 0.542543 | no |
| Nup160        | -0.0980372 | -0.286483 | 0.58435 | 0.700259 | no |
| Ttl4          | -0.0981333 | -0.181976 | 0.7281  | 0.818341 | no |
| Ttbk1         | -0.0982206 | -0.458329 | 0.3666  | 0.498481 | no |
| Socs5         | -0.0982494 | -0.45048  | 0.39065 | 0.522244 | no |
| Hps3          | -0.0982908 | -0.325101 | 0.5088  | 0.635079 | no |
| Yars          | -0.0984756 | -0.265233 | 0.6203  | 0.729756 | no |
| Atxn2         | -0.0985136 | -0.456986 | 0.3771  | 0.508604 | no |
| Emc8          | -0.0985615 | -0.436289 | 0.39745 | 0.529202 | no |
| Sco1          | -0.0986996 | -0.284592 | 0.5854  | 0.701074 | no |
| Gm17296       | -0.098754  | 0         | 1       | 1        | no |
| Zfp959        | -0.0987651 | -0.166916 | 0.76615 | 0.846408 | no |
| Hist1h3b      | -0.0987723 | 0         | 1       | 1        | no |
| Snap23        | -0.0988027 | -0.198704 | 0.68825 | 0.785734 | no |
| Cnot4         | -0.09884   | -0.357738 | 0.46785 | 0.597302 | no |
| Abca6         | -0.0988705 | -0.433063 | 0.37805 | 0.509611 | no |
| Tcta          | -0.0988987 | -0.452454 | 0.41695 | 0.548832 | no |
| Fam115a       | -0.0989568 | -0.485243 | 0.3502  | 0.482461 | no |
| Btbd7         | -0.0990564 | -0.316975 | 0.5378  | 0.660464 | no |
| Lrp11         | -0.099165  | -0.494326 | 0.34605 | 0.478184 | no |
| Babam1        | -0.0991679 | -0.440841 | 0.4351  | 0.566873 | no |
| Ephx4         | -0.0991822 | -0.271634 | 0.6445  | 0.749591 | no |
| Zfp68         | -0.0991843 | -0.340164 | 0.4917  | 0.619269 | no |
| Cend1         | -0.0993236 | -0.525747 | 0.35195 | 0.484118 | no |
| Pip5k1c       | -0.0996066 | -0.470267 | 0.3414  | 0.473188 | no |
| Gtf2h4        | -0.099684  | -0.284831 | 0.6173  | 0.727264 | no |
| Emc4          | -0.0997679 | -0.237887 | 0.63025 | 0.737986 | no |
| Polr3h        | -0.0998015 | -0.125959 | 0.8017  | 0.870745 | no |
| C130046K22Rik | -0.0999698 | -0.230194 | 0.64435 | 0.749591 | no |
| Ppp4r1        | -0.100104  | -0.368253 | 0.4611  | 0.590541 | no |
| Gtf3c2        | -0.100151  | -0.12087  | 0.80705 | 0.875123 | no |
| Nup54         | -0.100241  | -0.267971 | 0.624   | 0.732685 | no |
| Cadps         | -0.100662  | -0.444812 | 0.3711  | 0.502489 | no |
| Gm5801        | -0.100821  | -0.29516  | 0.6223  | 0.731077 | no |
| Atad1         | -0.100831  | -0.499715 | 0.3438  | 0.475769 | no |
| Ppp2ca        | -0.100904  | -0.530022 | 0.33885 | 0.47044  | no |
| Tln1          | -0.101092  | -0.485908 | 0.33775 | 0.469306 | no |
| Hist1h1b      | -0.101345  | 0         | 1       | 1        | no |
| Zscan21       | -0.10139   | -0.308825 | 0.5358  | 0.658617 | no |
| Pard6a        | -0.101396  | -0.256123 | 0.60475 | 0.717255 | no |

|               |           |            |         |          |    |
|---------------|-----------|------------|---------|----------|----|
| Cox15         | -0.101477 | -0.312855  | 0.5318  | 0.655401 | no |
| Rpap3         | -0.101613 | -0.341412  | 0.5256  | 0.649631 | no |
| Ktn1          | -0.101646 | -0.466506  | 0.36835 | 0.499887 | no |
| Nbn           | -0.101847 | -0.335446  | 0.5346  | 0.65763  | no |
| St6galnac6    | -0.101865 | -0.407862  | 0.41905 | 0.550613 | no |
| Etfhdh        | -0.101935 | -0.438936  | 0.41565 | 0.547501 | no |
| Homez         | -0.102187 | -0.27791   | 0.57755 | 0.694746 | no |
| Txk           | -0.102297 | 0          | 1       | 1        | no |
| Golph3        | -0.102341 | -0.505248  | 0.3459  | 0.478076 | no |
| Zxdc          | -0.1024   | -0.31715   | 0.526   | 0.649943 | no |
| Pfn4          | -0.102413 | -0.139627  | 0.81125 | 0.877795 | no |
| Trmt61b       | -0.102448 | -0.134812  | 0.7902  | 0.863256 | no |
| Vps52         | -0.1025   | -0.445097  | 0.4104  | 0.542308 | no |
| Gm14325       | -0.102544 | -0.332365  | 0.52015 | 0.645299 | no |
| Akr7a5        | -0.102578 | -0.339885  | 0.54545 | 0.667265 | no |
| Tob1          | -0.103108 | -0.391712  | 0.4744  | 0.603612 | no |
| Nhlrc2        | -0.103145 | -0.284974  | 0.58665 | 0.702061 | no |
| Bnip3         | -0.103159 | -0.506118  | 0.36495 | 0.497002 | no |
| Pcdhgc3       | -0.103177 | -0.150319  | 0.75915 | 0.841899 | no |
| R3hdm2        | -0.103178 | -0.428299  | 0.3928  | 0.524432 | no |
| Eif2b4        | -0.103252 | -0.0948514 | 0.8502  | 0.905338 | no |
| Slc31a1       | -0.103568 | -0.439664  | 0.40035 | 0.532209 | no |
| Slc41a2       | -0.103628 | -0.445142  | 0.3948  | 0.52648  | no |
| Selo          | -0.103767 | -0.309013  | 0.57665 | 0.693973 | no |
| BC023829      | -0.10383  | -0.380362  | 0.4894  | 0.616841 | no |
| Mrpl55        | -0.103893 | -0.367279  | 0.58515 | 0.700838 | no |
| Fstl1         | -0.103955 | -0.325609  | 0.54065 | 0.66286  | no |
| Aftph         | -0.103977 | -0.442473  | 0.3767  | 0.508152 | no |
| 4930453N24Rik | -0.103982 | -0.332476  | 0.5711  | 0.689488 | no |
| Scap          | -0.104037 | -0.450788  | 0.3664  | 0.498312 | no |
| Ddx19a        | -0.104047 | -0.293627  | 0.5867  | 0.702061 | no |
| Ndufa1        | -0.10421  | -0.611776  | 0.4596  | 0.589132 | no |
| Utp6          | -0.104316 | -0.447345  | 0.38625 | 0.518033 | no |
| Repin1        | -0.104721 | -0.288151  | 0.5605  | 0.680095 | no |
| Psmc5         | -0.104846 | -0.482564  | 0.3897  | 0.521132 | no |
| Ndufb7        | -0.10491  | -0.634838  | 0.43175 | 0.563283 | no |
| Neurl4        | -0.104997 | -0.458471  | 0.35455 | 0.486384 | no |
| Kctd7         | -0.105155 | -0.392498  | 0.4482  | 0.578777 | no |
| Usp42         | -0.105201 | -0.309781  | 0.5552  | 0.675269 | no |
| Napg          | -0.105396 | -0.522782  | 0.3198  | 0.449781 | no |
| 1700003E16Rik | -0.10542  | -0.204916  | 0.70445 | 0.79955  | no |
| Tnfaip3       | -0.105463 | -0.211529  | 0.6698  | 0.769895 | no |
| Drg2          | -0.105553 | -0.462978  | 0.41295 | 0.544864 | no |
| Jag2          | -0.105854 | -0.435241  | 0.3812  | 0.512503 | no |
| Gpx4          | -0.105868 | -0.0366972 | 0.94615 | 0.966698 | no |
| Rufy1         | -0.10589  | -0.321212  | 0.56025 | 0.680037 | no |
| Chmp3         | -0.105905 | -0.539766  | 0.3116  | 0.441007 | no |
| Pdp2          | -0.105943 | -0.132586  | 0.7849  | 0.859803 | no |
| Nudcd1        | -0.105946 | -0.264165  | 0.61815 | 0.727878 | no |
| Inpp5e        | -0.106477 | -0.233666  | 0.6439  | 0.749221 | no |
| Pdcd4         | -0.106616 | -0.23903   | 0.66595 | 0.767074 | no |
| Pcdhga9       | -0.106668 | -0.0428595 | 0.93375 | 0.959051 | no |
| Aamp          | -0.106677 | -0.470858  | 0.34585 | 0.478076 | no |



|               |           |            |         |          |    |
|---------------|-----------|------------|---------|----------|----|
| Sympk         | -0.106714 | -0.501848  | 0.33375 | 0.464916 | no |
| Yipf3         | -0.106724 | -0.488324  | 0.3705  | 0.501949 | no |
| Tnks1bp1      | -0.106854 | -0.49556   | 0.3339  | 0.465027 | no |
| Cpsf2         | -0.106894 | -0.475843  | 0.3539  | 0.485862 | no |
| 2810006K23Rik | -0.107171 | -0.244975  | 0.6302  | 0.737986 | no |
| 2310067B10Rik | -0.107208 | -0.430676  | 0.3812  | 0.512503 | no |
| Phc3          | -0.107238 | -0.451806  | 0.3594  | 0.4917   | no |
| 4930429B21Rik | -0.107258 | -0.0501946 | 0.92265 | 0.953185 | no |
| Cask          | -0.107374 | -0.486066  | 0.34195 | 0.473653 | no |
| Armcx2        | -0.10741  | -0.49604   | 0.31505 | 0.444798 | no |
| Abhd17a       | -0.107567 | -0.525668  | 0.3663  | 0.498227 | no |
| Insig2        | -0.10767  | -0.410038  | 0.40615 | 0.537978 | no |
| Wdr37         | -0.107791 | -0.477692  | 0.3382  | 0.469734 | no |
| Rsl24d1       | -0.108172 | -0.412619  | 0.4748  | 0.604005 | no |
| Adprhl2       | -0.10819  | -0.295274  | 0.60715 | 0.719202 | no |
| Ccrn4l        | -0.108209 | -0.344846  | 0.51735 | 0.642847 | no |
| Armc9         | -0.108349 | -0.257373  | 0.61    | 0.721606 | no |
| Zfp346        | -0.108355 | -0.360378  | 0.4848  | 0.613082 | no |
| Spcs1         | -0.108515 | -0.47209   | 0.4475  | 0.578259 | no |
| Wbp1          | -0.108723 | -0.322607  | 0.5195  | 0.644794 | no |
| Sdhb          | -0.108761 | -0.586639  | 0.33585 | 0.467106 | no |
| Tma7          | -0.108942 | -0.415345  | 0.565   | 0.683741 | no |
| Mga           | -0.109158 | -0.4456    | 0.36995 | 0.501561 | no |
| Nod2          | -0.109231 | 0          | 1       | 1        | no |
| Sh3bp2        | -0.10926  | 0          | 1       | 1        | no |
| Pms2          | -0.10928  | -0.281657  | 0.5912  | 0.706045 | no |
| Rnaseh2a      | -0.109431 | -0.342529  | 0.53405 | 0.657197 | no |
| Anks1         | -0.109737 | -0.440247  | 0.37315 | 0.504646 | no |
| Mtg2          | -0.109769 | -0.227674  | 0.64685 | 0.751402 | no |
| Etv5          | -0.109895 | -0.515596  | 0.31925 | 0.449198 | no |
| Snrpb2        | -0.110032 | -0.444856  | 0.45255 | 0.582571 | no |
| Maged1        | -0.110088 | -0.536014  | 0.31105 | 0.440487 | no |
| Rnmt          | -0.11016  | -0.464216  | 0.3486  | 0.480756 | no |
| Atp8b2        | -0.110256 | -0.523703  | 0.3013  | 0.429453 | no |
| Dcaf5         | -0.110307 | -0.492168  | 0.3174  | 0.447212 | no |
| 1700052N19Rik | -0.110706 | -0.354026  | 0.5119  | 0.638047 | no |
| Urm1          | -0.110729 | -0.491124  | 0.37055 | 0.501949 | no |
| Rps6ka3       | -0.110845 | -0.536715  | 0.2908  | 0.417944 | no |
| Ski           | -0.110917 | -0.506777  | 0.32675 | 0.457519 | no |
| Tmem69        | -0.110991 | -0.305286  | 0.5698  | 0.688294 | no |
| Hmx1          | -0.110996 | -0.20261   | 0.7255  | 0.816318 | no |
| A330035P11Rik | -0.111022 | 0          | 1       | 1        | no |
| Gm11696       | -0.111128 | -0.0819635 | 0.8811  | 0.926786 | no |
| Cln3          | -0.111307 | -0.306295  | 0.538   | 0.660526 | no |
| Tmem120a      | -0.111344 | -0.304216  | 0.5338  | 0.657011 | no |
| Raf1          | -0.111418 | -0.44268   | 0.37145 | 0.50286  | no |
| Tmem117       | -0.11159  | -0.510519  | 0.34245 | 0.474247 | no |
| Iigp1         | -0.111631 | -0.239694  | 0.63265 | 0.739953 | no |
| Mtpn          | -0.111797 | -0.551984  | 0.28255 | 0.408299 | no |
| Cenpb         | -0.111906 | -0.268216  | 0.5885  | 0.703707 | no |
| Scly          | -0.112104 | -0.363673  | 0.4965  | 0.62348  | no |
| Strada        | -0.112148 | -0.367207  | 0.45825 | 0.588026 | no |
| Apold1        | -0.112273 | -0.225958  | 0.66985 | 0.769895 | no |

|          |           |           |         |          |    |
|----------|-----------|-----------|---------|----------|----|
| Txndc15  | -0.112297 | -0.487127 | 0.39665 | 0.528349 | no |
| Gpr107   | -0.112333 | -0.498527 | 0.34165 | 0.473435 | no |
| Trip11   | -0.112443 | -0.453998 | 0.3718  | 0.503231 | no |
| Mcm9     | -0.112534 | -0.170437 | 0.7468  | 0.832098 | no |
| Zfp454   | -0.112537 | -0.179474 | 0.7444  | 0.830596 | no |
| Sar1b    | -0.112573 | -0.47805  | 0.42115 | 0.55266  | no |
| Gtpbp4   | -0.112576 | -0.439344 | 0.41545 | 0.547346 | no |
| Pparg    | -0.112639 | -0.1243   | 0.80265 | 0.871492 | no |
| H1f0     | -0.11265  | -0.525825 | 0.3278  | 0.45865  | no |
| Gm608    | -0.112653 | -0.403892 | 0.4251  | 0.556358 | no |
| Acbd6    | -0.112778 | -0.374196 | 0.45825 | 0.588026 | no |
| Tbl1xr1  | -0.112859 | -0.515111 | 0.3069  | 0.435796 | no |
| Syngap1  | -0.112946 | -0.280896 | 0.56955 | 0.688118 | no |
| Lnp      | -0.113189 | -0.530914 | 0.29205 | 0.419377 | no |
| Rptor    | -0.113195 | -0.486337 | 0.32905 | 0.460011 | no |
| Cdk12    | -0.113249 | -0.423341 | 0.4011  | 0.532885 | no |
| Son      | -0.113296 | -0.529268 | 0.2836  | 0.409415 | no |
| Rmnd1    | -0.113321 | -0.201048 | 0.6813  | 0.779947 | no |
| Blvra    | -0.113697 | -0.401362 | 0.49775 | 0.624695 | no |
| D2Wsu81e | -0.113812 | -0.305784 | 0.5398  | 0.662185 | no |
| Amigo3   | -0.11385  | -0.319081 | 0.52345 | 0.648302 | no |
| Bcl6     | -0.114069 | -0.415429 | 0.4304  | 0.561798 | no |
| Supt6    | -0.114123 | -0.550552 | 0.2898  | 0.416733 | no |
| Pou2f1   | -0.114192 | -0.35899  | 0.46815 | 0.597379 | no |
| Scrib    | -0.114344 | -0.36291  | 0.4609  | 0.590342 | no |
| Sh2b1    | -0.114348 | -0.443119 | 0.3716  | 0.503012 | no |
| Gm13251  | -0.114388 | 0         | 1       | 1        | no |
| Cers2    | -0.114469 | -0.473012 | 0.39465 | 0.526372 | no |
| Fem1c    | -0.114469 | -0.397978 | 0.45125 | 0.581575 | no |
| Oard1    | -0.114554 | -0.259962 | 0.59895 | 0.712602 | no |
| Rbm12    | -0.114603 | -0.216082 | 0.6665  | 0.767414 | no |
| Slc30a9  | -0.114667 | -0.574195 | 0.27465 | 0.399625 | no |
| Mtmr9    | -0.114749 | -0.568551 | 0.2881  | 0.414738 | no |
| Isg20l2  | -0.115026 | -0.323099 | 0.54455 | 0.666655 | no |
| Hdac6    | -0.115254 | -0.39907  | 0.4256  | 0.556858 | no |
| Ap1b1    | -0.115394 | -0.118141 | 0.7593  | 0.84198  | no |
| Pdcd6    | -0.11542  | -0.486075 | 0.39995 | 0.53189  | no |
| Ddx3y    | -0.11589  | -0.508839 | 0.3305  | 0.461601 | no |
| Ncoa3    | -0.11596  | -0.452064 | 0.3725  | 0.503973 | no |
| Syncrip  | -0.116068 | -0.426074 | 0.38845 | 0.519722 | no |
| Tbl3     | -0.116247 | -0.436602 | 0.41565 | 0.547501 | no |
| Pdgfa    | -0.116256 | -0.471637 | 0.44265 | 0.57406  | no |
| Lace1    | -0.116356 | -0.335627 | 0.53245 | 0.655958 | no |
| Nus1     | -0.116508 | -0.545182 | 0.29655 | 0.424369 | no |
| Ears2    | -0.116588 | -0.212393 | 0.7018  | 0.797224 | no |
| Vac14    | -0.116605 | -0.428595 | 0.42205 | 0.553568 | no |
| Naf1     | -0.116691 | -0.294869 | 0.5782  | 0.695276 | no |
| Degs1    | -0.116741 | -0.610638 | 0.2665  | 0.390939 | no |
| Man2b2   | -0.116822 | -0.447347 | 0.3982  | 0.529988 | no |
| Hkdc1    | -0.11692  | 0         | 1       | 1        | no |
| Sncaip   | -0.116925 | -0.168704 | 0.72835 | 0.818471 | no |
| Serinc1  | -0.116941 | -0.506238 | 0.3471  | 0.479086 | no |
| Ndel1    | -0.116959 | -0.586011 | 0.2721  | 0.396902 | no |

|               |           |            |         |          |    |
|---------------|-----------|------------|---------|----------|----|
| S100a11       | -0.117039 | -0.425322  | 0.6082  | 0.72006  | no |
| Coa3          | -0.11709  | -0.641096  | 0.35775 | 0.489912 | no |
| Mturn         | -0.117092 | -0.544038  | 0.2743  | 0.399276 | no |
| Hlcs          | -0.11716  | -0.475064  | 0.3598  | 0.492009 | no |
| Emcn          | -0.117179 | -0.313437  | 0.5327  | 0.656023 | no |
| Rnf167        | -0.117211 | -0.507082  | 0.3756  | 0.507081 | no |
| Dhrs7b        | -0.117293 | -0.34297   | 0.4945  | 0.621675 | no |
| Nbr1          | -0.117353 | -0.542048  | 0.2764  | 0.401775 | no |
| Hectd1        | -0.117449 | -0.56357   | 0.26335 | 0.387303 | no |
| Abca17        | -0.117452 | 0          | 1       | 1        | no |
| Gabpa         | -0.117614 | -0.26315   | 0.6004  | 0.713563 | no |
| Zfp110        | -0.117889 | -0.404361  | 0.44205 | 0.573394 | no |
| Ttl           | -0.11795  | -0.568403  | 0.2704  | 0.395262 | no |
| Usp14         | -0.118147 | -0.500512  | 0.3075  | 0.436414 | no |
| Cnot6l        | -0.118597 | -0.435172  | 0.38195 | 0.513251 | no |
| Nlk           | -0.118654 | -0.537134  | 0.299   | 0.427    | no |
| Chd2          | -0.118678 | -0.409003  | 0.40875 | 0.540667 | no |
| Ulk1          | -0.118685 | -0.530184  | 0.302   | 0.430312 | no |
| C230004F18Rik | -0.11897  | -0.203544  | 0.7555  | 0.838974 | no |
| Gltp          | -0.119111 | -0.392514  | 0.4886  | 0.616184 | no |
| Anln          | -0.119136 | -0.142551  | 0.76105 | 0.84295  | no |
| Snrpn         | -0.119177 | -0.311864  | 0.4563  | 0.586204 | no |
| Gpr89         | -0.119309 | -0.464001  | 0.41435 | 0.546385 | no |
| Tor2a         | -0.11934  | -0.255459  | 0.6584  | 0.760557 | no |
| Ganc          | -0.119358 | -0.24316   | 0.64335 | 0.748713 | no |
| Ddost         | -0.11948  | -0.563131  | 0.3061  | 0.434986 | no |
| Frmd3         | -0.119585 | -0.489677  | 0.3266  | 0.457357 | no |
| Rab22a        | -0.119645 | -0.426214  | 0.38285 | 0.514148 | no |
| Senp1         | -0.119653 | -0.0950884 | 0.8493  | 0.90467  | no |
| Cept1         | -0.11977  | -0.484339  | 0.3296  | 0.460634 | no |
| Fam151b       | -0.11982  | -0.201036  | 0.7333  | 0.822222 | no |
| AF529169      | -0.119929 | -0.473224  | 0.36615 | 0.498074 | no |
| Golga7        | -0.119971 | -0.489402  | 0.3254  | 0.45611  | no |
| Prune2        | -0.120201 | -0.348429  | 0.49275 | 0.620121 | no |
| Mrpl17        | -0.120258 | -0.450642  | 0.3867  | 0.518269 | no |
| Pacs2         | -0.120284 | -0.5654    | 0.2569  | 0.379881 | no |
| Park7         | -0.120314 | -0.68838   | 0.28125 | 0.407219 | no |
| Ago3          | -0.120486 | -0.436462  | 0.3932  | 0.524702 | no |
| Asb7          | -0.120499 | -0.379604  | 0.441   | 0.572536 | no |
| Pafah1b2      | -0.120867 | -0.585959  | 0.25075 | 0.373451 | no |
| Fbxl14        | -0.12092  | -0.392896  | 0.43275 | 0.564366 | no |
| A4galt        | -0.121033 | -0.454739  | 0.3623  | 0.494306 | no |
| Macf1         | -0.121067 | -0.561018  | 0.26225 | 0.385857 | no |
| 1700007G11Rik | -0.121197 | 0          | 1       | 1        | no |
| Ulk4          | -0.121229 | 0          | 1       | 1        | no |
| Pgpep1        | -0.12124  | -0.382079  | 0.45335 | 0.583262 | no |
| Rfc4          | -0.12124  | -0.0350596 | 0.9478  | 0.967741 | no |
| Arhgap20      | -0.121281 | -0.40854   | 0.41325 | 0.545206 | no |
| Myh13         | -0.12129  | 0          | 1       | 1        | no |
| Alkbh6        | -0.121366 | -0.411302  | 0.52055 | 0.645494 | no |
| Tanc1         | -0.121541 | -0.553205  | 0.26645 | 0.390939 | no |
| Fam50a        | -0.122098 | -0.366995  | 0.45945 | 0.588996 | no |
| Gpr26         | -0.122105 | -0.207474  | 0.69125 | 0.788074 | no |

|          |           |            |         |          |    |
|----------|-----------|------------|---------|----------|----|
| Trim44   | -0.122106 | -0.596226  | 0.2477  | 0.369988 | no |
| Kctd6    | -0.122321 | -0.497146  | 0.38045 | 0.511962 | no |
| Tmem82   | -0.122413 | 0          | 1       | 1        | no |
| Itgb3bp  | -0.122461 | -0.237398  | 0.6547  | 0.7578   | no |
| Echdc1   | -0.122645 | -0.351729  | 0.5069  | 0.633422 | no |
| Hccs     | -0.12274  | -0.45603   | 0.39325 | 0.524716 | no |
| Ubl3     | -0.122789 | -0.613733  | 0.25165 | 0.374403 | no |
| Mrps31   | -0.122926 | -0.396867  | 0.48785 | 0.615589 | no |
| Wdr19    | -0.123178 | -0.397191  | 0.43625 | 0.568037 | no |
| Vdac1    | -0.12318  | -0.634892  | 0.2524  | 0.375066 | no |
| Cln3     | -0.123181 | -0.579526  | 0.2417  | 0.363358 | no |
| Prkab2   | -0.123189 | -0.56822   | 0.27    | 0.394851 | no |
| Furin    | -0.123596 | -0.486765  | 0.3273  | 0.458047 | no |
| Copa     | -0.123651 | -0.505847  | 0.30655 | 0.435485 | no |
| Fam221b  | -0.123698 | 0          | 1       | 1        | no |
| Picalm   | -0.123726 | -0.580713  | 0.2407  | 0.362471 | no |
| Lsm14a   | -0.123765 | -0.536344  | 0.31825 | 0.448124 | no |
| Adap1    | -0.123766 | -0.628403  | 0.24595 | 0.368079 | no |
| Ufsp2    | -0.123794 | -0.527663  | 0.3557  | 0.487608 | no |
| Uqcrb    | -0.123831 | -0.502407  | 0.54595 | 0.667507 | no |
| Txndc17  | -0.123857 | -0.560986  | 0.3239  | 0.454536 | no |
| Parl     | -0.123925 | -0.490192  | 0.40545 | 0.537212 | no |
| Ints12   | -0.124531 | -0.329813  | 0.52895 | 0.652677 | no |
| Zfp747   | -0.124556 | -0.261556  | 0.622   | 0.731042 | no |
| Rtn4     | -0.124671 | -0.46793   | 0.36475 | 0.496882 | no |
| Chac1    | -0.124852 | -0.24265   | 0.6694  | 0.769702 | no |
| Atg4b    | -0.124853 | -0.599148  | 0.2642  | 0.388338 | no |
| Mtch2    | -0.12492  | -0.599816  | 0.2669  | 0.39118  | no |
| Tmem170  | -0.124971 | -0.273709  | 0.62075 | 0.730161 | no |
| Tbc1d19  | -0.125023 | -0.571834  | 0.29085 | 0.417971 | no |
| Slc35e3  | -0.125513 | -0.510307  | 0.3305  | 0.461601 | no |
| Zxda     | -0.125587 | -0.290151  | 0.5643  | 0.683081 | no |
| Fastkd2  | -0.125925 | -0.447152  | 0.393   | 0.52454  | no |
| Atg13    | -0.126034 | -0.586179  | 0.26565 | 0.389994 | no |
| Saal1    | -0.126114 | -0.27046   | 0.60145 | 0.714363 | no |
| Cd2ap    | -0.126176 | -0.585586  | 0.25305 | 0.375737 | no |
| Adnp     | -0.126349 | -0.59729   | 0.2448  | 0.366771 | no |
| Tmem184c | -0.12637  | -0.631521  | 0.23445 | 0.355155 | no |
| Mcmbp    | -0.12637  | -0.41315   | 0.42305 | 0.554441 | no |
| Pnck     | -0.126378 | -0.296733  | 0.5459  | 0.667507 | no |
| 38230    | -0.126429 | -0.563269  | 0.2615  | 0.384924 | no |
| Atp5f1   | -0.12659  | -0.431534  | 0.45515 | 0.585067 | no |
| Nipbl    | -0.126742 | -0.502046  | 0.31215 | 0.441644 | no |
| Msrp3    | -0.12688  | -0.342315  | 0.506   | 0.632655 | no |
| Zfp691   | -0.126885 | -0.209309  | 0.67465 | 0.774128 | no |
| Pelo     | -0.127313 | -0.311193  | 0.53325 | 0.656517 | no |
| Zscan2   | -0.127357 | -0.236381  | 0.6597  | 0.761594 | no |
| Fam104a  | -0.127364 | -0.273901  | 0.58785 | 0.70312  | no |
| Pcdhga5  | -0.127491 | -0.0631622 | 0.90635 | 0.941772 | no |
| Nup214   | -0.127576 | -0.507112  | 0.30955 | 0.438948 | no |
| Gid8     | -0.12775  | -0.53256   | 0.2872  | 0.413711 | no |
| Tnrc18   | -0.127767 | -0.526839  | 0.28925 | 0.416032 | no |
| Tmem41b  | -0.127878 | -0.523451  | 0.323   | 0.453705 | no |

|               |           |            |         |          |    |
|---------------|-----------|------------|---------|----------|----|
| Pgm2          | -0.128026 | -0.632446  | 0.2378  | 0.358994 | no |
| Asic4         | -0.128093 | 0          | 1       | 1        | no |
| Trdmt1        | -0.128218 | -0.256335  | 0.6349  | 0.74135  | no |
| Ppp6r2        | -0.128231 | -0.54765   | 0.2692  | 0.393898 | no |
| Phf2          | -0.12827  | -0.466388  | 0.36335 | 0.495331 | no |
| Samd9l        | -0.12832  | -0.390943  | 0.4465  | 0.577748 | no |
| Ints4         | -0.128363 | -0.531994  | 0.3161  | 0.445901 | no |
| Vrk1          | -0.128384 | -0.352722  | 0.4813  | 0.609993 | no |
| P4ha1         | -0.128537 | -0.538237  | 0.29895 | 0.426975 | no |
| E130317F20Rik | -0.128548 | -0.0144523 | 0.91785 | 0.949409 | no |
| Elp2          | -0.128605 | -0.611881  | 0.2589  | 0.382455 | no |
| Clpb          | -0.128671 | -0.52683   | 0.3109  | 0.440463 | no |
| Nckipsd       | -0.128753 | -0.547396  | 0.30835 | 0.43748  | no |
| Sptssa        | -0.128923 | -0.468717  | 0.34135 | 0.473168 | no |
| Sumf1         | -0.128992 | -0.539781  | 0.31685 | 0.446627 | no |
| Nr2f6         | -0.129038 | -0.414729  | 0.44195 | 0.573377 | no |
| Gemin5        | -0.129145 | -0.471301  | 0.34175 | 0.473525 | no |
| Zfp952        | -0.129153 | -0.339108  | 0.52415 | 0.648806 | no |
| Sox6          | -0.129566 | -0.327032  | 0.50775 | 0.634245 | no |
| Adpgk         | -0.1297   | -0.448136  | 0.4025  | 0.533997 | no |
| Cnot1         | -0.129823 | -0.597357  | 0.24065 | 0.362437 | no |
| Mrpl12        | -0.129904 | -0.584031  | 0.35105 | 0.483131 | no |
| Cdk5r1        | -0.129913 | -0.584438  | 0.26095 | 0.384413 | no |
| Ccdc127       | -0.129998 | -0.584436  | 0.26405 | 0.388161 | no |
| Gpatch2l      | -0.13     | -0.469976  | 0.37005 | 0.501561 | no |
| Rnf187        | -0.130013 | -0.675899  | 0.22215 | 0.340921 | no |
| BC004004      | -0.130096 | -0.578507  | 0.28205 | 0.407915 | no |
| Oxsm          | -0.130121 | -0.247378  | 0.64085 | 0.746779 | no |
| Zfp516        | -0.130149 | -0.51167   | 0.2995  | 0.427392 | no |
| Cpsf1         | -0.130173 | -0.450048  | 0.37075 | 0.502168 | no |
| Ly75          | -0.130173 | -0.312874  | 0.5439  | 0.666044 | no |
| Trim45        | -0.130416 | -0.370072  | 0.45065 | 0.580915 | no |
| Pex5l         | -0.130457 | -0.570028  | 0.25605 | 0.379004 | no |
| Chmp7         | -0.130532 | -0.611057  | 0.2549  | 0.377766 | no |
| Dlgap1        | -0.130791 | -0.538427  | 0.2885  | 0.415178 | no |
| Fancm         | -0.130925 | -0.363579  | 0.4756  | 0.604559 | no |
| Nfya          | -0.131    | -0.413807  | 0.41    | 0.541942 | no |
| Dpp9          | -0.131019 | -0.600356  | 0.25465 | 0.37748  | no |
| Zfp532        | -0.131147 | -0.111175  | 0.82535 | 0.887639 | no |
| Heatr1        | -0.131229 | -0.440466  | 0.38255 | 0.513797 | no |
| Tyw1          | -0.131251 | -0.316967  | 0.5239  | 0.648678 | no |
| Ddx4          | -0.131508 | -0.196131  | 0.69625 | 0.792344 | no |
| Tmem8c        | -0.131686 | 0          | 1       | 1        | no |
| Ube4b         | -0.131695 | -0.642144  | 0.20775 | 0.323576 | no |
| Nif3l1        | -0.131759 | -0.461293  | 0.39485 | 0.52648  | no |
| Ncstn         | -0.131854 | -0.298596  | 0.5738  | 0.691741 | no |
| Chrn3         | -0.131928 | -0.395343  | 0.4268  | 0.558032 | no |
| Kdm3a         | -0.131999 | -0.415583  | 0.39505 | 0.526694 | no |
| Mrps9         | -0.132072 | -0.52095   | 0.36155 | 0.493689 | no |
| Wdr45b        | -0.132169 | -0.572853  | 0.29485 | 0.422484 | no |
| Mex3a         | -0.132173 | 0          | 1       | 1        | no |
| Actr10        | -0.132179 | -0.638134  | 0.2156  | 0.333337 | no |
| 0610010K14Rik | -0.13219  | -0.285612  | 0.5681  | 0.686616 | no |

|               |           |           |         |          |    |
|---------------|-----------|-----------|---------|----------|----|
| Klhl17        | -0.132294 | -0.472241 | 0.34135 | 0.473168 | no |
| Nup107        | -0.132319 | -0.463977 | 0.37265 | 0.504073 | no |
| Tmem70        | -0.132336 | -0.464344 | 0.35265 | 0.48488  | no |
| Apoa1bp       | -0.132486 | -0.63625  | 0.32005 | 0.44999  | no |
| Zbtb33        | -0.132611 | -0.140393 | 0.76745 | 0.847491 | no |
| Zfp938        | -0.132714 | -0.462549 | 0.4024  | 0.533971 | no |
| Ssr4          | -0.132775 | -0.416731 | 0.40065 | 0.532554 | no |
| Alg12         | -0.133006 | -0.347406 | 0.48375 | 0.612162 | no |
| Cirh1a        | -0.133212 | -0.458383 | 0.3925  | 0.524137 | no |
| Rims1         | -0.133356 | -0.389811 | 0.48205 | 0.610477 | no |
| Emc6          | -0.133528 | -0.428345 | 0.3882  | 0.519493 | no |
| Ppapdc3       | -0.133595 | -0.402698 | 0.47595 | 0.604888 | no |
| Tatdn2        | -0.133772 | -0.461039 | 0.3506  | 0.482799 | no |
| Btrc          | -0.133808 | -0.592436 | 0.23395 | 0.354722 | no |
| Alyref2       | -0.134112 | -0.19555  | 0.73955 | 0.826728 | no |
| Akr1c14       | -0.134275 | -0.299025 | 0.58195 | 0.698453 | no |
| Eif4ebp2      | -0.134288 | -0.384686 | 0.4967  | 0.623672 | no |
| Snrnp200      | -0.134473 | -0.639446 | 0.20795 | 0.323735 | no |
| Aqp11         | -0.134641 | -0.309631 | 0.60005 | 0.713403 | no |
| Zfp91         | -0.134686 | -0.590876 | 0.23065 | 0.351042 | no |
| Trpc1         | -0.134718 | -0.503427 | 0.3464  | 0.478468 | no |
| Ttc38         | -0.13478  | -0.440568 | 0.4003  | 0.532196 | no |
| Asna1         | -0.134798 | -0.663696 | 0.266   | 0.390379 | no |
| Herc6         | -0.134851 | -0.275375 | 0.5934  | 0.707653 | no |
| Top1mt        | -0.134967 | -0.355417 | 0.52575 | 0.649695 | no |
| Kdm5a         | -0.135043 | -0.533639 | 0.2879  | 0.414495 | no |
| Rdh12         | -0.135098 | 0         | 1       | 1        | no |
| Jup           | -0.13511  | -0.661453 | 0.1962  | 0.309033 | no |
| Wdr90         | -0.135131 | 0         | 1       | 1        | no |
| Zfp748        | -0.135161 | -0.331621 | 0.51885 | 0.644048 | no |
| Tbl1x         | -0.135232 | -0.538272 | 0.32805 | 0.458855 | no |
| Krt83         | -0.135249 | 0         | 1       | 1        | no |
| Fat3          | -0.135648 | -0.564926 | 0.25675 | 0.379702 | no |
| Cenpq         | -0.135671 | -0.287371 | 0.6244  | 0.732954 | no |
| Cd300a        | -0.135693 | 0         | 1       | 1        | no |
| Dnajc9        | -0.135718 | -0.452847 | 0.4187  | 0.550262 | no |
| Tvp23a        | -0.135933 | -0.551285 | 0.2723  | 0.397033 | no |
| Psmc6         | -0.135948 | -0.713661 | 0.20545 | 0.320633 | no |
| Zdhhc17       | -0.135955 | -0.661855 | 0.2021  | 0.316373 | no |
| Slc16a7       | -0.136096 | -0.361127 | 0.50805 | 0.634384 | no |
| Mrpl28        | -0.136291 | -0.580187 | 0.34125 | 0.473128 | no |
| Dazap2        | -0.136297 | -0.683619 | 0.217   | 0.334565 | no |
| Sf3b6         | -0.136526 | -0.514832 | 0.3959  | 0.527615 | no |
| Nrxn2         | -0.136765 | -0.64267  | 0.1953  | 0.307835 | no |
| Mtmr3         | -0.136784 | -0.629636 | 0.22275 | 0.341684 | no |
| Ptrhd1        | -0.136804 | -0.3081   | 0.5385  | 0.660957 | no |
| Gm5           | -0.136902 | -0.168881 | 0.8498  | 0.90513  | no |
| Klhl22        | -0.13692  | -0.573036 | 0.2916  | 0.418822 | no |
| Zfp612        | -0.136969 | -0.480636 | 0.353   | 0.48516  | no |
| Spag9         | -0.136971 | -0.628297 | 0.2051  | 0.3202   | no |
| 4632415L05Rik | -0.137105 | -0.46738  | 0.36575 | 0.497581 | no |
| Spock3        | -0.137151 | -0.62354  | 0.2092  | 0.325452 | no |
| Ppat          | -0.137201 | -0.275201 | 0.59985 | 0.713293 | no |



|               |           |           |         |          |    |
|---------------|-----------|-----------|---------|----------|----|
| Ccne1         | -0.137301 | -0.386689 | 0.48685 | 0.614912 | no |
| Dnajc30       | -0.137323 | -0.288415 | 0.5535  | 0.674124 | no |
| Setx          | -0.13749  | -0.61071  | 0.22535 | 0.345153 | no |
| Tmem80        | -0.137827 | -0.190331 | 0.6827  | 0.781145 | no |
| 2810025M15Rik | -0.137878 | -0.134863 | 0.78785 | 0.861863 | no |
| Ica1          | -0.13809  | -0.496943 | 0.31475 | 0.444422 | no |
| Fndc3a        | -0.138119 | -0.573666 | 0.2645  | 0.388736 | no |
| Golga2        | -0.138445 | -0.629976 | 0.20395 | 0.318742 | no |
| Pggt1b        | -0.138483 | -0.411796 | 0.44005 | 0.571638 | no |
| Pik3c2a       | -0.138514 | -0.562389 | 0.27215 | 0.396902 | no |
| 1110037F02Rik | -0.138622 | -0.551789 | 0.28035 | 0.406359 | no |
| Htt           | -0.138692 | -0.659895 | 0.1877  | 0.298766 | no |
| Aggf1         | -0.138907 | -0.570927 | 0.282   | 0.407915 | no |
| Nsun3         | -0.138949 | -0.2554   | 0.66405 | 0.76555  | no |
| Ankrd27       | -0.139194 | -0.58151  | 0.2445  | 0.366488 | no |
| Ap5m1         | -0.139241 | -0.24546  | 0.6181  | 0.727877 | no |
| Samhd1        | -0.139291 | -0.516844 | 0.2972  | 0.425025 | no |
| Epg5          | -0.139396 | -0.589556 | 0.2443  | 0.366312 | no |
| Tnfrsf26      | -0.139512 | 0         | 1       | 1        | no |
| Rtn4ip1       | -0.139728 | -0.562684 | 0.2913  | 0.418436 | no |
| Fgf12         | -0.139803 | -0.641676 | 0.19645 | 0.309353 | no |
| Cdv3          | -0.14002  | -0.611969 | 0.21905 | 0.337217 | no |
| 6430562O15Rik | -0.140089 | 0         | 1       | 1        | no |
| L3mbtl1       | -0.140136 | -0.314532 | 0.5579  | 0.67787  | no |
| Mgat1         | -0.140229 | -0.530402 | 0.28565 | 0.411881 | no |
| Atxn1l        | -0.140251 | -0.585663 | 0.25375 | 0.376482 | no |
| Cox6c         | -0.140318 | -0.990898 | 0.23535 | 0.356315 | no |
| Rbm19         | -0.140351 | -0.367943 | 0.46885 | 0.597984 | no |
| Akap1         | -0.140397 | -0.480397 | 0.33085 | 0.461895 | no |
| Degs2         | -0.140688 | -0.017065 | 0.9308  | 0.957281 | no |
| Mto1          | -0.14072  | -0.434814 | 0.41485 | 0.546881 | no |
| Olig1         | -0.140862 | 0         | 1       | 1        | no |
| Cdkl3         | -0.140906 | -0.268041 | 0.58125 | 0.697805 | no |
| Tmem8b        | -0.141001 | -0.61831  | 0.2371  | 0.358351 | no |
| Derl1         | -0.14106  | -0.656164 | 0.21575 | 0.333491 | no |
| Cnih4         | -0.141195 | -0.573517 | 0.27265 | 0.397456 | no |
| Herc2         | -0.141263 | -0.6562   | 0.1903  | 0.302071 | no |
| Ttc19         | -0.141291 | -0.326103 | 0.53785 | 0.660464 | no |
| Nmd3          | -0.141294 | -0.512079 | 0.35445 | 0.486347 | no |
| Foxk1         | -0.141334 | -0.57898  | 0.26015 | 0.383575 | no |
| Gltscr1       | -0.141366 | -0.376081 | 0.4687  | 0.597908 | no |
| Tmem230       | -0.141408 | -0.502019 | 0.3137  | 0.443175 | no |
| Prr12         | -0.141449 | -0.552503 | 0.27755 | 0.403122 | no |
| Myg1          | -0.142126 | -0.498824 | 0.3844  | 0.515917 | no |
| Tdrd3         | -0.142328 | -0.473374 | 0.34215 | 0.473881 | no |
| AU021092      | -0.14234  | -0.174257 | 0.76775 | 0.847611 | no |
| Zfp429        | -0.142555 | 0         | 1       | 1        | no |
| Pi4k2a        | -0.142687 | -0.697032 | 0.1821  | 0.291954 | no |
| Elk1          | -0.143295 | -0.4088   | 0.4391  | 0.570628 | no |
| Tmem66        | -0.143303 | -0.67267  | 0.1744  | 0.281788 | no |
| Tmem106b      | -0.143303 | -0.684329 | 0.18255 | 0.292464 | no |
| Tmem129       | -0.14334  | -0.531473 | 0.32795 | 0.458812 | no |
| Dcaf17        | -0.143644 | -0.235314 | 0.63195 | 0.739337 | no |

|               |           |           |         |          |    |
|---------------|-----------|-----------|---------|----------|----|
| Cdk16         | -0.143682 | -0.724125 | 0.1734  | 0.280446 | no |
| Elac2         | -0.143876 | -0.301333 | 0.5728  | 0.690975 | no |
| Gtpbp8        | -0.144007 | -0.378309 | 0.44865 | 0.579181 | no |
| Trim32        | -0.144044 | -0.555492 | 0.26075 | 0.384161 | no |
| Eif2b1        | -0.144135 | -0.526413 | 0.34055 | 0.472454 | no |
| Pld3          | -0.14416  | -0.728613 | 0.1788  | 0.287986 | no |
| Qser1         | -0.144219 | -0.499861 | 0.3288  | 0.45971  | no |
| Zfp273        | -0.144389 | -0.215166 | 0.66245 | 0.764104 | no |
| Herc1         | -0.144399 | -0.671972 | 0.18135 | 0.291174 | no |
| Tubb4b        | -0.144408 | -0.643368 | 0.1926  | 0.304774 | no |
| Klhl3         | -0.144418 | -0.247069 | 0.619   | 0.728684 | no |
| Eltd1         | -0.144484 | -0.45562  | 0.37715 | 0.508604 | no |
| Tpp1          | -0.144727 | -0.607817 | 0.25305 | 0.375737 | no |
| Pat1          | -0.144785 | -0.457193 | 0.35365 | 0.485651 | no |
| A830082N09Rik | -0.144819 | -0.45259  | 0.37015 | 0.501561 | no |
| Nsun2         | -0.144888 | -0.664354 | 0.20625 | 0.321693 | no |
| Ddx19b        | -0.144916 | -0.530934 | 0.28775 | 0.414324 | no |
| BC049762      | -0.144928 | 0         | 1       | 1        | no |
| Acot6         | -0.145161 | -0.276049 | 0.6212  | 0.730561 | no |
| Tdrp          | -0.14524  | -0.580848 | 0.285   | 0.411078 | no |
| Zfp281        | -0.145247 | -0.50927  | 0.2988  | 0.426853 | no |
| Zfp526        | -0.145277 | -0.318955 | 0.541   | 0.663166 | no |
| Lias          | -0.145308 | -0.581382 | 0.2996  | 0.427489 | no |
| Ttc17         | -0.145347 | -0.558768 | 0.2824  | 0.408171 | no |
| Cdk7          | -0.145607 | -0.636345 | 0.2002  | 0.314066 | no |
| Ankrd45       | -0.145617 | -0.473553 | 0.34165 | 0.473435 | no |
| Wnt3a         | -0.145721 | 0         | 1       | 1        | no |
| Selt          | -0.146002 | -0.722719 | 0.16525 | 0.27013  | no |
| Dcaf10        | -0.146153 | -0.55658  | 0.27425 | 0.399262 | no |
| Senp8         | -0.146154 | -0.432946 | 0.3854  | 0.517102 | no |
| Cdc42se1      | -0.14623  | -0.265066 | 0.59825 | 0.712092 | no |
| Insr          | -0.146267 | -0.607717 | 0.2334  | 0.354206 | no |
| Timm8b        | -0.146323 | -0.715866 | 0.37225 | 0.503686 | no |
| Def8          | -0.146334 | -0.640031 | 0.19405 | 0.30652  | no |
| Mllt4         | -0.146626 | -0.606611 | 0.2264  | 0.346402 | no |
| Tcp11l1       | -0.146686 | -0.679517 | 0.1975  | 0.310712 | no |
| Wipf2         | -0.146985 | -0.623188 | 0.21855 | 0.336564 | no |
| Zfp27         | -0.147034 | -0.348153 | 0.47915 | 0.607965 | no |
| Btbd6         | -0.14717  | -0.33679  | 0.49955 | 0.626361 | no |
| Tpd52l1       | -0.147241 | -0.197916 | 0.7378  | 0.825259 | no |
| Ipo9          | -0.147318 | -0.680604 | 0.18175 | 0.291569 | no |
| Uso1          | -0.147699 | -0.710711 | 0.16825 | 0.274054 | no |
| Slc45a4       | -0.147766 | -0.62435  | 0.21055 | 0.327054 | no |
| Anxa6         | -0.147841 | -0.655187 | 0.18595 | 0.296728 | no |
| Dhrs7         | -0.147956 | -0.635801 | 0.278   | 0.40357  | no |
| Ppp2r5e       | -0.147969 | -0.683718 | 0.1836  | 0.293756 | no |
| Erich6        | -0.148148 | -0.200973 | 0.718   | 0.810629 | no |
| Abcf3         | -0.148156 | -0.672191 | 0.20685 | 0.322401 | no |
| Ndst2         | -0.148202 | -0.362098 | 0.48845 | 0.616112 | no |
| Acvr2a        | -0.148219 | -0.45903  | 0.36285 | 0.494904 | no |
| Dusp2         | -0.14825  | 0         | 1       | 1        | no |
| Smurf2        | -0.148294 | -0.594848 | 0.249   | 0.371512 | no |
| Xrcc4         | -0.148314 | -0.354516 | 0.5407  | 0.66286  | no |

|               |           |            |         |          |    |
|---------------|-----------|------------|---------|----------|----|
| Oprk1         | -0.148318 | -0.248818  | 0.6139  | 0.724739 | no |
| Gtf2h3        | -0.148379 | -0.379272  | 0.4794  | 0.608224 | no |
| Thbs3         | -0.148487 | -0.274863  | 0.5973  | 0.711217 | no |
| Cpd           | -0.148546 | -0.713275  | 0.15745 | 0.259877 | no |
| Eps8l1        | -0.148553 | -0.215979  | 0.6836  | 0.781703 | no |
| Suv420h1      | -0.148727 | -0.524739  | 0.2859  | 0.412107 | no |
| Fam175a       | -0.149007 | -0.258977  | 0.62595 | 0.734383 | no |
| Prrc2b        | -0.149132 | -0.680484  | 0.17205 | 0.27884  | no |
| Neurl3        | -0.149392 | 0          | 1       | 1        | no |
| 1700001G17Rik | -0.149563 | 0          | 1       | 1        | no |
| Emg1          | -0.149643 | -0.284095  | 0.5627  | 0.681829 | no |
| B3gntl1       | -0.149746 | -0.0772912 | 0.8734  | 0.921809 | no |
| Thbd          | -0.15001  | -0.602148  | 0.2495  | 0.372049 | no |
| Erap1         | -0.150158 | -0.467217  | 0.3669  | 0.498634 | no |
| Adck5         | -0.15029  | -0.239796  | 0.6623  | 0.763997 | no |
| BC031361      | -0.150614 | -0.0595464 | 0.9122  | 0.945333 | no |
| Pcmt1         | -0.150739 | -0.785899  | 0.15435 | 0.25597  | no |
| Ikbkap        | -0.150801 | -0.654202  | 0.204   | 0.318783 | no |
| Cirbp         | -0.150806 | -0.0635037 | 0.90225 | 0.939403 | no |
| Tctn1         | -0.150846 | -0.451966  | 0.36735 | 0.498939 | no |
| Zfp113        | -0.150964 | -0.370235  | 0.46655 | 0.596082 | no |
| Phf11b        | -0.151042 | -0.175107  | 0.77475 | 0.852643 | no |
| Aff1          | -0.151102 | -0.611372  | 0.2165  | 0.334261 | no |
| Dnm1          | -0.151282 | -0.674607  | 0.16875 | 0.274734 | no |
| Nipa1         | -0.151355 | -0.615747  | 0.21355 | 0.330669 | no |
| Ssr3          | -0.151388 | -0.751797  | 0.1613  | 0.265077 | no |
| Leprot        | -0.151478 | -0.627621  | 0.2668  | 0.391163 | no |
| Ube2v1        | -0.151482 | -0.615229  | 0.26555 | 0.389891 | no |
| Actr3b        | -0.151492 | -0.674865  | 0.23025 | 0.350634 | no |
| Glt8d1        | -0.151628 | -0.292638  | 0.5938  | 0.707995 | no |
| Pcid2         | -0.151743 | -0.538661  | 0.3233  | 0.453934 | no |
| Igfbp3        | -0.151804 | -0.447337  | 0.4114  | 0.543305 | no |
| Upp2          | -0.151851 | -0.371731  | 0.45595 | 0.585868 | no |
| Rlim          | -0.152042 | -0.704383  | 0.1631  | 0.26734  | no |
| Dbn1          | -0.152253 | -0.690529  | 0.1624  | 0.266456 | no |
| Psmc2         | -0.152272 | -0.718041  | 0.14645 | 0.245601 | no |
| Pdk1          | -0.152532 | -0.643758  | 0.21635 | 0.334185 | no |
| Ing3          | -0.152589 | -0.406848  | 0.437   | 0.568734 | no |
| Zbtb18        | -0.152829 | -0.646173  | 0.19855 | 0.311957 | no |
| Zfyve28       | -0.152949 | -0.717998  | 0.1694  | 0.275589 | no |
| Hddc3         | -0.153047 | -0.212767  | 0.74405 | 0.830429 | no |
| Mtf1          | -0.153052 | -0.438752  | 0.3893  | 0.520754 | no |
| 4933408B17Rik | -0.153052 | 0          | 1       | 1        | no |
| Thsd7b        | -0.153084 | -0.514164  | 0.30975 | 0.439138 | no |
| Galnt14       | -0.153462 | -0.704335  | 0.19555 | 0.308192 | no |
| Sod2          | -0.153468 | -0.741106  | 0.15035 | 0.250495 | no |
| Gcc2          | -0.153646 | -0.681551  | 0.18275 | 0.292643 | no |
| Cdc16         | -0.153777 | -0.619927  | 0.254   | 0.376726 | no |
| Tmco1         | -0.153843 | -0.609677  | 0.24635 | 0.368511 | no |
| Mrps5         | -0.153956 | -0.515418  | 0.3671  | 0.498701 | no |
| Zfp354c       | -0.15408  | -0.579286  | 0.2605  | 0.383963 | no |
| Kdm2a         | -0.154117 | -0.709618  | 0.1624  | 0.266456 | no |
| Rint1         | -0.154563 | -0.288066  | 0.5934  | 0.707653 | no |

|               |           |            |         |          |    |
|---------------|-----------|------------|---------|----------|----|
| Coq5          | -0.154677 | -0.510099  | 0.35175 | 0.483944 | no |
| Exoc6b        | -0.154709 | -0.710166  | 0.1682  | 0.274007 | no |
| Tgoln1,Tgoln2 | -0.154907 | -0.708366  | 0.15085 | 0.251265 | no |
| Cwf1912       | -0.155066 | -0.556688  | 0.28645 | 0.412766 | no |
| Ank           | -0.155095 | -0.711353  | 0.1486  | 0.248109 | no |
| Man2a1        | -0.155096 | -0.43628   | 0.40095 | 0.532846 | no |
| Katnal1       | -0.15535  | -0.722961  | 0.1521  | 0.252903 | no |
| Hecw1         | -0.155445 | -0.746953  | 0.1361  | 0.231492 | no |
| Cd59a         | -0.155545 | -0.670709  | 0.181   | 0.290788 | no |
| Pcdhga3       | -0.155566 | -0.108939  | 0.82215 | 0.885669 | no |
| Elp4          | -0.155626 | -0.507871  | 0.3315  | 0.462462 | no |
| Tubgcp6       | -0.15563  | -0.506029  | 0.3096  | 0.438972 | no |
| Nck1          | -0.15567  | -0.544136  | 0.33295 | 0.464192 | no |
| Rpe           | -0.1557   | -0.536549  | 0.31955 | 0.449525 | no |
| Rhobtb2       | -0.155763 | -0.696647  | 0.17445 | 0.281835 | no |
| Impa1         | -0.155881 | -0.737841  | 0.16745 | 0.273053 | no |
| 3110001I22Rik | -0.156029 | -0.089391  | 0.86215 | 0.913225 | no |
| Med29         | -0.156104 | -0.291278  | 0.59555 | 0.709643 | no |
| Pccb          | -0.156265 | -0.688709  | 0.20745 | 0.323184 | no |
| Aldh18a1      | -0.156328 | -0.534998  | 0.28095 | 0.406873 | no |
| Prep          | -0.1566   | -0.715174  | 0.18515 | 0.295736 | no |
| Prss57        | -0.156657 | 0          | 1       | 1        | no |
| Rbpms         | -0.156666 | -0.265043  | 0.59045 | 0.705403 | no |
| Psmd13        | -0.156668 | -0.790446  | 0.1641  | 0.268581 | no |
| Atcay         | -0.156671 | -0.704867  | 0.151   | 0.251483 | no |
| Chp1          | -0.15668  | -0.79421   | 0.1399  | 0.23653  | no |
| B3gnt7        | -0.156702 | 0          | 1       | 1        | no |
| Slc22a5       | -0.156716 | -0.482699  | 0.35585 | 0.487663 | no |
| Ebag9         | -0.156869 | -0.520959  | 0.35535 | 0.48733  | no |
| Pcdha2        | -0.157017 | -0.0891687 | 0.8623  | 0.913311 | no |
| Ipo13         | -0.157085 | -0.688597  | 0.1916  | 0.30359  | no |
| Ccdc160       | -0.157092 | -0.333326  | 0.5628  | 0.681886 | no |
| E2f3          | -0.157289 | -0.578389  | 0.24015 | 0.361766 | no |
| Nup43         | -0.157301 | -0.343858  | 0.5548  | 0.675029 | no |
| Zfp87         | -0.157367 | -0.401377  | 0.45505 | 0.585052 | no |
| Ttc37         | -0.157475 | -0.593537  | 0.25155 | 0.37439  | no |
| Rab2a         | -0.158311 | -0.824298  | 0.13395 | 0.228627 | no |
| Tm9sf4        | -0.158347 | -0.690089  | 0.1914  | 0.303309 | no |
| Rab44         | -0.158539 | 0          | 1       | 1        | no |
| Ptk7          | -0.158631 | -0.62431   | 0.23325 | 0.3541   | no |
| Ppip5k2       | -0.158736 | -0.731654  | 0.15475 | 0.256505 | no |
| Zfp369        | -0.158844 | -0.413721  | 0.44285 | 0.574264 | no |
| Ppp1r12b      | -0.158938 | -0.500459  | 0.33105 | 0.462125 | no |
| Inpp5f        | -0.158967 | -0.735291  | 0.1549  | 0.256658 | no |
| Zbtb43        | -0.158972 | -0.448332  | 0.36695 | 0.498651 | no |
| Pikfyve       | -0.158995 | -0.65708   | 0.191   | 0.30282  | no |
| Scarf1        | -0.159173 | -0.231796  | 0.6596  | 0.761545 | no |
| Sgcb          | -0.159219 | -0.758044  | 0.14645 | 0.245601 | no |
| Myo1d         | -0.159248 | -0.677088  | 0.19255 | 0.304731 | no |
| Mrpl13        | -0.159255 | -0.684324  | 0.3085  | 0.437646 | no |
| Taf12         | -0.159276 | -0.428446  | 0.46055 | 0.58995  | no |
| Rcn2          | -0.159323 | -0.607228  | 0.22135 | 0.339969 | no |
| Crem          | -0.159575 | -0.329796  | 0.51685 | 0.642527 | no |

|               |           |           |         |          |    |
|---------------|-----------|-----------|---------|----------|----|
| Heatr3        | -0.159592 | -0.555036 | 0.26705 | 0.391357 | no |
| Ghdc          | -0.159948 | -0.438579 | 0.42045 | 0.551906 | no |
| Pcnxl2        | -0.160032 | -0.712245 | 0.15875 | 0.261502 | no |
| Utp11l        | -0.160193 | -0.476688 | 0.4492  | 0.579665 | no |
| Atf7ip        | -0.160207 | -0.62348  | 0.23085 | 0.351266 | no |
| Man2a2        | -0.160521 | -0.752796 | 0.13915 | 0.235502 | no |
| Rbbp4         | -0.160577 | -0.636593 | 0.20045 | 0.314272 | no |
| Ikbkg         | -0.160654 | -0.496606 | 0.31575 | 0.445644 | no |
| Rhbdd1        | -0.160683 | -0.50089  | 0.3093  | 0.438641 | no |
| Papss1        | -0.160991 | -0.695408 | 0.16155 | 0.265324 | no |
| Slc25a4       | -0.160997 | -0.877859 | 0.14685 | 0.246054 | no |
| Mob1b         | -0.161056 | -0.475895 | 0.3667  | 0.498515 | no |
| Kif3a         | -0.161121 | -0.755227 | 0.1308  | 0.224028 | no |
| Klhl12        | -0.161141 | -0.681608 | 0.1925  | 0.304688 | no |
| Ep400         | -0.161286 | -0.66224  | 0.17455 | 0.281928 | no |
| Ube2j1        | -0.161452 | -0.805144 | 0.1242  | 0.21472  | no |
| Gca           | -0.161531 | -0.516677 | 0.32335 | 0.453956 | no |
| Zdhhc7        | -0.161764 | -0.664823 | 0.21325 | 0.33032  | no |
| Gcfc2         | -0.161952 | 0         | 1       | 1        | no |
| Eif2ak4       | -0.162078 | -0.455386 | 0.3595  | 0.4917   | no |
| Gla           | -0.162111 | -0.609657 | 0.24935 | 0.371909 | no |
| Rbl2          | -0.162265 | -0.353293 | 0.4893  | 0.616774 | no |
| Gm15417       | -0.162266 | -0.120515 | 0.8053  | 0.873797 | no |
| Akt2          | -0.16235  | -0.532819 | 0.28425 | 0.410085 | no |
| Lonrf2        | -0.16246  | -0.776812 | 0.132   | 0.225705 | no |
| Kif3c         | -0.162492 | -0.758446 | 0.13975 | 0.236337 | no |
| 4732491K20Rik | -0.162794 | -0.329275 | 0.53465 | 0.65763  | no |
| Eprs          | -0.16304  | -0.794832 | 0.12265 | 0.212678 | no |
| Pgk1          | -0.16306  | -0.579326 | 0.291   | 0.418096 | no |
| Trappc12      | -0.163474 | -0.689432 | 0.16555 | 0.270487 | no |
| Arhgef33      | -0.163655 | 0         | 1       | 1        | no |
| Mrpl10        | -0.163741 | -0.718291 | 0.2044  | 0.319295 | no |
| Dnajb14       | -0.163999 | -0.65316  | 0.2412  | 0.362976 | no |
| Ifi47         | -0.164244 | -0.209937 | 0.66265 | 0.764202 | no |
| Slc9a5        | -0.164247 | -0.45293  | 0.3814  | 0.512616 | no |
| Taf1          | -0.164396 | -0.731779 | 0.142   | 0.239288 | no |
| Usp37         | -0.164599 | -0.333134 | 0.50755 | 0.634115 | no |
| Zfp35         | -0.164718 | -0.596061 | 0.25615 | 0.379068 | no |
| C2cd3         | -0.164743 | -0.490255 | 0.3295  | 0.460543 | no |
| Slc39a11      | -0.164848 | -0.50457  | 0.3124  | 0.441856 | no |
| Gpcpd1        | -0.16486  | -0.706603 | 0.1566  | 0.25886  | no |
| Slc12a5       | -0.164886 | 0         | 1       | 1        | no |
| Tsr1          | -0.164932 | -0.432636 | 0.41765 | 0.549372 | no |
| Eif3i         | -0.164958 | -0.791535 | 0.1885  | 0.299752 | no |
| Papd7         | -0.165041 | -0.532568 | 0.2864  | 0.412738 | no |
| Twf2          | -0.165284 | -0.530346 | 0.35275 | 0.484967 | no |
| Gm20597       | -0.165372 | 0         | 1       | 1        | no |
| Ano10         | -0.165426 | -0.687826 | 0.16725 | 0.272861 | no |
| Phtf1         | -0.165517 | -0.544312 | 0.26775 | 0.392253 | no |
| Slc16a11      | -0.165532 | 0         | 1       | 1        | no |
| Itgb1         | -0.165681 | -0.796684 | 0.1272  | 0.21905  | no |
| Spcs2         | -0.165729 | -0.71078  | 0.18235 | 0.292214 | no |
| Ubr4          | -0.165997 | -0.770351 | 0.1245  | 0.215183 | no |

|               |           |           |         |          |    |
|---------------|-----------|-----------|---------|----------|----|
| Eif2b5        | -0.166327 | -0.753759 | 0.16145 | 0.265192 | no |
| Spag1         | -0.166503 | -0.280681 | 0.59025 | 0.705291 | no |
| Rnls          | -0.166511 | -0.173632 | 0.7226  | 0.81416  | no |
| Rasl11b       | -0.166513 | -0.453633 | 0.4202  | 0.551632 | no |
| Mesdc2        | -0.166524 | -0.674526 | 0.19035 | 0.302078 | no |
| Necap1        | -0.166807 | -0.854782 | 0.1111  | 0.195512 | no |
| Ccni          | -0.166872 | -0.844405 | 0.11395 | 0.199548 | no |
| Kifap3        | -0.16695  | -0.812357 | 0.1203  | 0.209232 | no |
| Elmsan1       | -0.166986 | -0.515277 | 0.30435 | 0.433056 | no |
| Tmem205       | -0.167333 | -0.608766 | 0.3504  | 0.482587 | no |
| Rps6kb1       | -0.1675   | -0.647344 | 0.1887  | 0.299998 | no |
| Spty2d1       | -0.167581 | -0.679005 | 0.18745 | 0.298476 | no |
| Dock3         | -0.167825 | -0.772378 | 0.12185 | 0.211456 | no |
| Ggt7          | -0.167847 | -0.820644 | 0.1268  | 0.218475 | no |
| Ubqln1        | -0.16788  | -0.782283 | 0.1131  | 0.198321 | no |
| Smim3         | -0.167929 | -0.364316 | 0.5106  | 0.636846 | no |
| Prpf40a       | -0.167948 | -0.627167 | 0.23645 | 0.357695 | no |
| Pgap2         | -0.167957 | -0.400266 | 0.41675 | 0.548677 | no |
| Npas4         | -0.168025 | 0         | 1       | 1        | no |
| Dpf1          | -0.168042 | -0.291485 | 0.58475 | 0.700486 | no |
| Tmem126a      | -0.168054 | -0.503003 | 0.4579  | 0.587691 | no |
| Ermard        | -0.168091 | -0.303677 | 0.54275 | 0.664943 | no |
| Pltp          | -0.168193 | -0.291465 | 0.54885 | 0.670311 | no |
| Kxd1          | -0.16825  | -0.543397 | 0.35695 | 0.488867 | no |
| Atrip         | -0.168273 | -0.490836 | 0.3638  | 0.495843 | no |
| Mcl1          | -0.168319 | -0.800661 | 0.1256  | 0.216801 | no |
| Disc1         | -0.16833  | 0         | 1       | 1        | no |
| Xlr4b         | -0.1684   | 0         | 1       | 1        | no |
| Nox4          | -0.168571 | -0.24215  | 0.62735 | 0.735642 | no |
| Smu1          | -0.168782 | -0.354256 | 0.47825 | 0.607055 | no |
| Vsig10        | -0.168913 | -0.415416 | 0.42245 | 0.553873 | no |
| Trank1        | -0.169041 | 0         | 1       | 1        | no |
| Cd37          | -0.169183 | 0         | 1       | 1        | no |
| Ythdf1        | -0.16931  | -0.761642 | 0.15135 | 0.251908 | no |
| Lemd1         | -0.169339 | 0         | 1       | 1        | no |
| Apbb3         | -0.169586 | -0.637635 | 0.2453  | 0.367313 | no |
| Sec24c        | -0.169699 | -0.756607 | 0.12725 | 0.219108 | no |
| Mapk8ip2      | -0.169815 | -0.837432 | 0.114   | 0.199609 | no |
| Atxn7l3       | -0.169824 | -0.685607 | 0.16905 | 0.275155 | no |
| Gys1          | -0.169853 | -0.726232 | 0.1673  | 0.272909 | no |
| Mpg           | -0.170042 | -0.290272 | 0.60785 | 0.71971  | no |
| Gm21949       | -0.170101 | -0.168365 | 0.7366  | 0.824612 | no |
| Noc4l         | -0.170169 | -0.483483 | 0.38125 | 0.512518 | no |
| Chtf8         | -0.170224 | -0.725131 | 0.1706  | 0.2771   | no |
| Zcchc2        | -0.170341 | -0.523805 | 0.2924  | 0.419789 | no |
| Gmppa         | -0.170404 | -0.53085  | 0.3534  | 0.485477 | no |
| Hspa4l        | -0.170507 | -0.844402 | 0.105   | 0.18706  | no |
| 3110045C21Rik | -0.170525 | -0.104783 | 0.84365 | 0.899952 | no |
| Lamp2         | -0.170579 | -0.745325 | 0.13635 | 0.231798 | no |
| Shprh         | -0.170873 | -0.598984 | 0.2313  | 0.351789 | no |
| 2210016F16Rik | -0.17088  | -0.474376 | 0.3784  | 0.510031 | no |
| Mid2          | -0.170942 | -0.710705 | 0.1702  | 0.276653 | no |
| Ran           | -0.171102 | -0.852998 | 0.11265 | 0.197793 | no |



|               |           |           |         |          |    |
|---------------|-----------|-----------|---------|----------|----|
| Rdh14         | -0.171171 | -0.632873 | 0.2665  | 0.390939 | no |
| Gorab         | -0.171243 | -0.417431 | 0.4438  | 0.575158 | no |
| Lgals8        | -0.171402 | -0.787998 | 0.1087  | 0.192181 | no |
| Megf8         | -0.171412 | -0.81702  | 0.1025  | 0.183221 | no |
| Nsmf          | -0.171496 | -0.706653 | 0.15535 | 0.257275 | no |
| Pmpcb         | -0.171573 | -0.718302 | 0.2083  | 0.324204 | no |
| Zfp697        | -0.171603 | -0.30053  | 0.55425 | 0.674609 | no |
| Uevld         | -0.171616 | -0.594999 | 0.24605 | 0.368187 | no |
| AW046200      | -0.171705 | 0         | 1       | 1        | no |
| Lrprrc        | -0.17174  | -0.812949 | 0.117   | 0.204081 | no |
| 5430405H02Rik | -0.171857 | -0.214133 | 0.6639  | 0.765444 | no |
| Vmp1          | -0.172029 | -0.120792 | 0.82315 | 0.886135 | no |
| Vps13d        | -0.172047 | -0.803113 | 0.1063  | 0.188616 | no |
| Srm           | -0.172163 | -0.692994 | 0.2392  | 0.360621 | no |
| Vps25         | -0.172434 | -0.705881 | 0.1554  | 0.257325 | no |
| 2610301B20Rik | -0.172453 | -0.580238 | 0.28925 | 0.416032 | no |
| Slc36a4       | -0.172471 | -0.616409 | 0.2694  | 0.394148 | no |
| Blk           | -0.172873 | 0         | 1       | 1        | no |
| Zfp825        | -0.172875 | -0.406414 | 0.48925 | 0.616769 | no |
| Ddx20         | -0.172992 | -0.438048 | 0.4163  | 0.548139 | no |
| Tle3          | -0.173173 | -0.649206 | 0.192   | 0.304042 | no |
| Dync1h1       | -0.173176 | -0.576346 | 0.25555 | 0.378433 | no |
| 2700097O09Rik | -0.173366 | -0.223751 | 0.64855 | 0.752652 | no |
| Mocs1         | -0.17344  | -0.4076   | 0.4117  | 0.543593 | no |
| Gabrg2        | -0.173495 | -0.787261 | 0.11585 | 0.202448 | no |
| Sptan1        | -0.173512 | -0.589822 | 0.2342  | 0.354898 | no |
| Abt1          | -0.173552 | -0.434918 | 0.39635 | 0.528055 | no |
| Pdk2          | -0.173569 | -0.699393 | 0.19995 | 0.313748 | no |
| Rhobtb1       | -0.173606 | -0.31328  | 0.5201  | 0.645298 | no |
| Gm10190       | -0.173667 | 0         | 1       | 1        | no |
| Fam98a        | -0.173668 | -0.81231  | 0.1286  | 0.221203 | no |
| Zc3h7b        | -0.173686 | -0.800409 | 0.12385 | 0.214255 | no |
| Pvt1          | -0.173767 | -0.422955 | 0.42675 | 0.558032 | no |
| Tecpr2        | -0.173792 | -0.762756 | 0.12665 | 0.21833  | no |
| Pole3         | -0.173874 | -0.506647 | 0.50085 | 0.627517 | no |
| Zscan12       | -0.173902 | -0.337487 | 0.50975 | 0.635846 | no |
| Nfxl1         | -0.173959 | -0.362463 | 0.48505 | 0.613223 | no |
| Neo1          | -0.174003 | -0.685297 | 0.16635 | 0.27156  | no |
| Tspan15       | -0.174073 | -0.710321 | 0.14785 | 0.247075 | no |
| Dhx34         | -0.174093 | -0.406488 | 0.4153  | 0.547257 | no |
| Magoh         | -0.174144 | -0.479046 | 0.33245 | 0.463641 | no |
| Gins4         | -0.174293 | -0.513771 | 0.37865 | 0.510212 | no |
| Coa5          | -0.174331 | -0.839204 | 0.10555 | 0.187762 | no |
| Acp2          | -0.174444 | -0.79527  | 0.12515 | 0.216081 | no |
| Bivm          | -0.174506 | -0.595167 | 0.2533  | 0.37593  | no |
| Arf4          | -0.174531 | -0.861577 | 0.1152  | 0.201444 | no |
| Snx30         | -0.174601 | -0.455902 | 0.3812  | 0.512503 | no |
| Erp44         | -0.17467  | -0.702246 | 0.19475 | 0.30726  | no |
| Dll1          | -0.174773 | 0         | 1       | 1        | no |
| Got2          | -0.174864 | -0.879319 | 0.099   | 0.17802  | no |
| Srprb         | -0.174881 | -0.699048 | 0.1881  | 0.299223 | no |
| Hspb1         | -0.1749   | -0.91557  | 0.1564  | 0.258594 | no |
| Btla          | -0.174912 | 0         | 1       | 1        | no |

|               |           |           |         |          |    |
|---------------|-----------|-----------|---------|----------|----|
| Cuta          | -0.175179 | -0.560619 | 0.2612  | 0.384641 | no |
| Baalc         | -0.175582 | -0.522329 | 0.3092  | 0.438546 | no |
| P2rx4         | -0.1756   | -0.657225 | 0.2335  | 0.354242 | no |
| Mical3        | -0.175801 | -0.719447 | 0.15025 | 0.25036  | no |
| Dnajc15       | -0.176038 | -0.6955   | 0.346   | 0.478165 | no |
| Rab12         | -0.176099 | -0.608367 | 0.2668  | 0.391163 | no |
| Prph2         | -0.176107 | 0         | 1       | 1        | no |
| Nsf           | -0.176132 | -0.828676 | 0.1143  | 0.200055 | no |
| AI115009      | -0.17628  | 0         | 1       | 1        | no |
| Cacna1d       | -0.176433 | -0.324582 | 0.5179  | 0.64329  | no |
| Bag5          | -0.176462 | -0.722889 | 0.18605 | 0.296852 | no |
| Arfgap2       | -0.176484 | -0.652596 | 0.1879  | 0.298941 | no |
| Larp6         | -0.176512 | -0.635276 | 0.24095 | 0.362765 | no |
| Gna15         | -0.176627 | 0         | 1       | 1        | no |
| Pip4k2b       | -0.176711 | -0.850174 | 0.0987  | 0.177649 | no |
| Med31         | -0.176715 | -0.461966 | 0.4387  | 0.57022  | no |
| Slk           | -0.176773 | -0.804413 | 0.1062  | 0.188489 | no |
| Meis1         | -0.176819 | -0.356944 | 0.4657  | 0.595283 | no |
| Vwa9          | -0.17689  | -0.458287 | 0.3566  | 0.488489 | no |
| Tipin         | -0.176955 | -0.456532 | 0.44005 | 0.571638 | no |
| Nicn1         | -0.177009 | -0.873268 | 0.1084  | 0.191752 | no |
| Copb2         | -0.177021 | -0.866357 | 0.0999  | 0.179371 | no |
| 0610031J06Rik | -0.177145 | -0.738496 | 0.1983  | 0.311638 | no |
| Cntnap5c      | -0.17742  | -0.352598 | 0.50035 | 0.627127 | no |
| Alg13         | -0.177544 | -0.329954 | 0.50225 | 0.628737 | no |
| 1110032A03Rik | -0.177713 | -0.635291 | 0.2504  | 0.373013 | no |
| Ginm1         | -0.17775  | -0.545497 | 0.3478  | 0.479903 | no |
| 5430417L22Rik | -0.177752 | -0.461011 | 0.38395 | 0.515417 | no |
| Fam78b        | -0.177753 | -0.691836 | 0.16135 | 0.265126 | no |
| Apobr         | -0.177962 | 0         | 1       | 1        | no |
| Rtp3          | -0.178    | 0         | 1       | 1        | no |
| Tug1          | -0.178012 | -0.746146 | 0.1341  | 0.228794 | no |
| BC037032      | -0.178192 | 0         | 1       | 1        | no |
| Kcp           | -0.178345 | 0         | 1       | 1        | no |
| Mgat5b        | -0.178368 | -0.346254 | 0.5081  | 0.634384 | no |
| B3gat2        | -0.178493 | -0.17037  | 0.74495 | 0.830805 | no |
| Kdm3b         | -0.178628 | -0.712441 | 0.16355 | 0.267879 | no |
| Skor2         | -0.178734 | -0.480274 | 0.36555 | 0.497359 | no |
| Ppp1cb        | -0.178803 | -0.878225 | 0.0901  | 0.164627 | no |
| Hibch         | -0.178953 | -0.667499 | 0.2233  | 0.34229  | no |
| Zdhhc1        | -0.179259 | -0.610913 | 0.2616  | 0.385029 | no |
| Lrrn1         | -0.17926  | -0.87886  | 0.0941  | 0.17069  | no |
| Sf3a1         | -0.17926  | -0.790951 | 0.1299  | 0.222774 | no |
| Gm13212       | -0.179506 | 0         | 1       | 1        | no |
| Tspyl3        | -0.179594 | -0.57278  | 0.2829  | 0.408715 | no |
| Purb          | -0.179603 | -0.86274  | 0.08935 | 0.163527 | no |
| 4833412C05Rik | -0.179609 | 0         | 1       | 1        | no |
| Crtc3         | -0.179619 | -0.57195  | 0.24975 | 0.37238  | no |
| Cab39         | -0.179631 | -0.887278 | 0.08925 | 0.163389 | no |
| Wbp1l         | -0.179802 | -0.650949 | 0.191   | 0.30282  | no |
| Rrp8          | -0.179898 | -0.318525 | 0.54665 | 0.668178 | no |
| Calm1         | -0.179948 | -0.556414 | 0.28755 | 0.414081 | no |
| Wrb           | -0.180065 | -0.818742 | 0.1268  | 0.218475 | no |

|               |           |            |         |          |    |
|---------------|-----------|------------|---------|----------|----|
| Pdcd6ip       | -0.180186 | -0.847753  | 0.089   | 0.163066 | no |
| Psap          | -0.180243 | -0.636854  | 0.2041  | 0.318902 | no |
| Orc5          | -0.180308 | -0.533453  | 0.33485 | 0.466204 | no |
| Pacrg         | -0.180314 | -0.461375  | 0.42865 | 0.56001  | no |
| Yif1b         | -0.18036  | -0.772872  | 0.19915 | 0.312788 | no |
| Cacna1a       | -0.18075  | -0.820352  | 0.1005  | 0.180205 | no |
| Nanos2        | -0.180878 | 0          | 1       | 1        | no |
| BC052040      | -0.18096  | -0.334418  | 0.49965 | 0.626428 | no |
| Gm4070,Gvin1  | -0.181042 | 0          | 1       | 1        | no |
| 2310001H17Rik | -0.181048 | 0          | 1       | 1        | no |
| Galns         | -0.181094 | -0.270971  | 0.584   | 0.70003  | no |
| Pi4kb         | -0.181291 | -0.608173  | 0.2501  | 0.372818 | no |
| Lsm3          | -0.18159  | -0.538679  | 0.4649  | 0.594489 | no |
| Fkbp1         | -0.181926 | -0.46695   | 0.43525 | 0.567013 | no |
| Slc25a11      | -0.181987 | -0.86836   | 0.11765 | 0.20508  | no |
| Slc25a32      | -0.182134 | -0.577384  | 0.2756  | 0.400788 | no |
| Acvr1         | -0.182289 | -0.581081  | 0.24465 | 0.366588 | no |
| Samd8         | -0.182518 | -0.830625  | 0.1007  | 0.180466 | no |
| Pms1          | -0.182526 | -0.362217  | 0.4919  | 0.619345 | no |
| Osgin2        | -0.182564 | -0.551524  | 0.30685 | 0.435772 | no |
| Uhmk1         | -0.182657 | -0.924615  | 0.08675 | 0.159938 | no |
| Arl2bp        | -0.182744 | -0.824864  | 0.0962  | 0.173905 | no |
| Cetn2         | -0.182763 | -0.74761   | 0.2076  | 0.32338  | no |
| Tlk1          | -0.182994 | -0.861694  | 0.09865 | 0.177583 | no |
| Rab39b        | -0.183036 | -0.837993  | 0.1153  | 0.201593 | no |
| Slc46a1       | -0.183145 | -0.410702  | 0.45835 | 0.588041 | no |
| Srp54c        | -0.18322  | 0          | 1       | 1        | no |
| Timm23        | -0.183346 | -0.342898  | 0.57355 | 0.691565 | no |
| Gvin1         | -0.183401 | 0          | 1       | 1        | no |
| Pak3          | -0.183492 | -0.804777  | 0.1076  | 0.190591 | no |
| Sult4a1       | -0.183606 | -0.852475  | 0.11695 | 0.20402  | no |
| Apc           | -0.183643 | -0.855301  | 0.08275 | 0.154083 | no |
| Mast3         | -0.183826 | -0.643688  | 0.21565 | 0.333376 | no |
| Pcyox1        | -0.183887 | -0.903523  | 0.08015 | 0.150488 | no |
| Atxn7l1       | -0.183919 | -0.488153  | 0.38555 | 0.517251 | no |
| Gatad2a       | -0.183964 | -0.756999  | 0.12875 | 0.221375 | no |
| Pomp          | -0.184069 | -1.09882   | 0.11505 | 0.201235 | no |
| Gnpat         | -0.184349 | -0.772655  | 0.1466  | 0.245791 | no |
| Dcaf8         | -0.184428 | -0.885467  | 0.08895 | 0.16302  | no |
| Bmp2k         | -0.184479 | -0.344459  | 0.50075 | 0.627451 | no |
| Gm15663       | -0.184601 | -0.459061  | 0.38105 | 0.512457 | no |
| Uchl5         | -0.184765 | -0.679522  | 0.17335 | 0.280433 | no |
| Krt26         | -0.184787 | 0          | 1       | 1        | no |
| Atp7a         | -0.184831 | -0.662135  | 0.1866  | 0.297408 | no |
| Arl8b         | -0.185114 | -0.930668  | 0.0761  | 0.144376 | no |
| Cog8          | -0.185325 | -0.689119  | 0.2104  | 0.326897 | no |
| Atp5g3        | -0.185396 | -1.24199   | 0.07805 | 0.147401 | no |
| Micall1       | -0.185504 | -0.729736  | 0.1602  | 0.263563 | no |
| Dnajc19       | -0.185537 | -0.0793854 | 0.87045 | 0.919667 | no |
| Rsg1          | -0.185569 | -0.253356  | 0.6926  | 0.789274 | no |
| Smco4         | -0.185809 | -0.314012  | 0.62155 | 0.730714 | no |
| Cnnm4         | -0.185874 | -0.636794  | 0.21265 | 0.329429 | no |
| Cacng7        | -0.185899 | -0.850708  | 0.19715 | 0.310198 | no |

|                |           |           |         |          |    |
|----------------|-----------|-----------|---------|----------|----|
| Dhx30          | -0.185993 | -0.812654 | 0.1034  | 0.184631 | no |
| BC017158       | -0.186001 | -0.553274 | 0.2654  | 0.389757 | no |
| Commd6         | -0.186428 | -0.490805 | 0.32075 | 0.450926 | no |
| Commd5         | -0.186429 | -0.547825 | 0.38015 | 0.511714 | no |
| Tie1           | -0.186475 | -0.604749 | 0.23635 | 0.357584 | no |
| Mrps21         | -0.186489 | -1.03502  | 0.29295 | 0.420488 | no |
| Atp13a3        | -0.18656  | -0.812087 | 0.1033  | 0.184477 | no |
| Kif2a          | -0.186828 | -0.841495 | 0.09225 | 0.168023 | no |
| Nrros          | -0.18691  | -0.290177 | 0.57885 | 0.695868 | no |
| Dnajc21        | -0.187249 | -0.650675 | 0.23155 | 0.352089 | no |
| Mbd5           | -0.187365 | -0.682829 | 0.169   | 0.275107 | no |
| Fam134b        | -0.187436 | -0.860931 | 0.08295 | 0.154391 | no |
| Gpm6a          | -0.187513 | -0.780132 | 0.11665 | 0.203604 | no |
| Shank3         | -0.187822 | -0.630368 | 0.21185 | 0.328535 | no |
| 2700049A03Rik  | -0.18793  | -0.450746 | 0.36475 | 0.496882 | no |
| Hoxc10         | -0.187989 | -0.410439 | 0.46345 | 0.593207 | no |
| Gm14308,OTTMUS | -0.188016 | 0         | 1       | 1        | no |
| Nell2          | -0.188026 | -0.622334 | 0.2317  | 0.352196 | no |
| Tha1           | -0.188556 | -0.312443 | 0.57425 | 0.692031 | no |
| Zfp276         | -0.188705 | -0.571832 | 0.27205 | 0.396887 | no |
| Zfp518a        | -0.188716 | -0.515624 | 0.29665 | 0.424467 | no |
| Palld          | -0.188987 | -0.35883  | 0.49455 | 0.621678 | no |
| Tfip11         | -0.189181 | -0.783416 | 0.1387  | 0.234921 | no |
| Bcl11a         | -0.189193 | -0.257274 | 0.60165 | 0.714473 | no |
| Cbx4           | -0.189225 | -0.634285 | 0.21705 | 0.334565 | no |
| Pcmdt1         | -0.189269 | -0.8581   | 0.1002  | 0.179715 | no |
| Helz           | -0.189274 | -0.698786 | 0.16245 | 0.266472 | no |
| Commd2         | -0.189372 | -0.517163 | 0.33545 | 0.466794 | no |
| Apool          | -0.189583 | -0.415016 | 0.5107  | 0.636911 | no |
| Kpna4          | -0.189618 | -0.896481 | 0.08845 | 0.162305 | no |
| Bap1           | -0.189708 | -0.907866 | 0.0827  | 0.154055 | no |
| Umps           | -0.189718 | -0.569152 | 0.27775 | 0.403295 | no |
| Atp5h          | -0.189733 | -0.667976 | 0.38635 | 0.518114 | no |
| Atp6ap2        | -0.189989 | -0.974182 | 0.07385 | 0.140771 | no |
| AI314180       | -0.190154 | -0.926453 | 0.0712  | 0.13692  | no |
| 2310009A05Rik  | -0.190182 | -0.475604 | 0.57895 | 0.695923 | no |
| Dyrk1a         | -0.190333 | -0.810072 | 0.1007  | 0.180466 | no |
| Sgpp1          | -0.190436 | -0.899566 | 0.08845 | 0.162305 | no |
| Alkbh4         | -0.19054  | -0.381234 | 0.4948  | 0.621875 | no |
| Rab2b          | -0.190595 | -0.637809 | 0.23595 | 0.35706  | no |
| Klhl9          | -0.190829 | -0.930356 | 0.07155 | 0.137513 | no |
| Rph3a          | -0.190983 | -0.910559 | 0.0807  | 0.151072 | no |
| Spata33        | -0.19105  | 0         | 1       | 1        | no |
| Pdcd11         | -0.191096 | -0.64029  | 0.21115 | 0.327641 | no |
| Rapgef1        | -0.191173 | -0.831274 | 0.0953  | 0.172583 | no |
| Adck2          | -0.191372 | -0.62844  | 0.2278  | 0.348062 | no |
| Wasf1          | -0.191393 | -0.848175 | 0.1157  | 0.202212 | no |
| Arf3           | -0.191448 | -0.918829 | 0.0782  | 0.1476   | no |
| Dym            | -0.191585 | -0.95225  | 0.07175 | 0.137798 | no |
| Zfp341         | -0.191654 | -0.385065 | 0.4667  | 0.596159 | no |
| Stx11          | -0.191711 | -0.311295 | 0.52515 | 0.64944  | no |
| Immt           | -0.191924 | -0.893245 | 0.07245 | 0.13864  | no |
| Bckdha         | -0.192218 | -0.805528 | 0.1531  | 0.254342 | no |

|                  |           |            |         |          |    |
|------------------|-----------|------------|---------|----------|----|
| LOC100503676     | -0.19233  | 0          | 1       | 1        | no |
| Ccdc91           | -0.192431 | -0.844017  | 0.1202  | 0.209085 | no |
| Msn              | -0.192446 | -0.914018  | 0.08055 | 0.151004 | no |
| Anapc13          | -0.192493 | -0.907021  | 0.3452  | 0.477407 | no |
| Trpm7            | -0.192628 | -0.796019  | 0.1127  | 0.197829 | no |
| Mgll             | -0.192758 | -0.850771  | 0.08915 | 0.163251 | no |
| Arcn1            | -0.193151 | -0.942182  | 0.06955 | 0.134331 | no |
| 4930405A21Rik    | -0.193432 | -0.0954923 | 0.88505 | 0.928648 | no |
| Uqcr10           | -0.193586 | -1.31617   | 0.148   | 0.247294 | no |
| 0610010B08Rik,Gr | -0.193594 | 0          | 1       | 1        | no |
| Gap43            | -0.193651 | -0.886251  | 0.07535 | 0.143157 | no |
| Tmed4            | -0.193654 | -0.906103  | 0.10895 | 0.192571 | no |
| Trpc4ap          | -0.193712 | -0.898874  | 0.06945 | 0.134196 | no |
| Mthfd1           | -0.193787 | -0.747999  | 0.15795 | 0.260443 | no |
| Mkl1             | -0.194032 | -0.549123  | 0.2692  | 0.393898 | no |
| 37315            | -0.194098 | -0.934155  | 0.0679  | 0.131816 | no |
| Usp1             | -0.194265 | -0.501565  | 0.3359  | 0.467126 | no |
| Senp5            | -0.194311 | -0.915516  | 0.072   | 0.138078 | no |
| Clint1           | -0.194513 | -0.878981  | 0.0938  | 0.170285 | no |
| Ccdc79           | -0.194535 | 0          | 1       | 1        | no |
| Usp13            | -0.19454  | -0.88629   | 0.08675 | 0.159938 | no |
| Vps45            | -0.19488  | -0.724443  | 0.17745 | 0.286124 | no |
| Nacc2            | -0.195239 | -0.870811  | 0.07975 | 0.149907 | no |
| Smim15           | -0.195533 | -0.804187  | 0.1519  | 0.252729 | no |
| Erlec1           | -0.195541 | -0.791179  | 0.13145 | 0.224967 | no |
| Acyp2            | -0.195553 | -0.91518   | 0.19275 | 0.304902 | no |
| Plekhh3          | -0.195593 | -0.613304  | 0.24895 | 0.371479 | no |
| Cib2             | -0.195627 | -0.639215  | 0.349   | 0.481208 | no |
| Sec16a           | -0.19586  | -0.850723  | 0.09605 | 0.173728 | no |
| Krtcap2          | -0.196057 | -0.947948  | 0.24495 | 0.366913 | no |
| Pcdhb22          | -0.196123 | -0.0777563 | 0.87655 | 0.923685 | no |
| Phka1            | -0.196246 | -0.744616  | 0.13305 | 0.227354 | no |
| Ube2n            | -0.196341 | -0.960961  | 0.06975 | 0.134619 | no |
| Tuba1b           | -0.19641  | -1.03823   | 0.06755 | 0.131194 | no |
| Lipe             | -0.196514 | -0.305937  | 0.55365 | 0.674124 | no |
| Tubb4a           | -0.196569 | -0.964613  | 0.07545 | 0.143327 | no |
| Pars2            | -0.196962 | -0.330362  | 0.50135 | 0.627965 | no |
| Cers3            | -0.197038 | 0          | 1       | 1        | no |
| Ralgapa1         | -0.197068 | -0.9314    | 0.0626  | 0.122966 | no |
| AW209491         | -0.197157 | -0.597162  | 0.2291  | 0.349348 | no |
| Pecam1           | -0.19728  | -0.64536   | 0.19505 | 0.30755  | no |
| Brsk1            | -0.197366 | -0.966746  | 0.0693  | 0.134004 | no |
| Sptlc2           | -0.197771 | -0.871068  | 0.09955 | 0.178767 | no |
| Atp5j2           | -0.197902 | -1.44445   | 0.09375 | 0.170218 | no |
| Msh3             | -0.198051 | -0.539038  | 0.3026  | 0.430843 | no |
| Mul1             | -0.198152 | -0.832798  | 0.11185 | 0.196545 | no |
| Eny2             | -0.198154 | -0.572832  | 0.25285 | 0.375525 | no |
| Ngly1            | -0.198166 | -0.751442  | 0.1309  | 0.224171 | no |
| Tmem128          | -0.198318 | -0.788272  | 0.18995 | 0.30166  | no |
| Klhdc10          | -0.198483 | -0.919708  | 0.0771  | 0.145876 | no |
| Ndufa3           | -0.198919 | -1.60671   | 0.1576  | 0.259963 | no |
| 1700001L05Rik    | -0.19903  | -0.853247  | 0.0941  | 0.17069  | no |
| Bsg              | -0.199066 | -0.240358  | 0.6301  | 0.737953 | no |

|               |           |            |         |          |    |
|---------------|-----------|------------|---------|----------|----|
| Zbtb7b        | -0.199089 | -0.596394  | 0.25545 | 0.378412 | no |
| Pdzd8         | -0.199253 | -0.958619  | 0.05995 | 0.118692 | no |
| St3gal4       | -0.199292 | -0.617709  | 0.26465 | 0.38887  | no |
| Pcsk2         | -0.199397 | -0.92206   | 0.06075 | 0.11999  | no |
| Nucks1        | -0.199447 | -0.924918  | 0.061   | 0.12034  | no |
| Gdap1         | -0.199474 | -0.983895  | 0.05785 | 0.11543  | no |
| Mycbp         | -0.199769 | -0.667811  | 0.24485 | 0.366805 | no |
| Slc39a8       | -0.199923 | -0.414913  | 0.39915 | 0.530933 | no |
| Tmem222       | -0.19997  | -0.714563  | 0.1481  | 0.247399 | no |
| Asb8          | -0.200156 | -0.7861    | 0.11005 | 0.194024 | no |
| Vimp          | -0.200203 | -0.791374  | 0.1798  | 0.289245 | no |
| Slc35g1       | -0.200212 | -0.343085  | 0.5113  | 0.637539 | no |
| Gm5176        | -0.200224 | 0          | 1       | 1        | no |
| Hsd17b4       | -0.200237 | -0.910078  | 0.08905 | 0.163135 | no |
| Snappc2       | -0.20051  | -0.664154  | 0.24465 | 0.366588 | no |
| Tpst2         | -0.200595 | -0.663288  | 0.2275  | 0.34772  | no |
| Copz1         | -0.200629 | -0.825389  | 0.0934  | 0.169791 | no |
| H2-T22,H2-T9  | -0.200829 | -0.36037   | 0.4545  | 0.584514 | no |
| Ddt           | -0.200879 | -1.02091   | 0.17045 | 0.276992 | no |
| Gpatch3       | -0.200891 | -0.389296  | 0.4776  | 0.606579 | no |
| Irgq          | -0.200943 | -0.974269  | 0.0529  | 0.10692  | no |
| Pcdhgc4       | -0.201006 | -0.0982934 | 0.8473  | 0.903192 | no |
| Pnpla7        | -0.201063 | -0.421916  | 0.41805 | 0.549625 | no |
| Psm12         | -0.201223 | -1.01182   | 0.0718  | 0.137854 | no |
| Jph3          | -0.201607 | -0.976244  | 0.061   | 0.12034  | no |
| Rnf138        | -0.20188  | -0.436986  | 0.3806  | 0.512008 | no |
| Uqcrg         | -0.202232 | -1.39599   | 0.093   | 0.169157 | no |
| Ccdc57        | -0.202271 | 0          | 1       | 1        | no |
| Gm15706       | -0.20239  | -0.27525   | 0.67025 | 0.770221 | no |
| Tbxas1        | -0.20257  | 0          | 1       | 1        | no |
| Rab3gap1      | -0.20281  | -0.90089   | 0.0841  | 0.156137 | no |
| Fam168b       | -0.203006 | -0.951171  | 0.0546  | 0.109871 | no |
| Smarcd3       | -0.203187 | -0.645388  | 0.2472  | 0.369449 | no |
| Lix1l         | -0.203326 | -0.710644  | 0.1927  | 0.304859 | no |
| Gm20257       | -0.203352 | 0          | 1       | 1        | no |
| Daglb         | -0.203392 | -0.691613  | 0.18865 | 0.299954 | no |
| Prkd2         | -0.203487 | -0.337427  | 0.4988  | 0.625598 | no |
| Cyb561d2      | -0.203842 | -0.672736  | 0.2217  | 0.340428 | no |
| Mdga2         | -0.203857 | -0.787203  | 0.11415 | 0.199819 | no |
| Aldh9a1       | -0.203933 | -0.880273  | 0.1013  | 0.181345 | no |
| Thsd1         | -0.204225 | -0.400657  | 0.4249  | 0.556206 | no |
| Ash1l         | -0.204239 | -0.906639  | 0.07205 | 0.138094 | no |
| Slc35a2       | -0.204555 | -0.660496  | 0.1867  | 0.297531 | no |
| 8430429K09Rik | -0.20474  | -0.076849  | 0.883   | 0.92766  | no |
| Msantd4       | -0.20485  | -0.938362  | 0.08145 | 0.152218 | no |
| Tmem177       | -0.204948 | -0.574902  | 0.2823  | 0.408071 | no |
| Tmem202       | -0.204958 | -0.289262  | 0.6247  | 0.733118 | no |
| Pcyox1l       | -0.205014 | -0.94831   | 0.0888  | 0.162835 | no |
| Tbl2          | -0.20503  | -0.762237  | 0.1395  | 0.235974 | no |
| Nt5c2         | -0.205169 | -0.688199  | 0.19    | 0.301703 | no |
| Lnpep         | -0.205181 | -0.991208  | 0.05575 | 0.111896 | no |
| Tmem179       | -0.205223 | -0.976549  | 0.0719  | 0.137926 | no |
| Cops2         | -0.20529  | -0.956116  | 0.0555  | 0.111479 | no |



|               |           |           |         |          |    |
|---------------|-----------|-----------|---------|----------|----|
| Arhgef12      | -0.205291 | -0.981109 | 0.0532  | 0.107396 | no |
| 4930451G09Rik | -0.205447 | -0.338009 | 0.49225 | 0.619668 | no |
| Sap30l        | -0.205589 | -1.00871  | 0.07855 | 0.148092 | no |
| Slc15a2       | -0.205669 | -0.340777 | 0.4834  | 0.611836 | no |
| Gtpbp10       | -0.205756 | -0.374679 | 0.48415 | 0.612493 | no |
| Efna5         | -0.206058 | -0.831982 | 0.0939  | 0.170443 | no |
| Ubxn11        | -0.206332 | 0         | 1       | 1        | no |
| Tmem209       | -0.206338 | -0.816451 | 0.12065 | 0.209758 | no |
| Mmab          | -0.206428 | -0.730763 | 0.1671  | 0.272683 | no |
| Fbxo41        | -0.206439 | -0.797377 | 0.1067  | 0.189199 | no |
| Cdc40         | -0.20647  | -0.66974  | 0.20375 | 0.318505 | no |
| 9330162012Rik | -0.206617 | 0         | 1       | 1        | no |
| Cbr4          | -0.206645 | -0.607046 | 0.3222  | 0.452725 | no |
| Tars2         | -0.206674 | -0.641649 | 0.19755 | 0.310754 | no |
| Mfsd8         | -0.206791 | -0.582321 | 0.2761  | 0.401383 | no |
| Kpnb1         | -0.206834 | -1.00726  | 0.05045 | 0.102972 | no |
| Kif5c         | -0.206839 | -0.857004 | 0.09655 | 0.174513 | no |
| Pla2g12a      | -0.207195 | -0.569964 | 0.25195 | 0.374607 | no |
| Mlec          | -0.207212 | -1.00527  | 0.05085 | 0.103582 | no |
| Prrx2         | -0.207286 | 0         | 1       | 1        | no |
| Grin2d        | -0.207316 | 0         | 1       | 1        | no |
| Nacc1         | -0.207356 | -0.972057 | 0.062   | 0.121986 | no |
| Pank4         | -0.207371 | -0.733679 | 0.1708  | 0.277391 | no |
| 4933402D24Rik | -0.207603 | 0         | 1       | 1        | no |
| Gimap1        | -0.20763  | -0.246952 | 0.6174  | 0.727306 | no |
| Mkl2          | -0.20774  | -0.799237 | 0.1039  | 0.185374 | no |
| Zbtb9         | -0.207864 | -0.59376  | 0.2713  | 0.396228 | no |
| Scaf8         | -0.208182 | -0.876387 | 0.0947  | 0.171637 | no |
| Eng           | -0.208193 | -0.420402 | 0.4001  | 0.532036 | no |
| Gstcd         | -0.208314 | -0.386332 | 0.47275 | 0.602032 | no |
| Pex11b        | -0.208391 | -0.556077 | 0.2578  | 0.381084 | no |
| Map4k2        | -0.208417 | -0.806848 | 0.1083  | 0.191601 | no |
| Spg7          | -0.208532 | -0.910512 | 0.0932  | 0.169451 | no |
| Lman2l        | -0.208734 | -0.863649 | 0.11635 | 0.203214 | no |
| Cyp4f17       | -0.208766 | 0         | 1       | 1        | no |
| Dhx9          | -0.20889  | -1.0213   | 0.04745 | 0.097873 | no |
| Spata24       | -0.209066 | -0.263065 | 0.60165 | 0.714473 | no |
| Rnf40         | -0.209127 | -0.884377 | 0.087   | 0.16031  | no |
| Klhl20        | -0.209169 | -0.929984 | 0.0742  | 0.141296 | no |
| Idnk          | -0.209263 | -0.652957 | 0.1904  | 0.302121 | no |
| Clcn5         | -0.209411 | -0.750343 | 0.13235 | 0.226274 | no |
| Tapbp         | -0.209443 | -0.918462 | 0.0663  | 0.129125 | no |
| Tm9sf1        | -0.209471 | -0.858497 | 0.1094  | 0.193032 | no |
| Paqr4         | -0.209525 | -0.929696 | 0.05905 | 0.117454 | no |
| Tcf25         | -0.209561 | -0.952878 | 0.05595 | 0.112213 | no |
| Csnk1a1       | -0.209617 | -1.08923  | 0.049   | 0.100539 | no |
| Spry4         | -0.210081 | -0.825184 | 0.1127  | 0.197829 | no |
| Foxn3         | -0.210141 | -0.757533 | 0.15625 | 0.258443 | no |
| Heatr5b       | -0.210377 | -0.953747 | 0.0616  | 0.121343 | no |
| Ndufc1        | -0.210552 | -1.1146   | 0.25125 | 0.374028 | no |
| Mdn1          | -0.210575 | -0.885951 | 0.0774  | 0.14634  | no |
| Mapk8ip3      | -0.210579 | -1.07456  | 0.0616  | 0.121343 | no |
| Col18a1       | -0.210755 | -0.66433  | 0.1789  | 0.288112 | no |

|               |           |           |         |          |    |
|---------------|-----------|-----------|---------|----------|----|
| Thtpa         | -0.210812 | -0.663604 | 0.22045 | 0.338743 | no |
| Seh1l         | -0.210942 | -0.799097 | 0.10895 | 0.192571 | no |
| Phkb          | -0.211031 | -0.855619 | 0.1001  | 0.179584 | no |
| Tm4sf1        | -0.211171 | -0.649873 | 0.2395  | 0.36095  | no |
| Fam86         | -0.211291 | -0.241233 | 0.6159  | 0.726066 | no |
| Rap2b         | -0.211379 | -0.634594 | 0.22005 | 0.338207 | no |
| Ltn1          | -0.211396 | -0.975142 | 0.05565 | 0.111746 | no |
| Ier3ip1       | -0.211427 | -0.962351 | 0.09775 | 0.176322 | no |
| Gm5086        | -0.211617 | 0         | 1       | 1        | no |
| Nudt19        | -0.211655 | -0.777162 | 0.15875 | 0.261502 | no |
| Zfp180        | -0.21224  | -0.839698 | 0.0911  | 0.166248 | no |
| Serpinb9      | -0.212344 | -0.616976 | 0.24445 | 0.366454 | no |
| Dnaja3        | -0.212374 | -0.871258 | 0.08385 | 0.15576  | no |
| Ttc39d        | -0.212748 | 0         | 1       | 1        | no |
| Id1           | -0.212754 | -0.604105 | 0.33885 | 0.47044  | no |
| Desi2         | -0.212755 | -0.671946 | 0.1948  | 0.307302 | no |
| Pqlc2         | -0.212815 | -0.602201 | 0.28005 | 0.406102 | no |
| 2810001G20Rik | -0.213015 | -0.446383 | 0.47995 | 0.608689 | no |
| Mib1          | -0.213043 | -0.888793 | 0.0745  | 0.141746 | no |
| C130074G19Rik | -0.213342 | -0.849943 | 0.113   | 0.198224 | no |
| Rasgrp3       | -0.213565 | -0.39525  | 0.43365 | 0.565262 | no |
| Atp6v1b2      | -0.213606 | -0.936455 | 0.05795 | 0.115543 | no |
| Guca1b        | -0.21363  | 0         | 1       | 1        | no |
| Cmtr1         | -0.213647 | -0.94915  | 0.07245 | 0.13864  | no |
| Ints1         | -0.213889 | -0.918297 | 0.0655  | 0.127699 | no |
| Dtx3l         | -0.213941 | -0.623843 | 0.22865 | 0.34912  | no |
| Xpo5          | -0.214067 | -0.829978 | 0.09305 | 0.169225 | no |
| Hspa13        | -0.214129 | -0.805239 | 0.1018  | 0.182191 | no |
| Fyttd1        | -0.214321 | -0.936464 | 0.0607  | 0.119927 | no |
| Mrpl45        | -0.214355 | -0.784898 | 0.14945 | 0.249309 | no |
| Uqcc1         | -0.214369 | -0.896785 | 0.0738  | 0.140696 | no |
| Scrn3         | -0.21439  | -0.949305 | 0.07585 | 0.144004 | no |
| Ctnnd1        | -0.214399 | -0.97876  | 0.05045 | 0.102972 | no |
| Pex3          | -0.214496 | -0.71872  | 0.18715 | 0.298141 | no |
| Sgms2         | -0.214547 | -0.898314 | 0.08385 | 0.15576  | no |
| Gnl1          | -0.214889 | -0.995846 | 0.06375 | 0.124874 | no |
| Pik3r4        | -0.214946 | -0.906871 | 0.08055 | 0.151004 | no |
| Ftsj1         | -0.214955 | -0.637692 | 0.2053  | 0.320475 | no |
| Cog6          | -0.215234 | -0.912188 | 0.08605 | 0.159023 | no |
| Cmc1          | -0.215316 | -0.290435 | 0.5509  | 0.671825 | no |
| Urgcp         | -0.215685 | -0.890166 | 0.08745 | 0.160893 | no |
| Bfar          | -0.215836 | -0.903861 | 0.0895  | 0.163734 | no |
| Thoc3         | -0.215858 | -0.835199 | 0.12335 | 0.213612 | no |
| Tmem248       | -0.216208 | -0.910093 | 0.06845 | 0.13267  | no |
| Cand1         | -0.216313 | -1.03763  | 0.04005 | 0.084649 | no |
| Bbs1          | -0.216438 | -0.662337 | 0.2004  | 0.314231 | no |
| D330023K18Rik | -0.217002 | -0.290855 | 0.7243  | 0.815426 | no |
| Zfp217        | -0.217078 | -0.433363 | 0.38565 | 0.517333 | no |
| Fzd1          | -0.21708  | -0.768921 | 0.1367  | 0.232274 | no |
| Hadhb         | -0.217326 | -0.623467 | 0.2094  | 0.325611 | no |
| Ercc6         | -0.21741  | -0.629569 | 0.21345 | 0.330552 | no |
| Tbc1d7        | -0.217447 | -0.695645 | 0.1606  | 0.26409  | no |
| Myh7b         | -0.217875 | 0         | 1       | 1        | no |

|               |           |           |         |          |    |
|---------------|-----------|-----------|---------|----------|----|
| Ndufa4        | -0.217966 | -1.72674  | 0.04035 | 0.085188 | no |
| Ftsj2         | -0.218222 | -0.494116 | 0.39385 | 0.525411 | no |
| Pigk          | -0.21827  | -0.986711 | 0.0493  | 0.101014 | no |
| Hacl1         | -0.218496 | -0.516563 | 0.3314  | 0.462419 | no |
| Gtf3c4        | -0.218573 | -0.836454 | 0.09295 | 0.169089 | no |
| Exoc6         | -0.218637 | -0.830137 | 0.12085 | 0.210051 | no |
| Pdpx          | -0.218644 | -0.727244 | 0.1879  | 0.298941 | no |
| Msh6          | -0.218699 | -0.392986 | 0.45405 | 0.584049 | no |
| Tsn           | -0.218858 | -1.0256   | 0.05735 | 0.114553 | no |
| Trex1         | -0.218873 | -0.460413 | 0.36025 | 0.492573 | no |
| Mrps27        | -0.218905 | -0.791574 | 0.15735 | 0.259744 | no |
| Msl3          | -0.219372 | -0.780661 | 0.13635 | 0.231798 | no |
| Tspan31       | -0.219466 | -1.08141  | 0.05935 | 0.117821 | no |
| 2410015M20Rik | -0.219588 | -0.894796 | 0.1812  | 0.290968 | no |
| Nop56         | -0.219659 | -0.497497 | 0.37055 | 0.501949 | no |
| Gnpda1        | -0.219761 | -0.606439 | 0.26795 | 0.392502 | no |
| Tab2          | -0.220005 | -0.958571 | 0.06795 | 0.131894 | no |
| Arl5a         | -0.220073 | -1.03087  | 0.04605 | 0.095535 | no |
| Fbxl4         | -0.220259 | -0.735915 | 0.138   | 0.233914 | no |
| Gm3893        | -0.220731 | 0         | 1       | 1        | no |
| Med7          | -0.220842 | -0.146225 | 0.7734  | 0.851722 | no |
| Rnf4          | -0.220941 | -0.982428 | 0.0688  | 0.133212 | no |
| Mbtps1        | -0.220989 | -0.965684 | 0.0506  | 0.103263 | no |
| Brcc3         | -0.221148 | -0.661372 | 0.18655 | 0.297364 | no |
| Tgfb3         | -0.221241 | -0.786904 | 0.1351  | 0.230145 | no |
| Lims1         | -0.221307 | -0.991181 | 0.0472  | 0.097524 | no |
| Tbp           | -0.221375 | -0.558364 | 0.3194  | 0.449362 | no |
| Rfwd2         | -0.221451 | -0.586664 | 0.2338  | 0.354616 | no |
| Tmem30a       | -0.221561 | -1.01874  | 0.04905 | 0.10061  | no |
| Btbd9         | -0.221637 | -0.926502 | 0.0733  | 0.139884 | no |
| Tmppe         | -0.221699 | -0.621902 | 0.214   | 0.331172 | no |
| Pvrl3         | -0.221721 | -0.822605 | 0.0969  | 0.175003 | no |
| Elovl7        | -0.22175  | -1.08248  | 0.0345  | 0.07468  | no |
| Usb1          | -0.221787 | -0.51058  | 0.3633  | 0.495331 | no |
| Dusp12        | -0.221832 | -0.556965 | 0.34045 | 0.472414 | no |
| Ctps          | -0.221908 | -0.913358 | 0.0905  | 0.165267 | no |
| Wdr70         | -0.22196  | -0.633744 | 0.24505 | 0.367022 | no |
| Haus7         | -0.222157 | -0.420286 | 0.39865 | 0.530374 | no |
| Rap1b         | -0.222166 | -1.11532  | 0.04205 | 0.088216 | no |
| Poll          | -0.222223 | -0.640412 | 0.2388  | 0.360134 | no |
| Lman2         | -0.22228  | -0.992685 | 0.05965 | 0.118275 | no |
| Ccdc96        | -0.222332 | 0         | 1       | 1        | no |
| Gna13         | -0.2224   | -0.988254 | 0.04675 | 0.096685 | no |
| Slc29a3       | -0.222619 | -0.842968 | 0.09915 | 0.178266 | no |
| 8030462N17Rik | -0.222664 | -0.705468 | 0.17325 | 0.28034  | no |
| Tecpr1        | -0.222737 | -0.991707 | 0.0591  | 0.117518 | no |
| Tpi1          | -0.222742 | -1.02966  | 0.0388  | 0.082348 | no |
| Kdelr1        | -0.222841 | -0.981346 | 0.08445 | 0.156611 | no |
| Cacna1g       | -0.222968 | 0         | 1       | 1        | no |
| Trim13        | -0.223077 | -0.573567 | 0.3185  | 0.448333 | no |
| Xrcc3         | -0.223177 | 0         | 1       | 1        | no |
| C330006A16Rik | -0.223188 | -0.989376 | 0.04655 | 0.096331 | no |
| Med13         | -0.223189 | -0.96531  | 0.05905 | 0.117454 | no |

|               |           |           |         |          |    |
|---------------|-----------|-----------|---------|----------|----|
| Entpd5        | -0.223324 | -0.897225 | 0.07275 | 0.139054 | no |
| 4930452B06Rik | -0.223401 | -0.620952 | 0.2455  | 0.367571 | no |
| Gm10336       | -0.223438 | -0.753358 | 0.1512  | 0.251722 | no |
| Ahdc1         | -0.223471 | -0.778403 | 0.12975 | 0.222604 | no |
| Anapc1        | -0.223503 | -1.02874  | 0.0427  | 0.089466 | no |
| Rbm46         | -0.223717 | 0         | 1       | 1        | no |
| Sstr1         | -0.223779 | -0.418593 | 0.42465 | 0.555989 | no |
| Sptbn1        | -0.223877 | -0.744443 | 0.13385 | 0.228485 | no |
| Icam5         | -0.223905 | 0         | 1       | 1        | no |
| Pcnxl3        | -0.223937 | -0.890603 | 0.0723  | 0.138473 | no |
| Ctsa          | -0.22401  | -0.833288 | 0.1148  | 0.200877 | no |
| Enho          | -0.224162 | -0.651993 | 0.1852  | 0.29578  | no |
| Tbc1d30       | -0.224268 | -0.946464 | 0.06785 | 0.131738 | no |
| 5930438M14Rik | -0.224458 | 0         | 1       | 1        | no |
| AA415398      | -0.224611 | -0.314049 | 0.57095 | 0.68943  | no |
| Trappc11      | -0.224642 | -1.02616  | 0.0476  | 0.098121 | no |
| Zfat          | -0.224748 | -0.406481 | 0.41225 | 0.544211 | no |
| Slirp         | -0.224828 | -0.826275 | 0.38795 | 0.519315 | no |
| Ndufb10       | -0.224856 | -1.37973  | 0.05835 | 0.116253 | no |
| C630043F03Rik | -0.224884 | -0.46923  | 0.38245 | 0.513715 | no |
| Spns1         | -0.224931 | -0.782394 | 0.115   | 0.201174 | no |
| Rsad1         | -0.225614 | -0.629686 | 0.22885 | 0.349224 | no |
| Pigp          | -0.225655 | -0.210099 | 0.7565  | 0.840014 | no |
| Lipo1         | -0.22574  | -0.554615 | 0.3006  | 0.428731 | no |
| Cisd2         | -0.225767 | -0.938574 | 0.0824  | 0.153626 | no |
| Pank3         | -0.225834 | -1.05029  | 0.03295 | 0.071817 | no |
| Zc3h12b       | -0.225903 | -0.320298 | 0.52115 | 0.645936 | no |
| Mdm1          | -0.225934 | -0.322455 | 0.50945 | 0.63571  | no |
| Ube4a         | -0.225966 | -1.09644  | 0.03235 | 0.070741 | no |
| Grsf1         | -0.226371 | -1.03442  | 0.03735 | 0.079756 | no |
| 6430573F11Rik | -0.226732 | -0.490454 | 0.38245 | 0.513715 | no |
| Acaa1b        | -0.226914 | 0         | 1       | 1        | no |
| Bend5         | -0.227233 | -0.333305 | 0.5097  | 0.635843 | no |
| Cdh5          | -0.227322 | -0.841048 | 0.10915 | 0.192771 | no |
| Tmem261       | -0.227329 | -0.833557 | 0.2279  | 0.348135 | no |
| Rhot1         | -0.227384 | -1.00468  | 0.0441  | 0.092065 | no |
| Gdpgp1        | -0.227519 | -0.58391  | 0.26665 | 0.391073 | no |
| Eea1          | -0.227574 | -1.07602  | 0.0346  | 0.074811 | no |
| Tango2        | -0.227639 | -0.955601 | 0.05335 | 0.107633 | no |
| Stk3          | -0.227678 | -0.660184 | 0.21535 | 0.333106 | no |
| Aven          | -0.22775  | -0.618254 | 0.2107  | 0.327172 | no |
| Tmem18        | -0.227754 | -0.943215 | 0.0781  | 0.147474 | no |
| Pex10         | -0.22783  | -0.516327 | 0.36155 | 0.493689 | no |
| Ctdnep1       | -0.227835 | -0.629169 | 0.2065  | 0.322007 | no |
| Snx16         | -0.228113 | -0.868158 | 0.08245 | 0.153654 | no |
| Acadsb        | -0.228173 | -0.958334 | 0.0711  | 0.136807 | no |
| Rpp38         | -0.228496 | -0.405359 | 0.5132  | 0.639187 | no |
| Mthfd2        | -0.22851  | -0.869194 | 0.11005 | 0.194024 | no |
| Homer1        | -0.228558 | -0.704225 | 0.15915 | 0.261998 | no |
| Acadl         | -0.228674 | -1.16878  | 0.03395 | 0.073645 | no |
| Pex7          | -0.229604 | -0.754333 | 0.13055 | 0.223658 | no |
| Recql5        | -0.229703 | -0.638434 | 0.2184  | 0.336373 | no |
| Cstf2t        | -0.229776 | -0.443222 | 0.3845  | 0.515999 | no |

|               |           |           |         |          |    |
|---------------|-----------|-----------|---------|----------|----|
| Gm14305       | -0.229913 | -0.40112  | 0.48485 | 0.613087 | no |
| Alg3          | -0.229929 | -0.675932 | 0.24115 | 0.362942 | no |
| Smurf1        | -0.229954 | -0.882052 | 0.0767  | 0.145265 | no |
| Gbas          | -0.230306 | -1.09581  | 0.0492  | 0.100855 | no |
| Ece1          | -0.230496 | -1.07264  | 0.0374  | 0.079824 | no |
| Tubg1         | -0.230509 | -0.848938 | 0.13195 | 0.225678 | no |
| Tagap         | -0.230918 | 0         | 1       | 1        | no |
| Aagab         | -0.230927 | -0.96751  | 0.0722  | 0.138302 | no |
| Gosr2         | -0.231048 | -1.05309  | 0.0483  | 0.099302 | no |
| D2hgdh        | -0.231099 | -0.568316 | 0.28515 | 0.41125  | no |
| Usp53         | -0.231497 | -0.59024  | 0.2578  | 0.381084 | no |
| Tns1          | -0.231656 | -1.05221  | 0.0346  | 0.074811 | no |
| Tfb2m         | -0.231673 | -0.557701 | 0.29775 | 0.425628 | no |
| Wrap53        | -0.231801 | -0.493089 | 0.37945 | 0.510979 | no |
| Pgs1          | -0.231854 | -1.10468  | 0.0433  | 0.090595 | no |
| Ndufa13       | -0.231883 | -0.916141 | 0.06275 | 0.123206 | no |
| Vcl           | -0.232147 | -1.10907  | 0.0306  | 0.067572 | no |
| Cbx3          | -0.232167 | -0.632476 | 0.25965 | 0.383167 | no |
| Psd2          | -0.232314 | 0         | 1       | 1        | no |
| Kpna1         | -0.232352 | -1.11324  | 0.0325  | 0.070999 | no |
| Dtd2          | -0.232701 | -0.586777 | 0.27165 | 0.396478 | no |
| Rab11a        | -0.232729 | -1.19853  | 0.0252  | 0.057287 | no |
| Ntan1         | -0.232755 | -0.522827 | 0.38715 | 0.518611 | no |
| Napb          | -0.2328   | -1.13271  | 0.03145 | 0.069104 | no |
| Zdhhc6        | -0.232988 | -0.731661 | 0.14135 | 0.238496 | no |
| Ap2a1         | -0.233047 | -1.06608  | 0.0325  | 0.070999 | no |
| E130308A19Rik | -0.233152 | -0.431416 | 0.38645 | 0.518196 | no |
| Atp2b4        | -0.233225 | -1.04375  | 0.0353  | 0.076064 | no |
| Ndufa11       | -0.233449 | -0.989138 | 0.06275 | 0.123206 | no |
| Pias3         | -0.233691 | -0.727603 | 0.178   | 0.286871 | no |
| Ankrd17       | -0.233777 | -1.09607  | 0.02605 | 0.058917 | no |
| Fam19a3       | -0.234059 | -0.764926 | 0.13705 | 0.232661 | no |
| Fmnl2         | -0.234262 | -1.06658  | 0.0373  | 0.079688 | no |
| Adam22        | -0.234409 | -0.933891 | 0.05935 | 0.117821 | no |
| Dnajc24       | -0.234655 | -0.423841 | 0.3925  | 0.524137 | no |
| Tubgcp5       | -0.23467  | -0.884339 | 0.0901  | 0.164627 | no |
| Dhdh          | -0.234787 | -0.318022 | 0.54635 | 0.667873 | no |
| Wbscr27       | -0.235157 | -0.736362 | 0.16705 | 0.272635 | no |
| Ndufb8        | -0.235163 | -1.52954  | 0.0353  | 0.076064 | no |
| Rnf146        | -0.23517  | -0.674802 | 0.17055 | 0.277086 | no |
| Ctsf          | -0.235256 | -0.997829 | 0.07005 | 0.13508  | no |
| Cdc42ep3      | -0.235397 | -0.622596 | 0.2587  | 0.382244 | no |
| Tmem63b       | -0.235412 | -1.16887  | 0.0277  | 0.062088 | no |
| Sec31a        | -0.235447 | -1.12799  | 0.02725 | 0.061224 | no |
| 4933411K20Rik | -0.23562  | -0.956502 | 0.0659  | 0.128459 | no |
| Aste1         | -0.235706 | -0.339629 | 0.4937  | 0.621081 | no |
| Lrrc8a        | -0.235708 | -1.11811  | 0.031   | 0.06833  | no |
| Gfm2          | -0.235718 | -0.427925 | 0.41365 | 0.545679 | no |
| Slc25a16      | -0.235839 | -0.955411 | 0.07245 | 0.13864  | no |
| Taco1         | -0.236206 | -0.741521 | 0.2103  | 0.32678  | no |
| Gdap2         | -0.236292 | -0.866418 | 0.0804  | 0.150808 | no |
| Tmem241       | -0.236463 | -0.542786 | 0.27175 | 0.396536 | no |
| Ddx31         | -0.236496 | -0.649847 | 0.2184  | 0.336373 | no |

|               |           |           |         |          |     |
|---------------|-----------|-----------|---------|----------|-----|
| Adam11        | -0.236617 | -1.10231  | 0.02745 | 0.0616   | no  |
| Gm14326       | -0.236658 | -0.546536 | 0.30205 | 0.430337 | no  |
| Fam120aos     | -0.236751 | -0.471133 | 0.4042  | 0.53577  | no  |
| Traf6         | -0.237127 | -0.751405 | 0.14335 | 0.241287 | no  |
| Bbs10         | -0.237164 | -0.498222 | 0.35315 | 0.485266 | no  |
| Hsd11         | -0.237206 | -1.15681  | 0.02755 | 0.061783 | no  |
| Eml2          | -0.23727  | -1.10258  | 0.02665 | 0.060049 | no  |
| Sfxn2         | -0.23752  | -0.380747 | 0.47785 | 0.606664 | no  |
| Acox2         | -0.23763  | 0         | 1       | 1        | no  |
| Tmem185b      | -0.237763 | -0.625593 | 0.2434  | 0.365086 | no  |
| Trim37        | -0.237991 | -0.312797 | 0.5463  | 0.667873 | no  |
| Tmem126b      | -0.237997 | -0.912598 | 0.1542  | 0.255849 | no  |
| Nelfcd        | -0.238054 | -0.708569 | 0.19895 | 0.312511 | no  |
| Mrps2         | -0.238401 | -0.746899 | 0.135   | 0.230004 | no  |
| Gatad1        | -0.238452 | -1.08077  | 0.04805 | 0.09888  | no  |
| Pptc7         | -0.238588 | -1.05912  | 0.04155 | 0.087347 | no  |
| Nmnat3        | -0.238609 | 0         | 1       | 1        | no  |
| Mms19         | -0.23863  | -0.852847 | 0.08595 | 0.158904 | no  |
| Pde4d         | -0.238799 | -1.02872  | 0.03985 | 0.084294 | no  |
| Zbtb5         | -0.238801 | -0.563751 | 0.2589  | 0.382455 | no  |
| Mpnd          | -0.238868 | -1.04198  | 0.0663  | 0.129125 | no  |
| Mstn          | -0.239001 | 0         | 1       | 1        | no  |
| Herpud2       | -0.239163 | -0.857929 | 0.10555 | 0.187762 | no  |
| Arl6ip1       | -0.239423 | -1.2108   | 0.0273  | 0.061315 | no  |
| Txndc12       | -0.239604 | -0.658615 | 0.26535 | 0.389726 | no  |
| Rassf5        | -0.239608 | -1.14198  | 0.02965 | 0.065813 | no  |
| Ubxn2a        | -0.239984 | -1.07044  | 0.04915 | 0.100769 | no  |
| Rpp30         | -0.240115 | -0.722643 | 0.22925 | 0.349348 | no  |
| Tmem175       | -0.24035  | -0.520221 | 0.3124  | 0.441856 | no  |
| Abhd15        | -0.24062  | -0.405746 | 0.44675 | 0.577748 | no  |
| Ralgapb       | -0.240653 | -1.12588  | 0.02055 | 0.048246 | yes |
| Hps1          | -0.240674 | -0.471101 | 0.3848  | 0.516349 | no  |
| Cdkal1        | -0.240777 | -0.585852 | 0.2766  | 0.401977 | no  |
| Ubap1         | -0.240881 | -1.00336  | 0.04175 | 0.087698 | no  |
| Gm12060       | -0.240883 | 0         | 1       | 1        | no  |
| Kpna6         | -0.241062 | -1.12107  | 0.02965 | 0.065813 | no  |
| Cad           | -0.241376 | -0.229482 | 0.64685 | 0.751402 | no  |
| Ndufab1       | -0.241377 | -0.734086 | 0.26805 | 0.392562 | no  |
| Usp28         | -0.241418 | -0.641623 | 0.21215 | 0.328846 | no  |
| Syng2         | -0.241426 | -0.629589 | 0.2707  | 0.395526 | no  |
| Tbc1d23       | -0.241489 | -0.896421 | 0.0889  | 0.162973 | no  |
| Rora          | -0.241733 | -0.685491 | 0.1656  | 0.270535 | no  |
| A430005L14Rik | -0.241827 | -0.446741 | 0.3655  | 0.497359 | no  |
| Syng1         | -0.241997 | -1.03932  | 0.0361  | 0.077536 | no  |
| Dnajc5        | -0.242172 | -1.13335  | 0.02465 | 0.056249 | no  |
| Prpsap1       | -0.242219 | -1.0836   | 0.05185 | 0.105215 | no  |
| Timm10b       | -0.242345 | -0.725946 | 0.24625 | 0.368403 | no  |
| C330007P06Rik | -0.242474 | -0.984064 | 0.064   | 0.125253 | no  |
| Zfp687        | -0.242524 | -0.594045 | 0.2341  | 0.354868 | no  |
| Wars          | -0.242583 | -1.10146  | 0.0254  | 0.057673 | no  |
| Mtif3         | -0.242741 | -0.543684 | 0.2759  | 0.401136 | no  |
| Tmem110       | -0.242788 | -0.866759 | 0.09845 | 0.177296 | no  |
| Slc25a35      | -0.242799 | -0.511785 | 0.3595  | 0.4917   | no  |



|               |           |           |         |          |     |
|---------------|-----------|-----------|---------|----------|-----|
| Vps26b        | -0.242933 | -1.04934  | 0.0352  | 0.075898 | no  |
| Galnt16       | -0.243056 | 0         | 1       | 1        | no  |
| Nudt4         | -0.243564 | -1.14117  | 0.0214  | 0.049915 | yes |
| Ppp3r1        | -0.243905 | -1.22846  | 0.02235 | 0.051739 | no  |
| Slc12a6       | -0.243909 | -0.976309 | 0.057   | 0.11394  | no  |
| Fam3c         | -0.243935 | -1.10939  | 0.0404  | 0.085267 | no  |
| Fth1          | -0.244077 | -1.00652  | 0.04135 | 0.087023 | no  |
| Dmrtb1        | -0.244088 | 0         | 1       | 1        | no  |
| 2410006H16Rik | -0.244176 | -0.602772 | 0.2244  | 0.343738 | no  |
| Spryd4        | -0.244265 | -0.490501 | 0.3264  | 0.457174 | no  |
| Fbxo16        | -0.244332 | -0.465219 | 0.43045 | 0.561808 | no  |
| Stim2         | -0.244465 | -0.980319 | 0.05685 | 0.113691 | no  |
| Impdh2        | -0.244658 | 0         | 1       | 1        | no  |
| Gm13483       | -0.244663 | 0         | 1       | 1        | no  |
| Ly6e          | -0.244813 | -0.922863 | 0.06415 | 0.125417 | no  |
| Zfp472        | -0.244899 | -0.395008 | 0.473   | 0.602293 | no  |
| Xrcc5         | -0.245025 | -0.96329  | 0.0746  | 0.141915 | no  |
| Ncs1          | -0.245334 | -1.20264  | 0.0197  | 0.046489 | yes |
| Gm6377        | -0.245334 | 0         | 1       | 1        | no  |
| Gm15910       | -0.245673 | 0         | 1       | 1        | no  |
| Mtrf1         | -0.245798 | -0.509189 | 0.3622  | 0.494221 | no  |
| Mtmr12        | -0.245824 | -0.756992 | 0.14585 | 0.244967 | no  |
| Exoc4         | -0.245883 | -1.16237  | 0.02565 | 0.058101 | no  |
| Impdh1        | -0.246045 | -1.25008  | 0.0211  | 0.049362 | yes |
| Eral1         | -0.24605  | -0.832983 | 0.1249  | 0.215733 | no  |
| Ube2v2        | -0.246226 | -0.932679 | 0.06075 | 0.11999  | no  |
| Zfyve19       | -0.246316 | -0.704278 | 0.1564  | 0.258594 | no  |
| Sufu          | -0.246474 | -0.619834 | 0.217   | 0.334565 | no  |
| Yipf1         | -0.246602 | -0.943255 | 0.0579  | 0.115495 | no  |
| Znrd1as       | -0.246642 | -0.435954 | 0.4849  | 0.613091 | no  |
| Ccdc90b       | -0.246727 | -0.595886 | 0.23545 | 0.356385 | no  |
| Rap1a         | -0.247025 | -0.899336 | 0.09675 | 0.174804 | no  |
| Sec61a2       | -0.247134 | -1.08171  | 0.0444  | 0.092561 | no  |
| Stxbp4        | -0.247337 | -0.660914 | 0.2016  | 0.315814 | no  |
| Adnp2         | -0.247423 | -0.785108 | 0.1287  | 0.221317 | no  |
| Nudt9         | -0.247629 | -0.85798  | 0.0853  | 0.157989 | no  |
| Ube2g1        | -0.247631 | -1.05219  | 0.04675 | 0.096685 | no  |
| Ndufb9        | -0.247658 | -1.49245  | 0.03685 | 0.078917 | no  |
| Kif26a        | -0.248011 | -0.522995 | 0.3041  | 0.432746 | no  |
| Ttf2          | -0.248194 | -0.736156 | 0.15645 | 0.258645 | no  |
| Tbck          | -0.248394 | -0.762267 | 0.12685 | 0.218533 | no  |
| Kbtbd7        | -0.248417 | -0.900098 | 0.0818  | 0.152765 | no  |
| Nars          | -0.248582 | -1.14918  | 0.0205  | 0.048145 | yes |
| Zfp438        | -0.248595 | -0.440888 | 0.41165 | 0.543581 | no  |
| Smndc1        | -0.248897 | -0.930308 | 0.0879  | 0.161519 | no  |
| Lmbrd2        | -0.249102 | -0.998566 | 0.04805 | 0.09888  | no  |
| Pcdhga2       | -0.249182 | -0.120414 | 0.819   | 0.883604 | no  |
| Sdpr          | -0.249347 | -0.678626 | 0.17235 | 0.279258 | no  |
| Cdk2ap1       | -0.249349 | -0.733356 | 0.2106  | 0.327093 | no  |
| Fundc1        | -0.24968  | -1.21648  | 0.03    | 0.066457 | no  |
| Opa1          | -0.250099 | -1.18837  | 0.0187  | 0.044477 | yes |
| Acr           | -0.250236 | 0         | 1       | 1        | no  |
| Pcdhgb2       | -0.2503   | -0.120295 | 0.8146  | 0.880253 | no  |

|               |           |           |         |          |     |
|---------------|-----------|-----------|---------|----------|-----|
| Galc          | -0.250326 | -1.03371  | 0.04685 | 0.096876 | no  |
| Atg2b         | -0.250357 | -1.07709  | 0.033   | 0.071902 | no  |
| Fanca         | -0.250359 | 0         | 1       | 1        | no  |
| Apba2         | -0.250749 | -1.05979  | 0.03485 | 0.075278 | no  |
| Traip         | -0.250799 | 0         | 1       | 1        | no  |
| 9230110C19Rik | -0.250954 | -0.659086 | 0.2434  | 0.365086 | no  |
| Zdhhc3        | -0.25101  | -1.14025  | 0.0255  | 0.05786  | no  |
| Ganab         | -0.251034 | -1.21931  | 0.01875 | 0.04458  | yes |
| Slc33a1       | -0.251213 | -0.909864 | 0.06915 | 0.133773 | no  |
| Osbpl1a       | -0.251261 | -1.11757  | 0.02535 | 0.057579 | no  |
| Cda           | -0.251311 | -1.14926  | 0.0833  | 0.154955 | no  |
| Aif1          | -0.251384 | 0         | 1       | 1        | no  |
| Paip2b        | -0.251542 | -1.20701  | 0.0232  | 0.053381 | no  |
| Wdr8          | -0.251547 | -0.803618 | 0.15425 | 0.2559   | no  |
| Rab11b        | -0.251592 | -1.14337  | 0.02565 | 0.058101 | no  |
| Ech1          | -0.251729 | -1.15212  | 0.05605 | 0.112346 | no  |
| Dennd4b       | -0.252037 | -0.865555 | 0.0769  | 0.14554  | no  |
| Iah1          | -0.252199 | -0.608153 | 0.33805 | 0.469624 | no  |
| Zfp608        | -0.252244 | -0.769707 | 0.13065 | 0.2238   | no  |
| Sec16b        | -0.252253 | 0         | 1       | 1        | no  |
| Zfp37         | -0.252266 | -0.606546 | 0.21965 | 0.337905 | no  |
| Fam160b2      | -0.252406 | -0.937366 | 0.0752  | 0.142893 | no  |
| Fbxo3         | -0.252417 | -0.846933 | 0.089   | 0.163066 | no  |
| Prpf8         | -0.2525   | -1.21838  | 0.01755 | 0.042165 | yes |
| Gm12992       | -0.252659 | -0.224481 | 0.64045 | 0.746516 | no  |
| Mcc           | -0.252666 | -0.82286  | 0.1091  | 0.192734 | no  |
| Npm2          | -0.25274  | 0         | 1       | 1        | no  |
| Tigd2         | -0.25315  | -0.715745 | 0.1811  | 0.290843 | no  |
| Al118078      | -0.253253 | -0.402748 | 0.45715 | 0.587069 | no  |
| Fam98c        | -0.253676 | -0.597902 | 0.22555 | 0.34538  | no  |
| Gm14436       | -0.253913 | -0.44951  | 0.3708  | 0.502185 | no  |
| Rhob          | -0.253986 | -1.27166  | 0.0193  | 0.045667 | yes |
| Ppfibp2       | -0.254077 | -0.547625 | 0.30625 | 0.435152 | no  |
| Pdha1         | -0.254166 | -1.18983  | 0.01635 | 0.039706 | yes |
| Nos2          | -0.254363 | 0         | 1       | 1        | no  |
| Slc39a7       | -0.254706 | -1.13059  | 0.02325 | 0.053468 | no  |
| Jagn1         | -0.254891 | -0.899774 | 0.07035 | 0.13562  | no  |
| Bcl10         | -0.254926 | -0.816293 | 0.13975 | 0.236337 | no  |
| Cldn25        | -0.254941 | -1.09032  | 0.0278  | 0.062291 | no  |
| Lrrc56        | -0.255057 | -0.440736 | 0.41225 | 0.544211 | no  |
| D3Erttd254e   | -0.255303 | -0.891508 | 0.08265 | 0.153984 | no  |
| Zfp811        | -0.255355 | -0.407461 | 0.42065 | 0.552114 | no  |
| Slc37a4       | -0.255464 | -0.740772 | 0.13665 | 0.232249 | no  |
| Parp9         | -0.255601 | -0.343493 | 0.4845  | 0.612819 | no  |
| Atp5k         | -0.255603 | -2.69824  | 0.0635  | 0.124476 | no  |
| Ripply3       | -0.255614 | 0         | 1       | 1        | no  |
| Sppl3         | -0.2557   | -1.16091  | 0.03045 | 0.067274 | no  |
| Dst           | -0.255867 | -0.85774  | 0.08295 | 0.154391 | no  |
| Casd1         | -0.255997 | -1.07811  | 0.03985 | 0.084294 | no  |
| Gpr182        | -0.256079 | 0         | 1       | 1        | no  |
| Abca3         | -0.256408 | -1.21789  | 0.0163  | 0.039607 | yes |
| Cmtr2         | -0.256518 | -0.607511 | 0.24675 | 0.368943 | no  |
| Pyurf         | -0.25655  | -0.783453 | 0.12975 | 0.222604 | no  |

|               |           |           |         |          |     |
|---------------|-----------|-----------|---------|----------|-----|
| Usp54         | -0.256563 | -0.29842  | 0.55325 | 0.673948 | no  |
| Snx14         | -0.256579 | -1.06286  | 0.04875 | 0.100103 | no  |
| Taf13         | -0.256646 | -1.1465   | 0.0514  | 0.104477 | no  |
| Fbxo21        | -0.256777 | -1.2184   | 0.01935 | 0.045761 | yes |
| Cs            | -0.256855 | -1.29914  | 0.0139  | 0.034515 | yes |
| Gtpbp3        | -0.256913 | -0.794411 | 0.1389  | 0.235139 | no  |
| Psmc4         | -0.257017 | -1.33077  | 0.02235 | 0.051739 | no  |
| Ppfia4        | -0.257137 | -1.13313  | 0.02715 | 0.06102  | no  |
| Myl12a        | -0.257176 | -0.930993 | 0.0961  | 0.173771 | no  |
| Myo1b         | -0.257339 | -1.00748  | 0.0459  | 0.095283 | no  |
| Tfeb          | -0.257406 | -0.557065 | 0.26035 | 0.383827 | no  |
| Gmppb         | -0.257501 | -0.324714 | 0.564   | 0.682967 | no  |
| Kctd15        | -0.257508 | -0.890661 | 0.0968  | 0.174846 | no  |
| Pex12         | -0.257509 | -0.465095 | 0.34815 | 0.480286 | no  |
| Arhgef7       | -0.25775  | -1.10013  | 0.02615 | 0.059093 | no  |
| Mgat2         | -0.257824 | -1.07829  | 0.047   | 0.097141 | no  |
| Etfb          | -0.258025 | -1.02277  | 0.03735 | 0.079756 | no  |
| Lmf1          | -0.258079 | -0.749435 | 0.13165 | 0.225223 | no  |
| Zmpste24      | -0.258176 | -1.19179  | 0.02295 | 0.05287  | no  |
| Dfna5         | -0.25818  | -0.673705 | 0.21055 | 0.327054 | no  |
| Ndfip2        | -0.258286 | -1.21719  | 0.0138  | 0.034286 | yes |
| 1700028E10Rik | -0.258568 | 0         | 1       | 1        | no  |
| Mrpl1         | -0.258588 | -0.612534 | 0.2161  | 0.333838 | no  |
| Ank1          | -0.258669 | -1.1919   | 0.01855 | 0.044184 | yes |
| Hspa9         | -0.258673 | -1.30356  | 0.01395 | 0.034626 | yes |
| Tox4          | -0.258726 | -0.757714 | 0.1471  | 0.246318 | no  |
| Dhdds         | -0.258754 | -1.20907  | 0.023   | 0.052958 | no  |
| Nkd2          | -0.258893 | -0.393726 | 0.4567  | 0.586605 | no  |
| Cadm2         | -0.258932 | -0.961005 | 0.0533  | 0.107565 | no  |
| Gm16596       | -0.258955 | 0         | 1       | 1        | no  |
| Alms1         | -0.259248 | 0         | 1       | 1        | no  |
| Atm           | -0.259357 | -1.03258  | 0.039   | 0.082733 | no  |
| Tbc1d14       | -0.259501 | -1.08097  | 0.02735 | 0.061407 | no  |
| Cnbp          | -0.260102 | -1.21413  | 0.0131  | 0.032767 | yes |
| Hist1h1c      | -0.260185 | -1.08617  | 0.1106  | 0.194761 | no  |
| Mat1a         | -0.260247 | 0         | 1       | 1        | no  |
| Akap10        | -0.260264 | -0.982416 | 0.06    | 0.118738 | no  |
| Spg20         | -0.260298 | -1.09219  | 0.0275  | 0.061691 | no  |
| Dmxl2         | -0.2604   | -1.23515  | 0.01545 | 0.037763 | yes |
| Pcsk4         | -0.260502 | 0         | 1       | 1        | no  |
| Ago1          | -0.260528 | -0.987816 | 0.05495 | 0.110491 | no  |
| Poc1b         | -0.260584 | -0.550654 | 0.3024  | 0.430743 | no  |
| Tctn2         | -0.26079  | -0.649993 | 0.22565 | 0.345493 | no  |
| Sp3os         | -0.261224 | -0.239833 | 0.6243  | 0.732954 | no  |
| Hip1          | -0.261535 | -1.19265  | 0.01985 | 0.046793 | yes |
| Abhd10        | -0.26156  | -0.839152 | 0.08945 | 0.163665 | no  |
| Cdh26         | -0.262057 | 0         | 1       | 1        | no  |
| Zmynd10       | -0.26215  | 0         | 1       | 1        | no  |
| Amigo1        | -0.262175 | -1.22257  | 0.01335 | 0.033305 | yes |
| Cyb5r3        | -0.262217 | -1.36613  | 0.0134  | 0.033404 | yes |
| Sertad1       | -0.26243  | -0.692202 | 0.23885 | 0.360134 | no  |
| Doc2b         | -0.262437 | 0         | 1       | 1        | no  |
| Hmgcs1        | -0.262514 | -1.0827   | 0.03045 | 0.067274 | no  |

|               |           |           |         |          |     |
|---------------|-----------|-----------|---------|----------|-----|
| Zbtb37        | -0.2627   | -0.459495 | 0.37715 | 0.508604 | no  |
| Xxylt1        | -0.262733 | -0.192724 | 0.70735 | 0.802155 | no  |
| Ubqln4        | -0.262739 | -1.15593  | 0.0315  | 0.069179 | no  |
| Zkscan16      | -0.262752 | 0         | 1       | 1        | no  |
| Eri3          | -0.262965 | -1.06938  | 0.0309  | 0.068166 | no  |
| Cebpzoz       | -0.263235 | -0.606522 | 0.2997  | 0.427586 | no  |
| Sh3gl3        | -0.263289 | -0.493487 | 0.3155  | 0.445339 | no  |
| Pja2          | -0.263465 | -1.16408  | 0.02055 | 0.048246 | yes |
| Egfl7         | -0.263569 | -0.852755 | 0.08625 | 0.159259 | no  |
| Adam15        | -0.26364  | -1.15764  | 0.02035 | 0.047819 | yes |
| Map4k4        | -0.263875 | -1.21786  | 0.01515 | 0.037166 | yes |
| Rprd1a        | -0.263928 | -1.12814  | 0.0315  | 0.069179 | no  |
| Fundc2        | -0.264026 | -1.10214  | 0.03665 | 0.078514 | no  |
| Nphp1         | -0.264161 | -0.539821 | 0.27655 | 0.401949 | no  |
| Gba2          | -0.264196 | -0.600255 | 0.25795 | 0.381264 | no  |
| 2810408M09Rik | -0.264229 | -0.678458 | 0.21695 | 0.334565 | no  |
| Spire1        | -0.264739 | -1.10437  | 0.02885 | 0.064274 | no  |
| Ndufa5        | -0.264823 | -1.52967  | 0.0527  | 0.10663  | no  |
| Gm14322       | -0.264827 | 0         | 1       | 1        | no  |
| Dctd          | -0.265142 | -0.313197 | 0.5184  | 0.64367  | no  |
| Fbxw5         | -0.265214 | -1.07022  | 0.03005 | 0.066557 | no  |
| Cog2          | -0.265397 | -0.932496 | 0.07845 | 0.147988 | no  |
| Mkrn2         | -0.265777 | -0.591371 | 0.28225 | 0.408043 | no  |
| Sec11c        | -0.266093 | -1.24293  | 0.06475 | 0.126459 | no  |
| Atf7          | -0.266205 | -0.6994   | 0.1903  | 0.302071 | no  |
| 4933427G17Rik | -0.26641  | 0         | 1       | 1        | no  |
| Tmtc1         | -0.266535 | -1.06531  | 0.03755 | 0.080067 | no  |
| Npy1r         | -0.266631 | -0.890176 | 0.09345 | 0.169813 | no  |
| Sntg1         | -0.267144 | -0.563561 | 0.2519  | 0.374575 | no  |
| Dip2b         | -0.267205 | -1.14709  | 0.02295 | 0.05287  | no  |
| Sil1          | -0.267236 | -1.04864  | 0.06285 | 0.123366 | no  |
| 2900026A02Rik | -0.267666 | -1.13909  | 0.02735 | 0.061407 | no  |
| Ogdh          | -0.26773  | -1.23352  | 0.01515 | 0.037166 | yes |
| Gprasp2       | -0.267963 | -1.12102  | 0.02435 | 0.05567  | no  |
| Tnni3         | -0.267996 | 0         | 1       | 1        | no  |
| Sos1          | -0.268304 | -1.28264  | 0.01125 | 0.028747 | yes |
| Aldh7a1       | -0.268392 | -0.965792 | 0.0685  | 0.132709 | no  |
| Ext2          | -0.268394 | -1.10047  | 0.0363  | 0.077915 | no  |
| Tnpo1         | -0.268578 | -1.08526  | 0.0291  | 0.064799 | no  |
| Ppp3ca        | -0.268705 | -1.32154  | 0.01635 | 0.039706 | yes |
| Comtd1        | -0.268734 | -0.313487 | 0.52795 | 0.651685 | no  |
| Ndr4          | -0.268836 | -0.808901 | 0.1003  | 0.17987  | no  |
| Amfr          | -0.268904 | -1.33753  | 0.01035 | 0.026762 | yes |
| Cox7b         | -0.269038 | -1.38819  | 0.02665 | 0.060049 | no  |
| Abi2          | -0.269083 | -1.19738  | 0.01665 | 0.040309 | yes |
| Nbas          | -0.269138 | -1.21735  | 0.0175  | 0.042076 | yes |
| Dbt           | -0.269138 | -0.916126 | 0.0872  | 0.160567 | no  |
| Nuak1         | -0.269176 | -1.20059  | 0.0223  | 0.05166  | no  |
| Mtbp          | -0.269215 | 0         | 1       | 1        | no  |
| Supt7l        | -0.269614 | -0.767276 | 0.15465 | 0.256404 | no  |
| Mbnl1         | -0.269909 | -1.23465  | 0.01295 | 0.032429 | yes |
| Itga7         | -0.270333 | -1.24835  | 0.0116  | 0.029488 | yes |
| Ctla4         | -0.270647 | 0         | 1       | 1        | no  |

|               |           |           |         |          |     |
|---------------|-----------|-----------|---------|----------|-----|
| Svip          | -0.270655 | -1.20947  | 0.0149  | 0.036627 | yes |
| 8430419L09Rik | -0.270718 | -1.31503  | 0.0122  | 0.030789 | yes |
| Ankrd40       | -0.270749 | -1.25047  | 0.01055 | 0.027215 | yes |
| Acvr1b        | -0.270768 | -1.06407  | 0.03125 | 0.068732 | no  |
| Foxred1       | -0.270974 | -0.823931 | 0.099   | 0.17802  | no  |
| Fam122a       | -0.271358 | -0.516632 | 0.3012  | 0.429356 | no  |
| Ghitm         | -0.271492 | -1.19322  | 0.01605 | 0.039064 | yes |
| 4933409K07Rik | -0.271535 | 0         | 1       | 1        | no  |
| Atp5d         | -0.271671 | -0.225445 | 0.65135 | 0.754976 | no  |
| Sppl2b        | -0.271779 | -0.905048 | 0.08725 | 0.160614 | no  |
| Zfp300        | -0.272337 | 0         | 1       | 1        | no  |
| Tbc1d9b       | -0.272388 | -1.27217  | 0.0108  | 0.027763 | yes |
| Card6         | -0.272409 | 0         | 1       | 1        | no  |
| 2410002F23Rik | -0.272469 | -0.862218 | 0.08035 | 0.150736 | no  |
| Srr           | -0.272546 | -0.866426 | 0.0834  | 0.155076 | no  |
| Esam          | -0.272789 | -0.961071 | 0.083   | 0.154462 | no  |
| Tmed9         | -0.27281  | -1.37511  | 0.017   | 0.04103  | yes |
| Cycs          | -0.272901 | -1.04021  | 0.05155 | 0.104718 | no  |
| Rab33b        | -0.272946 | -1.08365  | 0.0408  | 0.086015 | no  |
| Dclre1b       | -0.272997 | -0.163018 | 0.75335 | 0.837077 | no  |
| Crot          | -0.273153 | -1.2946   | 0.01425 | 0.035265 | yes |
| D430020J02Rik | -0.273164 | 0         | 1       | 1        | no  |
| Mrpl16        | -0.273258 | -0.967922 | 0.1102  | 0.194263 | no  |
| Sec23a        | -0.273346 | -1.34434  | 0.00925 | 0.024243 | yes |
| Irf1          | -0.273646 | -0.800826 | 0.1071  | 0.189832 | no  |
| Rnft1         | -0.273738 | -0.320266 | 0.5453  | 0.667265 | no  |
| Slc25a17      | -0.273751 | -1.1476   | 0.0451  | 0.093843 | no  |
| Gtf3c3        | -0.274104 | -1.10716  | 0.03675 | 0.078715 | no  |
| Tmem165       | -0.274123 | -0.673655 | 0.22585 | 0.34568  | no  |
| Akap2         | -0.274153 | -1.23684  | 0.012   | 0.030371 | yes |
| Chd1l         | -0.274544 | -0.664911 | 0.21015 | 0.326624 | no  |
| Myo18a        | -0.274631 | -1.28639  | 0.00975 | 0.025413 | yes |
| Atp5a1        | -0.274648 | -1.27672  | 0.01795 | 0.042986 | yes |
| Sema6d        | -0.274662 | -1.24748  | 0.01235 | 0.031108 | yes |
| Haus3         | -0.275166 | -0.639872 | 0.19465 | 0.307218 | no  |
| Nedd9         | -0.275255 | -0.869291 | 0.0796  | 0.149667 | no  |
| Kbtbd4        | -0.275673 | -0.785815 | 0.1472  | 0.246392 | no  |
| Tmem104       | -0.275694 | -1.12505  | 0.0301  | 0.066634 | no  |
| Commd9        | -0.27571  | -1.0557   | 0.078   | 0.147348 | no  |
| Lyrn1         | -0.275819 | -0.561897 | 0.2526  | 0.375279 | no  |
| Gm19276       | -0.275971 | 0         | 1       | 1        | no  |
| Slc25a3       | -0.275986 | -1.49102  | 0.00885 | 0.02338  | yes |
| Rer1          | -0.276093 | -1.27119  | 0.027   | 0.060703 | no  |
| Rprd1b        | -0.276106 | -0.898185 | 0.07185 | 0.13791  | no  |
| Tbc1d5        | -0.276217 | -1.09287  | 0.0268  | 0.060335 | no  |
| Gns           | -0.27623  | -1.29137  | 0.01285 | 0.032203 | yes |
| Mrps22        | -0.276414 | -0.908103 | 0.1263  | 0.217896 | no  |
| Stard10       | -0.276548 | -1.31265  | 0.02665 | 0.060049 | no  |
| Ccdc172       | -0.276622 | -0.556377 | 0.36335 | 0.495331 | no  |
| Zfp609        | -0.276663 | -1.05278  | 0.0388  | 0.082348 | no  |
| Zfp184        | -0.276676 | 0         | 1       | 1        | no  |
| Cidea         | -0.276697 | -0.320379 | 0.5214  | 0.646185 | no  |
| Mageh1        | -0.27676  | -0.901837 | 0.1211  | 0.210403 | no  |

|               |           |           |         |          |     |
|---------------|-----------|-----------|---------|----------|-----|
| Nomo1         | -0.277196 | -1.33531  | 0.00845 | 0.022507 | yes |
| Dnah7a        | -0.277436 | 0         | 1       | 1        | no  |
| 9430083A17Rik | -0.277766 | 0         | 1       | 1        | no  |
| Nckap1        | -0.277892 | -1.27459  | 0.0107  | 0.027543 | yes |
| Ddx41         | -0.277924 | -0.715596 | 0.18975 | 0.301451 | no  |
| 2310014L17Rik | -0.277989 | 0         | 1       | 1        | no  |
| Itga2b        | -0.278036 | -0.413201 | 0.43005 | 0.561507 | no  |
| 9130023H24Rik | -0.278117 | -0.341487 | 0.5134  | 0.639316 | no  |
| Lipt2         | -0.278192 | -0.526244 | 0.38025 | 0.511796 | no  |
| Creg1         | -0.278775 | -0.888826 | 0.10725 | 0.190048 | no  |
| Ccnh          | -0.278822 | -1.0082   | 0.0682  | 0.132243 | no  |
| Zfp3          | -0.278852 | -0.549337 | 0.3253  | 0.456066 | no  |
| Eif4g3        | -0.279232 | -1.30338  | 0.00925 | 0.024243 | yes |
| Mtdh          | -0.279419 | -1.22566  | 0.01895 | 0.044999 | yes |
| Mief2         | -0.279473 | -0.761746 | 0.1221  | 0.211863 | no  |
| Sema6c        | -0.279652 | -0.891334 | 0.0733  | 0.139884 | no  |
| Stk38l        | -0.2797   | -1.08594  | 0.03855 | 0.081896 | no  |
| Fank1         | -0.279735 | -0.156477 | 0.7591  | 0.841899 | no  |
| Cyp20a1       | -0.279777 | -0.858609 | 0.1342  | 0.228906 | no  |
| Zfyve20       | -0.279799 | -1.19529  | 0.02155 | 0.050203 | no  |
| 2310081J21Rik | -0.279906 | 0         | 1       | 1        | no  |
| Cox14         | -0.279911 | -1.39027  | 0.04435 | 0.092471 | no  |
| Setd7         | -0.280018 | -1.34378  | 0.0083  | 0.022156 | yes |
| 2610035D17Rik | -0.280424 | -0.791178 | 0.1551  | 0.256957 | no  |
| Ccbl1         | -0.280539 | -0.651142 | 0.24465 | 0.366588 | no  |
| Usp4          | -0.280801 | -1.22334  | 0.0221  | 0.051304 | no  |
| Pigl          | -0.280813 | -0.513267 | 0.3611  | 0.493329 | no  |
| Tmem101       | -0.28083  | -0.989443 | 0.07925 | 0.149157 | no  |
| Cnpy3         | -0.281001 | -1.13065  | 0.04355 | 0.091046 | no  |
| Mutyh         | -0.281006 | 0         | 1       | 1        | no  |
| Mikl          | -0.281098 | -0.353424 | 0.53125 | 0.654906 | no  |
| Nudt3         | -0.281193 | -1.32256  | 0.0082  | 0.02192  | yes |
| Cpsf3         | -0.28128  | -1.09541  | 0.04135 | 0.087023 | no  |
| Tef           | -0.281566 | -1.24902  | 0.01155 | 0.029395 | yes |
| Zfp148        | -0.281585 | -1.16817  | 0.023   | 0.052958 | no  |
| Deb1          | -0.281935 | -1.07296  | 0.18645 | 0.297276 | no  |
| Gba           | -0.282021 | -1.01631  | 0.04025 | 0.085004 | no  |
| Ifi30         | -0.282352 | -0.662292 | 0.283   | 0.408771 | no  |
| Fan1          | -0.28249  | -0.647495 | 0.2168  | 0.334565 | no  |
| Igbp1         | -0.282656 | -1.01911  | 0.0728  | 0.13913  | no  |
| Rhbdl1        | -0.282664 | -0.674644 | 0.2395  | 0.36095  | no  |
| Dnah9         | -0.282863 | 0         | 1       | 1        | no  |
| Ctdspl2       | -0.282878 | -0.750198 | 0.13045 | 0.223515 | no  |
| Tvp23b        | -0.283058 | -0.983287 | 0.0766  | 0.145096 | no  |
| D4Erttd617e   | -0.28349  | 0         | 1       | 1        | no  |
| Zfp60         | -0.283558 | -0.941654 | 0.05945 | 0.117931 | no  |
| Naif1         | -0.283579 | 0         | 1       | 1        | no  |
| Smim12        | -0.283666 | -1.33274  | 0.03075 | 0.067846 | no  |
| Atrn          | -0.283713 | -1.34693  | 0.0081  | 0.021701 | yes |
| Zkscan7       | -0.283893 | -0.412748 | 0.44775 | 0.578469 | no  |
| Map3k15       | -0.283969 | 0         | 1       | 1        | no  |
| Hmbox1        | -0.284042 | -1.35934  | 0.01055 | 0.027215 | yes |
| Cd320         | -0.284108 | -0.751436 | 0.17335 | 0.280433 | no  |



|               |           |           |         |          |     |
|---------------|-----------|-----------|---------|----------|-----|
| Zranb3        | -0.284125 | -0.581316 | 0.2477  | 0.369988 | no  |
| Pkn3          | -0.284363 | 0         | 1       | 1        | no  |
| Ccl25         | -0.284423 | -0.319989 | 0.5171  | 0.642717 | no  |
| Lims2         | -0.284585 | -0.603725 | 0.217   | 0.334565 | no  |
| Wdr7          | -0.284948 | -1.37634  | 0.00725 | 0.019654 | yes |
| 1110008L16Rik | -0.285199 | -0.315399 | 0.55375 | 0.674124 | no  |
| Cpne7         | -0.285207 | 0         | 1       | 1        | no  |
| Myo10         | -0.285239 | -1.20681  | 0.01815 | 0.043387 | yes |
| Cib1          | -0.285585 | -0.621564 | 0.20905 | 0.325257 | no  |
| Bet1          | -0.285746 | -1.03913  | 0.07235 | 0.138509 | no  |
| Tdrd7         | -0.286055 | -1.2348   | 0.0124  | 0.031187 | yes |
| Pcdhb20       | -0.286098 | -0.117001 | 0.82225 | 0.885669 | no  |
| Vps39         | -0.286107 | -1.23291  | 0.0142  | 0.035181 | yes |
| Zfp85os       | -0.286302 | 0         | 1       | 1        | no  |
| Alad          | -0.286483 | -0.862503 | 0.08595 | 0.158904 | no  |
| Prmt10        | -0.286518 | -1.13115  | 0.03575 | 0.076921 | no  |
| Nrg4          | -0.286584 | 0         | 1       | 1        | no  |
| 1110008F13Rik | -0.286692 | -1.03732  | 0.03625 | 0.077833 | no  |
| Amdhd2        | -0.286879 | -0.775469 | 0.17775 | 0.286503 | no  |
| Slc9a8        | -0.286889 | -1.17185  | 0.0185  | 0.044088 | yes |
| Klc3          | -0.287479 | 0         | 1       | 1        | no  |
| Fam222b       | -0.287583 | -1.17526  | 0.0237  | 0.054324 | no  |
| Trp53bp2      | -0.287691 | -0.897306 | 0.0814  | 0.152146 | no  |
| Eml3          | -0.288039 | -0.945917 | 0.07325 | 0.139849 | no  |
| Asb1          | -0.288278 | -1.27718  | 0.00965 | 0.025197 | yes |
| Duox2         | -0.288365 | 0         | 1       | 1        | no  |
| Mmgt1         | -0.28845  | -1.25034  | 0.01215 | 0.030692 | yes |
| Mipep         | -0.288457 | -0.957268 | 0.05325 | 0.10748  | no  |
| Flt1          | -0.288725 | -1.10581  | 0.03185 | 0.069821 | no  |
| Jrk           | -0.28874  | -0.665692 | 0.18505 | 0.295612 | no  |
| Atp10d        | -0.289062 | -0.497224 | 0.31425 | 0.443763 | no  |
| Rpl27         | -0.289106 | -0.384589 | 0.5783  | 0.695333 | no  |
| Mkks          | -0.289265 | -1.01184  | 0.05795 | 0.115543 | no  |
| Vprbp         | -0.289528 | -1.07282  | 0.03845 | 0.081723 | no  |
| Dsg1b         | -0.289678 | 0         | 1       | 1        | no  |
| Tm9sf3        | -0.289735 | -1.40018  | 0.0072  | 0.01953  | yes |
| Sirpa         | -0.289789 | -1.15555  | 0.02145 | 0.050014 | no  |
| Tbrg4         | -0.289829 | -1.06484  | 0.0347  | 0.075015 | no  |
| Galnt9        | -0.290429 | -0.919647 | 0.06465 | 0.126301 | no  |
| Naalad2       | -0.290538 | -0.431717 | 0.4224  | 0.553863 | no  |
| Fam171b       | -0.290709 | -1.36653  | 0.00895 | 0.023578 | yes |
| Epdr1         | -0.29083  | -1.48494  | 0.0062  | 0.017151 | yes |
| Ppp1r10       | -0.290869 | -1.05314  | 0.03305 | 0.071987 | no  |
| Gngt2         | -0.290885 | 0         | 1       | 1        | no  |
| Atp6v0e2      | -0.290986 | -1.53225  | 0.0057  | 0.015927 | yes |
| Elac1         | -0.291013 | -1.09841  | 0.0333  | 0.072437 | no  |
| Tmem135       | -0.291066 | -1.30229  | 0.0136  | 0.033839 | yes |
| Traf2         | -0.291128 | -0.726232 | 0.14455 | 0.243029 | no  |
| Rgs12         | -0.291256 | -0.854345 | 0.08435 | 0.15647  | no  |
| 4632428C04Rik | -0.291454 | -0.750658 | 0.168   | 0.273748 | no  |
| Zfp422        | -0.291607 | -0.938998 | 0.0744  | 0.141637 | no  |
| Strn          | -0.291625 | -1.14028  | 0.031   | 0.06833  | no  |
| Are1          | -0.291658 | -1.36533  | 0.0078  | 0.020982 | yes |

|               |           |           |         |          |     |
|---------------|-----------|-----------|---------|----------|-----|
| Lcmt2         | -0.291884 | -0.460878 | 0.362   | 0.494168 | no  |
| Zxdb          | -0.292017 | -0.636468 | 0.22    | 0.338207 | no  |
| Gm3604        | -0.292081 | 0         | 1       | 1        | no  |
| Spock2        | -0.292344 | -1.03559  | 0.03475 | 0.075098 | no  |
| Slc25a36      | -0.292382 | -1.14744  | 0.0312  | 0.068657 | no  |
| Fam134c       | -0.292453 | -1.15379  | 0.01965 | 0.046379 | yes |
| H1fx          | -0.292498 | -0.906293 | 0.137   | 0.232635 | no  |
| Tmem208       | -0.292646 | -1.22975  | 0.0651  | 0.127105 | no  |
| Zbtb8os       | -0.292739 | -0.443976 | 0.54515 | 0.667144 | no  |
| Hif1an        | -0.292877 | -1.32877  | 0.0082  | 0.02192  | yes |
| Pla2g4f       | -0.292886 | 0         | 1       | 1        | no  |
| Lym7          | -0.29313  | -0.671339 | 0.22    | 0.338207 | no  |
| Fkbp4         | -0.2933   | -1.51227  | 0.00615 | 0.017052 | yes |
| 2310045N01Rik | -0.29366  | -0.910873 | 0.2288  | 0.349224 | no  |
| Ankrd55       | -0.293692 | -0.695749 | 0.16105 | 0.264732 | no  |
| Gm6710        | -0.293715 | 0         | 1       | 1        | no  |
| Cltc          | -0.294256 | -0.864508 | 0.09355 | 0.169901 | no  |
| B630005N14Rik | -0.294333 | -0.886401 | 0.0867  | 0.15989  | no  |
| Kdelr2        | -0.294397 | -1.24663  | 0.02665 | 0.060049 | no  |
| Epm2aip1      | -0.29442  | -1.42195  | 0.00465 | 0.013316 | yes |
| Huwe1         | -0.29451  | -1.33816  | 0.00635 | 0.017515 | yes |
| Polg2         | -0.294718 | -0.396844 | 0.4234  | 0.554845 | no  |
| Birc6         | -0.294865 | -1.39367  | 0.00465 | 0.013316 | yes |
| Pex13         | -0.294944 | -1.09229  | 0.0375  | 0.079986 | no  |
| Ogfrl1        | -0.294998 | -1.43943  | 0.00495 | 0.014084 | yes |
| Gppb1l1       | -0.295278 | -1.07912  | 0.0402  | 0.084939 | no  |
| Wfikkn2       | -0.295437 | 0         | 1       | 1        | no  |
| Adprhl1       | -0.295775 | -0.429823 | 0.4667  | 0.596159 | no  |
| Prss23        | -0.295909 | -0.965906 | 0.0673  | 0.130766 | no  |
| Cdip1         | -0.29594  | -1.01007  | 0.0415  | 0.087255 | no  |
| Itch          | -0.296246 | -1.31883  | 0.0076  | 0.02049  | yes |
| Mrpl30        | -0.296303 | -1.22242  | 0.07955 | 0.149595 | no  |
| Ccz1          | -0.296471 | -1.12565  | 0.04255 | 0.08918  | no  |
| Pfn2          | -0.296692 | -1.51872  | 0.00635 | 0.017515 | yes |
| 4933417D19Rik | -0.296703 | 0         | 1       | 1        | no  |
| Gfpt1         | -0.297128 | -1.34792  | 0.0087  | 0.023066 | yes |
| Tm2d2         | -0.297351 | -1.31962  | 0.0256  | 0.058038 | no  |
| Xpo4          | -0.29752  | -0.756849 | 0.1496  | 0.249517 | no  |
| Gpr137        | -0.29779  | -1.21634  | 0.03205 | 0.070178 | no  |
| Sucla2        | -0.29782  | -1.54979  | 0.00405 | 0.011765 | yes |
| Mpc2          | -0.297922 | -1.4209   | 0.02855 | 0.063713 | no  |
| 3110002H16Rik | -0.297994 | -0.822829 | 0.1355  | 0.230619 | no  |
| Nek9          | -0.298068 | -1.42481  | 0.0054  | 0.015172 | yes |
| Wnt5a         | -0.298088 | -0.96782  | 0.0491  | 0.100697 | no  |
| Srxn1         | -0.298243 | -1.50749  | 0.0047  | 0.013433 | yes |
| Urb2          | -0.29906  | -0.998675 | 0.05235 | 0.106067 | no  |
| E430018J23Rik | -0.29917  | -0.539521 | 0.3198  | 0.449781 | no  |
| Ndufb6        | -0.299567 | -1.86568  | 0.01775 | 0.042546 | yes |
| Nol9          | -0.299626 | -0.81327  | 0.1002  | 0.179715 | no  |
| Csf3r         | -0.299634 | 0         | 1       | 1        | no  |
| Zfp592        | -0.299648 | -1.12023  | 0.02885 | 0.064274 | no  |
| 1700052K11Rik | -0.299804 | -0.523747 | 0.3337  | 0.464916 | no  |
| Uap1          | -0.299842 | -1.33599  | 0.01445 | 0.0357   | yes |

|               |           |            |         |          |     |
|---------------|-----------|------------|---------|----------|-----|
| Nlgn2         | -0.299973 | -1.44855   | 0.005   | 0.014211 | yes |
| Pcdhb3        | -0.300319 | -0.0804531 | 0.8858  | 0.928921 | no  |
| Kdelc1        | -0.300337 | -0.61479   | 0.25945 | 0.383054 | no  |
| Ino80c        | -0.300427 | -1.04745   | 0.0539  | 0.108627 | no  |
| Ppp1cc        | -0.300513 | -0.855206  | 0.1149  | 0.201026 | no  |
| Srpr          | -0.300568 | -1.26658   | 0.0167  | 0.040408 | yes |
| 9030617O03Rik | -0.300627 | -0.791435  | 0.1324  | 0.22633  | no  |
| Cnm2          | -0.300656 | -0.868357  | 0.08195 | 0.152937 | no  |
| Nrxn3         | -0.300668 | -1.28801   | 0.0088  | 0.023271 | yes |
| Poldip2       | -0.300723 | -1.28257   | 0.0209  | 0.048946 | yes |
| Smap2         | -0.300733 | -1.36462   | 0.00605 | 0.016792 | yes |
| Agrrn         | -0.301178 | -1.19731   | 0.019   | 0.045077 | yes |
| Fndc7         | -0.30148  | 0          | 1       | 1        | no  |
| Tmbim4        | -0.3015   | -1.52047   | 0.02185 | 0.050786 | no  |
| Xrcc2         | -0.3015   | -0.71014   | 0.18215 | 0.291999 | no  |
| 5330434G04Rik | -0.301527 | -0.850995  | 0.1092  | 0.192782 | no  |
| Bre           | -0.302003 | -1.17783   | 0.01705 | 0.041135 | yes |
| Ube2k         | -0.302317 | -1.38007   | 0.0069  | 0.018824 | yes |
| Ppa1          | -0.30283  | -1.51047   | 0.01215 | 0.030692 | yes |
| Eif5a2        | -0.303035 | -1.4733    | 0.00445 | 0.012807 | yes |
| Itgb1bp1      | -0.303111 | -0.880958  | 0.08025 | 0.150591 | no  |
| Arnt2         | -0.303116 | -1.32598   | 0.01015 | 0.026321 | yes |
| Tmem9         | -0.303164 | -1.18287   | 0.01755 | 0.042165 | yes |
| Sec22b        | -0.303208 | -1.40244   | 0.01275 | 0.032    | yes |
| Ndufb11       | -0.303442 | -1.1984    | 0.0654  | 0.127522 | no  |
| Usp6nl        | -0.303527 | -1.20243   | 0.01465 | 0.0361   | yes |
| Rps6ka5       | -0.303708 | -1.04828   | 0.04175 | 0.087698 | no  |
| Tnfrsf10b     | -0.303862 | 0          | 1       | 1        | no  |
| Trim3         | -0.303988 | -1.24043   | 0.0136  | 0.033839 | yes |
| Dusp1         | -0.304023 | -1.33787   | 0.0165  | 0.03999  | yes |
| Zfand5        | -0.304256 | -1.47095   | 0.00305 | 0.009188 | yes |
| Gm13157       | -0.304281 | -0.545687  | 0.31395 | 0.443434 | no  |
| Acta1         | -0.304389 | -0.310328  | 0.5279  | 0.651684 | no  |
| Cdh23         | -0.30439  | 0          | 1       | 1        | no  |
| Il17rc        | -0.304473 | -0.577821  | 0.2467  | 0.36891  | no  |
| Tom1l2        | -0.30454  | -1.40671   | 0.00505 | 0.014344 | yes |
| Llgl1         | -0.304607 | -0.532497  | 0.3039  | 0.432555 | no  |
| Zfp770        | -0.304908 | -1.0522    | 0.04505 | 0.093768 | no  |
| Psd3          | -0.305188 | -1.40711   | 0.0049  | 0.013947 | yes |
| Pomk          | -0.305237 | -1.18863   | 0.02485 | 0.056589 | no  |
| Ephb6         | -0.305666 | -1.18356   | 0.01675 | 0.040507 | yes |
| Tada2b        | -0.305705 | -0.926314  | 0.0624  | 0.122664 | no  |
| Ptpn11        | -0.306128 | -1.43317   | 0.00435 | 0.012551 | yes |
| Aldh1a1       | -0.306695 | -0.841814  | 0.12515 | 0.216081 | no  |
| Tmem14a       | -0.306734 | -0.942988  | 0.05985 | 0.118565 | no  |
| Draxin        | -0.307031 | 0          | 1       | 1        | no  |
| Cpt2          | -0.307454 | -1.1759    | 0.03115 | 0.068581 | no  |
| Lrrc51        | -0.307567 | -0.408082  | 0.41455 | 0.546595 | no  |
| Rasd1         | -0.307832 | -0.278171  | 0.5759  | 0.693201 | no  |
| Bmpr2         | -0.307836 | -1.43556   | 0.0047  | 0.013433 | yes |
| Dpy19l4       | -0.308104 | -1.08162   | 0.0406  | 0.085621 | no  |
| Dhfr          | -0.308105 | -0.386181  | 0.41415 | 0.546176 | no  |
| P4hb          | -0.308157 | -1.54259   | 0.00415 | 0.012021 | yes |

|               |           |           |         |          |     |
|---------------|-----------|-----------|---------|----------|-----|
| Psme4         | -0.308275 | -1.46934  | 0.00405 | 0.011765 | yes |
| Dad1          | -0.308475 | -1.28329  | 0.0099  | 0.025759 | yes |
| Cfd           | -0.308527 | 0         | 1       | 1        | no  |
| Aldh16a1      | -0.308628 | -0.623594 | 0.25035 | 0.373013 | no  |
| Stk33         | -0.308649 | -0.419768 | 0.4468  | 0.577748 | no  |
| Cpeb3         | -0.309041 | -1.29972  | 0.01195 | 0.030273 | yes |
| Ttc39a        | -0.309162 | -0.890903 | 0.0745  | 0.141746 | no  |
| Ccdc136       | -0.309253 | -1.26597  | 0.01145 | 0.029174 | yes |
| Tmco3         | -0.309345 | -0.954887 | 0.0563  | 0.112761 | no  |
| Poc1a         | -0.309555 | -0.455959 | 0.4245  | 0.555847 | no  |
| Vipas39       | -0.30981  | -1.21451  | 0.0135  | 0.033622 | yes |
| Mpv17         | -0.309944 | -0.296591 | 0.55105 | 0.671885 | no  |
| Irgm1         | -0.309967 | -0.661477 | 0.2258  | 0.34568  | no  |
| Klhl11        | -0.30998  | -1.17415  | 0.0312  | 0.068657 | no  |
| Ubfd1         | -0.310167 | -1.47722  | 0.0042  | 0.012158 | yes |
| Atp5e         | -0.310318 | -2.42293  | 0.01325 | 0.033111 | yes |
| Thns12        | -0.31033  | -0.678507 | 0.17295 | 0.280025 | no  |
| Ptdss1        | -0.310613 | -1.27552  | 0.01095 | 0.028083 | yes |
| D3Ert751e     | -0.310688 | -0.750741 | 0.12295 | 0.213031 | no  |
| Hmgn3         | -0.310949 | -0.75406  | 0.13355 | 0.228091 | no  |
| Acadv1        | -0.310996 | -1.34748  | 0.00635 | 0.017515 | yes |
| Mthfd1l       | -0.311188 | -1.10011  | 0.0287  | 0.063994 | no  |
| Pou3f3        | -0.311411 | 0         | 1       | 1        | no  |
| Fuk           | -0.311483 | -0.739309 | 0.13695 | 0.23261  | no  |
| 1700001G11Rik | -0.311722 | 0         | 1       | 1        | no  |
| Clptm1        | -0.311827 | -1.49631  | 0.00405 | 0.011765 | yes |
| Ndufa9        | -0.311898 | -1.65507  | 0.00475 | 0.013561 | yes |
| Lsm11         | -0.312049 | -1.10384  | 0.03135 | 0.068918 | no  |
| Dlec1         | -0.312107 | 0         | 1       | 1        | no  |
| Dzank1        | -0.312137 | -1.49145  | 0.00305 | 0.009188 | yes |
| Pla2g3        | -0.312166 | -1.01872  | 0.058   | 0.115625 | no  |
| Tufm          | -0.312226 | -0.573005 | 0.24525 | 0.36728  | no  |
| 2010107E04Rik | -0.312469 | -2.93358  | 0.00845 | 0.022507 | yes |
| Alg14         | -0.312473 | -1.10644  | 0.0855  | 0.158293 | no  |
| Rp2h          | -0.312605 | -0.594858 | 0.21935 | 0.337561 | no  |
| Mpc1          | -0.312685 | -0.431777 | 0.4918  | 0.619337 | no  |
| Glb1          | -0.3127   | -0.892511 | 0.07315 | 0.139678 | no  |
| Lsamp         | -0.312849 | -1.21477  | 0.02465 | 0.056249 | no  |
| Dcaf11        | -0.313201 | -1.27599  | 0.01    | 0.025958 | yes |
| Aco1          | -0.313227 | -1.21573  | 0.0194  | 0.045862 | yes |
| Pofut2        | -0.313234 | -1.06544  | 0.0494  | 0.10114  | no  |
| D17H6S53E     | -0.313475 | -0.645921 | 0.2369  | 0.358212 | no  |
| Mtr           | -0.313523 | -1.09321  | 0.03405 | 0.073814 | no  |
| Med14         | -0.313636 | -1.33187  | 0.00805 | 0.021589 | yes |
| Zfp119b       | -0.3137   | -0.399332 | 0.48105 | 0.609793 | no  |
| Scarb2        | -0.313831 | -1.41871  | 0.00435 | 0.012551 | yes |
| Thada         | -0.314021 | -0.905659 | 0.07655 | 0.145043 | no  |
| Bmpr1a        | -0.314033 | -1.42968  | 0.00585 | 0.016305 | yes |
| Tmem138       | -0.31431  | -0.565166 | 0.3749  | 0.506703 | no  |
| Slc45a1       | -0.314877 | -1.41795  | 0.0091  | 0.023921 | yes |
| Ndufb3        | -0.315404 | -2.09745  | 0.0091  | 0.023921 | yes |
| Cox7a2        | -0.315415 | -1.90666  | 0.00535 | 0.015044 | yes |
| Tubb3         | -0.315491 | -1.25979  | 0.0245  | 0.055974 | no  |

|               |           |           |         |          |     |
|---------------|-----------|-----------|---------|----------|-----|
| Cd83          | -0.315762 | -0.525179 | 0.29445 | 0.422184 | no  |
| Scd4          | -0.31589  | 0         | 1       | 1        | no  |
| Apeh          | -0.315939 | -1.28162  | 0.01925 | 0.045565 | yes |
| MacroD2       | -0.316    | -0.826869 | 0.13685 | 0.2325   | no  |
| Pkd1          | -0.316019 | -0.872788 | 0.08625 | 0.159259 | no  |
| Lpar6         | -0.316108 | -0.221082 | 0.6337  | 0.740796 | no  |
| Glod4         | -0.316168 | -1.40935  | 0.00875 | 0.023162 | yes |
| Alg2          | -0.316198 | -1.57689  | 0.0027  | 0.008273 | yes |
| Akap13        | -0.316568 | -1.36752  | 0.0069  | 0.018824 | yes |
| Dnajc22       | -0.316647 | 0         | 1       | 1        | no  |
| Dse           | -0.316664 | -0.953752 | 0.0666  | 0.129558 | no  |
| Pdxk          | -0.316677 | -1.22101  | 0.0119  | 0.030181 | yes |
| Hsd3b7        | -0.316749 | -0.676275 | 0.17475 | 0.282148 | no  |
| Nme5          | -0.316804 | -0.43272  | 0.51975 | 0.644984 | no  |
| Tpmt          | -0.316867 | -0.75021  | 0.1635  | 0.26783  | no  |
| Frmd8         | -0.316903 | -1.19631  | 0.0222  | 0.0515   | no  |
| Tmem132a      | -0.317043 | -1.00693  | 0.04435 | 0.092471 | no  |
| Cdh8          | -0.317206 | -0.91977  | 0.07115 | 0.136863 | no  |
| Rnf150        | -0.317306 | -1.29696  | 0.0112  | 0.02863  | yes |
| Trap1         | -0.31789  | -1.36435  | 0.0067  | 0.018343 | yes |
| 1810055G02Rik | -0.318433 | -0.787248 | 0.1609  | 0.264518 | no  |
| Smim8         | -0.319153 | -0.922212 | 0.14715 | 0.246339 | no  |
| Plec          | -0.319252 | -1.33781  | 0.0074  | 0.02002  | yes |
| Vkorc1l1      | -0.319288 | -1.40532  | 0.0046  | 0.013192 | yes |
| Bcs1l         | -0.319407 | -0.863868 | 0.12455 | 0.215241 | no  |
| Slc4a8        | -0.319424 | -1.19107  | 0.01855 | 0.044184 | yes |
| Dmxl1         | -0.319905 | -1.41479  | 0.00525 | 0.014813 | yes |
| Taf4b         | -0.32023  | -0.913404 | 0.07625 | 0.144598 | no  |
| Dyrk2         | -0.32028  | -0.752073 | 0.16975 | 0.276091 | no  |
| Ogfod3        | -0.320965 | -0.54294  | 0.3683  | 0.499871 | no  |
| Dhtkd1        | -0.321111 | 0         | 1       | 1        | no  |
| Sspl2a        | -0.321202 | -1.24991  | 0.01075 | 0.027656 | yes |
| Ublcp1        | -0.321341 | -1.37327  | 0.01195 | 0.030273 | yes |
| Pcdhgb6       | -0.321342 | -0.160425 | 0.75845 | 0.84153  | no  |
| Copg1         | -0.321864 | -1.3683   | 0.00645 | 0.017754 | yes |
| Cog4          | -0.321959 | -1.51129  | 0.0034  | 0.010109 | yes |
| Pcdhb18       | -0.322051 | -0.118534 | 0.82215 | 0.885669 | no  |
| Ccr12         | -0.322127 | 0         | 1       | 1        | no  |
| Lzic          | -0.322176 | -0.905696 | 0.1046  | 0.186498 | no  |
| Nkrf          | -0.322232 | -1.27268  | 0.0172  | 0.041459 | yes |
| Cd19          | -0.322255 | 0         | 1       | 1        | no  |
| Acat1         | -0.322503 | -1.48168  | 0.00515 | 0.014587 | yes |
| Dhodh         | -0.322553 | -0.796633 | 0.1459  | 0.24502  | no  |
| Btf3l4        | -0.322588 | -1.01782  | 0.05495 | 0.110491 | no  |
| 1700030C10Rik | -0.322767 | -0.64197  | 0.25675 | 0.379702 | no  |
| Lmf2          | -0.322977 | -1.11937  | 0.03515 | 0.075802 | no  |
| Nudt22        | -0.323073 | -0.821802 | 0.19395 | 0.306399 | no  |
| Col4a3        | -0.323117 | 0         | 1       | 1        | no  |
| Nkx2-2os      | -0.323596 | 0         | 1       | 1        | no  |
| Slc9a9        | -0.323741 | -1.51416  | 0.0021  | 0.006649 | yes |
| Bcap31        | -0.323783 | -1.76306  | 0.00345 | 0.010237 | yes |
| Stx6          | -0.323789 | -1.28094  | 0.01775 | 0.042546 | yes |
| Mrpl39        | -0.323881 | -1.17377  | 0.0337  | 0.073163 | no  |

|               |           |           |         |          |     |
|---------------|-----------|-----------|---------|----------|-----|
| Ergic3        | -0.324058 | -1.54163  | 0.0094  | 0.024602 | yes |
| Fam172a       | -0.324066 | -1.17727  | 0.01945 | 0.045964 | yes |
| Ralb          | -0.324144 | -1.08053  | 0.046   | 0.095461 | no  |
| Ctsd          | -0.324308 | -1.55347  | 0.00525 | 0.014813 | yes |
| Lman1         | -0.324544 | -1.14021  | 0.0198  | 0.046708 | yes |
| Wdfy4         | -0.324573 | 0         | 1       | 1        | no  |
| Camta2        | -0.324694 | -1.4429   | 0.0037  | 0.010879 | yes |
| Cxx1b         | -0.325024 | -1.44734  | 0.01505 | 0.036948 | yes |
| Smad7         | -0.32506  | -0.757896 | 0.1462  | 0.245337 | no  |
| 2410004I01Rik | -0.325146 | 0         | 1       | 1        | no  |
| Rit2          | -0.325713 | -1.58317  | 0.0052  | 0.014691 | yes |
| Mgea5         | -0.325853 | -1.58985  | 0.00185 | 0.005939 | yes |
| Afap1l1       | -0.326089 | -0.827637 | 0.1175  | 0.204872 | no  |
| Sel1l         | -0.326105 | -1.50727  | 0.00235 | 0.007346 | yes |
| Ndufs8        | -0.326204 | -1.26246  | 0.01085 | 0.02787  | yes |
| Phpt1         | -0.326368 | -1.22521  | 0.10505 | 0.187099 | no  |
| Usp21         | -0.326484 | -0.820818 | 0.1293  | 0.221975 | no  |
| Cd52          | -0.326527 | -0.533753 | 0.5173  | 0.642846 | no  |
| Nudt21        | -0.326532 | -0.550457 | 0.3615  | 0.493689 | no  |
| Msra          | -0.326605 | -0.793904 | 0.10575 | 0.187942 | no  |
| Tlhc1         | -0.326746 | -0.906795 | 0.0955  | 0.172898 | no  |
| Jmy           | -0.326864 | -1.43292  | 0.0047  | 0.013433 | yes |
| Bckdk         | -0.327016 | -1.14047  | 0.0292  | 0.064967 | no  |
| Dscr3         | -0.327355 | -1.26918  | 0.01895 | 0.044999 | yes |
| Lpcat4        | -0.327941 | -1.48781  | 0.00745 | 0.020147 | yes |
| Btg1          | -0.328033 | -1.30581  | 0.01235 | 0.031108 | yes |
| Pirb          | -0.32842  | 0         | 1       | 1        | no  |
| Armc1         | -0.328447 | -1.52268  | 0.005   | 0.014211 | yes |
| Kdm6b         | -0.328573 | -1.1512   | 0.0243  | 0.055565 | no  |
| Vegfa         | -0.32881  | -1.15481  | 0.0216  | 0.050301 | no  |
| Timm22        | -0.328815 | -1.1418   | 0.02215 | 0.051402 | no  |
| 1700027J07Rik | -0.329035 | 0         | 1       | 1        | no  |
| Tmem41a       | -0.329054 | -1.12133  | 0.0236  | 0.054132 | no  |
| Bri3bp        | -0.329125 | -1.33625  | 0.0091  | 0.023921 | yes |
| Tanc2         | -0.3294   | -1.55049  | 0.00165 | 0.00538  | yes |
| Gclm          | -0.329454 | -1.59052  | 0.004   | 0.011645 | yes |
| Anp32e        | -0.32961  | -1.44905  | 0.0038  | 0.011141 | yes |
| Zfp334        | -0.329807 | -1.06917  | 0.03775 | 0.080455 | no  |
| Zbtb2         | -0.32988  | -0.632447 | 0.22905 | 0.349348 | no  |
| Rnf169        | -0.329882 | -1.00708  | 0.04535 | 0.094304 | no  |
| Ppp2r1a       | -0.329993 | -1.66045  | 0.00265 | 0.008146 | yes |
| H2-Q9         | -0.330007 | 0         | 1       | 1        | no  |
| Ppp5c         | -0.33024  | -1.54418  | 0.0066  | 0.01811  | yes |
| Slc7a1        | -0.330377 | -1.58038  | 0.0016  | 0.005236 | yes |
| Usp5          | -0.330432 | -1.65067  | 0.0014  | 0.004657 | yes |
| Sfxn4         | -0.330608 | -0.966863 | 0.07495 | 0.14252  | no  |
| 6820408C15Rik | -0.330652 | 0         | 1       | 1        | no  |
| Glud1         | -0.330809 | -1.65508  | 0.00135 | 0.004516 | yes |
| Pde3b         | -0.331046 | -1.14026  | 0.0257  | 0.058195 | no  |
| Pkdrej        | -0.331708 | 0         | 1       | 1        | no  |
| Egln1         | -0.331788 | -1.38557  | 0.00925 | 0.024243 | yes |
| Znf41-ps      | -0.331987 | -0.361034 | 0.4694  | 0.598398 | no  |
| Cacna1e       | -0.332209 | -0.980243 | 0.05135 | 0.104392 | no  |



|               |           |           |         |          |     |
|---------------|-----------|-----------|---------|----------|-----|
| Champ1        | -0.332212 | -1.22152  | 0.0207  | 0.048529 | yes |
| St6gal1       | -0.332272 | -1.45328  | 0.0039  | 0.011392 | yes |
| Serpinb7      | -0.332416 | 0         | 1       | 1        | no  |
| 5730409E04Rik | -0.332435 | -1.5314   | 0.0024  | 0.00748  | yes |
| Mdh2          | -0.332587 | -1.84652  | 0.0013  | 0.004375 | yes |
| Nrip3         | -0.332704 | -1.6212   | 0.0018  | 0.005802 | yes |
| Zfp202        | -0.33294  | -0.509572 | 0.33005 | 0.461118 | no  |
| Cyp51         | -0.332972 | -1.60364  | 0.0017  | 0.005514 | yes |
| 0610009L18Rik | -0.333454 | -0.475021 | 0.5233  | 0.648177 | no  |
| Hlx           | -0.333528 | 0         | 1       | 1        | no  |
| Supv3l1       | -0.333565 | -1.06218  | 0.0513  | 0.104322 | no  |
| Tmc3          | -0.333632 | 0         | 1       | 1        | no  |
| Scn7a         | -0.333857 | -1.49329  | 0.00365 | 0.010754 | yes |
| Pcdhb19       | -0.333944 | -0.109805 | 0.84165 | 0.898774 | no  |
| Pi4ka         | -0.333972 | -1.4509   | 0.00425 | 0.01229  | yes |
| Tub           | -0.334043 | -0.490902 | 0.34935 | 0.48159  | no  |
| Sp6           | -0.3341   | 0         | 1       | 1        | no  |
| Itgb2         | -0.334188 | 0         | 1       | 1        | no  |
| Tek           | -0.334347 | -0.895217 | 0.07125 | 0.136996 | no  |
| Yipf5         | -0.334379 | -1.32618  | 0.01485 | 0.036518 | yes |
| Phykp1        | -0.33462  | -0.173922 | 0.75815 | 0.841423 | no  |
| Ikzf2         | -0.334657 | -0.716309 | 0.15935 | 0.262295 | no  |
| Myo5a         | -0.334722 | -1.47293  | 0.0036  | 0.010628 | yes |
| Lym9          | -0.334767 | -1.35533  | 0.0087  | 0.023066 | yes |
| C030034L19Rik | -0.334948 | 0         | 1       | 1        | no  |
| Vcpip1        | -0.335086 | -1.47207  | 0.00305 | 0.009188 | yes |
| Mtor          | -0.335334 | -1.5634   | 0.0022  | 0.006933 | yes |
| Higd1c        | -0.335877 | 0         | 1       | 1        | no  |
| Dcp2          | -0.335888 | -1.56496  | 0.00255 | 0.007875 | yes |
| Ighmbp2       | -0.336239 | -1.00376  | 0.04925 | 0.100927 | no  |
| Cat           | -0.336835 | -1.69226  | 0.00185 | 0.005939 | yes |
| Uqcrc2        | -0.336862 | -1.55067  | 0.00235 | 0.007346 | yes |
| Rom1          | -0.336931 | -1.04851  | 0.06645 | 0.129342 | no  |
| M6pr          | -0.337076 | -1.57637  | 0.00405 | 0.011765 | yes |
| Cep83         | -0.337297 | -1.14404  | 0.0311  | 0.068516 | no  |
| 4930529C04Rik | -0.337557 | 0         | 1       | 1        | no  |
| Prdx6         | -0.337662 | -1.5714   | 0.0042  | 0.012158 | yes |
| Gyk           | -0.337678 | -1.2469   | 0.0122  | 0.030789 | yes |
| Pias2         | -0.337682 | -0.715774 | 0.14235 | 0.239847 | no  |
| Acads         | -0.337783 | -0.969476 | 0.0821  | 0.153174 | no  |
| Ube3b         | -0.337829 | -1.57826  | 0.0015  | 0.004953 | yes |
| Axin1         | -0.338435 | -1.01401  | 0.0428  | 0.089662 | no  |
| Gdgd1         | -0.338631 | -0.191029 | 0.73075 | 0.820377 | no  |
| Mus81         | -0.33937  | -0.816048 | 0.14185 | 0.239126 | no  |
| Fyn           | -0.33963  | -1.48137  | 0.00365 | 0.010754 | yes |
| Dynll2        | -0.339978 | -1.35267  | 0.0074  | 0.02002  | yes |
| Cux1          | -0.340065 | -1.22096  | 0.01455 | 0.035893 | yes |
| Ngf           | -0.340199 | 0         | 1       | 1        | no  |
| 1700019G17Rik | -0.340258 | -0.527785 | 0.27055 | 0.395394 | no  |
| Npm3-ps1      | -0.341025 | -0.489602 | 0.4373  | 0.568957 | no  |
| Dbil5         | -0.341048 | 0         | 1       | 1        | no  |
| Mnd1          | -0.342245 | 0         | 1       | 1        | no  |
| Lrrfip1       | -0.342314 | -1.00389  | 0.04425 | 0.092335 | no  |

|               |           |           |         |          |     |
|---------------|-----------|-----------|---------|----------|-----|
| Chpf          | -0.342497 | -1.50834  | 0.0026  | 0.008011 | yes |
| Polg          | -0.342618 | -1.28385  | 0.0106  | 0.027323 | yes |
| Atad2         | -0.342716 | -1.05523  | 0.0419  | 0.087943 | no  |
| H3f3b         | -0.343295 | -1.69624  | 0.0025  | 0.007739 | yes |
| Usp32         | -0.343318 | -1.66008  | 0.0009  | 0.003139 | yes |
| Sergef        | -0.343423 | -0.845611 | 0.13745 | 0.233101 | no  |
| Tmprss6       | -0.343479 | 0         | 1       | 1        | no  |
| Trim65        | -0.343509 | 0         | 1       | 1        | no  |
| Pola1         | -0.343791 | -0.826284 | 0.1121  | 0.196932 | no  |
| Accsl         | -0.344191 | 0         | 1       | 1        | no  |
| Fgl1          | -0.344229 | 0         | 1       | 1        | no  |
| Tsen54        | -0.344451 | -0.824221 | 0.13615 | 0.231548 | no  |
| Scrn2         | -0.344461 | -0.588597 | 0.30595 | 0.434913 | no  |
| Rtn1          | -0.344522 | -1.26994  | 0.01065 | 0.027441 | yes |
| Crkl          | -0.344602 | -1.44827  | 0.0034  | 0.010109 | yes |
| Trim34a       | -0.344621 | -0.516435 | 0.34185 | 0.473614 | no  |
| Sdr39u1       | -0.344727 | -1.46812  | 0.0142  | 0.035181 | yes |
| Ssr2          | -0.344741 | -1.54064  | 0.0104  | 0.02687  | yes |
| BC022687      | -0.344757 | -0.792161 | 0.1543  | 0.255919 | no  |
| Trappc10      | -0.344851 | -1.6194   | 0.00165 | 0.00538  | yes |
| Rpgrip1l      | -0.344881 | -1.10722  | 0.02945 | 0.065446 | no  |
| Chchd3        | -0.344884 | -1.52853  | 0.00905 | 0.023818 | yes |
| Stk40         | -0.344906 | -1.1376   | 0.0225  | 0.052005 | no  |
| Chid1         | -0.345094 | -1.05266  | 0.03425 | 0.074199 | no  |
| B3galnt1      | -0.345162 | -1.34249  | 0.01375 | 0.034174 | yes |
| Uprt          | -0.345242 | -0.821363 | 0.172   | 0.278793 | no  |
| Atp5g1        | -0.345281 | -1.28973  | 0.01215 | 0.030692 | yes |
| Zfp955b       | -0.345283 | -0.998764 | 0.0598  | 0.118501 | no  |
| Zmynd15       | -0.345378 | 0         | 1       | 1        | no  |
| Onecut2       | -0.345685 | -1.51022  | 0.0031  | 0.009315 | yes |
| Dars          | -0.345726 | -1.4438   | 0.00365 | 0.010754 | yes |
| Paox          | -0.346019 | -0.420635 | 0.4604  | 0.589872 | no  |
| Ttc30b        | -0.346048 | -0.814943 | 0.1292  | 0.221832 | no  |
| Adcy4         | -0.346278 | -0.565712 | 0.2917  | 0.41892  | no  |
| Stk36         | -0.346818 | 0         | 1       | 1        | no  |
| 2700070H01Rik | -0.346861 | -0.696047 | 0.21595 | 0.333722 | no  |
| Acaa2         | -0.346873 | -1.59253  | 0.0062  | 0.017151 | yes |
| Tspan12       | -0.346913 | -1.36216  | 0.01145 | 0.029174 | yes |
| Syp           | -0.34693  | -1.65767  | 0.0017  | 0.005514 | yes |
| Pigf          | -0.347003 | -0.29548  | 0.5456  | 0.667325 | no  |
| Ly96          | -0.347012 | -0.355372 | 0.4681  | 0.597372 | no  |
| Slc23a2       | -0.347045 | -1.57187  | 0.00245 | 0.007605 | yes |
| Ube3c         | -0.347092 | -1.67637  | 0.0008  | 0.002828 | yes |
| Loh12cr1      | -0.34719  | -1.11231  | 0.0251  | 0.057089 | no  |
| Kcnv1         | -0.347321 | -1.40893  | 0.00735 | 0.019896 | yes |
| Isca2         | -0.347358 | -1.39104  | 0.0307  | 0.067759 | no  |
| 9430015G10Rik | -0.347577 | -0.678356 | 0.1726  | 0.279561 | no  |
| AU022252      | -0.347595 | -1.1464   | 0.03915 | 0.082985 | no  |
| Maml2         | -0.347721 | -0.910069 | 0.07075 | 0.136173 | no  |
| Cnga4         | -0.347777 | 0         | 1       | 1        | no  |
| Inpp5d        | -0.347783 | -0.537342 | 0.26725 | 0.391607 | no  |
| Chpf2         | -0.347822 | -1.53432  | 0.0022  | 0.006933 | yes |
| Gata2         | -0.347867 | -0.555709 | 0.29755 | 0.425479 | no  |

|               |           |           |         |          |     |
|---------------|-----------|-----------|---------|----------|-----|
| Agpat5        | -0.348054 | -1.44772  | 0.0061  | 0.016927 | yes |
| Lrrc8c        | -0.348157 | -1.4713   | 0.0053  | 0.014929 | yes |
| Prdx5         | -0.348202 | -2.17611  | 0.00175 | 0.00566  | yes |
| Rnf121        | -0.3489   | -1.04035  | 0.0719  | 0.137926 | no  |
| Pcdhgc5       | -0.348962 | 0         | 1       | 1        | no  |
| Rab3a         | -0.349176 | -1.84605  | 0.001   | 0.003451 | yes |
| Mrpl3         | -0.349183 | -1.45355  | 0.0117  | 0.029708 | yes |
| Dpm1          | -0.349183 | -1.24148  | 0.02265 | 0.052306 | no  |
| Xpr1          | -0.349189 | -1.56745  | 0.0025  | 0.007739 | yes |
| Ap5s1         | -0.349301 | -0.28087  | 0.5665  | 0.684994 | no  |
| Edem3         | -0.34973  | -1.50519  | 0.003   | 0.009064 | yes |
| Tmbim1        | -0.350004 | -0.854196 | 0.11955 | 0.208036 | no  |
| Myoz2         | -0.350209 | 0         | 1       | 1        | no  |
| Fbxo28        | -0.3504   | -1.5558   | 0.0027  | 0.008273 | yes |
| 1700037C18Rik | -0.350678 | -0.519577 | 0.3951  | 0.526707 | no  |
| Aph1b         | -0.350755 | -1.31925  | 0.01125 | 0.028747 | yes |
| Dusp15        | -0.350793 | -0.90191  | 0.06185 | 0.121763 | no  |
| Alas1         | -0.350874 | -1.34087  | 0.00625 | 0.017282 | yes |
| Mrpl18        | -0.350957 | -1.47502  | 0.0181  | 0.043291 | yes |
| Arhgef10l     | -0.350967 | -1.54234  | 0.00165 | 0.00538  | yes |
| Dhx40         | -0.351019 | -0.185671 | 0.7305  | 0.820275 | no  |
| Mapre2        | -0.351375 | -1.59913  | 0.00095 | 0.003299 | yes |
| Impad1        | -0.351616 | -1.62067  | 0.00255 | 0.007875 | yes |
| Spg21         | -0.352162 | -1.29676  | 0.0155  | 0.037857 | yes |
| Cd93          | -0.352214 | -1.22367  | 0.01795 | 0.042986 | yes |
| Mapk9         | -0.352291 | -1.66167  | 0.0009  | 0.003139 | yes |
| Serf2         | -0.352368 | -1.63635  | 0.0023  | 0.007205 | yes |
| Uqcrrs1       | -0.352396 | -1.81909  | 0.00205 | 0.006503 | yes |
| Mrpl22        | -0.352499 | -0.918779 | 0.1794  | 0.288812 | no  |
| Uqcrc1        | -0.352509 | -1.87474  | 0.0009  | 0.003139 | yes |
| 3830408C21Rik | -0.352569 | 0         | 1       | 1        | no  |
| Scamp1        | -0.352949 | -1.75532  | 0.00095 | 0.003299 | yes |
| Coasy         | -0.353083 | -1.36964  | 0.0122  | 0.030789 | yes |
| Gpr149        | -0.353083 | -1.12249  | 0.03045 | 0.067274 | no  |
| Zfp879        | -0.353553 | 0         | 1       | 1        | no  |
| Phospho2      | -0.354096 | -1.27164  | 0.0199  | 0.046886 | yes |
| Aars          | -0.354237 | -1.74456  | 0.0011  | 0.00376  | yes |
| Pigt          | -0.354716 | -1.38627  | 0.0107  | 0.027543 | yes |
| Ndufs7        | -0.355223 | -0.151018 | 0.76905 | 0.84827  | no  |
| Map3k4        | -0.355819 | -1.39149  | 0.00805 | 0.021589 | yes |
| Chchd2        | -0.356318 | -1.84045  | 0.00445 | 0.012807 | yes |
| Zkscan1       | -0.356397 | -1.53012  | 0.00235 | 0.007346 | yes |
| Eci2          | -0.356497 | -1.27368  | 0.0094  | 0.024602 | yes |
| Gpr132        | -0.356507 | 0         | 1       | 1        | no  |
| Kdm7a         | -0.356549 | -1.45087  | 0.0033  | 0.009856 | yes |
| Lrrc55        | -0.356711 | -0.609123 | 0.26125 | 0.384641 | no  |
| Dera          | -0.356955 | -0.691724 | 0.22185 | 0.34054  | no  |
| Nrg3          | -0.357221 | -1.26834  | 0.01205 | 0.030463 | yes |
| Zfp882        | -0.357278 | -0.698532 | 0.1734  | 0.280446 | no  |
| B3galt4       | -0.357283 | -0.629465 | 0.2732  | 0.398083 | no  |
| Tmem240       | -0.357452 | -0.564351 | 0.33655 | 0.467834 | no  |
| Atp10a        | -0.357742 | -0.788775 | 0.1311  | 0.224484 | no  |
| Chd6          | -0.357859 | -1.63201  | 0.00135 | 0.004516 | yes |

|               |           |            |         |          |     |
|---------------|-----------|------------|---------|----------|-----|
| Speg          | -0.358242 | -0.652552  | 0.1757  | 0.283544 | no  |
| Galnt15       | -0.358288 | -0.487764  | 0.369   | 0.500616 | no  |
| Polr2b        | -0.358366 | -0.893871  | 0.0845  | 0.15666  | no  |
| Ranbp6        | -0.358463 | -1.61544   | 0.00185 | 0.005939 | yes |
| Lyp1a1        | -0.358715 | -0.898894  | 0.11255 | 0.197644 | no  |
| Wdr18         | -0.359112 | -0.150273  | 0.76895 | 0.84823  | no  |
| D5Ert579e     | -0.359172 | -1.66175   | 0.0011  | 0.00376  | yes |
| Lrrc61        | -0.359728 | -1.04929   | 0.05095 | 0.103753 | no  |
| Hmgcl         | -0.359831 | -0.991321  | 0.08745 | 0.160893 | no  |
| Mfsd12        | -0.360157 | -0.989746  | 0.04735 | 0.097743 | no  |
| Jdp2          | -0.360216 | -0.752892  | 0.1288  | 0.221432 | no  |
| Map3k13       | -0.360341 | -1.15594   | 0.02445 | 0.055889 | no  |
| Ap1g1         | -0.360393 | -1.67901   | 0.00055 | 0.002016 | yes |
| Themis        | -0.36064  | 0          | 1       | 1        | no  |
| Fgd5          | -0.360642 | -0.824688  | 0.11105 | 0.19545  | no  |
| Abcb7         | -0.360732 | -1.48311   | 0.00465 | 0.013316 | yes |
| Kiss1r        | -0.360748 | -0.0524115 | 0.92535 | 0.954488 | no  |
| Fitm2         | -0.360977 | -1.23284   | 0.01425 | 0.035265 | yes |
| Map2k4        | -0.361302 | -1.69406   | 0.00065 | 0.002343 | yes |
| Helz2         | -0.361416 | -0.839607  | 0.09955 | 0.178767 | no  |
| Tm9sf2        | -0.362065 | -1.82086   | 0.0005  | 0.00185  | yes |
| Zfp367        | -0.362356 | -1.2835    | 0.01585 | 0.038648 | yes |
| Mtus2         | -0.362381 | -1.3037    | 0.01195 | 0.030273 | yes |
| Dnajb12       | -0.362619 | -1.29309   | 0.0229  | 0.052791 | no  |
| Cxcl16        | -0.362771 | -0.520949  | 0.33335 | 0.464554 | no  |
| Ppp1r16b      | -0.363298 | -1.11251   | 0.0252  | 0.057287 | no  |
| Dcbl2         | -0.363832 | -1.5597    | 0.0025  | 0.007739 | yes |
| Pcdhb8        | -0.364136 | 0          | 1       | 1        | no  |
| Lage3         | -0.364268 | -0.854224  | 0.2001  | 0.313946 | no  |
| 36038         | -0.364273 | -1.53071   | 0.0022  | 0.006933 | yes |
| Zfp719        | -0.364302 | -1.01302   | 0.05245 | 0.106172 | no  |
| Itgad         | -0.36441  | 0          | 1       | 1        | no  |
| Pdss2         | -0.364453 | -0.829399  | 0.0971  | 0.175269 | no  |
| Ubr3          | -0.36454  | -1.70568   | 0.00085 | 0.002983 | yes |
| Cxx1a         | -0.364819 | -1.70726   | 0.0039  | 0.011392 | yes |
| E2f5          | -0.365014 | -0.798412  | 0.1577  | 0.260095 | no  |
| Nsmce2        | -0.365489 | -0.765153  | 0.123   | 0.21309  | no  |
| Tmem229a      | -0.365598 | -1.68955   | 0.00085 | 0.002983 | yes |
| Cacng3        | -0.365844 | -0.52755   | 0.3603  | 0.492591 | no  |
| Hhat          | -0.366013 | -0.65333   | 0.23035 | 0.350706 | no  |
| Erg           | -0.3661   | -0.60232   | 0.27165 | 0.396478 | no  |
| 1700010I14Rik | -0.366363 | 0          | 1       | 1        | no  |
| Rangrf        | -0.366401 | 0          | 1       | 1        | no  |
| Mast4         | -0.366632 | -1.25304   | 0.0125  | 0.031432 | yes |
| Wscd1         | -0.366869 | 0          | 1       | 1        | no  |
| Dhx8          | -0.367142 | -1.47488   | 0.00485 | 0.01382  | yes |
| Zfp106        | -0.367254 | -1.72961   | 0.0005  | 0.00185  | yes |
| Magee1        | -0.367392 | -1.8296    | 0.0004  | 0.001513 | yes |
| AA414768      | -0.367583 | -0.755887  | 0.1808  | 0.290502 | no  |
| Cox10         | -0.367661 | -1.21177   | 0.0229  | 0.052791 | no  |
| Mettl8        | -0.367704 | -0.802194  | 0.1048  | 0.186779 | no  |
| Gzfl          | -0.367729 | -1.30382   | 0.0133  | 0.033218 | yes |
| Wdr54         | -0.368324 | -0.956163  | 0.10395 | 0.185438 | no  |

|               |           |           |         |          |     |
|---------------|-----------|-----------|---------|----------|-----|
| Csrnp2        | -0.368363 | -1.15541  | 0.02475 | 0.056429 | no  |
| Adi1          | -0.368396 | -0.955054 | 0.05645 | 0.113045 | no  |
| Ldlrap1       | -0.36846  | -0.507832 | 0.3459  | 0.478076 | no  |
| Lrrc63        | -0.368528 | 0         | 1       | 1        | no  |
| Ppm1f         | -0.368585 | -1.65532  | 0.0011  | 0.00376  | yes |
| Cox6b1        | -0.36873  | -2.81387  | 0.0009  | 0.003139 | yes |
| Pstk          | -0.36883  | -0.977837 | 0.10505 | 0.187099 | no  |
| Cbx5          | -0.368842 | -1.71589  | 0.0003  | 0.001164 | yes |
| Atraid        | -0.368894 | -0.271626 | 0.5858  | 0.7013   | no  |
| Pcyt1a        | -0.369027 | -1.62736  | 0.00125 | 0.00422  | yes |
| Cpne4         | -0.369272 | -1.73274  | 0.00065 | 0.002343 | yes |
| Gpc5          | -0.369642 | -0.970717 | 0.0497  | 0.10166  | no  |
| Lgals7        | -0.369773 | 0         | 1       | 1        | no  |
| Paics         | -0.369944 | -1.52749  | 0.0018  | 0.005802 | yes |
| Slc25a5       | -0.370039 | -1.95287  | 0.001   | 0.003451 | yes |
| Sdhc          | -0.370281 | -1.90225  | 0.00145 | 0.004804 | yes |
| Irf2bp2       | -0.370308 | -1.52149  | 0.0037  | 0.010879 | yes |
| Apoo          | -0.370386 | -0.60754  | 0.31805 | 0.447937 | no  |
| Tmem44        | -0.37065  | -0.566594 | 0.27875 | 0.404437 | no  |
| Zfp383        | -0.370694 | -0.727854 | 0.17475 | 0.282148 | no  |
| Cerkl         | -0.370716 | 0         | 1       | 1        | no  |
| Fam83g        | -0.370758 | 0         | 1       | 1        | no  |
| Alg6          | -0.371073 | -0.941469 | 0.07515 | 0.142859 | no  |
| Pcdhb9        | -0.371081 | -0.185437 | 0.72085 | 0.813004 | no  |
| Arf2          | -0.371173 | -1.19159  | 0.02565 | 0.058101 | no  |
| Tspyl5        | -0.371482 | -1.28765  | 0.01425 | 0.035265 | yes |
| Isy1          | -0.371554 | -1.10439  | 0.05245 | 0.106172 | no  |
| Srcin1        | -0.371685 | -1.47336  | 0.00405 | 0.011765 | yes |
| Gm14440       | -0.371722 | -0.636546 | 0.2286  | 0.349083 | no  |
| Gm16576       | -0.371923 | 0         | 1       | 1        | no  |
| Klf9          | -0.372032 | -1.63116  | 0.00065 | 0.002343 | yes |
| Sgpl1         | -0.372072 | -1.58704  | 0.0023  | 0.007205 | yes |
| 9430020K01Rik | -0.372597 | -1.49462  | 0.00335 | 0.009985 | yes |
| Zfp146        | -0.372725 | -1.20245  | 0.0296  | 0.065724 | no  |
| Ppib          | -0.372755 | -1.97529  | 0.0021  | 0.006649 | yes |
| Slc25a12      | -0.372901 | -1.84836  | 0.0004  | 0.001513 | yes |
| Adss          | -0.372963 | -1.7913   | 0.0011  | 0.00376  | yes |
| Arl4c         | -0.373412 | -1.59898  | 0.0026  | 0.008011 | yes |
| Nmt2          | -0.373436 | -1.58244  | 0.0017  | 0.005514 | yes |
| Wdr33         | -0.373608 | -0.943057 | 0.05695 | 0.113874 | no  |
| Exoc3         | -0.37361  | -1.78068  | 0.0004  | 0.001513 | yes |
| Rtn3          | -0.373614 | -1.21257  | 0.0156  | 0.038087 | yes |
| Yae1d1        | -0.373771 | -0.911705 | 0.08245 | 0.153654 | no  |
| Golt1b        | -0.373937 | -1.58836  | 0.00345 | 0.010237 | yes |
| Ywhag         | -0.374389 | -1.1337   | 0.03325 | 0.072364 | no  |
| Pign          | -0.374511 | -1.04308  | 0.03965 | 0.083978 | no  |
| Plk5          | -0.374512 | 0         | 1       | 1        | no  |
| Xlr3c         | -0.374592 | 0         | 1       | 1        | no  |
| Ebi3          | -0.374716 | 0         | 1       | 1        | no  |
| Tacc2         | -0.374961 | -1.51351  | 0.00205 | 0.006503 | yes |
| Plekha8       | -0.375382 | -1.09065  | 0.0297  | 0.065902 | no  |
| Ppm1e         | -0.376053 | -0.316195 | 0.54475 | 0.666716 | no  |
| Tmem147       | -0.376667 | -1.84386  | 0.0047  | 0.013433 | yes |

|               |           |           |         |          |     |
|---------------|-----------|-----------|---------|----------|-----|
| Ipo4          | -0.37676  | -1.72436  | 0.00075 | 0.00267  | yes |
| Ptprn         | -0.376974 | -1.87003  | 0.00035 | 0.001342 | yes |
| Coq9          | -0.376983 | -1.27906  | 0.0226  | 0.052209 | no  |
| Rps15a-ps4    | -0.377037 | -0.718251 | 0.3073  | 0.436271 | no  |
| Sele          | -0.377201 | 0         | 1       | 1        | no  |
| Mvb12b        | -0.377515 | -1.64471  | 0.0009  | 0.003139 | yes |
| Lrch3         | -0.377879 | -1.16252  | 0.02845 | 0.063522 | no  |
| A630001G21Rik | -0.37791  | 0         | 1       | 1        | no  |
| Fam105a       | -0.378106 | -0.726542 | 0.1437  | 0.241815 | no  |
| 4833439L19Rik | -0.378215 | -1.62536  | 0.00075 | 0.00267  | yes |
| Vamp8         | -0.378351 | -1.09387  | 0.09705 | 0.17525  | no  |
| Ergic1        | -0.379004 | -1.76316  | 0.0014  | 0.004657 | yes |
| Nol6          | -0.379634 | -1.69342  | 0.001   | 0.003451 | yes |
| Aamdc         | -0.38023  | -0.984841 | 0.048   | 0.098838 | no  |
| Arl3          | -0.380272 | -1.92657  | 0.00325 | 0.009727 | yes |
| Serinc4       | -0.380274 | 0         | 1       | 1        | no  |
| Blmh          | -0.380494 | -1.69641  | 0.0017  | 0.005514 | yes |
| Sucgl1        | -0.38063  | -1.81932  | 0.0017  | 0.005514 | yes |
| Hgsnat        | -0.380882 | -1.84733  | 0.00085 | 0.002983 | yes |
| Grk4          | -0.381189 | -0.537644 | 0.2796  | 0.405538 | no  |
| Ap3m2         | -0.381546 | -1.35876  | 0.00735 | 0.019896 | yes |
| Zc3hav1l      | -0.381628 | -0.751575 | 0.14635 | 0.245496 | no  |
| Mmachc        | -0.381791 | -1.25942  | 0.0228  | 0.052607 | no  |
| Mastl         | -0.381804 | 0         | 1       | 1        | no  |
| Elf4          | -0.381821 | 0         | 1       | 1        | no  |
| Mgme1         | -0.382007 | -0.733604 | 0.137   | 0.232635 | no  |
| Desi1         | -0.382106 | -1.53918  | 0.00385 | 0.011268 | yes |
| Tbc1d24       | -0.382298 | -1.24044  | 0.0153  | 0.037465 | yes |
| Fam184a       | -0.382881 | -1.03064  | 0.0487  | 0.100047 | no  |
| Trim9         | -0.383151 | -1.07636  | 0.038   | 0.080935 | no  |
| Stra13        | -0.383693 | -0.763608 | 0.2947  | 0.422405 | no  |
| Rec8          | -0.383722 | 0         | 1       | 1        | no  |
| Dars2         | -0.383771 | -1.28461  | 0.0152  | 0.037255 | yes |
| Tenm4         | -0.383822 | -1.28868  | 0.01045 | 0.026983 | yes |
| Gm5113        | -0.38393  | -1.09808  | 0.0383  | 0.081444 | no  |
| Ift22         | -0.383992 | -1.37641  | 0.02985 | 0.066191 | no  |
| Tmprss13      | -0.384033 | 0         | 1       | 1        | no  |
| Sdhd          | -0.384035 | -1.99797  | 0.00085 | 0.002983 | yes |
| Dnaic1        | -0.384402 | 0         | 1       | 1        | no  |
| Dlst          | -0.384445 | -1.93636  | 0.00015 | 0.000615 | yes |
| Moap1         | -0.384614 | -0.468428 | 0.31165 | 0.44103  | no  |
| 3110043O21Rik | -0.384994 | -1.85292  | 0.00025 | 0.000985 | yes |
| Ggh           | -0.385508 | -1.21197  | 0.03955 | 0.083779 | no  |
| Pik3cb        | -0.385715 | -1.42326  | 0.0062  | 0.017151 | yes |
| Gfy           | -0.385739 | 0         | 1       | 1        | no  |
| Hdhd3         | -0.386533 | -0.696221 | 0.2542  | 0.376897 | no  |
| Maneal        | -0.386787 | -1.53249  | 0.00165 | 0.00538  | yes |
| Pcdha1        | -0.38682  | -0.120113 | 0.8211  | 0.885293 | no  |
| Cyp4v3        | -0.386996 | -1.12243  | 0.0384  | 0.081643 | no  |
| Szrd1         | -0.387019 | -1.42227  | 0.00395 | 0.011515 | yes |
| Cdc42se2      | -0.387105 | -1.74489  | 0.00095 | 0.003299 | yes |
| Sepn1         | -0.38733  | -1.34214  | 0.01045 | 0.026983 | yes |
| Marveld1      | -0.387471 | -1.44795  | 0.0067  | 0.018343 | yes |



|               |           |           |         |          |     |
|---------------|-----------|-----------|---------|----------|-----|
| 2700054A10Rik | -0.387477 | 0         | 1       | 1        | no  |
| Atp5o         | -0.387498 | -2.18305  | 0.0018  | 0.005802 | yes |
| Ppp1r13b      | -0.387831 | -1.59798  | 0.0023  | 0.007205 | yes |
| Sbf2          | -0.387876 | -1.55455  | 0.0024  | 0.00748  | yes |
| Vcpkmt        | -0.387925 | -1.05915  | 0.08535 | 0.15806  | no  |
| B9d2          | -0.388128 | -0.743616 | 0.2319  | 0.352459 | no  |
| Il1r1         | -0.388388 | -0.941725 | 0.05995 | 0.118692 | no  |
| Rps16         | -0.388641 | -0.335186 | 0.49805 | 0.624894 | no  |
| 38960         | -0.388858 | -0.952989 | 0.05615 | 0.112495 | no  |
| Cfl2          | -0.388954 | -1.95887  | 0.00025 | 0.000985 | yes |
| Fzd6          | -0.388981 | -0.793168 | 0.10765 | 0.190654 | no  |
| Tmc5          | -0.389333 | 0         | 1       | 1        | no  |
| Mpp7          | -0.389337 | -0.881901 | 0.0757  | 0.14374  | no  |
| Wdr25         | -0.389534 | -1.01787  | 0.06115 | 0.1206   | no  |
| Echs1         | -0.38954  | -1.67092  | 0.004   | 0.011645 | yes |
| Slc30a5       | -0.389581 | -1.60346  | 0.0031  | 0.009315 | yes |
| Ppp1r15b      | -0.38968  | -1.73377  | 0.00105 | 0.003607 | yes |
| Zkscan5       | -0.389856 | -0.994705 | 0.0462  | 0.095771 | no  |
| H2afv         | -0.390309 | -1.08728  | 0.05855 | 0.116582 | no  |
| Slc35f3       | -0.390338 | -1.14357  | 0.0328  | 0.071584 | no  |
| G6pd2         | -0.390721 | 0         | 1       | 1        | no  |
| Scpep1        | -0.3911   | -1.35119  | 0.00685 | 0.018707 | yes |
| Spats2        | -0.391297 | -1.40518  | 0.0105  | 0.027102 | yes |
| Ndufs2        | -0.391619 | -2.05636  | 0.00035 | 0.001342 | yes |
| Paqr7         | -0.391709 | -1.66651  | 0.0008  | 0.002828 | yes |
| Polr3a        | -0.391731 | -1.43689  | 0.0066  | 0.01811  | yes |
| Smcr8         | -0.391861 | -1.47128  | 0.00265 | 0.008146 | yes |
| Papl          | -0.392104 | -0.500661 | 0.375   | 0.506735 | no  |
| Arhgap24      | -0.392322 | -1.33488  | 0.0067  | 0.018343 | yes |
| Pip5k1b       | -0.39236  | -0.849757 | 0.121   | 0.210256 | no  |
| Frat1         | -0.392426 | -0.77991  | 0.1444  | 0.242808 | no  |
| Saa1          | -0.392875 | 0         | 1       | 1        | no  |
| Tmed10        | -0.393014 | -1.89154  | 0.0004  | 0.001513 | yes |
| Sec1          | -0.393326 | 0         | 1       | 1        | no  |
| Gata3         | -0.393363 | 0         | 1       | 1        | no  |
| Shd           | -0.393733 | -0.857645 | 0.0858  | 0.158738 | no  |
| Apbb1         | -0.393735 | -1.80956  | 0.0003  | 0.001164 | yes |
| 5430416O09Rik | -0.394262 | 0         | 1       | 1        | no  |
| Eftud1        | -0.394323 | -0.985356 | 0.04925 | 0.100927 | no  |
| Podxl         | -0.394502 | -1.46577  | 0.0053  | 0.014929 | yes |
| Gpr37         | -0.394569 | -1.14774  | 0.03185 | 0.069821 | no  |
| Bloc1s6       | -0.394653 | -1.34865  | 0.0112  | 0.02863  | yes |
| Hoxc11        | -0.394877 | 0         | 1       | 1        | no  |
| Crbn          | -0.394922 | -1.66693  | 0.0005  | 0.00185  | yes |
| Ly6g6d        | -0.395558 | 0         | 1       | 1        | no  |
| Slc50a1       | -0.396124 | -1.32556  | 0.0325  | 0.070999 | no  |
| D130040H23Rik | -0.396244 | 0         | 1       | 1        | no  |
| Trmt10a       | -0.396324 | -1.18591  | 0.0255  | 0.05786  | no  |
| Grb14         | -0.396427 | -1.59135  | 0.00435 | 0.012551 | yes |
| Etohi1        | -0.397108 | -1.12037  | 0.02455 | 0.056069 | no  |
| Ndufaf5       | -0.397665 | -1.44093  | 0.00765 | 0.020612 | yes |
| Rbbp9         | -0.397703 | -1.07112  | 0.05155 | 0.104718 | no  |
| Tirap         | -0.397897 | -0.971253 | 0.05065 | 0.103333 | no  |

|          |           |           |          |          |     |
|----------|-----------|-----------|----------|----------|-----|
| Vcan     | -0.397901 | -0.717655 | 0.14625  | 0.24539  | no  |
| Zfp955a  | -0.398122 | -0.882701 | 0.0961   | 0.173771 | no  |
| Alkbh3   | -0.398275 | -1.17471  | 0.0195   | 0.046066 | yes |
| Mrps35   | -0.398762 | -1.12791  | 0.06665  | 0.129636 | no  |
| Zbed5    | -0.398947 | -0.661265 | 0.21915  | 0.337332 | no  |
| Snx27    | -0.399697 | -1.78834  | 0.00035  | 0.001342 | yes |
| Slc25a23 | -0.400318 | -1.61645  | 0.00255  | 0.007875 | yes |
| Adck1    | -0.400552 | -1.15255  | 0.0223   | 0.05166  | no  |
| Acox3    | -0.400755 | -1.62583  | 0.00135  | 0.004516 | yes |
| Abca2    | -0.401007 | -1.88149  | 5.00E-05 | 0.00022  | yes |
| Coq6     | -0.401284 | -1.10556  | 0.0529   | 0.10692  | no  |
| Ccdc92   | -0.401607 | -2.06795  | 0.00035  | 0.001342 | yes |
| Osgepl1  | -0.40217  | -0.944762 | 0.0579   | 0.115495 | no  |
| Yaf2     | -0.402299 | -1.52835  | 0.00235  | 0.007346 | yes |
| Kcnab2   | -0.402312 | -1.65671  | 0.0009   | 0.003139 | yes |
| Kctd9    | -0.402718 | -1.78873  | 0.00035  | 0.001342 | yes |
| Wwox     | -0.402813 | -1.20594  | 0.0264   | 0.059566 | no  |
| Lhfpl2   | -0.402889 | -1.75665  | 0.00075  | 0.00267  | yes |
| Vrk2     | -0.40345  | -0.292021 | 0.51655  | 0.642214 | no  |
| Slc2a9   | -0.404319 | -0.639028 | 0.19165  | 0.303633 | no  |
| Prdx3    | -0.404404 | -1.99485  | 0.00085  | 0.002983 | yes |
| Zfp799   | -0.404877 | -1.13562  | 0.03025  | 0.066899 | no  |
| Pilra    | -0.404998 | 0         | 1        | 1        | no  |
| Snx5     | -0.405023 | -1.47393  | 0.00335  | 0.009985 | yes |
| Stk24    | -0.405384 | -2.0048   | 0.00015  | 0.000615 | yes |
| Abcc8    | -0.405754 | -1.11746  | 0.03225  | 0.070569 | no  |
| Snph     | -0.405787 | -1.80214  | 0.0006   | 0.002181 | yes |
| Akap6    | -0.406388 | -1.85446  | 0.00045  | 0.001682 | yes |
| Ntn3     | -0.40641  | -0.489821 | 0.3239   | 0.454536 | no  |
| Dgkd     | -0.406534 | -1.56946  | 0.00275  | 0.008412 | yes |
| Mpp5     | -0.406554 | -1.62132  | 0.002    | 0.006363 | yes |
| Sypl     | -0.406624 | -1.59483  | 0.0013   | 0.004375 | yes |
| Pcif1    | -0.406706 | -1.15852  | 0.0324   | 0.070839 | no  |
| Anxa3    | -0.406731 | -0.84524  | 0.13875  | 0.234945 | no  |
| Raly1    | -0.406854 | -1.66484  | 0.00065  | 0.002343 | yes |
| Ptp4a2   | -0.407006 | -1.867    | 0.0001   | 0.000422 | yes |
| Arsj     | -0.40706  | 0         | 1        | 1        | no  |
| Katnal2  | -0.407077 | 0         | 1        | 1        | no  |
| Scrn1    | -0.407117 | -2.00226  | 0.0001   | 0.000422 | yes |
| Btnl9    | -0.407156 | 0         | 1        | 1        | no  |
| Mettl15  | -0.40814  | -0.718304 | 0.19805  | 0.311319 | no  |
| Rhof     | -0.408657 | -1.39174  | 0.0128   | 0.032102 | yes |
| Ttbk2    | -0.408953 | -1.895    | 5.00E-05 | 0.00022  | yes |
| Ackr4    | -0.409299 | 0         | 1        | 1        | no  |
| Rfk      | -0.409468 | -1.98895  | 5.00E-05 | 0.00022  | yes |
| Tnfsf8   | -0.409516 | 0         | 1        | 1        | no  |
| Necap2   | -0.409681 | -1.21794  | 0.0289   | 0.064364 | no  |
| Lrguk    | -0.409724 | -0.639214 | 0.23275  | 0.353584 | no  |
| Pdyn     | -0.410099 | 0         | 1        | 1        | no  |
| Tshr     | -0.410183 | 0         | 1        | 1        | no  |
| Mthfd2l  | -0.410207 | -0.886413 | 0.10455  | 0.186433 | no  |
| Dffa     | -0.410223 | -1.69376  | 0.00085  | 0.002983 | yes |
| Fastkd5  | -0.410418 | -0.846666 | 0.0889   | 0.162973 | no  |

|               |           |           |          |          |     |
|---------------|-----------|-----------|----------|----------|-----|
| Ero1lb        | -0.410913 | -1.2714   | 0.01345  | 0.03351  | yes |
| Enpp4         | -0.411159 | -1.70448  | 0.001    | 0.003451 | yes |
| Slc4a7        | -0.411591 | -1.11122  | 0.0318   | 0.069746 | no  |
| Rcor1         | -0.411623 | -1.4212   | 0.00795  | 0.021355 | yes |
| Kat6a         | -0.411781 | -1.5573   | 0.00255  | 0.007875 | yes |
| Bmf           | -0.412059 | -0.880093 | 0.09115  | 0.166316 | no  |
| Tmem54        | -0.412248 | -0.51934  | 0.3694   | 0.501056 | no  |
| Nfkbia        | -0.412269 | -0.579826 | 0.24245  | 0.364114 | no  |
| Scamp5        | -0.412322 | -2.05296  | 5.00E-05 | 0.00022  | yes |
| Slmap         | -0.412575 | -1.88751  | 0.0001   | 0.000422 | yes |
| Pak7          | -0.41272  | 0         | 1        | 1        | no  |
| Sntb1         | -0.412861 | -1.18404  | 0.03095  | 0.068254 | no  |
| Gls2          | -0.412991 | -0.951348 | 0.07945  | 0.149491 | no  |
| Tmem106c      | -0.413556 | -1.19663  | 0.0171   | 0.041248 | yes |
| Pak2          | -0.414016 | -1.71784  | 0.001    | 0.003451 | yes |
| Hsd17b10      | -0.414042 | -1.70522  | 0.00695  | 0.018933 | yes |
| Sgol2         | -0.414402 | -0.794666 | 0.1106   | 0.194761 | no  |
| D630045J12Rik | -0.415011 | -1.41457  | 0.0044   | 0.012685 | yes |
| Csrp2         | -0.415056 | -1.26889  | 0.04945  | 0.101196 | no  |
| Pacsin2       | -0.415104 | -1.86719  | 0.0002   | 0.000803 | yes |
| Hibadh        | -0.415684 | -1.89724  | 0.00115  | 0.00391  | yes |
| Hdlbp         | -0.415701 | -1.95461  | 0.0001   | 0.000422 | yes |
| Ssh2          | -0.415815 | -1.62308  | 0.0011   | 0.00376  | yes |
| Fam174b       | -0.415966 | -1.37121  | 0.0108   | 0.027763 | yes |
| Zhx1          | -0.416323 | -1.78403  | 0.00025  | 0.000985 | yes |
| Gpr55         | -0.416372 | 0         | 1        | 1        | no  |
| Rnf24         | -0.416486 | -0.621526 | 0.2069   | 0.322441 | no  |
| Atp2c2        | -0.416768 | 0         | 1        | 1        | no  |
| Penk          | -0.4175   | -0.79274  | 0.17595  | 0.283878 | no  |
| Fam126a       | -0.417524 | -0.679161 | 0.18655  | 0.297364 | no  |
| Eefsec        | -0.418496 | -1.01338  | 0.05935  | 0.117821 | no  |
| Lpin1         | -0.41889  | -1.93132  | 0.00015  | 0.000615 | yes |
| Jmjd8         | -0.419209 | -0.828101 | 0.1341   | 0.228794 | no  |
| Adamtsl3      | -0.419295 | -0.964663 | 0.05945  | 0.117931 | no  |
| Tbc1d12       | -0.419309 | -1.22343  | 0.0184   | 0.043889 | yes |
| Slc25a47      | -0.419597 | 0         | 1        | 1        | no  |
| 9630033F20Rik | -0.419741 | -1.83628  | 0.0008   | 0.002828 | yes |
| Clstn2        | -0.420194 | -1.69501  | 0.0007   | 0.002506 | yes |
| Idh3b         | -0.42036  | -1.73691  | 0.00045  | 0.001682 | yes |
| Ablim1        | -0.420512 | -1.97484  | 5.00E-05 | 0.00022  | yes |
| Sdr42e1       | -0.42053  | -0.741848 | 0.16755  | 0.273149 | no  |
| Trio          | -0.420598 | -1.94056  | 0.0001   | 0.000422 | yes |
| Isoc2a        | -0.420675 | -1.43909  | 0.0199   | 0.046886 | yes |
| Peg13         | -0.420812 | -1.65226  | 0.00185  | 0.005939 | yes |
| C330013E15Rik | -0.420943 | -0.473224 | 0.4701   | 0.599175 | no  |
| Calhm2        | -0.42121  | -0.648205 | 0.23795  | 0.359104 | no  |
| Ehd4          | -0.421354 | -1.852    | 0.0006   | 0.002181 | yes |
| Vps11         | -0.421377 | -1.87306  | 0.00065  | 0.002343 | yes |
| Mbtps2        | -0.421443 | -1.51154  | 0.00385  | 0.011268 | yes |
| Ube2l3        | -0.421765 | -2.06566  | 5.00E-05 | 0.00022  | yes |
| Kcnh8         | -0.421784 | -0.847647 | 0.10605  | 0.188298 | no  |
| Ahcy1         | -0.421847 | -2.08996  | 5.00E-05 | 0.00022  | yes |
| Polr1a        | -0.421871 | -1.63517  | 0.00135  | 0.004516 | yes |

|               |           |           |          |          |     |
|---------------|-----------|-----------|----------|----------|-----|
| Rai2          | -0.42192  | -0.907047 | 0.0703   | 0.135543 | no  |
| Ptger4        | -0.421998 | -1.01631  | 0.0398   | 0.084228 | no  |
| Susd5         | -0.422043 | -0.704842 | 0.1815   | 0.291239 | no  |
| Aldh5a1       | -0.422231 | -1.46561  | 0.00545  | 0.015306 | yes |
| Pcdhga6       | -0.422267 | -0.211553 | 0.68405  | 0.78215  | no  |
| Capn2         | -0.422385 | -2.10819  | 5.00E-05 | 0.00022  | yes |
| Ctbs          | -0.422456 | -0.69259  | 0.1864   | 0.297268 | no  |
| Nedd1         | -0.422498 | -0.800609 | 0.1283   | 0.220773 | no  |
| Camk2n2       | -0.422569 | -1.27117  | 0.03335  | 0.07251  | no  |
| Sgms1         | -0.422663 | -1.50985  | 0.0027   | 0.008273 | yes |
| Ppa2          | -0.422792 | -1.76063  | 0.00335  | 0.009985 | yes |
| Zfp953        | -0.422847 | 0         | 1        | 1        | no  |
| Aar2          | -0.422859 | -1.57021  | 0.00175  | 0.00566  | yes |
| Hs3st5        | -0.42339  | -1.40726  | 0.00475  | 0.013561 | yes |
| Cluh          | -0.423582 | -2.00229  | 5.00E-05 | 0.00022  | yes |
| Adipor2       | -0.42365  | -1.93126  | 0.0002   | 0.000803 | yes |
| Hoxb6         | -0.423725 | -0.898584 | 0.1232   | 0.213408 | no  |
| Ap3s2         | -0.423971 | -2.05656  | 5.00E-05 | 0.00022  | yes |
| Uqcrh         | -0.424249 | -2.92156  | 0.00025  | 0.000985 | yes |
| Mapk10        | -0.424272 | -1.97988  | 5.00E-05 | 0.00022  | yes |
| Rhbdd2        | -0.424517 | -1.74471  | 0.001    | 0.003451 | yes |
| Gamt          | -0.424891 | -0.140192 | 0.788    | 0.861863 | no  |
| Mgat3         | -0.425179 | -2.07454  | 0.0002   | 0.000803 | yes |
| Ccny          | -0.425946 | -1.81104  | 0.0008   | 0.002828 | yes |
| Cstf1         | -0.426129 | -1.34891  | 0.0154   | 0.037682 | yes |
| Accs          | -0.42643  | -0.894637 | 0.0761   | 0.144376 | no  |
| Tm2d3         | -0.426501 | -1.19455  | 0.01725  | 0.041565 | yes |
| Gm10474       | -0.426542 | 0         | 1        | 1        | no  |
| Sspn          | -0.426555 | -1.45686  | 0.0052   | 0.014691 | yes |
| Tmem216       | -0.426769 | -0.608723 | 0.21685  | 0.334565 | no  |
| Abcb8         | -0.426808 | -1.69498  | 0.00205  | 0.006503 | yes |
| Dync2h1       | -0.426862 | -1.51874  | 0.00245  | 0.007605 | yes |
| Malsu1        | -0.427024 | -1.21304  | 0.0706   | 0.136022 | no  |
| Lysmd1        | -0.42712  | -0.804319 | 0.1384   | 0.234532 | no  |
| Exog          | -0.427227 | -1.31348  | 0.0094   | 0.024602 | yes |
| She           | -0.427402 | -0.884651 | 0.08445  | 0.156611 | no  |
| Cetn4         | -0.42759  | -0.566623 | 0.35555  | 0.487453 | no  |
| Prokr1        | -0.427618 | -1.63981  | 0.0024   | 0.00748  | yes |
| Dnpep         | -0.427717 | -1.54047  | 0.00225  | 0.007062 | yes |
| Fn3k          | -0.427899 | -0.793013 | 0.1082   | 0.191501 | no  |
| Gria2         | -0.428292 | -1.31342  | 0.00815  | 0.021826 | yes |
| Rmrp          | -0.428715 | -0.784802 | 0.63245  | 0.739791 | no  |
| Ndufc2        | -0.428769 | -2.53019  | 0.00055  | 0.002016 | yes |
| Pcyt1b        | -0.428864 | -1.89665  | 0.0002   | 0.000803 | yes |
| Yif1a         | -0.4289   | -1.40094  | 0.01525  | 0.03737  | yes |
| Zfp629        | -0.428936 | -1.12377  | 0.028    | 0.062644 | no  |
| Dkk2          | -0.429039 | 0         | 1        | 1        | no  |
| Snx19         | -0.429326 | -2.01878  | 0.00015  | 0.000615 | yes |
| Lrrc73        | -0.429497 | -1.01574  | 0.08305  | 0.154534 | no  |
| Obsl1         | -0.42969  | -1.08441  | 0.0346   | 0.074811 | no  |
| A330049N07Rik | -0.430157 | 0         | 1        | 1        | no  |
| Ptcd2         | -0.430525 | -1.71622  | 0.00245  | 0.007605 | yes |
| Abcd1         | -0.430581 | -1.04747  | 0.04595  | 0.095372 | no  |

|               |           |           |          |          |     |
|---------------|-----------|-----------|----------|----------|-----|
| Plcg2         | -0.430716 | -0.772668 | 0.13725  | 0.232881 | no  |
| Htr2b         | -0.430986 | 0         | 1        | 1        | no  |
| Samd5         | -0.431051 | -0.787813 | 0.13995  | 0.236585 | no  |
| Gm13238       | -0.431171 | 0         | 1        | 1        | no  |
| Dnajc27       | -0.431205 | -1.91081  | 0.0003   | 0.001164 | yes |
| Smyd2         | -0.431254 | -1.94117  | 0.00075  | 0.00267  | yes |
| C030039L03Rik | -0.431284 | -0.915766 | 0.06415  | 0.125417 | no  |
| Emc1          | -0.431608 | -1.97167  | 0.0001   | 0.000422 | yes |
| Phactr2       | -0.431711 | -1.9952   | 0.0002   | 0.000803 | yes |
| Tsc22d1       | -0.432108 | -1.80942  | 0.0003   | 0.001164 | yes |
| Epha5         | -0.432192 | -1.33905  | 0.00905  | 0.023818 | yes |
| Sema4c        | -0.43228  | -1.51167  | 0.0037   | 0.010879 | yes |
| Pak1ip1       | -0.433096 | -2.04508  | 0.00045  | 0.001682 | yes |
| E130112N10Rik | -0.433377 | -0.319835 | 0.5886   | 0.703763 | no  |
| Gbf1          | -0.433405 | -2.08289  | 5.00E-05 | 0.00022  | yes |
| Prrt1         | -0.433696 | -0.694518 | 0.27685  | 0.402297 | no  |
| Rps29         | -0.433754 | -0.804489 | 0.43765  | 0.569301 | no  |
| Dld           | -0.433812 | -2.18177  | 5.00E-05 | 0.00022  | yes |
| Ankrd9        | -0.433996 | -1.08496  | 0.0448   | 0.093321 | no  |
| Fh1           | -0.434125 | -2.0152   | 0.0005   | 0.00185  | yes |
| Abhd6         | -0.43449  | -1.49266  | 0.00755  | 0.020384 | yes |
| Hivep1        | -0.434519 | -1.88512  | 0.0003   | 0.001164 | yes |
| Hpcal4        | -0.434653 | 0         | 1        | 1        | no  |
| Tmem200c      | -0.434832 | -1.05134  | 0.0482   | 0.099127 | no  |
| Igfbp7        | -0.434993 | -0.607623 | 0.2293   | 0.349348 | no  |
| Ssc5d         | -0.435075 | -0.693861 | 0.18435  | 0.294742 | no  |
| Rnf2          | -0.435144 | -1.24713  | 0.01945  | 0.045964 | yes |
| Glg1          | -0.435168 | -2.15263  | 5.00E-05 | 0.00022  | yes |
| Pfkfb1        | -0.435424 | 0         | 1        | 1        | no  |
| Ndufa10       | -0.436087 | -1.96673  | 0.0001   | 0.000422 | yes |
| Glis2         | -0.43612  | -1.24587  | 0.01885  | 0.044778 | yes |
| A730017C20Rik | -0.436284 | -1.40092  | 0.0046   | 0.013192 | yes |
| Scd2          | -0.436405 | -1.3707   | 0.00655  | 0.017992 | yes |
| Tfpi          | -0.436544 | -0.60578  | 0.20665  | 0.322127 | no  |
| Xlr4c         | -0.436571 | 0         | 1        | 1        | no  |
| Fto           | -0.436722 | -2.11226  | 0.0001   | 0.000422 | yes |
| Stau2         | -0.437073 | -1.86201  | 5.00E-05 | 0.00022  | yes |
| Manea         | -0.437793 | -1.81959  | 0.00105  | 0.003607 | yes |
| Ext1          | -0.438552 | -1.63609  | 0.00245  | 0.007605 | yes |
| Dhx33         | -0.438771 | -1.62847  | 0.0018   | 0.005802 | yes |
| Adamts4       | -0.438902 | 0         | 1        | 1        | no  |
| Aebp2         | -0.439194 | -0.605277 | 0.2066   | 0.322125 | no  |
| Ide           | -0.439364 | -1.96963  | 0.0001   | 0.000422 | yes |
| B230118H07Rik | -0.43967  | -1.23834  | 0.01255  | 0.03154  | yes |
| Cdc42ep4      | -0.439969 | -1.60628  | 0.0013   | 0.004375 | yes |
| Ly6c2         | -0.440082 | 0         | 1        | 1        | no  |
| Zfp366        | -0.440144 | -0.596134 | 0.2668   | 0.391163 | no  |
| Uvrag         | -0.440287 | -1.82609  | 0.0006   | 0.002181 | yes |
| Fibcd1        | -0.440432 | 0         | 1        | 1        | no  |
| Kbtbd3        | -0.440735 | -1.27589  | 0.01025  | 0.026534 | yes |
| Gpsm1         | -0.440855 | -1.1527   | 0.0297   | 0.065902 | no  |
| Rwdd4a        | -0.441064 | -1.51322  | 0.0047   | 0.013433 | yes |
| Hdhd2         | -0.441602 | -1.8104   | 0.0002   | 0.000803 | yes |

|               |           |           |          |          |     |
|---------------|-----------|-----------|----------|----------|-----|
| Sncb          | -0.441901 | -2.22859  | 0.00015  | 0.000615 | yes |
| Dpm3          | -0.442082 | -1.32986  | 0.1106   | 0.194761 | no  |
| Nck2          | -0.442136 | -0.880792 | 0.10595  | 0.188222 | no  |
| Enc1          | -0.442152 | -1.28882  | 0.01335  | 0.033305 | yes |
| Dnah10        | -0.442155 | 0         | 1        | 1        | no  |
| Suox          | -0.442389 | -1.40371  | 0.0104   | 0.02687  | yes |
| Pet100        | -0.442403 | -1.13979  | 0.0207   | 0.048529 | yes |
| Med1          | -0.443269 | -1.46683  | 0.00305  | 0.009188 | yes |
| Dennd6a       | -0.443643 | -1.4968   | 0.0025   | 0.007739 | yes |
| Tmem223       | -0.443728 | -1.74835  | 0.01065  | 0.027441 | yes |
| Snap91        | -0.443921 | -2.0618   | 5.00E-05 | 0.00022  | yes |
| Dynlt1b       | -0.443937 | 0         | 1        | 1        | no  |
| Mad1l1        | -0.443964 | -1.508    | 0.00515  | 0.014587 | yes |
| 4833422C13Rik | -0.444445 | -0.282795 | 0.5935   | 0.707708 | no  |
| Tmem143       | -0.444655 | -1.65378  | 0.00245  | 0.007605 | yes |
| Insig1        | -0.444769 | -2.10631  | 0.0002   | 0.000803 | yes |
| Usp29         | -0.445185 | 0         | 1        | 1        | no  |
| Nutf2         | -0.445357 | -1.25236  | 0.01155  | 0.029395 | yes |
| Fam167b       | -0.445729 | -0.637223 | 0.31785  | 0.447703 | no  |
| Vps41         | -0.44603  | -2.23162  | 5.00E-05 | 0.00022  | yes |
| Grk1          | -0.446037 | 0         | 1        | 1        | no  |
| Gm5617        | -0.446481 | -0.621522 | 0.39775  | 0.529495 | no  |
| Pcdhb6        | -0.447054 | 0         | 1        | 1        | no  |
| Liph          | -0.447352 | 0         | 1        | 1        | no  |
| Tnnc2         | -0.448219 | 0         | 1        | 1        | no  |
| Herc3         | -0.448278 | -1.22429  | 0.022    | 0.051098 | no  |
| Flt4          | -0.44843  | 0         | 1        | 1        | no  |
| Usp51         | -0.448505 | 0         | 1        | 1        | no  |
| Batf2         | -0.448648 | 0         | 1        | 1        | no  |
| Pcnx          | -0.44903  | -2.04417  | 5.00E-05 | 0.00022  | yes |
| Sh3bp4        | -0.449294 | -1.56845  | 0.003    | 0.009064 | yes |
| Slc39a9       | -0.44935  | -1.90659  | 0.00015  | 0.000615 | yes |
| Atf6          | -0.449408 | -1.9316   | 5.00E-05 | 0.00022  | yes |
| Tmed2         | -0.449516 | -1.712    | 0.00225  | 0.007062 | yes |
| A730008H23Rik | -0.449597 | -0.396344 | 0.43345  | 0.565112 | no  |
| Srebf1        | -0.450134 | -1.40015  | 0.0064   | 0.017627 | yes |
| Gphn          | -0.450334 | -1.78424  | 0.00055  | 0.002016 | yes |
| Smim11        | -0.450411 | -0.757865 | 0.126    | 0.217435 | no  |
| Idh3a         | -0.451099 | -2.24799  | 5.00E-05 | 0.00022  | yes |
| Dchs1         | -0.451206 | -1.00313  | 0.0461   | 0.095624 | no  |
| Cipc          | -0.451684 | -1.9447   | 5.00E-05 | 0.00022  | yes |
| Jazf1         | -0.451959 | -1.20212  | 0.0174   | 0.041888 | yes |
| Tmem39a       | -0.452364 | -0.862061 | 0.08195  | 0.152937 | no  |
| Ndufs1        | -0.452515 | -2.08282  | 5.00E-05 | 0.00022  | yes |
| Txndc5        | -0.453154 | -1.95967  | 0.0001   | 0.000422 | yes |
| Dusp10        | -0.453235 | -0.838469 | 0.11675  | 0.203752 | no  |
| Tfam          | -0.453331 | -1.53033  | 0.0031   | 0.009315 | yes |
| Ppp1r26       | -0.453779 | -1.03276  | 0.0473   | 0.097655 | no  |
| Gprc5a        | -0.454069 | 0         | 1        | 1        | no  |
| LOC100503496  | -0.4541   | 0         | 1        | 1        | no  |
| Slc5a7        | -0.454251 | -0.803658 | 0.12295  | 0.213031 | no  |
| Ggact         | -0.454341 | -1.5939   | 0.0093   | 0.024365 | yes |
| Elovl4        | -0.454428 | -2.1116   | 5.00E-05 | 0.00022  | yes |



|                |           |            |          |          |     |
|----------------|-----------|------------|----------|----------|-----|
| Acsf3          | -0.454662 | -1.40414   | 0.0123   | 0.031006 | yes |
| Fgf14          | -0.454832 | 0          | 1        | 1        | no  |
| Gm694          | -0.455091 | 0          | 1        | 1        | no  |
| Gm13139,Gm1325 | -0.455156 | -0.305575  | 0.54555  | 0.667325 | no  |
| Gm8615         | -0.455177 | -0.55581   | 0.264    | 0.38813  | no  |
| Fgfbp3         | -0.455182 | 0          | 1        | 1        | no  |
| Cmtm6          | -0.455306 | -1.83116   | 0.00105  | 0.003607 | yes |
| Lamp1          | -0.455674 | -2.30457   | 5.00E-05 | 0.00022  | yes |
| Arhgap32       | -0.455842 | -1.86387   | 0.00035  | 0.001342 | yes |
| Ociad1         | -0.455959 | -2.07452   | 0.00015  | 0.000615 | yes |
| Ctsz           | -0.456062 | -1.48561   | 0.0034   | 0.010109 | yes |
| Slc35a4        | -0.456794 | -1.23062   | 0.01365  | 0.033938 | yes |
| Nr1h4          | -0.456887 | 0          | 1        | 1        | no  |
| Nedd4          | -0.457085 | -2.02589   | 0.00015  | 0.000615 | yes |
| Zfp931         | -0.457256 | -0.637757  | 0.2481   | 0.370377 | no  |
| Gm14124        | -0.457474 | 0          | 1        | 1        | no  |
| Gfra4          | -0.458096 | -1.06385   | 0.0345   | 0.07468  | no  |
| Ncoa1          | -0.458187 | -2.06767   | 5.00E-05 | 0.00022  | yes |
| Dvl2           | -0.458194 | -0.897345  | 0.0994   | 0.178594 | no  |
| Ddx24          | -0.458212 | -2.11671   | 0.0001   | 0.000422 | yes |
| Gypc           | -0.458789 | -1.18911   | 0.03025  | 0.066899 | no  |
| Clcc1          | -0.458938 | -1.02677   | 0.063    | 0.123642 | no  |
| Lysmd2         | -0.458993 | -1.8697    | 0.00165  | 0.00538  | yes |
| Zp3            | -0.459161 | 0          | 1        | 1        | no  |
| Ncdn           | -0.459201 | -2.11045   | 0.0001   | 0.000422 | yes |
| Acsl3          | -0.459241 | -1.89716   | 0.00015  | 0.000615 | yes |
| Ltk            | -0.45928  | 0          | 1        | 1        | no  |
| Trim2          | -0.459796 | -2.12557   | 5.00E-05 | 0.00022  | yes |
| Zfp706         | -0.459895 | -2.17406   | 5.00E-05 | 0.00022  | yes |
| Ubtfd1         | -0.459941 | -1.50981   | 0.00915  | 0.024038 | yes |
| Rad51c         | -0.459991 | -0.0730666 | 0.91125  | 0.944718 | no  |
| Gm12338        | -0.460268 | -0.67801   | 0.171    | 0.277579 | no  |
| Myeov2         | -0.460537 | -1.71446   | 0.0006   | 0.002181 | yes |
| Kif1b          | -0.46081  | -1.5651    | 0.0023   | 0.007205 | yes |
| Zfp119a        | -0.460934 | -0.745459  | 0.1765   | 0.284696 | no  |
| Lrmp           | -0.46095  | 0          | 1        | 1        | no  |
| Fgd3           | -0.460986 | 0          | 1        | 1        | no  |
| Fbxw11         | -0.461044 | -2.16353   | 5.00E-05 | 0.00022  | yes |
| BC030307       | -0.462241 | 0          | 1        | 1        | no  |
| Rmnd5a         | -0.462718 | -2.16598   | 5.00E-05 | 0.00022  | yes |
| Hdac8          | -0.462776 | -1.09844   | 0.05215  | 0.105726 | no  |
| Rbm4b          | -0.462879 | -0.856151  | 0.1257   | 0.216946 | no  |
| Hist1h4k       | -0.462959 | 0          | 1        | 1        | no  |
| Btd            | -0.463353 | -1.4661    | 0.00935  | 0.024486 | yes |
| Dap            | -0.463727 | -1.34451   | 0.0203   | 0.04771  | yes |
| Fam20c         | -0.464028 | -1.752     | 0.0017   | 0.005514 | yes |
| Tsc22d2        | -0.464154 | -1.77548   | 0.00045  | 0.001682 | yes |
| Smg7           | -0.464176 | -1.96301   | 0.00025  | 0.000985 | yes |
| Acvrl1         | -0.464303 | -1.14225   | 0.02185  | 0.050786 | no  |
| Rims4          | -0.464318 | -0.616697  | 0.3467   | 0.478634 | no  |
| Zfp503         | -0.464468 | -1.43837   | 0.00585  | 0.016305 | yes |
| Kctd4          | -0.46451  | 0          | 1        | 1        | no  |
| Ern2           | -0.464927 | 0          | 1        | 1        | no  |

|               |           |           |          |          |     |
|---------------|-----------|-----------|----------|----------|-----|
| Slc27a3       | -0.465129 | -0.960138 | 0.0806   | 0.151013 | no  |
| Cdk14         | -0.465139 | -2.26637  | 5.00E-05 | 0.00022  | yes |
| Cmc2          | -0.465726 | -1.35435  | 0.0193   | 0.045667 | yes |
| Ccdc81        | -0.465768 | 0         | 1        | 1        | no  |
| Dnaja4        | -0.466139 | -1.98802  | 5.00E-05 | 0.00022  | yes |
| Phc1          | -0.466233 | -0.964131 | 0.05105  | 0.103925 | no  |
| Sptbn4        | -0.467008 | -1.81733  | 0.0001   | 0.000422 | yes |
| Cdc25a        | -0.467228 | -1.14168  | 0.0221   | 0.051304 | no  |
| Slfn2         | -0.467563 | -0.644621 | 0.25315  | 0.375802 | no  |
| Gabbr3        | -0.467775 | -2.06308  | 5.00E-05 | 0.00022  | yes |
| Lin52         | -0.468265 | -1.07639  | 0.0503   | 0.102698 | no  |
| Itga10        | -0.468455 | 0         | 1        | 1        | no  |
| Cep104        | -0.468757 | -1.76459  | 0.0011   | 0.00376  | yes |
| Adamts14      | -0.469126 | 0         | 1        | 1        | no  |
| Nabp1         | -0.469159 | -0.948756 | 0.0786   | 0.148123 | no  |
| Dpp8          | -0.469356 | -2.29985  | 5.00E-05 | 0.00022  | yes |
| Kdr           | -0.470053 | -1.45298  | 0.0054   | 0.015172 | yes |
| Gbp9          | -0.470119 | -0.788741 | 0.1371   | 0.232686 | no  |
| Dlk2          | -0.470169 | 0         | 1        | 1        | no  |
| Fam71e1       | -0.470265 | -0.591848 | 0.36815  | 0.499718 | no  |
| Slc41a3       | -0.470427 | -1.44012  | 0.0038   | 0.011141 | yes |
| Abcb9         | -0.470432 | -1.98212  | 0.0001   | 0.000422 | yes |
| Psmb2         | -0.470458 | -2.57327  | 5.00E-05 | 0.00022  | yes |
| Fdxacb1       | -0.47059  | -0.839085 | 0.13285  | 0.227041 | no  |
| Cbl           | -0.47099  | -1.92162  | 0.0001   | 0.000422 | yes |
| Mest          | -0.471079 | -1.33821  | 0.0153   | 0.037465 | yes |
| Rbpj          | -0.471097 | -1.41989  | 0.0043   | 0.012421 | yes |
| Scp2          | -0.471649 | -1.82255  | 0.00035  | 0.001342 | yes |
| Xlr4a         | -0.471784 | 0         | 1        | 1        | no  |
| Tob2          | -0.472044 | -1.53785  | 0.00305  | 0.009188 | yes |
| Foxred2       | -0.472077 | -0.932334 | 0.06135  | 0.120959 | no  |
| Grin1         | -0.472122 | -2.14049  | 5.00E-05 | 0.00022  | yes |
| Pcdhgb5       | -0.472187 | -0.17237  | 0.74545  | 0.831222 | no  |
| Lhfpl4        | -0.472291 | -2.23822  | 5.00E-05 | 0.00022  | yes |
| Rfx5          | -0.47237  | -0.952499 | 0.06825  | 0.132302 | no  |
| Ndufb2        | -0.472395 | -3.15638  | 0.0006   | 0.002181 | yes |
| Ptchd1        | -0.472515 | -0.940629 | 0.0662   | 0.128968 | no  |
| Tmed1         | -0.473039 | -0.53865  | 0.26875  | 0.39337  | no  |
| Rnf103        | -0.473579 | -2.13148  | 5.00E-05 | 0.00022  | yes |
| Myo1g         | -0.474196 | 0         | 1        | 1        | no  |
| Zfp947        | -0.47436  | 0         | 1        | 1        | no  |
| Amz2          | -0.474404 | -1.87889  | 0.00015  | 0.000615 | yes |
| 4921509O07Rik | -0.4745   | 0         | 1        | 1        | no  |
| Hspa12b       | -0.474554 | -0.248    | 0.6215   | 0.730714 | no  |
| Por           | -0.474723 | -1.9223   | 0.00045  | 0.001682 | yes |
| Rdh9          | -0.474932 | 0         | 1        | 1        | no  |
| Ssr1          | -0.474965 | -2.26063  | 5.00E-05 | 0.00022  | yes |
| Tmem42        | -0.475191 | -0.887682 | 0.06595  | 0.128519 | no  |
| Esrp1         | -0.475689 | 0         | 1        | 1        | no  |
| Dnajc10       | -0.475765 | -2.2412   | 5.00E-05 | 0.00022  | yes |
| Atp2a3        | -0.475876 | -1.01642  | 0.04175  | 0.087698 | no  |
| Dpy19l1       | -0.475956 | -1.80063  | 0.0005   | 0.00185  | yes |
| Fam168a       | -0.476204 | -2.29653  | 5.00E-05 | 0.00022  | yes |

|               |           |           |          |          |     |
|---------------|-----------|-----------|----------|----------|-----|
| Man2b1        | -0.476654 | -1.80831  | 0.00085  | 0.002983 | yes |
| Idh2          | -0.476809 | -1.38731  | 0.0146   | 0.035997 | yes |
| Smpd13a       | -0.476984 | -1.95002  | 0.00045  | 0.001682 | yes |
| Nt5dc3        | -0.477221 | -2.17784  | 5.00E-05 | 0.00022  | yes |
| Lrppap1       | -0.477492 | -2.36133  | 5.00E-05 | 0.00022  | yes |
| Necab3        | -0.477506 | -2.13524  | 5.00E-05 | 0.00022  | yes |
| Esd           | -0.477888 | -1.58004  | 0.00165  | 0.00538  | yes |
| Mrs2          | -0.477952 | -1.9147   | 0.00055  | 0.002016 | yes |
| Grin3a        | -0.478453 | -1.68425  | 0.00065  | 0.002343 | yes |
| Arhgap15      | -0.478516 | -1.15873  | 0.0224   | 0.051828 | no  |
| Cyp4f41-ps    | -0.478787 | 0         | 1        | 1        | no  |
| Gmpr          | -0.479061 | -2.00616  | 0.00065  | 0.002343 | yes |
| Mapk8ip1      | -0.479669 | -2.20747  | 5.00E-05 | 0.00022  | yes |
| Gm1966        | -0.479726 | 0         | 1        | 1        | no  |
| Stt3a         | -0.479753 | -2.19106  | 5.00E-05 | 0.00022  | yes |
| Slc25a45      | -0.479757 | -0.793642 | 0.1579   | 0.260393 | no  |
| Slc25a30      | -0.480162 | -1.66436  | 0.00395  | 0.011515 | yes |
| Srek1ip1      | -0.480168 | -1.09712  | 0.05195  | 0.105369 | no  |
| Gpr146        | -0.480884 | -1.28345  | 0.01405  | 0.034848 | yes |
| Ssfa2         | -0.480958 | -2.05484  | 0.00015  | 0.000615 | yes |
| Hexim2        | -0.481459 | -0.725197 | 0.14165  | 0.23885  | no  |
| Dnah8         | -0.481504 | 0         | 1        | 1        | no  |
| Zfp862-ps     | -0.481567 | -1.21754  | 0.01665  | 0.040309 | yes |
| Rnd1          | -0.481655 | 0         | 1        | 1        | no  |
| 4930550C14Rik | -0.481719 | 0         | 1        | 1        | no  |
| Ccdc6         | -0.481788 | -2.11878  | 5.00E-05 | 0.00022  | yes |
| Pbx3          | -0.481901 | -1.38526  | 0.00565  | 0.015794 | yes |
| Abcd3         | -0.482013 | -2.24552  | 5.00E-05 | 0.00022  | yes |
| Npc2          | -0.482602 | -2.24549  | 5.00E-05 | 0.00022  | yes |
| Gk5           | -0.48268  | -0.710175 | 0.1822   | 0.292044 | no  |
| Pou2af1       | -0.482715 | 0         | 1        | 1        | no  |
| Efcab6        | -0.482756 | 0         | 1        | 1        | no  |
| Ndufs3        | -0.483112 | -1.49994  | 0.019    | 0.045077 | yes |
| Otof          | -0.483506 | 0         | 1        | 1        | no  |
| Cdk19         | -0.483629 | -1.87277  | 0.00015  | 0.000615 | yes |
| Ptpn3         | -0.483641 | -2.24465  | 5.00E-05 | 0.00022  | yes |
| Ift27         | -0.483647 | -1.33386  | 0.0323   | 0.070667 | no  |
| Car9          | -0.483782 | 0         | 1        | 1        | no  |
| Cited2        | -0.483862 | -1.37482  | 0.01375  | 0.034174 | yes |
| Calcr1        | -0.483921 | -1.36049  | 0.00885  | 0.02338  | yes |
| Peak1         | -0.484005 | -1.96875  | 0.0002   | 0.000803 | yes |
| Ahcy          | -0.484253 | -1.25767  | 0.0203   | 0.04771  | yes |
| Clasp1        | -0.484622 | -2.32617  | 5.00E-05 | 0.00022  | yes |
| Mtmt6         | -0.484631 | -2.30725  | 5.00E-05 | 0.00022  | yes |
| Ehhadh        | -0.484887 | -1.03457  | 0.05175  | 0.105044 | no  |
| Atp5b         | -0.484949 | -1.96019  | 5.00E-05 | 0.00022  | yes |
| Kcnh1         | -0.484979 | -2.0347   | 0.0001   | 0.000422 | yes |
| 1810006J02Rik | -0.485554 | 0         | 1        | 1        | no  |
| Actrt3        | -0.485745 | 0         | 1        | 1        | no  |
| Tmtc2         | -0.485817 | -1.94209  | 0.0002   | 0.000803 | yes |
| Gm15800       | -0.485953 | -2.27579  | 5.00E-05 | 0.00022  | yes |
| Lif           | -0.486217 | 0         | 1        | 1        | no  |
| Sh2b3         | -0.486238 | -0.958843 | 0.05545  | 0.111395 | no  |

|               |           |           |          |          |     |
|---------------|-----------|-----------|----------|----------|-----|
| Dstyk         | -0.486624 | -2.03974  | 5.00E-05 | 0.00022  | yes |
| Etv1          | -0.486759 | -2.10028  | 5.00E-05 | 0.00022  | yes |
| Serpinf1      | -0.48703  | -2.27536  | 5.00E-05 | 0.00022  | yes |
| Nab1          | -0.487101 | -1.9544   | 0.0002   | 0.000803 | yes |
| Pcdhb2        | -0.487475 | 0         | 1        | 1        | no  |
| Prmt6         | -0.487557 | -1.43369  | 0.00455  | 0.013069 | yes |
| Cstl1         | -0.487769 | 0         | 1        | 1        | no  |
| Slc38a2       | -0.488173 | -2.38588  | 5.00E-05 | 0.00022  | yes |
| Cnn3          | -0.488626 | -2.52394  | 5.00E-05 | 0.00022  | yes |
| Ift81         | -0.488813 | -1.3692   | 0.0123   | 0.031006 | yes |
| Gm13582       | -0.489305 | 0         | 1        | 1        | no  |
| Appbp2        | -0.490195 | -1.9236   | 0.00055  | 0.002016 | yes |
| Emc7          | -0.490238 | -2.41988  | 5.00E-05 | 0.00022  | yes |
| Unc45b        | -0.491279 | 0         | 1        | 1        | no  |
| Ndufaf1       | -0.491515 | -1.79374  | 0.00135  | 0.004516 | yes |
| Tmem81        | -0.491831 | -0.71351  | 0.20315  | 0.317717 | no  |
| Cd99l2        | -0.492162 | -2.31574  | 5.00E-05 | 0.00022  | yes |
| Yipf2         | -0.492794 | -0.730455 | 0.17245  | 0.279386 | no  |
| Pycr1         | -0.493001 | 0         | 1        | 1        | no  |
| Gm5878        | -0.493244 | 0         | 1        | 1        | no  |
| AV039307      | -0.493547 | 0         | 1        | 1        | no  |
| Tmem176b      | -0.493651 | -2.04144  | 5.00E-05 | 0.00022  | yes |
| Ptcd3         | -0.493665 | -1.93025  | 0.0004   | 0.001513 | yes |
| Pin1          | -0.493756 | -2.06703  | 0.0001   | 0.000422 | yes |
| Zc3h12a       | -0.494186 | 0         | 1        | 1        | no  |
| Pramef8       | -0.494332 | -1.44619  | 0.0064   | 0.017627 | yes |
| Tll2          | -0.494338 | 0         | 1        | 1        | no  |
| Trpm2         | -0.494602 | -1.83592  | 0.00045  | 0.001682 | yes |
| Rilpl1        | -0.494789 | -1.45829  | 0.00795  | 0.021355 | yes |
| Klhdc9        | -0.495273 | -0.683441 | 0.23375  | 0.354581 | no  |
| Dnajb9        | -0.495442 | -2.15458  | 0.00015  | 0.000615 | yes |
| Gper1         | -0.495548 | -0.389909 | 0.44755  | 0.578267 | no  |
| Efhb          | -0.495775 | 0         | 1        | 1        | no  |
| Lilra6        | -0.49589  | 0         | 1        | 1        | no  |
| Mt3           | -0.49614  | -3.43499  | 5.00E-05 | 0.00022  | yes |
| Mir703        | -0.496445 | -0.117127 | 0.54765  | 0.669215 | no  |
| C2cd4d        | -0.496715 | 0         | 1        | 1        | no  |
| D130017N08Rik | -0.496716 | -1.14845  | 0.04625  | 0.095845 | no  |
| Calm3         | -0.49672  | -2.2964   | 5.00E-05 | 0.00022  | yes |
| Glcci1        | -0.496861 | -1.81766  | 0.00025  | 0.000985 | yes |
| Slc2a8        | -0.497466 | -1.64066  | 0.0028   | 0.008532 | yes |
| Sys1          | -0.497566 | -1.33171  | 0.0207   | 0.048529 | yes |
| Usp43         | -0.49797  | 0         | 1        | 1        | no  |
| AI506816      | -0.498248 | 0         | 1        | 1        | no  |
| Ccdc121       | -0.498315 | 0         | 1        | 1        | no  |
| B830017H08Rik | -0.498474 | 0         | 1        | 1        | no  |
| Prnp          | -0.498781 | -2.40794  | 5.00E-05 | 0.00022  | yes |
| Sdha          | -0.499126 | -2.5183   | 5.00E-05 | 0.00022  | yes |
| Adat1         | -0.499172 | -1.17644  | 0.0268   | 0.060335 | no  |
| Aldh6a1       | -0.499422 | -1.80582  | 0.00055  | 0.002016 | yes |
| Tmem178b      | -0.499504 | -1.7394   | 0.0008   | 0.002828 | yes |
| Pdia4         | -0.499659 | -2.02132  | 5.00E-05 | 0.00022  | yes |
| Ttc7b         | -0.49995  | -2.09055  | 5.00E-05 | 0.00022  | yes |

|               |           |           |          |          |     |
|---------------|-----------|-----------|----------|----------|-----|
| Tgoln2        | -0.500635 | 0         | 1        | 1        | no  |
| Btbd3         | -0.50124  | -2.28353  | 5.00E-05 | 0.00022  | yes |
| Fads1         | -0.501725 | -2.31005  | 5.00E-05 | 0.00022  | yes |
| Atp6v0a2      | -0.501742 | -2.20088  | 5.00E-05 | 0.00022  | yes |
| Xlr3a         | -0.501933 | 0         | 1        | 1        | no  |
| Tarsl2        | -0.50198  | -1.93111  | 0.0002   | 0.000803 | yes |
| Pkm           | -0.502176 | -2.18187  | 5.00E-05 | 0.00022  | yes |
| Il22ra1       | -0.503012 | 0         | 1        | 1        | no  |
| Plxna4        | -0.503438 | -2.342    | 5.00E-05 | 0.00022  | yes |
| Tti1          | -0.503628 | -1.68828  | 0.0017   | 0.005514 | yes |
| Prss53        | -0.503876 | 0         | 1        | 1        | no  |
| Mall          | -0.503925 | 0         | 1        | 1        | no  |
| 2610507B11Rik | -0.504039 | -2.42458  | 5.00E-05 | 0.00022  | yes |
| Fahd2a        | -0.504294 | -1.2757   | 0.03265  | 0.07128  | no  |
| Cd53          | -0.504567 | -0.688634 | 0.1977   | 0.310916 | no  |
| Lrriq3        | -0.50474  | 0         | 1        | 1        | no  |
| Cnksr2        | -0.504781 | -1.72055  | 0.00115  | 0.00391  | yes |
| Ntsr1         | -0.505226 | 0         | 1        | 1        | no  |
| Epha7         | -0.505492 | -0.939866 | 0.0621   | 0.122147 | no  |
| 6720416L17Rik | -0.505567 | -0.915452 | 0.064    | 0.125253 | no  |
| Fv1           | -0.505799 | -0.960201 | 0.1008   | 0.180523 | no  |
| Sez6          | -0.50588  | -1.8562   | 0.00025  | 0.000985 | yes |
| Ropn1l        | -0.506248 | 0         | 1        | 1        | no  |
| Trpm8         | -0.507047 | -1.85186  | 0.00045  | 0.001682 | yes |
| Git1          | -0.50727  | -2.30371  | 5.00E-05 | 0.00022  | yes |
| Decr1         | -0.50755  | -1.90053  | 0.00015  | 0.000615 | yes |
| Gbp5          | -0.507767 | -0.859642 | 0.10625  | 0.188553 | no  |
| Hus1          | -0.508196 | -1.43597  | 0.0064   | 0.017627 | yes |
| Pdgfra        | -0.508292 | -1.28993  | 0.00915  | 0.024038 | yes |
| Clec16a       | -0.508357 | -2.05044  | 5.00E-05 | 0.00022  | yes |
| Nap1l2        | -0.508507 | -2.51593  | 5.00E-05 | 0.00022  | yes |
| Dok6          | -0.508557 | -1.12208  | 0.07165  | 0.137646 | no  |
| Sacm1l        | -0.508634 | -2.52987  | 5.00E-05 | 0.00022  | yes |
| Abcb6         | -0.508707 | -1.74702  | 0.001    | 0.003451 | yes |
| Nr5a2         | -0.5089   | 0         | 1        | 1        | no  |
| Tnni1         | -0.509066 | 0         | 1        | 1        | no  |
| Trps1         | -0.509131 | -1.16644  | 0.02145  | 0.050014 | no  |
| Nrip2         | -0.509592 | -1.44783  | 0.00395  | 0.011515 | yes |
| Pdgfrb        | -0.509673 | -1.79391  | 0.0001   | 0.000422 | yes |
| Zfp111        | -0.510611 | -1.1104   | 0.03215  | 0.070374 | no  |
| Slc30a4       | -0.510655 | -1.65551  | 0.00105  | 0.003607 | yes |
| Ccdc28a       | -0.51087  | -2.07178  | 0.0008   | 0.002828 | yes |
| Gp5           | -0.512028 | 0         | 1        | 1        | no  |
| Rgs20         | -0.512093 | -0.611276 | 0.20865  | 0.324711 | no  |
| Map1a         | -0.512311 | -1.55172  | 0.00245  | 0.007605 | yes |
| Tmem260       | -0.51246  | -1.78612  | 0.0008   | 0.002828 | yes |
| Pcdhb16       | -0.512652 | -0.194338 | 0.7101   | 0.804037 | no  |
| Med27         | -0.512823 | -1.55957  | 0.00215  | 0.006796 | yes |
| Mtmr4         | -0.513957 | -2.45979  | 5.00E-05 | 0.00022  | yes |
| Trmu          | -0.514176 | -1.11018  | 0.05215  | 0.105726 | no  |
| Pon1          | -0.514362 | 0         | 1        | 1        | no  |
| Pcdhga8       | -0.51439  | -0.20275  | 0.6995   | 0.795088 | no  |
| Ptbp1         | -0.514636 | -0.144725 | 0.78495  | 0.859803 | no  |

|               |           |           |          |          |     |
|---------------|-----------|-----------|----------|----------|-----|
| Ms4a6b        | -0.515665 | 0         | 1        | 1        | no  |
| Ccdc176       | -0.515928 | 0         | 1        | 1        | no  |
| Tmem43        | -0.515931 | -2.0401   | 0.00025  | 0.000985 | yes |
| 6330418K02Rik | -0.516803 | -0.255916 | 0.70815  | 0.802651 | no  |
| Egf           | -0.516856 | 0         | 1        | 1        | no  |
| Ascl2         | -0.517117 | 0         | 1        | 1        | no  |
| Man1a2        | -0.517227 | -2.47614  | 5.00E-05 | 0.00022  | yes |
| Ispd          | -0.517265 | -1.57574  | 0.0017   | 0.005514 | yes |
| Gm4371        | -0.517571 | 0         | 1        | 1        | no  |
| Hadha         | -0.517919 | -2.38808  | 5.00E-05 | 0.00022  | yes |
| Fermt2        | -0.517941 | -2.49585  | 5.00E-05 | 0.00022  | yes |
| Dtna          | -0.51797  | -1.72005  | 0.0004   | 0.001513 | yes |
| Aldh1b1       | -0.518065 | -0.959627 | 0.07815  | 0.147526 | no  |
| Dnajc18       | -0.518165 | -2.38765  | 5.00E-05 | 0.00022  | yes |
| P2ry2         | -0.518492 | -1.55657  | 0.00405  | 0.011765 | yes |
| Ctnna1        | -0.518554 | -2.19657  | 5.00E-05 | 0.00022  | yes |
| Frpm3         | -0.518712 | -0.674    | 0.2516   | 0.374403 | no  |
| Mtmt2         | -0.519069 | -2.16077  | 5.00E-05 | 0.00022  | yes |
| Wnt4          | -0.51924  | 0         | 1        | 1        | no  |
| Rab3ip        | -0.519281 | -1.88156  | 0.00065  | 0.002343 | yes |
| Ccdc30        | -0.519469 | -0.690807 | 0.12815  | 0.220543 | no  |
| Cdc3711       | -0.519506 | -2.17435  | 0.00015  | 0.000615 | yes |
| Hcar2         | -0.519853 | 0         | 1        | 1        | no  |
| Syt13         | -0.520327 | -1.31249  | 0.01105  | 0.02829  | yes |
| Sephs2        | -0.520365 | -1.84972  | 0.0006   | 0.002181 | yes |
| Susd2         | -0.520994 | -2.38469  | 5.00E-05 | 0.00022  | yes |
| Glul          | -0.521074 | -2.40463  | 5.00E-05 | 0.00022  | yes |
| Tbc1d2b       | -0.521178 | -1.69505  | 0.00115  | 0.00391  | yes |
| Atr           | -0.521744 | -1.97922  | 5.00E-05 | 0.00022  | yes |
| Sowahc        | -0.522308 | -1.70938  | 0.00105  | 0.003607 | yes |
| Zmynd12       | -0.522588 | 0         | 1        | 1        | no  |
| Il1rn         | -0.522908 | 0         | 1        | 1        | no  |
| 2300009A05Rik | -0.522985 | -0.891456 | 0.24265  | 0.36425  | no  |
| Fcrla         | -0.523158 | 0         | 1        | 1        | no  |
| Hoxd9         | -0.523272 | -1.40519  | 0.0115   | 0.02929  | yes |
| Nceh1         | -0.523415 | -2.40939  | 5.00E-05 | 0.00022  | yes |
| Nhlrc3        | -0.52348  | -0.824683 | 0.1537   | 0.255147 | no  |
| Zscan29       | -0.523857 | -1.29359  | 0.0112   | 0.02863  | yes |
| Fmnl3         | -0.523858 | -1.30386  | 0.01335  | 0.033305 | yes |
| Fabp3         | -0.524549 | -0.993247 | 0.1701   | 0.276525 | no  |
| Tubgcp2       | -0.524721 | -1.90263  | 0.00065  | 0.002343 | yes |
| 4930578C19Rik | -0.524798 | 0         | 1        | 1        | no  |
| Grm3          | -0.525226 | 0         | 1        | 1        | no  |
| Dcbld1        | -0.525445 | -1.92518  | 0.0004   | 0.001513 | yes |
| Tspan13       | -0.525891 | -2.6393   | 5.00E-05 | 0.00022  | yes |
| Carns1        | -0.52636  | -1.78859  | 0.0007   | 0.002506 | yes |
| Clvs1         | -0.526829 | -1.11642  | 0.0355   | 0.076445 | no  |
| Ggt1          | -0.526838 | 0         | 1        | 1        | no  |
| Idh3g         | -0.526951 | -2.54163  | 5.00E-05 | 0.00022  | yes |
| Spidr         | -0.527034 | -0.614838 | 0.18885  | 0.3002   | no  |
| Grxcr2        | -0.527035 | -0.827431 | 0.17565  | 0.283497 | no  |
| Prepl         | -0.527067 | -2.4159   | 5.00E-05 | 0.00022  | yes |
| Slco1c1       | -0.527323 | -0.869941 | 0.08275  | 0.154083 | no  |



|               |           |           |          |          |     |
|---------------|-----------|-----------|----------|----------|-----|
| Lrba          | -0.527574 | -1.39327  | 0.0082   | 0.02192  | yes |
| Qpctl         | -0.527686 | -1.40778  | 0.01145  | 0.029174 | yes |
| Rnf13         | -0.527736 | -2.20869  | 5.00E-05 | 0.00022  | yes |
| Magi2         | -0.527949 | -1.74925  | 0.00075  | 0.00267  | yes |
| Tap1          | -0.528363 | -1.19297  | 0.01775  | 0.042546 | yes |
| Tgm2          | -0.528487 | -1.58881  | 0.0034   | 0.010109 | yes |
| BC030500      | -0.52859  | 0         | 1        | 1        | no  |
| Rab8b         | -0.528849 | -2.15214  | 5.00E-05 | 0.00022  | yes |
| Ak3           | -0.528853 | -2.28485  | 5.00E-05 | 0.00022  | yes |
| Elovl1        | -0.528855 | -2.1558   | 0.0001   | 0.000422 | yes |
| Pdpr          | -0.529279 | -1.68447  | 0.0024   | 0.00748  | yes |
| Slain1        | -0.529595 | -0.934885 | 0.0609   | 0.120214 | no  |
| Mgat4c        | -0.529643 | -0.999196 | 0.0463   | 0.095919 | no  |
| Cyc1          | -0.529771 | -2.858    | 5.00E-05 | 0.00022  | yes |
| Pnkd          | -0.530097 | -1.86428  | 0.0003   | 0.001164 | yes |
| Sirt2         | -0.53033  | -2.35627  | 5.00E-05 | 0.00022  | yes |
| Lrrc27        | -0.530433 | -0.694962 | 0.16475  | 0.269379 | no  |
| Efcab2        | -0.530462 | -1.24623  | 0.02105  | 0.049263 | yes |
| 2810408A11Rik | -0.530575 | 0         | 1        | 1        | no  |
| Eme2          | -0.530829 | -1.49404  | 0.00875  | 0.023162 | yes |
| BC037704      | -0.530957 | 0         | 1        | 1        | no  |
| Rab19         | -0.531088 | 0         | 1        | 1        | no  |
| Dlat          | -0.531265 | -2.55433  | 5.00E-05 | 0.00022  | yes |
| Tbx4          | -0.531337 | 0         | 1        | 1        | no  |
| Sat1          | -0.531574 | -1.82592  | 0.00025  | 0.000985 | yes |
| Tmem30b       | -0.532338 | -0.76046  | 0.15115  | 0.25167  | no  |
| Serp1         | -0.532402 | -1.69506  | 0.003    | 0.009064 | yes |
| Nrep          | -0.532415 | -1.80423  | 0.00065  | 0.002343 | yes |
| Mblac1        | -0.532429 | -0.822887 | 0.1626   | 0.266652 | no  |
| Slco2b1       | -0.532567 | -1.05317  | 0.0332   | 0.072267 | no  |
| Hmgn2         | -0.532703 | -1.29912  | 0.0307   | 0.067759 | no  |
| Ptpre         | -0.53302  | -2.14038  | 5.00E-05 | 0.00022  | yes |
| Gm7367        | -0.534144 | -0.224525 | 0.67295  | 0.772779 | no  |
| St3gal2       | -0.534266 | -2.40268  | 5.00E-05 | 0.00022  | yes |
| Gstm1         | -0.534443 | -1.37453  | 0.02125  | 0.049643 | yes |
| 2900097C17Rik | -0.534472 | -2.36712  | 5.00E-05 | 0.00022  | yes |
| Atp1a3        | -0.534615 | -2.23749  | 5.00E-05 | 0.00022  | yes |
| Zdhhc15       | -0.534647 | -2.0572   | 5.00E-05 | 0.00022  | yes |
| Tlr4          | -0.534796 | -1.00688  | 0.053    | 0.10709  | no  |
| Prkcdp        | -0.534812 | -1.77315  | 0.00415  | 0.012021 | yes |
| Mks1          | -0.535072 | -0.796396 | 0.1426   | 0.240116 | no  |
| Tmed7         | -0.53567  | -2.53019  | 5.00E-05 | 0.00022  | yes |
| Mettl20       | -0.535703 | -0.579565 | 0.21065  | 0.327133 | no  |
| Ubiad1        | -0.53634  | -1.02178  | 0.0574   | 0.114636 | no  |
| Gipc2         | -0.536805 | -0.607569 | 0.31275  | 0.44221  | no  |
| 2310039H08Rik | -0.536958 | -0.752978 | 0.26555  | 0.389891 | no  |
| Sugct         | -0.538265 | -0.708617 | 0.21125  | 0.327719 | no  |
| Zfp652        | -0.538482 | -1.16978  | 0.03105  | 0.068417 | no  |
| Gm12429       | -0.538544 | 0         | 1        | 1        | no  |
| Flnb          | -0.538998 | -2.29322  | 5.00E-05 | 0.00022  | yes |
| Ttpa          | -0.539004 | 0         | 1        | 1        | no  |
| Rdh10         | -0.539326 | -1.19534  | 0.0295   | 0.065546 | no  |
| Fhit          | -0.53965  | -1.08274  | 0.084    | 0.155995 | no  |

|               |           |           |          |          |     |
|---------------|-----------|-----------|----------|----------|-----|
| Gucy1a2       | -0.539772 | -2.26489  | 5.00E-05 | 0.00022  | yes |
| Hpse          | -0.539859 | -0.93842  | 0.07755  | 0.146582 | no  |
| Syn2          | -0.540063 | -2.6572   | 5.00E-05 | 0.00022  | yes |
| Dscam         | -0.540254 | -1.84481  | 0.00065  | 0.002343 | yes |
| Tcap          | -0.540528 | 0         | 1        | 1        | no  |
| Snx18         | -0.541033 | -2.24887  | 5.00E-05 | 0.00022  | yes |
| Tmem59l       | -0.541087 | -2.81024  | 5.00E-05 | 0.00022  | yes |
| Zfp108        | -0.541716 | 0         | 1        | 1        | no  |
| Cxx1c         | -0.541801 | -2.78158  | 5.00E-05 | 0.00022  | yes |
| Ttc1          | -0.542127 | -2.56209  | 5.00E-05 | 0.00022  | yes |
| Zyg11b        | -0.543282 | -2.59434  | 5.00E-05 | 0.00022  | yes |
| Ttc3          | -0.544233 | -2.4193   | 5.00E-05 | 0.00022  | yes |
| Plcb2         | -0.544686 | 0         | 1        | 1        | no  |
| Tifab         | -0.545619 | -0.860635 | 0.0861   | 0.159093 | no  |
| Lmbrd1        | -0.545973 | -2.62078  | 5.00E-05 | 0.00022  | yes |
| Celf2         | -0.546146 | -2.3165   | 5.00E-05 | 0.00022  | yes |
| Tspyl4        | -0.546829 | -2.60322  | 5.00E-05 | 0.00022  | yes |
| Cox4i1        | -0.546938 | -3.65093  | 5.00E-05 | 0.00022  | yes |
| Slc27a5       | -0.547078 | 0         | 1        | 1        | no  |
| Its1          | -0.54775  | -2.09312  | 5.00E-05 | 0.00022  | yes |
| Itpr1l1       | -0.548004 | -1.39625  | 0.0055   | 0.015427 | yes |
| 9030624G23Rik | -0.548234 | 0         | 1        | 1        | no  |
| Maml1         | -0.548281 | -1.2895   | 0.01365  | 0.033938 | yes |
| Sgsm2         | -0.549064 | -1.99867  | 5.00E-05 | 0.00022  | yes |
| Wnt3          | -0.549306 | 0         | 1        | 1        | no  |
| Kcnc4         | -0.54932  | -2.47962  | 5.00E-05 | 0.00022  | yes |
| Hp            | -0.54947  | 0         | 1        | 1        | no  |
| Aim2          | -0.549524 | 0         | 1        | 1        | no  |
| Pcdhga7       | -0.550057 | -0.30521  | 0.5537   | 0.674124 | no  |
| Cnksr3        | -0.550615 | -0.907865 | 0.08475  | 0.15708  | no  |
| Traf5         | -0.550725 | 0         | 1        | 1        | no  |
| Pde8b         | -0.550841 | -1.63615  | 0.00115  | 0.00391  | yes |
| Btg2          | -0.551116 | -2.17408  | 5.00E-05 | 0.00022  | yes |
| Inpp1         | -0.551407 | -1.7496   | 0.0006   | 0.002181 | yes |
| Arl16         | -0.551712 | -1.52574  | 0.0024   | 0.00748  | yes |
| Mob1a         | -0.551791 | -1.63281  | 0.00535  | 0.015044 | yes |
| Dolk          | -0.552695 | -2.16033  | 5.00E-05 | 0.00022  | yes |
| Ppp4r4        | -0.552726 | -1.94826  | 0.0004   | 0.001513 | yes |
| Skil          | -0.552807 | -1.6637   | 0.00115  | 0.00391  | yes |
| Adat2         | -0.552811 | -0.534553 | 0.28745  | 0.414027 | no  |
| Slc16a4       | -0.552895 | -1.07485  | 0.05415  | 0.109065 | no  |
| Ptgr2         | -0.553172 | -2.0542   | 5.00E-05 | 0.00022  | yes |
| Aak1          | -0.55323  | -2.57951  | 5.00E-05 | 0.00022  | yes |
| Dnase2a       | -0.553245 | -0.685442 | 0.22695  | 0.347123 | no  |
| Pisd          | -0.553274 | -1.77913  | 0.0015   | 0.004953 | yes |
| A830018L16Rik | -0.553516 | -2.06226  | 5.00E-05 | 0.00022  | yes |
| Oxr1          | -0.553584 | -2.38674  | 5.00E-05 | 0.00022  | yes |
| Lrat          | -0.55379  | 0         | 1        | 1        | no  |
| Hvcn1         | -0.554082 | 0         | 1        | 1        | no  |
| Hdac3         | -0.554104 | -2.46455  | 5.00E-05 | 0.00022  | yes |
| Etl4          | -0.554532 | -2.35639  | 5.00E-05 | 0.00022  | yes |
| Dhrs4         | -0.554679 | -1.36455  | 0.00755  | 0.020384 | yes |
| Ush1g         | -0.554797 | -1.14464  | 0.02155  | 0.050203 | no  |

|               |           |           |          |          |     |
|---------------|-----------|-----------|----------|----------|-----|
| Atat1         | -0.555146 | -1.18118  | 0.01995  | 0.046987 | yes |
| 1700066B19Rik | -0.555377 | 0         | 1        | 1        | no  |
| Nek7          | -0.55545  | -2.77377  | 5.00E-05 | 0.00022  | yes |
| Itpr1         | -0.556624 | -1.66788  | 0.00135  | 0.004516 | yes |
| Emb           | -0.557259 | -2.82844  | 5.00E-05 | 0.00022  | yes |
| Tmem141       | -0.558191 | -1.18106  | 0.019    | 0.045077 | yes |
| Adcy7         | -0.559467 | -1.48365  | 0.0029   | 0.008796 | yes |
| Fam73b        | -0.559709 | -2.24546  | 5.00E-05 | 0.00022  | yes |
| Pigh          | -0.560301 | -1.03132  | 0.0381   | 0.081096 | no  |
| Gad2          | -0.560375 | 0         | 1        | 1        | no  |
| Aldh4a1       | -0.560518 | -1.85516  | 0.0003   | 0.001164 | yes |
| Lmln          | -0.56066  | -1.71278  | 0.00065  | 0.002343 | yes |
| Hmgn5         | -0.561277 | -0.80834  | 0.14865  | 0.248162 | no  |
| Dnajb4        | -0.561352 | -2.23745  | 5.00E-05 | 0.00022  | yes |
| Ccdc126       | -0.561589 | -1.75045  | 0.00175  | 0.00566  | yes |
| Nlrp3         | -0.562279 | 0         | 1        | 1        | no  |
| Nek8          | -0.562911 | -1.28257  | 0.0191   | 0.045266 | yes |
| Siglec5       | -0.564738 | 0         | 1        | 1        | no  |
| Marcks        | -0.564756 | -2.66989  | 5.00E-05 | 0.00022  | yes |
| Morc4         | -0.5649   | -1.21773  | 0.01485  | 0.036518 | yes |
| Lrrc48        | -0.564901 | -0.928418 | 0.09865  | 0.177583 | no  |
| Elmod3        | -0.565198 | -1.11848  | 0.02575  | 0.058288 | no  |
| Slc35f6       | -0.565639 | -2.12606  | 5.00E-05 | 0.00022  | yes |
| Zkscan4       | -0.565929 | -0.779009 | 0.14715  | 0.246339 | no  |
| Racgap1       | -0.566181 | -1.25571  | 0.0145   | 0.03579  | yes |
| Pecr          | -0.566185 | -1.14085  | 0.0588   | 0.117027 | no  |
| Rcbtb2        | -0.566427 | -1.92093  | 0.0001   | 0.000422 | yes |
| Gm14420       | -0.566508 | -1.71797  | 0.0008   | 0.002828 | yes |
| Twsg1         | -0.566962 | -2.23144  | 0.0001   | 0.000422 | yes |
| BC048546      | -0.567045 | -2.00603  | 0.00025  | 0.000985 | yes |
| Gpr174        | -0.567109 | 0         | 1        | 1        | no  |
| Ppm1k         | -0.567974 | -1.80131  | 0.0009   | 0.003139 | yes |
| Mocos         | -0.568969 | -1.18436  | 0.02885  | 0.064274 | no  |
| Dock6         | -0.569049 | -1.452    | 0.00365  | 0.010754 | yes |
| Nhej1         | -0.569419 | -0.982123 | 0.13755  | 0.233241 | no  |
| Fggy          | -0.569852 | -1.33376  | 0.0085   | 0.022613 | yes |
| Cnpy2         | -0.570018 | -1.94785  | 0.0021   | 0.006649 | yes |
| Tmem127       | -0.570045 | -2.72091  | 5.00E-05 | 0.00022  | yes |
| Kcnh7         | -0.570658 | -2.2429   | 5.00E-05 | 0.00022  | yes |
| Fadd          | -0.57094  | -0.880614 | 0.1007   | 0.180466 | no  |
| Foxf2         | -0.571025 | 0         | 1        | 1        | no  |
| Slc9a2        | -0.571357 | -0.838224 | 0.11395  | 0.199548 | no  |
| Plvap         | -0.571457 | -1.58312  | 0.00505  | 0.014344 | yes |
| Stk39         | -0.5715   | -2.85613  | 5.00E-05 | 0.00022  | yes |
| Tomm20        | -0.571811 | -2.75672  | 5.00E-05 | 0.00022  | yes |
| Pde4dip       | -0.572146 | -2.64108  | 5.00E-05 | 0.00022  | yes |
| Smad5         | -0.572512 | -2.02801  | 5.00E-05 | 0.00022  | yes |
| Rilpl2        | -0.573034 | -1.20402  | 0.04385  | 0.091587 | no  |
| Satb2         | -0.573261 | 0         | 1        | 1        | no  |
| Usp24         | -0.573432 | -2.32223  | 5.00E-05 | 0.00022  | yes |
| Syne4         | -0.574704 | -0.899894 | 0.0735   | 0.140245 | no  |
| Sesn3         | -0.574982 | -1.94692  | 0.00035  | 0.001342 | yes |
| Chd3os        | -0.575228 | -1.19536  | 0.0358   | 0.077004 | no  |

|               |           |           |          |          |     |
|---------------|-----------|-----------|----------|----------|-----|
| Diras1        | -0.575366 | -2.8855   | 5.00E-05 | 0.00022  | yes |
| Trpc7         | -0.575449 | 0         | 1        | 1        | no  |
| Gjc2          | -0.576916 | 0         | 1        | 1        | no  |
| 1700020I14Rik | -0.577371 | -2.15245  | 5.00E-05 | 0.00022  | yes |
| 2200002D01Rik | -0.577758 | -0.153237 | 0.7813   | 0.857575 | no  |
| Sarm1         | -0.578051 | -2.34882  | 5.00E-05 | 0.00022  | yes |
| Primpol       | -0.578162 | -1.15742  | 0.02245  | 0.051907 | no  |
| Klhl32        | -0.578414 | -1.02438  | 0.04055  | 0.085556 | no  |
| Aph1a         | -0.578443 | -1.50458  | 0.0048   | 0.013695 | yes |
| Sh3tc1        | -0.578984 | 0         | 1        | 1        | no  |
| Tab3          | -0.579032 | -2.32487  | 5.00E-05 | 0.00022  | yes |
| Nhs12         | -0.579101 | -1.09539  | 0.0359   | 0.077156 | no  |
| Kdm8          | -0.580303 | -1.3894   | 0.0114   | 0.029069 | yes |
| 6330403A02Rik | -0.580727 | -1.06803  | 0.0395   | 0.0837   | no  |
| Ralgapa2      | -0.581561 | -2.24127  | 5.00E-05 | 0.00022  | yes |
| Gnmt          | -0.581655 | 0         | 1        | 1        | no  |
| Fyco1         | -0.581839 | -1.591    | 0.0024   | 0.00748  | yes |
| Mef2c         | -0.582054 | -2.10744  | 5.00E-05 | 0.00022  | yes |
| Cyb561a3      | -0.583225 | -1.40344  | 0.00595  | 0.016553 | yes |
| Zfp809        | -0.583489 | -0.719752 | 0.20565  | 0.320908 | no  |
| Gpr111        | -0.583558 | 0         | 1        | 1        | no  |
| Pde3a         | -0.58363  | 0         | 1        | 1        | no  |
| Abhd12        | -0.583954 | -3.03495  | 5.00E-05 | 0.00022  | yes |
| Stard5        | -0.584297 | -1.377    | 0.01285  | 0.032203 | yes |
| 5730522E02Rik | -0.584319 | 0         | 1        | 1        | no  |
| Ak1           | -0.584927 | -2.6086   | 5.00E-05 | 0.00022  | yes |
| Stxbp3a       | -0.585042 | -1.46405  | 0.0082   | 0.02192  | yes |
| B2m           | -0.58535  | -2.55251  | 5.00E-05 | 0.00022  | yes |
| Nit2          | -0.585541 | -1.37424  | 0.02135  | 0.049824 | yes |
| Pik3r3        | -0.585963 | -2.52158  | 5.00E-05 | 0.00022  | yes |
| Entpd7        | -0.586041 | -1.43537  | 0.0067   | 0.018343 | yes |
| Tacc1         | -0.586255 | -2.55637  | 5.00E-05 | 0.00022  | yes |
| Gm6213        | -0.586581 | 0         | 1        | 1        | no  |
| Ankrd52       | -0.586702 | -2.74616  | 5.00E-05 | 0.00022  | yes |
| Slc1a4        | -0.586729 | -2.65081  | 5.00E-05 | 0.00022  | yes |
| Arhgdib       | -0.586758 | -0.994222 | 0.1053   | 0.187393 | no  |
| Tmem246       | -0.586998 | -2.68242  | 5.00E-05 | 0.00022  | yes |
| Vhl           | -0.587195 | -1.83263  | 0.0008   | 0.002828 | yes |
| Hsd17b14      | -0.587566 | 0         | 1        | 1        | no  |
| 2210416O15Rik | -0.587886 | 0         | 1        | 1        | no  |
| Tnfsf10       | -0.588002 | -1.17356  | 0.02165  | 0.0504   | no  |
| 5830417I10Rik | -0.588603 | -0.746649 | 0.14615  | 0.245284 | no  |
| Amph          | -0.589031 | -2.73325  | 5.00E-05 | 0.00022  | yes |
| Rsph4a        | -0.589292 | 0         | 1        | 1        | no  |
| Pcca          | -0.589314 | -1.88034  | 0.0005   | 0.00185  | yes |
| Ets2          | -0.589826 | -2.12443  | 0.00015  | 0.000615 | yes |
| Ltbp3         | -0.589968 | -1.9082   | 0.0005   | 0.00185  | yes |
| Gng12         | -0.59008  | -2.06342  | 5.00E-05 | 0.00022  | yes |
| 9430037G07Rik | -0.590131 | -1.1273   | 0.03695  | 0.07908  | no  |
| Tmem219       | -0.59023  | -1.24408  | 0.01405  | 0.034848 | yes |
| Dnajc1        | -0.590504 | -1.23949  | 0.02005  | 0.047189 | yes |
| Pcdhgb4       | -0.590544 | -0.196993 | 0.70365  | 0.798984 | no  |
| Maml3         | -0.590627 | -1.29006  | 0.0133   | 0.033218 | yes |

|               |           |           |          |          |     |
|---------------|-----------|-----------|----------|----------|-----|
| Gm166         | -0.590629 | 0         | 1        | 1        | no  |
| Klf4          | -0.590694 | -1.89906  | 0.0002   | 0.000803 | yes |
| Dyx1c1        | -0.591629 | -0.615069 | 0.21685  | 0.334565 | no  |
| Hist1h2bc     | -0.591772 | -1.89504  | 0.00015  | 0.000615 | yes |
| Fam35a        | -0.591787 | -1.26114  | 0.01935  | 0.045761 | yes |
| Coq7          | -0.591818 | -2.18494  | 0.00085  | 0.002983 | yes |
| Tnfrsf1b      | -0.592344 | -1.01773  | 0.05385  | 0.108559 | no  |
| Mcam          | -0.592366 | -2.9212   | 5.00E-05 | 0.00022  | yes |
| 0610007P14Rik | -0.592433 | -2.10513  | 0.00045  | 0.001682 | yes |
| Sesn2         | -0.592938 | -1.02534  | 0.05765  | 0.115083 | no  |
| Tacstd2       | -0.593149 | 0         | 1        | 1        | no  |
| Hspa12a       | -0.593536 | -2.66209  | 5.00E-05 | 0.00022  | yes |
| Cyb5rl        | -0.594227 | -0.867213 | 0.1292   | 0.221832 | no  |
| Vmn1r85       | -0.594239 | 0         | 1        | 1        | no  |
| Enpp6         | -0.594326 | 0         | 1        | 1        | no  |
| Serpini1      | -0.594475 | -2.89498  | 5.00E-05 | 0.00022  | yes |
| Asb17os       | -0.59462  | 0         | 1        | 1        | no  |
| Znrf1         | -0.594698 | -2.24956  | 5.00E-05 | 0.00022  | yes |
| Ndufv2        | -0.595281 | -2.6202   | 5.00E-05 | 0.00022  | yes |
| Stap1         | -0.595837 | 0         | 1        | 1        | no  |
| Srcrb4d       | -0.596171 | -0.915057 | 0.08665  | 0.15982  | no  |
| Prpf19        | -0.596198 | -2.72256  | 5.00E-05 | 0.00022  | yes |
| Smim13        | -0.596872 | -2.90672  | 5.00E-05 | 0.00022  | yes |
| Errfi1        | -0.596878 | -2.28374  | 5.00E-05 | 0.00022  | yes |
| Gm13446       | -0.596919 | -0.3786   | 0.4954   | 0.622452 | no  |
| Pttg1ip       | -0.59714  | -2.69887  | 5.00E-05 | 0.00022  | yes |
| Utrn          | -0.597385 | -2.77095  | 5.00E-05 | 0.00022  | yes |
| Med9os        | -0.597519 | 0         | 1        | 1        | no  |
| Cx3cl1        | -0.598273 | -1.38266  | 0.01025  | 0.026534 | yes |
| B630019K06Rik | -0.598768 | -2.2952   | 5.00E-05 | 0.00022  | yes |
| Atp9b         | -0.598803 | -2.63287  | 5.00E-05 | 0.00022  | yes |
| Grwd1         | -0.598913 | -1.63669  | 0.0034   | 0.010109 | yes |
| Mia3          | -0.599122 | -2.81376  | 5.00E-05 | 0.00022  | yes |
| Mknk1         | -0.599335 | -2.0155   | 0.00015  | 0.000615 | yes |
| Lsp1          | -0.599366 | -0.814103 | 0.14675  | 0.24598  | no  |
| Myh14         | -0.600095 | -2.66068  | 5.00E-05 | 0.00022  | yes |
| Dennd5a       | -0.600146 | -2.81785  | 5.00E-05 | 0.00022  | yes |
| Foxr2         | -0.600553 | 0         | 1        | 1        | no  |
| Lphn1         | -0.600757 | -2.87835  | 5.00E-05 | 0.00022  | yes |
| Rel           | -0.600915 | 0         | 1        | 1        | no  |
| Vma21         | -0.601056 | -2.51174  | 5.00E-05 | 0.00022  | yes |
| Bcl6b         | -0.601161 | 0         | 1        | 1        | no  |
| Sun2          | -0.601285 | -2.46948  | 5.00E-05 | 0.00022  | yes |
| Fntb          | -0.601524 | -2.37144  | 5.00E-05 | 0.00022  | yes |
| Klf6          | -0.601913 | -2.71112  | 5.00E-05 | 0.00022  | yes |
| Ndufb5        | -0.601976 | -2.98459  | 5.00E-05 | 0.00022  | yes |
| Pxmp4         | -0.602091 | -1.73153  | 0.00325  | 0.009727 | yes |
| Slc25a25      | -0.602359 | -2.80423  | 5.00E-05 | 0.00022  | yes |
| 1700049G17Rik | -0.602694 | -1.09819  | 0.03455  | 0.074739 | no  |
| Camk2b        | -0.603051 | -2.45939  | 5.00E-05 | 0.00022  | yes |
| Acot11        | -0.603383 | -1.69739  | 0.0008   | 0.002828 | yes |
| Rock2         | -0.603384 | -2.65384  | 5.00E-05 | 0.00022  | yes |
| Hadh          | -0.603849 | -2.45651  | 5.00E-05 | 0.00022  | yes |

|          |           |           |          |          |     |
|----------|-----------|-----------|----------|----------|-----|
| Fau      | -0.603876 | -0.717726 | 0.20635  | 0.321811 | no  |
| Kcnj3    | -0.604119 | -1.68938  | 0.003    | 0.009064 | yes |
| Tet1     | -0.604256 | -1.36944  | 0.0064   | 0.017627 | yes |
| Kremen2  | -0.604286 | 0         | 1        | 1        | no  |
| Stox2    | -0.604353 | -2.33188  | 5.00E-05 | 0.00022  | yes |
| Plekhd1  | -0.604481 | -2.72141  | 5.00E-05 | 0.00022  | yes |
| Fbxo47   | -0.60485  | 0         | 1        | 1        | no  |
| Junb     | -0.604878 | -2.81584  | 5.00E-05 | 0.00022  | yes |
| Olfir920 | -0.604949 | -0.854975 | 0.1238   | 0.214224 | no  |
| Tm6sf1   | -0.605291 | -1.31501  | 0.0212   | 0.049553 | yes |
| Slc16a1  | -0.605394 | -2.69032  | 5.00E-05 | 0.00022  | yes |
| H2afy3   | -0.605559 | 0         | 1        | 1        | no  |
| Vps26a   | -0.605688 | -2.40051  | 5.00E-05 | 0.00022  | yes |
| Cd63     | -0.605969 | -1.34215  | 0.0081   | 0.021701 | yes |
| Pcdhgb7  | -0.606368 | -0.189667 | 0.71955  | 0.811827 | no  |
| Oscp1    | -0.606688 | -1.81621  | 0.0019   | 0.00608  | yes |
| Zfp951   | -0.606807 | 0         | 1        | 1        | no  |
| Ptgir    | -0.606867 | -2.61555  | 5.00E-05 | 0.00022  | yes |
| Slc25a33 | -0.607407 | -2.47149  | 5.00E-05 | 0.00022  | yes |
| Elp3     | -0.608543 | -2.66973  | 5.00E-05 | 0.00022  | yes |
| Nkiras1  | -0.608876 | -2.24228  | 5.00E-05 | 0.00022  | yes |
| Notum    | -0.609302 | 0         | 1        | 1        | no  |
| Alpk2    | -0.609561 | 0         | 1        | 1        | no  |
| Tbc1d4   | -0.609908 | -2.05766  | 5.00E-05 | 0.00022  | yes |
| Gltpd1   | -0.610656 | -2.67212  | 5.00E-05 | 0.00022  | yes |
| Gramd1b  | -0.610724 | -2.58967  | 5.00E-05 | 0.00022  | yes |
| Atp5l    | -0.61141  | -0.873529 | 0.29615  | 0.423934 | no  |
| Slc22a21 | -0.611437 | 0         | 1        | 1        | no  |
| Dusp6    | -0.611453 | -2.31164  | 5.00E-05 | 0.00022  | yes |
| Slc35e1  | -0.61147  | -2.73991  | 5.00E-05 | 0.00022  | yes |
| Gm10432  | -0.611978 | 0         | 1        | 1        | no  |
| Fhdc1    | -0.613166 | -1.91281  | 0.0003   | 0.001164 | yes |
| Cacna2d3 | -0.613341 | -2.48677  | 5.00E-05 | 0.00022  | yes |
| Samd15   | -0.614094 | 0         | 1        | 1        | no  |
| Selp     | -0.614555 | 0         | 1        | 1        | no  |
| Galr2    | -0.614744 | 0         | 1        | 1        | no  |
| Ckap4    | -0.61496  | -2.36299  | 5.00E-05 | 0.00022  | yes |
| Nde1     | -0.615569 | -1.47911  | 0.00375  | 0.011009 | yes |
| Neurod4  | -0.615689 | 0         | 1        | 1        | no  |
| Vezf1    | -0.615839 | -2.25568  | 5.00E-05 | 0.00022  | yes |
| Ankrd33b | -0.615876 | -1.29834  | 0.0115   | 0.02929  | yes |
| Svil     | -0.615982 | -1.87505  | 0.00035  | 0.001342 | yes |
| Cyb5d2   | -0.615993 | -2.20226  | 5.00E-05 | 0.00022  | yes |
| Ric3     | -0.616318 | -2.37018  | 5.00E-05 | 0.00022  | yes |
| Galnt1   | -0.616439 | -2.44593  | 5.00E-05 | 0.00022  | yes |
| Aco2     | -0.6165   | -2.97409  | 5.00E-05 | 0.00022  | yes |
| Birc3    | -0.616557 | -0.974432 | 0.0727   | 0.138979 | no  |
| Rfxank   | -0.616612 | -1.17224  | 0.02995  | 0.066379 | no  |
| Slc43a2  | -0.616955 | -2.70305  | 5.00E-05 | 0.00022  | yes |
| Adam10   | -0.617707 | -2.92018  | 5.00E-05 | 0.00022  | yes |
| Slc10a4  | -0.618065 | 0         | 1        | 1        | no  |
| Cdon     | -0.618612 | -1.48055  | 0.00475  | 0.013561 | yes |
| Sik1     | -0.618681 | -1.63692  | 0.00195  | 0.006219 | yes |



|               |           |           |          |          |     |
|---------------|-----------|-----------|----------|----------|-----|
| Triobp        | -0.618797 | -1.4168   | 0.00635  | 0.017515 | yes |
| Jade1         | -0.618884 | -1.70987  | 0.0006   | 0.002181 | yes |
| Pcdhb14       | -0.618982 | -0.181095 | 0.74075  | 0.82786  | no  |
| Tpgs2         | -0.619131 | -2.4163   | 5.00E-05 | 0.00022  | yes |
| Cbfa2t2       | -0.619375 | -1.96382  | 0.0001   | 0.000422 | yes |
| Syne2         | -0.62036  | -2.35959  | 5.00E-05 | 0.00022  | yes |
| Msi2          | -0.62049  | -2.64898  | 5.00E-05 | 0.00022  | yes |
| Shroom3       | -0.620655 | -2.0827   | 5.00E-05 | 0.00022  | yes |
| Csf1          | -0.620919 | -1.6686   | 0.0015   | 0.004953 | yes |
| Efnb2         | -0.62257  | -2.46098  | 5.00E-05 | 0.00022  | yes |
| Mgst3         | -0.622745 | -3.41864  | 5.00E-05 | 0.00022  | yes |
| Tmem176a      | -0.622818 | -2.39364  | 5.00E-05 | 0.00022  | yes |
| Znrf3         | -0.623185 | -1.26792  | 0.01195  | 0.030273 | yes |
| Gm14295       | -0.623208 | -1.26669  | 0.0363   | 0.077915 | no  |
| Cartpt        | -0.62345  | -1.51614  | 0.0035   | 0.01036  | yes |
| Pus3          | -0.624131 | -1.18941  | 0.03635  | 0.077997 | no  |
| Rnf149        | -0.624416 | -2.19971  | 5.00E-05 | 0.00022  | yes |
| Nek4          | -0.62492  | -1.58723  | 0.00415  | 0.012021 | yes |
| Tmem25        | -0.625106 | -2.97419  | 5.00E-05 | 0.00022  | yes |
| Fam53b        | -0.625146 | -2.08337  | 5.00E-05 | 0.00022  | yes |
| Tdrd6         | -0.62526  | 0         | 1        | 1        | no  |
| Supt16        | -0.62595  | -2.58182  | 5.00E-05 | 0.00022  | yes |
| Sec14l1       | -0.625992 | -2.51104  | 5.00E-05 | 0.00022  | yes |
| Nrm           | -0.626622 | -1.01676  | 0.0813   | 0.152045 | no  |
| Sh3kbp1       | -0.626956 | -2.09641  | 5.00E-05 | 0.00022  | yes |
| Slc25a20      | -0.627225 | -2.15055  | 0.0002   | 0.000803 | yes |
| Farp1         | -0.628451 | -2.05635  | 0.00025  | 0.000985 | yes |
| Plscr1        | -0.62865  | -0.713038 | 0.15575  | 0.25768  | no  |
| 1110006O24Rik | -0.628738 | 0         | 1        | 1        | no  |
| Fndc4         | -0.629093 | -0.500437 | 0.30685  | 0.435772 | no  |
| Tmem17        | -0.629357 | -1.2978   | 0.0271   | 0.060918 | no  |
| Clstn1        | -0.629934 | -2.74159  | 5.00E-05 | 0.00022  | yes |
| Sgpp2         | -0.630154 | -2.65283  | 5.00E-05 | 0.00022  | yes |
| Plxna1        | -0.630653 | -2.69874  | 5.00E-05 | 0.00022  | yes |
| Bfsp1         | -0.630694 | -0.795609 | 0.1091   | 0.192734 | no  |
| Me1           | -0.630987 | -2.8394   | 5.00E-05 | 0.00022  | yes |
| Scn4a         | -0.631099 | -1.45474  | 0.00515  | 0.014587 | yes |
| Fam110a       | -0.632652 | -0.832402 | 0.08345  | 0.155147 | no  |
| AI593442      | -0.632921 | -2.87401  | 5.00E-05 | 0.00022  | yes |
| Lypd6         | -0.633387 | -1.32215  | 0.00975  | 0.025413 | yes |
| Tnfrsf13c     | -0.634266 | 0         | 1        | 1        | no  |
| Creb3l2       | -0.634695 | -1.7532   | 0.0011   | 0.00376  | yes |
| Abca4         | -0.635065 | 0         | 1        | 1        | no  |
| Fas           | -0.635195 | -0.446899 | 0.28095  | 0.406873 | no  |
| E430016F16Rik | -0.635261 | 0         | 1        | 1        | no  |
| Clec14a       | -0.635487 | -1.36783  | 0.00865  | 0.022947 | yes |
| Syt12         | -0.63573  | -2.60883  | 5.00E-05 | 0.00022  | yes |
| Has3          | -0.63613  | -1.07596  | 0.03985  | 0.084294 | no  |
| Zfyve21       | -0.636621 | -1.63745  | 0.00605  | 0.016792 | yes |
| Timp4         | -0.636846 | 0         | 1        | 1        | no  |
| Ascl3         | -0.636948 | 0         | 1        | 1        | no  |
| Fam58b        | -0.637778 | -1.63102  | 0.00835  | 0.022272 | yes |
| Slc12a2       | -0.638231 | -3.07884  | 5.00E-05 | 0.00022  | yes |

|               |           |           |          |          |     |
|---------------|-----------|-----------|----------|----------|-----|
| Kctd21        | -0.638343 | -1.59011  | 0.00375  | 0.011009 | yes |
| Sh3pxd2a      | -0.638833 | -2.94886  | 5.00E-05 | 0.00022  | yes |
| Sfxn5         | -0.639102 | -2.37713  | 5.00E-05 | 0.00022  | yes |
| Lpp           | -0.639178 | -1.14404  | 0.02505  | 0.057005 | no  |
| Slc27a4       | -0.639293 | -3.0748   | 5.00E-05 | 0.00022  | yes |
| F830016B08Rik | -0.639959 | 0         | 1        | 1        | no  |
| Shb           | -0.640295 | -0.857255 | 0.11275  | 0.197864 | no  |
| Zfa-ps        | -0.640844 | 0         | 1        | 1        | no  |
| Xkr5          | -0.641295 | 0         | 1        | 1        | no  |
| Eno2          | -0.641593 | -3.0897   | 5.00E-05 | 0.00022  | yes |
| Cyp2u1        | -0.641702 | -1.56368  | 0.0049   | 0.013947 | yes |
| Podxl2        | -0.641811 | -2.37881  | 5.00E-05 | 0.00022  | yes |
| Phactr4       | -0.6425   | -1.5181   | 0.00235  | 0.007346 | yes |
| Slc25a42      | -0.6428   | -1.67082  | 0.0024   | 0.00748  | yes |
| Prr32         | -0.64347  | -0.633573 | 0.29945  | 0.427367 | no  |
| Ankrd28       | -0.643906 | -2.15515  | 5.00E-05 | 0.00022  | yes |
| Fnta          | -0.644661 | -3.11509  | 5.00E-05 | 0.00022  | yes |
| Large         | -0.64489  | -2.87343  | 5.00E-05 | 0.00022  | yes |
| Chl1          | -0.645831 | -2.95687  | 5.00E-05 | 0.00022  | yes |
| 6030408B16Rik | -0.64712  | 0         | 1        | 1        | no  |
| Iqcj          | -0.647482 | 0         | 1        | 1        | no  |
| Capn3         | -0.647956 | 0         | 1        | 1        | no  |
| St18          | -0.648312 | 0         | 1        | 1        | no  |
| Rasl2-9       | -0.649117 | 0         | 1        | 1        | no  |
| Cldn9         | -0.649497 | -1.08788  | 0.062    | 0.121986 | no  |
| H6pd          | -0.649662 | -1.42596  | 0.0053   | 0.014929 | yes |
| Selenbp1      | -0.649685 | 0         | 1        | 1        | no  |
| Procr         | -0.649996 | -1.00948  | 0.0807   | 0.151072 | no  |
| Eva1c         | -0.650319 | -1.58716  | 0.00195  | 0.006219 | yes |
| Amer1         | -0.650964 | -2.60706  | 5.00E-05 | 0.00022  | yes |
| B9d1          | -0.651766 | -1.18647  | 0.0785   | 0.14804  | no  |
| Glyctk        | -0.652049 | -1.21478  | 0.01565  | 0.038195 | yes |
| Etnk2         | -0.65255  | 0         | 1        | 1        | no  |
| Ubt2          | -0.652727 | -2.50069  | 5.00E-05 | 0.00022  | yes |
| Uhrf1bp1      | -0.652832 | -2.16999  | 0.00015  | 0.000615 | yes |
| Zfp85         | -0.653189 | -0.746181 | 0.1343   | 0.229018 | no  |
| Cntn6         | -0.653264 | -1.39834  | 0.00885  | 0.02338  | yes |
| Cass4         | -0.653616 | 0         | 1        | 1        | no  |
| Slc12a9       | -0.6538   | -2.0594   | 0.0003   | 0.001164 | yes |
| Krt222        | -0.654071 | -2.58053  | 5.00E-05 | 0.00022  | yes |
| Klf2          | -0.654159 | -2.06799  | 0.00045  | 0.001682 | yes |
| Drd1a         | -0.654727 | 0         | 1        | 1        | no  |
| Tmem255b      | -0.655249 | 0         | 1        | 1        | no  |
| Slc44a1       | -0.655445 | -3.01556  | 5.00E-05 | 0.00022  | yes |
| Got1          | -0.655476 | -3.35994  | 5.00E-05 | 0.00022  | yes |
| Tmbim6        | -0.656156 | -3.06783  | 5.00E-05 | 0.00022  | yes |
| Raet1c,Raet1e | -0.656434 | 0         | 1        | 1        | no  |
| Syk           | -0.656549 | 0         | 1        | 1        | no  |
| Opn4          | -0.656819 | 0         | 1        | 1        | no  |
| Acss2         | -0.657103 | -2.79966  | 5.00E-05 | 0.00022  | yes |
| Flrt1         | -0.657328 | -1.05051  | 0.05525  | 0.111027 | no  |
| Ifitm1        | -0.657889 | -0.574588 | 0.36555  | 0.497359 | no  |
| Enpp2         | -0.658226 | -1.9774   | 0.00015  | 0.000615 | yes |

|               |           |           |          |          |     |
|---------------|-----------|-----------|----------|----------|-----|
| Ccdc122       | -0.658927 | -1.28166  | 0.0251   | 0.057089 | no  |
| Adam2         | -0.659873 | 0         | 1        | 1        | no  |
| 4930413G21Rik | -0.659912 | 0         | 1        | 1        | no  |
| Srgap2        | -0.660325 | -2.63303  | 5.00E-05 | 0.00022  | yes |
| Sox7          | -0.660342 | 0         | 1        | 1        | no  |
| Ifi44         | -0.660847 | -0.912744 | 0.09185  | 0.167433 | no  |
| Pcdhga10      | -0.660944 | -0.253015 | 0.6108   | 0.722236 | no  |
| Kcng1         | -0.660948 | -0.935242 | 0.0891   | 0.163204 | no  |
| Fgf5          | -0.660955 | -0.809968 | 0.11025  | 0.194325 | no  |
| Tecr          | -0.661548 | -3.07761  | 5.00E-05 | 0.00022  | yes |
| Vkorc1        | -0.662117 | -2.42968  | 0.0003   | 0.001164 | yes |
| Mettl21a      | -0.662128 | -1.90135  | 0.0005   | 0.00185  | yes |
| Lancl1        | -0.662453 | -3.00117  | 5.00E-05 | 0.00022  | yes |
| Abcg1         | -0.662975 | -2.93194  | 5.00E-05 | 0.00022  | yes |
| Atp5c1        | -0.663396 | -2.97315  | 5.00E-05 | 0.00022  | yes |
| Slc12a1       | -0.663876 | 0         | 1        | 1        | no  |
| Inca1         | -0.664021 | 0         | 1        | 1        | no  |
| Tmem181b-ps   | -0.664189 | -1.5446   | 0.00555  | 0.015544 | yes |
| Atp6v1g2      | -0.665165 | -3.28864  | 5.00E-05 | 0.00022  | yes |
| Gm16675       | -0.665452 | 0         | 1        | 1        | no  |
| Sntg2         | -0.665688 | 0         | 1        | 1        | no  |
| Ndufa12       | -0.665912 | -2.13269  | 0.0068   | 0.018594 | yes |
| Bhlhb9        | -0.666255 | -2.42119  | 5.00E-05 | 0.00022  | yes |
| Fam195a       | -0.667156 | -1.03745  | 0.12175  | 0.21131  | no  |
| Mtx3          | -0.667203 | -2.79332  | 5.00E-05 | 0.00022  | yes |
| Abl2          | -0.667277 | -2.69873  | 5.00E-05 | 0.00022  | yes |
| Grtp1         | -0.66758  | -0.720287 | 0.14685  | 0.246054 | no  |
| Il1rapl1      | -0.667747 | -0.924875 | 0.08915  | 0.163251 | no  |
| Six4          | -0.669462 | -2.7341   | 5.00E-05 | 0.00022  | yes |
| Pcdhgb1       | -0.669547 | -0.269881 | 0.6105   | 0.72201  | no  |
| Fam20b        | -0.670249 | -3.15133  | 5.00E-05 | 0.00022  | yes |
| Ctgf          | -0.670574 | -1.98704  | 0.00045  | 0.001682 | yes |
| Engase        | -0.670663 | -1.70288  | 0.0018   | 0.005802 | yes |
| Xlr3b         | -0.670765 | -1.22394  | 0.0336   | 0.07297  | no  |
| Mpi           | -0.670897 | -2.81795  | 5.00E-05 | 0.00022  | yes |
| Gm12250       | -0.671108 | 0         | 1        | 1        | no  |
| Gm16712       | -0.671118 | 0         | 1        | 1        | no  |
| Tgtp2         | -0.672072 | -0.720185 | 0.2096   | 0.325845 | no  |
| Dip2a         | -0.672302 | -2.76198  | 5.00E-05 | 0.00022  | yes |
| Casp7         | -0.672813 | -1.02623  | 0.06185  | 0.121763 | no  |
| Itga5         | -0.672901 | -1.13734  | 0.02225  | 0.051589 | no  |
| Gm7120        | -0.673074 | -1.57154  | 0.00415  | 0.012021 | yes |
| Cxcl1         | -0.673336 | -0.831716 | 0.1899   | 0.301617 | no  |
| Wisp3         | -0.673471 | 0         | 1        | 1        | no  |
| Atg9b         | -0.67393  | -0.702396 | 0.15055  | 0.250797 | no  |
| Pdgfb         | -0.67491  | -1.56993  | 0.002    | 0.006363 | yes |
| Agap1         | -0.675006 | -2.89251  | 5.00E-05 | 0.00022  | yes |
| Ccdc78        | -0.675016 | 0         | 1        | 1        | no  |
| Zfp30         | -0.675323 | -1.14088  | 0.03605  | 0.077454 | no  |
| Txndc16       | -0.675925 | -2.76218  | 5.00E-05 | 0.00022  | yes |
| Gm1653        | -0.676077 | 0         | 1        | 1        | no  |
| Foxo4         | -0.676406 | -1.99662  | 0.0003   | 0.001164 | yes |
| Syne3         | -0.676908 | -1.50222  | 0.00375  | 0.011009 | yes |

|                |           |           |          |          |     |
|----------------|-----------|-----------|----------|----------|-----|
| Sorl1          | -0.677476 | -3.24647  | 5.00E-05 | 0.00022  | yes |
| 4632428N05Rik  | -0.67852  | -1.18015  | 0.0204   | 0.047928 | yes |
| Siae           | -0.678953 | -2.43637  | 5.00E-05 | 0.00022  | yes |
| Habp4          | -0.679018 | -3.29439  | 5.00E-05 | 0.00022  | yes |
| Gm17757,Gm1885 | -0.679074 | 0         | 1        | 1        | no  |
| Tubgcp4        | -0.679461 | -1.71696  | 0.00195  | 0.006219 | yes |
| Rgag1          | -0.680113 | -1.35775  | 0.01195  | 0.030273 | yes |
| Pdhb           | -0.680459 | -3.33383  | 5.00E-05 | 0.00022  | yes |
| S100a13        | -0.680775 | -3.37437  | 5.00E-05 | 0.00022  | yes |
| Clic5          | -0.68128  | -1.6279   | 0.00225  | 0.007062 | yes |
| Lcp1           | -0.681416 | -2.92926  | 5.00E-05 | 0.00022  | yes |
| Trip10         | -0.681964 | -2.07685  | 5.00E-05 | 0.00022  | yes |
| Gm5141         | -0.682036 | 0         | 1        | 1        | no  |
| Lrrn4cl        | -0.682402 | -1.07989  | 0.04885  | 0.100277 | no  |
| Dsel           | -0.682453 | -2.4718   | 5.00E-05 | 0.00022  | yes |
| Rgl3           | -0.682484 | -0.940104 | 0.0876   | 0.161057 | no  |
| Asah1          | -0.682924 | -3.10471  | 5.00E-05 | 0.00022  | yes |
| Ninj1          | -0.683137 | -2.24919  | 0.0001   | 0.000422 | yes |
| Rnf208         | -0.683714 | -3.02455  | 5.00E-05 | 0.00022  | yes |
| Xk             | -0.684151 | -2.28733  | 5.00E-05 | 0.00022  | yes |
| Chga           | -0.684495 | -3.49396  | 5.00E-05 | 0.00022  | yes |
| Tube1          | -0.684568 | -1.04457  | 0.0455   | 0.094571 | no  |
| Slc26a10       | -0.684894 | 0         | 1        | 1        | no  |
| Hyal3          | -0.684923 | -0.594067 | 0.23345  | 0.354206 | no  |
| Rspo3          | -0.685133 | 0         | 1        | 1        | no  |
| Dner           | -0.686085 | -3.15356  | 5.00E-05 | 0.00022  | yes |
| Xylb           | -0.686368 | -0.918987 | 0.06065  | 0.119846 | no  |
| Tmem184a       | -0.686505 | 0         | 1        | 1        | no  |
| Cdh18          | -0.686669 | -2.39064  | 5.00E-05 | 0.00022  | yes |
| Nrg1           | -0.686752 | -2.99386  | 5.00E-05 | 0.00022  | yes |
| Slc46a3        | -0.687608 | -1.11293  | 0.0397   | 0.084043 | no  |
| Cadm3          | -0.687763 | -3.21595  | 5.00E-05 | 0.00022  | yes |
| Zfp870         | -0.6878   | -1.4197   | 0.00695  | 0.018933 | yes |
| Dnah1          | -0.687844 | 0         | 1        | 1        | no  |
| Cox5a          | -0.687947 | -4.3832   | 5.00E-05 | 0.00022  | yes |
| 4921531C22Rik  | -0.68815  | -0.810026 | 0.15025  | 0.25036  | no  |
| Lrrc24         | -0.688542 | -1.6132   | 0.005    | 0.014211 | yes |
| Gm12185        | -0.689089 | 0         | 1        | 1        | no  |
| Tlr2           | -0.689185 | 0         | 1        | 1        | no  |
| Ccbl2          | -0.689481 | -1.43817  | 0.0097   | 0.025313 | yes |
| Zfp398         | -0.689497 | -1.45971  | 0.00485  | 0.01382  | yes |
| Osbp2          | -0.68957  | -2.17281  | 5.00E-05 | 0.00022  | yes |
| Mboat1         | -0.689641 | -1.656    | 0.0028   | 0.008532 | yes |
| Gsg1l          | -0.690193 | -1.30607  | 0.0144   | 0.035596 | yes |
| Enpp3          | -0.690586 | 0         | 1        | 1        | no  |
| Rnf26          | -0.691349 | -2.50237  | 5.00E-05 | 0.00022  | yes |
| Dok5           | -0.691469 | -1.39748  | 0.00605  | 0.016792 | yes |
| Dnajc25        | -0.691671 | -1.05611  | 0.06605  | 0.128695 | no  |
| Elk4           | -0.69205  | -1.87591  | 0.00055  | 0.002016 | yes |
| Hsd17b7        | -0.692504 | -3.09899  | 5.00E-05 | 0.00022  | yes |
| Art4           | -0.692854 | -1.17774  | 0.03455  | 0.074739 | no  |
| Npr1           | -0.694152 | -1.31249  | 0.0155   | 0.037857 | yes |
| Abcg4          | -0.694727 | -2.90125  | 5.00E-05 | 0.00022  | yes |

|               |           |           |          |          |     |
|---------------|-----------|-----------|----------|----------|-----|
| Lrrc1         | -0.694936 | -1.14434  | 0.0217   | 0.05049  | no  |
| Ang           | -0.695065 | -0.400739 | 0.48705  | 0.614989 | no  |
| Hapln3        | -0.695662 | -0.949234 | 0.1045   | 0.186369 | no  |
| Pram1         | -0.695671 | 0         | 1        | 1        | no  |
| E2f6          | -0.696053 | -2.66273  | 5.00E-05 | 0.00022  | yes |
| Fat4          | -0.696548 | -2.00767  | 5.00E-05 | 0.00022  | yes |
| Prkaca        | -0.696869 | -3.26128  | 5.00E-05 | 0.00022  | yes |
| Epb4.1l3      | -0.697246 | -2.9861   | 5.00E-05 | 0.00022  | yes |
| Slc25a10      | -0.697397 | -2.28605  | 5.00E-05 | 0.00022  | yes |
| Gm6537        | -0.697514 | 0         | 1        | 1        | no  |
| Ldb3          | -0.697756 | -1.36836  | 0.00865  | 0.022947 | yes |
| Hist1h3d      | -0.697896 | 0         | 1        | 1        | no  |
| Ggcx          | -0.698471 | -1.91716  | 0.00045  | 0.001682 | yes |
| Caps2         | -0.699346 | 0         | 1        | 1        | no  |
| Sez6l2        | -0.699435 | -3.21098  | 5.00E-05 | 0.00022  | yes |
| Hist1h3f      | -0.699464 | 0         | 1        | 1        | no  |
| Arhgap42      | -0.699626 | -1.98955  | 5.00E-05 | 0.00022  | yes |
| Gm4980        | -0.700071 | -2.97149  | 5.00E-05 | 0.00022  | yes |
| Cd200         | -0.70015  | -3.22725  | 5.00E-05 | 0.00022  | yes |
| Gm7173        | -0.700245 | 0         | 1        | 1        | no  |
| Fam49a        | -0.700769 | -1.91034  | 0.0005   | 0.00185  | yes |
| Mog           | -0.701079 | 0         | 1        | 1        | no  |
| Npy           | -0.701528 | 0         | 1        | 1        | no  |
| Cabp1         | -0.701583 | -3.69799  | 5.00E-05 | 0.00022  | yes |
| Smpd1         | -0.701664 | -3.23681  | 5.00E-05 | 0.00022  | yes |
| Flna          | -0.701762 | -3.03334  | 5.00E-05 | 0.00022  | yes |
| Rgag4         | -0.701931 | -1.2673   | 0.0141   | 0.034959 | yes |
| Card9         | -0.701987 | 0         | 1        | 1        | no  |
| Zc2hc1c       | -0.702903 | 0         | 1        | 1        | no  |
| Nradd         | -0.702967 | -0.86917  | 0.1564   | 0.258594 | no  |
| Ccdc85c       | -0.703122 | -1.21533  | 0.03665  | 0.078514 | no  |
| Wfikkn1       | -0.703409 | 0         | 1        | 1        | no  |
| Pgm5          | -0.703709 | -1.10338  | 0.03165  | 0.069451 | no  |
| Bak1          | -0.704301 | -1.77561  | 0.0017   | 0.005514 | yes |
| Tbx3          | -0.704395 | -2.31913  | 5.00E-05 | 0.00022  | yes |
| Fam101b       | -0.704395 | -2.28055  | 0.00015  | 0.000615 | yes |
| Smim24        | -0.705028 | 0         | 1        | 1        | no  |
| Ihh           | -0.705844 | 0         | 1        | 1        | no  |
| Phf11d        | -0.705892 | 0         | 1        | 1        | no  |
| Napepld       | -0.706254 | -1.62962  | 0.00275  | 0.008412 | yes |
| Lyrn5         | -0.706277 | -2.13109  | 0.00015  | 0.000615 | yes |
| Muc1          | -0.70657  | 0         | 1        | 1        | no  |
| Pard6b        | -0.706653 | -1.40248  | 0.00995  | 0.025858 | yes |
| Iglon5        | -0.706921 | -2.49201  | 5.00E-05 | 0.00022  | yes |
| Mmgt2         | -0.707267 | -1.44779  | 0.01015  | 0.026321 | yes |
| Lyve1         | -0.708549 | -1.30607  | 0.01865  | 0.044374 | yes |
| 4930528A17Rik | -0.709017 | 0         | 1        | 1        | no  |
| Gm20753       | -0.709211 | 0         | 1        | 1        | no  |
| Sorbs1        | -0.709249 | -3.26922  | 5.00E-05 | 0.00022  | yes |
| Ptpn4         | -0.709884 | -1.64057  | 0.00265  | 0.008146 | yes |
| Dpf3          | -0.710613 | -1.16702  | 0.02135  | 0.049824 | yes |
| Klhl6         | -0.711038 | 0         | 1        | 1        | no  |
| Sh3d19        | -0.711293 | -2.81857  | 5.00E-05 | 0.00022  | yes |

|               |           |           |          |          |     |
|---------------|-----------|-----------|----------|----------|-----|
| Sptbn2        | -0.711381 | -3.3733   | 5.00E-05 | 0.00022  | yes |
| 5730480H06Rik | -0.712034 | 0         | 1        | 1        | no  |
| Klhl33        | -0.712196 | -1.19522  | 0.0391   | 0.082906 | no  |
| Prkrir        | -0.71248  | -2.75999  | 5.00E-05 | 0.00022  | yes |
| Napsa         | -0.713207 | 0         | 1        | 1        | no  |
| Fes           | -0.714428 | -0.929225 | 0.08425  | 0.156394 | no  |
| Shroom4       | -0.714667 | -1.1385   | 0.02195  | 0.051009 | no  |
| Pip4k2a       | -0.714936 | -3.32183  | 5.00E-05 | 0.00022  | yes |
| Cbfb          | -0.715281 | -3.33291  | 5.00E-05 | 0.00022  | yes |
| Bambi         | -0.715341 | -1.7907   | 0.00045  | 0.001682 | yes |
| Entpd6        | -0.715388 | -2.39325  | 5.00E-05 | 0.00022  | yes |
| Tc2n          | -0.715483 | 0         | 1        | 1        | no  |
| Rapgef2       | -0.715647 | -2.83544  | 5.00E-05 | 0.00022  | yes |
| Dusp16        | -0.716041 | -1.93985  | 0.00065  | 0.002343 | yes |
| Atp1a1        | -0.716151 | -2.18495  | 0.0002   | 0.000803 | yes |
| Epb4.1l1      | -0.718199 | -3.3441   | 5.00E-05 | 0.00022  | yes |
| Ppp2r5a       | -0.718298 | -1.22761  | 0.01825  | 0.043587 | yes |
| Klhl40        | -0.71894  | 0         | 1        | 1        | no  |
| Gm2115        | -0.719079 | -2.85697  | 5.00E-05 | 0.00022  | yes |
| 4931406P16Rik | -0.719306 | -2.62097  | 5.00E-05 | 0.00022  | yes |
| Hrsp12        | -0.719467 | -2.73577  | 0.0001   | 0.000422 | yes |
| Prlr          | -0.719921 | -0.71571  | 0.0916   | 0.167023 | no  |
| Itm2b         | -0.72026  | -3.65144  | 5.00E-05 | 0.00022  | yes |
| Tmem123       | -0.720553 | -2.05396  | 5.00E-05 | 0.00022  | yes |
| Gtdc1         | -0.720793 | -2.21417  | 0.0001   | 0.000422 | yes |
| Kbtbd12       | -0.720834 | 0         | 1        | 1        | no  |
| Kcnt2         | -0.721049 | -1.62692  | 0.0018   | 0.005802 | yes |
| St3gal5       | -0.721946 | -2.60196  | 5.00E-05 | 0.00022  | yes |
| Alg9          | -0.722055 | -1.82469  | 0.0004   | 0.001513 | yes |
| Mid1          | -0.722156 | 0         | 1        | 1        | no  |
| Ss18          | -0.722204 | -1.70716  | 0.00125  | 0.00422  | yes |
| Ripk1         | -0.72224  | -1.47473  | 0.0078   | 0.020982 | yes |
| Dsp           | -0.72231  | 0         | 1        | 1        | no  |
| Cth           | -0.722394 | 0         | 1        | 1        | no  |
| Fbxo7         | -0.722951 | -2.57016  | 5.00E-05 | 0.00022  | yes |
| Cdkl5         | -0.72376  | -1.15385  | 0.0263   | 0.059381 | no  |
| Dscaml1       | -0.723794 | 0         | 1        | 1        | no  |
| Lgalsl        | -0.723844 | -2.83399  | 5.00E-05 | 0.00022  | yes |
| Cyp2c44       | -0.72428  | 0         | 1        | 1        | no  |
| Efhd2         | -0.724549 | -2.79961  | 5.00E-05 | 0.00022  | yes |
| Fblim1        | -0.726337 | 0         | 1        | 1        | no  |
| A730056A06Rik | -0.72673  | 0         | 1        | 1        | no  |
| Eid1          | -0.726788 | -2.67978  | 5.00E-05 | 0.00022  | yes |
| Tsc22d4       | -0.72723  | -2.68853  | 5.00E-05 | 0.00022  | yes |
| Fkbp14        | -0.727891 | -2.34012  | 5.00E-05 | 0.00022  | yes |
| Art5          | -0.728766 | 0         | 1        | 1        | no  |
| Ttc16         | -0.729181 | 0         | 1        | 1        | no  |
| Fbxl7         | -0.729354 | -1.34514  | 0.0117   | 0.029708 | yes |
| Gm13298       | -0.729638 | 0         | 1        | 1        | no  |
| Rgs2          | -0.729648 | -2.04003  | 0.00025  | 0.000985 | yes |
| Tspan3        | -0.730211 | -3.85589  | 5.00E-05 | 0.00022  | yes |
| Igf2r         | -0.730322 | -2.97401  | 5.00E-05 | 0.00022  | yes |
| Zfp473        | -0.733369 | 0         | 1        | 1        | no  |



|               |           |           |          |          |     |
|---------------|-----------|-----------|----------|----------|-----|
| Cdk2          | -0.73368  | -0.986858 | 0.0523   | 0.105982 | no  |
| Gfm1          | -0.734495 | -1.33401  | 0.02465  | 0.056249 | no  |
| Vwa8          | -0.735001 | -2.97472  | 5.00E-05 | 0.00022  | yes |
| Mapkbp1       | -0.735378 | -1.91217  | 5.00E-05 | 0.00022  | yes |
| Arhgef5       | -0.735422 | 0         | 1        | 1        | no  |
| Mir8112       | -0.73554  | 0         | 1        | 1        | no  |
| Vmn1r181      | -0.736279 | 0         | 1        | 1        | no  |
| Ppargc1b      | -0.737211 | -1.4552   | 0.0064   | 0.017627 | yes |
| Srgn          | -0.737249 | -2.05407  | 0.00185  | 0.005939 | yes |
| Phb           | -0.73894  | -2.52471  | 5.00E-05 | 0.00022  | yes |
| Cdc26         | -0.739023 | -2.16685  | 0.0018   | 0.005802 | yes |
| Bcas1         | -0.739493 | -2.30068  | 5.00E-05 | 0.00022  | yes |
| Ptgr1         | -0.739517 | -1.81866  | 0.0014   | 0.004657 | yes |
| Il20rb        | -0.739905 | 0         | 1        | 1        | no  |
| Slitrk5       | -0.740309 | -2.7428   | 5.00E-05 | 0.00022  | yes |
| Slnf5         | -0.740595 | -2.05379  | 0.0001   | 0.000422 | yes |
| Atp8b4        | -0.740794 | 0         | 1        | 1        | no  |
| Gm18853       | -0.741786 | 0         | 1        | 1        | no  |
| Itga11        | -0.741818 | -1.39611  | 0.0085   | 0.022613 | yes |
| Kcnq2         | -0.742239 | -2.85681  | 5.00E-05 | 0.00022  | yes |
| Net1          | -0.742555 | -2.31982  | 5.00E-05 | 0.00022  | yes |
| Unc93b1       | -0.743735 | -1.49092  | 0.003    | 0.009064 | yes |
| Cdh24         | -0.743791 | -0.953866 | 0.0802   | 0.15054  | no  |
| Pigx          | -0.743803 | -1.30168  | 0.00995  | 0.025858 | yes |
| Kctd12b       | -0.744104 | -1.32517  | 0.01265  | 0.031774 | yes |
| Oasl1         | -0.744131 | -0.965155 | 0.0832   | 0.154791 | no  |
| Agt           | -0.74616  | -1.53461  | 0.00855  | 0.022737 | yes |
| Fxyd5         | -0.746523 | -1.52516  | 0.0025   | 0.007739 | yes |
| Tmx2          | -0.746574 | -2.66469  | 5.00E-05 | 0.00022  | yes |
| Rnft2         | -0.748597 | -2.68607  | 5.00E-05 | 0.00022  | yes |
| Auh           | -0.74891  | -3.5165   | 5.00E-05 | 0.00022  | yes |
| Vamp3         | -0.749361 | -2.64217  | 5.00E-05 | 0.00022  | yes |
| Ccdc125       | -0.74973  | 0         | 1        | 1        | no  |
| Nxpe3         | -0.75019  | -3.14332  | 5.00E-05 | 0.00022  | yes |
| Col6a4        | -0.750708 | 0         | 1        | 1        | no  |
| Cdc42ep2      | -0.75111  | -2.58336  | 5.00E-05 | 0.00022  | yes |
| H60b          | -0.751774 | 0         | 1        | 1        | no  |
| Gsdmd         | -0.752151 | -0.916398 | 0.11165  | 0.196297 | no  |
| Aldh1l2       | -0.75274  | -1.36937  | 0.00985  | 0.025654 | yes |
| Galk1         | -0.752936 | -0.787897 | 0.0725   | 0.138716 | no  |
| Gid4          | -0.753035 | -2.93682  | 5.00E-05 | 0.00022  | yes |
| Mgrn1         | -0.753456 | -2.21082  | 0.0002   | 0.000803 | yes |
| Ntrk1         | -0.753776 | -3.77307  | 5.00E-05 | 0.00022  | yes |
| A630033H20Rik | -0.754302 | 0         | 1        | 1        | no  |
| Foxo6         | -0.75434  | -1.18924  | 0.0305   | 0.067373 | no  |
| Hhip          | -0.754477 | 0         | 1        | 1        | no  |
| Slc6a6        | -0.755019 | -2.76959  | 5.00E-05 | 0.00022  | yes |
| Dact2         | -0.75566  | -1.19276  | 0.02925  | 0.065056 | no  |
| Rcbtb1        | -0.757401 | -3.31651  | 5.00E-05 | 0.00022  | yes |
| Rab11fip4     | -0.757528 | -3.00975  | 5.00E-05 | 0.00022  | yes |
| Kat2b         | -0.757699 | -2.58921  | 5.00E-05 | 0.00022  | yes |
| Prdx4         | -0.757724 | -2.71409  | 5.00E-05 | 0.00022  | yes |
| Lrrc20        | -0.757816 | -2.56703  | 5.00E-05 | 0.00022  | yes |

|               |           |           |          |          |     |
|---------------|-----------|-----------|----------|----------|-----|
| Mfsd2a        | -0.758112 | -2.7527   | 5.00E-05 | 0.00022  | yes |
| A630007B06Rik | -0.758567 | -2.69187  | 5.00E-05 | 0.00022  | yes |
| Pbx4          | -0.758936 | -1.11543  | 0.05995  | 0.118692 | no  |
| Cnst          | -0.758999 | -3.6887   | 5.00E-05 | 0.00022  | yes |
| Myof          | -0.759084 | -1.53918  | 0.0047   | 0.013433 | yes |
| 4930425O10Rik | -0.760776 | 0         | 1        | 1        | no  |
| Prps2         | -0.760792 | -2.70616  | 5.00E-05 | 0.00022  | yes |
| Tcf4          | -0.761013 | -2.77115  | 5.00E-05 | 0.00022  | yes |
| Kctd14        | -0.761089 | 0         | 1        | 1        | no  |
| Ptges3l       | -0.76137  | 0         | 1        | 1        | no  |
| Smad6         | -0.761863 | -1.08386  | 0.04725  | 0.097597 | no  |
| Zbp1          | -0.762094 | 0         | 1        | 1        | no  |
| Ppif          | -0.762569 | -2.19227  | 5.00E-05 | 0.00022  | yes |
| Cd79a         | -0.762782 | 0         | 1        | 1        | no  |
| Ufsp1         | -0.762952 | -1.74569  | 0.00655  | 0.017992 | yes |
| Fgfr3         | -0.764315 | 0         | 1        | 1        | no  |
| Crtap         | -0.765298 | -1.75813  | 0.0007   | 0.002506 | yes |
| Agtr2         | -0.765945 | 0         | 1        | 1        | no  |
| Cyba          | -0.766448 | -1.33805  | 0.0513   | 0.104322 | no  |
| Otop3         | -0.767241 | 0         | 1        | 1        | no  |
| 4930570G19Rik | -0.767425 | 0         | 1        | 1        | no  |
| Lrrk1         | -0.768093 | -1.81994  | 0.0005   | 0.00185  | yes |
| Hsd12         | -0.768183 | -3.53397  | 5.00E-05 | 0.00022  | yes |
| 2310010J17Rik | -0.768571 | -0.302187 | 0.55665  | 0.676599 | no  |
| Rftn1         | -0.769276 | 0         | 1        | 1        | no  |
| Gpr125        | -0.769481 | -2.85744  | 5.00E-05 | 0.00022  | yes |
| 0610043K17Rik | -0.769832 | 0         | 1        | 1        | no  |
| Arhgap44      | -0.769839 | -3.09584  | 5.00E-05 | 0.00022  | yes |
| Anp32a        | -0.770213 | -3.13695  | 5.00E-05 | 0.00022  | yes |
| Arhgap25      | -0.770947 | -1.24996  | 0.0148   | 0.036422 | yes |
| 1500009C09Rik | -0.77103  | 0         | 1        | 1        | no  |
| Ms4a4c        | -0.772156 | 0         | 1        | 1        | no  |
| Sptb          | -0.772705 | -3.48581  | 5.00E-05 | 0.00022  | yes |
| Gprin3        | -0.772847 | 0         | 1        | 1        | no  |
| Ndc1          | -0.772868 | -2.39222  | 5.00E-05 | 0.00022  | yes |
| Tcam1         | -0.773213 | 0         | 1        | 1        | no  |
| Lepre1        | -0.773375 | -1.55281  | 0.00285  | 0.008668 | yes |
| Tmem64        | -0.773655 | -3.24431  | 5.00E-05 | 0.00022  | yes |
| Mfsd7c        | -0.774261 | -1.24646  | 0.02025  | 0.047626 | yes |
| Nsun4         | -0.774442 | -2.44302  | 5.00E-05 | 0.00022  | yes |
| Pcdhb15       | -0.775328 | -0.157993 | 0.79095  | 0.863736 | no  |
| 9130008F23Rik | -0.775373 | 0         | 1        | 1        | no  |
| Nxt2          | -0.775409 | -2.62091  | 5.00E-05 | 0.00022  | yes |
| Rho           | -0.776052 | -1.10853  | 0.04325  | 0.090504 | no  |
| Myo15         | -0.776129 | 0         | 1        | 1        | no  |
| Ttyh2         | -0.776166 | -1.96953  | 0.00035  | 0.001342 | yes |
| Atp2a2        | -0.776456 | -3.45912  | 5.00E-05 | 0.00022  | yes |
| Plcd1         | -0.776934 | -1.8497   | 0.00165  | 0.00538  | yes |
| Phldb1        | -0.777463 | -3.05121  | 5.00E-05 | 0.00022  | yes |
| Rapgef4       | -0.777495 | -3.56554  | 5.00E-05 | 0.00022  | yes |
| Endog         | -0.777715 | -1.48668  | 0.01955  | 0.046159 | yes |
| Ttc21b        | -0.77803  | -2.0081   | 0.0001   | 0.000422 | yes |
| Inf2          | -0.778264 | -3.16977  | 5.00E-05 | 0.00022  | yes |

|               |           |           |          |          |     |
|---------------|-----------|-----------|----------|----------|-----|
| Rprml         | -0.778959 | 0         | 1        | 1        | no  |
| Chrm3         | -0.779016 | -1.11844  | 0.0385   | 0.081803 | no  |
| Fut10         | -0.779152 | -1.49121  | 0.00355  | 0.010494 | yes |
| Fut8          | -0.779158 | -3.11447  | 5.00E-05 | 0.00022  | yes |
| Dnah7b        | -0.779516 | 0         | 1        | 1        | no  |
| C1qtnf9       | -0.779766 | 0         | 1        | 1        | no  |
| Tango6        | -0.779877 | -1.68129  | 0.00195  | 0.006219 | yes |
| Arhgef2       | -0.780022 | -2.02223  | 0.00015  | 0.000615 | yes |
| Klhl36        | -0.780266 | -1.2499   | 0.0279   | 0.062451 | no  |
| A430035B10Rik | -0.780635 | -0.929968 | 0.1052   | 0.187316 | no  |
| Lrrd1         | -0.780844 | 0         | 1        | 1        | no  |
| Rhbd2         | -0.781446 | -1.55774  | 0.00225  | 0.007062 | yes |
| Rap1gap       | -0.782071 | -3.31302  | 5.00E-05 | 0.00022  | yes |
| Zbtb12        | -0.782196 | -0.997146 | 0.0783   | 0.147726 | no  |
| Vamp5         | -0.7825   | -1.16796  | 0.0217   | 0.05049  | no  |
| Ghsr          | -0.782529 | 0         | 1        | 1        | no  |
| Sp1           | -0.782563 | -2.8271   | 5.00E-05 | 0.00022  | yes |
| Nr3c1         | -0.782613 | -3.23061  | 5.00E-05 | 0.00022  | yes |
| Arhgap5       | -0.783147 | -3.25395  | 5.00E-05 | 0.00022  | yes |
| Ube2cbp       | -0.783243 | 0         | 1        | 1        | no  |
| Dlg1          | -0.784061 | -2.42702  | 5.00E-05 | 0.00022  | yes |
| Kcnp3         | -0.784255 | -3.63192  | 5.00E-05 | 0.00022  | yes |
| Hist1h4i      | -0.784658 | -0.973324 | 0.3435   | 0.475403 | no  |
| Slc8b1        | -0.785147 | -1.79023  | 0.00065  | 0.002343 | yes |
| Etv6          | -0.785367 | -2.57256  | 5.00E-05 | 0.00022  | yes |
| Spsb4         | -0.785572 | -1.8717   | 0.001    | 0.003451 | yes |
| Mpp3          | -0.785592 | -1.35026  | 0.0145   | 0.03579  | yes |
| Ephx1         | -0.786087 | -3.77269  | 5.00E-05 | 0.00022  | yes |
| Zfp219        | -0.786111 | -1.79224  | 0.0004   | 0.001513 | yes |
| Endou         | -0.786309 | 0         | 1        | 1        | no  |
| Mamstr        | -0.787785 | 0         | 1        | 1        | no  |
| Als2cr12      | -0.787927 | 0         | 1        | 1        | no  |
| Mirlet7bhg    | -0.78879  | 0         | 1        | 1        | no  |
| Mgat5         | -0.789913 | -2.54594  | 0.0001   | 0.000422 | yes |
| Diap2         | -0.78997  | -2.65717  | 5.00E-05 | 0.00022  | yes |
| Mbp           | -0.78997  | -2.62656  | 5.00E-05 | 0.00022  | yes |
| Rmdn2         | -0.792019 | -2.09359  | 0.0004   | 0.001513 | yes |
| Pyhin1        | -0.792021 | 0         | 1        | 1        | no  |
| Fam210a       | -0.792716 | -3.02752  | 5.00E-05 | 0.00022  | yes |
| Gm10033       | -0.795883 | -1.37769  | 0.00775  | 0.020864 | yes |
| Klhl25        | -0.797355 | -1.85567  | 0.00015  | 0.000615 | yes |
| Cd59b         | -0.797609 | 0         | 1        | 1        | no  |
| Micall2       | -0.797753 | -1.72388  | 0.00185  | 0.005939 | yes |
| Cd38          | -0.797989 | -1.50013  | 0.00695  | 0.018933 | yes |
| Serpine1      | -0.798423 | 0         | 1        | 1        | no  |
| Dagla         | -0.798965 | -2.80158  | 5.00E-05 | 0.00022  | yes |
| Depdc5        | -0.799917 | -3.32844  | 5.00E-05 | 0.00022  | yes |
| Fzd3          | -0.80004  | -3.33589  | 5.00E-05 | 0.00022  | yes |
| Prob1         | -0.800063 | 0         | 1        | 1        | no  |
| Sccpdh        | -0.800899 | -3.64461  | 5.00E-05 | 0.00022  | yes |
| Rbm24         | -0.801592 | 0         | 1        | 1        | no  |
| 9530068E07Rik | -0.802425 | -3.9703   | 5.00E-05 | 0.00022  | yes |
| Pnlip         | -0.80332  | -1.1014   | 0.05945  | 0.117931 | no  |

|               |           |          |          |          |     |
|---------------|-----------|----------|----------|----------|-----|
| Hist1h2af     | -0.803656 | 0        | 1        | 1        | no  |
| Vmn2r57       | -0.803929 | 0        | 1        | 1        | no  |
| Agpat2        | -0.805679 | -1.24427 | 0.03515  | 0.075802 | no  |
| Trim30d       | -0.805756 | 0        | 1        | 1        | no  |
| Neat1         | -0.805881 | -3.17726 | 5.00E-05 | 0.00022  | yes |
| Cflar         | -0.805951 | -3.10363 | 5.00E-05 | 0.00022  | yes |
| Mdh1          | -0.806665 | -4.13424 | 5.00E-05 | 0.00022  | yes |
| Cdh2          | -0.807    | -3.56641 | 5.00E-05 | 0.00022  | yes |
| Gpt2          | -0.807245 | -3.53596 | 5.00E-05 | 0.00022  | yes |
| Scamp2        | -0.807254 | -2.47342 | 0.0001   | 0.000422 | yes |
| Prodh         | -0.80748  | -1.20885 | 0.0317   | 0.069549 | no  |
| Syne1         | -0.807542 | -2.33936 | 5.00E-05 | 0.00022  | yes |
| Phyh          | -0.807897 | -3.6047  | 5.00E-05 | 0.00022  | yes |
| Bmp3          | -0.809985 | 0        | 1        | 1        | no  |
| Mrap2         | -0.810075 | -1.49687 | 0.00425  | 0.01229  | yes |
| Shh           | -0.810245 | -2.64076 | 5.00E-05 | 0.00022  | yes |
| Sntb2         | -0.810528 | -2.35467 | 5.00E-05 | 0.00022  | yes |
| Zfp934        | -0.810681 | -1.02213 | 0.04295  | 0.089933 | no  |
| Sh3bp1        | -0.811205 | 0        | 1        | 1        | no  |
| Smim19        | -0.811487 | -1.98392 | 0.00175  | 0.00566  | yes |
| Shank1        | -0.811711 | -2.32522 | 5.00E-05 | 0.00022  | yes |
| 0610040J01Rik | -0.81178  | -1.53835 | 0.00835  | 0.022272 | yes |
| E130008D07Rik | -0.811878 | 0        | 1        | 1        | no  |
| Fam186b       | -0.811904 | 0        | 1        | 1        | no  |
| Them6         | -0.812533 | -4.27676 | 5.00E-05 | 0.00022  | yes |
| Efcab14       | -0.812712 | -3.21644 | 5.00E-05 | 0.00022  | yes |
| Tmem245       | -0.813101 | -2.98319 | 5.00E-05 | 0.00022  | yes |
| Cdr2l         | -0.813151 | -3.80167 | 5.00E-05 | 0.00022  | yes |
| Ggt6          | -0.813572 | 0        | 1        | 1        | no  |
| 1700018L02Rik | -0.813932 | 0        | 1        | 1        | no  |
| Sln4          | -0.81503  | 0        | 1        | 1        | no  |
| Sstr4         | -0.816003 | -1.05456 | 0.0774   | 0.14634  | no  |
| Cfhr2         | -0.816221 | 0        | 1        | 1        | no  |
| Tubb1         | -0.816864 | 0        | 1        | 1        | no  |
| Esrp2         | -0.817572 | 0        | 1        | 1        | no  |
| Plekhh1       | -0.817577 | -2.55927 | 5.00E-05 | 0.00022  | yes |
| Lima1         | -0.817661 | -2.30808 | 5.00E-05 | 0.00022  | yes |
| Fxyd4         | -0.818111 | 0        | 1        | 1        | no  |
| Sphkap        | -0.818968 | -3.17245 | 5.00E-05 | 0.00022  | yes |
| Tenm3         | -0.819281 | -3.49999 | 5.00E-05 | 0.00022  | yes |
| Tlcd2         | -0.820158 | -0.69801 | 0.14665  | 0.245844 | no  |
| Ttc30a1       | -0.820233 | -1.22213 | 0.0264   | 0.059566 | no  |
| Zcwpw1        | -0.821031 | -1.68656 | 0.0023   | 0.007205 | yes |
| Ttc28         | -0.821217 | -2.56956 | 5.00E-05 | 0.00022  | yes |
| Arhgap35      | -0.821248 | -3.92708 | 5.00E-05 | 0.00022  | yes |
| Ptprs         | -0.821594 | -3.79153 | 5.00E-05 | 0.00022  | yes |
| Zfp423        | -0.822343 | -2.64246 | 5.00E-05 | 0.00022  | yes |
| D630045M09Rik | -0.822901 | 0        | 1        | 1        | no  |
| Ccnb1ip1      | -0.823463 | 0        | 1        | 1        | no  |
| Myo6          | -0.82503  | -2.78706 | 5.00E-05 | 0.00022  | yes |
| Scnn1b        | -0.825054 | 0        | 1        | 1        | no  |
| Foxc1         | -0.8256   | -1.36418 | 0.0109   | 0.027982 | yes |
| Tsx           | -0.82587  | 0        | 1        | 1        | no  |

|               |           |           |          |          |     |
|---------------|-----------|-----------|----------|----------|-----|
| Matk          | -0.826129 | -0.946001 | 0.05425  | 0.109249 | no  |
| Efr3a         | -0.82615  | -3.79034  | 5.00E-05 | 0.00022  | yes |
| Il15ra        | -0.826213 | -1.11733  | 0.017    | 0.04103  | yes |
| Abhd2         | -0.826323 | -3.93005  | 5.00E-05 | 0.00022  | yes |
| Slc19a2       | -0.82652  | -2.60745  | 5.00E-05 | 0.00022  | yes |
| Sacs          | -0.826672 | -2.47746  | 5.00E-05 | 0.00022  | yes |
| Nfkbiz        | -0.826806 | -1.7757   | 0.0005   | 0.00185  | yes |
| Sipa1l3       | -0.826914 | -2.31374  | 0.0001   | 0.000422 | yes |
| Fam69b        | -0.827064 | -3.32675  | 5.00E-05 | 0.00022  | yes |
| Qsox1         | -0.82786  | -3.15744  | 5.00E-05 | 0.00022  | yes |
| Irak4         | -0.828115 | -1.21163  | 0.02995  | 0.066379 | no  |
| Arntl         | -0.828257 | -0.981337 | 0.04715  | 0.097436 | no  |
| Kcns3         | -0.828344 | -3.19868  | 5.00E-05 | 0.00022  | yes |
| Synpo         | -0.828848 | -3.0612   | 5.00E-05 | 0.00022  | yes |
| Myrf          | -0.829211 | -1.47102  | 0.00675  | 0.018468 | yes |
| Uxt           | -0.829259 | 0         | 1        | 1        | no  |
| Cyfip1        | -0.829877 | -3.10091  | 5.00E-05 | 0.00022  | yes |
| Cldn10        | -0.83144  | 0         | 1        | 1        | no  |
| 1110008P14Rik | -0.831694 | -4.84872  | 5.00E-05 | 0.00022  | yes |
| Ccdc184       | -0.831843 | -2.42814  | 5.00E-05 | 0.00022  | yes |
| Mpp6          | -0.832425 | -2.02598  | 0.0001   | 0.000422 | yes |
| Traf3         | -0.833163 | -3.26197  | 5.00E-05 | 0.00022  | yes |
| Tmem26        | -0.833704 | 0         | 1        | 1        | no  |
| Cplx1         | -0.834076 | -3.92495  | 5.00E-05 | 0.00022  | yes |
| Kcnk4         | -0.83482  | -1.8301   | 0.0019   | 0.00608  | yes |
| Aph1c         | -0.835441 | -1.54588  | 0.0051   | 0.014464 | yes |
| Ifnlr1        | -0.836334 | 0         | 1        | 1        | no  |
| Bcl9          | -0.838079 | -2.64286  | 5.00E-05 | 0.00022  | yes |
| Ahcyl2        | -0.838318 | -3.77233  | 5.00E-05 | 0.00022  | yes |
| Ehd3          | -0.838893 | -4.12538  | 5.00E-05 | 0.00022  | yes |
| Lrrc72        | -0.839253 | 0         | 1        | 1        | no  |
| Slc22a17      | -0.839299 | -4.12289  | 5.00E-05 | 0.00022  | yes |
| Duoxa1        | -0.839808 | 0         | 1        | 1        | no  |
| Fancc         | -0.840032 | -1.01951  | 0.04625  | 0.095845 | no  |
| Arhgdig       | -0.841017 | -4.12307  | 5.00E-05 | 0.00022  | yes |
| Hmcn1         | -0.841679 | -2.04762  | 0.00015  | 0.000615 | yes |
| Rapsn         | -0.841851 | -1.2554   | 0.03115  | 0.068581 | no  |
| Fam228a       | -0.842081 | 0         | 1        | 1        | no  |
| Elovl5        | -0.84242  | -4.2362   | 5.00E-05 | 0.00022  | yes |
| Gpr137c       | -0.843593 | -2.56107  | 5.00E-05 | 0.00022  | yes |
| Pnmal1        | -0.844364 | -1.73854  | 0.00325  | 0.009727 | yes |
| Bcar3         | -0.844397 | -2.626    | 5.00E-05 | 0.00022  | yes |
| Maged2        | -0.844552 | -3.17431  | 5.00E-05 | 0.00022  | yes |
| Actn3         | -0.846011 | 0         | 1        | 1        | no  |
| Pdzk1         | -0.846186 | 0         | 1        | 1        | no  |
| Itm2c         | -0.84661  | -4.3978   | 5.00E-05 | 0.00022  | yes |
| Rpgrip1       | -0.84709  | 0         | 1        | 1        | no  |
| Dmpk          | -0.847099 | -1.62086  | 0.002    | 0.006363 | yes |
| Olr1          | -0.847606 | 0         | 1        | 1        | no  |
| BC055111      | -0.848249 | 0         | 1        | 1        | no  |
| Hey1          | -0.849188 | -2.84719  | 5.00E-05 | 0.00022  | yes |
| Gm13293       | -0.849232 | 0         | 1        | 1        | no  |
| Dact3         | -0.849295 | -2.92885  | 5.00E-05 | 0.00022  | yes |

|               |           |           |          |          |     |
|---------------|-----------|-----------|----------|----------|-----|
| Ezr           | -0.849574 | -3.38588  | 5.00E-05 | 0.00022  | yes |
| Chml          | -0.8497   | -2.96419  | 5.00E-05 | 0.00022  | yes |
| Bcl11b        | -0.850545 | -2.34857  | 5.00E-05 | 0.00022  | yes |
| Ivd           | -0.850595 | -2.68107  | 5.00E-05 | 0.00022  | yes |
| H2-Q4         | -0.85152  | -1.9828   | 0.0009   | 0.003139 | yes |
| Pnoc          | -0.853655 | 0         | 1        | 1        | no  |
| Hunk          | -0.854459 | -2.24012  | 0.0001   | 0.000422 | yes |
| Tacr2         | -0.854631 | 0         | 1        | 1        | no  |
| Raver1-fdx1l  | -0.855586 | 0         | 1        | 1        | no  |
| 1110046J04Rik | -0.856186 | -0.484731 | 0.4649   | 0.594489 | no  |
| Il23a         | -0.85645  | 0         | 1        | 1        | no  |
| Tmem53        | -0.857605 | -1.65562  | 0.0012   | 0.004068 | yes |
| Skida1        | -0.858339 | -1.92483  | 0.00055  | 0.002016 | yes |
| Dock10        | -0.858685 | -2.97594  | 5.00E-05 | 0.00022  | yes |
| Edil3         | -0.858879 | -3.93933  | 5.00E-05 | 0.00022  | yes |
| Nphp4         | -0.859147 | -1.68234  | 0.00225  | 0.007062 | yes |
| Cst3          | -0.859764 | -5.44184  | 5.00E-05 | 0.00022  | yes |
| 4833424O15Rik | -0.86009  | -1.60163  | 0.00355  | 0.010494 | yes |
| Gm711         | -0.860722 | 0         | 1        | 1        | no  |
| Amigo2        | -0.861033 | -3.23193  | 5.00E-05 | 0.00022  | yes |
| Afap1         | -0.861349 | -2.64546  | 5.00E-05 | 0.00022  | yes |
| Dpp4          | -0.861623 | 0         | 1        | 1        | no  |
| Plbd2         | -0.861647 | -3.97777  | 5.00E-05 | 0.00022  | yes |
| Nfic          | -0.86228  | -3.98568  | 5.00E-05 | 0.00022  | yes |
| Grb10         | -0.863258 | -3.14196  | 5.00E-05 | 0.00022  | yes |
| Ankmy1        | -0.863513 | 0         | 1        | 1        | no  |
| Arhgef9       | -0.863543 | -3.41048  | 5.00E-05 | 0.00022  | yes |
| Jsrp1         | -0.863655 | 0         | 1        | 1        | no  |
| Pik3r6        | -0.863919 | 0         | 1        | 1        | no  |
| Ctdsp2        | -0.864436 | -3.36296  | 5.00E-05 | 0.00022  | yes |
| Gemin4        | -0.864522 | -1.8221   | 0.0009   | 0.003139 | yes |
| Efcc1         | -0.864659 | -1.3918   | 0.01075  | 0.027656 | yes |
| Lgmn          | -0.865897 | -4.52574  | 5.00E-05 | 0.00022  | yes |
| Lingo3        | -0.86612  | -1.57486  | 0.0043   | 0.012421 | yes |
| Enpp5         | -0.866998 | -3.88392  | 5.00E-05 | 0.00022  | yes |
| E530011L22Rik | -0.868646 | -0.618975 | 0.22005  | 0.338207 | no  |
| 9330102E08Rik | -0.869491 | -2.53598  | 5.00E-05 | 0.00022  | yes |
| Grem1         | -0.869517 | 0         | 1        | 1        | no  |
| Oc90          | -0.869874 | 0         | 1        | 1        | no  |
| Frmd7         | -0.870065 | -1.65386  | 0.0025   | 0.007739 | yes |
| Il17f         | -0.870789 | 0         | 1        | 1        | no  |
| Cnn2          | -0.870963 | -0.155501 | 0.7872   | 0.861272 | no  |
| Rxrg          | -0.871451 | -1.83546  | 0.00045  | 0.001682 | yes |
| Apcdd1        | -0.87169  | -2.19903  | 0.0001   | 0.000422 | yes |
| Gm15408       | -0.871697 | 0         | 1        | 1        | no  |
| Calu          | -0.872105 | -4.15031  | 5.00E-05 | 0.00022  | yes |
| Phf21b        | -0.872243 | 0         | 1        | 1        | no  |
| 2410012M07Rik | -0.872701 | 0         | 1        | 1        | no  |
| Cebpe         | -0.873357 | 0         | 1        | 1        | no  |
| Amt           | -0.873475 | -1.25996  | 0.03375  | 0.073247 | no  |
| Dusp14        | -0.873533 | -1.55352  | 0.0106   | 0.027323 | yes |
| Chgb          | -0.873623 | -4.12648  | 5.00E-05 | 0.00022  | yes |
| Tbx19         | -0.873709 | 0         | 1        | 1        | no  |



|               |           |          |          |          |     |
|---------------|-----------|----------|----------|----------|-----|
| Mpl           | -0.873716 | 0        | 1        | 1        | no  |
| Gcsh          | -0.874633 | -3.91921 | 5.00E-05 | 0.00022  | yes |
| Fam102a       | -0.874823 | -3.89822 | 5.00E-05 | 0.00022  | yes |
| 2810049E08Rik | -0.875604 | 0        | 1        | 1        | no  |
| Pmp22         | -0.87661  | -3.46116 | 5.00E-05 | 0.00022  | yes |
| Cnga3         | -0.877315 | 0        | 1        | 1        | no  |
| Tmem132d      | -0.87779  | 0        | 1        | 1        | no  |
| Focad         | -0.878019 | -2.85939 | 5.00E-05 | 0.00022  | yes |
| Ptprb         | -0.878651 | -3.21695 | 5.00E-05 | 0.00022  | yes |
| Slc24a2       | -0.87924  | -3.97659 | 5.00E-05 | 0.00022  | yes |
| Chic1         | -0.879334 | -2.46    | 5.00E-05 | 0.00022  | yes |
| Glipr1        | -0.87977  | 0        | 1        | 1        | no  |
| Wwp1          | -0.880209 | -3.50554 | 5.00E-05 | 0.00022  | yes |
| Ttc30a2       | -0.880354 | 0        | 1        | 1        | no  |
| Gpr83         | -0.880709 | -1.27235 | 0.0227   | 0.052403 | no  |
| F11r          | -0.881268 | -1.96294 | 0.00065  | 0.002343 | yes |
| Susd4         | -0.881872 | -3.83097 | 5.00E-05 | 0.00022  | yes |
| Farp2         | -0.883502 | -1.22459 | 0.0279   | 0.062451 | no  |
| Synj1         | -0.883627 | -4.0459  | 5.00E-05 | 0.00022  | yes |
| Galnt2        | -0.88396  | -3.16753 | 5.00E-05 | 0.00022  | yes |
| Prdm11        | -0.884343 | 0        | 1        | 1        | no  |
| Dbpht2        | -0.884454 | -1.92954 | 0.00045  | 0.001682 | yes |
| Six5          | -0.884547 | -1.3017  | 0.0175   | 0.042076 | yes |
| Mctp1         | -0.884627 | -3.43465 | 5.00E-05 | 0.00022  | yes |
| Jun           | -0.885021 | -4.1948  | 5.00E-05 | 0.00022  | yes |
| Cnksr1        | -0.886404 | 0        | 1        | 1        | no  |
| Nynrin        | -0.88657  | -2.2998  | 5.00E-05 | 0.00022  | yes |
| Sdc3          | -0.886738 | -4.28508 | 5.00E-05 | 0.00022  | yes |
| Tm7sf3        | -0.886841 | -3.68916 | 5.00E-05 | 0.00022  | yes |
| Fam131c       | -0.886877 | -1.07244 | 0.068    | 0.131971 | no  |
| Slc30a1       | -0.886953 | -2.84107 | 5.00E-05 | 0.00022  | yes |
| Cd14          | -0.887676 | -1.12797 | 0.0544   | 0.109518 | no  |
| Irs2          | -0.88896  | -2.9976  | 5.00E-05 | 0.00022  | yes |
| Lzts2         | -0.889908 | -2.62679 | 5.00E-05 | 0.00022  | yes |
| E130012A19Rik | -0.890297 | 0        | 1        | 1        | no  |
| Acot2         | -0.890308 | -1.64859 | 0.0037   | 0.010879 | yes |
| Tor1aip1      | -0.891317 | -1.83567 | 0.00085  | 0.002983 | yes |
| Ackr1         | -0.891396 | -4.60543 | 5.00E-05 | 0.00022  | yes |
| A830052D11Rik | -0.891482 | 0        | 1        | 1        | no  |
| Snap25        | -0.891598 | -3.61459 | 5.00E-05 | 0.00022  | yes |
| Lefty1        | -0.891797 | 0        | 1        | 1        | no  |
| Smad9         | -0.891891 | -3.83256 | 5.00E-05 | 0.00022  | yes |
| Ptpn13        | -0.892275 | -3.43468 | 5.00E-05 | 0.00022  | yes |
| Slc39a12      | -0.892334 | 0        | 1        | 1        | no  |
| AV051173      | -0.892949 | 0        | 1        | 1        | no  |
| Paqr8         | -0.893141 | -3.8811  | 5.00E-05 | 0.00022  | yes |
| Abcg8         | -0.893248 | 0        | 1        | 1        | no  |
| D8Ert82e      | -0.893306 | -1.8249  | 0.00105  | 0.003607 | yes |
| Rxfp3         | -0.893498 | 0        | 1        | 1        | no  |
| Vstm2a        | -0.894363 | -2.98059 | 5.00E-05 | 0.00022  | yes |
| Gpr17         | -0.894659 | 0        | 1        | 1        | no  |
| Paqr9         | -0.895415 | -3.77942 | 5.00E-05 | 0.00022  | yes |
| Mreg          | -0.895904 | -1.77592 | 0.0014   | 0.004657 | yes |

|         |           |           |          |          |     |
|---------|-----------|-----------|----------|----------|-----|
| Ano4    | -0.896187 | -3.37506  | 5.00E-05 | 0.00022  | yes |
| Pcdhb10 | -0.896532 | -0.237942 | 0.66285  | 0.764366 | no  |
| Gpr64   | -0.896649 | -3.49985  | 5.00E-05 | 0.00022  | yes |
| Shf     | -0.896651 | -2.75649  | 5.00E-05 | 0.00022  | yes |
| Cd84    | -0.897578 | 0         | 1        | 1        | no  |
| Dennd4c | -0.897581 | -2.28793  | 5.00E-05 | 0.00022  | yes |
| Caly    | -0.897899 | -1.62997  | 0.0019   | 0.00608  | yes |
| Cd40    | -0.898218 | 0         | 1        | 1        | no  |
| Camkk1  | -0.898469 | -3.28359  | 5.00E-05 | 0.00022  | yes |
| Nanog   | -0.899435 | 0         | 1        | 1        | no  |
| Aga     | -0.899526 | -2.11358  | 5.00E-05 | 0.00022  | yes |
| Heatr5a | -0.901038 | -3.95594  | 5.00E-05 | 0.00022  | yes |
| Slc26a7 | -0.901404 | -1.09669  | 0.04615  | 0.095712 | no  |
| Spatc1l | -0.901531 | 0         | 1        | 1        | no  |
| Gria4   | -0.901804 | -3.04801  | 5.00E-05 | 0.00022  | yes |
| Kcnk2   | -0.902381 | -2.47526  | 5.00E-05 | 0.00022  | yes |
| St8sia1 | -0.90275  | -4.05192  | 5.00E-05 | 0.00022  | yes |
| Gbp3    | -0.902799 | -1.88642  | 0.0005   | 0.00185  | yes |
| Wdfy2   | -0.903427 | -2.62146  | 5.00E-05 | 0.00022  | yes |
| Tas1r1  | -0.903481 | 0         | 1        | 1        | no  |
| Cbln4   | -0.904097 | 0         | 1        | 1        | no  |
| Xkr8    | -0.904437 | -1.83616  | 0.0008   | 0.002828 | yes |
| Prtg    | -0.904441 | 0         | 1        | 1        | no  |
| Pdk3    | -0.90549  | -3.63074  | 5.00E-05 | 0.00022  | yes |
| Cdrt4   | -0.905584 | 0         | 1        | 1        | no  |
| Sirpb1b | -0.90579  | 0         | 1        | 1        | no  |
| L3mbtl4 | -0.906094 | -1.66744  | 0.0018   | 0.005802 | yes |
| Zdhhc22 | -0.90636  | -2.08683  | 0.00325  | 0.009727 | yes |
| Galnt6  | -0.908685 | -1.41719  | 0.0069   | 0.018824 | yes |
| Zfp41   | -0.909462 | -1.49634  | 0.0052   | 0.014691 | yes |
| Lss     | -0.910069 | -3.05247  | 5.00E-05 | 0.00022  | yes |
| Fgd4    | -0.910842 | -1.91575  | 0.0001   | 0.000422 | yes |
| Zfp651  | -0.910937 | -3.52377  | 5.00E-05 | 0.00022  | yes |
| Vps37b  | -0.910939 | -2.13098  | 0.00025  | 0.000985 | yes |
| Olf1r18 | -0.911921 | 0         | 1        | 1        | no  |
| Mfsd7a  | -0.912023 | -1.19733  | 0.0301   | 0.066634 | no  |
| Trhr    | -0.913467 | 0         | 1        | 1        | no  |
| Cxxc5   | -0.913518 | -3.13442  | 5.00E-05 | 0.00022  | yes |
| Fkbp7   | -0.913931 | -1.78138  | 0.00715  | 0.019434 | yes |
| Pak6    | -0.914044 | 0         | 1        | 1        | no  |
| Nhlh2   | -0.915268 | -1.28731  | 0.0195   | 0.046066 | yes |
| Scgn    | -0.915475 | -1.10731  | 0.0604   | 0.119441 | no  |
| Lrrc23  | -0.91549  | 0         | 1        | 1        | no  |
| Prss32  | -0.917213 | 0         | 1        | 1        | no  |
| Meox1   | -0.917409 | 0         | 1        | 1        | no  |
| Gpihbp1 | -0.917483 | -1.14434  | 0.0974   | 0.175762 | no  |
| Ier5    | -0.917746 | -1.69977  | 0.0027   | 0.008273 | yes |
| Eddm3b  | -0.917912 | 0         | 1        | 1        | no  |
| Bend6   | -0.918323 | -4.33572  | 5.00E-05 | 0.00022  | yes |
| Lmtk2   | -0.918595 | -3.65473  | 5.00E-05 | 0.00022  | yes |
| Irf8    | -0.918656 | 0         | 1        | 1        | no  |
| Cers6   | -0.918857 | -2.28685  | 5.00E-05 | 0.00022  | yes |
| Zfp704  | -0.919202 | -2.83875  | 5.00E-05 | 0.00022  | yes |

|                |           |           |          |          |     |
|----------------|-----------|-----------|----------|----------|-----|
| Gadd45b        | -0.919292 | -2.2487   | 0.00025  | 0.000985 | yes |
| Nkd1           | -0.919515 | -1.86721  | 0.00065  | 0.002343 | yes |
| Gm3317         | -0.919614 | 0         | 1        | 1        | no  |
| Irgc1          | -0.919803 | 0         | 1        | 1        | no  |
| 9930111J21Rik1 | -0.919843 | 0         | 1        | 1        | no  |
| Tmem254a,Tmem2 | -0.920044 | 0         | 1        | 1        | no  |
| Slc44a3        | -0.92101  | 0         | 1        | 1        | no  |
| Haghl          | -0.921118 | -3.00039  | 5.00E-05 | 0.00022  | yes |
| Pdgfd          | -0.921423 | -1.07241  | 0.0333   | 0.072437 | no  |
| Rdm1           | -0.921631 | -1.72872  | 0.00595  | 0.016553 | yes |
| Sash3          | -0.922022 | 0         | 1        | 1        | no  |
| C8g            | -0.922091 | -0.414602 | 0.47985  | 0.60862  | no  |
| Ttc39b         | -0.922248 | -3.98965  | 5.00E-05 | 0.00022  | yes |
| Kcnk10         | -0.922381 | -1.89858  | 0.001    | 0.003451 | yes |
| Cstad          | -0.922646 | 0         | 1        | 1        | no  |
| Slc29a4        | -0.923086 | -3.65061  | 5.00E-05 | 0.00022  | yes |
| Gm5544         | -0.923131 | 0         | 1        | 1        | no  |
| Ppt1           | -0.923538 | -4.03699  | 5.00E-05 | 0.00022  | yes |
| Dpy19l3        | -0.924051 | -2.11699  | 0.0002   | 0.000803 | yes |
| Nyx            | -0.924324 | 0         | 1        | 1        | no  |
| Xpnpep2        | -0.924526 | 0         | 1        | 1        | no  |
| Cyp2e1         | -0.924536 | 0         | 1        | 1        | no  |
| Fbxo32         | -0.924634 | -2.50339  | 5.00E-05 | 0.00022  | yes |
| 1700007L15Rik  | -0.92507  | 0         | 1        | 1        | no  |
| H2-DMa         | -0.92637  | -2.11854  | 0.00065  | 0.002343 | yes |
| Gm6644         | -0.926628 | 0         | 1        | 1        | no  |
| Rgl1           | -0.926782 | -3.95311  | 5.00E-05 | 0.00022  | yes |
| St8sia4        | -0.927529 | -1.91283  | 0.00035  | 0.001342 | yes |
| 1700063D05Rik  | -0.927709 | 0         | 1        | 1        | no  |
| Slc25a29       | -0.928317 | -2.19623  | 0.0001   | 0.000422 | yes |
| Camk2g         | -0.928379 | -4.26955  | 5.00E-05 | 0.00022  | yes |
| Npc1           | -0.928497 | -3.12069  | 5.00E-05 | 0.00022  | yes |
| Slc26a2        | -0.928965 | -1.70041  | 0.0019   | 0.00608  | yes |
| Wfdc6a         | -0.929133 | 0         | 1        | 1        | no  |
| Gm1604b        | -0.929153 | 0         | 1        | 1        | no  |
| Iqgap1         | -0.929218 | -3.70777  | 5.00E-05 | 0.00022  | yes |
| Shroom1        | -0.929657 | 0         | 1        | 1        | no  |
| L3mbtl3        | -0.930598 | -1.7377   | 0.00165  | 0.00538  | yes |
| Epha10         | -0.930901 | -1.44903  | 0.00305  | 0.009188 | yes |
| Pank1          | -0.931414 | -2.73526  | 5.00E-05 | 0.00022  | yes |
| Tal2           | -0.932155 | 0         | 1        | 1        | no  |
| Gpr153         | -0.933767 | -3.92219  | 5.00E-05 | 0.00022  | yes |
| Fbxo31         | -0.934081 | -4.51606  | 5.00E-05 | 0.00022  | yes |
| Pigz           | -0.935047 | -3.17199  | 5.00E-05 | 0.00022  | yes |
| Hipk2          | -0.935053 | -2.10002  | 0.0001   | 0.000422 | yes |
| Ppm1m          | -0.935471 | -1.59768  | 0.00275  | 0.008412 | yes |
| 1810011O10Rik  | -0.935611 | -2.30881  | 5.00E-05 | 0.00022  | yes |
| Mtss1l         | -0.935633 | -3.93851  | 5.00E-05 | 0.00022  | yes |
| Mfsd3          | -0.935917 | -1.73179  | 0.00445  | 0.012807 | yes |
| Tsc22d3        | -0.93618  | -4.31554  | 5.00E-05 | 0.00022  | yes |
| Slc7a15        | -0.93624  | 0         | 1        | 1        | no  |
| Arhgef17       | -0.938258 | -4.24539  | 5.00E-05 | 0.00022  | yes |
| Fam26e         | -0.938321 | -1.04993  | 0.03185  | 0.069821 | no  |

|               |           |           |          |          |     |
|---------------|-----------|-----------|----------|----------|-----|
| Kctd1         | -0.939072 | -2.27755  | 5.00E-05 | 0.00022  | yes |
| 2810055G20Rik | -0.939446 | 0         | 1        | 1        | no  |
| Lmo1          | -0.940014 | -2.22112  | 0.0007   | 0.002506 | yes |
| Nnmt          | -0.940124 | 0         | 1        | 1        | no  |
| Dclk1         | -0.940767 | -4.39838  | 5.00E-05 | 0.00022  | yes |
| Ilvbl         | -0.941    | -3.21293  | 5.00E-05 | 0.00022  | yes |
| Ckb           | -0.941732 | -5.06228  | 5.00E-05 | 0.00022  | yes |
| Ggct          | -0.941904 | -2.2343   | 0.0004   | 0.001513 | yes |
| Six6          | -0.942425 | 0         | 1        | 1        | no  |
| Serpinb6b     | -0.942598 | -1.12565  | 0.04945  | 0.101196 | no  |
| Slc1a2        | -0.942648 | 0         | 1        | 1        | no  |
| Lamc2         | -0.943915 | 0         | 1        | 1        | no  |
| Pxdn          | -0.944109 | -3.39597  | 5.00E-05 | 0.00022  | yes |
| Fuca1         | -0.945453 | -3.37986  | 5.00E-05 | 0.00022  | yes |
| Lfng          | -0.94576  | -1.78732  | 0.0024   | 0.00748  | yes |
| Gm766         | -0.946099 | 0         | 1        | 1        | no  |
| Zfp711        | -0.946877 | -1.41113  | 0.00955  | 0.024966 | yes |
| Kansl1l       | -0.947355 | -1.61871  | 0.00305  | 0.009188 | yes |
| Ndufaf2       | -0.947472 | -3.6312   | 5.00E-05 | 0.00022  | yes |
| Slc18a1       | -0.950145 | -0.267429 | 0.6407   | 0.746677 | no  |
| Rnf215        | -0.950184 | -2.39855  | 5.00E-05 | 0.00022  | yes |
| Dcstamp       | -0.951643 | 0         | 1        | 1        | no  |
| 1810007D17Rik | -0.951791 | 0         | 1        | 1        | no  |
| Pygb          | -0.95325  | -4.22165  | 5.00E-05 | 0.00022  | yes |
| Gpr63         | -0.953657 | -1.26653  | 0.02475  | 0.056429 | no  |
| Pcdhac2       | -0.953674 | -1.75124  | 0.00055  | 0.002016 | yes |
| Tmem150a      | -0.954415 | -0.635019 | 0.2597   | 0.383167 | no  |
| Gm16432       | -0.954477 | 0         | 1        | 1        | no  |
| Mmp15         | -0.954726 | -4.54085  | 5.00E-05 | 0.00022  | yes |
| Gm6277        | -0.955766 | -0.72969  | 0.23415  | 0.354898 | no  |
| Pcdhb7        | -0.955891 | -0.2402   | 0.66515  | 0.766552 | no  |
| Prrt3         | -0.955952 | -3.56413  | 5.00E-05 | 0.00022  | yes |
| Adam32        | -0.956816 | 0         | 1        | 1        | no  |
| Per1          | -0.957219 | -3.17122  | 5.00E-05 | 0.00022  | yes |
| Gpr18         | -0.958427 | 0         | 1        | 1        | no  |
| Ier2          | -0.958433 | -3.41073  | 5.00E-05 | 0.00022  | yes |
| Lgals1        | -0.958747 | -5.38873  | 5.00E-05 | 0.00022  | yes |
| Tfap2d        | -0.959724 | 0         | 1        | 1        | no  |
| Pcolce2       | -0.959836 | -3.4582   | 5.00E-05 | 0.00022  | yes |
| Oxa1l         | -0.959889 | -1.89629  | 0.00175  | 0.00566  | yes |
| Lrp6          | -0.960011 | -3.97021  | 5.00E-05 | 0.00022  | yes |
| Guca1a        | -0.960138 | 0         | 1        | 1        | no  |
| Ctnnd2        | -0.962685 | -4.28389  | 5.00E-05 | 0.00022  | yes |
| Kcnh4         | -0.962793 | 0         | 1        | 1        | no  |
| Rex2          | -0.962903 | 0         | 1        | 1        | no  |
| Fam69a        | -0.963546 | -1.70787  | 0.0018   | 0.005802 | yes |
| Prkg2         | -0.964624 | -2.56421  | 5.00E-05 | 0.00022  | yes |
| Cds1          | -0.964768 | -4.25908  | 5.00E-05 | 0.00022  | yes |
| Map6d1        | -0.965717 | -1.53949  | 0.006    | 0.016674 | yes |
| Grin3b        | -0.965734 | 0         | 1        | 1        | no  |
| Oxtr          | -0.966269 | 0         | 1        | 1        | no  |
| Nfatc1        | -0.96727  | -1.68188  | 0.00135  | 0.004516 | yes |
| 4930515G01Rik | -0.967815 | 0         | 1        | 1        | no  |

|               |           |           |          |          |     |
|---------------|-----------|-----------|----------|----------|-----|
| Slc16a9       | -0.968429 | -2.56248  | 0.0001   | 0.000422 | yes |
| Zhx2          | -0.968688 | -2.41171  | 5.00E-05 | 0.00022  | yes |
| Rpph1         | -0.968786 | -1.46614  | 0.2502   | 0.372925 | no  |
| Laptm5        | -0.9694   | -1.85074  | 0.00115  | 0.00391  | yes |
| 3010001F23Rik | -0.969419 | -0.730638 | 0.149    | 0.248715 | no  |
| Nmnat1        | -0.969682 | -1.84129  | 0.00445  | 0.012807 | yes |
| Tmem254b      | -0.969897 | 0         | 1        | 1        | no  |
| Slc26a5       | -0.969992 | 0         | 1        | 1        | no  |
| Mylk4         | -0.970351 | 0         | 1        | 1        | no  |
| Ndr3          | -0.972111 | -4.27337  | 5.00E-05 | 0.00022  | yes |
| Tenc1         | -0.972746 | -3.14493  | 5.00E-05 | 0.00022  | yes |
| Plxnb2        | -0.972994 | -3.3653   | 5.00E-05 | 0.00022  | yes |
| Oit3          | -0.973627 | 0         | 1        | 1        | no  |
| Cntnap5a      | -0.973951 | -2.49162  | 5.00E-05 | 0.00022  | yes |
| Atpaf1        | -0.974108 | -2.49443  | 5.00E-05 | 0.00022  | yes |
| Rgs22         | -0.974167 | 0         | 1        | 1        | no  |
| Lrrc49        | -0.974493 | -4.45859  | 5.00E-05 | 0.00022  | yes |
| C530008M17Rik | -0.975044 | -4.12837  | 5.00E-05 | 0.00022  | yes |
| Naip2         | -0.975125 | 0         | 1        | 1        | no  |
| Fbxl21        | -0.976052 | -1.69544  | 0.00445  | 0.012807 | yes |
| Eya1          | -0.976774 | 0         | 1        | 1        | no  |
| Actn2         | -0.977186 | 0         | 1        | 1        | no  |
| Timp2         | -0.977529 | -4.29431  | 5.00E-05 | 0.00022  | yes |
| Cenpm         | -0.978405 | -0.968658 | 0.0536   | 0.108121 | no  |
| Gm6981        | -0.978425 | -0.499961 | 0.38845  | 0.519722 | no  |
| Kit           | -0.978447 | -4.09922  | 5.00E-05 | 0.00022  | yes |
| Hipk4         | -0.978928 | 0         | 1        | 1        | no  |
| Gpr3          | -0.97894  | -1.60076  | 0.00465  | 0.013316 | yes |
| Ces1a         | -0.981338 | 0         | 1        | 1        | no  |
| Ado           | -0.982988 | -3.60007  | 5.00E-05 | 0.00022  | yes |
| Echdc2        | -0.984286 | -1.01133  | 0.04445  | 0.09265  | no  |
| Nrgn          | -0.984322 | -1.00949  | 0.09845  | 0.177296 | no  |
| Il21r         | -0.985064 | 0         | 1        | 1        | no  |
| Rnf157        | -0.985104 | -4.73126  | 5.00E-05 | 0.00022  | yes |
| Smim4         | -0.985242 | -2.37083  | 0.02225  | 0.051589 | no  |
| Arl5b         | -0.986953 | -2.89384  | 5.00E-05 | 0.00022  | yes |
| Adgb          | -0.987326 | 0         | 1        | 1        | no  |
| Selm          | -0.988012 | -4.79839  | 5.00E-05 | 0.00022  | yes |
| Phldb2        | -0.988644 | -2.33794  | 5.00E-05 | 0.00022  | yes |
| Ccdc102a      | -0.989309 | -1.86958  | 0.00175  | 0.00566  | yes |
| Ankdd1b       | -0.989541 | 0         | 1        | 1        | no  |
| Myrip         | -0.990474 | -2.20836  | 0.0001   | 0.000422 | yes |
| C1qtnf7       | -0.990799 | -1.42671  | 0.00615  | 0.017052 | yes |
| Ssmem1        | -0.991148 | 0         | 1        | 1        | no  |
| Adcy2         | -0.991241 | -3.6442   | 5.00E-05 | 0.00022  | yes |
| Agpat3        | -0.991445 | -4.68205  | 5.00E-05 | 0.00022  | yes |
| Hes1          | -0.992895 | -2.16973  | 0.00045  | 0.001682 | yes |
| Sema7a        | -0.993159 | -4.53759  | 5.00E-05 | 0.00022  | yes |
| Phlda1        | -0.99319  | -2.96842  | 5.00E-05 | 0.00022  | yes |
| Glb1l         | -0.993653 | -1.27537  | 0.0185   | 0.044088 | yes |
| Slc11a1       | -0.99369  | 0         | 1        | 1        | no  |
| Masp1         | -0.993753 | -1.72957  | 0.0029   | 0.008796 | yes |
| Stxbp3b       | -0.993906 | -1.51732  | 0.02085  | 0.048838 | yes |

|               |           |           |          |          |     |
|---------------|-----------|-----------|----------|----------|-----|
| Ugt1a6b       | -0.994119 | 0         | 1        | 1        | no  |
| Kcnj2         | -0.994252 | -1.97178  | 0.0004   | 0.001513 | yes |
| 4930568G15Rik | -0.994491 | 0         | 1        | 1        | no  |
| Psat1         | -0.99482  | -3.79398  | 5.00E-05 | 0.00022  | yes |
| Bckdhb        | -0.995146 | -3.02536  | 5.00E-05 | 0.00022  | yes |
| Zfp191        | -0.995223 | -3.75406  | 5.00E-05 | 0.00022  | yes |
| Tcf12         | -0.995316 | -3.28762  | 5.00E-05 | 0.00022  | yes |
| Mical2        | -0.995633 | -2.96307  | 5.00E-05 | 0.00022  | yes |
| Adcy9         | -0.998737 | -4.11159  | 5.00E-05 | 0.00022  | yes |
| Palm3         | -0.998952 | -4.08843  | 5.00E-05 | 0.00022  | yes |
| BC035044      | -0.999236 | 0         | 1        | 1        | no  |
| Pld1          | -1.001    | -2.26413  | 5.00E-05 | 0.00022  | yes |
| Rasal2        | -1.00106  | -4.14885  | 5.00E-05 | 0.00022  | yes |
| Aldh2         | -1.00183  | -4.7898   | 5.00E-05 | 0.00022  | yes |
| 4930590J08Rik | -1.00255  | 0         | 1        | 1        | no  |
| Tert          | -1.0035   | 0         | 1        | 1        | no  |
| Tjp2          | -1.00358  | -2.76667  | 5.00E-05 | 0.00022  | yes |
| 4932418E24Rik | -1.00415  | 0         | 1        | 1        | no  |
| Zfp286        | -1.00417  | -1.67626  | 0.00245  | 0.007605 | yes |
| Dnm3os        | -1.00422  | 0         | 1        | 1        | no  |
| Tgfb2         | -1.00613  | -2.49824  | 5.00E-05 | 0.00022  | yes |
| Mab21l2       | -1.00631  | -1.81649  | 0.0009   | 0.003139 | yes |
| Fyb           | -1.00789  | 0         | 1        | 1        | no  |
| Zswim2        | -1.00861  | 0         | 1        | 1        | no  |
| Hcn1          | -1.01043  | -4.54863  | 5.00E-05 | 0.00022  | yes |
| Casc1         | -1.01253  | 0         | 1        | 1        | no  |
| Ggt5          | -1.01328  | -1.74606  | 0.00165  | 0.00538  | yes |
| Prr15l        | -1.01433  | 0         | 1        | 1        | no  |
| Gpr22         | -1.01438  | -1.22911  | 0.0286   | 0.063814 | no  |
| Reep3         | -1.01531  | -3.72022  | 5.00E-05 | 0.00022  | yes |
| Klhl41        | -1.01552  | 0         | 1        | 1        | no  |
| Gcnt4         | -1.01598  | 0         | 1        | 1        | no  |
| Chst7         | -1.01611  | 0         | 1        | 1        | no  |
| Abra          | -1.01721  | 0         | 1        | 1        | no  |
| Gm6938        | -1.01731  | 0         | 1        | 1        | no  |
| Hlf           | -1.01773  | -2.46097  | 5.00E-05 | 0.00022  | yes |
| Nthl1         | -1.01802  | -1.3716   | 0.03     | 0.066457 | no  |
| Tmem198b      | -1.01868  | -1.93327  | 0.0002   | 0.000803 | yes |
| Fam126b       | -1.01876  | -4.55129  | 5.00E-05 | 0.00022  | yes |
| Sord          | -1.01885  | -3.52847  | 5.00E-05 | 0.00022  | yes |
| Naip1         | -1.0197   | -1.62359  | 0.0033   | 0.009856 | yes |
| Gdf11         | -1.01974  | -2.90498  | 5.00E-05 | 0.00022  | yes |
| Kif27         | -1.02059  | 0         | 1        | 1        | no  |
| Ccr10         | -1.02111  | 0         | 1        | 1        | no  |
| Krt23         | -1.02323  | 0         | 1        | 1        | no  |
| Nckap5        | -1.02327  | 0         | 1        | 1        | no  |
| Figl2         | -1.02376  | -1.94907  | 0.00055  | 0.002016 | yes |
| Scx           | -1.02377  | -0.734013 | 0.15195  | 0.25278  | no  |
| Cd80          | -1.02397  | 0         | 1        | 1        | no  |
| Vegfc         | -1.02647  | 0         | 1        | 1        | no  |
| Ccdc155       | -1.02717  | 0         | 1        | 1        | no  |
| Styk1         | -1.0272   | 0         | 1        | 1        | no  |
| Vav1          | -1.02826  | 0         | 1        | 1        | no  |



|               |          |           |          |          |     |
|---------------|----------|-----------|----------|----------|-----|
| Hsd11b1       | -1.02865 | 0         | 1        | 1        | no  |
| Lama5         | -1.02947 | -2.59318  | 5.00E-05 | 0.00022  | yes |
| Ces2e         | -1.0306  | 0         | 1        | 1        | no  |
| Luzp1         | -1.03132 | -4.71329  | 5.00E-05 | 0.00022  | yes |
| Ctbp2         | -1.03203 | -2.29532  | 5.00E-05 | 0.00022  | yes |
| Nudt7         | -1.0338  | -2.41968  | 5.00E-05 | 0.00022  | yes |
| Rnaset2b      | -1.03425 | -1.90197  | 0.00365  | 0.010754 | yes |
| Rab11fip5     | -1.03526 | -4.61695  | 5.00E-05 | 0.00022  | yes |
| Atp2b2        | -1.03564 | -4.76626  | 5.00E-05 | 0.00022  | yes |
| Rab40b        | -1.03738 | -1.32362  | 0.0103   | 0.026643 | yes |
| Fzd4          | -1.03752 | -2.43691  | 5.00E-05 | 0.00022  | yes |
| Cecr6         | -1.03878 | 0         | 1        | 1        | no  |
| 4930523C07Rik | -1.03896 | 0         | 1        | 1        | no  |
| Ar            | -1.03956 | -2.53554  | 5.00E-05 | 0.00022  | yes |
| Acss1         | -1.04003 | -2.15425  | 0.0001   | 0.000422 | yes |
| Dlc1          | -1.04133 | -4.12559  | 5.00E-05 | 0.00022  | yes |
| Itpka         | -1.0424  | 0         | 1        | 1        | no  |
| AA536875      | -1.04245 | 0         | 1        | 1        | no  |
| Gm1141        | -1.04264 | 0         | 1        | 1        | no  |
| Atp2b3        | -1.0429  | -4.67191  | 5.00E-05 | 0.00022  | yes |
| 5830416P10Rik | -1.0432  | 0         | 1        | 1        | no  |
| Plod1         | -1.04335 | -3.57811  | 5.00E-05 | 0.00022  | yes |
| Lamb2         | -1.044   | -3.80223  | 5.00E-05 | 0.00022  | yes |
| Fam171a1      | -1.04459 | -4.3889   | 5.00E-05 | 0.00022  | yes |
| Inhba         | -1.04479 | 0         | 1        | 1        | no  |
| Bcl2l12       | -1.04503 | -0.921022 | 0.07205  | 0.138094 | no  |
| Myo7a         | -1.04552 | -3.06503  | 5.00E-05 | 0.00022  | yes |
| Bmp6          | -1.04651 | -1.41492  | 0.0148   | 0.036422 | yes |
| Bambi-ps1     | -1.04659 | 0         | 1        | 1        | no  |
| Slc2a13       | -1.04748 | -2.66982  | 5.00E-05 | 0.00022  | yes |
| Parp14        | -1.04765 | -2.90226  | 5.00E-05 | 0.00022  | yes |
| Atp8a2        | -1.04956 | -5.04835  | 5.00E-05 | 0.00022  | yes |
| 1700096K18Rik | -1.04963 | -1.15523  | 0.0546   | 0.109871 | no  |
| D630032N06Rik | -1.05013 | 0         | 1        | 1        | no  |
| Gabre         | -1.05058 | 0         | 1        | 1        | no  |
| Ifitm3        | -1.05092 | -4.11541  | 5.00E-05 | 0.00022  | yes |
| Npnt          | -1.05121 | -1.26073  | 0.12045  | 0.209465 | no  |
| Hist1h2bh     | -1.05126 | 0         | 1        | 1        | no  |
| Ifngr1        | -1.0514  | -3.54796  | 5.00E-05 | 0.00022  | yes |
| Peli2         | -1.05171 | -3.81483  | 5.00E-05 | 0.00022  | yes |
| Kcnk3         | -1.05241 | -2.87555  | 5.00E-05 | 0.00022  | yes |
| Irf4          | -1.05307 | 0         | 1        | 1        | no  |
| Pde4b         | -1.05383 | -2.96231  | 5.00E-05 | 0.00022  | yes |
| 2810403D21Rik | -1.05391 | 0         | 1        | 1        | no  |
| Lrrc32        | -1.05444 | -1.72783  | 0.0029   | 0.008796 | yes |
| 1700112E06Rik | -1.05462 | -1.24139  | 0.05245  | 0.106172 | no  |
| Cep85l        | -1.05552 | -2.2659   | 5.00E-05 | 0.00022  | yes |
| Begain        | -1.05561 | -2.08029  | 0.00045  | 0.001682 | yes |
| Eps8          | -1.05579 | -1.94614  | 0.0003   | 0.001164 | yes |
| Snn           | -1.0558  | -4.48784  | 5.00E-05 | 0.00022  | yes |
| Pacs1         | -1.05596 | -3.62305  | 5.00E-05 | 0.00022  | yes |
| Vwf           | -1.05625 | -4.02012  | 5.00E-05 | 0.00022  | yes |
| Slc15a3       | -1.05709 | 0         | 1        | 1        | no  |

|               |          |          |          |          |     |
|---------------|----------|----------|----------|----------|-----|
| Inpp5j        | -1.05748 | -4.22208 | 5.00E-05 | 0.00022  | yes |
| Bmpr1b        | -1.05777 | -1.90408 | 0.00035  | 0.001342 | yes |
| Hs3st6        | -1.05933 | -1.29337 | 0.035    | 0.075528 | no  |
| Fmo2          | -1.0606  | -2.56802 | 5.00E-05 | 0.00022  | yes |
| Gyg           | -1.06077 | -5.2568  | 5.00E-05 | 0.00022  | yes |
| 39325         | -1.06126 | -4.39753 | 5.00E-05 | 0.00022  | yes |
| Slc30a8       | -1.06157 | 0        | 1        | 1        | no  |
| Egr4          | -1.0641  | 0        | 1        | 1        | no  |
| Rem2          | -1.06535 | -3.02914 | 5.00E-05 | 0.00022  | yes |
| Cd180         | -1.06585 | 0        | 1        | 1        | no  |
| Rnd3          | -1.06589 | -3.2747  | 5.00E-05 | 0.00022  | yes |
| Manba         | -1.06747 | -2.32139 | 5.00E-05 | 0.00022  | yes |
| Bach1         | -1.07163 | -3.32276 | 5.00E-05 | 0.00022  | yes |
| Neto1         | -1.07167 | -2.44399 | 5.00E-05 | 0.00022  | yes |
| Itfg3         | -1.07186 | -3.79653 | 5.00E-05 | 0.00022  | yes |
| Slc39a14      | -1.07222 | -3.25007 | 5.00E-05 | 0.00022  | yes |
| Tnfrsf21      | -1.07228 | -5.25606 | 5.00E-05 | 0.00022  | yes |
| Wfs1          | -1.07321 | -4.64195 | 5.00E-05 | 0.00022  | yes |
| Ly6d          | -1.0744  | 0        | 1        | 1        | no  |
| Myliip        | -1.07621 | -2.48977 | 5.00E-05 | 0.00022  | yes |
| Rapgef5       | -1.07673 | -3.80082 | 5.00E-05 | 0.00022  | yes |
| Gas2          | -1.07873 | -2.78555 | 5.00E-05 | 0.00022  | yes |
| Apbb2         | -1.08072 | -4.53479 | 5.00E-05 | 0.00022  | yes |
| 3110070M22Rik | -1.08097 | 0        | 1        | 1        | no  |
| Slc12a8       | -1.08153 | 0        | 1        | 1        | no  |
| G630025P09Rik | -1.08164 | 0        | 1        | 1        | no  |
| Gdf6          | -1.08236 | 0        | 1        | 1        | no  |
| Zfp652os      | -1.08313 | -1.42405 | 0.08625  | 0.159259 | no  |
| Adcy8         | -1.08381 | -2.5893  | 5.00E-05 | 0.00022  | yes |
| Plxna2        | -1.08413 | -5.03001 | 5.00E-05 | 0.00022  | yes |
| Ncan          | -1.08432 | -2.98579 | 5.00E-05 | 0.00022  | yes |
| Ppm1h         | -1.08452 | -4.85245 | 5.00E-05 | 0.00022  | yes |
| Aldh3a1       | -1.08478 | 0        | 1        | 1        | no  |
| Hebp2         | -1.08536 | -4.28678 | 5.00E-05 | 0.00022  | yes |
| Rab30         | -1.08547 | -2.91978 | 5.00E-05 | 0.00022  | yes |
| Unc5c         | -1.0859  | -3.26541 | 5.00E-05 | 0.00022  | yes |
| Dsg1a         | -1.0863  | 0        | 1        | 1        | no  |
| Comp          | -1.08638 | -2.73329 | 5.00E-05 | 0.00022  | yes |
| Rpl3l         | -1.08663 | 0        | 1        | 1        | no  |
| Rxfp2         | -1.08828 | 0        | 1        | 1        | no  |
| Cryz          | -1.08834 | -1.71296 | 0.00165  | 0.00538  | yes |
| B230208H11Rik | -1.08838 | 0        | 1        | 1        | no  |
| Grpr          | -1.08997 | 0        | 1        | 1        | no  |
| Bcl9l         | -1.09084 | -3.00216 | 5.00E-05 | 0.00022  | yes |
| Opcml         | -1.09088 | -4.89303 | 5.00E-05 | 0.00022  | yes |
| Kif1c         | -1.09172 | -3.75745 | 5.00E-05 | 0.00022  | yes |
| Zyx           | -1.09175 | -4.26406 | 5.00E-05 | 0.00022  | yes |
| Dennd5b       | -1.09287 | -3.86383 | 5.00E-05 | 0.00022  | yes |
| Rgs9          | -1.09445 | -2.85299 | 5.00E-05 | 0.00022  | yes |
| Spdya         | -1.09493 | 0        | 1        | 1        | no  |
| Kifc3         | -1.09514 | -2.17705 | 0.00015  | 0.000615 | yes |
| Fndc1         | -1.09588 | -2.34619 | 0.0001   | 0.000422 | yes |
| Plcb4         | -1.09601 | -3.95882 | 5.00E-05 | 0.00022  | yes |

|               |          |           |          |          |     |
|---------------|----------|-----------|----------|----------|-----|
| Foxj1         | -1.09656 | -3.23567  | 5.00E-05 | 0.00022  | yes |
| Nfkb1         | -1.09671 | -3.51012  | 5.00E-05 | 0.00022  | yes |
| A330009N23Rik | -1.09727 | 0         | 1        | 1        | no  |
| Cnih3         | -1.09748 | -1.6967   | 0.0014   | 0.004657 | yes |
| Ptrf          | -1.09755 | -4.59013  | 5.00E-05 | 0.00022  | yes |
| 6430548M08Rik | -1.09795 | -5.0573   | 5.00E-05 | 0.00022  | yes |
| Psmc3ip       | -1.09814 | -0.478842 | 0.41055  | 0.542399 | no  |
| AA986860      | -1.09831 | -1.89462  | 0.00125  | 0.00422  | yes |
| Tmem38b       | -1.09896 | -2.34612  | 5.00E-05 | 0.00022  | yes |
| Gm4461        | -1.09898 | 0         | 1        | 1        | no  |
| Spry1         | -1.09904 | -1.6523   | 0.0045   | 0.012942 | yes |
| Col6a5        | -1.09961 | 0         | 1        | 1        | no  |
| Dlg3          | -1.09984 | -2.0122   | 0.00035  | 0.001342 | yes |
| Gm16062       | -1.09985 | -0.542017 | 0.46225  | 0.591842 | no  |
| Npb           | -1.1002  | 0         | 1        | 1        | no  |
| 1810062O18Rik | -1.1003  | 0         | 1        | 1        | no  |
| 2610316D01Rik | -1.10272 | -1.41421  | 0.0348   | 0.075182 | no  |
| Il11ra1       | -1.10404 | -2.17528  | 0.00075  | 0.00267  | yes |
| Csdc2         | -1.10448 | -4.73871  | 5.00E-05 | 0.00022  | yes |
| Agl           | -1.10531 | -5.1506   | 5.00E-05 | 0.00022  | yes |
| Tjp1          | -1.10535 | -4.37714  | 5.00E-05 | 0.00022  | yes |
| Rab26         | -1.10608 | 0         | 1        | 1        | no  |
| D430036J16Rik | -1.1066  | -0.971256 | 0.14035  | 0.23711  | no  |
| Tax1bp3       | -1.10687 | -2.00428  | 0.00165  | 0.00538  | yes |
| Slc6a12       | -1.10719 | 0         | 1        | 1        | no  |
| Cadps2        | -1.10737 | -3.98195  | 5.00E-05 | 0.00022  | yes |
| Csmd2         | -1.11017 | -3.4321   | 5.00E-05 | 0.00022  | yes |
| Tmprss2       | -1.1121  | 0         | 1        | 1        | no  |
| Gm16740       | -1.11212 | 0         | 1        | 1        | no  |
| Vgll4         | -1.11243 | -2.85777  | 5.00E-05 | 0.00022  | yes |
| 1700086L19Rik | -1.11294 | -1.76683  | 0.00085  | 0.002983 | yes |
| C77370        | -1.11306 | 0         | 1        | 1        | no  |
| Shisa4        | -1.11307 | -4.61481  | 5.00E-05 | 0.00022  | yes |
| Dennd1a       | -1.11355 | -2.85913  | 5.00E-05 | 0.00022  | yes |
| 4930513N10Rik | -1.11444 | 0         | 1        | 1        | no  |
| Gprc5c        | -1.11463 | -3.15497  | 5.00E-05 | 0.00022  | yes |
| Mmp11         | -1.11478 | -1.41351  | 0.01555  | 0.037972 | yes |
| Slc35b2       | -1.11507 | -3.56933  | 5.00E-05 | 0.00022  | yes |
| Plekhd1os     | -1.11515 | 0         | 1        | 1        | no  |
| Tpbg          | -1.11515 | 0         | 1        | 1        | no  |
| Hmgn1         | -1.11522 | -3.68271  | 5.00E-05 | 0.00022  | yes |
| Nptn          | -1.1154  | -5.73242  | 5.00E-05 | 0.00022  | yes |
| Wtip          | -1.11608 | -2.08443  | 0.00045  | 0.001682 | yes |
| Arhgap30      | -1.11809 | 0         | 1        | 1        | no  |
| Rtp1          | -1.1186  | 0         | 1        | 1        | no  |
| Nln           | -1.11915 | -2.68743  | 5.00E-05 | 0.00022  | yes |
| 1700008J07Rik | -1.11939 | 0         | 1        | 1        | no  |
| Crtac1        | -1.12045 | -3.91357  | 5.00E-05 | 0.00022  | yes |
| Spink10       | -1.12118 | -1.17996  | 0.0228   | 0.052607 | no  |
| Oprd1         | -1.12128 | -2.99107  | 5.00E-05 | 0.00022  | yes |
| Cdk17         | -1.12286 | -3.69874  | 5.00E-05 | 0.00022  | yes |
| Bend7         | -1.12295 | -1.66941  | 0.00225  | 0.007062 | yes |
| Abo           | -1.1233  | 0         | 1        | 1        | no  |

|               |          |           |          |          |     |
|---------------|----------|-----------|----------|----------|-----|
| Zfp365        | -1.12337 | -4.90187  | 5.00E-05 | 0.00022  | yes |
| Stx17         | -1.12362 | -3.27247  | 5.00E-05 | 0.00022  | yes |
| R3hcc1        | -1.12399 | -3.33975  | 5.00E-05 | 0.00022  | yes |
| Casc4         | -1.12513 | -4.48355  | 5.00E-05 | 0.00022  | yes |
| Hcn2          | -1.12621 | -0.7672   | 0.12405  | 0.214489 | no  |
| Zfp456        | -1.12641 | 0         | 1        | 1        | no  |
| Nyap2         | -1.12719 | -2.24154  | 5.00E-05 | 0.00022  | yes |
| Slc4a4        | -1.12736 | -4.96058  | 5.00E-05 | 0.00022  | yes |
| Casr          | -1.12838 | 0         | 1        | 1        | no  |
| Pck1          | -1.12912 | 0         | 1        | 1        | no  |
| Cd276         | -1.13    | -2.07402  | 0.0003   | 0.001164 | yes |
| Kcnn4         | -1.13035 | -2.53187  | 5.00E-05 | 0.00022  | yes |
| Cys1          | -1.13046 | -1.30777  | 0.01105  | 0.02829  | yes |
| Fuom          | -1.13052 | -1.78763  | 0.00045  | 0.001682 | yes |
| Slc16a13      | -1.13254 | -1.51549  | 0.0092   | 0.024131 | yes |
| Rps6ka1       | -1.13276 | -2.601    | 5.00E-05 | 0.00022  | yes |
| Asb13         | -1.13402 | -4.22888  | 5.00E-05 | 0.00022  | yes |
| Myl6b         | -1.13416 | -2.62194  | 0.00015  | 0.000615 | yes |
| B3gnt9        | -1.13428 | -0.708443 | 0.15575  | 0.25768  | no  |
| Col5a3        | -1.1351  | -4.51316  | 5.00E-05 | 0.00022  | yes |
| Nefl          | -1.13572 | -3.51226  | 5.00E-05 | 0.00022  | yes |
| Cyp2f2        | -1.13842 | 0         | 1        | 1        | no  |
| Has1          | -1.13937 | 0         | 1        | 1        | no  |
| Nlrp4f        | -1.14202 | 0         | 1        | 1        | no  |
| Kitl          | -1.14461 | -4.9915   | 5.00E-05 | 0.00022  | yes |
| Map1b         | -1.14521 | -3.27655  | 5.00E-05 | 0.00022  | yes |
| Spred1        | -1.14667 | -4.77829  | 5.00E-05 | 0.00022  | yes |
| Bzrap1        | -1.14726 | -3.15192  | 5.00E-05 | 0.00022  | yes |
| Simc1         | -1.14794 | -1.04014  | 0.05465  | 0.109955 | no  |
| Oprl1         | -1.14846 | -3.22496  | 5.00E-05 | 0.00022  | yes |
| Ablim2        | -1.14867 | -3.87603  | 5.00E-05 | 0.00022  | yes |
| Leprel2       | -1.14896 | -2.19064  | 0.00025  | 0.000985 | yes |
| Adck3         | -1.14902 | -1.19445  | 0.02565  | 0.058101 | no  |
| Ccdc37        | -1.14929 | -2.12281  | 0.00075  | 0.00267  | yes |
| D830031N03Rik | -1.15008 | -0.932229 | 0.0802   | 0.15054  | no  |
| Fgfr1         | -1.15142 | -1.72115  | 0.002    | 0.006363 | yes |
| 6330409D20Rik | -1.15163 | -0.843806 | 0.1071   | 0.189832 | no  |
| Otud7b        | -1.15179 | -4.74077  | 5.00E-05 | 0.00022  | yes |
| Pilrb1        | -1.15227 | 0         | 1        | 1        | no  |
| Trim66        | -1.15425 | -2.14405  | 5.00E-05 | 0.00022  | yes |
| Zfp493        | -1.15444 | 0         | 1        | 1        | no  |
| Dnaaf3        | -1.15455 | 0         | 1        | 1        | no  |
| Reck          | -1.15457 | -2.67656  | 5.00E-05 | 0.00022  | yes |
| Rwdd2a        | -1.15492 | -1.65881  | 0.0017   | 0.005514 | yes |
| Slc1a5        | -1.15558 | -3.8062   | 5.00E-05 | 0.00022  | yes |
| Ryk           | -1.15585 | -3.14846  | 5.00E-05 | 0.00022  | yes |
| Nfib          | -1.15597 | -4.62501  | 5.00E-05 | 0.00022  | yes |
| Rnf165        | -1.15658 | -2.3054   | 5.00E-05 | 0.00022  | yes |
| Hsd17b11      | -1.15746 | -5.32161  | 5.00E-05 | 0.00022  | yes |
| Rara          | -1.15783 | -1.989    | 0.00025  | 0.000985 | yes |
| Echdc3        | -1.15882 | 0         | 1        | 1        | no  |
| Klhl4         | -1.15983 | 0         | 1        | 1        | no  |
| Clybl         | -1.16147 | -2.98531  | 5.00E-05 | 0.00022  | yes |

|               |          |           |          |          |     |
|---------------|----------|-----------|----------|----------|-----|
| Dnmt3b        | -1.16365 | 0         | 1        | 1        | no  |
| Zak           | -1.16526 | -3.93079  | 5.00E-05 | 0.00022  | yes |
| Dmkn          | -1.16531 | 0         | 1        | 1        | no  |
| Ddah2         | -1.166   | -2.9609   | 5.00E-05 | 0.00022  | yes |
| Aldh1a3       | -1.16619 | -1.60187  | 0.0052   | 0.014691 | yes |
| Alpk3         | -1.16762 | 0         | 1        | 1        | no  |
| Limd1         | -1.16879 | -3.48182  | 5.00E-05 | 0.00022  | yes |
| Tbx18         | -1.16887 | 0         | 1        | 1        | no  |
| Adcy3         | -1.1689  | -2.85741  | 5.00E-05 | 0.00022  | yes |
| Map10         | -1.16927 | -1.55302  | 0.00685  | 0.018707 | yes |
| F5            | -1.16931 | 0         | 1        | 1        | no  |
| Hhipl2        | -1.16939 | 0         | 1        | 1        | no  |
| Catip         | -1.1697  | 0         | 1        | 1        | no  |
| Serpinb6c     | -1.16974 | 0         | 1        | 1        | no  |
| 4833419F23Rik | -1.16981 | 0         | 1        | 1        | no  |
| Gm8898        | -1.17039 | 0         | 1        | 1        | no  |
| Cyp1b1        | -1.17066 | -3.75417  | 5.00E-05 | 0.00022  | yes |
| Muc15         | -1.17129 | 0         | 1        | 1        | no  |
| Cc2d2a        | -1.17237 | -2.79639  | 5.00E-05 | 0.00022  | yes |
| Soga1         | -1.17314 | -4.47166  | 5.00E-05 | 0.00022  | yes |
| Aplnr         | -1.17332 | -1.95262  | 0.0005   | 0.00185  | yes |
| Oat           | -1.17369 | -5.3386   | 5.00E-05 | 0.00022  | yes |
| Fbxo27        | -1.1751  | -1.95187  | 0.00015  | 0.000615 | yes |
| Cables1       | -1.17542 | -1.95126  | 0.00025  | 0.000985 | yes |
| Myom1         | -1.17542 | 0         | 1        | 1        | no  |
| Ybx2          | -1.17566 | 0         | 1        | 1        | no  |
| Tubb6         | -1.17626 | -2.16759  | 0.0005   | 0.00185  | yes |
| Cd96          | -1.17713 | -1.33519  | 0.02245  | 0.051907 | no  |
| Pkd1l3        | -1.17722 | 0         | 1        | 1        | no  |
| Extl2         | -1.17814 | -4.82193  | 5.00E-05 | 0.00022  | yes |
| Dexi          | -1.17845 | -4.45574  | 5.00E-05 | 0.00022  | yes |
| Tnfrsf8       | -1.17888 | 0         | 1        | 1        | no  |
| Pcdh19        | -1.179   | -2.56542  | 5.00E-05 | 0.00022  | yes |
| Nhsl1         | -1.18095 | -2.81301  | 5.00E-05 | 0.00022  | yes |
| Trabd2b       | -1.18152 | 0         | 1        | 1        | no  |
| Fgf1          | -1.18333 | -5.44299  | 5.00E-05 | 0.00022  | yes |
| Fam213b       | -1.1841  | -4.62344  | 5.00E-05 | 0.00022  | yes |
| Atp1b1        | -1.18449 | -4.58673  | 5.00E-05 | 0.00022  | yes |
| Secisbp2l     | -1.18494 | -5.60801  | 5.00E-05 | 0.00022  | yes |
| Asah2         | -1.18652 | -4.25204  | 5.00E-05 | 0.00022  | yes |
| 1700009P17Rik | -1.18685 | -1.22446  | 0.062    | 0.121986 | no  |
| Ifi204        | -1.18709 | 0         | 1        | 1        | no  |
| Dgat2         | -1.18739 | -3.1192   | 5.00E-05 | 0.00022  | yes |
| Lin7b         | -1.18924 | -1.07146  | 0.04675  | 0.096685 | no  |
| Toporsos      | -1.1898  | -0.535185 | 0.2858   | 0.412008 | no  |
| Resp18        | -1.19101 | -5.90012  | 5.00E-05 | 0.00022  | yes |
| Rab13         | -1.19116 | -1.95955  | 0.00275  | 0.008412 | yes |
| Krt1          | -1.19116 | 0         | 1        | 1        | no  |
| Col16a1       | -1.19141 | -3.54944  | 5.00E-05 | 0.00022  | yes |
| Gm6787        | -1.19155 | 0         | 1        | 1        | no  |
| Cables2       | -1.19293 | -3.79555  | 5.00E-05 | 0.00022  | yes |
| Gm14403       | -1.19338 | -2.10234  | 0.0003   | 0.001164 | yes |
| Sh3rf1        | -1.1942  | -2.84596  | 5.00E-05 | 0.00022  | yes |

|               |          |           |          |          |     |
|---------------|----------|-----------|----------|----------|-----|
| 2310065F04Rik | -1.19526 | 0         | 1        | 1        | no  |
| Ppard         | -1.19613 | -2.75702  | 5.00E-05 | 0.00022  | yes |
| Gm19705       | -1.19654 | -0.687654 | 0.26985  | 0.394719 | no  |
| Arhgef37      | -1.19734 | -1.96523  | 0.00055  | 0.002016 | yes |
| 4933412E12Rik | -1.1975  | -1.05034  | 0.03225  | 0.070569 | no  |
| 2610037D02Rik | -1.19798 | 0         | 1        | 1        | no  |
| Fbxo2         | -1.19833 | -6.4736   | 5.00E-05 | 0.00022  | yes |
| Zfp114        | -1.19859 | 0         | 1        | 1        | no  |
| Scarb1        | -1.19898 | -3.30782  | 5.00E-05 | 0.00022  | yes |
| Tmprss9       | -1.19903 | 0         | 1        | 1        | no  |
| Adam21        | -1.19956 | 0         | 1        | 1        | no  |
| Ly9           | -1.20101 | 0         | 1        | 1        | no  |
| Aox3          | -1.20188 | 0         | 1        | 1        | no  |
| Mansc1        | -1.20193 | -2.77442  | 5.00E-05 | 0.00022  | yes |
| BC021767      | -1.20228 | 0         | 1        | 1        | no  |
| Fbll1         | -1.20286 | -2.02213  | 0.0016   | 0.005236 | yes |
| Megf6         | -1.2034  | 0         | 1        | 1        | no  |
| Mpp2          | -1.20348 | -3.72343  | 5.00E-05 | 0.00022  | yes |
| Nrsn2         | -1.20477 | -1.9873   | 0.00055  | 0.002016 | yes |
| Aldoc         | -1.20482 | -5.85269  | 5.00E-05 | 0.00022  | yes |
| Tmem121       | -1.20529 | -2.02919  | 0.0012   | 0.004068 | yes |
| Tlr6          | -1.20587 | 0         | 1        | 1        | no  |
| 4930556M19Rik | -1.20604 | 0         | 1        | 1        | no  |
| Zfp773        | -1.20662 | 0         | 1        | 1        | no  |
| Socs3         | -1.20963 | -4.90642  | 5.00E-05 | 0.00022  | yes |
| Slc38a1       | -1.20988 | -4.98198  | 5.00E-05 | 0.00022  | yes |
| 2610100L16Rik | -1.21012 | 0         | 1        | 1        | no  |
| BC033916      | -1.21075 | 0         | 1        | 1        | no  |
| Plcb1         | -1.21181 | -4.41591  | 5.00E-05 | 0.00022  | yes |
| Prickle1      | -1.21336 | -2.51932  | 5.00E-05 | 0.00022  | yes |
| Gm6498        | -1.21394 | 0         | 1        | 1        | no  |
| Plxdc1        | -1.21441 | -1.96085  | 0.00035  | 0.001342 | yes |
| Bmp4          | -1.21508 | -1.19302  | 0.0223   | 0.05166  | no  |
| 1810062G17Rik | -1.21593 | 0         | 1        | 1        | no  |
| Grm5          | -1.21705 | 0         | 1        | 1        | no  |
| Tigd4         | -1.21908 | 0         | 1        | 1        | no  |
| Sqrdl         | -1.21983 | -1.8482   | 0.00055  | 0.002016 | yes |
| Eli2          | -1.22023 | -4.1425   | 5.00E-05 | 0.00022  | yes |
| Gsto2         | -1.22078 | 0         | 1        | 1        | no  |
| Sost          | -1.2209  | 0         | 1        | 1        | no  |
| Ntn5          | -1.22127 | -1.26296  | 0.02245  | 0.051907 | no  |
| Nav2          | -1.22218 | -3.2414   | 5.00E-05 | 0.00022  | yes |
| Higd1b        | -1.22357 | 0         | 1        | 1        | no  |
| Cobll1        | -1.22398 | -3.08335  | 5.00E-05 | 0.00022  | yes |
| Npffr2        | -1.22709 | 0         | 1        | 1        | no  |
| 6030498E09Rik | -1.22827 | 0         | 1        | 1        | no  |
| Dock5         | -1.2287  | -5.27658  | 5.00E-05 | 0.00022  | yes |
| Rbm20         | -1.22949 | 0         | 1        | 1        | no  |
| Ms4a4d        | -1.22962 | 0         | 1        | 1        | no  |
| Zfhx2os       | -1.22992 | 0         | 1        | 1        | no  |
| Slc4a10       | -1.23002 | -2.46196  | 5.00E-05 | 0.00022  | yes |
| Ltb4r1        | -1.23018 | 0         | 1        | 1        | no  |
| Lmo4          | -1.2311  | -3.72692  | 5.00E-05 | 0.00022  | yes |



|               |          |          |          |          |     |
|---------------|----------|----------|----------|----------|-----|
| Dcun1d4       | -1.2313  | -4.75983 | 5.00E-05 | 0.00022  | yes |
| Pycard        | -1.23246 | 0        | 1        | 1        | no  |
| LOC100861978  | -1.23317 | 0        | 1        | 1        | no  |
| Stk32c        | -1.23396 | -4.23669 | 5.00E-05 | 0.00022  | yes |
| Pcgf5         | -1.23452 | -1.74914 | 0.0055   | 0.015427 | yes |
| Gbp11         | -1.23472 | 0        | 1        | 1        | no  |
| Slc6a17       | -1.23562 | -5.88915 | 5.00E-05 | 0.00022  | yes |
| Spsb1         | -1.23692 | -4.09633 | 5.00E-05 | 0.00022  | yes |
| Zfp467        | -1.23957 | -1.81919 | 0.00065  | 0.002343 | yes |
| Nr3c2         | -1.23967 | -3.42027 | 5.00E-05 | 0.00022  | yes |
| Marcksl1      | -1.2403  | -3.29699 | 5.00E-05 | 0.00022  | yes |
| Btbd11        | -1.24065 | -3.16727 | 5.00E-05 | 0.00022  | yes |
| Mdk           | -1.241   | -1.14566 | 0.03245  | 0.070925 | no  |
| Prox2         | -1.24115 | 0        | 1        | 1        | no  |
| Crispld1      | -1.24205 | -2.66429 | 5.00E-05 | 0.00022  | yes |
| Slco3a1       | -1.24362 | -4.29672 | 5.00E-05 | 0.00022  | yes |
| Ngfr          | -1.24491 | -5.91558 | 5.00E-05 | 0.00022  | yes |
| Cd1d1         | -1.24513 | -1.82875 | 0.0026   | 0.008011 | yes |
| Sik2          | -1.24519 | -1.70386 | 0.00155  | 0.005095 | yes |
| Cdh13         | -1.24567 | -2.51349 | 0.0001   | 0.000422 | yes |
| Gstt1         | -1.24719 | -3.06392 | 5.00E-05 | 0.00022  | yes |
| Ttc23         | -1.24773 | -1.75071 | 0.0009   | 0.003139 | yes |
| Abcg2         | -1.24774 | -5.37155 | 5.00E-05 | 0.00022  | yes |
| Tnni2         | -1.24811 | 0        | 1        | 1        | no  |
| Slc9a1        | -1.24876 | -4.81055 | 5.00E-05 | 0.00022  | yes |
| Gli1          | -1.2499  | 0        | 1        | 1        | no  |
| Cnr1          | -1.25155 | -4.81302 | 5.00E-05 | 0.00022  | yes |
| Eda2r         | -1.25351 | 0        | 1        | 1        | no  |
| Tlcd1         | -1.25432 | -2.28495 | 5.00E-05 | 0.00022  | yes |
| Pik3cg        | -1.25488 | 0        | 1        | 1        | no  |
| 4930539E08Rik | -1.25516 | 0        | 1        | 1        | no  |
| 4930579F01Rik | -1.25546 | 0        | 1        | 1        | no  |
| Gnai1         | -1.25582 | -5.94145 | 5.00E-05 | 0.00022  | yes |
| Stc2          | -1.25602 | 0        | 1        | 1        | no  |
| Hoxb7         | -1.25609 | -2.51825 | 0.0002   | 0.000803 | yes |
| Fam83e        | -1.25643 | 0        | 1        | 1        | no  |
| Adamts13      | -1.25684 | 0        | 1        | 1        | no  |
| Cndp1         | -1.25723 | 0        | 1        | 1        | no  |
| Maob          | -1.25766 | -1.82326 | 0.0028   | 0.008532 | yes |
| Nos1ap        | -1.26087 | -2.29114 | 5.00E-05 | 0.00022  | yes |
| 1700007B14Rik | -1.26329 | 0        | 1        | 1        | no  |
| Angptl2       | -1.26342 | -2.30745 | 0.0001   | 0.000422 | yes |
| Ephb2         | -1.26361 | -2.15371 | 0.0003   | 0.001164 | yes |
| Map7d2        | -1.26487 | -6.05093 | 5.00E-05 | 0.00022  | yes |
| Mettl9        | -1.26541 | -3.63989 | 5.00E-05 | 0.00022  | yes |
| Gm10789       | -1.26719 | 0        | 1        | 1        | no  |
| Nf1           | -1.2677  | -5.69803 | 5.00E-05 | 0.00022  | yes |
| Evi2b         | -1.26813 | 0        | 1        | 1        | no  |
| Rbp2          | -1.26864 | -1.79814 | 0.01775  | 0.042546 | yes |
| Pde4a         | -1.26925 | -2.43403 | 5.00E-05 | 0.00022  | yes |
| 2410131K14Rik | -1.26975 | -3.3953  | 5.00E-05 | 0.00022  | yes |
| Edaradd       | -1.27037 | 0        | 1        | 1        | no  |
| Kcnrg         | -1.27062 | 0        | 1        | 1        | no  |

|               |          |          |          |          |     |
|---------------|----------|----------|----------|----------|-----|
| Bfsp2         | -1.27188 | 0        | 1        | 1        | no  |
| Gem           | -1.27357 | -1.71214 | 0.00405  | 0.011765 | yes |
| Fbxo44        | -1.27386 | -4.40954 | 5.00E-05 | 0.00022  | yes |
| Adamtsl4      | -1.27401 | -2.54184 | 5.00E-05 | 0.00022  | yes |
| Greb1l        | -1.27538 | -2.70912 | 5.00E-05 | 0.00022  | yes |
| Pkdcc         | -1.27538 | -2.5851  | 0.00015  | 0.000615 | yes |
| Nr4a2         | -1.27588 | -2.6402  | 5.00E-05 | 0.00022  | yes |
| Trp53i11      | -1.27735 | -2.16732 | 0.0002   | 0.000803 | yes |
| Plat          | -1.27839 | -3.3065  | 5.00E-05 | 0.00022  | yes |
| Kcnq5         | -1.27867 | -4.2969  | 5.00E-05 | 0.00022  | yes |
| 2310005G13Rik | -1.27904 | 0        | 1        | 1        | no  |
| Gm20063       | -1.27909 | 0        | 1        | 1        | no  |
| E330009J07Rik | -1.28131 | -1.95166 | 0.00155  | 0.005095 | yes |
| Prickle2      | -1.28165 | -4.85654 | 5.00E-05 | 0.00022  | yes |
| Tgif1         | -1.28166 | -1.4537  | 0.00265  | 0.008146 | yes |
| Abi3bp        | -1.28304 | -2.5787  | 5.00E-05 | 0.00022  | yes |
| Pros1         | -1.28352 | -3.43136 | 5.00E-05 | 0.00022  | yes |
| Gm4890        | -1.28386 | 0        | 1        | 1        | no  |
| Slc20a2       | -1.2845  | -2.82483 | 5.00E-05 | 0.00022  | yes |
| Cyp27a1       | -1.2845  | -1.32767 | 0.026    | 0.058814 | no  |
| Fam189a1      | -1.28698 | -1.65745 | 0.00315  | 0.009455 | yes |
| Htr3b         | -1.28751 | -3.90901 | 5.00E-05 | 0.00022  | yes |
| Nkain2        | -1.28758 | -3.85731 | 5.00E-05 | 0.00022  | yes |
| Ermp1         | -1.288   | -6.10541 | 5.00E-05 | 0.00022  | yes |
| Mtfp1         | -1.28843 | -3.17399 | 5.00E-05 | 0.00022  | yes |
| Mpzl1         | -1.2892  | -3.74198 | 5.00E-05 | 0.00022  | yes |
| Cfh           | -1.29151 | -4.20404 | 5.00E-05 | 0.00022  | yes |
| Slc35d2       | -1.29309 | -1.90912 | 0.00185  | 0.005939 | yes |
| Gabra4        | -1.29318 | 0        | 1        | 1        | no  |
| Golim4        | -1.29357 | -4.97203 | 5.00E-05 | 0.00022  | yes |
| Aifm2         | -1.29372 | -1.48839 | 0.01105  | 0.02829  | yes |
| Pou4f3        | -1.29449 | -2.85996 | 0.00015  | 0.000615 | yes |
| Susd1         | -1.29458 | -1.86902 | 0.00155  | 0.005095 | yes |
| Henmt1        | -1.29492 | 0        | 1        | 1        | no  |
| Elmo1         | -1.2953  | -5.28685 | 5.00E-05 | 0.00022  | yes |
| Acsl6         | -1.29538 | -5.37429 | 5.00E-05 | 0.00022  | yes |
| Lurap1        | -1.29689 | -2.64051 | 5.00E-05 | 0.00022  | yes |
| Rel2          | -1.29781 | -5.31883 | 5.00E-05 | 0.00022  | yes |
| Nod1          | -1.29812 | -3.13247 | 5.00E-05 | 0.00022  | yes |
| Tiam1         | -1.30158 | -2.86546 | 5.00E-05 | 0.00022  | yes |
| Espnl         | -1.30167 | 0        | 1        | 1        | no  |
| 6430710C18Rik | -1.30246 | 0        | 1        | 1        | no  |
| Laptm4b       | -1.30265 | -5.91585 | 5.00E-05 | 0.00022  | yes |
| Ttc34         | -1.30328 | 0        | 1        | 1        | no  |
| Ceacam1       | -1.30366 | -1.41042 | 0.03345  | 0.07268  | no  |
| Sifn8         | -1.30367 | 0        | 1        | 1        | no  |
| Gm2a          | -1.30436 | -4.53948 | 5.00E-05 | 0.00022  | yes |
| Gbp2          | -1.30466 | -2.55924 | 5.00E-05 | 0.00022  | yes |
| Gas6          | -1.30523 | -6.26568 | 5.00E-05 | 0.00022  | yes |
| C1qtnf2       | -1.30584 | -1.7554  | 0.00755  | 0.020384 | yes |
| 1700047M11Rik | -1.30585 | 0        | 1        | 1        | no  |
| Lrrk2         | -1.30673 | -5.25316 | 5.00E-05 | 0.00022  | yes |
| Mx1           | -1.30682 | 0        | 1        | 1        | no  |

|               |          |           |          |          |     |
|---------------|----------|-----------|----------|----------|-----|
| Gm12504       | -1.30687 | 0         | 1        | 1        | no  |
| Cttnbp2nl     | -1.30727 | -4.66876  | 5.00E-05 | 0.00022  | yes |
| Yes1          | -1.30742 | -3.41393  | 5.00E-05 | 0.00022  | yes |
| Kazn          | -1.3076  | -4.46586  | 5.00E-05 | 0.00022  | yes |
| AW549542      | -1.30938 | 0         | 1        | 1        | no  |
| Cpt1a         | -1.3102  | -6.18922  | 5.00E-05 | 0.00022  | yes |
| Mum1l1        | -1.31138 | -1.61017  | 0.00115  | 0.00391  | yes |
| Pik3c2b       | -1.31148 | -2.8105   | 5.00E-05 | 0.00022  | yes |
| Fndc3b        | -1.31223 | -3.98335  | 5.00E-05 | 0.00022  | yes |
| Tmc7          | -1.31232 | -3.95617  | 5.00E-05 | 0.00022  | yes |
| Tdrd5         | -1.31267 | 0         | 1        | 1        | no  |
| Itga6         | -1.3128  | -5.40734  | 5.00E-05 | 0.00022  | yes |
| 36769         | -1.31356 | -3.95979  | 5.00E-05 | 0.00022  | yes |
| Slc24a3       | -1.31501 | -4.12241  | 5.00E-05 | 0.00022  | yes |
| Zic2          | -1.3155  | -1.69984  | 0.00425  | 0.01229  | yes |
| Scd3          | -1.31579 | 0         | 1        | 1        | no  |
| Pyroxd2       | -1.31615 | 0         | 1        | 1        | no  |
| Lipk          | -1.31685 | -1.29642  | 0.0159   | 0.038763 | yes |
| Ephb4         | -1.31752 | -2.8534   | 5.00E-05 | 0.00022  | yes |
| Cd27          | -1.31809 | 0         | 1        | 1        | no  |
| Plekhh2       | -1.31855 | 0         | 1        | 1        | no  |
| Foxs1         | -1.32131 | 0         | 1        | 1        | no  |
| Slc29a2       | -1.32188 | -2.59813  | 5.00E-05 | 0.00022  | yes |
| Mtap          | -1.32438 | -4.05675  | 5.00E-05 | 0.00022  | yes |
| Hrk           | -1.32505 | 0         | 1        | 1        | no  |
| A230009B12Rik | -1.32508 | 0         | 1        | 1        | no  |
| Pkp1          | -1.32591 | 0         | 1        | 1        | no  |
| Robo3         | -1.32798 | 0         | 1        | 1        | no  |
| Zdbf2         | -1.32937 | 0         | 1        | 1        | no  |
| Ggnbp1        | -1.32946 | -0.571678 | 0.2542   | 0.376897 | no  |
| Fbxo15        | -1.33037 | 0         | 1        | 1        | no  |
| Ppap2a        | -1.33102 | -3.72245  | 5.00E-05 | 0.00022  | yes |
| Stk10         | -1.33112 | -2.88933  | 5.00E-05 | 0.00022  | yes |
| Gm11762       | -1.33207 | 0         | 1        | 1        | no  |
| Htr1b         | -1.33272 | -1.91985  | 0.0007   | 0.002506 | yes |
| Srd5a2        | -1.33431 | -1.76051  | 0.01235  | 0.031108 | yes |
| Tcirg1        | -1.33555 | -2.53144  | 5.00E-05 | 0.00022  | yes |
| Hoxd1         | -1.33596 | -4.22325  | 5.00E-05 | 0.00022  | yes |
| Plekhg1       | -1.3362  | -4.51833  | 5.00E-05 | 0.00022  | yes |
| Ccdc69        | -1.33753 | 0         | 1        | 1        | no  |
| Ccl3          | -1.33823 | 0         | 1        | 1        | no  |
| Aatk          | -1.33843 | -5.99598  | 5.00E-05 | 0.00022  | yes |
| Adamts18      | -1.33878 | 0         | 1        | 1        | no  |
| Ccdc24        | -1.33885 | 0         | 1        | 1        | no  |
| Tgfa          | -1.33938 | -3.32132  | 5.00E-05 | 0.00022  | yes |
| Calcoco2      | -1.33954 | 0         | 1        | 1        | no  |
| Epha4         | -1.33985 | -2.77774  | 5.00E-05 | 0.00022  | yes |
| Dtx4          | -1.34003 | -4.03848  | 5.00E-05 | 0.00022  | yes |
| Smpd3         | -1.34004 | -4.99751  | 5.00E-05 | 0.00022  | yes |
| Csrnp1        | -1.3418  | -3.12811  | 5.00E-05 | 0.00022  | yes |
| Cilp2         | -1.3419  | 0         | 1        | 1        | no  |
| Gpr123        | -1.3422  | -2.51579  | 0.0001   | 0.000422 | yes |
| 4931406C07Rik | -1.34244 | -2.79258  | 5.00E-05 | 0.00022  | yes |

|               |          |           |          |          |     |
|---------------|----------|-----------|----------|----------|-----|
| Ifitm10       | -1.34367 | -2.01028  | 0.0008   | 0.002828 | yes |
| Dact1         | -1.34402 | -2.78522  | 5.00E-05 | 0.00022  | yes |
| Magix         | -1.34427 | -1.4864   | 0.0068   | 0.018594 | yes |
| Phyhip        | -1.34507 | -2.55647  | 5.00E-05 | 0.00022  | yes |
| Gal3st3       | -1.34756 | -1.98931  | 0.00115  | 0.00391  | yes |
| Ckmt1         | -1.34774 | -6.14327  | 5.00E-05 | 0.00022  | yes |
| Txnip         | -1.34852 | -5.25493  | 5.00E-05 | 0.00022  | yes |
| Sall2         | -1.35157 | -4.30385  | 5.00E-05 | 0.00022  | yes |
| 4931408D14Rik | -1.3523  | 0         | 1        | 1        | no  |
| Slc25a34      | -1.35276 | 0         | 1        | 1        | no  |
| Gm9899        | -1.35317 | 0         | 1        | 1        | no  |
| Cers1         | -1.35337 | 0         | 1        | 1        | no  |
| Cd226         | -1.3549  | 0         | 1        | 1        | no  |
| Nos1          | -1.35598 | -2.79812  | 5.00E-05 | 0.00022  | yes |
| Gm14169       | -1.35621 | 0         | 1        | 1        | no  |
| Ripply2       | -1.35694 | 0         | 1        | 1        | no  |
| Hykk          | -1.35738 | -2.33715  | 0.0001   | 0.000422 | yes |
| Ikbip         | -1.3585  | -2.67884  | 5.00E-05 | 0.00022  | yes |
| 9330117012Rik | -1.36042 | 0         | 1        | 1        | no  |
| Trim12a       | -1.36105 | -1.37915  | 0.01095  | 0.028083 | yes |
| Tbx3os2       | -1.36106 | -2.20926  | 0.00085  | 0.002983 | yes |
| P2rx5         | -1.36191 | -3.14421  | 5.00E-05 | 0.00022  | yes |
| Gm14379       | -1.36304 | 0         | 1        | 1        | no  |
| Pcdh17        | -1.36346 | -4.87234  | 5.00E-05 | 0.00022  | yes |
| Zfp36         | -1.36378 | -5.5476   | 5.00E-05 | 0.00022  | yes |
| Psph          | -1.36433 | -3.25716  | 5.00E-05 | 0.00022  | yes |
| Msi1          | -1.36452 | -2.4103   | 0.0002   | 0.000803 | yes |
| Msln          | -1.3649  | 0         | 1        | 1        | no  |
| Tcf23         | -1.36555 | 0         | 1        | 1        | no  |
| Rassf10       | -1.36618 | -1.86953  | 0.0015   | 0.004953 | yes |
| Ctns          | -1.36703 | -4.35095  | 5.00E-05 | 0.00022  | yes |
| Cttnbp2       | -1.368   | -3.16781  | 5.00E-05 | 0.00022  | yes |
| Hspa1l        | -1.36936 | 0         | 1        | 1        | no  |
| Wscd2         | -1.36937 | -2.18432  | 0.0002   | 0.000803 | yes |
| Glr3          | -1.37087 | -6.17675  | 5.00E-05 | 0.00022  | yes |
| Plin1         | -1.37223 | 0         | 1        | 1        | no  |
| Gipc3         | -1.37238 | 0         | 1        | 1        | no  |
| Fam13a        | -1.37272 | -4.14813  | 5.00E-05 | 0.00022  | yes |
| Ccnd2         | -1.37324 | -3.39617  | 5.00E-05 | 0.00022  | yes |
| Airn          | -1.37384 | -0.971308 | 0.1796   | 0.288994 | no  |
| Ptprd         | -1.37457 | -4.711    | 5.00E-05 | 0.00022  | yes |
| Crim1         | -1.37482 | -2.63751  | 5.00E-05 | 0.00022  | yes |
| Klrg2         | -1.37542 | -1.9058   | 0.0026   | 0.008011 | yes |
| Slc4a2        | -1.37609 | -5.46179  | 5.00E-05 | 0.00022  | yes |
| Gdnf          | -1.37611 | 0         | 1        | 1        | no  |
| Jam2          | -1.37617 | -5.40464  | 5.00E-05 | 0.00022  | yes |
| Adamts1       | -1.37681 | -3.97195  | 5.00E-05 | 0.00022  | yes |
| Exd1          | -1.37719 | 0         | 1        | 1        | no  |
| Ksr1          | -1.3772  | -3.51539  | 5.00E-05 | 0.00022  | yes |
| Rest          | -1.37926 | -2.39825  | 5.00E-05 | 0.00022  | yes |
| 4921508D12Rik | -1.37961 | 0         | 1        | 1        | no  |
| Pwwp2b        | -1.38033 | -2.79993  | 5.00E-05 | 0.00022  | yes |
| Kcna10        | -1.38086 | 0         | 1        | 1        | no  |

|               |          |          |          |          |     |
|---------------|----------|----------|----------|----------|-----|
| Csad          | -1.38231 | -3.29307 | 5.00E-05 | 0.00022  | yes |
| Magee2        | -1.38254 | -2.43884 | 5.00E-05 | 0.00022  | yes |
| Cit           | -1.3828  | -3.32383 | 5.00E-05 | 0.00022  | yes |
| Cntnap2       | -1.38346 | -5.8988  | 5.00E-05 | 0.00022  | yes |
| Igfn1         | -1.3839  | 0        | 1        | 1        | no  |
| Atp11a        | -1.38425 | -6.14065 | 5.00E-05 | 0.00022  | yes |
| Rapgef3       | -1.38607 | -2.25812 | 0.0001   | 0.000422 | yes |
| Hc            | -1.38613 | 0        | 1        | 1        | no  |
| Atp8b1        | -1.38667 | 0        | 1        | 1        | no  |
| Rnd2          | -1.38674 | -4.40783 | 5.00E-05 | 0.00022  | yes |
| Gpr1          | -1.38722 | 0        | 1        | 1        | no  |
| Zfp536        | -1.38771 | -3.17904 | 5.00E-05 | 0.00022  | yes |
| Cdkn2c        | -1.38815 | -1.97403 | 0.00375  | 0.011009 | yes |
| Il1rap        | -1.38825 | -2.85749 | 5.00E-05 | 0.00022  | yes |
| Fam184b       | -1.3884  | -2.38246 | 5.00E-05 | 0.00022  | yes |
| Il12rb1       | -1.38844 | 0        | 1        | 1        | no  |
| Lrp1          | -1.38893 | -6.22722 | 5.00E-05 | 0.00022  | yes |
| Cd81          | -1.38961 | -5.76913 | 5.00E-05 | 0.00022  | yes |
| Slc44a5       | -1.38962 | 0        | 1        | 1        | no  |
| Zfp599        | -1.38987 | 0        | 1        | 1        | no  |
| Chchd10       | -1.3914  | -6.02503 | 5.00E-05 | 0.00022  | yes |
| Ccdc157       | -1.39177 | -3.62795 | 5.00E-05 | 0.00022  | yes |
| Megf9         | -1.39239 | -6.1549  | 5.00E-05 | 0.00022  | yes |
| Cryba4        | -1.39273 | 0        | 1        | 1        | no  |
| Celsr2        | -1.39333 | -5.48253 | 5.00E-05 | 0.00022  | yes |
| Dmbx1         | -1.39357 | 0        | 1        | 1        | no  |
| Fzd9          | -1.39357 | 0        | 1        | 1        | no  |
| Tdrd1         | -1.39397 | 0        | 1        | 1        | no  |
| Tmem71        | -1.39405 | 0        | 1        | 1        | no  |
| Kcnd2         | -1.39408 | -2.05212 | 0.0004   | 0.001513 | yes |
| Dlx4          | -1.39501 | 0        | 1        | 1        | no  |
| Nmbr          | -1.39596 | 0        | 1        | 1        | no  |
| Tmem56        | -1.39597 | -6.42393 | 5.00E-05 | 0.00022  | yes |
| C2cd4c        | -1.397   | -3.00847 | 5.00E-05 | 0.00022  | yes |
| Sox13         | -1.3976  | -2.90027 | 5.00E-05 | 0.00022  | yes |
| Cdkl4         | -1.39997 | -1.93125 | 0.00145  | 0.004804 | yes |
| Ache          | -1.40041 | -5.8134  | 5.00E-05 | 0.00022  | yes |
| Ctso          | -1.40054 | -3.53002 | 5.00E-05 | 0.00022  | yes |
| Sulf1         | -1.40056 | -4.56874 | 5.00E-05 | 0.00022  | yes |
| C130030K03Rik | -1.40057 | 0        | 1        | 1        | no  |
| Iqub          | -1.40252 | 0        | 1        | 1        | no  |
| Myh3          | -1.40267 | 0        | 1        | 1        | no  |
| 9030025P20Rik | -1.40322 | 0        | 1        | 1        | no  |
| Fam65c        | -1.40366 | 0        | 1        | 1        | no  |
| Sema4g        | -1.40382 | -3.10275 | 5.00E-05 | 0.00022  | yes |
| 5031414D18Rik | -1.404   | 0        | 1        | 1        | no  |
| Igsf6         | -1.40405 | 0        | 1        | 1        | no  |
| BC064078      | -1.40556 | -1.27008 | 0.07205  | 0.138094 | no  |
| Elf3          | -1.40595 | 0        | 1        | 1        | no  |
| Abcb1b        | -1.40631 | 0        | 1        | 1        | no  |
| Itgae         | -1.40705 | 0        | 1        | 1        | no  |
| Mtmr10        | -1.40717 | -3.69698 | 5.00E-05 | 0.00022  | yes |
| Espn          | -1.40735 | 0        | 1        | 1        | no  |

|               |          |          |          |          |     |
|---------------|----------|----------|----------|----------|-----|
| Vat1l         | -1.40765 | -6.67849 | 5.00E-05 | 0.00022  | yes |
| Gm4951        | -1.40856 | 0        | 1        | 1        | no  |
| Scnn1a        | -1.40945 | 0        | 1        | 1        | no  |
| Soat1         | -1.41017 | -4.60299 | 5.00E-05 | 0.00022  | yes |
| B930018H19Rik | -1.4108  | 0        | 1        | 1        | no  |
| Sphk1         | -1.41159 | -2.02702 | 5.00E-05 | 0.00022  | yes |
| Adamts2       | -1.41182 | -3.50371 | 5.00E-05 | 0.00022  | yes |
| Hgf           | -1.41261 | -2.58493 | 5.00E-05 | 0.00022  | yes |
| Vash2         | -1.41278 | -2.08782 | 0.0003   | 0.001164 | yes |
| Entpd1        | -1.41322 | -3.93382 | 5.00E-05 | 0.00022  | yes |
| B130024G19Rik | -1.41327 | 0        | 1        | 1        | no  |
| Rimk1a        | -1.41408 | -6.63101 | 5.00E-05 | 0.00022  | yes |
| E230025N22Rik | -1.41444 | 0        | 1        | 1        | no  |
| Btbd17        | -1.41507 | 0        | 1        | 1        | no  |
| Ntrk3         | -1.4151  | -5.3885  | 5.00E-05 | 0.00022  | yes |
| Akr1c19       | -1.4155  | 0        | 1        | 1        | no  |
| Dpyd          | -1.41613 | -3.66204 | 5.00E-05 | 0.00022  | yes |
| 2010300C02Rik | -1.41619 | -2.09661 | 0.00045  | 0.001682 | yes |
| Fam57b        | -1.41664 | -6.35517 | 5.00E-05 | 0.00022  | yes |
| Myo1f         | -1.41723 | 0        | 1        | 1        | no  |
| Dydc2         | -1.41818 | -1.59816 | 0.04955  | 0.101369 | no  |
| Fam20a        | -1.41962 | -2.82486 | 5.00E-05 | 0.00022  | yes |
| Sec24d        | -1.42029 | -3.82615 | 5.00E-05 | 0.00022  | yes |
| Cfb           | -1.42051 | 0        | 1        | 1        | no  |
| Nkx6-2        | -1.42193 | 0        | 1        | 1        | no  |
| Gm16023       | -1.42376 | 0        | 1        | 1        | no  |
| 6030419C18Rik | -1.42399 | -6.59245 | 5.00E-05 | 0.00022  | yes |
| Fosb          | -1.42402 | -5.47134 | 5.00E-05 | 0.00022  | yes |
| Psmb11        | -1.42404 | 0        | 1        | 1        | no  |
| Cd164         | -1.42433 | -7.08348 | 5.00E-05 | 0.00022  | yes |
| Cd79b         | -1.42489 | -1.29253 | 0.0447   | 0.093142 | no  |
| Tmie          | -1.42625 | 0        | 1        | 1        | no  |
| B3galt1       | -1.42635 | -5.53981 | 5.00E-05 | 0.00022  | yes |
| Cldn14        | -1.42661 | 0        | 1        | 1        | no  |
| Srl           | -1.42676 | -3.0391  | 5.00E-05 | 0.00022  | yes |
| Lpin3         | -1.4274  | 0        | 1        | 1        | no  |
| Lrig1         | -1.42761 | -2.65854 | 5.00E-05 | 0.00022  | yes |
| Cyp26a1       | -1.4277  | 0        | 1        | 1        | no  |
| Gm2762        | -1.42775 | 0        | 1        | 1        | no  |
| G730013B05Rik | -1.42801 | 0        | 1        | 1        | no  |
| Sdc2          | -1.4286  | -4.70262 | 5.00E-05 | 0.00022  | yes |
| Chd7          | -1.42865 | -2.79509 | 5.00E-05 | 0.00022  | yes |
| Itgam         | -1.42878 | 0        | 1        | 1        | no  |
| Adssl1        | -1.42904 | -1.64385 | 0.00895  | 0.023578 | yes |
| Ly6h          | -1.43031 | -3.76345 | 5.00E-05 | 0.00022  | yes |
| Nab2          | -1.43059 | -1.11448 | 0.05385  | 0.108559 | no  |
| Iqcd          | -1.43319 | 0        | 1        | 1        | no  |
| AW011738      | -1.4332  | -2.01011 | 0.00115  | 0.00391  | yes |
| Hydin         | -1.43381 | 0        | 1        | 1        | no  |
| Faah          | -1.43406 | -4.11845 | 5.00E-05 | 0.00022  | yes |
| Cilp          | -1.43524 | -2.30978 | 0.0001   | 0.000422 | yes |
| Clec1b        | -1.43719 | 0        | 1        | 1        | no  |
| Gm2897        | -1.43748 | 0        | 1        | 1        | no  |



|               |          |          |          |          |     |
|---------------|----------|----------|----------|----------|-----|
| Col6a2        | -1.43802 | -4.39131 | 5.00E-05 | 0.00022  | yes |
| Scrt1         | -1.44011 | -6.2043  | 5.00E-05 | 0.00022  | yes |
| Gm5535        | -1.44048 | 0        | 1        | 1        | no  |
| Esrra         | -1.4405  | -4.53934 | 5.00E-05 | 0.00022  | yes |
| A930017M01Rik | -1.4416  | -1.9077  | 0.0025   | 0.007739 | yes |
| Clvs2         | -1.44368 | -3.16377 | 5.00E-05 | 0.00022  | yes |
| Ppp1r3a       | -1.44593 | 0        | 1        | 1        | no  |
| Map2k6        | -1.44596 | -2.90752 | 5.00E-05 | 0.00022  | yes |
| Ifitm2        | -1.44722 | -4.33484 | 5.00E-05 | 0.00022  | yes |
| Cebpd         | -1.4474  | -2.71713 | 5.00E-05 | 0.00022  | yes |
| Swap70        | -1.44752 | -3.58373 | 5.00E-05 | 0.00022  | yes |
| Tgfb1         | -1.44861 | -2.2608  | 0.00045  | 0.001682 | yes |
| Dixdc1        | -1.44917 | -3.07879 | 5.00E-05 | 0.00022  | yes |
| Tmem140       | -1.45039 | -1.32791 | 0.0359   | 0.077156 | no  |
| Ppp1r3c       | -1.4508  | -1.68971 | 0.005    | 0.014211 | yes |
| Doc2a         | -1.45105 | 0        | 1        | 1        | no  |
| Tgfr1         | -1.45162 | -4.44652 | 5.00E-05 | 0.00022  | yes |
| Rbp7          | -1.45253 | -1.24885 | 0.11345  | 0.198803 | no  |
| Casp4         | -1.45253 | 0        | 1        | 1        | no  |
| Ppp1r14a      | -1.45262 | -1.41741 | 0.0948   | 0.171795 | no  |
| Cnp           | -1.45275 | -6.46062 | 5.00E-05 | 0.00022  | yes |
| C920025E04Rik | -1.45285 | 0        | 1        | 1        | no  |
| Krt28         | -1.45385 | 0        | 1        | 1        | no  |
| Mdfi          | -1.45403 | 0        | 1        | 1        | no  |
| Fam163b       | -1.45432 | -1.98794 | 0.00185  | 0.005939 | yes |
| Myl2          | -1.45436 | 0        | 1        | 1        | no  |
| Uckl1os       | -1.45559 | 0        | 1        | 1        | no  |
| Lingo2        | -1.45591 | -3.7173  | 5.00E-05 | 0.00022  | yes |
| Gja4          | -1.4567  | -2.05852 | 0.00195  | 0.006219 | yes |
| Lacc1         | -1.45689 | -2.44364 | 0.00015  | 0.000615 | yes |
| Zfp618        | -1.45728 | 0        | 1        | 1        | no  |
| Vasn          | -1.45787 | -1.21683 | 0.03285  | 0.071646 | no  |
| Erb2ip        | -1.45934 | -4.69085 | 5.00E-05 | 0.00022  | yes |
| Cntnap3       | -1.46009 | -3.07811 | 5.00E-05 | 0.00022  | yes |
| Agap2         | -1.46042 | -4.5473  | 5.00E-05 | 0.00022  | yes |
| Htr1d         | -1.46117 | -4.80729 | 5.00E-05 | 0.00022  | yes |
| Mesp2         | -1.46202 | 0        | 1        | 1        | no  |
| 1810024B03Rik | -1.46225 | 0        | 1        | 1        | no  |
| Tagln3        | -1.46233 | -7.90852 | 5.00E-05 | 0.00022  | yes |
| Sgcx          | -1.4626  | -2.12254 | 0.0003   | 0.001164 | yes |
| Prr5l         | -1.46356 | 0        | 1        | 1        | no  |
| Tspan9        | -1.46392 | -3.66795 | 5.00E-05 | 0.00022  | yes |
| Wwc2          | -1.46482 | -4.10836 | 5.00E-05 | 0.00022  | yes |
| Klf12         | -1.46575 | -3.03213 | 5.00E-05 | 0.00022  | yes |
| Cdc14a        | -1.46587 | -2.39717 | 5.00E-05 | 0.00022  | yes |
| Zfp804b       | -1.46599 | 0        | 1        | 1        | no  |
| Mapkapk2      | -1.46638 | -4.69778 | 5.00E-05 | 0.00022  | yes |
| Tnfr1         | -1.46807 | 0        | 1        | 1        | no  |
| Stpg2         | -1.4682  | 0        | 1        | 1        | no  |
| Nat8l         | -1.46844 | -6.89023 | 5.00E-05 | 0.00022  | yes |
| Gm11710       | -1.46846 | 0        | 1        | 1        | no  |
| Mos           | -1.46902 | 0        | 1        | 1        | no  |
| Stbd1         | -1.4691  | -6.36365 | 5.00E-05 | 0.00022  | yes |

|               |          |          |          |          |     |
|---------------|----------|----------|----------|----------|-----|
| Abcd2         | -1.46931 | -4.97546 | 5.00E-05 | 0.00022  | yes |
| Itga8         | -1.46965 | 0        | 1        | 1        | no  |
| BC147527      | -1.46967 | 0        | 1        | 1        | no  |
| Cbs           | -1.47062 | 0        | 1        | 1        | no  |
| Olf1033       | -1.47213 | 0        | 1        | 1        | no  |
| Arid5b        | -1.47224 | -3.61489 | 5.00E-05 | 0.00022  | yes |
| Syt4          | -1.47315 | 0        | 1        | 1        | no  |
| 4930507D05Rik | -1.47324 | 0        | 1        | 1        | no  |
| Nkain3        | -1.47375 | -1.84423 | 0.00105  | 0.003607 | yes |
| Tmem211       | -1.47394 | 0        | 1        | 1        | no  |
| S1pr3         | -1.47501 | -6.82528 | 5.00E-05 | 0.00022  | yes |
| Nrk           | -1.47581 | 0        | 1        | 1        | no  |
| Tceal6        | -1.47595 | -3.17143 | 5.00E-05 | 0.00022  | yes |
| Dach1         | -1.47661 | -3.52783 | 5.00E-05 | 0.00022  | yes |
| Mxra7         | -1.47852 | -4.46042 | 5.00E-05 | 0.00022  | yes |
| Fads2         | -1.47895 | -6.7427  | 5.00E-05 | 0.00022  | yes |
| Bche          | -1.48196 | -4.27022 | 5.00E-05 | 0.00022  | yes |
| 4933427I22Rik | -1.48231 | 0        | 1        | 1        | no  |
| Serpinb1b     | -1.48254 | -3.50468 | 5.00E-05 | 0.00022  | yes |
| Xrra1         | -1.48368 | 0        | 1        | 1        | no  |
| Lrrc75a       | -1.48379 | -2.28608 | 0.00025  | 0.000985 | yes |
| Dnah5         | -1.48462 | 0        | 1        | 1        | no  |
| Npas3         | -1.48469 | 0        | 1        | 1        | no  |
| Stab1         | -1.48527 | -3.18025 | 5.00E-05 | 0.00022  | yes |
| Glis3         | -1.48595 | 0        | 1        | 1        | no  |
| Abhd1         | -1.48678 | 0        | 1        | 1        | no  |
| Bhlhe40       | -1.4877  | -4.40538 | 5.00E-05 | 0.00022  | yes |
| Pcx           | -1.488   | -4.56235 | 5.00E-05 | 0.00022  | yes |
| A730085K08Rik | -1.48873 | 0        | 1        | 1        | no  |
| Chrna1        | -1.48874 | 0        | 1        | 1        | no  |
| Id3           | -1.48995 | -6.44725 | 5.00E-05 | 0.00022  | yes |
| Nptx1         | -1.49112 | -7.08516 | 5.00E-05 | 0.00022  | yes |
| Wnk2          | -1.49508 | -4.4577  | 5.00E-05 | 0.00022  | yes |
| C2cd2         | -1.49617 | -5.26304 | 5.00E-05 | 0.00022  | yes |
| Ppbp          | -1.49657 | 0        | 1        | 1        | no  |
| Nt5dc2        | -1.49675 | -1.21591 | 0.03555  | 0.076528 | no  |
| Adam12        | -1.49732 | 0        | 1        | 1        | no  |
| Acy3          | -1.49746 | -1.60236 | 0.0132   | 0.032999 | yes |
| Sh3tc2        | -1.49769 | -2.93373 | 5.00E-05 | 0.00022  | yes |
| Itgax         | -1.49818 | 0        | 1        | 1        | no  |
| Slc24a5       | -1.49888 | 0        | 1        | 1        | no  |
| Slc6a8        | -1.50025 | -5.20519 | 5.00E-05 | 0.00022  | yes |
| 1700123I01Rik | -1.5008  | 0        | 1        | 1        | no  |
| Gm3383        | -1.50082 | 0        | 1        | 1        | no  |
| Klhl38        | -1.50119 | 0        | 1        | 1        | no  |
| Igsf5         | -1.50174 | 0        | 1        | 1        | no  |
| 4930599N23Rik | -1.50187 | 0        | 1        | 1        | no  |
| Wdr93         | -1.50218 | 0        | 1        | 1        | no  |
| Mxi1          | -1.50314 | -4.97437 | 5.00E-05 | 0.00022  | yes |
| Rimbp2        | -1.50472 | -4.07162 | 5.00E-05 | 0.00022  | yes |
| Col9a3        | -1.50536 | 0        | 1        | 1        | no  |
| Adcy1         | -1.50553 | -6.30535 | 5.00E-05 | 0.00022  | yes |
| Col6a6        | -1.5058  | 0        | 1        | 1        | no  |

|               |          |           |          |          |     |
|---------------|----------|-----------|----------|----------|-----|
| 3110039I08Rik | -1.50647 | 0         | 1        | 1        | no  |
| Snai1         | -1.50773 | 0         | 1        | 1        | no  |
| Rhbdf1        | -1.50799 | -3.57532  | 5.00E-05 | 0.00022  | yes |
| Mavs          | -1.50866 | -0.662978 | 0.19505  | 0.30755  | no  |
| Snx20         | -1.51024 | 0         | 1        | 1        | no  |
| Slitrk4       | -1.51081 | -4.72788  | 5.00E-05 | 0.00022  | yes |
| Ctxn2         | -1.51184 | 0         | 1        | 1        | no  |
| Casp6         | -1.51253 | -2.25064  | 0.0009   | 0.003139 | yes |
| 6330416G13Rik | -1.51272 | -3.15428  | 5.00E-05 | 0.00022  | yes |
| Cplx2         | -1.51317 | -7.27435  | 5.00E-05 | 0.00022  | yes |
| Arhgap29      | -1.51438 | -4.06573  | 5.00E-05 | 0.00022  | yes |
| Stc1          | -1.51555 | 0         | 1        | 1        | no  |
| Car3          | -1.51611 | -1.59919  | 0.0113   | 0.028847 | yes |
| Gm15441       | -1.51635 | 0         | 1        | 1        | no  |
| Slc13a5       | -1.51681 | 0         | 1        | 1        | no  |
| Foxp2         | -1.51778 | -2.18861  | 5.00E-05 | 0.00022  | yes |
| Cyp2j8        | -1.5179  | 0         | 1        | 1        | no  |
| 9230112J17Rik | -1.51802 | 0         | 1        | 1        | no  |
| Dusp18        | -1.51835 | -3.46438  | 5.00E-05 | 0.00022  | yes |
| Odf1          | -1.51934 | 0         | 1        | 1        | no  |
| 1810034E14Rik | -1.51977 | 0         | 1        | 1        | no  |
| Rab3b         | -1.52064 | -2.95795  | 5.00E-05 | 0.00022  | yes |
| Efcab12       | -1.52098 | -1.74913  | 0.0049   | 0.013947 | yes |
| Kcna2         | -1.52148 | -6.95081  | 5.00E-05 | 0.00022  | yes |
| 2310069B03Rik | -1.52172 | 0         | 1        | 1        | no  |
| Serhl         | -1.52253 | -1.50908  | 0.0264   | 0.059566 | no  |
| Hcls1         | -1.52296 | -1.65072  | 0.0086   | 0.022847 | yes |
| Kdm4d         | -1.52458 | -1.90625  | 0.00225  | 0.007062 | yes |
| Gria3         | -1.52468 | -3.99193  | 5.00E-05 | 0.00022  | yes |
| Pou6f2        | -1.52496 | 0         | 1        | 1        | no  |
| Fcrlb         | -1.52609 | 0         | 1        | 1        | no  |
| Tnfsf12       | -1.52624 | -2.61114  | 5.00E-05 | 0.00022  | yes |
| Slc6a13       | -1.52668 | -1.58924  | 0.00975  | 0.025413 | yes |
| Trim16        | -1.52689 | -4.42122  | 5.00E-05 | 0.00022  | yes |
| Sema3f        | -1.52794 | -4.96676  | 5.00E-05 | 0.00022  | yes |
| Igsf10        | -1.52797 | 0         | 1        | 1        | no  |
| St5           | -1.52891 | -3.48106  | 5.00E-05 | 0.00022  | yes |
| Cish          | -1.52933 | -3.66319  | 5.00E-05 | 0.00022  | yes |
| BC051628      | -1.53115 | 0         | 1        | 1        | no  |
| Zfp385a       | -1.53199 | -5.12826  | 5.00E-05 | 0.00022  | yes |
| Dclk2         | -1.53511 | -5.50332  | 5.00E-05 | 0.00022  | yes |
| Prokr2        | -1.53543 | -3.4631   | 5.00E-05 | 0.00022  | yes |
| Mab21i3       | -1.53585 | 0         | 1        | 1        | no  |
| Tcea3         | -1.53625 | 0         | 1        | 1        | no  |
| Ptgs1         | -1.53716 | -1.97794  | 0.00145  | 0.004804 | yes |
| Tead4         | -1.53812 | 0         | 1        | 1        | no  |
| Kcnk6         | -1.53956 | 0         | 1        | 1        | no  |
| Adamtsl1      | -1.54077 | -2.4934   | 0.0001   | 0.000422 | yes |
| Dsg1c         | -1.54096 | 0         | 1        | 1        | no  |
| Calr3         | -1.54239 | -2.05613  | 5.00E-05 | 0.00022  | yes |
| Ptpn21        | -1.54623 | -3.93106  | 5.00E-05 | 0.00022  | yes |
| A830019L24Rik | -1.54644 | 0         | 1        | 1        | no  |
| Ccdc177       | -1.54856 | 0         | 1        | 1        | no  |

|               |          |          |          |          |     |
|---------------|----------|----------|----------|----------|-----|
| Hoxc5         | -1.54868 | 0        | 1        | 1        | no  |
| Prss41        | -1.54918 | 0        | 1        | 1        | no  |
| Cpa3          | -1.55022 | -1.299   | 0.136    | 0.231352 | no  |
| Slc5a8        | -1.55029 | 0        | 1        | 1        | no  |
| Scn1b         | -1.55045 | -8.06608 | 5.00E-05 | 0.00022  | yes |
| Pip5kl1       | -1.55158 | -2.33026 | 0.00055  | 0.002016 | yes |
| Pkd2          | -1.55188 | -4.51236 | 5.00E-05 | 0.00022  | yes |
| Per3          | -1.55189 | -3.39117 | 5.00E-05 | 0.00022  | yes |
| Mob3b         | -1.55223 | -4.64985 | 5.00E-05 | 0.00022  | yes |
| Mitf          | -1.55247 | -2.34943 | 5.00E-05 | 0.00022  | yes |
| C5ar2         | -1.55251 | 0        | 1        | 1        | no  |
| S100a1        | -1.55351 | -4.52542 | 5.00E-05 | 0.00022  | yes |
| Riad1         | -1.55386 | 0        | 1        | 1        | no  |
| Rab7l1        | -1.5546  | -2.12346 | 0.00225  | 0.007062 | yes |
| Fgfr2         | -1.55503 | 0        | 1        | 1        | no  |
| Insl6         | -1.55567 | -1.53005 | 0.06     | 0.118738 | no  |
| Gm13710       | -1.5557  | 0        | 1        | 1        | no  |
| Wipi1         | -1.55581 | -4.09628 | 5.00E-05 | 0.00022  | yes |
| Gdpd2         | -1.55832 | -2.05179 | 0.00115  | 0.00391  | yes |
| 9530036O11Rik | -1.55857 | 0        | 1        | 1        | no  |
| Slc41a1       | -1.55877 | -4.77601 | 5.00E-05 | 0.00022  | yes |
| Tgfbr2        | -1.55917 | -4.95695 | 5.00E-05 | 0.00022  | yes |
| Spata9        | -1.5604  | 0        | 1        | 1        | no  |
| Gm5468        | -1.56052 | 0        | 1        | 1        | no  |
| Agbl1         | -1.56125 | 0        | 1        | 1        | no  |
| Cacna1f       | -1.56205 | 0        | 1        | 1        | no  |
| Slc5a5        | -1.56236 | -4.0275  | 5.00E-05 | 0.00022  | yes |
| Cyb5r2        | -1.56266 | 0        | 1        | 1        | no  |
| Rilp          | -1.56319 | -1.74825 | 0.00785  | 0.021108 | yes |
| Trip6         | -1.56386 | -2.5773  | 5.00E-05 | 0.00022  | yes |
| Tchh          | -1.56387 | 0        | 1        | 1        | no  |
| Efna4         | -1.56397 | 0        | 1        | 1        | no  |
| Glrx          | -1.56449 | -4.54253 | 5.00E-05 | 0.00022  | yes |
| Apln          | -1.57016 | 0        | 1        | 1        | no  |
| Them5         | -1.57101 | -2.16305 | 0.0013   | 0.004375 | yes |
| Ctnna1        | -1.57126 | -5.68354 | 5.00E-05 | 0.00022  | yes |
| Cntfr         | -1.57162 | -5.73279 | 5.00E-05 | 0.00022  | yes |
| Cxcl11        | -1.57205 | 0        | 1        | 1        | no  |
| Rimkb         | -1.5724  | -3.25955 | 5.00E-05 | 0.00022  | yes |
| Clic6         | -1.57281 | 0        | 1        | 1        | no  |
| Kif21b        | -1.57453 | -3.87262 | 5.00E-05 | 0.00022  | yes |
| Map2          | -1.57619 | -6.53775 | 5.00E-05 | 0.00022  | yes |
| Eno4          | -1.57628 | 0        | 1        | 1        | no  |
| Sult5a1       | -1.57641 | 0        | 1        | 1        | no  |
| Satb1         | -1.57718 | -5.57317 | 5.00E-05 | 0.00022  | yes |
| Fam81a        | -1.5772  | -4.84703 | 5.00E-05 | 0.00022  | yes |
| 4430402I18Rik | -1.57729 | 0        | 1        | 1        | no  |
| Ung           | -1.57769 | -1.50208 | 0.0049   | 0.013947 | yes |
| Gpx7          | -1.58    | -2.56835 | 0.0002   | 0.000803 | yes |
| Nsun7         | -1.58051 | 0        | 1        | 1        | no  |
| Ptchd2        | -1.58122 | -5.34317 | 5.00E-05 | 0.00022  | yes |
| Pmaip1        | -1.58124 | 0        | 1        | 1        | no  |
| Sh3gl2        | -1.58156 | -7.26214 | 5.00E-05 | 0.00022  | yes |

|               |          |          |          |          |     |
|---------------|----------|----------|----------|----------|-----|
| Efhd1         | -1.58373 | -4.01542 | 5.00E-05 | 0.00022  | yes |
| Spock1        | -1.58385 | -7.25923 | 5.00E-05 | 0.00022  | yes |
| Rimbp3        | -1.58393 | 0        | 1        | 1        | no  |
| AF251705      | -1.58445 | 0        | 1        | 1        | no  |
| Anxa8         | -1.58531 | 0        | 1        | 1        | no  |
| Phospho1      | -1.58565 | -5.54051 | 5.00E-05 | 0.00022  | yes |
| Sft2d2        | -1.58589 | -5.3807  | 5.00E-05 | 0.00022  | yes |
| Akr1b8        | -1.58613 | -2.08466 | 0.00245  | 0.007605 | yes |
| Hoxc8         | -1.58618 | -2.51126 | 0.0001   | 0.000422 | yes |
| Ddit4         | -1.58692 | -6.87028 | 5.00E-05 | 0.00022  | yes |
| Syndig1l      | -1.58723 | -3.85597 | 5.00E-05 | 0.00022  | yes |
| Adarb2        | -1.58742 | 0        | 1        | 1        | no  |
| Camkv         | -1.58759 | 0        | 1        | 1        | no  |
| Fermt1        | -1.58849 | 0        | 1        | 1        | no  |
| Xirp2         | -1.58937 | 0        | 1        | 1        | no  |
| Bcl2l11       | -1.59214 | -2.4748  | 0.00015  | 0.000615 | yes |
| Stx1b         | -1.59371 | -6.9618  | 5.00E-05 | 0.00022  | yes |
| B230209E15Rik | -1.59588 | 0        | 1        | 1        | no  |
| Arl5c         | -1.59592 | 0        | 1        | 1        | no  |
| Gjc1          | -1.59689 | -2.15893 | 0.0002   | 0.000803 | yes |
| Ndp           | -1.59695 | -3.98693 | 5.00E-05 | 0.00022  | yes |
| Hrasls        | -1.59703 | -3.16579 | 5.00E-05 | 0.00022  | yes |
| Serpine3      | -1.59706 | 0        | 1        | 1        | no  |
| Col11a2       | -1.59727 | 0        | 1        | 1        | no  |
| Nlrp10        | -1.59856 | 0        | 1        | 1        | no  |
| Tmprss7       | -1.59867 | -2.15828 | 0.00105  | 0.003607 | yes |
| Ahr           | -1.60052 | -4.2301  | 5.00E-05 | 0.00022  | yes |
| Lepr          | -1.6026  | -2.85079 | 5.00E-05 | 0.00022  | yes |
| Gabrg3        | -1.60337 | 0        | 1        | 1        | no  |
| Mapkapk3      | -1.6038  | -1.84672 | 0.00285  | 0.008668 | yes |
| Edar          | -1.60405 | 0        | 1        | 1        | no  |
| Plod2         | -1.60485 | -3.25652 | 5.00E-05 | 0.00022  | yes |
| Strbp         | -1.60584 | -6.82292 | 5.00E-05 | 0.00022  | yes |
| Hpgd          | -1.60651 | -1.7913  | 0.00575  | 0.016057 | yes |
| Kcnp1         | -1.60724 | -3.26681 | 5.00E-05 | 0.00022  | yes |
| B930041F14Rik | -1.60799 | -4.88192 | 5.00E-05 | 0.00022  | yes |
| Elf2          | -1.60806 | -2.43807 | 5.00E-05 | 0.00022  | yes |
| Kcnh2         | -1.60824 | -6.9739  | 5.00E-05 | 0.00022  | yes |
| Zfp804a       | -1.61008 | -4.58725 | 5.00E-05 | 0.00022  | yes |
| Cd101         | -1.61074 | 0        | 1        | 1        | no  |
| Tor3a         | -1.61256 | -2.88395 | 5.00E-05 | 0.00022  | yes |
| Frem1         | -1.61279 | -2.63766 | 5.00E-05 | 0.00022  | yes |
| Tmem132b      | -1.61308 | -3.42178 | 5.00E-05 | 0.00022  | yes |
| Zfp964        | -1.61548 | -1.66614 | 0.01095  | 0.028083 | yes |
| Cox6a2        | -1.61563 | 0        | 1        | 1        | no  |
| Abhd3         | -1.61611 | -4.77432 | 5.00E-05 | 0.00022  | yes |
| Amn           | -1.61613 | 0        | 1        | 1        | no  |
| Epas1         | -1.61667 | -7.44254 | 5.00E-05 | 0.00022  | yes |
| Mafb          | -1.61685 | -2.23795 | 0.0002   | 0.000803 | yes |
| Rxra          | -1.61766 | -4.82889 | 5.00E-05 | 0.00022  | yes |
| Cpq           | -1.61832 | -4.17046 | 5.00E-05 | 0.00022  | yes |
| Rnf17         | -1.61887 | 0        | 1        | 1        | no  |
| Cyp2j6        | -1.62155 | -6.24793 | 5.00E-05 | 0.00022  | yes |

|               |          |           |          |          |     |
|---------------|----------|-----------|----------|----------|-----|
| Fzd7          | -1.62197 | -4.07389  | 5.00E-05 | 0.00022  | yes |
| Nrp2          | -1.62197 | -5.98187  | 5.00E-05 | 0.00022  | yes |
| 1700028J19Rik | -1.62337 | 0         | 1        | 1        | no  |
| Rcn1          | -1.62367 | -5.55289  | 5.00E-05 | 0.00022  | yes |
| Sec14l2       | -1.62409 | -4.2824   | 5.00E-05 | 0.00022  | yes |
| Eva1b         | -1.62535 | -2.16913  | 0.00215  | 0.006796 | yes |
| Vcam1         | -1.62657 | -3.00411  | 5.00E-05 | 0.00022  | yes |
| Gpc2          | -1.62739 | 0         | 1        | 1        | no  |
| Slc22a8       | -1.62771 | 0         | 1        | 1        | no  |
| 2310022B05Rik | -1.62785 | -6.37637  | 5.00E-05 | 0.00022  | yes |
| Ror1          | -1.63195 | 0         | 1        | 1        | no  |
| Slitrk3       | -1.63208 | -6.40372  | 5.00E-05 | 0.00022  | yes |
| Pole2         | -1.63219 | 0         | 1        | 1        | no  |
| Tnn           | -1.63406 | 0         | 1        | 1        | no  |
| Cldn15        | -1.6349  | 0         | 1        | 1        | no  |
| Clrn2         | -1.63574 | -2.19536  | 0.00325  | 0.009727 | yes |
| S100a14       | -1.63616 | 0         | 1        | 1        | no  |
| Ciita         | -1.6362  | 0         | 1        | 1        | no  |
| 38776         | -1.6363  | 0         | 1        | 1        | no  |
| Prrg3         | -1.63633 | -5.60764  | 5.00E-05 | 0.00022  | yes |
| Cyp3a13       | -1.63657 | 0         | 1        | 1        | no  |
| Parva         | -1.63714 | -7.6417   | 5.00E-05 | 0.00022  | yes |
| Zfp36l1       | -1.63837 | -5.11846  | 5.00E-05 | 0.00022  | yes |
| Tesc          | -1.6395  | -6.00357  | 5.00E-05 | 0.00022  | yes |
| Xylt1         | -1.64005 | 0         | 1        | 1        | no  |
| Tmem37        | -1.64023 | 0         | 1        | 1        | no  |
| Lhx6          | -1.64078 | 0         | 1        | 1        | no  |
| St3gal3       | -1.64095 | -4.30648  | 5.00E-05 | 0.00022  | yes |
| AU022754      | -1.64125 | 0         | 1        | 1        | no  |
| Retnlg        | -1.64188 | -2.2554   | 0.0088   | 0.023271 | yes |
| 2310069G16Rik | -1.64309 | -0.863105 | 0.10525  | 0.187379 | no  |
| Pitpnm3       | -1.6431  | -2.74386  | 5.00E-05 | 0.00022  | yes |
| Prdm5         | -1.64354 | -1.72124  | 0.00665  | 0.018232 | yes |
| Cdh4          | -1.64495 | -4.30347  | 5.00E-05 | 0.00022  | yes |
| Ryr3          | -1.64559 | -3.39397  | 5.00E-05 | 0.00022  | yes |
| Nxf2          | -1.64705 | 0         | 1        | 1        | no  |
| Ky            | -1.64736 | 0         | 1        | 1        | no  |
| D7Ert443e     | -1.65028 | -2.25954  | 0.0001   | 0.000422 | yes |
| Nr1d2         | -1.65029 | -6.40056  | 5.00E-05 | 0.00022  | yes |
| Endod1        | -1.65206 | -7.78311  | 5.00E-05 | 0.00022  | yes |
| Thsd4         | -1.65322 | -3.23528  | 5.00E-05 | 0.00022  | yes |
| Cnm1          | -1.6536  | -5.38025  | 5.00E-05 | 0.00022  | yes |
| Tdrd9         | -1.65384 | 0         | 1        | 1        | no  |
| Stox1         | -1.65453 | 0         | 1        | 1        | no  |
| Adam17        | -1.65459 | -3.52774  | 5.00E-05 | 0.00022  | yes |
| Rab20         | -1.6548  | -1.46908  | 0.05195  | 0.105369 | no  |
| 4931409K22Rik | -1.65598 | 0         | 1        | 1        | no  |
| Abhd4         | -1.65724 | -6.9797   | 5.00E-05 | 0.00022  | yes |
| Dppa2         | -1.65915 | 0         | 1        | 1        | no  |
| Slc22a23      | -1.65995 | -6.24417  | 5.00E-05 | 0.00022  | yes |
| Psma8         | -1.66203 | 0         | 1        | 1        | no  |
| Gm4013        | -1.6628  | 0         | 1        | 1        | no  |
| Galnt4        | -1.66569 | -1.84969  | 0.00895  | 0.023578 | yes |



|               |          |          |          |          |     |
|---------------|----------|----------|----------|----------|-----|
| 1190002N15Rik | -1.66651 | -6.36877 | 5.00E-05 | 0.00022  | yes |
| Tead1         | -1.66863 | -5.48512 | 5.00E-05 | 0.00022  | yes |
| Etv4          | -1.66893 | -2.03608 | 0.00135  | 0.004516 | yes |
| Fbxo40        | -1.66973 | -1.9086  | 0.00285  | 0.008668 | yes |
| 4930525G20Rik | -1.67035 | 0        | 1        | 1        | no  |
| Qpct          | -1.67111 | -2.56549 | 0.00015  | 0.000615 | yes |
| Siglecg       | -1.67423 | 0        | 1        | 1        | no  |
| Mt2           | -1.67502 | -6.81782 | 5.00E-05 | 0.00022  | yes |
| Smim1         | -1.67523 | -1.22404 | 0.02975  | 0.065991 | no  |
| Col11a1       | -1.67627 | -4.27496 | 5.00E-05 | 0.00022  | yes |
| B230206H07Rik | -1.67691 | -1.45668 | 0.0845   | 0.15666  | no  |
| Sort1         | -1.67716 | -6.65745 | 5.00E-05 | 0.00022  | yes |
| Dleu7         | -1.67808 | 0        | 1        | 1        | no  |
| Arhgef19      | -1.67873 | -3.5451  | 5.00E-05 | 0.00022  | yes |
| Lhpp          | -1.6791  | -2.82987 | 5.00E-05 | 0.00022  | yes |
| Chn2          | -1.68002 | -5.6006  | 5.00E-05 | 0.00022  | yes |
| Arsk          | -1.68005 | -3.08561 | 5.00E-05 | 0.00022  | yes |
| Cxcr2         | -1.68116 | 0        | 1        | 1        | no  |
| Cyp2d26       | -1.68124 | 0        | 1        | 1        | no  |
| Srd5a1        | -1.68191 | -4.18556 | 5.00E-05 | 0.00022  | yes |
| Fam212a       | -1.68206 | -2.53506 | 0.0002   | 0.000803 | yes |
| Pard3b        | -1.683   | -3.05998 | 5.00E-05 | 0.00022  | yes |
| Fscn1         | -1.68356 | -5.31644 | 5.00E-05 | 0.00022  | yes |
| Clcn2         | -1.68412 | -2.08791 | 0.00075  | 0.00267  | yes |
| Robo1         | -1.6852  | -4.73403 | 5.00E-05 | 0.00022  | yes |
| Sgce          | -1.6876  | -4.17884 | 5.00E-05 | 0.00022  | yes |
| Zpbp2         | -1.69019 | 0        | 1        | 1        | no  |
| Nuak2         | -1.69063 | 0        | 1        | 1        | no  |
| Lmcd1         | -1.6908  | -2.24019 | 5.00E-05 | 0.00022  | yes |
| Usp27x        | -1.6908  | -1.99977 | 0.00135  | 0.004516 | yes |
| Fam65b        | -1.69187 | -2.23188 | 0.00025  | 0.000985 | yes |
| Cysltr1       | -1.69332 | 0        | 1        | 1        | no  |
| Nup62-il4i1   | -1.69519 | 0        | 1        | 1        | no  |
| Opn3          | -1.69744 | -2.17231 | 0.0014   | 0.004657 | yes |
| Dab2          | -1.69951 | -3.2686  | 5.00E-05 | 0.00022  | yes |
| Sall4         | -1.70017 | 0        | 1        | 1        | no  |
| Fam101a       | -1.70062 | -2.41487 | 0.00075  | 0.00267  | yes |
| Myl1          | -1.70288 | 0        | 1        | 1        | no  |
| Sema6a        | -1.70308 | -4.7175  | 5.00E-05 | 0.00022  | yes |
| Pde6b         | -1.70414 | 0        | 1        | 1        | no  |
| B230319C09Rik | -1.706   | 0        | 1        | 1        | no  |
| Itm2a         | -1.70709 | -6.53515 | 5.00E-05 | 0.00022  | yes |
| Spata18       | -1.70734 | 0        | 1        | 1        | no  |
| Ear3          | -1.70858 | 0        | 1        | 1        | no  |
| Gng8          | -1.70949 | -3.39107 | 5.00E-05 | 0.00022  | yes |
| C1qtnf1       | -1.71039 | -6.59028 | 5.00E-05 | 0.00022  | yes |
| Tcf24         | -1.71159 | 0        | 1        | 1        | no  |
| Sema6b        | -1.71209 | -2.93928 | 5.00E-05 | 0.00022  | yes |
| 6430571L13Rik | -1.71464 | -3.75668 | 5.00E-05 | 0.00022  | yes |
| Camk1d        | -1.71471 | -6.77243 | 5.00E-05 | 0.00022  | yes |
| Gm53          | -1.7154  | -1.57729 | 0.0614   | 0.121021 | no  |
| Fhl2          | -1.71621 | -1.59522 | 0.09275  | 0.168772 | no  |
| 4930539J05Rik | -1.71672 | 0        | 1        | 1        | no  |

|               |          |           |          |          |     |
|---------------|----------|-----------|----------|----------|-----|
| Smad3         | -1.71697 | -2.67266  | 5.00E-05 | 0.00022  | yes |
| Iqck          | -1.71929 | 0         | 1        | 1        | no  |
| Arpp21        | -1.71996 | -4.27197  | 5.00E-05 | 0.00022  | yes |
| Gm13306       | -1.72227 | 0         | 1        | 1        | no  |
| Garem         | -1.72283 | -4.31644  | 5.00E-05 | 0.00022  | yes |
| Grasp         | -1.72398 | -2.55594  | 5.00E-05 | 0.00022  | yes |
| Morn5         | -1.72458 | 0         | 1        | 1        | no  |
| AB124611      | -1.72645 | -1.23478  | 0.017    | 0.04103  | yes |
| Sdk1          | -1.72714 | -4.76849  | 5.00E-05 | 0.00022  | yes |
| Vmn2r87       | -1.72732 | 0         | 1        | 1        | no  |
| Prr15         | -1.72784 | -0.830007 | 0.1556   | 0.257528 | no  |
| Nav3          | -1.72844 | -3.56573  | 5.00E-05 | 0.00022  | yes |
| Grik2         | -1.72847 | -3.7706   | 5.00E-05 | 0.00022  | yes |
| Bcl2          | -1.731   | -6.25369  | 5.00E-05 | 0.00022  | yes |
| Ptch1         | -1.73124 | -5.02069  | 5.00E-05 | 0.00022  | yes |
| Ankrd66       | -1.73321 | 0         | 1        | 1        | no  |
| 3425401B19Rik | -1.73393 | -2.76199  | 5.00E-05 | 0.00022  | yes |
| Il15          | -1.73418 | 0         | 1        | 1        | no  |
| Cacng5        | -1.73494 | -4.78436  | 5.00E-05 | 0.00022  | yes |
| Olfml3        | -1.73589 | -1.60965  | 0.01285  | 0.032203 | yes |
| Ltbr          | -1.73626 | -3.96183  | 5.00E-05 | 0.00022  | yes |
| 9430076C15Rik | -1.73698 | 0         | 1        | 1        | no  |
| Fhad1         | -1.74155 | 0         | 1        | 1        | no  |
| Ntm           | -1.74181 | -3.53929  | 5.00E-05 | 0.00022  | yes |
| Wls           | -1.74261 | -5.95693  | 5.00E-05 | 0.00022  | yes |
| Cd300lb       | -1.74302 | 0         | 1        | 1        | no  |
| Pak1          | -1.74386 | -7.57219  | 5.00E-05 | 0.00022  | yes |
| Cux2          | -1.74412 | -4.05201  | 5.00E-05 | 0.00022  | yes |
| Elovl2        | -1.7451  | -3.96135  | 5.00E-05 | 0.00022  | yes |
| Tbc1d10a      | -1.74584 | -4.65389  | 5.00E-05 | 0.00022  | yes |
| Arsg          | -1.74588 | -2.04406  | 0.00045  | 0.001682 | yes |
| Pctp          | -1.74732 | -5.3616   | 5.00E-05 | 0.00022  | yes |
| Gpc3          | -1.74912 | -4.80794  | 5.00E-05 | 0.00022  | yes |
| Pla1a         | -1.74955 | 0         | 1        | 1        | no  |
| Asap3         | -1.75058 | -3.58307  | 5.00E-05 | 0.00022  | yes |
| Mycl          | -1.75078 | 0         | 1        | 1        | no  |
| Slc2a5        | -1.75322 | 0         | 1        | 1        | no  |
| Tmem220       | -1.75473 | 0         | 1        | 1        | no  |
| Ramp2         | -1.75485 | -4.33877  | 5.00E-05 | 0.00022  | yes |
| Gm16532       | -1.7593  | -3.00505  | 5.00E-05 | 0.00022  | yes |
| Fam155a       | -1.75938 | -4.97678  | 5.00E-05 | 0.00022  | yes |
| Snx24         | -1.76067 | -3.02742  | 5.00E-05 | 0.00022  | yes |
| Gm17769       | -1.76265 | 0         | 1        | 1        | no  |
| Clec1a        | -1.76281 | -2.0911   | 0.00175  | 0.00566  | yes |
| Dusp23        | -1.76366 | -2.55812  | 0.0003   | 0.001164 | yes |
| Asic1         | -1.76778 | -7.03658  | 5.00E-05 | 0.00022  | yes |
| Tmem200b      | -1.76782 | -1.68898  | 0.0131   | 0.032767 | yes |
| G530011O06Rik | -1.77011 | 0         | 1        | 1        | no  |
| Slc39a1       | -1.77029 | -5.24957  | 5.00E-05 | 0.00022  | yes |
| Cd68          | -1.77145 | -1.08722  | 0.26955  | 0.394324 | no  |
| Tnfrsf1a      | -1.77359 | -4.95865  | 5.00E-05 | 0.00022  | yes |
| Itpr2         | -1.77438 | 0         | 1        | 1        | no  |
| 2310040G24Rik | -1.77513 | -1.22659  | 0.0142   | 0.035181 | yes |

|               |          |          |          |          |     |
|---------------|----------|----------|----------|----------|-----|
| Hnmt          | -1.77612 | -3.83034 | 5.00E-05 | 0.00022  | yes |
| Peg10         | -1.77931 | -5.00272 | 5.00E-05 | 0.00022  | yes |
| Tns3          | -1.78163 | -7.37999 | 5.00E-05 | 0.00022  | yes |
| Cped1         | -1.78215 | -2.90393 | 5.00E-05 | 0.00022  | yes |
| Gm6568        | -1.78232 | 0        | 1        | 1        | no  |
| Nek6          | -1.78294 | -4.33744 | 5.00E-05 | 0.00022  | yes |
| B430319G15Rik | -1.78331 | 0        | 1        | 1        | no  |
| Ccr1          | -1.78367 | 0        | 1        | 1        | no  |
| Ecm1          | -1.78427 | -3.05956 | 5.00E-05 | 0.00022  | yes |
| Klhdc7a       | -1.78597 | 0        | 1        | 1        | no  |
| Lgr6          | -1.78654 | 0        | 1        | 1        | no  |
| Ace           | -1.78753 | -2.99452 | 5.00E-05 | 0.00022  | yes |
| Cacnb2        | -1.78767 | -2.49296 | 5.00E-05 | 0.00022  | yes |
| Fgf7          | -1.79228 | -1.52747 | 0.01155  | 0.029395 | yes |
| Zfp36l2       | -1.79313 | -5.2245  | 5.00E-05 | 0.00022  | yes |
| Clca2         | -1.79342 | 0        | 1        | 1        | no  |
| Rin3          | -1.79495 | -2.63424 | 5.00E-05 | 0.00022  | yes |
| Pcdh10        | -1.79524 | -6.04571 | 5.00E-05 | 0.00022  | yes |
| Mmp23         | -1.79556 | -1.90711 | 0.005    | 0.014211 | yes |
| S100a3        | -1.79559 | 0        | 1        | 1        | no  |
| Lrrc25        | -1.79595 | 0        | 1        | 1        | no  |
| Gabra5        | -1.79673 | -2.98961 | 5.00E-05 | 0.00022  | yes |
| Il16          | -1.79718 | -4.30018 | 5.00E-05 | 0.00022  | yes |
| Tas1r3        | -1.7972  | 0        | 1        | 1        | no  |
| D630023F18Rik | -1.80008 | -1.17503 | 0.015    | 0.036839 | yes |
| Tpm2          | -1.80075 | -3.27579 | 5.00E-05 | 0.00022  | yes |
| Fam84b        | -1.80202 | -2.46092 | 5.00E-05 | 0.00022  | yes |
| C030006K11Rik | -1.80324 | -2.4661  | 0.0001   | 0.000422 | yes |
| Dapl1         | -1.80346 | -1.5293  | 0.08075  | 0.151144 | no  |
| Vwa7          | -1.80514 | -7.52034 | 5.00E-05 | 0.00022  | yes |
| 9630001P10Rik | -1.80589 | 0        | 1        | 1        | no  |
| Pcp4l1        | -1.80633 | -9.1958  | 5.00E-05 | 0.00022  | yes |
| Ankrd29       | -1.8084  | -6.12122 | 5.00E-05 | 0.00022  | yes |
| 2810454H06Rik | -1.81153 | 0        | 1        | 1        | no  |
| Slc25a2       | -1.81215 | 0        | 1        | 1        | no  |
| Loxl2         | -1.81292 | -2.3108  | 0.0001   | 0.000422 | yes |
| Hepacam2      | -1.81852 | 0        | 1        | 1        | no  |
| Fzd10         | -1.81928 | 0        | 1        | 1        | no  |
| Zfp607        | -1.8194  | 0        | 1        | 1        | no  |
| Il17re        | -1.81945 | 0        | 1        | 1        | no  |
| Tpcn1         | -1.82076 | -7.21503 | 5.00E-05 | 0.00022  | yes |
| Fabp4         | -1.82158 | -2.45322 | 0.0053   | 0.014929 | yes |
| Ccr5          | -1.82172 | 0        | 1        | 1        | no  |
| Tnfrsf11b     | -1.82193 | 0        | 1        | 1        | no  |
| Pde1a         | -1.82218 | -2.70117 | 5.00E-05 | 0.00022  | yes |
| Kcnab3        | -1.82361 | -2.22351 | 0.0006   | 0.002181 | yes |
| Ncf1          | -1.82497 | -1.64961 | 0.00165  | 0.00538  | yes |
| Pou2f3        | -1.8256  | 0        | 1        | 1        | no  |
| Lama1         | -1.82626 | 0        | 1        | 1        | no  |
| Mn1           | -1.8276  | 0        | 1        | 1        | no  |
| Serpinb1a     | -1.8282  | -6.87727 | 5.00E-05 | 0.00022  | yes |
| Igf2bp2       | -1.83095 | -2.14391 | 0.0012   | 0.004068 | yes |
| Tcf15         | -1.83107 | 0        | 1        | 1        | no  |

|                |          |          |          |          |     |
|----------------|----------|----------|----------|----------|-----|
| Rab42          | -1.83156 | 0        | 1        | 1        | no  |
| Shc3           | -1.83158 | -2.65297 | 0.0001   | 0.000422 | yes |
| Bicc1          | -1.83379 | -2.83167 | 5.00E-05 | 0.00022  | yes |
| Greb1          | -1.83455 | -4.15801 | 5.00E-05 | 0.00022  | yes |
| Nckap1l        | -1.83521 | 0        | 1        | 1        | no  |
| Dhh            | -1.83607 | -6.67248 | 5.00E-05 | 0.00022  | yes |
| Prkd3          | -1.83693 | -3.77983 | 5.00E-05 | 0.00022  | yes |
| Rnf152         | -1.8371  | 0        | 1        | 1        | no  |
| Rreb1          | -1.83754 | -3.00987 | 5.00E-05 | 0.00022  | yes |
| Cd164l2        | -1.83793 | -2.0072  | 0.0084   | 0.022392 | yes |
| Snta1          | -1.83803 | -4.49541 | 5.00E-05 | 0.00022  | yes |
| Fgf18          | -1.83914 | -3.44147 | 5.00E-05 | 0.00022  | yes |
| Pcdh11x        | -1.8394  | -2.85762 | 5.00E-05 | 0.00022  | yes |
| AI427809       | -1.84033 | -1.57135 | 0.00625  | 0.017282 | yes |
| Tlr12          | -1.84037 | 0        | 1        | 1        | no  |
| Nsg1           | -1.84097 | -4.93684 | 5.00E-05 | 0.00022  | yes |
| Heph           | -1.8416  | 0        | 1        | 1        | no  |
| A2m            | -1.84248 | -4.13902 | 5.00E-05 | 0.00022  | yes |
| Edn2           | -1.84339 | 0        | 1        | 1        | no  |
| Slc7a11        | -1.8437  | 0        | 1        | 1        | no  |
| Slc25a15       | -1.84392 | -4.03436 | 5.00E-05 | 0.00022  | yes |
| Cdhr2          | -1.84406 | 0        | 1        | 1        | no  |
| Ypel2          | -1.84472 | -0.52478 | 0.3338   | 0.464937 | no  |
| Gm11744        | -1.84602 | 0        | 1        | 1        | no  |
| Col2a1         | -1.84659 | 0        | 1        | 1        | no  |
| Mgmt           | -1.84802 | -2.39374 | 0.0027   | 0.008273 | yes |
| Slco2a1        | -1.84819 | -3.53817 | 5.00E-05 | 0.00022  | yes |
| Gpr88          | -1.8485  | 0        | 1        | 1        | no  |
| Acox1          | -1.84964 | 0        | 1        | 1        | no  |
| Csrp1          | -1.84994 | -8.11567 | 5.00E-05 | 0.00022  | yes |
| BC100451       | -1.85034 | 0        | 1        | 1        | no  |
| Gpr62          | -1.8504  | 0        | 1        | 1        | no  |
| Nefm           | -1.85109 | -6.34452 | 5.00E-05 | 0.00022  | yes |
| Hopx           | -1.85148 | -7.43278 | 5.00E-05 | 0.00022  | yes |
| Ctdsp1         | -1.852   | -4.60466 | 5.00E-05 | 0.00022  | yes |
| Tyro3          | -1.85245 | -6.04746 | 5.00E-05 | 0.00022  | yes |
| Zbtb8b         | -1.85275 | 0        | 1        | 1        | no  |
| Ngef           | -1.85651 | -3.09267 | 5.00E-05 | 0.00022  | yes |
| Sorbs3         | -1.85692 | -4.43219 | 5.00E-05 | 0.00022  | yes |
| Amot           | -1.85733 | -4.20459 | 5.00E-05 | 0.00022  | yes |
| Bai1           | -1.85971 | -6.17748 | 5.00E-05 | 0.00022  | yes |
| Agpat9         | -1.85998 | -2.66643 | 5.00E-05 | 0.00022  | yes |
| Lphn2          | -1.86163 | -5.53392 | 5.00E-05 | 0.00022  | yes |
| Tbxa2r         | -1.86228 | -2.0737  | 0.0008   | 0.002828 | yes |
| Tnfsf12Tnfsf13 | -1.86256 | -1.00556 | 0.1025   | 0.183221 | no  |
| Myh10          | -1.86427 | -8.54415 | 5.00E-05 | 0.00022  | yes |
| Enah           | -1.86677 | -8.34193 | 5.00E-05 | 0.00022  | yes |
| Lrrc14b        | -1.86729 | 0        | 1        | 1        | no  |
| Plekhg5        | -1.86877 | -4.15991 | 5.00E-05 | 0.00022  | yes |
| Itrip1         | -1.87383 | -2.33709 | 0.00015  | 0.000615 | yes |
| Slc8a3         | -1.87398 | -4.95453 | 5.00E-05 | 0.00022  | yes |
| Entpd4         | -1.87449 | 0        | 1        | 1        | no  |
| Ebf2           | -1.875   | -2.58137 | 5.00E-05 | 0.00022  | yes |

|               |          |          |          |          |     |
|---------------|----------|----------|----------|----------|-----|
| Filip1l       | -1.8757  | -1.41549 | 0.0464   | 0.096066 | no  |
| Sorcs3        | -1.87643 | -4.82233 | 5.00E-05 | 0.00022  | yes |
| C6            | -1.8765  | 0        | 1        | 1        | no  |
| Zkscan17      | -1.87809 | -2.82197 | 5.00E-05 | 0.00022  | yes |
| Cdh6          | -1.88093 | -3.62803 | 5.00E-05 | 0.00022  | yes |
| Ntn4          | -1.88158 | -2.28424 | 0.00115  | 0.00391  | yes |
| Pappa         | -1.88278 | -4.25117 | 5.00E-05 | 0.00022  | yes |
| Gucy2e        | -1.88283 | 0        | 1        | 1        | no  |
| Tril          | -1.8848  | -3.79428 | 5.00E-05 | 0.00022  | yes |
| Impa2         | -1.88489 | -3.23591 | 5.00E-05 | 0.00022  | yes |
| Lao1          | -1.88548 | 0        | 1        | 1        | no  |
| Lpl           | -1.88819 | -3.48273 | 5.00E-05 | 0.00022  | yes |
| Srpk3         | -1.88878 | 0        | 1        | 1        | no  |
| Mgp           | -1.89015 | -6.50964 | 5.00E-05 | 0.00022  | yes |
| Slc14a2       | -1.89063 | 0        | 1        | 1        | no  |
| Chrn4         | -1.89083 | -4.18337 | 5.00E-05 | 0.00022  | yes |
| Cntnap1       | -1.89205 | -8.73358 | 5.00E-05 | 0.00022  | yes |
| Dok7          | -1.89333 | -2.67465 | 0.0001   | 0.000422 | yes |
| Clstn3        | -1.89391 | -7.88092 | 5.00E-05 | 0.00022  | yes |
| Tead2         | -1.89471 | -1.76859 | 0.06095  | 0.120295 | no  |
| Nrarp         | -1.8962  | -5.41397 | 5.00E-05 | 0.00022  | yes |
| Ccdc60        | -1.89624 | 0        | 1        | 1        | no  |
| 2900079G21Rik | -1.89868 | -1.63302 | 0.00345  | 0.010237 | yes |
| Pdlim3        | -1.89888 | 0        | 1        | 1        | no  |
| Colq          | -1.89961 | -2.88996 | 5.00E-05 | 0.00022  | yes |
| Gbp6          | -1.9006  | 0        | 1        | 1        | no  |
| Arhgef3       | -1.90104 | -5.26626 | 5.00E-05 | 0.00022  | yes |
| Pik3ap1       | -1.90123 | 0        | 1        | 1        | no  |
| Anxa4         | -1.90128 | -4.74813 | 5.00E-05 | 0.00022  | yes |
| C1ql2         | -1.90184 | 0        | 1        | 1        | no  |
| Prrg1         | -1.90185 | -3.93894 | 5.00E-05 | 0.00022  | yes |
| Ndnf          | -1.90186 | -4.07056 | 5.00E-05 | 0.00022  | yes |
| Anxa9         | -1.90244 | 0        | 1        | 1        | no  |
| Pcsk1         | -1.90269 | -7.15666 | 5.00E-05 | 0.00022  | yes |
| Slc22a6       | -1.90319 | 0        | 1        | 1        | no  |
| Ogdhl         | -1.90452 | -6.14403 | 5.00E-05 | 0.00022  | yes |
| Plekha2       | -1.90472 | -5.66122 | 5.00E-05 | 0.00022  | yes |
| Iqgap2        | -1.90522 | -1.57764 | 0.017    | 0.04103  | yes |
| Sema4a        | -1.90528 | -2.91361 | 5.00E-05 | 0.00022  | yes |
| Amotl2        | -1.90748 | -5.07766 | 5.00E-05 | 0.00022  | yes |
| Arhgef10      | -1.90764 | -6.26007 | 5.00E-05 | 0.00022  | yes |
| Tex15         | -1.90855 | 0        | 1        | 1        | no  |
| Kctd12        | -1.91451 | -5.11533 | 5.00E-05 | 0.00022  | yes |
| Fos           | -1.91465 | -8.27265 | 5.00E-05 | 0.00022  | yes |
| Prima1        | -1.91478 | -3.45078 | 5.00E-05 | 0.00022  | yes |
| Trem1         | -1.91567 | 0        | 1        | 1        | no  |
| Nfatc2        | -1.91596 | 0        | 1        | 1        | no  |
| Hsh2d         | -1.91613 | 0        | 1        | 1        | no  |
| Whrn          | -1.9173  | -4.93118 | 5.00E-05 | 0.00022  | yes |
| Slc22a22      | -1.91816 | 0        | 1        | 1        | no  |
| Vipr1         | -1.91898 | 0        | 1        | 1        | no  |
| Brinp1        | -1.91948 | -5.62103 | 5.00E-05 | 0.00022  | yes |
| Ldlrad3       | -1.92051 | -4.31581 | 5.00E-05 | 0.00022  | yes |

|               |          |          |          |          |     |
|---------------|----------|----------|----------|----------|-----|
| Tst           | -1.92073 | -3.04215 | 0.0001   | 0.000422 | yes |
| Tlr1          | -1.92138 | 0        | 1        | 1        | no  |
| Bai3          | -1.92205 | -5.29944 | 5.00E-05 | 0.00022  | yes |
| Ido2          | -1.92226 | 0        | 1        | 1        | no  |
| Hist1h4h      | -1.92263 | -2.22932 | 0.03995  | 0.084465 | no  |
| Pde6a         | -1.92331 | 0        | 1        | 1        | no  |
| Irx3          | -1.92332 | -1.77433 | 0.0028   | 0.008532 | yes |
| Kcns1         | -1.9234  | -7.52873 | 5.00E-05 | 0.00022  | yes |
| S100a8        | -1.92356 | -5.78542 | 5.00E-05 | 0.00022  | yes |
| 4631405J19Rik | -1.92497 | 0        | 1        | 1        | no  |
| Insc          | -1.92661 | -4.03711 | 5.00E-05 | 0.00022  | yes |
| Sag           | -1.92682 | 0        | 1        | 1        | no  |
| Efemp2        | -1.92739 | -3.3964  | 5.00E-05 | 0.00022  | yes |
| Cdkn1c        | -1.92823 | -2.11182 | 0.0005   | 0.00185  | yes |
| Cma1          | -1.9289  | 0        | 1        | 1        | no  |
| Cacng8        | -1.92896 | -1.71488 | 0.0164   | 0.039806 | yes |
| Padi4         | -1.92973 | 0        | 1        | 1        | no  |
| Adra2c        | -1.93037 | -4.80274 | 5.00E-05 | 0.00022  | yes |
| Fam46a        | -1.93037 | -2.75693 | 5.00E-05 | 0.00022  | yes |
| Asb9          | -1.93164 | 0        | 1        | 1        | no  |
| Tnfrsf12a     | -1.93186 | -1.37433 | 0.01615  | 0.039278 | yes |
| Aifm3         | -1.9319  | -4.09908 | 5.00E-05 | 0.00022  | yes |
| Klhl30        | -1.93238 | 0        | 1        | 1        | no  |
| Cyr61         | -1.93369 | -6.41811 | 5.00E-05 | 0.00022  | yes |
| Enpep         | -1.93575 | -3.11795 | 5.00E-05 | 0.00022  | yes |
| Rnf130        | -1.93576 | -5.33458 | 5.00E-05 | 0.00022  | yes |
| Rorc          | -1.93648 | -2.24648 | 0.00125  | 0.00422  | yes |
| Gm6524        | -1.93698 | 0        | 1        | 1        | no  |
| Atp2a1        | -1.93715 | 0        | 1        | 1        | no  |
| Dennd1c       | -1.93823 | 0        | 1        | 1        | no  |
| Vmn2r85       | -1.93903 | 0        | 1        | 1        | no  |
| Gm4841        | -1.93926 | 0        | 1        | 1        | no  |
| Gdpd4         | -1.93952 | 0        | 1        | 1        | no  |
| Kcnj9         | -1.93972 | 0        | 1        | 1        | no  |
| Sorbs2os      | -1.94031 | 0        | 1        | 1        | no  |
| Ptn           | -1.9405  | -8.13763 | 5.00E-05 | 0.00022  | yes |
| Elfn1         | -1.94063 | -6.18407 | 5.00E-05 | 0.00022  | yes |
| Aard          | -1.94074 | -2.88574 | 0.0002   | 0.000803 | yes |
| Scarf2        | -1.94151 | -2.3483  | 0.00055  | 0.002016 | yes |
| Nrcam         | -1.9473  | -8.01986 | 5.00E-05 | 0.00022  | yes |
| Trhde         | -1.94758 | -3.2998  | 5.00E-05 | 0.00022  | yes |
| Ltbp4         | -1.9492  | -5.89517 | 5.00E-05 | 0.00022  | yes |
| 5830444B04Rik | -1.94983 | 0        | 1        | 1        | no  |
| Pvrl4         | -1.95006 | -5.16742 | 5.00E-05 | 0.00022  | yes |
| Ctsh          | -1.95079 | -3.15332 | 5.00E-05 | 0.00022  | yes |
| Mfge8         | -1.95084 | -4.00886 | 5.00E-05 | 0.00022  | yes |
| Plin4         | -1.95186 | 0        | 1        | 1        | no  |
| Col4a2        | -1.95417 | -7.23005 | 5.00E-05 | 0.00022  | yes |
| Calml4        | -1.9549  | -1.86756 | 0.00185  | 0.005939 | yes |
| Ano5          | -1.95686 | 0        | 1        | 1        | no  |
| Gm19461       | -1.9579  | -0.8636  | 0.1189   | 0.206987 | no  |
| Slc27a1       | -1.95892 | -7.02378 | 5.00E-05 | 0.00022  | yes |
| Gpr143        | -1.95983 | 0        | 1        | 1        | no  |



|               |          |          |          |          |     |
|---------------|----------|----------|----------|----------|-----|
| Klhl23        | -1.9606  | -3.2837  | 5.00E-05 | 0.00022  | yes |
| Atoh8         | -1.96094 | 0        | 1        | 1        | no  |
| Vil1          | -1.9633  | 0        | 1        | 1        | no  |
| Frmprd4       | -1.96344 | -6.70712 | 5.00E-05 | 0.00022  | yes |
| Il6ra         | -1.96378 | -2.23573 | 0.0008   | 0.002828 | yes |
| Palld1        | -1.96475 | -4.58408 | 5.00E-05 | 0.00022  | yes |
| Slc12a4       | -1.96506 | -5.07106 | 5.00E-05 | 0.00022  | yes |
| Glb1l2        | -1.96679 | -4.10046 | 5.00E-05 | 0.00022  | yes |
| Asrgl1        | -1.96861 | -6.37535 | 5.00E-05 | 0.00022  | yes |
| Tfcp2l1       | -1.9699  | 0        | 1        | 1        | no  |
| Cntn4         | -1.97003 | -4.43419 | 5.00E-05 | 0.00022  | yes |
| 9230116L04Rik | -1.97033 | 0        | 1        | 1        | no  |
| Itga9         | -1.97083 | -3.17755 | 5.00E-05 | 0.00022  | yes |
| Spib          | -1.97336 | 0        | 1        | 1        | no  |
| Thbs1         | -1.97466 | -4.64029 | 5.00E-05 | 0.00022  | yes |
| Loxl4         | -1.97491 | -3.20044 | 5.00E-05 | 0.00022  | yes |
| Ttc36         | -1.97522 | 0        | 1        | 1        | no  |
| Pcdh8         | -1.97531 | -3.06111 | 5.00E-05 | 0.00022  | yes |
| Leprel4       | -1.97591 | -3.37617 | 5.00E-05 | 0.00022  | yes |
| Duxbl3        | -1.97639 | 0        | 1        | 1        | no  |
| Tph1          | -1.97659 | 0        | 1        | 1        | no  |
| Col13a1       | -1.97672 | 0        | 1        | 1        | no  |
| Layn          | -1.97747 | -1.90677 | 0.00695  | 0.018933 | yes |
| Ltbp1         | -1.97767 | -3.09676 | 5.00E-05 | 0.00022  | yes |
| Itga1         | -1.98094 | -2.66278 | 0.0001   | 0.000422 | yes |
| Egr1          | -1.98095 | -8.14586 | 5.00E-05 | 0.00022  | yes |
| Gm5820        | -1.98122 | 0        | 1        | 1        | no  |
| Ptk2b         | -1.98255 | -5.57675 | 5.00E-05 | 0.00022  | yes |
| Dzip1l        | -1.98317 | 0        | 1        | 1        | no  |
| 1700017B05Rik | -1.98423 | -2.67636 | 5.00E-05 | 0.00022  | yes |
| Plch1         | -1.98685 | 0        | 1        | 1        | no  |
| Phlda3        | -1.98787 | -5.69694 | 5.00E-05 | 0.00022  | yes |
| Cps1          | -1.98872 | 0        | 1        | 1        | no  |
| Gstm6         | -1.98919 | -2.43146 | 0.00135  | 0.004516 | yes |
| Mfap3l        | -1.98925 | -7.92162 | 5.00E-05 | 0.00022  | yes |
| Tpo           | -1.99272 | 0        | 1        | 1        | no  |
| Ehd2          | -1.99395 | -6.6793  | 5.00E-05 | 0.00022  | yes |
| Pbx1          | -1.99422 | -6.87451 | 5.00E-05 | 0.00022  | yes |
| Zeb2          | -1.99428 | -7.70262 | 5.00E-05 | 0.00022  | yes |
| Fign          | -1.99477 | -4.47795 | 5.00E-05 | 0.00022  | yes |
| Dpysl4        | -1.99716 | -4.43453 | 5.00E-05 | 0.00022  | yes |
| Arhgap10      | -1.99772 | -3.08608 | 5.00E-05 | 0.00022  | yes |
| D930028M14Rik | -1.99936 | -4.8     | 5.00E-05 | 0.00022  | yes |
| Gm684         | -2.00266 | 0        | 1        | 1        | no  |
| D1Pas1        | -2.00311 | 0        | 1        | 1        | no  |
| Pi16          | -2.00366 | -3.94588 | 5.00E-05 | 0.00022  | yes |
| Fam19a5       | -2.00424 | -5.91349 | 5.00E-05 | 0.00022  | yes |
| Cdsn          | -2.00446 | 0        | 1        | 1        | no  |
| Slc2a12       | -2.00539 | 0        | 1        | 1        | no  |
| Lpar4         | -2.00583 | 0        | 1        | 1        | no  |
| Vamp1         | -2.00822 | -9.04773 | 5.00E-05 | 0.00022  | yes |
| Chrm2         | -2.00954 | -3.36167 | 5.00E-05 | 0.00022  | yes |
| Iqch          | -2.01097 | 0        | 1        | 1        | no  |

|               |          |          |          |          |     |
|---------------|----------|----------|----------|----------|-----|
| Arhgef4       | -2.01099 | -7.70243 | 5.00E-05 | 0.00022  | yes |
| Tnfsf9        | -2.01104 | 0        | 1        | 1        | no  |
| Adra2a        | -2.0119  | -3.67064 | 5.00E-05 | 0.00022  | yes |
| Hs3st4        | -2.01382 | -3.33891 | 5.00E-05 | 0.00022  | yes |
| Arhgef40      | -2.01533 | -5.16667 | 5.00E-05 | 0.00022  | yes |
| Rasgrf1       | -2.01661 | -3.15858 | 5.00E-05 | 0.00022  | yes |
| Tgfbr3        | -2.01769 | -7.57544 | 5.00E-05 | 0.00022  | yes |
| Arhgef6       | -2.01783 | -5.99806 | 5.00E-05 | 0.00022  | yes |
| Cygb          | -2.01849 | -6.77345 | 5.00E-05 | 0.00022  | yes |
| Adtrp         | -2.01881 | 0        | 1        | 1        | no  |
| Asic3         | -2.02009 | -8.21304 | 5.00E-05 | 0.00022  | yes |
| Zic5          | -2.02123 | 0        | 1        | 1        | no  |
| Lipi          | -2.0218  | 0        | 1        | 1        | no  |
| B3gat1        | -2.02217 | -2.6897  | 5.00E-05 | 0.00022  | yes |
| Epha2         | -2.02387 | -2.65571 | 5.00E-05 | 0.00022  | yes |
| Prkcb         | -2.02409 | -8.34149 | 5.00E-05 | 0.00022  | yes |
| Epb4.1l2      | -2.02412 | -7.79518 | 5.00E-05 | 0.00022  | yes |
| Met           | -2.02485 | 0        | 1        | 1        | no  |
| Grm8          | -2.02501 | -5.33864 | 5.00E-05 | 0.00022  | yes |
| Tex40         | -2.02515 | -3.08541 | 0.00025  | 0.000985 | yes |
| Ajap1         | -2.02753 | 0        | 1        | 1        | no  |
| Emilin1       | -2.02775 | -2.45272 | 0.00025  | 0.000985 | yes |
| Ndrp2         | -2.02799 | -8.32645 | 5.00E-05 | 0.00022  | yes |
| Emilin3       | -2.03054 | 0        | 1        | 1        | no  |
| Phf19         | -2.03124 | 0        | 1        | 1        | no  |
| Cntn1         | -2.03565 | -9.17051 | 5.00E-05 | 0.00022  | yes |
| Ccdc65        | -2.03966 | -2.31843 | 0.00105  | 0.003607 | yes |
| Stxbp5l       | -2.04044 | -7.02574 | 5.00E-05 | 0.00022  | yes |
| Kndc1         | -2.04087 | -5.26161 | 5.00E-05 | 0.00022  | yes |
| Traf1         | -2.04113 | 0        | 1        | 1        | no  |
| Copz2         | -2.04249 | -2.59953 | 5.00E-05 | 0.00022  | yes |
| Il34          | -2.0459  | -4.55782 | 5.00E-05 | 0.00022  | yes |
| Dlgap2        | -2.04666 | 0        | 1        | 1        | no  |
| Nr1d1         | -2.0491  | -5.85303 | 5.00E-05 | 0.00022  | yes |
| L3hypdh       | -2.05011 | 0        | 1        | 1        | no  |
| Lrtm2         | -2.05101 | 0        | 1        | 1        | no  |
| Rhobtb3       | -2.05158 | -6.74799 | 5.00E-05 | 0.00022  | yes |
| Vdr           | -2.05403 | 0        | 1        | 1        | no  |
| Gm7854        | -2.05481 | 0        | 1        | 1        | no  |
| Sla           | -2.05618 | 0        | 1        | 1        | no  |
| Ikzf4         | -2.05655 | 0        | 1        | 1        | no  |
| Hspb6         | -2.05669 | -4.03033 | 5.00E-05 | 0.00022  | yes |
| Tuba4a        | -2.0568  | -7.89711 | 5.00E-05 | 0.00022  | yes |
| Tlr5          | -2.0574  | -2.76749 | 5.00E-05 | 0.00022  | yes |
| Asb2          | -2.05862 | -2.51626 | 0.00015  | 0.000615 | yes |
| Spin4         | -2.05938 | 0        | 1        | 1        | no  |
| Syt15         | -2.06004 | 0        | 1        | 1        | no  |
| Slc16a14      | -2.06159 | -2.29836 | 0.00085  | 0.002983 | yes |
| Phyhipl       | -2.06399 | -6.15809 | 5.00E-05 | 0.00022  | yes |
| 5930430L01Rik | -2.06476 | 0        | 1        | 1        | no  |
| Itih5         | -2.07008 | -8.26814 | 5.00E-05 | 0.00022  | yes |
| S100a4        | -2.07127 | -6.00627 | 5.00E-05 | 0.00022  | yes |
| Slc16a6       | -2.07166 | -4.73347 | 5.00E-05 | 0.00022  | yes |

|          |          |           |          |          |     |
|----------|----------|-----------|----------|----------|-----|
| Shroom2  | -2.07351 | -5.35602  | 5.00E-05 | 0.00022  | yes |
| P2rx1    | -2.07398 | 0         | 1        | 1        | no  |
| Cspg5    | -2.07546 | -3.4951   | 5.00E-05 | 0.00022  | yes |
| Lamb1    | -2.07596 | -8.78095  | 5.00E-05 | 0.00022  | yes |
| Plch2    | -2.0761  | -2.56553  | 5.00E-05 | 0.00022  | yes |
| Chst1    | -2.07686 | -3.72296  | 5.00E-05 | 0.00022  | yes |
| Ccl6     | -2.07808 | -1.6909   | 0.00645  | 0.017754 | yes |
| Mep1a    | -2.07879 | 0         | 1        | 1        | no  |
| Col25a1  | -2.07891 | -4.08111  | 5.00E-05 | 0.00022  | yes |
| Col19a1  | -2.0797  | -3.33301  | 5.00E-05 | 0.00022  | yes |
| Adam23   | -2.07972 | -9.21479  | 5.00E-05 | 0.00022  | yes |
| Jam3     | -2.08018 | -7.10335  | 5.00E-05 | 0.00022  | yes |
| Ecsr     | -2.0828  | -3.37171  | 5.00E-05 | 0.00022  | yes |
| Gja1     | -2.08438 | -6.77228  | 5.00E-05 | 0.00022  | yes |
| Shmt1    | -2.08898 | 0         | 1        | 1        | no  |
| Raver2   | -2.08957 | -0.489504 | 0.3107   | 0.440297 | no  |
| Rab31    | -2.09047 | -6.35552  | 5.00E-05 | 0.00022  | yes |
| Hrct1    | -2.09168 | 0         | 1        | 1        | no  |
| Hbegf    | -2.09427 | -4.23734  | 5.00E-05 | 0.00022  | yes |
| Styx11   | -2.09607 | 0         | 1        | 1        | no  |
| Pde9a    | -2.09742 | 0         | 1        | 1        | no  |
| Gng11    | -2.09904 | -3.68368  | 5.00E-05 | 0.00022  | yes |
| Apobec2  | -2.10037 | 0         | 1        | 1        | no  |
| Sez6l    | -2.10146 | -4.62564  | 5.00E-05 | 0.00022  | yes |
| Btnl6    | -2.10228 | 0         | 1        | 1        | no  |
| Rasd2    | -2.1031  | -3.92063  | 5.00E-05 | 0.00022  | yes |
| Syt3     | -2.10337 | -5.98521  | 5.00E-05 | 0.00022  | yes |
| Naprt1   | -2.10447 | -2.27227  | 0.0016   | 0.005236 | yes |
| Ucp3     | -2.10509 | 0         | 1        | 1        | no  |
| Kank4    | -2.10606 | -8.61396  | 5.00E-05 | 0.00022  | yes |
| Tnfrsf22 | -2.1068  | -2.11485  | 0.0023   | 0.007205 | yes |
| Cthrc1   | -2.10947 | -3.54778  | 5.00E-05 | 0.00022  | yes |
| Lama4    | -2.10984 | -7.35671  | 5.00E-05 | 0.00022  | yes |
| Setbp1   | -2.11096 | -3.95324  | 5.00E-05 | 0.00022  | yes |
| Cpxm1    | -2.11116 | -3.96191  | 5.00E-05 | 0.00022  | yes |
| Mdga1    | -2.11305 | -6.50633  | 5.00E-05 | 0.00022  | yes |
| Bace2    | -2.11542 | -4.66242  | 5.00E-05 | 0.00022  | yes |
| Sspo     | -2.11627 | 0         | 1        | 1        | no  |
| Nfam1    | -2.11644 | 0         | 1        | 1        | no  |
| Tcn2     | -2.11654 | -5.41575  | 5.00E-05 | 0.00022  | yes |
| Creb3l4  | -2.11757 | 0         | 1        | 1        | no  |
| S100a9   | -2.11791 | -3.30566  | 5.00E-05 | 0.00022  | yes |
| Retsat   | -2.11858 | -3.27784  | 5.00E-05 | 0.00022  | yes |
| Lhfpl1   | -2.11872 | -6.11601  | 5.00E-05 | 0.00022  | yes |
| Ddit4l   | -2.11927 | 0         | 1        | 1        | no  |
| Slc1a1   | -2.11986 | -3.54551  | 5.00E-05 | 0.00022  | yes |
| Mal      | -2.12037 | -8.73845  | 5.00E-05 | 0.00022  | yes |
| Abi3     | -2.12304 | 0         | 1        | 1        | no  |
| Abhd11os | -2.12309 | -0.755922 | 0.26485  | 0.389121 | no  |
| F2r      | -2.1238  | -5.72413  | 5.00E-05 | 0.00022  | yes |
| Lrrtm4   | -2.12414 | -2.57825  | 5.00E-05 | 0.00022  | yes |
| Cyp2s1   | -2.12442 | -2.53528  | 0.0004   | 0.001513 | yes |
| Kcnq3    | -2.12464 | -4.27645  | 5.00E-05 | 0.00022  | yes |

|               |          |          |          |          |     |
|---------------|----------|----------|----------|----------|-----|
| Ptprq         | -2.12499 | 0        | 1        | 1        | no  |
| Gm6249        | -2.12876 | 0        | 1        | 1        | no  |
| Rassf4        | -2.13061 | -7.09752 | 5.00E-05 | 0.00022  | yes |
| Prg2          | -2.13103 | -1.50027 | 0.0494   | 0.10114  | no  |
| D430041D05Rik | -2.13122 | -5.76999 | 5.00E-05 | 0.00022  | yes |
| Xkrx          | -2.13142 | 0        | 1        | 1        | no  |
| Nova1         | -2.13206 | -3.31528 | 5.00E-05 | 0.00022  | yes |
| Cntnap5b      | -2.13238 | -3.49747 | 5.00E-05 | 0.00022  | yes |
| Tspan6        | -2.13397 | -3.9773  | 5.00E-05 | 0.00022  | yes |
| Scn8a         | -2.13481 | -9.63408 | 5.00E-05 | 0.00022  | yes |
| Ppp2r3a       | -2.13483 | -5.44676 | 5.00E-05 | 0.00022  | yes |
| Adh1          | -2.13777 | -2.0334  | 0.0052   | 0.014691 | yes |
| Dusp4         | -2.13793 | -3.32621 | 5.00E-05 | 0.00022  | yes |
| Tyrobp        | -2.13828 | -2.57345 | 0.0076   | 0.02049  | yes |
| Cyp4f18       | -2.13916 | 0        | 1        | 1        | no  |
| Prtn3         | -2.13995 | 0        | 1        | 1        | no  |
| Gatsl3        | -2.1457  | -2.77431 | 0.00025  | 0.000985 | yes |
| Tbx15         | -2.14572 | 0        | 1        | 1        | no  |
| Sapcd2        | -2.14714 | 0        | 1        | 1        | no  |
| Tesk2         | -2.15009 | -2.3234  | 0.00075  | 0.00267  | yes |
| Sult1a1       | -2.15097 | -4.08037 | 5.00E-05 | 0.00022  | yes |
| Sash1         | -2.15135 | -6.89997 | 5.00E-05 | 0.00022  | yes |
| 5930412G12Rik | -2.15202 | 0        | 1        | 1        | no  |
| Nrtn          | -2.15221 | 0        | 1        | 1        | no  |
| Fap           | -2.15241 | -2.19423 | 0.00185  | 0.005939 | yes |
| Hck           | -2.1567  | 0        | 1        | 1        | no  |
| Clmp          | -2.15677 | -6.86541 | 5.00E-05 | 0.00022  | yes |
| Gramd3        | -2.15731 | -2.29811 | 0.00085  | 0.002983 | yes |
| Gpr141        | -2.15886 | 0        | 1        | 1        | no  |
| Skor1         | -2.15915 | 0        | 1        | 1        | no  |
| Ephx3         | -2.15918 | 0        | 1        | 1        | no  |
| Mertk         | -2.16011 | -4.15701 | 5.00E-05 | 0.00022  | yes |
| Cyp1a1        | -2.16211 | 0        | 1        | 1        | no  |
| Shpk          | -2.16379 | -4.95144 | 5.00E-05 | 0.00022  | yes |
| Sall1         | -2.16485 | 0        | 1        | 1        | no  |
| Gm5860        | -2.1652  | 0        | 1        | 1        | no  |
| Klra21        | -2.16876 | 0        | 1        | 1        | no  |
| Myh4          | -2.16925 | 0        | 1        | 1        | no  |
| Clic4         | -2.17018 | -8.68752 | 5.00E-05 | 0.00022  | yes |
| Gpr171        | -2.17123 | 0        | 1        | 1        | no  |
| Arap2         | -2.17278 | -7.23191 | 5.00E-05 | 0.00022  | yes |
| Apobec1       | -2.17377 | -2.44219 | 0.0002   | 0.000803 | yes |
| Ptpn14        | -2.17644 | -5.37755 | 5.00E-05 | 0.00022  | yes |
| Capg          | -2.17895 | -4.77514 | 5.00E-05 | 0.00022  | yes |
| Ankrd33       | -2.18094 | 0        | 1        | 1        | no  |
| Lrrc4c        | -2.18366 | -5.86232 | 5.00E-05 | 0.00022  | yes |
| Fhod1         | -2.18376 | 0        | 1        | 1        | no  |
| Scn4b         | -2.18592 | -10.3644 | 5.00E-05 | 0.00022  | yes |
| Chst9         | -2.18617 | -1.96225 | 0.0078   | 0.020982 | yes |
| AI464131      | -2.18814 | -5.94032 | 5.00E-05 | 0.00022  | yes |
| Pcp4          | -2.18837 | -13.1744 | 5.00E-05 | 0.00022  | yes |
| Plxnb1        | -2.18853 | -5.69001 | 5.00E-05 | 0.00022  | yes |
| Plet1         | -2.18859 | 0        | 1        | 1        | no  |

|               |          |           |          |          |     |
|---------------|----------|-----------|----------|----------|-----|
| Iqsec1        | -2.19001 | -9.08329  | 5.00E-05 | 0.00022  | yes |
| Clu           | -2.19095 | -11.0569  | 5.00E-05 | 0.00022  | yes |
| Nr1h3         | -2.19113 | -2.21519  | 0.00045  | 0.001682 | yes |
| Gm3086        | -2.19289 | 0         | 1        | 1        | no  |
| Gm11837       | -2.19411 | -0.582478 | 0.39915  | 0.530933 | no  |
| Spaca1        | -2.20002 | 0         | 1        | 1        | no  |
| Reep6         | -2.2001  | -0.123802 | 0.59755  | 0.711451 | no  |
| Vangl1        | -2.2007  | -3.4975   | 5.00E-05 | 0.00022  | yes |
| Phlpp1        | -2.20178 | -6.1668   | 5.00E-05 | 0.00022  | yes |
| Twist2        | -2.2028  | 0         | 1        | 1        | no  |
| Sgk2          | -2.20362 | 0         | 1        | 1        | no  |
| 35489         | -2.20422 | 0         | 1        | 1        | no  |
| Slc27a6       | -2.2061  | 0         | 1        | 1        | no  |
| 1700023E05Rik | -2.20734 | 0         | 1        | 1        | no  |
| AI197445      | -2.20874 | 0         | 1        | 1        | no  |
| Zcchc5        | -2.20941 | 0         | 1        | 1        | no  |
| Rgma          | -2.21031 | -4.28606  | 5.00E-05 | 0.00022  | yes |
| Bmp1          | -2.21059 | -4.41093  | 5.00E-05 | 0.00022  | yes |
| Pon3          | -2.213   | -2.06686  | 0.00375  | 0.011009 | yes |
| Grem2         | -2.21325 | -3.01372  | 5.00E-05 | 0.00022  | yes |
| Cdh15         | -2.21579 | -4.12034  | 5.00E-05 | 0.00022  | yes |
| Tgm4          | -2.21674 | -2.36465  | 0.00045  | 0.001682 | yes |
| Hapln2        | -2.21693 | 0         | 1        | 1        | no  |
| Wif1          | -2.21697 | 0         | 1        | 1        | no  |
| Tenm2         | -2.21733 | -6.03441  | 5.00E-05 | 0.00022  | yes |
| Prdm16        | -2.21758 | -3.56585  | 5.00E-05 | 0.00022  | yes |
| C1rl          | -2.21928 | 0         | 1        | 1        | no  |
| Mchr1         | -2.21946 | -2.46473  | 0.00025  | 0.000985 | yes |
| Ifitm6        | -2.21988 | 0         | 1        | 1        | no  |
| Syce1         | -2.22028 | 0         | 1        | 1        | no  |
| Gm3985        | -2.22099 | 0         | 1        | 1        | no  |
| Tmem47        | -2.22156 | -9.75448  | 5.00E-05 | 0.00022  | yes |
| Gja5          | -2.2219  | 0         | 1        | 1        | no  |
| Mt1           | -2.2228  | -9.77247  | 5.00E-05 | 0.00022  | yes |
| Rcn3          | -2.22387 | -5.16785  | 5.00E-05 | 0.00022  | yes |
| Sorcs1        | -2.225   | -6.34047  | 5.00E-05 | 0.00022  | yes |
| Scube3        | -2.2258  | 0         | 1        | 1        | no  |
| Heg1          | -2.22629 | -5.84835  | 5.00E-05 | 0.00022  | yes |
| Col4a4        | -2.22719 | 0         | 1        | 1        | no  |
| 2310030G06Rik | -2.22782 | -1.72024  | 0.02175  | 0.050597 | no  |
| Mmp8          | -2.22874 | 0         | 1        | 1        | no  |
| Gal3st1       | -2.22964 | -4.15756  | 5.00E-05 | 0.00022  | yes |
| Tnfaip8l1     | -2.23019 | -2.46966  | 0.0007   | 0.002506 | yes |
| Qprt          | -2.23039 | -2.3413   | 0.00265  | 0.008146 | yes |
| 1700012D01Rik | -2.23174 | 0         | 1        | 1        | no  |
| Ramp3         | -2.23206 | -1.82582  | 0.0788   | 0.148458 | no  |
| Chrna7        | -2.23243 | -7.79312  | 5.00E-05 | 0.00022  | yes |
| Igfals        | -2.235   | 0         | 1        | 1        | no  |
| Shisa7        | -2.23507 | -3.24966  | 5.00E-05 | 0.00022  | yes |
| Mmp9          | -2.23561 | 0         | 1        | 1        | no  |
| Ust           | -2.23678 | -8.23489  | 5.00E-05 | 0.00022  | yes |
| Tnxb          | -2.2373  | -5.51425  | 5.00E-05 | 0.00022  | yes |
| E330011O21Rik | -2.23952 | 0         | 1        | 1        | no  |

|               |          |           |          |          |     |
|---------------|----------|-----------|----------|----------|-----|
| Atp6ap1l      | -2.24085 | -3.20254  | 5.00E-05 | 0.00022  | yes |
| Lrp5          | -2.24094 | -4.59283  | 5.00E-05 | 0.00022  | yes |
| Aoc3          | -2.24138 | -3.00129  | 5.00E-05 | 0.00022  | yes |
| Klhl14        | -2.24173 | 0         | 1        | 1        | no  |
| Nr4a3         | -2.24324 | 0         | 1        | 1        | no  |
| Negr1         | -2.24369 | -6.16119  | 5.00E-05 | 0.00022  | yes |
| Tnnt3         | -2.24462 | 0         | 1        | 1        | no  |
| Rassf6        | -2.2447  | -2.30183  | 0.00145  | 0.004804 | yes |
| Tctex1d1      | -2.24618 | -0.838038 | 0.0807   | 0.151072 | no  |
| Foxd2os       | -2.24758 | 0         | 1        | 1        | no  |
| Itpripl2      | -2.25007 | -5.87437  | 5.00E-05 | 0.00022  | yes |
| BC049352      | -2.25237 | -1.4956   | 0.2785   | 0.404207 | no  |
| Rrad          | -2.25311 | 0         | 1        | 1        | no  |
| Arl11         | -2.25332 | 0         | 1        | 1        | no  |
| Esr1          | -2.25365 | -4.6331   | 5.00E-05 | 0.00022  | yes |
| Kank2         | -2.25546 | -5.2415   | 5.00E-05 | 0.00022  | yes |
| 4930447K03Rik | -2.25583 | 0         | 1        | 1        | no  |
| Dbp           | -2.25772 | -3.74093  | 5.00E-05 | 0.00022  | yes |
| Sgk1          | -2.25859 | -6.58631  | 5.00E-05 | 0.00022  | yes |
| Slc2a10       | -2.25972 | 0         | 1        | 1        | no  |
| Igsf21        | -2.26059 | -5.65726  | 5.00E-05 | 0.00022  | yes |
| Suclg2        | -2.26107 | -3.30129  | 5.00E-05 | 0.00022  | yes |
| 1700008O03Rik | -2.26227 | 0         | 1        | 1        | no  |
| Wnk3          | -2.26338 | -4.41121  | 5.00E-05 | 0.00022  | yes |
| 1110017D15Rik | -2.26362 | 0         | 1        | 1        | no  |
| 6330410L21Rik | -2.2643  | 0         | 1        | 1        | no  |
| Nfix          | -2.26493 | -5.04361  | 5.00E-05 | 0.00022  | yes |
| Kank1         | -2.26496 | -6.02852  | 5.00E-05 | 0.00022  | yes |
| AI848285      | -2.26555 | 0         | 1        | 1        | no  |
| Gm10658       | -2.26586 | 0         | 1        | 1        | no  |
| St8sia2       | -2.26648 | 0         | 1        | 1        | no  |
| Coch          | -2.2677  | 0         | 1        | 1        | no  |
| Lrfn2         | -2.26778 | -4.2749   | 5.00E-05 | 0.00022  | yes |
| Plekhg2       | -2.26813 | -4.77097  | 5.00E-05 | 0.00022  | yes |
| 2210039B01Rik | -2.26888 | 0         | 1        | 1        | no  |
| Tmem181c-ps   | -2.26989 | -3.35238  | 5.00E-05 | 0.00022  | yes |
| Htr3a         | -2.27723 | -8.72836  | 5.00E-05 | 0.00022  | yes |
| Gm9866        | -2.28041 | -3.01096  | 5.00E-05 | 0.00022  | yes |
| Rhoj          | -2.28202 | -4.19368  | 5.00E-05 | 0.00022  | yes |
| Aoah          | -2.28342 | 0         | 1        | 1        | no  |
| Mybph         | -2.28947 | 0         | 1        | 1        | no  |
| Cyp26c1       | -2.28961 | 0         | 1        | 1        | no  |
| Athl1         | -2.28986 | -3.23099  | 5.00E-05 | 0.00022  | yes |
| Hfe           | -2.2902  | -3.16473  | 5.00E-05 | 0.00022  | yes |
| Unc80         | -2.29162 | -9.93692  | 5.00E-05 | 0.00022  | yes |
| Pcdha8        | -2.29172 | 0         | 1        | 1        | no  |
| Olfm2         | -2.29313 | -4.03179  | 5.00E-05 | 0.00022  | yes |
| Vsx1          | -2.29329 | 0         | 1        | 1        | no  |
| Grid2ip       | -2.29486 | -3.12216  | 5.00E-05 | 0.00022  | yes |
| Lrp4          | -2.29554 | -4.58999  | 5.00E-05 | 0.00022  | yes |
| Adamts6       | -2.29581 | 0         | 1        | 1        | no  |
| Ptch2         | -2.29667 | 0         | 1        | 1        | no  |
| Npy5r         | -2.29821 | 0         | 1        | 1        | no  |



|               |          |          |          |          |     |
|---------------|----------|----------|----------|----------|-----|
| Mylk          | -2.29984 | -4.68101 | 5.00E-05 | 0.00022  | yes |
| F630028O10Rik | -2.30188 | 0        | 1        | 1        | no  |
| Acss3         | -2.30516 | 0        | 1        | 1        | no  |
| Gsta4         | -2.30583 | -5.06046 | 5.00E-05 | 0.00022  | yes |
| Slco5a1       | -2.30593 | -7.63038 | 5.00E-05 | 0.00022  | yes |
| Ninj2         | -2.3086  | 0        | 1        | 1        | no  |
| Ldhb          | -2.31072 | -10.6054 | 5.00E-05 | 0.00022  | yes |
| Fgr           | -2.31421 | 0        | 1        | 1        | no  |
| Dnah2         | -2.31487 | 0        | 1        | 1        | no  |
| Kcne4         | -2.31504 | -2.89174 | 5.00E-05 | 0.00022  | yes |
| Amhr2         | -2.31504 | 0        | 1        | 1        | no  |
| Grp           | -2.31589 | 0        | 1        | 1        | no  |
| Plscr2        | -2.31764 | -3.54082 | 5.00E-05 | 0.00022  | yes |
| Scn1a         | -2.32001 | -9.96199 | 5.00E-05 | 0.00022  | yes |
| Chrm1         | -2.32013 | 0        | 1        | 1        | no  |
| Tmigd1        | -2.32013 | 0        | 1        | 1        | no  |
| Lgr4          | -2.32039 | -8.52974 | 5.00E-05 | 0.00022  | yes |
| Rbp1          | -2.32083 | -3.69249 | 5.00E-05 | 0.00022  | yes |
| Gpr158        | -2.32107 | -10.3015 | 5.00E-05 | 0.00022  | yes |
| Chrna3        | -2.32108 | -5.77257 | 5.00E-05 | 0.00022  | yes |
| Cadm4         | -2.32192 | -9.84787 | 5.00E-05 | 0.00022  | yes |
| Emp1          | -2.32374 | -4.44364 | 5.00E-05 | 0.00022  | yes |
| Pxn           | -2.32552 | -6.26744 | 5.00E-05 | 0.00022  | yes |
| Chpt1         | -2.32779 | -5.32596 | 5.00E-05 | 0.00022  | yes |
| Gsap          | -2.32905 | -4.00754 | 5.00E-05 | 0.00022  | yes |
| Il18          | -2.32992 | -2.625   | 0.0019   | 0.00608  | yes |
| Ccdc170       | -2.3306  | 0        | 1        | 1        | no  |
| Col26a1       | -2.33216 | -3.00653 | 5.00E-05 | 0.00022  | yes |
| Hoxb9         | -2.33236 | -4.01574 | 5.00E-05 | 0.00022  | yes |
| Fam198b       | -2.33478 | -7.26506 | 5.00E-05 | 0.00022  | yes |
| Dcc           | -2.33742 | 0        | 1        | 1        | no  |
| Gira3         | -2.34238 | 0        | 1        | 1        | no  |
| Mboat2        | -2.34253 | -7.06291 | 5.00E-05 | 0.00022  | yes |
| Dennd2a       | -2.3433  | -4.98932 | 5.00E-05 | 0.00022  | yes |
| Flt3          | -2.3441  | -5.99858 | 5.00E-05 | 0.00022  | yes |
| Dpep1         | -2.34423 | 0        | 1        | 1        | no  |
| Nfasc         | -2.3452  | -10.3159 | 5.00E-05 | 0.00022  | yes |
| Fam115c       | -2.34705 | -3.7574  | 5.00E-05 | 0.00022  | yes |
| Hs3st1        | -2.34879 | -4.48455 | 5.00E-05 | 0.00022  | yes |
| Il17rb        | -2.34908 | 0        | 1        | 1        | no  |
| Fxyd7         | -2.35534 | -12.0918 | 5.00E-05 | 0.00022  | yes |
| Cyp7b1        | -2.35809 | -3.72133 | 5.00E-05 | 0.00022  | yes |
| Grm1          | -2.36017 | 0        | 1        | 1        | no  |
| Kcnj15        | -2.36133 | 0        | 1        | 1        | no  |
| D330050G23Rik | -2.36374 | -1.58142 | 0.00455  | 0.013069 | yes |
| Pla2g4e       | -2.36404 | 0        | 1        | 1        | no  |
| Abca12        | -2.36501 | 0        | 1        | 1        | no  |
| Relt          | -2.36575 | -5.43664 | 5.00E-05 | 0.00022  | yes |
| Rapgef11      | -2.36616 | 0        | 1        | 1        | no  |
| Ntf3          | -2.36776 | 0        | 1        | 1        | no  |
| Cdc42ep1      | -2.37018 | -4.51514 | 5.00E-05 | 0.00022  | yes |
| Tmco4         | -2.37881 | -3.19741 | 5.00E-05 | 0.00022  | yes |
| Alox5ap       | -2.3795  | -2.29137 | 0.0077   | 0.020742 | yes |

|               |          |           |          |          |     |
|---------------|----------|-----------|----------|----------|-----|
| Tmem163       | -2.37961 | -6.86467  | 5.00E-05 | 0.00022  | yes |
| Pygm          | -2.38143 | 0         | 1        | 1        | no  |
| Pgr           | -2.38251 | -4.12344  | 5.00E-05 | 0.00022  | yes |
| Olfm3         | -2.38377 | -3.20033  | 5.00E-05 | 0.00022  | yes |
| Rcsd1         | -2.38572 | -4.51379  | 5.00E-05 | 0.00022  | yes |
| Lrrc8e        | -2.38605 | 0         | 1        | 1        | no  |
| Clec4d        | -2.38828 | 0         | 1        | 1        | no  |
| Cbln2         | -2.38866 | -6.99441  | 5.00E-05 | 0.00022  | yes |
| Eln           | -2.3889  | -5.53646  | 5.00E-05 | 0.00022  | yes |
| Akr1c13       | -2.39077 | 0         | 1        | 1        | no  |
| Syt13         | -2.39413 | -2.96805  | 5.00E-05 | 0.00022  | yes |
| Perm1         | -2.39497 | 0         | 1        | 1        | no  |
| Meox2         | -2.39835 | -2.28586  | 0.00225  | 0.007062 | yes |
| Fgf11         | -2.39884 | -4.47047  | 5.00E-05 | 0.00022  | yes |
| Ciart         | -2.39912 | -1.87917  | 0.01475  | 0.036326 | yes |
| Cpxm2         | -2.40567 | -3.47519  | 5.00E-05 | 0.00022  | yes |
| Rad21l        | -2.40801 | 0         | 1        | 1        | no  |
| Wnt5b         | -2.41031 | 0         | 1        | 1        | no  |
| Smoc1         | -2.4122  | -4.34537  | 5.00E-05 | 0.00022  | yes |
| Sowahb        | -2.41223 | 0         | 1        | 1        | no  |
| Kazald1       | -2.41234 | -3.70804  | 5.00E-05 | 0.00022  | yes |
| Fzd8          | -2.41283 | -4.37167  | 5.00E-05 | 0.00022  | yes |
| Ociad2        | -2.41387 | -3.47483  | 5.00E-05 | 0.00022  | yes |
| Anxa1         | -2.41506 | -3.90335  | 5.00E-05 | 0.00022  | yes |
| Gabrb2        | -2.4167  | -6.46493  | 5.00E-05 | 0.00022  | yes |
| Acot4         | -2.41825 | 0         | 1        | 1        | no  |
| Ppap2b        | -2.4199  | -8.97234  | 5.00E-05 | 0.00022  | yes |
| Lbp           | -2.4215  | -4.53337  | 5.00E-05 | 0.00022  | yes |
| Cacna2d4      | -2.4261  | 0         | 1        | 1        | no  |
| Kcnc3         | -2.42831 | -9.432    | 5.00E-05 | 0.00022  | yes |
| Fgfr1         | -2.42945 | -10.3281  | 5.00E-05 | 0.00022  | yes |
| Cpne6         | -2.43047 | -10.5227  | 5.00E-05 | 0.00022  | yes |
| Fam178b       | -2.43085 | -5.14558  | 5.00E-05 | 0.00022  | yes |
| Akr1b10       | -2.43226 | -3.02465  | 0.0002   | 0.000803 | yes |
| Pik3r5        | -2.43243 | -2.71206  | 0.0002   | 0.000803 | yes |
| Capn6         | -2.43384 | -2.39127  | 0.0007   | 0.002506 | yes |
| Cox4i2        | -2.43533 | -0.633349 | 0.29375  | 0.421408 | no  |
| Ppargc1a      | -2.43722 | -6.24597  | 5.00E-05 | 0.00022  | yes |
| Batf          | -2.438   | 0         | 1        | 1        | no  |
| Plbd1         | -2.43882 | -2.08056  | 0.00575  | 0.016057 | yes |
| Rab34         | -2.44107 | -3.56758  | 5.00E-05 | 0.00022  | yes |
| Fn1           | -2.44113 | -7.55966  | 5.00E-05 | 0.00022  | yes |
| Adra1b        | -2.44183 | 0         | 1        | 1        | no  |
| Pcdh9         | -2.44275 | -8.93853  | 5.00E-05 | 0.00022  | yes |
| Gatm          | -2.44809 | -11.091   | 5.00E-05 | 0.00022  | yes |
| C130060K24Rik | -2.45024 | 0         | 1        | 1        | no  |
| Gpr124        | -2.4506  | -5.36684  | 5.00E-05 | 0.00022  | yes |
| Samd4         | -2.45218 | -4.83512  | 5.00E-05 | 0.00022  | yes |
| Lynx1         | -2.45342 | -11.5027  | 5.00E-05 | 0.00022  | yes |
| Mcf2          | -2.4543  | -3.09815  | 5.00E-05 | 0.00022  | yes |
| Tlr3          | -2.45624 | -3.92105  | 5.00E-05 | 0.00022  | yes |
| Kcnc1         | -2.45648 | -8.4267   | 5.00E-05 | 0.00022  | yes |
| Ankrd35       | -2.45787 | -4.42308  | 5.00E-05 | 0.00022  | yes |

|               |          |          |          |          |     |
|---------------|----------|----------|----------|----------|-----|
| Zfp750        | -2.45854 | 0        | 1        | 1        | no  |
| 9430041J12Rik | -2.45982 | 0        | 1        | 1        | no  |
| Chst2         | -2.4605  | -8.13831 | 5.00E-05 | 0.00022  | yes |
| Sec14I5       | -2.46265 | -2.62197 | 0.00035  | 0.001342 | yes |
| Lamc3         | -2.46405 | -3.72297 | 5.00E-05 | 0.00022  | yes |
| Lcp2          | -2.46452 | -2.75584 | 0.00015  | 0.000615 | yes |
| 2410018L13Rik | -2.46468 | -2.1028  | 0.00685  | 0.018707 | yes |
| Inpp4b        | -2.46696 | 0        | 1        | 1        | no  |
| Fam181b       | -2.468   | -4.7863  | 5.00E-05 | 0.00022  | yes |
| Fads6         | -2.4687  | -4.92139 | 5.00E-05 | 0.00022  | yes |
| Efna3         | -2.46919 | -2.35222 | 0.0035   | 0.01036  | yes |
| BC026585      | -2.4705  | -2.47543 | 0.0017   | 0.005514 | yes |
| Ddc           | -2.4705  | 0        | 1        | 1        | no  |
| Il5ra         | -2.47157 | 0        | 1        | 1        | no  |
| Rfx8          | -2.47159 | 0        | 1        | 1        | no  |
| Dcaf12l2      | -2.47309 | 0        | 1        | 1        | no  |
| Slc22a3       | -2.47458 | 0        | 1        | 1        | no  |
| Nr2f2         | -2.47551 | -7.13758 | 5.00E-05 | 0.00022  | yes |
| Creb5         | -2.4764  | -2.8146  | 0.00015  | 0.000615 | yes |
| Mfap2         | -2.47685 | -1.56548 | 0.0894   | 0.163596 | no  |
| Wfdc6b        | -2.47795 | 0        | 1        | 1        | no  |
| Ptprj         | -2.4785  | -4.83157 | 5.00E-05 | 0.00022  | yes |
| Gm5607        | -2.47893 | 0        | 1        | 1        | no  |
| Asb18         | -2.47968 | 0        | 1        | 1        | no  |
| Trib1         | -2.48046 | -4.80095 | 5.00E-05 | 0.00022  | yes |
| Klhl13        | -2.48142 | -6.05716 | 5.00E-05 | 0.00022  | yes |
| Wfdc1         | -2.48169 | -2.62016 | 0.00155  | 0.005095 | yes |
| Fbn1          | -2.48322 | -6.80457 | 5.00E-05 | 0.00022  | yes |
| Syndig1       | -2.48728 | -3.6694  | 5.00E-05 | 0.00022  | yes |
| Prex2         | -2.48864 | -6.3406  | 5.00E-05 | 0.00022  | yes |
| Pard3         | -2.48956 | -5.18971 | 5.00E-05 | 0.00022  | yes |
| Clec11a       | -2.4918  | -2.11848 | 0.0046   | 0.013192 | yes |
| Gstk1         | -2.49233 | -4.0236  | 5.00E-05 | 0.00022  | yes |
| Gfpt2         | -2.49262 | -2.37855 | 0.0011   | 0.00376  | yes |
| AA467197      | -2.49534 | 0        | 1        | 1        | no  |
| Vwc2l         | -2.49664 | -4.84128 | 5.00E-05 | 0.00022  | yes |
| Lrrc17        | -2.49847 | -2.06356 | 0.1267   | 0.218359 | no  |
| Alox15        | -2.49997 | 0        | 1        | 1        | no  |
| Hpd1          | -2.50027 | -2.3367  | 0.002    | 0.006363 | yes |
| Fam69c        | -2.50199 | 0        | 1        | 1        | no  |
| Epb4.1l4b     | -2.5038  | -5.39716 | 5.00E-05 | 0.00022  | yes |
| 4930502E18Rik | -2.50388 | -2.01687 | 0.01195  | 0.030273 | yes |
| Sulf2         | -2.50502 | -7.82299 | 5.00E-05 | 0.00022  | yes |
| Glyat         | -2.50601 | 0        | 1        | 1        | no  |
| Vit           | -2.50716 | -3.70285 | 5.00E-05 | 0.00022  | yes |
| Fhod3         | -2.50962 | -3.0409  | 5.00E-05 | 0.00022  | yes |
| Fam83f        | -2.5103  | -2.57345 | 0.0002   | 0.000803 | yes |
| G0s2          | -2.51106 | -4.05155 | 5.00E-05 | 0.00022  | yes |
| Gsn           | -2.51198 | -10.586  | 5.00E-05 | 0.00022  | yes |
| Parp3         | -2.51238 | -4.76479 | 5.00E-05 | 0.00022  | yes |
| Fam196a       | -2.51274 | 0        | 1        | 1        | no  |
| Astn2         | -2.51382 | -4.40526 | 5.00E-05 | 0.00022  | yes |
| Lctl          | -2.51437 | -1.26499 | 0.15665  | 0.258911 | no  |

|               |          |          |          |          |     |
|---------------|----------|----------|----------|----------|-----|
| Cd33          | -2.51486 | 0        | 1        | 1        | no  |
| Corin         | -2.51525 | 0        | 1        | 1        | no  |
| B3galt5       | -2.51609 | -6.59715 | 5.00E-05 | 0.00022  | yes |
| 2010107G12Rik | -2.51854 | 0        | 1        | 1        | no  |
| Cgnl1         | -2.52417 | -10.1608 | 5.00E-05 | 0.00022  | yes |
| Ptgis         | -2.52531 | -3.02532 | 0.0002   | 0.000803 | yes |
| Fstl5         | -2.52676 | -7.40526 | 5.00E-05 | 0.00022  | yes |
| Gucy1a3       | -2.52681 | -3.49925 | 5.00E-05 | 0.00022  | yes |
| Nr4a1         | -2.52892 | -8.53377 | 5.00E-05 | 0.00022  | yes |
| Fkbp11        | -2.52894 | 0        | 1        | 1        | no  |
| Lct           | -2.52955 | 0        | 1        | 1        | no  |
| Smtnl1        | -2.52978 | 0        | 1        | 1        | no  |
| Pacsin3       | -2.52997 | -3.77267 | 5.00E-05 | 0.00022  | yes |
| Gal3st4       | -2.53254 | 0        | 1        | 1        | no  |
| Col4a1        | -2.53327 | -9.79307 | 5.00E-05 | 0.00022  | yes |
| Gm1715        | -2.53675 | 0        | 1        | 1        | no  |
| Thrsp         | -2.53826 | -5.04084 | 5.00E-05 | 0.00022  | yes |
| Cxcr4         | -2.54017 | -5.90931 | 5.00E-05 | 0.00022  | yes |
| 4930505A04Rik | -2.54253 | 0        | 1        | 1        | no  |
| Dock1         | -2.54301 | -5.93565 | 5.00E-05 | 0.00022  | yes |
| C1qtnf3       | -2.54447 | 0        | 1        | 1        | no  |
| Wisp1         | -2.54476 | -3.81765 | 5.00E-05 | 0.00022  | yes |
| Kcng4         | -2.54499 | -5.20423 | 5.00E-05 | 0.00022  | yes |
| Ces4a         | -2.54591 | 0        | 1        | 1        | no  |
| Glb1l3        | -2.54594 | 0        | 1        | 1        | no  |
| Kbtbd13       | -2.54705 | 0        | 1        | 1        | no  |
| Gprc5b        | -2.55165 | -6.09037 | 5.00E-05 | 0.00022  | yes |
| Tomt          | -2.55222 | 0        | 1        | 1        | no  |
| Lhfp          | -2.55283 | -7.37575 | 5.00E-05 | 0.00022  | yes |
| Plekha7       | -2.55394 | -4.27757 | 5.00E-05 | 0.00022  | yes |
| CK137956      | -2.55401 | -2.34391 | 0.0019   | 0.00608  | yes |
| Mc4r          | -2.55454 | 0        | 1        | 1        | no  |
| Pygo1         | -2.55561 | -2.91413 | 5.00E-05 | 0.00022  | yes |
| Kcnk1         | -2.5584  | -9.3141  | 5.00E-05 | 0.00022  | yes |
| Smpd2         | -2.55999 | -4.0054  | 5.00E-05 | 0.00022  | yes |
| Rbpjl         | -2.56024 | 0        | 1        | 1        | no  |
| Caskin2       | -2.56122 | -6.84319 | 5.00E-05 | 0.00022  | yes |
| Sema3g        | -2.56552 | -6.67311 | 5.00E-05 | 0.00022  | yes |
| Ddn           | -2.56739 | -4.90773 | 5.00E-05 | 0.00022  | yes |
| Pld6          | -2.56809 | 0        | 1        | 1        | no  |
| Sox5          | -2.57189 | -3.08121 | 5.00E-05 | 0.00022  | yes |
| Igdcc4        | -2.57226 | -4.99811 | 5.00E-05 | 0.00022  | yes |
| Dhrs3         | -2.57265 | -3.41161 | 5.00E-05 | 0.00022  | yes |
| Slmo1         | -2.57268 | -3.87652 | 5.00E-05 | 0.00022  | yes |
| Dio2          | -2.5729  | 0        | 1        | 1        | no  |
| S100a16       | -2.57379 | -7.21677 | 5.00E-05 | 0.00022  | yes |
| Renbp         | -2.57416 | -1.90216 | 0.07155  | 0.137513 | no  |
| Asb15         | -2.57494 | 0        | 1        | 1        | no  |
| Cp            | -2.57517 | -2.94288 | 0.0001   | 0.000422 | yes |
| Ccr2          | -2.57767 | -2.71126 | 5.00E-05 | 0.00022  | yes |
| Gpx8          | -2.57887 | -4.17414 | 5.00E-05 | 0.00022  | yes |
| Asb5          | -2.57887 | 0        | 1        | 1        | no  |
| Stk32b        | -2.58024 | 0        | 1        | 1        | no  |

|               |          |          |          |          |     |
|---------------|----------|----------|----------|----------|-----|
| Ttc18         | -2.58523 | 0        | 1        | 1        | no  |
| Sipa1l2       | -2.58542 | -6.80037 | 5.00E-05 | 0.00022  | yes |
| Fhl3          | -2.59331 | -2.93729 | 0.00015  | 0.000615 | yes |
| Sik3          | -2.59347 | -6.09938 | 5.00E-05 | 0.00022  | yes |
| Nfkb2         | -2.59855 | -1.99823 | 0.0042   | 0.012158 | yes |
| Gng7          | -2.6015  | -4.85353 | 5.00E-05 | 0.00022  | yes |
| Pth1r         | -2.60414 | -5.60238 | 5.00E-05 | 0.00022  | yes |
| Lrrc7         | -2.60566 | 0        | 1        | 1        | no  |
| Pon2          | -2.60661 | -6.66655 | 5.00E-05 | 0.00022  | yes |
| Lamc1         | -2.61089 | -9.75328 | 5.00E-05 | 0.00022  | yes |
| Gm10941       | -2.61166 | 0        | 1        | 1        | no  |
| Mdh1b         | -2.61286 | 0        | 1        | 1        | no  |
| Cdh3          | -2.61287 | -2.84976 | 5.00E-05 | 0.00022  | yes |
| Mael          | -2.61374 | 0        | 1        | 1        | no  |
| Htra1         | -2.6144  | -10.6392 | 5.00E-05 | 0.00022  | yes |
| Pcdhac1       | -2.61571 | -2.1019  | 0.00105  | 0.003607 | yes |
| Csmd3         | -2.61637 | 0        | 1        | 1        | no  |
| Ednra         | -2.62311 | -4.21679 | 5.00E-05 | 0.00022  | yes |
| Chp2          | -2.62449 | -7.19816 | 5.00E-05 | 0.00022  | yes |
| Caln1         | -2.62452 | -4.03164 | 5.00E-05 | 0.00022  | yes |
| Sema5b        | -2.62521 | -3.82086 | 5.00E-05 | 0.00022  | yes |
| Mmp28         | -2.62539 | -3.24776 | 5.00E-05 | 0.00022  | yes |
| Slc43a3       | -2.62754 | -7.38402 | 5.00E-05 | 0.00022  | yes |
| Tox           | -2.62811 | -3.3404  | 5.00E-05 | 0.00022  | yes |
| Mir143hg      | -2.62925 | 0        | 1        | 1        | no  |
| Tmem196       | -2.63695 | -3.09413 | 0.00015  | 0.000615 | yes |
| Dag1          | -2.63701 | -11.2806 | 5.00E-05 | 0.00022  | yes |
| Rsph9         | -2.63793 | -3.8879  | 5.00E-05 | 0.00022  | yes |
| 4933424G06Rik | -2.63829 | 0        | 1        | 1        | no  |
| Btnl5-ps      | -2.63844 | 0        | 1        | 1        | no  |
| Alox5         | -2.64153 | 0        | 1        | 1        | no  |
| Atp10b        | -2.64244 | 0        | 1        | 1        | no  |
| Cd86          | -2.64245 | 0        | 1        | 1        | no  |
| Angpt1        | -2.64353 | -3.27135 | 5.00E-05 | 0.00022  | yes |
| Tnfsf13       | -2.64411 | -1.53146 | 0.0666   | 0.129558 | no  |
| Bmp7          | -2.64596 | -3.42701 | 5.00E-05 | 0.00022  | yes |
| Sepp1         | -2.64855 | -11.0834 | 5.00E-05 | 0.00022  | yes |
| Il1f9         | -2.64881 | 0        | 1        | 1        | no  |
| Lonrf3        | -2.64997 | 0        | 1        | 1        | no  |
| Rhod          | -2.65453 | 0        | 1        | 1        | no  |
| 1810014B01Rik | -2.65608 | 0        | 1        | 1        | no  |
| Rbms2         | -2.65736 | -5.5054  | 5.00E-05 | 0.00022  | yes |
| Foxo1         | -2.65755 | -6.51828 | 5.00E-05 | 0.00022  | yes |
| Baiap2l1      | -2.65803 | -4.955   | 5.00E-05 | 0.00022  | yes |
| Epn3          | -2.65967 | -8.30678 | 5.00E-05 | 0.00022  | yes |
| D630003M21Rik | -2.65973 | -3.28361 | 5.00E-05 | 0.00022  | yes |
| Slc25a13      | -2.66135 | -2.9141  | 5.00E-05 | 0.00022  | yes |
| Syt1l         | -2.66162 | 0        | 1        | 1        | no  |
| Myadml2       | -2.6629  | -3.05309 | 5.00E-05 | 0.00022  | yes |
| 38595         | -2.66302 | -7.67621 | 5.00E-05 | 0.00022  | yes |
| Crybb1        | -2.66342 | -2.874   | 0.00155  | 0.005095 | yes |
| Zfp395        | -2.6645  | -3.90131 | 5.00E-05 | 0.00022  | yes |
| Asgr1         | -2.66551 | 0        | 1        | 1        | no  |

|               |          |           |          |          |     |
|---------------|----------|-----------|----------|----------|-----|
| Sec1414       | -2.66744 | 0         | 1        | 1        | no  |
| Fbxw10        | -2.66955 | 0         | 1        | 1        | no  |
| 6530402F18Rik | -2.67005 | -4.62711  | 5.00E-05 | 0.00022  | yes |
| Cuzd1         | -2.67042 | 0         | 1        | 1        | no  |
| Pxdc1         | -2.67044 | -4.07834  | 5.00E-05 | 0.00022  | yes |
| 2810468N07Rik | -2.67054 | -3.3835   | 5.00E-05 | 0.00022  | yes |
| Gas2l3        | -2.67104 | -6.98641  | 5.00E-05 | 0.00022  | yes |
| Pcdh18        | -2.67139 | -4.54171  | 5.00E-05 | 0.00022  | yes |
| Fam160a1      | -2.67369 | 0         | 1        | 1        | no  |
| Epha3         | -2.67381 | 0         | 1        | 1        | no  |
| Zbtb16        | -2.67405 | -4.3362   | 5.00E-05 | 0.00022  | yes |
| Snai2         | -2.67592 | 0         | 1        | 1        | no  |
| Trappc3l      | -2.67621 | -7.27822  | 5.00E-05 | 0.00022  | yes |
| Opn1mw        | -2.67824 | 0         | 1        | 1        | no  |
| Lingo4        | -2.68004 | -4.06574  | 5.00E-05 | 0.00022  | yes |
| Nfatc4        | -2.68273 | 0         | 1        | 1        | no  |
| Gm5643        | -2.68276 | -1.41615  | 0.06425  | 0.125575 | no  |
| Plac9b        | -2.68702 | 0         | 1        | 1        | no  |
| Vim           | -2.68873 | -13.2708  | 5.00E-05 | 0.00022  | yes |
| Atp6v0a4      | -2.68897 | 0         | 1        | 1        | no  |
| Ncam2         | -2.68933 | -6.52068  | 5.00E-05 | 0.00022  | yes |
| Syt12         | -2.69166 | -5.03774  | 5.00E-05 | 0.00022  | yes |
| Gc            | -2.69673 | 0         | 1        | 1        | no  |
| Cmtm3         | -2.69747 | -3.98014  | 5.00E-05 | 0.00022  | yes |
| Rell1         | -2.69978 | -5.8888   | 5.00E-05 | 0.00022  | yes |
| Lrrn2         | -2.70234 | -6.57786  | 5.00E-05 | 0.00022  | yes |
| Mrc1          | -2.70248 | -4.00901  | 5.00E-05 | 0.00022  | yes |
| Osgin1        | -2.70488 | -2.19283  | 0.0055   | 0.015427 | yes |
| Tmem229b      | -2.70618 | -11.081   | 5.00E-05 | 0.00022  | yes |
| Fcer1g        | -2.70774 | -2.34214  | 0.0162   | 0.039385 | yes |
| Me3           | -2.7098  | -3.74977  | 5.00E-05 | 0.00022  | yes |
| Gm13749       | -2.71198 | 0         | 1        | 1        | no  |
| Pxylp1        | -2.71245 | -2.51465  | 0.0001   | 0.000422 | yes |
| 4933425L06Rik | -2.71267 | 0         | 1        | 1        | no  |
| Mlip          | -2.71723 | -5.1907   | 5.00E-05 | 0.00022  | yes |
| Rgcc          | -2.71964 | -7.06743  | 5.00E-05 | 0.00022  | yes |
| Etnppl        | -2.71964 | 0         | 1        | 1        | no  |
| Dmgdh         | -2.72028 | 0         | 1        | 1        | no  |
| Wee1          | -2.72223 | -4.92515  | 5.00E-05 | 0.00022  | yes |
| Rhbdl3        | -2.72239 | -5.74092  | 5.00E-05 | 0.00022  | yes |
| E030011O05Rik | -2.72265 | -0.910981 | 0.19655  | 0.309401 | no  |
| Dlg2          | -2.72284 | -8.92634  | 5.00E-05 | 0.00022  | yes |
| Macc1         | -2.7253  | 0         | 1        | 1        | no  |
| Adamtsl5      | -2.72996 | -0.289306 | 0.4892   | 0.616765 | no  |
| Clmn          | -2.73499 | -5.3915   | 5.00E-05 | 0.00022  | yes |
| Yipf7         | -2.73576 | 0         | 1        | 1        | no  |
| Irs1          | -2.73647 | -5.30118  | 5.00E-05 | 0.00022  | yes |
| Tmem98        | -2.73721 | -3.54304  | 5.00E-05 | 0.00022  | yes |
| Add3          | -2.73726 | -8.35062  | 5.00E-05 | 0.00022  | yes |
| Myo5c         | -2.73783 | 0         | 1        | 1        | no  |
| Drp2          | -2.73978 | -11.0193  | 5.00E-05 | 0.00022  | yes |
| Smr2          | -2.74408 | -2.95938  | 5.00E-05 | 0.00022  | yes |
| Wwtr1         | -2.74484 | -6.58083  | 5.00E-05 | 0.00022  | yes |



|               |          |          |          |          |     |
|---------------|----------|----------|----------|----------|-----|
| Casq1         | -2.74696 | 0        | 1        | 1        | no  |
| Fat1          | -2.74787 | -9.05839 | 5.00E-05 | 0.00022  | yes |
| Tlr13         | -2.74887 | 0        | 1        | 1        | no  |
| Ppic          | -2.74907 | -3.79325 | 5.00E-05 | 0.00022  | yes |
| Mas1          | -2.7492  | 0        | 1        | 1        | no  |
| Sp9           | -2.75056 | 0        | 1        | 1        | no  |
| Cdc42bpg      | -2.7515  | -3.52077 | 5.00E-05 | 0.00022  | yes |
| Kank4os       | -2.75625 | 0        | 1        | 1        | no  |
| Iffo2         | -2.75801 | -5.15103 | 5.00E-05 | 0.00022  | yes |
| Klhl34        | -2.75934 | 0        | 1        | 1        | no  |
| Aqp3          | -2.76086 | 0        | 1        | 1        | no  |
| Arc           | -2.76161 | -3.90368 | 5.00E-05 | 0.00022  | yes |
| Nfia          | -2.76466 | -9.92176 | 5.00E-05 | 0.00022  | yes |
| Fam212b       | -2.76805 | -6.5862  | 5.00E-05 | 0.00022  | yes |
| Gm11413       | -2.77129 | 0        | 1        | 1        | no  |
| Hyal1         | -2.77215 | -2.41194 | 0.00125  | 0.00422  | yes |
| F9            | -2.77267 | -2.98201 | 0.00015  | 0.000615 | yes |
| Sucnr1        | -2.77352 | 0        | 1        | 1        | no  |
| Cbln3         | -2.77413 | 0        | 1        | 1        | no  |
| Slc5a9        | -2.77521 | 0        | 1        | 1        | no  |
| Fgf10         | -2.77657 | 0        | 1        | 1        | no  |
| Pla2g4a       | -2.77679 | -2.45041 | 0.00125  | 0.00422  | yes |
| Proca1        | -2.77811 | 0        | 1        | 1        | no  |
| Ppp1r9a       | -2.7786  | -8.61399 | 5.00E-05 | 0.00022  | yes |
| Hoxb8         | -2.77952 | -4.89201 | 5.00E-05 | 0.00022  | yes |
| Runx3         | -2.77988 | -4.72604 | 5.00E-05 | 0.00022  | yes |
| Fam19a1       | -2.78161 | -6.28894 | 5.00E-05 | 0.00022  | yes |
| Sipa1l1       | -2.7834  | -7.43391 | 5.00E-05 | 0.00022  | yes |
| Clec4a1       | -2.78461 | 0        | 1        | 1        | no  |
| Cxcl14        | -2.78578 | 0        | 1        | 1        | no  |
| Mpzl2         | -2.78696 | 0        | 1        | 1        | no  |
| Susd3         | -2.78741 | 0        | 1        | 1        | no  |
| Pla2g16       | -2.78756 | -8.21672 | 5.00E-05 | 0.00022  | yes |
| Glt8d2        | -2.78813 | -1.55447 | 0.06535  | 0.127481 | no  |
| Hic1          | -2.78833 | -2.29121 | 0.04     | 0.084557 | no  |
| Thy1          | -2.78837 | -13.7786 | 5.00E-05 | 0.00022  | yes |
| Dbi           | -2.79648 | -9.42924 | 5.00E-05 | 0.00022  | yes |
| B430212C06Rik | -2.79847 | 0        | 1        | 1        | no  |
| Edn3          | -2.80078 | 0        | 1        | 1        | no  |
| Nipal1        | -2.8019  | 0        | 1        | 1        | no  |
| S100b         | -2.80215 | -13.9124 | 5.00E-05 | 0.00022  | yes |
| Cmklr1        | -2.80482 | 0        | 1        | 1        | no  |
| Frem2         | -2.80754 | -4.2773  | 5.00E-05 | 0.00022  | yes |
| Ptchd4        | -2.80787 | 0        | 1        | 1        | no  |
| Htr6          | -2.80872 | 0        | 1        | 1        | no  |
| Calb1         | -2.80944 | -8.89015 | 5.00E-05 | 0.00022  | yes |
| 9130019P16Rik | -2.81113 | 0        | 1        | 1        | no  |
| Has2          | -2.81712 | 0        | 1        | 1        | no  |
| Smtn          | -2.82111 | -6.72706 | 5.00E-05 | 0.00022  | yes |
| Snx33         | -2.82247 | -3.85186 | 5.00E-05 | 0.00022  | yes |
| Hspb2         | -2.83271 | -2.04606 | 0.0145   | 0.03579  | yes |
| Nkpd1         | -2.83272 | 0        | 1        | 1        | no  |
| Grik3         | -2.83296 | -6.67972 | 5.00E-05 | 0.00022  | yes |

|               |          |           |          |          |     |
|---------------|----------|-----------|----------|----------|-----|
| Esrrb         | -2.83625 | -3.94437  | 5.00E-05 | 0.00022  | yes |
| Rad51ap2      | -2.83875 | 0         | 1        | 1        | no  |
| Ramp1         | -2.83916 | 0         | 1        | 1        | no  |
| Yap1          | -2.84123 | -6.45056  | 5.00E-05 | 0.00022  | yes |
| Galm          | -2.8424  | -5.90044  | 5.00E-05 | 0.00022  | yes |
| Sox9          | -2.84277 | 0         | 1        | 1        | no  |
| Myrf1         | -2.84306 | 0         | 1        | 1        | no  |
| Col6a1        | -2.84496 | -6.29799  | 5.00E-05 | 0.00022  | yes |
| Tnfrsf23      | -2.84632 | 0         | 1        | 1        | no  |
| Fam135b       | -2.84725 | 0         | 1        | 1        | no  |
| Tspan11       | -2.84746 | -3.1184   | 0.0001   | 0.000422 | yes |
| Tcf7l2        | -2.85056 | -3.31259  | 5.00E-05 | 0.00022  | yes |
| Cdh22         | -2.85194 | 0         | 1        | 1        | no  |
| Grm4          | -2.8523  | -6.74144  | 5.00E-05 | 0.00022  | yes |
| Mrv1          | -2.85443 | -4.04228  | 5.00E-05 | 0.00022  | yes |
| Plcx1         | -2.85658 | 0         | 1        | 1        | no  |
| Tnfrsf25      | -2.86014 | -2.28482  | 0.00705  | 0.019182 | yes |
| 1700007K13Rik | -2.86293 | 0         | 1        | 1        | no  |
| 493052004Rik  | -2.86327 | 0         | 1        | 1        | no  |
| Arhgap19      | -2.86441 | -7.96083  | 5.00E-05 | 0.00022  | yes |
| Sfrp4         | -2.86512 | -6.28014  | 5.00E-05 | 0.00022  | yes |
| Ptx3          | -2.86762 | 0         | 1        | 1        | no  |
| Ntng2         | -2.87222 | -6.25953  | 5.00E-05 | 0.00022  | yes |
| Sparcl1       | -2.87361 | -12.9922  | 5.00E-05 | 0.00022  | yes |
| Col5a1        | -2.8799  | -6.92296  | 5.00E-05 | 0.00022  | yes |
| Cabp7         | -2.88095 | -4.87738  | 5.00E-05 | 0.00022  | yes |
| Foxc2         | -2.88205 | -2.42039  | 0.0017   | 0.005514 | yes |
| Faim2         | -2.88383 | -11.5107  | 5.00E-05 | 0.00022  | yes |
| Padi2         | -2.88641 | -3.51981  | 5.00E-05 | 0.00022  | yes |
| Glt2d2        | -2.88677 | 0         | 1        | 1        | no  |
| Ndufa4l2      | -2.88827 | -0.984626 | 0.15145  | 0.252011 | no  |
| Iyd           | -2.88891 | 0         | 1        | 1        | no  |
| Clec2l        | -2.89168 | -12.2669  | 5.00E-05 | 0.00022  | yes |
| Loxl3         | -2.89197 | -1.72806  | 0.02545  | 0.057776 | no  |
| Cdc42ep5      | -2.89324 | -2.6254   | 0.0058   | 0.016179 | yes |
| Cxcl9         | -2.89456 | 0         | 1        | 1        | no  |
| 1500012K07Rik | -2.89496 | -0.600251 | 0.2714   | 0.396287 | no  |
| Zpld1         | -2.89496 | 0         | 1        | 1        | no  |
| Pabpc4l       | -2.89526 | 0         | 1        | 1        | no  |
| Cela1         | -2.89549 | -4.89713  | 5.00E-05 | 0.00022  | yes |
| Chdh          | -2.90306 | -2.57694  | 0.00355  | 0.010494 | yes |
| Scube1        | -2.90357 | -4.07808  | 5.00E-05 | 0.00022  | yes |
| Syde1         | -2.90414 | -5.28622  | 5.00E-05 | 0.00022  | yes |
| Sfmbt2        | -2.90486 | 0         | 1        | 1        | no  |
| Col23a1       | -2.90842 | -6.93311  | 5.00E-05 | 0.00022  | yes |
| Olfml2b       | -2.90983 | -6.91581  | 5.00E-05 | 0.00022  | yes |
| Plip          | -2.91024 | -8.33207  | 5.00E-05 | 0.00022  | yes |
| Rasgrp2       | -2.91068 | -3.16339  | 0.00015  | 0.000615 | yes |
| Celsr1        | -2.91126 | -5.45137  | 5.00E-05 | 0.00022  | yes |
| Rhpn1         | -2.91638 | -2.84542  | 0.14965  | 0.249517 | no  |
| Rasgrf2       | -2.91657 | -8.05245  | 5.00E-05 | 0.00022  | yes |
| 2610027K06Rik | -2.9166  | 0         | 1        | 1        | no  |
| C1ql3         | -2.91714 | -3.80769  | 5.00E-05 | 0.00022  | yes |

|               |          |           |          |          |     |
|---------------|----------|-----------|----------|----------|-----|
| Frrs1l        | -2.91992 | -7.79125  | 5.00E-05 | 0.00022  | yes |
| Stard8        | -2.92183 | -5.73076  | 5.00E-05 | 0.00022  | yes |
| Plxdc2        | -2.92554 | -7.88375  | 5.00E-05 | 0.00022  | yes |
| Bmp2          | -2.9272  | 0         | 1        | 1        | no  |
| Tmem108       | -2.92721 | -4.80907  | 5.00E-05 | 0.00022  | yes |
| C1ra          | -2.92746 | -2.64939  | 0.0008   | 0.002828 | yes |
| Dnali1        | -2.92772 | 0         | 1        | 1        | no  |
| Fbn2          | -2.9293  | 0         | 1        | 1        | no  |
| Adm           | -2.93252 | -2.27516  | 0.0089   | 0.023488 | yes |
| Impg1         | -2.93469 | 0         | 1        | 1        | no  |
| Ckm           | -2.93525 | 0         | 1        | 1        | no  |
| Bdh2          | -2.93528 | -1.32341  | 0.24165  | 0.363324 | no  |
| Rufy4         | -2.93962 | 0         | 1        | 1        | no  |
| Grid2         | -2.94021 | -3.97277  | 5.00E-05 | 0.00022  | yes |
| Hoga1         | -2.9429  | 0         | 1        | 1        | no  |
| Rassf8        | -2.94586 | -4.19281  | 5.00E-05 | 0.00022  | yes |
| Ly6g6f        | -2.94711 | 0         | 1        | 1        | no  |
| Serpinh1      | -2.94729 | -8.45663  | 5.00E-05 | 0.00022  | yes |
| Tacr3         | -2.9474  | 0         | 1        | 1        | no  |
| Dmd           | -2.94837 | -8.98965  | 5.00E-05 | 0.00022  | yes |
| E130310I04Rik | -2.94847 | 0         | 1        | 1        | no  |
| Dusp27        | -2.94897 | 0         | 1        | 1        | no  |
| Usp2          | -2.9493  | -4.75262  | 5.00E-05 | 0.00022  | yes |
| Myl3          | -2.95328 | 0         | 1        | 1        | no  |
| Slc36a2       | -2.95413 | -5.28829  | 5.00E-05 | 0.00022  | yes |
| Cyp2j9        | -2.95626 | -6.82002  | 5.00E-05 | 0.00022  | yes |
| Prg4          | -2.95747 | -0.723942 | 0.174    | 0.281279 | no  |
| Onecut1       | -2.95764 | -2.89204  | 0.00055  | 0.002016 | yes |
| Ajuba         | -2.95808 | -3.20955  | 5.00E-05 | 0.00022  | yes |
| A730043L09Rik | -2.95823 | 0         | 1        | 1        | no  |
| Cmya5         | -2.96033 | 0         | 1        | 1        | no  |
| Cdk6          | -2.96193 | -3.24286  | 5.00E-05 | 0.00022  | yes |
| Gm3716        | -2.96204 | 0         | 1        | 1        | no  |
| Tram2         | -2.96221 | 0         | 1        | 1        | no  |
| Lrrc9         | -2.96261 | 0         | 1        | 1        | no  |
| Inhbb         | -2.96552 | -4.71105  | 5.00E-05 | 0.00022  | yes |
| 5430421F17Rik | -2.96572 | 0         | 1        | 1        | no  |
| Hspg2         | -2.96607 | -11.1795  | 5.00E-05 | 0.00022  | yes |
| Fam64a        | -2.96927 | 0         | 1        | 1        | no  |
| BC049715      | -2.9704  | 0         | 1        | 1        | no  |
| Casp12        | -2.97252 | -4.84135  | 5.00E-05 | 0.00022  | yes |
| Egln3         | -2.97323 | -4.06406  | 5.00E-05 | 0.00022  | yes |
| Krt9          | -2.97562 | 0         | 1        | 1        | no  |
| Nefh          | -2.97746 | -8.57513  | 5.00E-05 | 0.00022  | yes |
| Tmem178       | -2.98095 | -3.0743   | 5.00E-05 | 0.00022  | yes |
| Meis2         | -2.98474 | -6.45566  | 5.00E-05 | 0.00022  | yes |
| Hspb7         | -2.99144 | 0         | 1        | 1        | no  |
| Pde5a         | -2.99326 | -3.75881  | 5.00E-05 | 0.00022  | yes |
| Chadl         | -2.99373 | -3.27238  | 5.00E-05 | 0.00022  | yes |
| Slitrk1       | -3.00507 | -7.99635  | 5.00E-05 | 0.00022  | yes |
| Sh3pxd2b      | -3.01204 | -9.56577  | 5.00E-05 | 0.00022  | yes |
| Cyp39a1       | -3.01288 | -5.15614  | 5.00E-05 | 0.00022  | yes |
| Alox8         | -3.01354 | 0         | 1        | 1        | no  |

|         |          |           |          |          |     |
|---------|----------|-----------|----------|----------|-----|
| Anpep   | -3.0139  | -3.65284  | 5.00E-05 | 0.00022  | yes |
| Ecm2    | -3.01392 | -2.00449  | 0.0002   | 0.000803 | yes |
| Abcc3   | -3.01524 | 0         | 1        | 1        | no  |
| Timp3   | -3.01526 | -5.93736  | 5.00E-05 | 0.00022  | yes |
| Angptl4 | -3.01554 | -5.31903  | 5.00E-05 | 0.00022  | yes |
| Gjb6    | -3.01556 | -1.82031  | 0.23815  | 0.359283 | no  |
| Vwa1    | -3.01702 | -9.97422  | 5.00E-05 | 0.00022  | yes |
| Itgb4   | -3.0179  | -4.73691  | 5.00E-05 | 0.00022  | yes |
| Efnb3   | -3.01965 | -2.93648  | 0.0003   | 0.001164 | yes |
| Fcgr3   | -3.02093 | -2.62303  | 0.00285  | 0.008668 | yes |
| Calr4   | -3.02265 | -1.54089  | 0.03235  | 0.070741 | no  |
| Rab38   | -3.02384 | -2.3917   | 0.00635  | 0.017515 | yes |
| Mpo     | -3.0254  | 0         | 1        | 1        | no  |
| Eda     | -3.03022 | -4.16153  | 5.00E-05 | 0.00022  | yes |
| H2-M11  | -3.03206 | 0         | 1        | 1        | no  |
| Asap2   | -3.03625 | -3.12967  | 5.00E-05 | 0.00022  | yes |
| Matn2   | -3.0402  | -9.92075  | 5.00E-05 | 0.00022  | yes |
| Chodl   | -3.04089 | -2.44435  | 0.0031   | 0.009315 | yes |
| Pik3c2g | -3.04092 | 0         | 1        | 1        | no  |
| Kcna1   | -3.04102 | -13.4334  | 5.00E-05 | 0.00022  | yes |
| Npr3    | -3.04108 | 0         | 1        | 1        | no  |
| Lilrb4  | -3.04318 | 0         | 1        | 1        | no  |
| Nms     | -3.04448 | 0         | 1        | 1        | no  |
| Abca8b  | -3.04633 | -9.3374   | 5.00E-05 | 0.00022  | yes |
| Pnmal2  | -3.04912 | -7.87226  | 5.00E-05 | 0.00022  | yes |
| C5ar1   | -3.04923 | 0         | 1        | 1        | no  |
| Zeb2os  | -3.05165 | -0.991699 | 0.0517   | 0.104975 | no  |
| Crhr1   | -3.05721 | -2.58097  | 0.00145  | 0.004804 | yes |
| Rerg    | -3.05744 | -2.00665  | 0.1625   | 0.266521 | no  |
| Exoc3l4 | -3.0639  | 0         | 1        | 1        | no  |
| Bhlhe22 | -3.06417 | 0         | 1        | 1        | no  |
| Grhpr   | -3.0689  | -4.38498  | 5.00E-05 | 0.00022  | yes |
| Hao1    | -3.06964 | 0         | 1        | 1        | no  |
| Acacb   | -3.07042 | -5.01004  | 5.00E-05 | 0.00022  | yes |
| Fcgrt   | -3.07081 | -6.99142  | 5.00E-05 | 0.00022  | yes |
| P2ry13  | -3.07115 | 0         | 1        | 1        | no  |
| Mdfic   | -3.07194 | -4.71548  | 5.00E-05 | 0.00022  | yes |
| Rarb    | -3.07272 | -3.35712  | 5.00E-05 | 0.00022  | yes |
| Slc38a4 | -3.07392 | 0         | 1        | 1        | no  |
| Tbc1d8b | -3.07436 | -5.34719  | 5.00E-05 | 0.00022  | yes |
| Bai2    | -3.07481 | -5.20544  | 5.00E-05 | 0.00022  | yes |
| Ccl22   | -3.07676 | 0         | 1        | 1        | no  |
| Sema3d  | -3.07717 | -5.37313  | 5.00E-05 | 0.00022  | yes |
| Cap2    | -3.0815  | -4.86328  | 5.00E-05 | 0.00022  | yes |
| Egr3    | -3.08218 | -5.0921   | 5.00E-05 | 0.00022  | yes |
| Aqp4    | -3.08362 | -5.27895  | 5.00E-05 | 0.00022  | yes |
| P2rx7   | -3.08475 | -3.98966  | 5.00E-05 | 0.00022  | yes |
| Fgf4    | -3.086   | 0         | 1        | 1        | no  |
| Nes     | -3.08601 | -7.7142   | 5.00E-05 | 0.00022  | yes |
| Aldh1l1 | -3.08712 | -4.37279  | 5.00E-05 | 0.00022  | yes |
| Neb     | -3.09034 | 0         | 1        | 1        | no  |
| Prkag3  | -3.09857 | 0         | 1        | 1        | no  |
| Rasl10b | -3.09908 | -9.1656   | 5.00E-05 | 0.00022  | yes |

|               |          |          |          |          |     |
|---------------|----------|----------|----------|----------|-----|
| Ankrd34c      | -3.10272 | -4.73759 | 5.00E-05 | 0.00022  | yes |
| Coro6         | -3.10408 | -4.59851 | 5.00E-05 | 0.00022  | yes |
| Gulp1         | -3.10466 | -5.71084 | 5.00E-05 | 0.00022  | yes |
| Ankrd34b      | -3.11046 | -3.77992 | 5.00E-05 | 0.00022  | yes |
| Dleu2         | -3.11078 | 0        | 1        | 1        | no  |
| C3            | -3.11304 | -3.33157 | 0.01905  | 0.045164 | yes |
| Akap3         | -3.11396 | 0        | 1        | 1        | no  |
| Mgst1         | -3.11761 | -5.79676 | 5.00E-05 | 0.00022  | yes |
| Fbxo24        | -3.11857 | 0        | 1        | 1        | no  |
| 4932412D23Rik | -3.11871 | 0        | 1        | 1        | no  |
| Nrl           | -3.12082 | 0        | 1        | 1        | no  |
| Tmem232       | -3.121   | 0        | 1        | 1        | no  |
| Ryr2          | -3.12159 | -10.7176 | 5.00E-05 | 0.00022  | yes |
| Serpinb3a     | -3.12526 | 0        | 1        | 1        | no  |
| Aox4          | -3.12546 | -3.91079 | 5.00E-05 | 0.00022  | yes |
| Lgi2          | -3.12572 | -7.50332 | 5.00E-05 | 0.00022  | yes |
| 3632454L22Rik | -3.1321  | 0        | 1        | 1        | no  |
| Fam26d        | -3.13547 | -2.52722 | 0.0047   | 0.013433 | yes |
| Ntn1          | -3.13782 | -4.84705 | 5.00E-05 | 0.00022  | yes |
| Gm19522       | -3.13891 | 0        | 1        | 1        | no  |
| Shox2         | -3.14606 | -4.17596 | 5.00E-05 | 0.00022  | yes |
| Vsnl1         | -3.14758 | -12.5333 | 5.00E-05 | 0.00022  | yes |
| Mrc2          | -3.14774 | -4.53183 | 5.00E-05 | 0.00022  | yes |
| Cyp2d22       | -3.14982 | -5.22302 | 5.00E-05 | 0.00022  | yes |
| Scara3        | -3.15018 | -5.45299 | 5.00E-05 | 0.00022  | yes |
| Gpc4          | -3.15039 | -4.29902 | 5.00E-05 | 0.00022  | yes |
| Chad          | -3.15483 | -2.28175 | 0.0019   | 0.00608  | yes |
| Myo3b         | -3.15695 | 0        | 1        | 1        | no  |
| Syna          | -3.16177 | -2.51317 | 0.0024   | 0.00748  | yes |
| H2-Ab1        | -3.16444 | -5.32913 | 5.00E-05 | 0.00022  | yes |
| E130114P18Rik | -3.16797 | -1.31528 | 0.0975   | 0.175919 | no  |
| Itgb2l        | -3.16834 | 0        | 1        | 1        | no  |
| Tagln         | -3.16933 | -1.79131 | 0.0182   | 0.043483 | yes |
| Trp53cor1     | -3.17264 | 0        | 1        | 1        | no  |
| Fut9          | -3.17394 | 0        | 1        | 1        | no  |
| Gpr152        | -3.17396 | 0        | 1        | 1        | no  |
| Dnaic2        | -3.17408 | -1.58717 | 0.0388   | 0.082348 | no  |
| Syt17         | -3.17479 | 0        | 1        | 1        | no  |
| Sh3rf3        | -3.17589 | -3.19091 | 0.0001   | 0.000422 | yes |
| Ppara         | -3.17635 | -3.02122 | 0.0261   | 0.059    | no  |
| Pls1          | -3.17914 | -7.32123 | 5.00E-05 | 0.00022  | yes |
| Jag1          | -3.17989 | -7.21433 | 5.00E-05 | 0.00022  | yes |
| Gm6416        | -3.18094 | 0        | 1        | 1        | no  |
| P2rx6         | -3.18095 | -6.44493 | 5.00E-05 | 0.00022  | yes |
| E130006D01Rik | -3.18288 | 0        | 1        | 1        | no  |
| Xntrpc        | -3.18296 | 0        | 1        | 1        | no  |
| 8030423F21Rik | -3.18504 | 0        | 1        | 1        | no  |
| Col22a1       | -3.18585 | 0        | 1        | 1        | no  |
| Cntf          | -3.18631 | -2.20498 | 0.0177   | 0.042472 | yes |
| Sh3bgr        | -3.19127 | -6.63776 | 5.00E-05 | 0.00022  | yes |
| Myh1          | -3.19142 | 0        | 1        | 1        | no  |
| Metrn1        | -3.19536 | -5.0145  | 5.00E-05 | 0.00022  | yes |
| Cdkn2a        | -3.19908 | 0        | 1        | 1        | no  |

|               |          |          |          |          |     |
|---------------|----------|----------|----------|----------|-----|
| Pdzd2         | -3.19975 | -10.6357 | 5.00E-05 | 0.00022  | yes |
| Plscr4        | -3.20025 | -5.57056 | 5.00E-05 | 0.00022  | yes |
| Ctsk          | -3.20873 | -4.61689 | 5.00E-05 | 0.00022  | yes |
| Zic4          | -3.20913 | 0        | 1        | 1        | no  |
| Ddr2          | -3.20936 | -5.10387 | 5.00E-05 | 0.00022  | yes |
| Mmp19         | -3.21322 | 0        | 1        | 1        | no  |
| Pbxip1        | -3.21703 | -6.71929 | 5.00E-05 | 0.00022  | yes |
| Gpam          | -3.21871 | -9.548   | 5.00E-05 | 0.00022  | yes |
| Pthlh         | -3.21875 | -3.01447 | 0.0006   | 0.002181 | yes |
| Fam19a2       | -3.22387 | -9.36291 | 5.00E-05 | 0.00022  | yes |
| Mr1           | -3.22421 | -4.12332 | 5.00E-05 | 0.00022  | yes |
| Antxr1        | -3.22514 | -7.21489 | 5.00E-05 | 0.00022  | yes |
| Aebp1         | -3.22773 | -3.30466 | 0.0004   | 0.001513 | yes |
| Ston1         | -3.2288  | -6.22921 | 5.00E-05 | 0.00022  | yes |
| Duxbl2        | -3.23028 | 0        | 1        | 1        | no  |
| Ccbe1         | -3.23066 | 0        | 1        | 1        | no  |
| Krt79         | -3.23111 | 0        | 1        | 1        | no  |
| Rassf2        | -3.23181 | -5.49299 | 5.00E-05 | 0.00022  | yes |
| Tcf7l1        | -3.23296 | -3.99914 | 5.00E-05 | 0.00022  | yes |
| Bcat1         | -3.23707 | -10.342  | 5.00E-05 | 0.00022  | yes |
| Piwil4        | -3.23758 | 0        | 1        | 1        | no  |
| Fgf9          | -3.23792 | -6.72499 | 5.00E-05 | 0.00022  | yes |
| Gm12522       | -3.23796 | 0        | 1        | 1        | no  |
| Stra6         | -3.24324 | -2.24434 | 0.1302   | 0.223145 | no  |
| Serpinb1c     | -3.24519 | 0        | 1        | 1        | no  |
| St8sia5       | -3.24841 | -3.83394 | 5.00E-05 | 0.00022  | yes |
| Crabp2        | -3.2505  | -2.82504 | 0.00615  | 0.017052 | yes |
| Fgl2          | -3.25058 | -6.26217 | 5.00E-05 | 0.00022  | yes |
| Qk            | -3.25686 | -12.1261 | 5.00E-05 | 0.00022  | yes |
| Hcar1         | -3.25801 | 0        | 1        | 1        | no  |
| Cald1         | -3.26015 | -7.98356 | 5.00E-05 | 0.00022  | yes |
| Fam107a       | -3.26281 | -5.52101 | 5.00E-05 | 0.00022  | yes |
| Lrig3         | -3.2636  | 0        | 1        | 1        | no  |
| A230077H06Rik | -3.26521 | 0        | 1        | 1        | no  |
| Gabrg1        | -3.26608 | -7.01976 | 5.00E-05 | 0.00022  | yes |
| Phldb3        | -3.27356 | 0        | 1        | 1        | no  |
| Htr7          | -3.27368 | -5.852   | 5.00E-05 | 0.00022  | yes |
| Epha6         | -3.27375 | -3.72229 | 5.00E-05 | 0.00022  | yes |
| Cfi           | -3.28193 | 0        | 1        | 1        | no  |
| Creg2         | -3.28282 | -7.33916 | 5.00E-05 | 0.00022  | yes |
| A130077B15Rik | -3.28336 | 0        | 1        | 1        | no  |
| Fpr1          | -3.28887 | 0        | 1        | 1        | no  |
| Colec12       | -3.29039 | -3.5175  | 5.00E-05 | 0.00022  | yes |
| Gm12530       | -3.29047 | 0        | 1        | 1        | no  |
| Rtkn2         | -3.29112 | 0        | 1        | 1        | no  |
| Tbx2          | -3.29135 | -7.13782 | 5.00E-05 | 0.00022  | yes |
| Igdcc3        | -3.29224 | 0        | 1        | 1        | no  |
| Ctsc          | -3.29702 | -5.77485 | 5.00E-05 | 0.00022  | yes |
| Gstm2         | -3.29736 | -2.40722 | 0.0124   | 0.031187 | yes |
| B3galt2       | -3.29998 | -2.4523  | 0.00395  | 0.011515 | yes |
| Medag         | -3.30072 | -4.90457 | 5.00E-05 | 0.00022  | yes |
| Rasal1        | -3.3017  | 0        | 1        | 1        | no  |
| Smtnl2        | -3.30257 | -3.34279 | 0.00015  | 0.000615 | yes |



|               |          |          |          |          |     |
|---------------|----------|----------|----------|----------|-----|
| Ltf           | -3.30264 | -3.21944 | 0.00015  | 0.000615 | yes |
| Angpt4        | -3.30399 | 0        | 1        | 1        | no  |
| 2300005B03Rik | -3.30581 | -1.88818 | 0.1603   | 0.26363  | no  |
| Mxra8         | -3.30603 | -7.00406 | 5.00E-05 | 0.00022  | yes |
| Crispld2      | -3.30838 | -5.16813 | 5.00E-05 | 0.00022  | yes |
| Zic1          | -3.30877 | -3.18772 | 0.00025  | 0.000985 | yes |
| Hs3st2        | -3.30947 | -8.96249 | 5.00E-05 | 0.00022  | yes |
| Ccl7          | -3.31452 | 0        | 1        | 1        | no  |
| Sox8          | -3.31535 | -3.17926 | 0.00025  | 0.000985 | yes |
| Slitrk2       | -3.31605 | -5.38626 | 5.00E-05 | 0.00022  | yes |
| Lgi3          | -3.31816 | -12.6732 | 5.00E-05 | 0.00022  | yes |
| Htra4         | -3.32096 | -2.81486 | 0.0015   | 0.004953 | yes |
| Rnf128        | -3.32424 | -4.97167 | 5.00E-05 | 0.00022  | yes |
| Serpina3c     | -3.33267 | -3.05248 | 0.0003   | 0.001164 | yes |
| Fam196b       | -3.33319 | -3.83205 | 5.00E-05 | 0.00022  | yes |
| Col8a1        | -3.33535 | -6.05167 | 5.00E-05 | 0.00022  | yes |
| Omd           | -3.33776 | -1.32839 | 0.1053   | 0.187393 | no  |
| Cdkn2b        | -3.3418  | -3.55507 | 5.00E-05 | 0.00022  | yes |
| Pvalb         | -3.34343 | -11.1878 | 5.00E-05 | 0.00022  | yes |
| Fibin         | -3.34364 | -3.88938 | 5.00E-05 | 0.00022  | yes |
| Piwil1        | -3.34691 | 0        | 1        | 1        | no  |
| Omg           | -3.34811 | -2.89138 | 0.00015  | 0.000615 | yes |
| Sdc4          | -3.35523 | -9.58584 | 5.00E-05 | 0.00022  | yes |
| Sv2b          | -3.35538 | -13.8193 | 5.00E-05 | 0.00022  | yes |
| Ephb1         | -3.35601 | -3.92493 | 5.00E-05 | 0.00022  | yes |
| Evi2a         | -3.35749 | 0        | 1        | 1        | no  |
| Notch1        | -3.36077 | -8.47027 | 5.00E-05 | 0.00022  | yes |
| Gldc          | -3.36341 | -2.73862 | 0.0018   | 0.005802 | yes |
| F13a1         | -3.36635 | -3.44725 | 5.00E-05 | 0.00022  | yes |
| Fa2h          | -3.36919 | -6.99778 | 5.00E-05 | 0.00022  | yes |
| Spint1        | -3.37205 | -3.18512 | 0.00025  | 0.000985 | yes |
| Sbspon        | -3.37457 | -5.17104 | 5.00E-05 | 0.00022  | yes |
| Lpar1         | -3.37533 | -10.9549 | 5.00E-05 | 0.00022  | yes |
| Vangl2        | -3.37557 | -2.6246  | 0.0022   | 0.006933 | yes |
| Ndst4         | -3.39356 | -8.50235 | 5.00E-05 | 0.00022  | yes |
| Eya2          | -3.39373 | -3.03743 | 0.0152   | 0.037255 | yes |
| Uts2b         | -3.39608 | -3.30618 | 0.00155  | 0.005095 | yes |
| Mag           | -3.3978  | -6.13027 | 5.00E-05 | 0.00022  | yes |
| Syt2          | -3.40357 | -13.2133 | 5.00E-05 | 0.00022  | yes |
| Dcn           | -3.40447 | -11.7438 | 5.00E-05 | 0.00022  | yes |
| Ntrk2         | -3.40657 | -13.5141 | 5.00E-05 | 0.00022  | yes |
| Drd5          | -3.4091  | 0        | 1        | 1        | no  |
| Bcl2a1d       | -3.41353 | 0        | 1        | 1        | no  |
| Gpc6          | -3.41515 | -6.3704  | 5.00E-05 | 0.00022  | yes |
| Col9a2        | -3.41552 | -3.89358 | 5.00E-05 | 0.00022  | yes |
| Ankef1        | -3.41621 | 0        | 1        | 1        | no  |
| Col4a5        | -3.41832 | -3.29166 | 0.0213   | 0.049734 | yes |
| B230312C02Rik | -3.43063 | -2.2557  | 0.24265  | 0.36425  | no  |
| Plac8         | -3.43157 | -1.66653 | 0.10185  | 0.182231 | no  |
| Spon2         | -3.43503 | -3.06804 | 0.0005   | 0.00185  | yes |
| Serpinb12     | -3.4353  | 0        | 1        | 1        | no  |
| Lancl3        | -3.43621 | -7.28717 | 5.00E-05 | 0.00022  | yes |
| Afp           | -3.4389  | 0        | 1        | 1        | no  |

|               |          |          |          |          |     |
|---------------|----------|----------|----------|----------|-----|
| Syde2         | -3.44366 | -3.4634  | 5.00E-05 | 0.00022  | yes |
| Sptssb        | -3.44419 | -2.33437 | 0.027    | 0.060703 | no  |
| H2-Eb1        | -3.44434 | -5.67109 | 5.00E-05 | 0.00022  | yes |
| Derl3         | -3.44441 | 0        | 1        | 1        | no  |
| Crlf1         | -3.44495 | 0        | 1        | 1        | no  |
| Podnl1        | -3.44659 | 0        | 1        | 1        | no  |
| Clrn1         | -3.44814 | -5.48991 | 5.00E-05 | 0.00022  | yes |
| Itgb6         | -3.44948 | -3.189   | 5.00E-05 | 0.00022  | yes |
| Pcdh7         | -3.45112 | -10.3658 | 5.00E-05 | 0.00022  | yes |
| Il17b         | -3.45165 | 0        | 1        | 1        | no  |
| A330050F15Rik | -3.45186 | -4.38713 | 5.00E-05 | 0.00022  | yes |
| Kif19a        | -3.45293 | -6.01662 | 5.00E-05 | 0.00022  | yes |
| Ip6k3         | -3.45351 | 0        | 1        | 1        | no  |
| Lyz1          | -3.45472 | 0        | 1        | 1        | no  |
| Wnk4          | -3.45855 | -3.05088 | 0.0005   | 0.00185  | yes |
| Hhatl         | -3.4605  | -6.45126 | 5.00E-05 | 0.00022  | yes |
| Slc22a2       | -3.46312 | 0        | 1        | 1        | no  |
| Cd22          | -3.46521 | 0        | 1        | 1        | no  |
| Prss12        | -3.46568 | -6.86391 | 5.00E-05 | 0.00022  | yes |
| Foxd2         | -3.46587 | 0        | 1        | 1        | no  |
| Ephx2         | -3.46672 | -3.07862 | 5.00E-05 | 0.00022  | yes |
| Slit2         | -3.46763 | -8.19377 | 5.00E-05 | 0.00022  | yes |
| Plekhb1       | -3.46842 | -11.3588 | 5.00E-05 | 0.00022  | yes |
| Plekhf1       | -3.47239 | -2.8455  | 0.00185  | 0.005939 | yes |
| Bpifb5        | -3.47255 | 0        | 1        | 1        | no  |
| Slc9a3r1      | -3.47535 | -10.251  | 5.00E-05 | 0.00022  | yes |
| Peg12         | -3.47717 | 0        | 1        | 1        | no  |
| Cgn           | -3.47806 | 0        | 1        | 1        | no  |
| Trem2         | -3.47891 | 0        | 1        | 1        | no  |
| Fkbp9         | -3.48579 | -9.89098 | 5.00E-05 | 0.00022  | yes |
| Gdf10         | -3.4874  | -2.97926 | 0.0009   | 0.003139 | yes |
| Klrb1a        | -3.4909  | -1.35698 | 0.2305   | 0.350894 | no  |
| F730043M19Rik | -3.49322 | -3.33286 | 0.00035  | 0.001342 | yes |
| Atp8b3        | -3.49344 | 0        | 1        | 1        | no  |
| Slamf9        | -3.49554 | -1.83957 | 0.0529   | 0.10692  | no  |
| Afap1l2       | -3.49689 | -6.88148 | 5.00E-05 | 0.00022  | yes |
| Cntn5         | -3.50259 | 0        | 1        | 1        | no  |
| Slc13a4       | -3.50603 | -2.53126 | 0.00415  | 0.012021 | yes |
| Agmo          | -3.5072  | -3.93067 | 5.00E-05 | 0.00022  | yes |
| Mme           | -3.50927 | -7.35882 | 5.00E-05 | 0.00022  | yes |
| Wwc1          | -3.51263 | 0        | 1        | 1        | no  |
| Fcgr2b        | -3.51371 | -1.85925 | 0.2158   | 0.33353  | no  |
| Ccdc80        | -3.51695 | -5.03889 | 5.00E-05 | 0.00022  | yes |
| Pde7b         | -3.51816 | -5.56884 | 5.00E-05 | 0.00022  | yes |
| Wisp2         | -3.51934 | -2.62052 | 0.00535  | 0.015044 | yes |
| Ccdc3         | -3.5252  | -3.38211 | 0.0001   | 0.000422 | yes |
| Pid1          | -3.52775 | -5.40169 | 5.00E-05 | 0.00022  | yes |
| Foxd1         | -3.53059 | -2.47975 | 0.00595  | 0.016553 | yes |
| Chil1         | -3.53355 | -2.43858 | 0.0092   | 0.024131 | yes |
| Itgb5         | -3.53888 | -6.6034  | 5.00E-05 | 0.00022  | yes |
| Gm16796       | -3.5399  | 0        | 1        | 1        | no  |
| Cd302         | -3.54016 | -2.62083 | 0.0463   | 0.095919 | no  |
| Mfap4         | -3.54118 | -4.8832  | 5.00E-05 | 0.00022  | yes |

|               |          |          |          |          |     |
|---------------|----------|----------|----------|----------|-----|
| Gpr34         | -3.54523 | 0        | 1        | 1        | no  |
| Papss2        | -3.54991 | 0        | 1        | 1        | no  |
| Fmod          | -3.55073 | -3.72217 | 5.00E-05 | 0.00022  | yes |
| Shc4          | -3.55091 | -3.58663 | 5.00E-05 | 0.00022  | yes |
| Sfrp1         | -3.55342 | -8.94748 | 5.00E-05 | 0.00022  | yes |
| Evc2          | -3.55479 | -4.38612 | 5.00E-05 | 0.00022  | yes |
| Esrrg         | -3.55509 | -8.40281 | 5.00E-05 | 0.00022  | yes |
| Cox7a1        | -3.55671 | -4.00994 | 0.0188   | 0.044675 | yes |
| Slc17a7       | -3.55849 | -13.1127 | 5.00E-05 | 0.00022  | yes |
| Mrgprf        | -3.56039 | -2.64061 | 0.0039   | 0.011392 | yes |
| Il33          | -3.56272 | -2.49793 | 0.04875  | 0.100103 | no  |
| Mettl24       | -3.56294 | 0        | 1        | 1        | no  |
| Slitrk6       | -3.56334 | 0        | 1        | 1        | no  |
| Acsf2         | -3.56424 | -2.39026 | 0.015    | 0.036839 | yes |
| Sema5a        | -3.56922 | -12.0903 | 5.00E-05 | 0.00022  | yes |
| Tmem28        | -3.57084 | -4.56228 | 5.00E-05 | 0.00022  | yes |
| Ccl24         | -3.57302 | 0        | 1        | 1        | no  |
| Kcnh5         | -3.58564 | -4.86416 | 5.00E-05 | 0.00022  | yes |
| Slc35d3       | -3.58744 | -2.86802 | 0.001    | 0.003451 | yes |
| Themis2       | -3.59041 | 0        | 1        | 1        | no  |
| 4932411E22Rik | -3.59106 | -2.72005 | 0.0019   | 0.00608  | yes |
| Egr2          | -3.59177 | -7.66536 | 5.00E-05 | 0.00022  | yes |
| Zcchc24       | -3.59344 | -8.11428 | 5.00E-05 | 0.00022  | yes |
| Kcne1l        | -3.59819 | -2.52005 | 0.0117   | 0.029708 | yes |
| Myocd         | -3.60082 | 0        | 1        | 1        | no  |
| Tmprss5       | -3.60228 | -3.59317 | 0.0001   | 0.000422 | yes |
| Clec7a        | -3.60563 | 0        | 1        | 1        | no  |
| Ndrgr1        | -3.60684 | -15.6421 | 5.00E-05 | 0.00022  | yes |
| Plekha4       | -3.607   | -10.8845 | 5.00E-05 | 0.00022  | yes |
| Ntng1         | -3.60889 | -8.11839 | 5.00E-05 | 0.00022  | yes |
| Gstt3         | -3.60898 | -2.43841 | 0.00745  | 0.020147 | yes |
| Kcnj14        | -3.61796 | 0        | 1        | 1        | no  |
| Cspg4         | -3.61945 | -5.50029 | 5.00E-05 | 0.00022  | yes |
| Slc35f1       | -3.6291  | -10.2225 | 5.00E-05 | 0.00022  | yes |
| Smpx          | -3.62927 | -2.86086 | 5.00E-05 | 0.00022  | yes |
| Bgn           | -3.63314 | -10.2253 | 5.00E-05 | 0.00022  | yes |
| Tlr9          | -3.63415 | 0        | 1        | 1        | no  |
| Lrrc4         | -3.63461 | -2.28943 | 0.00285  | 0.008668 | yes |
| Vstm4         | -3.63737 | -4.19586 | 5.00E-05 | 0.00022  | yes |
| Sparc         | -3.64967 | -14.2683 | 5.00E-05 | 0.00022  | yes |
| Ngp           | -3.65096 | -4.30051 | 5.00E-05 | 0.00022  | yes |
| Klf15         | -3.65203 | -4.13306 | 5.00E-05 | 0.00022  | yes |
| Col5a2        | -3.65211 | -8.23303 | 5.00E-05 | 0.00022  | yes |
| Aldh1a7       | -3.65413 | -3.89731 | 5.00E-05 | 0.00022  | yes |
| A330074K22Rik | -3.65525 | -4.79196 | 5.00E-05 | 0.00022  | yes |
| Vwc2          | -3.65531 | -3.98775 | 5.00E-05 | 0.00022  | yes |
| Mup3          | -3.65634 | 0        | 1        | 1        | no  |
| Kcnk5         | -3.65847 | -4.07807 | 5.00E-05 | 0.00022  | yes |
| Bhmt2         | -3.65931 | 0        | 1        | 1        | no  |
| Limch1        | -3.66031 | -10.8328 | 5.00E-05 | 0.00022  | yes |
| Fam198a       | -3.66082 | -3.07837 | 5.00E-05 | 0.00022  | yes |
| Frk           | -3.66238 | 0        | 1        | 1        | no  |
| Ripk4         | -3.67018 | -3.48812 | 5.00E-05 | 0.00022  | yes |

|               |          |           |          |          |     |
|---------------|----------|-----------|----------|----------|-----|
| Pipox         | -3.67324 | -2.46174  | 0.0075   | 0.020274 | yes |
| Cdh12         | -3.67738 | -4.87315  | 5.00E-05 | 0.00022  | yes |
| Kcnq4         | -3.67841 | -7.94     | 5.00E-05 | 0.00022  | yes |
| Pice1         | -3.67974 | -8.0276   | 5.00E-05 | 0.00022  | yes |
| Brinp3        | -3.68046 | -2.36609  | 0.19235  | 0.304487 | no  |
| Epyc          | -3.68198 | 0         | 1        | 1        | no  |
| Pld4          | -3.68573 | -2.0814   | 0.0212   | 0.049553 | yes |
| Snhg18        | -3.68737 | -3.47045  | 0.0001   | 0.000422 | yes |
| Fbln7         | -3.6942  | -2.97925  | 0.0011   | 0.00376  | yes |
| Gm16551       | -3.70146 | -6.07522  | 5.00E-05 | 0.00022  | yes |
| Sardh         | -3.70214 | -4.82067  | 5.00E-05 | 0.00022  | yes |
| Itga2         | -3.70341 | -2.94433  | 0.00085  | 0.002983 | yes |
| Gm10684       | -3.70475 | -0.449214 | 0.212    | 0.328729 | no  |
| Dgkb          | -3.70961 | -5.84642  | 5.00E-05 | 0.00022  | yes |
| Pmel          | -3.71162 | 0         | 1        | 1        | no  |
| Fpr2          | -3.71299 | 0         | 1        | 1        | no  |
| Col15a1       | -3.7169  | -8.59047  | 5.00E-05 | 0.00022  | yes |
| Ano1          | -3.7184  | -6.18259  | 5.00E-05 | 0.00022  | yes |
| Bco2          | -3.71931 | 0         | 1        | 1        | no  |
| Ncmap         | -3.72447 | -7.92366  | 5.00E-05 | 0.00022  | yes |
| Tll1          | -3.72601 | -4.42289  | 5.00E-05 | 0.00022  | yes |
| Spp1          | -3.73187 | -10.3365  | 5.00E-05 | 0.00022  | yes |
| Six2          | -3.73362 | 0         | 1        | 1        | no  |
| Lmod1         | -3.73598 | 0         | 1        | 1        | no  |
| Rasl12        | -3.73764 | -2.72707  | 0.02075  | 0.048621 | yes |
| B3gnt5        | -3.74068 | -4.30613  | 5.00E-05 | 0.00022  | yes |
| Serpind1      | -3.74565 | -0.96636  | 0.17565  | 0.283497 | no  |
| Cotl1         | -3.74615 | -8.04865  | 5.00E-05 | 0.00022  | yes |
| Chrna5        | -3.74986 | 0         | 1        | 1        | no  |
| Notch2        | -3.76778 | -7.47139  | 5.00E-05 | 0.00022  | yes |
| Leprel1       | -3.77077 | -3.33925  | 0.00045  | 0.001682 | yes |
| Hapln4        | -3.77214 | -10.2828  | 5.00E-05 | 0.00022  | yes |
| Drd2          | -3.77272 | 0         | 1        | 1        | no  |
| Gm10790       | -3.77504 | 0         | 1        | 1        | no  |
| H2-DMb1       | -3.77537 | -3.21927  | 0.00175  | 0.00566  | yes |
| Rasa3         | -3.78614 | -6.98705  | 5.00E-05 | 0.00022  | yes |
| Gldn          | -3.78875 | -7.11931  | 5.00E-05 | 0.00022  | yes |
| Ackr3         | -3.79213 | -4.13632  | 5.00E-05 | 0.00022  | yes |
| Rasgef1c      | -3.80273 | -4.86141  | 5.00E-05 | 0.00022  | yes |
| Lrrc6         | -3.81007 | 0         | 1        | 1        | no  |
| Igsf11        | -3.8204  | -7.09795  | 5.00E-05 | 0.00022  | yes |
| Abcc9         | -3.82064 | -3.89928  | 5.00E-05 | 0.00022  | yes |
| Pdk4          | -3.82091 | -4.63677  | 5.00E-05 | 0.00022  | yes |
| Prox1         | -3.82123 | 0         | 1        | 1        | no  |
| Pard6g        | -3.82485 | -5.24357  | 5.00E-05 | 0.00022  | yes |
| Sult2b1       | -3.82666 | 0         | 1        | 1        | no  |
| Gjd2          | -3.82888 | -3.64447  | 0.0002   | 0.000803 | yes |
| Rab32         | -3.82961 | -2.52734  | 0.00555  | 0.015544 | yes |
| Ogn           | -3.83485 | -8.17102  | 5.00E-05 | 0.00022  | yes |
| Egfl8         | -3.83855 | -2.07438  | 0.0119   | 0.030181 | yes |
| A830082K12Rik | -3.84182 | 0         | 1        | 1        | no  |
| Dtx1          | -3.84229 | 0         | 1        | 1        | no  |
| Grid1         | -3.84249 | -5.49183  | 5.00E-05 | 0.00022  | yes |

|          |          |           |          |          |     |
|----------|----------|-----------|----------|----------|-----|
| Pappa2   | -3.8429  | -4.15151  | 5.00E-05 | 0.00022  | yes |
| Rgs18    | -3.8468  | 0         | 1        | 1        | no  |
| Lrrtm1   | -3.85198 | -1.45417  | 0.0726   | 0.138827 | no  |
| Gjb1     | -3.85821 | -4.25168  | 5.00E-05 | 0.00022  | yes |
| Ccnd1    | -3.8592  | -7.62691  | 5.00E-05 | 0.00022  | yes |
| Gmnc     | -3.85951 | 0         | 1        | 1        | no  |
| Apod     | -3.86642 | -13.4457  | 5.00E-05 | 0.00022  | yes |
| Cideb    | -3.86966 | 0         | 1        | 1        | no  |
| P2ry14   | -3.87231 | -0.833148 | 0.00055  | 0.002016 | yes |
| Chrdl1   | -3.87516 | -5.03652  | 5.00E-05 | 0.00022  | yes |
| C1s1     | -3.87855 | -3.68344  | 0.1543   | 0.255919 | no  |
| Slnf9    | -3.88183 | 0         | 1        | 1        | no  |
| Gbgt1    | -3.88234 | 0         | 1        | 1        | no  |
| Pcdh20   | -3.88238 | 0         | 1        | 1        | no  |
| Ephb3    | -3.88354 | -4.87218  | 5.00E-05 | 0.00022  | yes |
| Wnt7b    | -3.88838 | 0         | 1        | 1        | no  |
| Stk31    | -3.89364 | 0         | 1        | 1        | no  |
| Ptgds    | -3.89547 | -9.32054  | 5.00E-05 | 0.00022  | yes |
| Bpifb1   | -3.89617 | 0         | 1        | 1        | no  |
| Gm10754  | -3.89708 | -2.98891  | 0.2279   | 0.348135 | no  |
| Sh3bp5   | -3.89889 | -7.90759  | 5.00E-05 | 0.00022  | yes |
| Pcolce   | -3.89898 | -6.10366  | 5.00E-05 | 0.00022  | yes |
| Ppp1r14c | -3.90482 | -6.59176  | 5.00E-05 | 0.00022  | yes |
| Cyth4    | -3.90929 | -2.756    | 0.0028   | 0.008532 | yes |
| Ptgfr    | -3.91012 | -8.91657  | 5.00E-05 | 0.00022  | yes |
| Pcsk5    | -3.91029 | -4.83322  | 0.0066   | 0.01811  | yes |
| Itpr3    | -3.91245 | -10.7581  | 5.00E-05 | 0.00022  | yes |
| Cubn     | -3.91697 | 0         | 1        | 1        | no  |
| Wnt7a    | -3.91742 | -4.45115  | 5.00E-05 | 0.00022  | yes |
| Aif1l    | -3.92086 | -7.25852  | 5.00E-05 | 0.00022  | yes |
| Maf      | -3.92101 | -10.0449  | 5.00E-05 | 0.00022  | yes |
| Cybb     | -3.92481 | -3.60876  | 5.00E-05 | 0.00022  | yes |
| Pgf      | -3.92616 | -3.86213  | 5.00E-05 | 0.00022  | yes |
| Igfbp5   | -3.94023 | -13.6947  | 5.00E-05 | 0.00022  | yes |
| Arg2     | -3.94042 | -1.02078  | 0.18645  | 0.297276 | no  |
| Cd177    | -3.94458 | 0         | 1        | 1        | no  |
| Cdh20    | -3.94757 | -4.53641  | 5.00E-05 | 0.00022  | yes |
| Oaf      | -3.9493  | -4.6617   | 5.00E-05 | 0.00022  | yes |
| Igf1     | -3.96322 | -3.10962  | 0.008    | 0.021468 | yes |
| Smco3    | -3.96455 | -5.04404  | 0.0065   | 0.017869 | yes |
| Shisa3   | -3.96846 | -3.65683  | 5.00E-05 | 0.00022  | yes |
| Erbp2    | -3.97109 | -2.17884  | 0.0192   | 0.045454 | yes |
| Tnc      | -3.97608 | 0         | 1        | 1        | no  |
| Them7    | -3.97871 | 0         | 1        | 1        | no  |
| Ccdc13   | -3.98049 | -2.72625  | 0.00525  | 0.014813 | yes |
| Gm13629  | -3.9831  | -0.418002 | 0.29675  | 0.424518 | no  |
| Steap4   | -3.988   | -4.39548  | 5.00E-05 | 0.00022  | yes |
| Adhfe1   | -3.99023 | 0         | 1        | 1        | no  |
| Acot1    | -3.99437 | -3.5986   | 0.0006   | 0.002181 | yes |
| Bcan     | -3.99558 | -10.1537  | 5.00E-05 | 0.00022  | yes |
| Fkbp10   | -3.99856 | -2.77524  | 0.004    | 0.011645 | yes |
| Lcat     | -4.00099 | -3.45074  | 0.00085  | 0.002983 | yes |
| Pmepa1   | -4.01544 | -9.95566  | 5.00E-05 | 0.00022  | yes |

|               |          |           |          |          |     |
|---------------|----------|-----------|----------|----------|-----|
| Svep1         | -4.01856 | 0         | 1        | 1        | no  |
| Cldn11        | -4.02057 | -4.42445  | 5.00E-05 | 0.00022  | yes |
| Dach2         | -4.02177 | 0         | 1        | 1        | no  |
| Tead3         | -4.03171 | -2.23849  | 0.1425   | 0.240009 | no  |
| Twist1        | -4.03829 | 0         | 1        | 1        | no  |
| C1qtnf6       | -4.03864 | -2.98888  | 5.00E-05 | 0.00022  | yes |
| Trf           | -4.04243 | -6.81746  | 5.00E-05 | 0.00022  | yes |
| Fjx1          | -4.04287 | -4.2132   | 5.00E-05 | 0.00022  | yes |
| Mamdc2        | -4.04384 | -5.22373  | 5.00E-05 | 0.00022  | yes |
| Clec3b        | -4.05939 | -3.96659  | 0.0003   | 0.001164 | yes |
| Clec4a2       | -4.06054 | 0         | 1        | 1        | no  |
| Tekt5         | -4.07409 | -1.5733   | 0.11335  | 0.198654 | no  |
| Slc15a5       | -4.07651 | 0         | 1        | 1        | no  |
| Plin3         | -4.07865 | -6.45685  | 5.00E-05 | 0.00022  | yes |
| Rdh5          | -4.0857  | -5.10114  | 5.00E-05 | 0.00022  | yes |
| Kirrel        | -4.08769 | -7.50258  | 5.00E-05 | 0.00022  | yes |
| Itih2         | -4.09002 | -2.67102  | 0.0085   | 0.022613 | yes |
| Igfbp4        | -4.09224 | -12.4832  | 5.00E-05 | 0.00022  | yes |
| Cxcl10        | -4.09462 | -0.986581 | 0.0152   | 0.037255 | yes |
| Folr2         | -4.10666 | 0         | 1        | 1        | no  |
| Mmp13         | -4.1122  | 0         | 1        | 1        | no  |
| Mmp2          | -4.11223 | -5.45509  | 5.00E-05 | 0.00022  | yes |
| Rgs6          | -4.1137  | -5.69688  | 5.00E-05 | 0.00022  | yes |
| Ugt8a         | -4.11488 | -10.6806  | 5.00E-05 | 0.00022  | yes |
| Tgfb1         | -4.11709 | -7.33789  | 5.00E-05 | 0.00022  | yes |
| Efemp1        | -4.11749 | -6.56933  | 5.00E-05 | 0.00022  | yes |
| Cx3cr1        | -4.12107 | -2.51359  | 0.0056   | 0.015668 | yes |
| Pmfbp1        | -4.13104 | -3.02159  | 0.00215  | 0.006796 | yes |
| Car14         | -4.132   | -1.61005  | 0.0462   | 0.095771 | no  |
| Ptplad2       | -4.137   | -2.28761  | 0.02575  | 0.058288 | no  |
| Itgav         | -4.14999 | -9.86003  | 5.00E-05 | 0.00022  | yes |
| Ttn           | -4.15385 | 0         | 1        | 1        | no  |
| Tspan18       | -4.15996 | -9.14483  | 5.00E-05 | 0.00022  | yes |
| Fmo1          | -4.17072 | -6.83229  | 5.00E-05 | 0.00022  | yes |
| C4b           | -4.18847 | -6.08906  | 5.00E-05 | 0.00022  | yes |
| Kcnj8         | -4.18863 | 0         | 1        | 1        | no  |
| Frmd6         | -4.19004 | -6.88595  | 5.00E-05 | 0.00022  | yes |
| Ptprz1        | -4.1927  | -11.1717  | 5.00E-05 | 0.00022  | yes |
| 2010204K13Rik | -4.19844 | -0.597581 | 0.19855  | 0.311957 | no  |
| Folh1         | -4.20118 | -6.87854  | 5.00E-05 | 0.00022  | yes |
| Smo           | -4.20389 | -5.73978  | 5.00E-05 | 0.00022  | yes |
| Mfap5         | -4.22038 | -7.24236  | 5.00E-05 | 0.00022  | yes |
| Gas7          | -4.22071 | -8.83071  | 5.00E-05 | 0.00022  | yes |
| Myo5b         | -4.22487 | 0         | 1        | 1        | no  |
| Ccl9          | -4.22561 | 0         | 1        | 1        | no  |
| Chst3         | -4.23231 | -5.3713   | 5.00E-05 | 0.00022  | yes |
| Emid1         | -4.23495 | -4.7781   | 5.00E-05 | 0.00022  | yes |
| Hrc           | -4.23509 | 0         | 1        | 1        | no  |
| Slc38a11      | -4.237   | -3.98715  | 0.0002   | 0.000803 | yes |
| Hey2          | -4.23827 | -8.28014  | 5.00E-05 | 0.00022  | yes |
| Shank2        | -4.24099 | -1.19592  | 0.0529   | 0.10692  | no  |
| Slc47a1       | -4.24697 | -4.13395  | 5.00E-05 | 0.00022  | yes |
| Nid2          | -4.2566  | -3.62683  | 5.00E-05 | 0.00022  | yes |



|               |          |           |          |          |     |
|---------------|----------|-----------|----------|----------|-----|
| Pln           | -4.25963 | -2.14063  | 0.01105  | 0.02829  | yes |
| Wdr72         | -4.27106 | -3.88579  | 5.00E-05 | 0.00022  | yes |
| Pcsk6         | -4.27144 | -4.68806  | 5.00E-05 | 0.00022  | yes |
| Nlgn1         | -4.27215 | -5.17366  | 5.00E-05 | 0.00022  | yes |
| Col6a3        | -4.27805 | -6.87689  | 5.00E-05 | 0.00022  | yes |
| Prelp         | -4.27838 | -5.23775  | 5.00E-05 | 0.00022  | yes |
| Sp140         | -4.28191 | 0         | 1        | 1        | no  |
| Vldlr         | -4.28457 | -9.1808   | 5.00E-05 | 0.00022  | yes |
| Lpcat2        | -4.28858 | -3.23339  | 0.03695  | 0.07908  | no  |
| Camp          | -4.2939  | -2.23773  | 0.1136   | 0.199014 | no  |
| 2210011C24Rik | -4.29497 | -2.09926  | 0.1475   | 0.24677  | no  |
| Phyhd1        | -4.29653 | -0.976635 | 0.1155   | 0.201889 | no  |
| Col4a6        | -4.30217 | 0         | 1        | 1        | no  |
| AA387883      | -4.30231 | 0         | 1        | 1        | no  |
| Rbp4          | -4.30377 | -1.7615   | 0.2308   | 0.35123  | no  |
| Podn          | -4.30481 | -1.88546  | 0.2293   | 0.349348 | no  |
| Reln          | -4.30854 | -10.0965  | 5.00E-05 | 0.00022  | yes |
| Adra1a        | -4.31064 | 0         | 1        | 1        | no  |
| Myl9          | -4.31132 | -6.18195  | 5.00E-05 | 0.00022  | yes |
| Shisa2        | -4.31132 | -4.26503  | 5.00E-05 | 0.00022  | yes |
| Mpz           | -4.31636 | -14.4855  | 5.00E-05 | 0.00022  | yes |
| Evc           | -4.32422 | -3.82479  | 5.00E-05 | 0.00022  | yes |
| Stxbp6        | -4.32554 | -7.8055   | 5.00E-05 | 0.00022  | yes |
| Mmp14         | -4.33935 | -8.03593  | 5.00E-05 | 0.00022  | yes |
| Chrd          | -4.34623 | 0         | 1        | 1        | no  |
| Pmp2          | -4.3496  | -7.55768  | 5.00E-05 | 0.00022  | yes |
| Entpd2        | -4.34994 | -6.66018  | 5.00E-05 | 0.00022  | yes |
| Lox           | -4.35    | -6.05644  | 5.00E-05 | 0.00022  | yes |
| Fxyd3         | -4.36289 | -2.42184  | 0.0896   | 0.163871 | no  |
| C1qtnf5       | -4.36478 | -3.30564  | 0.0133   | 0.033218 | yes |
| Thbs2         | -4.3728  | -5.27463  | 5.00E-05 | 0.00022  | yes |
| Lrp2          | -4.37884 | 0         | 1        | 1        | no  |
| Gpd1          | -4.379   | -7.50965  | 5.00E-05 | 0.00022  | yes |
| Gucy1b3       | -4.38028 | -3.52509  | 0.0251   | 0.057089 | no  |
| Cd74          | -4.38814 | -6.56362  | 5.00E-05 | 0.00022  | yes |
| Clec18a       | -4.39136 | -2.50425  | 0.024    | 0.054955 | no  |
| Hapln1        | -4.39341 | -8.90746  | 5.00E-05 | 0.00022  | yes |
| Ehf           | -4.39428 | 0         | 1        | 1        | no  |
| Cdo1          | -4.39824 | -5.87746  | 5.00E-05 | 0.00022  | yes |
| Sema3b        | -4.40347 | -11.6314  | 5.00E-05 | 0.00022  | yes |
| Fgd2          | -4.40767 | 0         | 1        | 1        | no  |
| Slco1a5       | -4.41079 | 0         | 1        | 1        | no  |
| Art3          | -4.41282 | -8.47388  | 5.00E-05 | 0.00022  | yes |
| H2-Ob         | -4.42244 | 0         | 1        | 1        | no  |
| P2ry6         | -4.42269 | 0         | 1        | 1        | no  |
| Metrn         | -4.42565 | -7.3637   | 5.00E-05 | 0.00022  | yes |
| Lmo3          | -4.42995 | 0         | 1        | 1        | no  |
| Ankfn1        | -4.4339  | -2.36186  | 0.0326   | 0.071194 | no  |
| A530058N18Rik | -4.43435 | 0         | 1        | 1        | no  |
| Pou3f1        | -4.44213 | -4.96917  | 5.00E-05 | 0.00022  | yes |
| Heyl          | -4.44955 | -5.14216  | 5.00E-05 | 0.00022  | yes |
| Adamts5       | -4.45207 | -9.64921  | 5.00E-05 | 0.00022  | yes |
| Dmp1          | -4.45843 | 0         | 1        | 1        | no  |

|               |          |          |          |          |     |
|---------------|----------|----------|----------|----------|-----|
| Srpx2         | -4.45902 | -2.05388 | 0.2371   | 0.358351 | no  |
| Prx           | -4.47154 | -15.3458 | 5.00E-05 | 0.00022  | yes |
| Cd248         | -4.48049 | -3.44145 | 0.0013   | 0.004375 | yes |
| Col27a1       | -4.48174 | -5.01072 | 5.00E-05 | 0.00022  | yes |
| Emp2          | -4.488   | -10.1269 | 5.00E-05 | 0.00022  | yes |
| Fras1         | -4.4995  | 0        | 1        | 1        | no  |
| Gxylt2        | -4.4999  | 0        | 1        | 1        | no  |
| Vstm2b        | -4.50059 | -4.75044 | 5.00E-05 | 0.00022  | yes |
| Mmrn1         | -4.50098 | 0        | 1        | 1        | no  |
| Ccdc158       | -4.50528 | 0        | 1        | 1        | no  |
| Col1a1        | -4.5076  | -12.096  | 5.00E-05 | 0.00022  | yes |
| Apoc1         | -4.51163 | -1.30115 | 0.2028   | 0.317207 | no  |
| Slit3         | -4.52114 | -4.02317 | 0.00015  | 0.000615 | yes |
| Adamts12      | -4.5224  | 0        | 1        | 1        | no  |
| Plxnb3        | -4.52258 | -6.56308 | 5.00E-05 | 0.00022  | yes |
| Arhgef16      | -4.53273 | 0        | 1        | 1        | no  |
| Lama2         | -4.53571 | -9.15149 | 5.00E-05 | 0.00022  | yes |
| Lamp5         | -4.53884 | 0        | 1        | 1        | no  |
| Olfm4         | -4.55928 | 0        | 1        | 1        | no  |
| Pex11a        | -4.57199 | -3.35482 | 0.0107   | 0.027543 | yes |
| Kif7          | -4.57783 | 0        | 1        | 1        | no  |
| Prrx1         | -4.59028 | -3.88695 | 0.0095   | 0.024845 | yes |
| Myh8          | -4.6093  | 0        | 1        | 1        | no  |
| 1500015010Rik | -4.61565 | -3.06521 | 0.01715  | 0.041361 | yes |
| C1qb          | -4.61578 | -3.86433 | 0.00095  | 0.003299 | yes |
| Ranbp3l       | -4.62541 | 0        | 1        | 1        | no  |
| Ibsp          | -4.62625 | -3.60628 | 0.0017   | 0.005514 | yes |
| Cand2         | -4.63098 | -1.84467 | 0.0373   | 0.079688 | no  |
| Pdgfc         | -4.63321 | -4.33233 | 5.00E-05 | 0.00022  | yes |
| Lgi4          | -4.63809 | -8.79967 | 5.00E-05 | 0.00022  | yes |
| Gm7714        | -4.6399  | 0        | 1        | 1        | no  |
| Cryab         | -4.65052 | -9.64532 | 5.00E-05 | 0.00022  | yes |
| Rbpms2        | -4.65077 | 0        | 1        | 1        | no  |
| Col1a2        | -4.65886 | -14.5349 | 5.00E-05 | 0.00022  | yes |
| Ptgfrn        | -4.65987 | -10.2401 | 5.00E-05 | 0.00022  | yes |
| 9930014A18Rik | -4.66519 | 0        | 1        | 1        | no  |
| Ace2          | -4.66546 | -2.09251 | 0.22435  | 0.343738 | no  |
| Kcnj13        | -4.6715  | 0        | 1        | 1        | no  |
| Cd163         | -4.6817  | -2.40028 | 0.18295  | 0.292892 | no  |
| Dlk1          | -4.68928 | 0        | 1        | 1        | no  |
| Adamts20      | -4.69025 | -3.78099 | 0.0082   | 0.02192  | yes |
| Ccdc8         | -4.69142 | -2.68709 | 0.0238   | 0.054535 | no  |
| Lmx1b         | -4.69714 | 0        | 1        | 1        | no  |
| Egflam        | -4.69784 | -5.51937 | 5.00E-05 | 0.00022  | yes |
| Phgdh         | -4.70626 | -4.42321 | 0.0001   | 0.000422 | yes |
| Mrap          | -4.73057 | 0        | 1        | 1        | no  |
| Notch3        | -4.73756 | -5.95143 | 5.00E-05 | 0.00022  | yes |
| Calb2         | -4.76518 | -4.9239  | 0.0095   | 0.024845 | yes |
| Foxd3         | -4.77186 | -5.48993 | 5.00E-05 | 0.00022  | yes |
| Otop1         | -4.77628 | -3.78175 | 0.0003   | 0.001164 | yes |
| Tgif2         | -4.78734 | -2.13019 | 0.02485  | 0.056589 | no  |
| Plp1          | -4.78972 | -15.8239 | 5.00E-05 | 0.00022  | yes |
| Fam163a       | -4.79191 | -2.97657 | 0.0143   | 0.035369 | yes |

|          |          |           |          |          |     |
|----------|----------|-----------|----------|----------|-----|
| Ctnna3   | -4.80559 | -1.50724  | 0.0091   | 0.023921 | yes |
| Col8a2   | -4.81501 | -3.52414  | 0.0006   | 0.002181 | yes |
| Smoc2    | -4.81881 | -5.51713  | 0.0065   | 0.017869 | yes |
| Ccl11    | -4.83017 | -2.77646  | 0.0437   | 0.091316 | no  |
| Cnn1     | -4.83263 | -0.668715 | 0.1439   | 0.242121 | no  |
| Fbln1    | -4.83334 | -3.82912  | 0.00055  | 0.002016 | yes |
| Fam84a   | -4.83613 | 0         | 1        | 1        | no  |
| Trp63    | -4.83615 | 0         | 1        | 1        | no  |
| Sox3     | -4.83659 | 0         | 1        | 1        | no  |
| Islr     | -4.84997 | -6.49779  | 5.00E-05 | 0.00022  | yes |
| Angpt2   | -4.85779 | -3.15475  | 0.0014   | 0.004657 | yes |
| Adamts7  | -4.86689 | -3.34503  | 0.0031   | 0.009315 | yes |
| F3       | -4.87424 | -5.41875  | 5.00E-05 | 0.00022  | yes |
| Cdh19    | -4.87647 | -8.52508  | 5.00E-05 | 0.00022  | yes |
| Acta2    | -4.8889  | -6.19865  | 5.00E-05 | 0.00022  | yes |
| Gli3     | -4.89192 | 0         | 1        | 1        | no  |
| Pdpn     | -4.89659 | -5.27847  | 0.00585  | 0.016305 | yes |
| Chrna10  | -4.9003  | 0         | 1        | 1        | no  |
| Igfbp6   | -4.90347 | -6.31185  | 5.00E-05 | 0.00022  | yes |
| Cldn19   | -4.90361 | -5.15799  | 5.00E-05 | 0.00022  | yes |
| Abca13   | -4.90705 | 0         | 1        | 1        | no  |
| Slc6a1   | -4.91032 | -4.23982  | 0.00015  | 0.000615 | yes |
| Tmc1     | -4.94092 | 0         | 1        | 1        | no  |
| Nkain4   | -4.95874 | -3.67405  | 0.0001   | 0.000422 | yes |
| Fzd2     | -4.96483 | -4.11729  | 0.0001   | 0.000422 | yes |
| Hk3      | -4.98146 | 0         | 1        | 1        | no  |
| Matn4    | -4.98327 | -5.80737  | 5.00E-05 | 0.00022  | yes |
| Rbm47    | -4.98385 | 0         | 1        | 1        | no  |
| Nr2f1    | -4.99341 | -5.14401  | 5.00E-05 | 0.00022  | yes |
| Rftn2    | -4.99354 | -4.84577  | 5.00E-05 | 0.00022  | yes |
| Mgl2     | -4.99511 | -2.46349  | 0.0851   | 0.157663 | no  |
| Nxph1    | -5.00188 | -4.48666  | 0.00035  | 0.001342 | yes |
| Myh11    | -5.00409 | -6.22569  | 5.00E-05 | 0.00022  | yes |
| Sox10    | -5.00549 | -9.57313  | 5.00E-05 | 0.00022  | yes |
| Lyz2     | -5.01452 | -6.16579  | 5.00E-05 | 0.00022  | yes |
| Adap2    | -5.01648 | -1.58236  | 0.14765  | 0.246896 | no  |
| Gjb2     | -5.02506 | -2.68792  | 0.02355  | 0.054046 | no  |
| Aspa     | -5.02575 | -7.00197  | 5.00E-05 | 0.00022  | yes |
| Gjc3     | -5.02986 | -8.87402  | 5.00E-05 | 0.00022  | yes |
| Slc9a3   | -5.0391  | -2.12872  | 0.09     | 0.16449  | no  |
| Col3a1   | -5.04535 | -13.7115  | 5.00E-05 | 0.00022  | yes |
| Paqr6    | -5.04815 | -5.69587  | 5.00E-05 | 0.00022  | yes |
| Nid1     | -5.07577 | -11.9469  | 5.00E-05 | 0.00022  | yes |
| Angptl7  | -5.08462 | -1.01151  | 0.18815  | 0.299267 | no  |
| Veph1    | -5.09692 | 0         | 1        | 1        | no  |
| Mcpt4    | -5.11107 | 0         | 1        | 1        | no  |
| Fam129a  | -5.11355 | -7.77189  | 5.00E-05 | 0.00022  | yes |
| Pou3f2   | -5.11387 | -4.34948  | 5.00E-05 | 0.00022  | yes |
| Crabp1   | -5.12158 | -1.52846  | 0.2215   | 0.34016  | no  |
| Cmtm5    | -5.14343 | -4.74703  | 0.0082   | 0.02192  | yes |
| Map3k7cl | -5.14443 | 0         | 1        | 1        | no  |
| Ctss     | -5.14949 | -2.92519  | 0.24735  | 0.36959  | no  |
| Olfml2a  | -5.15183 | -6.72639  | 5.00E-05 | 0.00022  | yes |

|               |          |          |          |          |     |
|---------------|----------|----------|----------|----------|-----|
| Arhgef26      | -5.15744 | -4.99745 | 5.00E-05 | 0.00022  | yes |
| Col14a1       | -5.16709 | -7.33951 | 5.00E-05 | 0.00022  | yes |
| Tmem40        | -5.19393 | -1.10918 | 0.10465  | 0.186562 | no  |
| Pamr1         | -5.2     | -2.54833 | 0.07555  | 0.143476 | no  |
| Igf2          | -5.20898 | -7.19482 | 5.00E-05 | 0.00022  | yes |
| Col12a1       | -5.21482 | -7.95421 | 5.00E-05 | 0.00022  | yes |
| Erb3          | -5.23755 | -7.00858 | 0.00435  | 0.012551 | yes |
| Myo16         | -5.23768 | -3.7471  | 0.0027   | 0.008273 | yes |
| Hmgcs2        | -5.23885 | -10.2888 | 5.00E-05 | 0.00022  | yes |
| Lum           | -5.2439  | -6.06094 | 5.00E-05 | 0.00022  | yes |
| Galnt16       | -5.24435 | -6.17219 | 5.00E-05 | 0.00022  | yes |
| Prrg4         | -5.24514 | -2.97025 | 0.01605  | 0.039064 | yes |
| Gm10046       | -5.26025 | -3.1427  | 0.0865   | 0.159588 | no  |
| Papln         | -5.27467 | -5.04217 | 5.00E-05 | 0.00022  | yes |
| Pm20d1        | -5.27996 | 0        | 1        | 1        | no  |
| Gpr126        | -5.2842  | -8.15317 | 5.00E-05 | 0.00022  | yes |
| Aspn          | -5.28657 | -2.20182 | 0.03215  | 0.070374 | no  |
| Axl           | -5.29026 | -6.20726 | 0.0051   | 0.014464 | yes |
| Cybrd1        | -5.29782 | -5.71555 | 5.00E-05 | 0.00022  | yes |
| Sorcs2        | -5.29817 | -5.95313 | 5.00E-05 | 0.00022  | yes |
| Nwd1          | -5.30302 | -5.74059 | 5.00E-05 | 0.00022  | yes |
| Itgb3         | -5.30754 | -7.01714 | 5.00E-05 | 0.00022  | yes |
| Ppp1r1b       | -5.31456 | -3.18684 | 0.2507   | 0.373418 | no  |
| Myoc          | -5.32768 | -3.67697 | 0.23585  | 0.35695  | no  |
| Atp1b2        | -5.35461 | -11.1367 | 5.00E-05 | 0.00022  | yes |
| Tsku          | -5.35645 | 0        | 1        | 1        | no  |
| Csf1r         | -5.37582 | -4.57192 | 0.0245   | 0.055974 | no  |
| Sox2ot        | -5.37786 | -3.8032  | 0.0028   | 0.008532 | yes |
| Gpm6b         | -5.38022 | -13.6251 | 5.00E-05 | 0.00022  | yes |
| Atp1a2        | -5.38227 | -15.3734 | 5.00E-05 | 0.00022  | yes |
| Sfrp5         | -5.41355 | -11.8306 | 5.00E-05 | 0.00022  | yes |
| Ltbp2         | -5.42055 | -3.30857 | 0.0896   | 0.163871 | no  |
| Phex          | -5.42638 | 0        | 1        | 1        | no  |
| Htra3         | -5.44282 | -3.17165 | 0.04765  | 0.098209 | no  |
| Cldn1         | -5.44545 | -5.12594 | 5.00E-05 | 0.00022  | yes |
| Cyp4f14       | -5.45103 | -2.07316 | 0.0176   | 0.042247 | yes |
| Egfl6         | -5.45614 | 0        | 1        | 1        | no  |
| Vgll3         | -5.45698 | -4.20904 | 0.0009   | 0.003139 | yes |
| Zfpm2         | -5.46557 | -3.10952 | 0.01785  | 0.042762 | yes |
| Spon1         | -5.466   | -6.59504 | 5.00E-05 | 0.00022  | yes |
| Extl1         | -5.472   | 0        | 1        | 1        | no  |
| Adamts17      | -5.47326 | -3.23969 | 0.0173   | 0.041678 | yes |
| Pdgfrl        | -5.48588 | -1.74582 | 0.14765  | 0.246896 | no  |
| Slc13a3       | -5.48737 | -3.93286 | 0.00175  | 0.00566  | yes |
| Pla2g5        | -5.49787 | 0        | 1        | 1        | no  |
| Hepacam       | -5.50776 | -5.9302  | 5.00E-05 | 0.00022  | yes |
| Daam2         | -5.52173 | -9.32276 | 5.00E-05 | 0.00022  | yes |
| 2900052N01Rik | -5.54185 | -4.94216 | 5.00E-05 | 0.00022  | yes |
| Clec12a       | -5.55069 | 0        | 1        | 1        | no  |
| Vipr2         | -5.5517  | 0        | 1        | 1        | no  |
| Alpl          | -5.55852 | -4.35782 | 5.00E-05 | 0.00022  | yes |
| Itgbl1        | -5.59241 | -3.36485 | 0.0124   | 0.031187 | yes |
| Loxl1         | -5.61225 | -2.92281 | 0.03045  | 0.067274 | no  |

|               |          |           |          |          |     |
|---------------|----------|-----------|----------|----------|-----|
| Lipg          | -5.62516 | 0         | 1        | 1        | no  |
| Gm14005       | -5.63858 | -0.866541 | 0.24985  | 0.372487 | no  |
| Slc7a2        | -5.65053 | -10.4021  | 5.00E-05 | 0.00022  | yes |
| Tuba8         | -5.6641  | -2.47393  | 0.0911   | 0.166248 | no  |
| Fbln5         | -5.68722 | -10.2579  | 5.00E-05 | 0.00022  | yes |
| Egfr          | -5.6948  | 0         | 1        | 1        | no  |
| Kdelr3        | -5.69664 | -0.642518 | 0.24315  | 0.364835 | no  |
| Fxyd1         | -5.69846 | -4.61305  | 0.0064   | 0.017627 | yes |
| Sod3          | -5.70598 | -6.23726  | 5.00E-05 | 0.00022  | yes |
| C1qc          | -5.71498 | -3.16655  | 0.05005  | 0.102298 | no  |
| Mpeg1         | -5.72768 | -3.49876  | 0.0071   | 0.019306 | yes |
| Col28a1       | -5.75212 | -10.7355  | 5.00E-05 | 0.00022  | yes |
| 5930403L14Rik | -5.77411 | -5.41136  | 5.00E-05 | 0.00022  | yes |
| Kcnj16        | -5.78698 | -2.00928  | 0.13735  | 0.232991 | no  |
| Myom3         | -5.79523 | 0         | 1        | 1        | no  |
| B4galnt3      | -5.79725 | 0         | 1        | 1        | no  |
| Rarres2       | -5.81062 | -2.04918  | 0.03345  | 0.07268  | no  |
| Vtn           | -5.8215  | -4.45956  | 0.00105  | 0.003607 | yes |
| Des           | -5.8239  | -1.69531  | 0.041    | 0.086396 | no  |
| Thbs4         | -5.82447 | -3.23565  | 0.04235  | 0.088803 | no  |
| Pf4           | -5.83678 | -1.81734  | 0.23655  | 0.357764 | no  |
| Enpp1         | -5.84978 | -5.53691  | 5.00E-05 | 0.00022  | yes |
| Cryba2        | -5.86151 | -1.5858   | 0.23785  | 0.358994 | no  |
| Gpr3711       | -5.86726 | -9.61228  | 5.00E-05 | 0.00022  | yes |
| Fbln2         | -5.87449 | -12.3804  | 5.00E-05 | 0.00022  | yes |
| Hba-a1,Hba-a2 | -5.8789  | 0         | 1        | 1        | no  |
| Postn         | -5.89287 | -5.73794  | 0.1119   | 0.196607 | no  |
| Tlr7          | -5.89817 | 0         | 1        | 1        | no  |
| Mafa          | -5.91741 | -2.68819  | 0.0921   | 0.167819 | no  |
| Srpx          | -5.9175  | -3.74289  | 0.00685  | 0.018707 | yes |
| Lrrc4b        | -5.92699 | -5.3449   | 0.00015  | 0.000615 | yes |
| Pi15          | -5.94616 | 0         | 1        | 1        | no  |
| Fabp7         | -5.95319 | -15.4609  | 5.00E-05 | 0.00022  | yes |
| Amd1,Amd2     | -5.95323 | -1.20289  | 0.3963   | 0.528042 | no  |
| Efs           | -5.98221 | -3.19951  | 0.0203   | 0.04771  | yes |
| Fcrls         | -5.99003 | -1.84879  | 0.14765  | 0.246896 | no  |
| Lect1         | -6.01284 | -5.33366  | 0.0002   | 0.000803 | yes |
| Gas1          | -6.01586 | -4.03286  | 0.004    | 0.011645 | yes |
| Hes5          | -6.02868 | -1.1813   | 0.0652   | 0.127245 | no  |
| Car5b         | -6.03916 | -4.34991  | 0.00155  | 0.005095 | yes |
| Serpine2      | -6.05024 | -10.8229  | 5.00E-05 | 0.00022  | yes |
| Adcyap1r1     | -6.07887 | -2.92825  | 0.25035  | 0.373013 | no  |
| Ttyh1         | -6.08735 | -7.68795  | 0.0003   | 0.001164 | yes |
| Abca9         | -6.09342 | -5.50467  | 5.00E-05 | 0.00022  | yes |
| Mfrp          | -6.11144 | 0         | 1        | 1        | no  |
| Tyrp1         | -6.14312 | -4.40411  | 0.1944   | 0.306927 | no  |
| Cacng4        | -6.2335  | -2.96641  | 0.1419   | 0.23915  | no  |
| Olf558        | -6.25435 | 0         | 1        | 1        | no  |
| 2610034M16Rik | -6.26504 | 0         | 1        | 1        | no  |
| Apoe          | -6.28591 | -22.5683  | 5.00E-05 | 0.00022  | yes |
| Pdlim4        | -6.29908 | -4.25176  | 0.0188   | 0.044675 | yes |
| Sostdc1       | -6.35638 | -8.31419  | 5.00E-05 | 0.00022  | yes |
| Megf10        | -6.36584 | -8.17961  | 5.00E-05 | 0.00022  | yes |

|                   |          |           |          |          |     |
|-------------------|----------|-----------|----------|----------|-----|
| Scara5            | -6.42977 | -3.5123   | 0.205    | 0.320119 | no  |
| Wnt6              | -6.47643 | -4.63768  | 0.0033   | 0.009856 | yes |
| Lgr5              | -6.5171  | -5.41664  | 0.02695  | 0.060632 | no  |
| Abca8a            | -6.56284 | -13.6938  | 5.00E-05 | 0.00022  | yes |
| P2ry12            | -6.6123  | -1.16128  | 0.1765   | 0.284696 | no  |
| H2-Aa             | -6.62331 | -4.93994  | 0.00835  | 0.022272 | yes |
| Angptl1           | -6.62445 | -1.11718  | 0.1289   | 0.22146  | no  |
| Hif3a             | -6.63837 | 0         | 1        | 1        | no  |
| Ptges             | -6.67529 | -4.28952  | 0.01445  | 0.0357   | yes |
| 5430435G22Rik     | -6.68345 | -1.50039  | 0.23655  | 0.357764 | no  |
| Aldh1a2           | -6.69542 | -1.44744  | 0.23785  | 0.358994 | no  |
| C1qa              | -6.69904 | -3.12629  | 0.1419   | 0.23915  | no  |
| Acsbg1            | -6.81015 | -8.4511   | 5.00E-05 | 0.00022  | yes |
| Nfe2l3            | -6.82916 | -2.73752  | 0.14815  | 0.24742  | no  |
| Megf11            | -6.91893 | -1.68914  | 0.23825  | 0.359393 | no  |
| Tfap2a            | -6.95648 | -1.01413  | 0.1997   | 0.313467 | no  |
| Slc1a3            | -6.99309 | -5.50891  | 0.0013   | 0.004375 | yes |
| Prss35            | -7.06617 | -7.76757  | 5.00E-05 | 0.00022  | yes |
| H2-Q8             | -7.06801 | 0         | 1        | 1        | no  |
| Emr1              | -7.10775 | -1.49563  | 0.23785  | 0.358994 | no  |
| Mmd2              | -7.11883 | -9.45111  | 5.00E-05 | 0.00022  | yes |
| Sox2              | -7.14981 | -2.8884   | 0.03     | 0.066457 | no  |
| Ednrb             | -7.17793 | -9.05927  | 5.00E-05 | 0.00022  | yes |
| Itgb8             | -7.18296 | -8.00901  | 5.00E-05 | 0.00022  | yes |
| Olfml1            | -7.27542 | -0.660013 | 0.2124   | 0.329118 | no  |
| H19               | -7.35714 | -3.07567  | 0.0545   | 0.109703 | no  |
| Car13             | -7.35927 | -3.28915  | 0.0838   | 0.155711 | no  |
| Kcnj10            | -7.36359 | -9.4592   | 5.00E-05 | 0.00022  | yes |
| Ugt1a6a           | -7.58146 | -2.69636  | 0.06925  | 0.133927 | no  |
| Bmp5              | -7.65234 | -1.37119  | 0.0652   | 0.127245 | no  |
| Gm10591           | -8.91045 | 0         | 1        | 1        | no  |
| Gm13304           | -9.07729 | 0         | 1        | 1        | no  |
| Gm21541           | -9.11809 | 0         | 1        | 1        | no  |
| Fsbp              | -9.18934 | 0         | 1        | 1        | no  |
| Slc6a11           | -9.198   | -1.59622  | 0.0652   | 0.127245 | no  |
| Gm12191           | -10.3009 | 0         | 1        | 1        | no  |
| Rbm14-rbm4        | -11.7252 | 0         | 1        | 1        | no  |
| Krt85             | -11.7777 | 0         | 1        | 1        | no  |
| Hist1h4m,Hist1h4n | -13.4013 | 0         | 1        | 1        | no  |
| Pira1             | -15.336  | 0         | 1        | 1        | no  |
| Ear2,Ear3         | -19.1024 | 0         | 1        | 1        | no  |



## Genes depleted from MACS DRG

| gene         | locus                     | FPKM dissociated DRG | FPKM MACS DRG | log2 fold change |
|--------------|---------------------------|----------------------|---------------|------------------|
| Kcnj10       | chr1:172341209-172374085  | 25.1946              | 0.152984      | -7.36359         |
| Itgb8        | chr12:119162802-119238276 | 25.5496              | 0.175833      | -7.18296         |
| Ednrb        | chr14:103814614-103844476 | 63.0298              | 0.435286      | -7.17793         |
| Mmd2         | chr5:142563480-142608752  | 58.5913              | 0.421553      | -7.11883         |
| Prss35       | chr9:86743632-86757506    | 29.8687              | 0.222888      | -7.06617         |
| Slc1a3       | chr15:8634123-8710807     | 5.94844              | 0.0466953     | -6.99309         |
| Acsbg1       | chr9:54604996-54661885    | 30.7905              | 0.274382      | -6.81015         |
| H2-Aa        | chr17:34282750-34287771   | 15.3354              | 0.155553      | -6.62331         |
| Abca8a       | chr11:110025633-110095937 | 64.7776              | 0.685194      | -6.56284         |
| Wnt6         | chr1:74771891-74785319    | 7.69204              | 0.0863859     | -6.47643         |
| Megf10       | chr18:57133089-57297467   | 8.55432              | 0.103723      | -6.36584         |
| Sostdc1      | chr12:36314168-36318452   | 32.9999              | 0.402764      | -6.35638         |
| Pdlim4       | chr11:54054927-54069017   | 8.68026              | 0.110235      | -6.29908         |
| Apoe         | chr7:19696243-19699166    | 2422.41              | 31.0456       | -6.28591         |
| Ttyh1        | chr7:4074124-4136926      | 38.9537              | 0.572892      | -6.08735         |
| Serpine2     | chr1:79794320-79858665    | 62.9212              | 0.949496      | -6.05024         |
| Lect1        | chr14:79637689-79662170   | 14.1165              | 0.218615      | -6.01284         |
| Fabp7        | chr10:57784922-57788450   | 322.961              | 5.21266       | -5.95319         |
| Lrrc4b       | chr7:44442486-44463344    | 6.80041              | 0.111772      | -5.92699         |
| Fbln2        | chr6:91212763-91272540    | 48.9744              | 0.834781      | -5.87449         |
| Gpr37l1      | chr1:135160249-135167681  | 43.5701              | 0.746391      | -5.86726         |
| Enpp1        | chr10:24641410-24712102   | 6.59106              | 0.114287      | -5.84978         |
| Vtn          | chr11:78499119-78502325   | 6.82521              | 0.120689      | -5.8215          |
| 5930403L14Ri | chr4:154316124-154636873  | 11.4213              | 0.208707      | -5.77411         |
| Col28a1      | chr6:7997807-8192617      | 33.1054              | 0.614241      | -5.75212         |
| Sod3         | chr5:52363803-52369738    | 12.9546              | 0.248172      | -5.70598         |
| Fxyd1        | chr7:31051677-31055656    | 65.3426              | 1.25831       | -5.69846         |
| Fbln5        | chr12:101746564-101819119 | 21.2586              | 0.412582      | -5.68722         |
| Slc7a2       | chr8:40862366-40922070    | 18.812               | 0.374503      | -5.65053         |
| Alpl         | chr4:137741730-137796384  | 6.06153              | 0.128618      | -5.55852         |
| 2900052N01Ri | chr9:46913602-46927366    | 5.43881              | 0.116746      | -5.54185         |
| Daam2        | chr17:49456021-49564337   | 15.142               | 0.329591      | -5.52173         |
| Hepacam      | chr9:37367605-37386571    | 9.27856              | 0.203929      | -5.50776         |
| Sfrp5        | chr19:42197970-42202252   | 78.3842              | 1.83902       | -5.41355         |
| Atp1a2       | chr1:172271708-172298064  | 68.4787              | 1.64184       | -5.38227         |
| Gpm6b        | chrX:166238942-166389033  | 110.609              | 2.65574       | -5.38022         |
| Atp1b2       | chr11:69599749-69605960   | 40.6936              | 0.994554      | -5.35461         |
| Itgb3        | chr11:104607999-104670471 | 6.89186              | 0.174023      | -5.30754         |
| Axl          | chr7:25756499-25788733    | 9.43099              | 0.241007      | -5.29026         |
| Gpr126       | chr10:14402584-14545036   | 8.69059              | 0.223022      | -5.2842          |
| Galnt16      | chr12:80518989-80603896   | 7.17047              | 0.189165      | -5.24435         |
| Lum          | chr10:97565500-97572703   | 15.4158              | 0.406812      | -5.2439          |
| Hmgcs2       | chr3:98280430-98310738    | 30.4608              | 0.806659      | -5.23885         |
| ErbB3        | chr10:128569367-128589501 | 16.3533              | 0.433455      | -5.23755         |
| Col12a1      | chr9:79598986-79718722    | 5.36985              | 0.144592      | -5.21482         |
| Igf2         | chr7:142650767-142670356  | 13.7769              | 0.372469      | -5.20898         |
| Col14a1      | chr15:55307749-55520803   | 6.97519              | 0.194136      | -5.16709         |
| Olfml2a      | chr2:38931979-38960585    | 11.5974              | 0.326215      | -5.15183         |
| Cmtm5        | chr14:54936469-54939277   | 32.7856              | 0.927592      | -5.14343         |

|         |                           |         |          |          |
|---------|---------------------------|---------|----------|----------|
| Fam129a | chr1:151571372-151719347  | 10.7947 | 0.311801 | -5.11355 |
| Nid1    | chr13:13437601-13512275   | 27.793  | 0.824093 | -5.07577 |
| Paqr6   | chr3:88364588-88368541    | 11.0556 | 0.334148 | -5.04815 |
| Col3a1  | chr1:45311537-45349706    | 58.3065 | 1.76569  | -5.04535 |
| Gjc3    | chr5:137953808-137962959  | 20.1718 | 0.617458 | -5.02986 |
| Aspa    | chr11:73304987-73324637   | 25.0348 | 0.7685   | -5.02575 |
| Lyz2    | chr10:117277540-117282272 | 19.0984 | 0.590848 | -5.01452 |
| Sox10   | chr15:79154912-79164490   | 32.1017 | 0.999371 | -5.00549 |
| Nr2f1   | chr13:78188972-78236564   | 7.0682  | 0.221892 | -4.99341 |
| Matn4   | chr2:164389392-164415448  | 11.0272 | 0.348619 | -4.98327 |
| Nkain4  | chr2:180934771-180954699  | 9.42345 | 0.303027 | -4.95874 |
| Cldn19  | chr4:119255440-119262438  | 32.0812 | 1.07181  | -4.90361 |
| Igfbp6  | chr15:102144185-102149512 | 19.8049 | 0.661733 | -4.90347 |
| Pdpm    | chr4:143267408-143299564  | 15.3054 | 0.513838 | -4.89659 |
| Acta2   | chr19:34240335-34255373   | 9.69859 | 0.327343 | -4.8889  |
| Cdh19   | chr1:110889194-110977372  | 22.623  | 0.770168 | -4.87647 |
| F3      | chr3:121723536-121735052  | 9.85746 | 0.336104 | -4.87424 |
| Angpt2  | chr8:18595172-18803188    | 7.446   | 0.256793 | -4.85779 |
| Islr    | chr9:58156263-58159221    | 16.8173 | 0.583136 | -4.84997 |
| Smoc2   | chr17:14279505-14404790   | 10.6943 | 0.378917 | -4.81881 |
| Plp1    | chrX:136822745-136838582  | 191.808 | 6.93454  | -4.78972 |
| Foxd3   | chr4:99656298-99658671    | 7.39769 | 0.270783 | -4.77186 |
| Calb2   | chr8:110142537-110168206  | 11.9156 | 0.438182 | -4.76518 |
| Ptgfrn  | chr3:101040235-101110166  | 15.7544 | 0.62322  | -4.65987 |
| Col1a2  | chr6:4505696-4541543      | 88.9173 | 3.5199   | -4.65886 |
| Cryab   | chr9:50751071-50756635    | 119.196 | 4.74589  | -4.65052 |
| Lgi4    | chr7:31059934-31076697    | 24.2186 | 0.972627 | -4.63809 |
| C1qb    | chr4:136880144-136886177  | 5.82643 | 0.237638 | -4.61578 |
| Lama2   | chr10:26981284-27616942   | 7.47464 | 0.32226  | -4.53571 |
| Plxnb3  | chrX:73757102-73772510    | 5.46038 | 0.237569 | -4.52258 |
| Col1a1  | chr11:94936269-94951856   | 48.0789 | 2.11365  | -4.5076  |
| Vstm2b  | chr7:40899277-40929968    | 7.28504 | 0.321825 | -4.50059 |
| Emp2    | chr16:10281748-10313968   | 24.8144 | 1.10581  | -4.488   |
| Prx     | chr7:27499323-27520041    | 96.1528 | 4.33405  | -4.47154 |
| Adamts5 | chr16:85858156-85901125   | 10.7471 | 0.491002 | -4.45207 |
| Metrn   | chr17:25794570-25797045   | 21.6256 | 1.00627  | -4.42565 |
| Art3    | chr5:92331840-92414627    | 40.1301 | 1.88399  | -4.41282 |
| Sema3b  | chr9:107597673-107609241  | 50.442  | 2.3835   | -4.40347 |
| Cdo1    | chr18:46713204-46728342   | 10.6261 | 0.50393  | -4.39824 |
| Hapln1  | chr13:89540635-89611832   | 12.3731 | 0.588749 | -4.39341 |
| Cd74    | chr18:60803848-60812652   | 28.3717 | 1.35495  | -4.38814 |
| Gpd1    | chr15:99717592-99725007   | 12.8563 | 0.617883 | -4.379   |
| C1qtnf5 | chr9:44101769-44109187    | 6.84385 | 0.332178 | -4.36478 |
| Lox     | chr18:52516059-52529867   | 6.21158 | 0.304594 | -4.35    |
| Entpd2  | chr2:25395873-25401323    | 13.1568 | 0.645193 | -4.34994 |
| Pmp2    | chr3:10179850-10183885    | 24.5919 | 1.20624  | -4.3496  |
| Mmp14   | chr14:54431603-54441258   | 17.0109 | 0.840333 | -4.33935 |
| Stxbp6  | chr12:44852485-45074483   | 9.77266 | 0.487413 | -4.32554 |
| Mpz     | chr1:171150712-171161123  | 1585.64 | 79.5886  | -4.31636 |
| Myl9    | chr2:156775463-156781657  | 17.8889 | 0.901042 | -4.31132 |
| Reln    | chr5:21884453-22344705    | 9.58975 | 0.483958 | -4.30854 |
| Vldlr   | chr19:27217019-27254231   | 8.83414 | 0.453293 | -4.28457 |
| Nid2    | chr14:19751256-19823823   | 7.33907 | 0.383951 | -4.2566  |

|          |                           |         |          |          |
|----------|---------------------------|---------|----------|----------|
| Hey2     | chr10:30832358-30842783   | 18.6154 | 0.986342 | -4.23827 |
| Emid1    | chr11:5106265-5152222     | 5.4516  | 0.289518 | -4.23495 |
| Gas7     | chr11:67532997-67688992   | 10.1283 | 0.543217 | -4.22071 |
| Mfap5    | chr6:122513675-122529287  | 21.0542 | 1.12948  | -4.22038 |
| Folh1    | chr7:86718975-86775864    | 11.0373 | 0.600043 | -4.20118 |
| Ptprz1   | chr6:22875501-23052916    | 14.7545 | 0.80686  | -4.1927  |
| Frmd6    | chr12:70825513-70902234   | 6.60218 | 0.36171  | -4.19004 |
| Fmo1     | chr1:162829560-162866548  | 14.1248 | 0.784276 | -4.17072 |
| Tspan18  | chr2:93201759-93334487    | 17.1885 | 0.961535 | -4.15996 |
| Itgav    | chr2:83724396-83806917    | 12.931  | 0.728384 | -4.14999 |
| Efemp1   | chr11:28853204-28926743   | 12.2345 | 0.704853 | -4.11749 |
| Tgfb1    | chr13:56609602-56639339   | 13.0564 | 0.752411 | -4.11709 |
| Ugt8a    | chr3:125865342-125938550  | 34.004  | 1.96259  | -4.11488 |
| Rgs6     | chr12:82617037-83158813   | 9.02694 | 0.521426 | -4.1137  |
| Mmp2     | chr8:92827327-92853420    | 5.32526 | 0.307919 | -4.11223 |
| Igfbp4   | chr11:99041259-99052643   | 74.3154 | 4.35705  | -4.09224 |
| Kirrel   | chr3:87078591-87174747    | 6.49831 | 0.382193 | -4.08769 |
| Rdh5     | chr10:128913590-128919297 | 8.30093 | 0.488886 | -4.0857  |
| Plin3    | chr17:56278961-56290511   | 10.6008 | 0.627396 | -4.07865 |
| Clec3b   | chr9:123150945-123157432  | 5.70519 | 0.342192 | -4.05939 |
| Trf      | chr9:103208875-103230286  | 12.1067 | 0.73474  | -4.04243 |
| Cldn11   | chr3:31149919-31164326    | 5.18246 | 0.319319 | -4.02057 |
| Pmepa1   | chr2:173224464-173276533  | 18.2138 | 1.12624  | -4.01544 |
| Bcan     | chr3:87987530-88000356    | 38.949  | 2.44179  | -3.99558 |
| Smco3    | chr6:136828842-136840557  | 10.6301 | 0.680909 | -3.96455 |
| Igfbp5   | chr1:72858064-72874865    | 42.8562 | 2.79181  | -3.94023 |
| Pgf      | chr12:85166638-85177313   | 6.83809 | 0.449826 | -3.92616 |
| Maf      | chr8:115703252-115706894  | 25.6127 | 1.69089  | -3.92101 |
| Aif1l    | chr2:31950302-31973442    | 11.5161 | 0.76034  | -3.92086 |
| Itpr3    | chr17:27057303-27122223   | 14.6661 | 0.973976 | -3.91245 |
| Ptgfr    | chr3:151798609-151837528  | 14.1675 | 0.942385 | -3.91012 |
| Ppp1r14c | chr10:3366149-3464975     | 9.61387 | 0.641843 | -3.90482 |
| Pcolce   | chr5:137605106-137611404  | 14.4317 | 0.967401 | -3.89898 |
| Sh3bp5   | chr14:31373963-31436033   | 16.6056 | 1.11319  | -3.89889 |
| Ptgds    | chr2:25466711-25469749    | 73.402  | 4.93235  | -3.89547 |
| Apod     | chr16:31296191-31314596   | 116.26  | 7.97112  | -3.86642 |
| Ccnd1    | chr7:144929930-144939925  | 12.6538 | 0.87194  | -3.8592  |
| Grid1    | chr14:34820135-35581115   | 5.46416 | 0.380906 | -3.84249 |
| Egfl8    | chr17:34605860-34615971   | 27.7101 | 1.93696  | -3.83855 |
| Ogn      | chr13:49464058-49652731   | 46.9717 | 3.29179  | -3.83485 |
| Igsf11   | chr16:38902344-39027157   | 9.93646 | 0.703359 | -3.8204  |
| Gldn     | chr9:54268579-54341777    | 8.78097 | 0.635351 | -3.78875 |
| Rasa3    | chr8:13567217-13677587    | 8.21679 | 0.595607 | -3.78614 |
| Hapln4   | chr8:70083528-70090862    | 26.2265 | 1.91961  | -3.77214 |
| Cotl1    | chr8:119809213-119840579  | 24.2518 | 1.80734  | -3.74615 |
| Spp1     | chr5:104435110-104441053  | 96.3289 | 7.25024  | -3.73187 |
| Ncmap    | chr4:135369576-135398227  | 40.9055 | 3.0946   | -3.72447 |
| Ano1     | chr7:144588548-144738592  | 5.62826 | 0.427588 | -3.7184  |
| Col15a1  | chr4:47208011-47313165    | 11.4195 | 0.868457 | -3.7169  |
| Gm16551  | chr9:74848436-74852872    | 7.9737  | 0.612927 | -3.70146 |
| Plce1    | chr19:38524196-38785100   | 5.16373 | 0.402951 | -3.67974 |
| Kcnq4    | chr4:120697472-120747176  | 16.7859 | 1.31109  | -3.67841 |
| Limch1   | chr5:66745839-67057159    | 22.8104 | 1.80414  | -3.66031 |

|          |                           |         |          |          |
|----------|---------------------------|---------|----------|----------|
| Col5a2   | chr1:45374330-45503282    | 8.25474 | 0.656611 | -3.65211 |
| Ngp      | chr9:110419807-110423012  | 8.23148 | 0.655285 | -3.65096 |
| Sparc    | chr11:55394158-55420080   | 449.942 | 35.8506  | -3.64967 |
| Lrrc4    | chr6:28480347-28888832    | 5.20926 | 0.419421 | -3.63461 |
| Bgn      | chrX:73483634-73495936    | 38.635  | 3.11384  | -3.63314 |
| Slc35f1  | chr10:52690500-53111622   | 18.9917 | 1.53496  | -3.6291  |
| Ntng1    | chr3:109780049-110143472  | 14.5793 | 1.19496  | -3.60889 |
| Plekha4  | chr7:45526329-45554229    | 40.6349 | 3.33491  | -3.607   |
| Ndrp1    | chr15:66929317-66969641   | 169.853 | 13.9414  | -3.60684 |
| Zcchc24  | chr14:25711639-25768856   | 11.8036 | 0.977873 | -3.59344 |
| Egr2     | chr10:67537868-67542188   | 17.3605 | 1.43991  | -3.59177 |
| Tmem28   | chrX:99821068-99846345    | 5.94622 | 0.500392 | -3.57084 |
| Sema5a   | chr15:32244812-32696341   | 16.8652 | 1.42085  | -3.56922 |
| Slc17a7  | chr7:45163920-45176139    | 99.4313 | 8.43941  | -3.55849 |
| Cox7a1   | chr7:30184170-30186030    | 8.40184 | 0.713997 | -3.55671 |
| Esrrg    | chr1:187609005-188214884  | 12.0086 | 1.02165  | -3.55509 |
| Sfrp1    | chr8:23411501-23449632    | 14.7879 | 1.25957  | -3.55342 |
| Shc4     | chr2:125627446-125724148  | 10.1574 | 0.866664 | -3.55091 |
| Mfap4    | chr11:61485443-61488704   | 7.10272 | 0.610132 | -3.54118 |
| Itgb5    | chr16:33829664-33949338   | 9.74407 | 0.838363 | -3.53888 |
| Pid1     | chr1:84036292-84284645    | 6.98671 | 0.605778 | -3.52775 |
| Mme      | chr3:63295434-63383713    | 7.49425 | 0.658162 | -3.50927 |
| Afap1l2  | chr19:56912353-57008575   | 9.9244  | 0.879094 | -3.49689 |
| Fkbp9    | chr6:56832058-56879360    | 28.0435 | 2.50325  | -3.48579 |
| Slc9a3r1 | chr11:115163340-115181178 | 45.1303 | 4.05773  | -3.47535 |
| Plekha1  | chr7:100643895-100662394  | 106.665 | 9.63659  | -3.46842 |
| Slit2    | chr5:47983154-48306282    | 6.95541 | 0.628728 | -3.46763 |
| Prss12   | chr3:123446912-123506602  | 11.6342 | 1.05308  | -3.46568 |
| Hhat1    | chr9:121784015-121792507  | 17.1002 | 1.55341  | -3.4605  |
| Kif19a   | chr11:114765388-114790575 | 7.03806 | 0.642715 | -3.45293 |
| Pcdh7    | chr5:57718020-58132240    | 16.6081 | 1.51855  | -3.45112 |
| Clrn1    | chr3:58844027-58885212    | 6.78095 | 0.621293 | -3.44814 |
| H2-Eb1   | chr17:34305866-34316674   | 9.79743 | 0.900041 | -3.44434 |
| Lancl3   | chrX:9199972-9268085      | 9.46441 | 0.87436  | -3.43621 |
| Ntrk2    | chr13:58806568-59133970   | 46.2385 | 4.36039  | -3.40657 |
| Dcn      | chr10:97479499-97518162   | 111.308 | 10.5119  | -3.40447 |
| Syt2     | chr1:134646680-134749417  | 80.1341 | 7.5725   | -3.40357 |
| Mag      | chr7:30899182-30914832    | 10.9632 | 1.04016  | -3.3978  |
| Ndst4    | chr3:125404090-125724986  | 16.6083 | 1.58038  | -3.39356 |
| Lpar1    | chr4:58435251-58553491    | 44.2857 | 4.26764  | -3.37533 |
| Sbspon   | chr1:15853861-15892722    | 5.23768 | 0.505002 | -3.37457 |
| Fa2h     | chr8:111345137-111393821  | 15.5782 | 1.50761  | -3.36919 |
| Notch1   | chr2:26457901-26503822    | 6.86269 | 0.66804  | -3.36077 |
| Sv2b     | chr7:75114894-75331419    | 81.7942 | 7.99197  | -3.35538 |
| Sdc4     | chr2:164424246-164443188  | 31.4659 | 3.07479  | -3.35523 |
| Omg      | chr11:79339891-79581609   | 10.5255 | 1.03362  | -3.34811 |
| Pvalb    | chr15:78191117-78206351   | 101.564 | 10.0061  | -3.34343 |
| Rnf128   | chrX:139563339-139673145  | 5.7481  | 0.573888 | -3.32424 |
| Lgi3     | chr14:70530820-70538324   | 66.7493 | 6.69236  | -3.31816 |
| Hs3st2   | chr7:121392295-121501768  | 27.4816 | 2.77199  | -3.30947 |
| Mxra8    | chr4:155839679-155844102  | 14.8885 | 1.50534  | -3.30603 |
| Ctsc     | chr7:88278092-88310875    | 7.84143 | 0.797797 | -3.29702 |
| Tbx2     | chr11:85832614-85841948   | 9.8292  | 1.00398  | -3.29135 |

|          |                           |         |          |          |
|----------|---------------------------|---------|----------|----------|
| Creg2    | chr1:39618405-39651182    | 6.97584 | 0.716755 | -3.28282 |
| Epha6    | chr16:59613320-60605531   | 5.67428 | 0.586697 | -3.27375 |
| Htr7     | chr19:35958728-36057360   | 6.60622 | 0.683087 | -3.27368 |
| Gabrg1   | chr5:70751046-70842617    | 7.45254 | 0.774671 | -3.26608 |
| Fam107a  | chr14:8296277-8309776     | 5.78171 | 0.602355 | -3.26281 |
| Cald1    | chr6:34709443-34775469    | 12.9579 | 1.35248  | -3.26015 |
| Qk       | chr17:10206470-10319361   | 61.5446 | 6.43838  | -3.25686 |
| Fgl2     | chr5:21292960-21424677    | 8.14094 | 0.855365 | -3.25058 |
| Fgf9     | chr14:58072685-58112720   | 7.38422 | 0.782698 | -3.23792 |
| Bcat1    | chr6:144993834-145076157  | 16.0024 | 1.69719  | -3.23707 |
| Ston1    | chr17:88626554-88645724   | 8.04137 | 0.857758 | -3.2288  |
| Antxr1   | chr6:87133852-87335775    | 7.72148 | 0.825728 | -3.22514 |
| Fam19a2  | chr10:123264075-123741204 | 22.5623 | 2.41491  | -3.22387 |
| Gpam     | chr19:55069733-55099447   | 21.8238 | 2.34424  | -3.21871 |
| Pbxip1   | chr3:89436703-89450952    | 7.41001 | 0.796887 | -3.21703 |
| Ctsk     | chr3:95499209-95509387    | 6.35636 | 0.687518 | -3.20873 |
| Plscr4   | chr9:92457377-92492516    | 5.84289 | 0.635708 | -3.20025 |
| Pdzd2    | chr15:12357053-12592556   | 9.68724 | 1.05433  | -3.19975 |
| Metrn1   | chr11:121702426-121717389 | 5.73036 | 0.62558  | -3.19536 |
| Sh3bgr   | chr16:96200469-96228933   | 18.6019 | 2.03652  | -3.19127 |
| Cntf     | chr19:12763527-12796123   | 22.6159 | 2.48451  | -3.18631 |
| P2rx6    | chr16:17561884-17572012   | 14.4395 | 1.59217  | -3.18095 |
| Jag1     | chr2:137081450-137116520  | 7.52089 | 0.829902 | -3.17989 |
| Pls1     | chr9:95752641-95845279    | 10.8785 | 1.20103  | -3.17914 |
| Tagln    | chr9:45863690-45936058    | 15.4728 | 1.7199   | -3.16933 |
| H2-Ab1   | chr17:34263226-34269418   | 11.3641 | 1.26749  | -3.16444 |
| Scara3   | chr14:65919394-65953744   | 5.3096  | 0.598083 | -3.15018 |
| Cyp2d22  | chr15:82370526-82380260   | 6.86665 | 0.773666 | -3.14982 |
| Vsnl1    | chr12:11325244-11436649   | 98.6559 | 11.1329  | -3.14758 |
| Shox2    | chr3:66973265-66981771    | 5.12968 | 0.579471 | -3.14606 |
| Lgi2     | chr5:52537863-52566280    | 19.917  | 2.28186  | -3.12572 |
| Ryr2     | chr13:11553102-12106945   | 8.46634 | 0.972755 | -3.12159 |
| Mgst1    | chr6:138140536-138156752  | 17.1533 | 1.9763   | -3.11761 |
| Gulp1    | chr1:44551670-44796836    | 8.49719 | 0.987825 | -3.10466 |
| Coro6    | chr11:77463912-77469501   | 11.7761 | 1.36956  | -3.10408 |
| Rasl10b  | chr11:83410071-83421038   | 21.9423 | 2.56074  | -3.09908 |
| Nes      | chr3:87971092-87980451    | 8.04752 | 0.947718 | -3.08601 |
| P2rx7    | chr5:122643910-122691432  | 5.55197 | 0.654403 | -3.08475 |
| Fcgrt    | chr7:45092992-45103822    | 18.6433 | 2.21879  | -3.07081 |
| Grhpr    | chr4:44981410-44990696    | 7.21735 | 0.860097 | -3.0689  |
| Pnmal2   | chr7:16944681-16948828    | 12.1941 | 1.47324  | -3.04912 |
| Abca8b   | chr11:109933405-109995816 | 14.0633 | 1.70236  | -3.04633 |
| Kcna1    | chr6:126636462-126645801  | 99.1854 | 12.0506  | -3.04102 |
| Matn2    | chr15:34306680-34436240   | 34.3979 | 4.18158  | -3.0402  |
| Itgb4    | chr11:115974724-116012719 | 7.85818 | 0.970158 | -3.0179  |
| Vwa1     | chr4:155768494-155774561  | 36.1144 | 4.46135  | -3.01702 |
| Angptl4  | chr17:33774899-33781575   | 9.28338 | 1.14799  | -3.01554 |
| Timp3    | chr10:86048745-86498896   | 93.0543 | 11.5094  | -3.01526 |
| Cyp39a1  | chr17:43667371-43751431   | 6.07857 | 0.753067 | -3.01288 |
| Sh3pxd2b | chr11:32347810-32428183   | 13.2238 | 1.63924  | -3.01204 |
| Slitrk1  | chr14:108909988-108914239 | 12.6511 | 1.57583  | -3.00507 |
| Chadl    | chr15:81663888-81697287   | 9.21761 | 1.15722  | -2.99373 |
| Meis2    | chr2:115861263-116065058  | 7.48913 | 0.946096 | -2.98474 |

|          |                           |         |          |          |
|----------|---------------------------|---------|----------|----------|
| Nefh     | chr11:4938755-5042794     | 757.806 | 96.2175  | -2.97746 |
| Casp12   | chr9:5345475-5373034      | 5.16157 | 0.657605 | -2.97252 |
| Hspg2    | chr4:137468802-137570630  | 17.5662 | 2.24802  | -2.96607 |
| Cyp2j9   | chr4:96568428-96591485    | 16.0874 | 2.07284  | -2.95626 |
| Slc36a2  | chr11:55158467-55185077   | 8.5043  | 1.09738  | -2.95413 |
| Dmd      | chrX:82948869-85205050    | 6.39557 | 0.828573 | -2.94837 |
| Serpinh1 | chr7:99345374-99353239    | 37.6943 | 4.88711  | -2.94729 |
| Rassf8   | chr6:145808382-145817584  | 5.27543 | 0.684644 | -2.94586 |
| Plxdc2   | chr2:16356303-16755839    | 8.00547 | 1.05369  | -2.92554 |
| Frrs1l   | chr4:56960135-56990391    | 13.1994 | 1.7441   | -2.91992 |
| Rasgrf2  | chr13:91880406-91988042   | 9.99967 | 1.32437  | -2.91657 |
| Plip     | chr8:94674894-94696242    | 31.3727 | 4.17334  | -2.91024 |
| Olfml2b  | chr1:170644531-170682789  | 11.3565 | 1.51112  | -2.90983 |
| Col23a1  | chr11:51289919-51583925   | 7.21712 | 0.961263 | -2.90842 |
| Syde1    | chr10:78584502-78591964   | 5.36622 | 0.716861 | -2.90414 |
| Cela1    | chr15:100674421-100687920 | 9.88513 | 1.32847  | -2.89549 |
| Clec2l   | chr6:38663068-38680865    | 128.219 | 17.277   | -2.89168 |
| Faim2    | chr15:99497004-99528165   | 54.0537 | 7.32331  | -2.88383 |
| Cabp7    | chr11:4738820-4746778     | 12.9625 | 1.75968  | -2.88095 |
| Col5a1   | chr2:27886424-28039510    | 5.27863 | 0.717108 | -2.8799  |
| Sparcl1  | chr5:104079108-104114088  | 183.564 | 25.0465  | -2.87361 |
| Ntng2    | chr2:29194820-29252993    | 25.9492 | 3.54405  | -2.87222 |
| Sfrp4    | chr13:19623174-19632823   | 14.5396 | 1.99556  | -2.86512 |
| Arhgap19 | chr19:41766587-41802084   | 13.974  | 1.91887  | -2.86441 |
| Grm4     | chr17:27422387-27503533   | 10.1537 | 1.40604  | -2.8523  |
| Col6a1   | chr10:76708791-76726044   | 8.95657 | 1.24659  | -2.84496 |
| Galm     | chr17:80127470-80185032   | 9.95351 | 1.38781  | -2.8424  |
| Yap1     | chr9:7932000-8004596      | 8.8971  | 1.24152  | -2.84123 |
| Hspb2    | chr9:50751071-50756635    | 5.04117 | 0.707618 | -2.83271 |
| Smtn     | chr11:3517521-3539292     | 12.9367 | 1.83056  | -2.82111 |
| Calb1    | chr4:15881263-15906709    | 27.6068 | 3.93815  | -2.80944 |
| S100b    | chr10:76253835-76261319   | 416.322 | 59.6898  | -2.80215 |
| Dbi      | chr1:120113279-120121096  | 279.419 | 40.2192  | -2.79648 |
| Thy1     | chr9:44043383-44048579    | 508.722 | 73.6375  | -2.78837 |
| Pla2g16  | chr19:7557458-7588545     | 19.8942 | 2.88128  | -2.78756 |
| Sipa1l1  | chr12:82170015-82451784   | 7.33265 | 1.06506  | -2.7834  |
| Fam19a1  | chr6:96113153-96657198    | 10.6261 | 1.54535  | -2.78161 |
| Hoxb8    | chr11:96281904-96285325   | 5.38421 | 0.784156 | -2.77952 |
| Ppp1r9a  | chr6:4903319-5165661      | 8.44914 | 1.23132  | -2.7786  |
| Fam212b  | chr3:105704598-105720842  | 8.14496 | 1.1957   | -2.76805 |
| Nfia     | chr4:97567874-98118876    | 15.63   | 2.29993  | -2.76466 |
| Fat1     | chr8:44950207-45052257    | 6.67431 | 0.993606 | -2.74787 |
| Wwtr1    | chr3:57455643-57575910    | 8.61247 | 1.28484  | -2.74484 |
| Smr2     | chr5:88086555-88109053    | 9.52474 | 1.42168  | -2.74408 |
| Drp2     | chrX:134404779-134456573  | 36.09   | 5.40295  | -2.73978 |
| Add3     | chr19:53140442-53247326   | 19.041  | 2.85555  | -2.73726 |
| Dlg2     | chr7:91090785-92449246    | 15.8526 | 2.40128  | -2.72284 |
| Rhbdl3   | chr11:80300911-80355986   | 6.35879 | 0.963506 | -2.72239 |
| Rgcc     | chr14:79288749-79301635   | 34.1231 | 5.18032  | -2.71964 |
| Mlip     | chr9:77102083-77347870    | 11.6836 | 1.77668  | -2.71723 |
| Tmem229b | chr12:78961794-79007277   | 70.3215 | 10.7757  | -2.70618 |
| Lrrn2    | chr1:132880354-132940005  | 10.1737 | 1.56312  | -2.70234 |
| Rell1    | chr5:63908897-63968897    | 7.78305 | 1.19794  | -2.69978 |



|              |                           |         |          |          |
|--------------|---------------------------|---------|----------|----------|
| Syt12        | chr19:4425456-4477143     | 6.1837  | 0.957147 | -2.69166 |
| Ncam2        | chr16:81200696-81624287   | 10.6048 | 1.64412  | -2.68933 |
| Vim          | chr2:13574310-13582826    | 312.036 | 48.3967  | -2.68873 |
| Trappc3l     | chr10:34037596-34109815   | 51.4782 | 8.05384  | -2.67621 |
| Gas2l3       | chr10:89408822-89443967   | 7.86012 | 1.23414  | -2.67104 |
| 6530402F18Ri | chr2:29194820-29252993    | 6.46804 | 1.01626  | -2.67005 |
| Sep-09       | chr11:117199660-117362325 | 23.0594 | 3.64082  | -2.66302 |
| Epn3         | chr11:94489598-94499974   | 18.2142 | 2.88252  | -2.65967 |
| Baiap2l1     | chr5:144244436-144361005  | 13.8361 | 2.19214  | -2.65803 |
| Foxo1        | chr3:52268336-52350109    | 6.60329 | 1.04655  | -2.65755 |
| Sepp1        | chr15:3270766-3280508     | 179.046 | 28.5544  | -2.64855 |
| Rsph9        | chr17:46129276-46144198   | 6.75744 | 1.08564  | -2.63793 |
| Dag1         | chr9:108204860-108263958  | 61.8579 | 9.94435  | -2.63701 |
| Slc43a3      | chr2:84936645-84958509    | 19.8969 | 3.21972  | -2.62754 |
| Chp2         | chr7:122219495-122222539  | 32.192  | 5.22032  | -2.62449 |
| Pcdhac1      | chr18:36930284-37841872   | 19.8747 | 3.2426   | -2.61571 |
| Htra1        | chr7:130936202-130985658  | 73.7341 | 12.0408  | -2.6144  |
| Lamc1        | chr1:153218921-153332786  | 18.01   | 2.9482   | -2.61089 |
| Pon2         | chr6:5264623-5298373      | 18.5683 | 3.04864  | -2.60661 |
| Pth1r        | chr9:110722084-110747145  | 12.5398 | 2.06236  | -2.60414 |
| Gng7         | chr10:80948623-81014925   | 5.5715  | 0.918    | -2.6015  |
| Sipa1l2      | chr8:125418062-125492710  | 6.54748 | 1.0909   | -2.58542 |
| Gpx8         | chr13:113035378-113091135 | 15.4392 | 2.58409  | -2.57887 |
| Cp           | chr3:19957053-20035310    | 14.3095 | 2.40115  | -2.57517 |
| S100a16      | chr3:90541222-90543151    | 35.2284 | 5.91706  | -2.57379 |
| Dhrs3        | chr4:144892826-144927645  | 5.89778 | 0.991389 | -2.57265 |
| Ddn          | chr15:98803781-98807925   | 5.69686 | 0.961112 | -2.56739 |
| Sema3g       | chr14:31217872-31229511   | 11.1768 | 1.88807  | -2.56552 |
| Caskin2      | chr11:115799351-115813592 | 9.45282 | 1.60161  | -2.56122 |
| Smpd2        | chr10:41487171-41490340   | 5.52525 | 0.936956 | -2.55999 |
| Kcnk1        | chr8:125995101-126030688  | 43.7343 | 7.42451  | -2.5584  |
| Lhfp         | chr3:53041546-53261679    | 22.9137 | 3.90496  | -2.55283 |
| Gprc5b       | chr7:118842217-118995211  | 30.3309 | 5.17323  | -2.55165 |
| Kcng4        | chr8:119623853-119635680  | 5.17658 | 0.887003 | -2.54499 |
| Cxcr4        | chr1:128588198-128592299  | 14.2569 | 2.45109  | -2.54017 |
| Thrsp        | chr7:97412956-97417510    | 13.3788 | 2.30316  | -2.53826 |
| Col4a1       | chr8:11198422-11312826    | 29.4197 | 5.08217  | -2.53327 |
| Pacsin3      | chr2:91256164-91264680    | 5.56057 | 0.962771 | -2.52997 |
| Nr4a1        | chr15:101266845-101274794 | 41.0628 | 7.11489  | -2.52892 |
| Fstl5        | chr3:76074560-76710005    | 12.9749 | 2.25151  | -2.52676 |
| Cgnl1        | chr9:71626508-71771602    | 26.7935 | 4.65777  | -2.52417 |
| B3galt5      | chr16:96235800-96319858   | 8.93456 | 1.56191  | -2.51609 |
| Astn2        | chr4:65380802-66404483    | 12.683  | 2.22068  | -2.51382 |
| Parp3        | chr9:106470352-106476651  | 5.87475 | 1.02965  | -2.51238 |
| Gsn          | chr2:35256358-35307902    | 116.688 | 20.4571  | -2.51198 |
| G0s2         | chr1:193272159-193273188  | 9.52087 | 1.67021  | -2.51106 |
| Sulf2        | chr2:166073898-166155683  | 19.6662 | 3.46445  | -2.50502 |
| Epb4.1l4b    | chr4:57061725-57143156    | 7.25299 | 1.27878  | -2.5038  |
| Gstk1        | chr6:42245934-42250441    | 7.84202 | 1.39367  | -2.49233 |
| Pard3        | chr8:127064055-127612286  | 5.50679 | 0.980545 | -2.48956 |
| Prex2        | chr1:10993464-11303682    | 5.36132 | 0.95525  | -2.48864 |
| Klhl13       | chrX:23219270-23365082    | 11.152  | 1.99697  | -2.48142 |
| Nr2f2        | chr7:70351949-70411146    | 12.2439 | 2.20149  | -2.47551 |

|          |                           |         |          |          |
|----------|---------------------------|---------|----------|----------|
| Fads6    | chr11:115283365-115297546 | 11.3872 | 2.05714  | -2.4687  |
| Fam181b  | chr7:93079878-93081721    | 8.09885 | 1.4638   | -2.468   |
| Chst2    | chr9:95400925-95407270    | 12.5514 | 2.28038  | -2.4605  |
| Kcnc1    | chr7:46396467-46438704    | 21.3975 | 3.89842  | -2.45648 |
| Lynx1    | chr15:74747855-74752979   | 157.363 | 28.7309  | -2.45342 |
| Gatm     | chr2:122594472-122611277  | 101.873 | 18.6685  | -2.44809 |
| Pcdh9    | chr14:93013699-93890669   | 22.4547 | 4.13015  | -2.44275 |
| Fn1      | chr1:71585472-71653234    | 9.59686 | 1.76716  | -2.44113 |
| Rab34    | chr11:78188426-78192193   | 7.62756 | 1.40459  | -2.44107 |
| Ppargc1a | chr5:51454248-51553921    | 5.94364 | 1.09743  | -2.43722 |
| Fam178b  | chr1:36562695-36683183    | 27.914  | 5.17682  | -2.43085 |
| Cpne6    | chr14:55510447-55517431   | 176.898 | 32.8155  | -2.43047 |
| Fgfr1    | chr8:25518758-25575718    | 58.6167 | 10.8813  | -2.42945 |
| Kcnc3    | chr7:44590885-44604751    | 32.2655 | 5.99438  | -2.42831 |
| Lbp      | chr2:158306492-158332852  | 5.45301 | 1.01787  | -2.4215  |
| Ppap2b   | chr4:105157346-105232767  | 35.0753 | 6.55448  | -2.4199  |
| Gabrb2   | chr11:42419756-42632591   | 5.35282 | 1.0025   | -2.4167  |
| Anxa1    | chr19:20373433-20390671   | 5.86754 | 1.10015  | -2.41506 |
| Kazald1  | chr19:45076138-45079289   | 5.16113 | 0.969525 | -2.41234 |
| Fgf11    | chr11:69796067-69801716   | 6.27778 | 1.19037  | -2.39884 |
| Eln      | chr5:134702595-134747254  | 7.15667 | 1.36641  | -2.3889  |
| Cbln2    | chr18:86713047-86718283   | 20.4512 | 3.90535  | -2.38866 |
| Rcsd1    | chr1:165648944-165708094  | 6.5528  | 1.25387  | -2.38572 |
| Tmem163  | chr1:127490341-127678021  | 17.5376 | 3.37005  | -2.37961 |
| Cdc42ep1 | chr15:78842646-78855529   | 7.0332  | 1.36037  | -2.37018 |
| Relt     | chr7:100845847-100863413  | 8.56521 | 1.66179  | -2.36575 |
| Fxyd7    | chr7:31042514-31051454    | 231.684 | 45.2761  | -2.35534 |
| Hs3st1   | chr5:39613934-39644631    | 8.11326 | 1.59272  | -2.34879 |
| Nfasc    | chr1:132564689-132741797  | 36.9147 | 7.26481  | -2.3452  |
| Flt3     | chr5:147330741-147400489  | 8.79299 | 1.73178  | -2.3441  |
| Mboat2   | chr12:24831598-24960299   | 22.7847 | 4.49233  | -2.34253 |
| Fam198b  | chr3:79885929-79946278    | 9.73123 | 1.92898  | -2.33478 |
| Chpt1    | chr10:88459586-88503970   | 12.9387 | 2.57725  | -2.32779 |
| Pxn      | chr5:115506675-115555987  | 12.3559 | 2.46504  | -2.32552 |
| Emp1     | chr6:135362930-135383173  | 6.46847 | 1.29207  | -2.32374 |
| Cadm4    | chr7:24482022-24504533    | 70.3086 | 14.0618  | -2.32192 |
| Chrna3   | chr9:55011342-55026559    | 9.20085 | 1.84125  | -2.32108 |
| Gpr158   | chr2:21367566-21830542    | 40.6674 | 8.13834  | -2.32107 |
| Lgr4     | chr2:109917646-110014257  | 20.1066 | 4.02562  | -2.32039 |
| Scn1a    | chr2:66270781-66440837    | 28.2254 | 5.6526   | -2.32001 |
| Plscr2   | chr9:92275601-92297752    | 5.28177 | 1.0595   | -2.31764 |
| Ldhb     | chr6:142490248-142507943  | 130.996 | 26.4035  | -2.31072 |
| Slco5a1  | chr1:12866549-12991135    | 8.62223 | 1.74367  | -2.30593 |
| Gsta4    | chr9:78191965-78209349    | 16.0367 | 3.24334  | -2.30583 |
| Olfm2    | chr9:20667985-20728214    | 6.72234 | 1.37158  | -2.29313 |
| Unc80    | chr1:66468446-66699148    | 19.8359 | 4.05141  | -2.29162 |
| Rhoj     | chr12:75308312-75401455   | 5.24169 | 1.07774  | -2.28202 |
| Htr3a    | chr9:48899212-48911099    | 70.9188 | 14.6301  | -2.27723 |
| Kank1    | chr19:25237201-25434496   | 6.58474 | 1.37     | -2.26496 |
| Nfix     | chr8:84701456-84800338    | 5.1714  | 1.07596  | -2.26493 |
| Igsf21   | chr4:140026851-140246811  | 13.4824 | 2.81361  | -2.26059 |
| Sgk1     | chr10:21882183-21999902   | 24.1679 | 5.05052  | -2.25859 |
| Dbp      | chr7:45705246-45718002    | 17.1149 | 3.57876  | -2.25772 |

|          |                           |         |         |          |
|----------|---------------------------|---------|---------|----------|
| Negr1    | chr3:156561793-157316464  | 8.87115 | 1.8731  | -2.24369 |
| Ust      | chr10:8204752-8518825     | 22.1575 | 4.70093 | -2.23678 |
| Chrna7   | chr7:63098691-63212526    | 34.4394 | 7.32868 | -2.23243 |
| Gal3st1  | chr11:3983635-3999328     | 9.11073 | 1.94251 | -2.22964 |
| Heg1     | chr16:33684465-33768195   | 7.07451 | 1.51188 | -2.22629 |
| Sorcs1   | chr19:50143300-50678646   | 11.2034 | 2.39639 | -2.225   |
| Rcn3     | chr7:45082913-45092213    | 14.1017 | 3.01871 | -2.22387 |
| Mt1      | chr8:94179088-94180327    | 128.34  | 27.4935 | -2.2228  |
| Tmem47   | chrX:81070643-81097875    | 52.8972 | 11.3417 | -2.22156 |
| Rgma     | chr7:73310379-73419899    | 5.0141  | 1.08349 | -2.21031 |
| Phlpp1   | chr1:106171868-106394245  | 6.60745 | 1.43626 | -2.20178 |
| Clu      | chr14:65968482-65981545   | 251.457 | 55.0709 | -2.19095 |
| Iqsec1   | chr6:90659597-90810123    | 33.9261 | 7.43489 | -2.19001 |
| Pcp4     | chr16:96467605-96525793   | 419.103 | 91.9509 | -2.18837 |
| AI464131 | chr4:41495600-41503075    | 8.40502 | 1.84435 | -2.18814 |
| Scn4b    | chr9:45139041-45154061    | 144.293 | 31.7115 | -2.18592 |
| Lrrc4c   | chr2:96318168-97631664    | 11.5447 | 2.54119 | -2.18366 |
| Capg     | chr6:72544390-72562983    | 19.8828 | 4.39084 | -2.17895 |
| Arap2    | chr5:62602445-62766177    | 9.42169 | 2.08957 | -2.17278 |
| Clic4    | chr4:135213969-135272760  | 34.2337 | 7.60614 | -2.17018 |
| Shpk     | chr11:73199481-73224506   | 7.39158 | 1.64957 | -2.16379 |
| Clmp     | chr9:40685963-40784046    | 18.2657 | 4.09623 | -2.15677 |
| Sash1    | chr10:8722218-8886070     | 8.57433 | 1.9301  | -2.15135 |
| Sult1a1  | chr7:126672869-126676357  | 8.35574 | 1.88139 | -2.15097 |
| Scn8a    | chr15:100870644-101045938 | 36.3577 | 8.27855 | -2.13481 |
| Tspan6   | chrX:133891069-133898429  | 6.16762 | 1.40517 | -2.13397 |
| Rassf4   | chr6:116633007-116673836  | 17.2808 | 3.94627 | -2.13061 |
| Kcnq3    | chr15:65994914-66286224   | 5.03976 | 1.15566 | -2.12464 |
| F2r      | chr13:95601788-95618433   | 10.0867 | 2.31431 | -2.1238  |
| Mal      | chr2:127633225-127656695  | 70.8689 | 16.299  | -2.12037 |
| Lhfpl1   | chrX:145290358-145348894  | 20.1078 | 4.62982 | -2.11872 |
| S100a9   | chr3:90692629-90695721    | 28.9284 | 6.66451 | -2.11791 |
| Tcn2     | chr11:3917077-3932078     | 17.4188 | 4.01677 | -2.11654 |
| Bace2    | chr16:97356727-97439012   | 5.10275 | 1.17761 | -2.11542 |
| Mdga1    | chr17:29827957-29887882   | 6.92624 | 1.60106 | -2.11305 |
| Lama4    | chr10:38965514-39110188   | 13.0669 | 3.02725 | -2.10984 |
| Cthrc1   | chr15:39076931-39087119   | 6.18176 | 1.43252 | -2.10947 |
| Kank4    | chr4:98754891-98817537    | 30.1532 | 7.00402 | -2.10606 |
| Syt3     | chr7:44384125-44400030    | 18.671  | 4.34501 | -2.10337 |
| Gng11    | chr6:4003986-4008446      | 9.10329 | 2.12484 | -2.09904 |
| Hbegf    | chr18:36504926-36515805   | 5.92081 | 1.38657 | -2.09427 |
| Rab31    | chr17:65651725-65772752   | 13.1244 | 3.08167 | -2.09047 |
| Gja1     | chr10:56377299-56390419   | 19.1208 | 4.50863 | -2.08438 |
| Ecscr    | chr18:35713088-35721491   | 5.80319 | 1.36988 | -2.0828  |
| Jam3     | chr9:27097383-27155421    | 30.5318 | 7.22031 | -2.08018 |
| Adam23   | chr1:63445903-63596515    | 117.114 | 27.7044 | -2.07972 |
| Lamb1    | chr12:31265293-31329639   | 28.5008 | 6.75975 | -2.07596 |
| Shroom2  | chrX:152609508-152769486  | 7.06751 | 1.6791  | -2.07351 |
| Slc16a6  | chr11:109440077-109573329 | 6.19415 | 1.4735  | -2.07166 |
| S100a4   | chr3:90603769-90606045    | 35.8161 | 8.52247 | -2.07127 |
| Itih5    | chr2:10153542-10256529    | 20.6955 | 4.92855 | -2.07008 |
| Phyhipl  | chr10:70440667-70599291   | 44.8915 | 10.736  | -2.06399 |
| Tuba4a   | chr1:75210828-75219253    | 179.361 | 43.1094 | -2.0568  |

|             |                           |         |         |          |
|-------------|---------------------------|---------|---------|----------|
| Hspb6       | chr7:30553301-30555439    | 8.55716 | 2.05686 | -2.05669 |
| Rhobtb3     | chr13:75869536-75943824   | 12.1141 | 2.92217 | -2.05158 |
| Nr1d1       | chr11:98767931-98775377   | 13.1252 | 3.1715  | -2.0491  |
| Il34        | chr8:110741828-110805924  | 13.4723 | 3.26259 | -2.0459  |
| Copz2       | chr11:96849875-96861202   | 6.33057 | 1.53671 | -2.04249 |
| Stxbp5l     | chr16:37107309-37384958   | 6.71742 | 1.63294 | -2.04044 |
| Cntn1       | chr15:92051164-92341967   | 133.551 | 32.5727 | -2.03565 |
| Ndrp2       | chr14:51905270-51913488   | 82.4777 | 20.2232 | -2.02799 |
| Tex40       | chr19:6922425-6925380     | 5.96139 | 1.46459 | -2.02515 |
| Grm8        | chr6:27275120-28134369    | 9.36516 | 2.30104 | -2.02501 |
| Epb4.1l2    | chr10:25359797-25523518   | 28.3289 | 6.96479 | -2.02412 |
| Prkcb       | chr7:122289124-122634401  | 17.6231 | 4.33283 | -2.02409 |
| Asic3       | chr5:24413450-24417834    | 55.5911 | 13.7055 | -2.02009 |
| Cygb        | chr11:116645594-116654313 | 24.0753 | 5.9422  | -2.01849 |
| Arhgef6     | chrX:57231484-57338729    | 9.2474  | 2.28345 | -2.01783 |
| Tgfb3       | chr5:107106569-107289595  | 15.8089 | 3.90405 | -2.01769 |
| Arhgef40    | chr14:51984832-52020733   | 10.9518 | 2.709   | -2.01533 |
| Arhgef4     | chr1:34801721-34812754    | 33.2762 | 8.25592 | -2.01099 |
| Chrm2       | chr6:36333137-36524774    | 5.13508 | 1.27531 | -2.00954 |
| Vamp1       | chr6:125215580-125222306  | 294.394 | 73.1802 | -2.00822 |
| Fam19a5     | chr15:87544298-87759364   | 19.4303 | 4.84334 | -2.00424 |
| Pi16        | chr17:29318881-29328902   | 5.60092 | 1.39668 | -2.00366 |
| D930028M14R | chr7:25152456-25156630    | 31.5562 | 7.89256 | -1.99936 |
| Dpysl4      | chr7:139086000-139101791  | 6.52482 | 1.63442 | -1.99716 |
| Zeb2        | chr2:44983511-45114084    | 12.8427 | 3.22343 | -1.99428 |
| Pbx1        | chr1:168119363-168432169  | 11.5731 | 2.90488 | -1.99422 |
| Ehd2        | chr7:15948986-15967535    | 19.0004 | 4.77005 | -1.99395 |
| Mfap3l      | chr8:60632859-60676731    | 21.4545 | 5.40374 | -1.98925 |
| Phlda3      | chr1:135766084-135769134  | 21.5701 | 5.43806 | -1.98787 |
| Ptk2b       | chr14:66153256-66281052   | 10.8918 | 2.75609 | -1.98255 |
| Egr1        | chr18:34861206-34864956   | 78.8381 | 19.9715 | -1.98095 |
| Cntn4       | chr6:105677744-106699305  | 5.95131 | 1.51905 | -1.97003 |
| Asrgl1      | chr19:9111718-9135566     | 21.2845 | 5.43817 | -1.96861 |
| Slc12a4     | chr8:105943589-105966115  | 8.20358 | 2.10118 | -1.96506 |
| Frmpd4      | chrX:167471305-168577233  | 8.94312 | 2.29317 | -1.96344 |
| Slc27a1     | chr8:71568926-71586708    | 24.9366 | 6.41419 | -1.95892 |
| Calml4      | chr9:62838786-62875917    | 11.9283 | 3.07677 | -1.9549  |
| Col4a2      | chr8:11312828-11449287    | 16.5672 | 4.27547 | -1.95417 |
| Mfge8       | chr7:79133767-79149060    | 8.88372 | 2.29791 | -1.95084 |
| Pvrl4       | chr1:171370172-171388287  | 9.71545 | 2.51441 | -1.95006 |
| Ltbp4       | chr7:27305140-27337612    | 9.97981 | 2.58437 | -1.9492  |
| Nrcam       | chr12:44328884-44601846   | 20.6487 | 5.35426 | -1.9473  |
| Elfn1       | chr5:139907942-139974724  | 13.2786 | 3.45912 | -1.94063 |
| Ptn         | chr6:36715662-36811361    | 58.8375 | 15.3287 | -1.9405  |
| Rnf130      | chr11:50025330-50125719   | 35.5496 | 9.29208 | -1.93576 |
| Cyr61       | chr3:145646970-145649985  | 28.9348 | 7.57396 | -1.93369 |
| Aifm3       | chr16:17489676-17507485   | 8.1168  | 2.12729 | -1.9319  |
| Tnfrsf12a   | chr17:23660522-23677449   | 9.18984 | 2.40858 | -1.93186 |
| Adra2c      | chr5:35278565-35281763    | 7.28412 | 1.91107 | -1.93037 |
| Efemp2      | chr19:5474689-5481854     | 7.48938 | 1.96899 | -1.92739 |
| Insc        | chr7:114745765-114850380  | 6.10612 | 1.6062  | -1.92661 |
| S100a8      | chr3:90669070-90670034    | 39.4618 | 10.4023 | -1.92356 |
| Kcns1       | chr2:164163618-164171113  | 34.1256 | 8.99663 | -1.9234  |

|              |                           |         |         |          |
|--------------|---------------------------|---------|---------|----------|
| Bai3         | chr1:25067475-25829707    | 6.62058 | 1.74704 | -1.92205 |
| Tst          | chr15:78399555-78405859   | 5.06021 | 1.33651 | -1.92073 |
| Ldlrad3      | chr2:101950200-102186460  | 5.39257 | 1.42451 | -1.92051 |
| Brinp1       | chr4:68761371-68954397    | 10.9991 | 2.90759 | -1.91948 |
| Whrn         | chr4:63414909-63495991    | 7.89266 | 2.08958 | -1.9173  |
| Prima1       | chr12:103196907-103242146 | 7.77854 | 2.06296 | -1.91478 |
| Fos          | chr12:85473900-85477270   | 191.273 | 50.7324 | -1.91465 |
| Kctd12       | chr14:102976580-102982637 | 5.7537  | 1.52623 | -1.91451 |
| Arhgef10     | chr8:14911662-15001085    | 11.166  | 2.97605 | -1.90764 |
| Amotl2       | chr9:102717803-102733417  | 6.86292 | 1.82937 | -1.90748 |
| Plekha2      | chr8:25039143-25101811    | 8.07817 | 2.15742 | -1.90472 |
| Ogdhl        | chr14:32322018-32347820   | 14.345  | 3.83162 | -1.90452 |
| Pcsk1        | chr13:75089986-75132498   | 30.7619 | 8.22708 | -1.90269 |
| Anxa4        | chr6:86736839-86793584    | 10.8054 | 2.89267 | -1.90128 |
| Arhgef3      | chr14:27143992-27403911   | 10.427  | 2.79184 | -1.90104 |
| Nrarp        | chr2:25180757-25183332    | 12.7331 | 3.42075 | -1.8962  |
| Clstn3       | chr6:124430755-124464784  | 32.4001 | 8.71812 | -1.89391 |
| Cntnap1      | chr11:101176116-101190720 | 52.6172 | 14.1763 | -1.89205 |
| Mgp          | chr6:136872434-136875805  | 56.1066 | 15.1364 | -1.89015 |
| Impa2        | chr18:67289222-67318841   | 5.18496 | 1.4039  | -1.88489 |
| Slc8a3       | chr12:81197914-81333180   | 6.45292 | 1.76048 | -1.87398 |
| Plekhg5      | chr4:152086862-152115404  | 5.12584 | 1.40349 | -1.86877 |
| Enah         | chr1:181896385-182019980  | 31.6686 | 8.68309 | -1.86677 |
| Myh10        | chr11:68691914-68816624   | 39.81   | 10.9343 | -1.86427 |
| Lphn2        | chr3:148815585-148954635  | 6.64403 | 1.82821 | -1.86163 |
| Bai1         | chr15:74516195-74589464   | 8.98018 | 2.47432 | -1.85971 |
| Sorbs3       | chr14:70180467-70207671   | 12.6557 | 3.49379 | -1.85692 |
| Tyro3        | chr2:119797739-119818103  | 14.9379 | 4.13663 | -1.85245 |
| Ctdsp1       | chr1:74391608-74397285    | 9.97583 | 2.76338 | -1.852   |
| Hopx         | chr5:77086985-77115123    | 146.112 | 40.489  | -1.85148 |
| Nefm         | chr14:68119544-68131371   | 1526.75 | 423.19  | -1.85109 |
| Csrp1        | chr1:135729196-135752229  | 69.4418 | 19.2635 | -1.84994 |
| Nsg1         | chr5:38039229-38159467    | 58.9809 | 16.4636 | -1.84097 |
| Fgf18        | chr11:33116977-33147400   | 8.89955 | 2.48733 | -1.83914 |
| Snta1        | chr2:154376313-154408084  | 9.5487  | 2.67081 | -1.83803 |
| Dhh          | chr15:98893026-98898540   | 27.9354 | 7.82425 | -1.83607 |
| Serpinb1a    | chr13:32842091-32851185   | 36.3579 | 10.2389 | -1.8282  |
| Tpcn1        | chr5:120534156-120588613  | 22.6167 | 6.40217 | -1.82076 |
| Ankrd29      | chr18:12252356-12305720   | 16.5674 | 4.73012 | -1.8084  |
| Pcp4l1       | chr1:171173263-171196268  | 189.449 | 54.1665 | -1.80633 |
| Vwa7         | chr17:35016578-35028016   | 34.4356 | 9.85386 | -1.80514 |
| C030006K11Ri | chr15:76715275-76723845   | 6.16515 | 1.7665  | -1.80324 |
| Pcdh10       | chr3:45378397-45439309    | 16.9015 | 4.86973 | -1.79524 |
| Zfp36l2      | chr17:84183927-84187947   | 10.0283 | 2.89361 | -1.79313 |
| Ecm1         | chr3:95734147-95739569    | 5.34965 | 1.55312 | -1.78427 |
| Nek6         | chr2:38511696-38587490    | 7.63141 | 2.21761 | -1.78294 |
| Tns3         | chr11:8431651-8664535     | 17.3398 | 5.04336 | -1.78163 |
| Hnmt         | chr2:24002912-24049379    | 8.03238 | 2.34519 | -1.77612 |
| Tnfrsf1a     | chr6:125349722-125362483  | 13.2894 | 3.88691 | -1.77359 |
| Slc39a1      | chr3:90248191-90253612    | 14.351  | 4.20698 | -1.77029 |
| Asic1        | chr15:99670717-99701130   | 31.4513 | 9.23602 | -1.76778 |
| Fam155a      | chr8:9206009-9771023      | 9.68929 | 2.86198 | -1.75938 |
| Ramp2        | chr11:101246333-101248250 | 17.9183 | 5.30928 | -1.75485 |

|              |                           |         |         |          |
|--------------|---------------------------|---------|---------|----------|
| Gpc3         | chrX:52272426-52619047    | 15.4852 | 4.60658 | -1.74912 |
| Pctp         | chr11:89983416-90002894   | 18.0005 | 5.3615  | -1.74732 |
| Tbc1d10a     | chr11:4186832-4215505     | 12.5814 | 3.75128 | -1.74584 |
| Pak1         | chr7:97842938-97912381    | 44.4698 | 13.2773 | -1.74386 |
| Wls          | chr3:159839694-159935175  | 25.1833 | 7.52547 | -1.74261 |
| Ntm          | chr9:28995963-29963129    | 6.23039 | 1.86285 | -1.74181 |
| Ltbr         | chr6:125306570-125313870  | 7.581   | 2.27541 | -1.73626 |
| Olfml3       | chr3:103193822-103854618  | 17.6392 | 5.2957  | -1.73589 |
| Cacng5       | chr11:107874604-107915055 | 9.00442 | 2.70511 | -1.73494 |
| Ptch1        | chr13:63511532-63565520   | 7.75943 | 2.33709 | -1.73124 |
| Bcl2         | chr1:106538177-106714290  | 12.0971 | 3.64418 | -1.731   |
| Arpp21       | chr9:112065090-112348925  | 7.2922  | 2.2136  | -1.71996 |
| Camk1d       | chr2:5293456-5714762      | 16.9505 | 5.16418 | -1.71471 |
| 6430571L13Ri | chr9:107340639-107349683  | 5.64271 | 1.71922 | -1.71464 |
| C1qtnf1      | chr11:118428456-118454995 | 22.6804 | 6.9306  | -1.71039 |
| Gng8         | chr7:16891785-16895435    | 9.25247 | 2.8291  | -1.70949 |
| Itm2a        | chrX:107397194-107403360  | 41.8335 | 12.8126 | -1.70709 |
| Opn3         | chr1:175662420-175692632  | 5.81988 | 1.79446 | -1.69744 |
| Sgce         | chr6:4674349-4747204      | 15.1228 | 4.69474 | -1.6876  |
| Fscn1        | chr5:142960354-142973189  | 15.0379 | 4.68152 | -1.68356 |
| Srd5a1       | chr13:69573448-69611463   | 7.49961 | 2.3374  | -1.68191 |
| Chn2         | chr6:54039931-54430221    | 15.8871 | 4.958   | -1.68002 |
| Sort1        | chr3:108284063-108361519  | 16.5974 | 5.18997 | -1.67716 |
| Mt2          | chr8:94172617-94173567    | 76.9997 | 24.1133 | -1.67502 |
| Tead1        | chr7:112679319-112906805  | 5.66077 | 1.78061 | -1.66863 |
| 1190002N15Ri | chr9:94517863-94538081    | 19.8782 | 6.26193 | -1.66651 |
| Slc22a23     | chr13:34179157-34345182   | 12.6591 | 4.00598 | -1.65995 |
| Abhd4        | chr14:54254128-54269169   | 66.4998 | 21.0835 | -1.65724 |
| Adam17       | chr12:21316391-21373632   | 8.34927 | 2.65196 | -1.65459 |
| Cnm1         | chr19:43440435-43497213   | 9.20314 | 2.92519 | -1.6536  |
| Endod1       | chr9:14353989-14381242    | 186.025 | 59.1903 | -1.65206 |
| Nr1d2        | chr14:18204055-18239106   | 18.4947 | 5.89195 | -1.65029 |
| St3gal3      | chr4:117932152-118134946  | 11.7656 | 3.77258 | -1.64095 |
| Tesc         | chr5:118027823-118061870  | 46.8229 | 15.0287 | -1.6395  |
| Zfp36l1      | chr12:80107759-80113013   | 13.2581 | 4.25874 | -1.63837 |
| Parva        | chr7:112427705-112591688  | 61.7935 | 19.8662 | -1.63714 |
| Prrg3        | chrX:71963020-71972728    | 9.49706 | 3.05496 | -1.63633 |
| Slitrk3      | chr3:73048124-73056943    | 22.912  | 7.39193 | -1.63208 |
| 2310022B05Ri | chr8:124635755-124663369  | 24.661  | 7.97955 | -1.62785 |
| Sec14l2      | chr11:4097039-4118729     | 9.00618 | 2.92173 | -1.62409 |
| Rcn1         | chr2:105385947-105399319  | 16.5798 | 5.38031 | -1.62367 |
| Nrp2         | chr1:62703316-62818692    | 15.6997 | 5.10068 | -1.62197 |
| Cyp2j6       | chr4:96516137-96553651    | 22.0422 | 7.1634  | -1.62155 |
| Cpq          | chr15:33083128-33653436   | 14.2881 | 4.65382 | -1.61832 |
| Rxra         | chr2:27677200-27763319    | 7.63767 | 2.48884 | -1.61766 |
| Epas1        | chr17:86753863-86833410   | 48.9765 | 15.9707 | -1.61667 |
| Abhd3        | chr18:10644410-10706696   | 15.5885 | 5.08519 | -1.61611 |
| Zfp804a      | chr2:82053657-82259878    | 7.15236 | 2.34298 | -1.61008 |
| Kcnh2        | chr5:24319588-24351604    | 33.348  | 10.9381 | -1.60824 |
| B930041F14Ri | chr4:155694341-155696483  | 15.1733 | 4.97769 | -1.60799 |
| Kcnip1       | chr11:33629340-33993193   | 17.4521 | 5.72824 | -1.60724 |
| Strbp        | chr2:37569867-37647285    | 8.92605 | 2.9326  | -1.60584 |
| Ndp          | chrX:16885521-16911764    | 9.56626 | 3.16237 | -1.59695 |



|           |                           |         |         |          |
|-----------|---------------------------|---------|---------|----------|
| Stx1b     | chr7:127806843-127824531  | 64.7792 | 21.4625 | -1.59371 |
| Syndig1l  | chr12:84677277-84698807   | 7.08531 | 2.35805 | -1.58723 |
| Ddit4     | chr10:59949674-59951770   | 61.7588 | 20.5583 | -1.58692 |
| Sft2d2    | chr1:165174340-165194433  | 9.31092 | 3.10164 | -1.58589 |
| Phospho1  | chr11:95824499-95845731   | 26.4106 | 8.79936 | -1.58565 |
| Spock1    | chr13:57421194-57908332   | 100.11  | 33.3959 | -1.58385 |
| Efh1      | chr1:87264363-87310791    | 10.5939 | 3.53432 | -1.58373 |
| Sh3gl2    | chr4:85205455-85389379    | 60.5803 | 20.2411 | -1.58156 |
| Ptchd2    | chr4:148236856-148287965  | 6.06519 | 2.02698 | -1.58122 |
| Fam81a    | chr9:70089309-70141557    | 12.1227 | 4.06269 | -1.5772  |
| Satb1     | chr17:51736186-51833290   | 10.4825 | 3.51308 | -1.57718 |
| Map2      | chr1:66175328-66442583    | 29.2416 | 9.80663 | -1.57619 |
| Cntfr     | chr4:41657497-41697091    | 40.8066 | 13.7286 | -1.57162 |
| Ctnnal1   | chr4:56810934-56865211    | 18.6752 | 6.28447 | -1.57126 |
| Glrx      | chr13:75839885-75850151   | 18.6786 | 6.31517 | -1.56449 |
| Slc5a5    | chr8:70882888-70892757    | 7.22275 | 2.4456  | -1.56236 |
| Tgfb2     | chr9:116087694-116175363  | 10.3232 | 3.50313 | -1.55917 |
| Slc41a1   | chr1:131828011-131848864  | 7.79671 | 2.64652 | -1.55877 |
| Wipi1     | chr11:109573520-109611389 | 11.3462 | 3.85929 | -1.55581 |
| S100a1    | chr3:90511033-90514330    | 27.8945 | 9.50313 | -1.55351 |
| Mob3b     | chr4:34949073-35157484    | 6.38812 | 2.17823 | -1.55223 |
| Pkd2      | chr5:104459456-104505819  | 6.21872 | 2.12099 | -1.55188 |
| Scn1b     | chr7:31116523-31126945    | 193.692 | 66.127  | -1.55045 |
| Dclk2     | chr3:86786149-86920884    | 17.4125 | 6.0082  | -1.53511 |
| Zfp385a   | chr15:103313894-103340086 | 18.6448 | 6.44735 | -1.53199 |
| Cish      | chr9:107296688-107301961  | 7.53431 | 2.61018 | -1.52933 |
| St5       | chr7:109523910-109617147  | 6.23564 | 2.16089 | -1.52891 |
| Sema3f    | chr9:107681501-107710475  | 12.2461 | 4.24658 | -1.52794 |
| Trim16    | chr11:62820252-62842948   | 7.65988 | 2.65816 | -1.52689 |
| Tnfsf12   | chr11:69682576-69696098   | 9.13249 | 3.17063 | -1.52624 |
| Gria3     | chrX:41401300-41678601    | 5.90801 | 2.05337 | -1.52468 |
| Kcna2     | chr3:107101566-107115005  | 69.7651 | 24.3011 | -1.52148 |
| Arhgap29  | chr3:121953325-122016153  | 5.07345 | 1.77595 | -1.51438 |
| Cplx2     | chr13:54371348-54383917   | 91.5765 | 32.083  | -1.51317 |
| Slitrk4   | chrX:64269443-64276996    | 9.45339 | 3.31734 | -1.51081 |
| Rhbdf1    | chr11:32209584-32222293   | 6.98968 | 2.45757 | -1.50799 |
| Adcy1     | chr11:7063488-7178505     | 10.097  | 3.55615 | -1.50553 |
| Rimbp2    | chr5:128760400-128953362  | 5.77428 | 2.03486 | -1.50472 |
| Mxi1      | chr19:53310505-53375810   | 10.1103 | 3.56674 | -1.50314 |
| Slc6a8    | chrX:73673132-73682500    | 15.5398 | 5.49319 | -1.50025 |
| C2cd2     | chr16:97855208-97922633   | 9.48226 | 3.3614  | -1.49617 |
| Wnk2      | chr13:49036301-49148328   | 5.0459  | 1.79009 | -1.49508 |
| Nptx1     | chr11:119538718-119547820 | 62.0886 | 22.0872 | -1.49112 |
| Id3       | chr4:136143821-136145392  | 71.5407 | 25.4703 | -1.48995 |
| Pcx       | chr19:4510471-4621752     | 17.8705 | 6.37091 | -1.488   |
| Bhlhe40   | chr6:108577035-108666925  | 12.3953 | 4.41993 | -1.4877  |
| Serp1nb1b | chr13:33084102-33094380   | 8.6381  | 3.09122 | -1.48254 |
| Fads2     | chr19:10064163-10101503   | 74.7192 | 26.8055 | -1.47895 |
| Mxra7     | chr11:116803399-116828046 | 16.5252 | 5.93019 | -1.47852 |
| Tceal6    | chrX:135208685-135210687  | 9.04678 | 3.25228 | -1.47595 |
| S1pr3     | chr13:51408617-51422797   | 50.9584 | 18.3313 | -1.47501 |
| Abcd2     | chr15:91145870-91191807   | 8.68106 | 3.13521 | -1.46931 |
| Stbd1     | chr5:92603050-92606579    | 50.1852 | 18.1272 | -1.4691  |

|              |                           |         |         |          |
|--------------|---------------------------|---------|---------|----------|
| Nat8l        | chr5:33995983-34005916    | 105.018 | 37.9505 | -1.46844 |
| Mapkapk2     | chr1:131053703-131097543  | 14.2798 | 5.16772 | -1.46638 |
| Wwc2         | chr8:47827605-47990551    | 5.31608 | 1.92591 | -1.46482 |
| Tagln3       | chr16:45711229-45724531   | 230.343 | 83.5932 | -1.46233 |
| Htr1d        | chr4:136423523-136444401  | 18.5369 | 6.73259 | -1.46117 |
| Agap2        | chr10:127078906-127093169 | 6.54103 | 2.37693 | -1.46042 |
| Erbp2ip      | chr13:103818785-103920586 | 7.24944 | 2.63632 | -1.45934 |
| Lingo2       | chr4:35706647-36951744    | 5.6638  | 2.0646  | -1.45591 |
| Cnp          | chr11:100574938-100581739 | 94.8766 | 34.6607 | -1.45275 |
| Tgfbr1       | chr4:47353304-47414924    | 6.26922 | 2.29209 | -1.45162 |
| Cebpd        | chr16:15887285-16146851   | 6.82274 | 2.50178 | -1.4474  |
| Ifitm2       | chr7:140954838-140955961  | 28.6905 | 10.5216 | -1.44722 |
| Clvs2        | chr10:33512333-33624600   | 5.01973 | 1.84539 | -1.44368 |
| Esrra        | chr19:6909697-6921808     | 25.207  | 9.28727 | -1.4405  |
| Scrt1        | chr15:76516202-76522129   | 30.2916 | 11.1636 | -1.44011 |
| Col6a2       | chr10:76595755-76623404   | 9.60968 | 3.54669 | -1.43802 |
| Faah         | chr4:115996655-116017902  | 7.21931 | 2.67178 | -1.43406 |
| Ly6h         | chr15:75564744-75567182   | 33.713  | 12.5092 | -1.43031 |
| Sdc2         | chr15:32920722-33034721   | 12.5715 | 4.67019 | -1.4286  |
| B3galt1      | chr2:68104671-68122882    | 14.8136 | 5.51171 | -1.42635 |
| Cd164        | chr10:41519499-41531042   | 145.748 | 54.3047 | -1.42433 |
| Fosb         | chr7:19302695-19310045    | 38.4316 | 14.3224 | -1.42402 |
| 6030419C18Ri | chr9:58488602-58499742    | 67.4093 | 25.1221 | -1.42399 |
| Sec24d       | chr3:123267495-123365636  | 5.9026  | 2.20543 | -1.42029 |
| Fam57b       | chr7:126816884-126830219  | 111.33  | 41.7024 | -1.41664 |
| Ntrk3        | chr7:78192113-78577838    | 29.22   | 10.957  | -1.4151  |
| Rimkla       | chr4:119465284-119492598  | 56.1137 | 21.0567 | -1.41408 |
| Entpd1       | chr19:40659793-40741602   | 6.35125 | 2.38472 | -1.41322 |
| Soat1        | chr1:156428107-156474328  | 8.62368 | 3.24481 | -1.41017 |
| Vat1l        | chr8:114205639-114374070  | 115.437 | 43.5114 | -1.40765 |
| Sulf1        | chr1:12692429-12860372    | 10.002  | 3.7886  | -1.40056 |
| Ctso         | chr3:81932615-81956725    | 5.43632 | 2.0592  | -1.40054 |
| Ache         | chr5:137288253-137294466  | 62.0343 | 23.4999 | -1.40041 |
| Tmem56       | chr3:121202009-121263316  | 34.9266 | 13.2718 | -1.39597 |
| Celsr2       | chr3:108390847-108415494  | 9.02004 | 3.43379 | -1.39333 |
| Megf9        | chr4:70431926-70534928    | 40.8033 | 15.5433 | -1.39239 |
| Ccdc157      | chr11:4135159-4160293     | 7.93645 | 3.02455 | -1.39177 |
| Chchd10      | chr10:75935572-75940672   | 79.5787 | 30.335  | -1.3914  |
| Cd81         | chr7:143021783-143067930  | 105.319 | 40.1968 | -1.38961 |
| Lrp1         | chr10:127538157-127621148 | 13.0741 | 4.99233 | -1.38893 |
| Rnd2         | chr11:101468337-101471306 | 31.1892 | 11.9276 | -1.38674 |
| Atp11a       | chr8:12757015-12868728    | 105.764 | 40.517  | -1.38425 |
| Cntnap2      | chr6:45060060-47301371    | 53.0097 | 20.3186 | -1.38346 |
| Csad         | chr15:102176997-102189043 | 6.66299 | 2.55594 | -1.38231 |
| Pwwp2b       | chr7:139248481-139267253  | 5.20483 | 1.99934 | -1.38033 |
| Ksr1         | chr11:79014800-79146354   | 5.23715 | 2.01611 | -1.3772  |
| Adamts1      | chr16:85793827-85803115   | 5.9316  | 2.28407 | -1.37681 |
| Jam2         | chr16:84774122-84826375   | 16.866  | 6.49747 | -1.37617 |
| Slc4a2       | chr5:24425231-24440947    | 24.6259 | 9.48744 | -1.37609 |
| Crim1        | chr17:78200247-78418152   | 6.92804 | 2.67145 | -1.37482 |
| Ptprd        | chr4:75941236-78211895    | 5.41246 | 2.08741 | -1.37457 |
| Fam13a       | chr6:58933535-59024502    | 7.30391 | 2.8205  | -1.37272 |
| Glr3         | chr3:80843598-80913660    | 76.1778 | 29.4547 | -1.37087 |

|              |                           |         |         |          |
|--------------|---------------------------|---------|---------|----------|
| Ctns         | chr11:73183132-73199019   | 11.6342 | 4.51044 | -1.36703 |
| Psph         | chr5:129765557-129787253  | 9.1155  | 3.5406  | -1.36433 |
| Zfp36        | chr7:28376783-28379228    | 58.0225 | 22.5454 | -1.36378 |
| Pcdh17       | chr14:84443562-84537060   | 7.00822 | 2.72374 | -1.36346 |
| P2rx5        | chr11:73160529-73172687   | 6.04563 | 2.35216 | -1.36191 |
| Ikbip        | chr10:91083038-91102613   | 10.3041 | 4.01849 | -1.3585  |
| Sall2        | chr14:52311176-52328670   | 8.74472 | 3.42676 | -1.35157 |
| Txnip        | chr3:96555767-96566801    | 37.6929 | 14.8018 | -1.34852 |
| Ckmt1        | chr2:121358640-121380940  | 213.358 | 83.8295 | -1.34774 |
| 4931406C07Ri | chr9:15283336-15357788    | 10.8699 | 4.28656 | -1.34244 |
| Csrnp1       | chr9:119971165-119984658  | 5.14864 | 2.03128 | -1.3418  |
| Smpd3        | chr8:106252547-106337988  | 12.1851 | 4.81322 | -1.34004 |
| Dtx4         | chr19:12466335-12501996   | 5.4597  | 2.15665 | -1.34003 |
| Aatk         | chr11:120007315-120047145 | 60.6649 | 23.9899 | -1.33843 |
| Plekhg1      | chr10:3740376-3967302     | 6.82457 | 2.70296 | -1.3362  |
| Hoxd1        | chr2:74762979-74765142    | 16.6988 | 6.61489 | -1.33596 |
| Htr1b        | chr9:81631391-81645156    | 6.60054 | 2.62054 | -1.33272 |
| Ppap2a       | chr13:112800776-112927380 | 54.0447 | 21.4821 | -1.33102 |
| Mtap         | chr4:89137369-89181090    | 11.6586 | 4.65551 | -1.32438 |
| Slc24a3      | chr2:145242610-145641939  | 11.8614 | 4.76739 | -1.31501 |
| Sep-04       | chr11:87578388-87590539   | 28.005  | 11.2672 | -1.31356 |
| Itga6        | chr2:71786938-71858427    | 20.0813 | 8.08349 | -1.3128  |
| Tmc7         | chr7:118535843-118584686  | 6.78059 | 2.73036 | -1.31232 |
| Fndc3b       | chr3:27416161-27710439    | 5.1013  | 2.05428 | -1.31223 |
| Cpt1a        | chr19:3323300-3385733     | 54.1929 | 21.8541 | -1.3102  |
| Kazn         | chr4:142102389-142239401  | 15.8538 | 6.40483 | -1.3076  |
| Yes1         | chr5:32611170-32687066    | 5.56137 | 2.24703 | -1.30742 |
| Cttnbp2nl    | chr3:105001914-105053146  | 12.5393 | 5.06693 | -1.30727 |
| Lrrk2        | chr15:91673223-91816124   | 10.8543 | 4.38769 | -1.30673 |
| Gas6         | chr8:13465373-13494535    | 78.763  | 31.8719 | -1.30523 |
| Gm2a         | chr11:55097984-55113028   | 10.9721 | 4.44262 | -1.30436 |
| Laptm4b      | chr15:34238025-34284295   | 59.0952 | 23.9561 | -1.30265 |
| Rell2        | chr18:37955558-37969731   | 71.0642 | 28.9049 | -1.29781 |
| Lurap1       | chr4:116136727-116144616  | 6.01706 | 2.44896 | -1.29689 |
| Acsl6        | chr11:54303823-54361539   | 48.3725 | 19.7084 | -1.29538 |
| Elmo1        | chr13:20090506-20608356   | 26.8146 | 10.9256 | -1.2953  |
| Pou4f3       | chr18:42394596-42396093   | 8.7204  | 3.55514 | -1.29449 |
| Golim4       | chr3:75876182-75956949    | 17.9355 | 7.31659 | -1.29357 |
| Cfh          | chr1:140085854-140183411  | 9.70794 | 3.96591 | -1.29151 |
| Mpzl1        | chr1:165592180-165634541  | 14.4805 | 5.92511 | -1.2892  |
| Mtfp1        | chr11:4091480-4095431     | 10.1266 | 4.1458  | -1.28843 |
| Ermp1        | chr19:29609882-29648420   | 48.227  | 19.7498 | -1.288   |
| Nkain2       | chr10:31689318-32889915   | 12.7566 | 5.22559 | -1.28758 |
| Htr3b        | chr9:48935007-48964990    | 11.7577 | 4.81663 | -1.28751 |
| Slc20a2      | chr8:22462613-22569616    | 7.21514 | 2.96192 | -1.2845  |
| Pros1        | chr16:62854333-62929340   | 6.38568 | 2.62319 | -1.28352 |
| Prickle2     | chr6:92370891-92706184    | 9.82021 | 4.03931 | -1.28165 |
| Kcnq5        | chr1:21398402-21961942    | 6.93256 | 2.85743 | -1.27867 |
| Plat         | chr8:22757743-22782848    | 7.65492 | 3.15578 | -1.27839 |
| Fbxo44       | chr4:148152798-148160094  | 38.0899 | 15.7522 | -1.27386 |
| 2410131K14Ri | chr5:118245226-118263114  | 7.50736 | 3.11353 | -1.26975 |
| Nf1          | chr11:79339891-79581609   | 21.407  | 8.8908  | -1.2677  |
| Mettl9       | chr7:121034444-121076835  | 12.8391 | 5.3408  | -1.26541 |

|           |                           |         |         |          |
|-----------|---------------------------|---------|---------|----------|
| Map7d2    | chrX:159414577-159498947  | 189.067 | 78.678  | -1.26487 |
| Angptl2   | chr2:33133418-33371494    | 8.0046  | 3.33435 | -1.26342 |
| Hoxb7     | chr11:96286645-96290163   | 6.16815 | 2.58246 | -1.25609 |
| Gnai1     | chr5:18265134-18360413    | 59.7728 | 25.0302 | -1.25582 |
| Tlcd1     | chr11:78178148-78180819   | 7.00038 | 2.93449 | -1.25432 |
| Cnr1      | chr4:33924631-33948831    | 12.0143 | 5.04595 | -1.25155 |
| Slc9a1    | chr4:133369771-133423698  | 17.4539 | 7.3448  | -1.24876 |
| Abcg2     | chr6:58596671-58692451    | 39.9816 | 16.8365 | -1.24774 |
| Gstt1     | chr10:75783812-75798584   | 11.9991 | 5.05486 | -1.24719 |
| Ngfr      | chr11:95568820-95587698   | 254.907 | 107.554 | -1.24491 |
| Slco3a1   | chr7:74275417-74554780    | 18.7021 | 7.89807 | -1.24362 |
| Btdb11    | chr10:85386813-85660292   | 5.72653 | 2.42337 | -1.24065 |
| Marcks1   | chr4:129513580-129515981  | 11.1254 | 4.70922 | -1.2403  |
| Nr3c2     | chr8:76902507-77243639    | 5.54409 | 2.34776 | -1.23967 |
| Spsb1     | chr4:149896283-149955006  | 12.1764 | 5.16616 | -1.23692 |
| Slc6a17   | chr3:107467547-107518018  | 57.9275 | 24.5995 | -1.23562 |
| Stk32c    | chr7:139103637-139242973  | 23.0583 | 9.8032  | -1.23396 |
| Dcun1d4   | chr5:73481054-73560794    | 19.5436 | 8.32429 | -1.2313  |
| Lmo4      | chr3:144188529-144205255  | 22.557  | 9.60908 | -1.2311  |
| Dock5     | chr14:67751927-67933572   | 13.8497 | 5.90966 | -1.2287  |
| Ell2      | chr13:75707483-75772358   | 11.3074 | 4.85331 | -1.22023 |
| Plcb1     | chr2:134786163-135475258  | 8.63125 | 3.72633 | -1.21181 |
| Slc38a1   | chr15:96571417-96642913   | 15.4975 | 6.69967 | -1.20988 |
| Socs3     | chr11:117966086-117969366 | 36.5794 | 15.8162 | -1.20963 |
| Aldoc     | chr11:78324197-78326760   | 92.7866 | 40.2529 | -1.20482 |
| Nrsn2     | chr2:152345668-152376566  | 5.17561 | 2.24538 | -1.20477 |
| Mpp2      | chr11:102057016-102088515 | 7.66258 | 3.3273  | -1.20348 |
| Mansc1    | chr6:134609206-134632488  | 5.38926 | 2.34268 | -1.20193 |
| Scarb1    | chr5:125277086-125341094  | 11.3725 | 4.95366 | -1.19898 |
| Fbxo2     | chr4:148160667-148166417  | 204.747 | 89.2248 | -1.19833 |
| Cables2   | chr2:180258538-180273465  | 11.0985 | 4.85462 | -1.19293 |
| Col16a1   | chr4:130047839-130099277  | 5.88578 | 2.57723 | -1.19141 |
| Resp18    | chr1:75272201-75278380    | 105.52  | 46.2174 | -1.19101 |
| Dgat2     | chr7:99153662-99182713    | 7.94136 | 3.48702 | -1.18739 |
| Asah2     | chr19:31984650-32103140   | 10.2727 | 4.51344 | -1.18652 |
| Secisbp2l | chr2:125736985-125782870  | 49.5331 | 21.7868 | -1.18494 |
| Atp1b1    | chr1:164307674-164458355  | 730.843 | 321.556 | -1.18449 |
| Fam213b   | chr4:154896429-154899043  | 47.9384 | 21.0977 | -1.1841  |
| Fgf1      | chr18:38838672-38971274   | 223.184 | 98.2757 | -1.18333 |
| Dexi      | chr16:10530206-10543054   | 32.5904 | 14.3993 | -1.17845 |
| Extl2     | chr3:116007448-116029016  | 37.6849 | 16.6537 | -1.17814 |
| Oat       | chr7:132557474-132576398  | 52.5569 | 23.2978 | -1.17369 |
| Soga1     | chr2:157010441-157079265  | 5.06129 | 2.24445 | -1.17314 |
| Cyp1b1    | chr17:79706952-79715041   | 6.99411 | 3.10691 | -1.17066 |
| Adcy3     | chr12:4133396-4240123     | 7.76877 | 3.45525 | -1.1689  |
| Limd1     | chr9:123478700-123521552  | 5.81346 | 2.58579 | -1.16879 |
| Ddah2     | chr17:35059034-35062099   | 16.5143 | 7.35969 | -1.166   |
| Zak       | chr2:72285636-72442610    | 8.6358  | 3.85058 | -1.16526 |
| Clybl     | chr14:122181693-122451146 | 18.9167 | 8.45687 | -1.16147 |
| Hsd17b11  | chr5:103989764-104021796  | 62.2216 | 27.8939 | -1.15746 |
| Nfib      | chr4:82290172-82505779    | 10.7334 | 4.81675 | -1.15597 |
| Ryk       | chr9:102834919-102908307  | 7.60275 | 3.41213 | -1.15585 |
| Slc1a5    | chr7:16781345-16798274    | 13.2701 | 5.95676 | -1.15558 |

|              |                           |         |         |          |
|--------------|---------------------------|---------|---------|----------|
| Otud7b       | chr3:96080595-96161129    | 12.9196 | 5.81468 | -1.15179 |
| Ablim2       | chr5:35757879-35884979    | 13.1203 | 5.91776 | -1.14867 |
| Oprl1        | chr2:181715015-181720985  | 8.79847 | 3.96903 | -1.14846 |
| Spred1       | chr2:117121070-117182277  | 21.1438 | 9.54993 | -1.14667 |
| Map1b        | chr13:99421463-99516602   | 752.194 | 340.085 | -1.14521 |
| Kitl         | chr10:100015823-100100412 | 23.8046 | 10.7671 | -1.14461 |
| Nefl         | chr14:68083883-68087737   | 2464.02 | 1121.4  | -1.13572 |
| Col5a3       | chr9:20770049-20815034    | 15.2275 | 6.93316 | -1.1351  |
| Myl6b        | chr10:128494156-128498685 | 9.81871 | 4.47341 | -1.13416 |
| Asb13        | chr13:3634031-3651779     | 28.4598 | 12.9675 | -1.13402 |
| Rps6ka1      | chr4:133847290-133887797  | 5.09872 | 2.32523 | -1.13276 |
| Kcnn4        | chr7:24370262-24385212    | 7.90658 | 3.61177 | -1.13035 |
| Slc4a4       | chr5:88887259-89239656    | 22.3113 | 10.213  | -1.12736 |
| Casc4        | chr2:121866969-121936207  | 24.4771 | 11.2218 | -1.12513 |
| R3hcc1       | chr14:69697303-69707580   | 13.3636 | 6.13156 | -1.12399 |
| Zfp365       | chr10:67886104-67912662   | 27.0487 | 12.4159 | -1.12337 |
| Cdk17        | chr10:93160875-93241342   | 11.7422 | 5.39181 | -1.12286 |
| Crtac1       | chr19:42283036-42431783   | 15.4585 | 7.11016 | -1.12045 |
| Nptn         | chr9:58582239-58741559    | 226.019 | 104.322 | -1.1154  |
| Hmgn1        | chr16:96121587-96127725   | 23.3538 | 10.7806 | -1.11522 |
| Slc35b2      | chr17:45564151-45567669   | 13.9649 | 6.44717 | -1.11507 |
| Gprc5c       | chr11:114851531-114872617 | 15.9249 | 7.35424 | -1.11463 |
| Shisa4       | chr1:135371455-135375063  | 47.1132 | 21.7808 | -1.11307 |
| 1700086L19Ri | chr12:74284275-74295950   | 8.62843 | 3.98937 | -1.11294 |
| Vgll4        | chr6:114862091-114921752  | 11.1172 | 5.14184 | -1.11243 |
| Cadps2       | chr6:23262773-23839421    | 12.6614 | 5.87663 | -1.10737 |
| Tjp1         | chr7:65296164-65371244    | 12.7833 | 5.94156 | -1.10535 |
| Agl          | chr3:116739998-116808166  | 25.1387 | 11.6845 | -1.10531 |
| Csdc2        | chr15:81936758-81950941   | 34.772  | 16.1715 | -1.10448 |
| Il11ra1      | chr4:41760442-41774176    | 6.17228 | 2.87143 | -1.10404 |
| 6430548M08R  | chr8:120114151-120165307  | 53.167  | 24.8385 | -1.09795 |
| Ptrf         | chr11:100956735-100970617 | 27.973  | 13.0721 | -1.09755 |
| Nfkb1        | chr3:135584654-135691547  | 7.86843 | 3.67912 | -1.09671 |
| Foxj1        | chr11:116330703-116335354 | 9.39115 | 4.39158 | -1.09656 |
| Plcb4        | chr2:135741829-136013068  | 12.9215 | 6.04479 | -1.09601 |
| Kifc3        | chr8:95081200-95142540    | 8.78105 | 4.11033 | -1.09514 |
| Zyx          | chr6:42349827-42380558    | 31.3461 | 14.7074 | -1.09175 |
| Kif1c        | chr11:70700547-70731970   | 7.19399 | 3.37544 | -1.09172 |
| Opcml        | chr9:27791268-28925048    | 23.5295 | 11.0465 | -1.09088 |
| Comp         | chr8:70373547-70382066    | 6.39873 | 3.01342 | -1.08638 |
| Rab30        | chr7:92741713-92837117    | 9.25727 | 4.36239 | -1.08547 |
| Hebp2        | chr10:18540122-18546076   | 29.7194 | 14.006  | -1.08536 |
| Ppm1h        | chr10:122678761-122945793 | 29.6762 | 13.9937 | -1.08452 |
| Plxna2       | chr1:194619828-194816868  | 21.5376 | 10.1588 | -1.08413 |
| Apbb2        | chr5:66298724-66618817    | 21.9977 | 10.4003 | -1.08072 |
| Gas2         | chr7:51879144-51994458    | 7.49744 | 3.54963 | -1.07873 |
| Rapgef5      | chr12:117516478-117756978 | 11.0949 | 5.26012 | -1.07673 |
| Wfs1         | chr5:36966103-36988982    | 28.4161 | 13.5051 | -1.07321 |
| Tnfrsf21     | chr17:43016554-43089188   | 107.557 | 51.1507 | -1.07228 |
| Slc39a14     | chr14:70303466-70351424   | 6.43985 | 3.0627  | -1.07222 |
| Itfg3        | chr17:26212691-26244242   | 19.8154 | 9.42624 | -1.07186 |
| Bach1        | chr16:87698953-87733346   | 5.14557 | 2.44816 | -1.07163 |
| Rnd3         | chr2:51130438-51149111    | 9.61164 | 4.59127 | -1.06589 |

|             |                           |         |         |           |
|-------------|---------------------------|---------|---------|-----------|
| Rem2        | chr14:54476099-54480434   | 10.7027 | 5.11437 | -1.06535  |
| Sep-11      | chr5:93093456-93174958    | 16.7801 | 8.04127 | -1.06126  |
| Gyg         | chr3:20122083-20155116    | 94.5626 | 45.331  | -1.06077  |
| Inpp5j      | chr11:3494271-3504821     | 19.1604 | 9.20597 | -1.05748  |
| Vwf         | chr6:125552947-125686679  | 7.63825 | 3.67308 | -1.05625  |
| Pacs1       | chr19:5133684-5273119     | 9.13783 | 4.3951  | -1.05596  |
| Snn         | chr16:11066297-11134532   | 47.9723 | 23.0761 | -1.0558   |
| Pde4b       | chr4:102254741-102607262  | 6.73167 | 3.24255 | -1.05383  |
| Kcnk3       | chr5:30573986-30625270    | 6.80124 | 3.2793  | -1.05241  |
| Peli2       | chr14:48120868-48260883   | 9.09826 | 4.38897 | -1.05171  |
| Ifngr1      | chr10:19591957-19610225   | 16.0809 | 7.75901 | -1.0514   |
| Ifitm3      | chr7:141009589-141010744  | 50.5241 | 24.3859 | -1.05092  |
| Atp8a2      | chr14:59647740-60086834   | 67.7877 | 32.7494 | -1.04956  |
| Fam171a1    | chr2:3118387-3227809      | 20.8079 | 10.0873 | -1.04459  |
| Lamb2       | chr9:108479861-108490530  | 9.51887 | 4.61646 | -1.044    |
| Plod1       | chr4:147909752-147936776  | 11.7884 | 5.7197  | -1.04335  |
| Atp2b3      | chrX:73503085-73573270    | 21.0347 | 10.2092 | -1.0429   |
| Dlc1        | chr8:36567738-36952442    | 13.9867 | 6.79585 | -1.04133  |
| Atp2b2      | chr6:113745667-114042080  | 41.2503 | 20.1219 | -1.03564  |
| Rab11fip5   | chr6:85334961-85374634    | 44.1667 | 21.5502 | -1.03526  |
| Rnaset2b    | chr17:8128590-8147832     | 5.2354  | 2.55628 | -1.03425  |
| Nudt7       | chr8:114133573-114152312  | 16.1364 | 7.8814  | -1.0338   |
| Luzp1       | chr4:136469760-136549318  | 22.9614 | 11.2342 | -1.03132  |
| Gdf11       | chr10:128884545-128891718 | 11.0703 | 5.4599  | -1.01974  |
| Sord        | chr2:122234838-122265337  | 16.0903 | 7.94071 | -1.01885  |
| Fam126b     | chr1:58522805-58586333    | 16.4941 | 8.14049 | -1.01876  |
| Reep3       | chr10:67005074-67096988   | 10.6478 | 5.26767 | -1.01531  |
| Hcn1        | chr13:117602319-117981028 | 23.6555 | 11.7425 | -1.01043  |
| Mab21l2     | chr3:86224689-86782694    | 7.09614 | 3.53258 | -1.00631  |
| Tjp2        | chr19:24094501-24225026   | 5.10703 | 2.54718 | -1.00358  |
| Aldh2       | chr5:121567686-121593824  | 66.1298 | 33.0229 | -1.00183  |
| Rasal2      | chr1:157135182-157420236  | 11.599  | 5.79522 | -1.00106  |
| Palm3       | chr8:84021473-84042575    | 28.1291 | 14.0748 | -0.998952 |
| Adcy9       | chr16:4284885-4420498     | 11.9706 | 5.99053 | -0.998737 |
| Mical2      | chr7:112225835-112355194  | 8.48064 | 4.25317 | -0.995633 |
| Tcf12       | chr9:71844251-72111819    | 9.35937 | 4.6949  | -0.995316 |
| Zfp191      | chr18:24012266-24020771   | 16.377  | 8.21567 | -0.995223 |
| Bckdhb      | chr9:83948780-84124240    | 15.851  | 7.9522  | -0.995146 |
| Psat1       | chr19:15905122-15925059   | 32.4496 | 16.2831 | -0.99482  |
| Phlda1      | chr10:111506285-111508649 | 11.7005 | 5.87795 | -0.99319  |
| Sema7a      | chr9:57940134-57962865    | 43.3853 | 21.7957 | -0.993159 |
| Hes1        | chr16:30065356-30067796   | 6.37874 | 3.20511 | -0.992895 |
| Agpat3      | chr10:78271562-78351700   | 48.7026 | 24.4961 | -0.991445 |
| Adcy2       | chr13:68620042-68999541   | 11.7739 | 5.9228  | -0.991241 |
| Selm        | chr11:3514701-3517351     | 88.1792 | 44.4575 | -0.988012 |
| Arl5b       | chr2:15055361-15079191    | 6.57365 | 3.31669 | -0.986953 |
| Rnf157      | chr11:116336344-116413032 | 118.216 | 59.7213 | -0.985104 |
| Ado         | chr10:67544510-67548955   | 10.8193 | 5.4738  | -0.982988 |
| Kit         | chr5:75574986-75656721    | 23.8542 | 12.1066 | -0.978447 |
| Timp2       | chr11:118301060-118355411 | 368.712 | 187.25  | -0.977529 |
| C530008M17R | chr5:76840598-76873554    | 14.0471 | 7.14613 | -0.975044 |
| Lrrc49      | chr9:60587234-60688134    | 84.8574 | 43.1855 | -0.974493 |
| Atpaf1      | chr4:115784813-115812314  | 6.55136 | 3.335   | -0.974108 |



|              |                           |         |         |           |
|--------------|---------------------------|---------|---------|-----------|
| Plxnb2       | chr15:89155545-89180788   | 7.08937 | 3.61166 | -0.972994 |
| Tenc1        | chr15:102102987-102116401 | 6.80555 | 3.46767 | -0.972746 |
| Ndr3         | chr2:156927341-156992111  | 61.122  | 31.1575 | -0.972111 |
| Nmnat1       | chr4:149468786-149485142  | 5.62547 | 2.87247 | -0.969682 |
| Cds1         | chr5:101765129-101823852  | 28.9997 | 14.8583 | -0.964768 |
| Ctnnd2       | chr15:30172592-31029343   | 21.1986 | 10.877  | -0.962685 |
| Lrp6         | chr6:134446477-134566913  | 9.23492 | 4.74724 | -0.960011 |
| Oxa1l        | chr14:54360840-54417702   | 15.1702 | 7.79896 | -0.959889 |
| Pcolce2      | chr9:95637627-95695551    | 20.6551 | 10.6191 | -0.959836 |
| Lgals1       | chr15:78926724-78930465   | 173.94  | 89.4927 | -0.958747 |
| Ier2         | chr8:84661330-84662852    | 24.7225 | 12.7226 | -0.958433 |
| Per1         | chr11:69098955-69109957   | 8.33332 | 4.29207 | -0.957219 |
| Prrt3        | chr6:113493638-113501931  | 16.4018 | 8.45517 | -0.955952 |
| Mmp15        | chr8:95352336-95374293    | 46.7876 | 24.1396 | -0.954726 |
| Pcdhac2      | chr18:36930284-37841872   | 44.557  | 23.0055 | -0.953674 |
| Pygb         | chr2:150786795-150831748  | 331.909 | 171.42  | -0.95325  |
| Rnf215       | chr11:4135159-4160293     | 14.1334 | 7.31497 | -0.950184 |
| Ndufaf2      | chr13:108052588-108158625 | 42.405  | 21.9887 | -0.947472 |
| Fuca1        | chr4:135920725-135940300  | 15.8614 | 8.2363  | -0.945453 |
| Pxdn         | chr12:29938035-30017658   | 7.20376 | 3.74416 | -0.944109 |
| Ggct         | chr6:54985094-54992867    | 7.93236 | 4.12915 | -0.941904 |
| Ckb          | chr12:111669354-111672338 | 344.38  | 179.287 | -0.941732 |
| Ilvbl        | chr10:78574499-78584502   | 14.6343 | 7.62261 | -0.941    |
| Dcl1         | chr3:55242525-55539068    | 48.4825 | 25.2572 | -0.940767 |
| Lmo1         | chr7:109138571-109170308  | 9.31748 | 4.85653 | -0.940014 |
| Kctd1        | chr18:14968684-15151446   | 7.46294 | 3.89244 | -0.939072 |
| Arhgef17     | chr7:100869745-100932161  | 18.6709 | 9.74366 | -0.938258 |
| Tsc22d3      | chrX:140539528-140600522  | 132.738 | 69.3709 | -0.93618  |
| Mtss1l       | chr8:110721483-110741400  | 18.9029 | 9.8827  | -0.935633 |
| 1810011O10Ri | chr8:24437615-24438946    | 9.19387 | 4.80675 | -0.935611 |
| Pigz         | chr16:31933850-31946046   | 15.0259 | 7.85891 | -0.935047 |
| Fbxo31       | chr8:121549442-121578806  | 61.5806 | 32.2298 | -0.934081 |
| Gpr153       | chr4:152274361-152285337  | 21.3428 | 11.1727 | -0.933767 |
| Iqgap1       | chr7:80711582-80803331    | 10.0614 | 5.28366 | -0.929218 |
| Npc1         | chr18:12168729-12236386   | 16.4243 | 8.6294  | -0.928497 |
| Camk2g       | chr14:20734872-20794088   | 127.027 | 66.7463 | -0.928379 |
| Slc25a29     | chr12:108825877-108835876 | 5.94745 | 3.12521 | -0.928317 |
| Rgl1         | chr1:152517529-152625111  | 22.3681 | 11.7663 | -0.926782 |
| H2-DMa       | chr17:34122831-34139101   | 6.23419 | 3.28031 | -0.92637  |
| Ppt1         | chr4:122836226-122859175  | 34.5838 | 18.2331 | -0.923538 |
| Slc29a4      | chr5:142702100-142722490  | 21.1664 | 11.1627 | -0.923086 |
| Ttc39b       | chr4:83220300-83324189    | 12.6052 | 6.65157 | -0.922248 |
| Haghl        | chr17:25773775-25785586   | 56.8316 | 30.0128 | -0.921118 |
| Gadd45b      | chr10:80930090-80932204   | 9.23552 | 4.88345 | -0.919292 |
| Lmtk2        | chr5:144100435-144188204  | 8.53348 | 4.51441 | -0.918595 |
| Bend6        | chr1:33852051-33907621    | 56.9043 | 30.1094 | -0.918323 |
| Fkbp7        | chr2:76663033-76673098    | 6.20035 | 3.29075 | -0.913931 |
| Cxxc5        | chr18:35829817-35861688   | 15.0501 | 7.98991 | -0.913518 |
| Zfp651       | chr9:121760032-121771742  | 9.34925 | 4.9723  | -0.910937 |
| Lss          | chr10:76531626-76562226   | 13.2072 | 7.02835 | -0.910069 |
| Zdhhc22      | chr12:86983380-86988676   | 10.2419 | 5.46437 | -0.90636  |
| Pdk3         | chrX:93764615-93832095    | 27.5094 | 14.6859 | -0.90549  |
| Wdfy2        | chr14:62837689-62956886   | 13.5815 | 7.26086 | -0.903427 |

|              |                           |         |         |           |
|--------------|---------------------------|---------|---------|-----------|
| St8sia1      | chr6:142814230-142964452  | 18.9406 | 10.1307 | -0.90275  |
| Kcnk2        | chr1:189207929-189402273  | 6.61575 | 3.53945 | -0.902381 |
| Gria4        | chr9:4417892-4796234      | 29.0596 | 15.5532 | -0.901804 |
| Heatr5a      | chr12:51875872-51971321   | 15.5287 | 8.31561 | -0.901038 |
| Aga          | chr8:53511701-53523422    | 12.4625 | 6.6807  | -0.899526 |
| Camkk1       | chr11:73019007-73042065   | 12.8457 | 6.89116 | -0.898469 |
| Caly         | chr7:140069879-140082548  | 8.6109  | 4.62119 | -0.897899 |
| Shf          | chr2:122348891-122368918  | 14.3839 | 7.72607 | -0.896651 |
| Gpr64        | chrX:160390689-160498076  | 16.4661 | 8.84449 | -0.896649 |
| Ano4         | chr10:88948993-89257790   | 14.9185 | 8.01579 | -0.896187 |
| Paqr9        | chr9:95559816-95562121    | 30.5211 | 16.4079 | -0.895415 |
| Vstm2a       | chr11:16257723-16284551   | 11.385  | 6.12494 | -0.894363 |
| Paqr8        | chr1:20890621-20938756    | 22.2662 | 11.989  | -0.893141 |
| Ptpn13       | chr5:103425191-103598361  | 7.20173 | 3.88003 | -0.892275 |
| Smad9        | chr3:54755581-54801269    | 17.909  | 9.65131 | -0.891891 |
| Snap25       | chr2:136713449-136782428  | 744.637 | 401.372 | -0.891598 |
| Ackr1        | chr1:173331885-173333503  | 114.735 | 61.8528 | -0.891396 |
| Tor1aip1     | chr1:156004598-156068859  | 8.1805  | 4.41029 | -0.891317 |
| Lzts2        | chr19:45015175-45045772   | 9.42414 | 5.08573 | -0.889908 |
| Irs2         | chr8:10986963-11054541    | 10.3221 | 5.57399 | -0.88896  |
| Slc30a1      | chr1:191894071-191913247  | 6.8155  | 3.68552 | -0.886953 |
| Tm7sf3       | chr6:146602275-146634592  | 22.0922 | 11.9474 | -0.886841 |
| Sdc3         | chr4:130792536-130826318  | 64.1488 | 34.694  | -0.886738 |
| Jun          | chr4:95049035-95052222    | 118.207 | 64.0068 | -0.885021 |
| Mctp1        | chr13:76384960-77031810   | 13.3755 | 7.24454 | -0.884627 |
| Galnt2       | chr8:124231393-124345723  | 10.3342 | 5.59986 | -0.88396  |
| Synj1        | chr16:90936096-91044379   | 51.9966 | 28.1823 | -0.883627 |
| Susd4        | chr1:182764905-182895654  | 37.9244 | 20.5801 | -0.881872 |
| Wwp1         | chr4:19608299-19709004    | 12.2852 | 6.67441 | -0.880209 |
| Slc24a2      | chr4:86983125-87230540    | 63.3139 | 34.4208 | -0.87924  |
| Focad        | chr4:88094629-88411011    | 6.14994 | 3.34627 | -0.878019 |
| Pmp22        | chr11:62951192-63386069   | 875.285 | 476.72  | -0.87661  |
| Fam102a      | chr2:32535358-32569750    | 26.5366 | 14.471  | -0.874823 |
| Gcsh         | chr8:116981827-116993449  | 53.1941 | 29.0117 | -0.874633 |
| Chgb         | chr2:132781277-132795072  | 51.5181 | 28.1173 | -0.873623 |
| Calu         | chr6:29348105-29380513    | 54.2177 | 29.6218 | -0.872105 |
| Apcdd1       | chr18:62922326-62953195   | 5.39474 | 2.94826 | -0.87169  |
| Rxrg         | chr1:167598361-167639623  | 5.54938 | 3.03327 | -0.871451 |
| 9330102E08Ri | chr6:128169699-128183803  | 5.78629 | 3.16707 | -0.869491 |
| Enpp5        | chr17:44078845-44086561   | 71.2358 | 39.0576 | -0.866998 |
| Lgmn         | chr12:102394097-102439697 | 188.024 | 103.17  | -0.865897 |
| Ctdsp2       | chr10:126978716-126999975 | 17.113  | 9.39949 | -0.864436 |
| Arhgef9      | chrX:95048934-95166539    | 14.8642 | 8.16937 | -0.863543 |
| Grb10        | chr11:11930498-12037420   | 10.8128 | 5.94393 | -0.863258 |
| Nfic         | chr10:81396190-81427173   | 77.4962 | 42.6293 | -0.86228  |
| Plbd2        | chr5:120476546-120503623  | 69.4885 | 38.2412 | -0.861647 |
| Amigo2       | chr15:97244073-97385691   | 21.8272 | 12.0172 | -0.861033 |
| Cst3         | chr2:148871731-148875468  | 413.606 | 227.914 | -0.859764 |
| Edil3        | chr13:88821471-89323225   | 110.021 | 60.6635 | -0.858879 |
| Dock10       | chr1:80501067-80758553    | 5.97374 | 3.29425 | -0.858685 |
| Tmem53       | chr4:117251950-117268588  | 10.358  | 5.71627 | -0.857605 |
| H2-Q4        | chr17:35379616-35384674   | 6.10836 | 3.38525 | -0.85152  |
| Ivd          | chr2:118861999-118881357  | 12.1922 | 6.76126 | -0.850595 |

|              |                           |         |         |           |
|--------------|---------------------------|---------|---------|-----------|
| Chml         | chr1:175662420-175692632  | 8.37109 | 4.64512 | -0.8497   |
| Ezr          | chr17:6738130-6782780     | 19.0796 | 10.5882 | -0.849574 |
| Dact3        | chr7:16875316-16887301    | 12.3512 | 6.85561 | -0.849295 |
| Hey1         | chr3:8663358-8667038      | 13.761  | 7.63872 | -0.849188 |
| Itm2c        | chr1:85894509-85908698    | 180.56  | 100.408 | -0.84661  |
| Maged2       | chrX:150806420-150814339  | 29.8403 | 16.6176 | -0.844552 |
| Bcar3        | chr3:122419779-122530182  | 7.88578 | 4.39193 | -0.844397 |
| Gpr137c      | chr14:45219716-45280976   | 9.53005 | 5.31066 | -0.843593 |
| Elovl5       | chr9:77917364-77984519    | 122.516 | 68.3282 | -0.84242  |
| Arhgdig      | chr17:26199182-26201350   | 84.2727 | 47.0452 | -0.841017 |
| Slc22a17     | chr14:54906726-54913132   | 76.319  | 42.6558 | -0.839299 |
| Ehd3         | chr17:73804840-73832093   | 81.9319 | 45.8059 | -0.838893 |
| Ahcy12       | chr6:29768442-29912310    | 31.6014 | 17.6745 | -0.838318 |
| Kcnk4        | chr19:6925689-6934515     | 5.19385 | 2.91195 | -0.83482  |
| Cplx1        | chr5:108518553-108550027  | 533.362 | 299.185 | -0.834076 |
| Traf3        | chr12:111166369-111267155 | 9.81435 | 5.50877 | -0.833163 |
| Mpp6         | chr6:50110240-50198598    | 7.39065 | 4.15047 | -0.832425 |
| Ccdc184      | chr15:98167805-98170134   | 8.86138 | 4.97842 | -0.831843 |
| 1110008P14Ri | chr2:32379100-32381915    | 170.361 | 95.7207 | -0.831694 |
| Cyfp1        | chr7:55842070-55962493    | 20.1487 | 11.3352 | -0.829877 |
| Synpo        | chr18:60593989-60624305   | 11.3266 | 6.37661 | -0.828848 |
| Kcns3        | chr12:11090201-11150842   | 23.3065 | 13.1257 | -0.828344 |
| Qsox1        | chr1:155778154-155812899  | 23.6847 | 13.3431 | -0.82786  |
| Fam69b       | chr2:26628456-26636497    | 30.9107 | 17.4236 | -0.827064 |
| Sacs         | chr14:61138456-61258490   | 7.59747 | 4.28367 | -0.826672 |
| Slc19a2      | chr1:164249045-164265385  | 9.14569 | 5.15714 | -0.82652  |
| Abhd2        | chr7:79273265-79361601    | 53.6986 | 30.2841 | -0.826323 |
| Efr3a        | chr15:65787040-65873812   | 27.406  | 15.4579 | -0.82615  |
| Zfp423       | chr8:87661809-87959595    | 6.0219  | 3.40552 | -0.822343 |
| Ptprs        | chr17:56412425-56476480   | 86.8029 | 49.1145 | -0.821594 |
| Arhgap35     | chr7:16494472-16614993    | 49.5237 | 28.0281 | -0.821248 |
| Tenm3        | chr8:48225664-48674690    | 10.087  | 5.71656 | -0.819281 |
| Sphkap       | chr1:83255780-83408200    | 9.18719 | 5.20773 | -0.818968 |
| Lima1        | chr15:99778467-99875456   | 5.60807 | 3.1818  | -0.817661 |
| Plekhh1      | chr12:79029162-79103939   | 5.90942 | 3.35297 | -0.817577 |
| Cdr2l        | chr11:115381915-115396132 | 40.4617 | 23.0282 | -0.813151 |
| Tmem245      | chr4:56876012-56947429    | 7.72542 | 4.39698 | -0.813101 |
| Efcab14      | chr4:115738072-115777327  | 14.0038 | 7.97253 | -0.812712 |
| Them6        | chr15:74721233-74724373   | 151.154 | 86.0645 | -0.812533 |
| Smim19       | chr8:22462613-22569616    | 15.2035 | 8.66286 | -0.811487 |
| Shh          | chr5:28456839-28719209    | 10.9404 | 6.23915 | -0.810245 |
| Phyh         | chr2:4918995-4938743      | 48.1998 | 27.5324 | -0.807897 |
| Scamp2       | chr9:57560943-57588798    | 9.95445 | 5.68866 | -0.807254 |
| Gpt2         | chr8:85492616-85527558    | 26.2042 | 14.975  | -0.807245 |
| Cdh2         | chr18:16588876-16809049   | 22.6199 | 12.9288 | -0.807    |
| Mdh1         | chr11:21556691-21571934   | 321.438 | 183.767 | -0.806665 |
| Cflar        | chr1:58711507-58759203    | 8.27585 | 4.73366 | -0.805951 |
| Neat1        | chr19:5842301-5845478     | 26.3253 | 15.0584 | -0.805881 |
| 9530068E07Ri | chr11:52396427-52408723   | 79.2449 | 45.4378 | -0.802425 |
| Sccpdh       | chr1:179668230-179687184  | 47.5252 | 27.279  | -0.800899 |
| Fzd3         | chr14:65192440-65262463   | 7.08949 | 4.07173 | -0.80004  |
| Depdc5       | chr5:32863720-32994233    | 17.2622 | 9.91511 | -0.799917 |
| Dagla        | chr19:10245264-10304877   | 6.91777 | 3.97607 | -0.798965 |

|              |                           |         |         |           |
|--------------|---------------------------|---------|---------|-----------|
| Fam210a      | chr18:68260184-68300333   | 6.29907 | 3.63618 | -0.792716 |
| Rmdn2        | chr17:79614899-79682152   | 8.13346 | 4.69736 | -0.792019 |
| Mbp          | chr18:82475122-82585637   | 593.438 | 343.218 | -0.78997  |
| Mgat5        | chr1:127204985-127482972  | 9.21118 | 5.32755 | -0.789913 |
| Zfp219       | chr14:51984832-52020733   | 10.7308 | 6.22287 | -0.786111 |
| Ephx1        | chr1:180989555-181017495  | 66.9222 | 38.8092 | -0.786087 |
| Spsb4        | chr9:96943481-97018355    | 5.25271 | 3.04721 | -0.785572 |
| Etv6         | chr6:134035706-134270147  | 5.58357 | 3.23961 | -0.785367 |
| Kcnip3       | chr2:127456497-127522094  | 85.5713 | 49.6871 | -0.784255 |
| Dlg1         | chr16:31663442-31873356   | 6.56169 | 3.81057 | -0.784061 |
| Arhgap5      | chr12:52516076-52567851   | 14.6771 | 8.52884 | -0.783147 |
| Nr3c1        | chr18:39410544-39487245   | 12.1163 | 7.04338 | -0.782613 |
| Sp1          | chr15:102406315-102436404 | 5.90861 | 3.43487 | -0.782563 |
| Rap1gap      | chr4:137664725-137729861  | 34.8279 | 20.2535 | -0.782071 |
| Fut8         | chr12:77238103-77475996   | 28.7673 | 16.7629 | -0.779158 |
| Inf2         | chr12:112588783-112615557 | 14.5271 | 8.47031 | -0.778264 |
| Endog        | chr2:30171523-30178459    | 9.71398 | 5.66607 | -0.777715 |
| Rapgef4      | chr2:71981214-72257474    | 50.5687 | 29.5007 | -0.777495 |
| Phldb1       | chr9:44686307-44735198    | 10.6933 | 6.23837 | -0.777463 |
| Atp2a2       | chr5:122453512-122502225  | 120.303 | 70.233  | -0.776456 |
| Ttyh2        | chr11:114344525-114757886 | 5.57206 | 3.25361 | -0.776166 |
| Nxt2         | chrX:142226769-142239700  | 16.0641 | 9.38502 | -0.775409 |
| Nsun4        | chr4:116031769-116053876  | 7.53558 | 4.40541 | -0.774442 |
| Tmem64       | chr4:15265819-15286753    | 16.6794 | 9.75631 | -0.773655 |
| Ndc1         | chr4:107367783-107414338  | 9.29572 | 5.44035 | -0.772868 |
| Sptb         | chr12:76580487-76710547   | 18.7372 | 10.9672 | -0.772705 |
| Anp32a       | chr9:62341342-62378805    | 26.8296 | 15.731  | -0.770213 |
| Arhgap44     | chr11:64979034-65162961   | 37.2689 | 21.8575 | -0.769839 |
| Gpr125       | chr5:49959950-50058996    | 10.3094 | 6.0478  | -0.769481 |
| Hsd12        | chr4:59581562-59618694    | 41.6312 | 24.444  | -0.768183 |
| Crtap        | chr9:114368323-114390712  | 8.13491 | 4.78603 | -0.765298 |
| Ufsp1        | chr5:137294668-137295664  | 8.24736 | 4.86008 | -0.762952 |
| Ppif         | chr14:25694169-25701282   | 13.5474 | 7.98546 | -0.762569 |
| Tcf4         | chr18:69344491-69687967   | 7.52204 | 4.43862 | -0.761013 |
| Prps2        | chrX:167346332-167382699  | 10.5887 | 6.24918 | -0.760792 |
| Cnst         | chr1:179546528-179627473  | 56.9871 | 33.674  | -0.758999 |
| A630007B06Ri | chr19:56790962-56813683   | 13.1814 | 7.7913  | -0.758567 |
| Mfsd2a       | chr4:122946850-122961188  | 18.5486 | 10.9672 | -0.758112 |
| Lrrc20       | chr10:61475832-61582228   | 11.9572 | 7.0714  | -0.757816 |
| Prdx4        | chrX:155323919-155338454  | 28.1236 | 16.6331 | -0.757724 |
| Kat2b        | chr17:53566970-53672721   | 9.92688 | 5.87114 | -0.757699 |
| Rab11fip4    | chr11:79591211-79694012   | 24.1487 | 14.2842 | -0.757528 |
| Rcbtb1       | chr14:59201227-59237265   | 23.8342 | 14.0994 | -0.757401 |
| Slc6a6       | chr6:91684066-91759063    | 7.65895 | 4.53823 | -0.755019 |
| Ntrk1        | chr3:87778243-87795162    | 146.787 | 87.0517 | -0.753776 |
| Mgrn1        | chr16:4886099-4941020     | 18.4536 | 10.9463 | -0.753456 |
| Gid4         | chr11:60417144-60445277   | 12.5474 | 7.44505 | -0.753035 |
| Cdc42ep2     | chr19:5917555-5924816     | 19.2858 | 11.4586 | -0.75111  |
| Nxpe3        | chr16:55839952-55895279   | 12.4913 | 7.42637 | -0.75019  |
| Vamp3        | chr4:151047304-151057953  | 16.1245 | 9.59193 | -0.749361 |
| Auh          | chr13:52835109-52929677   | 62.2905 | 37.0661 | -0.74891  |
| Rnft2        | chr5:118190735-118245025  | 10.6657 | 6.34802 | -0.748597 |
| Tmx2         | chr2:84671310-84715164    | 82.0674 | 48.9136 | -0.746574 |

|              |                           |         |         |           |
|--------------|---------------------------|---------|---------|-----------|
| Fxyd5        | chr7:31032722-31042331    | 10.7294 | 6.39515 | -0.746523 |
| Pigx         | chr16:32084415-32099727   | 7.38508 | 4.4101  | -0.743803 |
| Net1         | chr13:3882017-3918220     | 8.17102 | 4.88365 | -0.742555 |
| Kcnq2        | chr2:181075578-181135225  | 24.9988 | 14.9445 | -0.742239 |
| Slitrk5      | chr14:111675114-111683135 | 9.40817 | 5.63184 | -0.740309 |
| Ptgr1        | chr4:58965589-58987078    | 5.85155 | 3.50473 | -0.739517 |
| Bcas1        | chr2:170346990-170427845  | 11.0806 | 6.63673 | -0.739493 |
| Cdc26        | chr4:62394588-62408623    | 17.6594 | 10.5806 | -0.739023 |
| Phb          | chr11:95666956-95680773   | 16.2794 | 9.75431 | -0.73894  |
| Srgn         | chr10:62494427-62507755   | 14.8104 | 8.88452 | -0.737249 |
| Vwa8         | chr14:78849177-79202310   | 15.2364 | 9.15432 | -0.735001 |
| Igf2r        | chr17:12682405-12868143   | 8.23682 | 4.9649  | -0.730322 |
| Tspan3       | chr9:56135883-56161070    | 188.015 | 113.339 | -0.730211 |
| Rgs2         | chr1:143999337-144004149  | 6.10268 | 3.68023 | -0.729648 |
| Fkbp14       | chr6:54577604-54593128    | 9.9556  | 6.01105 | -0.727891 |
| Tsc22d4      | chr5:137745968-137768453  | 23.3848 | 14.1259 | -0.72723  |
| Eid1         | chr2:125627446-125724148  | 37.715  | 22.7892 | -0.726788 |
| Efhd2        | chr4:141858141-141874920  | 19.4762 | 11.7867 | -0.724549 |
| Lgalsl       | chr11:20823354-20831108   | 14.9075 | 9.02621 | -0.723844 |
| Fbxo7        | chr10:86021928-86048328   | 17.5642 | 10.6414 | -0.722951 |
| Alg9         | chr9:50775224-50843639    | 6.00503 | 3.64045 | -0.722055 |
| St3gal5      | chr6:72097607-72154570    | 24.3513 | 14.7637 | -0.721946 |
| Gtdc1        | chr2:44564411-44861622    | 8.96559 | 5.44    | -0.720793 |
| Tmem123      | chr9:7764076-7794332      | 8.12963 | 4.93359 | -0.720553 |
| Itm2b        | chr14:73362231-73385271   | 451.969 | 274.34  | -0.72026  |
| Hrsp12       | chr15:34484021-34495246   | 32.3336 | 19.6369 | -0.719467 |
| 4931406P16Ri | chr7:34236713-34285609    | 7.54893 | 4.58514 | -0.719306 |
| Gm2115       | chr7:84528953-84578339    | 26.0376 | 15.8175 | -0.719079 |
| Epb4.1l1     | chr2:156420908-156543214  | 42.155  | 25.6242 | -0.718199 |
| Atp1a1       | chr3:101576218-101604707  | 1087.2  | 661.802 | -0.716151 |
| Rapgef2      | chr3:79062528-79145875    | 9.24585 | 5.63009 | -0.715647 |
| Entpd6       | chr2:150749080-150771674  | 11.6602 | 7.10156 | -0.715388 |
| Cbfb         | chr8:105170673-105217988  | 125.799 | 76.6224 | -0.715281 |
| Pip4k2a      | chr2:18842255-18998121    | 37.8318 | 23.0483 | -0.714936 |
| Prkrir       | chr7:98703362-98718061    | 14.7396 | 8.99514 | -0.71248  |
| Sptbn2       | chr19:4711222-4752352     | 30.0605 | 18.359  | -0.711381 |
| Sh3d19       | chr3:86084433-86130521    | 9.43115 | 5.76029 | -0.711293 |
| Sorbs1       | chr19:40292039-40513812   | 58.1062 | 35.54   | -0.709249 |
| Iglon5       | chr7:43472906-43490023    | 13.3418 | 8.17354 | -0.706921 |
| Lym5         | chr6:145211133-145216542  | 20.8659 | 12.7887 | -0.706277 |
| Fam101b      | chr11:76019194-76027782   | 7.94659 | 4.87682 | -0.704395 |
| Tbx3         | chr5:119670861-119684724  | 7.61028 | 4.67042 | -0.704395 |
| Bak1         | chr17:27018034-27036378   | 6.86878 | 4.21565 | -0.704301 |
| Flna         | chrX:74223460-74246534    | 16.7307 | 10.2864 | -0.701762 |
| Smpd1        | chr7:105554359-105558389  | 43.019  | 26.4507 | -0.701664 |
| Cabp1        | chr5:115168690-115186121  | 127.522 | 78.4129 | -0.701583 |
| Cd200        | chr16:45382134-45409053   | 43.6974 | 26.8961 | -0.70015  |
| Gm4980       | chr7:99624066-99627103    | 24.5778 | 15.1287 | -0.700071 |
| Sez6l2       | chr7:126950534-126970606  | 58.778  | 36.1963 | -0.699435 |
| Ggcx         | chr6:72414307-72431106    | 5.16515 | 3.1829  | -0.698471 |
| Ldb3         | chr14:34526698-34588681   | 5.23159 | 3.22543 | -0.697756 |
| Slc25a10     | chr11:120491836-120501161 | 7.3031  | 4.5037  | -0.697397 |
| Epb4.1l3     | chr17:69156809-69289987   | 255.603 | 157.643 | -0.697246 |

|          |                           |         |         |           |
|----------|---------------------------|---------|---------|-----------|
| Prkaca   | chr8:83972977-83996442    | 168.203 | 103.766 | -0.696869 |
| E2f6     | chr12:16810964-16826752   | 25.8778 | 15.9733 | -0.696053 |
| Abcg4    | chr9:44273189-44288244    | 19.2357 | 11.8843 | -0.694727 |
| Hsd17b7  | chr1:169949536-169969205  | 24.0389 | 14.8747 | -0.692504 |
| Dok5     | chr2:170731806-170879775  | 5.38984 | 3.33751 | -0.691469 |
| Rnf26    | chr9:44110780-44113051    | 15.9474 | 9.87585 | -0.691349 |
| Osbp2    | chr11:3703730-3863903     | 6.32977 | 3.9247  | -0.68957  |
| Lrrc24   | chr15:76715275-76723845   | 7.00572 | 4.34691 | -0.688542 |
| Cox5a    | chr9:57521231-57532426    | 325.444 | 202.015 | -0.687947 |
| Cadm3    | chr1:173334253-173367695  | 197.342 | 122.513 | -0.687763 |
| Nrg1     | chr8:31818027-31918203    | 34.8248 | 21.6349 | -0.686752 |
| Cdh18    | chr15:23036462-23474418   | 12.0425 | 7.48182 | -0.686669 |
| Dner     | chr1:84369838-84696221    | 58.4211 | 36.311  | -0.686085 |
| Chga     | chr12:102554968-102565027 | 106.543 | 66.2938 | -0.684495 |
| Xk       | chrX:9272783-9313245      | 6.70342 | 4.17202 | -0.684151 |
| Rnf208   | chr2:25242928-25244261    | 46.5738 | 28.995  | -0.683714 |
| Ninj1    | chr13:49187546-49196251   | 19.7469 | 12.2986 | -0.683137 |
| Asah1    | chr8:41340642-41374697    | 41.777  | 26.023  | -0.682924 |
| Dsel     | chr1:111858701-111864918  | 7.22615 | 4.50265 | -0.682453 |
| Trip10   | chr17:57249450-57263697   | 12.473  | 7.77463 | -0.681964 |
| Lcp1     | chr14:75004109-75388146   | 61.0843 | 38.0893 | -0.681416 |
| S100a13  | chr3:90514434-90524581    | 83.3079 | 51.97   | -0.680775 |
| Pdhb     | chr14:8165990-8172992     | 73.899  | 46.1105 | -0.680459 |
| Tubgcp4  | chr2:121171167-121271407  | 22.2198 | 13.874  | -0.679461 |
| Habp4    | chr13:64161865-64186537   | 61.4006 | 38.3502 | -0.679018 |
| Siae     | chr9:37613846-37648318    | 10.9902 | 6.8647  | -0.678953 |
| Sorl1    | chr9:41968488-42124289    | 57.6161 | 36.0249 | -0.677476 |
| Foxo4    | chrX:101254527-101260873  | 6.57925 | 4.11678 | -0.676406 |
| Txndc16  | chr14:45134447-45219394   | 15.854  | 9.92351 | -0.675925 |
| Agap1    | chr1:89454810-89895282    | 11.4998 | 7.20264 | -0.675006 |
| Gm7120   | chr13:119487256-119610459 | 6.58435 | 4.1295  | -0.673074 |
| Dip2a    | chr10:76263048-76345291   | 10.9985 | 6.90161 | -0.672302 |
| Mpi      | chr9:57544267-57552752    | 32.6716 | 20.5216 | -0.670897 |
| Ctgf     | chr10:24595441-24598682   | 8.67083 | 5.44751 | -0.670574 |
| Fam20b   | chr1:156678570-156718910  | 35.7371 | 22.4571 | -0.670249 |
| Six4     | chr12:73100258-73113245   | 12.0783 | 7.59412 | -0.669462 |
| Abl2     | chr1:156558786-156649619  | 7.1971  | 4.53197 | -0.667277 |
| Mtx3     | chr13:92844786-92858230   | 12.1656 | 7.66098 | -0.667203 |
| Bhlhb9   | chrX:135885850-135891081  | 17.3999 | 10.9644 | -0.666255 |
| Ndufa12  | chr10:94199008-94220948   | 23.8771 | 15.0495 | -0.665912 |
| Atp6v1g2 | chr17:35236595-35238768   | 78.4557 | 49.4754 | -0.665165 |
| Atp5c1   | chr2:10056030-10080510    | 150.965 | 95.3177 | -0.663396 |
| Abcg1    | chr17:31057693-31117981   | 17.8968 | 11.3032 | -0.662975 |
| Lancl1   | chr1:67000516-67038872    | 38.3511 | 24.2304 | -0.662453 |
| Mettl21a | chr1:64606479-64617168    | 7.01645 | 4.43401 | -0.662128 |
| Vkorc1   | chr7:127893062-127895617  | 32.3424 | 20.4388 | -0.662117 |
| Tecr     | chr8:83571697-83594491    | 329.347 | 208.213 | -0.661548 |
| Srgap2   | chr1:131285250-131527361  | 7.73484 | 4.89411 | -0.660325 |
| Enpp2    | chr15:54838678-54920146   | 7.59616 | 4.81336 | -0.658226 |
| Acss2    | chr2:155518042-155562743  | 37.9424 | 24.0612 | -0.657103 |
| Tmbim6   | chr15:99392946-99410049   | 151.87  | 96.3716 | -0.656156 |
| Got1     | chr19:43499752-43524605   | 120.935 | 76.7778 | -0.655476 |
| Slc44a1  | chr4:53440412-53622478    | 71.2694 | 45.2475 | -0.655445 |



|          |                           |         |         |           |
|----------|---------------------------|---------|---------|-----------|
| Klf2     | chr8:72319061-72321654    | 13.3409 | 8.4774  | -0.654159 |
| Krt222   | chr11:99233097-99244067   | 18.339  | 11.6541 | -0.654071 |
| Slc12a9  | chr5:137314557-137333582  | 7.51979 | 4.77961 | -0.6538   |
| Ubttd2   | chr11:32455371-32518709   | 15.1997 | 9.66815 | -0.652727 |
| Amer1    | chrX:95420313-95444840    | 7.46344 | 4.75313 | -0.650964 |
| Eva1c    | chr16:90830858-90904885   | 7.07297 | 4.50647 | -0.650319 |
| Chl1     | chr6:103510875-103733035  | 18.7375 | 11.9756 | -0.645831 |
| Large    | chr8:72814598-73352556    | 39.8424 | 25.4809 | -0.64489  |
| Fnta     | chr8:25998721-26015601    | 63.4169 | 40.5642 | -0.644661 |
| Ankrd28  | chr14:31700014-31830415   | 5.95258 | 3.80952 | -0.643906 |
| Podxl2   | chr6:88842557-88874044    | 22.4889 | 14.4133 | -0.641811 |
| Cyp2u1   | chr3:131290490-131303227  | 5.00679 | 3.20913 | -0.641702 |
| Eno2     | chr6:124760054-124769509  | 310.035 | 198.734 | -0.641593 |
| Slc27a4  | chr2:29802679-29817522    | 47.4651 | 30.4739 | -0.639293 |
| Sfxn5    | chr6:85213050-85333422    | 11.593  | 7.44398 | -0.639102 |
| Sh3pxd2a | chr19:47260173-47464411   | 20.2646 | 13.0146 | -0.638833 |
| Slc12a2  | chr18:57878677-57946821   | 45.4556 | 29.2053 | -0.638231 |
| Fam58b   | chr11:78750505-78751729   | 9.22222 | 5.92714 | -0.637778 |
| Zfyve21  | chr12:111814169-111828388 | 8.94175 | 5.75149 | -0.636621 |
| Syt12    | chr7:90302354-90410719    | 48.0606 | 30.9326 | -0.63573  |
| Creb3l2  | chr6:37331020-37442148    | 5.12868 | 3.30326 | -0.634695 |
| AI593442 | chr9:52673031-52679780    | 30.1856 | 19.4658 | -0.632921 |
| Me1      | chr9:86581362-86701253    | 31.4796 | 20.3274 | -0.630987 |
| Plxna1   | chr6:89316313-89362613    | 10.3714 | 6.69875 | -0.630653 |
| Sgpp2    | chr1:78310345-78488897    | 75.2303 | 48.6069 | -0.630154 |
| Clstn1   | chr4:149586467-149648899  | 205.565 | 132.837 | -0.629934 |
| Farp1    | chr14:121035573-121283726 | 5.91269 | 3.82475 | -0.628451 |
| Slc25a20 | chr9:108662097-108684641  | 15.7893 | 10.2223 | -0.627225 |
| Sh3kbp1  | chrX:159627271-159975920  | 7.30191 | 4.72829 | -0.626956 |
| Sec14l1  | chr11:117115171-117159268 | 25.2558 | 16.3651 | -0.625992 |
| Supt16   | chr14:52110902-52197239   | 20.9472 | 13.5736 | -0.62595  |
| Fam53b   | chr7:132712083-132813196  | 7.14852 | 4.63477 | -0.625146 |
| Tmem25   | chr9:44793778-44799216    | 52.4986 | 34.0387 | -0.625106 |
| Rnf149   | chr1:39551295-39577347    | 13.4471 | 8.72289 | -0.624416 |
| Cartpt   | chr13:99898482-99900683   | 21.4776 | 13.9415 | -0.62345  |
| Tmem176a | chr6:48841482-48845364    | 67.6069 | 43.904  | -0.622818 |
| Mgst3    | chr1:167372383-167393797  | 116.609 | 75.7295 | -0.622745 |
| Efnb2    | chr8:8617438-8660773      | 12.8403 | 8.33992 | -0.62257  |
| Shroom3  | chr5:92683434-92965759    | 5.13066 | 3.33686 | -0.620655 |
| Msi2     | chr11:88339381-88718267   | 16.9945 | 11.0541 | -0.62049  |
| Tpgs2    | chr18:24708622-25168877   | 24.1828 | 15.7445 | -0.619131 |
| Adam10   | chr9:70679000-70780229    | 38.4709 | 25.0717 | -0.617707 |
| Slc43a2  | chr11:75531693-75577572   | 17.9158 | 11.6819 | -0.616955 |
| Aco2     | chr15:81872462-81926213   | 97.7651 | 63.7674 | -0.6165   |
| Galnt1   | chr18:24205343-24286816   | 17.493  | 11.4103 | -0.616439 |
| Ric3     | chr7:109010879-109083324  | 25.6948 | 16.7616 | -0.616318 |
| Cyb5d2   | chr11:72777231-72795839   | 14.2958 | 9.3277  | -0.615993 |
| Vezf1    | chr11:88068278-88084729   | 8.94114 | 5.83454 | -0.615839 |
| Nde1     | chr16:14163274-14192923   | 7.37786 | 4.81533 | -0.615569 |
| Ckap4    | chr10:84526304-84533888   | 15.6878 | 10.2433 | -0.61496  |
| Cacna2d3 | chr14:28904942-29721864   | 21.5163 | 14.0648 | -0.613341 |
| Slc35e1  | chr8:72477994-72492614    | 16.5632 | 10.8411 | -0.61147  |
| Dusp6    | chr10:99263230-99267489   | 16.0694 | 10.518  | -0.611453 |

|              |                           |         |         |           |
|--------------|---------------------------|---------|---------|-----------|
| Gramd1b      | chr9:40297906-40455764    | 36.149  | 23.6728 | -0.610724 |
| Gltpd1       | chr4:155864722-155869440  | 29.5401 | 19.3458 | -0.610656 |
| Nkiras1      | chr14:18271141-18331844   | 25.119  | 16.4707 | -0.608876 |
| Elp3         | chr14:65530445-65593112   | 42.1544 | 27.6473 | -0.608543 |
| Slc25a33     | chr4:149744035-149774267  | 26.6901 | 17.5187 | -0.607407 |
| Ptgir        | chr7:16906489-16910905    | 24.0398 | 15.7851 | -0.606867 |
| Oscp1        | chr4:126058564-126089334  | 9.18925 | 6.03461 | -0.606688 |
| Cd63         | chr10:128908918-128912818 | 14.6256 | 9.60944 | -0.605969 |
| Vps26a       | chr10:62454842-62486805   | 22.9627 | 15.0901 | -0.605688 |
| Slc16a1      | chr3:104638663-104658462  | 23.9102 | 15.716  | -0.605394 |
| Tm6sf1       | chr7:81859000-81934459    | 22.3593 | 14.6977 | -0.605291 |
| Junb         | chr8:84976908-84978748    | 66.8822 | 43.9769 | -0.604878 |
| Plekhd1      | chr12:80692600-80724216   | 30.4667 | 20.0382 | -0.604481 |
| Stox2        | chr8:47180047-47352348    | 6.01264 | 3.95491 | -0.604353 |
| Kcnj3        | chr2:55437155-55595525    | 9.24897 | 6.08465 | -0.604119 |
| Hadh         | chr3:131233419-131272101  | 27.3365 | 17.9873 | -0.603849 |
| Rock2        | chr12:16894977-16988274   | 13.5122 | 8.89384 | -0.603384 |
| Camk2b       | chr11:5969665-6065748     | 20.2585 | 13.3374 | -0.603051 |
| Slc25a25     | chr2:32414486-32455476    | 38.9412 | 25.6496 | -0.602359 |
| Pxmp4        | chr2:154587043-154603673  | 10.9999 | 7.2467  | -0.602091 |
| Ndufb5       | chr3:32737062-32751559    | 80.6226 | 53.1183 | -0.601976 |
| Klf6         | chr13:5861488-5870393     | 28.4809 | 18.7655 | -0.601913 |
| Fntb         | chr12:76837466-76921412   | 19.0711 | 12.5689 | -0.601524 |
| Sun2         | chr15:79724067-79742536   | 21.9395 | 14.4618 | -0.601285 |
| Vma21        | chrX:71816079-71824706    | 21.7937 | 14.368  | -0.601056 |
| Lphn1        | chr8:83900097-83941954    | 32.2575 | 21.2708 | -0.600757 |
| Dennd5a      | chr7:109893780-109960422  | 31.4773 | 20.7651 | -0.600146 |
| Myh14        | chr7:44605802-44670843    | 22.6266 | 14.927  | -0.600095 |
| Mknk1        | chr4:115839197-115879256  | 14.229  | 9.39198 | -0.599335 |
| Mia3         | chr1:183326235-183369565  | 27.8047 | 18.3554 | -0.599122 |
| Grwd1        | chr7:45825222-45830789    | 7.85998 | 5.18957 | -0.598913 |
| Atp9b        | chr18:80734140-80934058   | 22.5713 | 14.9039 | -0.598803 |
| B630019K06Ri | chrX:8892352-8894964      | 17.0521 | 11.2598 | -0.598768 |
| Utrn         | chr10:12382187-12861735   | 45.861  | 30.3118 | -0.597385 |
| Pttg1ip      | chr10:77581766-77598732   | 39.1539 | 25.8832 | -0.59714  |
| Errfi1       | chr4:150855090-150868880  | 15.2377 | 10.0749 | -0.596878 |
| Smim13       | chr13:41249843-41276577   | 53.6957 | 35.5028 | -0.596872 |
| Prpf19       | chr19:10895230-10909559   | 31.7512 | 21.0033 | -0.596198 |
| Ndufv2       | chr17:66078794-66101559   | 91.3647 | 60.4757 | -0.595281 |
| Znrf1        | chr8:111536639-111626030  | 10.8414 | 7.17898 | -0.594698 |
| Serpini1     | chr3:75557532-75642523    | 59.4663 | 39.3836 | -0.594475 |
| Hspa12a      | chr19:58795750-58860984   | 162.817 | 107.902 | -0.593536 |
| 0610007P14Ri | chr12:85815454-85824545   | 22.8406 | 15.1484 | -0.592433 |
| Mcam         | chr9:44134657-44142726    | 78.077  | 51.7849 | -0.592366 |
| Coq7         | chr7:118525061-118533313  | 30.1207 | 19.9853 | -0.591818 |
| Hist1h2bc    | chr13:23684198-23692480   | 60.1998 | 39.9442 | -0.591772 |
| Klf4         | chr4:55527136-55532475    | 8.9856  | 5.96665 | -0.590694 |
| Tmem219      | chr7:126886218-126898278  | 12.2472 | 8.13506 | -0.59023  |
| Gng12        | chr6:66896396-67021361    | 9.77698 | 6.49491 | -0.59008  |
| Ltbp3        | chr19:5740903-5771401     | 18.6844 | 12.4131 | -0.589968 |
| Ets2         | chr16:95702406-95721049   | 10.655  | 7.0794  | -0.589826 |
| Pcca         | chr14:122534327-122889944 | 9.27045 | 6.16169 | -0.589314 |
| Amph         | chr13:18948350-19150919   | 76.6253 | 50.9397 | -0.589031 |

|               |                           |         |         |           |
|---------------|---------------------------|---------|---------|-----------|
| Vhl           | chr6:113624020-113631633  | 8.422   | 5.60599 | -0.587195 |
| Tmem246       | chr4:49584505-49597870    | 34.445  | 22.931  | -0.586998 |
| Slc1a4        | chr11:20302179-20332713   | 26.7883 | 17.837  | -0.586729 |
| Ankrd52       | chr10:128377123-128394006 | 51.9278 | 34.5769 | -0.586702 |
| Tacc1         | chr8:25154551-25201542    | 20.1257 | 13.4051 | -0.586255 |
| Entpd7        | chr19:43689688-43753000   | 5.11133 | 3.40501 | -0.586041 |
| Pik3r3        | chr4:116221913-116303056  | 16.5461 | 11.0231 | -0.585963 |
| Nit2          | chr16:57156664-57167332   | 6.97139 | 4.64573 | -0.585541 |
| B2m           | chr2:122120107-122186189  | 192.558 | 128.337 | -0.58535  |
| Stxbp3a       | chr3:108793179-108840502  | 5.10722 | 3.40463 | -0.585042 |
| Ak1           | chr2:32621757-32635058    | 73.1079 | 48.7398 | -0.584927 |
| Abhd12        | chr2:150832514-150904731  | 141.321 | 94.2797 | -0.583954 |
| Mef2c         | chr13:83504033-83667079   | 7.08589 | 4.73346 | -0.582054 |
| Ralgapa2      | chr2:146241298-146512004  | 6.00242 | 4.01106 | -0.581561 |
| Tab3          | chrX:85574021-85634469    | 9.44081 | 6.3198  | -0.579032 |
| Sarm1         | chr11:78472329-78497754   | 14.9983 | 10.0469 | -0.578051 |
| 1700020I14Ril | chr2:119594295-119600744  | 38.972  | 26.1184 | -0.577371 |
| Diras1        | chr10:81019589-81025377   | 97.2451 | 65.2627 | -0.575366 |
| Sesn3         | chr9:14276300-14326134    | 12.8192 | 8.60546 | -0.574982 |
| Usp24         | chr4:106316212-106441327  | 6.23875 | 4.19254 | -0.573432 |
| Smad5         | chr13:56703009-56742378   | 6.24693 | 4.20071 | -0.572512 |
| Pde4dip       | chr3:97689828-97888707    | 43.7654 | 29.4373 | -0.572146 |
| Tomm20        | chr8:126930663-126945921  | 41.7953 | 28.1187 | -0.571811 |
| Stk39         | chr2:68210446-68471981    | 93.4277 | 62.869  | -0.5715   |
| Plvap         | chr8:71497752-71511769    | 7.88902 | 5.30882 | -0.571457 |
| Kcnh7         | chr2:62702945-63184287    | 13.5821 | 9.14499 | -0.570658 |
| Tmem127       | chr2:127247974-127260764  | 40.1654 | 27.0553 | -0.570045 |
| Cnpy2         | chr10:128322458-128327187 | 22.2934 | 15.0171 | -0.570018 |
| Fggy          | chr4:95557506-95926939    | 6.89183 | 4.64293 | -0.569852 |
| BC048546      | chr6:128539821-128581606  | 7.64434 | 5.15991 | -0.567045 |
| Twsg1         | chr17:65923064-65951187   | 12.8331 | 8.6628  | -0.566962 |
| Rcbtb2        | chr14:73142509-73184054   | 10.5322 | 7.11229 | -0.566427 |
| Slc35f6       | chr5:30647935-30659729    | 17.3947 | 11.7529 | -0.565639 |
| Marcks        | chr10:37133242-37138926   | 39.9127 | 26.9838 | -0.564756 |
| Ccdc126       | chr6:49319352-49341581    | 9.65084 | 6.53898 | -0.561589 |
| Dnajb4        | chr3:152183870-152210083  | 28.1628 | 19.085  | -0.561352 |
| Lmln          | chr16:33062520-33125659   | 6.30438 | 4.27432 | -0.56066  |
| Aldh4a1       | chr4:139622893-139649691  | 9.99589 | 6.7778  | -0.560518 |
| Fam73b        | chr2:30364232-30385519    | 20.9865 | 14.238  | -0.559709 |
| Tmem141       | chr2:25620065-25622005    | 13.4485 | 9.13356 | -0.558191 |
| Emb           | chr13:117220572-117274415 | 114.349 | 77.7107 | -0.557259 |
| Nek7          | chr1:138484713-138619696  | 100.536 | 68.4092 | -0.55545  |
| Atat1         | chr17:35897597-35910068   | 5.34623 | 3.63858 | -0.555146 |
| Dhrs4         | chr14:55478757-55490340   | 13.148  | 8.95125 | -0.554679 |
| Etl4          | chr2:20289912-20810535    | 18.7246 | 12.7491 | -0.554532 |
| Hdac3         | chr18:37936970-37954988   | 36.4644 | 24.8352 | -0.554104 |
| Oxr1          | chr15:41447481-41861047   | 88.3703 | 60.209  | -0.553584 |
| A830018L16Ri  | chr1:11414104-11975902    | 20.0764 | 13.6792 | -0.553516 |
| Pisd          | chr5:32736313-32785626    | 10.9821 | 7.484   | -0.553274 |
| Aak1          | chr6:86849516-87003227    | 20.7214 | 14.1215 | -0.55323  |
| Ptgr2         | chr12:84285295-84315832   | 16.463  | 11.2199 | -0.553172 |
| Ppp4r4        | chr12:103532564-103613832 | 9.18531 | 6.26191 | -0.552726 |
| Dolk          | chr2:30284228-30286354    | 20.5084 | 13.9815 | -0.552695 |

|              |                           |         |         |           |
|--------------|---------------------------|---------|---------|-----------|
| Mob1a        | chr6:83326038-83340949    | 11.1937 | 7.63602 | -0.551791 |
| Arl16        | chr11:120458128-120467600 | 18.1966 | 12.4139 | -0.551712 |
| Inpp11       | chr7:101818312-101838226  | 6.17904 | 4.2163  | -0.551407 |
| Btg2         | chr1:134074864-134079155  | 22.0734 | 15.0649 | -0.551116 |
| Pde8b        | chr13:95024104-95250304   | 5.42048 | 3.70014 | -0.550841 |
| Kcnc4        | chr3:107438302-107458898  | 33.5738 | 22.9424 | -0.54932  |
| Sgsm2        | chr11:74849263-74897080   | 9.71681 | 6.64108 | -0.549064 |
| Its1         | chr16:91729370-91920579   | 12.3569 | 8.4532  | -0.54775  |
| Cox4i1       | chr8:120668289-120674209  | 684.653 | 468.625 | -0.546938 |
| Tspyl4       | chr10:34297420-34301320   | 179.051 | 122.564 | -0.546829 |
| Celf2        | chr2:6539698-7396198      | 11.987  | 8.20925 | -0.546146 |
| Lmbrd1       | chr1:24678543-24766301    | 37.9998 | 26.0272 | -0.545973 |
| Ttc3         | chr16:94358762-94469221   | 92.6197 | 63.5145 | -0.544233 |
| Zyg11b       | chr4:108227754-108301090  | 32.6128 | 22.3792 | -0.543282 |
| Ttc1         | chr11:43730005-43747973   | 57.6576 | 39.5968 | -0.542127 |
| Cxx1c        | chrX:53607921-53609134    | 93.0441 | 63.9132 | -0.541801 |
| Tmem59l      | chr8:70483866-70487358    | 111.521 | 76.6435 | -0.541087 |
| Snx18        | chr13:113592178-113618564 | 14.9721 | 10.29   | -0.541033 |
| Syn2         | chr6:115134901-115282626  | 80.7326 | 55.5231 | -0.540063 |
| Gucy1a2      | chr9:3532348-3905787      | 5.98262 | 4.11532 | -0.539772 |
| Flnb         | chr14:7817956-7951587     | 10.7251 | 7.3815  | -0.538998 |
| Tmed7        | chr18:46585927-46597535   | 39.6771 | 27.3708 | -0.53567  |
| Prkcdbp      | chr7:105480615-105482197  | 20.0317 | 13.8268 | -0.534812 |
| Zdhhc15      | chrX:104536969-104671064  | 8.83487 | 6.09895 | -0.534647 |
| Atp1a3       | chr7:24978168-25005937    | 293.01  | 202.277 | -0.534615 |
| 2900097C17Ri | chr2:156388062-156392979  | 216.672 | 149.593 | -0.534472 |
| Gstm1        | chr3:108012249-108017973  | 8.64769 | 5.97058 | -0.534443 |
| St3gal2      | chr8:110919864-110972497  | 23.3668 | 16.135  | -0.534266 |
| Ptpre        | chr7:135537823-135686294  | 11.8362 | 8.18006 | -0.53302  |
| Nrep         | chr18:33437018-33464029   | 17.8527 | 12.3433 | -0.532415 |
| Serp1        | chr3:58521970-58557501    | 24.5648 | 16.9842 | -0.532402 |
| Sat1         | chrX:155213125-155216449  | 42.5894 | 29.4634 | -0.531574 |
| Dlat         | chr9:50634632-50659780    | 43.8391 | 30.3344 | -0.531265 |
| Eme2         | chr17:24892151-24895087   | 9.92718 | 6.87117 | -0.530829 |
| Sirt2        | chr7:28766751-28788665    | 79.2319 | 54.8598 | -0.53033  |
| Pnkd         | chr1:74285033-74353692    | 59.5857 | 41.2636 | -0.530097 |
| Cyc1         | chr15:76343522-76345934   | 138.732 | 96.0945 | -0.529771 |
| Pdpr         | chr8:111094744-111145498  | 9.3104  | 6.45118 | -0.529279 |
| Elovl1       | chr4:118428092-118437343  | 28.3939 | 19.6799 | -0.528855 |
| Ak3          | chr19:29020831-29048729   | 31.9998 | 22.1793 | -0.528853 |
| Rab8b        | chr9:66843663-66919705    | 13.0181 | 9.02294 | -0.528849 |
| Tgm2         | chr2:158116404-158146392  | 6.1696  | 4.27727 | -0.528487 |
| Rnf13        | chr3:57736065-57835233    | 69.1345 | 47.9546 | -0.527736 |
| Qpctl        | chr7:19140216-19149196    | 6.63313 | 4.60118 | -0.527686 |
| Prepl        | chr17:85028346-85090274   | 160.696 | 111.518 | -0.527067 |
| Idh3g        | chrX:73778962-73786897    | 65.4726 | 45.4393 | -0.526951 |
| Carns1       | chr19:4164323-4175479     | 7.74094 | 5.37457 | -0.52636  |
| Tspan13      | chr12:36014554-36042478   | 82.4341 | 57.253  | -0.525891 |
| Dcbld1       | chr10:52233618-52321377   | 12.2888 | 8.53758 | -0.525445 |
| Tubgcp2      | chr7:139995954-140040605  | 15.1377 | 10.5221 | -0.524721 |
| Zscan29      | chr2:121157426-121171149  | 5.38252 | 3.74359 | -0.523857 |
| Nceh1        | chr3:27183003-27244911    | 27.9406 | 19.4389 | -0.523415 |
| Hoxd9        | chr2:74697762-74700208    | 6.73288 | 4.68468 | -0.523272 |

|              |                           |         |         |           |
|--------------|---------------------------|---------|---------|-----------|
| Sowahc       | chr10:59221921-59226433   | 5.98799 | 4.16918 | -0.522308 |
| Atr          | chr9:95855417-95951644    | 6.54209 | 4.55676 | -0.521744 |
| Glul         | chr1:153899925-153909723  | 184.154 | 128.328 | -0.521074 |
| Susd2        | chr10:75636618-75644008   | 190.225 | 132.566 | -0.520994 |
| Sephs2       | chr7:127271878-127274059  | 14.4423 | 10.0691 | -0.520365 |
| Syt13        | chr17:6673609-6738044     | 11.0127 | 7.67817 | -0.520327 |
| Cdc3711      | chr19:28990493-29017569   | 23.4074 | 16.3292 | -0.519506 |
| Rab3ip       | chr10:116905783-116950380 | 12.9405 | 9.02886 | -0.519281 |
| Mtmr2        | chr9:13749180-13806481    | 27.5695 | 19.2386 | -0.519069 |
| Ctnna1       | chr18:35118911-35254775   | 62.2549 | 43.4584 | -0.518554 |
| P2ry2        | chr7:100996571-101011991  | 6.72379 | 4.69388 | -0.518492 |
| Dnajc18      | chr18:35671104-35703144   | 25.1411 | 17.555  | -0.518165 |
| Dtna         | chr18:23310019-23659719   | 20.6163 | 14.3975 | -0.51797  |
| Fermt2       | chr14:45458791-45530065   | 51.3794 | 35.8817 | -0.517941 |
| Hadha        | chr5:30103583-30154980    | 52.6842 | 36.7935 | -0.517919 |
| Ispd         | chr12:36381449-36689503   | 9.98731 | 6.97808 | -0.517265 |
| Man1a2       | chr3:100562204-100685473  | 30.7139 | 21.4603 | -0.517227 |
| Tmem43       | chr6:91473750-91488458    | 16.8325 | 11.7716 | -0.515931 |
| Mtmr4        | chr11:87592216-87616296   | 34.7532 | 24.3377 | -0.513957 |
| Med27        | chr2:29346809-29524790    | 22.6894 | 15.9019 | -0.512823 |
| Tmem260      | chr14:48446351-48515159   | 6.3774  | 4.47072 | -0.51246  |
| Map1a        | chr2:121289601-121351013  | 268.672 | 188.366 | -0.512311 |
| Ccdc28a      | chr10:18213684-18234981   | 33.897  | 23.7889 | -0.51087  |
| Slc30a4      | chr2:122681232-122702663  | 5.49336 | 3.85581 | -0.510655 |
| Pdgfrb       | chr18:61045149-61085067   | 7.40603 | 5.20186 | -0.509673 |
| Nrip2        | chr6:128399765-128408935  | 11.5447 | 8.10926 | -0.509592 |
| Abcb6        | chr1:75171640-75180283    | 10.19   | 7.16204 | -0.508707 |
| Sacm1l       | chr9:123529881-123592598  | 77.0732 | 54.1738 | -0.508634 |
| Nap1l2       | chrX:103184058-103186664  | 69.0614 | 48.5467 | -0.508507 |
| Clec16a      | chr16:10545338-10744878   | 11.213  | 7.88297 | -0.508357 |
| Decr1        | chr4:15917239-15945507    | 17.6117 | 12.3883 | -0.50755  |
| Git1         | chr11:77493411-77507774   | 28.2066 | 19.8448 | -0.50727  |
| Trpm8        | chr1:88306711-88388851    | 10.3879 | 7.30955 | -0.507047 |
| Sez6         | chr11:77930838-77979052   | 11.0899 | 7.80982 | -0.50588  |
| Cnksr2       | chrX:157821572-158043110  | 5.95116 | 4.19418 | -0.504781 |
| 2610507B11Ri | chr11:78261753-78290625   | 52.9664 | 37.3482 | -0.504039 |
| Tti1         | chr2:157981802-158009360  | 7.56739 | 5.33752 | -0.503628 |
| Plxna4       | chr6:32144556-32588192    | 17.5563 | 12.3846 | -0.503438 |
| Pkm          | chr9:59656367-59679375    | 387.279 | 273.435 | -0.502176 |
| Tarsl2       | chr7:65644897-65692093    | 13.7974 | 9.74284 | -0.50198  |
| Atp6v0a2     | chr5:124629051-124724455  | 16.825  | 11.8827 | -0.501742 |
| Fads1        | chr19:10182887-10196872   | 58.6483 | 41.4211 | -0.501725 |
| Btbd3        | chr2:138256583-138287422  | 37.379  | 26.4082 | -0.50124  |

| gene         | test stat | p value  | q value    | significant |
|--------------|-----------|----------|------------|-------------|
| Kcnj10       | -9.4592   | 5.00E-05 | 0.00021987 | yes         |
| Itgb8        | -8.00901  | 5.00E-05 | 0.00021987 | yes         |
| Ednrb        | -9.05927  | 5.00E-05 | 0.00021987 | yes         |
| Mmd2         | -9.45111  | 5.00E-05 | 0.00021987 | yes         |
| Prss35       | -7.76757  | 5.00E-05 | 0.00021987 | yes         |
| Slc1a3       | -5.50891  | 0.0013   | 0.00437522 | yes         |
| Acsbg1       | -8.4511   | 5.00E-05 | 0.00021987 | yes         |
| H2-Aa        | -4.93994  | 0.00835  | 0.0222717  | yes         |
| Abca8a       | -13.6938  | 5.00E-05 | 0.00021987 | yes         |
| Wnt6         | -4.63768  | 0.0033   | 0.00985617 | yes         |
| Megf10       | -8.17961  | 5.00E-05 | 0.00021987 | yes         |
| Sostdc1      | -8.31419  | 5.00E-05 | 0.00021987 | yes         |
| Pdlim4       | -4.25176  | 0.0188   | 0.0446748  | yes         |
| ApoE         | -22.5683  | 5.00E-05 | 0.00021987 | yes         |
| Ttyh1        | -7.68795  | 0.0003   | 0.00116377 | yes         |
| Serpine2     | -10.8229  | 5.00E-05 | 0.00021987 | yes         |
| Lect1        | -5.33366  | 0.0002   | 0.00080284 | yes         |
| Fabp7        | -15.4609  | 5.00E-05 | 0.00021987 | yes         |
| Lrrc4b       | -5.3449   | 0.00015  | 0.00061459 | yes         |
| Fbln2        | -12.3804  | 5.00E-05 | 0.00021987 | yes         |
| Gpr37l1      | -9.61228  | 5.00E-05 | 0.00021987 | yes         |
| Enpp1        | -5.53691  | 5.00E-05 | 0.00021987 | yes         |
| Vtn          | -4.45956  | 0.00105  | 0.00360703 | yes         |
| 5930403L14Ri | -5.41136  | 5.00E-05 | 0.00021987 | yes         |
| Col28a1      | -10.7355  | 5.00E-05 | 0.00021987 | yes         |
| Sod3         | -6.23726  | 5.00E-05 | 0.00021987 | yes         |
| Fxyd1        | -4.61305  | 0.0064   | 0.0176269  | yes         |
| Fbln5        | -10.2579  | 5.00E-05 | 0.00021987 | yes         |
| Slc7a2       | -10.4021  | 5.00E-05 | 0.00021987 | yes         |
| Alpl         | -4.35782  | 5.00E-05 | 0.00021987 | yes         |
| 2900052N01Ri | -4.94216  | 5.00E-05 | 0.00021987 | yes         |
| Daam2        | -9.32276  | 5.00E-05 | 0.00021987 | yes         |
| Hepacam      | -5.9302   | 5.00E-05 | 0.00021987 | yes         |
| Sfrp5        | -11.8306  | 5.00E-05 | 0.00021987 | yes         |
| Atp1a2       | -15.3734  | 5.00E-05 | 0.00021987 | yes         |
| Gpm6b        | -13.6251  | 5.00E-05 | 0.00021987 | yes         |
| Atp1b2       | -11.1367  | 5.00E-05 | 0.00021987 | yes         |
| Itgb3        | -7.01714  | 5.00E-05 | 0.00021987 | yes         |
| Axl          | -6.20726  | 0.0051   | 0.0144638  | yes         |
| Gpr126       | -8.15317  | 5.00E-05 | 0.00021987 | yes         |
| Galnt16      | -6.17219  | 5.00E-05 | 0.00021987 | yes         |
| Lum          | -6.06094  | 5.00E-05 | 0.00021987 | yes         |
| Hmgcs2       | -10.2888  | 5.00E-05 | 0.00021987 | yes         |
| ErbB3        | -7.00858  | 0.00435  | 0.0125514  | yes         |
| Col12a1      | -7.95421  | 5.00E-05 | 0.00021987 | yes         |
| Igf2         | -7.19482  | 5.00E-05 | 0.00021987 | yes         |
| Col14a1      | -7.33951  | 5.00E-05 | 0.00021987 | yes         |
| Olfml2a      | -6.72639  | 5.00E-05 | 0.00021987 | yes         |
| Cmtm5        | -4.74703  | 0.0082   | 0.0219201  | yes         |



|         |          |          |            |     |
|---------|----------|----------|------------|-----|
| Fam129a | -7.77189 | 5.00E-05 | 0.00021987 | yes |
| Nid1    | -11.9469 | 5.00E-05 | 0.00021987 | yes |
| Paqr6   | -5.69587 | 5.00E-05 | 0.00021987 | yes |
| Col3a1  | -13.7115 | 5.00E-05 | 0.00021987 | yes |
| Gjc3    | -8.87402 | 5.00E-05 | 0.00021987 | yes |
| Aspa    | -7.00197 | 5.00E-05 | 0.00021987 | yes |
| Lyz2    | -6.16579 | 5.00E-05 | 0.00021987 | yes |
| Sox10   | -9.57313 | 5.00E-05 | 0.00021987 | yes |
| Nr2f1   | -5.14401 | 5.00E-05 | 0.00021987 | yes |
| Matn4   | -5.80737 | 5.00E-05 | 0.00021987 | yes |
| Nkain4  | -3.67405 | 0.0001   | 0.00042184 | yes |
| Cldn19  | -5.15799 | 5.00E-05 | 0.00021987 | yes |
| Igfbp6  | -6.31185 | 5.00E-05 | 0.00021987 | yes |
| Pdpr    | -5.27847 | 0.00585  | 0.016305   | yes |
| Acta2   | -6.19865 | 5.00E-05 | 0.00021987 | yes |
| Cdh19   | -8.52508 | 5.00E-05 | 0.00021987 | yes |
| F3      | -5.41875 | 5.00E-05 | 0.00021987 | yes |
| Angpt2  | -3.15475 | 0.0014   | 0.00465742 | yes |
| Islr    | -6.49779 | 5.00E-05 | 0.00021987 | yes |
| Smoc2   | -5.51713 | 0.0065   | 0.0178689  | yes |
| Plp1    | -15.8239 | 5.00E-05 | 0.00021987 | yes |
| Foxd3   | -5.48993 | 5.00E-05 | 0.00021987 | yes |
| Calb2   | -4.9239  | 0.0095   | 0.0248446  | yes |
| Ptgfrn  | -10.2401 | 5.00E-05 | 0.00021987 | yes |
| Col1a2  | -14.5349 | 5.00E-05 | 0.00021987 | yes |
| Cryab   | -9.64532 | 5.00E-05 | 0.00021987 | yes |
| Lgi4    | -8.79967 | 5.00E-05 | 0.00021987 | yes |
| C1qb    | -3.86433 | 0.00095  | 0.00329852 | yes |
| Lama2   | -9.15149 | 5.00E-05 | 0.00021987 | yes |
| Plxnb3  | -6.56308 | 5.00E-05 | 0.00021987 | yes |
| Col1a1  | -12.096  | 5.00E-05 | 0.00021987 | yes |
| Vstm2b  | -4.75044 | 5.00E-05 | 0.00021987 | yes |
| Emp2    | -10.1269 | 5.00E-05 | 0.00021987 | yes |
| Prx     | -15.3458 | 5.00E-05 | 0.00021987 | yes |
| Adamts5 | -9.64921 | 5.00E-05 | 0.00021987 | yes |
| Metrn   | -7.3637  | 5.00E-05 | 0.00021987 | yes |
| Art3    | -8.47388 | 5.00E-05 | 0.00021987 | yes |
| Sema3b  | -11.6314 | 5.00E-05 | 0.00021987 | yes |
| Cdo1    | -5.87746 | 5.00E-05 | 0.00021987 | yes |
| Hapln1  | -8.90746 | 5.00E-05 | 0.00021987 | yes |
| Cd74    | -6.56362 | 5.00E-05 | 0.00021987 | yes |
| Gpd1    | -7.50965 | 5.00E-05 | 0.00021987 | yes |
| C1qtnf5 | -3.30564 | 0.0133   | 0.0332175  | yes |
| Lox     | -6.05644 | 5.00E-05 | 0.00021987 | yes |
| Entpd2  | -6.66018 | 5.00E-05 | 0.00021987 | yes |
| Pmp2    | -7.55768 | 5.00E-05 | 0.00021987 | yes |
| Mmp14   | -8.03593 | 5.00E-05 | 0.00021987 | yes |
| Stxbp6  | -7.8055  | 5.00E-05 | 0.00021987 | yes |
| Mpz     | -14.4855 | 5.00E-05 | 0.00021987 | yes |
| MyI9    | -6.18195 | 5.00E-05 | 0.00021987 | yes |
| Reln    | -10.0965 | 5.00E-05 | 0.00021987 | yes |
| Vldlr   | -9.1808  | 5.00E-05 | 0.00021987 | yes |
| Nid2    | -3.62683 | 5.00E-05 | 0.00021987 | yes |

|          |          |          |            |     |
|----------|----------|----------|------------|-----|
| Hey2     | -8.28014 | 5.00E-05 | 0.00021987 | yes |
| Emid1    | -4.7781  | 5.00E-05 | 0.00021987 | yes |
| Gas7     | -8.83071 | 5.00E-05 | 0.00021987 | yes |
| Mfap5    | -7.24236 | 5.00E-05 | 0.00021987 | yes |
| Folh1    | -6.87854 | 5.00E-05 | 0.00021987 | yes |
| Ptprz1   | -11.1717 | 5.00E-05 | 0.00021987 | yes |
| Frmd6    | -6.88595 | 5.00E-05 | 0.00021987 | yes |
| Fmo1     | -6.83229 | 5.00E-05 | 0.00021987 | yes |
| Tspan18  | -9.14483 | 5.00E-05 | 0.00021987 | yes |
| Itgav    | -9.86003 | 5.00E-05 | 0.00021987 | yes |
| Efemp1   | -6.56933 | 5.00E-05 | 0.00021987 | yes |
| Tgfb1    | -7.33789 | 5.00E-05 | 0.00021987 | yes |
| Ugt8a    | -10.6806 | 5.00E-05 | 0.00021987 | yes |
| Rgs6     | -5.69688 | 5.00E-05 | 0.00021987 | yes |
| Mmp2     | -5.45509 | 5.00E-05 | 0.00021987 | yes |
| Igfbp4   | -12.4832 | 5.00E-05 | 0.00021987 | yes |
| Kirrel   | -7.50258 | 5.00E-05 | 0.00021987 | yes |
| Rdh5     | -5.10114 | 5.00E-05 | 0.00021987 | yes |
| Plin3    | -6.45685 | 5.00E-05 | 0.00021987 | yes |
| Clec3b   | -3.96659 | 0.0003   | 0.00116377 | yes |
| Trf      | -6.81746 | 5.00E-05 | 0.00021987 | yes |
| Cldn11   | -4.42445 | 5.00E-05 | 0.00021987 | yes |
| Pmepa1   | -9.95566 | 5.00E-05 | 0.00021987 | yes |
| Bcan     | -10.1537 | 5.00E-05 | 0.00021987 | yes |
| Smco3    | -5.04404 | 0.0065   | 0.0178689  | yes |
| Igfbp5   | -13.6947 | 5.00E-05 | 0.00021987 | yes |
| Pgf      | -3.86213 | 5.00E-05 | 0.00021987 | yes |
| Maf      | -10.0449 | 5.00E-05 | 0.00021987 | yes |
| Aif1l    | -7.25852 | 5.00E-05 | 0.00021987 | yes |
| Itpr3    | -10.7581 | 5.00E-05 | 0.00021987 | yes |
| Ptgfr    | -8.91657 | 5.00E-05 | 0.00021987 | yes |
| Ppp1r14c | -6.59176 | 5.00E-05 | 0.00021987 | yes |
| Pcolce   | -6.10366 | 5.00E-05 | 0.00021987 | yes |
| Sh3bp5   | -7.90759 | 5.00E-05 | 0.00021987 | yes |
| Ptgds    | -9.32054 | 5.00E-05 | 0.00021987 | yes |
| Apod     | -13.4457 | 5.00E-05 | 0.00021987 | yes |
| Ccnd1    | -7.62691 | 5.00E-05 | 0.00021987 | yes |
| Grid1    | -5.49183 | 5.00E-05 | 0.00021987 | yes |
| Egfl8    | -2.07438 | 0.0119   | 0.0301811  | yes |
| Ogn      | -8.17102 | 5.00E-05 | 0.00021987 | yes |
| Igsf11   | -7.09795 | 5.00E-05 | 0.00021987 | yes |
| Gldn     | -7.11931 | 5.00E-05 | 0.00021987 | yes |
| Rasa3    | -6.98705 | 5.00E-05 | 0.00021987 | yes |
| Hapln4   | -10.2828 | 5.00E-05 | 0.00021987 | yes |
| Cotl1    | -8.04865 | 5.00E-05 | 0.00021987 | yes |
| Spp1     | -10.3365 | 5.00E-05 | 0.00021987 | yes |
| Ncmap    | -7.92366 | 5.00E-05 | 0.00021987 | yes |
| Ano1     | -6.18259 | 5.00E-05 | 0.00021987 | yes |
| Col15a1  | -8.59047 | 5.00E-05 | 0.00021987 | yes |
| Gm16551  | -6.07522 | 5.00E-05 | 0.00021987 | yes |
| Plce1    | -8.0276  | 5.00E-05 | 0.00021987 | yes |
| Kcnq4    | -7.94    | 5.00E-05 | 0.00021987 | yes |
| Limch1   | -10.8328 | 5.00E-05 | 0.00021987 | yes |

|          |          |          |            |     |
|----------|----------|----------|------------|-----|
| Col5a2   | -8.23303 | 5.00E-05 | 0.00021987 | yes |
| Ngp      | -4.30051 | 5.00E-05 | 0.00021987 | yes |
| Sparc    | -14.2683 | 5.00E-05 | 0.00021987 | yes |
| Lrrc4    | -2.28943 | 0.00285  | 0.00866826 | yes |
| Bgn      | -10.2253 | 5.00E-05 | 0.00021987 | yes |
| Slc35f1  | -10.2225 | 5.00E-05 | 0.00021987 | yes |
| Ntng1    | -8.11839 | 5.00E-05 | 0.00021987 | yes |
| Plekha4  | -10.8845 | 5.00E-05 | 0.00021987 | yes |
| Ndrg1    | -15.6421 | 5.00E-05 | 0.00021987 | yes |
| Zcchc24  | -8.11428 | 5.00E-05 | 0.00021987 | yes |
| Egr2     | -7.66536 | 5.00E-05 | 0.00021987 | yes |
| Tmem28   | -4.56228 | 5.00E-05 | 0.00021987 | yes |
| Sema5a   | -12.0903 | 5.00E-05 | 0.00021987 | yes |
| Slc17a7  | -13.1127 | 5.00E-05 | 0.00021987 | yes |
| Cox7a1   | -4.00994 | 0.0188   | 0.0446748  | yes |
| Esrrg    | -8.40281 | 5.00E-05 | 0.00021987 | yes |
| Sfrp1    | -8.94748 | 5.00E-05 | 0.00021987 | yes |
| Shc4     | -3.58663 | 5.00E-05 | 0.00021987 | yes |
| Mfap4    | -4.8832  | 5.00E-05 | 0.00021987 | yes |
| Itgb5    | -6.6034  | 5.00E-05 | 0.00021987 | yes |
| Pid1     | -5.40169 | 5.00E-05 | 0.00021987 | yes |
| Mme      | -7.35882 | 5.00E-05 | 0.00021987 | yes |
| Afap1l2  | -6.88148 | 5.00E-05 | 0.00021987 | yes |
| Fkbp9    | -9.89098 | 5.00E-05 | 0.00021987 | yes |
| Slc9a3r1 | -10.251  | 5.00E-05 | 0.00021987 | yes |
| Plekha1  | -11.3588 | 5.00E-05 | 0.00021987 | yes |
| Slit2    | -8.19377 | 5.00E-05 | 0.00021987 | yes |
| Prss12   | -6.86391 | 5.00E-05 | 0.00021987 | yes |
| Hhatl    | -6.45126 | 5.00E-05 | 0.00021987 | yes |
| Kif19a   | -6.01662 | 5.00E-05 | 0.00021987 | yes |
| Pcdh7    | -10.3658 | 5.00E-05 | 0.00021987 | yes |
| Clrn1    | -5.48991 | 5.00E-05 | 0.00021987 | yes |
| H2-Eb1   | -5.67109 | 5.00E-05 | 0.00021987 | yes |
| Lancl3   | -7.28717 | 5.00E-05 | 0.00021987 | yes |
| Ntrk2    | -13.5141 | 5.00E-05 | 0.00021987 | yes |
| Dcn      | -11.7438 | 5.00E-05 | 0.00021987 | yes |
| Syt2     | -13.2133 | 5.00E-05 | 0.00021987 | yes |
| Mag      | -6.13027 | 5.00E-05 | 0.00021987 | yes |
| Ndst4    | -8.50235 | 5.00E-05 | 0.00021987 | yes |
| Lpar1    | -10.9549 | 5.00E-05 | 0.00021987 | yes |
| Sbspon   | -5.17104 | 5.00E-05 | 0.00021987 | yes |
| Fa2h     | -6.99778 | 5.00E-05 | 0.00021987 | yes |
| Notch1   | -8.47027 | 5.00E-05 | 0.00021987 | yes |
| Sv2b     | -13.8193 | 5.00E-05 | 0.00021987 | yes |
| Sdc4     | -9.58584 | 5.00E-05 | 0.00021987 | yes |
| Omg      | -2.89138 | 0.00015  | 0.00061459 | yes |
| Pvalb    | -11.1878 | 5.00E-05 | 0.00021987 | yes |
| Rnf128   | -4.97167 | 5.00E-05 | 0.00021987 | yes |
| Lgi3     | -12.6732 | 5.00E-05 | 0.00021987 | yes |
| Hs3st2   | -8.96249 | 5.00E-05 | 0.00021987 | yes |
| Mxra8    | -7.00406 | 5.00E-05 | 0.00021987 | yes |
| Ctsc     | -5.77485 | 5.00E-05 | 0.00021987 | yes |
| Tbx2     | -7.13782 | 5.00E-05 | 0.00021987 | yes |

|          |          |          |            |     |
|----------|----------|----------|------------|-----|
| Creg2    | -7.33916 | 5.00E-05 | 0.00021987 | yes |
| Epha6    | -3.72229 | 5.00E-05 | 0.00021987 | yes |
| Htr7     | -5.852   | 5.00E-05 | 0.00021987 | yes |
| Gabrg1   | -7.01976 | 5.00E-05 | 0.00021987 | yes |
| Fam107a  | -5.52101 | 5.00E-05 | 0.00021987 | yes |
| Cald1    | -7.98356 | 5.00E-05 | 0.00021987 | yes |
| Qk       | -12.1261 | 5.00E-05 | 0.00021987 | yes |
| Fgl2     | -6.26217 | 5.00E-05 | 0.00021987 | yes |
| Fgf9     | -6.72499 | 5.00E-05 | 0.00021987 | yes |
| Bcat1    | -10.342  | 5.00E-05 | 0.00021987 | yes |
| Ston1    | -6.22921 | 5.00E-05 | 0.00021987 | yes |
| Antxr1   | -7.21489 | 5.00E-05 | 0.00021987 | yes |
| Fam19a2  | -9.36291 | 5.00E-05 | 0.00021987 | yes |
| Gpam     | -9.548   | 5.00E-05 | 0.00021987 | yes |
| Pbxip1   | -6.71929 | 5.00E-05 | 0.00021987 | yes |
| Ctsk     | -4.61689 | 5.00E-05 | 0.00021987 | yes |
| Plscr4   | -5.57056 | 5.00E-05 | 0.00021987 | yes |
| Pdzd2    | -10.6357 | 5.00E-05 | 0.00021987 | yes |
| Metrn1   | -5.0145  | 5.00E-05 | 0.00021987 | yes |
| Sh3bgr   | -6.63776 | 5.00E-05 | 0.00021987 | yes |
| Cntf     | -2.20498 | 0.0177   | 0.0424717  | yes |
| P2rx6    | -6.44493 | 5.00E-05 | 0.00021987 | yes |
| Jag1     | -7.21433 | 5.00E-05 | 0.00021987 | yes |
| Pls1     | -7.32123 | 5.00E-05 | 0.00021987 | yes |
| Tagln    | -1.79131 | 0.0182   | 0.0434827  | yes |
| H2-Ab1   | -5.32913 | 5.00E-05 | 0.00021987 | yes |
| Scara3   | -5.45299 | 5.00E-05 | 0.00021987 | yes |
| Cyp2d22  | -5.22302 | 5.00E-05 | 0.00021987 | yes |
| Vsnl1    | -12.5333 | 5.00E-05 | 0.00021987 | yes |
| Shox2    | -4.17596 | 5.00E-05 | 0.00021987 | yes |
| Lgi2     | -7.50332 | 5.00E-05 | 0.00021987 | yes |
| Ryr2     | -10.7176 | 5.00E-05 | 0.00021987 | yes |
| Mgst1    | -5.79676 | 5.00E-05 | 0.00021987 | yes |
| Gulp1    | -5.71084 | 5.00E-05 | 0.00021987 | yes |
| Coro6    | -4.59851 | 5.00E-05 | 0.00021987 | yes |
| Rasl10b  | -9.1656  | 5.00E-05 | 0.00021987 | yes |
| Nes      | -7.7142  | 5.00E-05 | 0.00021987 | yes |
| P2rx7    | -3.98966 | 5.00E-05 | 0.00021987 | yes |
| Fcgrt    | -6.99142 | 5.00E-05 | 0.00021987 | yes |
| Grhpr    | -4.38498 | 5.00E-05 | 0.00021987 | yes |
| Pnmal2   | -7.87226 | 5.00E-05 | 0.00021987 | yes |
| Abca8b   | -9.3374  | 5.00E-05 | 0.00021987 | yes |
| Kcna1    | -13.4334 | 5.00E-05 | 0.00021987 | yes |
| Matn2    | -9.92075 | 5.00E-05 | 0.00021987 | yes |
| Itgb4    | -4.73691 | 5.00E-05 | 0.00021987 | yes |
| Vwa1     | -9.97422 | 5.00E-05 | 0.00021987 | yes |
| Angptl4  | -5.31903 | 5.00E-05 | 0.00021987 | yes |
| Timp3    | -5.93736 | 5.00E-05 | 0.00021987 | yes |
| Cyp39a1  | -5.15614 | 5.00E-05 | 0.00021987 | yes |
| Sh3pxd2b | -9.56577 | 5.00E-05 | 0.00021987 | yes |
| Slitrk1  | -7.99635 | 5.00E-05 | 0.00021987 | yes |
| Chadl    | -3.27238 | 5.00E-05 | 0.00021987 | yes |
| Meis2    | -6.45566 | 5.00E-05 | 0.00021987 | yes |

|          |          |          |            |     |
|----------|----------|----------|------------|-----|
| Nefh     | -8.57513 | 5.00E-05 | 0.00021987 | yes |
| Casp12   | -4.84135 | 5.00E-05 | 0.00021987 | yes |
| Hspg2    | -11.1795 | 5.00E-05 | 0.00021987 | yes |
| Cyp2j9   | -6.82002 | 5.00E-05 | 0.00021987 | yes |
| Slc36a2  | -5.28829 | 5.00E-05 | 0.00021987 | yes |
| Dmd      | -8.98965 | 5.00E-05 | 0.00021987 | yes |
| Serpinh1 | -8.45663 | 5.00E-05 | 0.00021987 | yes |
| Rassf8   | -4.19281 | 5.00E-05 | 0.00021987 | yes |
| Plxdc2   | -7.88375 | 5.00E-05 | 0.00021987 | yes |
| Frrs1l   | -7.79125 | 5.00E-05 | 0.00021987 | yes |
| Rasgrf2  | -8.05245 | 5.00E-05 | 0.00021987 | yes |
| Plip     | -8.33207 | 5.00E-05 | 0.00021987 | yes |
| Olfml2b  | -6.91581 | 5.00E-05 | 0.00021987 | yes |
| Col23a1  | -6.93311 | 5.00E-05 | 0.00021987 | yes |
| Syde1    | -5.28622 | 5.00E-05 | 0.00021987 | yes |
| Cela1    | -4.89713 | 5.00E-05 | 0.00021987 | yes |
| Clec2l   | -12.2669 | 5.00E-05 | 0.00021987 | yes |
| Faim2    | -11.5107 | 5.00E-05 | 0.00021987 | yes |
| Cabp7    | -4.87738 | 5.00E-05 | 0.00021987 | yes |
| Col5a1   | -6.92296 | 5.00E-05 | 0.00021987 | yes |
| Sparcl1  | -12.9922 | 5.00E-05 | 0.00021987 | yes |
| Ntng2    | -6.25953 | 5.00E-05 | 0.00021987 | yes |
| Sfrp4    | -6.28014 | 5.00E-05 | 0.00021987 | yes |
| Arhgap19 | -7.96083 | 5.00E-05 | 0.00021987 | yes |
| Grm4     | -6.74144 | 5.00E-05 | 0.00021987 | yes |
| Col6a1   | -6.29799 | 5.00E-05 | 0.00021987 | yes |
| Galm     | -5.90044 | 5.00E-05 | 0.00021987 | yes |
| Yap1     | -6.45056 | 5.00E-05 | 0.00021987 | yes |
| Hspb2    | -2.04606 | 0.0145   | 0.03579    | yes |
| Smtn     | -6.72706 | 5.00E-05 | 0.00021987 | yes |
| Calb1    | -8.89015 | 5.00E-05 | 0.00021987 | yes |
| S100b    | -13.9124 | 5.00E-05 | 0.00021987 | yes |
| Dbi      | -9.42924 | 5.00E-05 | 0.00021987 | yes |
| Thy1     | -13.7786 | 5.00E-05 | 0.00021987 | yes |
| Pla2g16  | -8.21672 | 5.00E-05 | 0.00021987 | yes |
| Sipa1l1  | -7.43391 | 5.00E-05 | 0.00021987 | yes |
| Fam19a1  | -6.28894 | 5.00E-05 | 0.00021987 | yes |
| Hoxb8    | -4.89201 | 5.00E-05 | 0.00021987 | yes |
| Ppp1r9a  | -8.61399 | 5.00E-05 | 0.00021987 | yes |
| Fam212b  | -6.5862  | 5.00E-05 | 0.00021987 | yes |
| Nfia     | -9.92176 | 5.00E-05 | 0.00021987 | yes |
| Fat1     | -9.05839 | 5.00E-05 | 0.00021987 | yes |
| Wwtr1    | -6.58083 | 5.00E-05 | 0.00021987 | yes |
| Smr2     | -2.95938 | 5.00E-05 | 0.00021987 | yes |
| Drp2     | -11.0193 | 5.00E-05 | 0.00021987 | yes |
| Add3     | -8.35062 | 5.00E-05 | 0.00021987 | yes |
| Dlg2     | -8.92634 | 5.00E-05 | 0.00021987 | yes |
| Rhbdl3   | -5.74092 | 5.00E-05 | 0.00021987 | yes |
| Rgcc     | -7.06743 | 5.00E-05 | 0.00021987 | yes |
| Mlip     | -5.1907  | 5.00E-05 | 0.00021987 | yes |
| Tmem229b | -11.081  | 5.00E-05 | 0.00021987 | yes |
| Lrrn2    | -6.57786 | 5.00E-05 | 0.00021987 | yes |
| Rell1    | -5.8888  | 5.00E-05 | 0.00021987 | yes |

|              |          |          |            |     |
|--------------|----------|----------|------------|-----|
| Syt12        | -5.03774 | 5.00E-05 | 0.00021987 | yes |
| Ncam2        | -6.52068 | 5.00E-05 | 0.00021987 | yes |
| Vim          | -13.2708 | 5.00E-05 | 0.00021987 | yes |
| Trappc3l     | -7.27822 | 5.00E-05 | 0.00021987 | yes |
| Gas2l3       | -6.98641 | 5.00E-05 | 0.00021987 | yes |
| 6530402F18Ri | -4.62711 | 5.00E-05 | 0.00021987 | yes |
| Sep-09       | -7.67621 | 5.00E-05 | 0.00021987 | yes |
| Epn3         | -8.30678 | 5.00E-05 | 0.00021987 | yes |
| Baiap2l1     | -4.955   | 5.00E-05 | 0.00021987 | yes |
| Foxo1        | -6.51828 | 5.00E-05 | 0.00021987 | yes |
| Sepp1        | -11.0834 | 5.00E-05 | 0.00021987 | yes |
| Rsph9        | -3.8879  | 5.00E-05 | 0.00021987 | yes |
| Dag1         | -11.2806 | 5.00E-05 | 0.00021987 | yes |
| Slc43a3      | -7.38402 | 5.00E-05 | 0.00021987 | yes |
| Chp2         | -7.19816 | 5.00E-05 | 0.00021987 | yes |
| Pcdhac1      | -2.1019  | 0.00105  | 0.00360703 | yes |
| Htra1        | -10.6392 | 5.00E-05 | 0.00021987 | yes |
| Lamc1        | -9.75328 | 5.00E-05 | 0.00021987 | yes |
| Pon2         | -6.66655 | 5.00E-05 | 0.00021987 | yes |
| Pth1r        | -5.60238 | 5.00E-05 | 0.00021987 | yes |
| Gng7         | -4.85353 | 5.00E-05 | 0.00021987 | yes |
| Sipa1l2      | -6.80037 | 5.00E-05 | 0.00021987 | yes |
| Gpx8         | -4.17414 | 5.00E-05 | 0.00021987 | yes |
| Cp           | -2.94288 | 0.0001   | 0.00042184 | yes |
| S100a16      | -7.21677 | 5.00E-05 | 0.00021987 | yes |
| Dhrs3        | -3.41161 | 5.00E-05 | 0.00021987 | yes |
| Ddn          | -4.90773 | 5.00E-05 | 0.00021987 | yes |
| Sema3g       | -6.67311 | 5.00E-05 | 0.00021987 | yes |
| Caskin2      | -6.84319 | 5.00E-05 | 0.00021987 | yes |
| Smpd2        | -4.0054  | 5.00E-05 | 0.00021987 | yes |
| Kcnk1        | -9.3141  | 5.00E-05 | 0.00021987 | yes |
| Lhfp         | -7.37575 | 5.00E-05 | 0.00021987 | yes |
| Gprc5b       | -6.09037 | 5.00E-05 | 0.00021987 | yes |
| Kcng4        | -5.20423 | 5.00E-05 | 0.00021987 | yes |
| Cxcr4        | -5.90931 | 5.00E-05 | 0.00021987 | yes |
| Thrsp        | -5.04084 | 5.00E-05 | 0.00021987 | yes |
| Col4a1       | -9.79307 | 5.00E-05 | 0.00021987 | yes |
| Pacsin3      | -3.77267 | 5.00E-05 | 0.00021987 | yes |
| Nr4a1        | -8.53377 | 5.00E-05 | 0.00021987 | yes |
| Fstl5        | -7.40526 | 5.00E-05 | 0.00021987 | yes |
| Cgnl1        | -10.1608 | 5.00E-05 | 0.00021987 | yes |
| B3galt5      | -6.59715 | 5.00E-05 | 0.00021987 | yes |
| Astn2        | -4.40526 | 5.00E-05 | 0.00021987 | yes |
| Parp3        | -4.76479 | 5.00E-05 | 0.00021987 | yes |
| Gsn          | -10.586  | 5.00E-05 | 0.00021987 | yes |
| G0s2         | -4.05155 | 5.00E-05 | 0.00021987 | yes |
| Sulf2        | -7.82299 | 5.00E-05 | 0.00021987 | yes |
| Epb4.1l4b    | -5.39716 | 5.00E-05 | 0.00021987 | yes |
| Gstk1        | -4.0236  | 5.00E-05 | 0.00021987 | yes |
| Pard3        | -5.18971 | 5.00E-05 | 0.00021987 | yes |
| Prex2        | -6.3406  | 5.00E-05 | 0.00021987 | yes |
| Klhl13       | -6.05716 | 5.00E-05 | 0.00021987 | yes |
| Nr2f2        | -7.13758 | 5.00E-05 | 0.00021987 | yes |



|          |          |          |            |     |
|----------|----------|----------|------------|-----|
| Fads6    | -4.92139 | 5.00E-05 | 0.00021987 | yes |
| Fam181b  | -4.7863  | 5.00E-05 | 0.00021987 | yes |
| Chst2    | -8.13831 | 5.00E-05 | 0.00021987 | yes |
| Kcnc1    | -8.4267  | 5.00E-05 | 0.00021987 | yes |
| Lynx1    | -11.5027 | 5.00E-05 | 0.00021987 | yes |
| Gatm     | -11.091  | 5.00E-05 | 0.00021987 | yes |
| Pcdh9    | -8.93853 | 5.00E-05 | 0.00021987 | yes |
| Fn1      | -7.55966 | 5.00E-05 | 0.00021987 | yes |
| Rab34    | -3.56758 | 5.00E-05 | 0.00021987 | yes |
| Ppargc1a | -6.24597 | 5.00E-05 | 0.00021987 | yes |
| Fam178b  | -5.14558 | 5.00E-05 | 0.00021987 | yes |
| Cpne6    | -10.5227 | 5.00E-05 | 0.00021987 | yes |
| Fgfr1    | -10.3281 | 5.00E-05 | 0.00021987 | yes |
| Kcnc3    | -9.432   | 5.00E-05 | 0.00021987 | yes |
| Lbp      | -4.53337 | 5.00E-05 | 0.00021987 | yes |
| Ppap2b   | -8.97234 | 5.00E-05 | 0.00021987 | yes |
| Gabrb2   | -6.46493 | 5.00E-05 | 0.00021987 | yes |
| Anxa1    | -3.90335 | 5.00E-05 | 0.00021987 | yes |
| Kazald1  | -3.70804 | 5.00E-05 | 0.00021987 | yes |
| Fgf11    | -4.47047 | 5.00E-05 | 0.00021987 | yes |
| Eln      | -5.53646 | 5.00E-05 | 0.00021987 | yes |
| Cbln2    | -6.99441 | 5.00E-05 | 0.00021987 | yes |
| Rcsd1    | -4.51379 | 5.00E-05 | 0.00021987 | yes |
| Tmem163  | -6.86467 | 5.00E-05 | 0.00021987 | yes |
| Cdc42ep1 | -4.51514 | 5.00E-05 | 0.00021987 | yes |
| Relt     | -5.43664 | 5.00E-05 | 0.00021987 | yes |
| Fxyd7    | -12.0918 | 5.00E-05 | 0.00021987 | yes |
| Hs3st1   | -4.48455 | 5.00E-05 | 0.00021987 | yes |
| Nfasc    | -10.3159 | 5.00E-05 | 0.00021987 | yes |
| Flt3     | -5.99858 | 5.00E-05 | 0.00021987 | yes |
| Mboat2   | -7.06291 | 5.00E-05 | 0.00021987 | yes |
| Fam198b  | -7.26506 | 5.00E-05 | 0.00021987 | yes |
| Chpt1    | -5.32596 | 5.00E-05 | 0.00021987 | yes |
| Pxn      | -6.26744 | 5.00E-05 | 0.00021987 | yes |
| Emp1     | -4.44364 | 5.00E-05 | 0.00021987 | yes |
| Cadm4    | -9.84787 | 5.00E-05 | 0.00021987 | yes |
| Chrna3   | -5.77257 | 5.00E-05 | 0.00021987 | yes |
| Gpr158   | -10.3015 | 5.00E-05 | 0.00021987 | yes |
| Lgr4     | -8.52974 | 5.00E-05 | 0.00021987 | yes |
| Scn1a    | -9.96199 | 5.00E-05 | 0.00021987 | yes |
| Plscr2   | -3.54082 | 5.00E-05 | 0.00021987 | yes |
| Ldhb     | -10.6054 | 5.00E-05 | 0.00021987 | yes |
| Slco5a1  | -7.63038 | 5.00E-05 | 0.00021987 | yes |
| Gsta4    | -5.06046 | 5.00E-05 | 0.00021987 | yes |
| Olfm2    | -4.03179 | 5.00E-05 | 0.00021987 | yes |
| Unc80    | -9.93692 | 5.00E-05 | 0.00021987 | yes |
| Rhoj     | -4.19368 | 5.00E-05 | 0.00021987 | yes |
| Htr3a    | -8.72836 | 5.00E-05 | 0.00021987 | yes |
| Kank1    | -6.02852 | 5.00E-05 | 0.00021987 | yes |
| Nfix     | -5.04361 | 5.00E-05 | 0.00021987 | yes |
| Igsf21   | -5.65726 | 5.00E-05 | 0.00021987 | yes |
| Sgk1     | -6.58631 | 5.00E-05 | 0.00021987 | yes |
| Dbp      | -3.74093 | 5.00E-05 | 0.00021987 | yes |

|          |          |          |            |     |
|----------|----------|----------|------------|-----|
| Negr1    | -6.16119 | 5.00E-05 | 0.00021987 | yes |
| Ust      | -8.23489 | 5.00E-05 | 0.00021987 | yes |
| Chrna7   | -7.79312 | 5.00E-05 | 0.00021987 | yes |
| Gal3st1  | -4.15756 | 5.00E-05 | 0.00021987 | yes |
| Heg1     | -5.84835 | 5.00E-05 | 0.00021987 | yes |
| Sorcs1   | -6.34047 | 5.00E-05 | 0.00021987 | yes |
| Rcn3     | -5.16785 | 5.00E-05 | 0.00021987 | yes |
| Mt1      | -9.77247 | 5.00E-05 | 0.00021987 | yes |
| Tmem47   | -9.75448 | 5.00E-05 | 0.00021987 | yes |
| Rgma     | -4.28606 | 5.00E-05 | 0.00021987 | yes |
| Phlpp1   | -6.1668  | 5.00E-05 | 0.00021987 | yes |
| Clu      | -11.0569 | 5.00E-05 | 0.00021987 | yes |
| Iqsec1   | -9.08329 | 5.00E-05 | 0.00021987 | yes |
| Pcp4     | -13.1744 | 5.00E-05 | 0.00021987 | yes |
| AI464131 | -5.94032 | 5.00E-05 | 0.00021987 | yes |
| Scn4b    | -10.3644 | 5.00E-05 | 0.00021987 | yes |
| Lrrc4c   | -5.86232 | 5.00E-05 | 0.00021987 | yes |
| Capg     | -4.77514 | 5.00E-05 | 0.00021987 | yes |
| Arap2    | -7.23191 | 5.00E-05 | 0.00021987 | yes |
| Clic4    | -8.68752 | 5.00E-05 | 0.00021987 | yes |
| Shpk     | -4.95144 | 5.00E-05 | 0.00021987 | yes |
| Clmp     | -6.86541 | 5.00E-05 | 0.00021987 | yes |
| Sash1    | -6.89997 | 5.00E-05 | 0.00021987 | yes |
| Sult1a1  | -4.08037 | 5.00E-05 | 0.00021987 | yes |
| Scn8a    | -9.63408 | 5.00E-05 | 0.00021987 | yes |
| Tspan6   | -3.9773  | 5.00E-05 | 0.00021987 | yes |
| Rassf4   | -7.09752 | 5.00E-05 | 0.00021987 | yes |
| Kcnq3    | -4.27645 | 5.00E-05 | 0.00021987 | yes |
| F2r      | -5.72413 | 5.00E-05 | 0.00021987 | yes |
| Mal      | -8.73845 | 5.00E-05 | 0.00021987 | yes |
| Lhfpl1   | -6.11601 | 5.00E-05 | 0.00021987 | yes |
| S100a9   | -3.30566 | 5.00E-05 | 0.00021987 | yes |
| Tcn2     | -5.41575 | 5.00E-05 | 0.00021987 | yes |
| Bace2    | -4.66242 | 5.00E-05 | 0.00021987 | yes |
| Mdga1    | -6.50633 | 5.00E-05 | 0.00021987 | yes |
| Lama4    | -7.35671 | 5.00E-05 | 0.00021987 | yes |
| Cthrc1   | -3.54778 | 5.00E-05 | 0.00021987 | yes |
| Kank4    | -8.61396 | 5.00E-05 | 0.00021987 | yes |
| Syt3     | -5.98521 | 5.00E-05 | 0.00021987 | yes |
| Gng11    | -3.68368 | 5.00E-05 | 0.00021987 | yes |
| Hbegf    | -4.23734 | 5.00E-05 | 0.00021987 | yes |
| Rab31    | -6.35552 | 5.00E-05 | 0.00021987 | yes |
| Gja1     | -6.77228 | 5.00E-05 | 0.00021987 | yes |
| Ecscr    | -3.37171 | 5.00E-05 | 0.00021987 | yes |
| Jam3     | -7.10335 | 5.00E-05 | 0.00021987 | yes |
| Adam23   | -9.21479 | 5.00E-05 | 0.00021987 | yes |
| Lamb1    | -8.78095 | 5.00E-05 | 0.00021987 | yes |
| Shroom2  | -5.35602 | 5.00E-05 | 0.00021987 | yes |
| Slc16a6  | -4.73347 | 5.00E-05 | 0.00021987 | yes |
| S100a4   | -6.00627 | 5.00E-05 | 0.00021987 | yes |
| Itih5    | -8.26814 | 5.00E-05 | 0.00021987 | yes |
| Phyhipl  | -6.15809 | 5.00E-05 | 0.00021987 | yes |
| Tuba4a   | -7.89711 | 5.00E-05 | 0.00021987 | yes |

|             |          |          |            |     |
|-------------|----------|----------|------------|-----|
| Hspb6       | -4.03033 | 5.00E-05 | 0.00021987 | yes |
| Rhobtb3     | -6.74799 | 5.00E-05 | 0.00021987 | yes |
| Nr1d1       | -5.85303 | 5.00E-05 | 0.00021987 | yes |
| Il34        | -4.55782 | 5.00E-05 | 0.00021987 | yes |
| Copz2       | -2.59953 | 5.00E-05 | 0.00021987 | yes |
| Stxbp5l     | -7.02574 | 5.00E-05 | 0.00021987 | yes |
| Cntn1       | -9.17051 | 5.00E-05 | 0.00021987 | yes |
| Ndrg2       | -8.32645 | 5.00E-05 | 0.00021987 | yes |
| Tex40       | -3.08541 | 0.00025  | 0.00098508 | yes |
| Grm8        | -5.33864 | 5.00E-05 | 0.00021987 | yes |
| Epb4.1l2    | -7.79518 | 5.00E-05 | 0.00021987 | yes |
| Prkcb       | -8.34149 | 5.00E-05 | 0.00021987 | yes |
| Asic3       | -8.21304 | 5.00E-05 | 0.00021987 | yes |
| Cygb        | -6.77345 | 5.00E-05 | 0.00021987 | yes |
| Arhgef6     | -5.99806 | 5.00E-05 | 0.00021987 | yes |
| Tgfb3       | -7.57544 | 5.00E-05 | 0.00021987 | yes |
| Arhgef40    | -5.16667 | 5.00E-05 | 0.00021987 | yes |
| Arhgef4     | -7.70243 | 5.00E-05 | 0.00021987 | yes |
| Chrm2       | -3.36167 | 5.00E-05 | 0.00021987 | yes |
| Vamp1       | -9.04773 | 5.00E-05 | 0.00021987 | yes |
| Fam19a5     | -5.91349 | 5.00E-05 | 0.00021987 | yes |
| Pi16        | -3.94588 | 5.00E-05 | 0.00021987 | yes |
| D930028M14R | -4.8     | 5.00E-05 | 0.00021987 | yes |
| Dpysl4      | -4.43453 | 5.00E-05 | 0.00021987 | yes |
| Zeb2        | -7.70262 | 5.00E-05 | 0.00021987 | yes |
| Pbx1        | -6.87451 | 5.00E-05 | 0.00021987 | yes |
| Ehd2        | -6.6793  | 5.00E-05 | 0.00021987 | yes |
| Mfap3l      | -7.92162 | 5.00E-05 | 0.00021987 | yes |
| Phlda3      | -5.69694 | 5.00E-05 | 0.00021987 | yes |
| Ptk2b       | -5.57675 | 5.00E-05 | 0.00021987 | yes |
| Egr1        | -8.14586 | 5.00E-05 | 0.00021987 | yes |
| Cntn4       | -4.43419 | 5.00E-05 | 0.00021987 | yes |
| Asrgl1      | -6.37535 | 5.00E-05 | 0.00021987 | yes |
| Slc12a4     | -5.07106 | 5.00E-05 | 0.00021987 | yes |
| Frmpd4      | -6.70712 | 5.00E-05 | 0.00021987 | yes |
| Slc27a1     | -7.02378 | 5.00E-05 | 0.00021987 | yes |
| Calml4      | -1.86756 | 0.00185  | 0.00593853 | yes |
| Col4a2      | -7.23005 | 5.00E-05 | 0.00021987 | yes |
| Mfge8       | -4.00886 | 5.00E-05 | 0.00021987 | yes |
| Pvrl4       | -5.16742 | 5.00E-05 | 0.00021987 | yes |
| Ltbp4       | -5.89517 | 5.00E-05 | 0.00021987 | yes |
| Nrcam       | -8.01986 | 5.00E-05 | 0.00021987 | yes |
| Elfn1       | -6.18407 | 5.00E-05 | 0.00021987 | yes |
| Ptn         | -8.13763 | 5.00E-05 | 0.00021987 | yes |
| Rnf130      | -5.33458 | 5.00E-05 | 0.00021987 | yes |
| Cyr61       | -6.41811 | 5.00E-05 | 0.00021987 | yes |
| Aifm3       | -4.09908 | 5.00E-05 | 0.00021987 | yes |
| Tnfrsf12a   | -1.37433 | 0.01615  | 0.0392781  | yes |
| Adra2c      | -4.80274 | 5.00E-05 | 0.00021987 | yes |
| Efemp2      | -3.3964  | 5.00E-05 | 0.00021987 | yes |
| Insc        | -4.03711 | 5.00E-05 | 0.00021987 | yes |
| S100a8      | -5.78542 | 5.00E-05 | 0.00021987 | yes |
| Kcns1       | -7.52873 | 5.00E-05 | 0.00021987 | yes |

|              |          |          |            |     |
|--------------|----------|----------|------------|-----|
| Bai3         | -5.29944 | 5.00E-05 | 0.00021987 | yes |
| Tst          | -3.04215 | 0.0001   | 0.00042184 | yes |
| Ldlrad3      | -4.31581 | 5.00E-05 | 0.00021987 | yes |
| Brinp1       | -5.62103 | 5.00E-05 | 0.00021987 | yes |
| Whrn         | -4.93118 | 5.00E-05 | 0.00021987 | yes |
| Prima1       | -3.45078 | 5.00E-05 | 0.00021987 | yes |
| Fos          | -8.27265 | 5.00E-05 | 0.00021987 | yes |
| Kctd12       | -5.11533 | 5.00E-05 | 0.00021987 | yes |
| Arhgef10     | -6.26007 | 5.00E-05 | 0.00021987 | yes |
| Amotl2       | -5.07766 | 5.00E-05 | 0.00021987 | yes |
| Plekha2      | -5.66122 | 5.00E-05 | 0.00021987 | yes |
| Ogdhl        | -6.14403 | 5.00E-05 | 0.00021987 | yes |
| Pcsk1        | -7.15666 | 5.00E-05 | 0.00021987 | yes |
| Anxa4        | -4.74813 | 5.00E-05 | 0.00021987 | yes |
| Arhgef3      | -5.26626 | 5.00E-05 | 0.00021987 | yes |
| Nrarp        | -5.41397 | 5.00E-05 | 0.00021987 | yes |
| Clstn3       | -7.88092 | 5.00E-05 | 0.00021987 | yes |
| Cntnap1      | -8.73358 | 5.00E-05 | 0.00021987 | yes |
| Mgp          | -6.50964 | 5.00E-05 | 0.00021987 | yes |
| Impa2        | -3.23591 | 5.00E-05 | 0.00021987 | yes |
| Slc8a3       | -4.95453 | 5.00E-05 | 0.00021987 | yes |
| Plekhg5      | -4.15991 | 5.00E-05 | 0.00021987 | yes |
| Enah         | -8.34193 | 5.00E-05 | 0.00021987 | yes |
| Myh10        | -8.54415 | 5.00E-05 | 0.00021987 | yes |
| Lphn2        | -5.53392 | 5.00E-05 | 0.00021987 | yes |
| Bai1         | -6.17748 | 5.00E-05 | 0.00021987 | yes |
| Sorbs3       | -4.43219 | 5.00E-05 | 0.00021987 | yes |
| Tyro3        | -6.04746 | 5.00E-05 | 0.00021987 | yes |
| Ctdsp1       | -4.60466 | 5.00E-05 | 0.00021987 | yes |
| Hopx         | -7.43278 | 5.00E-05 | 0.00021987 | yes |
| Nefm         | -6.34452 | 5.00E-05 | 0.00021987 | yes |
| Csrp1        | -8.11567 | 5.00E-05 | 0.00021987 | yes |
| Nsg1         | -4.93684 | 5.00E-05 | 0.00021987 | yes |
| Fgf18        | -3.44147 | 5.00E-05 | 0.00021987 | yes |
| Snta1        | -4.49541 | 5.00E-05 | 0.00021987 | yes |
| Dhh          | -6.67248 | 5.00E-05 | 0.00021987 | yes |
| Serpib1a     | -6.87727 | 5.00E-05 | 0.00021987 | yes |
| Tpcn1        | -7.21503 | 5.00E-05 | 0.00021987 | yes |
| Ankrd29      | -6.12122 | 5.00E-05 | 0.00021987 | yes |
| Pcp4l1       | -9.1958  | 5.00E-05 | 0.00021987 | yes |
| Vwa7         | -7.52034 | 5.00E-05 | 0.00021987 | yes |
| C030006K11Ri | -2.4661  | 0.0001   | 0.00042184 | yes |
| Pcdh10       | -6.04571 | 5.00E-05 | 0.00021987 | yes |
| Zfp36l2      | -5.2245  | 5.00E-05 | 0.00021987 | yes |
| Ecm1         | -3.05956 | 5.00E-05 | 0.00021987 | yes |
| Nek6         | -4.33744 | 5.00E-05 | 0.00021987 | yes |
| Tns3         | -7.37999 | 5.00E-05 | 0.00021987 | yes |
| Hnmt         | -3.83034 | 5.00E-05 | 0.00021987 | yes |
| Tnfrsf1a     | -4.95865 | 5.00E-05 | 0.00021987 | yes |
| Slc39a1      | -5.24957 | 5.00E-05 | 0.00021987 | yes |
| Asic1        | -7.03658 | 5.00E-05 | 0.00021987 | yes |
| Fam155a      | -4.97678 | 5.00E-05 | 0.00021987 | yes |
| Ramp2        | -4.33877 | 5.00E-05 | 0.00021987 | yes |

|              |          |          |            |     |
|--------------|----------|----------|------------|-----|
| Gpc3         | -4.80794 | 5.00E-05 | 0.00021987 | yes |
| Pctp         | -5.3616  | 5.00E-05 | 0.00021987 | yes |
| Tbc1d10a     | -4.65389 | 5.00E-05 | 0.00021987 | yes |
| Pak1         | -7.57219 | 5.00E-05 | 0.00021987 | yes |
| Wls          | -5.95693 | 5.00E-05 | 0.00021987 | yes |
| Ntm          | -3.53929 | 5.00E-05 | 0.00021987 | yes |
| Ltbr         | -3.96183 | 5.00E-05 | 0.00021987 | yes |
| Olfml3       | -1.60965 | 0.01285  | 0.0322027  | yes |
| Cacng5       | -4.78436 | 5.00E-05 | 0.00021987 | yes |
| Ptch1        | -5.02069 | 5.00E-05 | 0.00021987 | yes |
| Bcl2         | -6.25369 | 5.00E-05 | 0.00021987 | yes |
| Arpp21       | -4.27197 | 5.00E-05 | 0.00021987 | yes |
| Camk1d       | -6.77243 | 5.00E-05 | 0.00021987 | yes |
| 6430571L13Ri | -3.75668 | 5.00E-05 | 0.00021987 | yes |
| C1qtnf1      | -6.59028 | 5.00E-05 | 0.00021987 | yes |
| Gng8         | -3.39107 | 5.00E-05 | 0.00021987 | yes |
| Itm2a        | -6.53515 | 5.00E-05 | 0.00021987 | yes |
| Opn3         | -2.17231 | 0.0014   | 0.00465742 | yes |
| Sgce         | -4.17884 | 5.00E-05 | 0.00021987 | yes |
| Fscn1        | -5.31644 | 5.00E-05 | 0.00021987 | yes |
| Srd5a1       | -4.18556 | 5.00E-05 | 0.00021987 | yes |
| Chn2         | -5.6006  | 5.00E-05 | 0.00021987 | yes |
| Sort1        | -6.65745 | 5.00E-05 | 0.00021987 | yes |
| Mt2          | -6.81782 | 5.00E-05 | 0.00021987 | yes |
| Tead1        | -5.48512 | 5.00E-05 | 0.00021987 | yes |
| 1190002N15Ri | -6.36877 | 5.00E-05 | 0.00021987 | yes |
| Slc22a23     | -6.24417 | 5.00E-05 | 0.00021987 | yes |
| Abhd4        | -6.9797  | 5.00E-05 | 0.00021987 | yes |
| Adam17       | -3.52774 | 5.00E-05 | 0.00021987 | yes |
| Cnm1         | -5.38025 | 5.00E-05 | 0.00021987 | yes |
| Endod1       | -7.78311 | 5.00E-05 | 0.00021987 | yes |
| Nr1d2        | -6.40056 | 5.00E-05 | 0.00021987 | yes |
| St3gal3      | -4.30648 | 5.00E-05 | 0.00021987 | yes |
| Tesc         | -6.00357 | 5.00E-05 | 0.00021987 | yes |
| Zfp36l1      | -5.11846 | 5.00E-05 | 0.00021987 | yes |
| Parva        | -7.6417  | 5.00E-05 | 0.00021987 | yes |
| Prrg3        | -5.60764 | 5.00E-05 | 0.00021987 | yes |
| Slitrk3      | -6.40372 | 5.00E-05 | 0.00021987 | yes |
| 2310022B05Ri | -6.37637 | 5.00E-05 | 0.00021987 | yes |
| Sec14l2      | -4.2824  | 5.00E-05 | 0.00021987 | yes |
| Rcn1         | -5.55289 | 5.00E-05 | 0.00021987 | yes |
| Nrp2         | -5.98187 | 5.00E-05 | 0.00021987 | yes |
| Cyp2j6       | -6.24793 | 5.00E-05 | 0.00021987 | yes |
| Cpq          | -4.17046 | 5.00E-05 | 0.00021987 | yes |
| Rxra         | -4.82889 | 5.00E-05 | 0.00021987 | yes |
| Epas1        | -7.44254 | 5.00E-05 | 0.00021987 | yes |
| Abhd3        | -4.77432 | 5.00E-05 | 0.00021987 | yes |
| Zfp804a      | -4.58725 | 5.00E-05 | 0.00021987 | yes |
| Kcnh2        | -6.9739  | 5.00E-05 | 0.00021987 | yes |
| B930041F14Ri | -4.88192 | 5.00E-05 | 0.00021987 | yes |
| Kcnip1       | -3.26681 | 5.00E-05 | 0.00021987 | yes |
| Strbp        | -6.82292 | 5.00E-05 | 0.00021987 | yes |
| Ndp          | -3.98693 | 5.00E-05 | 0.00021987 | yes |

|          |          |          |            |     |
|----------|----------|----------|------------|-----|
| Stx1b    | -6.9618  | 5.00E-05 | 0.00021987 | yes |
| Syndig1l | -3.85597 | 5.00E-05 | 0.00021987 | yes |
| Ddit4    | -6.87028 | 5.00E-05 | 0.00021987 | yes |
| Sft2d2   | -5.3807  | 5.00E-05 | 0.00021987 | yes |
| Phospho1 | -5.54051 | 5.00E-05 | 0.00021987 | yes |
| Spock1   | -7.25923 | 5.00E-05 | 0.00021987 | yes |
| Efhd1    | -4.01542 | 5.00E-05 | 0.00021987 | yes |
| Sh3gl2   | -7.26214 | 5.00E-05 | 0.00021987 | yes |
| Ptchd2   | -5.34317 | 5.00E-05 | 0.00021987 | yes |
| Fam81a   | -4.84703 | 5.00E-05 | 0.00021987 | yes |
| Satb1    | -5.57317 | 5.00E-05 | 0.00021987 | yes |
| Map2     | -6.53775 | 5.00E-05 | 0.00021987 | yes |
| Cntfr    | -5.73279 | 5.00E-05 | 0.00021987 | yes |
| Ctnnal1  | -5.68354 | 5.00E-05 | 0.00021987 | yes |
| Glrx     | -4.54253 | 5.00E-05 | 0.00021987 | yes |
| Slc5a5   | -4.0275  | 5.00E-05 | 0.00021987 | yes |
| Tgfb2    | -4.95695 | 5.00E-05 | 0.00021987 | yes |
| Slc41a1  | -4.77601 | 5.00E-05 | 0.00021987 | yes |
| Wipi1    | -4.09628 | 5.00E-05 | 0.00021987 | yes |
| S100a1   | -4.52542 | 5.00E-05 | 0.00021987 | yes |
| Mob3b    | -4.64985 | 5.00E-05 | 0.00021987 | yes |
| Pkd2     | -4.51236 | 5.00E-05 | 0.00021987 | yes |
| Scn1b    | -8.06608 | 5.00E-05 | 0.00021987 | yes |
| Dclk2    | -5.50332 | 5.00E-05 | 0.00021987 | yes |
| Zfp385a  | -5.12826 | 5.00E-05 | 0.00021987 | yes |
| Cish     | -3.66319 | 5.00E-05 | 0.00021987 | yes |
| St5      | -3.48106 | 5.00E-05 | 0.00021987 | yes |
| Sema3f   | -4.96676 | 5.00E-05 | 0.00021987 | yes |
| Trim16   | -4.42122 | 5.00E-05 | 0.00021987 | yes |
| Tnfsf12  | -2.61114 | 5.00E-05 | 0.00021987 | yes |
| Gria3    | -3.99193 | 5.00E-05 | 0.00021987 | yes |
| Kcna2    | -6.95081 | 5.00E-05 | 0.00021987 | yes |
| Arhgap29 | -4.06573 | 5.00E-05 | 0.00021987 | yes |
| Cplx2    | -7.27435 | 5.00E-05 | 0.00021987 | yes |
| Slitrk4  | -4.72788 | 5.00E-05 | 0.00021987 | yes |
| Rhbdf1   | -3.57532 | 5.00E-05 | 0.00021987 | yes |
| Adcy1    | -6.30535 | 5.00E-05 | 0.00021987 | yes |
| Rimbp2   | -4.07162 | 5.00E-05 | 0.00021987 | yes |
| Mxi1     | -4.97437 | 5.00E-05 | 0.00021987 | yes |
| Slc6a8   | -5.20519 | 5.00E-05 | 0.00021987 | yes |
| C2cd2    | -5.26304 | 5.00E-05 | 0.00021987 | yes |
| Wnk2     | -4.4577  | 5.00E-05 | 0.00021987 | yes |
| Nptx1    | -7.08516 | 5.00E-05 | 0.00021987 | yes |
| Id3      | -6.44725 | 5.00E-05 | 0.00021987 | yes |
| Pcx      | -4.56235 | 5.00E-05 | 0.00021987 | yes |
| Bhlhe40  | -4.40538 | 5.00E-05 | 0.00021987 | yes |
| Serpib1b | -3.50468 | 5.00E-05 | 0.00021987 | yes |
| Fads2    | -6.7427  | 5.00E-05 | 0.00021987 | yes |
| Mxra7    | -4.46042 | 5.00E-05 | 0.00021987 | yes |
| Tceal6   | -3.17143 | 5.00E-05 | 0.00021987 | yes |
| S1pr3    | -6.82528 | 5.00E-05 | 0.00021987 | yes |
| Abcd2    | -4.97546 | 5.00E-05 | 0.00021987 | yes |
| Stbd1    | -6.36365 | 5.00E-05 | 0.00021987 | yes |



|              |          |          |            |     |
|--------------|----------|----------|------------|-----|
| Nat8l        | -6.89023 | 5.00E-05 | 0.00021987 | yes |
| Mapkapk2     | -4.69778 | 5.00E-05 | 0.00021987 | yes |
| Wwc2         | -4.10836 | 5.00E-05 | 0.00021987 | yes |
| Tagln3       | -7.90852 | 5.00E-05 | 0.00021987 | yes |
| Htr1d        | -4.80729 | 5.00E-05 | 0.00021987 | yes |
| Agap2        | -4.5473  | 5.00E-05 | 0.00021987 | yes |
| Erb2ip       | -4.69085 | 5.00E-05 | 0.00021987 | yes |
| Lingo2       | -3.7173  | 5.00E-05 | 0.00021987 | yes |
| Cnp          | -6.46062 | 5.00E-05 | 0.00021987 | yes |
| Tgfbr1       | -4.44652 | 5.00E-05 | 0.00021987 | yes |
| Cebpd        | -2.71713 | 5.00E-05 | 0.00021987 | yes |
| Ifitm2       | -4.33484 | 5.00E-05 | 0.00021987 | yes |
| Clvs2        | -3.16377 | 5.00E-05 | 0.00021987 | yes |
| Esrra        | -4.53934 | 5.00E-05 | 0.00021987 | yes |
| Scrt1        | -6.2043  | 5.00E-05 | 0.00021987 | yes |
| Col6a2       | -4.39131 | 5.00E-05 | 0.00021987 | yes |
| Faah         | -4.11845 | 5.00E-05 | 0.00021987 | yes |
| Ly6h         | -3.76345 | 5.00E-05 | 0.00021987 | yes |
| Sdc2         | -4.70262 | 5.00E-05 | 0.00021987 | yes |
| B3galt1      | -5.53981 | 5.00E-05 | 0.00021987 | yes |
| Cd164        | -7.08348 | 5.00E-05 | 0.00021987 | yes |
| Fosb         | -5.47134 | 5.00E-05 | 0.00021987 | yes |
| 6030419C18Ri | -6.59245 | 5.00E-05 | 0.00021987 | yes |
| Sec24d       | -3.82615 | 5.00E-05 | 0.00021987 | yes |
| Fam57b       | -6.35517 | 5.00E-05 | 0.00021987 | yes |
| Ntrk3        | -5.3885  | 5.00E-05 | 0.00021987 | yes |
| Rimk1a       | -6.63101 | 5.00E-05 | 0.00021987 | yes |
| Entpd1       | -3.93382 | 5.00E-05 | 0.00021987 | yes |
| Soat1        | -4.60299 | 5.00E-05 | 0.00021987 | yes |
| Vat1l        | -6.67849 | 5.00E-05 | 0.00021987 | yes |
| Sulf1        | -4.56874 | 5.00E-05 | 0.00021987 | yes |
| Ctso         | -3.53002 | 5.00E-05 | 0.00021987 | yes |
| Ache         | -5.8134  | 5.00E-05 | 0.00021987 | yes |
| Tmem56       | -6.42393 | 5.00E-05 | 0.00021987 | yes |
| Celsr2       | -5.48253 | 5.00E-05 | 0.00021987 | yes |
| Megf9        | -6.1549  | 5.00E-05 | 0.00021987 | yes |
| Ccdc157      | -3.62795 | 5.00E-05 | 0.00021987 | yes |
| Chchd10      | -6.02503 | 5.00E-05 | 0.00021987 | yes |
| Cd81         | -5.76913 | 5.00E-05 | 0.00021987 | yes |
| Lrp1         | -6.22722 | 5.00E-05 | 0.00021987 | yes |
| Rnd2         | -4.40783 | 5.00E-05 | 0.00021987 | yes |
| Atp11a       | -6.14065 | 5.00E-05 | 0.00021987 | yes |
| Cntnap2      | -5.8988  | 5.00E-05 | 0.00021987 | yes |
| Csad         | -3.29307 | 5.00E-05 | 0.00021987 | yes |
| Pwwp2b       | -2.79993 | 5.00E-05 | 0.00021987 | yes |
| Ksr1         | -3.51539 | 5.00E-05 | 0.00021987 | yes |
| Adamts1      | -3.97195 | 5.00E-05 | 0.00021987 | yes |
| Jam2         | -5.40464 | 5.00E-05 | 0.00021987 | yes |
| Slc4a2       | -5.46179 | 5.00E-05 | 0.00021987 | yes |
| Crim1        | -2.63751 | 5.00E-05 | 0.00021987 | yes |
| Ptprd        | -4.711   | 5.00E-05 | 0.00021987 | yes |
| Fam13a       | -4.14813 | 5.00E-05 | 0.00021987 | yes |
| Glr3         | -6.17675 | 5.00E-05 | 0.00021987 | yes |

|              |          |          |            |     |
|--------------|----------|----------|------------|-----|
| Ctns         | -4.35095 | 5.00E-05 | 0.00021987 | yes |
| Psph         | -3.25716 | 5.00E-05 | 0.00021987 | yes |
| Zfp36        | -5.5476  | 5.00E-05 | 0.00021987 | yes |
| Pcdh17       | -4.87234 | 5.00E-05 | 0.00021987 | yes |
| P2rx5        | -3.14421 | 5.00E-05 | 0.00021987 | yes |
| Ikbip        | -2.67884 | 5.00E-05 | 0.00021987 | yes |
| Sall2        | -4.30385 | 5.00E-05 | 0.00021987 | yes |
| Txnip        | -5.25493 | 5.00E-05 | 0.00021987 | yes |
| Ckmt1        | -6.14327 | 5.00E-05 | 0.00021987 | yes |
| 4931406C07Ri | -2.79258 | 5.00E-05 | 0.00021987 | yes |
| Csrnp1       | -3.12811 | 5.00E-05 | 0.00021987 | yes |
| Smpd3        | -4.99751 | 5.00E-05 | 0.00021987 | yes |
| Dtx4         | -4.03848 | 5.00E-05 | 0.00021987 | yes |
| Aatk         | -5.99598 | 5.00E-05 | 0.00021987 | yes |
| Plekhg1      | -4.51833 | 5.00E-05 | 0.00021987 | yes |
| Hoxd1        | -4.22325 | 5.00E-05 | 0.00021987 | yes |
| Htr1b        | -1.91985 | 0.0007   | 0.00250591 | yes |
| Ppap2a       | -3.72245 | 5.00E-05 | 0.00021987 | yes |
| Mtap         | -4.05675 | 5.00E-05 | 0.00021987 | yes |
| Slc24a3      | -4.12241 | 5.00E-05 | 0.00021987 | yes |
| Sep-04       | -3.95979 | 5.00E-05 | 0.00021987 | yes |
| Itga6        | -5.40734 | 5.00E-05 | 0.00021987 | yes |
| Tmc7         | -3.95617 | 5.00E-05 | 0.00021987 | yes |
| Fndc3b       | -3.98335 | 5.00E-05 | 0.00021987 | yes |
| Cpt1a        | -6.18922 | 5.00E-05 | 0.00021987 | yes |
| Kazn         | -4.46586 | 5.00E-05 | 0.00021987 | yes |
| Yes1         | -3.41393 | 5.00E-05 | 0.00021987 | yes |
| Cttnbp2nl    | -4.66876 | 5.00E-05 | 0.00021987 | yes |
| Lrrk2        | -5.25316 | 5.00E-05 | 0.00021987 | yes |
| Gas6         | -6.26568 | 5.00E-05 | 0.00021987 | yes |
| Gm2a         | -4.53948 | 5.00E-05 | 0.00021987 | yes |
| Laptm4b      | -5.91585 | 5.00E-05 | 0.00021987 | yes |
| Rel2         | -5.31883 | 5.00E-05 | 0.00021987 | yes |
| Lurap1       | -2.64051 | 5.00E-05 | 0.00021987 | yes |
| Acsl6        | -5.37429 | 5.00E-05 | 0.00021987 | yes |
| Elmo1        | -5.28685 | 5.00E-05 | 0.00021987 | yes |
| Pou4f3       | -2.85996 | 0.00015  | 0.00061459 | yes |
| Golim4       | -4.97203 | 5.00E-05 | 0.00021987 | yes |
| Cfh          | -4.20404 | 5.00E-05 | 0.00021987 | yes |
| Mpzl1        | -3.74198 | 5.00E-05 | 0.00021987 | yes |
| Mtfp1        | -3.17399 | 5.00E-05 | 0.00021987 | yes |
| Ermp1        | -6.10541 | 5.00E-05 | 0.00021987 | yes |
| Nkain2       | -3.85731 | 5.00E-05 | 0.00021987 | yes |
| Htr3b        | -3.90901 | 5.00E-05 | 0.00021987 | yes |
| Slc20a2      | -2.82483 | 5.00E-05 | 0.00021987 | yes |
| Pros1        | -3.43136 | 5.00E-05 | 0.00021987 | yes |
| Prickle2     | -4.85654 | 5.00E-05 | 0.00021987 | yes |
| Kcnq5        | -4.2969  | 5.00E-05 | 0.00021987 | yes |
| Plat         | -3.3065  | 5.00E-05 | 0.00021987 | yes |
| Fbxo44       | -4.40954 | 5.00E-05 | 0.00021987 | yes |
| 2410131K14Ri | -3.3953  | 5.00E-05 | 0.00021987 | yes |
| Nf1          | -5.69803 | 5.00E-05 | 0.00021987 | yes |
| Mettl9       | -3.63989 | 5.00E-05 | 0.00021987 | yes |

|           |          |          |            |     |
|-----------|----------|----------|------------|-----|
| Map7d2    | -6.05093 | 5.00E-05 | 0.00021987 | yes |
| Angptl2   | -2.30745 | 0.0001   | 0.00042184 | yes |
| Hoxb7     | -2.51825 | 0.0002   | 0.00080284 | yes |
| Gnai1     | -5.94145 | 5.00E-05 | 0.00021987 | yes |
| Tlcd1     | -2.28495 | 5.00E-05 | 0.00021987 | yes |
| Cnr1      | -4.81302 | 5.00E-05 | 0.00021987 | yes |
| Slc9a1    | -4.81055 | 5.00E-05 | 0.00021987 | yes |
| Abcg2     | -5.37155 | 5.00E-05 | 0.00021987 | yes |
| Gstt1     | -3.06392 | 5.00E-05 | 0.00021987 | yes |
| Ngfr      | -5.91558 | 5.00E-05 | 0.00021987 | yes |
| Slco3a1   | -4.29672 | 5.00E-05 | 0.00021987 | yes |
| Btbd11    | -3.16727 | 5.00E-05 | 0.00021987 | yes |
| Marcks1   | -3.29699 | 5.00E-05 | 0.00021987 | yes |
| Nr3c2     | -3.42027 | 5.00E-05 | 0.00021987 | yes |
| Spsb1     | -4.09633 | 5.00E-05 | 0.00021987 | yes |
| Slc6a17   | -5.88915 | 5.00E-05 | 0.00021987 | yes |
| Stk32c    | -4.23669 | 5.00E-05 | 0.00021987 | yes |
| Dcun1d4   | -4.75983 | 5.00E-05 | 0.00021987 | yes |
| Lmo4      | -3.72692 | 5.00E-05 | 0.00021987 | yes |
| Dock5     | -5.27658 | 5.00E-05 | 0.00021987 | yes |
| Eil2      | -4.1425  | 5.00E-05 | 0.00021987 | yes |
| Plcb1     | -4.41591 | 5.00E-05 | 0.00021987 | yes |
| Slc38a1   | -4.98198 | 5.00E-05 | 0.00021987 | yes |
| Socs3     | -4.90642 | 5.00E-05 | 0.00021987 | yes |
| Aldoc     | -5.85269 | 5.00E-05 | 0.00021987 | yes |
| Nrsn2     | -1.9873  | 0.00055  | 0.0020157  | yes |
| Mpp2      | -3.72343 | 5.00E-05 | 0.00021987 | yes |
| Mansc1    | -2.77442 | 5.00E-05 | 0.00021987 | yes |
| Scarb1    | -3.30782 | 5.00E-05 | 0.00021987 | yes |
| Fbxo2     | -6.4736  | 5.00E-05 | 0.00021987 | yes |
| Cables2   | -3.79555 | 5.00E-05 | 0.00021987 | yes |
| Col16a1   | -3.54944 | 5.00E-05 | 0.00021987 | yes |
| Resp18    | -5.90012 | 5.00E-05 | 0.00021987 | yes |
| Dgat2     | -3.1192  | 5.00E-05 | 0.00021987 | yes |
| Asah2     | -4.25204 | 5.00E-05 | 0.00021987 | yes |
| Secisbp2l | -5.60801 | 5.00E-05 | 0.00021987 | yes |
| Atp1b1    | -4.58673 | 5.00E-05 | 0.00021987 | yes |
| Fam213b   | -4.62344 | 5.00E-05 | 0.00021987 | yes |
| Fgf1      | -5.44299 | 5.00E-05 | 0.00021987 | yes |
| Dexi      | -4.45574 | 5.00E-05 | 0.00021987 | yes |
| Extl2     | -4.82193 | 5.00E-05 | 0.00021987 | yes |
| Oat       | -5.3386  | 5.00E-05 | 0.00021987 | yes |
| Soga1     | -4.47166 | 5.00E-05 | 0.00021987 | yes |
| Cyp1b1    | -3.75417 | 5.00E-05 | 0.00021987 | yes |
| Adcy3     | -2.85741 | 5.00E-05 | 0.00021987 | yes |
| Limd1     | -3.48182 | 5.00E-05 | 0.00021987 | yes |
| Ddah2     | -2.9609  | 5.00E-05 | 0.00021987 | yes |
| Zak       | -3.93079 | 5.00E-05 | 0.00021987 | yes |
| Clybl     | -2.98531 | 5.00E-05 | 0.00021987 | yes |
| Hsd17b11  | -5.32161 | 5.00E-05 | 0.00021987 | yes |
| Nfib      | -4.62501 | 5.00E-05 | 0.00021987 | yes |
| Ryk       | -3.14846 | 5.00E-05 | 0.00021987 | yes |
| Slc1a5    | -3.8062  | 5.00E-05 | 0.00021987 | yes |

|              |          |          |            |     |
|--------------|----------|----------|------------|-----|
| Otud7b       | -4.74077 | 5.00E-05 | 0.00021987 | yes |
| Ablim2       | -3.87603 | 5.00E-05 | 0.00021987 | yes |
| Oprl1        | -3.22496 | 5.00E-05 | 0.00021987 | yes |
| Spred1       | -4.77829 | 5.00E-05 | 0.00021987 | yes |
| Map1b        | -3.27655 | 5.00E-05 | 0.00021987 | yes |
| Kitl         | -4.9915  | 5.00E-05 | 0.00021987 | yes |
| Nefl         | -3.51226 | 5.00E-05 | 0.00021987 | yes |
| Col5a3       | -4.51316 | 5.00E-05 | 0.00021987 | yes |
| Myl6b        | -2.62194 | 0.00015  | 0.00061459 | yes |
| Asb13        | -4.22888 | 5.00E-05 | 0.00021987 | yes |
| Rps6ka1      | -2.601   | 5.00E-05 | 0.00021987 | yes |
| Kcnn4        | -2.53187 | 5.00E-05 | 0.00021987 | yes |
| Slc4a4       | -4.96058 | 5.00E-05 | 0.00021987 | yes |
| Casc4        | -4.48355 | 5.00E-05 | 0.00021987 | yes |
| R3hcc1       | -3.33975 | 5.00E-05 | 0.00021987 | yes |
| Zfp365       | -4.90187 | 5.00E-05 | 0.00021987 | yes |
| Cdk17        | -3.69874 | 5.00E-05 | 0.00021987 | yes |
| Crtac1       | -3.91357 | 5.00E-05 | 0.00021987 | yes |
| Nptn         | -5.73242 | 5.00E-05 | 0.00021987 | yes |
| Hmgn1        | -3.68271 | 5.00E-05 | 0.00021987 | yes |
| Slc35b2      | -3.56933 | 5.00E-05 | 0.00021987 | yes |
| Gprc5c       | -3.15497 | 5.00E-05 | 0.00021987 | yes |
| Shisa4       | -4.61481 | 5.00E-05 | 0.00021987 | yes |
| 1700086L19Ri | -1.76683 | 0.00085  | 0.00298332 | yes |
| Vgll4        | -2.85777 | 5.00E-05 | 0.00021987 | yes |
| Cadps2       | -3.98195 | 5.00E-05 | 0.00021987 | yes |
| Tjp1         | -4.37714 | 5.00E-05 | 0.00021987 | yes |
| Agl          | -5.1506  | 5.00E-05 | 0.00021987 | yes |
| Csdc2        | -4.73871 | 5.00E-05 | 0.00021987 | yes |
| Il11ra1      | -2.17528 | 0.00075  | 0.00266977 | yes |
| 6430548M08R  | -5.0573  | 5.00E-05 | 0.00021987 | yes |
| Ptrf         | -4.59013 | 5.00E-05 | 0.00021987 | yes |
| Nfkb1        | -3.51012 | 5.00E-05 | 0.00021987 | yes |
| Foxj1        | -3.23567 | 5.00E-05 | 0.00021987 | yes |
| Plcb4        | -3.95882 | 5.00E-05 | 0.00021987 | yes |
| Kifc3        | -2.17705 | 0.00015  | 0.00061459 | yes |
| Zyx          | -4.26406 | 5.00E-05 | 0.00021987 | yes |
| Kif1c        | -3.75745 | 5.00E-05 | 0.00021987 | yes |
| Opcml        | -4.89303 | 5.00E-05 | 0.00021987 | yes |
| Comp         | -2.73329 | 5.00E-05 | 0.00021987 | yes |
| Rab30        | -2.91978 | 5.00E-05 | 0.00021987 | yes |
| Hebp2        | -4.28678 | 5.00E-05 | 0.00021987 | yes |
| Ppm1h        | -4.85245 | 5.00E-05 | 0.00021987 | yes |
| Plxna2       | -5.03001 | 5.00E-05 | 0.00021987 | yes |
| Apbb2        | -4.53479 | 5.00E-05 | 0.00021987 | yes |
| Gas2         | -2.78555 | 5.00E-05 | 0.00021987 | yes |
| Rapgef5      | -3.80082 | 5.00E-05 | 0.00021987 | yes |
| Wfs1         | -4.64195 | 5.00E-05 | 0.00021987 | yes |
| Tnfrsf21     | -5.25606 | 5.00E-05 | 0.00021987 | yes |
| Slc39a14     | -3.25007 | 5.00E-05 | 0.00021987 | yes |
| Itfg3        | -3.79653 | 5.00E-05 | 0.00021987 | yes |
| Bach1        | -3.32276 | 5.00E-05 | 0.00021987 | yes |
| Rnd3         | -3.2747  | 5.00E-05 | 0.00021987 | yes |

|             |          |          |            |     |
|-------------|----------|----------|------------|-----|
| Rem2        | -3.02914 | 5.00E-05 | 0.00021987 | yes |
| Sep-11      | -4.39753 | 5.00E-05 | 0.00021987 | yes |
| Gyg         | -5.2568  | 5.00E-05 | 0.00021987 | yes |
| Inpp5j      | -4.22208 | 5.00E-05 | 0.00021987 | yes |
| Vwf         | -4.02012 | 5.00E-05 | 0.00021987 | yes |
| Pacs1       | -3.62305 | 5.00E-05 | 0.00021987 | yes |
| Snn         | -4.48784 | 5.00E-05 | 0.00021987 | yes |
| Pde4b       | -2.96231 | 5.00E-05 | 0.00021987 | yes |
| Kcnk3       | -2.87555 | 5.00E-05 | 0.00021987 | yes |
| Peli2       | -3.81483 | 5.00E-05 | 0.00021987 | yes |
| Ifngr1      | -3.54796 | 5.00E-05 | 0.00021987 | yes |
| Ifitm3      | -4.11541 | 5.00E-05 | 0.00021987 | yes |
| Atp8a2      | -5.04835 | 5.00E-05 | 0.00021987 | yes |
| Fam171a1    | -4.3889  | 5.00E-05 | 0.00021987 | yes |
| Lamb2       | -3.80223 | 5.00E-05 | 0.00021987 | yes |
| Plod1       | -3.57811 | 5.00E-05 | 0.00021987 | yes |
| Atp2b3      | -4.67191 | 5.00E-05 | 0.00021987 | yes |
| Dlc1        | -4.12559 | 5.00E-05 | 0.00021987 | yes |
| Atp2b2      | -4.76626 | 5.00E-05 | 0.00021987 | yes |
| Rab11fip5   | -4.61695 | 5.00E-05 | 0.00021987 | yes |
| Rnaset2b    | -1.90197 | 0.00365  | 0.0107538  | yes |
| Nudt7       | -2.41968 | 5.00E-05 | 0.00021987 | yes |
| Luzp1       | -4.71329 | 5.00E-05 | 0.00021987 | yes |
| Gdf11       | -2.90498 | 5.00E-05 | 0.00021987 | yes |
| Sord        | -3.52847 | 5.00E-05 | 0.00021987 | yes |
| Fam126b     | -4.55129 | 5.00E-05 | 0.00021987 | yes |
| Reep3       | -3.72022 | 5.00E-05 | 0.00021987 | yes |
| Hcn1        | -4.54863 | 5.00E-05 | 0.00021987 | yes |
| Mab21l2     | -1.81649 | 0.0009   | 0.00313888 | yes |
| Tjp2        | -2.76667 | 5.00E-05 | 0.00021987 | yes |
| Aldh2       | -4.7898  | 5.00E-05 | 0.00021987 | yes |
| Rasa1       | -4.14885 | 5.00E-05 | 0.00021987 | yes |
| Palm3       | -4.08843 | 5.00E-05 | 0.00021987 | yes |
| Adcy9       | -4.11159 | 5.00E-05 | 0.00021987 | yes |
| Mical2      | -2.96307 | 5.00E-05 | 0.00021987 | yes |
| Tcf12       | -3.28762 | 5.00E-05 | 0.00021987 | yes |
| Zfp191      | -3.75406 | 5.00E-05 | 0.00021987 | yes |
| Bckdhb      | -3.02536 | 5.00E-05 | 0.00021987 | yes |
| Psat1       | -3.79398 | 5.00E-05 | 0.00021987 | yes |
| Phlda1      | -2.96842 | 5.00E-05 | 0.00021987 | yes |
| Sema7a      | -4.53759 | 5.00E-05 | 0.00021987 | yes |
| Hes1        | -2.16973 | 0.00045  | 0.00168221 | yes |
| Agpat3      | -4.68205 | 5.00E-05 | 0.00021987 | yes |
| Adcy2       | -3.6442  | 5.00E-05 | 0.00021987 | yes |
| Selm        | -4.79839 | 5.00E-05 | 0.00021987 | yes |
| Arl5b       | -2.89384 | 5.00E-05 | 0.00021987 | yes |
| Rnf157      | -4.73126 | 5.00E-05 | 0.00021987 | yes |
| Ado         | -3.60007 | 5.00E-05 | 0.00021987 | yes |
| Kit         | -4.09922 | 5.00E-05 | 0.00021987 | yes |
| Timp2       | -4.29431 | 5.00E-05 | 0.00021987 | yes |
| C530008M17R | -4.12837 | 5.00E-05 | 0.00021987 | yes |
| Lrrc49      | -4.45859 | 5.00E-05 | 0.00021987 | yes |
| Atpaf1      | -2.49443 | 5.00E-05 | 0.00021987 | yes |

|              |          |          |            |     |
|--------------|----------|----------|------------|-----|
| Plxnb2       | -3.3653  | 5.00E-05 | 0.00021987 | yes |
| Tenc1        | -3.14493 | 5.00E-05 | 0.00021987 | yes |
| Ndr3         | -4.27337 | 5.00E-05 | 0.00021987 | yes |
| Nmnat1       | -1.84129 | 0.00445  | 0.0128065  | yes |
| Cds1         | -4.25908 | 5.00E-05 | 0.00021987 | yes |
| Ctnnd2       | -4.28389 | 5.00E-05 | 0.00021987 | yes |
| Lrp6         | -3.97021 | 5.00E-05 | 0.00021987 | yes |
| Oxa1l        | -1.89629 | 0.00175  | 0.00565998 | yes |
| Pcolce2      | -3.4582  | 5.00E-05 | 0.00021987 | yes |
| Lgals1       | -5.38873 | 5.00E-05 | 0.00021987 | yes |
| Ier2         | -3.41073 | 5.00E-05 | 0.00021987 | yes |
| Per1         | -3.17122 | 5.00E-05 | 0.00021987 | yes |
| Pr3          | -3.56413 | 5.00E-05 | 0.00021987 | yes |
| Mmp15        | -4.54085 | 5.00E-05 | 0.00021987 | yes |
| Pcdhac2      | -1.75124 | 0.00055  | 0.0020157  | yes |
| Pygb         | -4.22165 | 5.00E-05 | 0.00021987 | yes |
| Rnf215       | -2.39855 | 5.00E-05 | 0.00021987 | yes |
| Ndufaf2      | -3.6312  | 5.00E-05 | 0.00021987 | yes |
| Fuca1        | -3.37986 | 5.00E-05 | 0.00021987 | yes |
| Pxdn         | -3.39597 | 5.00E-05 | 0.00021987 | yes |
| Ggct         | -2.2343  | 0.0004   | 0.00151277 | yes |
| Ckb          | -5.06228 | 5.00E-05 | 0.00021987 | yes |
| Ilvbl        | -3.21293 | 5.00E-05 | 0.00021987 | yes |
| Dclk1        | -4.39838 | 5.00E-05 | 0.00021987 | yes |
| Lmo1         | -2.22112 | 0.0007   | 0.00250591 | yes |
| Kctd1        | -2.27755 | 5.00E-05 | 0.00021987 | yes |
| Arhgef17     | -4.24539 | 5.00E-05 | 0.00021987 | yes |
| Tsc22d3      | -4.31554 | 5.00E-05 | 0.00021987 | yes |
| Mtss1l       | -3.93851 | 5.00E-05 | 0.00021987 | yes |
| 1810011O10Ri | -2.30881 | 5.00E-05 | 0.00021987 | yes |
| Pigz         | -3.17199 | 5.00E-05 | 0.00021987 | yes |
| Fbxo31       | -4.51606 | 5.00E-05 | 0.00021987 | yes |
| Gpr153       | -3.92219 | 5.00E-05 | 0.00021987 | yes |
| Iqgap1       | -3.70777 | 5.00E-05 | 0.00021987 | yes |
| Npc1         | -3.12069 | 5.00E-05 | 0.00021987 | yes |
| Camk2g       | -4.26955 | 5.00E-05 | 0.00021987 | yes |
| Slc25a29     | -2.19623 | 0.0001   | 0.00042184 | yes |
| Rgl1         | -3.95311 | 5.00E-05 | 0.00021987 | yes |
| H2-DMa       | -2.11854 | 0.00065  | 0.00234272 | yes |
| Ppt1         | -4.03699 | 5.00E-05 | 0.00021987 | yes |
| Slc29a4      | -3.65061 | 5.00E-05 | 0.00021987 | yes |
| Ttc39b       | -3.98965 | 5.00E-05 | 0.00021987 | yes |
| Haghl        | -3.00039 | 5.00E-05 | 0.00021987 | yes |
| Gadd45b      | -2.2487  | 0.00025  | 0.00098508 | yes |
| Lmtk2        | -3.65473 | 5.00E-05 | 0.00021987 | yes |
| Bend6        | -4.33572 | 5.00E-05 | 0.00021987 | yes |
| Fkbp7        | -1.78138 | 0.00715  | 0.0194343  | yes |
| Cxxc5        | -3.13442 | 5.00E-05 | 0.00021987 | yes |
| Zfp651       | -3.52377 | 5.00E-05 | 0.00021987 | yes |
| Lss          | -3.05247 | 5.00E-05 | 0.00021987 | yes |
| Zdhhc22      | -2.08683 | 0.00325  | 0.00972654 | yes |
| Pdk3         | -3.63074 | 5.00E-05 | 0.00021987 | yes |
| Wdfy2        | -2.62146 | 5.00E-05 | 0.00021987 | yes |



|              |          |          |            |     |
|--------------|----------|----------|------------|-----|
| St8sia1      | -4.05192 | 5.00E-05 | 0.00021987 | yes |
| Kcnk2        | -2.47526 | 5.00E-05 | 0.00021987 | yes |
| Gria4        | -3.04801 | 5.00E-05 | 0.00021987 | yes |
| Heatr5a      | -3.95594 | 5.00E-05 | 0.00021987 | yes |
| Aga          | -2.11358 | 5.00E-05 | 0.00021987 | yes |
| Camkk1       | -3.28359 | 5.00E-05 | 0.00021987 | yes |
| Caly         | -1.62997 | 0.0019   | 0.00607991 | yes |
| Shf          | -2.75649 | 5.00E-05 | 0.00021987 | yes |
| Gpr64        | -3.49985 | 5.00E-05 | 0.00021987 | yes |
| Ano4         | -3.37506 | 5.00E-05 | 0.00021987 | yes |
| Paqr9        | -3.77942 | 5.00E-05 | 0.00021987 | yes |
| Vstm2a       | -2.98059 | 5.00E-05 | 0.00021987 | yes |
| Paqr8        | -3.8811  | 5.00E-05 | 0.00021987 | yes |
| Ptpn13       | -3.43468 | 5.00E-05 | 0.00021987 | yes |
| Smad9        | -3.83256 | 5.00E-05 | 0.00021987 | yes |
| Snap25       | -3.61459 | 5.00E-05 | 0.00021987 | yes |
| Ackr1        | -4.60543 | 5.00E-05 | 0.00021987 | yes |
| Tor1aip1     | -1.83567 | 0.00085  | 0.00298332 | yes |
| Lzts2        | -2.62679 | 5.00E-05 | 0.00021987 | yes |
| Irs2         | -2.9976  | 5.00E-05 | 0.00021987 | yes |
| Slc30a1      | -2.84107 | 5.00E-05 | 0.00021987 | yes |
| Tm7sf3       | -3.68916 | 5.00E-05 | 0.00021987 | yes |
| Sdc3         | -4.28508 | 5.00E-05 | 0.00021987 | yes |
| Jun          | -4.1948  | 5.00E-05 | 0.00021987 | yes |
| Mctp1        | -3.43465 | 5.00E-05 | 0.00021987 | yes |
| Galnt2       | -3.16753 | 5.00E-05 | 0.00021987 | yes |
| Synj1        | -4.0459  | 5.00E-05 | 0.00021987 | yes |
| Susd4        | -3.83097 | 5.00E-05 | 0.00021987 | yes |
| Wwp1         | -3.50554 | 5.00E-05 | 0.00021987 | yes |
| Slc24a2      | -3.97659 | 5.00E-05 | 0.00021987 | yes |
| Focad        | -2.85939 | 5.00E-05 | 0.00021987 | yes |
| Pmp22        | -3.46116 | 5.00E-05 | 0.00021987 | yes |
| Fam102a      | -3.89822 | 5.00E-05 | 0.00021987 | yes |
| Gcsh         | -3.91921 | 5.00E-05 | 0.00021987 | yes |
| Chgb         | -4.12648 | 5.00E-05 | 0.00021987 | yes |
| Calu         | -4.15031 | 5.00E-05 | 0.00021987 | yes |
| Apcdd1       | -2.19903 | 0.0001   | 0.00042184 | yes |
| Rxrg         | -1.83546 | 0.00045  | 0.00168221 | yes |
| 9330102E08Ri | -2.53598 | 5.00E-05 | 0.00021987 | yes |
| Enpp5        | -3.88392 | 5.00E-05 | 0.00021987 | yes |
| Lgmn         | -4.52574 | 5.00E-05 | 0.00021987 | yes |
| Ctdsp2       | -3.36296 | 5.00E-05 | 0.00021987 | yes |
| Arhgef9      | -3.41048 | 5.00E-05 | 0.00021987 | yes |
| Grb10        | -3.14196 | 5.00E-05 | 0.00021987 | yes |
| Nfic         | -3.98568 | 5.00E-05 | 0.00021987 | yes |
| Plbd2        | -3.97777 | 5.00E-05 | 0.00021987 | yes |
| Amigo2       | -3.23193 | 5.00E-05 | 0.00021987 | yes |
| Cst3         | -5.44184 | 5.00E-05 | 0.00021987 | yes |
| Edil3        | -3.93933 | 5.00E-05 | 0.00021987 | yes |
| Dock10       | -2.97594 | 5.00E-05 | 0.00021987 | yes |
| Tmem53       | -1.65562 | 0.0012   | 0.00406755 | yes |
| H2-Q4        | -1.9828  | 0.0009   | 0.00313888 | yes |
| Ivd          | -2.68107 | 5.00E-05 | 0.00021987 | yes |

|              |          |          |            |     |
|--------------|----------|----------|------------|-----|
| Chml         | -2.96419 | 5.00E-05 | 0.00021987 | yes |
| Ezr          | -3.38588 | 5.00E-05 | 0.00021987 | yes |
| Dact3        | -2.92885 | 5.00E-05 | 0.00021987 | yes |
| Hey1         | -2.84719 | 5.00E-05 | 0.00021987 | yes |
| Itm2c        | -4.3978  | 5.00E-05 | 0.00021987 | yes |
| Maged2       | -3.17431 | 5.00E-05 | 0.00021987 | yes |
| Bcar3        | -2.626   | 5.00E-05 | 0.00021987 | yes |
| Gpr137c      | -2.56107 | 5.00E-05 | 0.00021987 | yes |
| Elovl5       | -4.2362  | 5.00E-05 | 0.00021987 | yes |
| Arhgdig      | -4.12307 | 5.00E-05 | 0.00021987 | yes |
| Slc22a17     | -4.12289 | 5.00E-05 | 0.00021987 | yes |
| Ehd3         | -4.12538 | 5.00E-05 | 0.00021987 | yes |
| Ahcyl2       | -3.77233 | 5.00E-05 | 0.00021987 | yes |
| Kcnk4        | -1.8301  | 0.0019   | 0.00607991 | yes |
| Cplx1        | -3.92495 | 5.00E-05 | 0.00021987 | yes |
| Traf3        | -3.26197 | 5.00E-05 | 0.00021987 | yes |
| Mpp6         | -2.02598 | 0.0001   | 0.00042184 | yes |
| Ccdc184      | -2.42814 | 5.00E-05 | 0.00021987 | yes |
| 1110008P14Ri | -4.84872 | 5.00E-05 | 0.00021987 | yes |
| Cyfp1        | -3.10091 | 5.00E-05 | 0.00021987 | yes |
| Synpo        | -3.0612  | 5.00E-05 | 0.00021987 | yes |
| Kcns3        | -3.19868 | 5.00E-05 | 0.00021987 | yes |
| Qsox1        | -3.15744 | 5.00E-05 | 0.00021987 | yes |
| Fam69b       | -3.32675 | 5.00E-05 | 0.00021987 | yes |
| Sacs         | -2.47746 | 5.00E-05 | 0.00021987 | yes |
| Slc19a2      | -2.60745 | 5.00E-05 | 0.00021987 | yes |
| Abhd2        | -3.93005 | 5.00E-05 | 0.00021987 | yes |
| Efr3a        | -3.79034 | 5.00E-05 | 0.00021987 | yes |
| Zfp423       | -2.64246 | 5.00E-05 | 0.00021987 | yes |
| Ptprs        | -3.79153 | 5.00E-05 | 0.00021987 | yes |
| Arhgap35     | -3.92708 | 5.00E-05 | 0.00021987 | yes |
| Tenm3        | -3.49999 | 5.00E-05 | 0.00021987 | yes |
| Sphkap       | -3.17245 | 5.00E-05 | 0.00021987 | yes |
| Lima1        | -2.30808 | 5.00E-05 | 0.00021987 | yes |
| Plekhh1      | -2.55927 | 5.00E-05 | 0.00021987 | yes |
| Cdr2l        | -3.80167 | 5.00E-05 | 0.00021987 | yes |
| Tmem245      | -2.98319 | 5.00E-05 | 0.00021987 | yes |
| Efcab14      | -3.21644 | 5.00E-05 | 0.00021987 | yes |
| Them6        | -4.27676 | 5.00E-05 | 0.00021987 | yes |
| Smim19       | -1.98392 | 0.00175  | 0.00565998 | yes |
| Shh          | -2.64076 | 5.00E-05 | 0.00021987 | yes |
| Phyh         | -3.6047  | 5.00E-05 | 0.00021987 | yes |
| Scamp2       | -2.47342 | 0.0001   | 0.00042184 | yes |
| Gpt2         | -3.53596 | 5.00E-05 | 0.00021987 | yes |
| Cdh2         | -3.56641 | 5.00E-05 | 0.00021987 | yes |
| Mdh1         | -4.13424 | 5.00E-05 | 0.00021987 | yes |
| Cflar        | -3.10363 | 5.00E-05 | 0.00021987 | yes |
| Neat1        | -3.17726 | 5.00E-05 | 0.00021987 | yes |
| 9530068E07Ri | -3.9703  | 5.00E-05 | 0.00021987 | yes |
| Sccpdh       | -3.64461 | 5.00E-05 | 0.00021987 | yes |
| Fzd3         | -3.33589 | 5.00E-05 | 0.00021987 | yes |
| Depdc5       | -3.32844 | 5.00E-05 | 0.00021987 | yes |
| Dagla        | -2.80158 | 5.00E-05 | 0.00021987 | yes |

|              |          |          |            |     |
|--------------|----------|----------|------------|-----|
| Fam210a      | -3.02752 | 5.00E-05 | 0.00021987 | yes |
| Rmdn2        | -2.09359 | 0.0004   | 0.00151277 | yes |
| Mbp          | -2.62656 | 5.00E-05 | 0.00021987 | yes |
| Mgat5        | -2.54594 | 0.0001   | 0.00042184 | yes |
| Zfp219       | -1.79224 | 0.0004   | 0.00151277 | yes |
| Ephx1        | -3.77269 | 5.00E-05 | 0.00021987 | yes |
| Spsb4        | -1.8717  | 0.001    | 0.00345135 | yes |
| Etv6         | -2.57256 | 5.00E-05 | 0.00021987 | yes |
| Kcnip3       | -3.63192 | 5.00E-05 | 0.00021987 | yes |
| Dlg1         | -2.42702 | 5.00E-05 | 0.00021987 | yes |
| Arhgap5      | -3.25395 | 5.00E-05 | 0.00021987 | yes |
| Nr3c1        | -3.23061 | 5.00E-05 | 0.00021987 | yes |
| Sp1          | -2.8271  | 5.00E-05 | 0.00021987 | yes |
| Rap1gap      | -3.31302 | 5.00E-05 | 0.00021987 | yes |
| Fut8         | -3.11447 | 5.00E-05 | 0.00021987 | yes |
| Inf2         | -3.16977 | 5.00E-05 | 0.00021987 | yes |
| Endog        | -1.48668 | 0.01955  | 0.0461594  | yes |
| Rapgef4      | -3.56554 | 5.00E-05 | 0.00021987 | yes |
| Phldb1       | -3.05121 | 5.00E-05 | 0.00021987 | yes |
| Atp2a2       | -3.45912 | 5.00E-05 | 0.00021987 | yes |
| Ttyh2        | -1.96953 | 0.00035  | 0.00134243 | yes |
| Nxt2         | -2.62091 | 5.00E-05 | 0.00021987 | yes |
| Nsun4        | -2.44302 | 5.00E-05 | 0.00021987 | yes |
| Tmem64       | -3.24431 | 5.00E-05 | 0.00021987 | yes |
| Ndc1         | -2.39222 | 5.00E-05 | 0.00021987 | yes |
| Sptb         | -3.48581 | 5.00E-05 | 0.00021987 | yes |
| Anp32a       | -3.13695 | 5.00E-05 | 0.00021987 | yes |
| Arhgap44     | -3.09584 | 5.00E-05 | 0.00021987 | yes |
| Gpr125       | -2.85744 | 5.00E-05 | 0.00021987 | yes |
| Hsd12        | -3.53397 | 5.00E-05 | 0.00021987 | yes |
| Crtap        | -1.75813 | 0.0007   | 0.00250591 | yes |
| Ufsp1        | -1.74569 | 0.00655  | 0.0179915  | yes |
| Ppif         | -2.19227 | 5.00E-05 | 0.00021987 | yes |
| Tcf4         | -2.77115 | 5.00E-05 | 0.00021987 | yes |
| Prps2        | -2.70616 | 5.00E-05 | 0.00021987 | yes |
| Cnst         | -3.6887  | 5.00E-05 | 0.00021987 | yes |
| A630007B06Ri | -2.69187 | 5.00E-05 | 0.00021987 | yes |
| Mfsd2a       | -2.7527  | 5.00E-05 | 0.00021987 | yes |
| Lrrc20       | -2.56703 | 5.00E-05 | 0.00021987 | yes |
| Prdx4        | -2.71409 | 5.00E-05 | 0.00021987 | yes |
| Kat2b        | -2.58921 | 5.00E-05 | 0.00021987 | yes |
| Rab11fip4    | -3.00975 | 5.00E-05 | 0.00021987 | yes |
| Rcbtb1       | -3.31651 | 5.00E-05 | 0.00021987 | yes |
| Slc6a6       | -2.76959 | 5.00E-05 | 0.00021987 | yes |
| Ntrk1        | -3.77307 | 5.00E-05 | 0.00021987 | yes |
| Mgrn1        | -2.21082 | 0.0002   | 0.00080284 | yes |
| Gid4         | -2.93682 | 5.00E-05 | 0.00021987 | yes |
| Cdc42ep2     | -2.58336 | 5.00E-05 | 0.00021987 | yes |
| Nxpe3        | -3.14332 | 5.00E-05 | 0.00021987 | yes |
| Vamp3        | -2.64217 | 5.00E-05 | 0.00021987 | yes |
| Auh          | -3.5165  | 5.00E-05 | 0.00021987 | yes |
| Rnft2        | -2.68607 | 5.00E-05 | 0.00021987 | yes |
| Tmx2         | -2.66469 | 5.00E-05 | 0.00021987 | yes |

|              |          |          |            |     |
|--------------|----------|----------|------------|-----|
| Fxyd5        | -1.52516 | 0.0025   | 0.00773857 | yes |
| Pigx         | -1.30168 | 0.00995  | 0.0258583  | yes |
| Net1         | -2.31982 | 5.00E-05 | 0.00021987 | yes |
| Kcnq2        | -2.85681 | 5.00E-05 | 0.00021987 | yes |
| Slitrk5      | -2.7428  | 5.00E-05 | 0.00021987 | yes |
| Ptgr1        | -1.81866 | 0.0014   | 0.00465742 | yes |
| Bcas1        | -2.30068 | 5.00E-05 | 0.00021987 | yes |
| Cdc26        | -2.16685 | 0.0018   | 0.0058019  | yes |
| Phb          | -2.52471 | 5.00E-05 | 0.00021987 | yes |
| Srgn         | -2.05407 | 0.00185  | 0.00593853 | yes |
| Vwa8         | -2.97472 | 5.00E-05 | 0.00021987 | yes |
| Igf2r        | -2.97401 | 5.00E-05 | 0.00021987 | yes |
| Tspan3       | -3.85589 | 5.00E-05 | 0.00021987 | yes |
| Rgs2         | -2.04003 | 0.00025  | 0.00098508 | yes |
| Fkbp14       | -2.34012 | 5.00E-05 | 0.00021987 | yes |
| Tsc22d4      | -2.68853 | 5.00E-05 | 0.00021987 | yes |
| Eid1         | -2.67978 | 5.00E-05 | 0.00021987 | yes |
| Efhd2        | -2.79961 | 5.00E-05 | 0.00021987 | yes |
| Lgalsl       | -2.83399 | 5.00E-05 | 0.00021987 | yes |
| Fbxo7        | -2.57016 | 5.00E-05 | 0.00021987 | yes |
| Alg9         | -1.82469 | 0.0004   | 0.00151277 | yes |
| St3gal5      | -2.60196 | 5.00E-05 | 0.00021987 | yes |
| Gtdc1        | -2.21417 | 0.0001   | 0.00042184 | yes |
| Tmem123      | -2.05396 | 5.00E-05 | 0.00021987 | yes |
| Itm2b        | -3.65144 | 5.00E-05 | 0.00021987 | yes |
| Hrsp12       | -2.73577 | 0.0001   | 0.00042184 | yes |
| 4931406P16Ri | -2.62097 | 5.00E-05 | 0.00021987 | yes |
| Gm2115       | -2.85697 | 5.00E-05 | 0.00021987 | yes |
| Epb4.1l1     | -3.3441  | 5.00E-05 | 0.00021987 | yes |
| Atp1a1       | -2.18495 | 0.0002   | 0.00080284 | yes |
| Rapgef2      | -2.83544 | 5.00E-05 | 0.00021987 | yes |
| Entpd6       | -2.39325 | 5.00E-05 | 0.00021987 | yes |
| Cbfb         | -3.33291 | 5.00E-05 | 0.00021987 | yes |
| Pip4k2a      | -3.32183 | 5.00E-05 | 0.00021987 | yes |
| Prkrir       | -2.75999 | 5.00E-05 | 0.00021987 | yes |
| Sptbn2       | -3.3733  | 5.00E-05 | 0.00021987 | yes |
| Sh3d19       | -2.81857 | 5.00E-05 | 0.00021987 | yes |
| Sorbs1       | -3.26922 | 5.00E-05 | 0.00021987 | yes |
| Iglon5       | -2.49201 | 5.00E-05 | 0.00021987 | yes |
| Lym5         | -2.13109 | 0.00015  | 0.00061459 | yes |
| Fam101b      | -2.28055 | 0.00015  | 0.00061459 | yes |
| Tbx3         | -2.31913 | 5.00E-05 | 0.00021987 | yes |
| Bak1         | -1.77561 | 0.0017   | 0.0055144  | yes |
| Flna         | -3.03334 | 5.00E-05 | 0.00021987 | yes |
| Smpd1        | -3.23681 | 5.00E-05 | 0.00021987 | yes |
| Cabp1        | -3.69799 | 5.00E-05 | 0.00021987 | yes |
| Cd200        | -3.22725 | 5.00E-05 | 0.00021987 | yes |
| Gm4980       | -2.97149 | 5.00E-05 | 0.00021987 | yes |
| Sez6l2       | -3.21098 | 5.00E-05 | 0.00021987 | yes |
| Ggcx         | -1.91716 | 0.00045  | 0.00168221 | yes |
| Ldb3         | -1.36836 | 0.00865  | 0.0229473  | yes |
| Slc25a10     | -2.28605 | 5.00E-05 | 0.00021987 | yes |
| Epb4.1l3     | -2.9861  | 5.00E-05 | 0.00021987 | yes |

|          |          |          |            |     |
|----------|----------|----------|------------|-----|
| Prkaca   | -3.26128 | 5.00E-05 | 0.00021987 | yes |
| E2f6     | -2.66273 | 5.00E-05 | 0.00021987 | yes |
| Abcg4    | -2.90125 | 5.00E-05 | 0.00021987 | yes |
| Hsd17b7  | -3.09899 | 5.00E-05 | 0.00021987 | yes |
| Dok5     | -1.39748 | 0.00605  | 0.0167919  | yes |
| Rnf26    | -2.50237 | 5.00E-05 | 0.00021987 | yes |
| Osbp2    | -2.17281 | 5.00E-05 | 0.00021987 | yes |
| Lrrc24   | -1.6132  | 0.005    | 0.0142106  | yes |
| Cox5a    | -4.3832  | 5.00E-05 | 0.00021987 | yes |
| Cadm3    | -3.21595 | 5.00E-05 | 0.00021987 | yes |
| Nrg1     | -2.99386 | 5.00E-05 | 0.00021987 | yes |
| Cdh18    | -2.39064 | 5.00E-05 | 0.00021987 | yes |
| Dner     | -3.15356 | 5.00E-05 | 0.00021987 | yes |
| Chga     | -3.49396 | 5.00E-05 | 0.00021987 | yes |
| Xk       | -2.28733 | 5.00E-05 | 0.00021987 | yes |
| Rnf208   | -3.02455 | 5.00E-05 | 0.00021987 | yes |
| Ninj1    | -2.24919 | 0.0001   | 0.00042184 | yes |
| Asah1    | -3.10471 | 5.00E-05 | 0.00021987 | yes |
| Dsel     | -2.4718  | 5.00E-05 | 0.00021987 | yes |
| Trip10   | -2.07685 | 5.00E-05 | 0.00021987 | yes |
| Lcp1     | -2.92926 | 5.00E-05 | 0.00021987 | yes |
| S100a13  | -3.37437 | 5.00E-05 | 0.00021987 | yes |
| Pdhb     | -3.33383 | 5.00E-05 | 0.00021987 | yes |
| Tubgcp4  | -1.71696 | 0.00195  | 0.00621891 | yes |
| Habp4    | -3.29439 | 5.00E-05 | 0.00021987 | yes |
| Siae     | -2.43637 | 5.00E-05 | 0.00021987 | yes |
| Sorl1    | -3.24647 | 5.00E-05 | 0.00021987 | yes |
| Foxo4    | -1.99662 | 0.0003   | 0.00116377 | yes |
| Txndc16  | -2.76218 | 5.00E-05 | 0.00021987 | yes |
| Agap1    | -2.89251 | 5.00E-05 | 0.00021987 | yes |
| Gm7120   | -1.57154 | 0.00415  | 0.0120214  | yes |
| Dip2a    | -2.76198 | 5.00E-05 | 0.00021987 | yes |
| Mpi      | -2.81795 | 5.00E-05 | 0.00021987 | yes |
| Ctgf     | -1.98704 | 0.00045  | 0.00168221 | yes |
| Fam20b   | -3.15133 | 5.00E-05 | 0.00021987 | yes |
| Six4     | -2.7341  | 5.00E-05 | 0.00021987 | yes |
| Abl2     | -2.69873 | 5.00E-05 | 0.00021987 | yes |
| Mtx3     | -2.79332 | 5.00E-05 | 0.00021987 | yes |
| Bhlhb9   | -2.42119 | 5.00E-05 | 0.00021987 | yes |
| Ndufa12  | -2.13269 | 0.0068   | 0.0185935  | yes |
| Atp6v1g2 | -3.28864 | 5.00E-05 | 0.00021987 | yes |
| Atp5c1   | -2.97315 | 5.00E-05 | 0.00021987 | yes |
| Abcg1    | -2.93194 | 5.00E-05 | 0.00021987 | yes |
| Lancl1   | -3.00117 | 5.00E-05 | 0.00021987 | yes |
| Mettl21a | -1.90135 | 0.0005   | 0.00185035 | yes |
| Vkorc1   | -2.42968 | 0.0003   | 0.00116377 | yes |
| Tecr     | -3.07761 | 5.00E-05 | 0.00021987 | yes |
| Srgap2   | -2.63303 | 5.00E-05 | 0.00021987 | yes |
| Enpp2    | -1.9774  | 0.00015  | 0.00061459 | yes |
| Acss2    | -2.79966 | 5.00E-05 | 0.00021987 | yes |
| Tmbim6   | -3.06783 | 5.00E-05 | 0.00021987 | yes |
| Got1     | -3.35994 | 5.00E-05 | 0.00021987 | yes |
| Slc44a1  | -3.01556 | 5.00E-05 | 0.00021987 | yes |

|          |          |          |            |     |
|----------|----------|----------|------------|-----|
| Klf2     | -2.06799 | 0.00045  | 0.00168221 | yes |
| Krt222   | -2.58053 | 5.00E-05 | 0.00021987 | yes |
| Slc12a9  | -2.0594  | 0.0003   | 0.00116377 | yes |
| Ubtcd2   | -2.50069 | 5.00E-05 | 0.00021987 | yes |
| Amer1    | -2.60706 | 5.00E-05 | 0.00021987 | yes |
| Eva1c    | -1.58716 | 0.00195  | 0.00621891 | yes |
| Chl1     | -2.95687 | 5.00E-05 | 0.00021987 | yes |
| Large    | -2.87343 | 5.00E-05 | 0.00021987 | yes |
| Fnta     | -3.11509 | 5.00E-05 | 0.00021987 | yes |
| Ankrd28  | -2.15515 | 5.00E-05 | 0.00021987 | yes |
| Podxl2   | -2.37881 | 5.00E-05 | 0.00021987 | yes |
| Cyp2u1   | -1.56368 | 0.0049   | 0.0139473  | yes |
| Eno2     | -3.0897  | 5.00E-05 | 0.00021987 | yes |
| Slc27a4  | -3.0748  | 5.00E-05 | 0.00021987 | yes |
| Sfxn5    | -2.37713 | 5.00E-05 | 0.00021987 | yes |
| Sh3pxd2a | -2.94886 | 5.00E-05 | 0.00021987 | yes |
| Slc12a2  | -3.07884 | 5.00E-05 | 0.00021987 | yes |
| Fam58b   | -1.63102 | 0.00835  | 0.0222717  | yes |
| Zfyve21  | -1.63745 | 0.00605  | 0.0167919  | yes |
| Syt12    | -2.60883 | 5.00E-05 | 0.00021987 | yes |
| Creb3l2  | -1.7532  | 0.0011   | 0.00376029 | yes |
| AI593442 | -2.87401 | 5.00E-05 | 0.00021987 | yes |
| Me1      | -2.8394  | 5.00E-05 | 0.00021987 | yes |
| Plxna1   | -2.69874 | 5.00E-05 | 0.00021987 | yes |
| Sgpp2    | -2.65283 | 5.00E-05 | 0.00021987 | yes |
| Clstn1   | -2.74159 | 5.00E-05 | 0.00021987 | yes |
| Farp1    | -2.05635 | 0.00025  | 0.00098508 | yes |
| Slc25a20 | -2.15055 | 0.0002   | 0.00080284 | yes |
| Sh3kbp1  | -2.09641 | 5.00E-05 | 0.00021987 | yes |
| Sec14l1  | -2.51104 | 5.00E-05 | 0.00021987 | yes |
| Supt16   | -2.58182 | 5.00E-05 | 0.00021987 | yes |
| Fam53b   | -2.08337 | 5.00E-05 | 0.00021987 | yes |
| Tmem25   | -2.97419 | 5.00E-05 | 0.00021987 | yes |
| Rnf149   | -2.19971 | 5.00E-05 | 0.00021987 | yes |
| Cartpt   | -1.51614 | 0.0035   | 0.0103602  | yes |
| Tmem176a | -2.39364 | 5.00E-05 | 0.00021987 | yes |
| Mgst3    | -3.41864 | 5.00E-05 | 0.00021987 | yes |
| Efnb2    | -2.46098 | 5.00E-05 | 0.00021987 | yes |
| Shroom3  | -2.0827  | 5.00E-05 | 0.00021987 | yes |
| Msi2     | -2.64898 | 5.00E-05 | 0.00021987 | yes |
| Tpgs2    | -2.4163  | 5.00E-05 | 0.00021987 | yes |
| Adam10   | -2.92018 | 5.00E-05 | 0.00021987 | yes |
| Slc43a2  | -2.70305 | 5.00E-05 | 0.00021987 | yes |
| Aco2     | -2.97409 | 5.00E-05 | 0.00021987 | yes |
| Galnt1   | -2.44593 | 5.00E-05 | 0.00021987 | yes |
| Ric3     | -2.37018 | 5.00E-05 | 0.00021987 | yes |
| Cyb5d2   | -2.20226 | 5.00E-05 | 0.00021987 | yes |
| Vezf1    | -2.25568 | 5.00E-05 | 0.00021987 | yes |
| Nde1     | -1.47911 | 0.00375  | 0.0110093  | yes |
| Ckap4    | -2.36299 | 5.00E-05 | 0.00021987 | yes |
| Cacna2d3 | -2.48677 | 5.00E-05 | 0.00021987 | yes |
| Slc35e1  | -2.73991 | 5.00E-05 | 0.00021987 | yes |
| Dusp6    | -2.31164 | 5.00E-05 | 0.00021987 | yes |



|              |          |          |            |     |
|--------------|----------|----------|------------|-----|
| Gramd1b      | -2.58967 | 5.00E-05 | 0.00021987 | yes |
| Gltpd1       | -2.67212 | 5.00E-05 | 0.00021987 | yes |
| Nkiras1      | -2.24228 | 5.00E-05 | 0.00021987 | yes |
| Elp3         | -2.66973 | 5.00E-05 | 0.00021987 | yes |
| Slc25a33     | -2.47149 | 5.00E-05 | 0.00021987 | yes |
| Ptgir        | -2.61555 | 5.00E-05 | 0.00021987 | yes |
| Oscp1        | -1.81621 | 0.0019   | 0.00607991 | yes |
| Cd63         | -1.34215 | 0.0081   | 0.0217009  | yes |
| Vps26a       | -2.40051 | 5.00E-05 | 0.00021987 | yes |
| Slc16a1      | -2.69032 | 5.00E-05 | 0.00021987 | yes |
| Tm6sf1       | -1.31501 | 0.0212   | 0.0495526  | yes |
| Junb         | -2.81584 | 5.00E-05 | 0.00021987 | yes |
| Plekhd1      | -2.72141 | 5.00E-05 | 0.00021987 | yes |
| Stox2        | -2.33188 | 5.00E-05 | 0.00021987 | yes |
| Kcnj3        | -1.68938 | 0.003    | 0.00906422 | yes |
| Hadh         | -2.45651 | 5.00E-05 | 0.00021987 | yes |
| Rock2        | -2.65384 | 5.00E-05 | 0.00021987 | yes |
| Camk2b       | -2.45939 | 5.00E-05 | 0.00021987 | yes |
| Slc25a25     | -2.80423 | 5.00E-05 | 0.00021987 | yes |
| Pxmp4        | -1.73153 | 0.00325  | 0.00972654 | yes |
| Ndufb5       | -2.98459 | 5.00E-05 | 0.00021987 | yes |
| Klf6         | -2.71112 | 5.00E-05 | 0.00021987 | yes |
| Fntb         | -2.37144 | 5.00E-05 | 0.00021987 | yes |
| Sun2         | -2.46948 | 5.00E-05 | 0.00021987 | yes |
| Vma21        | -2.51174 | 5.00E-05 | 0.00021987 | yes |
| Lphn1        | -2.87835 | 5.00E-05 | 0.00021987 | yes |
| Dennd5a      | -2.81785 | 5.00E-05 | 0.00021987 | yes |
| Myh14        | -2.66068 | 5.00E-05 | 0.00021987 | yes |
| Mknk1        | -2.0155  | 0.00015  | 0.00061459 | yes |
| Mia3         | -2.81376 | 5.00E-05 | 0.00021987 | yes |
| Grwd1        | -1.63669 | 0.0034   | 0.0101093  | yes |
| Atp9b        | -2.63287 | 5.00E-05 | 0.00021987 | yes |
| B630019K06Ri | -2.2952  | 5.00E-05 | 0.00021987 | yes |
| Utrn         | -2.77095 | 5.00E-05 | 0.00021987 | yes |
| Pttg1ip      | -2.69887 | 5.00E-05 | 0.00021987 | yes |
| Errfi1       | -2.28374 | 5.00E-05 | 0.00021987 | yes |
| Smim13       | -2.90672 | 5.00E-05 | 0.00021987 | yes |
| Prpf19       | -2.72256 | 5.00E-05 | 0.00021987 | yes |
| Ndufv2       | -2.6202  | 5.00E-05 | 0.00021987 | yes |
| Znrf1        | -2.24956 | 5.00E-05 | 0.00021987 | yes |
| Serpini1     | -2.89498 | 5.00E-05 | 0.00021987 | yes |
| Hspa12a      | -2.66209 | 5.00E-05 | 0.00021987 | yes |
| O610007P14Ri | -2.10513 | 0.00045  | 0.00168221 | yes |
| Mcam         | -2.9212  | 5.00E-05 | 0.00021987 | yes |
| Coq7         | -2.18494 | 0.00085  | 0.00298332 | yes |
| Hist1h2bc    | -1.89504 | 0.00015  | 0.00061459 | yes |
| Klf4         | -1.89906 | 0.0002   | 0.00080284 | yes |
| Tmem219      | -1.24408 | 0.01405  | 0.0348479  | yes |
| Gng12        | -2.06342 | 5.00E-05 | 0.00021987 | yes |
| Ltbp3        | -1.9082  | 0.0005   | 0.00185035 | yes |
| Ets2         | -2.12443 | 0.00015  | 0.00061459 | yes |
| Pcca         | -1.88034 | 0.0005   | 0.00185035 | yes |
| Amph         | -2.73325 | 5.00E-05 | 0.00021987 | yes |

|               |          |          |            |     |
|---------------|----------|----------|------------|-----|
| Vhl           | -1.83263 | 0.0008   | 0.00282803 | yes |
| Tmem246       | -2.68242 | 5.00E-05 | 0.00021987 | yes |
| Slc1a4        | -2.65081 | 5.00E-05 | 0.00021987 | yes |
| Ankrd52       | -2.74616 | 5.00E-05 | 0.00021987 | yes |
| Tacc1         | -2.55637 | 5.00E-05 | 0.00021987 | yes |
| Entpd7        | -1.43537 | 0.0067   | 0.0183427  | yes |
| Pik3r3        | -2.52158 | 5.00E-05 | 0.00021987 | yes |
| Nit2          | -1.37424 | 0.02135  | 0.0498242  | yes |
| B2m           | -2.55251 | 5.00E-05 | 0.00021987 | yes |
| Stxbp3a       | -1.46405 | 0.0082   | 0.0219201  | yes |
| Ak1           | -2.6086  | 5.00E-05 | 0.00021987 | yes |
| Abhd12        | -3.03495 | 5.00E-05 | 0.00021987 | yes |
| Mef2c         | -2.10744 | 5.00E-05 | 0.00021987 | yes |
| Ralgapa2      | -2.24127 | 5.00E-05 | 0.00021987 | yes |
| Tab3          | -2.32487 | 5.00E-05 | 0.00021987 | yes |
| Sarm1         | -2.34882 | 5.00E-05 | 0.00021987 | yes |
| 1700020I14Ril | -2.15245 | 5.00E-05 | 0.00021987 | yes |
| Diras1        | -2.8855  | 5.00E-05 | 0.00021987 | yes |
| Sesn3         | -1.94692 | 0.00035  | 0.00134243 | yes |
| Usp24         | -2.32223 | 5.00E-05 | 0.00021987 | yes |
| Smad5         | -2.02801 | 5.00E-05 | 0.00021987 | yes |
| Pde4dip       | -2.64108 | 5.00E-05 | 0.00021987 | yes |
| Tomm20        | -2.75672 | 5.00E-05 | 0.00021987 | yes |
| Stk39         | -2.85613 | 5.00E-05 | 0.00021987 | yes |
| Plvap         | -1.58312 | 0.00505  | 0.0143435  | yes |
| Kcnh7         | -2.2429  | 5.00E-05 | 0.00021987 | yes |
| Tmem127       | -2.72091 | 5.00E-05 | 0.00021987 | yes |
| Cnpy2         | -1.94785 | 0.0021   | 0.00664933 | yes |
| Fggy          | -1.33376 | 0.0085   | 0.0226127  | yes |
| BC048546      | -2.00603 | 0.00025  | 0.00098508 | yes |
| Twsg1         | -2.23144 | 0.0001   | 0.00042184 | yes |
| Rcbtb2        | -1.92093 | 0.0001   | 0.00042184 | yes |
| Slc35f6       | -2.12606 | 5.00E-05 | 0.00021987 | yes |
| Marcks        | -2.66989 | 5.00E-05 | 0.00021987 | yes |
| Ccdc126       | -1.75045 | 0.00175  | 0.00565998 | yes |
| Dnajb4        | -2.23745 | 5.00E-05 | 0.00021987 | yes |
| Lmln          | -1.71278 | 0.00065  | 0.00234272 | yes |
| Aldh4a1       | -1.85516 | 0.0003   | 0.00116377 | yes |
| Fam73b        | -2.24546 | 5.00E-05 | 0.00021987 | yes |
| Tmem141       | -1.18106 | 0.019    | 0.0450774  | yes |
| Emb           | -2.82844 | 5.00E-05 | 0.00021987 | yes |
| Nek7          | -2.77377 | 5.00E-05 | 0.00021987 | yes |
| Atat1         | -1.18118 | 0.01995  | 0.0469868  | yes |
| Dhrs4         | -1.36455 | 0.00755  | 0.0203838  | yes |
| Etl4          | -2.35639 | 5.00E-05 | 0.00021987 | yes |
| Hdac3         | -2.46455 | 5.00E-05 | 0.00021987 | yes |
| Oxr1          | -2.38674 | 5.00E-05 | 0.00021987 | yes |
| A830018L16Ri  | -2.06226 | 5.00E-05 | 0.00021987 | yes |
| Pisd          | -1.77913 | 0.0015   | 0.00495284 | yes |
| Aak1          | -2.57951 | 5.00E-05 | 0.00021987 | yes |
| Ptgr2         | -2.0542  | 5.00E-05 | 0.00021987 | yes |
| Ppp4r4        | -1.94826 | 0.0004   | 0.00151277 | yes |
| Dolk          | -2.16033 | 5.00E-05 | 0.00021987 | yes |

|              |          |          |            |     |
|--------------|----------|----------|------------|-----|
| Mob1a        | -1.63281 | 0.00535  | 0.0150442  | yes |
| Arl16        | -1.52574 | 0.0024   | 0.00747963 | yes |
| Inpp1        | -1.7496  | 0.0006   | 0.00218147 | yes |
| Btg2         | -2.17408 | 5.00E-05 | 0.00021987 | yes |
| Pde8b        | -1.63615 | 0.00115  | 0.00391006 | yes |
| Kcnc4        | -2.47962 | 5.00E-05 | 0.00021987 | yes |
| Sgsm2        | -1.99867 | 5.00E-05 | 0.00021987 | yes |
| Itsn1        | -2.09312 | 5.00E-05 | 0.00021987 | yes |
| Cox4i1       | -3.65093 | 5.00E-05 | 0.00021987 | yes |
| Tspyl4       | -2.60322 | 5.00E-05 | 0.00021987 | yes |
| Celf2        | -2.3165  | 5.00E-05 | 0.00021987 | yes |
| Lmbrd1       | -2.62078 | 5.00E-05 | 0.00021987 | yes |
| Ttc3         | -2.4193  | 5.00E-05 | 0.00021987 | yes |
| Zyg11b       | -2.59434 | 5.00E-05 | 0.00021987 | yes |
| Ttc1         | -2.56209 | 5.00E-05 | 0.00021987 | yes |
| Cxx1c        | -2.78158 | 5.00E-05 | 0.00021987 | yes |
| Tmem59l      | -2.81024 | 5.00E-05 | 0.00021987 | yes |
| Snx18        | -2.24887 | 5.00E-05 | 0.00021987 | yes |
| Syn2         | -2.6572  | 5.00E-05 | 0.00021987 | yes |
| Gucy1a2      | -2.26489 | 5.00E-05 | 0.00021987 | yes |
| Flnb         | -2.29322 | 5.00E-05 | 0.00021987 | yes |
| Tmed7        | -2.53019 | 5.00E-05 | 0.00021987 | yes |
| Prkcdbp      | -1.77315 | 0.00415  | 0.0120214  | yes |
| Zdhhc15      | -2.0572  | 5.00E-05 | 0.00021987 | yes |
| Atp1a3       | -2.23749 | 5.00E-05 | 0.00021987 | yes |
| 2900097C17Ri | -2.36712 | 5.00E-05 | 0.00021987 | yes |
| Gstm1        | -1.37453 | 0.02125  | 0.0496432  | yes |
| St3gal2      | -2.40268 | 5.00E-05 | 0.00021987 | yes |
| Ptpre        | -2.14038 | 5.00E-05 | 0.00021987 | yes |
| Nrep         | -1.80423 | 0.00065  | 0.00234272 | yes |
| Serp1        | -1.69506 | 0.003    | 0.00906422 | yes |
| Sat1         | -1.82592 | 0.00025  | 0.00098508 | yes |
| Dlat         | -2.55433 | 5.00E-05 | 0.00021987 | yes |
| Eme2         | -1.49404 | 0.00875  | 0.0231617  | yes |
| Sirt2        | -2.35627 | 5.00E-05 | 0.00021987 | yes |
| Pnkd         | -1.86428 | 0.0003   | 0.00116377 | yes |
| Cyc1         | -2.858   | 5.00E-05 | 0.00021987 | yes |
| Pdpr         | -1.68447 | 0.0024   | 0.00747963 | yes |
| Elovl1       | -2.1558  | 0.0001   | 0.00042184 | yes |
| Ak3          | -2.28485 | 5.00E-05 | 0.00021987 | yes |
| Rab8b        | -2.15214 | 5.00E-05 | 0.00021987 | yes |
| Tgm2         | -1.58881 | 0.0034   | 0.0101093  | yes |
| Rnf13        | -2.20869 | 5.00E-05 | 0.00021987 | yes |
| Qpctl        | -1.40778 | 0.01145  | 0.0291736  | yes |
| Prepl        | -2.4159  | 5.00E-05 | 0.00021987 | yes |
| Idh3g        | -2.54163 | 5.00E-05 | 0.00021987 | yes |
| Carns1       | -1.78859 | 0.0007   | 0.00250591 | yes |
| Tspan13      | -2.6393  | 5.00E-05 | 0.00021987 | yes |
| Dcbld1       | -1.92518 | 0.0004   | 0.00151277 | yes |
| Tubgcp2      | -1.90263 | 0.00065  | 0.00234272 | yes |
| Zscan29      | -1.29359 | 0.0112   | 0.0286301  | yes |
| Nceh1        | -2.40939 | 5.00E-05 | 0.00021987 | yes |
| Hoxd9        | -1.40519 | 0.0115   | 0.0292898  | yes |

|              |          |          |            |     |
|--------------|----------|----------|------------|-----|
| Sowahc       | -1.70938 | 0.00105  | 0.00360703 | yes |
| Atr          | -1.97922 | 5.00E-05 | 0.00021987 | yes |
| Glul         | -2.40463 | 5.00E-05 | 0.00021987 | yes |
| Susd2        | -2.38469 | 5.00E-05 | 0.00021987 | yes |
| Sephs2       | -1.84972 | 0.0006   | 0.00218147 | yes |
| Syt13        | -1.31249 | 0.01105  | 0.0282903  | yes |
| Cdc3711      | -2.17435 | 0.00015  | 0.00061459 | yes |
| Rab3ip       | -1.88156 | 0.00065  | 0.00234272 | yes |
| Mtmr2        | -2.16077 | 5.00E-05 | 0.00021987 | yes |
| Ctnna1       | -2.19657 | 5.00E-05 | 0.00021987 | yes |
| P2ry2        | -1.55657 | 0.00405  | 0.0117651  | yes |
| Dnajc18      | -2.38765 | 5.00E-05 | 0.00021987 | yes |
| Dtna         | -1.72005 | 0.0004   | 0.00151277 | yes |
| Fermt2       | -2.49585 | 5.00E-05 | 0.00021987 | yes |
| Hadha        | -2.38808 | 5.00E-05 | 0.00021987 | yes |
| Ispd         | -1.57574 | 0.0017   | 0.0055144  | yes |
| Man1a2       | -2.47614 | 5.00E-05 | 0.00021987 | yes |
| Tmem43       | -2.0401  | 0.00025  | 0.00098508 | yes |
| Mtmr4        | -2.45979 | 5.00E-05 | 0.00021987 | yes |
| Med27        | -1.55957 | 0.00215  | 0.00679629 | yes |
| Tmem260      | -1.78612 | 0.0008   | 0.00282803 | yes |
| Map1a        | -1.55172 | 0.00245  | 0.00760509 | yes |
| Ccdc28a      | -2.07178 | 0.0008   | 0.00282803 | yes |
| Slc30a4      | -1.65551 | 0.00105  | 0.00360703 | yes |
| Pdgfrb       | -1.79391 | 0.0001   | 0.00042184 | yes |
| Nrip2        | -1.44783 | 0.00395  | 0.011515   | yes |
| Abcb6        | -1.74702 | 0.001    | 0.00345135 | yes |
| Sacm1l       | -2.52987 | 5.00E-05 | 0.00021987 | yes |
| Nap1l2       | -2.51593 | 5.00E-05 | 0.00021987 | yes |
| Clec16a      | -2.05044 | 5.00E-05 | 0.00021987 | yes |
| Decr1        | -1.90053 | 0.00015  | 0.00061459 | yes |
| Git1         | -2.30371 | 5.00E-05 | 0.00021987 | yes |
| Trpm8        | -1.85186 | 0.00045  | 0.00168221 | yes |
| Sez6         | -1.8562  | 0.00025  | 0.00098508 | yes |
| Cnksr2       | -1.72055 | 0.00115  | 0.00391006 | yes |
| 2610507B11Ri | -2.42458 | 5.00E-05 | 0.00021987 | yes |
| Tti1         | -1.68828 | 0.0017   | 0.0055144  | yes |
| Plxna4       | -2.342   | 5.00E-05 | 0.00021987 | yes |
| Pkm          | -2.18187 | 5.00E-05 | 0.00021987 | yes |
| Tarsl2       | -1.93111 | 0.0002   | 0.00080284 | yes |
| Atp6v0a2     | -2.20088 | 5.00E-05 | 0.00021987 | yes |
| Fads1        | -2.31005 | 5.00E-05 | 0.00021987 | yes |
| Btbd3        | -2.28353 | 5.00E-05 | 0.00021987 | yes |

## Genes enriched in MACS DRG

| gene          | locus                     | FPKM dissociated DRG | FPKM MACS DRG | log2 fold change |
|---------------|---------------------------|----------------------|---------------|------------------|
| Mobp          | chr9:120149741-120176091  | 0.494799             | 8.57956       | 4.11599          |
| Sprr1a        | chr3:92483953-92485881    | 0.723039             | 6.19335       | 3.09858          |
| C1ql4         | chr15:99084753-99087728   | 4.3798               | 25.459        | 2.53924          |
| Snhg11        | chr2:158375637-158386145  | 36.2003              | 209.829       | 2.53514          |
| Ccl5          | chr11:83525778-83530518   | 1.01888              | 5.83732       | 2.51833          |
| Meg3          | chr12:109540995-109571729 | 38.0262              | 206.413       | 2.44047          |
| Slc51a        | chr16:32475577-32487879   | 0.993672             | 5.28095       | 2.40996          |
| Pde4c         | chr8:70724063-70751176    | 2.32634              | 12.2795       | 2.40012          |
| Wfdc2         | chr2:164562715-164568506  | 4.90589              | 24.0105       | 2.29108          |
| Cdh9          | chr15:16778100-16856777   | 2.69985              | 12.9506       | 2.26207          |
| Bhlha9        | chr11:76672469-76673676   | 5.44651              | 26.0586       | 2.25835          |
| Th            | chr7:142892775-142899966  | 44.8482              | 208.333       | 2.21577          |
| Mrgpra3       | chr7:47588949-47601372    | 14.0776              | 62.2377       | 2.14438          |
| Ceacam10      | chr7:24777203-24784655    | 4.77003              | 20.9802       | 2.13696          |
| Amy1          | chr3:113555951-113577750  | 3.44901              | 14.9848       | 2.11924          |
| A930011O12Rik | chr14:64588114-64593961   | 3.72841              | 15.9681       | 2.09856          |
| Cacna1i       | chr15:80287237-80398292   | 2.17031              | 9.25567       | 2.09244          |
| Slc17a8       | chr10:89574019-89621249   | 3.91945              | 16.2287       | 2.04982          |
| Nxpe2         | chr9:48318003-48340898    | 3.11021              | 12.3391       | 1.98815          |
| Tmprss11c     | chr5:86231480-86289308    | 1.71747              | 6.76192       | 1.97715          |
| Dgkk          | chrX:6873483-6948363      | 1.61636              | 6.07713       | 1.91064          |
| Gm7271        | chr5:76484076-76516628    | 47.0629              | 174.27        | 1.88867          |
| Mirg          | chr12:109734980-109749457 | 4.23411              | 15.2178       | 1.84563          |
| Fbp2          | chr13:62836884-62858370   | 1.70161              | 6.01929       | 1.8227           |
| Lgals3        | chr14:47373859-47386167   | 4.03869              | 14.2712       | 1.82115          |
| Ccdc68        | chr18:69925558-69969484   | 12.0693              | 41.9807       | 1.79839          |
| Bmp15         | chrX:6314105-6320723      | 1.91327              | 6.59549       | 1.78544          |
| Card11        | chr5:140872998-141000596  | 2.49761              | 8.51389       | 1.76927          |
| P2rx2         | chr5:110339811-110343035  | 1.94761              | 6.54405       | 1.74848          |
| Fxyd2         | chr9:45399708-45410278    | 607.391              | 2035.6        | 1.74475          |
| Nts           | chr10:102481755-102490418 | 5.18462              | 17.1737       | 1.72789          |
| Miat          | chr5:112213227-112228948  | 18.1515              | 59.2417       | 1.70653          |
| Mrgprb5       | chr7:48168016-48168985    | 5.94189              | 19.335        | 1.70222          |
| Wdfy1         | chr1:79702261-79761769    | 3.67641              | 11.9041       | 1.69509          |
| AW551984      | chr9:39587395-39604124    | 1.6063               | 5.16749       | 1.68572          |
| Mrgprx1       | chr7:48020970-48027597    | 14.431               | 46.0247       | 1.67324          |
| Il31ra        | chr13:112522806-112580662 | 6.35222              | 20.2027       | 1.66922          |
| Fam19a4       | chr6:96831208-97060411    | 25.392               | 80.7151       | 1.66846          |
| 2810008D09Rik | chr11:117076782-117078955 | 7.18133              | 22.2027       | 1.62841          |
| Insm1         | chr2:146221996-146225018  | 3.41746              | 10.5448       | 1.62554          |
| Scin          | chr12:40059770-40134228   | 4.54131              | 13.9631       | 1.62044          |
| Klf5          | chr14:99298690-99313409   | 14.1979              | 43.5496       | 1.61698          |
| Nppb          | chr4:147985787-147987205  | 11.5426              | 34.9622       | 1.59883          |
| Adam8         | chr7:139978937-139992509  | 2.11102              | 6.38586       | 1.59694          |
| Ly86          | chr13:37345344-37419036   | 58.9898              | 178.365       | 1.5963           |
| Rnf112        | chr11:61448416-61453992   | 45.0243              | 135.9         | 1.59377          |
| Plaur         | chr7:24462499-24475873    | 3.06948              | 9.23192       | 1.58864          |
| Tmem158       | chr9:123259056-123260789  | 51.1339              | 152.882       | 1.58007          |
| Celf3         | chr3:94478294-94492198    | 4.51423              | 13.4408       | 1.57407          |

|               |                           |         |         |         |
|---------------|---------------------------|---------|---------|---------|
| Smim5         | chr11:115892594-115933492 | 5.47549 | 16.2571 | 1.57001 |
| Fam167a       | chr14:63436393-63465502   | 2.31177 | 6.79963 | 1.55646 |
| Nptxr         | chr15:79786350-79834333   | 20.273  | 59.214  | 1.54638 |
| Dnase1l3      | chr14:7965189-7994182     | 4.15721 | 12.0824 | 1.53922 |
| Cpn1          | chr19:43956307-43986520   | 2.41052 | 7.00292 | 1.53861 |
| Casp1         | chr9:5298516-5307281      | 3.56451 | 10.3536 | 1.53836 |
| Rgs8          | chr1:153653036-153697665  | 12.7367 | 36.9804 | 1.53777 |
| Zdhhc23       | chr16:43969145-43979050   | 2.51237 | 7.22064 | 1.52308 |
| Scn2b         | chr9:45079182-45135606    | 19.398  | 55.1479 | 1.5074  |
| Kcnh6         | chr11:106008202-106034064 | 11.2649 | 32.0067 | 1.50654 |
| Stx3          | chr19:11775117-11819403   | 2.72897 | 7.62657 | 1.48268 |
| D7Erttd715e   | chr7:59969576-59974431    | 14.8775 | 41.5111 | 1.48037 |
| Myo1a         | chr10:127705255-127720940 | 10.8712 | 30.2437 | 1.47612 |
| Cyp4f39       | chr17:32452722-32493320   | 6.78942 | 18.8514 | 1.47331 |
| Rarres1       | chr3:67478885-67515523    | 34.6985 | 96.0882 | 1.46949 |
| Ppp1r1a       | chr15:103530278-103537992 | 21.8334 | 60.3361 | 1.46649 |
| Paqr5         | chr9:61953737-62026790    | 11.8149 | 32.6304 | 1.46561 |
| Cysltr2       | chr14:73029127-73049114   | 4.93942 | 13.5079 | 1.45139 |
| Lpar5         | chr6:125067919-125082472  | 8.18619 | 22.2504 | 1.44257 |
| Osmr          | chr15:6813576-6874313     | 10.5765 | 28.7426 | 1.44233 |
| Rasgrp1       | chr2:117279992-117342877  | 50.6337 | 137.336 | 1.43954 |
| Nxph3         | chr11:95509845-95514565   | 5.79728 | 15.6915 | 1.43653 |
| Kcnk12        | chr17:87745820-87797994   | 7.44636 | 20.0779 | 1.431   |
| Celf6         | chr9:59578336-59607292    | 19.8591 | 53.2602 | 1.42326 |
| Capn9         | chr8:124576110-124618731  | 2.78996 | 7.38192 | 1.40375 |
| Rspo4         | chr2:151842926-151874668  | 1.97533 | 5.22009 | 1.40198 |
| Pthr1         | chr2:32775820-32784405    | 12.4205 | 32.5967 | 1.392   |
| Gm13498       | chr2:50909683-50911846    | 2.56652 | 6.71282 | 1.3871  |
| 1700003M02Rik | chr4:34711331-34730206    | 3.44232 | 8.98301 | 1.38382 |
| Ctxn3         | chr18:57468485-57478134   | 48.4221 | 125.877 | 1.37828 |
| Ppp1r2-ps3    | chr19:30538875-30539679   | 2.78031 | 7.22249 | 1.37725 |
| Gfra2         | chr14:70890129-70979838   | 68.3953 | 177.267 | 1.37395 |
| A3galt2       | chr4:128759257-128769298  | 17.2829 | 44.7644 | 1.37301 |
| Gpr35         | chr1:92973118-92986391    | 8.8864  | 22.9123 | 1.36645 |
| Rgs10         | chr7:128373624-128418172  | 137.501 | 354.443 | 1.36611 |
| Lxn           | chr3:67430114-67475068    | 184.94  | 476.185 | 1.36446 |
| Acpp          | chr9:104288239-104337722  | 131.722 | 338.437 | 1.36139 |
| Cmtm8         | chr9:114789344-114844152  | 2.31264 | 5.88826 | 1.3483  |
| Ms4a3         | chr19:11629496-11640834   | 5.0909  | 12.9377 | 1.34558 |
| Gm11549       | chr3:36515056-36521445    | 3.66638 | 9.28461 | 1.34048 |
| Ldb2          | chr5:44472132-44799746    | 47.2482 | 119.582 | 1.33967 |
| Pnpla3        | chr15:84167815-84189521   | 3.99589 | 10.0945 | 1.33699 |
| Nrn1l         | chr8:105893569-105895015  | 18.4387 | 46.5793 | 1.33695 |
| Nt5e          | chr9:88327608-88372089    | 16.3601 | 41.2015 | 1.33251 |
| P2ry1         | chr3:61002784-61008982    | 22.9793 | 57.7654 | 1.32987 |
| Trim14        | chr4:46505071-46536141    | 3.15203 | 7.8985  | 1.3253  |
| Insm2         | chr12:55598916-55602017   | 6.3283  | 15.813  | 1.32122 |
| Nnat          | chr2:157556361-157566361  | 13.8098 | 34.3594 | 1.31501 |
| Rsrp1         | chr4:134923624-134927370  | 75.0788 | 186.398 | 1.31191 |
| Nptx2         | chr5:144545886-144557478  | 45.6728 | 113.352 | 1.31141 |
| Rasa4         | chr5:136083915-136111861  | 7.09664 | 17.5833 | 1.309   |
| Cckar         | chr5:53698484-53707704    | 11.4473 | 28.2087 | 1.30113 |
| Car8          | chr4:8141492-8239041      | 4.48229 | 11.0306 | 1.29921 |



|          |                          |         |         |         |
|----------|--------------------------|---------|---------|---------|
| Dusp26   | chr8:31089661-31097047   | 92.656  | 227.328 | 1.29482 |
| Syt5     | chr7:4539764-4546567     | 33.5326 | 81.4237 | 1.27989 |
| Msantd2  | chr9:37489320-37524150   | 2.10882 | 5.11001 | 1.27689 |
| Mal2     | chr15:54571365-54602846  | 89.8087 | 217.472 | 1.2759  |
| Sox11    | chr12:27334267-27342718  | 2.29673 | 5.55328 | 1.27376 |
| Pou4f2   | chr8:78433008-78436652   | 7.57354 | 18.2333 | 1.26754 |
| Sst      | chr16:23889580-23890844  | 15.8063 | 38.0425 | 1.26711 |
| Pdlim1   | chr19:40222238-40271616  | 6.50473 | 15.5801 | 1.26014 |
| Nbl1     | chr4:139082291-139092970 | 90.5025 | 216.711 | 1.25974 |
| Ass1     | chr2:31470269-31520670   | 5.05376 | 12.0911 | 1.25851 |
| Gpx2     | chr12:76792334-76795554  | 2.10114 | 5.0265  | 1.25838 |
| Dgkz     | chr2:91932821-91963563   | 161.227 | 383.569 | 1.25039 |
| Kcng2    | chr18:80294543-80364254  | 4.65535 | 11.0753 | 1.25039 |
| Firre    | chrX:50555743-50635258   | 5.76584 | 13.7161 | 1.25027 |
| Grik1    | chr16:87895896-88290258  | 85.2794 | 202.837 | 1.25005 |
| Kcnip2   | chr19:45792345-45816063  | 54.5379 | 129.711 | 1.24997 |
| Rps17    | chr7:81342732-81345234   | 7.47309 | 17.7607 | 1.24891 |
| Zfp40    | chr17:23173868-23193228  | 5.62862 | 13.3714 | 1.24829 |
| Gm16702  | chr17:8372395-8422726    | 3.31534 | 7.87118 | 1.24742 |
| Zbtb48   | chr4:152019775-152027671 | 2.24282 | 5.27835 | 1.23477 |
| Atf5     | chr7:44812255-44849079   | 32.3517 | 75.8435 | 1.22919 |
| Synpr    | chr14:13284779-13615469  | 145.602 | 341.308 | 1.22904 |
| Gpr162   | chr6:124858444-124863917 | 10.1986 | 23.9063 | 1.22902 |
| Mst1r    | chr9:107906888-107920383 | 2.3233  | 5.43661 | 1.22653 |
| Prkcd    | chr14:30595353-30626208  | 119.971 | 280.535 | 1.22549 |
| Isl2     | chr9:55541148-55546178   | 81.7221 | 190.99  | 1.2247  |
| Tmem45b  | chr9:31426195-31464238   | 109.094 | 254.443 | 1.22178 |
| Slc10a6  | chr5:103605710-103629403 | 3.81745 | 8.89477 | 1.22035 |
| Syt7     | chr19:10389089-10453181  | 45.1442 | 105.048 | 1.21843 |
| Socs2    | chr10:95411489-95416857  | 15.5128 | 36.0513 | 1.2166  |
| Plxnc1   | chr10:94790865-94944578  | 59.4887 | 138.2   | 1.21607 |
| Dgki     | chr6:36846021-37299976   | 28.7491 | 66.759  | 1.21545 |
| Gm527    | chr12:64917910-64924591  | 5.7805  | 13.3832 | 1.21116 |
| Fam122b  | chrX:53243414-53269805   | 6.41953 | 14.8418 | 1.20912 |
| Hspa1b   | chr17:34956428-34959238  | 7.25762 | 16.7635 | 1.20776 |
| Ypel1    | chr16:17070138-17111252  | 2.79554 | 6.45239 | 1.20671 |
| Adamts9  | chr6:92772698-92901441   | 2.30415 | 5.31534 | 1.20593 |
| Slc45a3  | chr1:131962914-131982972 | 10.3901 | 23.9633 | 1.20561 |
| Ssh3     | chr19:4261668-4269172    | 4.71871 | 10.8794 | 1.20514 |
| Ptgdr    | chr14:44851234-44859375  | 17.4054 | 39.9455 | 1.1985  |
| Snhg7    | chr2:26637175-26640244   | 2.69981 | 6.19551 | 1.19836 |
| Fam222a  | chr5:114568250-114613218 | 3.33616 | 7.64935 | 1.19715 |
| Gna14    | chr19:16435666-16610818  | 33.7869 | 77.4094 | 1.19605 |
| Trpc3    | chr3:36620481-36690167   | 36.0726 | 82.3544 | 1.19094 |
| Serinc2  | chr4:130253496-130275586 | 15.0028 | 34.229  | 1.18999 |
| Slc37a1  | chr17:31295482-31350698  | 6.56055 | 14.9124 | 1.18463 |
| N4bp2l1  | chr5:150571642-150594525 | 4.54131 | 10.2614 | 1.17605 |
| Nog      | chr11:89300637-89302559  | 2.94987 | 6.66094 | 1.17507 |
| Zfp521   | chr18:13687013-13972733  | 8.80978 | 19.8338 | 1.17078 |
| Kcnip4   | chr5:48389502-49285659   | 87.0295 | 195.867 | 1.1703  |
| Slc16a12 | chr19:34668405-34747111  | 5.98954 | 13.4435 | 1.1664  |
| Tnr      | chr1:159523768-159924922 | 2.80068 | 6.27876 | 1.1647  |
| Rgs4     | chr1:169741476-169747642 | 464.407 | 1041.02 | 1.16453 |

|               |                           |         |         |         |
|---------------|---------------------------|---------|---------|---------|
| Cyp2j12       | chr4:96099317-96141152    | 4.24458 | 9.50122 | 1.16249 |
| Tlx3          | chr11:33200751-33203588   | 38.5865 | 86.1592 | 1.15891 |
| Atg16l2       | chr7:101289615-101302088  | 2.3425  | 5.23037 | 1.15886 |
| Myt1          | chr2:181763331-181827775  | 15.019  | 33.4874 | 1.15683 |
| Tubb2b        | chr13:34127007-34130354   | 164.977 | 367.79  | 1.15662 |
| Plekha5       | chr6:140424098-140594906  | 6.34873 | 14.1264 | 1.15386 |
| Cdk15         | chr1:59256906-59352369    | 23.266  | 51.7423 | 1.15312 |
| Hyls1         | chr9:35559465-35570069    | 3.45701 | 7.68484 | 1.15249 |
| Nkain1        | chr4:130530130-130574036  | 5.79097 | 12.8652 | 1.1516  |
| Tia1          | chr6:86404218-86433405    | 3.80603 | 8.42912 | 1.1471  |
| Tubb2a-ps2    | chr12:11882195-11882899   | 49.1676 | 108.887 | 1.14705 |
| Grhl3         | chr4:135541887-135573620  | 3.72934 | 8.25651 | 1.14661 |
| Casz1         | chr4:148804391-148954892  | 14.4527 | 31.9926 | 1.1464  |
| Rasgef1a      | chr6:118066384-118091546  | 19.2068 | 42.4556 | 1.14434 |
| 4931429I11Rik | chr9:40894848-40964112    | 6.18992 | 13.6679 | 1.1428  |
| Kcnn1         | chr8:70842048-70857008    | 9.03001 | 19.9238 | 1.1417  |
| Prdm12        | chr2:31640036-31655795    | 64.8452 | 142.945 | 1.14039 |
| Kcnt1         | chr2:25863853-25918273    | 30.7203 | 67.6819 | 1.13957 |
| Tmem233       | chr5:116040533-116083246  | 206.674 | 454.533 | 1.13703 |
| Vstm5         | chr9:15239044-15259413    | 32.9116 | 72.312  | 1.13564 |
| Aff2          | chrX:69360330-69868037    | 2.9213  | 6.41539 | 1.13492 |
| Mmp25         | chr17:23629457-23645269   | 18.018  | 39.5623 | 1.13469 |
| 9430021M05Rik | chr2:162661162-162675204  | 6.49662 | 14.22   | 1.13016 |
| Camk2a        | chr18:60925631-60988152   | 46.25   | 101.101 | 1.12827 |
| Slc35b3       | chr13:38932139-38960875   | 6.01332 | 13.1305 | 1.12669 |
| Trpc6         | chr9:8544141-8740988      | 7.13048 | 15.5383 | 1.12376 |
| Setd6         | chr8:95715912-95719004    | 5.06273 | 11.0097 | 1.12078 |
| Slc4a11       | chr2:130684107-130697519  | 7.3353  | 15.9202 | 1.11793 |
| Moxd1         | chr10:24223516-24302783   | 14.6084 | 31.5741 | 1.11195 |
| Cpne2         | chr8:94533027-94570529    | 24.5861 | 52.9124 | 1.10577 |
| Hmga2-ps1     | chr1:176814659-177020432  | 4.68591 | 10.0755 | 1.10445 |
| Actn1         | chr12:80167541-80260371   | 17.404  | 37.4067 | 1.10387 |
| Hmox1         | chr8:75093617-75100593    | 14.2657 | 30.6412 | 1.10292 |
| Cnih2         | chr19:5088537-5098418     | 8.71718 | 18.7016 | 1.10122 |
| Kcnk13        | chr12:99964498-100062682  | 4.61203 | 9.89282 | 1.10098 |
| Fnbp1l        | chr3:122538718-122619714  | 7.40714 | 15.8865 | 1.10081 |
| Fmnl1         | chr11:103171137-103198900 | 24.7759 | 52.9682 | 1.09619 |
| Scn11a        | chr9:119753764-119825456  | 147.309 | 314.697 | 1.09512 |
| Kcng3         | chr17:83585956-83631895   | 3.65145 | 7.74312 | 1.08445 |
| Gm525         | chr11:89073840-89093064   | 3.05454 | 6.45801 | 1.08013 |
| Pcgf1         | chr6:83078389-83080855    | 9.93021 | 20.9747 | 1.07876 |
| Rian          | chr12:109603944-109661711 | 62.5428 | 132.025 | 1.07789 |
| Pnlsr         | chr4:21846326-21876475    | 8.89515 | 18.723  | 1.07372 |
| Lrrc3         | chr10:77897575-77902536   | 6.87661 | 14.4667 | 1.07296 |
| Fam220a       | chr5:143548705-143564525  | 17.5997 | 36.9734 | 1.07093 |
| Mab21l1       | chr3:55625197-56183701    | 2.69624 | 5.65705 | 1.0691  |
| Zcchc7        | chr4:44756558-44932214    | 4.84868 | 10.1398 | 1.06436 |
| Pcgf6         | chr19:47033618-47050845   | 2.88951 | 6.03753 | 1.06313 |
| Plcb3         | chr19:6953712-6969814     | 113.299 | 236.447 | 1.06138 |
| A430105I19Rik | chr2:118754144-118762661  | 2.91073 | 6.06289 | 1.05863 |
| 2010107G23Rik | chr10:62107655-62111013   | 14.7269 | 30.6448 | 1.05718 |
| Ror2          | chr13:53109316-53286109   | 3.49369 | 7.26975 | 1.05715 |
| Kcnd3         | chr3:105448189-105674002  | 38.4005 | 79.7905 | 1.05509 |

|               |                           |         |         |          |
|---------------|---------------------------|---------|---------|----------|
| Tmem200a      | chr10:25991185-26079447   | 12.2716 | 25.3662 | 1.04759  |
| Stx1a         | chr5:135023571-135051099  | 17.6794 | 36.5316 | 1.04708  |
| St6galnac3    | chr3:153202508-153725133  | 2.99429 | 6.18212 | 1.04589  |
| N28178        | chr4:42917250-42941607    | 260.47  | 536.951 | 1.04367  |
| Fam89a        | chr8:124740256-124751809  | 36.3109 | 74.7045 | 1.04079  |
| Nrg2          | chr18:36017657-36197160   | 2.98258 | 6.13335 | 1.04011  |
| Fam193b       | chr13:55539315-55571120   | 4.23231 | 8.69723 | 1.03911  |
| Tox2          | chr2:163225453-163323102  | 7.04412 | 14.4729 | 1.03887  |
| Dgkh          | chr14:78569608-78725089   | 91.3741 | 187.55  | 1.03742  |
| Syt9          | chr7:107284774-107591365  | 45.6169 | 93.5697 | 1.03647  |
| Npy2r         | chr3:82538382-82548085    | 8.22588 | 16.8471 | 1.03426  |
| Hpca          | chr4:129105529-129121925  | 17.3732 | 35.5195 | 1.03175  |
| Tcerg1l       | chr7:138208971-138397730  | 7.29298 | 14.9075 | 1.03145  |
| Rab33a        | chrX:48519284-48530240    | 7.91763 | 16.1835 | 1.03138  |
| Samsn1        | chr16:75858793-75909266   | 6.3077  | 12.8843 | 1.03043  |
| Spink2        | chr5:77205105-77211471    | 3.25061 | 6.63676 | 1.02977  |
| Hs6st2        | chrX:51386636-51681602    | 29.3921 | 60.0057 | 1.02967  |
| Ttc14         | chr3:33800182-33844310    | 5.29474 | 10.8018 | 1.02864  |
| Scg3          | chr9:75643365-75684056    | 410.621 | 837.423 | 1.02815  |
| Gpr27         | chr6:99692678-99693818    | 3.36472 | 6.85752 | 1.0272   |
| Eml1          | chr12:108371152-108702306 | 153.626 | 311.913 | 1.02172  |
| St6galnac5    | chr3:152820709-152982207  | 5.84588 | 11.865  | 1.02122  |
| Zfhx2         | chr14:55061658-55092048   | 6.69321 | 13.5768 | 1.02037  |
| Rab27b        | chr18:69979130-70141590   | 19.4388 | 39.4178 | 1.01991  |
| Pak4          | chr7:28558818-28598184    | 4.08585 | 8.26713 | 1.01675  |
| Cd44          | chr2:102811141-102901665  | 77.0094 | 155.691 | 1.01558  |
| Stac          | chr9:111561433-111690216  | 28.6869 | 57.9941 | 1.01551  |
| Snrpf         | chr10:93540631-93605245   | 3.87701 | 7.83686 | 1.01533  |
| Zfp692        | chr11:58307068-58314613   | 2.71104 | 5.47694 | 1.01452  |
| Iqcg          | chr16:32914099-33056186   | 3.54449 | 7.15002 | 1.01237  |
| Ppp1r14b      | chr19:6975047-6977324     | 8.35059 | 16.836  | 1.0116   |
| Tmem132c      | chr5:127241825-127565790  | 3.50219 | 7.04674 | 1.0087   |
| Mrgprd        | chr7:145314834-145324059  | 66.7719 | 134.11  | 1.0061   |
| Redrum        | chr18:54422294-54453294   | 2.82484 | 5.67168 | 1.0056   |
| 39141         | chr15:26309071-26409573   | 10.5145 | 21.0836 | 1.00374  |
| Kcnc2         | chr10:112271122-112466304 | 6.04687 | 12.1185 | 1.00295  |
| Rspo1         | chr4:124986429-125009099  | 4.11246 | 8.21844 | 0.998861 |
| Timeless      | chr10:128232062-128252941 | 4.49198 | 8.97523 | 0.998597 |
| Nfil3         | chr13:52967208-52981039   | 2.84965 | 5.67917 | 0.994894 |
| Gabra2        | chr5:70961056-71095849    | 11.7759 | 23.463  | 0.994558 |
| Clasrp        | chr7:19581042-19604468    | 6.29815 | 12.5456 | 0.994181 |
| Fam150b       | chr12:30884323-30911612   | 6.75444 | 13.4475 | 0.993426 |
| Nxpe4         | chr9:48362040-48400025    | 3.7046  | 7.37013 | 0.992373 |
| Hes6          | chr1:91411482-91413222    | 13.1416 | 26.1314 | 0.991645 |
| Rgs5          | chr1:169655500-169693526  | 53.9022 | 106.77  | 0.98609  |
| 6720468P15Rik | chr19:57508563-57512788   | 3.66293 | 7.23903 | 0.982799 |
| Klhdc8b       | chr9:108447638-108465945  | 10.3035 | 20.3593 | 0.982552 |
| Klhl29        | chr12:5077465-5375682     | 7.89542 | 15.5997 | 0.982427 |
| Clgn          | chr8:83389890-83426829    | 52.2039 | 103.082 | 0.981559 |
| Pstpip2       | chr18:77794549-77882879   | 17.2132 | 33.9455 | 0.979703 |
| Dpp10         | chr1:123332137-124045559  | 51.5312 | 101.586 | 0.979191 |
| 2210408F21Rik | chr6:31220350-31337394    | 8.62795 | 16.9857 | 0.977227 |
| Lrp8          | chr4:107802258-107876840  | 5.17825 | 10.1655 | 0.973143 |

|               |                            |         |         |          |
|---------------|----------------------------|---------|---------|----------|
| Tmem79        | chr3:88328652-88334433     | 47.4108 | 93.0201 | 0.972328 |
| Sdc1          | chr12:8771395-8793687      | 10.299  | 20.1939 | 0.971419 |
| Amer2         | chr14:60378285-60381003    | 8.67797 | 17.0024 | 0.970311 |
| Palm2         | chr4:57568247-57717128     | 14.0831 | 27.5765 | 0.969474 |
| Mical1        | chr10:41476313-41487030    | 23.9169 | 46.8253 | 0.969254 |
| Rgs11         | chr17:26202961-26211324    | 4.98534 | 9.74811 | 0.967432 |
| Sdsl          | chr5:120458201-120472763   | 3.40431 | 6.65462 | 0.966992 |
| Ankrd10       | chr8:11611580-11635757     | 10.1806 | 19.8991 | 0.966879 |
| Mapk7         | chr11:61488811-61494266    | 7.52896 | 14.6973 | 0.965026 |
| Lpar3         | chr3:146220960-146286214   | 33.3301 | 65.0331 | 0.96435  |
| Eno3          | chr11:70657175-70662513    | 3.89248 | 7.58353 | 0.962181 |
| Mex3d         | chr10:80380354-80387651    | 5.90083 | 11.4837 | 0.960591 |
| Htr4          | chr18:62324203-62467802    | 3.12981 | 6.08992 | 0.960346 |
| Zdhhc12       | chr2:30078765-30093635     | 8.91271 | 17.3396 | 0.960132 |
| Arhgap26      | chr18:38993144-39376285    | 17.4433 | 33.8969 | 0.958479 |
| Ubald2        | chr11:116434093-116439077  | 4.32152 | 8.39541 | 0.958063 |
| Dapk1         | chr13:60601946-60763191    | 22.1293 | 42.8703 | 0.954022 |
| Rhebl1        | chr15:98877759-98881414    | 11.3531 | 21.9504 | 0.951161 |
| Cpne3         | chr4:19519251-19570104     | 78.7717 | 151.858 | 0.946978 |
| Bach2         | chr4:32417434-32586108     | 3.07651 | 5.92365 | 0.945192 |
| Magi1         | chr6:93675452-94283917     | 41.8162 | 80.4143 | 0.94339  |
| Frmd4b        | chr6:97286866-97617657     | 6.24471 | 12.0084 | 0.943343 |
| Rgs3          | chr4:62559846-62703019     | 14.8704 | 28.5645 | 0.941783 |
| Lime1         | chr2:181381234-181383628   | 5.03112 | 9.63985 | 0.93813  |
| Med10         | chr13:69809881-69816094    | 28.5195 | 54.5568 | 0.935808 |
| AI413582      | chr17:27563768-27565727    | 62.8663 | 120.114 | 0.934051 |
| Trim39        | chr17:36258872-36272004    | 4.43794 | 8.47515 | 0.93335  |
| Dgkg          | chr16:22466568-22657231    | 15.1395 | 28.8685 | 0.931182 |
| Pafah1b3      | chr7:25295048-25297955     | 17.7411 | 33.8242 | 0.930965 |
| Bex4          | chrX:136139044-136140437   | 3.98175 | 7.59061 | 0.930812 |
| Ccdc141       | chr2:77009905-77170635     | 16.4857 | 31.3823 | 0.928736 |
| Rgs17         | chr10:5825663-5922400      | 11.214  | 21.3145 | 0.926539 |
| P2rx3         | chr2:84996551-85035834     | 111.77  | 211.955 | 0.923227 |
| Rhov          | chr2:119269200-119271226   | 20.1123 | 38.11   | 0.922088 |
| Pisd-ps3      | chrUn_JH584304:52673-59689 | 10.6369 | 20.1336 | 0.92052  |
| Ptbp3         | chr4:59471867-59549364     | 16.7017 | 31.6112 | 0.920444 |
| Zfp945        | chr17:22846696-22867134    | 3.37713 | 6.39174 | 0.920409 |
| Ndst3         | chr3:123526165-123672392   | 3.69179 | 6.97403 | 0.91767  |
| Prkcq         | chr2:11172381-11301226     | 33.6652 | 63.5433 | 0.916479 |
| Gnb4          | chr3:32583527-32616535     | 37.1262 | 69.8156 | 0.911112 |
| Neurl1a       | chr19:47178819-47259441    | 10.5139 | 19.7116 | 0.906746 |
| Pdlim2        | chr14:70164217-70177672    | 10.2102 | 19.1391 | 0.906507 |
| Sh2d5         | chr4:138250410-138260968   | 3.61108 | 6.75871 | 0.904317 |
| Cblb          | chr16:52031548-52208046    | 7.94826 | 14.8617 | 0.902884 |
| 4930503L19Rik | chr18:70453139-70501065    | 2.89264 | 5.40215 | 0.901145 |
| Prkca         | chr11:107933386-108343888  | 60.6531 | 113.27  | 0.901112 |
| Izumo4        | chr10:80702692-80705382    | 13.6158 | 25.4237 | 0.900891 |
| Arhgap28      | chr17:67842707-68004108    | 26.6613 | 49.7811 | 0.900852 |
| Mrgpra2b      | chr7:47463806-47489582     | 5.6603  | 10.5582 | 0.899409 |
| Ptger3        | chr3:157566891-157644758   | 7.48439 | 13.9493 | 0.898234 |
| Tle1          | chr4:72109944-72200893     | 22.0174 | 41.009  | 0.897296 |
| Klhl2         | chr8:64739674-64849924     | 20.0227 | 37.28   | 0.896767 |
| Mrgprb4       | chr7:48198212-48199178     | 13.4722 | 25.0583 | 0.895306 |

|                 |                           |         |         |          |
|-----------------|---------------------------|---------|---------|----------|
| Tox3            | chr8:90247111-90348252    | 6.76159 | 12.5733 | 0.894929 |
| Actl6b          | chr5:137553554-137569573  | 16.2207 | 30.1525 | 0.894446 |
| Smarca1         | chrX:47809369-47892552    | 8.83306 | 16.4138 | 0.893923 |
| Bex2            | chrX:136066564-136068236  | 194.481 | 360.474 | 0.890265 |
| Rpl34,Rpl34-ps1 | chr3:130726826-130730398  | 5.61151 | 10.3902 | 0.888755 |
| Plcx3           | chr15:4375490-4575579     | 19.7767 | 36.6044 | 0.888216 |
| Exosc6          | chr8:111056338-111057664  | 5.4963  | 10.1709 | 0.887919 |
| Tmem164         | chrX:142681399-142843494  | 21.7072 | 40.1636 | 0.887713 |
| Nsg2            | chr11:32000418-32059211   | 86.6828 | 160.373 | 0.887617 |
| Fam83h          | chr15:76001091-76014336   | 3.06164 | 5.65939 | 0.886341 |
| Celsr3          | chr9:108826319-108852969  | 4.83204 | 8.92905 | 0.885876 |
| 5031425E22Rik   | chr5:23431807-23434353    | 3.52178 | 6.50371 | 0.884959 |
| Sox4            | chr13:28950729-28953682   | 11.1473 | 20.5538 | 0.882706 |
| Fads3           | chr19:10041547-10059671   | 21.8271 | 40.2104 | 0.881449 |
| Fdx1            | chr9:51943306-51963533    | 10.1817 | 18.7279 | 0.879212 |
| Smyd3           | chr1:178955038-179518003  | 7.98327 | 14.6802 | 0.878824 |
| Uaca            | chr9:60794547-60880370    | 22.1622 | 40.6741 | 0.876011 |
| Pitpnc1         | chr11:107207891-107470720 | 65.7978 | 120.758 | 0.876006 |
| Trpa1           | chr1:14872647-14918862    | 18.6735 | 34.2468 | 0.874976 |
| Basp1           | chr15:25363276-25413764   | 123.468 | 226.435 | 0.874956 |
| Hcn3            | chr3:89146774-89160157    | 11.1843 | 20.5054 | 0.874528 |
| Lcorl           | chr5:45669924-45857540    | 6.83288 | 12.5249 | 0.87423  |
| Prrxl1          | chr14:32599926-32649246   | 15.2569 | 27.9518 | 0.873476 |
| Ica1l           | chr1:59989067-60043087    | 4.244   | 7.76989 | 0.87247  |
| Gnao1           | chr8:93810837-93969388    | 305.811 | 558.236 | 0.868235 |
| Tes             | chr6:17065148-17105825    | 4.88649 | 8.88822 | 0.863096 |
| Lap3            | chr5:45493373-45512691    | 25.1905 | 45.7901 | 0.862155 |
| Tagln2          | chr1:172500245-172507375  | 126.898 | 230.401 | 0.860479 |
| Nyap1           | chr5:137730962-137739998  | 31.5156 | 57.1982 | 0.859902 |
| Unc13c          | chr9:73479423-73933567    | 6.69281 | 12.1403 | 0.859118 |
| Lrrc45          | chr11:120713952-120721127 | 4.78961 | 8.68751 | 0.859036 |
| Arap1           | chr7:101348068-101412586  | 11.5387 | 20.9221 | 0.858541 |
| Tmem159         | chr7:120102425-120120986  | 7.42478 | 13.4583 | 0.858078 |
| Srek1           | chr13:103741614-103764582 | 5.59321 | 10.1309 | 0.857016 |
| Trmt10b         | chr4:45297167-45316131    | 5.23878 | 9.47058 | 0.854222 |
| Hyi             | chr4:118359998-118409263  | 18.1355 | 32.766  | 0.853384 |
| Trim11          | chr11:58978092-58991462   | 5.13837 | 9.27914 | 0.852681 |
| Tshz2           | chr2:169633645-169888504  | 45.7996 | 82.683  | 0.852255 |
| Irf6            | chr1:193153111-193172035  | 2.78778 | 5.02536 | 0.85011  |
| Slc12a7         | chr13:73763696-73816742   | 6.87407 | 12.3827 | 0.849087 |
| Prph            | chr15:99055173-99058978   | 1065.39 | 1918.98 | 0.848962 |
| Ctxn1           | chr8:4257645-4259274      | 36.7868 | 66.2085 | 0.84783  |
| Unc13b          | chr4:43058983-43264887    | 3.84719 | 6.92389 | 0.847778 |
| Sncg            | chr14:34370273-34374669   | 2246.55 | 4037.66 | 0.845806 |
| Ppfia2          | chr10:106470309-106933468 | 9.36111 | 16.8239 | 0.84576  |
| Efn1            | chr3:89271729-89280951    | 19.5254 | 35.0772 | 0.84518  |
| Slc4a3          | chr1:75546265-75559431    | 4.56178 | 8.18272 | 0.842984 |
| Rpl29           | chr9:106429538-106431567  | 30.6387 | 54.9577 | 0.842965 |
| Psd             | chr19:46304736-46327156   | 3.39088 | 6.0636  | 0.838515 |
| Zfp760          | chr17:21707740-21725636   | 3.11496 | 5.56654 | 0.837568 |
| Bok             | chr1:93685693-93695762    | 4.48124 | 8.00665 | 0.837302 |
| Magi3           | chr3:104013264-104220406  | 54.14   | 96.6172 | 0.835586 |
| 2810032G03Rik   | chr12:5376501-5416132     | 3.61615 | 6.45082 | 0.835029 |

|               |                           |         |         |          |
|---------------|---------------------------|---------|---------|----------|
| Vgf           | chr5:137030294-137033351  | 43.5806 | 77.6806 | 0.833867 |
| Tmem151b      | chr17:45523433-45549677   | 21.208  | 37.7782 | 0.832947 |
| Hsbp1l1       | chr18:80229755-80247102   | 21.3241 | 37.973  | 0.832488 |
| Phactr3       | chr2:178118974-178338492  | 5.98244 | 10.6482 | 0.831805 |
| Hal           | chr10:93488767-93516743   | 3.42255 | 6.08885 | 0.831098 |
| Tyw5          | chr1:57388243-57415958    | 5.59134 | 9.94701 | 0.83107  |
| Grip1         | chr10:119454033-120112965 | 8.87331 | 15.775  | 0.830099 |
| Tapbpl        | chr6:125224211-125239934  | 8.1358  | 14.4325 | 0.826969 |
| Lmbr1l        | chr15:98903920-98918098   | 5.90722 | 10.4778 | 0.826782 |
| Abhd14b       | chr9:106448639-106452918  | 10.4258 | 18.474  | 0.825341 |
| Gnaq          | chr19:16132830-16387453   | 103.772 | 183.723 | 0.824113 |
| E4f1          | chr17:24443778-24455311   | 3.89283 | 6.89188 | 0.824077 |
| Bex1          | chrX:136213971-136215513  | 7.13669 | 12.634  | 0.823989 |
| Prkd1         | chr12:50341231-50649223   | 8.5444  | 15.1158 | 0.823005 |
| Cpne8         | chr15:90487480-90679388   | 27.7905 | 49.1135 | 0.82153  |
| Zfp579        | chr7:4992851-4996101      | 3.33504 | 5.89324 | 0.821356 |
| Schip1        | chr3:67892219-68626482    | 32.3523 | 57.1475 | 0.82082  |
| Chia1         | chr3:106113381-106132116  | 3.64517 | 6.43652 | 0.820294 |
| Cadm1         | chr9:47530351-47853385    | 126.225 | 222.86  | 0.820138 |
| Ptms          | chr6:124913674-124917946  | 245.707 | 433.156 | 0.817949 |
| Tstd1         | chr1:171419032-171420352  | 6.44466 | 11.341  | 0.815374 |
| Fam132a       | chr4:155962311-155966629  | 9.97493 | 17.5481 | 0.81494  |
| Arhgap22      | chr14:33216822-33369936   | 8.40394 | 14.7835 | 0.814851 |
| Bhlhe41       | chr6:145858242-145865420  | 10.4548 | 18.3911 | 0.81484  |
| Odf2l         | chr3:145118588-145153915  | 4.35341 | 7.65299 | 0.813876 |
| 5330417C22Rik | chr3:108458068-108536522  | 4.24087 | 7.45161 | 0.813191 |
| Pde11a        | chr2:75991131-76338653    | 13.8868 | 24.3954 | 0.812893 |
| Tmem72        | chr6:116692724-116716758  | 13.2493 | 23.2693 | 0.812511 |
| Zfp948        | chr17:21567045-21588682   | 6.52926 | 11.4649 | 0.812226 |
| Syt1          | chr10:108497649-109010975 | 78.0097 | 136.955 | 0.81198  |
| Shkbp1        | chr7:27342132-27356008    | 4.83404 | 8.47904 | 0.81067  |
| Camk4         | chr18:32939040-33195767   | 4.08034 | 7.15175 | 0.809609 |
| Mex3b         | chr7:82867332-82871576    | 3.73299 | 6.54178 | 0.809349 |
| Agtr1b        | chr3:20314472-20367177    | 3.74766 | 6.56257 | 0.80827  |
| Ptptr         | chr2:161521987-162661147  | 23.346  | 40.878  | 0.80815  |
| Ebf3          | chr7:137193670-137314445  | 21.3776 | 37.399  | 0.806901 |
| Rpl30         | chr15:34440505-34443276   | 6.95372 | 12.1624 | 0.806576 |
| Rarg          | chr15:102234937-102257522 | 13.7816 | 24.0813 | 0.805166 |
| Rgs19         | chr2:181688418-181693977  | 5.38113 | 9.40142 | 0.804971 |
| Fam129b       | chr2:32876133-32961255    | 33.6246 | 58.7031 | 0.803919 |
| Inha          | chr1:75507076-75510354    | 3.47718 | 6.07008 | 0.803797 |
| Rnh1          | chr7:141160325-141172851  | 46.898  | 81.8685 | 0.80378  |
| Sft2d1        | chr17:8283812-8327442     | 5.57484 | 9.72513 | 0.802788 |
| Klhl5         | chr5:65131230-65168142    | 36.8512 | 64.2216 | 0.801345 |
| Mpped2        | chr2:106693458-106868360  | 20.0778 | 34.9805 | 0.80095  |
| Chka          | chr19:3851772-3894369     | 26.8995 | 46.857  | 0.800685 |
| Pld5          | chr1:175962305-176275312  | 19.7142 | 34.3149 | 0.799603 |
| Srrm3         | chr5:135818105-135874772  | 6.31068 | 10.9778 | 0.798719 |
| Nrsn1         | chr13:25252038-25269996   | 45.1705 | 78.562  | 0.798452 |
| S100a6        | chr3:90612893-90614414    | 511.496 | 888.956 | 0.797389 |
| Hivep3        | chr4:119814677-120135411  | 2.93228 | 5.09581 | 0.797285 |
| Arpc1b        | chr5:145114255-145128186  | 92.4992 | 160.686 | 0.796728 |
| Tpd52         | chr3:8929435-9004515      | 136.577 | 237.157 | 0.796132 |



|               |                           |         |         |          |
|---------------|---------------------------|---------|---------|----------|
| Ret           | chr6:118151747-118197744  | 162.265 | 281.532 | 0.794943 |
| Acbd4         | chr11:103101687-103112199 | 21.3949 | 37.105  | 0.794346 |
| Rbms1         | chr2:60751952-60963204    | 51.6348 | 89.5003 | 0.79355  |
| Scn3b         | chr9:40269215-40291618    | 32.0746 | 55.5313 | 0.791872 |
| H2afy         | chr13:56073621-56135550   | 24.2043 | 41.9047 | 0.791849 |
| Slc7a7        | chr14:54360840-54417702   | 41.7696 | 72.3066 | 0.791676 |
| Rnf144a       | chr12:26306793-26415262   | 18.431  | 31.8791 | 0.790476 |
| Bcat2         | chr7:45567794-45589710    | 15.1224 | 26.1437 | 0.78978  |
| Nedd4l        | chr18:64887755-65751537   | 54.1916 | 93.6837 | 0.789728 |
| Dok4          | chr8:94857449-94876312    | 134.304 | 232.095 | 0.789211 |
| Il4ra         | chr7:125552281-125579474  | 8.57857 | 14.8218 | 0.788915 |
| Wipf3         | chr6:54452882-54503768    | 35.7087 | 61.5735 | 0.786034 |
| Mapk4         | chr18:73928485-74064949   | 7.01155 | 12.0766 | 0.784404 |
| Adrbk2        | chr5:112910477-113015538  | 5.28975 | 9.11038 | 0.784311 |
| Bri3          | chr5:144244436-144361005  | 18.9926 | 32.6968 | 0.783711 |
| Ube2ql1       | chr13:69702831-69739897   | 32.2267 | 55.4638 | 0.783288 |
| Asic2         | chr11:80880162-81968396   | 40.7991 | 70.2082 | 0.783102 |
| Dclk3         | chr9:111439080-111489611  | 13.6059 | 23.3813 | 0.781116 |
| Mvp           | chr7:126986859-127014594  | 20.6043 | 35.3945 | 0.78058  |
| Gprin1        | chr13:54736672-54749669   | 3.99786 | 6.86501 | 0.780035 |
| Ppef1         | chrX:160623093-160719972  | 38.8228 | 66.6284 | 0.779235 |
| Flot1         | chr17:35823356-35832787   | 171.822 | 294.834 | 0.778988 |
| Mb21d2        | chr16:28826175-28929698   | 7.15722 | 12.2722 | 0.777918 |
| Pusl1         | chr4:155869566-155891762  | 8.21137 | 14.0785 | 0.777802 |
| Kcnk18        | chr19:59219647-59237370   | 4.73889 | 8.11874 | 0.776706 |
| Tusc5         | chr11:76679872-76698664   | 255.299 | 437.315 | 0.776488 |
| Cenpv         | chr11:62524943-62539261   | 5.32295 | 9.11647 | 0.776248 |
| Arhgef1       | chr7:24902985-24926591    | 12.8669 | 22.0241 | 0.775425 |
| Gm13826       | chr5:115102921-115110268  | 71.9509 | 123.14  | 0.775217 |
| 9930104L06Rik | chr4:124937047-124944661  | 3.00025 | 5.13281 | 0.774666 |
| Tbc1d1        | chr5:64160259-64351486    | 10.5281 | 18.0025 | 0.773948 |
| Mmp17         | chr5:129584213-129608211  | 4.40699 | 7.52857 | 0.772581 |
| Rab27a        | chr9:73044864-73097592    | 11.0969 | 18.9532 | 0.772288 |
| Scn10a        | chr9:119608455-119719032  | 212.704 | 363.038 | 0.771271 |
| Fam135a       | chr1:24010757-24100341    | 5.92361 | 10.1094 | 0.771142 |
| 6820431F20Rik | chr8:20268285-20297432    | 3.04634 | 5.1934  | 0.769602 |
| Gpd1l         | chr9:114899338-114933987  | 39.6072 | 67.3265 | 0.765413 |
| Wnt2b         | chr3:104944804-104961709  | 8.98123 | 15.2657 | 0.765306 |
| Ccdc43        | chr11:102684687-102697725 | 17.3097 | 29.4188 | 0.765153 |
| Bcl3          | chr7:19808461-19822755    | 3.25631 | 5.53258 | 0.764716 |
| Cdh10         | chr15:18820328-19014234   | 5.44225 | 9.24196 | 0.763995 |
| 1700019D03Rik | chr1:52925126-52952840    | 5.26692 | 8.93559 | 0.762605 |
| Arhgap39      | chr15:76723984-76818170   | 22.0067 | 37.3334 | 0.762521 |
| Arl4d         | chr11:101665540-101667832 | 12.2816 | 20.8347 | 0.762496 |
| Serpina3g     | chr12:104214543-104241934 | 35.9627 | 60.9505 | 0.761137 |
| Gng2          | chr14:19872558-19977249   | 107.657 | 182.451 | 0.761068 |
| Plagl1        | chr10:13090787-13131695   | 16.012  | 27.1259 | 0.760513 |
| Fbxl2         | chr9:113930933-114026751  | 26.0697 | 44.1212 | 0.759098 |
| Def6          | chr17:28207777-28228608   | 11.0659 | 18.7181 | 0.758316 |
| Ppp1r2        | chr16:30920553-31275697   | 102.376 | 172.864 | 0.755754 |
| F2rl2         | chr13:95627176-95891922   | 41.649  | 70.1458 | 0.752074 |
| Scand1        | chr2:156311845-156375638  | 13.1561 | 22.1558 | 0.751952 |
| Apba1         | chr19:23758875-23949597   | 94.6435 | 159.304 | 0.751205 |

|               |                           |         |         |          |
|---------------|---------------------------|---------|---------|----------|
| Snx11         | chr11:96767548-96777555   | 22.6302 | 38.0672 | 0.7503   |
| Golga7b       | chr19:42247577-42270348   | 25.2693 | 42.4878 | 0.749662 |
| Itpkb         | chr1:180326968-180423659  | 32.2869 | 54.2524 | 0.748735 |
| Zfp593        | chr4:134243305-134245873  | 4.13132 | 6.94178 | 0.748705 |
| Htr5b         | chr1:121509772-121528465  | 3.40524 | 5.71148 | 0.746107 |
| Camk1g        | chr1:193346345-193370282  | 11.2101 | 18.801  | 0.746007 |
| Nudt8         | chr19:4000579-4002102     | 5.77339 | 9.68192 | 0.745875 |
| Tmeff1        | chr4:48585192-48663131    | 14.65   | 24.5342 | 0.743895 |
| Tmem63a       | chr1:180942517-180975104  | 9.28726 | 15.5333 | 0.742035 |
| Ptger1        | chr8:83666639-83699179    | 8.85994 | 14.8183 | 0.74201  |
| Pde1c         | chr6:56069803-56369634    | 17.0232 | 28.4675 | 0.74181  |
| Krit1         | chr5:3803164-3844515      | 5.49104 | 9.17818 | 0.741128 |
| Dock4         | chr12:40446052-40846488   | 7.78319 | 13.0054 | 0.740675 |
| Kcnmb1        | chr11:33629340-33993193   | 11.2669 | 18.8194 | 0.740134 |
| Fam43a        | chr16:30599722-30602797   | 3.18745 | 5.32389 | 0.740078 |
| Map7          | chr10:20148919-20281590   | 17.0187 | 28.3914 | 0.738335 |
| Nipsnap3b     | chr4:53011923-53022059    | 22.0686 | 36.8    | 0.737709 |
| Kctd16        | chr18:40258360-40531184   | 16.5833 | 27.6342 | 0.736729 |
| Samd12        | chr15:53461800-53902436   | 14.9516 | 24.9023 | 0.73598  |
| Anxa11        | chr14:25842154-25886804   | 16.5687 | 27.5909 | 0.735732 |
| Trnp1         | chr4:133491099-133498550  | 275.669 | 458.506 | 0.734005 |
| Impact        | chr18:12972251-12992948   | 39.0591 | 64.9521 | 0.733719 |
| Tspan14       | chr14:40906443-40966807   | 28.4795 | 47.3584 | 0.733694 |
| 9530077C05Rik | chr9:22411576-22444679    | 7.23609 | 12.0281 | 0.733121 |
| Tradd         | chr8:105258574-105264594  | 8.32771 | 13.8394 | 0.732785 |
| Adamts3       | chr5:89673840-89883334    | 3.2099  | 5.33417 | 0.732733 |
| Ifit2         | chr19:34550693-34576534   | 9.76742 | 16.2305 | 0.732655 |
| Gtpbp6        | chr5:110099968-110108197  | 12.4196 | 20.6244 | 0.731737 |
| H13           | chr2:152669460-152708668  | 30.316  | 50.314  | 0.73088  |
| Rras          | chr7:45018006-45021644    | 32.4943 | 53.9282 | 0.730854 |
| Txndc11       | chr16:11066297-11134532   | 5.9909  | 9.93978 | 0.730442 |
| 36585         | chr1:72427111-72536564    | 5.39699 | 8.94051 | 0.728201 |
| 2700094K13Rik | chr2:84669220-84670708    | 25.4439 | 42.1285 | 0.727477 |
| Serf1         | chr13:100108018-100114233 | 29.6207 | 49.0251 | 0.726915 |
| Rspo2         | chr15:43020794-43170818   | 25.2956 | 41.852  | 0.726408 |
| Nek1          | chr8:60993219-61130234    | 23.2814 | 38.5064 | 0.725918 |
| Hnrnpa1       | chr15:103240396-103246698 | 9.99832 | 16.5366 | 0.725907 |
| Hmgcll1       | chr9:76014976-76136350    | 3.82949 | 6.33092 | 0.725263 |
| Chd5          | chr4:152338650-152390194  | 12.2881 | 20.3077 | 0.724765 |
| Snx9          | chr17:5841379-5930711     | 14.5571 | 24.0496 | 0.724288 |
| Snhg6         | chr1:9942024-9944118      | 13.8802 | 22.8905 | 0.721716 |
| Rnase4        | chr14:51091076-51106151   | 10.4301 | 17.1995 | 0.721621 |
| Diras2        | chr13:52504374-52530836   | 12.3861 | 20.4143 | 0.720862 |
| Sema3e        | chr5:14025275-14256689    | 4.61343 | 7.6002  | 0.720197 |
| Zmat4         | chr8:23669660-24063116    | 11.6135 | 19.1313 | 0.72013  |
| Kcna4         | chr2:107290588-107298504  | 7.53034 | 12.3911 | 0.718513 |
| Zfx3          | chr8:108714643-108961636  | 13.1858 | 21.6859 | 0.717773 |
| Kctd8         | chr5:69109284-69341709    | 23.9238 | 39.3445 | 0.717717 |
| A330021E22Rik | chr5:5580981-5664232      | 3.07546 | 5.05415 | 0.716669 |
| Ier3          | chr17:35821712-35822911   | 19.0557 | 31.2557 | 0.713899 |
| Zfp580        | chr7:5051531-5053723      | 10.177  | 16.681  | 0.71289  |
| Card10        | chr15:78775135-78803042   | 3.80798 | 6.24095 | 0.712739 |
| Car11         | chr7:45699966-45704661    | 31.0535 | 50.8532 | 0.711584 |

|               |                           |         |         |          |
|---------------|---------------------------|---------|---------|----------|
| Kri1          | chr9:21265284-21287969    | 8.83971 | 14.4642 | 0.710418 |
| Ankrd6        | chr4:32804034-32950826    | 7.33709 | 11.9997 | 0.709721 |
| Nek3          | chr8:22128282-22166435    | 3.9114  | 6.3935  | 0.708921 |
| Lbh           | chr17:72918304-72941946   | 34.9467 | 57.0966 | 0.708249 |
| Rims2         | chr15:39198285-39684372   | 9.70151 | 15.8461 | 0.707845 |
| Ctsl          | chr13:64363213-64370306   | 412.355 | 672.458 | 0.705558 |
| Cacna2d2      | chr9:107399879-107529343  | 8.64915 | 14.1005 | 0.705115 |
| Tlx2          | chr6:83068324-83070225    | 40.7746 | 66.3746 | 0.702962 |
| Ddx55         | chr5:124552863-124569660  | 4.3463  | 7.06946 | 0.701812 |
| Zcchc9        | chr13:91796532-91807696   | 7.08635 | 11.5253 | 0.701686 |
| Ano3          | chr2:110655200-110950244  | 64.752  | 105.215 | 0.700337 |
| Rab15         | chr12:76797962-76822524   | 69.9104 | 113.552 | 0.699768 |
| Cacnb3        | chr15:98632327-98644536   | 109.195 | 177.31  | 0.699369 |
| Tnfrsf11a     | chr1:105780722-105847981  | 8.86578 | 14.3961 | 0.69936  |
| Cdkn1a        | chr17:29090985-29100722   | 34.7025 | 56.3435 | 0.69921  |
| Ebf1          | chr11:44618099-45008096   | 46.4298 | 75.3745 | 0.699027 |
| Klf8          | chrX:153238044-153396134  | 4.31985 | 7.00744 | 0.697906 |
| Anks1b        | chr10:89873508-90972984   | 9.88292 | 16.0303 | 0.69779  |
| Slc35f4       | chr14:49298519-49525837   | 7.11492 | 11.5396 | 0.697668 |
| Nup93         | chr8:94214600-94315066    | 38.9466 | 63.1548 | 0.697394 |
| Tmem132e      | chr11:82388899-82446327   | 47.7418 | 77.3285 | 0.695747 |
| Pcbd1         | chr10:61089330-61094329   | 29.3864 | 47.5706 | 0.69492  |
| Thra          | chr11:98741872-98765111   | 71.6991 | 116.023 | 0.694382 |
| Mfsd10        | chr5:34633646-34637114    | 8.66608 | 14.0204 | 0.694081 |
| Auts2         | chr5:131437681-132542343  | 11.2281 | 18.1319 | 0.691412 |
| Pde10a        | chr17:8526800-8986648     | 6.65739 | 10.7498 | 0.691278 |
| Nt5c          | chr11:115475676-115491814 | 46.189  | 74.5666 | 0.690981 |
| Tmem198       | chr1:75479531-75485693    | 3.2952  | 5.31415 | 0.689472 |
| Hypk          | chr2:121457087-121458440  | 95.6832 | 154.252 | 0.68895  |
| Slc25a27      | chr17:43641899-43667015   | 11.5684 | 18.6439 | 0.68851  |
| Syt4          | chr18:31437807-31447415   | 126.698 | 204.117 | 0.688007 |
| Nckap5l       | chr15:99422033-99457748   | 7.9067  | 12.7379 | 0.687977 |
| Tmsb4x        | chrX:167207093-167209218  | 1569.18 | 2527.15 | 0.687495 |
| Dock11        | chrX:35888831-36076562    | 32.6793 | 52.5807 | 0.686158 |
| Pou4f1        | chr14:104462324-104467999 | 64.0662 | 103.05  | 0.685703 |
| Plau          | chr14:20836661-20843388   | 4.48719 | 7.21527 | 0.68524  |
| Pura          | chr18:36281161-36288244   | 12.7217 | 20.4349 | 0.683741 |
| Hctr2         | chr9:76225879-76323578    | 3.93078 | 6.3124  | 0.68337  |
| Arhgap17      | chr7:123279148-123369915  | 22.7859 | 36.5835 | 0.683049 |
| Rgmb          | chr17:15806252-15826586   | 81.8353 | 131.338 | 0.682487 |
| Zfp946        | chr17:22424267-22456689   | 7.15501 | 11.4831 | 0.682487 |
| Serp2         | chr14:76532811-76556889   | 35.4418 | 56.8746 | 0.682333 |
| Xylt2         | chr11:94663846-94677493   | 11.4072 | 18.3029 | 0.682123 |
| Nrn1          | chr13:36725621-36734477   | 332.066 | 532.674 | 0.681784 |
| Zfp524        | chr7:5015507-5018488      | 4.01795 | 6.4444  | 0.681587 |
| Myt1l         | chr12:29528383-29923209   | 20.4567 | 32.7807 | 0.680273 |
| Hpcal1        | chr12:17690813-17791926   | 78.9773 | 126.529 | 0.679955 |
| Slit1         | chr19:41600256-41743856   | 27.3332 | 43.7851 | 0.679789 |
| C2cd5         | chr6:143010919-143100152  | 12.8044 | 20.5105 | 0.679725 |
| 4921524J17Rik | chr8:85408758-85432841    | 5.82587 | 9.323   | 0.678322 |
| Fam124a       | chr14:62555736-62608485   | 5.03566 | 8.05694 | 0.678052 |
| Gpr19         | chr6:134869091-134897925  | 5.87237 | 9.39217 | 0.677516 |
| Ndn           | chr7:62348276-62349927    | 117.846 | 188.35  | 0.67651  |

|          |                           |         |         |          |
|----------|---------------------------|---------|---------|----------|
| Fgf13    | chrX:59062145-59585572    | 348.187 | 556.392 | 0.67624  |
| Rgl2     | chr17:33929893-33937687   | 6.88732 | 11.0054 | 0.67619  |
| Eogt     | chr6:97110943-97148883    | 6.82171 | 10.8985 | 0.675925 |
| Sema4d   | chr13:51701247-51793747   | 22.3474 | 35.662  | 0.67428  |
| Sfn      | chr4:133600555-133602168  | 3.4443  | 5.49386 | 0.673612 |
| Tsen34   | chr7:3693609-3701035      | 26.5219 | 42.2517 | 0.671825 |
| Cds2     | chr2:132263147-132312050  | 182.459 | 290.163 | 0.66929  |
| Tpm4     | chr8:72135291-72153129    | 35.7666 | 56.8208 | 0.667808 |
| Ankrd13b | chr11:77470486-77489678   | 25.701  | 40.7974 | 0.66665  |
| Myd88    | chr9:119335987-119340040  | 4.48125 | 7.10972 | 0.665892 |
| Ubald1   | chr16:4874778-4879851     | 36.3267 | 57.5929 | 0.664861 |
| Avil     | chr10:127000708-127020994 | 281.18  | 445.734 | 0.664688 |
| Rpl13    | chr8:123102349-123105242  | 6.81732 | 10.799  | 0.663627 |
| Slc15a4  | chr5:127595665-127617392  | 10.8937 | 17.2554 | 0.663555 |
| Akap17b  | chrX:36608182-36645414    | 5.67838 | 8.99437 | 0.663542 |
| Csnk1e   | chr15:79417851-79442057   | 22.3626 | 35.4156 | 0.663294 |
| Lrrc16b  | chr14:55491092-55508264   | 13.8522 | 21.931  | 0.662858 |
| Deaf1    | chr7:141297175-141338783  | 14.2442 | 22.5458 | 0.662482 |
| Cystm1   | chr18:36348623-36393370   | 71.8709 | 113.73  | 0.662129 |
| Myadm    | chr7:3289037-3299349      | 64.868  | 102.636 | 0.661964 |
| Rnaseh1  | chr12:28649601-28659591   | 6.38256 | 10.087  | 0.660284 |
| Cbr3     | chr16:93683218-93690991   | 5.65749 | 8.94062 | 0.660214 |
| Ina      | chr19:46886830-47024346   | 17.3747 | 27.4544 | 0.66005  |
| Mtcl1    | chr17:66336981-66449750   | 24.0222 | 37.933  | 0.659085 |
| Tppp3    | chr8:105467491-105471422  | 1107.27 | 1747.59 | 0.658356 |
| Ralgps1  | chr2:33133418-33371494    | 3.90534 | 6.14954 | 0.655029 |
| Bst2     | chr8:71534261-71537437    | 11.2122 | 17.6475 | 0.654402 |
| Unc119   | chr11:78343521-78349156   | 33.2972 | 52.4066 | 0.654346 |
| Pvrl1    | chr9:43744575-43807461    | 16.2551 | 25.583  | 0.654295 |
| Fez1     | chr9:36843658-36878640    | 248.193 | 390.45  | 0.653674 |
| Klf7     | chr1:64035670-64121389    | 61.001  | 95.9163 | 0.652943 |
| Sh3bgrl3 | chr4:134127405-134128753  | 439.547 | 690.638 | 0.651914 |
| Tspan2   | chr3:102720230-102772310  | 33.2992 | 52.2534 | 0.650038 |
| Mgat4a   | chr1:37439339-37541016    | 13.3019 | 20.8685 | 0.6497   |
| Pqlc3    | chr12:16988647-17000118   | 32.7742 | 51.402  | 0.649263 |
| Ccdc109b | chr3:129914959-129970206  | 17.7914 | 27.9008 | 0.649129 |
| Coro1a   | chr7:126699773-126704754  | 70.4661 | 110.39  | 0.647613 |
| Snx10    | chr6:51523902-51590670    | 78.5115 | 122.982 | 0.647472 |
| Faim     | chr9:98986372-99002019    | 19.4861 | 30.5213 | 0.647367 |
| Znf512b  | chr2:181569152-181592461  | 7.87464 | 12.3314 | 0.647047 |
| Tmem206  | chr1:191325964-191397041  | 4.95754 | 7.76201 | 0.646806 |
| Popdc3   | chr10:45289304-45318450   | 15.5249 | 24.3028 | 0.646535 |
| Fam189b  | chr3:89183224-89189289    | 183.273 | 286.819 | 0.646151 |
| Ankrd13d | chr19:4270179-4283137     | 29.8869 | 46.7557 | 0.645628 |
| Hdac9    | chr12:34047581-34917095   | 7.66699 | 11.987  | 0.64474  |
| Tmsb10   | chr6:72957346-72958748    | 119.127 | 186.236 | 0.64463  |
| F8a      | chrX:73228305-73230795    | 6.43214 | 10.0525 | 0.644182 |
| Lrrc75b  | chr10:75550124-75560330   | 40.3832 | 63.1005 | 0.643895 |
| Gm13889  | chr2:93955809-93957100    | 78.923  | 123.286 | 0.64349  |
| Med11    | chr11:70451930-70453726   | 12.812  | 19.989  | 0.641716 |
| Pfkl     | chr10:77986948-78009796   | 25.7561 | 40.1815 | 0.641621 |
| Psma5    | chr3:108256925-108279952  | 6.26175 | 9.76733 | 0.641398 |
| Ttc8     | chr12:98920573-98983238   | 4.37523 | 6.81996 | 0.640405 |

|               |                           |         |         |          |
|---------------|---------------------------|---------|---------|----------|
| Ggta1         | chr2:35400178-35461425    | 8.74979 | 13.6284 | 0.639297 |
| Trpv2         | chr11:62574485-62600305   | 28.3063 | 44.0709 | 0.638706 |
| Ap3b1         | chr13:94358959-94566316   | 6.48318 | 10.0919 | 0.638422 |
| 1500004A13Rik | chr3:88777056-88832487    | 6.09451 | 9.47892 | 0.637212 |
| 1500011B03Rik | chr5:114808195-114813976  | 54.5371 | 84.803  | 0.636876 |
| Ptpn9         | chr9:56994967-57071966    | 26.54   | 41.2644 | 0.636729 |
| Tmem169       | chr1:72284372-72302995    | 5.84383 | 9.07778 | 0.635424 |
| Lmnb2         | chr10:80901362-80918245   | 3.75735 | 5.83574 | 0.635202 |
| Gm17066       | chr14:105106727-105177327 | 6.10504 | 9.47992 | 0.634873 |
| Rmnd5b        | chr11:51619772-51635896   | 15.4206 | 23.9334 | 0.634172 |
| Chrna6        | chr8:27403211-27413944    | 22.9159 | 35.559  | 0.633864 |
| Six1          | chr12:73041826-73046712   | 25.0527 | 38.8619 | 0.633389 |
| Abca5         | chr11:110269368-110337716 | 27.7932 | 43.1036 | 0.633075 |
| Ltv1          | chr10:13178637-13193137   | 13.0106 | 20.1568 | 0.631579 |
| Gstp1         | chr19:4035410-4037912     | 32.3094 | 50.0362 | 0.631021 |
| Lrrc8d        | chr5:105699968-105815215  | 32.5873 | 50.397  | 0.629029 |
| Agk           | chr6:40325477-40396762    | 4.06561 | 6.28681 | 0.628854 |
| Sertad4       | chr1:192844487-192855752  | 11.5593 | 17.874  | 0.628812 |
| Skap2         | chr6:51859164-52012549    | 16.4729 | 25.4385 | 0.626919 |
| Arhgef28      | chr13:97898594-98206165   | 5.84518 | 9.02354 | 0.626447 |
| Enox1         | chr14:77156762-77721763   | 16.7506 | 25.8458 | 0.625716 |
| Rcan3         | chr4:135412308-135433805  | 28.1986 | 43.4992 | 0.625364 |
| Rmdn1         | chr4:19575065-19606932    | 3.96372 | 6.11225 | 0.624846 |
| Coro2a        | chr4:46536936-46601929    | 51.1237 | 78.8252 | 0.624664 |
| Cntn3         | chr6:102163305-102464667  | 3.90556 | 6.01962 | 0.624144 |
| 4931428F04Rik | chr8:105276446-105289528  | 10.5945 | 16.3139 | 0.622786 |
| Rufy2         | chr10:62980222-63023849   | 8.84357 | 13.6136 | 0.622351 |
| Brinp2        | chr1:158245268-158356260  | 14.1124 | 21.7085 | 0.621298 |
| Erlin1        | chr19:44034942-44069785   | 6.77551 | 10.4203 | 0.621002 |
| Brd9          | chr13:73937837-73960895   | 14.8591 | 22.8474 | 0.62068  |
| Cacna2d1      | chr5:15934690-16374511    | 44.2517 | 68.0367 | 0.620578 |
| Stk11ip       | chr1:75521528-75537335    | 8.09348 | 12.441  | 0.62027  |
| Rac3          | chr11:120721467-120723969 | 27.6683 | 42.5214 | 0.619956 |
| Uri1          | chr7:37959991-38019552    | 10.0251 | 15.4005 | 0.619356 |
| Zc3h7a        | chr16:11136593-11176393   | 8.48492 | 13.0283 | 0.618673 |
| Cxxc4         | chr3:134236494-134262089  | 4.70818 | 7.22896 | 0.618618 |
| Icmt          | chr4:152297213-152318625  | 47.2822 | 72.5743 | 0.61816  |
| Bbs5          | chr2:69647254-69667569    | 7.06313 | 10.8393 | 0.617895 |
| Gramd4        | chr15:86057694-86137636   | 13.1833 | 20.2314 | 0.617888 |
| Armcx6        | chrX:134748454-134751419  | 5.47151 | 8.39667 | 0.617878 |
| Rsph3a        | chr17:7945613-7979556     | 4.85024 | 7.44288 | 0.617804 |
| Snx7          | chr3:117781496-117868936  | 78.5812 | 120.526 | 0.617089 |
| Tac1          | chr6:7555070-7562973      | 188.8   | 289.472 | 0.616566 |
| B3glct        | chr5:149678256-149762599  | 12.5912 | 19.2966 | 0.615927 |
| Boc           | chr16:44485044-44558870   | 6.28079 | 9.62355 | 0.615624 |
| Vezt          | chr10:93968099-94035748   | 14.8229 | 22.7022 | 0.615007 |
| Aacs          | chr5:125475872-125517403  | 54.855  | 84.0048 | 0.614848 |
| Ccdc12        | chr9:110656502-110711593  | 7.84602 | 12.0152 | 0.614831 |
| Bdnf          | chr2:109674699-109727043  | 9.21153 | 14.1019 | 0.614372 |
| Nol3          | chr8:105276446-105289528  | 42.3412 | 64.7975 | 0.613878 |
| B4galt5       | chr2:167298444-167349178  | 32.7663 | 50.1142 | 0.613009 |
| Hilpda        | chr6:29272487-29275449    | 6.20655 | 9.49182 | 0.612894 |
| Abr           | chr11:76416731-76577739   | 60.7909 | 92.9577 | 0.612719 |

|               |                           |         |         |          |
|---------------|---------------------------|---------|---------|----------|
| Kifc2         | chr15:76660640-76668196   | 13.7947 | 21.0911 | 0.61252  |
| Bend4         | chr5:67392146-67427799    | 3.48219 | 5.32293 | 0.612225 |
| Prdm8         | chr5:98180868-98187448    | 7.63028 | 11.6607 | 0.611842 |
| Snx21         | chr2:164786020-164804881  | 35.0435 | 53.5439 | 0.611574 |
| Supt20        | chr3:54693104-54716837    | 11.1734 | 17.0716 | 0.611537 |
| Zdhhc13       | chr7:48789002-48827437    | 17.0199 | 26.0033 | 0.611472 |
| Rab40c        | chr17:25882113-25919714   | 11.8805 | 18.1492 | 0.611315 |
| Wipf1         | chr2:73429609-73529487    | 13.8356 | 21.1291 | 0.610847 |
| 1110007C09Rik | chr13:49202950-49216026   | 43.0135 | 65.6672 | 0.610384 |
| Plcl1         | chr1:55405945-55754285    | 3.47142 | 5.29757 | 0.609804 |
| Utp18         | chr11:93859242-93885766   | 5.1263  | 7.82064 | 0.609368 |
| Asl           | chr5:130011502-130024331  | 14.3327 | 21.8525 | 0.60849  |
| Ralgds        | chr2:28513166-28553082    | 21.7336 | 33.1256 | 0.608018 |
| Ino80b        | chr6:83121827-83125029    | 9.04555 | 13.7858 | 0.607903 |
| Creld1        | chr6:113483568-113493338  | 99.6485 | 151.85  | 0.607723 |
| 8430427H17Rik | chr2:153407460-153529971  | 19.812  | 30.1826 | 0.607339 |
| 2010111I01Rik | chr13:62964892-63431745   | 21.6158 | 32.9262 | 0.607146 |
| Glipr2        | chr4:43957701-43979118    | 7.24067 | 11.0245 | 0.606523 |
| Ankrd12       | chr17:65967500-66077046   | 10.0006 | 15.222  | 0.606069 |
| Rp9           | chr9:22448311-22468356    | 21.4134 | 32.5709 | 0.605071 |
| Zmat5         | chr11:4704677-4737666     | 18.5755 | 28.2457 | 0.604631 |
| Pla2g6        | chr15:79286227-79328371   | 12.034  | 18.2956 | 0.604385 |
| Ydjc          | chr16:17146966-17148857   | 9.44873 | 14.3634 | 0.604208 |
| Rpusd1        | chr17:25727750-25731456   | 9.60435 | 14.597  | 0.603912 |
| Gpatch4       | chr3:88043105-88055994    | 8.64985 | 13.1422 | 0.603461 |
| Fbxo36        | chr1:84839840-84900486    | 7.63436 | 11.5993 | 0.603458 |
| Flot2         | chr11:78037940-78060432   | 140.006 | 212.615 | 0.60275  |
| Cep78         | chr19:15955772-15984989   | 4.21976 | 6.40722 | 0.602536 |
| Wbscr17       | chr5:130874950-131307522  | 50.5631 | 76.7386 | 0.601868 |
| Tec           | chr5:72755717-72868448    | 3.62284 | 5.4967  | 0.601445 |
| Jph4          | chr14:55106825-55116935   | 50.6527 | 76.8172 | 0.60079  |
| Gucd1         | chr10:75506813-75517322   | 11.2307 | 17.0291 | 0.600559 |
| Zfp827        | chr8:79028436-79193766    | 5.44555 | 8.25329 | 0.599891 |
| Fam178a       | chr19:44931118-44984550   | 3.82463 | 5.79562 | 0.599642 |
| Zcchc18       | chrX:136981115-137038302  | 82.5457 | 125.059 | 0.599343 |
| AW549877      | chr15:3982034-3995752     | 25.4253 | 38.5137 | 0.599109 |
| Nagk          | chr6:83795056-83802556    | 44.0442 | 66.6892 | 0.598501 |
| Grk5          | chr19:60889748-61092555   | 5.44676 | 8.24652 | 0.598386 |
| Pknox2        | chr9:36890978-37147322    | 20.9052 | 31.6497 | 0.598329 |
| Rps19bp1      | chr15:80260613-80264306   | 11.0525 | 16.7279 | 0.597887 |
| Pygl          | chr12:70190814-70227683   | 11.1903 | 16.9344 | 0.597707 |
| Socs7         | chr11:97362550-97398542   | 20.1869 | 30.546  | 0.597566 |
| Dennd6b       | chr15:89182212-89196474   | 4.23366 | 6.40561 | 0.59743  |
| Anxa5         | chr3:36448923-36475887    | 640.234 | 967.842 | 0.596172 |
| Erich3        | chr3:154711132-154749012  | 3.48788 | 5.27207 | 0.596018 |
| Slc25a1       | chr16:17925210-17928219   | 65.4516 | 98.8534 | 0.594863 |
| Rnf219        | chr14:104477533-104522666 | 9.73866 | 14.706  | 0.594611 |
| Fah           | chr7:84585158-84605942    | 13.5849 | 20.5041 | 0.593912 |
| Id4           | chr13:48044230-48264036   | 27.4859 | 41.4835 | 0.593846 |
| Tmem74        | chr15:43866694-43870029   | 15.537  | 23.4386 | 0.593179 |
| Rtn4rl1       | chr11:75193992-75267762   | 39.0057 | 58.7689 | 0.59137  |
| Gcnt2         | chr13:40859767-40960892   | 111.801 | 168.346 | 0.590487 |
| Pde8a         | chr7:81213803-81333622    | 3.32466 | 5.00393 | 0.589857 |



|               |                           |         |         |          |
|---------------|---------------------------|---------|---------|----------|
| Ugcg          | chr4:59189549-59222833    | 54.5559 | 82.1009 | 0.589664 |
| Ankzf1        | chr1:75192159-75210778    | 4.97716 | 7.49008 | 0.58966  |
| Zfp941        | chr7:140809676-140822178  | 5.76556 | 8.66933 | 0.588459 |
| Cdh1          | chr8:106603367-106670246  | 51.2669 | 76.9926 | 0.586691 |
| 2510009E07Rik | chr16:21649044-21694665   | 43.4253 | 65.2086 | 0.586527 |
| Cacna1b       | chr2:24603888-24763152    | 22.0412 | 33.0934 | 0.586341 |
| Ppp1r1c       | chr2:79707779-79818546    | 123.184 | 184.878 | 0.585756 |
| Nkiras2       | chr11:100622954-100650693 | 13.5898 | 20.3806 | 0.584677 |
| Fam189a2      | chr19:23972749-24031019   | 12.7599 | 19.1264 | 0.583951 |
| Emp3          | chr7:45918022-45921426    | 28.6394 | 42.8926 | 0.582727 |
| Rrp36         | chr17:46667452-46674255   | 8.62876 | 12.9203 | 0.582413 |
| Frat2         | chr19:41845975-41848132   | 5.63341 | 8.43484 | 0.582351 |
| Dbndd2        | chr2:164486139-164493323  | 8.37646 | 12.5353 | 0.581578 |
| Nipal2        | chr15:34572798-34679204   | 10.0304 | 15.005  | 0.58107  |
| Fam102b       | chr3:108970996-109027607  | 58.9717 | 88.1789 | 0.580411 |
| Tspan5        | chr3:138742194-138904424  | 48.6281 | 72.6711 | 0.579594 |
| C77080        | chr4:129189794-129261404  | 38.9646 | 58.2246 | 0.579467 |
| Fbxo22        | chr9:55208934-55283625    | 26.8944 | 40.1626 | 0.578546 |
| Lclat1        | chr17:73107984-73243366   | 23.1676 | 34.5864 | 0.578095 |
| Rnf7          | chr9:96470956-96478595    | 88.1451 | 131.59  | 0.578093 |
| Eef1g         | chr19:8967040-8978180     | 16.534  | 24.6794 | 0.577869 |
| Bbs9          | chr9:22475714-22888280    | 6.39062 | 9.53645 | 0.577496 |
| Myc           | chr15:61985340-61990361   | 4.62496 | 6.89908 | 0.576965 |
| Ccdc85a       | chr11:28385683-28584324   | 15.6701 | 23.3724 | 0.576798 |
| Lypd6b        | chr2:49787685-49948846    | 4.15571 | 6.19621 | 0.576289 |
| Pten          | chr19:32757576-32826160   | 44.1691 | 65.8353 | 0.575826 |
| Tmem256       | chr11:69838524-69839558   | 67.0782 | 99.9723 | 0.575684 |
| Tcof1         | chr18:60813755-60848964   | 5.0445  | 7.51817 | 0.575671 |
| Raph1         | chr1:60483184-60566765    | 18.42   | 27.4522 | 0.575653 |
| Rnps1         | chr17:24414674-24425897   | 11.9318 | 17.7805 | 0.575491 |
| 37499         | chrX:36910833-36989695    | 33.6244 | 50.1005 | 0.575316 |
| Taf9b         | chrX:106206873-106221158  | 14.9687 | 22.2996 | 0.575073 |
| Vav3          | chr3:109340682-109685694  | 7.73783 | 11.5268 | 0.574986 |
| Clk2          | chr3:89164804-89177087    | 4.51737 | 6.72851 | 0.574803 |
| Tmem106a      | chr11:101582241-101591785 | 3.94941 | 5.87832 | 0.573767 |
| Kdsr          | chr1:106720409-106759742  | 11.18   | 16.6336 | 0.573182 |
| Trim46        | chr3:89234176-89245897    | 13.9702 | 20.7803 | 0.572864 |
| Zadh2         | chr18:84088157-84097514   | 20.4347 | 30.3931 | 0.572727 |
| Plekha6       | chr1:133246096-133303435  | 54.1547 | 80.5455 | 0.572717 |
| Slc9a3r2      | chr17:24639281-24650305   | 51.3576 | 76.3847 | 0.572706 |
| Arl10         | chr13:54575012-54581128   | 10.2048 | 15.1697 | 0.571952 |
| Pwwp2a        | chr11:43681997-43722633   | 3.84794 | 5.71899 | 0.571673 |
| 2900056M20Rik | chrX:152294823-152327493  | 5.94834 | 8.83192 | 0.570238 |
| Gtf3a         | chr5:146948656-146963797  | 11.6585 | 17.3057 | 0.569858 |
| Mrgpre        | chr7:143778362-143784500  | 9.27307 | 13.7599 | 0.569352 |
| Tmem29        | chrX:150397772-150459150  | 11.1274 | 16.5097 | 0.569189 |
| Gadd45g       | chr13:51846674-51848474   | 18.9937 | 28.1726 | 0.568768 |
| Leo1          | chr9:75441523-75466432    | 14.1059 | 20.914  | 0.568172 |
| Ankrd24       | chr10:81628539-81647612   | 4.56136 | 6.76222 | 0.568032 |
| Lrch4         | chr5:137629122-137642902  | 9.45851 | 14.0144 | 0.567225 |
| Zmym6         | chr4:127077382-127124374  | 3.85734 | 5.71503 | 0.567157 |
| Spag7         | chr11:70663768-70669416   | 37.4946 | 55.5262 | 0.566485 |
| Mbnl2         | chr14:120275668-120431698 | 153.729 | 227.483 | 0.565373 |

|               |                           |         |         |          |
|---------------|---------------------------|---------|---------|----------|
| Pkp4          | chr2:59160849-59355205    | 10.2769 | 15.2051 | 0.565151 |
| Cisd3         | chr11:97685951-97688625   | 49.365  | 73.0155 | 0.564712 |
| Pgls          | chr8:71592183-71596267    | 25.0058 | 36.9778 | 0.564397 |
| Supt4a        | chr11:87737564-87743617   | 11.9622 | 17.6854 | 0.564069 |
| Zfp738        | chr13:67667440-67683512   | 5.01256 | 7.40435 | 0.562828 |
| Lyar          | chr5:38220481-38234306    | 5.02996 | 7.42635 | 0.562108 |
| Hdac10        | chr15:89123302-89128700   | 6.36098 | 9.3837  | 0.560906 |
| Rbfox1        | chr16:5884792-7412480     | 64.6056 | 95.2511 | 0.560077 |
| A230050P20Rik | chr9:20868641-20879710    | 6.21831 | 9.15741 | 0.558418 |
| Cd34          | chr1:194938820-194976959  | 28.4079 | 41.8246 | 0.558058 |
| Nin           | chr12:70011434-70112035   | 3.63201 | 5.34412 | 0.557185 |
| Cobl          | chr11:12236675-12464960   | 17.9751 | 26.443  | 0.556886 |
| Pitpnm2       | chr5:124118688-124249760  | 45.5515 | 66.9324 | 0.555205 |
| Trpv1         | chr11:73238258-73260507   | 44.4312 | 65.284  | 0.555155 |
| Scn9a         | chr2:66440879-66634962    | 62.9032 | 92.4137 | 0.554972 |
| Plekho1       | chr3:95988835-95995839    | 14.9052 | 21.8915 | 0.55456  |
| 9330159F19Rik | chr10:29211642-29230779   | 15.8453 | 23.2708 | 0.55447  |
| Qdpr          | chr5:45434031-45450229    | 99.2172 | 145.677 | 0.554112 |
| Ptpr          | chr10:116018362-116274929 | 16.5822 | 24.3457 | 0.554033 |
| BC029214      | chr2:25459487-25461094    | 11.302  | 16.5926 | 0.553959 |
| Lonrf1        | chr8:36216063-36249516    | 10.4328 | 15.3163 | 0.553948 |
| Arhgef18      | chr8:3393007-3456600      | 10.6964 | 15.6957 | 0.553243 |
| Trmt1         | chr8:84689246-84699808    | 13.0528 | 19.1533 | 0.55324  |
| Chrm4         | chr2:91922188-91932297    | 3.58217 | 5.25588 | 0.553097 |
| Dapk3         | chr10:81183006-81193197   | 19.0629 | 27.9537 | 0.552273 |
| Ankra2        | chr13:98263075-98274754   | 12.5703 | 18.4289 | 0.551951 |
| Kdelc2        | chr9:53384022-53401867    | 7.81401 | 11.4544 | 0.551767 |
| Dolpp1        | chr2:30392253-30415748    | 17.1587 | 25.1523 | 0.551756 |
| Gpr176        | chr2:118277097-118373419  | 4.60399 | 6.74846 | 0.551675 |
| Snx8          | chr5:140340302-140389247  | 7.75645 | 11.3485 | 0.549028 |
| Parp11        | chr6:127453722-127494239  | 6.90991 | 10.1097 | 0.548998 |
| Slc35f5       | chr1:125561015-125595684  | 16.6209 | 24.3104 | 0.548576 |
| Calcb         | chr7:114718642-114723365  | 149.559 | 218.746 | 0.548547 |
| Mrps6         | chr16:92058321-92112227   | 67.3982 | 98.5301 | 0.547856 |
| 2610203C20Rik | chr9:41581338-41592487    | 3.82917 | 5.59503 | 0.547113 |
| Kcnab1        | chr3:65109367-65378225    | 62.6625 | 91.5469 | 0.546908 |
| Trappc5       | chr8:3676476-3680921      | 16.9854 | 24.8138 | 0.546847 |
| Smad1         | chr8:79338397-79399468    | 18.7824 | 27.4135 | 0.545506 |
| Stk19         | chr17:34823992-34836903   | 12.6746 | 18.496  | 0.545269 |
| AI414108      | chr9:27352684-27357543    | 4.409   | 6.43253 | 0.544937 |
| Gigyf1        | chr5:137518879-137527935  | 5.54022 | 8.08072 | 0.544541 |
| Osbpl3        | chr6:50293326-50456170    | 72.5162 | 105.722 | 0.543907 |
| Lactb         | chr9:66955392-66975484    | 5.4702  | 7.97193 | 0.543335 |
| Prkx          | chrX:77762029-77795960    | 33.6808 | 49.0589 | 0.542586 |
| Fkbp1b        | chr12:4833173-4841595     | 148.646 | 216.491 | 0.542428 |
| AI846148      | chr19:7356463-7383557     | 5.97281 | 8.69812 | 0.542294 |
| Eif1a         | chr18:46597703-46610225   | 27.7249 | 40.3572 | 0.541644 |
| Cacna1c       | chr6:118587239-119221614  | 9.59312 | 13.9583 | 0.541053 |
| Zbtb10        | chr3:9250566-9285332      | 5.22701 | 7.60495 | 0.540952 |
| Cd97          | chr8:83715176-83741311    | 4.50125 | 6.54818 | 0.540769 |
| Nmi           | chr2:51948498-51973208    | 5.88805 | 8.56401 | 0.540498 |
| Ppapdc1b      | chr8:25720047-25724887    | 7.2064  | 10.4803 | 0.540333 |
| Mrpl57        | chr14:57826238-57828745   | 6.15684 | 8.94847 | 0.539452 |

|               |                           |         |         |          |
|---------------|---------------------------|---------|---------|----------|
| Man1c1        | chr4:134561689-134704290  | 11.7934 | 17.1298 | 0.538532 |
| Mob3a         | chr10:80685252-80701820   | 11.4418 | 16.606  | 0.537393 |
| B230217O12Rik | chr19:57323196-57360899   | 7.49357 | 10.8704 | 0.536686 |
| 2610001J05Rik | chr6:13869073-13871483    | 24.2599 | 35.1801 | 0.536188 |
| Slc22a18      | chr7:143473754-143499332  | 8.93671 | 12.9535 | 0.535531 |
| Kcnj12        | chr11:61022563-61073267   | 16.4833 | 23.884  | 0.535037 |
| Armcx4        | chrX:134686518-134697772  | 6.12125 | 8.86916 | 0.534971 |
| Elavl3        | chr9:22015004-22052023    | 44.9874 | 65.1393 | 0.534005 |
| Arrdc1        | chr2:24925351-24935281    | 13.7101 | 19.8421 | 0.533323 |
| Gale          | chr4:135965164-135968178  | 15.4659 | 22.3793 | 0.533068 |
| BC018507      | chr13:70588688-70637634   | 11.6618 | 16.8697 | 0.53264  |
| Wsb1          | chr11:79239381-79254695   | 20.0619 | 29.0089 | 0.532038 |
| Stat6         | chr10:127642985-127666703 | 32.3504 | 46.7627 | 0.531574 |
| Sdccag8       | chr1:176814659-177020432  | 4.78159 | 6.91049 | 0.531299 |
| Pik3cd        | chr4:149649167-149701629  | 16.6954 | 24.0902 | 0.528992 |
| Mink1         | chr11:70562880-70614482   | 49.6519 | 71.6285 | 0.528686 |
| Piezo2        | chr18:63010212-63387183   | 69.1812 | 99.7844 | 0.528435 |
| Syngn3        | chr17:24685091-24689949   | 119.336 | 172.041 | 0.527727 |
| Wdr34         | chr2:30031557-30048879    | 5.4294  | 7.82499 | 0.527296 |
| Adc           | chr4:128932145-128962417  | 50.9081 | 73.3322 | 0.526552 |
| Mtmr1         | chrX:71364759-71419196    | 6.0012  | 8.6356  | 0.525045 |
| Chd3          | chr11:69343272-69369426   | 42.2012 | 60.7024 | 0.524471 |
| Crmp1         | chr5:37242057-37292163    | 47.7852 | 68.7267 | 0.524306 |
| Lifr          | chr15:7129571-7197489     | 114.786 | 165.066 | 0.524095 |
| Vps4b         | chr1:106770787-106796725  | 41.5721 | 59.7737 | 0.523895 |
| Vamp4         | chr1:162570827-162599078  | 46.4784 | 66.8229 | 0.523782 |
| Plekha3       | chr2:76675314-76697335    | 12.8034 | 18.4039 | 0.523484 |
| Csrnp3        | chr2:65845766-66031546    | 12.4917 | 17.9557 | 0.523468 |
| Mtss1         | chr15:58941233-59082026   | 16.2765 | 23.3956 | 0.523443 |
| Tpgs1         | chr10:79669409-79676126   | 35.3231 | 50.7672 | 0.523282 |
| Ap4m1         | chr5:138172020-138187186  | 7.84564 | 11.2741 | 0.523052 |
| Prmt2         | chr10:76207221-76237865   | 52.9646 | 76.1078 | 0.523016 |
| Mef2a         | chr7:67231162-67372858    | 34.2831 | 49.2413 | 0.522374 |
| Mcf2l         | chr8:12915892-13020509    | 19.5324 | 28.0354 | 0.521381 |
| Hras          | chr7:141189933-141194004  | 38.365  | 55.058  | 0.521161 |
| Cdyl2         | chr8:116568723-116732991  | 4.68642 | 6.72307 | 0.520635 |
| Acly          | chr11:100476351-100528000 | 179.654 | 257.651 | 0.5202   |
| Parp8         | chr13:116854823-117025516 | 10.6559 | 15.282  | 0.520186 |
| Osbpl6        | chr2:76406507-76600647    | 11.5383 | 16.5378 | 0.519334 |
| Pdcd2         | chr17:15521574-15527301   | 14.9354 | 21.3988 | 0.518792 |
| Bid           | chr6:120893118-120916820  | 14.7088 | 21.073  | 0.518716 |
| Pdcl3         | chr1:38987813-38997236    | 19.9361 | 28.5505 | 0.518132 |
| Mapkapk5      | chr5:121525050-121545892  | 10.3439 | 14.8117 | 0.517958 |
| Rab39         | chr9:53684109-53706232    | 13.4018 | 19.1896 | 0.517895 |
| 2610034B18Rik | chr7:79925358-79935264    | 13.438  | 19.2392 | 0.517728 |
| Mapk11        | chr15:89142483-89149606   | 45.9643 | 65.7406 | 0.51627  |
| Mnt           | chr11:74830923-74845725   | 12.3251 | 17.5931 | 0.51341  |
| Usp12         | chr5:146734811-146794956  | 31.9607 | 45.6159 | 0.513238 |
| Aff3          | chr1:38175990-38664955    | 17.6851 | 25.2298 | 0.512598 |
| Gpatch11      | chr17:78835515-78848308   | 10.4553 | 14.9091 | 0.511949 |
| Ank3          | chr10:69533707-70027436   | 35.381  | 50.4455 | 0.511751 |
| Nvl           | chr1:181093422-181144157  | 9.32227 | 13.2909 | 0.511689 |
| Vti1b         | chr12:79130787-79172458   | 90.9311 | 129.531 | 0.510455 |

|               |                          |         |         |          |
|---------------|--------------------------|---------|---------|----------|
| Disp2         | chr2:118779718-118795175 | 73.9096 | 105.246 | 0.50993  |
| Zfp428        | chr7:24507086-24515682   | 11.2079 | 15.9564 | 0.509617 |
| Tmcc3         | chr10:94514856-94590954  | 11.6272 | 16.5511 | 0.509426 |
| Rnf31         | chr14:55591789-55603671  | 6.4684  | 9.19813 | 0.507931 |
| Mtm1          | chrX:71210766-71315295   | 5.49765 | 7.81386 | 0.507218 |
| Eif4e3        | chr6:99625136-99666771   | 19.9244 | 28.3177 | 0.507167 |
| Prkrip1       | chr5:136180356-136198954 | 8.96851 | 12.7464 | 0.507151 |
| Filip1        | chr9:79815561-79977882   | 10.1256 | 14.3897 | 0.507021 |
| Ccp110        | chr7:118712610-118737018 | 25.5579 | 36.3123 | 0.506693 |
| Zfp954        | chr7:7114682-7121476     | 6.96264 | 9.89205 | 0.506634 |
| Galk2         | chr2:125859108-126152004 | 8.13237 | 11.5501 | 0.506162 |
| Zfp703        | chr8:26977335-26981462   | 13.1554 | 18.6828 | 0.506058 |
| Ppp3cc        | chr14:70217897-70289449  | 22.3936 | 31.7634 | 0.504282 |
| 5330426P16Rik | chr16:50726750-50732773  | 8.85221 | 12.5546 | 0.504105 |
| Luzp2         | chr7:54835244-55268888   | 37.6919 | 53.456  | 0.504099 |
| Ccdc82        | chr9:13246978-13292353   | 4.09531 | 5.80804 | 0.504078 |
| Lrrc8b        | chr5:105415774-105486189 | 23.9728 | 33.9846 | 0.50348  |
| Oraov1        | chr7:144915193-144921137 | 17.0228 | 24.1311 | 0.503426 |
| Mvd           | chr8:122433595-122443422 | 26.4792 | 37.5228 | 0.50291  |
| Dnajc12       | chr10:63382442-63408840  | 12.1688 | 17.2295 | 0.501697 |
| Slc7a6os      | chr8:106200437-106210933 | 7.03739 | 9.95409 | 0.50025  |
| Ston2         | chr12:91633008-91786436  | 5.10969 | 7.22744 | 0.50025  |
| Fgfr1op       | chr17:8165517-8196470    | 9.01349 | 12.7473 | 0.50003  |

| <b>gene</b> | <b>test stat</b> | <b>p value</b> | <b>q value</b> | <b>significant</b> |
|-------------|------------------|----------------|----------------|--------------------|
| Mobp        | 4.38453          | 5.00E-05       | 0.000219871    | yes                |
| Sprr1a      | 3.91064          | 0.0001         | 0.000421844    | yes                |
| C1ql4       | 6.04213          | 5.00E-05       | 0.000219871    | yes                |
| Snhg11      | 10.238           | 5.00E-05       | 0.000219871    | yes                |
| Ccl5        | 3.44952          | 0.00195        | 0.00621891     | yes                |
| Meg3        | 6.24309          | 5.00E-05       | 0.000219871    | yes                |
| Slc51a      | 3.8725           | 5.00E-05       | 0.000219871    | yes                |
| Pde4c       | 6.49692          | 5.00E-05       | 0.000219871    | yes                |
| Wfdc2       | 5.59497          | 5.00E-05       | 0.000219871    | yes                |
| Cdh9        | 6.23943          | 5.00E-05       | 0.000219871    | yes                |
| Bhlha9      | 6.32683          | 5.00E-05       | 0.000219871    | yes                |
| Th          | 10.6178          | 5.00E-05       | 0.000219871    | yes                |
| Mrgpra3     | 8.33276          | 5.00E-05       | 0.000219871    | yes                |
| Ceacam10    | 5.47505          | 5.00E-05       | 0.000219871    | yes                |
| Amy1        | 4.68074          | 5.00E-05       | 0.000219871    | yes                |
| A9300110    | 6.53931          | 5.00E-05       | 0.000219871    | yes                |
| Cacna1i     | 7.52557          | 5.00E-05       | 0.000219871    | yes                |
| Slc17a8     | 7.14966          | 5.00E-05       | 0.000219871    | yes                |
| Nxpe2       | 5.89911          | 5.00E-05       | 0.000219871    | yes                |
| Tmprss11c   | 3.85218          | 5.00E-05       | 0.000219871    | yes                |
| Dgkk        | 5.6649           | 5.00E-05       | 0.000219871    | yes                |
| Gm7271      | 9.5164           | 5.00E-05       | 0.000219871    | yes                |
| Mirg        | 3.86618          | 5.00E-05       | 0.000219871    | yes                |
| Fbp2        | 3.26921          | 5.00E-05       | 0.000219871    | yes                |
| Lgals3      | 3.91272          | 5.00E-05       | 0.000219871    | yes                |
| Ccdc68      | 6.78787          | 5.00E-05       | 0.000219871    | yes                |
| Bmp15       | 4.30622          | 5.00E-05       | 0.000219871    | yes                |
| Card11      | 5.12756          | 5.00E-05       | 0.000219871    | yes                |
| P2rx2       | 3.27805          | 5.00E-05       | 0.000219871    | yes                |
| Fxyd2       | 7.8005           | 5.00E-05       | 0.000219871    | yes                |
| Nts         | 4.56246          | 5.00E-05       | 0.000219871    | yes                |
| Miat        | 7.65706          | 5.00E-05       | 0.000219871    | yes                |
| Mrgprb5     | 4.5454           | 5.00E-05       | 0.000219871    | yes                |
| Wdfy1       | 5.32296          | 5.00E-05       | 0.000219871    | yes                |
| AW551984    | 4.04576          | 5.00E-05       | 0.000219871    | yes                |
| Mrgprx1     | 6.32514          | 5.00E-05       | 0.000219871    | yes                |
| Il31ra      | 6.07722          | 5.00E-05       | 0.000219871    | yes                |
| Fam19a4     | 7.635            | 5.00E-05       | 0.000219871    | yes                |
| 2810008D    | 2.82217          | 5.00E-05       | 0.000219871    | yes                |
| Insm1       | 4.80637          | 5.00E-05       | 0.000219871    | yes                |
| Scin        | 4.85064          | 5.00E-05       | 0.000219871    | yes                |
| Klf5        | 6.49484          | 5.00E-05       | 0.000219871    | yes                |
| Nppb        | 3.7954           | 5.00E-05       | 0.000219871    | yes                |
| Adam8       | 3.71511          | 5.00E-05       | 0.000219871    | yes                |
| Ly86        | 8.36651          | 5.00E-05       | 0.000219871    | yes                |
| Rnf112      | 7.14877          | 5.00E-05       | 0.000219871    | yes                |
| Plaur       | 3.5892           | 5.00E-05       | 0.000219871    | yes                |
| Tmem158     | 7.91404          | 5.00E-05       | 0.000219871    | yes                |
| Celf3       | 4.52965          | 5.00E-05       | 0.000219871    | yes                |

|             |         |          |             |     |
|-------------|---------|----------|-------------|-----|
| Smim5       | 2.89378 | 5.00E-05 | 0.000219871 | yes |
| Fam167a     | 4.42213 | 5.00E-05 | 0.000219871 | yes |
| Nptxr       | 3.41949 | 5.00E-05 | 0.000219871 | yes |
| Dnase1l3    | 5.10834 | 5.00E-05 | 0.000219871 | yes |
| Cpn1        | 3.39029 | 5.00E-05 | 0.000219871 | yes |
| Casp1       | 3.73927 | 5.00E-05 | 0.000219871 | yes |
| Rgs8        | 7.03573 | 5.00E-05 | 0.000219871 | yes |
| Zdhhc23     | 3.10395 | 5.00E-05 | 0.000219871 | yes |
| Scn2b       | 6.54708 | 5.00E-05 | 0.000219871 | yes |
| Kcnh6       | 6.19778 | 5.00E-05 | 0.000219871 | yes |
| Stx3        | 3.73147 | 5.00E-05 | 0.000219871 | yes |
| D7Erttd715c | 5.7782  | 5.00E-05 | 0.000219871 | yes |
| Myo1a       | 6.12162 | 5.00E-05 | 0.000219871 | yes |
| Cyp4f39     | 5.18886 | 5.00E-05 | 0.000219871 | yes |
| Rarres1     | 6.94437 | 5.00E-05 | 0.000219871 | yes |
| Ppp1r1a     | 6.27298 | 5.00E-05 | 0.000219871 | yes |
| Paqr5       | 6.28357 | 5.00E-05 | 0.000219871 | yes |
| Cysltr2     | 3.58757 | 5.00E-05 | 0.000219871 | yes |
| Lpar5       | 3.91424 | 5.00E-05 | 0.000219871 | yes |
| Osmr        | 6.18155 | 5.00E-05 | 0.000219871 | yes |
| Rasgrp1     | 6.81041 | 5.00E-05 | 0.000219871 | yes |
| Nxph3       | 4.47315 | 5.00E-05 | 0.000219871 | yes |
| Kcnk12      | 4.79764 | 5.00E-05 | 0.000219871 | yes |
| Celf6       | 6.46748 | 5.00E-05 | 0.000219871 | yes |
| Capn9       | 3.48541 | 5.00E-05 | 0.000219871 | yes |
| Rspo4       | 3.08559 | 5.00E-05 | 0.000219871 | yes |
| Pthr1       | 3.63793 | 5.00E-05 | 0.000219871 | yes |
| Gm13498     | 3.26755 | 5.00E-05 | 0.000219871 | yes |
| 1700003M0   | 3.39741 | 5.00E-05 | 0.000219871 | yes |
| Ctxn3       | 6.91706 | 5.00E-05 | 0.000219871 | yes |
| Ppp1r2-ps3  | 2.6057  | 0.00065  | 0.00234272  | yes |
| Gfra2       | 6.65803 | 5.00E-05 | 0.000219871 | yes |
| A3galt2     | 6.23347 | 5.00E-05 | 0.000219871 | yes |
| Gpr35       | 5.39971 | 5.00E-05 | 0.000219871 | yes |
| Rgs10       | 8.01432 | 5.00E-05 | 0.000219871 | yes |
| Lxn         | 5.47027 | 5.00E-05 | 0.000219871 | yes |
| Acpp        | 5.54803 | 5.00E-05 | 0.000219871 | yes |
| Cmtm8       | 2.49449 | 0.0002   | 0.000802844 | yes |
| Ms4a3       | 3.3274  | 5.00E-05 | 0.000219871 | yes |
| Gm11549     | 3.71912 | 5.00E-05 | 0.000219871 | yes |
| Ldb2        | 6.14685 | 5.00E-05 | 0.000219871 | yes |
| Pnpla3      | 4.40569 | 5.00E-05 | 0.000219871 | yes |
| Nrn1l       | 4.92163 | 5.00E-05 | 0.000219871 | yes |
| Nt5e        | 5.99445 | 5.00E-05 | 0.000219871 | yes |
| P2ry1       | 5.78179 | 5.00E-05 | 0.000219871 | yes |
| Trim14      | 3.78512 | 5.00E-05 | 0.000219871 | yes |
| Insm2       | 4.70674 | 5.00E-05 | 0.000219871 | yes |
| Nnat        | 2.65341 | 5.00E-05 | 0.000219871 | yes |
| Rsrp1       | 6.74329 | 5.00E-05 | 0.000219871 | yes |
| Nptx2       | 6.4733  | 5.00E-05 | 0.000219871 | yes |
| Rasa4       | 4.40186 | 5.00E-05 | 0.000219871 | yes |
| Cckar       | 4.92882 | 5.00E-05 | 0.000219871 | yes |
| Car8        | 4.84239 | 5.00E-05 | 0.000219871 | yes |



|          |         |          |             |     |
|----------|---------|----------|-------------|-----|
| Dusp26   | 6.73999 | 5.00E-05 | 0.000219871 | yes |
| Syt5     | 6.08952 | 5.00E-05 | 0.000219871 | yes |
| Msantd2  | 2.77497 | 5.00E-05 | 0.000219871 | yes |
| Mal2     | 6.29581 | 5.00E-05 | 0.000219871 | yes |
| Sox11    | 4.34885 | 5.00E-05 | 0.000219871 | yes |
| Pou4f2   | 4.72936 | 5.00E-05 | 0.000219871 | yes |
| Sst      | 4.32384 | 5.00E-05 | 0.000219871 | yes |
| Pdlim1   | 3.72369 | 5.00E-05 | 0.000219871 | yes |
| Nbl1     | 6.55826 | 5.00E-05 | 0.000219871 | yes |
| Ass1     | 3.03737 | 5.00E-05 | 0.000219871 | yes |
| Gpx2     | 2.24429 | 0.00085  | 0.00298332  | yes |
| Dgkz     | 5.24533 | 5.00E-05 | 0.000219871 | yes |
| Kcng2    | 3.90227 | 5.00E-05 | 0.000219871 | yes |
| Firre    | 4.60944 | 5.00E-05 | 0.000219871 | yes |
| Grik1    | 5.65729 | 5.00E-05 | 0.000219871 | yes |
| Kcnip2   | 5.63544 | 5.00E-05 | 0.000219871 | yes |
| Rps17    | 3.26418 | 0.0004   | 0.00151277  | yes |
| Zfp40    | 4.54733 | 5.00E-05 | 0.000219871 | yes |
| Gm16702  | 2.9151  | 5.00E-05 | 0.000219871 | yes |
| Zbtb48   | 2.7542  | 5.00E-05 | 0.000219871 | yes |
| Atf5     | 4.33765 | 5.00E-05 | 0.000219871 | yes |
| Synpr    | 5.47864 | 5.00E-05 | 0.000219871 | yes |
| Gpr162   | 4.79319 | 5.00E-05 | 0.000219871 | yes |
| Mst1r    | 2.64108 | 5.00E-05 | 0.000219871 | yes |
| Prkcd    | 5.94148 | 5.00E-05 | 0.000219871 | yes |
| Isl2     | 6.35089 | 5.00E-05 | 0.000219871 | yes |
| Tmem45b  | 6.49273 | 5.00E-05 | 0.000219871 | yes |
| Slc10a6  | 3.26742 | 5.00E-05 | 0.000219871 | yes |
| Syt7     | 5.52147 | 5.00E-05 | 0.000219871 | yes |
| Socs2    | 4.6567  | 5.00E-05 | 0.000219871 | yes |
| Plxnc1   | 5.44712 | 5.00E-05 | 0.000219871 | yes |
| Dgki     | 5.82112 | 5.00E-05 | 0.000219871 | yes |
| Gm527    | 3.39283 | 5.00E-05 | 0.000219871 | yes |
| Fam122b  | 4.13631 | 5.00E-05 | 0.000219871 | yes |
| Hspa1b   | 4.32738 | 5.00E-05 | 0.000219871 | yes |
| Ypel1    | 2.04552 | 0.00025  | 0.000985076 | yes |
| Adamts9  | 3.71065 | 5.00E-05 | 0.000219871 | yes |
| Slc45a3  | 4.61804 | 5.00E-05 | 0.000219871 | yes |
| Ssh3     | 3.42853 | 5.00E-05 | 0.000219871 | yes |
| Ptgdr    | 5.37516 | 5.00E-05 | 0.000219871 | yes |
| Snhg7    | 1.56184 | 0.00335  | 0.00998527  | yes |
| Fam222a  | 3.26896 | 5.00E-05 | 0.000219871 | yes |
| Gna14    | 5.79254 | 5.00E-05 | 0.000219871 | yes |
| Trpc3    | 5.79394 | 5.00E-05 | 0.000219871 | yes |
| Serinc2  | 4.31478 | 5.00E-05 | 0.000219871 | yes |
| Slc37a1  | 4.02141 | 5.00E-05 | 0.000219871 | yes |
| N4bp2l1  | 3.23228 | 5.00E-05 | 0.000219871 | yes |
| Nog      | 2.76103 | 5.00E-05 | 0.000219871 | yes |
| Zfp521   | 5.05481 | 5.00E-05 | 0.000219871 | yes |
| Kcnip4   | 5.9389  | 5.00E-05 | 0.000219871 | yes |
| Slc16a12 | 4.27421 | 5.00E-05 | 0.000219871 | yes |
| Tnr      | 3.69847 | 5.00E-05 | 0.000219871 | yes |
| Rgs4     | 4.19476 | 5.00E-05 | 0.000219871 | yes |

|            |         |          |             |     |
|------------|---------|----------|-------------|-----|
| Cyp2j12    | 3.13658 | 5.00E-05 | 0.000219871 | yes |
| Tlx3       | 5.61156 | 5.00E-05 | 0.000219871 | yes |
| Atg16l2    | 2.58866 | 5.00E-05 | 0.000219871 | yes |
| Myt1       | 5.124   | 5.00E-05 | 0.000219871 | yes |
| Tubb2b     | 5.87006 | 5.00E-05 | 0.000219871 | yes |
| Plekha5    | 4.54548 | 5.00E-05 | 0.000219871 | yes |
| Cdk15      | 5.0114  | 5.00E-05 | 0.000219871 | yes |
| Hyls1      | 2.05101 | 0.00045  | 0.00168221  | yes |
| Nkain1     | 3.73081 | 5.00E-05 | 0.000219871 | yes |
| Tia1       | 3.50298 | 5.00E-05 | 0.000219871 | yes |
| Tubb2a-ps1 | 5.78924 | 5.00E-05 | 0.000219871 | yes |
| Grhl3      | 3.27013 | 5.00E-05 | 0.000219871 | yes |
| Casz1      | 4.96817 | 5.00E-05 | 0.000219871 | yes |
| Rasgef1a   | 4.90612 | 5.00E-05 | 0.000219871 | yes |
| 4931429I1  | 3.97766 | 5.00E-05 | 0.000219871 | yes |
| Kcnn1      | 4.66867 | 5.00E-05 | 0.000219871 | yes |
| Prdm12     | 5.74552 | 5.00E-05 | 0.000219871 | yes |
| Kcnt1      | 5.29958 | 5.00E-05 | 0.000219871 | yes |
| Tmem233    | 7.24597 | 5.00E-05 | 0.000219871 | yes |
| Vstm5      | 5.4179  | 5.00E-05 | 0.000219871 | yes |
| Aff2       | 3.4494  | 5.00E-05 | 0.000219871 | yes |
| Mmp25      | 5.12849 | 5.00E-05 | 0.000219871 | yes |
| 9430021M0  | 3.62568 | 5.00E-05 | 0.000219871 | yes |
| Camk2a     | 5.21509 | 5.00E-05 | 0.000219871 | yes |
| Slc35b3    | 3.06113 | 5.00E-05 | 0.000219871 | yes |
| Trpc6      | 3.88465 | 5.00E-05 | 0.000219871 | yes |
| Setd6      | 3.08336 | 5.00E-05 | 0.000219871 | yes |
| Slc4a11    | 4.14473 | 5.00E-05 | 0.000219871 | yes |
| Moxd1      | 4.82652 | 5.00E-05 | 0.000219871 | yes |
| Cpne2      | 5.08561 | 5.00E-05 | 0.000219871 | yes |
| Hmga2-ps1  | 2.02927 | 0.0001   | 0.000421844 | yes |
| Actn1      | 5.01576 | 5.00E-05 | 0.000219871 | yes |
| Hmox1      | 4.24467 | 5.00E-05 | 0.000219871 | yes |
| Cnih2      | 2.29693 | 5.00E-05 | 0.000219871 | yes |
| Kcnk13     | 3.22755 | 5.00E-05 | 0.000219871 | yes |
| Fnbp1l     | 4.34015 | 5.00E-05 | 0.000219871 | yes |
| Fmnl1      | 4.88927 | 5.00E-05 | 0.000219871 | yes |
| Scn11a     | 4.37152 | 5.00E-05 | 0.000219871 | yes |
| Kcng3      | 3.24335 | 5.00E-05 | 0.000219871 | yes |
| Gm525      | 1.95822 | 0.0134   | 0.0334043   | yes |
| Pcgf1      | 3.24834 | 5.00E-05 | 0.000219871 | yes |
| Rian       | 4.80563 | 5.00E-05 | 0.000219871 | yes |
| Pnlsr      | 4.14359 | 5.00E-05 | 0.000219871 | yes |
| Lrrc3      | 4.16255 | 5.00E-05 | 0.000219871 | yes |
| Fam220a    | 4.13335 | 5.00E-05 | 0.000219871 | yes |
| Mab21l1    | 1.72943 | 0.001    | 0.00345135  | yes |
| Zcchc7     | 3.18293 | 5.00E-05 | 0.000219871 | yes |
| Pcgf6      | 2.51461 | 5.00E-05 | 0.000219871 | yes |
| Plcb3      | 4.59492 | 5.00E-05 | 0.000219871 | yes |
| A430105I1  | 3.25582 | 5.00E-05 | 0.000219871 | yes |
| 2010107G2  | 4.16845 | 5.00E-05 | 0.000219871 | yes |
| Ror2       | 3.27594 | 5.00E-05 | 0.000219871 | yes |
| Kcnd3      | 4.20377 | 5.00E-05 | 0.000219871 | yes |

|            |         |          |             |     |
|------------|---------|----------|-------------|-----|
| Tmem200a   | 4.52668 | 5.00E-05 | 0.000219871 | yes |
| Stx1a      | 4.45333 | 5.00E-05 | 0.000219871 | yes |
| St6galnac3 | 3.04782 | 5.00E-05 | 0.000219871 | yes |
| N28178     | 4.31645 | 5.00E-05 | 0.000219871 | yes |
| Fam89a     | 4.91967 | 5.00E-05 | 0.000219871 | yes |
| Nrg2       | 2.53792 | 5.00E-05 | 0.000219871 | yes |
| Fam193b    | 3.45064 | 5.00E-05 | 0.000219871 | yes |
| Tox2       | 3.19723 | 5.00E-05 | 0.000219871 | yes |
| Dgkh       | 4.68945 | 5.00E-05 | 0.000219871 | yes |
| Syt9       | 4.87866 | 5.00E-05 | 0.000219871 | yes |
| Npy2r      | 3.62417 | 5.00E-05 | 0.000219871 | yes |
| Hpca       | 3.50774 | 5.00E-05 | 0.000219871 | yes |
| Tcerg1l    | 3.58723 | 5.00E-05 | 0.000219871 | yes |
| Rab33a     | 3.01869 | 5.00E-05 | 0.000219871 | yes |
| Samsn1     | 3.1195  | 5.00E-05 | 0.000219871 | yes |
| Spink2     | 1.2583  | 0.0086   | 0.0228467   | yes |
| Hs6st2     | 4.68446 | 5.00E-05 | 0.000219871 | yes |
| Ttc14      | 4.08148 | 5.00E-05 | 0.000219871 | yes |
| Scg3       | 3.98403 | 5.00E-05 | 0.000219871 | yes |
| Gpr27      | 2.17344 | 0.00075  | 0.00266977  | yes |
| Eml1       | 4.15818 | 5.00E-05 | 0.000219871 | yes |
| St6galnac5 | 3.08056 | 5.00E-05 | 0.000219871 | yes |
| Zfhx2      | 4.43437 | 5.00E-05 | 0.000219871 | yes |
| Rab27b     | 4.7413  | 5.00E-05 | 0.000219871 | yes |
| Pak4       | 2.79607 | 5.00E-05 | 0.000219871 | yes |
| Cd44       | 4.57424 | 5.00E-05 | 0.000219871 | yes |
| Stac       | 4.78999 | 5.00E-05 | 0.000219871 | yes |
| Snrpf      | 1.83743 | 0.0032   | 0.00959205  | yes |
| Zfp692     | 2.04161 | 0.0001   | 0.000421844 | yes |
| Iqcg       | 1.96749 | 5.00E-05 | 0.000219871 | yes |
| Ppp1r14b   | 2.86693 | 5.00E-05 | 0.000219871 | yes |
| Tmem132c   | 3.20521 | 5.00E-05 | 0.000219871 | yes |
| Mrgprd     | 4.92443 | 5.00E-05 | 0.000219871 | yes |
| Redrum     | 2.39581 | 5.00E-05 | 0.000219871 | yes |
| 39141      | 3.45728 | 5.00E-05 | 0.000219871 | yes |
| Kcnc2      | 4.05289 | 5.00E-05 | 0.000219871 | yes |
| Rspo1      | 2.58289 | 5.00E-05 | 0.000219871 | yes |
| Timeless   | 3.29021 | 5.00E-05 | 0.000219871 | yes |
| Nfil3      | 2.29656 | 0.0001   | 0.000421844 | yes |
| Gabra2     | 3.84684 | 5.00E-05 | 0.000219871 | yes |
| Clasrp     | 3.13119 | 5.00E-05 | 0.000219871 | yes |
| Fam150b    | 1.91481 | 0.0016   | 0.00523611  | yes |
| Nxpe4      | 2.90621 | 5.00E-05 | 0.000219871 | yes |
| Hes6       | 3.56367 | 5.00E-05 | 0.000219871 | yes |
| Rgs5       | 4.87279 | 5.00E-05 | 0.000219871 | yes |
| 6720468P1  | 1.92426 | 0.00045  | 0.00168221  | yes |
| Klhdc8b    | 3.36248 | 5.00E-05 | 0.000219871 | yes |
| Klhl29     | 4.26364 | 5.00E-05 | 0.000219871 | yes |
| Clgn       | 4.92797 | 5.00E-05 | 0.000219871 | yes |
| Pstpip2    | 4.18044 | 5.00E-05 | 0.000219871 | yes |
| Dpp10      | 4.74674 | 5.00E-05 | 0.000219871 | yes |
| 2210408F2  | 1.82271 | 0.00035  | 0.00134243  | yes |
| Lrp8       | 3.77311 | 5.00E-05 | 0.000219871 | yes |

|           |         |          |             |     |
|-----------|---------|----------|-------------|-----|
| Tmem79    | 4.79774 | 5.00E-05 | 0.000219871 | yes |
| Sdc1      | 3.8487  | 5.00E-05 | 0.000219871 | yes |
| Amer2     | 3.19437 | 5.00E-05 | 0.000219871 | yes |
| Palm2     | 4.5509  | 5.00E-05 | 0.000219871 | yes |
| Mical1    | 4.28055 | 5.00E-05 | 0.000219871 | yes |
| Rgs11     | 2.70189 | 5.00E-05 | 0.000219871 | yes |
| Sdsl      | 2.07134 | 0.0022   | 0.00693287  | yes |
| Ankrd10   | 3.29524 | 5.00E-05 | 0.000219871 | yes |
| Mapk7     | 3.28315 | 5.00E-05 | 0.000219871 | yes |
| Lpar3     | 4.53646 | 5.00E-05 | 0.000219871 | yes |
| Eno3      | 1.95611 | 0.0002   | 0.000802844 | yes |
| Mex3d     | 3.31518 | 5.00E-05 | 0.000219871 | yes |
| Htr4      | 2.98374 | 5.00E-05 | 0.000219871 | yes |
| Zdhhc12   | 2.25668 | 5.00E-05 | 0.000219871 | yes |
| Arhgap26  | 4.54684 | 5.00E-05 | 0.000219871 | yes |
| Ubald2    | 1.36728 | 0.01905  | 0.0451638   | yes |
| Dapk1     | 4.38776 | 5.00E-05 | 0.000219871 | yes |
| Rhebl1    | 3.17433 | 5.00E-05 | 0.000219871 | yes |
| Cpne3     | 4.36103 | 5.00E-05 | 0.000219871 | yes |
| Bach2     | 3.38317 | 5.00E-05 | 0.000219871 | yes |
| Magi1     | 4.25005 | 5.00E-05 | 0.000219871 | yes |
| Frmd4b    | 3.67183 | 5.00E-05 | 0.000219871 | yes |
| Rgs3      | 3.92955 | 5.00E-05 | 0.000219871 | yes |
| Lime1     | 2.62893 | 5.00E-05 | 0.000219871 | yes |
| Med10     | 4.0102  | 5.00E-05 | 0.000219871 | yes |
| AI413582  | 4.98748 | 5.00E-05 | 0.000219871 | yes |
| Trim39    | 2.68059 | 5.00E-05 | 0.000219871 | yes |
| Dgkg      | 4.10936 | 5.00E-05 | 0.000219871 | yes |
| Pafah1b3  | 3.39607 | 5.00E-05 | 0.000219871 | yes |
| Bex4      | 1.92638 | 0.00555  | 0.015544    | yes |
| Ccdc141   | 4.34867 | 5.00E-05 | 0.000219871 | yes |
| Rgs17     | 4.17153 | 5.00E-05 | 0.000219871 | yes |
| P2rx3     | 4.24444 | 5.00E-05 | 0.000219871 | yes |
| Rhov      | 3.87875 | 5.00E-05 | 0.000219871 | yes |
| Pisd-ps3  | 3.58796 | 5.00E-05 | 0.000219871 | yes |
| Ptbp3     | 4.22162 | 5.00E-05 | 0.000219871 | yes |
| Zfp945    | 3.12228 | 5.00E-05 | 0.000219871 | yes |
| Ndst3     | 3.11698 | 5.00E-05 | 0.000219871 | yes |
| Prkcq     | 4.40404 | 5.00E-05 | 0.000219871 | yes |
| Gnb4      | 4.41902 | 5.00E-05 | 0.000219871 | yes |
| Neurl1a   | 3.56302 | 5.00E-05 | 0.000219871 | yes |
| Pdlim2    | 2.63431 | 5.00E-05 | 0.000219871 | yes |
| Sh2d5     | 2.59481 | 5.00E-05 | 0.000219871 | yes |
| Cblb      | 3.83928 | 5.00E-05 | 0.000219871 | yes |
| 4930503L1 | 2.12349 | 0.00035  | 0.00134243  | yes |
| Prkca     | 3.88593 | 5.00E-05 | 0.000219871 | yes |
| Izumo4    | 3.03166 | 5.00E-05 | 0.000219871 | yes |
| Arhgap28  | 4.34683 | 5.00E-05 | 0.000219871 | yes |
| Mrgpra2b  | 2.34181 | 0.00025  | 0.000985076 | yes |
| Ptger3    | 2.92595 | 5.00E-05 | 0.000219871 | yes |
| Tle1      | 2.95989 | 5.00E-05 | 0.000219871 | yes |
| Klhl2     | 4.09469 | 5.00E-05 | 0.000219871 | yes |
| Mrgprb4   | 3.01687 | 5.00E-05 | 0.000219871 | yes |

|            |         |          |             |     |
|------------|---------|----------|-------------|-----|
| Tox3       | 3.18418 | 5.00E-05 | 0.000219871 | yes |
| Actl6b     | 3.50468 | 5.00E-05 | 0.000219871 | yes |
| Smarca1    | 3.43756 | 5.00E-05 | 0.000219871 | yes |
| Bex2       | 5.31425 | 5.00E-05 | 0.000219871 | yes |
| Rpl34,Rpl3 | 1.34578 | 0.00695  | 0.0189334   | yes |
| Plcx3      | 3.79552 | 5.00E-05 | 0.000219871 | yes |
| Exosc6     | 2.30145 | 0.0004   | 0.00151277  | yes |
| Tmem164    | 3.83616 | 5.00E-05 | 0.000219871 | yes |
| Nsg2       | 4.13739 | 5.00E-05 | 0.000219871 | yes |
| Fam83h     | 2.58617 | 5.00E-05 | 0.000219871 | yes |
| Celsr3     | 3.77364 | 5.00E-05 | 0.000219871 | yes |
| 5031425E2  | 2.3547  | 0.0001   | 0.000421844 | yes |
| Sox4       | 3.55045 | 5.00E-05 | 0.000219871 | yes |
| Fads3      | 4.0741  | 5.00E-05 | 0.000219871 | yes |
| Fdx1       | 2.61351 | 0.00015  | 0.000614592 | yes |
| Smyd3      | 3.40704 | 5.00E-05 | 0.000219871 | yes |
| Uaca       | 4.13515 | 5.00E-05 | 0.000219871 | yes |
| Pitpnc1    | 4.07121 | 5.00E-05 | 0.000219871 | yes |
| Trpa1      | 4.029   | 5.00E-05 | 0.000219871 | yes |
| Baspl      | 4.55199 | 5.00E-05 | 0.000219871 | yes |
| Hcn3       | 3.57752 | 5.00E-05 | 0.000219871 | yes |
| Lcorl      | 3.10363 | 5.00E-05 | 0.000219871 | yes |
| Prrxl1     | 3.3662  | 5.00E-05 | 0.000219871 | yes |
| Ica1l      | 2.77238 | 5.00E-05 | 0.000219871 | yes |
| Gnao1      | 3.40322 | 5.00E-05 | 0.000219871 | yes |
| Tes        | 2.54726 | 5.00E-05 | 0.000219871 | yes |
| Lap3       | 3.94274 | 5.00E-05 | 0.000219871 | yes |
| Tagln2     | 4.68516 | 5.00E-05 | 0.000219871 | yes |
| Nyap1      | 4.14325 | 5.00E-05 | 0.000219871 | yes |
| Unc13c     | 3.67235 | 5.00E-05 | 0.000219871 | yes |
| Lrrc45     | 2.51694 | 5.00E-05 | 0.000219871 | yes |
| Arap1      | 3.37348 | 5.00E-05 | 0.000219871 | yes |
| Tmem159    | 2.52136 | 5.00E-05 | 0.000219871 | yes |
| Srek1      | 3.06412 | 5.00E-05 | 0.000219871 | yes |
| Trmt10b    | 2.44894 | 5.00E-05 | 0.000219871 | yes |
| Hyi        | 2.15465 | 0.00055  | 0.0020157   | yes |
| Trim11     | 2.2848  | 5.00E-05 | 0.000219871 | yes |
| Tshz2      | 4.13322 | 5.00E-05 | 0.000219871 | yes |
| Irf6       | 2.40472 | 5.00E-05 | 0.000219871 | yes |
| Slc12a7    | 3.34439 | 5.00E-05 | 0.000219871 | yes |
| Prph       | 2.69757 | 5.00E-05 | 0.000219871 | yes |
| Ctxn1      | 3.96202 | 5.00E-05 | 0.000219871 | yes |
| Unc13b     | 2.91098 | 5.00E-05 | 0.000219871 | yes |
| Sncg       | 4.18779 | 5.00E-05 | 0.000219871 | yes |
| Ppfia2     | 3.5852  | 5.00E-05 | 0.000219871 | yes |
| Efna1      | 2.98447 | 5.00E-05 | 0.000219871 | yes |
| Slc4a3     | 2.87836 | 5.00E-05 | 0.000219871 | yes |
| Rpl29      | 3.60862 | 5.00E-05 | 0.000219871 | yes |
| Psd        | 2.23061 | 0.0001   | 0.000421844 | yes |
| Zfp760     | 2.49183 | 5.00E-05 | 0.000219871 | yes |
| Bok        | 2.04227 | 0.00055  | 0.0020157   | yes |
| Magi3      | 3.81975 | 5.00E-05 | 0.000219871 | yes |
| 2810032Gc  | 1.82259 | 0.00305  | 0.00918809  | yes |

|           |         |          |             |     |
|-----------|---------|----------|-------------|-----|
| Vgf       | 4.07526 | 5.00E-05 | 0.000219871 | yes |
| Tmem151b  | 3.7561  | 5.00E-05 | 0.000219871 | yes |
| Hsbp1l1   | 3.39999 | 5.00E-05 | 0.000219871 | yes |
| Phactr3   | 3.05301 | 5.00E-05 | 0.000219871 | yes |
| Hal       | 2.22922 | 5.00E-05 | 0.000219871 | yes |
| Tyw5      | 1.73171 | 0.0033   | 0.00985617  | yes |
| Grip1     | 3.29421 | 5.00E-05 | 0.000219871 | yes |
| Tapbp1    | 2.73895 | 5.00E-05 | 0.000219871 | yes |
| Lmbr1l    | 2.51194 | 5.00E-05 | 0.000219871 | yes |
| Abhd14b   | 2.76485 | 5.00E-05 | 0.000219871 | yes |
| Gnaq      | 3.65529 | 5.00E-05 | 0.000219871 | yes |
| E4f1      | 2.26429 | 5.00E-05 | 0.000219871 | yes |
| Bex1      | 2.13634 | 0.00155  | 0.00509511  | yes |
| Prkd1     | 3.24258 | 5.00E-05 | 0.000219871 | yes |
| Cpne8     | 2.02343 | 5.00E-05 | 0.000219871 | yes |
| Zfp579    | 2.02328 | 0.00065  | 0.00234272  | yes |
| Schip1    | 3.20148 | 5.00E-05 | 0.000219871 | yes |
| Chia1     | 1.89058 | 0.0015   | 0.00495284  | yes |
| Cadm1     | 3.64106 | 5.00E-05 | 0.000219871 | yes |
| Ptms      | 4.60629 | 5.00E-05 | 0.000219871 | yes |
| Tstd1     | 1.9339  | 0.01855  | 0.0441836   | yes |
| Fam132a   | 2.61822 | 0.0001   | 0.000421844 | yes |
| Arhgap22  | 2.92577 | 5.00E-05 | 0.000219871 | yes |
| Bhlhe41   | 3.47798 | 5.00E-05 | 0.000219871 | yes |
| Odf2l     | 2.04628 | 0.00015  | 0.000614592 | yes |
| 5330417C2 | 2.49714 | 5.00E-05 | 0.000219871 | yes |
| Pde11a    | 3.38778 | 5.00E-05 | 0.000219871 | yes |
| Tmem72    | 3.41821 | 5.00E-05 | 0.000219871 | yes |
| Zfp948    | 2.66089 | 5.00E-05 | 0.000219871 | yes |
| Syt1      | 3.69092 | 5.00E-05 | 0.000219871 | yes |
| Shkbp1    | 2.34758 | 0.00015  | 0.000614592 | yes |
| Camk4     | 3.39502 | 5.00E-05 | 0.000219871 | yes |
| Mex3b     | 2.39842 | 5.00E-05 | 0.000219871 | yes |
| Agtr1b    | 2.07813 | 0.00055  | 0.0020157   | yes |
| Ptptr     | 3.68538 | 5.00E-05 | 0.000219871 | yes |
| Ebf3      | 3.66649 | 5.00E-05 | 0.000219871 | yes |
| Rpl30     | 1.25874 | 0.01255  | 0.0315402   | yes |
| Rarg      | 3.08725 | 5.00E-05 | 0.000219871 | yes |
| Rgs19     | 1.82205 | 0.00035  | 0.00134243  | yes |
| Fam129b   | 2.63416 | 5.00E-05 | 0.000219871 | yes |
| Inha      | 1.79075 | 0.00255  | 0.00787496  | yes |
| Rnh1      | 3.4723  | 5.00E-05 | 0.000219871 | yes |
| Sft2d1    | 1.4682  | 0.00465  | 0.0133157   | yes |
| Klhl5     | 3.90709 | 5.00E-05 | 0.000219871 | yes |
| Mpped2    | 3.24273 | 5.00E-05 | 0.000219871 | yes |
| Chka      | 3.44483 | 5.00E-05 | 0.000219871 | yes |
| Pld5      | 3.46795 | 5.00E-05 | 0.000219871 | yes |
| Srrm3     | 2.91521 | 5.00E-05 | 0.000219871 | yes |
| Nrsn1     | 3.9419  | 5.00E-05 | 0.000219871 | yes |
| S100a6    | 5.12352 | 5.00E-05 | 0.000219871 | yes |
| Hivep3    | 2.90267 | 5.00E-05 | 0.000219871 | yes |
| Arpc1b    | 4.18876 | 5.00E-05 | 0.000219871 | yes |
| Tpd52     | 3.67556 | 5.00E-05 | 0.000219871 | yes |



|           |         |          |             |     |
|-----------|---------|----------|-------------|-----|
| Ret       | 2.95121 | 5.00E-05 | 0.000219871 | yes |
| Acbd4     | 3.46345 | 5.00E-05 | 0.000219871 | yes |
| Rbms1     | 3.63717 | 5.00E-05 | 0.000219871 | yes |
| Scn3b     | 3.63177 | 5.00E-05 | 0.000219871 | yes |
| H2afy     | 3.16401 | 5.00E-05 | 0.000219871 | yes |
| Slc7a7    | 3.18353 | 5.00E-05 | 0.000219871 | yes |
| Rnf144a   | 3.55008 | 5.00E-05 | 0.000219871 | yes |
| Bcat2     | 2.74608 | 5.00E-05 | 0.000219871 | yes |
| Nedd4l    | 3.51141 | 5.00E-05 | 0.000219871 | yes |
| Dok4      | 3.59712 | 5.00E-05 | 0.000219871 | yes |
| Il4ra     | 3.27733 | 5.00E-05 | 0.000219871 | yes |
| Wipf3     | 3.618   | 5.00E-05 | 0.000219871 | yes |
| Mapk4     | 2.92219 | 5.00E-05 | 0.000219871 | yes |
| Adrbk2    | 2.99254 | 5.00E-05 | 0.000219871 | yes |
| Bri3      | 2.29347 | 0.00125  | 0.00421978  | yes |
| Ube2ql1   | 3.73312 | 5.00E-05 | 0.000219871 | yes |
| Asic2     | 3.70737 | 5.00E-05 | 0.000219871 | yes |
| Dclk3     | 3.35629 | 5.00E-05 | 0.000219871 | yes |
| Mvp       | 3.50915 | 5.00E-05 | 0.000219871 | yes |
| Gprin1    | 2.50155 | 5.00E-05 | 0.000219871 | yes |
| Ppef1     | 3.79607 | 5.00E-05 | 0.000219871 | yes |
| Flot1     | 4.10681 | 5.00E-05 | 0.000219871 | yes |
| Mb21d2    | 2.77064 | 5.00E-05 | 0.000219871 | yes |
| Pusl1     | 1.47152 | 0.00535  | 0.0150442   | yes |
| Kcnk18    | 2.405   | 5.00E-05 | 0.000219871 | yes |
| Tusc5     | 3.37028 | 5.00E-05 | 0.000219871 | yes |
| Cenpv     | 1.85898 | 0.00395  | 0.011515    | yes |
| Arhgef1   | 3.0664  | 5.00E-05 | 0.000219871 | yes |
| Gm13826   | 2.94337 | 5.00E-05 | 0.000219871 | yes |
| 9930104L0 | 2.01864 | 0.0003   | 0.00116377  | yes |
| Tbc1d1    | 3.18399 | 5.00E-05 | 0.000219871 | yes |
| Mmp17     | 2.40414 | 5.00E-05 | 0.000219871 | yes |
| Rab27a    | 3.07258 | 5.00E-05 | 0.000219871 | yes |
| Scn10a    | 2.72376 | 5.00E-05 | 0.000219871 | yes |
| Fam135a   | 3.07858 | 5.00E-05 | 0.000219871 | yes |
| 6820431F2 | 2.33534 | 5.00E-05 | 0.000219871 | yes |
| Gpd1l     | 3.73376 | 5.00E-05 | 0.000219871 | yes |
| Wnt2b     | 2.97079 | 5.00E-05 | 0.000219871 | yes |
| Ccdc43    | 3.24626 | 5.00E-05 | 0.000219871 | yes |
| Bcl3      | 1.76955 | 0.0027   | 0.00827273  | yes |
| Cdh10     | 2.55238 | 5.00E-05 | 0.000219871 | yes |
| 1700019D0 | 1.74088 | 0.00995  | 0.0258583   | yes |
| Arhgap39  | 3.44092 | 5.00E-05 | 0.000219871 | yes |
| Arl4d     | 2.6344  | 5.00E-05 | 0.000219871 | yes |
| Serpina3g | 3.62124 | 5.00E-05 | 0.000219871 | yes |
| Gng2      | 3.43842 | 5.00E-05 | 0.000219871 | yes |
| Plagl1    | 3.49701 | 5.00E-05 | 0.000219871 | yes |
| Fbxl2     | 2.58411 | 5.00E-05 | 0.000219871 | yes |
| Def6      | 2.85057 | 5.00E-05 | 0.000219871 | yes |
| Ppp1r2    | 3.05042 | 5.00E-05 | 0.000219871 | yes |
| F2rl2     | 3.25091 | 5.00E-05 | 0.000219871 | yes |
| Scand1    | 2.3192  | 0.00115  | 0.00391006  | yes |
| Apba1     | 3.3156  | 5.00E-05 | 0.000219871 | yes |

|           |         |          |             |     |
|-----------|---------|----------|-------------|-----|
| Snx11     | 3.11276 | 5.00E-05 | 0.000219871 | yes |
| Golga7b   | 3.21907 | 5.00E-05 | 0.000219871 | yes |
| Itpkb     | 3.36006 | 5.00E-05 | 0.000219871 | yes |
| Zfp593    | 1.73228 | 0.0007   | 0.00250591  | yes |
| Htr5b     | 1.80119 | 0.002    | 0.00636307  | yes |
| Camk1g    | 2.85673 | 5.00E-05 | 0.000219871 | yes |
| Nudt8     | 1.73829 | 0.01175  | 0.0298235   | yes |
| Tmeff1    | 3.04446 | 5.00E-05 | 0.000219871 | yes |
| Tmem63a   | 2.86735 | 5.00E-05 | 0.000219871 | yes |
| Ptger1    | 1.39195 | 0.01745  | 0.0419857   | yes |
| Pde1c     | 3.11551 | 5.00E-05 | 0.000219871 | yes |
| Krit1     | 2.76634 | 5.00E-05 | 0.000219871 | yes |
| Dock4     | 3.23467 | 5.00E-05 | 0.000219871 | yes |
| Kcnmb1    | 2.51923 | 5.00E-05 | 0.000219871 | yes |
| Fam43a    | 1.98858 | 0.00035  | 0.00134243  | yes |
| Map7      | 3.09378 | 5.00E-05 | 0.000219871 | yes |
| Nipsnap3b | 3.10542 | 5.00E-05 | 0.000219871 | yes |
| Kctd16    | 2.81224 | 5.00E-05 | 0.000219871 | yes |
| Samd12    | 2.51733 | 0.00025  | 0.000985076 | yes |
| Anxa11    | 3.10088 | 5.00E-05 | 0.000219871 | yes |
| Trnp1     | 3.77196 | 5.00E-05 | 0.000219871 | yes |
| Impact    | 3.59082 | 5.00E-05 | 0.000219871 | yes |
| Tspan14   | 3.43063 | 5.00E-05 | 0.000219871 | yes |
| 9530077CC | 2.37558 | 5.00E-05 | 0.000219871 | yes |
| Tradd     | 2.20983 | 0.0004   | 0.00151277  | yes |
| Adamts3   | 2.51256 | 5.00E-05 | 0.000219871 | yes |
| Ifit2     | 2.98524 | 5.00E-05 | 0.000219871 | yes |
| Gtpbp6    | 2.29596 | 5.00E-05 | 0.000219871 | yes |
| H13       | 2.83576 | 5.00E-05 | 0.000219871 | yes |
| Rras      | 3.227   | 5.00E-05 | 0.000219871 | yes |
| Txndc11   | 1.16197 | 0.02075  | 0.0486207   | yes |
| 36585     | 2.5692  | 5.00E-05 | 0.000219871 | yes |
| 2700094K1 | 1.99669 | 0.00015  | 0.000614592 | yes |
| Serf1     | 3.01827 | 0.00015  | 0.000614592 | yes |
| Rspo2     | 3.37442 | 5.00E-05 | 0.000219871 | yes |
| Nek1      | 3.41955 | 5.00E-05 | 0.000219871 | yes |
| Hnrnpa1   | 1.68137 | 0.00245  | 0.00760509  | yes |
| Hmgcll1   | 2.19352 | 0.0001   | 0.000421844 | yes |
| Chd5      | 3.29071 | 5.00E-05 | 0.000219871 | yes |
| Snx9      | 2.87723 | 5.00E-05 | 0.000219871 | yes |
| Snhg6     | 1.15879 | 0.02125  | 0.0496432   | yes |
| Rnase4    | 2.24442 | 0.0001   | 0.000421844 | yes |
| Diras2    | 3.11713 | 5.00E-05 | 0.000219871 | yes |
| Sema3e    | 2.71079 | 5.00E-05 | 0.000219871 | yes |
| Zmat4     | 2.91528 | 5.00E-05 | 0.000219871 | yes |
| Kcna4     | 2.86414 | 5.00E-05 | 0.000219871 | yes |
| Zfhx3     | 3.35863 | 5.00E-05 | 0.000219871 | yes |
| Kctd8     | 3.30751 | 5.00E-05 | 0.000219871 | yes |
| A330021E2 | 1.92763 | 0.00055  | 0.0020157   | yes |
| Ier3      | 2.7187  | 5.00E-05 | 0.000219871 | yes |
| Zfp580    | 2.1879  | 0.0006   | 0.00218147  | yes |
| Card10    | 2.32277 | 5.00E-05 | 0.000219871 | yes |
| Car11     | 3.23167 | 5.00E-05 | 0.000219871 | yes |

|           |         |          |             |     |
|-----------|---------|----------|-------------|-----|
| Kri1      | 1.74747 | 0.0004   | 0.00151277  | yes |
| Ankrd6    | 2.63386 | 5.00E-05 | 0.000219871 | yes |
| Nek3      | 1.62042 | 0.0015   | 0.00495284  | yes |
| Lbh       | 3.42603 | 5.00E-05 | 0.000219871 | yes |
| Rims2     | 2.63416 | 5.00E-05 | 0.000219871 | yes |
| Ctsl      | 3.2532  | 5.00E-05 | 0.000219871 | yes |
| Cacna2d2  | 2.83919 | 5.00E-05 | 0.000219871 | yes |
| Tlx2      | 3.35824 | 5.00E-05 | 0.000219871 | yes |
| Ddx55     | 1.88695 | 0.00015  | 0.000614592 | yes |
| Zcchc9    | 2.04573 | 0.00105  | 0.00360703  | yes |
| Ano3      | 3.24929 | 5.00E-05 | 0.000219871 | yes |
| Rab15     | 3.48633 | 5.00E-05 | 0.000219871 | yes |
| Cacnb3    | 3.22792 | 5.00E-05 | 0.000219871 | yes |
| Tnfrsf11a | 2.8972  | 5.00E-05 | 0.000219871 | yes |
| Cdkn1a    | 2.91288 | 5.00E-05 | 0.000219871 | yes |
| Ebf1      | 3.2748  | 5.00E-05 | 0.000219871 | yes |
| Klf8      | 2.33359 | 5.00E-05 | 0.000219871 | yes |
| Anks1b    | 2.79949 | 5.00E-05 | 0.000219871 | yes |
| Slc35f4   | 2.14855 | 0.00025  | 0.000985076 | yes |
| Nup93     | 3.4033  | 5.00E-05 | 0.000219871 | yes |
| Tmem132e  | 3.39159 | 5.00E-05 | 0.000219871 | yes |
| Pcbd1     | 2.92907 | 5.00E-05 | 0.000219871 | yes |
| Thra      | 3.54522 | 5.00E-05 | 0.000219871 | yes |
| Mfsd10    | 2.27411 | 0.0001   | 0.000421844 | yes |
| Auts2     | 2.95741 | 5.00E-05 | 0.000219871 | yes |
| Pde10a    | 2.82134 | 5.00E-05 | 0.000219871 | yes |
| Nt5c      | 2.30388 | 5.00E-05 | 0.000219871 | yes |
| Tmem198   | 1.67856 | 0.0031   | 0.00931545  | yes |
| Hypk      | 4.03584 | 5.00E-05 | 0.000219871 | yes |
| Slc25a27  | 2.70477 | 5.00E-05 | 0.000219871 | yes |
| Syt4      | 3.21724 | 5.00E-05 | 0.000219871 | yes |
| Nckap5l   | 2.7706  | 5.00E-05 | 0.000219871 | yes |
| Tmsb4x    | 4.09588 | 5.00E-05 | 0.000219871 | yes |
| Dock11    | 3.31562 | 5.00E-05 | 0.000219871 | yes |
| Pou4f1    | 3.38645 | 5.00E-05 | 0.000219871 | yes |
| Plau      | 1.90796 | 0.0007   | 0.00250591  | yes |
| Pura      | 2.46686 | 5.00E-05 | 0.000219871 | yes |
| Hcrtr2    | 2.08356 | 0.0002   | 0.000802844 | yes |
| Arhgap17  | 2.96277 | 5.00E-05 | 0.000219871 | yes |
| Rgmb      | 3.46361 | 5.00E-05 | 0.000219871 | yes |
| Zfp946    | 2.37486 | 5.00E-05 | 0.000219871 | yes |
| Serp2     | 2.23183 | 5.00E-05 | 0.000219871 | yes |
| Xylt2     | 2.78616 | 5.00E-05 | 0.000219871 | yes |
| Nrn1      | 3.47735 | 5.00E-05 | 0.000219871 | yes |
| Zfp524    | 1.47514 | 0.0181   | 0.0432906   | yes |
| Myt1l     | 3.24274 | 5.00E-05 | 0.000219871 | yes |
| Hpcal1    | 3.54189 | 5.00E-05 | 0.000219871 | yes |
| Slit1     | 3.25522 | 5.00E-05 | 0.000219871 | yes |
| C2cd5     | 2.80463 | 5.00E-05 | 0.000219871 | yes |
| 4921524J1 | 1.5896  | 0.0022   | 0.00693287  | yes |
| Fam124a   | 2.22783 | 5.00E-05 | 0.000219871 | yes |
| Gpr19     | 1.60997 | 0.00145  | 0.00480448  | yes |
| Ndn       | 3.56672 | 5.00E-05 | 0.000219871 | yes |

|          |         |          |             |     |
|----------|---------|----------|-------------|-----|
| Fgf13    | 2.84065 | 5.00E-05 | 0.000219871 | yes |
| Rgl2     | 2.31787 | 5.00E-05 | 0.000219871 | yes |
| Eogt     | 2.37983 | 5.00E-05 | 0.000219871 | yes |
| Sema4d   | 3.04842 | 5.00E-05 | 0.000219871 | yes |
| Sfn      | 1.51956 | 0.00895  | 0.0235782   | yes |
| Tsen34   | 2.51525 | 5.00E-05 | 0.000219871 | yes |
| Cds2     | 2.22987 | 5.00E-05 | 0.000219871 | yes |
| Tpm4     | 3.18331 | 5.00E-05 | 0.000219871 | yes |
| Ankrd13b | 3.12667 | 5.00E-05 | 0.000219871 | yes |
| Myd88    | 1.73676 | 0.0021   | 0.00664933  | yes |
| Ubald1   | 3.09725 | 5.00E-05 | 0.000219871 | yes |
| Avil     | 2.91086 | 5.00E-05 | 0.000219871 | yes |
| Rpl13    | 1.19957 | 0.0174   | 0.0418882   | yes |
| Slc15a4  | 2.56347 | 5.00E-05 | 0.000219871 | yes |
| Akap17b  | 2.59361 | 5.00E-05 | 0.000219871 | yes |
| Csnk1e   | 2.78626 | 5.00E-05 | 0.000219871 | yes |
| Lrrc16b  | 2.93094 | 5.00E-05 | 0.000219871 | yes |
| Deaf1    | 2.36311 | 5.00E-05 | 0.000219871 | yes |
| Cystm1   | 3.61293 | 5.00E-05 | 0.000219871 | yes |
| Myadm    | 3.09879 | 5.00E-05 | 0.000219871 | yes |
| Rnaseh1  | 1.56429 | 0.0017   | 0.0055144   | yes |
| Cbr3     | 1.6423  | 0.008    | 0.0214676   | yes |
| Ina      | 1.85314 | 0.00025  | 0.000985076 | yes |
| Mtcl1    | 3.09052 | 5.00E-05 | 0.000219871 | yes |
| Tppp3    | 3.22826 | 5.00E-05 | 0.000219871 | yes |
| Ralgps1  | 1.79559 | 0.00085  | 0.00298332  | yes |
| Bst2     | 1.93367 | 0.0058   | 0.0161793   | yes |
| Unc119   | 2.97516 | 5.00E-05 | 0.000219871 | yes |
| Pvrl1    | 2.96766 | 5.00E-05 | 0.000219871 | yes |
| Fez1     | 3.60124 | 5.00E-05 | 0.000219871 | yes |
| Klf7     | 2.81297 | 5.00E-05 | 0.000219871 | yes |
| Sh3bgrl3 | 4.26845 | 5.00E-05 | 0.000219871 | yes |
| Tspan2   | 2.99585 | 5.00E-05 | 0.000219871 | yes |
| Mgat4a   | 2.89907 | 5.00E-05 | 0.000219871 | yes |
| Pqlc3    | 2.712   | 5.00E-05 | 0.000219871 | yes |
| Ccdc109b | 2.49398 | 0.00015  | 0.000614592 | yes |
| Coro1a   | 3.33403 | 5.00E-05 | 0.000219871 | yes |
| Snx10    | 3.02244 | 5.00E-05 | 0.000219871 | yes |
| Faim     | 2.00077 | 5.00E-05 | 0.000219871 | yes |
| Znf512b  | 2.20934 | 5.00E-05 | 0.000219871 | yes |
| Tmem206  | 2.02762 | 0.0003   | 0.00116377  | yes |
| Popdc3   | 2.54598 | 5.00E-05 | 0.000219871 | yes |
| Fam189b  | 3.03852 | 5.00E-05 | 0.000219871 | yes |
| Ankrd13d | 2.98977 | 5.00E-05 | 0.000219871 | yes |
| Hdac9    | 2.43997 | 5.00E-05 | 0.000219871 | yes |
| Tmsb10   | 2.55583 | 5.00E-05 | 0.000219871 | yes |
| F8a      | 2.06294 | 0.0004   | 0.00151277  | yes |
| Lrrc75b  | 3.14472 | 5.00E-05 | 0.000219871 | yes |
| Gm13889  | 3.38604 | 5.00E-05 | 0.000219871 | yes |
| Med11    | 2.03492 | 0.0027   | 0.00827273  | yes |
| Pfkl     | 3.0241  | 5.00E-05 | 0.000219871 | yes |
| Psma5    | 1.6739  | 0.0062   | 0.0171508   | yes |
| Ttc8     | 1.58418 | 0.0018   | 0.0058019   | yes |

|           |         |          |             |     |
|-----------|---------|----------|-------------|-----|
| Ggta1     | 2.31873 | 5.00E-05 | 0.000219871 | yes |
| Trpv2     | 2.99167 | 5.00E-05 | 0.000219871 | yes |
| Ap3b1     | 2.34103 | 5.00E-05 | 0.000219871 | yes |
| 1500004A1 | 1.93576 | 5.00E-05 | 0.000219871 | yes |
| 1500011BC | 2.60263 | 5.00E-05 | 0.000219871 | yes |
| Ptpn9     | 3.02542 | 5.00E-05 | 0.000219871 | yes |
| Tmem169   | 2.04029 | 0.0002   | 0.000802844 | yes |
| Lmnb2     | 1.84779 | 0.0008   | 0.00282803  | yes |
| Gm17066   | 1.46939 | 0.007    | 0.0190657   | yes |
| Rmnd5b    | 1.97957 | 5.00E-05 | 0.000219871 | yes |
| Chrna6    | 2.84926 | 5.00E-05 | 0.000219871 | yes |
| Six1      | 2.92513 | 5.00E-05 | 0.000219871 | yes |
| Abca5     | 3.03898 | 5.00E-05 | 0.000219871 | yes |
| Ltv1      | 2.34307 | 5.00E-05 | 0.000219871 | yes |
| Gstp1     | 2.70103 | 0.0001   | 0.000421844 | yes |
| Lrrc8d    | 2.9075  | 5.00E-05 | 0.000219871 | yes |
| Agk       | 1.65273 | 0.0028   | 0.00853183  | yes |
| Sertad4   | 2.37666 | 5.00E-05 | 0.000219871 | yes |
| Skap2     | 2.4568  | 5.00E-05 | 0.000219871 | yes |
| Arhgef28  | 2.45891 | 5.00E-05 | 0.000219871 | yes |
| Enox1     | 2.7575  | 5.00E-05 | 0.000219871 | yes |
| Rcan3     | 2.89272 | 5.00E-05 | 0.000219871 | yes |
| Rmdn1     | 1.5468  | 0.0069   | 0.0188242   | yes |
| Coro2a    | 2.91704 | 5.00E-05 | 0.000219871 | yes |
| Cntn3     | 2.08832 | 5.00E-05 | 0.000219871 | yes |
| 4931428F0 | 1.34102 | 0.00655  | 0.0179915   | yes |
| Rufy2     | 2.53566 | 5.00E-05 | 0.000219871 | yes |
| Brinp2    | 2.71588 | 5.00E-05 | 0.000219871 | yes |
| Erlin1    | 2.0178  | 5.00E-05 | 0.000219871 | yes |
| Brd9      | 2.53036 | 5.00E-05 | 0.000219871 | yes |
| Cacna2d1  | 2.85976 | 5.00E-05 | 0.000219871 | yes |
| Stk11ip   | 2.46125 | 5.00E-05 | 0.000219871 | yes |
| Rac3      | 2.63041 | 5.00E-05 | 0.000219871 | yes |
| Uri1      | 2.45421 | 5.00E-05 | 0.000219871 | yes |
| Zc3h7a    | 2.26779 | 5.00E-05 | 0.000219871 | yes |
| Cxxc4     | 2.16656 | 5.00E-05 | 0.000219871 | yes |
| Icmt      | 2.98059 | 5.00E-05 | 0.000219871 | yes |
| Bbs5      | 1.74713 | 0.0024   | 0.00747963  | yes |
| Gramd4    | 2.53386 | 5.00E-05 | 0.000219871 | yes |
| Armcx6    | 1.76157 | 0.0018   | 0.0058019   | yes |
| Rsph3a    | 1.66455 | 0.00295  | 0.00892738  | yes |
| Snx7      | 2.87871 | 5.00E-05 | 0.000219871 | yes |
| Tac1      | 3.51128 | 5.00E-05 | 0.000219871 | yes |
| B3glct    | 2.67767 | 5.00E-05 | 0.000219871 | yes |
| Boc       | 2.17351 | 5.00E-05 | 0.000219871 | yes |
| Vezt      | 2.74108 | 5.00E-05 | 0.000219871 | yes |
| Aacs      | 3.05537 | 5.00E-05 | 0.000219871 | yes |
| Ccdc12    | 1.59765 | 0.0165   | 0.03999     | yes |
| Bdnf      | 2.31539 | 5.00E-05 | 0.000219871 | yes |
| Nol3      | 2.65211 | 5.00E-05 | 0.000219871 | yes |
| B4galt5   | 2.96749 | 5.00E-05 | 0.000219871 | yes |
| Hilpda    | 1.19415 | 0.0178   | 0.0426499   | yes |
| Abr       | 2.82351 | 5.00E-05 | 0.000219871 | yes |

|           |         |          |             |     |
|-----------|---------|----------|-------------|-----|
| Kifc2     | 2.55549 | 5.00E-05 | 0.000219871 | yes |
| Bend4     | 2.22984 | 5.00E-05 | 0.000219871 | yes |
| Prdm8     | 2.19548 | 5.00E-05 | 0.000219871 | yes |
| Snx21     | 2.72833 | 5.00E-05 | 0.000219871 | yes |
| Supt20    | 2.21264 | 5.00E-05 | 0.000219871 | yes |
| Zdhhc13   | 2.57696 | 5.00E-05 | 0.000219871 | yes |
| Rab40c    | 2.36218 | 5.00E-05 | 0.000219871 | yes |
| Wipf1     | 2.56307 | 5.00E-05 | 0.000219871 | yes |
| 1110007CC | 2.85962 | 5.00E-05 | 0.000219871 | yes |
| Plcl1     | 2.09361 | 5.00E-05 | 0.000219871 | yes |
| Utp18     | 1.82306 | 0.001    | 0.00345135  | yes |
| Asl       | 2.24684 | 5.00E-05 | 0.000219871 | yes |
| Ralgds    | 2.63338 | 5.00E-05 | 0.000219871 | yes |
| Ino80b    | 1.74361 | 0.0062   | 0.0171508   | yes |
| Creld1    | 3.15337 | 5.00E-05 | 0.000219871 | yes |
| 8430427H1 | 2.76403 | 5.00E-05 | 0.000219871 | yes |
| 2010111I0 | 1.99827 | 0.00055  | 0.0020157   | yes |
| Glipr2    | 1.9004  | 0.0006   | 0.00218147  | yes |
| Ankrd12   | 2.75435 | 5.00E-05 | 0.000219871 | yes |
| Rp9       | 2.39591 | 0.0003   | 0.00116377  | yes |
| Zmat5     | 2.15105 | 0.0016   | 0.00523611  | yes |
| Pla2g6    | 2.31175 | 5.00E-05 | 0.000219871 | yes |
| Ydjc      | 1.85982 | 0.00205  | 0.00650343  | yes |
| Rpusd1    | 1.9964  | 0.0005   | 0.00185035  | yes |
| Gpatch4   | 1.66079 | 0.00155  | 0.00509511  | yes |
| Fbxo36    | 1.5751  | 0.01545  | 0.0377626   | yes |
| Flot2     | 2.77722 | 5.00E-05 | 0.000219871 | yes |
| Cep78     | 1.6688  | 0.00215  | 0.00679629  | yes |
| Wbscr17   | 2.95737 | 5.00E-05 | 0.000219871 | yes |
| Tec       | 1.46834 | 0.0037   | 0.0108794   | yes |
| Jph4      | 2.94451 | 5.00E-05 | 0.000219871 | yes |
| Gucd1     | 2.36923 | 5.00E-05 | 0.000219871 | yes |
| Zfp827    | 2.4176  | 5.00E-05 | 0.000219871 | yes |
| Fam178a   | 2.08121 | 5.00E-05 | 0.000219871 | yes |
| Zcchc18   | 2.63908 | 5.00E-05 | 0.000219871 | yes |
| AW549877  | 2.86439 | 5.00E-05 | 0.000219871 | yes |
| Nagk      | 2.43121 | 5.00E-05 | 0.000219871 | yes |
| Grk5      | 1.93503 | 0.00065  | 0.00234272  | yes |
| Pknox2    | 2.57136 | 5.00E-05 | 0.000219871 | yes |
| Rps19bp1  | 1.76758 | 0.0084   | 0.0223916   | yes |
| Pygl      | 2.33532 | 5.00E-05 | 0.000219871 | yes |
| Socs7     | 2.84695 | 5.00E-05 | 0.000219871 | yes |
| Dennd6b   | 1.88585 | 0.0001   | 0.000421844 | yes |
| Anxa5     | 2.34897 | 5.00E-05 | 0.000219871 | yes |
| Erich3    | 1.42627 | 0.01085  | 0.0278697   | yes |
| Slc25a1   | 3.03223 | 5.00E-05 | 0.000219871 | yes |
| Rnf219    | 2.33488 | 5.00E-05 | 0.000219871 | yes |
| Fah       | 2.17189 | 0.0003   | 0.00116377  | yes |
| Id4       | 2.26565 | 5.00E-05 | 0.000219871 | yes |
| Tmem74    | 2.2197  | 0.00015  | 0.000614592 | yes |
| Rtn4rl1   | 2.88147 | 5.00E-05 | 0.000219871 | yes |
| Gcnt2     | 2.6378  | 5.00E-05 | 0.000219871 | yes |
| Pde8a     | 1.51714 | 0.00515  | 0.0145869   | yes |



|           |         |          |             |     |
|-----------|---------|----------|-------------|-----|
| Ugcg      | 2.90579 | 5.00E-05 | 0.000219871 | yes |
| Ankzf1    | 1.37119 | 0.0145   | 0.03579     | yes |
| Zfp941    | 2.05208 | 0.00015  | 0.000614592 | yes |
| Cdh1      | 2.87864 | 5.00E-05 | 0.000219871 | yes |
| 2510009E0 | 2.8613  | 5.00E-05 | 0.000219871 | yes |
| Cacna1b   | 2.72584 | 5.00E-05 | 0.000219871 | yes |
| Ppp1r1c   | 2.66216 | 5.00E-05 | 0.000219871 | yes |
| Nkiras2   | 2.24067 | 0.00015  | 0.000614592 | yes |
| Fam189a2  | 2.31036 | 5.00E-05 | 0.000219871 | yes |
| Emp3      | 1.74095 | 0.00085  | 0.00298332  | yes |
| Rrp36     | 1.69321 | 0.00535  | 0.0150442   | yes |
| Frat2     | 1.69507 | 0.0034   | 0.0101093   | yes |
| Dbndd2    | 2.09636 | 5.00E-05 | 0.000219871 | yes |
| Nipal2    | 2.22235 | 5.00E-05 | 0.000219871 | yes |
| Fam102b   | 2.78099 | 5.00E-05 | 0.000219871 | yes |
| Tspan5    | 2.85989 | 5.00E-05 | 0.000219871 | yes |
| C77080    | 2.18325 | 5.00E-05 | 0.000219871 | yes |
| Fbxo22    | 2.60938 | 5.00E-05 | 0.000219871 | yes |
| Lclat1    | 2.58285 | 5.00E-05 | 0.000219871 | yes |
| Rnf7      | 3.10224 | 5.00E-05 | 0.000219871 | yes |
| Eef1g     | 2.2327  | 0.0001   | 0.000421844 | yes |
| Bbs9      | 1.88218 | 0.0002   | 0.000802844 | yes |
| Myc       | 1.47883 | 0.00455  | 0.0130688   | yes |
| Ccdc85a   | 2.50848 | 5.00E-05 | 0.000219871 | yes |
| Lypd6b    | 1.52985 | 0.0051   | 0.0144638   | yes |
| Pten      | 2.7083  | 5.00E-05 | 0.000219871 | yes |
| Tmem256   | 3.20695 | 0.0005   | 0.00185035  | yes |
| Tcof1     | 1.91611 | 0.0003   | 0.00116377  | yes |
| Raph1     | 2.74091 | 5.00E-05 | 0.000219871 | yes |
| Rnps1     | 1.88158 | 0.00015  | 0.000614592 | yes |
| 37499     | 2.63512 | 5.00E-05 | 0.000219871 | yes |
| Taf9b     | 2.18474 | 5.00E-05 | 0.000219871 | yes |
| Vav3      | 1.99119 | 5.00E-05 | 0.000219871 | yes |
| Clk2      | 1.43503 | 0.0041   | 0.0119026   | yes |
| Tmem106a  | 1.49741 | 0.0081   | 0.0217009   | yes |
| Kdsr      | 2.50515 | 5.00E-05 | 0.000219871 | yes |
| Trim46    | 2.20538 | 5.00E-05 | 0.000219871 | yes |
| Zadh2     | 2.59405 | 5.00E-05 | 0.000219871 | yes |
| Plekha6   | 2.66581 | 5.00E-05 | 0.000219871 | yes |
| Slc9a3r2  | 2.52281 | 5.00E-05 | 0.000219871 | yes |
| Arl10     | 1.7158  | 0.0055   | 0.0154267   | yes |
| Pwwp2a    | 1.60014 | 0.0014   | 0.00465742  | yes |
| 2900056M: | 1.94197 | 5.00E-05 | 0.000219871 | yes |
| Gtf3a     | 1.65637 | 0.00535  | 0.0150442   | yes |
| Mrgpre    | 2.24607 | 0.0001   | 0.000421844 | yes |
| Tmem29    | 1.57845 | 0.00195  | 0.00621891  | yes |
| Gadd45g   | 2.11373 | 0.0004   | 0.00151277  | yes |
| Leo1      | 2.24396 | 5.00E-05 | 0.000219871 | yes |
| Ankrd24   | 1.8013  | 0.00095  | 0.00329852  | yes |
| Lrch4     | 1.8387  | 0.00065  | 0.00234272  | yes |
| Zmym6     | 1.67011 | 0.0009   | 0.00313888  | yes |
| Spag7     | 2.15372 | 5.00E-05 | 0.000219871 | yes |
| Mbnl2     | 2.43605 | 5.00E-05 | 0.000219871 | yes |

|           |         |          |             |     |
|-----------|---------|----------|-------------|-----|
| Pkp4      | 2.24329 | 5.00E-05 | 0.000219871 | yes |
| Cisd3     | 2.74177 | 5.00E-05 | 0.000219871 | yes |
| Pgls      | 2.25645 | 0.00035  | 0.00134243  | yes |
| Supt4a    | 1.66943 | 0.01975  | 0.0465985   | yes |
| Zfp738    | 1.9454  | 0.0002   | 0.000802844 | yes |
| Lyar      | 1.42551 | 0.01365  | 0.0339383   | yes |
| Hdac10    | 1.62131 | 0.00125  | 0.00421978  | yes |
| Rbfox1    | 2.62088 | 5.00E-05 | 0.000219871 | yes |
| A230050P2 | 1.42067 | 0.0143   | 0.0353688   | yes |
| Cd34      | 2.42805 | 5.00E-05 | 0.000219871 | yes |
| Nin       | 1.77396 | 0.0005   | 0.00185035  | yes |
| Cobl      | 2.50691 | 5.00E-05 | 0.000219871 | yes |
| Pitpnm2   | 2.5693  | 5.00E-05 | 0.000219871 | yes |
| Trpv1     | 2.6973  | 5.00E-05 | 0.000219871 | yes |
| Scn9a     | 2.40597 | 5.00E-05 | 0.000219871 | yes |
| Plekho1   | 2.00987 | 0.00065  | 0.00234272  | yes |
| 9330159F1 | 2.54816 | 5.00E-05 | 0.000219871 | yes |
| Qdpr      | 2.95246 | 5.00E-05 | 0.000219871 | yes |
| Ptpr      | 2.26936 | 5.00E-05 | 0.000219871 | yes |
| BC029214  | 1.69283 | 0.00725  | 0.0196538   | yes |
| Lonrf1    | 2.26129 | 5.00E-05 | 0.000219871 | yes |
| Arhgef18  | 2.38777 | 5.00E-05 | 0.000219871 | yes |
| Trmt1     | 1.90785 | 0.00035  | 0.00134243  | yes |
| Chrm4     | 1.365   | 0.01285  | 0.0322027   | yes |
| Dapk3     | 1.97679 | 0.0003   | 0.00116377  | yes |
| Ankra2    | 1.82863 | 0.0002   | 0.000802844 | yes |
| Kdelc2    | 1.94843 | 0.00015  | 0.000614592 | yes |
| Dolpp1    | 1.83508 | 0.0011   | 0.00376029  | yes |
| Gpr176    | 1.69347 | 0.0011   | 0.00376029  | yes |
| Snx8      | 1.8838  | 0.00015  | 0.000614592 | yes |
| Parp11    | 1.99496 | 0.0003   | 0.00116377  | yes |
| Slc35f5   | 2.31642 | 5.00E-05 | 0.000219871 | yes |
| Calcb     | 3.15644 | 5.00E-05 | 0.000219871 | yes |
| Mrps6     | 1.34819 | 0.00705  | 0.0191822   | yes |
| 2610203C2 | 1.32694 | 0.0076   | 0.0204896   | yes |
| Kcnab1    | 2.62896 | 5.00E-05 | 0.000219871 | yes |
| Trappc5   | 2.23359 | 5.00E-05 | 0.000219871 | yes |
| Smad1     | 2.41333 | 5.00E-05 | 0.000219871 | yes |
| Stk19     | 1.77274 | 0.0044   | 0.0126847   | yes |
| AI414108  | 1.85131 | 0.0007   | 0.00250591  | yes |
| Gigyf1    | 2.03485 | 0.0002   | 0.000802844 | yes |
| Osbpl3    | 2.4391  | 5.00E-05 | 0.000219871 | yes |
| Lactb     | 1.53523 | 0.00605  | 0.0167919   | yes |
| Prkx      | 2.60869 | 5.00E-05 | 0.000219871 | yes |
| Fkbp1b    | 3.10762 | 5.00E-05 | 0.000219871 | yes |
| AI846148  | 1.51355 | 0.00295  | 0.00892738  | yes |
| Eif1a     | 2.53326 | 5.00E-05 | 0.000219871 | yes |
| Cacna1c   | 2.45656 | 5.00E-05 | 0.000219871 | yes |
| Zbtb10    | 2.13626 | 0.0001   | 0.000421844 | yes |
| Cd97      | 1.32766 | 0.009    | 0.0236958   | yes |
| Nmi       | 1.1737  | 0.01985  | 0.0467928   | yes |
| Ppapdc1b  | 1.54162 | 0.00815  | 0.021826    | yes |
| Mrpl57    | 1.65322 | 0.0028   | 0.00853183  | yes |

|           |         |          |             |     |
|-----------|---------|----------|-------------|-----|
| Man1c1    | 2.21585 | 5.00E-05 | 0.000219871 | yes |
| Mob3a     | 2.07405 | 0.0001   | 0.000421844 | yes |
| B2302170: | 1.67906 | 0.0027   | 0.00827273  | yes |
| 2610001J0 | 2.33612 | 5.00E-05 | 0.000219871 | yes |
| Slc22a18  | 1.43003 | 0.0045   | 0.012942    | yes |
| Kcnj12    | 2.29899 | 5.00E-05 | 0.000219871 | yes |
| Armcx4    | 2.26082 | 5.00E-05 | 0.000219871 | yes |
| Elavl3    | 2.6095  | 5.00E-05 | 0.000219871 | yes |
| Arrdc1    | 1.73489 | 0.0006   | 0.00218147  | yes |
| Gale      | 1.99971 | 0.0005   | 0.00185035  | yes |
| BC018507  | 2.42717 | 5.00E-05 | 0.000219871 | yes |
| Wsb1      | 2.00195 | 5.00E-05 | 0.000219871 | yes |
| Stat6     | 2.49893 | 5.00E-05 | 0.000219871 | yes |
| Sdccag8   | 1.3907  | 0.0107   | 0.0275431   | yes |
| Pik3cd    | 2.28553 | 5.00E-05 | 0.000219871 | yes |
| Mink1     | 2.47335 | 5.00E-05 | 0.000219871 | yes |
| Piezo2    | 2.26789 | 5.00E-05 | 0.000219871 | yes |
| Syng3     | 2.74801 | 5.00E-05 | 0.000219871 | yes |
| Wdr34     | 1.43029 | 0.012    | 0.0303709   | yes |
| Adc       | 2.60132 | 5.00E-05 | 0.000219871 | yes |
| Mtmt1     | 1.92913 | 0.00045  | 0.00168221  | yes |
| Chd3      | 2.50447 | 5.00E-05 | 0.000219871 | yes |
| Crmp1     | 2.4265  | 5.00E-05 | 0.000219871 | yes |
| Lifr      | 1.9426  | 5.00E-05 | 0.000219871 | yes |
| Vps4b     | 2.56366 | 5.00E-05 | 0.000219871 | yes |
| Vamp4     | 2.5817  | 5.00E-05 | 0.000219871 | yes |
| Plekha3   | 2.13413 | 5.00E-05 | 0.000219871 | yes |
| Csrnp3    | 2.42055 | 5.00E-05 | 0.000219871 | yes |
| Mtss1     | 2.2903  | 5.00E-05 | 0.000219871 | yes |
| Tpgs1     | 2.35974 | 0.0001   | 0.000421844 | yes |
| Ap4m1     | 1.32689 | 0.01905  | 0.0451638   | yes |
| Prmt2     | 2.34941 | 5.00E-05 | 0.000219871 | yes |
| Mef2a     | 2.45203 | 5.00E-05 | 0.000219871 | yes |
| Mcf2l     | 2.34523 | 5.00E-05 | 0.000219871 | yes |
| Hras      | 2.24286 | 5.00E-05 | 0.000219871 | yes |
| Cdyl2     | 2.04257 | 0.00015  | 0.000614592 | yes |
| Acly      | 2.17093 | 0.0001   | 0.000421844 | yes |
| Parp8     | 2.03683 | 0.00015  | 0.000614592 | yes |
| Osbpl6    | 2.25134 | 5.00E-05 | 0.000219871 | yes |
| Pdcd2     | 1.79929 | 0.00345  | 0.0102373   | yes |
| Bid       | 2.00032 | 0.0003   | 0.00116377  | yes |
| Pdcl3     | 2.13421 | 0.0002   | 0.000802844 | yes |
| Mapkapk5  | 1.86122 | 0.001    | 0.00345135  | yes |
| Rab39     | 2.12962 | 5.00E-05 | 0.000219871 | yes |
| 2610034B1 | 2.00064 | 0.0004   | 0.00151277  | yes |
| Mapk11    | 2.54355 | 5.00E-05 | 0.000219871 | yes |
| Mnt       | 2.21824 | 5.00E-05 | 0.000219871 | yes |
| Usp12     | 2.47967 | 5.00E-05 | 0.000219871 | yes |
| Aff3      | 2.31132 | 5.00E-05 | 0.000219871 | yes |
| Gpatch11  | 2.11764 | 5.00E-05 | 0.000219871 | yes |
| Ank3      | 2.29901 | 5.00E-05 | 0.000219871 | yes |
| Nvl       | 1.92758 | 0.0006   | 0.00218147  | yes |
| Vti1b     | 2.27158 | 5.00E-05 | 0.000219871 | yes |

|           |         |          |             |     |
|-----------|---------|----------|-------------|-----|
| Disp2     | 2.36565 | 5.00E-05 | 0.000219871 | yes |
| Zfp428    | 1.33174 | 0.0067   | 0.0183427   | yes |
| Tmcc3     | 2.1284  | 5.00E-05 | 0.000219871 | yes |
| Rnf31     | 1.75754 | 0.0008   | 0.00282803  | yes |
| Mtm1      | 1.55749 | 0.00185  | 0.00593853  | yes |
| Eif4e3    | 2.20468 | 0.0001   | 0.000421844 | yes |
| Prkrip1   | 1.60826 | 0.0047   | 0.0134328   | yes |
| Filip1    | 2.07234 | 5.00E-05 | 0.000219871 | yes |
| Ccp110    | 2.4203  | 5.00E-05 | 0.000219871 | yes |
| Zfp954    | 1.55548 | 0.0054   | 0.0151719   | yes |
| Galk2     | 1.67352 | 0.0026   | 0.00801073  | yes |
| Zfp703    | 1.9495  | 0.00015  | 0.000614592 | yes |
| Ppp3cc    | 2.1739  | 5.00E-05 | 0.000219871 | yes |
| 5330426P1 | 1.4523  | 0.0034   | 0.0101093   | yes |
| Luzp2     | 2.44944 | 5.00E-05 | 0.000219871 | yes |
| Ccdc82    | 1.64555 | 0.0018   | 0.0058019   | yes |
| Lrrc8b    | 2.28111 | 5.00E-05 | 0.000219871 | yes |
| Oraov1    | 2.03264 | 0.00045  | 0.00168221  | yes |
| Mvd       | 1.96003 | 0.0001   | 0.000421844 | yes |
| Dnajc12   | 1.40038 | 0.0062   | 0.0171508   | yes |
| Slc7a6os  | 1.42098 | 0.0158   | 0.0385328   | yes |
| Ston2     | 2.06886 | 0.00015  | 0.000614592 | yes |
| Fgfr1op   | 1.73615 | 0.00045  | 0.00168221  | yes |

## Suppl. Table 3 TRPV1 lineage gene list

**Table S3: Highly Differentially Expressed Transcripts in the TRPV1<sub>L</sub> Preparation**

This table contains the molecular signature of TRPV1<sub>L</sub> neurons based on level of expression. The table lists all 263 TRPV1<sub>L</sub> functionally well annotated transcripts with a differential of 5X and above (there is partial overlap with Table 1). The genes have been grouped into functional categories according to known annotations and publications. Within the groups, the genes have been sorted on expression (high to low) and only genes with an expression level above 1 RPKM are included. The adjusted fold change values are color coded: Red: >20 fold, Blue: 2-10 fold, and Green: < 10 fold difference. The accession id provides the exact reference to the gene isoform analyzed within this study.

| Gene Symbol                                                                                     | Gene Name                                                                                   | Lineage RPKM | Depleted RPKM | Adjusted Fold Change | Accession Id         | Location                  |
|-------------------------------------------------------------------------------------------------|---------------------------------------------------------------------------------------------|--------------|---------------|----------------------|----------------------|---------------------------|
| <b>Ligand and Voltage Gated Ion Channels, Channel Subunits and Channel Interacting proteins</b> |                                                                                             |              |               |                      |                      |                           |
| Scn11a                                                                                          | sodium channel, voltage-gated, type XI, alpha; Nav1.9                                       | 169.2        | 16.4          | 10.3                 | NM_011887(refseq)::  | chr9:119662883-119734574  |
| P2rx3                                                                                           | purinergic receptor P2X, ligand-gated ion channel, 3                                        | 163.6        | 22.4          | 7.3                  | NM_145526(refseq)::  | chr2:84836709-84875991    |
| Trpv1                                                                                           | transient receptor potential cation channel, subfamily V, member 1                          | 151.2        | 1.3           | 105.3                | uc007kah.1(ucsc)     | chr11:73047794-73074009   |
| Kcnp4                                                                                           | a-type potassium channel modulatory protein 4                                               | 133          | 19.6          | 6.8                  | uc008x.jv.1(ucsc)    | chr5:48780742-48990921    |
| Grik1                                                                                           | glutamate receptor, ionotropic, kainate 1                                                   | 130.8        | 8.6           | 15.1                 | NM_146072(refseq)    | chr16:87896142-88290503   |
| Kcnp2                                                                                           | a-type potassium channel modulatory protein 2                                               | 102.2        | 14.8          | 6.9                  | uc008hrr.1(ucsc)     | chr19:45868160-45886781   |
| Scn3b                                                                                           | sodium channel, voltage-gated, type III, beta                                               | 39.9         | 7.8           | 5.1                  | NM_153522(refseq)::  | chr9:40076801-40099203    |
| Trpc3                                                                                           | transient receptor potential cation channel, subfamily C, member 3                          | 38.9         | 4.8           | 7.9                  | NM_019510(refseq)::  | chr3:36519404-36589089    |
| Kcnh6                                                                                           | potassium voltage-gated channel, subfamily H (eag-related), member 6, K <sub>v</sub> 11.2   | 30.6         | 2.5           | 11.9                 | NM_001037712(refseq) | chr11:105869517-105895378 |
| Chrna6                                                                                          | cholinergic receptor, nicotinic, alpha polypeptide 6                                        | 30.3         | 4             | 7.4                  | NM_021369(refseq)::  | chr8:28513684-28524416    |
| Trpa1                                                                                           | transient receptor potential cation channel, subfamily A, member 1                          | 23.6         | 0.9           | 22.6                 | NM_177781(refseq)::  | chr1:14862729-14908943    |
| Kcnmb1                                                                                          | potassium large conductance calcium-activated channel, subfamily M, BKbeta1, Maxi           | 16.3         | 3.6           | 5                    | NM_031169(refseq)    | chr11:33863013-33873638   |
| Trpm8                                                                                           | transient receptor potential cation channel, subfamily M, member 8                          | 15.2         | 0.7           | 18.4                 | NM_134252(refseq)    | chr1:90203287-90285426    |
| Kcnc2                                                                                           | potassium voltage-gated channel, Shaw-related subfamily, member 2, K <sub>v</sub> 3.2       | 9.9          | 0.7           | 12.6                 | NM_001025581(refseq) | chr10:111708179-111903360 |
| Kcnk12                                                                                          | potassium channel, subfamily K, member 12, THIK2, tandem pore domain K <sup>+</sup> channel | 8.9          | 0.8           | 9.9                  | NM_199251(refseq)::  | chr17:88145161-88197334   |
| Trpc6                                                                                           | transient receptor potential cation channel, subfamily C, member 6                          | 8.3          | 0.7           | 10.7                 | NM_013838(refseq)::  | chr9:8544142-8880741      |
| Kcnk13                                                                                          | potassium channel, subfamily K, member 13, THIK1, tandem pore domain K <sup>+</sup> channel | 7.7          | 1.1           | 6.7                  | NM_001164427(refseq) | chr12:101202709-101300891 |
| Kcng2                                                                                           | potassium voltage-gated channel, subfamily G, member 2, K <sub>v</sub> 6.2                  | 7.1          | 0.4           | 14.2                 | NM_001190373(refseq) | chr18:80491283-80560993   |
| Gria1                                                                                           | glutamate receptor, ionotropic, AMPA1 (alpha 1)                                             | 6.7          | 1.2           | 5.4                  | NM_001113325(refseq) | chr11:56825193-57143746   |
| P2rx2                                                                                           | purinergic receptor P2X, ligand-gated ion channel, 2                                        | 6.1          | 0.1           | 39.6                 | NM_153400(refseq)    | chr5:110768831-110772054  |
| Chrn3b                                                                                          | cholinergic receptor, nicotinic, beta polypeptide 3                                         | 5.3          | 0.1           | 23.3                 | NM_173212(refseq)::  | chr8:28479183-28510201    |
| Kcnf1                                                                                           | potassium voltage-gated channel, subfamily F, member 1, K <sub>v</sub> 5.1                  | 4.9          | 0.3           | 14                   | NM_201531(refseq)    | chr12:17178908-17183694   |
| Cacnal1                                                                                         | calcium channel, voltage-dependent, alpha I subunit                                         | 4            | 0.1           | 24.6                 | NM_001044308(refseq) | chr15:80117668-80228722   |
| Kcnmb2                                                                                          | potassium large conductance calcium-activated channel, subfamily M, BKbeta2, Maxi           | 3.8          | 0.2           | 11.9                 | NM_028231(refseq)::  | chr3:31801625-32099102    |
| Trpc4                                                                                           | transient receptor potential cation channel, subfamily C, member 4                          | 3.1          | 0.2           | 11.2                 | NM_016984(refseq)::  | chr3:53960026-54122389    |
| Cacng3                                                                                          | calcium channel, voltage-dependent, gamma subunit 3                                         | 2.5          | 0.3           | 6.5                  | NM_019430(refseq)    | chr7:129815258-129912905  |
| Trpv3                                                                                           | transient receptor potential cation channel, subfamily V, member 3                          | 2.2          | 0.3           | 5.8                  | NM_145099(refseq)::  | chr11:73081122-73110702   |
| Kcns2                                                                                           | K <sup>+</sup> voltage-gated channel, subfamily S, 2, K <sub>v</sub> 9.2                    | 1.9          | 0.1           | 10                   | NM_181317(refseq)::  | chr15:34767136-34772092   |
| Kcnj6                                                                                           | potassium inwardly-rectifying channel, subfamily J, member 6, GIRK2, Kir3.2, weave          | 1.3          | 0.1           | 7                    | NM_001025584(refseq) | chr16:94970290-95219303   |
| Trpc7                                                                                           | transient receptor potential cation channel, subfamily C, member 7                          | 1.3          | 0.2           | 5                    | NM_012035(refseq)::  | chr13:56874469-56969649   |
| <b>G-protein Coupled Receptors and Associated Proteins</b>                                      |                                                                                             |              |               |                      |                      |                           |
| Rgs4                                                                                            | regulator of G-protein signaling 4                                                          | 606          | 125.2         | 5                    | NM_009062(refseq)::  | chr1:171671608-171677773  |
| Rgs10                                                                                           | regulator of G-protein signaling 10                                                         | 222.9        | 28.6          | 7.8                  | NM_026418(refseq)::  | chr7:135517139-135561686  |
| Mrgprd                                                                                          | MAS-related GPR, member D                                                                   | 125.4        | 4.2           | 29.1                 | NM_203490(refseq)::  | chr7:152500740-152509964  |
| Gnb4                                                                                            | guanine nucleotide binding protein (G protein), beta 4                                      | 68           | 8.1           | 8.3                  | NM_013531(refseq)::  | chr3:32482450-32515457    |
| F2r12                                                                                           | coagulation factor II (thrombin) receptor-like 2; PAR3                                      | 57.5         | 10.1          | 5.6                  | NM_010170(refseq)::  | chr13:96466875-96472723   |
| Gna14                                                                                           | guanine nucleotide binding protein, alpha 14                                                | 53           | 4.9           | 10.6                 | NM_008137(refseq)    | chr19:16510157-16685308   |
| Lpar3                                                                                           | lysophosphatidic acid receptor 3                                                            | 45.8         | 1.9           | 22.8                 | NM_022983(refseq)    | chr3:145883925-145949178  |
| Mrgpra3                                                                                         | MAS-related GPR, member A3                                                                  | 37.4         | 6.3           | 5.8                  | NM_153067(refseq)    | chr7:54844321-54856742    |
| Rgs3                                                                                            | regulator of G-protein signaling 3                                                          | 37.4         | 6.5           | 5.7                  | NM_134257(refseq)    | chr4:62280706-62364053    |
| Mrgprx1                                                                                         | MAS-related GPR, member X1                                                                  | 28.6         | 1.3           | 21.3                 | NM_207540(refseq)::  | chr7:55276341-55282967    |
| Rgs8                                                                                            | regulator of G-protein signaling 8                                                          | 22.6         | 0.8           | 26                   | NM_026380(refseq)::  | chr1:155500167-155544795  |
| Ptgdrr                                                                                          | prostaglandin D receptor                                                                    | 20           | 1.4           | 13.3                 | NM_008962(refseq)::  | chr14:45470910-45479050   |
| Mrgprb5                                                                                         | MAS-related GPR, member B5                                                                  | 17.3         | 0.7           | 21.9                 | NM_207538(refseq)::  | chr7:55423387-55424355    |
| Gpr35                                                                                           | G protein-coupled receptor 35                                                               | 17.3         | 1             | 15.5                 | NM_022320(refseq)::  | chr1:94875480-94882968    |
| Npy1r                                                                                           | neuropeptide Y receptor Y1                                                                  | 17.3         | 2.4           | 7                    | NM_010934(refseq)    | chr8:69221321-69230697    |
| Npy2r                                                                                           | neuropeptide Y receptor Y2                                                                  | 14.6         | 1.4           | 10                   | NM_008731(refseq)::  | chr3:82342305-82352007    |
| Agtr1a                                                                                          | angiotensin II receptor, type 1a                                                            | 13.3         | 1.6           | 8                    | NM_177322(refseq)    | chr13:30428225-30474736   |
| Lpar5                                                                                           | lysophosphatidic acid receptor 5                                                            | 13.1         | 0.9           | 13.1                 | NM_001163269(refseq) | chr6:125017938-125032489  |
| Sstr2                                                                                           | somatostatin receptor 2                                                                     | 11.2         | 0.3           | 28.5                 | uc007mep.1(ucsc)     | chr11:113480795-113486950 |
| Cysl1r2                                                                                         | cysteinyl leukotriene receptor 2                                                            | 10.8         | 0.3           | 25.4                 | NM_001162412(refseq) | chr14:73428936-73448921   |
| Htr1a                                                                                           | 5-hydroxytryptamine (serotonin) receptor 1A                                                 | 6.1          | 0.6           | 9.4                  | NM_008308(refseq)    | chr13:106233773-106238213 |
| Nmur1                                                                                           | neuromedin U receptor 1                                                                     | 4.6          | 0.2           | 18.2                 | NM_010341(refseq)::  | chr1:88282900-88284716    |
| Rgs14                                                                                           | regulator of G-protein signaling 14                                                         | 4.5          | 0.4           | 8.9                  | NM_016758(refseq)    | chr13:55471093-55486047   |
| Gpr160                                                                                          | G protein-coupled receptor 160                                                              | 3.9          | 0.5           | 6.5                  | NM_001134385(refseq) | chr3:30754872-30761114    |
| Galr1                                                                                           | galanin receptor 1                                                                          | 3.7          | 0.2           | 11.2                 | NM_008082(refseq)::  | chr18:82561888-82576169   |
| Gpr68                                                                                           | G protein-coupled receptor 68                                                               | 2.9          | 0.3           | 7.5                  | NM_001177674(refseq) | chr12:102114893-102137734 |
| Avpr1a                                                                                          | arginine vasopressin receptor 1A                                                            | 1.8          | 0.1           | 9.5                  | NM_016847(refseq)::  | chr10:12188555-121890509  |
| Crrh2                                                                                           | corticotropin releasing hormone receptor 2                                                  | 1.7          | 0.1           | 9                    | NM_009953(refseq)    | chr6:55040042-55082966    |
| Mrgpra4                                                                                         | MAS-related GPR, member A4                                                                  | 1.6          | 0.1           | 8.5                  | uc009hak.1(ucsc)     | chr7:55236164-55237666    |
| Mrgpra9                                                                                         | MAS-related GPR, member A9                                                                  | 1.4          | 0.1           | 7.5                  | NM_001177566(refseq) | chr7:54490290-54508218    |
| <b>Neuropeptides and Cytokines</b>                                                              |                                                                                             |              |               |                      |                      |                           |
| Calca*                                                                                          | calcitonin-related polypeptide alpha; CGRP                                                  | 924.2        | 372.1         | 2.5                  | NM_001033954(refseq) | chr7:121774992-121779871  |
| Tac1                                                                                            | tachykinin 1; substance P                                                                   | 597.7        | 14.1          | 42                   | NM_009311(refseq)::  | chr6:7505071-7512973      |
| Calcb*                                                                                          | calcitonin-related polypeptide beta; CGRP2                                                  | 105.4        | 31.9          | 3.3                  | NM_054084(refseq)    | chr7:121862157-121866879  |
| Adcyap1                                                                                         | adenylate cyclase activating polypeptide 1; PACAP                                           | 95           | 5.3           | 17.6                 | NM_009625(refseq)::  | chr17:93598762-93604829   |
| Cartpt                                                                                          | CART prepropeptide                                                                          | 64.7         | 2.1           | 29                   | NM_013732(refseq)::  | chr13:100668439-100670638 |
| Sst                                                                                             | somatostatin; growth hormone release-inhibiting factor                                      | 53.8         | 0.5           | 97.3                 | NM_009215(refseq)::  | chr16:23889667-23890930   |
| Gal                                                                                             | galanin                                                                                     | 33.8         | 1.2           | 25.7                 | NM_010253(refseq)::  | chr19:3409917-3414457     |
| Nppb                                                                                            | natriuretic peptide precursor type B                                                        | 24.1         | 0.2           | 86.9                 | NM_008726(refseq)    | chr4:147359898-147361314  |
| Ccl1                                                                                            | chemokine (C-C motif) ligand 1                                                              | 7.8          | 0.3           | 22.5                 | NM_011329(refseq)::  | chr11:81990168-81993314   |
| <b>Synaptic Vesicle Proteins and Associated Synaptic Proteins</b>                               |                                                                                             |              |               |                      |                      |                           |
| Scg3                                                                                            | secretogranin III                                                                           | 585.8        | 111.5         | 5.2                  | NM_001164790(refseq) | chr9:75491174-75531863    |
| Scg2                                                                                            | secretogranin II; secretoneurin                                                             | 202.8        | 33.8          | 6                    | NM_009129(refseq)::  | chr1:79431244-79436665    |
| Synpr                                                                                           | synaptotagmin                                                                               | 184.9        | 14            | 13.1                 | NM_001163032(refseq) | chr14:14286472-14447982   |
| Mal2                                                                                            | mal, T-cell differentiation protein 2                                                       | 124.8        | 6.4           | 19.1                 | NM_178920(refseq)    | chr15:54402921-54434401   |
| Syt7                                                                                            | synaptotagmin VII                                                                           | 75.1         | 9.3           | 8                    | NM_173068(refseq)    | chr19:10463580-10527671   |
| Nptx2                                                                                           | neuronal pentraxin 2                                                                        | 73.8         | 10.4          | 7                    | NM_016789(refseq)    | chr5:145306756-145318347  |
| Syt9                                                                                            | synaptotagmin IX                                                                            | 66.9         | 6.2           | 10.7                 | NM_021889(refseq)::  | chr7:114514304-114692169  |
| Syt5                                                                                            | synaptotagmin V                                                                             | 66.5         | 3.8           | 17.3                 | NM_016908(refseq)::  | chr7:4491367-4498169      |
| Nptxr                                                                                           | neuronal pentraxin receptor                                                                 | 66.3         | 12.6          | 5.2                  | NM_030689(refseq)::  | chr15:79616781-79635139   |
| Nrsn1                                                                                           | neuroligin 1                                                                                | 65.4         | 11.5          | 5.6                  | NM_009513(refseq)    | chr13:25343908-25361865   |

|                                                                                                                    |                                                                                 |        |       |       |                      |                           |
|--------------------------------------------------------------------------------------------------------------------|---------------------------------------------------------------------------------|--------|-------|-------|----------------------|---------------------------|
| C1ql4                                                                                                              | complement component 1, q subcomponent-like 4                                   | 31.8   | 1.4   | 21.9  | NM_001024702(refseq) | chr15:98915185-98918159   |
| Syt16                                                                                                              | synaptotagmin XVI                                                               | 3.6    | 0.3   | 8.7   | uc007nww.1(ucsc)     | chr12:75098748-75368903   |
| <b>Transcription Factors, mRNA-binding proteins and Transcription Related and Splicing Factors</b>                 |                                                                                 |        |       |       |                      |                           |
| Prdm12                                                                                                             | PR domain zinc finger protein 12                                                | 136.4  | 21.8  | 6.2   | NM_001123362(refseq) | chr2:31495557-31511315    |
| Nbl1                                                                                                               | neuroblastoma, suppression of tumorigenicity 1                                  | 132.9  | 22.6  | 5.9   | NM_008675(refseq)::  | chr4:138638207-138648885  |
| Tshz2                                                                                                              | teashirt zinc finger family member 2                                            | 115.8  | 19.3  | 6     | NM_080455(refseq)    | chr2:169459146-169714004  |
| Ldb2                                                                                                               | LIM domain binding 2                                                            | 103.5  | 5     | 20.4  | NM_001077398(refseq) | chr5:44863372-45190946    |
| Carhsp1                                                                                                            | calcium regulated heat stable protein 1                                         | 66.7   | 7.9   | 8.3   | NM_025821(refseq)::  | chr16:8658680-8672246     |
| Fos                                                                                                                | FBJ osteosarcoma oncogene; cFos                                                 | 59.6   | 1.7   | 34.1  | NM_010234(refseq)::  | chr12:86814851-86818219   |
| Junb                                                                                                               | Jun-B oncogene                                                                  | 55.8   | 9.8   | 5.6   | uc009mop.1(ucsc)     | chr8:87498383-87502617    |
| Celf6                                                                                                              | bruno-like 6, RNA binding protein (Drosophila)                                  | 41.5   | 1.1   | 35.4  | NM_175235(refseq)::  | chr9:59426144-59455099    |
| Runx1                                                                                                              | run1 related transcription factor 1                                             | 35.2   | 2.4   | 14    | NM_001111023(refseq) | chr16:92601711-92697573   |
| Egr1                                                                                                               | early growth response 1; Krox-1; nerve growth factor-induced protein A          | 30     | 4.3   | 6.9   | NM_007913(refseq)::  | chr18:35020861-35024610   |
| Klf5                                                                                                               | Kruppel-like factor 5; basic transcription element-binding protein 2            | 27.5   | 3     | 8.9   | NM_009769(refseq)::  | chr14:99697910-99712628   |
| Pagr5                                                                                                              | progesterin and adipoQ receptor family member V                                 | 27.4   | 1     | 24.9  | NM_028748(refseq)::  | chr9:61801545-61874597    |
| Bex1                                                                                                               | brain expressed gene 1                                                          | 26.7   | 1     | 24.9  | NM_009052(refseq)::  | chrX:132748511-132750052  |
| Zfp36                                                                                                              | zinc finger protein 36                                                          | 21.7   | 3.4   | 6.2   | NM_011756(refseq)::  | chr7:29161803-29164247    |
| Myt1                                                                                                               | myelin transcription factor 1                                                   | 20.2   | 2.7   | 7.2   | NM_008665(refseq)    | chr2:181501734-181562480  |
| Zmat4                                                                                                              | zinc finger, matrin type 4                                                      | 17.1   | 3     | 5.6   | NM_177086(refseq)    | chr8:24780133-25173575    |
| Celf3                                                                                                              | trinucleotide repeat containing 4                                               | 16.2   | 2.2   | 7     | uc008agg.1(ucsc)     | chr3:94282753-94296115    |
| Samsn1                                                                                                             | SAM domain, SH3 domain and nuclear localization signals, 1                      | 14.5   | 2.4   | 5.8   | uc007zrt.1(ucsc)     | chr16:75859039-75953577   |
| Zcchc12                                                                                                            | zinc finger, CCHC domain containing 12                                          | 14     | 0.5   | 23.5  | NM_028325(refseq)    | chrX:33735899-33739153    |
| Fosb                                                                                                               | FBJ osteosarcoma oncogene B                                                     | 13.4   | 0.3   | 32.3  | NM_008036(refseq)::  | chr7:19888045-19895394    |
| Bex4                                                                                                               | brain expressed gene 4                                                          | 12.3   | 0.8   | 14.1  | NM_212457(refseq)    | chrX:132673584-132674974  |
| Btg2                                                                                                               | B-cell translocation gene 2, anti-proliferative                                 | 11.8   | 2     | 5.7   | NM_007570(refseq)::  | chr1:135971442-135975732  |
| Insm2                                                                                                              | insulinoma-associated 2                                                         | 11.7   | 1.6   | 7.1   | NM_020287(refseq)::  | chr12:56699904-56703004   |
| Prdm8                                                                                                              | PR domain containing 8                                                          | 10     | 1.9   | 5.2   | NM_029947(refseq)::  | chr5:98609888-98616467    |
| Grh13                                                                                                              | grainyhead-like 3 (Drosophila)                                                  | 7.3    | 0.7   | 8.7   | NM_001013756(refseq) | chr4:135097803-135129535  |
| Timeless                                                                                                           | timeless homolog (Drosophila)                                                   | 7.3    | 1.2   | 5.8   | NM_001136082(refseq) | chr10:127669119-127689988 |
| Insm1                                                                                                              | insulinoma-associated 1                                                         | 6.5    | 0.5   | 11.4  | NM_016889(refseq)    | chr2:146047733-146050752  |
| Irf6                                                                                                               | interferon regulatory factor 6                                                  | 6.4    | 0.2   | 22.6  | NM_016851(refseq)::  | chr1:194979306-194998229  |
| Trim14                                                                                                             | tripartite motif-containing 14                                                  | 6      | 1     | 5.7   | NM_029077(refseq)::  | chr4:46519719-46549016    |
| Zfp575                                                                                                             | zinc finger protein 575                                                         | 4.3    | 0.4   | 8.1   | NM_001033205(refseq) | chr7:25368857-25372660    |
| Bcl11a                                                                                                             | B-cell CLL/lymphoma 11A (zinc finger protein)                                   | 2.8    | 0.3   | 7.3   | NM_016707(refseq)    | chr11:23978056-24073558   |
| Neurog3                                                                                                            | neurogenin 3                                                                    | 2      | 0.1   | 10.5  | NM_009719(refseq)::  | chr10:61595838-61597511   |
| Ascl4                                                                                                              | achaete-scute domain homolog 4                                                  | 1.5    | 0     | 16    | NM_001163614(refseq) | chr10:85391236-85392392   |
| Smad1                                                                                                              | SET and MYND domain containing 1                                                | 1.4    | 0.2   | 5     | NM_001160127(refseq) | chr6:71163935-71212275    |
| Ovo12                                                                                                              | ovo-like 2 (Drosophila)                                                         | 1.3    | 0     | 14    | NM_026924(refseq)::  | chr2:144130912-144157816  |
| Dll3                                                                                                               | delta-like 3 (Drosophila)                                                       | 1.3    | 0.1   | 7     | NM_007866(refseq)::  | chr7:29078574-29086804    |
| Hes3                                                                                                               | hairy and enhancer of split 3 (Drosophila)                                      | 1.1    | 0     | 12    | NM_008237(refseq)::  | chr4:151660081-151665771  |
| Pax8                                                                                                               | paired box gene 8                                                               | 1.1    | 0.1   | 6     | NM_011040(refseq)::  | chr2:24276080-24331086    |
| Rpp25                                                                                                              | ribonuclease P 25 subunit (human)                                               | 2.8    | 0.5   | 5     | NM_133982(refseq)::  | chr9:57351909-57353254    |
| <b>Transporters, Trafficking and Interacting Proteins</b>                                                          |                                                                                 |        |       |       |                      |                           |
| Fxyd2                                                                                                              | FXD ion transport regulator 2; ATPase subunit gamma                             | 2196.7 | 252.1 | 8.7   | NM_007503(refseq)::  | chr9:45214160-45218361    |
| Aqp1                                                                                                               | aquaporin 1                                                                     | 152.6  | 21.9  | 6.9   | NM_007472(refseq)::  | chr6:55286293-55298549    |
| Atp2b4                                                                                                             | ATPase, Ca++ transporting, plasma membrane 4                                    | 18.5   | 2.1   | 8.4   | NM_213616(refseq)    | chr1:135600842-135600908  |
| Slc4a11                                                                                                            | solute carrier family 4, sodium bicarbonate transporter-like, member 11         | 15.8   | 2.2   | 6.8   | NM_001081162(refseq) | chr2:130509844-130523255  |
| Slc45a3                                                                                                            | solute carrier family 45, member 3                                              | 15.2   | 2.6   | 5.7   | uc007cnz.1(ucsc)     | chr1:133859544-133879541  |
| Slc37a1                                                                                                            | solute carrier family 37 (glycerol-3-phosphate transporter), member 1           | 10.1   | 1.9   | 5.2   | uc008bux.1(ucsc)     | chr17:31433164-31487643   |
| Slc10a6                                                                                                            | solute carrier family 10 (sodium/bile acid cotransporter family), member 6      | 9.2    | 0.5   | 15.5  | NM_029415(refseq)::  | chr5:104034730-104058422  |
| Slc17a8                                                                                                            | sodium-dependent inorganic phosphate cotransporter, member 8                    | 8.3    | 0.3   | 22.9  | NM_182959(refseq)    | chr10:89036765-89083994   |
| Slc16a12                                                                                                           | monocarboxylic acid transporters, member 12                                     | 6.3    | 0.5   | 10.6  | NM_172838(refseq)::  | chr19:34742896-34821601   |
| Slc47a2                                                                                                            | solute carrier family 47, member 2                                              | 3.7    | 0.5   | 6.1   | NM_001033542(refseq) | chr11:61115133-61156362   |
| Slc7a3                                                                                                             | solute carrier family 7 (cationic amino acid transporter, y+ system), member 3  | 3      | 0.3   | 7.8   | NM_007515(refseq)::  | chrX:98274560-98280691    |
| Osta                                                                                                               | organic solute transporter alpha                                                | 2.6    | 0.1   | 13.5  | NM_145932(refseq)::  | chr16:32475664-32487965   |
| Bcl2l14                                                                                                            | BCL2-like 14 (apoptosis facilitator)                                            | 2.5    | 0.2   | 8.7   | uc009ekj.1(ucsc)     | chr6:134364483-134388742  |
| Slc6a7                                                                                                             | solute carrier family 6 (neurotransmitter transporter, L-proline), member 7     | 1.8    | 0.2   | 6.3   | NM_201353(refseq)::  | chr18:61155034-61173853   |
| Slc5a7                                                                                                             | solute carrier family 5 (choline transporter), member 7                         | 1.3    | 0.1   | 7     | uc008czy.1(ucsc)     | chr17:54412915-54438359   |
| <b>Growth Factors, Matrix and Glycoproteins, Cell Adhesion, Semaphorins, and Cytokine Receptors and Modulators</b> |                                                                                 |        |       |       |                      |                           |
| Cd24a                                                                                                              | CD24a antigen; nectadrin                                                        | 924.2  | 83.6  | 11    | NM_009846(refseq)::  | chr10:43298975-43304071   |
| Egfl3                                                                                                              | fibroblast growth factor 13, microtubule regulation                             | 395.2  | 76.1  | 5.2   | NM_010200(refseq)::  | chrX:56315328-56387613    |
| Cd55                                                                                                               | CD55 antigen; complement decay-accelerating factor                              | 226.6  | 39.6  | 5.7   | NM_010016(refseq)::  | chr1:132335607-132359317  |
| sglgsf                                                                                                             | cell adhesion molecule 1; Cadml                                                 | 158.4  | 22.4  | 7     | uc009phm.1(ucsc)     | chr9:47338435-47597249    |
| Gfra2                                                                                                              | glial cell line neurotrophic factor family receptor alpha 2; neurturin receptor | 115.7  | 11.5  | 9.9   | NM_008115(refseq)::  | chr14:71289937-71379645   |
| Ly86                                                                                                               | lymphocyte antigen 86                                                           | 109.9  | 13.7  | 8     | NM_010745(refseq)    | chr13:37437214-37510904   |
| Cd44                                                                                                               | CD44 antigen; hyaluronate receptor                                              | 81.4   | 5.2   | 15.3  | NM_009851(refseq)::  | chr2:102651300-102741822  |
| Plxnc1                                                                                                             | plexin C1; semaphorin receptor                                                  | 77.6   | 10.3  | 7.4   | NM_018797(refseq)::  | chr10:94253612-94407212   |
| Gfra3                                                                                                              | glial cell line derived neurotrophic factor family receptor alpha 3             | 73.5   | 0.4   | 148.6 | NM_010280(refseq)    | chr18:34849557-34880041   |
| Stac1                                                                                                              | src homology three (SH3) and cysteine rich domain                               | 47.2   | 6.2   | 7.5   | NM_016853(refseq)::  | chr9:111463938-111592720  |
| Ccdc68                                                                                                             | cutaneous T-cell lymphoma-associated antigen                                    | 28     | 2.1   | 12.8  | NM_201362(refseq)::  | chr18:70085213-70129138   |
| Ggref1                                                                                                             | cell growth regulator with EF hand domain 1                                     | 24.9   | 4.7   | 5.2   | NM_026770(refseq)::  | chr5:31235516-31247853    |
| Osmr                                                                                                               | oncostatin M receptor                                                           | 23.6   | 1.8   | 12.8  | NM_011019(refseq)::  | chr15:6763577-6824313     |
| Il13ra                                                                                                             | interleukin 13 receptor A                                                       | 22     | 0.6   | 33.9  | uc007rwi.1(ucsc)     | chr13:113313016-113370870 |
| Socs3                                                                                                              | suppressor of cytokine signaling 3                                              | 14.6   | 2.2   | 6.5   | NM_007707(refseq)    | chr11:117827403-117830680 |
| Lrrc3                                                                                                              | leucine rich repeat containing 3                                                | 13.5   | 1.5   | 8.3   | NM_145152(refseq)::  | chr10:77360320-77365281   |
| Ceacam10                                                                                                           | carcinoembryonic antigen-related cell adhesion molecule 10                      | 13.1   | 0.2   | 51.8  | NM_007675(refseq)    | chr7:25562223-25569672    |
| Nxph3                                                                                                              | neurexophilin 3                                                                 | 9.9    | 1.6   | 6     | NM_130858(refseq)::  | chr11:95371160-95375879   |
| Cdh9                                                                                                               | cadherin 9                                                                      | 8.5    | 0.5   | 13.3  | NM_009869(refseq)    | chr15:16707856-16786532   |
| Islr2                                                                                                              | immunoglobulin superfamily containing leucine-rich repeat 2                     | 6.3    | 0.7   | 8.4   | NM_001161541(refseq) | chr9:58044105-58052126    |
| Nel11                                                                                                              | NEL-like 1 (chicken)                                                            | 5.4    | 0.2   | 16.8  | NM_001037906(refseq) | chr7:57230720-58118659    |
| Plaur                                                                                                              | plasminogen activator, urokinase receptor                                       | 5.2    | 0.7   | 6.3   | NM_011113(refseq)::  | chr7:25247519-25260892    |
| Dkk1l1                                                                                                             | dickkopf-like 1                                                                 | 4.2    | 0.2   | 12.8  | NM_015789(refseq)::  | chr7:52462896-52467253    |
| Tnr                                                                                                                | tenascin R                                                                      | 4.2    | 0.3   | 10.1  | NM_022312(refseq)::  | chr1:161453900-161855053  |
| Otoa                                                                                                               | otoacoronin                                                                     | 3.6    | 0.3   | 9.3   | NM_139310(refseq)::  | chr7:128226952-128306603  |
| Bmp15                                                                                                              | bone morphogenetic protein 15                                                   | 3.2    | 0.1   | 18.1  | NM_009757(refseq)    | chrX:5891224-5897841      |
| Wnt11                                                                                                              | wingless-related MMTV integration site 11                                       | 2.4    | 0.1   | 12.5  | NM_009519(refseq)::  | chr7:105987355-106003257  |
| Lrrn4                                                                                                              | leucine rich repeat neuronal 4                                                  | 1.8    | 0.1   | 9.5   | NM_177303(refseq)::  | chr2:132694252-132706598  |
| Dcx                                                                                                                | doublecortin                                                                    | 1.8    | 0.2   | 6.3   | NM_001110223(refseq) | chrX:140290385-140367762  |
| Nxph4                                                                                                              | neurexophilin 4                                                                 | 1.8    | 0.1   | 9.5   | NM_183297(refseq)::  | chr10:126962529-126971615 |
| Secm1b                                                                                                             | secreted and transmembrane 1B; single pass transmembrane glycoprotein           | 1.6    | 0     | 17    | NM_026907(refseq)::  | chr11:120914737-120924883 |
| Cxcl1                                                                                                              | chemokine (C-X-C motif) ligand 1                                                | 1.5    | 0.2   | 5.3   | NM_008176(refseq)    | chr5:91320271-91322139    |
| Bmp8a                                                                                                              | bone morphogenetic protein 8a                                                   | 1.2    | 0     | 13    | NM_007558(refseq)::  | chr4:122989893-123020046  |
| <b>Membrane, Structural and Rho/Rac Proteins</b>                                                                   |                                                                                 |        |       |       |                      |                           |
| Tmem233                                                                                                            | transmembrane protein 45b                                                       | 461.8  | 55.5  | 8.3   | NM_001101546(refseq) | chr5:116490545-116533255  |
| Tmem45b                                                                                                            | transmembrane protein 45B                                                       | 178.1  | 6.6   | 26.8  | NM_144936(refseq)::  | chr9:31233781-31271823    |

|                                                                                                           |                                                                            |       |      |       |                        |                           |
|-----------------------------------------------------------------------------------------------------------|----------------------------------------------------------------------------|-------|------|-------|------------------------|---------------------------|
| Tubb2b                                                                                                    | tubulin, beta 2a                                                           | 254.2 | 37.1 | 6.8   | NM_023716(refseq)::    | chr13:34218877-34222223   |
| Rasgrp1                                                                                                   | RAS guanyl releasing protein 1                                             | 90.5  | 2.5  | 34.8  | NM_011246(refseq)::    | chr2:117105729-117168613  |
| Ctxn3                                                                                                     | cortexin 3                                                                 | 81.3  | 4.2  | 18.8  | NM_001134697(refseq):: | chr18:57628140-57637788   |
| Ctxn1                                                                                                     | cortexin 1                                                                 | 62.8  | 8.8  | 7.1   | NM_183315(refseq)::    | chr8:4257646-4259274      |
| Rarres1                                                                                                   | retinoic acid receptor responder (tazarotene induced) 1                    | 60.1  | 9.1  | 6.5   | NM_001164763(refseq):: | chr3:67282808-67319445    |
| Rasgrp                                                                                                    | RAS guanyl releasing protein 1                                             | 51.1  | 1.5  | 31.8  | uc0081rm.1(ucsc)       | chr2:117123829-117127757  |
| Cpne2                                                                                                     | copine II                                                                  | 48.5  | 7.2  | 6.7   | NM_153507(refseq)::    | chr8:97056928-97094429    |
| Nrn1l                                                                                                     | neuritin 1-like, Cpg15-2                                                   | 46.2  | 6.7  | 6.8   | NM_175024(refseq)::    | chr8:108417470-108418915  |
| Tmem158                                                                                                   | transmembrane protein 158                                                  | 45.7  | 2.1  | 20.8  | NM_001002267(refseq):: | chr9:123168175-123169907  |
| Rab27b                                                                                                    | RAB27b, member RAS oncogene family                                         | 22.6  | 4.4  | 5.1   | NM_030554(refseq)::    | chr18:70138785-70213023   |
| Arhgap26                                                                                                  | Rho GTPase activating protein 26                                           | 21.6  | 3.4  | 6.3   | NM_175164(refseq)::    | chr18:39152799-39535939   |
| Hspalb                                                                                                    | 70kDa heat shock protein 1B; chaperone protein                             | 16.8  | 3    | 5.4   | NM_010478(refseq)::    | chr17:35093374-35096183   |
| Ms4a3                                                                                                     | membrane-spanning 4-domains, subfamily A, member 3                         | 6.6   | 0.7  | 8.3   | uc008gsr.1(ucsc)       | chr19:11706392-11715324   |
| Plek2                                                                                                     | pleckstrin 2                                                               | 4.4   | 0.7  | 5.6   | NM_013738(refseq)::    | chr12:79989684-800027925  |
| Krt27                                                                                                     | keratin 27                                                                 | 3.6   | 0.5  | 6.3   | NM_010666(refseq)::    | chr11:99206880-99212408   |
| Cpne5                                                                                                     | copine V                                                                   | 3.1   | 0.3  | 8.9   | NM_153166(refseq)::    | chr17:29293466-29374735   |
| Prrt4                                                                                                     | proline-rich transmembrane protein 4                                       | 2.3   | 0.2  | 8     | NM_001101443(refseq):: | chr6:29119230-29129584    |
| Eyst3                                                                                                     | family with sequence similarity 62 (C2 domain containing), member C        | 2.2   | 0.3  | 5.8   | NM_177775(refseq)::    | chr9:99210386-992258949   |
| <b>Kinases, Phosphatases, Proteases, Mmps, Phosphodiesterases and Other Enzymes and Enzyme inhibitors</b> |                                                                            |       |      |       |                        |                           |
| Lxn                                                                                                       | latexin; endogenous carboxypeptidase inhibitor                             | 328.5 | 66.3 | 5     | NM_016753(refseq)::    | chr3:67261921-67267829    |
| Prkcd                                                                                                     | protein kinase C, delta                                                    | 224.8 | 24.4 | 9.2   | NM_011103(refseq)::    | chr14:31408555-31423498   |
| Acpp                                                                                                      | acid phosphatase, prostate; PAP                                            | 207.6 | 13.2 | 15.6  | NM_207668(refseq)::    | chr9:104190570-10420052   |
| Plcb3                                                                                                     | phospholipase C, beta 3                                                    | 202.2 | 28.4 | 7.1   | NM_008874(refseq)::    | chr19:7028203-7044242     |
| Dusp26                                                                                                    | MAP kinase phosphatase 8                                                   | 169.3 | 14.4 | 11.6  | NM_025869(refseq)::    | chr8:32200134-32207519    |
| Th                                                                                                        | tyrosine 3-hydroxylase                                                     | 142.8 | 1.3  | 103.7 | NM_009377(refseq)::    | chr7:150078681-150085871  |
| Dgkh                                                                                                      | diacylglycerol kinase, eta                                                 | 91.9  | 12.3 | 7.4   | uc007usn.1(ucsc)       | chr14:78964916-7904258    |
| Gpx3                                                                                                      | glutathione peroxidase 3                                                   | 90.6  | 6.9  | 13    | NM_001083929(refseq):: | chr11:54716355-54723889   |
| Camk2a                                                                                                    | calcium/calmodulin-dependent protein kinase II alpha                       | 79.7  | 9    | 8.8   | NM_177407(refseq)::    | chr18:61085286-61147806   |
| Ppp1r1a                                                                                                   | protein phosphatase 1, regulatory (inhibitor) subunit 1A                   | 51.3  | 7.3  | 7     | NM_021391(refseq)::    | chr15:103360710-103368423 |
| Hs6st2                                                                                                    | heparan sulfate 6-O-sulfotransferase 2                                     | 42.8  | 6.4  | 6.6   | NM_001077202(refseq):: | chrX:48740389-49034779    |
| Prkcg                                                                                                     | protein kinase C, theta                                                    | 40.3  | 3.1  | 12.7  | NM_008859(refseq)::    | chr2:11094009-11222853    |
| Mmp25                                                                                                     | matrix metalloproteinase 25                                                | 36.7  | 4.1  | 8.6   | NM_001033339(refseq):: | chr17:2376425-23782236    |
| A3galt2                                                                                                   | alpha 1,3-galactosyltransferase 2 (isoglobotriaosylceramide synthase)      | 33.5  | 2    | 15.7  | NM_001009819(refseq):: | chr4:128436502-128446542  |
| Dgki                                                                                                      | diacylglycerol kinase, iota                                                | 28.9  | 5.5  | 5.2   | NM_001081206(refseq):: | chr6:36796022-37249976    |
| Plcx3                                                                                                     | phosphatidylinositol-specific phospholipase C, X domain containing 3       | 25    | 4.3  | 5.7   | NM_177355(refseq)::    | chr15:4325491-4525579     |
| Dgkg                                                                                                      | diacylglycerol kinase, gamma                                               | 23.6  | 2.8  | 8.3   | NM_138650(refseq)::    | chr16:22466642-22657304   |
| Ang                                                                                                       | angiogenin, ribonuclease, RNase A family, 5                                | 22.4  | 3.6  | 6.1   | NM_001161731(refseq):: | chr14:51710752-51721682   |
| Nt5e                                                                                                      | 5' nucleotidase, ecto                                                      | 20.2  | 1.8  | 10.8  | NM_011851(refseq)::    | chr9:88222447-88266927    |
| Moxd1                                                                                                     | monooxygenase, DBH-like 1                                                  | 19.1  | 3.7  | 5.1   | NM_021509(refseq)::    | chr10:23943323-24022589   |
| Assl                                                                                                      | argininosuccinate synthetase 1                                             | 17.8  | 2.6  | 6.7   | NM_007494(refseq)::    | chr2:31325790-31376190    |
| Pdella                                                                                                    | phosphodiesterase 11A                                                      | 17.5  | 1.5  | 11    | NM_001081033(refseq):: | chr2:75829189-76176710    |
| Ptprt                                                                                                     | protein tyrosine phosphatase, receptor type, T                             | 15.2  | 2.8  | 5.3   | uc008nrx.1(ucsc)       | chr2:161353359-162486883  |
| Cyp4f39                                                                                                   | cytochrome P450, family 4, subfamily F, polypeptide 39                     | 14.6  | 1.3  | 10.4  | NM_177307(refseq)::    | chr17:32589668-32630265   |
| St6galnac5                                                                                                | ST6-N-acetylgalactosaminide alpha-2,6-sialyltransferase 5                  | 13.6  | 1.4  | 8.9   | NM_012028(refseq)::    | chr3:152483674-152645171  |
| Cyp2j12                                                                                                   | cytochrome P450, family 2, subfamily J, polypeptide 12                     | 12.9  | 0.5  | 21.2  | NM_001100182(refseq):: | chr4:95766334-95807733    |
| Zdhhc12                                                                                                   | Probable palmitoyltransferase ZDHHC12                                      | 10.9  | 2    | 5.2   | NM_025428(refseq)::    | chr2:29946464-29949155    |
| Pde4c                                                                                                     | phosphodiesterase 4C, cAMP specific                                        | 9.4   | 0.4  | 19.8  | uc009mbh.1(ucsc)       | chr8:73247963-73275075    |
| Dapk2                                                                                                     | death-associated protein kinase 2                                          | 9.2   | 1    | 8.5   | NM_010019(refseq)::    | chr9:66006033-66120049    |
| Dnasell3                                                                                                  | deoxyribonuclease 1-like 3                                                 | 9.1   | 0.3  | 25.1  | NM_007870(refseq)::    | chr14:8797704-8826696     |
| Car8                                                                                                      | carbonic anhydrase 8                                                       | 7.9   | 0.1  | 45    | NM_007592(refseq)::    | chr4:8068640-8166188      |
| Capn9                                                                                                     | calpain 9                                                                  | 7.8   | 0.3  | 19    | NM_023709(refseq)::    | chr8:127100011-127142630  |
| Ppapdc1a                                                                                                  | phosphatidic acid phosphatase type 2 domain containing 1A                  | 7.6   | 1.4  | 5.2   | NM_001080963(refseq):: | chr7:136400608-136534821  |
| Wfdc2                                                                                                     | WAP four-disulfide core domain 2                                           | 6.6   | 0.1  | 34    | NM_026323(refseq)::    | chr2:164388216-164394006  |
| Stk32a                                                                                                    | serine/threonine kinase 32A                                                | 5.5   | 0.4  | 11    | NM_178749(refseq)::    | chr18:43367351-43477135   |
| Zdhhc23                                                                                                   | Probable palmitoyltransferase ZDHHC23                                      | 5     | 0.6  | 7.2   | uc007zgr.1(ucsc)       | chr16:43969259-43979901   |
| Tmprss11c                                                                                                 | transmembrane protease, serine 11c                                         | 4.6   | 0.2  | 16.5  | NM_001030297(refseq):: | chr5:86660506-86718333    |
| Gm5424                                                                                                    | argininosuccinate synthase pseudogene                                      | 4.4   | 0.8  | 5.3   | NR_002687(refseq)::    | chr10:61533770-61535319   |
| Cpn1                                                                                                      | carboxypeptidase N, polypeptide 1                                          | 4.3   | 0.7  | 5.6   | uc008hpa.1(ucsc)       | chr19:44030798-44061010   |
| St6gal2                                                                                                   | beta galactoside alpha 2,6 sialyltransferase 2                             | 4     | 0.5  | 6.6   | NM_172829(refseq)::    | chr17:55585015-55638524   |
| Dgkk                                                                                                      | diacylglycerol kinase kappa                                                | 3.9   | 0.1  | 25.1  | NM_177914(refseq)::    | chrX:6356432-6525489      |
| Ada                                                                                                       | adenosine deaminase                                                        | 3.9   | 0.5  | 6.5   | NM_007398(refseq)::    | chr2:163552320-163575913  |
| Rnf182                                                                                                    | E3 ubiquitin-protein ligase RNF182                                         | 3.9   | 0.7  | 5.1   | NM_183204(refseq)::    | chr13:43711166-43766312   |
| Mpped1                                                                                                    | metallophosphoesterase domain containing 1                                 | 3.7   | 0.3  | 9.1   | uc007abl.1(ucsc)       | chr15:83615259-83688904   |
| Fbp2                                                                                                      | fructose biphosphatase 2                                                   | 3.7   | 0.6  | 5.9   | NM_007994(refseq)::    | chr13:62938245-62959730   |
| Gad11                                                                                                     | glutamate decarboxylase-like 1                                             | 3.6   | 0.2  | 13.2  | NM_028638(refseq)::    | chr9:115818573-115985294  |
| Hal                                                                                                       | histidine ammonia lyase                                                    | 3.3   | 0.2  | 10.9  | NM_010401(refseq)::    | chr10:92951513-92979488   |
| Klk5                                                                                                      | kallikrein related-peptidase 5                                             | 3.1   | 0.1  | 17.9  | NM_026806(refseq)::    | chr7:51097639-51106551    |
| Serpina11                                                                                                 | serine (or cysteine) peptidase inhibitor, clade A, member 11               | 3.1   | 0.2  | 11.6  | NM_199314(refseq)::    | chr12:105218453-105238153 |
| Serpina1e                                                                                                 | serine (or cysteine) peptidase inhibitor, clade A, member 1E               | 2.7   | 0.1  | 14    | NM_009247(refseq)::    | chr12:105185142-105195107 |
| Klk8                                                                                                      | kallikrein related-peptidase 8                                             | 2.5   | 0.1  | 13    | NM_008940(refseq)::    | chr7:51052947-51059192    |
| Itk                                                                                                       | IL2-inducible T-cell kinase                                                | 2     | 0.2  | 7     | NM_010583(refseq)::    | chr11:46138652-46203017   |
| Ak4                                                                                                       | GTP:AMP phosphotransferase AK4                                             | 1.7   | 0.2  | 6     | NM_001177602(refseq):: | chr4:101091894-101140376  |
| <b>Incomplete Annotations</b>                                                                             |                                                                            |       |      |       |                        |                           |
| Samd14                                                                                                    | sterile alpha motif domain containing 14                                   | 103.9 | 17.2 | 6     | NM_146025(refseq)::    | chr11:94871193-94887401   |
| Fam89a                                                                                                    | family with sequence similarity 89, member A                               | 42.4  | 6.3  | 6.7   | NM_001081120(refseq):: | chr8:127264157-127275709  |
| Fam19a4                                                                                                   | family with sequence similarity 19 (chemokine (C-C motif)-like), member A4 | 36.7  | 3.3  | 11    | NM_177233(refseq)::    | chr6:96781203-97010405    |
| Bag2                                                                                                      | BCL2-associated athanogene 2                                               | 19.6  | 2.9  | 6.5   | NM_145392(refseq)::    | chr1:33802329-33814595    |
| Bves                                                                                                      | blood vessel epicardial substance; popeye domain containing 1              | 19.4  | 3.7  | 5.1   | NM_024285(refseq)::    | chr10:45055568-45089514   |
| Scin                                                                                                      | scinderin; adseverin                                                       | 10.6  | 1.3  | 7.4   | NM_001146196(refseq):: | chr12:40786360-40860815   |
| Igh                                                                                                       | immunoglobulin heavy chain complex                                         | 6.9   | 0.4  | 15    | uc007pgl.1(ucsc)       | chr12:114525498-114667344 |
| Ighg                                                                                                      | Immunoglobulin heavy chain (gamma polypeptide)                             | 6.9   | 0.4  | 13.6  | uc007pgm.1(ucsc)       | chr12:114525498-114668044 |
| Gm525                                                                                                     | Uncharacterized protein Clorf67 homolog                                    | 6.7   | 0.3  | 16.6  | NM_001033266(refseq):: | chr11:88935155-88954378   |
| Fam167a                                                                                                   | family with sequence similarity 167, member A                              | 4.9   | 0.3  | 13    | NM_177628(refseq)::    | chr14:64055231-64084339   |
| Card11                                                                                                    | caspace recruitment domain family, member 11                               | 4.7   | 0.7  | 6.2   | NM_175362(refseq)::    | chr5:141348953-141476550  |
| Cmtm8                                                                                                     | CKLF-like MARVEL transmembrane domain containing 8                         | 4.1   | 0.7  | 5.4   | NM_027294(refseq)::    | chr9:114698463-114753270  |
| T2                                                                                                        | brachyury 2                                                                | 4     | 0.2  | 15.8  | NM_001161832(refseq):: | chr17:8565261-8615589     |
| Rspo4                                                                                                     | R-spondin 4                                                                | 3.7   | 0.2  | 14.3  | NM_001040689(refseq):: | chr2:151668663-151700404  |
| Fgg                                                                                                       | fibrinogen gamma chain                                                     | 3.5   | 0.1  | 17.3  | uc008ppd.1(ucsc)       | chr3:82811818-82818627    |
| Tnfaip813                                                                                                 | tumor necrosis factor, alpha-induced protein 8-like 3                      | 2.6   | 0.2  | 9     | NM_001033535(refseq):: | chr9:53873413-53916218    |
| Sh2d4a                                                                                                    | SH2 domain containing 4A                                                   | 2     | 0.3  | 5.3   | NM_028182(refseq)::    | chr8:70800427-70871603    |
| Lrrc10b                                                                                                   | predicted gene 705                                                         | 1.4   | 0.1  | 7.5   | NM_001111140(refseq):: | chr19:10530579-10531937   |
| Ttc29                                                                                                     | tetratricopeptide repeat domain 29                                         | 1.4   | 0.2  | 5     | NM_183096(refseq)::    | chr8:80737241-80918224    |
| Gm7325                                                                                                    | predicted gene 7325                                                        | 1.2   | 0.1  | 6.5   | NM_001177468(refseq):: | chr17:45737916-45739016   |
| Nccrpl                                                                                                    | non-specific cytotoxic cell receptor protein 1 homolog (zebrafish)         | 1.2   | 0.1  | 6.5   | NM_001081115(refseq):: | chr7:29328616-29332273    |
| Prr15l                                                                                                    | ATPase family, AAA domain containing 4                                     | 1.1   | 0.1  | 6     | NM_146026(refseq)::    | chr11:96790638-96796961   |



|      |                                   |     |     |   |                   |                          |
|------|-----------------------------------|-----|-----|---|-------------------|--------------------------|
| Pigr | polymeric immunoglobulin receptor | 1.1 | 0.1 | 6 | NM_011082(refseq) | chr1:132723261-132748824 |
|------|-----------------------------------|-----|-----|---|-------------------|--------------------------|

## Suppl. Table 4 All genes

| Gene ID   | Gene Symbol  | CPIP1<br>Read<br>Count | CPIP2<br>Read<br>Count | CPIP3<br>Read<br>Count | CPIP4<br>Read<br>Count | Sham1<br>Read<br>Count | Sham2<br>Read<br>Count | Sham3<br>Read<br>Count | Sham4<br>Read<br>Count |
|-----------|--------------|------------------------|------------------------|------------------------|------------------------|------------------------|------------------------|------------------------|------------------------|
| 317418    | Tsr2         | 0                      | 239.86                 | 470.02                 | 379.86                 | 0                      | 0.01                   | 0                      | 0                      |
| 100912618 | LOC100912618 | 0                      | 61.85                  | 0                      | 21.07                  | 0                      | 0                      | 0                      | 0.05                   |
| 100910581 | LOC100910581 | 119                    | 0                      | 65.54                  | 92                     | 0                      | 0                      | 0                      | 0                      |
| 300802    | Aph1b        | 0                      | 0                      | 121.81                 | 96.21                  | 0                      | 0                      | 0                      | 0                      |
| 103691556 | LOC103691556 | 0                      | 3.78                   | 0                      | 272.78                 | 0                      | 1.25                   | 0                      | 0.17                   |
| 102550456 | LOC102550456 | 70.49                  | 0                      | 0                      | 0                      | 0                      | 0                      | 0                      | 0                      |
| 108349606 | LOC108349606 | 0                      | 32.58                  | 0                      | 18.99                  | 0                      | 0                      | 0                      | 0                      |
| 100909868 | LOC100909868 | 2                      | 0                      | 1                      | 0                      | 0                      | 0                      | 0.03                   | 0                      |
| 100911233 | LOC100911233 | 0                      | 13.86                  | 20.69                  | 8.1                    | 0                      | 0                      | 0                      | 0                      |
| 100912399 | LOC100912399 | 13.04                  | 9.9                    | 18.72                  | 0                      | 0                      | 0                      | 0                      | 0                      |
| 684969    | Potef        | 0                      | 0                      | 17.74                  | 21.2                   | 0                      | 0                      | 0                      | 0                      |
| 100910616 | Hmgn5        | 0                      | 11.41                  | 15.97                  | 3.96                   | 0                      | 0                      | 0                      | 0                      |
| 108348106 | LOC108348106 | 0                      | 0                      | 23.96                  | 0                      | 0                      | 0                      | 0                      | 0                      |
| 100909795 | LOC100909795 | 0                      | 0                      | 0                      | 22.59                  | 0                      | 0                      | 0                      | 0                      |
| 100911564 | LOC100911564 | 5.9                    | 10.35                  | 4.76                   | 0                      | 0                      | 0                      | 0                      | 0                      |
| 100361265 | LOC100361265 | 20.33                  | 14.16                  | 0.97                   | 4                      | 1                      | 0                      | 0                      | 0                      |
| 690146    | RGD1584023   | 10.05                  | 0                      | 5.98                   | 0                      | 0                      | 0                      | 0                      | 0                      |
| 297402    | RGD1560795   | 7.78                   | 0                      | 7.84                   | 0                      | 0                      | 0                      | 0                      | 0                      |
| 102552708 | LOC102552708 | 6.88                   | 4.82                   | 2.97                   | 0                      | 0                      | 0                      | 0                      | 0                      |
| 100911713 | LOC100911713 | 0                      | 0                      | 0                      | 13.36                  | 0                      | 0                      | 0                      | 0                      |
| 100911814 | LOC100911814 | 3.85                   | 0                      | 0                      | 8.37                   | 0                      | 0                      | 0                      | 0                      |
| 207119    | Rin1         | 0.88                   | 0                      | 10.14                  | 0.88                   | 0                      | 0                      | 0                      | 0                      |
| 24421     | Gstal        | 0                      | 0                      | 11.68                  | 0                      | 0                      | 0                      | 0                      | 0                      |
| 100910240 | LOC100910240 | 0                      | 8.28                   | 0                      | 3.22                   | 0                      | 0                      | 0                      | 0                      |
| 81828     | Zp2          | 0                      | 1                      | 0                      | 21                     | 0                      | 1                      | 0                      | 0                      |
| 100911804 | LOC100911804 | 6                      | 1.94                   | 0.64                   | 1                      | 0                      | 0                      | 0                      | 0                      |
| 100912489 | LOC100912489 | 6.91                   | 0                      | 0                      | 0.91                   | 0.41                   | 0                      | 0                      | 0                      |
| 100912564 | LOC100912564 | 6.91                   | 0                      | 0                      | 0.91                   | 0.41                   | 0                      | 0                      | 0                      |
| 502913    | Hist2h4a     | 6.91                   | 0                      | 0                      | 0.91                   | 0.41                   | 0                      | 0                      | 0                      |
| 100361850 | LOC100361850 | 9                      | 0                      | 0                      | 0                      | 0                      | 0                      | 0                      | 0                      |
| 100909964 | LOC100909964 | 0                      | 9                      | 0                      | 0                      | 0                      | 0                      | 0                      | 0                      |
| 103692699 | LOC103692699 | 2                      | 1                      | 4                      | 2                      | 0                      | 0                      | 0                      | 0                      |
| 103694404 | LOC103694404 | 0                      | 2.38                   | 2.41                   | 3.78                   | 0                      | 0                      | 0                      | 0                      |
| 108348231 | LOC108348231 | 3.92                   | 2.12                   | 0                      | 2                      | 0                      | 0                      | 0                      | 0                      |
| 498911    | Mt4          | 1                      | 2                      | 2                      | 3                      | 0                      | 0                      | 0                      | 0                      |
| 108351339 | LOC108351339 | 5.96                   | 0                      | 0                      | 2.01                   | 0                      | 0                      | 0                      | 0                      |
| 364991    | Slc25a36l1   | 0                      | 28.43                  | 17.21                  | 0                      | 0                      | 0                      | 2.92                   | 0                      |
| 103691102 | C1H19orf84   | 1                      | 2                      | 1                      | 3                      | 0                      | 0                      | 0                      | 0                      |
| 24346     | Ces1c        | 0                      | 1                      | 5                      | 1                      | 0                      | 0                      | 0                      | 0                      |
| 362629    | Il22ra1      | 0                      | 2                      | 2                      | 3                      | 0                      | 0                      | 0                      | 0                      |
| 685849    | LOC685849    | 1                      | 1                      | 2                      | 3                      | 0                      | 0                      | 0                      | 0                      |
| 24856     | Ttr          | 31                     | 2                      | 35                     | 1                      | 3                      | 1                      | 1                      | 0                      |
| 300054    | Foxh1        | 0                      | 2.43                   | 1.16                   | 2.45                   | 0                      | 0                      | 0                      | 0                      |
| 114105    | Cxc12        | 0                      | 0                      | 0                      | 6                      | 0                      | 0                      | 0                      | 0                      |
| 25110     | Klrd1        | 4                      | 2                      | 3                      | 3                      | 1                      | 0                      | 0                      | 0                      |
| 103691013 | LOC103691013 | 0                      | 2                      | 1.93                   | 2.06                   | 0                      | 0                      | 0                      | 0                      |
| 679149    | LOC679149    | 9.74                   | 2                      | 10.01                  | 1                      | 1                      | 1                      | 0                      | 0                      |
| 108348195 | LOC108348195 | 1.33                   | 2.94                   | 1.36                   | 0                      | 0                      | 0                      | 0                      | 0                      |
| 103690061 | LOC103690061 | 0                      | 1.33                   | 0                      | 4.23                   | 0                      | 0                      | 0                      | 0                      |

|           |              |       |       |        |       |       |       |       |       |
|-----------|--------------|-------|-------|--------|-------|-------|-------|-------|-------|
| 260324    | Ly49i2       | 1     | 1.4   | 3      | 0     | 0     | 0     | 0     | 0     |
| 689484    | Frg111       | 4.06  | 0     | 0      | 0     | 0     | 0.38  | 0     | 0     |
| 100910107 | LOC100910107 | 2.14  | 2.14  | 1      | 0     | 0     | 0     | 0     | 0     |
| 102551539 | LOC102551539 | 0     | 0     | 0      | 12.3  | 1.2   | 0     | 0     | 0     |
| 286914    | Vom2r27      | 1.03  | 1.98  | 2      | 4.99  | 0     | 0     | 0.99  | 0     |
| 100912038 | LOC100912038 | 3     | 2.03  | 0      | 0     | 0     | 0     | 0     | 0     |
| 102552324 | LOC102552324 | 1     | 2     | 1      | 1     | 0     | 0     | 0     | 0     |
| 24620     | Reg3g        | 0     | 0     | 5      | 0     | 0     | 0     | 0     | 0     |
| 24933     | Klra22       | 2     | 1     | 1      | 1     | 0     | 0     | 0     | 0     |
| 299279    | RGD1565462   | 0     | 1     | 1      | 3     | 0     | 0     | 0     | 0     |
| 305840    | Rnase10      | 1     | 0     | 0      | 4     | 0     | 0     | 0     | 0     |
| 366568    | Slc30a3      | 4     | 0     | 5      | 1     | 0     | 0     | 1     | 0     |
| 494210    | Ly49i7       | 0     | 1     | 3      | 1     | 0     | 0     | 0     | 0     |
| 503651    | Klri1        | 3     | 1     | 1      | 5     | 0     | 1     | 0     | 0     |
| 300303    | LOC300303    | 2.97  | 0     | 0      | 0     | 0     | 0     | 0.26  | 0.05  |
| 500338    | Klrc3        | 6.53  | 5     | 2      | 5     | 0     | 1     | 1     | 0     |
| 60333     | Msln         | 0     | 39    | 371    | 12    | 3     | 10    | 29    | 4     |
| 100912262 | LOC100912262 | 0     | 19.82 | 0      | 14.9  | 0     | 0     | 3.84  | 0     |
| 103692449 | LOC103692449 | 0.66  | 0     | 0.79   | 1.83  | 0     | 0     | 0     | 0.41  |
| 302964    | Bicd12       | 2     | 1     | 4      | 1     | 1     | 0     | 0     | 0     |
| 108352634 | LOC108352634 | 9.33  | 0.35  | 12.62  | 0.02  | 0.27  | 0.19  | 0.33  | 2.01  |
| 100911251 | LOC100911251 | 4     | 4     | 4      | 3     | 0     | 0     | 1     | 1     |
| 319105    | Taar8c       | 0     | 0     | 2      | 0     | 0     | 0.27  | 0     | 0     |
| 100912019 | LOC100912019 | 0     | 3.9   | 8.3    | 5.27  | 1.57  | 0     | 0     | 0.8   |
| 289926    | RGD1565725   | 0     | 3     | 3      | 1     | 0     | 1     | 0     | 0     |
| 294197    | Olr1743      | 1     | 2     | 2      | 2     | 0     | 0     | 1     | 0     |
| 498109    | Polr2h       | 47.42 | 154   | 107.59 | 167   | 0     | 25.42 | 51.42 | 0     |
| 295041    | Stoml3       | 4.89  | 3.86  | 23.2   | 6     | 0     | 1.01  | 2.04  | 3.11  |
| 100909830 | LOC100909830 | 16.08 | 0     | 10.72  | 5.36  | 5.36  | 0     | 0     | 0     |
| 100911818 | LOC100911818 | 1     | 0     | 3      | 2     | 0     | 1     | 0     | 0     |
| 29680     | Cyp11a1      | 3     | 0     | 1      | 2     | 0     | 1     | 0     | 0     |
| 364680    | Barx1        | 1     | 3     | 0      | 2     | 0     | 0     | 1     | 0     |
| 366035    | Wdr38        | 1     | 2     | 3      | 0     | 0     | 0     | 0     | 1     |
| 367944    | Zic3         | 2     | 1     | 1      | 2     | 0     | 0     | 0     | 1     |
| 100364561 | LOC100364561 | 0     | 4.02  | 0      | 2.01  | 1.01  | 0     | 0     | 0     |
| 293347    | Gvinp1       | 1.31  | 3.21  | 3      | 0     | 1.26  | 0     | 0     | 0     |
| 100909439 | LOC100909439 | 10.79 | 0     | 0      | 5.06  | 0     | 0     | 0     | 2.68  |
| 100911156 | LOC100911156 | 0     | 0     | 2.76   | 0     | 0.5   | 0     | 0     | 0     |
| 304954    | Uap112       | 9.56  | 24.79 | 5.52   | 24.76 | 0     | 0     | 0     | 11.74 |
| 315294    | Wnt10b       | 2     | 2     | 18     | 0     | 1     | 2     | 1     | 0     |
| 100910678 | LOC100910678 | 32.83 | 10    | 0      | 12.89 | 0     | 0     | 0     | 10.19 |
| 100360880 | Fosb         | 44    | 29    | 33     | 621   | 37    | 44    | 32    | 20    |
| 690082    | LOC690082    | 4.08  | 0     | 0      | 0     | 0     | 0     | 0     | 0.81  |
| 100365810 | LOC100365810 | 0     | 16.87 | 48.98  | 27.43 | 16.78 | 0.49  | 1.28  | 0     |
| 100362810 | LOC100362810 | 1     | 2     | 1      | 1     | 0     | 1     | 0     | 0     |
| 171371    | Xcl1         | 3     | 1     | 0      | 1     | 0     | 0     | 1     | 0     |
| 289250    | Olr1588      | 1     | 0     | 1      | 3     | 0     | 0     | 0     | 1     |
| 29531     | Hpd          | 1     | 0     | 3      | 1     | 0     | 1     | 0     | 0     |
| 297698    | Erp27        | 5     | 0     | 0      | 0     | 0     | 1     | 0     | 0     |
| 300458    | Npsr1        | 1     | 0     | 1      | 3     | 1     | 0     | 0     | 0     |
| 305999    | Nkx3-1       | 1     | 2     | 0      | 2     | 0     | 0     | 1     | 0     |
| 307556    | Ccdc178      | 0     | 0     | 2      | 3     | 1     | 0     | 0     | 0     |
| 361342    | Cplx4        | 3     | 1     | 0      | 1     | 1     | 0     | 0     | 0     |
| 83790     | Cyp2c23      | 0     | 2     | 0      | 3     | 0     | 0     | 0     | 1     |
| 299656    | RGD1560291   | 1     | 2.84  | 4      | 4     | 0     | 0     | 2.39  | 0     |
| 108349682 | LOC108349682 | 0     | 70.6  | 72.25  | 36.12 | 36.13 | 0     | 0     | 0     |

|           |              |        |        |        |        |      |      |      |        |
|-----------|--------------|--------|--------|--------|--------|------|------|------|--------|
| 100911168 | LOC100911168 | 0      | 6.31   | 15.23  | 13.4   | 3.04 | 0    | 0    | 4.09   |
| 502301    | Vom2r36      | 1      | 3      | 0      | 0.82   | 0    | 1    | 0    | 0      |
| 100909443 | LOC100909443 | 0      | 2.62   | 0      | 6.25   | 1.87 | 0    | 0    | 0      |
| 499322    | Fam111a      | 37     | 32     | 50     | 542    | 35   | 39   | 36   | 31     |
| 25453     | Gdnf         | 1      | 4      | 20     | 3      | 0    | 1    | 3    | 2      |
| 108350810 | LOC108350810 | 0      | 0      | 3      | 1.65   | 0    | 1    | 0    | 0      |
| 100912070 | LOC100912070 | 0      | 5.04   | 13.5   | 1.75   | 0.63 | 1.18 | 2.58 | 0      |
| 406159    | Btnl7        | 2      | 1.45   | 1      | 2      | 0    | 0    | 1.4  | 0      |
| 494206    | Ly49sil      | 51.29  | 2.1    | 7.46   | 9.5    | 3.61 | 1.17 | 4.4  | 6.18   |
| 102553785 | LOC102553785 | 7.67   | 2.84   | 3.03   | 0      | 0    | 0    | 1    | 2      |
| 499886    | LOC499886    | 4.64   | 3.71   | 0      | 3.31   | 1.51 | 0    | 1.08 | 0      |
| 29183     | Areg         | 4      | 1      | 2      | 2      | 1    | 0    | 1    | 0      |
| 29683     | Klrc1        | 2.47   | 0      | 2      | 0      | 0    | 0    | 1    | 0      |
| 100911728 | LOC100911728 | 2.65   | 1.16   | 1.22   | 1.68   | 0    | 0    | 0    | 1.51   |
| 360649    | RGD1359290   | 372.23 | 159.41 | 151.03 | 128.78 | 0    | 1.36 | 0    | 183.14 |
| 287562    | Ccl12        | 9      | 6      | 7      | 4      | 1    | 2    | 0    | 3      |
| 501741    | RGD1565046   | 2.12   | 6.15   | 7.2    | 3.48   | 0    | 2.41 | 1.98 | 0      |
| 292918    | Otog         | 5.24   | 0      | 1      | 2.01   | 0.04 | 1.15 | 0.73 | 0      |
| 290209    | LOC290209    | 2.08   | 3      | 1.47   | 3.79   | 1.18 | 0    | 0    | 1.24   |
| 103690198 | LOC103690198 | 3.91   | 2.9    | 2.99   | 6.9    | 1.56 | 1.99 | 0.38 | 0      |
| 690784    | LOC690784    | 1.03   | 1      | 1.03   | 1.16   | 0    | 1    | 0    | 0      |
| 103690084 | LOC103690084 | 1.08   | 2.2    | 7.5    | 7.61   | 0    | 1.09 | 2.17 | 1.1    |
| 304197    | RGD1564571   | 1      | 3      | 12     | 5      | 0    | 1    | 4    | 0      |
| 100360950 | LOC100360950 | 0      | 2.14   | 4.61   | 2.15   | 1.24 | 0    | 0.89 | 0      |
| 102549227 | LOC102549227 | 0      | 2.4    | 2.13   | 0      | 0    | 0    | 0    | 1.09   |
| 116637    | Ccl14        | 8      | 3.33   | 4      | 5      | 0    | 0    | 1    | 4      |
| 100909671 | LOC100909671 | 0      | 2.52   | 2.39   | 0      | 0    | 0    | 0    | 1.21   |
| 102550845 | LOC102550845 | 0      | 0      | 1.45   | 4.23   | 0    | 0    | 0    | 1.41   |
| 302676    | RGD1564836   | 0      | 2.01   | 1      | 1      | 0    | 1    | 0    | 0      |
| 100359930 | LOC100359930 | 0      | 1      | 0      | 3      | 0    | 1    | 0    | 0      |
| 102551168 | LOC102551168 | 2      | 0      | 1      | 1      | 1    | 0    | 0    | 0      |
| 102557108 | LOC102557108 | 1      | 3      | 1      | 3      | 1    | 0    | 1    | 0      |
| 103692315 | LOC103692315 | 2      | 1      | 3      | 2      | 0    | 1    | 1    | 0      |
| 103694885 | LOC103694885 | 1      | 2      | 0      | 1      | 0    | 0    | 1    | 0      |
| 108348236 | LOC108348236 | 0      | 1      | 1      | 2      | 0    | 0    | 1    | 0      |
| 108353019 | LOC108353019 | 1      | 0      | 3      | 0      | 0    | 0    | 0    | 1      |
| 287480    | Olr1466      | 1      | 2      | 1      | 0      | 0    | 1    | 0    | 0      |
| 294196    | Olr1742      | 3      | 0      | 1      | 0      | 0    | 0    | 1    | 0      |
| 297894    | Matn1        | 1      | 0      | 1      | 2      | 0    | 0    | 0    | 1      |
| 303817    | RGD1560559   | 3      | 0      | 0      | 1      | 0    | 1    | 0    | 0      |
| 306307    | Rgr          | 0      | 1      | 2      | 1      | 0    | 0    | 1    | 0      |
| 309583    | Olr1733      | 1      | 1      | 0      | 0      | 0    | 0.5  | 0    | 0      |
| 315451    | Muc16        | 0      | 2      | 1      | 1      | 0    | 1    | 0    | 0      |
| 367032    | Olr1193      | 0      | 7      | 1      | 0      | 0.5  | 1    | 0    | 0.5    |
| 405142    | Olr804       | 1      | 3      | 0      | 0      | 0    | 1    | 0    | 0      |
| 499660    | Sprrla       | 0      | 2      | 2      | 0      | 1    | 0    | 0    | 0      |
| 500245    | Bmp10        | 3      | 1      | 0      | 0      | 0    | 0    | 1    | 0      |
| 500359    | RGD1561551   | 2      | 1      | 0      | 1      | 0    | 1    | 0    | 0      |
| 501177    | Gpr55        | 2      | 7      | 1      | 2      | 1    | 0    | 1    | 1      |
| 64573     | Trpc2        | 2      | 0      | 1      | 1      | 0    | 1    | 0    | 0      |
| 680315    | Fsip2        | 0      | 1      | 2      | 1      | 1    | 0    | 0    | 0      |
| 680523    | Tmem236      | 2      | 3      | 4      | 3      | 1    | 1    | 0    | 1      |
| 682837    | Muc5ac       | 0      | 2      | 2      | 0      | 0    | 0    | 1    | 0      |
| 686106    | Ccdc144b     | 1      | 2      | 1      | 0      | 0    | 1    | 0    | 0      |
| 103694586 | LOC103694586 | 0      | 4.68   | 21.75  | 0      | 0    | 0.31 | 6.31 | 0      |
| 102553148 | Cfap58       | 0      | 0      | 1.48   | 0.5    | 0    | 0.5  | 0    | 0      |

|           |              |        |        |        |        |       |       |       |       |
|-----------|--------------|--------|--------|--------|--------|-------|-------|-------|-------|
| 309467    | Ccdc147      | 0      | 0      | 1.48   | 0.5    | 0     | 0.5   | 0     | 0     |
| 362935    | Ly6al        | 2      | 1.03   | 1      | 0      | 0     | 1.02  | 0     | 0     |
| 103690008 | LOC103690008 | 0      | 1.97   | 4.16   | 10.07  | 2.41  | 0     | 1.87  | 0     |
| 100910308 | LOC100910308 | 125.14 | 238.42 | 200.84 | 172.79 | 0     | 100.3 | 94.96 | 0     |
| 494207    | Ly49si2      | 5.52   | 5.77   | 16.49  | 6.61   | 0     | 4.77  | 1.72  | 2.66  |
| 100910243 | LOC100910243 | 0.15   | 0      | 1.64   | 1.02   | 0.75  | 0     | 0     | 0     |
| 54242     | Cpa3         | 10     | 57     | 199    | 32     | 21    | 14    | 34    | 11    |
| 108351097 | LOC108351097 | 173.69 | 133.17 | 3013.9 | 146.25 | 254.8 | 441.1 | 152   | 92.38 |
| 303886    | Muc20        | 6      | 2      | 3      | 0      | 2     | 1     | 0     | 0     |
| 309225    | Olr337       | 1      | 4      | 4      | 2      | 0     | 0     | 2     | 1     |
| 103690049 | LOC103690049 | 2.29   | 0      | 5.7    | 1      | 0.93  | 0     | 1.53  | 0     |
| 681126    | Krt83        | 3      | 0      | 3.23   | 1      | 1     | 0     | 1     | 0     |
| 100910750 | LOC100910750 | 8.2    | 2.96   | 8.35   | 11.57  | 0     | 0     | 3.05  | 5.73  |
| 100909897 | LOC100909897 | 0      | 4      | 3.01   | 0      | 2     | 0     | 0     | 0     |
| 25305     | Cort         | 1      | 1      | 3      | 2      | 0     | 1     | 1     | 0     |
| 296846    | Hepacam2     | 4      | 2      | 0      | 1      | 0     | 1     | 0     | 1     |
| 100910095 | LOC100910095 | 0      | 0      | 1.01   | 1.01   | 0     | 0     | 0     | 0.58  |
| 690680    | Vom2r15      | 0      | 0      | 2.78   | 1      | 0     | 0     | 0     | 1.09  |
| 689790    | Clec2d11     | 3      | 8.83   | 32.18  | 4.94   | 0     | 5.12  | 3.3   | 5.71  |
| 100912499 | Lilra3       | 9.89   | 10.92  | 0      | 0      | 0     | 6.02  | 0     | 0     |
| 684526    | LOC684526    | 0      | 0      | 0      | 1.41   | 0.41  | 0     | 0     | 0     |
| 100912642 | LOC100912642 | 1      | 1      | 1      | 8.14   | 0     | 0     | 0     | 3.28  |
| 303782    | Vpreb1       | 4.52   | 4.52   | 12     | 4      | 4.88  | 0     | 0     | 2.53  |
| 192267    | Obplf        | 3.07   | 2      | 2      | 2.95   | 2     | 0     | 0     | 1     |
| 100912379 | LOC100912379 | 0      | 4.81   | 0      | 6.69   | 0     | 3.45  | 0     | 0     |
| 25680     | Clps         | 0      | 5      | 3      | 2      | 1     | 0     | 2     | 0     |
| 289515    | Epgn         | 4      | 1      | 5      | 0      | 0     | 1     | 2     | 0     |
| 29165     | Gzmk         | 4      | 1      | 2      | 3      | 1     | 1     | 0     | 1     |
| 310611    | Pglyrp4      | 1      | 4      | 4      | 1      | 0     | 1     | 1     | 1     |
| 502585    | Cd160        | 3      | 2      | 3      | 2      | 0     | 1     | 1     | 1     |
| 171118    | Ces2c        | 0      | 6      | 3.99   | 0      | 1     | 2     | 0     | 0     |
| 288398    | RGD1562451   | 0      | 0      | 1.98   | 2.59   | 0     | 1.38  | 0     | 0     |
| 24828     | Hist1h2aa    | 0      | 2.39   | 0.95   | 3.71   | 0     | 0     | 2.14  | 0     |
| 108352834 | LOC108352834 | 3      | 0      | 0      | 0.26   | 0     | 0     | 1     | 0     |
| 100910915 | LOC100910915 | 1.95   | 3.67   | 3.82   | 3.39   | 0     | 1.97  | 1.97  | 0     |
| 306748    | Cxcl14       | 53     | 183    | 508    | 33     | 33    | 126   | 55    | 26    |
| 497084    | Spetex-2B    | 0.52   | 0.11   | 1.6    | 0.6    | 0     | 0     | 0.89  | 0     |
| 365807    | Vom2r47      | 0      | 1.05   | 2.07   | 0.98   | 0     | 0     | 1.3   | 0     |
| 108348150 | LOC108348150 | 14.79  | 53.94  | 14.42  | 13.02  | 15.91 | 0     | 14.72 | 0     |
| 100910579 | LOC100910579 | 0      | 1.03   | 1.73   | 2.8    | 0     | 0     | 0     | 1.78  |
| 102556085 | LOC102556085 | 5.26   | 3.65   | 5.1    | 4.79   | 0     | 0     | 4.99  | 1.06  |
| 100911090 | LOC100911090 | 133.82 | 67     | 70.63  | 0      | 0.01  | 0     | 88.17 | 0     |
| 498067    | RGD1565472   | 10.92  | 7.01   | 5.61   | 8.91   | 3.75  | 3.21  | 3.6   | 0     |
| 292615    | Vom2r35      | 0      | 0      | 0.31   | 2.76   | 1     | 0     | 0     | 0     |
| 108348438 | LOC108348438 | 10.99  | 18.42  | 15.94  | 13.8   | 0     | 1     | 0     | 18.48 |
| 405976    | Olr1254      | 0      | 1      | 0      | 0      | 0     | 0.33  | 0     | 0     |
| 751812    | Ras12-9      | 1.09   | 0      | 0      | 2.17   | 0     | 1.08  | 0     | 0     |
| 103690165 | LOC103690165 | 0      | 1.3    | 1.29   | 1.29   | 0     | 0     | 1.29  | 0     |
| 498169    | RGD1561730   | 7.68   | 17.63  | 32.46  | 5.33   | 7.81  | 0     | 5.03  | 8.16  |
| 103689998 | Nupr111      | 10.05  | 0      | 0      | 20.11  | 0     | 10.05 | 0     | 0     |
| 100360197 | Rad51ap2     | 0      | 1      | 2      | 0      | 0     | 0     | 0     | 1     |
| 100365184 | Prdm14       | 1      | 2      | 0      | 0      | 1     | 0     | 0     | 0     |
| 100912573 | Ms4a6e       | 0      | 20.65  | 41.3   | 0      | 0     | 0     | 0     | 20.65 |
| 102552016 | LOC102552016 | 2      | 0      | 2      | 2      | 1     | 0     | 0     | 1     |
| 102553208 | LOC102553208 | 2      | 0      | 1      | 0      | 1     | 0     | 0     | 0     |
| 103690566 | LOC103690566 | 1      | 0      | 2      | 0      | 0     | 0     | 0     | 1     |

|           |              |        |       |       |       |      |       |      |       |
|-----------|--------------|--------|-------|-------|-------|------|-------|------|-------|
| 108349482 | LOC108349482 | 3      | 1     | 5     | 3     | 0    | 2     | 0    | 2     |
| 108349722 | LOC108349722 | 0      | 3     | 0     | 0     | 0    | 1     | 0    | 0     |
| 116562    | Ii2          | 2      | 1     | 0     | 0     | 1    | 0     | 0    | 0     |
| 246073    | Foxi2        | 1      | 0     | 1     | 1     | 0    | 0     | 0    | 1     |
| 24835     | Tnf          | 0      | 3     | 5     | 10    | 0    | 0     | 2    | 4     |
| 25569     | Trh          | 0      | 2     | 1     | 0     | 1    | 0     | 0    | 0     |
| 25593     | Hcrtr1       | 3      | 1     | 3     | 5     | 0    | 0     | 4    | 0     |
| 266708    | Gzma         | 1      | 0     | 2     | 0     | 0    | 1     | 0    | 0     |
| 288602    | Ervfrd-1     | 0      | 4     | 2     | 3     | 2    | 1     | 0    | 0     |
| 290227    | Rec8         | 1      | 0     | 2     | 3     | 0    | 1     | 0    | 1     |
| 290338    | Adamdec1     | 2      | 1     | 0     | 0     | 0    | 0     | 1    | 0     |
| 292848    | Klk13        | 0      | 2     | 0     | 1     | 0    | 0     | 0    | 1     |
| 293594    | Olr292       | 1      | 2     | 0     | 0     | 0    | 1     | 0    | 0     |
| 294793    | Ugt3a2       | 2      | 1     | 0     | 3     | 1    | 1     | 0    | 0     |
| 301088    | Ccr111       | 0      | 2     | 1     | 0     | 0    | 0     | 1    | 0     |
| 304784    | Slc26a9      | 2      | 0     | 1     | 0     | 1    | 0     | 0    | 0     |
| 310303    | Kcnmb3       | 2      | 1     | 0     | 0     | 1    | 0     | 0    | 0     |
| 311558    | Bpifb6       | 2      | 2     | 2     | 0     | 0    | 2     | 0    | 0     |
| 315601    | Foxr1        | 2      | 3     | 1     | 0     | 0    | 0     | 1    | 1     |
| 360268    | Sult1e1      | 0      | 3     | 0     | 0     | 1    | 0     | 0    | 0     |
| 360719    | Hgd          | 4      | 0     | 3     | 2     | 1    | 1     | 0    | 1     |
| 362576    | RGD1305347   | 0      | 2     | 1     | 0     | 1    | 0     | 0    | 0     |
| 362623    | Catsper4     | 2      | 1     | 1     | 2     | 0    | 2     | 0    | 0     |
| 365384    | Olr286       | 0      | 2     | 1     | 0     | 0    | 1     | 0    | 0     |
| 502961    | RGD1559679   | 0      | 0     | 1     | 2     | 0    | 1     | 0    | 0     |
| 54282     | Padi1        | 0      | 3     | 0     | 0     | 0    | 0     | 0    | 1     |
| 683282    | LOC683282    | 2      | 0     | 0     | 1     | 1    | 0     | 0    | 0     |
| 685666    | Vom2r9       | 1      | 0     | 2     | 0     | 0    | 0     | 0    | 1     |
| 690212    | Slc16a5      | 0      | 1     | 1     | 1     | 0    | 0     | 1    | 0     |
| 691033    | LOC691033    | 0      | 1     | 0     | 2     | 0    | 0     | 0    | 1     |
| 78976     | Kiss1r       | 1      | 2     | 2     | 1     | 2    | 0     | 0    | 0     |
| 81924     | Cyp8b1       | 1      | 0     | 1     | 1     | 0    | 0     | 0    | 1     |
| 83630     | Pax4         | 0      | 2     | 1     | 0     | 0    | 0     | 0    | 1     |
| 100910172 | LOC100910172 | 1.97   | 1.98  | 1     | 1     | 1    | 0     | 0    | 1     |
| 691998    | Nlrp1b       | 2      | 0     | 1.03  | 0     | 0    | 0     | 0    | 1.02  |
| 100361056 | LOC100361056 | 3.13   | 2.25  | 3.27  | 4.5   | 1.16 | 1.15  | 1.08 | 1.1   |
| 103690132 | Hoxa1        | 3.56   | 3.42  | 3     | 0     | 0    | 2.84  | 0    | 0.57  |
| 25192     | Klrb1b       | 5      | 0     | 1     | 3.62  | 0    | 1     | 1    | 1.3   |
| 108349143 | LOC108349143 | 3.53   | 0     | 7.87  | 8.15  | 3.77 | 0     | 0    | 2.99  |
| 100909648 | LOC100909648 | 1.34   | 1.34  | 0     | 2.67  | 0    | 1.85  | 0    | 0     |
| 59113     | Kmo          | 5      | 4     | 16    | 1     | 2    | 3     | 4    | 0     |
| 102546312 | LOC102546312 | 1.12   | 1.06  | 0     | 1.08  | 1.13 | 0     | 0    | 0     |
| 100912336 | LOC100912336 | 3      | 10    | 10    | 0     | 0    | 0     | 6    | 2     |
| 687560    | LOC687560    | 6      | 3     | 9     | 5     | 0    | 3     | 3    | 2     |
| 305811    | Rcor2        | 120.85 | 0     | 34.31 | 61.02 | 0    | 48.86 | 0    | 26.37 |
| 502966    | RGD1560539   | 2.3    | 2     | 0     | 2.3   | 0    | 2.3   | 0    | 0     |
| 103694886 | LOC103694886 | 2.37   | 3.88  | 2.97  | 12.38 | 0    | 2.2   | 2.63 | 2.72  |
| 687553    | Foxl1        | 5      | 4     | 4     | 7     | 1    | 1     | 2    | 3     |
| 100360307 | Fam83g       | 4      | 3     | 5     | 5     | 0    | 3     | 1    | 2     |
| 679784    | Slc17a4      | 6      | 4     | 3     | 4     | 1    | 2     | 0    | 3     |
| 304407    | Cldn4        | 5      | 3.06  | 5     | 1.04  | 1    | 2     | 1.04 | 1     |
| 363215    | Prss39       | 5      | 7     | 1.77  | 3     | 0    | 0     | 1    | 5     |
| 309209    | Vwce         | 9.53   | 8     | 20.59 | 16.6  | 0    | 8.58  | 4.19 | 6.89  |
| 305858    | Otx2         | 10.63  | 17.15 | 13.18 | 18.45 | 5.14 | 5.33  | 4.09 | 6.92  |
| 685860    | Lrr1         | 2      | 2     | 7     | 0     | 0    | 1     | 3    | 0     |
| 288456    | RGD1560801   | 1      | 0     | 0     | 1.72  | 1    | 0     | 0    | 0     |

|           |              |        |        |        |        |       |       |       |       |
|-----------|--------------|--------|--------|--------|--------|-------|-------|-------|-------|
| 685245    | Ears211      | 13.86  | 0      | 22.85  | 18.49  | 12.32 | 8.19  | 0     | 0     |
| 108353403 | LOC108353403 | 9.23   | 1.58   | 14.55  | 2      | 3.25  | 1.05  | 3.3   | 2.58  |
| 366992    | Kb15         | 3      | 4      | 2.04   | 2.03   | 2.14  | 0     | 2     | 0     |
| 103693626 | LOC103693626 | 1.99   | 0      | 5.97   | 0      | 0     | 0     | 2.98  | 0     |
| 24235     | C4bpa        | 2      | 1      | 4      | 1      | 1     | 2     | 0     | 0     |
| 288596    | Trim50       | 3      | 2      | 1      | 2      | 1     | 1     | 0     | 1     |
| 363768    | Zp1d1        | 4      | 2      | 1      | 1      | 0     | 2     | 1     | 0     |
| 494193    | Klra2        | 1      | 6      | 1      | 0      | 0     | 1     | 1     | 1     |
| 685963    | LOC685963    | 60.5   | 60.7   | 78.04  | 69.37  | 0     | 40.47 | 20.23 | 40.47 |
| 108352618 | LOC108352618 | 4      | 5.1    | 6.65   | 2      | 4.38  | 2.33  | 0     | 0     |
| 364629    | Tpte2        | 2.55   | 4.51   | 4.55   | 4.5    | 0     | 0     | 1.49  | 4.64  |
| 100360774 | LOC100360774 | 2.65   | 0      | 0      | 0      | 0     | 0.53  | 0.48  | 0     |
| 301595    | Ugt1a8       | 17.21  | 8.61   | 7.34   | 8.17   | 0     | 10.57 | 0     | 5.26  |
| 498335    | Cxcl13       | 84     | 95     | 272    | 64     | 42    | 36    | 52    | 68    |
| 289337    | Tlr5         | 20     | 49     | 162    | 29     | 14    | 29    | 48    | 9     |
| 25370     | Adora3       | 2.35   | 0      | 3.63   | 8.49   | 3.12  | 0     | 1.31  | 1.16  |
| 300124    | Pkdrej       | 4      | 6      | 5      | 3      | 2     | 0     | 0     | 5     |
| 365962    | Slc44a5      | 1      | 4      | 9      | 4      | 1     | 1     | 2     | 3     |
| 691519    | LOC691519    | 10.35  | 12.6   | 17.96  | 16.61  | 4.11  | 10.04 | 5     | 3.22  |
| 102550614 | LOC102550614 | 3      | 1      | 4      | 3      | 0     | 2     | 0     | 2.28  |
| 100360872 | Mcpt111      | 39.98  | 166.97 | 502.98 | 97.99  | 44.94 | 80    | 130.9 | 60    |
| 308428    | Irgc         | 4      | 9      | 5      | 5      | 1     | 1     | 5     | 2     |
| 108352174 | LOC108352174 | 1.08   | 1.37   | 3.78   | 2.04   | 1.08  | 2.16  | 0     | 0     |
| 292850    | Klk10        | 0.78   | 0      | 0      | 1      | 0.7   | 0     | 0     | 0     |
| 108352465 | LOC108352465 | 19.4   | 13.3   | 15.32  | 8.83   | 4.7   | 6.59  | 1.65  | 9.6   |
| 108349728 | LOC108349728 | 3.44   | 1.42   | 0.33   | 4.05   | 2     | 0     | 0     | 1.67  |
| 100911485 | LOC100911485 | 22.53  | 38.66  | 7.48   | 7.02   | 7.69  | 7.61  | 0     | 14.86 |
| 680920    | LOC680920    | 4      | 6.37   | 2.41   | 2.76   | 0     | 2.95  | 2.25  | 1     |
| 102547118 | LOC102547118 | 3      | 0      | 2      | 0      | 2     | 0     | 0     | 0     |
| 170570    | Acot12       | 4      | 3      | 2      | 1      | 2     | 0     | 1     | 1     |
| 245921    | Acvrlc       | 0      | 0      | 0      | 5      | 0     | 0     | 2     | 0     |
| 25430     | Dio1         | 0      | 3      | 0      | 2      | 0     | 2     | 0     | 0     |
| 25735     | Hnf4a        | 3      | 1      | 1      | 0      | 0     | 0     | 0     | 2     |
| 289038    | Mgat4e       | 1      | 8      | 1      | 5      | 3     | 1     | 2     | 0     |
| 291558    | RGD1562699   | 2      | 2      | 1      | 0      | 1     | 0     | 0     | 1     |
| 29180     | Uts2         | 1      | 4      | 10     | 5      | 2     | 3     | 3     | 0     |
| 293741    | Ms4a12       | 3      | 6      | 12     | 4      | 2     | 0     | 4     | 4     |
| 29589     | Pou3f4       | 2      | 1      | 1      | 1      | 0     | 0     | 0     | 2     |
| 296323    | Arhgap40     | 2      | 1      | 0      | 2      | 0     | 1     | 1     | 0     |
| 298881    | Nt5c1b       | 1      | 0      | 2      | 2      | 1     | 0     | 1     | 0     |
| 353218    | Tnfsf9       | 2      | 6      | 9      | 3      | 0     | 4     | 3     | 1     |
| 66022     | Kcns2        | 3      | 7      | 3      | 2      | 2     | 2     | 1     | 1     |
| 680875    | LOC680875    | 1      | 0      | 1      | 3      | 1     | 1     | 0     | 0     |
| 681033    | Prss41       | 5      | 2      | 0      | 3      | 1     | 1     | 1     | 1     |
| 85259     | Cngal        | 1      | 1      | 2      | 1      | 2     | 0     | 0     | 0     |
| 288995    | Gpr39        | 1      | 0      | 1.49   | 0      | 0     | 0     | 0     | 1     |
| 289309    | Kif28p       | 2.02   | 0      | 0      | 3      | 0     | 0     | 1     | 1.02  |
| 353303    | Col23a1      | 0      | 0      | 0      | 11.1   | 4.47  | 0     | 0     | 0     |
| 170847    | Kcnj15       | 100.02 | 62.03  | 221.58 | 197.67 | 43.84 | 36.02 | 78.82 | 76.37 |
| 685181    | LOC685181    | 1.98   | 4      | 4.25   | 0      | 0     | 1.56  | 0     | 2.58  |
| 59327     | Twist2       | 25     | 29     | 54     | 22     | 5     | 12    | 18    | 18    |
| 686129    | LOC686129    | 0      | 1.42   | 0      | 0      | 0     | 0.58  | 0     | 0     |
| 102547956 | LOC102547956 | 1.04   | 4.65   | 3.04   | 2.29   | 0     | 1.52  | 1.52  | 1.48  |
| 304922    | Fmo6         | 6.04   | 4.24   | 1.04   | 1.01   | 0     | 0     | 4.05  | 1.01  |
| 103689957 | LOC103689957 | 10.99  | 7.03   | 5.59   | 12.45  | 9.45  | 0     | 2.8   | 2.58  |
| 170896    | Ucn2         | 0      | 4      | 11     | 2      | 3     | 3     | 1     | 0     |



|           |                 |       |       |       |       |       |      |       |       |
|-----------|-----------------|-------|-------|-------|-------|-------|------|-------|-------|
| 303496    | Tbx21           | 4     | 4     | 4     | 5     | 2     | 4    | 1     | 0     |
| 301012    | Col7a1          | 24    | 26    | 126   | 13    | 14    | 25   | 21    | 18    |
| 316153    | Sult1c2a        | 0     | 2.41  | 0     | 0     | 1     | 0    | 0     | 0     |
| 315870    | Tbx18           | 144   | 182   | 369   | 245   | 57    | 74   | 165   | 95    |
| 102547504 | LOC102547504    | 4     | 2     | 3     | 3     | 0     | 3    | 1     | 1     |
| 94168     | Spp2            | 7     | 3     | 1     | 1     | 1     | 2    | 1     | 1     |
| 689519    | LOC689519       | 4.3   | 5     | 5.15  | 3.06  | 0     | 2.21 | 5.1   | 0     |
| 103691744 | LOC103691744    | 9.04  | 25.31 | 16.71 | 7.94  | 9.11  | 9.94 | 0     | 5.91  |
| 103690230 | LOC103690230    | 2     | 0     | 5.03  | 5.49  | 3.25  | 0    | 1.04  | 1.03  |
| 689346    | LOC689346       | 1     | 0     | 1.35  | 0     | 1     | 0    | 0     | 0     |
| 192107    | Prss8           | 3.11  | 6.23  | 3.09  | 2.09  | 0     | 3.11 | 2.06  | 1.04  |
| 108348553 | LOC108348553    | 7     | 7.75  | 4     | 9.79  | 3.01  | 3    | 1.51  | 4.7   |
| 246758    | Allc            | 1     | 2     | 3     | 1     | 1     | 2    | 0     | 0     |
| 292165    | Wdr63           | 1     | 1     | 0     | 5     | 0     | 1    | 2     | 0     |
| 294562    | Pou5f1          | 2     | 8     | 3     | 1     | 2     | 1    | 1     | 2     |
| 301075    | Topaz1          | 2     | 3     | 2     | 0     | 2     | 0    | 1     | 0     |
| 315190    | Upk3a           | 6     | 5     | 0     | 3     | 0     | 0    | 0     | 6     |
| 365226    | Ovol3           | 5     | 2     | 6     | 1     | 2     | 0    | 1     | 3     |
| 365362    | Abca14          | 3     | 2     | 1     | 1     | 0     | 2    | 1     | 0     |
| 499278    | Fam24a          | 1     | 2     | 1     | 3     | 3     | 0    | 0     | 0     |
| 361938    | Intu            | 6.68  | 3.69  | 9.85  | 7.86  | 5.47  | 1.11 | 0     | 5.46  |
| 102553715 | LOC102553715    | 0     | 55.96 | 55.96 | 74.61 | 0     | 24.2 | 18.65 | 37.3  |
| 100910018 | LOC100910018    | 0     | 0     | 4.98  | 0     | 1.22  | 0.92 | 0     | 0     |
| 310738    | Ngf             | 18    | 10    | 46    | 40    | 2     | 6    | 18    | 23    |
| 691194    | Mrgprb3         | 4.02  | 10.47 | 18    | 5     | 2.02  | 5.03 | 6.04  | 3.03  |
| 24695     | Pthlh           | 23    | 8     | 29    | 12    | 5     | 8    | 9     | 9     |
| 685125    | LOC685125       | 0     | 0     | 1.41  | 1.04  | 0     | 1.06 | 0     | 0     |
| 311120    | RGD1565767      | 2     | 2.08  | 0     | 2.2   | 2.72  | 0    | 0     | 0     |
| 108352192 | LOC108352192    | 1     | 0     | 2     | 0     | 1     | 0    | 0     | 0.3   |
| 102550375 | LOC102550375    | 2.01  | 3.04  | 3.01  | 8.06  | 0     | 4    | 2     | 1     |
| 103690398 | NEWGENE_1565505 | 8     | 3     | 8     | 4     | 3     | 3    | 4     | 0     |
| 108349753 | LOC108349753    | 3     | 7     | 5     | 8     | 5     | 3    | 1     | 1     |
| 100911964 | LOC100911964    | 1.3   | 0     | 0     | 1.16  | 0     | 0    | 1.07  | 0     |
| 690171    | LOC690171       | 4.26  | 3.06  | 1.87  | 1.69  | 1.82  | 2.25 | 0     | 0.68  |
| 103690344 | LOC103690344    | 0     | 0     | 0     | 2.31  | 0     | 1.01 | 0     | 0     |
| 311013    | Arsj            | 8     | 6     | 19    | 8     | 2     | 3    | 7     | 6     |
| 246075    | Prlhr           | 8.31  | 12.16 | 4.58  | 1     | 2.55  | 1.04 | 4.64  | 3.21  |
| 688900    | Slfn1           | 24.03 | 16.73 | 20    | 12.38 | 11.5  | 7.11 | 7.34  | 6.21  |
| 50669     | Prf1            | 6     | 6     | 6     | 7     | 2     | 1    | 5     | 3     |
| 114122    | Vcan            | 157   | 467   | 1107  | 239   | 139   | 224  | 342   | 162   |
| 102555951 | LOC102555951    | 0     | 0     | 18.57 | 9.8   | 0     | 0.24 | 0     | 12.26 |
| 60584     | Lif             | 7     | 5     | 22    | 9     | 7     | 5    | 5     | 2     |
| 362443    | Klrbla          | 7     | 4     | 3     | 3.38  | 2     | 0    | 1     | 4.7   |
| 103690099 | LOC103690099    | 0     | 4.14  | 5.38  | 7.4   | 0     | 0    | 0     | 7.5   |
| 25660     | Cd28            | 17    | 20    | 29.07 | 30.98 | 9     | 9.03 | 9.01  | 16    |
| 25656     | Guca2a          | 4     | 2     | 1     | 2     | 0     | 1    | 2     | 1     |
| 501738    | Cd300lb         | 0     | 4     | 4     | 1     | 0     | 0    | 3     | 1     |
| 25583     | Cryba1          | 2     | 3     | 4     | 5     | 3.26  | 3    | 0     | 0     |
| 25661     | Fn1             | 2436  | 5396  | 18430 | 4833  | 2076  | 4806 | 4275  | 2753  |
| 287813    | Igsf7           | 23.41 | 26.86 | 71.57 | 31.49 | 13.14 | 6.5  | 28.41 | 20.58 |
| 100912132 | LOC100912132    | 0     | 4.33  | 0     | 0     | 1.94  | 0    | 0     | 0     |
| 292793    | Sbsn            | 31    | 112   | 253   | 63    | 38    | 78   | 61    | 30    |
| 29220     | Thbs4           | 1071  | 1624  | 3045  | 1435  | 486   | 772  | 1587  | 391   |
| 293779    | Glyat           | 7.04  | 4.05  | 6.88  | 8.05  | 2.99  | 2.01 | 1.76  | 5.02  |
| 353253    | Kir3dl1         | 0     | 1     | 0     | 1.27  | 0     | 0.03 | 0     | 1     |
| 140944    | Slc28a3         | 1     | 2     | 2     | 6     | 1     | 2    | 1     | 1     |

|           |                 |       |        |        |        |       |       |       |       |
|-----------|-----------------|-------|--------|--------|--------|-------|-------|-------|-------|
| 25047     | Fcer1a          | 1     | 3      | 6      | 1      | 3     | 2     | 0     | 0     |
| 29391     | Tsx             | 2     | 5      | 2      | 2      | 0     | 2     | 2     | 1     |
| 300846    | Tinag           | 2     | 4      | 4      | 1      | 1     | 4     | 0     | 0     |
| 690479    | Bpifb5          | 51    | 100    | 93     | 79     | 2     | 52    | 89    | 4     |
| 298478    | Olr869          | 1.5   | 3.87   | 1      | 1.31   | 1     | 1     | 0.5   | 1     |
| 360707    | RGD1310935      | 1     | 2.45   | 0      | 1.93   | 1.62  | 0     | 0     | 0.84  |
| 100911660 | LOC100911660    | 30.32 | 38.47  | 26.38  | 31.84  | 20.35 | 13.52 | 10.64 | 13.77 |
| 103690044 | LOC103690044    | 0     | 1.23   | 1.33   | 0      | 1.18  | 0     | 0     | 0     |
| 286912    | Krt20           | 4     | 3      | 3      | 3      | 3     | 0     | 3     | 0     |
| 304918    | Zbtb37          | 5     | 10     | 7      | 17     | 4     | 0     | 8     | 6     |
| 685440    | Nek5            | 5     | 2      | 5      | 1      | 2     | 0     | 3     | 1     |
| 690948    | LOC690948       | 6.78  | 4.36   | 38.31  | 0      | 16.99 | 0     | 5.86  | 0     |
| 103690125 | NEWGENE_1590969 | 2.42  | 3      | 2      | 3.34   | 0     | 1     | 1     | 3     |
| 683163    | Tnfsf8          | 2     | 6      | 5      | 2      | 3     | 2     | 1     | 1     |
| 685157    | LOC685157       | 24.59 | 38.59  | 36.18  | 23.32  | 36.56 | 0     | 1.43  | 19.29 |
| 108348270 | LOC108348270    | 0     | 3.63   | 1.53   | 4      | 2.25  | 2.04  | 0     | 0     |
| 100910180 | LOC100910180    | 0     | 0.32   | 0      | 0      | 0     | 0     | 0.15  | 0     |
| 362445    | Clec2d2         | 13.85 | 6.18   | 4.18   | 9.6    | 6.49  | 1.01  | 1     | 7.36  |
| 308099    | Fndc1           | 209   | 433    | 1298   | 294    | 147   | 287   | 393   | 225   |
| 25542     | Ccl3            | 7     | 6.67   | 7      | 9      | 1     | 1     | 4     | 8     |
| 25694     | Has2            | 53    | 91     | 111    | 50     | 28    | 34    | 46    | 36    |
| 25627     | Cma1            | 9     | 25     | 78     | 19     | 12    | 21    | 22    | 7     |
| 108352430 | C12H7orf61      | 4.41  | 4.41   | 4.41   | 10     | 0     | 4.41  | 4.41  | 2.21  |
| 103690078 | LOC103690078    | 0.86  | 0      | 0      | 2.34   | 0     | 1.07  | 0     | 0.45  |
| 310926    | LOC310926       | 134.3 | 118.83 | 1126.1 | 107.75 | 183.2 | 288.9 | 142.1 | 92.61 |
| 366545    | Atp6v1e2        | 3     | 7      | 5      | 6      | 3     | 1     | 3     | 3     |
| 501183    | Rbm44           | 5     | 6      | 3      | 7      | 2     | 3     | 2     | 3     |
| 405968    | Olr1105         | 8     | 6      | 12     | 18     | 0     | 5     | 7     | 9     |
| 108351574 | LOC108351574    | 3.19  | 5.5    | 19.74  | 9.21   | 4.64  | 0     | 4.13  | 9.22  |
| 102552860 | LOC102552860    | 14.2  | 5.05   | 17.79  | 15.58  | 11.33 | 7.31  | 6.51  | 0     |
| 292777    | Tbc1            | 43.6  | 30.91  | 12.5   | 43.34  | 6.21  | 31.25 | 18.69 | 6.19  |
| 362262    | Emilin3         | 10    | 19     | 22     | 20     | 8     | 6     | 14    | 6     |
| 25292     | Apoc1           | 0     | 0      | 2.85   | 5.5    | 0     | 3.5   | 0.5   | 0     |
| 363071    | Stra6           | 60    | 61     | 256    | 126    | 36    | 33    | 77    | 95    |
| 314467    | Rd31            | 8     | 7      | 3      | 7      | 4     | 1     | 5     | 2     |
| 367264    | Stat4           | 14    | 17     | 8      | 13     | 6     | 6     | 4     | 9     |
| 311783    | Il36rn          | 2.17  | 1.99   | 6      | 1.08   | 2     | 0     | 1     | 2.41  |
| 309775    | Nepn            | 18    | 19     | 8      | 9      | 10    | 5     | 8     | 3     |
| 681124    | Dnase112        | 6.81  | 5.72   | 3.07   | 1.8    | 3.32  | 2.08  | 1.34  | 1.65  |
| 679564    | Lypd6           | 8     | 8      | 6      | 7      | 3     | 6     | 3     | 2     |
| 497856    | Rmi2            | 5     | 9      | 11     | 8      | 3     | 5     | 4     | 4     |
| 266771    | Vomlr90         | 9.99  | 6.57   | 5.09   | 3.55   | 3.93  | 1.82  | 2.7   | 3.79  |
| 501028    | RGD1560917      | 7.04  | 7.1    | 5.33   | 8.79   | 9.84  | 0.91  | 0     | 2.98  |
| 102547294 | Iqcn            | 15    | 17     | 34     | 16     | 10    | 11    | 9     | 10    |
| 25253     | Dpp4            | 161   | 201    | 573    | 173    | 69    | 110   | 225   | 137   |
| 287131    | Ccdc154         | 2     | 6      | 10     | 5.14   | 3     | 2.26  | 2     | 4.04  |
| 84007     | C3ar1           | 59.4  | 73     | 137.15 | 66.07  | 21.4  | 26.97 | 42.59 | 73.04 |
| 689757    | LOC689757       | 3     | 2      | 6.55   | 2      | 0     | 1     | 2.67  | 2.96  |
| 500224    | Lbx2            | 0.41  | 1.41   | 3.71   | 0      | 0     | 2.71  | 0     | 0     |
| 313019    | Tent5b          | 10    | 9.24   | 14.91  | 26.09  | 8     | 10.94 | 5.98  | 4.62  |
| 103690024 | LOC103690024    | 8.98  | 6.98   | 3.5    | 2.07   | 2.85  | 0.01  | 0     | 7.71  |
| 108349825 | LOC108349825    | 1.22  | 0      | 0      | 1.22   | 0     | 0     | 0     | 1.2   |
| 306079    | LOC306079       | 5.54  | 2.11   | 2.62   | 3.17   | 1.35  | 1.06  | 1.05  | 3.16  |
| 501031    | RGD1560775      | 30.2  | 18.15  | 20.58  | 32.38  | 20.97 | 14.32 | 6.21  | 8.41  |
| 102553500 | LOC102553500    | 1     | 0      | 2      | 1.05   | 1     | 0     | 0     | 1     |
| 102553456 | LOC102553456    | 1.11  | 1      | 0      | 2      | 0     | 1.03  | 1     | 0     |

|           |              |        |        |       |       |      |       |       |        |
|-----------|--------------|--------|--------|-------|-------|------|-------|-------|--------|
| 304729    | Gli2         | 72     | 57     | 76    | 84    | 33   | 38    | 36    | 36     |
| 108348191 | LOC108348191 | 0      | 0      | 2.97  | 2.38  | 0    | 1.51  | 1.14  | 0      |
| 305431    | Stk32b       | 47     | 64     | 76    | 47    | 20   | 30    | 29    | 37     |
| 681871    | LOC681871    | 1      | 4      | 1     | 2.06  | 2    | 2     | 0     | 0      |
| 287561    | Cc17         | 34     | 36     | 42    | 79    | 17   | 13    | 31    | 34     |
| 103693367 | LOC103693367 | 0      | 0      | 1.11  | 3.36  | 0    | 1.06  | 0     | 1.17   |
| 100912450 | LOC100912450 | 111.59 | 32.4   | 19.28 | 61.74 | 8.03 | 28.72 | 30.84 | 44.84  |
| 100911615 | LOC100911615 | 0      | 550.63 | 0     | 0     | 0    | 0     | 0     | 275.31 |
| 100328908 | Zfp831       | 5      | 1      | 1     | 5     | 3    | 1     | 1     | 1      |
| 100359775 | Bpifa6       | 0      | 1      | 1     | 0     | 1    | 0     | 0     | 0      |
| 100361314 | Prr9         | 1      | 0      | 0     | 1     | 0    | 0     | 1     | 0      |
| 100361371 | Smco2        | 1      | 0      | 0     | 1     | 1    | 0     | 0     | 0      |
| 100365683 | Nr2e3        | 1      | 1      | 2     | 0     | 0    | 0     | 2     | 0      |
| 100909643 | LOC100909643 | 1      | 0      | 0     | 1     | 0    | 1     | 0     | 0      |
| 100909960 | LOC100909960 | 0      | 0      | 2     | 0     | 0    | 0     | 0     | 1      |
| 100911044 | LOC100911044 | 1      | 3      | 0     | 0     | 0    | 0     | 0     | 2      |
| 100911639 | LOC100911639 | 0      | 1      | 0     | 1     | 1    | 0     | 0     | 0      |
| 100912524 | LOC100912524 | 0      | 0      | 0     | 2     | 0    | 0     | 0     | 1      |
| 102547412 | LOC102547412 | 0      | 0      | 0     | 2     | 1    | 0     | 0     | 0      |
| 102548161 | LOC102548161 | 3      | 1      | 3     | 3     | 1    | 1     | 1     | 2      |
| 102551309 | LOC102551309 | 1      | 0      | 0     | 1     | 0    | 0     | 0     | 1      |
| 102554838 | LOC102554838 | 0      | 4      | 2     | 0     | 0    | 0     | 0     | 3      |
| 102554931 | LOC102554931 | 0      | 0      | 1     | 1     | 1    | 0     | 0     | 0      |
| 103689938 | LOC103689938 | 1      | 1      | 2     | 0     | 0    | 0     | 1     | 1      |
| 103690003 | LOC103690003 | 0.04   | 0      | 0.04  | 0     | 0    | 0     | 0.04  | 0      |
| 103690116 | LOC103690116 | 0      | 0      | 1.69  | 1.69  | 0    | 0     | 0     | 1.69   |
| 108349946 | LOC108349946 | 0      | 1      | 1     | 0     | 1    | 0     | 0     | 0      |
| 108349954 | LOC108349954 | 0      | 2      | 0     | 0     | 1    | 0     | 0     | 0      |
| 108351843 | Vsig1012     | 0      | 1      | 1     | 0     | 0    | 1     | 0     | 0      |
| 108352945 | LOC108352945 | 0      | 2      | 0     | 0     | 1    | 0     | 0     | 0      |
| 117232    | Barhl1       | 0      | 3      | 2     | 1     | 2    | 0     | 1     | 0      |
| 117518    | Cc117        | 1      | 1      | 0     | 0     | 0    | 0     | 1     | 0      |
| 140936    | Rcvrn        | 1      | 1      | 0     | 0     | 0    | 0     | 1     | 0      |
| 171028    | Atp12a       | 0      | 1      | 0     | 1     | 0    | 0     | 0     | 1      |
| 171179    | Glyat12      | 1      | 0      | 0     | 1     | 0    | 1     | 0     | 0      |
| 171496    | Atp2c2       | 2      | 2      | 2     | 2     | 1    | 1     | 0     | 2      |
| 171528    | Gzmb         | 0      | 1      | 7     | 0     | 0    | 2     | 2     | 0      |
| 24217     | Atp4b        | 1      | 0      | 0     | 1     | 0    | 0     | 0     | 1      |
| 24792     | Agxt         | 0      | 1      | 0     | 1     | 0    | 0     | 1     | 0      |
| 24903     | Kng2         | 1      | 1      | 2     | 0     | 0    | 2     | 0     | 0      |
| 25086     | Cyp2e1       | 3      | 2      | 1     | 2     | 3    | 1     | 0     | 0      |
| 25206     | Gucylb2      | 1      | 1      | 0     | 0     | 1    | 0     | 0     | 0      |
| 252859    | Mlnr         | 1      | 7      | 6     | 0     | 0    | 6     | 0     | 1      |
| 25483     | Msx2         | 0      | 0      | 2     | 0     | 1    | 0     | 0     | 0      |
| 25658     | Gckr         | 4      | 1      | 4     | 3     | 3    | 1     | 1     | 1      |
| 25726     | Mc5r         | 5      | 6      | 9     | 8     | 2    | 5     | 5     | 2      |
| 286976    | Gcnt3        | 0      | 3      | 1     | 0     | 1    | 1     | 0     | 0      |
| 289533    | Ugt2a3       | 0      | 1      | 0     | 1     | 0    | 0     | 0     | 1      |
| 289720    | Psap11       | 0      | 1      | 2     | 1     | 1    | 0     | 1     | 0      |
| 290055    | Olr1644      | 0      | 0      | 1.02  | 1     | 0    | 0     | 0     | 1.01   |
| 291754    | Dsg4         | 0      | 1      | 2     | 1     | 0    | 0     | 1     | 1      |
| 291846    | Prss54       | 0      | 0      | 0     | 2     | 0    | 1     | 0     | 0      |
| 293197    | Olr40        | 1      | 0      | 1     | 0     | 0    | 1     | 0     | 0      |
| 29323     | Slc6a18      | 0      | 0      | 0     | 2     | 0    | 0     | 0     | 1      |
| 293305    | Olr159       | 0      | 0      | 2     | 0     | 0    | 0.5   | 0.5   | 0      |
| 29646     | Adh4         | 2      | 1      | 4     | 3     | 0    | 1     | 1     | 3      |

|        |            |      |    |      |    |   |   |      |   |
|--------|------------|------|----|------|----|---|---|------|---|
| 299829 | RGD1559995 | 3    | 2  | 3    | 0  | 3 | 0 | 1    | 0 |
| 304990 | Olr1595    | 0    | 1  | 0    | 1  | 0 | 0 | 1    | 0 |
| 306365 | Potem      | 1    | 0  | 1    | 0  | 0 | 0 | 1    | 0 |
| 308190 | Cyp26c1    | 1    | 0  | 4    | 1  | 3 | 0 | 0    | 0 |
| 312316 | Dox11      | 27   | 8  | 11   | 2  | 8 | 6 | 7    | 3 |
| 313149 | Cfap221    | 0    | 2  | 0    | 0  | 1 | 0 | 0    | 0 |
| 313152 | Ifnk       | 1    | 0  | 0    | 1  | 0 | 0 | 0    | 1 |
| 313545 | Tmem125    | 2    | 1  | 4    | 1  | 2 | 1 | 1    | 0 |
| 315947 | Nme9       | 0    | 0  | 0    | 2  | 0 | 0 | 1    | 0 |
| 317221 | Rtl3       | 3    | 8  | 11   | 10 | 3 | 6 | 2    | 5 |
| 360486 | Linc00514  | 0    | 1  | 1    | 2  | 2 | 0 | 0    | 0 |
| 361412 | Adamts18   | 7    | 10 | 6    | 3  | 6 | 3 | 1    | 3 |
| 361707 | Tsgal0ip   | 17   | 11 | 17   | 21 | 7 | 6 | 14   | 6 |
| 362604 | Tlr12      | 10   | 5  | 4    | 5  | 2 | 4 | 5    | 1 |
| 363993 | Gpr25      | 3    | 1  | 0    | 0  | 2 | 0 | 0    | 0 |
| 364304 | Rnase1     | 1    | 0  | 1    | 0  | 0 | 0 | 1    | 0 |
| 364729 | Nme8       | 0    | 1  | 0    | 1  | 0 | 1 | 0    | 0 |
| 364973 | Best2      | 1    | 0  | 0    | 1  | 0 | 0 | 0    | 1 |
| 365564 | Atoh7      | 1    | 0  | 1    | 0  | 0 | 0 | 1    | 0 |
| 405038 | Olr312     | 2    | 0  | 0    | 0  | 0 | 1 | 0    | 0 |
| 405207 | Olr837     | 0    | 3  | 0    | 5  | 1 | 3 | 0    | 0 |
| 405216 | Olr1104    | 0    | 1  | 0    | 1  | 0 | 1 | 0    | 0 |
| 494499 | Gsta5      | 4    | 2  | 0    | 0  | 0 | 0 | 1    | 2 |
| 497651 | Rnase11    | 1    | 1  | 0    | 0  | 0 | 0 | 0    | 1 |
| 497970 | Heatr9     | 0    | 1  | 0    | 1  | 0 | 0 | 0    | 1 |
| 498275 | Fcrlb      | 1    | 1  | 2    | 2  | 1 | 1 | 1    | 0 |
| 498943 | RGD1561415 | 2    | 1  | 0    | 1  | 0 | 1 | 1    | 0 |
| 499000 | Zdhhc11    | 4    | 1  | 3    | 2  | 1 | 1 | 0    | 3 |
| 499721 | Clca41     | 2    | 1  | 1    | 0  | 0 | 0 | 1    | 1 |
| 500409 | Esrp1      | 0    | 1  | 1    | 0  | 0 | 1 | 0    | 0 |
| 500513 | RGD1562532 | 2    | 0  | 0    | 0  | 0 | 0 | 0    | 1 |
| 500598 | Tnfrsf18   | 2    | 0  | 2    | 6  | 2 | 1 | 2    | 0 |
| 501084 | RGD1559960 | 1    | 0  | 0    | 1  | 0 | 1 | 0    | 0 |
| 57305  | Uts2r      | 0    | 1  | 0    | 1  | 1 | 0 | 0    | 0 |
| 641640 | Defb36     | 3    | 1  | 1    | 1  | 1 | 1 | 1    | 0 |
| 64621  | Akp3       | 1    | 0  | 1    | 0  | 0 | 1 | 0    | 0 |
| 65050  | Barhl2     | 1    | 1  | 0    | 0  | 0 | 0 | 1    | 0 |
| 65132  | Cldn7      | 1    | 1  | 0    | 0  | 0 | 0 | 0    | 1 |
| 679834 | Meig1      | 1    | 0  | 0    | 1  | 1 | 0 | 0    | 0 |
| 680620 | Pou5f2     | 0    | 2  | 0    | 0  | 0 | 0 | 0    | 1 |
| 681290 | LOC681290  | 6    | 3  | 4    | 5  | 0 | 1 | 3    | 5 |
| 682006 | Tmem247    | 1    | 1  | 0    | 0  | 0 | 0 | 0    | 1 |
| 684545 | Nlrp2      | 1    | 1  | 0    | 0  | 0 | 0 | 1    | 0 |
| 685227 | Wfdc11     | 2    | 0  | 0    | 0  | 0 | 1 | 0    | 0 |
| 686140 | Fam47e     | 0    | 2  | 2    | 0  | 0 | 0 | 1    | 1 |
| 687403 | Acp7       | 0    | 0  | 0    | 2  | 0 | 1 | 0    | 0 |
| 687866 | Myo1h      | 1    | 1  | 0    | 0  | 0 | 0 | 0    | 1 |
| 688389 | LOC688389  | 2    | 0  | 0    | 0  | 1 | 0 | 0    | 0 |
| 688750 | Cd209f     | 2    | 2  | 0    | 0  | 0 | 0 | 2    | 0 |
| 689437 | LOC689437  | 0    | 0  | 0    | 2  | 0 | 0 | 0    | 1 |
| 689524 | Wdr64      | 1    | 1  | 1    | 3  | 2 | 0 | 1    | 0 |
| 690227 | Vom2r77    | 0    | 1  | 0    | 1  | 0 | 0 | 0    | 1 |
| 691352 | LOC691352  | 0    | 2  | 0    | 0  | 1 | 0 | 0    | 0 |
| 691693 | LOC691693  | 0.96 | 0  | 0.96 | 0  | 0 | 0 | 0.96 | 0 |
| 691982 | Tmem95     | 4    | 3  | 2    | 3  | 1 | 4 | 0    | 1 |
| 78974  | Six3       | 1    | 0  | 0    | 1  | 1 | 0 | 0    | 0 |

|           |                 |        |       |        |        |       |       |       |        |
|-----------|-----------------|--------|-------|--------|--------|-------|-------|-------|--------|
| 291615    | Pabpc2          | 5      | 6     | 10.9   | 4      | 3     | 3     | 3     | 4      |
| 503122    | Cyp4f40         | 0      | 0     | 1.14   | 1.23   | 1.19  | 0     | 0     | 0      |
| 362951    | RGD1309808      | 14.79  | 5.05  | 7.75   | 15.76  | 3.65  | 3.1   | 9.68  | 5.34   |
| 103693700 | LOC103693700    | 1.11   | 0     | 0      | 1.1    | 0     | 1.11  | 0     | 0      |
| 108352309 | LOC108352309    | 0      | 1     | 1.01   | 0      | 0     | 0     | 1.01  | 0      |
| 25276     | Sycp1           | 1      | 0     | 0      | 0.99   | 0     | 1     | 0     | 0      |
| 108351325 | LOC108351325    | 0      | 0     | 1.72   | 1.68   | 1.71  | 0     | 0     | 0      |
| 108350933 | LOC108350933    | 7.83   | 2.9   | 5.49   | 0      | 0.99  | 0     | 1     | 6.21   |
| 499413    | Hsf2bp          | 5.97   | 5     | 8.63   | 8      | 1     | 6     | 3     | 4      |
| 83584     | Casp6           | 21.23  | 36.97 | 14.02  | 23.62  | 13.37 | 28.38 | 6.96  | 0      |
| 100363268 | LOC100363268    | 64.22  | 66.9  | 0      | 0      | 44.75 | 0     | 0     | 21.98  |
| 54271     | Tpsab1          | 7      | 8     | 31     | 3      | 7     | 5     | 9     | 4      |
| 292594    | Lilrb4          | 46     | 28    | 55     | 16     | 17    | 25    | 7     | 25     |
| 102555622 | LOC102555622    | 0      | 2.33  | 0      | 0      | 0     | 0     | 1.19  | 0      |
| 25008     | Lta             | 1      | 0     | 1.91   | 1      | 1     | 1     | 0     | 0      |
| 171178    | Adh7            | 8      | 19    | 12     | 4      | 0     | 8     | 4     | 10     |
| 81503     | Cxcl1           | 9      | 4     | 1      | 27     | 5     | 5     | 8     | 3      |
| 103693258 | LOC103693258    | 0      | 1.11  | 0      | 1.17   | 0     | 1.17  | 0     | 0      |
| 108351354 | LOC108351354    | 1      | 3     | 2      | 1.97   | 1.02  | 2.07  | 0     | 1      |
| 108348142 | LOC108348142    | 35.82  | 41.55 | 18.66  | 25.02  | 10.6  | 13.08 | 20.69 | 17.91  |
| 102552889 | LOC102552889    | 19.63  | 8.58  | 7.09   | 13.17  | 7.32  | 4.41  | 7.45  | 5.76   |
| 103693048 | LOC103693048    | 7.5    | 3.5   | 3.5    | 2.66   | 3     | 0     | 1.83  | 4.01   |
| 100910117 | LOC100910117    | 7.98   | 15.83 | 8.66   | 10.04  | 6.29  | 2.85  | 12.83 | 0      |
| 102546376 | LOC102546376    | 16.75  | 14.79 | 5.96   | 9.1    | 5.63  | 6.36  | 9.32  | 2.79   |
| 103694543 | LOC103694543    | 0      | 0     | 3.38   | 1.12   | 0     | 1.14  | 1.19  | 0      |
| 299685    | Bpifc           | 5.24   | 16.94 | 8.54   | 7.37   | 4.33  | 3.52  | 8.38  | 3.51   |
| 108348094 | NEWGENE_1306399 | 106.18 | 119   | 116.27 | 107    | 0     | 58.5  | 105.9 | 68     |
| 102548194 | LOC102548194    | 1      | 2     | 3      | 2      | 2     | 0     | 1     | 1.15   |
| 365395    | Clcf1           | 16     | 17    | 56     | 17     | 9     | 13    | 20    | 13     |
| 499377    | Plekhs1         | 6.65   | 5.94  | 6.91   | 5.95   | 0     | 7.44  | 1.18  | 4.6    |
| 303148    | Slc36a3         | 1.01   | 3.02  | 3.02   | 1.01   | 0     | 1.18  | 1     | 2.01   |
| 100910264 | LOC100910264    | 1.13   | 0     | 0      | 1.12   | 0     | 1.17  | 0     | 0      |
| 103690020 | LOC103690020    | 39.34  | 40.03 | 27.17  | 14.42  | 4.7   | 10.63 | 13.44 | 34.21  |
| 310550    | Dchs2           | 15     | 11    | 8      | 14     | 10    | 5     | 3     | 7      |
| 100910669 | LOC100910669    | 31     | 39.51 | 53.99  | 79.73  | 47.51 | 20.19 | 21.95 | 16.8   |
| 100912416 | LOC100912416    | 11.37  | 16.46 | 22.2   | 28.62  | 4.87  | 6.27  | 14.7  | 15.19  |
| 501568    | RGD1560207      | 3      | 8     | 6      | 6      | 3     | 3     | 0     | 6      |
| 192203    | Fap             | 57     | 71    | 147    | 69     | 26    | 51    | 66    | 37     |
| 296499    | Dlx2            | 5      | 8     | 6      | 2      | 1     | 4     | 1     | 5      |
| 498491    | Tlr11           | 8      | 5     | 5      | 3      | 0     | 2     | 3     | 6      |
| 59300     | Nat8f1          | 13.52  | 10.48 | 23.85  | 28.95  | 5.24  | 6.99  | 8.73  | 19.35  |
| 679594    | LOC679594       | 0      | 3.33  | 8.21   | 6.63   | 2.99  | 4.03  | 2.53  | 0      |
| 498894    | RGD1560813      | 0      | 8.85  | 0      | 3.9    | 0     | 6.71  | 0     | 0      |
| 81737     | Ntf3            | 6      | 5     | 2      | 6      | 1     | 5     | 2     | 2      |
| 500534    | Ccdc24          | 7.2    | 3.07  | 7.62   | 3.47   | 5.42  | 0     | 2.5   | 3.33   |
| 286986    | Vom2r75         | 1      | 3     | 0      | 0      | 1.11  | 1     | 0     | 0      |
| 303856    | Atp13a5         | 24     | 15    | 16     | 53     | 5     | 4     | 21    | 27     |
| 679817    | Cesla           | 8      | 10    | 10     | 8      | 4     | 3     | 2     | 10     |
| 501998    | Cbln3           | 10.14  | 8.09  | 5.7    | 5.7    | 7.59  | 2.92  | 1     | 4.14   |
| 103690038 | LOC103690038    | 0      | 0     | 91.29  | 220.96 | 0     | 0     | 0     | 164.99 |
| 291555    | Atp8b1          | 54.74  | 57.74 | 124.35 | 71.83  | 29.96 | 50.34 | 47.34 | 35.47  |
| 108351613 | LOC108351613    | 1.09   | 0     | 1.42   | 1.95   | 0     | 1.26  | 1.1   | 0      |
| 688996    | Kcnk16          | 27     | 6     | 5      | 11     | 5     | 3     | 11    | 7      |
| 24237     | C6              | 43     | 36    | 223    | 22     | 34    | 36    | 58    | 44     |
| 25194     | Gnrh1           | 9      | 7     | 11     | 5      | 3     | 0     | 7     | 7      |
| 361873    | Cxadr11         | 4.01   | 1.33  | 2.22   | 6.16   | 1.16  | 2.15  | 1.6   | 2.38   |

|           |              |        |        |        |        |       |       |       |        |
|-----------|--------------|--------|--------|--------|--------|-------|-------|-------|--------|
| 297756    | LOC297756    | 0      | 2.59   | 0      | 2.5    | 0     | 0     | 2.71  | 0      |
| 114768    | Uox          | 3      | 3      | 5      | 4      | 1     | 2     | 3     | 2      |
| 500931    | Fam186b      | 4      | 3      | 3      | 5      | 3     | 3     | 1     | 1      |
| 100911599 | LOC100911599 | 81.31  | 49.13  | 72.36  | 30.6   | 21.27 | 39.92 | 38.02 | 25.27  |
| 81508     | Bhmt         | 12.56  | 7.91   | 11.63  | 12     | 3.21  | 4.35  | 8.46  | 7.52   |
| 103694556 | LOC103694556 | 0.13   | 0.27   | 0.38   | 0.4    | 0.36  | 0     | 0.13  | 0.14   |
| 103694557 | LOC103694557 | 0.13   | 0.27   | 0.38   | 0.4    | 0.36  | 0     | 0.13  | 0.14   |
| 113918    | Slc6a20      | 277.96 | 121.66 | 227.73 | 681.98 | 44.95 | 83.45 | 191.1 | 381.03 |
| 100910720 | LOC100910720 | 0      | 2.81   | 10.45  | 2.87   | 2.51  | 2.79  | 0     | 3.34   |
| 310836    | Abca4        | 13     | 9      | 52     | 10     | 9     | 12    | 12    | 12     |
| 24617     | Serpine1     | 88.47  | 106.57 | 311.23 | 187.04 | 82.87 | 123.8 | 121.1 | 43.79  |
| 29403     | Asgr2        | 78     | 61     | 77     | 60     | 24    | 25    | 54    | 45     |
| 60378     | Lypd3        | 5      | 19     | 6      | 11     | 3     | 5     | 3     | 11     |
| 192262    | C1s          | 1512   | 1505   | 2972   | 1785   | 632   | 954   | 1517  | 1071   |
| 100363289 | LOC100363289 | 15.12  | 16.14  | 16.17  | 19.95  | 9.74  | 8.07  | 9.78  | 8.65   |
| 29132     | Atpla4       | 38.64  | 20.71  | 23.25  | 48.55  | 13.71 | 9.03  | 32.06 | 15.78  |
| 499754    | Ccdc183      | 5      | 3      | 3      | 2      | 2     | 2     | 0     | 3      |
| 680522    | Hist1hlb     | 6      | 3      | 3      | 1      | 3     | 2     | 2     | 0      |
| 316620    | Mlph         | 3      | 7      | 11     | 5      | 3     | 4     | 2     | 5      |
| 690955    | Lilrb3b      | 76.59  | 115    | 78.28  | 7.78   | 54.7  | 40.68 | 16.26 | 37.92  |
| 687345    | LOC687345    | 3.3    | 5.94   | 0      | 11.01  | 1.05  | 2.49  | 5.24  | 2.13   |
| 287140    | Prss34       | 9      | 10     | 31     | 0      | 1     | 6     | 17    | 3      |
| 501416    | LOC501416    | 128.19 | 124.1  | 114.94 | 32.59  | 53.15 | 37    | 53.25 | 72.72  |
| 407756    | Btla         | 22     | 12     | 56     | 8      | 10    | 20    | 16    | 7      |
| 309767    | Rsph4a       | 1.06   | 0.6    | 0      | 2.07   | 0     | 0     | 0     | 2.02   |
| 25553     | Slc6a4       | 12     | 8      | 11     | 17     | 3     | 9     | 3     | 11     |
| 292401    | Smoc2        | 439    | 373    | 814    | 738    | 279   | 353   | 415   | 237    |
| 362119    | C5           | 7      | 17     | 11     | 11     | 7     | 9     | 3     | 6      |
| 102549995 | LOC102549995 | 0      | 0      | 0.8    | 0.8    | 0.87  | 0     | 0     | 0      |
| 498012    | Ace3         | 1      | 5      | 5      | 2      | 2.01  | 1     | 1     | 3.06   |
| 108348047 | LOC108348047 | 97.96  | 189.62 | 234.3  | 121.47 | 74.68 | 73.02 | 89.03 | 113.41 |
| 366270    | Edn3         | 25     | 22     | 67     | 20     | 13    | 18    | 20    | 22     |
| 405224    | Olr1587      | 5      | 4      | 4      | 3      | 2     | 2     | 1     | 3.72   |
| 100361556 | LOC100361556 | 5      | 3      | 1      | 2      | 1     | 2     | 3     | 0      |
| 289236    | Vsig8        | 3      | 1      | 2      | 5      | 1     | 1     | 3     | 1      |
| 296130    | Gpat2        | 4      | 3      | 0      | 4      | 2     | 2     | 1     | 1      |
| 311446    | Haol         | 2      | 3      | 3      | 3      | 0     | 2     | 1     | 3      |
| 315829    | Fam83b       | 2      | 5      | 1      | 3      | 0     | 3     | 1     | 2      |
| 363913    | Fzd10        | 6      | 5      | 7      | 4      | 2     | 1     | 5     | 4      |
| 365402    | RGD1566289   | 3      | 3      | 4      | 1      | 1     | 1     | 1     | 3      |
| 108351831 | LOC108351831 | 9.05   | 13.1   | 9.06   | 11.21  | 8.06  | 5.02  | 3.02  | 7.04   |
| 316018    | Rtp3         | 4      | 2      | 2.01   | 3      | 1     | 2     | 2     | 1.02   |
| 299343    | Tdrd9        | 0      | 3.48   | 3.26   | 2      | 0     | 1.14  | 0     | 3.64   |
| 29142     | Vnn1         | 8      | 3      | 12     | 8      | 7     | 4     | 3     | 3      |
| 685590    | LOC685590    | 54.32  | 26.75  | 18.35  | 76.69  | 40.59 | 26.72 | 15.48 | 13.79  |
| 499949    | Apcdd11      | 4.83   | 2.07   | 6.73   | 4.09   | 0.99  | 2.12  | 6.61  | 0      |
| 501072    | Acaalb       | 1.11   | 0      | 1.2    | 5.69   | 3.44  | 0.95  | 0     | 0      |
| 363677    | Gjd3         | 9      | 2      | 2      | 7      | 3     | 3     | 4     | 1      |
| 102551486 | LOC102551486 | 3      | 6      | 7      | 4      | 3     | 5.01  | 0     | 3      |
| 685394    | Ar114epl     | 9.73   | 9.05   | 8.69   | 15.18  | 8.21  | 6.76  | 5.43  | 3.08   |
| 298579    | Pla2g2d      | 30     | 52     | 171    | 32     | 25    | 41    | 54    | 37     |
| 365855    | RGD1563667   | 3.51   | 4.7    | 3      | 11.45  | 2.35  | 3.74  | 1.18  | 5.22   |
| 494201    | Oas1e        | 1.29   | 5      | 4.03   | 1      | 2.11  | 4.13  | 0     | 0      |
| 108350568 | LOC108350568 | 1.07   | 4.22   | 4.17   | 2.13   | 0     | 1.05  | 2.1   | 3.25   |
| 24470     | Hsd3b5       | 0      | 1.38   | 0.92   | 1.19   | 0     | 0     | 0     | 1.93   |
| 316137    | Adgre1       | 191    | 279    | 447    | 294    | 107   | 132   | 218   | 213    |

|           |              |        |         |        |        |       |       |       |         |
|-----------|--------------|--------|---------|--------|--------|-------|-------|-------|---------|
| 362741    | Pax9         | 54.98  | 41      | 48     | 83     | 18    | 19    | 52    | 37      |
| 294093    | Ankrd22      | 2      | 4       | 3      | 0      | 1     | 3     | 0     | 1       |
| 680678    | Tcf24        | 3      | 1       | 3      | 2      | 1     | 3     | 0     | 1       |
| 108349232 | LOC108349232 | 4      | 6       | 1      | 6      | 2     | 2     | 2     | 3.45    |
| 103690108 | LOC103690108 | 1216.1 | 505.68  | 1452.5 | 1901.5 | 480.3 | 552.1 | 1225  | 567.69  |
| 102551365 | LOC102551365 | 9      | 16      | 31     | 14     | 8     | 8     | 18    | 5       |
| 689008    | Fbn2         | 68     | 100     | 173    | 120    | 42    | 43    | 87    | 85      |
| 25293     | Aqp4         | 123.58 | 15.22   | 65.07  | 93.74  | 27    | 47.54 | 16.52 | 75.31   |
| 170672    | Nphs2        | 7.34   | 10.7    | 10.19  | 17.88  | 6.12  | 7.89  | 4.13  | 7.7     |
| 305340    | Rbm47        | 17     | 23      | 45     | 22     | 16    | 11    | 13    | 20      |
| 108351322 | LOC108351322 | 11     | 5       | 15     | 17     | 3     | 5     | 14    | 5       |
| 117249    | Dnah3        | 2      | 4       | 3      | 7      | 2     | 3     | 0     | 4       |
| 311956    | Wdr86        | 3      | 5       | 4      | 4      | 3     | 0     | 1     | 5       |
| 313018    | Kdf1         | 1.87   | 4.67    | 4.63   | 0      | 2.6   | 0     | 3.69  | 0       |
| 103690143 | LOC103690143 | 1      | 0       | 0      | 2.55   | 1     | 0     | 1     | 0       |
| 83497     | Ocln         | 100.57 | 77.2    | 112.65 | 130.31 | 36.74 | 37.71 | 80.85 | 82.14   |
| 108349777 | LOC108349777 | 1.16   | 1.79    | 1.86   | 4.35   | 0     | 2.89  | 2.28  | 0       |
| 100909612 | LOC100909612 | 1      | 1       | 0      | 1.54   | 0     | 0     | 1     | 1       |
| 688583    | LOC688583    | 62.87  | 36.02   | 62.51  | 14.79  | 32.27 | 21.57 | 21.79 | 23.99   |
| 102550582 | LOC102550582 | 0      | 2.01    | 5.94   | 6.14   | 0     | 0     | 7.99  | 0       |
| 300718    | Sh2d7        | 14.74  | 17.46   | 16.33  | 9.12   | 5.82  | 6.89  | 6.61  | 13.38   |
| 100909893 | LOC100909893 | 9      | 8       | 6      | 14     | 6     | 6     | 7     | 2       |
| 297584    | Clec4a2      | 12     | 17      | 10     | 5      | 5     | 6     | 5     | 9       |
| 108353009 | LOC108353009 | 5.44   | 2.45    | 3.22   | 1.66   | 0     | 2.02  | 2.85  | 2.39    |
| 108353010 | LOC108353010 | 5.44   | 2.45    | 3.22   | 1.66   | 0     | 2.02  | 2.85  | 2.39    |
| 24186     | Alb          | 15     | 8       | 17     | 11     | 11    | 5     | 7     | 6       |
| 307049    | RGD1564062   | 2.23   | 4.25    | 0      | 6.11   | 1.76  | 0     | 4.27  | 1.13    |
| 304966    | Fcgr3a       | 39     | 23      | 52     | 30     | 17    | 21    | 15    | 29      |
| 684440    | Tlr8         | 58     | 65      | 104    | 61     | 27    | 18    | 61    | 58      |
| 24646     | Abcb1b       | 6.25   | 21.2    | 43.07  | 20.6   | 7.38  | 14.86 | 23.01 | 6.64    |
| 102554231 | LOC102554231 | 0      | 0       | 1      | 7.53   | 1     | 0     | 0     | 3.86    |
| 290681    | Nat3         | 4.04   | 8       | 7.02   | 4      | 4.09  | 1     | 5.1   | 2.95    |
| 108348048 | LOC108348048 | 2637.9 | 1198.12 | 3404.3 | 3956.8 | 70.28 | 3358  | 1492  | 1459.97 |
| 502160    | Lvrn         | 146    | 173     | 203    | 176    | 70    | 77    | 150   | 101     |
| 29252     | Gzmm         | 41     | 31      | 23     | 33     | 13    | 12    | 18    | 30      |
| 25314     | Emp1         | 1098   | 1363    | 3017   | 1229   | 647   | 989   | 1185  | 1010    |
| 102546579 | LOC102546579 | 2      | 0       | 3      | 2      | 1     | 1     | 2     | 0       |
| 102548061 | LOC102548061 | 5      | 2       | 3      | 4      | 2     | 1     | 2     | 3       |
| 24886     | Tbxas1       | 37     | 43      | 83     | 33     | 21    | 28    | 30    | 33      |
| 252898    | Acox2        | 3      | 4       | 3      | 4      | 2     | 5     | 0     | 1       |
| 288322    | Lipi         | 1      | 0       | 3      | 3      | 1     | 1     | 2     | 0       |
| 303236    | Odf4         | 1      | 1       | 1      | 4      | 0     | 1     | 1     | 2       |
| 680246    | Tdgf1        | 2      | 4       | 1      | 0      | 0     | 1     | 3     | 0       |
| 687030    | Muc3         | 4      | 1       | 0      | 2      | 0     | 3     | 1     | 0       |
| 89810     | Opnlmw       | 1      | 2       | 3      | 1      | 0     | 1     | 1     | 2       |
| 89814     | Tnfsf4       | 4      | 2       | 4      | 4      | 2     | 3     | 2     | 1       |
| 302369    | Tbx22        | 8      | 9       | 4      | 7      | 4     | 3     | 4     | 5       |
| 100909441 | LOC100909441 | 914.67 | 1036.04 | 752.14 | 1288.5 | 0     | 704.1 | 731.6 | 845.69  |
| 296510    | Sp5          | 9      | 3       | 16     | 10.49  | 4     | 2     | 4     | 12      |
| 60327     | F13a1        | 153    | 149     | 495    | 84     | 87    | 129   | 170   | 118     |
| 291669    | RGD1564574   | 5      | 9.01    | 9.01   | 12.64  | 3.39  | 5.01  | 6     | 6.01    |
| 114020    | Nat8f5       | 42.78  | 33.51   | 31.05  | 54.84  | 25.62 | 13.18 | 28.32 | 25.72   |
| 296149    | Sirpb3       | 7.03   | 5.16    | 6.89   | 2.26   | 2.76  | 4.09  | 1     | 4.37    |
| 494199    | Oas1f        | 117.32 | 105.63  | 68.47  | 28.48  | 30.15 | 37.2  | 79.4  | 36.45   |
| 501668    | Dmrtcla      | 55.22  | 40.72   | 77.1   | 14.94  | 34.55 | 34.23 | 31.71 | 7.18    |
| 688913    | Dcun1d2      | 263.85 | 157.64  | 87.01  | 212.97 | 178.2 | 128.2 | 107.2 | 0       |



|           |              |        |        |        |        |       |       |       |        |
|-----------|--------------|--------|--------|--------|--------|-------|-------|-------|--------|
| 303384    | Mmp28        | 37.99  | 67.72  | 47.66  | 57.26  | 14.19 | 57.92 | 29.92 | 18.72  |
| 24370     | Foxg1        | 5.19   | 5.1    | 2.92   | 6.4    | 0     | 3.09  | 5.1   | 3.06   |
| 287136    | Prss29       | 12     | 22     | 26     | 1      | 4     | 9     | 16    | 6      |
| 24190     | Aldob        | 11     | 8      | 8      | 6      | 6     | 3     | 4     | 6      |
| 679787    | Clec5a       | 67.01  | 39.57  | 66.17  | 68.6   | 35.09 | 29    | 42.72 | 32.21  |
| 103691544 | LOC103691544 | 0      | 3      | 0      | 0      | 0     | 0     | 1.73  | 0      |
| 100362113 | LOC100362113 | 192.9  | 179.05 | 181.22 | 126.28 | 109.4 | 47.2  | 132.3 | 102.94 |
| 689081    | LOC689081    | 5      | 7      | 11     | 3      | 3     | 4     | 4     | 4      |
| 102555392 | LOC102555392 | 0      | 1.06   | 0      | 6.13   | 0     | 0     | 0     | 4.15   |
| 103694226 | LOC103694226 | 0      | 1.06   | 0      | 6.13   | 0     | 0     | 0     | 4.15   |
| 360918    | Pf4          | 49     | 23     | 32     | 17     | 19    | 15    | 17    | 19     |
| 25616     | Rln1         | 7      | 5      | 4      | 3      | 1     | 2     | 1     | 7      |
| 363458    | Col4a6       | 11     | 5      | 10     | 12     | 4     | 4     | 6     | 8      |
| 681341    | LOC681341    | 3      | 0      | 11.56  | 2.31   | 1.96  | 3     | 1     | 3.82   |
| 108348812 | LOC108348812 | 0      | 5.6    | 2.94   | 4.89   | 2.44  | 2.59  | 0     | 2.77   |
| 113892    | Nat8f3       | 248.39 | 195.27 | 131.17 | 299.6  | 100.5 | 119.7 | 153.1 | 134.7  |
| 24231     | C2           | 398    | 493    | 805    | 437    | 220   | 322   | 376   | 322    |
| 405349    | Olr1737      | 2      | 1.5    | 1      | 0.66   | 0     | 0     | 3     | 0      |
| 291760    | Dsc2         | 12     | 15     | 14     | 14     | 2     | 10    | 13    | 7      |
| 308350    | Lilrb3       | 18     | 74     | 49     | 29     | 32    | 23    | 32    | 12     |
| 305269    | Stap1        | 26.12  | 20.04  | 29.12  | 19.33  | 11.08 | 10.89 | 20.06 | 13.07  |
| 309288    | Rorb         | 10.9   | 5.11   | 11.09  | 12.7   | 6.05  | 1.98  | 5.09  | 10.06  |
| 29268     | Tpsb2        | 7      | 18     | 50     | 16     | 13    | 17    | 16    | 7      |
| 306889    | RGD1564786   | 13     | 9.01   | 11     | 3      | 6     | 7     | 7     | 1      |
| 100361444 | Angptl8      | 1      | 4      | 4      | 3      | 0     | 3     | 0     | 4      |
| 117064    | Vip          | 3      | 1      | 5      | 3      | 0     | 3     | 2     | 2      |
| 360417    | Ptprq        | 1      | 3      | 5      | 3      | 1     | 4     | 2     | 0      |
| 690393    | Tex12        | 11.6   | 14.99  | 19.09  | 18.93  | 4.01  | 4.01  | 9.43  | 20.26  |
| 685025    | LOC685025    | 25.69  | 9.62   | 9.09   | 19.83  | 10.76 | 10.12 | 5.41  | 11.2   |
| 25432     | Drd4         | 2      | 1      | 3.09   | 3.4    | 1.25  | 2.07  | 2.22  | 0      |
| 116487    | Tgfb1        | 1896   | 2518   | 3532   | 2828   | 1106  | 1339  | 1932  | 1923   |
| 313504    | Foxd2        | 143.95 | 124    | 166.3  | 141.91 | 61    | 57.56 | 85.85 | 132.77 |
| 292301    | Tbxt         | 11     | 6      | 16     | 8      | 3     | 6     | 7     | 8      |
| 689210    | Spdef        | 11     | 7      | 16     | 7      | 11    | 4     | 4     | 5      |
| 100912068 | LOC100912068 | 66.86  | 61.2   | 75.46  | 63.55  | 27.13 | 31.13 | 60.15 | 38     |
| 366452    | Ptch2        | 157    | 177    | 234    | 238    | 64    | 91    | 161   | 157    |
| 100911796 | LOC100911796 | 11.31  | 5.56   | 10.91  | 2.1    | 1     | 10.02 | 3.95  | 2.58   |
| 689458    | LOC689458    | 9.74   | 9      | 8      | 8      | 7     | 3.2   | 5     | 5.22   |
| 293591    | Scart1       | 3      | 2      | 6      | 6      | 0     | 2     | 6     | 2      |
| 25236     | Gpc3         | 1139   | 1525   | 2631   | 1888   | 537   | 958   | 1538  | 1193   |
| 100361947 | Zfp42        | 3.3    | 6.26   | 2.47   | 3.33   | 2.71  | 0.37  | 3.39  | 2.57   |
| 246266    | Aspg         | 36     | 74     | 97     | 34     | 19    | 46    | 47    | 30     |
| 298605    | Tmem82       | 11     | 12     | 11     | 5      | 11    | 5     | 4     | 3      |
| 29139     | Dcn          | 15622  | 16782  | 22653  | 17216  | 6427  | 8904  | 14791 | 12546  |
| 108348208 | LOC108348208 | 9.06   | 6.11   | 12.36  | 8.36   | 4.19  | 7.29  | 3.19  | 6.53   |
| 102547257 | LOC102547257 | 8.88   | 5.8    | 1.09   | 3.36   | 2.31  | 1.12  | 2.37  | 5.5    |
| 293154    | Folr2        | 94     | 110    | 211    | 81     | 46    | 61    | 96    | 90     |
| 102547688 | LOC102547688 | 20.2   | 8.68   | 8.79   | 9.17   | 9.6   | 2.45  | 6.2   | 9.42   |
| 117027    | Ccr3         | 6      | 4      | 12     | 0      | 4     | 4     | 2     | 3      |
| 501570    | RGD1565785   | 12     | 14     | 11     | 7      | 7     | 5     | 6     | 8      |
| 497796    | LOC497796    | 13.46  | 5.82   | 1.82   | 1.1    | 5.21  | 0     | 7.91  | 0      |
| 685357    | Baiap212     | 23     | 18     | 21     | 9      | 7     | 14    | 11    | 10     |
| 108348044 | LOC108348044 | 37.12  | 42     | 89.86  | 37.12  | 21    | 33    | 30    | 38     |
| 100909455 | LOC100909455 | 45.18  | 23.29  | 51.11  | 27.63  | 11.05 | 21.62 | 10.98 | 43.71  |
| 293744    | Ms4a7        | 20     | 24     | 31     | 21     | 8     | 11    | 18    | 20     |
| 309666    | Ubash3a      | 44     | 9      | 38     | 37     | 11    | 18    | 24    | 23     |

|           |              |        |        |        |        |       |       |       |        |
|-----------|--------------|--------|--------|--------|--------|-------|-------|-------|--------|
| 108349172 | LOC108349172 | 1      | 1.03   | 1      | 0      | 0     | 0     | 1.8   | 0      |
| 298861    | Ptrhd1       | 411.13 | 262.53 | 291.13 | 270.28 | 238   | 133.4 | 173.5 | 189.16 |
| 301227    | Trem2        | 81     | 105    | 168    | 73     | 60    | 45    | 67    | 82     |
| 116649    | Kcnj4        | 26     | 34     | 42     | 14     | 19    | 16.99 | 7     | 26.03  |
| 306454    | Cldn22       | 53.13  | 22.02  | 34     | 32.8   | 9.47  | 16.45 | 33.3  | 25.4   |
| 102546424 | LOC102546424 | 23.15  | 18.32  | 30.55  | 18.58  | 7.3   | 14.65 | 17.38 | 14.7   |
| 24653     | Pla2g4a      | 37     | 39     | 92     | 55     | 28    | 21    | 56    | 27.99  |
| 681092    | Pou6f2       | 19     | 17     | 21     | 14     | 9.35  | 9     | 10    | 14     |
| 89829     | Socs3        | 142    | 176    | 325    | 309    | 145   | 153   | 117   | 153    |
| 689257    | Adgrd1       | 178    | 124    | 216    | 157    | 68    | 97    | 101   | 137    |
| 313831    | Vit          | 243    | 334    | 491    | 374    | 118   | 209   | 292   | 242    |
| 295279    | Fcgr1a       | 103    | 103    | 137    | 114    | 58    | 46    | 80    | 89     |
| 448830    | Ly96         | 72.02  | 38.3   | 58.75  | 56.3   | 32.42 | 30.53 | 37.12 | 34.59  |
| 108348113 | Egfl1        | 14.04  | 11.42  | 11.04  | 37.63  | 12.59 | 11.84 | 6.7   | 13.19  |
| 25021     | Itgam        | 79.17  | 100.74 | 215    | 58     | 67.02 | 53    | 86    | 65     |
| 407760    | Krt86        | 2      | 0      | 3.68   | 1      | 1     | 0     | 1     | 2      |
| 108351105 | LOC108351105 | 54.82  | 60     | 78     | 90     | 19    | 24.43 | 64.15 | 62     |
| 103690152 | LOC103690152 | 12.22  | 12.46  | 4.49   | 13.69  | 6.23  | 13.25 | 6.23  | 0      |
| 102551208 | Tctex1d4     | 1      | 1      | 2      | 1      | 1     | 0     | 0     | 2      |
| 102555817 | LOC102555817 | 0      | 0      | 2      | 3      | 0     | 3     | 0     | 0      |
| 103692827 | LOC103692827 | 0      | 0      | 1      | 4      | 1     | 1     | 1     | 0      |
| 108348722 | LOC108348722 | 0      | 0      | 3      | 2      | 0     | 1     | 1     | 1      |
| 108351813 | LOC108351813 | 3      | 3      | 5      | 4      | 1     | 3     | 4     | 1      |
| 24443     | Hdc          | 18     | 30     | 36     | 11     | 14    | 19    | 12    | 12     |
| 25069     | Tnfrsf8      | 2      | 2      | 3      | 3      | 1     | 3     | 2     | 0      |
| 25294     | Azgp1        | 4      | 5      | 3      | 8      | 3     | 3     | 4     | 2      |
| 290595    | LOC290595    | 2      | 0      | 0      | 3      | 1     | 1     | 0     | 1      |
| 301266    | Adgrf1       | 4      | 0      | 4      | 2      | 1     | 1     | 2     | 2      |
| 304000    | Igsf5        | 0      | 3      | 3      | 4      | 4     | 0     | 1     | 1      |
| 305307    | Cwh43        | 2      | 2      | 0      | 1      | 1     | 1     | 1     | 0      |
| 367306    | RGD1561755   | 0.83   | 0      | 0      | 1.27   | 0     | 0     | 0     | 1.26   |
| 498036    | Csnka2ip     | 1      | 0      | 2      | 2      | 1     | 0     | 0     | 2      |
| 498300    | LOC498300    | 2      | 2      | 0      | 1      | 1     | 1     | 0     | 1      |
| 499277    | RGD1560958   | 7      | 1      | 6      | 1      | 2     | 1     | 4     | 2      |
| 499765    | Cfap77       | 3      | 1      | 0      | 1      | 2     | 0     | 1     | 0      |
| 64572     | Vax2         | 1      | 0      | 1      | 3      | 1     | 0     | 1     | 1      |
| 685102    | Nkx6-3       | 1      | 1      | 2      | 1      | 1     | 1     | 0     | 1      |
| 689108    | Slc25a31     | 2      | 0      | 2      | 1      | 1     | 0     | 1     | 1      |
| 84475     | Cxcr3        | 8      | 5      | 3      | 4      | 1     | 5     | 0     | 6      |
| 102551737 | LOC102551737 | 10     | 11     | 5      | 9      | 10    | 5     | 4     | 2      |
| 296500    | Dlx1         | 20     | 17     | 23     | 10     | 6     | 12    | 15    | 9      |
| 498345    | Tmprss11f    | 8      | 12     | 32     | 18     | 10    | 14    | 10    | 8      |
| 25239     | Apod         | 19875  | 24987  | 40158  | 18965  | 10232 | 14373 | 21182 | 16748  |
| 100359752 | LOC100359752 | 16     | 33     | 40     | 29     | 12    | 13    | 30    | 16     |
| 100364500 | LOC100364500 | 232.15 | 151.54 | 229.06 | 258.4  | 115.7 | 113.5 | 193.4 | 101.7  |
| 294257    | Cfb          | 94     | 104    | 192    | 85     | 62    | 68    | 91    | 65     |
| 108349608 | LOC108349608 | 29.82  | 62.08  | 42.31  | 21     | 23.36 | 6     | 10.87 | 53.3   |
| 498241    | RGD1564614   | 2.1    | 1.04   | 1.03   | 1.03   | 2.09  | 0     | 0     | 1.05   |
| 361266    | Akr1c12      | 9      | 23     | 17     | 21     | 9.57  | 6.11  | 14    | 12.6   |
| 689907    | Ankrd61      | 11     | 11     | 8      | 13     | 8     | 8     | 2     | 8      |
| 315039    | Osr2         | 86     | 111    | 166    | 91     | 53    | 57    | 84    | 81     |
| 29509     | Slc22a6      | 35     | 9      | 28     | 60     | 6     | 6     | 24    | 44     |
| 681236    | Cd79a1       | 14.88  | 10.42  | 11.84  | 0      | 12.87 | 4.15  | 5.47  | 0.02   |
| 100909794 | LOC100909794 | 16.78  | 1.88   | 0      | 12.41  | 1.9   | 5.84  | 6.14  | 4.96   |
| 170635    | Dhrs9        | 6      | 4      | 9      | 9      | 4     | 4     | 5     | 4      |
| 24500     | I19r         | 11     | 4      | 6      | 7      | 3     | 1     | 7     | 6      |

|           |              |        |         |        |        |       |       |       |        |
|-----------|--------------|--------|---------|--------|--------|-------|-------|-------|--------|
| 394266    | Gjb2         | 166    | 72      | 244    | 407    | 48    | 57    | 191   | 244    |
| 117029    | Ccr5         | 135.83 | 76.78   | 136.57 | 105.36 | 70.03 | 52.91 | 61.47 | 91.71  |
| 103694534 | LOC103694534 | 0      | 1.44    | 1.36   | 1.71   | 0     | 2.74  | 0     | 0      |
| 100365773 | LOC100365773 | 28     | 7       | 11     | 5      | 5     | 11    | 2     | 13     |
| 102555624 | LOC102555624 | 1.86   | 8.17    | 4.04   | 4.02   | 3.96  | 4.03  | 2.02  | 1      |
| 300520    | Vsig2        | 3      | 3       | 15     | 2      | 2     | 6     | 3     | 3      |
| 686581    | Tmprss11a    | 4      | 8       | 8      | 3      | 2     | 4     | 4     | 4      |
| 498638    | Msr1         | 96.86  | 106.67  | 251.93 | 105.43 | 78.02 | 55.99 | 101.2 | 106.39 |
| 66021     | Cybb         | 133    | 111     | 185    | 119    | 71    | 72    | 95    | 96     |
| 65129     | Cldn1        | 1116   | 815     | 1137   | 1341   | 466   | 432   | 938   | 852    |
| 305355    | Tlr10        | 4.31   | 7.75    | 7.1    | 3.81   | 2.54  | 1.58  | 5.86  | 4.03   |
| 100910688 | LOC100910688 | 50.52  | 29.41   | 50.67  | 23.82  | 15.47 | 15.95 | 26.32 | 36.49  |
| 499271    | Itgax        | 46     | 52.65   | 69.74  | 52.95  | 25.81 | 20.93 | 55.4  | 32.96  |
| 498022    | RGD1559482   | 18.22  | 36.1    | 85.52  | 36.32  | 27.45 | 35.25 | 33.98 | 10.93  |
| 282586    | Muc6         | 12     | 9       | 8      | 7      | 5     | 4     | 7     | 6      |
| 298017    | Actl7a       | 4      | 4       | 4      | 6      | 2     | 3     | 3     | 3      |
| 308716    | Ii20ra       | 5      | 7       | 4      | 2      | 3     | 1     | 6     | 1      |
| 304988    | Mnda         | 60.71  | 67.71   | 94.91  | 36.12  | 27.27 | 43.14 | 44.7  | 43.55  |
| 24379     | Gad1         | 37     | 43      | 29     | 56     | 15    | 21    | 24    | 41     |
| 293490    | Gdpd3        | 7      | 32      | 36     | 5      | 5     | 4     | 34    | 6      |
| 295012    | RGD1563562   | 0      | 1       | 0      | 6      | 2     | 1.29  | 1     | 0      |
| 363143    | Gnat1        | 8      | 8       | 9      | 6      | 3     | 4     | 7     | 5      |
| 687532    | LOC687532    | 5      | 10      | 4.93   | 11.06  | 4     | 5.32  | 2     | 7.68   |
| 408229    | Slpil2       | 5.34   | 5.99    | 1.99   | 1      | 2     | 2     | 2.79  | 2      |
| 292406    | Thbs2        | 415    | 765     | 1781   | 647    | 374   | 667   | 646   | 529    |
| 24536     | Lepr         | 316    | 275     | 505.22 | 409    | 153.2 | 128.1 | 354.6 | 289.45 |
| 305842    | Rnase6       | 1.22   | 0.72    | 12.96  | 0      | 5.02  | 1.26  | 1.87  | 1.01   |
| 25383     | Apobec1      | 55     | 81      | 133    | 48     | 39    | 45    | 48    | 63     |
| 296179    | Fermt1       | 1.96   | 5.09    | 9.62   | 4.02   | 6.75  | 1.04  | 0     | 4.94   |
| 108348111 | LOC108348111 | 33.5   | 83.75   | 50.25  | 50.25  | 33.5  | 50.25 | 33.5  | 16.75  |
| 299599    | Theg         | 5      | 3       | 1      | 4      | 1     | 2     | 3     | 2      |
| 305236    | Cxcl11       | 3      | 2       | 4      | 4      | 1     | 1     | 3     | 3      |
| 140586    | Sox9         | 64.86  | 85.46   | 114    | 100.51 | 33    | 62.72 | 71.36 | 57.78  |
| 362431    | Clec4a3      | 85     | 80      | 95     | 53     | 37    | 38    | 57    | 61     |
| 500697    | RGD1565693   | 4      | 1       | 0      | 10.52  | 0     | 3.39  | 0     | 6.18   |
| 362430    | Clec4a1      | 102.26 | 108.15  | 118    | 97.86  | 60    | 43.95 | 82.01 | 77     |
| 100912590 | LOC100912590 | 90.31  | 18.06   | 54.18  | 126.43 | 33.82 | 54.18 | 36.12 | 54.18  |
| 364858    | Stk32a       | 19     | 25      | 9      | 15     | 8     | 12    | 10    | 12     |
| 680346    | LOC680346    | 9.09   | 12.02   | 11.08  | 10     | 7.01  | 3.02  | 4.02  | 12.08  |
| 24494     | I11b         | 15     | 15      | 9      | 32     | 10    | 4     | 12    | 18     |
| 685351    | LOC685351    | 1      | 2       | 3      | 3      | 0     | 2     | 0     | 3.58   |
| 499536    | Ccdc152      | 20.21  | 21.1    | 13.4   | 14.22  | 12.12 | 9.19  | 6.08  | 15.35  |
| 316638    | Sned1        | 950.95 | 1135.49 | 1440.6 | 1347.8 | 569.5 | 772.7 | 888.7 | 793.47 |
| 100361584 | Ano2         | 8      | 7       | 6      | 8      | 8     | 4     | 5     | 1      |
| 306127    | Acod1        | 7.98   | 6.81    | 7.24   | 7.85   | 8.71  | 4.54  | 4.29  | 1.01   |
| 297666    | Klra5        | 8.87   | 12.62   | 16     | 6      | 2.81  | 6.19  | 11    | 7      |
| 59323     | ErbB4        | 13     | 39      | 39     | 41     | 18    | 14    | 23    | 27     |
| 108351351 | LOC108351351 | 1.21   | 0       | 1.32   | 1.14   | 0     | 0     | 1.13  | 1.15   |
| 681319    | Ido2         | 13.19  | 19      | 3.02   | 5      | 7     | 9     | 1     | 8      |
| 304021    | Col8a1       | 157    | 193     | 629    | 210    | 192   | 146   | 271   | 131    |
| 84397     | Tnfaip6      | 18     | 38      | 56     | 31     | 7     | 26    | 30    | 26     |
| 685007    | Unc93a       | 9.42   | 11.83   | 11.45  | 31.22  | 9.88  | 15.56 | 5.33  | 9.06   |
| 171339    | Dnah1        | 47     | 40      | 44     | 31     | 22    | 30    | 28    | 21     |
| 679841    | Dnd1         | 7.24   | 2.09    | 5.15   | 2.05   | 3.19  | 2.08  | 5.04  | 0      |
| 498781    | RGD1561231   | 45.49  | 123.72  | 145.84 | 119.38 | 54.53 | 65.75 | 79.6  | 71.14  |
| 64552     | Mpeg1        | 562.86 | 666.92  | 801.13 | 568.18 | 329.5 | 326   | 466   | 501.04 |

|           |                 |        |        |        |        |       |       |       |        |
|-----------|-----------------|--------|--------|--------|--------|-------|-------|-------|--------|
| 114099    | Cysltrl         | 34     | 47     | 70     | 46     | 19    | 24    | 45    | 35     |
| 688858    | LOC688858       | 0.01   | 5      | 0.03   | 3      | 0     | 2     | 0.02  | 3      |
| 103690021 | NEWGENE_1589866 | 5.95   | 2.87   | 2      | 2.5    | 1.4   | 1     | 3.42  | 2.5    |
| 690912    | Fam124b         | 5.95   | 2.87   | 2      | 2.5    | 1.4   | 1     | 3.42  | 2.5    |
| 100359656 | LOC100359656    | 3      | 1      | 2      | 2      | 1     | 1     | 1     | 2      |
| 103690541 | Fam237a         | 3      | 4      | 1      | 0      | 2     | 2     | 1     | 0      |
| 29151     | Ucn             | 4      | 0      | 4      | 0      | 3     | 1     | 1     | 0      |
| 295449    | Arhgef38        | 4      | 6      | 3      | 19     | 3     | 11    | 2     | 4      |
| 310090    | Ddx4            | 0      | 2      | 3      | 3      | 1     | 3     | 0     | 1      |
| 500705    | Efcab11         | 8      | 6      | 7      | 3      | 4     | 2     | 4     | 5      |
| 103692570 | LOC103692570    | 0      | 13.48  | 0      | 46.44  | 11.5  | 0     | 13.12 | 12.92  |
| 266778    | Vom2r44         | 39.02  | 27.99  | 45.84  | 25.02  | 12.04 | 12    | 31.39 | 31     |
| 81682     | Lum             | 3019   | 2925   | 4754   | 3545   | 1467  | 1917  | 3023  | 2523   |
| 54250     | Fgf2            | 26     | 16     | 30     | 22     | 6     | 13    | 17    | 23     |
| 100362830 | LOC100362830    | 20.94  | 10.43  | 8.99   | 6.39   | 3.9   | 11.26 | 0     | 14.19  |
| 24233     | C4a             | 251.87 | 328.46 | 755.23 | 238.38 | 195.3 | 298.9 | 215.8 | 278.86 |
| 24330     | Egr1            | 272    | 239    | 177    | 1300   | 354   | 316   | 311   | 268    |
| 500362    | Lmntd1          | 8      | 8      | 2      | 9      | 4     | 2     | 4     | 7      |
| 85272     | Bmp7            | 72     | 105    | 231    | 103    | 54    | 74    | 93    | 101    |
| 266685    | Ugt2b17         | 8.63   | 8.76   | 5.72   | 9.04   | 8.03  | 4     | 1.02  | 7.21   |
| 102553099 | LOC102553099    | 21.7   | 18.71  | 7.49   | 24.18  | 0     | 17.88 | 11.98 | 15.57  |
| 360747    | Spag6           | 2.65   | 3      | 1.28   | 1      | 1     | 0     | 0     | 4      |
| 308762    | Tt1113          | 48     | 30     | 50     | 29     | 27    | 25    | 22    | 25     |
| 312701    | Cd163           | 272    | 201    | 346    | 158.08 | 153   | 207   | 146.2 | 110    |
| 503462    | Trmt2b          | 16     | 21     | 12     | 16     | 9     | 9     | 13    | 10     |
| 302586    | LOC302586       | 0      | 1.45   | 4.1    | 7.82   | 2.83  | 1.25  | 1.57  | 2.79   |
| 301365    | I118r1          | 8      | 9      | 9      | 12     | 6     | 4     | 7     | 7      |
| 365391    | Trpm5           | 10     | 13     | 14     | 20     | 9     | 6     | 10    | 11     |
| 361221    | No18            | 111.67 | 50.57  | 13.18  | 131.28 | 22.82 | 67.75 | 32.25 | 70.89  |
| 299737    | Ntn4            | 228    | 327    | 436    | 310    | 164   | 188   | 263   | 207    |
| 317181    | Srpx2           | 37     | 60     | 116    | 37     | 19    | 37    | 55    | 47     |
| 298765    | Zfp3612         | 21.39  | 15.92  | 18.59  | 10.53  | 18.18 | 7.97  | 5.34  | 10.52  |
| 503146    | RGD1561812      | 9.21   | 5.05   | 2.05   | 6.05   | 4     | 2.02  | 6.09  | 2.04   |
| 300384    | Naalad2         | 15     | 20     | 19     | 25     | 13    | 10    | 21    | 6      |
| 474143    | Clec4a          | 22     | 19     | 19     | 19     | 8     | 4     | 19    | 19     |
| 103693375 | LOC103693375    | 1.1    | 0      | 0      | 2.58   | 2.33  | 0     | 0     | 0      |
| 266684    | Cyp2d1          | 41.57  | 13.79  | 17.4   | 34.78  | 18.71 | 9.54  | 14.22 | 25.7   |
| 287231    | RGD1559575      | 98     | 66     | 123    | 101    | 51    | 41    | 78    | 76     |
| 24826     | Tg              | 10     | 8      | 11     | 12     | 9     | 3     | 9     | 5      |
| 299242    | Gpr65           | 12     | 12     | 15     | 13     | 8     | 4     | 14    | 7      |
| 679975    | Gpr183          | 51     | 46     | 54     | 52     | 20    | 20    | 35    | 54     |
| 103693234 | LOC103693234    | 12.32  | 1.06   | 10.79  | 21.18  | 11.19 | 4.49  | 7.41  | 5.73   |
| 691382    | Hus1b           | 2      | 5.71   | 2.71   | 1.71   | 2     | 2     | 2.71  | 1      |
| 103690097 | LOC103690097    | 12.24  | 7.88   | 10.55  | 11.63  | 6.32  | 5.04  | 7.71  | 7.83   |
| 292902    | Slc6a16         | 3      | 4      | 3      | 1      | 3     | 2     | 2     | 0      |
| 314711    | Spic            | 6      | 1      | 8      | 7      | 5     | 2     | 2     | 5      |
| 315074    | RGD1308195      | 1      | 4      | 4      | 2      | 2     | 3     | 1     | 1      |
| 366990    | RGD1305207      | 3      | 3      | 5      | 0      | 1     | 3     | 2     | 1      |
| 500088    | Rab19           | 7      | 1      | 2      | 1      | 2     | 2     | 1     | 2      |
| 688111    | Hsf5            | 8      | 9      | 7      | 20     | 7     | 3     | 10    | 8      |
| 114523    | Ntn1            | 150    | 87     | 243    | 224    | 78    | 88    | 169   | 113    |
| 307838    | Chst4           | 4.41   | 15.23  | 6.89   | 7.86   | 7.31  | 4.45  | 6.01  | 4.12   |
| 100912787 | LOC100912787    | 0      | 20.74  | 2.84   | 4.08   | 6.1   | 0     | 11.52 | 0      |
| 103690032 | LOC103690032    | 1.16   | 5.28   | 1.4    | 3.31   | 1.13  | 4.5   | 0     | 1.48   |
| 100910606 | LOC100910606    | 0      | 0.5    | 0.88   | 0      | 0     | 0     | 0     | 0.88   |
| 310869    | Rrh             | 11.53  | 4.45   | 9.48   | 11.01  | 3.51  | 8.38  | 4.61  | 6.76   |

|           |              |        |        |        |        |       |       |       |        |
|-----------|--------------|--------|--------|--------|--------|-------|-------|-------|--------|
| 171452    | Rab3i11      | 141    | 130    | 157    | 196    | 65    | 91    | 119   | 123    |
| 685158    | Cfap299      | 15     | 8      | 20     | 15     | 11    | 10    | 10    | 6      |
| 494209    | Ly49si3      | 14.73  | 8.86   | 9.24   | 8.37   | 4.86  | 9.44  | 5.24  | 6.75   |
| 64033     | Ccnd2        | 100    | 116    | 240    | 163    | 69    | 103   | 140   | 83     |
| 316061    | Slc22a14     | 12     | 13     | 11     | 11     | 7     | 7     | 7     | 9      |
| 406865    | Mpig6b       | 7      | 17     | 9      | 14     | 10    | 9     | 5     | 6      |
| 103694852 | LOC103694852 | 4.83   | 3.49   | 0      | 3.86   | 0     | 4.72  | 3.06  | 0      |
| 103690035 | LOC103690035 | 1.45   | 2.74   | 1.36   | 5.8    | 0     | 1.4   | 0     | 5.85   |
| 140594    | Syt14        | 37.01  | 41     | 64.03  | 38.01  | 19.01 | 29    | 33    | 34     |
| 689931    | Mgarp        | 10     | 4      | 12     | 10     | 9     | 3     | 7     | 4      |
| 445442    | Thbs1        | 246    | 236    | 466    | 653    | 268   | 184   | 316   | 255    |
| 84386     | Slpi         | 43.66  | 30.01  | 29.01  | 10     | 20    | 15    | 14    | 23     |
| 316207    | RGD1307182   | 13     | 16.63  | 14.59  | 12.75  | 12    | 5.05  | 10.36 | 9      |
| 296952    | Kcp          | 35     | 61     | 128    | 65     | 26    | 59    | 54.72 | 45     |
| 64668     | Mbl2         | 0      | 3.42   | 0      | 9.75   | 6.7   | 1.73  | 0     | 0      |
| 94341     | Kcnj13       | 91     | 47     | 76     | 114    | 33    | 30    | 66    | 81     |
| 311425    | Adam33       | 132    | 77     | 127    | 123    | 50    | 74    | 96    | 74     |
| 315979    | Col6a6       | 404.09 | 360.64 | 645.16 | 694.56 | 275.7 | 291.2 | 419.2 | 363.6  |
| 316559    | Slc19a3      | 35     | 27     | 31     | 27     | 21    | 25    | 12    | 19     |
| 103690109 | LOC103690109 | 2      | 5.32   | 3      | 3.7    | 2     | 5     | 1     | 1      |
| 64825     | N5           | 50.61  | 22.24  | 35.25  | 27.71  | 11.29 | 26.64 | 25.4  | 23.87  |
| 102552784 | LOC102552784 | 6.32   | 0      | 2.82   | 0      | 2.14  | 3.73  | 0     | 0      |
| 313060    | Spocd1       | 5      | 3      | 4      | 2      | 4     | 2     | 0     | 3      |
| 680270    | Ccdc83       | 5      | 4      | 1      | 4      | 3     | 3     | 1     | 2      |
| 690888    | Oosp2        | 8      | 2      | 1      | 3      | 2     | 3     | 2     | 2      |
| 303566    | LOC303566    | 10     | 4      | 6      | 8      | 5     | 6     | 0     | 7      |
| 686596    | LOC686596    | 6      | 7      | 8      | 7      | 6     | 3     | 8     | 1      |
| 100360801 | Ddx60        | 58.15  | 69.39  | 63.12  | 82.83  | 44.12 | 69.13 | 28.81 | 34.02  |
| 114247    | Slfn4        | 376.31 | 329.52 | 397.92 | 348.25 | 369.6 | 232.7 | 97.99 | 235.68 |
| 100910790 | LOC100910790 | 0      | 0      | 0      | 14.58  | 9.4   | 0     | 0     | 0      |
| 287098    | Cldn6        | 8      | 2      | 0      | 0      | 1     | 1     | 4.45  | 0      |
| 686050    | LOC686050    | 8      | 5      | 8      | 10     | 2     | 4     | 9     | 5      |
| 362417    | I117re       | 29     | 17     | 46     | 35     | 15    | 15    | 26    | 26     |
| 361821    | Col6a2       | 2192   | 2336   | 3570   | 2547   | 1173  | 1885  | 2143  | 1674   |
| 361289    | Colec12      | 225    | 278    | 431    | 278    | 126   | 162   | 271   | 224    |
| 299699    | Aldh112      | 52     | 46     | 64     | 50     | 31    | 43    | 38    | 25     |
| 298566    | Clqa         | 378    | 356    | 692    | 333    | 228   | 236   | 334   | 339    |
| 29200     | Inhba        | 48.5   | 38.53  | 129.25 | 64.2   | 29    | 46.37 | 59.42 | 46.54  |
| 297411    | Tprkb        | 139.78 | 204.79 | 452.72 | 133.94 | 218.7 | 44.62 | 38.26 | 300.61 |
| 100911422 | LOC100911422 | 0      | 50.95  | 0      | 34.38  | 0     | 0     | 0     | 55.18  |
| 100365733 | Tmem262      | 2.28   | 3.49   | 2      | 2.09   | 1     | 0     | 1.14  | 4.24   |
| 294795    | Caps1        | 0      | 2      | 4      | 11     | 1     | 5     | 2     | 3      |
| 102554774 | LOC102554774 | 0      | 1.62   | 1.07   | 3.12   | 1.19  | 1.47  | 0     | 1.1    |
| 81523     | Myoc         | 5509   | 6926   | 8155   | 6122   | 2429  | 3541  | 5595  | 5733   |
| 100360841 | LOC100360841 | 0      | 1.66   | 6.36   | 6.58   | 1.96  | 1.9   | 0     | 5.61   |
| 303666    | Cd300c2      | 14.25  | 22.34  | 18.27  | 5.72   | 6.86  | 8.84  | 9.58  | 14.02  |
| 103689965 | LOC103689965 | 263.59 | 428.84 | 866.72 | 338.1  | 232.5 | 465.4 | 277.5 | 255.43 |
| 691499    | Zfp469       | 106    | 109    | 244    | 142    | 73    | 117   | 107   | 93     |
| 100912350 | LOC100912350 | 9.72   | 14.99  | 13.62  | 22.64  | 9.55  | 9.27  | 8.67  | 12.09  |
| 312677    | Ccdc77       | 254    | 145    | 155    | 67     | 136   | 63    | 66.12 | 138.05 |
| 311426    | Siglec1      | 108.63 | 114.52 | 164.23 | 137.42 | 78.81 | 89.78 | 84.31 | 88.02  |
| 362550    | Ror1         | 78     | 83     | 108    | 137    | 49    | 45    | 105   | 65     |
| 367332    | RGD1566007   | 2.69   | 1      | 1      | 1.46   | 0     | 1     | 0     | 3      |
| 26296     | Tfec         | 15     | 10     | 23     | 15     | 7     | 6     | 15    | 13     |
| 554353    | Gpr34        | 43     | 54     | 82     | 53     | 32    | 25    | 35    | 59     |
| 688925    | LOC688925    | 2.13   | 2.1    | 2.12   | 3.28   | 4.82  | 0     | 0.88  | 0.57   |

|           |              |        |        |        |        |       |       |       |        |
|-----------|--------------|--------|--------|--------|--------|-------|-------|-------|--------|
| 311835    | Ddx31        | 106    | 166    | 212    | 190    | 114   | 102   | 109   | 114    |
| 301232    | RGD1561662   | 38.3   | 27.14  | 62.95  | 30.57  | 26.21 | 17.74 | 31.75 | 27.91  |
| 310683    | Itga10       | 11     | 29     | 67     | 8      | 17    | 33    | 14    | 11     |
| 102555239 | LOC102555239 | 3.53   | 3.01   | 2.04   | 5.2    | 4.07  | 0     | 3.2   | 1.73   |
| 50621     | Slc23a1      | 9      | 5      | 6      | 6      | 5     | 3     | 6     | 3      |
| 100912948 | LOC100912948 | 1.26   | 1.39   | 3.04   | 7.49   | 1.54  | 0     | 4.2   | 2.88   |
| 691249    | LOC691249    | 4.24   | 2.35   | 4.92   | 0.4    | 3.07  | 4.72  | 0     | 0      |
| 24188     | Aldh1a1      | 698    | 861    | 959.89 | 871.79 | 377   | 466   | 704   | 671    |
| 89843     | Cxadr        | 1075   | 914    | 1560   | 1605.1 | 545   | 600   | 1170  | 1058   |
| 353227    | Zbtb16       | 657.98 | 310.05 | 355.22 | 323.43 | 311.2 | 454.1 | 145.4 | 166.99 |
| 100270669 | Rriad1       | 6.67   | 10.46  | 11.78  | 6.13   | 7.79  | 4     | 5.04  | 6.11   |
| 314652    | RGD1564744   | 7.6    | 7.03   | 10.58  | 7.17   | 7.5   | 3.06  | 4.49  | 6.15   |
| 689936    | Gpr81        | 35     | 11     | 30     | 37     | 8     | 11    | 18    | 37     |
| 100911562 | LOC100911562 | 3.95   | 5.05   | 2.57   | 4.11   | 0.69  | 3.1   | 4.1   | 2.38   |
| 102556253 | Tdrd15       | 18.46  | 17.53  | 34.11  | 27.65  | 25.84 | 10.85 | 13.38 | 13.98  |
| 100910978 | LOC100910978 | 151.71 | 168.21 | 165.13 | 241.93 | 104.2 | 172.8 | 153.1 | 46.29  |
| 60449     | Gnb3         | 19     | 32     | 24     | 15     | 16    | 32    | 3     | 8      |
| 361734    | Ms4a4a       | 13.04  | 18.25  | 10.43  | 5.21   | 5.21  | 7.31  | 7.82  | 10.43  |
| 499991    | Steap4       | 467    | 498    | 594    | 644    | 277   | 323   | 424   | 421    |
| 306761    | F12          | 13     | 6      | 6      | 7      | 4     | 3     | 10    | 4      |
| 366189    | Tgm3         | 8      | 6      | 10     | 8      | 5     | 3     | 5     | 8      |
| 64352     | Gstm5        | 0      | 72.07  | 35.7   | 42.05  | 7.02  | 42.09 | 21.66 | 27.56  |
| 494200    | Oaslh        | 3.74   | 0      | 3.03   | 1      | 4.1   | 0     | 1     | 0      |
| 312279    | Epha1        | 6.17   | 2.03   | 11.18  | 7.11   | 3.08  | 5.09  | 5.1   | 4.12   |
| 680866    | Tmem45a      | 0      | 37.55  | 0      | 1.54   | 0     | 0     | 4.8   | 20.89  |
| 295703    | Serping1     | 2195   | 2223   | 3664   | 3115   | 1280  | 1597  | 2347  | 2137   |
| 287392    | Tekt3        | 36     | 45     | 42     | 61     | 21    | 37    | 27    | 36     |
| 102553405 | LOC102553405 | 59.8   | 57.32  | 92.61  | 64.4   | 47.95 | 44.91 | 56.62 | 30.84  |
| 313233    | Galnt12      | 23     | 13     | 19     | 21     | 6     | 9     | 23    | 12     |
| 690416    | Rbbp8nl      | 12.37  | 6.48   | 9.99   | 13.25  | 9.59  | 5     | 5.16  | 7.97   |
| 102554393 | Adamts13     | 38.97  | 36.62  | 40.28  | 29.18  | 16.76 | 28.67 | 24.98 | 25.17  |
| 102557539 | LOC102557539 | 0      | 0      | 3.05   | 0      | 0     | 0     | 2.01  | 0      |
| 286926    | Tfpi2        | 27     | 23     | 19     | 19     | 10    | 16    | 20    | 12     |
| 102550277 | LOC102550277 | 85.42  | 88.35  | 0      | 25     | 37.3  | 64.09 | 0     | 29.62  |
| 290403    | Rubcn1       | 43     | 37     | 44     | 26     | 27    | 21    | 18    | 33     |
| 685567    | Ppil6        | 20.03  | 10.17  | 19.03  | 13.09  | 11.03 | 10.04 | 10.07 | 10     |
| 60423     | Slc28a2      | 139.74 | 132.35 | 158.9  | 79.21  | 82    | 108   | 84.01 | 62.94  |
| 24988     | RT1-M2       | 5.02   | 2      | 0      | 2.01   | 2.01  | 1     | 1     | 1.96   |
| 304382    | RGD1561143   | 20.33  | 16.73  | 14.18  | 8.32   | 12.02 | 8.58  | 7.25  | 11.54  |
| 317590    | Magec2       | 2      | 2      | 6      | 5.01   | 0     | 2     | 5.93  | 2      |
| 103692555 | LOC103692555 | 19.05  | 20.29  | 25.04  | 26.5   | 10.58 | 12.04 | 20.52 | 17.01  |
| 291653    | Pcdhb6       | 40.88  | 34     | 51.14  | 49.19  | 51.92 | 35.66 | 17.71 | 10.69  |
| 100363472 | LOC100363472 | 9.87   | 0      | 3.86   | 0      | 5.4   | 3.69  | 0     | 0      |
| 24329     | Egfr         | 374.28 | 357.38 | 518.49 | 547.65 | 196.1 | 240.7 | 431.5 | 322.84 |
| 108348197 | LOC108348197 | 2.77   | 6.61   | 6.48   | 7.85   | 1.28  | 2.6   | 9.23  | 2.61   |
| 102555503 | LOC102555503 | 13     | 21     | 32     | 26     | 6     | 12    | 15    | 28     |
| 24521     | Kcnj1        | 31.09  | 21.92  | 27.95  | 20.38  | 15.64 | 11.05 | 17.04 | 23.51  |
| 311252    | Pamr1        | 113    | 146    | 302    | 123    | 70    | 142   | 113   | 129    |
| 103692301 | LOC103692301 | 0      | 2.46   | 0      | 2.1    | 0     | 3.03  | 0     | 0      |
| 311797    | Fam166a      | 7.23   | 2.08   | 6.18   | 6.25   | 3.07  | 4.14  | 4.13  | 3.11   |
| 301489    | Pi15         | 27.37  | 27.53  | 37.06  | 26.14  | 15.89 | 14.06 | 29.04 | 19.51  |
| 307414    | MGC108823    | 119.99 | 68.34  | 114.97 | 93.19  | 54.98 | 74.98 | 63.2  | 70.39  |
| 80899     | Slc21a4      | 0      | 1      | 3      | 2.01   | 0     | 0     | 1     | 3      |
| 317227    | Tlr13        | 90     | 91     | 100    | 87     | 47    | 44    | 76    | 78     |
| 687424    | Dtx1         | 362    | 353    | 485    | 472    | 165   | 231   | 371   | 347    |
| 311406    | Dusp2        | 10     | 6      | 16     | 7      | 6     | 7     | 9     | 4      |

|           |              |     |        |     |       |     |     |       |    |
|-----------|--------------|-----|--------|-----|-------|-----|-----|-------|----|
| 100360476 | Sh2d3a       | 3   | 4      | 4   | 13    | 5   | 7   | 2     | 2  |
| 100360666 | Lrtml        | 0   | 0.5    | 0.5 | 0.5   | 0.5 | 0.5 | 0     | 0  |
| 100360795 | Tmco2        | 1   | 0      | 2   | 0     | 0   | 1   | 0     | 1  |
| 100363367 | Dthd1        | 0   | 0      | 2   | 1     | 1   | 0   | 1     | 0  |
| 102546838 | LOC102546838 | 1   | 1      | 1   | 0     | 0   | 0   | 2     | 0  |
| 102547963 | LOC102547963 | 0   | 0.5    | 0.5 | 0.5   | 0.5 | 0.5 | 0     | 0  |
| 102549011 | LOC102549011 | 0   | 0      | 1   | 2     | 0   | 0   | 1     | 1  |
| 103691649 | LOC103691649 | 3   | 1      | 1   | 1     | 1   | 1   | 2     | 0  |
| 103693455 | LOC103693455 | 0   | 3      | 0   | 0     | 0   | 1   | 1     | 0  |
| 108349768 | LOC108349768 | 0   | 0      | 2   | 1     | 2   | 0   | 0     | 0  |
| 108351090 | LOC108351090 | 1   | 2      | 1   | 2     | 3   | 0   | 0     | 1  |
| 108352613 | LOC108352613 | 1   | 0      | 2   | 0     | 1   | 1   | 0     | 0  |
| 114552    | Bcl2l10      | 4   | 0      | 1   | 1     | 3   | 1   | 0     | 0  |
| 140927    | Selenbp1     | 0   | 188.76 | 0   | 94.38 | 0   | 0   | 188.8 | 0  |
| 170637    | Samsn1       | 37  | 32     | 38  | 25    | 19  | 18  | 31    | 20 |
| 171459    | Gp2          | 1   | 1      | 1   | 0     | 0   | 0   | 1     | 1  |
| 24254     | Cel          | 6   | 4      | 5   | 6     | 1   | 4   | 7     | 2  |
| 24898     | Slc6a3       | 1   | 0      | 1   | 1     | 0   | 1   | 1     | 0  |
| 24938     | Grpr         | 0   | 0      | 1   | 2     | 0   | 1   | 1     | 0  |
| 286911    | Prss3        | 1   | 1      | 0   | 1     | 0   | 0   | 0     | 2  |
| 287346    | Fam183a      | 2   | 0      | 0   | 1     | 1   | 0   | 0     | 1  |
| 287751    | Lyzl6        | 1   | 0      | 0   | 2     | 1   | 1   | 0     | 0  |
| 287885    | Sectmla      | 8   | 5      | 13  | 1     | 3   | 7   | 6     | 2  |
| 289687    | Gba3         | 0   | 0      | 2   | 1     | 0   | 0   | 1     | 1  |
| 290425    | RGD1306441   | 0   | 1      | 1   | 1     | 1   | 0   | 1     | 0  |
| 293426    | Nlrp10       | 0   | 1      | 2   | 0     | 2   | 0   | 0     | 0  |
| 29394     | Gcml         | 0   | 1      | 0   | 2     | 0   | 1   | 0     | 1  |
| 294394    | Gprc6a       | 2   | 0      | 0   | 1     | 0   | 0   | 1     | 1  |
| 296138    | Acox1        | 1   | 0      | 0   | 2     | 0   | 1   | 1     | 0  |
| 298394    | Olr836       | 0   | 0      | 2   | 1     | 0   | 0   | 2     | 0  |
| 300250    | Krt1         | 3   | 6      | 0   | 6     | 3   | 3   | 4     | 0  |
| 300549    | Olr1223      | 1   | 1      | 1   | 0     | 0   | 1   | 0     | 1  |
| 300676    | Ttc36        | 1   | 1      | 0   | 1     | 1   | 1   | 0     | 0  |
| 301154    | Vom2r76      | 2   | 4      | 1   | 2     | 2   | 1   | 1     | 2  |
| 301233    | Gucala       | 1   | 2      | 0   | 0     | 0   | 1   | 0     | 1  |
| 303477    | Igf2bp1      | 3   | 1      | 2   | 0     | 0   | 3   | 1     | 0  |
| 304690    | Serpinb13    | 0   | 0      | 2   | 1     | 0   | 0   | 1     | 1  |
| 306441    | Spata4       | 1   | 1      | 0   | 1     | 2   | 0   | 0     | 0  |
| 309584    | RT1-M4       | 1   | 0      | 1   | 1     | 0   | 1   | 0     | 1  |
| 310327    | Qrfpr        | 1   | 1      | 0   | 1     | 0   | 1   | 1     | 0  |
| 310902    | LOC310902    | 0   | 1      | 0   | 2     | 1   | 0   | 1     | 0  |
| 319106    | Taar8b       | 1   | 1      | 0   | 1     | 1   | 1   | 0     | 0  |
| 319107    | Taar9        | 0   | 1      | 0   | 2     | 0   | 0   | 1     | 1  |
| 360750    | Ccl25        | 1   | 1      | 0   | 1     | 0   | 1   | 0     | 1  |
| 361979    | Tsacc        | 0   | 2      | 0   | 1     | 0   | 1   | 1     | 0  |
| 362727    | Efcab10      | 2   | 8      | 7   | 7     | 4   | 4   | 4     | 4  |
| 363784    | Tigit        | 2   | 0      | 0   | 1     | 0   | 1   | 0     | 1  |
| 367201    | RGD1562392   | 1   | 0      | 2   | 0     | 2   | 0   | 0     | 0  |
| 405023    | Olr1345      | 1.5 | 0      | 0   | 0     | 0   | 0   | 0     | 1  |
| 405066    | Olr1388      | 0   | 0      | 0   | 1.5   | 0   | 1   | 0     | 0  |
| 499287    | Ano9         | 0   | 3      | 6   | 0     | 1   | 1   | 1     | 3  |
| 500243    | Asprv1       | 1   | 1      | 3   | 1     | 1   | 2   | 1     | 0  |
| 501056    | Tmem89       | 0   | 0      | 1   | 2     | 0   | 2   | 0     | 0  |
| 554302    | Tas2r108     | 1   | 2      | 1   | 2     | 1   | 1   | 1     | 1  |
| 58850     | Nr0b1        | 1   | 1      | 1   | 0     | 0   | 0   | 2     | 0  |
| 58980     | Slc13a1      | 2   | 1      | 2   | 1     | 1   | 3   | 0     | 0  |



|           |              |        |        |        |        |       |       |       |        |
|-----------|--------------|--------|--------|--------|--------|-------|-------|-------|--------|
| 679942    | Angptl1      | 22     | 27     | 54     | 17     | 15    | 21    | 26    | 18     |
| 680244    | Tmem139      | 1      | 0      | 1      | 1      | 1     | 0     | 1     | 0      |
| 681682    | Ct45a9       | 0      | 0      | 3      | 0      | 2     | 0     | 0     | 0      |
| 688155    | B4galnt2     | 2      | 10     | 2      | 4      | 2     | 3     | 2     | 5      |
| 690037    | Izumolr      | 4      | 1      | 15     | 1      | 3     | 3     | 3     | 5      |
| 117253    | Dnah11       | 136.96 | 156.16 | 255.24 | 189.65 | 80.68 | 112.2 | 175.7 | 124    |
| 498564    | Itgbl1       | 713    | 676    | 967    | 814    | 362   | 406   | 763   | 587    |
| 102552068 | LOC102552068 | 8.68   | 17.17  | 6.51   | 9.47   | 2.44  | 7.08  | 4.52  | 13.91  |
| 171356    | Foxc2        | 146    | 113.48 | 193.59 | 184.05 | 78.4  | 88    | 123   | 136.46 |
| 108348188 | LOC108348188 | 0      | 2.11   | 2.45   | 2.44   | 0     | 0     | 2.45  | 2.23   |
| 29169     | Vtn          | 765    | 570    | 610    | 1164   | 355   | 409   | 592   | 723    |
| 116662    | Ecm1         | 308    | 399    | 703    | 332    | 252   | 361   | 301   | 251    |
| 302668    | Ace2         | 142    | 127    | 103    | 187    | 42    | 73    | 110   | 149    |
| 502534    | RGD1560162   | 3.84   | 0      | 0      | 0      | 1.38  | 0     | 0     | 1.19   |
| 680910    | LOC680910    | 73.13  | 61.48  | 74.86  | 24.89  | 39.41 | 26.8  | 42.84 | 47.88  |
| 25641     | Igfbp6       | 2721   | 2053   | 4338   | 2526   | 1346  | 1492  | 2282  | 2673   |
| 309810    | RGD1304770   | 5.69   | 4.77   | 5.67   | 3.82   | 3.43  | 4.28  | 1.11  | 4.54   |
| 362268    | Rbpjl        | 9.18   | 16.9   | 17.24  | 13.53  | 6.12  | 8.13  | 15.13 | 8.7    |
| 688022    | LOC688022    | 0      | 1      | 1      | 1      | 1.01  | 0     | 0     | 1      |
| 154516    | Ugt1a7c      | 81.7   | 94.04  | 190.05 | 76.92  | 84.82 | 68.16 | 84.73 | 59.01  |
| 246239    | Slc15a3      | 67.35  | 80.79  | 123.4  | 71.28  | 45.41 | 47.1  | 77.39 | 59.91  |
| 311547    | Foxs1        | 215    | 250    | 322    | 203    | 73    | 159   | 192   | 240    |
| 296371    | Pltp         | 576.01 | 569.75 | 1179.7 | 544.69 | 426.3 | 449.1 | 528.2 | 521.44 |
| 301562    | Col4a4       | 16     | 20     | 14     | 23     | 6     | 14    | 12    | 17     |
| 360857    | Rgs16        | 99     | 73     | 133    | 112    | 75    | 69    | 72    | 64     |
| 289048    | Lhx9         | 23.46  | 25.32  | 34.36  | 22.33  | 14.41 | 15.92 | 25.38 | 15.19  |
| 108348162 | Thpo         | 3.59   | 3.59   | 6.95   | 3.46   | 0     | 4.12  | 4.19  | 3.52   |
| 314322    | Fos          | 122    | 153    | 149    | 423    | 186   | 145   | 113   | 126    |
| 302756    | Ppp4r3c      | 0      | 0      | 0      | 2.97   | 0     | 2     | 0     | 0      |
| 287435    | Cd68         | 119    | 157    | 244    | 123    | 94    | 125   | 112   | 102    |
| 103690057 | LOC103690057 | 116.58 | 145.41 | 133.02 | 140.84 | 111.3 | 95.9  | 113.8 | 39.88  |
| 311785    | Psd4         | 76.39  | 46.08  | 71.5   | 42.32  | 44.08 | 38.64 | 39.21 | 37.25  |
| 25556     | I11r11       | 49     | 31     | 63     | 93     | 37    | 39    | 41    | 42     |
| 361493    | Lilrb3l      | 60.44  | 45.04  | 91.97  | 27.45  | 39.06 | 40.99 | 44.19 | 27.43  |
| 293686    | Slc22a20     | 7      | 10     | 19     | 7      | 6     | 9     | 10    | 4      |
| 294932    | Spata16      | 7      | 12     | 12     | 12     | 13    | 9     | 6     | 1      |
| 361834    | Cabcocol     | 25     | 38     | 46     | 17     | 14    | 19    | 29    | 23     |
| 353317    | Acsm4        | 9.68   | 7.26   | 11.02  | 9.21   | 5.46  | 4.23  | 9.72  | 5.67   |
| 686932    | Cdhr3        | 44.62  | 33.17  | 30.43  | 35.81  | 30.36 | 20.68 | 18.47 | 27.69  |
| 685645    | Ces2j        | 0      | 0      | 2      | 0      | 0     | 0     | 0     | 1.35   |
| 24176     | Adrb2        | 43.81  | 40.02  | 48.09  | 23.64  | 25.02 | 20    | 22    | 38.02  |
| 300920    | Cl1dn2       | 12.06  | 13.72  | 8.23   | 14.95  | 3.36  | 2     | 10.7  | 17     |
| 303505    | Plxdc1       | 131    | 147    | 171    | 147.77 | 64    | 90    | 133   | 116    |
| 25752     | Cd6          | 16     | 16     | 30     | 15     | 9     | 16    | 9     | 18     |
| 500594    | LOC500594    | 10.84  | 9      | 12.59  | 18.7   | 8.34  | 7.77  | 11.6  | 6.82   |
| 316399    | Ccdc150      | 14     | 19     | 21     | 20     | 15    | 6     | 13    | 16     |
| 100361909 | Ear1         | 8.25   | 6.76   | 25.82  | 2      | 11.87 | 13.42 | 1.71  | 1.95   |
| 100911256 | LOC100911256 | 2.96   | 12.55  | 0      | 8.46   | 3.28  | 9.85  | 3.08  | 0      |
| 500046    | Cped1        | 304    | 221    | 239    | 345    | 141   | 168   | 234   | 207    |
| 100911993 | LOC100911993 | 10.69  | 13.93  | 9.93   | 25.39  | 16.89 | 4.23  | 9.2   | 10.22  |
| 100911545 | LOC100911545 | 125.1  | 62.55  | 140.73 | 203.28 | 46.91 | 93.82 | 31.27 | 187.65 |
| 84382     | Tcf4         | 232    | 247    | 281    | 350    | 156   | 172   | 264   | 159    |
| 310444    | P2ry13       | 44     | 58     | 77     | 53     | 34    | 34    | 43    | 46     |
| 308569    | Acp4         | 17.38  | 6      | 23     | 7.62   | 12.79 | 6.33  | 5     | 12.43  |
| 317614    | Map7d3       | 74     | 18     | 66     | 71     | 32    | 26    | 48    | 49     |
| 498609    | Lpar2        | 19     | 18     | 22     | 6      | 2     | 17    | 11    | 14     |

|           |              |        |        |        |        |       |       |       |        |
|-----------|--------------|--------|--------|--------|--------|-------|-------|-------|--------|
| 59107     | Ltbp1        | 230    | 253    | 433    | 403    | 165   | 192   | 279   | 257    |
| 24932     | Cd4          | 639.22 | 709.35 | 1103.2 | 735.41 | 481   | 448.6 | 615.4 | 613.58 |
| 83727     | Fbn1         | 1253   | 1841   | 4632   | 1742   | 1260  | 1702  | 2200  | 1251   |
| 100911854 | LOC100911854 | 12.46  | 7.49   | 6.79   | 0      | 5.43  | 0     | 8.28  | 4.41   |
| 686539    | Islr         | 948    | 715    | 1276   | 1402   | 484   | 506   | 967   | 988    |
| 25060     | Hk3          | 14     | 13     | 51     | 6      | 16    | 10    | 13    | 18     |
| 292746    | Fcgbp11      | 10.8   | 3.11   | 0.94   | 1.08   | 2.19  | 1.09  | 1.01  | 6.52   |
| 24963     | Hspal1       | 33.78  | 64.71  | 47.55  | 63.92  | 27.17 | 52.31 | 34.86 | 28.36  |
| 310663    | Tnfaip812    | 119    | 110    | 143    | 90     | 57    | 82    | 81    | 94     |
| 100911041 | Tmem45a1     | 90     | 61.45  | 167    | 61.46  | 49    | 71    | 92.2  | 46.11  |
| 294119    | Moxd1        | 7      | 8      | 4      | 6      | 4     | 5     | 4     | 4      |
| 498572    | Spert        | 14     | 11     | 13     | 12     | 8     | 11    | 10    | 5      |
| 100910196 | LOC100910196 | 0      | 8.91   | 20.84  | 15.04  | 3.61  | 8.02  | 7.49  | 11.38  |
| 302993    | Sox8         | 93     | 108    | 147    | 94     | 63    | 65    | 69    | 104    |
| 108349185 | LOC108349185 | 114.44 | 95.75  | 249.82 | 134.02 | 102.7 | 92.51 | 129.3 | 80.32  |
| 140589    | Gli1         | 440.92 | 357.7  | 527.65 | 494.41 | 188.6 | 229.5 | 418.4 | 404.2  |
| 690686    | LOC690686    | 7.83   | 1.1    | 5.53   | 5.33   | 2.94  | 4.03  | 3.36  | 3.16   |
| 405110    | Olr868       | 1.5    | 0      | 0      | 0.7    | 0     | 1     | 0.5   | 0      |
| 66020     | Gapdhs       | 9      | 10     | 12     | 13     | 12    | 11    | 4     | 3      |
| 102554096 | LOC102554096 | 10.57  | 7.37   | 14.24  | 14.35  | 5.4   | 10.15 | 5.2   | 10.98  |
| 64512     | Fzd2         | 366    | 293.01 | 532    | 454    | 192   | 211   | 350   | 369    |
| 307106    | Sfmbt2       | 18     | 16     | 32     | 16     | 13    | 13    | 17    | 13     |
| 100912428 | LOC100912428 | 2.72   | 8.4    | 4.84   | 8.36   | 4.59  | 4.66  | 2.78  | 4.58   |
| 108350583 | LOC108350583 | 46.2   | 42.05  | 55.23  | 40.48  | 35.25 | 34    | 36.97 | 19.55  |
| 309212    | Ptgdr2       | 8.7    | 12     | 7.1    | 3.34   | 4.4   | 6.42  | 6.47  | 4      |
| 100911692 | LOC100911692 | 23.12  | 10.81  | 12.23  | 7.57   | 9.72  | 9.73  | 4.32  | 12.97  |
| 681364    | LOC681364    | 5.1    | 2.04   | 4.89   | 1      | 2.7   | 0     | 5.03  | 1.18   |
| 116642    | Slc28a1      | 3      | 2      | 9      | 5      | 6     | 3     | 1     | 3      |
| 302538    | Syt15        | 7      | 5      | 4      | 3      | 2     | 1     | 5     | 5      |
| 287450    | Slc16a11     | 1225   | 694    | 1007   | 1452   | 460   | 482   | 961   | 1093   |
| 290361    | Dok2         | 33     | 40     | 64     | 31     | 17    | 23    | 37    | 38     |
| 100912012 | Clec3b       | 336    | 291    | 439    | 345    | 169   | 220   | 303   | 274    |
| 367216    | Ncr2         | 0      | 2      | 0      | 1.49   | 0     | 0     | 2.39  | 0      |
| 360565    | Spata22      | 12     | 8      | 5      | 10     | 8     | 9     | 1     | 6      |
| 60567     | Syt10        | 11     | 9      | 8      | 7      | 9     | 4     | 5     | 6      |
| 500877    | LOC500877    | 10.78  | 5.01   | 7.01   | 7.34   | 3.52  | 7.12  | 5     | 5.03   |
| 307403    | Csflr        | 872    | 943    | 1302   | 1042   | 499   | 635   | 856   | 863    |
| 308445    | Cyp2s1       | 177    | 79     | 236    | 286    | 74    | 73    | 205   | 182    |
| 313589    | Rspo1        | 50.56  | 61.57  | 51.41  | 35.63  | 29.91 | 32.99 | 32.83 | 41.02  |
| 294706    | Cd180        | 36     | 42     | 52     | 36     | 11    | 30    | 31    | 42     |
| 363104    | Cd109        | 33     | 44     | 134    | 38     | 29    | 62    | 49    | 31     |
| 363938    | Oas2         | 17     | 22     | 28     | 32     | 15    | 24    | 12    | 17     |
| 103693640 | LOC103693640 | 42.29  | 0      | 67.07  | 23.29  | 0     | 24.31 | 53.03 | 13.83  |
| 362336    | Fam180a      | 141    | 111    | 159    | 248    | 76    | 111   | 157   | 109    |
| 103690834 | LOC103690834 | 4      | 4      | 3      | 5      | 1     | 5     | 2     | 3      |
| 363653    | Efcab5       | 7      | 2      | 3      | 4      | 1     | 4     | 5     | 1      |
| 102552204 | LOC102552204 | 30.1   | 23.51  | 43.55  | 8.29   | 0     | 38.94 | 15.84 | 17.74  |
| 304608    | Mmp19        | 130    | 125    | 300    | 176    | 80    | 131   | 166   | 126    |
| 100910474 | LOC100910474 | 4.06   | 2.13   | 0      | 0      | 0     | 1.15  | 3.11  | 0      |
| 498757    | Aoah         | 12     | 13     | 26     | 10     | 8     | 9     | 17    | 8      |
| 25646     | Otx1         | 0      | 0      | 1.06   | 0      | 0.73  | 0     | 0     | 0      |
| 116676    | Aldh1a2      | 137    | 49     | 70     | 226    | 34    | 22    | 81    | 195    |
| 360814    | Rasa11       | 8      | 8      | 23     | 6      | 9     | 9     | 7     | 6      |
| 360704    | Hmgn1        | 545.36 | 673.72 | 598.93 | 600.24 | 329   | 339.6 | 443.6 | 553.84 |
| 499174    | Cers3        | 4      | 15.39  | 9      | 9      | 8     | 2.76  | 5     | 10     |
| 24303     | Cyp2d3       | 8.61   | 9.84   | 8.59   | 3.27   | 6.86  | 6.36  | 1.52  | 6.15   |

|           |                 |        |         |        |        |       |       |       |        |
|-----------|-----------------|--------|---------|--------|--------|-------|-------|-------|--------|
| 83837     | Bambi           | 95     | 131     | 155    | 99     | 60    | 69    | 100   | 102    |
| 289129    | Tdrd5           | 24     | 15      | 6      | 13     | 9     | 8     | 12    | 11     |
| 317468    | Tlr7            | 117    | 109     | 97     | 96     | 86.98 | 60.02 | 86    | 55.99  |
| 499249    | Plekha7         | 81     | 146     | 173    | 119    | 62    | 99    | 89    | 108    |
| 366859    | Glt8d2          | 70     | 89      | 138    | 77     | 49    | 63    | 86    | 60     |
| 498650    | Rab11fip1       | 90.35  | 77.65   | 103.6  | 149.81 | 74.3  | 57.99 | 75.06 | 83.4   |
| 65053     | Rassf9          | 26     | 17      | 10     | 18     | 12    | 8     | 12    | 17     |
| 309621    | RT1-Ba          | 748    | 272     | 623    | 773    | 391   | 322   | 494   | 462    |
| 102549803 | Nat8f4          | 55.79  | 86.2    | 80.71  | 75.27  | 31.31 | 40.23 | 54.39 | 80.26  |
| 103693165 | LOC103693165    | 3.29   | 7.25    | 17.64  | 5.78   | 7.3   | 4     | 7.74  | 4.47   |
| 365901    | Gnat2           | 2      | 3       | 5      | 3      | 1     | 2     | 3     | 3      |
| 685479    | S100a7a         | 6      | 3       | 1      | 3      | 2     | 2     | 2     | 3      |
| 79438     | Igfals          | 6      | 3       | 1      | 3      | 0     | 3     | 3     | 3      |
| 295631    | Pla2r1          | 48     | 44      | 61     | 36     | 33.58 | 34    | 45    | 18.29  |
| 362634    | Clqc            | 421    | 452     | 793    | 490    | 307   | 346   | 436   | 404    |
| 294337    | Col6a1          | 1961   | 2133    | 3857   | 2412   | 1144  | 2058  | 2266  | 1710   |
| 299038    | Spin4           | 32     | 40      | 40     | 41     | 23    | 29    | 28    | 26     |
| 685868    | Otogl           | 0.99   | 3       | 3.2    | 3.2    | 2.13  | 2     | 1.07  | 2      |
| 315179    | Efcab6          | 24     | 26      | 43     | 21     | 29    | 26    | 12    | 12     |
| 685277    | Ildr2           | 23     | 23      | 34     | 34     | 10    | 18    | 23    | 28     |
| 303692    | St6galnac2      | 163    | 109     | 237    | 153    | 90    | 126   | 136   | 107    |
| 287910    | Ccl6            | 134    | 125     | 170    | 119    | 73    | 67    | 103   | 137    |
| 108348057 | NEWGENE_1591402 | 210.53 | 228.07  | 256.37 | 278.95 | 140.4 | 136.8 | 221.1 | 177.2  |
| 362734    | Stxbp6          | 263    | 253     | 310    | 317    | 153   | 166   | 236   | 238    |
| 293561    | Rnf152          | 211.63 | 175.15  | 183.41 | 203.22 | 136.5 | 140   | 135.2 | 124.97 |
| 56822     | Cd86            | 11     | 13      | 14     | 11     | 8     | 9     | 9     | 8      |
| 266603    | Aldh1a3         | 65     | 64      | 143    | 130    | 32    | 43    | 133   | 71     |
| 312705    | Clr             | 1430   | 1832.99 | 2900   | 1770.2 | 964   | 1564  | 1665  | 1313   |
| 292414    | Vom2r10         | 3      | 3       | 2      | 3.52   | 1     | 2     | 4     | 1      |
| 294027    | Col17a1         | 3      | 7       | 22     | 4      | 6     | 8     | 8     | 3      |
| 310553    | Tlr2            | 61     | 72      | 99     | 63     | 48    | 40    | 52    | 65     |
| 361832    | Bicc1           | 563.57 | 592.94  | 670.53 | 823.45 | 397   | 378.3 | 547.7 | 519.37 |
| 25389     | Atf3            | 188.33 | 203.34  | 430.09 | 342.56 | 150.6 | 178.2 | 285.5 | 195.15 |
| 497931    | Pik3r5          | 17     | 35      | 59     | 17     | 23    | 16    | 28    | 22     |
| 500902    | RGD1565356      | 24.9   | 11.03   | 23.78  | 19.06  | 10.44 | 15.87 | 15.15 | 13.31  |
| 311373    | Trim69          | 21.49  | 25.35   | 23.69  | 21.47  | 14.22 | 8.69  | 19.32 | 21.75  |
| 80848     | Cubn            | 88     | 89      | 93     | 111    | 60    | 55    | 67    | 83     |
| 171040    | I111            | 10     | 4       | 6      | 3      | 4     | 5     | 0     | 7      |
| 361576    | Tulp2           | 6      | 9       | 3      | 5      | 5     | 3     | 1     | 7      |
| 688542    | LOC688542       | 7      | 1       | 4      | 0      | 2     | 2.35  | 1     | 3      |
| 103689945 | LOC103689945    | 875.11 | 670.74  | 967.1  | 853.01 | 446.2 | 689.8 | 630.3 | 576.01 |
| 287467    | Pitpnm3         | 135    | 92      | 200    | 188    | 88    | 94    | 146   | 100    |
| 108350811 | LOC108350811    | 4.41   | 3.1     | 4.21   | 1.5    | 1.99  | 3.97  | 1.25  | 2      |
| 292263    | Fbxo5           | 33     | 31      | 34     | 24     | 20    | 21    | 22    | 22     |
| 680813    | Cfap47          | 12     | 7       | 5      | 9      | 5     | 2     | 6     | 10     |
| 317219    | P2ry10          | 15.43  | 7       | 6.35   | 9      | 3     | 7     | 8.62  | 7.72   |
| 444985    | Dnmt3b          | 26     | 48      | 41     | 37     | 21    | 25    | 34    | 26     |
| 64357     | Cd200r1         | 19.01  | 12      | 38.01  | 24.9   | 14.85 | 19.01 | 14    | 17.65  |
| 100361043 | Dytn            | 18     | 11      | 6      | 8      | 8     | 8     | 10    | 4      |
| 89830     | Ptch1           | 965    | 937     | 1109   | 1721   | 605   | 613   | 1073  | 1011   |
| 307415    | RGD1309362      | 330.01 | 273.6   | 382.37 | 361.87 | 211.4 | 209.4 | 236.4 | 283.92 |
| 303378    | S1fn13          | 457.94 | 481     | 656    | 486    | 298.9 | 442   | 344   | 368.09 |
| 24571     | Muc1            | 10     | 13      | 26     | 14     | 12    | 9     | 9     | 14     |
| 102555634 | LOC102555634    | 30     | 33      | 40     | 43     | 27    | 24    | 23    | 28     |
| 295660    | RGD1564400      | 123.81 | 212.53  | 183.66 | 0      | 0     | 103.3 | 113.9 | 146.18 |
| 291327    | Mrc1            | 447    | 402     | 583    | 478    | 310   | 299   | 394   | 333    |

|           |              |        |         |        |        |       |       |       |         |
|-----------|--------------|--------|---------|--------|--------|-------|-------|-------|---------|
| 293065    | Tmc3         | 16     | 22      | 21     | 21     | 14    | 15    | 12    | 15      |
| 24931     | Cd8b         | 5      | 0       | 2      | 3      | 1     | 3     | 1     | 2       |
| 259235    | Sdr9c7       | 9      | 6       | 7      | 8      | 7     | 3     | 4     | 7       |
| 290753    | Lrp2bp       | 10     | 3       | 6      | 1      | 5     | 5     | 3     | 1       |
| 296198    | Banf2        | 2      | 3       | 2      | 3      | 1     | 3     | 3     | 0       |
| 364031    | Tnfsf18      | 2      | 3       | 2      | 3      | 2     | 2     | 3     | 0       |
| 365748    | Bhlhe22      | 12     | 12      | 18     | 18     | 5     | 16    | 15    | 6       |
| 501158    | Spagl6       | 2      | 3       | 2      | 3      | 1     | 4     | 0     | 2       |
| 690105    | Kncn         | 0      | 4       | 3      | 3      | 3     | 1     | 1     | 2       |
| 79111     | Slc27a5      | 1      | 3       | 3      | 3      | 2     | 1     | 3     | 1       |
| 361312    | RGD1563159   | 14.9   | 5       | 14.92  | 15     | 9     | 3.88  | 6     | 16      |
| 102556463 | LOC102556463 | 6.08   | 18.91   | 8.84   | 9.23   | 4.75  | 0     | 20.39 | 5.03    |
| 315101    | Zfp7         | 31.71  | 106     | 3.08   | 44.96  | 33.91 | 38.02 | 36.22 | 22.01   |
| 102551683 | LOC102551683 | 8.66   | 15.51   | 7.83   | 12.94  | 5.28  | 12.06 | 10.2  | 3.96    |
| 100912342 | LOC100912342 | 23.42  | 19.17   | 17.12  | 15.76  | 12.49 | 15.14 | 11.12 | 14.16   |
| 25746     | I12rb        | 23.06  | 10.04   | 17.91  | 23.04  | 15.84 | 11    | 9     | 16.08   |
| 25026     | Adm          | 83.05  | 47.38   | 65.51  | 133    | 47.27 | 50.55 | 74.88 | 58.13   |
| 305947    | Kcnrg        | 40     | 40      | 61     | 37     | 28    | 33    | 30    | 34      |
| 691993    | Scimp        | 8      | 12      | 12     | 5      | 3     | 7     | 8     | 8       |
| 114482    | Nek2         | 15     | 16.81   | 41     | 14     | 12.61 | 22    | 18    | 8.4     |
| 691533    | Lilra5       | 47.03  | 58.44   | 56.29  | 63.36  | 29.06 | 23.06 | 46    | 60.12   |
| 102547665 | LOC102547665 | 8.07   | 8.03    | 5.29   | 6.98   | 3.94  | 6.66  | 3.17  | 6.2     |
| 503568    | Slc13a4      | 506    | 340     | 490    | 892    | 160   | 202   | 544   | 663     |
| 685692    | Gcsam        | 26.6   | 28.22   | 25.76  | 8.97   | 21.24 | 18.11 | 8.88  | 14.88   |
| 140914    | Olr1         | 25     | 27      | 30     | 23     | 25    | 18    | 16    | 15      |
| 102552882 | LOC102552882 | 12     | 12      | 12     | 8      | 9     | 8     | 12.02 | 2       |
| 360655    | Cd300le      | 55     | 56.75   | 92.96  | 51.99  | 36    | 35.02 | 47.97 | 62      |
| 498072    | Hmgb211      | 139.96 | 108.44  | 158.98 | 22.98  | 15.42 | 23.48 | 130.4 | 134.16  |
| 83508     | Timeless     | 52.04  | 59      | 66.03  | 64     | 39    | 46    | 49    | 36.03   |
| 679155    | Zbtb7c       | 88     | 81      | 114    | 131    | 56    | 43    | 99    | 94      |
| 245978    | Cklf         | 25     | 32      | 36     | 36     | 22    | 20    | 24    | 25      |
| 100363228 | LOC100363228 | 20.12  | 17.62   | 28.39  | 24.54  | 11.06 | 13.04 | 18.69 | 21.18   |
| 362464    | Arntl2       | 9.95   | 34.19   | 23.35  | 28.56  | 14.88 | 11.39 | 18.61 | 22.91   |
| 102550588 | LOC102550588 | 28.17  | 61.05   | 18.97  | 53.98  | 27.25 | 25.8  | 27.31 | 34.11   |
| 117284    | Lrrc7        | 6      | 13      | 7      | 8      | 10    | 5     | 4     | 5       |
| 288821    | Neurod4      | 7      | 5       | 4      | 18     | 5     | 8     | 7     | 4       |
| 499204    | Ddias        | 11     | 10      | 21     | 9      | 14    | 9     | 4     | 9       |
| 680671    | Glis3        | 9      | 3       | 3      | 2      | 2     | 4     | 4     | 2       |
| 292077    | Sult5a1      | 165    | 279     | 311    | 187    | 65    | 186   | 156   | 258     |
| 298947    | Pik3cg       | 133    | 117     | 167    | 158    | 89    | 94    | 108   | 115     |
| 282836    | Cthrc1       | 33     | 60      | 99     | 26     | 26    | 54    | 34    | 40      |
| 361095    | Zic5         | 29     | 19.39   | 23.06  | 36.23  | 11.3  | 13.47 | 25.29 | 26.03   |
| 292060    | Irf8         | 156    | 152     | 164    | 111    | 103   | 90    | 104   | 115     |
| 108348074 | LOC108348074 | 1723.1 | 1795.2  | 2449   | 2151.6 | 877.7 | 1575  | 1694  | 1591.5  |
| 305974    | Scara5       | 661    | 682     | 945    | 701    | 372   | 447   | 729   | 565     |
| 108349944 | LOC108349944 | 2.52   | 4.82    | 5.31   | 2.54   | 2.1   | 4.02  | 3.3   | 1.32    |
| 297695    | Wbp11        | 438.79 | 458.25  | 519.05 | 899.83 | 430.1 | 634.4 | 10.14 | 562.76  |
| 103692302 | LOC103692302 | 3.63   | 5.69    | 7.84   | 9.06   | 4.36  | 6.9   | 0.05  | 7.23    |
| 364396    | Ar111        | 41     | 35      | 66     | 29     | 32    | 30    | 27    | 32      |
| 100912609 | LOC100912609 | 19.88  | 18.7    | 9.77   | 9.13   | 10.41 | 10.59 | 9.91  | 9.77    |
| 246245    | Fmo2         | 594.93 | 283     | 242.14 | 381.39 | 250.9 | 233   | 270.8 | 308.08  |
| 100911932 | LOC100911932 | 80.5   | 108     | 203    | 108.5  | 78    | 99    | 94.5  | 82.5    |
| 108348067 | LOC108348067 | 80.5   | 108     | 203    | 108.5  | 78    | 99    | 94.5  | 82.5    |
| 102551901 | LOC102551901 | 2.75   | 5.32    | 15.39  | 6.97   | 8.39  | 5.26  | 2.72  | 5.18    |
| 29569     | Pcolce       | 767    | 922     | 1463   | 937    | 530   | 781   | 811   | 774     |
| 24153     | A2m          | 1067.9 | 1687.45 | 1801.3 | 1249.7 | 795.1 | 822.2 | 1177  | 1318.35 |

|           |              |        |        |        |        |       |       |       |        |
|-----------|--------------|--------|--------|--------|--------|-------|-------|-------|--------|
| 117517    | C7           | 899.63 | 535.12 | 526.03 | 988.62 | 449   | 481.8 | 604.4 | 554.28 |
| 65154     | Wispl        | 102    | 115    | 113    | 116    | 49    | 70    | 103   | 94     |
| 29687     | Clqb         | 337    | 335    | 738    | 296    | 255   | 244   | 369   | 341    |
| 155012    | Cfh          | 565.9  | 575.96 | 1066   | 655.96 | 390.9 | 469   | 542   | 627.95 |
| 64195     | Clec10a      | 262    | 198    | 255    | 203    | 113   | 132   | 229   | 177    |
| 102550729 | LOC102550729 | 16.18  | 9.01   | 8.19   | 15     | 9.25  | 7.72  | 7.15  | 10.19  |
| 100363178 | Tmigd3       | 14     | 13.13  | 16.5   | 12.74  | 9     | 8     | 9     | 14     |
| 266714    | Myo7a        | 29     | 25     | 45     | 32     | 22    | 22    | 28    | 21     |
| 363974    | Nckap5       | 10     | 7.97   | 19.32  | 12     | 7     | 13    | 11    | 4      |
| 100912756 | LOC100912756 | 5.22   | 2.35   | 9.1    | 0      | 2.02  | 5.93  | 0     | 3.89   |
| 690097    | LOC690097    | 32.36  | 28.78  | 65.71  | 21.94  | 30.25 | 19.28 | 37.26 | 18.89  |
| 502129    | Hist1h2ai    | 6.04   | 5.04   | 7.95   | 2.51   | 2.46  | 4.61  | 4.85  | 3.39   |
| 25267     | Pdgfra       | 652.24 | 610    | 734    | 876.52 | 378   | 415   | 638   | 611    |
| 103691841 | LOC103691841 | 4      | 6.78   | 9.86   | 0      | 4.43  | 0     | 3.13  | 7.12   |
| 287788    | Abca9        | 446.48 | 464.2  | 388.25 | 721.94 | 360   | 267.5 | 431.2 | 378.79 |
| 29269     | Mcpt8        | 36.28  | 57.99  | 31.01  | 8.1    | 47.73 | 44.25 | 2.9   | 0      |
| 29485     | Slc7a3       | 8.38   | 9.04   | 9      | 7.85   | 5.89  | 6.12  | 5.07  | 7.31   |
| 365245    | Saa4         | 2.11   | 0      | 3.65   | 0      | 1     | 1.65  | 0     | 1.45   |
| 103690030 | LOC103690030 | 55.86  | 55.09  | 62.7   | 35.45  | 33.52 | 46.84 | 41.31 | 27.17  |
| 365977    | Dusp14l1     | 5.92   | 0      | 0      | 14.7   | 0     | 5.51  | 0     | 9.17   |
| 685324    | LOC685324    | 41.28  | 13.7   | 26.78  | 14.99  | 15.81 | 10.61 | 23.82 | 18.66  |
| 50654     | Ctss         | 501    | 447    | 543    | 389    | 283   | 260   | 372   | 424    |
| 84403     | Gjb6         | 92     | 40     | 60     | 166    | 24    | 25    | 54    | 152    |
| 685899    | Svepl        | 124    | 84     | 171    | 174    | 71.01 | 70    | 123   | 130    |
| 298657    | Car6         | 29     | 27     | 24     | 28     | 10    | 19    | 19    | 29     |
| 50563     | Gja5         | 11     | 37     | 29     | 31     | 23    | 11    | 25    | 18     |
| 117264    | P2ry6        | 45     | 49     | 84.94  | 44     | 29    | 26    | 44    | 60.03  |
| 108349506 | LOC108349506 | 3.58   | 4      | 5      | 3      | 7     | 0     | 3     | 1.12   |
| 308586    | Sec1         | 9      | 8      | 12.14  | 11.41  | 7.8   | 5.6   | 10    | 5.55   |
| 498988    | RGD1559962   | 7.64   | 5.05   | 11.86  | 12.6   | 4.62  | 3.15  | 6.67  | 12.09  |
| 100361913 | LOC100361913 | 41.33  | 35.36  | 56.7   | 38.89  | 23.6  | 36.36 | 31.25 | 31.83  |
| 103690068 | LOC103690068 | 41.33  | 35.36  | 56.7   | 38.89  | 23.6  | 36.36 | 31.25 | 31.83  |
| 24268     | Cp           | 906.1  | 811.15 | 1170.7 | 968.28 | 514.2 | 635.5 | 831.9 | 772.61 |
| 154985    | Cyp26a1      | 2      | 1      | 4      | 0      | 2     | 0     | 1     | 2      |
| 25100     | Foxa3        | 2      | 2      | 5      | 5      | 3     | 2     | 2     | 3      |
| 25343     | Pdc          | 3      | 3      | 4      | 4      | 5     | 1     | 1     | 3      |
| 295186    | Crnn         | 1      | 4      | 1      | 1      | 0     | 2     | 1     | 2      |
| 295541    | Msh4         | 1      | 3      | 1      | 2      | 2     | 2     | 1     | 0      |
| 298225    | Ifne         | 4      | 1      | 1      | 1      | 2     | 1     | 1     | 1      |
| 301132    | Cd70         | 1      | 1      | 3      | 2      | 2     | 1     | 1     | 1      |
| 304073    | Cldn14       | 9      | 9      | 13     | 4      | 0     | 8     | 9     | 8      |
| 306251    | Itih1        | 1      | 1      | 4      | 1      | 1     | 0     | 3     | 1      |
| 307036    | Armc4        | 1      | 3      | 0      | 3      | 0     | 1     | 2     | 2      |
| 316413    | Als2cr12     | 15     | 3      | 11     | 13     | 1     | 7     | 6     | 16     |
| 361725    | Scgb2a2      | 3      | 2      | 1      | 1      | 0     | 0     | 1     | 4      |
| 362675    | Tp73         | 1      | 3      | 3      | 0      | 3     | 0     | 1     | 1      |
| 64673     | Pip          | 0      | 4      | 5      | 5      | 3     | 0     | 2     | 5      |
| 296947    | Fscn3        | 10     | 7      | 5      | 6      | 8     | 5     | 5     | 2      |
| 246262    | Sema3d       | 245    | 179    | 362    | 262    | 203   | 133   | 230   | 183    |
| 114522    | Stag3        | 7      | 7      | 10.11  | 0      | 4     | 0     | 11.8  | 1.44   |
| 684762    | LOC684762    | 26.25  | 14.88  | 6.92   | 25.83  | 14.59 | 13    | 10.24 | 15.03  |
| 361096    | Zic2         | 147    | 87     | 136    | 210    | 55    | 51    | 112   | 197    |
| 102553193 | LOC102553193 | 0      | 3.69   | 3.33   | 4.57   | 0     | 0     | 5.8   | 2.5    |
| 246208    | Ifi47        | 168    | 163    | 202    | 207    | 123   | 99    | 135   | 173    |
| 108349573 | LOC108349573 | 0.05   | 2.33   | 1.16   | 1.29   | 0     | 1.42  | 0.53  | 1.51   |
| 300870    | Tent5a       | 133    | 170    | 249    | 150    | 81    | 156   | 148   | 118    |

|           |              |        |         |        |        |       |       |       |         |
|-----------|--------------|--------|---------|--------|--------|-------|-------|-------|---------|
| 155183    | Skap2        | 300    | 254     | 336    | 313    | 212   | 190   | 252   | 208     |
| 63851     | Fgf14        | 90     | 75      | 107    | 119    | 51.92 | 52.39 | 93    | 83      |
| 100360940 | LOC100360940 | 4.53   | 14.38   | 6.86   | 8.69   | 2.25  | 4.34  | 11.62 | 6.5     |
| 81686     | Mmp2         | 1068   | 1433    | 2362   | 1579   | 865   | 1239  | 1364  | 1152    |
| 100361997 | Ect212       | 4.75   | 1.38    | 6.48   | 3.39   | 9     | 0     | 1.38  | 1.1     |
| 102550330 | LOC102550330 | 9      | 8.37    | 7.47   | 4      | 3.75  | 5.96  | 7     | 4       |
| 494194    | Klra1        | 35.99  | 65.08   | 78.66  | 67.2   | 30.45 | 27.8  | 48.07 | 71.02   |
| 100909709 | LOC100909709 | 18.57  | 27.73   | 17.11  | 15.12  | 15.04 | 12.35 | 9.93  | 19.11   |
| 116593    | Upb1         | 8      | 2       | 17     | 5      | 3     | 10    | 9     | 1       |
| 100912971 | LOC100912971 | 11.32  | 7.83    | 11.31  | 20.21  | 6.79  | 9.78  | 5.23  | 14.63   |
| 499847    | Prrg4        | 179    | 294     | 352    | 232    | 168   | 147   | 231   | 214     |
| 301287    | Pkhd1        | 17     | 28      | 20     | 24     | 17    | 14    | 11    | 22      |
| 100364958 | LOC100364958 | 14.48  | 6.12    | 12.02  | 7.22   | 3.62  | 8.23  | 8.37  | 8.43    |
| 298850    | Cenpa        | 10     | 11      | 27     | 9      | 7     | 12    | 14    | 8       |
| 338457    | Tlr9         | 9      | 15      | 16     | 17     | 3     | 6     | 19    | 13      |
| 685646    | Ropn11       | 11     | 21      | 10     | 15     | 7     | 7     | 12    | 15      |
| 117512    | C9           | 1      | 1.78    | 0      | 0      | 0     | 1     | 0     | 1       |
| 100101439 | Vom2r21      | 0      | 0       | 1.89   | 0      | 0     | 1.36  | 0     | 0       |
| 24934     | Klrk1        | 25     | 28      | 24     | 30     | 18    | 22    | 25    | 12      |
| 360546    | Efnb3        | 38     | 20      | 24     | 50     | 22    | 20    | 21    | 32      |
| 58965     | Ramp1        | 172    | 189     | 338    | 129    | 104   | 154   | 166   | 172     |
| 108349832 | LOC108349832 | 0      | 3.66    | 0      | 1.09   | 3.42  | 0     | 0     | 0       |
| 29725     | Baat         | 6      | 5       | 12     | 2      | 2     | 8     | 6     | 2       |
| 498399    | Sec1414      | 4.04   | 5       | 5      | 4.01   | 3     | 3     | 3     | 4       |
| 57301     | Ccr1         | 60.62  | 39      | 62     | 35     | 32.33 | 36    | 33    | 40.41   |
| 296621    | Phyhd1       | 94     | 82      | 132    | 50.34  | 58.41 | 50.34 | 94.59 | 55      |
| 291359    | Ly86         | 82     | 60      | 65     | 62     | 48    | 41    | 46    | 59      |
| 100361866 | LOC100361866 | 25.3   | 18.35   | 20.46  | 0      | 0     | 16.22 | 0     | 30.04   |
| 102547271 | LOC102547271 | 0      | 0       | 14.18  | 16.65  | 15.68 | 0     | 6.57  | 0       |
| 306081    | Pcdh20       | 20     | 22      | 72     | 1      | 24    | 25    | 28    | 6       |
| 502208    | Slc38a8      | 10.2   | 8.2     | 14.23  | 10.69  | 8.1   | 9.02  | 5.86  | 8.3     |
| 100363196 | Zfp791       | 18     | 24      | 14     | 16     | 14    | 12    | 15    | 11      |
| 102554031 | LOC102554031 | 7      | 9       | 12     | 8      | 7     | 8     | 3     | 8       |
| 25674     | Glr1         | 2      | 9       | 2      | 5      | 1     | 3     | 6     | 3       |
| 494235    | Vomlr82      | 5      | 2       | 8      | 3      | 3     | 1     | 5     | 4       |
| 691485    | LOC691485    | 11     | 3       | 2      | 2      | 0     | 3     | 6     | 4       |
| 309622    | RT1-Bb       | 452    | 165     | 387    | 474    | 243   | 237   | 318   | 270.63  |
| 25022     | Fgfr2        | 228    | 224     | 265    | 255    | 132   | 177   | 198   | 196     |
| 100912845 | LOC100912845 | 0      | 3.92    | 1.43   | 1.67   | 0     | 2.85  | 2.23  | 0       |
| 289076    | Rgs18        | 90.76  | 78.12   | 119.45 | 61.37  | 55.68 | 53.96 | 60.29 | 83.17   |
| 100363111 | C2cd4d       | 27     | 32      | 21     | 25     | 18    | 18    | 22    | 18      |
| 108348115 | Rps19        | 63.91  | 52.24   | 46.29  | 51.97  | 58.03 | 47.49 | 49.69 | 0       |
| 305843    | Ang          | 6.92   | 7       | 10     | 9.72   | 6     | 5.37  | 4     | 9       |
| 102554047 | LOC102554047 | 35.2   | 27.95   | 45.78  | 31.1   | 39.37 | 18.9  | 21.66 | 21.53   |
| 100909521 | LOC100909521 | 30.05  | 45.03   | 57.93  | 103.17 | 55.83 | 48.25 | 67.08 | 0       |
| 100910912 | LOC100910912 | 36.43  | 37.87   | 25.79  | 28.71  | 23.45 | 18.96 | 22.63 | 28.32   |
| 309837    | Adamts14     | 93     | 100     | 179    | 148    | 70    | 88    | 129   | 90      |
| 298972    | Smarcell     | 9.01   | 5       | 10.03  | 5      | 13    | 0     | 6.06  | 2       |
| 108350026 | LOC108350026 | 37.26  | 16.47   | 39.24  | 20     | 25.05 | 15.36 | 15.57 | 25.95   |
| 311934    | Ns5atp4      | 58.51  | 74.51   | 70.44  | 51.56  | 45.48 | 36.09 | 42.74 | 60.65   |
| 291076    | Eci3         | 213.39 | 213.49  | 236.24 | 168.14 | 105.2 | 117.7 | 237.4 | 142.84  |
| 102551034 | Crocc2       | 10     | 11      | 20     | 10     | 13    | 12    | 7     | 5       |
| 24773     | Sftpal       | 15     | 14      | 12     | 10     | 5     | 6     | 5     | 21      |
| 84352     | Colla2       | 5365.4 | 8205.69 | 11912  | 8611.6 | 3262  | 8660  | 6850  | 5966.47 |
| 399684    | Vkorc111     | 510    | 638.9   | 844.72 | 622.34 | 215.8 | 624.1 | 400.2 | 658.27  |
| 29209     | Casq2        | 68     | 44      | 70     | 66     | 35    | 45    | 65    | 35      |



|           |              |        |        |        |        |       |       |       |         |
|-----------|--------------|--------|--------|--------|--------|-------|-------|-------|---------|
| 361735    | Ms4a6a       | 47.98  | 48     | 61     | 40     | 26    | 26.99 | 50    | 40      |
| 100912218 | LOC100912218 | 78.71  | 87.11  | 88     | 95.2   | 54.62 | 55.14 | 65.4  | 78.45   |
| 116491    | Kcnk6        | 59     | 61.5   | 80.5   | 86.5   | 49.5  | 44.49 | 57.5  | 57.5    |
| 108350705 | LOC108350705 | 32     | 22     | 25     | 9      | 16.06 | 15    | 22.92 | 10      |
| 100912943 | LOC100912943 | 0      | 1      | 8      | 2      | 2     | 0     | 5     | 1       |
| 113911    | Gucy2d       | 1      | 3      | 5      | 2      | 3     | 2     | 2     | 1       |
| 301229    | Trem1        | 6      | 5      | 10     | 1      | 6     | 3     | 7     | 0       |
| 171164    | Gbp2         | 445    | 478.97 | 827    | 563    | 297   | 457   | 454   | 477     |
| 64316     | Srpx         | 337.21 | 382.45 | 396.35 | 358    | 208.4 | 249.8 | 297.5 | 318.04  |
| 309108    | Lmntd2       | 3      | 3.06   | 1      | 4      | 2     | 3.06  | 2     | 1       |
| 294054    | Cc2d2b       | 10.63  | 7.84   | 3.61   | 7.79   | 7.74  | 6.04  | 6.31  | 1.69    |
| 499588    | Gpr160       | 49     | 45     | 55     | 47     | 30    | 29    | 33    | 51      |
| 315174    | Scubel       | 422    | 652    | 992    | 545    | 333   | 613   | 534   | 426     |
| 364255    | Spetex-2C    | 10.21  | 6.4    | 7.4    | 2.7    | 5     | 3     | 4.66  | 6.85    |
| 113959    | C5ar1        | 133    | 113    | 161    | 135    | 85    | 79    | 107   | 125     |
| 315920    | Vsig1        | 8      | 8      | 4      | 6      | 5     | 6     | 3     | 5       |
| 64545     | Icos         | 6      | 3      | 10     | 7      | 7     | 4     | 2     | 6       |
| 682408    | Cdsn         | 89.99  | 129.98 | 225    | 142    | 64.98 | 92    | 157   | 115     |
| 688822    | Tbx10        | 63.11  | 72.24  | 72.21  | 66.43  | 47.55 | 55.35 | 49.07 | 48.28   |
| 305354    | Tlr1         | 11.73  | 18.8   | 17.72  | 34.73  | 15.08 | 11.68 | 14.74 | 19.16   |
| 315259    | Prickle1     | 382    | 311    | 419    | 472    | 240   | 248   | 320   | 350     |
| 501346    | LOC501346    | 432.94 | 266.92 | 388.71 | 202.08 | 244.2 | 141.4 | 338.6 | 219.75  |
| 108350017 | Mindy4b      | 25     | 33     | 23     | 27     | 16    | 13    | 26    | 24      |
| 313352    | Dmrtal       | 17     | 24     | 16     | 25     | 14    | 13    | 18    | 15      |
| 499864    | RGD1563680   | 25     | 27     | 30     | 33.11  | 22    | 28.08 | 19.15 | 15      |
| 315759    | Igdcc3       | 120.61 | 70.23  | 95.92  | 106.11 | 60.04 | 46.79 | 82.01 | 98.66   |
| 58949     | Ptafr        | 164    | 155    | 220    | 162    | 125   | 103   | 157   | 128     |
| 171099    | Rasd2        | 37     | 79     | 50     | 69     | 43    | 62    | 29    | 38      |
| 362966    | Nfam1        | 87.54  | 92.74  | 119.1  | 69.66  | 65.11 | 75.43 | 72.6  | 57.17   |
| 498256    | Ier5         | 162    | 169    | 221    | 147    | 116   | 120   | 125   | 151     |
| 102548397 | LOC102548397 | 6.33   | 4.69   | 20.69  | 19.42  | 11.45 | 26.01 | 0     | 0       |
| 310540    | Fam198b      | 704.6  | 751.72 | 942.38 | 759.75 | 441   | 584.1 | 665.5 | 624.16  |
| 25119     | Mr1          | 75     | 102    | 119    | 75     | 56    | 64    | 76    | 76      |
| 360757    | Medag        | 151    | 157    | 369    | 155    | 118   | 168   | 181   | 143     |
| 303380    | Slfn2        | 291.89 | 234.34 | 325.32 | 230.96 | 194.3 | 210.3 | 199   | 190.16  |
| 307805    | Cenpt        | 13     | 8.86   | 19.77  | 6.48   | 10    | 10.49 | 7.73  | 7.06    |
| 25677     | Mak          | 4      | 4      | 6      | 1      | 3     | 1     | 2     | 5       |
| 293052    | Isg20        | 26     | 31     | 35     | 13     | 14    | 24    | 23    | 16      |
| 293676    | Ctsw         | 14     | 6      | 7      | 3      | 6     | 5     | 4     | 7       |
| 29458     | Neurod1      | 5      | 4      | 5      | 1      | 4     | 3     | 3     | 1       |
| 29634     | Ldhc         | 5      | 4      | 3      | 3      | 5     | 5     | 1     | 0       |
| 367345    | Clu11        | 5      | 1      | 4      | 5      | 3     | 2     | 5     | 1       |
| 498286    | Slamf1       | 5      | 7      | 1      | 2      | 3     | 4     | 1     | 3       |
| 499746    | Stpg3        | 3      | 3      | 5      | 4      | 2     | 2     | 2     | 5       |
| 303377    | Slfn5        | 1387.2 | 1181.8 | 1509   | 1413.2 | 1040  | 886.5 | 1070  | 1032.65 |
| 113937    | Clec2d       | 6      | 6      | 19.18  | 12.08  | 6.71  | 7.96  | 9.06  | 8.02    |
| 690102    | Hist2h2ab    | 5.09   | 0      | 1.64   | 0      | 3.5   | 0     | 0     | 1.44    |
| 499532    | Tmem267      | 77.02  | 61.7   | 65.69  | 56.82  | 45.58 | 44.87 | 39.3  | 62.19   |
| 29260     | Tlr4         | 107    | 106    | 135    | 139    | 77    | 71    | 106   | 104     |
| 83826     | Nr5a1        | 6      | 7      | 10     | 11     | 9     | 8     | 7     | 1       |
| 290655    | Cr1f1        | 252    | 394    | 573    | 184    | 168   | 314   | 269   | 281     |
| 60350     | Cd14         | 67.71  | 69.73  | 139.2  | 60.87  | 64.2  | 58.73 | 76.94 | 48.51   |
| 299016    | Npas3        | 39     | 40     | 38     | 46     | 35    | 27    | 31    | 27      |
| 361954    | Veph1        | 30     | 30     | 18     | 32     | 17    | 19    | 29    | 16      |
| 360717    | Gramd1c      | 26.01  | 34.02  | 30.02  | 22.02  | 24.41 | 12.33 | 25.98 | 19.81   |
| 102551086 | LOC102551086 | 5      | 3      | 7      | 4      | 2     | 4     | 5     | 3       |



|           |                 |        |        |        |        |       |       |       |        |
|-----------|-----------------|--------|--------|--------|--------|-------|-------|-------|--------|
| 108349261 | LOC108349261    | 7      | 8      | 7      | 16     | 5     | 6     | 7     | 10     |
| 108352163 | LOC108352163    | 8      | 9      | 10     | 11     | 6     | 5     | 7     | 10     |
| 288478    | Rsph10b         | 5      | 6      | 2      | 6      | 1     | 6     | 3     | 4      |
| 691937    | Strc            | 5      | 5      | 7      | 2      | 2     | 3     | 6     | 3      |
| 499229    | Gvin1           | 33.99  | 24.79  | 50     | 51     | 31.74 | 21    | 28    | 37     |
| 287571    | Taf15           | 264.19 | 231.97 | 300.31 | 271.38 | 180.3 | 156   | 157.2 | 293.86 |
| 499263    | Gsg11           | 55     | 47     | 40     | 37     | 29    | 26    | 39    | 38     |
| 292657    | Slc1a5          | 86.11  | 90     | 99.03  | 90.01  | 61.64 | 83.14 | 66.28 | 58.43  |
| 685215    | LOC685215       | 36     | 37     | 41     | 35     | 22    | 30    | 24    | 34     |
| 681180    | LOC681180       | 12.71  | 37.65  | 15.15  | 47.93  | 47.41 | 3.56  | 14.71 | 18.08  |
| 84032     | Col3a1          | 13865  | 17167  | 30755  | 19236  | 9406  | 16350 | 19320 | 14758  |
| 81658     | Gabrp           | 6.26   | 4.29   | 5.18   | 7.38   | 1.08  | 6.15  | 2.16  | 7.68   |
| 685781    | Ddr2            | 670.29 | 730.7  | 1088.2 | 898.19 | 572.1 | 587.9 | 710.4 | 632.2  |
| 363767    | Abi3bp          | 1084   | 1153   | 1697   | 1383   | 759   | 922   | 1209  | 1039   |
| 291354    | Enkur           | 11     | 9      | 15     | 11     | 3     | 6     | 15    | 10     |
| 292890    | Tsks            | 6      | 7      | 5      | 5      | 5     | 3     | 7     | 2      |
| 307917    | Klhdc4          | 13     | 34     | 31     | 37     | 30    | 22    | 14    | 19     |
| 100910833 | LOC100910833    | 12.12  | 6.99   | 5.28   | 8.83   | 3.53  | 5.24  | 10.52 | 5.28   |
| 690930    | Ms4a6c          | 6.28   | 4.11   | 15.81  | 5.22   | 7.47  | 5.22  | 4.06  | 6.49   |
| 308797    | Cemip           | 323    | 267    | 278    | 534    | 216   | 211   | 252   | 358    |
| 683415    | Prss55          | 23     | 15     | 14     | 21     | 11    | 9     | 17    | 17     |
| 290350    | Loxl2           | 98     | 142    | 231    | 149    | 77    | 148   | 142   | 92     |
| 690492    | Cd33            | 22     | 30     | 55.62  | 40.96  | 29    | 27    | 24    | 30     |
| 24891     | Abcb4           | 45.34  | 61.2   | 132.66 | 42.03  | 49.13 | 70.98 | 53.3  | 34.86  |
| 84348     | Ackr3           | 291    | 226    | 338    | 267    | 147   | 195   | 281   | 208    |
| 309925    | Fam81b          | 9.14   | 11.05  | 11.1   | 8.09   | 5.01  | 2.02  | 12.12 | 10.02  |
| 360553    | Vmol            | 8      | 7      | 9      | 3      | 3     | 5     | 8     | 4      |
| 24546     | Slco2a1         | 164    | 82.6   | 124.31 | 166.05 | 102   | 115.3 | 91.46 | 89.06  |
| 103692126 | NEWGENE_1587253 | 31.3   | 12.61  | 8.25   | 0      | 0.01  | 0     | 25.59 | 13.04  |
| 289104    | Prg4            | 58.57  | 39.04  | 79.78  | 90.85  | 38.14 | 52.87 | 56.95 | 50.94  |
| 100158223 | Zfp786          | 83.6   | 69.1   | 88.55  | 72.01  | 68.54 | 44.46 | 54.85 | 64.46  |
| 100359478 | Tstd1           | 49.01  | 58.03  | 53.77  | 39.18  | 32.24 | 23.15 | 56.31 | 36.64  |
| 685719    | Dand5           | 6      | 11     | 8      | 6      | 3     | 9     | 6     | 5      |
| 689374    | Tkt11           | 13     | 15     | 25     | 9      | 12    | 8     | 16    | 10     |
| 100910940 | Evi2b           | 74     | 46     | 76     | 25     | 48    | 44    | 30    | 42     |
| 108353135 | LOC108353135    | 4.08   | 0      | 2.04   | 2.04   | 2.04  | 1     | 2     | 1.02   |
| 114097    | Ltc4s           | 18     | 29     | 58     | 31     | 18    | 34    | 19    | 30     |
| 296872    | Eda2r           | 3      | 6.01   | 19.31  | 7.25   | 10.78 | 4.52  | 6.01  | 5.11   |
| 64522     | Slc5a2          | 6.91   | 18.89  | 7.17   | 5.69   | 4.16  | 10.33 | 9.83  | 4.41   |
| 171163    | Slc6a13         | 179.82 | 84.54  | 150.81 | 297.41 | 74    | 54    | 144   | 257.58 |
| 171547    | Crispld2        | 1681   | 1676   | 1120   | 2027   | 923   | 1041  | 1420  | 1451   |
| 100910838 | LOC100910838    | 31.38  | 23.42  | 25.07  | 0      | 14.01 | 12.08 | 22.1  | 11.19  |
| 474348    | Sspo            | 45     | 26     | 27     | 19     | 22    | 18    | 24    | 23     |
| 360626    | Krt19           | 52     | 41     | 78     | 75     | 33    | 17    | 76    | 57     |
| 363265    | Col4a3          | 44.67  | 36.74  | 51.93  | 61.33  | 27.96 | 26.44 | 54.45 | 35.97  |
| 108351300 | Rt11            | 65.99  | 48     | 51     | 46     | 37    | 38    | 51    | 31     |
| 291912    | Nod2            | 25     | 22     | 23     | 20     | 15    | 14    | 15    | 23     |
| 292884    | Zfp473          | 17     | 17     | 24     | 36     | 23    | 17    | 10    | 20     |
| 290604    | RGD1564958      | 18.4   | 27.19  | 21.31  | 12.69  | 13.93 | 16.71 | 19.05 | 9.6    |
| 24699     | Ptpnc           | 175    | 184    | 267.76 | 183.99 | 165   | 148   | 153   | 138    |
| 287527    | Serpinf2        | 20     | 13     | 8      | 10     | 12    | 10    | 8     | 8      |
| 291604    | Dcp2            | 0      | 8.03   | 24.68  | 44.72  | 31.86 | 0     | 0     | 25.84  |
| 79128     | Dab2            | 500    | 477    | 658    | 800    | 370   | 381   | 599   | 465    |
| 24387     | Gfap            | 321    | 401    | 989    | 384    | 185   | 492   | 393   | 492    |
| 685433    | Evi2a           | 101    | 115    | 122    | 118    | 67    | 85    | 81    | 107    |
| 300228    | Limal           | 288.4  | 314.63 | 428.91 | 425.47 | 230.6 | 290.7 | 299.1 | 266.56 |

|           |                 |        |         |        |        |       |       |       |         |
|-----------|-----------------|--------|---------|--------|--------|-------|-------|-------|---------|
| 309729    | Rtkn2           | 24.83  | 22.97   | 29.04  | 26.02  | 20.91 | 19.01 | 21.96 | 14.85   |
| 294809    | Adamts12        | 262    | 210     | 395    | 291    | 136   | 164   | 283   | 281     |
| 361060    | Ebf2            | 280    | 295     | 388    | 523    | 167   | 219   | 372   | 351     |
| 299750    | RGD1565753      | 0      | 2.72    | 0      | 0      | 0     | 0     | 2.03  | 0       |
| 362792    | Pld4            | 220    | 272     | 360    | 276    | 167   | 187   | 239   | 249     |
| 680422    | Fam115c         | 37.63  | 73.54   | 95.6   | 38.26  | 40    | 29.73 | 45.3  | 67.99   |
| 303412    | Rnf43           | 53.96  | 60.31   | 60.62  | 49.2   | 52.69 | 21.23 | 25.61 | 67.86   |
| 501153    | Zdbf2           | 22.18  | 19.03   | 32.43  | 20.48  | 19.83 | 8.38  | 16.07 | 26.03   |
| 100911733 | LOC100911733    | 2.95   | 1.83    | 0      | 1.55   | 0     | 3.17  | 1.56  | 0       |
| 288593    | Ccl124          | 55.94  | 51.8    | 55     | 59.22  | 45.34 | 40.12 | 47.68 | 32.85   |
| 83717     | Omd             | 252    | 127     | 173.31 | 214.31 | 96    | 125   | 194   | 158.31  |
| 116718    | Pex12           | 163.98 | 196.72  | 176.41 | 183.82 | 191.6 | 160.6 | 173.8 | 13.43   |
| 366126    | Spi1            | 125    | 104     | 131    | 85     | 80    | 82    | 83    | 88      |
| 500818    | Rfx4            | 39     | 42      | 33     | 37     | 16    | 29    | 37    | 31      |
| 282817    | Pycard          | 52     | 39      | 48     | 28     | 33    | 29    | 25    | 38      |
| 361206    | Slc25a48        | 103    | 114     | 105    | 92     | 45    | 78    | 65    | 122     |
| 100911813 | LOC100911813    | 20.99  | 21.82   | 19.16  | 5.78   | 14.74 | 19.67 | 15.9  | 0.44    |
| 108350249 | LOC108350249    | 72.43  | 66.88   | 107.2  | 82.09  | 60.31 | 68.08 | 60.14 | 57.62   |
| 25494     | Nid1            | 5340.8 | 6052.97 | 8231.6 | 7763.3 | 4121  | 5007  | 6148  | 5245.52 |
| 102553611 | LOC102553611    | 10.03  | 16.19   | 12.99  | 16.07  | 8.66  | 8.96  | 15.87 | 7.93    |
| 24763     | Acsm3           | 32.1   | 24.29   | 18.33  | 20.97  | 18.1  | 17.52 | 14.42 | 21.67   |
| 282634    | Pxmp4           | 306    | 404     | 378    | 377    | 218   | 298   | 391   | 191     |
| 291861    | Nlrc5           | 112    | 120     | 111    | 88     | 76    | 88.41 | 76    | 82.68   |
| 291654    | Pcdhb5          | 50.87  | 50.29   | 62.22  | 63.59  | 45.75 | 45.62 | 33.06 | 45.73   |
| 108348099 | NEWGENE_1359268 | 37.1   | 0       | 74.21  | 37.1   | 37.1  | 0     | 37.1  | 37.1    |
| 100361672 | Zc2hc1b         | 0      | 0       | 2      | 2      | 0     | 2     | 0     | 1       |
| 100911528 | LOC100911528    | 2      | 0       | 1      | 1      | 1     | 0     | 2     | 0       |
| 102551806 | LOC102551806    | 3      | 8       | 6      | 3      | 2     | 5     | 3     | 5       |
| 103691796 | LOC103691796    | 1      | 0       | 2      | 1      | 1     | 1     | 1     | 0       |
| 108352224 | LOC108352224    | 8      | 4       | 3      | 5      | 4     | 5     | 0     | 6       |
| 171161    | Csap1           | 2      | 7       | 1      | 2      | 1     | 2     | 6     | 0       |
| 293609    | Olr315          | 0      | 2       | 0      | 2      | 2     | 1     | 0     | 0       |
| 294241    | Ly6g6c          | 9      | 33      | 19     | 15     | 12    | 15    | 11    | 19      |
| 298567    | Cela3b          | 0      | 2       | 1      | 1      | 1     | 0     | 0     | 2       |
| 299637    | Tle6            | 2      | 1       | 4      | 1      | 1     | 1     | 1     | 3       |
| 303741    | Fscn2           | 98     | 116     | 131    | 107    | 74    | 82    | 99    | 84      |
| 304815    | Elf3            | 1      | 2       | 0      | 1      | 2     | 1     | 0     | 0       |
| 308325    | Nlrp5           | 2      | 0       | 2      | 0      | 1     | 1     | 0     | 1       |
| 310616    | Creb314         | 0      | 1       | 2      | 1      | 0     | 0     | 1     | 2       |
| 317051    | Hhip12          | 0      | 4       | 2      | 2      | 1     | 5     | 0     | 0       |
| 362879    | Myrf1           | 0      | 0       | 3      | 1      | 2     | 1     | 0     | 0       |
| 363681    | Hspb9           | 1      | 4       | 3      | 0      | 3     | 1     | 1     | 1       |
| 367901    | Btk             | 29     | 27      | 45     | 23     | 25    | 22    | 30    | 16      |
| 497859    | Atf7ip2         | 1      | 1       | 1      | 1      | 1     | 1     | 1     | 0       |
| 498102    | Gmnc            | 7      | 2       | 3      | 8      | 3     | 2     | 5     | 5       |
| 498152    | LOC498152       | 1      | 2       | 1      | 0      | 0     | 0     | 1     | 2       |
| 498608    | Yjefn3          | 2      | 0       | 5      | 1      | 1     | 2     | 0     | 3       |
| 499573    | LOC499573       | 1      | 2       | 1      | 0      | 0     | 1     | 0     | 2       |
| 500061    | Fam71f1         | 0      | 1       | 2      | 1      | 0     | 0     | 1     | 2       |
| 500906    | Cyth4           | 165    | 158     | 229    | 156    | 124   | 113   | 140   | 154     |
| 60464     | Fgf16           | 1      | 0       | 3      | 0      | 1     | 1     | 0     | 1       |
| 679870    | Capns2          | 7      | 9       | 8      | 8      | 2     | 11    | 7     | 4       |
| 680486    | Daz1            | 2      | 1       | 1      | 0      | 1     | 1     | 1     | 0       |
| 686084    | LOC686084       | 8      | 3       | 4      | 5      | 7     | 2     | 4     | 2       |
| 688328    | Znf750          | 0      | 1       | 1      | 2      | 1     | 0     | 1     | 1       |
| 691446    | Tmem190         | 16     | 9       | 9      | 10     | 9     | 8     | 12    | 4       |

|           |              |        |         |        |        |       |       |       |        |
|-----------|--------------|--------|---------|--------|--------|-------|-------|-------|--------|
| 81753     | Pth2r        | 2      | 2       | 3      | 5      | 3     | 2     | 4     | 0      |
| 84494     | Trpc4        | 25     | 28      | 24     | 31     | 24    | 24    | 17    | 16     |
| 24418     | Grm5         | 10     | 8       | 3      | 7      | 4     | 6     | 7     | 4      |
| 294430    | Calhm6       | 8      | 9       | 6      | 5      | 2     | 4     | 7     | 8      |
| 680520    | LOC680520    | 5.68   | 4.8     | 2.55   | 3.7    | 2.11  | 2.22  | 2.79  | 5.43   |
| 683469    | LOC683469    | 8      | 0       | 5.99   | 2      | 0     | 1     | 5     | 6      |
| 29279     | Meox2        | 87     | 68      | 145    | 117    | 33    | 70    | 120   | 90     |
| 305494    | Aebp1        | 1356   | 1308    | 2362   | 2050   | 1087  | 1348  | 1456  | 1421   |
| 367333    | LOC367333    | 0      | 4       | 5      | 13.68  | 3     | 3     | 8.03  | 3      |
| 312495    | Cyp26b1      | 182    | 272     | 226.99 | 239.98 | 143   | 149   | 236   | 164    |
| 364206    | Plek         | 92     | 75      | 102    | 73     | 68    | 48    | 69    | 72     |
| 80900     | Slco1a5      | 3.06   | 2.03    | 3.04   | 0      | 1.01  | 2.04  | 1.02  | 2.04   |
| 100910781 | LOC100910781 | 9.16   | 8.38    | 13.86  | 10.82  | 9.37  | 5.79  | 7.26  | 9.31   |
| 304825    | Crb1         | 41     | 37      | 28     | 51     | 27    | 29    | 33    | 29     |
| 25584     | F3           | 253    | 254     | 223    | 321    | 145   | 155   | 316   | 174    |
| 246249    | Arhgap4      | 170    | 116     | 166    | 124    | 115   | 110   | 100   | 108    |
| 364867    | Ticam2       | 35     | 26      | 46     | 34     | 16    | 20    | 43    | 27     |
| 171056    | Cx3cr1       | 48.92  | 51.51   | 74.59  | 60.83  | 20.65 | 26.75 | 53.74 | 76.24  |
| 308028    | Slc2a12      | 61     | 41      | 78     | 58     | 35    | 43    | 40    | 61     |
| 100912139 | LOC100912139 | 0      | 3       | 2.36   | 2.72   | 1.36  | 2     | 0     | 2.72   |
| 306664    | Adamts16     | 121    | 129     | 184    | 140    | 70    | 121   | 129   | 112    |
| 79209     | Frk          | 45.15  | 38.01   | 61.12  | 65     | 35.04 | 44.83 | 45.7  | 32     |
| 287899    | Adamts2      | 558.57 | 593.05  | 1007.7 | 798.33 | 387.6 | 556.1 | 729.7 | 553.65 |
| 293624    | Irf7         | 331    | 364     | 287    | 299    | 215   | 345   | 200   | 205    |
| 81782     | Soat1        | 346    | 346     | 356    | 493    | 229   | 258   | 358   | 316    |
| 29152     | Mstn         | 72     | 42      | 57     | 48     | 38    | 36    | 47    | 44     |
| 103690106 | LOC103690106 | 43.08  | 33.56   | 42.77  | 64.95  | 34.71 | 35.82 | 32.6  | 35.78  |
| 298069    | Coll15a1     | 912.95 | 1301.8  | 1995   | 1555.4 | 845.3 | 896.1 | 1437  | 1166.5 |
| 289201    | Lmx1a        | 50     | 74      | 57     | 91     | 54    | 37    | 69    | 45     |
| 103693666 | Zbed6        | 491.09 | 679.07  | 735.31 | 843.93 | 631   | 228.2 | 557.6 | 656.41 |
| 309526    | Ifit3        | 66.13  | 63.28   | 54.37  | 64.56  | 55.39 | 45.89 | 49.98 | 36.02  |
| 100910957 | LOC100910957 | 362.42 | 399.15  | 336.95 | 370.97 | 218   | 319.3 | 317.2 | 253.83 |
| 60589     | Epha8        | 59     | 39      | 33     | 105    | 31    | 40    | 27    | 80     |
| 24947     | Gabra3       | 576.91 | 472.65  | 506.4  | 546.95 | 393.1 | 357.7 | 436   | 399.61 |
| 58919     | Ccnd1        | 869.69 | 1002.58 | 1524.4 | 1005.7 | 694.4 | 812.7 | 853.6 | 961.65 |
| 289237    | Slamf8       | 36.57  | 37.5    | 33.12  | 35.36  | 21.51 | 15.07 | 26.46 | 44.54  |
| 25051     | Gpllr        | 3.9    | 4.74    | 3.02   | 2.94   | 2.04  | 4.03  | 3.94  | 1.01   |
| 308113    | Cnksr3       | 177    | 179     | 228    | 236    | 129   | 129   | 172   | 189    |
| 114005    | Epm2a        | 44     | 28      | 29     | 46     | 42    | 27    | 17    | 25     |
| 499520    | Shisal2b     | 8      | 10      | 19     | 12     | 10    | 1     | 19    | 7      |
| 108351679 | LOC108351679 | 5.23   | 5.47    | 7.38   | 9.21   | 6.72  | 1.32  | 7.32  | 5.25   |
| 681266    | LOC681266    | 2.17   | 3.55    | 2.17   | 2.29   | 2.08  | 2.14  | 3.47  | 0      |
| 299330    | RGD1305298   | 8.52   | 10.41   | 22.24  | 12.43  | 10.35 | 13.01 | 7.77  | 9.37   |
| 100911180 | LOC100911180 | 33.39  | 52.16   | 32.72  | 44.4   | 31.87 | 30.56 | 37.67 | 22.83  |
| 84400     | Prelp        | 999    | 1052    | 1875   | 1595   | 778   | 1023  | 1169  | 1203   |
| 25703     | Rbp4         | 402    | 230     | 220    | 259    | 176   | 159   | 152   | 353    |
| 301155    | St6gal2      | 57     | 57      | 68     | 64     | 58    | 34    | 32    | 62     |
| 317553    | Il1rap11     | 22     | 17      | 23     | 20     | 29    | 8     | 15    | 10     |
| 25300     | Cd247        | 14.28  | 14.44   | 16.06  | 11.86  | 15.4  | 5.72  | 8.15  | 13.56  |
| 108351349 | LOC108351349 | 3.29   | 1.05    | 0      | 4.52   | 2.37  | 1.06  | 1.09  | 2.18   |
| 353252    | Rdh10        | 101    | 133     | 173    | 114    | 83    | 108   | 117   | 86     |
| 690865    | Pcdh15       | 6.58   | 18      | 13     | 12.66  | 13    | 5     | 11    | 9      |
| 292138    | Eno4         | 65.93  | 54.03   | 76.38  | 68.09  | 39.18 | 44.11 | 63.26 | 53.5   |
| 499415    | Icoslg       | 647    | 491     | 823    | 674    | 456   | 597   | 428   | 513    |
| 294051    | Dntt         | 6      | 6       | 22     | 3      | 7     | 8     | 11    | 2      |
| 501467    | LOC501467    | 84.87  | 42.34   | 76.14  | 33.42  | 49.07 | 15.71 | 67.62 | 46.82  |

|           |              |        |         |        |        |       |       |       |         |
|-----------|--------------|--------|---------|--------|--------|-------|-------|-------|---------|
| 360524    | Zcchc10      | 114    | 98      | 114    | 94     | 62    | 93    | 79    | 84      |
| 365212    | Micb         | 16     | 14      | 15     | 21     | 11    | 13    | 15    | 11      |
| 690547    | Adam30       | 5.7    | 8.36    | 11.79  | 7.3    | 10.32 | 2.26  | 4.72  | 7.82    |
| 316062    | Slc22a13     | 7.04   | 12.51   | 3.09   | 9.04   | 7.63  | 3.91  | 8.48  | 3.99    |
| 94339     | Mmp23        | 83     | 114     | 152    | 85     | 58    | 82    | 101   | 88      |
| 54301     | Slc14a1      | 86.37  | 108.6   | 83.45  | 84.2   | 69.01 | 65.48 | 73.89 | 66.51   |
| 100911379 | LOC100911379 | 9.88   | 4.25    | 10.1   | 12.73  | 6.94  | 3.96  | 6.31  | 10.82   |
| 24508     | Irf1         | 211    | 196     | 241    | 213    | 133   | 161   | 154   | 205     |
| 315388    | Tmprss6      | 12     | 14      | 12     | 20     | 13    | 10    | 14    | 7       |
| 83820     | Sycp2        | 12     | 17      | 12     | 17     | 7     | 10    | 15    | 12      |
| 102552169 | LOC102552169 | 15.91  | 6.04    | 21.19  | 15.65  | 11.03 | 9.85  | 9.45  | 14.27   |
| 291813    | Cmtm3        | 163    | 207     | 208    | 189    | 121   | 144   | 163   | 154     |
| 680338    | Clec12a      | 39     | 38      | 51     | 42     | 33    | 24    | 34    | 38      |
| 308954    | Pdzd9        | 70.1   | 62.49   | 69.81  | 78.66  | 47.12 | 49.21 | 57.78 | 59.19   |
| 303948    | Nepro        | 85     | 102     | 90     | 80     | 74    | 59    | 71    | 67      |
| 299190    | LOC299190    | 1      | 3.56    | 2      | 0      | 2     | 1     | 0     | 1.98    |
| 102551354 | LOC102551354 | 34     | 38.99   | 32.73  | 32.1   | 27.82 | 26.13 | 26.51 | 24.17   |
| 64043     | Gcnt1        | 263.11 | 212.14  | 271.71 | 210.18 | 134.1 | 167.2 | 220.1 | 205.56  |
| 25211     | Lyz2         | 7162.8 | 6555.3  | 8367.8 | 3560.6 | 5409  | 4557  | 4884  | 4628.61 |
| 25404     | Cav1         | 3244   | 2901    | 3808   | 3540   | 1702  | 2389  | 3224  | 2935    |
| 367056    | Ccdc15       | 37     | 53      | 59     | 55     | 36    | 31    | 44    | 44      |
| 361239    | Bph1         | 156    | 146     | 149    | 124    | 115   | 131   | 118   | 73      |
| 498582    | Wdfy4        | 81     | 70      | 103    | 71     | 81    | 63    | 50    | 53      |
| 293619    | Pkp3         | 7.01   | 5.58    | 5.43   | 8.37   | 5.81  | 8     | 1.04  | 5.21    |
| 102554913 | LOC102554913 | 0      | 2.63    | 0      | 2.63   | 0     | 4     | 0     | 0       |
| 497194    | Rnase13      | 16     | 23      | 16     | 16     | 14    | 9     | 21    | 10      |
| 171112    | Wfdc1        | 297    | 238     | 429    | 315    | 184   | 207   | 334   | 248     |
| 108351645 | LOC108351645 | 0.97   | 1       | 0.99   | 0.97   | 1.99  | 1     | 0     | 0       |
| 362800    | Itgb8        | 3414.7 | 4124.95 | 6229   | 4234.5 | 3009  | 2807  | 3999  | 3883.82 |
| 362376    | Herc6        | 207    | 177     | 170    | 191    | 157   | 146   | 147   | 117     |
| 500015    | Samd91       | 444.9  | 407.98  | 408.22 | 411.19 | 269.5 | 342.9 | 323.6 | 336.77  |
| 102555289 | LOC102555289 | 50.18  | 41      | 49.11  | 58.12  | 37.79 | 37.99 | 37.58 | 37.65   |
| 500047    | Wnt16        | 242.13 | 309.09  | 311.8  | 287.71 | 237.8 | 221.3 | 190.2 | 226.61  |
| 690826    | LOC690826    | 48.37  | 37.95   | 41.29  | 44.76  | 36.32 | 27.3  | 38.97 | 28.68   |
| 64169     | Necab1       | 1411   | 1158    | 1157   | 934    | 446   | 735   | 1521  | 847     |
| 25346     | Ros1         | 6      | 7       | 3      | 14     | 6.29  | 8     | 6     | 2.56    |
| 100912585 | LOC100912585 | 122.24 | 117.49  | 267.52 | 138.12 | 105.9 | 147.6 | 152.8 | 85.27   |
| 100912365 | LOC100912365 | 8      | 5       | 5      | 3      | 5     | 0     | 7     | 4       |
| 287059    | RGD1565166   | 0      | 9       | 7      | 5      | 2     | 5     | 8     | 1       |
| 29585     | Gjb3         | 2      | 5       | 8      | 6      | 5     | 3     | 4     | 4       |
| 315806    | Prtg         | 4      | 8       | 5      | 4      | 4     | 5     | 3     | 4       |
| 499260    | Otoa         | 4      | 7       | 5      | 5      | 4     | 6     | 2     | 4       |
| 548326    | Fcmr         | 131    | 109     | 182    | 137    | 93    | 93    | 124   | 116     |
| 316976    | Etfbkmt      | 126    | 116     | 80     | 65     | 48    | 70    | 96    | 81      |
| 64513     | Pawr         | 50     | 39      | 64     | 70     | 42    | 45    | 46    | 37      |
| 364688    | Sycp21       | 22     | 21      | 15     | 22     | 16    | 11    | 16    | 18      |
| 171104    | Gper1        | 31     | 34      | 24     | 29     | 19    | 27    | 26    | 18      |
| 500118    | Fam221a      | 42     | 34      | 31     | 11     | 32    | 19    | 24    | 15      |
| 293840    | Pnma3        | 18.04  | 17.77   | 14.4   | 18.62  | 17.79 | 5.68  | 12.3  | 16.74   |
| 306247    | I117rb       | 101    | 103     | 114    | 163    | 66    | 85    | 105   | 111     |
| 361752    | Pde6c        | 21     | 18      | 18     | 19     | 16    | 16    | 12    | 14      |
| 63840     | Per2         | 337.65 | 292.41  | 230.63 | 327.81 | 251.9 | 295.9 | 185.6 | 173.93  |
| 314626    | Adamts15     | 196.71 | 235     | 446.06 | 180.87 | 135.1 | 214   | 254.2 | 205     |
| 100169747 | Phykp1       | 36.86  | 52.41   | 64.26  | 43.33  | 27.29 | 32.65 | 60.63 | 29.73   |
| 308108    | Zfp541       | 15     | 8       | 21     | 11     | 12    | 12    | 15    | 3       |
| 25164     | Cdkn2b       | 206.19 | 284.31  | 324.54 | 286.96 | 200.3 | 196.5 | 245.9 | 198.89  |

|           |              |        |         |        |        |       |       |       |        |
|-----------|--------------|--------|---------|--------|--------|-------|-------|-------|--------|
| 305909    | Cenpj        | 297.3  | 327.52  | 361.72 | 300.37 | 246.4 | 248.7 | 266.2 | 221.88 |
| 689710    | Hegl         | 473    | 500     | 874    | 581    | 393   | 463   | 536   | 463    |
| 102549694 | LOC102549694 | 123.21 | 108     | 168.16 | 148.83 | 112.5 | 113.9 | 107.4 | 85.08  |
| 84358     | Efna2        | 30     | 26.92   | 20     | 25.91  | 18    | 17    | 32.93 | 10.67  |
| 501712    | Slfn3        | 33.76  | 26.41   | 27.54  | 28.14  | 18    | 29.03 | 13.36 | 28.17  |
| 366124    | Agbl2        | 7      | 3       | 12     | 12     | 5     | 7     | 6     | 8      |
| 498666    | Tnfsf13b     | 24     | 11      | 21     | 12     | 21    | 9     | 8     | 14     |
| 289440    | Ephx4        | 81     | 85      | 79     | 78     | 54    | 65    | 58    | 70     |
| 363018    | Cep295       | 402.55 | 406.18  | 465.6  | 356.53 | 335.8 | 261.6 | 329.9 | 320.22 |
| 309499    | Myof         | 311    | 437     | 868    | 337    | 335   | 383   | 431   | 345    |
| 361839    | Ctnna3       | 189    | 222     | 248    | 308    | 190   | 151   | 200   | 199    |
| 246774    | Gimap5       | 70     | 52      | 47     | 35     | 34.02 | 36.11 | 40    | 46     |
| 296959    | Cpa2         | 64     | 76      | 52     | 34     | 53    | 31    | 22    | 67     |
| 291549    | Oacyl        | 54.93  | 69.58   | 73.91  | 59.19  | 41.55 | 44.67 | 48.5  | 62.49  |
| 85250     | Col5a2       | 2328   | 2589    | 4224   | 3041   | 1621  | 2420  | 2731  | 2558   |
| 24373     | Fst          | 25     | 35      | 57     | 24     | 13    | 40    | 30    | 25     |
| 361383    | Adgre5       | 194    | 199     | 368    | 192    | 188   | 200   | 186   | 156    |
| 313479    | Orc1         | 61.83  | 47.08   | 52.49  | 36.63  | 31.56 | 35.85 | 36.62 | 47.69  |
| 297077    | Tmem176a     | 10299  | 7217    | 7609   | 3856   | 5371  | 4663  | 7458  | 4717   |
| 312688    | Usp18        | 135    | 121     | 87     | 68     | 66    | 122   | 54    | 73     |
| 295356    | Slc16a4      | 60     | 56      | 35     | 59     | 46    | 30    | 39    | 46     |
| 360604    | Spata20      | 23     | 14      | 17     | 6      | 14    | 11    | 14    | 7      |
| 362572    | Artn         | 24     | 12      | 26     | 28     | 10    | 20    | 24    | 15     |
| 690743    | Mkl1         | 73     | 97      | 135    | 98     | 60    | 90    | 102   | 57     |
| 309653    | Fgd2         | 107    | 104     | 128    | 90     | 73    | 67    | 95    | 94     |
| 364674    | Tifab        | 60     | 60      | 72     | 44     | 30    | 43    | 48    | 60     |
| 310392    | Slc7a11      | 80.05  | 68.43   | 76.44  | 120.5  | 55.73 | 41.73 | 75.01 | 92.45  |
| 29197     | I118         | 21     | 19      | 36     | 27     | 14    | 18    | 26    | 21     |
| 499566    | Car13        | 249    | 239     | 247    | 244    | 150   | 157   | 211   | 233    |
| 296257    | Cst7         | 23     | 16      | 25     | 9      | 11    | 11    | 21    | 13     |
| 406161    | C4b          | 234.54 | 204.7   | 466.04 | 178.52 | 170.2 | 313.8 | 205.7 | 141.72 |
| 297891    | Tssk3        | 16.65  | 18.42   | 8.2    | 6.09   | 6.24  | 18.34 | 7.09  | 6.2    |
| 100361180 | LOC100361180 | 9.84   | 9.87    | 2.8    | 1.3    | 0     | 5.92  | 5.68  | 6.67   |
| 307401    | Pde6a        | 13     | 4       | 8      | 18     | 6     | 2     | 9     | 16     |
| 245960    | Alg10        | 190    | 199     | 199    | 199    | 175   | 95    | 145   | 189    |
| 314349    | Ston2        | 90.32  | 114.01  | 119.59 | 145.11 | 101   | 61.92 | 98.33 | 98.73  |
| 100363116 | LOC100363116 | 29.99  | 29.19   | 54.5   | 42.23  | 24.51 | 36.37 | 38.01 | 20.82  |
| 65030     | Ephx2        | 76     | 131     | 52     | 4      | 11    | 58    | 65    | 68     |
| 687615    | Morn3        | 24     | 13      | 14     | 18     | 12    | 17    | 12    | 12     |
| 171360    | Vsx2         | 16.23  | 11.67   | 10.85  | 13.58  | 10.85 | 9.01  | 14.12 | 6.23   |
| 84012     | Slc1a6       | 28     | 28      | 23     | 16     | 13    | 20    | 21    | 19     |
| 54264     | Mafb         | 87     | 99      | 153    | 98     | 74    | 95    | 92    | 75     |
| 103694857 | LOC103694857 | 121.28 | 39.38   | 123.37 | 0      | 100   | 33.93 | 15.23 | 69.3   |
| 100362748 | Cfap74       | 3      | 5       | 3      | 2      | 3     | 1     | 4     | 2      |
| 108351075 | LOC108351075 | 4      | 5       | 2      | 2      | 0     | 4     | 1     | 5      |
| 497083    | Xkr5         | 8      | 2       | 14     | 15     | 5     | 9     | 9     | 7      |
| 498365    | Tmem156      | 2      | 5       | 2      | 4      | 4     | 3     | 0     | 3      |
| 500673    | Six6os1      | 3      | 8       | 1      | 1      | 2     | 1     | 3     | 4      |
| 681249    | Fam72a       | 2      | 4       | 5      | 2      | 1     | 0     | 2     | 7      |
| 691215    | LOC691215    | 8      | 13      | 8      | 10     | 7     | 5     | 7     | 11     |
| 291936    | Hhip         | 9      | 6       | 24     | 13     | 4     | 7     | 13    | 16     |
| 361419    | Dnaaf1       | 3      | 8       | 8      | 7      | 4     | 3     | 3     | 10     |
| 685004    | Itga9        | 242.18 | 205.54  | 330.5  | 277.85 | 184.4 | 210.5 | 220.3 | 197.43 |
| 102546678 | LOC102546678 | 628.58 | 1125.61 | 958.16 | 489.06 | 563.2 | 703.7 | 462   | 734.45 |
| 291069    | Ppp1r3g      | 32     | 24      | 38     | 19     | 27    | 23    | 16    | 21     |
| 363656    | Bhlha9       | 65     | 58      | 31     | 68     | 64    | 38    | 34    | 35     |

|           |              |        |         |        |        |       |       |       |        |
|-----------|--------------|--------|---------|--------|--------|-------|-------|-------|--------|
| 314997    | Fer116       | 44.01  | 23      | 32     | 24.46  | 21    | 16    | 25    | 33.12  |
| 102547060 | LOC102547060 | 8      | 19      | 8      | 13     | 6     | 11    | 6     | 14     |
| 102554658 | LOC102554658 | 12     | 14      | 11     | 11     | 8     | 10    | 8     | 11     |
| 498547    | Epstil       | 45     | 37      | 49     | 35     | 36    | 38    | 20    | 34     |
| 311642    | Sulf2        | 1273   | 1154    | 1700   | 1741   | 914   | 1075  | 1286  | 1251   |
| 310810    | Frrs1        | 88.06  | 77.46   | 83.81  | 66.17  | 59.44 | 62.74 | 52.28 | 68.89  |
| 79557     | Chrna1       | 68.02  | 59.56   | 55.82  | 61.75  | 58.42 | 39.89 | 47.7  | 43.08  |
| 102556148 | LOC102556148 | 51.91  | 30.28   | 30.28  | 38.94  | 17.3  | 34.61 | 34.61 | 30.28  |
| 25582     | Agrp         | 11     | 10      | 9      | 5      | 6     | 5     | 4     | 12     |
| 688019    | Thap2        | 228    | 226     | 245    | 255    | 190   | 165   | 194   | 187    |
| 100912596 | LOC100912596 | 7.75   | 8.6     | 5.31   | 9.93   | 2.69  | 9.91  | 3.81  | 7.97   |
| 100911365 | LOC100911365 | 355.38 | 230.81  | 117.37 | 311.61 | 251.6 | 268.3 | 159.5 | 104.11 |
| 102553140 | LOC102553140 | 10.15  | 14.65   | 23.89  | 17     | 14.94 | 12.21 | 6.23  | 17.33  |
| 500995    | RGD1564937   | 1      | 3       | 4      | 3.2    | 1     | 3.84  | 3.81  | 0      |
| 171064    | Igsf6        | 34     | 37      | 63     | 33     | 45    | 26    | 35    | 23     |
| 305309    | Slc10a4      | 21     | 26      | 20     | 21     | 24    | 17    | 20    | 7      |
| 307616    | Cmtm2a       | 2      | 8       | 7      | 5      | 7     | 6     | 4     | 0      |
| 316254    | Tdrd6        | 2      | 5       | 8      | 7      | 2     | 5     | 4     | 6      |
| 102550127 | LOC102550127 | 32.09  | 49.36   | 53.2   | 24.44  | 29.8  | 33.04 | 35.29 | 24.83  |
| 302396    | Nexmif       | 61.55  | 73.2    | 68.85  | 71.17  | 65.14 | 45.58 | 46.92 | 54.73  |
| 310843    | Sec24d       | 356    | 387     | 537    | 531    | 316   | 418   | 361   | 305    |
| 313993    | Grhl1        | 43     | 42      | 47     | 62     | 40    | 37    | 38    | 35     |
| 100909548 | LOC100909548 | 1927.5 | 1976.33 | 317.9  | 2075.9 | 2037  | 1133  | 835.3 | 864.27 |
| 361537    | Tyrobp       | 179    | 150     | 255    | 105    | 137   | 107   | 157   | 132    |
| 305427    | Otop1        | 38     | 57      | 54     | 41     | 21    | 45    | 42    | 39     |
| 300067    | Sh3bp1       | 80     | 81      | 82     | 84     | 66    | 52    | 65    | 70     |
| 100911428 | LOC100911428 | 6.95   | 7.66    | 10.89  | 16.79  | 11.85 | 7.77  | 4.94  | 8.16   |
| 414783    | RT1-CE4      | 298.71 | 198.88  | 301.18 | 325.04 | 203.8 | 247.3 | 251.3 | 167.14 |
| 500638    | Fam110c      | 11.25  | 12      | 10.91  | 15     | 11    | 15.17 | 5.01  | 6.86   |
| 291847    | Ccdc113      | 7      | 8       | 12     | 4      | 3     | 8     | 6     | 7      |
| 301271    | Ptchd4       | 22     | 25      | 22     | 24     | 10    | 26    | 17    | 19     |
| 314126    | Baz1a        | 118    | 126     | 165    | 119    | 107   | 109   | 104   | 89     |
| 307988    | Vwa2         | 20     | 21      | 18     | 12     | 16    | 8     | 13    | 18     |
| 499429    | Tbata        | 66     | 25      | 49     | 73     | 16    | 38    | 57    | 54     |
| 499656    | RGD1564171   | 20     | 17      | 19     | 15     | 12    | 15    | 10    | 18     |
| 286985    | Vom2r31      | 7.67   | 8.07    | 7.99   | 12.59  | 5.52  | 6.01  | 9.19  | 7.42   |
| 114243    | Nox1         | 9.09   | 8.78    | 7.91   | 10.19  | 12.15 | 2.3   | 8.92  | 4.5    |
| 287776    | Cep112       | 76.95  | 61      | 87     | 63.03  | 47    | 65.22 | 66.98 | 44     |
| 246247    | Fmo4         | 76     | 61      | 64     | 48     | 49    | 49    | 56    | 39     |
| 102551484 | LOC102551484 | 6.52   | 9.37    | 7.68   | 6.54   | 8.03  | 4.53  | 4.68  | 6.1    |
| 362049    | Unc5c        | 154.1  | 184.22  | 205.49 | 228.08 | 144.4 | 134.9 | 184.6 | 134.42 |
| 116597    | Opcml        | 803.14 | 720.81  | 774.86 | 845.78 | 700.8 | 564.5 | 599.7 | 572.77 |
| 685275    | LOC685275    | 8.83   | 12.68   | 5.25   | 1      | 5.54  | 5.06  | 6.34  | 4.58   |
| 365194    | Cabp5        | 4.4    | 4.92    | 3.72   | 3.91   | 4.29  | 3.85  | 2.68  | 2.32   |
| 100910717 | LOC100910717 | 129.79 | 78.8    | 119.5  | 158.8  | 175.3 | 87.68 | 64.26 | 50.17  |
| 303953    | Abhd10       | 102.18 | 78.56   | 52.38  | 70.64  | 48.35 | 16.87 | 66.35 | 103.93 |
| 103689991 | Ect2l        | 3.25   | 4.62    | 4.52   | 7.61   | 0     | 7     | 4.61  | 3.9    |
| 29373     | Bmp2         | 25     | 24      | 37     | 21     | 24    | 21    | 18    | 20     |
| 100362909 | Tex52        | 1      | 2       | 2.1    | 4.09   | 2.05  | 1.03  | 1.05  | 3      |
| 499537    | Fyb1         | 95     | 84      | 118    | 100    | 86    | 70    | 72.09 | 80     |
| 24410     | Grin2b       | 126.4  | 270     | 422.07 | 244.09 | 185   | 226   | 237.9 | 175.99 |
| 266761    | Cyp4v3       | 172.84 | 301.21  | 223.63 | 276.52 | 165.5 | 165.2 | 212.9 | 212.89 |
| 100911319 | LOC100911319 | 1271.6 | 1071.08 | 1435.4 | 1201.8 | 915   | 1013  | 969.7 | 970.48 |
| 498368    | LOC498368    | 120    | 104     | 148    | 130    | 85    | 93    | 105   | 107    |
| 100360518 | Hsh2d        | 19.99  | 21.16   | 22.67  | 14.43  | 17.11 | 18.22 | 12.9  | 12.57  |
| 299639    | Ankrd24      | 76.25  | 127.8   | 127.74 | 91.17  | 76.39 | 86.82 | 74.9  | 90.62  |



|           |                |        |         |        |        |       |       |       |         |
|-----------|----------------|--------|---------|--------|--------|-------|-------|-------|---------|
| 102555341 | LOC102555341   | 27.21  | 40.28   | 54.69  | 35.24  | 18.21 | 30.67 | 31.39 | 42.11   |
| 298693    | Isg15          | 143    | 78      | 86     | 84     | 58    | 121   | 72    | 53      |
| 313063    | Rad54b         | 26.01  | 23      | 17     | 15     | 21    | 20    | 15    | 7       |
| 288905    | I127ra         | 8.06   | 6.06    | 9.08   | 4.02   | 8.08  | 4     | 7.09  | 2       |
| 117274    | Nr0b2          | 6      | 2       | 1      | 0      | 1     | 4     | 1     | 1       |
| 25378     | Amh            | 4      | 1       | 1      | 3      | 0     | 2     | 2     | 3       |
| 282839    | Mc2r           | 6      | 2       | 0      | 1      | 1     | 1     | 1     | 4       |
| 298602    | Srarp          | 5      | 7       | 3      | 3      | 1     | 1     | 7     | 5       |
| 365868    | Hormad1        | 10     | 12      | 7      | 16     | 5     | 7     | 16    | 7       |
| 685839    | Dnajb7         | 1      | 3       | 3      | 2      | 1     | 2     | 1     | 3       |
| 685936    | Pfn3           | 3      | 2       | 0      | 4      | 1     | 3     | 2     | 1       |
| 681408    | Prr19          | 5      | 4       | 7      | 11     | 7     | 3     | 5     | 6       |
| 308995    | Itgal          | 74     | 99      | 107    | 85     | 77    | 73    | 73    | 61      |
| 305101    | RGD1304622     | 145.13 | 94.45   | 161.34 | 113.27 | 86.28 | 83.62 | 117.1 | 113.2   |
| 361430    | Piezol         | 312.74 | 299.28  | 525    | 394.35 | 236.1 | 272.7 | 378   | 305.03  |
| 171299    | Foxd1          | 97.71  | 74      | 138.69 | 110.08 | 82    | 48.99 | 69.01 | 127.32  |
| 100360238 | LOC100360238   | 5.77   | 13.55   | 10.56  | 2.35   | 5.86  | 7.28  | 5.71  | 6.24    |
| 102556346 | LOC102556346   | 71     | 71      | 59     | 61     | 42    | 67    | 54    | 41      |
| 100911881 | LOC100911881   | 158.91 | 171.44  | 179.3  | 227.23 | 128   | 169.6 | 141.9 | 134.21  |
| 363551    | Zg16b          | 2      | 2       | 2      | 2.99   | 1     | 2     | 1     | 3       |
| 289247    | Olr1584        | 8.23   | 8.8     | 8.07   | 10.05  | 7.02  | 6.02  | 9.08  | 5.25    |
| 60587     | Dusp4          | 70     | 102     | 35     | 37     | 49    | 34    | 54    | 53      |
| 302931    | Eef2kmt        | 71.67  | 39.99   | 48.39  | 42.54  | 32.71 | 40.68 | 33.88 | 50.51   |
| 102547811 | LOC102547811   | 110.98 | 91.04   | 87.18  | 74.87  | 65.73 | 54.02 | 90.79 | 73.01   |
| 366988    | Bin2           | 74     | 67      | 97     | 47     | 68    | 40    | 54    | 60      |
| 171369    | Cd40           | 32.83  | 27.09   | 32.37  | 28.19  | 24.74 | 15.15 | 17.36 | 36.6    |
| 502316    | Zfp566         | 104.02 | 89.21   | 90.19  | 75.81  | 60.56 | 69.12 | 66.03 | 84.17   |
| 292071    | Cdt1           | 36     | 49      | 51     | 27     | 28    | 35    | 29    | 35      |
| 360997    | Abcg314        | 335.65 | 299.02  | 483.35 | 283.21 | 283.7 | 263.2 | 280.6 | 264.47  |
| 361319    | Spink5         | 2.49   | 7       | 4      | 25     | 7     | 5     | 12    | 6       |
| 100362023 | LOC100362023   | 0      | 4.86    | 11.35  | 5.06   | 0     | 0     | 16.58 | 0       |
| 292843    | Siglec5        | 87     | 74      | 112    | 62.97  | 55    | 54    | 69    | 83.92   |
| 308906    | Trim5          | 266    | 272     | 275    | 291    | 173   | 229   | 253   | 206     |
| 80338     | Zbtb10         | 102    | 117     | 112    | 119    | 102   | 52    | 90.97 | 106     |
| 499975    | Fam126a        | 81     | 105     | 109    | 105    | 80    | 71    | 89    | 72      |
| 100361272 | Ankub1         | 12     | 12      | 11     | 15     | 13    | 9     | 9     | 8       |
| 363130    | Astel          | 85.27  | 117.43  | 111.52 | 91.43  | 76.05 | 72.02 | 84.98 | 83.4    |
| 293677    | Efemp2         | 320    | 329     | 436    | 398    | 227   | 300   | 324   | 306     |
| 100912199 | LOC100912199   | 3.34   | 7.38    | 5.37   | 2.11   | 5.55  | 3.19  | 5.46  | 0       |
| 498330    | Aff1-as1       | 0      | 3       | 1.55   | 0      | 1     | 1     | 1.55  | 0       |
| 288369    | Pex11g         | 19     | 24      | 14     | 25     | 12    | 17    | 14    | 21      |
| 287745    | Plcd3          | 254    | 172     | 211    | 288    | 160   | 128   | 197   | 237     |
| 499022    | Qk             | 427.38 | 524.88  | 483.39 | 666.99 | 356.8 | 315   | 471.7 | 498.02  |
| 102551435 | LOC102551435   | 20.29  | 27      | 23     | 39     | 25    | 23    | 16.34 | 21      |
| 307810    | Esrp2          | 2.07   | 1.03    | 3.07   | 3.05   | 2.03  | 1.03  | 4.14  | 0       |
| 192228    | Haus1          | 105.17 | 63.77   | 86.16  | 44.57  | 74.69 | 19    | 72.18 | 68.18   |
| 679937    | Dram1          | 84     | 89      | 113    | 84     | 70    | 62    | 90    | 67      |
| 29455     | Gdf15          | 0      | 2.13    | 10.21  | 3.38   | 1.34  | 5.95  | 3.36  | 1.63    |
| 25683     | Col12a1        | 894    | 1165    | 1908   | 1586   | 820   | 1107  | 1233  | 1178    |
| 501116    | LOC501116      | 1410.5 | 1452.67 | 910.69 | 1752   | 1105  | 738.7 | 1318  | 1155.66 |
| 690246    | LOC690246      | 0      | 0       | 1.28   | 0      | 0     | 0     | 1     | 0       |
| 108348131 | NEWGENE_620180 | 189.44 | 156.01  | 156.01 | 161.58 | 161.6 | 128.2 | 122.6 | 105.86  |
| 83578     | Pdxk           | 96.68  | 48.26   | 65.06  | 90.35  | 68.81 | 57.09 | 55.75 | 53.21   |
| 313834    | Prkd3          | 522.62 | 517.37  | 545.72 | 574.16 | 395.3 | 385.2 | 473   | 435.4   |
| 500571    | Kif17          | 21     | 17      | 17     | 23     | 21    | 8     | 15    | 17      |
| 500564    | Ldlrap1        | 73     | 76      | 95     | 91     | 63    | 77    | 60    | 62      |



|           |              |        |         |        |        |       |       |       |         |
|-----------|--------------|--------|---------|--------|--------|-------|-------|-------|---------|
| 311821    | Agpat2       | 41     | 51      | 56     | 31     | 34    | 45    | 31    | 30      |
| 103692025 | LOC103692025 | 53.07  | 34.02   | 82.67  | 54.09  | 44.06 | 27.09 | 46.02 | 57.91   |
| 100362342 | LOC100362342 | 40     | 46      | 44     | 40     | 22    | 47    | 28    | 36      |
| 171108    | P2ryl4       | 78     | 79      | 117    | 89     | 55    | 67    | 93    | 69      |
| 305450    | Sh3bp2       | 111    | 114     | 120    | 87     | 70    | 90    | 94    | 84      |
| 299313    | Uxt          | 340    | 377     | 324    | 315    | 212   | 229   | 248   | 372     |
| 266610    | Fadd         | 24     | 15      | 25     | 28     | 13    | 22    | 18    | 19      |
| 29482     | Slc1a2       | 7      | 9       | 2      | 5      | 4     | 2     | 2     | 10      |
| 296344    | Mybl2        | 20     | 17      | 36     | 19     | 28    | 24    | 11    | 9       |
| 316019    | Ccrl2        | 20     | 16      | 17     | 16     | 5     | 19    | 21    | 9       |
| 295669    | Cybrd1       | 359.77 | 244.24  | 402.36 | 377.36 | 234.4 | 241.2 | 302.2 | 305.2   |
| 100912689 | LOC100912689 | 0      | 5.15    | 3.46   | 2.58   | 3.11  | 3.08  | 2.57  | 0       |
| 502901    | Clec9a       | 49     | 45      | 50     | 31     | 36    | 38    | 30    | 33      |
| 171577    | Epcam        | 9      | 7       | 16     | 5.05   | 7     | 7.01  | 10    | 5       |
| 679730    | LOC679730    | 152.27 | 136.44  | 125.28 | 47.2   | 89.82 | 57.16 | 136.9 | 77.36   |
| 353316    | Gsdme        | 159    | 151     | 141    | 186    | 118   | 107   | 144   | 130     |
| 113984    | Nr2f2        | 1685.2 | 1695.59 | 2116.2 | 2251.2 | 1348  | 1337  | 1688  | 1698.21 |
| 500561    | Themis2      | 39.34  | 24.14   | 35.67  | 28.03  | 26.23 | 21.83 | 28.54 | 23.04   |
| 246248    | Fmo5         | 35     | 38      | 30     | 31     | 23    | 39    | 25    | 18      |
| 288364    | Qtrt2        | 101    | 106     | 93     | 93     | 83    | 89    | 67    | 69      |
| 306548    | Hook3        | 172    | 150     | 231    | 210    | 129   | 110   | 157   | 202     |
| 102552895 | LOC102552895 | 360.26 | 304.39  | 319.94 | 329.3  | 211.1 | 254   | 322.9 | 241.77  |
| 103690896 | LOC103690896 | 5      | 7       | 12     | 13     | 8     | 1     | 10    | 10      |
| 78964     | Npffr2       | 14     | 6       | 8      | 9      | 2     | 5     | 7     | 15      |
| 300696    | Ttc12        | 70     | 89      | 99     | 103    | 66    | 72    | 80    | 65      |
| 367195    | LOC367195    | 9.12   | 10.05   | 9.05   | 5.04   | 6.56  | 6.03  | 5.72  | 7.77    |
| 361084    | Lmo7         | 356    | 318     | 481    | 453    | 214   | 225   | 429   | 393     |
| 690286    | Hlf          | 132.04 | 79.1    | 75.43  | 193.63 | 80.16 | 92.98 | 81.77 | 121.71  |
| 306950    | Slc17a2      | 13     | 16      | 9      | 13     | 13    | 9     | 6     | 12      |
| 103690168 | LOC103690168 | 1.38   | 4       | 7      | 2      | 4.14  | 3     | 2.76  | 1.38    |
| 365851    | RGD1564513   | 1.08   | 3.27    | 1.11   | 2.15   | 2.87  | 2.1   | 0     | 1       |
| 296156    | Cpxml        | 178    | 194     | 296    | 242    | 127   | 172   | 222   | 193     |
| 679640    | Cntln        | 143    | 177     | 157    | 174    | 143   | 120   | 115   | 133     |
| 79242     | Hpgd         | 8.76   | 3       | 2.32   | 5.04   | 3     | 6     | 2     | 4.01    |
| 362508    | Spag8        | 26     | 26      | 27     | 28     | 14    | 24    | 24    | 22      |
| 500696    | RGD1563496   | 18.25  | 5.14    | 1.69   | 27.89  | 5.96  | 11.26 | 9.63  | 14.75   |
| 288937    | Serpib8      | 15     | 32      | 50.13  | 20     | 24    | 22.01 | 28    | 18      |
| 691932    | Tgm7l1       | 4      | 4       | 4      | 2      | 4     | 2     | 2     | 3       |
| 296078    | Pak6         | 58     | 87      | 67     | 82     | 62    | 66    | 45    | 58      |
| 362402    | Fgd5         | 234    | 230     | 378    | 297    | 182   | 226   | 282   | 205     |
| 108350822 | LOC108350822 | 10.33  | 17.71   | 14.78  | 18.8   | 16.12 | 8.32  | 10.57 | 13.41   |
| 498011    | Mrc2         | 330.58 | 295.26  | 406.38 | 553.06 | 259.1 | 288.5 | 338   | 360.24  |
| 314785    | Tmtc3        | 571    | 572     | 595    | 597    | 423   | 410   | 505   | 497     |
| 363093    | Mns1         | 72     | 75      | 63     | 80     | 50    | 49    | 46    | 83      |
| 293746    | Ms4a4c       | 12.44  | 0       | 16.09  | 9.08   | 10.66 | 9.79  | 4.65  | 4.48    |
| 24210     | Asgr1        | 26     | 16      | 15     | 32     | 8     | 9     | 15    | 38      |
| 290646    | Pde4c        | 306    | 202     | 230    | 307    | 193   | 205   | 228   | 196     |
| 102549509 | LOC102549509 | 7.89   | 12.97   | 9.75   | 2.91   | 0     | 0     | 16.71 | 9.66    |
| 361749    | I133         | 2361   | 1978    | 1537   | 2003   | 1020  | 1240  | 1984  | 1955    |
| 117242    | Tenm2        | 418.89 | 491     | 655    | 777.95 | 379.9 | 416   | 590   | 457.92  |
| 500896    | Wdr97        | 14     | 10      | 12     | 11     | 10    | 10    | 10    | 7       |
| 108348118 | LOC108348118 | 1869.3 | 1496.28 | 2027.3 | 1589.6 | 1331  | 1834  | 1653  | 679.51  |
| 289881    | Dr1          | 466.84 | 241.91  | 486.3  | 319.84 | 143.7 | 315.8 | 427.1 | 306.6   |
| 252917    | Nr1d1        | 1172.1 | 1103.46 | 1244.8 | 1040.9 | 1028  | 1095  | 571   | 899.64  |
| 103689941 | LOC103689941 | 143.6  | 246.98  | 306.81 | 132.38 | 161.9 | 264.3 | 89.97 | 137.56  |
| 293449    | Vwa3a        | 16     | 24      | 9      | 17     | 7     | 12    | 15    | 18      |

|           |              |        |        |        |        |       |       |       |        |
|-----------|--------------|--------|--------|--------|--------|-------|-------|-------|--------|
| 291130    | Dcdc2        | 85.85  | 120.13 | 93.67  | 103.86 | 58.29 | 76.29 | 84.23 | 99.2   |
| 100362083 | Zfp866       | 72.32  | 66.29  | 79.36  | 57.09  | 39.44 | 55.32 | 53.62 | 68.41  |
| 100125363 | Fbxl13       | 7      | 7      | 9.06   | 9      | 5     | 6.07  | 6.12  | 8.08   |
| 29665     | P2rx7        | 469.89 | 608    | 730    | 657    | 406.3 | 481.8 | 593.6 | 461.34 |
| 299818    | Llph         | 55.44  | 55.44  | 55.44  | 114.97 | 83.16 | 27.72 | 55.44 | 55.44  |
| 117267    | Slc26a2      | 248    | 189    | 232    | 277    | 153   | 156   | 212   | 225    |
| 296409    | Cass4        | 31.82  | 28.99  | 46.2   | 27.88  | 35.48 | 16.67 | 24.89 | 29.34  |
| 310257    | Samd7        | 2.75   | 5.8    | 4.17   | 7.18   | 3.66  | 3.78  | 0.49  | 7.77   |
| 363096    | Dnaaf4       | 34     | 24     | 23     | 28     | 18    | 21    | 21    | 26     |
| 364405    | Scara3       | 596    | 522    | 1078   | 819    | 512   | 523   | 760   | 584    |
| 108349054 | LOC108349054 | 3.55   | 2.22   | 1.14   | 2.1    | 2.17  | 1.08  | 1.09  | 2.77   |
| 500624    | Mfsd2b       | 14     | 10.03  | 18.03  | 6.02   | 5.96  | 14.1  | 8.86  | 9.03   |
| 24689     | Prps2        | 621.79 | 826.15 | 829.02 | 784.01 | 501.8 | 592.7 | 661.1 | 660.63 |
| 24837     | Tnnt2        | 41     | 18     | 35     | 39     | 22    | 9     | 38    | 36     |
| 155268    | Cldn16       | 13     | 11     | 9      | 5      | 7     | 11    | 7     | 5      |
| 315564    | Robo3        | 18     | 23     | 15     | 20     | 8     | 16    | 14    | 22     |
| 362076    | I136b        | 7      | 10     | 14     | 7      | 11    | 6     | 6     | 7      |
| 502201    | Lrrc29       | 11     | 7      | 12     | 8      | 5     | 7     | 7     | 11     |
| 83517     | Fcna         | 52     | 31     | 141    | 28     | 63    | 60    | 51    | 25     |
| 29473     | Aoc3         | 547    | 417    | 597    | 640.98 | 376   | 509   | 476   | 378    |
| 305139    | Gbp6         | 51.91  | 39.88  | 81.89  | 63.77  | 44.77 | 50.22 | 57.53 | 35.01  |
| 25693     | Slc18a1      | 34.82  | 21.6   | 29.87  | 18.56  | 15.84 | 18.88 | 30.42 | 17.68  |
| 100359714 | Phf6         | 666    | 621    | 579.31 | 732    | 470.7 | 400.8 | 625   | 556    |
| 316400    | Pgap1        | 89     | 117    | 113    | 138    | 99    | 57    | 98    | 107    |
| 64086     | Csnklg1      | 78     | 88     | 59     | 75     | 67    | 46    | 66    | 58     |
| 29348     | Fgf7         | 376.14 | 456.07 | 503.88 | 366.18 | 248.6 | 390.4 | 352.3 | 353.53 |
| 363205    | RGD1562107   | 17     | 14     | 22     | 9      | 15    | 13    | 9     | 12     |
| 287818    | Cd3001f      | 19.01  | 17     | 32     | 36.98  | 21    | 12    | 27    | 23     |
| 315658    | Zc3h12c      | 197    | 223    | 188    | 233    | 191   | 117   | 167   | 190    |
| 100909950 | LOC100909950 | 1.18   | 4.92   | 0.51   | 1.95   | 6.14  | 0     | 0.63  | 0      |
| 84588     | Cldn11       | 399    | 307    | 406    | 554    | 297   | 205   | 250   | 566    |
| 103691072 | LOC103691072 | 2.2    | 5.73   | 6.76   | 9.47   | 6.16  | 4.18  | 2.94  | 5.84   |
| 298532    | Tekt2        | 7      | 5      | 3      | 9      | 2     | 1     | 3     | 13     |
| 301086    | Xcr1         | 7      | 9      | 1      | 7      | 3     | 7     | 3     | 6      |
| 444986    | I122ra2      | 9      | 13     | 12     | 14     | 10    | 10    | 14    | 4      |
| 502380    | Pfpl         | 11.01  | 5.01   | 18.01  | 9      | 11.02 | 6.02  | 7.01  | 10.02  |
| 140898    | Arhgef5      | 54     | 54     | 84     | 82     | 47    | 42    | 46    | 82     |
| 361226    | Cd83         | 216    | 222    | 187    | 241    | 175   | 130   | 189   | 192    |
| 360635    | Etv4         | 167    | 167    | 226.09 | 237.74 | 140   | 161   | 161   | 170    |
| 367218    | Runx2        | 89.22  | 94.13  | 151.5  | 92.51  | 90.44 | 103.8 | 74.14 | 70.16  |
| 288054    | Ccdc14       | 112.96 | 92.3   | 126.99 | 126.58 | 90.53 | 101.9 | 87.11 | 84     |
| 24968     | Psmb8        | 174    | 179.86 | 188.62 | 129.6  | 115   | 143   | 153   | 121.5  |
| 501736    | Cd300a       | 27     | 18     | 29     | 22     | 16    | 24    | 23    | 13.1   |
| 29501     | Slc12a4      | 855    | 989    | 1176   | 1130   | 759   | 842   | 847   | 842    |
| 103694906 | LOC103694906 | 9.2    | 0      | 3.14   | 4.84   | 3.18  | 0     | 4.27  | 6.17   |
| 295425    | Usp53        | 691    | 784    | 713    | 949    | 590   | 595   | 657   | 645    |
| 102554161 | LOC102554161 | 37.13  | 41.98  | 66.42  | 29.13  | 24.32 | 30.5  | 34.86 | 48.79  |
| 116740    | B3gnt5       | 209    | 222    | 257    | 278    | 151   | 177   | 233   | 205    |
| 305491    | Ankrd36      | 7      | 3      | 12     | 7      | 1     | 10    | 8     | 4      |
| 103694879 | LOC103694879 | 57.63  | 51.14  | 34.68  | 52.62  | 39.15 | 30.35 | 46.25 | 39.76  |
| 680990    | Gdpd4        | 176    | 159    | 170    | 172    | 125   | 136   | 135   | 141    |
| 108350654 | LOC108350654 | 74.84  | 79.13  | 67.6   | 80.94  | 58.46 | 54.38 | 63.85 | 63.27  |
| 498084    | LOC498084    | 19.13  | 19.01  | 17.24  | 22.99  | 23.02 | 15.07 | 12.08 | 12.01  |
| 363984    | Ikbke        | 117    | 94     | 138    | 140    | 75    | 101   | 110   | 102    |
| 501740    | RGD1562156   | 3      | 6.34   | 2.09   | 0      | 0     | 3     | 2.07  | 4      |
| 79425     | C1cnka       | 3      | 3.06   | 5.11   | 4.19   | 4.19  | 2     | 4     | 2      |

|           |              |        |        |        |        |       |       |       |         |
|-----------|--------------|--------|--------|--------|--------|-------|-------|-------|---------|
| 25668     | Cd38         | 99.37  | 105.51 | 169.03 | 109.25 | 90.22 | 105.5 | 95.8  | 91.99   |
| 24930     | Cd8a         | 10     | 3.09   | 5.14   | 12.01  | 5     | 4     | 7     | 8       |
| 100361923 | Ikzf4        | 27.75  | 24.08  | 16     | 25.01  | 24.63 | 13.06 | 14    | 22      |
| 108350921 | LOC108350921 | 25.33  | 26.02  | 33.48  | 29.87  | 18.17 | 21.59 | 26.67 | 24.62   |
| 680434    | Dqx1         | 111.9  | 130.8  | 98.45  | 115.76 | 84.6  | 87.67 | 102.2 | 88.22   |
| 108348140 | LOC108348140 | 30.08  | 18.06  | 20.07  | 17.07  | 19.09 | 9.1   | 22.43 | 17.08   |
| 108349748 | LOC108349748 | 1.37   | 23.16  | 19.24  | 20.65  | 21.33 | 12.89 | 11.65 | 5.28    |
| 103690070 | LOC103690070 | 3.01   | 2.67   | 2.22   | 0.84   | 0.84  | 2.85  | 1.6   | 1.65    |
| 66023     | Gfra4        | 50     | 30     | 30     | 26     | 27    | 29    | 25    | 27      |
| 309478    | Zfp518a      | 205    | 204    | 215    | 212    | 185   | 150   | 155   | 174     |
| 29504     | Slc22a3      | 36     | 18     | 14     | 44     | 11    | 22    | 36    | 20      |
| 308787    | Adamts13     | 317    | 254    | 375    | 375    | 257   | 191   | 321   | 281     |
| 303903    | Parp14       | 436    | 451    | 491    | 524    | 381   | 351   | 407   | 373     |
| 56826     | Adap2        | 119.74 | 92.07  | 126.88 | 100    | 99.23 | 80    | 93.62 | 75.91   |
| 294981    | Spry1        | 109    | 108    | 97     | 150    | 76    | 104   | 107   | 82      |
| 83783     | Sult1a1      | 906    | 758    | 582    | 843    | 469   | 575   | 660   | 753     |
| 100361830 | Tram2        | 36     | 41     | 54     | 50     | 44    | 40    | 37    | 23      |
| 360733    | Rtp4         | 156.77 | 124.55 | 115.29 | 118.33 | 79.73 | 104   | 108.3 | 117.65  |
| 307376    | Onecut2      | 411    | 551    | 486    | 734    | 550   | 253   | 425   | 508     |
| 500442    | Dnail        | 32     | 20     | 29     | 12     | 19    | 20    | 17    | 18      |
| 100912108 | Nupr1        | 393.95 | 252    | 395    | 382.89 | 209   | 264   | 256   | 404     |
| 84481     | Arid4b       | 515.93 | 543.85 | 605.58 | 670.81 | 597.1 | 406.7 | 490.7 | 364.62  |
| 140860    | Slco2b1      | 513    | 451    | 551    | 665    | 346   | 357   | 518   | 514     |
| 311984    | Gsap         | 137    | 133    | 186    | 127    | 102   | 116   | 126   | 120     |
| 298189    | Bnc2         | 708.72 | 524.15 | 810.85 | 848.65 | 573.9 | 476.1 | 634.9 | 617.36  |
| 685325    | Ddo          | 4      | 9      | 3.24   | 7      | 3.5   | 2     | 4     | 9       |
| 500089    | Tas2r137     | 55     | 49     | 63     | 39     | 35    | 37    | 47    | 45      |
| 103689946 | LOC103689946 | 10.27  | 9.38   | 3.61   | 2.4    | 8.53  | 8.35  | 2.37  | 1.18    |
| 361673    | Ifitm3       | 822.71 | 923.25 | 1314.3 | 761.05 | 664.3 | 947.5 | 721   | 709.68  |
| 64519     | Entpd1       | 299.33 | 176.55 | 280.66 | 282.92 | 214.4 | 230   | 168.5 | 214.74  |
| 108351043 | LOC108351043 | 1.07   | 2.19   | 1.11   | 1.08   | 2.17  | 1.1   | 0     | 1.07    |
| 85419     | Lyst         | 664    | 873    | 863    | 908    | 723   | 520   | 696   | 696     |
| 366078    | Sp9          | 0      | 0      | 0      | 2.51   | 0     | 1     | 1     | 0       |
| 305897    | Nfatc4       | 97     | 69     | 99     | 114    | 63    | 84    | 74    | 81      |
| 361641    | Ears2        | 75.14  | 79     | 44.15  | 59.51  | 54.68 | 44.81 | 54    | 52      |
| 497892    | Sgcd         | 106.01 | 102    | 120.03 | 135    | 89.09 | 68    | 113   | 99      |
| 299933    | Dscc1        | 25     | 17     | 18     | 14     | 21    | 10    | 8     | 20      |
| 312257    | Dennd2a      | 615    | 499    | 587    | 682    | 412   | 439   | 551   | 498     |
| 499843    | LOC499843    | 10.86  | 15.22  | 9.12   | 5.9    | 11.55 | 8.06  | 6.53  | 6.63    |
| 100912042 | LOC100912042 | 238.23 | 54.53  | 17.9   | 55.14  | 78.55 | 54.81 | 52.22 | 106.11  |
| 100911034 | LOC100911034 | 964.28 | 834.75 | 765.61 | 920.46 | 780.4 | 49.21 | 930.3 | 1019.42 |
| 314870    | Irak3        | 246    | 266    | 375    | 234    | 210   | 247   | 237   | 200     |
| 103691893 | LOC103691893 | 1.02   | 2.12   | 6.47   | 5.11   | 2.31  | 1.86  | 1.08  | 6.49    |
| 295649    | Fign         | 140    | 144    | 185    | 218    | 162   | 96    | 147   | 143     |
| 308990    | LOC308990    | 37.28  | 25.44  | 37.13  | 27.16  | 21    | 22.79 | 17.16 | 40.37   |
| 296129    | Ast1         | 33     | 24     | 17     | 15     | 22    | 14    | 18    | 17      |
| 685046    | Erich4       | 29     | 15     | 22     | 23     | 25    | 9     | 18    | 19      |
| 296953    | Irf5         | 94     | 118    | 148    | 95     | 90    | 68    | 122   | 83      |
| 298884    | Gen1         | 42.13  | 40     | 44.07  | 35     | 38    | 20.36 | 34.06 | 36.19   |
| 25156     | Vav1         | 43     | 53     | 76     | 36     | 41    | 41    | 42    | 42      |
| 287569    | Slfn14       | 9.7    | 15.73  | 12.66  | 2.63   | 27.18 | 0     | 0     | 5.32    |
| 499240    | LOC499240    | 43.25  | 21.18  | 23.41  | 23.26  | 27.74 | 22.54 | 26.51 | 11.9    |
| 117271    | Hrk          | 93     | 51     | 44     | 60     | 53    | 49    | 53    | 43      |
| 362339    | Creb312      | 380    | 513    | 646    | 695    | 395   | 439   | 510   | 441     |
| 313866    | Plekhh2      | 176    | 134    | 191    | 206    | 110   | 94    | 181   | 180     |
| 501872    | Cd84         | 191    | 211    | 269    | 246    | 176   | 135   | 211   | 211     |

|           |              |        |        |        |        |       |       |       |         |
|-----------|--------------|--------|--------|--------|--------|-------|-------|-------|---------|
| 79212     | Slc6a1       | 202    | 168    | 217    | 326    | 106   | 157   | 169   | 298     |
| 29694     | Gabrr1       | 23.7   | 29     | 21.78  | 32.86  | 28.01 | 13    | 21    | 23.82   |
| 54297     | Rgs8         | 93.96  | 87.83  | 73.29  | 87.42  | 45.47 | 50.87 | 73.73 | 103.88  |
| 100365935 | Cep851       | 236.49 | 239.04 | 262.02 | 290.71 | 215.8 | 166.8 | 217.3 | 222.49  |
| 102546892 | Prrtlb       | 4      | 4      | 1      | 1      | 3     | 2     | 1     | 2       |
| 103691253 | LOC103691253 | 21     | 27     | 16     | 21     | 15    | 16    | 17    | 20      |
| 103694522 | LOC103694522 | 2      | 2      | 0      | 1      | 0     | 0     | 1     | 3       |
| 171398    | Ust5r        | 1      | 2      | 0      | 2      | 3     | 0     | 1     | 0       |
| 24207     | Apoc3        | 9      | 8      | 5      | 8      | 6     | 4     | 9     | 5       |
| 24409     | Grin2a       | 4      | 3      | 14     | 14     | 4     | 10    | 13    | 1       |
| 24777     | Slc10a1      | 9      | 8      | 6      | 7      | 8     | 7     | 5     | 4       |
| 25298     | Cck          | 12     | 9      | 7      | 7      | 7     | 7     | 6     | 8       |
| 288751    | Lrrc43       | 1      | 4      | 3      | 2      | 2     | 1     | 4     | 1       |
| 290359    | Npm2         | 2      | 2      | 2      | 4      | 3     | 3     | 1     | 1       |
| 295277    | Hist2h4      | 2      | 0      | 2      | 1      | 1     | 1     | 0     | 2       |
| 295475    | Neurog2      | 4      | 3      | 3      | 0      | 1     | 2     | 0     | 5       |
| 303572    | Meioc        | 3      | 4      | 4      | 4      | 4     | 2     | 4     | 2       |
| 365363    | Ern2         | 5      | 5      | 4      | 6      | 7     | 2     | 4     | 3       |
| 365542    | RT1-D0b      | 23     | 12     | 17     | 13     | 15    | 10    | 11    | 16      |
| 366261    | Spo11        | 0      | 1      | 3      | 1      | 0     | 2     | 1     | 1       |
| 367080    | Ankk1        | 6      | 5      | 2      | 2      | 3     | 4     | 3     | 2       |
| 499589    | Lrrc34       | 5      | 2      | 1      | 2      | 2     | 3     | 1     | 2       |
| 499658    | Pglyrp3      | 1      | 1      | 3      | 0      | 2     | 0     | 1     | 1       |
| 499715    | LOC499715    | 2      | 0      | 2      | 1      | 0     | 2     | 0     | 2       |
| 60325     | Serpinb2     | 3      | 0      | 2      | 0      | 1     | 0     | 0     | 3       |
| 64827     | Crisp3       | 2      | 1      | 2      | 0      | 1     | 1     | 0     | 2       |
| 664630    | Slc6a19      | 0      | 1      | 4      | 0      | 2     | 0     | 1     | 1       |
| 681112    | Il20         | 0      | 2      | 2      | 1      | 1     | 1     | 1     | 1       |
| 686008    | Tnfrsf22     | 4      | 1      | 4      | 1      | 1     | 3     | 2     | 2       |
| 688730    | Gpr84        | 2      | 3      | 6      | 4      | 5     | 2     | 4     | 1       |
| 691311    | LOC691311    | 1      | 2      | 1      | 1      | 2     | 0     | 2     | 0       |
| 81779     | Sctr         | 2      | 3      | 2      | 3      | 0     | 2     | 4     | 2       |
| 89776     | Slc22a7      | 1      | 0      | 1      | 3      | 0     | 0     | 1     | 3       |
| 102550256 | LOC102550256 | 6      | 4      | 9      | 6      | 3     | 6     | 4     | 7       |
| 307919    | Snai3        | 6      | 6      | 9      | 4      | 4     | 4     | 8     | 4       |
| 100911302 | LOC100911302 | 25.57  | 33.51  | 16.25  | 34.69  | 21.08 | 26.28 | 21.82 | 18.87   |
| 314618    | Arhgap45     | 231    | 193    | 298    | 185    | 187   | 171   | 185   | 183     |
| 245920    | Cxcl10       | 101    | 58     | 73     | 74     | 47    | 76    | 58    | 64      |
| 100910483 | LOC100910483 | 10.41  | 17.54  | 29.07  | 16.89  | 26.57 | 9.83  | 7.74  | 15.04   |
| 689421    | Sntb2        | 45     | 66     | 80     | 85     | 60    | 43    | 61    | 57      |
| 501026    | Sh3bgrl2     | 24.42  | 45.19  | 44.48  | 22.45  | 26.32 | 25.95 | 29.47 | 27.6    |
| 29432     | Pak2         | 214.23 | 207.2  | 205.68 | 353    | 169.2 | 196.3 | 233.5 | 186.14  |
| 81773     | Rps10        | 1634.4 | 858.5  | 1361.2 | 1422.3 | 885.5 | 913.7 | 1296  | 1131.74 |
| 102556297 | LOC102556297 | 32.58  | 25.87  | 27.48  | 22.05  | 17.17 | 19.82 | 24.87 | 24.66   |
| 689153    | Chn3         | 6.68   | 5.59   | 8.24   | 5.51   | 4.26  | 3.37  | 7.65  | 5.57    |
| 499933    | Dsn1         | 64.27  | 33.9   | 72.01  | 56.57  | 54.27 | 39    | 41.64 | 46.79   |
| 108348169 | LOC108348169 | 40.06  | 39.51  | 42.18  | 47.64  | 32.62 | 39.27 | 37.22 | 26.66   |
| 299783    | Glpr1        | 69     | 68     | 75     | 45     | 42    | 43    | 64    | 57      |
| 302977    | Rnf151       | 28     | 31     | 32     | 30     | 17    | 24    | 22    | 34      |
| 25720     | Tcf12        | 709    | 768    | 824    | 833    | 538   | 602   | 722   | 651     |
| 498741    | Mboat1       | 359    | 450    | 501    | 326    | 245   | 326   | 372   | 369     |
| 365299    | Bnc1         | 28     | 28     | 33     | 33     | 26    | 25.88 | 20.96 | 25      |
| 298159    | Dcaf1212     | 0      | 0      | 2      | 3      | 2     | 1     | 1.01  | 0       |
| 405098    | Olr1236      | 3      | 0      | 1      | 1      | 1     | 3.01  | 0     | 0       |
| 116466    | Wnt2b        | 203.02 | 162    | 219.83 | 199.96 | 129.5 | 119   | 198   | 183     |
| 83470     | Bmp1         | 965    | 743    | 1303   | 1042   | 690   | 830   | 937   | 795     |

|           |              |        |         |        |        |       |       |       |        |
|-----------|--------------|--------|---------|--------|--------|-------|-------|-------|--------|
| 89788     | Gna15        | 29     | 22      | 62     | 29     | 25    | 28    | 22    | 39     |
| 497904    | Meikin       | 1.97   | 1       | 1      | 1      | 2     | 0     | 0.99  | 1      |
| 83469     | Lrp4         | 428    | 391     | 479    | 574    | 365   | 370   | 384   | 384    |
| 103692111 | LOC103692111 | 12.87  | 7.18    | 14.77  | 5.35   | 5.66  | 11.16 | 10.25 | 5.19   |
| 100360487 | Fam131a      | 176.99 | 301.61  | 166.64 | 122.29 | 186.8 | 76.83 | 154.6 | 198.28 |
| 316415    | Fam126b      | 373    | 434     | 407    | 499    | 421   | 183   | 365   | 407    |
| 113955    | Gpnmb        | 281    | 342     | 516    | 255    | 207   | 330   | 355   | 228    |
| 289235    | Slamf9       | 67     | 70      | 83     | 65     | 30    | 60    | 77    | 62     |
| 102552659 | LOC102552659 | 69.25  | 89.44   | 113.96 | 50.55  | 45.49 | 60.14 | 47.62 | 106.53 |
| 117539    | I110ra       | 91     | 78      | 91     | 102    | 58    | 55    | 93    | 85     |
| 100366216 | LOC100366216 | 75.54  | 55.06   | 70.03  | 46.21  | 27.8  | 55.61 | 56.38 | 58.67  |
| 499973    | Atg9b        | 4      | 5.52    | 2.16   | 2.3    | 2.23  | 4.78  | 2     | 2.23   |
| 297176    | Mad211       | 115    | 92      | 137    | 90     | 82    | 77    | 104   | 86     |
| 25118     | Itgal        | 77     | 113     | 126    | 144    | 74    | 49    | 137   | 110    |
| 257649    | Cenpf        | 42     | 18      | 56     | 22     | 28    | 29    | 35    | 19     |
| 498583    | Frmpd2       | 12     | 7       | 7      | 20     | 9     | 8     | 11    | 9      |
| 100360475 | Galnt15      | 38.08  | 34.1    | 32.94  | 26.89  | 27.17 | 31.02 | 31.02 | 16.99  |
| 296468    | Birc7        | 2      | 6       | 3      | 6.4    | 6     | 3     | 1     | 4      |
| 682431    | Iqcc         | 86     | 58.98   | 87.77  | 56.82  | 47    | 58    | 78    | 50     |
| 362598    | Sh3d21       | 28     | 30      | 40     | 30     | 14    | 27    | 25    | 37     |
| 291015    | Ogn          | 2589   | 1600    | 2176   | 2950   | 1425  | 1476  | 2326  | 2271   |
| 79129     | Cyba         | 217    | 174     | 268    | 177    | 162   | 162   | 182   | 167    |
| 297073    | Rarres2      | 860.44 | 741.98  | 938.26 | 618.73 | 533.7 | 567.5 | 746.1 | 697.01 |
| 102553986 | LOC102553986 | 54.03  | 62.87   | 68.01  | 72.73  | 56.46 | 60.89 | 50.06 | 40.11  |
| 289747    | Osm          | 4      | 13      | 8      | 11     | 12    | 5     | 6     | 6      |
| 301082    | Cdcp1        | 9      | 8       | 5      | 14     | 6     | 3     | 15    | 5      |
| 688297    | Pde6g        | 8      | 13      | 5      | 10     | 5     | 9     | 9     | 6      |
| 84024     | Pon1         | 6      | 8       | 9      | 13     | 5     | 6     | 9     | 9      |
| 315309    | Tfcp2        | 254    | 445.99  | 455.71 | 339.03 | 258   | 256   | 344   | 346.13 |
| 500527    | Lurap1       | 136    | 127     | 134    | 113    | 90    | 96    | 89    | 136    |
| 100359680 | Lpcat2       | 285    | 396     | 365    | 263    | 249   | 310   | 217   | 279    |
| 500386    | RGD1564405   | 14.52  | 3.03    | 32.01  | 16.47  | 11.54 | 7.07  | 18.57 | 16.06  |
| 24309     | Dbp          | 893    | 740     | 650    | 619    | 716   | 729   | 343   | 552    |
| 362415    | Tt113        | 95     | 90      | 96     | 96     | 82    | 70    | 79    | 73     |
| 102553858 | LOC102553858 | 9      | 5       | 11     | 6      | 6     | 2     | 5     | 12     |
| 680609    | Ebi3         | 37.33  | 24.76   | 53.92  | 32.07  | 40.96 | 30.3  | 26.4  | 21.76  |
| 103690914 | LOC103690914 | 19.12  | 27.1    | 18.8   | 16.15  | 22.19 | 10.93 | 10.41 | 21.94  |
| 316711    | Gtf2a11      | 30     | 26      | 32     | 31     | 18    | 27    | 30    | 21     |
| 287451    | Slc16a13     | 193    | 155     | 202    | 216    | 115   | 125   | 193   | 185    |
| 29520     | Padi3        | 20     | 21      | 27     | 20     | 23    | 13    | 19    | 16     |
| 100912479 | LOC100912479 | 1.51   | 5.26    | 3.35   | 2.98   | 1.36  | 0     | 6.05  | 3.16   |
| 679572    | Romo1        | 300.36 | 259.08  | 171.59 | 259.54 | 211.6 | 293.9 | 268.8 | 25.09  |
| 25570     | Trhr         | 17     | 14      | 16     | 10     | 9     | 13    | 11    | 13     |
| 499885    | Itpripl1     | 104    | 98      | 121    | 102    | 78    | 77    | 86    | 102    |
| 291649    | Pcdhb10      | 50.99  | 58.29   | 55.77  | 50.05  | 47.38 | 38.9  | 46.52 | 40.81  |
| 313625    | Myom3        | 53.53  | 39.45   | 103.24 | 66.87  | 50.27 | 48.79 | 49.08 | 64.22  |
| 25464     | Icam1        | 170    | 144     | 260    | 220    | 113   | 179   | 166   | 183    |
| 102550664 | LOC102550664 | 10.97  | 12.57   | 16.67  | 15.49  | 17.98 | 5.55  | 11.37 | 10.07  |
| 498176    | Bri3bp       | 35     | 37      | 32     | 31     | 33    | 23    | 29    | 24     |
| 100911403 | Ms4a4e       | 69.96  | 43.75   | 68.57  | 55.79  | 33.79 | 41.69 | 69.18 | 47.57  |
| 311071    | Zeb2         | 1999.6 | 2282.06 | 2795.4 | 2731.4 | 1746  | 1754  | 2362  | 2058.9 |
| 361122    | Ankle1       | 32.61  | 23.99   | 38.96  | 21.03  | 31.15 | 25.01 | 24    | 14     |
| 100359517 | LOC100359517 | 0      | 0       | 1.04   | 0      | 0.84  | 0     | 0     | 0      |
| 362801    | Garem2       | 3      | 3       | 5      | 15     | 9     | 5     | 3     | 4      |
| 363782    | Cfap44       | 7      | 6       | 9      | 4      | 2     | 11    | 2     | 6      |
| 685067    | LOC685067    | 211.01 | 265     | 344.46 | 300.97 | 201.7 | 188.3 | 242.8 | 273.01 |

|           |              |        |         |        |        |       |       |       |         |
|-----------|--------------|--------|---------|--------|--------|-------|-------|-------|---------|
| 306204    | Flnb         | 1194.2 | 1522.4  | 1806.9 | 1804.2 | 1257  | 1214  | 1306  | 1335.57 |
| 171498    | Sgk3         | 83     | 97      | 122    | 73     | 88    | 65    | 90    | 60      |
| 361051    | Phf11        | 70.08  | 56.45   | 72.33  | 55.91  | 41.56 | 50.78 | 60.18 | 53.36   |
| 315191    | Fbln1        | 415.67 | 333.71  | 533.64 | 792.1  | 367.4 | 335.2 | 495.1 | 479.59  |
| 103690317 | LOC103690317 | 254.59 | 236.78  | 94.56  | 178.23 | 99.27 | 71.32 | 231.6 | 215.62  |
| 360539    | Slc47a1      | 98     | 96      | 85     | 118    | 99    | 41    | 67    | 114     |
| 308346    | Tmem150b     | 23.27  | 10.71   | 31.03  | 22.53  | 18.11 | 16.91 | 13.3  | 22.47   |
| 499935    | Tti1         | 526    | 514.02  | 530.24 | 546.82 | 453.1 | 411   | 436   | 411.94  |
| 306264    | Ankrd28      | 1304.4 | 1127.97 | 1197.1 | 1096.5 | 1074  | 947.4 | 942.1 | 858.39  |
| 682865    | Rab42        | 49.19  | 28.34   | 46.49  | 34.67  | 35.4  | 25.67 | 36.25 | 31.05   |
| 100365450 | LOC100365450 | 8      | 1       | 7      | 5      | 3     | 3     | 4     | 7       |
| 25525     | Pspn         | 9      | 14      | 8      | 11     | 8     | 6     | 10    | 10      |
| 499265    | RGD1563217   | 15     | 10      | 9      | 8      | 10    | 9     | 9     | 6       |
| 293947    | Arhgap18     | 140.02 | 152     | 185    | 152.97 | 111   | 128   | 149   | 122     |
| 361617    | Arap1        | 1100.9 | 911.72  | 1149.6 | 1107.2 | 769.8 | 821.8 | 908.6 | 957.17  |
| 266715    | Fzd3         | 113    | 125     | 142    | 193    | 142   | 55    | 122   | 145     |
| 100910478 | LOC100910478 | 43.82  | 24.2    | 21.6   | 24.68  | 32.31 | 17.49 | 24.28 | 18.49   |
| 317237    | Uppt         | 168.27 | 184.18  | 197.82 | 241.12 | 162   | 114   | 189   | 176     |
| 295619    | Ernm         | 25     | 36      | 37     | 23     | 21    | 21    | 30    | 26      |
| 300236    | Smagp        | 33     | 25      | 37     | 26     | 18    | 20    | 34    | 26      |
| 297758    | Terf1        | 197    | 153     | 198    | 194    | 140   | 147   | 152   | 162     |
| 85311     | Plala        | 59     | 54      | 71     | 53     | 50    | 37    | 48    | 57      |
| 24298     | Cyp21a1      | 136    | 117     | 181    | 98     | 97    | 106   | 91    | 137     |
| 103690031 | LOC103690031 | 205.41 | 177.04  | 213.66 | 210.32 | 164.2 | 105.1 | 215.1 | 168.98  |
| 361914    | LOC361914    | 18.3   | 22.52   | 23.18  | 25.39  | 11.25 | 25.56 | 20.26 | 15.36   |
| 289712    | Evc          | 194.74 | 191     | 218    | 214    | 146   | 188.7 | 154   | 174     |
| 308068    | Nkd2         | 200    | 205     | 313    | 232    | 152   | 173   | 247   | 198     |
| 308232    | Zfp51        | 47.32  | 34.5    | 53.5   | 45.95  | 27.14 | 36.32 | 37.17 | 46.3    |
| 686611    | Sinhcaf      | 92     | 69      | 80     | 76     | 62    | 73    | 72    | 50      |
| 24783     | Slc9a2       | 38.97  | 23      | 36     | 34     | 37    | 18    | 21    | 31      |
| 361105    | Plac9        | 98     | 72      | 166    | 71     | 70    | 92    | 98    | 70      |
| 366733    | Diras3       | 15     | 5       | 10     | 7      | 8     | 6     | 8     | 8       |
| 286963    | Cyp2d5       | 5.2    | 0       | 1.9    | 4.69   | 3.99  | 0     | 3.6   | 1.97    |
| 680177    | Prr22        | 54     | 64      | 62     | 58     | 56    | 56    | 39    | 42      |
| 367714    | Rp2          | 139.16 | 137.12  | 154.66 | 137.5  | 105   | 111.5 | 129.1 | 115.42  |
| 100911109 | LOC100911109 | 10.01  | 7.51    | 17.68  | 16.65  | 6.15  | 9.49  | 12.51 | 13.9    |
| 363577    | Itk          | 34     | 12      | 15     | 29     | 17    | 23    | 15    | 18      |
| 361135    | 1-Mar        | 54.71  | 54.69   | 82.1   | 48.58  | 60.29 | 36.69 | 50.75 | 47.02   |
| 78962     | Per3         | 552    | 523     | 442    | 570    | 459   | 436   | 368   | 430     |
| 100912009 | LOC100912009 | 60.85  | 94.27   | 98.21  | 58     | 65    | 30.55 | 88    | 69.01   |
| 102553010 | LOC102553010 | 8529.4 | 3335.58 | 3490.4 | 6040.2 | 7230  | 6194  | 3763  | 171.13  |
| 100364132 | Zfp300       | 41     | 31      | 43     | 44     | 35    | 19    | 38    | 37      |
| 100360287 | Zfp952       | 101.09 | 117     | 117.51 | 138.18 | 104.1 | 99    | 80.42 | 100.99  |
| 689853    | Clec2e       | 30.9   | 18.34   | 24.41  | 27.51  | 19.91 | 27.36 | 12.6  | 22.23   |
| 500666    | Dact1        | 174    | 127     | 272    | 193    | 154   | 141   | 145   | 182     |
| 57022     | Adam4        | 16.21  | 18.79   | 15     | 26.9   | 13.86 | 18.92 | 15.05 | 14.62   |
| 297590    | Vom2r52      | 31.81  | 22.89   | 34.25  | 34     | 28.01 | 24.53 | 22.35 | 24.97   |
| 360692    | RGD1563888   | 157    | 129.6   | 171.87 | 141    | 125   | 97    | 148   | 116.91  |
| 499801    | Ifih1        | 220    | 204     | 189    | 219    | 141   | 173   | 184   | 178     |
| 83585     | Gda          | 787    | 816     | 975    | 798    | 673   | 608   | 796   | 666     |
| 192208    | Slc38a5      | 21     | 16      | 15     | 12     | 19    | 4     | 12    | 17      |
| 501861    | Axdnd1       | 8      | 6       | 7      | 11     | 5     | 4     | 9     | 8       |
| 102548694 | LOC102548694 | 32     | 23      | 25     | 32     | 23    | 16    | 27    | 25      |
| 108350448 | LOC108350448 | 1      | 7       | 4      | 4      | 1     | 3     | 5     | 4       |
| 25704     | I12ra        | 5      | 1       | 4      | 6      | 3     | 1     | 6     | 3       |
| 314416    | Ak7          | 7      | 7       | 1      | 1      | 2     | 3     | 4     | 4       |



|           |              |        |        |        |        |       |       |       |        |
|-----------|--------------|--------|--------|--------|--------|-------|-------|-------|--------|
| 501046    | Bfsp2        | 6      | 3      | 5      | 2      | 4     | 3     | 1     | 5      |
| 58813     | Nt5e         | 246.31 | 229.82 | 344.5  | 279.49 | 226.6 | 208.8 | 196.8 | 261.69 |
| 363292    | Ing5         | 130    | 137    | 140    | 127    | 99    | 112   | 116   | 107    |
| 307212    | Cndp1        | 251    | 337    | 414    | 265    | 195   | 249   | 294   | 292    |
| 310833    | Arhgap29     | 508    | 412    | 487    | 471    | 323   | 316   | 422   | 466    |
| 361746    | Rfx3         | 198.55 | 191.68 | 216.26 | 211.97 | 166.2 | 145.8 | 186.2 | 167.59 |
| 311170    | Slc43a3      | 487.57 | 489.59 | 651.97 | 575.49 | 360.7 | 420.5 | 516.6 | 495.63 |
| 29731     | Kcna3        | 25     | 50     | 75     | 70     | 61    | 24    | 54    | 40     |
| 100362547 | Aplg2        | 181    | 139    | 186    | 138    | 124   | 149   | 138   | 113    |
| 257646    | Frmd6        | 811    | 935    | 1153   | 1049   | 661   | 774   | 962   | 816    |
| 311764    | Zfp217       | 163    | 164    | 178    | 145    | 136   | 133   | 133   | 127    |
| 25166     | Casp1        | 60     | 48     | 79     | 44     | 42    | 36    | 53    | 57     |
| 24649     | Pim1         | 66     | 48     | 81     | 63     | 48    | 54    | 45    | 63     |
| 689232    | Nxn12        | 47     | 28     | 28     | 26     | 25    | 23    | 35    | 22     |
| 497979    | Tmem100      | 258    | 201    | 312    | 240    | 165   | 190   | 263   | 205    |
| 498226    | Pm20d1       | 43     | 56     | 56     | 44     | 37    | 42    | 43    | 40     |
| 287719    | Ifi35        | 210    | 185    | 193    | 133    | 174   | 150   | 129   | 134    |
| 311910    | Zbtb26       | 168    | 163    | 164    | 170.42 | 142.4 | 95.94 | 126.4 | 177    |
| 100910265 | Cdr1         | 178    | 146    | 119    | 192    | 199   | 76    | 112   | 130    |
| 117955    | Slc4a7       | 252.58 | 302.83 | 348.35 | 318.67 | 226.4 | 240.9 | 287.9 | 240.14 |
| 103693664 | LOC103693664 | 7.27   | 5.91   | 2.82   | 10.28  | 4.5   | 2.28  | 7.79  | 6.83   |
| 103690154 | LOC103690154 | 313.32 | 306.42 | 305.09 | 215.84 | 201.6 | 235.7 | 249.8 | 241.73 |
| 408240    | Mcpt812      | 59.57  | 32.14  | 61.87  | 1.61   | 41.83 | 37.83 | 29.73 | 16.99  |
| 108352965 | LOC108352965 | 176.09 | 112.01 | 135.27 | 133.5  | 95.61 | 107.4 | 127.5 | 122.99 |
| 312474    | Gcfc2        | 145    | 124    | 145    | 136    | 121   | 100   | 109   | 118    |
| 305142    | Abcg313      | 375.95 | 563.06 | 737.77 | 544.3  | 522.2 | 325   | 575   | 387.3  |
| 286972    | Ptar1        | 47     | 55     | 43     | 87     | 67    | 17    | 43    | 62     |
| 100361818 | Nfatc1       | 323    | 381    | 384    | 563    | 232   | 322   | 434   | 357    |
| 414788    | RT1-T24-3    | 288.94 | 323.29 | 238.28 | 203.81 | 210.1 | 275   | 157.3 | 216.57 |
| 24230     | Tspo         | 165    | 109    | 176    | 90     | 99    | 113   | 108   | 120    |
| 25651     | Selp         | 23     | 27     | 37     | 21     | 33    | 14    | 28    | 13     |
| 290755    | Ccdc110      | 6      | 2      | 1      | 4.5    | 1.5   | 3     | 3     | 3.5    |
| 315882    | Zic4         | 6      | 5      | 7      | 9      | 6     | 1     | 6     | 9      |
| 103690160 | LOC103690160 | 194.3  | 206.21 | 178.11 | 159.84 | 138.1 | 130   | 123.7 | 210.16 |
| 685116    | Gbp3         | 26.99  | 41.05  | 33.99  | 26.15  | 23.51 | 22.68 | 31.99 | 26.31  |
| 100363368 | Poteh        | 25.14  | 26.84  | 24.99  | 33.71  | 15.23 | 23    | 24    | 28     |
| 689069    | Parvg        | 58     | 64     | 77     | 61     | 47    | 47    | 60    | 58     |
| 309368    | Lama2        | 2780   | 3185   | 3501   | 4008   | 2242  | 2535  | 3180  | 3031   |
| 108349516 | LOC108349516 | 34.04  | 30.83  | 26.02  | 32.79  | 23.48 | 45.12 | 15.69 | 16.58  |
| 306970    | Hist1h2an    | 14.61  | 6.03   | 6.98   | 11.91  | 6.46  | 5.53  | 13.56 | 6.69   |
| 302705    | Mbtps2       | 288.15 | 269.61 | 291.41 | 321.68 | 221.2 | 179.3 | 315.1 | 239.35 |
| 690507    | LOC690507    | 3      | 6.99   | 3.2    | 0      | 2.07  | 4.69  | 2     | 2      |
| 310839    | Fnbp11       | 102    | 93     | 113    | 110    | 91    | 70    | 94    | 86     |
| 100910033 | LOC100910033 | 1.74   | 12.26  | 9.46   | 16.4   | 9.22  | 4.52  | 9.94  | 8.84   |
| 361448    | Ginml        | 407    | 540    | 522    | 456    | 372   | 451   | 357   | 391    |
| 83575     | Cpz          | 122    | 166    | 96     | 253    | 85    | 118   | 95    | 222    |
| 79429     | Pdgfc        | 38     | 37     | 46     | 37     | 26    | 38    | 34    | 31     |
| 315263    | Adamts20     | 588.41 | 659    | 639    | 661    | 407   | 506   | 643   | 523.87 |
| 361747    | Spata6l      | 54.01  | 43     | 46.74  | 38.63  | 47.24 | 36.3  | 40.43 | 24.94  |
| 103690110 | Zfp78        | 43     | 39     | 48     | 39     | 34    | 26    | 36    | 42     |
| 294410    | Man1a1       | 358    | 372    | 577    | 439    | 360   | 352   | 386   | 328    |
| 305584    | Rel          | 49     | 35     | 47     | 60     | 39    | 38    | 44    | 35     |
| 102552482 | LOC102552482 | 107.2  | 118.21 | 78.62  | 81.92  | 90.88 | 66.44 | 82.81 | 75.19  |
| 24553     | Met          | 98     | 90     | 159    | 74     | 82    | 83    | 98    | 81     |
| 102553620 | LOC102553620 | 10.56  | 3.68   | 6.65   | 13.78  | 4.91  | 9.01  | 6.21  | 8.2    |
| 25273     | Smo          | 345    | 298    | 349    | 408    | 258   | 246   | 329   | 311    |



|           |              |        |        |        |        |       |       |       |        |
|-----------|--------------|--------|--------|--------|--------|-------|-------|-------|--------|
| 100910879 | LOC100910879 | 4.81   | 3.13   | 0      | 0      | 0     | 1.91  | 1.61  | 2.97   |
| 100365872 | Eif4ebp3     | 87     | 82     | 103    | 73     | 74    | 69    | 69    | 70     |
| 303742    | Faap100      | 197    | 197    | 190    | 183    | 151   | 160   | 180   | 136    |
| 314196    | L2hgdh       | 53.13  | 58.34  | 48.43  | 55.75  | 30.98 | 43.72 | 56.73 | 44.9   |
| 108348165 | NEWGENE_2813 | 77     | 36.94  | 62.16  | 68.38  | 28.73 | 62.16 | 51    | 58.02  |
| 689174    | Zbtb34       | 62     | 63     | 55     | 67     | 52    | 45    | 55    | 50     |
| 102555942 | LOC102555942 | 26.63  | 35.14  | 29.05  | 22.21  | 26.79 | 27.94 | 18.92 | 18.79  |
| 690538    | Scai         | 113    | 128    | 157    | 162    | 115   | 75    | 116   | 152    |
| 108349109 | LOC108349109 | 22.18  | 18.24  | 18.2   | 19.53  | 11.87 | 13.58 | 23.81 | 14.66  |
| 83722     | Plk2         | 575    | 590    | 751    | 528    | 459   | 501   | 534   | 505    |
| 303538    | Dhx58        | 108    | 104    | 92     | 97     | 73    | 106   | 70    | 79     |
| 688637    | LOC688637    | 475    | 484    | 448    | 479    | 372   | 376   | 431   | 364    |
| 24612     | Omp          | 13     | 12     | 10     | 9      | 8     | 15    | 9     | 4      |
| 292684    | Rsph6a       | 7      | 5      | 5      | 5      | 4     | 5     | 0     | 9      |
| 296472    | Srms         | 8      | 4      | 3      | 7      | 3     | 3     | 8     | 4      |
| 317324    | MGC114492    | 4      | 3      | 2      | 2      | 3     | 2     | 3     | 1      |
| 366206    | Otor         | 2      | 3      | 3      | 3      | 2     | 2     | 3     | 2      |
| 498691    | Cts113       | 2      | 2      | 5      | 2      | 2     | 1     | 5     | 1      |
| 29363     | Cxcr5        | 24     | 12.05  | 18     | 17.1   | 18.09 | 11    | 15.08 | 14.05  |
| 310855    | Gstcd        | 74.32  | 84     | 61.54  | 71     | 56.62 | 53.69 | 72.53 | 55.2   |
| 502902    | Clec7a       | 89     | 74     | 153    | 75     | 75    | 54    | 108   | 83     |
| 293186    | Lyve1        | 185.54 | 189.02 | 535.92 | 129.46 | 173   | 208.3 | 278.1 | 191.7  |
| 290027    | Parp2        | 219    | 253    | 239    | 209    | 170   | 182   | 194   | 207    |
| 171575    | Dnase2       | 290.97 | 295.54 | 366.09 | 264    | 239   | 255.8 | 226.6 | 274.55 |
| 289211    | Fcgr2b       | 37.67  | 28.76  | 83.82  | 42.87  | 27.86 | 33.81 | 53.64 | 42.79  |
| 79431     | Bhlhe40      | 283    | 315    | 383    | 459    | 328   | 311   | 283   | 257    |
| 315750    | Lct1         | 5.02   | 4.15   | 3.02   | 1      | 1.15  | 5.41  | 2.11  | 2.13   |
| 108351334 | LOC108351334 | 2.04   | 2.09   | 2.02   | 5.17   | 2.06  | 1     | 3.09  | 3.12   |
| 365661    | Erbin        | 960    | 967    | 1276   | 1041   | 794   | 845   | 952   | 885    |
| 81678     | Itpr2        | 218    | 230    | 281    | 305    | 186   | 209   | 200   | 252    |
| 498089    | Dtx3l        | 419    | 384    | 426    | 414    | 329   | 330   | 332   | 355    |
| 102556967 | LOC102556967 | 298.66 | 275.47 | 320.24 | 281.66 | 235.9 | 228.8 | 229.8 | 268.97 |
| 499723    | Col24a1      | 448    | 575    | 513    | 618    | 319   | 477   | 457   | 512    |
| 102547029 | LOC102547029 | 289    | 2.66   | 4.24   | 138.23 | 4.94  | 87.53 | 140.2 | 123.05 |
| 306110    | Klf12        | 432.51 | 453.12 | 460.21 | 501.86 | 361.5 | 308.2 | 418.3 | 426.14 |
| 361433    | Cpne7        | 134    | 147    | 163    | 149    | 85    | 117   | 118   | 166    |
| 103694881 | LOC103694881 | 0      | 0      | 0.44   | 2      | 0     | 1     | 0     | 1      |
| 294188    | Olr1731      | 0      | 1.22   | 0      | 0      | 0     | 1     | 0     | 0      |
| 363464    | Piga         | 71     | 77     | 71     | 75     | 66    | 50    | 67    | 58     |
| 304960    | Olfml2b      | 593    | 653    | 1065   | 747    | 494   | 726   | 711   | 576    |
| 362429    | Mfap5        | 506    | 384    | 570    | 394    | 302   | 395   | 428   | 395    |
| 25147     | Cyp19a1      | 4.18   | 8.33   | 7.71   | 3.17   | 5.85  | 3.1   | 1.17  | 9.06   |
| 366792    | Mettl7b      | 36.01  | 8.46   | 12.71  | 48.51  | 20.54 | 9.28  | 35.52 | 21.33  |
| 102554034 | LOC102554034 | 231.85 | 398.86 | 230.62 | 258.61 | 196.9 | 238.6 | 331   | 151.9  |
| 314654    | Myo1f        | 157    | 144    | 192    | 113    | 130   | 115   | 125   | 127    |
| 102555644 | LOC102555644 | 113.53 | 117.22 | 95.84  | 96.48  | 75.59 | 75.64 | 83.03 | 112.83 |
| 58917     | Hpx          | 10     | 6      | 13     | 10     | 6     | 7     | 9     | 10     |
| 690467    | LOC690467    | 96.9   | 45.14  | 89.64  | 42.69  | 68.61 | 22.32 | 77.64 | 56.56  |
| 303612    | Polg2        | 44     | 50     | 46     | 33     | 45    | 25    | 39    | 33     |
| 301255    | Spats1       | 20.56  | 15.39  | 7.12   | 14.52  | 15.18 | 12.2  | 9.56  | 10.34  |
| 305604    | Efemp1       | 1358   | 1497   | 1764   | 1432   | 1079  | 1127  | 1469  | 1294   |
| 29415     | Slpr2        | 328    | 321    | 359    | 379    | 262   | 252   | 310   | 315    |
| 65191     | Gabre        | 6.12   | 14.04  | 17.03  | 14.02  | 10.02 | 13.05 | 9.95  | 9.04   |
| 103694855 | LOC103694855 | 110.09 | 71.24  | 153.75 | 12.97  | 76.92 | 114.4 | 35.11 | 59.41  |
| 499469    | LOC499469    | 16.08  | 15.63  | 19.72  | 9.26   | 10.16 | 14.97 | 11.38 | 13.34  |
| 685664    | Dnal1        | 213    | 249    | 207    | 261    | 182   | 167   | 216   | 199    |

|           |              |        |        |        |        |       |       |       |        |
|-----------|--------------|--------|--------|--------|--------|-------|-------|-------|--------|
| 295337    | Bcl2l15      | 9.12   | 10     | 9      | 6      | 9     | 5.03  | 7     | 7      |
| 367313    | Col6a3       | 757    | 1073   | 1963   | 1093   | 753   | 1281  | 1088  | 892    |
| 309902    | Tet1         | 29     | 34     | 32     | 62     | 43    | 14    | 31    | 41     |
| 499697    | Trmt13       | 115.73 | 108.77 | 135.64 | 129.57 | 93.36 | 92.28 | 108.4 | 108.32 |
| 85251     | Col18a1      | 999    | 1191   | 1853   | 1172   | 924   | 1212  | 1076  | 1074   |
| 313994    | Klf11        | 281    | 270    | 312    | 243    | 224   | 219   | 237   | 229    |
| 170632    | Fgf11        | 43.62  | 29.68  | 53.52  | 55.15  | 30.39 | 34.94 | 41.1  | 43.14  |
| 315760    | Parp16       | 110    | 117    | 106    | 77     | 73    | 88    | 73    | 103    |
| 310405    | Maml3        | 78.73  | 94.86  | 103.75 | 110.43 | 71.08 | 80.35 | 89.49 | 77.85  |
| 100911104 | LOC100911104 | 37.87  | 21.39  | 31.93  | 15.31  | 43.08 | 16.49 | 11.98 | 16     |
| 313370    | Hook1        | 158    | 146    | 160    | 143    | 124   | 96    | 126   | 153    |
| 156117    | Casp12       | 62     | 56     | 70     | 65     | 36    | 47    | 61    | 64     |
| 289287    | Gpr137b      | 1430   | 1643   | 1740   | 1632   | 1265  | 1336  | 1326  | 1372   |
| 24273     | Cryaa        | 9      | 15     | 9      | 12     | 6     | 7     | 11    | 13     |
| 252959    | Dnah12       | 7      | 10     | 21     | 7      | 10    | 5     | 11    | 11     |
| 25450     | Gabbr1       | 42     | 38     | 49     | 51     | 30    | 25    | 58    | 35     |
| 59320     | Adcy10       | 13     | 16     | 7      | 9      | 6     | 11    | 12    | 8      |
| 499253    | Itipr12      | 94     | 111    | 118    | 99     | 79    | 78    | 100   | 90     |
| 103690137 | LOC103690137 | 63.18  | 54.02  | 54.45  | 67.46  | 60.57 | 34.7  | 55.08 | 46.32  |
| 315348    | Nckap11      | 241    | 210    | 282    | 243    | 198   | 177   | 223   | 205    |
| 362133    | Lypd6b       | 19     | 15     | 14     | 31     | 11    | 10    | 20    | 24     |
| 498528    | Shisa2       | 16     | 11     | 21     | 31     | 11    | 17    | 11    | 26     |
| 499241    | Scube2       | 23     | 26     | 36     | 28     | 21    | 22    | 17    | 33     |
| 679566    | Alkal2       | 16     | 25     | 30     | 42     | 28    | 28    | 23    | 14     |
| 25148     | Egr3         | 223    | 199    | 191    | 557.99 | 256   | 249   | 233   | 226    |
| 155696    | Dcbld2       | 1440   | 1509   | 1765   | 1553   | 1153  | 1181  | 1470  | 1356   |
| 102546590 | LOC102546590 | 13     | 15     | 7      | 9      | 14.65 | 4     | 4     | 13.58  |
| 502217    | Raet1d       | 8.36   | 3.91   | 2.49   | 3.59   | 1.46  | 4.34  | 3.63  | 5.68   |
| 100124593 | Cxcr6        | 7      | 2      | 3      | 5      | 1     | 4     | 7     | 2      |
| 24448     | Hrh1         | 155    | 96     | 111    | 97     | 93    | 66    | 114   | 105    |
| 298398    | Fam221b      | 5      | 8      | 0      | 4      | 4     | 5     | 1     | 4      |
| 316384    | Cavin2       | 405.77 | 285.25 | 393.26 | 485.1  | 290.9 | 288.8 | 391.8 | 321.24 |
| 296072    | Spred1       | 964    | 922    | 1072   | 1024   | 741   | 847   | 892   | 800    |
| 81646     | Creb1        | 790    | 724    | 847    | 864    | 640   | 634   | 700   | 683    |
| 500124    | LOC500124    | 28     | 37     | 32     | 28     | 26    | 17    | 35    | 25     |
| 312358    | Prr15        | 108    | 126    | 98     | 83     | 59    | 96    | 93    | 94     |
| 304485    | Hvcn1        | 61.58  | 76.79  | 89.65  | 74.61  | 64.43 | 67.28 | 67.03 | 50.68  |
| 100361655 | LOC100361655 | 18     | 26     | 22     | 25     | 15    | 25    | 21    | 14     |
| 84492     | Tec          | 190    | 189    | 268    | 275    | 147   | 123   | 241   | 249    |
| 312510    | Tial         | 483.44 | 521.02 | 598.56 | 522.47 | 434.4 | 373.1 | 487.5 | 457.08 |
| 65190     | Rsad2        | 251    | 161    | 176    | 118    | 179   | 235   | 98    | 70     |
| 313782    | Fbxl12       | 96     | 119    | 114    | 64     | 92    | 72    | 72    | 88     |
| 361112    | Vstm4        | 106    | 126    | 127    | 143    | 84    | 117   | 93    | 120    |
| 307986    | Nhlrc2       | 474    | 481    | 520    | 505.81 | 379   | 421   | 434   | 400    |
| 294711    | Ppwd1        | 235    | 215    | 249    | 222    | 178   | 182   | 210.8 | 189    |
| 499762    | Med22        | 278.24 | 275.77 | 277.24 | 253.31 | 240.6 | 222.1 | 256.2 | 175.86 |
| 102549817 | LOC102549817 | 67.88  | 70.41  | 74.62  | 60.23  | 60.67 | 64.34 | 49.27 | 51.06  |
| 54257     | Grik2        | 267.99 | 181    | 361    | 242    | 243   | 165   | 208   | 252    |
| 299897    | Trps1        | 172    | 171    | 189    | 172    | 134   | 145   | 164   | 138    |
| 317676    | Lat2         | 48     | 28     | 59     | 31     | 41    | 35    | 26    | 35     |
| 298138    | Rasef        | 49     | 54     | 62     | 64     | 45    | 38    | 54    | 52     |
| 498492    | Ccnblip1     | 15.42  | 15.63  | 20.34  | 12.02  | 13.73 | 17.57 | 7.19  | 13.85  |
| 681217    | Zfp862       | 165    | 201    | 226    | 193    | 164   | 141   | 163   | 180    |
| 497894    | Zfp62        | 314.08 | 295.69 | 345.17 | 326.27 | 223.4 | 222.3 | 315.8 | 296.23 |
| 500131    | Creb5        | 262    | 221.03 | 301    | 306    | 211   | 206   | 264   | 219    |
| 685136    | Spint3       | 1      | 6      | 7.96   | 4.66   | 1.01  | 8.19  | 7     | 0      |

|           |              |        |         |        |        |       |       |       |         |
|-----------|--------------|--------|---------|--------|--------|-------|-------|-------|---------|
| 362863    | LOC362863    | 60     | 61      | 54     | 66     | 44    | 49    | 52    | 54      |
| 367323    | Nudt12       | 475    | 498     | 472    | 428    | 386   | 350   | 411   | 400     |
| 681694    | Liph         | 12.34  | 10.78   | 11.71  | 11.39  | 10.07 | 9.8   | 6.91  | 11.4    |
| 286915    | Vom2r53      | 6      | 7       | 4      | 6      | 4     | 6     | 4     | 5       |
| 305311    | Txk          | 5      | 7       | 6      | 5      | 1     | 5     | 4     | 9       |
| 679957    | Gpr18        | 7      | 8       | 5      | 3      | 4     | 9     | 2     | 4       |
| 367039    | Dock6        | 575.03 | 544.01  | 769    | 863.08 | 534   | 514   | 639   | 585.88  |
| 362050    | Gbp5         | 217    | 241     | 324    | 271    | 201   | 209   | 235   | 225     |
| 100912604 | LOC100912604 | 0      | 101.24  | 101.24 | 0      | 0     | 0     | 97.14 | 70.17   |
| 298185    | Frem1        | 48     | 67      | 98     | 116    | 49    | 47    | 102   | 74      |
| 290046    | Hnrnpc       | 907.01 | 1119.58 | 936.06 | 771.29 | 688.8 | 749.2 | 605.5 | 1043.93 |
| 498331    | Ptpn13       | 988    | 1001.72 | 1148   | 1202.8 | 741   | 951   | 882   | 1015    |
| 103693267 | LOC103693267 | 40.07  | 50.24   | 44.05  | 64.67  | 24.63 | 49.82 | 59.09 | 31.04   |
| 117240    | Heph         | 80     | 86      | 147    | 103    | 70    | 61    | 102   | 111     |
| 317391    | Shroom4      | 91.23  | 91.96   | 106.17 | 109.92 | 100.2 | 66.45 | 90.21 | 73.38   |
| 282825    | Zfp161       | 315.99 | 295.73  | 288.2  | 259.81 | 232.3 | 260.9 | 244.3 | 221.66  |
| 305112    | Vom2r66      | 5      | 4       | 2      | 7      | 5.89  | 0     | 5     | 4       |
| 25441     | Fcerlg       | 399    | 359     | 519    | 286    | 301   | 295   | 363   | 334     |
| 315651    | RGD1562811   | 32     | 25      | 22     | 31     | 27    | 25    | 25    | 14      |
| 306934    | Ripor2       | 245    | 253.4   | 239    | 237    | 198   | 196.5 | 209   | 202.67  |
| 296654    | Gsn          | 7525   | 9351    | 7360   | 6600   | 5216  | 7104  | 7306  | 5886    |
| 500112    | Gimap8       | 177.67 | 144.76  | 148.06 | 97.86  | 96.23 | 113.8 | 154.9 | 105.4   |
| 25316     | Ms4a2        | 6      | 7       | 40     | 5      | 10    | 13    | 17    | 8       |
| 314615    | Prtn3        | 9      | 6       | 8      | 6      | 9     | 3     | 9     | 3       |
| 360591    | Prr11        | 21     | 12      | 29     | 25     | 21    | 22    | 21    | 8       |
| 310207    | Sema5a       | 3728.1 | 4099.52 | 4212.9 | 3820.9 | 2497  | 3438  | 3667  | 3528.24 |
| 681309    | Thbs3        | 140    | 161     | 160    | 137    | 87    | 138   | 149   | 121     |
| 306819    | Kdmlb        | 221    | 223     | 266    | 238    | 210   | 188   | 204   | 183     |
| 103690058 | LOC103690058 | 10.29  | 16.79   | 17.93  | 10.27  | 8.75  | 12.37 | 14.33 | 10.33   |
| 304500    | Acad10       | 155    | 176     | 162    | 118    | 96    | 127   | 118   | 165     |
| 363113    | Syncrip      | 1310   | 1232.1  | 1302.8 | 1281.1 | 980.8 | 912   | 1191  | 1161.45 |
| 306469    | Cfap97       | 193    | 223     | 227    | 195    | 189   | 178   | 152   | 175     |
| 312727    | Tspan11      | 242    | 237     | 412    | 217    | 206   | 215   | 277   | 220     |
| 296616    | Cercam       | 145.9  | 147.02  | 208.08 | 153.85 | 112.2 | 173   | 150.2 | 107.13  |
| 303130    | Fst14        | 8      | 12      | 9      | 6      | 8     | 8     | 8     | 5       |
| 500113    | Gimap7       | 34     | 20      | 36     | 15     | 27    | 23    | 16    | 21      |
| 690368    | Tmem253      | 6      | 8       | 8      | 13     | 8     | 2     | 11    | 8       |
| 294770    | Card6        | 365    | 303     | 351    | 399    | 276   | 322   | 256   | 321     |
| 685881    | LOC685881    | 8.95   | 16.27   | 7.92   | 9.47   | 9.16  | 11.7  | 6.44  | 8.01    |
| 103693723 | LOC103693723 | 13     | 18.48   | 19     | 19     | 16    | 12    | 16.58 | 13      |
| 100910554 | LOC100910554 | 1      | 1       | 3      | 4.93   | 2.19  | 4     | 1     | 1.04    |
| 100911456 | LOC100911456 | 70.83  | 56.51   | 59.39  | 7.99   | 48.25 | 9.51  | 56.8  | 46.83   |
| 314111    | Klh115       | 89     | 84.69   | 62.77  | 74.6   | 66.96 | 50    | 73    | 67.91   |
| 315306    | Mettl7a      | 695    | 524     | 464    | 494    | 389   | 417   | 454   | 545     |
| 306825    | Myliip       | 399    | 387.48  | 423.2  | 357.61 | 300   | 289.7 | 335   | 374.99  |
| 78972     | Zfp354c      | 102    | 90      | 109.77 | 114    | 84    | 63    | 105.8 | 92      |
| 25056     | Rbp1         | 203    | 220     | 255    | 242    | 179   | 130   | 212   | 242     |
| 60442     | Lin7c        | 132    | 118     | 158    | 137    | 113   | 95    | 126   | 118     |
| 114002    | Ndst2        | 225.92 | 226.55  | 294.8  | 224.29 | 192.5 | 172.5 | 181   | 259.77  |
| 361710    | Sipal        | 706    | 698     | 951    | 752    | 536   | 695   | 700   | 646     |
| 305967    | Kif13b       | 1981   | 2226    | 2056   | 2121   | 1310  | 1830  | 1752  | 2063    |
| 360518    | Gfpt2        | 214    | 259     | 293    | 255    | 169   | 236   | 252   | 190     |
| 307428    | Tnfaip8      | 141.59 | 98.47   | 120.26 | 114.42 | 89.34 | 101   | 111.5 | 92.01   |
| 315863    | Ube3d        | 41     | 27      | 44     | 70     | 52    | 55    | 24    | 20      |
| 303905    | Parp9        | 439.1  | 420.48  | 481.69 | 563.38 | 428.1 | 435.9 | 334.9 | 381.41  |
| 64021     | Gpr173       | 28.17  | 29.41   | 30.73  | 26.84  | 20.54 | 22.19 | 23.41 | 29.41   |

|           |              |        |        |        |        |       |       |       |        |
|-----------|--------------|--------|--------|--------|--------|-------|-------|-------|--------|
| 364837    | Gypc         | 174.91 | 136.66 | 193.07 | 172.9  | 110.8 | 124   | 168.6 | 158.8  |
| 691138    | Spx          | 0      | 1.53   | 1.62   | 3.27   | 0     | 0     | 3.17  | 2.16   |
| 81750     | Prosl        | 493    | 438    | 569    | 450    | 339   | 405   | 432   | 443    |
| 83580     | Thbd         | 616    | 522    | 713    | 490    | 435   | 440   | 632   | 437    |
| 314360    | Galc         | 518    | 643    | 565    | 574    | 370   | 587   | 513   | 440    |
| 29141     | Gal          | 104    | 96     | 69     | 79     | 41    | 63    | 71    | 114    |
| 308768    | Ticrr        | 11     | 11     | 22     | 15     | 17    | 15    | 9     | 8      |
| 301056    | Ctdspl       | 505.56 | 413.5  | 439.35 | 495.78 | 394   | 406   | 390.2 | 350.11 |
| 310448    | Igsf10       | 79     | 69     | 140    | 96     | 59    | 91    | 89    | 80     |
| 303310    | Hic1         | 100.14 | 99.8   | 156.54 | 106.45 | 58.87 | 90.87 | 99.85 | 135    |
| 311592    | RGD1563354   | 734    | 862    | 828    | 740    | 473   | 784   | 655   | 717    |
| 315824    | Bmp5         | 131.45 | 144.41 | 108.23 | 167.74 | 106.5 | 75.93 | 117.8 | 158.46 |
| 102551899 | LOC102551899 | 27.77  | 49     | 43     | 27     | 21    | 23    | 41    | 37     |
| 502389    | Npm3         | 68     | 53     | 77     | 51     | 58    | 43    | 51    | 55     |
| 287285    | Shroom1      | 54     | 52     | 83     | 66     | 43    | 48    | 59    | 62     |
| 79049     | Secisbp2     | 198    | 220    | 211    | 225    | 153   | 192   | 191   | 174    |
| 140587    | Sox5         | 119.81 | 123.12 | 138.6  | 157.82 | 93.34 | 102.8 | 126.1 | 126.33 |
| 294804    | Rail4        | 425    | 472    | 540    | 459    | 337   | 399   | 407   | 434    |
| 100910278 | LOC100910278 | 5.33   | 4.2    | 4.22   | 6.88   | 2.62  | 5.19  | 3.94  | 5.41   |
| 499866    | Fam98b       | 27.99  | 10.55  | 7.25   | 13.8   | 11.85 | 9.53  | 12.69 | 15.5   |
| 100360380 | LOC100360380 | 305.18 | 241.64 | 257.77 | 241.11 | 184.2 | 206.7 | 228.1 | 250.97 |
| 311886    | Cntrl        | 228    | 215    | 285    | 272    | 211   | 198   | 201   | 222    |
| 317204    | Pcdh11x      | 21     | 28     | 35     | 47     | 40    | 16    | 25    | 28     |
| 498282    | Arhgap30     | 71     | 65     | 99     | 57     | 69    | 43    | 64    | 67     |
| 295672    | Fkbp7        | 175    | 196    | 228    | 170    | 121   | 158   | 163   | 198    |
| 117036    | Lamc1        | 3753   | 4398   | 5345   | 5609   | 3512  | 4002  | 4486  | 3902   |
| 364514    | Shld2        | 200    | 183    | 154    | 179    | 162   | 131   | 151   | 152    |
| 171146    | Kcnh5        | 45     | 53     | 56     | 85     | 64    | 22    | 52    | 61     |
| 102553031 | LOC102553031 | 12.15  | 8.11   | 7      | 10.17  | 11    | 4     | 8.06  | 8.11   |
| 81507     | Bmpr1a       | 928    | 945.58 | 925    | 1065   | 789   | 699.4 | 873   | 856    |
| 314275    | Slc39a9      | 317    | 298    | 267    | 314    | 253   | 211   | 238   | 294    |
| 363328    | Ticam1       | 46.24  | 70.5   | 71.55  | 71.41  | 45.67 | 46.06 | 67.26 | 57.29  |
| 80881     | Serp1        | 1469   | 1554   | 1615   | 1427   | 1102  | 1291  | 1346  | 1312   |
| 361487    | Zfp52        | 60.38  | 63.38  | 64.65  | 51.46  | 47.91 | 49.95 | 53.7  | 48.22  |
| 94196     | Rnf138       | 174    | 208    | 174    | 168    | 152   | 145   | 167   | 139    |
| 308444    | Axl          | 880    | 862    | 1182   | 1071   | 730   | 869   | 875   | 854    |
| 360579    | Cc19         | 20.98  | 10.16  | 29.21  | 14.28  | 24.98 | 8.87  | 11.02 | 17.3   |
| 293566    | Cpxm2        | 530    | 313    | 640    | 656    | 406   | 246   | 732   | 398    |
| 306226    | Dux4         | 199.33 | 163.98 | 160.47 | 163.13 | 173.9 | 120.9 | 151.9 | 125.53 |
| 100362915 | Zfp648       | 0      | 3      | 1      | 2      | 1     | 0     | 3     | 1      |
| 100363433 | Srrm5        | 2      | 3      | 4      | 3      | 1     | 2     | 6     | 1      |
| 102551929 | LOC102551929 | 4      | 4      | 1      | 3      | 3     | 4     | 3     | 0      |
| 102554659 | LOC102554659 | 30.46  | 19.66  | 18.74  | 25.64  | 19.83 | 9.51  | 22.09 | 27.32  |
| 117551    | Cc122        | 2      | 1      | 1      | 2      | 2     | 2     | 0     | 1      |
| 171397    | UST4r        | 1      | 1      | 1      | 3      | 0     | 1     | 1     | 3      |
| 24528     | Lalba        | 1      | 3      | 0      | 2      | 2     | 2     | 1     | 0      |
| 24616     | Pah          | 3      | 1      | 5      | 3      | 3     | 4     | 2     | 1      |
| 266787    | Eaf2         | 1      | 1      | 3      | 1      | 2     | 2     | 0     | 1      |
| 297419    | Gkn2         | 1      | 3      | 5      | 3      | 2     | 4     | 2     | 2      |
| 306956    | Btn1a1       | 5      | 1      | 0      | 0      | 2     | 1     | 2     | 0      |
| 309620    | Btn12        | 2      | 1      | 3      | 0      | 2     | 2     | 0     | 1      |
| 310152    | Slc45a2      | 3      | 3      | 4      | 2      | 4     | 1     | 0     | 5      |
| 314537    | Abcb5        | 1      | 2      | 2      | 1      | 2     | 1     | 1     | 1      |
| 361994    | Bnpl         | 3      | 1      | 1      | 1      | 1     | 2     | 0     | 2      |
| 366531    | Ttc39d       | 2      | 0      | 1      | 3      | 2     | 1     | 1     | 1      |
| 500531    | Armhl        | 8      | 5      | 10     | 7      | 7     | 5     | 7     | 6      |

|           |              |        |        |        |        |       |       |       |        |
|-----------|--------------|--------|--------|--------|--------|-------|-------|-------|--------|
| 502900    | Clec12b      | 6      | 13     | 5      | 6      | 4     | 9     | 4     | 8      |
| 50546     | Insl6        | 0      | 2      | 1      | 3      | 2     | 2     | 1     | 0      |
| 60448     | Htr1f        | 6      | 13     | 3      | 8      | 9     | 4     | 4     | 8      |
| 678704    | Atp13a3      | 26     | 42     | 35     | 35     | 33    | 10    | 32    | 40     |
| 685355    | L1td1        | 4      | 3      | 2      | 3      | 4     | 1     | 2     | 3      |
| 687483    | Tmem217      | 5      | 2      | 3      | 2      | 2     | 0     | 4     | 4      |
| 689704    | Vsx1         | 1      | 1      | 1      | 3      | 1     | 1     | 0     | 3      |
| 690918    | Tmem215      | 6      | 3      | 3      | 0      | 2     | 3     | 0     | 5      |
| 282821    | Has1         | 14     | 8      | 7      | 7      | 10    | 4     | 10    | 6      |
| 293743    | Ms4a14       | 4      | 2      | 10     | 8      | 4     | 2     | 10    | 4      |
| 29586     | Gjb5         | 10     | 13     | 21     | 10     | 7     | 10    | 16    | 12     |
| 303563    | Nags         | 6      | 4      | 4      | 4      | 3     | 5     | 3     | 4      |
| 309208    | Lrrc10b      | 6      | 4      | 8      | 6      | 4     | 12    | 2     | 2      |
| 407781    | Btnl3        | 7      | 4      | 2      | 11     | 7     | 6     | 5     | 2      |
| 79225     | Hes5         | 68     | 38     | 32     | 12     | 27    | 26    | 35    | 37     |
| 291647    | Pcdhb14      | 44.7   | 38.25  | 28.29  | 30.44  | 24.55 | 34.09 | 32.61 | 26.85  |
| 360903    | Fgfr11       | 122    | 152    | 147    | 138    | 89    | 132   | 102   | 143    |
| 501150    | RGD1562029   | 57.22  | 62.68  | 67.19  | 52.46  | 62.28 | 48.12 | 46.11 | 43.19  |
| 114517    | Itga6        | 3296   | 3946   | 4327   | 4376   | 2414  | 3371  | 3935  | 3574   |
| 25615     | Sdc2         | 1383   | 1230   | 1872   | 1423   | 1123  | 1136  | 1371  | 1296   |
| 289419    | Nuak2        | 74     | 65     | 80     | 70     | 55    | 53    | 66    | 67     |
| 25473     | Lamb2        | 2447   | 2367   | 3093   | 3069   | 1904  | 2316  | 2588  | 2345   |
| 298184    | Zdhhc21      | 496    | 564    | 496    | 678    | 604   | 279   | 486   | 494    |
| 29528     | Vamp3        | 1093   | 1076   | 1060   | 893    | 677   | 924   | 909   | 928    |
| 367832    | Zfx          | 436    | 434    | 472    | 447.97 | 360   | 336   | 413   | 384    |
| 246775    | Tnfsf10      | 141.29 | 126.52 | 149.75 | 146.33 | 104.2 | 113.5 | 127.9 | 124.81 |
| 364594    | Tlr3         | 123    | 126    | 227    | 121    | 115   | 128   | 142   | 113    |
| 100909408 | Zfp397       | 217    | 249    | 248    | 276    | 210   | 148   | 254   | 214    |
| 361269    | Fam208b      | 313    | 355    | 359    | 362    | 305   | 239   | 308   | 307    |
| 361474    | Ipcef1       | 71     | 64     | 81     | 92     | 71    | 48    | 68    | 70     |
| 689613    | Mtmr11       | 221    | 172.82 | 273    | 193.38 | 172.9 | 145   | 189.4 | 210.5  |
| 100912235 | Mast4        | 259.62 | 266.87 | 305.33 | 343.56 | 264   | 272.1 | 157.5 | 287.87 |
| 685009    | Rnf169       | 323.63 | 272.21 | 357.67 | 367.63 | 242.6 | 297.4 | 314.1 | 249.09 |
| 679845    | Shc4         | 669    | 790    | 740    | 844    | 533   | 686   | 685   | 637    |
| 102551014 | LOC102551014 | 10.19  | 7.77   | 14.54  | 16.19  | 8.26  | 8.69  | 14.23 | 9.48   |
| 58838     | Sh2b3        | 326.27 | 336.83 | 439.22 | 320.55 | 266.5 | 337.7 | 310.9 | 273.16 |
| 304498    | Wdr66        | 33.19  | 18.22  | 27.67  | 25.97  | 19.98 | 21.31 | 23.43 | 23.01  |
| 25408     | Cd80         | 36.43  | 38.46  | 54.14  | 51.73  | 29.37 | 29.09 | 45.69 | 46.82  |
| 311111    | Nostrin      | 50     | 45     | 44     | 37     | 37    | 30    | 30    | 50     |
| 286921    | Akr1b8       | 52.87  | 97.63  | 136.21 | 36.39  | 58.68 | 62.52 | 87.01 | 61.66  |
| 287423    | Hes7         | 19     | 18     | 11     | 16     | 18    | 10    | 17.46 | 8      |
| 100912481 | LOC100912481 | 620.54 | 600.97 | 824.1  | 880.95 | 465.8 | 526.2 | 572.4 | 880.32 |
| 306816    | Zfp169       | 79     | 82     | 80     | 87     | 78    | 54    | 67    | 75     |
| 289437    | Glmn         | 332    | 334    | 307.37 | 288    | 270   | 223   | 269   | 291.79 |
| 290326    | Pbk          | 12     | 14     | 40     | 13     | 12    | 20    | 18    | 16     |
| 297483    | Shq1         | 44.83  | 60.6   | 52.62  | 49.3   | 45.5  | 41.72 | 47.61 | 38.41  |
| 316421    | Aox2         | 7      | 1.95   | 8.41   | 6.29   | 3     | 7.49  | 4.2   | 5.07   |
| 360627    | Fkbp10       | 365    | 360    | 494    | 328    | 253   | 396   | 348   | 296    |
| 114507    | Slc5a3       | 18     | 37     | 35     | 44     | 35    | 9     | 27    | 41     |
| 316527    | Wnt10a       | 19     | 17     | 13     | 18     | 12    | 13    | 14    | 17     |
| 100910714 | LOC100910714 | 3.93   | 1.99   | 5.56   | 1.86   | 5.59  | 0     | 0     | 5.56   |
| 300796    | Snx22        | 23.6   | 31.72  | 22.6   | 20.11  | 15.94 | 24.48 | 21.45 | 20.07  |
| 289864    | Prorsd1      | 56     | 45     | 60     | 34     | 41    | 25    | 46    | 51     |
| 316982    | Resf1        | 544    | 528    | 625    | 580.01 | 457   | 421   | 573   | 452.39 |
| 100910885 | LOC100910885 | 136.84 | 101.31 | 116.36 | 93.36  | 73.94 | 107.7 | 113.8 | 78.98  |
| 287949    | Scarf2       | 281    | 258    | 348    | 302    | 225   | 228   | 286   | 255    |

|           |              |        |         |        |        |       |       |       |         |
|-----------|--------------|--------|---------|--------|--------|-------|-------|-------|---------|
| 24790     | Sp1          | 854    | 843     | 963    | 956    | 709   | 716   | 791   | 807     |
| 360905    | Mtf2         | 335    | 248     | 268    | 253    | 220   | 229   | 235   | 239     |
| 103690888 | LOC103690888 | 0      | 2.04    | 1.62   | 0      | 1.02  | 0     | 1.02  | 1.02    |
| 286993    | Taok1        | 383    | 549     | 528    | 651    | 546   | 237   | 453   | 529     |
| 499668    | Lingo4       | 65.02  | 51      | 55.71  | 102.69 | 69    | 43.44 | 55.6  | 61.43   |
| 291978    | Dus2         | 184    | 225     | 204    | 199    | 162   | 172   | 152   | 193     |
| 64702     | Trim17       | 31     | 25      | 35     | 25     | 27    | 24    | 29    | 17      |
| 311401    | Sppl2a       | 525.85 | 614.04  | 669.29 | 551.23 | 459.8 | 454.7 | 550.3 | 509.09  |
| 305449    | Mfsd10       | 192.72 | 221.08  | 240.81 | 208.81 | 168.8 | 172.4 | 168.3 | 212.53  |
| 301083    | RGD1566368   | 49.72  | 22.92   | 46.73  | 16.45  | 25.83 | 30.42 | 33.63 | 23.71   |
| 363144    | Cdhr4        | 57     | 42      | 54     | 55     | 59    | 48    | 32    | 35      |
| 367645    | Pif1         | 11.22  | 6.83    | 21.55  | 9.63   | 13.25 | 8.46  | 10.85 | 8.63    |
| 294789    | Ranbp31      | 257    | 244     | 239    | 326    | 189   | 209   | 251   | 243     |
| 114208    | Skil         | 617    | 634     | 734    | 662    | 519   | 538   | 610   | 548     |
| 500068    | Ssmem1       | 28.9   | 24.23   | 18.94  | 32.54  | 26.39 | 19.02 | 20.81 | 21.33   |
| 310806    | Cdc14a       | 290    | 292     | 298    | 261    | 264   | 189   | 286   | 216     |
| 366474    | Coll16a1     | 1693   | 1865    | 3100   | 1980   | 1726  | 1927  | 1975  | 1602    |
| 64459     | Masp2        | 200.17 | 154.78  | 199.49 | 162.14 | 135.1 | 135   | 196.5 | 133.19  |
| 502086    | RGD1564308   | 20     | 12.87   | 23     | 17     | 11    | 14    | 16    | 20      |
| 679346    | Tarbp1       | 83.38  | 78.84   | 84.16  | 97.57  | 76.17 | 73.31 | 77.24 | 61.23   |
| 310807    | Sass6        | 93.87  | 80.36   | 76.13  | 91.96  | 87.77 | 54.78 | 60.84 | 83.22   |
| 171380    | Cyp2t1       | 97     | 95      | 109    | 74     | 63    | 81    | 75    | 95      |
| 315610    | Jaml         | 24.2   | 26.77   | 26.18  | 20.54  | 21.47 | 19.48 | 20.37 | 20.48   |
| 363185    | Foxp4        | 300    | 304.67  | 343    | 392    | 231   | 282   | 312.8 | 296     |
| 309129    | Fcho2        | 372    | 361     | 417    | 376    | 306   | 303   | 360   | 309     |
| 305350    | RGD1565119   | 0      | 0       | 4.18   | 1.79   | 5     | 0     | 0     | 0       |
| 246240    | Ripk3        | 33     | 31      | 56     | 59     | 30    | 30    | 49    | 41      |
| 307660    | Ces5a        | 51     | 37      | 62     | 29     | 43    | 27    | 40    | 40      |
| 313069    | Rbm12b       | 187.53 | 158.03  | 176.45 | 172.42 | 133.7 | 118.5 | 158   | 171.77  |
| 24747     | RT1-M3-1     | 251.49 | 216.82  | 215.59 | 237.05 | 179.3 | 144.1 | 199.8 | 248.75  |
| 501552    | Fancb        | 54     | 40      | 57     | 53     | 43    | 41    | 46    | 41      |
| 362418    | Irak2        | 98     | 91      | 116    | 97     | 74    | 91    | 86    | 86      |
| 309131    | Slc22a18     | 42     | 39      | 50     | 36     | 22    | 36    | 40    | 42      |
| 294375    | Reep3        | 1671   | 1649.65 | 1838   | 1742.8 | 1275  | 1429  | 1629  | 1453.01 |
| 690419    | Zfp70911     | 178.65 | 139.62  | 201.1  | 233.43 | 150   | 123   | 158.1 | 200.09  |
| 302377    | RGD1560455   | 6.57   | 4       | 12.65  | 5      | 8     | 7     | 5.38  | 3.28    |
| 25094     | Mitf         | 169.45 | 198.66  | 222.36 | 223.5  | 148.5 | 151.4 | 204.9 | 177.64  |
| 192281    | Oas1a        | 108.09 | 109.17  | 87.16  | 98.37  | 80.35 | 120   | 62.45 | 74.91   |
| 365583    | Dse          | 354    | 329     | 414    | 365    | 297   | 281   | 323   | 325     |
| 310416    | Nhlrc3       | 330    | 315     | 350    | 306    | 273   | 269   | 284   | 265     |
| 102557607 | LOC102557607 | 6      | 7       | 15     | 3      | 3     | 9     | 7     | 7       |
| 287761    | Prr29        | 17     | 16      | 15     | 14     | 13    | 12    | 14    | 13      |
| 100363145 | Stab1        | 570.39 | 500.28  | 778.02 | 662.66 | 451.8 | 485.9 | 622   | 546.9   |
| 307206    | Neto1        | 52     | 58      | 57     | 75     | 56    | 36    | 66    | 45      |
| 25380     | Anxa1        | 1545   | 1221    | 1882   | 883    | 880   | 998   | 1462  | 1300    |
| 100359529 | Immp21       | 50     | 46      | 54     | 55     | 54    | 40    | 39    | 39      |
| 307618    | Cdh5         | 423    | 369     | 490    | 613    | 337   | 385   | 422   | 446     |
| 108348298 | LOC108348298 | 57.62  | 60.83   | 114.43 | 57.11  | 60.83 | 60.83 | 0     | 121.66  |
| 305064    | Ptpn14       | 539.57 | 573.42  | 651.92 | 704.45 | 420.5 | 550.7 | 534.9 | 565.87  |
| 360711    | Cip2a        | 32.69  | 49.07   | 60.53  | 62.87  | 40.62 | 43.4  | 46.74 | 41.4    |
| 299858    | Lrp1         | 3490   | 3537    | 4589   | 4524   | 3014  | 3532  | 3698  | 3300    |
| 313922    | Asx12        | 456.56 | 425.62  | 509.84 | 527.78 | 433.5 | 366.1 | 403.6 | 408.01  |
| 414792    | RT1-CE10     | 790.01 | 506.59  | 855.57 | 869.92 | 585   | 668.4 | 715.2 | 567.87  |
| 501588    | Tex11        | 8.88   | 6       | 17     | 11     | 9     | 7     | 6.99  | 13      |
| 171414    | Pmfbp1       | 73     | 97      | 91     | 44     | 49    | 53    | 75    | 79      |
| 113940    | Gmfg         | 68     | 78      | 113    | 71     | 62    | 60    | 91    | 64      |



|           |              |        |         |        |        |       |       |       |         |
|-----------|--------------|--------|---------|--------|--------|-------|-------|-------|---------|
| 308865    | Atg16l2      | 235    | 173     | 207    | 182    | 152   | 170   | 195   | 152     |
| 24615     | SI00a4       | 1424   | 1535    | 2004   | 989    | 787   | 1371  | 1323  | 1516    |
| 362442    | A2ml1        | 22     | 28      | 31     | 25     | 23    | 28    | 23    | 15      |
| 499126    | Igflr1       | 39     | 45      | 39     | 33     | 31    | 35    | 21    | 44      |
| 286979    | Zfp455       | 50.88  | 43.14   | 70.26  | 67.17  | 47.05 | 40.59 | 49.17 | 57.55   |
| 299285    | Clmn         | 279    | 335     | 393    | 341    | 260   | 300   | 290   | 282     |
| 103694306 | LOC103694306 | 122.6  | 104.37  | 98.15  | 119.49 | 91.41 | 84.47 | 101.9 | 95.67   |
| 500688    | Adam411      | 50.79  | 55.21   | 60     | 56.1   | 51.14 | 33.08 | 43.95 | 58.38   |
| 310588    | Tchh         | 16     | 10      | 10     | 14     | 8     | 13    | 14    | 7       |
| 361478    | Pnlcd1       | 21     | 19      | 27     | 33     | 13    | 14    | 37    | 20      |
| 59316     | Nxph4        | 31     | 39      | 39     | 41     | 35    | 26    | 38    | 27      |
| 304807    | Rabif        | 180.99 | 168.6   | 0      | 0      | 0     | 0.01  | 119.5 | 174.17  |
| 81762     | Rock1        | 858.96 | 896.01  | 1049.9 | 984.72 | 782   | 683.9 | 870.8 | 847     |
| 301333    | Ptpn18       | 52     | 52      | 52     | 38     | 45    | 35    | 38    | 45      |
| 303285    | Traf4        | 147    | 104     | 140    | 110    | 90    | 104   | 92    | 135     |
| 679900    | RGD1564247   | 43.13  | 54.88   | 44.1   | 58.23  | 40.59 | 32.8  | 45.92 | 49.04   |
| 361630    | Tead1        | 1463   | 1590.79 | 1929.8 | 1743.8 | 1219  | 1530  | 1537  | 1367.84 |
| 259241    | Nr1d2        | 1327   | 1288    | 1118   | 1211   | 1053  | 1107  | 973   | 1022    |
| 290432    | Setsip       | 8.52   | 0       | 8.74   | 4.01   | 3.79  | 0     | 14.09 | 0       |
| 360886    | Ahctf1       | 814.98 | 825     | 884    | 852    | 701   | 645   | 734   | 757.98  |
| 116463    | Akr1b7       | 7.08   | 6.82    | 6.43   | 6.34   | 2.12  | 5.44  | 4.23  | 10.63   |
| 681086    | Pigf         | 212.94 | 226.73  | 197.99 | 236.4  | 171.2 | 166.7 | 210.8 | 186.13  |
| 503429    | Mpc11        | 80.68  | 76.93   | 75.48  | 67.2   | 47.87 | 69.08 | 75.2  | 60.44   |
| 287715    | Wnk4         | 476    | 340     | 450    | 485    | 372   | 414   | 340   | 347     |
| 64025     | Cd244        | 17     | 12      | 23     | 11     | 17    | 12    | 14    | 10      |
| 500557    | Nkain1       | 146    | 143     | 133    | 101    | 131   | 110   | 83    | 116     |
| 363457    | Col4a5       | 149    | 104     | 165    | 176    | 110   | 113   | 101   | 176     |
| 301455    | Pard3b       | 77     | 88      | 91     | 111    | 80    | 82    | 68    | 79      |
| 79252     | Adamts1      | 316    | 371     | 478    | 696    | 303   | 350   | 526   | 388     |
| 103689927 | LOC103689927 | 39.67  | 70.53   | 108.36 | 65.36  | 45.22 | 65.78 | 61.4  | 66.67   |
| 103692168 | LOC103692168 | 2.59   | 2.59    | 1.29   | 1      | 2     | 1.29  | 0     | 3       |
| 100363146 | Fam228b      | 15     | 20      | 18     | 23     | 22    | 13    | 13    | 16      |
| 287366    | Pld6         | 5      | 7       | 3      | 4      | 3     | 5     | 5     | 3       |
| 289001    | Map3k19      | 5      | 3       | 5      | 6      | 7     | 3     | 3     | 3       |
| 290729    | Neil3        | 2      | 6       | 5      | 6      | 3     | 5     | 6     | 2       |
| 303537    | Zfp385c      | 5      | 6       | 2      | 6      | 3     | 4     | 4     | 5       |
| 58978     | Slcolb2      | 49.7   | 36.08   | 40.32  | 43.75  | 49.67 | 32.91 | 23.92 | 36.55   |
| 688708    | LOC688708    | 239.15 | 276.95  | 279.81 | 294.41 | 257.6 | 249.5 | 193.6 | 217.72  |
| 684529    | Ctso         | 151    | 182     | 197    | 187    | 124   | 127   | 178   | 175     |
| 317599    | Atp11c       | 343    | 338     | 359    | 337    | 265   | 268   | 334   | 293     |
| 108348302 | LOC108348302 | 106    | 114     | 137    | 115    | 105.6 | 82    | 95    | 115     |
| 503164    | Apol9a       | 100    | 70      | 59     | 82     | 38    | 91    | 70    | 63      |
| 306259    | RGD1564325   | 1.11   | 1.45    | 2.21   | 0.25   | 4.23  | 0     | 0     | 0       |
| 313774    | Clqtnf12     | 74     | 94      | 74     | 44     | 50    | 65    | 59    | 67      |
| 574531    | Lair1        | 39     | 15.02   | 23.23  | 27.18  | 10    | 26    | 19    | 33      |
| 50677     | Ptpro        | 219    | 342     | 296    | 383    | 300   | 248   | 220   | 277     |
| 316440    | Ino80d       | 600.01 | 580.86  | 606.03 | 703.17 | 547.5 | 476   | 552   | 523     |
| 688324    | Ccdc57       | 66     | 69      | 79     | 66     | 59    | 50    | 74    | 53      |
| 102556989 | LOC102556989 | 10.64  | 8.92    | 6.1    | 3.04   | 6.35  | 2.33  | 11.39 | 4.12    |
| 29344     | Zfp3611      | 1204   | 1149    | 1232   | 1333.7 | 1071  | 979   | 993   | 1102.99 |
| 117542    | Baiap2       | 501.13 | 519.6   | 606.63 | 430.49 | 394.7 | 436.7 | 457.4 | 445.86  |
| 103690007 | LOC103690007 | 194.69 | 204.11  | 189.27 | 178.58 | 185.3 | 130.3 | 150.1 | 180.76  |
| 315578    | Jhy          | 70     | 66      | 64     | 68     | 68    | 44    | 57    | 57      |
| 363425    | Cav2         | 1057   | 1108    | 1098   | 1051   | 609   | 867   | 1091  | 1071    |
| 103690827 | Yy2          | 49     | 47      | 45     | 38     | 38    | 35    | 36    | 42      |
| 303090    | Irgm         | 104.03 | 118.57  | 150.47 | 172.14 | 90.14 | 125.1 | 110   | 134.65  |



|           |              |        |        |        |        |       |       |       |        |
|-----------|--------------|--------|--------|--------|--------|-------|-------|-------|--------|
| 25599     | Cd74         | 3184   | 2101   | 3379   | 2166   | 1825  | 1728  | 2139  | 3444   |
| 362056    | Spata1       | 75.81  | 50.23  | 77.11  | 72.84  | 53.11 | 56.27 | 70.91 | 52.56  |
| 56764     | Samd13       | 16     | 12     | 11     | 25     | 13    | 10    | 21    | 10     |
| 114121    | Ccn11        | 651.53 | 623.46 | 713.32 | 728.27 | 503.7 | 556.7 | 670.4 | 561.41 |
| 191568    | Naip6        | 33.85  | 37.06  | 6.79   | 9.44   | 24.23 | 12.39 | 25.58 | 11.33  |
| 307351    | Tubb6        | 361.9  | 385.36 | 457.69 | 313.01 | 274.1 | 327.3 | 396.8 | 282.84 |
| 360487    | RGD1561157   | 52     | 49     | 61     | 43     | 36    | 34    | 53    | 50     |
| 302812    | Zfp280c      | 266.48 | 259.02 | 261.51 | 294.16 | 225.2 | 225.6 | 243.2 | 218.47 |
| 309986    | Zcchc9       | 756.33 | 552.67 | 647.56 | 654.82 | 652.4 | 516.6 | 516.1 | 518.95 |
| 102548693 | Zfp28        | 138    | 133    | 155    | 158    | 114   | 145   | 110   | 124    |
| 361878    | Tent2        | 343    | 283    | 349    | 277    | 238   | 230   | 348   | 241    |
| 84423     | Nrtn         | 35     | 27     | 37     | 23     | 23    | 29    | 24    | 27     |
| 362696    | Ttc7a        | 208    | 208    | 347    | 207    | 205   | 207   | 211   | 196    |
| 103690063 | LOC103690063 | 158.59 | 130.43 | 184.1  | 157.41 | 117.3 | 129   | 138.3 | 147.85 |
| 303016    | Crebrf       | 1176   | 1153   | 1141   | 1128   | 983   | 820   | 1041  | 1039   |
| 311549    | Xkr7         | 670.1  | 761.48 | 1186.2 | 850.08 | 457.8 | 637.8 | 971.5 | 862.01 |
| 100911069 | Mtfr2        | 47     | 37     | 44     | 33     | 25    | 28    | 40    | 43     |
| 691907    | Pla2g4f      | 73.55  | 69.3   | 92.59  | 72.58  | 60.06 | 70.79 | 62.1  | 67.25  |
| 297682    | Duspl6       | 234.84 | 227.35 | 262.34 | 264.86 | 199.4 | 188.2 | 231.3 | 216.85 |
| 291377    | Rttt         | 81     | 81     | 78     | 76     | 60    | 76    | 77    | 54     |
| 290644    | Ifi30        | 306.46 | 284.73 | 377.89 | 258.88 | 230.3 | 275.7 | 292.1 | 239.47 |
| 499602    | Abhd18       | 95     | 121    | 85     | 106    | 82    | 80    | 92    | 90     |
| 315852    | Ttk          | 19     | 18     | 37     | 10     | 22    | 15    | 20    | 14     |
| 362491    | Ripk2        | 264    | 227    | 226    | 246    | 214   | 197   | 196   | 207    |
| 64036     | Cd55         | 7666   | 6594   | 7176   | 6156   | 6021  | 5117  | 5574  | 6611   |
| 316580    | Sp140        | 132.05 | 142.17 | 192    | 118.45 | 111   | 120.8 | 135.4 | 127    |
| 84410     | Klf5         | 837    | 737    | 943    | 1054   | 699   | 611   | 811   | 898    |
| 83500     | Slc22a8      | 32     | 21     | 19     | 64     | 14    | 11    | 22    | 68     |
| 108353270 | LOC108353270 | 15.09  | 19.44  | 15.74  | 23.86  | 11.64 | 20.08 | 17.36 | 13.61  |
| 296115    | Secisbp21    | 7739   | 9018   | 8861   | 9670   | 6195  | 7145  | 8185  | 8318   |
| 103690092 | LOC103690092 | 20.51  | 7.99   | 24.8   | 25.56  | 19.76 | 21.35 | 11.37 | 14.22  |
| 114709    | Ifitm2       | 730.16 | 685.78 | 835.32 | 626.93 | 492.9 | 548.1 | 761.1 | 632.48 |
| 690005    | Zcchc3       | 207    | 200    | 218    | 186    | 172   | 170   | 160   | 184    |
| 363062    | Dixdc1       | 253    | 264    | 269    | 285    | 224   | 209   | 246   | 227    |
| 690329    | Lrrn4c1      | 121.33 | 96.6   | 104.17 | 102    | 102.1 | 99.71 | 75.21 | 81.81  |
| 314584    | Zfp563       | 120.55 | 119.64 | 123.43 | 105.55 | 91.81 | 96.7  | 97.07 | 111.37 |
| 100361631 | Tmem35b      | 8      | 14     | 9      | 8      | 3     | 9     | 11    | 10     |
| 259226    | Ppp1r14d     | 2      | 4      | 3      | 4      | 1     | 3     | 5     | 2      |
| 500904    | Ncf4         | 56     | 63     | 105    | 49     | 61    | 52    | 71    | 47     |
| 102555975 | LOC102555975 | 4      | 8      | 6      | 8      | 7     | 4     | 7     | 4      |
| 498079    | Cd96         | 4      | 11     | 5      | 6      | 5     | 6     | 3     | 8      |
| 58962     | Hpgds        | 16     | 4      | 21     | 11     | 14    | 8     | 14    | 8      |
| 100362641 | Zfp945       | 165    | 167.68 | 116.39 | 182.17 | 138   | 112   | 126.1 | 158.12 |
| 288022    | Ccdc50       | 1284   | 1351   | 1504   | 1447   | 1155  | 986   | 1320  | 1267   |
| 310864    | Manba        | 231    | 231    | 234    | 235    | 188   | 211   | 186   | 203    |
| 303101    | Maml1        | 232.43 | 252.45 | 266.39 | 206.15 | 212.5 | 206.3 | 179.2 | 212.47 |
| 301434    | Clk1         | 1675   | 1480   | 1596   | 1442.6 | 1305  | 1259  | 1280  | 1399   |
| 25619     | Plau         | 120    | 79     | 86     | 119    | 84    | 73    | 93    | 92     |
| 306460    | Enpp6        | 34.47  | 36.49  | 22.44  | 24.54  | 26.58 | 19.65 | 18.75 | 34.87  |
| 103694120 | LOC103694120 | 1      | 1.52   | 2      | 2      | 0     | 1.52  | 4     | 0      |
| 288559    | Sap25        | 68     | 59     | 69     | 65     | 47    | 54    | 45    | 75     |
| 116831    | Fxyd3        | 104.83 | 111.2  | 97.7   | 67.11  | 79.88 | 78.06 | 95.85 | 68.71  |
| 83819     | Slc26a5      | 19     | 29     | 29     | 21     | 18    | 20    | 27    | 18     |
| 362557    | Ndc1         | 370    | 394    | 381    | 384    | 290   | 319   | 356   | 330    |
| 108348090 | LOC108348090 | 156.49 | 177.55 | 185.53 | 172.54 | 150.7 | 141   | 134.1 | 160.34 |
| 102555832 | LOC102555832 | 39.02  | 39.78  | 49.47  | 46.06  | 34.11 | 43.43 | 32.22 | 37.91  |

|           |                 |        |         |        |        |       |       |       |        |
|-----------|-----------------|--------|---------|--------|--------|-------|-------|-------|--------|
| 108348216 | LOC108348216    | 17.83  | 13.59   | 5.27   | 5.16   | 8.46  | 6.81  | 6.59  | 13.59  |
| 305835    | Peli2           | 838.38 | 1068.8  | 1195.3 | 1090.8 | 735.2 | 947   | 1064  | 806.13 |
| 25186     | Efnb1           | 723    | 644     | 976    | 935    | 510   | 590   | 812   | 865    |
| 102548800 | LOC102548800    | 7      | 4       | 16     | 12.13  | 5     | 9     | 9.15  | 10     |
| 294141    | Clic2           | 124    | 126     | 153    | 114    | 103   | 108   | 106   | 121    |
| 252971    | Socs1           | 40     | 33      | 25     | 33     | 22    | 26    | 28    | 35     |
| 684773    | LOC684773       | 4.2    | 6.07    | 4.46   | 3.68   | 3.49  | 8.34  | 0     | 3.77   |
| 295274    | Hist2h2be       | 156    | 142.99  | 143    | 128    | 124   | 98    | 112   | 149    |
| 25491     | Nes             | 2468.3 | 3053.41 | 3265   | 2929   | 1660  | 2432  | 2769  | 3067   |
| 681355    | LOC681355       | 107    | 148     | 132    | 157    | 97    | 117   | 119   | 128    |
| 299236    | Flrt2           | 435.03 | 330.96  | 470.88 | 518.76 | 353.5 | 351   | 390.1 | 393.22 |
| 307475    | Gpr151          | 22     | 9       | 11     | 17     | 12    | 9     | 23    | 6      |
| 309724    | Tmem26          | 117    | 122     | 171    | 154    | 126   | 111   | 128   | 113    |
| 60382     | Arfip1          | 768    | 716     | 768    | 680    | 584   | 598   | 625   | 678    |
| 100910577 | LOC100910577    | 201.91 | 148.94  | 182.84 | 219.97 | 164.6 | 115.1 | 188.7 | 170.5  |
| 308582    | Tead2           | 50     | 48      | 61     | 51     | 36    | 42    | 50    | 50     |
| 89783     | Laptm5          | 886    | 921     | 1038   | 649    | 615   | 679   | 749   | 919    |
| 29175     | Ctsk            | 260    | 264     | 446    | 246    | 167   | 375   | 221   | 268    |
| 60460     | Hspa2           | 1322   | 1725    | 2118   | 1357   | 1067  | 1701  | 1293  | 1469   |
| 360420    | Rdh7            | 1.32   | 0       | 1.31   | 0      | 1.1   | 0     | 1.13  | 0      |
| 310019    | Utp15           | 463.98 | 505.59  | 543.9  | 523.85 | 417.6 | 412   | 478   | 420    |
| 308003    | Rab11fip2       | 300    | 262     | 282    | 348    | 268   | 214   | 273   | 256    |
| 116689    | Ptpn6           | 153    | 135     | 209    | 155    | 123   | 142   | 149   | 139    |
| 316767    | Ddx11           | 75.78  | 76.19   | 83.43  | 74.99  | 56.93 | 69.21 | 69.45 | 67.68  |
| 686091    | Ccdc13          | 36     | 27      | 30     | 19     | 23    | 26    | 26    | 20     |
| 100912456 | Lilrb1          | 9.7    | 12.8    | 27.21  | 13.87  | 9     | 12.9  | 18.95 | 13.09  |
| 294521    | Ak9             | 10     | 6       | 5      | 12     | 7     | 5     | 14    | 2      |
| 497906    | Ccdc69          | 9      | 8       | 8      | 8      | 4     | 4     | 13    | 7      |
| 501043    | I120rb          | 35     | 27      | 40     | 30     | 29    | 25    | 31    | 27     |
| 289865    | Clhc1           | 26     | 20      | 30     | 23     | 14    | 15    | 20    | 35     |
| 498769    | Edaradd         | 14.67  | 13.83   | 11.21  | 13.36  | 10.51 | 13.49 | 11.72 | 9.32   |
| 498366    | Fam114a1        | 565.98 | 643.91  | 673.68 | 583.86 | 460.6 | 546.2 | 552.5 | 535.18 |
| 103689975 | LOC103689975    | 51.18  | 43.95   | 59.27  | 80.64  | 55.05 | 44.93 | 56.53 | 43     |
| 102554737 | LOC102554737    | 1.52   | 2.75    | 5.87   | 3.62   | 4.8   | 0     | 2.87  | 4.01   |
| 58808     | Mpp4            | 19     | 20      | 26     | 21     | 14    | 18    | 26    | 15     |
| 689537    | Calr4           | 70     | 81      | 70     | 77     | 55    | 59    | 64    | 75     |
| 366174    | Catsper2        | 95.93  | 71.71   | 83.03  | 111.64 | 80.18 | 82.72 | 71.67 | 73.03  |
| 102554874 | LOC102554874    | 3.82   | 1.57    | 6.43   | 5.2    | 8.78  | 4.04  | 1.63  | 0      |
| 363463    | Mospd2          | 595    | 553     | 602    | 588    | 471   | 416   | 538   | 560    |
| 291577    | Chsy3           | 33     | 36      | 41     | 49     | 40    | 43    | 28    | 24     |
| 291047    | Gcm2            | 19.41  | 18.8    | 16.41  | 17.68  | 18.13 | 15.67 | 15.87 | 11.72  |
| 25707     | Cntf            | 1639   | 1600    | 1467   | 1173   | 683   | 1307  | 1386  | 1616   |
| 314814    | Nav3            | 191    | 267     | 266    | 264    | 196   | 246   | 190   | 207    |
| 497078    | Xk              | 407.5  | 355.11  | 382.31 | 390.32 | 352.1 | 276.1 | 366.7 | 308.84 |
| 103690025 | NEWGENE_1305243 | 92     | 68      | 91     | 74     | 85    | 70    | 56    | 65     |
| 25537     | Rock2           | 1605   | 1615    | 1853   | 1935   | 1463  | 1427  | 1602  | 1460   |
| 293545    | Gpr139          | 44     | 45      | 43     | 54     | 44    | 38    | 34    | 42     |
| 317322    | Gpc4            | 225    | 314     | 395    | 302    | 234   | 288   | 273   | 255    |
| 362261    | Lpin3           | 121    | 91      | 125    | 95     | 82    | 96    | 102   | 87     |
| 363455    | Chrd11          | 169    | 180.57  | 306.29 | 142.71 | 113.6 | 208   | 168.3 | 188.7  |
| 312113    | Stard8          | 385.39 | 420.97  | 469.81 | 465.82 | 327.5 | 339.9 | 405   | 408.11 |
| 50552     | Zfp292          | 410    | 398     | 465    | 466    | 419   | 315   | 353   | 391    |
| 84586     | Fgl2            | 4506   | 5080    | 5755   | 4808   | 2619  | 4509  | 4955  | 5042   |
| 317435    | Shroom2         | 1252   | 1494    | 1454   | 1412   | 1010  | 1157  | 1266  | 1337   |
| 293294    | Trim6           | 4      | 5       | 4      | 7      | 3     | 4     | 5     | 5      |
| 316326    | Neurl3          | 10     | 9       | 11     | 10     | 6     | 7     | 9     | 12     |

|           |              |        |        |        |        |       |       |       |        |
|-----------|--------------|--------|--------|--------|--------|-------|-------|-------|--------|
| 688276    | Tmc8         | 47     | 39     | 46     | 28     | 39    | 30    | 34    | 33     |
| 287060    | Sec1415      | 204    | 221    | 213    | 222    | 144   | 202   | 190   | 195    |
| 366031    | Crb2         | 9      | 8      | 15.01  | 21     | 12    | 9.01  | 15.04 | 9.01   |
| 29588     | Pou3f2       | 326.21 | 392.28 | 416.05 | 372.63 | 325.6 | 333.7 | 309.5 | 312.41 |
| 100912656 | LOC100912656 | 26.07  | 19.24  | 11.23  | 10.32  | 17.39 | 12.05 | 15.33 | 12.07  |
| 414779    | RT1-CE2      | 266.72 | 207.64 | 320.88 | 197.67 | 243.5 | 272.3 | 227.9 | 100.47 |
| 296532    | Spopl        | 690    | 705    | 653    | 730    | 591   | 530   | 608   | 633    |
| 100911549 | LOC100911549 | 2.54   | 2.63   | 3.54   | 3.38   | 2.48  | 5.35  | 1.26  | 1.19   |
| 362817    | Cdk2         | 106    | 104    | 103    | 88     | 76    | 112   | 80    | 73     |
| 360920    | Mob1b        | 217    | 211    | 213    | 228    | 200   | 113   | 228   | 198    |
| 315646    | Fdxacb1      | 87     | 89     | 91     | 74     | 71    | 64    | 75    | 80     |
| 362477    | Rgs20        | 94.06  | 75.46  | 81.5   | 92.32  | 85.84 | 71.62 | 64.77 | 69.8   |
| 316583    | B3gnt7       | 43     | 35     | 46     | 30     | 35    | 32    | 30    | 34     |
| 360595    | Rnft1        | 298    | 279    | 367    | 315    | 239   | 294   | 301   | 237    |
| 304388    | Cldn15       | 71.89  | 71.32  | 102.57 | 64.1   | 73.74 | 60.11 | 62.83 | 66.93  |
| 363035    | Zbtb44       | 365.9  | 371.86 | 419.88 | 393.86 | 323.8 | 334.9 | 344.6 | 316.62 |
| 287738    | Higd1b       | 26     | 18     | 14     | 9      | 8     | 16    | 20    | 13     |
| 303534    | Ttc25        | 16     | 24     | 15     | 12     | 16    | 12    | 11    | 18     |
| 499300    | Ptprcap      | 17     | 15     | 25     | 10     | 18    | 19    | 9     | 11     |
| 298301    | Mroh7        | 97     | 83     | 107    | 82     | 84    | 74    | 79    | 77     |
| 108353166 | LOC108353166 | 127.45 | 123.57 | 126.99 | 161.64 | 107.8 | 114.1 | 120.6 | 116.68 |
| 310808    | Slc35a3      | 226    | 238    | 218    | 211    | 214   | 175   | 197   | 174    |
| 307740    | Sall1        | 12     | 10     | 6      | 19     | 3     | 1     | 10    | 26     |
| 365948    | Bank1        | 7      | 13     | 18     | 9      | 6     | 18    | 11    | 5      |
| 24592     | Nf1          | 1484   | 1644   | 1719   | 2179   | 1746  | 1210  | 1585  | 1439   |
| 308222    | Wdr27        | 135.18 | 127.64 | 145.31 | 126.71 | 116.2 | 107.4 | 125.2 | 106.53 |
| 304833    | Trove2       | 264.19 | 295.41 | 312.71 | 459.96 | 344.3 | 122.8 | 291.5 | 375.53 |
| 498922    | Cbln1        | 37     | 48     | 30     | 33     | 32    | 30    | 30    | 34     |
| 65044     | Clgalt1      | 664    | 647    | 734    | 674    | 587   | 532   | 598   | 598    |
| 102551633 | LOC102551633 | 60.03  | 49.09  | 35.21  | 49.88  | 66.63 | 42.02 | 26.52 | 30.19  |
| 100361645 | LOC100361645 | 311.01 | 252.64 | 295.45 | 312.12 | 225.8 | 215.7 | 296.4 | 259.42 |
| 102550397 | LOC102550397 | 125.95 | 108.12 | 153.63 | 153.91 | 101.6 | 104.4 | 121.4 | 133.81 |
| 63883     | Kcne3        | 62     | 83     | 92     | 46     | 42    | 75    | 73    | 51     |
| 306164    | Tgds         | 176    | 152    | 159    | 133    | 124   | 123   | 145   | 136    |
| 304646    | Mgat4d       | 59     | 0      | 59     | 64     | 36    | 0     | 63    | 56     |
| 246215    | Tpcn1        | 2083   | 2072   | 2602   | 2398   | 1583  | 1859  | 2196  | 2160   |
| 312846    | Rassf8       | 588    | 667    | 689    | 695    | 527   | 552   | 609   | 560    |
| 25575     | Scgbla1      | 2      | 6      | 13     | 6      | 5     | 5     | 0     | 13     |
| 29393     | Colla1       | 13387  | 19058  | 35117  | 20816  | 11413 | 28445 | 19279 | 16149  |
| 116677    | F2r11        | 25.12  | 41.99  | 61.33  | 59.23  | 50.06 | 48.4  | 33.03 | 28.41  |
| 296972    | Akr1b10      | 165.67 | 178.1  | 142.98 | 166.7  | 130.2 | 127.8 | 162.5 | 136.3  |
| 691810    | Pla2g4c      | 1      | 0      | 2.11   | 0      | 0     | 0.03  | 0     | 2.62   |
| 500076    | Agbl3        | 103.48 | 146.51 | 117.59 | 123.45 | 93.88 | 99.42 | 108.4 | 116.78 |
| 500133    | Nod1         | 581    | 596    | 596    | 534    | 442   | 572   | 553   | 399    |
| 29735     | Slc16a7      | 378    | 367    | 400    | 472    | 363   | 264   | 370   | 381    |
| 287388    | Zswim7       | 28     | 49     | 35     | 37     | 30    | 30    | 32    | 35     |
| 499156    | Gas2         | 482    | 572    | 487    | 540    | 416   | 439   | 430   | 489    |
| 494338    | Trim25       | 151    | 173    | 194    | 160    | 170   | 141   | 141   | 126    |
| 291105    | E2f3         | 106    | 120    | 130    | 146    | 125   | 81    | 123   | 99     |
| 100912062 | LOC100912062 | 21.08  | 22.19  | 23.4   | 30.07  | 19.27 | 17.79 | 22.09 | 23.34  |
| 192177    | Unc13d       | 78     | 75     | 101    | 72     | 64    | 83    | 66    | 65     |
| 100912536 | Styx         | 397    | 394    | 383    | 328    | 290   | 319   | 320   | 352    |
| 289595    | Nfx11        | 207    | 239    | 223    | 208    | 206   | 159   | 197   | 186    |
| 191572    | Ahnak        | 13758  | 14868  | 18162  | 18039  | 13234 | 13638 | 13684 | 14736  |
| 366896    | Tbc1d15      | 796    | 756    | 817    | 719    | 618   | 630   | 678   | 708    |
| 688649    | LOC688649    | 231.6  | 136.22 | 219.01 | 119.13 | 163.4 | 78.65 | 215.4 | 144.83 |

|           |              |        |         |        |        |       |       |       |         |
|-----------|--------------|--------|---------|--------|--------|-------|-------|-------|---------|
| 294892    | tGap1        | 24.96  | 23.72   | 24.36  | 19     | 16.06 | 20.42 | 17.66 | 24.38   |
| 100911700 | LOC100911700 | 44.58  | 35.99   | 33.74  | 38.94  | 31.47 | 33.81 | 34.3  | 31.19   |
| 366029    | Zbtb6        | 325    | 300     | 319    | 293.58 | 227.6 | 248.1 | 279.6 | 301     |
| 298247    | Mysm1        | 753.01 | 754.54  | 806.83 | 786.7  | 648.8 | 619.7 | 680.8 | 697.73  |
| 25157     | Plagl1       | 462    | 646     | 780    | 756    | 518   | 641   | 569   | 529     |
| 100361083 | LOC100361083 | 125    | 97      | 140    | 171    | 160   | 66    | 92    | 137     |
| 313033    | Xkr8         | 78.34  | 55.51   | 67.64  | 65.35  | 55.02 | 55.42 | 54.38 | 62.98   |
| 25601     | Oprm1        | 96     | 125     | 136    | 224    | 177   | 52    | 105   | 162     |
| 108351703 | LOC108351703 | 14.86  | 15.09   | 27.9   | 14.79  | 22.21 | 16.45 | 9.97  | 13.39   |
| 362772    | Btbd7        | 794    | 830     | 788    | 899    | 711   | 613   | 760   | 743     |
| 691277    | LOC691277    | 4.4    | 3.95    | 1.04   | 1.08   | 1.28  | 2.11  | 3.18  | 2.37    |
| 691379    | Ice2         | 155    | 161     | 169    | 186    | 137   | 146   | 148   | 142     |
| 63879     | Xiap         | 1094.1 | 1155.96 | 1110.8 | 1150.2 | 1043  | 910.9 | 970.5 | 927.44  |
| 100911949 | LOC100911949 | 17.2   | 20.83   | 18.66  | 16.05  | 15.44 | 12.23 | 15.01 | 19.44   |
| 102548478 | LOC102548478 | 72.76  | 62.63   | 69.53  | 96.86  | 78.35 | 60.52 | 52.11 | 66.75   |
| 294269    | RT1-Da       | 936    | 568     | 809    | 531    | 452   | 442   | 600   | 935     |
| 117063    | Ptpn2        | 229    | 187     | 226    | 167    | 165   | 157   | 176   | 193     |
| 311936    | Rnf32        | 221    | 194     | 206    | 188    | 177   | 164   | 173   | 177     |
| 308406    | Six5         | 228    | 254     | 243    | 235    | 184   | 218   | 211   | 207     |
| 102550424 | LOC102550424 | 9      | 8       | 17     | 14     | 9     | 6     | 13    | 13      |
| 64355     | Lsr          | 121    | 112     | 118    | 129    | 79    | 87    | 131   | 113     |
| 288093    | Arhgap31     | 614    | 745     | 715    | 765    | 554   | 646   | 564   | 661     |
| 81813     | Klf10        | 341    | 360     | 408    | 284    | 292   | 277   | 285   | 336     |
| 25514     | Lyplal       | 927    | 850     | 852    | 819    | 724   | 506   | 820   | 896     |
| 338477    | Sla          | 41     | 23      | 39     | 14     | 27    | 24    | 28    | 21      |
| 311166    | Clp1         | 132    | 124     | 128    | 98     | 94    | 103   | 102   | 113     |
| 680915    | Mbd4         | 211.19 | 216.5   | 193.77 | 185.82 | 187.1 | 157.5 | 162.8 | 182.68  |
| 690358    | Prdm11       | 155    | 150     | 160    | 162    | 123   | 154   | 124   | 135     |
| 316130    | Plin3        | 369.76 | 336.5   | 399.45 | 352.59 | 248.3 | 276.9 | 356.7 | 364.71  |
| 686081    | B3galt2      | 200    | 244     | 182    | 237    | 154   | 191   | 209   | 184     |
| 305081    | Cd34         | 252    | 255     | 344    | 233    | 239   | 239   | 263   | 186     |
| 498185    | Slc8b1       | 371    | 335     | 416    | 391    | 292   | 312   | 344   | 346     |
| 500011    | Samd9        | 839    | 841     | 908    | 847    | 782   | 657   | 689   | 810     |
| 300880    | Cep162       | 172    | 160     | 157    | 147    | 136   | 108   | 147   | 153     |
| 24413     | Nr3c1        | 1205.8 | 1187.5  | 1258.8 | 1461.8 | 1003  | 1011  | 1257  | 1103.89 |
| 315120    | Card10       | 223    | 219     | 246    | 156    | 147   | 192   | 184   | 199     |
| 315912    | Tbcl8b       | 215    | 227     | 258    | 290    | 211   | 179   | 221   | 236     |
| 305342    | N4bp2        | 161.16 | 159.9   | 174.44 | 233.97 | 174.3 | 131.7 | 144.9 | 173.36  |
| 29630     | Psm1         | 761    | 730     | 827    | 650    | 590   | 660   | 656   | 634     |
| 498130    | Stard13      | 978    | 1173    | 1477   | 1194   | 882   | 1026  | 1131  | 1088    |
| 309757    | Sirt1        | 332    | 345     | 370    | 341    | 304   | 284   | 293   | 307     |
| 309186    | Fermt3       | 152.97 | 113.75  | 178.84 | 95.05  | 133.1 | 110.2 | 125.4 | 94.13   |
| 362171    | Prr5l        | 31.16  | 45.43   | 53     | 48.77  | 40.02 | 33.15 | 40.91 | 38.62   |
| 315959    | Msl2         | 534    | 464     | 492    | 505    | 431   | 387   | 451   | 439     |
| 303272    | Pipox        | 35     | 31      | 53     | 27     | 13    | 34    | 47    | 31      |
| 498206    | Tnfrsf11a    | 127    | 103     | 114    | 101    | 83    | 87    | 98    | 113     |
| 501203    | My112a       | 1031.9 | 982.22  | 1348.8 | 835.65 | 726.6 | 930.7 | 1081  | 856.35  |
| 360589    | Ints2        | 235    | 225     | 224    | 255    | 198   | 189   | 201   | 216     |
| 363269    | Sp100        | 50.6   | 61.85   | 72.27  | 33.34  | 48.68 | 37.56 | 52.31 | 48.16   |
| 100911779 | LOC100911779 | 103.14 | 121.05  | 117.64 | 115.74 | 97.09 | 107.2 | 111.9 | 75.62   |
| 690559    | Zfp758       | 179.21 | 185.74  | 221.47 | 224.04 | 161.5 | 137.5 | 186.9 | 208.27  |
| 690374    | Trim47       | 119    | 115     | 167    | 94     | 102   | 122   | 102   | 98      |
| 361632    | Pik3c2a      | 935    | 1053    | 1047   | 1116   | 936   | 724.8 | 939   | 956     |
| 246284    | Atrx         | 1205.7 | 1206.01 | 1463.4 | 1488.1 | 1215  | 908.4 | 1318  | 1152.4  |
| 246115    | Plpp2        | 83     | 71      | 89     | 85     | 68    | 71    | 64    | 78      |
| 306926    | RGD1563300   | 3.55   | 3.52    | 2.39   | 1.57   | 4.7   | 0     | 3.57  | 1.18    |

|           |              |        |         |        |        |       |       |       |         |
|-----------|--------------|--------|---------|--------|--------|-------|-------|-------|---------|
| 306873    | Rreb1        | 254    | 282     | 339    | 348    | 260   | 247   | 281   | 260     |
| 170520    | Cygb         | 498    | 485.31  | 492.43 | 480.52 | 409.1 | 443.2 | 401   | 423.01  |
| 100359945 | Zfp267       | 480    | 425     | 445.84 | 464.81 | 374   | 366   | 396   | 420     |
| 100911215 | LOC100911215 | 5      | 0       | 1      | 1      | 0     | 5     | 1     | 0       |
| 100911925 | LOC100911925 | 0      | 2       | 2      | 3      | 3     | 0     | 3     | 0       |
| 103690241 | LOC103690241 | 2      | 1       | 1      | 3      | 0     | 3     | 1     | 2       |
| 291752    | Dsg3         | 0      | 6       | 7      | 1      | 5     | 4     | 2     | 1       |
| 299908    | Gsdmc        | 4      | 0       | 1      | 2      | 0     | 4     | 1     | 1       |
| 300913    | Il1rap12     | 5      | 6       | 1      | 2      | 2     | 4     | 4     | 2       |
| 363658    | Cct6b        | 11     | 8       | 10     | 13     | 11    | 9     | 7     | 9       |
| 369018    | Ldhal6b      | 3      | 1       | 0      | 3      | 1     | 1     | 1     | 3       |
| 65054     | Aqp9         | 2      | 6       | 7      | 6      | 4     | 4     | 2     | 8       |
| 108348429 | LOC108348429 | 16     | 6       | 6      | 7      | 6     | 6     | 5     | 13      |
| 171151    | Slc25a21     | 11     | 9       | 8      | 7      | 9     | 8     | 3     | 10      |
| 365323    | Olr63        | 54     | 46      | 82     | 49     | 36    | 61    | 61    | 40      |
| 85483     | Ciita        | 58     | 39      | 50     | 49     | 40    | 38    | 52    | 38      |
| 100910540 | LOC100910540 | 132.53 | 198.8   | 132.53 | 0      | 66.27 | 132.5 | 66.27 | 132.53  |
| 362160    | Celf1        | 1342   | 1294    | 1405   | 1358   | 1183  | 1104  | 1202  | 1139    |
| 309380    | Lox14        | 26.14  | 38      | 59     | 32     | 38    | 46    | 23    | 26      |
| 311352    | Adal         | 188.06 | 171     | 162.01 | 165.81 | 159.9 | 137.1 | 146   | 145.99  |
| 691172    | Uevld        | 31.01  | 41.12   | 45.08  | 66.93  | 40    | 16    | 48.93 | 52.99   |
| 85490     | Col5a1       | 2149   | 2753    | 3838   | 2983   | 1899  | 2900  | 2798  | 2457    |
| 100362733 | Irgm2        | 432.52 | 416.92  | 473.7  | 453.32 | 319.8 | 410.4 | 360   | 434.01  |
| 29146     | Jag1         | 989    | 893     | 816    | 903    | 826   | 737   | 650   | 877     |
| 297824    | Dpy1914      | 365.03 | 385.38  | 399.02 | 434    | 358   | 244   | 373.8 | 383     |
| 300711    | Atm          | 540    | 576     | 575    | 573    | 495   | 378   | 532   | 538     |
| 103692719 | LOC103692719 | 269.36 | 163.3   | 202.76 | 174.2  | 161.1 | 190   | 170.7 | 173.01  |
| 24517     | Junb         | 494    | 438     | 481    | 830    | 576   | 515   | 463   | 371     |
| 298322    | Lonrf3       | 48.9   | 49.52   | 35.75  | 61.36  | 44.52 | 45.2  | 29.29 | 48.8    |
| 313587    | Zc3h12a      | 54     | 52      | 71     | 70     | 56    | 46    | 59    | 51      |
| 29345     | Serpinh1     | 3648   | 3864    | 5531   | 4964   | 3015  | 4173  | 4340  | 3928    |
| 297989    | Ddx58        | 297    | 284     | 291    | 321    | 254   | 317   | 238   | 215     |
| 499342    | Cd274        | 770.98 | 748.59  | 798.27 | 832.16 | 726.8 | 625   | 722   | 630     |
| 100910807 | LOC100910807 | 224.89 | 303.18  | 340    | 308.27 | 167.1 | 199.2 | 334   | 309.68  |
| 361100    | Top2b        | 998    | 942     | 1084   | 956    | 813   | 827   | 930   | 847     |
| 310190    | Otulinl      | 201    | 163     | 184    | 166    | 133   | 160   | 138   | 182     |
| 315883    | Plscr2       | 60.42  | 86.33   | 109.6  | 75.98  | 39.33 | 71.14 | 97.57 | 77.29   |
| 302946    | Glis2        | 411.24 | 373.48  | 438.24 | 436.19 | 309.7 | 302.1 | 350   | 462.85  |
| 140433    | Lama5        | 415    | 517     | 557    | 450    | 366   | 475   | 415   | 409     |
| 303242    | Dnah2        | 19     | 22      | 25     | 26     | 23    | 15    | 27    | 14      |
| 303382    | Ras110b      | 72.07  | 66.48   | 111.06 | 110.54 | 72.19 | 78.58 | 81.26 | 77.24   |
| 304037    | Ar113b       | 344.6  | 354.35  | 369    | 370    | 302.5 | 276   | 322.2 | 334.43  |
| 316732    | Smchd1       | 665    | 674     | 746    | 707    | 593   | 537   | 657   | 611     |
| 307940    | Disc1        | 105    | 174     | 174    | 185    | 102   | 147   | 133   | 166     |
| 100361376 | Kank2        | 1014.1 | 967     | 1203   | 1152.7 | 771   | 935.3 | 971.2 | 1048.25 |
| 502541    | Lor          | 13     | 23      | 20     | 15     | 11    | 19    | 20    | 11      |
| 302703    | Klhl134      | 180.85 | 133.78  | 210.83 | 184.69 | 136.4 | 149.9 | 180.2 | 143.73  |
| 494320    | Ccdc8        | 158    | 181     | 190    | 163.84 | 163   | 131.4 | 174   | 127     |
| 316052    | Eomes        | 5      | 3.44    | 2      | 4.51   | 2     | 2.11  | 2.58  | 6.16    |
| 305083    | Zfp281       | 179    | 196     | 188    | 199    | 157   | 144   | 172   | 182     |
| 301264    | Cyp39a1      | 100    | 102     | 104    | 100    | 76    | 70    | 98    | 105     |
| 300060    | Apol11a      | 18     | 15      | 17     | 7      | 10    | 16    | 12    | 11      |
| 287918    | Mett123      | 111.71 | 92      | 98     | 100.04 | 92.35 | 79    | 83.09 | 91.02   |
| 288010    | Lpp          | 891.6  | 840.01  | 1020.6 | 1029.3 | 738.1 | 779.7 | 943.2 | 790.99  |
| 100910056 | LOC100910056 | 336.65 | 345.03  | 266.04 | 349.72 | 317   | 276.8 | 208.2 | 313.88  |
| 306891    | Serpinblb    | 3510.4 | 1697.58 | 1946   | 3326.3 | 3763  | 3084  | 2020  | 145.59  |

|           |              |        |         |        |        |       |       |       |         |
|-----------|--------------|--------|---------|--------|--------|-------|-------|-------|---------|
| 103690131 | LOC103690131 | 13.26  | 5.49    | 3.65   | 0.47   | 5.4   | 9.53  | 0     | 4.74    |
| 64803     | P2ry12       | 119    | 134     | 111    | 115    | 89    | 110   | 112   | 101     |
| 360817    | Med131       | 787.96 | 833.19  | 944.27 | 939.01 | 761.9 | 776.4 | 796.6 | 679.66  |
| 89828     | Ch11         | 1007   | 1356    | 1614   | 1475   | 1110  | 928   | 1350  | 1302    |
| 114123    | Sardh        | 285    | 281     | 297    | 290    | 187   | 267   | 273   | 265     |
| 100188934 | Ctxn3        | 469    | 482     | 486    | 425    | 333   | 319   | 480   | 470     |
| 289054    | Aspm         | 69.99  | 68      | 114    | 49     | 79    | 55    | 63.99 | 61      |
| 102546864 | LOC102546864 | 10     | 13      | 11     | 9      | 10    | 7     | 9     | 11      |
| 246296    | Lrrc15       | 8      | 6       | 26     | 3      | 14    | 13    | 6     | 4       |
| 140935    | Afap1        | 266    | 236     | 299    | 375    | 244   | 229   | 302   | 237     |
| 315675    | Gldn         | 1048   | 1529    | 1487   | 1135   | 785   | 1275  | 1176  | 1238    |
| 361727    | Tmem216      | 209    | 226     | 190    | 171    | 158   | 170   | 192   | 165     |
| 66015     | Adamts4      | 84.44  | 108.62  | 185.15 | 126.53 | 80.46 | 104.6 | 141.5 | 107.75  |
| 500246    | Arhgap25     | 157    | 159     | 171    | 152    | 134   | 133   | 137   | 146     |
| 378467    | Tmem159      | 300    | 330     | 343    | 298    | 261   | 287   | 275   | 271     |
| 25291     | Anxa3        | 220    | 158     | 310    | 224    | 187   | 154   | 220   | 224     |
| 252878    | Tnfsf15      | 22     | 20      | 16     | 21     | 10    | 12    | 14    | 32      |
| 689377    | Rab20        | 125    | 127     | 117    | 105    | 106   | 100   | 107   | 95      |
| 25242     | Arnt         | 398.22 | 408.25  | 463.45 | 475.73 | 366.2 | 382.3 | 399.6 | 354.62  |
| 100910284 | LOC100910284 | 49.49  | 69.5    | 41.97  | 1.48   | 26.55 | 71.2  | 11.21 | 30.88   |
| 292734    | Ltbp4        | 628    | 953     | 1638   | 756    | 720   | 1049  | 860   | 793     |
| 85246     | Gas7         | 5194   | 6257    | 8875   | 6752   | 4960  | 5906  | 6463  | 5983    |
| 83472     | Ugdh         | 501    | 473     | 588    | 430    | 369   | 431   | 467   | 448     |
| 171334    | I112rb2      | 125    | 106     | 146    | 148    | 122   | 98    | 108   | 124     |
| 29464     | Slc6a6       | 419.45 | 424.19  | 491.99 | 455.37 | 369.3 | 415.5 | 388.5 | 368.73  |
| 367304    | Ap1s3        | 45     | 51      | 29     | 49     | 45    | 44    | 30    | 30.81   |
| 690035    | LOC690035    | 196    | 173     | 191    | 210    | 163   | 150   | 179   | 171     |
| 367251    | Ankrd39      | 93.98  | 90.5    | 115.45 | 80.9   | 72.2  | 65.38 | 77.42 | 112.91  |
| 100360552 | Fzd7         | 88     | 70.99   | 85     | 87     | 57    | 58    | 59    | 111     |
| 497940    | LOC497940    | 125    | 120     | 115    | 108    | 84    | 108   | 103   | 108     |
| 361787    | RT1-T24-1    | 17.09  | 41.52   | 27.09  | 31.38  | 42.71 | 18.32 | 12.2  | 27.6    |
| 316098    | Exosc7       | 96     | 126     | 100    | 96     | 89    | 87    | 94    | 90      |
| 246306    | Rmt1         | 3      | 5       | 5      | 3      | 3     | 1     | 4     | 5.78    |
| 287249    | Cnot6        | 1023   | 1091    | 1152   | 1075   | 866   | 871   | 981   | 1021    |
| 29712     | Kcnj2        | 119.81 | 100.82  | 93.83  | 104.64 | 90.16 | 75.68 | 77.71 | 117.44  |
| 252963    | I113ra1      | 938.33 | 950.3   | 1023   | 913.02 | 791.3 | 827.8 | 867.4 | 807.89  |
| 100911047 | LOC100911047 | 10.11  | 6.24    | 10.82  | 3.56   | 6.5   | 10.22 | 0.62  | 9.13    |
| 315958    | Stag1        | 460    | 476     | 531    | 474    | 371   | 368   | 474   | 459     |
| 78947     | Gcs1         | 141.46 | 295.15  | 299.23 | 214.31 | 151.5 | 67.69 | 294.2 | 305.15  |
| 300679    | Mpz12        | 149    | 102     | 134    | 171    | 81    | 81    | 141   | 176     |
| 266680    | St18         | 13.43  | 8.19    | 12.95  | 13.03  | 9.21  | 10.49 | 9.2   | 12.11   |
| 689268    | LOC689268    | 92.06  | 111.9   | 121.47 | 129.6  | 82.13 | 62.72 | 135.2 | 112.01  |
| 292947    | Arfgef3      | 1158   | 1411.98 | 1457.2 | 1935   | 1685  | 704   | 1262  | 1485.85 |
| 316370    | Kdelc1       | 164    | 216     | 218    | 190    | 155   | 146   | 196   | 182     |
| 306128    | Cln5         | 211.83 | 201.46  | 234.09 | 174.32 | 172.4 | 175.6 | 170   | 190.01  |
| 315508    | Ncapd3       | 214    | 218     | 241    | 173    | 195   | 170   | 203   | 161     |
| 310352    | Jadel        | 351    | 322     | 370    | 325    | 302   | 285   | 301   | 291     |
| 103689974 | LOC103689974 | 1.62   | 4       | 1.62   | 0      | 1.62  | 1.62  | 0     | 3       |
| 298468    | Olr855       | 1      | 0.5     | 1.12   | 1      | 0     | 1     | 1     | 1.12    |
| 309533    | Sorcs1       | 1674   | 2345.99 | 2390   | 2307   | 1666  | 2030  | 1853  | 1963.99 |
| 81811     | Thpo         | 6.48   | 6.51    | 5.05   | 4.55   | 5     | 4.06  | 3.9   | 6.51    |
| 316775    | Ankrd12      | 991.35 | 955.46  | 1085.9 | 1182.1 | 931.4 | 825.2 | 959.3 | 916.96  |
| 102548320 | LOC102548320 | 291.76 | 303.12  | 344.19 | 372.55 | 283.2 | 276.3 | 307.6 | 263.61  |
| 83511     | Slc6a2       | 11     | 11      | 3      | 4      | 12    | 2     | 7     | 4       |
| 100910852 | LOC100910852 | 10.18  | 7.12    | 10.15  | 7.73   | 8.04  | 9.02  | 6.03  | 7.24    |
| 500116    | Tra2a        | 1531.1 | 1497.52 | 1455.7 | 1348   | 1314  | 1100  | 1361  | 1253.14 |



|           |              |        |         |        |        |       |       |       |         |
|-----------|--------------|--------|---------|--------|--------|-------|-------|-------|---------|
| 361650    | Hirip3       | 209    | 199     | 241    | 200    | 170   | 172   | 194   | 196     |
| 691375    | Serpine3     | 12.18  | 13.21   | 14.05  | 23.07  | 9.82  | 10.04 | 15.48 | 18.56   |
| 25402     | Casp3        | 241    | 230     | 281    | 214    | 194   | 220   | 198   | 221     |
| 288077    | Hcls1        | 89     | 91      | 131    | 103    | 90    | 84    | 97    | 86      |
| 361875    | Atp6ap11     | 75     | 68      | 41     | 63     | 49    | 38    | 65    | 61      |
| 679028    | Rbpj         | 946    | 873     | 938    | 941    | 738   | 707   | 871   | 873     |
| 306974    | Zkscan8      | 456.46 | 509.06  | 488    | 538.08 | 418.3 | 337.1 | 448   | 514.03  |
| 498843    | Pcdhb2       | 25     | 32.17   | 34.98  | 38     | 39.99 | 21.07 | 20.08 | 31.11   |
| 500853    | Rgs22        | 16     | 25      | 19     | 20     | 18    | 17    | 19    | 15      |
| 314988    | Zhx2         | 270.09 | 292.87  | 323.95 | 321.46 | 224.8 | 285.2 | 243.7 | 288.77  |
| 103690050 | LOC103690050 | 263.86 | 308.28  | 328.25 | 460.1  | 285.3 | 284.5 | 336.8 | 267.2   |
| 289150    | Cenpl        | 114    | 105     | 102    | 87     | 73    | 79    | 99    | 101     |
| 679539    | LOC679539    | 86.61  | 0       | 115.36 | 0      | 21.11 | 40.73 | 25.28 | 87.14   |
| 100911730 | LOC100911730 | 1992   | 1681.25 | 1700.5 | 1807.5 | 1293  | 1778  | 1410  | 1715.82 |
| 246143    | Nradd        | 54     | 37      | 36     | 48     | 33    | 30    | 44    | 44      |
| 300852    | Mto1         | 213    | 197     | 182    | 181    | 156   | 165   | 175   | 171     |
| 680576    | Tet3         | 512    | 451     | 481    | 467    | 378   | 410   | 398   | 463     |
| 102553278 | LOC102553278 | 142.85 | 114.95  | 125.62 | 149.03 | 140.9 | 79.19 | 121.9 | 117.48  |
| 59086     | Tgfb1        | 253    | 230     | 337    | 239    | 214   | 238   | 226   | 236     |
| 102548514 | LOC102548514 | 324.16 | 276.71  | 346.1  | 248.23 | 237   | 270.9 | 217.6 | 306.27  |
| 100363520 | LOC100363520 | 56.58  | 46.27   | 48.48  | 46.19  | 45.33 | 34.38 | 60.36 | 30.46   |
| 362489    | Runx1t1      | 332.01 | 337.96  | 364.98 | 423.94 | 321.7 | 286.9 | 331.6 | 319.44  |
| 364398    | Triml3       | 249.05 | 256     | 226.75 | 220    | 169   | 206   | 212   | 234.83  |
| 171091    | Zbp1         | 75     | 55      | 68     | 51     | 55    | 61    | 52    | 47      |
| 100909712 | LOC100909712 | 20.47  | 12.54   | 22.68  | 21.73  | 20.29 | 9.32  | 20.65 | 16.59   |
| 288227    | Bace2        | 522    | 613     | 660    | 593    | 452   | 505   | 559   | 546     |
| 301033    | Lrrc2        | 156.63 | 182.83  | 159.65 | 103.14 | 139.8 | 124   | 116.8 | 139.51  |
| 310132    | Osmr         | 510    | 544     | 684    | 541    | 506   | 449   | 465   | 548     |
| 102549174 | LOC102549174 | 8      | 5       | 4      | 5      | 3     | 2     | 8     | 6       |
| 108350391 | LOC108350391 | 4      | 7       | 3      | 8      | 4     | 5     | 6     | 4       |
| 108350547 | LOC108350547 | 4      | 4       | 12     | 2      | 5     | 5     | 3     | 6       |
| 108350563 | Fam180b      | 6      | 6       | 4      | 6      | 8     | 3     | 1     | 7       |
| 312793    | Gsg1         | 3      | 4       | 10     | 5      | 3     | 6     | 4     | 6       |
| 498328    | Pkd2         | 499    | 473     | 535    | 510    | 385   | 412   | 478   | 467     |
| 288204    | Crybg3       | 515.58 | 596.72  | 734.61 | 643.78 | 520.5 | 503.2 | 567.9 | 559.61  |
| 680155    | Fam208a      | 732.65 | 675.18  | 772.2  | 801.09 | 641.7 | 559   | 690.3 | 683.94  |
| 103689928 | LOC103689928 | 34.71  | 19.4    | 30.64  | 20.19  | 23.1  | 22.23 | 23.55 | 21.76   |
| 684297    | Kdm7a        | 442.52 | 453.11  | 458.44 | 518.12 | 438   | 322   | 434.1 | 423     |
| 314836    | Zfc3h1       | 1077   | 1024    | 1166   | 1066   | 942   | 745   | 1077  | 979     |
| 366669    | Syne2        | 1194   | 1146.6  | 1600.6 | 1458.3 | 1151  | 1184  | 1143  | 1186.13 |
| 296936    | Iqub         | 39     | 48      | 42     | 40     | 34    | 41    | 46    | 25      |
| 140928    | Pdella       | 152    | 201     | 188    | 216    | 204   | 152   | 146   | 152     |
| 315072    | Mroh4        | 5.13   | 6.07    | 5.02   | 4.07   | 2.01  | 8.1   | 5.37  | 2.05    |
| 24165     | Ada          | 141    | 118     | 109    | 132    | 99    | 125   | 84    | 124     |
| 89789     | Lbr          | 121    | 121     | 138    | 128    | 132   | 100   | 98    | 109     |
| 116711    | Ceacam9      | 22.79  | 22.13   | 12.29  | 20.55  | 11.55 | 18.15 | 12.72 | 24.78   |
| 311723    | Sox18        | 127.42 | 102.81  | 118.21 | 80.59  | 112.7 | 116   | 77.86 | 64.16   |
| 497932    | Pik3r6       | 59     | 48      | 64     | 50     | 38    | 61    | 49    | 43      |
| 171296    | Myo9a        | 969    | 1185    | 1362   | 1570   | 1289  | 721   | 1135  | 1251    |
| 252916    | Rab38        | 97     | 87      | 81     | 67     | 68    | 58    | 80    | 81      |
| 100363372 | LOC100363372 | 88.21  | 59.9    | 90.23  | 80.74  | 65.46 | 61.91 | 84.94 | 63.57   |
| 312248    | Ubn2         | 910.1  | 961.27  | 986.29 | 1056.3 | 852.3 | 717.6 | 860   | 954.5   |
| 304798    | Mdm4         | 1828   | 1687    | 1831   | 1817   | 1576  | 1477  | 1658  | 1483    |
| 360202    | Ston1        | 526    | 642     | 660.18 | 656    | 441.3 | 536   | 541   | 630     |
| 29734     | Hspa13       | 390    | 435     | 474    | 439    | 365   | 339   | 429   | 370     |
| 246759    | Cxcl9        | 31     | 28      | 63     | 26     | 34    | 35    | 34    | 25      |



|           |              |        |         |        |        |       |       |       |         |
|-----------|--------------|--------|---------|--------|--------|-------|-------|-------|---------|
| 299356    | Syne3        | 246.77 | 262     | 278.71 | 290.01 | 247.2 | 223   | 239   | 222.79  |
| 116640    | Tnc          | 1234   | 1229    | 1691   | 1581   | 1056  | 1205  | 1367  | 1333    |
| 498828    | RGD1563861   | 4.41   | 2.26    | 1.78   | 0      | 3.88  | 1.72  | 1.71  | 0       |
| 305633    | Antxr2       | 931    | 982     | 1100   | 990    | 838   | 850   | 900   | 875     |
| 50557     | Pten         | 1200   | 1122    | 1216   | 1340   | 1078  | 926   | 1108  | 1108    |
| 24750     | RT1-N3       | 233.02 | 207.64  | 209.56 | 233.85 | 191   | 161.7 | 196.1 | 216.12  |
| 367733    | Rpgr         | 135    | 134.55  | 121.9  | 158.18 | 124.2 | 109.8 | 124.4 | 117.21  |
| 500035    | LOC500035    | 35     | 36      | 30     | 40     | 34    | 29    | 23    | 36      |
| 81511     | Lat          | 20     | 11      | 14     | 7      | 15    | 12    | 15    | 3       |
| 363326    | Dennd1c      | 65     | 65      | 92     | 53     | 69    | 59    | 51    | 59      |
| 103693583 | LOC103693583 | 33.52  | 37.15   | 37.9   | 37.33  | 33.83 | 25.08 | 33.7  | 33.67   |
| 103693647 | LOC103693647 | 1.19   | 0       | 0      | 0      | 0     | 0     | 0     | 1.03    |
| 303970    | Bbx          | 156    | 158     | 179    | 184    | 180   | 101   | 133   | 172     |
| 499874    | Mga          | 630    | 643     | 702    | 875    | 631   | 545   | 652   | 639     |
| 364785    | Suv39h2      | 167.87 | 197.73  | 177    | 190.01 | 174   | 136.1 | 148   | 176.07  |
| 287924    | Yars2        | 131    | 114     | 125    | 107    | 94    | 101   | 102   | 116     |
| 100362725 | Cdk15        | 27     | 51      | 38     | 63     | 66    | 24    | 35    | 30      |
| 288167    | Senp7        | 370    | 357     | 350    | 385    | 334   | 275   | 333   | 324     |
| 366140    | Fjx1         | 83     | 121     | 149    | 117    | 97    | 109   | 96    | 105     |
| 303946    | Usf3         | 486.72 | 489.81  | 520.87 | 559.44 | 471.4 | 423.7 | 417.6 | 468.7   |
| 245975    | Setd4        | 543.25 | 512     | 446.12 | 446    | 418.5 | 407   | 455   | 406     |
| 310233    | Zfp704       | 264    | 321     | 353    | 339    | 257   | 255   | 314   | 280     |
| 306574    | Slc25a15     | 184.45 | 188.5   | 194.45 | 187.5  | 170   | 144   | 167.5 | 172.34  |
| 501559    | Bclaf3       | 261    | 275     | 274    | 251    | 214   | 207   | 257   | 241     |
| 309684    | Itgb2        | 110.17 | 109.96  | 241.45 | 78.92  | 125.2 | 134.1 | 112.4 | 96.5    |
| 56817     | Kcnip2       | 85.32  | 302.97  | 198.5  | 158.48 | 208.6 | 156.3 | 71.19 | 209.53  |
| 691306    | Tmem202      | 49     | 46      | 30     | 32     | 22    | 32    | 51    | 31      |
| 315055    | Dennd3       | 123.43 | 138.84  | 167.27 | 100.02 | 128.2 | 111.8 | 115   | 103.71  |
| 360835    | Cdh19        | 2525.4 | 2554.24 | 2395   | 2500.6 | 1763  | 2180  | 2407  | 2292.68 |
| 63880     | Dnajc3       | 369    | 340     | 375    | 398    | 281   | 315   | 378   | 310     |
| 360764    | Zfp655       | 712.7  | 758.99  | 684.22 | 655.3  | 619.2 | 530.6 | 631.8 | 653.98  |
| 298686    | Ccn12        | 1683   | 1591    | 1646   | 1540   | 1334  | 1274  | 1531  | 1458    |
| 29591     | Tgfbr1       | 545.55 | 580.26  | 655.64 | 651.2  | 480   | 466.6 | 595   | 566.15  |
| 24771     | Sdc4         | 599.06 | 659.04  | 812.94 | 816.1  | 616.9 | 599.9 | 621.8 | 663     |
| 307726    | Chd9         | 1160   | 1099    | 1225   | 1400   | 975   | 1039  | 1153  | 1065    |
| 100360057 | LOC100360057 | 8.34   | 0       | 5.36   | 2.71   | 2.66  | 5.94  | 5.62  | 0       |
| 117515    | 2-Sep        | 2774.9 | 2796.86 | 3114.8 | 2716   | 2178  | 2394  | 2716  | 2593.79 |
| 314319    | Prox2        | 9      | 9       | 10     | 2      | 6     | 8     | 6     | 6       |
| 498115    | Ccdc188      | 20     | 14      | 15     | 11     | 19    | 10    | 17    | 6       |
| 689897    | Crygs        | 8      | 2       | 14     | 6      | 8     | 7     | 7     | 4       |
| 171043    | Fbxo32       | 30     | 36      | 34     | 35     | 33    | 27    | 25    | 32      |
| 298429    | Rad541       | 16     | 30      | 35     | 24     | 18    | 21    | 20    | 32      |
| 690895    | Zfp426       | 496.01 | 467     | 456    | 487    | 430   | 411   | 434   | 377     |
| 314964    | Phf2011      | 820    | 832     | 842    | 793    | 690   | 638   | 744   | 777     |
| 29302     | Itgb3        | 114    | 141     | 184    | 199    | 137   | 141   | 156   | 119     |
| 680586    | Rc3h1        | 1330   | 1319    | 1424   | 1422   | 1280  | 1024  | 1257  | 1202    |
| 361317    | Rbm27        | 377    | 359     | 435    | 473    | 397   | 287   | 367   | 374     |
| 363795    | Lmln         | 613.67 | 604     | 566.64 | 640.87 | 508.9 | 498.8 | 549.2 | 545.43  |
| 690155    | LOC690155    | 314.77 | 342.6   | 296.11 | 241.46 | 221.7 | 242.4 | 289.5 | 282.46  |
| 304127    | Bach1        | 200.68 | 246.58  | 313.91 | 271.16 | 232.4 | 214.3 | 240.2 | 208.27  |
| 296653    | Phf19        | 39     | 39      | 39     | 26     | 25    | 43    | 22    | 34      |
| 361597    | Fes          | 80     | 88      | 92     | 49     | 67    | 86    | 67    | 48      |
| 317218    | Itm2a        | 1342   | 1312    | 1373   | 1174   | 1056  | 1165  | 1006  | 1284    |
| 304832    | Cdc73        | 147    | 147     | 138    | 141    | 106   | 104   | 147   | 140     |
| 315084    | Gsdmd        | 143    | 131     | 164    | 135    | 118   | 121   | 122   | 136     |
| 361856    | Tube1        | 89.12  | 69.48   | 81.15  | 79.84  | 72.45 | 66.38 | 66.15 | 72.23   |

|           |              |        |         |        |        |       |       |       |         |
|-----------|--------------|--------|---------|--------|--------|-------|-------|-------|---------|
| 303141    | Rapgef6      | 738    | 721     | 745    | 904    | 723   | 564   | 700   | 709     |
| 24446     | Hgf          | 93     | 114     | 108    | 115    | 96    | 85    | 101   | 91      |
| 288652    | Rilpl2       | 244    | 240     | 192    | 184    | 178   | 193   | 194   | 181     |
| 25424     | Ctse         | 32     | 46      | 62     | 26     | 47    | 36    | 28    | 33      |
| 360482    | Tfap4        | 117.32 | 124.22  | 119.16 | 140.99 | 102.7 | 125.7 | 98.17 | 108.66  |
| 288604    | Tmem270      | 21     | 20      | 12     | 15     | 23    | 9     | 7     | 20      |
| 316021    | Epm2aip1     | 4898   | 5070.86 | 4962.6 | 5459.9 | 4555  | 3513  | 4799  | 4828.83 |
| 680611    | Bcl3         | 143.17 | 172.83  | 201.77 | 192.56 | 133.2 | 155.7 | 159.4 | 168.12  |
| 303250    | Ybx2         | 37     | 36      | 42     | 44     | 29    | 36    | 39    | 34      |
| 100364016 | LOC100364016 | 42.36  | 25      | 51.17  | 19.13  | 41.53 | 36.59 | 32.95 | 8.41    |
| 108348215 | LOC108348215 | 1.45   | 6.07    | 2.01   | 6.3    | 2.02  | 2.37  | 7.31  | 2.04    |
| 494322    | Pms1         | 165    | 194     | 196    | 180    | 148   | 146   | 154   | 190     |
| 24575     | Mx1          | 332.12 | 269.03  | 293.68 | 295.12 | 184.4 | 318   | 268.7 | 261.92  |
| 317165    | LOC317165    | 20.35  | 22.35   | 22.1   | 37.18  | 18.37 | 22.19 | 20.72 | 27.25   |
| 311655    | Mocs3        | 137    | 142     | 123    | 144    | 133   | 97    | 131   | 113     |
| 116744    | Lpar1        | 1766   | 1640.54 | 1747   | 1843   | 1379  | 1488  | 1696  | 1511    |
| 287464    | Dhx33        | 217    | 208     | 196    | 206    | 199   | 160   | 168   | 191     |
| 305509    | Adcy1        | 1573.3 | 1485.06 | 1628   | 1677.2 | 1337  | 1484  | 1441  | 1262.1  |
| 108353169 | LOC108353169 | 63     | 34      | 36     | 34     | 38    | 37    | 32    | 38      |
| 360625    | Krt12        | 13     | 12      | 8      | 5      | 9     | 3     | 14    | 7       |
| 679342    | LOC679342    | 16     | 22      | 16     | 22     | 22    | 15    | 16    | 13      |
| 296787    | Sema3c       | 1891   | 1457    | 2118   | 1858   | 1615  | 1422  | 1799  | 1525    |
| 117025    | Rhbd11       | 139    | 143     | 134    | 124    | 129   | 113   | 114   | 113     |
| 500595    | Smim1        | 144.53 | 110.76  | 143.63 | 113.41 | 96.45 | 103.4 | 112.5 | 132.57  |
| 365018    | Zcchc14      | 468    | 524     | 558    | 496    | 439   | 435   | 467   | 436     |
| 361946    | Supt20h      | 845.41 | 767.3   | 872.36 | 767.1  | 671.8 | 658.3 | 788   | 706.5   |
| 500501    | Caapl        | 248    | 201     | 220    | 237    | 204   | 178   | 193   | 212     |
| 29558     | Fcgrt        | 904    | 840     | 900    | 767    | 649   | 711   | 767   | 836     |
| 690422    | Tedc1        | 241    | 268     | 287    | 179    | 216   | 194   | 214   | 223     |
| 445269    | C5ar2        | 88     | 91      | 127    | 98     | 93    | 69    | 88    | 101     |
| 29407     | Taslr1       | 15     | 13      | 19     | 14     | 11    | 14    | 15    | 13      |
| 25322     | Hsd17b1      | 25.5   | 29.41   | 26.49  | 22.86  | 19.69 | 12.76 | 25.23 | 32.91   |
| 499772    | Ier5l        | 152    | 158     | 214    | 117    | 152   | 141   | 149   | 115     |
| 361585    | Ube3a        | 1179   | 1128.25 | 1258.7 | 1289   | 1181  | 869   | 1059  | 1110    |
| 207122    | Pkn2         | 698    | 686     | 727    | 737    | 566   | 610   | 678   | 621     |
| 171068    | Pou2f1       | 189    | 169     | 170    | 175    | 164   | 156   | 152   | 139     |
| 25197     | St6gal1      | 1058   | 976     | 1077   | 1143   | 800   | 887   | 1075  | 936     |
| 252889    | Tmed7        | 1699   | 1620    | 1829   | 1696   | 1387  | 1410  | 1630  | 1523    |
| 362391    | Mxd1         | 248    | 222     | 263    | 201    | 213   | 216   | 197   | 186     |
| 59328     | Smad5        | 721    | 757     | 863    | 814    | 658   | 708   | 681   | 696     |
| 498944    | Tsnaxip1     | 7.01   | 2.25    | 7.88   | 14.89  | 11.01 | 5.64  | 6.11  | 5.09    |
| 29436     | Tfpi         | 472    | 399     | 480    | 481    | 349   | 382   | 435   | 427     |
| 294806    | Clqtnf3      | 9      | 7       | 14     | 16     | 4     | 11    | 6     | 19      |
| 497955    | Tlcd2        | 18     | 16      | 16     | 19     | 13    | 17    | 15    | 15      |
| 681178    | Pcgf5        | 164    | 187     | 150    | 143    | 142   | 124   | 148   | 146     |
| 85471     | Gata3        | 11     | 8       | 5      | 22     | 9     | 11    | 13    | 7       |
| 503257    | Nemp2        | 73     | 66      | 75     | 62     | 64    | 58    | 60    | 58      |
| 100360087 | LOC100360087 | 516.13 | 424.08  | 521.05 | 393.01 | 412.9 | 344.6 | 347.9 | 507.09  |
| 100911305 | LOC100911305 | 86     | 83      | 86.5   | 70.5   | 81.5  | 62.5  | 65.5  | 74      |
| 316403    | Mars2        | 86     | 83      | 86.5   | 70.5   | 81.5  | 62.5  | 65.5  | 74      |
| 305477    | Dusp18       | 1022.5 | 1086.01 | 1131   | 1174.1 | 842.9 | 976.3 | 993   | 1026.23 |
| 298655    | H6pd         | 412.49 | 402.74  | 437.84 | 372.25 | 356.2 | 387.4 | 356.4 | 313.62  |
| 685081    | LOC685081    | 17     | 13.49   | 19.9   | 12.96  | 14.37 | 8.25  | 17.53 | 14.95   |
| 363126    | Nphp3        | 67     | 70      | 95     | 83     | 77    | 60    | 61    | 76      |
| 207120    | Nudt6        | 81     | 75      | 75     | 61     | 65    | 64    | 74    | 51      |
| 498850    | Pcdhga12     | 63.86  | 82.05   | 94.44  | 75.4   | 75.56 | 84.15 | 41.49 | 73.47   |

|           |              |        |         |        |        |       |       |       |         |
|-----------|--------------|--------|---------|--------|--------|-------|-------|-------|---------|
| 295171    | Sh3d19       | 1951   | 2232    | 2471   | 2325   | 1632  | 1949  | 2288  | 1942    |
| 689949    | Zfp185       | 36     | 33      | 29     | 25     | 28    | 34    | 23    | 22      |
| 363674    | Stac2        | 14     | 19      | 44     | 23     | 16    | 19    | 25    | 27      |
| 310258    | Phc3         | 1431.3 | 1395.34 | 1522.8 | 1697.9 | 1395  | 1147  | 1302  | 1417.09 |
| 312952    | Impad1       | 819.89 | 1124.98 | 0      | 249.26 | 538   | 25.98 | 1224  | 121.58  |
| 100360522 | LOC100360522 | 622.56 | 424.29  | 521.41 | 527.85 | 303.6 | 373.6 | 591.9 | 554.76  |
| 307452    | RGD1305704   | 569.86 | 581.16  | 590.49 | 590.91 | 469.6 | 496   | 539.9 | 524.2   |
| 291610    | Spry4        | 445.34 | 515.84  | 466    | 688.19 | 385   | 466.5 | 494.8 | 494.69  |
| 305353    | Tlr6         | 167.51 | 171.57  | 207.83 | 190.46 | 157.6 | 124.8 | 174.3 | 185.08  |
| 296311    | Cnbd2        | 137.32 | 119.11  | 117.33 | 112.38 | 94.14 | 106.4 | 121.5 | 101.16  |
| 25567     | Tnr          | 284.28 | 312.15  | 306.46 | 326.41 | 360.7 | 255.2 | 216.6 | 237.66  |
| 301676    | Foxn2        | 545    | 504     | 526    | 496    | 425   | 426   | 497   | 455     |
| 100912393 | LOC100912393 | 19.95  | 7.72    | 0      | 0      | 14.16 | 0     | 0     | 9.93    |
| 364993    | Pskh1        | 75     | 82      | 64     | 81     | 61    | 71    | 50    | 81      |
| 678739    | Phka2        | 66     | 64      | 87     | 85     | 77    | 65    | 55    | 66      |
| 302582    | Klf8         | 159    | 141     | 163    | 180    | 165   | 94    | 168   | 133     |
| 116510    | Timp1        | 970    | 1094    | 1424   | 735    | 843   | 971   | 879   | 985     |
| 306278    | Lrrc18       | 6      | 5       | 9      | 11     | 6     | 5     | 6     | 10      |
| 364241    | Kcnk5        | 128    | 89      | 118    | 99     | 83    | 76    | 104   | 115     |
| 685823    | Xpnpep3      | 210.54 | 195.32  | 232.98 | 223.12 | 204.1 | 170.9 | 171.6 | 204.18  |
| 54349     | Aox1         | 591    | 658     | 659    | 542    | 483   | 548   | 650   | 453     |
| 303991    | Hoxd10       | 204    | 148     | 99     | 115    | 144   | 108   | 137   | 104     |
| 60447     | Clock        | 983.47 | 1062.59 | 1131   | 1172   | 964.5 | 797   | 1051  | 976     |
| 100134827 | Hiatl3       | 757.9  | 870.74  | 801.36 | 654.43 | 618.4 | 689   | 675.7 | 703.82  |
| 301164    | Kat2b        | 1356   | 1362    | 1462   | 1323   | 1089  | 1195  | 1293  | 1217    |
| 170841    | Mutyh        | 92     | 56      | 82     | 65     | 65    | 62    | 78    | 52      |
| 287657    | Gpr179       | 6.65   | 12.77   | 17.83  | 21.52  | 8.73  | 9.97  | 18.4  | 14.1    |
| 290722    | Cep44        | 163    | 125     | 135    | 136    | 114   | 117   | 135   | 121     |
| 309243    | Vps13a       | 1023   | 1160    | 1122   | 1276   | 1117  | 772   | 1023  | 1079    |
| 360899    | Sertad4      | 263    | 272     | 265    | 256    | 233   | 221   | 214   | 252     |
| 103690006 | LOC103690006 | 553.64 | 524.86  | 593.38 | 648.2  | 502.9 | 476.9 | 541.3 | 500.19  |
| 360596    | Msi2         | 906    | 748     | 947    | 1080   | 676   | 802   | 1007  | 722     |
| 301624    | D2hgdh       | 293    | 329     | 320    | 293    | 267   | 306   | 265   | 238     |
| 116663    | Dusp6        | 345    | 324     | 376    | 392    | 208   | 297   | 364   | 383     |
| 192280    | Ppplr3b      | 124.93 | 135.6   | 133.2  | 136.04 | 122   | 98.05 | 95.57 | 146     |
| 684015    | Ankmy1       | 86.42  | 90.54   | 124.29 | 105.51 | 81.07 | 92.69 | 88.71 | 91.95   |
| 312678    | Kdm5a        | 831.99 | 879     | 835    | 945    | 811   | 677   | 767.9 | 785.95  |
| 303132    | Aff4         | 2655.3 | 2735.73 | 2828.3 | 3012.9 | 2583  | 2092  | 2627  | 2485.46 |
| 100910385 | LOC100910385 | 33.13  | 44.91   | 44.01  | 52.18  | 42    | 40.32 | 45.58 | 23.92   |
| 619382    | Acap2        | 1003   | 971     | 1025   | 1060   | 886   | 815   | 934   | 902     |
| 314543    | Gulp1        | 651    | 670     | 712    | 689    | 469   | 607   | 694   | 602     |
| 310358    | Plcx3        | 356    | 375     | 365    | 475    | 392   | 196   | 365   | 416     |
| 301431    | Nif311       | 362    | 301.44  | 280.24 | 334.99 | 237.7 | 282.4 | 280.6 | 313.55  |
| 100912658 | LOC100912658 | 23.38  | 27.75   | 17.82  | 27.67  | 22.75 | 25.67 | 15.23 | 20.55   |
| 287472    | Tlcd1        | 263    | 229     | 227    | 246    | 178   | 213   | 216   | 234     |
| 307169    | Mast1        | 67     | 56      | 73     | 50.69  | 63    | 42    | 61    | 49      |
| 313304    | Stag2        | 1287   | 1250    | 1394   | 1482   | 1072  | 1036  | 1309  | 1301    |
| 83618     | Rest         | 241    | 268     | 311    | 263    | 228   | 211   | 220   | 285     |
| 292994    | Tjp1         | 1603   | 1918    | 1992   | 2111   | 1458  | 1555  | 1810  | 1823    |
| 100911515 | LOC100911515 | 184.06 | 296.54  | 286.31 | 193.99 | 112.3 | 234.5 | 214.7 | 276.09  |
| 102551403 | LOC102551403 | 157    | 220     | 167    | 174    | 138   | 151   | 192   | 144.89  |
| 307251    | Rnf165       | 11     | 15      | 9      | 4      | 10    | 6     | 11    | 7       |
| 361975    | Lrba         | 436    | 456     | 430    | 433    | 405   | 374   | 410   | 341     |
| 308937    | Wee1         | 583.51 | 451.09  | 476.81 | 506.31 | 476.2 | 528.6 | 419   | 335.2   |
| 308021    | Syde2        | 214.67 | 235.42  | 206.86 | 245.9  | 181   | 195.9 | 199.5 | 210.83  |
| 24914     | Lox          | 348    | 355     | 495    | 425    | 288   | 393   | 402   | 332     |

|           |              |        |         |        |        |       |       |       |         |
|-----------|--------------|--------|---------|--------|--------|-------|-------|-------|---------|
| 309922    | Rhobtb3      | 836    | 902     | 897    | 830    | 607   | 778   | 835   | 801     |
| 292073    | Galns        | 211.45 | 318.06  | 289.95 | 187.7  | 186.1 | 258   | 168.2 | 266.12  |
| 307429    | Dmxl1        | 1273   | 1251.49 | 1299.2 | 1508   | 1230  | 927.1 | 1208  | 1284.13 |
| 100364265 | LOC100364265 | 1396.8 | 1422.34 | 1544.6 | 1702.1 | 1404  | 1151  | 1335  | 1401.83 |
| 313417    | Wdr78        | 172.76 | 179.25  | 161.41 | 174.59 | 123.9 | 141.9 | 163.8 | 170.54  |
| 313609    | Pdik11       | 200.13 | 147.88  | 198.24 | 171.83 | 160.8 | 142.7 | 163.7 | 159.25  |
| 293654    | Doc2g        | 32.85  | 23.58   | 31.3   | 35.42  | 38.78 | 22.44 | 26.46 | 19.74   |
| 81810     | Tgfbr2       | 2633   | 3015    | 3582   | 3379   | 2247  | 3000  | 2912  | 2840    |
| 64022     | Btc          | 9      | 7       | 25     | 6      | 7     | 13    | 9     | 12      |
| 311144    | Itga4        | 63.98  | 134.26  | 181.89 | 145.47 | 111.7 | 107   | 142.7 | 97.19   |
| 500727    | Cdca4        | 174    | 141     | 175    | 138.05 | 118   | 138   | 115   | 177     |
| 29428     | Celf2        | 1278.1 | 1335.92 | 1456.7 | 1411.2 | 1177  | 1153  | 1221  | 1232.34 |
| 102553088 | LOC102553088 | 18     | 16      | 11     | 10     | 15    | 3     | 20    | 10      |
| 310859    | Tet2         | 486    | 446     | 494    | 515    | 418   | 403   | 464   | 409     |
| 140585    | Ryk          | 608    | 535     | 567    | 569    | 447   | 484   | 557   | 501     |
| 117050    | Arl5a        | 1868   | 1910    | 1929   | 1956   | 1596  | 1626  | 1818  | 1648    |
| 103692066 | LOC103692066 | 424.69 | 374.98  | 420.12 | 411.49 | 346.3 | 307   | 406.3 | 364.25  |
| 103690114 | LOC103690114 | 134.5  | 132     | 114    | 119    | 91.5  | 115.5 | 113.5 | 115.5   |
| 103690163 | LOC103690163 | 134.5  | 132     | 114    | 119    | 91.5  | 115.5 | 113.5 | 115.5   |
| 24807     | Tacr1        | 29.3   | 36.81   | 40.89  | 56.38  | 49.49 | 43.84 | 23.14 | 26.14   |
| 29650     | Adam10       | 2090   | 2172    | 2417   | 2383   | 1794  | 1857  | 2231  | 2028    |
| 364529    | Calr3        | 73     | 60      | 52     | 59     | 47    | 58    | 50    | 58      |
| 59105     | Milr1        | 22.42  | 16.55   | 28.14  | 24.44  | 18.1  | 19.66 | 16.33 | 25.84   |
| 362191    | Dph6         | 193.05 | 170.36  | 181.69 | 196.78 | 182.8 | 181.6 | 150.1 | 133.26  |
| 308431    | Phldb3       | 34     | 30      | 27     | 43     | 23    | 32    | 29    | 33      |
| 361400    | Nfatc3       | 791.04 | 773.97  | 746.68 | 751.33 | 685.9 | 627.9 | 715.9 | 644.84  |
| 310418    | Frem2        | 45     | 42      | 36     | 82     | 35    | 48    | 45    | 51      |
| 367846    | Sp3          | 632    | 629     | 713    | 636    | 578   | 553   | 558   | 590     |
| 305448    | Dok7         | 108    | 91.09   | 57.67  | 132.79 | 66.13 | 93.02 | 66.01 | 115     |
| 315131    | Kdelr3       | 607    | 569     | 576    | 528    | 420   | 508   | 510   | 553     |
| 314393    | Trip11       | 1135.5 | 1135.28 | 1278.6 | 1463   | 1219  | 998.7 | 1128  | 1031.53 |
| 365266    | Atp10a       | 173    | 153     | 158    | 156    | 143   | 145   | 156   | 115     |
| 116598    | Pdia4        | 1081   | 1228    | 1430   | 1392   | 957   | 1175  | 1177  | 1173    |
| 100911572 | LOC100911572 | 125.33 | 96.26   | 86.07  | 96.66  | 69.04 | 75.56 | 108.6 | 100.03  |
| 58952     | Cpq          | 912    | 826     | 1059   | 840    | 699   | 778   | 842   | 858     |
| 317213    | Brwd3        | 157    | 161     | 176    | 210    | 158   | 123   | 169   | 165     |
| 302248    | Nid2         | 1080.3 | 1348.68 | 1739.3 | 1538.7 | 969.1 | 1191  | 1448  | 1377.08 |
| 100909697 | Slc25a51     | 737.65 | 639.14  | 636.25 | 666.4  | 373.3 | 725.5 | 588.1 | 653.94  |
| 81722     | Ager         | 43     | 43      | 53     | 43     | 35    | 38    | 46    | 40      |
| 690489    | Cys1         | 157    | 184     | 148    | 168    | 121   | 185   | 135   | 133     |
| 64366     | Calu         | 2639   | 2743    | 3142   | 2669   | 2194  | 2393  | 2739  | 2453    |
| 680317    | Endou        | 26     | 26      | 21     | 22     | 20    | 18    | 24    | 21      |
| 304893    | Rasa12       | 586    | 748     | 833    | 779    | 591   | 499   | 769   | 715     |
| 500797    | Misp         | 56     | 38      | 62     | 42     | 39    | 43    | 41    | 50      |
| 295568    | Hl1f         | 392.96 | 382.56  | 417.04 | 471.35 | 345.5 | 331.5 | 405.9 | 370.94  |
| 313308    | Thoc2        | 777    | 795     | 887    | 900    | 768   | 682   | 768   | 717.01  |
| 361680    | Lsp1         | 281    | 225     | 330    | 186    | 246   | 220   | 269   | 158     |
| 315593    | Tmem136      | 26     | 20      | 30     | 27     | 34    | 12    | 23    | 21      |
| 361153    | Fam149a      | 338    | 365     | 362    | 385    | 329   | 282   | 347   | 309     |
| 266762    | Mrgprf       | 222    | 267     | 432    | 284    | 224   | 285   | 289   | 255     |
| 499856    | Fibin        | 142    | 107     | 112    | 99     | 102   | 84    | 116   | 100     |
| 24941     | Atp7a        | 648    | 637     | 630    | 688    | 606   | 488   | 590   | 591     |
| 297480    | Foxp1        | 355.97 | 310.8   | 465.23 | 384.28 | 359.4 | 331.6 | 358   | 276.36  |
| 25096     | Pld1         | 532    | 553     | 583    | 573    | 458   | 460   | 529   | 512     |
| 100361079 | LOC100361079 | 69.89  | 56.82   | 41.88  | 39.7   | 53.03 | 46.06 | 36.54 | 46.46   |
| 296102    | E113         | 658.44 | 599.5   | 658.2  | 540.38 | 484   | 569.2 | 548.9 | 545.4   |

|           |              |        |         |        |        |       |       |       |         |
|-----------|--------------|--------|---------|--------|--------|-------|-------|-------|---------|
| 499401    | Znrclas1     | 138    | 117     | 131    | 123    | 123   | 104   | 117   | 101     |
| 315843    | Phip         | 578    | 584     | 620.96 | 653    | 538   | 479   | 607   | 506     |
| 25466     | Illrap       | 182    | 224     | 240    | 190    | 161   | 174   | 195   | 201     |
| 288174    | Nit2         | 357    | 344     | 408    | 278    | 280   | 310   | 256   | 367     |
| 116967    | Magt1        | 214    | 221     | 230    | 252    | 197   | 168   | 218   | 219     |
| 690745    | 1-Mar        | 184.15 | 146     | 166    | 159    | 146   | 151   | 126   | 150     |
| 304786    | Elk4         | 703.1  | 697.14  | 797.03 | 710.08 | 592.4 | 630.7 | 659   | 660.81  |
| 24459     | Hoxc4        | 162    | 153     | 194    | 185    | 116   | 172   | 165   | 154     |
| 25603     | Marcks       | 1355   | 1483    | 2022   | 1610   | 1207  | 1471  | 1593  | 1388    |
| 170630    | Fgf12        | 6280   | 5748.79 | 5421.8 | 6512   | 5010  | 4525  | 5922  | 5502    |
| 171070    | Ptpn21       | 262    | 258     | 286    | 279    | 195   | 222   | 259   | 273     |
| 80897     | Erap1        | 872    | 779     | 869    | 879    | 638   | 726   | 826   | 783     |
| 171135    | Slc31a1      | 305    | 293     | 294    | 305    | 258   | 276   | 259   | 254     |
| 499797    | RGD1560248   | 1677   | 1742    | 1936   | 1867   | 1486  | 1393  | 1744  | 1695    |
| 293173    | Far1         | 2450   | 2368    | 2339   | 2611   | 2043  | 1898  | 2233  | 2372    |
| 498097    | Wdr53        | 175.29 | 154.26  | 150.79 | 131.44 | 135.8 | 119.4 | 136.3 | 143.79  |
| 303019    | Neur11b      | 24     | 27      | 23     | 14     | 27    | 21    | 17    | 12      |
| 24367     | Fgg          | 1      | 2       | 3      | 2      | 3     | 1     | 1     | 2       |
| 246263    | Acsm2        | 5      | 2       | 0      | 1      | 2     | 2     | 0     | 3       |
| 287668    | Lrrc3c       | 2      | 1       | 3      | 2      | 1     | 2     | 1     | 3       |
| 291853    | Drc7         | 4      | 5       | 3      | 4      | 3     | 1     | 4     | 6       |
| 294255    | Slc44a4      | 9      | 18      | 8      | 13     | 4     | 8     | 14    | 16      |
| 29440     | Slc26a4      | 3      | 1       | 3      | 1      | 4     | 1     | 2     | 0       |
| 298702    | Icam4        | 3      | 3       | 1      | 1      | 3     | 1     | 2     | 1       |
| 304379    | Zan          | 2      | 1       | 7      | 6      | 7     | 2     | 2     | 3       |
| 363072    | Tbcd21       | 1      | 2       | 3      | 2      | 3     | 0     | 2     | 2       |
| 363493    | Taf71        | 3      | 4       | 5      | 4      | 1     | 3     | 7     | 3       |
| 686660    | LOC686660    | 2      | 2       | 3      | 1      | 2     | 1     | 3     | 1       |
| 688510    | Ripor3       | 39     | 26      | 42     | 29     | 28    | 36    | 31    | 24      |
| 689918    | Sox30        | 1      | 4       | 1      | 2      | 2     | 1     | 1     | 3       |
| 80840     | Gpr12        | 3      | 3       | 1      | 1      | 1     | 3     | 2     | 1       |
| 501174    | Pid1         | 81     | 76      | 106    | 89     | 71    | 70    | 88    | 79      |
| 103694869 | LOC103694869 | 520.18 | 173.39  | 173.39 | 520.18 | 173.4 | 346.8 | 173.4 | 520.18  |
| 108353281 | LOC108353281 | 8.89   | 7.99    | 8.13   | 18.07  | 6.91  | 9.28  | 11.15 | 10.36   |
| 313340    | Dennd4c      | 525.93 | 551     | 611.13 | 606.73 | 504.7 | 399.5 | 591.4 | 512.82  |
| 303638    | Abca8a       | 9757.1 | 10595.5 | 8653.2 | 11302  | 7842  | 8302  | 9759  | 9375.17 |
| 499539    | Lmbrd2       | 604.19 | 665.13  | 674.72 | 877.48 | 773.8 | 365.4 | 653.4 | 677.02  |
| 499690    | Tmem167b     | 264.32 | 197.38  | 224.97 | 235.38 | 210.5 | 198.4 | 208.2 | 190.03  |
| 192350    | Cdk12        | 520    | 500     | 479    | 595    | 522   | 379   | 491   | 441     |
| 499255    | Knop1        | 140    | 156     | 174    | 196    | 157   | 129   | 147   | 150     |
| 311030    | Stam2        | 432    | 387     | 348    | 486    | 326   | 332   | 416   | 373     |
| 290029    | Pnp          | 1043   | 949     | 1053   | 743    | 778   | 792   | 844   | 902     |
| 83515     | Ptbp3        | 1412   | 1343    | 1511   | 1521   | 1354  | 1095  | 1255  | 1362    |
| 363268    | Fbxo36       | 83     | 60      | 59     | 63     | 49    | 46    | 77    | 60      |
| 315291    | Ccnt1        | 377.16 | 389.99  | 355.95 | 342.84 | 324.5 | 305.4 | 346   | 307.58  |
| 302697    | Eiflax       | 1393   | 1486.01 | 1532.3 | 1393   | 1176  | 1231  | 1344  | 1331.13 |
| 114861    | Scpep1       | 949    | 908     | 1210   | 936    | 818   | 919   | 928   | 840     |
| 103693699 | LOC103693699 | 61     | 48      | 60     | 40     | 67    | 47    | 29    | 40      |
| 362591    | Mtf1         | 443.11 | 479.5   | 488.82 | 479.99 | 374.7 | 435.4 | 437.5 | 408.54  |
| 287170    | Snrnp25      | 234    | 208     | 161    | 169    | 160   | 163   | 162   | 191     |
| 364994    | Dpep3        | 5      | 5.14    | 4      | 2.99   | 7     | 4     | 3     | 1       |
| 305850    | Rpgrip1      | 82.36  | 57.77   | 61.54  | 61.38  | 62.01 | 53.78 | 55.77 | 58.79   |
| 317439    | Wwc3         | 697    | 587.99  | 611    | 591    | 530   | 543   | 561   | 544     |
| 502715    | Lrrc17       | 74     | 90      | 133.94 | 74     | 64    | 78.93 | 87.88 | 94.92   |
| 315297    | Nckap51      | 1137   | 1040.3  | 1161.5 | 1201.2 | 1031  | 1045  | 979.7 | 920.36  |
| 100910258 | LOC100910258 | 61.11  | 55.57   | 51.89  | 45.04  | 41.95 | 47.66 | 39.65 | 57.82   |

|           |              |        |         |        |        |       |       |       |         |
|-----------|--------------|--------|---------|--------|--------|-------|-------|-------|---------|
| 64630     | Snap23       | 222    | 210     | 250    | 212    | 165   | 173   | 219   | 226     |
| 24890     | Esrl         | 127    | 104     | 78     | 102    | 77    | 81    | 103   | 99      |
| 100910771 | LOC100910771 | 29.99  | 39.7    | 41.3   | 68.2   | 40.18 | 19.55 | 19.73 | 77.5    |
| 500441    | RGD1561916   | 41     | 20      | 36     | 32     | 28    | 35    | 25    | 25      |
| 103692307 | LOC103692307 | 484.98 | 476.12  | 512.26 | 381.62 | 345.1 | 482.6 | 467.3 | 330.03  |
| 170636    | Pnma1        | 35     | 28      | 27     | 31     | 29    | 28    | 25    | 24      |
| 290686    | Tma16        | 207    | 150     | 177    | 192    | 148   | 172   | 164   | 152     |
| 29227     | Nfib         | 476    | 554     | 579    | 658    | 575   | 440   | 507   | 464     |
| 681429    | Rps271       | 175    | 208     | 253    | 179    | 154   | 189   | 169   | 202     |
| 498533    | Fam167a      | 167    | 191     | 230    | 187    | 181   | 175   | 185   | 138     |
| 310969    | Ifi44        | 605    | 503     | 494    | 336    | 415   | 394   | 443   | 446     |
| 360868    | Sft2d2       | 497    | 396     | 413    | 487    | 377   | 369   | 453   | 372     |
| 309003    | Zfp646       | 425.68 | 371.35  | 468.98 | 418.96 | 359   | 386   | 378   | 353.36  |
| 363930    | Selplg       | 84     | 78      | 99     | 54     | 64    | 77    | 66    | 69      |
| 406163    | Gpsm3        | 121    | 120     | 142    | 142    | 117   | 99    | 131   | 113     |
| 378947    | Bst2         | 281    | 276     | 320    | 270    | 214   | 278   | 240   | 273     |
| 691920    | Stard9       | 667.39 | 739.08  | 827    | 787.04 | 667.6 | 600   | 730   | 649     |
| 360254    | Brca2        | 87     | 122     | 129    | 131    | 115   | 95    | 95    | 106     |
| 25252     | Dlg1         | 449    | 430     | 504    | 550    | 393   | 407   | 449   | 445     |
| 302965    | Tnfrsf12a    | 84     | 107     | 163    | 67     | 76    | 114   | 101   | 78      |
| 680723    | Tmem88b      | 146    | 173     | 132    | 132    | 104   | 125   | 130   | 152     |
| 363872    | Zscan25      | 119.47 | 105.42  | 119.49 | 101    | 92.38 | 108   | 100   | 90      |
| 64566     | Wnt5a        | 225.6  | 167.04  | 153.6  | 245.46 | 120.1 | 96.96 | 230.3 | 246.59  |
| 100126191 | Rab1b        | 1178   | 1312.43 | 1178   | 729.75 | 963.8 | 856.7 | 856.7 | 1177.97 |
| 689296    | Mis18bp1     | 91     | 89      | 111    | 106    | 90    | 81    | 92    | 85      |
| 691921    | LOC691921    | 54     | 46      | 29     | 25     | 34    | 27    | 20    | 54      |
| 108349511 | LOC108349511 | 12.28  | 17.25   | 13.39  | 7.05   | 10.49 | 12.64 | 9.43  | 11.25   |
| 266773    | Zfp709       | 322.72 | 289.03  | 281.82 | 316.06 | 283   | 226.3 | 289.2 | 262.12  |
| 294601    | S1f1         | 157    | 142     | 165    | 153    | 130   | 130   | 169   | 112     |
| 361935    | Spata5       | 157    | 161     | 128    | 163    | 130   | 120   | 139   | 145     |
| 59266     | Hcn4         | 201.6  | 158.24  | 282.64 | 270.27 | 222.1 | 177.6 | 180.1 | 220.61  |
| 100174910 | LOC100174910 | 116    | 148     | 107    | 165    | 96    | 119   | 135   | 120     |
| 289883    | Tmed5        | 473.17 | 461.4   | 456.16 | 462.07 | 431.6 | 388.4 | 414.9 | 389.73  |
| 315745    | Fem1b        | 461.8  | 450.53  | 463.56 | 529.86 | 486.3 | 324   | 441.9 | 418.94  |
| 116509    | Slc6a9       | 108.83 | 73      | 105.51 | 104.54 | 76.67 | 90    | 99.5  | 77.5    |
| 501658    | Vma21        | 915.38 | 778.37  | 863.38 | 951.93 | 660   | 784.1 | 818.7 | 815.18  |
| 361197    | Ercc612      | 543    | 460     | 538    | 502    | 435   | 384   | 486   | 487     |
| 687707    | LOC687707    | 14     | 13      | 12     | 18     | 16    | 13    | 9     | 12      |
| 24986     | RT1-Ha       | 2.48   | 0       | 1      | 1      | 0     | 2.48  | 0     | 1.45    |
| 299805    | Cnot2        | 1027   | 929.99  | 975.06 | 927.08 | 823   | 807   | 869   | 886.34  |
| 290705    | Nek1         | 887    | 1000    | 1024   | 993    | 784   | 819   | 980   | 842     |
| 304336    | RGD1566386   | 162    | 148.99  | 134    | 131    | 105   | 134   | 131.3 | 135     |
| 307901    | Tldc1        | 146    | 143     | 246    | 158    | 151   | 159   | 163   | 135     |
| 295297    | Etv3         | 501    | 508     | 498.97 | 489.96 | 423   | 424   | 445   | 460.96  |
| 313790    | Lacc1        | 659.04 | 653     | 568    | 697.86 | 590   | 506   | 604.9 | 561     |
| 300944    | Xrn1         | 557.78 | 542.86  | 566.97 | 572.26 | 520.4 | 428.6 | 553.3 | 463.03  |
| 500789    | Gipc3        | 115.99 | 70      | 129    | 85     | 76.99 | 66    | 107   | 101     |
| 24483     | Igf2         | 504    | 303     | 449    | 860.01 | 449   | 288.9 | 445   | 674     |
| 308821    | Rab30        | 883.89 | 897.63  | 866.86 | 1007.1 | 874.5 | 604.4 | 815.8 | 913.24  |
| 312974    | Chd7         | 208    | 262     | 373    | 268    | 235   | 263   | 250   | 227     |
| 100359865 | Hrct1        | 193    | 199     | 216    | 185    | 140   | 173   | 204   | 179     |
| 499742    | LOC499742    | 410.68 | 414.7   | 470.66 | 437.54 | 358.9 | 314.4 | 444.2 | 404.23  |
| 305828    | Socs4        | 74     | 64      | 91     | 82     | 68    | 48    | 80    | 77      |
| 102551085 | Xrcc3        | 238    | 179     | 218    | 241    | 184   | 181   | 203   | 201     |
| 102552551 | Smim6        | 8.04   | 19      | 25.72  | 35.12  | 15.93 | 22.65 | 18.48 | 20.09   |
| 108348175 | LOC108348175 | 2554.6 | 2480.11 | 2650.6 | 2388   | 1872  | 2403  | 2184  | 2383.98 |



|           |              |        |         |        |        |       |       |       |         |
|-----------|--------------|--------|---------|--------|--------|-------|-------|-------|---------|
| 309465    | Gsto2        | 183.46 | 150.47  | 151.45 | 149.73 | 157.2 | 118.4 | 133.9 | 148.07  |
| 24974     | RT1-A2       | 2295.9 | 1775.05 | 2654.3 | 1706.6 | 1943  | 2148  | 1989  | 1322.89 |
| 114845    | Klf3         | 593.82 | 510.92  | 580.77 | 618.14 | 503.8 | 450.7 | 516.1 | 552.16  |
| 282587    | Cttnbp2      | 359    | 414     | 409    | 474    | 333   | 291   | 423   | 407     |
| 681766    | Stpg4        | 8      | 11      | 10     | 12     | 10    | 5     | 12    | 9       |
| 317253    | Nhs12        | 404.81 | 314.93  | 342.94 | 380.99 | 303.2 | 290.7 | 364.1 | 309.67  |
| 81717     | Ctbp2        | 227    | 232     | 246    | 222    | 192   | 202   | 216   | 204     |
| 288106    | Ccdc191      | 62     | 57      | 62     | 57     | 53    | 52    | 54    | 50      |
| 310946    | Lrrc40       | 617    | 564     | 629    | 546    | 442   | 454   | 624   | 549     |
| 103690064 | LOC103690064 | 847.53 | 880.85  | 789.65 | 920.28 | 822.6 | 638.6 | 775   | 783.23  |
| 291787    | Rbbp8        | 546    | 501     | 558    | 472    | 421   | 445   | 486   | 472     |
| 361149    | Ankrd37      | 38     | 22      | 37     | 18     | 18    | 26    | 22    | 35      |
| 308594    | Ccdc114      | 23     | 16      | 17     | 18     | 16    | 10    | 19    | 20      |
| 299907    | Ext1         | 411    | 483     | 553    | 428    | 380   | 410   | 430   | 427     |
| 497923    | Zfp286a      | 111    | 130     | 114    | 122    | 101   | 84    | 126   | 108     |
| 54248     | Dgkb         | 504.87 | 421.75  | 470.01 | 497.01 | 494.9 | 380.2 | 412.1 | 376.31  |
| 685487    | Znrf3        | 41     | 43      | 38     | 59     | 45    | 39    | 42    | 33      |
| 65032     | Htr7         | 95.5   | 92.5    | 0      | 98.5   | 0     | 85.69 | 89    | 77      |
| 294429    | Ranbp2       | 2002   | 2126    | 2337   | 2605   | 2160  | 1477  | 2189  | 2142    |
| 316238    | Rsph9        | 39     | 37      | 31     | 33     | 36    | 20    | 26    | 41      |
| 365038    | Samd5        | 34     | 49      | 49     | 41     | 35    | 27    | 53    | 37      |
| 300743    | Lman11       | 6      | 7       | 13     | 7      | 8     | 6     | 10    | 5       |
| 301000    | Uba7         | 151    | 130     | 143    | 137    | 103   | 151   | 126   | 113     |
| 307900    | Kcng4        | 278.09 | 239.09  | 241.76 | 244.44 | 207.1 | 207.9 | 213   | 253.82  |
| 362798    | Ncapg2       | 92     | 105     | 112    | 112    | 90    | 88    | 117   | 75      |
| 100362123 | Rex2         | 131.26 | 143.52  | 162.87 | 150.95 | 127.1 | 118.5 | 130.9 | 140.76  |
| 361253    | Sugct        | 60     | 63      | 71     | 62     | 43    | 57    | 59    | 66      |
| 309106    | Sigirr       | 61     | 26      | 40     | 30     | 30    | 21    | 45    | 42      |
| 102556425 | LOC102556425 | 67.17  | 73.46   | 83.18  | 71.33  | 69.65 | 54.18 | 65.54 | 70.06   |
| 363985    | Slc41a1      | 621    | 632     | 711    | 790    | 568   | 560   | 600   | 693     |
| 100910882 | LOC100910882 | 1754.7 | 1730.46 | 1907.7 | 1365.5 | 1372  | 1510  | 1539  | 1520.69 |
| 408223    | Usp54        | 1044   | 1026    | 942    | 959    | 918   | 944   | 821   | 808     |
| 108351267 | LOC108351267 | 37     | 18.27   | 23.41  | 33.81  | 28.03 | 25.91 | 23.13 | 21.83   |
| 293997    | Kazald1      | 31     | 33      | 53     | 32     | 34    | 34    | 31    | 32      |
| 304592    | Orai2        | 822.74 | 978.16  | 1104.1 | 848.81 | 851.4 | 910.1 | 834.4 | 704.45  |
| 299811    | Cpsf6        | 1574   | 1575    | 1552   | 1579   | 1386  | 1149  | 1500  | 1487    |
| 360640    | Map3k14      | 137    | 131     | 145    | 109    | 110   | 108   | 117   | 124     |
| 103692234 | LOC103692234 | 0.21   | 0       | 2.11   | 0      | 2.04  | 0     | 0     | 0       |
| 100911548 | LOC100911548 | 61.89  | 77.99   | 115.24 | 82.79  | 62.42 | 69.49 | 76.16 | 89.06   |
| 100911986 | LOC100911986 | 43.06  | 43.5    | 26.78  | 26.49  | 26.18 | 40.26 | 30.2  | 26.32   |
| 312115    | Col28a1      | 1342   | 1425    | 1918   | 1604   | 1149  | 1331  | 1505  | 1546    |
| 24864     | Pgc          | 26     | 18      | 19     | 20     | 22    | 14    | 22    | 15      |
| 291539    | Psmg2        | 312    | 327     | 290    | 258    | 257   | 239   | 282   | 266     |
| 501647    | Fam122b      | 132.72 | 102.05  | 144.82 | 121.47 | 119.4 | 103.4 | 125.3 | 92.66   |
| 24603     | Npr1         | 82     | 59      | 70     | 63     | 76    | 53    | 55    | 57      |
| 25333     | Mgp          | 2665   | 1658    | 2263   | 1875   | 1858  | 1564  | 1952  | 2068    |
| 295985    | Mettl15      | 114.32 | 124.43  | 103.52 | 136.4  | 101.6 | 93.94 | 118.8 | 106.74  |
| 100359879 | Tmem91       | 58     | 60      | 50     | 48     | 48    | 46    | 43    | 53      |
| 689499    | Stum         | 250    | 279     | 276    | 259    | 284   | 220   | 217   | 215     |
| 192205    | Prok1        | 16.1   | 9.82    | 12.47  | 3.18   | 11.79 | 15.08 | 7.4   | 2.3     |
| 360272    | Slit2        | 987    | 1240    | 1279   | 1169   | 890   | 1130  | 1088  | 1005    |
| 100364165 | Nktr         | 1707   | 1683    | 1835   | 1880   | 1559  | 1462  | 1690  | 1540    |
| 363073    | Glce         | 1699   | 1613    | 1738   | 1689   | 1528  | 1230  | 1561  | 1610    |
| 311328    | Rmdn3        | 667    | 637.67  | 625    | 656    | 575   | 550.9 | 582.5 | 566.55  |
| 25749     | Clcn5        | 267    | 295     | 298    | 439    | 316   | 212   | 308   | 307     |
| 29427     | Aif1         | 120    | 150     | 187    | 101    | 109   | 100   | 152   | 130     |



|           |              |        |        |        |        |       |       |       |        |
|-----------|--------------|--------|--------|--------|--------|-------|-------|-------|--------|
| 313387    | Usp1         | 280    | 250    | 278    | 275    | 234   | 222   | 262   | 235    |
| 311182    | Nup160       | 271    | 249    | 333    | 255    | 255   | 241   | 245   | 234    |
| 688765    | LOC688765    | 108.62 | 100.91 | 88.09  | 102.2  | 101.2 | 86.22 | 81.13 | 83.28  |
| 108348125 | LOC108348125 | 119    | 79     | 105    | 97     | 67    | 80    | 93    | 112    |
| 361394    | Lrrc36       | 36     | 42     | 52     | 45     | 36    | 48    | 36    | 34     |
| 29503     | Slc22a2      | 13     | 9      | 15     | 13     | 10    | 7     | 13    | 14     |
| 302976    | Noxol        | 1.25   | 2      | 2      | 0      | 1     | 1     | 1.22  | 1.4    |
| 103691225 | LOC103691225 | 2.21   | 1.07   | 3.24   | 1.15   | 1.08  | 0     | 2.26  | 3.41   |
| 365238    | LOC365238    | 123.17 | 116.39 | 107.92 | 90.46  | 105   | 84.7  | 98.69 | 97.07  |
| 171120    | Jmjd1c       | 927    | 916    | 1045   | 1066   | 877   | 801   | 936   | 866    |
| 689102    | Chml         | 50     | 64     | 74     | 104    | 65    | 46    | 72    | 74     |
| 140938    | Psmc3ip      | 56     | 59     | 65     | 62     | 46    | 61    | 52    | 54     |
| 311088    | Cob111       | 314    | 521    | 428    | 523    | 286   | 371   | 501   | 414    |
| 361941    | RGD1359508   | 51     | 56     | 62     | 48     | 39    | 60    | 47    | 45     |
| 311093    | Csrnp3       | 66.57  | 63.67  | 70     | 94.07  | 81.01 | 32.89 | 72.15 | 73     |
| 309798    | Gcc2         | 859    | 835    | 926    | 1011   | 804   | 726   | 862   | 804    |
| 363231    | Rftn2        | 157.79 | 193.46 | 209.04 | 191.52 | 149   | 152.7 | 189.1 | 170.98 |
| 360560    | RGD1304728   | 356.29 | 254.64 | 295.71 | 307.4  | 288.3 | 237.2 | 238.6 | 304.71 |
| 311854    | Tor1b        | 304.27 | 306.28 | 336.25 | 267.3  | 235.3 | 252   | 291.7 | 289.82 |
| 297910    | Slc26a7      | 110    | 40     | 66     | 60     | 92    | 34    | 48    | 69     |
| 102555377 | LOC102555377 | 216.6  | 217.67 | 201.01 | 238.59 | 211.7 | 174.6 | 201.5 | 181.6  |
| 295293    | Pear1        | 721    | 697    | 930    | 965    | 678   | 666   | 802   | 771    |
| 361104    | Zcchc24      | 1452   | 1522   | 1685   | 1643   | 1249  | 1397  | 1505  | 1398   |
| 303060    | Pwyp2a       | 388    | 380    | 415    | 383    | 323   | 317   | 352   | 387    |
| 307645    | Adgrg5       | 22     | 18     | 15     | 12     | 22    | 9     | 17    | 11     |
| 690693    | Ddx19b       | 487.07 | 505.95 | 506.12 | 467.07 | 439.5 | 427.8 | 439.8 | 424.31 |
| 293849    | Zfp275       | 357    | 349    | 302    | 392    | 329   | 266   | 318   | 320    |
| 315346    | Itga5        | 200    | 181    | 305    | 186    | 162   | 232   | 227   | 147    |
| 294019    | Calhm2       | 130    | 101    | 102    | 78     | 90    | 88    | 83    | 101    |
| 102551340 | LOC102551340 | 350.59 | 301.35 | 317.33 | 326.98 | 282.2 | 262.3 | 299.1 | 298.12 |
| 304850    | Rnf2         | 407    | 430    | 441    | 359    | 320   | 325   | 414   | 383    |
| 65261     | Myo1c        | 1025   | 1093   | 1268   | 1140   | 857   | 1114  | 1046  | 970    |
| 363484    | Chic1        | 506.5  | 510.7  | 436.91 | 533.2  | 435   | 368.7 | 447.2 | 499.87 |
| 306137    | Rbm26        | 535    | 590    | 676    | 635    | 535   | 473   | 575   | 563    |
| 691981    | Spem1        | 16     | 3      | 15     | 8      | 6     | 9     | 12    | 10     |
| 81685     | Mlh1         | 122    | 161    | 143    | 154    | 114   | 128   | 141   | 128    |
| 298908    | Kcnf1        | 306    | 313    | 324    | 327    | 292   | 265   | 273   | 289    |
| 499716    | Dnajb14      | 269    | 294    | 292    | 374    | 300   | 199   | 313   | 271    |
| 304061    | Brwd1        | 693.39 | 602.9  | 688.63 | 679.54 | 642.5 | 493.4 | 665.6 | 546.51 |
| 100359523 | LOC100359523 | 81.29  | 73.69  | 73     | 66.23  | 65.37 | 59.49 | 79.3  | 55.12  |
| 103693812 | LOC103693812 | 0      | 3.01   | 1      | 6.52   | 2.01  | 1.01  | 2.26  | 4      |
| 315804    | Rfx7         | 621    | 606    | 611    | 681    | 583   | 495   | 536   | 606    |
| 500592    | Tnfrsf25     | 105    | 84     | 90     | 75     | 71    | 96    | 67    | 78     |
| 308790    | Mex3b        | 148    | 131    | 170    | 116    | 109   | 113   | 129   | 147    |
| 114520    | Strn3        | 1062   | 961    | 1045   | 1074   | 928   | 879   | 972   | 872    |
| 24361     | Fancc        | 307    | 271    | 271    | 223    | 231   | 209   | 253   | 252    |
| 292064    | Banp         | 623    | 691    | 693    | 754    | 555   | 594   | 648   | 637    |
| 103692905 | LOC103692905 | 200.15 | 130.73 | 113.6  | 115.19 | 129.6 | 109.8 | 141.4 | 112.54 |
| 305467    | Sfi1         | 722    | 765    | 696    | 645    | 570.4 | 670   | 668   | 585    |
| 291635    | Pcdhga7      | 509.79 | 527.54 | 545.63 | 535.77 | 448.5 | 476.4 | 492.7 | 450.62 |
| 366595    | Syp11        | 828    | 866    | 839    | 850    | 631   | 757   | 821   | 774    |
| 688790    | Pmp2         | 6452   | 8136   | 6948   | 5631   | 3144  | 5357  | 6932  | 8522   |
| 294074    | Cep55        | 27     | 21     | 44     | 18     | 27    | 24    | 24    | 22     |
| 499110    | Zfp780b      | 178.35 | 194.07 | 170.08 | 218.07 | 152.8 | 155   | 184.8 | 178.19 |
| 65218     | Agap2        | 377    | 315    | 285    | 420    | 299   | 306   | 334   | 293    |
| 25426     | Cyp11b1      | 718    | 630    | 845    | 705    | 558   | 574   | 735   | 689    |

|           |              |        |        |        |        |       |       |       |         |
|-----------|--------------|--------|--------|--------|--------|-------|-------|-------|---------|
| 100361383 | Ecm2         | 152.45 | 96.02  | 158.07 | 223.79 | 126.3 | 33.18 | 139.1 | 257.41  |
| 498407    | Purb         | 444    | 484    | 509    | 657    | 529   | 315   | 560   | 443     |
| 299706    | Nup37        | 134.45 | 128    | 142.25 | 113.03 | 93.03 | 106   | 141   | 116.59  |
| 306571    | Kat6a        | 825.52 | 800.61 | 923.42 | 1025.5 | 847.6 | 764.1 | 778.3 | 763.49  |
| 108350588 | LOC108350588 | 66.92  | 73.05  | 66.43  | 69.91  | 62.86 | 55.4  | 55.67 | 69.8    |
| 295340    | Rplp011      | 1.14   | 0      | 0      | 1.15   | 2.02  | 0     | 0     | 0       |
| 303443    | Stxbp4       | 244    | 217    | 247    | 276    | 221   | 202   | 231   | 214     |
| 25667     | Bmp3         | 20.21  | 18.12  | 35.73  | 27.9   | 26.38 | 12.83 | 32.53 | 18.21   |
| 361147    | Primpol      | 155.75 | 166.9  | 159.47 | 185.31 | 138.8 | 149.1 | 156.4 | 144.6   |
| 29360     | Selenop      | 6975.8 | 6263.9 | 7514.6 | 6403.8 | 5392  | 5486  | 6542  | 6541.65 |
| 289229    | Vangl2       | 50.85  | 35.25  | 58.7   | 64.76  | 56.23 | 50.31 | 46.27 | 32.09   |
| 316516    | Tmbim1       | 884    | 997.84 | 924.31 | 816.71 | 691.3 | 880.8 | 764.7 | 859.72  |
| 24811     | Tap1         | 294.65 | 243.98 | 317.79 | 297.49 | 229.2 | 289.7 | 273.6 | 225.69  |
| 307449    | Mcc          | 3      | 3      | 8      | 3      | 6     | 2     | 3     | 4       |
| 365581    | Edar         | 7      | 7      | 6      | 14     | 5     | 5     | 8     | 12      |
| 291078    | Prpf4b       | 1310   | 1265   | 1484   | 1391   | 1180  | 1075  | 1376  | 1178    |
| 100529260 | Ankhd1       | 836    | 817    | 979    | 974    | 824   | 729   | 849   | 780     |
| 296968    | Lrguk        | 235.56 | 275.2  | 264.19 | 264.91 | 298   | 166.8 | 257.3 | 195.66  |
| 310968    | Ifi441       | 60     | 54     | 60     | 90     | 43    | 89    | 53    | 48      |
| 102553002 | Zscan22      | 315    | 340    | 338    | 319    | 277   | 313   | 305   | 263     |
| 503053    | LOC503053    | 61.69  | 37.87  | 52.24  | 71.91  | 50.87 | 42.37 | 47.39 | 56.83   |
| 366791    | Rdh5         | 48     | 31     | 32     | 34     | 33    | 26    | 32    | 37      |
| 685451    | Gng13        | 10     | 1      | 6      | 1      | 4.43  | 6     | 2     | 3.46    |
| 362597    | Evalb        | 175    | 195    | 246    | 152    | 140   | 166   | 190   | 182     |
| 499360    | Slf2         | 511.25 | 487.37 | 488.89 | 581.74 | 447.4 | 420.8 | 493.4 | 465.22  |
| 282822    | Trpc7        | 6.02   | 4.85   | 2      | 8.66   | 4     | 5.01  | 6     | 4       |
| 313418    | Mier1        | 870.24 | 888.75 | 974.59 | 906.35 | 780.1 | 788.2 | 853.2 | 792.46  |
| 310399    | Naa15        | 1616   | 1541   | 1571   | 1646   | 1449  | 1306  | 1525  | 1348    |
| 689065    | LOC689065    | 12.03  | 10.56  | 6.36   | 5.74   | 12.92 | 3.48  | 8.95  | 5.28    |
| 299940    | Sntb1        | 866.54 | 879.71 | 901.36 | 957.11 | 705.4 | 746.2 | 946.4 | 784.86  |
| 298316    | Nkrf1        | 185.46 | 184.26 | 130.09 | 207.41 | 150.3 | 143.5 | 181.8 | 148.86  |
| 58868     | Fzd1         | 572    | 513    | 662    | 758    | 462   | 491   | 652   | 607     |
| 29497     | Ptbp1        | 1103   | 1077   | 1309   | 1061   | 850   | 1057  | 1053  | 1058    |
| 298487    | Cldn19       | 3149   | 4034   | 3570   | 3035   | 2222  | 3427  | 3002  | 3525    |
| 171436    | Mk1          | 547.17 | 528.47 | 553.32 | 549.8  | 472.6 | 438.1 | 509.5 | 503.84  |
| 304007    | Cep97        | 256    | 318    | 274    | 333    | 268   | 220   | 286   | 269     |
| 59296     | Dnase2b      | 8.11   | 6.22   | 7.11   | 6.13   | 4.93  | 7.17  | 7.37  | 4.88    |
| 361838    | Hnrnp3       | 457.43 | 464.17 | 423.64 | 413.15 | 313.4 | 373.5 | 449.1 | 417.2   |
| 295588    | Rnd3         | 414    | 484    | 524    | 446    | 347   | 386   | 459   | 458     |
| 102554881 | LOC102554881 | 17     | 15     | 10     | 18     | 14    | 12    | 16    | 11      |
| 361415    | Dynlrb2      | 16     | 19     | 17     | 8      | 14    | 14    | 12    | 13      |
| 691221    | Faxdc2       | 864.07 | 870.97 | 893.49 | 798.35 | 669.8 | 787.3 | 786.7 | 783.3   |
| 25124     | Stat1        | 1669   | 1685   | 1563   | 1582   | 1271  | 1582  | 1442  | 1446    |
| 308738    | Chd2         | 1348.1 | 1274   | 1346.1 | 1375   | 1163  | 1066  | 1289  | 1202    |
| 365770    | Bbs12        | 75.66  | 71.19  | 74.19  | 81.45  | 73.86 | 58    | 56.17 | 79.19   |
| 685202    | Efcc1        | 355.17 | 347.81 | 347.53 | 411.5  | 302.1 | 246.2 | 335.9 | 407.37  |
| 499356    | Blnk         | 73     | 63     | 118    | 55     | 71    | 82    | 61    | 59      |
| 361388    | Gab1         | 1566   | 1746   | 1950   | 2163   | 1340  | 1572  | 1815  | 1833    |
| 102555274 | Zfp853       | 78.11  | 65.44  | 88.84  | 89.65  | 68.24 | 67.27 | 71.82 | 77.2    |
| 303963    | Dzip3        | 903    | 756    | 692    | 921    | 704   | 582   | 856   | 749     |
| 100359861 | Smim15       | 510    | 482    | 534    | 484    | 399   | 422   | 466   | 489     |
| 114110    | Flt4         | 61     | 33     | 50     | 45     | 56    | 35    | 33    | 43      |
| 316344    | Rev1         | 388.61 | 387.09 | 390.73 | 388.47 | 315.3 | 372.1 | 373.6 | 313     |
| 498289    | Opn3         | 166    | 180    | 175    | 167    | 138   | 154   | 168   | 148     |
| 299012    | Arhgap5      | 1446   | 1516   | 1544   | 1854   | 1388  | 1234  | 1535  | 1464    |
| 314824    | Osbpl8       | 1316   | 1188   | 1366   | 1423   | 1246  | 977   | 1279  | 1176    |

|           |              |        |         |        |        |       |       |       |         |
|-----------|--------------|--------|---------|--------|--------|-------|-------|-------|---------|
| 29335     | Oprk1        | 226.76 | 218.64  | 217.39 | 244.72 | 136.1 | 151   | 222.3 | 292.68  |
| 102553845 | LOC102553845 | 19     | 0       | 5.96   | 5.52   | 0     | 0     | 6.94  | 20      |
| 362739    | Ppp2r3c      | 677    | 608     | 544.55 | 613.77 | 558   | 500   | 504   | 597.59  |
| 64679     | Tgm4         | 7.38   | 10.06   | 5.17   | 8.83   | 1.9   | 6.22  | 3.62  | 16.05   |
| 361245    | Cmahp        | 12.99  | 7       | 19     | 4      | 8     | 14    | 6     | 10      |
| 102555453 | LOC102555453 | 1462.6 | 1399.8  | 1469.8 | 1100.7 | 1208  | 1282  | 792.2 | 1520.62 |
| 680111    | Rbl1         | 35     | 42      | 62     | 42     | 47    | 40    | 39    | 34      |
| 298878    | Osr1         | 88.05  | 38.62   | 64.22  | 77.7   | 56.05 | 62.99 | 41.78 | 76.61   |
| 294519    | Cep57l1      | 245    | 204     | 231    | 217    | 199   | 200   | 204   | 190     |
| 25663     | Il1r1        | 289.03 | 216     | 318.33 | 301.71 | 249.4 | 235.3 | 265.3 | 244.68  |
| 362728    | Twistnb      | 310    | 275     | 277    | 277    | 280   | 245   | 228   | 254     |
| 317494    | Nhs          | 246.71 | 209.54  | 265.67 | 321.61 | 219   | 222.1 | 231.8 | 249.62  |
| 100910046 | LOC100910046 | 454.08 | 441.12  | 410.66 | 498.27 | 404.9 | 339.9 | 406.8 | 443.61  |
| 300125    | Ttc38        | 304.39 | 332.6   | 306.95 | 313.73 | 295.3 | 269   | 281.6 | 266.11  |
| 89824     | Chi3l1       | 154    | 167     | 193    | 108    | 157   | 159   | 139   | 95      |
| 64046     | Mrella       | 315    | 332     | 332    | 378    | 319   | 252   | 338   | 291     |
| 315798    | Zfp280d      | 694    | 697     | 749    | 731    | 534   | 625   | 593   | 787     |
| 312781    | Lrp6         | 723    | 699     | 671    | 865    | 676   | 564   | 704   | 672     |
| 304092    | Son          | 4957.1 | 5184.54 | 5430   | 5578   | 4758  | 4111  | 5078  | 4757.7  |
| 314119    | Zxdb         | 260.88 | 292     | 257    | 235.04 | 229.2 | 227   | 212   | 256.11  |
| 312855    | Ppfibp1      | 1056   | 1119    | 1279   | 1311   | 873   | 1059  | 1156  | 1127    |
| 246301    | Ascl3        | 4      | 7       | 7      | 8      | 3     | 3     | 9     | 8       |
| 501996    | Il25         | 7      | 6       | 7      | 6      | 5     | 10    | 5     | 3       |
| 83476     | Cyr61        | 289    | 350     | 227    | 1041   | 406   | 567   | 477   | 237     |
| 499877    | Ubr1         | 701    | 728     | 707    | 864    | 730   | 551   | 670   | 703     |
| 29433     | Pak3         | 1069.3 | 1083.06 | 1090.2 | 1294.7 | 1144  | 893.4 | 1038  | 938.78  |
| 25690     | Ahr          | 493    | 414     | 527.98 | 629    | 527   | 452   | 400   | 447     |
| 310812    | Plppr5       | 80     | 57      | 84     | 74     | 67    | 57    | 78    | 59      |
| 309460    | Sh3pxd2a     | 3758.1 | 3990.71 | 5034.3 | 4719.2 | 3576  | 3787  | 4173  | 3948.78 |
| 313325    | Lad1         | 125    | 74      | 116    | 145    | 82    | 86    | 108   | 131     |
| 361598    | Iqgap1       | 1471   | 1581    | 2100   | 1766   | 1458  | 1552  | 1677  | 1434    |
| 259171    | Dclrelc      | 168.92 | 150     | 184.96 | 154.96 | 149   | 137   | 144   | 152.98  |
| 296074    | Fsip1        | 25     | 22      | 20     | 27.03  | 20.02 | 23    | 18    | 22.18   |
| 291463    | Ppic         | 320    | 261     | 340    | 252    | 220   | 278   | 295   | 245     |
| 313373    | Cyp2j10      | 225.01 | 238.99  | 266.98 | 238    | 192   | 207   | 239   | 219.46  |
| 298476    | Olr867       | 0      | 0.13    | 0      | 1      | 0     | 0     | 0     | 1       |
| 115769    | Tjp2         | 689    | 861     | 922    | 832    | 586   | 741   | 805   | 792     |
| 317673    | Bbc3         | 69     | 83      | 64     | 71     | 59    | 57    | 62    | 76      |
| 691042    | Sbf2         | 1009   | 1166    | 1247   | 1120   | 896   | 980   | 1093  | 1051    |
| 301261    | Enpp4        | 1723.3 | 1551.45 | 1424.6 | 1341.9 | 1400  | 1337  | 1402  | 1207.76 |
| 114560    | Rap2a        | 65.09  | 65      | 72     | 77     | 60.01 | 68    | 57.01 | 62      |
| 688133    | Mbtd1        | 310    | 312     | 364.01 | 343.94 | 266   | 280.1 | 321   | 310.02  |
| 266670    | Riox2        | 144.99 | 141.59  | 122.37 | 124.97 | 120.3 | 111.9 | 107.3 | 133.09  |
| 314787    | Cep290       | 232.23 | 182.69  | 254.71 | 302.37 | 235   | 178.1 | 203.7 | 243.57  |
| 304721    | Pdxdc1       | 528.54 | 586.96  | 545.58 | 649.94 | 527.6 | 410.6 | 557.3 | 550.19  |
| 311494    | Rin2         | 597    | 582     | 657    | 568    | 503   | 499   | 561   | 565     |
| 681849    | Mlip         | 1586   | 1874    | 1765   | 1456   | 919   | 1507  | 1647  | 1841    |
| 102549548 | LOC102549548 | 8.02   | 6       | 7.1    | 6      | 5.01  | 4     | 9     | 6       |
| 81818     | Vim          | 17934  | 21164   | 28152  | 18523  | 15771 | 20739 | 19522 | 19906   |
| 309362    | Dnmbp        | 230    | 228     | 288    | 257    | 181   | 215   | 248   | 244     |
| 310086    | Mier3        | 358    | 305     | 343    | 329    | 315   | 267   | 288   | 312     |
| 502017    | Dpm3         | 253    | 232     | 251    | 235    | 231.4 | 206   | 196.2 | 226.18  |
| 301476    | Ikzf2        | 107.03 | 133     | 120    | 154.9  | 122   | 106   | 125   | 102.98  |
| 56759     | Rnase4       | 359    | 388     | 566    | 386    | 269   | 361.5 | 434   | 440     |
| 301556    | Dock10       | 1221   | 1308    | 1430   | 1519   | 1118  | 1232  | 1320  | 1181    |
| 287662    | Pcgf2        | 214.03 | 210.42  | 207.76 | 228.01 | 190.2 | 186.4 | 189.2 | 195.98  |

|           |              |        |         |        |        |       |       |       |         |
|-----------|--------------|--------|---------|--------|--------|-------|-------|-------|---------|
| 362466    | Bicd1        | 716.04 | 777.37  | 794.59 | 1030.9 | 857   | 533.4 | 740.6 | 808.3   |
| 362341    | Zc3hav11     | 81.33  | 70.66   | 82.62  | 67.8   | 70.41 | 56.64 | 70.3  | 70.47   |
| 290500    | Ggact        | 224.13 | 177.27  | 198.7  | 168.95 | 164.3 | 157.1 | 187.5 | 172.16  |
| 361308    | Kif20a       | 85.74  | 63.21   | 131.46 | 67.68  | 77.44 | 70.92 | 95.74 | 64.19   |
| 25262     | Itpr1        | 209    | 176     | 211    | 235    | 180   | 185   | 195   | 176     |
| 691002    | Dhdh         | 98.11  | 121.18  | 116.67 | 132    | 103.6 | 96.28 | 109.3 | 105.32  |
| 361091    | Uggt2        | 242    | 228     | 251    | 259    | 232   | 214   | 219   | 203     |
| 686412    | Sall4        | 3      | 6       | 12     | 14     | 5     | 7     | 10    | 9       |
| 306459    | Stox2        | 825.15 | 853.44  | 944.6  | 979.51 | 764   | 739.5 | 845.1 | 842.79  |
| 360519    | Rasgeflc     | 354    | 466     | 461    | 348    | 315   | 375   | 337   | 416     |
| 103690170 | LOC103690170 | 8.52   | 10.41   | 14.36  | 12.43  | 10.35 | 13.01 | 7.77  | 9.37    |
| 361753    | Noc31        | 314    | 382     | 363    | 334    | 310   | 320   | 305   | 299     |
| 501699    | Myo15a       | 50     | 44      | 44     | 46     | 44    | 41    | 46    | 32      |
| 117057    | Myo1b        | 742    | 719     | 742    | 726    | 571   | 661   | 714   | 649     |
| 103694069 | LOC103694069 | 101.88 | 83.2    | 76.54  | 119.87 | 112.5 | 70.7  | 70.42 | 84.38   |
| 501795    | Prr36        | 36     | 64      | 39     | 54     | 40    | 50    | 35    | 46      |
| 308708    | Ttc23        | 262    | 249     | 229    | 208    | 208   | 199   | 204   | 229     |
| 498846    | Pcdhga2      | 414.48 | 448.6   | 347.51 | 326.88 | 360.1 | 360.7 | 317.7 | 323.9   |
| 140583    | Chek1        | 83     | 61      | 75     | 62     | 50    | 61    | 80    | 58      |
| 81809     | Tgfb2        | 456    | 419     | 427    | 376    | 382   | 458   | 352   | 295     |
| 293024    | Akap13       | 1423   | 1362    | 1569   | 1585   | 1351  | 1394  | 1299  | 1219    |
| 266767    | Slc17a8      | 58.32  | 59.78   | 69.98  | 62.49  | 56.91 | 39.96 | 58.51 | 66.67   |
| 500582    | RGD1565622   | 72.86  | 71.8    | 95.38  | 97     | 82.96 | 72.24 | 73.12 | 70.36   |
| 300225    | Fmn13        | 256    | 277     | 362    | 256    | 248   | 250   | 270   | 252     |
| 500057    | Zfp800       | 176.92 | 157.27  | 174.77 | 187.73 | 149   | 130.5 | 171.4 | 166.55  |
| 24337     | Erbp2        | 383.75 | 381.56  | 478.04 | 414.45 | 335.5 | 350.9 | 436.4 | 346.47  |
| 103694506 | LOC103694506 | 298.5  | 255.9   | 207.42 | 185.76 | 218.3 | 185   | 228.2 | 208.38  |
| 309164    | Ovol1        | 35.27  | 31      | 29.01  | 36.05  | 24.21 | 29    | 35.13 | 28.06   |
| 364395    | Clqtnf9      | 8      | 15      | 15     | 6      | 4     | 13    | 6     | 16      |
| 60662     | Fgf5         | 7      | 6       | 24     | 7      | 8     | 9     | 12    | 10      |
| 498333    | Bmp2k        | 625.12 | 606.1   | 713.02 | 708.02 | 539.2 | 554.5 | 651.6 | 605.72  |
| 361646    | LOC361646    | 315    | 350     | 373    | 309.07 | 289   | 283   | 342   | 280.03  |
| 25029     | Calcr1       | 444.24 | 418.54  | 455.01 | 394.51 | 305.2 | 379.9 | 468.2 | 364.56  |
| 363016    | RGD1309534   | 399    | 352     | 368    | 327    | 292   | 338   | 327   | 325     |
| 246755    | Bcas1        | 1095   | 1270    | 1327   | 1158   | 909   | 1081  | 1080  | 1230    |
| 294273    | RT1-DMb      | 164.34 | 134.73  | 199.3  | 135.24 | 119.6 | 108.6 | 135.4 | 198.24  |
| 83685     | Capn6        | 105.77 | 120.22  | 148.62 | 128.01 | 98    | 127   | 110   | 110.66  |
| 102551819 | LOC102551819 | 92     | 115     | 94     | 114    | 90    | 84    | 101   | 93      |
| 362526    | Dnajc25      | 71     | 60      | 67     | 67     | 63    | 54    | 55    | 63      |
| 498831    | RGD1562608   | 270.1  | 237.21  | 246.85 | 288.81 | 259.1 | 202.6 | 236.8 | 226.43  |
| 309349    | Slitrk2      | 913    | 916     | 913    | 1048   | 775   | 714   | 943   | 929     |
| 103694558 | LOC103694558 | 181.16 | 198.07  | 167.17 | 160.56 | 161.6 | 137.1 | 173.5 | 154.77  |
| 114206    | Tmf1         | 1027   | 1046.08 | 1145.1 | 1303.8 | 1101  | 753.4 | 1101  | 1055.26 |
| 304486    | Tctn1        | 616.42 | 727.21  | 725.35 | 599.39 | 552.6 | 594.7 | 559   | 660.32  |
| 689909    | Ccdc62       | 117    | 128     | 150    | 118    | 92    | 102   | 142   | 119     |
| 311658    | Nfatc2       | 240.91 | 272.02  | 307.63 | 212.98 | 193   | 223.7 | 233.8 | 266.33  |
| 362106    | Fubp3        | 538    | 547     | 551    | 514    | 534   | 456   | 538   | 379     |
| 360840    | Srgap2       | 1083   | 1091    | 1304   | 1194   | 918   | 1073  | 1137  | 1016    |
| 497886    | Clqtnf2      | 224    | 216     | 291    | 207    | 194   | 190   | 209   | 239     |
| 361247    | Hist1h2bd    | 0      | 0       | 0      | 2.39   | 0     | 0     | 2.12  | 0       |
| 84021     | Irs3         | 103    | 59      | 72     | 67     | 67    | 47    | 66    | 87      |
| 58948     | Dlg3         | 196    | 204     | 229    | 168    | 171   | 156   | 202   | 178     |
| 287275    | Sec24a       | 564    | 601     | 692    | 633    | 536   | 548   | 583   | 542     |
| 501194    | Ppip5k2      | 267    | 289     | 265    | 331    | 247   | 228   | 274   | 273     |
| 361927    | Fxr1         | 427.43 | 417.06  | 322.62 | 428.88 | 372.4 | 346.9 | 380.4 | 316.24  |
| 103692848 | LOC103692848 | 26.54  | 20.81   | 13.07  | 15.54  | 21.36 | 13.08 | 14.27 | 18.69   |

|           |              |        |         |        |        |       |       |       |         |
|-----------|--------------|--------|---------|--------|--------|-------|-------|-------|---------|
| 289777    | Figl1        | 21     | 19      | 21     | 10     | 10    | 18    | 24    | 11      |
| 363170    | Zkscan7      | 134.37 | 103.3   | 133.92 | 116.39 | 128   | 102   | 111.7 | 91.37   |
| 313765    | Slc35e2b     | 722.74 | 824.14  | 849.65 | 876.4  | 650.2 | 723.2 | 761.3 | 769.61  |
| 362342    | Hipk2        | 834    | 740     | 782.01 | 1057.3 | 830   | 693   | 717   | 789     |
| 171100    | Angpt12      | 535    | 547     | 766    | 630    | 443   | 593   | 581   | 582     |
| 680076    | Asb14        | 19     | 13      | 14     | 16     | 6     | 21.01 | 13.01 | 15      |
| 303208    | Specc1       | 401    | 525     | 531    | 462    | 418   | 457   | 449   | 379     |
| 246304    | Cep350       | 493    | 590     | 606    | 702    | 622   | 355   | 568   | 577     |
| 25306     | Cpd          | 1301   | 1408    | 1387   | 1641   | 1432  | 1084  | 1297  | 1279    |
| 294667    | Poc5         | 318.87 | 302.35  | 283.31 | 273.13 | 262.9 | 286.5 | 281.7 | 214.19  |
| 303403    | Med13        | 407    | 425     | 487    | 478    | 395   | 344   | 419   | 437     |
| 360629    | Nt5c3b       | 383.83 | 364.92  | 342.75 | 374.85 | 313.6 | 322.7 | 330.7 | 334.55  |
| 56266     | Cyp4f1       | 22.86  | 19.07   | 14.67  | 14.49  | 13.97 | 17.81 | 15.88 | 15.44   |
| 312903    | Tram1        | 1391   | 1368    | 1577   | 1362   | 1119  | 1215  | 1338  | 1386    |
| 79238     | Hmgcl        | 125    | 164     | 156    | 125    | 111   | 133   | 115   | 147     |
| 64640     | Rpl30        | 1254.1 | 1113.29 | 2125.4 | 869.47 | 932.1 | 42.59 | 1689  | 2096.81 |
| 305987    | Dock5        | 1458.1 | 1605.79 | 1456.1 | 1673.2 | 1344  | 1254  | 1582  | 1317.46 |
| 301085    | Fyco1        | 345    | 365     | 419    | 412    | 325   | 339   | 380   | 324     |
| 310315    | Ccdc39       | 210    | 166     | 196    | 195    | 178   | 149   | 176   | 177.94  |
| 296456    | Itgav        | 3679   | 3992    | 3949   | 4323   | 3369  | 3379  | 3839  | 3567    |
| 305605    | Ccdc88a      | 527    | 562     | 619    | 637    | 559   | 439   | 543   | 541     |
| 58820     | Zfp148       | 996    | 953     | 1101   | 1081   | 957.7 | 837.2 | 964   | 909     |
| 114202    | Mpp3         | 190.24 | 143.57  | 183    | 167    | 167.6 | 156   | 168.6 | 115     |
| 310363    | Fbxo4        | 53     | 69      | 60     | 59     | 42    | 51    | 63    | 58      |
| 287990    | Vps8         | 968    | 949     | 893    | 957    | 804   | 833   | 868   | 840     |
| 117255    | Ptpn12       | 964    | 1004    | 1044   | 979    | 814   | 871   | 970   | 889     |
| 689933    | Syce3        | 22     | 38      | 47     | 18     | 22    | 25    | 28    | 36      |
| 310538    | Fnip2        | 413    | 448     | 474    | 389    | 412   | 365   | 408   | 346     |
| 25181     | Bgn          | 2322   | 2003.75 | 3568.4 | 2931.4 | 2095  | 2641  | 2679  | 2200.36 |
| 362366    | Fkbp14       | 318.83 | 385.19  | 332.03 | 306.13 | 242.8 | 302.9 | 336.6 | 309.81  |
| 361348    | Mro          | 83     | 65      | 70     | 95     | 64    | 60    | 74    | 80      |
| 259237    | Dock9        | 2172   | 2070    | 2071   | 2492   | 1906  | 1866  | 2042  | 2007    |
| 309557    | Epb4112      | 2849   | 3320    | 3857   | 3350   | 2428  | 3005  | 3328  | 3121    |
| 103691999 | LOC103691999 | 10.78  | 12.26   | 5.94   | 4.15   | 9.5   | 4.44  | 10.1  | 5.39    |
| 497903    | Sowaha       | 49     | 56      | 65     | 36     | 42    | 38    | 53    | 50      |
| 192242    | Akr1d1       | 59.04  | 61.79   | 61.68  | 65.41  | 50.8  | 60.11 | 45.37 | 63.97   |
| 29412     | Adrala       | 58     | 61      | 46     | 68     | 46    | 48    | 60    | 53      |
| 308666    | Cyfipl       | 1145.6 | 1280.33 | 1402.6 | 1322.1 | 1089  | 1139  | 1249  | 1098.4  |
| 689253    | Nbeal1       | 236.49 | 239.57  | 268.97 | 344.02 | 254.9 | 159.7 | 241.9 | 311.09  |
| 84050     | Enpp2        | 553    | 532     | 589    | 569    | 414   | 502   | 626   | 451     |
| 100363275 | Adgra2       | 1025.7 | 1122.68 | 1337.1 | 1460.5 | 1029  | 1118  | 1143  | 1104.98 |
| 312566    | Adamts9      | 250.05 | 229     | 327    | 237    | 197.6 | 228   | 244   | 257.2   |
| 116996    | I116         | 686    | 862     | 818    | 652    | 615   | 785   | 611   | 671     |
| 360760    | Pan3         | 777.9  | 824.18  | 816.28 | 843.03 | 717.8 | 690.5 | 768.4 | 722.05  |
| 100362170 | Zfp964       | 97     | 108.93  | 95.68  | 99     | 92.75 | 95.7  | 86.86 | 80.78   |
| 103690962 | LOC103690962 | 14     | 13      | 24     | 30     | 30    | 13    | 11    | 18      |
| 108352495 | LOC108352495 | 1      | 2       | 3      | 3      | 1     | 0     | 2     | 5       |
| 117182    | Hsd17b3      | 4      | 6       | 2      | 6      | 0     | 7     | 5     | 4       |
| 291165    | Nkapl        | 9      | 3       | 3      | 3      | 5     | 4     | 4     | 3       |
| 302516    | Nyx          | 7      | 2       | 4      | 5      | 4     | 3     | 5     | 4       |
| 304577    | Ung          | 39     | 41      | 47     | 53     | 38    | 43    | 44    | 35      |
| 308810    | Ccdc81       | 1      | 3       | 2      | 3      | 0     | 3     | 3     | 2       |
| 311613    | L3mbt11      | 60     | 34      | 39     | 56     | 47    | 50    | 42    | 29      |
| 315085    | Naprt        | 198    | 173     | 212    | 191    | 126   | 166   | 189   | 207     |
| 364620    | Poteg        | 1      | 3       | 0      | 5      | 3     | 1     | 1     | 3       |
| 691416    | Aknad1       | 1      | 3       | 2      | 3      | 2     | 2     | 2     | 2       |

|           |                 |        |         |        |        |       |       |       |         |
|-----------|-----------------|--------|---------|--------|--------|-------|-------|-------|---------|
| 691992    | Gp1ba           | 7      | 4       | 2      | 5      | 8     | 3     | 3     | 2       |
| 303735    | Rnf213          | 781    | 803     | 888    | 894    | 755.1 | 711   | 767   | 759     |
| 501157    | Rpe             | 723.64 | 658.04  | 673.45 | 651.66 | 597.2 | 574.1 | 609.3 | 625.91  |
| 313228    | Invs            | 250.69 | 243.05  | 280.69 | 214.02 | 239.7 | 212   | 232.5 | 194.58  |
| 311146    | Itprid2         | 3300   | 3655    | 3872   | 4129   | 2859  | 3120  | 3682  | 3636    |
| 295263    | Gabpb2          | 78.96  | 73.99   | 100.99 | 94     | 87    | 63.02 | 83.94 | 75.4    |
| 306506    | Pragl           | 196    | 182     | 193    | 259    | 193   | 177   | 160   | 208     |
| 494344    | Ier2            | 171    | 188     | 158    | 286    | 248   | 188   | 146   | 132     |
| 100362347 | Fnip1           | 498    | 458     | 493    | 501    | 478   | 423   | 421   | 412     |
| 317420    | Wnk3            | 59     | 84      | 63     | 74     | 59    | 44    | 70    | 76      |
| 24514     | Jak2            | 521    | 545     | 588    | 577    | 502   | 440   | 565   | 477     |
| 309381    | Pyroxd2         | 233    | 245     | 278    | 257    | 233   | 224   | 218   | 226     |
| 295347    | Rap1a           | 1294   | 1247    | 1472   | 1143   | 960   | 1163  | 1284  | 1179    |
| 114483    | Cdk6            | 235.85 | 218.72  | 253.14 | 313.31 | 228.9 | 217.2 | 241.4 | 220.7   |
| 306022    | Fndc3a          | 1069.3 | 1167.45 | 1179.2 | 1335.3 | 1130  | 947   | 1146  | 1003.01 |
| 63843     | P2ry4           | 91     | 88      | 91     | 101    | 88    | 69    | 107   | 66      |
| 108348149 | LOC108348149    | 522.72 | 513.12  | 528.22 | 452.84 | 318.8 | 422.2 | 475.1 | 577.91  |
| 361948    | Nbea            | 511    | 456     | 554    | 580    | 453   | 484   | 482   | 450     |
| 292085    | Nup133          | 288    | 264     | 293    | 261    | 251   | 262   | 226   | 245     |
| 500069    | Cep41           | 132    | 138     | 121    | 144    | 123   | 108   | 128   | 117     |
| 300983    | Abhd14b         | 440    | 482     | 478    | 450    | 345   | 370   | 429   | 502     |
| 103692172 | NEWGENE_1562258 | 152.09 | 132.61  | 128.58 | 96.11  | 106   | 127.8 | 100.3 | 119.17  |
| 293971    | RGD1564433      | 2.84   | 2.24    | 1.51   | 4.12   | 1.79  | 1.61  | 4.21  | 1.92    |
| 362401    | Tmem43          | 768    | 939     | 1127   | 797    | 708   | 894   | 816   | 813     |
| 79126     | Cfi             | 237    | 297     | 307    | 194    | 249   | 225   | 188   | 259     |
| 689926    | Smim5           | 195    | 181     | 153    | 134    | 124   | 131   | 158   | 177     |
| 315121    | Cdc42ep1        | 866    | 1042    | 1012   | 904    | 700   | 876   | 862   | 965     |
| 297942    | Pnlsr           | 1862   | 1817    | 1975   | 1970   | 1709  | 1574  | 1795  | 1707    |
| 310749    | Rsbnl           | 436    | 438     | 430    | 441    | 418   | 364   | 372   | 399     |
| 266792    | Zscan26         | 778    | 749     | 791    | 755    | 600   | 654   | 746   | 735     |
| 361300    | Mocos           | 259    | 283     | 309    | 313    | 259   | 263   | 229   | 285     |
| 64469     | Slc30a4         | 604.88 | 559.89  | 570.91 | 610.96 | 495.9 | 434.8 | 564   | 593.92  |
| 363013    | Tmem123         | 350    | 356     | 454    | 368    | 324   | 401   | 318   | 317     |
| 24907     | Dmd             | 3135.2 | 3259.55 | 3228.8 | 3278.7 | 2739  | 2674  | 3069  | 3001.56 |
| 66027     | Drp2            | 7816   | 9677    | 8532.1 | 8570   | 5555  | 8210  | 7482  | 9545    |
| 64475     | P4ha1           | 1367   | 1417    | 1505   | 1588   | 1090  | 1360  | 1389  | 1392    |
| 117108    | B3gat1          | 18     | 25      | 24     | 24     | 17    | 18    | 26    | 20      |
| 362630    | Srsf10          | 1062   | 1071    | 1109   | 1139   | 962   | 920   | 1101  | 917     |
| 289625    | Klb             | 19     | 22      | 17     | 24     | 15    | 19    | 14    | 25      |
| 681292    | Shld1           | 35     | 46      | 42     | 41     | 34    | 33    | 50    | 29      |
| 25478     | Man2a1          | 339    | 391     | 420.99 | 407    | 321   | 330   | 340   | 396     |
| 302424    | Eda             | 279    | 279     | 310    | 271    | 209   | 261   | 264   | 280     |
| 686240    | Naa16           | 310    | 313     | 290    | 363    | 285   | 260   | 310   | 281     |
| 309307    | RGD1311595      | 472    | 404     | 464    | 556    | 442   | 379   | 446   | 421     |
| 689284    | Rpl38           | 1994.2 | 1578.87 | 1812   | 1294.6 | 1347  | 1326  | 1436  | 1838.3  |
| 100910069 | LOC100910069    | 254.75 | 271.41  | 245.59 | 197.54 | 192.2 | 204.9 | 213.9 | 252.07  |
| 315903    | U2surp          | 1162   | 1152.99 | 1233   | 1296   | 1069  | 1000  | 1202  | 1042    |
| 102551957 | LOC102551957    | 5.05   | 4.09    | 4.49   | 5.44   | 4.04  | 3.95  | 3.74  | 5.25    |
| 497943    | Gltpd2          | 9.4    | 13.13   | 14.42  | 10.68  | 5.48  | 7.08  | 16.64 | 13.21   |
| 114635    | Trafdl1         | 1043   | 954     | 938    | 816    | 821   | 833   | 858   | 828     |
| 297508    | Nampt           | 673    | 645     | 586    | 543    | 572   | 536   | 537   | 534     |
| 103689969 | Kdm6a           | 346.58 | 340.54  | 339.25 | 322.74 | 284.6 | 260   | 333.7 | 323.23  |
| 362132    | Epc2            | 399    | 407     | 395    | 419    | 332   | 365   | 383   | 363     |
| 276720    | Kcnj14          | 105.13 | 125.39  | 109.36 | 99.85  | 107.4 | 95.9  | 86.07 | 102.37  |
| 361714    | Rasgrp2         | 97     | 80      | 99     | 72     | 91    | 83    | 72    | 64      |
| 303247    | Tnk1            | 41.61  | 47.14   | 30.68  | 60.43  | 41.89 | 31.42 | 36.81 | 50.11   |



|           |              |        |         |        |        |       |       |       |         |
|-----------|--------------|--------|---------|--------|--------|-------|-------|-------|---------|
| 313270    | Megf9        | 2278   | 2346    | 2444   | 2774   | 2275  | 1831  | 2455  | 2207    |
| 287406    | Adprm        | 368    | 431     | 339    | 310    | 303   | 325   | 329   | 333     |
| 299103    | Klhl28       | 424.64 | 388.38  | 391.81 | 408.11 | 366.1 | 306.5 | 362.8 | 401.63  |
| 29695     | Gabrr2       | 4.3    | 1       | 6.22   | 2.14   | 2.99  | 3     | 4     | 2.18    |
| 81516     | Smad7        | 97     | 107     | 113    | 114    | 95    | 92    | 108   | 89      |
| 306810    | Susd3        | 18     | 37      | 28     | 18     | 26    | 23    | 16    | 25      |
| 362893    | Arhgap9      | 99.28  | 78.56   | 113.15 | 73.86  | 105.6 | 62.57 | 83.34 | 73.65   |
| 307016    | Arhgap12     | 916    | 878     | 939    | 980    | 848.8 | 726   | 904   | 830     |
| 292139    | Shtn1        | 615.32 | 696.88  | 832.88 | 717.96 | 503.9 | 653   | 745   | 649.61  |
| 362971    | Mpped1       | 86     | 101.08  | 81.67  | 74.77  | 74.13 | 71    | 64.01 | 97      |
| 312896    | Trpa1        | 1638   | 1554    | 1879   | 1676   | 1538  | 1231  | 1507  | 1737    |
| 290212    | Efs          | 326    | 360     | 433    | 334    | 316   | 340   | 310   | 329     |
| 360829    | Ankle2       | 472    | 446     | 520    | 513    | 425   | 375   | 481   | 458     |
| 366016    | Nup188       | 381.43 | 378.49  | 442.75 | 364.31 | 371.9 | 358.7 | 352.2 | 314.13  |
| 500988    | Ddx6         | 2158   | 2214    | 2079   | 2278   | 1999  | 1846  | 2031  | 1906    |
| 303824    | Igf2bp2      | 52     | 58      | 102    | 83     | 47    | 67    | 76    | 73      |
| 29388     | Tnni1        | 21     | 17      | 28     | 17     | 23    | 37    | 8     | 6       |
| 684996    | Mplkip       | 211    | 188     | 208    | 177    | 172   | 168   | 173   | 186     |
| 315045    | Pop1         | 77     | 84      | 85     | 77     | 66    | 62    | 79    | 81      |
| 684293    | Syt14        | 445    | 415     | 342    | 460    | 416   | 336   | 357   | 373     |
| 313592    | Col8a2       | 822    | 889     | 943    | 959    | 850   | 898   | 652   | 822     |
| 29618     | Btg1         | 1062   | 1069    | 1113   | 925.98 | 881   | 985.9 | 946   | 906     |
| 313128    | Casp8ap2     | 220    | 203     | 245    | 238    | 229   | 167   | 212   | 200     |
| 100360982 | Relb         | 140    | 168     | 161.2  | 133    | 114.8 | 131   | 139.3 | 152     |
| 84426     | Wnt4         | 23     | 28      | 28     | 32     | 23    | 22    | 23    | 31      |
| 308820    | Ccdc90b      | 274    | 287     | 273    | 249    | 201   | 223   | 270   | 272     |
| 315594    | Oaf          | 1745   | 1124    | 1330   | 1022   | 1271  | 1177  | 1163  | 1046    |
| 300838    | Tmod3        | 393    | 398     | 526    | 405    | 345   | 334   | 457   | 400     |
| 293118    | Prcp         | 292    | 267     | 320    | 260    | 238   | 282   | 280   | 216     |
| 116667    | Map3k1       | 259.96 | 258.1   | 302.28 | 359    | 272   | 233   | 275   | 272     |
| 294343    | Zfp280b      | 44.2   | 50.59   | 102.21 | 86.97  | 89.01 | 95.21 | 13.64 | 55.45   |
| 54223     | Adcy4        | 92     | 72      | 105    | 83     | 66    | 87    | 94    | 67      |
| 360463    | Mpv17        | 369.31 | 363.34  | 396.75 | 346.61 | 315.5 | 311   | 339.4 | 350.83  |
| 24605     | Nras         | 1799   | 1733.36 | 1764.3 | 1630.2 | 1546  | 1468  | 1595  | 1569.7  |
| 365352    | Mical2       | 1076   | 1057    | 1184   | 1079   | 993   | 1127  | 918   | 884     |
| 287550    | Tp53i13      | 182    | 188     | 128    | 170    | 144   | 187   | 119   | 146     |
| 498305    | Spata17      | 15     | 12      | 21     | 17     | 9     | 12    | 15    | 22      |
| 681008    | Bend4        | 404    | 359     | 377    | 440    | 371   | 342   | 332   | 365     |
| 63852     | Pter         | 103    | 113     | 145    | 76     | 81    | 98    | 96    | 115     |
| 103694513 | LOC103694513 | 20     | 18      | 19     | 36     | 24    | 14    | 20    | 25      |
| 367034    | Zfp266       | 1674.9 | 1662.28 | 1694.3 | 1785.3 | 1455  | 1427  | 1666  | 1536.83 |
| 25324     | Htr4         | 175    | 197     | 196    | 177    | 193   | 152   | 168   | 152     |
| 108351576 | LOC108351576 | 115.2  | 75.11   | 105.27 | 139.39 | 119.6 | 121   | 50.63 | 97.12   |
| 100911761 | LOC100911761 | 9.52   | 12.57   | 26.54  | 21.7   | 11.28 | 12.21 | 20.31 | 18.98   |
| 293749    | Ms4a6b1      | 78.13  | 45.12   | 42.04  | 52.83  | 43.96 | 44.84 | 63.05 | 42.87   |
| 100125361 | Zfp867       | 70     | 78      | 84     | 76     | 64    | 56    | 77    | 78      |
| 363261    | Mogat1       | 19     | 33      | 13     | 19     | 14    | 15    | 26    | 20      |
| 103694559 | Usp9y        | 0      | 2       | 4.72   | 0      | 1     | 2     | 1     | 2       |
| 59264     | Ltb4r        | 11     | 3       | 6      | 8      | 10    | 6     | 5     | 4       |
| 679600    | Xaf1         | 148    | 68      | 105    | 127    | 77    | 119   | 71    | 133     |
| 365984    | St6galnac5   | 46.45  | 45.01   | 72.13  | 58.11  | 34.54 | 47.05 | 68.27 | 48.1    |
| 498605    | Lrrc25       | 112.93 | 95.19   | 133.67 | 124.96 | 79.53 | 71.07 | 134.4 | 131.77  |
| 25526     | Ptgds        | 5892   | 2634    | 3923   | 10055  | 2462  | 2334  | 4140  | 11159   |
| 310362    | RGD1305938   | 1484   | 1364    | 1459   | 1459   | 1305  | 1144  | 1290  | 1410    |
| 298977    | Zfp277       | 286    | 272     | 250    | 220    | 227   | 218   | 240   | 233     |
| 291423    | Setbp1       | 326    | 227     | 279    | 355    | 253   | 240   | 330   | 237     |



|           |              |        |         |        |        |       |       |       |         |
|-----------|--------------|--------|---------|--------|--------|-------|-------|-------|---------|
| 108351806 | Znf660       | 38.73  | 48.14   | 41.77  | 44.54  | 33.18 | 33.07 | 44.93 | 43.48   |
| 684173    | Traf5        | 43     | 39      | 43     | 34     | 32    | 42    | 35    | 33      |
| 362956    | Triobp       | 845.7  | 809.3   | 991.85 | 780.9  | 846.2 | 828.7 | 651.8 | 734.54  |
| 156767    | Tnfrsf1b     | 69     | 63      | 80     | 78     | 73    | 62    | 63    | 61      |
| 498697    | Klh13        | 35     | 38      | 28     | 30     | 33    | 27    | 28    | 29      |
| 313111    | Klh132       | 503.33 | 503.81  | 477.73 | 510.32 | 470.4 | 482.3 | 446.4 | 383.25  |
| 309338    | Cstf2t       | 370    | 371     | 360    | 333    | 299   | 346   | 310   | 326     |
| 103694018 | LOC103694018 | 63.13  | 62.83   | 48.01  | 67.13  | 61.31 | 39.39 | 64.62 | 50.07   |
| 684901    | Zfp449       | 228.37 | 213     | 187    | 207.18 | 170.1 | 168   | 189   | 219.32  |
| 500393    | Vxn          | 23.22  | 19.08   | 34.25  | 24.21  | 20.54 | 26.21 | 30.29 | 12.98   |
| 499016    | Tulp4        | 1259.2 | 1388.08 | 1352.7 | 1523.9 | 1328  | 1066  | 1318  | 1222.81 |
| 313138    | Orc3         | 524    | 520     | 528    | 540    | 547   | 405   | 455   | 480     |
| 499929    | Tgif2        | 189    | 193     | 199    | 189    | 143   | 167   | 197   | 181     |
| 292771    | Sipal13      | 493.53 | 491.28  | 574.38 | 579.12 | 471.2 | 475.2 | 490.3 | 473.84  |
| 64547     | Bcl2l11      | 130.75 | 129.39  | 122.04 | 173.27 | 125.6 | 126.2 | 119.4 | 125.12  |
| 360674    | Bahcc1       | 268.94 | 325.57  | 297    | 380.32 | 307.8 | 272   | 283.4 | 273.29  |
| 311266    | Qser1        | 712    | 688     | 739    | 822    | 650   | 544   | 724   | 728     |
| 306957    | Btn2a2       | 48.08  | 63.85   | 49.97  | 45     | 46.07 | 42.97 | 43.87 | 51.99   |
| 360714    | Gtpbp8       | 103    | 119     | 82     | 91     | 82    | 83    | 80    | 108     |
| 100911674 | LOC100911674 | 101.21 | 85.34   | 197.05 | 240.74 | 54.19 | 319.2 | 48.66 | 135.96  |
| 84114     | Agps         | 456    | 541     | 502    | 590    | 480   | 352   | 478   | 557     |
| 690115    | Dnhd1        | 271    | 241.11  | 290.55 | 288.02 | 227.4 | 217.3 | 261.5 | 268.61  |
| 360851    | RGD1566099   | 132.41 | 117.74  | 121.34 | 93.92  | 103.6 | 115.7 | 106.3 | 90.35   |
| 316351    | Npas2        | 19     | 41      | 77     | 23     | 17    | 17    | 63    | 46      |
| 100359823 | Tmem167a     | 1520   | 1360    | 1340   | 1382   | 1161  | 1227  | 1283  | 1336    |
| 691254    | LOC691254    | 256.83 | 291.31  | 346.63 | 342    | 268.4 | 230.6 | 307.3 | 299.22  |
| 102555474 | LOC102555474 | 31.29  | 28.59   | 34.68  | 30.51  | 28.3  | 23.41 | 29.56 | 30.52   |
| 767613    | Gpr17        | 36     | 36      | 32.25  | 52.1   | 19    | 37    | 42.75 | 41      |
| 363476    | Yipf6        | 1809   | 1897    | 1772   | 1878   | 1688  | 1474  | 1723  | 1690    |
| 363294    | Twsg1        | 773    | 812     | 936    | 908    | 671   | 743   | 852   | 799     |
| 108351541 | LOC108351541 | 73.42  | 38.63   | 67.58  | 56.35  | 56.2  | 46.33 | 50.18 | 58.23   |
| 502084    | Rwdd4        | 480    | 446     | 456    | 488    | 398.7 | 442   | 422   | 409     |
| 690366    | Vangl1       | 320    | 342     | 393    | 369    | 255   | 339   | 374   | 305     |
| 29502     | Slc20a2      | 793    | 862     | 887    | 787    | 603   | 862   | 777   | 734     |
| 305923    | Zdhhc20      | 512    | 500     | 474    | 562    | 478   | 425   | 504   | 424     |
| 309008    | Inpp5f       | 2171.9 | 2323.8  | 2499.5 | 2144.4 | 1946  | 2052  | 2249  | 1924.9  |
| 291540    | Cep76        | 243    | 241     | 255    | 253    | 220   | 209   | 250   | 208     |
| 680280    | Gas2l3       | 1154   | 1456    | 1473   | 1539   | 959   | 1125  | 1531  | 1412    |
| 81515     | Lyn          | 137    | 173     | 210    | 142    | 155   | 141   | 156   | 140     |
| 81708     | Aldh6a1      | 1271.4 | 1481.47 | 1209.2 | 1451.7 | 999.1 | 1249  | 1280  | 1313.58 |
| 64467     | Entpd2       | 2139.6 | 2482.45 | 3013.2 | 2117.1 | 1718  | 2549  | 2351  | 2102.74 |
| 89809     | Rfc1         | 1034   | 1062.72 | 1023.9 | 1064   | 925   | 915   | 990   | 912.96  |
| 494339    | Zfp799       | 251.37 | 260.21  | 268.03 | 214.47 | 214.8 | 208.6 | 226.7 | 239.16  |
| 108348366 | LOC108348366 | 46.99  | 69.99   | 57.23  | 61.21  | 63.14 | 35.87 | 52.01 | 59.56   |
| 502285    | Vom2r80      | 17.95  | 8       | 20     | 13     | 11    | 9     | 13.8  | 18.93   |
| 60630     | Unc5b        | 268.46 | 322.77  | 323.64 | 321.92 | 253.5 | 321.3 | 256.9 | 274.72  |
| 53982     | Zfp260       | 703.69 | 659.45  | 676.88 | 701.62 | 560.4 | 591.5 | 689.2 | 611.56  |
| 100909682 | LOC100909682 | 22.78  | 19.14   | 27.18  | 20     | 15.25 | 21.54 | 25.2  | 17.72   |
| 306066    | Tdrd3        | 303    | 322     | 318    | 329    | 315   | 261   | 294   | 268     |
| 690661    | Zfp40        | 291    | 263.99  | 276.51 | 319.04 | 303   | 222   | 265.4 | 238.99  |
| 301570    | Sp110        | 280    | 265     | 297    | 298    | 233   | 264   | 275   | 248     |
| 363490    | RGD1561958   | 13     | 10      | 9      | 6      | 9     | 6     | 8     | 11      |
| 171122    | Rab29        | 281    | 294     | 294    | 224    | 238   | 246   | 257   | 237     |
| 83498     | Hnrnpab      | 1972.4 | 1913.77 | 2930.8 | 1831.1 | 1953  | 1829  | 1979  | 1976.92 |
| 81742     | Pdelc        | 1973   | 1583    | 1841   | 2184   | 1840  | 1449  | 1842  | 1653    |
| 304885    | Fam20b       | 1593.2 | 1580.12 | 1528   | 1662.9 | 1469  | 1407  | 1447  | 1372.47 |

|           |              |        |         |        |        |       |       |       |         |
|-----------|--------------|--------|---------|--------|--------|-------|-------|-------|---------|
| 500686    | Ccdc177      | 49.18  | 52.39   | 59.08  | 66.35  | 47    | 46    | 58    | 52.15   |
| 684024    | Dusp28       | 132    | 129     | 109    | 106    | 101   | 98    | 110   | 117     |
| 64047     | Lrat         | 26.17  | 26.81   | 35.35  | 26.58  | 20.65 | 25.68 | 26.74 | 29.77   |
| 362484    | Plekhf2      | 306    | 282     | 305    | 221    | 222   | 238   | 273   | 264     |
| 297520    | I117rc       | 100    | 95      | 144    | 99     | 88    | 108   | 104   | 92      |
| 315211    | Zbed4        | 214    | 227     | 219    | 197    | 186   | 179   | 202   | 200     |
| 692004    | Siah3        | 32     | 33      | 29     | 49     | 30    | 29    | 25    | 44      |
| 25425     | Ctsh         | 2389   | 2197    | 2662   | 2373   | 1805  | 2034  | 2380  | 2393    |
| 303764    | RGD1310429   | 658    | 567     | 616    | 648    | 584   | 464   | 623   | 557     |
| 361032    | Armh4        | 1079.5 | 1174.48 | 1093.4 | 1160.7 | 1106  | 975.8 | 951.4 | 1002.18 |
| 84584     | Ncoa3        | 571    | 572     | 593    | 729    | 574   | 588.2 | 532   | 512.52  |
| 360914    | Plac8        | 102.97 | 69.65   | 118.11 | 27.26  | 87.82 | 75.71 | 57.54 | 63.6    |
| 296086    | Ndufaf1      | 529.32 | 483.67  | 444.3  | 480.17 | 457.4 | 426.7 | 387.5 | 462.92  |
| 361552    | Wtip         | 204    | 187     | 190    | 154    | 150   | 174   | 157   | 177     |
| 688618    | Gxylt2       | 24     | 19      | 36     | 26     | 18    | 23    | 25    | 28      |
| 171287    | Epha7        | 178.86 | 196.21  | 180.69 | 194.52 | 168.2 | 139.5 | 193   | 170.98  |
| 308900    | rnf141       | 2248   | 2449    | 2158   | 2111   | 1594  | 1899  | 2183  | 2351    |
| 100364769 | LOC100364769 | 13     | 12.04   | 16     | 24     | 16    | 11.04 | 18.19 | 13      |
| 498690    | Ctla2a       | 66.2   | 65.46   | 62.97  | 49.07  | 57.45 | 40.85 | 63.36 | 56.53   |
| 500846    | LOC500846    | 31.15  | 23.09   | 43.52  | 25.39  | 31.6  | 20.85 | 34.53 | 23.28   |
| 306994    | Yae1         | 380    | 355     | 413    | 352    | 296   | 344   | 344   | 359     |
| 103690779 | LOC103690779 | 93.18  | 117.2   | 84.99  | 119.97 | 82.11 | 73.38 | 79.66 | 136.73  |
| 682206    | LOC682206    | 352    | 316     | 354.99 | 345.99 | 290.9 | 298   | 312   | 324.96  |
| 500316    | Acrbp        | 46     | 32      | 43     | 32     | 29    | 38    | 35    | 35      |
| 108348081 | LOC108348081 | 245.54 | 222.07  | 211.82 | 327.65 | 203   | 223.1 | 216.3 | 259.37  |
| 29547     | Homer2       | 132    | 122     | 134    | 138    | 124   | 114   | 109   | 124     |
| 304135    | Adamts5      | 343    | 339     | 379    | 412    | 329   | 248   | 366   | 376     |
| 103693051 | LOC103693051 | 0      | 5.5     | 4.5    | 2.34   | 0     | 4.39  | 4.67  | 1.99    |
| 361501    | Isoc2b       | 73     | 74      | 79     | 61     | 48    | 65    | 62    | 82      |
| 308668    | Nipal        | 1320   | 1465.52 | 1351   | 1653.6 | 1417  | 957   | 1487  | 1323.99 |
| 684538    | Echdc3       | 23     | 7       | 25     | 12     | 15    | 19    | 11    | 15      |
| 171434    | Phldb1       | 1941   | 2296.01 | 2316   | 2149   | 1748  | 1922  | 1987  | 2136    |
| 102555826 | Clec20a      | 345.1  | 289.83  | 331.66 | 216.09 | 188.3 | 289.1 | 300.3 | 281.42  |
| 364018    | Ncf2         | 30.05  | 38.15   | 48.24  | 28.15  | 28.17 | 27.04 | 42.19 | 32.09   |
| 81517     | Mdk          | 325.71 | 254.9   | 363.93 | 319    | 291   | 244   | 279.9 | 316.72  |
| 291984    | Dpep2        | 16     | 24.86   | 13     | 12.01  | 22    | 11    | 14    | 12      |
| 307924    | Zfp276       | 234.65 | 259.57  | 274.58 | 232.08 | 197.3 | 251.8 | 236.7 | 210.88  |
| 363210    | Phf3         | 818    | 793     | 880    | 926    | 805   | 711   | 811   | 734     |
| 306183    | Farpl        | 580    | 650     | 673    | 679    | 546   | 596   | 628   | 543     |
| 108349781 | Hs3st4       | 73     | 56      | 63     | 48     | 46    | 40    | 82    | 47      |
| 300665    | Hinfp        | 258    | 264.86  | 266.78 | 245.13 | 251   | 209   | 239   | 228     |
| 60331     | Atxn3        | 691    | 733     | 694    | 705    | 596   | 587   | 676   | 670     |
| 497942    | Cxcl16       | 363.76 | 293.72  | 313.9  | 390.81 | 296.8 | 277.9 | 330.9 | 314.69  |
| 366205    | Flrt3        | 316    | 296     | 358    | 298    | 245   | 259   | 305   | 327     |
| 303173    | Zfp39        | 110.32 | 110.42  | 127.42 | 115.93 | 110.4 | 82.85 | 123.5 | 99.07   |
| 171159    | Zhx1         | 1500   | 1502    | 1587   | 1569   | 1401  | 1245  | 1518  | 1353    |
| 310695    | Kirrel1      | 1365   | 1519    | 1984   | 1828   | 1303  | 1526  | 1675  | 1495    |
| 117261    | Slc15a1      | 32.93  | 18.86   | 6.12   | 24.37  | 23.88 | 13.69 | 20.6  | 15.55   |
| 361564    | Fam71e1      | 87.36  | 85.76   | 83.92  | 55.94  | 79.65 | 68.37 | 81.1  | 51.3    |
| 296117    | Galk2        | 479.55 | 470.76  | 427.64 | 363.67 | 343.9 | 415.5 | 394.4 | 406.81  |
| 688442    | LOC688442    | 102.97 | 96.24   | 138.79 | 137.23 | 121.3 | 118.9 | 108.5 | 77.23   |
| 315914    | Morc4        | 172    | 193     | 250    | 222    | 171   | 200   | 206   | 173     |
| 308265    | Lats1        | 697    | 805     | 801    | 837    | 702   | 656.7 | 766   | 689.03  |
| 257650    | LOC257650    | 94.58  | 78.41   | 101.45 | 104.54 | 78.19 | 74.78 | 107.3 | 79.29   |
| 501127    | Rfx8         | 62     | 68      | 43     | 58     | 49    | 55    | 43    | 60      |
| 687266    | Fpgs         | 264    | 316     | 300    | 227    | 242   | 255   | 236   | 259     |

|           |              |        |         |        |        |       |       |       |         |
|-----------|--------------|--------|---------|--------|--------|-------|-------|-------|---------|
| 25724     | Itgb4        | 10789  | 10411   | 12494  | 13736  | 8779  | 10963 | 11455 | 11308   |
| 310638    | Ash11        | 1708.4 | 1776.52 | 1896.3 | 2135.6 | 1792  | 1557  | 1807  | 1580.22 |
| 314800    | Acss3        | 64     | 48.12   | 66.93  | 66.02  | 56.65 | 49.09 | 53.88 | 60.01   |
| 289378    | Tatdn3       | 202    | 237     | 197    | 106    | 196   | 174   | 185   | 110     |
| 361505    | Cdc42ep5     | 82     | 65      | 94     | 77     | 73    | 67    | 80    | 65      |
| 291044    | Nedd9        | 421.76 | 483.97  | 487.55 | 448.01 | 380.2 | 413.1 | 427.6 | 429.3   |
| 361183    | Ankrd10      | 712    | 789     | 816    | 739    | 673   | 582   | 713   | 771     |
| 102548730 | LOC102548730 | 27.45  | 21.78   | 16.36  | 26.67  | 23.96 | 27.53 | 15.41 | 15.79   |
| 501854    | Rab7b        | 225.12 | 254.11  | 391.97 | 207.27 | 201.6 | 229.2 | 265.1 | 270.83  |
| 362325    | Mdfic        | 389    | 377     | 505    | 466    | 295   | 360   | 494   | 408     |
| 690435    | LOC690435    | 1.05   | 1.02    | 3.86   | 3.24   | 4.12  | 1     | 2.16  | 0.94    |
| 406170    | Sapcd1       | 45.55  | 72.65   | 110.21 | 37.91  | 49.66 | 65.13 | 56.68 | 67.26   |
| 102556352 | LOC102556352 | 100.68 | 100.69  | 83.2   | 120.1  | 91.79 | 94.91 | 102.1 | 74      |
| 27080     | Hbp1         | 1161   | 1131    | 1099   | 1070   | 972   | 956   | 1025  | 1046    |
| 360492    | Jpt2         | 346    | 372     | 409    | 399    | 286   | 333   | 388   | 361     |
| 689914    | Trabd2b      | 221.98 | 295.57  | 386.34 | 327.71 | 283.8 | 268.8 | 299.4 | 252.18  |
| 102552069 | LOC102552069 | 4.5    | 4.64    | 3.16   | 8.48   | 6.13  | 5.81  | 3.08  | 3.61    |
| 102553085 | LOC102553085 | 4.5    | 4.64    | 3.16   | 8.48   | 6.13  | 5.81  | 3.08  | 3.61    |
| 289089    | Ivns1abp     | 4581   | 4695    | 4663   | 4193   | 3577  | 3975  | 4288  | 4416    |
| 294213    | RT1-M1-4     | 8      | 2       | 9      | 10     | 5     | 5     | 15    | 1       |
| 29527     | Ptgs2        | 3      | 6       | 4      | 16     | 9     | 2     | 8     | 7       |
| 498580    | Tmem273      | 4      | 8       | 13     | 4      | 5     | 9     | 5     | 7       |
| 103689954 | LOC103689954 | 184.48 | 223.63  | 309.5  | 197.44 | 178.2 | 189.5 | 305.5 | 147.35  |
| 293967    | Smc5         | 664.64 | 624.64  | 659.72 | 689.63 | 546.8 | 513.4 | 660.1 | 645.62  |
| 81651     | Cspg4        | 602    | 677     | 856    | 828    | 498   | 815   | 753   | 591     |
| 293935    | Prrg3        | 633.22 | 472.44  | 338.56 | 878.88 | 420.8 | 566.9 | 568.9 | 526.49  |
| 685933    | LOC685933    | 163.67 | 179.39  | 191.81 | 190.78 | 61.5  | 211.7 | 156.6 | 220.96  |
| 100360061 | LOC100360061 | 8.36   | 4.17    | 2.3    | 2.41   | 0     | 5.84  | 2.01  | 7.61    |
| 100909786 | LOC100909786 | 8.36   | 4.17    | 2.3    | 2.41   | 0     | 5.84  | 2.01  | 7.61    |
| 100909537 | Iqck         | 675.87 | 756.98  | 605.36 | 640.15 | 483.9 | 676.2 | 635.7 | 606.23  |
| 360521    | Rufy1        | 350    | 378     | 388    | 338    | 278   | 360   | 329   | 337     |
| 303336    | Wsb1         | 1377   | 1426    | 1471   | 1205   | 1038  | 1186  | 1475  | 1215    |
| 362472    | Cspp1        | 425    | 386     | 412    | 467.12 | 372   | 370.9 | 399.9 | 373     |
| 299339    | Tnfaip2      | 93     | 74      | 133    | 88     | 88    | 101   | 92    | 67      |
| 362514    | Tstd2        | 602.19 | 629.97  | 570.68 | 624.9  | 545.5 | 545.5 | 544.4 | 542.05  |
| 58921     | Foxm1        | 103    | 72      | 116.9  | 85.91  | 97.95 | 87.97 | 82.95 | 70      |
| 64012     | Rad50        | 815    | 736     | 774    | 831    | 776   | 632   | 756   | 667     |
| 29498     | Pts          | 188.43 | 187.34  | 169.06 | 176.46 | 185.6 | 143.3 | 152.8 | 165.37  |
| 54308     | Slk          | 1360   | 1296    | 1437   | 1430   | 1319  | 1082  | 1380  | 1174    |
| 192178    | Tnrc6b       | 1439.7 | 1402.76 | 1472.1 | 1645.7 | 1438  | 1203  | 1425  | 1281.06 |
| 102551257 | LOC102551257 | 123.75 | 128.77  | 138.58 | 107.18 | 103.4 | 85.12 | 157.2 | 101.36  |
| 79213     | Slc6a11      | 29     | 53      | 76     | 56     | 41    | 49    | 61    | 41      |
| 299996    | Matn2        | 4448   | 5175    | 4860   | 4621   | 3930  | 5443  | 4058  | 3710    |
| 300173    | Gxylt1       | 578    | 563     | 595    | 590    | 503   | 476   | 604   | 504     |
| 303634    | Gna13        | 300    | 253     | 243    | 304    | 271   | 220   | 284   | 212     |
| 309375    | Marveld1     | 719    | 800     | 843    | 744    | 614   | 689   | 808   | 676     |
| 64088     | Snx16        | 780    | 769     | 776    | 734    | 601   | 639   | 771   | 734     |
| 502710    | Kmt2c        | 1439.1 | 1429.15 | 1504.2 | 1803.1 | 1529  | 1240  | 1412  | 1360.96 |
| 116680    | Ptpru        | 239    | 293     | 248    | 243    | 187   | 211   | 239   | 281     |
| 365894    | Trim33       | 744.01 | 711     | 721    | 786    | 674   | 648   | 687   | 649     |
| 296084    | Ino80        | 565    | 575     | 597    | 612    | 529   | 513   | 552   | 514     |
| 114102    | Cdh23        | 24     | 14      | 32     | 8      | 23    | 19    | 14    | 14      |
| 364653    | Wdr17        | 84     | 78      | 82     | 88     | 82    | 57    | 83    | 76      |
| 59295     | Nucb2        | 892    | 828     | 861    | 798    | 713   | 732   | 813   | 775     |
| 361776    | Ccdc172      | 160.76 | 158     | 201.04 | 191.01 | 160.4 | 130   | 188.7 | 159.01  |
| 293783    | Lpxn         | 112    | 108     | 120    | 100    | 84    | 92    | 100   | 119     |

|           |                 |        |         |        |        |       |       |       |         |
|-----------|-----------------|--------|---------|--------|--------|-------|-------|-------|---------|
| 314740    | RGD1565866      | 22     | 26      | 17     | 23     | 13    | 26    | 14    | 26      |
| 29459     | Rbbp9           | 205.63 | 215.73  | 240.02 | 218.45 | 201.8 | 178.2 | 187.3 | 222.69  |
| 50556     | Exoc6           | 764    | 777     | 870    | 720    | 647   | 712   | 704   | 748     |
| 108352059 | NEWGENE_6497122 | 142    | 167     | 115    | 124    | 153   | 105   | 124   | 110     |
| 619580    | Ctps2           | 1152   | 1103    | 1160   | 1138   | 928   | 985   | 1180  | 995     |
| 24212     | Atpla2          | 7903.9 | 6792.26 | 6564.9 | 10716  | 6156  | 7029  | 7339  | 8188.36 |
| 309187    | At13            | 1165.3 | 1197.21 | 1164.7 | 1173   | 1166  | 847.1 | 1170  | 1037.72 |
| 100360777 | Mroh8           | 45.06  | 38.03   | 41.02  | 56.36  | 25.12 | 39.34 | 48.52 | 49.07   |
| 293104    | Eed             | 306    | 286     | 294    | 261    | 247   | 247   | 266   | 270     |
| 315217    | Plxnb2          | 1083   | 1201    | 1497   | 1336.8 | 1092  | 1121  | 1192  | 1190.81 |
| 298250    | Fggy            | 150    | 157     | 158    | 160.82 | 120   | 133   | 136   | 173.01  |
| 303803    | Klhl24          | 1127   | 1089    | 1105   | 1172   | 1032  | 913   | 1024  | 1066    |
| 29631     | Bet1            | 380    | 405     | 399    | 317    | 291   | 326   | 361   | 370     |
| 102553158 | LOC102553158    | 25.42  | 17.85   | 16.33  | 26.85  | 16.05 | 19.21 | 18.92 | 23.46   |
| 102555672 | LOC102555672    | 300    | 323.77  | 302    | 319    | 251   | 241   | 315   | 310.97  |
| 366980    | Arid2           | 618    | 608     | 658    | 728    | 596   | 522   | 654   | 574     |
| 301059    | Myd88           | 235    | 247     | 267    | 184    | 195   | 204   | 192   | 247     |
| 298366    | Ttc39a          | 89.26  | 139.54  | 90.28  | 75.93  | 93.26 | 60.05 | 138.8 | 62.68   |
| 688400    | Edil3           | 3151   | 3220    | 3149   | 2608   | 2795  | 2692  | 2553  | 2854    |
| 313969    | Fam84a          | 20     | 8       | 12     | 19     | 12    | 12    | 17    | 12      |
| 108348168 | Rlim            | 1191.2 | 983.64  | 1070   | 1442.1 | 1131  | 871.3 | 1228  | 979.92  |
| 361871    | Rfesd           | 363    | 401     | 384    | 486    | 424   | 304   | 353   | 387     |
| 54410     | Enpp3           | 287    | 193     | 372    | 232    | 238   | 206   | 296   | 234     |
| 103693189 | LOC103693189    | 1115.8 | 866.88  | 1019.1 | 793.12 | 562.8 | 984.4 | 1029  | 833.77  |
| 360993    | Ppp4r3b         | 846    | 737     | 943    | 797    | 661   | 671   | 848   | 806     |
| 300811    | Bnip2           | 923.52 | 1009.36 | 1091.1 | 996.91 | 772.9 | 877.5 | 1023  | 939.66  |
| 299117    | Nin             | 567.01 | 529.3   | 570.58 | 707.01 | 529.3 | 519.7 | 560.4 | 523.73  |
| 317627    | Baz2b           | 633    | 643     | 804    | 790    | 628   | 578   | 711   | 662     |
| 298941    | Lamb1           | 3619   | 4748    | 5101   | 4514   | 3614  | 4044  | 4469  | 4032    |
| 503306    | Sowahc          | 918    | 946     | 970    | 964    | 791   | 753   | 940   | 929     |
| 498013    | Ern1            | 238    | 239     | 277    | 272    | 224   | 222   | 233   | 243     |
| 314764    | Eea1            | 851    | 885     | 901    | 1290   | 1025  | 608   | 952   | 944     |
| 64681     | Mvp             | 802    | 1055    | 1055   | 848    | 750   | 892   | 869   | 868     |
| 310689    | Lrrc71          | 126.14 | 114.08  | 168.66 | 192.08 | 93.47 | 149.7 | 140.5 | 156.39  |
| 688611    | Cetn4           | 90     | 86      | 94     | 66     | 63    | 78    | 88    | 73      |
| 108348078 | LOC108348078    | 1168.8 | 1007.95 | 1009.5 | 957.93 | 1059  | 823.3 | 902.8 | 939.5   |
| 309995    | Xrcc4           | 193.04 | 195.74  | 197.37 | 190.66 | 170.7 | 146.5 | 193   | 188.05  |
| 363982    | Yod1            | 51     | 59      | 71     | 76     | 63    | 40    | 53    | 75      |
| 293750    | Ms4a6b          | 355.61 | 319.11  | 369.86 | 310.95 | 277.6 | 297   | 306.9 | 336.99  |
| 301436    | Kctd18          | 390.22 | 446.45  | 448.2  | 395.91 | 372.8 | 351.1 | 412   | 374.99  |
| 690893    | Oosp1           | 30.92  | 32.07   | 26.32  | 30.92  | 37.7  | 25.31 | 15.33 | 29.73   |
| 303801    | Lamp3           | 17     | 22      | 22     | 28     | 11    | 23    | 22    | 24      |
| 102548230 | Znf235          | 80.14  | 74.35   | 74.64  | 69.35  | 61.08 | 63.89 | 66.8  | 76.54   |
| 100909664 | LOC100909664    | 180.62 | 148.94  | 140.08 | 212.61 | 177.2 | 102.5 | 164.6 | 168.98  |
| 317517    | Ptchd1          | 27     | 21      | 19     | 32     | 26    | 11    | 19    | 33      |
| 691280    | LOC691280       | 364.16 | 383.57  | 411.02 | 399.26 | 339.5 | 329.4 | 361.1 | 370.77  |
| 688555    | Atg10           | 104.76 | 117     | 86     | 95     | 86.11 | 76    | 93    | 107     |
| 60338     | Fxyd5           | 372    | 317     | 441    | 287    | 338   | 300   | 336   | 300     |
| 102548101 | LOC102548101    | 234.01 | 279.92  | 239.93 | 262.24 | 254.2 | 223.6 | 232   | 203.74  |
| 313474    | Eps15           | 3573   | 3377    | 3236   | 3595   | 3248  | 2806  | 3091  | 3246    |
| 64709     | Nucks1          | 1706   | 1752    | 1836   | 1743   | 1597  | 1520  | 1626  | 1585    |
| 685610    | Zfp59           | 218.14 | 225.85  | 186.41 | 205.79 | 207.2 | 142.5 | 193.2 | 208.99  |
| 117538    | Wipfl           | 928    | 964     | 1042   | 1048   | 846   | 838   | 946   | 951     |
| 498940    | Ces2h           | 8.71   | 9.82    | 9.9    | 13.28  | 7.15  | 12.93 | 11.43 | 6       |
| 363122    | Ppp2r3a         | 677    | 636.81  | 623.03 | 742    | 571   | 622.2 | 650   | 566     |
| 361764    | Sema4g          | 647    | 811     | 714    | 739    | 545   | 733   | 590   | 750     |

|           |            |        |         |        |        |       |       |       |         |
|-----------|------------|--------|---------|--------|--------|-------|-------|-------|---------|
| 64044     | Casp8      | 79.4   | 61.22   | 88.76  | 71.57  | 61.1  | 50.69 | 82.33 | 76.54   |
| 25296     | Bmp4       | 74.32  | 43.16   | 52.11  | 83.37  | 62.39 | 53.07 | 55.21 | 56.85   |
| 25672     | Nr3c2      | 494    | 501     | 464    | 550    | 444   | 434   | 467   | 462     |
| 100911395 | Agbl4      | 41.02  | 38.83   | 50.58  | 36.47  | 41.78 | 28.43 | 41.97 | 37.94   |
| 50554     | Smad4      | 792    | 826     | 851    | 883    | 800   | 704   | 767   | 744     |
| 316395    | Hecw2      | 418    | 436     | 382    | 525    | 417   | 383   | 393   | 391     |
| 298020    | Tmem245    | 2536   | 2792    | 2789   | 2970   | 2370  | 2381  | 2612  | 2610    |
| 302288    | Fem1c      | 496    | 471     | 475    | 509    | 431   | 449   | 413   | 462     |
| 291444    | Prrcl      | 642    | 593     | 645    | 670    | 552   | 603   | 563   | 576     |
| 365297    | Crtc3      | 535.82 | 560.71  | 571.89 | 545.37 | 406   | 544.4 | 517   | 524.29  |
| 295319    | Man1a2     | 1342   | 1331    | 1321   | 1460   | 1340  | 1078  | 1255  | 1234    |
| 24973     | RT1-A1     | 949.69 | 644.97  | 1091.2 | 990.57 | 817.1 | 980.5 | 862.2 | 648.77  |
| 315923    | Lysmd3     | 120    | 108     | 126    | 106    | 122   | 86    | 100   | 106     |
| 100361506 | Armc3      | 3      | 4       | 2      | 1      | 5     | 1     | 0     | 3       |
| 296610    | Spaca9     | 8      | 12      | 5      | 5      | 6     | 6     | 8     | 7       |
| 299206    | Batf       | 4      | 7       | 7      | 2      | 3     | 5     | 2     | 8       |
| 309609    | Ly6g6f     | 5      | 1       | 4      | 0      | 5     | 0     | 3     | 1       |
| 317271    | Mageb4     | 4      | 4       | 1      | 1      | 2     | 0     | 2     | 5       |
| 361192    | RGD1308544 | 1      | 3       | 4      | 2      | 2     | 2     | 4     | 1       |
| 361993    | Them5      | 8      | 10      | 8      | 4      | 3     | 9     | 5     | 10      |
| 498060    | RGD1562726 | 14     | 8       | 13     | 5      | 11    | 6     | 9     | 10      |
| 499964    | En2        | 1      | 3       | 3      | 3      | 2     | 3     | 2     | 2       |
| 500895    | Iqank1     | 3      | 1       | 5      | 1      | 2     | 3     | 1     | 3       |
| 681325    | LOC681325  | 1      | 3       | 4      | 2      | 1     | 4     | 1     | 3       |
| 140473    | Ackr2      | 15     | 13      | 20     | 2      | 18    | 15    | 7     | 5       |
| 245955    | Lgals3bp   | 1362   | 1795    | 1781   | 1415   | 1302  | 1807  | 1282  | 1327    |
| 362624    | Selenon    | 1345   | 1547    | 1673   | 1538   | 1269  | 1440  | 1404  | 1380    |
| 114486    | Braf       | 814.7  | 782.9   | 804.04 | 925.87 | 799.4 | 690.5 | 761.3 | 743.89  |
| 362017    | Cyb561d1   | 160    | 171     | 169    | 131    | 114   | 174   | 131   | 149     |
| 25277     | Mfge8      | 883    | 901     | 987    | 618    | 676   | 875   | 726   | 774     |
| 170907    | Serinc5    | 1340   | 1674    | 1840   | 1694   | 1241  | 1485  | 1673  | 1496    |
| 315523    | Nfrkb      | 695    | 718     | 801    | 645    | 654   | 631   | 667   | 622     |
| 113970    | Magi2      | 333    | 417     | 385    | 440    | 329   | 320   | 382   | 387     |
| 25204     | Pcsk1      | 1389.8 | 1553.7  | 1544   | 1362.9 | 1436  | 1088  | 1366  | 1376.93 |
| 307393    | Sh3tc2     | 500    | 566     | 500    | 471    | 380   | 448   | 467   | 539     |
| 29186     | Cd63       | 1813   | 1912    | 2336   | 1619   | 1424  | 1729  | 1785  | 1977    |
| 362602    | Zmym6      | 356    | 335     | 379    | 356    | 305   | 292   | 354   | 333     |
| 298934    | Adi1       | 289    | 274     | 272    | 242    | 221   | 252   | 269   | 228     |
| 364666    | Cdk20      | 213    | 199     | 181    | 162    | 169   | 170   | 145   | 196     |
| 316526    | Wnt6       | 413    | 385     | 394    | 439    | 307   | 319   | 366   | 477     |
| 680478    | Lrrc19     | 3.58   | 5.18    | 2.49   | 7.58   | 7.66  | 2.99  | 2.2   | 4.11    |
| 309816    | Lama4      | 1695   | 2120    | 2754   | 2636   | 1659  | 2066  | 2309  | 2257    |
| 294322    | Pknnox1    | 306    | 347     | 291    | 305    | 269   | 299   | 268   | 289     |
| 313662    | Mfap2      | 83     | 96      | 127    | 97     | 80    | 100   | 111   | 72      |
| 100365370 | Ctdsp2     | 2021   | 1959    | 2145   | 1867   | 1569  | 1933  | 1793  | 1904    |
| 363684    | Meox1      | 61     | 77      | 94     | 111    | 37    | 89    | 90    | 93      |
| 303008    | Rhbdf1     | 1254.5 | 1291.07 | 1572.7 | 1220   | 1043  | 1197  | 1237  | 1332.51 |
| 29383     | Fah        | 167    | 168     | 188    | 153    | 146   | 144   | 147   | 172     |
| 117526    | Tbp        | 270    | 244.61  | 237    | 240    | 227.4 | 185   | 253   | 228.02  |
| 308361    | Zfp329     | 204.98 | 221.47  | 271.67 | 301.57 | 244.7 | 170.4 | 249.5 | 236.12  |
| 498514    | RGD1565222 | 102    | 103     | 109    | 90     | 92    | 104   | 79    | 89      |
| 502784    | Gprin3     | 61.4   | 54.49   | 62.34  | 72.5   | 65.83 | 37.88 | 46.43 | 75.79   |
| 116499    | Fgf4       | 139    | 144     | 138    | 125    | 94    | 111   | 116   | 171     |
| 293617    | Ifitm5     | 19     | 20      | 27     | 25     | 17    | 32    | 16    | 17      |
| 363472    | Prrgl      | 637.53 | 611.46  | 661.28 | 777.73 | 584.9 | 545.7 | 661.5 | 630.19  |
| 304758    | Ccnt2      | 1434.9 | 1346.33 | 1404.4 | 1440.9 | 1263  | 1172  | 1362  | 1273.11 |

|           |              |        |         |        |        |       |       |       |         |
|-----------|--------------|--------|---------|--------|--------|-------|-------|-------|---------|
| 108351567 | LOC108351567 | 17.01  | 6.19    | 13.51  | 17.44  | 11.44 | 14.71 | 14.35 | 8.3     |
| 313837    | Qpct         | 115    | 148     | 132    | 101    | 80    | 78    | 176   | 113     |
| 681383    | Lrmda        | 89.34  | 99.1    | 87.89  | 92.49  | 79.1  | 86.09 | 82.16 | 85.04   |
| 652957    | Csf2ra       | 153    | 134     | 204    | 147    | 153   | 139   | 158   | 125     |
| 304507    | Oasli        | 72.64  | 75.26   | 0      | 0      | 41.95 | 0     | 0     | 91.35   |
| 500000    | Cldn12       | 440    | 474     | 436    | 474    | 353   | 427   | 463   | 401     |
| 103694908 | LOC103694908 | 98.6   | 55.57   | 112.33 | 17.78  | 68.6  | 39.36 | 108.4 | 39.89   |
| 314979    | Deptor       | 2371.8 | 2703.91 | 2642.8 | 2436.8 | 2455  | 2211  | 2208  | 2278.52 |
| 298019    | Ctnnal1      | 2075   | 2606    | 2649   | 2023   | 1555  | 2191  | 2458  | 2227    |
| 303690    | Rhbdf2       | 202.31 | 264.01  | 346.71 | 219.01 | 228.5 | 269.4 | 236.4 | 196.01  |
| 313566    | Rlf          | 562    | 532     | 514    | 575    | 523   | 446   | 524   | 475     |
| 501317    | LOC501317    | 104.8  | 52.01   | 76.15  | 49.47  | 67.73 | 32.96 | 66.77 | 87.16   |
| 293939    | Erlin1       | 305    | 284     | 353    | 267    | 242   | 271   | 278   | 299     |
| 679906    | Trpm7        | 1312   | 1282    | 1352   | 1459   | 1156  | 1106  | 1346  | 1265    |
| 108351482 | LOC108351482 | 43.64  | 54.57   | 39.99  | 42.67  | 42.51 | 36.94 | 29.9  | 53.72   |
| 360590    | Ypel2        | 843.98 | 920.97  | 880.47 | 918.22 | 778.7 | 803.6 | 800.2 | 830.43  |
| 290741    | Dctd         | 35     | 38      | 68     | 42     | 43    | 27    | 52    | 43      |
| 363089    | Mindy2       | 2832   | 2829    | 2908   | 3145   | 2716  | 2326  | 2757  | 2763    |
| 365277    | Asb7         | 257    | 289     | 253    | 320    | 280   | 232   | 240   | 257     |
| 313860    | Pkdcc        | 369    | 283     | 310    | 310    | 206   | 285   | 326   | 330     |
| 295248    | Zbtb7b       | 300    | 270     | 290    | 280    | 252   | 271   | 263   | 242     |
| 102553001 | LOC102553001 | 173.95 | 132.94  | 156.47 | 160.73 | 151.3 | 129.3 | 140.8 | 141.39  |
| 362182    | Rcn1         | 2137   | 2400    | 2358   | 2168   | 1702  | 2098  | 2084  | 2290    |
| 29610     | Tgfbr3       | 1161   | 1301    | 1376   | 1596   | 1188  | 1237  | 1305  | 1171    |
| 361773    | Ccdc186      | 1709   | 1745    | 1627   | 1740   | 1599  | 1356  | 1657  | 1540    |
| 296474    | Helz2        | 249    | 218     | 236    | 215    | 201   | 239   | 192   | 196     |
| 24324     | Edn2         | 4      | 8.79    | 10.37  | 8.77   | 5.16  | 10.13 | 7.13  | 6.38    |
| 314690    | Washc4       | 2076   | 2031    | 1930   | 2148   | 1937  | 1767  | 1869  | 1810    |
| 102554748 | LOC102554748 | 75.13  | 82.14   | 122.1  | 128.95 | 91.94 | 107.3 | 69.67 | 99.39   |
| 64155     | Scn7a        | 14491  | 15918   | 16327  | 16552  | 13087 | 12404 | 16451 | 15149   |
| 102550291 | LOC102550291 | 127.74 | 127.5   | 147.34 | 160.56 | 136.6 | 91.32 | 130.7 | 149.39  |
| 81746     | Pggt1b       | 384    | 421     | 409    | 441    | 379   | 331   | 407   | 376     |
| 687508    | LOC687508    | 135.93 | 115.86  | 97.01  | 92.31  | 106.7 | 105.1 | 96.65 | 89.53   |
| 299145    | Rhoj         | 650    | 592     | 750    | 767    | 534   | 621   | 693   | 641     |
| 362465    | Tmtc1        | 2218   | 1982    | 2232   | 2186   | 1923  | 1979  | 2025  | 1848    |
| 363611    | Iba57        | 111.66 | 126.26  | 120.49 | 126.44 | 117.2 | 117   | 93.03 | 110.19  |
| 25617     | Hspa5        | 5877   | 5734    | 6817   | 7588   | 5380  | 6078  | 6531  | 5483    |
| 64322     | Dap          | 691    | 794     | 993    | 673    | 610   | 730   | 771   | 732     |
| 361276    | Cdnf         | 36     | 27      | 29     | 41     | 26    | 39    | 31    | 24      |
| 685472    | Lrrtm2       | 254    | 242     | 214    | 262    | 251   | 216   | 194   | 216     |
| 315341    | Hoxc5        | 74     | 67      | 56     | 59     | 51    | 54    | 53    | 73      |
| 116670    | Ppp1r12a     | 1400   | 1362    | 1557   | 1458   | 1308  | 1279  | 1369  | 1257    |
| 108351873 | LOC108351873 | 1.65   | 1.11    | 4.23   | 10.33  | 5.26  | 1.34  | 7.82  | 1.21    |
| 312478    | Loxl3        | 190    | 180     | 200    | 209    | 137   | 219   | 178   | 169     |
| 689972    | Piwil4       | 4      | 13      | 18     | 6      | 10    | 9     | 9     | 9       |
| 362152    | Hnrnpa3      | 5067.7 | 4879.28 | 5510.2 | 5158.6 | 4574  | 4322  | 4959  | 4749.2  |
| 360799    | Nupr2        | 77     | 66      | 88     | 87     | 76    | 72    | 63    | 76      |
| 114120    | Gngl2        | 982.83 | 887.56  | 998.63 | 939.9  | 788.5 | 863.6 | 893.9 | 891.72  |
| 362229    | Xrn2         | 632    | 604     | 677    | 652    | 529   | 544   | 652   | 590     |
| 102550203 | LOC102550203 | 31.53  | 42.91   | 37.14  | 27.27  | 33.22 | 25.57 | 33.32 | 33.21   |
| 296750    | Rint1        | 472    | 451     | 435    | 469    | 428   | 409   | 398   | 414     |
| 304109    | Tiam1        | 393.16 | 408.27  | 461.86 | 403.5  | 388.2 | 408   | 392.7 | 315.57  |
| 103689983 | LOC103689983 | 483.99 | 435.59  | 419.46 | 483.99 | 338.8 | 403.3 | 371.1 | 532.39  |
| 290315    | Tdh          | 34     | 26      | 23     | 30     | 27    | 23    | 20    | 32      |
| 314171    | Prpf39       | 638    | 656     | 699    | 671    | 604   | 520   | 624   | 657     |
| 311487    | Polr3f       | 514.85 | 519.66  | 475.97 | 515.75 | 440.7 | 442.5 | 465.1 | 481.15  |



|           |                |        |         |        |        |       |       |       |         |
|-----------|----------------|--------|---------|--------|--------|-------|-------|-------|---------|
| 361159    | Eri1           | 358    | 352     | 365    | 296    | 306   | 283   | 330   | 319     |
| 252919    | Slc38a3        | 54     | 30      | 24     | 57     | 26    | 44    | 29    | 50      |
| 103690178 | LOC103690178   | 200.81 | 170.64  | 216.47 | 194.92 | 168   | 187.9 | 159.1 | 191.88  |
| 289052    | Zbtb41         | 461.04 | 476.82  | 473.1  | 480.41 | 415   | 340.3 | 468.7 | 484.11  |
| 315510    | Igsf9b         | 199    | 216     | 262    | 314    | 280   | 158   | 237   | 220     |
| 404641    | Mas11          | 78.19  | 89.23   | 66.22  | 96.34  | 78.8  | 61.12 | 70.05 | 88.06   |
| 295602    | Rif1           | 185    | 139     | 193    | 175    | 156   | 100   | 182   | 187     |
| 311412    | Anapc1         | 1042.7 | 1067.1  | 1114.4 | 1168.1 | 1004  | 999.2 | 992.6 | 971.7   |
| 368070    | Pnn            | 1193   | 1047    | 1213   | 1186   | 1089  | 970   | 1119  | 1012    |
| 24218     | Atp7b          | 58     | 39      | 52     | 68     | 49    | 44    | 50    | 53      |
| 303233    | Cfap52         | 16     | 18      | 16     | 12     | 10    | 10    | 20    | 16      |
| 315763    | Mtfmt          | 203    | 190     | 160    | 160    | 141   | 168   | 186   | 149     |
| 294299    | Tead3          | 143.19 | 119.65  | 147    | 133    | 103   | 148   | 134   | 105.31  |
| 304477    | Kntc1          | 130.81 | 112     | 119    | 143    | 109   | 110   | 125   | 111.97  |
| 103689932 | NEWGENE 621351 | 7913.7 | 8872.31 | 14317  | 10219  | 6942  | 12024 | 9599  | 8759.53 |
| 302670    | Zrsr2          | 380    | 408     | 377    | 396    | 397   | 369   | 344   | 300     |
| 362368    | Ggct           | 173    | 174     | 178    | 147    | 122   | 179   | 144   | 162     |
| 499179    | LOC499179      | 167.59 | 169.62  | 184.74 | 181.62 | 162.8 | 154.7 | 176   | 141.92  |
| 302470    | F8             | 421.12 | 491.01  | 550    | 535    | 443   | 456   | 441   | 464     |
| 316599    | Usp40          | 475    | 487     | 539    | 495    | 414   | 431   | 490   | 468     |
| 314862    | Dyrk2          | 274    | 251     | 294    | 267    | 214   | 246   | 257   | 264     |
| 81740     | Pcm1           | 1884   | 1771    | 1853   | 1995   | 1733  | 1498  | 1864  | 1683    |
| 313449    | Upf3b          | 547    | 477     | 520    | 495    | 514   | 390   | 473   | 465     |
| 108348336 | LOC108348336   | 45.04  | 85.9    | 57.71  | 63.59  | 74.54 | 68.54 | 33.09 | 51.7    |
| 690625    | Oc90           | 10.89  | 18.59   | 12.41  | 8.52   | 6.03  | 19.99 | 8.43  | 11.09   |
| 500762    | Tmem198b       | 208.06 | 188.22  | 207.76 | 223.33 | 162.6 | 182.4 | 212.7 | 189.79  |
| 691658    | LOC691658      | 619.24 | 574.78  | 617.27 | 633.82 | 574.5 | 545.1 | 583.7 | 505.73  |
| 497930    | Scol           | 383    | 350     | 303    | 290    | 280   | 320   | 255   | 343     |
| 24918     | Stat5a         | 284.16 | 287.3   | 277.31 | 278.63 | 231.4 | 296.9 | 230.5 | 259.78  |
| 293057    | Whamm          | 168    | 147     | 130    | 156    | 150   | 121   | 132   | 140     |
| 317423    | FAM120C        | 887.45 | 847.97  | 908.66 | 1099.1 | 905   | 789.1 | 855.6 | 832.31  |
| 691610    | Zfp770         | 288    | 273     | 278    | 312    | 267   | 218   | 262   | 293     |
| 293019    | Arrdc4         | 547    | 567     | 591    | 463    | 494   | 492   | 520   | 453     |
| 312398    | Smarcad1       | 534.3  | 504.78  | 586.39 | 558.13 | 467.6 | 470.9 | 547.4 | 487.25  |
| 685203    | LOC685203      | 102.97 | 93.54   | 94.67  | 103.44 | 81.5  | 97.48 | 85.19 | 92.42   |
| 314169    | Togaram1       | 1093   | 1102    | 1152   | 1243   | 1091  | 920   | 1110  | 1027    |
| 500108    | Zfp398         | 141    | 179     | 167    | 177    | 156   | 133   | 134.1 | 177     |
| 317344    | RGD1565685     | 525.51 | 482.7   | 448.62 | 429.64 | 414.2 | 403.9 | 428.6 | 458.31  |
| 310166    | RGD1564125     | 167.17 | 143.54  | 167.91 | 179.68 | 135.6 | 139.4 | 152   | 167.99  |
| 300189    | Rpap3          | 785    | 773     | 720    | 809    | 712   | 675   | 712   | 691     |
| 301346    | Sema4c         | 1223.1 | 1202.49 | 1354.4 | 1121.5 | 936.1 | 1214  | 1095  | 1185.74 |
| 360602    | Luc713         | 2005   | 1880    | 2075   | 2009   | 1825  | 1645  | 1927  | 1806    |
| 301081    | Zdhhc3         | 1788.7 | 1846.14 | 1882.6 | 1893.6 | 1549  | 1696  | 1701  | 1752.35 |
| 306424    | Mfap31         | 3722   | 3509    | 3513   | 3850   | 2958  | 3094  | 3679  | 3461    |
| 25162     | Sp4            | 128    | 129     | 158    | 168    | 146   | 94    | 141   | 146     |
| 102552880 | LOC102552880   | 449.88 | 515.12  | 443.02 | 560.49 | 493.1 | 355.5 | 476.6 | 454.34  |
| 311968    | Kmt2e          | 1698   | 1692    | 1919   | 1846   | 1621  | 1611  | 1651  | 1586    |
| 313488    | Reck           | 1051   | 1176    | 1243   | 1297   | 897   | 1012  | 1192  | 1209    |
| 24718     | Reln           | 3172   | 4098    | 5248   | 4209   | 3605  | 3975  | 4100  | 3444    |
| 294800    | Rad1           | 125    | 113     | 95     | 95     | 95    | 78    | 101   | 113     |
| 100364335 | LOC100364335   | 2559.7 | 2482.35 | 2587.4 | 2630.3 | 2252  | 2299  | 2441  | 2285.17 |
| 367072    | Arhgef12       | 983    | 1052    | 1111   | 1132   | 1058  | 863   | 1023  | 925     |
| 691125    | Atp8b5p        | 41     | 26      | 47     | 43     | 31    | 36    | 33    | 42      |
| 108348112 | LOC108348112   | 996.18 | 1219.32 | 1012.4 | 818.89 | 781.1 | 1120  | 964.8 | 794.65  |
| 307029    | Wac            | 1497.3 | 1385.58 | 1356.8 | 1529.1 | 1262  | 1302  | 1351  | 1301.66 |
| 303251    | Dvl2           | 183    | 195     | 206    | 191    | 179   | 186   | 171   | 165     |



|           |              |        |         |        |        |       |       |       |         |
|-----------|--------------|--------|---------|--------|--------|-------|-------|-------|---------|
| 287526    | Serpinf1     | 1008   | 849     | 1045   | 837    | 694   | 886   | 1008  | 794     |
| 689800    | LOC689800    | 13     | 8       | 15     | 18.16  | 12.99 | 13    | 11    | 12      |
| 363131    | Pik3r4       | 636    | 756     | 773    | 790    | 692   | 698   | 647   | 636     |
| 311134    | Ccdc141      | 680.62 | 608.62  | 734.7  | 744.38 | 641.2 | 519.6 | 647.1 | 696.29  |
| 308376    | Adgrg6       | 1693   | 1572    | 1672   | 1827   | 1382  | 1457  | 1728  | 1552    |
| 116666    | Lman1        | 1002   | 904     | 915    | 934    | 808   | 812   | 892   | 885     |
| 295528    | Erich3       | 1239   | 1343    | 1241   | 1348   | 1463  | 1156  | 973   | 1086    |
| 306451    | Tenm3        | 1190   | 1257    | 1617   | 1246   | 1277  | 1276  | 1218  | 1033    |
| 291211    | Ggps1        | 1080.7 | 1014.43 | 969.94 | 1094.4 | 964.7 | 842.5 | 928.9 | 1027.06 |
| 361237    | Cdyl         | 212    | 225     | 241    | 256    | 207   | 194   | 221   | 223     |
| 362756    | Pigh         | 400.54 | 367.7   | 409.13 | 325.84 | 311   | 356.9 | 351.7 | 340.32  |
| 54404     | Itih4        | 1      | 6       | 9      | 5      | 2     | 4     | 4     | 9       |
| 65200     | Slc16a8      | 3      | 4       | 7      | 7      | 5     | 3     | 5     | 6       |
| 362581    | Scmh1        | 363    | 357     | 370    | 354    | 286   | 344   | 342.5 | 334     |
| 499655    | Cks1b        | 245.46 | 235.21  | 217.53 | 208.96 | 175.6 | 191.4 | 230.8 | 223.06  |
| 499210    | Acer3        | 1120.1 | 1175.55 | 1162.6 | 1181.2 | 998.7 | 957.1 | 1105  | 1137.08 |
| 292044    | Cdyl2        | 472    | 499     | 469.94 | 524    | 470   | 358   | 504   | 446     |
| 305972    | Zfp395       | 322    | 305     | 333    | 312    | 257   | 270   | 297   | 327     |
| 312947    | Tgs1         | 295    | 277     | 280    | 263    | 262   | 232   | 262   | 253     |
| 29261     | Tyms         | 91.99  | 71      | 85     | 78     | 67    | 81    | 79    | 68      |
| 294744    | Gpx8         | 513.05 | 453.55  | 567.13 | 420.43 | 369   | 424.3 | 492.4 | 482.79  |
| 296219    | Nxt1         | 96     | 79      | 95     | 67     | 81    | 81    | 61    | 82      |
| 362516    | Msantd3      | 276    | 259     | 250    | 227    | 220   | 225   | 240   | 231     |
| 308839    | Rsf1         | 661.17 | 601.37  | 676.35 | 693.08 | 609.6 | 528.1 | 612.2 | 632.46  |
| 266674    | Cyp4a8       | 19.84  | 22.1    | 18.84  | 22.1   | 16.11 | 15.31 | 17.52 | 26.08   |
| 170946    | Marf1        | 2556.9 | 2498.76 | 2615.2 | 2793.5 | 2436  | 2158  | 2459  | 2419.26 |
| 305600    | Fanc1        | 113.64 | 108.92  | 113.27 | 96.13  | 86.41 | 91.93 | 115.3 | 97.37   |
| 362096    | Setx         | 1062.3 | 1049.04 | 1206.4 | 1210.4 | 1051  | 926.7 | 1098  | 1023.32 |
| 296090    | Sptbn5       | 2712   | 3141.23 | 2999.7 | 2646.6 | 1839  | 2916  | 2888  | 2767.76 |
| 54272     | Mcpt9        | 13.2   | 5.29    | 14.05  | 1.15   | 16.69 | 6.28  | 5.5   | 2.03    |
| 297822    | Tp53inp1     | 396.98 | 414.96  | 425    | 410    | 369   | 355   | 378   | 389     |
| 681288    | T2           | 48     | 50      | 37     | 34     | 44    | 27    | 45    | 37      |
| 100363074 | Acot11       | 69.51  | 66.56   | 77.61  | 96.79  | 69.06 | 68.71 | 69.31 | 74      |
| 140931    | Hnrnp1       | 2312   | 2112    | 2402   | 2164   | 1830  | 1978  | 2216  | 2115    |
| 85252     | Xpo1         | 1602   | 1555    | 1648   | 1640   | 1443  | 1374  | 1554  | 1464    |
| 296280    | Tspy26       | 104.83 | 125.19  | 125.75 | 103.19 | 104.1 | 93.17 | 122.5 | 95.81   |
| 100125373 | Pnrc2        | 881    | 795     | 992    | 746    | 669   | 704   | 816   | 902     |
| 306866    | Slc35b3      | 341    | 313     | 322    | 303    | 289   | 255   | 297   | 317     |
| 311598    | Fam83d       | 19     | 11      | 31     | 13     | 10    | 18    | 22    | 17      |
| 295971    | Depdc7       | 72     | 114     | 105    | 79     | 76    | 63    | 102   | 94      |
| 103694328 | LOC103694328 | 935    | 928     | 977    | 987    | 882   | 785   | 888   | 910     |
| 308516    | Rhpn2        | 132.79 | 103.46  | 115.27 | 142.95 | 120.1 | 116.6 | 100.1 | 111.02  |
| 291182    | Stard3n1     | 990    | 1006    | 961    | 809    | 834   | 805   | 900   | 871     |
| 498819    | Greb11       | 181    | 203     | 186    | 213    | 225   | 136   | 171   | 177     |
| 363443    | Ndp          | 321    | 365     | 350    | 239.46 | 229.9 | 294   | 340   | 291     |
| 100312982 | Ddx3         | 1298.3 | 1213.96 | 1227.3 | 1268   | 1149  | 976   | 1196  | 1213.27 |
| 679087    | LOC679087    | 170.47 | 120.97  | 108.55 | 124.58 | 114.3 | 93.55 | 119   | 148.23  |
| 300470    | Thyn1        | 570    | 587     | 523    | 470    | 459   | 454   | 538   | 496     |
| 117547    | Ncr1         | 5.18   | 10.14   | 18.8   | 20.15  | 13.5  | 15    | 11.76 | 8.89    |
| 102552170 | LOC102552170 | 11     | 16      | 10     | 16     | 11    | 13    | 13    | 11      |
| 291324    | Trdmt1       | 310    | 314     | 309    | 265    | 265   | 238   | 296   | 286     |
| 64456     | Spon1        | 564    | 554     | 364    | 681    | 438   | 385   | 466   | 670     |
| 315265    | Twf1         | 1144   | 1157    | 1219   | 1114   | 940   | 1009  | 1171  | 1077    |
| 500973    | Slc37a2      | 283    | 229     | 299    | 250    | 236   | 245   | 231   | 249     |
| 317346    | Bcor         | 255    | 271     | 348    | 325    | 254   | 284   | 278   | 270     |
| 100910732 | LOC100910732 | 1398.8 | 1387.8  | 1534.3 | 1421   | 1225  | 1310  | 1396  | 1270.86 |

|           |              |        |         |        |        |       |       |       |         |
|-----------|--------------|--------|---------|--------|--------|-------|-------|-------|---------|
| 291023    | Id4          | 642    | 724     | 689    | 684    | 598   | 553   | 724   | 606     |
| 361241    | Serpinb9     | 2344   | 2267    | 2218   | 2240   | 1945  | 1815  | 2641  | 1813.96 |
| 691397    | Smg1         | 1839   | 1896    | 1991   | 2256   | 1936  | 1369  | 1972  | 1954    |
| 308496    | Nfkbid       | 30     | 25      | 31     | 31     | 26    | 25    | 34    | 21      |
| 108350407 | LOC108350407 | 41.72  | 55.36   | 40.65  | 49.06  | 35.3  | 41.88 | 47.72 | 44.33   |
| 302566    | Usp27x       | 71     | 71      | 73.03  | 74.03  | 56.89 | 82    | 52    | 71      |
| 287989    | Ephb3        | 156.96 | 185.3   | 224.24 | 158.42 | 171.3 | 179.6 | 145.1 | 160.78  |
| 363886    | Cnpy4        | 260    | 269     | 295    | 241    | 236   | 237   | 233   | 259     |
| 83518     | Aplnr        | 91.19  | 92.9    | 83.69  | 72.51  | 96.95 | 90.01 | 53.89 | 67.49   |
| 365895    | Hipk1        | 2162   | 2156    | 2256   | 2337   | 2006  | 1836  | 2212  | 2021    |
| 310743    | Olfml3       | 498    | 471     | 571    | 486    | 450   | 439   | 486   | 461     |
| 498806    | Myo3a        | 302    | 289     | 210    | 276    | 249   | 219   | 280   | 228     |
| 100912151 | LOC100912151 | 331    | 350     | 304.01 | 331.41 | 276   | 272   | 348   | 297     |
| 25153     | Mas1         | 22     | 20      | 21     | 33     | 20    | 20    | 24    | 23      |
| 65187     | Gabrq        | 14     | 20      | 13     | 17     | 11    | 8     | 13    | 26      |
| 315840    | Myo6         | 1028   | 1156    | 1105   | 1159   | 1103  | 1019  | 992   | 917     |
| 116591    | Fcgr2a       | 46.58  | 64.28   | 52.65  | 39.51  | 31.97 | 47.3  | 44.18 | 60.54   |
| 50555     | Ugt8         | 4069   | 4597    | 4055   | 4186   | 2890  | 3860  | 4009  | 4565    |
| 26295     | Ogt          | 3198   | 3257    | 3159   | 3358   | 2909  | 2725  | 3234  | 2890    |
| 25528     | Sirpa        | 888.35 | 917.05  | 1014.3 | 995.16 | 847.3 | 918.7 | 859.8 | 832.19  |
| 497009    | Naaa         | 296    | 332     | 345    | 310    | 289   | 265   | 318   | 291     |
| 497974    | Myo19        | 246.33 | 216.49  | 200.37 | 211.04 | 200   | 196.3 | 179.9 | 216.39  |
| 688146    | Rsad1        | 41     | 66      | 60     | 47     | 56    | 59    | 34    | 45      |
| 304862    | Tpr          | 1799.4 | 1771.96 | 1957.2 | 2097.2 | 1780  | 1639  | 1862  | 1632.06 |
| 59303     | Tmem33       | 966.98 | 1028.15 | 1032.4 | 975.24 | 948.3 | 791.1 | 830   | 1059.46 |
| 363554    | Msln1        | 33     | 30.25   | 43.84  | 26.1   | 28.69 | 28.01 | 36.09 | 27.96   |
| 298074    | Xpa          | 167.66 | 159.98  | 171.93 | 136.37 | 151.1 | 134   | 146.8 | 144.66  |
| 360511    | Pank3        | 4313   | 4498    | 4500   | 5102   | 3838  | 3509  | 4553  | 4795    |
| 103691573 | LOC103691573 | 44.21  | 38.84   | 29.9   | 44.62  | 40.09 | 42.15 | 27.18 | 33.45   |
| 25470     | Kcna5        | 243.98 | 300.66  | 234.33 | 239.35 | 202.3 | 286.1 | 204.1 | 230.94  |
| 25289     | Adcy6        | 779.98 | 747.37  | 796.26 | 752.47 | 632.5 | 760.8 | 706.9 | 689.13  |
| 29263     | Acvr2a       | 1047   | 972     | 1043   | 1046   | 905   | 867   | 1009  | 944     |
| 501100    | Crip3        | 2.06   | 1.24    | 0      | 4.53   | 0     | 1.46  | 1.47  | 4.17    |
| 293618    | Ifitm1       | 619.12 | 402.97  | 548.39 | 406.81 | 382.7 | 405.5 | 479.9 | 524.84  |
| 361605    | Pcf11        | 553    | 488     | 554    | 508    | 477   | 473   | 475   | 482     |
| 56763     | Srekl1       | 1143   | 1212    | 1264   | 1286   | 1166  | 978   | 1215  | 1089    |
| 300518    | Robo4        | 3.04   | 17.52   | 9.75   | 4.79   | 6.38  | 7.62  | 10.92 | 6.91    |
| 114510    | Mllt3        | 249.11 | 207.15  | 218.69 | 265.28 | 223.2 | 210.3 | 223.4 | 195.8   |
| 302499    | C1galt1c1    | 583    | 577     | 567    | 474    | 470   | 454   | 515   | 557     |
| 689500    | Mcts2        | 243    | 231     | 209    | 262    | 217   | 192   | 235   | 213     |
| 309009    | Mcmbp        | 353    | 336     | 388    | 405    | 305   | 311   | 363   | 365     |
| 498004    | Cfap97d1     | 2.76   | 1.43    | 0      | 0      | 2.42  | 0     | 1.38  | 0       |
| 100912447 | Nynrin       | 355    | 359     | 473    | 457    | 315   | 404   | 354   | 418     |
| 304883    | Abl2         | 540.03 | 589.84  | 687.66 | 596.52 | 601.1 | 524.2 | 597.9 | 466.24  |
| 296137    | Bub1         | 87     | 83      | 114    | 60     | 70    | 86    | 86    | 70      |
| 682914    | Zfp326       | 297    | 307     | 317    | 380    | 261   | 260   | 361   | 298     |
| 499157    | Svip         | 2429   | 2456    | 2400   | 2341   | 1952  | 2148  | 2294  | 2337    |
| 308901    | Trim21       | 269    | 252     | 264    | 280    | 221   | 252   | 238   | 255     |
| 288354    | Zfp654       | 344    | 335     | 306    | 349    | 304   | 266   | 288   | 352     |
| 362540    | Hacd4        | 449.44 | 478.28  | 515.18 | 422.74 | 309.4 | 447.1 | 467.4 | 468.37  |
| 306515    | Mboat4       | 57     | 49      | 43     | 34     | 39    | 35    | 47    | 45      |
| 25687     | Cald1        | 2876   | 2877    | 3043   | 3166   | 2661  | 2527  | 3006  | 2657    |
| 29308     | Arl4a        | 472.78 | 457.58  | 506.07 | 529.39 | 402.3 | 403.8 | 498.9 | 478.3   |
| 103690155 | LOC103690155 | 127.27 | 165.55  | 148.35 | 60.24  | 112.7 | 74.62 | 141.7 | 125.82  |
| 293953    | R3hcc11      | 126.86 | 115     | 130    | 133    | 115   | 104   | 114   | 125     |
| 100360623 | Iqgap2       | 676    | 797     | 615    | 692    | 551   | 650   | 636   | 685     |

|           |              |        |         |        |        |       |       |       |         |
|-----------|--------------|--------|---------|--------|--------|-------|-------|-------|---------|
| 108348771 | LOC108348771 | 47.71  | 59.72   | 45.86  | 47.35  | 52.04 | 47.91 | 40.38 | 41.7    |
| 500943    | Arhgap42     | 573    | 528     | 579    | 704    | 493   | 494   | 595   | 581     |
| 81816     | Ube2b        | 3237.6 | 2960.71 | 2808.3 | 2731.6 | 2814  | 2805  | 2879  | 2152.98 |
| 171493    | Osgin1       | 69     | 58      | 55     | 77     | 71    | 61    | 47    | 56      |
| 498630    | Wwc2         | 687    | 809     | 776    | 815    | 682   | 653   | 763   | 703     |
| 100125370 | Nadk         | 868    | 954     | 1021   | 850    | 715   | 865   | 902   | 869     |
| 362226    | Sec23b       | 462    | 482     | 452    | 429    | 378   | 433   | 467   | 378     |
| 291527    | Stard6       | 93.14  | 71.38   | 103.6  | 83.15  | 68.87 | 76.81 | 94.18 | 78.9    |
| 310670    | Adamts14     | 1168   | 1183    | 1359   | 1229   | 1126  | 1145  | 1082  | 1129    |
| 500616    | Socs5        | 1509   | 1547    | 1625   | 1566   | 1333  | 1457  | 1453  | 1426    |
| 308581    | Ccdc155      | 28.37  | 15.2    | 21.56  | 18.43  | 19.16 | 13.77 | 24.77 | 18.13   |
| 494340    | Zfp868       | 474.5  | 410.52  | 428.86 | 390.15 | 382.9 | 380.6 | 357.9 | 424.96  |
| 294030    | Sfr1         | 1013   | 982     | 1050   | 977    | 864   | 848   | 935   | 1003    |
| 60627     | Exoc5        | 997    | 890     | 906    | 962    | 849   | 751   | 922   | 886     |
| 361730    | Tkfc         | 141.33 | 167.2   | 165.76 | 125.44 | 131   | 144.2 | 143.4 | 125.8   |
| 308282    | Shprh        | 490    | 502     | 483    | 517    | 447   | 419   | 507   | 435     |
| 300900    | Plscr4       | 448    | 428     | 471    | 451    | 344   | 366   | 482   | 440     |
| 116684    | Oplah        | 368.41 | 325.01  | 355.98 | 382.07 | 309.8 | 319.8 | 344.5 | 325.31  |
| 102552729 | LOC102552729 | 19.07  | 9.3     | 10.76  | 11.17  | 12.32 | 9.24  | 8.05  | 16.05   |
| 362857    | Tmem263      | 824    | 818     | 845    | 818    | 690   | 666   | 807   | 837.54  |
| 289501    | Sowahb       | 78.11  | 68.96   | 68.96  | 72.27  | 74.33 | 43.52 | 72.97 | 70.93   |
| 363502    | Mid2         | 1033.2 | 1045.19 | 1087.8 | 1035.2 | 970   | 839.9 | 1006  | 998.47  |
| 307604    | Elac1        | 146.36 | 187.86  | 173.24 | 175    | 180.8 | 157.9 | 129.4 | 151.56  |
| 307151    | Bmil         | 726    | 779     | 739    | 713    | 648   | 592   | 769   | 676     |
| 366352    | Mob3b        | 478.52 | 549.68  | 530.55 | 720.26 | 430.7 | 466.7 | 547.9 | 624.21  |
| 499254    | Tmc7         | 533.05 | 556.21  | 577    | 631.32 | 582.5 | 502   | 687.7 | 314.23  |
| 79124     | Anxa4        | 2314   | 2529    | 2504   | 2202   | 1930  | 2048  | 2415  | 2279    |
| 313961    | Smc6         | 866    | 812     | 948    | 902    | 849   | 725   | 860   | 770     |
| 308173    | Kif13a       | 698    | 741     | 875    | 790    | 661   | 722   | 730   | 706     |
| 297554    | Csgalnact2   | 332    | 339     | 392    | 277    | 270   | 314   | 338   | 295     |
| 686117    | Meis1        | 67     | 86      | 85     | 100    | 93    | 83    | 61    | 70      |
| 287362    | Nlrp3        | 69.46  | 64.94   | 87.02  | 65.26  | 69.19 | 49.96 | 58.89 | 82.36   |
| 315427    | Sesn3        | 3045.1 | 3235.96 | 3390.8 | 3687.4 | 2736  | 2818  | 3403  | 3177.68 |
| 362359    | Mpp6         | 788    | 905     | 841    | 925    | 743   | 712   | 830   | 857     |
| 307829    | Zfhx3        | 1236.5 | 1258.09 | 1446.6 | 1536.3 | 1319  | 1249  | 1235  | 1173.34 |
| 108348055 | LOC108348055 | 9.6    | 6.16    | 5.34   | 6.73   | 5.39  | 5.36  | 7.29  | 7.24    |
| 314265    | Zfyve26      | 514    | 512.37  | 544.36 | 605    | 493   | 508.4 | 518.9 | 456.16  |
| 679894    | LOC679894    | 358.83 | 340     | 347.79 | 373.4  | 351.1 | 271.5 | 332   | 335.41  |
| 64199     | Gng11        | 157.61 | 160.45  | 190.09 | 83.06  | 143.7 | 73.37 | 156.1 | 163.99  |
| 499807    | Dcaf17       | 588.49 | 610.32  | 601.34 | 586.83 | 561.2 | 532   | 515.2 | 560.17  |
| 84493     | Fmo3         | 129.96 | 44.76   | 44.96  | 50.99  | 68    | 53    | 53.95 | 70.99   |
| 310461    | Dhx36        | 1266   | 1257.98 | 1237   | 1209   | 1166  | 995   | 1172  | 1183    |
| 298786    | Slc30a6      | 266    | 233     | 235    | 252    | 200   | 218   | 226   | 252     |
| 308845    | Thap12       | 625    | 626     | 677    | 571    | 527   | 585   | 611   | 548     |
| 266706    | Gjc1         | 58     | 66      | 94     | 67     | 52    | 75    | 66    | 66      |
| 315108    | Apol3        | 89     | 57      | 83     | 78     | 68    | 68    | 79    | 64      |
| 100909590 | LOC100909590 | 24.31  | 24.64   | 13.45  | 22.91  | 22.62 | 19.09 | 15.85 | 19.97   |
| 363854    | Elavl1       | 276    | 244     | 293    | 251    | 242   | 239   | 236   | 250     |
| 287706    | Klh111       | 457    | 468     | 429    | 555    | 548   | 218   | 479   | 490     |
| 24948     | Fmr1         | 741    | 774     | 796    | 861    | 657   | 689   | 780   | 757     |
| 681371    | Nufip2       | 1972.3 | 1877.44 | 2101.5 | 2060.8 | 1780  | 1603  | 2042  | 1857.04 |
| 654496    | Fubp1        | 1341.8 | 1287.52 | 1331.6 | 1243.8 | 1209  | 1114  | 1213  | 1194.5  |
| 305556    | Ehbp1        | 1519   | 1731    | 1662   | 1908   | 1427  | 1468  | 1743  | 1561    |
| 313641    | Hspg2        | 6575   | 8706    | 11868  | 8567   | 6986  | 9391  | 8688  | 7399    |
| 363014    | Yap1         | 1404   | 1435    | 1567   | 1470   | 1295  | 1292  | 1371  | 1383    |
| 307820    | Nfat5        | 2221.7 | 2288.92 | 2324.5 | 2628.4 | 2047  | 1958  | 2314  | 2282.36 |

|           |              |        |         |        |        |       |       |       |         |
|-----------|--------------|--------|---------|--------|--------|-------|-------|-------|---------|
| 266808    | Lrrcc1       | 175    | 195     | 172    | 172    | 154   | 163   | 164   | 168     |
| 25423     | Ctsc         | 523.99 | 605.93  | 703.07 | 570.54 | 471.7 | 607.8 | 667.4 | 437.92  |
| 29548     | Homer3       | 372.85 | 346.03  | 419.25 | 296.64 | 326.8 | 340.4 | 332.4 | 304.63  |
| 287269    | Clk4         | 777    | 651     | 686    | 673.45 | 550   | 598   | 683   | 703     |
| 100362908 | LOC100362908 | 5      | 1       | 2      | 3      | 3     | 2     | 3     | 2       |
| 102552996 | LOC102552996 | 2      | 5       | 3      | 1      | 3     | 1     | 2     | 4       |
| 289167    | Mettl11b     | 4      | 2       | 0      | 5      | 3     | 3     | 3     | 1       |
| 297596    | Lag3         | 19     | 14      | 14     | 8      | 12    | 15    | 11    | 12      |
| 362136    | Dapl1        | 2      | 2       | 2      | 5      | 1     | 1     | 5     | 3       |
| 365544    | Umodl1       | 14     | 9       | 26     | 6      | 8     | 13    | 16    | 13      |
| 60422     | Slc18a3      | 3      | 3       | 4      | 1      | 2     | 1     | 3     | 4       |
| 282708    | Afm          | 2      | 7       | 4      | 9      | 2     | 4     | 11    | 3       |
| 499848    | Ccdc73       | 25     | 18      | 26     | 19     | 19    | 19    | 22    | 20      |
| 689978    | Nrsn2        | 85     | 94      | 92     | 70     | 67    | 81    | 73    | 89      |
| 29584     | Gjb1         | 328    | 441     | 413    | 359    | 258   | 364   | 376   | 403     |
| 309953    | Tmem161b     | 340    | 323     | 329    | 307    | 285   | 254   | 326   | 316     |
| 108348102 | LOC108348102 | 269.29 | 306.03  | 359.67 | 364.67 | 330.8 | 290.8 | 309   | 250.99  |
| 102546572 | LOC102546572 | 1381   | 1376.67 | 1430.6 | 1422.6 | 1237  | 1134  | 1399  | 1331.89 |
| 288414    | Rfc3         | 190    | 211     | 210    | 171    | 162   | 175   | 186   | 188     |
| 81784     | Ssr3         | 1677.5 | 1662.27 | 1666.7 | 1596.3 | 1520  | 1426  | 1588  | 1468.55 |
| 286984    | Vom2r18      | 3.79   | 4.95    | 4.36   | 6.18   | 7.37  | 1.49  | 2.63  | 6.04    |
| 85241     | Polal        | 100    | 85      | 108    | 104    | 85    | 99    | 89    | 88      |
| 314246    | Zbtb1        | 767    | 777     | 754    | 758    | 721   | 702   | 704   | 652     |
| 306380    | Psd3         | 2111.5 | 2178.03 | 2182.7 | 2558.7 | 2312  | 1727  | 2109  | 2064.45 |
| 680591    | Lrch2        | 104    | 128     | 123    | 120    | 98    | 105   | 122   | 107     |
| 308306    | Eif5b        | 1303   | 1258    | 1441   | 1301   | 1273  | 1212  | 1211  | 1127    |
| 301415    | Ankrd44      | 326.41 | 373.31  | 420.99 | 366.16 | 304.2 | 331.9 | 366.5 | 349.75  |
| 362264    | Srsf6        | 1984   | 1882    | 1908   | 1818   | 1717  | 1707  | 1803  | 1678    |
| 83718     | Clic4        | 400    | 424     | 448    | 519    | 380   | 409   | 445   | 395     |
| 363445    | Usp9x        | 8386.2 | 8578.18 | 8643.6 | 8894.6 | 8202  | 7003  | 8663  | 7514.49 |
| 29362     | Tef          | 1837   | 1789    | 1590   | 1723   | 1677  | 1738  | 1421  | 1476    |
| 25050     | Camk4        | 1123.3 | 1087.24 | 1039.1 | 1208.9 | 1154  | 772.7 | 1088  | 1040.76 |
| 65037     | Mertk        | 344    | 326     | 334    | 347    | 266   | 376   | 273   | 314     |
| 297757    | Sbson        | 752.37 | 891.11  | 902.58 | 947.58 | 511.7 | 831.5 | 882.7 | 952.26  |
| 170915    | Ep300        | 1064   | 1068    | 1151   | 1292   | 1093  | 1061  | 1051  | 957     |
| 311580    | Samhd1       | 145    | 139     | 160    | 110    | 140   | 126   | 136   | 102     |
| 289088    | Swt1         | 323.27 | 266.27  | 305.55 | 318.9  | 249.2 | 268.8 | 285.2 | 301.44  |
| 499264    | Apobr        | 63.89  | 43      | 78     | 47     | 61    | 49    | 49    | 52      |
| 362046    | Dappl        | 42.72  | 21.62   | 59.23  | 36.06  | 33.17 | 33.25 | 39.5  | 39.33   |
| 57027     | Adam17       | 785    | 852     | 1129   | 988    | 732   | 839   | 1034  | 811     |
| 306998    | Cdk13        | 682    | 751     | 810    | 756    | 687   | 657   | 693   | 692     |
| 116668    | Myt11        | 530    | 543     | 493    | 567    | 538   | 431   | 515   | 457     |
| 691922    | Nt5dc3       | 892    | 906     | 843    | 803    | 835   | 707   | 774   | 818     |
| 24681     | Prkcg        | 57.99  | 44.85   | 55.88  | 53.52  | 46.76 | 57.39 | 53.77 | 35.23   |
| 680201    | Zfp322a      | 302    | 298.02  | 293.5  | 313    | 278   | 245   | 276   | 299     |
| 316742    | Tgif1        | 85     | 84      | 104    | 94     | 76    | 81    | 83    | 94      |
| 299626    | Gadd45b      | 191    | 187     | 199    | 246    | 194   | 183   | 179   | 193     |
| 103690074 | LOC103690074 | 66     | 66      | 97     | 127    | 105   | 41    | 84    | 94      |
| 316211    | Usp49        | 155    | 169.15  | 136.01 | 174.09 | 157   | 148   | 141.1 | 131.12  |
| 501515    | Tut7         | 1117.3 | 1171.33 | 1214.9 | 1247.7 | 1137  | 1067  | 1101  | 1018.89 |
| 305882    | Haus4        | 280    | 287     | 284    | 218    | 264   | 247   | 200   | 262     |
| 314713    | Utp20        | 476    | 444     | 484    | 534    | 432   | 455   | 465   | 412     |
| 292737    | Blvrb        | 465    | 421.61  | 427    | 387    | 348   | 407   | 382   | 411     |
| 362978    | Creld2       | 173    | 159     | 197    | 207    | 144   | 165   | 217   | 144     |
| 619582    | Tmem69       | 499.22 | 507     | 428    | 494.37 | 425   | 395   | 451.3 | 484.55  |
| 29540     | Hsd17b7      | 555.12 | 652     | 569.98 | 577    | 493   | 542.7 | 573   | 534.59  |

|           |              |        |         |        |        |       |       |       |         |
|-----------|--------------|--------|---------|--------|--------|-------|-------|-------|---------|
| 498404    | Ccdc117      | 205    | 145     | 160    | 149    | 141   | 134   | 148   | 177     |
| 292127    | Dclrela      | 221    | 263     | 245    | 223.19 | 229   | 193   | 228   | 217     |
| 315864    | Dopla        | 928    | 987     | 862    | 969    | 903   | 811   | 872   | 825     |
| 364827    | Zscan30      | 231    | 222     | 224    | 229    | 206   | 181   | 201   | 237     |
| 81921     | Sh3gl3       | 312    | 353     | 270    | 218    | 273   | 258   | 253   | 266     |
| 366203    | Esf1         | 536    | 502     | 488    | 500    | 480   | 444   | 483   | 438     |
| 84472     | Ilf3         | 991.63 | 1101.9  | 1075.5 | 1040.5 | 982.9 | 1013  | 924.2 | 913.79  |
| 293736    | Myrf         | 302    | 335     | 448    | 393    | 347   | 375   | 331   | 293     |
| 245953    | Tmem37       | 12     | 7       | 23     | 14     | 11    | 6     | 14    | 20      |
| 79011     | Camkv        | 111    | 110     | 126    | 146    | 137   | 110   | 105   | 97      |
| 690728    | Ints13       | 347    | 330     | 367    | 346    | 273   | 310   | 373   | 310     |
| 312491    | Zfp638       | 1292   | 1328    | 1407   | 1537   | 1268  | 1105  | 1378  | 1317    |
| 29486     | Smc3         | 881    | 805     | 968    | 970    | 833   | 763   | 900   | 805     |
| 100909461 | LOC100909461 | 5.15   | 0       | 4.84   | 0      | 0     | 4.56  | 0     | 4.54    |
| 291002    | Cdhr2        | 177    | 145     | 154    | 119    | 142   | 146   | 105   | 149     |
| 498411    | Hus1         | 529    | 548     | 438    | 416    | 401   | 403   | 520   | 435     |
| 288744    | RGD1306556   | 346    | 387     | 398    | 430    | 335   | 403   | 350   | 334     |
| 297387    | Mobla        | 699.69 | 761.84  | 876.24 | 727.84 | 634.5 | 667.3 | 747.1 | 743.79  |
| 29419     | Numb         | 424.09 | 363.23  | 435.12 | 446.08 | 382.5 | 410.3 | 389.8 | 337.42  |
| 294274    | RT1-DMa      | 226    | 166     | 235    | 171    | 188   | 163   | 190   | 186     |
| 313388    | Dock7        | 1347   | 1371    | 1448   | 1412   | 1225  | 1255  | 1299  | 1303    |
| 362763    | Lin52        | 301.2  | 323.06  | 263.25 | 296.72 | 243   | 249.4 | 283.3 | 303.19  |
| 362520    | Fktn         | 1360.5 | 1411.23 | 1258   | 1452.7 | 1309  | 1112  | 1324  | 1249.9  |
| 56766     | Leprot       | 883    | 902     | 969.78 | 837    | 772.8 | 801.9 | 838.5 | 859.55  |
| 24944     | Lamp2        | 6805   | 6149    | 6116   | 6229   | 5671  | 5328  | 5869  | 6184    |
| 25705     | Zeb1         | 1663.2 | 1657.86 | 1937   | 1821   | 1574  | 1595  | 1639  | 1642.59 |
| 366783    | Alkbh8       | 219.48 | 213.53  | 202.32 | 241.3  | 221.6 | 180.4 | 193.6 | 203.22  |
| 691517    | Megf11       | 1327.5 | 1237.31 | 1392.6 | 1425.5 | 1181  | 1396  | 1240  | 1087.92 |
| 306618    | Arhgef10     | 1874   | 2010    | 2168   | 1893   | 1573  | 1858  | 1789  | 2020    |
| 64618     | Zic1         | 139    | 96      | 122    | 139    | 93    | 89    | 88    | 182     |
| 85432     | Ddx52        | 226    | 162     | 236    | 188    | 160   | 208   | 185   | 187     |
| 282635    | Mbnl1        | 1248   | 1138    | 1086   | 1412   | 1252  | 925   | 1172  | 1102    |
| 361659    | Plekha1      | 1338   | 1408    | 1551.3 | 1285.2 | 1264  | 1257  | 1384  | 1183    |
| 24504     | Inha         | 131    | 127     | 138    | 112    | 133   | 111   | 113   | 106     |
| 315871    | Snx14        | 458    | 367     | 371    | 464    | 331   | 350   | 435   | 397     |
| 290823    | Erlin2       | 571    | 534     | 563    | 489.29 | 456.1 | 488   | 532.1 | 490.08  |
| 24223     | B2m          | 12027  | 10890   | 11246  | 9952   | 8982  | 9734  | 11458 | 10036   |
| 171154    | Serpina10    | 45     | 33      | 43     | 46.84  | 40    | 37    | 40    | 36      |
| 362343    | Parp12       | 204    | 215     | 216    | 202    | 180   | 203   | 178   | 202     |
| 103691134 | Flt3lg       | 61     | 56      | 70     | 62     | 54    | 65    | 61    | 47      |
| 100911216 | LOC100911216 | 674.17 | 766.3   | 864.98 | 637.09 | 576   | 653.7 | 795   | 658.07  |
| 303112    | N4bp3        | 40.91  | 37.82   | 56.64  | 33.64  | 31.64 | 42.82 | 44.54 | 35.09   |
| 25750     | Maob         | 1603.5 | 1579.45 | 1431.6 | 1263.6 | 1020  | 1419  | 1509  | 1411.04 |
| 432363    | Slco4c1      | 11     | 20      | 18     | 19     | 12    | 20    | 20    | 10      |
| 682978    | Nudt13       | 39     | 56      | 61     | 48     | 51    | 33    | 54    | 48      |
| 100362814 | LOC100362814 | 943.9  | 1109.89 | 1112.7 | 1377.7 | 923.8 | 1066  | 1125  | 1028.43 |
| 303448    | LOC303448    | 157.46 | 158.36  | 214.27 | 163.9  | 155.7 | 126.9 | 179.5 | 170.73  |
| 311872    | Zbtb43       | 229    | 233     | 213    | 222    | 187   | 222   | 208   | 201     |
| 499770    | Spout1       | 305.53 | 322.96  | 281.89 | 285.35 | 289.7 | 259.3 | 267.8 | 273.64  |
| 307615    | Terb1        | 8      | 17      | 9      | 12     | 10    | 7     | 10    | 14.95   |
| 299830    | Lrig3        | 150    | 163     | 174    | 161    | 133   | 154   | 173   | 131     |
| 311909    | Rc3h2        | 1233   | 1095    | 1165   | 1157   | 992   | 1081  | 1120  | 1048    |
| 312365    | Mindy4       | 264.72 | 341.55  | 353.15 | 331.89 | 324.1 | 268.9 | 310.5 | 274.34  |
| 100361114 | Zfp869       | 349.84 | 316.32  | 323.08 | 345.72 | 293   | 301.7 | 330.9 | 291.95  |
| 25643     | Gnai3        | 2024   | 1958    | 2070   | 1951   | 1773  | 1660  | 2003  | 1864    |
| 686098    | Sorbs1       | 8644   | 8802    | 9270   | 10369  | 8226  | 8676  | 8626  | 8300    |

|           |                 |        |         |        |        |       |       |       |         |
|-----------|-----------------|--------|---------|--------|--------|-------|-------|-------|---------|
| 305171    | Lin54           | 439    | 416     | 437    | 416    | 394   | 415   | 370   | 379     |
| 103689950 | NEWGENE_1306455 | 1599.1 | 1189.02 | 2316   | 2186.7 | 1599  | 1898  | 999.5 | 2154.42 |
| 100912372 | Tcaf2           | 0      | 0       | 2.2    | 2.13   | 2.13  | 0     | 0     | 1.82    |
| 362095    | Gtf3c5          | 441    | 528     | 528    | 509    | 461   | 471   | 458   | 440     |
| 361346    | LOC361346       | 343    | 272     | 338    | 358    | 281   | 269   | 309   | 337     |
| 303312    | Wdr81           | 428    | 417     | 459    | 509    | 456   | 427   | 372   | 399     |
| 83629     | Slc12a2         | 3464   | 3499    | 3034   | 3819   | 3066  | 3011  | 3430  | 3098    |
| 500623    | Wdcp            | 260    | 310     | 254    | 249    | 227   | 237   | 257   | 258     |
| 360863    | Suco            | 724    | 719     | 831    | 854    | 706   | 645   | 744   | 759     |
| 497865    | Rbm2511         | 879.84 | 835.36  | 832.78 | 978.4  | 858.7 | 757.5 | 854   | 747.32  |
| 309407    | Trpm3           | 950    | 1053    | 1274   | 1439   | 1238  | 833   | 1162  | 1070    |
| 252858    | Frmd4b          | 416    | 425     | 484    | 445    | 422   | 402   | 417   | 374     |
| 114555    | Casp4           | 256    | 237     | 283    | 252    | 197   | 212   | 281   | 248     |
| 294270    | RT1-Db1         | 714.63 | 411.17  | 612.37 | 445    | 492.1 | 420.7 | 501.9 | 577.35  |
| 688517    | Mut             | 1393   | 1446    | 1238   | 1361   | 1195  | 1185  | 1290  | 1292    |
| 499617    | Rfxap           | 270.94 | 167.75  | 124.75 | 113.75 | 69.62 | 237.9 | 206.8 | 103.62  |
| 315648    | Ppp2r1b         | 197    | 194     | 225    | 161    | 174   | 190   | 166   | 179     |
| 25742     | S100b           | 30823  | 28385   | 24597  | 26364  | 21094 | 23410 | 27961 | 28066   |
| 299557    | RGD1310212      | 38.91  | 37.66   | 39.25  | 39.32  | 26.91 | 39.73 | 35.11 | 39.82   |
| 361944    | Elf2            | 400    | 380     | 405    | 393    | 375   | 365   | 369   | 331     |
| 362912    | Der11           | 1016   | 1041    | 912    | 852    | 837   | 835   | 913   | 902     |
| 317579    | Utp14a          | 305    | 292     | 287    | 283    | 264   | 262   | 279   | 260     |
| 100909505 | LOC100909505    | 353.54 | 393.16  | 393.62 | 395.82 | 287.4 | 321.9 | 379   | 413.53  |
| 362501    | Topors          | 407    | 378     | 426    | 357    | 367   | 328   | 350   | 386     |
| 296199    | Snx5            | 1407   | 1417    | 1473   | 1291   | 1129  | 1239  | 1385  | 1347    |
| 306222    | Lsm5            | 109    | 83      | 97     | 66     | 72    | 83    | 77    | 92      |
| 293645    | Ppfial          | 923.94 | 923.87  | 940.06 | 1100.9 | 886.7 | 811.4 | 946.6 | 904.51  |
| 299153    | Ppp1r36         | 424    | 472     | 497    | 339    | 323   | 421   | 413   | 424     |
| 287612    | Mks1            | 150    | 150     | 150    | 127.91 | 133   | 140   | 114   | 140.53  |
| 312437    | Krcc1           | 468    | 477     | 604    | 506    | 472   | 426   | 496   | 482     |
| 85420     | Prkcq           | 457    | 515     | 465    | 343    | 335   | 469   | 389   | 432     |
| 360845    | Zc3h11a         | 1209.9 | 1165.93 | 1272.7 | 1314.1 | 1153  | 1066  | 1200  | 1111.59 |
| 680424    | Pex10           | 152.02 | 124     | 119    | 109    | 125   | 112.1 | 113.1 | 110     |
| 315911    | Rnf128          | 170.37 | 195.66  | 163.33 | 167.97 | 131.3 | 172.7 | 166.7 | 166.06  |
| 100363332 | Card11          | 80     | 64      | 86     | 69     | 55    | 74    | 69    | 75      |
| 259222    | Npb             | 16     | 11      | 12     | 7      | 7     | 15    | 11    | 9       |
| 315615    | Dscaml1         | 24     | 57      | 42     | 38     | 37    | 39    | 40    | 31      |
| 81677     | Itpka           | 10     | 3       | 8      | 2      | 3     | 4     | 6     | 8       |
| 83568     | Naalad11        | 9      | 11      | 11     | 15     | 12    | 11    | 10    | 9       |
| 305625    | Slc49a3         | 69     | 50      | 69     | 88     | 60    | 52    | 75    | 65      |
| 83720     | Fat1            | 1418   | 1729    | 1969   | 1890   | 1431  | 1619  | 1728  | 1619    |
| 306886    | Ripk1           | 317.28 | 308.81  | 388.01 | 317.05 | 293.2 | 275.5 | 342   | 304.84  |
| 24706     | Rarb            | 127    | 104     | 166    | 144    | 107   | 104   | 141   | 142     |
| 314320    | Mlh3            | 286.57 | 330.58  | 259.99 | 259.08 | 254.6 | 264.4 | 257.8 | 260.76  |
| 498898    | Dok6            | 94     | 89      | 85     | 112    | 100   | 40    | 94    | 113     |
| 307927    | Taf5l           | 291.4  | 285.78  | 281.9  | 232.15 | 237.3 | 222.5 | 242.7 | 293.93  |
| 360204    | Zfp24           | 1225.4 | 1236.48 | 1234.7 | 1193.1 | 999.3 | 1146  | 1218  | 1101.57 |
| 363227    | Nabp1           | 111    | 118     | 110    | 99     | 91    | 99    | 106   | 104     |
| 291921    | N4bp1           | 572.41 | 571.95  | 651.96 | 618.27 | 573.3 | 592.2 | 511.6 | 528.17  |
| 316731    | Mettl4          | 48     | 44      | 46     | 58     | 41    | 48    | 36    | 54      |
| 297504    | Edem1           | 1248   | 1173    | 1358   | 1250   | 1152  | 1093  | 1233  | 1115    |
| 303637    | Abca8           | 582.44 | 638.19  | 622.27 | 663.01 | 564.3 | 474.1 | 631.3 | 619.12  |
| 288016    | P3h2            | 137.88 | 120.39  | 122.95 | 107.4  | 73.66 | 132.7 | 123.9 | 116.03  |
| 314128    | RGD1304624      | 49.24  | 74.09   | 80.06  | 39.89  | 36.4  | 66.17 | 64.56 | 55.1    |
| 362553    | Tctex1d1        | 85.96  | 105.11  | 82.33  | 117.13 | 90.2  | 74    | 109.1 | 83.46   |
| 288353    | Cggbp1          | 798    | 911     | 951    | 831    | 731   | 700   | 874   | 884     |



|           |              |        |         |        |        |       |       |       |        |
|-----------|--------------|--------|---------|--------|--------|-------|-------|-------|--------|
| 314259    | Mpp5         | 1111.6 | 1101.07 | 1080.1 | 1102.5 | 1010  | 892   | 1039  | 1073.7 |
| 252941    | Hdgfl3       | 724.01 | 793.53  | 707.15 | 823.07 | 711.7 | 602.6 | 713   | 756.87 |
| 360820    | Pxn          | 1554   | 1346    | 1658   | 1412   | 1322  | 1503  | 1387  | 1242   |
| 108348069 | LOC108348069 | 55.88  | 57.92   | 83.02  | 89.9   | 82.32 | 33.05 | 65.9  | 80.67  |
| 64570     | Nat8         | 0      | 1.18    | 1.25   | 0      | 0     | 0     | 2.22  | 0      |
| 362153    | Cwc22        | 284.1  | 250.99  | 300.29 | 267.29 | 237.6 | 246.6 | 251.2 | 272    |
| 313115    | Ufl1         | 588    | 542     | 578    | 561    | 492   | 504   | 541   | 536    |
| 296511    | Alx4         | 9.17   | 5.26    | 8.12   | 15.32  | 2.12  | 11.21 | 9.16  | 12.11  |
| 316101    | Limd1        | 430    | 444     | 576    | 520    | 406   | 432   | 534   | 428    |
| 296789    | Sema3e       | 294    | 271     | 326    | 303    | 270   | 296   | 279   | 246    |
| 102556119 | Znf354b      | 84.69  | 71.48   | 67.88  | 75.08  | 63.06 | 62.42 | 80.81 | 67.04  |
| 315326    | Tns2         | 1113   | 1076    | 1226   | 1294   | 978   | 1154  | 1089  | 1082   |
| 25614     | Ptk2         | 722    | 784     | 895    | 814    | 680   | 798   | 766   | 694    |
| 299347    | Brf1         | 559.12 | 550.52  | 575.37 | 525.41 | 484.1 | 475.8 | 549.9 | 510.27 |
| 689134    | Sec61g       | 497.29 | 521.65  | 523.14 | 356.67 | 419.6 | 392.8 | 406.4 | 516.42 |
| 294854    | Dnah5        | 23     | 17      | 23     | 30     | 20    | 17    | 23    | 25     |
| 688452    | Spaca6       | 255.66 | 268.13  | 284.38 | 271.43 | 236.3 | 237   | 262   | 251.52 |
| 362107    | Aif11        | 989.88 | 1056.39 | 991.52 | 878.4  | 656.4 | 986.9 | 971.9 | 964.33 |
| 315716    | Cd276        | 469    | 500     | 675    | 506    | 456.2 | 518   | 518   | 473    |
| 100360772 | Zfp17        | 228.42 | 185     | 217    | 212    | 158   | 190   | 214   | 208    |
| 25631     | Smad3        | 155    | 189     | 270    | 189    | 156   | 194   | 173   | 211    |
| 361621    | Olfml1       | 1388   | 1331    | 1314.8 | 1400   | 1192  | 1232  | 1280  | 1263   |
| 306254    | Pbrml        | 1329   | 1400    | 1434   | 1472   | 1273  | 1198  | 1430  | 1250   |
| 315114    | Clqtnf6      | 102    | 121     | 160    | 106    | 98    | 134   | 128   | 87     |
| 361813    | Stk38        | 579    | 479     | 581    | 515    | 481   | 521   | 481   | 486    |
| 140590    | Bmpr2        | 5189   | 5148    | 5286   | 6231   | 5171  | 4382  | 5183  | 5242   |
| 192181    | Podxl        | 655    | 715     | 661    | 660    | 622   | 615   | 611   | 612    |
| 680127    | Tirap        | 111    | 89      | 110    | 98     | 90    | 97    | 90    | 96     |
| 691394    | Chst14       | 122    | 105     | 121    | 95     | 81    | 100   | 127   | 97     |
| 296290    | Bpifb2       | 5      | 10      | 12     | 8      | 2     | 9     | 18    | 3      |
| 64354     | Htr6         | 6      | 13      | 8      | 8      | 7     | 6     | 13    | 6      |
| 78960     | Prx          | 13935  | 17719   | 16561  | 15310  | 10416 | 16450 | 13694 | 17521  |
| 288105    | Zbtb20       | 100    | 113     | 145    | 179    | 153   | 71    | 97    | 170    |
| 691538    | Rnpc3        | 385    | 399     | 450    | 377    | 389   | 348   | 348   | 388    |
| 316258    | Cd2ap        | 912    | 875     | 894    | 1079   | 979   | 704   | 914   | 841    |
| 307213    | Zfp407       | 369    | 340     | 337    | 391    | 330   | 336   | 322   | 326    |
| 679082    | Arhgap19     | 1001   | 1080    | 967    | 948    | 752   | 919   | 997   | 986    |
| 303399    | Tbx4         | 13     | 10      | 17.86  | 6      | 9.85  | 11    | 16    | 6      |
| 84685     | Ppplr9a      | 1253   | 1272    | 1366   | 1462   | 1235  | 1123  | 1298  | 1239   |
| 306071    | Lcp1         | 3212   | 3319    | 3361   | 3211   | 3106  | 3068  | 2638  | 3170   |
| 305244    | Thap6        | 225.81 | 267.78  | 235.57 | 231.59 | 222.8 | 183.1 | 245.1 | 227.63 |
| 25105     | Nppb         | 51     | 13      | 33     | 20     | 33    | 9     | 17    | 48     |
| 57341     | Parva        | 3684   | 3963    | 4290   | 4087   | 3529  | 3732  | 3609  | 3785   |
| 29365     | Mpdz         | 1452   | 1481    | 1476   | 1631   | 1334  | 1338  | 1423  | 1429   |
| 363139    | Zmynd10      | 69     | 72      | 75     | 65     | 62    | 68    | 66    | 61     |
| 85426     | Slc5a7       | 176.36 | 206.86  | 173.6  | 155.5  | 160.8 | 131.3 | 191.5 | 167.87 |
| 315696    | Snx33        | 342    | 276     | 362    | 297    | 286   | 301   | 296   | 285    |
| 296866    | Gpr165       | 33     | 28      | 27     | 41     | 28    | 31    | 29    | 30     |
| 304291    | Zdhhc4       | 255    | 244     | 267    | 243    | 210   | 239   | 224   | 250    |
| 690752    | Med121       | 231.03 | 231.88  | 253.63 | 259.65 | 269.7 | 166   | 240.1 | 217.3  |
| 498795    | Ccdc3        | 152    | 94      | 193    | 136    | 136   | 121   | 121   | 148    |
| 304297    | Sdk1         | 238    | 248     | 270    | 282.99 | 215   | 286   | 228   | 221.46 |
| 58834     | Dlc1         | 1069   | 1374    | 1349.9 | 1451   | 1068  | 1256  | 1294  | 1179   |
| 29224     | Cbr1         | 456.43 | 584.23  | 452.03 | 529.03 | 481   | 558.3 | 337.8 | 472.43 |
| 313519    | Gpbp111      | 1216   | 1241    | 1140   | 1159   | 1091  | 1047  | 1101  | 1112   |
| 29203     | Foxd3        | 368.11 | 391.25  | 524.13 | 365.69 | 313.4 | 379.7 | 421.7 | 393.99 |



|           |              |        |         |        |        |       |       |       |         |
|-----------|--------------|--------|---------|--------|--------|-------|-------|-------|---------|
| 315308    | Csrnp2       | 504.55 | 460.55  | 472.18 | 465.63 | 422.4 | 452   | 429.9 | 436.62  |
| 296560    | Uap111       | 259    | 274     | 345    | 262    | 227   | 269   | 254   | 293     |
| 308624    | Heca         | 756.07 | 671.46  | 735.09 | 711.18 | 653.2 | 639.8 | 663.7 | 672.69  |
| 310131    | Rictor       | 734.83 | 810.98  | 781.7  | 826.92 | 816.8 | 566   | 779.2 | 724.3   |
| 361845    | Eif4ebp2     | 446.59 | 420.76  | 486.01 | 517.38 | 426.8 | 424.3 | 446   | 414.79  |
| 309945    | Arrdc3       | 761    | 748     | 689    | 1017   | 791   | 716   | 853   | 582     |
| 690825    | Gngt2        | 34     | 26      | 25     | 21     | 19    | 27    | 24    | 27      |
| 100302447 | Cox16        | 475    | 438     | 436    | 453    | 389   | 403   | 418   | 439     |
| 498701    | RGD1566359   | 2305   | 2335    | 2361   | 2223   | 2046  | 2025  | 2256  | 2114    |
| 29409     | Mag          | 590    | 807     | 782    | 614    | 464   | 749   | 614   | 729     |
| 305343    | Pds5a        | 1323   | 1222    | 1301   | 1319   | 1250  | 1060  | 1309  | 1108    |
| 100910200 | LOC100910200 | 17.6   | 35.11   | 5.47   | 18.98  | 11.52 | 26.53 | 15.83 | 16.74   |
| 103691261 | LOC103691261 | 24     | 10      | 14     | 11     | 19    | 9     | 17    | 9       |
| 171026    | Akap5        | 16     | 19      | 6      | 18     | 15    | 11    | 14    | 14      |
| 300193    | Senp1        | 359    | 368     | 387    | 373    | 287   | 362   | 366   | 346     |
| 494125    | Rcn3         | 777    | 872     | 1035   | 834    | 724   | 854   | 806   | 836     |
| 65205     | Mmp16        | 235.63 | 213.57  | 257.02 | 308.8  | 253.6 | 204.7 | 229.6 | 241.21  |
| 361819    | RGD1566085   | 556.38 | 461.74  | 499.03 | 530.44 | 462.5 | 498.8 | 440.1 | 473.02  |
| 85254     | Slc44a1      | 6511.6 | 6997.33 | 7606.3 | 6872.6 | 6138  | 6651  | 6622  | 6208.45 |
| 360869    | Tipr1        | 818    | 752     | 725    | 601    | 626   | 648   | 687   | 690     |
| 307446    | Ythdc2       | 695.28 | 665.18  | 710    | 667    | 672   | 589.7 | 614.5 | 629.73  |
| 362332    | Flnc         | 247    | 280     | 491    | 401    | 242   | 545   | 259   | 253     |
| 305332    | Limch1       | 3021   | 3780    | 3323   | 3463   | 2362  | 3240  | 3118  | 3718    |
| 117275    | Chrd         | 66     | 65      | 74     | 67     | 48    | 54    | 76    | 71      |
| 309475    | Tm9sf3       | 4594.1 | 4388.06 | 4544.3 | 4580.2 | 4063  | 3988  | 4355  | 4169.72 |
| 84411     | Ick          | 623    | 661     | 684    | 599    | 517   | 614   | 635   | 584     |
| 360503    | Luc71        | 1710.8 | 1703.7  | 1586   | 1579.8 | 1461  | 1461  | 1621  | 1481.01 |
| 100363314 | LOC100363314 | 32.29  | 23.35   | 16.82  | 17     | 18    | 26.25 | 19.34 | 18.31   |
| 310091    | Slc38a9      | 501.1  | 481.83  | 484.55 | 526.54 | 482   | 410   | 492.4 | 441.15  |
| 290907    | Lig4         | 519    | 523     | 631    | 588    | 492   | 465   | 579   | 534     |
| 25230     | Add3         | 3027   | 3037    | 3276   | 3183   | 2667  | 2829  | 3032  | 2938    |
| 680782    | Spcs3        | 203    | 204     | 211    | 224    | 198   | 165   | 207   | 201     |
| 302528    | RGD1559951   | 308.65 | 322.22  | 353.1  | 244.02 | 280.8 | 283   | 260.6 | 300.02  |
| 362404    | Suclg2       | 663    | 606     | 570    | 559    | 490   | 502   | 605   | 599     |
| 362866    | Chpt1        | 313.72 | 304.23  | 294.45 | 310.84 | 274.6 | 305.9 | 286.9 | 252.81  |
| 686610    | Tb12         | 546    | 612     | 604    | 637    | 573   | 559   | 550   | 515     |
| 302495    | Rap2c        | 1315   | 1271    | 1152   | 1203   | 1123  | 1063  | 1198  | 1141    |
| 691493    | Zwilch       | 162.98 | 135.85  | 187.98 | 150    | 145.9 | 134.6 | 158.9 | 143.87  |
| 360824    | Wscd2        | 23     | 22      | 25.99  | 24     | 20    | 22    | 22    | 23      |
| 288280    | Ncam2        | 331    | 305     | 345    | 446    | 385   | 187   | 365   | 370     |
| 690654    | Wars2        | 281.49 | 270.94  | 254.14 | 298.51 | 278.4 | 223.9 | 274.1 | 235.71  |
| 363162    | Cmc1         | 94     | 95      | 84     | 72     | 74    | 62    | 97    | 83      |
| 360468    | Emp2         | 1194   | 1383    | 1516   | 1120   | 878   | 1266  | 1295  | 1336    |
| 303601    | Cyb561       | 346    | 385     | 323    | 303    | 271   | 331   | 287   | 354     |
| 102556082 | LOC102556082 | 5      | 10      | 8      | 7      | 3     | 4     | 8.48  | 12      |
| 500502    | Eqtn         | 60.94  | 160.35  | 122.87 | 166.93 | 152.5 | 109.5 | 63.03 | 143.14  |
| 499124    | Zfp14        | 168.68 | 132.76  | 148.13 | 99.79  | 119.9 | 116.7 | 137.9 | 128.79  |
| 84359     | Dffb         | 70     | 63      | 83     | 58     | 57    | 67    | 63    | 64      |
| 24232     | C3           | 184    | 109     | 198    | 105    | 128   | 101   | 194   | 123     |
| 29633     | Ndst1        | 1335.1 | 1498.45 | 1556   | 1619.4 | 1395  | 1340  | 1307  | 1462.65 |
| 29199     | Hfe          | 43     | 41      | 39     | 44     | 42    | 32    | 51    | 28      |
| 292681    | Nova2        | 34     | 40      | 48     | 45     | 55    | 30    | 32    | 36      |
| 365668    | Mtrex        | 1008.9 | 1021.45 | 1041.4 | 1006.4 | 931.9 | 857.8 | 1008  | 938.97  |
| 297514    | Setd5        | 1729   | 1619    | 1693   | 1870   | 1645  | 1527  | 1628  | 1532    |
| 498112    | Yeats2       | 415    | 427     | 418    | 423    | 384   | 398   | 415   | 345     |
| 314587    | Zfp472       | 59     | 70      | 68.49  | 47     | 58    | 52    | 52    | 62.01   |

|           |              |        |         |        |        |       |       |       |         |
|-----------|--------------|--------|---------|--------|--------|-------|-------|-------|---------|
| 681647    | Lysmd4       | 304    | 308     | 316    | 266    | 275   | 250   | 269   | 300     |
| 108349536 | LOC108349536 | 277    | 289.99  | 330.69 | 345.42 | 297   | 232   | 320   | 290     |
| 29596     | Ifrd1        | 388    | 402     | 432    | 391    | 356   | 360   | 399   | 363     |
| 63847     | Fxyd6        | 3330.4 | 3680.01 | 3854.2 | 3396.8 | 2118  | 3275  | 3952  | 3723    |
| 289635    | Rel11        | 575    | 531     | 530    | 575    | 410   | 481   | 533   | 602     |
| 689954    | Setd7        | 546    | 579     | 585    | 729    | 669   | 489   | 534   | 543     |
| 308140    | Tfblm        | 560.26 | 591.69  | 516.09 | 528.21 | 446.4 | 502.1 | 523.6 | 540.48  |
| 24950     | Srd5a1       | 719    | 767     | 723    | 603    | 558   | 748   | 632   | 639     |
| 313842    | Hnrnp11      | 668    | 746     | 744    | 654    | 584   | 640   | 672   | 681     |
| 25270     | Abcd3        | 1819   | 1898    | 1774   | 1884   | 1556  | 1607  | 1815  | 1781    |
| 306238    | Ccdc66       | 315.35 | 274.82  | 338.8  | 360.91 | 323.3 | 281   | 285.7 | 292.06  |
| 24915     | Pdlim4       | 928    | 1041    | 1228   | 779    | 740   | 1033  | 927   | 944     |
| 302363    | Sh3bgr1      | 4211.2 | 3820.22 | 4239.8 | 4044.1 | 3518  | 3437  | 3930  | 4069.14 |
| 103691527 | LOC103691527 | 608.78 | 722.88  | 748.49 | 692.81 | 520   | 636   | 660.9 | 724.8   |
| 302855    | Rbmx         | 725.07 | 656.75  | 699.02 | 675.39 | 563.4 | 618.5 | 676.9 | 667.65  |
| 498095    | Tctex1d2     | 179.25 | 157.23  | 160.28 | 165.57 | 147.7 | 126   | 158.9 | 174.59  |
| 364712    | Sox4         | 750    | 766     | 975    | 759    | 762   | 751   | 682   | 784     |
| 308118    | Rgs17        | 405    | 426     | 461    | 460    | 425   | 346   | 405   | 430     |
| 501779    | Cd200r11     | 0.99   | 1       | 2.99   | 2.1    | 2.15  | 1.99  | 0     | 2.35    |
| 108348955 | LOC108348955 | 14     | 19      | 15     | 12     | 12    | 11    | 11    | 21      |
| 140638    | Apoa5        | 5      | 4       | 3      | 0      | 2     | 2     | 3     | 4       |
| 292755    | Nccrp1       | 6      | 1       | 2      | 3      | 2     | 3     | 0     | 6       |
| 317189    | Diaph2       | 59     | 61      | 76     | 80     | 68    | 51    | 68    | 66      |
| 53949     | Chrm5        | 2      | 1       | 5      | 4      | 1     | 3     | 5     | 2       |
| 685153    | Wfdc6a       | 2      | 5       | 5      | 0      | 1     | 4     | 4     | 2       |
| 689388    | Ptx3         | 3      | 6       | 11     | 4      | 5     | 5     | 3     | 9       |
| 84399     | Ihh          | 4      | 3       | 3      | 2      | 2     | 6     | 2     | 1       |
| 308918    | Ppfibp2      | 463.05 | 512     | 555.16 | 483    | 419.1 | 492.4 | 438   | 496     |
| 689106    | Vstm2a       | 526    | 517     | 534    | 560    | 512   | 413   | 577   | 457     |
| 286994    | Lgr4         | 1242   | 1271    | 1309   | 1354   | 1162  | 1163  | 1263  | 1157    |
| 690516    | Smurf1       | 1147   | 1430    | 1296   | 1135   | 1023  | 1265  | 1151  | 1152    |
| 25205     | I16st        | 5251   | 5027    | 5537   | 5733   | 4976  | 4984  | 5224  | 4570    |
| 100911831 | Zfp182       | 242    | 198     | 273    | 260    | 206   | 193   | 246   | 247     |
| 307724    | Rpgrip11     | 333    | 315     | 353    | 333    | 329   | 271   | 328   | 295     |
| 313434    | Akap17b      | 498    | 447     | 481    | 533    | 465   | 426   | 447   | 458     |
| 291534    | Rnmt         | 1181   | 1111    | 1104   | 1111   | 1023  | 1026  | 1046  | 1037    |
| 306014    | Reep4        | 152    | 164     | 169    | 116    | 133   | 144   | 133   | 141     |
| 24482     | Igf1         | 1195   | 981     | 1272   | 1193   | 1064  | 927   | 1355  | 909     |
| 362871    | Elk3         | 309.03 | 302.16  | 376    | 302.31 | 267.2 | 315.7 | 315.7 | 283.72  |
| 315532    | Fli1         | 278.08 | 251.36  | 263.67 | 241.04 | 250.6 | 234.2 | 252.1 | 211.24  |
| 360600    | Spag9        | 6868   | 6977    | 6657   | 7329   | 6537  | 5900  | 6677  | 6403    |
| 102550403 | LOC102550403 | 15.94  | 16      | 16.55  | 17.18  | 12.93 | 15.78 | 13.35 | 18.15   |
| 303348    | Atad5        | 86     | 87      | 122    | 114    | 90    | 89    | 104   | 92      |
| 309035    | Dcun1d3      | 453.38 | 420.21  | 390.69 | 414.08 | 376.3 | 349.5 | 400.5 | 412.63  |
| 299759    | Lrriq1       | 63     | 64      | 74     | 88     | 82    | 62    | 60    | 61      |
| 303747    | Cd7          | 71     | 69      | 85     | 52     | 56    | 90    | 99    | 9       |
| 682988    | Med18        | 146.73 | 154.85  | 179.67 | 132.66 | 154   | 121   | 165.4 | 122.62  |
| 363070    | Fam219b      | 1153   | 1124    | 1060   | 975    | 939   | 928   | 997   | 1090    |
| 361458    | Akap7        | 60     | 59      | 71     | 75     | 59    | 53    | 63    | 68      |
| 108352957 | LOC108352957 | 84.3   | 127.29  | 96.78  | 179.31 | 151.2 | 68.1  | 109.3 | 118.55  |
| 294009    | Cuedc2       | 257    | 301     | 408    | 251    | 210   | 292   | 306   | 308     |
| 103693480 | LOC103693480 | 541.63 | 630.31  | 705.16 | 693.19 | 543.4 | 605.4 | 652.2 | 555.94  |
| 290501    | Tmtc4        | 1324   | 1333.99 | 1311   | 1358   | 1217  | 1110  | 1292  | 1266    |
| 298890    | Fam49a       | 171    | 147     | 167    | 190    | 160   | 112   | 170   | 177     |
| 304056    | Zbtb21       | 424    | 383     | 410    | 447    | 396   | 359   | 403   | 368     |
| 116545    | Pou6f1       | 556    | 579     | 564    | 556    | 481   | 558   | 548   | 481     |

|           |              |        |         |        |        |       |       |       |         |
|-----------|--------------|--------|---------|--------|--------|-------|-------|-------|---------|
| 114901    | Sorbs2       | 508    | 527     | 595    | 397    | 389   | 507   | 495   | 468     |
| 84486     | Sf3b1        | 3699   | 3742    | 3832   | 3766   | 3288  | 3048  | 3816  | 3641    |
| 64026     | Casp7        | 114    | 99.15   | 142    | 105.15 | 104   | 103.9 | 116.3 | 98      |
| 500464    | Epb4114b     | 510    | 605     | 588    | 461    | 501   | 524   | 493   | 467     |
| 310324    | Dcun1d1      | 1056.1 | 978.92  | 1049.1 | 1037.2 | 985.2 | 830   | 1015  | 949.94  |
| 64466     | Cited1       | 36     | 24      | 33     | 28     | 23    | 24    | 31    | 33      |
| 102549471 | LOC102549471 | 86     | 93      | 67     | 81     | 73    | 73    | 78    | 76      |
| 305419    | Pi4k2b       | 187    | 196     | 198    | 182    | 172   | 161   | 191   | 176     |
| 497039    | Amy2a3       | 0      | 0       | 1.09   | 0      | 1     | 0     | 0     | 0       |
| 497961    | Nlk          | 1249.4 | 1180.86 | 1100.7 | 1352.7 | 1160  | 1128  | 1147  | 1044.75 |
| 313706    | Ubiad1       | 165    | 143     | 162    | 148    | 128   | 160   | 129   | 150     |
| 246235    | Slc36a2      | 642    | 882     | 775.98 | 802.99 | 571   | 875   | 610   | 790.99  |
| 361109    | Dcpl1a       | 109    | 91      | 119    | 130    | 105   | 105   | 100   | 102     |
| 687001    | Hdac9        | 410.94 | 357     | 372    | 437    | 397   | 315   | 353   | 382     |
| 362988    | Cpne8        | 788    | 821     | 905    | 763    | 695   | 756   | 798   | 758     |
| 363337    | LOC363337    | 428.69 | 198.1   | 313.68 | 170.46 | 298   | 155.5 | 288.3 | 277.6   |
| 309457    | Pcgf6        | 94     | 116     | 123    | 92     | 102   | 90    | 104   | 94      |
| 679504    | Nemp1        | 44     | 52      | 35     | 39     | 40    | 28    | 48    | 40      |
| 500584    | LOC500584    | 229.05 | 246.89  | 244.75 | 243.72 | 216.5 | 204.6 | 248.4 | 215.54  |
| 312927    | Rblcc1       | 1939   | 1827    | 1960   | 2158   | 1899  | 1700  | 1886  | 1750    |
| 317183    | Pcdh19       | 318    | 274     | 340    | 380    | 281   | 280   | 351   | 292     |
| 102555172 | Tmppe        | 91     | 122     | 89     | 99     | 102   | 84    | 104   | 78      |
| 361953    | Lekr1        | 34     | 38      | 37     | 49     | 31    | 32    | 46    | 36      |
| 100362110 | LOC100362110 | 3886.9 | 3523.29 | 3833.8 | 3876.9 | 3258  | 3194  | 3684  | 3741.68 |
| 361381    | Rad23a       | 1083.5 | 1136.46 | 1100.5 | 994.56 | 983.1 | 1045  | 930.7 | 1001.59 |
| 499821    | Fam171b      | 2562   | 2536    | 2483   | 2647   | 2495  | 2200  | 2494  | 2198    |
| 25459     | Hmgb1        | 1326.2 | 1376.34 | 1397.3 | 1315.5 | 1304  | 1292  | 1146  | 1227.95 |
| 313581    | Utp11        | 728    | 751     | 748    | 717    | 630   | 633   | 709   | 730     |
| 309728    | Arid5b       | 212    | 228     | 265    | 342    | 233   | 244   | 268   | 216     |
| 315394    | Kbtbd3       | 1069.7 | 1112.74 | 1030.6 | 1231   | 1151  | 862   | 991.9 | 1074.28 |
| 297604    | Ltbr         | 794    | 693     | 925    | 746    | 586   | 640   | 868   | 805     |
| 309053    | Relch        | 1484   | 1392    | 1332   | 1451   | 1354  | 1253  | 1306  | 1282    |
| 288306    | Usp16        | 441.29 | 399.64  | 451.87 | 408.25 | 353   | 369.4 | 423.3 | 415.82  |
| 364706    | Foxc1        | 217    | 182.52  | 204.41 | 247.95 | 173.6 | 168   | 206   | 234.54  |
| 360703    | Vps26c       | 518    | 540     | 548    | 471    | 438   | 476   | 498   | 495     |
| 290794    | Tnks         | 759    | 755     | 693    | 909    | 786   | 625   | 756   | 694     |
| 299700    | RGD1563365   | 133    | 127     | 122    | 107    | 100   | 105   | 117   | 127     |
| 691429    | Shisa7       | 148    | 141     | 151    | 173.41 | 156   | 116   | 139   | 152.24  |
| 362706    | Rbks         | 160    | 150     | 143    | 157    | 133   | 130.1 | 142   | 155     |
| 306977    | Zkscan3      | 362.24 | 356.54  | 326.27 | 314.38 | 309.1 | 304.1 | 336.2 | 298.99  |
| 303504    | Mllt6        | 815.03 | 791.6   | 804    | 919.6  | 815   | 793   | 756   | 694     |
| 100359832 | Fam104b      | 221.6  | 231.8   | 218.71 | 210.32 | 193.4 | 164.8 | 232.1 | 220.04  |
| 301446    | Carf         | 296    | 324     | 348    | 317    | 295   | 245   | 327   | 313     |
| 84428     | Dctn4        | 3740   | 3768    | 3418   | 3640   | 3439  | 3194  | 3579  | 3164    |
| 361568    | Rras         | 457    | 407     | 442    | 359    | 334   | 428   | 388   | 379     |
| 64824     | Nab1         | 1350.1 | 1395.94 | 1328.9 | 1375   | 1140  | 1196  | 1339  | 1330.02 |
| 309452    | Nfkb2        | 236    | 264     | 326    | 252    | 219   | 265   | 248   | 258     |
| 116651    | E2f5         | 145    | 156     | 154    | 133    | 141   | 128   | 158   | 113     |
| 50645     | Rab27a       | 411.99 | 396.04  | 490    | 426.27 | 421   | 354   | 426   | 382.68  |
| 497984    | Zfp652       | 127    | 148     | 147    | 212    | 131.3 | 131   | 166   | 154     |
| 292770    | Spint2       | 179    | 178     | 236    | 241    | 174   | 171   | 211   | 210     |
| 500337    | Clecl1a      | 113    | 101     | 100    | 91     | 93    | 78    | 111   | 90      |
| 100910839 | Luzp2        | 1427.1 | 1430.9  | 1353.2 | 1553.5 | 1392  | 1113  | 1486  | 1304.11 |
| 362317    | Krit1        | 867    | 805     | 845    | 797    | 738   | 718   | 774   | 814     |
| 288111    | Spic1        | 109    | 85      | 93     | 106    | 93    | 87    | 94    | 87      |
| 100361710 | Setdb2       | 212.03 | 251.63  | 265.89 | 265.77 | 238.4 | 198.8 | 250.4 | 226.78  |

|           |              |        |         |        |        |       |       |       |         |
|-----------|--------------|--------|---------|--------|--------|-------|-------|-------|---------|
| 501665    | Slc10a3      | 309    | 283     | 308    | 304    | 266   | 305   | 259   | 276     |
| 304887    | Ralgs2       | 241    | 233     | 264    | 245    | 232   | 187   | 249   | 235     |
| 360548    | Tnfsf12      | 614    | 578     | 607    | 585    | 498   | 557   | 530   | 605     |
| 313243    | Exosc3       | 140    | 111.25  | 110    | 104.73 | 104   | 94    | 114   | 116.07  |
| 282584    | Mtmr9        | 1177   | 1188    | 1124   | 1416   | 1317  | 980   | 1167  | 1042    |
| 499056    | Znf761       | 96.13  | 87.6    | 86.51  | 88.43  | 81.19 | 72.24 | 89.2  | 86.87   |
| 292999    | Chsy1        | 353    | 365     | 456    | 425    | 364   | 360   | 416   | 329     |
| 360773    | Sun1         | 721    | 791     | 821    | 818    | 674   | 724   | 761   | 736     |
| 29357     | Smad2        | 719    | 729     | 731    | 825    | 686   | 625   | 721   | 728     |
| 361476    | Rsph3        | 129    | 123     | 112    | 117.32 | 109.3 | 103   | 115   | 115     |
| 308894    | Rassf10      | 119.02 | 90.98   | 94     | 78     | 69    | 72    | 115   | 95      |
| 311716    | Col20a1      | 89     | 93      | 143    | 94     | 98    | 98    | 98    | 91      |
| 313917    | Abhd1        | 843.78 | 518.88  | 460.87 | 466.35 | 547   | 524.5 | 471.8 | 560.89  |
| 307594    | Mib1         | 495    | 592     | 571    | 673    | 636   | 361   | 562   | 583     |
| 116554    | Mapk8        | 1621.2 | 1636.67 | 1716.4 | 1757.8 | 1502  | 1401  | 1634  | 1649.37 |
| 315639    | Usp28        | 458    | 452     | 466    | 425    | 439   | 435   | 416   | 365     |
| 192352    | Ss18l1       | 121    | 111     | 98     | 139    | 115   | 105   | 108   | 103     |
| 366232    | Rem1         | 69     | 57      | 94     | 64     | 52    | 71    | 78    | 60      |
| 103691988 | LOC103691988 | 132.28 | 122     | 141    | 142    | 135   | 103   | 134.9 | 120.88  |
| 499281    | Lrrc27       | 73     | 75      | 65     | 96     | 64    | 67    | 83    | 70      |
| 500824    | Fgd6         | 190.35 | 189.86  | 215.74 | 251.97 | 241.2 | 145.7 | 198.8 | 193.58  |
| 100363266 | Igip         | 2808.9 | 2730.37 | 2679   | 3037.8 | 2505  | 2455  | 2733  | 2653.13 |
| 363849    | Hira         | 489.92 | 404.3   | 430.03 | 469.91 | 291.8 | 500.8 | 424.9 | 431.64  |
| 365871    | Ciart        | 62     | 51      | 49     | 36     | 49    | 76    | 27    | 30      |
| 246776    | Filip1       | 583.19 | 673.05  | 691.25 | 676.93 | 496.6 | 541.7 | 716   | 658.13  |
| 117521    | Scaper       | 646    | 586     | 628    | 653    | 629   | 559   | 594   | 528     |
| 85261     | Mterf1       | 412    | 333     | 349    | 330    | 293   | 310   | 353   | 353     |
| 500981    | Zfp202       | 113    | 114     | 127    | 129    | 116   | 92    | 128   | 108     |
| 363578    | Havcr2       | 4.09   | 6.01    | 4.03   | 13     | 10    | 6.05  | 4     | 4.89    |
| 307764    | Usp38        | 449    | 436     | 436    | 488    | 419   | 387   | 446   | 411     |
| 362297    | Rbm33        | 1273   | 1241    | 1358   | 1207   | 1169  | 1136  | 1183  | 1181    |
| 289324    | Cnih4        | 957    | 975     | 1009   | 938    | 810   | 821   | 945   | 990     |
| 361512    | Ehd2         | 692    | 715     | 887    | 682    | 593   | 785   | 676   | 682     |
| 363334    | Stap2        | 74     | 47      | 56     | 71     | 52    | 62    | 58    | 56      |
| 687813    | Traf1        | 35     | 32      | 31     | 26     | 24    | 21    | 29    | 40      |
| 100909998 | LOC100909998 | 51     | 62      | 56     | 42     | 51    | 42    | 41    | 60      |
| 100909569 | LOC100909569 | 38.9   | 56.11   | 63.64  | 48.01  | 50.6  | 35.76 | 43.09 | 60.56   |
| 305896    | Irf9         | 693    | 668     | 651    | 584    | 573   | 616   | 572   | 626     |
| 102554586 | Tmem265      | 49     | 37      | 55     | 33     | 40    | 33    | 48    | 39      |
| 499270    | Prss53       | 101.32 | 84.65   | 89.02  | 53.04  | 73.01 | 81.02 | 63.98 | 83.64   |
| 361271    | Upf2         | 578    | 558     | 591    | 586    | 583   | 500   | 544   | 500     |
| 682469    | Kdm3b        | 862    | 911     | 911    | 960    | 850   | 786   | 902   | 813     |
| 366196    | Cr1s1        | 361.68 | 330.63  | 310.46 | 312.59 | 286.9 | 286.9 | 313.1 | 322.78  |
| 366894    | Trhde        | 57     | 42.57   | 56     | 60.18  | 48    | 53    | 49    | 48.41   |
| 313208    | Fsd11        | 2720.1 | 2684.25 | 2444   | 2849   | 2694  | 2140  | 2485  | 2518.04 |
| 307296    | Zfp608       | 318    | 429     | 452    | 444    | 341   | 358   | 422   | 390     |
| 306141    | Spry2        | 407    | 371     | 426    | 428    | 308   | 387   | 402   | 404     |
| 83805     | Src          | 1399   | 1466    | 1451   | 1441   | 1281  | 1304  | 1295  | 1415    |
| 100363276 | Arhgap6      | 42     | 31      | 57     | 32     | 31    | 32    | 54    | 32      |
| 81647     | Atf2         | 647    | 636     | 651    | 760    | 675   | 560   | 628   | 615     |
| 305960    | Xkr6         | 38     | 31.98   | 27     | 40     | 29    | 21    | 39    | 37      |
| 310589    | RGD1566337   | 12.93  | 9.73    | 19.59  | 13.4   | 18.13 | 12.57 | 7     | 13.49   |
| 313851    | Thumpd2      | 171    | 148     | 150    | 155    | 135   | 157   | 141   | 141     |
| 102550396 | LOC102550396 | 526.29 | 546.21  | 631.44 | 577.48 | 501   | 567.5 | 497.4 | 532.71  |
| 303346    | Nsrp1        | 368    | 356     | 383    | 367    | 380   | 346   | 323   | 307     |
| 298441    | Nasp         | 261    | 233     | 285    | 208    | 232   | 198   | 237   | 241     |

|           |              |        |         |        |        |       |       |       |         |
|-----------|--------------|--------|---------|--------|--------|-------|-------|-------|---------|
| 309306    | Ric1         | 679    | 631     | 667    | 760    | 620   | 583   | 633   | 681.98  |
| 309887    | Ascc3        | 622    | 610     | 678    | 715    | 632   | 486   | 627   | 670     |
| 373540    | Il18rap      | 10     | 4       | 9      | 2      | 8     | 2     | 8     | 5       |
| 474146    | Hcst         | 4      | 5       | 11     | 5      | 6     | 3     | 4     | 10      |
| 29516     | Pde3b        | 372.15 | 333.56  | 316.17 | 350.97 | 334.3 | 283.5 | 323.4 | 321.85  |
| 293526    | Ate1         | 1005   | 1001    | 1000   | 1110   | 940   | 886   | 992   | 969     |
| 361930    | Bbs7         | 255    | 272     | 257    | 242    | 240   | 215   | 235   | 254     |
| 312560    | Xpc          | 365    | 339     | 363    | 347    | 313   | 328   | 343   | 317     |
| 314374    | Foxn3        | 779.58 | 888.32  | 805.2  | 856.36 | 714.1 | 815   | 762.3 | 772.13  |
| 288702    | Unc119b      | 687    | 675     | 681    | 624    | 568   | 624   | 598   | 664     |
| 304074    | Morc3        | 623    | 592     | 671    | 607    | 561   | 530   | 622   | 581     |
| 500032    | Thsd7a       | 2443   | 2299    | 2495   | 2542   | 2559  | 1839  | 2428  | 2173    |
| 500258    | RGD1560289   | 209.05 | 232.64  | 257.82 | 233.64 | 237.5 | 194.4 | 243.2 | 183.67  |
| 500551    | S100pbp      | 655    | 624     | 572    | 619    | 546.9 | 559   | 586   | 581.21  |
| 297408    | Alms1        | 540    | 562     | 557    | 625    | 534   | 430   | 567   | 571     |
| 286932    | Vps54        | 677    | 614     | 656    | 689    | 607   | 571   | 632   | 616     |
| 302711    | Tb11x        | 1699   | 1711    | 1560   | 1608   | 1443  | 1521  | 1671  | 1419    |
| 81529     | Pdela        | 145    | 146     | 155    | 119    | 125   | 112   | 133   | 150     |
| 54278     | Nr4a2        | 265.04 | 268.61  | 305.78 | 338.14 | 242.7 | 287.3 | 311.1 | 242.77  |
| 303888    | Osbp111      | 384    | 447     | 458    | 421    | 350   | 406   | 434   | 384     |
| 102550657 | LOC102550657 | 86.05  | 73.98   | 98.49  | 96.1   | 85.13 | 65.28 | 82.96 | 93.06   |
| 288091    | Poglut1      | 823    | 848     | 809    | 730    | 754   | 670   | 763   | 768     |
| 311661    | Zfp64        | 331.96 | 291.95  | 333.97 | 339    | 323.9 | 299   | 263   | 308     |
| 116639    | Cux1         | 2007   | 2181    | 2267   | 2300   | 1900  | 2043  | 2061  | 2056    |
| 361697    | Tbcd10c      | 22     | 14      | 17     | 10     | 15    | 21    | 13    | 9       |
| 81710     | Msx1         | 16     | 25      | 9      | 13     | 14    | 22    | 7     | 15      |
| 497198    | Impact       | 1896   | 2016    | 1835   | 1914   | 1682  | 1595  | 1866  | 1910    |
| 287750    | Prp211       | 320.92 | 333.63  | 295.22 | 363.79 | 325.9 | 320.6 | 277   | 285.88  |
| 362170    | Api5         | 1783   | 1762    | 1746   | 1691   | 1476  | 1611  | 1642  | 1699    |
| 64040     | Aldh9a1      | 954.22 | 878.75  | 763.38 | 914.01 | 627.1 | 872.8 | 751.2 | 980.73  |
| 317546    | Tab3         | 676    | 674     | 668    | 755    | 730   | 569   | 669   | 585     |
| 311731    | Scrn3        | 995    | 1100    | 986    | 1030   | 897   | 900   | 1034  | 954     |
| 313838    | Cdc42ep3     | 239    | 254     | 213    | 202    | 189   | 226   | 200   | 221     |
| 360726    | Fytt1        | 1897   | 1871    | 1981   | 1888   | 1704  | 1609  | 1897  | 1822    |
| 312912    | Prex2        | 1185   | 1179.41 | 1018.4 | 1289.4 | 1152  | 916.4 | 1169  | 1065.03 |
| 117514    | Txnip        | 2655   | 2575    | 2977   | 2601   | 2370  | 2755  | 2743  | 2084    |
| 444984    | Dnmt3a       | 596    | 588     | 637    | 667    | 542   | 570   | 625   | 554     |
| 315344    | Smug1        | 448.9  | 505.84  | 457.45 | 456.18 | 445.9 | 395   | 422.4 | 457.17  |
| 360961    | Mxd4         | 1992.6 | 1969.02 | 2233.7 | 1817.4 | 1757  | 1893  | 1879  | 1849.83 |
| 363069    | Ppcdc        | 287.7  | 220.47  | 211.58 | 135.96 | 171.7 | 232.2 | 207.9 | 176.26  |
| 363198    | Cenpq        | 56     | 62      | 62     | 35     | 39    | 46    | 56    | 57      |
| 316312    | Zfp451       | 722.98 | 718     | 727    | 753.99 | 693   | 599   | 725   | 674     |
| 64515     | Cdc20        | 55     | 54      | 70     | 49     | 55.98 | 51    | 56    | 47      |
| 245986    | Gng8         | 99     | 84      | 96     | 88     | 80    | 86    | 85    | 87      |
| 24251     | Cd53         | 350.38 | 272.04  | 275.63 | 247.43 | 257.6 | 279.1 | 184.9 | 333.31  |
| 361554    | Lsm14a       | 913.23 | 925.75  | 950.64 | 914.05 | 808.6 | 858.3 | 888.2 | 856     |
| 314028    | Cb111        | 418    | 430     | 423    | 527    | 422   | 397   | 423   | 414     |
| 100362565 | LOC100362565 | 74.41  | 56.18   | 61.79  | 56.08  | 57.87 | 49.92 | 59.37 | 61.68   |
| 289233    | Pex19        | 2345.9 | 2174.73 | 2242.3 | 2278.9 | 2033  | 1930  | 2243  | 2122.13 |
| 293165    | Sox6         | 201    | 155     | 197    | 182    | 148   | 140   | 217   | 172     |
| 498952    | Zfp1         | 163.79 | 161.94  | 176.25 | 136.68 | 165.5 | 137.1 | 164   | 121.79  |
| 313348    | Klh19        | 2885.5 | 2723.89 | 2772   | 2937.7 | 2568  | 2405  | 2735  | 2718.41 |
| 56083     | Tgm2         | 594    | 568     | 702    | 584    | 429   | 591   | 650   | 585     |
| 365494    | Nanos1       | 256.49 | 251.09  | 220.17 | 208.76 | 212.4 | 223.7 | 219.1 | 207.58  |
| 191571    | Fat3         | 339    | 340     | 326    | 506    | 447   | 254   | 376   | 315     |
| 306104    | Pibf1        | 290    | 307     | 293    | 317    | 257   | 254   | 297   | 304     |

|           |                 |        |         |        |        |       |       |       |         |
|-----------|-----------------|--------|---------|--------|--------|-------|-------|-------|---------|
| 432392    | Fut8            | 1911   | 1836    | 1838   | 1708   | 1341  | 1756  | 1746  | 1876    |
| 299194    | Ptgr2           | 704.25 | 642.51  | 668.14 | 648.49 | 583.5 | 571.7 | 670.3 | 628.26  |
| 313620    | Srrml           | 2174   | 2267    | 2377   | 2424   | 2113  | 2093  | 2224  | 2085    |
| 303313    | Scarfl          | 65     | 85      | 75     | 42     | 59    | 72    | 55    | 60      |
| 364788    | Arl5b           | 619.05 | 570     | 563.44 | 606.75 | 574.5 | 490.8 | 578.1 | 530.31  |
| 192649    | Prokr2          | 358.43 | 317.78  | 347.68 | 431.13 | 334.6 | 303.6 | 341.6 | 360.81  |
| 108349769 | LOC108349769    | 110    | 122     | 82     | 106    | 92    | 90    | 110   | 95      |
| 500972    | Stt3a           | 1557   | 1568.95 | 1754.4 | 1613.8 | 1486  | 1482  | 1599  | 1417.52 |
| 500950    | Zfp317          | 408    | 363     | 395    | 400    | 371   | 307   | 400   | 365     |
| 117550    | Kif5b           | 9985   | 9733    | 9696   | 10767  | 9545  | 7865  | 9667  | 9951    |
| 500077    | Cyren           | 110.03 | 143.78  | 127.96 | 105.38 | 112.1 | 119.1 | 117.9 | 99.92   |
| 303511    | Ikzf3           | 14     | 13      | 15     | 9      | 17    | 11    | 7     | 12      |
| 310626    | Tmem79          | 15     | 10      | 15     | 11     | 8     | 18    | 10    | 11      |
| 501664    | Fam3a           | 697    | 652     | 699.59 | 765    | 672   | 593   | 665   | 663     |
| 360990    | Usp34           | 2683.3 | 2807.89 | 2959.1 | 3222.2 | 3005  | 2215  | 2861  | 2677.12 |
| 312371    | Avl9            | 1275   | 1304    | 1239   | 1338   | 1239  | 1098  | 1225  | 1190    |
| 58954     | Klf6            | 1760   | 1610    | 1769   | 1741   | 1535  | 1534  | 1542  | 1730    |
| 294190    | Olr1735         | 0      | 1.5     | 0      | 0.67   | 2     | 0     | 0     | 0       |
| 83574     | Rxrg            | 427.97 | 436.13  | 403.99 | 377.27 | 331.5 | 400.1 | 425.9 | 358.89  |
| 310958    | Zzz3            | 676    | 622     | 636    | 645    | 597   | 526   | 629   | 625     |
| 308476    | Capn12          | 21.86  | 16.37   | 17.65  | 14.23  | 17.59 | 13.27 | 17.41 | 16.35   |
| 302680    | Txlng           | 427.65 | 405.25  | 426.7  | 459.71 | 360.3 | 382.2 | 439.9 | 402.23  |
| 171071    | Ppp1r15a        | 960    | 994     | 1078   | 940    | 943   | 877   | 897   | 944     |
| 288416    | N4bp212         | 516    | 458     | 449    | 457    | 404   | 380   | 499   | 450     |
| 170908    | Tesk2           | 197.85 | 212.47  | 165.29 | 142.93 | 133.7 | 195.1 | 155.4 | 178.24  |
| 108348092 | NEWGENE_1582771 | 315.06 | 234.91  | 262.55 | 248.73 | 234.9 | 237.7 | 268.1 | 237.67  |
| 63912     | Fam129a         | 975    | 1091    | 1553   | 1349   | 1209  | 1078  | 1281  | 1012    |
| 297804    | Plagl1          | 155    | 168.03  | 160.99 | 144    | 169   | 102   | 137   | 171     |
| 313433    | RGD1564541      | 481.35 | 398.19  | 433.36 | 435.67 | 431.5 | 386.9 | 400   | 393.69  |
| 308283    | Fbxo30          | 615.99 | 567     | 566    | 583    | 554   | 497   | 550   | 548.99  |
| 311726    | Pcmt2           | 1048   | 1028    | 1078   | 960    | 950   | 884   | 994   | 965     |
| 312562    | Rbsn            | 872.85 | 1015.57 | 1056.1 | 1018.9 | 957.6 | 847.6 | 939.9 | 909.05  |
| 362793    | Clba1           | 108    | 102     | 124    | 89     | 85    | 103   | 108   | 94      |
| 691777    | Lrrc75a         | 275    | 277     | 333    | 295    | 207   | 272   | 286   | 323     |
| 192211    | Prom2           | 19     | 22      | 23     | 13     | 22    | 16    | 12    | 21      |
| 679711    | LOC679711       | 519.29 | 259.85  | 307.88 | 191.16 | 293   | 194   | 363.4 | 328.16  |
| 683788    | Fscn1           | 889    | 1048    | 1296   | 977    | 874   | 1069  | 904   | 1035    |
| 689890    | Srsf1           | 2565   | 2358    | 2601   | 2475   | 2281  | 2207  | 2385  | 2347    |
| 314245    | Zbtb25          | 567.93 | 582.79  | 531.44 | 542.57 | 553.1 | 491.1 | 489.4 | 517.84  |
| 309144    | Ppp6r3          | 1020   | 1084    | 1108   | 1000   | 926   | 949   | 1056  | 953     |
| 25403     | Cast            | 3722.4 | 3655.88 | 3820.6 | 3921.4 | 3440  | 3339  | 3785  | 3379.37 |
| 83824     | Cxxc4           | 426.73 | 450.78  | 390.77 | 491.06 | 401   | 357.6 | 467.9 | 395.99  |
| 291699    | Stard4          | 1005   | 941.94  | 982.63 | 1005.4 | 874   | 845.9 | 1001  | 907.31  |
| 366957    | Rac2            | 193    | 161     | 216    | 112    | 190   | 175   | 149   | 115     |
| 100910772 | Cox7a1          | 35.51  | 25.66   | 34.62  | 16.35  | 28.47 | 28.85 | 23.61 | 22.5    |
| 24842     | Tp53            | 482    | 551     | 675.98 | 556.99 | 452   | 558   | 553   | 527     |
| 287554    | Tefm            | 83     | 99      | 75     | 78     | 76    | 64    | 77    | 92      |
| 361167    | Bag4            | 284.38 | 287.71  | 247.63 | 262.35 | 262.3 | 213.6 | 264.2 | 258     |
| 59115     | Ninj2           | 33     | 38      | 28     | 30     | 37    | 28    | 15    | 39      |
| 288532    | Mcm7            | 240    | 209     | 267    | 226    | 235   | 225   | 224   | 185     |
| 311551    | Pofut1          | 125    | 111     | 147    | 159    | 123   | 121   | 135   | 121     |
| 300860    | Senp6           | 2047   | 1887    | 2131   | 2079   | 1908  | 1736  | 1976  | 1893    |
| 311327    | Kn11            | 70     | 59      | 91     | 77     | 67    | 54    | 72    | 81      |
| 680581    | Rbm41           | 82     | 72      | 77     | 66     | 77    | 56    | 60    | 81      |
| 24525     | Kras            | 2143   | 1954    | 2085   | 2085   | 1840  | 1725  | 2071  | 1991    |
| 89842     | Mbtps1          | 1800   | 1782    | 1804   | 1771   | 1516  | 1690  | 1663  | 1734    |



|           |              |        |         |        |        |       |       |       |         |
|-----------|--------------|--------|---------|--------|--------|-------|-------|-------|---------|
| 362187    | Ccdc34       | 82     | 63      | 89     | 89     | 70    | 69    | 79    | 80      |
| 303206    | Ulk2         | 2104   | 2205    | 2078   | 2142   | 1985  | 1799  | 2050  | 2035    |
| 298031    | Susd1        | 98     | 89      | 78     | 71     | 80    | 77    | 73    | 80      |
| 502097    | Dkk4         | 218    | 219     | 188    | 190    | 175   | 192   | 187   | 198     |
| 24208     | Ar           | 135.04 | 121     | 100.19 | 155.82 | 156.6 | 79.8  | 124   | 112.12  |
| 289491    | Mrpl1        | 155.77 | 123.04  | 0      | 276.44 | 114.4 | 0     | 398   | 0       |
| 310614    | Gatad2b      | 407    | 418     | 404    | 468    | 420   | 371   | 398   | 377     |
| 360611    | Copz2        | 236    | 203     | 284    | 210    | 173   | 246   | 214   | 228     |
| 171457    | Cep170       | 2622.4 | 2650.06 | 2758.9 | 2985.4 | 2642  | 2272  | 2833  | 2419.02 |
| 83617     | Hipk3        | 1899   | 1827    | 1904   | 1907   | 1736  | 1584  | 1799  | 1837    |
| 362862    | Hsp90b1      | 6170   | 6338    | 7317   | 7411   | 5795  | 5985  | 6788  | 6569    |
| 500629    | Rdh14        | 364    | 345     | 355    | 312    | 269   | 301   | 367   | 333     |
| 301416    | Coq10b       | 399    | 395     | 441    | 362    | 343   | 346   | 384   | 401     |
| 303057    | Slu7         | 855    | 883     | 823    | 854    | 783   | 781   | 846   | 742     |
| 100911140 | LOC100911140 | 2      | 2       | 1      | 1.5    | 1.5   | 1     | 1     | 2.5     |
| 300649    | Crtam        | 6      | 3       | 2      | 2      | 2     | 2     | 2     | 6       |
| 301057    | Vill         | 3      | 6       | 1      | 3      | 0     | 3     | 4     | 5       |
| 315215    | Mlcl         | 1      | 5       | 4      | 3      | 2     | 5     | 1     | 4       |
| 492821    | Pmaip1       | 55     | 25      | 37     | 39     | 34    | 37    | 40    | 33      |
| 497761    | Cd2          | 15     | 4       | 9      | 11     | 8     | 5     | 10    | 13      |
| 498664    | Tex29        | 2      | 3       | 4      | 4      | 5     | 2     | 3     | 2       |
| 685680    | LOC685680    | 6      | 4       | 2      | 1      | 5     | 4     | 2     | 1       |
| 102555083 | LOC102555083 | 22.5   | 20.5    | 21.5   | 20     | 21.5  | 19    | 18    | 19.5    |
| 114093    | St14         | 40     | 52      | 42     | 35     | 32    | 28    | 45    | 51      |
| 300884    | Trim43a      | 8      | 4       | 6      | 8      | 5     | 11    | 3     | 5       |
| 312401    | Ndnf         | 22     | 23      | 15     | 31     | 16    | 24    | 24    | 20      |
| 315652    | Colca2       | 7      | 8       | 4      | 7      | 6     | 6     | 4     | 8       |
| 362948    | Zfp647       | 22.5   | 20.5    | 21.5   | 20     | 21.5  | 19    | 18    | 19.5    |
| 304429    | Psph         | 217    | 207     | 239    | 195    | 183   | 191   | 208   | 210     |
| 287765    | Ddx5         | 9064.6 | 8900.56 | 8960.5 | 9018.8 | 7867  | 8069  | 9049  | 8195.61 |
| 308959    | Usp31        | 1029   | 933     | 899    | 1222   | 1121  | 771   | 957   | 920     |
| 298032    | Inip         | 403.27 | 410.64  | 409.14 | 341.32 | 324.6 | 366.2 | 372.4 | 380.92  |
| 100361585 | RGD1310951   | 177.38 | 215.76  | 183.62 | 232.97 | 191.9 | 166.6 | 213.7 | 175.27  |
| 304423    | Tywl         | 251    | 214     | 246    | 213    | 201   | 216   | 227   | 209     |
| 24797     | Sst          | 1540   | 1380    | 1240   | 1320   | 1467  | 1008  | 1028  | 1556    |
| 313481    | Tut4         | 212    | 195     | 248    | 231    | 206   | 182   | 228   | 202     |
| 500964    | Prdm10       | 195.59 | 193.36  | 205.29 | 219.87 | 172   | 211.3 | 184   | 184.29  |
| 103690016 | LOC103690016 | 151.1  | 249.97  | 327.39 | 275.37 | 259.4 | 211.9 | 304.6 | 151.06  |
| 293949    | Hoga1        | 136.52 | 156.93  | 159.29 | 110.49 | 120   | 126.1 | 134.6 | 139.41  |
| 499337    | Dock8        | 171    | 173.95  | 251    | 176    | 163.7 | 185   | 177   | 187     |
| 25511     | Pemt         | 111    | 60      | 63     | 53     | 72    | 55    | 67    | 71      |
| 100909750 | LOC100909750 | 353.95 | 355.03  | 434.08 | 353.75 | 330.5 | 371.8 | 342   | 337.8   |
| 300231    | Dip2b        | 1022   | 1124    | 1251   | 1354   | 1077  | 1003  | 1186  | 1121    |
| 310760    | Cttnbp2n1    | 1186   | 1279    | 1375   | 1382   | 1101  | 1146  | 1356  | 1219    |
| 289026    | Sox13        | 423    | 382     | 407    | 420    | 350   | 402   | 346   | 409     |
| 116722    | Psmd10       | 173    | 179     | 163    | 164    | 143   | 140   | 174   | 170     |
| 293488    | Sgf29        | 295    | 306     | 264    | 245    | 279   | 282   | 220   | 244     |
| 362740    | Mbip         | 210    | 213     | 222    | 178    | 180   | 180   | 180   | 220     |
| 24852     | Tpm4         | 1554   | 1403    | 1620   | 1342   | 1227  | 1278  | 1586  | 1375    |
| 306872    | Cage1        | 44     | 49      | 47     | 56     | 38    | 39    | 53    | 51      |
| 313876    | Birc6        | 2267   | 2212    | 2438   | 2741   | 2381  | 1951  | 2364  | 2223    |
| 100359484 | Zfp628       | 220    | 202     | 252    | 215    | 213   | 192   | 192   | 224     |
| 498858    | Ccdc112      | 203    | 200     | 188    | 220    | 220   | 171   | 183   | 175     |
| 316129    | Uhrf1        | 47     | 28      | 58     | 24     | 42    | 35    | 39    | 29      |
| 294925    | Fndc3b       | 910    | 998     | 1105   | 1122   | 878   | 895   | 1062  | 984     |
| 307547    | Zfp35        | 322.8  | 317.53  | 312.38 | 334.83 | 311.5 | 287.4 | 293.6 | 296.88  |



|           |              |        |         |        |        |       |       |       |         |
|-----------|--------------|--------|---------|--------|--------|-------|-------|-------|---------|
| 25609     | Tub          | 113.74 | 144.82  | 116.98 | 151.38 | 114.6 | 114.6 | 152.1 | 105.53  |
| 499443    | Lims1        | 1636   | 1607.63 | 1595   | 1619   | 1390  | 1367  | 1669  | 1539.1  |
| 305268    | Uba6         | 1441.1 | 1385.84 | 1391   | 1685   | 1476  | 1148  | 1426  | 1403    |
| 292267    | Armt1        | 456    | 440     | 428    | 394    | 404   | 384   | 408   | 391     |
| 499508    | Zfyve16      | 448    | 477     | 543    | 552    | 419   | 408   | 512   | 527     |
| 296757    | Napepld      | 219    | 243     | 226    | 199    | 197.1 | 215   | 217.3 | 190.08  |
| 652955    | Rnf130       | 692    | 768     | 758    | 655    | 545   | 633   | 734   | 742     |
| 246152    | Wdr44        | 843    | 850     | 821    | 884    | 763   | 750   | 818   | 808     |
| 362078    | Ehmt1        | 398    | 440     | 425    | 430    | 380   | 356   | 439   | 389     |
| 315666    | Npat         | 429    | 387     | 427    | 438    | 423   | 317   | 401   | 412     |
| 290959    | Slc35d2      | 170    | 149     | 156    | 116    | 140   | 113   | 142   | 151     |
| 246212    | Sipa111      | 908    | 950     | 1024   | 1099   | 864   | 907   | 1003  | 904     |
| 361886    | Adamts6      | 44     | 26      | 59     | 55     | 40    | 44    | 41    | 45      |
| 83803     | Prkab1       | 331    | 294     | 360    | 277    | 270   | 305   | 272   | 319     |
| 289344    | Hhat         | 22.87  | 23.17   | 29.29  | 35.38  | 28.22 | 37.7  | 21.25 | 15.12   |
| 26956     | Ak3          | 937.62 | 961.12  | 873.1  | 903.49 | 835.2 | 852.2 | 814.1 | 894.41  |
| 313087    | Cpne3        | 3674.8 | 3650.66 | 3598   | 3749.5 | 3485  | 3100  | 3273  | 3699.17 |
| 303919    | Lrrc58       | 657    | 656     | 607    | 790    | 768   | 401   | 608   | 727     |
| 100360601 | LOC100360601 | 53.86  | 51.14   | 42.62  | 60.77  | 51.81 | 41.03 | 31.16 | 68.55   |
| 25467     | Irs1         | 75.83  | 103.94  | 94.86  | 78.72  | 88.72 | 55    | 75    | 107.78  |
| 685258    | Eny2         | 1097   | 1024    | 1053   | 932    | 913   | 898   | 1001  | 982     |
| 108353205 | LOC108353205 | 276.42 | 167.92  | 228.55 | 103.08 | 137.5 | 103.9 | 233.6 | 242.06  |
| 689176    | Tmem64       | 535    | 461     | 466    | 526    | 457   | 421   | 483   | 476     |
| 287747    | Spata32      | 11     | 20      | 19     | 29     | 10    | 11    | 23    | 29      |
| 502603    | Srsf11       | 1537   | 1611    | 1714   | 1565   | 1469  | 1435  | 1584  | 1451    |
| 307667    | Hmgxb4       | 251    | 299     | 265    | 265    | 232   | 246   | 265   | 255     |
| 363172    | Lars2        | 423    | 479     | 483    | 446    | 470   | 422   | 382   | 418     |
| 310764    | Inka2        | 1087.1 | 1325.46 | 1334.8 | 1214   | 973.4 | 1141  | 1156  | 1314.24 |
| 361843    | Aifm2        | 269.71 | 254.14  | 270.45 | 270.36 | 195.4 | 279   | 236.7 | 272.73  |
| 313130    | Pm20d2       | 154    | 163     | 130    | 133    | 131   | 125   | 150   | 130     |
| 314180    | Mdga2        | 388    | 348     | 367    | 440    | 393   | 319   | 358   | 356     |
| 310506    | Ppm11        | 2252.7 | 2438.79 | 2345.8 | 2662.6 | 2272  | 2270  | 2276  | 2146.91 |
| 679812    | Plekhg1      | 403.09 | 409.26  | 460.83 | 495.78 | 384.7 | 406.9 | 440   | 403.29  |
| 293627    | Tspan4       | 331.63 | 225.54  | 246.84 | 189.65 | 269.2 | 244.8 | 228.5 | 175.81  |
| 309591    | Trim39       | 299    | 305     | 346    | 304    | 280   | 243   | 317   | 319     |
| 25315     | Ephx1        | 863.83 | 796.88  | 758.47 | 802    | 734   | 746.2 | 716.6 | 780.58  |
| 316369    | Nck2         | 224.77 | 228.89  | 286.5  | 221.6  | 192.2 | 218.4 | 240.7 | 237.66  |
| 25369     | Adora2a      | 165    | 136     | 143    | 151    | 143   | 152   | 134   | 121     |
| 366153    | Nutml        | 81     | 115     | 113    | 101    | 95    | 90    | 101   | 93      |
| 294235    | Ier3         | 223    | 204     | 220    | 226    | 207   | 233   | 183   | 184     |
| 362713    | Selenoi      | 957    | 1026    | 951    | 1048   | 950   | 874   | 975   | 882     |
| 499330    | Nmrk1        | 163    | 168.76  | 140    | 147    | 133   | 136   | 155   | 148     |
| 291597    | Trim36       | 3037   | 3052    | 2766   | 3029   | 2951  | 2596  | 2507  | 2932    |
| 500086    | Ttc26        | 223.81 | 235.77  | 251.82 | 266.88 | 241.4 | 191.4 | 243.8 | 227.82  |
| 288242    | Chaf1b       | 37.12  | 50.83   | 46     | 53.79  | 54.9  | 45.77 | 34.35 | 38.54   |
| 360681    | Narf         | 759.87 | 787.66  | 864.72 | 661.52 | 693.7 | 688   | 735.3 | 724.68  |
| 365192    | Zfp324       | 167.17 | 150     | 189.94 | 163.29 | 138.4 | 169.9 | 157.6 | 153.96  |
| 290300    | Tnfrsf19     | 18     | 29      | 34     | 25     | 18    | 26    | 29    | 25      |
| 29645     | Ptprj        | 867    | 777     | 905    | 949.99 | 742   | 796   | 806   | 891     |
| 298875    | Laptm4a      | 5935   | 5798    | 5851   | 5386   | 4608  | 5018  | 5650  | 5962    |
| 499442    | Ccdc138      | 100.85 | 91.07   | 94.56  | 99.73  | 82.05 | 82.85 | 100.8 | 91.42   |
| 64563     | Nphs1        | 35.13  | 21.1    | 23.13  | 19.45  | 15    | 20.26 | 26.22 | 29.88   |
| 308908    | RGD1561034   | 58     | 57      | 58     | 79     | 76    | 37    | 73    | 47      |
| 100360606 | Zranb1       | 884    | 778     | 877    | 777    | 754   | 730   | 829   | 753     |
| 308807    | Prss23       | 294    | 246     | 368    | 193    | 244   | 299   | 281   | 194     |
| 690899    | Vsir         | 588    | 679     | 777    | 636    | 506   | 579   | 723   | 670     |

|           |              |        |         |        |        |       |       |       |         |
|-----------|--------------|--------|---------|--------|--------|-------|-------|-------|---------|
| 312965    | Ubxn2b       | 375    | 318     | 347    | 367    | 317   | 293   | 339   | 352     |
| 298443    | Toe1         | 156.15 | 142.53  | 147.71 | 109.07 | 123.3 | 126   | 119.6 | 144.76  |
| 315634    | Rbm7         | 320    | 322     | 341    | 279    | 262   | 274   | 315   | 316     |
| 304543    | Mlec         | 3966.5 | 3895.29 | 4028.6 | 4421.2 | 3666  | 3654  | 3976  | 3787.58 |
| 65134     | Stx5         | 644    | 607     | 646    | 574    | 556   | 559   | 601   | 569     |
| 302811    | Elf4         | 76.41  | 74.32   | 87.23  | 88.74  | 90.44 | 73.08 | 69.96 | 68.63   |
| 315434    | Ankrd49      | 292    | 265     | 315    | 231    | 227   | 268   | 256   | 269     |
| 102552783 | Ac1576       | 68.52  | 82.84   | 59.47  | 67.39  | 69.66 | 54.67 | 54.55 | 78.41   |
| 84587     | Plcl1        | 257.95 | 290.41  | 273.89 | 299.87 | 243.1 | 246.6 | 253.9 | 294.18  |
| 362011    | Dram2        | 436    | 478     | 511    | 451    | 436   | 343   | 464   | 492     |
| 690512    | Tt114        | 457.62 | 357.49  | 427.7  | 406.18 | 359.9 | 344.3 | 471.3 | 349.6   |
| 295496    | Trmt10a      | 449    | 521     | 524    | 516    | 415   | 438   | 519   | 487     |
| 362924    | St3gall      | 447    | 419     | 497    | 541    | 400   | 450   | 436   | 475     |
| 497958    | Gemin4       | 304.99 | 322.63  | 282.53 | 316.03 | 265.6 | 315.9 | 299.5 | 253.12  |
| 361238    | Pxdc1        | 216    | 216     | 198    | 169    | 138   | 205   | 210   | 186     |
| 314249    | Plekhg3      | 1088   | 1046    | 1120   | 1141   | 987   | 1005  | 1047  | 1026    |
| 298075    | Ncbp1        | 941.95 | 976.14  | 926.12 | 955.79 | 869.5 | 806.9 | 906.4 | 931.8   |
| 688705    | Dgki         | 5551.8 | 5316.33 | 4914.2 | 5712.4 | 5648  | 4264  | 5003  | 4966.55 |
| 691246    | Rnf207       | 123    | 90.94   | 91     | 94.01  | 83    | 115   | 92    | 79      |
| 306487    | Mtus1        | 2206   | 2231    | 2192   | 2390   | 2150  | 2114  | 2088  | 1990    |
| 29534     | Pex2         | 291    | 264     | 281    | 257    | 250   | 243   | 264   | 254     |
| 287615    | Vezf1        | 847    | 798.99  | 901    | 855.24 | 698   | 805   | 879   | 765     |
| 100360457 | Fmn2         | 604    | 634     | 670    | 705    | 593   | 604   | 596   | 624     |
| 100362554 | Otulin       | 483    | 519     | 498    | 420    | 445   | 432   | 464   | 435     |
| 680515    | Ckap2l       | 30     | 20      | 39     | 31     | 30    | 22    | 29    | 30      |
| 503169    | RGD1564963   | 63.93  | 62.8    | 85.37  | 38.31  | 42.47 | 59.59 | 54.74 | 74.83   |
| 25454     | Gfra1        | 4476.4 | 4402.21 | 5318.6 | 4374.9 | 4200  | 4263  | 4423  | 4293.28 |
| 310667    | Cers2        | 1915.4 | 2092.09 | 2058.7 | 1933.4 | 1544  | 1929  | 1856  | 2070.72 |
| 361326    | Dtwd2        | 87.03  | 72.43   | 73.27  | 78.05  | 69.11 | 78.92 | 69.36 | 70.09   |
| 84006     | Prkci        | 1411   | 1293    | 1357   | 1368   | 1228  | 1237  | 1325  | 1232    |
| 685072    | Rarg         | 683    | 573     | 721    | 598    | 523   | 596   | 571   | 692     |
| 117259    | Tra2b        | 1706   | 1630    | 1712   | 1468   | 1443  | 1515  | 1567  | 1503    |
| 309595    | Mdc1         | 223    | 249     | 259    | 324    | 233   | 206   | 267   | 270     |
| 378794    | Trmt11       | 87.15  | 75.87   | 91.46  | 77.81  | 82.01 | 66.32 | 77.97 | 81.12   |
| 309361    | Chuk         | 559    | 524     | 510    | 492    | 460   | 442   | 522   | 505     |
| 171337    | Rap1b        | 3480   | 3164    | 3464   | 3115   | 2942  | 2704  | 3305  | 3283    |
| 297417    | Gfpt1        | 1165   | 1277    | 1280.8 | 1259   | 1072  | 1136  | 1251  | 1150.37 |
| 58821     | Zranb2       | 1949   | 1906    | 1953   | 1954   | 1852  | 1735  | 1812  | 1783    |
| 306672    | Tent4a       | 513    | 514     | 497    | 497    | 480   | 435   | 495   | 460     |
| 102556047 | LOC102556047 | 888.12 | 825.45  | 863.59 | 939.6  | 788.8 | 694.9 | 843.3 | 927.07  |
| 298598    | Necap2       | 570    | 602     | 646    | 580    | 443   | 602   | 592   | 582     |
| 102551716 | Nkain2       | 1472.8 | 1466.08 | 1489.4 | 1402.1 | 1298  | 1282  | 1435  | 1380.43 |
| 103694079 | LOC103694079 | 419.71 | 441.87  | 384.24 | 405.93 | 413.2 | 311.9 | 388.8 | 414.63  |
| 308503    | RGD1563307   | 169.69 | 192.35  | 181.96 | 162.28 | 182.2 | 146.6 | 182.6 | 142.23  |
| 360949    | Cpeb2        | 2503   | 2362    | 2270   | 2715   | 2408  | 2059  | 2347  | 2302    |
| 289754    | Xbp1         | 1625   | 1591    | 1721   | 1505   | 1448  | 1506  | 1526  | 1482    |
| 308923    | Ahi1         | 272.43 | 351.7   | 292.89 | 383.43 | 300.7 | 276.1 | 299   | 327.79  |
| 300901    | Plod2        | 485    | 462     | 588    | 533    | 411   | 499   | 548   | 456     |
| 497975    | Znhit3       | 346.63 | 293.58  | 313    | 284.53 | 297.1 | 261.8 | 259.3 | 327.47  |
| 171433    | Micu2        | 979    | 946     | 878    | 784    | 839   | 832   | 815   | 834     |
| 315509    | Jam3         | 881    | 938     | 877    | 824    | 710   | 790   | 924   | 834     |
| 81666     | Gnaq         | 1246.2 | 1233.01 | 1188.3 | 1391   | 1259  | 1018  | 1232  | 1173.35 |
| 310261    | Eif5a2       | 5883   | 5798    | 5306   | 6000   | 5426  | 4819  | 5556  | 5476    |
| 309126    | Tnpo1        | 1755   | 1830    | 1857   | 2046   | 1732  | 1588  | 1880  | 1731    |
| 310467    | Tiparp       | 685    | 653     | 604    | 586    | 558   | 562   | 579   | 641     |
| 299510    | Zbtb39       | 231    | 256     | 232    | 263    | 209   | 242   | 230   | 228     |

|           |              |        |         |        |        |       |       |       |         |
|-----------|--------------|--------|---------|--------|--------|-------|-------|-------|---------|
| 305310    | Slain2       | 1088   | 1114    | 1270   | 1224   | 1013  | 1093  | 1094  | 1147    |
| 365407    | Cpsf7        | 908    | 871     | 1023   | 939    | 842   | 868   | 874   | 879     |
| 300996    | Rbm5         | 1592   | 1480    | 1564   | 1573   | 1350  | 1411  | 1553  | 1434    |
| 500985    | Cbl          | 1610   | 1700    | 1738   | 1849   | 1624  | 1430  | 1719  | 1612    |
| 297998    | Nudt2        | 684.21 | 658.92  | 648.88 | 578.58 | 635.9 | 557.9 | 554.3 | 631.78  |
| 311919    | Golga1       | 614.89 | 649.49  | 588.71 | 604.14 | 600.3 | 505.8 | 627.2 | 541.68  |
| 296995    | Mrps33       | 617    | 597     | 559    | 491    | 468   | 514   | 552   | 562     |
| 497976    | Rad51c       | 91     | 87      | 88     | 71     | 70    | 72    | 97    | 73      |
| 64521     | Tspan2       | 1469   | 1410    | 1405   | 1325   | 1296  | 1142  | 1391  | 1364    |
| 25275     | Cnp          | 4134   | 5027    | 5513   | 4343   | 3829  | 4484  | 4682  | 4612    |
| 501285    | Yju2         | 505.82 | 499.22  | 444.18 | 420.76 | 396.5 | 411.7 | 469.9 | 453.36  |
| 501059    | Kif9         | 126.02 | 98.95   | 131.85 | 161.38 | 156.9 | 107.6 | 113.3 | 101.96  |
| 365371    | Tbx6         | 8      | 6       | 10     | 3      | 4     | 7     | 6     | 8       |
| 292767    | Catsperg     | 95.49  | 77.47   | 108.62 | 87.26  | 69.97 | 92.87 | 93.17 | 85.51   |
| 362303    | Klhl7        | 994    | 957     | 936    | 1018   | 859   | 926   | 963   | 868     |
| 291164    | Zkscan4      | 78.76  | 68.46   | 99.86  | 77.62  | 58.9  | 75.94 | 86.85 | 79.01   |
| 498840    | Tmem173      | 68     | 47      | 68     | 47     | 49    | 45    | 53    | 66      |
| 499437    | Mcm9         | 199    | 173     | 210    | 230    | 168   | 177   | 209   | 198     |
| 287076    | Zfp263       | 228.83 | 177.7   | 187.76 | 164.02 | 172   | 173   | 183.1 | 174.22  |
| 304863    | Odr4         | 824.05 | 816.89  | 869.67 | 864.57 | 749.8 | 768.8 | 838.6 | 768.73  |
| 499068    | Zfp583       | 179.92 | 175.34  | 256.33 | 164.13 | 183.5 | 184.8 | 180.7 | 169.44  |
| 25695     | Cebpd        | 389    | 299     | 381    | 489    | 284   | 312   | 443   | 404     |
| 85240     | Plcb2        | 28     | 33      | 33     | 27     | 28    | 33.07 | 28    | 23      |
| 83537     | Smpd2        | 103    | 80      | 129    | 81     | 72    | 99    | 93    | 100     |
| 361999    | Anp32e       | 1436   | 1411    | 1461   | 1411   | 1302  | 1294  | 1428  | 1273    |
| 292155    | Hs2st1       | 1440   | 1539    | 1705   | 1374   | 1431  | 1384  | 1397  | 1399    |
| 302378    | Lpar4        | 24     | 29      | 35     | 34     | 25    | 25    | 41    | 22      |
| 304268    | Rasl11a      | 34     | 20      | 42     | 26     | 24    | 34    | 30    | 25      |
| 310775    | Lrif1        | 347    | 294     | 332    | 342    | 277   | 298   | 294   | 349     |
| 301737    | Fer          | 548    | 491     | 464    | 531    | 484   | 463   | 497   | 440     |
| 498412    | Sun3         | 5.12   | 6.33    | 7.92   | 11.42  | 6.91  | 6.17  | 8.46  | 6.98    |
| 294978    | RGD1307100   | 3132   | 3353    | 3426   | 3723   | 3444  | 2617  | 3197  | 3371    |
| 305579    | RGD1305110   | 2316   | 2363    | 2314.8 | 2489   | 2151  | 2049  | 2274  | 2310    |
| 310378    | Nnt          | 406    | 436     | 469    | 549    | 346   | 518   | 435   | 424     |
| 291409    | Zfp236       | 411    | 454     | 512    | 485    | 432   | 424   | 442   | 427     |
| 100359678 | Armcx4       | 586    | 568.24  | 572.17 | 619.07 | 544   | 475   | 601   | 553     |
| 65157     | Amotl2       | 593    | 468     | 423    | 462    | 349   | 441   | 476   | 537     |
| 689997    | Fam91a1      | 1914   | 1803    | 1824   | 1717   | 1703  | 1517  | 1745  | 1760    |
| 312812    | Eps8         | 379    | 346.99  | 357    | 388    | 340   | 381   | 316   | 326     |
| 293166    | Insc         | 361    | 356     | 305    | 354    | 333   | 266   | 336   | 340     |
| 311348    | Cdan1        | 381    | 366.01  | 403    | 413.76 | 371   | 369   | 348   | 361     |
| 298874    | Pum2         | 2398   | 2403    | 2466   | 2437   | 2253  | 2169  | 2364  | 2206    |
| 302953    | Slx4         | 455    | 528     | 553    | 537    | 457   | 510   | 485   | 469     |
| 686298    | Ppmlm        | 142    | 127     | 172    | 132    | 127   | 129   | 137   | 138     |
| 294962    | Gnb4         | 628    | 751     | 659    | 637    | 592   | 570   | 613   | 704     |
| 102552000 | LOC102552000 | 374.1  | 365.7   | 386.85 | 427.36 | 368   | 287.7 | 388.3 | 396.18  |
| 304150    | Usp25        | 1340   | 1244    | 1292   | 1354   | 1210  | 1177  | 1227  | 1233    |
| 85247     | S100a6       | 3693   | 3474    | 4193   | 2585   | 2852  | 2934  | 3187  | 3951    |
| 85270     | Tekt1        | 14     | 29      | 17     | 22     | 20    | 20    | 21    | 15      |
| 25290     | Alox5        | 57.61  | 47.21   | 93.45  | 52.25  | 54.61 | 49.57 | 57.31 | 70.7    |
| 170910    | Mtdh         | 1422.4 | 1443.83 | 1453.5 | 1468.7 | 1279  | 1404  | 1416  | 1266.36 |
| 291259    | Zmynd11      | 1566   | 1502    | 1552   | 1683   | 1464  | 1429  | 1532  | 1417    |
| 29411     | Ppt1         | 1636   | 1755    | 1469   | 1649   | 1472  | 1466  | 1532  | 1563    |
| 29647     | Cask         | 457.36 | 458.91  | 458.89 | 511.95 | 457.6 | 373.2 | 494   | 424.4   |
| 54267     | Maf          | 2404.8 | 2390.98 | 2322.3 | 2383.2 | 2190  | 2252  | 2083  | 2282.16 |
| 361688    | Kmt5b        | 768.58 | 699.07  | 760.34 | 777.39 | 684.6 | 677.3 | 740.1 | 683.76  |

|           |              |        |         |        |        |       |       |       |         |
|-----------|--------------|--------|---------|--------|--------|-------|-------|-------|---------|
| 25126     | Stat5b       | 541.84 | 484.7   | 566.69 | 601.37 | 534.6 | 523.1 | 486.5 | 490.22  |
| 365548    | Pttglip      | 2056   | 2125    | 2215   | 2142   | 1801  | 1991  | 2004  | 2119    |
| 311987    | Rsbnl1       | 287    | 275     | 308    | 309    | 328   | 244   | 278   | 243     |
| 192223    | Opn4         | 81     | 70      | 61     | 76     | 78    | 70    | 52    | 67      |
| 362040    | Ostc         | 1169   | 1143    | 1094   | 973    | 883   | 1026  | 1084  | 1067    |
| 501015    | C2cd4b       | 100.13 | 95.92   | 105    | 127.46 | 97.29 | 87.05 | 112.8 | 100.16  |
| 303617    | Bptf         | 1124   | 1207    | 1251   | 1417   | 1211  | 1139  | 1214  | 1071    |
| 207118    | Bod111       | 1049   | 1019    | 1254   | 1265   | 1111  | 1029  | 1115  | 998     |
| 313131    | Rngtt        | 455    | 431     | 428    | 444    | 400   | 410   | 438   | 382     |
| 103690018 | LOC103690018 | 227.73 | 147.89  | 235.58 | 208.14 | 196.9 | 161.2 | 207.8 | 193.84  |
| 498385    | Lcor1        | 277.82 | 287.62  | 296.99 | 319.18 | 280.4 | 246.4 | 300.5 | 268.37  |
| 501039    | Slc25a36     | 1973   | 2072.57 | 1915.8 | 1920   | 1807  | 1678  | 1922  | 1901    |
| 25689     | Htr5a        | 14     | 9       | 19     | 13     | 11    | 12    | 15    | 13      |
| 287774    | Apoh         | 24     | 29      | 28     | 29     | 30    | 25    | 25    | 22      |
| 288308    | Ltn1         | 1215   | 1243    | 1202   | 1250   | 1126  | 1019  | 1257  | 1151    |
| 301076    | Zfp445       | 1083   | 1094    | 1084   | 1168   | 992   | 909   | 1157  | 1049    |
| 25097     | Pld2         | 584.95 | 471.03  | 527.62 | 561.64 | 469.6 | 497.4 | 535.6 | 486.81  |
| 64831     | Ireb2        | 1267   | 1334    | 1304   | 1408   | 1274  | 1105  | 1316  | 1232    |
| 312182    | Rbm28        | 371    | 344     | 408    | 350    | 319   | 366   | 335   | 346     |
| 306814    | Phf2         | 659    | 703     | 764    | 794    | 650   | 723   | 703   | 632     |
| 291091    | Serpinb1a    | 5342.3 | 3734.09 | 3575.6 | 3909.7 | 4903  | 4029  | 3554  | 2873.58 |
| 302502    | Cul4b        | 1363   | 1220    | 1155   | 1292   | 1172  | 1057  | 1238  | 1198    |
| 360574    | Utp6         | 978.14 | 930.9   | 940.79 | 884.34 | 841.3 | 782.2 | 945.6 | 894.2   |
| 498823    | Ankrd29      | 1083   | 1087    | 1028   | 1176   | 961   | 967   | 1104  | 1025    |
| 108350772 | LOC108350772 | 20     | 19      | 13     | 17     | 18    | 15    | 18    | 13      |
| 287127    | Cramp1       | 390.12 | 438.74  | 423.52 | 442.85 | 342.4 | 393.7 | 427.6 | 408.78  |
| 293514    | Bcl7c        | 304    | 284     | 359    | 269    | 268   | 297   | 278   | 285     |
| 313593    | Ago3         | 539.63 | 659.02  | 661.58 | 893.5  | 742.8 | 399.7 | 636.8 | 775.21  |
| 317371    | Was          | 50     | 42      | 48     | 26     | 49    | 45    | 31    | 29      |
| 122799    | Rps25        | 2761   | 2439    | 2566   | 1864   | 2113  | 2117  | 2189  | 2515    |
| 25359     | Tmpo         | 862    | 883     | 950    | 864    | 773   | 810   | 904   | 815     |
| 63845     | Tmeff1       | 693    | 604     | 458    | 641    | 541   | 408   | 530   | 744     |
| 297123    | Fkbp9        | 1196   | 1566    | 1834   | 1429   | 1187  | 1478  | 1484  | 1441    |
| 64370     | Metap2       | 1539.2 | 1449.17 | 1354.1 | 1394.9 | 1323  | 1185  | 1393  | 1422.69 |
| 361580    | Gtf2h1       | 795    | 684     | 705    | 686    | 648   | 669   | 699   | 647     |
| 299008    | Nubpl        | 103    | 119     | 104    | 90     | 80    | 102   | 100   | 104     |
| 310621    | Iqgap3       | 106    | 87      | 144    | 93     | 127   | 108   | 92    | 72      |
| 361103    | Zmiz1        | 1784.6 | 1967.96 | 2254.5 | 2453.9 | 1922  | 2035  | 1924  | 1970.71 |
| 299139    | Slc38a6      | 85     | 84      | 85     | 79     | 65    | 93    | 65    | 86      |
| 297705    | Aebp2        | 619.27 | 613     | 612.65 | 601.7  | 581   | 546   | 572   | 571.31  |
| 311403    | Mtfr1        | 202.95 | 195.17  | 186.95 | 184.28 | 179.8 | 169.7 | 180.4 | 184.04  |
| 290270    | Mphosph8     | 1365   | 1325    | 1365   | 1456   | 1312  | 1207  | 1324  | 1271    |
| 679822    | LOC679822    | 2.05   | 2.09    | 5.04   | 5.12   | 3.86  | 1.03  | 4.29  | 4.09    |
| 81638     | Agtrlb       | 11.99  | 15      | 13.29  | 11.09  | 9.11  | 15.36 | 9.08  | 14.12   |
| 100910371 | LOC100910371 | 45.63  | 45.92   | 47.14  | 49.58  | 35.92 | 37.42 | 48.44 | 52.93   |
| 308631    | Nhs11        | 68     | 81      | 100    | 112    | 92    | 86    | 84    | 73      |
| 101241893 | Trim34       | 141    | 180     | 154    | 150    | 143   | 154   | 131   | 152     |
| 362263    | Ptprt        | 1300.9 | 1005.32 | 1109.6 | 1133.9 | 1120  | 894.6 | 1049  | 1158.21 |
| 85424     | Elf1         | 268    | 315     | 389    | 348    | 288   | 313   | 298   | 326     |
| 100365928 | Fam166b      | 8.23   | 7.07    | 3.06   | 11.1   | 3.08  | 7.08  | 10.09 | 7.09    |
| 363146    | Dalrd3       | 366.71 | 387.17  | 325.23 | 310.23 | 297.8 | 318.2 | 334.8 | 338.62  |
| 307271    | Mex3c        | 860    | 801     | 798    | 809    | 707   | 765   | 762   | 799     |
| 312046    | Dbf4         | 36.21  | 41.46   | 44.75  | 42.9   | 40.88 | 45.98 | 31.77 | 34.81   |
| 288589    | Rasa4        | 51     | 37      | 63     | 30     | 38    | 58    | 43    | 29      |
| 287954    | Dgcr8        | 460    | 464     | 489    | 411    | 413   | 428   | 444   | 408     |
| 362609    | Pum1         | 986    | 1019    | 1120   | 1094   | 928   | 968   | 1045  | 975     |

|           |           |        |         |        |        |       |       |       |          |
|-----------|-----------|--------|---------|--------|--------|-------|-------|-------|----------|
| 304827    | Kcnt2     | 179    | 176     | 195    | 216    | 207   | 166   | 171   | 167      |
| 315728    | Thsd4     | 2067   | 2139    | 1905   | 2427   | 2032  | 1821  | 2147  | 1925     |
| 83830     | Gtf2a1    | 738    | 740     | 801    | 772    | 756   | 689   | 702   | 685      |
| 361015    | Atxn7     | 331.71 | 277.7   | 319.9  | 359.03 | 304.7 | 273.5 | 299.3 | 318.31   |
| 312135    | Tmem168   | 520    | 529     | 532    | 510    | 465   | 433   | 533   | 510      |
| 293038    | Zfp592    | 707    | 723.05  | 817    | 751.99 | 685   | 745   | 696   | 658      |
| 84590     | Rab27b    | 795    | 962     | 885    | 1054   | 976   | 603   | 912   | 940      |
| 362779    | Vrk1      | 219    | 216     | 199    | 189    | 197   | 185   | 211   | 171      |
| 171574    | Dnm3      | 6746.1 | 7412.99 | 6229.6 | 8203.2 | 6503  | 6852  | 6621  | 6565.99  |
| 282838    | Gm2a      | 1485   | 1684    | 1826   | 1492   | 1374  | 1604  | 1557  | 1487     |
| 497991    | Med1      | 870    | 794     | 884    | 887    | 812   | 824   | 792   | 761      |
| 309156    | Bbs1      | 472.02 | 504.47  | 425.17 | 503.09 | 398.3 | 468.1 | 470   | 432.03   |
| 363017    | Taf1d     | 165.45 | 170.82  | 166.4  | 148.47 | 135.2 | 138.4 | 160.1 | 170.78   |
| 289315    | Sde2      | 297.17 | 269.97  | 307.01 | 306.03 | 248.3 | 282   | 298.3 | 267.08   |
| 361057    | Ints6     | 391    | 339.2   | 355    | 364    | 324   | 312   | 402.6 | 307      |
| 170945    | Chrna2    | 6      | 2       | 4      | 2      | 2     | 4     | 2     | 5        |
| 287799    | Cpsf41    | 5      | 3       | 4      | 2      | 5     | 1     | 2     | 5        |
| 29244     | Gch1      | 24     | 19      | 25     | 16     | 31    | 12    | 19    | 16       |
| 298288    | C8a       | 5      | 4       | 1      | 4      | 3     | 2     | 3     | 5        |
| 300776    | Iqch      | 7      | 8       | 5      | 8      | 10    | 7     | 4     | 5        |
| 312668    | Cacna2d4  | 3      | 5       | 3      | 3      | 5     | 4     | 3     | 1        |
| 502306    | Igsf23    | 5      | 5       | 10     | 8      | 7     | 11    | 3     | 5        |
| 689055    | Rad51ap1  | 77     | 65      | 57     | 53     | 50    | 58    | 74    | 52       |
| 691670    | LOC691670 | 2      | 6       | 3      | 3      | 1     | 4     | 4     | 4        |
| 80722     | Sost      | 6      | 3       | 2      | 3      | 5     | 0     | 5     | 3        |
| 84018     | Synj2     | 178    | 186     | 221    | 213    | 184   | 156   | 229   | 172      |
| 298682    | Atad3a    | 395.72 | 409.52  | 389.6  | 415.8  | 340   | 399.5 | 391.7 | 364.45   |
| 102552199 | Tgm7      | 155.36 | 146.12  | 142.05 | 122.08 | 128.2 | 116   | 128   | 153      |
| 296285    | Commd7    | 539.14 | 538.03  | 539.69 | 439.11 | 410.2 | 484.4 | 609   | 405.75   |
| 171121    | Ppp6c     | 1742   | 1711    | 1663   | 1598   | 1564  | 1491  | 1631  | 1549     |
| 299636    | Tle2      | 112    | 134     | 140    | 133    | 105   | 132   | 139   | 106      |
| 25358     | Timp3     | 10005  | 9928    | 9745   | 12377  | 9099  | 9606  | 9484  | 10868    |
| 363188    | Ubr2      | 1149   | 1312    | 1220   | 1383   | 1160  | 1156  | 1211  | 1176     |
| 308968    | Rbbp6     | 956    | 972     | 1038   | 1004   | 925   | 899   | 947   | 916      |
| 360534    | Trim11    | 253    | 186     | 228    | 231    | 213   | 200   | 181   | 240      |
| 25111     | Chrm4     | 61.29  | 69.1    | 61.07  | 62     | 53    | 55    | 61.12 | 66.28    |
| 310677    | Otud7b    | 1300.6 | 1259.25 | 1221.6 | 1204.3 | 1147  | 1280  | 1096  | 1107.08  |
| 302553    | Suv39h1   | 209    | 192     | 215    | 204    | 207.8 | 194   | 178.8 | 181      |
| 680258    | Zfp748    | 285.64 | 256.25  | 301.17 | 266.06 | 256.4 | 223.9 | 250.7 | 299.19   |
| 361391    | Cbfb      | 3316   | 3417    | 3161   | 3447   | 3052  | 2971  | 3301  | 3067     |
| 65189     | Stk3      | 436    | 378     | 358    | 374    | 347   | 380   | 360   | 349      |
| 685928    | Zc3h10    | 244    | 227     | 277    | 208    | 194   | 226   | 216   | 252      |
| 362004    | Gdap2     | 658    | 625     | 573    | 647    | 596   | 551   | 601   | 577      |
| 114612    | Ddx39b    | 2401   | 2370    | 2481   | 2355   | 2019  | 2184  | 2488  | 2233     |
| 316235    | Polh      | 159    | 162     | 149    | 135    | 133   | 152   | 143   | 134      |
| 688903    | Nme5      | 72.45  | 59.69   | 56.28  | 81.06  | 71.05 | 49.61 | 71.95 | 57.73    |
| 246174    | Fgd4      | 282    | 350     | 312    | 352    | 314   | 190   | 330   | 370      |
| 64550     | Top1      | 576.41 | 637.38  | 582.26 | 654.38 | 632.2 | 514.3 | 592   | 538.08   |
| 58852     | Nr1h3     | 180    | 214     | 206    | 203    | 170   | 175   | 178   | 223      |
| 171407    | Gprasp1   | 2070.8 | 1991.95 | 1963.8 | 2247.8 | 1996  | 1790  | 2060  | 1840.66  |
| 29144     | Canx      | 14297  | 14439.6 | 13977  | 14734  | 12555 | 12674 | 14388 | 13753.53 |
| 500350    | LOC500350 | 95.14  | 86.11   | 79.53  | 95.41  | 92.05 | 72.04 | 68.07 | 98.76    |
| 294975    | Exosc9    | 596.61 | 638.09  | 624.89 | 566.28 | 591.7 | 500.3 | 563.1 | 598.59   |
| 304470    | Sbno1     | 1868   | 1866    | 1869   | 2152   | 1882  | 1738  | 1949  | 1636     |
| 691143    | LOC691143 | 67     | 78      | 81     | 56     | 53    | 64    | 79    | 66       |
| 301038    | Ubp1      | 1054.7 | 995.45  | 1115.1 | 1069   | 918.6 | 995.5 | 1046  | 973.96   |

|           |                 |        |         |        |        |       |       |       |         |
|-----------|-----------------|--------|---------|--------|--------|-------|-------|-------|---------|
| 303211    | Mmgt2           | 314    | 306     | 312    | 323    | 222   | 294   | 315   | 335     |
| 81661     | Gmfb            | 5452   | 5425    | 5261   | 5086   | 5004  | 4549  | 5014  | 5152    |
| 288620    | Cct6a           | 2649   | 2616    | 2553   | 2522   | 2406  | 2252  | 2520  | 2429    |
| 287418    | Arhgef15        | 130.49 | 151.59  | 219.76 | 150.3  | 139.5 | 130.5 | 171.8 | 164.12  |
| 25597     | Rasa2           | 193    | 212     | 223    | 233    | 207   | 167   | 209   | 217     |
| 313429    | Pars2           | 120    | 126     | 129    | 105    | 115   | 121   | 110   | 100     |
| 293828    | Mphosph10       | 357    | 334     | 333    | 374    | 314   | 300   | 349   | 336     |
| 367252    | Mgat4a          | 607    | 586     | 555    | 583    | 595   | 475   | 586   | 510     |
| 24530     | Lcat            | 370    | 376     | 450    | 344    | 294   | 392   | 370   | 375     |
| 286973    | Elavl2          | 4824   | 4474    | 4327   | 4794   | 4534  | 3805  | 4454  | 4323    |
| 170842    | Tob1            | 517.33 | 571.59  | 536.61 | 495.32 | 477.2 | 515.4 | 424.1 | 554.21  |
| 360734    | Dnajb11         | 731    | 815     | 741    | 810    | 689   | 726   | 753   | 710     |
| 300284    | Alg13           | 217    | 195.27  | 214.77 | 154.42 | 170.1 | 187   | 188   | 181.17  |
| 360894    | RGD1310587      | 461    | 316     | 552    | 468    | 384   | 373   | 454   | 459     |
| 691113    | LOC691113       | 252.55 | 240     | 241.85 | 212.01 | 196.7 | 203.4 | 257.1 | 222.27  |
| 311530    | Nanp            | 111    | 98      | 77     | 82     | 77    | 83    | 86    | 96      |
| 108348214 | NEWGENE_1565644 | 402    | 373     | 318    | 365    | 339   | 337   | 367   | 312     |
| 25676     | Rasa1           | 1102   | 1019    | 1092   | 1219   | 1042  | 917   | 1188  | 972     |
| 304860    | Npl             | 234    | 217     | 205    | 208    | 193   | 194   | 218   | 198     |
| 366889    | Zdhhc17         | 1694   | 1498    | 1443   | 1698   | 1459  | 1409  | 1557  | 1461    |
| 497811    | Xdh             | 402    | 458     | 623    | 458    | 549   | 437   | 442   | 376     |
| 366300    | Pcmt1           | 1731   | 1640    | 1766   | 1834   | 1625  | 1542  | 1669  | 1643    |
| 294787    | Nipbl           | 868    | 884     | 1020   | 1139   | 927   | 834   | 960   | 914     |
| 302935    | Ubn1            | 648    | 613     | 662    | 628    | 614   | 579   | 621   | 557     |
| 289453    | Abcg311         | 1017.3 | 907.52  | 1073.3 | 924.12 | 852.9 | 922.3 | 898.9 | 971.38  |
| 293452    | Palb2           | 66.16  | 64      | 53.48  | 51.02  | 49.08 | 51.2  | 58.48 | 59.35   |
| 306279    | Arhgap22        | 531    | 566     | 585    | 489    | 521   | 462   | 466   | 569     |
| 289085    | Edem3           | 1502.2 | 1514.24 | 1492.1 | 1617.4 | 1452  | 1342  | 1437  | 1463.24 |
| 84404     | Gemin2          | 136    | 140     | 136    | 99     | 118   | 124   | 122   | 111     |
| 367021    | Fam76b          | 304    | 254     | 294    | 312    | 262   | 234   | 295   | 291     |
| 295678    | Sestd1          | 1240.2 | 1104.99 | 1255.2 | 1394.2 | 1200  | 1141  | 1175  | 1127.88 |
| 108353138 | LOC108353138    | 20.51  | 19.28   | 24.16  | 29.62  | 19.47 | 26.25 | 23.4  | 17.86   |
| 308215    | Chd1            | 454    | 505     | 566    | 534    | 525   | 451   | 498   | 440     |
| 305955    | Zc3h13          | 827    | 899     | 890    | 936    | 874   | 780   | 865   | 783     |
| 170698    | Slcola2         | 776.94 | 803.97  | 744.96 | 756.99 | 689   | 565   | 823   | 788.96  |
| 295596    | Orc4            | 1272   | 1269    | 1192   | 1442   | 1225  | 1111  | 1228  | 1247    |
| 362955    | Nol12           | 175    | 186     | 163    | 130    | 151   | 163   | 161   | 133     |
| 301010    | Slc26a6         | 234    | 234     | 222    | 192    | 198   | 227   | 194   | 201     |
| 312251    | Luc712          | 2204.9 | 2414.08 | 2354.4 | 2456.9 | 2240  | 2027  | 2299  | 2202.36 |
| 297486    | Ppp4r2          | 1079   | 1025    | 1090   | 1061   | 976   | 969   | 1041  | 970     |
| 290556    | Gn13            | 513    | 478     | 475    | 413    | 381   | 436   | 502   | 428     |
| 192204    | Ehd4            | 1296   | 1331    | 1452   | 1203   | 1156  | 1297  | 1250  | 1208    |
| 114024    | Acs13           | 1583   | 1597    | 1552   | 1634   | 1346  | 1413  | 1644  | 1516    |
| 313770    | Mxra8           | 1442   | 1594    | 1664   | 1467   | 1185  | 1463  | 1559  | 1527    |
| 498355    | Grxcr1          | 13     | 18      | 15     | 11     | 12    | 7     | 16    | 18      |
| 688018    | Zfp106          | 4319.9 | 4460    | 4388   | 4775.7 | 4175  | 4230  | 4196  | 4084.33 |
| 361802    | Hsd17b8         | 259    | 206     | 218    | 187    | 190   | 221   | 194   | 204     |
| 25301     | Cebpg           | 1059   | 1099    | 920    | 988    | 909   | 904   | 1028  | 940     |
| 362686    | Cebpz           | 743.82 | 770.34  | 809.13 | 764.21 | 731.6 | 683.3 | 719.7 | 736.58  |
| 309512    | Tnks2           | 1196.2 | 1343.2  | 1315.5 | 1291.2 | 1154  | 1136  | 1233  | 1262.83 |
| 295062    | Wwtr1           | 256    | 276     | 368    | 356    | 283   | 276   | 296   | 313     |
| 64823     | Csnk1g3         | 1638.9 | 1482.42 | 1444.3 | 1482   | 1341  | 1336  | 1493  | 1454.27 |
| 292095    | Ttc13           | 587    | 570     | 629    | 527    | 515   | 520   | 589   | 527     |
| 304014    | Adgrg7          | 16.28  | 15.11   | 19     | 12.16  | 16.83 | 9.58  | 15.19 | 16.57   |
| 498265    | LOC498265       | 26.68  | 18.82   | 35.68  | 40.23  | 32.16 | 23.33 | 29.3  | 28.12   |
| 363225    | RGD1305645      | 179    | 211     | 209    | 201    | 162   | 187   | 163   | 232     |



|           |              |        |         |        |        |       |       |       |          |
|-----------|--------------|--------|---------|--------|--------|-------|-------|-------|----------|
| 102550789 | LOC102550789 | 25.31  | 20.34   | 33.51  | 28.03  | 40.12 | 24.99 | 18.94 | 15.64    |
| 302937    | Anks3        | 337    | 327     | 328    | 338    | 278   | 304   | 346   | 309      |
| 294606    | Fam172a      | 864    | 771     | 831    | 856    | 722   | 713   | 831   | 824      |
| 315723    | Senp8        | 105    | 97      | 109    | 90     | 80    | 92    | 92    | 109      |
| 29487     | Gstt2        | 311.18 | 278.16  | 317.13 | 250.33 | 262.1 | 228.9 | 274.3 | 310.79   |
| 305539    | Spred2       | 355    | 356     | 357    | 408    | 353   | 322   | 339   | 359      |
| 289594    | Nipal1       | 65     | 72      | 65     | 56     | 44    | 77    | 47    | 72       |
| 501126    | Vwa3b        | 10     | 12      | 11     | 10     | 12    | 10    | 7     | 11       |
| 59302     | Bmp15        | 12     | 5       | 11     | 15     | 6     | 10    | 12    | 12       |
| 54286     | Prkg1        | 364.22 | 373.24  | 406.24 | 426.42 | 438.8 | 299.5 | 353.8 | 368.44   |
| 24205     | Apc          | 3484   | 3589    | 3511   | 4609   | 3992  | 3068  | 3614  | 3460     |
| 66012     | Gucyla2      | 64     | 71      | 58     | 94     | 70    | 37    | 68    | 92       |
| 303469    | Dlx4         | 8.86   | 10.35   | 6.85   | 12.4   | 5.08  | 4.93  | 8.58  | 17.19    |
| 312159    | Fam3c        | 837    | 994     | 1039   | 1049   | 840   | 993   | 868   | 945      |
| 314545    | Wdr75        | 583    | 590     | 638    | 572    | 521   | 528   | 613   | 555      |
| 316482    | Crispld1     | 166.9  | 122.91  | 123.17 | 194.22 | 94.05 | 160.8 | 147.9 | 162.2    |
| 312132    | Tmem106b     | 1062   | 1078    | 1099   | 1057   | 965   | 947   | 1013  | 1072     |
| 171564    | Pbld1        | 110.63 | 149.45  | 103.17 | 118.05 | 79.91 | 113.2 | 112.3 | 142.43   |
| 102554045 | LOC102554045 | 5.42   | 4       | 4      | 7      | 6     | 4     | 5     | 4        |
| 25479     | Vps35        | 5340   | 5193    | 4904   | 5000   | 4695  | 4346  | 4897  | 5078     |
| 192179    | Gpm6b        | 8748   | 9549    | 9079   | 9466   | 7736  | 8269  | 8915  | 9362     |
| 25281     | Nup153       | 905    | 999     | 974    | 1051   | 915   | 898   | 941   | 902      |
| 102550851 | LOC102550851 | 284.72 | 244.13  | 296.04 | 288.86 | 263.2 | 223.2 | 273.2 | 276.82   |
| 246282    | Zfp91        | 2160   | 2055    | 2072   | 2206   | 1979  | 1953  | 2006  | 1965     |
| 301516    | Stk36        | 143    | 126     | 152    | 155    | 144   | 116   | 140   | 136      |
| 305012    | Kif26b       | 271    | 288     | 331    | 363    | 337   | 271   | 294   | 264      |
| 294283    | Rgl2         | 461    | 391     | 438    | 309    | 364   | 383   | 380   | 361      |
| 363517    | Plxn3        | 1215   | 1271    | 1430   | 1300   | 1014  | 1370  | 1355  | 1115     |
| 362251    | Rbm39        | 1966.4 | 1982.54 | 2039.3 | 2413.5 | 1940  | 1602  | 2158  | 2118.31  |
| 432360    | Sgce         | 690    | 700     | 843    | 649    | 542   | 707   | 710   | 723      |
| 170911    | Pik3ca       | 1467.9 | 1504.65 | 1452   | 1659.6 | 1418  | 1266  | 1580  | 1397.69  |
| 306455    | Cdkn2aip     | 315    | 311     | 296    | 260    | 273   | 233   | 297   | 297      |
| 362751    | Tmx1         | 1637   | 1650    | 1634   | 1437   | 1438  | 1369  | 1499  | 1611     |
| 688405    | Cdk2ap2      | 412    | 483     | 441    | 395    | 348   | 402   | 419   | 442      |
| 308692    | Peg12        | 6      | 12      | 4      | 7      | 4.99  | 8     | 9     | 5        |
| 100911798 | Seh1l        | 565    | 506     | 549    | 516    | 479   | 489   | 522   | 498      |
| 498873    | MGC105567    | 160    | 162     | 165    | 151.09 | 148   | 131.9 | 159   | 155.08   |
| 290533    | Slmap        | 1804.7 | 1647.85 | 1813.1 | 2047   | 1742  | 1659  | 1792  | 1612.85  |
| 296281    | Plagl2       | 133    | 165     | 200    | 152    | 161   | 129   | 151   | 164      |
| 312574    | Lrig1        | 435    | 547     | 669    | 590    | 441   | 523   | 590   | 532      |
| 294065    | Kcnv2        | 82     | 96      | 85     | 84     | 73    | 84    | 90    | 76       |
| 361449    | Ppil4        | 363    | 366     | 343    | 345    | 312   | 304   | 351   | 352      |
| 294924    | Mecom        | 98     | 103     | 105    | 95     | 95    | 80    | 112.3 | 86       |
| 680229    | Sgcb         | 1991   | 2114    | 2063   | 1917   | 1808  | 1837  | 1985  | 1896     |
| 287159    | Pigq         | 1512.7 | 1540.59 | 1536.2 | 1388   | 1293  | 1376  | 1468  | 1427.49  |
| 117060    | Ubr5         | 3271   | 3418    | 3330   | 3715   | 3505  | 2924  | 3250  | 3106     |
| 108350812 | LOC108350812 | 47.55  | 33      | 23.53  | 35     | 27    | 40.47 | 28    | 34       |
| 252832    | Zc3hav1      | 882.01 | 1036.09 | 1151   | 1028   | 891   | 1043  | 955   | 925.01   |
| 289277    | Desi2        | 344.58 | 347.67  | 388.25 | 374.44 | 319   | 331.3 | 362.4 | 341.81   |
| 366959    | Gcat         | 132.34 | 106.02  | 137.48 | 93.01  | 125.8 | 110.6 | 87.95 | 112.12   |
| 299331    | Hsp90aa1     | 51158  | 52664.4 | 50224  | 52545  | 48716 | 43040 | 49270 | 51299.67 |
| 24812     | Tap2         | 221.35 | 233.4   | 287.21 | 252.7  | 238   | 209.9 | 251.6 | 226.5    |
| 65144     | Pdzk1        | 240    | 220     | 245    | 251    | 231   | 225   | 218   | 216      |
| 641520    | Popdc3       | 376    | 370     | 320    | 441    | 370   | 357   | 329   | 347      |
| 102548228 | Bivm         | 403    | 412     | 391    | 446    | 373   | 365   | 397   | 403      |
| 304266    | Gbp1         | 4      | 1.98    | 5      | 7.28   | 1     | 7     | 3     | 6        |

|           |              |        |         |        |        |       |       |       |         |
|-----------|--------------|--------|---------|--------|--------|-------|-------|-------|---------|
| 362925    | Zfat         | 286    | 306     | 367    | 273    | 283   | 302   | 271   | 291     |
| 103690550 | LOC103690550 | 3      | 12      | 7      | 7      | 9     | 5     | 8     | 5       |
| 689721    | Rnf212       | 19     | 6       | 18     | 15     | 9     | 13    | 15    | 17      |
| 499653    | Gon4l        | 541.16 | 577.25  | 606.78 | 636    | 561.8 | 544.2 | 572.3 | 520.02  |
| 298168    | Tenm1        | 347.63 | 315.51  | 369.38 | 403.69 | 386.8 | 277.2 | 342   | 331.27  |
| 79127     | Dck          | 122    | 129     | 116    | 141    | 130   | 104   | 119   | 120     |
| 501550    | Trappc2      | 1856   | 1863    | 1889   | 1708   | 1597  | 1567  | 1733  | 1915    |
| 304157    | Nrip1        | 869    | 760     | 806    | 817    | 829   | 628   | 833   | 738     |
| 292483    | Stx11        | 74     | 100     | 88     | 72     | 76    | 56    | 106   | 73      |
| 54287     | Eif2ak2      | 877    | 791     | 836    | 778    | 749   | 772   | 764   | 771     |
| 305624    | Pcgf3        | 359    | 380     | 354    | 403    | 369   | 316   | 349   | 359     |
| 308266    | Zc3h12d      | 28.77  | 18.56   | 30.46  | 27.09  | 31.25 | 15.96 | 27.08 | 23.37   |
| 365216    | Cadm4        | 2967   | 3538    | 4037   | 2635   | 2409  | 3443  | 3117  | 3301    |
| 689826    | Ncmap        | 1919   | 2157    | 1741   | 1727   | 1335  | 1894  | 1791  | 2005    |
| 102553119 | Mettl21a     | 89.11  | 82.73   | 81.74  | 66.17  | 71.39 | 76.22 | 80    | 70.15   |
| 361689    | Unc93b1      | 328    | 380     | 400    | 317    | 331   | 299   | 329   | 368     |
| 25744     | Nf2          | 830    | 877     | 910    | 917    | 792   | 837   | 788   | 874     |
| 102556337 | LOC102556337 | 1556.8 | 1526.28 | 1213.2 | 1474.9 | 1385  | 1269  | 1269  | 1451.49 |
| 361243    | Cdkal1       | 144    | 142     | 143    | 124    | 126   | 115   | 132   | 142     |
| 353229    | Sgms1        | 500    | 578     | 609    | 584    | 520   | 470   | 596   | 529     |
| 304799    | Ppp1r15b     | 740.05 | 791.4   | 782.47 | 707.69 | 659.5 | 707   | 704.4 | 743.1   |
| 29624     | Alox5ap      | 85     | 81      | 119    | 79     | 98    | 68    | 97    | 76      |
| 299976    | Rrm2b        | 268    | 249     | 257    | 289    | 265   | 206   | 289   | 230     |
| 691506    | Ttc19        | 1158   | 1118    | 1060   | 1077   | 994   | 1009  | 1061  | 1046    |
| 314614    | Plppr3       | 195.85 | 220.83  | 226.38 | 192.32 | 183.2 | 200.3 | 214.6 | 180.03  |
| 100362634 | Kmt2d        | 2633.7 | 2514.62 | 2640.5 | 2851.5 | 2543  | 2570  | 2482  | 2315.57 |
| 296884    | Glcci1       | 345    | 364     | 337    | 397    | 315   | 298   | 376   | 355     |
| 289758    | Pold2        | 169    | 186     | 205    | 198    | 183   | 180   | 166   | 177     |
| 362184    | Dnajc24      | 155    | 142     | 122    | 135    | 123   | 129   | 115   | 149     |
| 303702    | Engase       | 231    | 253     | 246    | 276    | 235   | 251   | 254   | 197     |
| 305497    | Cobl         | 1058   | 1119    | 1239   | 1178   | 1058  | 1071  | 1045  | 1105    |
| 500364    | Sspn         | 461.72 | 444.24  | 483.22 | 513.62 | 377.8 | 491.4 | 475.3 | 427.93  |
| 170900    | Rbm14        | 296.94 | 352.87  | 352.87 | 382.78 | 309.2 | 336.3 | 321.6 | 323.42  |
| 102547287 | LOC102547287 | 212.99 | 233.26  | 231.91 | 187.66 | 214   | 176.9 | 216   | 199.68  |
| 291677    | Dnajc18      | 436    | 413     | 365    | 523    | 413   | 425   | 411   | 369     |
| 682999    | Aida         | 1627   | 1623    | 1676   | 1573   | 1451  | 1446  | 1610  | 1547    |
| 691387    | LOC691387    | 2849   | 2776    | 2955   | 3709.8 | 3152  | 2617  | 3028  | 2652    |
| 310659    | Rfx5         | 437    | 436     | 429    | 422    | 357   | 387   | 421   | 441     |
| 29662     | Gdi2         | 6305   | 6269    | 6209   | 5867   | 5545  | 5436  | 6066  | 5916    |
| 65166     | Sec11a       | 564    | 517     | 624    | 443    | 423   | 489   | 541   | 548     |
| 498549    | Akap11       | 4664.6 | 4964.46 | 5062.4 | 5164.3 | 4956  | 3651  | 4965  | 4924.8  |
| 498386    | Cc2d2a       | 351    | 358     | 353    | 371    | 317   | 343   | 348   | 327     |
| 310250    | Zfhx4        | 249    | 240     | 232    | 259    | 236   | 193   | 251   | 233     |
| 499800    | Ly75         | 146    | 145     | 158    | 136    | 126   | 124   | 157   | 138     |
| 687713    | Gucd1        | 132    | 146     | 115    | 119    | 107   | 124   | 114   | 132     |
| 171387    | Rnf39        | 39.11  | 35.01   | 45.1   | 41.13  | 33.09 | 33.08 | 41.13 | 42.09   |
| 314830    | Krr1         | 177    | 184     | 211    | 189    | 161   | 171   | 178   | 199     |
| 81505     | Emp3         | 1045   | 985     | 1234   | 937    | 914   | 961   | 975   | 1064    |
| 83534     | Tpp1         | 1162.1 | 1283.95 | 1322.9 | 1282.1 | 1083  | 1234  | 1187  | 1201.75 |
| 300691    | Nnmt         | 347    | 356     | 394    | 353    | 341   | 315   | 362   | 333     |
| 25549     | Slc18a2      | 1198   | 1175    | 1129   | 1217   | 1147  | 1105  | 1052  | 1093    |
| 501512    | RGD1559731   | 100    | 82      | 116    | 98     | 84    | 84    | 106   | 95      |
| 361086    | Scel         | 146    | 143     | 146    | 137    | 122   | 116   | 170   | 125     |
| 114217    | Yme111       | 1158.2 | 1262.05 | 1204.5 | 1300.1 | 1030  | 1013  | 1278  | 1268.5  |
| 291314    | Sephs1       | 670    | 656     | 667    | 648    | 583   | 592   | 654   | 632     |
| 312828    | Etnk1        | 4546   | 4769    | 4254   | 4759   | 4283  | 3926  | 4571  | 4299    |

|           |              |        |         |        |        |       |       |       |         |
|-----------|--------------|--------|---------|--------|--------|-------|-------|-------|---------|
| 100360619 | LOC100360619 | 2.84   | 2.75    | 2.6    | 1.35   | 1.28  | 4.46  | 0.11  | 3.04    |
| 25046     | Pigr         | 18.93  | 21.11   | 19.68  | 24.4   | 29.01 | 15.12 | 18.91 | 15.35   |
| 100362279 | Trappc31     | 291    | 286     | 247    | 351    | 349   | 203   | 279   | 264     |
| 100910575 | LOC100910575 | 59.08  | 34.72   | 45.5   | 40.33  | 43.55 | 44.87 | 47.95 | 31.03   |
| 25049     | Atxn1        | 145.05 | 121.7   | 139.94 | 169.83 | 156.8 | 98.37 | 152.8 | 129.32  |
| 89816     | Picalm       | 4816   | 4518    | 4532   | 4596   | 4069  | 4373  | 4534  | 4230    |
| 500030    | Phf14        | 1174.7 | 1216.91 | 1179.1 | 1318.7 | 1220  | 948.5 | 1243  | 1145.71 |
| 25718     | Igflr        | 683.78 | 683.11  | 716.48 | 698.81 | 624.9 | 660.6 | 617   | 690.43  |
| 684274    | Mtif3        | 267.35 | 261.33  | 243.98 | 247.98 | 244.4 | 228.3 | 221.1 | 257.49  |
| 140668    | Abcc3        | 160.74 | 162.55  | 179.31 | 155.13 | 142.4 | 135.6 | 170.3 | 164.75  |
| 94267     | Nudt4        | 2236   | 2134    | 2552   | 2300   | 1936  | 2094  | 2341  | 2224    |
| 315036    | Vps13b       | 1196   | 1249    | 1305   | 1428   | 1230  | 1149  | 1272  | 1175    |
| 287379    | Shmt1        | 30     | 24      | 29     | 20     | 20    | 35    | 17    | 24      |
| 360609    | Cbx1         | 530    | 560     | 533    | 556    | 506   | 493   | 536   | 496     |
| 29508     | Nfya         | 338    | 296     | 298    | 305    | 268   | 266   | 327   | 292     |
| 287129    | Tmem204      | 210    | 226     | 173    | 201    | 146   | 188   | 203   | 218     |
| 680537    | Nsd2         | 2139   | 2158    | 1970   | 2290   | 2119  | 1847  | 2040  | 1970    |
| 84487     | Slc17a6      | 2696   | 2551    | 2661   | 2669   | 2492  | 2448  | 2423  | 2496    |
| 108351875 | LOC108351875 | 15     | 8       | 13     | 14.42  | 7     | 12    | 17    | 11      |
| 362498    | Mdn1         | 635    | 655     | 648    | 775    | 654   | 558   | 672   | 645     |
| 103692804 | LOC103692804 | 8.07   | 4.02    | 11.77  | 1.51   | 9.16  | 5.38  | 5.57  | 3.54    |
| 292690    | Ppmln        | 13     | 16      | 17     | 13     | 12    | 18    | 13    | 12      |
| 108349754 | LOC108349754 | 0      | 12.28   | 2.01   | 15.37  | 10.26 | 9.3   | 4.85  | 3.24    |
| 25372     | Grk3         | 591.89 | 607.01  | 633.2  | 636.3  | 617.9 | 589.5 | 550.6 | 543.18  |
| 499313    | Zbtb3        | 59     | 69      | 61     | 62     | 57    | 63    | 56    | 58      |
| 100911807 | LOC100911807 | 16.09  | 36.28   | 12.77  | 21.57  | 23.78 | 17.46 | 24.63 | 14.97   |
| 499677    | Lix11        | 599.74 | 594.82  | 606.48 | 598.4  | 542.6 | 557.7 | 587.6 | 549.15  |
| 691145    | Immp11       | 180    | 179     | 187    | 178    | 156   | 173   | 146   | 200     |
| 303754    | Rab40b       | 91     | 108     | 113    | 102    | 85    | 97    | 93    | 111     |
| 114248    | Pde6h        | 10.02  | 2.01    | 8.01   | 2      | 9.6   | 7     | 2     | 1.95    |
| 83507     | Parg         | 630.14 | 596.52  | 613.42 | 603.27 | 573.8 | 550.6 | 609.1 | 544.75  |
| 361018    | Fam107a      | 594.93 | 621.36  | 730.81 | 509.75 | 498   | 642.7 | 580.6 | 569.61  |
| 100365679 | Dennd5b      | 209    | 204     | 234    | 286    | 254   | 160   | 206   | 250     |
| 288264    | Ifnar1       | 1794.9 | 1835.67 | 1846   | 1852   | 1698  | 1700  | 1757  | 1679.12 |
| 309081    | Dock1        | 935    | 901.7   | 1053   | 1063   | 924   | 923   | 922   | 917     |
| 100911597 | Myh9         | 1664.1 | 1837.46 | 2426.8 | 2808.2 | 2288  | 1560  | 2115  | 2184.15 |
| 313757    | Ski          | 1234   | 1157    | 1432   | 1311   | 1129  | 1283  | 1183  | 1193    |
| 83840     | Rps6kb1      | 677    | 678     | 612    | 704    | 681   | 594   | 612   | 604     |
| 688041    | Suz12        | 761    | 791     | 780    | 786    | 761   | 682   | 752   | 713     |
| 299180    | Med6         | 339    | 290     | 321    | 253    | 257   | 284   | 296   | 285     |
| 502736    | Cpa4         | 6.41   | 2.71    | 9.05   | 3.22   | 4.31  | 5.56  | 4.64  | 5.44    |
| 317163    | Eif1a        | 1322   | 1286    | 1272   | 1215   | 1162  | 1128  | 1315  | 1147    |
| 59087     | Nxf1         | 1453   | 1412    | 1572   | 1565   | 1315  | 1363  | 1454  | 1466    |
| 500526    | Mknk1        | 481    | 485     | 509    | 457    | 460   | 458   | 428   | 456     |
| 302422    | Pdzd11       | 577    | 567     | 537    | 474    | 468   | 477   | 497   | 568     |
| 362505    | Cc127        | 130    | 120     | 102    | 94     | 114   | 103   | 99    | 100     |
| 287585    | Ppml1        | 231    | 244     | 215    | 217    | 197   | 201   | 222   | 226     |
| 65168     | Scamp2       | 455    | 471     | 553    | 484    | 431   | 439   | 499   | 462     |
| 367235    | Fam135a      | 663    | 631     | 620    | 629    | 582   | 508   | 687   | 595     |
| 317589    | Stk26        | 128.69 | 120.93  | 110.74 | 127.68 | 114.2 | 121.7 | 112.5 | 106.85  |
| 311715    | Tcf15        | 37     | 24      | 40     | 33     | 36    | 35    | 26    | 28      |
| 288771    | Rbms2        | 1087   | 982     | 1165   | 998    | 864   | 957   | 1050  | 1077    |
| 298024    | Akap2        | 1813   | 1873    | 2370.1 | 2241.1 | 1937  | 1919  | 2136  | 1747.75 |
| 500247    | Aplf         | 240    | 237     | 227    | 220    | 232   | 182   | 249   | 199     |
| 171058    | Rab3c        | 1020   | 1086    | 939    | 1341   | 1242  | 676   | 1124  | 1050    |
| 307189    | Neb1         | 291    | 322     | 324    | 361    | 338   | 259   | 307   | 307     |

|           |              |        |         |        |        |       |       |       |         |
|-----------|--------------|--------|---------|--------|--------|-------|-------|-------|---------|
| 361282    | Plxdc2       | 2555.8 | 2319.07 | 2919.1 | 3097.4 | 2304  | 2444  | 2682  | 2732.53 |
| 81527     | Nrp2         | 1702.8 | 1921.01 | 2275.1 | 2530.9 | 1866  | 1911  | 2113  | 1975.57 |
| 301665    | Srbd1        | 412    | 463     | 485    | 463    | 405   | 395   | 482   | 419     |
| 25562     | Eloa         | 646    | 611     | 590    | 604    | 533   | 570   | 594   | 590     |
| 100361684 | Simc1        | 178.07 | 189.08  | 193.09 | 203.04 | 165.1 | 178.1 | 176   | 193.08  |
| 362324    | Mios         | 207    | 236     | 223    | 232    | 202   | 194   | 240   | 202     |
| 266774    | Zfp597       | 115    | 119     | 107    | 123    | 116   | 87    | 118   | 112     |
| 25600     | Utrn         | 5371.9 | 5772.21 | 6148.1 | 6699.9 | 5568  | 5290  | 5694  | 5837.63 |
| 287798    | MGC95210     | 148.48 | 130.81  | 150.14 | 123.33 | 137.5 | 116.6 | 132.9 | 128.81  |
| 360959    | Htra3        | 261    | 231     | 257    | 285    | 214   | 244   | 233   | 274     |
| 100912115 | LOC100912115 | 733    | 768     | 792    | 825    | 666   | 775   | 736   | 733     |
| 303292    | Ankfy1       | 1741   | 1920    | 1950   | 1930   | 1764  | 1641  | 1897  | 1736    |
| 293589    | Paox         | 512    | 486     | 528    | 408    | 402   | 440   | 455   | 508     |
| 360571    | Rab34        | 530    | 544     | 579    | 476    | 447   | 477   | 529   | 534     |
| 117106    | Scarb2       | 1378   | 1480    | 1411   | 1624   | 1407  | 1322  | 1409  | 1362    |
| 317464    | Msl3         | 677    | 647     | 569.82 | 557.35 | 552.3 | 562   | 605.4 | 568     |
| 25083     | Adra2a       | 105    | 79      | 114    | 107    | 90    | 85    | 115   | 88      |
| 306231    | Pde12        | 106    | 127     | 125    | 107    | 127   | 101   | 100   | 106     |
| 64565     | Tmprss11d    | 24     | 16      | 5      | 15     | 12    | 18    | 9     | 17      |
| 25554     | Snai2        | 12     | 10      | 14     | 9      | 7     | 14    | 6     | 15      |
| 282580    | Stab2        | 6      | 3       | 1      | 5      | 4     | 7     | 2     | 1       |
| 294395    | Rfx6         | 5      | 4       | 3      | 3      | 2     | 4     | 5     | 3       |
| 361658    | Btbd16       | 20     | 28      | 41     | 16     | 29    | 28    | 23    | 18      |
| 685612    | Col26a1      | 25     | 21      | 34     | 25     | 21    | 23    | 26    | 28      |
| 315530    | Arhgap32     | 1268.2 | 1240.45 | 1256   | 1532.6 | 1173  | 1256  | 1358  | 1158.07 |
| 317432    | Kdm5c        | 851    | 827     | 909    | 943    | 807   | 809   | 822   | 857     |
| 679110    | Frat2        | 186.61 | 211.65  | 191    | 186    | 196.1 | 193   | 147   | 187.53  |
| 498764    | Jcad         | 683    | 613.68  | 681.47 | 772.8  | 619   | 529.5 | 679   | 740.4   |
| 310877    | Tifa         | 283    | 250     | 265    | 269    | 233   | 257   | 256   | 250     |
| 685082    | Zfp318       | 697    | 672     | 653    | 789    | 705   | 606   | 669   | 644     |
| 309969    | Ap3b1        | 1308   | 1348    | 1355   | 1431   | 1335  | 1250  | 1295  | 1200    |
| 317335    | Ddx3x        | 5821.4 | 5791.85 | 5671.5 | 5815.7 | 5169  | 4971  | 5781  | 5643.43 |
| 64551     | 7-Sep        | 5619.2 | 5288.74 | 5562.7 | 5507.2 | 4869  | 4874  | 5546  | 5227.31 |
| 404658    | Mrgprb4      | 627.29 | 514.32  | 533.31 | 453.32 | 449.9 | 438.5 | 518   | 580.38  |
| 298033    | Snx30        | 421    | 388     | 417    | 429    | 383   | 359   | 391   | 412     |
| 299198    | Fcf1         | 535    | 495     | 479    | 432    | 453   | 440   | 436   | 483     |
| 83789     | Rps2         | 6630.7 | 6536.1  | 7477   | 5147.4 | 5913  | 5784  | 6168  | 6213.21 |
| 114765    | Wbp4         | 1259   | 1160    | 1134   | 1251   | 1193  | 1059  | 1140  | 1093    |
| 113992    | Ugt1a6       | 119.14 | 154.04  | 150.4  | 142.37 | 109.8 | 135.8 | 135.6 | 147.29  |
| 29750     | Galnt7       | 168.94 | 170.23  | 192.82 | 229.41 | 180.7 | 161.4 | 187   | 181.85  |
| 64200     | Hnrnpf       | 2111   | 1989    | 2099   | 1923   | 1818  | 1853  | 1996  | 1916    |
| 171111    | Rab26        | 48     | 49      | 53     | 46     | 47    | 47    | 44    | 45      |
| 681943    | Tmed8        | 1004   | 977     | 907    | 942    | 991   | 839   | 834   | 912     |
| 362519    | Smc2         | 319.6  | 324.08  | 351.9  | 357.36 | 329.6 | 289.4 | 355.1 | 289.08  |
| 361047    | Ska3         | 124.61 | 129.44  | 134.28 | 112.85 | 112.5 | 99.64 | 103.6 | 152.25  |
| 305583    | Pus10        | 419    | 339.3   | 425.51 | 407.28 | 366.1 | 349.4 | 398.2 | 371.95  |
| 64016     | Qtrt1        | 104    | 94      | 94     | 70     | 88    | 77    | 92    | 81      |
| 305270    | Cenpc        | 311    | 312     | 312    | 302    | 286   | 282   | 305   | 282     |
| 681578    | Rnf13        | 2821   | 2682    | 2687   | 2507   | 2282  | 2355  | 2677  | 2674    |
| 497988    | Hoxb4        | 71     | 82      | 90     | 74     | 71    | 68    | 82    | 75      |
| 81645     | Chrm2        | 146    | 141     | 156    | 176    | 131   | 111   | 153   | 183     |
| 292949    | Perp         | 660.18 | 566.57  | 573.99 | 541.04 | 577.4 | 467.2 | 578.1 | 563.97  |
| 360893    | Taf1a        | 126    | 112     | 102    | 98     | 103   | 101   | 104   | 101     |
| 307485    | Taf7         | 164    | 123     | 134    | 138    | 124   | 133   | 132   | 133     |
| 29386     | Mecp2        | 1511.5 | 1603.73 | 1573   | 1738.5 | 1649  | 1375  | 1539  | 1439    |
| 314721    | Anks1b       | 753.93 | 751.96  | 795.46 | 771.13 | 778.6 | 703.9 | 685.9 | 700.99  |

|           |              |        |         |        |        |       |       |       |         |
|-----------|--------------|--------|---------|--------|--------|-------|-------|-------|---------|
| 29682     | Kcnq3        | 268    | 266     | 220    | 427    | 365   | 160   | 282   | 296     |
| 81510     | Mia          | 31     | 35      | 21     | 19     | 20    | 39    | 19    | 21      |
| 680419    | Rsu1         | 1276   | 1339    | 1398   | 1213   | 1160  | 1206  | 1180  | 1335    |
| 686295    | Wdr82        | 794    | 766     | 804    | 742    | 697   | 660   | 799   | 745     |
| 25336     | Nfyb         | 410    | 378     | 434    | 369    | 389   | 325   | 407   | 365     |
| 29556     | Myh6         | 491.88 | 498.87  | 387.53 | 466.03 | 429.8 | 441.6 | 538.6 | 312.6   |
| 100365363 | LOC100365363 | 144.99 | 114.01  | 114.77 | 123    | 119   | 98    | 112   | 135     |
| 363735    | Gabpa        | 691.69 | 705.78  | 771.62 | 742.98 | 698.9 | 633.6 | 679   | 708.49  |
| 314075    | Pnpla8       | 2717   | 2302    | 2525   | 2873   | 2057  | 2306  | 2792  | 2575    |
| 302972    | Amdhd2       | 281    | 288     | 270    | 223    | 271   | 228   | 232   | 261     |
| 498642    | Rbpms        | 266.4  | 243.14  | 273.69 | 216.79 | 207   | 311.8 | 225   | 190.36  |
| 361846    | Vps26a       | 1608   | 1539    | 1534   | 1469   | 1391  | 1398  | 1547  | 1409    |
| 313591    | Thrap3       | 2018   | 1969    | 2158   | 2162   | 1920  | 1898  | 2033  | 1909    |
| 81660     | Gatm         | 1263.7 | 1491    | 1396.1 | 1234   | 942.4 | 1328  | 1357  | 1403.16 |
| 367909    | Tceal8       | 1523   | 1444    | 1575   | 1368   | 1198  | 1375  | 1445  | 1503    |
| 499445    | Calhm4       | 18     | 17      | 20     | 21     | 17    | 18    | 17    | 19      |
| 502292    | Zfp773-ps1   | 16     | 16      | 26     | 18     | 16    | 23    | 16    | 16      |
| 450231    | Krt42        | 9      | 8       | 2      | 6.69   | 11    | 3     | 7     | 3       |
| 498269    | Fam78b       | 421    | 449     | 619    | 427    | 408   | 476   | 468   | 438     |
| 685374    | Ankrd13c     | 1747.7 | 1499.31 | 1680.3 | 1572.6 | 1465  | 1408  | 1616  | 1584    |
| 170895    | Cetn3        | 460.59 | 413.09  | 454.89 | 399.87 | 368.1 | 385.7 | 450.5 | 410.48  |
| 312030    | Scaf11       | 1093   | 1126    | 1219   | 1299   | 1086  | 998   | 1181  | 1161    |
| 365037    | Sash1        | 907.84 | 1043.13 | 1135.7 | 1065.7 | 872.1 | 967.3 | 1076  | 963.98  |
| 114212    | Chek2        | 68.44  | 57.13   | 71.83  | 54.59  | 71.51 | 60.74 | 51.06 | 52.14   |
| 108350576 | LOC108350576 | 39.81  | 36.15   | 58.47  | 58.87  | 51.8  | 38.33 | 41.29 | 49.2    |
| 406867    | Ly6g5b       | 17     | 14      | 19     | 11     | 19    | 11    | 13    | 14      |
| 362799    | Rapgef5      | 889    | 755     | 669    | 830    | 587   | 759   | 725   | 866     |
| 100911190 | LOC100911190 | 15.48  | 38.86   | 33.07  | 22.5   | 26.13 | 32.2  | 11.95 | 32.43   |
| 25313     | Egf          | 39.96  | 55.58   | 35.96  | 39.37  | 35.41 | 33.16 | 34.3  | 56.81   |
| 306630    | Abhd13       | 381    | 344     | 350.01 | 345    | 307   | 309   | 354   | 357.03  |
| 308871    | Rnf121       | 240    | 198     | 204    | 198    | 186   | 194   | 199   | 206     |
| 317425    | Phf8         | 722    | 757     | 738.4  | 862    | 706   | 736.8 | 749   | 686     |
| 498301    | Wdr26        | 1914.8 | 1896.69 | 2068.4 | 1937.9 | 1785  | 1849  | 1951  | 1721.02 |
| 100910990 | LOC100910990 | 777.82 | 702.2   | 711.88 | 667.09 | 615   | 710.9 | 770.9 | 575.16  |
| 113976    | Acs14        | 1161   | 1118    | 1202   | 1227   | 1090  | 931   | 1221  | 1158    |
| 102556092 | LOC102556092 | 1237.7 | 1200    | 1181   | 1357   | 1147  | 1119  | 1255  | 1129.65 |
| 103693197 | LOC103693197 | 4      | 2       | 5.08   | 1      | 4.16  | 1.01  | 1.02  | 5.1     |
| 308912    | Dchs1        | 155    | 164     | 230    | 231    | 141   | 198   | 186   | 204     |
| 366507    | Lzic         | 503    | 550     | 509    | 564    | 467   | 489   | 501   | 530     |
| 364681    | Rnf144b      | 173.37 | 175.21  | 201.17 | 204.8  | 166.1 | 151.8 | 229   | 158.34  |
| 54400     | Bet11        | 365    | 351     | 276    | 264    | 272   | 299   | 286   | 317     |
| 100363539 | Mrpl33       | 398.57 | 343.78  | 329.07 | 309.11 | 301.4 | 298.3 | 345.1 | 345.58  |
| 85274     | Prdx4        | 444    | 552     | 538    | 396    | 430   | 438   | 479   | 457     |
| 100911312 | LOC100911312 | 109    | 95      | 98     | 81     | 94    | 76    | 78    | 110     |
| 316034    | Cnot10       | 638    | 629     | 614    | 617    | 506   | 622   | 605   | 602     |
| 681185    | Cenph        | 12     | 7       | 21     | 6      | 13    | 11    | 14    | 5       |
| 306587    | Tcta         | 1137   | 1021    | 1010   | 866    | 869   | 924   | 899   | 1079    |
| 691105    | Fancg        | 86.66  | 81.74   | 80.98  | 82.88  | 78.06 | 85.31 | 73.8  | 73.43   |
| 368062    | Ankib1       | 1172   | 1066    | 1123   | 1196   | 1018  | 984   | 1133  | 1125    |
| 102552463 | Zfp446       | 385.83 | 359     | 294.06 | 347.71 | 310.6 | 309.1 | 313.4 | 363.04  |
| 308944    | St5          | 702    | 694     | 785    | 842    | 606   | 732   | 757   | 731     |
| 690263    | Tmem179b     | 189.66 | 187.65  | 192.82 | 152.43 | 172.6 | 165.8 | 184.5 | 152.67  |
| 316519    | Slc11a1      | 56.57  | 61.31   | 104.78 | 72.83  | 78.03 | 56.56 | 68.47 | 73.18   |
| 102551980 | LOC102551980 | 136.74 | 105.75  | 134.09 | 150.33 | 121.8 | 125.1 | 101.9 | 143.73  |
| 682967    | Tmx3         | 2464   | 2289    | 2261   | 2445   | 2190  | 2051  | 2307  | 2295    |
| 499806    | Erich2       | 70     | 43      | 54     | 48     | 47    | 59    | 50    | 45      |

|           |              |        |         |        |        |       |       |       |         |
|-----------|--------------|--------|---------|--------|--------|-------|-------|-------|---------|
| 287929    | Mzt2b        | 471    | 456     | 472    | 444    | 438   | 459   | 438   | 388     |
| 298374    | Prpf38a      | 338    | 345     | 344    | 279    | 326   | 266   | 289   | 340     |
| 293546    | Gprc5b       | 974.13 | 1099.02 | 980.64 | 1105.9 | 923.1 | 965.8 | 988.3 | 1011.77 |
| 686781    | Ppp1r13l     | 140    | 147     | 181    | 147    | 136   | 140   | 153   | 146     |
| 287191    | Rars         | 1021   | 1001    | 945    | 954    | 917   | 870   | 982   | 897     |
| 362093    | Wdr5         | 307    | 274     | 344    | 291    | 265   | 319   | 283   | 270     |
| 65196     | B4galt6      | 795.87 | 738.77  | 814.41 | 767.32 | 794.1 | 709.6 | 692.9 | 717.46  |
| 689249    | Rspryl       | 325    | 336     | 309    | 339    | 315   | 258   | 330   | 321     |
| 310643    | Efna4        | 23     | 10      | 29     | 15     | 11    | 21    | 25    | 15      |
| 305911    | Zmym5        | 1056.4 | 907.6   | 1059.7 | 1048.5 | 952.1 | 878.8 | 1018  | 959.09  |
| 364458    | Kctd12       | 4285   | 4763    | 4427   | 5347   | 4199  | 4213  | 4942  | 4247    |
| 313438    | Dock11       | 3287   | 3162    | 3332   | 3308   | 3253  | 2601  | 3196  | 3190    |
| 289400    | Camsap2      | 4312   | 4192    | 4176   | 4609   | 4237  | 3630  | 4156  | 4145    |
| 298079    | Aldh1b1      | 73     | 50      | 49     | 44     | 53    | 60    | 49    | 40      |
| 497933    | Slc25a35     | 102    | 83      | 112    | 135    | 87    | 98    | 108   | 111     |
| 117186    | Sh3bp5       | 372.67 | 434.41  | 499.37 | 349.88 | 317.5 | 425.5 | 430.2 | 375.82  |
| 309928    | Mctpl        | 561    | 542     | 589    | 499    | 546   | 462   | 553   | 488     |
| 313391    | Atg4c        | 396    | 373     | 359    | 415    | 344   | 371   | 369   | 359     |
| 361314    | Arap3        | 597    | 601     | 713    | 652    | 570   | 587   | 665   | 575     |
| 501125    | Fam178b      | 80     | 64.59   | 74     | 53     | 37    | 65    | 78    | 74      |
| 25165     | Zfp386       | 341.01 | 344.86  | 337    | 373.78 | 340.6 | 289   | 341.7 | 334.93  |
| 314894    | Mon2         | 1031   | 1086    | 1125   | 1283   | 1075  | 951   | 1142  | 1064    |
| 310753    | Lrig2        | 914    | 877     | 845    | 917    | 855   | 792   | 894   | 782     |
| 361028    | Mapklip1l    | 460.01 | 482.9   | 556.2  | 654.34 | 548.1 | 449.4 | 525.9 | 490.77  |
| 290537    | Appl1        | 1459   | 1479    | 1453   | 1561   | 1448  | 1235  | 1433  | 1451    |
| 365462    | Lcor         | 302    | 329.01  | 366    | 420    | 395   | 238   | 325   | 367.36  |
| 309548    | Shoc2        | 1225   | 1193    | 1162   | 1292   | 1136  | 1006  | 1265  | 1150    |
| 29614     | Psme2        | 900.79 | 936.66  | 1045.1 | 908.5  | 821   | 904.6 | 851.1 | 969.28  |
| 691149    | Capza1       | 3689.3 | 3482.9  | 3468.5 | 3545.2 | 3363  | 3144  | 3420  | 3343.29 |
| 362547    | Alg6         | 262.5  | 264.92  | 254.2  | 239.94 | 221.6 | 221.9 | 258   | 254.09  |
| 680668    | Tpk1         | 181    | 199.01  | 205.77 | 175.01 | 158.3 | 154.7 | 184.2 | 214.46  |
| 317312    | Mospd1       | 804    | 767     | 739.91 | 711    | 738   | 554.8 | 751   | 783     |
| 297342    | Elmod3       | 135.94 | 127.09  | 146.64 | 100.88 | 123.9 | 122.8 | 115.3 | 115.62  |
| 288080    | Stxbp5l      | 212    | 253     | 185    | 326    | 267   | 142   | 232   | 272     |
| 310791    | Slc25a24     | 601.91 | 667     | 712    | 617    | 617   | 566.3 | 647   | 600     |
| 498034    | Fn3k         | 91     | 70      | 57     | 92     | 65    | 77    | 62    | 86      |
| 679805    | Mei4         | 13     | 4       | 10     | 4      | 11    | 6     | 6     | 6       |
| 81676     | Hnmt         | 25     | 28      | 25     | 15     | 17    | 20    | 21    | 29      |
| 500693    | Bbof1        | 104.57 | 109.53  | 108.8  | 105.32 | 99.91 | 93.36 | 116.9 | 90.42   |
| 307801    | Gfod2        | 1275.5 | 1300.16 | 1268.5 | 1404.2 | 1337  | 1192  | 1233  | 1148.69 |
| 680663    | LOC680663    | 8      | 3.93    | 12.04  | 6      | 8.04  | 4.02  | 5.99  | 9.99    |
| 360612    | Scrn2        | 145    | 110     | 137    | 105    | 121   | 105   | 109   | 130     |
| 291095    | Gmds         | 295    | 279     | 285    | 275    | 246   | 253   | 281   | 281     |
| 304431    | Sfswap       | 709    | 705     | 714    | 716    | 632   | 734   | 696   | 599     |
| 315989    | Manf         | 901    | 788     | 942    | 790    | 737   | 764   | 830   | 870     |
| 363167    | Ulk4         | 122    | 131     | 120    | 125    | 115   | 139   | 114   | 98      |
| 501038    | LOC501038    | 435.32 | 356.3   | 369.5  | 456.22 | 361.4 | 364.6 | 414.1 | 373.29  |
| 29577     | Hes1         | 224    | 217     | 290    | 188    | 187   | 248   | 242   | 183     |
| 84582     | Hdac7        | 474    | 444     | 488    | 401    | 425   | 424   | 433   | 409     |
| 362166    | Phf21a       | 355.51 | 319.61  | 317.42 | 360.65 | 323   | 341.1 | 280.9 | 321.39  |
| 84429     | Kcnk9        | 58     | 38      | 34     | 57     | 51    | 38    | 44    | 42      |
| 313155    | RGD1359108   | 1107   | 1114    | 1115   | 1092   | 964   | 985   | 1103  | 1092    |
| 102555183 | LOC102555183 | 566.18 | 551.94  | 581.92 | 563.25 | 502.5 | 474.5 | 566.8 | 574.37  |
| 363528    | 363528       | 84.86  | 90.55   | 79.37  | 82.36  | 91.58 | 71.31 | 79.16 | 73.48   |
| 79214     | Galnt1       | 1227   | 1084    | 1141   | 1057   | 961   | 1074  | 1211  | 974     |
| 293860    | Flna         | 2969   | 2886    | 3929   | 3067   | 2689  | 3505  | 3223  | 2611    |



|           |                 |        |         |        |        |       |       |       |         |
|-----------|-----------------|--------|---------|--------|--------|-------|-------|-------|---------|
| 64206     | Tdo2            | 66     | 48      | 50     | 39     | 50    | 43    | 53    | 44      |
| 303926    | Igsf11          | 1811   | 1829.02 | 1818   | 1936.4 | 1659  | 1754  | 1785  | 1723.54 |
| 291962    | Elmo3           | 77     | 71      | 77     | 72     | 67    | 66    | 66    | 79      |
| 691657    | Crip1           | 721    | 677     | 891    | 590    | 622   | 730   | 659   | 684     |
| 494219    | Eogt            | 497.7  | 472.84  | 550.85 | 463.55 | 442.7 | 452.7 | 478   | 484.74  |
| 315987    | Dcaf1           | 606.24 | 643.77  | 683.2  | 749.64 | 648.4 | 636.7 | 674.3 | 552.16  |
| 108349551 | NEWGENE_1309147 | 8.27   | 12.28   | 27.64  | 15.55  | 9.27  | 13.25 | 15.53 | 21.62   |
| 117250    | Dnah6           | 21     | 23      | 22     | 28     | 19    | 20    | 27    | 22      |
| 361916    | Chmp4c          | 12     | 13      | 17     | 5      | 7     | 11    | 16    | 10      |
| 685750    | Aldh8a1         | 18     | 17      | 25     | 34     | 18    | 22    | 28    | 20      |
| 364996    | Chtf8           | 903.96 | 964.94  | 1015   | 894.97 | 871   | 848.9 | 911   | 907     |
| 25285     | Igfbp5          | 967    | 788     | 1794   | 1108   | 1141  | 1222  | 1148  | 849     |
| 64030     | Kit             | 962    | 1010    | 1019   | 1227   | 966   | 909   | 1125  | 949     |
| 310914    | Bmpr1b          | 272.47 | 252.18  | 236.32 | 296.94 | 247   | 235.8 | 268.9 | 238.84  |
| 314910    | Nab2            | 757.95 | 795.99  | 769    | 762.38 | 701.1 | 722.7 | 706   | 759     |
| 304300    | Pap01b          | 31.03  | 17      | 15.93  | 28.96  | 23    | 17    | 23    | 24      |
| 287475    | Med31           | 309    | 318     | 265    | 254    | 253   | 239   | 284   | 297     |
| 303342    | Ssh2            | 700    | 774     | 858    | 902    | 749   | 702   | 818   | 759     |
| 117056    | H3f3b           | 4206.7 | 4471.93 | 4727.1 | 3673.3 | 3530  | 3951  | 4254  | 4256.32 |
| 361180    | Grtp1           | 222    | 168     | 188    | 176    | 196   | 158   | 170   | 182     |
| 56819     | Extl3           | 1443.4 | 1521.95 | 1514.4 | 1740.1 | 1418  | 1330  | 1601  | 1474.54 |
| 60628     | Cxcr4           | 339    | 365     | 358    | 321    | 353   | 342   | 298   | 302     |
| 498188    | RGD1562310      | 208    | 186     | 180    | 181    | 194   | 174   | 180   | 159     |
| 367308    | Alpg            | 118.53 | 88.79   | 121.15 | 98.78  | 90.22 | 114   | 105.2 | 90.67   |
| 361967    | Ppid            | 1029.9 | 886.81  | 995.72 | 957.75 | 878.9 | 830.9 | 941.8 | 972.79  |
| 25506     | P4hb            | 3522   | 3890    | 4461   | 3593   | 3331  | 3719  | 3949  | 3485    |
| 108353410 | LOC108353410    | 17     | 14      | 18     | 14     | 16    | 15    | 11    | 17      |
| 81758     | Rbl2            | 967.38 | 1035.72 | 952    | 1021.6 | 884.3 | 904.3 | 952.4 | 983.25  |
| 685882    | Syndig11        | 941    | 403     | 672    | 615    | 723   | 482   | 651   | 608     |
| 29627     | Gria2           | 556.42 | 647     | 531.87 | 639.43 | 540   | 509.2 | 583.2 | 591.59  |
| 295704    | Ube216          | 385    | 433     | 455    | 366    | 383   | 360   | 390   | 402     |
| 78971     | Birc3           | 38.17  | 47.44   | 50.59  | 31.83  | 30.8  | 44.13 | 31.78 | 50.66   |
| 24284     | Csn1s1          | 51     | 71      | 89     | 57     | 79    | 54    | 40    | 78      |
| 25065     | Slc12a1         | 34     | 37      | 39     | 32     | 40    | 36    | 35    | 22      |
| 300126    | Gtse1           | 68     | 66      | 82     | 68     | 77    | 69    | 70    | 50      |
| 89784     | Idi1            | 2595   | 2721.81 | 2717   | 2630.9 | 2108  | 2230  | 2539  | 3112.01 |
| 100125368 | LOC100125368    | 93.78  | 85.26   | 77.34  | 66.08  | 64.33 | 66.19 | 98.76 | 72.75   |
| 311191    | Ckap5           | 3756   | 3876    | 3920   | 4175   | 3827  | 3361  | 3945  | 3598    |
| 102553842 | Hoxd11          | 152    | 88      | 64     | 75     | 114   | 78    | 75    | 88      |
| 29515     | Atn1            | 1774.5 | 1682.62 | 1923.9 | 2237.9 | 1523  | 1759  | 2032  | 1823.24 |
| 301517    | Cyp27a1         | 337    | 291     | 307    | 297    | 252   | 281   | 286   | 335     |
| 500308    | Cecr2           | 156    | 175     | 180    | 184    | 196   | 158   | 137   | 160     |
| 299848    | RGD1565117      | 18.52  | 17.23   | 17.26  | 27.39  | 31.75 | 16.12 | 12.8  | 14.64   |
| 259224    | Npw             | 24     | 24      | 21     | 10     | 12    | 17    | 19    | 26      |
| 29237     | Penk            | 88     | 123     | 141    | 122    | 72    | 110   | 143   | 119     |
| 293112    | Crebzf          | 1151.3 | 1012.7  | 1142.2 | 1133.5 | 992.4 | 941.9 | 1108  | 1116.4  |
| 362165    | Creb311         | 704    | 716     | 860    | 882    | 622   | 718   | 764   | 858     |
| 114116    | Cdc42bpa        | 2202   | 2296    | 2180   | 2779   | 2412  | 1889  | 2333  | 2225    |
| 64019     | Pag1            | 31     | 39      | 42     | 62     | 54    | 32    | 44    | 33      |
| 287595    | Dhx40           | 833    | 856     | 791    | 907    | 790   | 701   | 831   | 851     |
| 313574    | Nt5c1a          | 68.79  | 59.24   | 77.5   | 98.41  | 57.42 | 74.91 | 76.21 | 76.21   |
| 362607    | Kpna6           | 582    | 529     | 543    | 611    | 594   | 500   | 544   | 484     |
| 307947    | Set             | 1478.2 | 1597.89 | 1702.3 | 1578.7 | 1507  | 1449  | 1541  | 1459.42 |
| 300834    | Wdr72           | 29     | 24      | 22     | 36     | 28    | 22    | 31    | 23      |
| 685611    | Phldb2          | 94.47  | 77.93   | 126.63 | 120.99 | 65.65 | 93.15 | 110.9 | 123.8   |
| 100364027 | Hkdc1           | 51     | 58      | 63     | 66     | 54    | 65    | 56    | 48      |

|           |              |        |         |        |        |       |       |       |         |
|-----------|--------------|--------|---------|--------|--------|-------|-------|-------|---------|
| 308501    | Cd22         | 404.3  | 335.01  | 355.55 | 323.95 | 348.8 | 336.3 | 352.3 | 292.05  |
| 290946    | Fastkd3      | 233    | 228     | 189    | 207    | 189   | 190   | 218   | 206     |
| 100360342 | Msh6         | 275    | 292     | 282    | 310    | 266   | 280   | 293   | 247     |
| 291797    | Thoc1        | 394.01 | 385     | 443    | 349    | 345.1 | 351   | 354   | 422     |
| 311578    | Sogal        | 125    | 137     | 176    | 213    | 185   | 140   | 134   | 151     |
| 363448    | Dynlt3       | 6918   | 6641    | 6221   | 6470   | 5705  | 5650  | 6439  | 6803    |
| 299802    | Lgr5         | 1200   | 1273    | 1153   | 1424   | 1173  | 1124  | 1297  | 1138    |
| 313906    | Zfp512       | 694    | 670     | 687    | 649    | 616   | 662   | 640   | 612     |
| 289997    | Dlgap5       | 110    | 99      | 128    | 92     | 75    | 120   | 118   | 89      |
| 29232     | Clcn2        | 669.04 | 650.11  | 617.65 | 596.61 | 460.1 | 678.4 | 602.1 | 633.46  |
| 362112    | Tor2a        | 285    | 257.87  | 280.82 | 256.53 | 256.2 | 257.1 | 243.2 | 255.69  |
| 64013     | Pdcl         | 452.23 | 446.4   | 396.89 | 374.54 | 371.3 | 382.6 | 397.5 | 413.54  |
| 497918    | Smcr8        | 274    | 279     | 267    | 325    | 280   | 241   | 279   | 273     |
| 59075     | Grk5         | 958    | 974     | 1088   | 1004   | 974   | 862   | 1019  | 916     |
| 315686    | Peak1        | 1500   | 1553.36 | 1738.1 | 1798.5 | 1547  | 1553  | 1597  | 1478.54 |
| 100911887 | LOC100911887 | 18.79  | 0       | 0      | 0      | 0     | 17.61 | 0     | 0       |
| 56003     | 3-Sep        | 441    | 477     | 362    | 424    | 373   | 419   | 385   | 420     |
| 102552920 | LOC102552920 | 380.68 | 381.9   | 351.57 | 341.88 | 326.8 | 331.7 | 345.4 | 360.79  |
| 373544    | Ermp1        | 2124.6 | 2133.87 | 1963.6 | 2130   | 2055  | 1893  | 1980  | 1899.71 |
| 501033    | LOC501033    | 471    | 434     | 458.08 | 583    | 509   | 417   | 470   | 428     |
| 311604    | Zhx3         | 625.22 | 562.73  | 581.29 | 679.09 | 601.2 | 613.9 | 553   | 526.71  |
| 83624     | Ppig         | 1358   | 1219    | 1327   | 1423   | 1374  | 1180  | 1241  | 1198    |
| 311567    | Itch         | 1709   | 1654    | 1671   | 1745   | 1563  | 1483  | 1655  | 1653    |
| 25348     | Rps29        | 3654.8 | 3044.27 | 3404.2 | 2488.6 | 2939  | 2707  | 2647  | 3509.2  |
| 140866    | Dgka         | 472    | 471     | 496    | 428    | 435   | 444   | 465   | 406     |
| 309774    | Gopc         | 1168   | 1149    | 1138   | 1078   | 1037  | 1063  | 1089  | 1060    |
| 316001    | Inka1        | 111    | 118     | 116    | 86     | 79    | 92    | 116   | 117     |
| 683722    | Fgfrlop      | 528    | 524     | 525    | 532    | 508   | 438   | 490   | 541     |
| 100362684 | LOC100362684 | 94.97  | 31.23   | 32.1   | 35.69  | 62.34 | 24.22 | 63.2  | 32.09   |
| 252885    | Hoxc6        | 328.16 | 302.65  | 302.02 | 280.45 | 242.1 | 267.1 | 290.4 | 337.78  |
| 292964    | Rpl36a       | 1115.4 | 1023.51 | 1184.8 | 855.22 | 944.6 | 906.7 | 884   | 1182.35 |
| 102552675 | LOC102552675 | 5      | 10      | 7      | 10     | 5     | 5     | 12    | 8       |
| 287070    | Nlrc3        | 9      | 7       | 9      | 7      | 9     | 8     | 7     | 6       |
| 302328    | Pof1b        | 2      | 2       | 6      | 6      | 0     | 6     | 7     | 2       |
| 308436    | Cxcl17       | 2      | 5       | 3      | 6      | 2     | 4     | 4     | 5       |
| 499926    | Bpifb1       | 3      | 6       | 2      | 5      | 3     | 4     | 6     | 2       |
| 56227     | Espn         | 3      | 4       | 4      | 5      | 1     | 5     | 4     | 5       |
| 64576     | Ptprv        | 18     | 26      | 64     | 20     | 32    | 45    | 25    | 18      |
| 65135     | Dpys         | 9      | 8       | 7      | 8      | 6     | 8     | 8     | 8       |
| 290354    | Pdlim2       | 138    | 105     | 112    | 93     | 123   | 89    | 103   | 105     |
| 292124    | Tectb        | 11.75  | 14.74   | 15.07  | 11.79  | 16.05 | 9.05  | 12.47 | 12.45   |
| 252924    | Nr2c1        | 420    | 505     | 419    | 483    | 431   | 426   | 460   | 396     |
| 300862    | Irak1bp1     | 154    | 147     | 143    | 133    | 122   | 123   | 146   | 150     |
| 291964    | Fhod1        | 183.58 | 200.52  | 228.96 | 181.77 | 169.6 | 194   | 188.6 | 193.05  |
| 365652    | Col4a3bp     | 2947   | 2684    | 2721   | 2969   | 2665  | 2638  | 2702  | 2610    |
| 362627    | Rcan3        | 160    | 180     | 174    | 192    | 183   | 148   | 161   | 170     |
| 286928    | Abi2         | 1435   | 1492    | 1402   | 1562   | 1429  | 1217  | 1491  | 1387    |
| 317241    | Rlim         | 1031.8 | 1132.69 | 1064.3 | 709.88 | 891.8 | 867.7 | 879.8 | 1054.04 |
| 297498    | Crbn         | 5751.7 | 5163.18 | 5271.3 | 5663.4 | 4959  | 4684  | 5324  | 5521.62 |
| 361920    | Ythdf3       | 1298   | 1289    | 1280   | 1365.8 | 1209  | 1120  | 1320  | 1258    |
| 308362    | Zfp110       | 934    | 868     | 849    | 819    | 775   | 804   | 834   | 841     |
| 685462    | Emid1        | 472    | 613     | 580    | 521    | 352   | 491   | 582   | 625     |
| 290365    | Nudt15       | 129    | 98      | 109    | 98     | 106   | 102   | 102   | 97      |
| 29511     | Padi2        | 950.88 | 1128.97 | 1017.9 | 907    | 716.9 | 1115  | 897.9 | 1026    |
| 311437    | Rassf2       | 387.28 | 321.09  | 371.78 | 425.04 | 337.5 | 294.4 | 415.7 | 364.13  |
| 24560     | Cd200        | 2325   | 2342.2  | 2435.6 | 2163   | 2077  | 2189  | 2171  | 2252.59 |

|           |              |        |         |        |        |       |       |       |         |
|-----------|--------------|--------|---------|--------|--------|-------|-------|-------|---------|
| 362892    | Mbd6         | 1105   | 1007.06 | 1112   | 970    | 983   | 1030  | 976   | 944     |
| 297392    | Tex261       | 1687   | 1479    | 1524   | 1539   | 1464  | 1470  | 1405  | 1503    |
| 362559    | Zygl1b       | 1550   | 1606    | 1527   | 1852   | 1718  | 1220  | 1627  | 1564    |
| 302642    | Sat1         | 2408   | 2795.99 | 2612   | 2619   | 1883  | 2066  | 3251  | 2587    |
| 291705    | Iws1         | 299    | 270     | 297    | 310    | 278   | 257   | 284   | 284     |
| 79121     | Arf6         | 822    | 864     | 876    | 822    | 812   | 788   | 801   | 773     |
| 291071    | Rpp40        | 392    | 365     | 348    | 297    | 324   | 257   | 332   | 402     |
| 246325    | Kcnh8        | 72     | 68      | 70     | 64     | 65    | 49    | 75    | 68      |
| 266760    | Nalcn        | 1637   | 1634    | 1551   | 1628   | 1573  | 1263  | 1711  | 1503    |
| 308482    | Zfp84        | 409.9  | 401.21  | 400.72 | 390.59 | 382.4 | 369.4 | 362.9 | 388.46  |
| 315664    | Kdelc2       | 818    | 782     | 839    | 804    | 754   | 696   | 804   | 788     |
| 65165     | Tmed2        | 2311   | 2294    | 2330   | 2181   | 2007  | 2065  | 2303  | 2176    |
| 24954     | Insr         | 246    | 281     | 298    | 321    | 315   | 216   | 279   | 265     |
| 364205    | Fbxo48       | 67.25  | 84.14   | 93.3   | 81.41  | 87.75 | 81.08 | 72.81 | 64.26   |
| 116502    | Bak1         | 321    | 302     | 298    | 290    | 255   | 311   | 269   | 301     |
| 554172    | Pxdn         | 1629   | 1558    | 1539   | 1620   | 1577  | 1564  | 1420  | 1392    |
| 361039    | Lmln2        | 9.6    | 10.56   | 16.17  | 5.21   | 5.31  | 11.46 | 10.56 | 11.64   |
| 59077     | Grk4         | 72.18  | 77.43   | 83.94  | 64.83  | 71.78 | 72.76 | 73.01 | 62.37   |
| 24680     | Prkca        | 6028.6 | 6526.07 | 6312.8 | 7032.8 | 6306  | 5800  | 6056  | 6136.87 |
| 64157     | Ddah1        | 2519   | 3017    | 2871   | 2512   | 1940  | 2734  | 2724  | 2846    |
| 360860    | Cop1         | 1104   | 1022    | 1054   | 978    | 907   | 953   | 985   | 1056    |
| 108348107 | LOC108348107 | 0      | 3       | 11.89  | 0      | 5     | 3.97  | 5     | 0       |
| 303029    | Ranbp17      | 207    | 184     | 179    | 207    | 159   | 193   | 191   | 186     |
| 362731    | Snx13        | 1782   | 1720    | 1661   | 1879   | 1599  | 1469  | 1791  | 1748    |
| 360969    | Castor1      | 190    | 143     | 144    | 203    | 165   | 157   | 150   | 166     |
| 294799    | Brix1        | 293    | 304     | 362    | 304    | 269   | 281   | 298   | 337     |
| 286900    | Selenos      | 876    | 885     | 787    | 707    | 718   | 740   | 745   | 851     |
| 498028    | Cep295nl     | 19     | 15      | 22     | 25     | 16    | 22    | 14    | 24      |
| 499486    | Gpr150       | 28.06  | 28.06   | 42     | 34.08  | 26.04 | 34    | 32.09 | 31.91   |
| 117279    | Cflar        | 828.27 | 784.81  | 912.18 | 925.09 | 840.9 | 750.8 | 842.1 | 803.58  |
| 503027    | Map4k5       | 1360   | 1295    | 1294   | 1287   | 1233  | 1268  | 1241  | 1171    |
| 304302    | Tnrc18       | 1184.6 | 1249.1  | 1359.1 | 1546.3 | 1227  | 1215  | 1275  | 1292.96 |
| 499419    | RGD1564149   | 10.63  | 4.16    | 7.2    | 11.41  | 10.09 | 5.65  | 9.38  | 6.22    |
| 291469    | Srfbp1       | 290    | 254     | 289    | 302    | 265   | 262   | 253   | 285     |
| 406195    | Tcf19        | 138    | 108     | 158    | 115    | 117   | 115   | 148   | 107     |
| 100359558 | Fam177a1     | 917    | 826     | 786    | 861    | 904   | 696   | 764   | 817     |
| 83619     | Nfe212       | 1004   | 1014    | 1020   | 985    | 896   | 897   | 982   | 1000    |
| 103690937 | LOC103690937 | 1297.2 | 1188.47 | 1141.4 | 1117.1 | 1143  | 1037  | 1145  | 1127.06 |
| 85491     | Vamp7        | 2026.2 | 1997.4  | 1898   | 1966.3 | 1831  | 1694  | 1916  | 1960.85 |
| 679272    | 9-Mar        | 337    | 329     | 366    | 315    | 311   | 322   | 322   | 309     |
| 309858    | Sec63        | 2071   | 2033    | 2035   | 2238   | 1930  | 1928  | 2080  | 1923    |
| 58942     | Cacnb4       | 1715   | 1782    | 1649   | 1870   | 1772  | 1355  | 1769  | 1688    |
| 363466    | Reps2        | 1558   | 1520    | 1383   | 1695   | 1559  | 1181  | 1467  | 1570    |
| 362456    | Arhgdib      | 460    | 384     | 547    | 396    | 481   | 396   | 419   | 381     |
| 300258    | Myg1         | 454    | 435     | 407    | 410    | 378   | 428   | 384   | 411     |
| 302640    | Acot9        | 1272   | 1226    | 1193   | 1151   | 1047  | 958   | 1182  | 1357    |
| 684439    | Cenpo        | 35     | 29      | 42     | 24     | 26    | 41    | 33    | 22      |
| 361601    | Abhd17c      | 308    | 344     | 311    | 305    | 296   | 297   | 314   | 283     |
| 100910202 | Crnk11       | 94.84  | 154.29  | 130.9  | 182.77 | 125   | 142.1 | 151.4 | 109.73  |
| 362224    | Kat14        | 179    | 170     | 153    | 165    | 160   | 164   | 163   | 139     |
| 298533    | Ago4         | 98.96  | 88.07   | 109    | 83.97  | 77.04 | 78.32 | 106.3 | 95.01   |
| 367171    | Map4         | 8080   | 8328    | 8274   | 9513   | 7254  | 8308  | 8347  | 8186    |
| 499893    | Ap5s1        | 88     | 93      | 84     | 77     | 71    | 88    | 87    | 75      |
| 314859    | Mdm1         | 172    | 151     | 172    | 157    | 173   | 142   | 149   | 148     |
| 117051    | Arfrp1       | 693    | 676     | 687    | 634    | 647   | 597   | 627   | 654     |
| 29555     | Vipr2        | 85     | 91      | 97     | 102    | 97    | 87    | 91    | 77      |

|           |              |        |         |        |        |       |       |       |         |
|-----------|--------------|--------|---------|--------|--------|-------|-------|-------|---------|
| 294392    | Kpna5        | 562    | 502     | 522    | 632    | 542   | 466   | 552   | 522     |
| 309312    | Gldc         | 93.15  | 111     | 97     | 135.63 | 56    | 124   | 89    | 141     |
| 65027     | Chd8         | 1218   | 1325    | 1383   | 1541   | 1335  | 1269  | 1335  | 1193    |
| 311020    | Rbm43        | 137.78 | 142.65  | 130.71 | 143.35 | 121.6 | 129.7 | 152   | 117.15  |
| 360807    | Rsrc2        | 847    | 786     | 786    | 719    | 701   | 682   | 776   | 787     |
| 293844    | Haus7        | 226    | 212     | 220    | 241    | 206   | 214   | 209   | 215     |
| 288092    | Tmem39a      | 211    | 172     | 208    | 161    | 160   | 176   | 187   | 183     |
| 685925    | Rs11         | 87.32  | 106.86  | 85.56  | 92.85  | 92.95 | 76.41 | 85.87 | 94.57   |
| 302678    | Syap1        | 726    | 684     | 739    | 696    | 605   | 618   | 693   | 755     |
| 679578    | Ldlrad4      | 339.26 | 299.33  | 353.24 | 400.62 | 310.5 | 302.3 | 356.4 | 338.19  |
| 362802    | Atp6v1c2     | 116.82 | 105.12  | 108.61 | 89.34  | 75.39 | 97.96 | 111.1 | 109.76  |
| 108348061 | LOC108348061 | 1200   | 1123.45 | 837.66 | 925.81 | 871.4 | 894.7 | 1069  | 1002.33 |
| 315880    | Tbc1d2b      | 611    | 592     | 615    | 623    | 569   | 578   | 570   | 575     |
| 290235    | Nop9         | 280    | 305     | 292    | 255    | 267   | 302   | 245   | 249     |
| 314352    | Sel11        | 2684.5 | 2699.9  | 2788.6 | 3033   | 2706  | 2682  | 2706  | 2429.44 |
| 303763    | Zfp207       | 2216   | 2075    | 2161   | 2054   | 1992  | 1955  | 2037  | 2004    |
| 301363    | Map4k4       | 3540   | 3803    | 4037   | 4421   | 3594  | 3545  | 3872  | 3828    |
| 103693553 | LOC103693553 | 13.07  | 14.75   | 23.97  | 8.66   | 3.75  | 20    | 19.14 | 13.88   |
| 311550    | Ccm21        | 191    | 250     | 196    | 201    | 176   | 209   | 191   | 211     |
| 298376    | Gpx7         | 276    | 271     | 327    | 227    | 237   | 258   | 279   | 260     |
| 316090    | Fam198a      | 40.96  | 55.08   | 43.92  | 57.62  | 43    | 40.68 | 50.95 | 50.93   |
| 25625     | Tnfrsf1a     | 863    | 926     | 1151   | 1006   | 866   | 950   | 964   | 926     |
| 100912615 | LOC100912615 | 18.7   | 26.09   | 26.26  | 62.01  | 43.91 | 32.49 | 28.74 | 19.83   |
| 359726    | Rnase1       | 559.98 | 579     | 533.1  | 565.08 | 546.3 | 491.9 | 533.8 | 529.19  |
| 680466    | Plpp5        | 221    | 172     | 273    | 190    | 180   | 181   | 188   | 255     |
| 361073    | Cog3         | 748.03 | 736.27  | 731.87 | 702.28 | 636.9 | 596.6 | 812.6 | 695.14  |
| 310811    | Palmd        | 641    | 705     | 733    | 655    | 619   | 636   | 717   | 596     |
| 362699    | Yipf4        | 1059.3 | 1025.83 | 1077.8 | 948.68 | 939.8 | 925.6 | 966.8 | 1029.84 |
| 311508    | Gzfl         | 341    | 326     | 319    | 299    | 294   | 298   | 298   | 317     |
| 498327    | Abcg3        | 92.14  | 96.53   | 111.21 | 114.25 | 72.62 | 109.2 | 103.1 | 104.05  |
| 171411    | Tmem176b     | 14392  | 13254   | 13734  | 10858  | 11682 | 12428 | 11638 | 13324   |
| 292016    | Cmtr2        | 159    | 177     | 127    | 131    | 141   | 131   | 148   | 138     |
| 499974    | Nup12        | 148    | 120     | 128    | 132    | 142   | 108   | 137   | 109     |
| 363676    | Zpbp2        | 23     | 11      | 18     | 14     | 19    | 14    | 18    | 11      |
| 25508     | Pam          | 3735   | 4129    | 4426   | 3947   | 3493  | 4008  | 3978  | 3774    |
| 252894    | Pcdhga4      | 76.65  | 87.34   | 73.22  | 89.02  | 91.43 | 66.96 | 88.84 | 59.24   |
| 50692     | Plaur        | 218    | 232     | 181    | 178    | 194   | 177   | 193   | 196     |
| 259269    | Erc2         | 402.28 | 397     | 421    | 469    | 445   | 323   | 423   | 396     |
| 361389    | Anapc10      | 414    | 407     | 382.97 | 351    | 344   | 364   | 368.9 | 383.9   |
| 103694875 | LOC103694875 | 73.97  | 113.95  | 84.53  | 97.53  | 80.46 | 119.6 | 87.69 | 59.89   |
| 311368    | Ctdspl2      | 67     | 78      | 62     | 74     | 58    | 61    | 76    | 69      |
| 444982    | Em15         | 276.7  | 262.09  | 264.62 | 252.06 | 277   | 182.4 | 213.3 | 318.94  |
| 313905    | Supt71       | 111    | 113     | 132    | 107    | 109   | 106   | 116   | 104     |
| 688777    | Grpel2       | 342    | 313     | 346    | 289    | 335   | 261   | 312   | 304     |
| 29177     | Hpca         | 266.93 | 204.2   | 176    | 226    | 200.6 | 196.1 | 243.3 | 180.41  |
| 311059    | 7-Mar        | 1250   | 1257    | 1202   | 1315   | 1173  | 1076  | 1252  | 1220    |
| 312381    | Ppmlk        | 688.41 | 844.44  | 711.71 | 543.84 | 673.3 | 590.4 | 723.3 | 633.03  |
| 300160    | Lrrk2        | 1264   | 1273    | 1117   | 1433   | 1175  | 1167  | 1306  | 1132    |
| 361700    | Kdm2a        | 1787   | 1701    | 1873   | 2015   | 1732  | 1734  | 1770  | 1695    |
| 102553270 | LOC102553270 | 44     | 40      | 27     | 55     | 36    | 32    | 57    | 31      |
| 293544    | Pdilt        | 24     | 11      | 19     | 29     | 17    | 20    | 22    | 19      |
| 303375    | Rad51d       | 293    | 265     | 256    | 265    | 251   | 254   | 262   | 247     |
| 680726    | Rbms3        | 1682   | 1782    | 1743   | 1949   | 1796  | 1595  | 1685  | 1649    |
| 102547920 | LOC102547920 | 58.95  | 63.42   | 46.23  | 57.65  | 47.49 | 40.82 | 55.3  | 69.02   |
| 365703    | Zfr          | 4107   | 4083    | 4016   | 4291   | 3968  | 3583  | 4115  | 3839    |
| 498953    | Tmem170a     | 81     | 90      | 67     | 78     | 78    | 67    | 86    | 66      |

|           |              |        |         |        |        |       |       |       |         |
|-----------|--------------|--------|---------|--------|--------|-------|-------|-------|---------|
| 288651    | Gtf2h3       | 278    | 272     | 261    | 237    | 225   | 271   | 264   | 225     |
| 498415    | Zpbp         | 57     | 39      | 41     | 46     | 37    | 37    | 44    | 54      |
| 305913    | Zmy2         | 1489.3 | 1501.76 | 1481.5 | 1557.1 | 1484  | 1279  | 1458  | 1446.99 |
| 368042    | Btaf1        | 686.92 | 730.67  | 728.2  | 714.83 | 703.3 | 615.4 | 703.7 | 666.31  |
| 304859    | Dhx9         | 1719   | 1846    | 1805   | 1924   | 1653  | 1628  | 1861  | 1714    |
| 360673    | Tepsin       | 428    | 411     | 454    | 389    | 437   | 413   | 392   | 339     |
| 360956    | Tbcd14       | 1281   | 1300    | 1300   | 1216   | 1201  | 1211  | 1225  | 1154    |
| 308663    | Tubgcp5      | 586    | 540     | 504    | 686    | 583   | 496   | 539   | 559     |
| 289711    | Evc2         | 100    | 81      | 97     | 72     | 90    | 97    | 80    | 62      |
| 361442    | Sipall2      | 900    | 1045    | 1090   | 966    | 923   | 980   | 886   | 972     |
| 293508    | Prkacb       | 7035.7 | 6937.55 | 6249.3 | 7290.3 | 6561  | 6157  | 6781  | 6363.06 |
| 310685    | Polr3c       | 553    | 588     | 476    | 516.99 | 518   | 562   | 462   | 464     |
| 310508    | B3galnt1     | 479    | 550     | 495    | 511    | 510   | 511   | 434   | 458     |
| 24252     | Cebpa        | 82     | 66      | 99     | 70     | 72    | 94    | 72    | 60      |
| 309732    | Ado          | 140    | 156     | 170    | 168    | 154   | 155   | 145   | 142     |
| 289307    | Tfb2m        | 619    | 638.87  | 554.04 | 587.42 | 520.5 | 508.5 | 605.5 | 621.01  |
| 295607    | Prpf40a      | 917    | 859     | 949    | 930    | 833   | 784   | 902   | 917     |
| 83839     | Calb1        | 175    | 63      | 116    | 97     | 86    | 76    | 160   | 102     |
| 681004    | Paxbp1       | 477    | 509     | 502    | 500    | 436   | 420   | 532   | 481     |
| 297885    | Zbtb8os      | 383    | 409     | 387    | 358    | 319   | 345   | 372   | 409     |
| 83422     | Pias2        | 521    | 604     | 513    | 551    | 498   | 516   | 532   | 512     |
| 299256    | Cpsf2        | 1093   | 1145    | 1111   | 1200   | 1125  | 957   | 1124  | 1071    |
| 287112    | Abca17       | 20.03  | 18.11   | 20.96  | 15.2   | 18.23 | 20.3  | 18.29 | 13.04   |
| 170699    | Atp2c1       | 4540.9 | 4326.17 | 4447.5 | 4445.6 | 4259  | 3823  | 4574  | 4043.71 |
| 29560     | Hif1a        | 1610   | 1499    | 1511   | 1609   | 1404  | 1429  | 1550  | 1474    |
| 363249    | Ctdsp1       | 1611   | 1641    | 1656   | 1472   | 1329  | 1525  | 1513  | 1632    |
| 294673    | Hexb         | 705.1  | 775.06  | 752.16 | 760.66 | 643.7 | 723.4 | 720   | 727.11  |
| 297872    | Syt11        | 17     | 12      | 25     | 13     | 18    | 15    | 20    | 10      |
| 315250    | Pdzrn4       | 21     | 20      | 11     | 15     | 19    | 17    | 17    | 10      |
| 310960    | Usp33        | 2551   | 2648    | 2481   | 2808   | 2467  | 2389  | 2591  | 2415    |
| 686774    | LOC686774    | 674    | 632     | 620    | 738    | 661   | 556   | 660   | 628     |
| 100910823 | Der12        | 650    | 651     | 612    | 617    | 593   | 523   | 628   | 635     |
| 154968    | Oga          | 2792.8 | 3000    | 2933   | 2999.8 | 2838  | 2663  | 2872  | 2652.8  |
| 360720    | Rabl3        | 248    | 329     | 298    | 231    | 267   | 270   | 247   | 256     |
| 295245    | Slc50a1      | 211    | 230     | 231    | 200    | 201   | 208   | 206   | 205     |
| 368066    | Inmt         | 96     | 25      | 51     | 46     | 49    | 30    | 62    | 64      |
| 363972    | Dpp10        | 5564   | 5228    | 4760   | 5528   | 5081  | 4251  | 5155  | 5336    |
| 108348101 | LOC108348101 | 129.63 | 118.96  | 93.44  | 163.94 | 88.92 | 117.8 | 104.4 | 164.65  |
| 63888     | A4galt       | 846    | 857     | 851    | 616    | 795   | 704   | 745   | 737     |
| 78965     | Csf1         | 384    | 387     | 541    | 433    | 364   | 422   | 441   | 414     |
| 498100    | Mb21d2       | 190    | 201     | 216    | 249    | 158   | 200   | 242   | 205     |
| 360992    | Pnpt1        | 852    | 843     | 727    | 751    | 711   | 724   | 731   | 818     |
| 311349    | Ttbk2        | 4014   | 3774.11 | 3822.2 | 4573.8 | 4156  | 3154  | 3939  | 3972    |
| 312656    | 8-Mar        | 1018.1 | 1042.12 | 1036.2 | 989.03 | 1003  | 908.6 | 937   | 993.48  |
| 64301     | Smn1         | 217    | 234     | 244    | 246    | 183   | 235   | 214   | 253     |
| 100361238 | Rasgef1b     | 62     | 69      | 51     | 87     | 63    | 51    | 61    | 78      |
| 497863    | Tmem186      | 366.78 | 364.97  | 335.65 | 332.54 | 327.3 | 313.9 | 339.3 | 336.18  |
| 362618    | Fam76a       | 457.5  | 461.86  | 420.59 | 448.28 | 400.6 | 459.4 | 398.8 | 423.08  |
| 299488    | Esyt2        | 3027   | 2919    | 2847   | 2980   | 2803  | 2633  | 2924  | 2713    |
| 108348073 | Eif5         | 5586.2 | 5514.47 | 5299.3 | 5573   | 5131  | 4848  | 5600  | 5088.82 |
| 312603    | Rybp         | 801    | 802     | 792    | 821    | 748   | 727   | 745   | 805     |
| 690303    | Magohb       | 91     | 72      | 85     | 72     | 66    | 63    | 76    | 96      |
| 362138    | Rbms1        | 1127   | 1163    | 1135.1 | 1294   | 1184  | 1010  | 1157  | 1088    |
| 50655     | Aco1         | 653    | 664     | 744    | 770    | 613   | 708   | 680   | 662     |
| 498803    | Otud1        | 165    | 196     | 182    | 199    | 140   | 191   | 178   | 189     |
| 362479    | Tcea1        | 1319.1 | 1230.02 | 1244.8 | 1192   | 1048  | 1136  | 1313  | 1192.14 |

|           |                 |        |         |        |        |       |       |       |         |
|-----------|-----------------|--------|---------|--------|--------|-------|-------|-------|---------|
| 652928    | Rbm12           | 245.92 | 333.24  | 365.91 | 338.83 | 300.2 | 318.9 | 260.7 | 328.04  |
| 685756    | Tmem229a        | 2895.1 | 2809    | 2523.9 | 2688   | 2557  | 2458  | 2723  | 2529.9  |
| 100359977 | Cd16412         | 82     | 76      | 67     | 45     | 61    | 66    | 69    | 58      |
| 64314     | Casp2           | 284    | 266     | 299    | 282    | 272   | 235   | 262   | 295     |
| 293060    | Btbd1           | 2202   | 2254    | 2333   | 2175   | 1997  | 2008  | 2263  | 2165    |
| 305035    | Angel2          | 478.6  | 487.64  | 394.43 | 388.44 | 407.3 | 369.8 | 438.7 | 429.69  |
| 315333    | Atf7            | 1088   | 1178.87 | 1317.1 | 1341.2 | 1096  | 1135  | 1222  | 1180.5  |
| 368175    | RGD1565071      | 91.81  | 122.73  | 98.43  | 127.03 | 123.2 | 94.61 | 80.52 | 115.61  |
| 314993    | Atad2           | 162    | 162     | 170    | 165    | 183   | 126   | 151   | 160     |
| 25489     | Nedd4           | 16332  | 16363   | 16766  | 17720  | 16022 | 14560 | 16800 | 15825   |
| 361034    | Arhgef40        | 1751   | 1975.23 | 2006.8 | 2025.7 | 1849  | 1816  | 1938  | 1696.11 |
| 287380    | Dhrs7b          | 459    | 453     | 426    | 456    | 399   | 427   | 426   | 436     |
| 311860    | Ab11            | 670.05 | 736.97  | 840.92 | 753.25 | 651.5 | 708.3 | 740   | 724.2   |
| 311795    | Tor4a           | 104.98 | 96      | 117    | 105    | 98    | 97    | 95    | 108     |
| 310644    | Pbxip1          | 1335   | 1436    | 1986   | 1593   | 1377  | 1584  | 1470  | 1544    |
| 288257    | Donson          | 170.9  | 162.34  | 182.7  | 166.36 | 160.7 | 160.5 | 158.6 | 162.27  |
| 315305    | Atf1            | 308    | 331     | 355    | 311    | 282   | 315   | 332   | 299     |
| 500514    | Fyb2            | 18     | 23      | 18     | 19     | 17.05 | 12    | 16    | 28.35   |
| 362088    | Snopc4          | 176    | 151     | 179    | 156    | 145   | 194   | 148   | 136     |
| 298309    | Lrrc42          | 403    | 439.55  | 387.56 | 378.07 | 384   | 342   | 384.8 | 402.66  |
| 29157     | Ccng2           | 664    | 721     | 653    | 579    | 569   | 625   | 601   | 668     |
| 100359836 | Kirrel2         | 10     | 6       | 12     | 6      | 9     | 10    | 5     | 8       |
| 291947    | Prmt9           | 370    | 340     | 339    | 345    | 330   | 314   | 363   | 305     |
| 300761    | Gramd2a         | 27     | 24      | 22     | 29     | 19    | 23    | 28    | 26      |
| 307305    | Prdm6           | 70     | 49      | 70     | 66     | 60    | 63    | 55    | 62      |
| 307390    | Fbxo38          | 698    | 706     | 689    | 712    | 649   | 658   | 672   | 661     |
| 317203    | Rps6ka6         | 186    | 185     | 167    | 176    | 154   | 156   | 181   | 181     |
| 360615    | Fbxo47          | 4      | 3       | 8      | 2      | 3     | 7     | 4     | 2       |
| 407758    | Krt26           | 48     | 74      | 79     | 71     | 50    | 63    | 78    | 65      |
| 501036    | Plscr5          | 6      | 27      | 19     | 16     | 23    | 33    | 7     | 1       |
| 683593    | Jmy             | 986.75 | 1014.65 | 963.06 | 1056.4 | 914.8 | 895.9 | 1040  | 934.14  |
| 60563     | Hr              | 871    | 854     | 652    | 667    | 690   | 757   | 661   | 757     |
| 300888    | Tmed3           | 725    | 688     | 831    | 613    | 658   | 644   | 675   | 712     |
| 266772    | Klhl12          | 693.62 | 602.45  | 619.3  | 598.63 | 586.5 | 600   | 607.7 | 572.03  |
| 301323    | Prim2           | 106    | 139.84  | 129.7  | 136.2  | 117.1 | 99.47 | 126   | 139.08  |
| 686922    | Gstt4           | 1      | 0       | 6      | 1      | 4     | 1.53  | 1     | 1       |
| 360952    | Tmem128         | 562.27 | 588.57  | 564.4  | 468.91 | 436.1 | 504.1 | 537.9 | 577.73  |
| 116655    | Hnrnpm          | 1333.9 | 1346    | 1410.9 | 1373   | 1243  | 1182  | 1339  | 1379    |
| 103690051 | NEWGENE_1304700 | 175.08 | 157.45  | 148.2  | 119.71 | 131.5 | 172.5 | 181   | 80.23   |
| 361574    | Snrnp70         | 2552   | 2471    | 2541   | 2556   | 2404  | 2475  | 2477  | 2170    |
| 494445    | Srsf2           | 3606.3 | 3440    | 3603   | 3317   | 3198  | 3238  | 3556  | 3154.98 |
| 289693    | Dhx15           | 2033.8 | 2007.04 | 1922.7 | 1956.4 | 1839  | 1754  | 1921  | 1941.27 |
| 294912    | Sec62           | 3916   | 3979    | 4041   | 3983   | 3835  | 3724  | 3749  | 3677    |
| 363084    | Usp3            | 166    | 168     | 169    | 145    | 140   | 147   | 172   | 151     |
| 292019    | Sf3b3           | 656    | 732     | 764    | 680    | 636   | 723   | 671   | 636     |
| 360895    | Rrp15           | 147    | 141     | 138    | 137    | 121   | 141   | 136   | 132     |
| 364654    | Rnf170          | 983.98 | 924.43  | 936.82 | 946.27 | 822.3 | 827.7 | 991.1 | 928.28  |
| 306966    | Zfp184          | 54.45  | 54.06   | 52     | 61     | 40.36 | 54    | 56.18 | 57.99   |
| 362269    | Pcif1           | 354.22 | 344.74  | 380.06 | 359.85 | 316.5 | 351.6 | 333.9 | 352.61  |
| 29483     | Slcla3          | 306    | 317     | 231    | 341    | 269   | 282   | 279   | 295     |
| 83726     | Ctcf            | 824    | 793     | 874    | 838    | 787   | 793   | 785   | 769     |
| 499878    | Mfap1a          | 586    | 597     | 558    | 581    | 548   | 548   | 530   | 560     |
| 289388    | G0s2            | 66     | 67      | 33     | 56     | 56    | 61    | 36    | 56      |
| 65161     | Litaf           | 697    | 810     | 1086   | 908    | 713   | 853   | 793   | 937     |
| 690369    | Il15ra          | 31.53  | 17.74   | 29.36  | 25.38  | 20.45 | 25.39 | 25.35 | 26.73   |
| 85237     | Ptp4a2          | 2373   | 2383    | 2367   | 2527   | 2178  | 2335  | 2320  | 2252    |



|           |              |        |         |        |        |       |       |       |         |
|-----------|--------------|--------|---------|--------|--------|-------|-------|-------|---------|
| 314306    | Elmsan1      | 566    | 560     | 658    | 676    | 555   | 621   | 604   | 536     |
| 100312983 | Kdm5d        | 649    | 588     | 559.62 | 592.88 | 553   | 576.9 | 567.8 | 552     |
| 498962    | Acsf3        | 329    | 448     | 421    | 306    | 312   | 351   | 361   | 392     |
| 301419    | Tyw5         | 132.18 | 131.53  | 139.53 | 131.91 | 120   | 108.5 | 136.5 | 138.83  |
| 293058    | Ramac        | 421    | 413     | 387    | 369    | 376   | 337   | 407   | 377     |
| 299949    | Tbc1d31      | 311    | 293     | 305    | 322    | 288   | 325   | 267   | 279     |
| 363232    | Bzw1         | 3845   | 3567    | 3587   | 3417   | 3175  | 3218  | 3555  | 3625    |
| 310707    | Chd11        | 159    | 165     | 199    | 144    | 189   | 123   | 159   | 157     |
| 289809    | Pno1         | 365    | 384     | 383    | 322    | 309   | 325   | 364   | 371     |
| 259225    | Ppp1r14b     | 436    | 337     | 462    | 340    | 374   | 349   | 382   | 378     |
| 314417    | Papola       | 2164   | 2122    | 2192.1 | 2153   | 2051  | 1922  | 2133  | 2021    |
| 685909    | H2afv        | 472.24 | 355.96  | 383.86 | 287.98 | 359.4 | 360.7 | 337.3 | 355.16  |
| 498257    | Fam163a      | 163    | 164     | 93     | 163    | 109   | 140   | 147   | 153     |
| 289606    | Gabra2       | 3406.4 | 3347.68 | 3485.8 | 3974   | 3800  | 2825  | 3421  | 3339.54 |
| 361925    | Actl6a       | 241.69 | 240.5   | 266.94 | 250.68 | 221.9 | 256.2 | 241.6 | 221.92  |
| 679571    | Hmg111       | 2204.7 | 2166.5  | 2295.6 | 1982.1 | 2049  | 1988  | 2151  | 1957.65 |
| 303165    | Zfp672       | 301    | 294     | 298    | 292.03 | 261   | 291   | 261   | 303     |
| 114200    | P3h1         | 315    | 372     | 457    | 368    | 279   | 392   | 373   | 380     |
| 300088    | Polr3h       | 503    | 497     | 436    | 351    | 407   | 396   | 451   | 429     |
| 294734    | Gpbp1        | 1582   | 1406    | 1480   | 1529   | 1435  | 1329  | 1470  | 1414    |
| 365465    | Cwf1911      | 324.53 | 303.55  | 304.09 | 282.37 | 305.6 | 257.7 | 281.5 | 299.04  |
| 100359583 | LOC100359583 | 1655.2 | 1564.66 | 1785.8 | 1437.1 | 1455  | 1589  | 1554  | 1470.1  |
| 117058    | Pou2f2       | 20     | 15      | 25     | 26     | 13    | 23    | 25    | 20      |
| 297595    | P3h3         | 833    | 974     | 1094   | 851    | 819   | 1052  | 822   | 841     |
| 293505    | Cd2bp2       | 1178.5 | 1391.32 | 1301.3 | 1207.5 | 1144  | 1160  | 1248  | 1230.49 |
| 81684     | Mipep        | 416    | 420     | 418    | 416    | 386   | 406   | 422   | 359     |
| 315936    | Zbtb38       | 1098   | 1023.57 | 1147   | 1175   | 1015  | 1021  | 1069  | 1080.99 |
| 314619    | Sbno2        | 607    | 597     | 734    | 579    | 572   | 619   | 630   | 549.92  |
| 60336     | Arpp19       | 4582.2 | 4419.79 | 4307.4 | 4255.5 | 3993  | 3982  | 4270  | 4300.42 |
| 305938    | Spata13      | 1058.3 | 1213.54 | 1427.9 | 1259.6 | 1138  | 1164  | 1173  | 1196.1  |
| 295305    | Acp6         | 158    | 138     | 204    | 155    | 143   | 151   | 162   | 161     |
| 303577    | Acbd4        | 513.71 | 457.98  | 465.37 | 408.74 | 497.6 | 483.9 | 343.4 | 413.87  |
| 316214    | Tfeb         | 242    | 255     | 245    | 241    | 229   | 256   | 221   | 220     |
| 690032    | Wdr4         | 234    | 137     | 203    | 151    | 114   | 174   | 189   | 206     |
| 102554605 | LOC102554605 | 441.55 | 417.58  | 444.27 | 419.25 | 430.5 | 352.6 | 394.7 | 445     |
| 364475    | Dzipl        | 1155   | 1128    | 1085   | 1312   | 1110  | 1096  | 1143  | 1060    |
| 289734    | Smtn         | 864.12 | 1082.07 | 921.55 | 820.35 | 715.7 | 994.4 | 812.4 | 952.08  |
| 360739    | Ranbp1       | 1571.6 | 1657.69 | 1568.4 | 1514.4 | 1518  | 1406  | 1489  | 1534.23 |
| 103693932 | LOC103693932 | 0.76   | 1.94    | 2.07   | 3.35   | 0.74  | 4.67  | 0     | 2.24    |
| 691335    | 6-Sep        | 1567.6 | 1384.39 | 1418.1 | 1450.1 | 1318  | 1244  | 1440  | 1481.12 |
| 300215    | Lmbr11       | 295.74 | 286.64  | 327.43 | 292.88 | 282.9 | 297.1 | 274.1 | 279.09  |
| 360775    | Zfp157       | 276    | 290.01  | 258    | 271    | 271   | 234   | 244.7 | 282     |
| 304982    | Igsf9        | 129.6  | 140.06  | 142.04 | 118.78 | 119.2 | 144.3 | 100.1 | 136.24  |
| 24848     | Tph1         | 154.78 | 154.27  | 193.94 | 149.81 | 164.4 | 130.5 | 153.2 | 166.89  |
| 114767    | Ptpre        | 498    | 587     | 608    | 591    | 490   | 561   | 543   | 558     |
| 287930    | Top3b        | 465    | 464     | 438    | 451    | 429   | 427   | 449   | 408     |
| 301235    | Bicral       | 542.99 | 585     | 662    | 669    | 571   | 614   | 557   | 575     |
| 85255     | Hacl1        | 299    | 317     | 299    | 246    | 270   | 317   | 256   | 251     |
| 81783     | Ssb          | 1771.8 | 1739.79 | 1759.5 | 1863.6 | 1656  | 1566  | 1804  | 1697.65 |
| 60337     | Npff         | 16     | 9       | 14     | 13     | 6     | 14    | 15    | 14      |
| 680210    | Psca         | 12     | 14      | 10     | 16     | 14    | 12    | 14    | 9       |
| 414065    | Nanog        | 6.01   | 7.12    | 6.12   | 2.09   | 3.31  | 5.51  | 7.06  | 4.23    |
| 689621    | Lsmem2       | 300.96 | 306.19  | 278.04 | 296.13 | 227   | 290.9 | 309   | 286.4   |
| 315795    | Cgn11        | 2364   | 2175    | 2515   | 2877   | 2488  | 2047  | 2686  | 2138    |
| 308326    | Zfp667       | 105    | 114     | 128    | 122    | 119   | 108   | 95    | 120     |
| 315447    | Chordc1      | 1203   | 1153    | 1111   | 1347   | 1138  | 987   | 1202  | 1210    |

|           |              |        |         |        |        |       |       |       |         |
|-----------|--------------|--------|---------|--------|--------|-------|-------|-------|---------|
| 311115    | Ubr3         | 4381   | 4551    | 4261   | 4937   | 4670  | 3770  | 4414  | 4233    |
| 362564    | Bend5        | 64     | 59      | 49     | 54     | 60    | 48    | 56    | 49      |
| 500874    | Tmem65       | 2926.7 | 2870    | 2821.6 | 2791.8 | 2691  | 2564  | 2844  | 2655.2  |
| 306547    | Thap1        | 105    | 98      | 88     | 109    | 93    | 91    | 90    | 103     |
| 81002     | Trim23       | 1079   | 1108    | 1046   | 1082   | 1014  | 915   | 1107  | 1031    |
| 298318    | Slc25a43     | 28.55  | 21.03   | 27.94  | 16.79  | 24.18 | 25.15 | 21.09 | 18.47   |
| 81820     | Doc2b        | 438.81 | 407.76  | 421.84 | 486.04 | 431.9 | 375.6 | 412.4 | 433.77  |
| 298086    | Zcchc7       | 392    | 365     | 455    | 425    | 357   | 411   | 385   | 390     |
| 309758    | Herc4        | 490    | 480     | 496    | 469    | 463   | 431   | 471   | 459     |
| 312077    | Golga3       | 1449   | 1393    | 1462   | 1572   | 1418  | 1316  | 1470  | 1335    |
| 312299    | Ezh2         | 140    | 157     | 160    | 136    | 145   | 128   | 149   | 137     |
| 64364     | Pllp         | 1845   | 2227    | 2205   | 1712   | 1379  | 2115  | 1920  | 2117    |
| 81656     | Dpyd         | 475    | 450     | 403    | 384    | 389   | 350   | 442   | 433     |
| 100361503 | Zfp717       | 1684.9 | 1553.53 | 1510.5 | 1633.7 | 1559  | 1407  | 1609  | 1442.12 |
| 313027    | Eya3         | 1195   | 1276    | 1230   | 1369   | 1266  | 1200  | 1199  | 1115    |
| 296136    | Nphp1        | 223    | 266     | 232    | 206    | 212   | 214   | 210   | 238     |
| 303439    | Mmd          | 601    | 614     | 588    | 734    | 575   | 555   | 646   | 616     |
| 108349244 | LOC108349244 | 89.73  | 85.81   | 85.35  | 84.16  | 71.56 | 76.57 | 81.51 | 95.69   |
| 100361733 | Ociad2       | 82     | 104     | 105    | 94     | 104   | 86    | 92    | 81      |
| 362474    | Adhfe1       | 48     | 47      | 41     | 39     | 49    | 29    | 45    | 42      |
| 688390    | LOC688390    | 12     | 6       | 9      | 8      | 8     | 8     | 11    | 6       |
| 691807    | LOC691807    | 1225   | 1223    | 1165   | 1095   | 1082  | 1076  | 1172  | 1109    |
| 304277    | Cpsf4        | 239    | 235     | 214    | 205    | 210   | 195   | 226   | 211     |
| 100910508 | Zfp41        | 255    | 238     | 228    | 222.01 | 218   | 221   | 225.2 | 224.99  |
| 685697    | Supt3h       | 617    | 691     | 652    | 615    | 652   | 611   | 583   | 582     |
| 289928    | RGD1306063   | 856    | 887     | 787    | 782    | 717   | 750   | 800   | 856     |
| 81655     | Dync11i2     | 5638   | 5412    | 4991.4 | 5461.7 | 4938  | 4820  | 5346  | 5173    |
| 50719     | Slc7a5       | 1373   | 1482    | 1572   | 1536   | 1292  | 1473  | 1403  | 1455    |
| 314381    | Nrde2        | 262    | 249     | 255    | 269    | 262   | 234   | 252   | 228     |
| 317370    | Wdr13        | 1437   | 1346    | 1430   | 1348   | 1356  | 1206  | 1359  | 1323    |
| 363140    | Rassf1       | 248    | 209     | 240    | 198    | 209   | 172   | 248   | 215     |
| 362962    | Cbx7         | 824    | 796     | 801    | 756    | 712   | 756   | 733   | 795     |
| 362586    | Trit1        | 279.04 | 292.11  | 253.01 | 288.02 | 241   | 248.8 | 287.1 | 272     |
| 680445    | Mbnl2        | 7078   | 6933    | 6880   | 7517   | 7005  | 6343  | 6822  | 6620    |
| 307343    | Fam210a      | 915.27 | 946.86  | 856.56 | 879.25 | 832.7 | 824.7 | 885.3 | 850.35  |
| 682908    | Rcc1         | 167.91 | 135     | 191.5  | 133.41 | 145.6 | 153.2 | 142.8 | 150.47  |
| 100360594 | Fanci        | 108.91 | 118.36  | 89.26  | 120    | 82.09 | 93.33 | 87.14 | 149.12  |
| 298068    | Sec61b       | 340    | 360     | 395    | 294    | 288   | 299   | 338   | 385     |
| 100909445 | Ube2w        | 932.5  | 938.1   | 816.58 | 1010.2 | 861.8 | 763   | 898.8 | 963.62  |
| 361354    | Fbxo15       | 32     | 17      | 22     | 17     | 23    | 22    | 15    | 23      |
| 291958    | B3gnt9       | 160.83 | 134.69  | 158.06 | 140.2  | 131.8 | 134.1 | 143   | 151.14  |
| 366014    | Zdhhc12      | 161.71 | 141.93  | 149.86 | 129.83 | 151.7 | 139.8 | 106.9 | 151.87  |
| 299514    | Mterf3       | 356    | 306     | 309    | 263    | 267   | 290   | 295   | 312     |
| 499636    | RGD1563962   | 523.01 | 472.4   | 618    | 574    | 574   | 545   | 449.5 | 494.83  |
| 688478    | Commd2       | 393.76 | 356.95  | 376.71 | 323.4  | 345.2 | 325   | 355.3 | 343.05  |
| 300359    | Ccdc82       | 398    | 304     | 327    | 364    | 354   | 290   | 359   | 311     |
| 81768     | Rpl22        | 1279.7 | 1179    | 1375.6 | 977.29 | 1083  | 1078  | 1186  | 1191    |
| 102549542 | LOC102549542 | 4164.1 | 4092.46 | 3857.2 | 4498.9 | 3836  | 3658  | 4073  | 4104.37 |
| 498150    | Brat1        | 418    | 403     | 424    | 359.93 | 379   | 372   | 397   | 366     |
| 29491     | Itsn1        | 845    | 856     | 937    | 928    | 860   | 806   | 871   | 827     |
| 500723    | Zfp839       | 116.91 | 98.85   | 93.05  | 84     | 101.9 | 81.8  | 105.4 | 81.51   |
| 366588    | Colec11      | 28     | 18      | 38     | 22     | 24    | 22    | 28    | 26      |
| 29611     | Dbt          | 720.84 | 648     | 651    | 680    | 603   | 593   | 681.1 | 670     |
| 364183    | Bloc1s4      | 172    | 132     | 172    | 125    | 139   | 139   | 142   | 147     |
| 24590     | Mme          | 355    | 366     | 372    | 463    | 290   | 344   | 421   | 413     |
| 685579    | Rrm1         | 508    | 403     | 507    | 439    | 451   | 391   | 464   | 446     |

|           |              |        |         |        |        |       |       |       |         |
|-----------|--------------|--------|---------|--------|--------|-------|-------|-------|---------|
| 317380    | Prickle3     | 123    | 126     | 138    | 126    | 119   | 107   | 115   | 143     |
| 309103    | Pgghg        | 175    | 153     | 217    | 145    | 141   | 163   | 190   | 157     |
| 29257     | Rp19         | 3686.3 | 3302.47 | 3213.8 | 2775   | 2914  | 2736  | 3013  | 3581.36 |
| 364154    | Smiml4       | 2745   | 2745.78 | 2745.4 | 2675.8 | 2511  | 2675  | 2648  | 2462.02 |
| 313563    | Exo5         | 102    | 108     | 92     | 70     | 76    | 86    | 85    | 104     |
| 81524     | Nflx         | 609    | 652     | 738.99 | 712.04 | 589   | 776   | 605.9 | 588     |
| 100912032 | Rps27a       | 4693   | 4265    | 4407   | 3446   | 4022  | 3558  | 3812  | 4470    |
| 361151    | Ufsp2        | 1077   | 1020    | 1011   | 915    | 923   | 959   | 939   | 975     |
| 304656    | Ccdc130      | 270.99 | 267.98  | 290.99 | 275.64 | 264   | 284.3 | 253   | 241.94  |
| 292156    | Sh3glb1      | 2449.9 | 2266.18 | 2487.8 | 2265.8 | 2081  | 2218  | 2321  | 2316.19 |
| 286918    | Mx2          | 1112   | 1069.21 | 1068.3 | 1232.9 | 996.4 | 1288  | 943.4 | 1001.89 |
| 297725    | Tm7sf3       | 608    | 610     | 657    | 592    | 604   | 591   | 603   | 530     |
| 290230    | Mdp1         | 292.97 | 258.6   | 200.65 | 223.21 | 231.6 | 231.5 | 233   | 224.4   |
| 364410    | Kctd9        | 1484   | 1433    | 1428   | 1442   | 1325  | 1306  | 1424  | 1406    |
| 309070    | Uros         | 206    | 231     | 211    | 222    | 253   | 198   | 181   | 189     |
| 293504    | Qprt         | 136    | 167     | 242    | 112    | 136   | 146   | 171   | 167     |
| 365755    | Tbllxr1      | 1606.8 | 1510.03 | 1544.2 | 1592.8 | 1553  | 1381  | 1517  | 1451.34 |
| 103690502 | LOC103690502 | 657.89 | 656.74  | 657.24 | 656.83 | 583.8 | 518.5 | 696.4 | 682.21  |
| 304204    | Snapc2       | 896    | 957     | 992    | 871    | 820   | 932   | 814   | 941     |
| 316035    | Cmtm6        | 1235   | 1345    | 1419   | 1123   | 927   | 1242  | 1255  | 1410    |
| 292148    | Eif3a        | 3054.5 | 3087.91 | 3207.8 | 3466.2 | 3233  | 2691  | 3241  | 2931.41 |
| 171305    | Clk3         | 878    | 790     | 822    | 767    | 762   | 801   | 786   | 725     |
| 362910    | Samd12       | 58     | 52      | 83     | 74     | 78    | 40    | 62    | 72      |
| 362537    | Snapc3       | 574    | 494     | 486    | 441    | 443   | 432   | 511   | 497     |
| 78956     | Scn9a        | 7208.2 | 6759.43 | 7436.5 | 7794.5 | 7782  | 5682  | 7209  | 6887.69 |
| 308598    | Hps5         | 433.01 | 398.64  | 418.01 | 426.4  | 408.5 | 371.3 | 405.3 | 396.98  |
| 60396     | Cdk13        | 56     | 45.67   | 46.03  | 30.14  | 74.17 | 5.27  | 21.1  | 67.32   |
| 300441    | Tmem205      | 574    | 514     | 425    | 448    | 459   | 436   | 428   | 528     |
| 309295    | Ikbkg        | 421    | 351     | 390    | 407    | 389   | 337   | 381   | 374     |
| 494345    | Pdcd10       | 1549   | 1434    | 1411   | 1295   | 1304  | 1279  | 1383  | 1404    |
| 313216    | Rnf20        | 1286   | 1284    | 1262   | 1360   | 1281  | 1135  | 1319  | 1166    |
| 288028    | Tmem44       | 21.01  | 30.99   | 21.18  | 20     | 30.93 | 19.03 | 19    | 19      |
| 100910751 | Mtg1         | 355    | 328     | 285    | 264    | 262   | 292   | 276   | 333     |
| 170465    | Acaa2        | 1481   | 1022    | 1276   | 526    | 1055  | 974   | 965   | 1070    |
| 362736    | Hectd1       | 2789   | 2764    | 3013   | 3117   | 2953  | 2588  | 2929  | 2559    |
| 171096    | Cst6         | 222    | 163     | 180    | 132    | 156   | 151   | 151   | 200     |
| 362020    | RGD1309139   | 74.58  | 57.97   | 67.78  | 77.63  | 74.06 | 56.62 | 63.31 | 68.42   |
| 362392    | Snrnp27      | 462    | 443     | 443    | 423    | 417   | 379   | 402   | 474     |
| 290348    | Synb         | 66.93  | 69.12   | 39.91  | 56.24  | 51.44 | 50.63 | 65    | 52.16   |
| 306253    | Glt8d1       | 465    | 502     | 528    | 511    | 408   | 478   | 495   | 513     |
| 300674    | Arcn1        | 3313   | 3304    | 3295   | 3255   | 3047  | 3033  | 3331  | 3021    |
| 24660     | Pmp22        | 82646  | 94714   | 90329  | 74722  | 57498 | 87387 | 80077 | 98339   |
| 54299     | Ncor1        | 1638   | 1658    | 1813   | 1972   | 1782  | 1572  | 1641  | 1691    |
| 689883    | Setdb1       | 643.59 | 677.48  | 731.14 | 718.02 | 655.7 | 672   | 666.1 | 621.99  |
| 300687    | Bud13        | 186    | 227     | 205    | 189    | 173   | 198   | 179   | 212     |
| 308942    | Dennd5a      | 3848   | 4155    | 4311   | 4231   | 3794  | 3918  | 3926  | 3985    |
| 156826    | Eya2         | 185    | 147     | 170    | 216    | 127   | 167   | 175   | 209     |
| 316452    | Ccnyl1       | 255    | 223     | 344    | 363    | 206   | 221   | 291   | 401     |
| 316820    | LOC316820    | 83.27  | 80.42   | 65.6   | 65.41  | 41.82 | 60.63 | 73.06 | 102.78  |
| 25235     | Ghr          | 867.99 | 869     | 784    | 856    | 767   | 772   | 796   | 854     |
| 298312    | Yipf1        | 1089.1 | 1082.88 | 1017.1 | 921.91 | 953.5 | 908.3 | 1044  | 976.18  |
| 690599    | Mxra7        | 722.58 | 761.76  | 708.78 | 744.96 | 729.8 | 718.8 | 632.8 | 693.17  |
| 316219    | Trerf1       | 202.56 | 193.91  | 205.3  | 236.96 | 188.6 | 204.1 | 221   | 178.33  |
| 24825     | Tf           | 1234   | 1489    | 1993   | 950    | 1334  | 1269  | 1478  | 1270    |
| 100359562 | Mroh6        | 11     | 9       | 11     | 5      | 11    | 10    | 7     | 6       |
| 116467    | Tm4sf4       | 15     | 23      | 20     | 14     | 14    | 19    | 14    | 21      |

|           |              |        |         |        |        |       |       |       |         |
|-----------|--------------|--------|---------|--------|--------|-------|-------|-------|---------|
| 25129     | Egr4         | 2      | 4       | 4      | 8      | 5     | 4     | 3     | 5       |
| 287824    | Trim80       | 10     | 4       | 17     | 5      | 7     | 4     | 11    | 12      |
| 302579    | RGD1565862   | 1      | 11      | 2      | 4      | 6     | 3     | 6     | 2       |
| 498486    | Gnpnat1      | 161    | 167     | 157    | 145    | 143   | 129   | 156   | 167     |
| 500832    | Bbs10        | 205    | 217     | 169    | 201    | 191   | 175   | 213   | 169     |
| 502916    | Rerg         | 16     | 38      | 40     | 14     | 23    | 30    | 23    | 26      |
| 171361    | Eef1a1       | 37820  | 39802   | 42872  | 34591  | 35504 | 35177 | 37436 | 38354   |
| 311575    | Phf20        | 1594.4 | 1707.79 | 1633.9 | 1754.7 | 1662  | 1525  | 1616  | 1516.24 |
| 362129    | Gtdc1        | 404    | 343     | 353    | 359    | 292   | 337   | 373   | 376     |
| 360663    | Unk          | 325    | 305     | 350    | 353    | 317   | 334   | 315   | 293     |
| 361977    | Isg2012      | 163.9  | 172.56  | 197    | 179.71 | 154   | 165.8 | 163.8 | 190     |
| 100912286 | Leng9        | 123.34 | 111.55  | 124.09 | 113.58 | 99.4  | 103   | 140.1 | 103.83  |
| 246314    | Tor1aip1     | 435    | 394     | 434    | 433    | 381   | 391.9 | 412   | 416.99  |
| 292130    | Afap112      | 1360   | 1563    | 1885   | 1608   | 1313  | 1575  | 1690  | 1482    |
| 299762    | Tmtc2        | 760    | 772     | 771    | 815    | 745   | 683   | 793   | 724     |
| 293113    | Tmem126a     | 293.68 | 242.3   | 263.78 | 212.5  | 205.6 | 222.1 | 246.8 | 281.6   |
| 499846    | Tcp1111      | 1722.9 | 1835.81 | 1783.5 | 2485.8 | 2172  | 1437  | 1871  | 1913.73 |
| 363142    | Sema3b       | 6037   | 8636    | 7808   | 6772   | 5555  | 8199  | 6804  | 7073    |
| 406166    | Egf18        | 3075.4 | 3399.19 | 3375.1 | 2316.9 | 2155  | 3126  | 2830  | 3380.53 |
| 299521    | Camkmt       | 295    | 288     | 297    | 275    | 283   | 261   | 283   | 264     |
| 60374     | Lmna         | 2488   | 2736    | 3270   | 2263   | 2474  | 2698  | 2543  | 2446    |
| 361541    | Proser3      | 299.04 | 290.11  | 302.02 | 308.08 | 286.5 | 313.1 | 283.9 | 249.35  |
| 293059    | RGD1305713   | 422.06 | 418.35  | 412.31 | 350.28 | 379.5 | 367.1 | 401.9 | 365.79  |
| 361059    | Ccdc25       | 665.68 | 663.82  | 674.84 | 584.63 | 568.2 | 575   | 659   | 643.47  |
| 360389    | Zfp422       | 345    | 338     | 368    | 376    | 330   | 291   | 367   | 360     |
| 678772    | Casd1        | 1128   | 1056    | 1000   | 1080   | 981   | 985   | 1088  | 974     |
| 310056    | Ipo11        | 1464.7 | 1399.01 | 1311.1 | 1310.5 | 1324  | 1207  | 1338  | 1313.39 |
| 299625    | Lmb2         | 131    | 161     | 169    | 117    | 149   | 143   | 122   | 132     |
| 360917    | Cnot61       | 290    | 267     | 298    | 338    | 278   | 262   | 303   | 284     |
| 314879    | Xpot         | 1835   | 1955    | 1832   | 1977   | 1756  | 1754  | 1923  | 1746    |
| 362804    | Cwf1912      | 438    | 414.17  | 424.12 | 448    | 431.4 | 357   | 386.3 | 454.29  |
| 362511    | Fbxo10       | 193    | 249     | 248    | 233    | 225   | 197   | 226   | 224     |
| 315969    | Topbp1       | 364.52 | 340.97  | 471.92 | 394.25 | 397.2 | 365.6 | 402.1 | 319.9   |
| 266606    | Tor1a        | 464    | 433     | 440    | 329    | 343   | 397   | 466   | 368     |
| 362483    | MGC94199     | 395    | 411     | 340    | 321    | 315   | 353   | 356   | 362     |
| 24382     | Ganc         | 422.81 | 416.89  | 432.3  | 419.11 | 365.4 | 418.3 | 412.7 | 401.4   |
| 102555303 | LOC102555303 | 0      | 0       | 0      | 1.45   | 0     | 0     | 1.37  | 0       |
| 362151    | Lnpk         | 1223.8 | 1199.88 | 1151.8 | 1281.7 | 1155  | 1035  | 1291  | 1108.22 |
| 498038    | Vg113        | 541.44 | 604.87  | 597.66 | 542.31 | 472.5 | 452.3 | 573   | 662.44  |
| 289855    | Ccdc85a      | 450.08 | 371     | 330.45 | 452.87 | 401.1 | 352.9 | 405.6 | 356.35  |
| 291318    | Nmt2         | 1471   | 1487    | 1414   | 1668   | 1377  | 1405  | 1525  | 1400    |
| 680227    | LOC680227    | 547.06 | 487.76  | 577.91 | 512.89 | 467.9 | 476.2 | 506.4 | 557.91  |
| 309004    | Vkorc1       | 427    | 398     | 445    | 345    | 339   | 400   | 371   | 416     |
| 288659    | Vps37b       | 263    | 253     | 292    | 299    | 229   | 258   | 247   | 312     |
| 309051    | Pign         | 553.1  | 623.27  | 600.86 | 693.57 | 609.8 | 506.6 | 623.9 | 594.45  |
| 24246     | Camk2d       | 1988.8 | 1920.37 | 2250   | 1914.1 | 1817  | 1904  | 1952  | 1956.11 |
| 24772     | Cxcl12       | 787.07 | 727.07  | 737.77 | 794.26 | 638.9 | 736.5 | 797.4 | 705.75  |
| 362041    | Rpl34        | 2249   | 2139    | 2159   | 1685   | 1919  | 1806  | 1835  | 2219    |
| 266688    | Rab8b        | 192    | 227     | 242.01 | 266    | 214   | 212   | 235   | 215     |
| 308584    | Plekha4      | 4965.9 | 5635    | 6157   | 4687   | 4239  | 5304  | 5607  | 5115    |
| 361755    | Aldh18a1     | 579.98 | 592.63  | 690.35 | 636.14 | 535   | 540   | 672.4 | 614.23  |
| 315655    | Rdx          | 1166   | 1198    | 1336   | 1335   | 1127  | 1175  | 1275  | 1181    |
| 288003    | Rfc4         | 222    | 204     | 194    | 180    | 200   | 149   | 201   | 206     |
| 408200    | Pan2         | 402    | 380     | 392    | 372    | 361   | 363   | 393   | 344     |
| 297607    | RGD1311164   | 292    | 286     | 282    | 286    | 281   | 265   | 282   | 255     |
| 302810    | Bcor11       | 280    | 271     | 280    | 315    | 287   | 262   | 250   | 284     |

|           |              |        |         |        |        |       |       |       |         |
|-----------|--------------|--------|---------|--------|--------|-------|-------|-------|---------|
| 290401    | Esd          | 835    | 839     | 816    | 713    | 718   | 693   | 795   | 821     |
| 24180     | Agtr1a       | 93.01  | 99      | 77.71  | 99.91  | 71.89 | 67.64 | 107.9 | 101.88  |
| 362719    | Asap2        | 426    | 531.84  | 732.82 | 575.95 | 487.8 | 613.1 | 555.6 | 485.64  |
| 366170    | Tmem87a      | 701.19 | 756.11  | 668.7  | 656.89 | 671.6 | 572.7 | 691.3 | 694.59  |
| 54350     | Scfd1        | 912    | 966     | 939    | 903    | 810   | 803   | 966   | 937     |
| 361377    | Phkb         | 1178   | 990     | 943    | 1067   | 1107  | 942   | 983   | 917     |
| 304935    | Tbx19        | 17.04  | 33.96   | 36.24  | 33.76  | 22.11 | 30.45 | 29.14 | 32.67   |
| 499214    | Coa4         | 235    | 201     | 194    | 172    | 165   | 197   | 213   | 183.08  |
| 362974    | RGD1304694   | 2529   | 2501    | 2483   | 2497   | 2221  | 2382  | 2407  | 2452    |
| 114851    | Cdkn1a       | 115    | 125     | 226    | 137    | 108   | 155   | 198   | 109     |
| 499136    | LOC499136    | 524.54 | 464.28  | 553.11 | 544.55 | 493.8 | 456.6 | 478.4 | 543.54  |
| 687192    | Gid4         | 1781.5 | 1971.48 | 1837.1 | 1914.8 | 1579  | 1748  | 1813  | 1954.03 |
| 306229    | Dennd6a      | 924    | 876     | 809    | 810    | 795   | 756   | 844   | 837     |
| 361814    | Srsf3        | 1748   | 1694    | 1761   | 1288   | 1486  | 1372  | 1715  | 1563    |
| 291228    | Mkx          | 92     | 100     | 81     | 111    | 104   | 77    | 84    | 98      |
| 100362202 | Znf408       | 205.7  | 201.09  | 216.04 | 165.62 | 176.2 | 186.2 | 202.6 | 180.39  |
| 362896    | Stat6        | 1169   | 1210    | 1274   | 1253   | 1129  | 1174  | 1191  | 1144    |
| 499317    | Tmem258      | 362.32 | 315.18  | 361.91 | 311.94 | 299.8 | 334.5 | 296.9 | 346.31  |
| 363174    | Sgol         | 28     | 23      | 38     | 21     | 33    | 33    | 20    | 18      |
| 312382    | Abcg2        | 566    | 420     | 321.06 | 419    | 434   | 376   | 392   | 430     |
| 680039    | LOC680039    | 1458   | 1466    | 1409   | 1630   | 1452  | 1361  | 1442  | 1383    |
| 300955    | Nck1         | 529    | 486     | 444    | 468    | 464   | 414   | 452   | 492     |
| 498796    | Fam107b      | 653    | 710.15  | 694.01 | 498.55 | 664   | 565.1 | 589.2 | 598.17  |
| 497948    | Trpv3        | 148.36 | 245.09  | 240.53 | 222.67 | 171.8 | 186.8 | 274.3 | 177.16  |
| 286931    | Unc13c       | 747    | 921     | 990    | 815    | 873   | 770   | 796   | 845     |
| 682964    | Zfp551       | 61     | 58      | 54     | 66     | 66    | 47    | 57    | 56      |
| 295663    | Phospho2     | 547    | 543     | 506    | 482    | 492   | 426   | 516   | 531     |
| 292729    | Snrpa        | 237    | 231     | 222    | 193    | 196   | 235   | 210   | 194     |
| 298648    | Tardbp       | 2000   | 1858    | 1829   | 1894   | 1714  | 1657  | 1995  | 1803    |
| 171552    | Prpf18       | 963.62 | 928.52  | 950.18 | 942.55 | 908.9 | 865.9 | 921.4 | 883.05  |
| 501110    | Gsta6        | 190.95 | 190     | 166.99 | 150    | 164.1 | 159   | 168   | 168.92  |
| 297801    | Xkr4         | 90     | 89      | 89     | 118    | 124   | 55.03 | 75    | 111     |
| 113929    | Nup88        | 576    | 619     | 557    | 570    | 549   | 529   | 602   | 516     |
| 361035    | Mettl3       | 885    | 948     | 934    | 864    | 818   | 903   | 849   | 864     |
| 296758    | Armc10       | 548    | 507     | 591    | 529    | 500   | 505   | 510   | 542     |
| 299841    | Rxylt1       | 433    | 411     | 357    | 404    | 326   | 381   | 408   | 403     |
| 363450    | Ftsj1        | 139    | 153     | 133    | 110    | 141   | 127   | 129   | 109     |
| 292087    | Urb2         | 153.52 | 175     | 151.11 | 152.65 | 149   | 158   | 146   | 145.02  |
| 266729    | Dab1         | 394.34 | 348     | 409.21 | 365.17 | 376   | 376   | 356   | 326.59  |
| 301525    | Glb11        | 223.43 | 189.57  | 308.43 | 259.2  | 217.7 | 214.7 | 272.7 | 222.42  |
| 310544    | Map9         | 1784   | 1787    | 1705   | 1779   | 1741  | 1523  | 1787  | 1622    |
| 298385    | Magoh        | 349    | 333     | 324    | 287    | 290   | 265   | 338   | 330     |
| 360748    | Prkdc        | 729    | 674     | 775    | 780    | 771   | 614   | 727   | 686     |
| 100909715 | LOC100909715 | 22.92  | 34.68   | 35.25  | 28.8   | 38.35 | 30.4  | 22.05 | 24.27   |
| 305451    | Tnip2        | 152    | 107     | 165    | 131    | 130   | 147   | 118   | 130     |
| 310548    | Rbm46        | 197    | 196     | 187    | 197    | 211   | 159   | 184   | 181     |
| 362722    | Tmem18       | 230    | 249     | 215    | 231    | 214   | 198   | 225   | 238     |
| 308004    | Fam204a      | 354.29 | 307.5   | 290.58 | 321.73 | 340.5 | 273.2 | 299.2 | 292.28  |
| 683522    | Tead4        | 86.3   | 105.35  | 109.74 | 85.49  | 73.96 | 84.79 | 97.54 | 109.69  |
| 308899    | Mrvil        | 215    | 157     | 169    | 181    | 177   | 195   | 147   | 164     |
| 102548728 | LOC102548728 | 29.17  | 31.14   | 27.66  | 29.43  | 26.06 | 21    | 30    | 34      |
| 681031    | Snrpg        | 272    | 216     | 228.63 | 165    | 207   | 197.1 | 189.9 | 240.02  |
| 362003    | Gpr89b       | 1003   | 980     | 913    | 939    | 912   | 920   | 913   | 883     |
| 290947    | Mtrr         | 548    | 492     | 462    | 462    | 442   | 429   | 504   | 483     |
| 303883    | Lrch3        | 1201   | 1177.23 | 1224.6 | 1334.8 | 1143  | 1102  | 1330  | 1096.14 |
| 60445     | Tsc1         | 985.79 | 1039.14 | 975.81 | 1139.6 | 1003  | 993.6 | 974.8 | 945.94  |



|           |              |        |         |        |        |       |       |       |         |
|-----------|--------------|--------|---------|--------|--------|-------|-------|-------|---------|
| 363127    | Dnajc13      | 1678   | 1609    | 1743   | 1868   | 1725  | 1588  | 1718  | 1495    |
| 499567    | RGD1565641   | 486    | 413     | 373    | 360    | 362   | 306   | 413   | 463     |
| 290577    | Wapl         | 906    | 867     | 933    | 952    | 885   | 746   | 947   | 883     |
| 300514    | Ei24         | 1783   | 1752    | 1683   | 1671   | 1614  | 1611  | 1601  | 1692    |
| 311713    | Mrgbp        | 256    | 280     | 273    | 216    | 254   | 251   | 252   | 212.8   |
| 298182    | Tyrp1        | 12440  | 12518   | 7833   | 10104  | 10331 | 10581 | 10645 | 9028    |
| 304549    | Oas12        | 275.43 | 312.38  | 310.36 | 356.83 | 267.1 | 381.2 | 263.6 | 275.58  |
| 313974    | Trib2        | 1355   | 1383    | 1447   | 1463   | 1272  | 1231  | 1463  | 1378    |
| 366975    | Pphln1       | 901.53 | 890.15  | 928.83 | 891.95 | 862.7 | 805   | 859.8 | 890.58  |
| 360563    | Ncbp3        | 189    | 228     | 204    | 197    | 205   | 188   | 195   | 186     |
| 313427    | Usp24        | 937    | 970     | 1039   | 1071   | 972   | 922   | 1002  | 905     |
| 498560    | Uchl3        | 429    | 388     | 388    | 321    | 328   | 348   | 388   | 380     |
| 100034253 |              | 1294   | 1276    | 1217   | 1350   | 1305  | 1167  | 1222  | 1167    |
| 362626    | Rsrp1        | 1937   | 1716    | 1699   | 1479   | 1613  | 1598  | 1562  | 1691    |
| 363067    | Sin3a        | 624.31 | 600     | 689.99 | 646.28 | 597   | 535.1 | 667.9 | 623.04  |
| 25486     | Myo9b        | 1738.2 | 1753.06 | 1897.9 | 1901.7 | 1637  | 1751  | 1840  | 1670.76 |
| 304546    | Git2         | 955    | 972     | 1001   | 909    | 842   | 931   | 980   | 878     |
| 108349010 | LOC108349010 | 1842.7 | 1878.62 | 1750   | 1662.6 | 1622  | 1620  | 1669  | 1840.97 |
| 296925    | Aass         | 97     | 97      | 64     | 96     | 93    | 79    | 66    | 97      |
| 29318     | Ddt          | 1126   | 952     | 813    | 838    | 828   | 832   | 833   | 1036    |
| 362048    | Tspan5       | 1020.1 | 1111.33 | 1228.5 | 1025.2 | 1060  | 1010  | 1029  | 1050.38 |
| 296813    | Slc25a40     | 208    | 196     | 185    | 195    | 189   | 182   | 193   | 178     |
| 304743    | Ccdc93       | 646    | 658     | 737    | 723    | 621   | 670   | 657   | 668     |
| 499895    | Slx4ip       | 130.26 | 113.35  | 129.49 | 138.25 | 136.7 | 111.1 | 116   | 120.19  |
| 293017    | Bclaf1       | 2139   | 1992    | 2123   | 2119   | 1997  | 1790  | 2120  | 2018    |
| 27100     | Gfer         | 293    | 322.4   | 248.69 | 261.07 | 259.3 | 241.1 | 272   | 292.62  |
| 307170    | Acbd5        | 1619.6 | 1483.85 | 1593.1 | 1632.7 | 1475  | 1373  | 1513  | 1629.67 |
| 171394    | Clstn2       | 605.68 | 834.41  | 582.56 | 710.69 | 707.5 | 650.6 | 629.9 | 599.2   |
| 680014    | Esco1        | 383    | 359     | 397    | 395    | 387   | 336   | 380   | 349     |
| 140588    | Gli3         | 34     | 32      | 29     | 36     | 22    | 24    | 42    | 36      |
| 313551    | RGD1564804   | 234    | 226     | 159    | 167    | 160   | 198   | 195   | 191     |
| 304208    | Cers4        | 846.45 | 868     | 828.01 | 1062.6 | 1011  | 700   | 856.7 | 844.95  |
| 84360     | Clcn3        | 2510   | 2486    | 2441   | 2410   | 2326  | 2340  | 2300  | 2355    |
| 362700    | Spast        | 1047   | 1067    | 1052   | 991    | 1044  | 939   | 996   | 956     |
| 364976    | Syce2        | 57     | 51      | 43     | 55     | 53    | 44    | 45    | 53      |
| 304695    | Zcchc2       | 617    | 594     | 593    | 650    | 539   | 577   | 607   | 600     |
| 294753    | Mocs2        | 832    | 876     | 830    | 760    | 802   | 660   | 806   | 854     |
| 290284    | Sap18        | 195.52 | 219.26  | 195.52 | 221.25 | 183.4 | 195.5 | 193.9 | 214.33  |
| 313024    | Wasf2        | 1096   | 1197    | 1277   | 1212   | 1093  | 1167  | 1118  | 1149    |
| 24166     | Adcyap1      | 1282   | 1395    | 1496   | 1341   | 1370  | 1202  | 1274  | 1374    |
| 366856    | Mterf2       | 122    | 93      | 87     | 102    | 81    | 99    | 113   | 89.46   |
| 316009    | Plxnb1       | 817    | 848     | 869    | 943    | 705   | 899   | 851   | 836.62  |
| 29600     | Atp2b4       | 1101   | 969.69  | 1119.2 | 1073.2 | 1004  | 995.2 | 1080  | 956.26  |
| 192647    | Mfn1         | 716    | 778     | 725    | 689    | 675   | 629   | 730   | 719     |
| 100360302 | Sec16a       | 1342   | 1339    | 1551   | 1585   | 1402  | 1382  | 1430  | 1293    |
| 314850    | Frs2         | 936    | 980     | 910    | 1005   | 932   | 856   | 925   | 914     |
| 100359464 | Zfp420       | 328.32 | 336.73  | 324.18 | 321.84 | 315.8 | 288.5 | 342.4 | 294.54  |
| 309812    | Rev3l        | 404.64 | 434.52  | 414.92 | 494.05 | 423.2 | 368.1 | 432   | 431.79  |
| 25481     | Mmp11        | 75     | 70      | 80     | 76     | 56    | 77    | 58    | 94      |
| 300442    | Ccdc159      | 94     | 121     | 111    | 107    | 95    | 100   | 101   | 114     |
| 361548    | Dmkn         | 2      | 7.96    | 4.5    | 6.25   | 1.37  | 7.82  | 6.42  | 4       |
| 686326    | Ifnar2       | 344    | 332     | 327    | 315    | 305   | 310   | 326   | 307     |
| 293989    | Cyp2c6v1     | 5.9    | 2.3     | 2.23   | 0.68   | 2.32  | 1.07  | 4.88  | 2.25    |
| 367793    | Scml2        | 29     | 34      | 32     | 18     | 33    | 24    | 28    | 22      |
| 500707    | Tc2n         | 105    | 78      | 83     | 92     | 76    | 82    | 86    | 95      |
| 360643    | Cdc27        | 1508   | 1440    | 1480   | 1583   | 1448  | 1341  | 1469  | 1434    |



|           |                 |        |         |        |        |       |       |       |         |
|-----------|-----------------|--------|---------|--------|--------|-------|-------|-------|---------|
| 24936     | Cd9             | 7256   | 8290    | 8319   | 6360   | 6113  | 7243  | 7490  | 7775    |
| 362938    | Scrib           | 962    | 1072    | 1185   | 1083   | 905   | 1131  | 1066  | 972     |
| 299825    | Gns             | 1728.5 | 1876.84 | 1968.4 | 1920.2 | 1586  | 1868  | 1826  | 1817.47 |
| 24855     | Tsc2            | 1060   | 1265    | 1223   | 1252   | 1097  | 1253  | 1151  | 1045    |
| 292464    | Katnal          | 159    | 139     | 157    | 131    | 145   | 111   | 162   | 137     |
| 500281    | Setmar          | 114    | 99      | 95     | 89     | 98    | 72    | 97    | 109     |
| 84031     | Chn2            | 380    | 423     | 389    | 415    | 315   | 383   | 409   | 415     |
| 94270     | Nnat            | 1471   | 1482    | 1441   | 1376   | 1565  | 1008  | 1120  | 1772    |
| 298683    | Vwal            | 3511   | 3603    | 3763   | 3218   | 2806  | 3733  | 3246  | 3565    |
| 308537    | Uri1            | 488    | 507     | 567    | 463    | 469   | 496   | 490   | 463     |
| 365458    | Fral0ac1        | 271    | 256     | 263    | 232    | 232   | 259   | 257   | 220     |
| 315473    | RGD1561444      | 166    | 169     | 139    | 132    | 139   | 139   | 155   | 141     |
| 288707    | Gltp            | 1058   | 1110    | 1292   | 1033   | 850   | 1119  | 1122  | 1165    |
| 100911610 | LOC100911610    | 235.17 | 237.35  | 139.86 | 251.74 | 189.2 | 162.7 | 224.8 | 241.86  |
| 499940    | Tp53tg5         | 7.17   | 10.68   | 4.03   | 11.3   | 8.65  | 9.08  | 6.89  | 6.81    |
| 294687    | Bdp1            | 645.29 | 624.51  | 670.85 | 683.65 | 696.1 | 552.7 | 671.1 | 566.1   |
| 24705     | Rara            | 316.59 | 299     | 446    | 335    | 306   | 353   | 310   | 354     |
| 24884     | Yes1            | 897.18 | 766.14  | 821.96 | 796.65 | 719.5 | 713.8 | 859.8 | 815.91  |
| 307845    | Mtss11          | 1803   | 1930.3  | 2261.6 | 2115.3 | 1657  | 2054  | 2082  | 1890.26 |
| 309962    | Pde8b           | 399.99 | 432     | 422    | 436    | 361   | 383   | 408   | 449     |
| 53372     | Nup54           | 298    | 293     | 277    | 272    | 263   | 270   | 285   | 262     |
| 500005    | Gatad1          | 1043.8 | 981     | 1012.2 | 959.46 | 916   | 966   | 965.1 | 939.27  |
| 170943    | Slc25a10        | 714.7  | 795.03  | 832.27 | 728.48 | 684.8 | 787.5 | 729.9 | 706.93  |
| 363442    | Fundc1          | 1421   | 1405    | 1322   | 1315   | 1221  | 1138  | 1426  | 1391    |
| 362289    | Lime1           | 386    | 342     | 360    | 322    | 319   | 372   | 331   | 314     |
| 64531     | Synj2bp         | 2282.7 | 2320.55 | 2199.8 | 2513.7 | 2286  | 2142  | 2238  | 2162.92 |
| 361929    | Atp11b          | 779    | 714     | 749    | 788    | 728   | 688   | 742   | 713     |
| 25618     | Acadsb          | 2071   | 2019    | 1991   | 2111   | 1880  | 2299  | 1578  | 2006    |
| 100365504 | Sf3b6           | 489    | 409     | 454    | 386    | 392   | 362   | 442   | 451     |
| 310192    | Trio            | 1656   | 1702    | 1822   | 1915   | 1753  | 1653  | 1791  | 1527    |
| 108349907 | LOC108349907    | 51.2   | 49.69   | 37.32  | 75.99  | 55.7  | 44.72 | 55.9  | 46.68   |
| 680692    | Golm1           | 228    | 223     | 223    | 244    | 230   | 197   | 229   | 214     |
| 305851    | Supt16h         | 1368.6 | 1369.39 | 1294.5 | 1362   | 1267  | 1208  | 1387  | 1250.21 |
| 288906    | Rfx1            | 248    | 257     | 263    | 296    | 242.9 | 267.9 | 261.8 | 235.81  |
| 310682    | Pex11b          | 474.03 | 434.74  | 448.46 | 380.28 | 394.1 | 418.9 | 391.5 | 442.25  |
| 306252    | Nek4            | 223.18 | 187.86  | 182.57 | 200.54 | 194.9 | 194.7 | 169.9 | 193.14  |
| 691170    | LOC691170       | 299    | 268     | 276    | 268    | 268   | 235   | 277   | 273     |
| 102551177 | LOC102551177    | 9.5    | 3.13    | 4.15   | 8.89   | 0     | 6.52  | 12.85 | 4.96    |
| 84431     | Asah1           | 2411.1 | 2271.11 | 2177.8 | 2223   | 2014  | 2057  | 2328  | 2209.45 |
| 500227    | LOC500227       | 69.79  | 59      | 48.99  | 44.43  | 54    | 57.43 | 49.19 | 50      |
| 114846    | Gstol           | 1196   | 1021    | 1114   | 887    | 982   | 914   | 956   | 1146    |
| 308561    | Zfp819          | 15.35  | 16.15   | 11.06  | 12.28  | 16.53 | 15.12 | 10.2  | 10.13   |
| 362223    | Snrpb2          | 640    | 614     | 533    | 496    | 508   | 493   | 566   | 597     |
| 307024    | Zfp438          | 73     | 78      | 72     | 84     | 69    | 51    | 72    | 99      |
| 619561    | Acsf2           | 490.73 | 443.93  | 406.64 | 466.5  | 425.6 | 413.5 | 416.3 | 458.24  |
| 65034     | Pdzd2           | 763    | 824     | 856    | 1127   | 915   | 765   | 856   | 848     |
| 314730    | Ikbip           | 294    | 277     | 299    | 301    | 292   | 269   | 270   | 279     |
| 619566    | Cdca71          | 54.04  | 44.84   | 64.76  | 38.35  | 61.32 | 49.81 | 36.34 | 44      |
| 29598     | Atp2b1          | 4368   | 4035    | 4364   | 4462   | 4447  | 3872  | 4392  | 3621    |
| 313125    | Bach2           | 84     | 89      | 92     | 100    | 92    | 64    | 92    | 98      |
| 108348199 | NEWGENE_1306210 | 2314.9 | 2296.06 | 2307   | 2179.9 | 2168  | 2149  | 2220  | 2087.91 |
| 310756    | Mov10           | 151    | 171     | 159    | 153    | 132   | 176   | 142   | 151     |
| 499672    | Cdc42sel        | 1362   | 1406    | 1424   | 1150   | 1220  | 1250  | 1274  | 1320    |
| 313098    | Usp45           | 963    | 912     | 960    | 1047   | 974   | 718   | 970   | 1018    |
| 307178    | Arhgap21        | 1786   | 1803    | 1906   | 2115   | 1871  | 1727  | 1753  | 1863    |
| 100910079 | LOC100910079    | 137    | 96      | 102    | 107    | 90    | 100   | 136   | 93      |

|           |              |        |         |        |        |       |       |       |         |
|-----------|--------------|--------|---------|--------|--------|-------|-------|-------|---------|
| 289584    | Usp46        | 1438.7 | 1386.58 | 1366   | 1380.4 | 1335  | 1253  | 1383  | 1310.78 |
| 291975    | Enkd1        | 50     | 55      | 33     | 35     | 32    | 41    | 41    | 50      |
| 499418    | Spatc11      | 32.75  | 40.88   | 0      | 53.88  | 16.38 | 0     | 54.75 | 49.75   |
| 311257    | Nat10        | 294    | 315     | 291    | 312    | 300   | 304   | 299   | 246     |
| 300062    | Ift27        | 263    | 238     | 235    | 207    | 251   | 225   | 244   | 174     |
| 310314    | Ttc14        | 355    | 394     | 390    | 421    | 358   | 300   | 397   | 424     |
| 298066    | Erp44        | 960    | 911     | 885    | 865    | 821   | 848   | 920   | 844     |
| 365619    | Arsk         | 184    | 198     | 155    | 195    | 167   | 170   | 190   | 167     |
| 361917    | Zfand1       | 186    | 157     | 149    | 144    | 122   | 154   | 161   | 166     |
| 691422    | LOC691422    | 211.11 | 194.13  | 190    | 206.37 | 216.8 | 176.9 | 180.3 | 186.06  |
| 309957    | Mef2a        | 1875   | 1959    | 1881   | 1976   | 1917  | 1747  | 1949  | 1679    |
| 363158    | Crtap        | 251.59 | 236.13  | 241.4  | 232.53 | 214.9 | 219.9 | 234.2 | 242.81  |
| 317398    | Usp51        | 0      | 4       | 7      | 5.99   | 7.11  | 5     | 4     | 0       |
| 54318     | Eif2s1       | 1090   | 1062    | 1009   | 953    | 954   | 891   | 1002  | 1054    |
| 314157    | Fbxo33       | 297    | 320     | 325    | 333    | 305   | 284   | 291   | 329     |
| 246273    | Trib3        | 10     | 13      | 12     | 23     | 18    | 15    | 9     | 13      |
| 65160     | Clnsl1a      | 814    | 740     | 724    | 643    | 660   | 705   | 722   | 683     |
| 361452    | Ltv1         | 326    | 372     | 368    | 366    | 308   | 342   | 351   | 357     |
| 303394    | Usp32        | 3422   | 3469    | 3411   | 3748   | 3370  | 3176  | 3662  | 3116    |
| 305466    | Prr141       | 999    | 980     | 1037   | 1068   | 1022  | 896   | 1005  | 950     |
| 310377    | RGD1306227   | 60     | 52      | 47     | 54     | 54    | 45    | 59    | 44      |
| 54320     | Pdpm         | 1322   | 1386    | 1702   | 1674   | 1465  | 1404  | 1385  | 1516    |
| 497896    | Zfp879       | 35     | 37      | 46.23  | 37     | 31    | 36    | 41.22 | 39      |
| 114021    | Ebnalbp2     | 334.61 | 216.02  | 326.21 | 367.81 | 243.6 | 257.6 | 281   | 398.21  |
| 103690073 | LOC103690073 | 11.5   | 18.14   | 18.41  | 22.72  | 22.39 | 12.61 | 20.2  | 11.92   |
| 116482    | Sacm11       | 2727.3 | 2766.42 | 2457.5 | 2579.6 | 2432  | 2330  | 2651  | 2574.26 |
| 100912216 | Prcd         | 34.74  | 33.22   | 29.03  | 21.33  | 31.95 | 21.7  | 33.37 | 25.2    |
| 295072    | RGD1560324   | 4.16   | 2       | 4      | 4      | 2.62  | 2     | 3     | 5.81    |
| 80773     | Cyb5b        | 1078.7 | 1221.84 | 1042.2 | 1150.1 | 1067  | 988.2 | 1076  | 1130.41 |
| 84577     | Hdac2        | 1510   | 1565    | 1560   | 1419   | 1431  | 1435  | 1471  | 1405    |
| 100909604 | LOC100909604 | 99.42  | 204.51  | 361.96 | 500.19 | 138   | 420.5 | 182.1 | 365.44  |
| 308650    | Hnrnp2       | 1638   | 1540    | 1547   | 1511   | 1457  | 1471  | 1506  | 1481    |
| 306941    | Carmil1      | 618    | 642     | 631    | 732    | 599   | 622   | 647   | 620     |
| 294091    | Ifit2        | 284.56 | 227.18  | 220.9  | 297.65 | 226.5 | 281.6 | 283.9 | 185.35  |
| 303552    | Rundc1       | 462    | 464     | 476    | 408    | 447   | 432   | 404   | 434     |
| 29423     | Gap43        | 4501.6 | 4649    | 4827   | 4211   | 4573  | 4081  | 4517  | 4083    |
| 500132    | Plekha8      | 276    | 270     | 274    | 271    | 268   | 239   | 283   | 245     |
| 298144    | Kdm4c        | 346.77 | 320.44  | 365.08 | 328.95 | 327.5 | 290.5 | 368.8 | 304.5   |
| 307348    | Spire1       | 2130.4 | 2006.92 | 1997.5 | 2001.8 | 1853  | 1996  | 2041  | 1830.28 |
| 315216    | Selenoo      | 643.21 | 657.72  | 659.6  | 589.96 | 604.5 | 609.5 | 589.2 | 616.39  |
| 102556290 | LOC102556290 | 33     | 21      | 25.03  | 19     | 21    | 25    | 32    | 15      |
| 315981    | Col6a4       | 9      | 10      | 8      | 12     | 8     | 1     | 10    | 18      |
| 680867    | Tmem191c     | 103    | 97      | 97     | 93     | 105   | 100   | 79    | 86      |
| 171050    | Mob4         | 1614   | 1636    | 1487   | 1523   | 1351  | 1367  | 1585  | 1636    |
| 361052    | Cdadcl       | 884    | 840     | 750    | 726    | 703   | 785   | 758   | 790     |
| 304881    | Torlaip2     | 1282   | 1248    | 1270   | 1233   | 1116  | 1177  | 1191  | 1291.01 |
| 301013    | Shisa5       | 1312   | 1392    | 1553   | 1403   | 1263  | 1399  | 1348  | 1360    |
| 83781     | Lgals3       | 3481   | 3289    | 3721   | 3001   | 3079  | 3066  | 3310  | 3346    |
| 290364    | Itm2b        | 10223  | 10067   | 10193  | 9312   | 8788  | 9508  | 9610  | 9852    |
| 363509    | Arhgef6      | 927    | 891     | 859    | 938    | 831   | 888   | 895   | 816     |
| 289615    | Atp8a1       | 3911   | 3957    | 3807   | 4216   | 3839  | 3643  | 4054  | 3542    |
| 79251     | Aspa         | 611    | 531     | 499    | 569    | 389   | 450   | 611   | 647     |
| 305164    | Wdfy3        | 3811   | 4192    | 4451   | 5256   | 4637  | 4216  | 4066  | 3886    |
| 361686    | Osbpl5       | 1587.4 | 1387.61 | 1433.6 | 1409.7 | 969.8 | 1494  | 1382  | 1675.6  |
| 298767    | Dync2li1     | 184    | 207     | 201    | 172    | 188   | 154   | 182   | 201     |
| 311536    | Slc52a3      | 32     | 38      | 42.58  | 40.81  | 35    | 34    | 35.56 | 41      |

|           |              |        |         |        |        |       |       |       |         |
|-----------|--------------|--------|---------|--------|--------|-------|-------|-------|---------|
| 690634    | Fbxo3        | 1961.5 | 1951.84 | 1844.3 | 1846.1 | 1748  | 1715  | 1854  | 1899.15 |
| 298091    | Slc31a2      | 140    | 153     | 134    | 102    | 114   | 108   | 127   | 153     |
| 103691564 | LOC103691564 | 85     | 95      | 75     | 98     | 78    | 86    | 82    | 89      |
| 301442    | Sumo1        | 1270.8 | 1246.84 | 1322.8 | 1156.9 | 1186  | 1085  | 1255  | 1216.91 |
| 361842    | Sarla        | 2247   | 2200    | 2266   | 2175   | 1899  | 2130  | 2207  | 2199    |
| 56042     | Uso1         | 2476   | 2518    | 2509   | 2582   | 2265  | 2374  | 2516  | 2416    |
| 304983    | Tagln2       | 6188   | 5943    | 6704   | 5832   | 5793  | 5429  | 6368  | 5820    |
| 100909586 | LOC100909586 | 1.51   | 0       | 1.42   | 2.96   | 1.43  | 0     | 2.8   | 1.36    |
| 314205    | Arid4a       | 338    | 353     | 358    | 404    | 372   | 301   | 343   | 363     |
| 295107    | Smc4         | 544    | 441     | 645    | 668    | 560   | 509   | 583   | 529     |
| 54245     | Crk          | 4537   | 4484    | 4294   | 4500   | 4148  | 4021  | 4479  | 4260    |
| 303885    | Rubcn        | 1688   | 1840    | 2095   | 1802   | 1743  | 1932  | 1694  | 1678    |
| 303599    | Tanc2        | 2322   | 2624    | 2746   | 2921   | 2509  | 2440  | 2681  | 2443    |
| 315058    | Chrcl        | 146    | 120     | 136    | 109    | 108   | 119   | 118   | 140     |
| 58840     | Mapk6        | 892    | 981     | 905    | 943.99 | 792   | 954   | 929   | 858     |
| 500054    | Pot1         | 225    | 230     | 200    | 192    | 223   | 169   | 188   | 224     |
| 116549    | Csnk2a1      | 3369   | 3334.03 | 3202   | 3155.9 | 2885  | 2899  | 3315  | 3299    |
| 305549    | Pelil        | 404    | 324     | 373    | 377    | 353   | 324   | 378   | 348     |
| 315000    | Rnf139       | 566    | 534     | 510    | 499    | 451   | 487   | 531   | 533     |
| 690244    | Sumo2        | 2155.6 | 2229.89 | 2115.4 | 1979.8 | 1860  | 1968  | 2148  | 2075.55 |
| 266806    | Erc1         | 993    | 998     | 1052   | 1119   | 982   | 976   | 1033  | 960     |
| 298199    | Plin2        | 1404   | 1297.99 | 1525   | 1298   | 1357  | 1328  | 1198  | 1362    |
| 361924    | Mynn         | 261    | 281.07  | 318    | 286    | 256   | 249   | 267   | 316     |
| 498594    | Lrit2        | 247.26 | 248.19  | 256.38 | 219.74 | 216.7 | 244.1 | 200.4 | 261.22  |
| 300652    | Sorl1        | 2316.1 | 2114.2  | 1932.9 | 2210.6 | 2246  | 1960  | 2109  | 1825.5  |
| 315740    | Kif23        | 46     | 28      | 53     | 31     | 40    | 34    | 38    | 38      |
| 100360437 | Nsun3        | 28.62  | 22.24   | 11.06  | 22.9   | 27.09 | 17.21 | 17.06 | 19.17   |
| 24239     | Cacnalc      | 1136   | 1188.11 | 1183.9 | 1034.7 | 1094  | 1151  | 1019  | 1049.54 |
| 367092    | Arid3b       | 123    | 123     | 119    | 110    | 111   | 115   | 119   | 106     |
| 361526    | Sertad1      | 179    | 175     | 193    | 126    | 149   | 164   | 150   | 176     |
| 171085    | Pcsk4        | 155    | 136     | 154    | 149    | 147   | 146   | 133   | 138     |
| 108348127 | LOC108348127 | 138.41 | 133.87  | 164.6  | 120.47 | 110.1 | 139.2 | 160.8 | 119.19  |
| 307035    | Mpp7         | 164    | 168     | 130    | 192    | 151   | 118   | 187   | 165     |
| 288783    | Ormdl2       | 534    | 555     | 501    | 491    | 478   | 479   | 504   | 515     |
| 311630    | Zswim3       | 218.99 | 189.17  | 175.13 | 193.02 | 166.5 | 202.9 | 174.1 | 193.59  |
| 102551184 | LOC102551184 | 20.61  | 18.68   | 12.59  | 16.78  | 17.37 | 23.46 | 8.98  | 15.39   |
| 303037    | Spdl1        | 53     | 77      | 60     | 68     | 59    | 54    | 67    | 65      |
| 360540    | Akap10       | 444.9  | 427.11  | 414.45 | 468.68 | 394.8 | 383.4 | 452.6 | 435.98  |
| 305918    | Ift88        | 435.21 | 452.91  | 432.99 | 395.79 | 398   | 401.7 | 421.3 | 409.5   |
| 29492     | Notch2       | 1016   | 1106    | 1189   | 1459   | 1091  | 1131  | 1151  | 1157    |
| 293343    | Fam160a2     | 413    | 418     | 413    | 426    | 419   | 365   | 416   | 386     |
| 100365779 | Zfp605       | 100.99 | 92.47   | 95.16  | 119.38 | 113.2 | 66.71 | 111.4 | 96.15   |
| 114023    | Copb1        | 1710   | 1686    | 1631   | 1635   | 1554  | 1480  | 1683  | 1610    |
| 689991    | Unc80        | 2384.9 | 2511.16 | 2338.8 | 3137.8 | 2791  | 1927  | 2651  | 2482.11 |
| 81680     | Lifr         | 4251   | 4436.14 | 4299.2 | 4915   | 5442  | 2819  | 4321  | 4419.95 |
| 299043    | Eapp         | 539    | 507     | 518    | 506    | 460   | 470   | 534   | 502     |
| 295344    | St7l         | 563.28 | 540.34  | 549.43 | 477.32 | 476.6 | 479.3 | 547.7 | 519.72  |
| 310999    | Plekhg5      | 398.42 | 497.78  | 457.94 | 397.54 | 391.6 | 452   | 434.4 | 385.68  |
| 83842     | Crot         | 1555   | 1414    | 1347   | 1458   | 1443  | 1357  | 1492  | 1192    |
| 361338    | Fech         | 823    | 900     | 773    | 710    | 819   | 760   | 715   | 751     |
| 308667    | Nipa2        | 1089.4 | 987.67  | 1051.4 | 1045.9 | 1018  | 921.7 | 1025  | 1000.6  |
| 309069    | Edrf1        | 312    | 311     | 304    | 329    | 290   | 270   | 321   | 312     |
| 100360066 | Evi5         | 2935   | 3110    | 3219   | 3181   | 2884  | 2679  | 3178  | 3080    |
| 362356    | Cull1        | 3315   | 3015    | 3081   | 3046   | 2920  | 2746  | 3168  | 2999    |
| 100361658 | Usp37        | 605    | 623     | 544    | 581    | 584   | 474   | 595   | 582.18  |
| 291445    | Megf10       | 1115   | 1254    | 1235   | 1550   | 1179  | 1113  | 1404  | 1200    |

|           |            |        |         |        |        |       |       |       |         |
|-----------|------------|--------|---------|--------|--------|-------|-------|-------|---------|
| 679712    | Myef2      | 1593.9 | 1409.22 | 1525.1 | 1564.7 | 1459  | 1407  | 1482  | 1439.27 |
| 306404    | Spock3     | 950    | 821     | 856    | 810    | 869   | 753   | 903   | 740     |
| 289175    | Slc19a2    | 510    | 458     | 459    | 472    | 426   | 457   | 489   | 432     |
| 499725    | Rpf1       | 294.07 | 280.73  | 267.27 | 265.68 | 227.9 | 265.5 | 299.3 | 259.69  |
| 366872    | Cep83      | 767    | 778     | 789    | 866    | 768   | 661   | 829   | 782     |
| 288118    | Tmprss7    | 5      | 7       | 5      | 3      | 5     | 5     | 4     | 5       |
| 301351    | RGD1310819 | 29     | 30      | 28     | 33     | 30    | 26    | 27    | 31      |
| 500577    | Fhad1      | 36     | 26      | 26     | 32     | 25    | 30    | 32    | 27      |
| 114485    | Dmtf1      | 1286   | 1239    | 1201   | 1274   | 1169  | 1115  | 1334  | 1132    |
| 305684    | Samd8      | 1527   | 1644    | 1499   | 1661   | 1624  | 1434  | 1538  | 1419    |
| 360471    | Usp7       | 2433.4 | 2535.53 | 2305.5 | 2375.5 | 2260  | 2224  | 2458  | 2225.96 |
| 300782    | Ints14     | 662    | 620     | 608    | 659    | 636   | 607   | 596   | 583     |
| 85421     | Prkd1      | 647.34 | 668.72  | 626.16 | 606.17 | 590.9 | 589.2 | 627.6 | 613.71  |
| 317593    | RGD1561327 | 739.77 | 678     | 645.82 | 752.86 | 672.1 | 587.1 | 730   | 687     |
| 292022    | Ddx19a     | 558.59 | 614.35  | 559.19 | 579.02 | 506.5 | 552.3 | 576.3 | 560.91  |
| 304138    | Cyyr1      | 414    | 389     | 355    | 428    | 339   | 395   | 378   | 395     |
| 289014    | Mapkapk2   | 590    | 663     | 720    | 659    | 568   | 727   | 610   | 596     |
| 308718    | Pex7       | 152    | 187     | 176    | 149    | 151   | 160   | 164   | 156     |
| 117280    | Hnrnpu     | 4983.4 | 5054.74 | 5178.5 | 5059.3 | 4741  | 4813  | 5041  | 4674.25 |
| 305288    | Cep135     | 135    | 102     | 101    | 105    | 107   | 101   | 124   | 89      |
| 308341    | Ssc5d      | 382.55 | 429.83  | 511.58 | 438.09 | 381   | 507.1 | 366.1 | 420.4   |
| 24929     | Ptger3     | 90     | 75      | 90     | 108    | 96    | 64    | 88    | 97      |
| 308509    | RGD1308428 | 1024   | 1060    | 1066   | 1048   | 996   | 1016  | 1025  | 953     |
| 289424    | Xpr1       | 352    | 360     | 368    | 435    | 395   | 304   | 366   | 375     |
| 170927    | Clcc1      | 634    | 606     | 560    | 604    | 553   | 524   | 623   | 585     |
| 687022    | Sec22c     | 1317   | 1418.02 | 1266.1 | 1360   | 1216  | 1273  | 1301  | 1306.1  |
| 301430    | Orc2       | 669    | 610     | 607    | 601    | 576   | 512   | 649   | 627     |
| 362923    | Efr3a      | 2588.1 | 2532.41 | 2334.6 | 2718.5 | 2418  | 2293  | 2517  | 2442.91 |
| 680200    | LOC680200  | 27.8   | 27      | 24.18  | 23.99  | 15    | 30    | 26    | 26.88   |
| 360466    | Zc3h7a     | 771    | 724     | 704    | 675    | 635   | 642   | 778   | 677     |
| 311483    | Rrbp1      | 1717   | 1748    | 2199   | 1907   | 1722  | 1917  | 1823  | 1735    |
| 292188    | Rnf217     | 157    | 146     | 172    | 153    | 162   | 143   | 140   | 152     |
| 85430     | Herpud1    | 925    | 938     | 824    | 960    | 863   | 1023  | 791   | 790     |
| 296501    | Hat1       | 405    | 406     | 417    | 354    | 347   | 370   | 411   | 376     |
| 361995    | Prpf3      | 478    | 434     | 443    | 431    | 395   | 429   | 455   | 419     |
| 289219    | Ppox       | 211    | 207     | 196    | 198    | 176   | 192   | 204   | 200     |
| 64171     | Card9      | 45.36  | 47.77   | 51.44  | 46.25  | 52    | 33.99 | 50.97 | 44.46   |
| 25256     | Fmol       | 544    | 417     | 368    | 559    | 426   | 456   | 410   | 503     |
| 688318    | Lrrc45     | 548    | 569     | 637    | 528    | 596.6 | 572   | 567   | 434     |
| 306306    | Ccser2     | 8333   | 8251    | 7387   | 8823   | 8152  | 7339  | 8129  | 7559    |
| 299247    | Cpg1       | 115.42 | 111.77  | 136.15 | 116.49 | 110   | 101.5 | 113.8 | 130.86  |
| 116477    | Wnk1       | 3336.7 | 3592.49 | 3883.5 | 4424   | 3799  | 3469  | 3732  | 3486.66 |
| 293698    | Ccdc88b    | 104    | 107     | 94     | 81     | 98    | 101   | 92    | 76      |
| 361667    | Dhx32      | 588.81 | 648.69  | 621.21 | 632.62 | 574.4 | 571   | 634.4 | 589.01  |
| 298018    | Fam206a    | 410.73 | 396.73  | 362    | 400.52 | 371.6 | 321   | 369.6 | 430.59  |
| 310710    | Sec22b     | 886    | 924     | 926    | 883    | 830   | 843   | 876   | 892     |
| 691018    | Hsd17b14   | 18     | 12      | 15     | 16     | 8     | 23    | 13    | 14      |
| 498205    | LOC498205  | 0      | 0       | 3.66   | 0      | 0     | 3.48  | 0     | 0       |
| 313981    | Nol10      | 412    | 475     | 471    | 411    | 420   | 412   | 411   | 439     |
| 291736    | Rprd1a     | 1713   | 1626    | 1523   | 1504   | 1534  | 1421  | 1611  | 1487    |
| 303241    | Chd3       | 2147   | 1825    | 2124   | 2365   | 2057  | 1948  | 2045  | 1995    |
| 100360412 | Dnajc1     | 149    | 177     | 177    | 189    | 151   | 170   | 164   | 173     |
| 295428    | Mettl14    | 592    | 535     | 572    | 540    | 502   | 494   | 613   | 520     |
| 306767    | Ar110      | 324    | 315     | 284    | 339    | 323   | 300   | 288   | 289     |
| 288486    | Zfp12      | 367.41 | 311.4   | 304.81 | 313    | 310.4 | 328.3 | 316.8 | 277.45  |
| 361895    | Elov17     | 1615   | 1435    | 1425   | 1455   | 1509  | 1323  | 1443  | 1364    |

|           |              |        |         |        |        |       |       |       |         |
|-----------|--------------|--------|---------|--------|--------|-------|-------|-------|---------|
| 310376    | Nimlk        | 63     | 76      | 76     | 50     | 80    | 58    | 51    | 63      |
| 295088    | Gmps         | 521    | 535     | 526    | 539    | 480   | 427   | 598   | 512     |
| 100910299 | Larp4        | 356.66 | 410.82  | 363.67 | 483.93 | 415.3 | 332.5 | 417.9 | 370.33  |
| 305120    | Rpap2        | 316    | 314     | 311.63 | 291    | 285   | 282   | 321   | 284.21  |
| 292090    | Galnt2       | 1354   | 1517    | 1746   | 1510   | 1332  | 1529  | 1531  | 1435    |
| 302492    | Mbnl3        | 48     | 51      | 62     | 50     | 65.73 | 32    | 48.94 | 54      |
| 316561    | Sphkap       | 1607   | 1491    | 1482   | 1510   | 1585  | 1288  | 1541  | 1378    |
| 100910130 | LOC100910130 | 359    | 346     | 311    | 313    | 280   | 292   | 330   | 362     |
| 25444     | Fgf9         | 254    | 338     | 260    | 293    | 260   | 281   | 313   | 235     |
| 84485     | Ccs          | 361    | 290     | 321    | 255    | 266   | 297   | 303   | 301     |
| 313375    | Cyp2j3       | 467    | 461     | 512    | 540.82 | 415   | 446   | 496   | 526.99  |
| 311112    | Fastkd1      | 370    | 340     | 339    | 319    | 336   | 306.1 | 342   | 317     |
| 50864     | Ntm          | 440.85 | 418.19  | 304.14 | 455.22 | 322.3 | 437.5 | 390.3 | 389.22  |
| 361233    | Ssr1         | 1620   | 1755    | 1763   | 1614   | 1600  | 1608  | 1723  | 1491    |
| 287361    | Zfp496       | 292    | 280     | 325    | 250    | 253   | 284   | 303   | 251     |
| 307503    | Etf1         | 1546   | 1337    | 1466   | 1391   | 1279  | 1263  | 1531  | 1387    |
| 311047    | Cytip        | 57     | 39      | 42     | 26     | 39    | 34    | 32    | 51      |
| 499113    | Selenov      | 4      | 15      | 10     | 12     | 9     | 3     | 13    | 14      |
| 295654    | Ttc21b       | 511.01 | 443     | 409.01 | 441.01 | 429   | 402   | 438   | 447     |
| 289707    | Lyar         | 211    | 263     | 248    | 201    | 200   | 244   | 212   | 222     |
| 25263     | Mal          | 6140   | 6463    | 5591   | 5688   | 4168  | 6474  | 5330  | 6746    |
| 80850     | Gng2         | 6066   | 6248    | 6171   | 5977   | 5660  | 5735  | 5901  | 5974    |
| 501088    | Tbc1d5       | 858.85 | 849.07  | 847.55 | 925.73 | 801   | 823.2 | 869.1 | 818.35  |
| 286761    | Vcpipl       | 659    | 678     | 659    | 817    | 788   | 500   | 690   | 698     |
| 365042    | Rab32        | 71     | 77      | 107    | 53     | 74    | 58    | 98    | 63      |
| 316008    | Ccdc51       | 174.2  | 163.45  | 159.21 | 163.47 | 140.7 | 142.8 | 172.6 | 172.07  |
| 29317     | Csrp2        | 192    | 146     | 129    | 129    | 150   | 120   | 120   | 177     |
| 25107     | Avpr1a       | 47     | 48      | 42     | 48     | 42    | 36    | 42    | 56      |
| 108353265 | LOC108353265 | 17.45  | 21.75   | 23.2   | 20.88  | 31.03 | 18.2  | 18.6  | 11.4    |
| 362283    | Stxl6        | 1251   | 1275    | 1266   | 1164   | 1172  | 1189  | 1217  | 1137    |
| 84511     | Slcolc1      | 112    | 136     | 82     | 143    | 70    | 78    | 71    | 231     |
| 499709    | Gar1         | 93     | 126     | 118    | 95     | 96    | 118   | 94    | 103     |
| 313702    | Mad212       | 155    | 152     | 182    | 149    | 157   | 143   | 152   | 155     |
| 117254    | Prdx1        | 3800   | 3679    | 3916   | 2972   | 3205  | 3075  | 3572  | 3817    |
| 100912483 | LOC100912483 | 58     | 71      | 52     | 66     | 62    | 42    | 61    | 70      |
| 501925    | Slc2a9       | 70     | 87      | 81     | 112    | 84    | 107   | 82    | 60      |
| 361055    | Kpna3        | 1414   | 1378    | 1330   | 1338   | 1233  | 1237  | 1407  | 1318    |
| 307491    | Hars2        | 597    | 603     | 615    | 617    | 551   | 555   | 602   | 605.99  |
| 25622     | Ptpn11       | 2448   | 2424    | 2450   | 2614   | 2439  | 2328  | 2454  | 2233    |
| 54244     | Crebbp       | 405    | 437.01  | 497.09 | 474.39 | 380   | 465   | 500.3 | 380.24  |
| 353233    | Nsmaf        | 585    | 503     | 544    | 512    | 521   | 490   | 513   | 516     |
| 81632     | Abat         | 791    | 697     | 693    | 1080   | 696   | 695   | 787   | 925     |
| 29150     | Matr3        | 3916.3 | 4058    | 4253.2 | 4189   | 3883  | 3554  | 4151  | 4033.52 |
| 171015    | Cyb5r4       | 457    | 422     | 444    | 392    | 387   | 365   | 404   | 476     |
| 114095    | Stxbp3       | 568    | 562     | 532    | 488    | 478   | 474   | 575   | 519     |
| 299027    | Eif2s3       | 2362   | 2310    | 2299   | 2325   | 2276  | 2105  | 2278  | 2187    |
| 58966     | Ramp2        | 1151   | 945     | 919    | 913    | 898   | 910   | 976   | 954     |
| 252855    | Sfpq         | 1259   | 1416    | 1497   | 1536   | 1402  | 1304  | 1415  | 1311    |
| 497897    | Zfp2         | 130    | 123     | 125    | 160    | 131   | 119   | 132   | 130     |
| 689256    | Tpd5211      | 230    | 205     | 197    | 196    | 188   | 183   | 191   | 226     |
| 313914    | Gtf3c2       | 864    | 897     | 910    | 952    | 825   | 941   | 838   | 844     |
| 246097    | Fas          | 90     | 84      | 104    | 74     | 96    | 85    | 79    | 75      |
| 289080    | Rgl1         | 1631.3 | 1563.87 | 1522.4 | 1892.6 | 1632  | 1655  | 1581  | 1423.82 |
| 305391    | Med28        | 459    | 424     | 439    | 397    | 378   | 416   | 397   | 445     |
| 361324    | Sema6a       | 662    | 572     | 646    | 730    | 675   | 601   | 676   | 532     |
| 315744    | Itgall       | 87.88  | 57.92   | 90.04  | 91.92  | 88.6  | 83.01 | 76.79 | 63.54   |

|           |              |        |         |        |        |       |       |       |         |
|-----------|--------------|--------|---------|--------|--------|-------|-------|-------|---------|
| 363614    | Natd1        | 301.08 | 276.84  | 231.99 | 92.47  | 290.4 | 29.33 | 296.9 | 242.3   |
| 192227    | Ptgr1        | 80     | 42      | 69     | 58     | 51    | 51    | 56    | 79      |
| 294408    | Asfla        | 267    | 273     | 287    | 252    | 236   | 235   | 268   | 288     |
| 366251    | Slc2a10      | 41.33  | 35.23   | 58.09  | 39.86  | 31.17 | 41.15 | 50.37 | 43.41   |
| 683570    | Gnpdal       | 345    | 314     | 334    | 315    | 307   | 293   | 312   | 333     |
| 192359    | Zc3h14       | 1109   | 1179    | 1192   | 1193   | 1083  | 1065  | 1205  | 1095    |
| 305614    | Sptbn1       | 26739  | 28572   | 29946  | 31798  | 27562 | 27158 | 29292 | 27408   |
| 687029    | Ss1812       | 362    | 383     | 338    | 309    | 326   | 299   | 324   | 376     |
| 313494    | Tln1         | 2833.2 | 3226    | 3631   | 3442.2 | 3026  | 3210  | 3090  | 3174.07 |
| 498995    | Ncoa7        | 6110   | 5940    | 5736   | 6261   | 6028  | 5494  | 5907  | 5461    |
| 287405    | Tmem220      | 70     | 77      | 74     | 70     | 69    | 66    | 80    | 62      |
| 498727    | Nol7         | 519    | 477     | 478    | 440    | 439   | 420   | 459   | 504     |
| 60384     | Copb2        | 1681   | 1579    | 1622   | 1506   | 1520  | 1361  | 1534  | 1666    |
| 361849    | Ccar1        | 1050   | 948.14  | 1077.3 | 1093.9 | 1068  | 895   | 1013  | 993     |
| 25248     | Cnr1         | 625.58 | 496.27  | 485.84 | 538    | 507.8 | 499   | 535   | 500.88  |
| 366960    | Maff         | 61     | 66      | 116    | 90     | 73    | 87    | 87    | 70      |
| 294090    | Ifit1bl      | 54.48  | 75.61   | 69.26  | 56.66  | 73.06 | 51.97 | 53.35 | 65.34   |
| 298558    | Zfp46        | 730    | 745     | 803.81 | 807    | 796.9 | 745   | 697   | 698.93  |
| 171123    | Rph3a1       | 38     | 32      | 39     | 37     | 28    | 36    | 27    | 48      |
| 25637     | Ptger1       | 117    | 123     | 138    | 102    | 114   | 126   | 121   | 96      |
| 316457    | Pikfyve      | 1426   | 1380    | 1372   | 1520   | 1448  | 1235  | 1404  | 1338    |
| 304741    | Tfcp2l1      | 240.31 | 203.31  | 276.82 | 261.93 | 257.7 | 215   | 230.5 | 232.17  |
| 60581     | Acaca        | 2036   | 2100    | 2000   | 2342   | 2093  | 1864  | 2071  | 2044    |
| 360866    | Scyl3        | 359.32 | 406.18  | 345.32 | 382.77 | 361.8 | 332.7 | 337.7 | 389.88  |
| 364535    | Tmem161a     | 318    | 298     | 313    | 283    | 280   | 322   | 292   | 260     |
| 311346    | Lrrc57       | 557.06 | 501.22  | 501.1  | 437.04 | 434.8 | 461.4 | 516.4 | 488.4   |
| 100364240 | Btbd8        | 573.26 | 687.35  | 585.94 | 708.72 | 553.3 | 627.7 | 664.3 | 587.72  |
| 102554315 | LOC102554315 | 417    | 408.16  | 370.62 | 331    | 336   | 359   | 404   | 354.73  |
| 310097    | Snx18        | 1007   | 1027    | 1015   | 965    | 870   | 960   | 992   | 1000    |
| 307505    | Ctnna1       | 3689.2 | 3803.82 | 3872.1 | 3700.2 | 3425  | 3749  | 3553  | 3618.56 |
| 299872    | Eif3e11      | 1898   | 1884.98 | 1849   | 1656   | 1557  | 1654  | 1847  | 1882    |
| 108351491 | LOC108351491 | 16.32  | 17.41   | 12.3   | 26.49  | 27.09 | 19.85 | 12.94 | 9.18    |
| 296293    | Cbfa2t2      | 564    | 667     | 618    | 710    | 635   | 560   | 665   | 577     |
| 24942     | Chm          | 521    | 551     | 510    | 579    | 506   | 470   | 494   | 588     |
| 114561    | Pitpnb       | 1690   | 1626    | 1578   | 1657   | 1528  | 1540  | 1643  | 1528    |
| 100361104 | LOC100361104 | 7      | 16      | 12     | 28     | 9     | 23    | 12    | 16      |
| 114125    | Dl13         | 8      | 6       | 3      | 4      | 7     | 5     | 5     | 3       |
| 289199    | Lrrc52       | 4      | 10      | 5      | 2      | 3     | 3     | 6     | 8       |
| 291427    | Loxhd1       | 7      | 5       | 6      | 3      | 8     | 4     | 6     | 2       |
| 297386    | Slc4a5       | 7      | 3       | 6      | 5      | 7     | 4     | 3     | 6       |
| 29755     | Colq         | 83     | 53      | 63     | 74     | 71    | 73    | 60    | 56      |
| 300019    | Gml          | 10     | 3       | 4      | 4      | 6     | 6     | 4     | 4       |
| 367074    | Tmprss4      | 5      | 7       | 5      | 4      | 5     | 2     | 4     | 9       |
| 680799    | Ccdc166      | 9      | 4       | 3      | 5      | 6     | 7     | 3     | 4       |
| 474154    | Rbm4b        | 179.46 | 201.4   | 195.7  | 175.2  | 164.3 | 166.4 | 189.1 | 196.16  |
| 317191    | Apool        | 294    | 321     | 302    | 281    | 259   | 260   | 308   | 314     |
| 102552497 | Pcdhgb6      | 56.41  | 77.4    | 96.49  | 100.54 | 83.3  | 104.4 | 45.05 | 82.33   |
| 296304    | Edem2        | 306    | 346     | 345    | 286    | 339   | 276   | 310   | 297     |
| 298916    | Cpsf3        | 622    | 624     | 631    | 585    | 533   | 633   | 590   | 589     |
| 305227    | 11-Sep       | 1032   | 1087    | 1082   | 1155   | 994   | 962   | 1119  | 1074    |
| 25679     | Itpr3        | 2562   | 3468    | 3512   | 3295   | 2749  | 3126  | 3040  | 3312    |
| 361718    | Naa40        | 124    | 116     | 118    | 84     | 85    | 125   | 93    | 118     |
| 311670    | Cstf1        | 305    | 312     | 370    | 318    | 301   | 316   | 315   | 311     |
| 170902    | Zfp347       | 274.19 | 261.58  | 248.84 | 276.79 | 230.6 | 223.5 | 268.7 | 288.19  |
| 315858    | Ibtk         | 522    | 562     | 570    | 537    | 495   | 528   | 565   | 499     |
| 679692    | Lpgat1       | 1740   | 1770    | 1637   | 1832   | 1713  | 1580  | 1711  | 1644    |



|           |              |        |         |        |        |       |       |       |         |
|-----------|--------------|--------|---------|--------|--------|-------|-------|-------|---------|
| 364144    | Fryl         | 1975   | 2222    | 2303   | 2484   | 2183  | 2210  | 2186  | 1979    |
| 292781    | Syne4        | 114.21 | 112.68  | 115.58 | 123.28 | 104.1 | 144.7 | 107.8 | 87.06   |
| 296099    | Tp53bp1      | 2029   | 2085    | 1993   | 2278   | 2152  | 1912  | 1981  | 1943    |
| 100362836 | Pocl1b       | 283.99 | 265.39  | 292.58 | 283.6  | 283.7 | 256.4 | 269.8 | 262.43  |
| 100362678 | Epcl         | 550    | 584     | 549    | 556    | 502   | 540   | 515   | 576     |
| 361959    | Kpna4        | 1131   | 1017    | 1028   | 1218   | 1061  | 1020  | 1061  | 1044    |
| 291526    | Pol1         | 92     | 81      | 91     | 74     | 84    | 68    | 94    | 76      |
| 29253     | Maoa         | 1032.5 | 1099.55 | 1212.4 | 1077.4 | 977   | 992   | 1117  | 1126.96 |
| 301549    | Wdfy1        | 1953   | 1910    | 1817   | 1929   | 1773  | 1771  | 1919  | 1786    |
| 303212    | Zfp287       | 349.57 | 393.87  | 336.08 | 370    | 363.1 | 329.2 | 328.3 | 360.4   |
| 294883    | Raly1        | 1126   | 1110    | 1023   | 1074   | 1047  | 962   | 1047  | 1072    |
| 25337     | Nfyc         | 696    | 743     | 713    | 702    | 669   | 653   | 708   | 689     |
| 362831    | Dot11        | 844    | 774     | 911    | 833    | 800   | 821   | 853   | 729     |
| 103693210 | 103693210    | 1224.6 | 1102.85 | 947.34 | 983.92 | 947.7 | 940.9 | 1095  | 1073.83 |
| 300516    | Tmem218      | 298    | 303     | 290    | 252    | 250   | 271   | 270   | 298     |
| 29347     | Faah         | 170.18 | 207.04  | 205    | 147.22 | 153   | 179.3 | 194.4 | 168.29  |
| 301374    | RGD1310553   | 384    | 414     | 384    | 448    | 393   | 397   | 380   | 383     |
| 170899    | Kcnk2        | 375    | 253     | 283    | 338    | 274   | 268   | 333   | 315     |
| 309016    | Wdr11        | 810    | 756     | 780    | 788    | 753   | 736   | 767   | 730     |
| 313865    | Thada        | 434.6  | 456.81  | 466.77 | 506.86 | 448.8 | 395   | 468   | 465.21  |
| 315769    | Trip4        | 585    | 583     | 556    | 566    | 572   | 498   | 562   | 550     |
| 64440     | Syt4         | 5812   | 6263    | 5887   | 5708   | 5745  | 5194  | 6081  | 5534    |
| 103691373 | Frat1        | 152.39 | 169.35  | 124    | 156    | 165.9 | 139   | 128   | 140.47  |
| 246217    | Ngef         | 353    | 301     | 234    | 259    | 315   | 227   | 262   | 289     |
| 309357    | Tmem185a     | 508    | 473     | 472    | 480    | 466   | 444   | 461   | 471     |
| 500318    | Cd27         | 14.43  | 16.45   | 12.6   | 27.47  | 23.31 | 9.77  | 19.26 | 15.27   |
| 246268    | Oas1b        | 192.36 | 212.57  | 199.35 | 240.17 | 209.6 | 227.8 | 191.5 | 175.82  |
| 305150    | Hsd17b13     | 20     | 23      | 23     | 19     | 14    | 28    | 21    | 18      |
| 361810    | Fkbp5        | 1018   | 659     | 593    | 580    | 771   | 764   | 553   | 628     |
| 366697    | Sptlc2       | 2300.8 | 2525.86 | 2418.3 | 2427.8 | 2218  | 2381  | 2319  | 2300.64 |
| 170956    | Ythdc1       | 849    | 928     | 915    | 1010   | 910   | 810   | 923   | 885     |
| 298370    | Txndc12      | 819    | 883     | 863    | 693    | 616   | 790   | 832   | 867     |
| 298065    | Tex10        | 530.31 | 532.95  | 513.31 | 496.98 | 486.3 | 480   | 541.5 | 468.42  |
| 171129    | Uggt1        | 1521   | 1517    | 1594   | 1719   | 1560  | 1479  | 1582  | 1432    |
| 100361558 | LOC100361558 | 2848.2 | 2892.75 | 3281   | 1900.3 | 2475  | 2563  | 3066  | 2306.49 |
| 113948    | Bbs2         | 681    | 721     | 597    | 623    | 613   | 632   | 639   | 615     |
| 171107    | Arr3         | 26.15  | 16.11   | 24.86  | 21.84  | 18.06 | 18.07 | 25.75 | 22.91   |
| 58959     | Crhr1        | 15     | 20      | 13     | 16     | 11    | 17    | 11    | 22      |
| 316317    | Imp4         | 392.61 | 372.43  | 403.02 | 321.18 | 342.7 | 348.2 | 353.8 | 374.78  |
| 497815    | Nrcam        | 3381   | 3411    | 3775   | 3520   | 3802  | 3129  | 3534  | 2962    |
| 102551838 | LOC102551838 | 11.97  | 1.36    | 8.01   | 5.98   | 5.34  | 9.07  | 4.13  | 7.5     |
| 54230     | Btg3         | 174    | 167     | 191    | 151    | 144   | 140   | 174   | 193     |
| 316575    | Trip12       | 3510   | 3534    | 3582   | 3889   | 3655  | 3200  | 3650  | 3330    |
| 64394     | Zmat3        | 1313   | 1493.84 | 1517.1 | 1399   | 1332  | 1257  | 1469  | 1396.57 |
| 289196    | Tmco1        | 1067   | 1039    | 977.18 | 963.22 | 949   | 900.9 | 1004  | 1002.98 |
| 24192     | Akr1b1       | 4614   | 5400    | 4653   | 4104   | 3475  | 4312  | 5093  | 5012    |
| 300756    | Arih1        | 2134   | 2033    | 2066   | 2098   | 2037  | 1872  | 2069  | 1963    |
| 291618    | Kctd16       | 342.21 | 388.13  | 399.08 | 526.35 | 460.5 | 295.2 | 379.4 | 443.12  |
| 108352427 | LOC108352427 | 13.19  | 26      | 11.25  | 26.08  | 15.39 | 11.24 | 13.58 | 32.73   |
| 316406    | RGD1306941   | 1023   | 944     | 900    | 874    | 888   | 823   | 944   | 911     |
| 295106    | Ift80        | 510    | 543     | 471    | 486    | 467   | 442   | 485   | 522     |
| 311748    | Metap1d      | 76     | 67      | 58     | 77     | 61    | 69    | 74    | 61      |
| 100910867 | Cfap69       | 268    | 209     | 204    | 260    | 225   | 251   | 166   | 255     |
| 81748     | Pls3         | 5643   | 5474    | 5167   | 5277   | 4766  | 4620  | 5518  | 5649    |
| 25132     | Myo5b        | 148    | 168     | 110    | 173    | 173   | 112   | 128   | 158     |
| 25245     | Bdkrb2       | 337    | 393     | 426    | 363    | 369   | 385   | 384   | 310     |

|           |              |        |         |        |        |       |       |       |          |
|-----------|--------------|--------|---------|--------|--------|-------|-------|-------|----------|
| 64133     | Xylt1        | 42.99  | 42.11   | 58.02  | 76.06  | 48.9  | 59.07 | 51.97 | 49       |
| 81640     | Amd1         | 2351   | 2235    | 2157   | 2165   | 2176  | 2104  | 2196  | 2016     |
| 24679     | Prkar2b      | 3074   | 3177    | 3613   | 2712   | 2886  | 2722  | 3116  | 3265     |
| 362724    | Sh3yl1       | 199    | 191     | 162    | 155    | 162   | 162   | 166   | 184      |
| 500901    | Arhgap39     | 1773.2 | 1928    | 2075   | 1922.1 | 1947  | 1883  | 1767  | 1741.99  |
| 24419     | Grm6         | 71.09  | 73.87   | 78.09  | 108.56 | 86.26 | 69.78 | 91.51 | 68.61    |
| 295690    | Dna.jc10     | 4070   | 4002    | 3925   | 3963   | 3822  | 3545  | 3975  | 3875     |
| 315145    | Fam83f       | 331.68 | 351.53  | 385.81 | 307.38 | 251.6 | 362.6 | 330.4 | 367.76   |
| 681284    | Hmgn5b       | 83     | 63.59   | 87.03  | 60.04  | 81    | 62    | 68    | 69       |
| 679168    | Fam199x      | 21     | 36      | 32     | 40     | 35    | 18    | 30    | 40       |
| 685679    | Nme4         | 22     | 19      | 24     | 21     | 23    | 15    | 19    | 25       |
| 311607    | Chd6         | 1893   | 2039.97 | 2017   | 2242.2 | 1993  | 1933  | 2063  | 1822.1   |
| 498390    | Zfp518b      | 569    | 555     | 570    | 522    | 566   | 471   | 514   | 562      |
| 315758    | Dpp8         | 4214.4 | 4206.87 | 4183.6 | 4564.5 | 4123  | 4069  | 4265  | 3914.46  |
| 361859    | Cdc40        | 366    | 367     | 385    | 346    | 356   | 350   | 356   | 334      |
| 360850    | Nek7         | 4811   | 4519    | 4267   | 4751   | 4224  | 4181  | 4660  | 4431     |
| 83627     | Galnt5       | 536    | 502     | 437    | 529    | 537   | 438   | 455   | 481      |
| 60430     | Mc11         | 769    | 713     | 792    | 766    | 639   | 729   | 766   | 765      |
| 361939    | Mfsd8        | 803.9  | 823.87  | 762.55 | 794.78 | 785.1 | 695.1 | 768.5 | 788.73   |
| 103691035 | LOC103691035 | 1.4    | 0.66    | 2      | 2.2    | 1.42  | 1.47  | 3.08  | 0        |
| 361315    | Yipf5        | 944    | 924     | 986    | 860    | 852   | 859   | 913   | 918      |
| 502935    | Eya1         | 19     | 18      | 26     | 45     | 12    | 19    | 44    | 28       |
| 681359    | E4f1         | 371.57 | 322.87  | 333.97 | 334.03 | 339.2 | 322.8 | 327.8 | 309.61   |
| 360725    | Snx4         | 1039   | 953     | 1013   | 953    | 934   | 906   | 999   | 936      |
| 501560    | Rps6ka3      | 2823.5 | 2739.84 | 2990.7 | 3186.1 | 2980  | 2508  | 2954  | 2755.1   |
| 171090    | Giot1        | 202.06 | 179.41  | 214.53 | 246.07 | 214.2 | 176.6 | 199   | 213.31   |
| 304054    | Prdm15       | 194.71 | 170.93  | 200.76 | 194.85 | 205.6 | 171.7 | 193.7 | 155.01   |
| 501195    | RGD1562136   | 1324   | 1334    | 1225   | 1159   | 1187  | 1145  | 1239  | 1238     |
| 100909657 | LOC100909657 | 195    | 204     | 218    | 184    | 178   | 206   | 198   | 182      |
| 290648    | Pgpep1       | 287.36 | 274.31  | 256.64 | 299.62 | 286.1 | 255.2 | 252.2 | 272.77   |
| 315141    | Mief1        | 817    | 845     | 841    | 876    | 796   | 881   | 773   | 773      |
| 305472    | Pik3ip1      | 1191   | 1350    | 1300   | 1120   | 1145  | 1265  | 1111  | 1211     |
| 366461    | Ppih         | 319    | 276     | 306    | 269    | 260   | 263   | 269   | 324      |
| 100359687 | LOC100359687 | 248.23 | 297.96  | 408    | 66.56  | 254.7 | 338   | 8.99  | 372      |
| 102547932 | Zfp623       | 182.35 | 153.21  | 184.33 | 149.51 | 147.3 | 152.1 | 157.4 | 181.66   |
| 311880    | Gapvd1       | 1433   | 1545.18 | 1539   | 1630   | 1478  | 1436  | 1527  | 1423.11  |
| 50659     | Nr2c2        | 546    | 475     | 525    | 605    | 562   | 413   | 561   | 516      |
| 315702    | RGD1305464   | 135    | 107     | 129    | 107    | 112   | 122   | 106   | 116      |
| 502642    | Selenoh      | 272    | 228     | 263    | 172    | 210   | 263   | 199   | 220      |
| 171576    | Bub1b        | 20     | 18      | 37     | 12     | 30    | 22    | 20    | 11       |
| 29316     | Adora2b      | 93     | 65      | 104    | 86     | 93    | 85    | 84    | 70       |
| 619385    | Ncoa4        | 2686   | 2679    | 2779   | 2644   | 2525  | 2489  | 2654  | 2624     |
| 362173    | Caprin1      | 7420   | 7331    | 6961   | 7458   | 7080  | 6587  | 7318  | 6844     |
| 307848    | Fuk          | 205    | 205     | 170    | 225    | 209   | 203   | 188   | 168      |
| 314384    | Rps6ka5      | 710    | 736     | 676    | 708    | 682   | 664   | 711   | 643      |
| 310982    | Tt117        | 23963  | 20596   | 18749  | 23465  | 21235 | 18510 | 21762 | 21280.45 |
| 361522    | Hnrnpull1    | 1517   | 1609    | 1697   | 1645   | 1574  | 1655  | 1557  | 1385     |
| 100361234 | Btbd19       | 120    | 159     | 118    | 104    | 104   | 126   | 128   | 120      |
| 288504    | Snx8         | 233    | 218     | 236    | 228    | 241   | 215   | 214   | 203      |
| 362092    | Brd3         | 635    | 625     | 692    | 685    | 639   | 613   | 634   | 630      |
| 114489    | Dag1         | 8486   | 10325   | 11150  | 11089  | 8908  | 10308 | 10188 | 9764     |
| 316639    | Farp2        | 869.93 | 914.38  | 854.93 | 928.48 | 832.6 | 952   | 809.7 | 809.84   |
| 316013    | Setd2        | 979    | 1008    | 1078   | 1125   | 1055  | 980   | 1061  | 902      |
| 311573    | Cep250       | 364    | 339     | 406    | 398    | 361   | 352   | 393   | 332      |
| 100909679 | LOC100909679 | 17.7   | 33.17   | 27.44  | 38.04  | 22.71 | 24.03 | 35.26 | 29.03    |
| 24770     | Cc12         | 240    | 260     | 318    | 320    | 206   | 245   | 335   | 300      |

|           |              |        |         |        |        |       |       |       |         |
|-----------|--------------|--------|---------|--------|--------|-------|-------|-------|---------|
| 680404    | C1ql3        | 47     | 52      | 73     | 47     | 27    | 50    | 43    | 89      |
| 365903    | Fam102b      | 2357   | 2278.64 | 2217.4 | 2440.1 | 2229  | 2117  | 2187  | 2336.08 |
| 84379     | Rab6a        | 13447  | 12947   | 12661  | 13306  | 12188 | 12511 | 13041 | 12232   |
| 362428    | Rimklb       | 512    | 667     | 604    | 651    | 501   | 583   | 608   | 631     |
| 296840    | Rbm48        | 113.45 | 106.65  | 117.32 | 98.55  | 87.86 | 108.8 | 120.1 | 99.3    |
| 299284    | Dicer1       | 968.05 | 970.66  | 982.76 | 1113.3 | 972.7 | 970.2 | 978.1 | 929.8   |
| 314388    | Ppp4r3a      | 648    | 601     | 662    | 592    | 599   | 573   | 620   | 597     |
| 100910996 | LOC100910996 | 373    | 359     | 275    | 311    | 313   | 334   | 318   | 293     |
| 308742    | Mctp2        | 1427   | 1290    | 1425   | 1552   | 1445  | 1230  | 1476  | 1284    |
| 361462    | Hddc2        | 397    | 373     | 367    | 380    | 362   | 329   | 358   | 399     |
| 300965    | Srprb        | 368    | 383     | 355    | 433    | 354   | 368   | 385   | 362     |
| 292756    | Pak4         | 419.75 | 333.78  | 386.9  | 416.9  | 372.5 | 354.4 | 345.5 | 414.2   |
| 155192    | Abcg8        | 21     | 10      | 18     | 17     | 15    | 11    | 21    | 16      |
| 298845    | Emilin1      | 201    | 174     | 255    | 228    | 176   | 217   | 191   | 235     |
| 313170    | Kif24        | 19     | 20      | 30     | 19     | 20    | 22    | 23    | 19      |
| 500356    | Rergl        | 8      | 0       | 1      | 13     | 6     | 5     | 8     | 2       |
| 54190     | Rabep1       | 1976   | 1966    | 1882   | 1991   | 1834  | 1805  | 2020  | 1801    |
| 29613     | Ntrk3        | 498    | 509     | 538    | 680    | 476   | 525   | 541   | 582     |
| 289820    | Actr2        | 6786   | 6571    | 6365   | 6227   | 6215  | 5687  | 6543  | 6327    |
| 100158232 | Zfp9         | 472.99 | 448.22  | 466.29 | 486.44 | 475.3 | 397.2 | 479.4 | 437.06  |
| 361990    | Chtop        | 1655.7 | 1547.41 | 1716.5 | 1441.2 | 1473  | 1463  | 1556  | 1580.47 |
| 362549    | Efcab7       | 139    | 125.06  | 138    | 129    | 103   | 106   | 157   | 141     |
| 363924    | Rad9b        | 183.77 | 156.22  | 142.77 | 142.19 | 144.9 | 165.8 | 124.7 | 161.3   |
| 64298     | Rpl31        | 3066.8 | 2859.65 | 3086.9 | 2338   | 2568  | 2456  | 2575  | 3238.11 |
| 290291    | Cab391       | 1795   | 1919    | 1850   | 1656   | 1535  | 1681  | 1838  | 1839    |
| 24827     | Tgfa         | 532.02 | 598.05  | 613.33 | 526.34 | 411.2 | 545.7 | 595.9 | 614.12  |
| 362367    | Znrf2        | 806    | 847     | 831    | 918.99 | 891   | 733   | 847   | 778     |
| 64562     | Prkab2       | 1667   | 1586    | 1470   | 1512   | 1696  | 1434  | 1503  | 1320    |
| 313365    | Ift74        | 201    | 164     | 188    | 199    | 170   | 156   | 204   | 188     |
| 25475     | Lgals5       | 58.42  | 45.51   | 80.11  | 13.28  | 43.19 | 56.67 | 42.29 | 46.25   |
| 363672    | Sp6          | 77     | 62      | 132    | 83     | 90    | 72    | 67    | 109     |
| 81757     | Rala         | 2316   | 2300    | 2236   | 2221   | 2073  | 2038  | 2236  | 2316    |
| 102548231 | LOC102548231 | 122.07 | 129.98  | 101.13 | 116    | 113   | 111   | 117   | 106.99  |
| 498081    | Slc35a5      | 616    | 663     | 679    | 632    | 557   | 638   | 660   | 618     |
| 65033     | Stx12        | 3503.4 | 3345.23 | 3329.3 | 3130.9 | 2997  | 3101  | 3208  | 3402.18 |
| 140568    | Chst10       | 281.89 | 267.97  | 227.04 | 296.09 | 263.2 | 249.7 | 253.7 | 257.92  |
| 59326     | Rapgef3      | 339.32 | 289.73  | 286.98 | 318.13 | 245.4 | 345   | 264.3 | 323.71  |
| 303602    | Dcaf7        | 1788   | 1812    | 1801   | 1933   | 1795  | 1754  | 1727  | 1727    |
| 688622    | I131ra       | 1578.6 | 1777.61 | 1703.7 | 1951.2 | 1932  | 1390  | 1439  | 1934.01 |
| 192263    | Pigl         | 135.08 | 87.83   | 112.34 | 121.35 | 105   | 95.18 | 113.9 | 121.88  |
| 100911751 | LOC100911751 | 20.63  | 17.59   | 26.27  | 27.37  | 29.54 | 27.67 | 15.09 | 15.42   |
| 683667    | Sri          | 3550.6 | 3502.03 | 3486.8 | 3450.2 | 3155  | 3271  | 3465  | 3467.86 |
| 100910854 | LOC100910854 | 164.27 | 172.88  | 166.87 | 135.48 | 143.7 | 187.6 | 159.7 | 119.71  |
| 304378    | Gigyf1       | 845    | 795.54  | 903.02 | 846    | 826   | 893   | 805   | 713     |
| 307745    | Tent4b       | 719    | 756     | 759    | 810    | 728   | 681   | 744   | 754     |
| 84356     | Abcd2        | 706.68 | 702.2   | 612.59 | 740.15 | 725   | 668.8 | 639.2 | 604.37  |
| 315762    | Ras112       | 235.45 | 184     | 176    | 164    | 153   | 207   | 186   | 179.28  |
| 360697    | Ifngr2       | 688.89 | 655.53  | 701.43 | 615.17 | 643.4 | 649.3 | 646.2 | 602.5   |
| 293667    | B4gat1       | 661.46 | 785     | 540.97 | 646.98 | 538.5 | 642.5 | 695.5 | 639.47  |
| 295446    | Tbck         | 466    | 492     | 510    | 533    | 492   | 488   | 461   | 470     |
| 310669    | Golph31      | 323.44 | 298     | 275    | 292.28 | 276.1 | 264.3 | 305.4 | 289.51  |
| 291209    | Hecw1        | 2882   | 3052.99 | 2919   | 3611   | 3207  | 2673  | 3134  | 2891.06 |
| 691501    | Snopc5       | 529    | 514     | 438    | 456    | 451   | 474   | 461   | 464     |
| 315891    | RGD1309079   | 571    | 534     | 592    | 619    | 554   | 534   | 586   | 538     |
| 293754    | Mrpl16       | 467    | 415     | 365    | 380    | 380   | 378   | 396   | 400     |
| 289668    | Lap3         | 1101   | 1155.95 | 1133   | 1040   | 982.2 | 1056  | 1107  | 1086    |

|           |              |        |         |        |        |       |       |       |         |
|-----------|--------------|--------|---------|--------|--------|-------|-------|-------|---------|
| 312440    | Kdm3a        | 664    | 596     | 658    | 668    | 622   | 617   | 628   | 603     |
| 117544    | Ppat         | 519.72 | 474.66  | 439.16 | 471.26 | 459.2 | 450.8 | 446.1 | 463.35  |
| 683758    | Klrb1c       | 2.59   | 0       | 6.24   | 4.11   | 8.23  | 1.06  | 2.07  | 1       |
| 25409     | Cdh6         | 472    | 477     | 429    | 631    | 538   | 394   | 491   | 496     |
| 116555    | Nup107       | 463    | 414     | 399    | 421    | 415   | 367   | 423   | 416     |
| 102547626 | LOC102547626 | 19.22  | 11.43   | 14.91  | 19.28  | 15.46 | 12.3  | 18.64 | 15.54   |
| 311415    | Zc3h6        | 158.48 | 211.53  | 177.9  | 188.11 | 166   | 167   | 170.5 | 199.61  |
| 450229    | Krt27        | 19.82  | 15      | 13.18  | 13.8   | 14.84 | 10.93 | 10.58 | 22.69   |
| 29597     | P2ry2        | 419.68 | 429.75  | 463.77 | 449.31 | 376.5 | 427.3 | 423.5 | 456.51  |
| 171018    | Zfp384       | 708    | 621     | 669    | 624    | 548   | 671   | 663   | 623     |
| 307766    | Smarca5      | 1604   | 1597    | 1720   | 1714   | 1541  | 1502  | 1704  | 1592    |
| 500266    | Fam19a1      | 190    | 167     | 154    | 162    | 135   | 160   | 175   | 173     |
| 103693914 | LOC103693914 | 13     | 7       | 13     | 6.04   | 5     | 10.23 | 10    | 12.07   |
| 316810    | Gtf3c3       | 504    | 513     | 494    | 576    | 502   | 456   | 545   | 491     |
| 310820    | Ptbp2        | 1898   | 1812    | 1675   | 1820   | 1740  | 1603  | 1894  | 1647    |
| 64365     | Tcn2         | 999.66 | 972.32  | 1121.2 | 1056.2 | 917.4 | 998.8 | 1014  | 1034.28 |
| 305956    | Wdfy2        | 1709.7 | 1822    | 1658   | 1787   | 1557  | 1691  | 1747  | 1671    |
| 501563    | Prkx         | 1158   | 1187    | 1161   | 1233   | 1068  | 1020  | 1224  | 1216    |
| 100910636 | LOC100910636 | 66     | 72.74   | 56     | 61     | 69    | 58    | 51    | 66.36   |
| 688581    | Elmod2       | 520.56 | 340.49  | 513.5  | 518.83 | 445.4 | 401.4 | 352.5 | 609.84  |
| 114107    | Kremen1      | 147    | 170     | 196    | 184    | 162   | 145   | 192   | 167     |
| 302864    | Mmgt1        | 2516.2 | 2655.68 | 2433.3 | 2636.6 | 2445  | 2395  | 2568  | 2378.82 |
| 287726    | Rdm1         | 50     | 63      | 68     | 44     | 58    | 49    | 46    | 62      |
| 362733    | Etv1         | 3778   | 4246    | 3113   | 4550   | 4238  | 3741  | 3408  | 3603    |
| 314523    | Wdr60        | 209    | 201     | 221    | 202    | 192   | 179   | 232   | 193     |
| 361506    | Leng8        | 4884.7 | 4355.45 | 4995.9 | 4734.4 | 4509  | 4879  | 4716  | 4025.17 |
| 685504    | Clgn         | 3052   | 2895    | 2785   | 2698   | 2890  | 2693  | 2700  | 2640    |
| 361986    | Slc39a1      | 1015.7 | 975.62  | 1219.5 | 1025.4 | 921.7 | 1003  | 1019  | 1105.28 |
| 361285    | Mllt10       | 683    | 610     | 700    | 645    | 663   | 595   | 666   | 597     |
| 499583    | Naalad12     | 103    | 71.85   | 95.06  | 116.04 | 77.38 | 78.01 | 100.4 | 113.01  |
| 63994     | Arhgap17     | 1052.8 | 1088.2  | 1165.1 | 1205.1 | 1063  | 1055  | 1118  | 1074.98 |
| 363054    | Mpz13        | 102    | 86      | 73     | 100    | 92    | 81    | 85    | 87      |
| 25122     | Scnn1a       | 25     | 26      | 43.98  | 40     | 32    | 26    | 39    | 32      |
| 362969    | Tt111        | 821    | 771     | 706    | 773    | 782   | 738   | 756   | 659     |
| 59322     | Cnksr2       | 270.2  | 267.74  | 317.47 | 390.38 | 355.3 | 234.3 | 318   | 283.05  |
| 25255     | Dyrk1a       | 1151   | 1172    | 1182   | 1170   | 1119  | 1121  | 1161  | 1067    |
| 363151    | Ccdc12       | 226    | 147     | 169    | 181    | 153   | 182   | 162   | 194     |
| 366693    | Rbm25        | 1215.2 | 1148.64 | 1326.2 | 1238.6 | 1220  | 1126  | 1238  | 1125.68 |
| 361481    | Prr18        | 209.18 | 221.29  | 227.78 | 227.57 | 238.2 | 207.8 | 190   | 210.67  |
| 308909    | Smpd1        | 2064   | 2304    | 2250   | 2162   | 1993  | 2178  | 2071  | 2150    |
| 292816    | Zfp507       | 267.28 | 266.01  | 266.48 | 278.36 | 265.5 | 225.8 | 255.3 | 283.91  |
| 116650    | Srp54a       | 1119   | 1092    | 1099   | 1016   | 1001  | 930   | 1113  | 1091    |
| 500795    | RGD1562114   | 94     | 106     | 125    | 83     | 93    | 93    | 95    | 109     |
| 54227     | Arpc1b       | 1589   | 1689    | 2146   | 1286   | 1468  | 1666  | 1724  | 1556    |
| 414786    | RT1-M1-2     | 18.55  | 19.57   | 20.72  | 32.11  | 22.34 | 25.48 | 21.67 | 17.45   |
| 300857    | Tmem30a      | 9812   | 9450    | 8693   | 9615   | 8722  | 8015  | 9791  | 9386    |
| 100362121 | Ddb2         | 98     | 109     | 76     | 80     | 85    | 73    | 99    | 90      |
| 300030    | Rhpn1        | 1206   | 1269    | 1315   | 1091   | 970   | 1305  | 1163  | 1228    |
| 362304    | Orc5         | 525    | 534     | 547    | 483    | 483   | 471   | 518   | 525     |
| 311913    | Dennd1a      | 405    | 422     | 428.99 | 427    | 387   | 412   | 421   | 388.99  |
| 291750    | Trappc8      | 1411   | 1362    | 1340   | 1479   | 1316  | 1319  | 1442  | 1269    |
| 307474    | Tcerg1       | 1753.5 | 1919.38 | 1879.4 | 2021.6 | 1807  | 1762  | 1976  | 1695.62 |
| 24778     | Slc2a1       | 1294   | 1412    | 1643   | 1791   | 1416  | 1456  | 1561  | 1437    |
| 312777    | Etv6         | 49     | 39      | 44     | 50     | 42    | 52    | 48    | 32      |
| 100360406 | Tsr1         | 695.54 | 698.22  | 693.27 | 676.38 | 642.5 | 656.3 | 679.5 | 663.66  |
| 310658    | Pogz         | 652    | 636     | 653    | 745    | 617   | 663   | 660   | 628     |

|           |              |        |         |        |        |       |       |       |         |
|-----------|--------------|--------|---------|--------|--------|-------|-------|-------|---------|
| 304019    | Tbc1d23      | 919    | 988     | 1019   | 967    | 866   | 905   | 976   | 975     |
| 500841    | RGD1561648   | 51.7   | 54.83   | 49.07  | 51.7   | 46.25 | 52.65 | 49.65 | 49.65   |
| 313663    | Crocc        | 128    | 129     | 135    | 147    | 108.3 | 149   | 142   | 116     |
| 367838    | Zc4h2        | 483    | 427     | 373    | 381    | 404   | 352   | 412   | 423     |
| 81802     | Stx3         | 293    | 304     | 283    | 283    | 310   | 230   | 288   | 284     |
| 297930    | Wwp1         | 1025   | 1189    | 1149   | 1175   | 1069  | 985   | 1186  | 1099    |
| 296954    | Tnpo3        | 1562   | 1496.93 | 1577.5 | 1550.1 | 1587  | 1417  | 1524  | 1388.46 |
| 305025    | Tp53bp2      | 287    | 316     | 300    | 377    | 294   | 307   | 319   | 304     |
| 83572     | Pafahlb1     | 20561  | 19960   | 19382  | 20556  | 19773 | 17623 | 20266 | 19277   |
| 311419    | Stk35        | 384    | 383     | 322    | 397    | 355   | 389   | 343   | 334     |
| 116483    | Dars         | 1118   | 1165    | 1146   | 1054   | 1018  | 1048  | 1124  | 1097    |
| 299668    | RGD1566251   | 753.17 | 657.7   | 601.62 | 848.61 | 793.7 | 630.1 | 610   | 702.25  |
| 311163    | Ctnnd1       | 2733   | 2981    | 3030   | 3254   | 2799  | 2915  | 2956  | 2804    |
| 295217    | Snapin       | 1406   | 1317    | 1273   | 1156   | 1094  | 1176  | 1330  | 1327    |
| 58823     | Nckap1       | 9937   | 9093    | 9318   | 9467   | 8973  | 8461  | 9626  | 9104    |
| 305127    | Zfp644       | 1007   | 958     | 1012   | 1009   | 952   | 882   | 1016  | 962     |
| 363098    | Ccpg1        | 2266.6 | 2091.32 | 2077.5 | 2262.6 | 2135  | 1976  | 2282  | 1925.08 |
| 114638    | Hps1         | 206    | 190     | 252    | 177    | 183   | 240   | 191   | 175     |
| 680259    | Fam171a1     | 2689.1 | 2803.16 | 2829.8 | 2963.5 | 2771  | 2747  | 2718  | 2556.71 |
| 295334    | Bcas2        | 382    | 430     | 370    | 377    | 331   | 360   | 391   | 409     |
| 170849    | Zfp111       | 135.44 | 136.86  | 141.78 | 99.74  | 119.4 | 123.1 | 123.4 | 125.5   |
| 309196    | Ttc9c        | 1240   | 1225.29 | 1262   | 1246   | 1226  | 1115  | 1204  | 1212.12 |
| 363629    | Cyb5d1       | 479.24 | 421.45  | 470.09 | 452.15 | 410.6 | 439   | 459.3 | 434.59  |
| 312480    | Pcgf1        | 192.69 | 110.01  | 145.15 | 118.66 | 132.6 | 151.7 | 160.6 | 96.98   |
| 287356    | Mrpl55       | 559    | 477     | 474    | 419    | 448   | 444   | 467   | 486     |
| 312439    | Rmnd5a       | 1774   | 1650    | 1737   | 1776   | 1594  | 1596  | 1788  | 1657    |
| 312664    | Rasgef1a     | 648    | 702     | 688    | 604    | 640   | 618   | 609   | 660     |
| 85244     | Spa17        | 301    | 286     | 252    | 264    | 278   | 237   | 285   | 255     |
| 366169    | Rtf1         | 963    | 974     | 953    | 947    | 914   | 924   | 937   | 895     |
| 306492    | Cnot7        | 1408   | 1268.02 | 1282   | 1259   | 1206  | 1218  | 1294  | 1272.14 |
| 304733    | Epb4115      | 82     | 139     | 91     | 148    | 108   | 106   | 100   | 126     |
| 54302     | Slc14a2      | 7      | 4       | 5      | 7      | 5     | 5     | 6     | 6       |
| 310460    | Arhgef26     | 296    | 308     | 320    | 250    | 221   | 272   | 317   | 313     |
| 500384    | Tmem70       | 703    | 617.51  | 527.68 | 546.14 | 516   | 524   | 631.7 | 618.71  |
| 361767    | Poll         | 504    | 544     | 499    | 480    | 425   | 539   | 506   | 469     |
| 309097    | Adgral       | 362.52 | 308.67  | 318.97 | 240.2  | 208   | 265   | 360   | 343.93  |
| 108348083 | LOC108348083 | 140.02 | 129.37  | 118.65 | 107.86 | 151   | 96.98 | 118.7 | 107.77  |
| 103693495 | Oxld1        | 115    | 85      | 59     | 87     | 73    | 69    | 101   | 88      |
| 64031     | Pdcd4        | 1420.3 | 1383.01 | 1605.3 | 1455.5 | 1480  | 1410  | 1557  | 1162.89 |
| 294390    | Zup1         | 247    | 215     | 194    | 222    | 190   | 223   | 215   | 212     |
| 282843    | Sorbs3       | 1133.5 | 1077.19 | 1102   | 1020.7 | 916.7 | 1200  | 1085  | 944.27  |
| 498136    | Mtus2        | 245    | 182     | 173    | 187    | 174   | 185   | 215   | 179     |
| 114119    | Gng10        | 802    | 770     | 836    | 672    | 670   | 724   | 755   | 798     |
| 305831    | Atg14        | 210.82 | 202.47  | 213.65 | 224.66 | 195.8 | 195.5 | 214.1 | 209.38  |
| 29524     | Limk2        | 640.27 | 673.25  | 738.56 | 691.11 | 620.2 | 674.8 | 669.8 | 660.01  |
| 81634     | Actn1        | 375.6  | 345.68  | 502.99 | 394.56 | 369.6 | 393.6 | 431.3 | 354.51  |
| 300710    | Ddx10        | 506    | 538     | 516    | 550    | 480   | 475   | 528   | 536     |
| 306375    | Csgalnact1   | 735.13 | 601.2   | 869.47 | 579.41 | 729.9 | 716.6 | 630.5 | 588.2   |
| 65195     | Kcnd3        | 2754   | 2696    | 2644   | 2806   | 2713  | 2360  | 2563  | 2794    |
| 261736    | Cops2        | 4805   | 4599    | 4512   | 4629   | 4155  | 4078  | 4648  | 4865    |
| 315606    | Kmt2a        | 1274   | 1254    | 1370   | 1557   | 1320  | 1280  | 1345  | 1275    |
| 317368    | Porcn        | 414    | 428     | 398    | 411    | 374   | 431   | 397   | 378     |
| 685859    | Ubxn2a       | 1988.2 | 1965.37 | 1658.1 | 2002.3 | 1760  | 1766  | 1893  | 1868.05 |
| 29500     | Slc10a2      | 893.37 | 808.18  | 874.14 | 810.57 | 732.1 | 819.5 | 888.4 | 800.6   |
| 367915    | Rab9b        | 2324.9 | 2087.88 | 2140.6 | 2221.9 | 2074  | 1894  | 2292  | 2137.88 |
| 498310    | Ns11         | 38     | 36      | 55     | 34     | 35    | 43    | 40    | 38      |



|           |                 |        |         |        |        |       |       |       |         |
|-----------|-----------------|--------|---------|--------|--------|-------|-------|-------|---------|
| 296370    | Ctsa            | 3845.9 | 3912.16 | 4277.2 | 3636.3 | 3460  | 3990  | 3705  | 3844.51 |
| 102554398 | LOC102554398    | 129.1  | 116.98  | 118.11 | 110.95 | 108.7 | 112.7 | 118.4 | 114.9   |
| 310935    | Fpgt            | 303    | 251     | 217    | 301    | 264   | 221   | 267   | 274     |
| 360792    | Styx11          | 83     | 81      | 100    | 69     | 59    | 92    | 97.02 | 70.7    |
| 291841    | Cnot1           | 1714   | 1800    | 1961   | 1945   | 1793  | 1703  | 1843  | 1763    |
| 108348063 | NEWGENE_1309551 | 140.33 | 175.43  | 212.82 | 101.72 | 153.2 | 132.3 | 210.8 | 107.11  |
| 309135    | Ano1            | 176.19 | 192.84  | 164.41 | 179.61 | 170.5 | 180.6 | 184.9 | 146.49  |
| 102554622 | LOC102554622    | 2748.4 | 3365.98 | 3366.3 | 2999.4 | 3233  | 3080  | 2896  | 2736.95 |
| 360667    | Mfsd11          | 751.48 | 800     | 830    | 758    | 732   | 748   | 793   | 732     |
| 312937    | Cyld            | 602    | 656     | 579    | 640    | 619   | 571   | 606   | 575     |
| 362890    | Tspan31         | 1148   | 1133    | 1131   | 1075   | 945   | 1032  | 1221  | 1097    |
| 293650    | Tcirg1          | 675    | 589     | 650    | 587    | 601   | 652   | 554   | 587     |
| 171057    | Cbwd1           | 200    | 209     | 182    | 157    | 175   | 177   | 176   | 188     |
| 362044    | Cenpe           | 69     | 56      | 105    | 74     | 90    | 62    | 75    | 64      |
| 100362710 | Tiam2           | 249.74 | 270.31  | 286.91 | 231.79 | 244.6 | 253.9 | 241.4 | 254.52  |
| 303088    | Trim41          | 738    | 696     | 732    | 712    | 691   | 668   | 739   | 657     |
| 362687    | Srsf7           | 988    | 890     | 972    | 850    | 889   | 868   | 930   | 855     |
| 100125385 | Mroh1           | 206    | 229     | 196    | 259    | 235   | 195   | 225   | 197     |
| 114906    | Pkia            | 2280   | 2376    | 2261   | 2035   | 1930  | 2078  | 2216  | 2346    |
| 499309    | RGD1560108      | 627    | 585     | 668    | 582    | 568   | 585   | 594   | 610     |
| 314297    | Papln           | 1168.9 | 1018.77 | 1074.9 | 1297.9 | 1189  | 1063  | 993.2 | 1121.58 |
| 362118    | Mvb12b          | 2825   | 3148    | 3258   | 3324   | 2573  | 3314  | 2977  | 3156    |
| 286978    | Tmsb15b2        | 352    | 343     | 328    | 268    | 356   | 248   | 295   | 337     |
| 296913    | Lsm8            | 242    | 234     | 238    | 178    | 169   | 211   | 241   | 233     |
| 309255    | Mtmr10          | 462    | 529     | 453    | 434    | 474   | 414   | 459   | 451     |
| 362383    | Rpia            | 177    | 165     | 179    | 137    | 137   | 157   | 175   | 161     |
| 498949    | Phlpp2          | 388    | 352     | 358    | 430    | 416   | 315   | 372   | 360     |
| 50681     | Acox1           | 1181.9 | 1206.09 | 1145   | 1161.8 | 1088  | 1116  | 1157  | 1134.08 |
| 291276    | LOC291276       | 1      | 0       | 0      | 3      | 1.83  | 1     | 0     | 1       |
| 314399    | Ubr7            | 519    | 456     | 479    | 452    | 455   | 433   | 493   | 444     |
| 100911486 | LOC100911486    | 0      | 0       | 9.18   | 0      | 4.71  | 4.08  | 0     | 0       |
| 687565    | Denr            | 812    | 722     | 714    | 672    | 763   | 636   | 717   | 680     |
| 678726    | Fbxl18          | 188.1  | 203.93  | 194    | 210.05 | 217.9 | 181.3 | 145   | 218.2   |
| 367289    | Kansl11         | 288.36 | 307.96  | 274.55 | 322.34 | 289.8 | 263   | 302.8 | 287.09  |
| 361390    | Abce1           | 2591.2 | 2459.08 | 2501.1 | 2521.4 | 2484  | 2293  | 2460  | 2408.24 |
| 296708    | Olfml2a         | 1739   | 1976    | 2332   | 1976.9 | 1771  | 2071  | 2086  | 1756    |
| 309429    | Kank1           | 940    | 855     | 924    | 1084   | 868   | 1006  | 925.2 | 842.94  |
| 116543    | Ebf1            | 2048.5 | 2085.15 | 2122.4 | 2296.1 | 2327  | 2098  | 1984  | 1781    |
| 80843     | Sec61a1         | 1849   | 1902    | 2032   | 1883   | 1778  | 1886  | 1876  | 1802    |
| 260323    | Snx27           | 1879   | 1856    | 1854   | 2032   | 1804  | 1807  | 1960  | 1728    |
| 100147704 | Usp43           | 16     | 15      | 20     | 20     | 14    | 21    | 16    | 17      |
| 499798    | Arl6ip6         | 92     | 70      | 115    | 78     | 80    | 72    | 94    | 94      |
| 114839    | Ccnc            | 890    | 942     | 906    | 860    | 861   | 765   | 884   | 936     |
| 29390     | Ptpmt1          | 424.6  | 441.68  | 409.24 | 351.57 | 368.7 | 376.2 | 395.7 | 417.88  |
| 301079    | RGD1311745      | 243    | 207     | 222    | 181    | 217   | 184   | 194   | 222     |
| 304923    | Gorab           | 218.21 | 220.07  | 206.95 | 202.33 | 182   | 183.7 | 216.9 | 229.32  |
| 114513    | Rasgrf2         | 83     | 55      | 61     | 62     | 78    | 48    | 67    | 57      |
| 102546968 | LOC102546968    | 108.29 | 134.67  | 122.01 | 68.53  | 119.5 | 113.7 | 121   | 61.05   |
| 78961     | Golph3          | 1756   | 1601    | 1700   | 1730   | 1576  | 1664  | 1718  | 1543    |
| 305884    | Acin1           | 1974   | 1975    | 2054   | 2120.8 | 1905  | 1954  | 1995  | 1927    |
| 362515    | Anks6           | 386    | 357.34  | 332    | 337.09 | 361   | 349   | 361   | 282     |
| 312166    | Cadps2          | 755    | 811     | 860    | 826    | 860   | 760.1 | 736   | 759     |
| 304601    | Baz2a           | 863    | 837.76  | 885.83 | 942.93 | 869   | 839   | 856   | 817     |
| 361425    | Emc8            | 260    | 284     | 266    | 212    | 245   | 233   | 260   | 241     |
| 79249     | Abi1            | 1237   | 1262    | 1356   | 1259   | 1163  | 1158  | 1352  | 1226    |
| 29546     | Homer1          | 290    | 263     | 257    | 332    | 276   | 276   | 282   | 260     |



|           |              |        |         |        |        |       |       |       |         |
|-----------|--------------|--------|---------|--------|--------|-------|-------|-------|---------|
| 309010    | Sec23ip      | 758    | 726     | 764.78 | 827    | 767   | 697   | 733.6 | 749     |
| 24766     | Scn2a        | 325.65 | 262.18  | 254.45 | 314.21 | 305.5 | 244   | 309.1 | 249.27  |
| 290549    | Selenok      | 1119   | 1120    | 1062   | 941    | 922   | 973   | 985   | 1184    |
| 85384     | Sos2         | 613.47 | 703.4   | 686.63 | 723.87 | 679.8 | 611   | 654.2 | 668.04  |
| 308236    | Zfp53        | 47.67  | 63.2    | 54.25  | 70.13  | 60.38 | 45.54 | 52.03 | 67.44   |
| 367307    | Dis3l2       | 304    | 291     | 297    | 301    | 264   | 300   | 288   | 291     |
| 306792    | Slpr3        | 2529   | 2678    | 2899   | 2062   | 2126  | 2427  | 2897  | 2292    |
| 246244    | Tax1bp1      | 4624   | 4342    | 4221   | 4168   | 4163  | 3746  | 4545  | 4174    |
| 291212    | B3galnt2     | 354.26 | 306.82  | 310.17 | 291.91 | 277.1 | 305.1 | 303.8 | 324.24  |
| 24564     | Mpz          | 193132 | 236439  | 223443 | 197282 | 1E+05 | 2E+05 | 2E+05 | 254558  |
| 291689    | Cdc23        | 1026.3 | 1039.79 | 903.54 | 880.32 | 900.6 | 874.1 | 925.3 | 988.81  |
| 100360508 | LOC100360508 | 2963.2 | 2113.31 | 2607.6 | 2193.4 | 2428  | 2162  | 2341  | 2533.27 |
| 260325    | Homez        | 60     | 59      | 52     | 68     | 62    | 62    | 47    | 58      |
| 499751    | Man1b1       | 2390   | 2373    | 2447   | 2279   | 2097  | 2211  | 2369  | 2415    |
| 313611    | Pafah2       | 236.7  | 245.02  | 242.02 | 221.42 | 233.4 | 240.6 | 229   | 202.66  |
| 192110    | Pou3f1       | 189    | 244     | 302    | 222    | 222   | 221   | 239   | 235     |
| 140915    | Slco3a1      | 1000   | 1123    | 1046   | 1116   | 917   | 1116  | 970   | 1103    |
| 683007    | Mia3         | 1490   | 1471    | 1607   | 1754   | 1542  | 1582  | 1540  | 1394    |
| 64465     | Cdc42        | 7339   | 7360    | 7196   | 6916   | 6378  | 6795  | 7095  | 7340    |
| 171455    | Exoc2        | 2145.8 | 2245.42 | 2133.7 | 2196.4 | 2164  | 2062  | 2203  | 1927.76 |
| 312649    | Tsen2        | 135    | 128     | 108    | 132    | 97    | 131   | 143   | 111     |
| 83731     | Kcnma1       | 495.54 | 510     | 509.29 | 678.2  | 622   | 383.4 | 519.1 | 577.02  |
| 192243    | Golgb1       | 2218   | 2207    | 2313   | 2511   | 2403  | 1990  | 2393  | 2077    |
| 293344    | Arfip2       | 1527   | 1414    | 1445   | 1295   | 1379  | 1314  | 1407  | 1344    |
| 305816    | Ddhd1        | 910    | 853     | 917    | 893    | 834   | 863   | 871   | 856     |
| 297522    | Sec13        | 669    | 704     | 666    | 647    | 600   | 644   | 660   | 670     |
| 29372     | Rasa3        | 445    | 549     | 571    | 570    | 464   | 522   | 585   | 475     |
| 79215     | Mtpn         | 1728   | 1605    | 1661   | 1699   | 1635  | 1446  | 1718  | 1615    |
| 288064    | Kpna1        | 1713   | 1611    | 1650   | 1768   | 1586  | 1565  | 1704  | 1606    |
| 292610    | Zfp606       | 173    | 145     | 154    | 152    | 144   | 136   | 161   | 157     |
| 691774    | Lpar6        | 141    | 135     | 123    | 129    | 152   | 100   | 103   | 151     |
| 171134    | Lgals2       | 5      | 7       | 4      | 8      | 3     | 5     | 6     | 9       |
| 25655     | Gja4         | 84     | 78      | 96     | 78     | 68    | 93    | 93    | 68      |
| 361321    | Atg12        | 1581   | 1442    | 1405   | 1502   | 1415  | 1353  | 1430  | 1485    |
| 103690102 | LOC103690102 | 82.3   | 64.01   | 83.78  | 116.7  | 60.78 | 85.36 | 79.19 | 107.02  |
| 310155    | Mtmr12       | 415.41 | 422.03  | 428.96 | 388.56 | 403   | 441   | 373   | 369.11  |
| 54265     | Llgl1        | 801.9  | 810.43  | 855.91 | 779.39 | 747.9 | 786.8 | 798.9 | 778.82  |
| 60427     | Kitlg        | 1487   | 1823    | 2113   | 2052   | 1822  | 1484  | 2086  | 1772    |
| 100362965 | LOC100362965 | 172.92 | 237.87  | 194.04 | 149.83 | 187   | 179.7 | 181.3 | 175.33  |
| 360670    | Slc26a11     | 111    | 115     | 116    | 115    | 108   | 112   | 108   | 110     |
| 362007    | Sike1        | 503    | 484     | 480    | 458    | 428   | 479   | 467   | 471     |
| 117045    | Eif4e        | 1828   | 1781    | 1683   | 1761   | 1608  | 1640  | 1764  | 1748    |
| 288617    | Tpst1        | 464    | 432     | 576    | 454    | 416   | 452   | 506   | 472     |
| 83836     | Nde1         | 168    | 163     | 177    | 180    | 153   | 161   | 187.4 | 158     |
| 302980    | Fahd1        | 312    | 284     | 220    | 221    | 229   | 256   | 270   | 239     |
| 315764    | Plekho2      | 694.93 | 642.08  | 708.38 | 722.63 | 770.1 | 620.4 | 645.4 | 617.36  |
| 314436    | Elk1         | 421    | 478     | 478    | 481    | 477   | 456   | 452   | 396     |
| 688673    | Pomt2        | 396.99 | 437.03  | 384.81 | 450.6  | 372.4 | 421.1 | 388.4 | 418.33  |
| 360687    | Cadm2        | 162    | 186     | 213    | 188    | 180   | 164   | 195   | 179     |
| 316067    | Xylb         | 579    | 553     | 543    | 574    | 525   | 549   | 531   | 551     |
| 25492     | Nfia         | 272    | 292     | 308    | 410    | 324   | 270   | 342   | 293     |
| 303245    | Senp3        | 867    | 914     | 951    | 824    | 828   | 859   | 873   | 849     |
| 363634    | Kctd11       | 169.98 | 200.09  | 224.23 | 166.41 | 156.8 | 211.1 | 151.7 | 209.7   |
| 29366     | Serpine2     | 2689   | 3021    | 2842   | 2436   | 2340  | 2797  | 2659  | 2739    |
| 116636    | Eif4ebp1     | 161    | 168     | 162    | 116    | 126   | 164   | 125   | 167     |
| 116633    | Akap8        | 951    | 934     | 942    | 864    | 880   | 873   | 915   | 871     |

|           |              |        |         |        |        |       |       |       |         |
|-----------|--------------|--------|---------|--------|--------|-------|-------|-------|---------|
| 296182    | Tmx4         | 3775   | 3779    | 3422   | 3607   | 3635  | 3189  | 3689  | 3470    |
| 362918    | Mtssl        | 740    | 746     | 857    | 841    | 740   | 734   | 836   | 743     |
| 114553    | Ncf1         | 321.81 | 345.65  | 405.04 | 322.49 | 341.1 | 322.6 | 343   | 330.89  |
| 291309    | Usp6nl       | 1487   | 1732    | 1741   | 1511   | 1365  | 1672  | 1680  | 1488    |
| 316412    | Tmem237      | 707    | 656     | 662    | 578    | 617   | 577   | 713   | 589     |
| 309513    | Ppplr3c      | 253    | 257     | 183    | 256    | 215   | 245   | 226   | 224     |
| 100364568 | Rprd2        | 728.01 | 701     | 723    | 769    | 747   | 680   | 712   | 662     |
| 29721     | Hivep2       | 1103   | 1264    | 1346   | 1449   | 1245  | 1234  | 1337  | 1134    |
| 25439     | F2r          | 928.17 | 885.21  | 979.07 | 975.8  | 841.3 | 1000  | 934.6 | 837.4   |
| 308577    | Fuz          | 271.74 | 267.25  | 240.4  | 257.84 | 225.1 | 241.3 | 248.2 | 280.12  |
| 290447    | Mycbp2       | 4468.8 | 4485.82 | 4624.2 | 5547.6 | 5033  | 4262  | 4644  | 4403.5  |
| 362876    | Ppfia2       | 558.56 | 551.06  | 502.66 | 586.98 | 583.3 | 469.3 | 536.2 | 520.23  |
| 315439    | Slc36a4      | 571.17 | 540.6   | 566.96 | 553.28 | 557.6 | 500.9 | 558.8 | 523.19  |
| 317617    | Hdx          | 25     | 31      | 30     | 36     | 32    | 10    | 45    | 30      |
| 498999    | Ahrr         | 29     | 38      | 24     | 31     | 31    | 31    | 34    | 21      |
| 301674    | Fbxo11       | 1512   | 1564.97 | 1503.4 | 1565.6 | 1437  | 1456  | 1519  | 1482.42 |
| 308602    | Tmem86a      | 79     | 107     | 112    | 93     | 86    | 91    | 102   | 96      |
| 293117    | Ankrd42      | 317    | 302     | 308    | 271    | 310   | 280   | 272   | 287     |
| 300308    | LOC300308    | 115.04 | 77.58   | 69.78  | 101.72 | 87.46 | 79.28 | 84.38 | 98.11   |
| 317612    | Htatsf1      | 748    | 705     | 759    | 747    | 683   | 686   | 754   | 715     |
| 85385     | Shc1         | 2824   | 2764.63 | 2939.9 | 2938.2 | 2828  | 2676  | 2766  | 2728.48 |
| 54705     | Pdp1         | 776    | 775     | 700    | 734    | 726   | 694   | 712   | 731     |
| 290746    | Trappc11     | 977    | 998     | 936    | 1006   | 902   | 919   | 946   | 990     |
| 117087    | Stim2        | 1259   | 1339    | 1236   | 1272   | 1216  | 1214  | 1305  | 1163    |
| 314798    | Mettl25      | 100.26 | 127.19  | 102.11 | 97.1   | 92.84 | 101.3 | 99.46 | 115.63  |
| 116464    | Ncoa6        | 941    | 966.01  | 956.5  | 1173   | 1012  | 999.6 | 950.2 | 910.16  |
| 298186    | Ttc39b       | 645    | 644     | 545    | 694    | 662   | 449   | 675   | 639     |
| 307926    | Ccsap        | 130.99 | 134     | 161.48 | 129.53 | 142   | 128.7 | 123.7 | 139     |
| 310013    | Fam169a      | 527    | 488     | 434    | 540    | 540   | 454   | 471   | 443     |
| 309242    | Gna14        | 2514.8 | 2325.99 | 2079.7 | 2008   | 2308  | 2020  | 2048  | 2188.65 |
| 100151767 | Nkapd1       | 328    | 363     | 379    | 355    | 340   | 327   | 332   | 368     |
| 25227     | Arsb         | 558    | 501     | 499    | 555    | 461   | 472   | 650   | 444     |
| 363460    | Fgd1         | 188    | 201.88  | 194.19 | 223.06 | 191.1 | 192   | 179.5 | 211.7   |
| 171494    | Aplg1        | 1434   | 1423    | 1376   | 1620   | 1458  | 1343  | 1432  | 1382    |
| 114511    | Emb          | 717    | 633     | 648    | 634    | 676   | 552   | 679   | 618     |
| 685619    | LOC685619    | 411.19 | 353.73  | 312.79 | 289.32 | 310.9 | 280.1 | 342.7 | 377.8   |
| 310533    | Rapgef2      | 724    | 775.99  | 753    | 873.99 | 774   | 744   | 785   | 697     |
| 100911664 | LOC100911664 | 3570   | 3812    | 3798   | 3756   | 3431  | 3516  | 3497  | 3886    |
| 286919    | Cdk5rap2     | 430    | 485     | 547    | 435    | 453   | 445   | 508   | 414     |
| 300791    | Spg21        | 967    | 954     | 939    | 862    | 819   | 857   | 943   | 952     |
| 310137    | Cplane1      | 962    | 990     | 1020   | 1147   | 1045  | 892   | 1049  | 966     |
| 308864    | Fchsd2       | 686    | 638     | 664    | 678    | 648   | 606   | 665   | 638.93  |
| 500855    | Zfp706       | 1084   | 1013    | 1027   | 972    | 943   | 969   | 1016  | 1002    |
| 294917    | Tnik         | 978.14 | 1049    | 1130.4 | 1153   | 1088  | 955   | 1003  | 1090    |
| 373066    | Ift81        | 387    | 347     | 353    | 370    | 347   | 311   | 390   | 350     |
| 678774    | LOC678774    | 581    | 506.86  | 543.87 | 461    | 466   | 535   | 511   | 496     |
| 25497     | Nup50        | 682    | 719     | 646    | 696    | 675   | 636   | 686   | 635     |
| 29223     | Ak4          | 73     | 90      | 82     | 101    | 76    | 86    | 59    | 111     |
| 293410    | Swap70       | 720    | 859     | 887    | 848    | 715   | 803   | 900   | 762     |
| 317256    | Taf1         | 1374.6 | 1356.98 | 1439.8 | 1563.1 | 1431  | 1158  | 1487  | 1426.72 |
| 24943     | Plp1         | 10913  | 12271   | 12294  | 11838  | 9843  | 11476 | 12101 | 11984   |
| 499624    | Tsc22d2      | 768.01 | 751.01  | 765.01 | 835    | 751   | 724   | 791   | 727     |
| 298442    | Ccdc163      | 88     | 96      | 114    | 98     | 97    | 92    | 94    | 97      |
| 363171    | Tmem42       | 246    | 270     | 261    | 238    | 254   | 230   | 233   | 257     |
| 58976     | Slc30a1      | 211    | 215     | 220    | 171    | 212   | 156   | 222   | 194     |
| 293829    | Mcee         | 303    | 307     | 256    | 224    | 246   | 241   | 260   | 299     |

|           |           |        |         |        |        |       |       |       |         |
|-----------|-----------|--------|---------|--------|--------|-------|-------|-------|---------|
| 499328    | Rfk       | 1806   | 1734    | 1645   | 1727   | 1718  | 1547  | 1715  | 1653    |
| 364682    | Nhlrc1    | 84     | 95      | 96     | 72     | 86    | 82    | 81    | 84      |
| 685574    | LOC685574 | 253    | 271     | 227    | 290    | 248   | 255   | 235   | 261     |
| 362256    | Snhg11    | 4387.6 | 3976.86 | 3678.7 | 4070.8 | 4340  | 3506  | 4004  | 3613.07 |
| 363165    | Csrnp1    | 47     | 47      | 71     | 108    | 58    | 83    | 76    | 45      |
| 300985    | Parp3     | 580.02 | 617.06  | 724.93 | 564.9  | 563.1 | 654.4 | 605.6 | 563.7   |
| 295394    | Dph5      | 226    | 215     | 217    | 212    | 193   | 190   | 223   | 229     |
| 79120     | Arf4      | 2475   | 2547    | 2595   | 2435   | 2205  | 2337  | 2580  | 2526    |
| 308939    | Ipo7      | 1734   | 1770    | 1757   | 1881   | 1688  | 1570  | 1889  | 1708    |
| 306357    | Gmip      | 284    | 322     | 344    | 295    | 283   | 267   | 319   | 326     |
| 690806    | Smim13    | 1761.4 | 1654.94 | 1424.7 | 1746.9 | 1480  | 1576  | 1601  | 1665.9  |
| 311372    | Spg11     | 735    | 719     | 716    | 771    | 687   | 680   | 740   | 716     |
| 360647    | Icam2     | 93     | 88      | 104    | 64     | 84    | 95    | 82    | 74      |
| 499593    | Sox2      | 507    | 532     | 611    | 496    | 512   | 531   | 510   | 507     |
| 363160    | Stt3b     | 1010   | 1017    | 1067   | 1150   | 1049  | 985   | 1032  | 1008    |
| 500282    | Arl8b     | 7370   | 7453    | 7164   | 7185   | 6833  | 6760  | 7210  | 7201    |
| 306586    | Amt       | 275    | 234     | 261    | 255    | 212   | 246   | 260   | 266     |
| 500050    | Asb15     | 14     | 19      | 22     | 20     | 15    | 12    | 19    | 26      |
| 288108    | Naa50     | 375.26 | 367.48  | 386.7  | 365.85 | 382.6 | 371.8 | 332.3 | 348.76  |
| 54243     | Cr11      | 1056   | 1058    | 1158   | 1079   | 1034  | 992   | 1112  | 1039    |
| 311279    | Ar114ep   | 835.59 | 841.29  | 833.65 | 824.62 | 794.5 | 783.2 | 804.6 | 819.46  |
| 293067    | Zfand6    | 955    | 937     | 880    | 880    | 827   | 836   | 904   | 939     |
| 362361    | Hnrnpa2b1 | 2420   | 2359    | 2412   | 2494   | 2304  | 2191  | 2542  | 2261    |
| 363287    | Hdac4     | 854    | 858     | 855    | 941    | 873   | 870   | 790   | 835     |
| 294421    | Serinc1   | 20484  | 19306   | 18561  | 18323  | 17824 | 17729 | 19282 | 18781   |
| 297602    | Tapbp1    | 299    | 328     | 323    | 305    | 236   | 321   | 315   | 333     |
| 171139    | Timm9     | 205    | 191     | 176    | 156    | 168   | 161   | 188   | 182     |
| 308789    | Ef11      | 273    | 294     | 285    | 328    | 263   | 279   | 305   | 286     |
| 63996     | Smcla     | 1958   | 2061    | 1998   | 2252   | 2085  | 1844  | 2163  | 1848    |
| 290028    | Osgep     | 140    | 139     | 135    | 114    | 105   | 123   | 152   | 127     |
| 497619    | Fut10     | 81     | 81      | 89     | 101    | 84    | 77    | 94    | 83      |
| 307839    | Zfp612    | 1244   | 1180    | 1116   | 1288   | 1171  | 1091  | 1232  | 1142    |
| 246769    | Hint3     | 230    | 204     | 221    | 200    | 187   | 184   | 227   | 223     |
| 307956    | Rbm34     | 303    | 349     | 333.76 | 291    | 302   | 289   | 302   | 333     |
| 29637     | Hmgcs1    | 17592  | 18493   | 16777  | 16768  | 15403 | 15960 | 16977 | 18522   |
| 360581    | Tada2a    | 314    | 284     | 281    | 279    | 269   | 306   | 275   | 262     |
| 64538     | Ilkap     | 522.61 | 486.11  | 422.68 | 401.02 | 416.2 | 429.1 | 453   | 461.34  |
| 309514    | Hectd2    | 221    | 266     | 243    | 252    | 212   | 231   | 256   | 244     |
| 290280    | Xpo4      | 651.61 | 621.43  | 644    | 748.93 | 642.2 | 530.1 | 695.7 | 692.1   |
| 366192    | Fastkd5   | 176.23 | 166.2   | 150.13 | 157.28 | 152.5 | 146.5 | 172.6 | 152.55  |
| 309891    | 10-Sep    | 586    | 609     | 569    | 604    | 514   | 518   | 646   | 596     |
| 307148    | Nsun6     | 105    | 91      | 101    | 81     | 85    | 89    | 96    | 93      |
| 289143    | Mrps14    | 402    | 427     | 393    | 316    | 364   | 328   | 381   | 404     |
| 303175    | Hist3h2ba | 287.11 | 258.01  | 263    | 189.01 | 265.5 | 194   | 267   | 231.08  |
| 294709    | Trappc13  | 1199   | 1148    | 1115   | 1053   | 1019  | 1030  | 1091  | 1196    |
| 84357     | Sh3kbp1   | 1629.5 | 1655.25 | 1603.6 | 1700.8 | 1617  | 1547  | 1614  | 1550.71 |
| 315423    | Cep57     | 346    | 306     | 294    | 292    | 272   | 278   | 317   | 322     |
| 100363253 | Nt5c2     | 1104.7 | 1228.04 | 1047.5 | 1037.5 | 1081  | 1050  | 1113  | 999.16  |
| 641452    | Ube2d2    | 1279.9 | 1340.19 | 1310.3 | 1242   | 1103  | 1262  | 1297  | 1305.19 |
| 117282    | Hnrnpk    | 6121   | 6121    | 6057   | 6152   | 5658  | 5828  | 6295  | 5703    |
| 312981    | Asph      | 1473.2 | 1385.42 | 1498.9 | 1621.2 | 1384  | 1526  | 1466  | 1366.55 |
| 117272    | Prpsap2   | 799    | 879     | 722    | 712    | 687   | 748   | 764   | 790     |
| 24326     | Ednra     | 225.23 | 204.13  | 237.07 | 237.62 | 257.1 | 194.6 | 182.7 | 233.94  |
| 309172    | Frmd8     | 1775   | 1844    | 2081   | 1768   | 1726  | 1945  | 1716  | 1786    |
| 293454    | Ubf1      | 1008   | 997     | 983    | 938    | 981   | 943   | 963   | 884     |
| 315771    | Herc1     | 3725.9 | 3871.68 | 3694.3 | 4157.6 | 4359  | 3129  | 3714  | 3638.38 |

|           |                 |        |         |        |        |       |       |       |         |
|-----------|-----------------|--------|---------|--------|--------|-------|-------|-------|---------|
| 314190    | Klhdc1          | 136    | 132     | 125    | 139    | 134   | 126   | 124   | 127     |
| 116478    | Kidins220       | 6971   | 6929    | 6846   | 7780   | 7314  | 6843  | 6768  | 6475    |
| 296374    | Zmynd8          | 1380.4 | 1534.59 | 1533.3 | 1592.7 | 1441  | 1470  | 1499  | 1392.56 |
| 297093    | Cbx3            | 1571   | 1545    | 1513   | 1456   | 1355  | 1396  | 1571  | 1523    |
| 25533     | Rabggtb         | 846    | 827     | 813    | 788    | 780   | 721   | 790   | 854     |
| 81662     | Gnal1           | 266    | 289     | 322    | 291    | 307   | 290   | 268   | 257     |
| 308291    | Phactr2         | 1469   | 1444    | 1679   | 1836.1 | 1670  | 1463  | 1612  | 1429.94 |
| 316157    | Pp2d1           | 546.72 | 513.11  | 520.05 | 493.19 | 433.6 | 478.1 | 499.2 | 580.64  |
| 81663     | Gnal2           | 3062   | 3119    | 3135   | 3058   | 2817  | 2964  | 2988  | 3118    |
| 171083    | Itfgl           | 6159   | 6289    | 5777   | 5688   | 5332  | 5507  | 6118  | 6015    |
| 291132    | Gpld1           | 282    | 218     | 202.01 | 235    | 198   | 243   | 248.2 | 211     |
| 500837    | Helb            | 317    | 337     | 337    | 306    | 295   | 310   | 345   | 296     |
| 100911928 | LOC100911928    | 6.02   | 11.16   | 11.44  | 11.31  | 13.17 | 2.5   | 6.04  | 16.65   |
| 310773    | Cept1           | 995    | 886     | 905    | 902    | 859   | 766   | 929   | 989     |
| 287834    | Recql5          | 288    | 275     | 305    | 277    | 283   | 283   | 263   | 271     |
| 689844    | Maml2           | 573.13 | 533.58  | 525.15 | 619.25 | 540   | 524   | 568.9 | 529.73  |
| 64678     | Tfrc            | 3388   | 3560    | 2868   | 3551   | 3129  | 3129  | 3281  | 3303    |
| 294643    | Lhfp12          | 839.05 | 864.05  | 962.01 | 810.14 | 782   | 715   | 960   | 881.72  |
| 309400    | Cemip2          | 1013.9 | 1083.01 | 1223.8 | 1285.7 | 1094  | 1168  | 1031  | 1132.92 |
| 100192313 | Atxn713b        | 3373   | 3308    | 2986   | 3279   | 3139  | 3054  | 3267  | 2978    |
| 686234    | Mtrf1           | 254    | 255     | 214    | 220    | 239   | 218   | 229   | 220     |
| 114514    | Clasp2          | 4792   | 4707    | 4549   | 4966   | 4662  | 4263  | 4793  | 4550    |
| 288238    | Pigp            | 644    | 582     | 577    | 466    | 513   | 529   | 532   | 606     |
| 100911537 | LOC100911537    | 0      | 2.04    | 0      | 0      | 0     | 1.96  | 0     | 0       |
| 361726    | Sdhaf2          | 1885   | 1747    | 1605   | 1775   | 1689  | 1663  | 1681  | 1704    |
| 25265     | P2ry1           | 725    | 670     | 647    | 713    | 681   | 621   | 680   | 665     |
| 291737    | Ino80c          | 1109   | 1070    | 961    | 975    | 919   | 976   | 1030  | 1029    |
| 282840    | Atf5            | 2128   | 2302.13 | 2112.1 | 1932.4 | 2012  | 2097  | 1789  | 2245.1  |
| 299138    | Six4            | 1337.3 | 1243.82 | 1114.4 | 1523.7 | 1298  | 1269  | 1320  | 1128.01 |
| 304914    | Rabgap11        | 1965   | 1779.63 | 1734.1 | 1865.5 | 1957  | 1450  | 1954  | 1695.97 |
| 308761    | Prc1            | 84     | 71      | 166    | 63     | 92    | 101   | 97    | 79      |
| 83689     | Cd164           | 7728   | 7898    | 7353   | 7643   | 7127  | 7228  | 7771  | 7300    |
| 689079    | Ar115           | 421.92 | 406.96  | 418.73 | 420.96 | 385.1 | 396.8 | 444.1 | 377.49  |
| 81815     | Tpp2            | 2101   | 2081    | 1977   | 2143   | 1975  | 1870  | 2250  | 1883    |
| 316426    | Spats21         | 468    | 416     | 435    | 475    | 402   | 376   | 487   | 459     |
| 305826    | Samd4a          | 82     | 105     | 135    | 114    | 94    | 114   | 108   | 103     |
| 362426    | Bms1            | 649    | 601     | 636    | 628    | 618   | 608   | 592   | 598     |
| 171329    | Usp15           | 1534   | 1547    | 1532   | 1699   | 1585  | 1368  | 1589  | 1524    |
| 362115    | Fam129b         | 1527   | 1540.49 | 1628.1 | 1601   | 1568  | 1690  | 1341  | 1451.9  |
| 29468     | Pdia3           | 7365.6 | 7611.5  | 7822.8 | 7653.6 | 6776  | 7071  | 7909  | 7511.6  |
| 288309    | N6amt1          | 116    | 100     | 107    | 88     | 101   | 109   | 99    | 86      |
| 310630    | Sema4a          | 168    | 157     | 192    | 151    | 135   | 169   | 172   | 166     |
| 500913    | Shisall         | 1614   | 1575.01 | 1468   | 1548   | 1521  | 1487  | 1225  | 1729.85 |
| 316524    | Zfp142          | 994.44 | 954.03  | 1033.1 | 1083.3 | 948.3 | 1066  | 953.6 | 938.83  |
| 684998    | LOC684998       | 206    | 227     | 227    | 240    | 243   | 192   | 235   | 195     |
| 252891    | Sral            | 450    | 403     | 383    | 333    | 346   | 408   | 393   | 361     |
| 361074    | Slc25a30        | 405    | 401     | 422    | 448    | 450   | 387   | 408   | 366     |
| 29719     | Kcnj16          | 24.94  | 21.21   | 8.01   | 25     | 34.06 | 7.06  | 21.02 | 13.95   |
| 25635     | Mc4r            | 33     | 28      | 43     | 25     | 38    | 36    | 16    | 34      |
| 287716    | Psme3           | 1875.3 | 1811.66 | 1752.7 | 1672.3 | 1907  | 1751  | 1621  | 1557.63 |
| 103690404 | NEWGENE_1310847 | 107.5  | 75.83   | 96.25  | 96.83  | 92.9  | 86.39 | 97.56 | 84.99   |
| 316611    | Agap1           | 1779   | 1916    | 2133   | 2053   | 1968  | 1917  | 1889  | 1802    |
| 303614    | Smurf2          | 705    | 701     | 731    | 759    | 616   | 685   | 772   | 711     |
| 685695    | MacroD2         | 513    | 577     | 443    | 510    | 507   | 480   | 512   | 465     |
| 685834    | Znf740          | 920.96 | 745.04  | 827.03 | 791.71 | 805   | 816.5 | 817.5 | 718.81  |
| 363487    | RGD1566265      | 195    | 216     | 201    | 216    | 195   | 172   | 233   | 196     |

|           |              |        |         |        |        |       |       |       |         |
|-----------|--------------|--------|---------|--------|--------|-------|-------|-------|---------|
| 290994    | Lman2        | 636    | 654     | 676    | 648    | 600   | 670   | 615   | 628     |
| 680717    | Zfp703       | 344    | 351     | 407    | 451    | 344   | 445   | 341   | 363     |
| 103693620 | LOC103693620 | 16.92  | 22.54   | 26.65  | 18.63  | 19    | 24.24 | 22.55 | 15.68   |
| 305070    | Tmem206      | 292    | 239     | 251    | 229    | 236   | 247   | 239   | 250     |
| 502994    | Pramef8      | 94     | 96      | 78     | 95     | 77    | 76    | 97    | 99      |
| 302969    | Srrm2        | 9105.5 | 8511.51 | 9806.9 | 10719  | 9668  | 9247  | 9385  | 8372.09 |
| 102551095 | LOC102551095 | 218    | 212     | 189    | 185    | 172   | 172   | 192   | 237     |
| 307855    | Fa2h         | 1876   | 2351    | 1933   | 1933   | 1397  | 2270  | 1729  | 2385    |
| 302313    | Tspan6       | 585    | 543     | 581    | 496    | 495   | 482   | 550   | 593     |
| 363661    | Mrm1         | 237.53 | 237     | 227    | 228    | 195.5 | 272   | 223.3 | 203     |
| 314718    | Actr6        | 658    | 560     | 496    | 519    | 519   | 499   | 551   | 578     |
| 299116    | Sav1         | 613    | 542     | 552    | 578    | 494   | 566   | 573   | 564     |
| 100362640 | Rps4x        | 5387   | 5096    | 5370   | 4097   | 4544  | 4494  | 4893  | 5251    |
| 363229    | Slc39a10     | 1426.2 | 1418.51 | 1273.4 | 1597.6 | 1379  | 1329  | 1498  | 1288.63 |
| 317508    | Map7d2       | 8313   | 7866    | 7767   | 8540   | 8790  | 6925  | 8271  | 7250    |
| 289822    | Cep68        | 799.8  | 877.34  | 883.37 | 829.97 | 788.5 | 855.4 | 816.7 | 799.52  |
| 689788    | Prdm5        | 44     | 24      | 38     | 50     | 31    | 44    | 46    | 29      |
| 288239    | Ripply3      | 11     | 4       | 6      | 5      | 14    | 4     | 5     | 2       |
| 500907    | Rps19bp1     | 98     | 108     | 92     | 92     | 111   | 71    | 103   | 90      |
| 686075    | Gapt         | 19     | 10      | 17     | 6      | 14    | 13    | 9     | 14      |
| 100361513 | Gcc1         | 312.65 | 333.14  | 280.14 | 290.88 | 278.5 | 300   | 300.6 | 290.87  |
| 108350839 | LOC108350839 | 160.95 | 194.63  | 182.45 | 173.04 | 175.9 | 176.5 | 172.1 | 159.29  |
| 100302453 | Mettl9       | 965    | 976     | 1038   | 821    | 821   | 861   | 927   | 1045    |
| 307398    | Arhgef37     | 501    | 436     | 425    | 462    | 369   | 485   | 451   | 449     |
| 360715    | Boc          | 446    | 329     | 464    | 533    | 424   | 397   | 426   | 457     |
| 500430    | Ankrd6       | 416    | 443     | 442    | 445    | 405   | 413   | 421   | 440     |
| 313825    | Vps13d       | 1995   | 1975    | 1899   | 2343   | 2185  | 1913  | 1925  | 1874    |
| 25399     | Cacna2d1     | 3383   | 3108    | 3413   | 3249   | 3396  | 2881  | 3321  | 3051    |
| 117152    | Cand1        | 3068   | 3079    | 2982   | 3325   | 3158  | 2745  | 3119  | 2955    |
| 81641     | Anpep        | 158    | 150     | 199    | 198    | 144   | 195   | 174   | 165     |
| 297783    | Mybl1        | 159    | 168     | 214    | 165    | 190   | 166   | 176   | 147     |
| 362906    | Nudcd1       | 401    | 405     | 382    | 434    | 384   | 349   | 398   | 429     |
| 498934    | Lsm6         | 86.3   | 54.13   | 72.02  | 61.46  | 73.23 | 63.09 | 75.65 | 51.47   |
| 493810    | Capza2       | 3340.9 | 3393    | 3458   | 3018   | 3054  | 2992  | 3321  | 3338    |
| 289168    | Kifap3       | 7281   | 7341    | 7129   | 7213   | 7145  | 6638  | 7333  | 6741    |
| 362573    | Szt2         | 836    | 787     | 847    | 959    | 841   | 831   | 810   | 816     |
| 29700     | Pcbd1        | 608    | 633     | 571    | 544    | 553   | 532   | 537   | 644     |
| 362828    | Spp12b       | 902    | 872     | 883    | 826    | 826   | 915   | 852   | 757     |
| 192129    | Vmp1         | 1769   | 1900    | 1735   | 1697   | 1724  | 1577  | 1745  | 1784    |
| 363194    | Xpo5         | 669    | 701     | 712    | 749    | 634   | 710   | 700   | 679     |
| 298643    | Miip         | 121.17 | 159.49  | 157.61 | 156.01 | 108.8 | 182.5 | 129.2 | 151.17  |
| 84496     | Stau1        | 1353   | 1356    | 1470   | 1405   | 1381  | 1350  | 1363  | 1277    |
| 25482     | Mras         | 1150   | 1296    | 1266   | 1323   | 1133  | 1202  | 1180  | 1328    |
| 286906    | Pdia6        | 2648.2 | 2656.88 | 3039.4 | 2818.7 | 2510  | 2608  | 2870  | 2750.24 |
| 303476    | Abi3         | 16     | 32      | 33     | 24     | 24    | 29    | 26    | 22      |
| 289382    | Ints7        | 383.83 | 382.21  | 449.24 | 410.38 | 402.9 | 394.8 | 383.2 | 382.85  |
| 308843    | Tsku         | 131    | 108     | 119    | 141    | 112   | 136   | 117   | 115     |
| 500006    | Pex1         | 432    | 479     | 466    | 462    | 452   | 413   | 474   | 430     |
| 303592    | Tlk2         | 981.01 | 951     | 914    | 966    | 925   | 876   | 938   | 928     |
| 24511     | Itgb1        | 7390.4 | 7710.13 | 7884.5 | 7465   | 6657  | 7473  | 8231  | 6931.34 |
| 288731    | Pgam5        | 399    | 399     | 387    | 341    | 345   | 351   | 394   | 378     |
| 117553    | Uba3         | 2126   | 2092    | 2175   | 2080   | 1887  | 1949  | 2202  | 2113    |
| 499067    | Smim17       | 984    | 1006    | 849    | 898    | 851   | 791   | 1037  | 916     |
| 303010    | Cpeb4        | 1883   | 1772    | 1772   | 1944   | 1821  | 1641  | 1941  | 1688    |
| 102549506 | LOC102549506 | 41     | 36      | 39     | 42     | 36    | 40    | 31    | 45      |
| 363783    | Zdhhc23      | 56     | 52      | 55     | 74     | 50    | 61    | 55    | 62      |

|           |              |        |         |        |        |       |       |       |         |
|-----------|--------------|--------|---------|--------|--------|-------|-------|-------|---------|
| 140926    | Daxx         | 442    | 374     | 461    | 407.98 | 372   | 408   | 419   | 422     |
| 116456    | Dnajc2       | 690    | 720     | 728    | 707    | 696   | 722   | 643   | 676     |
| 81738     | Nup98        | 777    | 826     | 901    | 974    | 835   | 866   | 860   | 785     |
| 289350    | Rab3gap2     | 1567.3 | 1572.56 | 1617.4 | 1810.2 | 1653  | 1452  | 1663  | 1549.76 |
| 29728     | Mcm4         | 365    | 294     | 374    | 339    | 362   | 337   | 316   | 305     |
| 364605    | Sgcz         | 29     | 33      | 32     | 38     | 41    | 27    | 25    | 34      |
| 246046    | Lmbrd1       | 2634   | 2379    | 2318   | 2309   | 2271  | 2372  | 2540  | 2092    |
| 314743    | Cdk17        | 476.65 | 518.63  | 495.43 | 530.31 | 485.2 | 486.5 | 530   | 442.78  |
| 685545    | Mcrip2       | 52     | 55      | 37     | 41     | 37    | 41    | 54    | 46      |
| 497954    | Ovca2        | 237.42 | 218.47  | 193.11 | 218.77 | 209   | 203.3 | 208.3 | 214.34  |
| 287126    | Mrps34       | 385    | 487     | 357    | 384    | 377   | 354   | 409   | 412     |
| 311911    | Rabgap1      | 1676.6 | 1747.99 | 1814.9 | 1783.1 | 1817  | 1540  | 1761  | 1639.23 |
| 84491     | Qsox1        | 806    | 803     | 819    | 878    | 815   | 837   | 756   | 773     |
| 310288    | Hps3         | 634.9  | 586.85  | 589.3  | 645.72 | 564.8 | 565.5 | 629.1 | 604.39  |
| 102548459 | LOC102548459 | 37.04  | 37.7    | 36.27  | 49.34  | 41.26 | 32.1  | 47.75 | 33.18   |
| 25594     | Ppplcb       | 4259   | 4275    | 4073   | 4153   | 3910  | 3995  | 4126  | 4096    |
| 499014    | Zdhhc14      | 506.99 | 541.97  | 496.43 | 449.68 | 434.8 | 537.9 | 506   | 441.01  |
| 116683    | Efna5        | 639    | 688     | 643    | 735    | 653   | 649   | 640   | 661     |
| 79559     | Alcam        | 3196   | 3169    | 3218   | 3465   | 3299  | 2837  | 3403  | 3017    |
| 362612    | Srsf4        | 732    | 671     | 746    | 689    | 615   | 715   | 713   | 688     |
| 287543    | Tnfaip1      | 1770.4 | 1722.06 | 1863.5 | 1794.4 | 1612  | 1710  | 1794  | 1764.7  |
| 24831     | Thrb         | 198.87 | 208.9   | 199.16 | 214    | 197   | 203   | 193   | 197     |
| 116600    | Cacnb2       | 87.18  | 72.71   | 77.65  | 80.88  | 74.41 | 80.65 | 82.4  | 69      |
| 54241     | Cltc         | 18916  | 18782   | 17887  | 20364  | 18636 | 17513 | 19843 | 17105   |
| 309331    | Uhrf2        | 873    | 884     | 832    | 873    | 811   | 746   | 904   | 871     |
| 289632    | Pgm2         | 427    | 398     | 371    | 323    | 341   | 355   | 387   | 379     |
| 294774    | Ttc33        | 949    | 950     | 852    | 1008   | 918   | 839   | 894   | 967     |
| 140923    | Bnip3l       | 3247   | 3158    | 2995   | 2921   | 2913  | 2871  | 3014  | 3061    |
| 502020    | Lrch1        | 384    | 471     | 419    | 429    | 387   | 384   | 445   | 423.15  |
| 361181    | Cul4a        | 1235   | 1270    | 1233   | 1251   | 1200  | 1158  | 1250  | 1194    |
| 25406     | Cd44         | 2915   | 2994    | 3494   | 2845   | 3003  | 2864  | 3050  | 2872    |
| 89821     | Trpc1        | 738.63 | 704.43  | 598.51 | 734.37 | 693.1 | 627.5 | 670.9 | 680.44  |
| 309098    | Tubgcp2      | 1085   | 1187    | 1188   | 1260.5 | 1280  | 1159  | 1121  | 983.32  |
| 499339    | Pum3         | 628    | 590     | 638    | 658    | 605   | 597   | 650   | 568     |
| 291464    | Snx2         | 1704   | 1705    | 1626   | 1518   | 1474  | 1505  | 1646  | 1683    |
| 171136    | Cblb         | 874    | 832     | 884    | 968    | 887   | 788   | 885   | 865     |
| 83825     | Dclk1        | 2918   | 3149    | 3451   | 3270   | 3057  | 3098  | 3203  | 2952    |
| 289900    | Fam149b1     | 712    | 693     | 710    | 614    | 594   | 679   | 660   | 694     |
| 306809    | Bicd2        | 2511   | 2467    | 2556   | 2689   | 2522  | 2453  | 2423  | 2443    |
| 366065    | Cers6        | 200    | 190     | 204    | 236    | 265   | 153   | 182   | 199     |
| 89820     | Prmt3        | 557    | 608     | 550    | 561    | 578   | 512   | 558   | 543     |
| 313061    | Virma        | 637    | 606     | 647    | 712    | 624   | 619   | 683   | 579     |
| 304337    | Zfp68        | 1087   | 1070    | 1009   | 1074   | 992   | 908   | 1102  | 1080    |
| 366381    | Cdc26        | 484    | 499     | 470    | 453    | 452   | 418   | 464   | 501     |
| 360745    | Lztrl        | 1644   | 1605    | 1551   | 1670   | 1493  | 1626  | 1548  | 1562    |
| 364052    | Pea15        | 17244  | 17971   | 17028  | 16115  | 14261 | 16606 | 16338 | 18607   |
| 114487    | Wnt2         | 58     | 48      | 42     | 40     | 43    | 37    | 60    | 41      |
| 500625    | Atad2b       | 28     | 52      | 51     | 57     | 46    | 30    | 58    | 47      |
| 362156    | Zdhhc5       | 1231.3 | 1240.72 | 1313.9 | 1315.5 | 1203  | 1179  | 1256  | 1272.69 |
| 24908     | Dnajb9       | 1061.1 | 1054    | 1108   | 1078   | 1123  | 919   | 1138  | 961     |
| 286970    | Abca5        | 1672   | 1562    | 1604   | 1909   | 1733  | 1430  | 1817  | 1516    |
| 499891    | RGD1565616   | 1320   | 1462    | 1528   | 1604   | 1284  | 1257  | 1598  | 1555    |
| 287773    | Helz         | 544    | 548     | 570    | 677    | 630   | 517   | 552   | 553     |
| 654482    | Cfap300      | 102    | 145     | 116    | 121    | 103   | 106   | 143   | 114     |
| 117513    | Sec22a       | 209    | 198     | 210    | 190    | 182   | 190   | 202   | 203     |
| 290997    | Uimc1        | 397    | 442     | 407    | 395    | 395   | 414   | 390   | 381     |



|           |              |        |         |        |        |       |       |       |         |
|-----------|--------------|--------|---------|--------|--------|-------|-------|-------|---------|
| 366698    | Adck1        | 134    | 135     | 142    | 155    | 169   | 128   | 130   | 118     |
| 297865    | Dsel         | 406    | 384     | 418    | 438    | 390   | 359   | 389   | 447     |
| 312199    | Klhdc10      | 2317   | 2476    | 2227   | 2371   | 2276  | 2268  | 2269  | 2230    |
| 81745     | Pdpk1        | 3299.1 | 3394.34 | 3156.3 | 3496   | 3508  | 2973  | 3283  | 3087.22 |
| 317407    | Bhlhb9       | 703.68 | 763.64  | 711.15 | 675.95 | 649.4 | 637.1 | 768   | 694.21  |
| 25044     | Sds          | 26     | 27      | 27     | 28     | 31    | 26    | 27    | 20      |
| 304299    | Radi1        | 187    | 218     | 213    | 219    | 189   | 215   | 202   | 200     |
| 54319     | Ezr          | 920    | 926     | 1073   | 1025   | 791   | 998   | 987   | 1022    |
| 29215     | Arg2         | 378    | 343     | 301    | 302    | 324   | 276   | 346   | 329     |
| 300963    | Cep63        | 227    | 263     | 252    | 285    | 241   | 222   | 262   | 264     |
| 305021    | Sccpdh       | 2058   | 2244.64 | 2055.7 | 1976.1 | 1790  | 2012  | 2088  | 2135.22 |
| 117257    | Gpr176       | 344    | 357     | 325    | 353    | 318   | 322   | 310   | 378     |
| 500244    | Aak1         | 4091.6 | 4170    | 4040   | 4905.9 | 4201  | 4055  | 4341  | 3974.67 |
| 245922    | Nup58        | 502    | 542     | 453    | 586    | 556   | 443   | 508   | 499     |
| 102550577 | LOC102550577 | 2.5    | 3.51    | 5.85   | 3.56   | 4.95  | 2.42  | 6.22  | 1.26    |
| 363521    | Taz          | 345    | 323     | 309    | 322    | 310   | 302   | 321   | 318     |
| 298936    | Sntg2        | 24     | 27      | 28.99  | 28     | 24    | 23    | 24    | 33      |
| 306038    | Enox1        | 548    | 560     | 504    | 582    | 527   | 529   | 564   | 493     |
| 290805    | Wrn          | 472.29 | 467.79  | 486.45 | 548.61 | 479.3 | 458.4 | 493.6 | 470.93  |
| 306262    | Btd          | 520    | 441     | 440    | 469    | 437   | 479   | 444   | 441     |
| 24962     | Cth          | 54.96  | 57.69   | 98.29  | 59.06  | 47.89 | 55.06 | 93    | 64.09   |
| 366593    | Dus4l        | 60     | 56      | 58     | 43     | 38    | 59    | 51    | 61      |
| 313413    | Sgip1        | 1484   | 1457    | 1496   | 1615   | 1531  | 1406  | 1530  | 1362    |
| 29284     | Rps14        | 2969.9 | 2874.31 | 2703.2 | 2091.9 | 2547  | 2329  | 2439  | 2932.59 |
| 288908    | Cc2d1a       | 788    | 711     | 851    | 748    | 745   | 759   | 755   | 725     |
| 313067    | Tmem67       | 286    | 280     | 278    | 299    | 247   | 278   | 296   | 280     |
| 311362    | Frmd5        | 255    | 248     | 252    | 252    | 221   | 237   | 276   | 236     |
| 498119    | Spidr        | 100    | 73      | 78     | 103    | 79    | 75    | 105   | 82      |
| 360932    | Atp10d       | 182    | 188     | 253    | 222    | 218   | 179   | 226   | 191     |
| 294715    | Rgs7bp       | 6889.9 | 6461.05 | 6565   | 7684   | 6811  | 6356  | 6937  | 6483.89 |
| 363284    | Ube2f        | 550    | 502     | 459    | 509    | 450   | 436   | 532   | 528     |
| 84599     | Tmed10       | 1809   | 1993    | 2081   | 1847   | 1693  | 1863  | 1951  | 1940    |
| 305586    | Papolg       | 295    | 284     | 308    | 288    | 321   | 265   | 255   | 291     |
| 361760    | Cutc         | 153    | 139     | 151    | 131    | 124   | 134   | 143   | 152     |
| 171086    | Trak2        | 2622   | 2782    | 2973   | 2970   | 2564  | 2833  | 2797  | 2738    |
| 367236    | Col19a1      | 221    | 155     | 191    | 226    | 252   | 180   | 214   | 118     |
| 361508    | Mzfl         | 256    | 241     | 220    | 213    | 214   | 224   | 230   | 228     |
| 683687    | Snx9         | 431    | 396     | 435    | 434    | 403   | 445   | 412   | 374     |
| 308519    | Dpy1913      | 472.02 | 514.96  | 568.54 | 612.3  | 472.1 | 522.6 | 548.8 | 545.19  |
| 307217    | Tshz1        | 530    | 554     | 604    | 585    | 531   | 584   | 557   | 518     |
| 307643    | Usb1         | 236    | 213     | 196    | 204    | 196   | 179   | 211   | 232     |
| 25340     | Npy5r        | 137    | 89      | 52     | 51     | 76    | 45    | 129   | 67      |
| 116645    | Plaa         | 1487   | 1351    | 1318   | 1383   | 1321  | 1267  | 1497  | 1252    |
| 291877    | Nudt21       | 1507   | 1498    | 1395   | 1391   | 1385  | 1344  | 1450  | 1401    |
| 287931    | Ppm1f        | 1902   | 1906    | 1776   | 1719   | 1725  | 1756  | 1845  | 1711    |
| 25130     | Stx2         | 1273   | 1377    | 1277   | 1211   | 1311  | 1187  | 1179  | 1274    |
| 317486    | RGD1565844   | 12     | 13      | 14     | 16     | 17    | 18    | 9     | 9       |
| 688613    | LOC688613    | 88     | 108     | 64     | 70     | 44    | 84    | 73    | 117     |
| 690297    | Pwp2         | 331    | 311     | 320    | 276    | 287   | 296   | 328   | 282     |
| 361624    | Akip1        | 175.78 | 174.89  | 167.43 | 136.03 | 141.2 | 121.6 | 177.3 | 190.27  |
| 315496    | Dpy1911      | 965    | 1040    | 1150   | 1084   | 988   | 1022  | 1040  | 1035    |
| 360991    | Vrk2         | 30.36  | 24.08   | 38.73  | 18.87  | 22.59 | 17.07 | 32.68 | 35.63   |
| 311430    | Mavs         | 477    | 487     | 486    | 505    | 515   | 475   | 459   | 435     |
| 548106    | Pcdhb19      | 85.62  | 102.75  | 89.28  | 73.22  | 90.8  | 89.26 | 90.83 | 67.24   |
| 24650     | Pkd1         | 2901   | 2841    | 2768   | 3030   | 2953  | 2990  | 2677  | 2501    |
| 499407    | LOC499407    | 19.17  | 14.75   | 16.7   | 18.24  | 16.46 | 17.25 | 14.59 | 18.06   |

|           |              |        |         |        |        |       |       |       |         |
|-----------|--------------|--------|---------|--------|--------|-------|-------|-------|---------|
| 361295    | Ss18         | 739    | 716     | 814    | 761    | 624   | 764   | 792   | 740     |
| 100910088 | LOC100910088 | 154    | 191     | 178    | 166    | 140   | 166   | 197   | 161     |
| 299923    | Ndrgr1       | 10927  | 11938   | 11021  | 11645  | 9297  | 12064 | 10409 | 12109   |
| 363135    | Rad5412      | 302.74 | 307.02  | 286.73 | 349.62 | 329   | 292.9 | 287.9 | 291.08  |
| 24624     | Pccb         | 638    | 610     | 572    | 578    | 506   | 587   | 584   | 634     |
| 192235    | Hyou1        | 1609   | 1783    | 2030   | 2132   | 1769  | 1914  | 1850  | 1747    |
| 29374     | Cct4         | 3451   | 3264    | 3188   | 3000   | 3075  | 2911  | 3226  | 3223    |
| 288150    | Mtx2         | 765.05 | 758.58  | 691.72 | 585.27 | 647.4 | 628.4 | 705.1 | 718.19  |
| 691729    | Spata5l1     | 70.09  | 58.94   | 67.95  | 62.62  | 72.33 | 52.42 | 58.51 | 66.93   |
| 108348145 | LOC108348145 | 159.29 | 89      | 186.92 | 128.04 | 110.1 | 115   | 156.8 | 160.99  |
| 311546    | Tpx2         | 101    | 85      | 145    | 83     | 115   | 103   | 90    | 91      |
| 306516    | Gtf2e2       | 483.04 | 450.28  | 427.86 | 397.84 | 393.7 | 386.7 | 445.9 | 469.03  |
| 114114    | Dnm1l        | 5636.8 | 5349.22 | 5253.8 | 5635.5 | 5324  | 4820  | 5771  | 5168.81 |
| 314212    | Daam1        | 1038   | 1011    | 974    | 1092   | 1116  | 920   | 1010  | 920     |
| 316552    | Rnf1112      | 1397.5 | 1384.81 | 1360.3 | 1317.6 | 1237  | 1283  | 1316  | 1426.22 |
| 295143    | Etfdh        | 862    | 736     | 754    | 770    | 669   | 693   | 853   | 794     |
| 361070    | Xpo7         | 1598   | 1601    | 1619   | 1574   | 1523  | 1473  | 1683  | 1482    |
| 362766    | Alkbh1       | 297.58 | 264.32  | 324.01 | 261.59 | 276.8 | 231.4 | 287.3 | 310.5   |
| 291034    | Mcurl        | 191    | 172     | 164    | 165    | 177   | 152   | 155   | 183     |
| 304817    | Ipo9         | 1573.5 | 1563.1  | 1661.7 | 1739.7 | 1529  | 1623  | 1607  | 1543.52 |
| 140932    | Bnip1        | 228    | 218     | 230    | 183    | 172   | 219   | 223   | 214     |
| 681023    | Qsox2        | 449.24 | 511.1   | 488.81 | 471.67 | 489.8 | 432.8 | 456.9 | 472.05  |
| 365793    | Rab33b       | 689    | 636     | 599    | 573    | 548   | 584   | 624   | 651     |
| 362204    | Casc4        | 2081   | 2005.02 | 1921   | 2134.2 | 2052  | 1745  | 2182  | 1869    |
| 103691376 | LOC103691376 | 21.74  | 19.59   | 20.22  | 11.15  | 16.66 | 11.99 | 19.3  | 22.13   |
| 29185     | Cd37         | 124    | 101     | 140    | 79     | 128   | 110   | 83    | 107     |
| 299957    | Nsmce2       | 285    | 285     | 303    | 266    | 277   | 248   | 276   | 297     |
| 291914    | Cnep1r1      | 464    | 477     | 459    | 463    | 449   | 407   | 488   | 452     |
| 680945    | Sdf2l1       | 140    | 166     | 209    | 177    | 161   | 146.1 | 158   | 202     |
| 29507     | Cox7a2       | 2138.6 | 1584.68 | 1412.6 | 1298.9 | 1460  | 1289  | 1493  | 1961.88 |
| 64189     | Pafah1b2     | 4428   | 4476    | 4077   | 4163   | 4075  | 4048  | 4251  | 4154    |
| 83536     | Mkln1        | 1123   | 1086    | 1082   | 1052   | 1069  | 936   | 1076  | 1106    |
| 293570    | Abraxas2     | 845    | 926     | 864    | 845    | 802   | 810   | 887   | 856     |
| 108351581 | LOC108351581 | 157.03 | 163.42  | 202.81 | 140.46 | 152.4 | 146.9 | 164.9 | 175.69  |
| 294988    | Ankrd50      | 1272   | 1459    | 1388   | 1513   | 1343  | 1309  | 1445  | 1333    |
| 296302    | Eif2s2       | 1885   | 1854    | 1831   | 1685   | 1717  | 1654  | 1818  | 1806    |
| 304941    | Pogk         | 1536.7 | 1492.67 | 1498.7 | 1594.9 | 1486  | 1382  | 1503  | 1531.88 |
| 65209     | Dync2h1      | 333.63 | 367.64  | 415    | 355    | 372.1 | 302.8 | 263.1 | 480.69  |
| 363513    | Ids          | 7479   | 7768    | 7707   | 8210   | 7907  | 7064  | 7755  | 7322    |
| 365057    | Map3k5       | 378    | 365     | 377    | 389    | 378   | 339   | 361   | 377     |
| 689142    | Snx29        | 613    | 623     | 652    | 714    | 699   | 605   | 571   | 634     |
| 79426     | Zfp36        | 500    | 457     | 436    | 1182   | 573   | 664   | 756   | 490     |
| 100361294 | Tyk2         | 439.04 | 459.04  | 483.17 | 394.52 | 449.2 | 454.4 | 396.7 | 412     |
| 108353146 | LOC108353146 | 7      | 6       | 5      | 10     | 8     | 5     | 6     | 8       |
| 353250    | Niacr1       | 4      | 8       | 6      | 10     | 6     | 8     | 5     | 8       |
| 366518    | Tnfrsf14     | 25.86  | 20.11   | 33.82  | 19.68  | 26.32 | 23.37 | 24.91 | 21.32   |
| 691209    | Slc12a6      | 1440.8 | 1538.07 | 1463.4 | 1623.4 | 1457  | 1419  | 1520  | 1453.14 |
| 288734    | Chfr         | 886    | 832     | 792    | 799    | 811   | 732   | 865   | 783     |
| 295384    | Prmt6        | 274.88 | 243.02  | 210.88 | 251.42 | 223   | 216.2 | 233.3 | 272.74  |
| 309167    | Pcnx3        | 962    | 925     | 1059   | 1009   | 982   | 998   | 951   | 883     |
| 290627    | Use1         | 1086   | 920     | 885    | 812    | 949   | 805   | 891   | 926     |
| 25288     | Acs1l        | 1630   | 1664    | 1496   | 1665   | 1472  | 1628  | 1577  | 1548    |
| 360557    | Nlrpla       | 143.4  | 109.09  | 135.29 | 105.05 | 129.8 | 110.4 | 109.7 | 125.47  |
| 291057    | Eef1e1       | 483    | 508     | 408    | 371    | 429   | 379   | 423   | 476     |
| 102553442 | LOC102553442 | 1.6    | 1.2     | 1.17   | 3.62   | 0     | 1.34  | 5.98  | 0       |
| 498160    | Zkscan1      | 410    | 440     | 412    | 481    | 485   | 362   | 431   | 403     |

|           |              |        |         |        |        |       |       |       |          |
|-----------|--------------|--------|---------|--------|--------|-------|-------|-------|----------|
| 353307    | Slc29a3      | 219    | 251     | 243    | 271    | 238   | 228   | 238   | 245      |
| 65156     | Dhodh        | 128    | 143     | 105    | 102    | 102   | 101   | 129   | 129      |
| 103691238 | LOC103691238 | 61.67  | 76.33   | 83.84  | 78.75  | 76.4  | 72.8  | 72.36 | 68.35    |
| 306096    | Dach1        | 190    | 204     | 156    | 210    | 166   | 213   | 196   | 158      |
| 102556057 | LOC102556057 | 27.65  | 26.15   | 34.44  | 36.54  | 26.4  | 29.75 | 30.61 | 33.59    |
| 364981    | Scoc         | 4789   | 4925    | 4451   | 4321   | 4423  | 4395  | 4458  | 4554     |
| 290651    | Isyna1       | 653    | 516     | 627    | 657    | 578   | 601   | 592   | 595      |
| 365527    | RT1-M6-2     | 23.61  | 19.92   | 26.77  | 42.99  | 31.3  | 23.41 | 29.05 | 25.52    |
| 83792     | Scd2         | 65803  | 74877.6 | 65424  | 78275  | 64543 | 71347 | 65619 | 72807.55 |
| 290232    | Tinf2        | 376.64 | 335.67  | 389.83 | 353.98 | 336   | 323.9 | 377.7 | 367.05   |
| 362685    | Gpatch11     | 923.52 | 881.44  | 885.73 | 864.94 | 922.5 | 780.8 | 838.9 | 887.76   |
| 300836    | Fam214a      | 488    | 485     | 516    | 519    | 478   | 535   | 497   | 427      |
| 304218    | Pds5b        | 1835   | 1901    | 1738   | 1997   | 1927  | 1674  | 1893  | 1713     |
| 500419    | Rmdn1        | 253    | 265     | 289    | 242    | 236   | 271   | 246   | 259      |
| 84391     | Kif2a        | 1875.5 | 1983.01 | 1958.8 | 2148.5 | 1950  | 1873  | 1949  | 1912.56  |
| 312651    | Ift122       | 461    | 476     | 504    | 431    | 375   | 465   | 497   | 469      |
| 498489    | Naa30        | 686    | 734     | 597    | 679    | 664   | 612   | 668   | 657      |
| 64846     | Slc13a3      | 740    | 688     | 688    | 694    | 618   | 669   | 679   | 745      |
| 313385    | Kank4        | 1781   | 1945    | 1687   | 2098   | 1634  | 1973  | 1877  | 1763     |
| 500288    | Thumpd3      | 885    | 772     | 821    | 823    | 772   | 711   | 855   | 847      |
| 81512     | Cnmd         | 2613.1 | 3367.12 | 2230.5 | 2476.2 | 2150  | 2659  | 2937  | 2564.49  |
| 170851    | Map2k1       | 2182   | 2208    | 2341   | 2068   | 2179  | 2125  | 2137  | 2049     |
| 296851    | Pon2         | 1910   | 1767    | 1849   | 1452   | 1504  | 1752  | 1838  | 1639     |
| 24356     | Ets1         | 395.24 | 381.01  | 477.34 | 398.38 | 441.8 | 409.5 | 346.3 | 396.43   |
| 303274    | Phf12        | 512    | 542     | 596    | 515    | 536   | 540   | 531   | 482      |
| 362295    | Lmbr1        | 336    | 326     | 333    | 287    | 311   | 301   | 302   | 323      |
| 64471     | Plekhb1      | 8434   | 9281    | 9191   | 7911   | 6587  | 8617  | 8737  | 9654     |
| 81803     | Stx4         | 653.06 | 584.24  | 635.31 | 585.51 | 568.6 | 570.2 | 634.7 | 598.46   |
| 680778    | Rt14         | 105    | 103     | 101    | 90     | 89    | 89    | 103   | 104      |
| 362495    | Ndufaf4      | 347    | 373     | 363    | 371    | 313   | 330   | 392   | 368      |
| 64442     | St3gal2      | 1540   | 1524    | 1430   | 1465   | 1411  | 1564  | 1370  | 1405     |
| 309532    | Atad1        | 2203.3 | 2047.28 | 2023.2 | 2070.5 | 1977  | 1908  | 2109  | 2058.19  |
| 303606    | Ccdc47       | 4787   | 4655    | 4519   | 4667   | 4619  | 4332  | 4670  | 4354     |
| 315330    | Esp11        | 33.38  | 55      | 62.37  | 41.81  | 47.44 | 48.31 | 53.37 | 36.69    |
| 287766    | Cep95        | 206.41 | 194.44  | 250.5  | 220.2  | 193.1 | 193.2 | 243.4 | 211.39   |
| 498030    | Anapc11      | 726.41 | 699.19  | 649.06 | 586.72 | 631.9 | 607.4 | 694.8 | 633.99   |
| 360953    | Stx18        | 682    | 734     | 648    | 648    | 624   | 626   | 679   | 688      |
| 500040    | Tes          | 1004   | 1009    | 1077   | 964    | 1036  | 908   | 1036  | 932      |
| 246142    | Bmf          | 169    | 189     | 183    | 173    | 156   | 186   | 183   | 164      |
| 307548    | Dtna         | 1100.3 | 1080.24 | 945.7  | 1142.2 | 1019  | 1032  | 1004  | 1064.47  |
| 246294    | Optn         | 2816   | 2910    | 2643   | 2860   | 2704  | 2751  | 2796  | 2585     |
| 302290    | Ap3s1        | 1633   | 1596.12 | 1666.6 | 1470.1 | 1467  | 1417  | 1579  | 1680.71  |
| 100361891 | Rab5a11      | 2232.4 | 2116.41 | 2082.5 | 1961.5 | 1928  | 1886  | 2183  | 2102.06  |
| 84593     | Cetn2        | 868    | 968     | 949    | 768    | 754   | 804   | 880   | 991      |
| 288124    | Nectin3      | 592    | 611     | 643    | 590    | 605   | 509   | 673   | 564      |
| 690254    | Polr3gl      | 136    | 161     | 162    | 143    | 147   | 137   | 151   | 146      |
| 362617    | Ahdcl        | 554.86 | 530     | 649.01 | 707    | 596   | 613   | 583.6 | 563.09   |
| 100910768 | LOC100910768 | 2741.6 | 2606.92 | 2460.3 | 2407.7 | 2440  | 2450  | 2373  | 2596.61  |
| 498003    | Dusp3        | 4814.5 | 4695.28 | 4715.3 | 4452.9 | 4723  | 4486  | 4572  | 4245.48  |
| 83724     | Ncoa2        | 1192.5 | 1196.25 | 1168.1 | 1452.3 | 1424  | 1053  | 1193  | 1163.4   |
| 303915    | Iqcb1        | 359    | 321     | 250    | 333    | 298   | 253   | 348   | 320      |
| 361857    | Traf3ip2     | 371.08 | 366.19  | 382.85 | 354.24 | 325.8 | 358.3 | 362.2 | 376.74   |
| 24651     | Pklr         | 37.5   | 39.44   | 57.53  | 44.01  | 47.95 | 43.13 | 37.66 | 43.53    |
| 362636    | Usp48        | 1727.3 | 1723.07 | 1666.1 | 1770.6 | 1736  | 1578  | 1730  | 1603.78  |
| 192272    | Acot2        | 376.29 | 346.87  | 370.82 | 376.95 | 366.3 | 356.8 | 323   | 373.61   |
| 89825     | Nap111       | 7324.9 | 7123.82 | 6288.3 | 7229.7 | 6603  | 6487  | 7063  | 6840.86  |

|           |              |        |         |        |        |       |       |       |         |
|-----------|--------------|--------|---------|--------|--------|-------|-------|-------|---------|
| 171138    | Kcne2        | 31     | 46      | 47.98  | 18     | 31    | 44.04 | 32.99 | 29.98   |
| 314228    | Snapc1       | 199    | 178     | 210    | 190    | 179   | 187   | 199   | 185     |
| 498941    | Fbxl8        | 71     | 58      | 70     | 60     | 53    | 85    | 57    | 55      |
| 361674    | Eps812       | 61     | 82      | 67     | 78     | 56    | 68    | 79    | 75      |
| 361645    | Nsmce1       | 384    | 414     | 338    | 304    | 337   | 345   | 340   | 368     |
| 308322    | Zim1         | 17     | 16.02   | 26     | 28     | 20    | 24    | 18    | 22      |
| 304005    | Nfkbiz       | 53     | 44      | 50     | 84     | 54    | 57    | 69    | 43      |
| 308971    | Tnrc6a       | 1543   | 1505    | 1492   | 1684   | 1570  | 1555  | 1571  | 1312.11 |
| 303238    | Ctcl         | 832    | 947     | 904    | 1015   | 825   | 940   | 884   | 921     |
| 362277    | Rnf114       | 892    | 850     | 855    | 841    | 805   | 866   | 794   | 854     |
| 24674     | Ppp3ca       | 6468   | 5946.99 | 6620   | 6418   | 6864  | 6039  | 6198  | 5470.99 |
| 108349548 | LOC108349548 | 406.1  | 369.81  | 387.93 | 280.42 | 303.1 | 337   | 366.3 | 387.87  |
| 191569    | Pde9a        | 104    | 109     | 120    | 101    | 119   | 91    | 98    | 111     |
| 503252    | Coa5         | 1730.5 | 1801.63 | 1761.6 | 1866.1 | 1788  | 1745  | 1740  | 1639.26 |
| 304176    | MGC95208     | 192    | 213     | 216    | 161    | 185   | 174   | 191   | 205     |
| 362545    | Tm2d1        | 1043   | 907.91  | 924.92 | 813.06 | 879   | 849   | 931   | 902.57  |
| 362530    | Akna         | 231    | 216     | 260    | 221    | 213   | 231   | 229   | 223     |
| 312790    | Gprc5a       | 12     | 10      | 17     | 19     | 12    | 8     | 26    | 10      |
| 307526    | Ammecr11     | 731    | 755     | 737    | 796    | 644   | 756   | 785   | 730     |
| 252853    | Stx17        | 433    | 476.44  | 501.52 | 504.36 | 478.7 | 485   | 475.4 | 410.24  |
| 100361660 | Zfp617       | 102    | 86.02   | 72.04  | 84.01  | 77    | 83.01 | 75.04 | 97.17   |
| 685707    | Nav1         | 4664.4 | 4804.7  | 5349   | 5943.9 | 5322  | 4924  | 4793  | 5008.54 |
| 289992    | Fermt2       | 3620   | 3649    | 3759   | 3791   | 3159  | 3540  | 3963  | 3647    |
| 500651    | Sptssa       | 798    | 728     | 719    | 661    | 634   | 633   | 743   | 796     |
| 116599    | Blvra        | 620    | 605     | 519    | 494    | 545   | 479   | 545   | 592     |
| 103689959 | Armh3        | 693    | 715     | 700    | 683    | 658   | 648   | 708   | 681     |
| 310652    | Tdrkh        | 1135   | 1099    | 1068   | 1094   | 1049  | 1088  | 1094  | 1014    |
| 319110    | Hnrnpr       | 905    | 844     | 846    | 870    | 854   | 752   | 956   | 784     |
| 307200    | Socs6        | 241.48 | 221.55  | 215.35 | 243.27 | 233.6 | 204.7 | 234.9 | 216.83  |
| 252895    | Pcdhga9      | 90.53  | 103.46  | 158.99 | 123.52 | 125.5 | 140.1 | 85.69 | 108.94  |
| 361065    | Bin3         | 453    | 439     | 394    | 378    | 366   | 380   | 452   | 409     |
| 24640     | Pfkfb2       | 816.1  | 772.46  | 710.16 | 705.91 | 768.6 | 711   | 715.9 | 706.24  |
| 100909824 | LOC100909824 | 141.98 | 124.52  | 88.13  | 112.88 | 143.6 | 86.53 | 90.18 | 131.17  |
| 362197    | Mapkbp1      | 389.4  | 394.98  | 406.25 | 395.89 | 407.1 | 396.1 | 384.2 | 344.9   |
| 100911685 | LOC100911685 | 206.74 | 218.41  | 633.89 | 174.73 | 311.9 | 222.7 | 484.2 | 172.72  |
| 191574    | Akr1c14      | 127    | 89      | 100    | 123    | 80    | 113   | 129   | 102     |
| 361692    | Nudt8        | 118    | 128     | 99     | 94     | 104   | 106   | 90    | 124     |
| 24390     | B4galt1      | 264    | 233     | 307    | 279    | 249   | 279   | 255   | 263     |
| 84430     | Pomt1        | 326    | 340     | 384    | 327    | 325   | 375   | 329   | 301     |
| 103689968 | LOC103689968 | 3124.1 | 2902.36 | 2854.2 | 2915.3 | 3002  | 2812  | 2758  | 2821.93 |
| 24499     | Il6r         | 166    | 195     | 212    | 160    | 178   | 202   | 187   | 141     |
| 64018     | Slc33a1      | 618    | 671     | 554    | 591    | 589   | 596   | 565   | 601     |
| 298841    | Atraid       | 360    | 418     | 435    | 283    | 330   | 365   | 349   | 401     |
| 192361    | Ppp1r2       | 10049  | 9534    | 9310   | 8815   | 8843  | 8548  | 9251  | 9781    |
| 683923    | Bend3        | 103.83 | 108.06  | 134.64 | 96.36  | 98.88 | 108.2 | 106.2 | 114.57  |
| 287522    | Smg6         | 412    | 452.61  | 459    | 504.73 | 427.5 | 438   | 429.8 | 470.75  |
| 679890    | Gpkow        | 713.63 | 687.85  | 681.23 | 661.04 | 638.6 | 637.4 | 699.6 | 674.67  |
| 692032    | Mzt1         | 426    | 400     | 436    | 443    | 392   | 378   | 396   | 481     |
| 29424     | Htt          | 2171.1 | 2205.65 | 2182.7 | 2646.2 | 2340  | 2105  | 2220  | 2228.02 |
| 684934    | Ccdc9        | 642    | 641     | 731    | 692    | 627   | 626   | 694   | 667     |
| 290551    | Chdh         | 409    | 398     | 386    | 455    | 382   | 385   | 426   | 399     |
| 305853    | Rab2b        | 2365   | 2199    | 2275   | 2144   | 2240  | 2068  | 2133  | 2237    |
| 310200    | Ankrd33b     | 27     | 18      | 48     | 25     | 26    | 25    | 31    | 32      |
| 690911    | Spen         | 875    | 889     | 992    | 1140   | 1019  | 964   | 900   | 881     |
| 315722    | Adpgk        | 426.99 | 445.51  | 417.15 | 365.87 | 376   | 377.3 | 428.9 | 417.32  |
| 316557    | Rhbdd1       | 232    | 254     | 278    | 270    | 223   | 266   | 277   | 233     |

|           |              |        |         |        |        |       |       |       |        |
|-----------|--------------|--------|---------|--------|--------|-------|-------|-------|--------|
| 362567    | Pomgnt1      | 1178   | 1200    | 1255   | 1097   | 1033  | 1211  | 1148  | 1178   |
| 303753    | Foxk2        | 946    | 949     | 974    | 1009   | 968   | 961   | 905   | 913    |
| 364033    | Vamp4        | 2757   | 2588    | 2421   | 2364   | 2443  | 2246  | 2589  | 2510   |
| 84473     | Ddx20        | 333    | 278     | 364    | 299    | 297   | 284   | 304   | 346    |
| 56785     | Ralgap1      | 2116   | 2073    | 2287   | 2265   | 2096  | 1872  | 2353  | 2125   |
| 252892    | Lgil         | 1082   | 1192    | 1048   | 1098   | 1059  | 932   | 1139  | 1141   |
| 307382    | Napg         | 3002   | 2892    | 2616   | 2844   | 2712  | 2625  | 2878  | 2757   |
| 305865    | Slc35f4      | 89     | 77      | 105    | 56     | 87    | 62    | 88    | 79     |
| 311846    | Lrrc8a       | 2245   | 2378    | 2451   | 2381.7 | 2521  | 2358  | 2354  | 1905   |
| 303678    | Caskin2      | 1813   | 2085    | 1904   | 1812   | 1585  | 1979  | 1732  | 2062   |
| 362886    | Rassf3       | 289    | 315     | 347    | 329    | 276   | 363   | 304   | 294    |
| 299732    | Lta4h        | 835    | 998     | 896    | 903    | 853   | 885   | 928   | 844    |
| 361980    | Khdc4        | 560    | 576     | 590    | 567    | 490   | 567   | 623   | 536    |
| 362212    | Tmem87b      | 1760   | 1728    | 1720   | 1672   | 1678  | 1546  | 1713  | 1712   |
| 84580     | Hdac5        | 982    | 927     | 971    | 903    | 916   | 935   | 877   | 928    |
| 24913     | Pla2g16      | 1008   | 1299    | 1145   | 930    | 868   | 1110  | 1133  | 1124   |
| 691814    | Mrpl57       | 470.13 | 487.46  | 449.38 | 418.99 | 508.6 | 402   | 394.1 | 460.1  |
| 362286    | Dido1        | 887.51 | 834.38  | 862.36 | 969.21 | 826.3 | 834.5 | 854.5 | 919.19 |
| 292097    | Arv1         | 261    | 277     | 248    | 229    | 247   | 231   | 262   | 241    |
| 116459    | Serpini1     | 1176   | 1035    | 1056   | 1002   | 1065  | 944   | 1140  | 977    |
| 24791     | Sparc        | 37164  | 42629   | 46640  | 40069  | 34454 | 45132 | 41313 | 40026  |
| 680068    | Dmrtclb      | 192.83 | 152.02  | 170.75 | 128.27 | 155   | 147.4 | 174.9 | 144.98 |
| 94273     | Mgat2        | 527    | 542     | 597    | 458    | 492   | 494   | 543   | 524    |
| 266681    | Tmprss5      | 3598   | 3446    | 3466   | 3166   | 3238  | 3361  | 3430  | 3190   |
| 60670     | Fut4         | 101    | 104     | 148    | 96     | 83    | 116   | 117   | 118    |
| 499280    | Mapklip1     | 524    | 493     | 487    | 472    | 472   | 448   | 473   | 517    |
| 360702    | Ttc3         | 8241   | 8317    | 8470   | 9558   | 8842  | 7647  | 8618  | 8324   |
| 679532    | Elovl1       | 2558   | 2547    | 2482   | 2417   | 2073  | 2449  | 2609  | 2539   |
| 500413    | Triqk        | 494    | 548     | 471    | 434    | 492   | 398   | 481   | 511    |
| 303519    | Krt25        | 28.79  | 28.69   | 35.95  | 37.83  | 33.13 | 36.4  | 34    | 23.35  |
| 89826     | Rpe65        | 32.23  | 40.07   | 20.49  | 18.1   | 26.33 | 28.22 | 26.61 | 26.03  |
| 304794    | Rbbp5        | 849    | 818     | 804    | 827    | 813   | 763   | 841   | 771    |
| 310879    | Alpk1        | 345    | 307     | 309    | 360    | 316   | 268   | 377   | 316    |
| 291133    | Aldh5a1      | 654    | 646     | 567    | 626    | 631   | 593   | 606   | 580    |
| 171116    | Opal         | 3892   | 4095    | 3789   | 4118   | 3886  | 3674  | 4175  | 3630   |
| 155173    | Sdf4         | 1899   | 1787    | 1712   | 1693   | 1614  | 1636  | 1809  | 1796   |
| 309454    | Mfsd13a      | 290    | 274     | 292    | 256    | 261   | 262   | 239   | 313    |
| 64202     | Calr         | 7515   | 7827    | 9729   | 9567   | 8254  | 8794  | 8316  | 8123   |
| 25054     | Ntrk2        | 6448.5 | 6170.73 | 5943.5 | 7106.7 | 6327  | 6204  | 6363  | 5922   |
| 64830     | Unc13b       | 153    | 145     | 171    | 163    | 154   | 141   | 163   | 153    |
| 103693024 | Zfp558       | 64.2   | 49.28   | 54.38  | 64.81  | 64.32 | 40.84 | 55.95 | 63.83  |
| 289560    | Igfbp7       | 3982.5 | 3287.79 | 4233.5 | 4054.1 | 3554  | 3355  | 3910  | 4222.9 |
| 312890    | Gdap1        | 2881   | 2693.96 | 2329   | 2769.1 | 2614  | 2263  | 2768  | 2674   |
| 292898    | Pih1d1       | 234.95 | 197.51  | 199.07 | 188.12 | 206.1 | 192   | 212.7 | 181.7  |
| 498014    | RGD1565033   | 429    | 482     | 447    | 424    | 397   | 383   | 472   | 471    |
| 292811    | Cep89        | 197    | 200     | 200    | 159    | 177   | 185   | 185   | 184    |
| 102550026 | LOC102550026 | 150.05 | 135.32  | 177.72 | 96.18  | 151.4 | 147.5 | 120.1 | 121.77 |
| 291145    | Hist1hla     | 8.02   | 13.01   | 5.01   | 3      | 4.01  | 2.01  | 12.03 | 10.03  |
| 108352464 | LOC108352464 | 79     | 40      | 64     | 59     | 59    | 52    | 81    | 42     |
| 362635    | Zbtb40       | 354    | 362.01  | 348    | 418    | 357   | 395   | 342   | 339    |
| 297381    | Wbp1         | 738.95 | 282.56  | 374.17 | 367.32 | 474.9 | 569.9 | 461.3 | 198.71 |
| 81522     | Mtr          | 334    | 373     | 335    | 442    | 378   | 323   | 387   | 347    |
| 292820    | Zfp536       | 260    | 324     | 324    | 334    | 301   | 264   | 328   | 308    |
| 171402    | Elovl6       | 18.38  | 8.03    | 30.78  | 54.04  | 36.15 | 12.26 | 29.1  | 30.05  |
| 315714    | Loxl1        | 193.07 | 201     | 310.6  | 166    | 232.4 | 205.5 | 231   | 173    |
| 192357    | Gmpr2        | 607.76 | 595.67  | 550.88 | 517.71 | 524.7 | 520   | 552.7 | 599.63 |

|           |              |        |         |        |        |       |       |       |         |
|-----------|--------------|--------|---------|--------|--------|-------|-------|-------|---------|
| 290234    | Dhrs1        | 350    | 318     | 342    | 324    | 312   | 339   | 344   | 295     |
| 266758    | Sec11c       | 841    | 756     | 653    | 632    | 590   | 616   | 751   | 830     |
| 312270    | RGD1563986   | 115    | 118     | 136    | 147    | 133   | 114   | 114   | 138     |
| 307236    | Adnp2        | 328    | 362     | 342    | 395    | 342   | 354   | 347   | 337     |
| 365382    | Inpp5a       | 392    | 409     | 429    | 380    | 330   | 405   | 392   | 430     |
| 689092    | Gcnt6        | 13.24  | 8.23    | 14.3   | 20.44  | 17.36 | 7.1   | 17.57 | 12.33   |
| 29670     | Psma3        | 3143.6 | 3166.3  | 3018.1 | 2744.3 | 2793  | 2748  | 2977  | 3157.71 |
| 25145     | Cd24         | 2929   | 2535    | 2236   | 2249   | 2543  | 2287  | 2234  | 2558    |
| 305424    | Fbxl5        | 1094   | 1057    | 970    | 988    | 906   | 982   | 1078  | 1008    |
| 100362805 | Txndc5       | 1344   | 1469    | 1635   | 1431   | 1314  | 1445  | 1508  | 1419    |
| 295975    | Eif3m        | 1473   | 1428    | 1462   | 1212   | 1329  | 1177  | 1390  | 1496    |
| 689364    | Chmp1b       | 879    | 893     | 929    | 772    | 815   | 836   | 885   | 823     |
| 64001     | Cyb5a        | 1440   | 1461    | 1394   | 1160   | 1065  | 1283  | 1426  | 1502    |
| 362980    | Tubgcp6      | 363.79 | 366.28  | 358.4  | 378.04 | 337.5 | 385.5 | 324.8 | 370.61  |
| 303554    | Nbr1         | 2813   | 2993    | 2940   | 3018   | 2741  | 2753  | 2984  | 2900    |
| 304091    | I110rb       | 386    | 355     | 394    | 329    | 327   | 331   | 367   | 391     |
| 65151     | Rida         | 372    | 371     | 374    | 349    | 308   | 373   | 330   | 407     |
| 315222    | Arsa         | 817    | 866     | 898    | 781    | 731   | 901   | 820   | 800     |
| 287110    | Tbc1d24      | 266    | 244     | 235    | 264    | 260   | 241   | 233   | 242     |
| 363452    | Otud5        | 1624   | 1527    | 1560   | 1468   | 1454  | 1440  | 1598  | 1485    |
| 501005    | Cplx3        | 15.11  | 12.49   | 18.48  | 17.61  | 23.03 | 14.28 | 14.21 | 10.09   |
| 680264    | Catsperd     | 60     | 53      | 72     | 60     | 51    | 60    | 63    | 63      |
| 680354    | Tceal9       | 1169   | 1124    | 1155   | 1058   | 982   | 991   | 1128  | 1258    |
| 171069    | Usmg5        | 1451.7 | 1236.39 | 1093.2 | 1114.7 | 1124  | 1049  | 1169  | 1394.51 |
| 307075    | Wdr37        | 1122.1 | 1135.19 | 1043.1 | 1153.1 | 1114  | 980   | 1135  | 1079.02 |
| 60383     | Rbck1        | 1022   | 1014    | 1046   | 999    | 948   | 999   | 1017  | 984     |
| 290645    | Mpv1712      | 143    | 145     | 154    | 111    | 140   | 114   | 126   | 155     |
| 690344    | Uqcc3        | 261    | 228     | 221    | 181    | 203   | 197   | 215   | 247     |
| 296178    | Mcm8         | 100    | 79      | 80     | 79     | 80    | 88    | 83    | 76      |
| 60582     | I11rn        | 25.01  | 25.04   | 37.31  | 22.37  | 32.69 | 30.63 | 27.22 | 15.62   |
| 292710    | Ethe1        | 279    | 324     | 281    | 254    | 278   | 282   | 282   | 259     |
| 290831    | Nsd3         | 1206.4 | 1142.08 | 1288   | 1322.3 | 1205  | 1110  | 1285  | 1197.47 |
| 116641    | Lgals8       | 3931.4 | 3755.83 | 3408.2 | 3616.1 | 3450  | 3339  | 3764  | 3681.6  |
| 450235    | Adgre4       | 27     | 23      | 29     | 32     | 26    | 23    | 31.4  | 27      |
| 307039    | Rab18        | 2556   | 2520    | 2418   | 2281   | 2359  | 2112  | 2449  | 2538    |
| 311341    | Pla2g4b      | 298.96 | 280.77  | 303.27 | 225.41 | 226.3 | 287.6 | 255.3 | 303.24  |
| 140674    | Gabrg1       | 1695   | 1632    | 1224   | 1805   | 1454  | 1460  | 1567  | 1669    |
| 365355    | Rras2        | 332    | 328     | 297    | 278    | 283   | 234   | 354   | 324     |
| 361685    | Tnfrsf26     | 28     | 43.35   | 31     | 28.9   | 37    | 38    | 28    | 24      |
| 64554     | Slc7a2       | 341.74 | 348     | 325.22 | 455.43 | 357.2 | 293.7 | 388.9 | 383     |
| 498420    | Etaal        | 109.21 | 107.47  | 134.09 | 113.43 | 139.1 | 86.66 | 134   | 89.43   |
| 100359595 | Tbc1d32      | 221    | 244     | 239    | 285    | 251   | 199   | 293   | 214     |
| 308850    | Klh135       | 45.29  | 70.55   | 78.83  | 48.72  | 58.61 | 43.26 | 66.1  | 67.55   |
| 301555    | Cul3         | 2827   | 2824    | 2831   | 2746   | 2533  | 2716  | 2932  | 2684    |
| 691556    | Zbtb42       | 207.57 | 197.36  | 210.77 | 192.85 | 175.7 | 195.2 | 191   | 220.56  |
| 317399    | Ddx21        | 895.31 | 868.38  | 923.91 | 910.17 | 798.2 | 852.9 | 962.6 | 867.8   |
| 685814    | Cnpy2        | 617    | 502.04  | 578.51 | 444.03 | 459.1 | 485   | 547.3 | 581     |
| 362394    | Isyl         | 198    | 176     | 186    | 152    | 159   | 164   | 187   | 179     |
| 103691872 | LOC103691872 | 795.46 | 789.71  | 687.49 | 782.89 | 778.2 | 663.2 | 779.9 | 735.56  |
| 310178    | Myo10        | 850    | 886     | 951    | 1153   | 990   | 898   | 913   | 915     |
| 83788     | 9-Sep        | 1978.4 | 2165.77 | 2488.2 | 2195.8 | 1963  | 2154  | 2287  | 2138.75 |
| 689414    | Slc25a42     | 490    | 431     | 398    | 416    | 439   | 423   | 416   | 401     |
| 170577    | Mark3        | 1136   | 1197    | 1119   | 1074   | 1051  | 1122  | 1178  | 1029    |
| 294072    | Slc35g1      | 9      | 7       | 7      | 8      | 9     | 4     | 8     | 9       |
| 316022    | Trank1       | 21     | 13      | 13     | 15     | 11    | 13    | 19    | 17      |
| 266809    | Sc1t1        | 143    | 126     | 151    | 138    | 122   | 130   | 147   | 141     |



|           |              |        |         |        |        |       |       |       |         |
|-----------|--------------|--------|---------|--------|--------|-------|-------|-------|---------|
| 299909    | Fam49b       | 1293   | 1263    | 1211   | 1162   | 1084  | 1236  | 1294  | 1156    |
| 100912748 | LOC100912748 | 26.04  | 27.45   | 21.07  | 28.13  | 17.69 | 23.07 | 32.28 | 26.34   |
| 362416    | Rpusd3       | 296.69 | 381.05  | 345.05 | 264.75 | 293   | 323.7 | 326.8 | 302.52  |
| 362288    | Rtel1        | 1116   | 975     | 1024   | 950    | 937   | 1022  | 1045  | 930     |
| 361775    | Trub1        | 252    | 241     | 228    | 210    | 251   | 209   | 238   | 203     |
| 362178    | Cstf3        | 299    | 333     | 305    | 337    | 326   | 282   | 309   | 316     |
| 310341    | Fat4         | 123.11 | 133.94  | 171.82 | 204.37 | 147.5 | 133.9 | 143.4 | 188.05  |
| 287622    | Tom111       | 616.86 | 614.3   | 570.88 | 510.26 | 542.6 | 538.3 | 584.2 | 572.81  |
| 291293    | Fbh1         | 1741   | 1683    | 1686   | 1640   | 1581  | 1557  | 1690  | 1705    |
| 303135    | 8-Sep        | 4312   | 4550    | 4499   | 4630   | 3999  | 4480  | 4683  | 4251    |
| 362273    | Cse11        | 1780   | 1773    | 1662   | 1703   | 1565  | 1614  | 1884  | 1633    |
| 108348139 | LOC108348139 | 7.66   | 5.44    | 2.82   | 9.05   | 8.37  | 4.4   | 6.64  | 4.76    |
| 81718     | Cdo1         | 493    | 459     | 346    | 606    | 422   | 524   | 469   | 428     |
| 306129    | Fbx13        | 1329   | 1243    | 1223   | 1171   | 1198  | 1134  | 1284  | 1191    |
| 50678     | Pde3a        | 148.35 | 114.36  | 142.69 | 145.02 | 125.2 | 130.8 | 173   | 103.85  |
| 100910506 | LOC100910506 | 1057.8 | 1017.01 | 1076.3 | 1020   | 1055  | 983.4 | 1065  | 934.61  |
| 361176    | Upf3a        | 614    | 521     | 552    | 470    | 496   | 504   | 544   | 544     |
| 684441    | Pin4         | 413    | 357     | 377    | 354    | 380   | 319   | 335   | 419     |
| 310698    | Dclk2        | 1883   | 1909    | 2094   | 1996   | 1924  | 2020  | 1998  | 1688    |
| 309165    | Rela         | 722    | 795     | 878    | 733    | 696   | 794   | 751   | 787     |
| 361092    | Stk24        | 646.77 | 655.85  | 604.56 | 729.87 | 646.3 | 616.2 | 655.4 | 634.85  |
| 25193     | Ccnd3        | 780    | 750     | 947    | 746    | 737   | 833   | 837   | 713     |
| 64633     | Rab5a        | 83.88  | 67.48   | 55.41  | 53.3   | 63.2  | 72.58 | 59.68 | 56.3    |
| 29635     | Timm44       | 647    | 654     | 601    | 540    | 589   | 574   | 626   | 575     |
| 311334    | Exd1         | 97.52  | 85.44   | 97.22  | 77.98  | 110.8 | 76.58 | 80.47 | 78.93   |
| 299899    | Eif3h        | 1987.6 | 1828.83 | 1788.8 | 1782   | 1789  | 1670  | 1956  | 1737.64 |
| 287772    | Psm12        | 2445.4 | 2436.42 | 2205.9 | 2373.8 | 2175  | 2198  | 2498  | 2290.24 |
| 307652    | Fam192a      | 590.17 | 621.7   | 646.98 | 561.86 | 521   | 640.4 | 619.1 | 563.16  |
| 64624     | Cul5         | 967    | 960     | 969    | 1017   | 1020  | 845   | 987.5 | 936     |
| 100912059 | LOC100912059 | 1234.7 | 1164.71 | 1108.5 | 1078.8 | 1158  | 1063  | 1117  | 1103.73 |
| 501659    | RGD1561481   | 1234.7 | 1164.71 | 1108.5 | 1078.8 | 1158  | 1063  | 1117  | 1103.73 |
| 287101    | Pkmyt1       | 85     | 106     | 116    | 102    | 96    | 102   | 102   | 96      |
| 306619    | Cln8         | 343    | 337     | 307    | 304    | 282   | 335   | 295   | 338     |
| 308009    | Fam45a       | 1209   | 1159    | 1076   | 1063   | 1100  | 1038  | 1121  | 1105    |
| 299002    | G2e3         | 194.04 | 177.73  | 163.07 | 142.27 | 167.3 | 113.5 | 195.6 | 179.21  |
| 100174909 | Smim11       | 96     | 83      | 90     | 78     | 73    | 92    | 81    | 90      |
| 25323     | Htr1d        | 402    | 391     | 295    | 490    | 367   | 413   | 347   | 401     |
| 365023    | Ankrd11      | 2525   | 2557.02 | 2705   | 2914   | 2736  | 2605  | 2683  | 2338.01 |
| 291624    | Lars         | 2587   | 2566    | 2458   | 2554   | 2431  | 2375  | 2527  | 2510    |
| 315608    | Ube4a        | 3456   | 3556    | 3695   | 3731   | 3714  | 3347  | 3467  | 3453    |
| 289180    | Gpr161       | 1843   | 1800    | 1692   | 1904   | 1876  | 1562  | 1798  | 1774    |
| 297066    | Zfp212       | 164    | 148     | 152.41 | 156    | 126.8 | 148   | 162.6 | 163.43  |
| 84350     | Dnmt1        | 399.93 | 462.32  | 479.51 | 451.68 | 440.7 | 447.3 | 416.8 | 432.06  |
| 298227    | Mtap         | 658    | 660     | 689    | 685    | 691   | 641   | 672   | 603     |
| 306562    | Tacc1        | 5417   | 5668    | 5329   | 5852   | 5096  | 5659  | 5482  | 5326    |
| 365493    | Cacul1       | 2062   | 2022    | 1967   | 2031   | 2041  | 1872  | 2016  | 1898    |
| 364049    | Slamf7       | 82.54  | 59.78   | 63.48  | 68.15  | 73.34 | 52.99 | 73.83 | 65.15   |
| 293156    | Lrrc51       | 74     | 62      | 66     | 52     | 79    | 54    | 54    | 59      |
| 170512    | Ifi27        | 4227   | 3669    | 3384   | 2829   | 3641  | 3254  | 3273  | 3497    |
| 100362321 | Smim19       | 700    | 744     | 709    | 648    | 621   | 684   | 674   | 734     |
| 314717    | Scyl2        | 1159   | 1121    | 1123   | 1213   | 1181  | 1054  | 1123  | 1113    |
| 25027     | Slc16a1      | 2329   | 2195    | 2129   | 2357   | 2048  | 2095  | 2436  | 2148    |
| 296399    | Zfp93        | 12.04  | 7.05    | 8.03   | 6      | 8.06  | 7     | 5.02  | 12      |
| 362790    | Inf2         | 1885   | 1979    | 2166   | 2030   | 1835  | 2155  | 1881  | 1936    |
| 309647    | Brpf3        | 241    | 246     | 243    | 258    | 256   | 234   | 243   | 224     |
| 296911    | ST7          | 216    | 182     | 192    | 207    | 214   | 192   | 187   | 179     |

|           |              |        |         |        |        |       |       |       |          |
|-----------|--------------|--------|---------|--------|--------|-------|-------|-------|----------|
| 79119     | Arf2         | 356    | 369     | 353    | 326    | 332   | 319   | 361   | 348      |
| 363603    | Cnot8        | 1073   | 1148    | 1010   | 986    | 956   | 936   | 1174  | 1019     |
| 246237    | Plekha5      | 1290   | 1260    | 1302   | 1293   | 1209  | 1256  | 1282  | 1237     |
| 108349819 | LOC108349819 | 7      | 6       | 8      | 11     | 9     | 13    | 6     | 3        |
| 287479    | Shpk         | 358    | 394     | 367    | 321    | 327   | 339   | 345   | 384      |
| 683512    | Uqcc1        | 1297   | 1215    | 1125   | 1165   | 1138  | 1131  | 1152  | 1231     |
| 303547    | Ezh1         | 2153   | 2115    | 1956   | 2196   | 2163  | 2039  | 1953  | 2002     |
| 291060    | Snrnp48      | 642    | 633     | 593    | 657.79 | 620   | 559   | 662   | 606      |
| 100364990 | Pdssl        | 108    | 145     | 120    | 108    | 107   | 114   | 117   | 128      |
| 365627    | Mblac2       | 341    | 332.63  | 319    | 324.63 | 328.6 | 291   | 305   | 351.6    |
| 313052    | Epb41        | 1438.2 | 1327.64 | 1291.7 | 1459.5 | 1383  | 1471  | 1309  | 1182.14  |
| 25352     | Sod3         | 2754   | 2729.38 | 3226.8 | 3230   | 2850  | 3237  | 2770  | 2711.84  |
| 113927    | Csnk1a1      | 1434   | 1377    | 1429   | 1475   | 1445  | 1233  | 1488  | 1371     |
| 25017     | Myo5a        | 4416   | 4927    | 4569   | 6412   | 5864  | 3468  | 5158  | 5201     |
| 102554884 | Rcor1        | 604    | 623     | 603    | 676    | 619   | 622   | 625   | 562      |
| 314198    | Cdk11        | 840.53 | 754.89  | 742.47 | 712.9  | 790.7 | 715.4 | 715.1 | 734.62   |
| 363169    | Tcaim        | 657.95 | 696.95  | 694.67 | 654.36 | 684.8 | 633.1 | 665   | 636.99   |
| 308911    | Rrp8         | 135    | 134     | 118    | 128    | 117   | 124   | 124   | 134      |
| 303755    | Fn3krp       | 634    | 649     | 577    | 683    | 660   | 573   | 598   | 633      |
| 362257    | Ralgapb      | 3093   | 3077    | 2986   | 3206   | 3077  | 2961  | 2998  | 2942     |
| 309147    | Aldh3b1      | 101.54 | 126.52  | 126.59 | 103.85 | 85.05 | 126.8 | 116.4 | 116      |
| 499644    | LOC499644    | 726.35 | 742.67  | 753.51 | 800.58 | 649.3 | 726.9 | 779   | 773.94   |
| 81869     | Gstm7        | 1377.4 | 1797.1  | 1377.2 | 1745.5 | 1433  | 1481  | 1380  | 1808.05  |
| 170920    | Map4k3       | 792    | 907     | 854    | 768    | 843   | 808   | 847   | 720      |
| 289608    | Gnpda2       | 854.71 | 768.93  | 745.88 | 726.19 | 716.3 | 763.9 | 747.9 | 771.66   |
| 316342    | Lipt1        | 37.69  | 28.5    | 54.09  | 40.07  | 43.29 | 34.69 | 32.87 | 44.53    |
| 84014     | Ralbp1       | 2534.9 | 2626.85 | 2476.5 | 2425.5 | 2431  | 2361  | 2494  | 2465.78  |
| 315713    | Pml          | 287    | 284     | 309    | 314    | 278   | 316   | 262   | 301      |
| 300128    | Celsr1       | 551    | 746     | 867    | 579    | 728   | 651   | 665   | 614      |
| 313200    | Hsd12        | 2062.1 | 1945.58 | 1853.9 | 1851.7 | 1861  | 1727  | 1883  | 2003.68  |
| 289457    | Klhl8        | 425    | 365     | 332    | 364    | 398   | 327   | 340   | 375      |
| 361076    | Dgkh         | 10262  | 9576.06 | 9651.9 | 10475  | 10640 | 7635  | 9692  | 10761.17 |
| 293551    | Arl6ipl      | 5348   | 5315    | 5304   | 4620   | 4769  | 4733  | 5112  | 5336     |
| 289757    | Polm         | 110    | 124     | 124    | 127    | 133   | 130   | 102   | 105      |
| 366064    | B3galt1      | 767    | 752.98  | 625    | 765    | 735   | 680   | 774   | 631      |
| 290829    | Ash21        | 960    | 933     | 924    | 969    | 845   | 885   | 1004  | 935      |
| 29143     | Grn          | 1200.9 | 1400.71 | 1606.7 | 1454.5 | 1288  | 1513  | 1324  | 1362.48  |
| 100910795 | LOC100910795 | 125.41 | 142.43  | 161.54 | 152.92 | 162.4 | 83.99 | 145.5 | 172.4    |
| 25577     | Ywhaq        | 9472   | 9561    | 9135   | 8640   | 8196  | 8838  | 9338  | 9301     |
| 292548    | Zfp418       | 229.67 | 222.15  | 203.26 | 197.59 | 193.5 | 209.9 | 211.6 | 211.31   |
| 499155    | Fancf        | 153    | 157     | 150    | 124    | 126   | 164   | 143   | 133      |
| 25151     | Igf2r        | 1015   | 1183    | 1202   | 1340   | 1086  | 1224  | 1179  | 1105     |
| 366954    | Zfp251       | 474    | 438     | 458    | 481    | 426   | 418   | 480   | 470      |
| 311024    | Kif5c        | 10725  | 10626   | 10638  | 11396  | 11071 | 10012 | 10713 | 10254    |
| 293871    | Carnmt1      | 265    | 235     | 258    | 282    | 214   | 283   | 285   | 226      |
| 287222    | Timd2        | 19.78  | 12.27   | 9.8    | 13.08  | 18.17 | 9.58  | 16.82 | 8.67     |
| 66030     | Synpr        | 4887   | 4886    | 4770   | 4146   | 4605  | 4168  | 4547  | 4795     |
| 362556    | Ttc4         | 858.47 | 844.15  | 840.22 | 834.56 | 794.2 | 830.1 | 884.2 | 765.16   |
| 79244     | Hsd17b4      | 1730   | 1659    | 1674   | 1656   | 1560  | 1525  | 1794  | 1634     |
| 498351    | Srp72        | 789.77 | 746.29  | 795.14 | 861.64 | 780.3 | 716.5 | 824.5 | 773.7    |
| 311326    | Rpusd2       | 118.16 | 113.44  | 123.89 | 128.35 | 138.2 | 123.6 | 123   | 84.26    |
| 313341    | Pigo         | 163    | 144     | 143    | 170    | 154   | 147   | 144   | 156      |
| 29254     | Mg11         | 5844   | 6254    | 6124   | 5821   | 4980  | 6071  | 5863  | 6393     |
| 288666    | Vps29        | 1743   | 1693    | 1540   | 1467   | 1480  | 1473  | 1579  | 1714     |
| 360985    | Tmem17       | 357    | 379     | 321    | 284    | 345   | 345   | 311   | 299      |
| 102555330 | LOC102555330 | 4.42   | 3.71    | 14.26  | 5.42   | 4.47  | 9.05  | 7.49  | 5.95     |

|           |              |        |         |        |        |       |       |       |          |
|-----------|--------------|--------|---------|--------|--------|-------|-------|-------|----------|
| 103694571 | LOC103694571 | 4.42   | 3.71    | 14.26  | 5.42   | 4.47  | 9.05  | 7.49  | 5.95     |
| 362463    | Fgfr1lop2    | 1755.9 | 1695.33 | 1544.4 | 1582.6 | 1652  | 1498  | 1640  | 1587.05  |
| 307498    | Pura         | 819.82 | 821.79  | 880.06 | 849.66 | 859.5 | 786   | 737.6 | 885.2    |
| 291411    | Atp9b        | 2233   | 2146    | 2006   | 2130   | 2150  | 2087  | 2090  | 1928     |
| 362353    | Tcaf1        | 1449.1 | 1452.97 | 1468.1 | 1502.8 | 1428  | 1360  | 1493  | 1413.01  |
| 364834    | Polr2d       | 251    | 231     | 202    | 168    | 203   | 189   | 208   | 226      |
| 29476     | Glg1         | 2732   | 2830    | 2787   | 3359   | 3074  | 2743  | 2917  | 2617     |
| 498685    | Prxl2c       | 541.44 | 489.01  | 473.57 | 534.84 | 464   | 469.9 | 552   | 490.93   |
| 305135    | Lrrc8b       | 2309   | 2164    | 2418   | 2272   | 2213  | 2198  | 2176  | 2297     |
| 315916    | Frmpd3       | 495.06 | 426.3   | 475.09 | 516.01 | 498   | 454.2 | 474   | 428      |
| 102551828 | LOC102551828 | 117    | 126     | 114    | 103    | 108   | 116   | 121   | 101      |
| 29467     | Ddit3        | 403.48 | 382.38  | 426.52 | 346.31 | 398.5 | 365.4 | 375.5 | 371.94   |
| 315997    | Rbm6         | 596    | 554     | 616    | 571    | 589   | 525   | 598   | 554      |
| 497929    | Pirt         | 14900  | 13753.5 | 13998  | 14110  | 14704 | 12876 | 13711 | 13745.96 |
| 309859    | Scml4        | 454    | 417.04  | 374.34 | 426.11 | 474.4 | 325.1 | 364.9 | 456.31   |
| 290875    | Cdc16        | 678    | 686     | 600    | 638    | 611   | 629   | 667   | 616      |
| 297415    | Fam136a      | 131    | 136     | 154    | 106    | 111   | 120   | 136   | 144      |
| 303067    | Thg1l        | 147    | 150     | 135    | 128    | 122   | 134   | 140   | 147      |
| 362490    | Pip4p2       | 1187   | 1080    | 995    | 1087   | 1053  | 1086  | 1054  | 1024     |
| 287437    | Tnfsf13      | 167    | 144     | 162    | 153    | 146   | 147   | 175   | 139      |
| 83571     | Cdkn1b       | 2016   | 2429.99 | 2091   | 2062   | 2046  | 2198  | 1895  | 2199     |
| 25697     | Ctsl         | 4216   | 4052    | 3754   | 3533   | 3724  | 3451  | 3808  | 4100     |
| 102549842 | LOC102549842 | 275    | 246.01  | 243.27 | 233.01 | 227   | 216   | 256.8 | 267.23   |
| 361788    | Prr3         | 570    | 532     | 614    | 559    | 548   | 587   | 529   | 542      |
| 100302405 | Zfp958       | 677.22 | 663.27  | 697.23 | 734.97 | 653.8 | 622.2 | 750   | 662.64   |
| 287113    | Rnps1        | 1501   | 1658    | 1633   | 1511   | 1540  | 1544  | 1501  | 1527     |
| 681037    | Preli2       | 78     | 100     | 110    | 108    | 97    | 85    | 86    | 116      |
| 116727    | Gp1bb        | 0      | 0       | 1.32   | 0      | 1.28  | 0     | 0     | 0        |
| 24882     | Wnt3         | 7      | 8       | 10     | 8      | 10    | 5     | 5     | 12       |
| 291640    | Slc25a2      | 27     | 20      | 34     | 18     | 16    | 29    | 27    | 24       |
| 304984    | Cfap45       | 8      | 10      | 9      | 6      | 13    | 7     | 10    | 2        |
| 682147    | Cgas         | 6      | 9       | 12     | 6      | 6     | 9     | 7     | 10       |
| 25319     | Fth1         | 66178  | 65109.4 | 62420  | 59919  | 49501 | 61040 | 61305 | 74096.7  |
| 366953    | Tonsl        | 125.81 | 113     | 100.12 | 99.52  | 115.6 | 117   | 94.48 | 98.17    |
| 297911    | Otud6b       | 1252   | 1300    | 1131   | 1205   | 1240  | 1133  | 1174  | 1193     |
| 288583    | Plod3        | 864.74 | 765.73  | 987.07 | 930.58 | 752.2 | 899.3 | 945.4 | 843.98   |
| 308449    | Hipk4        | 141    | 136     | 124    | 128    | 127   | 147   | 125   | 114      |
| 361473    | Mtrf11       | 126    | 134     | 136    | 133    | 127   | 129   | 124   | 133      |
| 292305    | Sft2d1       | 528    | 470     | 490    | 397    | 431   | 456   | 477   | 464      |
| 29414     | Akt3         | 1247   | 1240    | 1186   | 1455   | 1348  | 1087  | 1278  | 1260     |
| 245974    | Comm5        | 197.26 | 173.93  | 164.79 | 151.27 | 164.4 | 180   | 169.2 | 152.85   |
| 302999    | Prr35        | 80     | 81      | 66     | 71     | 56    | 85    | 86    | 62       |
| 362726    | Atxn711      | 602.66 | 583.71  | 631.16 | 610.08 | 630.4 | 550.4 | 583.6 | 589.93   |
| 29496     | Erbb3        | 2618   | 2674    | 3009   | 2699   | 2380  | 2690  | 2869  | 2729     |
| 170904    | Stk17b       | 137    | 136     | 177    | 147    | 158   | 133   | 151   | 137      |
| 171451    | 2-Mar        | 499.01 | 565.86  | 527.32 | 393.47 | 477.2 | 441.2 | 518.8 | 488.65   |
| 314310    | Zfp410       | 710.21 | 669.98  | 642.88 | 686.58 | 657.1 | 625.4 | 648.4 | 697.2    |
| 317343    | Med14        | 996.4  | 1120.1  | 966.11 | 1252.6 | 1085  | 1067  | 1000  | 1052.68  |
| 84009     | Kalrn        | 574    | 614     | 707    | 734    | 757   | 532   | 604   | 657      |
| 81807     | Elob         | 2545   | 2108    | 2188.9 | 1785   | 2185  | 1904  | 1995  | 2284     |
| 116725    | Ube2n        | 3330   | 3313.99 | 3103   | 3140   | 3012  | 2982  | 3343  | 3163     |
| 116657    | Cplx2        | 1467   | 1582    | 1655   | 1928   | 1806  | 1409  | 1692  | 1526     |
| 100910725 | LOC100910725 | 0.5    | 0.5     | 0      | 0      | 0     | 0     | 0     | 0.97     |
| 116654    | Exoc4        | 1731.9 | 1741.42 | 1823.3 | 1842.6 | 1833  | 1662  | 1771  | 1659.42  |
| 296128    | Stard7       | 1479.4 | 1340.09 | 1333.4 | 1227.5 | 1234  | 1328  | 1365  | 1292.04  |
| 295061    | Tm4sf1       | 352    | 293     | 325    | 265    | 299   | 291   | 335   | 273      |

|           |              |        |         |        |        |       |       |       |          |
|-----------|--------------|--------|---------|--------|--------|-------|-------|-------|----------|
| 295050    | Exosc8       | 101.59 | 108.7   | 116.64 | 89.9   | 74.19 | 100.7 | 110   | 119.5    |
| 312824    | Recql        | 857.69 | 843.53  | 844.65 | 761.93 | 789.2 | 758   | 869.4 | 792.46   |
| 298101    | Col27a1      | 348    | 442     | 720    | 365    | 391   | 610   | 500   | 318      |
| 498416    | Grb10        | 539    | 466     | 586    | 523.02 | 510   | 569   | 485.9 | 486      |
| 311422    | Itpa         | 1141   | 1195    | 1077   | 1014   | 1091  | 1018  | 1041  | 1145     |
| 366163    | Aqr          | 898    | 924     | 903    | 1067   | 885   | 927   | 982   | 885      |
| 171485    | Cd9912       | 3907.8 | 4005.54 | 3754.5 | 3891.3 | 3908  | 3641  | 3765  | 3781.97  |
| 60562     | Stx6         | 986.57 | 1084.99 | 1226.8 | 1029.8 | 1021  | 1039  | 1044  | 1095.55  |
| 29699     | Prkar2a      | 2166   | 2166    | 2185   | 2433   | 2202  | 2103  | 2254  | 2125     |
| 363266    | Agfgl1       | 2400   | 2295    | 2130   | 2249   | 2276  | 2099  | 2236  | 2194     |
| 315417    | Jrkl         | 188    | 164     | 165    | 158    | 153   | 168   | 166   | 168      |
| 299204    | Nek9         | 2041   | 2057    | 1887   | 2185   | 1898  | 1890  | 1998  | 2142     |
| 300083    | Slc25a17     | 905    | 948     | 888    | 839    | 847   | 838   | 859   | 930      |
| 312309    | Zfp775       | 391.06 | 427.31  | 391.82 | 318.09 | 340.1 | 368.9 | 422.2 | 351.86   |
| 366376    | Frrs11       | 178    | 176     | 183    | 240    | 209   | 173   | 187   | 185      |
| 108348148 | Gstm3        | 382    | 253.93  | 267.3  | 263.95 | 274   | 243.9 | 287.3 | 327.44   |
| 289311    | Mixl1        | 13.35  | 15.58   | 13.35  | 7.1    | 18.96 | 5.82  | 11.56 | 11.58    |
| 313242    | Dcaf10       | 373    | 342     | 339    | 367    | 377   | 260   | 391   | 351      |
| 58927     | Rpl36        | 1854.1 | 1719.18 | 1654.1 | 1262.3 | 1522  | 1469  | 1525  | 1781.54  |
| 307487    | Pcdhb21      | 17     | 27      | 22.99  | 23.02  | 26.29 | 15.99 | 30.18 | 14.89    |
| 681433    | Rgmb         | 4294   | 4646    | 4499   | 4707   | 4644  | 4296  | 4229  | 4441     |
| 25113     | Ddn          | 312    | 401     | 201    | 271    | 243   | 332   | 267   | 308      |
| 360980    | Tns3         | 3430.2 | 3783.41 | 4125.4 | 3741.7 | 3314  | 3632  | 3709  | 3979.72  |
| 688749    | Tulp3        | 686.85 | 683.15  | 674.05 | 650.99 | 617   | 659.7 | 680.1 | 658.7    |
| 363040    | St3gal4      | 807.92 | 721.71  | 669.82 | 607.6  | 671.5 | 775.7 | 612   | 665      |
| 25390     | Atp1b3       | 11642  | 11448.3 | 10844  | 10298  | 10228 | 10080 | 10968 | 11653.31 |
| 297065    | Zfp282       | 345.73 | 293.69  | 338.76 | 298.49 | 292.7 | 319.8 | 314.6 | 312      |
| 306764    | Nsd1         | 2791   | 2721    | 2843   | 3231   | 2880  | 2733  | 2946  | 2686     |
| 362646    | Fbxo42       | 764    | 805     | 782    | 844    | 802   | 812   | 768   | 719      |
| 362578    | Svbp         | 93     | 105     | 74     | 68     | 68    | 75    | 91    | 96       |
| 303785    | Rimbp3       | 7      | 10      | 11     | 6      | 5     | 4     | 12    | 12       |
| 311374    | Duoxa1       | 7      | 6       | 16     | 5      | 10    | 6     | 9     | 8        |
| 289380    | Nenf         | 768    | 566     | 663    | 554    | 623   | 581   | 580   | 692      |
| 100362548 | Elp3         | 1387   | 1407    | 1288   | 1293   | 1255  | 1283  | 1376  | 1303     |
| 308751    | Wdr73        | 193    | 225     | 156    | 141    | 156   | 158   | 179   | 201      |
| 108348233 | LOC108348233 | 39.43  | 32.93   | 33.44  | 25.74  | 39.56 | 32.49 | 33.23 | 22.4     |
| 361970    | Trim2        | 5783   | 5766    | 5569   | 6498   | 6078  | 5142  | 6026  | 5678     |
| 64441     | Hsf2         | 1051   | 1008    | 985    | 984    | 931   | 925   | 1006  | 1048     |
| 689399    | Cenpw        | 20.49  | 21.45   | 30.18  | 14.28  | 23.35 | 29.19 | 14.86 | 16.47    |
| 681315    | Tmem230      | 1623.9 | 1657.03 | 1414.9 | 1479.1 | 1452  | 1425  | 1586  | 1531.18  |
| 266802    | Alk          | 547    | 665     | 676    | 675    | 705   | 650   | 575   | 558      |
| 307905    | Usp10        | 585    | 636     | 678    | 664    | 620   | 650   | 622   | 596      |
| 499691    | Prpf38b      | 877    | 790     | 866    | 854    | 830   | 795   | 910   | 753      |
| 315970    | Cdv3         | 2303   | 2223    | 2286   | 2189   | 2018  | 2110  | 2202  | 2408     |
| 29439     | Jtb          | 512    | 493     | 513    | 399    | 458   | 471   | 499   | 433      |
| 305940    | Sacs         | 3697   | 3590    | 3588   | 4327   | 4082  | 3007  | 3933  | 3736     |
| 310631    | Mex3a        | 27     | 30      | 45     | 35     | 35    | 29    | 30    | 39       |
| 337920    | Naglt1       | 139.12 | 127.01  | 144.42 | 100.2  | 126   | 122.3 | 113.6 | 134.03   |
| 500750    | Tmem196      | 290    | 268     | 220    | 250    | 252   | 219   | 261   | 266      |
| 304791    | Dstyk        | 1173   | 1251    | 1155   | 1356   | 1251  | 1195  | 1244  | 1101     |
| 100911248 | LOC100911248 | 1425   | 1473    | 1385   | 1578   | 1447  | 1420  | 1437  | 1386     |
| 24667     | Ppmlb        | 1928   | 1788    | 1686   | 1762   | 1732  | 1739  | 1725  | 1759     |
| 288471    | Trrap        | 1780   | 1796    | 1972   | 2199   | 1971  | 1859  | 1892  | 1799     |
| 25678     | Ddr1         | 1560   | 1645    | 1818   | 1566   | 1471  | 1693  | 1607  | 1626     |
| 294203    | Olr1749      | 11.88  | 8.54    | 5.69   | 7.18   | 9.7   | 8.44  | 6.58  | 7.6      |
| 103694540 | LOC103694540 | 0      | 0       | 0      | 1.03   | 1     | 0     | 0     | 0        |

|           |              |        |         |        |        |       |       |       |         |
|-----------|--------------|--------|---------|--------|--------|-------|-------|-------|---------|
| 292808    | Pepd         | 937    | 1014    | 998    | 834    | 920   | 911   | 919   | 923     |
| 303611    | Tex2         | 2020   | 2276    | 2076   | 2226   | 2048  | 2159  | 2030  | 2111    |
| 363099    | Rsl24d1      | 846    | 817     | 779    | 690    | 801   | 712   | 773   | 755     |
| 100360750 | LOC100360750 | 193.7  | 160.87  | 224.98 | 161.54 | 173.8 | 164.9 | 193.4 | 187.53  |
| 682507    | Wasl         | 2026   | 2074    | 1991   | 2242   | 1984  | 1930  | 2154  | 2023    |
| 108348064 | LOC108348064 | 358.6  | 365.02  | 324.16 | 313.72 | 312.2 | 330.7 | 316.1 | 362.95  |
| 81825     | Cirbp        | 688    | 772     | 749    | 546    | 673   | 645   | 684   | 673     |
| 84353     | Ctnnb1       | 6470   | 6492    | 6572   | 6433   | 6248  | 6180  | 6468  | 6317    |
| 306203    | Pxk          | 864    | 924     | 867    | 895    | 870   | 865   | 882   | 830     |
| 140607    | Pip4k2c      | 532    | 528     | 574    | 503    | 518   | 512   | 514   | 531     |
| 306103    | Dis3         | 245    | 281     | 287    | 359    | 260   | 226   | 338   | 314     |
| 289500    | Ccni         | 3766   | 4030    | 4142   | 3889   | 3898  | 3848  | 3796  | 3826    |
| 303700    | Usp36        | 275    | 309     | 321    | 302    | 283   | 291   | 303   | 295     |
| 100909776 | LOC100909776 | 20     | 20      | 13     | 16     | 15    | 18    | 20    | 14      |
| 313210    | Abca1        | 1797   | 1909    | 2159   | 2208   | 2044  | 1920  | 2013  | 1862    |
| 58964     | Nme6         | 73     | 80      | 71     | 52     | 81    | 55    | 59    | 73      |
| 688839    | LOC688839    | 65.62  | 48.37   | 61.83  | 51.64  | 44.24 | 46.54 | 69.21 | 60.88   |
| 294993    | Hspa41       | 3298.9 | 3242.47 | 2987.7 | 3541.4 | 3122  | 2906  | 3343  | 3322.31 |
| 314336    | Ddx41        | 622    | 527.19  | 531.55 | 521.13 | 494.5 | 500.2 | 547   | 596.66  |
| 312195    | Nrf1         | 254.66 | 328.02  | 335    | 296    | 266   | 321.3 | 318   | 273.42  |
| 362294    | Ube3c        | 3351   | 3579    | 3171   | 3327   | 3327  | 3156  | 3395  | 3163    |
| 246332    | Uhmk1        | 5348   | 4954.98 | 4868   | 6223   | 6293  | 4101  | 5466  | 4917.89 |
| 84479     | Synrg        | 983    | 990     | 964    | 1125   | 1045  | 963   | 987   | 950     |
| 287156    | Rhot2        | 764    | 794     | 723    | 671    | 720   | 722   | 691   | 734     |
| 311881    | Fbxw2        | 1163   | 1210    | 1074   | 1068   | 1102  | 1069  | 1059  | 1155    |
| 288616    | Tmem248      | 1210   | 1238    | 1330   | 1226   | 1285  | 1199  | 1188  | 1188    |
| 307008    | RGD1308147   | 753    | 682     | 626    | 615    | 648   | 592   | 627   | 732     |
| 300813    | Rnf111       | 625    | 704     | 640    | 777    | 691   | 692   | 687   | 597     |
| 365314    | Lipt2        | 48     | 48      | 33     | 45     | 40    | 28    | 49    | 52      |
| 311570    | Myh7b        | 230.64 | 185.81  | 227.72 | 256.02 | 200.4 | 255.8 | 199.7 | 218.43  |
| 58967     | Sfmbt1       | 310    | 303     | 345    | 366    | 331   | 320   | 314   | 321     |
| 314616    | Arid3a       | 236    | 232     | 269    | 250    | 252.7 | 224   | 260   | 222     |
| 498272    | Uap1         | 457.44 | 474.21  | 469.48 | 417.24 | 417   | 456   | 452   | 441.26  |
| 406868    | G4           | 133    | 150     | 165    | 146    | 156   | 157   | 138   | 125.99  |
| 301373    | Tgfbrap1     | 584.28 | 584.51  | 577.59 | 533.77 | 540.6 | 579   | 540.1 | 555.26  |
| 294594    | Spata9       | 414    | 401     | 418    | 445    | 405   | 374   | 411   | 440     |
| 304193    | Arhgef18     | 710.61 | 659.84  | 715.49 | 685.16 | 690.8 | 705.6 | 649.8 | 645.62  |
| 170912    | Alcf         | 10     | 10      | 6      | 9      | 11    | 5     | 6     | 12      |
| 362759    | Exd2         | 624    | 629     | 608    | 624    | 571   | 610   | 612   | 621     |
| 304572    | Fbrs11       | 523.46 | 497     | 505.52 | 471.58 | 522.4 | 501.4 | 467.3 | 449.58  |
| 64622     | Adnp         | 1597   | 1724    | 1646   | 1765   | 1578  | 1599  | 1768  | 1595    |
| 306734    | Rmi1         | 570    | 618.99  | 647    | 654    | 534   | 531   | 689   | 665     |
| 500636    | Rnf144a      | 894    | 1003    | 883    | 1009   | 948   | 898   | 937   | 898     |
| 56064     | Nptn         | 6907   | 7085    | 6826   | 6828   | 6144  | 6856  | 7201  | 6657.1  |
| 310005    | Aggf1        | 428    | 436     | 397    | 425    | 419   | 404   | 396   | 419     |
| 100912537 | LOC100912537 | 133    | 103.5   | 107    | 113.5  | 117.5 | 103.5 | 114   | 109     |
| 309486    | Tctn3        | 133    | 103.5   | 107    | 113.5  | 117.5 | 103.5 | 114   | 109     |
| 361071    | Sucla2       | 3173   | 3296    | 3029   | 3057   | 2861  | 2912  | 3182  | 3243    |
| 24708     | Rb1          | 1001   | 912     | 1052   | 1047   | 964   | 924   | 1036  | 974     |
| 296312    | Aar2         | 349    | 316     | 319    | 283    | 326   | 289   | 296   | 320     |
| 291927    | Orc6         | 90     | 96      | 86     | 80     | 79    | 96    | 77    | 90      |
| 314981    | Col14a1      | 1478   | 1922    | 2169   | 1935   | 1656  | 1900  | 2176  | 1559    |
| 681361    | Pisd         | 586    | 569     | 608    | 506    | 538.7 | 595   | 517   | 554     |
| 293142    | Spcs2        | 1549   | 1632    | 1565.7 | 1525   | 1478  | 1467  | 1592  | 1557    |
| 691899    | Fbrs         | 839    | 904     | 921    | 869    | 827   | 898   | 875   | 833     |
| 117042    | Rpl6         | 4013   | 3993    | 4049   | 2997   | 3444  | 3569  | 3638  | 3975    |

|           |              |        |         |        |        |       |       |       |         |
|-----------|--------------|--------|---------|--------|--------|-------|-------|-------|---------|
| 298732    | Glis1        | 29     | 24      | 29     | 24     | 23    | 30    | 27    | 23      |
| 24655     | Plcd1        | 431    | 571     | 605    | 445    | 454   | 546   | 484   | 510     |
| 310244    | Zc2hcla      | 2721   | 2657    | 2429   | 2564   | 2564  | 2333  | 2677  | 2504    |
| 288182    | Cldnd1       | 1415   | 1383    | 1410   | 1279   | 1270  | 1269  | 1416  | 1377    |
| 316275    | Paqr8        | 1697   | 1886    | 1832   | 1988   | 1750  | 1798  | 1771  | 1875    |
| 122772    | Rps20        | 2180.4 | 2126.47 | 2342.3 | 1428.7 | 1849  | 1986  | 1739  | 2275.61 |
| 25476     | Lgals9       | 315.58 | 330.49  | 346.89 | 285.72 | 277.8 | 345.3 | 288.7 | 330.75  |
| 289827    | Ugp2         | 1477   | 1384    | 1478   | 1476   | 1333  | 1478  | 1448  | 1392    |
| 363055    | Cep164       | 549    | 655     | 670    | 679    | 640   | 601   | 697   | 543     |
| 498425    | Zrsr1        | 700    | 656     | 541    | 764    | 731   | 624   | 602   | 629     |
| 57025     | Adam15       | 1417   | 1334    | 1494   | 1434   | 1394  | 1454  | 1415  | 1256    |
| 685001    | Cnpy1        | 64     | 49      | 61     | 39     | 52    | 56    | 43    | 56      |
| 295922    | Mtch2        | 2609   | 2584    | 2378   | 2158   | 2253  | 2298  | 2515  | 2389    |
| 308870    | Numa1        | 2203.6 | 2519.48 | 2652.7 | 2646.6 | 2556  | 2502  | 2449  | 2233.83 |
| 100909476 | LOC100909476 | 94.29  | 80.85   | 69.5   | 75.77  | 81.46 | 66.85 | 86.97 | 76.11   |
| 84480     | Bnip3        | 7273   | 6965    | 6395   | 6020   | 6386  | 6183  | 6459  | 6876    |
| 361258    | Cul2         | 1786   | 1618    | 1658   | 1735   | 1659  | 1548  | 1737  | 1662    |
| 289603    | CommD8       | 412    | 433     | 421    | 371    | 352   | 420   | 421   | 398     |
| 293678    | Mus81        | 258    | 245     | 216    | 242    | 218   | 248   | 239   | 229     |
| 363858    | Trappc5      | 868    | 841     | 813    | 718    | 816   | 767   | 789   | 777     |
| 304401    | Ssc4d        | 116.28 | 117.54  | 127.06 | 79.26  | 101   | 94.52 | 98    | 134.28  |
| 366619    | Dtd2         | 109    | 128     | 113    | 113    | 129   | 95    | 118   | 108     |
| 192252    | Dctpp1       | 78     | 67      | 85     | 55     | 82    | 66    | 71    | 58      |
| 361328    | Snx24        | 486    | 417     | 485    | 430    | 367   | 454   | 482   | 464     |
| 293184    | Ctr9         | 1578   | 1691    | 1604   | 1687   | 1620  | 1570  | 1644  | 1542    |
| 58923     | Mefv         | 72     | 100     | 88     | 61     | 57    | 74    | 100   | 81      |
| 307362    | Zfp532       | 704    | 798     | 832    | 921    | 765   | 799   | 821   | 778.98  |
| 310917    | Gbp4         | 42     | 58      | 79.62  | 60.82  | 52.79 | 68.72 | 51.21 | 61      |
| 363412    | Zfp609       | 901    | 1040    | 1032   | 1176   | 1027  | 943   | 1062  | 1001    |
| 171501    | Rnf38        | 652    | 747     | 791    | 817    | 734   | 648   | 805   | 736     |
| 24437     | H1f0         | 1546   | 1568    | 1689   | 1355   | 1404  | 1476  | 1600  | 1506    |
| 287280    | Skp1         | 14688  | 14570   | 13398  | 12840  | 13119 | 12201 | 14018 | 14608   |
| 363633    | Polr2a       | 1704   | 2012    | 2164   | 2290   | 2068  | 2083  | 1908  | 1883    |
| 207123    | RGD621098    | 416    | 365     | 365    | 360    | 375   | 389   | 371   | 329     |
| 246781    | Ptpn7        | 72     | 66      | 91     | 58     | 75    | 70    | 63    | 71      |
| 498166    | Gal3st4      | 51     | 80      | 88     | 68     | 53    | 78    | 81    | 67      |
| 684270    | LOC684270    | 170    | 151     | 138    | 115    | 123   | 135   | 110   | 190     |
| 311183    | Fnbp4        | 718    | 696     | 790    | 738    | 665   | 689   | 750   | 756     |
| 25592     | Agrn         | 1668   | 1659    | 1796   | 1874   | 1648  | 1789  | 1810  | 1555    |
| 103690089 | LOC103690089 | 833    | 863     | 863    | 1105   | 997   | 833   | 829   | 903     |
| 81767     | Rpl19        | 5376.9 | 5319    | 5370   | 4160   | 4749  | 4591  | 4914  | 5409.25 |
| 361403    | Terf2        | 246    | 271     | 255    | 309    | 240   | 257   | 272   | 282     |
| 54321     | Cnn3         | 4733   | 4784    | 5235   | 4566   | 4243  | 4600  | 5268  | 4670    |
| 170816    | Olr59        | 7      | 14      | 8      | 7      | 7     | 11    | 9     | 8       |
| 315137    | Apobec3      | 12     | 17      | 23     | 20     | 13    | 21    | 27    | 9       |
| 315164    | Cenpm        | 38     | 40      | 46     | 20     | 33    | 46    | 38    | 23      |
| 304317    | Amz1         | 261    | 242     | 252    | 253    | 261   | 256   | 238   | 225     |
| 362142    | Bbs5         | 149    | 168     | 170    | 161    | 146   | 152   | 170   | 162     |
| 362608    | Tmem39b      | 126    | 148     | 144    | 158    | 137   | 165   | 130   | 128     |
| 266611    | Ptpn9        | 1567.3 | 1641.81 | 1679.3 | 1640.4 | 1516  | 1582  | 1609  | 1640.9  |
| 361037    | Mrpl52       | 786.25 | 862.64  | 839.72 | 774.06 | 666   | 874.8 | 773.1 | 858.27  |
| 84476     | Strbp        | 2265.8 | 2260    | 2015.3 | 2449.6 | 2224  | 2013  | 2346  | 2157.51 |
| 192348    | Fnbp1        | 1766.1 | 1903.21 | 1860.5 | 2081.4 | 2007  | 1825  | 1865  | 1703.5  |
| 361791    | Nrm          | 91.81  | 117.19  | 112.61 | 89.41  | 98.33 | 100.7 | 103.4 | 97.19   |
| 25271     | Rxra         | 177    | 174     | 173    | 162    | 170   | 161   | 162   | 174     |
| 680971    | Ddhd2        | 1704   | 1716    | 1579   | 1611   | 1590  | 1493  | 1738  | 1606    |



|           |              |        |         |        |        |       |       |       |          |
|-----------|--------------|--------|---------|--------|--------|-------|-------|-------|----------|
| 305339    | Nsun7        | 66.02  | 79.83   | 86.8   | 88.84  | 82.11 | 57.81 | 94.09 | 78.59    |
| 298425    | Efcab14      | 1128   | 1169    | 1083   | 1213   | 1098  | 1057  | 1194  | 1117     |
| 305351    | Klhl5        | 573    | 596     | 619    | 599    | 476   | 511   | 660   | 674      |
| 298748    | Ndufaf7      | 547    | 501     | 503    | 475    | 497   | 493   | 497   | 483      |
| 361628    | Eif4g2       | 25782  | 24440.3 | 24188  | 24604  | 24025 | 22722 | 24920 | 24612.34 |
| 81918     | Pard3        | 444    | 472     | 532    | 544    | 484   | 472   | 485   | 496      |
| 29441     | Por          | 1261   | 1180    | 1273   | 1287   | 1165  | 1349  | 1126  | 1223     |
| 29288     | Rps3a        | 5020   | 4993    | 5209   | 4060   | 4324  | 4415  | 4959  | 5052     |
| 84027     | Gsk3b        | 6207   | 6552.79 | 5955.5 | 6990.2 | 6375  | 6362  | 6416  | 5843.67  |
| 293735    | Best1        | 65.08  | 66.06   | 59.06  | 64.07  | 62.07 | 46.05 | 55.06 | 84.09    |
| 313678    | Prdm2        | 1818.1 | 1874.83 | 1865.6 | 1924.3 | 1904  | 1777  | 1816  | 1779.96  |
| 100361765 | Hoxb2        | 178    | 152     | 159    | 165    | 151   | 177   | 149   | 159      |
| 83628     | Cd82         | 2126   | 2091    | 2030   | 1897   | 1994  | 1994  | 1920  | 2012     |
| 286974    | Chst15       | 1206.4 | 1366.05 | 1112   | 1469   | 1383  | 1195  | 1211  | 1222.15  |
| 361571    | Aldh16a1     | 263.05 | 239.49  | 246.93 | 226.88 | 243.9 | 230   | 231.3 | 244.3    |
| 366608    | Dock4        | 384    | 487     | 504    | 555    | 481   | 429   | 488   | 479      |
| 300077    | Gtpbp1       | 340    | 361     | 387    | 369    | 317   | 372   | 347   | 381      |
| 298280    | Slc35d1      | 293    | 295     | 286    | 293    | 295   | 265   | 314   | 261      |
| 303536    | Dnajc7       | 2534   | 2517    | 2454   | 2416   | 2339  | 2254  | 2511  | 2545     |
| 498749    | Tdp2         | 450    | 409     | 407    | 339    | 341   | 345   | 442   | 433      |
| 361272    | Dhtkd1       | 291    | 282     | 250    | 281    | 259   | 263   | 270   | 281.74   |
| 103693953 | LOC103693953 | 60     | 45.01   | 54.24  | 58.96  | 57.26 | 38.2  | 59.28 | 57.49    |
| 361661    | Pstk         | 182    | 176     | 173    | 163    | 161   | 164   | 188   | 162      |
| 406162    | Notch4       | 293    | 276     | 301    | 226    | 263   | 293   | 267   | 243      |
| 257645    | Itgb5        | 1768.6 | 1899.28 | 1891.9 | 1836.4 | 1672  | 1923  | 1847  | 1752.66  |
| 24375     | Fucal        | 784    | 823     | 963    | 757    | 785   | 817   | 835   | 799      |
| 360637    | Ccdc43       | 384.3  | 382.22  | 386.61 | 376.25 | 335.8 | 351.3 | 384.2 | 416.34   |
| 84474     | Ddx1         | 3042   | 2843    | 2744   | 2734   | 2664  | 2592  | 2882  | 2915     |
| 103691005 | LOC103691005 | 358.24 | 359.22  | 369    | 368.21 | 378.5 | 300.1 | 373.3 | 363.15   |
| 100910007 | Zfp30        | 33.6   | 22.72   | 30.7   | 24.96  | 32.91 | 27.63 | 23.01 | 25.38    |
| 50993     | Rab10        | 3855   | 4068    | 3986   | 4181   | 3845  | 3937  | 3961  | 3909     |
| 501160    | Vwc21        | 968    | 953     | 999    | 1011   | 954   | 868   | 1046  | 956      |
| 312516    | Gmcl1        | 1646   | 1546    | 1485   | 1533   | 1553  | 1401  | 1527  | 1560     |
| 301361    | Lonrf2       | 3176.4 | 3285.37 | 3066.7 | 3872.9 | 3785  | 2789  | 3379  | 3084.49  |
| 94189     | Gosr1        | 842    | 866     | 817    | 824    | 816   | 776   | 868   | 798      |
| 100312984 | Eif2s3y      | 1633   | 1640    | 1634   | 1584   | 1549  | 1486  | 1532  | 1748     |
| 84351     | Ikbkb        | 383    | 401     | 452    | 385    | 368   | 413   | 407   | 389      |
| 192246    | Phf5a        | 356    | 369     | 321    | 318    | 315   | 324   | 345   | 343      |
| 114633    | Plcel        | 714    | 655     | 698    | 921    | 807   | 814   | 679   | 607      |
| 294012    | Borcs7       | 1585   | 1525.05 | 1566.9 | 1636.9 | 1605  | 1383  | 1446  | 1708.78  |
| 360823    | Ankrd13a     | 1162   | 1238    | 1301   | 1281   | 1105  | 1326  | 1198  | 1218     |
| 309696    | Bcr          | 1418   | 1526    | 1397   | 1564   | 1527  | 1374  | 1531  | 1313     |
| 295461    | Sec24b       | 1163   | 1241    | 1179   | 1398   | 1204  | 1269  | 1174  | 1199.03  |
| 171525    | Polk         | 159    | 156.44  | 127.02 | 166.74 | 151.2 | 143.5 | 167   | 131.01   |
| 287541    | Ift20        | 688    | 732     | 738    | 613    | 616   | 588   | 703   | 789      |
| 498529    | Amer2        | 227    | 215     | 206    | 239    | 249   | 170   | 210   | 234      |
| 366952    | Cpsf1        | 695    | 767     | 788    | 820    | 751   | 775   | 764   | 697      |
| 361170    | Adam32       | 8      | 11      | 9      | 9      | 4     | 9     | 11    | 12       |
| 296060    | Arhgap11a    | 85     | 83      | 108    | 57     | 77    | 74    | 88    | 85       |
| 680409    | Prodhl       | 891    | 701     | 639    | 767    | 694   | 793   | 680   | 750      |
| 288774    | Stat2        | 994    | 1172    | 1106   | 1134   | 1037  | 1185  | 1073  | 992      |
| 307133    | Hspa14       | 325    | 304     | 310    | 283    | 294   | 272   | 322   | 301      |
| 293528    | Nsmce4a      | 309    | 283     | 268    | 251    | 241   | 275   | 284   | 281      |
| 317275    | Rpl17l1      | 1129   | 1126    | 1148   | 1066   | 1076  | 1059  | 1184  | 1029     |
| 302415    | Foxo4        | 454    | 476     | 500    | 460    | 358   | 496   | 478   | 506.98   |
| 362749    | Atp5s        | 236    | 190     | 216    | 247    | 206   | 240   | 193   | 226      |

|           |              |        |         |        |        |       |       |       |         |
|-----------|--------------|--------|---------|--------|--------|-------|-------|-------|---------|
| 304763    | R3hdm1       | 970    | 995     | 977    | 1097   | 1014  | 1006  | 995   | 915     |
| 362203    | Tubgcp4      | 528    | 455     | 495    | 486    | 459   | 408   | 541   | 503     |
| 66013     | Arhgef9      | 882.66 | 908.97  | 806.29 | 919.87 | 923.9 | 771.8 | 866.9 | 860.37  |
| 301014    | Atrip        | 164.22 | 182.28  | 172.6  | 134.96 | 174.6 | 146.7 | 160.1 | 154.98  |
| 297755    | Rpl7         | 4477.9 | 4108.95 | 4370   | 3431   | 3777  | 3742  | 4085  | 4341.23 |
| 362950    | Rbfox2       | 1027   | 1012.08 | 876    | 1148.5 | 1073  | 925   | 1036  | 920     |
| 313618    | Macol        | 1092   | 1048    | 1039   | 1125   | 1076  | 1037  | 1073  | 1002    |
| 309041    | Thumpd1      | 846.32 | 825.74  | 783.98 | 773.79 | 743.5 | 737.8 | 851.3 | 810.33  |
| 56820     | Ramp3        | 282    | 279     | 280    | 275    | 249   | 254   | 284   | 299     |
| 314407    | LOC314407    | 206.26 | 199.99  | 172.89 | 182.53 | 183.4 | 162.3 | 221.9 | 173.61  |
| 362551    | Raver2       | 131.48 | 158.93  | 145.38 | 166.96 | 129.7 | 163.9 | 145.5 | 147.51  |
| 309912    | Rtn4ip1      | 411    | 292     | 283    | 280    | 336   | 385   | 217   | 294     |
| 315409    | Cep126       | 417    | 398     | 358    | 429    | 409   | 368   | 386   | 396     |
| 363247    | Xrcc5        | 815    | 747     | 832    | 774    | 779   | 763   | 820   | 721     |
| 315591    | Tbcel        | 905    | 959     | 846    | 980    | 899   | 884   | 963   | 845     |
| 361465    | Echdc1       | 493    | 426     | 407    | 352    | 384   | 361   | 449   | 439     |
| 682920    | Phactr4      | 220    | 245     | 275    | 268    | 251   | 269   | 222   | 239     |
| 100310874 | Parpbp       | 14.86  | 12      | 19.04  | 6      | 12    | 14    | 9.95  | 14.56   |
| 307494    | Wdr55        | 154.76 | 146.91  | 146.85 | 140.95 | 155.8 | 142.9 | 128   | 147     |
| 64020     | Gpr85        | 223    | 184     | 192    | 223    | 180   | 196   | 214   | 210     |
| 362375    | Lancl2       | 1257   | 1200    | 1129   | 1087   | 1139  | 1070  | 1232  | 1107    |
| 81764     | Rpl10        | 5626.4 | 5393.19 | 5287.9 | 4324.8 | 4831  | 4910  | 4995  | 5345.22 |
| 362934    | Ly6e         | 1583   | 1538    | 1572   | 1479   | 1529  | 1555  | 1391  | 1532    |
| 102552823 | LOC102552823 | 51.75  | 53      | 58.38  | 58.32  | 59.61 | 48.12 | 48.85 | 58.95   |
| 308652    | Smox         | 698    | 704     | 658    | 560    | 609   | 652   | 573   | 716     |
| 100911462 | Txn14a       | 591.49 | 507.92  | 456.41 | 435.86 | 455.9 | 480   | 474.5 | 528.09  |
| 361414    | Vat11        | 9959   | 10818   | 9919   | 10724  | 9893  | 9818  | 10576 | 10027   |
| 299314    | Cfp          | 133    | 110     | 145    | 99     | 130   | 130   | 123   | 91      |
| 361848    | Ddx50        | 579    | 608     | 589    | 586    | 531   | 540   | 617   | 611     |
| 365691    | Egflam       | 629    | 640     | 808.96 | 824.56 | 557.8 | 637.3 | 806   | 824.03  |
| 286998    | Zfand4       | 125    | 111     | 108    | 106    | 107   | 110   | 116   | 105     |
| 317252    | Ercc61       | 22     | 15      | 21     | 17     | 21    | 21    | 20    | 11      |
| 103694910 | LOC103694910 | 693.15 | 672.39  | 682.37 | 615.21 | 695.8 | 644.1 | 598.3 | 653.94  |
| 366964    | Tcf20        | 933    | 1032.42 | 1061   | 1090.1 | 1076  | 988   | 955.3 | 987.3   |
| 65248     | Prkaa1       | 1991   | 2057    | 1946   | 2223   | 2152  | 1901  | 2091  | 1854    |
| 289456    | Hsd17b11     | 1608   | 1927    | 1803   | 1641   | 1503  | 1763  | 1769  | 1758    |
| 361323    | Commd10      | 590    | 587     | 516.99 | 521    | 515   | 559   | 546   | 536     |
| 170820    | Prdm4        | 1046   | 1046    | 959    | 1080   | 1004  | 983   | 1020  | 1014    |
| 688288    | Eif4a3       | 978    | 923     | 966    | 783    | 863   | 907   | 893   | 890     |
| 363074    | RGD1309779   | 190    | 183     | 170    | 172    | 150   | 179   | 182   | 185     |
| 266716    | Zscan12      | 156    | 145     | 152    | 112    | 138   | 127   | 147   | 138     |
| 301128    | Kdm4b        | 1029   | 1096    | 970    | 1015   | 992   | 987   | 1016  | 1006    |
| 501926    | Zmat5        | 166.97 | 153.68  | 171.48 | 128.82 | 135.2 | 157.9 | 172.5 | 138.89  |
| 499563    | Zfp458       | 42.98  | 38.03   | 35.94  | 66.87  | 48.73 | 49.46 | 34.85 | 45.91   |
| 502320    | Faap24       | 49     | 62.54   | 71.49  | 45     | 53    | 39    | 68    | 62      |
| 308384    | Sael         | 1685   | 1559    | 1597   | 1437   | 1530  | 1538  | 1542  | 1502    |
| 689755    | Ccdc167      | 65     | 56      | 49     | 57     | 62    | 62    | 49    | 48      |
| 360763    | Usp12        | 533.52 | 546.58  | 474.99 | 542.42 | 557.1 | 470.8 | 520.6 | 493.54  |
| 298943    | Bcap29       | 890    | 785     | 801    | 742    | 752   | 691   | 821   | 869     |
| 296603    | Vav2         | 1133   | 1109    | 1144   | 1197   | 1229  | 1099  | 1078  | 1056    |
| 100911260 | LOC100911260 | 844.43 | 972.7   | 942.87 | 954.06 | 879.6 | 1064  | 835.3 | 836.8   |
| 294018    | Taf5         | 105    | 118     | 85     | 109    | 102   | 94    | 101   | 109     |
| 298744    | Crim1        | 409.12 | 271.57  | 378.83 | 408.2  | 352.9 | 387.3 | 402.2 | 286.72  |
| 315879    | Adamts7      | 218    | 237     | 248    | 246    | 242   | 260   | 211   | 211     |
| 100910875 | LOC100910875 | 219.69 | 231.1   | 262.49 | 262.49 | 282.5 | 256.8 | 174   | 236.81  |
| 295378    | Vav3         | 300    | 306     | 277    | 333    | 311   | 293   | 290   | 290     |

|           |              |        |         |        |        |       |       |       |         |
|-----------|--------------|--------|---------|--------|--------|-------|-------|-------|---------|
| 287631    | Wfikkn2      | 25     | 15      | 33     | 41     | 15    | 35    | 30    | 31      |
| 308064    | Cep72        | 9      | 8       | 13     | 8      | 10    | 7     | 12    | 8       |
| 303200    | Map2k3       | 307    | 216     | 301    | 164.05 | 201.1 | 282   | 244   | 235     |
| 102546648 | LOC102546648 | 103.58 | 131.64  | 125    | 108.05 | 105   | 94    | 124.9 | 132     |
| 313997    | Mboat2       | 2173   | 2042.95 | 1800.9 | 2086.9 | 1975  | 1937  | 2106  | 1872.83 |
| 65028     | Dna.jal      | 6562   | 6408    | 6214   | 6454   | 6142  | 5638  | 6486  | 6698    |
| 301887    | Cdh12        | 139.87 | 161     | 118.97 | 186.59 | 136   | 147   | 160   | 147.48  |
| 94266     | Rps27        | 2018.3 | 1752.71 | 1871.7 | 1501.1 | 1717  | 1551  | 1577  | 2111.38 |
| 50690     | Slc6a8       | 2076.4 | 2284.45 | 1949.6 | 1986.5 | 1991  | 2166  | 1902  | 2019.91 |
| 365215    | Smg9         | 414    | 405     | 393    | 351    | 365   | 454   | 371   | 332     |
| 252900    | Dgat2        | 453    | 383     | 352    | 378    | 358   | 430   | 339   | 398     |
| 291850    | Tepp         | 159.18 | 159.5   | 158.29 | 156    | 163.3 | 171.4 | 151.7 | 130.03  |
| 290912    | Arglu1       | 987    | 940     | 901    | 880    | 941   | 881   | 936   | 853     |
| 108351885 | LOC108351885 | 424.82 | 531.32  | 430.79 | 452.4  | 568.2 | 411.7 | 418.3 | 392.99  |
| 29278     | Laspl        | 2927.3 | 3006.72 | 3162.5 | 2931.9 | 2974  | 2930  | 2996  | 2812.95 |
| 114205    | Crcp         | 415    | 369     | 357    | 312    | 342   | 318   | 347   | 408     |
| 64367     | Ppib         | 1355.4 | 1371.28 | 1650.4 | 1204.9 | 1288  | 1300  | 1412  | 1436.93 |
| 684189    | Trim68       | 104    | 85      | 85     | 109    | 93    | 84    | 102   | 94      |
| 246766    | Ggtal        | 1137   | 1136    | 1096   | 1077   | 1075  | 1093  | 1089  | 1073    |
| 295455    | Slc39a8      | 355.91 | 405.85  | 394.76 | 420.11 | 389.4 | 382.5 | 402.4 | 361.18  |
| 100909512 | LOC100909512 | 189.93 | 163.95  | 181.47 | 214.15 | 195.9 | 146.2 | 181.5 | 206.38  |
| 361769    | Sufu         | 293    | 339     | 376    | 412    | 321   | 367   | 364   | 331     |
| 291694    | Fam13b       | 3986.5 | 3964.95 | 3469.4 | 3779.7 | 3667  | 3677  | 3819  | 3641.65 |
| 501349    | LOC501349    | 129.05 | 63.29   | 90.15  | 59.25  | 86.34 | 61.33 | 101.6 | 83.6    |
| 24412     | Grin2d       | 61.19  | 63.48   | 54.07  | 65.14  | 66.2  | 64.41 | 64.92 | 42.01   |
| 25283     | Gclc         | 831    | 901     | 776    | 803    | 770   | 804   | 856   | 795     |
| 246303    | Serbpl       | 2531   | 2369    | 2486   | 2280   | 2398  | 2285  | 2400  | 2332    |
| 306322    | Entr1        | 1568.3 | 1432.67 | 1541.4 | 1383.2 | 1347  | 1510  | 1522  | 1392.36 |
| 362434    | Lpcat3       | 710.31 | 664.83  | 798.37 | 778.67 | 714.4 | 643.4 | 750.3 | 767.49  |
| 298552    | Tmem50a      | 2427   | 2342    | 2370   | 2006   | 2029  | 2229  | 2265  | 2385    |
| 306471    | Snx25        | 708    | 664     | 698    | 634    | 693   | 620   | 650   | 671     |
| 24818     | Tcp1         | 3779.6 | 3793.4  | 3569.4 | 3753.4 | 3464  | 3373  | 3920  | 3753.41 |
| 363485    | Pbdc1        | 376    | 320     | 346    | 348    | 369   | 277   | 342   | 366     |
| 295625    | Pkp4         | 851    | 783     | 798    | 930    | 747   | 841   | 860   | 827     |
| 499966    | Xrcc2        | 132    | 107     | 139    | 125    | 128   | 126   | 119   | 117     |
| 301574    | Cab39        | 5914   | 6066    | 5674   | 5955   | 5788  | 5660  | 6034  | 5517    |
| 307833    | Ist1         | 1659.6 | 1695.82 | 1617.2 | 1588.9 | 1654  | 1569  | 1604  | 1565.32 |
| 313245    | Polr1e       | 187    | 187     | 193    | 170    | 179   | 185   | 182   | 172     |
| 314168    | RGD1307621   | 82     | 108     | 95     | 103    | 85    | 109   | 88    | 96      |
| 25246     | Bsg          | 11188  | 10390   | 10492  | 10429  | 9914  | 9701  | 10624 | 11165   |
| 64530     | Cnbp         | 4784   | 4596    | 4456   | 4100   | 4111  | 4126  | 4521  | 4716    |
| 316348    | Pdc13        | 654    | 601     | 681    | 549    | 545   | 562   | 691   | 623     |
| 303164    | Zfp692       | 332    | 253     | 327    | 287    | 273   | 293.1 | 343   | 259     |
| 294449    | Hs3st5       | 361    | 372     | 389    | 354    | 380   | 351   | 358   | 349     |
| 289152    | Ankrd45      | 112.03 | 101.12  | 77.15  | 101.1  | 89    | 87.19 | 109.9 | 95.22   |
| 361310    | Pfdn1        | 1633   | 1585    | 1515   | 1339   | 1391  | 1367  | 1502  | 1656    |
| 690450    | Taf1b        | 145    | 130     | 146    | 124    | 130   | 128   | 129   | 144     |
| 305827    | Wdhd1        | 167    | 136     | 154    | 166    | 162   | 134   | 175   | 136     |
| 296207    | Smim26       | 294    | 264     | 267    | 188    | 245   | 253   | 219   | 270     |
| 294232    | Dhx16        | 415    | 377     | 389    | 379    | 403   | 407   | 356   | 354     |
| 304495    | Kdm2b        | 237    | 232     | 270    | 236    | 239   | 234   | 258   | 219     |
| 108348147 | LOC108348147 | 256.92 | 272.79  | 290.54 | 307.6  | 318.5 | 257.4 | 254.5 | 268.5   |
| 311631    | Zswim1       | 253.72 | 246.91  | 251.76 | 257    | 236.8 | 276.8 | 245   | 224.92  |
| 361255    | Tbce         | 1266.7 | 1275.18 | 1245.8 | 1093.1 | 1097  | 1097  | 1288  | 1273.76 |
| 310512    | Nmd3         | 411    | 409     | 397    | 383    | 356   | 379   | 444   | 380     |
| 311502    | Kiz          | 298    | 285     | 268    | 281    | 266   | 259   | 262   | 316     |

|           |              |        |         |        |        |       |       |       |         |
|-----------|--------------|--------|---------|--------|--------|-------|-------|-------|---------|
| 25231     | Onecut1      | 551.66 | 633.92  | 522.77 | 807.68 | 638.1 | 619   | 671.9 | 522.51  |
| 252893    | Dnah7        | 23.81  | 19.49   | 16.57  | 19.41  | 20.56 | 20.61 | 22.71 | 13.37   |
| 65158     | Rab2a        | 4947   | 5074    | 4708   | 4455   | 4440  | 4384  | 4883  | 4986    |
| 298098    | Pole3        | 1044.4 | 1021.29 | 1004.8 | 959.17 | 955.7 | 970.6 | 1026  | 974.75  |
| 308977    | I121r        | 46.93  | 30.23   | 36.14  | 17.24  | 32.83 | 36.63 | 25.92 | 31.82   |
| 690285    | Tmem223      | 833    | 718     | 635    | 590    | 678   | 659   | 629   | 739     |
| 690976    | Cnn2         | 127    | 128     | 175    | 157    | 141   | 148   | 164   | 119     |
| 296147    | Chchd5       | 339    | 301     | 277    | 298    | 235   | 317   | 321   | 311     |
| 79114     | Fgfr1        | 4072   | 4294    | 4433   | 4844   | 4328  | 4670  | 4231  | 3964    |
| 500863    | Rspo2        | 1100.8 | 895.99  | 1043.9 | 877.13 | 1052  | 843   | 902.1 | 1020.81 |
| 288779    | Rab5b        | 6936   | 7150    | 7204   | 7263   | 6725  | 6897  | 7044  | 7159    |
| 79256     | Hnrnpd       | 900    | 921     | 960    | 910    | 906   | 867   | 920   | 904     |
| 289270    | Pld5         | 156    | 151     | 150    | 172    | 149   | 110   | 148   | 206     |
| 299104    | Fkbp3        | 4698   | 4482    | 3916   | 3848   | 4023  | 3736  | 4260  | 4494    |
| 298699    | Ppan         | 384    | 354     | 371    | 346    | 341   | 358   | 347   | 372     |
| 364670    | RGD1559908   | 89.48  | 111.99  | 88.19  | 146.54 | 118.5 | 90.25 | 110.9 | 105.44  |
| 307081    | Pitrm1       | 1812   | 1759    | 1730   | 1859   | 1715  | 1718  | 1784  | 1761    |
| 114104    | Asah2        | 806.26 | 843.58  | 704.41 | 891    | 786.2 | 738   | 860   | 778.64  |
| 65026     | Rwdd3        | 110    | 105     | 79     | 101    | 88    | 100   | 104   | 93      |
| 79237     | Hhex         | 52     | 45      | 40     | 21     | 44    | 48    | 30    | 32      |
| 361182    | Pcid2        | 557.77 | 574.3   | 527.37 | 526.9  | 564.1 | 523.1 | 504.2 | 539.59  |
| 619577    | Rnf14        | 6864   | 6616    | 6462   | 6575   | 6668  | 6318  | 6155  | 6705    |
| 296709    | Rpl35        | 3556   | 3341.95 | 3500   | 2749   | 3031  | 3012  | 3204  | 3567.47 |
| 84394     | Dcx          | 155.54 | 197.12  | 197.28 | 136.7  | 188.8 | 152.8 | 186.2 | 141.55  |
| 311450    | Pak7         | 71     | 75      | 92     | 79     | 79    | 97    | 76    | 57      |
| 362013    | Ahcy11       | 3139   | 3175    | 3082   | 3249   | 3024  | 3053  | 3269  | 2980    |
| 89815     | Syng2        | 230    | 213     | 255    | 214    | 213   | 261   | 216   | 199     |
| 312907    | Slco5a1      | 1173.1 | 1104    | 880.03 | 1224   | 1128  | 1045  | 1116  | 981.99  |
| 25448     | Cenpi        | 65     | 56      | 72     | 45     | 59    | 53    | 62    | 58      |
| 367902    | Armcx3       | 2874   | 2862    | 2641   | 2852   | 2804  | 2526  | 2771  | 2845    |
| 311209    | Tp53i11      | 561.14 | 464.77  | 509.81 | 556.15 | 479.2 | 486.8 | 459   | 614.16  |
| 140655    | Rps16        | 6708   | 6127.99 | 6589   | 5093.4 | 5948  | 5702  | 5607  | 6645    |
| 286910    | Smim3        | 449    | 396     | 463    | 362    | 376   | 376   | 441   | 435     |
| 294603    | RGD1560883   | 129    | 123     | 135    | 130    | 129   | 130   | 120   | 125     |
| 170955    | Zfp483       | 84     | 96      | 77     | 101    | 98    | 61    | 89    | 101     |
| 300032    | Zc3h3        | 226    | 265     | 322    | 301    | 283   | 276   | 259   | 268     |
| 299828    | Atp23        | 103    | 91      | 97     | 107    | 94    | 102   | 94    | 98      |
| 360632    | Retreg3      | 411    | 420     | 443    | 401    | 388   | 394   | 406   | 445     |
| 308478    | Spred3       | 412    | 420     | 527    | 398    | 444   | 443   | 427   | 399     |
| 81776     | Rps24        | 3873.9 | 3655.55 | 3878.8 | 3015.8 | 3400  | 3196  | 3463  | 4004    |
| 313564    | Zmpste24     | 1494   | 1308    | 1368   | 1381   | 1369  | 1341  | 1444  | 1258    |
| 83611     | Apba3        | 380.99 | 430.97  | 406.99 | 344    | 366   | 388.9 | 379   | 390     |
| 84482     | Foxo1        | 244    | 247     | 272    | 316    | 269   | 263   | 260   | 260     |
| 499903    | Napb         | 7128   | 7426    | 6491   | 7665   | 7263  | 6336  | 7188  | 7205.22 |
| 266780    | Rimbp2       | 549.58 | 430.83  | 462.04 | 517.48 | 452.1 | 473.7 | 495.1 | 490.09  |
| 306197    | Tm9sf2       | 2858   | 2941    | 2858   | 2742   | 2628  | 2881  | 2870  | 2735    |
| 305910    | Pspc1        | 502    | 515     | 454    | 529    | 477   | 490   | 519   | 464     |
| 171106    | I11rl2       | 10     | 7       | 11     | 12     | 14    | 7     | 11    | 7       |
| 362732    | Agmo         | 311    | 287     | 289    | 274    | 242   | 262   | 328   | 300     |
| 289338    | Disp1        | 478    | 643     | 666    | 576    | 501   | 614   | 611   | 578     |
| 304569    | Ep400        | 1043.3 | 1162.15 | 1282.2 | 1312   | 1140  | 1181  | 1180  | 1179    |
| 500034    | Bmt2         | 103    | 110     | 118    | 110    | 109   | 94    | 101   | 126     |
| 312703    | Pex5         | 684.02 | 641.02  | 582.5  | 619.93 | 623.2 | 617   | 628   | 596.29  |
| 361466    | Tppp         | 1530.3 | 1404.5  | 1262.9 | 1428.5 | 1500  | 1305  | 1375  | 1306.38 |
| 108351137 | LOC108351137 | 28.65  | 21      | 95.22  | 0      | 85.3  | 55.96 | 0     | 0       |
| 691976    | Slc35g3      | 6      | 5       | 16.92  | 9      | 9     | 10    | 6     | 11      |

|           |              |        |         |        |        |       |       |       |         |
|-----------|--------------|--------|---------|--------|--------|-------|-------|-------|---------|
| 315524    | Tmem45b      | 877.05 | 679.72  | 785.72 | 792.32 | 711.6 | 822.3 | 712   | 810.77  |
| 295549    | Dnajb4       | 1793.1 | 1610.98 | 1409.4 | 1593.3 | 1592  | 1492  | 1719  | 1443.89 |
| 294693    | Gtf2h2       | 210    | 175     | 182    | 157    | 171   | 171   | 188   | 176     |
| 294565    | Fam13c       | 552.7  | 466.34  | 483    | 481.94 | 482.1 | 475.9 | 496.8 | 479.86  |
| 364601    | Micu3        | 1957   | 1861    | 1759   | 1949   | 1793  | 1788  | 1875  | 1883    |
| 29274     | Rnf4         | 1856   | 1916    | 1892   | 1795   | 1764  | 1807  | 1962  | 1741    |
| 100359574 | LOC100359574 | 305.41 | 300.32  | 256.67 | 254.09 | 268.3 | 264.1 | 313.4 | 243.06  |
| 288479    | Pms2         | 401    | 367     | 308    | 336    | 327   | 331   | 379   | 340     |
| 305367    | Arap2        | 671    | 643     | 664    | 767    | 730   | 560   | 708   | 679     |
| 259218    | Rwdd1        | 695.41 | 697.13  | 651.04 | 651    | 657   | 615.8 | 661   | 693.99  |
| 56816     | Prkn         | 101    | 95      | 106    | 102    | 100   | 98    | 98    | 98      |
| 315134    | Josd1        | 607    | 612     | 600    | 525    | 534   | 552   | 615   | 585     |
| 315158    | Zc3h7b       | 3145   | 3283    | 3121   | 3626   | 3267  | 3173  | 3187  | 3222    |
| 312563    | Prickle2     | 584    | 678     | 674    | 692    | 599   | 681   | 637   | 646     |
| 296461    | Osbpl2       | 1020   | 997     | 999    | 990    | 897   | 1026  | 1013  | 971     |
| 361029    | Ktn1         | 3459   | 3313    | 3259   | 3409   | 3266  | 3163  | 3517  | 3162    |
| 310062    | Zswim6       | 838.99 | 799     | 881    | 842    | 864   | 779   | 846   | 789     |
| 304654    | RGD1306072   | 158.26 | 133.49  | 162.37 | 151.24 | 136.6 | 162.7 | 156.7 | 134.45  |
| 314600    | Zfp955a      | 523    | 462     | 493    | 508    | 505   | 408   | 481   | 543     |
| 78963     | Apaf1        | 234.3  | 235.36  | 307.41 | 279.78 | 257.9 | 251   | 273   | 248.86  |
| 307483    | Diaph1       | 518    | 499     | 591    | 543    | 517   | 529   | 517   | 535     |
| 89819     | Bud31        | 814.32 | 695.75  | 799.48 | 675.38 | 697.8 | 669   | 779.3 | 765.29  |
| 362398    | Plxna1       | 1341   | 1362    | 1629   | 1679   | 1449  | 1524  | 1497  | 1393    |
| 361256    | Svil         | 874.2  | 816.11  | 962.02 | 1043   | 775.8 | 1022  | 883   | 923.48  |
| 290668    | Mau2         | 1180   | 1111    | 1224   | 1102.6 | 1126  | 1127  | 1166  | 1085    |
| 295930    | RGD1309540   | 1233.3 | 1566.65 | 1583.9 | 1349.5 | 1381  | 1424  | 1565  | 1222.61 |
| 305420    | Anapc4       | 1294   | 1371    | 1315   | 1183   | 1225  | 1156  | 1337  | 1318    |
| 304978    | Copa         | 2672   | 2831    | 3032   | 2970   | 2800  | 2889  | 2882  | 2651    |
| 295211    | S100a5       | 27     | 34      | 27     | 34     | 35    | 27    | 25    | 32      |
| 266759    | Hspa4        | 4905   | 4974    | 4726   | 5038   | 4736  | 4560  | 5127  | 4737    |
| 100912008 | LOC100912008 | 87.75  | 99.14   | 87.66  | 50.67  | 62.3  | 96.68 | 93.05 | 65.2    |
| 303113    | Jade2        | 637    | 555     | 589    | 621    | 643   | 578   | 552   | 570     |
| 681913    | Gstz1        | 334.01 | 321.99  | 323.18 | 313.46 | 279.6 | 307.9 | 356.7 | 316.67  |
| 361363    | Ccdc102a     | 248    | 241     | 265    | 224    | 233   | 246   | 247   | 228     |
| 171126    | Ap3m1        | 1468   | 1473    | 1345   | 1463   | 1339  | 1332  | 1518  | 1419    |
| 502227    | Gtf2h5       | 849    | 814     | 800    | 637    | 760   | 706   | 761   | 797     |
| 81785     | Ssrp1        | 1455   | 1558    | 1564   | 1545   | 1476  | 1511  | 1527  | 1458    |
| 619346    | Surf4        | 2303.4 | 2278.15 | 2449.2 | 2238.3 | 2174  | 2232  | 2299  | 2336.99 |
| 24539     | Lpl          | 379    | 381     | 292    | 336    | 226   | 362   | 346   | 420     |
| 309550    | L3mbt13      | 174    | 183     | 217    | 243    | 196   | 182   | 237   | 182     |
| 102552166 | LOC102552166 | 58.05  | 41.78   | 62.42  | 95.14  | 62.12 | 61.33 | 64.07 | 63.57   |
| 364630    | Thsd1        | 133.4  | 142.16  | 124.7  | 125.19 | 139.1 | 157.7 | 103.8 | 112.12  |
| 315210    | Brd1         | 650    | 645     | 655    | 665    | 623   | 660   | 643   | 625     |
| 362425    | Zfp637       | 859    | 800     | 703    | 662    | 714   | 708   | 761   | 767     |
| 161452    | Lef1         | 85.54  | 94.64   | 102.13 | 96.52  | 103.5 | 80.64 | 78.32 | 107.12  |
| 84471     | Snx1         | 1011   | 972     | 978    | 966    | 893   | 988   | 994   | 956     |
| 310784    | Taf13        | 830    | 823     | 890    | 772    | 763   | 752   | 853   | 866     |
| 303553    | Rnd2         | 433    | 431     | 478    | 377    | 426   | 434   | 407   | 410     |
| 312320    | Igf2bp3      | 14     | 7       | 12     | 8      | 15    | 7     | 8     | 10      |
| 313234    | Tbc1d2       | 63     | 54      | 71     | 58     | 63    | 63    | 61    | 53      |
| 689526    | LOC689526    | 2.05   | 0       | 0      | 0      | 0     | 0     | 0     | 2       |
| 502503    | Serf1        | 900    | 801     | 794    | 828    | 821   | 708   | 817   | 896     |
| 293415    | Tmem9b       | 1510   | 1529    | 1591   | 1360   | 1467  | 1430  | 1419  | 1528    |
| 302526    | Atp6ap2      | 1821   | 1909    | 1668   | 1782   | 1674  | 1750  | 1854  | 1727    |
| 291075    | Eci2         | 549.56 | 561.71  | 571.22 | 501.5  | 501.8 | 518.5 | 548.2 | 562.27  |
| 312654    | Tmcc1        | 583    | 568     | 567    | 581    | 594   | 544   | 559   | 546     |



|           |              |        |         |        |        |       |       |       |         |
|-----------|--------------|--------|---------|--------|--------|-------|-------|-------|---------|
| 304010    | Zbtb11       | 647    | 656     | 710    | 781    | 720   | 627   | 754   | 624.96  |
| 293047    | Kif7         | 149    | 145     | 155    | 167    | 146   | 153   | 168   | 134     |
| 297728    | Ergic2       | 1006   | 911     | 852    | 891    | 926   | 818   | 899   | 928     |
| 102547414 | LOC102547414 | 0      | 1.95    | 0      | 2.99   | 0     | 1.11  | 1.62  | 2.09    |
| 373541    | Taf9         | 1337.5 | 1334.42 | 1032.4 | 860.82 | 1039  | 1102  | 1098  | 1215.57 |
| 292810    | Gpatch1      | 309    | 309     | 309    | 351    | 297   | 304   | 322   | 324     |
| 84484     | Slc4a4       | 3046.6 | 2637.21 | 2099.7 | 3062.4 | 2858  | 2402  | 2825  | 2498.63 |
| 311224    | Ttc17        | 1016   | 982     | 955    | 1047   | 947   | 1009  | 974   | 973     |
| 25595     | Map2         | 7611.6 | 7516.54 | 7001.5 | 9475.3 | 8485  | 6656  | 8205  | 7492.25 |
| 500390    | RGD1564053   | 1005.9 | 985.23  | 751.26 | 1099.7 | 891.5 | 856.3 | 986.5 | 1014.69 |
| 362409    | Sumf1        | 872    | 875     | 892    | 827    | 824   | 847   | 894   | 817     |
| 683626    | Lbh          | 1639   | 1947    | 2142   | 1823   | 1724  | 1932  | 1911  | 1801    |
| 66031     | Wdr7         | 3055   | 3288    | 3137   | 3562   | 3413  | 3147  | 3156  | 3010    |
| 289504    | Sdad1        | 134    | 130     | 156    | 158    | 137   | 126   | 173   | 128     |
| 140943    | Ppp4r1       | 804    | 811     | 813    | 752    | 764   | 850   | 752   | 737     |
| 287063    | Nmr11        | 123.05 | 126.33  | 128.18 | 122.61 | 117   | 123   | 110   | 138     |
| 246150    | Akap9        | 1411   | 1455    | 1556   | 1655   | 1620  | 1360  | 1464  | 1486    |
| 60443     | Epn2         | 2353   | 2237    | 2312   | 2359   | 2288  | 2257  | 2206  | 2286    |
| 690217    | Pcnx4        | 654    | 695     | 648    | 610    | 655   | 593   | 644   | 652     |
| 312690    | Phc1         | 343.65 | 367.4   | 399.47 | 377.32 | 365.8 | 342.3 | 359   | 384.83  |
| 360937    | Tbc1d1       | 575    | 531     | 602    | 611    | 569   | 569   | 567   | 558     |
| 25260     | Gstt1        | 107    | 76      | 90     | 100    | 87    | 88    | 83    | 106     |
| 308993    | Sephs2       | 526    | 476     | 473    | 434    | 439   | 463   | 461   | 500     |
| 306260    | Capn7        | 972    | 917     | 1004   | 1013   | 937   | 908   | 1019  | 948     |
| 362058    | Migal        | 2447   | 2167    | 2062   | 2023   | 2292  | 1933  | 2069  | 2196    |
| 64188     | Mafg         | 2639   | 2513    | 2493   | 2476   | 2586  | 2397  | 2485  | 2410    |
| 100912076 | LOC100912076 | 95.7   | 101.31  | 69.98  | 106.11 | 83.42 | 87.41 | 99.41 | 93.91   |
| 309804    | Cdk19        | 985    | 933     | 1026   | 1024   | 1004  | 922   | 1004  | 943     |
| 310326    | Arse         | 191    | 192     | 231    | 180    | 187   | 212   | 206   | 170     |
| 79113     | Fgr          | 53     | 46      | 74     | 36     | 62    | 59    | 42    | 41      |
| 29192     | Psen1        | 1648   | 1709    | 1717   | 1784   | 1727  | 1658  | 1677  | 1632    |
| 361684    | Nap114       | 2542   | 2443    | 2343   | 2267   | 2311  | 2316  | 2400  | 2339    |
| 308490    | Ddx18        | 343    | 322     | 303    | 331    | 351   | 287   | 338   | 292     |
| 309673    | Rrp1b        | 298    | 308     | 361    | 332    | 332   | 319   | 325   | 292     |
| 361042    | Pck2         | 624    | 584     | 535    | 520    | 564   | 515   | 567   | 563     |
| 361014    | Ngly1        | 951    | 977     | 934    | 868    | 856   | 914   | 911   | 960     |
| 29222     | Ptma         | 5114.8 | 5128.86 | 5744.3 | 4711.6 | 5086  | 5012  | 4962  | 5145.68 |
| 100362458 | Gigyf2       | 888.08 | 861.49  | 865.38 | 1015.2 | 912.2 | 886.4 | 927.3 | 817.81  |
| 311926    | Lrp1b        | 134    | 132     | 121    | 159    | 140   | 106   | 140   | 147     |
| 305240    | G3bp2        | 5991.6 | 5945.7  | 5499   | 5858.2 | 5784  | 5340  | 5931  | 5685.92 |
| 362958    | Mical11      | 1312.5 | 1529.17 | 1589.5 | 1467.4 | 1481  | 1443  | 1398  | 1436.4  |
| 360593    | Ppm1e        | 333    | 302     | 269    | 400    | 347   | 248   | 352   | 326     |
| 297893    | Hdac1        | 676    | 690.81  | 765    | 591    | 676.3 | 695   | 616   | 670.85  |
| 363760    | Arl6         | 513    | 519     | 501    | 446    | 478   | 432   | 496   | 526     |
| 314288    | Pcnx1        | 3167   | 3340    | 3444   | 3568   | 3583  | 3242  | 3374  | 2999    |
| 81805     | Suox         | 362.72 | 353.11  | 362.3  | 351.9  | 302.9 | 346.3 | 352.4 | 394.4   |
| 305895    | Dcaf11       | 1641   | 1653    | 1604   | 1594   | 1476  | 1702  | 1607  | 1553    |
| 306165    | Gpr180       | 1071.7 | 1002.98 | 938.29 | 1106.7 | 1018  | 983   | 1018  | 1003.6  |
| 316455    | Plekhm3      | 3125   | 3179    | 2547   | 3039   | 3370  | 3182  | 2792  | 2264.01 |
| 29184     | Cd36         | 244.54 | 189.84  | 316.27 | 140.86 | 185.5 | 286.9 | 238.2 | 159.79  |
| 24800     | Sts          | 329    | 322     | 347    | 310    | 323   | 359   | 292   | 303     |
| 117273    | Rhoa         | 8429   | 8150    | 8685   | 7734   | 7272  | 8037  | 8661  | 8246    |
| 681908    | Samd15       | 45     | 47      | 40     | 39     | 54    | 38.95 | 31    | 43      |
| 362593    | Gn12         | 910.97 | 911.98  | 892.92 | 875    | 900   | 876   | 910   | 819.97  |
| 360994    | Chac2        | 305    | 276     | 235    | 241    | 242   | 270   | 264   | 256     |
| 686506    | Lyrn7        | 710    | 747.23  | 681    | 663    | 686   | 619   | 678   | 752     |



|           |              |        |         |        |        |       |       |       |         |
|-----------|--------------|--------|---------|--------|--------|-------|-------|-------|---------|
| 114632    | Aimp1        | 949    | 840     | 736    | 818    | 833   | 837   | 792   | 802     |
| 292763    | Map4k1       | 72     | 56      | 71     | 55     | 58    | 79    | 59    | 52      |
| 299864    | Ebag9        | 596    | 620     | 561    | 509    | 481   | 569   | 592   | 590     |
| 313840    | Rmdn2        | 193    | 208     | 175    | 186    | 157   | 171   | 206   | 210     |
| 362522    | Zfp462       | 690.08 | 696.33  | 794.87 | 851.34 | 766.8 | 714.3 | 751.2 | 728.61  |
| 282547    | Mrgprx1      | 469.33 | 511.71  | 602.79 | 505.28 | 550   | 416.6 | 657.2 | 416.06  |
| 302863    | Slc9a6       | 2894   | 2836    | 2735   | 2773   | 2729  | 2515  | 2921  | 2808    |
| 100360054 | Vstml        | 3      | 1       | 6.03   | 1      | 4     | 4     | 1.77  | 1       |
| 309646    | Slc26a8      | 180.76 | 183.88  | 224.84 | 175.99 | 160   | 158.9 | 225.8 | 202.73  |
| 24392     | Gja1         | 608.53 | 570.79  | 708.45 | 780.94 | 665   | 692.3 | 661   | 587.5   |
| 303828    | Etv5         | 1106   | 1279    | 1484   | 1445   | 1238  | 1264  | 1384  | 1303    |
| 299199    | Ylpm1        | 1038   | 1108    | 1069   | 1251   | 1183  | 1061  | 1112  | 1005    |
| 314992    | RGD1310852   | 146    | 115     | 117    | 90     | 118   | 114   | 120   | 105     |
| 305177    | Enoph1       | 978    | 1084    | 1012   | 1011   | 917   | 1025  | 1020  | 1027    |
| 367146    | Gk5          | 63.46  | 32.84   | 37.31  | 53.21  | 57.67 | 36    | 42.27 | 46.49   |
| 117104    | Ppp2r2a      | 1917   | 1839    | 1937   | 1847   | 1763  | 1879  | 1937  | 1784    |
| 291450    | Aldh7a1      | 647    | 604     | 646    | 659    | 524   | 626   | 660   | 686     |
| 300253    | Eif4b        | 3101   | 2966    | 2794   | 3122   | 3046  | 2764  | 3017  | 2875    |
| 315170    | Poldip3      | 1081   | 1112    | 1111   | 957    | 1005  | 1055  | 1042  | 1059    |
| 303304    | Sgsm2        | 842    | 861     | 831    | 833    | 797   | 828   | 815   | 848     |
| 29313     | Clec11a      | 80     | 86      | 93     | 82     | 75    | 100   | 92    | 66      |
| 308381    | Zswim9       | 192    | 214     | 206    | 241    | 228   | 215   | 192   | 198     |
| 25507     | Pcsk6        | 454    | 478     | 444    | 460    | 389   | 484   | 442   | 478     |
| 58814     | Tmod2        | 3369   | 3164    | 2771   | 3643   | 3387  | 2994  | 2973  | 3290    |
| 361549    | Lgi4         | 5617.2 | 5796.47 | 6069.2 | 5175   | 4718  | 5819  | 5486  | 6104.29 |
| 298439    | Ipp          | 361.7  | 394.4   | 410.74 | 400.65 | 347.1 | 380.9 | 400.1 | 402.87  |
| 170546    | Ryr3         | 422    | 432     | 405    | 453    | 429   | 399   | 439   | 405     |
| 296050    | Emc7         | 1701   | 1555    | 1462   | 1366   | 1334  | 1422  | 1539  | 1647    |
| 292686    | Fbxo46       | 150    | 128     | 147    | 132    | 130   | 136   | 117   | 161     |
| 315988    | Rbm15b       | 353    | 317     | 366    | 378    | 356   | 334   | 349   | 342     |
| 117021    | Nup155       | 607    | 661     | 596    | 622    | 616   | 498   | 701   | 613     |
| 245903    | Magi3        | 2134.3 | 2051.06 | 1869.1 | 2129.1 | 2089  | 1847  | 2117  | 1940.56 |
| 362137    | Wdsub1       | 275.63 | 254.06  | 238.65 | 260.95 | 236.3 | 261.2 | 263.9 | 243.92  |
| 311118    | Tlk1         | 1876   | 1820    | 1788   | 1892   | 1768  | 1723  | 1956  | 1757.11 |
| 100359829 | Smpd5        | 267.2  | 285.07  | 252.02 | 216.02 | 256.4 | 229.7 | 267.6 | 242.83  |
| 293103    | Hikeshi      | 434    | 429     | 418    | 394    | 341   | 416   | 428   | 451     |
| 294230    | Mrps18b      | 691    | 670     | 658    | 687    | 618   | 638   | 702   | 685     |
| 679958    | Slc9b2       | 35     | 35      | 35     | 24     | 40    | 30    | 30    | 26      |
| 170928    | Necab2       | 128    | 112     | 134    | 99     | 81    | 116   | 131   | 134     |
| 305679    | Vcl          | 2286   | 2497    | 2880   | 2576   | 2447  | 2528  | 2583  | 2443    |
| 498798    | Stam         | 1538   | 1630    | 1457   | 1614   | 1522  | 1487  | 1601  | 1484    |
| 301121    | Rfx2         | 47     | 48      | 53     | 42     | 37.15 | 50.06 | 51.19 | 47.19   |
| 689443    | Tbc1d22a     | 334    | 318     | 312    | 329    | 309   | 315   | 367   | 272     |
| 360842    | Plekha6      | 3890   | 4235    | 4284   | 4447   | 4329  | 4233  | 3785  | 4118    |
| 296126    | Snrnp200     | 2141   | 2146    | 2256   | 2566   | 2172  | 2184  | 2366  | 2176    |
| 690182    | LOC690182    | 25.6   | 46.61   | 38.35  | 34.1   | 46.78 | 41.36 | 18.39 | 34.78   |
| 115768    | Zfp37        | 110.4  | 104.45  | 101.43 | 120.9  | 120.1 | 76.02 | 111.8 | 119.18  |
| 360915    | Cops4        | 2193   | 2148    | 1953   | 1918   | 1906  | 2013  | 2020  | 2083    |
| 252960    | Mrgprx3      | 450    | 429     | 327    | 437    | 482   | 361   | 383   | 379     |
| 312372    | Kbtbd2       | 1534   | 1535    | 1327   | 1399   | 1407  | 1401  | 1486  | 1367    |
| 100909595 | LOC100909595 | 1052.9 | 1325.54 | 1135.7 | 1062.9 | 1222  | 1029  | 991.8 | 1228.4  |
| 25604     | Pcmt1        | 5255   | 5034    | 4656   | 4494   | 4852  | 4488  | 4926  | 4724    |
| 360634    | Plekhh3      | 384    | 344     | 420    | 324    | 400   | 384   | 308   | 346     |
| 362789    | Zfyve21      | 358    | 463     | 421    | 318    | 327   | 387   | 381   | 429     |
| 103694552 | LOC103694552 | 29.07  | 37.03   | 42.57  | 36.07  | 28.43 | 32.62 | 32.7  | 47.65   |
| 83523     | Impa1        | 1162   | 1140    | 1038   | 1086   | 1032  | 1014  | 1160  | 1118    |

|           |            |        |         |        |        |       |       |       |         |
|-----------|------------|--------|---------|--------|--------|-------|-------|-------|---------|
| 317405    | Gprasp2    | 1340.7 | 1315.41 | 1287.2 | 1367.9 | 1322  | 1280  | 1305  | 1282.13 |
| 362884    | Tmbim4     | 696    | 667     | 667    | 575    | 597   | 616   | 687   | 645     |
| 29276     | Csrpl      | 4514   | 4516    | 4790   | 4330   | 3730  | 4766  | 4516  | 4720    |
| 293721    | Ganab      | 2553   | 2742    | 2823   | 2738   | 2501  | 2759  | 2689  | 2657    |
| 312490    | Paip2b     | 1369.4 | 1427.88 | 1309.4 | 1399.9 | 1323  | 1280  | 1390  | 1387.81 |
| 288042    | Fbxo45     | 1157.7 | 1115.73 | 1037.2 | 1098.6 | 1118  | 982.6 | 1114  | 1093.21 |
| 140934    | Elpl       | 899.42 | 1010.86 | 908.48 | 969.53 | 909.3 | 859.5 | 967.5 | 964.91  |
| 113894    | Sqstml     | 10836  | 10957   | 9459   | 9889   | 9167  | 9459  | 10790 | 10779   |
| 117258    | Cntnl      | 12459  | 11540   | 11818  | 12768  | 12767 | 11443 | 12703 | 10555   |
| 361467    | Lpcat1     | 519    | 547     | 605    | 550    | 534   | 531   | 562   | 543     |
| 361626    | Tmem41b    | 1858   | 1809    | 1712   | 1595   | 1674  | 1703  | 1752  | 1685    |
| 309441    | Twnk       | 525.52 | 494.21  | 514.36 | 491.53 | 498.5 | 485.5 | 495.4 | 499.77  |
| 290802    | Ubxn8      | 438.47 | 412.02  | 385.86 | 372.31 | 359.3 | 371.2 | 425.8 | 415.49  |
| 502421    | Slc35f1    | 1343   | 1340    | 1363   | 1494   | 1331  | 1422  | 1442  | 1218    |
| 246324    | Rab31      | 985    | 1130    | 1159   | 1132   | 981   | 1031  | 1243  | 1050    |
| 64627     | Hist1h4b   | 493.95 | 469.74  | 399.39 | 377.94 | 428.1 | 427.3 | 402.5 | 443.24  |
| 362905    | Emc2       | 1594   | 1525    | 1402   | 1418   | 1429  | 1288  | 1500  | 1586    |
| 691984    | Gpc6       | 417    | 342     | 465    | 436    | 364   | 390   | 485   | 383     |
| 294963    | Mrpl47     | 408.31 | 382.5   | 353.06 | 374.32 | 343.1 | 349.8 | 394.4 | 396.08  |
| 289323    | Nv1        | 130    | 162     | 193    | 156    | 156   | 158.3 | 152   | 160     |
| 500007    | LOC500007  | 10.57  | 11.35   | 15.68  | 7.45   | 16.14 | 5.27  | 12.91 | 9.7     |
| 680944    | Rbmx11     | 75.77  | 80.5    | 79.73  | 91.83  | 75.94 | 70.82 | 92.35 | 81.23   |
| 64154     | Gosr2      | 1387   | 1469    | 1457   | 1336   | 1383  | 1413  | 1369  | 1355    |
| 363675    | Stard3     | 746    | 765     | 754    | 763    | 684   | 762   | 733   | 780     |
| 361201    | RGD1311345 | 775.74 | 719.38  | 723.12 | 645.31 | 715.6 | 651.6 | 690.2 | 740.99  |
| 685398    | Ppplr26    | 309.83 | 319     | 292    | 271.96 | 288.9 | 290.9 | 287   | 298.93  |
| 81716     | Ggcx       | 412    | 441     | 488    | 418    | 408   | 460   | 460   | 391     |
| 313139    | Slc35a1    | 309.03 | 300.22  | 303.06 | 293.33 | 266.3 | 285.7 | 309.6 | 316.72  |
| 305178    | Hnrnpd1    | 2010   | 2108    | 2106   | 1917   | 1960  | 1951  | 2308  | 1737    |
| 446170    | Dear       | 8.49   | 7.45    | 6.4    | 9.81   | 11.77 | 4.27  | 8.56  | 6.82    |
| 683206    | Tnfaip3    | 140    | 140     | 158    | 179    | 131   | 141   | 160   | 171     |
| 287643    | Spop       | 2143.4 | 2097.9  | 2015.2 | 1995   | 1978  | 2025  | 2043  | 2018.86 |
| 296158    | Pced1a     | 371    | 402     | 394    | 378    | 377   | 394   | 388   | 351     |
| 683504    | Zfp639     | 256    | 292     | 271    | 241    | 244   | 251   | 274   | 267     |
| 29673     | Psma6      | 2480   | 2395    | 2305   | 2147   | 2041  | 2072  | 2411  | 2592    |
| 29240     | Polb       | 320    | 320     | 311    | 331    | 317   | 271   | 334   | 331     |
| 315272    | Ano6       | 1373   | 1334    | 1522   | 1522   | 1358  | 1452  | 1449  | 1362    |
| 299209    | Ift43      | 146    | 112     | 130    | 99     | 124   | 117   | 123   | 112     |
| 365022    | Rnf166     | 277    | 269     | 293    | 268    | 263   | 280   | 279   | 260     |
| 170821    | Atxn10     | 3849   | 4345    | 3844   | 3831   | 3995  | 3731  | 4279  | 3506    |
| 81830     | Rab11a     | 4373   | 4378    | 4230   | 4312   | 4169  | 4033  | 4377  | 4324    |
| 100912096 | Zfp113     | 92     | 85      | 90     | 88     | 85    | 83    | 86    | 93      |
| 303608    | Ftsj3      | 438    | 493     | 514    | 464    | 493   | 446   | 478   | 449     |
| 24547     | Mbp        | 50689  | 58780   | 50736  | 50913  | 38701 | 51821 | 50793 | 65050   |
| 25023     | Prkcb      | 2108   | 1627.99 | 1682.1 | 1813.1 | 1813  | 1742  | 1600  | 1913.06 |
| 361223    | Fgd3       | 81     | 60      | 66     | 60     | 73    | 64    | 75    | 49      |
| 29304     | Rps6       | 5934.2 | 5582.34 | 5931   | 4781.3 | 5232  | 4978  | 5689  | 5831.25 |
| 60466     | Stx7       | 4017   | 4126    | 3776.5 | 3627   | 3676  | 3558  | 3844  | 4120    |
| 366532    | Dhx57      | 1789   | 1672    | 1630   | 1812   | 1653  | 1597  | 1792  | 1706    |
| 360904    | Idua       | 1177.2 | 1025.39 | 1169.8 | 1062   | 1028  | 1081  | 1121  | 1104.4  |
| 307774    | Otud4      | 914    | 876     | 977    | 1022   | 922   | 905   | 945   | 932     |
| 27256     | Cntn6      | 110    | 114     | 118    | 104    | 106   | 116   | 108   | 106     |
| 24161     | Acpl       | 2632   | 2430    | 2302   | 2191   | 2162  | 2292  | 2499  | 2388    |
| 297530    | Washc2c    | 3224   | 3225    | 3252   | 3652   | 3249  | 3284  | 3479  | 3042    |
| 29595     | Htr2a      | 50     | 44      | 53     | 32     | 51    | 36    | 49    | 39      |
| 315133    | Ddx17      | 2211   | 2061    | 2209   | 2338   | 2087  | 2091  | 2325  | 2119    |

|           |              |        |         |        |        |       |       |       |          |
|-----------|--------------|--------|---------|--------|--------|-------|-------|-------|----------|
| 29149     | Strn         | 1740.6 | 1868.8  | 1753.4 | 1999.5 | 1850  | 1766  | 1827  | 1755.47  |
| 500323    | Parp11       | 162.88 | 184.19  | 167.31 | 181.11 | 166.1 | 154.1 | 176.6 | 183.14   |
| 29521     | Scamp1       | 3475   | 3462    | 3057   | 3262   | 3520  | 3037  | 3290  | 3113     |
| 689488    | LOC689488    | 0      | 2.88    | 1.43   | 2.86   | 1.43  | 4.12  | 0     | 1.46     |
| 291948    | Pgrmc1       | 2738.3 | 2722.42 | 2377.8 | 2599.5 | 2465  | 2529  | 2573  | 2638.45  |
| 192251    | Gpr149       | 781.21 | 748.6   | 747.7  | 738.91 | 781.4 | 715.2 | 712   | 740.54   |
| 297592    | Spsb2        | 261.11 | 229.01  | 216.76 | 200.21 | 262.6 | 198.5 | 222.8 | 202.94   |
| 363707    | Srp68        | 1061   | 1140.76 | 1115.7 | 1062.7 | 1075  | 1142  | 1014  | 1052.21  |
| 85382     | Ngb          | 98     | 84      | 80     | 97     | 92    | 81    | 81    | 97       |
| 316064    | Oxsrl        | 1584   | 1652    | 1754   | 1703   | 1688  | 1607  | 1669  | 1580     |
| 361303    | Lims2        | 1306   | 1417    | 1327   | 1116   | 1006  | 1473  | 1129  | 1443     |
| 100912165 | LOC100912165 | 54.34  | 57.03   | 48.71  | 68.13  | 68.13 | 51.22 | 58.15 | 45.63    |
| 500261    | Magi1        | 1981   | 1984    | 1923   | 2067   | 2077  | 1849  | 1909  | 1943     |
| 114089    | Inpp5e       | 447    | 400     | 384    | 387    | 346   | 406   | 418   | 412      |
| 301352    | Mrpl30       | 37.71  | 48.91   | 34.46  | 42.98  | 39.37 | 42.06 | 33.84 | 45.14    |
| 365380    | Jakmip3      | 322    | 310     | 319    | 353    | 327   | 319   | 314   | 315      |
| 300724    | Fbxo22       | 652    | 619     | 618    | 552    | 579   | 599   | 596   | 613      |
| 296865    | Las11        | 689    | 636     | 656    | 594    | 652   | 645.1 | 640   | 581      |
| 296259    | Acssl        | 371.86 | 422.87  | 393.75 | 398.67 | 358.4 | 415.3 | 330.6 | 447.78   |
| 64553     | Akap6        | 7140   | 7683    | 7299   | 9081   | 8361  | 7283  | 7839  | 7031     |
| 362642    | Pqlc2        | 522.06 | 476.01  | 489.07 | 558.96 | 522   | 526   | 489   | 464      |
| 314949    | Rad21        | 2258   | 2223    | 2374   | 2256   | 2144  | 2271  | 2236  | 2259     |
| 366962    | Grap2        | 40     | 24      | 41     | 31     | 20    | 45    | 37    | 31       |
| 25565     | Tle4         | 857.93 | 837.15  | 907.99 | 901.98 | 855   | 877   | 913.9 | 781.99   |
| 84420     | Adcy7        | 623.04 | 525     | 594    | 576    | 574   | 546   | 649   | 498      |
| 100910231 | Zfp82        | 320.54 | 337.68  | 334.99 | 370.19 | 370.9 | 319.2 | 347.3 | 296.01   |
| 295448    | Ints12       | 215.68 | 222     | 240.46 | 194    | 214.4 | 205.3 | 204.5 | 228.8    |
| 500105    | Cntnap2      | 3124   | 3141    | 3065   | 3493   | 3485  | 2835  | 3373  | 2848     |
| 25309     | Cycs         | 3688.6 | 3451.52 | 3434.7 | 3339.5 | 3229  | 2969  | 3956  | 3454.93  |
| 688999    | Hoxd9        | 412    | 391     | 342    | 357    | 411   | 370   | 363   | 325      |
| 25725     | Prkar1a      | 9902   | 10226   | 9815   | 10010  | 9718  | 9589  | 10151 | 9618     |
| 378774    | Pigw         | 157    | 147     | 108    | 135    | 122   | 131   | 127   | 155      |
| 360577    | Nxn          | 1104   | 1031    | 1010   | 963    | 1013  | 963   | 974   | 1068     |
| 360498    | Jmjd8        | 608.25 | 624.87  | 761.21 | 635.08 | 617.7 | 641.1 | 641.6 | 671.52   |
| 288058    | Hacd2        | 450.15 | 432.15  | 436.61 | 392.92 | 395.8 | 416.8 | 429.1 | 432.64   |
| 24242     | Calml        | 34345  | 32031.3 | 32461  | 33176  | 33439 | 30149 | 32253 | 33291.93 |
| 103694861 | LOC103694861 | 60.42  | 45.69   | 35.87  | 38     | 56.43 | 42.39 | 36.9  | 40.34    |
| 363255    | Ankzf1       | 514.57 | 459.43  | 518.57 | 432.8  | 486.3 | 436.3 | 499.3 | 461.58   |
| 363164    | Wdr48        | 1137   | 1225    | 1263   | 1153   | 1206  | 1198  | 1149  | 1121     |
| 310633    | Ubqln4       | 1103   | 1101    | 1134   | 1167   | 1083  | 1186  | 1098  | 1040     |
| 295647    | Gca          | 545.74 | 409.32  | 379.54 | 538.22 | 410.1 | 374.3 | 485.6 | 562.05   |
| 280670    | Lzts3        | 522    | 524     | 500    | 572    | 553   | 481   | 519   | 519      |
| 309391    | Cox15        | 855.61 | 799.6   | 788.71 | 841.06 | 800.2 | 772.4 | 817.2 | 823.92   |
| 687358    | Tvp23b       | 505    | 434     | 468    | 436    | 374   | 445   | 497   | 487      |
| 83614     | Pias3        | 516    | 497     | 533    | 528    | 476   | 495   | 500   | 558      |
| 361044    | Sdr39u1      | 468    | 460     | 419    | 406    | 396   | 424   | 419   | 476      |
| 288661    | Zcchc8       | 350    | 302     | 347    | 340    | 324   | 353   | 342   | 291      |
| 292622    | Bicra        | 501    | 531     | 677    | 554    | 542   | 620   | 570   | 482      |
| 500909    | Ccdc134      | 127.59 | 114.35  | 143.72 | 111.74 | 117.8 | 107.6 | 139.1 | 122.1    |
| 303158    | Larpl        | 5223.9 | 5556.02 | 5830.5 | 6123.3 | 5850  | 5534  | 5753  | 5104.76  |
| 296081    | Ccdc32       | 1303.8 | 1324.5  | 1051.5 | 1127.5 | 1198  | 1093  | 1235  | 1177.36  |
| 300786    | Clpx         | 562    | 621     | 438    | 508    | 520   | 529   | 526   | 508      |
| 364190    | Ras110a      | 71     | 74      | 70     | 63     | 66    | 69    | 72    | 65       |
| 297336    | Usp39        | 489.57 | 474     | 441.14 | 440.09 | 442.2 | 446.5 | 438.5 | 477.74   |
| 102553760 | LOC102553760 | 61.49  | 50.38   | 47.58  | 63.45  | 59.37 | 44.64 | 53.18 | 60.9     |
| 681367    | LOC681367    | 85.13  | 94.72   | 87.42  | 50.65  | 77.89 | 74.49 | 81.63 | 77.05    |

|           |              |        |         |        |        |       |       |       |         |
|-----------|--------------|--------|---------|--------|--------|-------|-------|-------|---------|
| 308060    | Ccdc127      | 691    | 647     | 653    | 651    | 682   | 567   | 668   | 668     |
| 685233    | Gpatch8      | 1240.6 | 1293    | 1166.1 | 1340.1 | 1283  | 1258  | 1242  | 1148.07 |
| 499108    | Sertad3      | 91     | 104     | 96     | 80     | 109   | 99    | 81    | 74      |
| 500575    | Szrd1        | 1072   | 1001    | 1104   | 1053   | 1023  | 1041  | 1036  | 1039    |
| 365875    | Bolal        | 124    | 146     | 177    | 111    | 127   | 138   | 104   | 177     |
| 681665    | Ints61       | 352    | 282     | 315    | 307    | 272   | 281   | 363   | 313     |
| 305571    | B3gnt2       | 1247   | 1241    | 1136   | 1121   | 1246  | 1106  | 1155  | 1136    |
| 299258    | Golga5       | 545    | 513     | 541    | 496    | 477   | 479   | 587   | 507     |
| 297867    | Aridla       | 1703.1 | 1699.6  | 1914.4 | 1997   | 1885  | 1867  | 1723  | 1682.12 |
| 311553    | Asxl1        | 825    | 897     | 823    | 856    | 825   | 863   | 804   | 836     |
| 305922    | Lats2        | 1676   | 1568    | 1702   | 1764   | 1663  | 1602  | 1586  | 1715    |
| 499095    | Zfp94        | 130.72 | 127.43  | 130.42 | 122.67 | 122.3 | 135.7 | 124.6 | 117.68  |
| 140544    | Pcyt1a       | 1768   | 1763    | 1736   | 1818   | 1670  | 1779  | 1795  | 1689    |
| 501569    | Tmem47       | 2715.4 | 2715.68 | 2505.7 | 2937.2 | 2755  | 2543  | 2769  | 2573.27 |
| 364754    | Fzd8         | 458    | 526     | 480    | 448    | 468   | 470   | 471   | 462     |
| 64666     | Taok2        | 2574.2 | 2523    | 2520.6 | 2645   | 2538  | 2578  | 2515  | 2412    |
| 24479     | Idh1         | 3777   | 3801    | 3235   | 2956   | 3626  | 3489  | 3358  | 3001    |
| 361213    | Sptlc1       | 728    | 782     | 761    | 765    | 682   | 772   | 777   | 740     |
| 303396    | Appbp2       | 1522.2 | 1436.21 | 1514.9 | 1499.1 | 1399  | 1388  | 1655  | 1401.86 |
| 432358    | Elavl4       | 4567   | 4716    | 4691   | 5091   | 4636  | 4648  | 4977  | 4396    |
| 298851    | Slc35f6      | 642    | 677     | 603    | 700    | 604   | 682   | 622   | 658     |
| 311391    | Cep152       | 58     | 78      | 69     | 76     | 65    | 74    | 78    | 58      |
| 361631    | Cyp2r1       | 56     | 35      | 49     | 46     | 39    | 51    | 45    | 47.03   |
| 300807    | Rora         | 159.77 | 143.89  | 120.72 | 149.12 | 128.5 | 163.3 | 141.4 | 128.11  |
| 368088    | Dgkd         | 995    | 868     | 848    | 898    | 855   | 843   | 971   | 863     |
| 313934    | Itsn2        | 1904   | 1840    | 1922   | 2069   | 2034  | 1745  | 1878  | 1913    |
| 289874    | Erlecl       | 2020.6 | 1965.77 | 1919.1 | 1801.6 | 1859  | 1797  | 1884  | 2002.45 |
| 83582     | Polr1b       | 235    | 251     | 238    | 262    | 242   | 259   | 194   | 270     |
| 305482    | Mtmr3        | 1254   | 1319    | 1279   | 1360   | 1233  | 1311  | 1331  | 1226    |
| 298859    | Dnajc27      | 1556   | 1522    | 1364   | 1573   | 1586  | 1411  | 1381  | 1509    |
| 25387     | Arrb1        | 4023   | 3838    | 3902   | 4270   | 3964  | 3693  | 3996  | 4039    |
| 362668    | Zbtb48       | 109    | 102     | 113    | 100    | 109   | 104   | 102   | 100     |
| 288993    | Slc35f5      | 660    | 587     | 557    | 647    | 605   | 565   | 586   | 643     |
| 300797    | Ciao2a       | 171    | 166.9   | 178.02 | 143.07 | 167   | 140   | 182   | 156     |
| 103689966 | LOC103689966 | 117.42 | 112.93  | 52.36  | 38.96  | 64.6  | 59.33 | 56.61 | 134.32  |
| 293774    | Dtx4         | 1280   | 1360    | 1345   | 1402   | 1241  | 1235  | 1396  | 1401    |
| 362587    | Macf1        | 2954   | 3011    | 3498   | 3633   | 3313  | 2954  | 3311  | 3241    |
| 56725     | Cript        | 1317   | 1206    | 1207   | 1097   | 1118  | 1079  | 1160  | 1368    |
| 361612    | P4ha3        | 123.41 | 104.52  | 152.53 | 111.39 | 109.2 | 146.4 | 121.1 | 104.76  |
| 171152    | Taf9b        | 676.45 | 617.83  | 644.04 | 627.44 | 654.8 | 607.6 | 625.7 | 623.48  |
| 171147    | Slc2a13      | 485    | 420     | 449    | 495    | 419   | 458   | 474   | 459     |
| 102551140 | LOC102551140 | 343.83 | 358.11  | 352.02 | 333.89 | 325.9 | 345.8 | 334.9 | 351.99  |
| 685465    | Polr3g       | 2676.5 | 2535.01 | 2443.6 | 2559.9 | 2668  | 2360  | 2438  | 2533.98 |
| 171128    | Gchfr        | 78     | 71      | 77     | 59     | 74    | 69    | 70    | 66      |
| 293922    | Aff2         | 427    | 448     | 468    | 549.86 | 485.1 | 389   | 536   | 442.99  |
| 303493    | Snx11        | 756    | 805     | 733    | 708    | 715   | 719   | 734   | 771     |
| 60391     | Nrxn1        | 1671   | 1640    | 1577   | 1927   | 1915  | 1287  | 1759  | 1711    |
| 363220    | Aff3         | 805.34 | 864.08  | 849.89 | 1089.1 | 890.3 | 864.5 | 889.3 | 888.7   |
| 192269    | Sub1         | 3240   | 3201    | 3099   | 3076   | 3020  | 2851  | 3120  | 3361    |
| 365085    | LOC365085    | 376.35 | 371.95  | 388    | 395.22 | 367   | 354.4 | 404.4 | 373.65  |
| 501706    | Mis12        | 1003.5 | 917.53  | 888.26 | 918.11 | 1006  | 807.4 | 929.4 | 906.24  |
| 25216     | Sdc1         | 91     | 77      | 96     | 71     | 72    | 121   | 73    | 62      |
| 363275    | Eif4e2       | 382    | 395     | 384    | 371    | 373   | 402   | 350   | 375     |
| 498233    | Lgr6         | 121    | 118     | 108    | 132    | 128   | 97    | 123   | 121     |
| 54269     | Mcpt10       | 36.4   | 24.26   | 97.06  | 0      | 32.1  | 33.07 | 57.63 | 31.63   |
| 362987    | Rab12        | 392    | 382     | 313    | 304    | 328   | 346   | 329   | 359     |

|           |              |        |         |        |        |       |       |       |          |
|-----------|--------------|--------|---------|--------|--------|-------|-------|-------|----------|
| 309300    | RGD1565057   | 11     | 11      | 18     | 8      | 13    | 12    | 11    | 11       |
| 364835    | Sft2d3       | 106    | 103     | 131    | 92     | 92    | 99    | 110   | 122      |
| 498515    | Cdh24        | 139    | 143     | 147    | 148    | 154   | 130   | 151   | 130      |
| 314855    | Cpm          | 573.23 | 693.93  | 569.58 | 527.77 | 638.8 | 515.4 | 611.4 | 549.77   |
| 682457    | Txlna        | 1318   | 1138    | 1228   | 1224   | 1242  | 1111  | 1330  | 1123     |
| 679641    | Cfap57       | 90     | 83      | 84     | 80     | 83    | 73    | 94    | 80       |
| 309809    | RGD1310495   | 17.86  | 16.6    | 12.73  | 19.25  | 22.71 | 15.97 | 10.24 | 16.14    |
| 499882    | Eid1         | 2955   | 3022    | 2997   | 2713   | 2759  | 2594  | 3115  | 2977     |
| 116551    | Pdk1         | 424.13 | 414.6   | 396.5  | 414.35 | 388.8 | 398.1 | 420.5 | 407.96   |
| 680991    | Tubg2        | 480.08 | 487.29  | 420.76 | 483.3  | 560.3 | 441.5 | 433.1 | 397.91   |
| 246302    | Pcyox1       | 1818   | 1902    | 1815   | 1863   | 1809  | 1767  | 1894  | 1775     |
| 305935    | Mtmr6        | 6128   | 6024    | 5853   | 5883   | 6088  | 5621  | 6066  | 5619     |
| 362702    | Lclat1       | 408    | 416     | 377    | 395    | 415   | 369   | 396   | 383      |
| 259243    | Kcnip4       | 1486   | 1421    | 1197   | 1268   | 1308  | 1220  | 1296  | 1436.99  |
| 688968    | Ecd          | 327    | 366     | 346    | 366    | 335   | 388   | 288   | 365      |
| 691171    | Ulk3         | 148.4  | 151.32  | 121.99 | 149.11 | 133   | 147.5 | 138   | 140.46   |
| 314312    | Entpd5       | 649.4  | 690.26  | 688.68 | 787.53 | 712.5 | 668.6 | 692.1 | 684.61   |
| 361570    | Prrg2        | 34     | 19      | 25     | 19     | 23    | 26    | 19    | 27       |
| 500538    | Ybx1         | 3667   | 3792    | 4190   | 3498   | 3416  | 3778  | 3744  | 3897     |
| 685405    | Fam53c       | 885    | 948     | 881    | 931    | 891   | 919   | 865   | 895      |
| 308106    | Map3k4       | 626    | 694     | 718    | 733    | 670   | 693   | 676   | 675      |
| 140665    | Rab3d        | 1586   | 1649    | 1682   | 1458   | 1667  | 1557  | 1467  | 1552.99  |
| 690262    | Yaf2         | 1369   | 1332    | 1260   | 1297   | 1333  | 1195  | 1313  | 1309     |
| 500692    | Heatr4       | 33     | 23      | 20.1   | 20     | 29    | 19    | 19    | 27.13    |
| 683630    | Mat2b        | 906    | 856     | 760    | 747    | 822   | 762   | 844   | 774      |
| 117556    | Sv2b         | 4253   | 4500    | 4045   | 4640   | 4413  | 4064  | 4300  | 4304     |
| 63839     | Fhl2         | 168    | 143     | 179    | 194    | 145   | 183   | 157   | 185      |
| 541589    | Kyat3        | 214    | 217     | 208    | 193    | 201   | 202   | 198   | 214      |
| 304529    | Vsig10       | 255    | 256     | 262    | 304    | 259   | 303   | 263   | 230      |
| 292027    | Cfdp1        | 937    | 922     | 954    | 957    | 927   | 841   | 931   | 994      |
| 691380    | Psrc1        | 9      | 9       | 21     | 10     | 9     | 12    | 12    | 15       |
| 83833     | Smarcd2      | 663    | 692     | 695    | 645    | 663   | 665   | 668   | 644      |
| 301345    | Cnnm3        | 647    | 660.01  | 639.11 | 608    | 582   | 662   | 631   | 627      |
| 116632    | Nat2         | 21.66  | 22.43   | 23.07  | 28.91  | 15.29 | 22.94 | 30.23 | 25.65    |
| 287302    | Mrpl22       | 305    | 298     | 278    | 247    | 283   | 268   | 260   | 294      |
| 25059     | Hk2          | 192.47 | 151.23  | 163.29 | 201.54 | 163.9 | 164.8 | 170.5 | 194.97   |
| 94203     | Pgf          | 173    | 151     | 144    | 122    | 169   | 136   | 129   | 144      |
| 304445    | Glt1d1       | 287    | 285     | 303    | 256    | 320   | 301   | 243   | 244      |
| 296284    | Kif3b        | 1515   | 1538    | 1413   | 1493   | 1506  | 1334  | 1498  | 1500     |
| 362374    | Voppl        | 2320   | 2329    | 2239   | 1934   | 2149  | 2000  | 2276  | 2218     |
| 117548    | Kif1b        | 12986  | 13194.2 | 12454  | 17051  | 15594 | 12044 | 13986 | 12932.01 |
| 305242    | Cdk12        | 1896   | 1874    | 1852   | 1823   | 1793  | 1660  | 1859  | 1982     |
| 311193    | Arhgap1      | 1029   | 1048    | 1113   | 1052   | 1029  | 1057  | 1029  | 1041     |
| 499994    | Zfp804b      | 79.02  | 76.07   | 63.01  | 112    | 97    | 51    | 90    | 85.41    |
| 363212    | Bend6        | 2544   | 2600    | 2307.4 | 2508   | 2420  | 2402  | 2606  | 2329.65  |
| 685179    | Smarcc2      | 3052   | 3112    | 3309   | 3360   | 3189  | 3225  | 3187  | 2972     |
| 103689999 | LOC103689999 | 1393   | 1295.36 | 1110.3 | 1022.9 | 1121  | 1095  | 1198  | 1310.78  |
| 24561     | Mpg          | 152    | 142     | 137    | 112    | 133   | 122   | 126   | 151      |
| 100911320 | LOC100911320 | 131    | 146     | 108    | 122    | 116   | 131   | 123   | 126.72   |
| 85428     | Rhoq         | 2196.1 | 2336.27 | 2284   | 2364.6 | 2157  | 2290  | 2227  | 2320.87  |
| 684112    | Sik3         | 809    | 846     | 860    | 899    | 852   | 915   | 792   | 786      |
| 292381    | Lix1         | 123    | 114     | 119    | 139    | 123   | 116   | 108   | 138      |
| 304063    | Ets2         | 239    | 230     | 293    | 327    | 292   | 272   | 265   | 238      |
| 304539    | Sirt4        | 73.55  | 80.98   | 84.81  | 79.53  | 80.16 | 78.31 | 74.66 | 79.3     |
| 50622     | Slc23a2      | 1078   | 1133    | 1018   | 1228   | 1144  | 1041  | 1171  | 1011     |
| 293950    | Morn4        | 742    | 744     | 687    | 650    | 683   | 697   | 641   | 745      |

|           |              |        |         |        |        |       |       |       |         |
|-----------|--------------|--------|---------|--------|--------|-------|-------|-------|---------|
| 360476    | Nagpa        | 146    | 132     | 145    | 122    | 132   | 124   | 148   | 130     |
| 305031    | Brox         | 2078   | 2081    | 2118   | 2105   | 2018  | 1983  | 2145  | 2067    |
| 360699    | Dnajc28      | 112    | 108     | 75     | 102    | 91    | 84    | 84    | 130     |
| 362065    | Wls          | 2511   | 2612    | 2399   | 2701   | 2175  | 2517  | 2729  | 2596    |
| 296188    | Sptlc3       | 275    | 215     | 204    | 250    | 293   | 185   | 223   | 224     |
| 502988    | Sesn2        | 178.31 | 201     | 222    | 210    | 219   | 206   | 200   | 170     |
| 287530    | Prpf8        | 4023   | 4358    | 4419   | 4920   | 4271  | 4443  | 4346  | 4304    |
| 25460     | Hmmr         | 118    | 104     | 122    | 104    | 117   | 106   | 99    | 117     |
| 360620    | Wipf2        | 404    | 443     | 437    | 508    | 426   | 402   | 449   | 479     |
| 83427     | Rack1        | 4033   | 3792    | 3974   | 2936   | 3676  | 3566  | 3458  | 3739    |
| 313707    | Exosc10      | 695    | 751     | 715    | 683    | 667   | 756   | 678   | 686     |
| 307582    | Lama3        | 410    | 386     | 404    | 447    | 388   | 373   | 432   | 421     |
| 307096    | Akr1c19      | 300.99 | 364     | 391    | 293    | 309   | 294   | 396   | 323     |
| 361420    | Taf1c        | 233    | 189     | 232    | 197    | 195   | 200   | 226   | 213     |
| 500262    | Kbtbd8       | 122    | 128     | 125    | 126    | 119   | 118   | 126   | 128     |
| 688757    | Tmem200b     | 38.92  | 23.51   | 31.88  | 28.48  | 32.79 | 34.5  | 31.71 | 21.34   |
| 108349256 | Soga3        | 1809   | 1843    | 1869   | 2200   | 2195  | 1568  | 1896  | 1908    |
| 361715    | Rps6ka4      | 428    | 402     | 429    | 396    | 421   | 428   | 382   | 391     |
| 363064    | Wdr61        | 810    | 782     | 802    | 717    | 752   | 738   | 776   | 783     |
| 287739    | Eftud2       | 1197   | 1368    | 1348   | 1408   | 1277  | 1352  | 1346  | 1240    |
| 317259    | Nono         | 2208   | 2244    | 2256   | 2127   | 2094  | 2240  | 2216  | 2109    |
| 500199    | Ptcd3        | 1005   | 947     | 850    | 964    | 912   | 857   | 993   | 929     |
| 314453    | Wdr20        | 391.66 | 409.56  | 351.11 | 387.47 | 353.4 | 349.3 | 394.6 | 411.93  |
| 299566    | Cyp4f39      | 351    | 384     | 381    | 292    | 374   | 378   | 276   | 352     |
| 309031    | Ikzf5        | 783    | 805     | 742    | 788    | 798   | 685   | 768   | 805     |
| 311441    | Trmt6        | 305    | 334     | 288    | 331    | 326   | 300   | 332   | 275     |
| 116590    | Mapk1        | 4659   | 4596    | 4313   | 4761   | 4457  | 4447  | 4796  | 4265    |
| 312227    | Cnot4        | 966.5  | 906.98  | 940.11 | 1097   | 992.7 | 920.6 | 953.3 | 966.39  |
| 108348156 | NEWGENE_2116 | 523.24 | 494.84  | 483.24 | 499.04 | 448.4 | 464.6 | 529.5 | 518.22  |
| 81800     | St13         | 5258   | 5402    | 4916   | 5470   | 5181  | 4861  | 5295  | 5292    |
| 361729    | Cyb561a3     | 283    | 296     | 280    | 302    | 272   | 336   | 252   | 278     |
| 25613     | Ptprz1       | 1977.3 | 2035.44 | 1959.6 | 2479.4 | 2155  | 1806  | 2277  | 2045.72 |
| 365946    | Slc9b1       | 34     | 19      | 21     | 27     | 26    | 30    | 20    | 23      |
| 295707    | Tnks1bp1     | 2079   | 2089    | 2312   | 2411   | 2242  | 2240  | 2138  | 2095    |
| 361217    | Spin1        | 176.12 | 179.94  | 143.99 | 229.09 | 174.4 | 190.2 | 184   | 166.09  |
| 299113    | Klhdc2       | 1915   | 1869    | 1745   | 1701   | 1672  | 1771  | 1850  | 1794    |
| 309002    | Zfp668       | 176.78 | 169.13  | 142.08 | 157.34 | 164.2 | 166.9 | 161   | 140.48  |
| 100125364 | LOC100125364 | 1012.7 | 882.07  | 876.04 | 772.85 | 881.5 | 836.1 | 893   | 863.2   |
| 502886    | Foxj2        | 635.36 | 610.11  | 593.14 | 680.98 | 634.6 | 639.3 | 602.3 | 593.63  |
| 361745    | Smarca2      | 1648.8 | 1727.72 | 1706.4 | 2051   | 1813  | 1814  | 1733  | 1632.15 |
| 502348    | Stard5       | 44     | 48      | 61     | 50     | 46    | 46    | 61    | 46      |
| 291061    | Riok1        | 534.29 | 549.54  | 547.01 | 478.46 | 500.9 | 477   | 546.2 | 543.71  |
| 313493    | Rgp1         | 964    | 969.9   | 961    | 915    | 935   | 947   | 943   | 910     |
| 678741    | Zc3h4        | 770.21 | 778.79  | 805.12 | 874.14 | 762.5 | 849.3 | 864.3 | 688.78  |
| 293497    | Kctd13       | 400    | 388     | 377    | 362    | 365   | 393   | 368   | 371     |
| 360919    | LOC360919    | 36     | 34      | 41     | 42     | 27    | 47    | 49    | 27      |
| 102552698 | LOC102552698 | 0      | 0       | 0      | 1.53   | 0     | 0     | 1     | 0.5     |
| 499123    | Zfp569       | 0      | 0       | 0      | 1.53   | 0     | 0     | 1     | 0.5     |
| 365468    | Lzts2        | 592.87 | 593.58  | 652.7  | 590.78 | 597.8 | 638   | 530.9 | 615.68  |
| 362094    | Mrps2        | 586    | 613     | 600    | 654    | 571   | 624   | 612   | 598     |
| 306626    | Ing1         | 177    | 154     | 190    | 195    | 178   | 170   | 175   | 179     |
| 313035    | Dnajc8       | 1495   | 1452    | 1372   | 1261   | 1343  | 1366  | 1364  | 1398    |
| 303280    | RGD1307929   | 3966   | 4151    | 4086   | 4294   | 4217  | 4001  | 4059  | 3898    |
| 295105    | Schip1       | 1715   | 1725    | 1620   | 1552   | 1542  | 1633  | 1614  | 1694    |
| 316216    | Taf8         | 287    | 303     | 293    | 245    | 298   | 265   | 263   | 280     |
| 290552    | Rft1         | 196.65 | 190.05  | 198.15 | 176.29 | 196.7 | 169.6 | 185.2 | 194.89  |



|           |              |        |         |        |        |       |       |       |         |
|-----------|--------------|--------|---------|--------|--------|-------|-------|-------|---------|
| 290905    | Col4a1       | 4949   | 6157    | 6974   | 5965   | 4940  | 6720  | 5703  | 6215    |
| 294595    | Ttc37        | 1298.9 | 1212.95 | 1199.9 | 1377.9 | 1284  | 1166  | 1317  | 1223.98 |
| 300361    | Cwc15        | 1970.8 | 1842.47 | 1772.8 | 1788.1 | 1820  | 1699  | 1757  | 1954.97 |
| 79208     | Epha5        | 351    | 332     | 398    | 415    | 376   | 322   | 442   | 327     |
| 308392    | Strn4        | 920    | 932     | 950    | 967    | 896   | 989   | 926   | 885     |
| 294712    | Cenpk        | 40     | 32      | 34     | 36     | 24    | 30    | 35.25 | 50      |
| 685076    | Pgm211       | 7558.8 | 7601.57 | 7111.8 | 8067.7 | 8468  | 6442  | 7471  | 7370.97 |
| 688466    | Usp21        | 356.61 | 290.82  | 368.25 | 332.38 | 312.6 | 325   | 367.5 | 317.02  |
| 84380     | Dhh          | 1468.3 | 1724.91 | 1828.4 | 1381.8 | 1524  | 1631  | 1711  | 1413.24 |
| 81759     | Renbp        | 159    | 168     | 163    | 132    | 122   | 155   | 167   | 166     |
| 102553866 | LOC102553866 | 98.24  | 123.21  | 99.14  | 101.96 | 97.02 | 96.47 | 107.6 | 113.32  |
| 303630    | Wipi1        | 602.32 | 677.08  | 707.75 | 594.61 | 545.7 | 645.4 | 666.8 | 674.2   |
| 246232    | Uxs1         | 1536   | 1451    | 1385   | 1339   | 1426  | 1373  | 1463  | 1339    |
| 103693222 | LOC103693222 | 8      | 18      | 14     | 12     | 13    | 11    | 12    | 15      |
| 297455    | Lsm3         | 353    | 291     | 308    | 245    | 280   | 268   | 316   | 310     |
| 309150    | Carns1       | 742    | 777     | 763    | 634    | 644   | 823   | 666   | 727     |
| 361043    | Tm9sf1       | 514    | 465     | 518    | 482    | 489   | 472   | 505   | 475     |
| 499615    | Lhfp16       | 781    | 763     | 940    | 798    | 705   | 779   | 854   | 881     |
| 282845    | Rnf34        | 597    | 617     | 561    | 570.99 | 549   | 572   | 584   | 595.99  |
| 302987    | Unk1         | 625    | 604     | 563    | 563    | 600   | 557   | 559   | 594     |
| 246326    | Zdhhc2       | 6030   | 5830    | 5679   | 5329   | 5545  | 5350  | 5842  | 5695    |
| 25513     | Pik3r1       | 4115   | 3882.73 | 3841.1 | 4206.3 | 4403  | 4314  | 3803  | 3219.22 |
| 690746    | Spag17       | 5.23   | 2       | 3      | 3.95   | 2.16  | 3.55  | 1.16  | 7.04    |
| 25675     | Hmgcr        | 2858   | 2922    | 2633   | 2960   | 2590  | 2635  | 2859  | 3073    |
| 365476    | Cfap43       | 43     | 33      | 42     | 40     | 39    | 31    | 42    | 43      |
| 312640    | Emc3         | 2038   | 2014    | 1987   | 1759   | 1762  | 1826  | 1977  | 2085    |
| 314856    | Mdm2         | 494    | 574     | 534    | 453    | 524   | 459   | 544   | 489     |
| 500882    | RGD1564548   | 3.78   | 1.35    | 2.19   | 3.22   | 3.04  | 2.13  | 1.66  | 3.51    |
| 296956    | Ube2h        | 2551   | 2658    | 2548   | 2628   | 2412  | 2534  | 2675  | 2567    |
| 305365    | Slc25a52     | 26.48  | 36.02   | 35.33  | 19.75  | 32.04 | 21.62 | 31.11 | 30.58   |
| 367384    | B3gnt11      | 285.15 | 265.8   | 282.46 | 250.81 | 285.4 | 237.4 | 265.6 | 275.3   |
| 686189    | Cabyr        | 558    | 520     | 503    | 531    | 472   | 525   | 539   | 536     |
| 287276    | Sar1b        | 745    | 739     | 784    | 692    | 653   | 747   | 678   | 826     |
| 300751    | Rec114       | 32.95  | 34      | 18.02  | 25     | 14    | 15    | 58    | 20.89   |
| 311591    | Rprd1b       | 399    | 398     | 418    | 424    | 388   | 455   | 371   | 394     |
| 301004    | Qrich1       | 941    | 951     | 987    | 928    | 1001  | 1018  | 879   | 837     |
| 65035     | Nr1i3        | 22.64  | 34.87   | 35.72  | 21.51  | 30.11 | 26.41 | 28.51 | 27.54   |
| 305443    | Trmt44       | 135    | 109     | 124    | 109    | 107   | 131   | 117   | 113     |
| 303586    | Wnt9b        | 32.01  | 21.84   | 26.49  | 26.2   | 27.82 | 22.73 | 33.75 | 20.23   |
| 302899    | Txndc11      | 386.54 | 412.87  | 435.3  | 428.57 | 424.7 | 411.2 | 412.5 | 383.44  |
| 63868     | Hspd1        | 4110   | 4246    | 3778   | 4039   | 3737  | 3795  | 4245  | 4091    |
| 298942    | Dld          | 2937   | 2929    | 2639   | 2844   | 2674  | 2610  | 2860  | 2991    |
| 81536     | Sgpp1        | 1264   | 1223    | 1141   | 1201   | 1189  | 1134  | 1164  | 1251    |
| 308523    | Tshz3        | 458    | 516     | 572    | 630    | 555   | 505   | 529   | 546     |
| 29578     | Hnrnpa1      | 3563.6 | 3361    | 3604.6 | 3399.6 | 3537  | 3291  | 3485  | 3354    |
| 307270    | Me2          | 957.63 | 972.57  | 897.1  | 970.21 | 913.1 | 845.1 | 963.6 | 1004.18 |
| 29561     | Lsamp        | 2332   | 2214.19 | 1860.6 | 2518.6 | 2383  | 2170  | 2309  | 1895.97 |
| 100188933 | Fam229b      | 109    | 100     | 89     | 74     | 94    | 80    | 99    | 92      |
| 288165    | Pcnp         | 2923   | 2741    | 2802   | 2489   | 2719  | 2593  | 2664  | 2773    |
| 81707     | Mmp14        | 1686   | 1846    | 2015   | 2123   | 1713  | 1862  | 1997  | 1954    |
| 100361520 | Rpl37a       | 2554.4 | 2208.78 | 2333.5 | 1756   | 2275  | 1948  | 1955  | 2507.98 |
| 314942    | Csmd3        | 64     | 77      | 85     | 94     | 83    | 53    | 92    | 86      |
| 299334    | Cinp         | 519    | 501     | 499    | 459    | 454   | 490   | 466   | 531     |
| 315023    | Slc25a32     | 257.98 | 259     | 225    | 220    | 220   | 231   | 252   | 241     |
| 304851    | Trmt11       | 437    | 404     | 366    | 400    | 385   | 396   | 415   | 381     |
| 300850    | Gsta4        | 526.87 | 586.9   | 520.88 | 436.72 | 367.2 | 499   | 571.1 | 595.43  |

|           |              |        |         |        |        |       |       |       |         |
|-----------|--------------|--------|---------|--------|--------|-------|-------|-------|---------|
| 316327    | Arid5a       | 127    | 104     | 151    | 182    | 115   | 154   | 157   | 127.49  |
| 689043    | Fam19a4      | 125    | 119     | 97     | 142    | 96    | 125   | 101   | 152     |
| 307288    | Gramd2b      | 229    | 222     | 217    | 191    | 205   | 208   | 224   | 206     |
| 304809    | Kdm5b        | 653    | 674     | 703    | 762    | 663   | 698   | 692   | 687     |
| 308267    | Tab2         | 1213   | 1139    | 1311   | 1334   | 1111  | 1249  | 1283  | 1261    |
| 362919    | Washc5       | 2074   | 2130    | 2074   | 2109   | 2008  | 2093  | 2094  | 2036    |
| 25233     | Akt2         | 921.81 | 894.01  | 937.05 | 821.06 | 856   | 959.8 | 824.9 | 866.81  |
| 266766    | Rcan1        | 1408   | 1394    | 1483   | 1365   | 1287  | 1376  | 1461  | 1421    |
| 317413    | Morf412      | 4157   | 4082    | 4003   | 3801   | 3844  | 3679  | 4137  | 4085    |
| 50568     | Cspg5        | 151    | 111     | 102    | 122    | 127   | 101   | 131   | 118     |
| 297708    | Pyroxd1      | 282.31 | 261.47  | 280.35 | 267.07 | 239.8 | 257   | 282.6 | 291.54  |
| 305287    | Exoc1        | 1506.4 | 1621.74 | 1573.2 | 1450   | 1486  | 1434  | 1542  | 1576.41 |
| 498008    | Hexim1       | 718    | 679     | 696    | 611    | 680   | 679   | 610   | 685     |
| 170922    | Ilk          | 2779   | 2723    | 2747   | 2409   | 2550  | 2666  | 2637  | 2608    |
| 305417    | Lgi2         | 571    | 481     | 499    | 615    | 546   | 514   | 523   | 543     |
| 306665    | Ice1         | 1420   | 1471    | 1503   | 1511   | 1580  | 1310  | 1444  | 1462    |
| 499285    | Adam8        | 120    | 123.1   | 135.01 | 101.04 | 140.1 | 112.1 | 113.1 | 105.04  |
| 308890    | Btdb10       | 792    | 870     | 824    | 773    | 795   | 762   | 842   | 800     |
| 114113    | Pafah1b3     | 474    | 423     | 369    | 418    | 376   | 381   | 429   | 467     |
| 365802    | Selenot      | 4949.9 | 4716.14 | 4595.6 | 4898   | 4769  | 4378  | 4881  | 4779.36 |
| 266732    | Npc1         | 805.56 | 864.2   | 919.26 | 1033.9 | 826.2 | 919.4 | 930.7 | 880.2   |
| 304920    | Klhl20       | 1229.4 | 1194.65 | 1043.9 | 1168.9 | 1224  | 1080  | 1167  | 1080.42 |
| 499219    | LOC499219    | 7.73   | 7.33    | 6.38   | 8.55   | 9.44  | 7.07  | 6.72  | 6.21    |
| 361409    | Rfwd3        | 154    | 163     | 161    | 122    | 140   | 129   | 163   | 157     |
| 300197    | Zfp641       | 157.08 | 149.55  | 184.22 | 134.63 | 144.9 | 131.7 | 172   | 165.43  |
| 363520    | Irak1        | 1583   | 1546    | 1631   | 1463   | 1510  | 1596  | 1542  | 1461    |
| 301535    | Stk11ip      | 487    | 508     | 529    | 497    | 535   | 459   | 490   | 500     |
| 309642    | Def6         | 180    | 204     | 187    | 194    | 211   | 176   | 179   | 185     |
| 25469     | Kcna4        | 537    | 574     | 582    | 603.02 | 562   | 499.1 | 635   | 558.01  |
| 316737    | Lpin2        | 597    | 536     | 578    | 588    | 600   | 536   | 573   | 548     |
| 299612    | RGD1359127   | 267    | 271     | 272    | 233    | 258   | 259   | 264   | 243     |
| 362316    | Cdk14        | 4524   | 4791    | 3974   | 4888   | 4497  | 4393  | 4666  | 4290    |
| 366265    | Rab22a       | 917.62 | 917.51  | 896.46 | 941.06 | 904   | 924   | 885.2 | 892.78  |
| 295543    | Pigk         | 968    | 1021    | 1022   | 957    | 956   | 960   | 1010  | 970     |
| 140661    | Rplp1        | 5138.8 | 4888.68 | 5382   | 3746   | 4536  | 4468  | 4226  | 5578.1  |
| 303369    | Lig3         | 832.33 | 771.08  | 854.29 | 899.96 | 769.9 | 898.3 | 831.6 | 797.06  |
| 292768    | Yif1b        | 618.45 | 871.79  | 683.52 | 653.66 | 643.2 | 658   | 823.6 | 651.32  |
| 292765    | Ggn          | 27.05  | 28      | 25.02  | 22.04  | 27.1  | 25.09 | 23.03 | 25.04   |
| 686103    | Frg1         | 336.94 | 327     | 369    | 310    | 306   | 336.6 | 351   | 325     |
| 25135     | Ncl          | 4013   | 3807    | 3982   | 4037.7 | 3960  | 3678  | 4104  | 3811    |
| 89827     | Ddx39a       | 219    | 208     | 226    | 178    | 178   | 189   | 232   | 217     |
| 305552    | Wdpcp        | 146    | 135     | 128    | 90     | 112   | 140   | 120   | 118     |
| 100360752 | Ccdc122      | 48     | 40      | 34     | 46.14  | 28    | 53    | 35.11 | 49      |
| 58854     | Psmb4        | 2908   | 2881    | 2622   | 2355   | 2608  | 2489  | 2621  | 2854    |
| 108348189 | LOC108348189 | 60.74  | 71.07   | 50.21  | 52.73  | 44.64 | 56.97 | 62.76 | 66.15   |
| 361418    | Hsd1l        | 1835   | 1897    | 1852   | 1688   | 1888  | 1695  | 1787  | 1771    |
| 338474    | Tmem132a     | 921.65 | 965.21  | 1086.6 | 860.72 | 919.6 | 964.9 | 1023  | 858.09  |
| 296360    | Pigt         | 1963   | 2148    | 2242   | 2207   | 2022  | 2173  | 2095  | 2116    |
| 362427    | Mical3       | 637    | 702     | 727    | 781    | 690   | 702   | 715   | 689     |
| 171357    | Ptprg        | 517    | 531     | 540    | 646    | 634   | 539   | 514   | 507     |
| 83577     | Itgae        | 118    | 106     | 84     | 83     | 75    | 86    | 105   | 118     |
| 289924    | Psmd6        | 3427   | 3361    | 3147   | 2968   | 3055  | 2950  | 3297  | 3370    |
| 81920     | Ube2d3       | 5920.1 | 5822.81 | 5669.7 | 5866.9 | 5603  | 5504  | 6027  | 5729.81 |
| 295342    | Rhoc         | 1443   | 1341    | 1498   | 1313   | 1264  | 1325  | 1448  | 1458    |
| 116465    | Ifngr1       | 1160   | 1146    | 1226   | 1112   | 1068  | 1153  | 1181  | 1159    |
| 100909392 | LOC100909392 | 169.65 | 148.06  | 180.78 | 179.23 | 144.1 | 193   | 149   | 179.58  |

|           |              |        |         |        |        |       |       |       |         |
|-----------|--------------|--------|---------|--------|--------|-------|-------|-------|---------|
| 100125374 | Adat3        | 45.79  | 42.15   | 47.66  | 29.64  | 47.39 | 32.49 | 39.31 | 43.1    |
| 308473    | Samd4b       | 852    | 919     | 1033   | 1062   | 957   | 1045  | 924   | 871     |
| 499529    | Ndufs4       | 1747   | 1720    | 1609   | 1544   | 1537  | 1543  | 1668  | 1754    |
| 29709     | Gabrg2       | 3565   | 3263    | 3025   | 3484   | 3279  | 3182  | 3427  | 3212    |
| 313048    | Rbbp4        | 1123.4 | 1085.67 | 1077.9 | 1042   | 973.6 | 1016  | 1165  | 1097.71 |
| 117557    | Tpm3         | 2319   | 2336    | 2426   | 2227   | 2306  | 2316  | 2356  | 2165    |
| 303024    | Fbxw11       | 2996.9 | 2933.11 | 2842.5 | 3129.5 | 3141  | 2865  | 2932  | 2753.43 |
| 25024     | Gipr         | 32     | 30      | 23     | 28     | 26    | 32    | 27    | 26      |
| 292750    | Plekhg2      | 1505   | 1823    | 2089   | 1937   | 1558  | 1913  | 1933  | 1820    |
| 365865    | Pip5k1a      | 562    | 599     | 563    | 539    | 586   | 576   | 572   | 489     |
| 103690996 | LOC103690996 | 1676.8 | 1500.43 | 1243.3 | 1242.2 | 1125  | 1427  | 1332  | 1678.86 |
| 103693323 | LOC103693323 | 1649   | 1688    | 1466   | 1559.9 | 1338  | 1713  | 1518  | 1682    |
| 287150    | Fam173a      | 253    | 289     | 282    | 252    | 234   | 263   | 286   | 274     |
| 303774    | Tnrc6c       | 830    | 905     | 1004   | 949    | 981   | 933   | 861   | 848     |
| 29194     | Chka         | 1101.3 | 1065.96 | 990.8  | 1023.6 | 1005  | 1035  | 1059  | 1009.42 |
| 192154    | Hip1         | 1588   | 1576    | 1516   | 1681   | 1627  | 1559  | 1584  | 1479    |
| 116631    | Nat1         | 72.05  | 59.72   | 94.44  | 59.35  | 49.78 | 68.4  | 83.01 | 79.35   |
| 64634     | Sh3bp4       | 578    | 544     | 560    | 594    | 566   | 540   | 537   | 593     |
| 690853    | Aatk         | 6858.9 | 7157.4  | 7683.8 | 6299.7 | 6463  | 7688  | 7383  | 5973.88 |
| 298675    | Rer1         | 931    | 1007    | 1043   | 892    | 888   | 972   | 979   | 966     |
| 100912391 | LOC100912391 | 0.69   | 4.45    | 1.14   | 0      | 2.61  | 1.09  | 2.47  | 0       |
| 289312    | Acbd3        | 1323   | 1431    | 1371   | 1371   | 1315  | 1346  | 1424  | 1315    |
| 305854    | Sall2        | 477    | 493     | 473    | 561    | 536   | 526   | 440   | 467     |
| 305501    | Ikzf1        | 80.99  | 58.37   | 81.25  | 70.36  | 93.77 | 80.1  | 54.66 | 57.36   |
| 66018     | Pdgfd        | 161    | 136     | 108    | 168    | 147   | 116   | 143   | 157     |
| 311114    | Klhl23       | 368.12 | 351.35  | 346.66 | 328.22 | 330.8 | 322.9 | 341.4 | 374.91  |
| 294287    | Phf1         | 804    | 757     | 737    | 692    | 709   | 687   | 746   | 796     |
| 307540    | Celf4        | 1196.5 | 1182.1  | 1299.8 | 1252.8 | 1334  | 1136  | 1178  | 1197.82 |
| 312559    | Chchd4       | 144.5  | 156.45  | 137.14 | 141.98 | 148.6 | 149.4 | 127.6 | 144.48  |
| 363875    | Rac1         | 7407   | 7769    | 7785   | 7345   | 7070  | 7582  | 7640  | 7488    |
| 79248     | Abca2        | 5443   | 6052    | 5843   | 6001   | 5707  | 6039  | 5734  | 5454    |
| 362697    | Ppp1r21      | 803    | 765     | 690    | 739    | 765   | 752   | 731   | 697     |
| 116500    | Snap29       | 1240   | 1127    | 1197   | 1223   | 1156  | 1165  | 1174  | 1209    |
| 315689    | Hmg20a       | 948    | 1017    | 1022   | 1058   | 1038  | 929   | 1029  | 979     |
| 81732     | Actr3        | 4864   | 4847    | 4663   | 4310   | 4512  | 4380  | 4862  | 4607    |
| 103694537 | LOC103694537 | 176.16 | 178.24  | 190.04 | 193.72 | 174   | 175.9 | 186.9 | 188.56  |
| 360777    | RGD1563400   | 38.59  | 35.05   | 34.83  | 18.61  | 30    | 21.87 | 52.21 | 20.81   |
| 100188936 | Ormdl1       | 177.85 | 191.88  | 174.01 | 154.91 | 165   | 161.8 | 193.8 | 166.01  |
| 303604    | Map3k3       | 643    | 651     | 711    | 610    | 651   | 640   | 653   | 626     |
| 308739    | Rgma         | 302    | 290     | 322    | 307    | 286   | 265   | 293   | 356     |
| 313049    | Zbtb8a       | 82     | 94      | 94     | 79     | 81    | 92    | 79    | 91      |
| 361634    | Ccp110       | 862    | 837     | 833    | 910    | 833   | 746   | 975   | 829     |
| 361485    | Ermard       | 489    | 520     | 471    | 504    | 536   | 452   | 470   | 492     |
| 364975    | Gcdh         | 754    | 831     | 686    | 706    | 679   | 726   | 710   | 811     |
| 299824    | Tbc1d30      | 424    | 411     | 400    | 462    | 417   | 417   | 411   | 423     |
| 499766    | Ttf1         | 182    | 200     | 192    | 188    | 175   | 182   | 192   | 200     |
| 25596     | Rpn1         | 3940   | 3903    | 4042   | 3707   | 3830  | 3685  | 3981  | 3830    |
| 292404    | Phf10        | 296.26 | 282.93  | 332.96 | 325.15 | 296.5 | 292.9 | 318   | 308.8   |
| 289993    | Cdkn3        | 47     | 44      | 61     | 24     | 48    | 48    | 43    | 34      |
| 296618    | Wdr34        | 196    | 174     | 187    | 147    | 179   | 172   | 152   | 189     |
| 498453    | LOC498453    | 182.89 | 222.98  | 173.16 | 147.99 | 185.7 | 176.6 | 171.5 | 180.86  |
| 362485    | Ccne2        | 119    | 128     | 140    | 84     | 114   | 113   | 123   | 113     |
| 360682    | Wdr45b       | 1002   | 956     | 950    | 921    | 987   | 909   | 961   | 907     |
| 311478    | Kif16b       | 960    | 1044    | 1049   | 1131   | 1099  | 949   | 1085  | 980     |
| 100912964 | LOC100912964 | 21     | 8       | 18     | 12     | 15    | 11    | 15    | 17      |
| 304203    | Lrrc8e       | 21     | 35      | 38     | 24     | 22    | 27    | 32    | 35      |

|           |              |        |         |        |        |       |       |       |         |
|-----------|--------------|--------|---------|--------|--------|-------|-------|-------|---------|
| 679837    | Adam12       | 150.54 | 144.89  | 240.74 | 151.91 | 135.4 | 149.9 | 219.2 | 171.97  |
| 688540    | Mast3        | 1114   | 1053    | 1255   | 1188   | 1129  | 1230  | 1141  | 1032    |
| 312667    | Ankrd26      | 168    | 191     | 188    | 222    | 206   | 149   | 199   | 202     |
| 687008    | Pcca         | 344    | 352     | 317    | 289    | 295   | 314   | 317   | 354     |
| 124440    | Rpl41        | 5560   | 4292    | 5414   | 3380   | 4445  | 4021  | 4245  | 5620    |
| 305610    | Em16         | 475.38 | 471.08  | 430.85 | 453.46 | 460.7 | 423.6 | 420.6 | 495     |
| 303201    | Usp22        | 1469   | 1595    | 1354   | 1687   | 1533  | 1499  | 1480  | 1490    |
| 308896    | Usp47        | 1766   | 1700    | 1694   | 1776   | 1691  | 1677  | 1808  | 1643    |
| 291996    | Nob1         | 558.03 | 474.11  | 542.01 | 473.02 | 522.9 | 473   | 498.7 | 518.02  |
| 689779    | Tctn2        | 183    | 149.1   | 178    | 151    | 141   | 173   | 163   | 173     |
| 499015    | Serac1       | 438    | 455     | 408    | 486    | 464   | 409   | 454   | 430     |
| 29480     | Rgs4         | 24372  | 24803   | 23271  | 22034  | 22937 | 21238 | 22595 | 26128   |
| 360619    | Gsdma        | 130.33 | 104.22  | 121.42 | 106.21 | 113   | 110.2 | 119.1 | 112.14  |
| 100366030 | LOC100366030 | 21.6   | 23.82   | 40.05  | 25.91  | 23.82 | 24.76 | 29.68 | 31.26   |
| 366790    | Pym1         | 244    | 314     | 335    | 245    | 288   | 253   | 291   | 287     |
| 307249    | RGD1308601   | 543.08 | 504.32  | 519.75 | 556.2  | 516.7 | 526.6 | 513   | 531.73  |
| 316663    | Fbx117       | 400    | 456     | 394    | 431    | 418   | 413   | 412   | 410     |
| 314273    | Dcaf5        | 1111   | 1120    | 1131   | 1215   | 1130  | 1139  | 1159  | 1073    |
| 361365    | Polr2c       | 548    | 515     | 499    | 426    | 460   | 505   | 486   | 504     |
| 498517    | Khyn         | 278    | 269     | 269    | 269    | 257   | 266   | 281   | 263     |
| 84026     | Dnaja2       | 2415   | 2360    | 2243   | 2206   | 2309  | 2165  | 2316  | 2281    |
| 316602    | Hjurp        | 148    | 124     | 145    | 126    | 130   | 141   | 130   | 133     |
| 25379     | Anp32a       | 562.39 | 526.61  | 584.6  | 508.98 | 526.1 | 496.4 | 509   | 614.99  |
| 25574     | Ubtf         | 1379.5 | 1380.25 | 1513   | 1474.4 | 1414  | 1353  | 1472  | 1412.86 |
| 308345    | Kmt5c        | 601    | 570.99  | 647.84 | 573.3  | 587.7 | 591   | 649   | 526     |
| 361184    | Cars2        | 300    | 296     | 265    | 232    | 253   | 277   | 298   | 247     |
| 315579    | Ubash3b      | 4746   | 4821    | 4836   | 4846   | 5028  | 4547  | 4836  | 4521    |
| 362900    | Rnf19a       | 2244   | 2324    | 2003   | 2298   | 2224  | 2241  | 2061  | 2197    |
| 362671    | RGD1304567   | 212    | 187     | 194    | 136    | 180   | 174   | 188   | 175     |
| 292721    | Erf          | 572    | 541     | 587    | 550    | 601   | 595   | 541   | 476     |
| 287979    | Par1         | 448    | 445     | 404    | 406    | 427   | 405   | 441   | 402     |
| 292306    | Rnaset2      | 662    | 608     | 661    | 563    | 573   | 588   | 646   | 646     |
| 102553825 | LOC102553825 | 251    | 274     | 254    | 316    | 315   | 244   | 269   | 249     |
| 685284    | Hspb11       | 122.97 | 142.45  | 135.46 | 119.93 | 117.8 | 118   | 134.2 | 142.25  |
| 303673    | Mrpl58       | 489    | 475     | 472    | 392    | 441   | 431   | 433   | 493     |
| 108348098 | LOC108348098 | 332.4  | 332.4   | 215.08 | 312.85 | 215.1 | 332.4 | 410.6 | 215.08  |
| 84013     | Hsd17b12     | 2224   | 2312    | 2081   | 1926   | 1902  | 2098  | 2167  | 2236    |
| 100322884 | Nemf         | 1172   | 1135    | 1404   | 1111   | 1234  | 1083  | 1275  | 1151    |
| 300114    | Rt16         | 1495   | 1543    | 1562   | 1639   | 1486  | 1529  | 1481  | 1641    |
| 108348727 | LOC108348727 | 13     | 16      | 26     | 27     | 30    | 9.66  | 21    | 20      |
| 309565    | Med23        | 515    | 483     | 521    | 562    | 499   | 522   | 526   | 500     |
| 290749    | Irf2         | 502.97 | 544.35  | 507.59 | 467.17 | 491.1 | 513.9 | 485.7 | 498.37  |
| 171562    | Erola        | 759.01 | 693.65  | 730.92 | 776.56 | 803   | 665.5 | 721.5 | 721.9   |
| 116699    | Inpp4b       | 219    | 188     | 190.84 | 189    | 211   | 156   | 227   | 180     |
| 24874     | Vhl          | 862    | 876.07  | 739    | 903    | 746   | 805   | 915   | 859     |
| 25696     | Vldlr        | 745    | 695     | 673    | 712    | 713   | 684   | 679   | 703     |
| 306504    | Trmt9b       | 172    | 193     | 191    | 243    | 238   | 177   | 187   | 184     |
| 83835     | Chic2        | 115    | 99      | 111    | 106    | 106   | 112   | 110   | 96      |
| 102551846 | Zfp174       | 85.04  | 86.03   | 83.21  | 78.08  | 77.88 | 83.31 | 92.5  | 73.28   |
| 369017    | Krt5         | 9      | 20      | 8.27   | 9      | 7     | 15.28 | 10.24 | 13      |
| 171102    | Cdc25a       | 266    | 271     | 268    | 306    | 273   | 259   | 308   | 253     |
| 140654    | Rps3         | 3017   | 2924    | 3031   | 2265   | 2775  | 2684  | 2651  | 2945    |
| 116564    | Npr2         | 2382   | 2354    | 2475   | 2547   | 2405  | 2482  | 2453  | 2260    |
| 363136    | Tmem115      | 569.9  | 647     | 644    | 606    | 537   | 692   | 635   | 563     |
| 363243    | Klf7         | 1616.5 | 1573.44 | 1474.6 | 1862.6 | 1873  | 1490  | 1593  | 1464.76 |
| 289623    | Ube2k        | 2023.6 | 1975.41 | 1815.4 | 1942.2 | 1901  | 1905  | 1937  | 1888.36 |

|           |              |        |         |        |        |       |       |       |          |
|-----------|--------------|--------|---------|--------|--------|-------|-------|-------|----------|
| 140639    | Nploc4       | 2226   | 2334    | 2134   | 2223   | 2164  | 2234  | 2481  | 1894     |
| 291439    | Mbd1         | 651    | 672     | 674    | 666    | 628   | 667   | 649   | 676      |
| 100910528 | LOC100910528 | 274    | 200.07  | 197.65 | 199.65 | 211.6 | 196.7 | 197.7 | 251.22   |
| 116568    | Ggt1         | 15     | 10      | 21     | 16     | 12    | 15    | 15    | 19       |
| 361171    | Golga7       | 2931   | 3093    | 2766   | 2633   | 2698  | 2747  | 3073  | 2721     |
| 287417    | Rpl26        | 4320   | 4130    | 4417.7 | 3393.4 | 3799  | 3589  | 4020  | 4591.86  |
| 170567    | Slc38a1      | 2258.4 | 2337.98 | 2069.7 | 2392.3 | 2105  | 2326  | 2338  | 2143.4   |
| 64196     | Safb         | 875.77 | 972.48  | 926.34 | 950.89 | 915.4 | 945   | 875.4 | 929.86   |
| 365601    | Atg5         | 652    | 650     | 573    | 616    | 601   | 623   | 647   | 580      |
| 103694158 | LOC103694158 | 1.04   | 0       | 1.08   | 2.24   | 0     | 1.1   | 3.19  | 0        |
| 308965    | Chp2         | 534    | 482     | 481    | 499    | 491   | 493   | 488   | 492      |
| 29258     | Rps7         | 4597.1 | 4464.57 | 4515   | 3571.6 | 4283  | 4007  | 4183  | 4400.81  |
| 291031    | Fam8a1       | 2318   | 2267    | 2127   | 2170   | 2130  | 2070  | 2247  | 2293     |
| 100361188 | Etfrf1       | 224.84 | 186.45  | 161.94 | 135.33 | 145.9 | 151   | 205.7 | 194.78   |
| 24398     | Gls          | 5909.1 | 5729.84 | 5504   | 5657.1 | 5961  | 5213  | 5789  | 5473.31  |
| 360572    | Rpl23a       | 5858.1 | 5683.8  | 5440.8 | 4675.1 | 4989  | 5115  | 5429  | 5780.08  |
| 83712     | Rbbp7        | 2924   | 2761    | 2668   | 2584   | 2617  | 2466  | 2917  | 2763     |
| 287709    | Rab5c        | 2888   | 2781    | 2985   | 2608   | 2634  | 2757  | 2966  | 2726     |
| 103694867 | LOC103694867 | 32     | 24.1    | 41.75  | 26.17  | 36.17 | 29.36 | 32.25 | 24.27    |
| 288700    | Rab35        | 1147   | 1057    | 1120   | 1085   | 1139  | 1096  | 1042  | 1062     |
| 360998    | LOC360998    | 411.38 | 528.66  | 437.65 | 484.98 | 485.8 | 449.6 | 411.1 | 486.69   |
| 114211    | Mtnrla       | 15     | 17      | 16     | 15     | 18    | 12    | 14    | 18       |
| 298436    | Tspan1       | 47     | 53      | 52     | 37     | 29    | 48    | 47    | 62       |
| 296462    | Mtg2         | 314    | 339     | 318    | 291    | 300   | 339   | 310   | 293      |
| 26955     | Afdn         | 779    | 764     | 868    | 998    | 863   | 781   | 885   | 826      |
| 171413    | Spata6       | 430    | 409     | 404    | 403    | 369   | 402   | 417   | 432      |
| 680825    | LOC680825    | 1.32   | 0       | 1.48   | 1      | 0     | 3.74  | 0     | 0        |
| 140925    | As3mt        | 204    | 189     | 180    | 187    | 178   | 173   | 202   | 195      |
| 497994    | Krt222       | 325.28 | 320.24  | 296.31 | 370.18 | 308.7 | 332.9 | 332.9 | 316.81   |
| 81022     | Stxbp5       | 1431.4 | 1463.31 | 1433.6 | 1536.8 | 1468  | 1409  | 1530  | 1364.76  |
| 25578     | Ywhaz        | 31366  | 31058   | 29414  | 28778  | 30474 | 28644 | 30307 | 29288    |
| 286897    | Dpy30        | 596    | 596     | 547    | 543    | 517   | 491   | 567   | 671      |
| 315283    | Pced1b       | 176.25 | 188.27  | 173.65 | 188.31 | 189.2 | 208   | 175   | 142.82   |
| 117043    | RragB        | 468.23 | 605.55  | 354.9  | 522.13 | 576.9 | 379.4 | 585   | 378.73   |
| 25670     | I115         | 85.87  | 70      | 72.31  | 72.48  | 48.64 | 87.22 | 87.49 | 72.57    |
| 117541    | Smu1         | 807    | 788     | 795    | 719    | 788   | 698   | 754   | 820      |
| 64313     | Oat          | 2595   | 2460    | 2394   | 2265   | 2203  | 2324  | 2549  | 2485     |
| 171060    | I113ra2      | 64     | 20      | 23     | 20     | 41    | 29    | 27    | 28       |
| 25747     | Ppara        | 186.89 | 208.14  | 185.74 | 202.27 | 204.8 | 213.7 | 151.1 | 201.15   |
| 360564    | Tax1bp3      | 1594   | 1760    | 1808   | 1380   | 1360  | 1693  | 1649  | 1737     |
| 310849    | Sgms2        | 169    | 161     | 183    | 186    | 192   | 162   | 199   | 135      |
| 304766    | Ubxn4        | 2413   | 2594    | 2416   | 2554   | 2409  | 2489  | 2559  | 2363     |
| 25664     | Pparg        | 49     | 80      | 50     | 76     | 54    | 75    | 75    | 47       |
| 296394    | Dpml         | 804    | 723     | 667    | 676    | 643   | 684   | 749   | 749      |
| 304731    | Tmem185b     | 397    | 388     | 362    | 389    | 342   | 397   | 390   | 383      |
| 25530     | Rab12        | 169    | 180     | 191    | 164    | 168   | 185   | 172   | 168      |
| 287420    | Pfas         | 762.2  | 773.79  | 789.33 | 772.77 | 801.9 | 749.5 | 762.5 | 735.87   |
| 25468     | Kcna2        | 12531  | 12496.2 | 11548  | 15000  | 13352 | 11562 | 13700 | 12157.39 |
| 286971    | Fut11        | 134    | 153     | 152    | 139    | 147   | 119   | 143   | 160      |
| 313873    | Fam98a       | 1201   | 1212    | 1127   | 1156   | 1097  | 1189  | 1215  | 1122     |
| 83828     | Gtf2a2       | 379.48 | 334.64  | 342.89 | 247.09 | 302.1 | 314.5 | 333.9 | 333.34   |
| 170905    | Lfng         | 268    | 253     | 366    | 208    | 292   | 275   | 245   | 266      |
| 291320    | Mindy3       | 4194   | 3943    | 3634   | 3766   | 3736  | 3716  | 3876  | 3968     |
| 493865    | Gimap9       | 60.44  | 61.06   | 64.48  | 45.47  | 63.3  | 50.66 | 43.01 | 70.89    |
| 292537    | Oscar        | 14.25  | 11.91   | 19.47  | 9.19   | 18.41 | 9.97  | 14.16 | 11.43    |
| 500989    | Zpr1         | 695    | 704     | 699    | 611    | 741   | 619   | 667   | 640      |



|           |              |        |         |        |        |       |       |       |         |
|-----------|--------------|--------|---------|--------|--------|-------|-------|-------|---------|
| 292199    | Kiaa0408L    | 3396   | 3356    | 3469   | 3716   | 3444  | 3492  | 3437  | 3348    |
| 25109     | Cd1d1        | 54     | 34      | 61     | 45     | 52    | 42    | 42    | 55      |
| 367214    | Oard1        | 203    | 199     | 197    | 177    | 181   | 199   | 194   | 190     |
| 303639    | Abca6        | 1179.6 | 1182.25 | 1086.9 | 1261.9 | 1206  | 926.6 | 1215  | 1290.47 |
| 81519     | Mgat1        | 604    | 608     | 624    | 561    | 600   | 568   | 595   | 597     |
| 29361     | Sox10        | 2738   | 3143    | 3185   | 2790   | 2800  | 3059  | 2715  | 3099    |
| 286888    | Wfdc2        | 77.97  | 64.66   | 56.75  | 62.89  | 62    | 76.14 | 59.09 | 61      |
| 307459    | Arhgap26     | 470.9  | 490.46  | 508    | 535    | 479.7 | 488   | 502.3 | 503.48  |
| 300663    | Ccdc153      | 14.8   | 11.28   | 13.02  | 12.89  | 14.34 | 7.47  | 12.05 | 17.33   |
| 499020    | Wtap         | 1586   | 1504    | 1496   | 1459   | 1478  | 1371  | 1566  | 1537    |
| 50577     | Galr1        | 109    | 90      | 125    | 131    | 149   | 78    | 136   | 85      |
| 63997     | Slc29a1      | 278    | 296     | 266    | 266    | 280   | 302   | 258   | 249     |
| 361344    | Mppel        | 417    | 443     | 426    | 406    | 420   | 418   | 427   | 401     |
| 304017    | Tomm70       | 2249   | 2270    | 2061   | 2401   | 2377  | 1936  | 2390  | 2140    |
| 364823    | Klhl14       | 86.87  | 92.01   | 123    | 106.36 | 88.9  | 113.9 | 116.7 | 82.51   |
| 85434     | Cdc5l        | 956    | 987     | 981    | 994    | 952   | 947   | 970   | 989     |
| 170751    | Xpnpep1      | 1399   | 1380    | 1363   | 1214   | 1179  | 1342  | 1336  | 1417    |
| 29398     | Stk10        | 459.47 | 469.49  | 567.2  | 508.91 | 487.9 | 525.1 | 490.3 | 471.14  |
| 308069    | Slc12a7      | 860    | 915     | 957    | 929    | 832   | 857   | 930   | 986     |
| 299246    | Ttc8         | 219    | 207     | 220    | 204    | 192   | 207   | 228   | 210     |
| 360772    | Zfand2a      | 1323.7 | 1271.68 | 1225.5 | 1181.2 | 1224  | 1185  | 1247  | 1269.53 |
| 311647    | Prex1        | 1497   | 1538    | 1523   | 1789   | 1551  | 1566  | 1548  | 1585    |
| 29241     | Adcy8        | 275    | 285     | 303    | 315    | 291   | 267   | 296   | 306     |
| 288647    | Dhx37        | 295    | 341     | 308    | 366    | 326   | 314   | 324   | 326     |
| 311529    | Ninl         | 131    | 126     | 127    | 140    | 133   | 124   | 149   | 110     |
| 84589     | Rab9a        | 502.23 | 422.6   | 434.86 | 441.86 | 411.8 | 439.4 | 464.2 | 458.73  |
| 690253    | Preli3a      | 425.97 | 416.36  | 383.23 | 457.1  | 388   | 469.7 | 419   | 380.35  |
| 24600     | Nos3         | 140.06 | 150.86  | 160.32 | 118.41 | 156.2 | 137.7 | 151.7 | 115.43  |
| 58940     | H2afz        | 674    | 681     | 660    | 542    | 627   | 583   | 612   | 696     |
| 100362980 | LOC100362980 | 305.28 | 255.46  | 281.33 | 267.24 | 253.7 | 277.8 | 309.7 | 251.3   |
| 362164    | Atg13        | 1371   | 1455    | 1293   | 1397   | 1418  | 1307  | 1298  | 1409    |
| 315126    | RGD1359634   | 152.51 | 105.83  | 94.76  | 88.59  | 90.39 | 128   | 102.7 | 113.84  |
| 246136    | Man2c1       | 663    | 644     | 633    | 632    | 597   | 675   | 656   | 605     |
| 286975    | Skap1        | 13     | 18      | 15     | 20     | 20    | 18    | 15    | 12      |
| 59268     | Ip6k2        | 975    | 906     | 871    | 878    | 880   | 930   | 896   | 869     |
| 292101    | Sprtn        | 278    | 234     | 273    | 207    | 234   | 255   | 248   | 240     |
| 100911682 | Actl10       | 145    | 119     | 153    | 113    | 124   | 136   | 134   | 128     |
| 24854     | Clu          | 15896  | 15763   | 18955  | 17134  | 16425 | 17338 | 16910 | 16053   |
| 301622    | Dtymk        | 614    | 527     | 502    | 413    | 502   | 448   | 557   | 518     |
| 50998     | Coil         | 224    | 203     | 227    | 210    | 200   | 239   | 211   | 201     |
| 313583    | Sf3a3        | 619    | 586     | 560    | 562    | 564   | 585   | 566   | 577     |
| 362228    | Naa20        | 852    | 831     | 806    | 703    | 715   | 793   | 779   | 857     |
| 289352    | Eprs         | 3733   | 3965    | 3925.3 | 3975.3 | 3779  | 3812  | 4094  | 3679    |
| 108348230 | LOC108348230 | 98.9   | 123.27  | 119.64 | 131.21 | 131.2 | 105.5 | 121.6 | 107.69  |
| 300211    | Fkbp11       | 56     | 61      | 91     | 59     | 72    | 75    | 53    | 63      |
| 286936    | Pcytlb       | 2250.1 | 2135.77 | 1993.4 | 2258.1 | 2138  | 2087  | 2186  | 2097.06 |
| 84686     | Ppp1r9b      | 2012   | 2093    | 2245   | 2292   | 2227  | 2124  | 1994  | 2168    |
| 24775     | Shbg         | 109    | 111     | 107    | 75     | 115   | 103   | 94    | 84      |
| 155918    | Lcp2         | 149.27 | 146.12  | 149.76 | 134.8  | 165.3 | 161.3 | 118   | 126.67  |
| 94167     | Prdx6        | 1203   | 1261    | 1207   | 1090   | 1056  | 1235  | 1218  | 1181    |
| 500233    | Exoc6b       | 2292   | 2471    | 2131   | 2648   | 2361  | 2345  | 2504  | 2190    |
| 362787    | Mok          | 95     | 86      | 86     | 69     | 77    | 92    | 86    | 76      |
| 305452    | Fam193a      | 922.4  | 967.92  | 983.33 | 1125   | 985.4 | 1062  | 989.8 | 901.82  |
| 288587    | Alkbh4       | 115    | 101     | 101    | 87     | 100   | 110   | 93    | 95      |
| 289990    | Psmc6        | 3020.4 | 3011.76 | 2782.4 | 2722   | 2696  | 2565  | 3029  | 3075.67 |
| 498902    | Cmt4         | 196    | 220     | 207    | 253    | 240   | 181   | 221   | 221     |



|           |              |        |         |        |        |       |       |       |         |
|-----------|--------------|--------|---------|--------|--------|-------|-------|-------|---------|
| 498418    | Wdr92        | 240    | 242     | 241    | 221    | 225   | 241   | 230   | 234     |
| 684122    | Asap3        | 329    | 275     | 337    | 409    | 308   | 301   | 332   | 389     |
| 689765    | B3glct       | 533    | 523     | 499    | 538    | 503   | 513   | 524   | 522     |
| 289362    | Gpatch2      | 403.35 | 403.6   | 417.18 | 445.36 | 409.2 | 431.1 | 425.7 | 378.81  |
| 313219    | Zfp189       | 205    | 158     | 160    | 156    | 180   | 143   | 186   | 160     |
| 497867    | Nudt1611     | 426    | 385     | 441    | 378    | 397   | 410   | 406   | 393     |
| 287721    | Vat1         | 6076   | 5896    | 6483   | 5389   | 6666  | 6007  | 5245  | 5575    |
| 685539    | Gtf3c4       | 562.41 | 608.62  | 587.84 | 586.17 | 582.9 | 535   | 597.2 | 595.48  |
| 311468    | Taspl        | 148.06 | 202.22  | 145    | 166.72 | 181.6 | 145   | 170.7 | 155     |
| 297481    | Eif4e3       | 300.95 | 304.1   | 296.12 | 277.31 | 268.5 | 314.9 | 291.6 | 286.13  |
| 304294    | Rnf216       | 496    | 538     | 504    | 575    | 504   | 522   | 525   | 531     |
| 314386    | Gpr68        | 471.35 | 452.14  | 469.87 | 404.33 | 409   | 467.7 | 377.3 | 517.33  |
| 313582    | Fhl3         | 165    | 188     | 239    | 158    | 147   | 243   | 193   | 156     |
| 502479    | Afg11        | 99     | 92      | 85     | 65     | 73    | 78    | 94    | 91      |
| 685243    | Ackr4        | 30.89  | 37.48   | 51.33  | 23.62  | 33.5  | 44.75 | 28.67 | 34.3    |
| 287986    | Eif4g1       | 6172   | 6373.71 | 6615.9 | 7264   | 6510  | 6686  | 6467  | 6374.65 |
| 296121    | Usp8         | 2254   | 2284    | 2216   | 2474   | 2331  | 2225  | 2365  | 2172    |
| 361957    | Mfsd1        | 1159   | 1076    | 1108   | 1032   | 1094  | 1114  | 1029  | 1074    |
| 81520     | Marcks11     | 1800.6 | 1923.07 | 1979.6 | 1766   | 1676  | 1911  | 1883  | 1889.68 |
| 305544    | Aftph        | 1397   | 1494    | 1391   | 1398   | 1332  | 1396  | 1523  | 1346    |
| 103692087 | Atp6v1fnb    | 19.12  | 19.94   | 19.92  | 16.36  | 20.38 | 12.85 | 12.85 | 28.16   |
| 311799    | Ndor1        | 248    | 198     | 231    | 214    | 216   | 225   | 244   | 193     |
| 291406    | Zfp516       | 717    | 666     | 685    | 743    | 724   | 663   | 732   | 651     |
| 296619    | Pkn3         | 123.34 | 107.94  | 114.8  | 103.34 | 114.9 | 96.82 | 128.3 | 102.9   |
| 361401    | Pla2g15      | 374    | 377     | 409    | 354    | 391   | 378   | 331   | 392     |
| 287109    | Kctd5        | 1051   | 987     | 1013   | 876    | 1023  | 891   | 927   | 1029    |
| 304290    | Kdelr2       | 820    | 830     | 915    | 880    | 781   | 894   | 860   | 860     |
| 304282    | Baiap211     | 887    | 863     | 890    | 943    | 855   | 918   | 920   | 838     |
| 94201     | Cdk4         | 912    | 952     | 974    | 819    | 803   | 923   | 899   | 979     |
| 311396    | Atp8b4       | 19     | 13      | 29     | 8      | 12    | 11    | 31    | 14      |
| 295500    | Metap1       | 872    | 809     | 778    | 784    | 809   | 764   | 807   | 816     |
| 287531    | Rilp         | 92.37  | 88.12   | 70.78  | 64.16  | 63.53 | 72.7  | 84.71 | 89.92   |
| 361005    | Chchd1       | 520    | 519     | 533    | 430    | 496   | 441   | 471   | 565     |
| 292543    | LOC292543    | 3.93   | 0       | 2.06   | 4.37   | 2.5   | 2.41  | 4.27  | 1.03    |
| 313554    | Foxj3        | 820.31 | 782.64  | 860.17 | 850.79 | 864   | 756.5 | 832.7 | 812.83  |
| 116696    | St8sia4      | 68     | 75      | 65     | 69     | 67    | 49    | 80    | 77      |
| 500558    | Gmeb1        | 185    | 197     | 217    | 232    | 214   | 202   | 198   | 205     |
| 500847    | Dtx3         | 986    | 863     | 899    | 859    | 913   | 888   | 867   | 887     |
| 296091    | Pla2g4e      | 93     | 75      | 55     | 124    | 68    | 93    | 96    | 85      |
| 308795    | Tlnrd1       | 555    | 552     | 604    | 512    | 599   | 538   | 525   | 529     |
| 362599    | Trappc3      | 1004   | 893     | 923    | 796    | 862   | 847   | 894   | 961     |
| 311361    | Wdr76        | 129    | 151     | 130    | 148    | 141   | 136   | 145   | 128     |
| 83531     | Vdac2        | 4373   | 4266    | 4058   | 3707   | 3816  | 4082  | 4096  | 4175    |
| 361274    | Nudt5        | 198    | 224     | 177    | 199.41 | 184   | 191   | 214   | 198     |
| 312444    | Immt         | 2817   | 2815    | 2617   | 2690   | 2582  | 2698  | 2884  | 2619    |
| 689130    | LOC689130    | 7095.1 | 6199.58 | 6674.6 | 6247.1 | 5545  | 6187  | 6533  | 7577.21 |
| 311952    | Galnt11      | 968    | 959     | 859    | 866    | 920   | 855   | 875   | 950     |
| 102550609 | LOC102550609 | 32.29  | 9.53    | 16.99  | 33.99  | 21.35 | 36.87 | 10.12 | 23.14   |
| 81531     | Pfn2         | 2412   | 2095.22 | 1924.7 | 2143.9 | 2607  | 1900  | 1827  | 2119.53 |
| 294499    | Fam241b      | 334.05 | 328.73  | 308.08 | 287.53 | 304.8 | 291.3 | 302.6 | 341.81  |
| 500368    | Far2         | 136.36 | 89.93   | 84.72  | 102.63 | 99.04 | 94.51 | 101.7 | 112.57  |
| 312108    | Ophn1        | 904    | 886     | 866    | 868    | 898   | 830   | 816   | 930     |
| 360803    | Snrnp35      | 319    | 272     | 292    | 246    | 286   | 280   | 278   | 269     |
| 116501    | Slc9a3r2     | 2338.4 | 2423.77 | 2336.7 | 2265.9 | 2336  | 2419  | 2287  | 2190.16 |
| 25363     | Acadv1       | 1476   | 1488    | 1468   | 1364   | 1336  | 1459  | 1498  | 1421    |
| 309197    | Hnrnpul2     | 1578   | 1665    | 1708   | 1851   | 1774  | 1636  | 1730  | 1566    |

|           |              |        |         |        |        |       |       |       |         |
|-----------|--------------|--------|---------|--------|--------|-------|-------|-------|---------|
| 315741    | Paqr5        | 564.63 | 521.35  | 576.01 | 595.1  | 536.5 | 544.1 | 541.9 | 602.77  |
| 313594    | Ago1         | 501.17 | 523.53  | 563.61 | 544.52 | 555.8 | 519.1 | 485.3 | 542.49  |
| 83841     | Sdcbp        | 10866  | 10714   | 9353   | 9418   | 9653  | 9392  | 10048 | 10689   |
| 58815     | Glrx3        | 3504   | 3388    | 3019   | 2935   | 3040  | 2874  | 3285  | 3466    |
| 246323    | Aard         | 29     | 36      | 33     | 44     | 40    | 29    | 39    | 32      |
| 289994    | Cnih1        | 2530   | 2413    | 2397   | 2176   | 2255  | 2185  | 2479  | 2463    |
| 361811    | Srpk1        | 1245   | 1268    | 1196   | 1265   | 1296  | 1167  | 1274  | 1167    |
| 690777    | Rufy2        | 2082.3 | 2083.08 | 1883.3 | 2040.6 | 2039  | 2008  | 1961  | 1966.83 |
| 29726     | Slc22a5      | 292.95 | 262.92  | 275.85 | 299.97 | 256.6 | 301   | 272.3 | 285.94  |
| 360464    | Parn         | 400    | 397     | 389    | 381    | 386   | 375   | 397   | 387     |
| 365252    | Zdhhc13      | 491    | 466     | 435    | 461    | 411   | 476   | 470   | 470     |
| 498434    | Gpr75        | 124    | 135     | 114    | 126    | 124   | 119   | 127   | 122     |
| 363068    | Comm4        | 684    | 601     | 586    | 484    | 601   | 584   | 579   | 558     |
| 314548    | Osgepl1      | 526    | 419.78  | 394.68 | 364.04 | 411.5 | 398.6 | 442.9 | 427.64  |
| 294900    | Tpd52        | 5667   | 5777    | 5494   | 5201   | 5506  | 5087  | 5599  | 5637    |
| 363584    | RGD1560464   | 377.01 | 351.45  | 310.75 | 320.2  | 338.2 | 348.5 | 349.3 | 304.5   |
| 296751    | Pus7         | 232.73 | 211.74  | 225.62 | 239.74 | 200.3 | 227.7 | 231   | 238.08  |
| 102238592 | Ak6          | 171.52 | 150.58  | 175.64 | 163.18 | 147.3 | 138.7 | 186.3 | 179.43  |
| 25621     | Cd81         | 13290  | 13625   | 14536  | 12184  | 13177 | 13654 | 13334 | 12725   |
| 306991    | Vps41        | 6222   | 6040    | 5643   | 5775   | 5843  | 5281  | 6156  | 6072    |
| 362957    | Ankrd54      | 222    | 185     | 180    | 209    | 201   | 188   | 204   | 192     |
| 498193    | Fam222a      | 135.02 | 153     | 148    | 140    | 133   | 163   | 119   | 153.04  |
| 100196907 | Tmem59       | 4111   | 3970    | 3798   | 3683   | 3597  | 3784  | 3998  | 3968    |
| 83765     | Rtn4         | 24416  | 24432.9 | 22857  | 25804  | 24792 | 23077 | 25288 | 23005   |
| 362973    | Parvb        | 2247   | 2391    | 2243   | 2469   | 2438  | 2159  | 2217  | 2407    |
| 117268    | Khdrbs1      | 1662   | 1664    | 1760   | 1585   | 1563  | 1711  | 1629  | 1676    |
| 363004    | Prr13        | 1991   | 2005    | 2001   | 1766   | 2091  | 1854  | 1812  | 1899    |
| 114481    | Dnajc14      | 1251.5 | 1243    | 1260.6 | 1327   | 1256  | 1184  | 1283  | 1289.44 |
| 81754     | Rabla        | 3980   | 3945    | 3815   | 3665   | 3700  | 3625  | 3915  | 3953    |
| 58974     | Gabarap      | 3652   | 3470    | 3436   | 3186   | 3295  | 3271  | 3369  | 3621    |
| 362683    | Heatr5b      | 919    | 959     | 1017   | 1054   | 984   | 951   | 1030  | 930     |
| 361719    | Spindoc      | 206    | 208     | 209    | 182    | 190   | 226   | 182   | 196     |
| 362275    | B4galt5      | 510    | 542     | 629    | 517    | 527   | 540   | 554   | 547     |
| 291733    | Slc39a6      | 1040   | 1067    | 1196   | 1240   | 1182  | 1075  | 1115  | 1109    |
| 297995    | Chmp5        | 1722   | 1727    | 1649   | 1575   | 1580  | 1568  | 1704  | 1730    |
| 680080    | Tomm5        | 1238   | 1168    | 1098   | 1071   | 1181  | 1089  | 1085  | 1158    |
| 499083    | Zscan18      | 224    | 210     | 237    | 215    | 230   | 194   | 241   | 209     |
| 363545    | Naa60        | 1253   | 1286    | 1138   | 1292   | 1211  | 1247  | 1195  | 1248.73 |
| 287877    | Pycr1        | 70     | 102     | 66     | 59     | 75    | 85    | 69    | 64      |
| 299827    | Tbk1         | 929    | 882     | 786    | 820    | 829   | 844   | 859   | 839     |
| 361202    | Gkap1        | 403    | 414     | 396    | 422    | 399   | 322   | 447   | 445     |
| 310635    | Arhgef2      | 771    | 752     | 778    | 826    | 781   | 789   | 730   | 785     |
| 307893    | Gan          | 441.67 | 473.44  | 483.48 | 597.89 | 587.6 | 403.5 | 483.7 | 494.81  |
| 291713    | Rit2         | 1347   | 1296    | 1141   | 1132   | 1192  | 1190  | 1231  | 1237    |
| 100359967 | Zfp560       | 332    | 274     | 230    | 282    | 252   | 277   | 271   | 303     |
| 363213    | Ccdc115      | 377.39 | 352.57  | 386.98 | 318.82 | 343.3 | 353.8 | 353.2 | 366.22  |
| 690585    | Alyref       | 656    | 634     | 699    | 551    | 616   | 595   | 674   | 621     |
| 24710     | Rbp2         | 73     | 85      | 84     | 58     | 71    | 59    | 92    | 74      |
| 361799    | Dxo          | 135    | 124     | 133    | 133    | 144   | 143   | 121   | 110     |
| 102547753 | LOC102547753 | 29.29  | 31.86   | 31.93  | 31.46  | 35.2  | 13.11 | 36.32 | 38.25   |
| 363720    | Chmp2b       | 848    | 876     | 876    | 854    | 797   | 743   | 976   | 892     |
| 498951    | I134         | 597.02 | 627.7   | 808.36 | 651.71 | 721.1 | 700.9 | 570.3 | 656.74  |
| 360854    | Arpc5        | 3081   | 3147    | 3072   | 2650   | 2767  | 2824  | 3053  | 3147    |
| 362566    | Lrrc41       | 1025   | 1086    | 1028   | 995    | 1042  | 1007  | 1017  | 1013    |
| 114524    | Ntn3         | 108    | 115     | 98     | 130    | 131   | 91    | 103   | 120     |
| 501069    | Golga4       | 1624   | 1637    | 1492   | 1864   | 1671  | 1530  | 1727  | 1601    |

|           |              |        |         |        |        |       |       |       |         |
|-----------|--------------|--------|---------|--------|--------|-------|-------|-------|---------|
| 303122    | RGD1310352   | 1945   | 1856    | 1798   | 1776   | 1759  | 1770  | 1874  | 1874    |
| 313166    | Nfx1         | 931.77 | 875     | 899.01 | 926.17 | 908   | 896.8 | 887.2 | 891.73  |
| 300723    | Hykk         | 101.5  | 63.04   | 72.94  | 96.86  | 103.1 | 71.79 | 82.72 | 72.34   |
| 297902    | Gem          | 45     | 51      | 51     | 79     | 59    | 57    | 60    | 47      |
| 361625    | Nrip3        | 3722   | 3687    | 3720   | 3792   | 4038  | 3581  | 3643  | 3461    |
| 497757    | Gucylal      | 207    | 138     | 172    | 162    | 140   | 202   | 179   | 149     |
| 553106    | Ncald        | 3572   | 3751    | 3529   | 3562   | 3787  | 3402  | 3378  | 3656    |
| 295661    | Spc25        | 41     | 44      | 48     | 18     | 41    | 35    | 34    | 39      |
| 304332    | Dnaaf5       | 266.81 | 243.44  | 258.14 | 286.21 | 254.4 | 280.4 | 227.4 | 278.46  |
| 27137     | Eif2ak1      | 1193.4 | 1299.35 | 1126.6 | 1272.4 | 1227  | 1206  | 1157  | 1237.01 |
| 298992    | Noval        | 162    | 184     | 200.99 | 209    | 163   | 175   | 215   | 193     |
| 84424     | Tle3         | 687    | 746     | 813    | 782    | 706   | 809   | 794   | 679     |
| 25062     | Gpd2         | 1062   | 1095.28 | 1063   | 1111.6 | 1154  | 1022  | 1029  | 1070.02 |
| 296753    | Srp2         | 1841   | 1835    | 1766   | 1904   | 1826  | 1778  | 1882  | 1763    |
| 685888    | Sdhaf4       | 317    | 289     | 263    | 267    | 283   | 259   | 283   | 296     |
| 102553881 | LOC102553881 | 208.19 | 200.79  | 219.51 | 464.36 | 304.9 | 181.7 | 333.9 | 258     |
| 499956    | Uck11        | 484    | 465     | 448    | 422    | 423   | 474   | 456   | 442     |
| 317646    | Rpl13a       | 6787   | 6343    | 6549   | 5445   | 5999  | 5822  | 6144  | 6827.62 |
| 114766    | Phb2         | 1273   | 1384    | 1194   | 1085   | 1158  | 1267  | 1257  | 1189    |
| 84488     | Fgf13        | 9138   | 8647    | 8347   | 7927   | 8186  | 7857  | 8750  | 8819    |
| 291565    | Afap111      | 290    | 286     | 265    | 308    | 297   | 267   | 267   | 303     |
| 114859    | Eif2ak4      | 414    | 469     | 484    | 474    | 412   | 470   | 496   | 439     |
| 25317     | Fgf1         | 12834  | 14142   | 12345  | 13779  | 12459 | 13436 | 13263 | 13250   |
| 361178    | Tfdp1        | 579    | 509     | 581    | 480    | 528   | 519   | 554   | 520     |
| 362393    | Antxr1       | 318    | 394     | 452    | 449    | 338   | 483   | 383   | 388     |
| 108350133 | LOC108350133 | 1433   | 1367    | 1253   | 1710   | 1661  | 980   | 1478  | 1569    |
| 306695    | Zfp367       | 340    | 358     | 292    | 318    | 337   | 297   | 343   | 314     |
| 690211    | Dip2a        | 873    | 839     | 875    | 954    | 882   | 848   | 941   | 824     |
| 363159    | Gpd11        | 345    | 330     | 346    | 365    | 354   | 309   | 343   | 362     |
| 302671    | Ap1s2        | 5219   | 5082    | 4463   | 4756   | 4610  | 4785  | 4933  | 4939    |
| 304545    | Oasl         | 116    | 90      | 83     | 97     | 81    | 136   | 99    | 65      |
| 58946     | Robo1        | 495    | 496     | 534    | 637    | 562   | 518   | 539   | 515     |
| 315422    | Mtmr2        | 2505   | 2503    | 2264   | 2382   | 2332  | 2603  | 2400  | 2194    |
| 362883    | Slc35e3      | 1174   | 1169    | 1191   | 1180   | 1134  | 1162  | 1118  | 1239    |
| 25418     | Dpysl3       | 3108   | 3024    | 3159   | 3858   | 3494  | 3021  | 3282  | 3182    |
| 100360638 | Zfp780b-ps1  | 177.95 | 167.06  | 195.15 | 177.55 | 186.1 | 175.5 | 156.8 | 190.08  |
| 360462    | Ntan1        | 2153.5 | 2023.91 | 1943.4 | 1755.1 | 1896  | 1815  | 2000  | 2062.81 |
| 117520    | Oxr1         | 7007.9 | 6678.98 | 5995   | 7326.9 | 6598  | 6246  | 7072  | 6744.95 |
| 498174    | Nipsnap2     | 1680   | 1589    | 1623   | 1542   | 1542  | 1621  | 1608  | 1580    |
| 140808    | Manea        | 864    | 867     | 946    | 890    | 924   | 826   | 881   | 890     |
| 619374    | Jam2         | 1115   | 1266    | 1035   | 1099   | 1231  | 1106  | 1093  | 1027    |
| 94165     | Cabin1       | 912.3  | 924.67  | 990.26 | 997.22 | 991   | 972.1 | 876.5 | 935.83  |
| 288785    | Bloc1s1      | 605    | 574     | 576    | 433    | 534   | 525   | 522   | 579     |
| 301246    | Polr1c       | 298    | 279     | 259    | 261    | 269   | 275   | 255   | 284     |
| 308508    | Uba2         | 1352   | 1259    | 1186   | 1140   | 1170  | 1191  | 1259  | 1254    |
| 114118    | Gng4         | 760.09 | 900.8   | 796.84 | 785.59 | 879.5 | 731   | 820.7 | 770.85  |
| 499979    | Fam185a      | 315.65 | 361.76  | 309.71 | 285.66 | 337.4 | 289.6 | 327.7 | 301.79  |
| 89803     | Sfrp4        | 237    | 257     | 328    | 200    | 266   | 245   | 303   | 195     |
| 100365921 | LOC100365921 | 158    | 173     | 157    | 141    | 165   | 137   | 168   | 151     |
| 680711    | Nxpe5        | 7.59   | 2.94    | 3.42   | 4.93   | 4.09  | 4.59  | 7.78  | 2.18    |
| 108348225 | LOC108348225 | 85     | 75      | 72     | 83     | 78    | 59    | 79    | 95      |
| 246327    | Prim1        | 892.15 | 463.09  | 598.65 | 369.46 | 391.5 | 420   | 653.7 | 828.7   |
| 362746    | Dnaaf2       | 269.58 | 270.46  | 244.87 | 265.11 | 244.9 | 241.7 | 267   | 283.15  |
| 25445     | Fos11        | 27     | 44      | 56     | 31     | 35    | 39    | 33    | 49      |
| 287925    | Pkp2         | 41     | 41      | 38     | 38     | 43    | 41    | 38    | 34      |
| 360718    | Popdc2       | 46     | 71      | 60     | 60     | 64    | 60    | 53    | 57      |

|           |              |        |         |        |        |       |       |       |         |
|-----------|--------------|--------|---------|--------|--------|-------|-------|-------|---------|
| 297334    | Mrpl35       | 547.4  | 553.49  | 517.94 | 484.76 | 507.2 | 496.7 | 496.9 | 576.25  |
| 687147    | Ric3         | 1291.6 | 1317.18 | 1027   | 1254.4 | 1144  | 1246  | 1254  | 1184.54 |
| 316736    | Emilin2      | 72     | 72      | 189    | 63     | 111   | 89    | 105   | 86      |
| 140693    | Plcd4        | 1974.6 | 1932.97 | 1663.9 | 1950.7 | 1756  | 1722  | 1898  | 2051.17 |
| 316005    | Arih2        | 914.59 | 961.32  | 853.5  | 884.62 | 898.6 | 932.5 | 893.8 | 843.6   |
| 287608    | Supt4h1      | 754    | 679     | 660    | 528    | 665   | 589   | 666   | 668     |
| 291946    | Tmem184c     | 2954   | 2818    | 2704   | 2645   | 2703  | 2685  | 2788  | 2805    |
| 29484     | Slc3a1       | 5.35   | 8.25    | 6.77   | 2.68   | 7.85  | 2.65  | 10.92 | 1.34    |
| 500361    | Lrmp         | 43     | 34      | 48     | 34     | 47    | 38    | 39    | 33      |
| 294680    | Btf3         | 3772   | 3271    | 3446   | 3059   | 3298  | 3152  | 3372  | 3556    |
| 64525     | Eloc         | 1799   | 1644    | 1616   | 1477   | 1607  | 1476  | 1634  | 1737    |
| 303740    | Slc38a10     | 978    | 1009    | 1036   | 975    | 920   | 976   | 1009  | 1043    |
| 679713    | Brpf1        | 379    | 363     | 383    | 319    | 368   | 358   | 341   | 359     |
| 192256    | Pja2         | 10345  | 10190   | 9640   | 11005  | 10447 | 9728  | 10873 | 9619    |
| 291942    | Slc10a7      | 222    | 214.87  | 213    | 223    | 228   | 194   | 221   | 219     |
| 362809    | Ptges3       | 3689.6 | 3615.49 | 3661.1 | 3438   | 3412  | 3285  | 3667  | 3861.77 |
| 501105    | Ankrd66      | 45     | 36      | 33     | 47     | 40    | 38    | 36    | 45      |
| 308796    | Mesd         | 1228   | 1262    | 1367   | 1145   | 1283  | 1207  | 1195  | 1255    |
| 295692    | Nup35        | 283    | 294     | 298    | 257    | 260   | 274   | 286   | 298     |
| 307923    | Vps9d1       | 625    | 661     | 693    | 610    | 613   | 655   | 619   | 670     |
| 368120    | Zkscan2      | 16     | 15      | 18     | 32     | 24    | 18    | 22    | 16      |
| 498225    | Eif2d        | 527.84 | 566.79  | 526.21 | 472.53 | 494.1 | 567.2 | 479.2 | 527.01  |
| 361407    | Cog4         | 1491   | 1537    | 1468   | 1345   | 1403  | 1445  | 1476  | 1445    |
| 293638    | Cars         | 558    | 591     | 572    | 559    | 557   | 589   | 565   | 541     |
| 294708    | Sgtb         | 2995   | 2843    | 2778   | 2866   | 2817  | 2567  | 3001  | 2956    |
| 306860    | Gcnt2        | 1700.4 | 1728.35 | 1761.3 | 1696.3 | 1901  | 1587  | 1674  | 1639.74 |
| 287443    | Acap1        | 53     | 32      | 49     | 29     | 52    | 39    | 42    | 28      |
| 311856    | Usp20        | 2850   | 2995    | 2716   | 2931   | 3069  | 2769  | 2842  | 2671    |
| 299982    | Ankrd46      | 3720   | 3567    | 3499   | 3379   | 3405  | 3400  | 3614  | 3573    |
| 116679    | Cgrrf1       | 392    | 375     | 308    | 318    | 301   | 339   | 360   | 376     |
| 103694121 | LOC103694121 | 24     | 15      | 19     | 24     | 23    | 22    | 18    | 18      |
| 301381    | Tex30        | 125    | 105     | 103    | 77     | 87    | 110   | 99    | 109     |
| 302808    | Zdhhc9       | 1099   | 1085    | 1165   | 1179   | 1061  | 1096  | 1173  | 1143    |
| 302950    | Adcy9        | 500    | 514     | 555    | 658    | 564   | 584   | 601   | 451     |
| 83526     | Atrn         | 3244   | 3333    | 3378   | 3491   | 3306  | 3272  | 3554  | 3151    |
| 282835    | Wrnip1       | 464    | 501     | 507    | 509    | 498   | 455   | 498   | 506     |
| 315732    | Uaca         | 857    | 974     | 1061   | 988    | 925   | 912   | 1040  | 956     |
| 309410    | Mamdc2       | 432    | 475     | 425    | 405    | 493   | 488   | 392   | 343     |
| 288516    | Eif3b        | 1828   | 1835    | 1913   | 1723   | 1801  | 1864  | 1770  | 1776    |
| 85265     | Ajuba        | 331    | 327     | 280    | 227    | 251   | 321   | 279   | 300     |
| 58918     | Casp9        | 520    | 555     | 500    | 510    | 534   | 512   | 519   | 495     |
| 367763    | Tmem164      | 1353   | 1469    | 1518   | 1591   | 1538  | 1426  | 1503  | 1393    |
| 89786     | Cox17        | 735    | 710     | 635    | 598    | 629   | 589   | 681   | 747     |
| 362403    | Slc25a26     | 130    | 133.95  | 111    | 104.21 | 116.2 | 122.2 | 112   | 123     |
| 25368     | Adk          | 2552   | 2338    | 2167   | 2158   | 2322  | 2184  | 2125  | 2474    |
| 84607     | Socs2        | 377.54 | 460.28  | 543.33 | 472.27 | 458.5 | 480.9 | 425.9 | 466.01  |
| 361261    | Ccny         | 752    | 825     | 856    | 755    | 807   | 794   | 776   | 773     |
| 108349349 | LOC108349349 | 19.79  | 4.6     | 5.6    | 10.33  | 17.65 | 5.08  | 14.45 | 2.66    |
| 502633    | Mettl8       | 85     | 88      | 85     | 78     | 80    | 96    | 81    | 75      |
| 314941    | Lrp12        | 432    | 439     | 437    | 458    | 442   | 453   | 425   | 425     |
| 309419    | Pip5k1b      | 286    | 284     | 260    | 265    | 266   | 251   | 280   | 285     |
| 59319     | Ambra1       | 960    | 952     | 927    | 1040   | 1001  | 973   | 931   | 928     |
| 314683    | Tcp1112      | 421.87 | 364.15  | 387.09 | 354    | 365.9 | 401.6 | 365.1 | 376.44  |
| 94197     | Rab14        | 3602   | 3526    | 3564   | 3679   | 3466  | 3474  | 3657  | 3604    |
| 246060    | Cdkn1c       | 108    | 95      | 104    | 116    | 81    | 127   | 97    | 113     |
| 100912459 | LOC100912459 | 148.03 | 137.36  | 151.03 | 181.94 | 213.4 | 107.1 | 141.3 | 149.19  |

|           |              |        |         |        |        |       |       |       |          |
|-----------|--------------|--------|---------|--------|--------|-------|-------|-------|----------|
| 29448     | Rab7a        | 7509.9 | 7497    | 7401   | 7305   | 7136  | 7369  | 7317  | 7540.94  |
| 307641    | Csnk2a2      | 807    | 776     | 832    | 813    | 771   | 808   | 800   | 811      |
| 310174    | Cdh18        | 507    | 465     | 425    | 472    | 476   | 411   | 488   | 472      |
| 360761    | Lnx2         | 255    | 252     | 241    | 272    | 280   | 240   | 252   | 236      |
| 305458    | Tmem129      | 366    | 355     | 344    | 383    | 328   | 357   | 346   | 400      |
| 315165    | Naga         | 809.5  | 851.88  | 861.46 | 789.56 | 823.3 | 820.8 | 827.2 | 802.29   |
| 691572    | Ubap11       | 21.17  | 21.45   | 28.26  | 26.27  | 23.03 | 28.71 | 21.96 | 22.31    |
| 312213    | Plxna4       | 1447.4 | 1336.77 | 1592.3 | 1819   | 1681  | 1543  | 1572  | 1327.08  |
| 361020    | Rpp14        | 645.51 | 648.19  | 684.62 | 520.15 | 597.5 | 565.7 | 624.2 | 681.96   |
| 288621    | Mrps17       | 446    | 414     | 391    | 380    | 393   | 418   | 391   | 410      |
| 25498     | Npm1         | 2643   | 2490    | 2766   | 2372.3 | 2482  | 2422  | 2620  | 2627.95  |
| 287456    | Med11        | 241.36 | 235.96  | 220.47 | 186.24 | 227.6 | 186.8 | 227.7 | 231.6    |
| 304024    | Cpox         | 281    | 306     | 314    | 303    | 308   | 307   | 309   | 266      |
| 619549    | Plpp6        | 358    | 296     | 319    | 318    | 334   | 299   | 333   | 310      |
| 360928    | Dcun1d4      | 1767   | 1666    | 1484   | 1803   | 1713  | 1641  | 1719  | 1569     |
| 293673    | Eif1ad       | 530.96 | 491.97  | 461.22 | 413.04 | 511.7 | 426.3 | 459.8 | 477.35   |
| 313323    | Psip1        | 1750   | 1494    | 1399   | 1576   | 1680  | 1542  | 1520  | 1405     |
| 60434     | Bcl2l2       | 3202   | 3018    | 2711   | 2992   | 3018  | 2848  | 2913  | 3006     |
| 368178    | Hoxc9        | 249    | 262     | 196    | 247    | 213   | 254   | 239   | 237      |
| 83576     | Sort1        | 2342   | 2488    | 2284   | 2860   | 2456  | 2526  | 2428  | 2449     |
| 300891    | Morf411      | 7495   | 8002    | 7152   | 6938   | 7288  | 7092  | 7434  | 7432     |
| 84402     | Sfrp1        | 1106.7 | 1153.78 | 1137.8 | 1130.4 | 924.2 | 1120  | 1383  | 1050.28  |
| 303021    | Sh3pxd2b     | 1019   | 1134    | 1278   | 1353   | 1193  | 1182  | 1231  | 1123     |
| 298687    | Aurkaip1     | 797    | 781     | 754    | 631    | 713   | 684   | 710   | 822      |
| 64532     | Adcy5        | 813.01 | 858     | 872.12 | 860.52 | 926.8 | 829   | 762.5 | 846.3    |
| 365924    | Tmem56       | 2197   | 2484    | 2074   | 2414   | 2161  | 2190  | 2490  | 2223     |
| 360475    | Alg1         | 238.33 | 217.01  | 232.61 | 202.46 | 213.3 | 227.3 | 224.1 | 215.49   |
| 287436    | Eif4a1       | 4765   | 4546    | 4495   | 4021   | 4393  | 4121  | 4473  | 4636     |
| 363630    | Kdm6b        | 733    | 711     | 865    | 839    | 814   | 804   | 796   | 698      |
| 315088    | RGD1311188   | 105.75 | 81.15   | 83.47  | 62.98  | 73.78 | 98.07 | 77.26 | 80.43    |
| 307545    | Elp2         | 1857   | 1909    | 1698   | 1713   | 1672  | 1706  | 1785  | 1932     |
| 307524    | Wdr33        | 563    | 579     | 512    | 537    | 549   | 516   | 558   | 543      |
| 361740    | RGD1359158   | 392    | 363.99  | 365.15 | 418.75 | 364   | 354   | 408.5 | 395.82   |
| 297601    | Mrpl51       | 902.35 | 931.77  | 886.12 | 864.74 | 935.5 | 858.7 | 866.7 | 883.34   |
| 313445    | Klhl13       | 1098   | 1002    | 934    | 1095   | 941   | 969   | 1110  | 1062     |
| 293663    | Rbm4         | 420.6  | 412.74  | 392.44 | 381.02 | 398.5 | 435.3 | 387.3 | 367.42   |
| 83532     | Vdac3        | 5734.3 | 5441.58 | 5274.5 | 4711.5 | 5007  | 4878  | 5356  | 5679.54  |
| 81822     | Actb         | 17426  | 18847.6 | 21068  | 20289  | 19661 | 20570 | 18427 | 18090.28 |
| 690632    | Gcn111       | 1199   | 1260    | 1402   | 1443   | 1314  | 1433  | 1270  | 1227     |
| 103692531 | LOC103692531 | 171.18 | 147.66  | 137.87 | 133.79 | 126.4 | 153.8 | 130.3 | 173.42   |
| 293674    | Drap1        | 1269   | 1257.81 | 1270.9 | 1141.6 | 1203  | 1237  | 1206  | 1237.59  |
| 295333    | Dennd2c      | 56     | 68      | 61     | 81     | 68    | 67    | 63    | 65       |
| 363001    | Bcdin3d      | 77     | 62      | 70     | 57     | 60    | 56    | 72    | 75       |
| 316012    | Klhl18       | 466    | 406     | 448    | 454    | 422   | 437   | 471   | 424      |
| 317444    | Hccs         | 477    | 437.01  | 367    | 408    | 426   | 410   | 396   | 438      |
| 494192    | Mycbpap      | 234    | 246     | 242    | 256    | 248   | 226   | 237   | 256      |
| 103693494 | LOC103693494 | 1.94   | 1.08    | 1.07   | 2.14   | 0     | 2.14  | 2.97  | 1.05     |
| 100188932 | Ost4         | 2203.4 | 1904.45 | 1868.5 | 1758.9 | 1778  | 1840  | 1839  | 2191.47  |
| 102547431 | LOC102547431 | 15.59  | 16.18   | 16.38  | 6.16   | 12.09 | 10.77 | 17.53 | 13.31    |
| 81808     | Nr2f1        | 952.76 | 991.41  | 1087.8 | 1159.9 | 904.4 | 1009  | 1143  | 1087.79  |
| 502674    | Dstn         | 5524.4 | 5546.99 | 5351.1 | 4893.3 | 4969  | 5094  | 5548  | 5467     |
| 252857    | Rapgef4      | 2307   | 2186    | 1925   | 2180   | 2081  | 2201  | 2233  | 1987     |
| 360779    | Lrch4        | 1033   | 945     | 1045   | 1100   | 1027  | 993   | 1016  | 1041     |
| 499934    | Manbal       | 1036   | 959     | 856    | 827    | 878   | 859   | 904   | 996      |
| 108348154 | LOC108348154 | 244.74 | 211.89  | 207.05 | 237.78 | 231.4 | 198.3 | 231.1 | 230.65   |
| 500306    | B4galnt3     | 62     | 78      | 86     | 224    | 88    | 194   | 109   | 54       |



|           |              |        |         |        |        |       |       |       |          |
|-----------|--------------|--------|---------|--------|--------|-------|-------|-------|----------|
| 293418    | Rpl27a       | 3891.6 | 3827.05 | 3856.3 | 3068   | 3465  | 3409  | 3546  | 4060.3   |
| 314843    | Ptprb        | 885.49 | 791.42  | 775.41 | 755.79 | 844   | 816.3 | 828.1 | 684.28   |
| 50658     | Mapk9        | 3402   | 3374    | 3274   | 3422   | 3481  | 3241  | 3456  | 3145     |
| 362036    | Ank2         | 19181  | 20889   | 20859  | 24835  | 23544 | 19901 | 21483 | 19887.98 |
| 114764    | Mapre1       | 2222   | 2152    | 2138   | 1999   | 2080  | 1968  | 2243  | 2126     |
| 295365    | Amigo1       | 3171   | 3163    | 3179   | 3269   | 3351  | 3210  | 3075  | 3005     |
| 302920    | Rbfox1       | 3550   | 3673    | 3475   | 3675.5 | 3818  | 3640  | 3415  | 3342     |
| 313689    | Dhrs3        | 185    | 187     | 321    | 217    | 165   | 216   | 291   | 228      |
| 305198    | Prdm8        | 526.01 | 574.02  | 606.93 | 646.78 | 647.7 | 578.6 | 566.3 | 535.33   |
| 84470     | Gnpat        | 892    | 879     | 779    | 823    | 797   | 805   | 887   | 847      |
| 81814     | Tmsb4x       | 32762  | 29285   | 30979  | 24965  | 28741 | 26119 | 29022 | 32815    |
| 294864    | Cct5         | 4781   | 4759    | 4415   | 4118   | 4372  | 4191  | 4581  | 4731     |
| 259271    | Aptx         | 207    | 202     | 221    | 192    | 215   | 184   | 204   | 210      |
| 364983    | Rnf150       | 140    | 121     | 126    | 162    | 143   | 125   | 130   | 145      |
| 361844    | H2afy2       | 236.03 | 212.11  | 221.17 | 224.59 | 220.5 | 205.3 | 222.7 | 235.67   |
| 362967    | Rrp7a        | 1066.4 | 1125.81 | 1126.9 | 976.92 | 1015  | 1186  | 1109  | 939.69   |
| 287427    | Trappc1      | 2435   | 2245    | 2228   | 2003   | 2211  | 2093  | 2199  | 2311     |
| 313647    | Hp1bp3       | 2350   | 2436    | 2343   | 2337   | 2339  | 2340  | 2370  | 2314     |
| 296167    | Pank2        | 201    | 175     | 168    | 192    | 175   | 159   | 192   | 202      |
| 305002    | Sdccag8      | 168    | 201     | 194    | 173    | 198   | 190   | 154   | 186      |
| 367073    | Trappc4      | 1098   | 1067    | 1000   | 890    | 953   | 960   | 995   | 1103     |
| 313658    | Ubr4         | 5887.4 | 6340.23 | 6434.1 | 7442.6 | 6913  | 6658  | 6382  | 5868.22  |
| 299197    | Are11        | 2633.3 | 2614.11 | 2578.2 | 2587   | 2765  | 2496  | 2575  | 2463.64  |
| 361262    | Heatr1       | 182.74 | 211.25  | 169.8  | 144.02 | 157.1 | 201.4 | 195   | 146.72   |
| 307757    | Neto2        | 221    | 187     | 202    | 224    | 190   | 191   | 219   | 225      |
| 294339    | Mcm3ap       | 895    | 931     | 963    | 1014   | 954   | 946   | 943   | 919      |
| 81749     | Prkch        | 182    | 156     | 163    | 150    | 165   | 150   | 159   | 170      |
| 25167     | Ptpra        | 3058   | 3007    | 3071   | 2965   | 2955  | 2960  | 3104  | 2952     |
| 288921    | Fbxw9        | 179    | 177     | 160    | 137    | 169   | 173   | 155   | 149      |
| 63865     | Lgmn         | 4055   | 4569    | 4799   | 4053   | 3946  | 4656  | 4275  | 4412     |
| 500157    | RGD1560028   | 165    | 224     | 206.19 | 169.82 | 184   | 150   | 194   | 228.84   |
| 84477     | Gab2         | 994    | 922     | 973    | 1046   | 1052  | 955   | 968   | 918      |
| 291908    | Tox3         | 242    | 240     | 247    | 302    | 267   | 258   | 243   | 252      |
| 83834     | Nrn1         | 5988   | 5611    | 5363   | 5727   | 5927  | 5293  | 5628  | 5599     |
| 299147    | Ppp2r5e      | 1463   | 1479.99 | 1495   | 1575   | 1490  | 1525  | 1500  | 1433.99  |
| 298914    | Itgblbp1     | 1240.9 | 1089.44 | 1151   | 967.11 | 1028  | 1054  | 1126  | 1193.12  |
| 363020    | Smco4        | 26     | 20.04   | 27.03  | 29.55  | 25.49 | 27.1  | 22.05 | 26.89    |
| 548104    | Pcdhb17      | 107.84 | 95.32   | 124.08 | 118.72 | 92.21 | 106.6 | 129.8 | 112.6    |
| 691307    | Lrrc39       | 27.51  | 23.98   | 19.94  | 28.57  | 22.79 | 39.28 | 16.29 | 20.58    |
| 364705    | Serpina6b    | 21.34  | 23.3    | 23.33  | 17.11  | 21.32 | 20.32 | 28.38 | 14.16    |
| 293886    | Cdc37l1      | 1625   | 1483    | 1406   | 1538   | 1500  | 1442  | 1555  | 1491     |
| 679819    | Glpr2        | 101    | 120     | 144    | 108    | 110   | 119   | 124   | 115      |
| 29355     | Pkn1         | 717    | 677     | 659    | 602    | 653   | 695   | 633   | 646      |
| 102555439 | LOC102555439 | 170    | 160     | 153    | 184    | 200   | 163   | 141   | 156      |
| 298342    | Nkap         | 192    | 190     | 204    | 179    | 200   | 169   | 190   | 198      |
| 60357     | Prom1        | 412    | 434     | 337    | 347    | 362   | 332   | 425   | 395      |
| 100359512 | Vtilb        | 774    | 739     | 691    | 666    | 729   | 638   | 711   | 762      |
| 296384    | Znfx1        | 1435   | 1477    | 1596   | 1717   | 1610  | 1621  | 1482  | 1447     |
| 312154    | Ing3         | 265    | 252     | 267    | 273    | 273   | 251   | 254   | 268      |
| 282834    | Chmp3        | 3066   | 3039    | 2922   | 2697   | 2940  | 2723  | 2975  | 2964     |
| 317409    | MGC109340    | 672.46 | 629.78  | 578.06 | 560.86 | 578.8 | 571.1 | 648.1 | 617.81   |
| 309168    | Map3k11      | 988    | 944     | 983    | 842    | 898   | 982   | 943   | 895      |
| 363478    | Snx12        | 538    | 537     | 585    | 558    | 537   | 540   | 537   | 581      |
| 361652    | Srcap        | 1801   | 1886.1  | 1973   | 2197   | 2082  | 1969  | 1928  | 1797     |
| 309626    | Ring1        | 501    | 471     | 464    | 508    | 464   | 494   | 494   | 472      |
| 298514    | Rragc        | 2018   | 2085    | 2025   | 1942   | 1921  | 1936  | 2089  | 2041     |



|           |              |        |         |        |        |       |       |       |         |
|-----------|--------------|--------|---------|--------|--------|-------|-------|-------|---------|
| 79220     | Grid2        | 218    | 223     | 206    | 229    | 272   | 196   | 218   | 181     |
| 362631    | Rpl11        | 3461   | 3101    | 3525   | 2690   | 3214  | 2895  | 3012  | 3525    |
| 313598    | Zmym4        | 839    | 881     | 897    | 997    | 971   | 839   | 938   | 829     |
| 25520     | Prkag1       | 1220   | 1185    | 1041   | 956    | 1059  | 1002  | 1173  | 1123    |
| 287463    | Rpain        | 155    | 122     | 100    | 113    | 112   | 116   | 121   | 136     |
| 310194    | Kat8         | 513.89 | 480.77  | 461.91 | 479.91 | 450   | 488.9 | 498.9 | 478.96  |
| 296278    | Pdrg1        | 1177   | 1226    | 1104   | 938    | 1032  | 1116  | 1052  | 1200    |
| 296306    | Ergic3       | 1244   | 1320    | 1408   | 1267   | 1298  | 1213  | 1347  | 1328    |
| 294810    | Tars         | 1257   | 1125    | 1268   | 1198   | 1308  | 1128  | 1151  | 1212    |
| 287454    | Alox12       | 27     | 26      | 22     | 24     | 31    | 23    | 22    | 22      |
| 306376    | Sh2d4a       | 96.83  | 88.59   | 99.43  | 86.54  | 103.5 | 76.28 | 104.2 | 83.61   |
| 289125    | Acbd6        | 365.12 | 359.84  | 341.55 | 317.91 | 327.1 | 317.6 | 363.7 | 362.05  |
| 500536    | Hyi          | 223    | 211     | 244    | 219    | 211   | 205   | 215   | 257     |
| 405103    | Olr1206      | 0      | 0       | 0      | 1      | 0     | 0.99  | 0     | 0       |
| 362943    | Adck5        | 223    | 192     | 208    | 177    | 191   | 197   | 199   | 205     |
| 689479    | LOC689479    | 32.08  | 10.55   | 41.66  | 10.77  | 0     | 20.85 | 41.88 | 31.38   |
| 295243    | Krtcap2      | 589.87 | 564.94  | 594.62 | 525.71 | 547.9 | 578.9 | 530.7 | 594.93  |
| 25347     | Rpl39        | 784.03 | 637.46  | 902.68 | 565.27 | 813.3 | 652.9 | 601.1 | 793.34  |
| 291567    | Ppargc1b     | 66.66  | 72      | 62     | 81.14  | 71    | 74    | 75    | 59      |
| 363005    | Pcbp2        | 4033.9 | 4227.89 | 4426.8 | 4188.7 | 4002  | 4205  | 4297  | 4206.34 |
| 93662     | Cdhr1        | 223    | 252     | 213    | 223    | 218   | 218   | 214   | 252     |
| 25692     | Plat         | 2863.3 | 3149    | 3594.5 | 3075.7 | 2860  | 3156  | 3220  | 3321.9  |
| 29563     | Crabp2       | 259.64 | 229.49  | 344.64 | 245.64 | 196.8 | 203.7 | 307.8 | 360.47  |
| 59265     | Phlpp1       | 724.38 | 725.33  | 601.67 | 815.1  | 699.8 | 764.6 | 649.3 | 724.71  |
| 29643     | Sv2c         | 19298  | 20226   | 18844  | 23225  | 20720 | 20358 | 20480 | 19236   |
| 171569    | Spon2        | 170    | 255     | 343    | 134.42 | 109.6 | 288   | 220   | 276     |
| 25437     | Emd          | 355    | 364     | 379    | 336    | 378   | 359   | 334   | 349     |
| 50566     | Greml        | 49     | 71      | 29     | 56     | 48    | 58    | 55    | 42      |
| 306687    | Mfsd14b      | 834    | 862     | 863    | 723    | 851   | 771   | 805   | 823     |
| 362737    | Heatr5a      | 1222.2 | 1329.85 | 1204   | 1482.5 | 1241  | 1368  | 1344  | 1235.04 |
| 297453    | Hdac11       | 1142   | 1096    | 1036   | 1039   | 1054  | 1097  | 1017  | 1103    |
| 50594     | Nb11         | 5237   | 4618    | 5059   | 4805   | 4541  | 4834  | 4807  | 5345    |
| 289051    | Dennd1b      | 1086   | 1133    | 974    | 1228   | 1191  | 983   | 1167  | 1037    |
| 100909840 | LOC100909840 | 5881.1 | 6076.78 | 5404.3 | 5469.1 | 4895  | 5514  | 6469  | 5731.47 |
| 308669    | Herc2        | 3337   | 3461    | 3463   | 4052   | 3775  | 3294  | 3692  | 3413    |
| 311051    | Ccdc148      | 25     | 32      | 19     | 27     | 23    | 18    | 35    | 26      |
| 362154    | Zc3h15       | 2564   | 2440    | 2357   | 2328   | 2340  | 2199  | 2620  | 2436    |
| 25499     | Nrdc         | 2153   | 2283.33 | 2275.7 | 2328.7 | 2270  | 2208  | 2296  | 2178.92 |
| 685232    | Atp6v1a      | 6159   | 6196    | 5651   | 5946   | 5889  | 5771  | 6360  | 5701    |
| 287212    | Rnf145       | 1273   | 1384    | 1323   | 1316   | 1257  | 1345  | 1276  | 1367    |
| 60577     | Slc15a2      | 353    | 336     | 303    | 358    | 321   | 314   | 352   | 350     |
| 289833    | Fam161a      | 31     | 18      | 30     | 25     | 24    | 27    | 17    | 35      |
| 29285     | Rps15        | 4479   | 4030    | 4328   | 3184   | 3942  | 3649  | 3831  | 4445    |
| 316842    | Metrn1       | 310    | 362     | 357    | 329    | 265   | 317   | 353   | 410     |
| 688905    | Mtx3         | 1357.2 | 1364.32 | 1228.9 | 1486.9 | 1413  | 1266  | 1408  | 1297.84 |
| 298676    | Morn1        | 118    | 114     | 85     | 101    | 108   | 92    | 131   | 83      |
| 289522    | Cox18        | 202    | 187     | 170    | 173    | 189   | 178   | 178   | 180     |
| 100361568 | Hilpda       | 100    | 75      | 84     | 55     | 78    | 66    | 84    | 83      |
| 309176    | Mrpl49       | 628    | 643     | 574    | 564    | 566   | 572   | 635   | 613     |
| 24551     | Mdh1         | 8548   | 8245    | 6841   | 6967   | 7123  | 7113  | 8092  | 7981    |
| 503052    | Vash1        | 1961.6 | 1966.95 | 1961.9 | 1912.9 | 1986  | 1809  | 1927  | 2008.05 |
| 287367    | Cops3        | 1429   | 1409    | 1313   | 1332   | 1324  | 1303  | 1402  | 1402    |
| 58817     | Sec23a       | 3424   | 3425    | 3202   | 3568   | 3445  | 3387  | 3347  | 3311    |
| 286917    | Phax         | 572    | 540     | 570    | 536    | 559   | 496   | 586   | 556     |
| 81801     | Stc1         | 111.01 | 113.07  | 43     | 70.81  | 80.6  | 72.08 | 111   | 71.03   |
| 25496     | Notch1       | 1646   | 1421    | 1691   | 1831   | 1827  | 1639  | 1576  | 1485    |

|           |              |        |         |        |        |       |       |       |         |
|-----------|--------------|--------|---------|--------|--------|-------|-------|-------|---------|
| 29479     | Odf2         | 603.1  | 599.03  | 581.39 | 559.81 | 601.9 | 552.9 | 583.1 | 583.4   |
| 302247    | Rtraf        | 1959   | 1793    | 1833   | 1465   | 1632  | 1659  | 1846  | 1847    |
| 29367     | Chkb         | 709    | 690     | 670    | 602    | 677   | 639   | 667   | 663     |
| 361790    | Ppp1r18      | 871    | 861.01  | 1080   | 833    | 883   | 876   | 905   | 947     |
| 297406    | Cct7         | 3251.9 | 3310.99 | 3036.7 | 2818   | 3004  | 2911  | 3275  | 3112    |
| 297561    | Rad52        | 123    | 103     | 96     | 109    | 104   | 103   | 108   | 112     |
| 686310    | Ephb4        | 255    | 220     | 291    | 206    | 257   | 261   | 222   | 223     |
| 287607    | Mtmr4        | 2220   | 2304    | 2261   | 2428   | 2381  | 2392  | 2309  | 2046    |
| 307858    | Ldhd         | 402.05 | 401.95  | 313    | 357.85 | 355.2 | 361   | 349   | 396     |
| 303701    | Clqtnf1      | 560    | 551     | 580    | 483    | 495   | 616   | 508   | 535     |
| 116508    | Nrxn3        | 1095   | 965     | 1173   | 1118   | 1144  | 1052  | 1151  | 964     |
| 302434    | MGC114483    | 18.52  | 13.26   | 15.91  | 22.02  | 21.45 | 14.02 | 10    | 23.6    |
| 309458    | Pdcd11       | 608.15 | 590.08  | 582.17 | 635.88 | 565.6 | 588.4 | 621   | 619.07  |
| 292067    | Zc3h18       | 622    | 624     | 673    | 699    | 662   | 694   | 660   | 578     |
| 316628    | Asb1         | 2446.9 | 2283.69 | 2244.8 | 2279.2 | 2509  | 2174  | 2280  | 2207.23 |
| 291339    | Comm3        | 1426   | 1297    | 1190   | 1128   | 1211  | 1218  | 1224  | 1342    |
| 502749    | Agk          | 353    | 370     | 356    | 348    | 352   | 352   | 351   | 359     |
| 298103    | Atp6v1g1     | 3412   | 3136    | 3268   | 2960   | 3000  | 3023  | 3213  | 3424    |
| 295224    | mrpl24       | 661.72 | 654.97  | 570.8  | 642.2  | 608.2 | 607.2 | 659.3 | 632.05  |
| 287457    | Zmynd15      | 47.24  | 24.28   | 17.1   | 38.19  | 41.18 | 28.1  | 18.07 | 38.31   |
| 361169    | Letm2        | 252    | 260     | 176    | 195    | 195   | 215   | 215   | 250     |
| 311236    | Lrrc4c       | 1142   | 1044    | 996    | 1243   | 1202  | 955   | 1146  | 1082    |
| 292074    | Trappc21     | 1133   | 1134.86 | 1039.7 | 959    | 1064  | 1032  | 948   | 1184    |
| 288233    | Wrb          | 1837   | 1687    | 1587   | 1538   | 1696  | 1568  | 1658  | 1667    |
| 361907    | Fbx17        | 141    | 123     | 152    | 140    | 133   | 127   | 146   | 145     |
| 291796    | Usp14        | 5411   | 5120    | 4948   | 4989   | 5207  | 4812  | 5244  | 5021    |
| 102549747 | LOC102549747 | 54.13  | 42.43   | 49.01  | 62.46  | 50.57 | 47.83 | 56.1  | 51.66   |
| 84550     | Slc24a2      | 6279.7 | 7050.7  | 5896.7 | 8555.2 | 7635  | 6222  | 7308  | 6366.51 |
| 500537    | Tmem269      | 44.63  | 56.62   | 57.65  | 35.07  | 52.03 | 41.35 | 43.94 | 54.91   |
| 291553    | Nedd41       | 2430   | 2688    | 2609   | 2882   | 2900  | 2421  | 2580  | 2613    |
| 362271    | Elmo2        | 1083.9 | 1081.26 | 1084.7 | 1048   | 1108  | 1118  | 995.5 | 1038.79 |
| 316085    | Trak1        | 2608   | 2780.76 | 2743.2 | 2927.3 | 2710  | 3043  | 2679  | 2527.95 |
| 316376    | Inpp1        | 333    | 300     | 321    | 277    | 265   | 302   | 295   | 358     |
| 686883    | Larp7        | 724.63 | 690.58  | 720.75 | 675.86 | 689.7 | 664.7 | 720.7 | 711.66  |
| 499900    | Zfp133       | 296    | 272     | 293    | 261    | 255   | 252   | 282   | 323     |
| 690300    | Cox11        | 193.08 | 158.98  | 181.28 | 128.73 | 155.9 | 140.3 | 184.6 | 175.27  |
| 303798    | Arvcf        | 1559   | 1515    | 1476   | 1412   | 1257  | 1541  | 1583  | 1528    |
| 313744    | Nol9         | 570.06 | 570     | 598    | 603    | 591   | 606   | 561.3 | 562     |
| 114559    | Arhgef7      | 1769   | 1825    | 1859   | 1867   | 1833  | 1858  | 1792  | 1772    |
| 64443     | Gpr88        | 154.13 | 146.52  | 117.38 | 174.01 | 171   | 128   | 166   | 121.83  |
| 365243    | Sergef       | 250    | 227     | 222    | 207    | 235   | 222   | 222   | 219     |
| 362279    | Pard6b       | 89     | 97      | 84     | 70     | 82    | 71    | 94    | 90      |
| 498538    | Trim35       | 2265   | 2128    | 2442   | 2354   | 2255  | 2361  | 2284  | 2208    |
| 494202    | Oas3         | 24.94  | 27.9    | 33.79  | 30.36  | 32.81 | 21    | 36.46 | 25.69   |
| 362453    | Crebl2       | 1513   | 1571    | 1368   | 1457   | 1474  | 1496  | 1446  | 1441    |
| 691123    | Fam19a3      | 1303.8 | 1184.04 | 1138   | 1066.3 | 1172  | 1108  | 1130  | 1241.3  |
| 291556    | Nars         | 5770   | 5974    | 5509   | 5728   | 5671  | 5899  | 5919  | 5292    |
| 317376    | Tfe3         | 734    | 914     | 896    | 790    | 863   | 800   | 827   | 815     |
| 59117     | Ago2         | 123    | 99      | 131    | 222    | 184   | 109   | 135   | 142     |
| 688993    | Kctd7        | 202    | 176     | 142    | 171    | 192   | 161   | 140   | 192     |
| 29554     | Pdha1        | 7754.4 | 7340.94 | 7314.9 | 7368.2 | 6867  | 7224  | 7898  | 7530.79 |
| 408243    | Ece2         | 963.71 | 866     | 762    | 880    | 869   | 788   | 782.7 | 1002    |
| 361212    | Rnf44        | 1676   | 1670    | 1760   | 1717   | 1776  | 1665  | 1631  | 1692    |
| 361459    | Clvs2        | 74     | 87      | 84     | 102    | 93    | 60    | 88    | 103     |
| 361450    | Ust          | 1164   | 1173    | 1034   | 1372   | 1242  | 1163  | 1211  | 1086    |
| 300982    | Abhd14a      | 256    | 220     | 244    | 209    | 195   | 261   | 183   | 282     |

|           |              |        |         |        |        |       |       |       |          |
|-----------|--------------|--------|---------|--------|--------|-------|-------|-------|----------|
| 313339    | Acer2        | 273.29 | 303.97  | 300.79 | 219.34 | 274.4 | 296.8 | 287.2 | 229.66   |
| 114711    | Gne          | 396    | 423     | 418    | 389    | 420   | 416   | 405   | 371      |
| 302500    | Mctsl        | 532    | 534     | 450    | 459    | 470   | 444   | 548   | 496      |
| 294282    | Rps18        | 1619   | 1414.71 | 1465.2 | 1002.5 | 1423  | 1435  | 1491  | 1105.2   |
| 498015    | Pitpnc1      | 6142   | 6292    | 5957   | 6691   | 6464  | 6158  | 6187  | 6058     |
| 501619    | Armex1       | 2033.2 | 1827.95 | 1632.4 | 1858.7 | 1689  | 1861  | 1784  | 1954.78  |
| 293149    | Mrpl48       | 983.49 | 801.69  | 849.57 | 736.37 | 729.4 | 828.7 | 886.7 | 897.48   |
| 691337    | Stk381       | 894.79 | 883.6   | 888.16 | 918.22 | 864.8 | 941.6 | 882.6 | 865.16   |
| 24170     | Add1         | 6428   | 6689    | 6574   | 6777   | 6551  | 6614  | 6691  | 6387     |
| 64468     | Hyal2        | 363    | 355     | 372    | 322    | 338   | 375   | 352   | 335      |
| 280671    | Txndc9       | 885    | 926     | 794    | 813    | 789   | 797   | 894   | 909      |
| 25307     | Cst3         | 29675  | 28671   | 24698  | 23405  | 24216 | 25196 | 26431 | 29703    |
| 680747    | Mrpl20       | 651    | 653     | 656    | 519    | 542   | 604   | 601   | 711      |
| 293823    | Prune2       | 36939  | 37445.6 | 37313  | 44492  | 43487 | 36282 | 39076 | 36021.68 |
| 295231    | Glmp         | 591    | 578     | 717    | 600    | 623   | 613   | 586   | 643      |
| 288371    | Mcoln1       | 1144   | 1099    | 1063   | 1099   | 1131  | 1102  | 1093  | 1042     |
| 300754    | Bbs4         | 783.17 | 703.89  | 699.01 | 655.34 | 639.1 | 715.8 | 690.3 | 772.36   |
| 300772    | Pias1        | 427    | 372     | 405    | 466    | 422   | 380   | 436   | 418      |
| 362625    | Man1c1       | 407.09 | 409.77  | 480.07 | 463.63 | 438.9 | 421.7 | 466.8 | 418.39   |
| 252920    | Olfm3        | 132    | 120     | 92     | 134    | 115   | 121   | 128   | 110      |
| 103689925 | LOC103689925 | 198.67 | 219.33  | 191.33 | 214    | 206   | 207   | 202.7 | 200.77   |
| 103692128 | LOC103692128 | 198.67 | 219.33  | 191.33 | 214    | 206   | 207   | 202.7 | 200.77   |
| 24669     | Ppplcc       | 3346   | 3212    | 3131   | 3127   | 2994  | 3296  | 3329  | 3090     |
| 310903    | Adh6         | 7.05   | 2.11    | 1.99   | 2.03   | 5.88  | 3.73  | 2.33  | 1.13     |
| 299735    | Amdhd1       | 115    | 85.95   | 70     | 100.96 | 96.9  | 92    | 88    | 91.92    |
| 691231    | Gemin5       | 309    | 381     | 375    | 380    | 370   | 381   | 347   | 335      |
| 313949    | Ldah         | 1097.7 | 950.09  | 1009   | 935.9  | 973.1 | 915.8 | 999.2 | 1071.5   |
| 363152    | Stac         | 1821   | 1862    | 1855   | 1757   | 1971  | 1594  | 1814  | 1856     |
| 312255    | Slc37a3      | 1290.3 | 1302.13 | 1251.9 | 1187.9 | 1258  | 1276  | 1196  | 1260.7   |
| 100360577 | LOC100360577 | 27     | 24.5    | 38     | 32.5   | 25    | 29.5  | 36    | 30.5     |
| 100912525 | Hoxa4        | 27     | 24.5    | 38     | 32.5   | 25    | 29.5  | 36    | 30.5     |
| 362424    | Tmem72       | 393    | 328     | 311    | 432    | 378   | 351   | 357   | 366      |
| 291840    | Slc38a7      | 632    | 642     | 626    | 551    | 605   | 595   | 635   | 596      |
| 500996    | Layn         | 365.23 | 377.72  | 391.13 | 468.22 | 363.8 | 421.8 | 430.1 | 373.58   |
| 64701     | Rpn2         | 3082   | 3292.96 | 3487   | 3267   | 3092  | 3470  | 3193  | 3266.93  |
| 683674    | LOC683674    | 272    | 293     | 295    | 245    | 274   | 290   | 258   | 274      |
| 309918    | E112         | 1024.7 | 968.92  | 973.37 | 1030.5 | 997.5 | 936.3 | 1096  | 935.04   |
| 313529    | Tmem53       | 181.72 | 194.66  | 179.65 | 164.11 | 183.6 | 179   | 184   | 167.71   |
| 361724    | Mta2         | 720    | 797     | 847    | 736    | 775   | 805   | 790   | 705      |
| 493574    | Ispd         | 316    | 347     | 256    | 323    | 291   | 285   | 371   | 285      |
| 309639    | Anks1a       | 1300   | 1325    | 1498   | 1219   | 1269  | 1485  | 1222  | 1323     |
| 103690162 | Eid2b        | 133    | 177     | 174    | 142    | 145   | 139   | 175   | 162      |
| 25700     | Ide          | 1129   | 1153    | 1186   | 1294   | 1196  | 1202  | 1218  | 1108     |
| 140671    | Phkg2        | 1448   | 1415    | 1290   | 1236   | 1332  | 1372  | 1359  | 1283     |
| 117041    | Nln          | 358.35 | 397.93  | 408.25 | 380.04 | 379.3 | 385.3 | 391.1 | 376.62   |
| 685152    | Atp8b2       | 1614   | 1586    | 1426   | 1655   | 1641  | 1595  | 1533  | 1462     |
| 308000    | Pdzd8        | 3600   | 3592    | 3134   | 4015   | 3575  | 3278  | 3817  | 3557     |
| 641386    | Ap5z1        | 369.06 | 338.44  | 382.35 | 344.37 | 344.7 | 379.2 | 344.5 | 354.47   |
| 501095    | Rftn1        | 71.16  | 57.85   | 83.43  | 70.87  | 66.84 | 77.57 | 61.95 | 74.7     |
| 102550344 | Kmt2b        | 676    | 759     | 760    | 703    | 724   | 725   | 724   | 702      |
| 100361517 | Psmg3        | 413    | 409     | 363    | 328    | 354   | 387   | 343   | 417      |
| 306055    | Pcdh17       | 1248.9 | 1052.5  | 1143.3 | 1426.3 | 1354  | 1204  | 1277  | 996.88   |
| 310375    | Zfp131       | 644.71 | 661.31  | 575.18 | 660    | 635   | 566.8 | 631.7 | 687.69   |
| 307412    | RGD1305184   | 17.22  | 9       | 14     | 8      | 12    | 12.18 | 10.64 | 13.02    |
| 29581     | Htr2b        | 18.36  | 8.97    | 18.75  | 13.59  | 12.1  | 19    | 17.31 | 10.79    |
| 364637    | Fbxo25       | 636    | 577     | 560    | 641    | 609   | 597   | 621   | 568      |

|           |              |        |         |        |        |       |       |       |         |
|-----------|--------------|--------|---------|--------|--------|-------|-------|-------|---------|
| 29702     | Eif2ak3      | 773    | 841     | 793    | 772    | 778   | 760   | 792   | 824     |
| 289342    | Rps6kcl      | 1201.5 | 1226.16 | 1183.8 | 1229.7 | 1250  | 1192  | 1206  | 1156.17 |
| 361822    | Ybey         | 186.93 | 182.93  | 179.19 | 151.03 | 154.5 | 166.1 | 184.9 | 189.04  |
| 361882    | Arhgef28     | 829    | 918     | 929    | 892    | 913   | 844   | 938   | 845     |
| 362248    | Procr        | 58     | 66      | 73     | 58     | 76    | 73    | 60    | 44      |
| 498576    | I117rd       | 365    | 345     | 325    | 370    | 360   | 318   | 403   | 313     |
| 498358    | Slc30a9      | 3958   | 3746    | 3507   | 3608   | 3631  | 3477  | 3866  | 3729    |
| 301253    | Tmem151b     | 715.01 | 690.48  | 605.23 | 693.6  | 798.4 | 615   | 614   | 655.79  |
| 170501    | Galnt10      | 504    | 489     | 461    | 472    | 507   | 463   | 483   | 458     |
| 114029    | Megf8        | 2182.4 | 2184.3  | 2305.6 | 2333.4 | 2439  | 2269  | 2192  | 2036.05 |
| 102554867 | LOC102554867 | 38     | 35      | 19     | 37     | 24    | 41    | 32    | 31      |
| 246756    | Tradd        | 170    | 175     | 158    | 143    | 178   | 147   | 161   | 155     |
| 299196    | Abcd4        | 141.67 | 122.4   | 144.92 | 110.7  | 114.2 | 124.5 | 140.6 | 136.28  |
| 360811    | Naa25        | 773    | 831     | 748    | 882    | 812   | 819   | 803   | 774.99  |
| 303874    | Senp5        | 2563.7 | 2526.71 | 2361.4 | 2372.7 | 2525  | 2280  | 2521  | 2421.9  |
| 360796    | Rcc1l        | 175.01 | 144     | 179    | 153    | 142   | 173   | 170   | 161     |
| 170913    | Abcb1a       | 612.26 | 594.38  | 536.78 | 588.29 | 666   | 515   | 581.9 | 551.02  |
| 50646     | Ptk2b        | 818    | 727     | 738.96 | 779.47 | 872   | 702   | 719   | 747     |
| 303968    | Ift57        | 356.19 | 331.28  | 304.81 | 380.37 | 321.3 | 306.6 | 389.1 | 345.19  |
| 362615    | Gpatch3      | 68     | 62      | 63     | 68     | 68    | 69    | 73    | 49      |
| 57033     | Adam22       | 5821   | 5476    | 5566   | 5863   | 5811  | 5709  | 6049  | 4983    |
| 309194    | Taf6l        | 126.34 | 135.35  | 126.18 | 124.57 | 124.4 | 129.3 | 131.5 | 123.33  |
| 303792    | Klh122       | 612    | 688     | 670    | 648    | 625   | 680   | 656   | 637     |
| 679462    | Tspan15      | 843    | 915     | 838    | 814    | 872   | 868   | 766   | 878     |
| 304132    | Rwdd2b       | 280    | 289     | 253    | 230    | 240   | 266   | 256   | 282     |
| 81643     | Atic         | 1431.5 | 1498.59 | 1364.3 | 1488.2 | 1394  | 1421  | 1497  | 1427.51 |
| 64523     | Tep1         | 796    | 873     | 938    | 957    | 912   | 856   | 864   | 905     |
| 287593    | Ptrh2        | 348.28 | 324.27  | 313.97 | 284.81 | 291.2 | 297.6 | 331.9 | 341.07  |
| 298104    | Tmem268      | 221    | 240     | 237    | 232    | 220   | 237   | 229   | 237     |
| 361668    | Ebf3         | 900.09 | 912.94  | 816.57 | 890.12 | 949.2 | 845.6 | 824.7 | 873.77  |
| 313539    | Kdm4a        | 1016   | 1078    | 1074   | 1086   | 1020  | 1091  | 1112  | 999     |
| 306400    | Arhgap35     | 5612   | 5762    | 5702   | 6361   | 6218  | 6001  | 5827  | 5215    |
| 288444    | Hsph1        | 6167   | 6365    | 5962   | 6832   | 6418  | 6104  | 6625  | 5989    |
| 690751    | Wdr59        | 368    | 342.76  | 384    | 346    | 375   | 352   | 406   | 297     |
| 296049    | Emc4         | 2221.4 | 2224.64 | 1811.9 | 1860.1 | 1950  | 1981  | 2125  | 2001.18 |
| 360942    | Pcdh7        | 1483.1 | 1552.42 | 1518.3 | 1771.6 | 1679  | 1526  | 1711  | 1362.83 |
| 296966    | Chchd3       | 1256   | 1293    | 1186   | 1110   | 1102  | 1217  | 1263  | 1227    |
| 100362311 | Arhgap33     | 247.03 | 221     | 253    | 226    | 221   | 250   | 235   | 234     |
| 363028    | Spc24        | 42     | 35      | 36     | 22     | 34    | 33    | 35    | 32      |
| 681740    | Jarid2       | 283.91 | 281.26  | 310.88 | 331.44 | 330.1 | 307.1 | 309   | 252.37  |
| 362814    | Rnf41        | 1519.1 | 1578.72 | 1417   | 1383.4 | 1497  | 1454  | 1475  | 1428.41 |
| 29748     | Ppp3r1       | 4772   | 4789    | 4288   | 4391   | 4562  | 4292  | 4722  | 4529    |
| 303607    | Ddx42        | 1375   | 1496    | 1467   | 1477   | 1498  | 1386  | 1476  | 1412    |
| 312946    | Tmem68       | 404    | 391     | 376    | 320    | 308   | 372   | 416   | 384     |
| 24214     | Atp1b2       | 2703   | 2770    | 3469   | 3536   | 3021  | 3221  | 2912  | 3232    |
| 361367    | Amfr         | 3429   | 3620    | 3469   | 3589   | 3299  | 3667  | 3510  | 3527    |
| 680066    | Lemd3        | 322    | 295     | 304    | 300    | 308   | 302   | 303   | 299     |
| 305470    | Drg1         | 758.26 | 729.32  | 727.87 | 645.26 | 805.2 | 651.3 | 627.1 | 756.09  |
| 79423     | Stmn4        | 401    | 314     | 323    | 322    | 347   | 326   | 323   | 354     |
| 83477     | Bcl10        | 428    | 357     | 395    | 316    | 325   | 399   | 375   | 386     |
| 691853    | Cox10        | 443    | 399     | 452    | 478    | 429   | 444   | 432   | 454     |
| 362735    | Coch         | 103    | 37      | 67     | 66     | 57    | 42    | 58    | 114     |
| 296731    | Nub1         | 2490   | 2477    | 2353   | 2399   | 2495  | 2414  | 2430  | 2309    |
| 246116    | Ptpn4        | 395    | 399     | 413    | 437    | 412   | 313   | 408   | 499     |
| 298369    | Osbpl9       | 2930   | 2697    | 2655   | 2843   | 2717  | 2710  | 2907  | 2710    |
| 24654     | Plcb1        | 415    | 403     | 367    | 467    | 422   | 359   | 434   | 425     |

|           |              |        |         |        |        |       |       |       |         |
|-----------|--------------|--------|---------|--------|--------|-------|-------|-------|---------|
| 362778    | Gskip        | 887.81 | 903.4   | 792.02 | 787.89 | 782.5 | 797   | 847.8 | 919.45  |
| 306879    | Fars2        | 281    | 276     | 272    | 280    | 265   | 270   | 276   | 290     |
| 65170     | Scamp4       | 730.21 | 741.85  | 730.34 | 716.36 | 695.6 | 718.5 | 738.7 | 744.9   |
| 304275    | Zkscan5      | 251.53 | 253.58  | 232.51 | 234    | 262.6 | 236   | 223   | 243     |
| 313430    | Fam151a      | 62.49  | 56.44   | 45.39  | 60.21  | 55.94 | 47.29 | 51.69 | 68      |
| 303398    | Tbx2         | 842    | 757     | 723    | 750    | 808   | 723   | 805   | 714     |
| 192147    | Polr2m       | 2164.8 | 2136.36 | 2052.7 | 2197.9 | 2076  | 2192  | 2065  | 2157.49 |
| 298384    | RGD1559786   | 897    | 832     | 766    | 748    | 798   | 785   | 801   | 836     |
| 114506    | Ankh         | 1805   | 2011    | 1947   | 1862   | 1748  | 2040  | 1917  | 1866    |
| 361877    | Ssbp2        | 966    | 992     | 862    | 994    | 899   | 919   | 979   | 990     |
| 300208    | Ddx23        | 1059   | 1092    | 1088   | 1003   | 1085  | 1062  | 1063  | 1002    |
| 288489    | Rbak         | 88.01  | 74.02   | 91.77  | 64.61  | 71.47 | 69.92 | 72.73 | 102.04  |
| 365387    | Odf3         | 41     | 36.37   | 51.66  | 33.79  | 40.11 | 44.21 | 35.01 | 42.34   |
| 500798    | C2cd4c       | 18.47  | 26.76   | 26.84  | 22.87  | 27.45 | 24.52 | 18.82 | 23.48   |
| 304951    | Nuf2         | 34     | 30      | 42     | 36     | 35    | 37    | 41    | 28      |
| 307067    | Dip2c        | 1517   | 1526    | 1520   | 1695   | 1599  | 1523  | 1608  | 1484    |
| 362037    | Aplar        | 1933.4 | 1832.99 | 1730.1 | 1753.9 | 1815  | 1820  | 1792  | 1773.5  |
| 313722    | Spsb1        | 462    | 443     | 469    | 464    | 480   | 460   | 447   | 438.21  |
| 116659    | Dync1i2      | 10708  | 10181   | 10000  | 10031  | 10038 | 9811  | 10706 | 10081   |
| 307050    | Mtpap        | 282    | 278     | 316    | 277    | 285   | 288   | 298   | 274     |
| 499755    | Tmem141      | 172    | 141     | 140    | 125    | 128   | 141   | 144   | 161     |
| 170921    | Itga2        | 64.01  | 105.32  | 140.91 | 73.6   | 89.71 | 105   | 88.08 | 98.42   |
| 309650    | Cpne5        | 201    | 219.82  | 214.95 | 204.97 | 214.8 | 225.9 | 184   | 210.26  |
| 170926    | Cysltr2      | 798    | 571     | 573    | 545    | 686   | 555   | 607   | 622     |
| 85472     | Polg         | 955.09 | 1016.64 | 987.74 | 1047   | 1016  | 1006  | 981.9 | 975.88  |
| 498350    | Theg1        | 4.02   | 8.5     | 6.05   | 9.56   | 8.04  | 3.04  | 4.01  | 12.85   |
| 108348096 | LOC108348096 | 344.57 | 196.99  | 384.1  | 279.48 | 165.1 | 367.6 | 209   | 455.38  |
| 498849    | Pcdhga10     | 353.22 | 390.17  | 460.17 | 392.38 | 408.2 | 432.4 | 399.6 | 345.07  |
| 313498    | Cd72         | 80.54  | 58.61   | 76.08  | 40.87  | 60.66 | 84.69 | 58.77 | 50.26   |
| 292100    | RGD1562218   | 429    | 431     | 391    | 389    | 384   | 408   | 432   | 405     |
| 361569    | Prr12        | 692    | 809     | 811    | 968    | 844   | 884   | 784   | 746     |
| 314251    | Sptb         | 2520   | 3348    | 2526   | 3430   | 2377  | 3256  | 3037  | 3075    |
| 100363065 | Zfp11        | 130.1  | 122     | 106.97 | 95     | 92    | 106   | 123   | 130     |
| 246280    | Slc15a4      | 492    | 543     | 547    | 517    | 549   | 545   | 491   | 500     |
| 170739    | Kcnh7        | 2352   | 2224    | 1795   | 3118   | 2493  | 1850  | 2511  | 2572    |
| 171137    | Khsrp        | 700.52 | 716.29  | 835.75 | 922.45 | 773.5 | 867.4 | 741.1 | 771.99  |
| 500790    | Cactin       | 266    | 276.29  | 303    | 241.65 | 268.4 | 281.6 | 265.4 | 264.38  |
| 25328     | Lamp1        | 10034  | 10434.2 | 9981.2 | 9396   | 9381  | 10067 | 10248 | 9885.84 |
| 313929    | Ncoal        | 1598   | 1607    | 1727   | 1882   | 1682  | 1652  | 1778  | 1657    |
| 288498    | Wipi2        | 557    | 565     | 533    | 624    | 572   | 579   | 556   | 557     |
| 303564    | Tmem101      | 418.93 | 372.8   | 348.51 | 324.19 | 416.2 | 363.5 | 345.3 | 329.78  |
| 25318     | Fnta         | 2258   | 2356    | 2216   | 1999   | 1960  | 2114  | 2279  | 2418    |
| 312192    | Ahcyl2       | 2093   | 2222    | 1959   | 2410   | 2069  | 2228  | 2230  | 2100    |
| 81763     | Rpl5         | 4458   | 4288    | 4576   | 3640   | 4019  | 3920  | 4224  | 4688    |
| 362757    | Rdh11        | 684    | 730     | 703    | 639    | 648   | 685   | 685   | 720     |
| 100910753 | Dnttip2      | 746    | 687     | 708    | 634    | 692   | 652   | 663   | 750     |
| 103692368 | Palm2        | 138.27 | 158.65  | 160.78 | 153.85 | 181.6 | 133.2 | 153.6 | 139.23  |
| 100911224 | LOC100911224 | 41.25  | 37.06   | 40.02  | 38.24  | 34.52 | 29.46 | 46.59 | 44.99   |
| 245981    | Rpl15        | 4014.6 | 3604.01 | 3825   | 3147.9 | 3494  | 3528  | 3576  | 3899.08 |
| 290224    | Emc9         | 150    | 179     | 165    | 127    | 136   | 131   | 167   | 183     |
| 315957    | Slc35g2      | 353    | 362     | 362    | 333    | 340   | 370   | 355   | 336     |
| 245966    | Tmem150a     | 311    | 306     | 334.99 | 300    | 275   | 331   | 312   | 326     |
| 361111    | Smim4        | 43     | 46      | 32     | 36     | 31    | 45    | 43    | 37      |
| 365410    | Osbp         | 1317.9 | 1479.92 | 1432   | 1436.7 | 1420  | 1474  | 1379  | 1356.95 |
| 64670     | Gabarapl2    | 1506.8 | 1387.22 | 1300.8 | 1298.6 | 1253  | 1242  | 1459  | 1504.59 |
| 292058    | Gins2        | 188.03 | 169.07  | 194.05 | 129.19 | 139.5 | 179.9 | 158.1 | 198.58  |



|           |              |        |         |        |        |       |       |       |         |
|-----------|--------------|--------|---------|--------|--------|-------|-------|-------|---------|
| 79223     | Gk           | 796    | 793     | 699    | 736    | 742   | 709   | 806   | 748     |
| 260416    | Carhsp1      | 1516   | 1512.16 | 1460   | 1268   | 1522  | 1307  | 1340  | 1551    |
| 313819    | Mast2        | 1607   | 1703    | 1767   | 1776   | 1735  | 1826  | 1656  | 1593    |
| 290206    | Psmbl1       | 31.93  | 35.05   | 37.86  | 32.45  | 41.99 | 21.79 | 36.91 | 35.74   |
| 170844    | Taf2         | 691    | 655     | 700    | 687    | 654   | 634   | 715   | 713     |
| 298836    | Snx17        | 1070   | 1023    | 1040   | 891    | 951   | 950   | 976   | 1122    |
| 100909704 | LOC100909704 | 2      | 4       | 2.05   | 0      | 4     | 0     | 2     | 2       |
| 310074    | Depdc1b      | 48     | 28      | 43     | 42     | 44    | 39    | 41    | 36      |
| 364648    | Shcbp1       | 45     | 33      | 55     | 28     | 45    | 31    | 45    | 39      |
| 315676    | Dmxl2        | 3636   | 3630    | 3421   | 4163   | 3950  | 3238  | 3895  | 3675    |
| 64205     | Rplp0        | 8491.9 | 8138    | 8808   | 6543.9 | 7749  | 8100  | 7653  | 8283    |
| 498703    | Fam193b      | 747    | 662     | 821    | 709    | 754   | 748   | 727   | 692     |
| 302661    | Ofd1         | 265.12 | 221     | 252.01 | 240    | 248.1 | 222   | 276   | 225.99  |
| 300994    | Ifrd2        | 141    | 126     | 122    | 101    | 120   | 137   | 111   | 119     |
| 362819    | Sarnp        | 985.96 | 919.74  | 1014.4 | 986    | 1008  | 907.2 | 945.8 | 1021.71 |
| 303183    | Snap47       | 501    | 484     | 448    | 374    | 436   | 456   | 481   | 423     |
| 303684    | Trim65       | 248.49 | 228     | 223    | 255.15 | 234   | 232   | 236.8 | 246     |
| 83626     | Ugcg         | 1661.1 | 1653.73 | 1535.9 | 1595.5 | 1679  | 1667  | 1595  | 1465.94 |
| 84019     | Nae1         | 653    | 632     | 605    | 582    | 585   | 607   | 614   | 651     |
| 84508     | Rnf103       | 984    | 1061    | 962    | 952    | 983   | 955   | 999   | 998     |
| 679140    | Exosc1       | 247    | 263     | 262    | 225    | 202   | 247   | 276   | 266     |
| 302559    | Wdr45        | 454    | 451     | 405    | 353    | 383   | 454   | 420   | 396     |
| 66028     | Arl6ip5      | 1160   | 1130    | 1032   | 1002   | 1014  | 1058  | 1158  | 1068    |
| 100145871 | Adh5         | 1168   | 1177    | 1149   | 1015   | 1106  | 1065  | 1132  | 1179    |
| 171048    | Tspan8       | 5438   | 4956    | 4735   | 4265   | 4724  | 4210  | 4992  | 5352    |
| 310159    | Drosha       | 1468   | 1551    | 1610   | 1741   | 1585  | 1617  | 1598  | 1532    |
| 313101    | Fbx14        | 512    | 548     | 466    | 487    | 475   | 503   | 517   | 506     |
| 83721     | Dvl1         | 1043.2 | 985.54  | 1038   | 1034   | 992.6 | 1041  | 1020  | 1022.64 |
| 64625     | Bid          | 1077.5 | 1135.68 | 1037.5 | 956.11 | 1105  | 1045  | 989.4 | 1042.52 |
| 290744    | Ing2         | 213    | 234     | 197    | 197    | 195   | 218   | 206   | 217     |
| 362856    | Pwp1         | 316    | 270     | 302    | 293    | 264   | 272   | 321   | 317     |
| 100362441 | Gpr82        | 5.32   | 5.76    | 4.63   | 2.86   | 2.53  | 6.74  | 1.73  | 7.46    |
| 108350028 | LOC108350028 | 48.92  | 53.03   | 45.46  | 43.47  | 42.29 | 48.48 | 54.85 | 44.13   |
| 362235    | Syndig1      | 146    | 138     | 116    | 108    | 138   | 104   | 128   | 135     |
| 362657    | Mthfr        | 662.17 | 746.37  | 718.16 | 691.53 | 684.9 | 712.4 | 703.3 | 701.12  |
| 314903    | Srgap1       | 1194   | 1220    | 1462   | 1405   | 1370  | 1326  | 1314  | 1240    |
| 114124    | Akap1        | 493    | 516     | 521    | 526    | 503   | 497   | 518   | 526     |
| 362320    | Fam133b      | 499    | 486     | 477    | 425    | 496   | 437   | 476   | 467     |
| 362762    | Dcaf4        | 278    | 271     | 249    | 236    | 268   | 259   | 250   | 251     |
| 362606    | Sync         | 1509.5 | 1394.36 | 1530.9 | 1566.3 | 1608  | 1457  | 1505  | 1395.81 |
| 293694    | Map4k2       | 885    | 877     | 811    | 883    | 863   | 888   | 869   | 816     |
| 287592    | Tubd1        | 89.56  | 84.09   | 87.75  | 63.49  | 81.24 | 65.05 | 101.9 | 74.79   |
| 56011     | Ywhab        | 17080  | 16788   | 15508  | 15858  | 15773 | 15762 | 17424 | 15898   |
| 362161    | Rapsn        | 84     | 96      | 85     | 82     | 79    | 70    | 83    | 113     |
| 54252     | Mid1         | 398    | 357     | 362    | 447    | 379   | 346   | 430   | 400     |
| 361985    | LOC361985    | 1215.5 | 1237.49 | 1140.6 | 1095.4 | 1099  | 1130  | 1174  | 1259.35 |
| 100362572 | Mpv171       | 517.5  | 435.42  | 421.93 | 436.28 | 446.9 | 405.9 | 429.2 | 518.74  |
| 297768    | Lactb2       | 668    | 645     | 603    | 524    | 571   | 591   | 634   | 630     |
| 287441    | Zbtb4        | 3037   | 2963    | 2935.1 | 3301   | 3153  | 2987  | 2930  | 3096    |
| 365841    | Slc25a44     | 557.12 | 506.58  | 554.3  | 556.63 | 585.2 | 556.3 | 473.1 | 547.53  |
| 29210     | Epha3        | 48     | 49      | 39     | 39     | 53    | 38    | 38    | 45      |
| 365797    | Ufml         | 901    | 838     | 861    | 728    | 817   | 797   | 830   | 865     |
| 310526    | Golim4       | 1857   | 1683.33 | 1680.1 | 1989   | 1926  | 1665  | 1882  | 1695.34 |
| 295674    | Plekha3      | 554    | 615     | 552    | 585    | 513   | 569   | 627   | 584     |
| 311384    | Sema6d       | 1536.9 | 1747.27 | 1688.5 | 1678.8 | 1667  | 1649  | 1791  | 1506.72 |
| 498704    | Prr7         | 214.85 | 187.18  | 200.59 | 146.4  | 190.9 | 193.3 | 200.8 | 159.89  |



|           |              |        |         |        |        |       |       |       |         |
|-----------|--------------|--------|---------|--------|--------|-------|-------|-------|---------|
| 303676    | Slc25a19     | 233    | 207.2   | 188    | 214    | 199.3 | 195.2 | 224   | 219     |
| 301544    | Farsb        | 1273   | 1230    | 1102   | 1242   | 1210  | 1234  | 1276  | 1100    |
| 361988    | Ints3        | 945    | 1006    | 1068   | 1116   | 954   | 1135  | 1081  | 942     |
| 364382    | Prmt5        | 922    | 930     | 958    | 977    | 949   | 996   | 886   | 935     |
| 691947    | Eif3j        | 1602   | 1643    | 1639   | 1612   | 1629  | 1549  | 1696  | 1586    |
| 288595    | Nsun5        | 286    | 283     | 272    | 242    | 258   | 270   | 273   | 276     |
| 300659    | Rnf26        | 599.64 | 652.27  | 633.84 | 624.46 | 678.3 | 642.8 | 567.7 | 607.54  |
| 315994    | Mapkapk3     | 299    | 374     | 260    | 333    | 284   | 325   | 303   | 347     |
| 314300    | Riox1        | 123    | 157     | 136.9  | 133    | 131   | 128   | 143   | 144.87  |
| 691318    | Ppp2r5c      | 3527   | 3365    | 3339   | 3580   | 3423  | 3482  | 3575  | 3255    |
| 246042    | Nifk         | 838    | 779     | 747    | 732    | 766   | 683   | 784   | 846     |
| 288305    | Cct8         | 4649.7 | 4532.36 | 4411.1 | 4173.8 | 4169  | 4131  | 4767  | 4603.18 |
| 680616    | Ppp1r16b     | 873.05 | 906.16  | 859.2  | 947.62 | 836.1 | 901.3 | 852.9 | 976.03  |
| 297523    | Vgll4        | 772    | 793     | 706    | 827    | 772   | 728   | 794   | 787     |
| 100910486 | LOC100910486 | 3.44   | 0.88    | 2.77   | 3.87   | 4.28  | 2.52  | 4.1   | 0       |
| 103694868 | LOC103694868 | 3.44   | 0.88    | 2.77   | 3.87   | 4.28  | 2.52  | 4.1   | 0       |
| 287707    | Nkiras2      | 431    | 362     | 428    | 424    | 380   | 396   | 436   | 424     |
| 83806     | Psm1         | 5238   | 5236    | 4865   | 5170   | 5213  | 5030  | 5294  | 4860    |
| 360800    | Sumf2        | 124    | 144     | 153    | 129    | 117   | 159   | 130   | 141     |
| 300472    | Vps26b       | 1499   | 1640    | 1550   | 1569   | 1516  | 1569  | 1605  | 1534    |
| 360426    | Pla2g6       | 1273   | 1309    | 1275   | 1304   | 1305  | 1322  | 1214  | 1292    |
| 294862    | 6-Mar        | 3794   | 3708    | 3596   | 4046   | 3946  | 3586  | 3978  | 3552    |
| 499587    | Slc7a14      | 305    | 311     | 339    | 523    | 455   | 288   | 419   | 308     |
| 304580    | Ssh1         | 607    | 567     | 593    | 640    | 610   | 550   | 640   | 594     |
| 24516     | Jun          | 1364   | 1355    | 1798   | 1812   | 1362  | 1677  | 1675  | 1581    |
| 100363310 | Cystm1       | 1628   | 1555    | 1551   | 1423   | 1525  | 1503  | 1477  | 1619    |
| 686393    | Pradcl       | 112.06 | 104.01  | 103.26 | 80.02  | 102   | 92.07 | 107.1 | 96      |
| 309510    | Cpeb3        | 1948.4 | 2066.61 | 1815.3 | 2046.8 | 2089  | 1995  | 2020  | 1730.79 |
| 58963     | Htr3b        | 2774   | 2418    | 2457   | 2464   | 2564  | 2313  | 2599  | 2583    |
| 291925    | RGD1308706   | 359    | 322     | 317    | 313    | 314   | 312   | 346   | 332     |
| 497983    | Fam117a      | 347    | 316     | 333    | 316    | 363   | 317   | 317   | 308     |
| 312616    | Trnt1        | 621.35 | 640.82  | 627.75 | 605.6  | 641.1 | 549.8 | 642.1 | 649.38  |
| 286898    | Npc2         | 2390   | 2448    | 2435   | 2014   | 2146  | 2333  | 2250  | 2509    |
| 300463    | Herpud2      | 632    | 605     | 633    | 600    | 607   | 652   | 609   | 589     |
| 305577    | Ahsa2        | 731.27 | 585.8   | 640.78 | 617.31 | 609.4 | 736   | 595.5 | 620.76  |
| 161477    | Rps13        | 1685   | 1580.03 | 1601   | 1302   | 1441  | 1395  | 1526  | 1773.29 |
| 282712    | Slc6a15      | 3044.3 | 2963.43 | 2808   | 2954.8 | 3067  | 2738  | 3049  | 2854.82 |
| 304884    | Tor3a        | 361.84 | 417.41  | 389.79 | 313.04 | 360.9 | 382.7 | 361.4 | 369.35  |
| 246255    | Ppp2r2d      | 1041   | 954     | 940    | 903    | 943   | 970   | 967   | 938     |
| 498591    | RGD1559804   | 1.01   | 2.83    | 0      | 0      | 0     | 0     | 2.75  | 1.07    |
| 313548    | Zfp691       | 168    | 163     | 140    | 105    | 137   | 146   | 157   | 133     |
| 29669     | Psm2         | 2397   | 2302    | 2056   | 1935   | 2013  | 1933  | 2217  | 2482    |
| 301543    | Sgpp2        | 2394.1 | 2520.79 | 2309.4 | 2634   | 2500  | 2564  | 2532  | 2211.85 |
| 685879    | Jazf1        | 342    | 338     | 343    | 333    | 331   | 329   | 358   | 331     |
| 683927    | Cstf2        | 847.91 | 809.22  | 796.09 | 824.81 | 873.9 | 809.7 | 825.1 | 752.5   |
| 116647    | Nlgn1        | 388.48 | 414.02  | 354.83 | 411.97 | 416.7 | 344   | 425.5 | 375.02  |
| 100909844 | LOC100909844 | 8.95   | 0       | 0      | 6.6    | 0     | 0     | 7.67  | 7.8     |
| 296762    | Phtf2        | 469    | 451     | 498    | 528    | 453   | 514   | 512   | 457     |
| 108348120 | LOC108348120 | 292.22 | 227.88  | 270.78 | 260.06 | 286.8 | 244   | 278.8 | 235.93  |
| 29539     | Aldh2        | 1679   | 1682    | 1675   | 1612   | 1429  | 1675  | 1610  | 1900    |
| 300849    | Fbxo9        | 1239   | 1200    | 1085   | 977    | 1128  | 1143  | 1166  | 1041    |
| 291541    | Cidea        | 45     | 65      | 41     | 46     | 41    | 47    | 69    | 39      |
| 64373     | Rhob         | 3054   | 2755    | 3043   | 3017   | 2758  | 3093  | 3115  | 2843    |
| 60334     | Ensa         | 2599   | 2520    | 2308   | 2279   | 2467  | 2388  | 2454  | 2348    |
| 363187    | Mrps10       | 279    | 258     | 229    | 230    | 254   | 226   | 261   | 250     |
| 287054    | Mettl22      | 387    | 432     | 427    | 348    | 369   | 413   | 367   | 437     |

|           |              |        |         |        |        |       |       |       |         |
|-----------|--------------|--------|---------|--------|--------|-------|-------|-------|---------|
| 100365259 | LOC100365259 | 241    | 253     | 226    | 278    | 241   | 228   | 262   | 262     |
| 363235    | Als2         | 715.88 | 709.93  | 709.97 | 861.42 | 747.5 | 791.1 | 695.3 | 748.23  |
| 294320    | Glo1         | 2213   | 2198    | 2146   | 1858   | 2035  | 2019  | 2083  | 2236    |
| 291794    | Snrpd1       | 613    | 555     | 515    | 523    | 529   | 525   | 560   | 581     |
| 63881     | Rapgef1      | 1305   | 1366.9  | 1341.3 | 1464   | 1392  | 1395  | 1391  | 1271.8  |
| 362548    | Itgb3bp      | 212    | 208.94  | 207    | 170    | 189   | 180   | 182   | 243     |
| 365590    | Zbtb24       | 205.35 | 234.67  | 213.7  | 162.72 | 216.1 | 195.9 | 194.4 | 205.96  |
| 296599    | Cacfd1       | 481.2  | 396.11  | 365.6  | 350.2  | 438.1 | 397.5 | 358.5 | 391.23  |
| 311569    | Acss2        | 2211   | 2317    | 2230   | 2199   | 2081  | 2355  | 2227  | 2250    |
| 684055    | Urad         | 1.02   | 0       | 1.02   | 0      | 0     | 0     | 2.03  | 0       |
| 289724    | Nop14        | 492    | 524     | 470    | 574    | 496   | 498   | 520   | 536     |
| 29332     | Stmn1        | 4980   | 4917    | 4967   | 4109   | 4243  | 4664  | 4669  | 5305    |
| 296969    | Slc35b4      | 1137   | 1076    | 1035   | 1102   | 1086  | 1030  | 1168  | 1045    |
| 363273    | Cops7b       | 431.91 | 454.96  | 422.71 | 423.12 | 418.2 | 430.5 | 439   | 436.72  |
| 84392     | Kif3a        | 4342   | 4525    | 3972   | 4843   | 4472  | 4088  | 4687  | 4350    |
| 116698    | Trim28       | 1587   | 1611    | 1716   | 1540   | 1564  | 1666  | 1624  | 1569    |
| 117543    | Decr1        | 438    | 359     | 361    | 304    | 302   | 324   | 432   | 397     |
| 117180    | Csdel        | 4030.3 | 4049.65 | 3927.6 | 3825.8 | 3983  | 3806  | 3914  | 4054.83 |
| 361030    | Tmem260      | 765    | 754     | 741    | 676    | 734   | 725   | 778   | 685     |
| 287710    | Cavin1       | 1425   | 1370    | 1622   | 1482   | 1523  | 1484  | 1313  | 1551    |
| 113922    | Selenof      | 4216   | 3850    | 3816   | 3504   | 3616  | 3680  | 3866  | 4151    |
| 289318    | Tmem63a      | 151    | 160     | 174    | 154    | 139   | 185   | 151   | 161     |
| 64053     | Dlg2         | 1822   | 1752    | 1822   | 2087   | 1940  | 1841  | 1968  | 1699    |
| 689560    | Ryr2         | 1453   | 1440    | 1527   | 1934   | 1764  | 1546  | 1623  | 1390.99 |
| 364678    | Sfxn1        | 1654   | 1688    | 1675   | 1624   | 1760  | 1641  | 1604  | 1605    |
| 689820    | Kmt5a        | 2484.6 | 2514.06 | 2427.4 | 2617.6 | 2422  | 2558  | 2545  | 2471.14 |
| 303514    | Msl1         | 1883   | 1787    | 1923   | 1920   | 1913  | 1826  | 1910  | 1829    |
| 300158    | Kif21a       | 10986  | 11391   | 10857  | 12734  | 12191 | 10874 | 11825 | 10864   |
| 64638     | Rpl28        | 3161.6 | 2743.85 | 2907.7 | 2384.9 | 2748  | 2783  | 2532  | 3083.04 |
| 313861    | Eml4         | 878.99 | 855     | 845    | 883    | 840   | 847   | 944   | 815     |
| 287532    | Slc43a2      | 818    | 927     | 908    | 1037   | 1003  | 926   | 894   | 850     |
| 287927    | Ube2v2       | 1953   | 1915    | 1752   | 1797   | 1791  | 1743  | 1929  | 1920    |
| 29671     | Psma4        | 1991   | 1981    | 1969   | 1711   | 1856  | 1796  | 1916  | 2049    |
| 103691034 | Peg3         | 7445   | 7494    | 6919   | 8541   | 8410  | 6923  | 7637  | 7290    |
| 315776    | Tln2         | 3399   | 3621    | 3756   | 4174   | 3871  | 3741  | 3722  | 3548    |
| 619573    | Fam104a      | 1116.9 | 1036.76 | 1058   | 981.9  | 1047  | 1091  | 1004  | 1032.66 |
| 360496    | Ciao3        | 375    | 357     | 314    | 275    | 323   | 305   | 328   | 359     |
| 362902    | Dcaf13       | 406    | 384     | 405    | 348    | 390   | 362   | 391   | 393     |
| 288526    | Akap17a      | 875    | 796     | 806    | 833    | 906   | 831   | 789   | 769     |
| 497874    | RGD1565784   | 395    | 408     | 420    | 324    | 369   | 359   | 392   | 420     |
| 361174    | Alg11        | 1636.7 | 1601.9  | 1538.4 | 1565   | 1607  | 1527  | 1447  | 1731.72 |
| 313409    | Dnajc6       | 3408   | 3392    | 3173   | 3812   | 3587  | 3440  | 3400  | 3296    |
| 310672    | Tars2        | 822    | 784     | 721    | 786    | 810   | 750   | 759   | 780     |
| 316328    | Kansl3       | 1377   | 1412    | 1416   | 1356   | 1342  | 1381  | 1376  | 1437    |
| 304714    | Rrn3         | 1121.4 | 1105.63 | 1010.4 | 1043   | 1127  | 961   | 1098  | 1074.71 |
| 619345    | Surf2        | 305.73 | 464.72  | 455.11 | 409.39 | 364.7 | 439   | 445.2 | 378.73  |
| 305408    | Adgra3       | 252    | 282     | 270    | 318    | 269   | 267   | 337   | 244     |
| 102548503 | LOC102548503 | 113.56 | 96.57   | 89.38  | 98.58  | 103.9 | 91.06 | 109   | 92.4    |
| 117088    | Adarb2       | 65.01  | 74.07   | 72.72  | 78.7   | 74.25 | 49.88 | 94.1  | 70.98   |
| 362750    | At11         | 5649   | 5393    | 5013   | 5226   | 5396  | 5123  | 5441  | 5227    |
| 360497    | Wdr24        | 431    | 493     | 427    | 462    | 434   | 426   | 454   | 491     |
| 25136     | Gfra2        | 1897.8 | 1945.14 | 1770.1 | 1981.8 | 1849  | 1960  | 1791  | 1961.06 |
| 108350443 | Inafm2       | 322    | 272     | 287    | 258    | 295   | 300   | 284   | 255     |
| 25435     | Eef2k        | 802    | 768     | 823    | 811    | 915   | 821   | 679   | 775     |
| 298867    | Klh129       | 528    | 507     | 493    | 545    | 467   | 554   | 543   | 500     |
| 245956    | Scn3b        | 1983.6 | 1751.85 | 1783.3 | 1768.8 | 2030  | 1642  | 1862  | 1721.92 |

|           |              |        |         |        |        |       |       |       |         |
|-----------|--------------|--------|---------|--------|--------|-------|-------|-------|---------|
| 305888    | Zfhx2        | 865    | 859     | 914    | 1061   | 1016  | 963   | 890   | 814     |
| 288701    | Srsf9        | 181    | 160     | 192    | 162    | 147   | 169   | 191   | 185     |
| 24849     | Tpil         | 7107.6 | 6845.21 | 6810.6 | 6024.3 | 6222  | 6426  | 6875  | 7148.79 |
| 503018    | Wdr35        | 456    | 456     | 491    | 457    | 444   | 459   | 519   | 430     |
| 315554    | Pus3         | 253    | 209     | 270    | 199    | 228   | 217   | 261   | 221     |
| 362769    | Dglucy       | 183    | 196.02  | 193.26 | 188    | 175.1 | 192.2 | 193.7 | 196.16  |
| 303068    | Adam19       | 3493   | 3733    | 3894   | 4073.9 | 3860  | 3702  | 3979  | 3589    |
| 81672     | Grm7         | 656.21 | 607.8   | 648.97 | 643.53 | 674.8 | 619.7 | 610.8 | 640.37  |
| 100909827 | Kbtbd7       | 300    | 286     | 265    | 327    | 315   | 291   | 268   | 299     |
| 361375    | Heatr3       | 391.44 | 385.81  | 353.87 | 315.12 | 366.4 | 378.3 | 375.7 | 319.72  |
| 313928    | Efr3b        | 2041   | 2143    | 2090   | 2271   | 2133  | 2154  | 2107  | 2115    |
| 690043    | Rnf168       | 431    | 393     | 405    | 436    | 440   | 371   | 392   | 455     |
| 363002    | Smarcd1      | 1238   | 1300    | 1180   | 1287   | 1227  | 1295  | 1242  | 1220    |
| 116646    | Tpt1         | 12294  | 11750   | 12299  | 10019  | 10581 | 11612 | 11245 | 12730   |
| 293960    | Zfand5       | 3279   | 2986    | 2885   | 3095   | 3099  | 2936  | 3166  | 2993    |
| 679898    | Zmat2        | 1202   | 1180    | 1250   | 1175   | 1216  | 1138  | 1200  | 1233    |
| 307070    | Larp4b       | 2028   | 2020    | 2046   | 2097   | 2138  | 1973  | 2103  | 1943    |
| 102557190 | LOC102557190 | 7.73   | 9.12    | 10.05  | 4.53   | 13.39 | 5     | 7.57  | 5.34    |
| 364137    | Tmem165      | 660    | 690     | 693    | 618    | 617   | 687   | 716   | 630     |
| 108350349 | LOC108350349 | 121    | 114     | 110    | 142    | 165   | 109   | 113   | 98      |
| 499071    | Ccdc106      | 116    | 110     | 138    | 124    | 119   | 116   | 110   | 141     |
| 29307     | Gpr182       | 68     | 62      | 50     | 64     | 50    | 63    | 54    | 76      |
| 361296    | Rnf125       | 304    | 314     | 289    | 314    | 341   | 251   | 324   | 300     |
| 100909598 | Pigbos1      | 95.32  | 76.65   | 70.22  | 70.99  | 76.08 | 58.55 | 74.37 | 102.9   |
| 29705     | Gabra1       | 1558   | 1312    | 1300   | 1459   | 1392  | 1335  | 1446  | 1433    |
| 296320    | Ctnnb11      | 575    | 536     | 566    | 527    | 544   | 576   | 581   | 494     |
| 312477    | Dok1         | 59     | 61      | 64     | 61     | 53    | 62    | 55    | 74      |
| 498183    | Mapkapk5     | 547    | 567     | 581    | 512    | 571   | 556   | 541   | 530     |
| 54283     | Pfkfb4       | 303    | 317     | 338    | 272    | 289   | 315   | 322   | 299     |
| 300120    | Fam118a      | 329    | 311     | 276    | 315    | 302   | 267   | 329   | 328     |
| 360831    | Abhd11       | 270.34 | 283.46  | 241.19 | 251.62 | 225.2 | 270.4 | 318.8 | 228.01  |
| 100362324 | Dhx29        | 644    | 676     | 691    | 702    | 673   | 680   | 721   | 628     |
| 100909597 | LOC100909597 | 328.68 | 275.42  | 309.21 | 328.88 | 350.6 | 282.7 | 312.5 | 291.34  |
| 690085    | Bcl7a        | 485    | 511     | 466    | 559    | 552   | 485   | 473   | 503     |
| 308568    | Fv1          | 679.62 | 616     | 642    | 491.37 | 547.2 | 609.7 | 653   | 609.57  |
| 367242    | Rab23        | 768.11 | 786.32  | 750.1  | 870.16 | 784.3 | 755.9 | 845.6 | 776.4   |
| 313867    | Lrpprc       | 2539   | 2708    | 2374   | 2556   | 2581  | 2466  | 2687  | 2403.01 |
| 140929    | Pde7b        | 320.82 | 249.21  | 232.1  | 273.44 | 244.6 | 279.5 | 264.4 | 283.04  |
| 301575    | Itm2c        | 9484   | 9550    | 9865   | 8958   | 8956  | 9143  | 9806  | 9806    |
| 363077    | Dis3l        | 493    | 544     | 509    | 535    | 510   | 540   | 506   | 517     |
| 287871    | Rptor        | 1199   | 1207    | 1233   | 1312   | 1251  | 1227  | 1203  | 1251    |
| 500219    | Lrrtm4       | 208    | 215     | 171    | 189    | 186   | 211   | 193   | 190     |
| 116643    | Vcp          | 12203  | 12264   | 11130  | 11881  | 11284 | 11765 | 12580 | 11668   |
| 299121    | Actr10       | 2435   | 2325.43 | 2138.7 | 2153.6 | 2193  | 2169  | 2284  | 2372.45 |
| 499314    | Tut1         | 275    | 256     | 276    | 254    | 254   | 262   | 256   | 285     |
| 500367    | Klhl42       | 384    | 405     | 383    | 422    | 466   | 338   | 386   | 398     |
| 362031    | Alg14        | 471    | 511     | 484    | 398    | 442   | 483   | 452   | 480     |
| 299971    | Atp6v1c1     | 3080   | 2867    | 2657   | 2667   | 2814  | 2611  | 2892  | 2912    |
| 360950    | Wdr1         | 4032   | 4162    | 4623   | 4291   | 4142  | 4317  | 4507  | 4079    |
| 362237    | Tbcd20       | 758    | 719     | 783    | 753    | 761   | 761   | 740   | 740     |
| 681059    | Vps25        | 1694   | 1702    | 1569   | 1345   | 1593  | 1514  | 1597  | 1583    |
| 291691    | Brd8         | 679    | 729     | 662    | 683    | 714   | 707   | 634   | 688     |
| 117095    | Bhlhe41      | 968    | 922     | 831    | 885    | 939   | 964   | 823   | 867     |
| 363236    | Fam117b      | 1527   | 1491    | 1546   | 1563   | 1623  | 1488  | 1515  | 1479    |
| 24400     | Gnb1         | 16706  | 16950   | 16365  | 15904  | 16867 | 16522 | 16509 | 15791   |
| 100363225 | LOC100363225 | 114.98 | 107.96  | 92.83  | 79.91  | 81.61 | 80.71 | 117.3 | 114.69  |

|           |              |        |         |        |        |       |       |       |          |
|-----------|--------------|--------|---------|--------|--------|-------|-------|-------|----------|
| 294318    | Btbd9        | 692    | 766     | 665    | 724    | 684   | 755   | 709   | 689      |
| 24626     | Pde4b        | 239    | 198     | 205    | 221    | 222   | 202   | 240   | 196      |
| 498154    | LOC498154    | 171    | 137     | 146    | 134    | 138   | 154   | 157   | 137      |
| 688885    | Nol11        | 517    | 556.99  | 477    | 519    | 509   | 507   | 540   | 507      |
| 294698    | Slc30a5      | 674    | 624     | 588    | 500    | 584   | 641   | 598   | 555      |
| 259274    | Nmt1         | 1602   | 1585    | 1549   | 1529   | 1659  | 1528  | 1539  | 1518     |
| 363836    | Ube2l3       | 4697   | 4923    | 4444   | 4755   | 4486  | 4875  | 4656  | 4740     |
| 288236    | Psmg1        | 698    | 643     | 555    | 544    | 591   | 568   | 645   | 628      |
| 361600    | Tm6sf1       | 1962.9 | 1870.47 | 2023.9 | 1814.8 | 1895  | 1825  | 2075  | 1852.13  |
| 85238     | Synj1        | 5035   | 5353    | 4917   | 6448   | 5605  | 5189  | 5563  | 5325     |
| 314325    | Gpatch2l     | 325    | 334.29  | 360.35 | 319.8  | 337.1 | 334.4 | 318.6 | 345.03   |
| 295443    | Papss1       | 2536   | 2783    | 2551   | 2258   | 2227  | 2571  | 2793  | 2504     |
| 140726    | Cacng5       | 538    | 511     | 517    | 584    | 569   | 495   | 547   | 532      |
| 498559    | CommD6       | 707.99 | 590.33  | 531.43 | 638.32 | 607.2 | 581.2 | 614.3 | 657.38   |
| 361695    | Tmem134      | 459    | 485     | 478    | 432    | 433   | 454   | 477   | 484      |
| 298410    | Cmpk1        | 2425   | 2516    | 2396   | 2246   | 2309  | 2274  | 2532  | 2437     |
| 102548541 | LOC102548541 | 116.79 | 96.86   | 105.99 | 118.78 | 104.4 | 112.5 | 104.4 | 115.77   |
| 100911235 | Med7         | 265    | 237     | 224    | 213    | 218   | 249   | 243   | 226      |
| 108348257 | LOC108348257 | 20     | 13.76   | 15.72  | 16.41  | 21    | 20    | 11    | 13.68    |
| 29140     | Snn          | 2315.5 | 2241.13 | 2024.7 | 2148.4 | 1908  | 2205  | 2226  | 2362.56  |
| 64631     | Ube2g1       | 1175   | 1102    | 1023   | 1136   | 1058  | 1105  | 1157  | 1102     |
| 366017    | Exosc2       | 175    | 137     | 174    | 149    | 146   | 164   | 168   | 155      |
| 304488    | Pptc7        | 1710.6 | 1629.51 | 1365.3 | 1587.4 | 1598  | 1590  | 1594  | 1491.43  |
| 303823    | Map3k13      | 322.22 | 331.05  | 339.09 | 433.22 | 373.4 | 369.9 | 339.7 | 338.22   |
| 299188    | Zfyve1       | 804    | 817     | 796    | 823    | 854   | 777   | 812   | 787      |
| 50663     | Calm2        | 10728  | 10441.8 | 9417   | 9318.3 | 9417  | 9085  | 10403 | 10877.07 |
| 266709    | Pkig         | 999    | 971     | 1065   | 866    | 1054  | 912   | 921   | 1002     |
| 100912259 | LOC100912259 | 106.95 | 123.36  | 93.98  | 54.29  | 65.87 | 97.45 | 94.25 | 119.85   |
| 309060    | Fam53b       | 712    | 763     | 733    | 734    | 718   | 824   | 716   | 675      |
| 689116    | Ncbp2        | 802.88 | 699.73  | 695.82 | 643.95 | 740.8 | 715.7 | 646.9 | 730.28   |
| 368002    | Baz1b        | 986    | 1036    | 1112   | 1157   | 1089  | 1020  | 1120  | 1049     |
| 310158    | RGD1306502   | 775.61 | 829.59  | 746.33 | 831.19 | 773.8 | 781.5 | 830.4 | 787.41   |
| 26954     | Rheb         | 3152   | 2943    | 2617   | 2566   | 2565  | 2822  | 2901  | 2956     |
| 294948    | Armc1        | 1095   | 1163    | 960    | 1099   | 1076  | 964   | 1101  | 1163     |
| 81513     | Lig1         | 412.18 | 367     | 454    | 405    | 410   | 441   | 394   | 388.27   |
| 287119    | Zfp598       | 634    | 657     | 745    | 648    | 685   | 696   | 671   | 624      |
| 373542    | Stk25        | 2357.1 | 2300.62 | 2184.1 | 2078.5 | 2374  | 2177  | 2186  | 2156.16  |
| 29653     | Gpam         | 3878   | 3838    | 3623   | 4272   | 4119  | 3565  | 3931  | 3950     |
| 102547219 | Mosmo        | 242    | 253     | 234    | 292.99 | 265   | 232   | 272   | 250      |
| 290637    | Colgalt1     | 1064   | 1129    | 1172   | 1087   | 1139  | 1083  | 1109  | 1108     |
| 366492    | Epha2        | 89     | 89      | 98     | 71     | 82    | 82    | 100   | 82       |
| 64474     | Hdlbp        | 10607  | 11060   | 10932  | 11944  | 11269 | 11231 | 11345 | 10570    |
| 117560    | Klf9         | 1023   | 875     | 853    | 1103   | 1078  | 1007  | 943   | 815      |
| 25456     | Glr3         | 3590   | 3590.91 | 3008.8 | 3668.3 | 3400  | 3406  | 3703  | 3310.32  |
| 690183    | LOC690183    | 369.71 | 365.97  | 361.96 | 361.4  | 310.5 | 358.4 | 378.7 | 407.33   |
| 29532     | Ighmbp2      | 643    | 621     | 609    | 602    | 558   | 689   | 625   | 596      |
| 500117    | Ccdc126      | 779    | 779     | 569    | 750    | 726   | 614   | 787   | 742      |
| 24248     | Cat          | 2656.3 | 2593.2  | 2480.3 | 2773.6 | 2863  | 2522  | 2598  | 2491.61  |
| 103690054 | LOC103690054 | 163.34 | 153.84  | 152.17 | 132.17 | 149.2 | 153   | 131.3 | 166.34   |
| 25374     | Alad         | 386    | 385     | 367    | 316    | 378   | 380   | 357   | 335      |
| 690349    | RGD1597339   | 173    | 193     | 192    | 172    | 161   | 159   | 209   | 199      |
| 103689984 | Tbc1d12      | 190.29 | 168.64  | 201.55 | 161.81 | 290.2 | 110.6 | 192.1 | 127.5    |
| 117582    | Tmem158      | 789    | 776     | 822    | 599    | 909   | 698   | 688   | 683      |
| 298906    | Pqlc3        | 1910   | 1790    | 1763   | 1629   | 1813  | 1753  | 1700  | 1807     |
| 360461    | Fopn1        | 739    | 682     | 614    | 621    | 579   | 620   | 693   | 757      |
| 688590    | Rundc3b      | 523    | 490     | 407    | 485    | 485   | 420   | 496   | 499      |

|           |              |        |         |        |        |       |       |       |         |
|-----------|--------------|--------|---------|--------|--------|-------|-------|-------|---------|
| 307527    | Sap130       | 624    | 640     | 667    | 763    | 691   | 705   | 639   | 652     |
| 303281    | Supt6h       | 3005   | 3220.81 | 3150.7 | 3766.4 | 3421  | 3404  | 3207  | 3076.58 |
| 360853    | Uchl5        | 528    | 481     | 491    | 440    | 458   | 444   | 534   | 499     |
| 301513    | Cnot9        | 493    | 496     | 511    | 444    | 453   | 501   | 456   | 529     |
| 307380    | Piezo2       | 7720   | 8294    | 8725   | 9163   | 9250  | 8006  | 8728  | 7831    |
| 362021    | Gpsm2        | 617    | 553     | 553    | 616    | 564   | 563   | 664   | 542     |
| 300029    | Top1mt       | 207    | 191     | 204    | 179    | 199   | 203   | 191   | 186     |
| 297685    | Ddx47        | 715    | 693     | 650    | 683    | 646   | 699   | 713   | 676     |
| 311462    | Btbd3        | 2315.9 | 2104.78 | 2127.8 | 2396.9 | 2412  | 1972  | 2175  | 2363.75 |
| 102551660 | Eml3         | 569    | 627     | 605    | 555    | 544   | 615   | 610   | 581     |
| 64473     | Bpnt1        | 1819   | 2029    | 1694   | 1919   | 1680  | 1933  | 1828  | 2001    |
| 293448    | Uqcrc2       | 3403.9 | 3073.51 | 2772.2 | 3036.3 | 2820  | 2886  | 3230  | 3318.81 |
| 288654    | Mphosph9     | 96     | 96      | 99     | 105    | 103   | 89    | 95    | 108     |
| 303584    | Plekhm1      | 373    | 376     | 429    | 416    | 383   | 408   | 406   | 393     |
| 362738    | Snx6         | 1879   | 1865    | 1749   | 1792   | 1722  | 1718  | 2001  | 1826    |
| 361662    | Bub3         | 541    | 505     | 540    | 471    | 495   | 468   | 551   | 538     |
| 24627     | Pde4d        | 1045   | 977     | 1023   | 1075   | 1080  | 1038  | 1024  | 968     |
| 317235    | Zdhhc15      | 1178   | 1070    | 1054   | 1235   | 1145  | 1081  | 1191  | 1109    |
| 299810    | Yeats4       | 449    | 409     | 430    | 368    | 417   | 389   | 426   | 420     |
| 360584    | Ggnbp2       | 1791   | 1675    | 1593   | 1617   | 1621  | 1565  | 1722  | 1752    |
| 79449     | Rpl21        | 4789.6 | 4804.82 | 4448.4 | 3903.6 | 4191  | 4146  | 4608  | 4959.11 |
| 687750    | Fam102a      | 1220   | 1298    | 1293   | 1302   | 1229  | 1324  | 1235  | 1313    |
| 24684     | Prlr         | 20.06  | 19.41   | 23.44  | 31.54  | 34.97 | 6.07  | 27.48 | 25.71   |
| 25612     | Asns         | 1628.8 | 1584.02 | 1487.2 | 1651.9 | 1650  | 1629  | 1617  | 1441.66 |
| 246760    | Mafk         | 440.97 | 462     | 449    | 385    | 406   | 446   | 441   | 440     |
| 192247    | Sez6         | 602    | 635     | 617    | 773    | 578   | 705   | 669   | 669     |
| 287446    | Elp5         | 336    | 337     | 357    | 294    | 286   | 325   | 365   | 345     |
| 303831    | Eif4a2       | 12196  | 11858   | 10658  | 10763  | 10757 | 10331 | 11931 | 12353   |
| 100366044 | LOC100366044 | 2282.7 | 2030.56 | 1991   | 2146.6 | 2099  | 2041  | 2166  | 2125.25 |
| 291340    | Spag61       | 11.35  | 11      | 2.72   | 6      | 5     | 9     | 11    | 6       |
| 287466    | Wscd1        | 70.94  | 40.09   | 58.62  | 61.17  | 65.11 | 54.2  | 52.22 | 58.77   |
| 24703     | Raf1         | 1514   | 1465    | 1412   | 1460   | 1458  | 1461  | 1509  | 1410    |
| 24822     | Tmbim6       | 4003   | 4240    | 4151   | 3830   | 3836  | 4237  | 3937  | 4178    |
| 64124     | Adgrl4       | 259    | 209     | 238    | 199    | 211   | 210   | 272   | 210     |
| 499883    | Gabpb1       | 241.21 | 237.5   | 253.05 | 261.05 | 232.3 | 257.3 | 242.8 | 258.35  |
| 24420     | Gspt1        | 1361.3 | 1412.59 | 1005.1 | 1533.3 | 1311  | 1419  | 1169  | 1401.28 |
| 366227    | Apmap        | 589    | 571     | 570    | 596    | 552   | 571   | 649   | 549     |
| 299730    | Nedd1        | 118    | 112     | 119    | 118    | 108   | 125   | 125   | 108     |
| 308126    | Zbtb2        | 107    | 125     | 126    | 113    | 134   | 126   | 100   | 110     |
| 295284    | Rbm8a        | 765    | 704     | 713    | 647    | 695   | 698   | 699   | 731     |
| 313648    | Ddost        | 1628   | 1652    | 1729   | 1612   | 1601  | 1754  | 1647  | 1605    |
| 362293    | Dnajb6       | 1210.4 | 1280.95 | 1223.7 | 1244.9 | 1299  | 1234  | 1202  | 1214.79 |
| 311355    | Ppip5k1      | 721    | 707     | 715    | 818    | 726   | 811   | 709   | 709     |
| 116470    | Stx1a        | 489    | 532     | 492    | 512    | 515   | 513   | 480   | 513     |
| 64516     | Vps45        | 822    | 801     | 710    | 717    | 792   | 736   | 809   | 707     |
| 502228    | Tmem181      | 977    | 1087    | 979    | 1038   | 1034  | 992   | 1038  | 1009    |
| 303193    | Alkbh5       | 260    | 256     | 240    | 271    | 287   | 219   | 276   | 243     |
| 310665    | Mindy1       | 531    | 534     | 489    | 538    | 492   | 519   | 552   | 525     |
| 292008    | Txn14b       | 536    | 536     | 487    | 534    | 539   | 505   | 549   | 496     |
| 681370    | Bricd5       | 9.07   | 3.64    | 8.23   | 10.59  | 7.96  | 0     | 14.72 | 8.79    |
| 305968    | Hmbox1       | 6759.6 | 6586.41 | 6224.2 | 7748.7 | 7490  | 6695  | 6838  | 6243.33 |
| 360698    | Tmem50b      | 2371   | 2304    | 2186   | 2206   | 2139  | 2229  | 2281  | 2401    |
| 502872    | Jagn1        | 632    | 517     | 487    | 503    | 485   | 529   | 558   | 563     |
| 310071    | Ercc8        | 414    | 410     | 420    | 378    | 403   | 382   | 408   | 426     |
| 296380    | Arfgef2      | 2265   | 2284    | 2182   | 2503   | 2395  | 2288  | 2315  | 2219    |
| 116552    | Plod1        | 1253   | 1265    | 1530   | 1464   | 1289  | 1519  | 1355  | 1339    |



|           |              |        |         |        |        |       |       |       |         |
|-----------|--------------|--------|---------|--------|--------|-------|-------|-------|---------|
| 360921    | Rufy3        | 10024  | 9862    | 9552   | 9875   | 10218 | 9545  | 10004 | 9475    |
| 295230    | Cct3         | 2701   | 2712    | 2545   | 2591   | 2513  | 2653  | 2758  | 2606    |
| 305152    | Aff1         | 490.88 | 558.55  | 551.08 | 599.56 | 532.9 | 566.4 | 584.7 | 512.12  |
| 287042    | Nubp1        | 431.09 | 392.54  | 361.01 | 392.09 | 417.8 | 396   | 390.7 | 369.46  |
| 85332     | Cavin3       | 1738   | 1845    | 1882   | 1347   | 1519  | 1707  | 1752  | 1822    |
| 306274    | Ercc6        | 368.77 | 337.63  | 360.9  | 335.1  | 337.4 | 349.3 | 392.6 | 320.68  |
| 171150    | Cdk7         | 302    | 307     | 273    | 254    | 293   | 276   | 287   | 278     |
| 29676     | Psbm3        | 2225   | 2201    | 1850   | 1754   | 1947  | 1920  | 2008  | 2141    |
| 361374    | Brd7         | 954    | 809     | 885    | 809    | 812   | 872   | 916   | 851     |
| 313278    | Ptprd        | 565    | 525     | 583    | 636    | 618   | 543   | 652   | 492     |
| 312083    | Vps50        | 2066   | 2069    | 2079.2 | 1989   | 2113  | 1759  | 2028  | 2289    |
| 361607    | Emsy         | 562.57 | 522.87  | 540.04 | 610.41 | 565.9 | 523   | 584.9 | 558.34  |
| 79428     | Luzp1        | 1584   | 1684    | 1534   | 1835   | 1693  | 1703  | 1710  | 1520    |
| 24267     | Comt         | 2192.3 | 2340.91 | 2242.9 | 1926.4 | 2052  | 2249  | 2048  | 2339.07 |
| 50662     | Runx1        | 628.3  | 613     | 596.65 | 693    | 641.2 | 636.6 | 621   | 628     |
| 691889    | Atp8a2       | 12504  | 12125   | 11029  | 14185  | 12833 | 13167 | 13282 | 10481   |
| 365699    | Nadk2        | 343    | 333     | 301    | 278    | 306   | 292   | 290   | 365     |
| 307128    | Frmd4a       | 449    | 417     | 456    | 571    | 509   | 450   | 448   | 483     |
| 367865    | RGD1560821   | 321.28 | 287.81  | 308.88 | 299.96 | 269.4 | 286.9 | 319.8 | 339.85  |
| 303580    | Hexim2       | 174.55 | 183.88  | 186.93 | 151.29 | 171.7 | 156.3 | 190.5 | 177.11  |
| 83467     | Slit3        | 299    | 350     | 323    | 331    | 283   | 415   | 258   | 345     |
| 309326    | Ranbp6       | 1766   | 1583    | 1529   | 1669   | 1721  | 1508  | 1703  | 1605    |
| 171115    | Pde5a        | 366    | 209     | 376    | 391    | 307   | 280   | 425   | 328     |
| 25037     | Mobp         | 14.26  | 18.35   | 10.21  | 18.29  | 21.91 | 18.72 | 10.54 | 9.85    |
| 500573    | Tmco4        | 160    | 182     | 181    | 159    | 129   | 193   | 171   | 188     |
| 316233    | Tjap1        | 540    | 479     | 597    | 483    | 520   | 559   | 536   | 481     |
| 295283    | Ankrd34a     | 74.01  | 100.99  | 75.78  | 108.74 | 77.01 | 88    | 82    | 112     |
| 25349     | Scn2b        | 1111.7 | 1112.92 | 1028.1 | 1124.7 | 1331  | 1073  | 812.3 | 1154.57 |
| 498394    | Msantd1      | 47.41  | 34.82   | 32.9   | 35.51  | 42.31 | 34.17 | 43.96 | 29.99   |
| 60665     | Cxcl6        | 30.16  | 23.91   | 18.29  | 14.12  | 28.85 | 16.36 | 23.75 | 17.4    |
| 29218     | Rcn2         | 1297   | 1271    | 1248   | 1233   | 1192  | 1259  | 1351  | 1240    |
| 108351838 | LOC108351838 | 6.54   | 0       | 2.48   | 5.42   | 3.63  | 2.65  | 5.72  | 2.42    |
| 303353    | Psm11        | 2150   | 2058    | 1965   | 2002   | 2046  | 1980  | 2102  | 2036    |
| 102556298 | LOC102556298 | 93.13  | 78.49   | 84.2   | 86.84  | 80.69 | 93.78 | 83.45 | 84.28   |
| 362595    | Oscpl        | 388    | 380     | 362    | 366    | 405   | 399   | 321   | 369     |
| 65049     | Megf6        | 128    | 89      | 104.82 | 137    | 125.3 | 125.9 | 113   | 94      |
| 362205    | Shf          | 567    | 598     | 624    | 500    | 589   | 651   | 534   | 512     |
| 296159    | Vps16        | 789    | 850     | 768    | 696    | 777   | 785   | 799   | 738     |
| 311039    | Galnt13      | 729    | 818     | 704    | 868    | 886   | 596   | 828   | 805     |
| 54259     | Inpp5d       | 539    | 607     | 615    | 597    | 588   | 597   | 542   | 628     |
| 305848    | Zfp219       | 1173.1 | 1115.23 | 1229.2 | 1088.4 | 1159  | 1170  | 1142  | 1129.89 |
| 116693    | Cyth3        | 1503   | 1597.77 | 1559.4 | 1463.9 | 1455  | 1528  | 1643  | 1490.76 |
| 140670    | Ap2b1        | 7611.4 | 8262.41 | 7315.2 | 9127.1 | 8581  | 7729  | 8406  | 7560.79 |
| 288925    | Wdr83os      | 646    | 641     | 637    | 605    | 575   | 653   | 644   | 654     |
| 108348241 | LOC108348241 | 19.88  | 14.92   | 16.78  | 16.32  | 12.06 | 15.44 | 12.46 | 27.86   |
| 311730    | Gpr155       | 816    | 870     | 818    | 909    | 824   | 827   | 888   | 870     |
| 24922     | Gabrb3       | 600.64 | 537.1   | 505.09 | 682.72 | 610.3 | 515.3 | 654.9 | 542.34  |
| 362219    | Gpcpd1       | 1559   | 1500    | 1448   | 1482   | 1453  | 1532  | 1592  | 1405    |
| 301509    | Tns1         | 9503.2 | 8988.78 | 9945.6 | 10378  | 9498  | 10011 | 10202 | 9059.58 |
| 306011    | Piwil2       | 236    | 216     | 192    | 226    | 223   | 204   | 227   | 215     |
| 362015    | Ampd2        | 686    | 608     | 633    | 722    | 672   | 712   | 642   | 620     |
| 362844    | Brd4         | 1783.9 | 1995.29 | 2141.1 | 2386   | 2258  | 2172  | 1966  | 1901    |
| 364032    | Pigc         | 477    | 475     | 430    | 410    | 419   | 426   | 491   | 454     |
| 50560     | Ip6k1        | 2673   | 2824    | 2669   | 2598   | 2696  | 2814  | 2651  | 2591    |
| 29562     | Prps1        | 1509.1 | 1561.69 | 1471.3 | 1483   | 1543  | 1474  | 1504  | 1496.89 |
| 292328    | RGD1562747   | 504    | 484     | 436    | 398    | 443   | 413   | 485   | 479     |



|           |              |        |         |        |        |       |       |       |          |
|-----------|--------------|--------|---------|--------|--------|-------|-------|-------|----------|
| 313604    | Zmym1        | 268.54 | 275.25  | 277.66 | 263.66 | 267.8 | 257.3 | 308.6 | 250.27   |
| 170714    | Dynlrbl      | 5498   | 5147    | 4967   | 4520   | 4928  | 4687  | 4965  | 5530     |
| 29582     | Mgat3        | 2341   | 2720    | 2395   | 2638   | 2385  | 2559  | 2625  | 2514     |
| 295027    | Pcdh18       | 204    | 222     | 288    | 218    | 229   | 263   | 242   | 197      |
| 296512    | Fmn1         | 602.55 | 654.53  | 710.26 | 878.43 | 910   | 485.1 | 722.5 | 725.28   |
| 299159    | Atp6v1d      | 2930   | 2882    | 2565   | 2624   | 2631  | 2468  | 2867  | 3024     |
| 297566    | Atp6v1e1     | 4566   | 4720    | 4015   | 3830   | 4309  | 3999  | 4433  | 4373     |
| 300266    | Cbx5         | 248    | 230     | 265    | 268    | 235   | 201   | 281   | 293      |
| 29364     | Cd47         | 2727   | 3213    | 3367   | 2996   | 3174  | 3057  | 2984  | 3076     |
| 83615     | Atp6ap1      | 4929   | 4952    | 4923   | 4809   | 4764  | 5081  | 4898  | 4851     |
| 293700    | Trmt112      | 1055.9 | 920.85  | 937.88 | 802    | 890   | 946   | 921   | 956      |
| 290558    | Nt5dc2       | 326.61 | 231.72  | 341.98 | 298.34 | 409.2 | 235.2 | 287.1 | 266.1    |
| 361191    | Nsun2        | 1100   | 1151    | 1072   | 997    | 1066  | 1067  | 1129  | 1054     |
| 362274    | Ddx27        | 545.15 | 607.12  | 544.83 | 640.95 | 639.3 | 631.2 | 546.1 | 519.29   |
| 362162    | Arfgap2      | 827.67 | 861.35  | 795.13 | 739.49 | 783.4 | 837.9 | 847   | 752.39   |
| 301742    | Copg2        | 2403   | 2227    | 2171   | 2152   | 2249  | 2093  | 2449  | 2154     |
| 292028    | Kars         | 1795   | 1794    | 1707   | 1590   | 1577  | 1772  | 1754  | 1777     |
| 498678    | Ccdc71       | 636.35 | 647.52  | 572.43 | 592.83 | 627   | 622.7 | 601.4 | 595.81   |
| 364136    | Aasdh        | 291    | 278     | 272    | 315    | 303   | 277   | 289   | 286      |
| 691966    | Sqor         | 299    | 338     | 299    | 234    | 244   | 273   | 311   | 341      |
| 298792    | Ypel5        | 3493   | 3290    | 3073   | 3061   | 3164  | 3025  | 3370  | 3347     |
| 361244    | RGD1307443   | 2928   | 3079    | 2765   | 3242   | 3138  | 2952  | 3038  | 2876     |
| 314675    | Btbd11       | 638    | 522     | 627    | 637    | 553   | 598   | 660   | 611      |
| 690294    | Tmem169      | 321    | 344     | 275    | 281    | 300   | 300   | 304   | 316      |
| 689688    | Atg2a        | 1183   | 1213    | 1304   | 1292   | 1309  | 1367  | 1200  | 1112     |
| 309451    | Gbf1         | 2620   | 2814    | 2595   | 3214   | 2850  | 2931  | 2741  | 2712     |
| 294307    | Kctd20       | 688.97 | 627.2   | 660.62 | 748.65 | 693.9 | 691.5 | 708.6 | 629.32   |
| 361088    | Rnf219       | 311    | 337     | 300    | 330    | 318   | 322   | 312   | 325      |
| 81574     | Scn1a        | 3205.6 | 2989.36 | 2995.2 | 3675.3 | 3367  | 3079  | 3356  | 3053.41  |
| 312915    | Arfgef1      | 2983   | 2831    | 2705   | 3344   | 3066  | 2691  | 3137  | 2960     |
| 100911383 | LOC100911383 | 3.48   | 1.33    | 1.51   | 7.01   | 2.47  | 4.25  | 3.48  | 3.12     |
| 296466    | Gid8         | 679    | 672     | 664    | 664    | 673   | 624   | 683   | 697      |
| 360722    | Pdia5        | 131.98 | 149.84  | 174.56 | 126.69 | 142.8 | 174.5 | 149   | 116.35   |
| 311387    | Slc24a5      | 12.07  | 19.78   | 9.86   | 13.33  | 11.76 | 12.61 | 15.9  | 14.73    |
| 300095    | Srebf2       | 2612   | 2831    | 2846   | 2921   | 2913  | 2905  | 2585  | 2799     |
| 304286    | Lmtk2        | 768.01 | 850.51  | 824.32 | 891.61 | 805.6 | 888.4 | 858.6 | 779.52   |
| 362665    | Camta1       | 3416.7 | 3348.72 | 3349.9 | 3838.9 | 3826  | 3483  | 3447  | 3188.95  |
| 303351    | Rhot1        | 1603   | 1580    | 1458   | 1528   | 1468  | 1529  | 1667  | 1501     |
| 364634    | Csmd1        | 1156   | 1100    | 1084   | 1360   | 1321  | 1067  | 1203  | 1106     |
| 311429    | Spef1        | 509    | 481.23  | 536    | 433    | 488   | 463   | 502   | 505      |
| 363254    | Atg9a        | 2018   | 2075    | 2063   | 2186   | 2074  | 2221  | 2083  | 1959     |
| 304055    | C2cd2        | 850.53 | 896.92  | 806.14 | 905.07 | 861   | 878.1 | 900.7 | 816.92   |
| 361413    | Nudt7        | 483    | 460     | 421    | 412    | 466   | 440   | 425   | 444      |
| 305645    | Dlg5         | 824    | 881     | 923    | 948    | 951   | 835   | 920   | 868      |
| 100362431 | Ttc30a       | 59.03  | 57.05   | 44.8   | 58.3   | 56.72 | 52.85 | 61.25 | 48.24    |
| 100911196 | LOC100911196 | 479    | 430     | 474    | 465    | 487   | 463   | 458   | 439      |
| 678769    | Atg4a        | 509    | 453     | 487    | 414    | 441   | 466   | 455   | 500      |
| 307480    | Dele1        | 1573.8 | 1506.08 | 1279   | 1444   | 1445  | 1468  | 1462  | 1424.86  |
| 315708    | Edc3         | 523    | 531     | 478    | 511    | 499   | 514   | 515   | 514      |
| 316108    | Snupn        | 213    | 203.35  | 198.01 | 159    | 192   | 196   | 206   | 179      |
| 59101     | P3h4         | 230.8  | 228.9   | 270.2  | 219.91 | 246   | 235.2 | 231.5 | 236.62   |
| 500037    | Foxp2        | 99.99  | 77.49   | 77.97  | 112.28 | 108   | 51.29 | 87.96 | 120.33   |
| 312728    | Tspan9       | 976    | 1052    | 1196   | 1129   | 1136  | 1093  | 1124  | 998      |
| 25541     | Scp2         | 3466   | 3480    | 3111   | 3037   | 2981  | 3228  | 3316  | 3563     |
| 25183     | Gdi1         | 12491  | 12251   | 11832  | 12078  | 12314 | 12080 | 12275 | 11960.99 |
| 678893    | Susd6        | 2556.7 | 2436.49 | 2446.7 | 2576.2 | 2619  | 2567  | 2506  | 2319.02  |

|           |              |        |         |        |        |       |       |       |          |
|-----------|--------------|--------|---------|--------|--------|-------|-------|-------|----------|
| 103694865 | LOC103694865 | 274.81 | 304.03  | 311.69 | 296.62 | 317.7 | 297   | 326.8 | 245.14   |
| 311842    | Zer1         | 1220   | 1324    | 1335   | 1284   | 1298  | 1292  | 1333  | 1238     |
| 29753     | Ywhae        | 15743  | 15755.2 | 15706  | 15866  | 15714 | 15595 | 15722 | 16017.23 |
| 298524    | Dnalil       | 25.03  | 20.02   | 25.08  | 16     | 22.05 | 22.02 | 17    | 25.03    |
| 306607    | Tmco3        | 873.48 | 1015    | 876.98 | 937.42 | 871.1 | 976.9 | 919.4 | 934.43   |
| 690073    | Nbas         | 833    | 845     | 799    | 931    | 844   | 839   | 873   | 851      |
| 362399    | Zxdc         | 363.17 | 353.22  | 345.89 | 352.94 | 341.2 | 378.3 | 345.6 | 349.74   |
| 305502    | Tmed4        | 952    | 904     | 868    | 847    | 845   | 935   | 817   | 973      |
| 360642    | Kansl1       | 949    | 926     | 970    | 966    | 952   | 971   | 1007  | 880      |
| 298596    | Sdhd         | 2423   | 2336    | 2220   | 2115   | 2129  | 2298  | 2284  | 2381     |
| 100366024 | Prdm16       | 335.05 | 433.26  | 481.16 | 412.16 | 377.5 | 416.1 | 450.7 | 416.99   |
| 24917     | Kpnb1        | 2453   | 2513    | 2534   | 2666   | 2665  | 2395  | 2671  | 2433     |
| 360654    | Dnai2        | 25.78  | 24.57   | 34.39  | 27.82  | 28.1  | 26.66 | 26.84 | 30.94    |
| 686779    | Caprin2      | 1519   | 1500    | 1278   | 1451   | 1462  | 1381  | 1496  | 1408     |
| 25701     | Mxil         | 1614   | 1458    | 1296   | 1384   | 1429  | 1504  | 1406  | 1412     |
| 304962    | Atf6         | 1821.4 | 1901.89 | 1923.7 | 2188.2 | 2028  | 1887  | 1995  | 1925.06  |
| 290986    | Agtpbp1      | 7098   | 7249    | 6620   | 7108   | 6967  | 6893  | 7298  | 6915     |
| 501065    | Cmtm7        | 153.94 | 196.76  | 229.88 | 179.86 | 170.8 | 208.1 | 197.4 | 184.1    |
| 361751    | Rnls         | 68     | 73      | 65     | 68     | 70    | 62    | 63.99 | 78       |
| 305317    | Guf1         | 581.29 | 591.07  | 595.12 | 625.81 | 587.7 | 588.1 | 646.1 | 571.34   |
| 64463     | Surf1        | 313.25 | 249.86  | 244.34 | 229.33 | 286.7 | 243.3 | 225   | 281.8    |
| 100312665 | Vomlr9       | 0      | 1       | 0      | 0      | 0     | 0     | 1     | 0        |
| 100322897 | Prr30        | 1      | 0       | 0      | 0      | 0     | 0     | 0     | 1        |
| 100359438 | Zfp683       | 0      | 0       | 1      | 0      | 0     | 0     | 0     | 1        |
| 100359479 | LOC100359479 | 0      | 1       | 0      | 0      | 1     | 0     | 0     | 0        |
| 100359924 | LOC100359924 | 1      | 6       | 3      | 0      | 3     | 1     | 4     | 2        |
| 100360209 | LOC100360209 | 0      | 1       | 1      | 0      | 1     | 1     | 0     | 0        |
| 100360296 | LOC100360296 | 1      | 0       | 0      | 0      | 0     | 0     | 1     | 0        |
| 100360426 | LOC100360426 | 1      | 1       | 0      | 0      | 1     | 0     | 0     | 1        |
| 100360640 | Pxt1         | 0      | 1       | 1      | 0      | 0     | 1     | 1     | 0        |
| 100360933 | LOC100360933 | 5      | 2       | 4      | 5      | 2     | 7     | 5     | 2        |
| 100362588 | Izumo3       | 0      | 1       | 0      | 1      | 0     | 0     | 2     | 0        |
| 100362817 | Cdrt4        | 0      | 0       | 1      | 0      | 0     | 0     | 0     | 1        |
| 100363110 | LOC100363110 | 1      | 0       | 0      | 0      | 0     | 0     | 1     | 0        |
| 100363193 | LOC100363193 | 10     | 16      | 15     | 12     | 14    | 15    | 12    | 12       |
| 100363238 | Lrcoll       | 1      | 0       | 1      | 1      | 1     | 1     | 0     | 1        |
| 100363341 | Lrriq4       | 0      | 0       | 0      | 1      | 0     | 0     | 1     | 0        |
| 100363492 | Ly6k         | 1      | 2       | 2      | 0.5    | 1     | 2     | 1     | 1.5      |
| 100909489 | Trpc5os      | 0      | 0       | 0      | 1      | 0     | 0     | 1     | 0        |
| 100909913 | LOC100909913 | 0      | 0       | 0      | 39.54  | 39.54 | 0     | 0     | 0        |
| 100909947 | LOC100909947 | 0      | 1       | 0      | 1      | 0     | 1     | 0     | 1        |
| 100910057 | LOC100910057 | 1      | 0       | 0      | 0      | 0     | 1     | 0     | 0        |
| 100910068 | LOC100910068 | 1      | 2       | 2      | 0.5    | 1     | 2     | 1     | 1.5      |
| 100910205 | Prss50       | 2      | 4       | 2      | 0      | 6     | 1     | 0     | 1        |
| 100910565 | LOC100910565 | 0      | 0       | 1      | 0      | 0     | 0     | 1     | 0        |
| 100910679 | LOC100910679 | 0      | 1       | 0      | 0      | 0     | 0     | 0     | 1        |
| 100910819 | LOC100910819 | 0      | 1.38    | 1.86   | 0      | 0     | 1.31  | 0     | 1.93     |
| 100911002 | LOC100911002 | 0      | 1       | 1      | 0      | 0     | 1     | 1     | 0        |
| 100911264 | LOC100911264 | 0      | 1       | 3      | 3      | 2     | 2     | 2     | 1        |
| 100911842 | LOC100911842 | 0      | 1       | 0      | 0      | 0     | 0     | 1     | 0        |
| 100912282 | LOC100912282 | 46.48  | 92.95   | 46.48  | 0      | 46.48 | 92.95 | 0     | 46.48    |
| 100912302 | Sox1         | 0      | 0       | 0      | 1      | 0     | 0     | 1     | 0        |
| 100912849 | LOC100912849 | 1      | 0       | 1      | 1      | 0     | 0     | 1     | 2        |
| 102546454 | LOC102546454 | 0      | 0       | 1.45   | 0      | 0     | 0     | 1.45  | 0        |
| 102546484 | LOC102546484 | 0      | 0       | 1      | 0      | 0     | 0     | 0     | 1        |
| 102546724 | Tex51        | 0      | 1       | 0      | 0      | 1     | 0     | 0     | 0        |

|           |                 |       |       |       |       |       |       |       |       |
|-----------|-----------------|-------|-------|-------|-------|-------|-------|-------|-------|
| 102546830 | LOC102546830    | 2     | 1     | 0     | 0     | 0     | 1     | 1     | 1     |
| 102548013 | Ccdc168         | 2     | 0     | 2     | 2     | 0     | 1     | 3     | 2     |
| 102548067 | LOC102548067    | 1     | 1     | 0     | 1     | 0     | 1     | 1     | 1     |
| 102550872 | LOC102550872    | 0     | 1     | 1     | 2     | 1     | 1     | 1     | 1     |
| 102551064 | LOC102551064    | 5     | 0     | 1     | 1     | 3     | 2     | 0     | 2     |
| 102552663 | LOC102552663    | 5     | 0     | 1     | 5     | 4     | 2     | 3     | 2     |
| 102553196 | LOC102553196    | 1     | 0     | 1     | 1     | 1     | 1     | 1     | 0     |
| 102554121 | LOC102554121    | 0     | 1     | 0     | 0     | 1     | 0     | 0     | 0     |
| 102554898 | LOC102554898    | 1     | 1     | 0     | 2     | 0     | 1     | 2     | 1     |
| 102555994 | LOC102555994    | 1     | 0     | 0     | 0     | 1     | 0     | 0     | 0     |
| 102556175 | LOC102556175    | 0     | 0     | 0     | 1     | 0     | 0     | 1     | 0     |
| 102556486 | LOC102556486    | 0     | 0     | 1     | 0     | 0     | 0     | 0     | 1     |
| 102557137 | LOC102557137    | 25    | 25    | 36    | 25    | 33    | 13    | 37    | 28    |
| 103690606 | LOC103690606    | 0.5   | 0     | 0     | 0     | 0     | 0     | 0.5   | 0     |
| 103690842 | LOC103690842    | 1     | 0     | 5     | 2     | 2     | 2     | 2     | 2     |
| 103690877 | LOC103690877    | 0     | 0     | 1     | 0     | 0     | 1     | 0     | 0     |
| 103691264 | LOC103691264    | 0     | 0     | 1     | 0     | 0     | 0     | 1     | 0     |
| 103692077 | LOC103692077    | 1     | 0     | 1     | 1     | 1     | 1     | 0     | 1     |
| 103692109 | Smkr1           | 0     | 1     | 1     | 0     | 1     | 0     | 1     | 0     |
| 103692131 | Hoxa11          | 0     | 4.38  | 3.55  | 8.75  | 13.13 | 0     | 3.55  | 0     |
| 103693021 | LOC103693021    | 1     | 1     | 0     | 1     | 0     | 0     | 1     | 2     |
| 103693237 | LOC103693237    | 1     | 0     | 0     | 0     | 1     | 0     | 0     | 0     |
| 103694381 | LOC103694381    | 4.48  | 0     | 8.96  | 0     | 0     | 4.48  | 8.96  | 0     |
| 103694516 | LOC103694516    | 0     | 0     | 1     | 0     | 0     | 0     | 1     | 0     |
| 103695246 | LOC103695246    | 1     | 0     | 0     | 0     | 1     | 0     | 0     | 0     |
| 108348045 | NEWGENE 1310680 | 170.7 | 170.7 | 170.7 | 170.7 | 170.7 | 170.7 | 170.7 | 170.7 |
| 108348079 | LOC108348079    | 0     | 0     | 0     | 50.61 | 0     | 0     | 0     | 50.61 |
| 108348082 | LOC108348082    | 0     | 0     | 0     | 33.95 | 33.95 | 0     | 0     | 0     |
| 108348104 | NEWGENE 1308310 | 0     | 0.5   | 0     | 0     | 0.5   | 0     | 0     | 0     |
| 108348170 | NEWGENE 1307313 | 0     | 1     | 0     | 0     | 1     | 0     | 0     | 0     |
| 108348288 | LOC108348288    | 0     | 0     | 1     | 0     | 0     | 1     | 0     | 0     |
| 108348808 | LOC108348808    | 0     | 0     | 1     | 0     | 0     | 1     | 0     | 0     |
| 108349632 | LOC108349632    | 0     | 0     | 1     | 1     | 2     | 0     | 0     | 0     |
| 108351244 | LOC108351244    | 1     | 0     | 1     | 0     | 0     | 0     | 0     | 2     |
| 108351992 | LOC108351992    | 0     | 1     | 1     | 0     | 0     | 2     | 0     | 0     |
| 108353197 | LOC108353197    | 2     | 1     | 0     | 1     | 2     | 1     | 1     | 0     |
| 108353379 | LOC108353379    | 0     | 0     | 1     | 0     | 0     | 1     | 0     | 0     |
| 114027    | Dao             | 1     | 3     | 1     | 6     | 2     | 5     | 2     | 2     |
| 114500    | Gbx2            | 1     | 0     | 2     | 0     | 0     | 0     | 3     | 0     |
| 114628    | Abcg5           | 14    | 11    | 10    | 6     | 14    | 12    | 6     | 9     |
| 114629    | Slc26a3         | 4     | 2     | 8     | 14    | 4     | 7     | 9     | 8     |
| 114858    | Shc3            | 34    | 35    | 40    | 49    | 40    | 40    | 44    | 34    |
| 116475    | Ift172          | 770   | 692   | 642   | 763   | 734   | 747   | 700   | 686   |
| 117033    | Mmp12           | 0     | 0     | 2     | 0     | 1     | 0     | 1     | 0     |
| 117034    | Ptfla           | 6     | 5     | 5     | 3     | 7     | 4     | 5     | 3     |
| 170580    | Fgf21           | 7     | 5     | 6     | 4     | 5     | 5     | 7     | 5     |
| 171075    | Fcer2           | 1     | 3     | 3     | 1     | 4     | 3     | 1     | 0     |
| 171158    | Gpha2           | 5     | 5     | 7     | 5     | 4     | 2     | 6     | 10    |
| 171304    | Kif11           | 82    | 54    | 126   | 59    | 101   | 71    | 77    | 72    |
| 191570    | Serpinal2       | 0     | 0     | 0     | 1     | 0     | 0     | 0     | 1     |
| 192273    | Slc22a25        | 2     | 1     | 1     | 2     | 1     | 0     | 0     | 5     |
| 24221     | Avp             | 2     | 0     | 3     | 0     | 1     | 2     | 2     | 0     |
| 24271     | Cpb1            | 1     | 0     | 1     | 0     | 0     | 0     | 1     | 1     |
| 24297     | Cypla2          | 1     | 1     | 0     | 0     | 1     | 0     | 1     | 0     |
| 24335     | Epo             | 1     | 0     | 0     | 0     | 0     | 1     | 0     | 0     |
| 24384     | Gc              | 4     | 1     | 1     | 1     | 1     | 1     | 2     | 3     |

|        |             |      |      |      |      |      |      |      |      |
|--------|-------------|------|------|------|------|------|------|------|------|
| 24385  | Gck         | 0    | 0    | 5    | 3    | 1    | 1    | 4    | 2    |
| 24495  | Ii3         | 0    | 0    | 0    | 1    | 0    | 0    | 1    | 0    |
| 24572  | Muc2        | 8    | 6    | 13   | 11   | 6    | 10   | 11   | 11   |
| 245917 | Sycn        | 1    | 0    | 0    | 0    | 0    | 0    | 1    | 0    |
| 245926 | Scaf8       | 868  | 883  | 833  | 935  | 926  | 877  | 869  | 847  |
| 24613  | Oprd1       | 26   | 24   | 13   | 25   | 21   | 22   | 24   | 21   |
| 246149 | Gbx1        | 9    | 4    | 7    | 3    | 6    | 7    | 7    | 3    |
| 246271 | Fev         | 2    | 1    | 3    | 1    | 3    | 1    | 1    | 2    |
| 24641  | Flg         | 1    | 2    | 2    | 5    | 4    | 2    | 2    | 2    |
| 24841  | Klklc2      | 0    | 0    | 3    | 0    | 0    | 1    | 0    | 2    |
| 24883  | Wt1         | 0    | 1    | 0    | 0    | 0    | 0    | 0    | 1    |
| 25128  | Umod        | 0    | 0    | 0    | 1    | 0    | 0    | 1    | 0    |
| 25251  | Cyp2g1      | 4    | 3    | 0    | 0    | 3    | 1    | 1    | 2    |
| 25471  | Kcnel       | 1    | 0    | 0    | 0    | 0    | 0    | 0    | 1    |
| 25571  | Ttpa        | 14   | 11   | 12   | 9    | 9    | 9    | 10   | 18   |
| 25642  | Cyp3a23/3a1 | 2    | 0    | 0    | 0    | 0    | 0    | 0    | 2    |
| 25649  | Apoa2       | 2    | 0    | 3    | 0    | 1    | 2    | 1    | 1    |
| 25653  | Tshb        | 2    | 2    | 2    | 1    | 1    | 0    | 4    | 2    |
| 25727  | Mep1b       | 1    | 1    | 0    | 0    | 1    | 1    | 0    | 0    |
| 25730  | Ntf4        | 1    | 2    | 0    | 0    | 0    | 1    | 2    | 0    |
| 260320 | F7          | 0    | 0    | 1    | 0    | 0    | 1    | 0    | 0    |
| 287278 | Cdkn2aipn1  | 865  | 791  | 781  | 730  | 839  | 762  | 762  | 804  |
| 287610 | Lpo         | 0    | 1    | 0    | 0    | 0    | 0    | 1    | 0    |
| 287700 | Krt15       | 1    | 0    | 0    | 0    | 0    | 1    | 0    | 0    |
| 287974 | Klhl6       | 33   | 46   | 50   | 27   | 44   | 49   | 30   | 33   |
| 288001 | Kng1        | 0    | 0    | 4    | 0    | 3    | 0    | 0    | 1    |
| 288588 | Polr2j      | 503  | 442  | 441  | 395  | 446  | 449  | 445  | 441  |
| 288597 | Fkbp6       | 0    | 0    | 0    | 2    | 2    | 0    | 0    | 0    |
| 289035 | LOC289035   | 1    | 0    | 1    | 1    | 3    | 0    | 0    | 0    |
| 289227 | Ly9         | 3    | 1    | 4    | 2    | 4    | 4    | 1    | 1    |
| 290003 | Olr1627     | 1    | 0    | 0    | 0    | 1    | 0    | 0    | 0    |
| 291755 | Dsg1        | 1    | 1    | 0    | 3    | 2    | 1    | 1    | 1    |
| 291929 | Olr1666     | 0    | 0    | 1    | 0    | 1    | 0    | 0    | 0    |
| 291944 | Ttc29       | 13   | 9    | 12   | 8    | 11   | 11   | 6    | 14   |
| 292172 | Eya4        | 17   | 24   | 45   | 18   | 17   | 34   | 24   | 29   |
| 29221  | Arg1        | 55   | 43   | 57   | 43   | 23   | 44   | 80   | 51   |
| 292559 | Olr3        | 1    | 0    | 0    | 0    | 0    | 0    | 1    | 0    |
| 292701 | Ceacam20    | 0    | 0    | 0    | 1    | 0    | 0    | 1    | 0    |
| 292757 | Fbxo17      | 0    | 5    | 4    | 3    | 4    | 1    | 3    | 4    |
| 29277  | Cyp2c11     | 0    | 0    | 1    | 0    | 0    | 0    | 0    | 1    |
| 292809 | Wdr88       | 0    | 2    | 0    | 0    | 0    | 1    | 1    | 0    |
| 293130 | Ndufc2      | 1310 | 1225 | 1163 | 1033 | 1197 | 1158 | 1165 | 1211 |
| 293309 | Olr163      | 0    | 1    | 0    | 0    | 0    | 0.5  | 0.5  | 0    |
| 293568 | Nkx1-2      | 0    | 0    | 1    | 0    | 1    | 0    | 0    | 0    |
| 293623 | Rassf7      | 40   | 43   | 41   | 42   | 31   | 46   | 36   | 53   |
| 293634 | Tmem171     | 4    | 1    | 3    | 3    | 3    | 1    | 4    | 3    |
| 293703 | Nudt22      | 210  | 216  | 171  | 128  | 175  | 191  | 164  | 195  |
| 293731 | Scgbld4     | 0    | 0    | 0    | 1    | 0    | 1    | 0    | 0    |
| 293812 | Olr379      | 1    | 0    | 0    | 0    | 0    | 0    | 1    | 0    |
| 293937 | Pkd211      | 4    | 1    | 4    | 4    | 5    | 3    | 3    | 2    |
| 294075 | Ffar4       | 0    | 2    | 2    | 1    | 2    | 0    | 0    | 3    |
| 294166 | Olr1708     | 0    | 0    | 1    | 0    | 0    | 0    | 0    | 1    |
| 294187 | Olr1730     | 1    | 1    | 2    | 1    | 0    | 2    | 1    | 2    |
| 294198 | Olr1744     | 4    | 0    | 1    | 2    | 4    | 1    | 1    | 1    |
| 294640 | Otp         | 2    | 0    | 0    | 0    | 1    | 1    | 0    | 0    |
| 294732 | Actb12      | 0    | 2    | 0    | 0    | 1    | 1    | 0    | 0    |

|        |            |       |       |      |     |       |       |     |      |
|--------|------------|-------|-------|------|-----|-------|-------|-----|------|
| 294979 | Adad1      | 3     | 4     | 5    | 2   | 2     | 5     | 4   | 3    |
| 295176 | SI00vp     | 0     | 1     | 1    | 0   | 1     | 0     | 1   | 0    |
| 29518  | Lgals7     | 0     | 0     | 1    | 0   | 0     | 0     | 0   | 1    |
| 295361 | Eps813     | 0     | 0.5   | 0    | 0   | 0.5   | 0     | 0   | 0    |
| 29552  | Lcn5       | 0     | 0     | 1    | 0   | 0     | 0     | 0   | 1    |
| 295728 | Olr458     | 0     | 1     | 0    | 0   | 1     | 0     | 0   | 0    |
| 296201 | Ovol2      | 1     | 0     | 0    | 0   | 0     | 0     | 1   | 0    |
| 296836 | Lrrd1      | 0     | 1     | 2    | 1   | 0     | 2     | 1   | 1    |
| 296867 | Pgr151     | 0     | 1     | 2    | 1   | 1     | 0     | 1   | 2    |
| 297444 | Cfap100    | 369   | 374   | 355  | 391 | 309   | 388   | 414 | 378  |
| 297576 | Dppa3      | 3     | 3     | 2    | 0   | 1     | 1     | 3   | 3    |
| 297960 | Rragd      | 140   | 118   | 130  | 121 | 145   | 132   | 118 | 114  |
| 298077 | RGD1305807 | 0     | 0     | 4    | 0   | 2     | 1     | 0   | 1    |
| 298392 | Ccin       | 0     | 0     | 1    | 1   | 0     | 0     | 2   | 0    |
| 298396 | Olr834     | 0     | 0     | 0    | 1   | 0     | 0     | 1   | 0    |
| 298981 | Nkx1-1     | 0     | 0     | 1    | 0   | 0     | 1     | 0   | 0    |
| 299152 | Tex21      | 4     | 5     | 7    | 4   | 6     | 5     | 4   | 5    |
| 299265 | RGD1309028 | 0     | 0     | 1    | 0   | 0     | 0     | 0   | 1    |
| 299586 | Olr1087    | 1     | 0     | 0    | 0   | 0     | 1     | 0   | 0    |
| 299756 | Mgat4c     | 41    | 42    | 39   | 43  | 32    | 42    | 39  | 52   |
| 299928 | Colec10    | 1     | 0     | 1    | 0   | 2     | 0     | 0   | 0    |
| 300016 | Slurp1     | 5     | 2     | 0    | 3   | 1     | 4     | 4   | 1    |
| 300122 | Ribc2      | 1     | 1     | 0    | 1   | 1     | 0     | 1   | 1    |
| 301042 | Trim71     | 0     | 1     | 1    | 0   | 0     | 0     | 0   | 2    |
| 301133 | Tnfsf14    | 6     | 3     | 3    | 0   | 2     | 2     | 4   | 4    |
| 301225 | Unc5cl     | 3     | 1     | 3    | 0   | 4     | 1     | 2   | 0    |
| 301269 | Adgrf2     | 0     | 0     | 0    | 1   | 0     | 1     | 0   | 0    |
| 301280 | Cyp2ac1    | 0     | 0     | 0    | 1   | 0     | 0     | 0   | 1    |
| 302087 | Olr1218    | 8     | 3     | 0    | 0   | 0     | 0     | 7   | 4    |
| 302432 | RGD1561382 | 0     | 0     | 0    | 1   | 0     | 0     | 0   | 1    |
| 302591 | Nxf3       | 2     | 8     | 3    | 4   | 4     | 4     | 3   | 6    |
| 302645 | RGD1566060 | 0     | 0     | 0    | 1   | 0     | 0     | 1   | 0    |
| 302813 | Gpr119     | 1     | 0     | 0    | 0   | 0     | 0     | 0   | 1    |
| 302954 | Olr1356    | 0     | 1     | 0    | 0   | 0     | 0     | 1   | 0    |
| 303330 | Tmem97     | 343   | 340   | 375  | 283 | 260   | 343   | 379 | 359  |
| 303523 | Krt39      | 1     | 1     | 0    | 0   | 0     | 0     | 0   | 2    |
| 303887 | Muc4       | 0     | 2     | 0    | 1   | 2     | 0     | 1   | 0    |
| 304050 | Fam3b      | 7     | 7     | 7    | 6   | 3     | 3     | 11  | 10   |
| 304124 | Cldn8      | 0     | 0     | 1    | 0   | 1     | 0     | 0   | 0    |
| 304484 | Ccdc63     | 0     | 1     | 0    | 0   | 0     | 1     | 0   | 0    |
| 304692 | Serpinb12  | 0     | 0     | 1    | 0   | 0     | 0     | 0   | 1    |
| 305073 | Dtl        | 16.03 | 10.31 | 14.2 | 8   | 22.02 | 13.04 | 5   | 8.48 |
| 305103 | Fcrl6      | 0     | 0     | 1    | 0   | 1     | 0     | 0   | 0    |
| 305265 | Tmprss11e  | 1     | 0     | 0    | 0   | 0     | 1     | 0   | 0    |
| 305606 | Mtif2      | 189   | 215   | 205  | 238 | 214   | 164   | 251 | 218  |
| 305841 | Olr1637    | 1     | 0     | 1    | 2   | 0     | 1     | 1   | 2    |
| 305846 | Slc39a2    | 0     | 1     | 0    | 0   | 0     | 0     | 1   | 0    |
| 306436 | Fbxo8      | 396   | 420   | 428  | 372 | 412   | 409   | 405 | 390  |
| 307865 | Cntnap4    | 330   | 275   | 219  | 307 | 312   | 266   | 310 | 243  |
| 307920 | Pabpn11    | 1     | 0     | 0    | 0   | 0     | 0     | 0   | 1    |
| 308551 | Vom2r38    | 0     | 0     | 0    | 1   | 0     | 0     | 0   | 1    |
| 308831 | Tenm4      | 393   | 403   | 408  | 560 | 440   | 476   | 499 | 349  |
| 309201 | Rom1       | 190   | 173   | 186  | 206 | 163   | 189   | 193 | 210  |
| 311325 | Knstrn     | 23    | 22    | 26   | 15  | 20    | 23    | 27  | 16   |
| 311399 | Usp50      | 6     | 3     | 4    | 5   | 6     | 2     | 6   | 4    |
| 311803 | Lrrc26     | 1     | 2     | 0    | 2   | 2     | 2     | 0   | 1    |

|        |            |     |     |     |     |     |     |     |     |
|--------|------------|-----|-----|-----|-----|-----|-----|-----|-----|
| 311825 | Stkld1     | 1   | 0   | 0   | 2   | 1   | 1   | 1   | 0   |
| 313225 | Cavin4     | 16  | 10  | 6   | 9   | 11  | 16  | 7   | 7   |
| 313254 | Kif12      | 1   | 0   | 0   | 0   | 0   | 0   | 0   | 1   |
| 313552 | Zmynd12    | 22  | 28  | 19  | 22  | 20  | 28  | 29  | 14  |
| 314406 | Serpinalf  | 0   | 1   | 1   | 0   | 0   | 0   | 0   | 2   |
| 315071 | Col22a1    | 64  | 61  | 118 | 45  | 61  | 97  | 77  | 53  |
| 315196 | Wnt7b      | 2   | 3   | 4   | 3   | 3   | 6   | 3   | 0   |
| 315320 | Krt84      | 0   | 0   | 1   | 0   | 1   | 0   | 0   | 0   |
| 315748 | Skor1      | 1   | 0   | 0   | 0   | 0   | 0   | 1   | 0   |
| 316014 | Nbeal2     | 238 | 261 | 242 | 214 | 274 | 245 | 217 | 219 |
| 316318 | Prss40     | 1   | 0   | 0   | 0   | 1   | 0   | 0   | 0   |
| 317161 | Mospd4     | 0   | 0   | 1   | 1   | 1   | 0   | 1   | 0   |
| 317224 | Fndc3c1    | 0   | 0   | 0   | 2   | 1   | 0   | 0   | 1   |
| 317270 | Mageb18    | 0   | 2   | 1   | 0   | 0   | 1   | 1   | 1   |
| 317389 | Ccnb3      | 0   | 0   | 0   | 1   | 0   | 0   | 0   | 1   |
| 360445 | Crisp2     | 0   | 0   | 1   | 0   | 0   | 0   | 1   | 0   |
| 361257 | RGD1564129 | 0   | 1   | 1   | 0   | 0   | 0   | 0   | 2   |
| 361275 | Bend7      | 24  | 32  | 19  | 40  | 29  | 32  | 26  | 28  |
| 361332 | Adamts19   | 2   | 2   | 2   | 3   | 3   | 3   | 2   | 1   |
| 361584 | Siglech    | 3   | 1   | 1   | 0   | 1   | 1   | 2   | 1   |
| 361757 | Opalin     | 1   | 0   | 1   | 4   | 1   | 1   | 3   | 1   |
| 362319 | Tmbim7     | 2   | 2   | 3   | 1   | 3   | 1   | 3   | 1   |
| 362580 | Ccdc30     | 37  | 34  | 29  | 18  | 40  | 26  | 29  | 23  |
| 362653 | Ctrc       | 5   | 3   | 3   | 1   | 1   | 2   | 3   | 6   |
| 362858 | Polr3b     | 560 | 523 | 527 | 581 | 581 | 502 | 541 | 567 |
| 363060 | Plet1      | 0   | 1   | 2   | 0   | 1   | 1   | 1   | 0   |
| 363270 | Spata3     | 1   | 0   | 1   | 1   | 0   | 1   | 0   | 2   |
| 363274 | Prss56     | 0   | 0   | 1   | 0   | 0   | 0   | 0   | 1   |
| 363453 | Ppplr3f    | 44  | 32  | 42  | 42  | 43  | 40  | 31  | 46  |
| 363483 | Dmrtc1c1   | 0   | 1   | 0   | 0   | 0   | 0   | 0   | 1   |
| 363627 | Rnf222     | 1   | 0   | 0   | 0   | 0   | 0   | 1   | 0   |
| 363991 | Ascl5      | 1   | 1   | 0   | 0   | 1   | 1   | 0   | 0   |
| 364029 | Slc9c2     | 1   | 2   | 0   | 1   | 1   | 1   | 0   | 2   |
| 364134 | Tecr1      | 2   | 1   | 0   | 0   | 1   | 0   | 1   | 1   |
| 364152 | Phox2b     | 1   | 1   | 0   | 0   | 2   | 0   | 0   | 0   |
| 364301 | Rnase9     | 1   | 1   | 1   | 0   | 2   | 0   | 0   | 1   |
| 364303 | Rnase111   | 0   | 0   | 2   | 0   | 0   | 2   | 0   | 0   |
| 364707 | Foxf2      | 6   | 5   | 8   | 7   | 9   | 4   | 7   | 6   |
| 365217 | Cnfn       | 1   | 1   | 0   | 1   | 1   | 2   | 0   | 0   |
| 365280 | Pgpep11    | 2   | 2   | 2   | 3   | 0   | 2   | 2   | 5   |
| 365322 | Olr43      | 1   | 0   | 0   | 0   | 1   | 0   | 0   | 0   |
| 365333 | Olr154     | 1   | 1   | 0   | 0   | 0   | 0   | 0   | 2   |
| 365394 | Cabp4      | 34  | 22  | 30  | 28  | 25  | 29  | 25  | 35  |
| 365408 | Ms4a15     | 1   | 0   | 0   | 2   | 0   | 0   | 1   | 2   |
| 365460 | Tl12       | 7   | 8   | 11  | 5   | 7   | 6   | 10  | 8   |
| 365900 | Alx3       | 0   | 0   | 0   | 1   | 0   | 1   | 0   | 0   |
| 366089 | RGD1564319 | 1   | 0   | 0   | 0   | 0   | 0   | 1   | 0   |
| 366116 | Olr729     | 1   | 0   | 0   | 0   | 0   | 1   | 0   | 0   |
| 366836 | Ephx3      | 2   | 1   | 2   | 4   | 3   | 4   | 2   | 0   |
| 366891 | Caps2      | 2   | 0   | 0   | 1   | 0   | 1   | 1   | 1   |
| 367086 | Sln        | 1   | 0   | 2   | 0   | 0   | 2   | 1   | 0   |
| 367196 | Acad8      | 303 | 299 | 276 | 227 | 247 | 292 | 270 | 296 |
| 367753 | Luzp4      | 0   | 2   | 1   | 0   | 1   | 0   | 1   | 1   |
| 404643 | Mrgprb13   | 0   | 0   | 1   | 0   | 1   | 0   | 0   | 0   |
| 404943 | Olr931     | 0   | 0   | 1   | 0   | 0   | 0   | 0   | 1   |
| 405152 | Olr1192    | 0   | 0   | 0   | 1   | 0.5 | 0   | 0   | 0.5 |



|        |            |     |     |     |     |     |     |     |     |
|--------|------------|-----|-----|-----|-----|-----|-----|-----|-----|
| 405993 | Olr1462    | 1   | 0   | 0   | 0   | 0   | 1   | 0   | 0   |
| 405997 | Olr1530    | 0   | 0   | 0   | 0.5 | 0   | 0   | 0.5 | 0   |
| 405999 | Olr1532    | 0   | 0   | 0   | 0.5 | 0   | 0   | 0.5 | 0   |
| 406227 | Krt72      | 0   | 0   | 1   | 1   | 0   | 2   | 0   | 0   |
| 407757 | Krt76      | 4   | 4   | 2   | 5   | 4   | 2   | 4   | 5   |
| 408206 | Ggt6       | 0   | 0   | 2   | 0   | 0   | 1   | 0   | 1   |
| 408218 | Capn11     | 1   | 0   | 0   | 1   | 0   | 2   | 0   | 0   |
| 408227 | Wfdc12     | 0   | 1   | 0   | 0   | 1   | 0   | 0   | 0   |
| 408241 | Prss57     | 2   | 0   | 2   | 0   | 1   | 1   | 0   | 2   |
| 445583 | Reg4       | 1   | 0   | 0   | 0   | 0   | 0   | 0   | 1   |
| 450223 | Clec4e     | 1   | 2   | 5   | 1   | 5   | 3   | 1   | 0   |
| 494208 | Ly49i3     | 1   | 0   | 0   | 0   | 0   | 0   | 0   | 1   |
| 494211 | Ly49i5     | 0   | 1   | 0   | 0   | 0   | 0   | 1   | 0   |
| 494244 | Bin2a      | 4   | 1   | 2   | 0   | 2   | 2   | 2   | 1   |
| 494250 | Vomlr85    | 1   | 0   | 0   | 0   | 1   | 0   | 0   | 0   |
| 494259 | Vomlr7     | 0   | 1   | 0   | 0   | 0   | 0   | 0   | 1   |
| 497196 | NMS        | 1   | 1   | 0   | 3   | 0   | 1   | 3   | 1   |
| 497862 | RGD1564086 | 2   | 1   | 0   | 1   | 1   | 0   | 3   | 0   |
| 497913 | Gjc2       | 16  | 17  | 26  | 23  | 17  | 24  | 21  | 20  |
| 497938 | LOC497938  | 1   | 0   | 0   | 0   | 0   | 0   | 1   | 0   |
| 498006 | Ccdc103    | 1   | 1   | 3   | 1   | 0   | 4   | 2   | 0   |
| 498129 | Tex45      | 1   | 0   | 0   | 0   | 0   | 1   | 0   | 0   |
| 498230 | Golt1a     | 1   | 4   | 4   | 1   | 3   | 3   | 1   | 3   |
| 498236 | LOC498236  | 1   | 1   | 2   | 0   | 1   | 0   | 1   | 2   |
| 498251 | Apobec4    | 1   | 0   | 0   | 0   | 1   | 0   | 0   | 0   |
| 498339 | LOC498339  | 0   | 0   | 0   | 1   | 0   | 0   | 0   | 1   |
| 498423 | Sertad2    | 781 | 779 | 771 | 795 | 722 | 780 | 794 | 830 |
| 498607 | Mef2b      | 7   | 5   | 10  | 3   | 3   | 8   | 4   | 10  |
| 498699 | RGD1562024 | 0   | 0   | 0   | 1   | 1   | 0   | 0   | 0   |
| 498705 | LOC498705  | 1   | 0   | 0   | 0   | 0   | 0   | 1   | 0   |
| 498836 | LOC498836  | 1   | 1   | 0   | 0   | 2   | 0   | 0   | 0   |
| 498950 | Marveld3   | 1   | 3   | 0   | 0   | 1   | 2   | 0   | 1   |
| 499072 | Tmem238    | 78  | 72  | 64  | 61  | 74  | 65  | 74  | 62  |
| 499152 | Izumol     | 3   | 2   | 3   | 1   | 3   | 1   | 3   | 2   |
| 499303 | Kcnk7      | 11  | 8   | 13  | 10  | 7   | 18  | 6   | 11  |
| 499657 | S100a712   | 0   | 1   | 0   | 0   | 0   | 1   | 0   | 0   |
| 499865 | Tmco5a     | 0   | 1   | 0   | 0   | 0   | 1   | 0   | 0   |
| 499925 | Bpifb4     | 1   | 3   | 2   | 0   | 2   | 0   | 2   | 2   |
| 499990 | Tmem243    | 199 | 201 | 178 | 174 | 197 | 211 | 164 | 180 |
| 500139 | Itprid1    | 0   | 1   | 1   | 0   | 2   | 0   | 0   | 0   |
| 500156 | Atoh1      | 1   | 0   | 0   | 0   | 0   | 0   | 1   | 0   |
| 500349 | Gprc5d     | 1   | 2   | 2   | 1   | 1   | 1   | 0   | 4   |
| 500366 | Rep15      | 0   | 1   | 3   | 1   | 0   | 3   | 1   | 1   |
| 500434 | RGD1563056 | 12  | 15  | 15  | 12  | 16  | 13  | 10  | 15  |
| 500449 | Sit1       | 5   | 7   | 7   | 0   | 3   | 3   | 9   | 4   |
| 500554 | Fam229a    | 6   | 8   | 10  | 4   | 8   | 10  | 4   | 6   |
| 500724 | Lbhd2      | 0   | 0   | 0   | 1   | 0   | 0   | 0   | 1   |
| 500938 | RGD1563200 | 0   | 1   | 0   | 0   | 0   | 0   | 1   | 0   |
| 500961 | Glb113     | 1   | 1   | 0   | 1   | 0   | 1   | 2   | 0   |
| 501049 | Gpr62      | 4   | 3   | 7   | 11  | 5   | 8   | 4   | 8   |
| 501050 | Iqcf3      | 0   | 1   | 0   | 0   | 0   | 1   | 0   | 0   |
| 501070 | Dlec1      | 11  | 11  | 17  | 18  | 20  | 13  | 16  | 8   |
| 502113 | Spata31d1b | 0   | 1   | 0   | 0   | 0   | 0   | 1   | 0   |
| 502689 | Tldc2      | 4   | 4   | 4   | 5   | 6   | 4   | 5   | 2   |
| 502852 | Cd207      | 0   | 0   | 0   | 1   | 1   | 0   | 0   | 0   |
| 502946 | Arid3c     | 2   | 2   | 2   | 1   | 3   | 2   | 1   | 1   |

|        |           |     |     |     |     |     |     |     |     |
|--------|-----------|-----|-----|-----|-----|-----|-----|-----|-----|
| 502970 | Angpt13   | 0   | 0   | 1   | 0   | 0   | 0   | 0   | 1   |
| 503435 | Cldn34a   | 0   | 1   | 0   | 0   | 0   | 0   | 0   | 1   |
| 541457 | Dbx2      | 0   | 0   | 2   | 0   | 0   | 1   | 1   | 0   |
| 55939  | Apom      | 13  | 16  | 13  | 8   | 11  | 13  | 13  | 13  |
| 56806  | Adam2     | 0   | 0   | 0   | 1   | 0   | 1   | 0   | 0   |
| 57395  | Cltrn     | 0   | 1   | 0   | 0   | 0   | 0   | 0   | 1   |
| 58975  | Klrg1     | 1   | 0   | 1   | 0   | 0   | 1   | 0   | 1   |
| 60432  | Glp2r     | 0   | 0   | 1   | 0   | 0   | 0   | 1   | 0   |
| 60566  | Syt8      | 3   | 2   | 3   | 1   | 0   | 8   | 1   | 0   |
| 60574  | Prap1     | 0   | 0   | 3   | 0   | 0   | 0   | 2   | 1   |
| 64027  | Bspry     | 56  | 77  | 59  | 41  | 66  | 49  | 55  | 63  |
| 64055  | Guca2b    | 0   | 0   | 1   | 0   | 0   | 0   | 1   | 0   |
| 641644 | Defb25    | 1   | 1   | 1   | 0   | 0   | 1   | 1   | 1   |
| 64186  | Ascl1     | 1   | 0   | 0   | 0   | 0   | 0   | 1   | 0   |
| 64349  | Crybb3    | 1   | 0   | 1   | 1   | 1   | 1   | 0   | 1   |
| 64549  | Inhbc     | 1   | 1   | 0   | 0   | 1   | 0   | 1   | 0   |
| 64680  | Crhr2     | 42  | 22  | 28  | 22  | 26  | 36  | 22  | 30  |
| 65241  | Trnaulap  | 213 | 186 | 233 | 208 | 213 | 211 | 215 | 201 |
| 679247 | Eef1akmt3 | 2   | 1   | 0   | 0   | 0   | 1   | 1   | 1   |
| 679701 | Barx2     | 0   | 1   | 2   | 2   | 1   | 1   | 2   | 1   |
| 679932 | Nxph2     | 1   | 1   | 0   | 0   | 1   | 0   | 1   | 0   |
| 680697 | Fcrl5     | 0   | 2   | 0   | 0   | 0   | 2   | 0   | 0   |
| 680923 | Pvrig     | 0   | 0   | 1   | 0   | 1   | 0   | 0   | 0   |
| 681006 | LOC681006 | 0   | 0   | 1   | 0   | 0   | 1   | 0   | 0   |
| 681377 | Rp1       | 0   | 1   | 0   | 0   | 0   | 1   | 0   | 0   |
| 681398 | Fam174b   | 53  | 50  | 51  | 69  | 77  | 41  | 49  | 56  |
| 684972 | Fam25a    | 1   | 0   | 0   | 0   | 1   | 0   | 0   | 0   |
| 685080 | Nipsnap3a | 0   | 0   | 0   | 1   | 1   | 0   | 0   | 0   |
| 685463 | LOC685463 | 0   | 1   | 0   | 0   | 0   | 0   | 0   | 1   |
| 685524 | Frg2      | 0   | 0   | 0   | 1   | 1   | 0   | 0   | 0   |
| 685767 | LOC685767 | 0   | 0   | 1   | 0   | 0   | 1   | 0   | 0   |
| 685940 | Samd3     | 0   | 1   | 1   | 1   | 0   | 2   | 1   | 0   |
| 687472 | Wdr87     | 0   | 0   | 1   | 0   | 0   | 1   | 0   | 0   |
| 689048 | Fam187b   | 1   | 0   | 0   | 2   | 1   | 2   | 0   | 0   |
| 689090 | Khdc1     | 0   | 3   | 1   | 0   | 1   | 1   | 2   | 0   |
| 689151 | Ccdc87    | 3   | 3   | 3   | 1   | 1   | 4   | 5   | 0   |
| 689717 | Cpo       | 1   | 1   | 0   | 0   | 1   | 0   | 1   | 0   |
| 689792 | Skint8    | 1   | 0   | 0   | 0   | 0   | 0   | 0   | 1   |
| 689869 | Tas2r140  | 1   | 0   | 0   | 0   | 0   | 1   | 0   | 0   |
| 689917 | Gpr21     | 4   | 0   | 2   | 1   | 1   | 2   | 2   | 2   |
| 689927 | LOC689927 | 0   | 1   | 0   | 0   | 0   | 0   | 0   | 1   |
| 690235 | LOC690235 | 1   | 0   | 0   | 0   | 1   | 0   | 0   | 0   |
| 690252 | Cnih3     | 10  | 11  | 5   | 10  | 11  | 7   | 7   | 11  |
| 690356 | Vom2r37   | 2   | 0   | 0   | 0   | 0   | 2   | 0   | 0   |
| 690415 | LOC690415 | 1   | 0   | 0   | 0   | 0   | 0   | 1   | 0   |
| 690504 | Kpna7     | 0   | 0   | 1   | 0   | 0   | 0   | 1   | 0   |
| 690544 | Cby3      | 8   | 8   | 9   | 6   | 7   | 5   | 13  | 6   |
| 690906 | Lilrc2    | 5   | 3   | 4   | 3   | 5   | 6   | 0   | 4   |
| 690953 | Rdh8      | 0   | 0   | 1   | 0   | 0   | 0   | 0   | 1   |
| 691044 | LOC691044 | 1   | 0   | 0   | 0   | 0   | 0   | 0   | 1   |
| 691438 | Vom2r54   | 0   | 0   | 0   | 1   | 0   | 0   | 0   | 1   |
| 691722 | LOC691722 | 7   | 3   | 5   | 4   | 5   | 5   | 6   | 3   |
| 691750 | Tmem107   | 69  | 78  | 72  | 73  | 64  | 74  | 85  | 69  |
| 691905 | Pla2g4d   | 1   | 0   | 0   | 0   | 0   | 0   | 1   | 0   |
| 691909 | Ccdc189   | 20  | 22  | 30  | 25  | 20  | 20  | 33  | 24  |
| 691970 | LOC691970 | 0   | 1   | 0   | 1   | 0   | 0   | 2   | 0   |

|           |                 |        |         |        |        |       |       |       |         |
|-----------|-----------------|--------|---------|--------|--------|-------|-------|-------|---------|
| 78951     | Hspb3           | 12     | 9       | 3      | 10     | 6     | 20    | 5     | 3       |
| 78969     | Trib1           | 183    | 183     | 168    | 178    | 141   | 186   | 210   | 175     |
| 81635     | Adar            | 1481   | 1592    | 1571   | 1706   | 1639  | 1656  | 1536  | 1519    |
| 81673     | Gtf2b           | 680    | 574     | 569    | 524    | 546   | 544   | 639   | 618     |
| 83784     | Agxt2           | 0      | 1       | 0      | 0      | 0     | 0     | 0     | 1       |
| 84349     | Cd40lg          | 1      | 1       | 0      | 0      | 1     | 0     | 0     | 1       |
| 84592     | Cetn1           | 0      | 0       | 1      | 0      | 0     | 0     | 1     | 0       |
| 84597     | Fut9            | 1      | 1       | 1      | 2      | 1     | 1     | 1     | 2       |
| 89833     | Ftcd            | 3      | 2       | 6      | 2      | 2     | 4     | 2     | 5       |
| 94199     | Dpep1           | 4      | 2       | 1      | 2      | 1     | 5     | 1     | 2       |
| 29228     | Nfic            | 3721   | 3586    | 3606   | 4379   | 4130  | 3772  | 3933  | 3457    |
| 303194    | Top3a           | 120.6  | 115.97  | 151.07 | 135.54 | 136.4 | 128.1 | 132.3 | 126.39  |
| 361828    | Specc11         | 1588   | 1669    | 1635   | 1749   | 1703  | 1623  | 1753  | 1563    |
| 363544    | Cluap1          | 543    | 566     | 503.64 | 493    | 508   | 513   | 546   | 539     |
| 295234    | Lamtor2         | 1053   | 953     | 919    | 827    | 928   | 938   | 845   | 1042    |
| 100911865 | LOC100911865    | 23.04  | 0       | 17.16  | 34.4   | 20.67 | 8.61  | 16.33 | 29.01   |
| 108348166 | NEWGENE_1309446 | 32.32  | 37.31   | 35.15  | 32.14  | 39.53 | 32.89 | 29    | 35.54   |
| 25125     | Stat3           | 4622   | 5048    | 5283   | 5068   | 5039  | 5189  | 5047  | 4752    |
| 84598     | Jak1            | 6561.5 | 7344.07 | 6506.7 | 7382   | 6983  | 6694  | 7073  | 7053.49 |
| 24924     | Ptn             | 7307   | 6790    | 6949   | 6980   | 7372  | 6449  | 6861  | 7354    |
| 117855    | Sf1             | 1883   | 2043    | 2180   | 2292   | 1979  | 2249  | 2042  | 2131    |
| 361577    | Kdelr1          | 1153   | 1116    | 1262   | 1104   | 1116  | 1176  | 1176  | 1169    |
| 302489    | Hs6st2          | 1043   | 1252    | 1152   | 1112   | 1284  | 1081  | 1014  | 1182    |
| 299135    | Dhrs7           | 854.57 | 792.67  | 683.66 | 648.97 | 716.8 | 708.7 | 740.7 | 815.02  |
| 678766    | Rhou            | 562.93 | 512.09  | 643.21 | 542.75 | 539.1 | 553.7 | 570.9 | 598.34  |
| 291703    | Ercc3           | 1028   | 1035    | 976    | 1014   | 1003  | 1056  | 1002  | 994     |
| 308023    | Ssx2ip          | 1442.2 | 1578.12 | 1580   | 1444.6 | 1526  | 1545  | 1498  | 1479.04 |
| 114100    | Sc5d            | 4589.6 | 4670.44 | 4205   | 5147.2 | 4405  | 4398  | 4887  | 4932.93 |
| 85267     | Slc24a3         | 843    | 795     | 880    | 910    | 882   | 828   | 844   | 876     |
| 298681    | Ssu72           | 2713   | 2712    | 2456   | 2261   | 2518  | 2418  | 2445  | 2767    |
| 314621    | Stk11           | 1095   | 1091.9  | 1136.2 | 968.25 | 1048  | 1089  | 1109  | 1047.35 |
| 294079    | 5-Mar           | 1650   | 1635    | 1490   | 1492   | 1565  | 1481  | 1645  | 1580    |
| 58924     | Fut2            | 15     | 5       | 18.86  | 7.59   | 17.63 | 7.4   | 14    | 7.45    |
| 289561    | Polr2b          | 1353.5 | 1260.21 | 1185.5 | 1205.9 | 1274  | 1235  | 1315  | 1184.1  |
| 296488    | Ola1            | 3058   | 3044    | 2890   | 2795   | 2774  | 2883  | 3188  | 2950    |
| 291295    | Rbm17           | 770    | 734     | 707    | 679    | 756   | 706   | 729   | 701     |
| 79255     | Atf4            | 4241   | 3907    | 3728   | 3731   | 3747  | 3869  | 3953  | 4049    |
| 170933    | Syf2            | 677    | 721     | 686    | 555    | 674   | 631   | 661   | 675     |
| 307657    | Ogfod1          | 351    | 292     | 323    | 341    | 340   | 342   | 327   | 299     |
| 116741    | Pcdha4          | 5341.7 | 5387.15 | 5259.6 | 5568.1 | 5622  | 5494  | 5456  | 5001.26 |
| 301005    | Impdh2          | 972    | 946     | 1070   | 864    | 926   | 955   | 1004  | 970     |
| 300947    | Tfdp2           | 988    | 951     | 974    | 924    | 996   | 1000  | 921   | 923     |
| 301440    | Cdk15           | 239.09 | 207.24  | 225.71 | 217.27 | 220.5 | 220.9 | 218.7 | 229.93  |
| 680737    | Snrpf           | 341    | 295     | 342.99 | 269    | 312   | 307   | 308   | 322     |
| 287552    | Blmh            | 631    | 666     | 600    | 598    | 611   | 627   | 661   | 598     |
| 365345    | Cyb5r2          | 618    | 643     | 438    | 492.21 | 394   | 563   | 566   | 670     |
| 305066    | Prox1           | 8      | 11      | 11     | 6      | 8.03  | 9     | 12    | 7       |
| 362188    | Slc5a12         | 2      | 3       | 4      | 3      | 2     | 3     | 4.01  | 3       |
| 303488    | Hoxb3           | 299.71 | 288.54  | 326.28 | 320.35 | 311.1 | 333.7 | 286.8 | 304.3   |
| 116674    | Jdp2            | 297    | 273     | 359    | 265    | 318   | 350   | 281   | 246     |
| 305977    | Pnma2           | 1710.9 | 1769.07 | 1620.3 | 1796   | 1946  | 1568  | 1722  | 1666.64 |
| 362460    | Golt1b          | 306    | 278     | 317    | 281    | 311   | 255   | 329   | 288     |
| 117044    | Rraga           | 2043   | 2029    | 2002   | 1835   | 1950  | 1979  | 1960  | 2027    |
| 29625     | Crhbp           | 9.56   | 9.39    | 4.39   | 9.79   | 7.01  | 9.03  | 5.09  | 12.03   |
| 361956    | Rsrc1           | 893    | 824     | 761    | 807    | 803   | 806   | 872   | 807     |
| 294007    | Pprc1           | 503    | 554     | 560    | 564    | 537   | 582   | 535   | 529     |

|           |              |        |         |        |        |       |       |       |         |
|-----------|--------------|--------|---------|--------|--------|-------|-------|-------|---------|
| 366984    | Cers5        | 1112   | 1110    | 1085   | 1025   | 1052  | 1075  | 1084  | 1125    |
| 500921    | Tmem117      | 1115   | 1209    | 903    | 1101   | 972   | 1140  | 1072  | 1148    |
| 362774    | Serpina11    | 206    | 263     | 324    | 249    | 179   | 341   | 210   | 313     |
| 293888    | Plgrkt       | 279    | 258     | 234    | 220    | 233   | 233   | 245   | 281     |
| 313477    | Zfyve9       | 1453   | 1485    | 1249   | 1481   | 1421  | 1411  | 1510  | 1332    |
| 294972    | Mccc1        | 233    | 247     | 243    | 221    | 224   | 212   | 269   | 240     |
| 294276    | Brd2         | 1858.8 | 1624.68 | 1796.6 | 1795.1 | 1994  | 1676  | 1604  | 1808.35 |
| 365872    | Aph1a        | 676    | 706     | 752    | 640    | 676   | 699   | 677   | 725     |
| 362894    | R3hdm2       | 1987   | 1994    | 2102   | 2238   | 2134  | 2141  | 2084  | 1971    |
| 25639     | Fkbpla       | 8175   | 8525    | 8581   | 8732   | 8604  | 8234  | 8046  | 9166    |
| 690586    | Ankrd40      | 3674   | 3716    | 3524   | 3622   | 3527  | 3766  | 3633  | 3626    |
| 100360821 | LOC100360821 | 2.01   | 1       | 3.01   | 3.01   | 3     | 1.01  | 3.02  | 2.01    |
| 300075    | Tomm22       | 1454   | 1390    | 1279   | 1169   | 1223  | 1281  | 1414  | 1380    |
| 306765    | Zfp346       | 397    | 434     | 449    | 453    | 349   | 451   | 488   | 447     |
| 266803    | Sostdcl      | 809    | 1188    | 1317   | 979    | 647   | 800   | 1501  | 1350    |
| 288269    | Cfap298      | 503    | 436     | 404    | 372    | 403   | 384   | 455   | 475     |
| 288762    | Mtm1         | 607.13 | 595.77  | 571.07 | 651.35 | 601.4 | 588.6 | 612.4 | 625.83  |
| 361399    | Edc4         | 735    | 911     | 810    | 880    | 886   | 827   | 843   | 784     |
| 300320    | L3mbt12      | 992.66 | 981.34  | 994.82 | 947.45 | 949.9 | 990.4 | 991   | 989.67  |
| 313121    | Map3k7       | 1101.6 | 1011.93 | 915.98 | 954.11 | 1030  | 955.9 | 1080  | 921.85  |
| 680423    | Aup1         | 1464   | 1372    | 1327   | 1275   | 1321  | 1404  | 1367  | 1353    |
| 691631    | Pacs2        | 5641.7 | 5990.65 | 5793   | 6122.5 | 5400  | 6280  | 5902  | 5996.72 |
| 294311    | RGD735065    | 1189   | 1203    | 1116   | 1146   | 1164  | 1149  | 1152  | 1195    |
| 100362333 | LOC100362333 | 236.57 | 208.71  | 203.21 | 204.83 | 258.4 | 168.4 | 230.5 | 197.25  |
| 288978    | LOC288978    | 75.7   | 99.51   | 95.41  | 87.24  | 107.8 | 70.78 | 94.02 | 85.72   |
| 360668    | Sec1411      | 2696   | 2620    | 2457   | 2775   | 2751  | 2580  | 2503  | 2728    |
| 310785    | Wdr47        | 2302   | 2170    | 2145   | 2133   | 2201  | 2134  | 2259  | 2168    |
| 64310     | Arf1         | 6497   | 6532    | 6479   | 5850   | 6177  | 6321  | 6381  | 6514    |
| 305256    | Grsf1        | 2339   | 2409    | 2266   | 2375   | 2302  | 2311  | 2440  | 2349    |
| 117140    | Hivep1       | 991.12 | 979.8   | 918.46 | 1064.1 | 1008  | 978.3 | 1067  | 906.62  |
| 304740    | Clasp1       | 3836.1 | 4276.09 | 4054   | 4712   | 4394  | 4360  | 4348  | 3800    |
| 295051    | Alg5         | 385    | 357     | 375    | 309    | 343   | 355   | 337   | 393     |
| 288770    | Naca         | 2765   | 2770    | 2792   | 2237   | 2465  | 2594  | 2737  | 2783    |
| 362835    | Reep6        | 327.33 | 364.99  | 350    | 343.99 | 320   | 370   | 339   | 359.28  |
| 364081    | Irf6         | 565    | 541     | 470    | 524    | 516   | 497   | 573   | 517     |
| 288667    | Fam216a      | 725    | 763     | 648    | 648    | 688   | 633   | 723   | 744     |
| 289034    | Tmem183a     | 1751   | 1689    | 1671   | 1662   | 1740  | 1647  | 1655  | 1741    |
| 294400    | Nus1         | 1947.6 | 1973.26 | 1818.6 | 1922.6 | 1882  | 1871  | 1992  | 1927.95 |
| 680860    | Eppk1        | 14.05  | 18.2    | 25.07  | 23.09  | 13.74 | 22.07 | 26.68 | 18.04   |
| 114558    | Becn1        | 1971   | 1864.22 | 1815.3 | 1735.5 | 1833  | 1785  | 1909  | 1870.47 |
| 362849    | 2-Mar        | 2116   | 2070    | 1999   | 1745   | 1987  | 1890  | 1966  | 2099    |
| 25709     | Hmbs         | 547    | 472     | 518    | 430    | 506   | 514   | 491   | 459     |
| 286927    | Stk16        | 710    | 690     | 653    | 540    | 576   | 611   | 682   | 728     |
| 361439    | Abcb10       | 312    | 317     | 330    | 324    | 319   | 363   | 297   | 306     |
| 314061    | Uvssa        | 114.33 | 118.44  | 107.23 | 111.53 | 122.9 | 94.9  | 108.4 | 126.03  |
| 315150    | Adsl         | 681.82 | 643.31  | 691.59 | 645.07 | 627.6 | 740.6 | 658.7 | 639.21  |
| 301250    | Mrpl14       | 334    | 296     | 310    | 250    | 283   | 306   | 294   | 309     |
| 287177    | Ergic1       | 883.68 | 885.45  | 850.71 | 945.45 | 938.9 | 954.3 | 855.9 | 822.27  |
| 306962    | Hist1h2ac    | 0      | 9.17    | 2.99   | 5.44   | 0     | 2.69  | 3.87  | 11.07   |
| 100366237 | Pfdn4        | 785    | 714     | 698    | 685    | 716   | 655   | 711   | 805     |
| 361227    | Tbcd17       | 542.1  | 535.15  | 507.23 | 522.06 | 536.1 | 524   | 530.6 | 519.59  |
| 362061    | Cryz         | 146    | 134     | 146    | 138    | 126   | 147   | 158   | 134     |
| 367930    | RbmX2        | 169    | 145     | 128    | 121    | 160   | 144   | 139   | 121     |
| 282585    | Mrfap1       | 6559   | 5903    | 6123   | 5576   | 6253  | 5716  | 6079  | 6156    |
| 155423    | Anxa7        | 2506   | 2603    | 2551   | 2448   | 2453  | 2508  | 2575  | 2590    |
| 108348180 | LOC108348180 | 1095.8 | 984.5   | 951.14 | 1063.4 | 1053  | 1104  | 1058  | 887.66  |

|           |              |        |         |        |        |       |       |       |         |
|-----------|--------------|--------|---------|--------|--------|-------|-------|-------|---------|
| 306628    | Col4a2       | 3307   | 3847    | 4596   | 3882   | 3227  | 4458  | 4005  | 3970    |
| 54304     | Ssbp1        | 274    | 263     | 275    | 285    | 270   | 259   | 295   | 275     |
| 362824    | Mfsd12       | 1527   | 1503    | 1611   | 1391   | 1628  | 1421  | 1551  | 1443    |
| 100360533 | Fam57a       | 458.01 | 438.37  | 430.47 | 345.97 | 345.4 | 461.1 | 410.5 | 458.88  |
| 301337    | Plekhb2      | 7470   | 7578    | 6877   | 7160   | 7490  | 7226  | 7350  | 7073    |
| 79463     | Timm22       | 753    | 669     | 612    | 596    | 663   | 627   | 631   | 714     |
| 296076    | Srp14        | 1927.2 | 1682    | 1681   | 1462.7 | 1647  | 1597  | 1720  | 1801.74 |
| 315756    | Dennd4a      | 1388.9 | 1388    | 1421   | 1615   | 1546  | 1280  | 1489  | 1509    |
| 306198    | Clybl        | 192.06 | 193.59  | 177.67 | 156.08 | 177.9 | 170.9 | 189   | 183.03  |
| 314553    | Ptdss1       | 1561   | 1587    | 1567   | 1529   | 1556  | 1529  | 1591  | 1580    |
| 292915    | Sult2b1      | 72.33  | 65.82   | 69.75  | 67.1   | 72    | 80.53 | 64    | 59      |
| 362990    | Zcrb1        | 717.47 | 685.85  | 716.17 | 668.05 | 650.3 | 641   | 717.2 | 784.42  |
| 311786    | Traf2        | 246    | 246     | 279    | 263    | 228   | 269   | 286   | 253     |
| 361866    | Hace1        | 647    | 656     | 621.82 | 604.25 | 628   | 596   | 648   | 661.97  |
| 100910106 | LOC100910106 | 86.41  | 57.56   | 79.86  | 83.14  | 80.79 | 63.72 | 76.17 | 86.89   |
| 113947    | Maged2       | 1688   | 1683    | 1698   | 1553   | 1492  | 1576  | 1802  | 1765    |
| 311359    | Hypk         | 979    | 862     | 924    | 798    | 922   | 816   | 868   | 964     |
| 364902    | Epg5         | 590    | 600     | 683    | 661    | 608   | 628   | 655   | 648     |
| 361923    | Rpl2211      | 452    | 381     | 388    | 294    | 347   | 361   | 361   | 449     |
| 289144    | Cacybp       | 2959   | 2804    | 2604   | 2741   | 2739  | 2682  | 2895  | 2814    |
| 64198     | Pmpcb        | 1144   | 1185    | 1156   | 1059   | 1125  | 1146  | 1159  | 1123    |
| 108352515 | LOC108352515 | 30.51  | 45.56   | 53.01  | 36.69  | 43.58 | 44.71 | 42.42 | 35.39   |
| 689712    | Tmed11       | 0      | 0.99    | 3      | 1      | 1     | 2     | 0     | 2       |
| 304081    | Clic6        | 91     | 127     | 119    | 149    | 114   | 133   | 130   | 110     |
| 287642    | Slc35b1      | 998    | 949     | 972    | 919    | 881   | 973   | 992   | 1000    |
| 171358    | Camklg       | 172    | 105     | 89     | 112    | 127   | 98    | 152   | 102     |
| 310664    | Prune1       | 1297   | 1367    | 1295   | 1274   | 1325  | 1351  | 1325  | 1243    |
| 362513    | Shb          | 105    | 118     | 148    | 104    | 99    | 139   | 118   | 120     |
| 300105    | Tt1112       | 348    | 321     | 396    | 354    | 366   | 351   | 370   | 335     |
| 29495     | Dlg4         | 2001   | 2072    | 2103.1 | 2361.8 | 2287  | 2276  | 2134  | 1859    |
| 24781     | Slc4a3       | 716    | 648     | 752    | 653    | 718   | 688   | 692   | 677     |
| 300149    | Ncaph2       | 1476.9 | 1413.32 | 1508.7 | 1388.6 | 1416  | 1407  | 1450  | 1526.86 |
| 301126    | Safb2        | 730.23 | 777.52  | 845.66 | 831.11 | 825.7 | 809   | 798.6 | 758.14  |
| 307235    | Rbfa         | 345    | 344     | 349    | 332    | 314   | 364   | 358   | 337     |
| 288333    | Gbe1         | 1054   | 1112    | 939    | 997    | 1040  | 1003  | 1048  | 1020    |
| 299809    | Cct2         | 4052   | 3890    | 3503   | 3558   | 3536  | 3591  | 3971  | 3938    |
| 29290     | Adora1       | 973    | 830     | 948    | 885    | 930   | 861   | 866   | 987     |
| 25149     | Esr2         | 12.92  | 14.38   | 9.93   | 8.08   | 25    | 5     | 7.54  | 7.87    |
| 108348201 | LOC108348201 | 32.95  | 37.31   | 42.4   | 45.71  | 38.5  | 38.18 | 42.86 | 39.18   |
| 500695    | Snw1         | 712.71 | 702.73  | 741.64 | 661.34 | 715.8 | 671.8 | 737.8 | 699.27  |
| 363091    | Myzap        | 39     | 22      | 23.76  | 28     | 27    | 38    | 31.01 | 17      |
| 117535    | Chd4         | 4107   | 4519    | 4571   | 4817   | 4675  | 4627  | 4448  | 4304    |
| 500956    | LOC500956    | 458.42 | 488.04  | 452.28 | 472.17 | 493.2 | 534.2 | 426.2 | 421.46  |
| 293856    | Pdzd4        | 557    | 538     | 573    | 571    | 609   | 539   | 521   | 575     |
| 308408    | Gpr4         | 65.1   | 65.22   | 63.3   | 123.79 | 73.81 | 76.92 | 84.29 | 83.1    |
| 29672     | Psma5        | 1284   | 1312    | 1206   | 1067   | 1170  | 1195  | 1206  | 1309    |
| 259273    | Kcnq5        | 944    | 1063    | 1147   | 1261   | 1148  | 993   | 1164  | 1120    |
| 290363    | Rcbtb2       | 353    | 325     | 314    | 308    | 335   | 309   | 344   | 315     |
| 81659     | Gak          | 1958   | 2131    | 1949   | 2121   | 2131  | 2076  | 2038  | 1933    |
| 25490     | Nedd8        | 1895   | 1696    | 1693   | 1526   | 1693  | 1532  | 1700  | 1901    |
| 289095    | Nmnat2       | 754    | 863     | 788    | 993    | 873   | 805   | 871   | 857     |
| 114862    | Cacnalh      | 1173   | 1187.71 | 1247.1 | 1412.8 | 1355  | 1269  | 1236  | 1173.57 |
| 679203    | Nelfcd       | 896    | 837     | 833    | 781    | 815   | 835   | 884   | 821     |
| 171010    | Ppplr14c     | 208    | 190     | 211    | 213    | 207   | 174   | 215   | 228     |
| 290555    | Spcs1        | 1352   | 1236    | 1173   | 1066   | 1133  | 1231  | 1218  | 1257    |
| 192218    | Kat5         | 1075   | 1023    | 979    | 922    | 907   | 1040  | 1055  | 1007    |

|           |              |        |         |        |        |       |       |       |         |
|-----------|--------------|--------|---------|--------|--------|-------|-------|-------|---------|
| 498122    | LOC498122    | 129.5  | 152.04  | 147.12 | 130.91 | 125.6 | 132.1 | 138.1 | 165.12  |
| 679651    | Tmem178b     | 1799.3 | 1732.03 | 1788.1 | 2060.6 | 1984  | 1714  | 1940  | 1761.49 |
| 289353    | Slc30a10     | 211    | 188     | 177    | 214    | 215   | 193   | 198   | 186     |
| 309262    | Nsdh1        | 2146   | 2225    | 1921   | 2002   | 1805  | 2078  | 2138  | 2294    |
| 117053    | Rps15a       | 2682   | 2504    | 2348   | 1941   | 2351  | 2209  | 2374  | 2565    |
| 338475    | Nrep         | 1058   | 1050.06 | 1145   | 1098.7 | 1001  | 1161  | 1203  | 997.99  |
| 311857    | Gpr107       | 1371   | 1379    | 1326   | 1409   | 1327  | 1367  | 1452  | 1353    |
| 311061    | Itgb6        | 220    | 181     | 194    | 186    | 226   | 211   | 199   | 147     |
| 363286    | Traf3ipl     | 176    | 199     | 186    | 209    | 209   | 175   | 204   | 184     |
| 302327    | Zfp711       | 108    | 95      | 81     | 100    | 108   | 81    | 104   | 92      |
| 24967     | Psemb9       | 106    | 88      | 92     | 94     | 85    | 93    | 97    | 106     |
| 360762    | Polr1d       | 289    | 273     | 329    | 247    | 263   | 269   | 304   | 305     |
| 363494    | Gla          | 1162   | 1213    | 1098   | 1072   | 1073  | 1126  | 1239  | 1119    |
| 192356    | Unc50        | 471    | 513     | 469    | 425    | 434   | 492   | 490   | 467     |
| 300257    | Pfdn5        | 995    | 1002    | 977    | 764    | 955   | 847   | 941   | 1005    |
| 313511    | Mob3c        | 46.51  | 48.23   | 37.46  | 50.29  | 43.96 | 35.72 | 47.26 | 56.04   |
| 100359982 | Mpc2         | 1003   | 1019    | 889    | 801    | 851   | 917   | 930   | 1024    |
| 100910418 | LOC100910418 | 13.67  | 0       | 18.53  | 12.31  | 13.86 | 8.42  | 19.25 | 3.1     |
| 300803    | Lactb        | 186    | 179     | 196    | 178    | 202   | 181   | 165   | 193     |
| 290939    | Med10        | 613    | 561     | 537    | 477    | 529   | 490   | 561   | 614     |
| 366448    | Uqcrh        | 2343   | 2182    | 1907   | 1939   | 2119  | 1853  | 1976  | 2446    |
| 116721    | Abcc5        | 3913   | 4133    | 3784   | 4458   | 4264  | 4229  | 3987  | 3853    |
| 54290     | Rgs10        | 2549   | 2490    | 2253   | 1918   | 2277  | 2086  | 2322  | 2551    |
| 316687    | Gin1         | 161    | 188     | 173    | 185    | 149   | 193   | 194   | 173     |
| 298609    | Efhd2        | 655.01 | 628     | 775    | 654    | 692   | 678   | 677.7 | 672.01  |
| 108348192 | LOC108348192 | 78.48  | 73.62   | 72.64  | 81.21  | 71.99 | 63.31 | 93.6  | 77.92   |
| 25671     | Smad1        | 509.07 | 481.08  | 504.96 | 515.57 | 514.8 | 507.1 | 530.4 | 464     |
| 499417    | Sumo3        | 2019   | 1949    | 1910   | 1824   | 1849  | 1904  | 1978  | 1993    |
| 313022    | Map3k6       | 106    | 80      | 87     | 76     | 87    | 118   | 93    | 52      |
| 298451    | Atp6v0b      | 1030   | 876     | 875    | 704    | 911   | 826   | 831   | 927     |
| 682937    | Wasf3        | 557    | 648     | 548    | 681    | 708   | 541   | 600   | 592     |
| 619574    | Cybc1        | 944.02 | 903.22  | 885.36 | 826.07 | 828.7 | 893.8 | 916.4 | 930.04  |
| 291849    | Zfp319       | 153    | 163     | 174    | 201    | 175   | 160   | 183   | 175     |
| 679921    | Vasn         | 261    | 274     | 271    | 228    | 265   | 297   | 240   | 235     |
| 25458     | Gss          | 727    | 768     | 673    | 586    | 709   | 654   | 669   | 730     |
| 116723    | Pip4k2a      | 2453.8 | 2604.08 | 2484.5 | 2674.1 | 2385  | 2641  | 2645  | 2575    |
| 103690508 | LOC103690508 | 14     | 9.05    | 12.36  | 5.74   | 15.34 | 3.83  | 6.91  | 15.19   |
| 364386    | Rnf31        | 435    | 420     | 469    | 387    | 448   | 424   | 414   | 430     |
| 85262     | Slc25a27     | 733    | 715     | 613    | 670    | 651   | 668   | 699   | 721     |
| 288256    | Cryz11       | 741    | 713     | 603    | 669    | 647   | 658   | 713   | 716     |
| 406864    | Clic1        | 1301   | 1238    | 1357   | 1187   | 1229  | 1280  | 1323  | 1266    |
| 299507    | Asnsd1       | 1872   | 1668    | 1611   | 1611   | 1693  | 1683  | 1674  | 1732    |
| 498297    | Cnst         | 2540   | 2350    | 2316   | 2207   | 2332  | 2404  | 2454  | 2251    |
| 81733     | Nell1        | 1773   | 1578    | 1679   | 1631   | 1832  | 1806  | 1372  | 1671    |
| 361006    | Cfap70       | 104    | 68      | 77     | 84     | 88    | 116   | 64    | 66      |
| 502525    | Dnajc19      | 379.87 | 324.38  | 340.39 | 314.48 | 313.1 | 336.3 | 325.3 | 388.52  |
| 24919     | Yy1          | 506    | 486     | 494    | 506    | 542   | 493   | 475   | 488     |
| 500941    | Msantd4      | 1147   | 1104    | 1024   | 1015   | 1044  | 1016  | 1138  | 1105    |
| 498675    | LOC498675    | 19     | 26      | 20     | 14.04  | 20.02 | 23.18 | 19.08 | 17      |
| 304469    | Rilpl1       | 417    | 399     | 382    | 439    | 364   | 473   | 385   | 420     |
| 64159     | Sptan1       | 28292  | 29880   | 29042  | 31300  | 30282 | 29692 | 31064 | 27840   |
| 117263    | Psmc1        | 4415   | 4381    | 4114   | 4019   | 4152  | 4246  | 4385  | 4198    |
| 298012    | Rad23b       | 5210   | 5109    | 4594   | 5182   | 5013  | 5005  | 5169  | 4970    |
| 81654     | Dlat         | 1612   | 1682    | 1469   | 1679   | 1666  | 1551  | 1629  | 1616    |
| 81770     | Rpl37        | 1937   | 1731.71 | 1799.1 | 1255.3 | 1666  | 1578  | 1595  | 1905.39 |
| 192209    | Spdya        | 46.15  | 43.12   | 31.1   | 46.18  | 63.65 | 31.11 | 39.1  | 33.21   |



|           |              |        |         |        |        |       |       |       |          |
|-----------|--------------|--------|---------|--------|--------|-------|-------|-------|----------|
| 314751    | Tmcc3        | 709    | 727     | 688    | 758    | 723   | 728   | 703   | 737      |
| 102554639 | LOC102554639 | 132.12 | 102.61  | 86.05  | 82.6   | 80.34 | 115.3 | 98.08 | 110.97   |
| 24675     | Ppp3cb       | 3345   | 3137    | 2732   | 3183   | 3121  | 3023  | 3236  | 3057     |
| 500226    | Wdr54        | 1058.1 | 981.27  | 955.35 | 810.58 | 868.8 | 1031  | 1014  | 903.99   |
| 287537    | Abr          | 3719   | 3985    | 3676   | 4070   | 4165  | 3913  | 3642  | 3780     |
| 296648    | Mapkap1      | 831    | 892     | 808    | 836    | 819   | 854   | 873   | 832      |
| 100362819 | LOC100362819 | 468    | 532     | 515    | 620    | 588   | 536   | 504   | 514      |
| 499818    | Ppp1rlc      | 8547   | 7793.11 | 7773   | 7876.8 | 8204  | 7517  | 8165  | 8209.66  |
| 100360781 | LOC100360781 | 0      | 11.63   | 11.49  | 46.13  | 22.97 | 46.51 | 0     | 0        |
| 25407     | Cd59         | 13607  | 12644.3 | 12020  | 12823  | 12795 | 12637 | 13015 | 12819.86 |
| 315338    | Hoxc10       | 315    | 304     | 275    | 290    | 303   | 337   | 267   | 281      |
| 83799     | Dpp7         | 1357   | 1329    | 1354   | 1278   | 1236  | 1414  | 1323  | 1363     |
| 303293    | Cyb5d2       | 257.32 | 243.32  | 217.71 | 230.06 | 240.8 | 237.5 | 237.9 | 235.47   |
| 691455    | Calml4       | 383    | 399     | 354    | 322    | 426   | 304   | 376   | 357      |
| 25682     | Ppard        | 660    | 594.95  | 596.23 | 566.9  | 632.3 | 642.6 | 576   | 575.46   |
| 79130     | Dnajc5       | 4537.1 | 4512    | 4253   | 4449   | 4469  | 4448  | 4486  | 4409     |
| 24565     | Abcc1        | 551.1  | 588.04  | 545.29 | 709.36 | 638.9 | 559.9 | 620   | 583.14   |
| 360481    | Dnaj3        | 1388   | 1339    | 1196   | 1311   | 1329  | 1337  | 1362  | 1224     |
| 83465     | Celsr2       | 2465   | 2754    | 2926   | 2903   | 2853  | 2876  | 2855  | 2502     |
| 171350    | Pabpc1       | 4027   | 4138    | 4742   | 4180   | 4426  | 4447  | 4095  | 4178     |
| 24672     | Ppp2ca       | 5641.4 | 5343.57 | 4962.6 | 4862.4 | 5141  | 5012  | 5403  | 5326.66  |
| 291963    | Tmem208      | 462    | 353     | 331    | 290    | 335   | 325   | 360   | 421      |
| 103693257 | LOC103693257 | 50.71  | 59.62   | 25.89  | 84.41  | 62.11 | 79.29 | 44.91 | 35.09    |
| 103692170 | LOC103692170 | 71.5   | 71.5    | 77.5   | 66     | 71.5  | 78.5  | 69    | 68.5     |
| 297380    | Ccdc142      | 71.5   | 71.5    | 77.5   | 66     | 71.5  | 78.5  | 69    | 68.5     |
| 360514    | Ublcp1       | 2332   | 2117    | 2058   | 2059   | 2156  | 2026  | 2178  | 2236     |
| 365823    | Fstl5        | 300    | 253     | 263    | 326    | 327   | 276   | 317   | 226      |
| 140945    | Rtn3         | 33957  | 34368   | 30890  | 33400  | 32564 | 33130 | 35025 | 32361    |
| 103693419 | LOC103693419 | 98.06  | 93.72   | 88.84  | 77.01  | 83.44 | 77.33 | 97.2  | 100.92   |
| 292892    | Irf3         | 968    | 914     | 945    | 839    | 870   | 916   | 1001  | 892      |
| 57302     | Cnr2         | 136.8  | 94.61   | 136.2  | 126.69 | 135.2 | 90.74 | 130.8 | 139.31   |
| 56768     | Pclo         | 1039.2 | 1211.87 | 1170.4 | 1770.1 | 1536  | 924.6 | 1325  | 1424.73  |
| 303901    | Sema5b       | 64     | 73      | 61     | 80     | 66    | 72    | 77    | 64       |
| 286905    | Cyp4f5       | 55.32  | 54.01   | 74.98  | 104.86 | 68.96 | 67.56 | 73.39 | 80.31    |
| 304284    | Bri3         | 627    | 659     | 639    | 553    | 578   | 643   | 622   | 644      |
| 362051    | Lmo4         | 1417   | 1410    | 1478   | 1457   | 1513  | 1449  | 1410  | 1411     |
| 362412    | Rad18        | 155    | 110     | 144    | 139    | 138   | 117   | 147   | 148      |
| 688786    | Pet100       | 849.87 | 809.87  | 757    | 657    | 755   | 685   | 777   | 868      |
| 360916    | Tmem150c     | 1875   | 2031    | 1993   | 1961   | 1975  | 1955  | 1985  | 1974     |
| 59073     | Lxn          | 7192   | 5981    | 5292   | 5344   | 5578  | 5588  | 5666  | 7065     |
| 289740    | Pes1         | 966    | 1038    | 994    | 952    | 990   | 974   | 1012  | 989      |
| 315345    | Copz1        | 2215   | 2341    | 2401   | 2174   | 2265  | 2340  | 2263  | 2298     |
| 289443    | Lrrc8c       | 1765   | 1746    | 1788   | 1956   | 1918  | 1940  | 1789  | 1636     |
| 100911832 | Rtl5         | 613    | 619     | 551    | 609.01 | 585   | 631   | 597   | 588.2    |
| 140922    | Txn11        | 3129   | 3058    | 2804   | 2922   | 2850  | 2820  | 3157  | 3132     |
| 361618    | Stim1        | 1342   | 1371    | 1322   | 1387   | 1407  | 1444  | 1332  | 1260     |
| 140666    | Rcan2        | 4833.5 | 4926.91 | 4449.9 | 4935.7 | 5050  | 4834  | 4572  | 4764.46  |
| 314456    | Tecpr2       | 1095.1 | 1128.52 | 1087.8 | 1163.1 | 1115  | 1158  | 1136  | 1082.76  |
| 316313    | Dst          | 20929  | 22853   | 23452  | 28065  | 26269 | 22975 | 23965 | 22466    |
| 317377    | Ccdc120      | 62     | 60      | 55     | 74     | 74    | 66    | 50    | 62       |
| 361436    | Afg3l1       | 430    | 479     | 463    | 376    | 452   | 447   | 439   | 417      |
| 293098    | Tmem135      | 623    | 643     | 585    | 642    | 580   | 598   | 675   | 650      |
| 289276    | Adss         | 2024   | 2041    | 1959   | 1933   | 1906  | 2037  | 2033  | 2013     |
| 305105    | Fbxo28       | 523    | 477     | 448    | 537    | 528   | 488   | 481   | 496      |
| 303470    | Kat7         | 1972   | 2118    | 2085   | 2256   | 2123  | 2121  | 1998  | 2223     |
| 688314    | Cenpx        | 213    | 185     | 173    | 171    | 199   | 177   | 169   | 200      |

|           |              |        |         |        |        |       |       |       |         |
|-----------|--------------|--------|---------|--------|--------|-------|-------|-------|---------|
| 171081    | Csf2rb       | 46     | 69      | 82     | 50     | 47    | 74    | 79    | 48      |
| 81774     | Rps11        | 3244   | 3102    | 3222   | 2487   | 2906  | 3058  | 2903  | 3237    |
| 360867    | Ccdc181      | 403    | 374     | 319    | 377    | 393   | 341   | 422   | 323     |
| 102551311 | LOC102551311 | 44.79  | 44.36   | 35.07  | 49.79  | 50.55 | 43.63 | 42.69 | 37.85   |
| 296624    | Dolpp1       | 626    | 646     | 615    | 554    | 639   | 584   | 620   | 608     |
| 499783    | Garnl3       | 1685   | 1671    | 1617   | 1608   | 1693  | 1681  | 1558  | 1676    |
| 287476    | Zzef1        | 1719   | 1946    | 1856   | 2033   | 2010  | 1930  | 1974  | 1671    |
| 25647     | I17          | 67     | 75      | 50     | 51     | 58    | 72    | 61    | 53      |
| 102557071 | LOC102557071 | 10.42  | 9.02    | 15.89  | 13.11  | 4.37  | 8.74  | 18.91 | 16.62   |
| 65183     | Aldh3a2      | 2122   | 2412    | 2192   | 2204   | 2202  | 2307  | 2256  | 2202    |
| 65274     | Nup62        | 534.15 | 551.81  | 594.65 | 550.59 | 549.9 | 585   | 585.9 | 519.71  |
| 25716     | Syt1         | 4473   | 4380    | 4065   | 4388   | 4594  | 4086  | 4305  | 4393    |
| 155205    | Slc36a1      | 1322   | 1316.98 | 1279   | 1531   | 1514  | 1331  | 1290  | 1337    |
| 89812     | Pip4k2b      | 2608   | 2559    | 2646   | 2695   | 2739  | 2673  | 2691  | 2449    |
| 306817    | Dek          | 599    | 583     | 664    | 541    | 595   | 603   | 635   | 564     |
| 498406    | Mrps24       | 323    | 312     | 303    | 255    | 302   | 332   | 279   | 285     |
| 688681    | Tgfbr31      | 63     | 61      | 76     | 37     | 52    | 73    | 55    | 58      |
| 287830    | Nup85        | 252    | 221     | 256    | 217    | 230   | 226   | 241   | 253     |
| 303419    | Cuedc1       | 403    | 428     | 390    | 426    | 401   | 434   | 391   | 428     |
| 171087    | Mpc1         | 2822   | 2715    | 2427   | 2379   | 2448  | 2438  | 2661  | 2840    |
| 363024    | Slc44a2      | 3643   | 4309    | 4593   | 3631   | 4182  | 4432  | 3734  | 3897    |
| 108350451 | LOC108350451 | 3.12   | 3.11    | 2.09   | 1.04   | 2.12  | 2.16  | 1.04  | 4.08    |
| 304012    | Trmt10c      | 359    | 350     | 371    | 323    | 310   | 341   | 379   | 379     |
| 619581    | Nicn1        | 1706   | 1742    | 1520   | 1806   | 1762  | 1612  | 1780  | 1649    |
| 362845    | Zfp870       | 158.73 | 150.43  | 157.65 | 156.8  | 171.8 | 148.6 | 151.2 | 154.72  |
| 315037    | Atmin        | 1082.4 | 1104.84 | 1032.9 | 1168.9 | 1145  | 1135  | 1139  | 988.28  |
| 306647    | Champ1       | 655.18 | 628.66  | 679.36 | 651.27 | 697.9 | 657.5 | 609.8 | 660.46  |
| 313482    | Zygl1a       | 36.99  | 37.3    | 36.23  | 44.96  | 65.01 | 32.29 | 29.31 | 29.54   |
| 361635    | Vps351       | 1047   | 1100    | 1137   | 1097   | 1027  | 1145  | 1096  | 1132    |
| 171400    | Elov15       | 6160   | 6695    | 5735   | 6575   | 5951  | 6375  | 6724  | 6225    |
| 296612    | Med27        | 495.97 | 550.7   | 513.05 | 505.41 | 501.7 | 527.1 | 548.3 | 497.21  |
| 289521    | Ankrd17      | 2936.4 | 2980.28 | 3074.1 | 3642.8 | 3351  | 3147  | 3294  | 2897.55 |
| 299738    | Vezt         | 2530   | 2516    | 2332   | 2356   | 2513  | 2372  | 2465  | 2427    |
| 304663    | Lyl1         | 53     | 44      | 98     | 31     | 61    | 57    | 56    | 53      |
| 311855    | RGD1305178   | 1293.1 | 1321.47 | 1299.6 | 1271.4 | 1332  | 1253  | 1313  | 1310.31 |
| 311847    | Dolk         | 545    | 525     | 495    | 461    | 534   | 555   | 502   | 444     |
| 56814     | Slc24a1      | 40.74  | 34.03   | 39.03  | 36.94  | 40.88 | 36.93 | 33    | 40.6    |
| 25249     | Coq7         | 172    | 183     | 164    | 148    | 159   | 153   | 193   | 165     |
| 362600    | Adprh12      | 280    | 272     | 317    | 238    | 249   | 279   | 274   | 310     |
| 25420     | Cryab        | 3559   | 3755    | 3317   | 3052   | 2288  | 3844  | 3339  | 4274    |
| 108348065 | LOC108348065 | 364    | 384     | 384    | 410    | 378   | 402.5 | 400.5 | 368     |
| 84581     | Hdac6        | 364    | 384     | 384    | 410    | 378   | 402.5 | 400.5 | 368     |
| 307992    | Atrn11       | 5134   | 4764    | 4577   | 5050   | 4960  | 4669  | 5103  | 4882    |
| 309678    | Trappc10     | 1877   | 1776    | 1948   | 2018   | 1951  | 1957  | 1915  | 1831    |
| 65137     | Ruvbl1       | 500    | 495.12  | 484    | 449    | 477   | 455   | 522   | 483     |
| 60379     | Col5a3       | 7380   | 7976    | 9165   | 7802   | 7860  | 8458  | 8325  | 7829    |
| 362770    | Ccdc88c      | 113    | 89      | 120    | 111    | 137   | 132   | 79    | 87      |
| 305889    | Thtpa        | 1282   | 1275    | 1220   | 1157   | 1252  | 1249  | 1212  | 1244    |
| 308588    | Car11        | 590    | 601     | 573    | 590    | 568   | 613   | 606   | 578     |
| 84389     | Ccnh         | 331    | 303     | 327    | 313    | 312   | 284   | 317   | 367     |
| 300732    | Pstpip1      | 106    | 130     | 122    | 64     | 111   | 85    | 116   | 112     |
| 85243     | Pik3cb       | 685    | 712     | 710    | 766    | 744.6 | 736   | 761   | 645     |
| 65042     | Sfxn3        | 2540   | 2639.01 | 2541   | 2598   | 2442  | 2701  | 2551  | 2673    |
| 691155    | Ccdc6        | 1246   | 1405    | 1457   | 1535   | 1469  | 1577  | 1372  | 1252    |
| 301617    | Pask         | 52     | 49      | 56     | 51     | 51    | 43    | 60    | 55      |
| 288455    | Pomp         | 1311.8 | 1191.06 | 1244.1 | 979.36 | 1061  | 1138  | 1229  | 1321.66 |

|           |              |        |         |        |        |       |       |       |         |
|-----------|--------------|--------|---------|--------|--------|-------|-------|-------|---------|
| 499651    | Etv31        | 0      | 0       | 1.03   | 1.04   | 0     | 1.04  | 0     | 1.04    |
| 499308    | Flrt1        | 248.26 | 256.66  | 283.07 | 286.51 | 277.7 | 283.6 | 263.2 | 255.16  |
| 314598    | Wiz          | 1176   | 1324    | 1311   | 1331   | 1287  | 1348  | 1249  | 1283    |
| 362260    | Dhx35        | 321    | 303     | 284    | 326    | 314   | 307   | 305   | 314     |
| 64226     | Mlst8        | 961.93 | 976.36  | 873.77 | 883.41 | 974   | 904   | 931.3 | 904.21  |
| 140595    | Gpr83        | 59.63  | 57.93   | 57.3   | 57.99  | 60.99 | 50    | 55    | 68      |
| 64470     | Ddb1         | 3741.9 | 3930.81 | 3996   | 4040.9 | 4014  | 4011  | 4078  | 3683.93 |
| 500287    | Srgap3       | 1945.8 | 1989    | 1883   | 2643.9 | 2400  | 2038  | 2042  | 2023.38 |
| 25045     | Dbi          | 5285.4 | 5519.05 | 4924.8 | 4310.1 | 4477  | 4794  | 5552  | 5314.45 |
| 116455    | Atp6v0a2     | 476    | 503     | 517    | 527    | 519   | 488   | 493   | 533     |
| 297699    | Strap        | 1842.9 | 1814.28 | 1763.5 | 1702.7 | 1709  | 1725  | 1863  | 1860.97 |
| 294520    | Mical1       | 1429   | 1602    | 1664   | 1523   | 1533  | 1648  | 1544  | 1523.78 |
| 81744     | Pde7a        | 257.34 | 235.67  | 243.98 | 232.81 | 273.1 | 207.2 | 256.8 | 237.59  |
| 114589    | Cntn5        | 114    | 110     | 88     | 91     | 122   | 85    | 120   | 78      |
| 64307     | Rpl24        | 2167.7 | 2105.19 | 2094.1 | 1642   | 1929  | 1894  | 2021  | 2205.15 |
| 690354    | Lymr2        | 417    | 352     | 357    | 274    | 344   | 320   | 347   | 396     |
| 308755    | Blm          | 201    | 211     | 221    | 164    | 205   | 189   | 216   | 191     |
| 299900    | Utp23        | 111    | 108     | 100    | 78     | 79    | 93    | 115   | 112     |
| 361050    | Rcbtb1       | 1090.6 | 1012.38 | 1072.8 | 1149   | 1160  | 1055  | 1099  | 1032.09 |
| 299346    | Nudt14       | 336    | 319     | 334    | 200    | 273   | 265   | 346   | 311     |
| 367949    | RGD1560171   | 49     | 49      | 50     | 50     | 60    | 56    | 52    | 31      |
| 501454    | Oaz2         | 3160   | 3130    | 2824   | 2742   | 3074  | 2966  | 2875  | 3001    |
| 361251    | Elmo1        | 3276.1 | 3549    | 3620   | 3722   | 3292  | 3676  | 3733  | 3537.89 |
| 300079    | Rpl3         | 5922   | 5765    | 5455   | 4709   | 5120  | 5404  | 5719  | 5719    |
| 681012    | Smg5         | 1887   | 1826    | 1780   | 1763   | 1836  | 1846  | 1828  | 1783    |
| 100361269 | Snrpa1       | 198    | 211     | 194    | 179    | 194   | 175   | 214   | 203     |
| 29716     | Cacna1d      | 476.77 | 414.48  | 403.53 | 465.66 | 505.8 | 423.2 | 455.9 | 384.6   |
| 361783    | Zfp57        | 101.08 | 109.57  | 91.07  | 118.78 | 110   | 104.9 | 101.6 | 106.14  |
| 293148    | C2cd3        | 287    | 328     | 354    | 393    | 383   | 317   | 329   | 340     |
| 313777    | Noc21        | 782.78 | 794.05  | 838.93 | 859.28 | 833.4 | 852.9 | 827.4 | 778.22  |
| 363869    | Ubl3         | 4231   | 4295    | 4011   | 4226   | 4377  | 4183  | 4231  | 4059    |
| 500655    | Timm17a11    | 74.42  | 70.56   | 66.28  | 54.68  | 71.18 | 47.18 | 83.02 | 65.95   |
| 683381    | Sin3b        | 619    | 690     | 737    | 616    | 671   | 662   | 632   | 711     |
| 362813    | Nabp2        | 960    | 1015    | 969    | 1042   | 965   | 1008  | 1005  | 1029    |
| 307091    | Akrle2       | 309    | 297     | 287    | 241    | 259   | 294   | 306   | 281     |
| 293160    | RGD1311703   | 1671   | 1590    | 1468   | 1445   | 1510  | 1567  | 1646  | 1484    |
| 363799    | Xxylt1       | 610    | 605     | 623    | 591    | 586   | 643   | 612   | 601     |
| 690188    | Fam168b      | 3050.2 | 3104.26 | 3140.1 | 3561.8 | 3397  | 3107  | 3294  | 3127.34 |
| 84551     | Slc7a8       | 729.13 | 802.25  | 690.53 | 948.85 | 791.7 | 770.2 | 779.9 | 846     |
| 688685    | Pheta2       | 46     | 43      | 54     | 43     | 42    | 38    | 55    | 52      |
| 299131    | Dhrs711      | 98.09  | 90.01   | 100.63 | 79.15  | 83.32 | 109.5 | 91.15 | 85.87   |
| 100911576 | LOC100911576 | 2381   | 2135.42 | 2193.9 | 2307.7 | 2217  | 2067  | 2533  | 2250.07 |
| 691031    | Cdc42se2     | 1152   | 1100.14 | 1161.7 | 977.94 | 1141  | 1022  | 1159  | 1093    |
| 100912936 | Hoxd8        | 408    | 374     | 353    | 347    | 320   | 392   | 404   | 374     |
| 298653    | Nmnat1       | 231    | 241.37  | 254.07 | 226.56 | 251.2 | 231.1 | 244.7 | 231.23  |
| 287383    | B9d1         | 179.4  | 160.84  | 161.66 | 148.27 | 161.6 | 164.6 | 156.7 | 170.76  |
| 298705    | Raver1       | 756    | 823     | 883    | 824    | 833   | 885   | 832   | 754     |
| 293502    | Kif22        | 81     | 87      | 140    | 55     | 109   | 85    | 101   | 70      |
| 303321    | Ccnq         | 209    | 197     | 147    | 172    | 199   | 190   | 193   | 147     |
| 361615    | Relt         | 140    | 151     | 103    | 149    | 123   | 166   | 139   | 118     |
| 64472     | Naa35        | 769    | 737     | 679    | 704    | 754   | 700   | 743   | 708     |
| 500864    | Tmem74       | 581    | 502     | 485    | 596    | 528   | 478   | 592   | 578     |
| 171092    | G3bp1        | 1861   | 1832.05 | 2008   | 1855.6 | 2017  | 1873  | 1895  | 1814    |
| 360741    | Ess2         | 476    | 446     | 417    | 437    | 449   | 468   | 460   | 409     |
| 499669    | Celf3        | 140.01 | 131.64  | 118.17 | 144.21 | 146   | 134   | 115   | 142     |
| 290408    | Sugt1        | 1199.8 | 1091.66 | 1026.8 | 1000.9 | 994.7 | 1046  | 1125  | 1178.56 |

|           |              |        |         |        |        |       |       |       |         |
|-----------|--------------|--------|---------|--------|--------|-------|-------|-------|---------|
| 311622    | Stk4         | 391.6  | 396.21  | 434.96 | 406.19 | 525.8 | 455   | 341.3 | 316.13  |
| 294515    | Foxo3        | 468    | 497     | 532    | 611    | 612   | 498   | 508   | 502     |
| 114216    | S100a3       | 128    | 134     | 138    | 126    | 106   | 111   | 125   | 187     |
| 311826    | Rexo4        | 383.53 | 387.8   | 400.98 | 409.02 | 390.2 | 427.3 | 395.6 | 377.26  |
| 103694538 | LOC103694538 | 127.27 | 94.11   | 91.35  | 103.27 | 101   | 88.19 | 112.5 | 116.64  |
| 312538    | Mcm2         | 155    | 151     | 230    | 162    | 189   | 156   | 196   | 161     |
| 301343    | Lman21       | 96     | 87      | 76     | 89     | 85    | 111   | 79    | 75      |
| 360672    | Cep131       | 337    | 409     | 456    | 364    | 396   | 383   | 435   | 361     |
| 362012    | Strip1       | 1116   | 1120    | 1185   | 1088   | 1160  | 1088  | 1141  | 1146    |
| 304181    | Tssk2        | 2.19   | 0       | 1      | 2      | 1.09  | 2     | 1.13  | 1       |
| 315484    | Bbs9         | 289    | 291     | 320    | 309    | 284   | 330   | 312   | 290     |
| 498192    | RGD1560398   | 2000   | 1745    | 1631   | 1502   | 1665  | 1663  | 1736  | 1854    |
| 171439    | Bzw2         | 252    | 280     | 277    | 220    | 230   | 276   | 287   | 242     |
| 309692    | Pcnt         | 489    | 501     | 514    | 550    | 536   | 560   | 497   | 473     |
| 353256    | Gtf2i        | 3848.5 | 3803.61 | 3815.5 | 4102.9 | 3914  | 3999  | 4128  | 3619.92 |
| 298399    | Gba2         | 883.71 | 760.86  | 780.36 | 771.96 | 791.7 | 840.7 | 867   | 716.44  |
| 310612    | Ilf2         | 1183   | 1125    | 1133   | 1107   | 1102  | 1101  | 1240  | 1132    |
| 295357    | Lamtor5      | 577    | 514     | 483    | 433    | 483   | 453   | 512   | 571     |
| 192225    | Spata7       | 266    | 249     | 246    | 242    | 221   | 242   | 296   | 250     |
| 103694491 | LOC103694491 | 81     | 97      | 87     | 69     | 75    | 78    | 88    | 95      |
| 315673    | Tnfaip813    | 38     | 39      | 45     | 43     | 32    | 34.99 | 53    | 46      |
| 314004    | Cmpk2        | 681.24 | 567.23  | 505.99 | 548.44 | 588.4 | 598.2 | 578.8 | 551.39  |
| 685144    | Sec24c       | 1581   | 1781    | 1810   | 1800   | 1720  | 1874  | 1710  | 1710    |
| 316640    | Atg4b        | 1607   | 1592    | 1587   | 1516   | 1611  | 1569  | 1537  | 1623    |
| 362265    | Ift52        | 822    | 832     | 769    | 721    | 764   | 773   | 780   | 846     |
| 290679    | Ints10       | 571.38 | 533.17  | 529.21 | 521.52 | 551.7 | 538   | 555.9 | 522.78  |
| 313786    | Fdx2         | 548    | 531     | 479    | 423    | 529   | 479   | 469   | 516     |
| 314904    | Arhgef25     | 1286   | 1278    | 1355   | 1353   | 1324  | 1271  | 1418  | 1291    |
| 108351053 | LOC108351053 | 215    | 257     | 254    | 256    | 272   | 232   | 257   | 227     |
| 305861    | Ap5m1        | 224    | 237     | 239    | 282    | 266   | 192   | 257   | 273     |
| 305837    | Ttc5         | 652    | 592     | 618    | 586    | 608   | 606   | 619   | 630     |
| 25433     | Hbegf        | 411    | 472     | 514    | 397    | 327   | 540   | 512   | 426     |
| 362423    | Rassf4       | 2145   | 2098    | 2006   | 1721   | 1782  | 2355  | 2130  | 1752    |
| 681389    | Cops9        | 1249   | 1107    | 1133   | 902    | 1100  | 1056  | 1052  | 1210    |
| 680308    | Mthfd2       | 276    | 264     | 209    | 220    | 228   | 231   | 276   | 240     |
| 362291    | Myt1         | 624.9  | 663.7   | 536.53 | 687.71 | 700   | 578.7 | 657.3 | 592.52  |
| 299851    | Mars         | 1475.5 | 1503.62 | 1383.5 | 1500.7 | 1451  | 1537  | 1488  | 1425.06 |
| 305710    | Nek10        | 42     | 55      | 24     | 40     | 49    | 39    | 27    | 47      |
| 308998    | Zfp629       | 245.33 | 270.46  | 237.56 | 267.42 | 270.6 | 244.9 | 262.8 | 248.89  |
| 289392    | Plxna2       | 2878   | 2301.01 | 2717   | 3026   | 3187  | 2756  | 2804  | 2243    |
| 360659    | Mif4gd       | 206    | 156     | 171    | 109    | 125   | 174   | 157   | 190     |
| 298317    | Ube2a        | 993    | 977     | 987    | 890    | 890   | 945   | 1029  | 1007    |
| 679747    | Tma7         | 1592.6 | 1310.97 | 1322.4 | 1256.1 | 1319  | 1258  | 1384  | 1555.74 |
| 362461    | C2cd5        | 1116.6 | 1121.36 | 984.09 | 1114.9 | 1154  | 1040  | 1046  | 1124.58 |
| 360161    | Nek6         | 1148   | 1114    | 1153   | 1061   | 1052  | 1162  | 1173  | 1117    |
| 315697    | Imp3         | 466    | 430     | 371    | 330    | 382   | 397   | 410   | 418     |
| 287424    | Aloxe3       | 9.47   | 4.51    | 7.54   | 16.67  | 13.55 | 11.51 | 2.99  | 10.38   |
| 363253    | Zfand2b      | 531    | 554     | 516    | 465    | 565   | 513   | 505   | 496     |
| 361765    | Btrc         | 1743   | 1801    | 1668   | 1939   | 1882  | 1755  | 1929  | 1630    |
| 287524    | Rpal         | 1248   | 1164    | 1093   | 1094   | 1128  | 1107  | 1295  | 1098    |
| 114300    | Gtpbp4       | 231.79 | 253.8   | 210.02 | 275.9  | 205.8 | 221.8 | 270.3 | 279.67  |
| 81735     | Neol         | 1080   | 1134    | 1061   | 1155   | 1083  | 1136  | 1091  | 1148    |
| 681415    | Erh          | 640    | 595     | 633    | 505    | 561   | 578   | 597   | 652     |
| 83632     | Deaf1        | 902.65 | 940.26  | 921.07 | 779.51 | 909.2 | 891.4 | 901   | 864.32  |
| 361883    | Mrps27       | 570    | 544     | 487    | 453    | 500   | 502   | 556   | 509     |
| 688939    | Ccdc149      | 453    | 509     | 465    | 467    | 473   | 470   | 486   | 477     |

|           |              |        |         |        |        |       |       |       |         |
|-----------|--------------|--------|---------|--------|--------|-------|-------|-------|---------|
| 298147    | Dmac1        | 245    | 253     | 241    | 202    | 243   | 227   | 232   | 245     |
| 100911757 | Tshz2        | 5578.1 | 5654.7  | 5603.5 | 5627.1 | 6254  | 5535  | 5482  | 5335.69 |
| 297890    | Bsdcl        | 1243.4 | 1166.58 | 1153.8 | 1183.9 | 1284  | 1238  | 1137  | 1119.8  |
| 290798    | Dctn6        | 2007   | 1819    | 1713   | 1612   | 1715  | 1779  | 1792  | 1911    |
| 246299    | Gtf3a        | 364.65 | 314.67  | 333.02 | 294.02 | 314.7 | 304.7 | 384.9 | 310.51  |
| 303226    | Zfp18        | 201    | 200     | 181    | 193    | 193   | 189   | 196   | 202     |
| 288041    | Pigx         | 475    | 411     | 459    | 356    | 454   | 374   | 424   | 460     |
| 500392    | Mcmdc2       | 145.07 | 111.05  | 124.89 | 124.17 | 101.6 | 103.5 | 143.5 | 159.85  |
| 301458    | Ndufs1       | 3573   | 3547    | 3042   | 3409   | 3324  | 3370  | 3621  | 3344    |
| 363031    | Anln         | 33.43  | 56      | 87.05  | 40.55  | 44.87 | 61.02 | 62.55 | 50      |
| 289469    | Mrps18c      | 414    | 348     | 319    | 301    | 351   | 311   | 316   | 413     |
| 300675    | Ift46        | 714    | 685     | 693    | 666    | 659   | 648   | 715   | 754     |
| 289231    | Ncstn        | 1605   | 1704    | 1708   | 1718   | 1643  | 1831  | 1632  | 1673    |
| 363058    | Cadml        | 4104   | 3850.63 | 3665.3 | 4334.6 | 4427  | 3781  | 4004  | 3846.12 |
| 290842    | Gins4        | 120    | 126     | 106    | 106    | 114   | 99    | 132   | 116     |
| 100912924 | Tigd2        | 244    | 245     | 216    | 209    | 224   | 210   | 251   | 235     |
| 287470    | Sdf2         | 1306   | 1211.19 | 1137.3 | 1057.6 | 1191  | 1083  | 1128  | 1341.42 |
| 252827    | Cdk5rap1     | 350    | 354     | 325    | 336    | 341   | 347   | 369   | 317     |
| 84023     | Ptger4       | 237.97 | 227.89  | 235.81 | 249.08 | 237.5 | 237.1 | 235.3 | 247.02  |
| 315644    | Bco2         | 19.83  | 19.02   | 36.31  | 19.94  | 20.19 | 26.61 | 26.77 | 22.16   |
| 114499    | Hdgf         | 1547   | 1419    | 1487   | 1418   | 1580  | 1356  | 1396  | 1578    |
| 304573    | Pole         | 103    | 123     | 117    | 108    | 133   | 108   | 107   | 106     |
| 298452    | Dph2         | 142    | 148     | 167    | 144    | 146   | 153   | 164   | 142     |
| 60465     | Ctnn         | 2287   | 2236    | 2562   | 2365   | 2282  | 2473  | 2479  | 2279    |
| 292925    | Tsg101       | 2072   | 2127    | 1954   | 1913   | 1953  | 1984  | 2043  | 2140    |
| 291999    | Wwp2         | 519    | 531     | 517    | 522    | 571   | 512   | 517   | 503     |
| 102547146 | LOC102547146 | 19.78  | 20.76   | 17.76  | 14.58  | 28.16 | 10.48 | 17.17 | 17.56   |
| 282844    | Rffl         | 438.67 | 397.92  | 402.71 | 373.04 | 384.1 | 405.8 | 429.4 | 403.94  |
| 499652    | Rit1         | 1075   | 1118    | 964    | 997    | 1100  | 961   | 1081  | 1040    |
| 310780    | Gpr61        | 122    | 127     | 104    | 92     | 109   | 114   | 105   | 120     |
| 595134    | Akirin1      | 2223   | 1999    | 1987   | 1936   | 2115  | 1946  | 2071  | 2068    |
| 60398     | Fhit         | 116    | 115     | 108    | 105    | 95    | 109   | 122   | 121     |
| 294362    | Cisd1        | 1193   | 1172    | 1031   | 1041   | 1052  | 1069  | 1170  | 1176    |
| 298071    | Nans         | 1449   | 1352    | 1310   | 1347   | 1385  | 1388  | 1353  | 1369    |
| 304591    | Dtx2         | 201    | 230     | 258    | 195    | 213   | 247   | 216   | 214     |
| 266604    | Alox15b      | 16.32  | 11.16   | 7.37   | 15.16  | 9.16  | 20.14 | 9     | 12.05   |
| 298517    | Mrps15       | 1007.9 | 944     | 896    | 860    | 943   | 922   | 968   | 900.13  |
| 24377     | G6pd         | 2156   | 2256    | 2272   | 2114   | 2116  | 2268  | 2269  | 2205    |
| 84407     | Cdh11        | 1843   | 1657    | 1956   | 2021   | 1926  | 1657  | 1847  | 2098    |
| 29744     | Sema6c       | 882.04 | 1013.01 | 860.1  | 722.39 | 763   | 990   | 793   | 955.26  |
| 363115    | Slc9a9       | 3992   | 4420    | 3327   | 3910   | 4070  | 3906  | 3499  | 4281    |
| 317381    | Ccdc22       | 348.23 | 298.59  | 311.96 | 326.97 | 312   | 337.3 | 299.4 | 345.92  |
| 288029    | Lsg1         | 306    | 314     | 325    | 364    | 330   | 328   | 325   | 335     |
| 497915    | Drg2         | 1063   | 1005    | 898    | 954    | 970   | 1029  | 980   | 968     |
| 295251    | Pygo2        | 808    | 761     | 853    | 768    | 812   | 809   | 757   | 834     |
| 287953    | Trmt2a       | 304    | 292     | 285    | 276    | 286   | 281   | 289   | 309     |
| 24803     | Vamp2        | 7887.4 | 7960.91 | 7914.1 | 8587.2 | 9298  | 7899  | 7654  | 7722.4  |
| 362344    | Ndufb2       | 1013   | 897     | 802    | 745    | 807   | 834   | 895   | 945     |
| 313558    | Foxo6        | 39     | 37      | 39     | 29     | 47    | 36    | 34    | 28      |
| 100310845 | Uty          | 47.26  | 40.4    | 69.59  | 71.7   | 63.77 | 35.95 | 59.82 | 71      |
| 363222    | Rnf149       | 751    | 737     | 683    | 563    | 632   | 708   | 727   | 686     |
| 684192    | Rcor3        | 182.17 | 197.89  | 184.98 | 191.11 | 227.1 | 178.2 | 190.1 | 166.01  |
| 24609     | Odc1         | 1392   | 1464    | 1451   | 1296   | 1376  | 1409  | 1424  | 1433    |
| 192210    | Dnajc21      | 455    | 403     | 428    | 435    | 414   | 435   | 428   | 456     |
| 690441    | Atp5mf       | 3919   | 3620    | 3317   | 2996   | 3622  | 3246  | 3247  | 3833.85 |
| 297109    | Mturn        | 6452.2 | 6092.56 | 6008   | 6174.4 | 6531  | 5641  | 6269  | 6459.12 |

|           |              |        |         |        |        |       |       |       |         |
|-----------|--------------|--------|---------|--------|--------|-------|-------|-------|---------|
| 317628    | Apex2        | 73     | 73      | 77     | 61     | 59    | 78    | 72    | 77      |
| 290214    | Cmtm5        | 1108   | 1163    | 1112   | 998    | 949   | 1132  | 1163  | 1168    |
| 287659    | Socs7        | 966    | 1007    | 944    | 1039   | 1044  | 944   | 1038  | 958     |
| 25102     | Chrna5       | 218.89 | 185.51  | 178.04 | 252.17 | 216.1 | 184.9 | 220.4 | 219.22  |
| 691835    | Kctd4        | 77     | 68      | 62     | 74     | 74    | 76    | 72    | 61      |
| 309638    | Taf11        | 371.91 | 346.35  | 303.06 | 289.63 | 330   | 320.5 | 327.8 | 341.98  |
| 688746    | Hdhd3        | 68     | 78      | 63     | 71     | 77    | 62    | 86    | 57      |
| 102550189 | Samd1        | 307    | 281     | 337    | 333    | 289   | 350   | 304   | 324     |
| 685425    | Odf21        | 181.81 | 148.16  | 151.55 | 187.82 | 185.1 | 134.6 | 197.7 | 156.72  |
| 293044    | Zfp710       | 605.87 | 560.9   | 612.49 | 672.44 | 650.1 | 609.9 | 631.5 | 577.94  |
| 102554620 | LOC102554620 | 4.47   | 0       | 3.41   | 0.4    | 2     | 1.42  | 1.81  | 3.11    |
| 25538     | Rps5         | 2299   | 2228    | 2256   | 1613   | 2058  | 2002  | 2171  | 2226    |
| 316228    | Cul9         | 872    | 941     | 887    | 991    | 1017  | 941   | 881   | 879     |
| 313167    | Nol6         | 966.59 | 1183.43 | 1167.1 | 1215.5 | 1136  | 1228  | 1112  | 1089.38 |
| 301113    | Slc25a23     | 847    | 747     | 647    | 764    | 754   | 780   | 742   | 751     |
| 116685    | Lmb1         | 53     | 57      | 93     | 64     | 76.98 | 76    | 67    | 49      |
| 363156    | Fbx12        | 1344.3 | 1325.55 | 1152.9 | 1207   | 1300  | 1227  | 1192  | 1348.04 |
| 502894    | Tigar        | 886    | 898     | 761    | 811    | 843   | 846   | 876   | 816     |
| 360592    | Trim37       | 4925   | 4553.96 | 4129.8 | 4730.8 | 4725  | 4563  | 4703  | 4484.9  |
| 287768    | Smndc1       | 524    | 499     | 513    | 475    | 464   | 484   | 563   | 515     |
| 100909688 | LOC100909688 | 71.96  | 92.99   | 75.51  | 94.99  | 78    | 92.81 | 85.1  | 82.05   |
| 103690850 | CXHXorf65    | 2      | 1       | 1      | 0      | 0     | 2.01  | 1     | 1.02    |
| 309153    | Rce1         | 234    | 191     | 206    | 167    | 199   | 201   | 191   | 213     |
| 362281    | Rae1         | 574    | 580     | 618    | 486    | 555   | 631   | 541   | 548     |
| 300328    | Aasdhppt     | 698.03 | 690     | 621    | 636.05 | 666   | 565   | 696   | 738     |
| 498143    | RGD1565131   | 174.59 | 283.79  | 152.18 | 215.32 | 217.7 | 214.7 | 274.2 | 125.53  |
| 81778     | S100a10      | 10774  | 9313    | 10405  | 8730   | 9170  | 9045  | 10024 | 11279   |
| 365396    | Ssh3         | 472    | 441     | 489    | 452    | 475   | 527   | 450   | 416     |
| 312503    | Smyd5        | 500    | 526     | 483    | 472    | 503   | 517   | 504   | 472     |
| 59103     | Ptges        | 34     | 30      | 25     | 43     | 36    | 30    | 23    | 44      |
| 360613    | Cwc25        | 350.66 | 357.14  | 356.72 | 400.24 | 351.6 | 375   | 399.9 | 349.28  |
| 363027    | Yipf2        | 515.67 | 487.14  | 522.89 | 417.61 | 434.3 | 502   | 490.4 | 531.41  |
| 108348122 | LOC108348122 | 8251.8 | 8863.89 | 8323.8 | 7679   | 9165  | 9120  | 7214  | 7873.18 |
| 291180    | Epdr1        | 5034   | 5426    | 4996   | 4823   | 4974  | 5147  | 5126  | 5188    |
| 360855    | Smg7         | 1140   | 1204.85 | 1186.8 | 1288.9 | 1212  | 1177  | 1274  | 1194.91 |
| 498475    | Ptgdr        | 105.56 | 109.45  | 74.22  | 122.43 | 110.1 | 94.21 | 115.6 | 94.94   |
| 311405    | Tmem127      | 2665.1 | 2767.99 | 2635.4 | 2811.1 | 2652  | 2823  | 2739  | 2749    |
| 363193    | Ppp2r5d      | 1379.2 | 1321.97 | 1334   | 1307.3 | 1239  | 1343  | 1382  | 1419.52 |
| 28298     | Rpl32        | 3350   | 3058    | 3213   | 2421   | 3068  | 2949  | 2981  | 3137    |
| 291100    | Irf4         | 145.27 | 113.9   | 125.17 | 131.51 | 167.4 | 148.6 | 115   | 88.85   |
| 499288    | Mob2         | 632    | 574     | 491    | 500    | 514   | 573   | 570   | 557     |
| 314647    | Celf5        | 337.42 | 289.19  | 303.38 | 326.23 | 353.4 | 325.1 | 291.5 | 295.98  |
| 360664    | Ten1         | 208    | 209     | 183    | 173    | 181   | 209   | 215   | 174     |
| 102555189 | LOC102555189 | 4.58   | 1.14    | 5.52   | 5.47   | 6.7   | 4.5   | 4.55  | 1.09    |
| 81922     | Sh3gl1       | 816    | 698     | 824    | 737    | 778   | 804   | 746   | 771     |
| 29454     | Gdf11        | 645    | 577     | 646    | 693    | 641   | 584   | 655   | 701     |
| 363118    | Nmnat3       | 41     | 24      | 33     | 30     | 35    | 27    | 45    | 22      |
| 368044    | Atp6v1g2     | 4242   | 4171    | 3872.8 | 4270   | 4207  | 4133  | 4324  | 4020.87 |
| 307124    | Camk1d       | 503    | 579     | 571    | 642.98 | 648   | 589   | 579   | 498     |
| 362897    | Uqcrb        | 1744   | 1555    | 1564   | 1380   | 1433  | 1461  | 1644  | 1754    |
| 58945     | Dynl11       | 5962.9 | 5651.8  | 5821.9 | 5206.9 | 5469  | 5552  | 5414  | 6386.87 |
| 686179    | Ttc39c       | 816    | 781     | 732    | 724    | 736   | 736   | 856   | 749     |
| 80849     | Inpp4a       | 2302   | 2263    | 2131   | 2311   | 2415  | 2223  | 2290  | 2150    |
| 29543     | Timp2        | 9507   | 8813    | 9295   | 9309   | 9628  | 9223  | 9426  | 8939    |
| 114637    | Hmgn2        | 1347.1 | 1296.09 | 1324.2 | 1110   | 1326  | 1314  | 1277  | 1201    |
| 309656    | Cmtr1        | 1464   | 1597    | 1388   | 1609   | 1589  | 1651  | 1480  | 1386    |



|           |              |        |         |        |        |       |       |       |         |
|-----------|--------------|--------|---------|--------|--------|-------|-------|-------|---------|
| 116743    | Sh3gl2       | 1669.4 | 1624.73 | 1593.8 | 1637.2 | 1749  | 1758  | 1524  | 1546.87 |
| 294088    | Pank1        | 411.84 | 437.76  | 357.74 | 500.25 | 434.3 | 415.1 | 444.5 | 427.49  |
| 286990    | Tox4         | 1303   | 1338    | 1342   | 1462   | 1353  | 1400  | 1381  | 1355    |
| 304802    | Optc         | 19.87  | 19.03   | 30.98  | 22.86  | 29.81 | 25.78 | 15.21 | 22.69   |
| 24520     | Kcna1        | 2056   | 2035    | 1762   | 2536   | 2421  | 2007  | 2120  | 1909    |
| 24887     | Bax          | 401.94 | 379     | 399    | 304    | 339   | 384   | 378   | 395     |
| 501841    | Coro1c       | 1661   | 1714    | 1826   | 1684   | 1769  | 1739  | 1747  | 1686    |
| 360768    | Ccz1b        | 690    | 652     | 630    | 606    | 644   | 663   | 659   | 633     |
| 300757    | Hexa         | 1510   | 1690    | 1728   | 1577   | 1584  | 1677  | 1712  | 1585    |
| 680172    | Mbd2         | 1824   | 1677    | 1760   | 1717   | 1747  | 1885  | 1768  | 1635    |
| 361089    | Ndfip2       | 3822   | 3729    | 3407   | 3487   | 3543  | 3571  | 3698  | 3751    |
| 78959     | Akrla1       | 8335   | 8240    | 7770   | 6949   | 7638  | 7637  | 7910  | 8365    |
| 287836    | Fbf1         | 425    | 416     | 445    | 418    | 431   | 443   | 429   | 415     |
| 25522     | Prkcz        | 1897   | 1923    | 1795   | 1803   | 1868  | 1890  | 1842  | 1879    |
| 294431    | Calhm5       | 146    | 111     | 116    | 113    | 110   | 124   | 141   | 115     |
| 360570    | Myo18a       | 2836   | 2950    | 2810   | 3529   | 3210  | 3268  | 3106  | 2641    |
| 245924    | Scaf4        | 543.55 | 532.51  | 575.43 | 639.34 | 616.5 | 577   | 542.8 | 573.57  |
| 298549    | Mtfr11       | 1501   | 1449    | 1271   | 1311   | 1440  | 1417  | 1366  | 1355    |
| 24533     | Ldha         | 7549   | 7714    | 7459   | 6175   | 6807  | 7687  | 7465  | 7180    |
| 81771     | Rps6ka1      | 403    | 451     | 516    | 421    | 469   | 468   | 401   | 468     |
| 314634    | Plekhj1      | 276.66 | 279.7   | 265.74 | 237.83 | 255.1 | 270.5 | 246   | 297.23  |
| 301119    | Mllt1        | 544    | 541     | 607    | 571    | 531   | 604   | 599   | 548     |
| 501162    | Mreg         | 190    | 183     | 176    | 165    | 178   | 188   | 189   | 165     |
| 287598    | Ska2         | 170    | 157     | 148    | 119    | 157   | 127   | 147   | 168     |
| 305230    | Shroom3      | 223.79 | 256.13  | 350.29 | 288.03 | 274.2 | 340.1 | 297.4 | 215.92  |
| 690214    | Pdf          | 208    | 168     | 189    | 147    | 158   | 193   | 184   | 183     |
| 60328     | Mark2        | 1012   | 1062    | 1135   | 1171   | 1160  | 1172  | 1028  | 1057    |
| 29286     | Rps17        | 1953   | 1868.25 | 1979.2 | 1451.2 | 1763  | 1675  | 1788  | 2087.33 |
| 686323    | Trip6        | 165    | 182     | 204    | 158    | 168   | 179   | 172   | 196     |
| 81664     | Gnai2        | 8787   | 9139    | 9617   | 8603   | 8854  | 9149  | 9115  | 9334    |
| 66026     | Trpv4        | 36     | 22      | 31     | 29     | 28    | 45    | 21    | 25      |
| 688621    | Tslp         | 28     | 24      | 29     | 37     | 25    | 16    | 44    | 34      |
| 308335    | U2af2        | 1561   | 1630    | 1678   | 1591   | 1550  | 1687  | 1713  | 1565    |
| 65271     | Mgat5        | 267.53 | 280.15  | 266.68 | 357.56 | 317.8 | 277.5 | 302   | 284.6   |
| 362045    | Lamtor3      | 539    | 544     | 506    | 517    | 511   | 535   | 571   | 507     |
| 295252    | Ube2q1       | 1731   | 1647    | 1627   | 1652   | 1676  | 1652  | 1745  | 1641    |
| 311651    | Slc9a8       | 649    | 625     | 608    | 686    | 701   | 686   | 612   | 591     |
| 360406    | Ptprf        | 4678   | 4725.99 | 5054   | 5266   | 5055  | 5140  | 4895  | 4803    |
| 54260     | Itpkb        | 2100.3 | 2392.66 | 2148.1 | 2380.4 | 2112  | 2431  | 2139  | 2416.4  |
| 499731    | Tyw3         | 94     | 89      | 86     | 79     | 86    | 68    | 90    | 107     |
| 295952    | RGD1309730   | 431    | 408     | 323    | 346    | 364   | 365   | 368   | 424     |
| 114590    | Ubqln1       | 5439   | 5976    | 5579   | 5866   | 5644  | 5862  | 5989  | 5563    |
| 313588    | Snip1        | 226.9  | 253     | 235.79 | 219.9  | 240.9 | 272   | 210.9 | 219.9   |
| 291129    | Nrsn1        | 1694   | 1557    | 1304   | 1320   | 1571  | 1425  | 1453  | 1477    |
| 362360    | Osbpl3       | 2803   | 2733    | 3150   | 3045   | 3004  | 2922  | 3112  | 2795    |
| 363644    | Glod4        | 1474   | 1378    | 1512   | 1153   | 1319  | 1314  | 1376  | 1556    |
| 315548    | Srpra        | 3242   | 3251    | 3066   | 3312   | 3217  | 3341  | 3298  | 3127    |
| 311404    | Ap4e1        | 218    | 219     | 219    | 262    | 236   | 195   | 241   | 254     |
| 79245     | Hsf1         | 699    | 642     | 673    | 736    | 683   | 756   | 706   | 629     |
| 296346    | Oser1        | 451    | 417     | 444    | 401    | 383   | 430   | 432   | 483     |
| 100125367 | LOC100125367 | 139.3  | 138.83  | 131.95 | 113.79 | 130.7 | 118.9 | 148.8 | 130.1   |
| 360906    | Fam69a       | 572.99 | 503.97  | 519.99 | 558.99 | 565   | 516.9 | 575   | 517.97  |
| 689088    | Ldlrad1      | 40.33  | 60.73   | 55.91  | 34.94  | 42.81 | 53.42 | 48.23 | 49.14   |
| 360968    | Tbc1d10a     | 320    | 319     | 383    | 340    | 371   | 283   | 349   | 371     |
| 290641    | Rpl18a       | 6008   | 5462    | 5592   | 4386   | 5512  | 4929  | 5246  | 5950    |
| 287734    | Atxn713      | 2963.1 | 3010.08 | 2954.5 | 2945.8 | 3082  | 3069  | 2901  | 2927.44 |

|           |              |        |         |        |        |       |       |       |         |
|-----------|--------------|--------|---------|--------|--------|-------|-------|-------|---------|
| 314397    | Rin3         | 339    | 306     | 376    | 337    | 428   | 362   | 301   | 279     |
| 116596    | Map3k8       | 20     | 22      | 34     | 37     | 22    | 26    | 30    | 36      |
| 103694878 | LOC103694878 | 18.69  | 27.93   | 18.14  | 23.33  | 22.51 | 18.37 | 29.77 | 18.22   |
| 293144    | Pold3        | 116    | 104     | 116    | 115    | 121   | 104   | 121   | 109     |
| 366624    | Cf12         | 3404   | 3449    | 2986   | 3213   | 3130  | 3199  | 3473  | 3366    |
| 314999    | Trmt12       | 115    | 119     | 123    | 93     | 108   | 108   | 128   | 110     |
| 58971     | Fxyd1        | 2203   | 2004    | 1918   | 1749   | 1688  | 2244  | 1787  | 2225    |
| 304342    | Zscan21      | 318    | 311     | 336    | 271    | 310   | 277   | 319   | 341     |
| 24552     | Me1          | 3487   | 3254    | 3117   | 3395   | 3255  | 3382  | 3414  | 3320    |
| 25738     | Plcg1        | 1790   | 1749    | 1799   | 1841   | 1896  | 1812  | 1794  | 1741    |
| 266686    | Dhrs4        | 211    | 193     | 199    | 181    | 184   | 214   | 208   | 185     |
| 498107    | RGD1562339   | 1949   | 1840    | 2053   | 1884   | 2122  | 1876  | 1922  | 1875    |
| 363000    | Prpf40b      | 741    | 757     | 763    | 746    | 771   | 767   | 754   | 742     |
| 301065    | Ttc21a       | 55     | 60      | 48     | 59     | 56    | 73    | 48    | 47      |
| 315617    | Sidt2        | 1778   | 1841    | 1921   | 1889   | 1902  | 1977  | 1877  | 1740    |
| 287703    | Eif1         | 6320   | 6243    | 5913   | 5564   | 5465  | 5945  | 6037  | 6810    |
| 367090    | Neill        | 90.07  | 91      | 88.01  | 84.05  | 100.3 | 89    | 80    | 87.04   |
| 310034    | Rad17        | 309    | 324     | 292    | 290    | 300   | 278   | 311   | 337     |
| 313264    | Trim32       | 740    | 747     | 657    | 727    | 722   | 767   | 702   | 706     |
| 295235    | Ssr2         | 1097   | 1044    | 1102   | 946    | 938   | 1090  | 1063  | 1136    |
| 309773    | Dcbld1       | 229    | 253     | 280    | 222    | 265   | 255   | 244   | 229     |
| 306417    | Sh3rf1       | 225    | 223     | 268    | 267    | 263   | 247   | 262   | 220     |
| 291802    | Zfp136       | 105    | 72      | 80     | 79.06  | 88    | 69    | 99.14 | 83      |
| 100910872 | Naa80        | 573.76 | 458.03  | 510.46 | 472.6  | 531.2 | 499.3 | 439.5 | 563.32  |
| 309136    | Ltol         | 565    | 565     | 549    | 501    | 558   | 559   | 558   | 525     |
| 100912578 | LOC100912578 | 807.43 | 775.72  | 755.35 | 772.2  | 634.3 | 720.2 | 891.3 | 893.53  |
| 353304    | Pigu         | 548    | 480     | 453    | 475    | 483   | 476   | 495   | 520     |
| 311903    | Mrrf         | 1087   | 1101    | 1031   | 1121   | 1070  | 1073  | 1147  | 1090    |
| 365813    | Trim59       | 132    | 116     | 119    | 67     | 123   | 107   | 96    | 112     |
| 64372     | Timm8b       | 1153   | 1180    | 1174   | 941    | 1065  | 971   | 1088  | 1365    |
| 65136     | Rps8         | 3866   | 3798.41 | 3786   | 3024.5 | 3597  | 3466  | 3720  | 3826    |
| 25366     | Acvr2b       | 326.5  | 283.95  | 290.78 | 293.56 | 305.5 | 331   | 288.1 | 281.26  |
| 58920     | Gpcl         | 3061.6 | 2935.46 | 3645.7 | 2986.5 | 3239  | 3435  | 3094  | 2978.05 |
| 291571    | Tcof1        | 530    | 545     | 588    | 596    | 554   | 626   | 546   | 554     |
| 307500    | Psd2         | 11.28  | 11.81   | 8.03   | 10.78  | 10.05 | 10    | 9.23  | 13.01   |
| 303214    | Trim16       | 344    | 354     | 307    | 499    | 329   | 429   | 439   | 321     |
| 29456     | Map1b        | 109498 | 118480  | 110721 | 147585 | 1E+05 | 1E+05 | 1E+05 | 111864  |
| 303669    | Nat9         | 392    | 409     | 435    | 372    | 358   | 421   | 452   | 392     |
| 79032     | Mrs2         | 297    | 264     | 248    | 261    | 252   | 266   | 278   | 284     |
| 294718    | Dimt1        | 277    | 265     | 259    | 256.12 | 280   | 258   | 272   | 257     |
| 498266    | Blzfl        | 352    | 301     | 321    | 308    | 299   | 321   | 334   | 340     |
| 252923    | Tsga10       | 116    | 108     | 96     | 107    | 116   | 77    | 121   | 117     |
| 287478    | Ctns         | 919    | 1045    | 867    | 797    | 842   | 1114  | 925   | 781     |
| 298541    | Dhdds        | 1447   | 1500    | 1384   | 1420   | 1471  | 1459  | 1471  | 1404    |
| 171458    | Ipmk         | 444.33 | 478.01  | 440.81 | 441.3  | 463.3 | 475.9 | 444.5 | 437.67  |
| 498869    | RGD1560341   | 587.76 | 551.83  | 549.95 | 562.14 | 609.5 | 583.3 | 543.8 | 536.31  |
| 100911734 | LOC100911734 | 640.97 | 668.04  | 673.42 | 763.54 | 696.8 | 696.6 | 730.9 | 647.63  |
| 60376     | Plrg1        | 664    | 641     | 642    | 600    | 583   | 646   | 660   | 682     |
| 296655    | Stom         | 411.71 | 415     | 451.98 | 382.38 | 448   | 405.5 | 434.3 | 388.96  |
| 100363531 | LOC100363531 | 0      | 0       | 2.12   | 0      | 0     | 0     | 1.07  | 1.07    |
| 360494    | Tsr3         | 261    | 257     | 234    | 201    | 214   | 256   | 254   | 238     |
| 312787    | Gpr19        | 118    | 98      | 106    | 100    | 103   | 107   | 107   | 109     |
| 83501     | Cdh2         | 3128.5 | 3004.53 | 2980.6 | 3276.5 | 3245  | 3180  | 3191  | 2891.16 |
| 25737     | Pcna         | 534    | 498     | 544    | 421    | 461   | 504   | 518   | 533     |
| 171440    | Abtb2        | 966    | 981.66  | 898    | 1013.5 | 1008  | 998.8 | 890.7 | 998     |
| 363059    | Zw10         | 266    | 251     | 278    | 250    | 275   | 253   | 270   | 257     |

|           |              |        |         |        |        |       |       |       |          |
|-----------|--------------|--------|---------|--------|--------|-------|-------|-------|----------|
| 113886    | Kif1c        | 1316   | 1265.5  | 1620   | 1398   | 1257  | 1595  | 1449  | 1352.01  |
| 306722    | Dapk1        | 1236   | 1176    | 1210   | 1264   | 1268  | 1174  | 1246  | 1245     |
| 100303643 | Fcgbp        | 100.2  | 113.89  | 115.06 | 98.92  | 85.81 | 116.9 | 119   | 110.48   |
| 313725    | Gpr157       | 168.78 | 193.33  | 125.99 | 163.33 | 123   | 216.6 | 185.2 | 133      |
| 313478    | Cc2d1b       | 1597   | 1867    | 1667   | 1591   | 1602  | 1756  | 1742  | 1687     |
| 29236     | Rpsa         | 6942   | 6465    | 7030   | 5222   | 6401  | 6130  | 6514  | 6863     |
| 300980    | Dusp7        | 469.86 | 483.91  | 528.68 | 462.79 | 500   | 463.1 | 486.2 | 514.8    |
| 294331    | Ube2g2       | 515    | 483     | 497    | 461    | 558   | 504   | 453   | 460      |
| 291388    | Cbln2        | 1113   | 950     | 1088   | 1068   | 1017  | 1044  | 1146  | 1053     |
| 102554977 | LOC102554977 | 0      | 0       | 0      | 1.02   | 0     | 0     | 1.03  | 0        |
| 362575    | Med8         | 164    | 156     | 158    | 134    | 125   | 142   | 184   | 167      |
| 363241    | Eef1b2       | 1888   | 1818    | 1771   | 1549   | 1697  | 1672  | 1792  | 1934     |
| 307302    | Cep120       | 1032   | 1009    | 931    | 999    | 985   | 949   | 1114  | 962      |
| 362335    | Nup205       | 413    | 395     | 408    | 411    | 423   | 423   | 435   | 362      |
| 367153    | Cep70        | 134    | 122     | 107    | 145    | 132   | 134   | 127   | 120      |
| 29380     | Phlda1       | 372    | 361     | 416    | 372    | 367   | 396   | 391   | 382      |
| 259270    | Zfp335       | 916.02 | 890.29  | 894.51 | 904.05 | 904.8 | 984.4 | 913.9 | 837.36   |
| 25405     | Ccng1        | 4474   | 4241    | 4379.7 | 4022.9 | 4343  | 4243  | 4313  | 4388.07  |
| 287419    | Rangrf       | 126    | 96      | 93     | 88     | 82    | 108   | 100   | 117      |
| 308757    | Man2a2       | 1540.7 | 1677.89 | 1675   | 1793   | 1690  | 1755  | 1665  | 1643     |
| 362832    | Izumo4       | 90.04  | 64.18   | 68.27  | 57.15  | 68.1  | 73.07 | 63.11 | 78.14    |
| 501103    | Slc35b2      | 543    | 536     | 619    | 511    | 545   | 617   | 539   | 530      |
| 292747    | Fbl          | 360    | 380     | 409    | 355    | 369   | 367   | 401   | 382      |
| 100910318 | Trappc2b     | 468    | 458     | 419    | 360    | 429   | 407   | 458   | 428      |
| 108351723 | LOC108351723 | 51.37  | 35.55   | 45.16  | 45.99  | 30.5  | 49    | 52.56 | 47.79    |
| 252939    | Gpr3711      | 2194.7 | 2453.52 | 2275.5 | 2524.7 | 2101  | 2465  | 2375  | 2601.54  |
| 307997    | Hspa12a      | 13565  | 13774   | 13425  | 15207  | 14242 | 14639 | 14510 | 13139.99 |
| 678759    | Ndufa10      | 3814   | 3404.47 | 3202.5 | 2921.2 | 3429  | 3448  | 3141  | 3458.43  |
| 500843    | RGD1565498   | 397    | 387     | 422    | 382.06 | 404   | 395   | 391   | 414      |
| 85263     | Slc25a14     | 329    | 335     | 315    | 313    | 321   | 311   | 347   | 326      |
| 288692    | Wsb2         | 4923   | 4762    | 4661   | 4705   | 4859  | 4901  | 4733  | 4750     |
| 24240     | Cad          | 535    | 626     | 580    | 639    | 596   | 631   | 591   | 586      |
| 100361133 | Mycbp        | 491    | 498.09  | 462.53 | 480.02 | 460.9 | 448.8 | 515.7 | 525.8    |
| 361778    | Sfxn4        | 359    | 318     | 294    | 315    | 329   | 291   | 342   | 337      |
| 361789    | Atat1        | 502    | 502     | 555    | 515    | 472   | 526   | 564   | 533      |
| 362855    | Rtcb         | 1550   | 1528    | 1479   | 1458   | 1520  | 1512  | 1530  | 1514     |
| 363009    | Uhrflbp11    | 2570.4 | 2719.72 | 2659.9 | 2784.6 | 2842  | 2597  | 2836  | 2568.54  |
| 59074     | Stx8         | 453.92 | 431.49  | 417.53 | 387.22 | 451.4 | 392.7 | 423.1 | 440.12   |
| 306589    | Klhdc8b      | 643.15 | 524.34  | 512.88 | 574.47 | 574.8 | 597.8 | 523.8 | 581.35   |
| 687127    | Zfp526       | 231.88 | 184.57  | 244.21 | 221.91 | 222.4 | 251.2 | 212.3 | 205.56   |
| 84556     | Rims1        | 1221   | 1159    | 1255   | 1442   | 1349  | 1210  | 1305  | 1265     |
| 290850    | Mrps31       | 396    | 389     | 324    | 356    | 382   | 336   | 389   | 373      |
| 25573     | Ube2i        | 2312   | 2327    | 2228   | 2197   | 2264  | 2249  | 2286  | 2358     |
| 298982    | Maea         | 2162   | 2177    | 2207   | 2127   | 2140  | 2242  | 2237  | 2143     |
| 140941    | Siah1        | 539    | 564     | 513    | 523    | 529   | 538   | 558   | 536      |
| 297961    | Ube2j1       | 3463   | 3517    | 3240   | 3488   | 3535  | 3454  | 3538  | 3322     |
| 361666    | Bccip        | 292.19 | 317.31  | 279.79 | 239.38 | 305.7 | 241   | 290.6 | 302.99   |
| 362185    | Mpped2       | 634.06 | 693     | 594    | 690    | 691   | 664   | 613   | 670      |
| 304813    | Ppp1r12b     | 1696.5 | 1612.72 | 1638.1 | 1904.4 | 1823  | 1806  | 1674  | 1619.78  |
| 311545    | Hml3         | 1694   | 1642    | 1680   | 1568   | 1629  | 1679  | 1733  | 1611     |
| 361293    | Riok3        | 1673   | 1718    | 1707   | 1577   | 1625  | 1656  | 1796  | 1667     |
| 361798    | Ehmt2        | 1409.7 | 1357.67 | 1484.4 | 1510.6 | 1512  | 1494  | 1475  | 1341.46  |
| 83709     | Git1         | 3460   | 3781    | 3819   | 3603   | 3574  | 3931  | 3585  | 3725     |
| 25745     | Myh9l1       | 3893.7 | 4053.96 | 4337.9 | 3993.8 | 4220  | 4717  | 3951  | 3560.56  |
| 303073    | Cyfip2       | 6178   | 6973    | 6491   | 7513   | 7348  | 6871  | 6702  | 6516     |
| 100360914 | Fbxw7        | 1583.7 | 1433.02 | 1372.4 | 1450.7 | 1580  | 1427  | 1483  | 1410.15  |

|           |                 |        |         |        |        |       |       |       |         |
|-----------|-----------------|--------|---------|--------|--------|-------|-------|-------|---------|
| 305887    | Ngdn            | 457    | 443     | 424    | 400    | 469   | 421   | 421   | 431     |
| 680835    | LOC680835       | 1501.1 | 1487.48 | 1633.6 | 1855.9 | 1833  | 1533  | 1692  | 1487.48 |
| 361649    | Atxn21          | 2830   | 2564    | 2878   | 3103   | 2847  | 3082  | 2879  | 2686    |
| 309256    | Fan1            | 169    | 167     | 152    | 181    | 187   | 159   | 167   | 163     |
| 361795    | Ltb             | 12.52  | 38      | 16.04  | 29     | 25    | 9.52  | 11.04 | 51      |
| 290864    | Usp4            | 1511.3 | 1551.31 | 1536.6 | 1622.7 | 1582  | 1538  | 1659  | 1507.57 |
| 363056    | Rnf214          | 1520   | 1424    | 1467   | 1607   | 1640  | 1525  | 1465  | 1451    |
| 287442    | Tmem256         | 260    | 246     | 243    | 206    | 227   | 226   | 229   | 283     |
| 296562    | Npdcl           | 5011   | 4883    | 5138   | 3964   | 4769  | 4944  | 4798  | 4684    |
| 498140    | Cdk8            | 582    | 542     | 545    | 526    | 538   | 536   | 632   | 512     |
| 497941    | Gps2            | 494.78 | 461.17  | 464.59 | 427.62 | 454.3 | 451   | 473.6 | 488.77  |
| 192275    | Dad1            | 2029   | 1682    | 1701   | 1535   | 1623  | 1719  | 1691  | 1987    |
| 313253    | Zfp618          | 220    | 213.02  | 223    | 231    | 250   | 221.2 | 220   | 205.2   |
| 83516     | Ppargcla        | 513.14 | 497.18  | 404.77 | 574.51 | 563.5 | 477.9 | 532.9 | 436.16  |
| 84383     | Timm8a1         | 480    | 466     | 391    | 369    | 417   | 414   | 432   | 461     |
| 308067    | Brd9            | 1043.6 | 975.68  | 904.88 | 916.28 | 1018  | 963.2 | 916.2 | 983.34  |
| 60421     | Prmt1           | 1142   | 1117    | 1074   | 905    | 1011  | 1028  | 1105  | 1138.79 |
| 685332    | Rpp30           | 557    | 505     | 437    | 487    | 472   | 546   | 492   | 497     |
| 290803    | Tex15           | 85     | 93      | 93     | 107    | 120   | 94    | 89    | 79      |
| 311350    | Tmem62          | 614    | 686     | 609    | 642    | 596   | 634   | 703   | 645     |
| 305258    | Utp3            | 616    | 579     | 558    | 512    | 625   | 532   | 576   | 556     |
| 300974    | Mrpl3           | 593    | 569     | 501    | 502    | 514   | 545   | 556   | 573     |
| 500324    | Cracr2a         | 25     | 20      | 24     | 25     | 26    | 26    | 21    | 22      |
| 192277    | Stipl           | 5024   | 4947    | 4609   | 5011   | 4925  | 4982  | 4960  | 4933    |
| 303456    | Utp18           | 327    | 358     | 323    | 303    | 353   | 285   | 340   | 347     |
| 499768    | Tbcd13          | 1340   | 1380    | 1372   | 1325   | 1419  | 1376  | 1349  | 1331    |
| 299207    | Erg28           | 569.98 | 583.05  | 467.91 | 438.16 | 497.1 | 505   | 578   | 501.11  |
| 311151    | Dusp19          | 97     | 95      | 97     | 83     | 107   | 87    | 97    | 85      |
| 24224     | Bcl2            | 74.93  | 113.53  | 70.24  | 119.54 | 110   | 89.4  | 86.63 | 96.32   |
| 287429    | Naa38           | 1362.6 | 1251.81 | 1214.8 | 978.43 | 1238  | 1106  | 1130  | 1385.79 |
| 291609    | Ndfip1          | 11197  | 10682   | 10038  | 9634   | 10773 | 9946  | 10627 | 10654   |
| 124323    | Rps23           | 2344   | 2225    | 2452   | 1737   | 2217  | 2115  | 2143  | 2378    |
| 361833    | Ank3            | 4345   | 4877    | 5166   | 5793   | 5402  | 4992  | 4930  | 5076    |
| 311844    | Kyat1           | 354    | 287     | 284    | 271    | 298   | 326   | 284   | 301     |
| 24171     | Add2            | 6906   | 7362    | 7138   | 8175   | 8220  | 7203  | 7300  | 7180    |
| 29717     | Cacnalg         | 72     | 52.08   | 66.76  | 69.03  | 56.08 | 71.03 | 76.45 | 59.14   |
| 315645    | Pih1d2          | 465    | 469.65  | 453    | 413    | 454   | 461.2 | 475   | 430.03  |
| 103689921 | NEWGENE_1306267 | 23.08  | 89.62   | 29.61  | 119.86 | 86.63 | 0     | 69.66 | 108.74  |
| 314401    | Unc79           | 443.72 | 469.68  | 421.38 | 510.75 | 515.1 | 438.7 | 478.2 | 433.57  |
| 293671    | Sf3b2           | 2218   | 2361    | 2488   | 2450   | 2476  | 2435  | 2485  | 2225    |
| 81755     | Rab3b           | 155    | 108     | 156    | 129    | 140   | 135   | 141   | 138     |
| 303407    | Gdpd1           | 566    | 519     | 499    | 516    | 540   | 501   | 565   | 517     |
| 64514     | Eif2b1          | 556    | 550     | 519    | 475    | 509   | 557   | 544   | 513     |
| 367767    | Mageh1          | 372    | 360     | 325    | 312    | 336   | 331   | 374   | 343     |
| 362002    | Rnf115          | 1356   | 1353    | 1263   | 1310   | 1277  | 1317  | 1444  | 1302    |
| 89806     | Tiel            | 458    | 441     | 434    | 306    | 458   | 482   | 367   | 350     |
| 25547     | St8sia3         | 671    | 641     | 650    | 768    | 779   | 574   | 756   | 651     |
| 361309    | Paip2           | 3348   | 3173    | 2925   | 2831   | 3005  | 2966  | 3292  | 3149    |
| 316023    | Dclk3           | 169    | 221     | 172    | 165    | 118   | 183   | 228   | 206     |
| 313743    | Klhl21          | 705    | 695     | 673    | 653    | 664   | 755   | 642   | 695     |
| 292554    | Aurkc           | 104    | 95      | 90     | 74     | 67    | 100   | 119   | 81      |
| 315160    | Desi1           | 909    | 944     | 850    | 927    | 845   | 885   | 982   | 958     |
| 362688    | Gemin6          | 186.02 | 183.01  | 199.3  | 189.67 | 201.6 | 168.5 | 232   | 164.34  |
| 288482    | Usp42           | 315    | 358.25  | 347.61 | 329.15 | 351.1 | 340.2 | 338.9 | 334.81  |
| 364070    | Iars2           | 1909   | 1689.11 | 1703   | 1871   | 1799  | 1773  | 1872  | 1807.44 |
| 306768    | Nop16           | 611    | 662.61  | 613    | 591    | 621   | 609   | 591   | 684     |

|           |              |        |         |        |        |       |       |       |          |
|-----------|--------------|--------|---------|--------|--------|-------|-------|-------|----------|
| 288065    | Ccdc58       | 111    | 122     | 138    | 81     | 129   | 95    | 114   | 119      |
| 100361633 | Cd300ld      | 3.33   | 1.99    | 7.99   | 2.04   | 4     | 3.23  | 3.26  | 5.03     |
| 365024    | Chmpla       | 1826   | 1840    | 1721   | 1731   | 1867  | 1725  | 1780  | 1825     |
| 24334     | Eno2         | 10438  | 12318.5 | 8860.7 | 11369  | 10625 | 12032 | 10571 | 10235.91 |
| 301123    | Ndufa11      | 1710   | 1607    | 1478   | 1311   | 1472  | 1496  | 1548  | 1658     |
| 94268     | Efna1        | 372    | 386     | 342    | 336    | 366   | 357   | 317   | 412      |
| 364656    | Mrpl36       | 274    | 288.93  | 258.35 | 261.35 | 261.4 | 250.3 | 285.3 | 297.78   |
| 108349732 | LOC108349732 | 18.08  | 23.9    | 20.48  | 32.54  | 24.39 | 20.89 | 20.92 | 29.86    |
| 316051    | Azi2         | 1023   | 970     | 997    | 952    | 1038  | 974   | 1011  | 963      |
| 293666    | mrpl11       | 390    | 391     | 368    | 373    | 390   | 382   | 381   | 386      |
| 362818    | Pmel         | 87     | 97      | 79     | 95     | 90    | 91    | 92    | 89       |
| 292244    | Mrpl18       | 463    | 430     | 440    | 361    | 377   | 433   | 427   | 476      |
| 361655    | Tial1        | 630    | 592.99  | 586.99 | 594    | 562   | 602   | 674   | 593      |
| 688966    | Borcs8       | 292    | 283     | 195    | 207    | 248   | 258   | 218   | 264      |
| 367085    | Arhgap20     | 247.49 | 212.98  | 223.7  | 238.48 | 220.3 | 226.2 | 245.6 | 241.03   |
| 25686     | Gnail        | 1602   | 1745    | 1422   | 1623   | 1571  | 1541  | 1686  | 1666     |
| 685045    | Abrac1       | 338    | 308     | 349    | 336    | 327   | 308   | 347   | 364      |
| 308518    | Nudt19       | 398.15 | 358.17  | 380.75 | 319.87 | 385.5 | 304.2 | 385.4 | 398.27   |
| 361677    | Tollip       | 2271   | 2351    | 2218   | 2168   | 2269  | 2323  | 2285  | 2233     |
| 117026    | Apbb3        | 1375   | 1260    | 1253   | 1227   | 1286  | 1327  | 1262  | 1298     |
| 116675    | Pgap2        | 331.02 | 322.1   | 359.04 | 304.09 | 338.3 | 342.1 | 303.8 | 347.04   |
| 140592    | Ppfia4       | 865    | 785     | 802    | 807    | 878   | 827   | 778   | 813      |
| 298141    | Frmd3        | 809.15 | 864.98  | 598.96 | 849.98 | 809.9 | 760.8 | 856.9 | 730.95   |
| 310848    | Cyp2u1       | 413    | 412     | 439    | 406    | 415   | 417   | 448   | 409      |
| 309399    | Abhd17b      | 932    | 874     | 919    | 877    | 925   | 901   | 874   | 943      |
| 361809    | Zfp523       | 595.68 | 564.16  | 541.01 | 524.98 | 615.1 | 558.6 | 517.5 | 560.04   |
| 246773    | Lrrc3        | 282    | 308     | 272    | 279    | 300   | 296   | 275   | 283      |
| 365842    | Clk2         | 436    | 435     | 458    | 426    | 434   | 465   | 458   | 418      |
| 373065    | Ddx24        | 1750.7 | 1802.15 | 1678.5 | 1871.2 | 1841  | 1867  | 1857  | 1618.89  |
| 307798    | Acd          | 396    | 342     | 408    | 339    | 364   | 391   | 392   | 355      |
| 303244    | Mpdu1        | 1106.3 | 1111.99 | 1023.1 | 987.39 | 1108  | 1092  | 1041  | 1036.69  |
| 361273    | Sec61a2      | 1514   | 1486    | 1511   | 1407   | 1491  | 1559  | 1482  | 1454     |
| 54238     | Cdkn2c       | 117    | 94      | 144    | 80     | 121   | 91    | 107   | 121      |
| 116687    | Dnase113     | 12.71  | 10      | 23.3   | 0      | 19.07 | 9     | 8.47  | 10       |
| 498599    | Slc35e1      | 759    | 732     | 704    | 669    | 749   | 686   | 758   | 704      |
| 24666     | Ppmla        | 2090   | 2091    | 1836   | 2130   | 2159  | 1902  | 2212  | 1968     |
| 100911440 | LOC100911440 | 780.45 | 889.66  | 768.35 | 811.71 | 777.6 | 874.8 | 822.7 | 812.72   |
| 316231    | Abcc10       | 174    | 179     | 188    | 162.87 | 207   | 175   | 186   | 144      |
| 24784     | Slc9a3       | 308.21 | 306.45  | 312.56 | 282.44 | 300.5 | 369.5 | 286   | 267.62   |
| 360645    | Taco1        | 88     | 116     | 116    | 111    | 129   | 95    | 95    | 117      |
| 309140    | Mrpl21       | 234    | 232     | 203    | 191    | 199   | 232   | 213   | 226      |
| 362614    | Gpn2         | 177    | 148     | 193    | 170    | 150   | 158   | 179   | 209      |
| 313520    | Mmachc       | 231    | 262     | 248    | 286    | 246   | 265   | 270   | 258      |
| 29675     | Psmb2        | 1465   | 1451    | 1371   | 1273   | 1332  | 1333  | 1500  | 1460     |
| 360302    | Ptprk        | 412.64 | 441.07  | 419.8  | 495.09 | 426.9 | 435.7 | 465.6 | 461.17   |
| 360623    | Krt28        | 216.39 | 197.31  | 188.87 | 178.37 | 194   | 196.7 | 202.4 | 196.96   |
| 303188    | Rail         | 815.02 | 878.61  | 897.91 | 984.89 | 972   | 910.9 | 879.3 | 856.23   |
| 311486    | Dzank1       | 682.82 | 749.62  | 582.59 | 830.27 | 824.7 | 573.4 | 744.2 | 736.32   |
| 682390    | Eif3i        | 884    | 847     | 801    | 707    | 774   | 784   | 878   | 841      |
| 361732    | Tmem109      | 545    | 556     | 586    | 525    | 530   | 614   | 534   | 560      |
| 114209    | Phyh         | 1150.6 | 1068.21 | 1121.4 | 1182.5 | 1093  | 1120  | 1176  | 1186.49  |
| 366618    | Ap4s1        | 214    | 184     | 186    | 181    | 185   | 172   | 205   | 212      |
| 680987    | Ciao2b       | 672    | 638     | 575    | 579    | 612   | 631   | 588   | 662      |
| 25587     | Id2          | 386    | 401     | 353    | 304    | 384   | 367   | 375   | 335      |
| 362214    | Nop56        | 1670   | 1513    | 1461   | 1384   | 1464  | 1529  | 1601  | 1505     |
| 680451    | Nrbp2        | 7065   | 7376    | 6978   | 6422   | 6461  | 7706  | 7237  | 6765     |

|           |              |        |         |        |        |       |       |       |         |
|-----------|--------------|--------|---------|--------|--------|-------|-------|-------|---------|
| 307816    | Tango6       | 223    | 235     | 218    | 257    | 222   | 255   | 237   | 230     |
| 29737     | Kcnab1       | 2528.5 | 2486.73 | 2421.3 | 2507.7 | 2554  | 2472  | 2676  | 2360.45 |
| 296637    | Prrc2b       | 4262.5 | 4457.02 | 4537.5 | 5061.5 | 4718  | 4806  | 4523  | 4486.81 |
| 288585    | Ift22        | 327    | 373     | 353    | 301    | 329   | 304   | 331   | 406     |
| 294560    | Mcu          | 1037   | 1164    | 1051   | 1058   | 1114  | 1110  | 1043  | 1094    |
| 140933    | Trpc5        | 75     | 67      | 83.95  | 110    | 87.99 | 74    | 90.93 | 87.01   |
| 25455     | Ggh          | 258.59 | 253     | 268    | 222    | 224   | 246.8 | 264.6 | 278     |
| 295053    | Spart        | 1030   | 1119    | 1056   | 1094   | 1036  | 1091  | 1156  | 1067    |
| 304670    | Tnpo2        | 3159   | 3275    | 3234   | 3521   | 3519  | 3184  | 3429  | 3214    |
| 502225    | Lrrc14b      | 68     | 56      | 63     | 65     | 47    | 87    | 63    | 58      |
| 300069    | Eif3l        | 1582   | 1731    | 1597   | 1474   | 1633  | 1695  | 1662  | 1470    |
| 682902    | Taf12        | 487    | 486     | 481    | 476    | 513   | 463   | 504   | 473     |
| 296300    | Zfp341       | 203    | 207     | 205    | 224    | 211   | 239   | 207   | 192     |
| 310856    | Ppa2         | 610    | 683     | 569    | 487    | 532   | 572   | 627   | 646     |
| 113960    | Cdc42bpb     | 2200   | 2530    | 2492   | 2675   | 2577  | 2551  | 2448  | 2439    |
| 306352    | Armc6        | 224.36 | 194.96  | 193.35 | 217.68 | 218.9 | 201.4 | 224.2 | 195.79  |
| 245983    | I111ral      | 685    | 548     | 605    | 589    | 645   | 611   | 563   | 637     |
| 291580    | RGD1312005   | 1056   | 1049.54 | 953.61 | 944.75 | 1047  | 1024  | 988.1 | 993.07  |
| 291317    | Rpp38        | 119    | 106     | 93     | 100    | 115   | 105   | 100   | 103     |
| 116686    | Gsr          | 1251   | 1216    | 1202   | 1175   | 1190  | 1240  | 1250  | 1222    |
| 79558     | Acvr1        | 408    | 435     | 490    | 502    | 442   | 472   | 461   | 482     |
| 313845    | Sos1         | 1528   | 1590    | 1626   | 1905   | 1782  | 1654  | 1663  | 1630    |
| 303275    | Dhrs13       | 202    | 176     | 201    | 169    | 188   | 216   | 157   | 196     |
| 287961    | Cdc45        | 24     | 18      | 26     | 15     | 16    | 19    | 24    | 25      |
| 311743    | Map3k20      | 264    | 230     | 295    | 290    | 273   | 248   | 318   | 253     |
| 295586    | Clcn6        | 2854.7 | 3061    | 2941   | 3254.8 | 3065  | 3162  | 2979  | 3051.19 |
| 293615    | Sirt3        | 366    | 356     | 372    | 316    | 329   | 373   | 342   | 383     |
| 362437    | Iffo1        | 1802.7 | 1693.97 | 1696.3 | 1535.5 | 1764  | 1797  | 1577  | 1672.61 |
| 361378    | Man2b1       | 801    | 825     | 939    | 826    | 847   | 922   | 840   | 823     |
| 296565    | Paxx         | 691    | 720     | 699    | 614    | 702   | 669   | 638   | 748     |
| 683713    | Gal3st1      | 288    | 297     | 284    | 286    | 267   | 263   | 288   | 351     |
| 290963    | Npepo        | 768    | 782     | 746    | 754    | 726   | 851   | 784   | 726     |
| 288321    | Rbm11        | 1423   | 1430    | 1257   | 1243   | 1467  | 1315  | 1369  | 1267    |
| 311215    | Ext2         | 693    | 822     | 884    | 895    | 766   | 949   | 863   | 756     |
| 291874    | Nup93        | 647.95 | 619.98  | 633.86 | 664.97 | 657   | 666   | 636.1 | 638.93  |
| 361387    | Zfp330       | 583    | 554     | 520    | 483    | 512   | 545   | 541   | 568     |
| 24673     | Ppp2cb       | 3453   | 3317    | 3221   | 3053   | 3206  | 3363  | 3385  | 3249    |
| 297428    | Copg1        | 5983   | 6248    | 6180   | 6522   | 6165  | 6538  | 6363  | 6171    |
| 100912608 | LOC100912608 | 292.82 | 314.02  | 274.71 | 307.63 | 298.7 | 313.2 | 314.6 | 277.24  |
| 361606    | Aamdc        | 40     | 29      | 45     | 50     | 43    | 41    | 44    | 38      |
| 102548917 | LOC102548917 | 127    | 117     | 126    | 121    | 123   | 121   | 112   | 141     |
| 64526     | Ech1         | 2040   | 1965    | 1799   | 1621   | 1780  | 1816  | 1922  | 1998    |
| 85425     | Tdrd7        | 1217   | 1280    | 1301   | 1338   | 1325  | 1302  | 1337  | 1235    |
| 81521     | Msn          | 2667   | 2716    | 2968   | 2893   | 2929  | 2655  | 3006  | 2792    |
| 494346    | Preli3b      | 781    | 803     | 714    | 714    | 713   | 758   | 792   | 786     |
| 81761     | Rnpep        | 475    | 492     | 546    | 521    | 521   | 530   | 488   | 520     |
| 64353     | Pdlim5       | 901.37 | 880.54  | 1034.7 | 983.04 | 971.8 | 1003  | 949.8 | 921.74  |
| 312607    | Pdzrn3       | 412.31 | 435.97  | 499.53 | 484.9  | 431.9 | 452.6 | 487.1 | 483.66  |
| 84575     | Fads1        | 4825   | 4934    | 4638   | 5083   | 4672  | 5188  | 4927  | 4933    |
| 291671    | Hspa9        | 4348.6 | 4526.28 | 4189.7 | 4659.8 | 4091  | 4074  | 5104  | 4674.47 |
| 363781    | Plcx2        | 2706.4 | 2653.53 | 2646.6 | 2861.6 | 2764  | 2634  | 2821  | 2783.55 |
| 59102     | Rpa2         | 183    | 150     | 167    | 146    | 189   | 152   | 137   | 176     |
| 290596    | Ghitm        | 5223.2 | 5101.65 | 4180.7 | 4703.6 | 4736  | 4708  | 5027  | 4976.28 |
| 299905    | Med30        | 286    | 302     | 271.93 | 250.83 | 263.7 | 258.8 | 311   | 291     |
| 680752    | Ccdc74a      | 194.53 | 206.49  | 196.62 | 229.96 | 197.4 | 209.3 | 222.9 | 208.35  |
| 307742    | Snx20        | 35     | 48      | 39     | 38     | 41    | 33    | 41    | 47      |



|           |              |        |         |        |        |       |       |       |          |
|-----------|--------------|--------|---------|--------|--------|-------|-------|-------|----------|
| 681352    | Letmd1       | 1046   | 1040    | 996    | 992    | 1063  | 1031  | 1006  | 1025     |
| 316335    | Tmem131      | 1259   | 1352    | 1424   | 1544   | 1430  | 1448  | 1451  | 1320     |
| 300235    | Dazap2       | 2950   | 3226    | 3173   | 2986   | 3035  | 3159  | 3166  | 3130     |
| 25579     | Map3k12      | 1207.1 | 1143.11 | 1110.2 | 1126.3 | 1208  | 1192  | 1113  | 1131.65  |
| 361532    | Sirt2        | 2891   | 2873    | 2717   | 2716   | 2569  | 3063  | 2827  | 2879     |
| 100360977 | LOC100360977 | 40.63  | 230.32  | 119.24 | 177.19 | 132.5 | 173.7 | 193.5 | 74.83    |
| 116665    | Rere         | 1862   | 1779    | 1920   | 2132   | 2122  | 2015  | 1890  | 1763     |
| 366138    | Ldlrad3      | 171.62 | 190.38  | 220.11 | 191.42 | 161.3 | 199.8 | 152.5 | 269.76   |
| 301124    | LOC301124    | 1759.1 | 1626.89 | 1637.5 | 1419.7 | 1529  | 1539  | 1638  | 1818.6   |
| 361640    | Polr3e       | 373    | 432     | 408    | 371    | 375   | 372   | 476   | 381      |
| 64152     | Chp1         | 7931   | 7936    | 7580   | 7644   | 8014  | 7831  | 7719  | 7922     |
| 289278    | Cox20        | 254.64 | 299.26  | 283.51 | 205.66 | 224.2 | 276.4 | 272   | 283.75   |
| 116697    | Pabpn1       | 1493   | 1276    | 1413   | 1240   | 1482  | 1381  | 1348  | 1280     |
| 60664     | Pik3r3       | 605.3  | 645.52  | 631.97 | 657.84 | 678.9 | 591.2 | 676.3 | 626.57   |
| 24468     | Hspa8        | 45131  | 45731   | 41136  | 43864  | 43507 | 44320 | 46555 | 43724.25 |
| 117049    | Rab28        | 821    | 828     | 802    | 755    | 717   | 765   | 884   | 881      |
| 29384     | H2afy        | 987    | 926     | 981    | 929    | 986   | 1004  | 965   | 917      |
| 300455    | Bmper        | 103    | 65      | 86     | 58     | 86    | 60    | 99    | 71       |
| 100910342 | Bbip1        | 147    | 145     | 119    | 135    | 138   | 120   | 120   | 175      |
| 300052    | Vps28        | 1427   | 1400    | 1303   | 1154   | 1319  | 1267  | 1365  | 1401     |
| 84595     | Nucb1        | 4906   | 5489    | 5530   | 5313   | 5170  | 5660  | 5313  | 5369     |
| 24686     | Prnp         | 13640  | 13463   | 12695  | 12359  | 12574 | 12813 | 13658 | 13786    |
| 103690203 | Znf48        | 267    | 234     | 251    | 253    | 281   | 241   | 236   | 260      |
| 293489    | Slx1b        | 572    | 529     | 545    | 440    | 482   | 601   | 513   | 517      |
| 296349    | Ttpal        | 1010.5 | 930.25  | 914.24 | 925.07 | 1039  | 955.9 | 915.3 | 918.7    |
| 25743     | Kcnj6        | 440.19 | 390.79  | 338.9  | 455.11 | 441.1 | 406.4 | 380.7 | 417.88   |
| 25019     | Xrcc6        | 502    | 520     | 500    | 485    | 463   | 499   | 572   | 499      |
| 54263     | Kcnn3        | 403.35 | 396.42  | 419.17 | 579.54 | 574.4 | 368.8 | 442.3 | 436.38   |
| 304567    | Pus1         | 243    | 252     | 228    | 201    | 244   | 233   | 224   | 235      |
| 312647    | Atg7         | 276    | 278     | 273    | 251    | 271   | 256   | 289   | 276      |
| 691075    | Mrpl10       | 836.01 | 872     | 741.98 | 818.6  | 836   | 849.3 | 815.7 | 810      |
| 100364162 | Rnf1111      | 944.53 | 992.19  | 922.75 | 962.38 | 946.9 | 944.8 | 989.1 | 990.78   |
| 687711    | Snrpd3       | 691    | 596     | 638    | 530    | 596   | 573   | 635   | 683      |
| 287173    | Bod1         | 288    | 289     | 250    | 247    | 248   | 268   | 265   | 307      |
| 360882    | Cadm3        | 13726  | 13898   | 13319  | 13745  | 13446 | 14533 | 14362 | 13061    |
| 171445    | Akr7a2       | 528    | 492     | 495    | 474    | 537   | 504   | 460   | 514      |
| 100911417 | LOC100911417 | 2945   | 2921    | 2718   | 2497.9 | 2778  | 2781  | 2809  | 2858.9   |
| 309029    | RGD1305014   | 272    | 270     | 224    | 228    | 267   | 274   | 222   | 244      |
| 24424     | Gstm2        | 955.58 | 896.88  | 823.7  | 965.59 | 892.6 | 809   | 866.2 | 1121.71  |
| 361242    | Dusp22       | 716    | 713     | 641    | 676    | 742   | 714   | 669   | 657      |
| 94170     | Atp6v0e1     | 812    | 757     | 778    | 624    | 704   | 721   | 746   | 839      |
| 287822    | Hid1         | 2436   | 2539    | 2508   | 2420   | 2455  | 2454  | 2441  | 2683     |
| 360495    | Lmf1         | 346    | 359     | 360    | 378    | 339   | 388   | 368   | 367      |
| 681193    | LOC681193    | 119.96 | 127.86  | 116.13 | 108.1  | 128.1 | 118.5 | 111   | 120.67   |
| 24162     | Acp2         | 1266   | 1254    | 1258   | 1222   | 1250  | 1299  | 1286  | 1231     |
| 315203    | Gramd4       | 559    | 525     | 568    | 542    | 546   | 558   | 569   | 550      |
| 498886    | RGD1562987   | 1687   | 1672    | 1601   | 1470   | 1579  | 1539  | 1620  | 1777     |
| 364148    | Kctd8        | 926    | 1026    | 923    | 906    | 1008  | 964   | 899   | 960      |
| 689248    | Ecsr         | 331.65 | 368.55  | 284.94 | 300.59 | 326.9 | 358.5 | 288.9 | 328.47   |
| 641521    | Lrrc4        | 281    | 308     | 282    | 336    | 284   | 326   | 322   | 291      |
| 296596    | Rpl7a        | 3869   | 3806.42 | 3992   | 3293   | 3786  | 3743  | 3786  | 3844     |
| 295382    | Ntng1        | 818    | 768     | 779    | 871    | 812   | 854   | 861   | 752      |
| 102547413 | LOC102547413 | 225.23 | 209.24  | 217.44 | 189.95 | 258   | 185.5 | 187.4 | 222.17   |
| 499941    | Dbnidd2      | 1480   | 1471    | 1558   | 1350   | 1450  | 1386  | 1562  | 1539     |
| 266608    | Fzd9         | 40     | 40      | 29     | 41     | 39    | 49    | 30    | 34       |
| 501907    | RGD1559459   | 6.53   | 4.69    | 5      | 4.01   | 4     | 2     | 7.5   | 7        |

|           |              |        |         |        |        |       |       |       |          |
|-----------|--------------|--------|---------|--------|--------|-------|-------|-------|----------|
| 361709    | Ap5b1        | 341.4  | 359.78  | 373.99 | 373.54 | 346   | 397.9 | 374.3 | 349.89   |
| 60418     | Gde1         | 2334   | 2316    | 2240   | 2015   | 2251  | 2167  | 2347  | 2259     |
| 362240    | No141        | 1905   | 2065    | 2029   | 2004   | 2096  | 2004  | 1962  | 2048     |
| 100910434 | Chad1        | 659.95 | 761.3   | 877.2  | 690.79 | 772.5 | 874.3 | 744.4 | 637.99   |
| 294239    | Ddah2        | 1448   | 1466    | 1520   | 1309   | 1261  | 1419  | 1577  | 1563     |
| 24158     | Acadm        | 1281   | 1187    | 1156   | 1138   | 1116  | 1209  | 1289  | 1212     |
| 293691    | Snx15        | 325    | 280     | 316    | 268    | 321   | 295   | 299   | 290      |
| 360230    | Stk40        | 879    | 880     | 926    | 946    | 875   | 958   | 898   | 949      |
| 315352    | Nxt2         | 97     | 88.93   | 99     | 90     | 88    | 89    | 100   | 103      |
| 498002    | RGD1561590   | 505.48 | 456.74  | 529.48 | 379.75 | 425.6 | 476.5 | 494.1 | 500.67   |
| 291848    | Mmp15        | 4081   | 4858    | 5186   | 4874   | 4242  | 5278  | 4801  | 4936     |
| 287151    | Metrn        | 810    | 895     | 1180   | 723    | 791   | 937   | 926   | 1003     |
| 100360100 | Taf3         | 321    | 329     | 285    | 315    | 336   | 332   | 313   | 286      |
| 54294     | Rgs5         | 314    | 306     | 340    | 216    | 273   | 316   | 361   | 242      |
| 64185     | Cap1         | 7676   | 7872    | 7814   | 7702   | 7884  | 7967  | 8067  | 7569     |
| 297332    | Thns12       | 246    | 245     | 195    | 195    | 212   | 218   | 238   | 225      |
| 290666    | Sugp1        | 690    | 726     | 777    | 743    | 778   | 782   | 705   | 711      |
| 305076    | Utp25        | 420    | 392     | 352    | 377    | 393   | 382   | 391   | 396      |
| 303918    | Gtf2e1       | 350    | 314     | 291    | 365    | 312   | 321   | 361   | 344      |
| 367100    | Smad6        | 55     | 58      | 62     | 45     | 45    | 63    | 46    | 69       |
| 681234    | Dbr1         | 172    | 185     | 154    | 149    | 169   | 162   | 154   | 184      |
| 311944    | Paxip1       | 425.42 | 489.99  | 452.62 | 441.59 | 460.4 | 486.6 | 460.3 | 427.1    |
| 499380    | Emx2         | 2.11   | 0.98    | 5.67   | 2.21   | 2.49  | 3.12  | 3.84  | 1.67     |
| 500694    | Isca2        | 775    | 759     | 603    | 642    | 611   | 752   | 728   | 726      |
| 307234    | Kcng2        | 254    | 321     | 251    | 268    | 302   | 233   | 282   | 292      |
| 362278    | Tmem189      | 4026   | 4079    | 3882   | 3982   | 3853  | 4451  | 3736  | 4148     |
| 290564    | Mettl6       | 181.51 | 171.47  | 193.34 | 163.24 | 177.4 | 166.8 | 179.5 | 195.57   |
| 304271    | Rnf6         | 990    | 1027    | 984    | 1075   | 980   | 1096  | 1086  | 970      |
| 171155    | Hadhb        | 3829   | 3973    | 3364   | 3474   | 3382  | 3669  | 3868  | 3924     |
| 171565    | Stampb       | 915.3  | 910.81  | 828.33 | 868.65 | 803   | 922.7 | 884.4 | 961.88   |
| 686590    | Iqsec1       | 2972   | 3223    | 3007   | 3610   | 3041  | 3575  | 3188  | 3186     |
| 363327    | Vmac         | 386    | 321     | 355    | 304    | 308   | 335   | 373   | 369      |
| 84409     | Robo2        | 3906   | 3906    | 3712   | 4147   | 4067  | 3754  | 4275  | 3793     |
| 103690141 | LOC103690141 | 106.07 | 105.19  | 96.18  | 111.91 | 108.6 | 95.42 | 109.7 | 111.42   |
| 171581    | Rhov         | 452    | 416     | 405    | 377    | 446   | 419   | 363   | 445      |
| 500569    | Kdmla        | 688    | 668     | 716    | 654    | 691   | 712   | 728   | 633      |
| 25012     | Snap25       | 31080  | 31684   | 26565  | 32980  | 31612 | 30409 | 31058 | 30935.93 |
| 502632    | Mettl5       | 291.25 | 310.21  | 291.47 | 226.42 | 262.9 | 281.3 | 289.4 | 301.35   |
| 54296     | Rgs7         | 979    | 920     | 943    | 1022   | 994   | 908   | 1063  | 953      |
| 308339    | Zfp579       | 232    | 220     | 241    | 237    | 271   | 259   | 220   | 193      |
| 311718    | Zbtb46       | 170    | 147     | 177    | 149    | 160   | 173   | 141   | 178      |
| 307821    | Psmd7        | 2439   | 2323    | 2334   | 2112   | 2325  | 2364  | 2342  | 2306     |
| 245918    | Cgref1       | 696    | 577     | 567    | 505    | 581   | 575   | 572   | 650      |
| 684800    | Smap1        | 2693   | 2592    | 2567   | 2520   | 2697  | 2710  | 2654  | 2457     |
| 360650    | Amz2         | 1428   | 1360    | 1354   | 1328   | 1473  | 1308  | 1458  | 1308     |
| 367746    | LOC367746    | 10     | 8       | 2      | 2.68   | 5     | 4     | 4     | 10       |
| 300644    | Gramd1b      | 5266.8 | 4833.57 | 4771.1 | 5227.7 | 5325  | 5189  | 5319  | 4550.41  |
| 363522    | Dnase111     | 299    | 265     | 273    | 225    | 272   | 254   | 282   | 269      |
| 309169    | Ehbp111      | 569    | 570     | 696    | 572    | 609   | 623   | 650   | 559      |
| 361898    | Ankrd55      | 234    | 241.03  | 202.8  | 252    | 250   | 223   | 234   | 236      |
| 108352362 | Cxx1a        | 106.21 | 128.97  | 123.19 | 98.56  | 108.4 | 147.3 | 102.7 | 105.1    |
| 108348250 | LOC108348250 | 480.88 | 426.52  | 518.42 | 300.06 | 314   | 508   | 418.8 | 509.52   |
| 315461    | Tmed1        | 292.28 | 284.52  | 306.86 | 235.97 | 286.6 | 289.5 | 283.7 | 275.77   |
| 290692    | Klh12        | 517    | 574     | 598    | 561    | 523   | 533   | 634   | 592      |
| 260430    | Gpr156       | 55.62  | 58.86   | 44.12  | 68.83  | 65.75 | 55.02 | 51.58 | 58.32    |
| 314681    | Ric8b        | 1094.1 | 1022.69 | 1041   | 1050   | 1079  | 1064  | 1070  | 1054.6   |

|           |              |        |         |        |        |       |       |       |         |
|-----------|--------------|--------|---------|--------|--------|-------|-------|-------|---------|
| 300759    | Parp6        | 2950   | 2746    | 2687.4 | 2754   | 2793  | 2898  | 2773  | 2832    |
| 25385     | Faslg        | 16     | 18      | 15     | 21     | 20    | 14    | 20    | 17      |
| 114115    | P2rx2        | 169    | 150     | 111    | 127    | 156   | 119   | 146   | 144     |
| 365191    | Chmp2a       | 1074.5 | 953.21  | 921.24 | 808.33 | 973.2 | 886.1 | 954.4 | 997.48  |
| 297994    | Bag1         | 1423   | 1324    | 1349   | 1255   | 1383  | 1292  | 1309  | 1444    |
| 287962    | Mrpl40       | 424    | 452     | 395    | 396    | 425   | 409   | 439   | 418     |
| 300713    | Slc35f2      | 140    | 108     | 123    | 115    | 122   | 137   | 107   | 127     |
| 308404    | Irf2bp1      | 570    | 529     | 576    | 546    | 599   | 596   | 511   | 547     |
| 309596    | Vars2        | 307    | 305     | 294.13 | 341    | 296.5 | 328.3 | 308   | 332.42  |
| 103690164 | LOC103690164 | 89.47  | 75.65   | 88.44  | 75.59  | 71.85 | 92.88 | 74.2  | 94.97   |
| 308576    | Pnkp         | 255    | 257     | 238    | 220    | 230   | 284   | 223   | 247     |
| 100910143 | LOC100910143 | 397.5  | 381.5   | 389    | 390.5  | 395   | 366   | 433.5 | 386.5   |
| 305626    | Pigg         | 397.5  | 381.5   | 389    | 390.5  | 395   | 366   | 433.5 | 386.5   |
| 364240    | Dnajc9       | 390    | 350     | 356    | 287    | 362   | 331   | 352   | 358     |
| 312694    | Necap1       | 2331   | 2513    | 2218   | 2402   | 2320  | 2480  | 2388  | 2413    |
| 287178    | Ubtd2        | 629    | 583     | 647    | 624    | 638   | 630   | 667   | 584     |
| 300035    | Pycr3        | 453.47 | 416.27  | 377.06 | 386.01 | 425.9 | 429.7 | 390.7 | 410.2   |
| 366468    | Lsm10        | 121    | 135.96  | 127.01 | 100    | 127   | 125   | 131   | 108     |
| 314586    | Zfp763       | 194.06 | 175.98  | 174.62 | 192.23 | 180.5 | 168.9 | 190.3 | 208     |
| 502727    | RGD1563349   | 1585.1 | 1628.32 | 1478.8 | 1699   | 1737  | 1490  | 1699  | 1557.99 |
| 361038    | RGD1308430   | 267.4  | 243.44  | 278.83 | 222.04 | 220.9 | 272.3 | 257   | 276.36  |
| 361110    | Tmem110      | 363    | 341     | 379    | 289    | 361   | 358   | 335   | 338     |
| 315033    | Spagl        | 129    | 125     | 103    | 123    | 130   | 119   | 114   | 124     |
| 288615    | Sbds         | 1393   | 1297    | 1236   | 1213   | 1187  | 1212  | 1407  | 1408    |
| 688981    | LOC688981    | 2      | 2       | 2.26   | 3.33   | 2     | 3.25  | 1.34  | 3.14    |
| 360962    | Tacc3        | 96.96  | 87.56   | 115    | 69.66  | 107.3 | 82.13 | 95.49 | 89.63   |
| 113898    | Prdx5        | 2817   | 2618    | 2297   | 2109   | 2516  | 2209  | 2538  | 2722    |
| 497936    | Tmem88       | 173.39 | 191.19  | 187.25 | 138.57 | 144.9 | 187.1 | 198.3 | 170.21  |
| 60450     | Matk         | 295    | 322     | 243    | 226    | 298   | 286   | 252   | 266     |
| 289372    | Smyd2        | 1678   | 1780    | 1470   | 1448   | 1499  | 1687  | 1578  | 1706    |
| 299075    | Trappc6b     | 871    | 820     | 750    | 747    | 771   | 782   | 831   | 851     |
| 100192314 | Inafm1       | 208    | 209     | 213    | 183    | 207   | 203   | 199   | 216     |
| 360505    | Nprl3        | 446    | 406     | 416    | 423    | 392   | 466   | 422   | 436     |
| 81741     | Cdk16        | 4716   | 4738    | 4471   | 4481   | 4537  | 4967  | 4673  | 4502    |
| 366734    | Bag5         | 803.5  | 734.17  | 614.75 | 648.17 | 732.1 | 632.6 | 748.4 | 729.01  |
| 100362495 | Haus5        | 183    | 145     | 137    | 141    | 150   | 167   | 123   | 175     |
| 171415    | Atg3         | 1178   | 1053    | 1029   | 977    | 1069  | 1055  | 1096  | 1080    |
| 140593    | Siah2        | 182    | 165     | 144    | 181    | 156   | 186   | 179   | 161     |
| 65139     | Rps12        | 2559   | 2385    | 2484   | 1845   | 2394  | 2205  | 2288  | 2524    |
| 100359662 | Ankdd1b      | 71.13  | 58.65   | 44.69  | 52.87  | 51.15 | 56.46 | 60.31 | 62.81   |
| 116484    | Txn1         | 2169   | 2091    | 2023   | 1696   | 1961  | 1902  | 1986  | 2249    |
| 103690149 | LOC103690149 | 411.57 | 380.21  | 405.11 | 427.28 | 373.3 | 399.9 | 454   | 421.21  |
| 307492    | Hars         | 2693   | 2572    | 2479   | 2419   | 2564  | 2666  | 2683  | 2402.01 |
| 308051    | Rnf146       | 780    | 736     | 719    | 635    | 704   | 667   | 793   | 749     |
| 296279    | Tm9sf4       | 845    | 806     | 818    | 868    | 832   | 938   | 844   | 773     |
| 294518    | Sesn1        | 635    | 715     | 553    | 560    | 592   | 601   | 684   | 623     |
| 83730     | Vamp8        | 121    | 119     | 124    | 101    | 118   | 106   | 115   | 133     |
| 29752     | Fau          | 3395.2 | 3238.4  | 3139.5 | 2391.6 | 3180  | 2825  | 2811  | 3531.67 |
| 406866    | Ly6g6e       | 100.93 | 92.69   | 174.35 | 50     | 87.21 | 151.5 | 111.6 | 74      |
| 84591     | Pick1        | 388    | 402     | 394    | 337    | 361   | 388   | 401   | 394     |
| 308390    | Fkrp         | 663    | 667     | 621    | 627    | 703   | 665   | 649   | 600     |
| 365388    | Psmd13       | 1849   | 1794    | 1788   | 1570   | 1752  | 1773  | 1851  | 1731    |
| 360946    | Zcchc4       | 131.73 | 116.36  | 124.06 | 116.98 | 124.7 | 129.8 | 124.1 | 117.97  |
| 302817    | Enox2        | 145    | 135     | 186    | 128    | 151   | 152   | 160   | 140     |
| 683983    | Nup43        | 191    | 203     | 201    | 196    | 171   | 174   | 217   | 241     |
| 296480    | Tpd5212      | 1806   | 1839    | 1563   | 1581   | 1636  | 1613  | 1835  | 1808    |

|           |              |        |         |        |        |       |       |       |         |
|-----------|--------------|--------|---------|--------|--------|-------|-------|-------|---------|
| 363519    | Hcfc1        | 997.57 | 1040.3  | 1163.1 | 1343.9 | 1212  | 1044  | 1242  | 1116.2  |
| 81747     | Pi4kb        | 1048   | 1091    | 1092   | 1102   | 1056  | 1133  | 1125  | 1085    |
| 364952    | Nkd1         | 383.5  | 436.39  | 425.68 | 430    | 401.6 | 402   | 453.5 | 444     |
| 304530    | Taok3        | 513    | 499     | 496    | 524    | 528   | 493   | 569   | 473     |
| 291000    | Faf2         | 1364   | 1511    | 1391   | 1435   | 1452  | 1494  | 1418  | 1424    |
| 299261    | Moap1        | 1218.6 | 1048.31 | 967.72 | 986.14 | 1011  | 1081  | 1179  | 1014.34 |
| 312451    | Tcf7l1       | 401    | 390     | 367    | 412    | 412   | 403   | 398   | 381     |
| 360622    | Igfbp4       | 1413.1 | 1290.92 | 1795.7 | 1358.6 | 1807  | 1467  | 1397  | 1276.38 |
| 116504    | Mprip        | 5936   | 7127    | 6697   | 7181   | 6538  | 6862  | 6727  | 7226    |
| 366854    | Fbxo7        | 1018   | 1063    | 1012   | 1022   | 997   | 1043  | 1003  | 1135    |
| 100910275 | LOC100910275 | 1792   | 1908    | 1856.7 | 1964   | 1885  | 1916  | 1853  | 1982.09 |
| 313666    | Zbtb17       | 329    | 305     | 349    | 321    | 356   | 336   | 320   | 312     |
| 117017    | Polr2g       | 772    | 760     | 640    | 631    | 687   | 664   | 737   | 758     |
| 494520    | Ggnbp1       | 18     | 13      | 17     | 17     | 15    | 23    | 22    | 6       |
| 310615    | Crtc2        | 718    | 737     | 679    | 660    | 715   | 733   | 707   | 682     |
| 171145    | Eif2b3       | 418    | 454     | 370    | 317    | 374   | 428   | 390   | 391     |
| 304285    | Tecpr1       | 1742   | 1779    | 1733   | 1753   | 1821  | 1850  | 1713  | 1731    |
| 301020    | Smarcc1      | 846    | 952     | 918    | 1021.8 | 969.9 | 903.5 | 994.1 | 928     |
| 192351    | Fbxo6        | 505    | 559     | 534    | 474    | 490   | 576   | 507   | 531     |
| 305845    | Mettl17      | 133    | 134     | 127    | 124    | 127   | 127   | 151   | 121     |
| 60661     | Max          | 1152   | 1199    | 1153   | 1153   | 1190  | 1123  | 1187  | 1229    |
| 246117    | Mcfd2        | 408    | 420     | 418    | 370    | 393   | 420   | 402   | 426     |
| 299201    | Dlst         | 3149.5 | 2821.3  | 2747   | 2946   | 2928  | 2869  | 3028  | 3018.92 |
| 373545    | Prkag2       | 1794   | 1839.68 | 1801.3 | 1853.7 | 1956  | 1830  | 1830  | 1785.41 |
| 245709    | Exoc8        | 453    | 483     | 457.35 | 580.05 | 523   | 468   | 492   | 521.01  |
| 79433     | Myh10        | 3893.8 | 3912.2  | 3901.9 | 5017.4 | 4337  | 4237  | 4484  | 3927.3  |
| 29381     | Acvrlb       | 484.59 | 496.3   | 454.93 | 568.55 | 576   | 481.9 | 508   | 469.66  |
| 500280    | Lrrn1        | 6274.9 | 4994.34 | 5269.4 | 6347.3 | 5861  | 5531  | 5925  | 5925.99 |
| 363259    | Obsl1        | 442    | 402     | 380    | 445    | 400   | 440   | 410   | 445     |
| 83688     | Taldo1       | 2345   | 2353    | 2329   | 2069   | 2209  | 2341  | 2406  | 2282    |
| 81715     | Camlg        | 982    | 948     | 891    | 810    | 889   | 853   | 1031  | 915     |
| 299691    | Cry1         | 132    | 119     | 117    | 141    | 114   | 130   | 158   | 115     |
| 296973    | Bpgm         | 1046   | 1129    | 1282   | 869    | 1100  | 1176  | 1050  | 1068    |
| 301552    | Mrpl44       | 401    | 375     | 344    | 342    | 378   | 342   | 384   | 381     |
| 362358    | Krbal        | 410    | 418     | 411    | 413    | 422   | 439   | 408   | 409     |
| 362666    | Dnajc11      | 1137   | 1260    | 1128   | 1167   | 1236  | 1224  | 1162  | 1144    |
| 307642    | Cfap20       | 799    | 798     | 868    | 700    | 708   | 804   | 890   | 813     |
| 287840    | Ubald2       | 571.82 | 570.84  | 585.76 | 547.87 | 592.9 | 605.8 | 532.8 | 580.85  |
| 292814    | Pdcd5        | 1004   | 929.27  | 885.27 | 674.54 | 870.5 | 883   | 875.3 | 919.54  |
| 171131    | Chrn3        | 981    | 1090    | 817    | 1152   | 1184  | 884   | 982   | 1054    |
| 499814    | Ttc30b       | 308.71 | 313.62  | 254.22 | 261.02 | 252.5 | 292.3 | 310.9 | 299.86  |
| 102553032 | LOC102553032 | 1.26   | 0       | 0      | 0      | 0     | 1.28  | 0     | 0       |
| 306766    | LOC306766    | 2350.9 | 2346.92 | 2205.9 | 2290   | 2167  | 2492  | 2353  | 2327.92 |
| 501201    | Tmem200c     | 243    | 160.99  | 227    | 188    | 193   | 226   | 246   | 167     |
| 287835    | Galk1        | 453    | 406     | 407    | 370    | 393   | 419   | 416   | 434     |
| 500555    | Zcchc17      | 1281.9 | 1211.78 | 1167.6 | 1131   | 1240  | 1186  | 1232  | 1210.95 |
| 308703    | Lrrk1        | 333.9  | 320.6   | 402.88 | 364.67 | 348.5 | 362.1 | 395.7 | 338.35  |
| 361728    | Tmem138      | 85     | 95      | 72     | 62     | 69    | 85    | 80    | 85      |
| 103690884 | LOC103690884 | 110.64 | 155.49  | 225.51 | 207.94 | 157.4 | 198.9 | 203.4 | 151.1   |
| 315189    | Prr5         | 550    | 541     | 491    | 553    | 539   | 610   | 494   | 526     |
| 685448    | Pcp4l1       | 628.26 | 447.98  | 581.03 | 583.02 | 591.7 | 568.1 | 540.2 | 576     |
| 54234     | Cacnale      | 308.9  | 322.77  | 324.28 | 330.96 | 356.8 | 298.6 | 354.1 | 297.98  |
| 308709    | Synm         | 7860   | 8576    | 8515   | 8447   | 8815  | 8168  | 8851  | 8097    |
| 100158225 | Tedc2        | 166.76 | 183.51  | 189.64 | 152.11 | 192.2 | 149   | 172.9 | 189.01  |
| 317247    | Nap112       | 2055   | 1973    | 1737   | 1938   | 2062  | 1835  | 2017  | 1912    |
| 365155    | Prdm9        | 36     | 34      | 20     | 35     | 33    | 26    | 34    | 34      |

|           |              |        |         |        |        |       |       |       |         |
|-----------|--------------|--------|---------|--------|--------|-------|-------|-------|---------|
| 114700    | Cyp27b1      | 14.44  | 5.75    | 10.75  | 5.27   | 8.75  | 10.43 | 8.52  | 9.09    |
| 294691    | Naip5        | 259.47 | 226.67  | 236.51 | 267.66 | 301.3 | 254.5 | 258.2 | 192.27  |
| 314623    | Midn         | 1082   | 1170    | 1348   | 1315   | 1277  | 1282  | 1170  | 1265    |
| 366012    | Trub2        | 370    | 350     | 374    | 337    | 412   | 367   | 355   | 320     |
| 102551518 | LOC102551518 | 110    | 106     | 142    | 139    | 120   | 121   | 137   | 127     |
| 29154     | Capn2        | 6791   | 6806    | 6689   | 6919   | 6847  | 7047  | 7033  | 6716    |
| 83499     | Psm4         | 2271   | 2219    | 1968   | 1864   | 2236  | 2072  | 2087  | 2061    |
| 362246    | Tp53inp2     | 1903   | 1902    | 1986   | 1966   | 1862  | 2069  | 1881  | 2070    |
| 686980    | Srrt         | 812    | 824     | 928    | 786    | 848   | 904   | 851   | 801     |
| 161476    | Hspb2        | 195    | 224     | 194    | 193    | 153   | 210   | 223   | 233     |
| 25480     | Mip          | 187.02 | 139.72  | 159.78 | 130.29 | 206.2 | 136.6 | 128.7 | 155.24  |
| 29513     | Mapk13       | 26.18  | 19.35   | 44.51  | 24.5   | 35.48 | 14.92 | 39.69 | 26.3    |
| 307859    | Chst5        | 138    | 156     | 122    | 139    | 161   | 125   | 127   | 151     |
| 362194    | Bahd1        | 969    | 1072    | 1058   | 1159   | 1158  | 1165  | 987   | 1017    |
| 360630    | Naglu        | 286    | 336     | 354    | 257    | 305   | 305   | 315   | 328     |
| 289508    | Rchyl        | 548.19 | 554.22  | 515.43 | 484.41 | 497.2 | 519.9 | 538.9 | 580.37  |
| 297393    | Nagk         | 1068.6 | 951.12  | 997.58 | 846.1  | 984.2 | 937.4 | 989.4 | 1015.19 |
| 117096    | Nlgn2        | 1276   | 1291    | 1361   | 1481   | 1433  | 1371  | 1432  | 1261    |
| 24787     | Sod2         | 3522   | 3467    | 3249   | 3829   | 3402  | 3139  | 3984  | 3771    |
| 59106     | Ltbp2        | 114    | 107     | 133    | 137    | 138   | 151   | 83    | 127     |
| 288718    | Tfip11       | 732.65 | 793.31  | 733.67 | 753.6  | 766.4 | 782.3 | 737.6 | 776.05  |
| 304522    | Fbxw8        | 1276   | 1272    | 1252   | 1225   | 1289  | 1368  | 1203  | 1247    |
| 65142     | Arl2         | 817    | 820     | 727    | 700    | 754   | 765   | 783   | 812     |
| 89817     | Sh2b1        | 926    | 834     | 902    | 892    | 958   | 923   | 823   | 908     |
| 360967    | Rnf185       | 542    | 492     | 532    | 516    | 496   | 552   | 537   | 531     |
| 60586     | Clcn4        | 2685.4 | 2505.95 | 2440.3 | 2624   | 2619  | 2626  | 2735  | 2443.1  |
| 29715     | Slc8a1       | 461    | 466     | 468    | 479.99 | 500   | 534.7 | 443   | 427.95  |
| 307199    | Cd226        | 43     | 42      | 45     | 53     | 50    | 44    | 49    | 43      |
| 362865    | Gnptab       | 1401.1 | 1442.18 | 1422   | 1495.3 | 1563  | 1381  | 1441  | 1470.68 |
| 287656    | Mrpl45       | 994.42 | 912.48  | 833.64 | 776.31 | 952.1 | 873   | 893.6 | 855.96  |
| 294456    | Nt5dc1       | 127    | 108     | 123    | 129    | 123   | 98    | 114   | 160     |
| 24629     | Pdgfrb       | 1156   | 1190    | 1460   | 1122   | 1099  | 1431  | 1267  | 1212    |
| 295395    | Rtca         | 1626   | 1549    | 1402   | 1263   | 1551  | 1432  | 1446  | 1507    |
| 65040     | Dlgap1       | 575.99 | 634.99  | 509    | 651    | 611   | 595   | 594   | 609.99  |
| 360515    | Clint1       | 1517   | 1616    | 1613   | 1692   | 1658  | 1594  | 1707  | 1585    |
| 288985    | Insig2       | 346.68 | 361.36  | 328.26 | 271.93 | 337.2 | 309.4 | 373.5 | 309.68  |
| 311456    | Mkks         | 769    | 657     | 601    | 640    | 646   | 652   | 673   | 740     |
| 314961    | Asap1        | 2116   | 2395    | 2309   | 2749   | 2475  | 2331  | 2419  | 2502    |
| 414784    | RT1-T24-4    | 677.11 | 610.13  | 661.69 | 545.27 | 725   | 842.1 | 453.1 | 515.09  |
| 171500    | Stau2        | 3206   | 3282    | 2983   | 3275   | 3374  | 3138  | 3397  | 3048    |
| 308961    | Dctn5        | 2158   | 2185    | 1994   | 1877   | 2081  | 2017  | 2183  | 2069    |
| 294881    | Slc7a12      | 2.83   | 2.07    | 0      | 2.95   | 1.95  | 2     | 2.03  | 2       |
| 366909    | Slc26a10     | 73.05  | 60.35   | 78.14  | 73.62  | 71.66 | 86.41 | 60.29 | 71.53   |
| 684028    | Cryga        | 62     | 70      | 43     | 66     | 77    | 68    | 51    | 49      |
| 25055     | Lipa         | 3212.5 | 3391.36 | 2549.7 | 3179.1 | 3036  | 3008  | 3287  | 3205.67 |
| 64476     | Mfn2         | 3089.5 | 3357.34 | 3355.5 | 3587   | 3444  | 3419  | 3393  | 3355.14 |
| 304293    | Zfp316       | 213    | 215     | 221    | 193    | 210   | 222   | 217   | 207     |
| 286988    | Pnrc1        | 842    | 841     | 803    | 881    | 876   | 838   | 858   | 851     |
| 690343    | Zfp141       | 185    | 127     | 142    | 133    | 150   | 169   | 139.8 | 138     |
| 291659    | Ik           | 2144   | 2077    | 2000   | 2070   | 2112  | 2059  | 2236  | 2022    |
| 362891    | Os9          | 3472   | 3664    | 3742   | 3599   | 3745  | 3778  | 3646  | 3549    |
| 100362022 | Zfp27        | 102.54 | 47.42   | 156.02 | 116.78 | 90.59 | 73.96 | 144   | 121.24  |
| 102554066 | LOC102554066 | 12     | 19      | 12     | 17     | 18    | 13    | 16    | 14      |
| 24172     | Adh1         | 31     | 9       | 8      | 12     | 19    | 19    | 8     | 15      |
| 93646     | Sec31a       | 1373   | 1529    | 1626   | 1769   | 1519  | 1769  | 1575  | 1539    |
| 94269     | Fez2         | 1310   | 1352    | 1271   | 1342   | 1291  | 1317  | 1340  | 1415    |

|           |              |        |         |        |        |       |       |       |          |
|-----------|--------------|--------|---------|--------|--------|-------|-------|-------|----------|
| 301062    | Exog         | 365.53 | 349.13  | 362.41 | 324.78 | 374.8 | 327.2 | 360   | 363.26   |
| 25652     | Ptgfr        | 310    | 249     | 280    | 358    | 330   | 245   | 301   | 341      |
| 245958    | Atp5fle      | 1845   | 1629    | 1712   | 1326   | 1632  | 1582  | 1632  | 1775     |
| 294512    | Ascc1        | 502.14 | 507.18  | 466.23 | 450.06 | 457.6 | 449.6 | 553.5 | 497.2    |
| 500990    | LOC500990    | 3.11   | 2.55    | 2.31   | 0.98   | 2.06  | 4.18  | 2.86  | 0        |
| 317598    | Mcf2         | 87     | 88      | 75     | 108    | 75    | 90    | 101   | 98       |
| 689397    | Sssca1       | 766    | 810     | 757    | 649    | 779   | 842   | 716   | 695      |
| 313843    | Galm         | 338.18 | 311.86  | 335    | 333.46 | 332.3 | 326.5 | 329.6 | 352.36   |
| 298096    | Wdr31        | 57     | 81      | 51     | 49     | 66    | 61    | 43    | 72       |
| 314214    | L3hypdh      | 35     | 22      | 23     | 39     | 22    | 29    | 36    | 34       |
| 317580    | Rab33a       | 249.47 | 269.58  | 245.23 | 206.51 | 267.1 | 216.1 | 224.6 | 279.31   |
| 292762    | Eif3k        | 1176.9 | 1171    | 1132   | 1039   | 1198  | 1137  | 1115  | 1145     |
| 117039    | Gps1         | 2042   | 2013    | 1851   | 1935   | 2014  | 1973  | 1967  | 2019     |
| 246144    | I13ra        | 179    | 164     | 164    | 146    | 171   | 176   | 162   | 155      |
| 24957     | Glul         | 5566   | 4710    | 4364   | 5483   | 4836  | 5545  | 4969  | 5112     |
| 100911519 | LOC100911519 | 100.5  | 115.48  | 138.68 | 109.97 | 123.1 | 127.5 | 124.1 | 97.7     |
| 312652    | Plxnd1       | 2733   | 2776.98 | 2883.9 | 3038   | 2912  | 2921  | 2923  | 2868.94  |
| 140937    | Higd1a       | 865    | 797     | 677    | 676    | 778   | 711   | 739   | 838      |
| 308061    | Pdcd6        | 1003   | 965     | 919    | 835    | 861   | 950   | 955   | 1019     |
| 191573    | Grin3a       | 59     | 79      | 71     | 86     | 85    | 63    | 85    | 67       |
| 500545    | Cdca8        | 53     | 62      | 65     | 56     | 69    | 66    | 63    | 42       |
| 288240    | Hlcs         | 961.55 | 895.61  | 867.17 | 1034.8 | 1013  | 979.4 | 896.5 | 934.1    |
| 171384    | Trpm8        | 2248.2 | 2116.56 | 2058   | 2209.4 | 2138  | 2080  | 2349  | 2211.99  |
| 60381     | Tsn          | 303    | 292     | 250    | 274    | 291   | 258   | 315   | 274      |
| 306255    | Nisch        | 8528   | 8935    | 9446   | 9698   | 9705  | 9438  | 9181  | 8905     |
| 304579    | Usp30        | 462    | 514     | 493    | 473    | 456   | 522   | 484   | 513      |
| 311414    | Zc3h8        | 151    | 160     | 147    | 130    | 133   | 141   | 151   | 173      |
| 300259    | Aaas         | 324    | 315     | 347    | 304    | 310   | 355   | 322   | 325      |
| 502531    | Eif2a        | 729.37 | 679     | 699.02 | 722.43 | 684.1 | 705   | 748   | 741      |
| 108351076 | LOC108351076 | 60.03  | 42.1    | 99.35  | 58.63  | 70.44 | 74.27 | 76.39 | 43.46    |
| 299295    | Setd3        | 3507.9 | 3510.01 | 3426.7 | 3481.2 | 3535  | 3562  | 3584  | 3482.72  |
| 64559     | Slc22a23     | 1880   | 1827.63 | 1935.4 | 2048.8 | 1947  | 2125  | 1933  | 1819.96  |
| 293180    | Micalcl      | 15     | 14      | 15     | 14     | 12    | 18    | 15    | 14       |
| 311113    | Ccdc173      | 15     | 13      | 12     | 18     | 17    | 15    | 16    | 11       |
| 361102    | Polr3a       | 608    | 657     | 591    | 694    | 592   | 701   | 657   | 644      |
| 100361574 | Polr2k       | 505    | 447     | 415    | 370    | 409   | 456   | 440   | 462      |
| 100362005 | Grcc10       | 1676   | 1539    | 1481   | 1223.6 | 1479  | 1441  | 1499  | 1603     |
| 500126    | Hoxa7        | 167.27 | 177.03  | 172.19 | 226.38 | 215.3 | 187.1 | 155.1 | 198.23   |
| 302395    | Abcb7        | 146    | 145     | 137    | 149    | 159   | 108   | 168   | 152      |
| 364838    | Reep5        | 29742  | 30337.1 | 27362  | 29740  | 30693 | 30408 | 28636 | 29475.26 |
| 29642     | Slc38a2      | 5394   | 4972    | 4734   | 5433   | 5001  | 5396  | 5351  | 5141     |
| 287146    | Chtf18       | 38     | 55      | 35     | 51     | 47.57 | 48    | 32    | 54.54    |
| 100360621 | I14i1        | 102.45 | 89.54   | 80.73  | 78.74  | 111   | 86.97 | 76.33 | 83.32    |
| 117035    | Slc25a20     | 902    | 939     | 840    | 764    | 842   | 817   | 956   | 890      |
| 303653    | Cdc42ep4     | 975    | 920     | 1006   | 831    | 940   | 986   | 988   | 883      |
| 294288    | Cuta         | 874    | 803     | 888    | 762    | 857   | 852   | 817   | 859      |
| 301514    | Bcs11        | 204    | 214     | 190    | 194    | 196   | 193   | 237   | 190      |
| 117536    | Nsmf         | 1866   | 1682    | 1654   | 1612   | 1690  | 1846  | 1753  | 1644     |
| 691534    | Nop10        | 2335   | 2125    | 2135   | 1822   | 2074  | 2091  | 2059  | 2340     |
| 102556781 | LOC102556781 | 5      | 3       | 1.03   | 7      | 2     | 2.31  | 4     | 8        |
| 100361774 | Ralgps1      | 186.17 | 176.25  | 157.38 | 206.56 | 216.9 | 169   | 164.2 | 189.04   |
| 54348     | Stk39        | 4454   | 4592    | 4202   | 4714   | 4602  | 4570  | 4736  | 4368     |
| 316102    | Lztf11       | 383    | 340     | 368    | 339    | 340   | 311   | 378   | 426      |
| 292228    | Tmem242      | 591.61 | 578.53  | 568.27 | 501.55 | 599.8 | 525.4 | 583.3 | 570.64   |
| 171566    | Nme7         | 359.91 | 345.43  | 334.87 | 313.6  | 323   | 329.1 | 390.4 | 335.04   |
| 308857    | Dnajb13      | 57.5   | 58.78   | 45.09  | 37.71  | 45.14 | 45    | 55.63 | 56.8     |



|        |           |        |         |        |        |       |       |       |         |
|--------|-----------|--------|---------|--------|--------|-------|-------|-------|---------|
| 114004 | Ppplr14a  | 63     | 64      | 49     | 52     | 50    | 64    | 57    | 61      |
| 361565 | Vrk3      | 579    | 590     | 502    | 551    | 599   | 547   | 546   | 569     |
| 501584 | Amer1     | 307    | 306     | 304    | 392    | 395   | 277   | 341   | 319     |
| 362238 | Duspl5    | 2944   | 3127.95 | 2938   | 3052.9 | 2869  | 3560  | 2853  | 2993    |
| 289021 | Pik3c2b   | 221    | 199     | 195    | 238    | 246   | 219   | 198   | 205     |
| 362149 | Cir1      | 616.05 | 577.27  | 599.45 | 593.26 | 658.2 | 603.8 | 608.5 | 557.53  |
| 25176  | Slc25a5   | 4082   | 4116    | 3737   | 3702   | 3664  | 3886  | 4103  | 4259    |
| 294380 | Lrrtm3    | 86.65  | 78.15   | 73.36  | 94.44  | 81.7  | 73.12 | 99.51 | 84.12   |
| 297459 | Mrps25    | 388    | 364     | 283    | 329    | 364   | 309   | 378   | 337     |
| 314224 | Tmem30b   | 234    | 240     | 232    | 259    | 255   | 245   | 217   | 265     |
| 309911 | Qrs11     | 143    | 126     | 111    | 130    | 119   | 121   | 131   | 148     |
| 445371 | Kcnk18    | 181    | 209     | 188    | 215    | 249   | 182   | 162   | 214     |
| 316033 | Glb1      | 615.23 | 740.51  | 860.04 | 750.24 | 771.7 | 796.2 | 780.3 | 670.16  |
| 303478 | Ube2z     | 2604   | 2666    | 2664   | 2746   | 2629  | 2716  | 2721  | 2803    |
| 170917 | Cry2      | 1706.6 | 1774.81 | 1618.5 | 1661   | 1820  | 1795  | 1664  | 1602.42 |
| 301242 | Ptk7      | 623    | 750     | 721    | 785    | 773   | 741   | 695   | 721     |
| 314897 | Ppmlh     | 1065   | 988     | 963    | 1161   | 1222  | 1068  | 1010  | 951     |
| 299628 | Mrpl54    | 648    | 589     | 551    | 526    | 555   | 539   | 573   | 688     |
| 24780  | Slc4a2    | 1699.4 | 1685.02 | 1757.9 | 1901.6 | 1846  | 1923  | 1780  | 1620.06 |
| 24260  | Chrm3     | 74     | 84      | 82     | 98     | 95    | 74    | 102   | 73      |
| 50599  | Kcnj3     | 318    | 278     | 271    | 372    | 345   | 326   | 315   | 275     |
| 689197 | Kin       | 124    | 95      | 91     | 84     | 78    | 106   | 99    | 118     |
| 25566  | Tmod1     | 3675   | 3483.35 | 3379.5 | 3499.8 | 3635  | 3497  | 3598  | 3557.81 |
| 683420 | LOC683420 | 363.71 | 375.2   | 370.06 | 269.13 | 344   | 403   | 319   | 336.71  |
| 294258 | Nelfe     | 420    | 433     | 397    | 374    | 407   | 403   | 437   | 406     |
| 500475 | LOC500475 | 84     | 98      | 72     | 82     | 83    | 89    | 94    | 76      |
| 308201 | Riok2     | 319    | 333     | 291    | 288    | 328   | 280   | 346   | 299     |
| 361434 | Cdk10     | 895    | 837     | 845    | 832    | 869   | 849   | 854   | 898     |
| 681021 | Paqr6     | 1305   | 1401    | 1312   | 1174   | 1105  | 1461  | 1295  | 1424    |
| 306030 | Med4      | 333    | 333     | 302    | 260    | 334   | 308   | 323   | 285     |
| 313524 | Zswim5    | 702    | 686     | 646    | 700    | 676   | 693   | 691   | 723     |
| 316333 | Actr1b    | 4656   | 4596    | 4840   | 4264   | 4811  | 4569  | 4669  | 4636    |
| 64639  | Bad       | 528    | 445     | 434    | 434    | 427   | 484   | 455   | 508     |
| 685079 | Sys1      | 331.96 | 363.25  | 318    | 290.39 | 331   | 339   | 339   | 318     |
| 192117 | Syngap1   | 340    | 379     | 402    | 438    | 436   | 416   | 369   | 366     |
| 300519 | Esam      | 185    | 196     | 242    | 212    | 186   | 249   | 246   | 169     |
| 60564  | Syt9      | 687    | 850     | 733    | 791    | 873   | 720   | 747   | 776     |
| 312826 | Cmas      | 2432   | 2373    | 2301   | 2178   | 2395  | 2269  | 2394  | 2393    |
| 54281  | Furin     | 824    | 786     | 907    | 761    | 827   | 857   | 859   | 794     |
| 292535 | Leng1     | 226.24 | 241.67  | 222.2  | 218.13 | 218.9 | 222.7 | 245.2 | 237.81  |
| 292944 | Reps1     | 797.35 | 818.94  | 733.22 | 757.77 | 778.9 | 829.1 | 798   | 757.42  |
| 304503 | Hectd4    | 3007   | 3323    | 3351   | 3872   | 3639  | 3691  | 3229  | 3239    |
| 316242 | Tctel1    | 532.76 | 572.31  | 481.34 | 482.49 | 605.1 | 521.2 | 468.9 | 511.15  |
| 296583 | Nacc2     | 5553.1 | 5644.98 | 5677.5 | 6248.3 | 6300  | 5871  | 5889  | 5482.69 |
| 171297 | Nlgn3     | 812    | 910     | 907    | 1071   | 1010  | 936   | 930   | 891     |
| 315851 | Elovl4    | 1470   | 1578.95 | 1343.3 | 1416.9 | 1503  | 1459  | 1513  | 1440.6  |
| 314304 | Acot3     | 178.68 | 234.92  | 181.94 | 175.3  | 228.3 | 203.4 | 173.4 | 179.81  |
| 29667  | Srsf5     | 2490   | 2619    | 2551   | 2276   | 2457  | 2339  | 2735  | 2585    |
| 308837 | Ints4     | 907    | 887     | 847    | 947    | 887   | 916   | 947   | 903     |
| 308875 | Rhog      | 1000   | 1092    | 1138   | 909    | 1054  | 1088  | 989   | 1083    |
| 680933 | LOC680933 | 104.84 | 87.22   | 77.31  | 85.48  | 86.99 | 89.15 | 95.06 | 90.08   |
| 498805 | Thns11    | 160    | 170     | 149    | 183    | 163   | 185   | 159   | 167     |
| 303356 | Tmem98    | 138    | 112     | 142    | 104    | 122   | 153   | 121   | 109     |
| 309444 | Fbxw4     | 549.48 | 510.81  | 528.03 | 460.38 | 506.4 | 560.4 | 513.7 | 505.43  |
| 79210  | Fst11     | 34572  | 33494   | 35645  | 34864  | 35763 | 35274 | 35531 | 34522   |
| 84578  | Hdac3     | 802    | 827     | 783    | 728    | 730   | 839   | 833   | 795     |

|           |                 |        |         |        |        |       |       |       |         |
|-----------|-----------------|--------|---------|--------|--------|-------|-------|-------|---------|
| 288025    | Hrasls          | 30     | 53.05   | 39     | 53     | 41    | 51    | 55.98 | 30.25   |
| 293852    | Bcap31          | 3141.3 | 3020.25 | 2788   | 2749   | 2845  | 2854  | 3033  | 3179.38 |
| 113965    | Hadh            | 1383   | 1413    | 1315   | 1225   | 1249  | 1390  | 1389  | 1405    |
| 108351584 | LOC108351584    | 256    | 208     | 193    | 168    | 170   | 205   | 226   | 239     |
| 64619     | Zbtb18          | 1152   | 1103    | 1088   | 1208   | 1109  | 1213  | 1195  | 1117    |
| 257648    | Cacnalb         | 2643   | 2701    | 2750   | 2926   | 3060  | 2754  | 2724  | 2683    |
| 297832    | Cntnap5a        | 13.61  | 13.11   | 9.03   | 15.23  | 16.52 | 9.49  | 9.05  | 16.85   |
| 361987    | Dennd4b         | 812    | 844     | 935    | 914    | 970   | 841   | 950   | 808     |
| 360871    | Mpz11           | 966    | 991     | 1001   | 983    | 988   | 1012  | 1043  | 970     |
| 140868    | Fabp5           | 3614   | 3419    | 3576   | 3093   | 3684  | 3168  | 3384  | 3717    |
| 503165    | Arfgap3         | 1125   | 1081    | 1062   | 1043   | 1129  | 1116  | 1146  | 999     |
| 24426     | Gstpl           | 1940.9 | 1983.59 | 1935.7 | 1651.1 | 1861  | 1909  | 1910  | 1969.31 |
| 298784    | Nlrc4           | 16.38  | 19.48   | 21.09  | 28.08  | 6.1   | 10    | 38.39 | 32.1    |
| 81636     | Adcy2           | 421    | 406     | 394    | 414    | 440   | 417   | 417   | 391     |
| 297082    | Malsul          | 310    | 263     | 253    | 209    | 281   | 263   | 258   | 252     |
| 171378    | Ppp3cc          | 746.97 | 666.78  | 705.22 | 730.97 | 782   | 675.7 | 696.9 | 747.67  |
| 100911374 | LOC100911374    | 177.65 | 210.42  | 159.13 | 192.57 | 217.1 | 152.1 | 200.7 | 183.52  |
| 360834    | Vps4b           | 1985   | 2121    | 1955   | 1934   | 1939  | 2006  | 2171  | 2026    |
| 500270    | Ier3ipl         | 35     | 47      | 46     | 35     | 37    | 45    | 36    | 48      |
| 619436    | Med24           | 1042   | 1067    | 1135   | 1089   | 1011  | 1181  | 1154  | 1067    |
| 362648    | Arhgef19        | 196    | 203     | 202    | 211    | 203   | 203   | 224   | 197     |
| 116479    | F11r            | 265.76 | 217.07  | 267.66 | 253.65 | 288.2 | 250.6 | 257.4 | 226.57  |
| 689314    | Mapk11          | 1374   | 1372    | 1432   | 1232   | 1478  | 1371  | 1369  | 1292    |
| 301579    | Armc9           | 621.12 | 581.07  | 615.5  | 594.1  | 562   | 631.5 | 645.5 | 617.34  |
| 296211    | Ralgapa2        | 620    | 700     | 561    | 818    | 707   | 619   | 759   | 664     |
| 309025    | Tacc2           | 1059   | 1270    | 1185   | 1342   | 1238  | 1295  | 1282  | 1131    |
| 64520     | Mtal            | 1052   | 1048    | 1090   | 1071   | 1052  | 1206  | 1073  | 1009    |
| 246047    | Calcocol        | 846.52 | 834.05  | 940.52 | 992    | 898.5 | 926.1 | 937   | 918.52  |
| 100909955 | LOC100909955    | 1      | 2       | 1.01   | 3      | 0     | 3     | 4.14  | 0       |
| 103693219 | NEWGENE_1308196 | 474.21 | 464.18  | 425.66 | 414.13 | 473.8 | 405.7 | 446.2 | 485.49  |
| 85482     | Nbn             | 1000   | 904     | 982    | 828    | 1054  | 850   | 976   | 903     |
| 50558     | Npepps          | 3705   | 3774    | 3674   | 4052   | 3953  | 3900  | 3829  | 3806    |
| 305471    | Patz1           | 533    | 538     | 509    | 515    | 527   | 586   | 479   | 542     |
| 89823     | Trpc6           | 96     | 86      | 81     | 113    | 85    | 106   | 68    | 124     |
| 308218    | Fam120b         | 1354.9 | 1381.7  | 1310.4 | 1562.9 | 1398  | 1416  | 1456  | 1444.56 |
| 363045    | Siae            | 359    | 347     | 355    | 333    | 327   | 373   | 373   | 347     |
| 312200    | Tmem209         | 271    | 333     | 303    | 326    | 296   | 324   | 301   | 335     |
| 361384    | Dnajb1          | 1189   | 1055    | 1085   | 1170   | 1098  | 1151  | 1196  | 1138    |
| 293408    | Hbs11           | 2728   | 2781    | 2438   | 2601   | 2658  | 2579  | 2811  | 2697    |
| 81674     | Gtf2f2          | 195    | 182     | 169    | 150    | 179   | 175   | 175   | 180     |
| 305464    | Depdc5          | 1656.2 | 1584.84 | 1548.9 | 1797.1 | 1761  | 1700  | 1658  | 1591.18 |
| 64511     | Fntb            | 1203   | 961     | 1326   | 1158   | 1265  | 1236  | 1024  | 1210    |
| 367302    | Kcne4           | 204    | 157     | 149    | 184    | 175   | 165   | 218   | 149     |
| 313346    | Focad           | 733.56 | 746.72  | 769.82 | 807.26 | 794.6 | 801.9 | 775.6 | 742.63  |
| 65038     | Inpp11          | 1002.8 | 883.93  | 958.75 | 987.85 | 913.9 | 1018  | 975.7 | 997.58  |
| 81024     | Ical            | 840    | 868     | 744    | 794    | 860   | 802   | 881   | 764     |
| 282826    | Elac2           | 617    | 602     | 624    | 711    | 652   | 664   | 700   | 586     |
| 29233     | Clcn7           | 800    | 850     | 852    | 842    | 857   | 889   | 831   | 830     |
| 294252    | Msh5            | 21     | 8       | 13     | 11     | 13    | 17    | 13    | 11      |
| 64896     | Nolc1           | 1853   | 2075    | 2131   | 2209   | 2053  | 2190  | 2090  | 2091    |
| 80977     | Syt13           | 19     | 5       | 13     | 16     | 10    | 9     | 15    | 20      |
| 500420    | Tstd3           | 895.3  | 728.66  | 850.93 | 904.77 | 899   | 722.4 | 886.9 | 935.14  |
| 366434    | Btf3l4          | 449    | 455     | 470    | 372    | 438   | 446   | 441   | 454     |
| 690195    | Primal          | 411    | 476.01  | 421.92 | 474.55 | 440.5 | 504   | 400.8 | 471.93  |
| 300988    | Tex264          | 1136   | 1222    | 1147   | 1044   | 1144  | 1159  | 1131  | 1201    |
| 114557    | Wif1            | 116    | 110     | 105    | 92     | 108   | 118   | 111   | 94      |

|           |              |        |         |        |        |       |       |       |         |
|-----------|--------------|--------|---------|--------|--------|-------|-------|-------|---------|
| 362384    | Reep1        | 13805  | 13437   | 12745  | 13045  | 14037 | 13118 | 13659 | 13221   |
| 79462     | Txn2         | 1016   | 932     | 939    | 858    | 896   | 1000  | 961   | 959     |
| 363481    | Hdac8        | 151.86 | 138.02  | 137.41 | 155.46 | 145.5 | 142.9 | 156.5 | 148.87  |
| 360874    | Tada1        | 248    | 261     | 235    | 205    | 230   | 230   | 248   | 259     |
| 498945    | Zfp90        | 214.36 | 226.25  | 240.75 | 193.44 | 245.6 | 218.2 | 221.8 | 205.76  |
| 290843    | Gpat4        | 1183   | 1101    | 1100   | 1145   | 1099  | 1167  | 1164  | 1185    |
| 310803    | Ext12        | 1266.3 | 1235.22 | 964.43 | 1342.3 | 1242  | 1176  | 1276  | 1206.07 |
| 304645    | Tbc1d9       | 2308   | 2480    | 2360   | 2586   | 2541  | 2474  | 2525  | 2379    |
| 366004    | Rnf224       | 2.02   | 3.99    | 0.83   | 0      | 3.03  | 1.42  | 2.52  | 0       |
| 100909954 | LOC100909954 | 327    | 294     | 271    | 302    | 392.9 | 249.3 | 302.6 | 271.92  |
| 29340     | Prkce        | 1679   | 1731    | 1669   | 1962   | 1989  | 1749  | 1742  | 1695    |
| 295686    | Ube2e3       | 1147.3 | 1150.64 | 1109.4 | 1084.9 | 1046  | 1138  | 1169  | 1224.67 |
| 293129    | Alg8         | 153    | 144     | 143    | 137    | 147   | 155   | 152   | 134     |
| 266689    | Cyp4f6       | 320.33 | 231.61  | 299.35 | 255.61 | 302.1 | 294   | 240.4 | 291.64  |
| 365389    | Lrrc56       | 28     | 45.94   | 46     | 37     | 39    | 48.94 | 34    | 38      |
| 289264    | Grem2        | 992    | 938     | 876    | 953    | 1010  | 879   | 979   | 963     |
| 300146    | Ppp6r2       | 1806   | 1792    | 1647   | 1694   | 1771  | 1831  | 1773  | 1697    |
| 309828    | Tspyl4       | 2714   | 2563    | 2273   | 2780   | 2866  | 2520  | 2732  | 2410    |
| 78966     | Arhgef11     | 3034.9 | 3087.92 | 2884.3 | 3296.9 | 3224  | 3314  | 3278  | 2723.61 |
| 29677     | Psmc3        | 3478   | 3360    | 3322   | 3081   | 3422  | 3437  | 3324  | 3312    |
| 501702    | Cenpv        | 133    | 120     | 110    | 106    | 111   | 116   | 135   | 116     |
| 58970     | Degs1        | 3179.5 | 3101.22 | 3060   | 3242.2 | 3096  | 3378  | 3161  | 3189.46 |
| 303163    | Igtp         | 204.82 | 186.91  | 223.64 | 197.49 | 161.9 | 201.4 | 200.1 | 265.08  |
| 100360427 | E2f4         | 389    | 411.61  | 389    | 355.03 | 370.6 | 390   | 413   | 400.75  |
| 298300    | Ttc22        | 14     | 14      | 13     | 11     | 9     | 11    | 20    | 13      |
| 287299    | Mfap3        | 135    | 120     | 118    | 147    | 133   | 121   | 130   | 146     |
| 299607    | Med16        | 961    | 1003    | 976    | 894    | 1023  | 932   | 926   | 1027    |
| 689030    | Tbpl1        | 574    | 528     | 485    | 485    | 521   | 497   | 569   | 525     |
| 361126    | Sugp2        | 1505.7 | 1423.41 | 1469.5 | 1562.8 | 1585  | 1534  | 1469  | 1488.33 |
| 290303    | Spryd7       | 1132   | 1138    | 1001   | 1022   | 1116  | 1016  | 1066  | 1178    |
| 315611    | Scn4b        | 8054   | 7597    | 7482   | 8877   | 8464  | 7725  | 8894  | 7546    |
| 361888    | Sreklipl     | 23.72  | 19.54   | 27.67  | 26.77  | 13.33 | 25.21 | 28.35 | 32.7    |
| 292584    | Fiz1         | 407    | 379     | 361    | 352    | 380   | 395   | 368   | 385     |
| 362419    | Tamm41       | 280    | 189     | 238    | 171    | 238   | 219   | 196   | 242     |
| 290527    | Anxa11       | 2285   | 2538    | 2393   | 2644   | 2428  | 2836  | 2455  | 2332    |
| 102548778 | Parp10       | 179.42 | 174.89  | 161.53 | 189.24 | 161.6 | 214.4 | 168.1 | 174.63  |
| 116673    | Sdc3         | 6896   | 7438    | 6555   | 7193   | 7251  | 7610  | 7003  | 6763    |
| 116565    | Lrpap1       | 1474   | 1468    | 1383   | 1487   | 1502  | 1381  | 1553  | 1489    |
| 297388    | Bola3        | 429    | 338     | 279    | 291    | 333   | 373   | 305   | 352     |
| 681024    | Ndufa4       | 4125   | 3859    | 3465   | 3308   | 3542  | 3380  | 3724  | 4398    |
| 64028     | Tsnax        | 2104.7 | 2028    | 1990   | 1833   | 1964  | 2063  | 2115  | 1969    |
| 314046    | Ankmy2       | 1006   | 990     | 966    | 1043   | 1015  | 953   | 1081  | 1034    |
| 252879    | Cdk11b       | 1210   | 1184    | 1294   | 1243   | 1229  | 1348  | 1266  | 1184    |
| 63836     | Actn4        | 5302.6 | 5372.94 | 5768.4 | 5902.2 | 5637  | 5972  | 5720  | 5452.13 |
| 102548559 | Vcpkmt       | 204    | 189     | 199    | 178    | 207   | 191   | 189   | 198     |
| 289159    | Mettl13      | 375    | 451     | 405    | 411    | 452   | 412   | 406   | 404     |
| 246211    | Hsd3b7       | 207.63 | 230.5   | 282.2  | 160.63 | 267.7 | 205.3 | 181.7 | 243.51  |
| 298594    | Rcc2         | 1733   | 1845    | 1846   | 1859   | 1914  | 1985  | 1785  | 1741    |
| 26962     | Rp18         | 3839.2 | 3869.28 | 3814.8 | 3188   | 3635  | 3759  | 3600  | 4005.09 |
| 64363     | Araf         | 1728   | 1735    | 1705   | 1591   | 1606  | 1675  | 1835  | 1775    |
| 25416     | Dpysl2       | 9246   | 11421   | 9047   | 10083  | 9244  | 11455 | 9690  | 10187   |
| 64302     | Rpl4         | 6698   | 6757    | 6951   | 6016   | 6463  | 6826  | 6571  | 7080    |
| 296119    | Dtwd1        | 137    | 122     | 125    | 126    | 145   | 123   | 134   | 118     |
| 685269    | Itga2b       | 50     | 33      | 41     | 29     | 44    | 40    | 39    | 33      |
| 294204    | Olr1750      | 22.62  | 3.47    | 11.79  | 15.5   | 14.77 | 18.42 | 12.82 | 8.42    |
| 307938    | Trim67       | 116.16 | 127     | 114.01 | 159.21 | 141.1 | 121   | 143.5 | 121     |

|           |            |        |         |        |        |       |       |       |         |
|-----------|------------|--------|---------|--------|--------|-------|-------|-------|---------|
| 309643    | Fance      | 307    | 282     | 262    | 211    | 286   | 285   | 237   | 275     |
| 29606     | Pcsk7      | 519    | 498     | 590    | 515    | 544   | 541   | 571   | 508     |
| 681989    | Vipas39    | 875    | 915     | 912    | 783    | 908   | 888   | 928   | 830     |
| 307913    | Gsel       | 405.69 | 495.19  | 412.65 | 517.3  | 514.9 | 459.3 | 462.4 | 430.49  |
| 171113    | Blcap      | 745.51 | 741.08  | 730.87 | 727.25 | 764.1 | 726.6 | 747.7 | 764.8   |
| 309207    | Dagla      | 1842   | 1964    | 2144   | 2195   | 2283  | 2174  | 2012  | 1838    |
| 300677    | Atp5mg     | 2827   | 2710    | 2564   | 2095   | 2349  | 2474  | 2494  | 3082    |
| 288669    | Arpc3      | 2472   | 2441    | 2352   | 1924   | 2144  | 2233  | 2570  | 2425    |
| 361094    | Ubac2      | 528    | 563     | 603    | 512    | 545   | 580   | 552   | 573     |
| 362703    | Wdr43      | 419    | 410     | 407    | 366    | 380   | 369   | 468   | 417     |
| 365684    | Paip1      | 1130   | 1158.99 | 1146   | 1020   | 1102  | 1086  | 1142  | 1214    |
| 291939    | Mmaa       | 104.99 | 146.4   | 127.71 | 134.17 | 135.2 | 126.7 | 122.5 | 139.2   |
| 29701     | Scn11a     | 6324.1 | 6673.01 | 6435   | 6771   | 7121  | 6468  | 6320  | 6819.21 |
| 684830    | Ttc32      | 71     | 56      | 68     | 54     | 38    | 79    | 74    | 63      |
| 500351    | RGD1562378 | 168.6  | 262.89  | 243.73 | 180.64 | 196.5 | 223   | 231.4 | 222.09  |
| 114850    | Wnt7a      | 93     | 111     | 119    | 125    | 113   | 127   | 104   | 113     |
| 691678    | Tmem121    | 207    | 219     | 201    | 169    | 221   | 201   | 186   | 204     |
| 245957    | Ddx46      | 1097   | 973     | 1042   | 1114   | 1153  | 1024  | 1117  | 1017    |
| 29287     | Rps19      | 1883.2 | 1803.68 | 1984.6 | 1272.9 | 1721  | 1678  | 1683  | 2002.37 |
| 300186    | Amigo2     | 389.23 | 404.15  | 389.68 | 377.16 | 353.7 | 445.5 | 423.3 | 369.09  |
| 502176    | LOC502176  | 6.67   | 4.52    | 9.98   | 7.57   | 6.79  | 2.29  | 12.32 | 7.92    |
| 113975    | Pom121     | 810    | 818     | 832    | 907    | 895   | 947   | 794   | 799     |
| 102550196 | Gcnt7      | 25     | 30.02   | 27.27  | 31.02  | 25.37 | 22.15 | 24.1  | 43.98   |
| 501869    | Sh2d1b     | 40.54  | 37.26   | 38.62  | 36.96  | 51.96 | 31.36 | 48.96 | 24.2    |
| 300733    | Tspan3     | 4158   | 3998    | 3684   | 3483   | 3812  | 3829  | 4059  | 3933    |
| 363237    | Wdr12      | 693    | 620     | 542    | 513    | 613   | 582   | 587   | 634     |
| 29648     | Nudc       | 2311   | 2214.05 | 2093   | 2016.6 | 2389  | 2148  | 2100  | 2172.82 |
| 315731    | Larp6      | 309    | 277     | 225    | 272    | 293   | 298   | 267   | 247     |
| 78967     | Mcam       | 4615.7 | 5374.96 | 5989.9 | 5566.6 | 5579  | 5719  | 5744  | 4942.41 |
| 78973     | Senp2      | 1035   | 1121    | 1056   | 1017   | 1103  | 1065  | 1086  | 1061    |
| 24716     | Ret        | 11075  | 11141   | 10748  | 12303  | 12490 | 11612 | 10947 | 11139   |
| 289934    | Oxsm       | 231.44 | 243.02  | 227.05 | 232.6  | 252.9 | 255.1 | 238.3 | 206.77  |
| 307410    | Rbm22      | 538    | 545     | 565    | 514    | 514   | 585   | 581   | 526     |
| 316764    | Mtcl1      | 809    | 812     | 828    | 989    | 905   | 834   | 932   | 837     |
| 315047    | Laptm4b    | 2212   | 2119    | 1957   | 1913   | 2063  | 2429  | 2064  | 1812    |
| 305131    | Lrrc8d     | 1369   | 1342    | 1454   | 1382   | 1381  | 1390  | 1464  | 1425    |
| 288088    | Ndufb4     | 1978   | 1879    | 1710   | 1696   | 1772  | 1778  | 1862  | 1999    |
| 287447    | Ctdnep1    | 1043   | 997     | 1083   | 1045   | 1010  | 1111  | 1056  | 1076    |
| 362524    | Ptpn3      | 977.2  | 944.05  | 949.66 | 905.81 | 966.3 | 973.4 | 946.9 | 967.25  |
| 171365    | Snrpb      | 537    | 491     | 540    | 491    | 526   | 512   | 542   | 521     |
| 289878    | Pde6b      | 9      | 19      | 8      | 13     | 7     | 20    | 11    | 12      |
| 314330    | Cipc       | 1077   | 1065    | 996    | 1076   | 1082  | 1094  | 1078  | 1046    |
| 363855    | Map2k7     | 357    | 395     | 350    | 366    | 376   | 371   | 395   | 356     |
| 287398    | Map2k4     | 1072   | 1035    | 902    | 1100   | 1101  | 982   | 1088  | 1022    |
| 252934    | Cox5a      | 4270   | 3975    | 3491   | 3396   | 3591  | 3642  | 3929  | 4280    |
| 499507    | Fam151b    | 233    | 235     | 245    | 214    | 217   | 249   | 252   | 228     |
| 306012    | Polr3d     | 1161   | 1048    | 1025   | 1005   | 1059  | 1083  | 1120  | 1064    |
| 94198     | Psmbl      | 3418   | 3214    | 2957   | 2689   | 3051  | 3029  | 3192  | 3258    |
| 29219     | Snca       | 1504   | 1143    | 1081   | 1337   | 842   | 1043  | 1035  | 2249    |
| 85242     | Pola2      | 140    | 99      | 110    | 89     | 120   | 114   | 108   | 105     |
| 680549    | Pknnox2    | 784    | 804     | 735    | 882    | 831   | 854   | 805   | 781     |
| 155430    | Hey2       | 832    | 804     | 748    | 866    | 890   | 855   | 813   | 759     |
| 294973    | Acad9      | 774    | 745     | 697    | 740    | 684   | 748   | 834   | 751     |
| 308336    | Zfp580     | 346    | 348     | 395    | 363    | 386   | 342   | 373   | 381     |
| 306549    | Pomk       | 1013.5 | 1071    | 1032   | 1091.3 | 1118  | 1115  | 1045  | 1017.57 |
| 502957    | Ccdc171    | 184.08 | 198.86  | 170.01 | 220.1  | 218.1 | 206   | 179   | 186     |

|           |              |        |         |        |        |       |       |       |          |
|-----------|--------------|--------|---------|--------|--------|-------|-------|-------|----------|
| 362125    | Nr6a1        | 241    | 257     | 253    | 261    | 288   | 247   | 267   | 231      |
| 171503    | Camk1        | 526.9  | 470.36  | 544    | 450.81 | 508.7 | 548.9 | 482.9 | 493      |
| 363662    | Bcas3        | 1022   | 1095    | 1073   | 1236   | 1159  | 1191  | 1111  | 1057     |
| 25179     | Idh3g        | 2520   | 2373    | 2120   | 2173   | 2345  | 2349  | 2412  | 2271     |
| 100361134 | Shisa9       | 126    | 142     | 129    | 180    | 154   | 118   | 118   | 199      |
| 290615    | RGD1311847   | 176.09 | 165.19  | 205.77 | 176.56 | 163.1 | 203.3 | 175.9 | 196.39   |
| 311676    | Pmepal       | 1134   | 1176    | 1221   | 1179   | 1276  | 1346  | 1139  | 1047     |
| 25518     | Ppia         | 29703  | 28169.5 | 26391  | 22664  | 26072 | 25482 | 27174 | 30428.63 |
| 362134    | Mmadhc       | 514    | 524     | 500    | 426    | 448   | 472   | 556   | 529      |
| 498910    | Arl2bp       | 2224   | 2238    | 2195   | 2010   | 2075  | 2249  | 2266  | 2258     |
| 100363455 | Zfp69        | 52.86  | 60.08   | 53.22  | 44.36  | 45    | 59.09 | 58.68 | 52.15    |
| 100359937 | LOC100359937 | 4257.1 | 4242.78 | 3696.2 | 3498.4 | 3903  | 3892  | 4020  | 4208.41  |
| 83471     | Prep         | 1367   | 1483    | 1426   | 1542   | 1471  | 1507  | 1513  | 1449     |
| 308430    | Zfp575       | 27     | 40      | 25     | 51     | 31    | 40    | 39    | 36       |
| 290783    | Tusc3        | 1404   | 1340    | 1348   | 1103   | 1296  | 1259  | 1306  | 1443     |
| 59312     | Shank3       | 457    | 412     | 413    | 386    | 479   | 472   | 406   | 346      |
| 303670    | Tmem104      | 757.33 | 844.08  | 785.61 | 853.01 | 921   | 854.7 | 806   | 726.27   |
| 362322    | Slc25a13     | 270    | 304     | 210    | 312    | 279   | 322   | 269   | 249      |
| 252902    | Dync11i1     | 2345.6 | 2271.3  | 2034.7 | 2234.7 | 2339  | 2273  | 2290  | 2170.18  |
| 306387    | Naf1         | 111    | 119     | 145    | 149    | 136   | 138   | 106   | 155      |
| 81775     | Rps21        | 1842   | 1600    | 1639   | 1204   | 1556  | 1490  | 1505  | 1866     |
| 362199    | Vps39        | 1627   | 1700    | 1559   | 1666   | 1718  | 1675  | 1681  | 1616     |
| 291844    | Setd6        | 88     | 72      | 95     | 77     | 74    | 88    | 94    | 83       |
| 192270    | Plpp3        | 1913   | 1707    | 1790   | 2222   | 1776  | 1939  | 2064  | 2014     |
| 316096    | Zfp105       | 157    | 131     | 141    | 139    | 133   | 150   | 157   | 140      |
| 299799    | Rab21        | 1135   | 1170    | 1120   | 1111   | 1095  | 1144  | 1195  | 1198     |
| 311130    | Prkra        | 553    | 451     | 510    | 466    | 488   | 539   | 483   | 512      |
| 295961    | Apip         | 289    | 251     | 238    | 210    | 233   | 231   | 268   | 277      |
| 313436    | Zcchc12      | 437.43 | 479.76  | 461    | 430.66 | 454   | 446   | 435.9 | 511.38   |
| 140669    | Abcb6        | 656    | 694     | 664    | 619    | 685   | 699   | 709   | 596      |
| 305149    | Nudt9        | 767    | 730     | 703    | 715    | 638   | 763   | 785   | 791      |
| 498987    | Tmem200a     | 253    | 291     | 276    | 261    | 295   | 281   | 247   | 281      |
| 684322    | Kcmf1        | 1404   | 1278    | 1282   | 1203   | 1357  | 1375  | 1327  | 1218     |
| 287474    | Txndc17      | 773.85 | 769.01  | 826.02 | 699    | 731   | 743.2 | 818   | 841.04   |
| 64462     | Csnk1d       | 3795.7 | 3886.33 | 3557   | 3943.7 | 3992  | 3887  | 3930  | 3697.22  |
| 286899    | Hsbp1        | 4732   | 4515    | 4576   | 4125   | 4299  | 4398  | 4771  | 4863     |
| 414793    | RT1-CE3      | 449.09 | 337.26  | 427.31 | 414.95 | 432.7 | 512.4 | 397.2 | 321.17   |
| 80278     | Cdk5rap3     | 545    | 578     | 585    | 539    | 578   | 561   | 577   | 579      |
| 300726    | Etfa         | 1979   | 1670    | 1617   | 1516   | 1738  | 1543  | 1827  | 1819     |
| 289717    | Tada2b       | 820    | 721     | 740    | 756    | 767   | 807   | 787   | 741      |
| 314030    | Cog5         | 587    | 552     | 527    | 529    | 585   | 519   | 559   | 579      |
| 363599    | Tnip1        | 1084   | 1094    | 1178   | 1026   | 1109  | 1169  | 1096  | 1102     |
| 24765     | Scg2         | 6498   | 5874    | 5764   | 5836   | 6190  | 5719  | 6818  | 5759     |
| 360709    | Tfg          | 2987   | 3015    | 2813   | 3023   | 2914  | 3058  | 3130  | 2990     |
| 680178    | Cldn20       | 61.17  | 55.45   | 92.66  | 87.75  | 101.4 | 45.32 | 81.51 | 75.16    |
| 83533     | Aifm1        | 668    | 669.32  | 566.25 | 599    | 652   | 619.7 | 647.7 | 637      |
| 313236    | Trim14       | 17     | 21      | 28     | 27     | 28    | 23    | 20    | 24       |
| 171456    | Nsa2         | 2320   | 2127    | 2022   | 1945   | 2103  | 2171  | 2130  | 2190.99  |
| 140725    | Cacng4       | 167    | 179     | 166    | 185    | 160   | 185   | 204   | 163      |
| 309456    | Wbp11        | 1166.2 | 1222.55 | 1267.9 | 1180.3 | 1216  | 1281  | 1310  | 1134.06  |
| 309628    | Wdr46        | 447.87 | 414.82  | 508.88 | 437.17 | 522.9 | 466.9 | 431.6 | 426.4    |
| 60326     | Kcnv1        | 314    | 296     | 323    | 316    | 365   | 323   | 309   | 279      |
| 315298    | Racgap1      | 361    | 399     | 431.07 | 390    | 439.4 | 452   | 427   | 296.91   |
| 297516    | Cpne9        | 196    | 138     | 124    | 189    | 159   | 161   | 191   | 150      |
| 362217    | Cenpb        | 1889.8 | 1880.86 | 1861.2 | 1621.5 | 1939  | 1795  | 1887  | 1789.95  |
| 361542    | U2af114      | 677    | 690     | 581    | 586    | 599   | 616   | 713   | 661      |

|           |              |        |         |        |        |       |       |       |         |
|-----------|--------------|--------|---------|--------|--------|-------|-------|-------|---------|
| 308776    | Pde8a        | 210    | 257     | 244    | 210    | 238   | 213   | 287   | 203     |
| 108348322 | LOC108348322 | 19     | 11      | 7      | 9      | 15    | 8     | 12    | 12      |
| 360559    | Pimreg       | 32     | 15      | 23     | 22     | 22    | 22    | 18    | 32      |
| 84497     | Dgat1        | 395    | 396     | 343    | 337    | 343   | 398   | 374   | 388     |
| 294025    | Stn1         | 373    | 385     | 339    | 328    | 359   | 363   | 363   | 371     |
| 289568    | RGD1311575   | 1787   | 2153    | 1799   | 2347   | 2104  | 2121  | 2047  | 1990    |
| 309377    | Sfrp5        | 7418.2 | 7460.06 | 6126.8 | 6141.5 | 6565  | 7760  | 6345  | 7068.17 |
| 691426    | Tmem201      | 258    | 236     | 285    | 276    | 271   | 273   | 270   | 264     |
| 25581     | Psmc2        | 3830   | 3614    | 3403   | 3229   | 3609  | 3399  | 3538  | 3837    |
| 289590    | Ociad1       | 3970   | 4010    | 3496   | 3557   | 3608  | 3757  | 4090  | 3906    |
| 317498    | Ppef1        | 2853   | 2710    | 2674   | 2532   | 2839  | 2550  | 2817  | 2798    |
| 306582    | Agpat5       | 597    | 572     | 554    | 521    | 589   | 564   | 539   | 601     |
| 100359821 | Zik1         | 169.75 | 149.94  | 168.98 | 152.76 | 157.5 | 141.5 | 188.4 | 168.01  |
| 362455    | Fam234b      | 1291   | 1345    | 1244   | 1425.1 | 1422  | 1429  | 1259  | 1311    |
| 299053    | Brms11       | 855    | 851     | 751    | 837    | 857   | 793   | 842   | 874     |
| 680021    | Grhpr        | 120    | 133     | 109    | 141    | 124   | 136   | 127   | 127     |
| 296272    | Tcf15        | 29     | 34      | 27.14  | 25.02  | 33.02 | 29.62 | 24.04 | 31      |
| 25529     | Ptprs        | 4340   | 4973    | 4541   | 5111   | 5084  | 5140  | 4775  | 4382    |
| 290669    | Gatad2a      | 990    | 1024    | 1075   | 1013   | 1096  | 1049  | 999   | 1047.99 |
| 304104    | Urb1         | 394    | 449     | 438    | 451    | 444   | 447   | 458   | 421     |
| 313775    | RGD1311517   | 141    | 176     | 155    | 166    | 142   | 161   | 165   | 184     |
| 117020    | Mcf21        | 1819   | 1742    | 1829   | 1716   | 1920  | 1867  | 1778  | 1697    |
| 654495    | Zdhhc16      | 264    | 271     | 269    | 243    | 265   | 263   | 249   | 293     |
| 291006    | Diras2       | 1110.5 | 1150.99 | 1048.3 | 1145.3 | 1181  | 1108  | 1101  | 1163.02 |
| 691712    | LOC691712    | 60.79  | 48.97   | 67.29  | 49.57  | 75.55 | 30.11 | 64.02 | 61.92   |
| 295229    | Naxe         | 423    | 419     | 438    | 357    | 425   | 379   | 424   | 445     |
| 314612    | Shc2         | 2051.3 | 2070.64 | 2068.5 | 2108.3 | 2225  | 2096  | 2106  | 2053.63 |
| 296710    | Arpc51       | 1315   | 1299    | 1127   | 1075   | 1323  | 1155  | 1245  | 1199    |
| 297029    | Gstk1        | 521    | 587     | 602    | 423    | 525   | 529   | 510   | 616     |
| 108348051 | LOC108348051 | 1709   | 1704    | 1620   | 1635   | 1701  | 1696  | 1723  | 1695    |
| 259242    | Wipf3        | 2843.6 | 2997.24 | 2799   | 3120   | 3121  | 3189  | 2736  | 2973.56 |
| 100216475 | Hexdc        | 228.98 | 213.78  | 218.64 | 188.93 | 228.3 | 217.2 | 206.6 | 216.96  |
| 362432    | Clec4d       | 20.36  | 17.08   | 44.63  | 5.89   | 35.41 | 24.57 | 18.08 | 11.84   |
| 317260    | Zmym3        | 1170   | 1226    | 1270   | 1222   | 1319  | 1222  | 1296  | 1159    |
| 303393    | Cox7b        | 2069   | 1995    | 1772.9 | 1810   | 1830  | 1892  | 1873  | 2220.93 |
| 81518     | Mef2d        | 1464.4 | 1498.29 | 1429.5 | 1627.4 | 1618  | 1676  | 1487  | 1371.72 |
| 367112    | Hmgcl11      | 261.03 | 274.01  | 245.13 | 252.61 | 257.1 | 260.8 | 256.6 | 281.21  |
| 291824    | Tk2          | 373    | 383     | 347    | 341    | 350   | 364   | 363   | 399     |
| 300045    | Exosc4       | 159    | 143     | 170    | 114    | 152   | 146   | 137   | 164     |
| 303260    | Spag7        | 728.8  | 672.41  | 647.69 | 616.28 | 735.9 | 639.5 | 680.2 | 668.78  |
| 315139    | Tab1         | 418    | 438     | 436    | 418    | 442   | 463   | 409   | 434     |
| 691153    | Epop         | 10     | 15      | 11     | 9      | 12    | 13    | 6     | 15      |
| 361654    | RGD1310127   | 658.09 | 685.11  | 617.83 | 643.31 | 608.8 | 692.7 | 679.2 | 681.59  |
| 266631    | Rbm45        | 305    | 329     | 288    | 336    | 329   | 305   | 300   | 352     |
| 100360682 | Snrpe        | 581    | 524     | 583    | 468    | 503   | 476   | 585   | 640     |
| 303056    | Atp10b       | 67     | 98      | 105    | 89     | 81    | 82    | 96    | 108     |
| 304490    | Anapc7       | 466    | 503     | 377    | 448    | 444   | 469   | 471   | 450     |
| 360983    | Lgals1       | 1733   | 1518    | 1442   | 1443   | 1615  | 1560  | 1618  | 1480    |
| 363110    | Rwdd2a       | 39.95  | 43.73   | 34.89  | 20.68  | 44.27 | 32.36 | 32.29 | 33.44   |
| 29230     | Sqle         | 3041   | 3094    | 2813   | 2825   | 2902  | 3047  | 3030  | 3057    |
| 361520    | Dmac2        | 642    | 622     | 584    | 524    | 592   | 599   | 641   | 593     |
| 289084    | RGD1309104   | 872.95 | 887.06  | 763.28 | 860.54 | 919.1 | 838.9 | 868.6 | 832.89  |
| 361736    | Pat11        | 536    | 557     | 557    | 586    | 537   | 597   | 560   | 592     |
| 100534597 | Cenps        | 122    | 119     | 136    | 114    | 141   | 105   | 125   | 131     |
| 686132    | Hmcn2        | 106    | 87      | 89     | 75     | 104   | 114   | 114   | 33      |
| 316424    | Aox4         | 157    | 149     | 137    | 137    | 136   | 144   | 165   | 148     |



|           |              |        |         |        |        |       |       |       |         |
|-----------|--------------|--------|---------|--------|--------|-------|-------|-------|---------|
| 289664    | Ldb2         | 2437   | 2193    | 2248   | 2268   | 2498  | 2245  | 2277  | 2331    |
| 360483    | RGD1561796   | 40     | 48      | 35.36  | 39     | 52    | 28    | 45    | 41      |
| 64529     | Ctsb         | 34247  | 34432   | 35943  | 34501  | 35574 | 36535 | 34170 | 35966   |
| 307779    | Rbmxt1       | 466.16 | 402.75  | 404.25 | 344.77 | 398.7 | 454.6 | 382.8 | 418.11  |
| 171347    | Mat2a        | 1042   | 923     | 902    | 826    | 966   | 952   | 936   | 922     |
| 54322     | Cox6c        | 2805   | 2724    | 2510   | 2458   | 2510  | 2353  | 2652  | 3218    |
| 366276    | Prpf6        | 966    | 1016    | 1088   | 1065   | 993   | 1062  | 1125  | 1048    |
| 292724    | Ccdc97       | 845    | 864     | 855    | 859    | 880   | 933   | 856   | 831     |
| 304570    | Ddx51        | 224.32 | 198     | 206.26 | 179.21 | 187   | 230   | 225   | 184     |
| 24416     | Grm3         | 243.53 | 230.65  | 240.95 | 237.17 | 248.3 | 234.8 | 247.3 | 243.27  |
| 114488    | Rbm3         | 1005   | 1054    | 990    | 715    | 995   | 929   | 1032  | 893     |
| 24513     | Ivd          | 850    | 889     | 790    | 880    | 859   | 972   | 780   | 875     |
| 292160    | Znhit6       | 316    | 302     | 291    | 330    | 330   | 326   | 302   | 309     |
| 296467    | Ythdf1       | 1135   | 1114    | 1193   | 1154   | 1197  | 1204  | 1221  | 1078    |
| 171396    | Sulf1        | 295    | 306     | 298    | 294    | 250   | 336   | 340   | 294     |
| 25524     | Psap         | 30949  | 33928   | 33530  | 32949  | 33837 | 35333 | 32706 | 32453   |
| 117596    | Atp6v1b2     | 8642   | 8217    | 7601   | 7998   | 8649  | 8157  | 8313  | 8075    |
| 501007    | RGD1562618   | 1100   | 1043    | 948    | 1142   | 1131  | 1019  | 1131  | 1048    |
| 683519    | Mrps22       | 517    | 498     | 439    | 442    | 525   | 391   | 531   | 492     |
| 83785     | Vegfa        | 1564   | 1195    | 1160   | 1413   | 1374  | 1415  | 1380  | 1284    |
| 298584    | Capzb        | 4259   | 4310    | 4350   | 4001   | 4263  | 4338  | 4397  | 4306    |
| 288533    | Taf6         | 683.27 | 667.29  | 688    | 651.78 | 641.3 | 730   | 706   | 674.15  |
| 246295    | Cep104       | 1238   | 1289    | 1213   | 1324   | 1276  | 1254  | 1354  | 1295    |
| 313535    | Eri3         | 1822   | 1869    | 1780   | 1703   | 1843  | 1848  | 1840  | 1806    |
| 102546990 | LOC102546990 | 10     | 9       | 10     | 15     | 11    | 10    | 15    | 9       |
| 688717    | Slirp        | 419.29 | 368.27  | 342.36 | 254.66 | 313.2 | 338.2 | 352.9 | 411.73  |
| 291019    | Fam120a      | 3234.3 | 3164.8  | 3211.9 | 3283.9 | 3276  | 3317  | 3297  | 3298.29 |
| 306439    | Gpm6a        | 848    | 899     | 761    | 961    | 863   | 943   | 960   | 782     |
| 360547    | Sat2         | 248    | 241     | 230    | 203    | 201   | 240   | 216   | 286     |
| 681177    | LOC681177    | 94.39  | 94.3    | 99.55  | 98.63  | 89.14 | 86.13 | 115.4 | 104.99  |
| 296558    | Anapc2       | 2342   | 2275    | 2317   | 2313   | 2333  | 2495  | 2283  | 2347    |
| 84495     | Xrcc1        | 551    | 522     | 560    | 514    | 572   | 539   | 555   | 530     |
| 282581    | Fzd6         | 91.61  | 106.86  | 109.44 | 69.3   | 104.5 | 87.45 | 107.9 | 85.95   |
| 360477    | Glyr1        | 912    | 969     | 897    | 1077   | 1019  | 962   | 983   | 979     |
| 117103    | Rab8a        | 795    | 763     | 784.99 | 675    | 781   | 749   | 766   | 791     |
| 500111    | Lrrc61       | 686.25 | 692.03  | 585.28 | 691.9  | 694.5 | 642.1 | 735.2 | 644.44  |
| 499010    | Syne1        | 3410   | 3537    | 3316   | 3893   | 3792  | 3606  | 3729  | 3353    |
| 303811    | Dvl3         | 1299   | 1450    | 1513   | 1679   | 1542  | 1612  | 1470  | 1453    |
| 29434     | Rasgrp1      | 535.55 | 448.73  | 524.92 | 462.46 | 518.4 | 472.6 | 440.5 | 585.3   |
| 58812     | Apln         | 24     | 43      | 35     | 29     | 29    | 34    | 33    | 38      |
| 287134    | Gnptg        | 733    | 690     | 613    | 584    | 668   | 634   | 709   | 669     |
| 288611    | Galnt17      | 965    | 1029    | 1061   | 1093   | 1141  | 1034  | 1050  | 1018    |
| 307210    | Timm21       | 368    | 351     | 323    | 311    | 340   | 314   | 359   | 371     |
| 292041    | Wwox         | 317.7  | 340.92  | 357.18 | 289.53 | 328.3 | 314.8 | 354.2 | 337.9   |
| 29283     | Rpl29        | 3885.3 | 3374.41 | 3748.6 | 3013.4 | 3607  | 3423  | 3434  | 3878.77 |
| 363915    | Tmem132c     | 742    | 647     | 704    | 743    | 796   | 771   | 683   | 651     |
| 363109    | Pgm3         | 376    | 398     | 323    | 341    | 318   | 361   | 420   | 372     |
| 310720    | Wdr3         | 235    | 258     | 257    | 252    | 250   | 274   | 249   | 252     |
| 406167    | Prrt1        | 903    | 853     | 832    | 1023   | 860   | 966   | 887   | 981     |
| 306576    | Nek3         | 100    | 116     | 122    | 97     | 101   | 128   | 97    | 119     |
| 499431    | Col13a1      | 58     | 34      | 30     | 52     | 41    | 63    | 36    | 38      |
| 298586    | Mrto4        | 416.77 | 423.84  | 362.52 | 354.03 | 416   | 406.8 | 391.6 | 378.68  |
| 24185     | Akt1         | 3369.2 | 3395.99 | 3504   | 3104.9 | 3370  | 3490  | 3345  | 3477.19 |
| 360616    | Ppp1r1b      | 321    | 324     | 320    | 292    | 286   | 343   | 338   | 319     |
| 683402    | Ap3s2        | 1306   | 1226    | 1166   | 1064   | 1223  | 1246  | 1147  | 1256    |
| 312754    | Ppp2r5a      | 485    | 375     | 489    | 425    | 437   | 437   | 466   | 475     |

|           |              |        |         |        |        |       |       |       |         |
|-----------|--------------|--------|---------|--------|--------|-------|-------|-------|---------|
| 365381    | Stk32c       | 503    | 453     | 489    | 502    | 527   | 481   | 516   | 468     |
| 309607    | RT1-CE5      | 1115.2 | 1190.82 | 1264.1 | 832.76 | 1154  | 1274  | 970.2 | 1106.12 |
| 81005     | Nptxr        | 3813   | 4312    | 4501   | 4412   | 4583  | 4409  | 4079  | 4361    |
| 307248    | Pstpip2      | 137    | 143     | 123    | 159    | 144   | 152   | 152   | 127     |
| 266711    | Lzts1        | 517.31 | 526.09  | 484    | 586.35 | 571.6 | 523.8 | 538.1 | 529.16  |
| 303652    | Cog1         | 781.58 | 804.43  | 785.83 | 825.78 | 862.7 | 833.5 | 825.9 | 749.53  |
| 60373     | Nop58        | 662    | 637     | 725    | 655    | 753   | 632   | 677   | 679     |
| 100294508 | LOC100294508 | 1653   | 1723    | 1743   | 1960   | 1855  | 1795  | 1857  | 1736    |
| 313241    | Mcart1       | 1332.1 | 1405.88 | 1391   | 1239.3 | 1678  | 1079  | 1474  | 1261.64 |
| 103690139 | LOC103690139 | 65.73  | 47.09   | 51.83  | 57.06  | 65.42 | 43.8  | 59.89 | 57.74   |
| 684327    | LOC684327    | 2880   | 3385    | 3245   | 3677   | 3274  | 3376  | 3687  | 3156    |
| 300981    | Acy1         | 570    | 634     | 663    | 586    | 506   | 684   | 589   | 731     |
| 445268    | Ufc1         | 1376   | 1209    | 1210   | 980    | 1169  | 1135  | 1251  | 1331    |
| 311332    | Dl14         | 91     | 110     | 97     | 132    | 137   | 103   | 106   | 94      |
| 305246    | Ppef2        | 72.23  | 63.77   | 53.3   | 58.77  | 60.18 | 70.13 | 64.85 | 58.68   |
| 290562    | Sema3g       | 1132   | 1326    | 1302   | 1441   | 1358  | 1319  | 1419  | 1226    |
| 303501    | Arhgap23     | 1536   | 1586    | 1682   | 1557   | 1712  | 1749  | 1564  | 1484    |
| 100359642 | Chmp4b       | 983.33 | 885.24  | 958.6  | 863.41 | 980.2 | 961.8 | 970   | 864.61  |
| 64315     | Cd151        | 5174   | 5458.75 | 5263.5 | 4047.5 | 5021  | 4656  | 5404  | 5328.18 |
| 25427     | Cyp51        | 8335   | 8205    | 7548   | 8029   | 7581  | 7910  | 8660  | 8717    |
| 363083    | Fbxl22       | 36.12  | 43.32   | 47.69  | 40.45  | 45.41 | 48.49 | 42.98 | 34.62   |
| 691898    | Prr14        | 370    | 365     | 409    | 352    | 349   | 385   | 388   | 409     |
| 294797    | I17r         | 1012   | 879     | 1003   | 696    | 909   | 802   | 987   | 976     |
| 296883    | Rpa3         | 135    | 119     | 108    | 108    | 104   | 117   | 139   | 121     |
| 295214    | S100a1       | 233    | 187     | 165    | 184    | 202   | 196   | 196   | 193     |
| 306599    | Tubgcp3      | 650    | 714     | 685    | 599    | 622   | 683   | 753   | 652     |
| 59315     | Nxph3        | 178    | 122     | 114    | 98     | 163   | 120   | 131   | 110     |
| 362517    | Mrpl50       | 331    | 351     | 273    | 282    | 298   | 251   | 342   | 375     |
| 302612    | Tspyl2       | 1202   | 1123    | 1188   | 1178   | 1242  | 1154  | 1283  | 1122    |
| 313056    | Snrnp40      | 321    | 302     | 317    | 296    | 300   | 323   | 305   | 337     |
| 64039     | Fbxl20       | 1551.1 | 1581.1  | 1522.9 | 1508.2 | 1577  | 1629  | 1667  | 1434.69 |
| 300206    | Kans12       | 1217.4 | 1227.22 | 1273.4 | 1102.8 | 1299  | 1272  | 1149  | 1214.38 |
| 100911668 | LOC100911668 | 376.09 | 393.49  | 354.65 | 396.18 | 390.7 | 412.4 | 401.7 | 351.38  |
| 103692129 | Hoxa10       | 376.09 | 393.49  | 354.65 | 396.18 | 390.7 | 412.4 | 401.7 | 351.38  |
| 313525    | Hectd3       | 1386.1 | 1496.19 | 1513.6 | 1490.4 | 1477  | 1566  | 1461  | 1520.63 |
| 366061    | Galnt3       | 66     | 47      | 88     | 96     | 77    | 77    | 81    | 69      |
| 497778    | Dut          | 523    | 506     | 411    | 384    | 455   | 475   | 508   | 429     |
| 64845     | Gphn         | 725    | 754     | 687    | 718    | 704   | 722   | 775   | 751     |
| 361614    | Fam168a      | 3071   | 3146    | 3063   | 3438   | 3289  | 3195  | 3257  | 3277    |
| 680252    | Dmwd         | 956    | 1038    | 916    | 947    | 993   | 1050  | 940   | 965     |
| 680858    | Tmem40       | 20.76  | 19.84   | 17.4   | 31.8   | 33.9  | 21.31 | 18.54 | 18.17   |
| 103694877 | LOC103694877 | 150.25 | 171.23  | 72.77  | 72.6   | 99.32 | 109   | 171.2 | 98.33   |
| 29282     | Rpl23        | 2521   | 2279    | 2496   | 1977.9 | 2274  | 2220  | 2364  | 2635    |
| 29723     | Slc19a1      | 187    | 160     | 163    | 167    | 163   | 178   | 170   | 182     |
| 305751    | Nkiras1      | 1393   | 1415    | 1222   | 1301   | 1431  | 1243  | 1396  | 1387    |
| 360822    | Sppl3        | 1107   | 1101    | 1195   | 1166   | 1163  | 1245  | 1151  | 1118    |
| 501083    | Pdcd6ip      | 3825   | 3937    | 4011   | 4472   | 4127  | 4269  | 4285  | 3948    |
| 688429    | Arhgap10     | 622.69 | 602.58  | 619.23 | 601.53 | 657.4 | 687.5 | 566.4 | 592.55  |
| 296315    | Rab5if       | 975.03 | 995.68  | 936.74 | 802.29 | 969.4 | 957.3 | 915.1 | 955.64  |
| 360550    | Phf23        | 705    | 694     | 751    | 639    | 735   | 701   | 711   | 708     |
| 116839    | Rims2        | 836.85 | 904.27  | 863.4  | 910.81 | 954.4 | 888.2 | 887.6 | 868.46  |
| 305428    | Zbtb49       | 54     | 66      | 71     | 62     | 67    | 56    | 73    | 63      |
| 311078    | Psm14        | 1434   | 1305    | 1302   | 1272   | 1325  | 1327  | 1387  | 1400    |
| 287984    | Psm2         | 4604   | 4568    | 4616   | 4544   | 4924  | 4664  | 4646  | 4533    |
| 108348046 | LOC108348046 | 843.34 | 815.52  | 840.43 | 940.76 | 967   | 876.1 | 866.6 | 812.19  |
| 303743    | Notum        | 8      | 7       | 19     | 8      | 10    | 13    | 16    | 4       |

|           |              |        |         |        |        |       |       |       |         |
|-----------|--------------|--------|---------|--------|--------|-------|-------|-------|---------|
| 691979    | Esco2        | 87     | 86      | 100    | 63     | 93    | 82    | 90    | 79      |
| 171442    | Svop         | 905    | 985.43  | 877    | 908    | 921   | 955   | 1000  | 887     |
| 288606    | Gtf2ird2     | 205.44 | 240.93  | 238.85 | 246.24 | 258.7 | 205.2 | 248.2 | 241.66  |
| 304410    | Castor2      | 592.06 | 617.48  | 589.71 | 698.56 | 644.3 | 684.7 | 636.4 | 591.99  |
| 310815    | Snx7         | 1779   | 1685    | 1635   | 1678   | 1675  | 1615  | 1814  | 1835    |
| 100911959 | LOC100911959 | 0      | 178.37  | 135.01 | 82.78  | 68.7  | 229.1 | 70.93 | 36.94   |
| 64510     | Rbm10        | 673    | 649     | 650    | 620    | 657   | 735   | 670   | 592     |
| 117524    | Ccnf         | 46     | 47      | 56     | 60     | 45    | 62    | 59    | 48      |
| 58958     | Nup210       | 129    | 119     | 125    | 128    | 152   | 135   | 117   | 109     |
| 297784    | Rrs1         | 205    | 206     | 266    | 199    | 231   | 223   | 228   | 215     |
| 368001    | Bcl7b        | 614    | 644     | 601    | 602    | 601   | 690   | 618   | 611     |
| 690163    | Oxct1        | 2740   | 2619    | 2526   | 2785   | 2564  | 2544  | 2855  | 2963    |
| 292462    | Lrp11        | 5396   | 5592    | 4738   | 5237   | 5462  | 5213  | 5500  | 5291    |
| 497672    | Brcal        | 89     | 99      | 87     | 100    | 116   | 83    | 94    | 91      |
| 170923    | Rap2b        | 37.91  | 22      | 39     | 29     | 24.99 | 29    | 38.99 | 38      |
| 294672    | Gfm2         | 310.9  | 270.94  | 335.84 | 320.34 | 362.3 | 348.6 | 261   | 295.89  |
| 100360017 | Mrps6        | 398    | 366     | 327    | 325    | 340   | 344   | 342   | 424     |
| 286896    | Sgpl1        | 1274   | 1341    | 1326   | 1334   | 1313  | 1364  | 1434  | 1291    |
| 363065    | Ube2q2       | 1023   | 1051    | 1030   | 1049   | 1138  | 965   | 1073  | 1077    |
| 293653    | Acy3         | 213    | 243     | 234    | 182    | 204   | 206   | 241   | 242     |
| 499391    | Gemin7       | 160.31 | 135.3   | 89.89  | 120.66 | 133.7 | 125.7 | 106.6 | 152.32  |
| 170538    | Prkcd        | 2383.1 | 2590.28 | 2310.7 | 2421.7 | 2717  | 2560  | 2327  | 2336.07 |
| 362201    | Ccndbp1      | 808    | 724     | 701    | 671    | 748   | 683   | 769   | 774     |
| 313610    | Extl1        | 54     | 53.02   | 29     | 44     | 47.36 | 61    | 45    | 31      |
| 304919    | Dars2        | 172    | 221     | 199    | 196    | 195   | 217   | 207   | 188     |
| 367033    | Zfp26        | 196.88 | 231.65  | 243.37 | 250.97 | 270.6 | 170.9 | 255.6 | 248.05  |
| 304709    | Bfar         | 657.14 | 644.45  | 570.63 | 598.64 | 622.4 | 622.7 | 660.8 | 624.52  |
| 290706    | Hpf1         | 443    | 417     | 429    | 409    | 415   | 418   | 452   | 454     |
| 315949    | Armc8        | 907.04 | 895.03  | 817.98 | 898.48 | 955.7 | 907.9 | 859.3 | 880.65  |
| 81008     | Itga7        | 3879   | 3951    | 4056   | 4244   | 4009  | 4370  | 4170  | 3971    |
| 294010    | Actrla       | 8620   | 8566    | 8295   | 7708   | 8681  | 8117  | 8656  | 8538    |
| 59317     | Epb4111      | 6850   | 7482.08 | 6975.3 | 8124   | 7944  | 7801  | 7473  | 6928    |
| 309415    | Fam189a2     | 406    | 460     | 460    | 446    | 407   | 499   | 446   | 463     |
| 363447    | Tspan7       | 5939   | 5803    | 5587   | 5904   | 5938  | 5916  | 5845  | 6098    |
| 29568     | Map2k5       | 516    | 582     | 515    | 567    | 590   | 615   | 531   | 497     |
| 58961     | Azin1        | 4112   | 4018    | 3535   | 3759   | 4009  | 3945  | 4116  | 3729    |
| 691931    | Fam241a      | 109    | 86      | 84     | 91     | 91    | 97    | 105   | 86      |
| 308592    | Grwd1        | 211    | 215     | 223    | 214    | 218   | 214   | 221   | 231     |
| 290322    | Ints9        | 503.6  | 512.4   | 524.72 | 536.22 | 574.5 | 547.8 | 534.2 | 470.94  |
| 313211    | Nipsnap3b    | 651    | 664     | 569    | 538    | 606   | 587   | 668   | 620     |
| 83588     | Kcns3        | 1578   | 1430    | 1428   | 1434   | 1647  | 1452  | 1557  | 1357    |
| 302557    | Pqbp1        | 537    | 482     | 481    | 469    | 486   | 510   | 510   | 511     |
| 305000    | Exo1         | 14     | 8       | 13     | 6      | 16    | 12    | 8     | 6       |
| 362110    | Cdk9         | 1129   | 1128    | 1166   | 962    | 1171  | 1132  | 1092  | 1097    |
| 298689    | Ube2j2       | 1011   | 1093    | 1040   | 912    | 971   | 1052  | 1034  | 1098    |
| 500532    | Rnf220       | 1433   | 1374    | 1314   | 1324   | 1397  | 1408  | 1328  | 1445    |
| 252918    | Spag5        | 187    | 160     | 159    | 148    | 152   | 194   | 170   | 153.98  |
| 94172     | Slc27a1      | 1891   | 2143.86 | 1969   | 1975   | 1998  | 2068  | 1955  | 2153    |
| 313235    | Coro2a       | 1940.7 | 2048.8  | 1984.7 | 2050.9 | 2168  | 2044  | 1931  | 2078.28 |
| 307811    | Slc7a6       | 479    | 453     | 438    | 428    | 454   | 466   | 465   | 457     |
| 361679    | Dusp8        | 387    | 388     | 404    | 455    | 434   | 458   | 383   | 399     |
| 25429     | Cyp7b1       | 54     | 45      | 55     | 50     | 47    | 58    | 61    | 43      |
| 301618    | Ppp1r7       | 1411.1 | 1332    | 1259   | 1307.8 | 1441  | 1265  | 1338  | 1396    |
| 100125362 | LOC100125362 | 2964   | 3052    | 2067   | 3583   | 2882  | 3099  | 3123  | 2848    |
| 300839    | Lysmd2       | 1091   | 1049    | 869    | 905    | 987   | 1009  | 1021  | 993     |
| 289810    | C1d          | 495    | 499     | 527    | 517    | 526   | 510   | 493   | 559     |

|           |              |        |         |        |        |       |       |       |          |
|-----------|--------------|--------|---------|--------|--------|-------|-------|-------|----------|
| 100362331 | Ndufa4l2     | 41     | 48      | 41     | 33     | 38    | 53    | 37    | 39       |
| 289796    | Pkd1l1       | 45     | 34      | 42     | 42     | 45    | 32    | 48    | 42       |
| 314555    | Tspyl5       | 669    | 672     | 633    | 755    | 670   | 687   | 721   | 718      |
| 679934    | Brk1         | 2137   | 2098    | 1811   | 1730   | 1849  | 1990  | 1916  | 2212     |
| 24399     | Glud1        | 5174   | 5185    | 4852   | 4952   | 5241  | 5220  | 5127  | 5071     |
| 313510    | Atpaf1       | 744.24 | 828.39  | 601.61 | 807.75 | 767.4 | 767.1 | 766.6 | 754.3    |
| 293652    | Ndufs8       | 1123   | 1085    | 1010   | 927    | 1030  | 1112  | 1002  | 1103     |
| 680532    | Sem1         | 561    | 496     | 517    | 417    | 472   | 462   | 560   | 546      |
| 689988    | Sox12        | 283    | 222     | 239    | 230    | 279   | 236   | 242   | 241      |
| 29580     | Fdft1        | 4159   | 4226.01 | 3738   | 3853   | 3813  | 4094  | 4051  | 4412.02  |
| 25715     | Slc11a2      | 553    | 580     | 591.33 | 580    | 584   | 643   | 562   | 572.23   |
| 102552182 | LOC102552182 | 327    | 240     | 194    | 211    | 232   | 193   | 351   | 220      |
| 83809     | Nsf11c       | 2547   | 2485    | 2426   | 2220   | 2468  | 2529  | 2467  | 2453     |
| 29559     | Grik1        | 2593   | 2825    | 2835   | 2517   | 2891  | 2751  | 2733  | 2661     |
| 100361457 | LOC100361457 | 15597  | 15337.3 | 15401  | 17248  | 17002 | 16911 | 15379 | 15861.25 |
| 315478    | Snx19        | 2360   | 2648    | 2240   | 2543   | 2716  | 2344  | 2571  | 2402     |
| 499724    | RGD1560065   | 402    | 424     | 402    | 430    | 386   | 410   | 446   | 457      |
| 360610    | Nfe2l1       | 8327   | 8299    | 7905   | 8702   | 8812  | 8564  | 8534  | 8145     |
| 308846    | Uvrag        | 706.61 | 717.65  | 729.39 | 703.53 | 745.9 | 720.9 | 737.1 | 724.02   |
| 290673    | Atp13a1      | 786    | 860     | 880    | 908    | 879   | 929   | 847   | 864      |
| 25257     | Gamt         | 557    | 587     | 624    | 493    | 520   | 578   | 590   | 629      |
| 102555033 | LOC102555033 | 29.93  | 32.42   | 39.72  | 30.7   | 33.28 | 34.18 | 31.34 | 37.26    |
| 114096    | Idh3a        | 4707   | 4761    | 4468   | 4489   | 4454  | 4797  | 4904  | 4727     |
| 315952    | Dzip11       | 89.68  | 79.1    | 92.57  | 76.4   | 84.64 | 88.5  | 88.98 | 84.01    |
| 246768    | Cby1         | 460    | 420     | 445    | 448    | 480   | 433   | 430   | 474      |
| 29234     | Galr2        | 163.46 | 141.44  | 158.87 | 127.2  | 109.9 | 175.7 | 122.5 | 197.66   |
| 500991    | Nxpe4        | 47     | 43      | 46     | 25     | 38    | 45    | 42    | 40       |
| 362720    | Rrm2         | 127    | 116     | 195    | 84     | 154   | 131   | 140   | 110      |
| 369016    | Myadm        | 1882.8 | 2170.39 | 2321.3 | 2189.8 | 2188  | 2144  | 2213  | 2232.25  |
| 304547    | Tchp         | 280    | 283     | 298    | 303    | 291   | 319   | 290   | 293      |
| 500102    | Fam131b      | 3070.8 | 3175.2  | 3162.1 | 2954.2 | 3304  | 2838  | 3407  | 3122.28  |
| 685867    | Myl6         | 7755.9 | 7497.75 | 7567   | 6532.8 | 7179  | 7355  | 7588  | 7965.52  |
| 300129    | Cerk         | 2005   | 2015    | 1860   | 2082   | 1970  | 2131  | 2182  | 1878     |
| 299938    | Mrpl13       | 656.17 | 598.62  | 556.94 | 521.56 | 538.8 | 587.5 | 597.3 | 668.03   |
| 364844    | Pcdhgb7      | 201.63 | 266.38  | 240.59 | 262.04 | 169.5 | 288.1 | 266.8 | 270.56   |
| 312638    | Creld1       | 2211.4 | 1968.39 | 1963.7 | 1959.8 | 2088  | 2134  | 2001  | 2083.36  |
| 83513     | Mmp24        | 1238   | 1140    | 1132   | 1120   | 1195  | 1214  | 1145  | 1192     |
| 294043    | Sorcs3       | 461    | 452     | 491    | 511    | 523   | 465   | 526   | 449      |
| 361453    | Adat2        | 73     | 86      | 83     | 77     | 72    | 84    | 85    | 86       |
| 24404     | Gpx1         | 1164   | 1091    | 1316   | 968    | 1204  | 1229  | 1163  | 1057     |
| 289657    | Tbcd1d19     | 1016   | 1026    | 902    | 878    | 972   | 996   | 1092  | 858      |
| 246772    | Vps4a        | 1845.5 | 1814.67 | 1666.5 | 1689.7 | 1859  | 1764  | 1831  | 1738.33  |
| 290381    | Vwa8         | 1072   | 1116    | 1156   | 1150   | 1200  | 1163  | 1181  | 1063     |
| 361472    | Mthfd11      | 406    | 448     | 448    | 447    | 443   | 461   | 452   | 437      |
| 316039    | Osbpl10      | 1656   | 1593    | 1639   | 1670   | 1724  | 1732  | 1655  | 1612     |
| 360537    | Tom1l2       | 8347   | 8566    | 7999   | 8658   | 8831  | 8574  | 8612  | 8399     |
| 361853    | Fam184a      | 284    | 305     | 293    | 348    | 309   | 333   | 330   | 289      |
| 679693    | Med12        | 941.54 | 932.73  | 1026.9 | 1111.3 | 1038  | 1030  | 1038  | 1007.74  |
| 113990    | Hmgn3        | 494    | 461     | 437    | 430    | 453   | 416   | 507   | 492      |
| 314280    | Smoc1        | 312    | 582     | 416    | 629    | 362   | 787   | 407   | 432      |
| 360491    | Traf7        | 759    | 701     | 818    | 650    | 683   | 791   | 759   | 769      |
| 293150    | Stard10      | 1177   | 1142    | 1173   | 975    | 1213  | 1174  | 1149  | 1044     |
| 365567    | Micul        | 3392   | 3545    | 3262   | 3235   | 3587  | 3487  | 3441  | 3259     |
| 314627    | Plk5         | 19     | 19      | 22     | 19     | 19    | 22    | 23    | 17       |
| 361794    | Nfkbil1      | 311    | 304     | 292.2  | 281    | 310.6 | 310   | 300.6 | 297.13   |
| 301511    | Arpc2        | 5551   | 5390    | 5405   | 4896   | 5119  | 5543  | 5729  | 5389     |

|           |              |        |         |        |        |       |       |       |          |
|-----------|--------------|--------|---------|--------|--------|-------|-------|-------|----------|
| 499191    | Ngrn         | 1629   | 1608    | 1278   | 1407   | 1536  | 1400  | 1552  | 1584     |
| 501282    | Mydgf        | 536    | 499     | 536    | 439    | 509   | 503   | 493   | 556      |
| 295401    | Plppr4       | 454    | 416     | 312    | 393    | 487   | 342   | 388   | 398      |
| 29392     | Bace1        | 1062   | 1063    | 950    | 1213   | 1109  | 1115  | 1081  | 1092     |
| 307948    | Map10        | 27     | 22      | 35     | 34     | 27    | 33    | 34    | 27       |
| 362588    | Ndufs5       | 2448.8 | 2312.1  | 2197   | 1946   | 2150  | 2110  | 2207  | 2663.02  |
| 81657     | Gabbr1       | 9910.7 | 11022   | 10486  | 10689  | 10603 | 11363 | 10993 | 10218.58 |
| 298557    | Pittd1       | 1750   | 1894    | 1743   | 1691   | 1781  | 1754  | 1850  | 1873     |
| 100360936 | Anapc16      | 400.86 | 316.82  | 355.77 | 291.94 | 312.4 | 353.4 | 351.5 | 382.8    |
| 108348052 | LOC108348052 | 132.68 | 142.3   | 98.65  | 111.39 | 125.8 | 157.1 | 109.4 | 105.15   |
| 295695    | Zfp804a      | 578    | 541     | 513    | 608    | 565   | 586   | 597   | 549      |
| 25266     | Pdgfa        | 759    | 816     | 840    | 728    | 850   | 807   | 784   | 782      |
| 362103    | Ntmt1        | 225    | 205     | 227    | 207    | 209   | 255   | 208   | 214      |
| 494521    | Kctd10       | 2171.6 | 2242.7  | 2199.7 | 2077.2 | 2234  | 2215  | 2216  | 2246.4   |
| 100911848 | LOC100911848 | 118.09 | 85.68   | 91.26  | 92.86  | 74.64 | 89.21 | 106   | 127.96   |
| 498001    | Cntd1        | 102.98 | 61.29   | 83.01  | 81.31  | 91.07 | 54.22 | 94.44 | 97.23    |
| 501003    | RGD1563578   | 46.96  | 45.75   | 48.83  | 38.61  | 57.62 | 44.99 | 41.44 | 40.69    |
| 363291    | Thap4        | 271    | 301     | 301    | 304    | 312   | 324   | 271   | 300      |
| 301245    | Yipf3        | 1433   | 1482    | 1381   | 1352   | 1390  | 1454  | 1460  | 1488     |
| 310306    | Usp13        | 1873.7 | 1756.03 | 1727.2 | 1928.7 | 1911  | 2004  | 1859  | 1697.73  |
| 680248    | Nudt11       | 641.22 | 576.84  | 523.56 | 581.03 | 581.4 | 568.4 | 608.8 | 623.39   |
| 679221    | Mapre2       | 6511   | 6940    | 6333   | 7541   | 7075  | 7037  | 6902  | 7009     |
| 298652    | Ube4b        | 2596   | 2807    | 2879   | 3264   | 3118  | 3167  | 2822  | 2734     |
| 287722    | Tmem106a     | 364    | 374     | 363    | 424    | 321   | 407   | 420   | 416      |
| 50672     | Ednrb        | 1998.4 | 1975.79 | 1553.1 | 1989   | 1801  | 1726  | 2427  | 1754.63  |
| 116717    | Trip10       | 629    | 624     | 605    | 643    | 585   | 664   | 672   | 644      |
| 50685     | My112b       | 3810.1 | 4041.78 | 3946.2 | 3779.4 | 3931  | 4101  | 4050  | 3893.66  |
| 286937    | Pex5l        | 836    | 790     | 707    | 907    | 949   | 693   | 875   | 806      |
| 307585    | Cables1      | 323    | 290     | 257    | 301    | 291   | 382   | 272   | 256      |
| 303332    | Tmem199      | 843    | 842     | 774    | 701    | 757   | 776   | 826   | 882      |
| 100910121 | LOC100910121 | 94.49  | 54.82   | 55.85  | 0      | 0     | 92.02 | 65.12 | 53.29    |
| 296372    | Ncoa5        | 520    | 535     | 545    | 539    | 556   | 526   | 579   | 533      |
| 300053    | Kifc2        | 866    | 768.57  | 893.84 | 730.55 | 850   | 884   | 839   | 770      |
| 171046    | Tcf3         | 445    | 467     | 509    | 399    | 475   | 484   | 460   | 448      |
| 364388    | Cideb        | 17.93  | 51.69   | 53.84  | 65.32  | 14.03 | 56.92 | 35.71 | 87       |
| 501231    | Vwc2         | 46     | 21      | 23     | 26     | 33    | 26    | 36    | 24       |
| 680133    | Tbcd8        | 347    | 361     | 359    | 402    | 377   | 366   | 357   | 407      |
| 289181    | Dcaf6        | 1649   | 1802    | 1806   | 1500   | 1782  | 1768  | 1654  | 1728     |
| 680594    | Dph3         | 526.39 | 529.28  | 531.48 | 501.16 | 529   | 507   | 550.4 | 556.03   |
| 29489     | Dync1h1      | 17841  | 19857.2 | 19553  | 23328  | 22295 | 20402 | 20778 | 19192.26 |
| 289502    | Ccdc158      | 117    | 80.01   | 121    | 106    | 115   | 84.01 | 116   | 119.99   |
| 81765     | Rpl13        | 3713   | 3604    | 3843   | 2957   | 3535  | 3575  | 3558  | 3815     |
| 58845     | Igbp1        | 749    | 711     | 643    | 751    | 704   | 668   | 790   | 766      |
| 50545     | Dpf1         | 76     | 99      | 85     | 87     | 107   | 93    | 83    | 73       |
| 679091    | Mettl1       | 138.43 | 203.77  | 190.92 | 172.3  | 190.7 | 166.7 | 177.4 | 189      |
| 292534    | Tsen34       | 848.46 | 872.67  | 853.72 | 771.15 | 851.2 | 814.3 | 832.6 | 934.7    |
| 25238     | Grk2         | 1652   | 1622    | 1762   | 1706   | 1870  | 1698  | 1662  | 1687     |
| 681282    | LOC681282    | 224    | 166     | 217    | 163    | 200   | 189   | 199   | 202      |
| 85489     | Twist1       | 70     | 51      | 79     | 69     | 53    | 62    | 82    | 79       |
| 290426    | Klh11        | 129    | 127     | 102    | 103    | 118   | 104   | 119   | 132      |
| 287125    | Nubp2        | 543    | 542     | 580    | 486    | 560   | 541   | 556   | 550      |
| 266712    | Rnf40        | 650.72 | 682.69  | 751.44 | 714.6  | 733.7 | 746.9 | 728.5 | 663.36   |
| 103692165 | LOC103692165 | 1401.9 | 1402.3  | 1268.4 | 1357.8 | 1381  | 1476  | 1334  | 1380.61  |
| 292894    | Nosip        | 567    | 567     | 486    | 487    | 543   | 570   | 540   | 509      |
| 140910    | Msmo1        | 3552   | 3563    | 3316   | 3283   | 3144  | 3676  | 3600  | 3652     |
| 689593    | Dna.jb2      | 3334   | 3300    | 3007   | 3253   | 3462  | 3406  | 3105  | 3258     |

|           |              |        |         |        |        |       |       |       |         |
|-----------|--------------|--------|---------|--------|--------|-------|-------|-------|---------|
| 171443    | Slc12a9      | 193    | 250     | 238    | 236    | 214   | 249   | 207   | 271     |
| 298757    | Atl2         | 838    | 662     | 752    | 765    | 810   | 760   | 761   | 765     |
| 140946    | Paics        | 1649   | 1604.81 | 1585   | 1486.8 | 1555  | 1423  | 1650  | 1863.54 |
| 288778    | Pa2g4        | 972    | 1047    | 1048   | 904    | 897   | 1041  | 1081  | 1056    |
| 360662    | Sap30bp      | 806    | 745     | 711    | 754    | 826   | 751   | 816   | 702     |
| 307989    | Ablim1       | 4934   | 5075    | 4779   | 5363   | 5389  | 5356  | 5092  | 4842    |
| 286922    | Fads3        | 1061   | 1020    | 1027   | 974    | 1023  | 1086  | 978   | 1102    |
| 291670    | Cxxc5        | 1027.4 | 1123.24 | 1092.1 | 967.14 | 1064  | 1091  | 1104  | 1061.11 |
| 100362764 | Ddx55        | 191    | 212     | 212    | 185    | 224   | 190   | 209   | 198     |
| 140940    | Arf3         | 6415   | 6803    | 6606   | 6610   | 7371  | 6600  | 6660  | 6497    |
| 367113    | Lrrc1        | 100    | 107     | 133    | 155    | 106   | 133   | 153   | 116     |
| 60571     | Mybbpla      | 1187.3 | 1242.21 | 1225.8 | 1201.4 | 1255  | 1286  | 1265  | 1178.93 |
| 291772    | Kctd1        | 415    | 470.26  | 441.25 | 519.99 | 499.3 | 557   | 433   | 405.87  |
| 114521    | Tdg          | 565    | 560     | 619    | 498    | 551   | 578   | 648   | 524     |
| 292699    | Cblc         | 15     | 9       | 7      | 7      | 9     | 14    | 9     | 7       |
| 25388     | Arrb2        | 1193   | 1034    | 1059   | 1004   | 1174  | 1105  | 1073  | 1051    |
| 312706    | Emg1         | 325.83 | 340.81  | 286.4  | 322.88 | 352.9 | 320.7 | 333.7 | 302.23  |
| 117243    | Acs16        | 2603   | 2560    | 2051   | 2727   | 2624  | 2582  | 2728  | 2269    |
| 500915    | Fam19a5      | 972    | 915     | 943    | 964    | 930   | 1004  | 1000  | 960     |
| 293016    | Map7         | 1545   | 1533    | 1467   | 1638   | 1768  | 1591  | 1483  | 1504    |
| 407764    | St6galnac4   | 247    | 293     | 245    | 238    | 232   | 303   | 271   | 244     |
| 259170    | Casc3        | 1037   | 1005    | 946    | 1138   | 1084  | 1078  | 1075  | 998     |
| 29745     | Sema4f       | 1176.1 | 1234.67 | 1139.8 | 1127.3 | 1324  | 1127  | 1242  | 1108.15 |
| 316122    | Abhd5        | 873    | 785     | 810    | 787    | 716   | 868   | 901   | 856     |
| 679383    | Sepsecs      | 307    | 289     | 290    | 287    | 264   | 288   | 313   | 339     |
| 84509     | Ran          | 4116.9 | 4013    | 3847   | 3618.8 | 3979  | 3942  | 4123  | 3964    |
| 171366    | Ppp4c        | 637    | 601     | 676    | 545    | 672   | 643   | 623   | 586     |
| 246254    | Gpsml        | 744    | 665     | 701    | 651    | 653   | 768   | 708   | 705     |
| 50689     | Mapk3        | 15847  | 16587   | 15667  | 14752  | 16387 | 16128 | 16039 | 15961   |
| 287661    | Cisd3        | 701    | 633     | 600    | 637    | 626   | 647   | 628   | 738     |
| 300721    | Dnaj4        | 1911   | 1885    | 1771   | 1975   | 1935  | 1805  | 2018  | 1984    |
| 687696    | Stambpl1     | 597    | 623     | 598    | 591    | 628   | 626   | 600   | 619     |
| 363123    | Rab6b        | 22332  | 22822   | 21334  | 23879  | 24472 | 23549 | 22618 | 22131   |
| 297900    | Pef1         | 1282   | 1413    | 1300   | 1194   | 1403  | 1322  | 1309  | 1293    |
| 360826    | Hscb         | 244    | 224     | 212    | 184    | 213   | 218   | 231   | 225     |
| 114613    | Slc5a5       | 65.65  | 63.39   | 51.9   | 84.07  | 68.7  | 76.42 | 52.53 | 74.42   |
| 292485    | Fuca2        | 562    | 531     | 495    | 476    | 515   | 531   | 533   | 540     |
| 309434    | Hiflan       | 320    | 341     | 301    | 351    | 360   | 312   | 336   | 340     |
| 308836    | Kctd14       | 84     | 49      | 50     | 42     | 65    | 46    | 51    | 69      |
| 360972    | Thoc5        | 711    | 729     | 727    | 683    | 718   | 742   | 716   | 750     |
| 498888    | Siglec15     | 23     | 19      | 18     | 15     | 21    | 22    | 18    | 16      |
| 292624    | Nop53        | 1360   | 1194    | 1188   | 1167   | 1313  | 1210  | 1251  | 1266    |
| 246246    | Pnpla7       | 305    | 323.34  | 314.68 | 367    | 373   | 342   | 286   | 344     |
| 367314    | Lrrfip1      | 1059   | 1219    | 1069   | 1143   | 1158  | 1254  | 1169  | 1029    |
| 299310    | Ndufb11      | 1296   | 1143    | 1053   | 914    | 1072  | 1113  | 1143  | 1196    |
| 60356     | Csad         | 586.6  | 653.35  | 619.83 | 567.23 | 572.3 | 662   | 606.4 | 651.29  |
| 103694866 | LOC103694866 | 733.65 | 580.59  | 757.85 | 248.94 | 361.4 | 1099  | 534.8 | 388.21  |
| 498957    | Klhl36       | 113    | 96      | 81     | 83     | 90    | 95    | 97    | 101     |
| 309674    | Rrp1         | 672    | 779     | 691    | 617    | 694   | 704   | 762   | 673     |
| 292413    | Fpr3         | 0.98   | 0       | 1      | 1      | 1     | 0     | 1     | 1.06    |
| 681062    | Slbp         | 484    | 505     | 525    | 421    | 485   | 483   | 531   | 488     |
| 303693    | Mgat5b       | 223    | 254     | 260    | 229    | 248   | 261   | 243   | 240     |
| 685699    | LOC685699    | 11     | 10.82   | 11     | 11     | 8     | 11    | 17    | 9       |
| 361402    | Prmt7        | 349    | 377     | 375    | 310    | 353   | 348   | 344   | 404     |
| 315136    | Cbx6         | 4806   | 5057    | 4733   | 4971   | 5326  | 4907  | 4891  | 4970    |
| 316435    | Cyp20a1      | 409    | 390     | 400    | 397    | 405   | 421   | 379   | 434.01  |



|           |              |        |         |        |        |       |       |       |         |
|-----------|--------------|--------|---------|--------|--------|-------|-------|-------|---------|
| 29421     | Urod         | 1021   | 998     | 871    | 855    | 899   | 1010  | 938   | 999     |
| 293620    | Ptdss2       | 1193   | 1217    | 1093   | 1206   | 1168  | 1233  | 1137  | 1298    |
| 498278    | Cfap126      | 68     | 68      | 59     | 64     | 64    | 73    | 61    | 68      |
| 691069    | Pkd112       | 12     | 14      | 4      | 7      | 5     | 6     | 16    | 11      |
| 79107     | Duox2        | 52.13  | 83.69   | 58.25  | 83.01  | 68.01 | 70.72 | 71.27 | 74.57   |
| 362441    | Itfg2        | 221    | 213     | 212    | 204    | 207   | 227   | 224   | 215     |
| 363219    | Mitd1        | 182    | 201     | 217    | 176    | 185   | 200   | 216   | 196     |
| 24611     | Gnal         | 4439   | 4312    | 3965   | 4084   | 4490  | 4116  | 4219  | 4430    |
| 498606    | Kxd1         | 826    | 868     | 893    | 732    | 760   | 840   | 906   | 903     |
| 295928    | Slc39a13     | 879    | 828     | 815    | 792    | 784   | 937   | 837   | 846     |
| 117107    | Zbtb7a       | 1978.3 | 2035.41 | 2020.6 | 2207   | 2283  | 2169  | 2002  | 2011.62 |
| 688634    | Kat6b        | 524    | 461     | 481.99 | 558    | 522   | 495.1 | 497   | 566     |
| 360746    | Ppil2        | 704    | 713     | 664    | 675    | 682   | 726   | 692   | 731     |
| 58827     | Mest         | 912    | 942     | 836    | 1021   | 939   | 984   | 932   | 957     |
| 25392     | Atp5if1      | 3456   | 2996    | 2964   | 2525   | 3136  | 2860  | 2882  | 3388    |
| 313231    | Alg2         | 3021   | 3141    | 3013   | 2984   | 3199  | 3187  | 3135  | 2969    |
| 361613    | Ppme1        | 2874   | 2799    | 2743   | 2856   | 2891  | 2945  | 2903  | 2840    |
| 683955    | Flvcr1       | 80     | 74      | 103    | 110    | 108   | 89    | 92    | 88      |
| 361879    | Wdr41        | 583    | 593     | 556    | 580    | 602   | 568   | 588   | 617     |
| 309681    | Cfap410      | 1005   | 1078    | 901    | 979    | 922   | 1019  | 1002  | 1128    |
| 84478     | Ufd1         | 1410   | 1373    | 1337   | 1306   | 1288  | 1409  | 1514  | 1363    |
| 65096     | Adgrl1       | 2010   | 2059    | 1913   | 2258   | 2314  | 2202  | 2134  | 1815    |
| 306091    | Pcdh9        | 1429   | 1313    | 1235   | 1549   | 1376  | 1440  | 1523  | 1338    |
| 367903    | Armex2       | 2542   | 2351    | 2397   | 2443   | 2574  | 2506  | 2463  | 2456    |
| 25075     | Htr1b        | 160    | 159     | 171    | 168    | 190   | 163   | 182   | 141     |
| 102556031 | Coa6         | 308.97 | 277.52  | 265.14 | 193.44 | 329.7 | 230.9 | 235.1 | 277.91  |
| 114591    | Dpp3         | 2142   | 2137    | 2167   | 2137   | 2260  | 2298  | 2090  | 2170    |
| 682058    | Nom1         | 479.03 | 414.56  | 458.72 | 486.43 | 457   | 461.2 | 474.9 | 496.04  |
| 294504    | Ppa1         | 2610   | 2523    | 2198   | 2256   | 2388  | 2363  | 2511  | 2588    |
| 296350    | Serinc3      | 7350   | 7234    | 6748   | 7172   | 7545  | 6841  | 7685  | 7215    |
| 363103    | Slc17a5      | 466    | 460     | 482    | 523.02 | 553   | 493   | 483   | 455     |
| 252881    | Exoc3        | 1093.8 | 1082.55 | 1058.4 | 1029.6 | 1127  | 1052  | 1143  | 1058.38 |
| 497921    | Slc47a2      | 86     | 51      | 61     | 57     | 68    | 66    | 54    | 74      |
| 502782    | Pigy         | 881    | 1005    | 795    | 669    | 768   | 782   | 973   | 919     |
| 314655    | Adamts10     | 746    | 529     | 594    | 607    | 631   | 580   | 656   | 677     |
| 306182    | Ipo5         | 2663   | 2759    | 2593   | 2762   | 2723  | 2787  | 2877  | 2686    |
| 362533    | Tle1         | 930.56 | 988.01  | 976.07 | 966.25 | 1021  | 1021  | 972.1 | 953.04  |
| 294783    | Wdr70        | 290.09 | 335.17  | 292.87 | 338.45 | 330.5 | 331.1 | 338.4 | 291.22  |
| 304900    | Astn1        | 1490   | 1514    | 1527   | 1594   | 1676  | 1584  | 1548  | 1486    |
| 303076    | Surf6        | 320    | 276     | 312    | 288    | 295   | 322   | 308   | 304     |
| 293500    | Pagr1        | 645.57 | 519.02  | 550.1  | 563.69 | 582.3 | 579   | 563.6 | 616.35  |
| 298646    | Agtrap       | 370.54 | 360.01  | 401.15 | 323.85 | 378.2 | 366.4 | 369   | 382.16  |
| 102557368 | LOC102557368 | 14.08  | 4.04    | 9.03   | 0      | 7.73  | 3.1   | 4.31  | 12.76   |
| 100233213 | Insyn2       | 147.99 | 194.04  | 132.01 | 130.27 | 187   | 153   | 144   | 137.02  |
| 171454    | Nacc1        | 2351   | 2481    | 2375   | 2407   | 2460  | 2533  | 2457  | 2430    |
| 310746    | Ap4b1        | 558    | 518     | 556    | 499    | 519   | 557   | 605   | 509     |
| 313742    | Phf13        | 171    | 157     | 163    | 195    | 167   | 182   | 173   | 183     |
| 306261    | Eaf1         | 1125.8 | 1160.57 | 1125   | 1190.8 | 1307  | 1137  | 1188  | 1097.43 |
| 300445    | Prkcsb       | 1985.6 | 1943.01 | 2053.6 | 1917   | 1920  | 2163  | 1992  | 2043.7  |
| 308913    | Egln1        | 890.4  | 893.39  | 914.65 | 880.9  | 852.2 | 1056  | 868.6 | 902.22  |
| 361531    | Paf1         | 763    | 748     | 825    | 761    | 759   | 839   | 761   | 824     |
| 498024    | Kctd2        | 614    | 603     | 595    | 563    | 604   | 613   | 592   | 632     |
| 266713    | Mnat1        | 491    | 470     | 476    | 505    | 485   | 502   | 522   | 487     |
| 314329    | Irf2bpl      | 648.12 | 595.52  | 754.18 | 737    | 688.5 | 756.8 | 677   | 688.59  |
| 362952    | Eif3d        | 921    | 982     | 940    | 870    | 970   | 908   | 1007  | 931.31  |
| 103689948 | LOC103689948 | 7.78   | 12.36   | 7.06   | 6.89   | 9.13  | 8.95  | 5.64  | 11.32   |

|           |              |        |         |        |        |       |       |       |          |
|-----------|--------------|--------|---------|--------|--------|-------|-------|-------|----------|
| 24465     | Hprt1        | 787.01 | 844.41  | 908.54 | 631.01 | 822.2 | 714.7 | 894.9 | 827.61   |
| 83782     | Nme2         | 3226   | 2958    | 2906   | 2468   | 2891  | 2766  | 2915  | 3309     |
| 361774    | Fam160b1     | 706    | 732     | 746    | 785    | 743   | 765   | 749   | 795      |
| 361801    | Rxbp1        | 797.29 | 775.36  | 771.32 | 701.45 | 825   | 801.2 | 752.1 | 752.34   |
| 304023    | St3gal6      | 459    | 427     | 377    | 453    | 428   | 446   | 466   | 424      |
| 294014    | Cnrm2        | 345    | 316     | 281    | 380    | 341   | 376   | 351   | 291      |
| 79240     | Nr4a1        | 951    | 1038    | 1069   | 1978   | 1251  | 1586  | 1397  | 943      |
| 108348229 | LOC108348229 | 260.29 | 229.83  | 284.86 | 327.33 | 265.6 | 271.3 | 289.5 | 306.82   |
| 363272    | Pde6d        | 956    | 935     | 982    | 835    | 915   | 934   | 971   | 992      |
| 360821    | Gatc         | 1311.6 | 1322.62 | 1344.3 | 1308.8 | 1296  | 1328  | 1396  | 1414.74  |
| 501167    | Gmppa        | 441    | 393     | 406    | 399    | 407   | 438   | 391   | 449      |
| 305438    | Sorcs2       | 1376   | 1652    | 1959   | 1671   | 1621  | 1879  | 1727  | 1618     |
| 360801    | Ncor2        | 4030   | 4635.97 | 4921.9 | 5385.8 | 4846  | 5240  | 4672  | 4749.01  |
| 689955    | LOC689955    | 31549  | 29827   | 27501  | 28527  | 30104 | 30048 | 30150 | 30406.75 |
| 362791    | Sival        | 148    | 132     | 143    | 110    | 121   | 133   | 134   | 160      |
| 502643    | Ypel4        | 399    | 420     | 406    | 408    | 412   | 428   | 450   | 389      |
| 306969    | Hist1h2bf    | 3.22   | 1.01    | 0      | 2.14   | 2.56  | 1.56  | 1.01  | 1.42     |
| 100360757 | Ctcf1        | 49     | 54      | 38     | 71     | 55    | 59    | 60    | 44       |
| 304761    | Zranb3       | 220.1  | 181.27  | 185.99 | 176.09 | 211.6 | 175.9 | 162.3 | 235.36   |
| 301512    | Aamp         | 1785.8 | 1754.39 | 1792.4 | 1666.1 | 1726  | 1773  | 1907  | 1791.71  |
| 301252    | Hsp90ab1     | 35722  | 37319.3 | 34887  | 39994  | 39078 | 38778 | 38170 | 36090.06 |
| 684035    | Rnpepl1      | 717    | 753     | 839    | 687    | 638   | 849   | 747   | 847      |
| 362590    | Inpp5b       | 672.4  | 620.02  | 609.19 | 707.62 | 661.1 | 589.7 | 788   | 644.44   |
| 691799    | I117d        | 314    | 277     | 246    | 255    | 282   | 253   | 278   | 310      |
| 297383    | Rtkn         | 1289.3 | 1292.1  | 1113.3 | 1151.6 | 1198  | 1308  | 1223  | 1254.88  |
| 303499    | Sp2          | 372    | 414     | 419    | 449    | 441   | 449   | 415   | 396      |
| 64371     | Prdx3        | 1625   | 1592    | 1406   | 1314   | 1427  | 1482  | 1646  | 1551     |
| 292007    | Dhx38        | 375    | 437     | 466    | 443    | 439   | 437   | 439   | 455      |
| 362438    | Ncapd2       | 193.4  | 213     | 216.39 | 192    | 225   | 235   | 196   | 182      |
| 25061     | Crabp1       | 123    | 90      | 84     | 89     | 123   | 90    | 88    | 96       |
| 60323     | Arhgef1      | 1062   | 1105    | 1180   | 1072   | 1117  | 1168  | 1215  | 1045     |
| 689054    | Lin28b       | 83.71  | 84.84   | 62.85  | 73.89  | 93.07 | 61.69 | 90.03 | 69.21    |
| 170929    | Bcl2a1       | 19     | 21      | 18     | 12     | 18    | 15    | 19    | 20       |
| 246331    | Nrpl         | 984    | 887     | 1043   | 1004   | 960   | 987   | 1044  | 1039     |
| 171432    | Tmem14c      | 1614   | 1429    | 1388   | 1199   | 1410  | 1476  | 1457  | 1448     |
| 308765    | Arpin        | 211    | 225     | 199    | 204    | 211   | 188   | 228   | 236      |
| 319113    | Yrdc         | 246    | 249     | 223    | 225    | 241   | 255   | 243   | 231      |
| 306945    | Hist1h2bh    | 1483.8 | 1390.18 | 1295.1 | 1380.3 | 1412  | 1492  | 1393  | 1411.9   |
| 100910596 | LOC100910596 | 56     | 42      | 46     | 65     | 64    | 47    | 38    | 66       |
| 498402    | Ascc2        | 260    | 221     | 259    | 270    | 245   | 247   | 288   | 259      |
| 306257    | Bap1         | 2788   | 2642    | 2656   | 2603   | 2831  | 2701  | 2747  | 2717     |
| 100362346 | Mta3         | 1256   | 1268    | 1239   | 1315.8 | 1358  | 1304  | 1301  | 1261.88  |
| 363989    | Phlda3       | 1697   | 1530.14 | 1720.8 | 1512.6 | 1456  | 1824  | 1645  | 1721.51  |
| 170897    | Sphk1        | 449    | 389     | 364    | 326    | 415   | 409   | 359   | 389      |
| 313030    | Ppp1r8       | 495    | 473     | 484    | 423    | 500   | 479   | 493   | 457      |
| 290657    | Klhl26       | 541.85 | 442.39  | 600.27 | 504.43 | 583   | 564.1 | 471.3 | 530.69   |
| 301460    | Adam23       | 12677  | 12645   | 10960  | 12523  | 13174 | 13297 | 13857 | 9884     |
| 81730     | Fez1         | 5815   | 5638    | 5209   | 4801   | 5491  | 5497  | 5445  | 5649     |
| 305386    | Tapt1        | 591    | 551     | 545    | 565    | 565   | 574   | 597   | 581      |
| 114495    | Map2k6       | 214    | 230     | 200    | 221    | 218   | 222   | 239   | 211      |
| 293455    | Gga2         | 787    | 905.9   | 880.25 | 816.83 | 900.8 | 883.6 | 873.8 | 829.73   |
| 362622    | Cep85        | 388    | 457     | 415.97 | 411.66 | 440   | 460   | 452   | 369      |
| 687183    | Kril         | 450.62 | 457.73  | 489.97 | 438.54 | 466.6 | 467.3 | 494.2 | 461.93   |
| 311187    | Pacsin3      | 339    | 446     | 413    | 358    | 366   | 461   | 411   | 363      |
| 293152    | Art2b        | 2.9    | 5.56    | 11.65  | 6.16   | 7.7   | 5.95  | 2.11  | 11.27    |
| 24206     | Apeh         | 1280   | 1216    | 1168   | 1104   | 1227  | 1288  | 1184  | 1207     |

|           |              |        |         |        |        |       |       |       |         |
|-----------|--------------|--------|---------|--------|--------|-------|-------|-------|---------|
| 83474     | Tfam         | 254    | 293     | 306    | 252    | 254   | 283   | 282   | 318     |
| 363061    | Sdhd         | 1437   | 1388    | 1290   | 1235   | 1283  | 1422  | 1395  | 1405    |
| 100302465 | LOC100302465 | 19     | 16      | 17     | 17     | 25    | 15    | 14    | 17      |
| 65272     | Kcnk10       | 182    | 162     | 209.26 | 214    | 210.5 | 195   | 193   | 191     |
| 296649    | Rabepk       | 407    | 384     | 339    | 385    | 384   | 382   | 393   | 400     |
| 303190    | Atpaf2       | 259    | 271     | 224    | 210    | 231   | 247   | 257   | 257     |
| 102546809 | Smim35       | 85     | 81      | 62     | 116    | 81    | 97    | 106   | 70      |
| 290995    | Preli1       | 2223   | 2110    | 2117   | 1735   | 2084  | 2196  | 2095  | 2048    |
| 500400    | Fam110b      | 585.07 | 582.18  | 591    | 559.01 | 568.6 | 612.1 | 592.1 | 611.87  |
| 289753    | Rhbdd3       | 345    | 373     | 380    | 344    | 374   | 383   | 365   | 362     |
| 314917    | Pkhd111      | 42     | 18      | 26     | 17     | 20    | 36    | 26    | 24      |
| 303660    | Btdb17       | 9      | 9       | 8      | 9      | 6.4   | 6.73  | 12.43 | 10.46   |
| 316241    | Nfkbie       | 342    | 348     | 326    | 322    | 357   | 317   | 357   | 346     |
| 363595    | Tcf7         | 70     | 65      | 70     | 69     | 84    | 76    | 54.99 | 67      |
| 29757     | Atp6v0a1     | 6131   | 6379    | 6067   | 6491   | 6490  | 6763  | 6409  | 6137    |
| 362776    | Glrx5        | 989    | 927     | 871    | 740    | 961   | 864   | 886   | 919     |
| 293692    | Ehd1         | 1609   | 1818    | 1924   | 1858   | 1983  | 1912  | 1901  | 1624    |
| 287444    | Eif5a        | 7717.2 | 7499.83 | 7355.4 | 6104.4 | 7159  | 7324  | 7491  | 7542.23 |
| 103691033 | LOC103691033 | 187    | 201     | 140    | 155    | 144   | 182   | 197   | 180     |
| 314788    | RGD1307947   | 309.77 | 295.31  | 286.29 | 290.63 | 298   | 279.9 | 319.3 | 319.43  |
| 100360334 | Fhod3        | 1110   | 1225    | 1184   | 1293   | 1225  | 1245  | 1204  | 1279    |
| 303659    | Kif19        | 1250   | 1517    | 1631   | 1299   | 1262  | 1525  | 1563  | 1514.54 |
| 304558    | Ttc28        | 539    | 458     | 546    | 536    | 553   | 539   | 540   | 508     |
| 100362470 | Mrtfb        | 26     | 27.95   | 39     | 45     | 35    | 32    | 44    | 31      |
| 306564    | Htra4        | 802.72 | 781.63  | 770.42 | 827.57 | 843.1 | 843.2 | 866.9 | 722.63  |
| 361190    | Usp19        | 2016   | 2005    | 2013   | 1991   | 2099  | 2167  | 2127  | 1868    |
| 292640    | Vtal         | 1091   | 1001    | 989    | 931    | 991   | 1072  | 1016  | 1051    |
| 29602     | Ptgfrn       | 943    | 1081    | 1256   | 1242   | 1110  | 1191  | 1324  | 1030    |
| 291906    | Aktip        | 2134   | 2170    | 2090   | 2022   | 2155  | 2208  | 2179  | 2122    |
| 83583     | Rabac1       | 3047   | 3045    | 2835   | 2441   | 3060  | 2898  | 2740  | 3005    |
| 100911699 | LOC100911699 | 3.27   | 0       | 12     | 0      | 0     | 0     | 6.37  | 9.35    |
| 58851     | Nr1h2        | 1578   | 1572    | 1561   | 1427   | 1539  | 1619  | 1524  | 1637    |
| 102555038 | LOC102555038 | 21.14  | 26.62   | 21.01  | 13.29  | 21.85 | 22.07 | 23.56 | 17      |
| 94271     | Atp5pf       | 2295.3 | 2156.68 | 2088.8 | 1805.7 | 2041  | 2022  | 2171  | 2358.94 |
| 313644    | Raplgap      | 3030   | 2701    | 2908   | 2336   | 2831  | 2835  | 3206  | 2427    |
| 367172    | Dhx30        | 1409   | 1492    | 1399   | 1326   | 1480  | 1548  | 1419  | 1345.16 |
| 306594    | McpH1        | 116    | 121     | 102    | 134    | 122   | 110   | 133   | 122     |
| 170914    | Nap113       | 1202   | 1152.3  | 1044.8 | 1225   | 1243  | 1140  | 1186  | 1192    |
| 307366    | Malt1        | 168.06 | 137.66  | 146.31 | 156.61 | 156.5 | 148.6 | 168.1 | 153.42  |
| 296162    | DdrGk1       | 1087   | 1029    | 1043   | 993    | 1111  | 1051  | 1040  | 1073    |
| 641434    | Atp5pd       | 2696   | 2691    | 2425   | 2141   | 2404  | 2361  | 2622  | 2861    |
| 302593    | Tceal1       | 390    | 363     | 336    | 361    | 359   | 322   | 402   | 410     |
| 296639    | Ciz1         | 794    | 785     | 807    | 846    | 820   | 870   | 786   | 852     |
| 100360501 | Rnh1         | 1519   | 1433    | 1438   | 1229   | 1335  | 1495  | 1432  | 1524    |
| 294508    | PalD1        | 474    | 465.99  | 456.06 | 418    | 508   | 490   | 427   | 443     |
| 293128    | Nars2        | 193    | 204     | 171    | 205    | 205   | 187   | 213   | 191     |
| 100912582 | LOC100912582 | 100.27 | 114.57  | 85.35  | 114.2  | 92.24 | 72.43 | 158.8 | 103.28  |
| 84489     | Fgfr3        | 49     | 35      | 40     | 44     | 35    | 66    | 27    | 45      |
| 140662    | Rplp2        | 2165.4 | 2004.74 | 2211.4 | 1768.7 | 1986  | 2090  | 1897  | 2419.06 |
| 310348    | Larplb       | 1034   | 1037    | 930    | 959    | 995   | 999   | 1041  | 1043    |
| 300089    | Pmm1         | 2127   | 2094    | 1847   | 1818   | 2032  | 2113  | 2012  | 1964    |
| 140720    | BaalC        | 439.52 | 466.28  | 526.75 | 415.05 | 485.1 | 495.2 | 447.1 | 475.28  |
| 363332    | Ubxn6        | 1096   | 1099    | 1026   | 934    | 1105  | 1039  | 1090  | 1045    |
| 246311    | Pdp2         | 159    | 148     | 136    | 160    | 156   | 153   | 157   | 155     |
| 361836    | Slc25a16     | 925.07 | 960.74  | 871.44 | 946.04 | 990.6 | 981.6 | 984.7 | 857.01  |
| 498159    | Spry3        | 386    | 443     | 412    | 464    | 452   | 438   | 430   | 435.95  |

|           |                 |        |         |        |        |       |       |       |         |
|-----------|-----------------|--------|---------|--------|--------|-------|-------|-------|---------|
| 29640     | Dpm2            | 388    | 371     | 343    | 303    | 373   | 333   | 332   | 409     |
| 25488     | Ndufa5          | 1257   | 1249    | 993    | 1045   | 1113  | 1071  | 1189  | 1307    |
| 311427    | Hspa12b         | 630    | 586     | 536    | 552    | 604   | 627   | 604   | 538     |
| 307861    | Terf2ip         | 972    | 1011    | 940    | 879    | 946   | 974   | 990   | 1006    |
| 361107    | Actr8           | 772    | 739     | 731    | 659    | 776   | 758   | 747   | 707     |
| 289397    | Kif21b          | 743    | 904     | 725    | 1162   | 911   | 970   | 998   | 761     |
| 296564    | Fut7            | 46     | 39      | 69     | 46     | 50    | 56    | 49    | 51      |
| 25591     | Parp1           | 1753   | 1934    | 1860   | 1917   | 1982  | 2020  | 1929  | 1757    |
| 108348076 | NEWGENE_1308105 | 529.75 | 576.45  | 611.59 | 654.32 | 612.4 | 598.4 | 642.6 | 590.02  |
| 619558    | Fam134b         | 896.89 | 1199.64 | 1457.9 | 1283.7 | 1005  | 1269  | 1456  | 1253.07 |
| 315992    | Dock3           | 1426   | 1524    | 1254   | 1680   | 1602  | 1502  | 1602  | 1355    |
| 498972    | Cpne2           | 963    | 884     | 835    | 908    | 1001  | 854   | 872   | 971     |
| 362385    | Pole4           | 579    | 533     | 556    | 425    | 508   | 516   | 545   | 587     |
| 100910792 | LOC100910792    | 2075   | 2113.39 | 1873.3 | 2055.2 | 2007  | 2200  | 2124  | 2030.21 |
| 58822     | Csnkle          | 1001.1 | 981.23  | 1034   | 1063   | 1121  | 1038  | 1034  | 1009.17 |
| 24697     | Ptpn1           | 209    | 238     | 292    | 221    | 229   | 274   | 245   | 241     |
| 691135    | LOC691135       | 89.93  | 98.34   | 86.22  | 92.27  | 77.68 | 88.66 | 115.9 | 95.64   |
| 29565     | Eef2            | 18606  | 19722   | 19556  | 18802  | 19697 | 20643 | 19527 | 19136   |
| 298933    | Rnaseh1         | 145    | 131     | 118    | 102    | 122   | 129   | 136   | 124     |
| 64060     | Vps33b          | 333    | 380     | 316    | 293    | 321   | 350   | 387   | 304     |
| 259275    | Ostf1           | 3518   | 3322    | 3069   | 2846   | 3122  | 3076  | 3392  | 3551    |
| 360971    | Nipsnap1        | 1536   | 1531    | 1500   | 1545   | 1544  | 1625  | 1619  | 1509    |
| 293456    | Cog7            | 558.35 | 540.85  | 572.92 | 550.09 | 554.8 | 605.2 | 592   | 537.49  |
| 309280    | Plxna3          | 1292.5 | 1319.4  | 1325.7 | 1395   | 1444  | 1330  | 1422  | 1297.22 |
| 303298    | Raplgap2        | 2883.7 | 2742.04 | 2648.6 | 2977.7 | 3086  | 2829  | 2995  | 2683.09 |
| 302325    | Sat11           | 8      | 8       | 10     | 7      | 9     | 9     | 12    | 4       |
| 313050    | Lck             | 31     | 26      | 26     | 16     | 26    | 19    | 29    | 28      |
| 303259    | Mink1           | 4927   | 4746.18 | 4482.1 | 4884.4 | 5069  | 4871  | 4786  | 4890    |
| 245925    | Phrf1           | 866    | 876     | 925    | 957    | 955   | 905   | 935   | 939     |
| 297720    | Casc1           | 176.02 | 177.46  | 170.08 | 185.04 | 179   | 169   | 195.1 | 187.08  |
| 298203    | Stoml2          | 859    | 869     | 786    | 813    | 817   | 885   | 902   | 824     |
| 303350    | Rnf135          | 110.49 | 82.42   | 123.86 | 108.41 | 91.95 | 110.7 | 93.83 | 141.65  |
| 295161    | Fhdcl           | 540    | 548     | 509    | 642    | 583   | 586   | 558   | 580     |
| 290614    | Cherp           | 708.91 | 671.8   | 763.23 | 727.41 | 719.9 | 804.5 | 696.1 | 738.1   |
| 306804    | Iars            | 2372.9 | 2379.14 | 2268.2 | 2740.3 | 2480  | 2680  | 2495  | 2402.78 |
| 311802    | Ssna1           | 586    | 508     | 523    | 422    | 531   | 514   | 511   | 545     |
| 114087    | Banf1           | 789    | 736     | 811    | 721    | 748   | 771   | 749   | 882     |
| 360531    | Sap301          | 1405   | 1305    | 1324   | 1322   | 1617  | 1403  | 1306  | 1193    |
| 293722    | B3gat3          | 3090   | 2869    | 2839   | 2795   | 3283  | 2932  | 2897  | 2834    |
| 303248    | Neurl4          | 1110   | 1140    | 1138   | 1235   | 1208  | 1237  | 1168  | 1151    |
| 100361928 | Tmem198         | 224    | 203     | 188    | 204    | 215   | 195   | 234   | 200     |
| 64120     | Kcnk13          | 31     | 31      | 35     | 34     | 30    | 32    | 41    | 32      |
| 100362255 | Adgrv1          | 215    | 206     | 216    | 247    | 279   | 181   | 223   | 228     |
| 81528     | Ogg1            | 191.1  | 228.64  | 230    | 188.19 | 197.3 | 206.2 | 234.1 | 226     |
| 313977    | Lpin1           | 2119   | 2251    | 2079   | 2282   | 2336  | 2290  | 2236  | 2136    |
| 498814    | Mtcp1           | 36     | 34.48   | 21.16  | 25.7   | 27    | 39.56 | 29.44 | 24.93   |
| 65025     | Rims3           | 563    | 531     | 583    | 578    | 673   | 564   | 523   | 564     |
| 313450    | Rnf113a1        | 96.98  | 78      | 86     | 33.39  | 82    | 90    | 90    | 41.38   |
| 680476    | Bloc1s3         | 211    | 204     | 183    | 186    | 209   | 189   | 215   | 195     |
| 102546764 | LOC102546764    | 308.75 | 280.03  | 284.22 | 249.37 | 304.7 | 263.3 | 276.6 | 312.14  |
| 292658    | Prkd2           | 107    | 101     | 124    | 92     | 119   | 115   | 121   | 82      |
| 305441    | Sh3tc1          | 38     | 40      | 53     | 32     | 37    | 51    | 43    | 37      |
| 63864     | Hsd17b10        | 850    | 886     | 782    | 773    | 774   | 801   | 872   | 945     |
| 29163     | Cdh9            | 184    | 185     | 196    | 217    | 186   | 202   | 207   | 211     |
| 117262    | Psmc4           | 1926   | 1858    | 1956   | 1743   | 1886  | 1952  | 1907  | 1968    |
| 301563    | Mff             | 2711.2 | 2402.72 | 2410.8 | 2251.1 | 2460  | 2431  | 2776  | 2409.51 |

|           |              |        |         |        |        |       |       |       |         |
|-----------|--------------|--------|---------|--------|--------|-------|-------|-------|---------|
| 301221    | Mocs1        | 269    | 261     | 259    | 282    | 285   | 277   | 258   | 284     |
| 302562    | Plp2         | 1064.7 | 992.83  | 1080.7 | 850.09 | 955.4 | 1039  | 1019  | 1098.52 |
| 683077    | Pja1         | 3583   | 3547    | 3437   | 3643   | 3624  | 3605  | 3764  | 3655    |
| 299569    | Akap81       | 1005   | 933     | 949    | 907    | 985   | 1003  | 1007  | 916     |
| 245961    | Dmgdh        | 102    | 100     | 91     | 96     | 105   | 82    | 108   | 106     |
| 314704    | Hcfc2        | 242    | 225     | 216    | 257    | 244   | 220   | 249   | 256     |
| 679811    | LOC679811    | 1035   | 1091    | 1037   | 1082   | 1155  | 1087  | 1094  | 1040    |
| 293056    | Cpeb1        | 2390   | 2516    | 2291   | 2446   | 2515  | 2667  | 2400  | 2359    |
| 303372    | Nle1         | 134    | 98      | 125    | 96     | 131   | 140   | 98    | 98      |
| 24215     | Atp2b2       | 1999   | 2115    | 1856   | 2695   | 2219  | 2549  | 2140  | 2025    |
| 78958     | Bcam         | 7126   | 6754    | 6950   | 6456   | 7566  | 7055  | 6839  | 6670    |
| 81649     | Mapk14       | 1001   | 1015    | 1051   | 1004   | 1040  | 1086  | 1091  | 980     |
| 298712    | Gpalpp1      | 216    | 244     | 216    | 195    | 232   | 208   | 218   | 240     |
| 65031     | Doc2a        | 359.32 | 303.36  | 280.55 | 346    | 327   | 346.5 | 340.3 | 315.42  |
| 307579    | Zfp521       | 572    | 492     | 413    | 521    | 499   | 540   | 546   | 475     |
| 680309    | Snrpd2       | 790    | 670     | 654    | 595    | 692   | 647   | 730   | 724.07  |
| 290396    | Diaph3       | 129    | 100     | 160    | 94     | 130   | 105   | 139   | 124     |
| 291709    | Slc25a46     | 2080.2 | 1928.5  | 1775.1 | 1867.5 | 2000  | 1911  | 2007  | 1970.93 |
| 315599    | Nlr1         | 221    | 399     | 537    | 388    | 530   | 400   | 407   | 256     |
| 58853     | Nr4a3        | 22     | 25.02   | 33     | 102.31 | 33    | 43    | 82    | 30      |
| 103694872 | LOC103694872 | 1145.8 | 1081.54 | 888.79 | 1360   | 1242  | 1124  | 1178  | 1070.83 |
| 303306    | Srr          | 305.46 | 325.17  | 291.73 | 288.89 | 313   | 285.8 | 306.7 | 343.59  |
| 100363361 | LOC100363361 | 429    | 444     | 463    | 430    | 478   | 450   | 447   | 446     |
| 294930    | Nceh1        | 876    | 881     | 753    | 924    | 857   | 889   | 940   | 855     |
| 311245    | Traf6        | 82     | 73      | 88     | 110    | 98    | 87    | 98    | 81      |
| 300968    | Uba5         | 1004   | 978     | 870    | 900    | 891   | 957   | 1003  | 1018    |
| 313699    | RGD1305350   | 973    | 1036    | 1095   | 968    | 1087  | 1074  | 996   | 1042    |
| 257647    | Slc35a4      | 1191   | 1201    | 1180   | 1108   | 1160  | 1236  | 1213  | 1217    |
| 29134     | Axin2        | 150    | 147     | 145    | 167    | 140   | 153   | 150   | 185     |
| 117251    | Dnah9        | 39     | 48      | 30     | 43     | 52    | 32    | 44    | 37      |
| 170668    | Rasgrp4      | 18     | 20      | 39     | 19     | 25    | 33    | 20    | 21      |
| 310727    | Cd101        | 13     | 18      | 20     | 13     | 17    | 20    | 16    | 13      |
| 362502    | Ubap1        | 898    | 885     | 929    | 870    | 947   | 918   | 906   | 923     |
| 252962    | Phtf1        | 1574.5 | 1585.01 | 1509.4 | 1462.8 | 1608  | 1537  | 1669  | 1509.57 |
| 689432    | Mrps21       | 695    | 617     | 652    | 482    | 580   | 577.6 | 625   | 740     |
| 102555298 | Wdr90        | 119    | 123     | 131    | 105    | 134   | 127   | 116   | 115.99  |
| 54292     | Rgs12        | 334    | 314     | 335    | 300.74 | 325   | 344   | 370   | 285     |
| 309447    | Ldb1         | 1054   | 1112    | 1037   | 974    | 1096  | 1097  | 1102  | 1013    |
| 360658    | Gga3         | 1132   | 1093.52 | 1144.5 | 1211.3 | 1252  | 1248  | 1108  | 1116.84 |
| 54398     | Ppt2         | 569    | 521     | 552    | 491    | 542   | 601   | 516   | 541     |
| 291352    | Gpr158       | 4143   | 3818    | 4079   | 4532   | 4499  | 4295  | 4464  | 3835    |
| 25284     | Amacr        | 248    | 261     | 245    | 232    | 227   | 236   | 301   | 253     |
| 29153     | Capn1        | 2725   | 2991.65 | 3036.4 | 2978.1 | 3210  | 3112  | 2992  | 2785.65 |
| 362641    | Minos1       | 1102   | 994     | 1040   | 947    | 1090  | 970.3 | 1019  | 1132    |
| 29666     | Psmb6        | 2655   | 2661    | 2374   | 2136.5 | 2475  | 2339  | 2519  | 2803    |
| 296131    | Fahd2a       | 407    | 338     | 337    | 347    | 340   | 369   | 368   | 397     |
| 499689    | Gstm4        | 491.29 | 515.23  | 552.36 | 459.04 | 521.6 | 520.9 | 539.3 | 499.72  |
| 406230    | Rpp21        | 285    | 258     | 238    | 203    | 258   | 237   | 237   | 283     |
| 56611     | Anxa2        | 19901  | 19116   | 19579  | 17435  | 19264 | 19479 | 19403 | 20281   |
| 100190936 | Rnf123       | 1684.3 | 1736.99 | 1653.9 | 1677.8 | 1761  | 1839  | 1743  | 1623.7  |
| 311791    | Zmynd19      | 202.73 | 207.12  | 181.13 | 195.52 | 233.3 | 183.5 | 178.3 | 216.29  |
| 292597    | Ttyh1        | 5094   | 4980    | 4765   | 5221   | 5079  | 5208  | 5448  | 4958    |
| 24522     | Zfp354a      | 95.9   | 96.93   | 84.56  | 80.69  | 90.44 | 86.58 | 99.39 | 92.97   |
| 685131    | Meal         | 1608.6 | 1532.64 | 1513.3 | 1354.9 | 1514  | 1536  | 1542  | 1607.62 |
| 365176    | Zfp787       | 205    | 177     | 179    | 167    | 180   | 207   | 175   | 189     |
| 500331    | LOC500331    | 496.67 | 428.49  | 408.19 | 539.46 | 581   | 432   | 516   | 403     |

|           |            |        |         |        |        |       |       |       |          |
|-----------|------------|--------|---------|--------|--------|-------|-------|-------|----------|
| 24596     | Ngfr       | 12809  | 12909.2 | 15951  | 13940  | 15282 | 14428 | 14353 | 13306.96 |
| 29477     | Mapt       | 8347.1 | 8768.83 | 8434.9 | 10059  | 9895  | 9414  | 8997  | 8429.79  |
| 294207    | Ppplr11    | 1935.9 | 1896.99 | 1800.9 | 1774.9 | 1812  | 1967  | 1930  | 1934.91  |
| 103693432 | Ptges31    | 59.79  | 53.11   | 59.13  | 39.96  | 75.62 | 58.42 | 38.43 | 46.25    |
| 60568     | Syt11      | 20620  | 20889   | 19598  | 21291  | 22093 | 21109 | 21458 | 20354    |
| 684352    | Twf2       | 378    | 328     | 322    | 293    | 346   | 356   | 327   | 334      |
| 296864    | Zc3h12b    | 47     | 32      | 31     | 47     | 42    | 36    | 45    | 39       |
| 499209    | Kctd21     | 206    | 203     | 168    | 208    | 186   | 214   | 177   | 233      |
| 300521    | Tbrg1      | 774    | 779     | 719    | 676    | 723   | 793   | 779   | 747      |
| 689574    | LOC689574  | 941    | 1006    | 928    | 880    | 951   | 950   | 955   | 1019     |
| 293181    | Galnt18    | 1181   | 1129    | 1039   | 1031   | 1154  | 1112  | 1064  | 1190     |
| 679126    | Zcchc18    | 3169.6 | 3099.24 | 2966   | 2825.3 | 2971  | 3012  | 3284  | 3178.62  |
| 291966    | Tppp3      | 16098  | 15633   | 16204  | 14712  | 16364 | 15401 | 16016 | 16869    |
| 246185    | Dus11      | 307    | 325     | 332    | 316    | 317   | 367   | 305   | 332      |
| 292788    | Psenen     | 1102   | 1137    | 1164   | 905    | 1070  | 1036  | 1124  | 1216     |
| 303000    | Capn15     | 571    | 564     | 576    | 599    | 613   | 592   | 612   | 567      |
| 140657    | Faf1       | 921    | 959     | 913    | 854    | 932   | 937   | 979   | 916      |
| 360631    | Mlx        | 1089   | 1043    | 885    | 971    | 1007  | 982   | 1042  | 1085     |
| 687633    | Ube3b      | 3148   | 3225    | 3054   | 3243   | 3477  | 3350  | 3151  | 3099     |
| 171435    | Aagab      | 1026.5 | 941.28  | 884.97 | 856.19 | 963.5 | 897.3 | 953.9 | 1013.62  |
| 78975     | Prkaa2     | 955.99 | 1008.96 | 951.15 | 1002   | 1025  | 950.2 | 1017  | 1051.99  |
| 498967    | RGD1559896 | 1614   | 2084    | 1715   | 1857   | 2025  | 2069  | 1622  | 1788     |
| 362528    | Fkbp15     | 859.32 | 969.31  | 916.8  | 1009.9 | 966.2 | 1037  | 956   | 917      |
| 29202     | Epha6      | 128    | 149     | 141    | 172    | 184   | 134   | 108   | 183      |
| 295324    | Ttf2       | 201    | 240     | 251    | 239    | 236   | 227   | 262   | 236      |
| 361207    | Tmed9      | 1138   | 1140    | 1175   | 1046   | 1084  | 1194  | 1199  | 1167     |
| 312301    | Zfp956     | 140.93 | 140.92  | 125.7  | 144.4  | 146.8 | 132   | 162.9 | 128      |
| 289036    | Adipor1    | 3986   | 4044    | 4080   | 3893   | 4073  | 4117  | 4139  | 4190     |
| 302540    | Lancl3     | 65     | 85      | 46     | 83     | 85    | 48    | 59    | 96       |
| 311496    | Cfap61     | 27     | 24      | 18     | 24     | 26    | 25    | 25    | 20       |
| 291171    | Trim27     | 623    | 552     | 595    | 551    | 581   | 607   | 621   | 587      |
| 287535    | Vps53      | 1669   | 1614    | 1567   | 1549   | 1643  | 1645  | 1678  | 1640     |
| 361800    | Stk19      | 180    | 159     | 157    | 122    | 156   | 163   | 154   | 165      |
| 685620    | Tomm7      | 1152   | 986     | 999    | 847    | 1007  | 941   | 991   | 1174     |
| 81859     | Sharpin    | 998    | 1029    | 949    | 946    | 947   | 1107  | 965   | 1030     |
| 294762    | Parp8      | 727    | 688     | 661    | 734    | 750   | 713   | 797   | 641      |
| 316212    | Prickle4   | 111    | 112     | 105    | 135    | 120   | 114   | 116   | 128      |
| 297357    | Ctnna2     | 2113   | 2113.98 | 1980   | 2137   | 2090  | 2139  | 2265  | 2120.97  |
| 295629    | Cd302      | 368    | 321     | 307    | 298    | 284   | 347   | 338   | 367      |
| 299208    | Tt115      | 956    | 913     | 876    | 980    | 1023  | 956   | 975   | 892      |
| 291394    | Cndp2      | 1670   | 1767    | 1773   | 1651   | 1743  | 1783  | 1737  | 1821     |
| 65201     | Clip1      | 1281   | 1400    | 1311   | 1448   | 1406  | 1425  | 1435  | 1351     |
| 688912    | Mrps16     | 353    | 368     | 310    | 320    | 337   | 333   | 342   | 383      |
| 314465    | Ppplr13b   | 838    | 801     | 840    | 959    | 917   | 935   | 860   | 838      |
| 362172    | Trim44     | 468    | 465     | 393    | 577    | 564   | 464   | 465   | 472      |
| 287069    | Trap1      | 1582   | 1509    | 1447   | 1507   | 1504  | 1617  | 1616  | 1505     |
| 362946    | MGC94207   | 726    | 721     | 581    | 610    | 666   | 671   | 700   | 687      |
| 60341     | Camkk1     | 988    | 974     | 918    | 949    | 1061  | 962   | 1014  | 917      |
| 64351     | Ykt6       | 1599   | 1623    | 1646   | 1557   | 1602  | 1601  | 1710  | 1722     |
| 501281    | Ranbp3     | 1008   | 883     | 977    | 895    | 945   | 1013  | 966   | 962      |
| 300025    | Ly6h       | 54     | 53      | 60     | 47     | 46    | 49    | 63    | 63       |
| 292751    | Med29      | 520    | 500     | 499    | 376    | 535   | 489   | 460   | 473      |
| 360891    | Enah       | 2209.2 | 2415.87 | 2052   | 2804.3 | 2585  | 2307  | 2494  | 2405.8   |
| 305792    | Kctd6      | 456.11 | 424     | 413.01 | 442    | 448.1 | 428   | 473   | 442.93   |
| 305984    | Cdca2      | 25     | 27      | 44     | 26     | 35    | 38    | 26    | 27       |
| 684233    | Rbm15      | 74     | 95      | 66     | 70     | 66    | 80    | 77    | 92       |



|           |              |        |         |        |        |       |       |       |          |
|-----------|--------------|--------|---------|--------|--------|-------|-------|-------|----------|
| 361840    | Spock2       | 22545  | 22799.6 | 21246  | 25923  | 26525 | 23494 | 23830 | 21696.67 |
| 289859    | Cfap36       | 2032   | 1932    | 1772   | 1947   | 1879  | 1910  | 2019  | 2127     |
| 29599     | Atp2b3       | 2198.3 | 2367.38 | 1935.2 | 2609.8 | 2524  | 2358  | 2374  | 2153.53  |
| 294674    | Enc1         | 168    | 180     | 174    | 209    | 189   | 193   | 209   | 164      |
| 497978    | Dgke         | 1026.9 | 918.34  | 934.62 | 967    | 1082  | 974.5 | 994.5 | 921.82   |
| 192241    | Atp5po       | 2945   | 2951    | 2659   | 2277   | 2697  | 2597  | 2825  | 3069     |
| 500394    | Sntg1        | 28.01  | 27.04   | 17     | 18     | 24    | 19    | 21    | 29.01    |
| 288772    | Spryd4       | 166    | 168     | 192    | 143    | 169   | 157   | 180   | 185      |
| 25084     | Il4r         | 213    | 229     | 292    | 208    | 233   | 272   | 278   | 190      |
| 100911970 | Mipol1       | 155.55 | 172.99  | 157    | 154.19 | 151.7 | 185.2 | 151.4 | 172.48   |
| 312246    | RGD1306271   | 229.22 | 221.28  | 242.76 | 357.33 | 305.3 | 239.9 | 292.4 | 247.6    |
| 361370    | Tom1         | 1266   | 1282    | 1241   | 1253   | 1284  | 1345  | 1219  | 1360     |
| 289950    | Pdhh         | 2744   | 2798    | 2399   | 2475   | 2572  | 2587  | 2837  | 2763     |
| 500711    | Ppp4r4       | 453    | 426     | 361    | 490    | 488   | 428   | 478   | 393      |
| 304555    | Hps4         | 495.66 | 483.23  | 519.17 | 499.26 | 479.7 | 537   | 555.8 | 490.58   |
| 361025    | Txndc16      | 515    | 496     | 476    | 484    | 446   | 517   | 520   | 553      |
| 314380    | Tdp1         | 126    | 125     | 108    | 126    | 112   | 140   | 113   | 136      |
| 362812    | Slc39a5      | 516    | 473     | 565    | 474    | 513   | 561   | 528   | 493      |
| 299202    | Rps6k11      | 483.61 | 385     | 434    | 431.63 | 491.6 | 411   | 456.7 | 432.25   |
| 361825    | Smarcb1      | 838.72 | 967.33  | 907.81 | 905.34 | 879.4 | 980.5 | 940.6 | 938.32   |
| 25620     | Crem         | 256.11 | 280.12  | 270.61 | 265.4  | 247.1 | 268   | 306.6 | 286      |
| 64204     | Plec         | 8374.5 | 9844.91 | 11167  | 11033  | 10753 | 12065 | 9632  | 9307.32  |
| 363289    | Mterf4       | 287    | 242     | 225    | 183    | 268   | 225   | 233   | 242      |
| 171093    | Shank2       | 683.69 | 746.9   | 700.75 | 900.86 | 802.2 | 749.1 | 788.9 | 792.24   |
| 108351182 | LOC108351182 | 88     | 97      | 115    | 123    | 140   | 94    | 98    | 105      |
| 307973    | Def8         | 617.09 | 562     | 578.16 | 504.73 | 608.3 | 616   | 559.6 | 553      |
| 363015    | Endod1       | 10348  | 10323   | 9706   | 11123  | 10468 | 11248 | 10992 | 10167    |
| 360618    | Ormdl3       | 942    | 802     | 911    | 876    | 911   | 938   | 894   | 905      |
| 364050    | Dcaf8        | 1450   | 1467    | 1412   | 1525   | 1484  | 1519  | 1542  | 1503     |
| 296478    | Zgpat        | 308    | 233     | 260    | 285    | 293   | 255   | 301   | 273      |
| 315904    | Paqr9        | 387    | 403     | 363    | 476    | 494   | 374   | 465   | 350      |
| 407784    | Rnf5         | 1205   | 1222    | 1162   | 1112   | 1271  | 1132  | 1175  | 1279     |
| 303734    | Tbcd1d16     | 316    | 333     | 294    | 322    | 384   | 324   | 309   | 290      |
| 303002    | Rab11fip3    | 1838   | 1790    | 1699   | 1810   | 1911  | 1914  | 1783  | 1766     |
| 500900    | Lrrc14       | 294    | 307     | 317    | 256    | 316   | 305   | 312   | 280      |
| 103692002 | LOC103692002 | 360    | 310     | 296    | 358    | 405   | 326   | 331   | 306      |
| 192126    | Dab2ip       | 1989   | 1985    | 2042   | 2108   | 2217  | 2124  | 2018  | 2035     |
| 315287    | Asb8         | 1175   | 1217    | 1161   | 1170   | 1230  | 1223  | 1237  | 1190     |
| 157074    | Sdha         | 3814   | 3827    | 3437   | 3714   | 3764  | 3833  | 3854  | 3833     |
| 303902    | Dirc2        | 967    | 968     | 914    | 969    | 960   | 1045  | 942   | 998      |
| 500546    | RGD1560436   | 98.2   | 83.23   | 91.66  | 76.17  | 74.55 | 92.97 | 98.14 | 95.22    |
| 85493     | Abcf1        | 1661   | 1600    | 1646   | 1584   | 1721  | 1755  | 1612  | 1619     |
| 170670    | Hadha        | 3552   | 3704    | 3409   | 3542   | 3657  | 3649  | 3621  | 3753     |
| 679127    | Rrp12        | 437    | 516     | 520    | 538    | 567   | 585   | 499   | 427      |
| 25557     | Star         | 10     | 5       | 4      | 11     | 8     | 6     | 9     | 8        |
| 312641    | Fancd2       | 83     | 90      | 97     | 60     | 75    | 83    | 92    | 91       |
| 85494     | Tpral        | 439    | 458     | 441    | 402    | 408   | 453   | 483   | 454      |
| 295923    | Ndufs3       | 1422.9 | 1281.99 | 1147   | 1156   | 1310  | 1268  | 1315  | 1281.9   |
| 246771    | Slc25a25     | 1523   | 1529    | 1267   | 1557   | 1584  | 1494  | 1617  | 1377     |
| 689161    | Gabarapl1    | 13675  | 13468   | 11657  | 12428  | 13402 | 12891 | 13414 | 13230    |
| 499474    | Ostml        | 771    | 771     | 791    | 752    | 855   | 780   | 765   | 788      |
| 294385    | Supv311      | 480    | 482     | 420    | 445    | 428   | 503   | 485   | 472      |
| 102547612 | LOC102547612 | 13.38  | 6.29    | 3.4    | 2.34   | 7.19  | 8.67  | 5.17  | 5.23     |
| 499913    | Abhd12       | 4939   | 4796    | 4072   | 3919   | 4335  | 4663  | 4733  | 4588     |
| 65041     | Clpb         | 548    | 569     | 507    | 588    | 610   | 560   | 577   | 539      |
| 691026    | Aspscr1      | 994    | 941     | 976    | 825    | 955   | 963   | 959   | 984      |

|           |              |        |         |        |        |       |       |       |         |
|-----------|--------------|--------|---------|--------|--------|-------|-------|-------|---------|
| 308134    | Tmem35a      | 2263   | 2140    | 2004   | 2046   | 2134  | 2111  | 2212  | 2279    |
| 360034    | Myrip        | 282.66 | 283.81  | 257.94 | 260.83 | 298.9 | 310.9 | 269.9 | 241.94  |
| 361984    | Ubp21        | 2397   | 2604    | 2672   | 2920   | 2731  | 2904  | 2687  | 2626    |
| 259229    | Ppmlg        | 924    | 920     | 949    | 936    | 943   | 998   | 954   | 959     |
| 288671    | Anapc5       | 3874   | 4084    | 4205   | 3498   | 4132  | 4042  | 3888  | 4124    |
| 192349    | Caly         | 365    | 507     | 395    | 462    | 537   | 425   | 428   | 397     |
| 65052     | Pik3c3       | 1088   | 1125    | 951    | 1158   | 1143  | 1088  | 1133  | 1103    |
| 303567    | Tmub2        | 1251   | 1286.92 | 1203.5 | 1185.2 | 1273  | 1315  | 1220  | 1283.56 |
| 298771    | Prepl        | 5545.2 | 5598.75 | 5464.3 | 6310.7 | 6195  | 6188  | 5893  | 5412.6  |
| 313705    | Disp3        | 204    | 246     | 231    | 212    | 277   | 255   | 203   | 188     |
| 116808    | Pcdh12       | 54     | 45      | 65     | 74     | 54    | 62    | 58    | 72      |
| 498963    | Spata2L      | 185    | 208     | 195    | 185    | 220   | 189   | 184   | 206     |
| 304334    | Fam20c       | 944    | 1004    | 903    | 984    | 968   | 1049  | 976   | 971     |
| 311692    | Fam217b      | 365    | 397     | 367    | 387    | 435   | 398   | 353   | 381     |
| 305203    | Paqr3        | 554.71 | 511.43  | 529.7  | 501.68 | 529.8 | 565   | 557.2 | 516.13  |
| 688047    | Lyc2         | 57.23  | 38.7    | 54.17  | 72.41  | 41.81 | 46.81 | 57.99 | 83.39   |
| 192362    | Lamc2        | 73     | 64      | 61     | 69     | 57    | 87    | 68    | 64      |
| 103694903 | LOC103694903 | 601.64 | 619.43  | 577.37 | 565.58 | 560.4 | 567.1 | 647.9 | 668.34  |
| 170566    | Slc16a10     | 68.59  | 42.06   | 50.98  | 37.49  | 70.39 | 55.39 | 47.17 | 32.9    |
| 309111    | Slc25a22     | 922.21 | 1002.05 | 916.04 | 1043.9 | 1026  | 1052  | 947.5 | 990.42  |
| 29525     | Pitpna       | 4622   | 4736    | 4387   | 4596   | 4748  | 4675  | 4805  | 4733    |
| 361423    | Fam92b       | 31.53  | 43.99   | 31.09  | 43.37  | 48.06 | 40.93 | 37.94 | 28.12   |
| 687346    | Brap         | 1736   | 1856    | 1819   | 1746   | 1880  | 1924  | 1849  | 1746    |
| 364064    | Pycr2        | 279    | 267     | 265    | 224    | 270   | 264   | 262   | 274     |
| 293485    | Cln3         | 340    | 335     | 291    | 335    | 317   | 352   | 304   | 372     |
| 290635    | Mvb12a       | 903    | 856     | 848    | 819    | 820   | 891   | 891   | 940     |
| 300286    | Lhfp11       | 489    | 477     | 406    | 576    | 547   | 452   | 530   | 485     |
| 112400    | Nrg1         | 3260.6 | 3261.34 | 3076.3 | 3591.2 | 3329  | 3536  | 3418  | 3353.2  |
| 682445    | Ccdc28b      | 71     | 58      | 58     | 49     | 59    | 65    | 50    | 70      |
| 29382     | Ctbp1        | 3474   | 3451    | 3469   | 3173   | 3596  | 3679  | 3427  | 3325    |
| 308869    | Lamtor1      | 1983   | 1848    | 1683   | 1707   | 1886  | 1865  | 1815  | 1900    |
| 25031     | Plcb4        | 626.28 | 619.99  | 579.83 | 628.13 | 635.2 | 636.7 | 684.4 | 581.34  |
| 58983     | Rabggta      | 479    | 449     | 414    | 480    | 456   | 492   | 441   | 495     |
| 288051    | Umps         | 481    | 511     | 489    | 429    | 532   | 454   | 523   | 466     |
| 117038    | Mt3          | 2852   | 2617    | 2248   | 2244   | 2439  | 2461  | 2387  | 3013    |
| 498356    | Shisa3       | 310    | 218     | 197    | 362    | 262   | 199   | 287   | 376     |
| 25757     | Cpt1a        | 2484   | 2642    | 2569   | 2637   | 2720  | 2731  | 2684  | 2549    |
| 474147    | Mib2         | 690    | 777     | 752    | 686    | 733   | 802   | 734   | 735     |
| 102549397 | LOC102549397 | 26.14  | 22.87   | 38.44  | 26.96  | 24.66 | 20.71 | 41.96 | 30.98   |
| 313749    | Nphp4        | 237.59 | 249.83  | 237.33 | 245.19 | 229.2 | 267.5 | 246.4 | 260     |
| 361063    | Entpd4       | 4157   | 4266    | 3564   | 3986   | 4234  | 4047  | 4345  | 3892    |
| 308337    | Zfp865       | 143.76 | 121.36  | 133.6  | 113.69 | 117.4 | 142.6 | 129.6 | 140.21  |
| 362084    | Rabl6        | 2417   | 2464    | 2324   | 2375   | 2622  | 2466  | 2440  | 2379    |
| 103689992 | Rps911       | 1378   | 1233    | 1173.5 | 930    | 1104  | 1119  | 1310  | 1343    |
| 81772     | Rps9         | 1378   | 1233    | 1173.5 | 930    | 1104  | 1119  | 1310  | 1343    |
| 289218    | Ndufs2       | 3814.5 | 3992    | 3523.1 | 3533.7 | 3656  | 3866  | 3917  | 3932.9  |
| 83838     | Ltbp3        | 1947.7 | 2175.17 | 2344.2 | 2449.4 | 2248  | 2427  | 2327  | 2219.82 |
| 25739     | Pygb         | 11806  | 12614.9 | 11366  | 11818  | 11872 | 12271 | 13031 | 12058.9 |
| 315600    | Vps11        | 2151   | 2184    | 1984   | 2096   | 2129  | 2304  | 2180  | 2090    |
| 294250    | Prrc2a       | 5200   | 5921    | 5932   | 6315   | 6186  | 6412  | 5814  | 5756    |
| 686809    | Exoc312      | 38     | 31      | 31     | 46     | 34    | 39    | 43    | 35      |
| 691849    | Ccpghos      | 28     | 44      | 34     | 40     | 35    | 31    | 46    | 39      |
| 287727    | Dhx8         | 717.71 | 752     | 762    | 752    | 782   | 784   | 774.9 | 745     |
| 312492    | Dysf         | 2252   | 2338    | 2230   | 2573   | 2495  | 2632  | 2346  | 2242    |
| 366602    | Tspan13      | 3115.6 | 2780.34 | 2794.1 | 2875.1 | 2888  | 3038  | 2917  | 3118.88 |
| 684961    | Zmat4        | 60     | 56      | 54     | 63     | 62    | 56    | 59    | 64      |

|           |                 |        |         |        |        |       |       |       |         |
|-----------|-----------------|--------|---------|--------|--------|-------|-------|-------|---------|
| 304278    | Ptcd1           | 268.68 | 303.25  | 278.52 | 271.62 | 274.2 | 268   | 326.7 | 291.71  |
| 83462     | Dynlt1          | 402    | 415     | 426    | 329    | 361   | 399   | 432   | 434     |
| 501266    | LOC501266       | 473.23 | 410.15  | 426.44 | 502.13 | 496.8 | 491.8 | 458.6 | 427.15  |
| 300191    | Slc48a1         | 1724   | 1647    | 1658   | 1544   | 1562  | 1735  | 1705  | 1797    |
| 680883    | Lrtm2           | 148.43 | 188.34  | 182.87 | 145.57 | 198.4 | 156.2 | 160   | 173.4   |
| 29622     | Ralgs           | 1767.6 | 1587.41 | 1660   | 1454   | 1868  | 1742  | 1620  | 1462    |
| 288740    | Iscu            | 3818   | 3951    | 3578   | 3234   | 3699  | 3856  | 3774  | 3754    |
| 361643    | Lcmt1           | 664    | 663     | 597    | 543    | 611   | 601   | 674   | 666     |
| 25673     | Anxa5           | 17823  | 17425   | 16502  | 16411  | 17098 | 17297 | 17484 | 18632   |
| 292082    | Tcf25           | 7774.5 | 7577.6  | 7475.7 | 7619.2 | 8125  | 7914  | 7681  | 7777.62 |
| 100361092 | Malrd1          | 19     | 10      | 12     | 17     | 11    | 9     | 22    | 18      |
| 100912347 | LOC100912347    | 4      | 8       | 10     | 7      | 5     | 12    | 8     | 5       |
| 287533    | Inpp5k          | 1024   | 999     | 984    | 995    | 1022  | 991   | 1066  | 1061    |
| 309145    | RGD1311946      | 227    | 219     | 250    | 203    | 220   | 237   | 234   | 239     |
| 59116     | Dbil5           | 4      | 12      | 8      | 5      | 9     | 8     | 8     | 5       |
| 691531    | Rps28           | 1090   | 868     | 1065.8 | 731    | 970   | 915.6 | 849   | 1150    |
| 305235    | Art3            | 2354   | 2307    | 2196   | 2193   | 2011  | 2473  | 2524  | 2355    |
| 360833    | Kdsr            | 400    | 411     | 397    | 382    | 409   | 410   | 410   | 416     |
| 307180    | Txndc15         | 1405   | 1410    | 1358   | 1368   | 1414  | 1390  | 1455  | 1474    |
| 108348178 | NEWGENE_1309258 | 427.5  | 376.49  | 446.5  | 475.5  | 383.3 | 458.6 | 487.5 | 456.53  |
| 301067    | Slc25a38        | 600    | 532     | 529    | 530    | 599   | 573   | 539   | 556     |
| 690164    | Harbi1          | 287.08 | 273.49  | 293.57 | 286.87 | 329.2 | 247.6 | 293.7 | 310.06  |
| 311959    | Abcf2           | 1707   | 1697    | 1609   | 1673   | 1706  | 1754  | 1751  | 1707    |
| 103690981 | LOC103690981    | 0      | 1.44    | 0      | 0      | 1.49  | 0     | 0     | 0       |
| 304719    | Ercc4           | 629.4  | 659.41  | 534.6  | 599.91 | 628.4 | 612   | 656.9 | 610.2   |
| 83519     | Pex3            | 964    | 873     | 819    | 797    | 785   | 896   | 969   | 923     |
| 684828    | LOC684828       | 34     | 14.88   | 24.94  | 34     | 28.22 | 24.67 | 21.9  | 36.78   |
| 687739    | Naif1           | 94     | 90      | 89     | 72     | 89    | 91    | 88    | 89      |
| 500668    | Ccdc175         | 161    | 141     | 127    | 146    | 146   | 133   | 160   | 156     |
| 25150     | Fyn             | 1959   | 2227    | 2223   | 2187   | 2195  | 2385  | 2159  | 2156    |
| 288153    | Hoxd4           | 239    | 189     | 216    | 208    | 221   | 227   | 220.6 | 213     |
| 64134     | Xylt2           | 1016   | 1020    | 991    | 995    | 1037  | 1115  | 988   | 1022    |
| 292588    | Ube2s           | 1664   | 1639    | 1565   | 1307   | 1551  | 1593  | 1590  | 1656    |
| 29336     | Sigmar1         | 2345   | 2241    | 2170   | 2000   | 2336  | 2426  | 1979  | 2320    |
| 261738    | Clrn1           | 405    | 342     | 264    | 337    | 361   | 325   | 349   | 360     |
| 25734     | Hck             | 157    | 144     | 161    | 140    | 198   | 157   | 139   | 129     |
| 289217    | Sdhc            | 1547   | 1600    | 1498   | 1337   | 1428  | 1591  | 1529  | 1643    |
| 64192     | Qdpr            | 2413   | 2472    | 2607   | 2170   | 2477  | 2463  | 2488  | 2572    |
| 83586     | Usf1            | 901    | 784     | 873    | 757    | 893   | 861   | 796   | 881     |
| 54312     | Timm23          | 1438   | 1345    | 1322   | 1189   | 1297  | 1451  | 1370  | 1361    |
| 307868    | Mon1b           | 926.72 | 925     | 856.95 | 854.94 | 941.8 | 924.6 | 941   | 880.93  |
| 293702    | Fkbp2           | 995    | 910     | 924    | 882    | 969   | 906   | 905   | 1061    |
| 29693     | Atp2a2          | 5462   | 5664.19 | 5487.1 | 6458.1 | 6026  | 6239  | 6166  | 5449    |
| 606294    | Kif1bp          | 1740   | 1771    | 1618   | 1604   | 1692  | 1735  | 1817  | 1725    |
| 298573    | Eif4g3          | 3147   | 3272    | 3252   | 3819   | 3573  | 3513  | 3620  | 3257    |
| 81727     | Mvk             | 893    | 921     | 894    | 770    | 892   | 915   | 881   | 912     |
| 29416     | Aadat           | 72     | 61      | 51     | 44     | 52    | 67    | 57    | 60      |
| 690848    | Uqcr11          | 1598   | 1412    | 1470   | 1248   | 1389  | 1461  | 1403  | 1676    |
| 65206     | Kcnn4           | 201    | 153.84  | 239.92 | 166.24 | 205   | 205   | 184.7 | 193     |
| 288557    | Mospd3          | 379    | 348     | 366    | 330    | 337   | 428   | 385   | 323     |
| 300763    | Lrrc49          | 3788   | 3793    | 2958   | 3633   | 3666  | 3615  | 3914  | 3475    |
| 311721    | Zfp512b         | 661    | 730     | 710    | 655    | 703   | 711   | 736   | 703     |
| 679357    | Irf2bp2         | 448    | 396     | 465    | 537    | 413   | 515   | 508   | 475     |
| 207126    | Muc13           | 0      | 0       | 2.84   | 0      | 0     | 0     | 1.85  | 1.09    |
| 65043     | Rpl14           | 3007.5 | 2799.89 | 2964.4 | 2382.8 | 2618  | 2968  | 2913  | 3048.84 |
| 296410    | Rtfdc1          | 1472   | 1447    | 1427   | 1361   | 1491  | 1444  | 1493  | 1480    |

|           |           |        |         |        |        |       |       |       |         |
|-----------|-----------|--------|---------|--------|--------|-------|-------|-------|---------|
| 100362059 | Ttc16     | 60     | 43.13   | 65     | 38.83  | 48.8  | 47.37 | 51.77 | 66.31   |
| 29271     | Cf11      | 17821  | 17968   | 17362  | 16605  | 18040 | 17831 | 18819 | 17524   |
| 315135    | Sun2      | 2754   | 2871    | 2807   | 2772   | 2898  | 3193  | 2737  | 2771    |
| 305291    | Srd5a3    | 1258   | 1242    | 1286   | 1149   | 1209  | 1342  | 1306  | 1252    |
| 116656    | Cdc123    | 1357   | 1193    | 1098   | 1145   | 1165  | 1192  | 1280  | 1325    |
| 24916     | Rnf112    | 1081   | 953     | 1083   | 1023   | 1073  | 1069  | 1084  | 1060    |
| 313913    | Zfp513    | 368    | 336     | 373    | 312    | 379   | 370   | 377   | 312     |
| 364298    | Pip4p1    | 1247   | 1379    | 1284   | 1216   | 1344  | 1383  | 1285  | 1295    |
| 315166    | Smdt1     | 1718   | 1655    | 1402   | 1306   | 1532  | 1542  | 1460  | 1762    |
| 295325    | Igsf3     | 1689.8 | 1784.72 | 1858   | 2054.9 | 2043  | 1958  | 1891  | 1757.18 |
| 24434     | Gusb      | 185    | 191     | 283    | 188    | 203   | 230   | 220   | 224     |
| 60660     | Ppp2r2b   | 2664   | 2532    | 2327   | 2507   | 2585  | 2499  | 2817  | 2485    |
| 293476    | Xpo6      | 1496.1 | 1531.63 | 1499   | 1593.6 | 1631  | 1684  | 1536  | 1487    |
| 171335    | Cox8a     | 4012   | 3748    | 3625   | 3442   | 3909  | 3708  | 3660  | 4077    |
| 192229    | Cep19     | 1028   | 968     | 896    | 934    | 1058  | 972   | 1026  | 906     |
| 652929    | Cd99      | 1106   | 983     | 1067   | 947    | 1018  | 1102  | 988   | 1141    |
| 81817     | Usf2      | 1236.6 | 1199.85 | 1334.7 | 1182.6 | 1315  | 1299  | 1225  | 1291.8  |
| 100361529 | Rad9a     | 233.87 | 259.26  | 277.71 | 213.09 | 260.5 | 264.9 | 221.2 | 272.43  |
| 362704    | Babam2    | 866.43 | 971.22  | 928.93 | 940.89 | 904.6 | 975.7 | 961.9 | 997.42  |
| 299618    | Mknk2     | 1258   | 1135    | 1247   | 1130   | 1231  | 1410  | 1175  | 1124    |
| 298555    | Grhl3     | 201    | 200     | 191    | 193    | 195   | 210   | 189   | 219     |
| 287731    | Lsm12     | 969    | 1120    | 1034   | 1136   | 1133  | 1051  | 1099  | 1128    |
| 360652    | Sdk2      | 368.73 | 402     | 477    | 569.41 | 430   | 529   | 446   | 477.06  |
| 306102    | Bora      | 54     | 56      | 64     | 50     | 48    | 61    | 68    | 55      |
| 500567    | LOC500567 | 4      | 7       | 10     | 7      | 3     | 9     | 8     | 9       |
| 291137    | Gmn       | 128    | 126     | 116    | 106    | 121   | 114   | 130   | 128     |
| 685187    | LOC685187 | 19.78  | 12.54   | 13.51  | 14.31  | 8.77  | 12.75 | 15.77 | 25      |
| 24460     | Hoxc8     | 94.34  | 105.48  | 97.91  | 105.37 | 106.1 | 118.4 | 96.13 | 96.93   |
| 309629    | Pfdn6     | 801    | 883     | 769    | 704    | 755   | 762   | 794   | 959     |
| 308999    | Fbxl19    | 678    | 638     | 682    | 684    | 754   | 697   | 699   | 628     |
| 502776    | Scrn1     | 5325   | 5717    | 5552   | 5528   | 5276  | 5670  | 6215  | 5753    |
| 287633    | Lrrc59    | 2159.9 | 2446.86 | 2331.8 | 2308.9 | 2367  | 2446  | 2414  | 2352    |
| 297968    | Akirin2   | 1043   | 1046    | 1108   | 1020   | 1064  | 1117  | 1129  | 1058    |
| 59267     | Syt7      | 4646.6 | 4460.01 | 4200   | 4489   | 4927  | 4629  | 4418  | 4459    |
| 297797    | Atp6v1h   | 2630   | 2544    | 2293   | 2194   | 2432  | 2302  | 2670  | 2603    |
| 24567     | Mt1       | 176    | 187     | 147    | 160    | 201   | 184   | 155   | 154     |
| 361454    | Ccdc28a   | 1137.1 | 1090.9  | 881.03 | 921.88 | 1037  | 989.8 | 1033  | 1115.93 |
| 29593     | Ckmt1     | 5369   | 5440    | 4528   | 5354   | 5318  | 5585  | 5340  | 5190    |
| 500255    | Eefsec    | 414    | 434     | 386    | 411    | 416   | 426   | 435   | 427     |
| 687118    | Dedd2     | 482    | 464.99  | 449.99 | 442    | 485   | 485   | 488   | 446.98  |
| 81729     | Rpl10a    | 2846   | 2582.03 | 2734.1 | 2203.4 | 2611  | 2525  | 2688  | 2913.91 |
| 690769    | Znrf1     | 671    | 683     | 674    | 648    | 723   | 695   | 706   | 648     |
| 406165    | Agpat1    | 2714.6 | 2913.81 | 2921.9 | 2685.2 | 2836  | 3128  | 2700  | 2975.47 |
| 309630    | Zbtb22    | 585    | 621     | 672    | 602    | 683   | 644   | 641   | 601     |
| 302982    | Eme2      | 481.1  | 475.74  | 415.35 | 466.12 | 472.4 | 506.5 | 464.7 | 460.72  |
| 298590    | Klhdc7a   | 67.52  | 65.8    | 67.58  | 60.67  | 62.52 | 77.26 | 54.16 | 77.04   |
| 25217     | Tapbp     | 391    | 389     | 485    | 514    | 485   | 490   | 470   | 398     |
| 297952    | Gpr63     | 118.06 | 100.2   | 104.09 | 106.32 | 133.3 | 114.1 | 95.18 | 101.51  |
| 291974    | Ripor1    | 1577   | 1618    | 1756   | 1910   | 1759  | 1896  | 1717  | 1736    |
| 25721     | Got2      | 6792   | 6875    | 6107   | 6167   | 6533  | 7100  | 6763  | 6479    |
| 364686    | Ranbp9    | 949    | 957     | 915    | 925    | 950   | 972   | 1034  | 925     |
| 293725    | Eef1g     | 7445.5 | 7466.22 | 7285.5 | 6805.9 | 7419  | 7599  | 7514  | 7516.85 |
| 25035     | Cyb5r3    | 6417.7 | 6012.72 | 5972.9 | 7363.7 | 7089  | 6375  | 6770  | 6462.55 |
| 316477    | Smarc11   | 222    | 309.17  | 270    | 259.95 | 264   | 267   | 286   | 282.39  |
| 498131    | N4bp211   | 117.11 | 100.67  | 118.98 | 94.31  | 106.7 | 97.09 | 113.9 | 128.9   |
| 25589     | Kdr       | 388    | 338     | 310    | 433    | 346   | 381   | 373   | 422     |

|           |              |        |         |        |        |       |       |       |         |
|-----------|--------------|--------|---------|--------|--------|-------|-------|-------|---------|
| 360594    | Mrps23       | 626    | 651     | 653    | 564    | 641   | 573   | 658   | 712     |
| 303922    | Timmdc1      | 404.57 | 404.53  | 362.82 | 351.3  | 390.8 | 390.9 | 407.4 | 389.17  |
| 84583     | Rgs2         | 150    | 161     | 148    | 150    | 163   | 156   | 163   | 149     |
| 501688    | Lsm11        | 562.31 | 515.89  | 551.15 | 556.68 | 651.8 | 520.5 | 565.8 | 526.93  |
| 500679    | Rad51b       | 29     | 18      | 19     | 17     | 23    | 17    | 24    | 22      |
| 690437    | Catip        | 18.01  | 21.02   | 18     | 17     | 21.07 | 22.03 | 17.01 | 16.6    |
| 362840    | R3hdm4       | 1274.2 | 1281.31 | 1421   | 1251.1 | 1386  | 1404  | 1272  | 1355.25 |
| 689639    | Tdrd12       | 36     | 47      | 17     | 38     | 41    | 46    | 34    | 22      |
| 316425    | Sgo2         | 5.92   | 7.2     | 16.89  | 5.31   | 13.36 | 8.69  | 8.61  | 5.94    |
| 362643    | Emc1         | 1459   | 1521.63 | 1641.8 | 1783.7 | 1657  | 1820  | 1599  | 1562.56 |
| 362710    | Agbl5        | 174.95 | 157.97  | 151.81 | 170.29 | 157.8 | 157.7 | 204   | 159.25  |
| 541462    | Sprn         | 813    | 838     | 743    | 859    | 960   | 780   | 829   | 802     |
| 294260    | Skiv21       | 934    | 973     | 1025   | 1092   | 1062  | 1088  | 1037  | 983     |
| 679068    | Tsfm         | 311    | 297     | 279    | 243    | 316   | 274   | 302   | 279     |
| 288622    | Zbed5        | 532.05 | 479.12  | 504.55 | 418.81 | 471.1 | 479.9 | 498.7 | 555.07  |
| 293733    | Incenp       | 894.41 | 757.17  | 879.06 | 911.55 | 1024  | 867.9 | 883.2 | 791.82  |
| 299954    | Ndufb9       | 2069   | 1992    | 1887   | 1762   | 1974  | 1885  | 1864  | 2267    |
| 361195    | Cdc14b       | 205.66 | 168.71  | 216.61 | 230.1  | 225.3 | 173.7 | 212.8 | 239.18  |
| 364420    | Tnfrsf10b    | 18     | 9       | 16     | 12     | 11    | 14    | 14    | 18      |
| 298576    | Mull1        | 357.37 | 406.31  | 398.03 | 384.05 | 398.9 | 406.2 | 374.2 | 422.68  |
| 363441    | Ndufa1       | 653.12 | 603.72  | 636.19 | 505.91 | 587.3 | 557.3 | 646.7 | 694.84  |
| 192648    | Prokr1       | 204    | 227     | 191    | 284    | 263   | 246   | 226   | 204     |
| 290868    | Qars         | 1339   | 1269    | 1372   | 1234   | 1289  | 1362  | 1447  | 1306    |
| 108348128 | LOC108348128 | 47.79  | 58.32   | 48.42  | 39.72  | 43.94 | 67.27 | 45.18 | 44.94   |
| 688393    | Gpn1         | 486    | 497     | 530    | 461    | 513   | 478   | 542   | 513     |
| 362652    | Dnajc16      | 367    | 351     | 307    | 428    | 373   | 373   | 416   | 344     |
| 308983    | Nfatc2ip     | 68     | 74      | 70     | 62     | 91    | 59    | 62    | 72      |
| 171140    | Camk2g       | 5821.2 | 5312.46 | 5375.3 | 5879.2 | 6185  | 5818  | 6018  | 5184.99 |
| 366995    | Tbca         | 1418   | 1383    | 1330   | 1176   | 1431  | 1289  | 1342  | 1439    |
| 311637    | Slc35c2      | 684.31 | 603.48  | 504.32 | 470.53 | 621.2 | 641.8 | 494.1 | 588.29  |
| 56646     | Lgals1       | 15363  | 14467   | 14102  | 12073  | 12775 | 14376 | 14204 | 16698   |
| 140547    | Echs1        | 1048.1 | 956     | 870    | 867.07 | 945.2 | 1040  | 928   | 965.07  |
| 306009    | Slc39a14     | 376.98 | 372.49  | 415.33 | 370    | 436.9 | 437.6 | 351.3 | 365.28  |
| 282546    | Arid1b       | 857    | 818     | 927    | 1132   | 1055  | 973   | 995   | 848     |
| 81827     | Psmc5        | 3418   | 3306    | 3145   | 2939   | 3206  | 3318  | 3434  | 3320    |
| 29338     | Prdx2        | 8117   | 7729    | 7252   | 6729   | 7465  | 7516  | 7876  | 8065    |
| 499758    | Tmem250      | 1221   | 1299    | 1203   | 1150   | 1259  | 1292  | 1232  | 1269    |
| 50665     | Tmsb10       | 15017  | 13174   | 14618  | 12215  | 14893 | 13198 | 14046 | 14908   |
| 54395     | Cr1f3        | 483    | 524     | 444    | 454    | 488   | 468   | 512   | 507     |
| 64312     | Aplp2        | 10342  | 10767   | 9858   | 10728  | 11024 | 11210 | 10774 | 10220   |
| 308434    | Zfp574       | 368    | 392     | 404    | 359    | 379   | 414   | 366   | 420     |
| 306575    | Ckap2        | 31     | 33      | 72     | 27     | 46    | 45    | 53    | 25      |
| 100366017 | Ube2e1       | 1107   | 1065    | 1036   | 1002   | 985   | 1144  | 1119  | 1117    |
| 497798    | Lmo3         | 47     | 41      | 48     | 54     | 54    | 58    | 37    | 48      |
| 314969    | Nop2         | 472    | 446     | 432    | 441    | 482   | 474   | 449   | 452     |
| 309686    | Pofut2       | 678    | 666     | 677    | 663    | 698   | 716   | 726   | 643     |
| 81728     | Ndufv2       | 2763   | 2665    | 2433   | 2278   | 2572  | 2498  | 2483  | 2960    |
| 499017    | Syt13        | 325    | 316     | 392    | 348    | 366   | 388   | 362   | 316     |
| 292847    | Ctuf1        | 111    | 114     | 124    | 111    | 111   | 118   | 116   | 132     |
| 296623    | Miga2        | 1146   | 1248    | 1114   | 1118   | 1122  | 1290  | 1161  | 1224    |
| 64664     | Arl3         | 1355.2 | 1253.72 | 1161.1 | 1124.1 | 1226  | 1220  | 1292  | 1336.78 |
| 362029    | Ag1          | 2559.2 | 2499.69 | 2411.6 | 2657.4 | 2630  | 2733  | 2728  | 2412.5  |
| 316164    | Satb1        | 791.95 | 782.38  | 767.22 | 800.95 | 832.2 | 896   | 801.6 | 728.97  |
| 317576    | Ocrl         | 746    | 746     | 706    | 692    | 823   | 678   | 717   | 779     |
| 60347     | Cep78        | 173    | 165     | 166    | 144    | 160   | 181   | 171   | 160     |
| 680844    | Trem12       | 9      | 4       | 10     | 4      | 8     | 11    | 5     | 4       |



|           |              |        |         |        |        |       |       |       |         |
|-----------|--------------|--------|---------|--------|--------|-------|-------|-------|---------|
| 362287    | Slc17a9      | 32     | 11      | 29     | 9      | 21.02 | 28    | 17.07 | 17.91   |
| 64829     | Unc13a       | 1014   | 1117    | 1163   | 1241   | 1296  | 1168  | 1136  | 1103    |
| 288591    | Tmem120a     | 616    | 661     | 615    | 564    | 644   | 664   | 624   | 615     |
| 297597    | Ing4         | 607    | 552     | 528    | 499    | 558   | 529   | 576   | 604     |
| 291022    | Ptpdc1       | 884    | 971     | 876    | 938    | 825   | 1032  | 1077  | 871     |
| 362111    | Sh2d3c       | 572.26 | 530.95  | 545.63 | 494.6  | 548.6 | 571.4 | 561   | 542     |
| 245980    | Nr2f6        | 518    | 538     | 559    | 459    | 537   | 507   | 555   | 552     |
| 313453    | Tmem255a     | 5551   | 6079    | 5440   | 5822   | 5741  | 5724  | 5991  | 6286    |
| 103693266 | Rsl1d1l11    | 537.69 | 542.09  | 473.78 | 459.94 | 502.1 | 463.1 | 605   | 518.17  |
| 302898    | Rsl1d1       | 537.69 | 542.09  | 473.78 | 459.94 | 502.1 | 463.1 | 605   | 518.17  |
| 312670    | Adipor2      | 1239.2 | 1229.35 | 1263.9 | 1170.8 | 1283  | 1276  | 1304  | 1222.25 |
| 684755    | Zfp11        | 485.72 | 490.51  | 483    | 488.91 | 491   | 527   | 496.9 | 505.76  |
| 89818     | Vamp5        | 56     | 43      | 54     | 35     | 52    | 63    | 43    | 37      |
| 246757    | Klhl17       | 526    | 488     | 472    | 527    | 516   | 586   | 502   | 484     |
| 296301    | Raly         | 2023   | 1968    | 2057   | 1895   | 2049  | 2158  | 2099  | 1933    |
| 29713     | Kcnj5        | 129.01 | 79.45   | 92.03  | 104.02 | 109   | 94.95 | 92.61 | 123.02  |
| 100362172 | LOC100362172 | 29.41  | 20.34   | 29.98  | 35.04  | 37.9  | 20.7  | 30.5  | 29.96   |
| 361771    | Zdhhc6       | 436    | 425     | 430    | 394    | 402   | 460   | 461   | 425     |
| 499671    | Lysmd1       | 283    | 263     | 220    | 223    | 236   | 255   | 287   | 248     |
| 302473    | Slitrk4      | 509    | 425     | 387    | 523    | 573   | 379   | 478   | 483     |
| 362504    | Dctn3        | 1865   | 1568    | 1457   | 1470   | 1719  | 1625  | 1544  | 1710    |
| 79239     | Hmox2        | 1812   | 1714    | 1655   | 1605   | 1759  | 1806  | 1791  | 1684    |
| 63995     | Dusp10       | 125    | 102     | 114    | 113    | 107   | 142   | 125   | 97      |
| 362454    | Hebpl        | 159    | 159     | 167    | 129    | 140   | 181   | 150   | 166     |
| 291355    | Prtfcd1      | 527    | 507     | 518    | 423    | 492   | 484   | 534   | 539     |
| 497900    | Rmnd5b       | 376.33 | 343.47  | 377.64 | 312.64 | 375.8 | 370.2 | 358.6 | 358.33  |
| 297458    | Ccdc174      | 201    | 174     | 197    | 175    | 197   | 185   | 196   | 197     |
| 29322     | Plcb3        | 4159   | 4280    | 4271   | 4521   | 4845  | 4401  | 4138  | 4493    |
| 292072    | Aprt         | 589    | 634     | 609    | 514    | 597   | 605   | 590   | 642     |
| 252961    | Tank         | 423    | 363     | 443    | 397    | 416   | 385   | 413   | 473     |
| 64300     | Mthfd1       | 535    | 594     | 514    | 586    | 574.2 | 581.5 | 627   | 530     |
| 680656    | Fndc10       | 935    | 901     | 909    | 796    | 935   | 871   | 945   | 923     |
| 362216    | Mrps26       | 428    | 408     | 416    | 372    | 352   | 430   | 460   | 443     |
| 288259    | Gart         | 854    | 864     | 790.07 | 897    | 827   | 875   | 944   | 887     |
| 299186    | Dpf3         | 44     | 29      | 27     | 33     | 38    | 32    | 35    | 33      |
| 684097    | Snx3         | 3789   | 3756    | 3745   | 3552   | 3802  | 4040  | 3786  | 3772    |
| 289736    | Morc2        | 483    | 497     | 538    | 555    | 525   | 543   | 593   | 490     |
| 500633    | Greb1        | 102    | 104     | 77     | 142    | 109   | 129   | 120   | 83      |
| 691484    | Eri2         | 97.9   | 115.71  | 124.67 | 86.03  | 101.9 | 108.5 | 104.6 | 125.33  |
| 689959    | LOC689959    | 139    | 148     | 123    | 121    | 134   | 118   | 136   | 163     |
| 296761    | Tmem60       | 430.87 | 446.75  | 393.73 | 338.5  | 375.8 | 383.9 | 429.9 | 480.9   |
| 313496    | Ccdc107      | 1324.7 | 1256.08 | 1258   | 1205.8 | 1307  | 1284  | 1312  | 1331.32 |
| 288656    | Arl6ip4      | 751    | 735     | 653    | 620    | 735   | 684   | 719   | 725     |
| 300177    | Irak4        | 181.24 | 210.7   | 193.09 | 108.98 | 181.8 | 195.1 | 203.3 | 140.06  |
| 362414    | Tada3        | 659    | 622     | 704    | 639    | 683   | 721   | 654   | 665     |
| 289752    | Ewsr1        | 1011.5 | 1090.02 | 1026.9 | 793.05 | 1190  | 1140  | 1052  | 687.68  |
| 103690130 | Hoxa3        | 59.65  | 44.16   | 49.66  | 49.01  | 48.51 | 57.58 | 52.49 | 51.54   |
| 108348320 | LOC108348320 | 59.65  | 44.16   | 49.66  | 49.01  | 48.51 | 57.58 | 52.49 | 51.54   |
| 688394    | Mab2111      | 79     | 60      | 94     | 85     | 75    | 80    | 106   | 69      |
| 361711    | Dpf2         | 1789   | 1923    | 1788   | 1858   | 1881  | 1951  | 1893  | 1911    |
| 287208    | Ttc1         | 2453   | 2376    | 2092   | 2050   | 2363  | 2219  | 2376  | 2352    |
| 360743    | Med15        | 1025.4 | 1096.51 | 1173.4 | 1116   | 1222  | 1241  | 1040  | 1075.62 |
| 29425     | Psmb5        | 2340   | 2200    | 1997   | 1820   | 2160  | 2110  | 2045  | 2358    |
| 117276    | Pfkfb3       | 1975   | 2021    | 1795   | 2089   | 2197  | 2081  | 1963  | 1937    |
| 361443    | Ntpcr        | 323    | 338     | 339    | 269    | 318   | 348   | 323   | 328     |
| 680266    | Gnb11        | 104    | 98      | 88     | 80     | 93    | 93    | 107   | 91      |



|           |              |        |         |        |        |       |       |       |         |
|-----------|--------------|--------|---------|--------|--------|-------|-------|-------|---------|
| 687090    | Tprg11       | 5227   | 5339    | 5074   | 4734   | 5249  | 5301  | 5134  | 5461    |
| 309252    | Otud7a       | 653    | 619     | 528    | 630    | 732   | 573   | 612   | 605     |
| 689938    | Ndufc1       | 544.85 | 566.18  | 513.22 | 466.06 | 515.2 | 518   | 588.2 | 548.12  |
| 287521    | Mnt          | 930    | 941     | 900    | 899    | 998   | 970   | 907   | 934     |
| 299743    | Mrpl42       | 789.81 | 775     | 692    | 655    | 739.7 | 710   | 739   | 833.42  |
| 300084    | Rbx1         | 1499   | 1465    | 1398   | 1310   | 1481  | 1418  | 1464  | 1524    |
| 309586    | Trim26       | 766    | 828.31  | 838.52 | 903.7  | 855.4 | 870.9 | 887.6 | 849.33  |
| 307404    | Arsi         | 21     | 12      | 25     | 21     | 21    | 14    | 24    | 23      |
| 363278    | Atg16l1      | 1043   | 990     | 951    | 910    | 1036  | 970   | 1036  | 1000    |
| 364900    | Ctif         | 691    | 785     | 724    | 798    | 893   | 731   | 762   | 726     |
| 170587    | Cs           | 2775   | 2912.28 | 2633   | 2872   | 2906  | 2952  | 2980  | 2780    |
| 502663    | Serf2        | 3638.7 | 3447.15 | 3464.8 | 3121   | 3370  | 3387  | 3600  | 3835.05 |
| 303836    | Bcl6         | 561    | 482     | 513    | 468    | 529   | 586   | 515   | 471     |
| 29376     | Irs2         | 1230   | 1284    | 1337   | 1561   | 1392  | 1561  | 1362  | 1303    |
| 360638    | Adam11       | 4191.4 | 3796.2  | 4151.3 | 4923.2 | 4400  | 4602  | 4468  | 4241.88 |
| 207117    | Dnah8        | 33     | 28      | 27     | 17     | 26    | 22    | 30    | 31      |
| 29668     | Psmal        | 2130   | 2007    | 1965   | 1769   | 2002  | 1923  | 2125  | 2121    |
| 94173     | Idh3B        | 3471   | 3386    | 2948   | 2938   | 3180  | 3243  | 3327  | 3479    |
| 288529    | Gjc3         | 144    | 159     | 140    | 160    | 145   | 164   | 157   | 160     |
| 302826    | Frmd7        | 50.31  | 67.07   | 44.26  | 69.32  | 50.8  | 67.33 | 69.49 | 52.15   |
| 171063    | Gtf3c1       | 2147   | 2300    | 2236   | 2516.9 | 2401  | 2434  | 2374  | 2341.97 |
| 308409    | Opa3         | 501    | 530     | 477    | 536    | 530   | 523   | 555   | 514     |
| 116458    | Ipo13        | 888    | 829     | 831    | 832    | 874   | 990   | 889   | 756     |
| 313490    | Tmem8b       | 1258.2 | 1215.14 | 1148.3 | 1251.7 | 1281  | 1251  | 1332  | 1195.89 |
| 364843    | Pcdhga8      | 164.16 | 145.78  | 164.59 | 168.38 | 185.9 | 145.9 | 153.4 | 182.32  |
| 100363129 | LOC100363129 | 18.53  | 14.31   | 17.78  | 20.88  | 18.11 | 15.4  | 19.33 | 21.39   |
| 293491    | Ypel3        | 3771   | 3737    | 3350   | 3075   | 3830  | 3526  | 3540  | 3569    |
| 691938    | Fam124a      | 174    | 192     | 173    | 168    | 192   | 198   | 158   | 186     |
| 300741    | Mpi          | 1195   | 1202    | 1062   | 1071   | 1102  | 1252  | 1228  | 1121    |
| 367166    | Hyal1        | 562.05 | 452.93  | 497.46 | 600.56 | 557.2 | 551.1 | 551.5 | 534     |
| 108348123 | LOC108348123 | 45.15  | 42.86   | 59.89  | 57.12  | 47.2  | 41.38 | 62.16 | 62.12   |
| 117281    | Ppp2r1a      | 7701   | 8108    | 7568   | 7740   | 8299  | 8194  | 8121  | 7693    |
| 291206    | Mrpl32       | 379    | 389     | 332    | 312    | 347   | 341   | 369   | 409     |
| 25532     | Rab4a        | 1651   | 1614    | 1502   | 1557   | 1651  | 1610  | 1669  | 1636    |
| 303240    | Cntrob       | 76     | 73      | 64     | 62.94  | 85.27 | 70    | 70.23 | 61      |
| 303515    | Rapgef11     | 236    | 215     | 178    | 233    | 220   | 270   | 218   | 187     |
| 691024    | Fam219a      | 3646.5 | 3585.99 | 3417.8 | 3750.5 | 3975  | 3790  | 3650  | 3536.65 |
| 259248    | Slc16a2      | 152    | 141     | 147    | 213    | 187   | 170   | 166   | 155     |
| 29474     | Coro1b       | 2029.9 | 1897.76 | 1869.7 | 1652.5 | 1925  | 1902  | 1939  | 1968.54 |
| 25014     | Acat1        | 1585   | 1646    | 1403   | 1314   | 1527  | 1533  | 1598  | 1518    |
| 24184     | Ak2          | 322    | 296     | 287    | 268    | 307   | 297   | 297   | 317     |
| 288657    | Ogfod2       | 213    | 209     | 199    | 161    | 210   | 194   | 218   | 190     |
| 113961    | Gorasp2      | 1676.3 | 1837.11 | 1691.4 | 1770.9 | 1831  | 1810  | 1762  | 1840.16 |
| 25356     | Cntn2        | 7250.3 | 7428.48 | 7580.5 | 8824   | 9131  | 8262  | 7747  | 7137.37 |
| 301463    | Fastkd2      | 447.36 | 409.66  | 362.91 | 412.19 | 446.8 | 384.4 | 419   | 444.75  |
| 65278     | Csnk1g2      | 2619.4 | 2552.82 | 2583.5 | 2337.4 | 2624  | 2680  | 2533  | 2645.7  |
| 24769     | Sct          | 8      | 7       | 7      | 4      | 7     | 4     | 4     | 12      |
| 499468    | RGD1561147   | 9      | 9       | 4      | 4      | 9     | 2     | 8     | 8       |
| 81919     | Fut1         | 3      | 9       | 7      | 7      | 8     | 5     | 6     | 8       |
| 292764    | Fam98c       | 238    | 218     | 250    | 203    | 254   | 221   | 250   | 219     |
| 309000    | Orai3        | 204    | 212.71  | 198.42 | 211    | 228.5 | 188.7 | 193.8 | 247     |
| 116658    | Cntn4        | 456    | 462     | 462    | 489    | 460   | 440   | 582   | 459     |
| 295341    | Ppmlj        | 1679   | 1540    | 1640   | 1317   | 1657  | 1533  | 1557  | 1667    |
| 680647    | Fam19a2      | 1070   | 1184.09 | 905.94 | 1145   | 1096  | 1208  | 1043  | 1124.07 |
| 362247    | Trpc4ap      | 2601.4 | 2772.19 | 2566.3 | 2741   | 2714  | 2875  | 2742  | 2761.57 |
| 298544    | Sh3bgr13     | 9483   | 9048    | 9340   | 7930   | 9199  | 8942  | 9127  | 9914    |

|           |            |        |         |        |        |       |       |       |          |
|-----------|------------|--------|---------|--------|--------|-------|-------|-------|----------|
| 679038    | Rtl8a      | 1761.5 | 1701.67 | 1784.6 | 1589.7 | 1854  | 1832  | 1718  | 1696.86  |
| 304655    | Zswim4     | 254    | 220     | 255    | 256    | 279   | 267   | 232   | 245      |
| 297113    | Gars       | 3290   | 3427    | 3102   | 3293   | 3356  | 3503  | 3445  | 3314     |
| 297376    | Htra2      | 701    | 674     | 688    | 580    | 645   | 700   | 707   | 693      |
| 100364984 | Rab37      | 995.54 | 829     | 798.99 | 757    | 942   | 795   | 849   | 925      |
| 305055    | Kctd3      | 905.82 | 911.83  | 960.73 | 910.75 | 1033  | 948.7 | 921.7 | 928.47   |
| 29292     | Ft11       | 12560  | 11977.5 | 12523  | 11031  | 11710 | 12497 | 11945 | 13796.23 |
| 25243     | Arnt2      | 809.02 | 786.03  | 723.17 | 865    | 864   | 810.1 | 781   | 851.07   |
| 29435     | Ssr4       | 704    | 659     | 704    | 573    | 669   | 677   | 708   | 688      |
| 306505    | Lonrf1     | 572    | 506     | 523    | 547    | 624   | 509   | 578   | 520      |
| 140675    | Gabra4     | 60     | 39      | 37     | 71     | 44    | 52    | 60    | 59       |
| 94342     | Bag6       | 2657   | 2949    | 2932   | 3155   | 3006  | 3324  | 2910  | 2905     |
| 170837    | Snrk       | 1097   | 1130    | 1096   | 1228   | 1274  | 1181  | 1147  | 1125     |
| 362102    | Ptpa       | 3660   | 3685    | 3610   | 3394   | 3780  | 3764  | 3728  | 3632     |
| 298447    | Dmap1      | 386    | 404     | 334    | 321    | 384   | 407   | 344   | 366      |
| 81751     | Psen2      | 1625   | 1713    | 1585   | 1527   | 1690  | 1717  | 1692  | 1601     |
| 301131    | Tnfaip8l1  | 68.12  | 86.43   | 78.21  | 57.68  | 55.18 | 91.57 | 73.74 | 81.21    |
| 684536    | Gba        | 2157   | 2382    | 2249   | 2290   | 2391  | 2353  | 2406  | 2280     |
| 117256    | Ppp2r2c    | 1467.8 | 1532.81 | 1449.8 | 1558.3 | 1689  | 1477  | 1577  | 1497.87  |
| 114588    | Cdh4       | 353    | 298     | 334    | 355    | 410   | 362   | 320   | 299.98   |
| 287805    | Gprc5c     | 604    | 626     | 603    | 667    | 620   | 791   | 633   | 553      |
| 100233176 | Gon7       | 540.38 | 684.69  | 591.28 | 565.86 | 660.7 | 612.9 | 481.4 | 719.66   |
| 316530    | Cnppd1     | 840    | 861     | 901    | 823    | 902   | 941   | 826   | 889      |
| 290632    | Mrpl34     | 269    | 219     | 238    | 201    | 240   | 227   | 242   | 254      |
| 289582    | Fip111     | 669    | 713     | 699    | 800    | 773   | 693   | 807   | 720      |
| 365361    | Lyrml      | 371.62 | 443.79  | 422.31 | 340.92 | 433.7 | 431.5 | 432.5 | 342.37   |
| 311055    | Tanc1      | 1838   | 2116    | 2055   | 2444   | 2229  | 2207  | 2163  | 2183     |
| 680558    | Tmem241    | 83     | 80      | 82     | 89     | 71    | 90    | 93    | 93       |
| 302986    | Telo2      | 377    | 372     | 371    | 370    | 399   | 375   | 352   | 422      |
| 360459    | RGD1305733 | 3164   | 3037    | 2806   | 2809   | 2977  | 2954  | 3049  | 3296     |
| 83764     | Flot2      | 5296.1 | 5663.85 | 5432.6 | 4973.2 | 6327  | 5516  | 5312  | 5043.09  |
| 364476    | Hs6st3     | 124    | 113     | 104    | 146    | 157   | 104   | 113   | 131.99   |
| 252929    | Ctsz       | 971    | 1006    | 969    | 849    | 968   | 977   | 968   | 1030     |
| 317341    | Ube2q2l    | 173    | 175     | 157    | 136    | 172   | 160   | 168   | 166      |
| 60590     | Grm8       | 170    | 146     | 162    | 163    | 164   | 185   | 156   | 161      |
| 501099    | Srf        | 522    | 454     | 463    | 612    | 521   | 526   | 579   | 505      |
| 499390    | Clasrp     | 680    | 648     | 662    | 569    | 707   | 719   | 656   | 577      |
| 288515    | Micall2    | 192    | 229     | 245    | 204    | 214   | 236   | 244   | 210      |
| 292935    | Htatip2    | 741    | 753     | 665    | 629    | 732   | 710   | 776   | 679      |
| 313668    | Ddi2       | 1477.1 | 1444.46 | 1432.9 | 1568.8 | 1765  | 1400  | 1715  | 1275.19  |
| 24586     | Ncam1      | 4357.3 | 4873.83 | 4679.2 | 5647.1 | 5213  | 5233  | 5110  | 4766.1   |
| 687539    | Mthfsd     | 154    | 147     | 127    | 134    | 149   | 153   | 151   | 131      |
| 501555    | Rai2       | 131.14 | 137.37  | 134.05 | 139.33 | 135.5 | 129.2 | 138.5 | 159.86   |
| 310417    | Proser1    | 403    | 393     | 447    | 441    | 446   | 491   | 433   | 380      |
| 287371    | Drc3       | 200    | 190     | 174    | 201    | 189   | 202   | 190   | 214      |
| 498153    | Gpr146     | 620.45 | 548.52  | 533.98 | 558.52 | 601.1 | 633.8 | 532.8 | 582.45   |
| 363221    | Cnot11     | 427    | 458     | 454    | 419    | 448   | 497   | 446   | 436      |
| 192234    | Eif2b5     | 1191   | 1025    | 1002   | 1008   | 1042  | 1001  | 1151  | 1198     |
| 170906    | Zdhhc7     | 1019   | 1033    | 983    | 936    | 1023  | 1067  | 987   | 1050     |
| 29691     | Pdelb      | 102.7  | 86.6    | 83.84  | 91.6   | 87.04 | 105.2 | 99.28 | 87.53    |
| 361698    | Pold4      | 135    | 153     | 157    | 140    | 130   | 134   | 179   | 165      |
| 81525     | Nfkbib     | 354    | 288     | 276    | 302    | 312   | 326   | 298   | 332      |
| 303337    | Rab11fip4  | 1903   | 2015    | 1858   | 1797   | 2043  | 1908  | 1970  | 1950     |
| 362645    | Atp13a2    | 4237   | 4371    | 4265   | 4585   | 5124  | 4683  | 4315  | 4023     |
| 293648    | Mrgprd     | 1099.1 | 1173.61 | 996.32 | 1039.3 | 1047  | 1137  | 1024  | 1269.96  |
| 287596    | Smg8       | 251    | 257     | 245    | 263    | 248   | 274   | 251   | 283      |

|           |              |        |         |        |        |       |       |       |          |
|-----------|--------------|--------|---------|--------|--------|-------|-------|-------|----------|
| 361438    | Gas8         | 90     | 78      | 83     | 79     | 77    | 82    | 94    | 90       |
| 691703    | C2cd4a       | 47.87  | 30.08   | 45     | 34.54  | 45.71 | 48.95 | 34.2  | 34.84    |
| 295645    | Slc4a10      | 40     | 36      | 39     | 37     | 37    | 31    | 39    | 51       |
| 317296    | Mtmr1        | 442    | 433     | 384    | 437    | 434   | 447   | 455   | 427      |
| 294297    | Scube3       | 235    | 215     | 229    | 131    | 213   | 259   | 157   | 213      |
| 60395     | Trpc3        | 413    | 420     | 414    | 398    | 451   | 407   | 405   | 447      |
| 684527    | Crtc1        | 1255   | 1318    | 1433   | 1460   | 1537  | 1418  | 1390  | 1337     |
| 288710    | Rnf10        | 5268   | 5571    | 5491   | 5351   | 5684  | 5732  | 5536  | 5586     |
| 302973    | Abca3        | 3647   | 3983.89 | 4030   | 4513.8 | 4393  | 4276  | 4241  | 3904.96  |
| 305234    | Stbd1        | 657    | 700     | 726    | 748    | 767   | 751   | 763   | 662      |
| 83620     | Cit          | 340    | 338     | 336    | 452    | 417   | 424   | 359   | 324      |
| 360576    | Trarg1       | 11390  | 11305   | 11613  | 10544  | 12397 | 11545 | 11194 | 11492    |
| 289587    | Lrrc66       | 21     | 29      | 22     | 29     | 28    | 26    | 25    | 26       |
| 100158233 | Slc35a2      | 503    | 498     | 543    | 526    | 530   | 583   | 500   | 539      |
| 313021    | Tmem222      | 488    | 508     | 482    | 413    | 485   | 462   | 493   | 526      |
| 294513    | Dnajb12      | 939    | 1042    | 1057   | 1040   | 1044  | 1123  | 1068  | 1005     |
| 29181     | Cdh10        | 173    | 156     | 127    | 173    | 172   | 168   | 190   | 124      |
| 100910864 | LOC100910864 | 54.82  | 42.32   | 45.08  | 52.43  | 50.89 | 44.92 | 64.36 | 42.22    |
| 266609    | Bles03       | 825    | 814     | 825    | 702    | 809   | 801   | 833   | 849      |
| 26989     | Cadps        | 3769   | 3854    | 3475   | 4327   | 4147  | 3936  | 4169  | 3787     |
| 192152    | Tgoln2       | 3106   | 2958    | 2945.9 | 3299   | 3210  | 3048  | 3348  | 3192.86  |
| 282824    | Elavl3       | 1159.6 | 1167.37 | 1118.3 | 1277   | 1413  | 1159  | 1141  | 1196.84  |
| 295635    | Arhgap15     | 43     | 68.15   | 47     | 36.45  | 52.03 | 45    | 60.74 | 44.58    |
| 312373    | Nt5c3a       | 606    | 626     | 581    | 497    | 596   | 626   | 567   | 613      |
| 361555    | Ankrd27      | 927    | 1018    | 925    | 921    | 1018  | 1035  | 957   | 932      |
| 64533     | Pnpo         | 918.61 | 945.78  | 805.37 | 881.84 | 931.7 | 854.3 | 919.2 | 987.89   |
| 29544     | Tspyl1       | 1733   | 1736    | 1744   | 1614   | 1829  | 1670  | 1750  | 1850     |
| 303497    | Osbpl7       | 389.4  | 363     | 388    | 365    | 419   | 406   | 340   | 400.4    |
| 500446    | Phf24        | 23992  | 25867   | 24159  | 25699  | 26921 | 24612 | 25847 | 26311.85 |
| 100911575 | LOC100911575 | 274.59 | 269.26  | 202.61 | 189.28 | 258.6 | 250.6 | 247.9 | 215.94   |
| 100362124 | Ift140       | 630    | 525     | 511    | 562    | 557   | 664   | 454   | 642      |
| 311129    | Osbpl6       | 1118   | 1133.84 | 1032   | 1363   | 1232  | 1178  | 1246  | 1176.99  |
| 102553506 | LOC102553506 | 7      | 7       | 4      | 7      | 7     | 8     | 6     | 5        |
| 302822    | Igsf1        | 12     | 7       | 14     | 17     | 12    | 18    | 7     | 15       |
| 499368    | Calhm3       | 11     | 15      | 12     | 12     | 10    | 15    | 14    | 13       |
| 294281    | Slc39a7      | 1352.7 | 1364.64 | 1440.7 | 1281.6 | 1419  | 1381  | 1488  | 1369.66  |
| 312800    | Atf7ip       | 960.01 | 1111    | 990    | 1157   | 1118  | 1117  | 1105  | 1047.01  |
| 308589    | Sphk2        | 1540   | 1512    | 1484   | 1476   | 1659  | 1533  | 1508  | 1553     |
| 291940    | Zfp827       | 613.09 | 646.79  | 629.24 | 749    | 743   | 694.8 | 647.5 | 658.63   |
| 360549    | Plscr3       | 836    | 828     | 857    | 743    | 828   | 876   | 846   | 845      |
| 687808    | Slc16a9      | 211    | 179     | 171    | 236    | 207   | 201   | 194   | 227      |
| 290985    | Isca1        | 2347   | 2443    | 2241   | 2184   | 2397  | 2299  | 2407  | 2482     |
| 64464     | Timm10       | 357    | 362     | 316    | 260    | 316   | 310   | 350   | 371      |
| 689523    | Lin9         | 71.89  | 65      | 71     | 68     | 67    | 77.97 | 64    | 78       |
| 64524     | Tkt          | 5201   | 5645    | 5367   | 5363   | 5328  | 5876  | 5407  | 5832     |
| 89804     | Tek          | 403.15 | 351.93  | 380.32 | 303.67 | 369.2 | 344.8 | 414.6 | 368.44   |
| 362811    | Ankrd52      | 1577   | 1490    | 1587   | 1907   | 1938  | 1638  | 1717  | 1532     |
| 359959    | Rheb11       | 95.14  | 91.1    | 84.51  | 86.24  | 92.46 | 77.9  | 105.8 | 95.23    |
| 687575    | U2af1        | 507    | 504     | 537    | 463    | 480   | 499   | 587   | 526      |
| 100360679 | LOC100360679 | 0.02   | 144.29  | 187.76 | 244.5  | 0     | 0     | 0     | 599.8    |
| 116692    | Cyth2        | 1141   | 1075.98 | 1231   | 1088   | 1100  | 1175  | 1195  | 1248.43  |
| 295701    | Tmx2         | 4047   | 4092    | 3887   | 3978   | 4134  | 4135  | 4301  | 4079     |
| 171355    | Pou4f2       | 344.62 | 237.59  | 279.6  | 290.48 | 330.2 | 297.5 | 281.6 | 289.41   |
| 498431    | RGD1562229   | 27     | 28      | 33     | 36     | 40    | 34    | 30    | 25       |
| 310909    | Rap1gds1     | 8339   | 8761    | 8772   | 9018   | 9419  | 9372  | 8908  | 8598     |
| 303787    | Slc7a4       | 206    | 219     | 202    | 190    | 219   | 193   | 226   | 212      |

|           |              |        |         |        |        |       |       |       |         |
|-----------|--------------|--------|---------|--------|--------|-------|-------|-------|---------|
| 24175     | Adra2c       | 269    | 281     | 259    | 280    | 322   | 298   | 260   | 253     |
| 246187    | Slc7a6os     | 282    | 308     | 302    | 271    | 268   | 318   | 300   | 324     |
| 363195    | Gtpbp2       | 806.98 | 735.59  | 765.76 | 699.74 | 817.1 | 797.6 | 733.2 | 781.81  |
| 361160    | Leprot11     | 804    | 790     | 757    | 692    | 791   | 828   | 778   | 769     |
| 292696    | Clptm1       | 3459   | 3529    | 3522   | 3516   | 3552  | 3908  | 3597  | 3536    |
| 293614    | Ric8a        | 2426   | 2129    | 2045   | 2105   | 2017  | 2161  | 2434  | 2445    |
| 316087    | Zbtb47       | 1518   | 1446    | 1510   | 1483   | 1516  | 1689  | 1519  | 1474    |
| 54251     | Flt1         | 589.01 | 568.14  | 585.01 | 699    | 630.1 | 608   | 675.9 | 626.05  |
| 362899    | Nipal2       | 448    | 431     | 407    | 389    | 435   | 430   | 444   | 434     |
| 292766    | Psm8         | 3223   | 2960    | 2788   | 2618   | 3019  | 2906  | 3074  | 3060.96 |
| 314633    | Ap3d1        | 5461   | 6075.82 | 6025.7 | 6113.9 | 6669  | 6362  | 5871  | 5736.86 |
| 680047    | Pcdhb9       | 78.17  | 101.18  | 83.08  | 86.98  | 98.68 | 97.2  | 96.94 | 70.79   |
| 313053    | Ythdf2       | 763    | 716     | 741    | 799    | 760   | 800   | 725   | 857     |
| 303343    | Abhd15       | 19.17  | 28.46   | 24.07  | 28.34  | 20.7  | 28.09 | 27.02 | 28.31   |
| 499094    | Zfp61        | 594.67 | 443.87  | 550.23 | 423.03 | 496.5 | 501   | 568.2 | 528.27  |
| 682033    | Ppp2r3b      | 228    | 232     | 220    | 177    | 254   | 217   | 211   | 210     |
| 113956    | Pecr         | 224    | 272     | 249    | 234    | 233   | 266   | 244   | 276     |
| 29309     | Coq3         | 408    | 405     | 368    | 385    | 407   | 349   | 411   | 463     |
| 25095     | Ampd3        | 623    | 576     | 625    | 645    | 689   | 673   | 628   | 580     |
| 301388    | Mfsd6        | 5076   | 5194    | 4572   | 4861   | 5443  | 5308  | 5085  | 4673    |
| 100910054 | Nkrf         | 54.54  | 49.74   | 68.91  | 64.59  | 70.69 | 56.49 | 62.19 | 58.14   |
| 65262     | Atp5fla      | 9810   | 9669    | 8251   | 8930   | 9246  | 9812  | 9911  | 9192    |
| 360838    | Lypd1        | 336    | 254     | 209.51 | 287    | 255   | 281   | 338   | 257     |
| 170916    | Lonpl        | 1398   | 1329    | 1295   | 1396   | 1412  | 1433  | 1400  | 1395    |
| 305714    | Thoc7        | 798.09 | 754.4   | 757.67 | 724.36 | 798.8 | 768.4 | 762.1 | 829.62  |
| 497040    | Prss36       | 43     | 19      | 22     | 38     | 39    | 24    | 32    | 32      |
| 362364    | Tril         | 1721   | 1706    | 1495   | 1690   | 1684  | 1740  | 1864  | 1595    |
| 307649    | Ciapin1      | 1031.8 | 1008.8  | 944.74 | 908.78 | 1025  | 1039  | 1006  | 984.57  |
| 297879    | Zfp362       | 427    | 423     | 426    | 504    | 458   | 507   | 468   | 420     |
| 362833    | Mob3a        | 1009   | 899     | 957    | 959    | 1017  | 1009  | 990   | 965     |
| 100911661 | LOC100911661 | 169    | 119     | 142    | 130    | 143   | 134   | 147   | 159     |
| 300057    | Recq14       | 52     | 52      | 60     | 55     | 54    | 66    | 46    | 62      |
| 315329    | Mfsd5        | 697    | 741     | 686    | 674    | 713   | 762   | 701   | 737     |
| 293710    | Lgals12      | 5.96   | 6.04    | 12.53  | 8.27   | 8.71  | 12.56 | 9.99  | 2.89    |
| 361066    | RGD1308117   | 138.89 | 121.91  | 152.41 | 129.5  | 147.4 | 130.1 | 135   | 152.48  |
| 308415    | Ercc2        | 316.89 | 269.82  | 296.99 | 287.17 | 312.7 | 312.8 | 318.5 | 275.16  |
| 299129    | Lrrc9        | 81     | 78      | 66     | 66     | 72    | 74    | 76    | 81      |
| 688298    | Ccdc137      | 288.8  | 264.35  | 251.06 | 263.28 | 276.1 | 298.5 | 259.6 | 277.3   |
| 296580    | Camsap1      | 1476   | 1576    | 1559   | 1735   | 1742  | 1687  | 1617  | 1562    |
| 364419    | Chmp7        | 1145   | 1125    | 1095   | 1112   | 1139  | 1220  | 1161  | 1142    |
| 501047    | Col6a5       | 405.96 | 427.1   | 522    | 423.69 | 424.6 | 503   | 477.5 | 447.13  |
| 29542     | Pebp1        | 8634   | 8428    | 7644   | 7204   | 8143  | 8575  | 7955  | 8556    |
| 360677    | Mcrip1       | 919    | 831     | 934    | 725    | 843   | 897   | 871   | 939     |
| 25367     | Adarb1       | 1543   | 1620    | 1240   | 1713   | 1583  | 1675  | 1551  | 1560    |
| 314694    | Chst11       | 891    | 938     | 857    | 1009   | 1069  | 1085  | 874   | 820     |
| 192183    | Nectin1      | 1002.5 | 951     | 1006   | 1065.4 | 1126  | 997.2 | 1057  | 1011.92 |
| 305156    | Arhgap24     | 352    | 383     | 377    | 336    | 301   | 467   | 372   | 368     |
| 303539    | Kat2a        | 1182   | 1236    | 1167   | 1145   | 1223  | 1260  | 1247  | 1196    |
| 102553763 | Znf768       | 227.27 | 222.79  | 225.42 | 231.49 | 240.6 | 241.5 | 230.6 | 231.89  |
| 304512    | Rbm19        | 182    | 202     | 194    | 218    | 198   | 196   | 229   | 206     |
| 116777    | Cdh3         | 354    | 334     | 337    | 373    | 393   | 382   | 361   | 320     |
| 294961    | Kcnmb2       | 67     | 68      | 53     | 53     | 58    | 62    | 67    | 64      |
| 310704    | Bcl9         | 546.92 | 538.57  | 604.77 | 619.92 | 635.9 | 605.7 | 602.7 | 561.83  |
| 361351    | Hdhd2        | 643    | 760     | 704    | 732    | 690   | 703   | 777   | 787     |
| 300822    | Tex9         | 408    | 438     | 402    | 388    | 478   | 359   | 466   | 401     |
| 29603     | Bckdk        | 843    | 763     | 766    | 779    | 802   | 835   | 818   | 827     |

|           |              |        |         |        |        |       |       |       |         |
|-----------|--------------|--------|---------|--------|--------|-------|-------|-------|---------|
| 690229    | Wdr74        | 286    | 259     | 295    | 218    | 249   | 280   | 254   | 319     |
| 362098    | Gle1         | 491.9  | 471.08  | 508.97 | 503.24 | 538.5 | 467.3 | 527.6 | 524.03  |
| 315093    | Maf1         | 1308   | 1270    | 1230   | 1190   | 1252  | 1314  | 1297  | 1343    |
| 100362155 | Cyhr1        | 286    | 315     | 265    | 263    | 310   | 266   | 299   | 301     |
| 288447    | Uspl1        | 546    | 573     | 600    | 539    | 562   | 608   | 607   | 575     |
| 681458    | LOC681458    | 345.79 | 479.41  | 495.46 | 372.8  | 383.4 | 440.2 | 504   | 436.43  |
| 25232     | Tyro3        | 1009   | 946     | 922    | 964    | 973   | 1054  | 1004  | 970     |
| 282832    | Ccr9         | 5.01   | 6.11    | 4.34   | 7.82   | 9.39  | 5.04  | 6.81  | 3.01    |
| 365834    | Fam160a1     | 6      | 2       | 6      | 10     | 7     | 12    | 2     | 4       |
| 687105    | Arhgef16     | 34     | 38      | 41     | 55     | 31    | 38    | 62    | 44      |
| 192260    | Cdipt        | 4625   | 4366    | 4164   | 4386   | 4673  | 4657  | 4226  | 4716    |
| 140673    | Napa         | 4364   | 4504    | 4196   | 3908   | 4564  | 4363  | 4489  | 4263    |
| 308632    | Hebp2        | 2689   | 2589    | 2329   | 2220   | 2650  | 2400  | 2638  | 2549    |
| 297570    | Pex26        | 163    | 172     | 187    | 197    | 191   | 185   | 182   | 191     |
| 108353239 | LOC108353239 | 206.88 | 155.18  | 181.05 | 187.32 | 199.5 | 187.8 | 196.6 | 176.95  |
| 314441    | Slc25a29     | 210    | 226     | 176    | 154    | 186   | 214   | 170   | 228     |
| 303518    | Smarcel      | 1064   | 1202    | 1173   | 1084   | 1120  | 1215  | 1166  | 1211    |
| 686911    | Exoc11       | 1289.6 | 1020.26 | 1090.8 | 1094   | 1163  | 1061  | 1077  | 1381.55 |
| 498545    | Tsc22d1      | 9100   | 8985.99 | 8354   | 8610   | 9276  | 8956  | 9196  | 9087    |
| 292874    | RGD1309036   | 57.42  | 58.21   | 48.96  | 47.84  | 41.6  | 58.04 | 68.21 | 53.46   |
| 83505     | St3gal5      | 961    | 953     | 836    | 934    | 904   | 988   | 961   | 985     |
| 116550    | Atp5flc      | 3166   | 3032    | 2581   | 2625   | 2885  | 2999  | 2974  | 3023    |
| 311671    | Npepl1       | 545    | 531     | 587    | 536    | 559   | 602   | 572   | 558     |
| 29272     | Dpp6         | 7278   | 7962    | 6866   | 8260   | 8316  | 8200  | 7678  | 7443    |
| 246307    | Asrgl1       | 902    | 836     | 779    | 777    | 817   | 788   | 968   | 859     |
| 363228    | Tmeff2       | 836    | 886     | 753    | 866    | 825   | 925   | 889   | 842     |
| 302032    | Amn1         | 300    | 293     | 313    | 263    | 247   | 310   | 308   | 353     |
| 308320    | Zfp772       | 369.08 | 347.43  | 304.37 | 289.09 | 341.8 | 322.5 | 348.4 | 352.28  |
| 171293    | Ctsd         | 11543  | 11617   | 11253  | 10766  | 11577 | 12174 | 11601 | 11722   |
| 311902    | Rbm18        | 1234   | 1154    | 1116   | 999    | 1151  | 1112  | 1209  | 1220    |
| 94202     | Ptprr        | 1027   | 961     | 1018   | 1044   | 1024  | 1035  | 1071  | 1090    |
| 316249    | Enpp5        | 2249   | 2221    | 1919   | 2066   | 2185  | 2208  | 2308  | 2109    |
| 314442    | Wars         | 3480   | 3507.22 | 3367.2 | 3546.9 | 3649  | 3728  | 3699  | 3409.17 |
| 305373    | Hmgb3        | 533.15 | 602.55  | 562.45 | 476.09 | 547.4 | 536.3 | 580.3 | 601.59  |
| 312054    | Gtpbp10      | 112    | 115     | 150    | 123    | 112   | 118   | 154   | 137     |
| 102551714 | LOC102551714 | 69.23  | 61.06   | 58.55  | 93.22  | 35.08 | 63.63 | 99.93 | 95.27   |
| 684304    | Mrpl39       | 327    | 245     | 245    | 254    | 278   | 240   | 299   | 299     |
| 293050    | Abhd2        | 1932   | 2010    | 2009   | 2283   | 2577  | 1915  | 2159  | 1929    |
| 116493    | Gripap1      | 1659   | 1705    | 1648   | 1674   | 1842  | 1691  | 1790  | 1644    |
| 291414    | Ctdpl        | 410    | 453     | 470    | 403    | 467   | 473   | 453   | 416     |
| 361504    | Rdh13        | 303.5  | 272     | 277.55 | 310    | 322   | 281   | 337   | 272     |
| 102552101 | LOC102552101 | 20.17  | 10      | 13.59  | 9      | 11    | 14.01 | 11.02 | 18.95   |
| 287746    | Fmn11        | 1257   | 1314    | 1274   | 1239   | 1427  | 1341  | 1215  | 1315    |
| 317374    | Timm17b      | 214    | 99.89   | 158.63 | 136    | 162.6 | 164.3 | 140.6 | 166.63  |
| 362388    | Mrpl53       | 460.32 | 425.51  | 380.51 | 363.34 | 440.2 | 433.3 | 353.8 | 471.03  |
| 102556446 | LOC102556446 | 10.48  | 4.15    | 4.15   | 5.18   | 2.1   | 9.39  | 8.33  | 5.15    |
| 290541    | Arhgef3      | 541    | 540     | 523    | 554    | 557   | 597   | 551   | 544     |
| 25751     | Dnm2         | 1211.7 | 1425.48 | 1489.2 | 1353   | 1399  | 1492  | 1421  | 1398.23 |
| 315112    | Foxred2      | 49     | 64      | 66     | 58     | 62    | 68    | 61    | 56      |
| 315218    | Lmf2         | 1074   | 1063    | 1146   | 1172   | 1171  | 1257  | 1059  | 1156    |
| 365224    | Zfp74        | 319.65 | 302.18  | 205.87 | 133.36 | 293.7 | 288.6 | 314.1 | 105.21  |
| 266600    | Csdc2        | 1734   | 1630    | 1685.8 | 1684   | 1718  | 1809  | 1664  | 1827    |
| 108352882 | LOC108352882 | 0      | 1.42    | 0      | 0      | 0     | 0     | 0     | 1.48    |
| 497935    | RGD1563441   | 25     | 18      | 17     | 11     | 21    | 19    | 14    | 20      |
| 245959    | Slc25a3      | 6601   | 6510    | 5859   | 5707   | 6083  | 6467  | 6587  | 6582.99 |
| 684258    | Chchd7       | 236    | 226     | 206    | 159    | 209   | 223   | 225   | 205     |

|           |              |        |         |        |        |       |       |       |         |
|-----------|--------------|--------|---------|--------|--------|-------|-------|-------|---------|
| 311840    | Urm1         | 655    | 626     | 640    | 630    | 639   | 637   | 671   | 712     |
| 292687    | Qpctl        | 436.72 | 435.24  | 384.61 | 411.11 | 477.3 | 411.9 | 415.3 | 433.92  |
| 304344    | Ap4ml        | 189.73 | 203.71  | 179    | 203.22 | 222.7 | 180   | 212   | 193.85  |
| 315996    | Sema3f       | 575    | 535     | 540    | 589    | 563   | 632   | 596   | 543     |
| 499779    | Swi5         | 1156   | 1184    | 1115   | 928    | 1109  | 1177  | 1158  | 1125    |
| 84469     | Maged1       | 5175   | 5521    | 5529   | 5641   | 5689  | 5756  | 5869  | 5480    |
| 24804     | Syp          | 11627  | 11922   | 11152  | 11551  | 12539 | 11911 | 12136 | 11629   |
| 64023     | Masp1        | 270    | 322     | 309    | 322    | 327   | 342   | 302   | 304     |
| 307852    | Pdpr         | 339    | 365     | 406    | 371    | 431   | 361   | 374   | 378     |
| 64156     | Uba52        | 4237   | 3879.99 | 3956   | 3302.8 | 4038  | 3856  | 3898  | 4238    |
| 315212    | Alg12        | 167    | 161     | 161    | 122    | 153   | 170   | 162   | 152     |
| 124461    | Pacsin2      | 2698.4 | 2589.04 | 2378.8 | 2714.4 | 2755  | 2744  | 2730  | 2593.79 |
| 58857     | Vapa         | 3687   | 3560    | 3459   | 3411   | 3657  | 3811  | 3655  | 3595.09 |
| 312680    | Hdhd5        | 222    | 226     | 226    | 217    | 235   | 232   | 239   | 223     |
| 114554    | Pi4k2a       | 1048   | 1050    | 951    | 1124   | 1097  | 1075  | 1104  | 1075    |
| 289046    | Tmem9        | 729    | 698     | 677    | 615    | 748   | 653   | 672   | 762     |
| 25244     | Bckdha       | 797    | 771     | 675    | 640    | 755   | 752   | 715   | 784     |
| 290277    | Cryl1        | 106    | 90      | 109    | 70     | 93    | 91    | 94    | 113     |
| 50567     | Slc3a2       | 2300   | 2544    | 2556   | 2549   | 2543  | 2641  | 2647  | 2543    |
| 64369     | Plpp1        | 1943.1 | 1946.55 | 1786.6 | 1759.6 | 1953  | 1960  | 1996  | 1844.03 |
| 299050    | RGD1305089   | 236    | 238     | 227    | 188    | 240   | 208   | 230   | 249     |
| 300046    | Gpaal        | 727    | 772     | 746    | 702    | 784   | 792   | 751   | 746     |
| 60431     | Vapb         | 3448   | 3491    | 3169   | 3375   | 3580  | 3444  | 3592  | 3443.91 |
| 500251    | Hmces        | 393    | 340     | 309    | 289    | 341   | 357   | 347   | 343     |
| 299739    | Ndufa12      | 1066.8 | 901     | 889    | 772.74 | 937   | 931   | 923   | 994     |
| 63837     | Tagln3       | 2665.7 | 2429.85 | 2214.1 | 2117.3 | 2378  | 2383  | 2505  | 2565.06 |
| 303311    | Rtn4r11      | 1887   | 1788    | 1734   | 1826   | 1995  | 1933  | 1778  | 1839    |
| 303583    | Arhgap27     | 616    | 606     | 511    | 554    | 676   | 579   | 581   | 549     |
| 303196    | Tmem11       | 464    | 428     | 382    | 429    | 442   | 453   | 425   | 456     |
| 29158     | Fbln5        | 3029   | 3031    | 2786   | 2884   | 2954  | 3256  | 3093  | 2930    |
| 363006    | Tarbp2       | 467    | 438     | 441    | 426    | 464   | 442   | 478   | 464     |
| 80846     | Hnrnp1       | 2563   | 2665    | 2687   | 2596   | 2577  | 2828  | 2822  | 2735    |
| 288719    | Tpst2        | 456    | 417     | 502    | 466    | 472   | 489   | 509   | 450     |
| 301024    | Scap         | 1798   | 1674    | 1770   | 1749   | 1867  | 1932  | 1759  | 1733    |
| 100125378 | Nudcd3       | 200    | 202     | 182    | 208    | 244   | 202   | 208   | 172     |
| 170818    | Icmt         | 608    | 639     | 584    | 638    | 694   | 603   | 607   | 671     |
| 25669     | Cpe          | 6172   | 6260    | 6682   | 6280   | 6529  | 6888  | 6554  | 6514    |
| 291987    | Utp4         | 449    | 426     | 427    | 420    | 422   | 448   | 473   | 453     |
| 287845    | Dnah17       | 137.93 | 140.75  | 140.93 | 118.83 | 134   | 113.7 | 178.9 | 134.93  |
| 684980    | Tsc22d4      | 1268.5 | 1190    | 1344   | 1118   | 1262  | 1413  | 1178  | 1279    |
| 290775    | Vps37a       | 299    | 310     | 310    | 314    | 316   | 285   | 350   | 335     |
| 25484     | Myole        | 1615   | 1676    | 1534   | 1710   | 1723  | 1797  | 1714  | 1582    |
| 54293     | Rgs3         | 6488.9 | 6081.84 | 6306.6 | 6422.6 | 7306  | 6343  | 6170  | 6569.5  |
| 94188     | Zfp423       | 344    | 340     | 370    | 387    | 343   | 432   | 414   | 314     |
| 361858    | Gtf3c6       | 187    | 174     | 188    | 171    | 191   | 183   | 183   | 194     |
| 688163    | Prr151       | 48     | 58      | 54     | 49     | 51    | 66    | 55    | 46      |
| 64187     | Ar11         | 1073   | 1075    | 972    | 990    | 1027  | 1022  | 1120  | 1118    |
| 688495    | Smim7        | 1210.5 | 1045.37 | 1051.1 | 913.45 | 1153  | 1053  | 1057  | 1139.32 |
| 108348293 | LOC108348293 | 86.31  | 45.01   | 41.93  | 40.4   | 36.29 | 25.86 | 101.8 | 58.91   |
| 685068    | Gemin711     | 121.69 | 127.63  | 141    | 118.34 | 138.3 | 104.3 | 152.4 | 135.62  |
| 301515    | Rnf25        | 474    | 445     | 461    | 429    | 496   | 502   | 401   | 488     |
| 311876    | Pbx3         | 471    | 482     | 498    | 453    | 486   | 522   | 506   | 472.1   |
| 691001    | Ndufa3       | 889    | 826     | 763.54 | 739    | 775   | 837   | 773.3 | 971     |
| 312682    | Bcl2l13      | 686    | 666     | 688    | 696    | 746   | 736   | 721   | 651     |
| 100912034 | LOC100912034 | 60.6   | 60.6    | 101.01 | 80.8   | 53.46 | 101   | 60.6  | 101.01  |
| 688841    | Fam155b      | 506    | 530     | 480    | 524    | 545   | 588   | 497   | 498     |



|           |              |        |         |        |        |       |       |       |         |
|-----------|--------------|--------|---------|--------|--------|-------|-------|-------|---------|
| 303596    | 10-Mar       | 33     | 33      | 31     | 42     | 43    | 41    | 24    | 37      |
| 81769     | Rpl36a1      | 952.6  | 873.1   | 884.09 | 743.7  | 872.9 | 876.7 | 897.1 | 956.04  |
| 56718     | Mtor         | 1436   | 1461    | 1490   | 1633   | 1586  | 1585  | 1603  | 1506    |
| 288599    | Eif4h        | 4630   | 4971    | 4372   | 4470   | 4816  | 4845  | 4929  | 4650    |
| 360678    | Arhgdia      | 13658  | 13441   | 13610  | 12584  | 14011 | 13913 | 13473 | 14200   |
| 362781    | Hhip11       | 309.21 | 323.27  | 303.04 | 298.5  | 370.2 | 336.7 | 318.1 | 262.43  |
| 290519    | Thoc3        | 556    | 468     | 504    | 413    | 497   | 524   | 492   | 512     |
| 619579    | Nrbp1        | 2118   | 2084    | 1940   | 1920   | 2186  | 2053  | 2129  | 2043    |
| 140610    | Brinp1       | 517.43 | 465.78  | 463.85 | 487.12 | 542.6 | 499.6 | 558.6 | 417.13  |
| 102549059 | LOC102549059 | 128    | 129     | 103    | 125    | 127   | 129   | 124   | 126     |
| 108348137 | LOC108348137 | 227.77 | 392.05  | 379.62 | 362.34 | 396.1 | 151.9 | 476.6 | 396.22  |
| 85248     | Kif3c        | 3704   | 4172    | 3772   | 4511   | 4412  | 4251  | 4141  | 4055    |
| 291440    | Cxxc1        | 460    | 488     | 532    | 482    | 512   | 516   | 505   | 514     |
| 361991    | S100a16      | 315    | 323     | 325    | 260    | 285   | 303   | 360   | 328     |
| 25218     | Vps52        | 1301   | 1253    | 1277   | 1309   | 1319  | 1362  | 1360  | 1322    |
| 295241    | Mtx1         | 619    | 678     | 650    | 587    | 636   | 648   | 708   | 652     |
| 170848    | Kcnq2        | 3593.2 | 3514.44 | 3243.3 | 3899.3 | 4057  | 3725  | 3709  | 3376.71 |
| 29231     | Ciao1        | 813    | 829     | 763    | 773    | 833   | 802   | 834   | 847     |
| 108350166 | LOC108350166 | 12.95  | 10.45   | 8.87   | 7.57   | 9.05  | 17.7  | 5.61  | 9.21    |
| 691589    | Chd5         | 846    | 886.41  | 898.04 | 935.95 | 932.6 | 1010  | 814   | 964.29  |
| 313978    | E2f6         | 936    | 879     | 697    | 871    | 870   | 902   | 866   | 892     |
| 25624     | Vamp1        | 21797  | 20949   | 18475  | 21070  | 21993 | 20494 | 22100 | 21281   |
| 304323    | Mrm2         | 65.81  | 83.18   | 72.83  | 79.75  | 89.06 | 68.06 | 84.87 | 72.69   |
| 114493    | Cacnalf      | 9      | 6       | 5      | 3      | 2     | 7     | 9     | 6       |
| 499361    | Tlx1         | 6      | 7       | 4      | 6      | 6     | 2     | 8     | 8       |
| 292536    | Prpf31       | 594    | 628     | 530    | 548    | 642   | 543   | 606   | 609     |
| 361185    | Naxd         | 323    | 379     | 299    | 286    | 354   | 345   | 333   | 311     |
| 192276    | Coro7        | 1159.8 | 1235.89 | 1158.8 | 1238.7 | 1212  | 1386  | 1219  | 1185.37 |
| 502750    | Wee2         | 6      | 8       | 17     | 13.08  | 4     | 15    | 17    | 10      |
| 303923    | B4galt4      | 252    | 283     | 299    | 245    | 275   | 286   | 272   | 293     |
| 81739     | P2rx3        | 9793   | 9506.91 | 8201.2 | 9228.1 | 9984  | 9045  | 9356  | 9945.57 |
| 100361946 | Lrrc74b      | 54     | 66      | 45     | 65     | 69    | 57    | 55    | 59.03   |
| 308654    | Zmat1        | 307.81 | 295.78  | 320.03 | 309.04 | 323.6 | 294.9 | 345.7 | 322.34  |
| 83522     | Acox3        | 1163   | 1130.06 | 1280   | 1022   | 1277  | 1232  | 1237  | 1050.04 |
| 79116     | Apex1        | 878    | 874     | 847    | 745    | 793   | 883   | 879   | 935     |
| 313038    | Phc2         | 2069   | 2154    | 2277   | 2180   | 2238  | 2208  | 2373  | 2240    |
| 81734     | Nell2        | 597    | 530     | 554    | 563    | 603   | 557   | 508   | 674     |
| 64360     | Mrpl23       | 305    | 249     | 276    | 223    | 289   | 252   | 271   | 287     |
| 300673    | Bcl91        | 743    | 715.95  | 740    | 820.9  | 810.9 | 808   | 732.9 | 799.95  |
| 50551     | Txnrd2       | 292.7  | 275.09  | 248.08 | 244.59 | 303.4 | 287   | 238.5 | 277.93  |
| 362592    | RGD1559909   | 369    | 354     | 385    | 286    | 343   | 353   | 346   | 413     |
| 302656    | Frmpd4       | 998    | 990     | 822    | 1186   | 1138  | 956   | 1099  | 978     |
| 288518    | Get4         | 888    | 871     | 927    | 828    | 867   | 971   | 879   | 951     |
| 291784    | Rmc1         | 1373.4 | 1323.8  | 1172.7 | 1276.1 | 1302  | 1388  | 1422  | 1259.8  |
| 361162    | Purg         | 720.61 | 654.96  | 610.49 | 729.17 | 718.1 | 748.1 | 712.1 | 655.95  |
| 100359816 | Setd1b       | 542    | 636     | 610.95 | 676    | 675   | 684   | 546   | 667.99  |
| 689226    | Ube2r2       | 1763   | 1700    | 1789.6 | 1736.6 | 1840  | 1862  | 1764  | 1830.25 |
| 293427    | Eif3f        | 1971   | 1997    | 1884   | 1707   | 1981  | 1961  | 1977  | 1972    |
| 290659    | Cope         | 1991   | 1881    | 1882   | 1530   | 1899  | 1935  | 1827  | 1943    |
| 79250     | Aco2         | 8957   | 9236.2  | 8607   | 9117.9 | 9247  | 9689  | 9276  | 9284.33 |
| 619393    | Dnajc12      | 309    | 278     | 227    | 232    | 262   | 254   | 291   | 285     |
| 100910729 | Islr2        | 84     | 87      | 72     | 98     | 93    | 72    | 88    | 103     |
| 363145    | Gmppb        | 249.71 | 232.01  | 258.13 | 239.17 | 277.1 | 261.3 | 233.4 | 250.3   |
| 290834    | Adam9        | 1431   | 1485    | 1666   | 1623   | 1602  | 1589  | 1787  | 1500    |
| 316356    | Mfsd9        | 393    | 385     | 415    | 352    | 391   | 386   | 406   | 430     |
| 298400    | Creb3        | 2043.1 | 2004.14 | 1958.6 | 1786.9 | 2037  | 2079  | 2026  | 1993.49 |

|           |              |        |         |        |        |       |       |       |          |
|-----------|--------------|--------|---------|--------|--------|-------|-------|-------|----------|
| 691056    | Lmtk3        | 224.67 | 191.18  | 205.25 | 229.9  | 251   | 233.5 | 217   | 187      |
| 498596    | Nrg3         | 658.7  | 737.9   | 595.77 | 706.51 | 747.9 | 690.3 | 745.5 | 634.04   |
| 116563    | Ap2m1        | 10924  | 11261   | 10839  | 10233  | 11519 | 11636 | 11415 | 10592    |
| 83581     | Polr1a       | 383    | 412     | 392    | 470    | 460   | 428   | 455   | 387      |
| 313615    | Paqr7        | 817.07 | 898.57  | 863.44 | 841.05 | 920   | 996.3 | 796.9 | 857.69   |
| 308100    | Acat2        | 1694.8 | 1704.33 | 1613.3 | 1464.6 | 1585  | 1702  | 1661  | 1814.26  |
| 294292    | Nudt3        | 3222   | 3254    | 3209   | 3193   | 3560  | 3424  | 3101  | 3361     |
| 683684    | Fam156b      | 14     | 15      | 17     | 22     | 17    | 13    | 23    | 18       |
| 292792    | Tmem147      | 340    | 319     | 331    | 279    | 297   | 355   | 326   | 347      |
| 680891    | Sf3b5        | 758    | 748     | 695    | 579    | 740   | 776   | 693   | 694      |
| 298506    | Mycl         | 56     | 54      | 60     | 56     | 64    | 59    | 47    | 66       |
| 293042    | Sema4b       | 641    | 602     | 597    | 645    | 698   | 650   | 635   | 612      |
| 117519    | Keap1        | 1094   | 1075    | 1106   | 1061   | 1143  | 1162  | 1080  | 1143     |
| 497770    | Scn3a        | 332.49 | 321.52  | 331.45 | 398.7  | 412.2 | 293.8 | 384.9 | 354.57   |
| 296733    | Chpf2        | 954    | 990     | 967    | 994    | 1015  | 1122  | 1030  | 911      |
| 309071    | Fank1        | 25.46  | 39.11   | 18.26  | 22.09  | 23.65 | 19.07 | 37.82 | 29.03    |
| 363288    | Kif1a        | 15439  | 17701.9 | 16628  | 20993  | 19438 | 18252 | 18388 | 17821.99 |
| 304315    | Ttyh3        | 1252   | 1082    | 1310   | 1136   | 1283  | 1234  | 1303  | 1172     |
| 298694    | Plekhn1      | 87     | 62      | 101    | 88     | 73    | 76    | 106   | 98       |
| 81681     | Lss          | 864    | 924     | 840    | 908    | 871   | 897   | 909   | 1016     |
| 56082     | Gorasp1      | 607    | 698     | 656    | 674    | 672   | 743   | 647   | 690      |
| 25338     | Ninj1        | 546    | 492     | 619    | 413    | 542   | 507   | 620   | 493      |
| 100910623 | LOC100910623 | 9      | 19      | 11     | 6      | 13    | 11    | 11    | 12       |
| 300948    | Rnf7         | 942.92 | 978.44  | 980.23 | 778.58 | 1071  | 923.5 | 839   | 1010.77  |
| 314478    | Ahnak2       | 13822  | 16799.8 | 17314  | 17720  | 16975 | 19280 | 16823 | 15497.24 |
| 140908    | Cdk5         | 1922   | 1737    | 1620   | 1489   | 1765  | 1757  | 1753  | 1794     |
| 299707    | Washc3       | 437    | 405     | 387    | 366    | 375   | 414   | 399   | 478      |
| 499331    | LOC499331    | 318    | 322     | 286    | 287    | 271   | 328   | 330   | 338      |
| 25719     | Scg5         | 3717   | 3233    | 2684   | 3053   | 3156  | 3107  | 3440  | 3549     |
| 690898    | Sh3bp5l      | 1911   | 1715    | 1579   | 1732   | 1883  | 1734  | 1734  | 1895     |
| 114634    | Six1         | 1417   | 1489    | 1399   | 1442   | 1648  | 1445  | 1444  | 1466     |
| 24668     | Ppplca       | 3057.1 | 2998.74 | 3258.3 | 2557.9 | 3014  | 3180  | 3143  | 3063.57  |
| 500317    | Lpar5        | 167    | 168     | 187    | 196    | 197   | 144   | 173   | 236      |
| 364430    | Nufip1       | 320    | 327     | 360    | 339    | 368   | 326   | 359   | 353      |
| 100362555 | Sptssb       | 110    | 146     | 71     | 144    | 112   | 121   | 138   | 121      |
| 312711    | Pianp        | 641    | 733     | 607    | 710    | 695   | 698   | 706   | 712      |
| 681123    | Tomm6        | 1238   | 1089    | 1083   | 940    | 1106  | 1128  | 1105  | 1205     |
| 63938     | Hibadh       | 967    | 1004    | 854    | 895    | 934   | 957   | 1000  | 995      |
| 24877     | Vsnl1        | 4498.7 | 4723.72 | 3580.8 | 4687.8 | 4329  | 4524  | 4605  | 4814.2   |
| 25361     | Vcam1        | 183.49 | 163.74  | 170.65 | 166.02 | 192.6 | 152   | 204   | 165.84   |
| 305461    | Fam53a       | 64     | 72      | 75     | 80     | 88    | 86    | 66    | 64       |
| 25550     | Slc1a1       | 41     | 45      | 45     | 48     | 48    | 49    | 50    | 40       |
| 296634    | Nup214       | 832    | 1019    | 1032   | 1119   | 1110  | 1107  | 1031  | 933      |
| 306527    | Dusp26       | 2575   | 2408    | 2292   | 1913   | 2623  | 2373  | 2153  | 2450     |
| 313040    | Csmd2        | 445    | 460     | 466    | 506    | 529   | 519   | 476   | 437      |
| 362836    | Dazap1       | 797    | 778     | 824    | 796    | 850   | 898   | 837   | 753      |
| 65138     | Adrml        | 1865   | 1807    | 1644   | 1649   | 1824  | 1922  | 1750  | 1781     |
| 365839    | LOC365839    | 29.65  | 31.72   | 18.76  | 30.8   | 24.54 | 24.6  | 32.41 | 34.35    |
| 501539    | Ammecr1      | 38.01  | 34      | 44.06  | 36.11  | 41    | 42    | 33    | 43       |
| 25287     | Acad1        | 2078   | 2016    | 1803   | 1845   | 1966  | 2080  | 2093  | 1950     |
| 298095    | Prpf4        | 328    | 337     | 322    | 307    | 355   | 365   | 326   | 306      |
| 25717     | Tgfb3        | 517    | 485     | 466    | 473    | 525   | 521   | 516   | 466      |
| 361208    | Rab24        | 677    | 635     | 632    | 577    | 631   | 679   | 710   | 614      |
| 364901    | St8sia5      | 222.33 | 304.27  | 208.57 | 276.05 | 206.2 | 284.6 | 262.9 | 302.81   |
| 681381    | Zcwpw2       | 1910.4 | 1805.19 | 1662.8 | 1731.5 | 1988  | 1834  | 1814  | 1791.92  |
| 259221    | Osbpl1a      | 1516   | 1710    | 1461   | 1668   | 1551  | 1695  | 1742  | 1652     |

|           |              |        |         |        |        |       |       |       |         |
|-----------|--------------|--------|---------|--------|--------|-------|-------|-------|---------|
| 25112     | Gadd45a      | 469    | 471     | 473    | 393    | 457   | 487   | 483   | 460     |
| 103694635 | LOC103694635 | 59.3   | 74.77   | 49.04  | 42.48  | 46.4  | 61.34 | 69.83 | 58.14   |
| 170724    | Anp32b       | 1094   | 1122    | 1179   | 996    | 1208  | 1193  | 1061  | 1126    |
| 303796    | Zdhhc8       | 1678   | 1831    | 1808   | 1793   | 1847  | 1992  | 1766  | 1824    |
| 307759    | Gpt2         | 925    | 910     | 811    | 987    | 909   | 1016  | 1040  | 831     |
| 102556957 | LOC102556957 | 20.86  | 8.54    | 5.83   | 14.89  | 14.94 | 8     | 10.67 | 18.76   |
| 497010    | Eng          | 665    | 637     | 638    | 666    | 659   | 748   | 673   | 643     |
| 306270    | Oxnad1       | 331    | 352     | 309    | 299    | 334   | 337   | 357   | 321     |
| 170667    | Atp6v0c      | 9695   | 9886    | 9403   | 9145   | 10065 | 10137 | 9609  | 10031   |
| 296651    | Psm5         | 678    | 705     | 637    | 651    | 671   | 658   | 733   | 729     |
| 309014    | Plpp4        | 182    | 181     | 159    | 168    | 196   | 159   | 169   | 197     |
| 25446     | Fosl2        | 33     | 34      | 51     | 60     | 50    | 48    | 56    | 32      |
| 305623    | Tmem175      | 709.27 | 740.82  | 689.6  | 718.6  | 752.8 | 776.7 | 736.6 | 720.7   |
| 294964    | Ndufb5       | 1624   | 1611    | 1372   | 1327   | 1471  | 1477  | 1600  | 1653    |
| 292735    | Shkbp1       | 242    | 242     | 254    | 195    | 248   | 253   | 222   | 252     |
| 291952    | Ces2g        | 10.3   | 4.76    | 6.11   | 6.15   | 7.98  | 11.88 | 6.01  | 2.68    |
| 290660    | Ddx49        | 531.15 | 499.97  | 506.75 | 452.36 | 498.2 | 548.6 | 518.7 | 514.37  |
| 290923    | Aga          | 502    | 480     | 545    | 494    | 464   | 533   | 566   | 549     |
| 300092    | Nhp211       | 696.59 | 658.68  | 609.33 | 669.91 | 636.7 | 691   | 651.6 | 773.94  |
| 301285    | Tfap2b       | 5.38   | 8       | 6.89   | 7.68   | 15.48 | 6.28  | 3.44  | 4.01    |
| 25740     | Gnaz         | 1502   | 1581    | 1511   | 1528   | 1705  | 1630  | 1582  | 1481    |
| 79218     | Gng5         | 131.83 | 141.46  | 152.8  | 136.91 | 170   | 113.6 | 166.4 | 138.44  |
| 295264    | Mllt11       | 6511   | 6670    | 6398   | 6447   | 7165  | 6905  | 6641  | 6489    |
| 686104    | Eif4e1b      | 8.94   | 13.4    | 17.06  | 18     | 15.02 | 15.05 | 15.96 | 13.96   |
| 406169    | Atf6b        | 1261   | 1369    | 1368   | 1296   | 1428  | 1389  | 1325  | 1391    |
| 690945    | Dera         | 493    | 578     | 596    | 525    | 556   | 549   | 627   | 559     |
| 114017    | Gfml         | 653    | 709     | 653    | 663    | 691   | 660   | 769   | 679     |
| 308958    | Cdr2         | 1206   | 1242    | 1083   | 1111   | 1251  | 1292  | 1126  | 1183    |
| 317385    | Fus          | 1816   | 1959    | 2029   | 1843   | 1876  | 2090  | 2096  | 1931    |
| 681091    | Ccdc157      | 127    | 136     | 111    | 156    | 140   | 151   | 143   | 120     |
| 292486    | Aig1         | 1293.3 | 1209.36 | 1194.9 | 1165.1 | 1246  | 1225  | 1280  | 1332    |
| 367315    | Gpr35        | 431    | 425     | 390    | 496    | 457   | 415   | 455   | 494     |
| 81824     | Arpcla       | 2539   | 2521    | 2390   | 2159   | 2454  | 2516  | 2430  | 2645    |
| 311165    | Med19        | 481.7  | 496.28  | 513.15 | 511.49 | 489.6 | 553.1 | 487.5 | 563.31  |
| 499335    | Fxn          | 355    | 325     | 291    | 284    | 303   | 323   | 328   | 358     |
| 294767    | Mrps30       | 834    | 757     | 713    | 668    | 762   | 771   | 754   | 820     |
| 300517    | Hepacam      | 1115   | 1171    | 1184   | 1064   | 1150  | 1321  | 1144  | 1125    |
| 292409    | Fpr1         | 13     | 22      | 14     | 17     | 27    | 15    | 15    | 12      |
| 310781    | Atxn712      | 185    | 166     | 181    | 150    | 172   | 196   | 163   | 182     |
| 500549    | Zscan20      | 133    | 125     | 113    | 135    | 108   | 140   | 132   | 149     |
| 503194    | Glb112       | 159.02 | 152.39  | 188.15 | 171.11 | 162.6 | 188.8 | 180.4 | 169.47  |
| 299211    | Zdhhc22      | 267    | 250     | 302    | 324    | 337   | 280   | 311   | 267     |
| 296271    | Srxn1        | 1567.3 | 1549.35 | 1377.1 | 1293.6 | 1499  | 1530  | 1526  | 1495.51 |
| 294154    | LOC294154    | 3858   | 3887.98 | 3737.9 | 3666   | 3976  | 4082  | 3952  | 3829.94 |
| 25636     | Prkaca       | 2916   | 3113    | 2972   | 3375   | 3183  | 3659  | 2964  | 3134    |
| 140734    | Dynl12       | 12931  | 12269   | 10944  | 12153  | 13642 | 12102 | 12580 | 12174   |
| 363474    | Apoo         | 502    | 497     | 454    | 411    | 482   | 451   | 470   | 546     |
| 29718     | Kcnj10       | 1219.7 | 1117.24 | 880.84 | 1450.5 | 1306  | 1163  | 1266  | 1145.58 |
| 102556178 | LOC102556178 | 6      | 4.28    | 1.07   | 2.45   | 3.22  | 3.56  | 6.48  | 1.17    |
| 407765    | St6galnac6   | 1036   | 1021    | 1035   | 959    | 1093  | 1064  | 1009  | 1070    |
| 79563     | Grpell       | 585    | 590     | 549    | 465    | 569   | 579   | 556   | 585     |
| 287523    | Dph1         | 255.3  | 269.64  | 254.08 | 225.83 | 293.8 | 258.5 | 264.5 | 233.98  |
| 361648    | Spns1        | 687    | 583     | 587    | 616    | 633   | 649   | 604   | 700     |
| 25521     | Prkar1b      | 7417   | 7349    | 6936   | 6835   | 7705  | 7458  | 7547  | 7131    |
| 85423     | Tfpt         | 362    | 338     | 325    | 288    | 319   | 318   | 362   | 374     |
| 498729    | C17h6orf52   | 57.43  | 67.29   | 57.76  | 56.92  | 56.19 | 56.89 | 96.79 | 40.47   |

|           |              |        |         |        |        |       |       |       |          |
|-----------|--------------|--------|---------|--------|--------|-------|-------|-------|----------|
| 50687     | L1cam        | 7961   | 8839.23 | 8343   | 9315   | 9568  | 9235  | 8774  | 8456     |
| 306157    | Gpc5         | 350    | 352     | 357    | 363    | 382   | 342   | 385   | 378      |
| 309036    | Rexo5        | 45     | 43      | 48     | 39     | 44    | 41    | 57    | 41       |
| 685634    | Smim12       | 792    | 765     | 745    | 673    | 757   | 775   | 724   | 855      |
| 260321    | Fkbp4        | 7808   | 7354    | 6948   | 7482   | 7826  | 7532  | 7779  | 7808     |
| 287544    | Poldip2      | 1405.6 | 1434.94 | 1369.5 | 1376.6 | 1396  | 1444  | 1528  | 1474.3   |
| 64635     | Snd1         | 1377   | 1455    | 1500   | 1549   | 1559  | 1504  | 1561  | 1526     |
| 288527    | Asmt1        | 525    | 445     | 505    | 339    | 503   | 441   | 466   | 487      |
| 85333     | Slc25a4      | 14598  | 13416   | 12146  | 11715  | 13085 | 13606 | 13477 | 14082    |
| 291905    | Fto          | 495    | 603     | 566    | 563    | 586   | 556   | 633   | 554      |
| 688174    | Pgap3        | 107    | 102     | 93     | 91     | 101   | 111   | 104   | 95       |
| 50561     | Resp18       | 2336   | 2202    | 2275   | 2002   | 2291  | 2037  | 2254  | 2637     |
| 100361939 | Rnaseh2c     | 88     | 93      | 98     | 70     | 85    | 88    | 95    | 97       |
| 304756    | RGD1563709   | 3.11   | 2.11    | 7.39   | 6.34   | 9.3   | 4.21  | 5.26  | 1.05     |
| 364624    | Lsml         | 297.62 | 288.29  | 282.37 | 284.65 | 278.7 | 312.5 | 329.8 | 285      |
| 301111    | Ano10        | 2082   | 2074    | 2001   | 2005   | 2126  | 2277  | 2095  | 2039     |
| 303300    | Cluh         | 2984   | 3249    | 2997   | 3284   | 3427  | 3375  | 3214  | 3073     |
| 85309     | Folh1        | 595    | 583     | 448    | 659    | 558   | 569   | 643   | 620      |
| 304805    | Cyb5r1       | 4757.9 | 4829.22 | 4565.1 | 4644.2 | 5203  | 4912  | 4820  | 4726.04  |
| 58935     | Gas6         | 3910   | 4028    | 3882   | 4116   | 4214  | 4408  | 4376  | 3671     |
| 361301    | Tpgs2        | 3561   | 3263    | 3103   | 2934   | 3355  | 3220  | 3457  | 3421     |
| 85245     | Kpna2        | 615    | 572     | 649    | 513    | 589   | 648   | 632   | 588.14   |
| 315549    | Fam118b      | 148    | 164     | 137    | 159    | 148   | 154   | 170   | 164      |
| 25371     | Adprh        | 589    | 591     | 604    | 581    | 594   | 624   | 627   | 629      |
| 301295    | Efhc1        | 224    | 212     | 235    | 239    | 238   | 236   | 243   | 235      |
| 171352    | Cyp3a9       | 63     | 77.05   | 60.01  | 59     | 63.01 | 77    | 53    | 78.01    |
| 301130    | Dpp9         | 1699   | 1645    | 1664   | 1763   | 1820  | 1764  | 1800  | 1700     |
| 155437    | Hey1         | 143    | 160     | 160    | 164    | 187   | 159   | 156   | 154      |
| 288454    | Slc46a3      | 86     | 83      | 74     | 59     | 79    | 101   | 72    | 64       |
| 684050    | PCOLCE2      | 193    | 199     | 185    | 220    | 169   | 232   | 228   | 205      |
| 300221    | Spats2       | 777    | 820     | 739    | 873    | 843   | 850   | 851   | 814      |
| 170944    | Dkc1         | 767    | 742     | 772    | 648    | 823   | 759   | 768   | 715      |
| 192255    | Ubb          | 31579  | 29593.4 | 28632  | 28624  | 30981 | 31519 | 30285 | 31143.27 |
| 690660    | Hint1        | 3028   | 2986    | 2621   | 2454   | 2950  | 2751  | 2905  | 2998     |
| 366360    | Myorg        | 1289   | 1433    | 1225   | 1375   | 1481  | 1456  | 1311  | 1322     |
| 102549491 | LOC102549491 | 12     | 7       | 10     | 14     | 10    | 14    | 11    | 10       |
| 81821     | Dgkz         | 8526   | 7758    | 7685   | 7252.2 | 9035  | 8548  | 7441  | 7651     |
| 261730    | Aurka        | 371    | 337     | 362    | 347    | 380   | 411   | 342   | 350      |
| 689404    | Amtn         | 8.58   | 14.08   | 8.15   | 10.19  | 11.27 | 16.93 | 7.46  | 7.25     |
| 24923     | Stx1b        | 4775.3 | 4825.52 | 4279.1 | 5548.4 | 5375  | 5234  | 5008  | 4716.63  |
| 301309    | Adgrb3       | 568    | 546     | 563    | 619    | 613   | 593   | 660   | 537      |
| 100360358 | Tmem251      | 146.21 | 119.65  | 145.49 | 128.04 | 157   | 129.6 | 128.2 | 149.68   |
| 311185    | Kbtbd4       | 266.49 | 248.34  | 231.73 | 213.48 | 238.3 | 276.8 | 255.4 | 234.23   |
| 312710    | Cops7a       | 2303   | 2296    | 2244   | 2246   | 2360  | 2473  | 2307  | 2373     |
| 306000    | Slc25a37     | 440    | 356     | 403    | 344    | 489   | 378   | 380   | 368      |
| 685174    | Cnpy3        | 994    | 930     | 920    | 884    | 975   | 926   | 960   | 1041     |
| 498171    | Prkrip1      | 248.48 | 275.31  | 298.14 | 228.05 | 286.4 | 257.4 | 272   | 283.17   |
| 288665    | Cux2         | 252    | 279     | 206    | 334    | 286   | 298   | 304   | 233      |
| 116690    | Nfasc        | 6152.7 | 6582.76 | 6127.4 | 7512.2 | 6880  | 7469  | 6971  | 6287.3   |
| 287375    | Flii         | 2660.6 | 2865.37 | 2849   | 3081   | 2958  | 3158  | 3003  | 2872     |
| 84347     | Cacng2       | 620    | 594     | 570    | 721    | 761   | 669   | 612   | 580      |
| 362859    | Ckap4        | 1086   | 1010    | 1186   | 999    | 1120  | 1149  | 1161  | 1051     |
| 310511    | RGD1563620   | 15.98  | 20.13   | 32.78  | 15.43  | 21.53 | 22.21 | 30.09 | 14.43    |
| 498667    | Fam155a      | 961.31 | 831.16  | 759.9  | 801.48 | 971.5 | 883.2 | 855.3 | 800.59   |
| 81736     | Nfkb1        | 652    | 730     | 885    | 728    | 762   | 806   | 817   | 750      |
| 306004    | Rhobtb2      | 1245   | 1249    | 1210   | 1236   | 1429  | 1284  | 1226  | 1232     |

|           |              |        |         |        |        |       |       |       |         |
|-----------|--------------|--------|---------|--------|--------|-------|-------|-------|---------|
| 297096    | Snx10        | 4786.1 | 4936.77 | 4143.2 | 4533.9 | 4879  | 4905  | 4469  | 5007.25 |
| 81812     | Thra         | 2715.9 | 2805.54 | 2715.3 | 2688.2 | 2919  | 2707  | 2859  | 2950.36 |
| 308468    | Dyrklb       | 481    | 495     | 459    | 510    | 544   | 516   | 516   | 460     |
| 313560    | Ctpsi        | 1242   | 1260.97 | 1205   | 1120   | 1146  | 1232  | 1429  | 1247    |
| 100361138 | Dgkq         | 766    | 850     | 791    | 797    | 835   | 889   | 819   | 811     |
| 499425    | Zfp365       | 584    | 583     | 438    | 595    | 626   | 556   | 563   | 558     |
| 171133    | Gcsh         | 821    | 782     | 776    | 759    | 826   | 759   | 823   | 877     |
| 282827    | Aip          | 1015   | 954.43  | 906.29 | 821.12 | 1011  | 961.8 | 931.1 | 966.54  |
| 305479    | Sf3a1        | 1078   | 1244    | 1298   | 1395   | 1356  | 1349  | 1260  | 1285    |
| 60335     | Tgm1         | 12     | 16      | 17     | 19     | 19    | 16    | 18    | 14      |
| 291922    | Lonp2        | 1484   | 1564    | 1470   | 1496   | 1660  | 1583  | 1558  | 1495    |
| 293938    | Bloc1s2      | 836    | 786     | 803    | 623    | 708   | 799   | 753   | 931     |
| 171548    | Dkk3         | 1686   | 1801    | 1825   | 2061   | 1846  | 1798  | 2235  | 1840    |
| 297372    | Mrpl19       | 335    | 354     | 320    | 312    | 326   | 302   | 395   | 360     |
| 313950    | Hslbp3       | 421    | 410     | 434    | 439    | 438   | 478   | 448   | 420     |
| 102552331 | LOC102552331 | 36     | 36      | 45     | 32     | 31    | 51    | 40    | 34      |
| 361502    | Ppp6r1       | 3538.1 | 3569.72 | 3607.1 | 3653.2 | 3975  | 3680  | 3747  | 3641.95 |
| 50664     | Gnao1        | 7867   | 8019    | 7449   | 8523   | 9011  | 8347  | 8004  | 7993    |
| 170824    | Steap3       | 1164   | 1175    | 1316   | 1238   | 1338  | 1249  | 1311  | 1225    |
| 309157    | Peli3        | 337.61 | 395.18  | 344.62 | 377.06 | 406.6 | 375.3 | 389.3 | 351.73  |
| 498179    | RGD1563482   | 140.1  | 103.15  | 123.34 | 103.41 | 128.1 | 93.31 | 125.8 | 144.89  |
| 103689982 | Mboat711     | 417    | 472     | 475.5  | 431.5  | 444   | 482   | 462   | 492.5   |
| 308309    | Mboat7       | 417    | 472     | 475.5  | 431.5  | 444   | 482   | 462   | 492.5   |
| 361807    | Lemd2        | 375.78 | 399.12  | 351.22 | 366.94 | 379.2 | 383   | 363.2 | 438.07  |
| 362227    | Dtd1         | 952    | 867     | 903    | 798    | 920   | 908   | 929   | 929     |
| 301068    | Eif1b        | 2368   | 2308    | 1950   | 1924   | 2140  | 2259  | 2215  | 2340    |
| 85260     | Entpd6       | 742    | 765     | 661    | 689    | 725   | 727   | 758   | 782     |
| 303185    | Flcn         | 735    | 713     | 634    | 626    | 728   | 704   | 736   | 668     |
| 316643    | Chchd2       | 2147.9 | 2101.04 | 1816.1 | 1877.2 | 1927  | 2003  | 2166  | 2222.61 |
| 294048    | Pik3ap1      | 99     | 95      | 136    | 93     | 107   | 113   | 119   | 104     |
| 364510    | Phf7         | 195    | 187     | 205    | 174    | 189   | 189   | 195   | 224     |
| 266735    | Adgrg2       | 1449   | 1374    | 1055   | 1470   | 1388  | 1393  | 1454  | 1366    |
| 314243    | Wdr89        | 104.63 | 78.43   | 72.39  | 69.86  | 108.5 | 76.41 | 72.2  | 83.57   |
| 361808    | Snrpc        | 568    | 605     | 551    | 516    | 581   | 573   | 598   | 594     |
| 502367    | Bola2        | 1041   | 912     | 903    | 694    | 925   | 848   | 916   | 1029    |
| 361940    | Pgrmc2       | 1237   | 1238    | 1179   | 1219   | 1273  | 1259  | 1273  | 1299    |
| 308593    | Tmem143      | 455    | 439     | 456    | 443    | 461   | 470   | 488   | 459     |
| 266807    | Duox1        | 9.87   | 14.31   | 16.75  | 11.99  | 14.99 | 7.28  | 26.73 | 6.43    |
| 361704    | Ctsf         | 2424   | 2538    | 2364   | 2341   | 2445  | 2663  | 2482  | 2536    |
| 24244     | Calm3        | 6897   | 6690    | 6133   | 6401   | 7296  | 6550  | 6841  | 6675    |
| 83800     | Clta         | 4338   | 3883    | 3649   | 3401   | 4014  | 4024  | 4037  | 3922    |
| 309860    | Sobp         | 629    | 630     | 685    | 663    | 791   | 655   | 629   | 656     |
| 499129    | Kctd15       | 451    | 456     | 432    | 427    | 458   | 508   | 463   | 421     |
| 300837    | Leo1         | 743    | 741     | 742    | 759    | 770   | 775   | 785   | 797     |
| 116546    | Ralb         | 634    | 572     | 574    | 511    | 617   | 630   | 612   | 541     |
| 64390     | Prpsap1      | 773    | 766     | 657    | 683    | 695   | 760   | 791   | 770     |
| 306147    | Slitrk1      | 942    | 908.99  | 775    | 988    | 1026  | 965   | 956   | 839     |
| 100363280 | Tmem74bos    | 6      | 5       | 5      | 5      | 7     | 5     | 3     | 7       |
| 24179     | Agt          | 182.92 | 107.61  | 74.42  | 114.43 | 127.2 | 116.7 | 114   | 144.32  |
| 500690    | Map3k9       | 1088   | 1147    | 1029   | 1331   | 1287  | 1205  | 1164  | 1158    |
| 291159    | Hist1h2a11   | 10.91  | 16.77   | 14.69  | 12.52  | 14.91 | 8.6   | 18.21 | 15.79   |
| 299203    | Acyp1        | 356    | 303     | 274    | 303    | 271   | 334   | 321   | 369     |
| 25353     | Spp1         | 14421  | 14418   | 13600  | 13183  | 12429 | 14899 | 14074 | 16876   |
| 113938    | Snurf        | 8760.8 | 8075.12 | 7800.5 | 7941.2 | 8496  | 8371  | 8458  | 8808.58 |
| 680415    | Pappa2       | 194.23 | 142.3   | 154.7  | 232.57 | 218.3 | 188   | 226.6 | 125.57  |
| 312225    | Wdr91        | 363    | 410     | 363    | 391    | 426   | 388   | 411   | 375     |

|           |              |        |         |        |        |       |       |       |         |
|-----------|--------------|--------|---------|--------|--------|-------|-------|-------|---------|
| 292673    | Ercc1        | 566.25 | 562.35  | 527.76 | 525.82 | 565.4 | 572.1 | 580.3 | 568.87  |
| 108349973 | LOC108349973 | 3.84   | 0       | 4      | 6.16   | 2.78  | 5.36  | 6.53  | 0       |
| 690068    | Tatdn1       | 199    | 201     | 208    | 186    | 193   | 175   | 234   | 230     |
| 314432    | Uba1         | 7286   | 7851    | 7452   | 7673   | 7685  | 8330  | 7846  | 7850    |
| 315668    | Rab39a       | 265    | 284     | 242    | 295    | 299   | 276   | 279   | 284     |
| 246074    | Scd          | 5059.8 | 5363.98 | 4904   | 5713.9 | 5603  | 5776  | 5230  | 5440.3  |
| 362678    | Faap20       | 265    | 266     | 267    | 225    | 287   | 264   | 265   | 256     |
| 293023    | Klhl25       | 158.99 | 146     | 149.6  | 145    | 171.5 | 172.2 | 141.1 | 143.63  |
| 292876    | Josd2        | 781    | 725     | 737    | 633    | 724   | 813   | 669   | 808     |
| 81670     | Gpt          | 112    | 104     | 92     | 67     | 104   | 114   | 93    | 82      |
| 300033    | Eef1d        | 1205   | 1243    | 1347   | 1141   | 1270  | 1406  | 1273  | 1224    |
| 293864    | Ubl4a        | 909    | 860     | 807    | 835    | 837   | 877   | 879   | 982     |
| 29751     | Sema3a       | 13     | 14      | 14.07  | 18.8   | 13.01 | 15.19 | 17.55 | 17      |
| 192268    | Gls2         | 580    | 606     | 488    | 528    | 559   | 630   | 588   | 531     |
| 299694    | Nuak1        | 300    | 301     | 270    | 375    | 328   | 305   | 363   | 310     |
| 362539    | Adamts11     | 404    | 589     | 501    | 520    | 476   | 587   | 535   | 513     |
| 313806    | Rnf19b       | 1084   | 1066    | 1038   | 1046   | 1163  | 1139  | 1104  | 1032    |
| 296570    | Edf1         | 2546   | 2451    | 2449   | 2142   | 2482  | 2371  | 2578  | 2619    |
| 83502     | Cdh1         | 4897   | 5569    | 5142   | 5967   | 5506  | 6033  | 5676  | 5400    |
| 291403    | Zadh2        | 440    | 391     | 354    | 308    | 393   | 385   | 398   | 389     |
| 50866     | Rab4b        | 1857   | 1768    | 1696   | 1675   | 1865  | 1805  | 1783  | 1881    |
| 361041    | Carmil3      | 1313   | 1259    | 1237   | 1301   | 1412  | 1388  | 1254  | 1303    |
| 313874    | Rasgrp3      | 239.01 | 222.87  | 244.74 | 266.64 | 247.9 | 249   | 270   | 253.38  |
| 299979    | Grhl2        | 14     | 12      | 13     | 23     | 16    | 18    | 17    | 14      |
| 170796    | Grin3b       | 95.17  | 121.11  | 101.04 | 110.05 | 124.1 | 124   | 109   | 91      |
| 311796    | Nelfb        | 2251   | 2032    | 1968   | 1966   | 2090  | 2274  | 2171  | 2080    |
| 297525    | Mkrn2        | 915    | 917     | 806    | 892    | 910   | 898   | 939   | 954     |
| 304582    | Sart3        | 375    | 318     | 373    | 358    | 366   | 356   | 392   | 379     |
| 103690112 | LOC103690112 | 52     | 51      | 52     | 72     | 65    | 43    | 67    | 63      |
| 685384    | Rnf180       | 350    | 347     | 354    | 352    | 413   | 344   | 348   | 366     |
| 81766     | Rpl18        | 1793   | 1625    | 1782   | 1314   | 1657  | 1675  | 1658  | 1840    |
| 296408    | Fam210b      | 306    | 331     | 340    | 321    | 319   | 344   | 322   | 376     |
| 315054    | Slc45a4      | 1583   | 1500    | 1362   | 1673   | 1670  | 1626  | 1589  | 1530    |
| 64161     | Pi4ka        | 4042   | 4878.09 | 4423.9 | 5228.2 | 5110  | 4903  | 4714  | 4746.15 |
| 301418    | Maip1        | 243.82 | 241.47  | 229.47 | 218.09 | 241   | 232.5 | 232.5 | 272.17  |
| 314906    | Kif5a        | 11732  | 12456   | 10721  | 14258  | 14217 | 12064 | 13312 | 11963   |
| 312303    | Zfp746       | 310    | 287     | 314.59 | 315    | 293.2 | 357   | 331.4 | 304.57  |
| 64527     | Pdap1        | 1636   | 1570    | 1624   | 1528   | 1757  | 1627  | 1621  | 1662    |
| 313672    | Kazn         | 1349   | 1297    | 1136   | 1444   | 1297  | 1420  | 1293  | 1470    |
| 117030    | Erp29        | 722    | 664     | 792    | 661    | 749   | 703   | 776   | 749     |
| 498234    | Arl8a        | 6346   | 6487    | 6232   | 6306   | 6937  | 6815  | 6332  | 6521    |
| 286996    | Zfp689       | 196    | 196.83  | 204    | 201    | 216   | 209   | 196.6 | 215     |
| 361815    | Rnf8         | 435    | 422     | 399    | 409    | 443   | 448   | 460   | 395     |
| 50686     | Gsk3a        | 2393.2 | 2193.01 | 2316.7 | 2249.7 | 2451  | 2473  | 2339  | 2335.59 |
| 497878    | Nsg2         | 7350   | 7155    | 6434   | 7278   | 8065  | 7201  | 7211  | 7113    |
| 301634    | Fam174a      | 582    | 529     | 478    | 486    | 538   | 517   | 577   | 544     |
| 362788    | Traf3        | 1226.3 | 1284.82 | 1304.8 | 1430.8 | 1433  | 1438  | 1429  | 1202    |
| 103692127 | LOC103692127 | 111.64 | 101.61  | 87.99  | 116.3  | 114.2 | 111.5 | 112.7 | 99.59   |
| 314644    | Dohh         | 842    | 825     | 695    | 652    | 813   | 837   | 731   | 780     |
| 500221    | Evala        | 8      | 10      | 12     | 11     | 8     | 13    | 15    | 7       |
| 308690    | Ndn          | 5333   | 5350    | 4844   | 4865   | 5603  | 5361  | 4994  | 5429    |
| 680448    | Pcdhgb5      | 109.04 | 132.5   | 106.13 | 112.23 | 117.3 | 122.6 | 130.2 | 112.21  |
| 140724    | Cacng3       | 150    | 170     | 162    | 152    | 168   | 162   | 186   | 149     |
| 64203     | Bcat2        | 809    | 907     | 771    | 826    | 857   | 927   | 841   | 850     |
| 293668    | Brms1        | 872.6  | 766.6   | 986.92 | 777.15 | 989.9 | 831.6 | 717.4 | 1030.92 |
| 81917     | Hiplr        | 1098   | 1095    | 969    | 1108   | 1210  | 1168  | 1098  | 1003    |



|           |            |        |         |        |        |       |       |       |         |
|-----------|------------|--------|---------|--------|--------|-------|-------|-------|---------|
| 100360041 | Zfp366     | 37     | 40      | 24     | 42     | 40    | 33    | 41    | 36      |
| 289335    | Susd4      | 3995   | 3970    | 3244   | 4008   | 3842  | 4255  | 3887  | 3978    |
| 29354     | Pla2g5     | 324    | 365     | 275    | 343    | 270   | 314   | 400   | 387     |
| 307481    | Pcdh1      | 937    | 939     | 1036   | 1207   | 1183  | 1027  | 1041  | 1070    |
| 362711    | Tmem214    | 930    | 1045    | 1016   | 944    | 1034  | 1036  | 1062  | 996     |
| 317575    | Smarca1    | 393    | 388     | 360    | 408    | 465   | 358   | 392   | 410     |
| 100360120 | Smim1011   | 212    | 197     | 180    | 185    | 210   | 212   | 200   | 190     |
| 364974    | Rnaseh2a   | 790    | 781     | 760    | 683    | 779   | 755   | 754   | 874     |
| 360646    | Limd2      | 383    | 417     | 423    | 324    | 422   | 359   | 407   | 435     |
| 691995    | LOC691995  | 527    | 637     | 532    | 482    | 572   | 506   | 610   | 597     |
| 288917    | Farsa      | 536    | 520     | 521    | 499    | 540   | 604   | 504   | 530     |
| 362081    | Fbxw5      | 1123   | 1087    | 1102   | 998    | 1112  | 1158  | 1158  | 1094    |
| 294289    | Zbtb9      | 230.37 | 202.6   | 217.67 | 208.13 | 222   | 235.6 | 243.9 | 199.53  |
| 300018    | Lynx1      | 8486.9 | 8410    | 8034   | 8171   | 9088  | 8741  | 8951  | 7950    |
| 24896     | Gnas       | 28593  | 28671   | 26647  | 27127  | 29799 | 30104 | 28219 | 28378   |
| 361087    | Slain1     | 222    | 233     | 196    | 304    | 249   | 256   | 250   | 247     |
| 314262    | Plekhhl1   | 570.46 | 549.3   | 552.87 | 583.69 | 648   | 664.1 | 544.6 | 510.68  |
| 25120     | Aanat      | 21     | 15      | 25     | 20.03  | 27    | 24    | 18    | 16.02   |
| 303635    | Fam20a     | 168    | 138     | 155    | 148    | 137   | 155   | 167   | 180     |
| 502091    | Rnf122     | 168    | 193     | 207    | 183    | 178   | 190   | 193   | 227     |
| 365592    | Pdss2      | 302    | 291     | 260    | 263    | 303   | 292   | 288   | 288     |
| 302934    | Ppl        | 97     | 90      | 77     | 60     | 83    | 99    | 83    | 75      |
| 362252    | Scand1     | 874.68 | 774.89  | 797.67 | 690.62 | 827.9 | 839.6 | 745.6 | 879.84  |
| 64303     | Pfn1       | 4136   | 4332    | 4791   | 3864   | 4453  | 4544  | 4459  | 4513    |
| 311171    | Lrrc55     | 906    | 807     | 568    | 876    | 838   | 856   | 824   | 795     |
| 303830    | Tbccd1     | 373    | 381     | 315    | 367    | 335   | 351   | 440   | 381     |
| 360912    | Helq       | 151    | 165     | 175    | 176    | 155   | 179   | 195   | 171     |
| 81826     | Slc20a1    | 2092   | 2102    | 1905   | 2092.8 | 2058  | 2152  | 2194  | 2193.04 |
| 29512     | Padi4      | 13.12  | 10.03   | 17.07  | 1      | 10.07 | 16.07 | 9.12  | 8       |
| 29681     | Clqbp      | 1187   | 1232    | 1125   | 997    | 1110  | 1189  | 1245  | 1222    |
| 310880    | Zgrf1      | 127.3  | 125.88  | 138.24 | 109.96 | 134.1 | 114.4 | 136   | 141.81  |
| 84401     | Puf60      | 2564   | 2696    | 2680   | 2491   | 2623  | 2852  | 2817  | 2656    |
| 362829    | Lsm7       | 415    | 357     | 345    | 276    | 348   | 350   | 360.1 | 404     |
| 295238    | Dap3       | 437.72 | 482     | 486.46 | 406.11 | 456   | 462   | 506   | 478.13  |
| 308572    | Myh14      | 1868.4 | 2052.38 | 1978.4 | 2338.7 | 2143  | 2231  | 2205  | 2067    |
| 25415     | Crmp1      | 1492   | 1552    | 1590   | 1615   | 1599  | 1688  | 1669  | 1603    |
| 308417    | Nectin2    | 594    | 578     | 645    | 561    | 600   | 690   | 635   | 571     |
| 84008     | Cntnap1    | 5315   | 5191.3  | 5241.4 | 5608.2 | 6165  | 5981  | 5320  | 4949.23 |
| 313296    | Dcaf1211   | 258.23 | 274.72  | 254.27 | 270.57 | 301.9 | 277.4 | 280.8 | 250.3   |
| 294696    | Mrps36     | 796    | 764     | 638    | 596    | 642   | 735   | 785   | 771     |
| 690820    | Klf16      | 359    | 360     | 394    | 354    | 417   | 377   | 362   | 384     |
| 307514    | Epb4114a   | 389.08 | 393     | 383.53 | 398.06 | 357.6 | 450   | 397   | 437     |
| 308976    | Kdm8       | 310    | 300     | 288    | 306    | 313   | 328   | 326   | 297     |
| 366311    | Clvs1      | 280.84 | 305.58  | 226.07 | 297.8  | 320.8 | 290.3 | 312.2 | 242.45  |
| 311862    | Lamc3      | 190.64 | 189.11  | 174.78 | 223.39 | 154.8 | 211.7 | 185.2 | 265.02  |
| 751787    | Flad1      | 827.6  | 810     | 808    | 771.94 | 823.8 | 895.7 | 843.6 | 815.12  |
| 360526    | P4ha2      | 218    | 207     | 217    | 219    | 213   | 239   | 231   | 221     |
| 299127    | Jkamp      | 1401   | 1474    | 1360   | 1406   | 1347  | 1558  | 1610  | 1408    |
| 266733    | Slc12a8    | 16     | 33      | 45     | 26     | 22    | 40    | 42    | 22      |
| 298084    | Zbtb5      | 227    | 201     | 195    | 177    | 188   | 209   | 220   | 223     |
| 308868    | Lrtomt     | 55     | 48      | 45     | 52     | 73    | 50    | 48    | 39      |
| 311742    | Cdca7      | 29     | 42      | 33     | 16     | 33    | 39    | 32    | 22      |
| 311852    | RGD1311084 | 35     | 32      | 46     | 27     | 43    | 28    | 36    | 40      |
| 361594    | Aen        | 149    | 203     | 190    | 178    | 207   | 197   | 181   | 171     |
| 500986    | Pdzd3      | 12     | 17      | 21     | 10     | 18    | 10    | 15    | 20      |
| 686035    | LOC686035  | 0      | 0       | 0      | 1      | 0     | 0     | 1.05  | 0       |

|        |            |        |         |        |        |       |       |       |         |
|--------|------------|--------|---------|--------|--------|-------|-------|-------|---------|
| 288704 | RGD1311899 | 2901   | 2812    | 2619   | 2520   | 2931  | 2675  | 2798  | 2991    |
| 308435 | Cic        | 3511   | 3525    | 3893   | 3799   | 4003  | 4155  | 3784  | 3523    |
| 361884 | Mccc2      | 424.99 | 401     | 372    | 400.99 | 400   | 436   | 433   | 410     |
| 310769 | Wdr77      | 699.74 | 654.22  | 691.53 | 630.26 | 610.1 | 803   | 776.6 | 619.96  |
| 84510  | Stmn2      | 38706  | 39352   | 36772  | 35814  | 39807 | 38704 | 40366 | 39310   |
| 360810 | Gpn3       | 299    | 339     | 288    | 272    | 281   | 297   | 339   | 341     |
| 295462 | Mcub       | 303.32 | 249.9   | 268.31 | 258.05 | 284   | 242.7 | 276.3 | 330.63  |
| 117099 | Bdh1       | 364.7  | 302.61  | 267.52 | 283.46 | 315.8 | 317   | 324.7 | 321.85  |
| 288832 | Olr1058    | 1      | 1.99    | 0      | 1      | 0     | 0.5   | 2.69  | 1       |
| 59076  | Grk6       | 1027   | 969     | 992    | 942    | 1048  | 1065  | 997   | 1017    |
| 361364 | Dok4       | 4095   | 3929    | 3669   | 3712   | 4332  | 3996  | 3897  | 3953    |
| 288031 | Fam43a     | 175    | 161     | 139.48 | 193    | 162   | 156   | 207   | 177     |
| 246120 | Plbd2      | 4028   | 4066    | 3902   | 3783   | 4146  | 4325  | 4053  | 4047    |
| 292069 | Ctu2       | 131    | 138     | 124    | 85     | 151   | 117   | 127   | 107     |
| 360480 | Cdip1      | 2004   | 2046    | 1932   | 2082   | 1962  | 2237  | 2210  | 2060    |
| 367145 | Chst2      | 2226   | 2320    | 2345   | 2444   | 2501  | 2686  | 2492  | 2125    |
| 313811 | Dnajb5     | 389    | 361     | 317    | 326    | 354   | 406   | 354   | 349     |
| 286930 | Dlgap4     | 909    | 919     | 997    | 913    | 971   | 1069  | 949   | 937     |
| 140667 | Ap3m2      | 253    | 240     | 233    | 228    | 282   | 235   | 216   | 269     |
| 305338 | Apbb2      | 1453   | 1557.17 | 1529.2 | 1699.2 | 1703  | 1827  | 1531  | 1491.41 |
| 361637 | Acsm5      | 3.56   | 3.14    | 4.22   | 4.78   | 2.04  | 2     | 7.98  | 4.47    |
| 294333 | Fam207a    | 478.91 | 437.09  | 423.77 | 405.83 | 500.7 | 441.3 | 452.5 | 438.99  |
| 297903 | Fam92a     | 484    | 437     | 415    | 392    | 444   | 432   | 457   | 482     |
| 502317 | Aplp1      | 2631   | 2679    | 2348   | 2687   | 2809  | 3036  | 2385  | 2636    |
| 362558 | Lrp8       | 837.65 | 796.28  | 808.41 | 871.14 | 919.9 | 855.8 | 846.8 | 857.92  |
| 502291 | RGD1562625 | 26.78  | 19.3    | 22.97  | 18.26  | 31.93 | 19.85 | 25.01 | 14.92   |
| 85435  | Smad9      | 1707   | 1746.22 | 1532   | 1744.2 | 1767  | 1820  | 1755  | 1726.83 |
| 360839 | Tmem163    | 621    | 565     | 500    | 556    | 564   | 646   | 606   | 539     |
| 361056 | Rnaseh2b   | 296    | 274     | 289    | 252    | 306   | 295   | 297   | 269     |
| 500295 | Tatdn2     | 904    | 835     | 848    | 804    | 923   | 800   | 880   | 959     |
| 502990 | Nipal3     | 1430   | 1436.92 | 1368   | 1537   | 1696  | 1527  | 1460  | 1380    |
| 310838 | Bcar3      | 499    | 497     | 477    | 549    | 501   | 563   | 522   | 538     |
| 171374 | Atp5f1b    | 19884  | 20531   | 18103  | 18372  | 19638 | 20838 | 20380 | 19915   |
| 311423 | Slc4a11    | 272    | 284     | 246    | 307    | 311   | 285   | 281   | 288     |
| 83425  | Akap12     | 21083  | 23762   | 22915  | 26102  | 24679 | 25501 | 23690 | 24734   |
| 310662 | Scnml      | 174    | 163     | 173    | 143    | 154   | 177   | 163   | 192     |
| 294313 | Mtch1      | 6067   | 6232    | 6320   | 5680   | 6048  | 6335  | 6314  | 6830    |
| 113906 | Hspb8      | 4756   | 4669    | 4348   | 4306   | 4636  | 4810  | 4696  | 4851    |
| 312709 | Mlf2       | 4909   | 4707    | 4719   | 4574   | 4965  | 5024  | 4866  | 5010    |
| 500552 | RGD1561149 | 1501   | 1588    | 1593   | 1684   | 1799  | 1729  | 1540  | 1620    |
| 114592 | Aurkb      | 21     | 17      | 29     | 12     | 23    | 36    | 14    | 10      |
| 362941 | Fbxl6      | 180    | 141     | 148    | 143    | 176   | 175   | 147   | 145     |
| 360804 | Cdk2ap1    | 2027   | 1972    | 2045   | 1813   | 1994  | 2154  | 2070  | 2037    |
| 315167 | Ndufa6     | 1088   | 930     | 956    | 875    | 1003  | 1005  | 922   | 1114    |
| 362481 | Tox        | 132    | 159     | 169    | 171    | 155   | 159   | 199   | 150     |
| 288563 | Actl6b     | 380    | 358     | 399    | 302    | 369   | 400   | 344   | 399     |
| 301709 | Arhgap28   | 733    | 764     | 913    | 941    | 867   | 775   | 976   | 903     |
| 366473 | Azin2      | 488    | 448     | 499    | 398    | 490   | 493   | 505   | 438     |
| 363112 | Mrap2      | 1219.2 | 1202.93 | 1158.1 | 1065.4 | 1230  | 1245  | 1211  | 1195.47 |
| 65171  | Scamp5     | 2025.4 | 2234    | 2074   | 2402   | 2346  | 2314  | 2276  | 2243    |
| 295490 | Emcn       | 453    | 339     | 315    | 291    | 396   | 350   | 359   | 364     |
| 304528 | Rfc5       | 202.39 | 183.82  | 172.95 | 161.47 | 201.5 | 182.4 | 197.1 | 176.19  |
| 359725 | Cbr4       | 187    | 205     | 201    | 194    | 205   | 205   | 230   | 187     |
| 171492 | Map3k2     | 40     | 46      | 44     | 47     | 74    | 22    | 41    | 49      |
| 298003 | Galt       | 483    | 379     | 340    | 391    | 449   | 476   | 350   | 399     |
| 287827 | Armc7      | 144.3  | 159.64  | 162.69 | 132.79 | 157.2 | 149.4 | 157   | 166.35  |

|           |              |        |         |        |        |       |       |       |          |
|-----------|--------------|--------|---------|--------|--------|-------|-------|-------|----------|
| 292708    | Irgq         | 2628   | 2762    | 2674   | 2887   | 2821  | 2953  | 2887  | 2847     |
| 361651    | Prrt2        | 2007   | 2008    | 2123   | 2157   | 2304  | 2194  | 2124  | 2095     |
| 361410    | Tmem231      | 485    | 468     | 407    | 468    | 436   | 503   | 508   | 474      |
| 304201    | Evi5l        | 1007.9 | 1041.38 | 1080   | 1009.7 | 1153  | 1041  | 1111  | 1044     |
| 100363436 | Mdfic2       | 1070   | 963     | 1003   | 1091   | 1120  | 1032  | 1016  | 1169     |
| 293693    | Cdc42bpg     | 107    | 112     | 110    | 123    | 114   | 109   | 123   | 129      |
| 288913    | LOC288913    | 714    | 704     | 661    | 554    | 626   | 665   | 736   | 740      |
| 690966    | Polr2e       | 990    | 986     | 1012   | 902    | 986   | 1064  | 977   | 1061     |
| 29337     | Plcg2        | 51     | 62      | 85     | 77     | 77    | 100   | 64    | 48       |
| 171103    | Cdc25b       | 1533.4 | 1503.52 | 1597.6 | 1342.3 | 1793  | 1610  | 1485  | 1392.95  |
| 362963    | Sgsm3        | 610    | 588     | 554    | 603    | 642   | 648   | 630   | 555      |
| 81823     | Cib1         | 195    | 172     | 205    | 173    | 189   | 197   | 200   | 197      |
| 24383     | Gapdh        | 48554  | 48183.9 | 44936  | 43292  | 46981 | 51574 | 46807 | 49039.66 |
| 81725     | Musk         | 24     | 21      | 26     | 27     | 30    | 21    | 32    | 20       |
| 302998    | Mettl26      | 175.16 | 189.11  | 147.01 | 140.71 | 153.6 | 189.1 | 176.6 | 166.04   |
| 681096    | Nxpe3        | 1005   | 905     | 778    | 876    | 956   | 916   | 982   | 892      |
| 312258    | Adck2        | 329    | 350     | 349    | 342    | 353   | 357   | 360   | 370      |
| 298688    | Ints11       | 486.73 | 494.52  | 521.98 | 487.12 | 492.8 | 597.8 | 494.5 | 506.99   |
| 260326    | Adgrg1       | 3840.4 | 4136.93 | 3968.3 | 4381.2 | 4381  | 4334  | 4122  | 4324.84  |
| 301173    | Plcl2        | 205.55 | 177     | 204.92 | 189.62 | 203.3 | 190.2 | 213.4 | 209.88   |
| 287097    | Hcfclr1      | 2384.2 | 2438.57 | 2356.2 | 2100.5 | 2446  | 2437  | 2394  | 2476.63  |
| 84016     | Grip1        | 361    | 351     | 346.99 | 388    | 372   | 379   | 415   | 355      |
| 288584    | Fis1         | 2385   | 2198    | 2098   | 1879   | 2303  | 2172  | 2160  | 2363     |
| 83725     | Wfs1         | 1343   | 1520    | 1483   | 1529   | 1661  | 1575  | 1503  | 1437     |
| 24401     | Got1         | 3787   | 4051    | 3734   | 3840   | 3949  | 4243  | 4016  | 3994     |
| 291981    | Nutf2        | 1859   | 1769    | 1519   | 1622   | 1829  | 1847  | 1747  | 1693     |
| 691193    | Elof1        | 357    | 376     | 396    | 334    | 376   | 381   | 366   | 415      |
| 297990    | Ndufb6       | 1185   | 1026    | 1019   | 905    | 1097  | 1053  | 1039  | 1158     |
| 502414    | Tbc1d22b     | 573.91 | 565.65  | 559.91 | 599.18 | 593.6 | 683.4 | 563   | 576.55   |
| 58844     | Grb14        | 581.69 | 638.55  | 605.87 | 563.75 | 575.9 | 666.9 | 629.3 | 640.44   |
| 108352187 | LOC108352187 | 15.93  | 9.17    | 14.08  | 13.08  | 15.63 | 12.55 | 11.55 | 15.21    |
| 503214    | Rbpms2       | 51     | 35      | 35     | 35     | 36    | 50    | 34    | 44       |
| 684555    | Gp6          | 11     | 6       | 11     | 11     | 12    | 6     | 12    | 11       |
| 361435    | Fanca        | 103.35 | 81.43   | 85.42  | 86.92  | 102.7 | 84.25 | 101.3 | 87.12    |
| 500715    | Ccnk         | 608.32 | 624.24  | 671.54 | 691.7  | 711   | 718.7 | 668.5 | 630.76   |
| 252880    | Drgx         | 1556   | 1493    | 1470   | 1617   | 1725  | 1632  | 1532  | 1562     |
| 287803    | Ttyh2        | 335    | 424     | 468    | 486    | 403   | 499   | 439   | 460      |
| 56777     | Adamla       | 61.23  | 53.45   | 62.44  | 39.65  | 54.14 | 56.72 | 72.29 | 44.76    |
| 361578    | Nomol        | 2206   | 2440    | 2346   | 2348   | 2421  | 2637  | 2454  | 2308     |
| 298762    | Cox7a2l      | 4437   | 4140    | 4056   | 3626   | 4113  | 4106  | 4464  | 4412     |
| 367083    | Alg9         | 356    | 402     | 395    | 422    | 404   | 425   | 424   | 403      |
| 315327    | Spryd3       | 3762   | 3527    | 3468   | 3572   | 4027  | 3750  | 3629  | 3660     |
| 293049    | Rlbp1        | 76.95  | 77.28   | 52.12  | 79.72  | 77.86 | 76.42 | 74.24 | 72.27    |
| 289783    | Zmiz2        | 621.84 | 853.92  | 958.54 | 769.96 | 908.4 | 722.6 | 779.3 | 958.92   |
| 365571    | Tysnd1       | 237    | 248     | 217    | 249    | 277   | 249   | 242   | 232      |
| 89811     | Vegfb        | 912.74 | 914.05  | 888.37 | 949.98 | 975.5 | 1005  | 903.2 | 970.45   |
| 25297     | Cacnb3       | 6581   | 6915    | 6528   | 5988   | 7052  | 7062  | 6462  | 6777     |
| 689852    | Psmf1        | 1372   | 1472    | 1377   | 1285   | 1197  | 1596  | 1450  | 1547     |
| 362721    | Eipr1        | 550    | 483     | 487    | 476    | 508   | 541   | 540   | 510      |
| 25247     | Nsg1         | 2980   | 2755    | 2295   | 2393   | 2759  | 2514  | 2785  | 2903     |
| 306007    | Ccar2        | 913    | 928     | 946    | 872    | 962   | 956   | 969   | 961      |
| 288663    | Atxn2        | 1620.3 | 1730    | 1686.7 | 2043.8 | 1780  | 1993  | 1845  | 1828.15  |
| 365096    | Acat211      | 705.23 | 772.27  | 693.98 | 665.5  | 654.5 | 712.1 | 768.4 | 848.68   |
| 306117    | Tbc1d4       | 470    | 510     | 401    | 476    | 510   | 524   | 521   | 398      |
| 29674     | Psma7        | 2467   | 2221    | 2189   | 2038   | 2288  | 2414  | 2287  | 2387     |
| 360785    | Ap1s1        | 1923   | 1819    | 1799   | 1670   | 1989  | 1827  | 1925  | 1843     |

|           |              |        |         |        |        |       |       |       |         |
|-----------|--------------|--------|---------|--------|--------|-------|-------|-------|---------|
| 297969    | Rars2        | 155    | 143     | 139    | 104    | 144   | 124   | 159   | 142     |
| 499358    | Scd4         | 14.56  | 23.66   | 9.33   | 24.71  | 19.69 | 10.75 | 29.43 | 16.13   |
| 294291    | Smim29       | 555    | 490     | 511    | 394    | 542   | 492   | 501   | 516     |
| 113958    | Mrps7        | 944.05 | 935.48  | 851.54 | 821.73 | 927.6 | 931.4 | 907.8 | 970.16  |
| 307056    | Anln1        | 11.57  | 0       | 22.95  | 15.45  | 13.13 | 18.98 | 20.45 | 0       |
| 685029    | Anapc13      | 336    | 291.94  | 253    | 217.11 | 265   | 295   | 267   | 328     |
| 306508    | Mfhas1       | 1684   | 1787    | 1857   | 1844   | 1939  | 1806  | 1897  | 1902    |
| 313557    | Hivep3       | 597.69 | 558.87  | 579.3  | 698.92 | 689.2 | 675   | 586.4 | 610.59  |
| 360926    | Lnx1         | 396    | 382     | 355    | 351    | 375   | 413   | 394   | 379     |
| 25272     | Mapk10       | 5737.7 | 5882.96 | 5302.9 | 6204.9 | 6568  | 5957  | 6038  | 5765.14 |
| 83589     | Apba1        | 3991   | 4047.87 | 3871.9 | 4819   | 5002  | 4319  | 4269  | 4007.72 |
| 305795    | Abhd6        | 504    | 549     | 463    | 506    | 517   | 546   | 550   | 514     |
| 679135    | Slc25a53     | 61     | 57      | 48     | 65     | 56    | 72    | 72    | 43      |
| 308416    | Tomm40       | 1115   | 1018    | 1097   | 1019   | 1147  | 1165  | 1107  | 1051    |
| 406196    | Cchcr1       | 356    | 313     | 352    | 344    | 366   | 394   | 383   | 293     |
| 296190    | Ndufaf5      | 559    | 528     | 429    | 482    | 537   | 489   | 490   | 586     |
| 100912195 | LOC100912195 | 888.09 | 890.3   | 824.75 | 715.45 | 930.7 | 801.2 | 805.5 | 954     |
| 296849    | Pdk3         | 735    | 714     | 720    | 693    | 799   | 705   | 761   | 746     |
| 291969    | Atp6v0d1     | 7206   | 7248    | 6861   | 6647   | 7417  | 7532  | 7329  | 7140    |
| 360815    | Ddx54        | 733.99 | 788.98  | 827.98 | 737.92 | 844.9 | 825   | 815   | 764.96  |
| 292804    | Gpi          | 10563  | 10700   | 10995  | 10583  | 11118 | 11833 | 11236 | 10887   |
| 302913    | RGD1309748   | 1598   | 1402    | 1412   | 1534   | 1573  | 1550  | 1524  | 1609    |
| 100359731 | Tipin1       | 43.1   | 25.69   | 46.55  | 38.8   | 44.54 | 38.38 | 32    | 47.26   |
| 294004    | Dpcd         | 778    | 688     | 724    | 627    | 750   | 686   | 758   | 770     |
| 361431    | Cbfa2t3      | 193    | 217     | 227    | 187    | 250   | 227   | 208   | 182     |
| 29264     | Clip2        | 3663   | 3848    | 3704   | 3959   | 4085  | 4096  | 4029  | 3756    |
| 58819     | Txnrd1       | 1995   | 2003    | 2053   | 2137   | 2300  | 2158  | 2197  | 1961    |
| 81504     | Grb2         | 3132.7 | 3280.45 | 3203.7 | 3152.8 | 3364  | 3444  | 3353  | 3275.18 |
| 306805    | Aspn         | 102.26 | 55.01   | 118.19 | 58.15  | 106.5 | 104.8 | 104.3 | 35.52   |
| 29328     | Gpx4         | 6144   | 5640    | 5623   | 4916   | 6112  | 5193  | 5819  | 6366    |
| 310645    | Pmvk         | 1053   | 966     | 928    | 821    | 890   | 908   | 1003  | 1164    |
| 499497    | Mef2c        | 582    | 507.98  | 507    | 603    | 562   | 701   | 557   | 495     |
| 289785    | Myo1g        | 51     | 36      | 48     | 18     | 52    | 50    | 29    | 30      |
| 287044    | Clecl6a      | 1020.5 | 1129.52 | 990.02 | 1064.2 | 1002  | 1190  | 1235  | 997     |
| 24642     | Pgam1        | 8784   | 9123    | 9295   | 8359   | 9283  | 9428  | 9530  | 9180    |
| 63885     | Pde10a       | 210    | 217     | 209    | 224    | 265   | 193   | 220   | 227     |
| 306840    | Sirt5        | 1406   | 1352    | 1246   | 1327   | 1402  | 1390  | 1370  | 1448    |
| 303875    | Nrros        | 144    | 111     | 133    | 147    | 158   | 142   | 173   | 90      |
| 114210    | Spata2       | 649    | 643     | 586    | 623    | 683   | 651   | 606   | 692     |
| 288741    | Ficd         | 427    | 497     | 435    | 434    | 457   | 524   | 492   | 414     |
| 300967    | Tmem108      | 272    | 229     | 279    | 326    | 263   | 328   | 292   | 281     |
| 690000    | LOC690000    | 703    | 668     | 654    | 700    | 680   | 736   | 720   | 732     |
| 361567    | Bcl2l12      | 89.01  | 88.99   | 79.4   | 88.71  | 95.38 | 84.75 | 89.65 | 94.5    |
| 315807    | Pigb         | 40.44  | 45.67   | 49.52  | 47.41  | 43.66 | 37.59 | 47.48 | 63.92   |
| 503035    | Tmem229b     | 3850   | 3620    | 3292   | 3586   | 3842  | 4090  | 3744  | 3426    |
| 171082    | Atp5mc2      | 1553   | 1534    | 1497   | 1275   | 1483  | 1543  | 1517  | 1624    |
| 307395    | Ablim3       | 1253   | 1361    | 1238   | 1355   | 1447  | 1457  | 1333  | 1244    |
| 363498    | Bex2         | 1634.3 | 1696.31 | 1527.6 | 1461.4 | 1805  | 1533  | 1619  | 1695.13 |
| 405982    | Olr1343      | 1.5    | 4       | 2      | 2      | 4     | 0     | 5     | 1       |
| 103691065 | Bsph1        | 0      | 0.95    | 0      | 0      | 0     | 1     | 0     | 0       |
| 296152    | Tgm6         | 8      | 8       | 1      | 2      | 9     | 3     | 1     | 7       |
| 313653    | Vwa5b1       | 8      | 8       | 12     | 10     | 10    | 9     | 12    | 9       |
| 316521    | Vill         | 9      | 7       | 12     | 10     | 16    | 12    | 6     | 6       |
| 307850    | Exosc6       | 143.28 | 134.79  | 165.4  | 123.5  | 160   | 137.6 | 152.8 | 146.42  |
| 681219    | Cox14        | 731    | 694     | 613    | 543    | 713   | 678   | 672   | 654     |
| 362326    | Tspan12      | 1833   | 1699    | 1724   | 1784   | 1813  | 1874  | 1912  | 1812    |

|           |              |        |         |        |        |       |       |       |         |
|-----------|--------------|--------|---------|--------|--------|-------|-------|-------|---------|
| 299156    | Rab15        | 2499   | 2246    | 2303   | 2169   | 2589  | 2347  | 2296  | 2471    |
| 361517    | Vasp         | 1347.7 | 1336.72 | 1348.4 | 1235.5 | 1385  | 1456  | 1418  | 1287.38 |
| 497972    | Heatr6       | 238    | 266     | 228    | 291    | 240   | 266   | 285   | 286     |
| 300866    | Lca5         | 143.19 | 116.96  | 96.04  | 149    | 122.2 | 130.8 | 141.9 | 137     |
| 313772    | Acap3        | 864    | 861     | 842    | 879    | 879   | 948   | 859   | 942     |
| 100911951 | LOC100911951 | 1622.7 | 1437.03 | 1401.5 | 1344.5 | 1339  | 1602  | 1522  | 1649.47 |
| 25104     | Pc           | 1287   | 1264    | 1200   | 1360   | 1313  | 1367  | 1356  | 1345    |
| 25713     | Itgb7        | 58.04  | 27.96   | 52.97  | 22.29  | 52.84 | 43.24 | 40.51 | 33.19   |
| 81652     | Ctbs         | 462.19 | 412.77  | 427.89 | 346.16 | 373.9 | 411.7 | 454.1 | 496.44  |
| 54226     | App          | 14876  | 16678   | 13348  | 16612  | 16652 | 16916 | 16214 | 14983   |
| 353230    | Lhfpl4       | 790.91 | 835.98  | 756.92 | 849.96 | 978.9 | 810   | 882   | 733.91  |
| 299338    | Exoc3l4      | 9.94   | 7       | 6      | 16     | 9     | 10    | 12    | 10      |
| 288683    | Rita1        | 1038   | 908     | 911    | 829    | 968   | 988   | 985   | 940     |
| 307511    | Cdc25c       | 184.1  | 187.61  | 229.38 | 203.56 | 217.6 | 206.9 | 229.9 | 192.89  |
| 305812    | Gpr137c      | 189    | 200     | 182    | 203    | 199   | 193   | 210   | 213     |
| 25098     | Foxa1        | 5.29   | 6.49    | 2.28   | 5.19   | 6.49  | 4.21  | 4.93  | 4.64    |
| 305455    | Nelfa        | 321    | 358     | 354    | 305    | 371   | 309   | 353   | 376     |
| 290796    | Saraf        | 2722   | 2791    | 2926   | 2650   | 2810  | 3024  | 2734  | 3110    |
| 360819    | Suds3        | 1237   | 1246    | 1136   | 1144   | 1243  | 1308  | 1274  | 1191    |
| 436582    | Atp6v0e2     | 3958   | 3876    | 3529   | 3547   | 3839  | 3655  | 4152  | 4056    |
| 498145    | Fam220a      | 534    | 542     | 579    | 490    | 547   | 579   | 581   | 552     |
| 100361417 | Tbcd         | 2886.9 | 2960.17 | 2741.3 | 2998.6 | 3175  | 3040  | 3038  | 2951.21 |
| 304375    | Agfg2        | 523.34 | 590.49  | 581.17 | 551.06 | 586.7 | 638.9 | 532.8 | 607.04  |
| 309651    | Ppil1        | 296    | 264     | 254    | 220    | 250   | 260   | 267   | 312     |
| 290529    | Tmem254      | 448    | 414     | 440    | 483    | 377   | 469   | 515   | 519     |
| 171495    | Capn5        | 5815   | 6141    | 6558   | 5818   | 6803  | 6435  | 6275  | 6115    |
| 299850    | Dctn2        | 6351   | 6251    | 5870   | 5632   | 6433  | 6520  | 6303  | 6132    |
| 171073    | Hdgf12       | 821    | 897     | 827    | 909    | 857   | 969   | 878   | 934     |
| 171114    | Ndrg2        | 6507   | 6322    | 5412   | 6307   | 6070  | 6858  | 6235  | 6693    |
| 304077    | Dop1b        | 1514   | 1508    | 1701   | 1789   | 1849  | 1838  | 1557  | 1615    |
| 24406     | Grik4        | 476.37 | 505.39  | 436.07 | 458.86 | 496.2 | 540.4 | 432   | 508.07  |
| 287873    | Chmp6        | 770    | 723     | 701    | 638    | 701   | 764   | 720   | 798     |
| 499780    | RGD1561113   | 3214   | 2818    | 2557   | 2814   | 2935  | 3056  | 2971  | 3049    |
| 100301568 | Abo          | 164    | 159     | 146    | 130    | 162   | 150   | 179   | 140     |
| 689963    | Tmem52b      | 9.44   | 7.18    | 8.12   | 14.78  | 10    | 8.17  | 11.3  | 12.16   |
| 306152    | Slitrk5      | 706    | 658     | 554    | 647    | 733   | 640   | 682   | 647     |
| 363632    | Sox15        | 5.72   | 9.01    | 7.92   | 5.61   | 3.47  | 6.05  | 8.94  | 11.31   |
| 363333    | Chaf1a       | 159    | 171     | 171    | 154    | 196   | 159   | 166   | 169     |
| 304537    | Bicd11       | 428    | 393     | 323    | 353    | 409   | 387   | 403   | 378     |
| 25280     | St8sial      | 254    | 254     | 255    | 266    | 322   | 248   | 264   | 250     |
| 303100    | Mgat4b       | 936    | 949     | 1073   | 819    | 989   | 1028  | 966   | 996     |
| 302983    | Mapk8ip3     | 9952   | 10600   | 10111  | 10844  | 11365 | 11449 | 10557 | 10356   |
| 316123    | Gtf2f1       | 1075   | 1046    | 1047   | 1020   | 1149  | 1112  | 1109  | 1042    |
| 100360180 | Pgd          | 1739   | 1853    | 1721   | 1675   | 1803  | 1936  | 1838  | 1785    |
| 81709     | Msh2         | 253    | 259     | 238    | 240    | 255   | 262   | 268   | 258     |
| 298508    | Ppie         | 277    | 210     | 240    | 188    | 205   | 268   | 242   | 249     |
| 310745    | Dclrelb      | 303    | 272     | 263    | 282    | 285   | 298   | 331   | 266     |
| 690161    | Hfml         | 18     | 9       | 18     | 11     | 13    | 8     | 19    | 19      |
| 679668    | LRRTM1       | 427    | 360     | 356    | 387    | 381   | 391   | 415   | 425     |
| 84596     | Srm          | 559    | 517.76  | 517.76 | 517    | 615   | 636   | 482.9 | 490.83  |
| 312675    | Fbx114       | 434.38 | 398.48  | 420.82 | 400.45 | 418.1 | 419.1 | 462.6 | 442.95  |
| 56084     | Hgs          | 2178.9 | 2325.53 | 2264.5 | 2421   | 2382  | 2594  | 2450  | 2256.94 |
| 311621    | Tomm34       | 1945   | 2181    | 2008   | 2081   | 2188  | 2275  | 2149  | 2044    |
| 24805     | Syt2         | 2533   | 2667    | 2416   | 3200   | 3164  | 2854  | 2836  | 2542.79 |
| 313169    | Ubap2        | 2336   | 2512    | 2531   | 2714   | 2741  | 2915  | 2509  | 2470    |
| 100911859 | Hoxc11       | 113    | 46      | 39     | 44     | 109   | 57    | 65    | 24      |

|           |              |        |         |        |        |       |       |       |          |
|-----------|--------------|--------|---------|--------|--------|-------|-------|-------|----------|
| 29663     | Ap1b1        | 2206   | 2491    | 2238   | 2648   | 2569  | 2693  | 2460  | 2376     |
| 103690028 | LOC103690028 | 71.84  | 55.07   | 47.89  | 47.89  | 52.68 | 64.65 | 45.5  | 71.84    |
| 293621    | Hras         | 1530   | 1438.51 | 1408   | 1169   | 1417  | 1537  | 1392  | 1498     |
| 29659     | P2rx4        | 479    | 739     | 786    | 447    | 735   | 688   | 476   | 684      |
| 311562    | Necab3       | 2388   | 2013    | 2061   | 1873   | 2293  | 2146  | 2131  | 2214     |
| 311338    | Rpap1        | 301    | 281     | 336    | 307    | 323   | 330   | 333   | 305      |
| 363129    | Nudt16       | 338    | 343     | 316    | 302    | 326   | 343   | 315   | 385      |
| 300240    | Atg101       | 544    | 547     | 518    | 431    | 581   | 542   | 511   | 516      |
| 305454    | Zfyve28      | 1476   | 1615    | 1515   | 1606   | 1692  | 1675  | 1652  | 1528     |
| 362754    | Trmt5        | 262    | 240     | 227    | 253    | 241   | 261   | 265   | 268      |
| 102552527 | LOC102552527 | 196.01 | 188.5   | 199.77 | 196.04 | 188.9 | 186.4 | 236.9 | 210.32   |
| 361268    | Asb13        | 165    | 185     | 170    | 202    | 196   | 178   | 186   | 201      |
| 287357    | Wnt9a        | 231    | 262     | 220    | 231    | 287   | 248   | 199   | 261      |
| 297954    | Fhl5         | 6      | 12      | 10     | 9      | 19    | 8     | 7     | 5        |
| 292888    | Ptov1        | 3174.8 | 3238.83 | 3188.4 | 2922.8 | 3412  | 3498  | 2993  | 3299.86  |
| 81829     | Mdh2         | 5773   | 6003    | 5265   | 5722   | 5787  | 6315  | 6148  | 5746     |
| 311839    | Slc27a4      | 1658   | 1781    | 1779   | 1498   | 1680  | 1835  | 1727  | 1838     |
| 29564     | Dync11l      | 4603   | 4473    | 4121   | 4584   | 4755  | 4696  | 4695  | 4599     |
| 29592     | Bcat1        | 23574  | 24599   | 20891  | 23948  | 24577 | 25182 | 24795 | 23502    |
| 24191     | Aldoc        | 8583   | 8505    | 7425   | 7576   | 8307  | 8571  | 8318  | 8634     |
| 303745    | Sirt7        | 262    | 249     | 273    | 209    | 306   | 229   | 261   | 251      |
| 103689922 | LOC103689922 | 111.64 | 101.61  | 87.99  | 116.3  | 114.2 | 113.9 | 112.7 | 99.59    |
| 79241     | Hoxa5        | 111.64 | 101.61  | 87.99  | 116.3  | 114.2 | 113.9 | 112.7 | 99.59    |
| 314164    | Lrfn5        | 1068   | 968     | 839.65 | 988    | 1055  | 944.2 | 1139  | 936      |
| 171437    | Dnttip1      | 436    | 488     | 404    | 397    | 416   | 464   | 467   | 472      |
| 302022    | LOC302022    | 573.64 | 539.3   | 461.88 | 565.95 | 520.6 | 561.3 | 597.2 | 578.36   |
| 361887    | Cwc27        | 249    | 243     | 221    | 241    | 256   | 268   | 238   | 244      |
| 305540    | Slcla4       | 522    | 562     | 564    | 590    | 608   | 602   | 582   | 568      |
| 25101     | Chrna3       | 850    | 772     | 872    | 807    | 971   | 810   | 849   | 851      |
| 690442    | Tmem116      | 11     | 13      | 18     | 13     | 8     | 15    | 20    | 15       |
| 102557427 | LOC102557427 | 86.45  | 87.9    | 85.69  | 87.01  | 74.55 | 99.28 | 101.6 | 90.54    |
| 25391     | Atp2a3       | 370    | 421.97  | 400.88 | 359.98 | 459.2 | 436.5 | 383   | 359      |
| 681300    | LOC681300    | 76.63  | 25.76   | 43.89  | 66.86  | 54.87 | 58.32 | 48.7  | 62.89    |
| 81925     | Cds1         | 777    | 780     | 663    | 855    | 849   | 803   | 792   | 799      |
| 79117     | Arf5         | 2614   | 2468    | 2393   | 2317   | 2758  | 2573  | 2479  | 2517     |
| 85383     | Nol3         | 847.65 | 699.96  | 623.61 | 693.47 | 735.7 | 772   | 709.7 | 803.78   |
| 116720    | Pik3c2g      | 92     | 55      | 83     | 81     | 75    | 77    | 89    | 87       |
| 406164    | Pbx2         | 810    | 819     | 833    | 794    | 884   | 820   | 868   | 862      |
| 290642    | Ccdc124      | 1045   | 953     | 929    | 877    | 1006  | 985   | 1027  | 994      |
| 361717    | Dnajc4       | 165    | 176     | 155    | 162    | 181   | 187   | 155   | 171      |
| 291202    | Hax1         | 476.26 | 520.46  | 423.08 | 465.82 | 514.4 | 467.9 | 488.7 | 517.86   |
| 314630    | Rexo1        | 894    | 869     | 909    | 890    | 934   | 1039  | 914   | 870      |
| 685607    | Pfdn2        | 1111.4 | 1054.39 | 1099   | 969.2  | 1144  | 1034  | 1088  | 1199.17  |
| 361664    | Eeflakmt2    | 121.1  | 114.17  | 129.88 | 96.76  | 130   | 102.4 | 131.4 | 123.55   |
| 100362785 | Ankdd1a      | 18     | 14      | 20     | 21     | 23    | 17    | 20    | 17       |
| 170551    | Slc5a6       | 901    | 915     | 905    | 946    | 1045  | 873   | 959   | 991      |
| 289728    | RGD1560394   | 253    | 206     | 192    | 188    | 245   | 197   | 196   | 247      |
| 303746    | Mrpl12       | 796    | 732     | 675    | 623    | 744   | 751   | 663   | 823      |
| 308777    | Ap3b2        | 4997   | 4879    | 4709   | 5150   | 5592  | 5315  | 4983  | 4929     |
| 298298    | Dhcr24       | 3740   | 4367    | 4303   | 4118   | 4514  | 4331  | 4059  | 4532     |
| 25527     | Ptgis        | 53     | 41      | 43     | 45     | 62    | 47    | 27    | 56       |
| 25330     | Lipe         | 635    | 634     | 597    | 627    | 662   | 693   | 657   | 618      |
| 364380    | Abhd4        | 14988  | 14449   | 13367  | 15375  | 15219 | 14961 | 15973 | 15225    |
| 100911483 | Ndufa13      | 1134   | 1025    | 1021   | 928    | 1142  | 1075  | 1024  | 1093     |
| 293991    | Ndufb8       | 2181   | 2220    | 2019   | 1723   | 1995  | 2206  | 2076  | 2314     |
| 306600    | Atp11a       | 9904.2 | 11278.5 | 8103.6 | 13024  | 11140 | 11948 | 11223 | 10327.39 |



|           |              |        |         |        |        |       |       |       |         |
|-----------|--------------|--------|---------|--------|--------|-------|-------|-------|---------|
| 116644    | Rtn1         | 14102  | 16287   | 15547  | 16064  | 16250 | 17368 | 16262 | 15534   |
| 300668    | Dpagt1       | 1102   | 1122    | 1178   | 1173   | 1164  | 1217  | 1227  | 1219    |
| 310201    | Cmb1         | 284    | 241     | 228    | 227    | 218   | 251   | 257   | 308     |
| 170919    | Agpat4       | 1052.3 | 1060.76 | 1044   | 1071.8 | 1159  | 1094  | 1038  | 1171.22 |
| 266601    | Tomm20       | 1993   | 1919    | 1693   | 1617   | 1972  | 1888  | 1865  | 1895    |
| 502764    | Zfp777       | 397    | 423     | 460    | 461    | 474   | 493   | 413   | 457     |
| 362981    | Hdac10       | 308    | 286     | 370    | 305    | 344   | 317   | 334   | 344     |
| 24788     | Sord         | 1086   | 1002    | 934    | 947    | 1007  | 1058  | 1060  | 1063    |
| 308495    | Lrfn3        | 298    | 270     | 268    | 269    | 323   | 314   | 280   | 249     |
| 500947    | Vstm5        | 462    | 435     | 392    | 394    | 487   | 422   | 445   | 422     |
| 641525    | Pcdhgc5      | 357.48 | 377.2   | 344.51 | 416.29 | 384.1 | 453.3 | 365.7 | 375.04  |
| 289369    | Ush2a        | 30.18  | 30.17   | 30.27  | 26.25  | 24.21 | 25.28 | 25.31 | 48.53   |
| 499626    | Erich6       | 34     | 38.04   | 31.01  | 31     | 39    | 35.46 | 32    | 35      |
| 79227     | Thoc6        | 296.79 | 341.43  | 311.79 | 251.53 | 331.1 | 332.7 | 323.8 | 280.37  |
| 56081     | Scaf1        | 2975   | 2997    | 3113.5 | 3201   | 3431  | 3530  | 3062  | 2942.79 |
| 289831    | Commd1       | 1134.1 | 1178    | 1017.2 | 906.83 | 1028  | 1077  | 1156  | 1210.33 |
| 361675    | Cend1        | 8212   | 8797.83 | 7662   | 7907.4 | 9006  | 8827  | 8421  | 8126.95 |
| 363023    | Mrpl4        | 779    | 756     | 646    | 802    | 758   | 789   | 802   | 799     |
| 29138     | Bsn          | 1280.4 | 1441.06 | 1391   | 1856.6 | 1634  | 1616  | 1462  | 1586.91 |
| 305453    | Cfap99       | 102.94 | 75.13   | 144.8  | 83.05  | 112.1 | 113.6 | 117.5 | 85.21   |
| 103689987 | Mfsd14a      | 325.1  | 296.26  | 253.64 | 379.57 | 274.6 | 276   | 383.3 | 390.18  |
| 79125     | Anxa6        | 14146  | 13869   | 13508  | 14022  | 14658 | 15059 | 15077 | 13827   |
| 84005     | Eif2b2       | 952    | 1046    | 912    | 882    | 1027  | 1017  | 951   | 1007    |
| 500242    | Pcbpl        | 3133   | 3292    | 3206   | 3207   | 3230  | 3573  | 3382  | 3364    |
| 362302    | Abcb8        | 704.1  | 702.31  | 675.78 | 654.09 | 728.1 | 696.5 | 725   | 738.3   |
| 114245    | Hcn3         | 372.51 | 394.81  | 338.34 | 361    | 418   | 377.6 | 367   | 385.5   |
| 114504    | Msx3         | 5      | 7       | 5      | 1      | 5     | 5     | 3     | 6       |
| 365183    | Fcar         | 6      | 1       | 7      | 4      | 4     | 5     | 3     | 7       |
| 365390    | Tspan32      | 6      | 6       | 5      | 1      | 4     | 5     | 6     | 4       |
| 498229    | Tmem81       | 16     | 15      | 15     | 26     | 19    | 19    | 19    | 19      |
| 60667     | Gpr20        | 5      | 3       | 3      | 7      | 4     | 5     | 6     | 4       |
| 619550    | Gpr153       | 489.71 | 469.6   | 473.58 | 545.28 | 541.7 | 544.7 | 501.2 | 500.57  |
| 289081    | Colgalt2     | 1213   | 1152    | 1054   | 1296   | 1301  | 1307  | 1217  | 1152    |
| 102552073 | LOC102552073 | 4.62   | 17.71   | 7.2    | 7.84   | 14.81 | 17.33 | 2.19  | 5.12    |
| 683891    | Ccdc160      | 113    | 114     | 97     | 125    | 113   | 129   | 114   | 118     |
| 64358     | Kcna6        | 2352   | 2472.34 | 2549.7 | 2842.7 | 2873  | 2691  | 2580  | 2642.06 |
| 24314     | Nqo1         | 1293   | 977     | 1179   | 823    | 1238  | 943   | 1268  | 1061    |
| 316077    | Entpd3       | 1467   | 1448    | 1277   | 1563   | 1517  | 1564  | 1528  | 1467    |
| 690345    | Srp9         | 698    | 719     | 599    | 547    | 654   | 659   | 710   | 683     |
| 81667     | Gnb2         | 3797   | 3764    | 3807   | 3219   | 3669  | 4038  | 3824  | 3870    |
| 360793    | Rhbdd2       | 669    | 784     | 700    | 642    | 726   | 729   | 651   | 845     |
| 288152    | Hoxd3        | 72     | 61      | 79     | 63     | 81    | 74    | 71.36 | 64      |
| 25202     | Gucylb1      | 125    | 111     | 122    | 125    | 139   | 129   | 124   | 118     |
| 298801    | Clip4        | 450    | 459     | 378    | 448    | 473   | 443   | 465   | 451     |
| 171381    | Psd          | 101    | 110     | 105    | 131    | 124   | 121   | 115   | 112     |
| 293863    | Lage3        | 1278.6 | 1168.79 | 1192   | 956.16 | 1179  | 1111  | 1213  | 1349.54 |
| 300047    | Cycl         | 2483   | 2489    | 2215   | 2052   | 2454  | 2448  | 2361  | 2493    |
| 306844    | Phactr1      | 350    | 354     | 390    | 407    | 434   | 421   | 366   | 364     |
| 246274    | Faim2        | 3683.3 | 3845.68 | 3581.6 | 3361   | 3979  | 4483  | 3375  | 3444.82 |
| 303772    | Slc16a6      | 675.6  | 712.81  | 625.68 | 699.49 | 776.1 | 756.8 | 686.9 | 645.65  |
| 66016     | Kcnmb4       | 151    | 175     | 163    | 118    | 135   | 171   | 169   | 166     |
| 296318    | Ndr3         | 1391.6 | 1421.28 | 1344.9 | 1461.6 | 1361  | 1594  | 1585  | 1394.45 |
| 291673    | Sil1         | 545    | 536     | 617    | 515    | 577   | 546   | 584   | 630     |
| 304822    | Pkp1         | 375.62 | 333.32  | 292.94 | 410.81 | 350.3 | 332.4 | 399.2 | 409.95  |
| 298696    | Pin1         | 2562   | 2529    | 2232   | 2148   | 2442  | 2388  | 2542  | 2630    |
| 50676     | Slc6a12      | 7.18   | 11.46   | 11.19  | 23.59  | 10    | 14    | 16    | 16.42   |

|           |              |        |         |        |        |       |       |       |         |
|-----------|--------------|--------|---------|--------|--------|-------|-------|-------|---------|
| 24451     | Hmox1        | 301    | 291     | 312    | 271    | 328   | 322   | 296   | 295     |
| 116724    | Epb4113      | 19479  | 20009   | 19473  | 21715  | 22584 | 21668 | 21599 | 19358   |
| 314332    | Tmem63c      | 3013.6 | 3386.61 | 3181.5 | 3208   | 3578  | 3497  | 3252  | 3181.87 |
| 500899    | Mfsd3        | 338    | 385     | 367    | 333    | 408   | 358   | 393   | 344     |
| 690137    | Tmem120b     | 269    | 250     | 265    | 176    | 248   | 261   | 250   | 255     |
| 65208     | Dpysl5       | 4028.8 | 4085.17 | 4119.1 | 4580.8 | 4634  | 4565  | 4304  | 4257.22 |
| 292845    | Etfb         | 758    | 602     | 738    | 600    | 686   | 747   | 691   | 726     |
| 292875    | Aspdh        | 21     | 18      | 18     | 14     | 19    | 25    | 16    | 15      |
| 29739     | Gclm         | 1086   | 1067    | 987    | 1137   | 1202  | 1037  | 1161  | 1118    |
| 365222    | Lrfn1        | 700.82 | 655     | 618.23 | 680.33 | 757   | 712   | 670.7 | 664.21  |
| 305248    | Mthfd21      | 101    | 92      | 82     | 62     | 88    | 92    | 95    | 81      |
| 81530     | Pdk2         | 851    | 803     | 811    | 744    | 866   | 951   | 839   | 734     |
| 305468    | Eif4enif1    | 627.48 | 661.77  | 707.01 | 708.96 | 679.2 | 773   | 706   | 699.63  |
| 171143    | Trpm4        | 329    | 388     | 330    | 388    | 427   | 367   | 382   | 340     |
| 363022    | Zfp846       | 993.55 | 786.07  | 687.52 | 827.93 | 786   | 884.3 | 831.3 | 979.88  |
| 25485     | Myold        | 340    | 394     | 338    | 342    | 354   | 421   | 342   | 377     |
| 102555457 | LOC102555457 | 104.14 | 79.74   | 112.29 | 101    | 123.5 | 107.5 | 83.49 | 105.21  |
| 366508    | Pik3cd       | 939    | 877     | 893    | 894    | 992   | 957   | 888   | 970     |
| 85496     | Enpp1        | 321.38 | 360     | 324    | 408    | 351.2 | 387.2 | 365   | 390.04  |
| 679869    | Tcf712       | 176    | 187     | 210    | 221    | 206   | 232   | 216   | 185     |
| 192226    | Cand2        | 114    | 114     | 120    | 146    | 129   | 141   | 131   | 121     |
| 306636    | Efnb2        | 208    | 233     | 239    | 254    | 221   | 243   | 282   | 241     |
| 338401    | Crip2        | 6822   | 6855    | 6774   | 6263   | 7382  | 7247  | 6349  | 7252    |
| 56281     | Mrpl37       | 742    | 747     | 654    | 711    | 791   | 792   | 683   | 750     |
| 64632     | Exoc7        | 453.73 | 405.79  | 345.56 | 297.33 | 379.2 | 434.7 | 348.1 | 425.74  |
| 25308     | Cstb         | 1491   | 1454    | 1304   | 1156   | 1337  | 1318  | 1378  | 1679    |
| 308398    | Ppplr37      | 1537   | 1567    | 1514   | 1540   | 1610  | 1687  | 1603  | 1608    |
| 171079    | B3galt4      | 63     | 44      | 60     | 44     | 51    | 58    | 46    | 68      |
| 363462    | Gemin8       | 184    | 200     | 220    | 169    | 212   | 206   | 197   | 202     |
| 688813    | Ddal         | 2110.6 | 2212.15 | 2073.6 | 1944.2 | 2329  | 2172  | 2059  | 2255.45 |
| 366277    | Polr3k       | 499    | 691     | 501    | 486    | 539   | 439   | 704   | 619     |
| 310269    | Egfem1       | 118.2  | 113.79  | 96.81  | 93.94  | 137.6 | 117.5 | 86.62 | 105.13  |
| 81650     | Csnk2b       | 1787   | 1519    | 1590   | 1668   | 1749  | 1748  | 1765  | 1676    |
| 25203     | Ccnb1        | 115.77 | 108.44  | 99.46  | 75.93  | 126   | 97.48 | 88.55 | 110.36  |
| 309301    | Rcl1         | 226    | 235     | 189    | 192    | 210   | 223   | 240   | 217     |
| 688869    | Cox6b1       | 3477   | 3247    | 3053   | 2729   | 3256  | 3235  | 3193  | 3535    |
| 298528    | Epha10       | 91     | 91      | 58     | 58     | 85    | 78    | 81    | 71      |
| 288753    | Diablo       | 2457.5 | 2697.62 | 2303.1 | 2281.3 | 2637  | 2538  | 2473  | 2647.5  |
| 363516    | Abcd1        | 213.68 | 222.75  | 238    | 208    | 218.2 | 256   | 215   | 243.62  |
| 361416    | Cenpn        | 252    | 240     | 247    | 242    | 281   | 253   | 257   | 246     |
| 314641    | Pip5k1c      | 5190   | 5275    | 5165   | 5442   | 5930  | 5654  | 5430  | 5261    |
| 363239    | Raph1        | 960    | 960     | 892    | 1128   | 1144  | 952   | 929   | 1140    |
| 364675    | B4galt7      | 426    | 432     | 398.66 | 395    | 455   | 438   | 442   | 411     |
| 116635    | Scg3         | 7948   | 7769    | 7028   | 7817   | 8102  | 7885  | 7988  | 8333    |
| 108349796 | LOC108349796 | 31     | 18      | 21     | 21     | 27    | 27    | 22    | 20.2    |
| 303376    | Fndc8        | 7      | 11      | 14     | 3      | 10    | 7     | 11    | 9       |
| 308701    | Tarsl2       | 408    | 382     | 362    | 388    | 420   | 420   | 409   | 379     |
| 313020    | Wdte1        | 2046   | 2074    | 2015   | 2118   | 2246  | 2284  | 2137  | 2058    |
| 304244    | Fry          | 1911   | 2103    | 1994   | 2312   | 2331  | 2267  | 2093  | 2105    |
| 29616     | Ptprm        | 943    | 967     | 939    | 1066   | 1021  | 1118  | 1038  | 962     |
| 362176    | Lmo2         | 180    | 165     | 213    | 141    | 165   | 179   | 195   | 200     |
| 361120    | Eps15l1      | 1170.4 | 1205.51 | 1153   | 1180.1 | 1291  | 1226  | 1301  | 1160.37 |
| 309866    | Crybg1       | 78     | 55      | 57     | 72     | 58    | 103   | 68    | 48      |
| 298201    | Fam214b      | 740    | 711     | 760    | 636    | 794   | 754   | 750   | 712     |
| 29179     | Syn2         | 3251   | 3580    | 3053   | 3769   | 3691  | 3642  | 3717  | 3385    |
| 108351600 | LOC108351600 | 57     | 44      | 47     | 44     | 58    | 54    | 57    | 34      |

|        |            |        |         |        |        |       |       |       |         |
|--------|------------|--------|---------|--------|--------|-------|-------|-------|---------|
| 311864 | Uck1       | 600    | 576     | 543    | 480    | 564   | 609   | 530   | 622     |
| 296267 | Snph       | 2295.7 | 2349.16 | 2168   | 2508.8 | 2526  | 2681  | 2392  | 2256.27 |
| 306347 | El1        | 347    | 337.09  | 343.12 | 345.05 | 365.4 | 392   | 345.1 | 348.42  |
| 498600 | Fam32a     | 1780   | 1828.9  | 1755.9 | 1648.1 | 1782  | 1802  | 1839  | 1992.92 |
| 360975 | Ogdh       | 4639.2 | 4794.56 | 4760   | 5849.8 | 5493  | 5191  | 5265  | 5245.71 |
| 171386 | Avp1l      | 431    | 421     | 429    | 371    | 428   | 456   | 436   | 427     |
| 54268  | Mapk4      | 347    | 375     | 299    | 439.01 | 444   | 386   | 320   | 394     |
| 60462  | Batf3      | 35.17  | 34.35   | 26.94  | 25.84  | 40.65 | 20.9  | 27.74 | 40.05   |
| 361816 | Zfand3     | 2295   | 2264    | 2244   | 2126   | 2286  | 2399  | 2383  | 2375    |
| 288923 | Dhps       | 608.91 | 566.99  | 554.58 | 508.48 | 569.8 | 551.9 | 608.8 | 637.33  |
| 83466  | Celsr3     | 1257   | 1240    | 1157   | 1259   | 1446  | 1231  | 1234  | 1285    |
| 64347  | Sncg       | 37184  | 33741   | 33485  | 30073  | 35745 | 33522 | 34241 | 38735   |
| 171499 | Crlf2      | 259    | 260     | 239    | 247    | 261   | 294   | 235   | 273     |
| 25501  | Nxph1      | 105    | 95      | 104    | 77     | 109   | 79    | 103   | 112     |
| 363283 | Cops8      | 1279   | 1246    | 1219   | 1173   | 1317  | 1321  | 1287  | 1276    |
| 246770 | Gtf2ird1   | 413    | 391.18  | 443    | 394.1  | 421   | 437   | 459.2 | 419     |
| 25666  | Dgkg       | 1027   | 1065    | 1018   | 1054   | 1125  | 1069  | 1086  | 1125    |
| 257644 | Zwint      | 36470  | 35488   | 31689  | 32738  | 36168 | 35094 | 36186 | 36835   |
| 306015 | Fam160b2   | 817.3  | 771.72  | 806.31 | 806.72 | 948.4 | 859.9 | 783.6 | 795.62  |
| 363216 | Cnnm4      | 804    | 793.99  | 737.89 | 774    | 842   | 855   | 786   | 807     |
| 282837 | Fibp       | 754    | 756     | 693    | 678    | 795   | 772   | 759   | 722     |
| 25344  | Phb        | 1955   | 2010    | 1814   | 1587   | 1911  | 1904  | 1985  | 1993    |
| 305957 | Neil2      | 14     | 23      | 19     | 13     | 17    | 14    | 29    | 13      |
| 84354  | Ssbp3      | 2794.3 | 2811.04 | 2788   | 2887.3 | 3131  | 3074  | 2758  | 2971.68 |
| 310653 | mrpl9      | 634    | 548     | 548    | 455    | 558   | 570   | 580   | 604     |
| 361588 | Lrrc28     | 698    | 619     | 656    | 607    | 720   | 651   | 631   | 728     |
| 360567 | Ccdc92b    | 484    | 440     | 441    | 458    | 466   | 479   | 516   | 468     |
| 288514 | Ints1      | 1125.8 | 1257.05 | 1267.7 | 1360.4 | 1357  | 1455  | 1269  | 1221    |
| 94194  | Cox5b      | 2596   | 2331    | 2233   | 1947   | 2390  | 2268  | 2339  | 2640    |
| 24225  | Bdnf       | 405    | 370     | 439    | 401    | 461   | 425   | 428   | 395     |
| 363192 | Klhdc3     | 1500.3 | 1620    | 1514.7 | 1462.8 | 1570  | 1718  | 1583  | 1582    |
| 58960  | Map2k2     | 1328   | 1377    | 1380   | 1186   | 1475  | 1443  | 1382  | 1278    |
| 50938  | Cdon       | 166    | 188     | 185    | 181.96 | 181   | 200   | 196   | 186     |
| 29211  | Sptbn2     | 2582   | 2662    | 2500   | 2847   | 3007  | 2838  | 2693  | 2670    |
| 94174  | Tinagl1    | 341    | 279     | 339    | 242    | 292   | 389   | 355   | 235     |
| 60324  | Synpo      | 1750   | 2065    | 2119   | 2196   | 2343  | 2193  | 2082  | 1986    |
| 362983 | Dennd6b    | 331    | 403     | 306    | 332    | 362   | 371   | 374   | 345     |
| 362594 | Meaf6      | 681    | 708     | 599    | 669    | 695   | 653   | 716   | 748     |
| 301384 | Hibch      | 504    | 448     | 384    | 378    | 458   | 461   | 466   | 429     |
| 29573  | Slc37a4    | 493    | 516     | 427    | 432    | 461   | 529   | 483   | 504     |
| 498890 | RGD1560212 | 1784.6 | 1695.08 | 1658.5 | 1343.1 | 1852  | 1741  | 1663  | 1603.95 |
| 360554 | Rnf167     | 1130   | 1133    | 1131   | 1113   | 1191  | 1231  | 1157  | 1191    |
| 266813 | Prrxl1     | 72.88  | 70.17   | 81.07  | 75.57  | 80.1  | 98.17 | 80.12 | 58.79   |
| 316578 | Slc16a14   | 380.83 | 339.3   | 305.26 | 330.92 | 388.5 | 330.9 | 362   | 354.1   |
| 310411 | Cog6       | 335    | 323     | 323    | 337    | 370   | 352   | 357   | 316     |
| 445415 | S100a11    | 2493   | 2344    | 2904   | 2219   | 2548  | 2705  | 2558  | 2731    |
| 306353 | Rfxank     | 156.91 | 184.58  | 154.37 | 143.57 | 157.3 | 152.7 | 187.7 | 179.05  |
| 140447 | Slc8a2     | 404    | 420     | 450    | 505    | 538   | 434   | 393   | 518     |
| 266764 | Tbkbp1     | 511.81 | 478.27  | 447.08 | 497.66 | 562.1 | 534.1 | 479.5 | 472.25  |
| 310801 | Slc30a7    | 98     | 88      | 102    | 105    | 97    | 96    | 102   | 121     |
| 292078 | Spata33    | 123    | 109     | 94     | 84     | 100   | 101   | 102   | 131     |
| 312916 | Cops5      | 1885   | 1793    | 1674   | 1637.9 | 1723  | 1854  | 1988  | 1834    |
| 64045  | Glrx       | 1912   | 1988    | 1372   | 1781   | 1779  | 1844  | 1957  | 1886    |
| 56029  | Srcin1     | 376    | 413     | 384    | 449    | 531   | 405   | 399   | 382     |
| 60416  | Pfcp       | 11378  | 10990   | 10656  | 10939  | 11754 | 11448 | 11948 | 11388   |
| 298782 | Ttc27      | 527    | 436     | 535    | 380    | 537   | 532   | 503   | 416     |

|           |              |        |         |        |        |       |       |       |         |
|-----------|--------------|--------|---------|--------|--------|-------|-------|-------|---------|
| 24484     | Igfbp3       | 422.78 | 374.37  | 503.13 | 388.67 | 493.9 | 431.8 | 402.4 | 459.8   |
| 315430    | Amotl1       | 1134.5 | 1173.21 | 1233.4 | 1462.6 | 1425  | 1469  | 1274  | 1128.94 |
| 289357    | Lyplal1      | 270    | 202     | 193    | 188    | 222   | 187   | 243   | 251     |
| 85256     | Slc2a8       | 741    | 690     | 661    | 703    | 760   | 761   | 727   | 711     |
| 681418    | Ndufb10      | 2279   | 2188    | 2016   | 1969   | 2173  | 2245  | 2245  | 2285    |
| 100909599 | LOC100909599 | 1.72   | 4.82    | 3      | 0      | 0     | 1.33  | 3.5   | 5.27    |
| 64544     | B3gat2       | 268    | 249     | 216    | 238    | 250   | 253   | 226   | 299     |
| 103693780 | LOC103693780 | 1342.8 | 1561.44 | 1305   | 854.25 | 993.9 | 1776  | 1402  | 1189.29 |
| 84609     | Sema6b       | 257.5  | 291.88  | 212.72 | 263.15 | 271.4 | 333.2 | 254.9 | 225.96  |
| 27139     | Rps26        | 458.4  | 1110.11 | 366.18 | 512.17 | 584.1 | 768.3 | 590.7 | 647.5   |
| 100362606 | Akain1       | 301.77 | 295.43  | 254.07 | 329.28 | 284.9 | 314.6 | 342.9 | 307.49  |
| 103693393 | LOC103693393 | 106.4  | 100.79  | 110.17 | 150.73 | 152.8 | 108.4 | 107.3 | 127.12  |
| 24888     | Bcl2l1       | 1456   | 1388.94 | 1326.7 | 1328.7 | 1426  | 1520  | 1472  | 1406.43 |
| 287603    | Tex14        | 2      | 5       | 5      | 5      | 4     | 4     | 3     | 7       |
| 311532    | Sdcbp2       | 4      | 8       | 9      | 13     | 12    | 9     | 8     | 7       |
| 363555    | Wfikkn1      | 27     | 31      | 31     | 30     | 42    | 24    | 31    | 29      |
| 500954    | Ubl5         | 1217   | 1059    | 1101   | 905    | 1197  | 1075  | 1133  | 1129    |
| 292654    | Tmem160      | 393    | 385     | 328    | 321    | 388   | 385   | 347   | 391     |
| 103690129 | LOC103690129 | 52.32  | 69.37   | 64.98  | 70.84  | 77.16 | 77.3  | 56.28 | 61.93   |
| 304343    | Cops6        | 2180   | 2223.94 | 2074   | 1882   | 2188  | 2212  | 2224  | 2228    |
| 29579     | Esyt1        | 5129   | 5433    | 5590   | 5473   | 6022  | 5926  | 5530  | 5421    |
| 288924    | Wdr83        | 306.09 | 234.01  | 228.42 | 216.52 | 309.2 | 251.1 | 258.2 | 224.67  |
| 303872    | Pigz         | 276.41 | 289.15  | 352.96 | 311.22 | 354.3 | 304.2 | 322   | 321.81  |
| 641316    | Aldh4a1      | 455    | 417     | 388    | 452    | 421   | 419   | 479   | 494     |
| 310344    | Plk4         | 148    | 159     | 164    | 139    | 174   | 149   | 164   | 159     |
| 360797    | Rabgef1      | 570    | 578     | 501    | 567    | 617   | 578   | 605   | 547     |
| 100911225 | LOC100911225 | 114.24 | 120.25  | 123.52 | 129.4  | 107.5 | 106.7 | 149.4 | 152.68  |
| 362994    | Ccdc65       | 132    | 139     | 138    | 132    | 129   | 146   | 141   | 157     |
| 308311    | Cnot3        | 555.76 | 587.33  | 622.8  | 594.87 | 649.2 | 657.3 | 613.8 | 580.19  |
| 619440    | Aarsd1       | 669.78 | 695.28  | 647.64 | 594.19 | 679.1 | 685.3 | 713   | 683.79  |
| 689172    | Tmem25       | 1226.7 | 1218.2  | 1144   | 1163.7 | 1302  | 1211  | 1291  | 1229.38 |
| 83631     | Dedd         | 507    | 497     | 531    | 509    | 512   | 540   | 546   | 567     |
| 64306     | Rpl27        | 2062   | 1938    | 1872   | 1575   | 1999  | 1861  | 1906  | 2122    |
| 245976    | Xab2         | 559    | 595     | 529    | 529    | 571   | 658   | 534   | 580     |
| 297432    | Abtb1        | 527    | 559     | 452    | 471    | 576   | 532   | 514   | 506     |
| 303920    | Maats1       | 38     | 29      | 35     | 33     | 34    | 33    | 34    | 42      |
| 306842    | Gfod1        | 2790   | 2684    | 2591   | 2828   | 2997  | 2927  | 2837  | 2778    |
| 689582    | Kdm4d        | 0      | 53.33   | 46.58  | 41.5   | 48.17 | 0     | 60.35 | 41.28   |
| 296588    | Pmpca        | 1361   | 1307    | 1282   | 1273   | 1360  | 1353  | 1434  | 1386    |
| 361712    | Syvn1        | 1256   | 1305    | 1305   | 1353   | 1423  | 1547  | 1334  | 1225    |
| 500889    | Mroh5        | 9      | 10      | 9      | 6      | 6.03  | 10    | 8.99  | 11      |
| 362965    | Rangap1      | 2877.8 | 3243.3  | 2956.9 | 3193.5 | 3289  | 3386  | 3273  | 3052.58 |
| 295326    | Mab2113      | 85     | 83      | 98     | 104    | 76    | 136   | 79    | 101     |
| 303089    | Trim7        | 239    | 291     | 217    | 228    | 251   | 279   | 229   | 274     |
| 102550385 | LOC102550385 | 496    | 504     | 440    | 409    | 513   | 478   | 492   | 476     |
| 286895    | Brinp2       | 492    | 536     | 467    | 588    | 537   | 550   | 613   | 507     |
| 500378    | Chtop11      | 347.05 | 316.47  | 332.43 | 305.54 | 382.8 | 328.4 | 369.2 | 298.65  |
| 297416    | Nful         | 393    | 365     | 345    | 340    | 366   | 362   | 410   | 391     |
| 363496    | Armcx6       | 333.97 | 329.27  | 334.33 | 332.2  | 381.4 | 348.1 | 352.6 | 327.02  |
| 300015    | Them6        | 3852   | 3837    | 3464   | 3381   | 3997  | 3561  | 3810  | 4033    |
| 305251    | Rassf6       | 44.08  | 32.14   | 32.21  | 40.13  | 41.94 | 42.36 | 33.1  | 40.03   |
| 300768    | Coro2b       | 4161   | 4457    | 3971   | 4762   | 4582  | 4840  | 4558  | 4407    |
| 296390    | Ube2v1       | 4090.4 | 4066.15 | 3717.6 | 3995.9 | 4378  | 4521  | 3893  | 4025.82 |
| 309446    | Hps6         | 367    | 382     | 388    | 387    | 426   | 417   | 391   | 381     |
| 65164     | Htra1        | 6460   | 6565    | 6224   | 5600   | 6320  | 6648  | 6507  | 6858    |
| 301382    | Ercc5        | 271.63 | 251.13  | 239.87 | 246.45 | 280.7 | 226.8 | 304   | 257.91  |

|           |              |        |         |        |        |       |       |       |          |
|-----------|--------------|--------|---------|--------|--------|-------|-------|-------|----------|
| 498728    | Elov12       | 3606   | 3454    | 2959   | 3489   | 3664  | 3301  | 3841  | 3510     |
| 64015     | Khdrbs3      | 648    | 609     | 606    | 611    | 660   | 634   | 660   | 668      |
| 114022    | Glrx2        | 1195   | 1068.96 | 1017.6 | 1053.7 | 1119  | 982.3 | 1193  | 1300.92  |
| 100362940 | Snx21        | 1373.6 | 1299.86 | 1221.5 | 1131.6 | 1329  | 1412  | 1275  | 1311.31  |
| 362377    | Herc3        | 2693   | 2633    | 2531   | 2816   | 2863  | 2762  | 2999  | 2688     |
| 25650     | Atp1b1       | 20344  | 19598.6 | 16996  | 19746  | 19668 | 21355 | 21528 | 18726.96 |
| 100909732 | LOC100909732 | 42.28  | 51.95   | 35.18  | 43.53  | 48.65 | 38.64 | 40.67 | 55.34    |
| 300147    | Sbf1         | 2863   | 2871    | 2886   | 2728   | 3008  | 2988  | 3032  | 3000     |
| 292023    | Aars         | 4773   | 5421    | 5103   | 5585   | 5619  | 6000  | 5338  | 5177     |
| 65046     | Ap2s1        | 2520   | 2390    | 2210   | 1999   | 2414  | 2402  | 2379  | 2471     |
| 25311     | Dcc          | 55     | 43      | 35     | 67     | 47    | 38    | 70    | 57       |
| 683404    | LOC683404    | 12     | 12      | 16     | 10     | 17    | 4     | 12    | 20       |
| 64350     | Itgad        | 0      | 8.35    | 11.26  | 1.05   | 6.19  | 9.07  | 5.6   | 1.04     |
| 102557590 | LOC102557590 | 28.03  | 11.79   | 19.89  | 34.21  | 21.06 | 36.08 | 14.98 | 27.44    |
| 24439     | Hagh         | 1194   | 1201    | 1123   | 1009   | 1181  | 1197  | 1219  | 1202     |
| 315546    | Kirrel3      | 860.45 | 1050.46 | 960.54 | 1014.6 | 1093  | 984.5 | 1034  | 1008.07  |
| 315500    | Eepd1        | 1840   | 1851    | 1960   | 1902   | 2085  | 2000  | 2006  | 1916     |
| 315159    | Tob2         | 361    | 316     | 330    | 289    | 326   | 383   | 349   | 316      |
| 83529     | Vdac1        | 5313   | 5417    | 4775   | 5131   | 5590  | 5501  | 5475  | 5312     |
| 296469    | Nkain4       | 194    | 164     | 136    | 153    | 172   | 149   | 184   | 181      |
| 171549    | Klc3         | 27.11  | 18.18   | 19.01  | 14.83  | 24.33 | 16.19 | 18.54 | 24.84    |
| 58856     | Ddx25        | 587    | 554     | 491    | 522    | 568   | 521   | 573   | 622      |
| 681996    | Ahsa1        | 2622   | 2624    | 2415   | 2527   | 2574  | 2740  | 2814  | 2675     |
| 170898    | Tmlhe        | 133    | 154     | 131    | 112    | 126   | 131   | 145   | 160      |
| 65984     | Aacs         | 1614   | 1763    | 1613   | 1635   | 1804  | 1701  | 1707  | 1813     |
| 29710     | Scn8a        | 2004.6 | 2115.45 | 1897.5 | 2841.4 | 2678  | 2192  | 2425  | 2098.38  |
| 310687    | Prcc         | 760    | 864     | 844    | 833    | 869   | 905   | 864   | 863      |
| 288750    | Tmem132d     | 9      | 10      | 7      | 7      | 11    | 7     | 9     | 8        |
| 366013    | Coq4         | 123    | 124     | 111    | 104    | 118   | 119   | 117   | 136      |
| 690079    | Tex38        | 11     | 9       | 8      | 5      | 9     | 13    | 5     | 8        |
| 314678    | Fhl4         | 28     | 37      | 20     | 30.97  | 33    | 24    | 30    | 36       |
| 114503    | Pou4f1       | 2894.4 | 2906.41 | 2982.4 | 3199.5 | 3336  | 3260  | 3155  | 2959.59  |
| 362825    | Hmg20b       | 451    | 412     | 443    | 391    | 470   | 441   | 464   | 425      |
| 102555079 | Poln         | 51     | 39      | 66     | 42     | 50    | 58    | 56    | 46.04    |
| 25240     | Aqp1         | 1638   | 1820    | 2158   | 1667   | 1849  | 1749  | 1952  | 2176     |
| 29430     | Hap1         | 156    | 153     | 154    | 178    | 157   | 160   | 181   | 182      |
| 297076    | Gimap6       | 26     | 31      | 34     | 24     | 34    | 38    | 21    | 29       |
| 361705    | Cnih2        | 358    | 364     | 292    | 299    | 368   | 358   | 315   | 352      |
| 362242    | Snta1        | 737    | 815     | 741    | 611    | 696   | 875   | 692   | 818      |
| 297099    | Hoxa9        | 198.67 | 219.33  | 191.33 | 160.19 | 206   | 207   | 202.7 | 200.77   |
| 365372    | Tbc1d10b     | 1724.3 | 1763.69 | 1878.8 | 1671   | 1951  | 1898  | 1904  | 1713.36  |
| 103694905 | LOC103694905 | 95.5   | 92.5    | 153    | 98.5   | 173   | 127.3 | 89    | 77       |
| 363252    | Retreg2      | 2167   | 2147    | 2053   | 2069   | 2281  | 2236  | 2243  | 2191     |
| 293705    | Otub1        | 2122   | 2149    | 2073   | 1996   | 2374  | 2307  | 2092  | 2077     |
| 361196    | Habp4        | 2256   | 2270    | 1994   | 2112   | 2201  | 2273  | 2268  | 2418     |
| 295338    | Ptpn22       | 13     | 11      | 14     | 11     | 14    | 15    | 10    | 13       |
| 296200    | Mgme1        | 47     | 45      | 54     | 50     | 43    | 50    | 65    | 50       |
| 309871    | Prdml        | 27     | 22      | 20     | 29     | 37    | 31    | 14    | 22       |
| 314264    | Rdh12        | 13     | 11      | 14     | 11     | 8     | 16    | 16    | 12       |
| 499205    | Fam181b      | 218    | 232     | 214    | 185    | 225   | 221   | 201   | 254      |
| 360509    | Dock2        | 218.86 | 253.74  | 264.71 | 245.72 | 277.3 | 232.8 | 233.2 | 299.97   |
| 140722    | Caskin1      | 3943   | 4142    | 3809   | 4268   | 4549  | 4436  | 4306  | 3861     |
| 362378    | Fam13a       | 443    | 423     | 336    | 445    | 418   | 498   | 408   | 424      |
| 295323    | Trim45       | 113    | 162     | 75     | 139    | 96    | 159   | 157   | 107      |
| 299643    | Ndufa7       | 895    | 769     | 750    | 682    | 843   | 744   | 759   | 940      |
| 361064    | R3hcc1       | 558    | 554     | 577    | 543    | 649   | 599   | 564   | 557      |

|           |              |        |         |        |        |       |       |       |         |
|-----------|--------------|--------|---------|--------|--------|-------|-------|-------|---------|
| 312511    | RGD1306746   | 312    | 298     | 299    | 264    | 326   | 322   | 319   | 278     |
| 299611    | Apc2         | 3419   | 3934.82 | 3456   | 4112   | 4314  | 4004  | 3809  | 3711    |
| 64536     | Esm1         | 99.79  | 76.62   | 79.94  | 106.42 | 83.56 | 89.39 | 108.7 | 103.43  |
| 302552    | Tbc1d25      | 315.05 | 359.14  | 313.38 | 350.53 | 328.8 | 371.4 | 371.1 | 348.97  |
| 685890    | Srrm3        | 705    | 673     | 646    | 775    | 788   | 763   | 718   | 702     |
| 313771    | Cptp         | 1148   | 1195    | 1036   | 1030   | 1160  | 1170  | 1176  | 1174    |
| 363646    | Eral1        | 412    | 401     | 353    | 428    | 394   | 417   | 443   | 438     |
| 306570    | Ank1         | 4453   | 4533    | 4614   | 5321   | 5621  | 4946  | 4947  | 4571    |
| 25400     | Camk2a       | 706    | 651     | 616    | 578    | 803   | 685   | 615   | 605     |
| 64158     | Tubala       | 83807  | 85457.1 | 81140  | 79914  | 88252 | 89660 | 84345 | 88401.5 |
| 117024    | Crym         | 309    | 275     | 235    | 236    | 280   | 290   | 263   | 287     |
| 315286    | Tmem106c     | 319    | 307     | 298    | 293    | 294   | 304   | 330   | 364     |
| 498295    | Smyd3        | 141    | 148     | 116    | 114    | 127   | 131   | 132   | 161     |
| 306542    | Brf2         | 169.31 | 166.32  | 180.89 | 165.53 | 173.7 | 191.4 | 178   | 181.02  |
| 686505    | Atg4d        | 526.38 | 519.27  | 495.03 | 467.46 | 547.4 | 518.7 | 506.8 | 559.07  |
| 306332    | Aplm1        | 1843   | 1964    | 1893   | 1819   | 2061  | 2056  | 2015  | 1851    |
| 494223    | Fbxl16       | 2012.7 | 2135.27 | 1882   | 2174.5 | 2388  | 2231  | 2039  | 2052.61 |
| 287653    | Lrrc46       | 64     | 72      | 74     | 65     | 93    | 71    | 63    | 65      |
| 312863    | Ccdc91       | 725    | 785     | 659.1  | 703.62 | 717   | 745.5 | 777.9 | 810     |
| 364534    | Ssbp4        | 705    | 679     | 735    | 662    | 769   | 754   | 740   | 690     |
| 316256    | Tnfrsf21     | 5570.9 | 5698.56 | 5573.1 | 6015.9 | 6247  | 6447  | 6204  | 5374.72 |
| 58953     | Sult4a1      | 10938  | 10752   | 10000  | 9767   | 11255 | 10957 | 10996 | 10814   |
| 361682    | Tssc4        | 388    | 431     | 443    | 338    | 391   | 432   | 430   | 446     |
| 84408     | Cdh8         | 179    | 185     | 151    | 131.06 | 169   | 157   | 179   | 181     |
| 306771    | Tspan17      | 6559.9 | 6141.97 | 5946   | 4873.4 | 6123  | 6327  | 5937  | 6591    |
| 367562    | Gaa          | 2617   | 2782    | 2411   | 2896   | 2785  | 3257  | 2544  | 2783    |
| 499420    | Prmt2        | 1051   | 994     | 997    | 976    | 1100  | 1054  | 1041  | 1072    |
| 317366    | Pim2         | 306    | 375     | 325    | 317    | 348   | 369   | 341   | 347     |
| 304775    | Dyrk3        | 50     | 67      | 68     | 73     | 74    | 74    | 70    | 56      |
| 678743    | Tl11         | 299.97 | 300.66  | 258.35 | 344.5  | 271.5 | 378.8 | 336.9 | 290.83  |
| 310674    | Plekh01      | 1183   | 1174    | 1106   | 1100   | 1229  | 1214  | 1205  | 1198    |
| 171553    | A3galt2      | 2456   | 2391    | 2384   | 2263   | 2625  | 2492  | 2389  | 2577    |
| 287433    | Fxr2         | 3222   | 3186    | 3074   | 3246   | 3357  | 3493  | 3452  | 3216    |
| 294436    | Rpf2         | 337    | 291     | 267    | 279    | 286   | 294   | 330   | 337     |
| 300666    | C2cd21       | 1736   | 1819    | 1805   | 1780   | 2001  | 2009  | 1793  | 1781    |
| 192360    | Eml2         | 2205   | 2100    | 2073   | 1964   | 2365  | 2254  | 2203  | 2039    |
| 29256     | Oprl1        | 655    | 694     | 579    | 707    | 727   | 729   | 714   | 629     |
| 85497     | Klf15        | 384    | 314     | 300    | 287    | 317   | 393   | 382   | 273     |
| 29460     | Tesk1        | 924.46 | 851.39  | 869.92 | 867.13 | 929.3 | 1091  | 846.2 | 864.74  |
| 79123     | Asic1        | 3717.8 | 3860.13 | 3529.8 | 3830.2 | 4178  | 4087  | 3835  | 3767.99 |
| 287525    | Smyd4        | 118.65 | 130.66  | 117.9  | 108.1  | 115.1 | 116.1 | 139.4 | 134.33  |
| 691278    | Triap1       | 343    | 329     | 293    | 299    | 348   | 288   | 353.3 | 353.49  |
| 24472     | Hspala       | 15.01  | 48.78   | 68.74  | 51.56  | 60.02 | 60.02 | 41.51 | 34.02   |
| 306324    | Tspan14      | 602    | 531     | 588    | 556    | 586   | 597   | 585   | 651     |
| 313667    | Plekhm2      | 1207   | 1355    | 1275   | 1290   | 1420  | 1383  | 1367  | 1277    |
| 103690002 | LOC103690002 | 48.85  | 48.85   | 61.06  | 36.64  | 73.28 | 12.21 | 61.06 | 61.06   |
| 108353263 | LOC108353263 | 4      | 9       | 1      | 2      | 1     | 3     | 6     | 7       |
| 311861    | Fibcd1       | 3      | 8       | 3      | 2      | 7     | 5     | 3     | 2       |
| 500640    | Ccdc711      | 309    | 258     | 261    | 275    | 310   | 292   | 282   | 288     |
| 100362027 | LOC100362027 | 614.14 | 660.08  | 20.6   | 543.3  | 607.6 | 1302  | 19.38 | 24.09   |
| 171142    | Ehhadh       | 159.29 | 200.93  | 158    | 156.13 | 179.1 | 213.4 | 135.4 | 188.74  |
| 688736    | Kiaa08951    | 1962.4 | 1766.71 | 1797.2 | 1633.5 | 1950  | 1869  | 1902  | 1886.87 |
| 361945    | Postn        | 82     | 113     | 184    | 132    | 96    | 275   | 77    | 95      |
| 287453    | Rnasek       | 2619   | 2445    | 2444   | 2245   | 2667  | 2447  | 2553  | 2697    |
| 85492     | Psbm7        | 4255   | 3899    | 3676   | 3412   | 3794  | 3884  | 3958  | 4561    |
| 25451     | Gabrb2       | 231.58 | 205.64  | 260.17 | 299.07 | 236.4 | 248.9 | 291.8 | 281.76  |



|           |              |        |         |        |        |       |       |       |         |
|-----------|--------------|--------|---------|--------|--------|-------|-------|-------|---------|
| 360551    | Bcl6b        | 89     | 75      | 73     | 66     | 60    | 69    | 137   | 56      |
| 365960    | Gipc2        | 80     | 80      | 73     | 70     | 72    | 74    | 88    | 88      |
| 298575    | Pink1        | 1525   | 1695    | 1479   | 1644   | 1663  | 1790  | 1557  | 1731    |
| 64119     | Kcnk12       | 200    | 184     | 151    | 182    | 244   | 182   | 173   | 163     |
| 501146    | Stradb       | 509    | 519.95  | 473.95 | 483    | 537   | 511   | 557   | 505.84  |
| 300289    | Amot         | 387    | 324     | 336    | 431    | 461   | 381   | 392   | 337     |
| 59109     | Ntrk1        | 4353   | 4725    | 4837   | 4264   | 5263  | 4996  | 4927  | 4137    |
| 363285    | Scly         | 199    | 212     | 207    | 208    | 208   | 220   | 231   | 219     |
| 171447    | Adgrl2       | 544    | 550     | 529    | 663    | 584   | 657   | 676   | 513     |
| 24806     | Tac1         | 4975   | 4545    | 4425   | 3484   | 4541  | 4239  | 4434  | 5313    |
| 685088    | She          | 477.96 | 521.88  | 539.22 | 541.73 | 534.3 | 563.4 | 625   | 489.23  |
| 287637    | Samd14       | 1497   | 1626    | 1507   | 1637   | 1785  | 1665  | 1513  | 1699    |
| 366848    | Kank3        | 197    | 156     | 138    | 143    | 174   | 177   | 168   | 155     |
| 25302     | Chrna7       | 1362   | 1400.29 | 1360.1 | 1405.9 | 1805  | 1315  | 1473  | 1284.04 |
| 296470    | Pdpdf        | 1871   | 1738    | 1524   | 1585   | 1761  | 1772  | 1709  | 1900    |
| 288525    | Dhrsx        | 456    | 366     | 392    | 337    | 431   | 393   | 385   | 440     |
| 316205    | Lrfn2        | 106    | 108     | 130    | 115    | 140   | 111   | 124   | 113     |
| 315073    | Jrk          | 269    | 277     | 247    | 283    | 300   | 289   | 304   | 251     |
| 83708     | Mybph        | 628    | 551     | 599    | 595    | 646   | 664   | 628   | 585     |
| 366333    | Faxc         | 199    | 159     | 146    | 192    | 220   | 162   | 181   | 177     |
| 684259    | Rusc2        | 2419.8 | 2639.93 | 2632.9 | 2903.9 | 2889  | 2997  | 2742  | 2638.91 |
| 290228    | Ipo4         | 1658   | 1771    | 1902   | 1904   | 1994  | 2055  | 1883  | 1761    |
| 313045    | Trim62       | 721    | 733     | 719    | 828    | 815   | 806   | 786   | 784     |
| 307907    | RGD1304884   | 7391.5 | 7663.01 | 7171.9 | 7621.6 | 8221  | 8225  | 7983  | 7308.88 |
| 290925    | Coprs        | 387    | 387     | 384    | 326    | 398   | 374   | 375   | 431     |
| 171061    | Mrpl17       | 2407   | 2323    | 2030   | 1931   | 2210  | 2272  | 2314  | 2446    |
| 362975    | Cdpf1        | 105    | 81      | 84     | 77     | 86    | 92    | 98    | 93      |
| 309139    | Tpcn2        | 371    | 431     | 437    | 400    | 434   | 453   | 507   | 349     |
| 309170    | Fam89b       | 2069   | 2170    | 2189   | 2031   | 2381  | 2368  | 2165  | 2082    |
| 65036     | Bche         | 75     | 81      | 75     | 147    | 115   | 96    | 105   | 86      |
| 300443    | Plppr2       | 992    | 1001    | 979    | 1012   | 1083  | 1087  | 1051  | 1016    |
| 301240    | Mrpl2        | 278    | 241     | 249    | 239    | 282   | 285   | 251   | 253     |
| 289094    | Hmcn1        | 180    | 165     | 186    | 271    | 228   | 162   | 239   | 224     |
| 300748    | Stoml1       | 1464   | 1574    | 1439   | 1388   | 1590  | 1518  | 1588  | 1542    |
| 690961    | Cog2         | 565.08 | 563.39  | 517.58 | 525.57 | 550.8 | 529.3 | 649.1 | 580.68  |
| 361623    | Trim66       | 72.46  | 73.26   | 88.06  | 90.89  | 106.6 | 87.66 | 77.86 | 73.19   |
| 58842     | Preb         | 1628.2 | 1617.12 | 1494.1 | 1569.7 | 1752  | 1687  | 1663  | 1609.11 |
| 360520    | Tbcd9b       | 4177   | 4303.41 | 4432.2 | 4478.6 | 5038  | 4939  | 4294  | 4228.56 |
| 296161    | Ubox5        | 458.77 | 411.8   | 470.87 | 412.72 | 487.6 | 453.5 | 470.4 | 454.45  |
| 56782     | Srgn         | 384.28 | 259.96  | 359.93 | 262.5  | 354.7 | 305.5 | 389.4 | 297.89  |
| 192213    | Rasgrf1      | 225    | 243     | 167    | 274    | 250   | 257   | 206   | 254     |
| 64457     | Ndrq4        | 37305  | 37797   | 32149  | 36158  | 38438 | 38923 | 38573 | 36626   |
| 361396    | Ranbp10      | 959    | 966     | 925    | 925.98 | 1072  | 1048  | 970   | 926.98  |
| 291325    | St8sia6      | 27     | 23      | 26     | 18     | 18    | 23    | 32    | 27      |
| 365985    | LOC365985    | 1813   | 1497    | 1478   | 1368   | 1793  | 1687  | 1577  | 1492    |
| 100188937 | Cox7c        | 2066   | 1782    | 1716   | 1563   | 1713  | 1745  | 1952  | 2172    |
| 25282     | Cox6a1       | 7127   | 6484    | 6028   | 5334   | 6628  | 6364  | 6484  | 7092    |
| 288545    | RGD1305455   | 1638   | 1721    | 1609   | 1730   | 1835  | 1846  | 1764  | 1681    |
| 364855    | Pou4f3       | 478    | 531     | 553    | 519    | 537   | 590   | 563   | 524     |
| 170673    | Palm         | 2918   | 2937    | 2929   | 2893   | 3111  | 3187  | 2936  | 3190    |
| 293684    | Scyl1        | 1513.4 | 1438.83 | 1466.8 | 1501.6 | 1605  | 1667  | 1507  | 1520.18 |
| 102551408 | LOC102551408 | 36.85  | 24.85   | 31.39  | 23.08  | 25.17 | 28.22 | 39.86 | 30.36   |
| 24407     | Grik5        | 683    | 663     | 738    | 617    | 739   | 771   | 675   | 689     |
| 304971    | Tomm401      | 1195.1 | 1003.45 | 1097.1 | 1083.2 | 1180  | 1157  | 1123  | 1200.12 |
| 25558     | Stxbp1       | 15399  | 16671   | 14762  | 17911  | 17963 | 18297 | 16705 | 15926   |
| 103691871 | LOC103691871 | 20     | 18      | 15     | 25     | 17    | 19    | 21    | 26      |

|           |              |        |         |        |        |       |       |       |         |
|-----------|--------------|--------|---------|--------|--------|-------|-------|-------|---------|
| 102555469 | LOC102555469 | 99.81  | 79.64   | 99.29  | 83.48  | 111.3 | 86.29 | 100.8 | 87.05   |
| 681944    | Mpnd         | 728    | 708     | 676    | 614    | 730   | 713   | 736   | 722     |
| 312936    | Sox17        | 323.64 | 269.9   | 328.09 | 265.43 | 305.2 | 335.5 | 374.2 | 248.49  |
| 360575    | Ankrd13b     | 906.43 | 852.42  | 894.86 | 821    | 970.8 | 952.8 | 906.4 | 867.98  |
| 84468     | Chst3        | 423.34 | 429.54  | 472.05 | 435.38 | 484.7 | 465.1 | 502.8 | 420.96  |
| 688292    | Card14       | 35     | 48      | 58     | 30     | 51    | 34    | 55    | 42      |
| 60355     | Nsf          | 6781   | 7629    | 5835   | 7894   | 7707  | 8446  | 7213  | 6584    |
| 308763    | Gdpgp1       | 160.5  | 152.11  | 135.21 | 137    | 150   | 191.2 | 135.4 | 145.92  |
| 309112    | Cracr2b      | 74.88  | 67.19   | 70.77  | 66.43  | 91.28 | 73.27 | 66.68 | 66.03   |
| 293719    | Ubxn1        | 1895   | 1976    | 1815   | 1700   | 2040  | 1971  | 1853  | 1998    |
| 294324    | Agpat3       | 3358.8 | 3127.79 | 3105.5 | 3522.3 | 3792  | 3731  | 3266  | 3170.92 |
| 306622    | Erich1       | 207    | 202     | 161    | 190    | 205   | 187   | 206   | 211     |
| 24577     | Myc          | 179    | 171     | 225    | 216    | 185   | 227   | 237   | 193     |
| 171109    | Dusp5        | 182    | 230     | 164    | 277    | 207   | 254   | 230   | 217     |
| 103691267 | LOC103691267 | 988    | 1040    | 1019   | 1013   | 1077  | 1187  | 1026  | 1032    |
| 292886    | Tbc1d17      | 637    | 657     | 638    | 655    | 664   | 702   | 675   | 713     |
| 65169     | Scamp3       | 1643   | 1695    | 1620   | 1796   | 1851  | 1843  | 1757  | 1739    |
| 29639     | Fxyd2        | 5234   | 5043    | 4491   | 4105   | 5477  | 4826  | 4513  | 5276    |
| 266976    | Rims4        | 165.24 | 185.52  | 223.28 | 229.85 | 213.9 | 235.3 | 184.3 | 222.44  |
| 309105    | B4galnt4     | 428    | 422     | 401    | 436    | 484   | 432   | 433   | 447     |
| 305349    | Wdr19        | 338    | 343     | 303    | 424    | 415   | 351   | 365   | 368     |
| 364845    | Pcdhgb8      | 272.03 | 294.03  | 231.62 | 277.75 | 288.3 | 310.1 | 284.6 | 261.99  |
| 65179     | Ppp5c        | 1870   | 1814    | 1733   | 1721   | 1869  | 2009  | 1954  | 1768    |
| 100362315 | LOC100362315 | 156    | 149     | 150    | 163    | 169   | 173   | 145   | 171     |
| 64665     | Flot1        | 3937   | 4041    | 3860   | 3270   | 4107  | 4139  | 3724  | 4116    |
| 64862     | Map11c3b     | 12006  | 11751   | 11287  | 10923  | 12277 | 12519 | 12043 | 12104   |
| 305880    | Lrp10        | 2120   | 2229    | 2318   | 2322   | 2232  | 2680  | 2326  | 2333    |
| 360843    | Etnk2        | 36     | 43      | 28     | 32     | 35    | 29    | 42    | 42      |
| 360569    | Mrm3         | 177    | 166     | 147    | 143    | 152   | 173   | 162   | 187     |
| 366478    | Pigv         | 211.1  | 178.52  | 164    | 193.06 | 204   | 191   | 172   | 228.07  |
| 300799    | Dapk2        | 118.8  | 112.78  | 132.07 | 129.07 | 140.6 | 118.6 | 137.3 | 128.21  |
| 64107     | Npffr1       | 61.24  | 51.25   | 56.82  | 46.37  | 60.43 | 62.96 | 49.41 | 56.87   |
| 291661    | Tmco6        | 231.25 | 206.08  | 196.08 | 178.19 | 229.4 | 195.3 | 222.3 | 217.33  |
| 116691    | Cyth1        | 620    | 613     | 574    | 535    | 638   | 608   | 655   | 593     |
| 292683    | Sympk        | 2016   | 2144    | 2131   | 2136   | 2350  | 2414  | 2126  | 2084    |
| 363138    | Nprl2        | 425    | 386     | 410    | 381    | 452   | 413   | 415   | 426     |
| 362873    | Plxnc1       | 1816   | 1753    | 1662   | 1374   | 1822  | 1196  | 1963  | 2053    |
| 306349    | Tmem591      | 2675   | 2651    | 2404   | 2890   | 2802  | 3031  | 2894  | 2583    |
| 289716    | Ccdc96       | 62.78  | 71.29   | 70.16  | 49.08  | 58.11 | 62.35 | 82    | 67.31   |
| 685691    | Eid2         | 516    | 477     | 523    | 514    | 615   | 506   | 527   | 514     |
| 305457    | Letm1        | 1071   | 1081    | 1072   | 1005   | 1230  | 1107  | 1117  | 1050    |
| 308453    | Coq8b        | 407    | 464     | 476    | 375    | 471   | 476   | 442   | 445     |
| 500540    | Slfnl1       | 33     | 27      | 33     | 30     | 32    | 32    | 34    | 33      |
| 363133    | Pcbp4        | 5631   | 5689    | 5717   | 5085   | 6045  | 6054  | 5625  | 5837    |
| 501181    | Efhd1        | 213.99 | 234     | 239    | 194    | 234   | 219   | 263.3 | 221.99  |
| 83506     | Camkk2       | 158    | 194     | 148    | 161    | 198   | 188   | 164   | 154     |
| 680624    | LOC680624    | 0      | 1.76    | 3.09   | 5.91   | 0     | 3.06  | 4.02  | 4.38    |
| 300664    | Abcg4        | 1083.4 | 1157    | 1109.3 | 1148.9 | 1220  | 1293  | 1208  | 1069.83 |
| 245977    | Adgrf5       | 830.6  | 817.76  | 773.68 | 725.84 | 884.1 | 856.2 | 840.8 | 771.68  |
| 791259    | Car14        | 85     | 85      | 59     | 78     | 89    | 90    | 79    | 69      |
| 316916    | Clptm11      | 1880   | 1996    | 1892   | 1845   | 1981  | 2024  | 2044  | 2060    |
| 360753    | Pnpla6       | 1194   | 1239    | 1192   | 1285   | 1348  | 1357  | 1263  | 1262    |
| 499125    | Sdhaf1       | 563.5  | 554.25  | 564.75 | 476.75 | 556.5 | 559.8 | 608.5 | 575.25  |
| 100137086 | Jmjd7        | 28     | 46      | 36     | 28     | 41    | 34    | 43    | 29      |
| 367160    | Cpne4        | 2043   | 2274    | 1989   | 2431   | 2317  | 2411  | 2417  | 2162    |
| 295691    | Frzb         | 111    | 97      | 101    | 120    | 120   | 94    | 107   | 136     |

|           |              |        |         |        |        |       |       |       |         |
|-----------|--------------|--------|---------|--------|--------|-------|-------|-------|---------|
| 25073     | Scarb1       | 790    | 709     | 725    | 717    | 865   | 776   | 765   | 727     |
| 114636    | Zyx          | 1141.8 | 1235.97 | 1288.8 | 1473.9 | 1281  | 1471  | 1483  | 1241.88 |
| 100910536 | Elf2         | 114    | 101     | 107    | 152    | 136   | 137   | 131   | 101     |
| 686432    | Ly6l         | 36     | 17      | 31     | 23     | 20    | 39    | 29    | 26      |
| 312634    | Mtmr14       | 615    | 591     | 529    | 557    | 661   | 629   | 552   | 600     |
| 305830    | Fbxo34       | 695    | 757     | 667    | 706    | 741   | 763   | 763   | 743     |
| 500087    | Fmc1         | 248.96 | 233.95  | 230.27 | 217.35 | 234.7 | 244.1 | 248.2 | 264.51  |
| 681820    | Erich5       | 17.94  | 15.29   | 12.83  | 13.49  | 21.45 | 7.77  | 9.45  | 24.78   |
| 682102    | LOC682102    | 25     | 36      | 39     | 22     | 29    | 34    | 36    | 31      |
| 83633     | Gabbr2       | 4412.6 | 4661.72 | 4456.6 | 4981   | 5330  | 5088  | 4703  | 4604.84 |
| 298700    | Eif3g        | 1594   | 1487    | 1295   | 1280   | 1529  | 1526  | 1505  | 1467    |
| 313262    | Pappal       | 146    | 122     | 193    | 179    | 196   | 160   | 188   | 138     |
| 29457     | Map6         | 3509   | 3885    | 4023   | 4001   | 4232  | 4577  | 3903  | 3718    |
| 500153    | Ccser1       | 72.45  | 51      | 55.47  | 74     | 75    | 60.53 | 62    | 72      |
| 305581    | Pex13        | 325.61 | 352     | 314    | 303    | 332.7 | 370   | 341   | 336     |
| 298381    | Echdc2       | 37     | 33      | 38     | 29     | 31    | 46    | 34    | 35      |
| 300993    | Hyal3        | 238.19 | 299.04  | 277.08 | 246.84 | 274.6 | 272.6 | 299   | 284.68  |
| 304318    | Iqce         | 444    | 426     | 402    | 417    | 460   | 450   | 476   | 414     |
| 305475    | Osbp2        | 627    | 639     | 567    | 647    | 623   | 682   | 652   | 686     |
| 362440    | Ndufa9       | 2080   | 1943    | 1754   | 1769   | 1880  | 2070  | 2060  | 2032    |
| 361286    | Msrb2        | 453    | 441     | 340    | 333    | 409   | 405   | 435   | 421     |
| 362087    | Ubac1        | 1236   | 1197    | 1232   | 1094   | 1289  | 1284  | 1268  | 1231    |
| 316507    | Shd          | 440    | 385     | 345    | 396    | 429   | 422   | 402   | 416     |
| 316273    | Mcm3         | 79     | 71      | 91     | 63     | 83    | 91    | 84    | 66      |
| 314648    | Ncln         | 1324   | 1330    | 1391   | 1332   | 1500  | 1472  | 1413  | 1346    |
| 314639    | Zfr2         | 477    | 477     | 429    | 500    | 537   | 546   | 455   | 469     |
| 361694    | Pitpnml      | 1212   | 1205.57 | 1068.7 | 1230.9 | 1271  | 1305  | 1235  | 1216.46 |
| 498709    | Cks2         | 15     | 24      | 30     | 22     | 16    | 34    | 21    | 26      |
| 292787    | Lin37        | 280    | 306     | 273    | 248    | 312   | 287   | 299   | 282     |
| 501403    | Cbx4         | 316    | 361     | 294.93 | 318.93 | 366   | 359   | 324   | 327     |
| 290652    | Fkbp8        | 5082   | 4988    | 5207   | 4693   | 5363  | 5379  | 5205  | 5341    |
| 313783    | Olfm2        | 296    | 272     | 249    | 304    | 259   | 324   | 330   | 282     |
| 679907    | Pam16        | 474    | 485     | 433    | 395    | 515   | 458   | 439   | 493     |
| 103694097 | Pgbd1        | 47.69  | 50.1    | 35.47  | 50.12  | 59.93 | 47.69 | 54.18 | 33.69   |
| 499171    | Klf13        | 82     | 107     | 134    | 116    | 147   | 131   | 111   | 79      |
| 361495    | Usp29        | 269.54 | 242.58  | 157.87 | 190.91 | 171.5 | 202.1 | 297.3 | 246.96  |
| 498662    | Tdrp         | 997    | 890     | 808    | 828    | 968   | 904   | 934   | 950     |
| 29443     | Ahcy         | 933    | 942     | 977    | 912    | 941   | 1045  | 1009  | 1018    |
| 171572    | Tt1          | 7464   | 7573    | 7437   | 7876   | 8748  | 7689  | 8424  | 7498    |
| 108349535 | LOC108349535 | 2.95   | 1.43    | 2.87   | 0      | 1.27  | 1.03  | 2.46  | 2.97    |
| 303698    | Pgs1         | 1651.5 | 1726.59 | 1532.4 | 1472.6 | 1759  | 1754  | 1643  | 1650.34 |
| 300036    | Tsta3        | 507    | 528     | 430    | 452    | 494   | 535   | 482   | 533     |
| 100911825 | LOC100911825 | 25.09  | 15.56   | 52.6   | 41.37  | 11.91 | 23.85 | 66.56 | 41.22   |
| 301701    | Ndc80        | 55     | 39      | 60     | 42     | 55    | 55    | 58    | 41      |
| 688272    | Rnf157       | 7492.5 | 7416.59 | 6999.4 | 7830   | 8268  | 8233  | 7845  | 7365.99 |
| 303812    | Vwa5b2       | 1240.9 | 1314.46 | 1335.2 | 1315.7 | 1502  | 1491  | 1356  | 1203.36 |
| 100912141 | Tro          | 806    | 793     | 751    | 736    | 831   | 821   | 791   | 848     |
| 304667    | Rtbdn        | 68     | 77      | 71     | 70     | 88    | 73    | 68    | 76      |
| 25728     | Apoe         | 72357  | 66004   | 61949  | 62903  | 76092 | 68626 | 64907 | 71079   |
| 300989    | Hemk1        | 94     | 87      | 70     | 80     | 90    | 77    | 90    | 96      |
| 299857    | Shmt2        | 896    | 954     | 778    | 891    | 979   | 976   | 924   | 874     |
| 171041    | Klc1         | 32571  | 32486   | 29628  | 31428  | 34315 | 34035 | 33821 | 32334   |
| 304542    | Coq5         | 636    | 593     | 542    | 558    | 639   | 598   | 638   | 609     |
| 287645    | Snf8         | 936    | 850     | 806    | 695    | 816   | 910   | 899   | 881     |
| 117092    | Serpinb7     | 2      | 7       | 1      | 5      | 2     | 3     | 5     | 6       |
| 288909    | Nanos3       | 3      | 5       | 4      | 3      | 6     | 3     | 3     | 4       |

|           |              |        |         |        |        |       |       |       |         |
|-----------|--------------|--------|---------|--------|--------|-------|-------|-------|---------|
| 408246    | C1rl         | 23     | 31      | 34     | 17     | 29    | 26    | 36    | 21      |
| 291793    | Abhd3        | 792    | 692     | 607    | 696    | 656   | 773   | 814   | 730     |
| 140581    | Patj         | 2411   | 2490.09 | 2010.1 | 2541   | 2516  | 2595  | 2555  | 2417.04 |
| 363076    | Tipin        | 87.9   | 100.31  | 72.45  | 53.2   | 73.46 | 63.61 | 96    | 101.74  |
| 288743    | Sgsml        | 1407   | 1576    | 1317   | 1615   | 1600  | 1605  | 1479  | 1626    |
| 293649    | Lrp5         | 292    | 318     | 323    | 369    | 354   | 371   | 339   | 325     |
| 246310    | Arfgap1      | 777    | 798     | 721    | 652    | 804   | 779   | 810   | 752     |
| 316136    | Gpr108       | 754    | 772     | 731    | 780    | 797   | 845   | 816   | 782     |
| 305628    | Ccdc18       | 20     | 29      | 38     | 24     | 28    | 24    | 31.42 | 35      |
| 29422     | Chrne        | 224.04 | 354.59  | 282    | 306    | 273.2 | 284.1 | 347.3 | 340.06  |
| 360467    | Tvp23a       | 416.91 | 433.46  | 368.99 | 376.91 | 472.2 | 414   | 412.3 | 404.54  |
| 287635    | Mrpl27       | 471    | 449     | 408    | 376    | 453   | 451   | 445   | 469     |
| 29201     | Ctf1         | 76     | 67      | 75     | 66     | 81    | 75    | 67    | 80      |
| 308451    | Itpkc        | 162    | 170     | 177    | 163    | 181   | 177   | 187   | 172     |
| 364879    | Isoc1        | 665.82 | 928.61  | 928.61 | 573.82 | 940.6 | 803.2 | 972.6 | 587.82  |
| 684811    | Arhgef101    | 1714   | 1745    | 1670   | 1649   | 1881  | 1816  | 1746  | 1789    |
| 361219    | Fbxw17       | 271    | 278     | 259    | 222    | 295   | 279   | 291   | 234     |
| 689625    | Slc25a45     | 233    | 290     | 255    | 237    | 279   | 297   | 281   | 226     |
| 103690156 | LOC103690156 | 660.24 | 614.01  | 676.84 | 698.48 | 876.1 | 626.9 | 674.1 | 650.04  |
| 100360015 | Car10        | 1412.9 | 1421.45 | 1304.1 | 1347.9 | 1482  | 1571  | 1443  | 1357.73 |
| 314670    | RGD1564409   | 16.94  | 9.9     | 9.93   | 8.27   | 20.72 | 10.03 | 6.52  | 10.79   |
| 311021    | Nmi          | 152    | 145     | 113    | 97     | 106   | 131   | 151   | 153     |
| 367743    | Praf2        | 2857   | 2809    | 2735   | 2735   | 2865  | 3048  | 2991  | 2979    |
| 116457    | Mapk8ipl     | 12003  | 12167   | 10932  | 11638  | 12276 | 12829 | 12023 | 12749   |
| 287545    | Sarm1        | 1445   | 1477    | 1509   | 1633   | 1630  | 1586  | 1703  | 1552    |
| 103690005 | LOC103690005 | 1505.4 | 1448.09 | 1508.5 | 1213.7 | 1470  | 1495  | 1521  | 1570.81 |
| 501002    | Tmem266      | 39     | 31      | 24     | 40     | 41    | 39    | 34    | 29      |
| 362837    | Ndufs7       | 1247   | 1175    | 1041   | 1003   | 1265  | 1317  | 1031  | 1153    |
| 287273    | Nhp2         | 233.28 | 220.44  | 199.46 | 179    | 243.3 | 210   | 209.4 | 225.42  |
| 246767    | Cyp4x1       | 328    | 363     | 351    | 342    | 371   | 361   | 377   | 368     |
| 304785    | Slc45a3      | 61     | 65      | 60     | 52     | 65    | 62    | 56    | 71      |
| 114562    | Cdc37        | 2717   | 2750    | 2698   | 2631   | 3007  | 2955  | 2678  | 2882    |
| 100360664 | Rrp36        | 446.13 | 394.83  | 382.48 | 358.9  | 451.2 | 376.9 | 380.1 | 480.63  |
| 161475    | Psmd9        | 817.85 | 842.32  | 779.24 | 657.56 | 937   | 801.5 | 743.7 | 823.12  |
| 680036    | Msrb3        | 273    | 223.34  | 253.36 | 242    | 263   | 325   | 273.4 | 197     |
| 297337    | Rnf181       | 1532   | 1441    | 1398   | 1246   | 1463  | 1489  | 1493  | 1550    |
| 103690082 | LOC103690082 | 2029   | 1988    | 1873   | 1925   | 2052  | 2105  | 2205  | 1979    |
| 304479    | Mlxip        | 407    | 417     | 426    | 487    | 512   | 437   | 456   | 449     |
| 312275    | Ephb6        | 741    | 971     | 884    | 863    | 881   | 942   | 806   | 1063    |
| 360878    | Klhdc9       | 20.83  | 19.3    | 20.38  | 24.4   | 20.87 | 20.16 | 24.79 | 24.81   |
| 290877    | Tmem255b     | 233    | 220     | 202    | 176    | 235   | 242   | 180   | 230     |
| 315707    | Csk          | 2064   | 2293    | 2389   | 2273   | 2530  | 2515  | 2337  | 2245    |
| 689046    | Ccdc84       | 102    | 130     | 122    | 105    | 120   | 140   | 114   | 116     |
| 294251    | Ncr3         | 3.42   | 3.34    | 9      | 2.3    | 5     | 9     | 1.28  | 4       |
| 287556    | Rhbd13       | 319    | 258     | 223    | 325    | 285   | 321   | 289   | 306     |
| 94340     | Acs15        | 768    | 810     | 690    | 707    | 781   | 773   | 811   | 811     |
| 503000    | Ctnnbip1     | 785    | 810     | 797    | 775    | 844   | 873   | 847   | 817     |
| 25326     | Jak3         | 171    | 149     | 184    | 147    | 177   | 180   | 178   | 160     |
| 100360867 | Ypel1        | 234    | 238     | 216.29 | 196    | 239   | 237.9 | 206.1 | 261.05  |
| 114597    | Suclg1       | 2419   | 2328    | 2011   | 1941   | 2334  | 2231  | 2332  | 2390    |
| 361437    | Dbn1         | 291    | 283     | 275    | 245    | 297   | 307   | 261   | 303     |
| 366001    | Arrdc1       | 916    | 925     | 892    | 741    | 922   | 1011  | 927   | 849     |
| 362944    | Ppp1r16a     | 387    | 407     | 361    | 367    | 393   | 399   | 420   | 413     |
| 287199    | Nudcd2       | 188    | 222     | 207    | 151    | 168   | 203   | 205   | 244     |
| 366466    | Maneal       | 1173   | 1147.35 | 1084.9 | 1165.1 | 1265  | 1194  | 1231  | 1189.35 |
| 58934     | Pdcd2        | 272    | 277     | 274    | 225    | 267   | 283   | 257   | 312     |

|           |              |        |         |        |        |       |       |       |          |
|-----------|--------------|--------|---------|--------|--------|-------|-------|-------|----------|
| 361128    | Nr2c2ap      | 635.09 | 683.42  | 593.63 | 472.43 | 588.7 | 638.3 | 655.3 | 663.95   |
| 64304     | Acads        | 661    | 585     | 551    | 593    | 699   | 623   | 627   | 603      |
| 309376    | Zfyve27      | 2577.5 | 2739.53 | 2599.6 | 2614.5 | 3012  | 2706  | 2808  | 2719.28  |
| 312488    | Atp6v1b1     | 1      | 4       | 2.76   | 3.15   | 1.02  | 2.02  | 3.78  | 4.83     |
| 84355     | Atox1        | 902    | 797     | 840    | 645    | 869   | 806   | 853   | 872      |
| 362959    | Tmem184b     | 2422   | 2410    | 2456   | 2350   | 2486  | 2702  | 2661  | 2443     |
| 301254    | Aars2        | 297.65 | 308.45  | 270.99 | 272.98 | 289.6 | 367.4 | 298.4 | 272.79   |
| 64667     | Sgta         | 1896   | 1896    | 1873   | 1797   | 2029  | 2101  | 1872  | 1967     |
| 682812    | Dcaf12       | 630.62 | 609     | 653.56 | 576.74 | 704.7 | 624   | 672.6 | 636.46   |
| 100361126 | RGD2320734   | 192.29 | 158.36  | 149.72 | 132.88 | 156   | 161.4 | 171.4 | 187.51   |
| 314622    | Cbarp        | 1826   | 1752.11 | 1685.8 | 1597.8 | 1941  | 1924  | 1791  | 1672.65  |
| 29571     | Scn10a       | 10651  | 11204.3 | 11197  | 11215  | 13271 | 11557 | 10945 | 11503.43 |
| 679154    | Gareml       | 96     | 108     | 102    | 150    | 132   | 129   | 130   | 96       |
| 116560    | Kcnj9        | 63.37  | 56.62   | 81.64  | 72.88  | 78.98 | 78.68 | 65.25 | 70.27    |
| 296988    | Mkrl1        | 2151   | 2035    | 1985   | 1894   | 2192  | 2202  | 2162  | 2058     |
| 56769     | Ndufaf3      | 371    | 366     | 361    | 312    | 363   | 376   | 342   | 425      |
| 291960    | Hsf4         | 671    | 623     | 611    | 635    | 702   | 689   | 668   | 654      |
| 64391     | Dapk3        | 747    | 715     | 697    | 704    | 820   | 778   | 727   | 733      |
| 295956    | CommD9       | 605    | 513     | 479    | 472    | 524   | 587   | 546   | 553      |
| 311827    | Adamts12     | 90     | 88      | 65     | 65     | 68    | 77    | 79    | 105      |
| 100910811 | Tmem249      | 14     | 10      | 9      | 11     | 10    | 16    | 11    | 10       |
| 307644    | Kifc3        | 332    | 293     | 315    | 262.03 | 311   | 357   | 277   | 339      |
| 301008    | P4htm        | 1209   | 1247    | 1089   | 1058   | 1174  | 1302  | 1130  | 1311     |
| 292661    | Ptgir        | 394    | 429     | 435    | 471    | 520   | 410   | 432   | 485      |
| 300719    | Cib2         | 2139   | 2056    | 1914   | 1830   | 2252  | 2107  | 2007  | 2115     |
| 102554302 | LOC102554302 | 140    | 89.18   | 89.01  | 124    | 115   | 102   | 122.4 | 133      |
| 303565    | G6pc3        | 1467   | 1525    | 1459   | 1401   | 1453  | 1760  | 1501  | 1538     |
| 25648     | Slc7a1       | 1343.4 | 1398.88 | 1210   | 1502.2 | 1474  | 1413  | 1368  | 1572.77  |
| 501052    | Tusc2        | 2783   | 2663    | 2383   | 2315   | 2730  | 2700  | 2646  | 2762     |
| 306750    | Fbxl21       | 53.03  | 51.83   | 44     | 36.28  | 46.06 | 42    | 54.75 | 55       |
| 266975    | Sars         | 3647   | 3639    | 3396   | 3549   | 3875  | 3777  | 3881  | 3672     |
| 681708    | Tmem41a      | 778    | 773     | 816    | 785    | 929   | 835   | 805   | 799      |
| 246272    | Cant1        | 625    | 664     | 690    | 647    | 707   | 727   | 676   | 696      |
| 301249    | Mrpsl8a      | 814    | 822     | 695    | 718    | 819   | 810   | 786   | 843      |
| 303277    | Pigs         | 1029   | 1072    | 1085   | 1073   | 1155  | 1152  | 1132  | 1112     |
| 311617    | Fitm2        | 721.71 | 708.46  | 742.44 | 744.97 | 897.5 | 791.7 | 677.6 | 750.87   |
| 54133     | Pdlim1       | 863    | 794     | 871    | 869    | 909   | 951   | 926   | 844      |
| 301117    | Clpp         | 483    | 448     | 423    | 366    | 471   | 406   | 488   | 473      |
| 315463    | Timm29       | 1681.7 | 1546.68 | 1506   | 1536.9 | 1658  | 1596  | 1706  | 1740.69  |
| 100360692 | Pbld2        | 33.37  | 30.49   | 40.15  | 27.08  | 36.44 | 36.17 | 29.43 | 38.05    |
| 114505    | Klf4         | 178    | 150     | 204    | 225    | 204   | 253   | 237   | 115      |
| 300111    | Samm50       | 1190   | 1146    | 1064   | 1069   | 1161  | 1238  | 1214  | 1163     |
| 83527     | Dbn1         | 2080   | 2156    | 2064   | 2053   | 2202  | 2373  | 2099  | 2253     |
| 292878    | Emc10        | 1946   | 1998    | 1991   | 1908   | 2129  | 2158  | 2015  | 2080     |
| 192249    | Ehd3         | 7422   | 7541.95 | 7050.1 | 6613.6 | 8240  | 7474  | 7381  | 7503.01  |
| 64832     | Cplx1        | 19409  | 19417   | 16879  | 19009  | 20234 | 20154 | 20226 | 19244    |
| 100360417 | Rusc1        | 3719   | 3707    | 3490   | 3857   | 4101  | 4229  | 3667  | 3794     |
| 302915    | Pmm2         | 1137   | 1137    | 1100   | 1078   | 1124  | 1201  | 1173  | 1261     |
| 103693563 | LOC103693563 | 474.82 | 499.44  | 448.62 | 508.36 | 532.7 | 528.1 | 521.7 | 482.07   |
| 117089    | Bex3         | 1667.3 | 1529.4  | 1470.7 | 1441.2 | 1700  | 1579  | 1584  | 1667.59  |
| 296551    | Mrpl41       | 939.96 | 822.9   | 811.67 | 706.21 | 883.2 | 807.1 | 895   | 922.02   |
| 313085    | Osgin2       | 204    | 226     | 219    | 205    | 192   | 194   | 243   | 284      |
| 316794    | Brcc3        | 516    | 455     | 461    | 435    | 494   | 497   | 539   | 466      |
| 691857    | Pygo1        | 45     | 49      | 53     | 70     | 56    | 50    | 59    | 67       |
| 499076    | Ppp1r12c     | 1820   | 1802    | 1683   | 1580   | 1950  | 1926  | 1846  | 1639     |
| 287462    | Camta2       | 2684   | 2766    | 2693   | 2810   | 3037  | 2934  | 3012  | 2728     |

|           |              |        |         |        |        |       |       |       |          |
|-----------|--------------|--------|---------|--------|--------|-------|-------|-------|----------|
| 116745    | Kcnh6        | 503    | 475     | 436    | 477    | 524   | 522   | 472   | 504      |
| 363153    | Arpp21       | 543.24 | 526     | 465.01 | 666.09 | 557.5 | 675   | 559.3 | 561      |
| 25502     | Oaz1         | 5625   | 5621    | 5250   | 4625   | 5704  | 5745  | 5498  | 5638     |
| 310537    | RGD1560010   | 109.69 | 134.38  | 110.43 | 100.47 | 109.3 | 92.37 | 141.3 | 143.53   |
| 306490    | Mtmr7        | 2021   | 2130    | 1639   | 2028   | 2055  | 2226  | 2098  | 1981     |
| 65199     | Kcnip3       | 4210.1 | 3989.04 | 4006.6 | 3952.7 | 4655  | 4339  | 4290  | 3994.94  |
| 365972    | Bhmt2        | 10.44  | 10.09   | 7.37   | 9      | 12.79 | 8.65  | 10.54 | 7.48     |
| 25510     | Pcp4         | 8683   | 7892    | 6320   | 7587   | 7649  | 7836  | 8241  | 8871     |
| 500685    | Plekhd1      | 2140   | 2350    | 2165   | 2307   | 2359  | 2751  | 2235  | 2239     |
| 24159     | Acly         | 7323   | 8054    | 7696   | 7468   | 8111  | 8379  | 8140  | 8031     |
| 317578    | Sash3        | 64     | 60      | 62     | 30     | 61    | 67    | 51    | 52       |
| 310641    | Trim46       | 650.05 | 624.51  | 658.61 | 603.34 | 686.4 | 679.2 | 631.7 | 715.29   |
| 361831    | Ube2d1       | 903    | 1008    | 847    | 955    | 980   | 1003  | 1000  | 988      |
| 29678     | Sart1        | 804    | 854     | 857    | 821    | 868   | 933   | 865   | 902      |
| 83535     | Kcnj11       | 164    | 172     | 171    | 183    | 190   | 228   | 156   | 164      |
| 192645    | Wbp2         | 9710   | 10505.5 | 9698   | 10865  | 11216 | 11617 | 10328 | 10455.46 |
| 311336    | Nusap1       | 51     | 30      | 58     | 19     | 49    | 37    | 51    | 32       |
| 56780     | Acpp         | 1708   | 1712    | 1727   | 1585   | 1979  | 1632  | 1872  | 1718     |
| 25121     | Pcsk2        | 1491   | 1418    | 1203   | 1441   | 1599  | 1480  | 1561  | 1300     |
| 641315    | Iffo2        | 48.27  | 49.03   | 52.68  | 60.47  | 69.02 | 49.26 | 45.45 | 61.39    |
| 360958    | Ablim2       | 746    | 875     | 732    | 902    | 895   | 885   | 836   | 866      |
| 290279    | Eeflakmt1    | 256    | 234     | 290    | 238    | 243   | 290   | 283   | 273      |
| 303689    | Ube2o        | 5163   | 5317    | 4942   | 5626   | 5851  | 5957  | 5627  | 5081     |
| 317431    | Ribc1        | 49     | 60      | 57     | 49     | 56    | 58    | 54    | 62       |
| 450225    | Krt10        | 59     | 52      | 60     | 44     | 53    | 57    | 66    | 54       |
| 116498    | F2r13        | 10     | 10      | 16     | 7      | 12    | 4     | 21    | 9        |
| 365546    | Tspear       | 26     | 25      | 12     | 23     | 28    | 21    | 27    | 16       |
| 85327     | Lin7a        | 62     | 81      | 70     | 88     | 86    | 52    | 87    | 97       |
| 103691294 | LOC103691294 | 3.19   | 2.08    | 13.36  | 4.29   | 7.54  | 7.6   | 3.33  | 6.05     |
| 312502    | Rab11fip5    | 2723   | 2935    | 2913   | 3130   | 3136  | 3274  | 3080  | 3028     |
| 305506    | Eif6         | 987    | 965     | 973    | 812    | 1030  | 1007  | 950   | 1011     |
| 361069    | Dmtn         | 4591   | 4926    | 3953   | 4416   | 4791  | 4984  | 4727  | 4634     |
| 79115     | Evl          | 1622   | 1776    | 1721   | 1777   | 1903  | 1909  | 1737  | 1829.01  |
| 498433    | Psme4        | 2640   | 2481    | 2749   | 2617   | 2850  | 2636  | 2970  | 2764     |
| 192248    | Cdh13        | 1433   | 1379    | 1685   | 1526   | 1540  | 1823  | 1542  | 1539     |
| 361722    | Bsc12        | 2307   | 2370    | 2094   | 2163   | 2484  | 2488  | 2249  | 2338     |
| 29445     | Cox4i1       | 6380   | 6292    | 5507   | 5200   | 6189  | 6121  | 6254  | 6451     |
| 289083    | Tsen15       | 486    | 468     | 389    | 429    | 467   | 452   | 469   | 508      |
| 25576     | Ywhah        | 31298  | 31184   | 28594  | 29770  | 33204 | 32713 | 31895 | 31491    |
| 362667    | Thap3        | 157    | 165     | 166    | 155    | 179   | 170   | 170   | 169      |
| 500911    | Serh12       | 455.56 | 447.79  | 354.23 | 541.77 | 472.1 | 472.5 | 469.6 | 511.17   |
| 685989    | LOC685989    | 14.04  | 3.94    | 10.54  | 3.75   | 14.64 | 3.6   | 8.81  | 7.48     |
| 308443    | B9d2         | 184    | 164     | 179    | 144    | 173   | 167   | 175   | 203      |
| 103693389 | LOC103693389 | 46     | 46      | 68     | 54     | 65    | 50    | 66    | 48       |
| 56778     | Ly6c         | 17.05  | 22.58   | 17.02  | 1.69   | 16.92 | 16.49 | 13.02 | 16       |
| 305478    | Rnf215       | 540.4  | 499.11  | 469.55 | 478.48 | 511   | 501.8 | 547.2 | 567.01   |
| 295270    | Sf3b4        | 493    | 528     | 479    | 510    | 569   | 553   | 544   | 485      |
| 288044    | Tm4sf19      | 16     | 21      | 11     | 9      | 18    | 18    | 14    | 11       |
| 54237     | Cdk1         | 36     | 21      | 43     | 14     | 38    | 34    | 23    | 27       |
| 362672    | Lrrc47       | 539.47 | 559.24  | 552.37 | 561.59 | 631.6 | 570.6 | 586.5 | 579.43   |
| 679119    | Bmp8b        | 1      | 0.99    | 0      | 1      | 1     | 1.2   | 0     | 1        |
| 308441    | Exosc5       | 266    | 249     | 218    | 206    | 248   | 249   | 230   | 278      |
| 361796    | Abhd16a      | 1418   | 1511    | 1313   | 1273   | 1513  | 1550  | 1435  | 1405     |
| 295430    | Ndst3        | 264.69 | 252.7   | 293.6  | 279.15 | 312.5 | 256.4 | 280.4 | 317.53   |
| 25545     | Selenow      | 5320   | 5093    | 4879   | 4329   | 5280  | 5382  | 4973  | 5367     |
| 103694037 | LOC103694037 | 13.79  | 14.19   | 9.01   | 11.27  | 13.25 | 14.39 | 9.2   | 14.82    |



|           |              |        |         |        |        |       |       |       |          |
|-----------|--------------|--------|---------|--------|--------|-------|-------|-------|----------|
| 450224    | Omg          | 636    | 581     | 501    | 692    | 574   | 648   | 655   | 703      |
| 100912566 | LOC100912566 | 1837.6 | 1775.09 | 1482   | 1695.6 | 1814  | 1762  | 1887  | 1805.78  |
| 266805    | Has3         | 51.04  | 48.06   | 47.97  | 66.03  | 46.02 | 57.07 | 65.05 | 60       |
| 308458    | Sptbn4       | 1049   | 936     | 1029   | 1109   | 1188  | 1094  | 1039  | 1093     |
| 309613    | Zbtb12       | 45     | 31      | 52     | 42     | 45    | 40    | 45    | 52       |
| 362436    | Gpr162       | 464    | 510     | 446    | 435    | 511   | 514   | 438   | 523      |
| 652956    | Mpp1         | 1185   | 1180    | 1171   | 1149   | 1229  | 1246  | 1252  | 1289     |
| 25736     | Kcnb1        | 945    | 870     | 858    | 1007   | 1099  | 933   | 996   | 912      |
| 100360645 | LOC100360645 | 15586  | 15857.2 | 15614  | 14968  | 16500 | 17022 | 16626 | 16260.13 |
| 684871    | LOC684871    | 66.52  | 70.52   | 145.03 | 93.03  | 82    | 95.55 | 148.6 | 75.52    |
| 291648    | Pcdhb11      | 88.96  | 85.53   | 80.67  | 78.33  | 85.61 | 76.34 | 98.82 | 96.3     |
| 498546    | Serp2        | 539    | 506     | 456    | 391    | 520   | 473   | 483   | 550      |
| 64445     | St3gal3      | 331    | 373     | 360    | 371    | 318   | 407   | 415   | 397      |
| 316209    | Med20        | 545    | 534     | 480    | 495    | 530   | 516   | 547   | 607      |
| 286894    | Parml        | 2673   | 2868    | 2838   | 3283   | 3492  | 3096  | 3026  | 2877     |
| 303569    | Rundc3a      | 4224.9 | 4312.04 | 4097.9 | 3924.5 | 4701  | 4626  | 4200  | 4209.31  |
| 292268    | Rmnd1        | 618    | 579     | 494    | 474    | 544   | 594   | 578   | 603      |
| 305166    | Gpat3        | 129    | 168     | 145    | 148    | 141   | 175   | 167   | 149      |
| 293484    | Eif3c        | 4603   | 3290    | 3236   | 4491   | 4681  | 4515  | 3301  | 4235     |
| 361013    | Ube2e2       | 600    | 530     | 581    | 536    | 602   | 641   | 611   | 553      |
| 58839     | Nrbf2        | 456.13 | 470     | 418.89 | 352.97 | 429.9 | 454.3 | 476.3 | 458.34   |
| 102550903 | Ufsp1        | 653    | 547     | 577    | 526    | 626   | 699   | 570   | 572      |
| 116782    | Pcdhgc3      | 1835.1 | 1950.69 | 1984.4 | 2204.7 | 2301  | 2041  | 2137  | 2063.31  |
| 500572    | Otud3        | 124    | 112     | 105    | 136    | 150   | 125   | 125   | 111      |
| 25339     | Npr3         | 833.39 | 730     | 962.6  | 1226.8 | 894   | 953.7 | 1235  | 937.64   |
| 362851    | Cd320        | 472    | 432     | 366    | 369    | 457   | 452   | 428   | 419      |
| 308405    | Dmpk         | 797    | 723     | 778    | 685    | 749   | 1079  | 685   | 683      |
| 300074    | Fam227a      | 72     | 52      | 59     | 55     | 59    | 53    | 75    | 68       |
| 501145    | Satb2        | 12     | 16      | 13     | 15     | 12    | 27    | 15    | 6        |
| 690038    | Bag2         | 143    | 144     | 144    | 128    | 120   | 150   | 170   | 159      |
| 362518    | Tmem246      | 1052   | 1118    | 923    | 987    | 1128  | 1148  | 1054  | 1042     |
| 103690067 | LOC103690067 | 489.64 | 391.22  | 187.2  | 419.69 | 323.5 | 480.9 | 519   | 270.81   |
| 311254    | Pdhx         | 484    | 524     | 469    | 506    | 539   | 521   | 545   | 520      |
| 361224    | Card19       | 727    | 661     | 660    | 549    | 682   | 683   | 710   | 708      |
| 298944    | Gpr22        | 315    | 304     | 270    | 352    | 330   | 322   | 353   | 325      |
| 500485    | Cer1         | 8.2    | 1.01    | 7.39   | 9.19   | 12.56 | 4.55  | 4.86  | 5.67     |
| 60377     | Lin7b        | 286    | 333     | 254    | 256    | 315   | 300   | 256   | 339      |
| 316226    | Klc4         | 449    | 428     | 461    | 460    | 479   | 499   | 464   | 485      |
| 295213    | S100a13      | 573    | 449     | 453    | 392    | 506   | 429   | 554   | 512      |
| 29246     | Stmn3        | 10559  | 10059   | 9500   | 8987   | 10891 | 10049 | 10064 | 10908    |
| 290811    | Tti2         | 182.02 | 165.74  | 232.63 | 197.23 | 191.5 | 223.3 | 188.5 | 230.09   |
| 613226    | Slc6a17      | 2806.9 | 2861.42 | 2417.1 | 3364.1 | 3137  | 3301  | 3109  | 2725.04  |
| 494196    | Ly49s6       | 8.51   | 12.11   | 10.88  | 9.3    | 13.1  | 11.4  | 12.1  | 7.13     |
| 64194     | Insig1       | 3319   | 3619    | 3345   | 3152   | 3467  | 3620  | 3557  | 3756     |
| 83579     | Gnb5         | 1087   | 1115    | 1003   | 1109   | 1152  | 1189  | 1182  | 1101     |
| 691093    | Tpgs1        | 793    | 765     | 718    | 645    | 792   | 784   | 735   | 820      |
| 24628     | Pdgfb        | 165    | 224     | 195    | 181    | 166   | 215   | 240   | 199      |
| 29619     | Btg2         | 277    | 286     | 237    | 549    | 471   | 421   | 340   | 214      |
| 24255     | Cftr         | 20.74  | 23.08   | 23.52  | 20.53  | 27.41 | 23.83 | 23.48 | 19.47    |
| 296587    | Dnlz         | 429.64 | 341.23  | 386.56 | 376.75 | 410   | 403   | 367   | 464.54   |
| 114214    | Dffa         | 2493.7 | 2458.56 | 2221.4 | 2301.4 | 2614  | 2621  | 2520  | 2402.32  |
| 685322    | Uqcr10       | 788.71 | 737.64  | 694.28 | 583.12 | 771   | 703.6 | 710.6 | 820.49   |
| 689025    | Mrps28       | 62     | 74      | 54     | 46     | 52    | 63    | 67    | 71       |
| 83616     | Trim3        | 1363   | 1309    | 1299   | 1245   | 1436  | 1401  | 1404  | 1351     |
| 689711    | Rflna        | 55     | 43      | 70     | 40     | 46    | 40    | 63    | 74       |
| 64201     | Slc25a11     | 1076   | 1110    | 1039   | 975    | 1036  | 1212  | 1146  | 1109     |

|           |                 |        |         |        |        |       |       |       |          |
|-----------|-----------------|--------|---------|--------|--------|-------|-------|-------|----------|
| 24644     | Pgk1            | 5461   | 5368    | 4986   | 4911   | 5228  | 5669  | 5656  | 5669     |
| 313633    | Ephb2           | 65     | 68      | 114    | 86.89  | 77    | 89    | 96    | 96       |
| 288691    | Ksr2            | 315    | 286     | 261    | 412    | 400   | 309   | 320   | 337      |
| 302975    | Syngn3          | 3316   | 3361    | 3228   | 2928   | 3483  | 3494  | 3348  | 3435     |
| 363081    | Igdcc4          | 690.66 | 759.72  | 573.27 | 850.49 | 795.7 | 833.9 | 743.7 | 708.46   |
| 116548    | Pcsk5           | 208    | 245     | 223    | 279    | 252   | 237   | 273   | 262      |
| 260327    | Fndc5           | 569    | 535     | 403    | 624    | 593   | 631   | 502   | 559      |
| 60349     | Nr5a2           | 18     | 26      | 19     | 20     | 24    | 22    | 21    | 22       |
| 29743     | Slc25a1         | 1789   | 1993    | 1811   | 1648   | 1769  | 2012  | 1882  | 2102     |
| 93667     | Olfm1           | 5807   | 5616    | 5296   | 5722   | 6257  | 6195  | 5543  | 6071     |
| 361604    | Sytl2           | 4402   | 3859    | 3878   | 3907   | 4345  | 4411  | 4242  | 4210     |
| 684516    | Kcnc4           | 1741.1 | 1941.1  | 1737.9 | 1801.4 | 1970  | 1941  | 1783  | 2051.3   |
| 64345     | Hif3a           | 27     | 11      | 13     | 18     | 34    | 29    | 8     | 3        |
| 25274     | Tst             | 528    | 452     | 366    | 434    | 494   | 507   | 470   | 438      |
| 108348056 | NEWGENE_1306714 | 120.65 | 136     | 122.23 | 149    | 155   | 122.2 | 141   | 148      |
| 292569    | Zfp444          | 381    | 385     | 389.65 | 443    | 412   | 440   | 451   | 411.6    |
| 682105    | Reep2           | 4448   | 4260    | 3842   | 4058   | 4565  | 4603  | 4329  | 4316     |
| 25237     | Acvrl1          | 244.43 | 246.23  | 300.29 | 235.76 | 255.5 | 270.9 | 307.1 | 267.74   |
| 288564    | Pop7            | 235    | 228     | 222    | 197    | 213   | 245   | 252   | 236      |
| 54279     | Cntn3           | 192    | 206     | 197    | 218    | 228   | 223   | 220   | 201      |
| 288109    | Sidtl           | 40     | 33      | 14     | 37     | 37    | 32    | 33    | 31       |
| 63848     | Fxyd7           | 7097   | 5469    | 6012   | 5432   | 6763  | 6195  | 6193  | 6602     |
| 303685    | Mrpl38          | 556    | 547     | 516    | 488    | 526   | 628   | 547   | 559      |
| 308178    | Vps37c          | 427.5  | 536.51  | 446.5  | 475.5  | 502.7 | 546.5 | 487.5 | 486.47   |
| 29216     | Lrp2            | 52     | 54      | 49     | 65     | 50    | 55    | 60    | 71       |
| 117018    | Kcnh2           | 2682   | 2703    | 2355   | 2929   | 2868  | 3277  | 2830  | 2470     |
| 114518    | Slc7a10         | 18.57  | 13.03   | 8.31   | 11.13  | 17.31 | 10.69 | 14.37 | 12.39    |
| 309525    | Slc16a12        | 257    | 298     | 266    | 317    | 284   | 267   | 337   | 333      |
| 297593    | Usp5            | 6210   | 6446.63 | 6122   | 6445.2 | 6946  | 6964  | 6713  | 6441.06  |
| 297846    | Cntnap5c        | 211.54 | 195.21  | 202.39 | 220.44 | 247.3 | 194   | 217.1 | 231.72   |
| 502374    | Polr21          | 407.59 | 474.3   | 442.58 | 335.87 | 436.3 | 439.9 | 416   | 489.45   |
| 287982    | Abcf3           | 1903   | 1864    | 1668   | 1902   | 2028  | 1989  | 1968  | 1888     |
| 103692785 | LOC103692785    | 173.86 | 137.67  | 163.91 | 75.25  | 155.4 | 99.9  | 139   | 196.66   |
| 25066     | PVR             | 122    | 131     | 134    | 119    | 123   | 145   | 152   | 123      |
| 498523    | RGD1565170      | 1.89   | 0.64    | 0.22   | 3.95   | 1.25  | 0     | 0     | 5.94     |
| 29333     | Cd46            | 73.93  | 105.23  | 94.31  | 72.92  | 87.57 | 75.27 | 93.11 | 115.78   |
| 100362102 | Lsm14b          | 1175   | 1191.57 | 1162.6 | 1199   | 1295  | 1343  | 1270  | 1166     |
| 691770    | Ankrd63         | 12     | 7       | 15     | 7      | 8     | 12    | 14    | 10       |
| 445271    | Jph4            | 2571   | 2533    | 2505   | 2625   | 3085  | 2700  | 2585  | 2613     |
| 297518    | Arpc4           | 3164   | 3735    | 3839   | 3258   | 4115  | 3686  | 3732  | 3489     |
| 360617    | Mien1           | 1176   | 1128    | 1124.2 | 1012   | 1190  | 1161  | 1176  | 1239.29  |
| 63834     | Capn10          | 414    | 399     | 397    | 331    | 451   | 415   | 393   | 395      |
| 364878    | 3-Mar           | 53.04  | 52.24   | 54.95  | 44.1   | 52.03 | 61.51 | 57.74 | 48.04    |
| 305685    | Comtd1          | 540    | 570     | 494    | 467    | 582   | 575   | 526   | 540      |
| 287876    | Actg1           | 31778  | 32999   | 33430  | 29615  | 32472 | 35492 | 34068 | 35172.26 |
| 304474    | Pitpnm2         | 4740   | 5140    | 4989   | 5115   | 5759  | 5423  | 5298  | 4971     |
| 287120    | Tb13            | 599    | 612     | 606    | 539    | 630   | 648   | 622   | 629      |
| 361527    | Pld3            | 2754   | 2945    | 2939   | 2830   | 3032  | 3298  | 3007  | 2974     |
| 79246     | Htr3a           | 2306   | 1999    | 1992   | 2175   | 2433  | 2176  | 2245  | 2242     |
| 293586    | Zfp511          | 219    | 200     | 173    | 190.55 | 194   | 204   | 226.5 | 215.68   |
| 362301    | Tmub1           | 373    | 406     | 443    | 351    | 446   | 409   | 402   | 432      |
| 292732    | Numb1           | 1806.8 | 1995.87 | 2115.9 | 1973.4 | 2246  | 2160  | 2030  | 2037.81  |
| 301606    | Espn1           | 12.5   | 13.41   | 19.48  | 12.32  | 12.06 | 13.71 | 22.25 | 13.95    |
| 29214     | Tubb5           | 23535  | 25601.7 | 23649  | 24146  | 25923 | 27287 | 25214 | 25663.54 |
| 301432    | Ppil3           | 271    | 298     | 264    | 237    | 277   | 275   | 279   | 318      |
| 108348912 | LOC108348912    | 120.37 | 92.33   | 51.59  | 40.91  | 104.4 | 44    | 88.86 | 90.47    |

|           |              |        |         |        |        |       |       |       |         |
|-----------|--------------|--------|---------|--------|--------|-------|-------|-------|---------|
| 299647    | Zfp414       | 339    | 325     | 329    | 333    | 375   | 342   | 350   | 357     |
| 293704    | Trpt1        | 219    | 195.45  | 203.21 | 203.68 | 199.1 | 248.5 | 215.7 | 218.9   |
| 89791     | Ncdn         | 12429  | 13259   | 12513  | 14003  | 15414 | 13931 | 13686 | 13037   |
| 315746    | Cln6         | 751    | 785.39  | 740    | 731    | 819   | 860   | 795   | 756     |
| 314613    | Rnf126       | 616    | 636     | 604    | 547    | 658   | 628   | 641   | 654     |
| 316626    | Hes6         | 307    | 277     | 309    | 214    | 299   | 273   | 268   | 349     |
| 680874    | Rnf223       | 109.18 | 109.83  | 144.52 | 102.19 | 137.6 | 113.5 | 116.1 | 132.94  |
| 499781    | Cfap157      | 130.13 | 118.5   | 113.72 | 154.04 | 162.3 | 153   | 121   | 118.34  |
| 100910754 | LOC100910754 | 30.77  | 11.26   | 35.3   | 11.8   | 17.89 | 29.42 | 35.61 | 12.82   |
| 59114     | Slc9a3r1     | 1526   | 1495    | 1291   | 1553   | 1632  | 1635  | 1538  | 1495    |
| 311866    | Lrsam1       | 2365   | 2410.51 | 2348.9 | 2506   | 2664  | 2655  | 2630  | 2396.1  |
| 291234    | Mki67        | 216.26 | 168.24  | 444.13 | 128.71 | 367   | 248.2 | 238.9 | 174.23  |
| 315405    | Dcun1d5      | 593    | 548     | 535    | 467    | 596   | 528   | 578   | 600     |
| 171124    | Mms19        | 1402   | 1604    | 1410   | 1595   | 1623  | 1671  | 1607  | 1556    |
| 24816     | Tbxa2r       | 39     | 39.71   | 63     | 49.35  | 49.62 | 57.37 | 54.63 | 43.62   |
| 289745    | Mtfp1        | 53     | 46      | 34     | 42     | 51    | 50    | 35    | 52      |
| 300744    | Ub17         | 1661   | 1728    | 1630   | 1615   | 1790  | 1806  | 1711  | 1820    |
| 364069    | Hlx          | 60     | 79      | 79     | 78     | 82    | 87    | 70    | 79      |
| 117540    | Plscr1       | 63.58  | 59.67   | 56.4   | 49.02  | 46.67 | 39.86 | 71.43 | 87.71   |
| 306868    | Bloc1s5      | 699    | 674     | 613    | 660    | 736   | 630   | 723   | 754     |
| 290370    | Dnajc15      | 535    | 536     | 405    | 458    | 505   | 480   | 516   | 577     |
| 497857    | Dexi         | 855    | 827     | 742    | 812    | 902   | 892   | 865   | 818     |
| 362826    | Atcay        | 2532   | 2475    | 2191   | 2557   | 2721  | 2635  | 2591  | 2535    |
| 246216    | Prpf19       | 3767   | 3717    | 3282   | 3641   | 3763  | 4069  | 3950  | 3699    |
| 100911871 | LOC100911871 | 34.24  | 21.6    | 29.59  | 41.73  | 38.36 | 34.41 | 35.03 | 28.84   |
| 499688    | Gstm6        | 57.08  | 44.12   | 44.2   | 56.08  | 45.28 | 65    | 57.19 | 49.04   |
| 100910806 | Trim15       | 73     | 91.69   | 100.48 | 93.3   | 91.65 | 107.1 | 106.8 | 79.67   |
| 306344    | Arrdc2       | 236    | 190     | 197    | 181    | 209   | 281   | 219   | 155     |
| 291852    | Katnb1       | 848    | 853     | 871    | 856    | 882   | 1004  | 906   | 892     |
| 29270     | Spr          | 350.22 | 361     | 351.16 | 298    | 365   | 332   | 376   | 389     |
| 29533     | Pxmp2        | 68     | 76      | 65     | 72     | 77    | 81    | 61    | 83      |
| 29884     | Bok          | 699    | 605     | 561    | 503    | 648   | 571   | 629   | 697     |
| 103689977 | LOC103689977 | 74.46  | 53.13   | 83.67  | 70.33  | 61.63 | 56.88 | 81.76 | 102.37  |
| 316539    | Epha4        | 77.19  | 68.73   | 83     | 101.65 | 98.3  | 91    | 85    | 81      |
| 298917    | Iah1         | 327    | 295     | 280    | 301    | 296   | 303   | 339   | 355     |
| 399489    | E2f1         | 315    | 285     | 305    | 271    | 330   | 316   | 312   | 306     |
| 287155    | Stub1        | 2382.8 | 2515.13 | 2435.8 | 2171.9 | 2607  | 2548  | 2560  | 2501.48 |
| 102546889 | LOC102546889 | 50.44  | 56.7    | 50.29  | 49.31  | 61.01 | 63.79 | 37.6  | 59.82   |
| 297799    | Mrpl15       | 640    | 579     | 570    | 521    | 598   | 641   | 633   | 611     |
| 300078    | Dnal4        | 295    | 271     | 257    | 264    | 300   | 284   | 298.3 | 286.12  |
| 360827    | Ulk1         | 1015   | 1030    | 989    | 1104   | 1121  | 1198  | 1092  | 1037    |
| 432367    | Npc111       | 14     | 14      | 4      | 8      | 12    | 11    | 6     | 14      |
| 353305    | Tbx3         | 347    | 332     | 349    | 384    | 387   | 388   | 377   | 366     |
| 83525     | Ogfr         | 666    | 650     | 630    | 597    | 675   | 689   | 668   | 702     |
| 361215    | Auh          | 2307   | 2176    | 1888   | 1952   | 2183  | 2237  | 2272  | 2257    |
| 310486    | Rarres1      | 1706   | 1705    | 1684   | 1512   | 1775  | 1843  | 1669  | 1817    |
| 84422     | Gfra3        | 1186   | 1237    | 1152   | 1090   | 1340  | 1261  | 1194  | 1221    |
| 140635    | Flt3         | 417    | 437     | 390    | 457    | 430   | 527   | 465   | 407     |
| 689730    | LOC689730    | 1.86   | 1.86    | 0      | 0      | 2     | 0     | 0     | 2       |
| 361627    | Zfp143       | 186    | 210     | 190    | 224    | 212   | 225   | 217   | 217     |
| 299154    | Churc1       | 227    | 223     | 205    | 181    | 180   | 227   | 236   | 256     |
| 688811    | Slc25a28     | 480    | 460     | 434    | 364    | 447   | 487   | 503   | 432     |
| 84030     | Chn1         | 2187.3 | 2144.41 | 1943.8 | 2097.5 | 2571  | 2216  | 2121  | 2096.43 |
| 108350662 | LOC108350662 | 158    | 159     | 156    | 190    | 225   | 138   | 179   | 171     |
| 315973    | Acad11       | 192    | 203     | 193    | 234    | 200   | 190   | 241   | 253     |
| 296658    | Ndufa8       | 2140.9 | 1991.81 | 1828.9 | 1748.9 | 2029  | 2118  | 1981  | 2164.81 |

|           |              |        |         |        |        |       |       |       |         |
|-----------|--------------|--------|---------|--------|--------|-------|-------|-------|---------|
| 296957    | Zc3hc1       | 276    | 294     | 254    | 222    | 277   | 293   | 276   | 279     |
| 361974    | Gatb         | 340    | 319     | 378    | 326    | 325   | 321   | 427   | 393     |
| 293655    | Ndufv1       | 2438   | 2248    | 2153   | 2209   | 2365  | 2477  | 2425  | 2465    |
| 24832     | Thy1         | 31801  | 31311   | 30525  | 31648  | 35633 | 33293 | 32226 | 33607   |
| 306759    | Spock1       | 1138   | 1220    | 1151   | 1357   | 1383  | 1296  | 1357  | 1198    |
| 25152     | Map1a        | 32435  | 36773   | 33697  | 46257  | 42817 | 42448 | 38595 | 36585   |
| 100912292 | Enho         | 442    | 398     | 340    | 366    | 403   | 415   | 391   | 454     |
| 687758    | Pip5k11      | 269    | 182     | 175    | 206    | 227   | 226   | 227   | 215     |
| 360977    | Tbrg4        | 553.83 | 653.14  | 639.41 | 547.92 | 645.9 | 694.5 | 614.8 | 620.54  |
| 361972    | Tmem154      | 202    | 219     | 212    | 198    | 226   | 223   | 228   | 217     |
| 298848    | Mapre3       | 3876   | 4035    | 3745   | 3796   | 4086  | 4421  | 4028  | 4090    |
| 500689    | Ttc9         | 3451   | 3280    | 2844   | 3122   | 3543  | 3435  | 3373  | 3310    |
| 691393    | Oxa11        | 1405   | 1368    | 1308   | 1322   | 1482  | 1486  | 1413  | 1433    |
| 60565     | Syt6         | 265    | 231     | 238    | 265    | 288   | 262   | 258   | 267     |
| 316444    | Mdh1b        | 17     | 20      | 28     | 27     | 33    | 18    | 21    | 27      |
| 497967    | Zfp830       | 120    | 125     | 135    | 106    | 107   | 122   | 141   | 153     |
| 290626    | Haus8        | 115    | 111.97  | 114    | 105    | 137   | 125   | 100.9 | 117     |
| 54311     | Timm17a      | 996.58 | 960.44  | 877.72 | 860.32 | 1011  | 1007  | 951   | 1008.05 |
| 29740     | Eci1         | 309    | 298     | 276    | 258    | 263   | 297   | 325   | 343     |
| 298072    | Trmo         | 24     | 33      | 29     | 32     | 32    | 28    | 30    | 37      |
| 687861    | Mmab         | 308.54 | 327.64  | 302.81 | 293.96 | 367.3 | 340.8 | 287.9 | 331.07  |
| 303180    | RGD1304587   | 207.02 | 194     | 216    | 195    | 230   | 213   | 195   | 236     |
| 78968     | Srebfl1      | 1397   | 1480.39 | 1437.7 | 1586.1 | 1589  | 1647  | 1589  | 1526.7  |
| 64534     | Pim3         | 779    | 727     | 652    | 723    | 847   | 847   | 712   | 695     |
| 103690013 | LOC103690013 | 223.72 | 213.56  | 183.54 | 179    | 229.7 | 210   | 202.6 | 218.58  |
| 108350059 | LOC108350059 | 281    | 229     | 265    | 285    | 271   | 310   | 274   | 286     |
| 298805    | Slc4a1ap     | 687    | 718     | 722    | 699    | 811   | 744   | 772   | 715     |
| 24659     | Pmch         | 1.14   | 0       | 2.96   | 1      | 1     | 0     | 2.05  | 2.44    |
| 304947    | Pbx1         | 275    | 217     | 213    | 262    | 274   | 246   | 294   | 227     |
| 293631    | Brsk2        | 784    | 730     | 709    | 871    | 873   | 868   | 821   | 769     |
| 117277    | Epn1         | 2014   | 2032    | 2009   | 2050   | 2173  | 2353  | 2107  | 2093    |
| 291990    | Cog8         | 666    | 690     | 690    | 628    | 736   | 738   | 715   | 690     |
| 245962    | Cd48         | 3028   | 2962    | 2884   | 2773   | 2654  | 3484  | 3028  | 3374    |
| 727679    | Pdpx         | 589    | 636     | 597    | 550    | 637   | 627   | 612   | 678     |
| 310661    | Vps72        | 482    | 455     | 448    | 438    | 471   | 531   | 482   | 479     |
| 81675     | Gyg1         | 3594   | 3489    | 3069   | 3387   | 3357  | 3691  | 3904  | 3627    |
| 316131    | Fem1a        | 635    | 733     | 587    | 725    | 742   | 765   | 699   | 680     |
| 108352018 | LOC108352018 | 3      | 3       | 3      | 4      | 4     | 1     | 5     | 4       |
| 25081     | Apoa1        | 4      | 3       | 3      | 3      | 3     | 5     | 3     | 3       |
| 310587    | Hrnr         | 4      | 4       | 4      | 14     | 10    | 6     | 8     | 4       |
| 310772    | Dennd2d      | 3      | 10      | 9      | 4      | 8     | 8     | 6     | 6       |
| 313183    | Act17b       | 3      | 3       | 4      | 3      | 2     | 5     | 4     | 3       |
| 499732    | Lrriq3       | 11     | 15      | 12     | 14     | 8     | 14    | 19    | 15      |
| 64305     | Sult1b1      | 9      | 4       | 6      | 7      | 5     | 4     | 10    | 9       |
| 291967    | Zdhhc1       | 372    | 402     | 395    | 391    | 402   | 401   | 453   | 424     |
| 500528    | Ccdc17       | 97     | 93      | 108    | 92     | 93    | 106   | 124   | 97      |
| 310640    | Fam189b      | 10560  | 11028   | 10547  | 10407  | 12432 | 11482 | 10716 | 11188   |
| 500801    | Cyp4f17      | 232.56 | 240.95  | 243.65 | 258.7  | 253   | 245.8 | 332.2 | 220.02  |
| 313047    | Yars         | 1842   | 1810    | 1826   | 1708   | 2018  | 1943  | 1927  | 1852    |
| 497986    | Hoxb6        | 227.74 | 221.64  | 207.31 | 201.34 | 252.3 | 231.5 | 198.9 | 241.48  |
| 293345    | Taf10        | 918    | 901     | 780    | 721    | 937   | 841   | 872   | 926     |
| 497959    | Proca1       | 88     | 73      | 110    | 105    | 88    | 121   | 105   | 91      |
| 293599    | Olr300       | 17.97  | 19.9    | 9.72   | 16.04  | 27.39 | 12.08 | 15.27 | 13.8    |
| 29417     | Men1         | 1151   | 1145    | 1233   | 1195   | 1264  | 1369  | 1251  | 1205    |
| 29553     | Kcnk3        | 136.24 | 100.81  | 87.47  | 120.24 | 152.5 | 114.7 | 111.6 | 100.44  |
| 687295    | Timm50       | 680.75 | 763     | 739    | 725.02 | 778.2 | 800.3 | 825   | 729.07  |

|           |              |        |         |        |        |       |       |       |          |
|-----------|--------------|--------|---------|--------|--------|-------|-------|-------|----------|
| 25659     | Khk          | 518    | 527     | 521    | 426    | 599   | 509   | 519   | 519      |
| 288717    | Srrd         | 125.35 | 125.69  | 112.33 | 113.4  | 118.6 | 131.7 | 140.4 | 122.95   |
| 100361053 | Hbqlb        | 31.24  | 28.52   | 38.63  | 27.42  | 53.1  | 31.46 | 27.73 | 23.25    |
| 498309    | Vash2        | 45.86  | 46      | 33     | 32     | 46    | 37    | 35    | 51       |
| 291685    | Srp19        | 729    | 642     | 604    | 607    | 670   | 683   | 678   | 751      |
| 64561     | Phka1        | 593    | 577     | 547    | 655    | 672   | 745   | 547   | 592      |
| 497876    | Mrpl28       | 692    | 722     | 669    | 558    | 671   | 729   | 719   | 727      |
| 288920    | Trir         | 1275.2 | 1174    | 1204   | 1023   | 1334  | 1216  | 1194  | 1295.4   |
| 100909474 | LOC100909474 | 0      | 0       | 31.52  | 0      | 0     | 33.97 | 0     | 0        |
| 303059    | Ccnj1        | 28     | 18      | 27     | 17     | 28    | 16    | 27    | 26       |
| 362272    | Tp53rk       | 80.36  | 66.22   | 80.34  | 62.86  | 75.27 | 81.73 | 74.69 | 80.63    |
| 50522     | Ubc          | 18089  | 18785.9 | 18336  | 20033  | 19352 | 21780 | 19775 | 20190.13 |
| 29738     | Kcnab2       | 16087  | 16243.6 | 14385  | 15989  | 17844 | 17249 | 16517 | 15973.71 |
| 304361    | Mepce        | 285.47 | 243.2   | 277.47 | 405    | 343.7 | 318.5 | 348.7 | 294.47   |
| 116468    | Rfc2         | 145    | 171     | 149    | 126    | 148   | 159   | 174   | 156      |
| 84573     | Otof         | 261    | 246     | 260    | 324    | 344   | 307   | 289   | 236      |
| 100911238 | LOC100911238 | 1285.2 | 1364.94 | 1115.9 | 1175.6 | 1338  | 1215  | 1156  | 1617.34  |
| 298490    | Ppcs         | 351    | 328     | 278    | 261    | 305   | 324   | 332   | 352      |
| 362838    | Mum1         | 552    | 503     | 549.05 | 521    | 530   | 568.4 | 597.4 | 595.02   |
| 689995    | Ppplr3d      | 616    | 644     | 644    | 593    | 732   | 667   | 662   | 631      |
| 309420    | Fam122a      | 229    | 218     | 212    | 186    | 243   | 228   | 234   | 206      |
| 102547078 | LOC102547078 | 22     | 15      | 9      | 18     | 24    | 13    | 10    | 22       |
| 117278    | Ebp          | 450    | 431     | 407    | 388    | 431   | 467   | 429   | 480      |
| 60371     | Birc2        | 726.83 | 600.56  | 579.41 | 685.17 | 629.2 | 764.9 | 631.2 | 769.33   |
| 497914    | Med9         | 491    | 550     | 466    | 513    | 523   | 560   | 538   | 557      |
| 79434     | Rab11b       | 4167   | 4288    | 3930   | 4068   | 4357  | 4630  | 4449  | 4304     |
| 688721    | Lrfn4        | 545    | 490     | 454    | 441    | 530   | 529   | 512   | 510      |
| 307171    | Apbb1ip      | 104    | 103     | 146    | 107    | 104   | 134   | 131   | 127      |
| 368084    | Bud23        | 311    | 295     | 292    | 239    | 371   | 277   | 279   | 299      |
| 29688     | Minpp1       | 588    | 648     | 688    | 618    | 691   | 697   | 695   | 658      |
| 25434     | Sparcl1      | 5061   | 5928    | 4510   | 5567   | 4669  | 6417  | 5755  | 5875     |
| 681287    | Map7d1       | 3199   | 3269    | 3230   | 3432   | 3643  | 3718  | 3384  | 3414     |
| 303333    | Slc46a1      | 552.37 | 522.49  | 648.53 | 552.79 | 556.5 | 597.6 | 655.8 | 644.76   |
| 57233     | Isl2         | 1779   | 1765    | 1585   | 1632   | 2067  | 1739  | 1628  | 1857     |
| 314596    | Rasa13       | 235.1  | 274.16  | 294.78 | 248.04 | 313   | 297.3 | 287.1 | 237.23   |
| 289197    | Mgst3        | 2410   | 2344    | 2379   | 2061   | 2491  | 2442  | 2607  | 2375     |
| 287940    | Hic2         | 70.17  | 42.92   | 67.72  | 59.53  | 79.18 | 49.57 | 65.62 | 64.82    |
| 59294     | Pold1        | 103    | 109     | 96     | 100    | 103   | 114   | 119   | 104      |
| 362765    | Angell       | 956    | 979     | 1013   | 936    | 1163  | 1016  | 1047  | 963      |
| 313173    | Cntfr        | 1072   | 1042    | 1047   | 1242   | 1149  | 1257  | 1183  | 1160     |
| 300999    | Mst1r        | 135    | 139     | 156    | 168    | 168   | 152   | 179   | 146      |
| 24534     | Ldhd         | 6046   | 6169    | 5213   | 5992   | 5791  | 6677  | 6421  | 6372     |
| 102547897 | LOC102547897 | 169    | 133     | 125    | 158    | 181   | 174   | 138   | 138      |
| 170845    | Ndel1        | 2138   | 2080    | 1993   | 2229   | 2295  | 2297  | 2171  | 2341     |
| 311299    | Aven         | 459    | 441     | 465    | 427    | 486   | 435   | 473   | 539      |
| 299269    | Ifi2712b     | 1560   | 1493    | 1323   | 1329   | 1435  | 1552  | 1513  | 1654     |
| 299312    | LOC299312    | 111.4  | 93.56   | 89.51  | 59.18  | 79.26 | 107.2 | 114.6 | 80.44    |
| 306284    | Gprin2       | 76.38  | 87.22   | 84     | 113.26 | 129.1 | 92.35 | 77.43 | 90.4     |
| 100364350 | Nwd1         | 202.17 | 157.74  | 135.95 | 163.88 | 206.1 | 195   | 137.5 | 173.16   |
| 100910438 | LOC100910438 | 182.35 | 177.71  | 93.1   | 109    | 157.7 | 139.3 | 179.3 | 130.2    |
| 100366121 | Smim24       | 27.44  | 29.25   | 22.53  | 36.47  | 32.46 | 28.91 | 28.29 | 35.15    |
| 367328    | Washc1       | 607    | 656     | 609    | 587    | 657   | 688   | 677   | 631      |
| 171047    | Dnph1        | 45     | 47      | 29     | 31     | 61    | 38    | 29    | 36       |
| 29481     | Rgs9         | 30     | 27      | 23     | 34     | 28    | 36    | 28    | 31       |
| 300886    | Mthfs        | 165    | 229     | 196    | 132    | 171   | 193   | 216   | 199      |
| 29722     | Apbb1        | 4550   | 4679    | 4248   | 4531   | 4969  | 4804  | 4792  | 4866     |

|           |              |        |         |        |        |       |       |       |         |
|-----------|--------------|--------|---------|--------|--------|-------|-------|-------|---------|
| 24211     | Atp1a1       | 49600  | 50726   | 49434  | 48859  | 55150 | 56937 | 52367 | 49863   |
| 500959    | LOC500959    | 771.34 | 763.25  | 666.12 | 617.7  | 706.6 | 821.1 | 748.4 | 765.12  |
| 362331    | Ccdc136      | 2310.8 | 2228    | 2115   | 2187   | 2571  | 2314  | 2377  | 2278    |
| 170641    | Adgrl3       | 968.13 | 982.19  | 1054.5 | 993.01 | 1021  | 1125  | 1094  | 1073.95 |
| 29707     | Gabra5       | 143    | 132     | 119    | 137    | 135   | 157   | 162   | 119     |
| 499194    | Nmb          | 861    | 867     | 788    | 733    | 920   | 832   | 892   | 862     |
| 303786    | Aifm3        | 556    | 454     | 480    | 532    | 563   | 578   | 532   | 509     |
| 497902    | Uqcrq        | 1577   | 1502    | 1291   | 1173   | 1575  | 1443  | 1403  | 1561    |
| 306288    | Mmrn2        | 316    | 303     | 329    | 326    | 343   | 366   | 337   | 329     |
| 314131    | Insm2        | 429.4  | 460.33  | 424.04 | 404.29 | 541.8 | 458.2 | 419.7 | 434.59  |
| 171519    | Calcb        | 2301.2 | 2175.85 | 2544.6 | 1562.2 | 2152  | 2215  | 2559  | 2338.23 |
| 301007    | Wdr6         | 1965.3 | 2137.83 | 2232.8 | 2334.8 | 2261  | 2321  | 2423  | 2353.38 |
| 360580    | Dusp14       | 194.08 | 187     | 197    | 177.3  | 186   | 203.5 | 226   | 199.83  |
| 83514     | Tsc22d3      | 4823   | 3673    | 3184   | 3901   | 4339  | 4482  | 4252  | 3745    |
| 291655    | Pcdhb4       | 39.29  | 32.58   | 35.59  | 31.18  | 30.42 | 38.04 | 45.06 | 36.13   |
| 309855    | Fig4         | 1181.1 | 894.2   | 1148.5 | 982.16 | 1076  | 1131  | 1147  | 1185.87 |
| 85268     | Hrh3         | 165.91 | 172.52  | 141.25 | 158.29 | 177.9 | 153.3 | 181.5 | 176.02  |
| 304289    | Daglb        | 495.41 | 526.02  | 541.29 | 496.62 | 532.4 | 581   | 536   | 573.73  |
| 297821    | Ndufaf6      | 154    | 183     | 183    | 134    | 178   | 184   | 157   | 187     |
| 246146    | Hspbp1       | 1553   | 1545    | 1466   | 1359   | 1605  | 1592  | 1551  | 1646    |
| 291660    | Ndufa2       | 731.75 | 679.92  | 650.92 | 480.81 | 679.6 | 695.7 | 658.7 | 711.67  |
| 362827    | Pias4        | 513    | 488     | 485    | 436    | 575   | 528   | 483   | 489     |
| 299609    | Abca7        | 3583   | 3802    | 3560   | 3677   | 4345  | 4032  | 3818  | 3591    |
| 25741     | Pfkl         | 1365   | 1367    | 1270   | 1283   | 1467  | 1482  | 1379  | 1378    |
| 83807     | Ybx3         | 1332   | 1558    | 2116   | 1320   | 1605  | 2248  | 1514  | 1463    |
| 309179    | Ppp2r5b      | 4437   | 4643    | 4344   | 4426   | 5094  | 5099  | 4661  | 4419    |
| 103690221 | Nyap2        | 238    | 208.01  | 237    | 245    | 265   | 252   | 225   | 260     |
| 306526    | Mak16        | 350.98 | 270.26  | 316.37 | 355.77 | 330.5 | 384.7 | 339.5 | 341.91  |
| 102552805 | LOC102552805 | 119.77 | 97.66   | 95.63  | 93.75  | 115.2 | 109.5 | 111.9 | 102.62  |
| 292758    | Mrps12       | 326    | 337     | 328    | 275    | 315   | 314   | 343   | 395     |
| 302963    | Mmp25        | 187    | 267     | 210    | 276    | 313   | 252   | 193   | 257     |
| 304979    | Igsf8        | 669.12 | 711.08  | 676.14 | 697.55 | 747.1 | 827.1 | 671   | 728.53  |
| 65047     | Slit1        | 1625   | 1768    | 1696   | 2071   | 2111  | 1858  | 1913  | 1850    |
| 25729     | Ccnel        | 134    | 119     | 140    | 120    | 131   | 132   | 137   | 154     |
| 680477    | Haus3        | 246.46 | 218.6   | 189.06 | 219.76 | 210.5 | 208   | 259.1 | 266.26  |
| 155140    | Il23a        | 13     | 18      | 10     | 9      | 9     | 16    | 16    | 13      |
| 25605     | Hcrtr2       | 7      | 6       | 6      | 6      | 7     | 7     | 8     | 5       |
| 292912    | Rasip1       | 319    | 307     | 280    | 281    | 329   | 354   | 321   | 278     |
| 84011     | Atp9a        | 7925   | 8159    | 7486   | 7875   | 9000  | 8938  | 8223  | 7801    |
| 102548600 | LOC102548600 | 85.34  | 73.09   | 72.99  | 59.3   | 78.81 | 64.52 | 87.56 | 83.11   |
| 360776    | Lamtor4      | 1134   | 1118    | 971    | 922    | 1105  | 1087  | 1026  | 1259    |
| 294303    | Lhfp15       | 563    | 559     | 516    | 470    | 611   | 529   | 553   | 584     |
| 85239     | Mlycd        | 420    | 396     | 416    | 364    | 455   | 485   | 399   | 385     |
| 307479    | Jakmip2      | 721.35 | 699.99  | 683.74 | 830.02 | 813.2 | 716   | 881.6 | 759.71  |
| 296083    | Vps18        | 472    | 547     | 504    | 546    | 572   | 599   | 539   | 525     |
| 59085     | As1          | 408    | 387     | 355    | 317    | 430   | 393   | 379   | 383     |
| 300438    | Ldlr         | 2124   | 2353    | 2271   | 2595   | 2661  | 2560  | 2466  | 2408    |
| 29526     | Pla2g1b      | 13     | 6       | 14.18  | 17.75  | 19    | 15    | 6     | 15.03   |
| 363029    | Swsap1       | 221    | 223     | 212    | 201    | 229   | 215   | 253   | 229     |
| 294846    | Zfp622       | 427.16 | 433.93  | 410.11 | 418.11 | 476.3 | 436.4 | 446.5 | 466.16  |
| 81781     | Snrpn        | 575.25 | 535.02  | 597.43 | 516.02 | 641.1 | 619.3 | 585.3 | 557.09  |
| 292051    | Cmip         | 2182   | 2255.77 | 2358.3 | 2546.6 | 2764  | 2579  | 2404  | 2348.13 |
| 309200    | Ints5        | 383    | 355     | 369    | 369    | 423   | 381   | 356   | 435     |
| 56813     | Pthlr        | 272.97 | 420.84  | 391.3  | 302.01 | 362.3 | 421.4 | 358.4 | 356.95  |
| 306960    | Abt1         | 276    | 279     | 249    | 188    | 269   | 276   | 250   | 277     |
| 317396    | Ubqln2       | 2279   | 2366    | 2385   | 2642   | 2619  | 2810  | 2612  | 2411    |



|           |              |        |         |        |        |       |       |       |         |
|-----------|--------------|--------|---------|--------|--------|-------|-------|-------|---------|
| 691842    | Maz          | 925    | 841.49  | 905    | 868    | 1056  | 998   | 929   | 842     |
| 309593    | Gn11         | 1086   | 1039    | 1082   | 1016   | 1146  | 1228  | 1122  | 1068    |
| 289786    | Nacad        | 7311   | 8038    | 7598   | 8607   | 8859  | 8967  | 8354  | 7922    |
| 307842    | Vac14        | 1111   | 1280    | 1174   | 1325   | 1317  | 1383  | 1277  | 1308    |
| 102552540 | LOC102552540 | 259.88 | 220.41  | 239.26 | 171.1  | 278.6 | 125.4 | 233.6 | 325.05  |
| 58950     | Fkbp1b       | 5821   | 5862    | 5753   | 5051   | 6088  | 5935  | 5978  | 6303    |
| 685656    | Kti12        | 197    | 171     | 171    | 154    | 164   | 195   | 185   | 205     |
| 94193     | Madd         | 1733   | 2013    | 1755   | 2292   | 2229  | 2118  | 2033  | 2043    |
| 100362120 | Catsperz     | 36     | 26      | 33     | 41     | 43    | 36    | 26    | 42      |
| 246281    | Asmt         | 31     | 26      | 30     | 49     | 41    | 32    | 42    | 32      |
| 688600    | Tcf23        | 121    | 74.01   | 58.21  | 65     | 104   | 86.23 | 73.01 | 80.72   |
| 29704     | Pacsin1      | 1373   | 1412    | 1229   | 1497   | 1643  | 1528  | 1376  | 1410    |
| 678880    | Rt18b        | 682.5  | 641.33  | 659.4  | 626.34 | 762.9 | 673.9 | 703.9 | 680.14  |
| 103691319 | CIH9orf66    | 0      | 1.1     | 1      | 0      | 2.27  | 0     | 0     | 0       |
| 307350    | Afg3l2       | 1240   | 1202    | 1160   | 1277   | 1351  | 1343  | 1328  | 1252    |
| 259272    | Msi1         | 75     | 43      | 57     | 72     | 70    | 72    | 66    | 59      |
| 362834    | Mbd3         | 934    | 880     | 988    | 865    | 1006  | 1051  | 948   | 959     |
| 292889    | Med25        | 1436.2 | 1461.17 | 1399.6 | 1338.2 | 1555  | 1493  | 1534  | 1509.14 |
| 305493    | Urgcp        | 793.21 | 830.55  | 771.72 | 716.09 | 858.9 | 871.7 | 773.3 | 859.77  |
| 25546     | Shox2        | 405    | 526     | 288    | 520    | 454   | 505   | 504   | 417     |
| 291773    | Taf4b        | 246    | 244     | 232    | 277    | 306   | 247   | 274   | 253     |
| 303879    | Slc51a       | 256    | 266     | 181    | 209    | 239   | 247   | 253   | 247     |
| 64508     | Adcy3        | 706    | 748     | 681    | 771    | 804   | 835   | 805   | 698     |
| 114501    | Lmx1b        | 42     | 31      | 38     | 49     | 56    | 49    | 38    | 30      |
| 500587    | Fbxo44       | 1884   | 1976    | 1719   | 1743   | 1949  | 2056  | 1976  | 1936    |
| 499185    | Mrps11       | 410    | 438     | 364    | 363    | 412   | 425   | 435   | 431     |
| 304376    | Nyap1        | 881.45 | 937.58  | 933.99 | 921.94 | 1051  | 1077  | 864.9 | 981.25  |
| 288272    | Mis18a       | 101.8  | 80.38   | 88.82  | 69.04  | 113.7 | 64.47 | 56.84 | 132.73  |
| 360955    | Man2b2       | 963    | 1035    | 1100   | 1316   | 1306  | 1516  | 996   | 955     |
| 83510     | Lypla2       | 1359   | 1403    | 1302   | 1247   | 1409  | 1519  | 1401  | 1414    |
| 116695    | Kcnd1        | 3768   | 4273    | 3866   | 3931   | 4399  | 4557  | 4161  | 4010    |
| 60663     | Insrr        | 310    | 319     | 377    | 345    | 369   | 373   | 334   | 385     |
| 296571    | Phpt1        | 504    | 418     | 466    | 392    | 498   | 467   | 469   | 491     |
| 680262    | Hyls1        | 97     | 104     | 114    | 90     | 120   | 83    | 118   | 117     |
| 684785    | Plekha2      | 404    | 394     | 334    | 436    | 466   | 406   | 460   | 364     |
| 310025    | Ptcd2        | 195    | 217     | 184    | 212    | 224   | 218   | 216   | 216     |
| 311203    | Pex16        | 424    | 405     | 372    | 366    | 419   | 459   | 413   | 404     |
| 500084    | Trim24       | 287.78 | 302.87  | 285.83 | 289.87 | 305.6 | 349.8 | 331.7 | 274.63  |
| 29167     | Dctn1        | 12389  | 13399   | 12829  | 13834  | 15139 | 14604 | 13467 | 13529   |
| 306782    | Ror2         | 94     | 109     | 106    | 119    | 127   | 119   | 117   | 100     |
| 363471    | Pnpla4       | 54     | 66      | 42     | 58     | 49    | 53    | 65    | 71      |
| 100912380 | LOC100912380 | 7105.3 | 7923.07 | 7890.5 | 7613.5 | 8393  | 8649  | 8022  | 7966.81 |
| 24782     | Slc9a1       | 1368   | 1433    | 1325   | 1532   | 1485  | 1769  | 1498  | 1369    |
| 288176    | Cmss1        | 162    | 207     | 165    | 150    | 187   | 186   | 160   | 207     |
| 103693239 | Arl4c        | 794    | 709     | 644    | 711    | 811   | 833   | 706   | 742     |
| 308393    | Pnma8b       | 458    | 525     | 502    | 649    | 630   | 559   | 545   | 575     |
| 63886     | Abcb9        | 970    | 961     | 839    | 1006   | 1020  | 1112  | 1024  | 930     |
| 309790    | Msl13l2      | 173    | 152     | 127    | 120    | 154   | 156   | 151   | 158     |
| 292988    | Mkrn3        | 24     | 13      | 24     | 12     | 17    | 21    | 19    | 22      |
| 688843    | Nap1l5       | 5302   | 5187    | 4361   | 5030   | 5348  | 5232  | 5522  | 5412    |
| 308579    | Cpt1c        | 805.37 | 768.29  | 678.21 | 723.27 | 787.5 | 829.4 | 790.6 | 812.34  |
| 103693776 | LOC103693776 | 1889.2 | 1633.08 | 1508.5 | 1650   | 1765  | 1990  | 1890  | 1586.08 |
| 314617    | Wdr18        | 588    | 593     | 536    | 504    | 651   | 591   | 579   | 583     |
| 299620    | Sf3a2        | 530.34 | 580.3   | 550.26 | 561.17 | 598.9 | 640.5 | 599   | 566.77  |
| 300142    | Trabd        | 479    | 467     | 444    | 418    | 484   | 527   | 474   | 472     |
| 498465    | LOC498465    | 9.56   | 8.6     | 10.11  | 0      | 12.56 | 0     | 12.83 | 5.21    |

|           |              |        |         |        |        |       |       |       |         |
|-----------|--------------|--------|---------|--------|--------|-------|-------|-------|---------|
| 361992    | Them4        | 251    | 292     | 206    | 258    | 260   | 264   | 284   | 282     |
| 362298    | Actr3b       | 483    | 417     | 424    | 423    | 455   | 491   | 516   | 429     |
| 301334    | Arhgef4      | 4932   | 5098    | 4758   | 4548   | 5323  | 5542  | 5063  | 5004    |
| 310732    | Slc22a15     | 164.88 | 155.19  | 167.04 | 139.18 | 164.2 | 178.4 | 189.8 | 145.63  |
| 65210     | Cyp2j4       | 65.99  | 64      | 67.99  | 59.04  | 80    | 56.99 | 65    | 76.28   |
| 499114    | Fbxo27       | 204    | 170     | 215    | 209    | 207   | 213   | 240   | 204     |
| 171441    | Yif1a        | 419    | 408     | 435    | 358    | 409   | 469   | 430   | 446     |
| 114031    | Fstl3        | 78     | 82      | 87     | 55     | 70    | 107   | 63    | 87      |
| 50671     | Fasn         | 7316   | 8578    | 7839   | 9155   | 8818  | 9764  | 8232  | 8797    |
| 497934    | Borcs6       | 574    | 551     | 562    | 547    | 618   | 599   | 628   | 574     |
| 311324    | Disp2        | 2984   | 3223    | 3368   | 3569   | 3678  | 3796  | 3460  | 3299    |
| 171379    | Smarca4      | 2337   | 2547    | 2671   | 2884   | 2943  | 2943  | 2649  | 2769    |
| 315939    | Pxylp1       | 278    | 248     | 331    | 277    | 276   | 348   | 293   | 311     |
| 304575    | Plcxdl       | 4      | 9       | 6.75   | 4.25   | 4.25  | 8.49  | 9     | 4.25    |
| 102553587 | Peg10        | 42     | 53      | 48     | 62     | 68    | 47    | 59    | 48      |
| 363518    | Naa10        | 273    | 289     | 243    | 220    | 288   | 286   | 272   | 264     |
| 289733    | Pla2g3       | 596    | 633     | 629    | 589    | 697   | 698   | 670   | 585     |
| 305505    | Ccm2         | 809    | 819     | 742    | 643    | 839   | 825   | 746   | 853     |
| 500059    | Prrt4        | 66     | 66      | 52     | 57     | 84    | 63    | 51    | 63      |
| 192180    | Nip7         | 137    | 138     | 114    | 93     | 117   | 133   | 130   | 142     |
| 29714     | Ptprn2       | 1008.5 | 1090.56 | 955.6  | 1026.1 | 1166  | 1122  | 1079  | 1052.88 |
| 83613     | Nefl         | 127447 | 128131  | 111015 | 132156 | 1E+05 | 1E+05 | 1E+05 | 127740  |
| 288912    | Mri1         | 405    | 460     | 384    | 362    | 424   | 415   | 462   | 444     |
| 171160    | Hopx         | 1600   | 1403    | 1352   | 1215   | 1451  | 1474  | 1512  | 1597    |
| 289562    | Noa1         | 395    | 342     | 342    | 313    | 385   | 396   | 366   | 361     |
| 102549235 | LOC102549235 | 3      | 8       | 6      | 7      | 7     | 7     | 4     | 8       |
| 108350942 | LOC108350942 | 9      | 6       | 4      | 5      | 8     | 9     | 7     | 2       |
| 24182     | Agtr2        | 8      | 4       | 7      | 5      | 6     | 7     | 10    | 3       |
| 292129    | Tdrd1        | 34     | 28      | 47     | 23     | 26    | 40    | 39    | 38      |
| 29446     | Ghrh         | 5      | 2       | 4      | 1      | 4     | 2     | 3     | 4       |
| 315820    | Myo5c        | 24     | 23      | 29     | 20     | 30    | 19    | 30    | 25      |
| 362042    | Gimd1        | 2      | 3       | 3      | 4      | 2     | 2     | 5     | 4       |
| 362047    | RGD1309170   | 4      | 3       | 1      | 4      | 5     | 3     | 2     | 3       |
| 290789    | Cldn23       | 12     | 18      | 31     | 11     | 16    | 21    | 16    | 25      |
| 116489    | Kcnk4        | 492.1  | 537.07  | 545.12 | 466.23 | 629.8 | 549.6 | 469.5 | 561.84  |
| 361550    | Gramd1a      | 1518   | 1494    | 1328   | 1395   | 1600  | 1592  | 1590  | 1432    |
| 299511    | Rdh16        | 38.46  | 51.95   | 39.64  | 44.95  | 40.9  | 40.98 | 51.78 | 55.96   |
| 361131    | Pbx4         | 79     | 74      | 55     | 67     | 81    | 74    | 73    | 70      |
| 294422    | Smpd13a      | 238    | 234     | 315    | 217    | 280   | 304   | 233   | 271     |
| 298500    | Smad2        | 1971   | 2066    | 1808   | 2058   | 2159  | 2207  | 2063  | 2136    |
| 289633    | Nwd2         | 911    | 543     | 594    | 924    | 556   | 661   | 1216  | 788     |
| 361358    | Bean1        | 2868   | 3257    | 2812   | 3306   | 3264  | 3393  | 3197  | 3415    |
| 362284    | Phactr3      | 263    | 256     | 211    | 272    | 262   | 249   | 291   | 284     |
| 366515    | Wrap73       | 256    | 229     | 207    | 214    | 247   | 249   | 227   | 259     |
| 305963    | Pinx1        | 133.36 | 121.5   | 124.87 | 124.74 | 134   | 123.7 | 151.2 | 137.92  |
| 289193    | Fmo13        | 2      | 2       | 0      | 1      | 2     | 0     | 2     | 1.42    |
| 681410    | LOC681410    | 1641   | 1614    | 1689   | 1538   | 1812  | 1847  | 1786  | 1582    |
| 306340    | Ano8         | 1040.5 | 1084.85 | 1114.4 | 1076.8 | 1204  | 1175  | 1227  | 1073.55 |
| 306243    | Cacna2d3     | 1493   | 1532    | 1374   | 1527   | 1519  | 1654  | 1705  | 1547    |
| 300689    | Rexo2        | 1395   | 1354    | 1348   | 1222   | 1372  | 1415  | 1469  | 1511    |
| 313156    | Lingo2       | 152    | 135     | 115    | 132    | 167   | 134   | 141   | 137     |
| 64444     | Isl1         | 518    | 449     | 434    | 521    | 563   | 526   | 497   | 498     |
| 192253    | Myo16        | 50     | 61      | 66     | 72     | 64    | 75    | 81    | 50      |
| 24245     | Camk2b       | 1684   | 1722    | 1617   | 1698   | 1931  | 1920  | 1623  | 1814    |
| 102549836 | LOC102549836 | 88     | 81      | 68     | 83     | 100   | 76    | 62    | 109     |
| 29189     | Fdx1         | 69     | 92      | 84     | 75     | 84    | 73    | 94    | 96      |

|           |              |        |         |        |        |       |       |       |         |
|-----------|--------------|--------|---------|--------|--------|-------|-------|-------|---------|
| 64517     | Thop1        | 612    | 620     | 579    | 583    | 675   | 656   | 612   | 653     |
| 360754    | Zfp358       | 357    | 395     | 383    | 322    | 384   | 400   | 368   | 428     |
| 308571    | Lrrc4b       | 1008   | 1068    | 1090   | 1110   | 1260  | 1228  | 1047  | 1102    |
| 500925    | Ccdc184      | 293    | 363     | 315    | 320    | 347   | 370   | 349   | 334     |
| 171039    | Rph3a        | 9395   | 10366   | 10059  | 12283  | 11816 | 12029 | 10793 | 11020   |
| 117287    | Park7        | 2694   | 2508    | 2389   | 2167   | 2553  | 2682  | 2649  | 2698    |
| 116486    | Sec14l2      | 745    | 781     | 755    | 700    | 783   | 855   | 862   | 733     |
| 294236    | Gtf2h4       | 228    | 235     | 223    | 189    | 238   | 231   | 248   | 232     |
| 313717    | Clstn1       | 9376   | 9908    | 8960   | 10023  | 9966  | 11687 | 10252 | 9602    |
| 296635    | Plpp7        | 160    | 172     | 172    | 133    | 157   | 205   | 181   | 148     |
| 304521    | Rnft2        | 1487   | 1369    | 1387.4 | 1414   | 1636  | 1605  | 1494  | 1402.08 |
| 24333     | Eno1         | 10537  | 10690.2 | 9948   | 10042  | 11455 | 11008 | 10426 | 11825   |
| 79247     | Htr5b        | 53.79  | 74.21   | 62.62  | 53.51  | 74.31 | 69.5  | 68.64 | 52.4    |
| 293701    | Esrra        | 655.13 | 665.15  | 503.12 | 621    | 644   | 684   | 669   | 655     |
| 170588    | Acot8        | 240.43 | 248.97  | 217.42 | 202.37 | 242.5 | 251.7 | 242.2 | 250.1   |
| 308097    | Tagap        | 39     | 38      | 43     | 33     | 29    | 35    | 57    | 45      |
| 25058     | Hk1          | 5196   | 5630    | 5541   | 5891   | 6104  | 6509  | 5721  | 5816    |
| 680465    | Trappc6a     | 119    | 124     | 152    | 99     | 128   | 120   | 137   | 151     |
| 29575     | Tcea2        | 1258   | 1315    | 1152   | 1177   | 1323  | 1415  | 1279  | 1302    |
| 311615    | Tox2         | 672    | 681     | 628    | 698    | 802   | 702   | 675   | 728     |
| 502334    | Ceacam18     | 14     | 13      | 14     | 6      | 13    | 10    | 16    | 12      |
| 65275     | Gpr27        | 44     | 54      | 48     | 42     | 59    | 49    | 44    | 52      |
| 29145     | Ctxnl        | 1086   | 1199    | 1107   | 1022   | 1317  | 1190  | 1102  | 1181    |
| 50592     | Grial        | 59     | 54      | 63     | 47     | 54    | 63    | 75    | 50      |
| 313892    | Togaram2     | 49     | 32      | 15     | 33     | 32    | 38    | 29    | 41      |
| 84393     | Kif4a        | 24     | 24      | 48     | 33     | 39    | 30    | 40    | 31      |
| 84388     | I118bp       | 204    | 154     | 174    | 183    | 189   | 185   | 199   | 203     |
| 287115    | Pgp          | 1429   | 1313    | 1312   | 1197   | 1475  | 1470  | 1367  | 1387    |
| 83610     | Apba2        | 1296   | 1438    | 1180   | 1355   | 1498  | 1400  | 1493  | 1328    |
| 29466     | Aes          | 8296   | 8347    | 8192   | 7647   | 8983  | 9016  | 8369  | 8889    |
| 116561    | Cltb         | 3859   | 3825    | 3684   | 3314   | 3931  | 4041  | 3901  | 4065    |
| 25413     | Cpt2         | 484    | 492     | 413    | 481    | 503   | 530   | 489   | 508     |
| 299800    | Tmem19       | 425.65 | 386.12  | 346.38 | 351.89 | 398.2 | 377.6 | 427.5 | 436.1   |
| 300446    | Zfp653       | 165    | 147     | 183    | 147    | 146   | 180   | 183   | 188     |
| 29452     | Epas1        | 2037   | 2078    | 1892   | 2138   | 2254  | 2371  | 2154  | 2064    |
| 680440    | Nkpd1        | 18     | 18      | 22     | 12     | 18    | 19    | 26    | 13      |
| 60352     | Mapk12       | 1169.2 | 1151.23 | 1012.5 | 1138.7 | 1322  | 1267  | 1106  | 1159.77 |
| 287828    | Jpt1         | 2121   | 1926    | 1958   | 1729   | 2170  | 2147  | 2062  | 2018    |
| 114028    | Ctnnd2       | 1038   | 1127    | 1086   | 1170   | 1298  | 1224  | 1166  | 1112    |
| 116728    | 5-Sep        | 5227   | 5182    | 5252.7 | 5214   | 5889  | 6002  | 5527  | 5248    |
| 314405    | Otub2        | 128    | 124     | 143    | 118    | 147   | 138   | 131   | 141     |
| 303730    | Cbx2         | 120    | 101     | 99     | 88     | 121   | 120   | 100   | 102     |
| 362053    | Clca4        | 8      | 4       | 7      | 5      | 11    | 10.06 | 3     | 2       |
| 252928    | Timm13       | 830    | 691     | 707    | 590    | 768   | 774   | 719   | 799     |
| 100910270 | LOC100910270 | 38.03  | 40.35   | 46.89  | 64.74  | 73.18 | 54.29 | 52.46 | 26.4    |
| 432361    | Nrg2         | 253.01 | 198     | 196    | 226    | 282   | 230   | 220   | 216     |
| 24338     | Ephb1        | 517    | 447     | 452    | 574    | 541   | 546   | 536   | 538     |
| 170843    | Khdrbs2      | 34     | 28      | 40     | 26     | 35    | 30    | 36    | 38      |
| 313244    | Frmpd1       | 2419   | 2836    | 2543   | 3001   | 2937  | 3237  | 2759  | 2797    |
| 362768    | Ttc7b        | 1399   | 1426    | 1369   | 1488   | 1498  | 1606  | 1517  | 1551    |
| 171097    | Adap1        | 2959   | 2882    | 2767   | 2752   | 3228  | 3089  | 3006  | 3017    |
| 100363376 | Cmc2         | 267    | 300     | 245    | 231    | 282   | 278   | 275   | 298     |
| 116671    | Cdk5r1       | 245    | 227     | 220    | 258    | 291   | 252   | 249   | 240     |
| 79435     | Ube2d4       | 14.01  | 8       | 4.01   | 6.07   | 11.02 | 4.82  | 6.01  | 13.01   |
| 359728    | Rab40c       | 412    | 376     | 345    | 418    | 408   | 427   | 435   | 415     |
| 54239     | Chrn2        | 1188   | 1288    | 1222   | 1428   | 1559  | 1409  | 1354  | 1247    |

|           |              |        |         |        |        |       |       |       |          |
|-----------|--------------|--------|---------|--------|--------|-------|-------|-------|----------|
| 289778    | RGD1309870   | 4.38   | 10      | 11.5   | 11.71  | 13.13 | 7.77  | 8.33  | 11.61    |
| 290658    | Cers1        | 501.06 | 511.84  | 478.3  | 524.4  | 565.7 | 579.7 | 532.8 | 511.72   |
| 306351    | Gdf1         | 501.06 | 511.84  | 478.3  | 524.4  | 565.7 | 579.7 | 532.8 | 511.72   |
| 682787    | Sumo4        | 266.43 | 258.11  | 253.6  | 343.17 | 285.3 | 369.1 | 274.5 | 289.45   |
| 100188944 | Pnkd         | 3583.2 | 3988.61 | 3361.7 | 3976.9 | 4219  | 4318  | 3689  | 3974.28  |
| 685244    | Iqsec2       | 824    | 877     | 879    | 942    | 1011  | 1014  | 909   | 893      |
| 291434    | Rpl17        | 3483.4 | 3487.55 | 3524   | 2726   | 3612  | 3459  | 3673  | 3622.24  |
| 155151    | Corola       | 1103   | 871     | 818    | 855    | 1073  | 1124  | 761   | 1005     |
| 117016    | Mark1        | 1441   | 1652    | 1288   | 1661   | 1640  | 1764  | 1634  | 1528     |
| 362783    | Eml1         | 2527   | 2437    | 2697   | 2331   | 2613  | 2678  | 2766  | 2802     |
| 312504    | Fbxo41       | 292    | 307     | 296    | 361    | 366   | 368   | 327   | 304      |
| 317232    | Magee1       | 1835   | 1985    | 1759   | 2104   | 2180  | 2184  | 2088  | 1898     |
| 306808    | Ippk         | 154    | 173     | 160    | 158    | 165   | 169   | 177   | 190      |
| 291103    | Uqcrfsl      | 1996   | 1908    | 1679   | 1487   | 1842  | 1922  | 2054  | 1866     |
| 25398     | Cacnala      | 1884   | 1834    | 1929   | 2236   | 2275  | 2268  | 2113  | 1912     |
| 102548151 | LOC102548151 | 9      | 16      | 6      | 15     | 11    | 9     | 13    | 17       |
| 366631    | RGD1560556   | 18     | 15      | 14     | 22     | 22    | 19    | 18    | 16       |
| 499603    | RGD1565989   | 7      | 5       | 8      | 3      | 8     | 6     | 7     | 4        |
| 682968    | Isx          | 7      | 2       | 6      | 8      | 11    | 3     | 2     | 9        |
| 315119    | Mfng         | 66     | 45      | 54     | 42     | 54    | 58    | 55    | 58       |
| 298873    | Slc7a15      | 198.91 | 157.17  | 165.52 | 239.35 | 283.3 | 190.9 | 197.4 | 155.57   |
| 64528     | Golga2       | 2459   | 2545.02 | 2476.7 | 2694   | 2775  | 2822  | 2655  | 2808.92  |
| 102554102 | Trim30c      | 6.86   | 3.21    | 2.92   | 1.02   | 2.21  | 4.41  | 4.09  | 4.52     |
| 361672    | Kndc1        | 416    | 452     | 440    | 504    | 414   | 509   | 544   | 503      |
| 499870    | Rad51        | 50     | 37      | 53     | 32     | 39    | 49    | 56    | 43       |
| 361232    | Paklip1      | 112    | 133     | 127    | 121    | 132   | 141   | 142   | 121      |
| 103693202 | LOC103693202 | 14.08  | 16.64   | 17.13  | 18.4   | 21.87 | 12.13 | 17    | 21.03    |
| 500929    | Tuba1b       | 50472  | 49760.9 | 47474  | 52657  | 53611 | 56021 | 52793 | 55425.41 |
| 140728    | Cacng7       | 2134   | 1999    | 1836   | 2085   | 2349  | 2355  | 2131  | 1922     |
| 25665     | Scn5a        | 58.62  | 50.55   | 46.38  | 64     | 72.58 | 65.71 | 57.23 | 43.2     |
| 291983    | Psmb10       | 470    | 382     | 342    | 260    | 421   | 400   | 371   | 389      |
| 83801     | Ptms         | 7418   | 7300    | 7941   | 7387   | 8738  | 8223  | 7494  | 8217     |
| 315220    | Mapk8ip2     | 6562   | 6757.02 | 6426.4 | 7253.9 | 7694  | 7696  | 7176  | 6793.33  |
| 116664    | Atp6v1f      | 2009   | 1958    | 1811   | 1715   | 2053  | 2065  | 2000  | 2030     |
| 299195    | Coq6         | 386.6  | 389.74  | 370.32 | 352.47 | 381.5 | 429.4 | 403.9 | 415.39   |
| 25364     | Asic2        | 351.13 | 311.99  | 361.74 | 349.71 | 356.5 | 413.2 | 390.8 | 334.18   |
| 81752     | Ptger2       | 64     | 41      | 64     | 71     | 89    | 43    | 64    | 65       |
| 309459    | Neur11       | 1065   | 1124    | 1056   | 1051   | 1222  | 1169  | 1077  | 1204     |
| 56827     | Cacnali      | 100.97 | 89      | 88     | 136    | 111   | 107.2 | 111   | 121      |
| 290771    | Pdgfr1       | 80     | 64      | 62     | 68     | 85    | 72    | 69    | 72       |
| 103693794 | LOC103693794 | 17.52  | 14.11   | 22.31  | 8.15   | 28.09 | 12.72 | 17.94 | 8.78     |
| 100359592 | Palm3        | 919.94 | 969.94  | 895.92 | 1003   | 1148  | 1006  | 1009  | 958      |
| 295310    | Zfp697       | 91.85  | 76.5    | 76.26  | 87.42  | 90.06 | 96.64 | 68.43 | 106      |
| 24588     | Nefm         | 161451 | 157676  | 128380 | 169597 | 2E+05 | 2E+05 | 2E+05 | 148816   |
| 83791     | Fdps         | 5789   | 5796    | 5431   | 4822   | 5629  | 5694  | 5983  | 6447     |
| 499558    | 11-Mar       | 172    | 188     | 200    | 147    | 185   | 181   | 185   | 218      |
| 315695    | Odf311       | 10     | 17      | 19     | 11     | 16    | 18    | 18    | 10       |
| 293494    | Ino80e       | 657.71 | 691.64  | 626.45 | 673.02 | 772.4 | 726.5 | 697.8 | 684.57   |
| 29213     | Tubb4a       | 11921  | 13601.3 | 12444  | 13010  | 14864 | 14932 | 12804 | 12851.84 |
| 29463     | Ptp4a1       | 612.54 | 966.86  | 697.69 | 939.51 | 1142  | 681.1 | 735.7 | 939.86   |
| 404280    | Midlip1      | 3265   | 3193    | 3057   | 2953   | 3426  | 3463  | 3206  | 3468     |
| 361528    | Ttc9b        | 736    | 560     | 563    | 532    | 716   | 638   | 573   | 674      |
| 301529    | Dnpep        | 1700   | 1577    | 1527   | 1408   | 1632  | 1628  | 1676  | 1822     |
| 690795    | H2afj        | 151.87 | 112.51  | 125.9  | 109.9  | 106.7 | 181.1 | 109.6 | 146.8    |
| 303794    | Dgcr6        | 1168   | 1051    | 1027   | 846    | 1159  | 1064  | 1040  | 1189     |
| 500709    | Itpk1        | 1413.4 | 1601.24 | 1575.3 | 1473.4 | 1627  | 1733  | 1566  | 1671.76  |

|           |              |        |         |        |        |       |       |       |          |
|-----------|--------------|--------|---------|--------|--------|-------|-------|-------|----------|
| 140591    | Ppfia3       | 1407   | 1538    | 1434   | 1593   | 1710  | 1651  | 1581  | 1556     |
| 497987    | Hoxb5        | 116    | 122     | 112    | 104    | 110   | 143   | 112   | 129      |
| 360636    | Slc25a39     | 2014   | 1925    | 1973   | 1716   | 2181  | 2087  | 1949  | 2083     |
| 171088    | Inpp5j       | 711    | 719     | 688    | 810    | 847   | 858   | 749   | 732      |
| 500566    | Stpgl        | 97     | 163.08  | 138    | 89     | 135   | 131   | 151   | 113      |
| 289007    | Thsd7b       | 250    | 268     | 245    | 303    | 265   | 305   | 304   | 286      |
| 302967    | Paqr4        | 2927   | 3084    | 2771   | 3046   | 3332  | 3451  | 3045  | 3043     |
| 445541    | Repin1       | 520.92 | 489.52  | 473.54 | 490.13 | 555   | 573.9 | 457   | 562.41   |
| 100361465 | Pate2        | 8      | 9       | 3      | 14     | 9     | 11    | 10    | 7        |
| 314328    | Lrrc74a      | 10     | 10      | 7      | 7      | 10    | 8     | 10    | 9        |
| 689035    | Cyb5r1       | 21     | 14      | 14     | 19     | 14    | 22    | 19    | 19       |
| 29657     | Arntl        | 199    | 252     | 287    | 225    | 183   | 239   | 316   | 310      |
| 25495     | Nog          | 145.71 | 118.14  | 133.07 | 131.54 | 158.8 | 159.9 | 130.7 | 125.75   |
| 501624    | Bex4         | 106    | 117     | 107    | 123    | 124   | 110   | 122   | 137      |
| 362810    | Coq10a       | 333    | 369     | 295    | 294    | 360   | 420   | 305   | 320      |
| 286920    | Asic3        | 2730   | 2592    | 2795   | 2758   | 3097  | 3134  | 2923  | 2682     |
| 108348136 | LOC108348136 | 312.83 | 478.23  | 472.84 | 485.43 | 415.3 | 507   | 490.8 | 490.82   |
| 65180     | Kcnd2        | 35     | 25.72   | 32.93  | 57.55  | 35.78 | 51.44 | 47.52 | 29.83    |
| 300222    | Mcrs1        | 667    | 708     | 648    | 565    | 687   | 741   | 697   | 692      |
| 117252    | Dnah10       | 407.73 | 403.31  | 395.34 | 404.75 | 460.3 | 463.9 | 395.4 | 434.26   |
| 313878    | Galnt14      | 943.69 | 909.37  | 863.46 | 909.72 | 1154  | 1001  | 885.3 | 906.47   |
| 246264    | Zfp382       | 306.29 | 282.98  | 265.76 | 289.05 | 357.3 | 230.2 | 300.2 | 357.75   |
| 309373    | Ubtcl        | 475    | 431     | 420    | 368    | 476   | 471   | 462   | 435      |
| 117265    | Pex6         | 403.69 | 469.87  | 442.64 | 443.4  | 489.7 | 472.1 | 464   | 489.73   |
| 311616    | Gdap111      | 1402   | 1419    | 1186   | 1318   | 1452  | 1522  | 1421  | 1402     |
| 500793    | Btbd2        | 2565   | 2435    | 2533   | 2574   | 2826  | 2891  | 2649  | 2638     |
| 81613     | Ceacam1      | 170.53 | 125     | 185.93 | 136.8  | 196.8 | 166.9 | 157.4 | 152.08   |
| 25630     | Pkm          | 20067  | 19694   | 19362  | 18845  | 20730 | 23271 | 20242 | 20649.97 |
| 300066    | Ggal         | 1441   | 1552    | 1512   | 1483   | 1674  | 1665  | 1619  | 1562     |
| 501582    | Gspt2        | 227    | 216     | 204    | 216    | 235.6 | 240   | 236.1 | 228      |
| 156435    | Tmprss2      | 24.96  | 15.98   | 19.22  | 31.21  | 14.94 | 37.07 | 29.97 | 17.51    |
| 29465     | Trpv2        | 1153   | 1200    | 1195   | 1178   | 1339  | 1303  | 1276  | 1228     |
| 102548695 | LOC102548695 | 250    | 270     | 252    | 231    | 262   | 271   | 278.1 | 281      |
| 293628    | Chidl        | 337.31 | 418.73  | 397.24 | 290.32 | 408   | 376.1 | 409.5 | 378.38   |
| 362169    | Alkbh3       | 1277   | 1246    | 1100   | 1057   | 1194  | 1411  | 1245  | 1246     |
| 361368    | Largel       | 3715   | 3617    | 3390   | 4022   | 3835  | 4335  | 3992  | 3894     |
| 114630    | Atp5mc3      | 3050   | 3022    | 2787   | 2670   | 3141  | 3105  | 3085  | 3224     |
| 288499    | Slc29a4      | 412    | 380     | 417    | 375    | 457   | 421   | 421   | 426      |
| 294286    | Kifcl        | 37     | 29      | 58     | 22     | 54    | 38    | 38    | 29       |
| 498909    | Coq9         | 693    | 703     | 600    | 642    | 701   | 717   | 737   | 718      |
| 291081    | Tubb2b       | 8758.1 | 8709.36 | 9046   | 8576   | 9541  | 9454  | 9201  | 10019.08 |
| 282819    | Ppif         | 221.93 | 238.93  | 179.91 | 160    | 203.5 | 250.9 | 195   | 222.74   |
| 304298    | Foxk1        | 108    | 96      | 113    | 143    | 135   | 103   | 117   | 146      |
| 102553890 | LOC102553890 | 2.94   | 0       | 1.21   | 0      | 0     | 0.96  | 2.07  | 1.49     |
| 500305    | Dcp1b        | 150    | 146     | 178    | 165    | 147   | 194   | 200   | 155      |
| 310256    | Lrrc31       | 51     | 46.5    | 31.44  | 46.47  | 55.2  | 41.36 | 46.57 | 47.93    |
| 315059    | Trappc9      | 787    | 778     | 829    | 844    | 927   | 898   | 862   | 840      |
| 311848    | Sh3glb2      | 3984   | 4067    | 3770   | 3750   | 4269  | 4262  | 4089  | 4341     |
| 25638     | Pde4a        | 60     | 74      | 59     | 87     | 73    | 101   | 78    | 53       |
| 100361647 | Galnt6       | 174    | 178     | 173    | 180    | 214   | 179   | 168   | 207      |
| 297437    | Txnrd3       | 523    | 555     | 524    | 513    | 599   | 582   | 586   | 537      |
| 310721    | Tent5c       | 82.01  | 63.81   | 84.15  | 54.88  | 101.5 | 70.35 | 44.94 | 93.56    |
| 303790    | Smpd4        | 547    | 553     | 609    | 617    | 598   | 652   | 635   | 649      |
| 501923    | Smim20       | 262    | 279     | 243    | 211    | 243   | 278   | 268   | 295      |
| 311849    | Crat         | 2381   | 2502    | 2487   | 2386   | 2734  | 2719  | 2617  | 2559     |
| 307916    | Jph3         | 2332   | 2365    | 2287   | 2323   | 2813  | 2578  | 2453  | 2296     |

|           |                 |        |         |        |        |       |       |       |         |
|-----------|-----------------|--------|---------|--------|--------|-------|-------|-------|---------|
| 81743     | Pde2a           | 1265   | 1248    | 1292   | 1288   | 1393  | 1396  | 1382  | 1378    |
| 24518     | Jund            | 2217   | 2105    | 2080   | 2174   | 2679  | 2365  | 2143  | 2157    |
| 25590     | Chrna4          | 20     | 8       | 20     | 19     | 22    | 15    | 20    | 16      |
| 293665    | Zdhhc24         | 163    | 145     | 142    | 130    | 177   | 155   | 161   | 139     |
| 171053    | Pank4           | 471    | 534     | 461    | 552    | 499   | 562   | 562   | 576     |
| 100912294 | LOC100912294    | 38.2   | 42.42   | 62.79  | 48.36  | 54.56 | 43.8  | 59.07 | 51.55   |
| 314637    | Slc39a3         | 229    | 220     | 202    | 207    | 264   | 253   | 192   | 226     |
| 363197    | Tmem63b         | 3025   | 3151    | 2857   | 3367   | 3381  | 3670  | 3342  | 3120    |
| 689616    | Apcdd1          | 577    | 590     | 589    | 594    | 775   | 650   | 617   | 519     |
| 313595    | RGD1563072      | 333.91 | 356.95  | 264.25 | 323.67 | 381.5 | 362.1 | 305.5 | 344.53  |
| 363082    | Pdcd7           | 515    | 531     | 525    | 497    | 571   | 573   | 523   | 587     |
| 361696    | Rps6kb2         | 380    | 323     | 361    | 359    | 387   | 407   | 397   | 360     |
| 114860    | Gale            | 512    | 542     | 539    | 497    | 564   | 598   | 547   | 569     |
| 83681     | Cish            | 298    | 345     | 354    | 392    | 381   | 393   | 350   | 390     |
| 290640    | Map1s           | 867    | 956     | 934    | 876    | 1054  | 1022  | 892   | 992     |
| 366826    | Diras1          | 1953.3 | 1973.08 | 1665.7 | 1970.7 | 2371  | 2041  | 2007  | 1824.71 |
| 300447    | Ecsit           | 687    | 731     | 635    | 722    | 741   | 829   | 738   | 717     |
| 64569     | Lst1            | 10.58  | 9.66    | 17     | 4.7    | 11    | 8     | 17.72 | 9       |
| 683460    | Proser2         | 76.45  | 68.01   | 68     | 80.19  | 80.09 | 84    | 81.94 | 73      |
| 360738    | Tango2          | 1885   | 1674    | 1654   | 1658   | 1999  | 1867  | 1908  | 1717    |
| 299608    | Tmem259         | 1381.8 | 1322.89 | 1419   | 1408   | 1487  | 1610  | 1514  | 1420    |
| 292739    | RGD1307554      | 267    | 251     | 268    | 222    | 258   | 284   | 265   | 292     |
| 29205     | Syngn1          | 810.22 | 831.96  | 766.74 | 896.39 | 1014  | 914.5 | 860.4 | 815.27  |
| 58979     | Gng7            | 473    | 367.01  | 375    | 335    | 398   | 358   | 465   | 469     |
| 29147     | Jag2            | 1502   | 1499    | 1449   | 1536   | 1807  | 1770  | 1474  | 1476    |
| 296134    | Mrps5           | 452    | 472     | 455    | 424    | 517   | 515   | 471   | 463     |
| 298081    | Trmt10b         | 119    | 122     | 117    | 95     | 139   | 109   | 131   | 115     |
| 364224    | Acyp2           | 858    | 754     | 701    | 680    | 779   | 824   | 796   | 865     |
| 690367    | Btbd6           | 1480   | 1449    | 1333   | 1347   | 1587  | 1553  | 1520  | 1457    |
| 54702     | Egln3           | 201    | 262     | 192    | 272    | 228   | 266   | 244   | 273     |
| 689074    | Camsap3         | 638    | 665     | 560    | 641    | 706   | 722   | 683   | 620     |
| 81653     | Dbn1            | 2860.2 | 2808.82 | 2896.4 | 2975.6 | 3279  | 3148  | 3144  | 3016.11 |
| 303631    | Arsg            | 136.08 | 139.11  | 125.57 | 126.9  | 140.2 | 150.8 | 137.3 | 147.15  |
| 362090    | Fam69b          | 1454   | 1285    | 1263   | 1159   | 1530  | 1314  | 1349  | 1436    |
| 103692164 | NEWGENE_1595506 | 708.74 | 630.45  | 581    | 624.27 | 776.7 | 690.2 | 661.4 | 646.93  |
| 171119    | Dscam           | 207    | 203     | 205    | 255    | 264   | 261   | 218   | 206     |
| 100363510 | LOC100363510    | 2      | 2       | 7      | 0      | 4     | 3     | 2     | 3       |
| 24715     | Ren             | 8      | 9       | 6      | 10     | 8     | 8     | 11    | 9       |
| 303070    | Nipal4          | 1      | 2       | 6      | 2      | 2     | 4     | 4     | 2       |
| 303167    | Trim58          | 4      | 3       | 3      | 1      | 5     | 6     | 1     | 0       |
| 364899    | Cfap53          | 24     | 19      | 19     | 26     | 21    | 19    | 30    | 26      |
| 689856    | L3mbtl4         | 2      | 2       | 6      | 1      | 3     | 6     | 3     | 0       |
| 29545     | Uchl1           | 46455  | 44617   | 40419  | 39268  | 46217 | 47818 | 45361 | 46892   |
| 688785    | Trim8           | 985    | 1104    | 1071   | 1117   | 1164  | 1211  | 1136  | 1155    |
| 24183     | Ak1             | 1444.1 | 1538.52 | 1417.1 | 1439.3 | 1554  | 1738  | 1540  | 1539.15 |
| 309637    | Uhrf1bp1        | 507    | 545     | 541    | 602    | 692   | 666   | 537   | 500     |
| 25462     | Hspe1           | 833    | 767     | 772    | 698    | 802   | 796   | 901   | 851     |
| 287477    | Emc6            | 568.66 | 469.01  | 427.42 | 396.07 | 558.4 | 484.3 | 464.8 | 523.45  |
| 25103     | Chrn4           | 145    | 158     | 141    | 191    | 197   | 185   | 154   | 157     |
| 310519    | Slitrk3         | 1446   | 1469    | 1196   | 1739   | 1738  | 1491  | 1657  | 1498.42 |
| 140608    | Atp5me          | 758    | 741     | 649    | 588    | 699   | 728   | 718   | 841     |
| 116660    | Ptprn           | 4964   | 5126    | 5265   | 5370   | 6178  | 5825  | 5696  | 4921    |
| 500110    | Zfp467          | 328    | 329     | 314    | 330    | 363   | 358   | 340   | 359     |
| 362285    | Col9a3          | 680    | 695     | 778    | 634    | 611   | 1057  | 705   | 669     |
| 60668     | Amph            | 1065.3 | 1133.43 | 1001.3 | 1273.8 | 1302  | 1167  | 1231  | 1183.76 |
| 308704    | Lins1           | 132    | 158     | 125    | 131    | 155   | 148   | 162   | 131     |



|           |              |        |         |        |        |       |       |       |         |
|-----------|--------------|--------|---------|--------|--------|-------|-------|-------|---------|
| 54315     | Ucp2         | 4574   | 4258    | 4174   | 4134   | 4891  | 4701  | 4136  | 4982    |
| 296600    | Slc2a6       | 954.73 | 974.27  | 846.34 | 832.8  | 981.4 | 1123  | 899.9 | 934.31  |
| 100361931 | Tmem221      | 6      | 7.33    | 6      | 5      | 8.32  | 6.24  | 3     | 9       |
| 292671    | Mill1        | 11.24  | 6.98    | 16.68  | 7.75   | 9.21  | 21.55 | 11.65 | 4.15    |
| 65153     | Ncs1         | 764    | 769     | 737    | 926    | 946   | 913   | 831   | 799     |
| 287670    | Psmc3        | 2667   | 2629    | 2413   | 2586   | 2878  | 3005  | 2658  | 2698    |
| 25417     | Dpysl4       | 2000   | 2053    | 1678   | 1891   | 2219  | 2120  | 1803  | 2179    |
| 364427    | Lrrc63       | 62     | 56      | 42     | 58     | 60    | 65    | 58    | 55      |
| 100912478 | LOC100912478 | 324.77 | 393.98  | 333.97 | 294.6  | 488.8 | 333.1 | 341.8 | 307.34  |
| 83512     | Fads2        | 2202   | 2158    | 2153   | 2645   | 2465  | 2609  | 2472  | 2453    |
| 362196    | Chac1        | 223    | 227     | 196    | 236    | 264   | 259   | 232   | 208     |
| 688502    | Prmt8        | 212.39 | 174.32  | 109.17 | 153.46 | 161.2 | 157.7 | 197.9 | 192.25  |
| 81804     | Stxbp2       | 88     | 79      | 103    | 78     | 99    | 94    | 104   | 83      |
| 24664     | Pomc         | 30     | 24      | 18     | 15     | 25    | 19    | 22    | 29      |
| 292907    | Ruvbl2       | 512    | 522     | 504    | 461    | 543   | 607   | 547   | 486     |
| 304020    | Filip11      | 204.44 | 148.93  | 219.61 | 169    | 156   | 269.5 | 240.5 | 144.3   |
| 500225    | Ino80b       | 202.35 | 232.04  | 202.04 | 177.2  | 259.3 | 212.5 | 202.1 | 214.72  |
| 684558    | Upf1         | 1019.9 | 1099.33 | 1120.4 | 1172.2 | 1194  | 1306  | 1211  | 1107.56 |
| 292680    | Ccdc61       | 133    | 98      | 124    | 101    | 120   | 138   | 111   | 129     |
| 361671    | Pwyp2b       | 435    | 432     | 414    | 397    | 511.6 | 442   | 445   | 434     |
| 117241    | Pop5         | 160    | 158     | 141    | 127    | 177   | 159   | 138   | 166     |
| 360552    | Pelp1        | 829    | 781     | 790    | 896    | 958   | 926.8 | 795   | 920     |
| 296368    | Ube2c        | 34     | 31      | 54     | 22     | 53    | 42    | 29    | 30      |
| 309159    | Klc2         | 8166   | 8315    | 7794   | 8382   | 9164  | 9134  | 8636  | 8737    |
| 500286    | Ssuh2        | 11     | 24      | 15     | 15     | 21    | 15    | 21    | 14      |
| 500608    | Arhgef33     | 27     | 35      | 30     | 38     | 36    | 31    | 39    | 36      |
| 287452    | RGD1308134   | 294    | 265.04  | 292.43 | 203.99 | 273.5 | 282   | 286.7 | 310.71  |
| 360872    | Rcsd1        | 316    | 379     | 298    | 349    | 346   | 421   | 360   | 339     |
| 308543    | Plekhf1      | 348    | 337     | 285    | 307    | 369   | 355   | 328   | 343     |
| 24786     | Sod1         | 4597   | 4587    | 4249   | 4332   | 4470  | 4269  | 4923  | 5745    |
| 117019    | Eif2b4       | 612    | 594     | 581    | 604    | 624   | 663   | 676   | 649     |
| 102550932 | Tigd4        | 35     | 29      | 27     | 28     | 30    | 38    | 31    | 31      |
| 499871    | Zfyve19      | 194    | 202     | 191    | 170    | 175   | 192   | 257   | 203     |
| 170901    | Efna3        | 84     | 62      | 63     | 60.99  | 78    | 83    | 60    | 73.99   |
| 289185    | Cregl        | 404    | 419     | 352    | 423    | 449   | 456   | 420   | 421     |
| 307482    | Fchsd1       | 527.77 | 585.31  | 575.69 | 535.64 | 608.5 | 613.4 | 555.6 | 653.03  |
| 64076     | Slc26a1      | 69.84  | 50.61   | 84.23  | 81.98  | 75.27 | 85.66 | 87.69 | 64.6    |
| 498830    | MGC116121    | 249    | 176     | 166    | 164    | 193   | 215   | 240   | 177     |
| 366431    | Tceanc2      | 219    | 202     | 207    | 224    | 224   | 226   | 239   | 242     |
| 690914    | Muc15        | 2.08   | 8.2     | 18.35  | 12.22  | 22.07 | 5.72  | 7.48  | 9.37    |
| 361137    | Tmem192      | 518    | 522     | 501    | 485    | 530   | 547   | 546   | 591     |
| 308988    | Sez6l2       | 2860   | 3311    | 2866   | 3536   | 3362  | 3936  | 3296  | 3146    |
| 298377    | Coa7         | 149    | 136     | 99     | 90     | 121   | 141   | 127   | 129     |
| 362535    | Lurap11      | 283    | 280     | 249    | 265    | 314   | 274   | 286   | 303     |
| 299714    | Ano4         | 1396   | 1412    | 1245   | 1470   | 1418  | 1431  | 1706  | 1481    |
| 304396    | Lrwd1        | 210    | 212     | 222    | 206    | 208   | 259   | 238   | 224     |
| 64636     | Ntsr2        | 109    | 103     | 139    | 90     | 146   | 106   | 113   | 117     |
| 687694    | Elp4         | 143.35 | 146.28  | 146.24 | 145.2  | 141.5 | 160.4 | 163.6 | 169.65  |
| 300091    | RGD1306782   | 23     | 17      | 26     | 20     | 26    | 14    | 31    | 23      |
| 24157     | Acaala       | 513.89 | 517     | 482.8  | 426.31 | 535.6 | 514.1 | 514   | 557     |
| 288626    | Mmp17        | 296    | 227     | 195    | 184    | 223   | 283   | 205   | 275     |
| 302938    | Mgrn1        | 1804.4 | 1834.75 | 1865.9 | 1925   | 1989  | 2306  | 1947  | 1880.58 |
| 362881    | RGD1306474   | 6.5    | 5.69    | 8.37   | 4.31   | 6.06  | 11.74 | 3.37  | 6.02    |
| 83817     | Ache         | 4408   | 4402    | 4263   | 4173   | 4815  | 5038  | 4578  | 4424    |
| 353498    | Cyp11b3      | 1      | 1.69    | 1.06   | 0      | 0     | 3     | 0     | 1.1     |
| 309722    | Rhobtb1      | 105.55 | 129.06  | 129.84 | 126.98 | 144   | 138.1 | 138   | 117.27  |

|           |              |        |         |        |        |       |       |       |         |
|-----------|--------------|--------|---------|--------|--------|-------|-------|-------|---------|
| 100911510 | LOC100911510 | 22     | 20      | 14     | 19.02  | 16    | 16.02 | 18.01 | 32      |
| 360896    | Esrrg        | 567.19 | 665     | 349    | 785    | 596.6 | 709.4 | 655.8 | 625.57  |
| 291135    | Acot13       | 184    | 182     | 172    | 157    | 198   | 184   | 183   | 195     |
| 60629     | Unc5a        | 162    | 153     | 118    | 176    | 165   | 174   | 157   | 170     |
| 362914    | Wdyhvl       | 154    | 184     | 150    | 153    | 168   | 189   | 165   | 179     |
| 59324     | Kcnk1        | 1275   | 1508    | 933    | 1260   | 1190  | 1511  | 1423  | 1318    |
| 114101    | Cds2         | 1252   | 1397    | 1317   | 1540   | 1861  | 1441  | 1445  | 1275    |
| 408230    | Wfdc15b      | 15     | 3       | 8      | 6      | 6     | 8     | 13    | 8       |
| 60393     | Sult1d1      | 10     | 10      | 9      | 3      | 8     | 17    | 1     | 9       |
| 300238    | Figl2        | 31.19  | 38.36   | 42.71  | 56.52  | 38.7  | 52.71 | 46.2  | 47      |
| 311865    | Ptges2       | 432    | 400     | 452    | 378    | 463   | 450   | 431   | 474     |
| 288271    | Mrap         | 569    | 372     | 252    | 328    | 254   | 382   | 328   | 700     |
| 362245    | Map11c3a     | 4814   | 4813    | 4862   | 4092   | 5076  | 4966  | 5004  | 5282    |
| 29431     | Pak1         | 2377   | 2730    | 1967   | 2624   | 2788  | 2517  | 2590  | 2716    |
| 361500    | Nat14        | 113.24 | 124.3   | 106    | 106    | 139.9 | 106   | 110.9 | 135.04  |
| 295052    | Ccnal        | 52.06  | 38.47   | 42.33  | 52.66  | 52.53 | 49.13 | 57.99 | 43.35   |
| 308493    | Clip3        | 4750.2 | 4465.11 | 5256.2 | 6783   | 4932  | 5621  | 6330  | 6373.82 |
| 294568    | Wasf1        | 1390   | 1420    | 1330   | 1536   | 1566  | 1663  | 1557  | 1425    |
| 292995    | Tm2d3        | 228    | 219     | 242    | 202    | 265   | 234   | 237   | 239     |
| 689984    | Gpr137       | 1742   | 1741    | 1674   | 1609   | 1816  | 1945  | 1755  | 1888    |
| 171460    | Hspbap1      | 100    | 75      | 84     | 112    | 109   | 113   | 84    | 100     |
| 103689951 | LOC103689951 | 235.06 | 255.08  | 228.94 | 122.06 | 173.3 | 273.6 | 222.2 | 251.49  |
| 311204    | Slc35c1      | 558    | 492     | 599    | 501    | 549   | 620   | 552   | 632     |
| 309259    | Nsmce3       | 300    | 296     | 249    | 235    | 283   | 306   | 282   | 311     |
| 117062    | Hmgal        | 1539   | 1565.99 | 1349   | 1411   | 1791  | 1581  | 1468  | 1578.99 |
| 290999    | Higd2a       | 967    | 972     | 939    | 806    | 1047  | 1005  | 1036  | 944     |
| 502694    | Dok5         | 166    | 144     | 124    | 148    | 156   | 153   | 179   | 149     |
| 689637    | Pdcd2l       | 149    | 139     | 128    | 113    | 158   | 160   | 127   | 134     |
| 309901    | Phyhip1      | 5688.7 | 5426.3  | 5228.6 | 5757.8 | 6348  | 6218  | 5990  | 5635.7  |
| 308578    | Ap2a1        | 4598.7 | 5188.95 | 4667.9 | 5152   | 5608  | 5765  | 5121  | 4968.01 |
| 293114    | Tmem126b     | 283    | 243     | 209    | 237    | 265   | 260   | 256   | 283     |
| 315670    | Elmod1       | 726    | 682     | 643    | 674    | 755   | 691   | 808   | 729     |
| 298296    | Pcsk9        | 109    | 118     | 136    | 91     | 116   | 116   | 143   | 122     |
| 690315    | Derl3        | 84.27  | 1.13    | 66.12  | 47.91  | 65.24 | 32.55 | 50.22 | 70.32   |
| 315094    | Hgh1         | 259    | 283     | 262    | 230    | 267   | 281   | 280   | 304     |
| 299617    | Abhd17a      | 2118   | 2011    | 1890.9 | 1736   | 2188  | 2117  | 2043  | 2144    |
| 302421    | Gdpd2        | 379    | 351     | 327    | 365    | 417   | 394   | 396   | 350     |
| 288914    | Trmt1        | 642    | 602     | 598    | 612    | 638   | 703   | 674   | 672     |
| 679944    | Alkbh7       | 260    | 232     | 235    | 210    | 250   | 230   | 235   | 311     |
| 683897    | LOC683897    | 390    | 340     | 348    | 269    | 363   | 349   | 365   | 398     |
| 688990    | Trnp1        | 7036   | 6597    | 5734   | 6566   | 7089  | 6995  | 6873  | 7441    |
| 362562    | 362562       | 68.89  | 53.79   | 73.85  | 69.27  | 73.31 | 66.17 | 76.26 | 75.33   |
| 301427    | Ndufb3       | 1043   | 937     | 876    | 908    | 1001  | 948   | 1006  | 1167    |
| 94338     | Smpd3        | 1156   | 1039    | 1191   | 1124   | 1368  | 1284  | 1188  | 1099    |
| 296741    | Fastk        | 1503   | 1494    | 1320   | 1263   | 1552  | 1540  | 1536  | 1483    |
| 257642    | LOC257642    | 11     | 12      | 8      | 11     | 11    | 10    | 13    | 12      |
| 303924    | Upk1b        | 5      | 7       | 3      | 6      | 11    | 2     | 8     | 2       |
| 307472    | Sh3rf2       | 5      | 3       | 4      | 9      | 3     | 8     | 7     | 5       |
| 304301    | Mmd2         | 2345   | 2243    | 1835   | 2193   | 2223  | 2389  | 2472  | 2353    |
| 313058    | Adgrb2       | 412    | 388     | 426    | 452    | 463   | 515   | 464   | 396     |
| 307797    | Carmil2      | 1712   | 1769    | 1711   | 1684   | 1881  | 1901  | 1816  | 1934    |
| 494342    | B4galt3      | 425    | 463     | 426    | 363    | 442   | 467   | 461   | 467     |
| 317630    | Bloc1s6      | 304.65 | 334     | 311    | 373    | 344   | 315   | 337   | 453     |
| 100911261 | LOC100911261 | 586.76 | 599.6   | 695.12 | 377.76 | 419.4 | 856.1 | 572.2 | 627.43  |
| 287473    | Nek8         | 118.28 | 150.72  | 162.51 | 146.22 | 164.7 | 175.1 | 156   | 137.13  |
| 266777    | Nptx1        | 4074   | 4434    | 4961   | 4694   | 5398  | 5231  | 4877  | 4393    |

|           |              |        |         |        |        |       |       |       |          |
|-----------|--------------|--------|---------|--------|--------|-------|-------|-------|----------|
| 287005    | Camk2n1      | 129    | 127     | 129    | 138    | 135   | 155   | 159   | 124      |
| 368128    | Hpse2        | 32.3   | 28.82   | 37.81  | 46.11  | 32.12 | 35.52 | 49.72 | 41.55    |
| 103694863 | LOC103694863 | 1718.9 | 1587.52 | 1432.9 | 1594.5 | 1941  | 1667  | 1628  | 1703.76  |
| 311210    | Tspan18      | 1235.6 | 1228.09 | 1159.1 | 1436   | 1424  | 1327  | 1375  | 1417.42  |
| 679312    | Tubb1        | 8      | 4       | 3      | 6      | 10    | 6.01  | 2     | 5        |
| 303749    | Ogfod3       | 165    | 140     | 125    | 134    | 138   | 127   | 193   | 160      |
| 362186    | Kif18a       | 25     | 16      | 36     | 17     | 21    | 25    | 32    | 25       |
| 24368     | Fh           | 1124   | 1049    | 910    | 999    | 1094  | 1155  | 1134  | 1090     |
| 362521    | Tmem38b      | 96     | 95      | 101    | 104    | 119   | 117   | 113   | 85       |
| 690407    | Rab36        | 176.16 | 224.62  | 188.42 | 194.57 | 249.6 | 172.9 | 201.4 | 235.09   |
| 361976    | Rrnad1       | 183.74 | 200.72  | 222.56 | 204.29 | 234.3 | 218.3 | 206.5 | 230.11   |
| 65045     | Ppp1r10      | 715    | 827     | 770    | 1123   | 873   | 1019  | 1087  | 786      |
| 25731     | Syt3         | 1124   | 1109    | 896    | 1116   | 1188  | 1235  | 1155  | 1075     |
| 25414     | Bcar1        | 914    | 969     | 995    | 1085   | 1148  | 1158  | 1034  | 1004     |
| 304078    | Cbr3         | 96.52  | 114.53  | 128.75 | 69.32  | 89.46 | 102   | 120.3 | 136.69   |
| 362650    | Fblim1       | 29.02  | 23.02   | 63.65  | 12.05  | 26.04 | 55    | 37    | 21.99    |
| 171563    | Nav2         | 790.56 | 639.14  | 700.58 | 762.08 | 894   | 779.2 | 771.9 | 725.57   |
| 294329    | Trpm2        | 603    | 538     | 500    | 572    | 718   | 578   | 642   | 488      |
| 85249     | Pex11a       | 216    | 181     | 119    | 232    | 201   | 184   | 193   | 242      |
| 316573    | Dner         | 4579.2 | 4391.91 | 4039.9 | 4536.7 | 4941  | 5062  | 4780  | 4453.87  |
| 501661    | F8a1         | 464    | 491     | 451    | 441    | 521   | 501   | 524   | 479      |
| 680122    | Sap30        | 58     | 70      | 66     | 55     | 71    | 64    | 69    | 69       |
| 304330    | Cox19        | 475.69 | 440     | 448.27 | 382.44 | 507.2 | 449.6 | 468.6 | 489.42   |
| 191575    | Nme1         | 1597   | 1640    | 1481   | 1385   | 1590  | 1629  | 1744  | 1729     |
| 363465    | Pir          | 579    | 510     | 484    | 488    | 554   | 556   | 587   | 563      |
| 24678     | Pkib         | 398    | 362     | 368    | 332    | 416   | 366   | 392   | 427      |
| 103690393 | LOC103690393 | 75.1   | 42.72   | 79.39  | 93.78  | 90.09 | 60.38 | 69.52 | 99.12    |
| 301011    | Uqcrc1       | 3375   | 3324    | 2973   | 3040   | 3540  | 3499  | 3417  | 3485     |
| 360488    | Flywch1      | 4932   | 4600    | 4345   | 4643   | 5244  | 5202  | 4881  | 4984     |
| 362842    | Syde1        | 415    | 392     | 462    | 405    | 444   | 483   | 489   | 420      |
| 29711     | Bckdhh       | 482    | 461     | 436    | 417    | 478   | 547   | 478   | 467      |
| 29754     | Atp5mc1      | 1619   | 1581    | 1432   | 1426   | 1533  | 1740  | 1608  | 1764     |
| 299638    | Sirt6        | 671    | 563     | 582    | 547    | 629   | 674   | 647   | 642      |
| 64828     | B4galnt1     | 463.41 | 493.07  | 467.39 | 523.68 | 551.4 | 573.3 | 511.7 | 499.83   |
| 317196    | Klh14        | 49     | 32      | 41     | 43     | 43    | 41    | 46    | 51       |
| 59314     | Camk2n2      | 151    | 157     | 139    | 151    | 191   | 160   | 151   | 154      |
| 300992    | Cacna2d2     | 1526   | 1621.92 | 1560.2 | 1657.8 | 1967  | 1742  | 1628  | 1646.69  |
| 297433    | Podx12       | 885.61 | 854.02  | 808.01 | 909.07 | 956   | 936   | 912   | 988.25   |
| 100911357 | LOC100911357 | 95     | 91      | 90     | 84.02  | 98    | 92    | 102   | 103      |
| 296554    | Tubb4b       | 19864  | 20131.9 | 17463  | 18029  | 20299 | 21859 | 21013 | 19659.09 |
| 293012    | Olig3        | 3.29   | 0       | 2.01   | 1.69   | 3.73  | 0     | 2.86  | 1.08     |
| 690987    | Gys1         | 1250   | 1294    | 1213   | 1321   | 1424  | 1520  | 1347  | 1281     |
| 500826    | Galnt4       | 52     | 44      | 45     | 44     | 44    | 64    | 50    | 45       |
| 292780    | Alkbh6       | 158    | 170     | 120.04 | 147    | 159   | 166   | 172   | 156      |
| 287061    | Rogdi        | 1868   | 1905    | 1786   | 1760   | 2077  | 2110  | 2010  | 1835     |
| 303731    | Cbx8         | 92     | 93      | 87     | 77     | 94    | 102   | 100   | 87       |
| 302941    | Ubal1        | 844.31 | 818.9   | 729.51 | 754.51 | 824.6 | 944.2 | 848   | 837.19   |
| 60444     | Kcnt1        | 1695   | 1697    | 1569   | 1678   | 1852  | 1946  | 1738  | 1750     |
| 266668    | Grina        | 9863   | 10555   | 9966   | 10007  | 11155 | 11727 | 10637 | 10809    |
| 499073    | Brsk1        | 3890.7 | 3954.29 | 3484   | 3961.5 | 4319  | 4435  | 4116  | 3911.53  |
| 298521    | Grik3        | 90     | 94      | 94     | 122    | 113   | 91    | 106   | 129      |
| 501628    | Tceal3       | 331.95 | 308.46  | 314.85 | 358.82 | 380.1 | 339.4 | 341.4 | 381.24   |
| 156275    | Ggt7         | 2867   | 2881    | 2765   | 2901   | 3124  | 3364  | 3092  | 2947     |
| 171062    | Nkg7         | 12     | 10      | 13     | 6      | 17    | 13    | 5     | 10       |
| 304653    | Dcaf15       | 336    | 322     | 334    | 329    | 388   | 369   | 334   | 359      |
| 362452    | Borcs5       | 322    | 330     | 307    | 321    | 377   | 352   | 363   | 313      |

|           |              |        |         |        |        |       |       |       |          |
|-----------|--------------|--------|---------|--------|--------|-------|-------|-------|----------|
| 309177    | Znhit2       | 315    | 355     | 306    | 271    | 349   | 338   | 336   | 346      |
| 360818    | Fbxo21       | 1015   | 1151    | 1098   | 1242   | 1280  | 1267  | 1194  | 1206     |
| 499745    | Nrarp        | 802    | 578     | 620    | 452    | 793   | 623   | 577   | 699      |
| 307396    | Pcyox11      | 1085   | 1135    | 1070   | 1103   | 1199  | 1298  | 1209  | 1117     |
| 363469    | Sms          | 886.42 | 835.54  | 813.59 | 887.77 | 915.4 | 879.5 | 959.6 | 1003.92  |
| 64677     | Srd5a2       | 235    | 134.09  | 88.39  | 213.02 | 308.1 | 87    | 238.1 | 103.01   |
| 171373    | Slc12a5      | 8      | 10      | 17     | 16     | 15    | 19    | 8     | 14       |
| 81780     | Ccl5         | 14     | 15      | 10     | 12     | 16    | 16    | 9     | 15       |
| 293897    | Dkk1         | 6.5    | 1.11    | 3.47   | 11.35  | 0     | 11.38 | 5.85  | 7.4      |
| 24984     | RT1-DOa      | 15.42  | 10.47   | 13.02  | 9.92   | 13    | 9.4   | 13.13 | 18.09    |
| 501506    | Zbtb33       | 137.11 | 39.82   | 0      | 10.73  | 106.9 | 52.84 | 0     | 46.32    |
| 288484    | Grid2ip      | 167    | 153     | 155    | 167    | 180   | 186   | 159   | 180      |
| 293453    | Ndufab1      | 1383   | 1307    | 1176   | 1091   | 1307  | 1346  | 1347  | 1444     |
| 680770    | Skidal       | 118.99 | 102.32  | 112.53 | 112.07 | 119   | 124.4 | 120.9 | 125.38   |
| 24795     | Serpina3n    | 111    | 23      | 19     | 14     | 78    | 47.89 | 21.83 | 35.69    |
| 307486    | Pcdhb22      | 60.03  | 69.26   | 67.37  | 57.3   | 68.09 | 80.47 | 68.26 | 62.11    |
| 298546    | Zfp593       | 236.93 | 228.81  | 166.89 | 171.92 | 269.8 | 235.9 | 166   | 211.93   |
| 497944    | Zfp3         | 65     | 66      | 61     | 52     | 61    | 62    | 75    | 70       |
| 367277    | LOC367277    | 58.83  | 74.62   | 79.49  | 93.75  | 90.16 | 102.9 | 77.06 | 66.74    |
| 680102    | Mab2112      | 498    | 510     | 479    | 464    | 556   | 579   | 522   | 486      |
| 641528    | Dtnbp1       | 227    | 226     | 204    | 196    | 229   | 243   | 252   | 213      |
| 362083    | Ajml         | 688    | 677     | 715    | 702    | 827   | 759   | 766   | 704      |
| 314462    | Trmt61a      | 194.64 | 226.7   | 196.24 | 190.8  | 282.9 | 182   | 204.3 | 218.99   |
| 191595    | Syt12        | 165    | 154     | 134    | 165    | 175   | 209   | 151   | 144      |
| 361385    | Ndufb7       | 920    | 855     | 792    | 715    | 892   | 916   | 792   | 1006     |
| 362145    | Slc25a12     | 2077   | 2117    | 1936   | 2428   | 2418  | 2165  | 2466  | 2354     |
| 65152     | Pfkm         | 5019   | 5036    | 4333   | 4976   | 5008  | 5804  | 5189  | 5281     |
| 295255    | RGD1560510   | 0      | 0       | 1.11   | 0      | 0     | 0     | 0     | 1.22     |
| 304581    | Tmem119      | 20     | 27      | 56     | 18     | 29    | 43    | 42    | 19       |
| 305886    | Slc22a17     | 4783   | 4898    | 4720   | 4931   | 5343  | 5773  | 5089  | 5045     |
| 287432    | Wrap53       | 220    | 176     | 187    | 172    | 208   | 231   | 204   | 187      |
| 300783    | Hacd3        | 2797.1 | 2851.62 | 2607.2 | 2766.1 | 3128  | 3121  | 2985  | 2882.57  |
| 313255    | Whrn         | 706    | 677     | 553    | 761    | 787   | 761   | 688   | 729      |
| 89841     | Pcyt2        | 1046   | 1008    | 983    | 917    | 1041  | 1109  | 1068  | 1129     |
| 100910708 | LOC100910708 | 132.37 | 218.45  | 184.38 | 150.58 | 264   | 134.3 | 221.3 | 134.41   |
| 361068    | Nudt18       | 285    | 291     | 309    | 291    | 312   | 355   | 294   | 332      |
| 170909    | Erg          | 103.82 | 90.45   | 125.77 | 101.52 | 120.1 | 121.8 | 106.2 | 115.51   |
| 298282    | Oma1         | 41     | 60      | 64     | 46     | 42    | 63    | 61    | 66       |
| 499931    | Sla2         | 10.42  | 13.04   | 3.4    | 7.09   | 4.86  | 7.05  | 13.52 | 11.9     |
| 252860    | Zfp394       | 222.29 | 215.58  | 190.42 | 191.6  | 220.2 | 251.6 | 223.5 | 206.24   |
| 246153    | Kcnc2        | 468    | 459     | 352.99 | 515    | 488   | 449   | 525   | 511.98   |
| 191576    | Tecr         | 14651  | 14151   | 13052  | 14012  | 14825 | 16397 | 14747 | 15468.98 |
| 293996    | Pdzd7        | 173.13 | 173.42  | 167.3  | 173.22 | 203.2 | 196   | 204.1 | 152.27   |
| 314642    | Fzr1         | 713    | 711     | 713    | 660    | 767   | 796   | 763   | 750      |
| 25041     | P2rx6        | 542.66 | 572.02  | 468.84 | 596.95 | 573.6 | 598.1 | 642.4 | 584.04   |
| 500865    | Sybu         | 1296   | 1253    | 1191   | 1297   | 1420  | 1334  | 1403  | 1383     |
| 94204     | Ecel         | 2248   | 2671    | 2386   | 2834   | 2702  | 3153  | 2552  | 2745     |
| 362843    | Ilvbl        | 878    | 876     | 790    | 807    | 943   | 969   | 871   | 903      |
| 100362089 | Zfp663       | 54     | 60      | 40     | 56     | 73    | 46    | 62    | 50       |
| 102552047 | LOC102552047 | 32     | 37      | 18     | 23     | 36    | 20    | 34    | 31       |
| 116682    | Kynu         | 4      | 2       | 3      | 1      | 2     | 5     | 1     | 3        |
| 25503     | Ocm2         | 2      | 3       | 4      | 1      | 2     | 1     | 3     | 5        |
| 287414    | Mfsd6l       | 2      | 2       | 4      | 2      | 0     | 3     | 4     | 4        |
| 29248     | Tnni3        | 2      | 2       | 5      | 1      | 1     | 3     | 1     | 6        |
| 29692     | Pla2g2a      | 21     | 6       | 6      | 7      | 10    | 16    | 16    | 2        |
| 300017    | Lypd2        | 0      | 3       | 5      | 2      | 4     | 2     | 3     | 2        |

|           |              |        |         |        |        |       |       |       |         |
|-----------|--------------|--------|---------|--------|--------|-------|-------|-------|---------|
| 315597    | Mfrp         | 8      | 5       | 3      | 4      | 4     | 6     | 7     | 5       |
| 689415    | Mt2A         | 92     | 78      | 86     | 105    | 111   | 113.4 | 81.67 | 91      |
| 690319    | LOC690319    | 16     | 13      | 10     | 11     | 20    | 9     | 16    | 10      |
| 688699    | Prdm12       | 2709   | 2698    | 2640   | 2922   | 3384  | 3065  | 2757  | 2860    |
| 362681    | Pusl1        | 440.27 | 397.06  | 416.28 | 407.42 | 474.9 | 451.1 | 461.9 | 439.42  |
| 25531     | Rab3a        | 9219   | 9294    | 8020   | 9160   | 9892  | 10222 | 10037 | 9113    |
| 297971    | Smim8        | 228    | 210     | 183    | 178    | 218   | 220   | 230   | 211     |
| 79253     | Avil         | 12988  | 12369   | 12042  | 12872  | 13596 | 14401 | 12903 | 14407   |
| 353255    | Nadsyn1      | 220    | 260     | 268    | 220    | 267   | 280   | 295   | 223     |
| 56010     | Ywhag        | 28810  | 31172   | 30364  | 34519  | 36418 | 37424 | 31235 | 32303   |
| 306338    | Abhd8        | 1470   | 1666    | 1348   | 1491   | 1633  | 1732  | 1502  | 1707    |
| 103693430 | LOC103693430 | 188.33 | 151.61  | 194.83 | 130.35 | 160.5 | 187.7 | 145.2 | 238.49  |
| 297389    | Dguok        | 338    | 243     | 267    | 249    | 261   | 334   | 316   | 296     |
| 54309     | Syt5         | 625.92 | 759.31  | 651.45 | 617.45 | 780.1 | 730.6 | 700.4 | 709.3   |
| 314140    | LOC314140    | 262.94 | 230.86  | 207.28 | 202.15 | 252.2 | 245.7 | 213.2 | 282.7   |
| 309161    | Ccdc85b      | 750    | 666     | 690    | 584    | 804   | 743   | 669   | 744     |
| 294790    | Skp2         | 56     | 61      | 47     | 55     | 65    | 67    | 66    | 43      |
| 682404    | Tmem234      | 193    | 183     | 170    | 140    | 167   | 166   | 201   | 221     |
| 293688    | Tm7sf2       | 658    | 807     | 728    | 660    | 743   | 828   | 754   | 815     |
| 289402    | Ddx59        | 272    | 240     | 222    | 210    | 247   | 270   | 245   | 277     |
| 315999    | Mon1a        | 534    | 496     | 481    | 436    | 553   | 566   | 518   | 506     |
| 298894    | Mycn         | 73     | 68      | 71     | 76     | 94    | 57    | 57    | 109     |
| 100909857 | LOC100909857 | 169.68 | 220.56  | 159.12 | 162.56 | 220.6 | 196.7 | 176.1 | 190.25  |
| 361515    | Pnma8a       | 161.66 | 122.24  | 147.52 | 126.35 | 171.1 | 144.2 | 165.5 | 133.1   |
| 290631    | Babam1       | 1004   | 858     | 925    | 795    | 967   | 997   | 989   | 990     |
| 287711    | Coasy        | 647    | 691     | 626    | 584    | 714   | 691   | 707   | 693     |
| 302669    | Car5b        | 191    | 175     | 177    | 141    | 171   | 186   | 199   | 197     |
| 102555217 | LOC102555217 | 26.2   | 44.95   | 33.67  | 34.75  | 34.53 | 37.76 | 39.05 | 42.31   |
| 100909793 | Smim18       | 208    | 207     | 162    | 176    | 206   | 169   | 233   | 221     |
| 308457    | Egln2        | 1865   | 1632    | 1652   | 1571   | 1928  | 1839  | 1740  | 1892    |
| 305970    | Fbxo16       | 152    | 149     | 123    | 140    | 152   | 139   | 191   | 139     |
| 680712    | Scx          | 138    | 152     | 131    | 133    | 165   | 152   | 150   | 143     |
| 300317    | Kctd17       | 1231   | 1101    | 1123   | 1155   | 1331  | 1278  | 1283  | 1184    |
| 361545    | Rbm42        | 840    | 854     | 980    | 788    | 963   | 975   | 932   | 942     |
| 314013    | Trappc12     | 1170   | 1405    | 1247   | 1466   | 1274  | 1275  | 1685  | 1589    |
| 303222    | Arhgap44     | 2161   | 2281    | 1871   | 2457   | 2443  | 2649  | 2363  | 2203    |
| 289222    | Nit1         | 943    | 750     | 862.73 | 579.58 | 835   | 874   | 881   | 863     |
| 100911408 | LOC100911408 | 75.74  | 52.81   | 40.21  | 40.46  | 67.15 | 47.77 | 60.73 | 54.77   |
| 362300    | Agap3        | 3395   | 3460    | 3225   | 3368   | 4069  | 3960  | 3460  | 3322    |
| 360721    | Fam162a      | 1705.9 | 1425.37 | 1360.1 | 1323.6 | 1707  | 1496  | 1476  | 1726.67 |
| 65178     | Snap91       | 5717   | 6062    | 5338   | 6590   | 6701  | 7005  | 6460  | 5950    |
| 58977     | Pppl1ra      | 1204.3 | 1024.4  | 951.16 | 1037.4 | 1171  | 1109  | 1047  | 1319.47 |
| 360947    | Pacrgl       | 92     | 81      | 62     | 60.01  | 83    | 82    | 88    | 72      |
| 29885     | Rab3ip       | 625    | 666     | 499    | 578    | 635   | 673   | 648   | 653     |
| 79219     | Grid1        | 226.68 | 159.74  | 170.25 | 208.26 | 248.9 | 213.2 | 194.8 | 185.86  |
| 81637     | Ap2a2        | 6847.6 | 5767.8  | 5928.7 | 6565.2 | 7027  | 6863  | 6646  | 7130.87 |
| 108351956 | LOC108351956 | 1712   | 1684    | 1682   | 1666   | 2027  | 1853  | 1772  | 1779    |
| 288916    | Gadd45gip1   | 666    | 596     | 574    | 517    | 744   | 631   | 598   | 620     |
| 363616    | Grap         | 37     | 44      | 40.63  | 29     | 40    | 36    | 52    | 38      |
| 295237    | Mstol        | 504.84 | 505.75  | 539.22 | 496    | 565.2 | 582.8 | 556.7 | 549.98  |
| 29741     | Pik3r2       | 1340   | 1567    | 1338   | 1271   | 1528  | 1509  | 1484  | 1558    |
| 361509    | Ube2m        | 2848.6 | 2737.79 | 2799.8 | 2556.7 | 3101  | 3122  | 2992  | 2846.52 |
| 294103    | Papss2       | 241.79 | 186.54  | 196.29 | 302.66 | 345.4 | 254.7 | 190   | 231.93  |
| 26760     | Akr7a3       | 252    | 233     | 204    | 211    | 253   | 247   | 242   | 250     |
| 310787    | Fndc7        | 78.3   | 76.09   | 82.74  | 101.82 | 99.87 | 77.85 | 98.9  | 97.01   |
| 293054    | Mrpl46       | 315    | 286     | 242    | 260    | 308   | 269   | 338   | 301     |

|           |              |        |         |        |        |       |       |       |          |
|-----------|--------------|--------|---------|--------|--------|-------|-------|-------|----------|
| 85269     | Nme3         | 212    | 191     | 180    | 188    | 209   | 194   | 216   | 231      |
| 295315    | Tbx15        | 56     | 57      | 99     | 61     | 66    | 124   | 61    | 50       |
| 307102    | Ankrd16      | 85     | 82      | 77     | 68     | 86    | 76    | 96    | 86       |
| 684903    | Dhx34        | 252    | 262     | 278    | 261    | 293   | 297   | 296   | 275      |
| 364948    | Asphd2       | 398    | 315     | 350    | 291    | 385   | 409   | 349   | 350      |
| 500992    | Nxpe1        | 102.81 | 72.5    | 64     | 47.72  | 113.2 | 104.4 | 43.59 | 55.27    |
| 100362241 | Plekhg6      | 44     | 40      | 49     | 42     | 53    | 47    | 46    | 47       |
| 294336    | Pcbp3        | 4755   | 4869    | 4634   | 4688   | 5314  | 5510  | 5212  | 4859     |
| 683470    | Gas1         | 184    | 128     | 110    | 140.99 | 190   | 172   | 136   | 123      |
| 294326    | Gatd3a       | 2530   | 2444    | 2048   | 2191   | 2490  | 2671  | 2358  | 2644     |
| 362220    | Lamp5        | 712    | 657     | 635    | 643    | 692   | 715   | 711   | 802      |
| 84384     | Timm10b      | 200.79 | 214.9   | 206.91 | 168    | 196.9 | 216.9 | 218.6 | 239.79   |
| 316091    | Pomgnt2      | 739    | 736     | 684    | 690    | 757   | 878   | 743   | 765      |
| 100912599 | LOC100912599 | 360.5  | 310     | 306.22 | 285.5  | 311   | 353   | 330.5 | 398      |
| 679739    | LOC679739    | 360.5  | 310     | 306.22 | 285.5  | 311   | 353   | 330.5 | 398      |
| 100911847 | LOC100911847 | 245.07 | 251.69  | 337.8  | 192.08 | 251.7 | 238.4 | 245.1 | 397.41   |
| 290308    | Dleu7        | 257    | 275     | 145    | 262    | 252   | 288   | 257   | 239      |
| 102546394 | LOC102546394 | 76.91  | 77.98   | 81.36  | 93.64  | 111.5 | 82.12 | 86.01 | 84.34    |
| 317170    | Slc9a7       | 271    | 282     | 247    | 332    | 405   | 199   | 384   | 261      |
| 298504    | Mfsd2a       | 563    | 599     | 514    | 568    | 602   | 691   | 587   | 596      |
| 313506    | Stil         | 52.32  | 52.2    | 61.33  | 43.46  | 63.91 | 47.02 | 67.78 | 52.29    |
| 297436    | Chchd6       | 657    | 660     | 617    | 488    | 613   | 618   | 730   | 712      |
| 289486    | Fras1        | 173    | 214     | 212    | 298    | 259   | 246   | 255   | 230      |
| 689986    | LOC689986    | 121.74 | 98.65   | 102.06 | 85.28  | 145.7 | 79.29 | 113.8 | 111.28   |
| 114512    | Aatf         | 231    | 200     | 222    | 205    | 257   | 241   | 236   | 213      |
| 292017    | Hydin        | 109    | 105     | 121    | 147    | 145   | 133   | 124   | 130      |
| 364995    | Ddx28        | 204.17 | 177.06  | 177.91 | 151.16 | 188   | 215.4 | 181.3 | 199.35   |
| 79112     | Pigm         | 361.6  | 377.47  | 281.76 | 458.17 | 407.1 | 364.7 | 511.8 | 349.02   |
| 308472    | Supt5h       | 2616.1 | 2419    | 2304   | 2502.6 | 2820  | 2871  | 2575  | 2598     |
| 300444    | Rgl3         | 127    | 110     | 114    | 111    | 138   | 127   | 128   | 117      |
| 680006    | Mad111       | 489    | 460     | 462    | 452    | 525   | 542   | 495   | 495      |
| 679949    | Ube2q11      | 862    | 957     | 816    | 937    | 1014  | 1030  | 967   | 933      |
| 362039    | Pla2g12a     | 377    | 352     | 322    | 312    | 363   | 406   | 355   | 381      |
| 311184    | Clqtnf4      | 109    | 104     | 94     | 115    | 136   | 115   | 101   | 114      |
| 24423     | Gstml        | 2051.5 | 1876.67 | 1709.6 | 1833.8 | 1962  | 2064  | 2056  | 2169.78  |
| 304280    | Tmem130      | 4794.5 | 4717    | 4652.4 | 4972.8 | 5529  | 5200  | 5181  | 5224.42  |
| 24310     | Ace          | 123    | 143     | 161    | 119    | 134   | 191   | 158   | 120      |
| 140729    | Cacng8       | 21     | 21      | 10     | 15     | 18    | 22    | 12    | 22       |
| 304944    | Uck2         | 798.54 | 834.85  | 696.22 | 815.95 | 876.6 | 935.6 | 857.6 | 804.7    |
| 58936     | Plk3         | 371    | 366     | 403    | 390    | 393   | 461   | 448   | 388      |
| 100359498 | LOC100359498 | 313.21 | 314.97  | 496.47 | 161.69 | 438.1 | 204.9 | 509.1 | 268.88   |
| 498332    | Coq2         | 830.89 | 782.16  | 810.18 | 827.38 | 1061  | 812.5 | 767.8 | 949.4    |
| 314930    | Zfpm2        | 55     | 48      | 59     | 48     | 51    | 68    | 66    | 47       |
| 314472    | Tmem179      | 1855.6 | 1920.94 | 1632.8 | 1867   | 2223  | 1949  | 1977  | 1889.46  |
| 498736    | Tubb2a       | 17308  | 17788.3 | 16794  | 16503  | 19133 | 20233 | 18461 | 17733.12 |
| 117552    | Ptpn23       | 1013   | 1110    | 1141   | 1266   | 1325  | 1417  | 1127  | 1136     |
| 303671    | Fads6        | 528    | 466     | 407    | 515    | 559   | 573   | 500   | 485      |
| 500726    | Cep170b      | 3395   | 3589.11 | 3456.9 | 3597   | 4143  | 3885  | 3820  | 3663.13  |
| 100362197 | LOC100362197 | 221.74 | 201.54  | 184.92 | 161.18 | 199.6 | 223.1 | 202.3 | 225.14   |
| 361352    | Pqlc1        | 2800   | 2668    | 2551   | 2293   | 3123  | 3037  | 2674  | 2561     |
| 498398    | Selenom      | 2363   | 2169    | 2324   | 1940   | 2519  | 2528  | 2223  | 2450     |
| 108348240 | LOC108348240 | 2.11   | 2.99    | 3.03   | 2.24   | 2.16  | 2.06  | 3.87  | 3.37     |
| 353231    | Spg7         | 1209   | 1063.11 | 1026   | 1018.7 | 1266  | 1212  | 1192  | 1100.88  |
| 300367    | Med17        | 366    | 343     | 341    | 337.02 | 374   | 363   | 404   | 392      |
| 293507    | 1-Sep        | 72     | 68      | 75     | 51     | 93    | 68    | 71    | 62       |
| 366489    | Sh2d5        | 23     | 20      | 25     | 8      | 26    | 11    | 33    | 14       |



|           |              |        |         |        |        |       |       |       |         |
|-----------|--------------|--------|---------|--------|--------|-------|-------|-------|---------|
| 114117    | Gng3         | 9388   | 9054    | 8002   | 8673   | 9813  | 9968  | 9398  | 9637    |
| 83503     | Polr2f       | 538    | 501     | 487    | 457    | 552   | 560   | 508   | 572     |
| 362613    | Zdhhc18      | 1166   | 1141    | 1082   | 1089   | 1281  | 1346  | 1137  | 1186    |
| 361663    | Lhpp         | 774    | 873     | 854    | 827    | 907   | 1048  | 794   | 930     |
| 83823     | Gipc1        | 1788.6 | 1721.1  | 1619.2 | 1471.7 | 1899  | 1871  | 1714  | 1812.76 |
| 361288    | Fundc2       | 665.25 | 632.49  | 643.36 | 643.47 | 710.3 | 758.1 | 680   | 708.93  |
| 310846    | Tram111      | 316    | 293     | 230    | 279    | 292   | 312   | 299   | 333     |
| 296627    | Asb6         | 420    | 391     | 413    | 377    | 450   | 449   | 450   | 421     |
| 362945    | Lrrc24       | 439    | 410     | 393    | 444    | 481   | 469   | 454   | 460     |
| 641603    | Slc41a3      | 305.8  | 318.5   | 312.91 | 315.71 | 333.2 | 355.8 | 355.8 | 340.83  |
| 311329    | Dnajc17      | 106.81 | 103.76  | 107.93 | 92.96  | 111.9 | 103.6 | 126.9 | 112.61  |
| 24503     | Ina          | 2361.5 | 2404.37 | 2356.8 | 2510   | 2788  | 2692  | 2462  | 2712.68 |
| 308440    | B3gnt8       | 285    | 280     | 251    | 276    | 307   | 306   | 298   | 297     |
| 100270678 | Spns2        | 395.66 | 405.79  | 364.19 | 353.61 | 454.3 | 475.5 | 389.9 | 361.07  |
| 361118    | Prxl2a       | 609    | 563     | 505    | 533    | 612   | 561   | 631   | 641     |
| 360656    | Cdr21        | 3378   | 3352.72 | 2962.7 | 3516.6 | 3754  | 3816  | 3630  | 3414.86 |
| 290647    | Lsm4         | 861    | 812     | 776    | 729    | 920   | 832   | 822   | 942     |
| 102551565 | LOC102551565 | 0      | 0.94    | 0      | 0      | 1.04  | 0     | 0     | 0       |
| 292700    | Ceacam16     | 67     | 56      | 51     | 42     | 46    | 56    | 82    | 55      |
| 108349002 | LOC108349002 | 3.38   | 4.17    | 3.58   | 1.44   | 5.97  | 5.05  | 0     | 2.89    |
| 497912    | Btnl10       | 21.87  | 14.13   | 41.56  | 19.4   | 35.57 | 29.4  | 22.38 | 19.95   |
| 81679     | Jup          | 4050   | 4255    | 4215   | 4374   | 4683  | 4900  | 4629  | 4485    |
| 288289    | Chod1        | 270.01 | 188     | 245    | 215    | 259   | 262   | 279   | 216     |
| 303907    | Wdr5b        | 80     | 57      | 75     | 69     | 69    | 70    | 90    | 82      |
| 102551647 | LOC102551647 | 30.1   | 18.54   | 30.82  | 27.26  | 32.65 | 31.49 | 30.34 | 23.64   |
| 65276     | Nmur1        | 31.85  | 23.69   | 26.77  | 29.45  | 40.07 | 28.7  | 27.18 | 27.75   |
| 404781    | Iqsec3       | 800.69 | 784.41  | 713.91 | 793.38 | 954   | 903.3 | 755.4 | 810.11  |
| 353118    | MAST1        | 4404   | 4698    | 4286   | 4672   | 5558  | 5195  | 4670  | 4567    |
| 50871     | Hpcal1       | 1850.9 | 1894    | 1886   | 1769   | 2010  | 2186  | 2003  | 1992    |
| 50688     | Cacnb1       | 1131   | 1109    | 1122   | 1048   | 1349  | 1257  | 1145  | 1131    |
| 688737    | Gpr171       | 19     | 16      | 13     | 36     | 22    | 21    | 31    | 19      |
| 362846    | RGD1560314   | 20     | 9       | 6      | 21     | 20    | 15    | 16    | 11      |
| 500606    | Morn2        | 37     | 29      | 42     | 32     | 33    | 33    | 47    | 42      |
| 683514    | Ppplr42      | 4      | 9       | 9      | 6      | 7     | 10    | 5     | 9       |
| 287009    | Ceacam4      | 20.07  | 7.46    | 20.2   | 4.45   | 18.01 | 20.79 | 18.98 | 0       |
| 288689    | Tesc         | 842    | 748     | 689    | 674    | 869   | 821   | 786   | 794     |
| 312707    | Lrrc23       | 102.04 | 112.73  | 111.59 | 110.51 | 109.9 | 101.4 | 131.8 | 140.68  |
| 65172     | Limk1        | 4521   | 4141    | 3798   | 4349   | 4848  | 5071  | 4487  | 4208    |
| 306348    | Rex1bd       | 487    | 445     | 444    | 365    | 501   | 458   | 453   | 516     |
| 100911068 | LOC100911068 | 150    | 120.48  | 139.53 | 114.42 | 132.6 | 165   | 149.1 | 134.1   |
| 246258    | Slc45a1      | 1542   | 1540    | 1421   | 1572   | 1818  | 1825  | 1582  | 1503    |
| 313521    | Hpd1         | 152    | 125     | 90     | 98     | 130   | 127   | 127   | 131     |
| 100049583 | Trex1        | 229    | 174     | 132    | 181    | 196   | 202   | 219   | 176     |
| 296395    | Kcng1        | 432    | 524     | 550    | 586    | 740   | 622   | 470   | 485     |
| 83635     | Gmeb2        | 68     | 87      | 96     | 93     | 92    | 83    | 112   | 94      |
| 64183     | Pde4dip      | 3170   | 3213    | 3134   | 3570   | 3818  | 4065  | 3541  | 3072    |
| 292831    | Pop4         | 534    | 494     | 465    | 437    | 518   | 499   | 553   | 568     |
| 54289     | Rgs1         | 15     | 16      | 12     | 59     | 24    | 13    | 48    | 28      |
| 25585     | Id3          | 859    | 831     | 717    | 559    | 805   | 897   | 846   | 738     |
| 363137    | Cyb561d2     | 447    | 362     | 358    | 325    | 401   | 397   | 402   | 453     |
| 25187     | Htr2c        | 69     | 67      | 16     | 61     | 53    | 62    | 71    | 50      |
| 365360    | Tmc5         | 38.27  | 38.81   | 59.19  | 65.12  | 59.49 | 54.56 | 48.14 | 60.96   |
| 25146     | Cyp17a1      | 4.33   | 7.74    | 9.31   | 11     | 13.08 | 9.32  | 6.71  | 6.77    |
| 499518    | Ccdc125      | 39     | 30      | 42     | 37     | 40    | 44    | 46    | 34      |
| 684148    | Lsm2         | 239    | 236     | 210    | 203    | 249   | 238   | 222   | 275     |
| 103690158 | LOC103690158 | 16.32  | 16.66   | 19.2   | 16.35  | 15    | 19.07 | 27.72 | 14.15   |

|           |              |        |         |        |        |       |       |       |         |
|-----------|--------------|--------|---------|--------|--------|-------|-------|-------|---------|
| 246279    | Zfp180       | 4593.9 | 3234.49 | 4460.1 | 3956.9 | 4423  | 4429  | 4663  | 4487.52 |
| 308410    | Rtn2         | 2150   | 2194    | 2093   | 1977   | 2386  | 2598  | 2136  | 2205    |
| 116557    | Foxj1        | 37     | 51      | 28     | 41     | 45    | 50    | 47    | 32      |
| 289468    | Abraxas1     | 33     | 44      | 48     | 32     | 38    | 41    | 52    | 43      |
| 362605    | Tmem54       | 448.16 | 488.8   | 404    | 382.99 | 500.4 | 484   | 471.8 | 454.59  |
| 140694    | Dnm1         | 7981   | 8543    | 7763   | 8915   | 8807  | 9901  | 8647  | 9443    |
| 170634    | Tas1r3       | 5.83   | 3.46    | 1      | 3      | 4.36  | 4.61  | 3.4   | 2.36    |
| 156726    | Runx3        | 99     | 120     | 69     | 118    | 117   | 126   | 117   | 90      |
| 24834     | Tk1          | 68     | 69      | 101    | 57     | 87    | 82    | 83    | 75      |
| 499090    | Mypop        | 555    | 535     | 532    | 516    | 655   | 579   | 591   | 545     |
| 499749    | Tprn         | 134    | 158     | 134    | 154    | 166   | 144   | 157   | 176     |
| 500410    | RGD1559441   | 120.68 | 114.02  | 135.47 | 144.78 | 154.5 | 145.8 | 133.9 | 136.71  |
| 689623    | Psmg4        | 164.96 | 168.37  | 182.63 | 128.16 | 158.3 | 160.4 | 170.4 | 225.04  |
| 408217    | Usp11        | 885    | 877     | 788    | 1024   | 993   | 1013  | 1007  | 950     |
| 64455     | Rasd1        | 97.14  | 66.6    | 53.68  | 111.19 | 85.31 | 84.18 | 127.4 | 67.54   |
| 361943    | Pcdh10       | 695    | 595     | 571    | 747    | 825   | 645   | 744   | 678     |
| 103693768 | LOC103693768 | 199.16 | 254.19  | 201.21 | 235.71 | 259.6 | 264.6 | 238.9 | 224.13  |
| 315926    | Pls1         | 1370   | 1529    | 1222   | 1498   | 1603  | 1588  | 1736  | 1304    |
| 361881    | Zbed3        | 100    | 103     | 104    | 106    | 105   | 113   | 105   | 135     |
| 108348167 | LOC108348167 | 55.89  | 43.75   | 50.76  | 48.91  | 61.94 | 62.17 | 52.44 | 44.48   |
| 89787     | Lrp3         | 1320.4 | 1342.97 | 1141.7 | 1361.9 | 1507  | 1525  | 1358  | 1340.61 |
| 24587     | Nefh         | 116860 | 125749  | 99682  | 138676 | 1E+05 | 1E+05 | 1E+05 | 116986  |
| 201097    | Hist1h1d     | 5      | 9       | 4      | 3      | 8.78  | 4.33  | 7     | 3.18    |
| 304648    | Asf1b        | 15     | 11      | 20     | 9      | 22    | 15    | 16    | 8       |
| 287983    | Alg3         | 401    | 425     | 419    | 459    | 474   | 455   | 443   | 518     |
| 362329    | Impdh1       | 5035   | 5093    | 4734   | 4925   | 5853  | 5708  | 5304  | 5082    |
| 316213    | Frs3         | 318    | 323     | 294    | 292    | 364   | 351   | 324   | 322     |
| 295037    | Mgst2        | 32     | 28      | 34     | 25     | 33    | 28    | 38    | 33      |
| 25523     | Prkg2        | 96     | 122     | 89     | 123    | 114   | 99    | 132   | 132     |
| 689945    | LOC689945    | 24.53  | 24.52   | 15.58  | 23.29  | 46.94 | 11.19 | 24.58 | 14.82   |
| 100362471 | Tmem240      | 60.28  | 47.48   | 43.4   | 41.2   | 38.04 | 67.54 | 50.26 | 57.55   |
| 364755    | Ero1b        | 778    | 492     | 506    | 638    | 660   | 621   | 743   | 654     |
| 292098    | Pgbd5        | 1017   | 1150    | 1014   | 1137   | 1157  | 1279  | 1183  | 1172    |
| 316229    | Ttbk1        | 621    | 629.03  | 640    | 797.96 | 858   | 764.5 | 705.1 | 655.01  |
| 360945    | Sel113       | 488    | 545     | 431    | 570    | 539   | 603   | 576   | 539     |
| 100911956 | LOC100911956 | 194.56 | 198.56  | 194.6  | 119.03 | 145.8 | 217.3 | 214.6 | 206.56  |
| 500354    | LOC500354    | 75.34  | 70.88   | 77.7   | 75.13  | 69.62 | 89.65 | 73.51 | 99.12   |
| 29566     | Ggt5         | 316    | 281     | 337    | 222    | 350   | 362   | 277   | 294     |
| 84398     | Cd93         | 218    | 198     | 247    | 238    | 236   | 245   | 312   | 207     |
| 687536    | Foxf1        | 23     | 17      | 27     | 24     | 22    | 25    | 36    | 18      |
| 311703    | Cables2      | 1972   | 2129    | 1871   | 2116   | 2238  | 2294  | 2235  | 2210    |
| 100359753 | Dnaaf3       | 46     | 52      | 40     | 53     | 46    | 59    | 58    | 49      |
| 315151    | Mrtfa        | 518.65 | 598.34  | 627.45 | 654.31 | 682.9 | 736.1 | 678.2 | 565.45  |
| 309453    | Fbxl15       | 213    | 229     | 224    | 197    | 258   | 227   | 232   | 241     |
| 295090    | Vom2r45      | 0      | 0       | 1.09   | 0      | 0     | 0     | 1.21  | 0       |
| 691431    | Slc25a33     | 541    | 518     | 415    | 451    | 532   | 509   | 578   | 518     |
| 25303     | Abcc2        | 29     | 26      | 21     | 42     | 40    | 35    | 34    | 22      |
| 404660    | Mrgpre       | 496.83 | 489.34  | 420.46 | 475.83 | 564.5 | 487.5 | 539.6 | 498.69  |
| 79131     | Fabp3        | 599.07 | 620.22  | 404.4  | 594.04 | 561.2 | 634.4 | 584.9 | 682.05  |
| 500249    | Rab43        | 49     | 36      | 52     | 35     | 46    | 39    | 49    | 57      |
| 103690147 | LOC103690147 | 65.29  | 45.58   | 21.84  | 62.82  | 71.77 | 50.07 | 41.88 | 53.43   |
| 300990    | RGD1307461   | 414    | 434     | 330    | 403    | 443   | 458   | 411   | 444     |
| 313491    | Hint2        | 402    | 312     | 342    | 317    | 358   | 425   | 371   | 371     |
| 298787    | Memol        | 767    | 713     | 720    | 663    | 779   | 777   | 829   | 795     |
| 362782    | Cyp46a1      | 93.42  | 70      | 92.5   | 88     | 84    | 105   | 98    | 95      |
| 102557179 | LOC102557179 | 1.01   | 1.06    | 8.01   | 2.02   | 3.45  | 1     | 7.02  | 1.97    |

|           |              |        |         |        |        |       |       |       |          |
|-----------|--------------|--------|---------|--------|--------|-------|-------|-------|----------|
| 100359972 | LOC100359972 | 2      | 5       | 2      | 0      | 1     | 1     | 6     | 2        |
| 103692813 | LOC103692813 | 4      | 1       | 3      | 1      | 4     | 2     | 1     | 3        |
| 103693041 | LOC103693041 | 2      | 1       | 5      | 1      | 3     | 3     | 2     | 2        |
| 116569    | Lct          | 3      | 2       | 2      | 2      | 1     | 4     | 2     | 3        |
| 300220    | Clql4        | 14     | 12      | 11     | 8      | 14    | 16    | 11    | 9        |
| 365763    | Actrt3       | 4      | 2       | 2      | 1      | 2     | 2     | 0     | 6        |
| 500348    | Bcl2l14      | 3      | 1       | 4      | 1      | 2     | 1     | 5     | 2        |
| 682416    | Dcdc2b       | 3      | 3       | 0      | 3      | 2     | 3     | 3     | 2        |
| 102547505 | LOC102547505 | 4      | 4       | 6      | 4      | 6     | 4     | 6     | 4        |
| 287936    | Ccdc116      | 6      | 7.99    | 7      | 6.01   | 6     | 10    | 9     | 5        |
| 300034    | Tigd5        | 40     | 46      | 46     | 66     | 58    | 56    | 58    | 48       |
| 311760    | Ism1         | 18     | 14      | 12     | 10     | 15    | 17    | 14    | 14       |
| 361230    | Tmem170b     | 25     | 22      | 17     | 17     | 22    | 26    | 20    | 22       |
| 499918    | Rspo4        | 21     | 23      | 15     | 22     | 22    | 21    | 23    | 24       |
| 59304     | Gdf9         | 6      | 10      | 7      | 13     | 10    | 16    | 4     | 10       |
| 687208    | Vps37d       | 105    | 113     | 87     | 73     | 130   | 98    | 95    | 97       |
| 304571    | Galnt9       | 553    | 557     | 522    | 536    | 628   | 579   | 625   | 577      |
| 290628    | Ocell        | 470    | 418.44  | 423.08 | 341    | 495.2 | 438   | 447   | 456      |
| 25443     | Fgf10        | 53     | 47      | 26.98  | 32.21  | 43.02 | 46.02 | 44    | 43.85    |
| 114705    | Rgs14        | 81.16  | 80.01   | 73.72  | 77.71  | 110   | 90.99 | 74.28 | 72.08    |
| 498726    | Rnf182       | 245    | 236     | 233    | 220    | 278   | 234   | 265   | 261      |
| 314799    | Ccdc59       | 163.4  | 154.73  | 176.45 | 124.46 | 195.1 | 148.7 | 167.3 | 176.92   |
| 100360754 | LOC100360754 | 14.61  | 15.32   | 13.12  | 8.93   | 20.97 | 13.65 | 12.31 | 10.84    |
| 299602    | Cdc34        | 1096   | 1010    | 1019   | 910    | 1158  | 1191  | 1060  | 1076     |
| 686999    | Mphosph6     | 189    | 217     | 214    | 150    | 194   | 211   | 228   | 223      |
| 294747    | RGD1561161   | 31     | 27      | 67     | 45     | 35    | 48    | 47    | 59       |
| 302890    | Cpped1       | 275    | 278     | 262    | 258    | 282   | 308   | 282   | 321      |
| 24598     | Nos1         | 61.86  | 64.33   | 77.11  | 73.74  | 89.43 | 73.31 | 61.88 | 83.42    |
| 361653    | Armc5        | 598.33 | 492     | 488.15 | 549.79 | 578   | 634.2 | 566.6 | 587.65   |
| 315598    | Clqtnf5      | 289    | 221     | 215    | 257    | 246   | 316   | 239   | 291      |
| 64672     | Pln          | 75     | 56      | 60     | 50     | 65    | 92    | 61    | 50       |
| 311535    | Fam110a      | 60     | 56      | 64     | 52     | 53    | 78    | 64    | 63       |
| 292887    | Akt1s1       | 1285   | 1331    | 1281   | 1152   | 1564  | 1381  | 1268  | 1403     |
| 24241     | Calca        | 13054  | 13071.2 | 16540  | 9188.9 | 14722 | 14340 | 15292 | 13324.77 |
| 295965    | Ehf          | 31.79  | 25.21   | 34.06  | 20.66  | 39.49 | 36.76 | 26.09 | 21.94    |
| 24604     | Npy          | 35     | 28      | 87     | 19     | 46    | 28    | 83    | 31       |
| 245965    | Atp5f1d      | 6849   | 6415    | 6339   | 5765   | 7051  | 7075  | 6918  | 7177     |
| 171444    | Pacs1        | 687    | 779     | 751    | 806    | 820   | 902   | 820   | 821      |
| 307639    | Gins3        | 62     | 60      | 59     | 59     | 77    | 61    | 64    | 65       |
| 361441    | Fam89a       | 575    | 592     | 512    | 471    | 645   | 610   | 543   | 594      |
| 64460     | Pex14        | 857    | 770     | 761    | 773    | 875   | 892   | 867   | 883      |
| 296098    | Lcmt2        | 124    | 125.83  | 114.63 | 100.64 | 131.3 | 126.3 | 148.9 | 111      |
| 312849    | Med21        | 257    | 203     | 172    | 140    | 182   | 201   | 234   | 242      |
| 689207    | Prob1        | 115.92 | 107.02  | 106.54 | 91.28  | 128.2 | 141.9 | 100.7 | 97.39    |
| 64461     | Decr2        | 226    | 244     | 186    | 222    | 231   | 240   | 252   | 254      |
| 291885    | Mcm5         | 68     | 58      | 96     | 35     | 85    | 72    | 70    | 59       |
| 364227    | Asb3         | 238.41 | 224.23  | 220.94 | 241.4  | 268.8 | 235   | 258   | 267.55   |
| 100911776 | LOC100911776 | 77.67  | 60.92   | 74.63  | 70.06  | 92.9  | 65.49 | 60.92 | 95.95    |
| 286908    | Pdlim7       | 2575   | 2346    | 2325   | 2233   | 2738  | 2968  | 2333  | 2511     |
| 288480    | Aimp2        | 632    | 649     | 637    | 576    | 639   | 731   | 707   | 699      |
| 362861    | Slc41a2      | 1067.2 | 1092.16 | 1020.5 | 1142.9 | 1323  | 1288  | 1231  | 969.49   |
| 113995    | P2rx5        | 377    | 266     | 202    | 295    | 319   | 338   | 312   | 300      |
| 309523    | Kif20b       | 38     | 33      | 51     | 37     | 62    | 36    | 47    | 32       |
| 360606    | Itga3        | 1419   | 1349    | 1373   | 1299   | 1639  | 1607  | 1504  | 1306     |
| 690136    | Zfp939       | 22.23  | 12.45   | 33.33  | 34.46  | 36.28 | 33.96 | 24.18 | 19.66    |
| 300758    | Celf6        | 592    | 616     | 565    | 592    | 763   | 616   | 609   | 645      |

|           |              |        |         |        |        |       |       |       |         |
|-----------|--------------|--------|---------|--------|--------|-------|-------|-------|---------|
| 315311    | Slc4a8       | 285    | 262     | 302    | 377    | 357   | 311   | 337   | 360     |
| 261737    | Sfxn5        | 309    | 271     | 262    | 331    | 332   | 337   | 315   | 322     |
| 100361814 | LOC100361814 | 11.32  | 6.61    | 44.23  | 1      | 23.68 | 24.95 | 17.3  | 4.4     |
| 316221    | Tbcc         | 467    | 446     | 390    | 353    | 467   | 441   | 454   | 482     |
| 364676    | Gprin1       | 197    | 214     | 208    | 209    | 249   | 206   | 217   | 250     |
| 246209    | Kif27        | 111    | 119     | 127    | 127    | 124   | 142   | 128   | 145     |
| 685474    | Zfp385a      | 1317   | 1298    | 1130   | 1332   | 1363  | 1526  | 1383  | 1382    |
| 313536    | B4galt2      | 255    | 210     | 234    | 242    | 249   | 207   | 288   | 304     |
| 298267    | Cachd1       | 193    | 233     | 214    | 230    | 250   | 273   | 245   | 201     |
| 499630    | RGD1565059   | 115    | 105     | 112    | 81     | 114   | 123   | 109   | 114     |
| 288919    | Asna1        | 1207   | 1214    | 1185   | 1059   | 1354  | 1340  | 1287  | 1215    |
| 108350747 | LOC108350747 | 10     | 5       | 8.68   | 2.5    | 12    | 4.2   | 7.61  | 5.35    |
| 685059    | Msrbl        | 650    | 558     | 510    | 460    | 628   | 626   | 505   | 667     |
| 309544    | Rbm20        | 51.33  | 38.71   | 71.17  | 61.85  | 48.49 | 84.39 | 66.33 | 49.25   |
| 64057     | Hapln2       | 178    | 150     | 95     | 139    | 138   | 167   | 141   | 180     |
| 363026    | Carm1        | 1187.6 | 1354.18 | 1230.1 | 1235.7 | 1500  | 1376  | 1383  | 1318.9  |
| 100362176 | LOC100362176 | 1509   | 1428    | 1424   | 1446   | 1577  | 1596  | 1644  | 1652    |
| 288475    | Nptx2        | 1497   | 1431    | 1346   | 1363   | 1648  | 1501  | 1472  | 1659    |
| 252915    | Mxd3         | 6      | 6       | 19     | 4      | 11    | 14    | 6     | 8       |
| 100360077 | Znhit1       | 654.26 | 693.27  | 670.93 | 561.42 | 711.8 | 726.8 | 687.6 | 749.02  |
| 498000    | Coa3         | 981.71 | 867.42  | 779.58 | 821.4  | 954.8 | 911.4 | 1008  | 970.76  |
| 100036765 | Ccdc92       | 9190.3 | 9139.69 | 8836.7 | 9465.7 | 10811 | 10808 | 9628  | 9588.77 |
| 309611    | Vwa7         | 2732.7 | 2673.37 | 2725.1 | 2799.6 | 3356  | 3192  | 2936  | 2700.81 |
| 29510     | Pctp         | 366    | 315     | 294    | 384    | 383   | 415   | 365   | 352     |
| 306862    | Tfap2a       | 84     | 122     | 89     | 97     | 99    | 91    | 91    | 156     |
| 294679    | Ankra2       | 111.65 | 116.29  | 171.9  | 119.99 | 123.3 | 147.7 | 164.8 | 143.8   |
| 367808    | Ptges3l1     | 24.44  | 4.51    | 27.89  | 4.01   | 24.36 | 20.04 | 11.21 | 12.23   |
| 288057    | Mylk         | 482    | 567     | 631    | 382    | 577   | 776   | 592   | 354     |
| 302981    | Spsb3        | 784.9  | 746.26  | 736.65 | 661.88 | 789.7 | 844.5 | 787.3 | 845.28  |
| 361805    | Uqcc2        | 546    | 472     | 503.3  | 426    | 548   | 534   | 523.6 | 566.08  |
| 363682    | Ccr10        | 43.05  | 37.7    | 35.57  | 41.81  | 44.89 | 49.92 | 47.78 | 33.77   |
| 499211    | Gdpd5        | 817    | 982     | 855    | 883    | 998   | 1084  | 944   | 919     |
| 308016    | Clca5        | 41     | 43      | 37     | 35     | 47    | 45    | 44    | 38      |
| 65198     | Kcnh1        | 709    | 647     | 677    | 688    | 777   | 857   | 722   | 679     |
| 365603    | Bves         | 154    | 130     | 149    | 156    | 169   | 182   | 161   | 145     |
| 113893    | Sncb         | 3089   | 3195    | 2733   | 3100   | 3349  | 3532  | 3211  | 3424    |
| 309378    | Golga7b      | 414    | 323     | 297    | 291    | 394   | 401   | 353   | 330     |
| 307309    | Sncaip       | 68     | 71      | 71     | 93     | 81    | 76    | 69    | 112     |
| 310395    | Noct         | 122    | 137     | 143    | 126    | 131   | 159   | 150   | 149     |
| 308387    | Npas1        | 59     | 40      | 55     | 45     | 63    | 59    | 51    | 49      |
| 361327    | Prr16        | 46     | 31      | 30     | 40     | 47    | 42    | 46    | 29      |
| 690130    | Rhof         | 715    | 801     | 688    | 691    | 846   | 833   | 766   | 785     |
| 307237    | Pard6g       | 114.34 | 120.51  | 88.66  | 109.39 | 133.4 | 128.4 | 112.3 | 109.05  |
| 290553    | Mustn1       | 131    | 98      | 150    | 122    | 126   | 242   | 104   | 87      |
| 116595    | Nrxn2        | 3549   | 3706    | 3799   | 3975   | 4472  | 4343  | 4049  | 3908    |
| 500870    | Mtbp         | 60.83  | 51.38   | 52.06  | 65.44  | 56.2  | 66.52 | 70.7  | 62.97   |
| 64017     | Enpep        | 219    | 119     | 175    | 184    | 161   | 213   | 207   | 197     |
| 690965    | Ccdc85c      | 648.76 | 684.4   | 553.41 | 698.27 | 691.6 | 766.6 | 711   | 716.16  |
| 685169    | Fam163b      | 12     | 10      | 12     | 9      | 14    | 10    | 8     | 16      |
| 84395     | Slc34a2      | 41     | 58      | 44     | 29     | 62    | 47    | 54    | 29      |
| 84427     | Grb7         | 27     | 27.95   | 26.91  | 30.01  | 35    | 29.86 | 32    | 28.02   |
| 360533    | Rnf187       | 7366   | 7369    | 7022   | 6918   | 8108  | 8035  | 8205  | 7663    |
| 306811    | Wnk2         | 1037   | 1048    | 1009   | 1039   | 1226  | 1248  | 1116  | 1024    |
| 313713    | Caszi        | 870.68 | 879.35  | 898.36 | 1149.3 | 1180  | 1015  | 1015  | 1028.99 |
| 311836    | Ntng2        | 1318   | 1347    | 1359   | 1654   | 1664  | 1773  | 1517  | 1385    |
| 304368    | Zcwpw1       | 0      | 3.26    | 0      | 0      | 0     | 0     | 0     | 3.64    |

|           |              |        |         |        |        |       |       |       |         |
|-----------|--------------|--------|---------|--------|--------|-------|-------|-------|---------|
| 316201    | Daam2        | 2089.7 | 2019.56 | 1703.1 | 2034.6 | 2255  | 2345  | 2091  | 2071.13 |
| 25394     | Bfsp1        | 49     | 61      | 54     | 50     | 56    | 55    | 66    | 62      |
| 81721     | Chrna6       | 602    | 491     | 408    | 526    | 652   | 502   | 543   | 567     |
| 306544    | Plpbp        | 411    | 416     | 361    | 359    | 385   | 451   | 439   | 453     |
| 499088    | Dact3        | 552    | 505     | 547    | 505    | 613   | 587   | 595   | 561     |
| 681337    | Acot4        | 62.41  | 42.14   | 56.75  | 46.87  | 70    | 37.51 | 70.49 | 54.58   |
| 301035    | Lrrfip2      | 891.49 | 897.2   | 977.75 | 942.71 | 1017  | 1095  | 1052  | 979.42  |
| 25114     | Fgfr4        | 64     | 47      | 46     | 39     | 45    | 32    | 77    | 65      |
| 102551788 | LOC102551788 | 0.93   | 2.32    | 3.65   | 2.3    | 3.73  | 1.39  | 3.02  | 2.14    |
| 287944    | Thap7        | 402    | 337     | 309    | 289    | 396   | 396   | 328   | 374     |
| 500893    | Gli4         | 124.94 | 117.5   | 104.22 | 120.5  | 123.8 | 137.7 | 124.8 | 135.68  |
| 25654     | Col11a1      | 615    | 811     | 1101   | 791    | 725   | 1422  | 776   | 785     |
| 100910460 | Ccdc180      | 2      | 6       | 5      | 4      | 5     | 5     | 4     | 5       |
| 299305    | Jade3        | 34     | 26      | 32     | 44     | 38    | 20    | 43    | 51      |
| 365769    | I121         | 6      | 4       | 5      | 2      | 8     | 8     | 2     | 1       |
| 361596    | Idh2         | 719    | 606     | 608    | 598    | 656   | 775   | 675   | 723     |
| 308759    | Unc45a       | 845    | 956     | 845    | 784    | 968   | 1007  | 950   | 909     |
| 499748    | Rnf208       | 660    | 540     | 484    | 565    | 646   | 677   | 641   | 550     |
| 295457    | Cisd2        | 980.03 | 923.96  | 1020.9 | 934.83 | 1108  | 985.4 | 1185  | 1035.92 |
| 301371    | Mrps9        | 525    | 519     | 477    | 473    | 546   | 561   | 580   | 542     |
| 64014     | Duspl2       | 138    | 107     | 97     | 82     | 110   | 110   | 128   | 126     |
| 300115    | Arhgap8      | 79     | 113     | 101    | 122    | 106   | 120   | 114   | 124     |
| 100912052 | LOC100912052 | 7.44   | 5.4     | 2.95   | 0.64   | 0     | 5.38  | 12.99 | 0       |
| 316325    | Hs6st1       | 1787   | 1566    | 1894   | 1568   | 2051  | 1994  | 1699  | 1877.01 |
| 315219    | Tymp         | 222.08 | 237.68  | 205.29 | 192.42 | 270.6 | 245.3 | 203.8 | 239.14  |
| 290833    | Tm2d2        | 1090   | 1032    | 1069   | 848    | 1036  | 1103  | 1215  | 1163    |
| 100361460 | Insyn2b      | 287.25 | 268.82  | 272.08 | 310.67 | 342.9 | 316.7 | 300   | 314.18  |
| 315691    | Lingol       | 1777   | 1675    | 1764   | 1710   | 2082  | 2061  | 1852  | 1753    |
| 25159     | Gata2        | 60     | 68      | 82     | 51     | 86    | 75    | 77    | 54      |
| 360828    | Noc4l        | 229.68 | 264     | 245.74 | 226.79 | 295   | 291   | 234   | 261     |
| 108348323 | LOC108348323 | 91.24  | 92.65   | 77.06  | 80.87  | 56.27 | 134.7 | 115.4 | 76.08   |
| 293738    | Ccdc86       | 165    | 162     | 184    | 162    | 175   | 215   | 174   | 189     |
| 103691004 | LOC103691004 | 24.38  | 35.78   | 26.6   | 17.37  | 16.72 | 24.63 | 43.19 | 31.97   |
| 360605    | Epn3         | 1364.4 | 1297.6  | 1237.9 | 1430.6 | 1573  | 1511  | 1496  | 1383.56 |
| 85264     | Abcg1        | 1572   | 1902    | 1580   | 2023   | 2077  | 2272  | 1807  | 1763    |
| 299210    | Esrrb        | 105    | 160     | 59     | 138    | 116   | 155   | 124   | 122     |
| 307126    | Mcm10        | 17     | 9       | 6      | 10     | 12    | 17    | 13    | 5       |
| 293135    | Lrrc32       | 167.49 | 112.24  | 175.84 | 182.01 | 181.6 | 183.8 | 211.4 | 136.71  |
| 296732    | Smarcd3      | 400    | 287     | 357    | 332    | 371   | 449   | 397   | 323     |
| 108348121 | LOC108348121 | 14.41  | 17.06   | 7.4    | 14.54  | 17.72 | 13.45 | 11.32 | 17.29   |
| 364060    | Rpl3011      | 8.41   | 10.74   | 0      | 7.01   | 10.99 | 18.29 | 0     | 0       |
| 497985    | Hoxb7        | 98     | 104     | 112    | 105    | 118   | 109   | 132   | 110     |
| 100909856 | LOC100909856 | 87.89  | 83.5    | 107.18 | 126.01 | 126.3 | 107.6 | 118.5 | 100.46  |
| 688319    | Rac3         | 880.87 | 795.24  | 797.72 | 757.76 | 888.7 | 930.3 | 897.5 | 900.9   |
| 309158    | Tmem151a     | 2862.3 | 2953.3  | 2718.3 | 2668.3 | 3209  | 3335  | 3047  | 2949.3  |
| 679886    | Chmp4b11     | 1324.7 | 1189.76 | 1245.4 | 1141.6 | 1462  | 1424  | 1384  | 1217.39 |
| 100361087 | LOC100361087 | 20     | 19      | 23     | 30     | 27    | 25    | 26    | 25      |
| 24173     | Adra1b       | 60     | 42      | 37     | 45     | 50    | 60    | 56    | 40      |
| 291676    | Spata24      | 56     | 39      | 47     | 42     | 55    | 54    | 41    | 56      |
| 301650    | Cntnap5b     | 41.46  | 30.19   | 31.91  | 48.29  | 53.8  | 20.99 | 43.08 | 52.14   |
| 103693015 | LOC103693015 | 1003   | 983.1   | 717.28 | 937.66 | 1174  | 887.9 | 1133  | 881.73  |
| 25472     | Kcnj8        | 49     | 43      | 43     | 32     | 45    | 50    | 40    | 52      |
| 307949    | Pcnx2        | 2332   | 2481    | 2091   | 2598   | 2825  | 2731  | 2626  | 2458    |
| 362960    | Dmc1         | 18.72  | 11.67   | 14.29  | 19.61  | 17.76 | 22.97 | 15.45 | 15.81   |
| 305434    | Jakmip1      | 1106   | 1056    | 980    | 1099   | 1377  | 1146  | 1137  | 1089    |
| 171522    | Cyp2d4       | 142.61 | 185.38  | 165.1  | 126.95 | 145.8 | 196   | 192.6 | 159.99  |

|           |              |        |         |        |        |       |       |       |          |
|-----------|--------------|--------|---------|--------|--------|-------|-------|-------|----------|
| 108348151 | LOC108348151 | 73.19  | 96.11   | 73.16  | 94.27  | 75.43 | 121.1 | 90.93 | 89.63    |
| 100360291 | Zglp1        | 9      | 9       | 4      | 3      | 6     | 7     | 5     | 10       |
| 287359    | Jmjd4        | 31     | 40      | 37     | 42     | 55    | 40    | 32    | 41       |
| 100911516 | LOC100911516 | 616.11 | 402.84  | 521.32 | 236.96 | 616.1 | 521.3 | 331.8 | 521.32   |
| 499430    | Lrrc20       | 248    | 268     | 238    | 278    | 287   | 371   | 254   | 244      |
| 364738    | Gabpb11      | 69.79  | 59.5    | 43.95  | 35.95  | 64.75 | 68.7  | 63.24 | 37.65    |
| 314323    | Flvcr2       | 188    | 194     | 182    | 151    | 216   | 181   | 213   | 191      |
| 24591     | Neu1         | 386    | 367.06  | 391.34 | 365    | 414   | 453   | 400   | 424      |
| 311428    | RGD1311739   | 1105.9 | 1109.48 | 1102.3 | 1005.9 | 1347  | 1226  | 1130  | 1141.24  |
| 362937    | Fam83h       | 386    | 340     | 322    | 314    | 399   | 344   | 395   | 388      |
| 108352474 | LOC108352474 | 7.14   | 0.89    | 3.19   | 1.98   | 3.61  | 4.03  | 5.13  | 2.02     |
| 24408     | Grin1        | 1878   | 2012    | 1604   | 2214   | 2307  | 2385  | 2067  | 1879     |
| 303882    | Tnk2         | 3033.6 | 2981.12 | 2926.7 | 3066.8 | 3614  | 3486  | 3417  | 2941.09  |
| 680498    | LOC680498    | 7.07   | 4.46    | 7.68   | 4.48   | 6.67  | 6.42  | 5.64  | 7.82     |
| 24688     | Prph         | 35908  | 32986   | 33733  | 31915  | 39758 | 37167 | 34902 | 38976    |
| 301009    | Nckipsd      | 1135   | 1258    | 1185   | 1227   | 1496  | 1399  | 1275  | 1216     |
| 291433    | Dym          | 1797   | 1948    | 1876   | 1900   | 2181  | 2242  | 2063  | 1945     |
| 304322    | Chst12       | 614    | 606     | 608    | 558    | 682   | 733   | 608   | 652      |
| 314756    | Cradd        | 26     | 41      | 36     | 36.99  | 38    | 37.98 | 52.98 | 28       |
| 83509     | Slc7a7       | 1070   | 993     | 1036   | 1042   | 1174  | 1142  | 1206  | 1121     |
| 171410    | Acsbg1       | 2096   | 1998    | 1894   | 2091   | 2292  | 2242  | 2265  | 2260     |
| 361894    | Ndufaf2      | 231    | 223     | 203    | 233    | 262   | 219   | 252   | 265      |
| 25133     | Pcdhb12      | 29.48  | 12      | 26.28  | 27.8   | 33.06 | 14.17 | 28.8  | 31.13    |
| 246118    | Tubb3        | 56216  | 58058.3 | 55016  | 54455  | 64883 | 69121 | 59930 | 57014.79 |
| 24250     | Cbs          | 34     | 46      | 11     | 57     | 31    | 42    | 55    | 38       |
| 315665    | RGD1311251   | 20     | 18      | 19     | 17     | 23    | 20    | 26    | 14       |
| 361560    | Vstm2b       | 240    | 262     | 162    | 239    | 243   | 293   | 260   | 217      |
| 103692716 | LOC103692716 | 1427.2 | 1268.6  | 1902.9 | 1901   | 2323  | 1321  | 1903  | 1744.33  |
| 290612    | Sh2d4b       | 16     | 10      | 6      | 9      | 19    | 14    | 5     | 8        |
| 81642     | Abcc6        | 55     | 49      | 62     | 55     | 62    | 52    | 78    | 56       |
| 114490    | Cited2       | 356    | 335     | 375    | 333    | 424   | 364   | 378   | 404      |
| 287606    | 4-Sep        | 1724   | 1663    | 1506   | 1526   | 1795  | 1743  | 1841  | 1825     |
| 305348    | Lias         | 293    | 314     | 286    | 309    | 356   | 349   | 323   | 321      |
| 117028    | Bin1         | 2399   | 2415    | 2339   | 2512   | 2818  | 2993  | 2549  | 2487     |
| 289727    | Nat81        | 7565   | 7699    | 6304   | 7673   | 8596  | 8688  | 8141  | 7393     |
| 59293     | Rgs19        | 444    | 499     | 464    | 350    | 469   | 409   | 545   | 549      |
| 24318     | Drd2         | 172    | 169     | 193    | 201    | 191   | 244   | 187   | 203      |
| 117549    | Gpr37        | 360    | 363     | 352    | 378    | 384   | 436   | 406   | 405      |
| 298510    | Pabpc4       | 784    | 790     | 883.02 | 833.41 | 964   | 1106  | 850   | 774      |
| 103692167 | LOC103692167 | 121.31 | 192.99  | 137.85 | 132.34 | 154.4 | 132.3 | 165.4 | 204.02   |
| 83684     | Tpbg         | 76     | 52      | 75     | 66     | 91    | 89    | 56    | 66       |
| 361313    | Rel12        | 1975.2 | 2059.69 | 1797.3 | 1728.4 | 2244  | 2250  | 1921  | 2073.97  |
| 499782    | Rpl12        | 1389.3 | 1484.57 | 1427.5 | 1093.6 | 1305  | 1365  | 1966  | 1421.97  |
| 306013    | Lgi3         | 4367   | 4402    | 4067   | 4458   | 4942  | 5339  | 4830  | 4308     |
| 24258     | Chga         | 2983.1 | 2471.7  | 2198.1 | 2884.3 | 3195  | 2934  | 3049  | 2655.11  |
| 64458     | Scrg1        | 91     | 68      | 71     | 87     | 90    | 95    | 74    | 97       |
| 499584    | LOC499584    | 18.49  | 8.44    | 7.39   | 10.27  | 16.1  | 12.9  | 14.69 | 6.39     |
| 100911795 | Erich6b      | 11.15  | 8.96    | 7.11   | 14.51  | 11.35 | 8.07  | 12.76 | 14.69    |
| 498392    | Cyt11        | 166    | 128     | 101    | 92     | 129   | 177   | 121   | 120      |
| 108352836 | LOC108352836 | 19     | 22      | 10     | 22     | 18    | 30    | 14    | 20       |
| 24796     | Spn          | 49     | 55.89   | 76.99  | 31.19  | 68    | 66    | 58.32 | 47.02    |
| 290851    | Vps36        | 909    | 929     | 779    | 893    | 1019  | 932   | 934   | 1058     |
| 363687    | Mett12b      | 174    | 186     | 188    | 173    | 209   | 197   | 209   | 195      |
| 680602    | Lcn12        | 28     | 19      | 19     | 15     | 17    | 19    | 27    | 28       |
| 308556    | Vsig101      | 680    | 328     | 689    | 489    | 590   | 735   | 553   | 578      |
| 289020    | Lrrn2        | 1031   | 1010    | 1133   | 1067   | 1181  | 1312  | 1230  | 1042     |



|           |              |        |        |        |        |       |       |       |        |
|-----------|--------------|--------|--------|--------|--------|-------|-------|-------|--------|
| 687064    | Col25a1      | 24     | 29     | 13     | 23     | 36    | 11    | 28    | 25     |
| 681050    | Pmf1         | 49     | 54     | 47     | 44     | 57    | 55    | 49    | 57     |
| 501742    | RGD1562667   | 0      | 2.97   | 4.97   | 1.99   | 3     | 0     | 5     | 3.16   |
| 291923    | Abcc12       | 57     | 55     | 61     | 53     | 47    | 82    | 71    | 54     |
| 117269    | Rps6ka2      | 1981   | 2266   | 1914   | 2110   | 2508  | 2324  | 2219  | 2245   |
| 690050    | Tpmt         | 645    | 511    | 505    | 436    | 571   | 531   | 595   | 660    |
| 290229    | Tssk4        | 52.35  | 69.84  | 68.54  | 59.45  | 70.05 | 59.12 | 66.77 | 85.29  |
| 691320    | LOC691320    | 18.83  | 35.59  | 13.79  | 0      | 38.23 | 24.23 | 7.35  | 6.87   |
| 303605    | Strada       | 428    | 451    | 486    | 438    | 518   | 518   | 507   | 484    |
| 360887    | Coq8a        | 311    | 299    | 316    | 265    | 339   | 414   | 276   | 310    |
| 84406     | Hs3st1       | 88     | 77     | 104    | 85     | 97    | 101   | 103   | 97     |
| 84683     | Cox4i2       | 53     | 47     | 50     | 43     | 61    | 55    | 53    | 48     |
| 117100    | Slc6a7       | 56     | 38.67  | 48     | 54.77  | 46    | 64    | 52    | 60     |
| 24949     | Syn1         | 5207   | 5997   | 5604   | 6701   | 6970  | 7090  | 6180  | 6198   |
| 25644     | Bmp6         | 204    | 138    | 146    | 162    | 197   | 172   | 179   | 183    |
| 361784    | Znrd1        | 121    | 113    | 105    | 110    | 117   | 114   | 123   | 151    |
| 102553659 | LOC102553659 | 4.83   | 9.95   | 0.2    | 0      | 7.3   | 0     | 0     | 9.55   |
| 291926    | Mylk3        | 8      | 5      | 7      | 4      | 3     | 5     | 12    | 7      |
| 292786    | RGD1560986   | 0      | 3      | 2      | 3      | 4     | 0     | 3     | 2      |
| 301045    | Cmtm8        | 19     | 27     | 21     | 5      | 23    | 23    | 19    | 16     |
| 304458    | Tmem132b     | 62     | 89     | 63     | 106    | 105   | 85    | 84    | 86     |
| 315163    | Shisa8       | 5      | 11     | 0      | 8      | 3     | 9     | 5     | 10     |
| 361586    | Trpm1        | 5      | 6      | 3      | 2      | 4     | 6     | 4     | 4      |
| 364853    | Plac8l1      | 5      | 1      | 1      | 1      | 2     | 2     | 3     | 2      |
| 365744    | Hnf4g        | 2      | 2      | 2      | 2      | 2     | 2     | 3     | 2      |
| 499607    | LOC499607    | 1      | 1      | 3      | 3      | 2     | 2     | 3     | 2      |
| 681395    | Rnf133       | 2      | 3      | 2      | 1      | 1     | 1     | 1     | 6      |
| 689322    | Shisa12a     | 3      | 3      | 2      | 0      | 3     | 1     | 3     | 2      |
| 315264    | Pus7l        | 111.83 | 111.39 | 82     | 66     | 115.7 | 110   | 93    | 99     |
| 155812    | Trim9        | 455    | 479    | 363    | 492    | 548   | 502   | 487   | 476    |
| 361602    | Me3          | 278    | 266    | 207    | 262    | 276   | 318   | 219   | 327    |
| 102555598 | LOC102555598 | 3      | 1      | 3      | 4      | 2     | 0     | 6     | 4.38   |
| 362850    | Angptl4      | 194    | 113    | 101    | 118    | 148   | 153   | 138   | 153    |
| 311807    | Bmyc         | 266    | 251    | 206    | 232    | 273   | 282   | 271   | 249    |
| 100360205 | LOC100360205 | 253    | 277    | 343    | 304    | 288   | 436   | 299   | 302    |
| 303878    | Ubxn7        | 59.18  | 48.41  | 53.15  | 54.77  | 79.42 | 45.1  | 61.47 | 56.63  |
| 305687    | Zfp503       | 247    | 219    | 204    | 236    | 250   | 308   | 238   | 224    |
| 682225    | LOC682225    | 33.16  | 34.7   | 41.29  | 30     | 29.11 | 36.27 | 38.02 | 53.26  |
| 100361323 | Astn2        | 502    | 462    | 486    | 559    | 575   | 565   | 583   | 539    |
| 497960    | Fam222b      | 964    | 1090   | 966    | 1105   | 1160  | 1198  | 1141  | 1146   |
| 286758    | Aqp11        | 253    | 196    | 199    | 208    | 242   | 247   | 231   | 244    |
| 79430     | C1cnkb       | 42     | 44.94  | 52.89  | 27.81  | 49.81 | 55    | 49    | 35     |
| 117559    | Sv2a         | 1005   | 1123   | 951    | 1172   | 1182  | 1242  | 1137  | 1227   |
| 308557    | Igln5        | 642.59 | 571.66 | 693.18 | 676.01 | 761.9 | 877.1 | 627   | 644.04 |
| 500563    | Fam110d      | 42     | 35     | 49     | 48     | 52    | 55    | 48    | 41     |
| 103692169 | LOC103692169 | 96.68  | 65.49  | 65.49  | 43.66  | 46.78 | 96.68 | 84.2  | 77.97  |
| 140448    | Slc8a3       | 303.86 | 332.9  | 262.08 | 360.37 | 334.5 | 451.4 | 359.2 | 273.49 |
| 360973    | Gas2l1       | 2602   | 2673   | 2708   | 2378   | 3079  | 3010  | 2873  | 2710   |
| 29628     | Gria3        | 264.95 | 238    | 243.25 | 302    | 301.5 | 289.2 | 308.1 | 282.06 |
| 679321    | Slc35f3      | 172    | 203    | 153    | 183    | 217   | 186   | 199   | 199    |
| 116653    | Cap2         | 120    | 105    | 104    | 121    | 105   | 172   | 115   | 115    |
| 25544     | Sele         | 12.71  | 13.95  | 14.26  | 11.63  | 15.95 | 14.06 | 17.28 | 11.92  |
| 499927    | RGD1561517   | 17     | 15     | 16     | 23     | 18    | 23    | 20    | 19     |
| 108349776 | LOC108349776 | 4.78   | 3.1    | 4.05   | 5.03   | 4.42  | 4.32  | 5.03  | 5.34   |
| 309570    | Slc18b1      | 313    | 322    | 286    | 262    | 343   | 348   | 323   | 319    |
| 103693540 | LOC103693540 | 41     | 36     | 22     | 35     | 30    | 31    | 42    | 48     |

|           |              |        |         |        |        |       |       |       |         |
|-----------|--------------|--------|---------|--------|--------|-------|-------|-------|---------|
| 84390     | Hcn1         | 828.29 | 809.53  | 733.99 | 1005.2 | 1015  | 951.1 | 1002  | 837.42  |
| 361708    | Snx32        | 551    | 531     | 551    | 510    | 574   | 627   | 573   | 641     |
| 362972    | Pnpla3       | 663.59 | 693.69  | 635.73 | 704.97 | 802.2 | 761.1 | 711.1 | 766.3   |
| 100911453 | LOC100911453 | 26.26  | 78.78   | 24.47  | 75.74  | 100.9 | 0     | 25.43 | 105.04  |
| 192254    | Grasp        | 117    | 94      | 114    | 92     | 114   | 113   | 124   | 119     |
| 309175    | Cdc42ep2     | 794    | 744     | 635    | 682    | 825   | 864   | 779   | 750     |
| 290636    | Pgls         | 464.92 | 444.79  | 481.92 | 377.17 | 477.5 | 520.6 | 538.9 | 456.97  |
| 680407    | Mark4        | 1331   | 1295    | 1235   | 1376.2 | 1534  | 1503  | 1451  | 1417.17 |
| 680312    | Hist1h2bk    | 53.56  | 33.86   | 38.3   | 44.02  | 38.67 | 56.59 | 48.45 | 47.69   |
| 266605    | Dcps         | 174    | 208     | 172    | 143    | 200   | 207   | 188   | 191     |
| 680282    | Tceal5       | 148.05 | 162.54  | 137.93 | 151.76 | 167.8 | 188.7 | 178   | 142.46  |
| 367295    | 4-Mar        | 176.63 | 176.9   | 209.65 | 184.48 | 243.3 | 212   | 200.7 | 187.21  |
| 80754     | Rabep2       | 680    | 647     | 592    | 624    | 725   | 711   | 687   | 745     |
| 685844    | Sh2d1b2      | 57.88  | 51.59   | 51.71  | 45.55  | 64.69 | 53.56 | 63.85 | 51.06   |
| 64626     | Rem2         | 377    | 335     | 327    | 345    | 383   | 394   | 451   | 333     |
| 103691272 | LOC103691272 | 10.4   | 10.33   | 7.7    | 18.48  | 19.07 | 15.37 | 10.06 | 8.41    |
| 287564    | Tmem132e     | 2008   | 2072    | 1950   | 2277   | 2580  | 2608  | 2118  | 2064    |
| 299613    | Mex3d        | 479    | 403     | 429    | 392    | 469   | 506   | 460   | 486     |
| 56825     | Cym          | 33.17  | 18.82   | 43.98  | 26.57  | 30.5  | 32.11 | 46.67 | 28.96   |
| 306534    | Unc5d        | 74.11  | 75.17   | 60.6   | 67.4   | 76.25 | 74.27 | 70.9  | 91.39   |
| 406228    | Krt2         | 24     | 19      | 13     | 22     | 24    | 27    | 21    | 16      |
| 362942    | Slc52a2      | 188.23 | 182.6   | 180.32 | 198.12 | 200   | 212.8 | 218.3 | 214.24  |
| 500307    | Tmem121b     | 53.08  | 48.04   | 59.09  | 32.31  | 61.95 | 55.68 | 47.77 | 51.87   |
| 24256     | Psgl9        | 4.87   | 2.99    | 8.74   | 4.06   | 5.08  | 5.82  | 6.05  | 6.37    |
| 65277     | Vtila        | 174    | 170     | 157    | 190    | 188   | 190   | 195   | 207     |
| 362979    | Panx2        | 1860   | 1813    | 1477   | 2089   | 2062  | 2244  | 1996  | 1870    |
| 681200    | Skor2        | 242    | 233     | 269    | 311    | 313   | 320   | 270   | 288     |
| 502576    | RGD1560554   | 7.34   | 7.19    | 6.53   | 5.52   | 4.11  | 9.24  | 7.92  | 8.74    |
| 366274    | Ntsr1        | 177    | 175     | 171    | 166    | 195   | 225   | 175   | 183     |
| 102547039 | LOC102547039 | 28.27  | 23.72   | 14.16  | 21.37  | 18.35 | 30.98 | 26.59 | 22.92   |
| 691504    | Zfpml        | 529    | 532.19  | 486.41 | 524.15 | 664   | 636.2 | 532.1 | 507.68  |
| 308758    | Hddc3        | 232    | 261     | 222    | 172    | 247   | 225   | 281   | 249     |
| 288664    | Pheta1       | 225    | 152     | 156    | 161    | 187   | 208   | 187   | 202     |
| 689576    | Nkain3       | 40.29  | 35.05   | 39.09  | 44.39  | 52.35 | 55.43 | 31.3  | 40.34   |
| 501828    | RGD1566006   | 2.16   | 2.39    | 2.31   | 0      | 3.25  | 1.12  | 1.34  | 2.04    |
| 102553382 | LOC102553382 | 17     | 18      | 18     | 24     | 20    | 19    | 28    | 20      |
| 292206    | Trip13       | 35.11  | 27.08   | 32.22  | 18.08  | 32.1  | 28    | 37    | 30      |
| 311137    | Zfp385b      | 709.95 | 764.75  | 614.02 | 857.82 | 830.4 | 915.2 | 847.2 | 736.58  |
| 108348093 | LOC108348093 | 5      | 0       | 0      | 0      | 0     | 0     | 3     | 2.65    |
| 309659    | Mdgal        | 326    | 400     | 332    | 426    | 465   | 442   | 369   | 401     |
| 291961    | Exoc311      | 125.15 | 124.94  | 126.99 | 120.2  | 143.5 | 140.6 | 150.4 | 127.48  |
| 681825    | Vbp1         | 1109   | 966     | 891    | 813    | 1139  | 1119  | 978   | 1035    |
| 29130     | Syn3         | 126.71 | 139.47  | 124.9  | 174.69 | 191.8 | 151.6 | 153.1 | 142.92  |
| 24167     | Adcyap1r1    | 111.2  | 80.15   | 69.23  | 130.43 | 125.6 | 114.1 | 109.2 | 93.1    |
| 308420    | Zfp112       | 74.28  | 69.57   | 72.58  | 81.33  | 89.68 | 94.33 | 74.26 | 78.32   |
| 25684     | Mep1a        | 9      | 4       | 4      | 6      | 8     | 4     | 10    | 4       |
| 171341    | Mgst1        | 894    | 779     | 903    | 727    | 898   | 897   | 975   | 964     |
| 314457    | Ankrd9       | 243    | 229     | 212    | 212    | 283   | 281   | 227   | 222     |
| 497962    | Lym9         | 305    | 320     | 289    | 287    | 303   | 302   | 366   | 387     |
| 298496    | Kcnq4        | 486    | 348     | 443    | 412    | 465   | 537   | 461   | 447     |
| 360583    | Dhrs11       | 177    | 165     | 143    | 149    | 185   | 180   | 170   | 182     |
| 311287    | Ano3         | 1851   | 1904.98 | 1828   | 1680.9 | 2374  | 1577  | 2251  | 2015.92 |
| 313017    | Sfn          | 45     | 54.16   | 75     | 45.18  | 53.53 | 67.21 | 66.03 | 61.36   |
| 314480    | Gpr132       | 34     | 26      | 25     | 14     | 34    | 33    | 28    | 17      |
| 84600     | Rag1         | 23     | 23      | 46     | 7      | 34    | 42    | 24    | 12      |
| 363150    | Elp6         | 283    | 316     | 287    | 241    | 313   | 331   | 305   | 326     |

|           |              |        |         |        |        |       |       |       |         |
|-----------|--------------|--------|---------|--------|--------|-------|-------|-------|---------|
| 60669     | Cmklr1       | 124.28 | 95.66   | 130.9  | 100.99 | 117   | 149.1 | 109.9 | 135.19  |
| 680906    | Fam169b      | 9      | 5       | 12     | 12     | 5     | 9     | 17    | 12      |
| 501230    | LOC501230    | 60.41  | 42.87   | 24.2   | 53.16  | 42.94 | 21.24 | 90.23 | 50.01   |
| 29686     | Scn1b        | 5542   | 5477    | 4873   | 5224   | 5875  | 6486  | 5939  | 5597    |
| 117052    | Kcnj12       | 663    | 642     | 570    | 636    | 725.8 | 759   | 683   | 673.97  |
| 295458    | Bdh2         | 51     | 51      | 60     | 58     | 62    | 62    | 63    | 62      |
| 299509    | Myo1a        | 359.36 | 249.64  | 277.51 | 304.09 | 296.8 | 360   | 332.3 | 358.5   |
| 287095    | Zfp13        | 84     | 72      | 88     | 97     | 122   | 75    | 99    | 90      |
| 64557     | Bard1        | 15     | 12      | 15     | 11     | 15    | 12    | 20    | 13      |
| 689786    | Catspere     | 13     | 14      | 9      | 17     | 16    | 13    | 17    | 14      |
| 25177     | Fhl1         | 1487   | 1354    | 1694   | 1241   | 1414  | 2144  | 1519  | 1463    |
| 108348144 | LOC108348144 | 17.87  | 31.28   | 26.81  | 58.09  | 26.66 | 44.69 | 31.28 | 49.16   |
| 298518    | Csf3r        | 84.84  | 79.8    | 99.51  | 61.55  | 110.4 | 86.59 | 103.6 | 68.17   |
| 114244    | Hcn2         | 2138.9 | 2302.96 | 1871   | 2370.7 | 2497  | 2634  | 2343  | 2359.89 |
| 680329    | LOC680329    | 37     | 30      | 90     | 9      | 69    | 62    | 40    | 17      |
| 117101    | Kcnc3        | 2242.1 | 2264.09 | 1819.9 | 2748.5 | 2684  | 2806  | 2585  | 2202.33 |
| 113907    | Sbk1         | 1213.9 | 1002.03 | 856.61 | 1081.6 | 1303  | 1209  | 938.5 | 1254.94 |
| 108352198 | LOC108352198 | 97.74  | 84.71   | 73.82  | 75.62  | 91.92 | 98.85 | 79.84 | 105.32  |
| 103690023 | LOC103690023 | 36.5   | 42.5    | 52.5   | 30.5   | 40.5  | 46    | 53.5  | 43.5    |
| 689039    | LOC689039    | 36.5   | 42.5    | 52.5   | 30.5   | 40.5  | 46    | 53.5  | 43.5    |
| 310655    | Cgn          | 54     | 58      | 49     | 65     | 58    | 71    | 66    | 61      |
| 301115    | Ak5          | 5.48   | 2.71    | 4.25   | 2.55   | 8.51  | 2.56  | 3.9   | 2.01    |
| 60666     | Gpd1         | 830.34 | 854.05  | 749.98 | 837.83 | 792.3 | 1141  | 825.3 | 947.97  |
| 363324    | LOC363324    | 534.57 | 266.26  | 353.1  | 255.02 | 434.5 | 223   | 479.3 | 459.34  |
| 301506    | Fsd1         | 321    | 345     | 312    | 324    | 394   | 367   | 346   | 368     |
| 691468    | RGD1561277   | 227.37 | 171.63  | 185    | 225.94 | 213.6 | 221.6 | 252.3 | 230     |
| 498281    | Nectin4      | 46     | 49      | 38     | 40     | 52    | 44    | 49    | 51      |
| 59318     | Negr1        | 161    | 143     | 124    | 203    | 208   | 158   | 189   | 160     |
| 295327    | Nhlh2        | 75     | 64      | 85     | 99     | 103   | 67    | 102   | 94      |
| 64387     | Ccdc80       | 283    | 249     | 356    | 305    | 317   | 449   | 330   | 256     |
| 65193     | Nkx6-1       | 3      | 2       | 2      | 8      | 6     | 3     | 2     | 6       |
| 688553    | LOC688553    | 6      | 2       | 3      | 4      | 6     | 4     | 5     | 2       |
| 360848    | Shisa4       | 1095   | 1087    | 1011   | 1067   | 1159  | 1261  | 1189  | 1219    |
| 685729    | Pcbd2        | 166.21 | 179.81  | 166.99 | 150.73 | 158.8 | 163.6 | 206.8 | 223.18  |
| 307806    | Thap11       | 260.53 | 255.63  | 227.32 | 210.99 | 238.7 | 271.8 | 307.8 | 263.6   |
| 288512    | Elf1         | 634.44 | 757.59  | 723.52 | 850.65 | 977.2 | 779.5 | 877.7 | 728.17  |
| 690308    | Tsen54       | 177    | 171     | 151    | 174    | 190   | 212   | 187   | 174     |
| 102549710 | Samd11       | 183.22 | 186.95  | 203.07 | 197.72 | 204.6 | 246.1 | 240.6 | 182.78  |
| 114502    | Pax3         | 8.77   | 6.07    | 14.02  | 16.14  | 14.29 | 17.27 | 12.21 | 7.25    |
| 362334    | Tmem140      | 98.97  | 104.22  | 88.04  | 98.62  | 112.9 | 140.9 | 106.1 | 82.08   |
| 308834    | Usp35        | 1019   | 995     | 904    | 1067   | 1194  | 1214  | 1075  | 1036    |
| 305691    | Zfp385d      | 199    | 175     | 165    | 252    | 254   | 188   | 221   | 234     |
| 315173    | Mcat         | 200    | 222     | 194    | 175    | 221   | 217   | 237   | 222     |
| 100360856 | LOC100360856 | 213.94 | 227.45  | 183.83 | 197.79 | 258.7 | 226.1 | 143.3 | 305.25  |
| 362841    | Mier2        | 295    | 289     | 348    | 291    | 316   | 343   | 386   | 342     |
| 500066    | Strip2       | 142.85 | 164.61  | 131.19 | 162.52 | 174.1 | 170.1 | 183   | 154.62  |
| 170924    | Abcc4        | 458.9  | 502.98  | 501.88 | 517.98 | 554   | 600   | 559   | 534.88  |
| 24203     | Amyla        | 5      | 14      | 11.91  | 7      | 7     | 16    | 10    | 10      |
| 307925    | Spire2       | 1547.1 | 1542.91 | 1416.8 | 1631.3 | 1783  | 1853  | 1707  | 1619.66 |
| 306328    | Med26        | 125.51 | 123.22  | 123.86 | 88     | 126   | 126.7 | 140.7 | 129.08  |
| 689996    | Tomm201      | 1      | 2.86    | 1.02   | 3      | 2     | 2.99  | 1.95  | 2       |
| 363563    | Fb111        | 476    | 433     | 427    | 358    | 522   | 489   | 464   | 447     |
| 100911693 | LOC100911693 | 58.04  | 120.29  | 79.1   | 69.03  | 106.8 | 86.59 | 135.6 | 41.35   |
| 310678    | Hist2h3c2    | 18.5   | 6.57    | 0      | 22.5   | 15.26 | 19.9  | 7.8   | 11.02   |
| 688407    | Mett127      | 78     | 85      | 85     | 56     | 101   | 71    | 79    | 94      |
| 361519    | Zfp428       | 312    | 275     | 261    | 256    | 316   | 308   | 290   | 339     |

|           |              |        |         |        |        |       |       |       |         |
|-----------|--------------|--------|---------|--------|--------|-------|-------|-------|---------|
| 684681    | Hist1hlc     | 3466   | 3683.11 | 3316.1 | 3417   | 4112  | 3873  | 3981  | 3795.01 |
| 293874    | Trpm6        | 119    | 108     | 119    | 134    | 137   | 150   | 133   | 125     |
| 293481    | Tufm         | 1300   | 1316    | 1146   | 1339   | 1486  | 1488  | 1290  | 1528    |
| 84010     | Dl11         | 41     | 36      | 33     | 45     | 51    | 50    | 53    | 22      |
| 497916    | Mief2        | 194    | 218     | 207    | 163    | 200   | 217   | 233   | 238     |
| 498959    | Fbxo31       | 1463   | 1538    | 1301   | 1369   | 1694  | 1747  | 1507  | 1492    |
| 29369     | Fgf18        | 108    | 114     | 98     | 100    | 117   | 131   | 113   | 116     |
| 288161    | B3galt5      | 191    | 184     | 94     | 194    | 192   | 191   | 195   | 175     |
| 298690    | B3galt6      | 145    | 108     | 96.98  | 129    | 146   | 105   | 164   | 129     |
| 307799    | Pard6a       | 129    | 106     | 111    | 103    | 138   | 120   | 119   | 133     |
| 361277    | Acbd7        | 49.37  | 55.03   | 40.1   | 42.31  | 55.97 | 52.29 | 53.74 | 50.19   |
| 100360464 | Arxes2       | 146.54 | 142.22  | 107.94 | 120.14 | 136.2 | 122.9 | 162   | 166.19  |
| 315705    | Rpp25        | 35     | 40      | 29     | 28     | 35    | 39    | 37    | 39      |
| 100910207 | LOC100910207 | 261.16 | 470.09  | 156.7  | 261.16 | 522.3 | 261.2 | 208.9 | 313.4   |
| 309390    | Entpd7       | 16.42  | 14.01   | 21.26  | 25.06  | 21.53 | 20.19 | 28.7  | 16.81   |
| 299341    | Apopt1       | 372    | 330     | 288    | 335    | 424   | 357   | 340   | 385     |
| 499957    | Samd10       | 274    | 260     | 228    | 204    | 265   | 247   | 275   | 311     |
| 291157    | Hist1h2bo    | 10.09  | 3.71    | 9.23   | 9.68   | 5.18  | 8.43  | 11.72 | 11.85   |
| 293587    | Fuom         | 5.03   | 10.74   | 4.24   | 4.57   | 4.32  | 3.78  | 4.61  | 15.23   |
| 304346    | Mblac1       | 124    | 126     | 113    | 105    | 123   | 128   | 142   | 139     |
| 304928    | Mettl18      | 33     | 37      | 27     | 20     | 23    | 45    | 32    | 33      |
| 116719    | Acacb        | 186    | 187     | 157    | 186    | 215   | 242   | 202   | 155     |
| 500152    | Mmrn1        | 76     | 39      | 40     | 13     | 56    | 42    | 45    | 48      |
| 245963    | Egfl7        | 203.12 | 205.64  | 196.82 | 129.56 | 201.2 | 252   | 221.6 | 160.99  |
| 294231    | RGD1302996   | 1258   | 1290    | 1141   | 1197   | 1361  | 1437  | 1399  | 1358    |
| 680403    | Hist1h2bc11  | 8.04   | 2.91    | 1.49   | 2.97   | 5.74  | 1.76  | 4.7   | 5.32    |
| 117183    | Rgcc         | 337    | 267     | 325    | 239    | 261   | 430   | 306   | 331     |
| 294208    | Trim31       | 15.82  | 24.79   | 19.24  | 16.87  | 23.67 | 23.95 | 17.21 | 22.4    |
| 364208    | Cnrip1       | 1035   | 878     | 841    | 986    | 1018  | 1071  | 1127  | 1037    |
| 314423    | Bcl11b       | 73.01  | 76.98   | 99     | 90     | 96.02 | 103   | 103.5 | 83      |
| 314213    | Gpr135       | 53     | 74      | 45     | 61     | 73    | 65    | 67    | 60      |
| 497899    | LOC497899    | 80     | 52      | 45     | 56     | 60    | 71    | 62    | 72      |
| 362100    | Endog        | 107.47 | 102.04  | 117.11 | 67.65  | 120.3 | 111.7 | 118.3 | 98.36   |
| 83810     | Trpv1        | 2074   | 1964    | 1785   | 2054   | 2430  | 2115  | 1977  | 2440    |
| 100363494 | LOC100363494 | 845.74 | 757.28  | 826.79 | 744.55 | 901.8 | 941.1 | 865.9 | 902.85  |
| 100233177 | Zfp949       | 131    | 125     | 119    | 133    | 149   | 111   | 127   | 191     |
| 500252    | Hlfx         | 951    | 925     | 852    | 790    | 1106  | 997   | 893   | 1007    |
| 114639    | Zp3          | 8      | 6       | 6      | 9      | 2     | 15    | 12    | 4       |
| 25431     | Dlx5         | 7      | 5       | 13     | 4      | 4     | 11    | 10    | 8       |
| 307897    | Sdr42e1      | 41     | 35      | 38     | 31     | 32    | 47    | 45    | 41      |
| 315435    | Panx1        | 275    | 293     | 302    | 384    | 387   | 378   | 346   | 316     |
| 304554    | Sez6l        | 173    | 168     | 182    | 223    | 213   | 278   | 191   | 167     |
| 287148    | Rpusd1       | 225    | 234     | 220    | 248    | 300   | 274   | 229   | 252     |
| 29331     | Hapln1       | 766    | 760     | 512    | 923    | 818   | 996   | 842   | 714     |
| 414790    | RT1-CE13     | 89.3   | 103.03  | 62.85  | 35.4   | 81.18 | 96.45 | 65.66 | 87.43   |
| 316003    | Amigo3       | 622    | 616     | 484    | 623    | 682   | 715   | 648   | 624     |
| 308992    | Zfp771       | 614    | 544     | 529    | 454    | 713   | 573   | 579   | 572     |
| 287094    | Zfp213       | 182    | 202     | 160    | 143    | 197   | 203   | 175   | 207     |
| 362676    | Prxl2b       | 445    | 408     | 407    | 367    | 480   | 434   | 435   | 503     |
| 361054    | Ebpl         | 222    | 209     | 204    | 182    | 226   | 218   | 232   | 254     |
| 298534    | Clspn        | 9      | 10      | 20.05  | 4.54   | 11.8  | 12.02 | 12.6  | 13.2    |
| 100363112 | LOC100363112 | 15.78  | 12.07   | 21.07  | 25.58  | 19.18 | 19.63 | 14.87 | 31.14   |
| 108348070 | LOC108348070 | 34.74  | 0       | 0      | 0      | 0     | 39.56 | 0     | 0       |
| 114491    | Cited4       | 9      | 4       | 13     | 10     | 12    | 12    | 6     | 11      |
| 688293    | Sgsh         | 48     | 55      | 64     | 56     | 63    | 67    | 72    | 52      |
| 681936    | Ism2         | 183    | 163     | 192    | 165    | 233   | 192   | 195   | 181     |

|           |              |        |        |        |        |       |       |       |         |
|-----------|--------------|--------|--------|--------|--------|-------|-------|-------|---------|
| 305095    | Tmcc2        | 851    | 890    | 814    | 901    | 1087  | 1028  | 920   | 903     |
| 691414    | LOC691414    | 655.07 | 624.49 | 506.13 | 529.61 | 754.5 | 600.6 | 482.2 | 800.89  |
| 293524    | Bag3         | 3039   | 3448   | 3249   | 3817   | 3796  | 4472  | 3810  | 3366    |
| 170579    | Fgf22        | 12     | 14     | 9      | 8      | 12    | 11    | 18    | 8       |
| 499470    | Armc2        | 30     | 33     | 32     | 34     | 31    | 43    | 38    | 35      |
| 303004    | Tmem8a       | 752    | 739    | 640    | 714    | 828   | 827   | 791   | 796     |
| 25327     | Kcnc1        | 464.89 | 541.81 | 382.12 | 635.12 | 585.3 | 596.9 | 567.7 | 556.4   |
| 680751    | Ebf4         | 140    | 115    | 102    | 123    | 152   | 144   | 130   | 121     |
| 502908    | LOC502908    | 1.13   | 2.38   | 0      | 0      | 1.19  | 2.81  | 0     | 0       |
| 29758     | St6galnac3   | 91     | 72     | 69     | 76     | 80    | 88    | 89    | 94      |
| 25261     | Id1          | 236    | 302.46 | 257.97 | 238.62 | 321.8 | 328.7 | 345.9 | 183.23  |
| 365179    | Zfp524       | 141    | 161    | 164    | 141    | 184   | 188   | 146   | 174     |
| 498228    | Mfsd4a       | 62     | 65     | 56     | 52     | 65    | 67    | 74.91 | 61      |
| 292722    | Tmem145      | 471    | 462    | 426    | 440    | 564   | 544   | 491   | 452     |
| 293493    | Fam57b       | 4317   | 4198   | 3637   | 4415   | 4729  | 5072  | 4476  | 4611    |
| 415064    | Gpank1       | 219    | 252    | 224    | 197    | 285   | 268   | 233   | 231     |
| 293107    | Ccdc89       | 16.33  | 30.08  | 18.37  | 20.94  | 32.1  | 27.51 | 23.08 | 15.05   |
| 690131    | Hist2h2aa2   | 459.65 | 452.45 | 518.66 | 336.34 | 414   | 558.3 | 400.4 | 642.26  |
| 102551000 | LOC102551000 | 1.01   | 0.93   | 3.19   | 1      | 2.11  | 1     | 1.95  | 1.93    |
| 300889    | Ankrd34c     | 87.73  | 113.82 | 104.39 | 113.66 | 97.17 | 121.2 | 149.9 | 110.22  |
| 499099    | Cd177        | 62     | 48     | 72     | 4      | 97.97 | 46.5  | 56    | 11.63   |
| 100910047 | Gfy          | 1144   | 1251   | 1130   | 1383   | 1349  | 1544  | 1455  | 1249    |
| 24799     | Eef1a2       | 15964  | 16882  | 14803  | 17421  | 18670 | 20504 | 18136 | 16896   |
| 499505    | Msh3         | 244    | 243    | 230    | 279    | 280   | 269   | 302   | 285     |
| 299604    | Polrmt       | 338    | 323    | 365    | 283    | 360   | 391   | 369   | 373     |
| 29204     | Neu2         | 25     | 19     | 7      | 13     | 18    | 24    | 13    | 18      |
| 360665    | Jmjd6        | 179    | 146    | 163    | 173    | 178   | 174   | 208   | 194     |
| 684111    | E2f2         | 135    | 78     | 138    | 54     | 179   | 113   | 81    | 89      |
| 497881    | Tlx3         | 1048   | 1004   | 942    | 913    | 1215  | 1180  | 1020  | 1042    |
| 289801    | Upp1         | 47     | 34     | 40     | 21     | 45    | 42    | 40    | 35      |
| 688283    | Afmid        | 113.46 | 123.02 | 117.58 | 113.98 | 126   | 145.4 | 132.7 | 129.85  |
| 117105    | Kcnb2        | 277    | 282    | 225    | 309    | 400   | 189   | 247   | 411     |
| 690333    | Sertm1       | 504    | 613    | 199    | 621    | 468   | 587   | 535   | 620     |
| 296048    | Lpcat4       | 1296   | 1344   | 1239   | 1421   | 1610  | 1606  | 1463  | 1368    |
| 308775    | Det1         | 93     | 86     | 102    | 95     | 104   | 117   | 113   | 95      |
| 360639    | Dcakd        | 764    | 911    | 802    | 954    | 849   | 1042  | 987   | 1037    |
| 25393     | Bcan         | 1511.5 | 1602.5 | 1437   | 1971.5 | 1767  | 2100  | 1656  | 1920.12 |
| 54295     | Rgs6         | 340    | 385    | 229    | 413    | 390   | 417   | 375   | 378     |
| 679806    | Fer115       | 40     | 48     | 44     | 45     | 46    | 47    | 60    | 49      |
| 113912    | Rtn4r        | 201    | 203    | 166    | 187    | 224   | 246   | 186   | 208     |
| 286923    | Dlgap3       | 1224   | 1111   | 1137   | 1133   | 1456  | 1315  | 1221  | 1264    |
| 24264     | Ckb          | 12823  | 13107  | 11842  | 11645  | 13635 | 15249 | 13834 | 13695   |
| 304669    | Hook2        | 94     | 73     | 107    | 79     | 103   | 94    | 107   | 99      |
| 103692792 | LOC103692792 | 243    | 214.46 | 194    | 191.01 | 271.8 | 215.1 | 239   | 236     |
| 499980    | Ccdc146      | 24.35  | 31.24  | 28.29  | 30.34  | 34.56 | 33.36 | 35.29 | 27.21   |
| 290633    | Gtpbp3       | 204    | 199    | 163    | 174    | 207   | 238   | 208   | 192     |
| 305096    | Klhdc8a      | 109    | 138    | 76     | 135    | 114   | 122   | 119   | 168     |
| 304496    | Orail        | 267    | 231    | 249    | 260    | 310   | 290   | 248   | 302     |
| 300050    | Bop1         | 519    | 528    | 539    | 475    | 599   | 625   | 586   | 544     |
| 25688     | Clcn1        | 131.24 | 193.8  | 133.88 | 197.83 | 155.8 | 221.5 | 183.2 | 189.72  |
| 316290    | Ogfrl1       | 793    | 806    | 624    | 827    | 977   | 795   | 766   | 946     |
| 287847    | Rbfox3       | 1817   | 1795   | 1781   | 1858   | 2277  | 2201  | 1960  | 1845    |
| 312679    | I117ra       | 398.52 | 428.43 | 591.11 | 502.71 | 554.2 | 605.4 | 605.6 | 429.07  |
| 360908    | Cdc7         | 68     | 60     | 74     | 79     | 78    | 77    | 81    | 85      |
| 100361898 | LOC100361898 | 47.5   | 39.55  | 55.86  | 19.02  | 30.41 | 50.62 | 52.45 | 51.52   |
| 114509    | Mapk7        | 366.78 | 347.45 | 263.38 | 325.88 | 401.9 | 348.4 | 332.2 | 406.73  |

|           |              |        |         |        |        |       |       |       |         |
|-----------|--------------|--------|---------|--------|--------|-------|-------|-------|---------|
| 108348114 | LOC108348114 | 230.37 | 276.82  | 275.29 | 237.48 | 318   | 307.7 | 258.4 | 281.42  |
| 24602     | Nppa         | 107    | 75      | 76     | 57     | 89    | 93    | 89    | 89      |
| 287102    | Kremen2      | 1      | 5       | 0      | 1      | 3     | 1     | 2     | 2       |
| 290032    | Eddm3b       | 3      | 2       | 4      | 5      | 2     | 6     | 6     | 2       |
| 295518    | Clnk         | 2      | 3       | 6      | 3      | 7     | 5     | 2     | 2       |
| 296608    | RGD1306233   | 5      | 5       | 5      | 6      | 6     | 5     | 10    | 3       |
| 299316    | Slc25a47     | 2      | 6       | 9      | 4      | 6     | 8     | 6     | 4       |
| 315712    | Ccdc33       | 2      | 1       | 2      | 2      | 0     | 3     | 3     | 2       |
| 58922     | Sebox        | 1      | 5       | 1      | 0      | 4     | 1     | 1     | 2       |
| 79217     | Gja3         | 4      | 0       | 5      | 5      | 7     | 8     | 1     | 0       |
| 100359918 | Lnp1         | 7      | 7       | 6      | 8      | 5     | 14    | 8     | 5       |
| 25117     | Hsd11b2      | 20     | 16      | 21     | 20     | 26    | 25    | 19    | 18      |
| 25633     | Dnase1       | 10     | 3       | 8      | 7      | 8     | 8     | 9     | 7       |
| 108348080 | LOC108348080 | 142.39 | 177.98  | 106.79 | 71.19  | 142.4 | 142.4 | 178   | 106.79  |
| 64191     | Dhcr7        | 1029   | 1055    | 952    | 1029   | 1099  | 1198  | 1112  | 1237    |
| 108352650 | LOC108352650 | 7.6    | 21.16   | 3.84   | 3.7    | 10.63 | 11.6  | 15.18 | 4.08    |
| 316758    | Lama1        | 15.32  | 12.27   | 8.87   | 29.14  | 27.31 | 15.04 | 17.77 | 14.86   |
| 362911    | Mal2         | 289    | 221     | 171.49 | 280    | 272   | 235   | 308   | 284     |
| 65155     | Alas1        | 811    | 831     | 745    | 742    | 876   | 975   | 948   | 778     |
| 56761     | Notch3       | 451    | 420     | 439    | 482    | 504   | 572   | 507   | 466     |
| 362628    | Ifnlr1       | 127.7  | 129.58  | 137.62 | 122.87 | 156.1 | 144.9 | 140.3 | 150.88  |
| 363206    | Tmem14a      | 170.38 | 126.15  | 158.66 | 131.08 | 178.3 | 159.1 | 151   | 182.17  |
| 690126    | LOC690126    | 91.56  | 69.8    | 97.66  | 86.95  | 114.3 | 99.85 | 95.34 | 86.29   |
| 362258    | Actr5        | 83     | 104     | 88     | 86     | 83    | 115   | 103   | 112     |
| 304929    | F5           | 43     | 21      | 40     | 7      | 38    | 33    | 31    | 25      |
| 64537     | Hpse         | 305    | 309     | 195    | 287    | 297   | 307   | 365   | 285     |
| 362931    | Adgrb1       | 809    | 893     | 845    | 907    | 984   | 1106  | 961   | 901     |
| 687827    | Haspin       | 54     | 55      | 42     | 50     | 61    | 51    | 65    | 53      |
| 102554194 | LOC102554194 | 150.61 | 117.22  | 146.3  | 201.18 | 183.5 | 169.2 | 147.4 | 204.05  |
| 64356     | Nrgn         | 29     | 20      | 16     | 25     | 39    | 24    | 22    | 18      |
| 171393    | Clstn3       | 2399   | 2473    | 2338   | 2839   | 2879  | 3135  | 2838  | 2652    |
| 85275     | Mpp2         | 407    | 475     | 422    | 441    | 513   | 540   | 462   | 483     |
| 306790    | Sema4d       | 581    | 560     | 554    | 643    | 692   | 699   | 617   | 669     |
| 315711    | Sema7a       | 2555   | 3031    | 2535   | 3224   | 3060  | 3621  | 3195  | 3116    |
| 296545    | C8g          | 47     | 42      | 44     | 40     | 65    | 41.14 | 45    | 47      |
| 363256    | Speg         | 557.12 | 499.58  | 530.66 | 620.35 | 746.2 | 704   | 543.9 | 534.7   |
| 252882    | Mamdc4       | 28     | 23      | 32     | 27     | 25    | 29    | 38    | 34      |
| 286939    | Clmp         | 1554   | 1792.97 | 1312   | 1924   | 1884  | 1918  | 2020  | 1719.99 |
| 108353318 | LOC108353318 | 23.82  | 19.28   | 22.91  | 16.89  | 25.41 | 27.69 | 21.66 | 20.22   |
| 79122     | Fdxr         | 120    | 124     | 129    | 121    | 142   | 162   | 129   | 133     |
| 362760    | Galnt16      | 86     | 92      | 92     | 73     | 96    | 117   | 95    | 85      |
| 361921    | Ect2         | 32     | 29      | 57     | 26     | 45    | 34    | 39    | 47      |
| 311311    | Meis2        | 312.31 | 309.46  | 266.42 | 344.58 | 362.9 | 397.1 | 326.1 | 326.54  |
| 102556459 | LOC102556459 | 18.45  | 13.44   | 23.89  | 26.86  | 25.71 | 16.51 | 21.38 | 31.1    |
| 103690027 | Aspn11       | 8.74   | 6.99    | 5.81   | 2.85   | 3.49  | 5.24  | 8.74  | 10.48   |
| 24247     | Casr         | 1559.5 | 472.26  | 465.01 | 1624.6 | 1202  | 1035  | 962.4 | 1522.77 |
| 29636     | F2r12        | 299    | 260     | 354    | 388    | 524   | 328   | 330   | 309     |
| 114090    | Egr2         | 421    | 565     | 656    | 658.01 | 406   | 835   | 860   | 535     |
| 81756     | Rab13        | 131    | 115     | 116    | 144    | 144   | 160   | 147   | 129     |
| 290639    | Fchol        | 520    | 444     | 506    | 449    | 617   | 555   | 518   | 510     |
| 60433     | Rfng         | 824    | 799     | 762    | 851    | 1007  | 980   | 795   | 928     |
| 114515    | Lancl1       | 1644   | 1403    | 1158   | 1631   | 1685  | 1626  | 1750  | 1630    |
| 66024     | Npy2r        | 184    | 141     | 176    | 161    | 199   | 191   | 183   | 186     |
| 293155    | Anapc15      | 357    | 319     | 339    | 295    | 392   | 345   | 361   | 404     |
| 65081     | Vps33a       | 655    | 673     | 650    | 358    | 692   | 690   | 638   | 659     |
| 25009     | Vars         | 1069   | 1287    | 1198   | 1203   | 1423  | 1517  | 1249  | 1267    |



|           |              |        |         |        |        |       |       |       |         |
|-----------|--------------|--------|---------|--------|--------|-------|-------|-------|---------|
| 100192205 | Hsbp111      | 71.83  | 77      | 72.13  | 66.97  | 107.3 | 72.56 | 71.71 | 78.69   |
| 368153    | RT1-CE7      | 234.52 | 244.21  | 283.19 | 148.28 | 303.8 | 261.4 | 232.2 | 246.78  |
| 359727    | Bysl         | 290    | 281     | 318    | 298    | 374   | 354   | 322   | 312     |
| 290356    | Phyhip       | 162    | 207     | 187    | 227    | 228   | 240   | 186.5 | 244     |
| 252897    | Pcdhgall     | 229.3  | 215.9   | 272.46 | 190.15 | 253.9 | 335.4 | 183.4 | 269.03  |
| 306657    | Irx2         | 18.99  | 10      | 13.01  | 17     | 21    | 12.7  | 13.01 | 21      |
| 365511    | Zfp296       | 15     | 17.07   | 16.1   | 12     | 17    | 24    | 14    | 14.06   |
| 309440    | Mrpl43       | 473.29 | 528.01  | 490.22 | 460.56 | 512.2 | 570   | 595.7 | 562.9   |
| 65023     | Kcnip1       | 1145   | 1020    | 813    | 1029   | 1132  | 1120  | 1201  | 1147    |
| 304374    | Fbxo24       | 14     | 34      | 19     | 14     | 17    | 31    | 20    | 25      |
| 685055    | Atr          | 1363   | 776     | 992    | 1592   | 1366  | 1123  | 1507  | 1427    |
| 314473    | Kif26a       | 98     | 91      | 91     | 104    | 112   | 101   | 115   | 113     |
| 171084    | Nat8b        | 10.28  | 11.43   | 10.02  | 0      | 0     | 1.31  | 13.14 | 21.99   |
| 313650    | Fam43b       | 889    | 932     | 849    | 900    | 975   | 1175  | 969   | 981     |
| 315978    | Nek11        | 62.87  | 83.44   | 68.1   | 76     | 84.58 | 93    | 69    | 87      |
| 500474    | Rnf183       | 3.02   | 3.03    | 5.07   | 1.99   | 7.79  | 2.85  | 2.4   | 2.02    |
| 26759     | Acot7        | 5681   | 6032    | 5652   | 5665   | 6706  | 6698  | 6354  | 6699    |
| 499421    | RGD1564162   | 15.9   | 11.87   | 0      | 13.35  | 14.3  | 17.51 | 0.02  | 15.41   |
| 361016    | LOC361016    | 103    | 109     | 111    | 53     | 120   | 114   | 80    | 118     |
| 116638    | Slc17a7      | 3513   | 3601    | 3055   | 3709   | 3940  | 4390  | 3965  | 3652    |
| 54233     | Car5a        | 23.76  | 25.61   | 23.37  | 16.23  | 24.12 | 18.12 | 30.92 | 29.08   |
| 24417     | Grm4         | 301    | 298     | 244    | 321    | 360   | 380   | 286   | 312     |
| 81726     | Mvd          | 720    | 851     | 888    | 691    | 857   | 934   | 837   | 993     |
| 305253    | Adamts3      | 124    | 119     | 149    | 136    | 138   | 158   | 154   | 157     |
| 245979    | Lmo1         | 124    | 114     | 125    | 98     | 118   | 146   | 142   | 124     |
| 688286    | LOC688286    | 41     | 48      | 39     | 39     | 50    | 45    | 48    | 49      |
| 366491    | Spata21      | 20.01  | 14      | 17     | 9      | 15    | 21    | 15    | 18      |
| 282583    | Fbln2        | 8108   | 7587    | 6944   | 7216   | 9168  | 9214  | 7759  | 8187    |
| 29685     | Mcm6         | 73     | 65      | 107    | 62     | 100   | 84    | 90    | 79      |
| 100912338 | LOC100912338 | 3      | 8       | 6      | 3      | 5     | 5     | 8     | 5       |
| 292916    | Syngn4       | 6      | 6       | 4      | 4      | 3     | 8     | 6     | 6       |
| 499586    | Tmem212      | 3      | 7       | 4      | 6      | 7     | 5     | 5     | 6       |
| 690755    | Lingo3       | 10     | 17      | 5      | 8      | 20    | 7     | 11    | 8       |
| 689439    | LOC689439    | 19.43  | 13.69   | 14.02  | 18.25  | 19.21 | 15.86 | 23.83 | 16.3    |
| 54262     | Kcnn2        | 174.71 | 189.42  | 181.16 | 203.18 | 242.2 | 201.9 | 226.1 | 190.57  |
| 290629    | Ushbp1       | 78     | 76      | 71     | 68     | 96    | 83    | 86    | 72      |
| 29470     | Mecr         | 151    | 155     | 140    | 113    | 145   | 182   | 158   | 158     |
| 682360    | Fam167b      | 34     | 24      | 39     | 16     | 32    | 38    | 39    | 21      |
| 316533    | Chpf         | 2795   | 2840    | 2786   | 2542   | 3189  | 3268  | 3212  | 2945    |
| 171051    | Cabp1        | 2633   | 2458    | 2141   | 2380   | 2854  | 2937  | 2636  | 2635    |
| 305705    | Lrrc3b       | 113.23 | 100.08  | 80.18  | 87.78  | 90.65 | 104.2 | 124.1 | 119.81  |
| 360323    | RT1-N2       | 154.46 | 179.55  | 118.23 | 132    | 154.7 | 174.4 | 129.7 | 213.85  |
| 315789    | Fam81a       | 274.12 | 252.25  | 186.26 | 228.5  | 309.7 | 263.9 | 243.1 | 266.89  |
| 297694    | Plbd1        | 70     | 74      | 89     | 51     | 75    | 99    | 89    | 64      |
| 681043    | Acnat1       | 5.29   | 2.93    | 3.07   | 0      | 2     | 4     | 3     | 4       |
| 294754    | Pelo         | 465    | 504     | 450    | 502    | 521   | 555   | 598   | 538     |
| 103694876 | LOC103694876 | 74.28  | 79.6    | 102.01 | 63.58  | 122.2 | 77.01 | 77.26 | 91.46   |
| 171554    | Cdhr5        | 24     | 25      | 27     | 36     | 37    | 35    | 29    | 28      |
| 363912    | Piwi1        | 24.88  | 14.93   | 19.03  | 21.05  | 14.94 | 25.06 | 21.01 | 31.04   |
| 363301    | LOC363301    | 140.93 | 87.22   | 124.76 | 100.79 | 155.8 | 61.2  | 149.7 | 156.05  |
| 316531    | Tuba4a       | 6926.1 | 7293.84 | 6200.2 | 7136.4 | 7886  | 8386  | 7971  | 7510.39 |
| 501122    | Amer3        | 262    | 284     | 299    | 264    | 323   | 307   | 330   | 318     |
| 29326     | Gpx2         | 1357   | 736     | 1649   | 1147   | 1933  | 1333  | 875   | 1494    |
| 360243    | Top2a        | 90     | 62      | 168    | 60     | 135   | 125   | 99    | 79      |
| 501502    | Sh2d1a       | 20.37  | 15.49   | 14.62  | 21.31  | 24.22 | 21.77 | 22.03 | 14.73   |
| 64628     | Hes3         | 26.29  | 32.4    | 26.42  | 13.72  | 33.34 | 31.3  | 27.85 | 21.43   |

|           |              |        |         |        |        |       |       |       |          |
|-----------|--------------|--------|---------|--------|--------|-------|-------|-------|----------|
| 680842    | RT1-M1-5     | 2      | 1.01    | 3      | 7.01   | 3     | 5     | 4     | 3.01     |
| 500622    | RGD1565766   | 9.69   | 12.17   | 37.19  | 36.32  | 28.18 | 31.44 | 19.2  | 31.16    |
| 500987    | H2afx        | 438.19 | 432.5   | 424.9  | 427.72 | 520.7 | 534.7 | 461   | 471.49   |
| 498353    | Scfd2        | 298    | 301     | 260    | 268    | 325   | 326   | 357   | 292      |
| 59301     | Ghr1         | 5      | 8       | 9      | 17     | 17    | 8     | 11    | 9        |
| 25375     | Aldh3a1      | 8      | 7       | 7      | 4      | 9     | 6     | 11    | 4        |
| 25477     | Lhcgr        | 7      | 2       | 3      | 1      | 2     | 4     | 5     | 4        |
| 366432    | Slc1a7       | 4      | 5       | 1      | 3      | 5     | 4     | 1     | 5        |
| 498065    | Lca5l        | 5      | 4       | 2      | 2      | 5     | 2     | 6     | 2        |
| 25259     | Gp5          | 31.77  | 29.98   | 17.53  | 18.7   | 24.01 | 32.23 | 27.04 | 29.79    |
| 108349568 | LOC108349568 | 3.17   | 5.62    | 4.7    | 5.33   | 8.98  | 2.79  | 5     | 4.95     |
| 108352688 | LOC108352688 | 21     | 17      | 22.01  | 22.01  | 16.35 | 25    | 20.3  | 33.01    |
| 29583     | Pecam1       | 327    | 251     | 255    | 218    | 351   | 359   | 299   | 204      |
| 362255    | Vstm21       | 1695   | 1691    | 1477   | 1574   | 2020  | 1953  | 1844  | 1614     |
| 192153    | Gpr26        | 57     | 57      | 44     | 49     | 71    | 59    | 51    | 58       |
| 360661    | Llgl2        | 76     | 58      | 58     | 73     | 76    | 79    | 85    | 66       |
| 498997    | Rspo3        | 17     | 7       | 20     | 27     | 18    | 22    | 17    | 25       |
| 303559    | Arl4d        | 61     | 57      | 45     | 95     | 49    | 66    | 87    | 96       |
| 499943    | Spata25      | 2.28   | 1.09    | 2.24   | 0      | 3.19  | 2.21  | 0     | 1.08     |
| 170509    | Cyp3a62      | 7      | 10.95   | 8.99   | 12     | 13.99 | 6     | 9     | 15.99    |
| 25662     | Igfbp2       | 837    | 635     | 840    | 660    | 980   | 780   | 665   | 1008     |
| 499917    | Tmem74b      | 23     | 30      | 18.02  | 19     | 26    | 24    | 27    | 27       |
| 307098    | Net1         | 625.07 | 564.75  | 545.47 | 529.94 | 728.9 | 765.2 | 610.4 | 512.64   |
| 296145    | Fbln7        | 45     | 38      | 33     | 32     | 39    | 50    | 50    | 32       |
| 266769    | Gpr3         | 50     | 46      | 42     | 42     | 56    | 62    | 48    | 42       |
| 308724    | Agbl1        | 14     | 10      | 8      | 13     | 16    | 19    | 10    | 7        |
| 83521     | Rrad         | 33     | 21      | 22     | 14     | 19    | 41    | 25    | 19       |
| 102557478 | LOC102557478 | 2.59   | 2.07    | 2.89   | 5.82   | 7.56  | 1.81  | 0     | 6.08     |
| 366949    | Mafa         | 272    | 248     | 249    | 246    | 323   | 312   | 293   | 245      |
| 363120    | Esyts3       | 25     | 35      | 24     | 25     | 29    | 33    | 28    | 36       |
| 292541    | Nlrp12       | 3.24   | 6       | 4.99   | 2.05   | 5.21  | 4.02  | 5.01  | 4.58     |
| 192172    | Mpst         | 341    | 351     | 312    | 271    | 352   | 374   | 364   | 384      |
| 103690052 | LOC103690052 | 3.5    | 2.5     | 3.11   | 3.5    | 2.08  | 3.5   | 5     | 4        |
| 103694870 | LOC103694870 | 3.5    | 2.5     | 3.11   | 3.5    | 2.08  | 3.5   | 5     | 4        |
| 108349537 | LOC108349537 | 0.93   | 0.99    | 0      | 0      | 1.7   | 0.52  | 0     | 0        |
| 108353041 | LOC108353041 | 0.93   | 0.99    | 0      | 0      | 1.7   | 0.52  | 0     | 0        |
| 313785    | Icam5        | 4      | 8       | 11     | 9      | 11    | 10    | 6     | 10       |
| 315550    | Rpusd4       | 233    | 164     | 161    | 145    | 192   | 209   | 183   | 229      |
| 103690019 | LOC103690019 | 18.79  | 12.54   | 12.25  | 13.1   | 18.12 | 20.02 | 15.23 | 12.19    |
| 499839    | RGD1564664   | 1285   | 1166    | 1099   | 1226   | 1452  | 1405  | 1311  | 1358     |
| 302996    | Ccdc78       | 13.08  | 7       | 7      | 4.03   | 8     | 13    | 8     | 7        |
| 291356    | Et14         | 2321   | 1965    | 1834   | 2441   | 2696  | 2528  | 2116  | 2567     |
| 362976    | Trmu         | 121    | 121     | 111    | 98     | 131   | 132   | 137   | 122      |
| 24189     | Aldoa        | 25114  | 25292.9 | 23304  | 24231  | 27571 | 33209 | 25148 | 27440.99 |
| 361424    | RGD1309651   | 38     | 50      | 28     | 30     | 45    | 44    | 43    | 37       |
| 499506    | Ankrd34b     | 93     | 62      | 80     | 76     | 97    | 90    | 85    | 88       |
| 295219    | Slc27a3      | 206    | 192     | 207    | 201    | 253   | 234   | 220   | 226      |
| 106146145 | Baiap3       | 10     | 11      | 6      | 11     | 14    | 10    | 12    | 8        |
| 25106     | Rgn          | 22     | 23      | 20     | 11     | 20    | 23    | 22    | 23       |
| 497860    | Rpl391       | 2      | 7       | 2      | 8      | 0     | 4     | 8     | 10       |
| 362715    | Dtnb         | 764    | 750     | 618    | 805    | 823   | 907   | 862   | 809      |
| 499561    | Fam173b      | 249    | 228     | 214    | 200    | 248   | 257   | 276   | 251      |
| 500065    | Tspan33      | 77     | 82      | 68     | 70     | 90    | 86    | 88    | 80       |
| 317382    | Foxp3        | 10.77  | 4.41    | 6.04   | 5.03   | 4.01  | 11.7  | 9.62  | 5.08     |
| 25362     | Slc30a2      | 30     | 13      | 11     | 9      | 16    | 20    | 13    | 24       |
| 108348172 | LOC108348172 | 504.64 | 565.44  | 589.76 | 484.3  | 711.3 | 583.7 | 589.8 | 599.9    |

|           |              |        |         |        |        |       |       |       |        |
|-----------|--------------|--------|---------|--------|--------|-------|-------|-------|--------|
| 108348185 | NEWGENE 2724 | 2.23   | 2.02    | 4.47   | 3.3    | 5.99  | 1.77  | 1.96  | 4.21   |
| 317675    | Tph2         | 205    | 162     | 177    | 141    | 185   | 186   | 209   | 214    |
| 298002    | Rpp251       | 128.3  | 105.83  | 147.66 | 105.67 | 163.5 | 152.5 | 118.9 | 130.22 |
| 360970    | Cabp7        | 190.03 | 154.32  | 149.52 | 149.18 | 218.8 | 167.1 | 206.6 | 153.11 |
| 689823    | Rad2111      | 10     | 18      | 23     | 18     | 15    | 15    | 14    | 36     |
| 100910954 | LOC100910954 | 0.94   | 0.98    | 3.11   | 1.99   | 3.15  | 2.99  | 2     | 0      |
| 85273     | Fbxo2        | 4867   | 4569    | 4627   | 4397   | 5774  | 5432  | 5099  | 5101   |
| 114032    | Kcnh4        | 6      | 5       | 9      | 5      | 6     | 9     | 6     | 8      |
| 24925     | Adrb1        | 12     | 13      | 7      | 18     | 11    | 14    | 16    | 17     |
| 64826     | Foxq1        | 26     | 34      | 21     | 19     | 39    | 32    | 24    | 21     |
| 308463    | Map3k10      | 1214   | 1011    | 983    | 1053   | 1348  | 1259  | 1166  | 1170   |
| 362860    | Appl2        | 652    | 661     | 493    | 616    | 669   | 630   | 844   | 667    |
| 691478    | Cpne6        | 5756   | 4946    | 5171   | 5948   | 6645  | 6535  | 6726  | 5412   |
| 685184    | LOC685184    | 14     | 19      | 25     | 23     | 31    | 21    | 17    | 25     |
| 25155     | Syk          | 103.21 | 100.03  | 183    | 67     | 140   | 143   | 130   | 113    |
| 29499     | Shh          | 483    | 397     | 488    | 438    | 472   | 614   | 565   | 445    |
| 117185    | Neu3         | 64.28  | 69.3    | 56.46  | 62.98  | 73.68 | 85.25 | 68.14 | 66.58  |
| 296985    | Clec21       | 4971   | 5315    | 3594   | 5051   | 5294  | 5681  | 5441  | 5555   |
| 499914    | Gins1        | 52     | 53      | 45     | 43     | 51    | 54    | 60    | 59     |
| 501630    | Mum111       | 103    | 142     | 87     | 110    | 163   | 103   | 136   | 111    |
| 298404    | Arhgef39     | 31.17  | 24.69   | 22.3   | 25.24  | 27.64 | 32.37 | 38.46 | 21.54  |
| 313108    | Mms221       | 36     | 12      | 42     | 22     | 32    | 30    | 36    | 32     |
| 100360722 | Sirpd        | 1      | 1       | 3.97   | 1.06   | 5.16  | 1.16  | 0.84  | 1      |
| 108348049 | LOC108348049 | 76.89  | 74.06   | 75.18  | 61.63  | 74.53 | 98.06 | 79.59 | 81.95  |
| 360960    | Hmx1         | 84     | 90      | 55     | 75     | 93    | 90    | 75    | 95     |
| 366517    | Ttc34        | 8      | 10      | 7      | 6      | 10    | 8     | 9     | 9      |
| 64348     | Cryba4       | 15     | 20      | 18     | 9      | 17    | 22    | 20    | 13     |
| 363134    | Rrp9         | 219    | 206     | 219    | 168    | 245   | 253   | 218   | 227    |
| 102550773 | LOC102550773 | 8.07   | 12.29   | 12.22  | 14.88  | 8.71  | 15.59 | 12.01 | 18.81  |
| 302083    | RGD1562660   | 349.44 | 204.16  | 191.11 | 124.96 | 251.6 | 129   | 295.5 | 334.11 |
| 361699    | Ankrd13d     | 918.57 | 884.58  | 875.14 | 872    | 1076  | 1029  | 1044  | 975.02 |
| 367786    | Bmx          | 20     | 18      | 18     | 12     | 20    | 17    | 26    | 16     |
| 305302    | Ras111b      | 155    | 142     | 144    | 140    | 163   | 223   | 153   | 136    |
| 680117    | Tlx2         | 748.26 | 771.55  | 636    | 650.73 | 902.3 | 761.8 | 793.7 | 803.07 |
| 171517    | Gpc2         | 18     | 19      | 22     | 21     | 27    | 29    | 19    | 18     |
| 301372    | Gpr45        | 18     | 21      | 14     | 27     | 17    | 30    | 29    | 17     |
| 305589    | Bcl11a       | 87.32  | 127.66  | 126.37 | 124.68 | 152.1 | 128.5 | 128.7 | 132.52 |
| 303039    | Wwc1         | 81.04  | 77.14   | 70.98  | 91.37  | 111.3 | 103.1 | 81.49 | 76.85  |
| 680110    | Rprm         | 718    | 582     | 573    | 527    | 693   | 692   | 739   | 667    |
| 502873    | Prrt3        | 818.59 | 882.61  | 787.29 | 898.22 | 1049  | 1092  | 993.3 | 804.64 |
| 246333    | Pcsk1n       | 8675.4 | 8001.56 | 7640.2 | 7078.7 | 10306 | 9353  | 8109  | 8747.1 |
| 681186    | LOC681186    | 0      | 0       | 0      | 2.82   | 0     | 0     | 1.64  | 1.64   |
| 24566     | Mst1         | 6      | 13      | 13     | 17     | 10    | 12    | 10    | 25     |
| 302819    | Arhgap36     | 375    | 372     | 434    | 410    | 490   | 444   | 481   | 436    |
| 493909    | Aox3         | 40.08  | 21.6    | 19.56  | 47.38  | 30.45 | 35.49 | 51.6  | 32.1   |
| 500553    | Zbtb8b       | 44     | 33      | 34     | 48     | 50    | 44    | 43    | 48     |
| 287796    | Slc39a11     | 166    | 174     | 162    | 150    | 208   | 198   | 145   | 208    |
| 29644     | Ptpn5        | 199    | 197     | 181    | 209    | 236   | 229   | 243   | 207    |
| 266687    | Slc35e4      | 540    | 465     | 546    | 450    | 586   | 649   | 567   | 528    |
| 361514    | Meis3        | 400    | 341     | 358    | 312    | 405   | 445   | 402   | 391    |
| 102553495 | LOC102553495 | 53     | 31      | 34     | 46     | 53    | 52    | 46    | 40     |
| 313057    | Serinc2      | 280    | 279     | 297    | 267    | 340   | 332   | 304   | 332    |
| 58835     | Phgdh        | 2166   | 2072    | 1628   | 1756   | 1875  | 2448  | 2077  | 2481   |
| 290566    | Ogdh1        | 155.63 | 180.42  | 169.76 | 204.16 | 193   | 228.8 | 195   | 210.56 |
| 308607    | E2f8         | 13     | 11.86   | 22.57  | 8.71   | 28.19 | 10    | 12    | 15.25  |
| 684792    | LOC684792    | 279    | 311     | 295    | 267    | 396   | 271   | 358   | 318    |

|           |              |        |         |        |        |       |       |       |         |
|-----------|--------------|--------|---------|--------|--------|-------|-------|-------|---------|
| 29557     | Myh7         | 276.12 | 297.53  | 294.54 | 222.74 | 344.7 | 376.4 | 320.4 | 230.4   |
| 360573    | Ksr1         | 34.37  | 15.91   | 0      | 0      | 26.82 | 29.04 | 0     | 2.76    |
| 681316    | Tpbgl        | 1348   | 1160    | 1241   | 1305   | 1574  | 1486  | 1439  | 1394    |
| 102555167 | LOC102555167 | 2050   | 1746.57 | 1776   | 2236.3 | 2365  | 2358  | 2276  | 2106.03 |
| 689746    | Tt1111       | 142    | 178     | 176    | 154    | 189   | 200   | 215   | 154     |
| 311202    | Large2       | 17.16  | 15.62   | 16.9   | 22.77  | 16.42 | 20.45 | 24.84 | 22.8    |
| 100910163 | LOC100910163 | 4.48   | 4.48    | 8.97   | 8.97   | 0     | 13.45 | 13.45 | 4.48    |
| 361432    | Cdh15        | 888    | 719     | 901    | 980    | 1286  | 1110  | 747   | 926     |
| 102548506 | LOC102548506 | 2      | 1       | 1      | 2      | 2     | 1     | 2     | 2       |
| 108351016 | LOC108351016 | 2      | 3       | 0      | 1      | 0     | 3     | 2     | 2       |
| 192258    | Gabrr3       | 2      | 5       | 3      | 2      | 4     | 2     | 7     | 1       |
| 25321     | Ghrhr        | 3      | 0       | 1      | 2      | 1     | 2     | 3     | 1       |
| 292266    | Ccdc170      | 5      | 6       | 11     | 2      | 4     | 7     | 10    | 7       |
| 298062    | Plppr1       | 19     | 9       | 10     | 10     | 14    | 12    | 17    | 13      |
| 301016    | Spink8       | 4      | 2       | 2      | 4      | 1     | 7     | 4     | 2       |
| 302302    | Chst7        | 39     | 30      | 30     | 27     | 35    | 29    | 40    | 43      |
| 309203    | Scgbl2       | 3      | 1       | 0      | 2      | 2     | 3     | 2     | 0       |
| 362506    | Ccl19        | 10     | 6       | 8      | 6      | 8     | 9     | 9     | 9       |
| 64193     | Pttg1        | 22     | 13      | 33     | 22     | 40    | 21    | 25    | 19      |
| 83928     | Fetub        | 0      | 2       | 0      | 4      | 2     | 0     | 3     | 2       |
| 307721    | Irx3         | 13.01  | 13      | 4      | 8      | 15.75 | 13.6  | 11    | 4       |
| 295228    | Gpatch4      | 86     | 87      | 95     | 61     | 89    | 99    | 101   | 95      |
| 680493    | Cd3eap       | 160.73 | 169.74  | 174.38 | 176.1  | 240.7 | 185.9 | 154.9 | 213.37  |
| 108351828 | Arih2os      | 15.41  | 17.68   | 13.5   | 16.38  | 22.44 | 15.5  | 20.17 | 15.4    |
| 25560     | Abcc9        | 165.09 | 140.02  | 192.46 | 156.72 | 174.1 | 236.1 | 195   | 158.73  |
| 102547212 | LOC102547212 | 13.49  | 12.34   | 12.84  | 9.43   | 8.79  | 15.79 | 17.34 | 14.25   |
| 368190    | Dnajc30      | 242    | 212     | 205    | 217    | 228   | 264   | 264   | 267     |
| 291770    | Chst9        | 139    | 107     | 75     | 90     | 128   | 117   | 125   | 110     |
| 500352    | Smco3        | 24.79  | 104.6   | 145.55 | 94.81  | 87.78 | 116.2 | 120.3 | 107.53  |
| 24558     | Mog          | 103.92 | 112.43  | 79.93  | 113.22 | 133   | 128.1 | 107.4 | 109.86  |
| 293894    | Tpd5213      | 18.91  | 20.9    | 20.34  | 13.4   | 18.23 | 24.45 | 27.64 | 15.6    |
| 498848    | RGD1560482   | 13.23  | 18.54   | 2.18   | 8.9    | 7.4   | 10.89 | 16.91 | 14.86   |
| 288079    | Polq         | 33     | 11      | 17     | 28     | 35    | 27    | 22    | 20      |
| 287368    | Nt5m         | 346    | 450     | 417    | 381    | 485   | 477   | 456   | 445     |
| 291656    | Pcdhb3       | 115.93 | 100.75  | 103.71 | 119.87 | 88.98 | 108.5 | 152   | 165.11  |
| 103691059 | LOC103691059 | 39.19  | 7.18    | 23.73  | 16.45  | 22.21 | 22.87 | 13.41 | 42.68   |
| 54323     | Arc          | 78     | 82      | 71     | 106    | 73    | 116   | 102   | 103     |
| 502774    | Cpv1         | 16     | 19      | 7      | 23     | 21    | 13    | 25    | 17      |
| 100365744 | Lrrc75b      | 456    | 418     | 460    | 498    | 623   | 547   | 490   | 483     |
| 297727    | Mrps35       | 634.43 | 508.67  | 415.16 | 441.87 | 592.7 | 599.9 | 593.3 | 554.65  |
| 689830    | Anxa9        | 75.33  | 58.18   | 40.86  | 41.34  | 50.37 | 72.49 | 66.02 | 63.54   |
| 302405    | Pabpc112a    | 198    | 216     | 219    | 217    | 250   | 260   | 265   | 220     |
| 103693341 | Tnfrsf13b    | 14     | 6       | 14     | 7      | 16    | 18    | 8     | 6       |
| 108349347 | LOC108349347 | 5.92   | 14.65   | 14.23  | 14.41  | 14.65 | 8.75  | 19.7  | 14.52   |
| 100911855 | LOC100911855 | 5.52   | 6.19    | 7.97   | 2.62   | 2.63  | 6.62  | 5.3   | 11.57   |
| 299112    | Pole2        | 18     | 20      | 20     | 12     | 25    | 13    | 21    | 23      |
| 25515     | Plk1         | 33     | 29      | 43     | 29     | 48    | 38    | 37    | 34      |
| 362691    | Tmem178a     | 54     | 80      | 52     | 76     | 73    | 86    | 64    | 84      |
| 25505     | P2rx1        | 14     | 17      | 22     | 11     | 22    | 25    | 17    | 11      |
| 54266     | Madcam1      | 24     | 34      | 39     | 31     | 34    | 38    | 39    | 39      |
| 501297    | LOC501297    | 354.32 | 195.56  | 271.64 | 160.36 | 436.9 | 151.6 | 267   | 295.44  |
| 288026    | Atp13a4      | 97     | 57      | 54     | 47     | 77    | 62    | 76    | 84      |
| 302392    | Magee2       | 30     | 40.01   | 42     | 44     | 33.09 | 46    | 51    | 52.86   |
| 309387    | Cnnm1        | 1097   | 1054    | 864    | 1165   | 1260  | 1309  | 1170  | 1163    |
| 108352200 | C10H5orf58   | 1.25   | 2.17    | 1.55   | 2.44   | 2.19  | 3.17  | 0     | 3.33    |
| 50564     | Gjd2         | 18     | 33      | 10     | 20     | 24    | 27    | 20    | 24      |

|           |              |        |        |        |        |       |       |       |        |
|-----------|--------------|--------|--------|--------|--------|-------|-------|-------|--------|
| 102546596 | LOC102546596 | 2      | 2.5    | 1.69   | 0      | 1.5   | 2.26  | 0     | 3.5    |
| 25108     | Avpr2        | 23.94  | 31.32  | 25.21  | 30.11  | 46.4  | 27.23 | 31.07 | 25     |
| 298426    | Nsun4        | 252.31 | 209.89 | 202.73 | 239.42 | 225.5 | 283.7 | 278.4 | 273.24 |
| 103690059 | LOC103690059 | 93.55  | 108.89 | 102.77 | 107.36 | 159.7 | 98.23 | 113.4 | 112.68 |
| 314260    | Plek2        | 4      | 10     | 12     | 9      | 16.06 | 5     | 9     | 11     |
| 314818    | E2f7         | 25     | 32     | 35     | 35     | 41    | 38    | 37    | 33     |
| 302507    | Efhc2        | 92     | 97     | 86     | 94     | 89    | 98    | 123   | 123    |
| 501101    | Lrrc73       | 252    | 267    | 204    | 268    | 305   | 287   | 274   | 297    |
| 501396    | LOC501396    | 175.47 | 108.41 | 94.17  | 101.81 | 173.6 | 132.7 | 105.3 | 151.58 |
| 303218    | Hs3st3b1     | 17     | 15.22  | 17.9   | 22     | 23.8  | 19.84 | 18    | 23     |
| 304987    | Aim2         | 7      | 11.09  | 10.99  | 13.13  | 5     | 21.04 | 13.5  | 10     |
| 302333    | Dach2        | 14.03  | 13.99  | 15.01  | 13     | 13.81 | 16.84 | 13.95 | 21.16  |
| 311633    | Neur12       | 23.12  | 25.09  | 27.08  | 22.07  | 31.06 | 34.09 | 28.09 | 21.04  |
| 103693564 | LOC103693564 | 46.3   | 23.15  | 28.94  | 34.73  | 69.45 | 34.73 | 23.15 | 28.94  |
| 303965    | Myh15        | 6      | 6      | 5      | 6      | 9     | 6     | 5     | 7      |
| 360588    | Brip1        | 10     | 9      | 16     | 11     | 22    | 12    | 12    | 8      |
| 79222     | Gucy2e       | 17     | 19     | 19     | 14     | 28    | 20    | 11    | 22     |
| 117533    | Gmpr         | 747    | 755    | 696    | 693    | 860   | 933   | 805   | 797    |
| 500917    | Odf3b        | 53     | 28     | 52     | 39     | 37    | 48    | 65    | 52     |
| 306342    | Nxn11        | 10     | 15.68  | 14     | 22     | 18.68 | 20.76 | 17    | 16     |
| 100911672 | LOC100911672 | 294.51 | 442.38 | 335.07 | 303.06 | 718.2 | 492.5 | 101   | 303.76 |
| 361669    | Tcerg11      | 171    | 171    | 164    | 180    | 219   | 219   | 191   | 177    |
| 291637    | Pcdhga5      | 77.89  | 94.66  | 105.12 | 96.57  | 90.21 | 112.9 | 128.9 | 107.83 |
| 294335    | Susd2        | 8424   | 8651   | 9434   | 9666   | 11453 | 11873 | 9906  | 9285   |
| 100361389 | Fam171a2     | 754.43 | 821.82 | 856.2  | 808.34 | 935.8 | 955.5 | 947.3 | 970.51 |
| 298034    | Slc46a2      | 62     | 57     | 50     | 53     | 78    | 77    | 52    | 54     |
| 502143    | Idi2         | 0      | 1.48   | 0      | 0      | 1.26  | 0.48  | 0     | 0      |
| 303140    | LOC303140    | 36.05  | 40.99  | 41.15  | 34.93  | 40.89 | 31.89 | 45.66 | 61.59  |
| 117055    | Gjb4         | 1.03   | 3.27   | 3.07   | 1.33   | 2.57  | 1     | 4.28  | 2.38   |
| 29162     | Cdh7         | 135    | 164    | 111    | 135    | 172   | 149   | 164   | 156    |
| 24471     | Hspb1        | 3902   | 3528   | 3854   | 3573   | 4843  | 4035  | 3683  | 4914   |
| 103692273 | LOC103692273 | 287.88 | 133.61 | 144.83 | 313.11 | 253.8 | 256.6 | 202.5 | 321.5  |
| 289459    | Slc10a6      | 22     | 21     | 28     | 14     | 21    | 32    | 28    | 19     |
| 686977    | RGD1624210   | 0      | 2.55   | 0      | 0      | 0     | 0     | 1     | 2      |
| 108352751 | LOC108352751 | 5      | 5      | 6      | 1      | 2     | 11    | 4     | 3      |
| 245708    | Gucy2g       | 6      | 6      | 2      | 3      | 9     | 5     | 4     | 2      |
| 312806    | Art4         | 5      | 1      | 6      | 5      | 6     | 7     | 4     | 3      |
| 366366    | Igfbp11      | 8      | 8      | 8      | 10     | 13    | 9     | 7     | 11     |
| 78957     | Shank1       | 245    | 241    | 222    | 289    | 313   | 285   | 325   | 250    |
| 494198    | Oas1k        | 8.39   | 5.94   | 2.46   | 9.67   | 5.54  | 6.49  | 12.74 | 6.37   |
| 24450     | Hmgcs2       | 1165   | 1140   | 1106   | 1151   | 1394  | 1290  | 1250  | 1436   |
| 294011    | Sfxn2        | 48.86  | 65.1   | 42.63  | 49.87  | 71.73 | 55.36 | 56.95 | 58.99  |
| 282582    | Wnt5b        | 21     | 21     | 16     | 21     | 24    | 21    | 20    | 28     |
| 690610    | Tmem86b      | 43.12  | 41.09  | 49.13  | 35.07  | 53.03 | 52.09 | 52.13 | 41.03  |
| 114494    | Ccna2        | 75.39  | 58.91  | 96.11  | 40.72  | 88.26 | 75.68 | 83.88 | 71.41  |
| 685488    | LOC685488    | 21.01  | 18.05  | 30.63  | 8.03   | 20.99 | 11    | 32.36 | 27.17  |
| 308773    | Hapln3       | 15.12  | 18.14  | 26.7   | 25.33  | 18.86 | 24.2  | 25.82 | 31.56  |
| 499302    | Gal3st3      | 42.07  | 42.65  | 27.23  | 45.85  | 47.04 | 54.42 | 45.55 | 38.82  |
| 24648     | Serpinal     | 283    | 200    | 151    | 182    | 295   | 217   | 252   | 197    |
| 192189    | Syt17        | 13     | 9      | 16     | 7      | 9     | 9     | 21    | 14     |
| 252835    | Gdf5         | 18     | 19     | 21     | 32     | 32    | 25    | 26    | 23     |
| 501558    | Map3k15      | 17.63  | 7.06   | 14.15  | 5.79   | 18.61 | 11.73 | 14.02 | 8.21   |
| 304053    | Ripk4        | 61     | 56     | 40     | 62     | 87    | 61    | 66    | 44     |
| 686753    | Npnt         | 115    | 108    | 78     | 92     | 110   | 111   | 151   | 91     |
| 317258    | Itgblbp2     | 7      | 7      | 7      | 7      | 9     | 17    | 2     | 5      |
| 63882     | Asic4        | 10     | 14     | 14     | 18     | 20    | 12    | 21    | 13     |

|           |              |        |         |        |        |       |       |       |         |
|-----------|--------------|--------|---------|--------|--------|-------|-------|-------|---------|
| 501747    | Qrich2       | 22.18  | 22.16   | 23.24  | 22.13  | 24.15 | 27.22 | 31.21 | 23.15   |
| 300218    | Tubalc       | 2964   | 2809.57 | 2348.8 | 2179.6 | 2877  | 2940  | 2961  | 3366.01 |
| 100362676 | Klhl33       | 154    | 124     | 157    | 134    | 200   | 198   | 137   | 136     |
| 102552503 | LOC102552503 | 2.34   | 9.17    | 11.28  | 7.63   | 12.82 | 10.26 | 5.25  | 7.55    |
| 108353163 | LOC108353163 | 12     | 8       | 12     | 7      | 9     | 14    | 11    | 12      |
| 100911402 | LOC100911402 | 768.45 | 697.2   | 830.93 | 911.89 | 831.4 | 1126  | 1129  | 697.33  |
| 245982    | Coro6        | 488.52 | 520.49  | 386.88 | 597.9  | 606.1 | 675.8 | 560.7 | 509.86  |
| 301122    | Dus3l        | 275    | 244     | 293    | 227    | 295   | 327   | 309   | 295     |
| 366229    | Scrt2        | 1478.5 | 1467.4  | 1174.3 | 1664.8 | 1769  | 1830  | 1631  | 1597.03 |
| 108349479 | LOC108349479 | 80.57  | 89.46   | 106.47 | 123.81 | 108.7 | 95.04 | 123.1 | 145.57  |
| 415062    | Ly6g6d       | 17.07  | 24.31   | 22.65  | 12     | 26.79 | 20.51 | 24.42 | 18      |
| 29358     | Npylr        | 1175.5 | 828.37  | 730.22 | 757.73 | 1062  | 963.6 | 1023  | 1072.44 |
| 64392     | Aldh1l1      | 54     | 86      | 53     | 79     | 71    | 83    | 84    | 83      |
| 302583    | Foxr2        | 10     | 8       | 10.01  | 12     | 9.06  | 8.16  | 12.99 | 17.01   |
| 501164    | Cdk5r2       | 2351   | 2223    | 2045   | 2293   | 2846  | 2883  | 2419  | 2372    |
| 65194     | Slc29a2      | 111.32 | 82.7    | 109.35 | 136.61 | 131.2 | 124.9 | 141.7 | 121.85  |
| 308511    | Chst8        | 152    | 189     | 163    | 146    | 182   | 184   | 205   | 197     |
| 100364194 | LOC100364194 | 1      | 0       | 3      | 7      | 7     | 0     | 2     | 4       |
| 116726    | Slc7a9       | 3      | 1       | 1      | 6      | 6     | 2     | 4     | 1       |
| 292913    | Fam83e       | 4      | 6       | 7      | 5      | 7     | 6     | 10    | 3       |
| 499971    | Iqca11       | 4      | 1       | 3      | 3      | 4     | 4     | 3     | 2       |
| 83569     | Abcb11       | 1      | 3       | 2      | 5      | 3     | 6     | 3     | 1       |
| 170808    | Capn8        | 8      | 13      | 5      | 7      | 12    | 9     | 9     | 9       |
| 171529    | Kif2c        | 16     | 15      | 25     | 10     | 21    | 22    | 19    | 16      |
| 300027    | Gpihbpl      | 39     | 25      | 12     | 23     | 23    | 44    | 20    | 30      |
| 360847    | Ube2t        | 9      | 5       | 11     | 8      | 10    | 11    | 8     | 10      |
| 500516    | Lexm         | 57     | 62      | 40     | 50     | 58    | 65    | 60    | 64      |
| 288151    | Hoxd1        | 385    | 358     | 347    | 367    | 444   | 415   | 427   | 436     |
| 100362216 | LOC100362216 | 16.09  | 29.26   | 23.97  | 29.16  | 30.66 | 27.52 | 21    | 37.22   |
| 103690039 | LOC103690039 | 25.06  | 12.62   | 24.14  | 18.35  | 25.11 | 22.01 | 15.59 | 32.05   |
| 89868     | Sec16b       | 142    | 97      | 112    | 171    | 157   | 145   | 187   | 128     |
| 362993    | Rnd1         | 129    | 122     | 130    | 119    | 135   | 146   | 151   | 159     |
| 293820    | Psat1        | 452    | 458     | 387    | 436    | 448   | 509   | 531   | 561     |
| 192363    | Noslap       | 68     | 72      | 57     | 132    | 94    | 91    | 107   | 97      |
| 102554500 | LOC102554500 | 9.4    | 3.59    | 0      | 0      | 3.97  | 3.96  | 7.43  | 0       |
| 102554600 | LOC102554600 | 11.99  | 13.98   | 16.31  | 9.97   | 13.16 | 19.25 | 18.34 | 11.05   |
| 50559     | Acot1        | 197.71 | 218.51  | 193.72 | 233.02 | 277   | 231   | 242.9 | 246.35  |
| 315866    | Prss35       | 76.62  | 62.97   | 74.02  | 75.48  | 97.54 | 86.88 | 93.66 | 63.97   |
| 102549615 | LOC102549615 | 495.61 | 587.93  | 602.72 | 451.5  | 663.7 | 711.8 | 553.6 | 600.36  |
| 297738    | Steap1       | 18     | 15      | 16     | 11     | 16    | 24    | 9     | 22      |
| 293004    | Adamts17     | 285.51 | 325.22  | 278.34 | 293.01 | 320.1 | 348.4 | 422.8 | 307.64  |
| 100362967 | LOC100362967 | 4.93   | 2.47    | 1.81   | 7.68   | 3.84  | 3.64  | 8.2   | 4.31    |
| 690845    | Rps4y2       | 150    | 117     | 112    | 133    | 115   | 211   | 153   | 127     |
| 690566    | Vom2r12      | 3      | 0       | 1.15   | 3.42   | 2.91  | 0     | 3.01  | 3.04    |
| 500585    | RGD1561413   | 25.78  | 11.71   | 11.67  | 15.25  | 17.13 | 13.35 | 19.47 | 26.29   |
| 100910735 | Oas1g        | 0      | 0       | 64.98  | 123.04 | 35.67 | 105.4 | 81.54 | 0       |
| 54249     | Cfd          | 109    | 63      | 203    | 42     | 53    | 276   | 110   | 55      |
| 687399    | LOC687399    | 27     | 29      | 31     | 32     | 43    | 32    | 34    | 32      |
| 192215    | Slc9a5       | 88     | 81      | 67     | 99     | 117   | 99    | 91    | 90      |
| 691354    | LOC691354    | 6      | 7       | 8      | 6      | 8     | 10    | 4     | 10      |
| 361046    | Parp4        | 3246   | 2413    | 2408   | 3804   | 3564  | 3556  | 3552  | 3399.35 |
| 89807     | Angpt1       | 121    | 62      | 78     | 68     | 93    | 92    | 108   | 97      |
| 100909510 | Tsen34l1     | 218.54 | 211.33  | 219.28 | 251.85 | 253.8 | 383.7 | 238.4 | 192.3   |
| 367782    | Tceanc       | 19     | 18      | 18     | 15     | 23    | 14    | 14    | 32      |
| 408234    | Spink2       | 5      | 3.45    | 15     | 3      | 15    | 9     | 4.48  | 2.89    |
| 103692166 | LOC103692166 | 49.8   | 39.52   | 47     | 54.8   | 66.62 | 68.48 | 30.06 | 61.52   |



|           |              |        |         |        |        |       |       |       |         |
|-----------|--------------|--------|---------|--------|--------|-------|-------|-------|---------|
| 362323    | Sdhaf3       | 61     | 65      | 49     | 56     | 68    | 67    | 62    | 77      |
| 360621    | Cdc6         | 35.51  | 26.72   | 47.81  | 19.9   | 46.45 | 34.29 | 29.04 | 44.36   |
| 311416    | RGD1561442   | 105    | 92      | 60     | 81     | 129   | 97    | 97    | 78      |
| 84490     | Fen1         | 200    | 197     | 188    | 166    | 225   | 205   | 230   | 231     |
| 316642    | Neu4         | 3.21   | 1.11    | 4.4    | 4.26   | 2.61  | 3     | 5.62  | 4.17    |
| 365877    | Hist2h2aa3   | 74.5   | 109.43  | 0      | 100.74 | 214.3 | 16.27 | 107.2 | 0       |
| 688311    | Ar116        | 457.13 | 406.47  | 364.47 | 465    | 456.6 | 491   | 534.2 | 527.06  |
| 362930    | Ptp4a3       | 497    | 430     | 424    | 418    | 547   | 662   | 441   | 449     |
| 29402     | Unc119       | 220    | 188     | 208    | 192    | 259   | 234   | 224   | 242     |
| 306464    | Cenpu        | 10.25  | 7.1     | 18.53  | 4.69   | 12.25 | 7.94  | 15.57 | 12.4    |
| 102554444 | LOC102554444 | 13.44  | 4.68    | 11.12  | 1.35   | 10.07 | 6.78  | 6.2   | 13.27   |
| 287938    | Ydjc         | 146    | 151     | 180    | 147    | 167   | 172   | 171   | 231     |
| 497891    | Timd4        | 4      | 4       | 6      | 2      | 1     | 13    | 3     | 2       |
| 65131     | Cldn5        | 564    | 585     | 618    | 488    | 710   | 684   | 648   | 636     |
| 100910288 | LOC100910288 | 22.14  | 0       | 0      | 19.27  | 30.85 | 0     | 12.82 | 5.51    |
| 689619    | Nrip2        | 294.67 | 234.39  | 194.84 | 245.42 | 289.3 | 271.8 | 282.2 | 307.95  |
| 289671    | Fam184b      | 123    | 112     | 104    | 151    | 123   | 153   | 145   | 161     |
| 304725    | LOC304725    | 47.18  | 61.12   | 43.56  | 82.36  | 55.15 | 57.38 | 88.79 | 76.89   |
| 287422    | Per1         | 977    | 526     | 758    | 1002   | 806   | 1257  | 1331  | 482     |
| 293444    | Abca16       | 26.87  | 16.49   | 19.26  | 13.51  | 14    | 29.9  | 26.03 | 20.52   |
| 502907    | LOC502907    | 0      | 0       | 1.01   | 0      | 0     | 0     | 1.2   | 0       |
| 292759    | Sars2        | 195    | 205     | 215    | 166    | 221   | 278   | 222   | 207     |
| 289230    | Nhlh1        | 11     | 10      | 7.98   | 3      | 8     | 6     | 12    | 12      |
| 361676    | Pnpla2       | 1294   | 551.37  | 1001   | 1027   | 1057  | 1408  | 1115  | 1023.69 |
| 363032    | Rp9          | 75     | 91      | 65     | 66     | 85    | 94    | 76    | 98      |
| 289019    | Cdk18        | 106    | 104     | 103    | 111    | 117   | 154   | 117   | 116     |
| 360695    | Evalc        | 184    | 190     | 176    | 197    | 242   | 244   | 226   | 176     |
| 25586     | Alpl         | 489    | 589     | 590    | 670    | 702   | 833   | 550   | 695     |
| 24889     | Cckar        | 97     | 75      | 50     | 74     | 98    | 79    | 98    | 77      |
| 499776    | Fam78a       | 63     | 76      | 47     | 78     | 83    | 103   | 76    | 52      |
| 81683     | Mif          | 2180.8 | 2045.77 | 2073.2 | 2023.4 | 2618  | 2635  | 2172  | 2481.67 |
| 291652    | Pcdhb7       | 83.87  | 76.73   | 81.28  | 69.02  | 56.81 | 76.3  | 133.6 | 103.43  |
| 171438    | Crtac1       | 401    | 289     | 306    | 331    | 414   | 396   | 405   | 365     |
| 259247    | Obp3         | 2.41   | 0       | 0      | 0      | 1.46  | 1.41  | 0     | 0       |
| 114492    | Ccl28        | 3.1    | 7.12    | 10.36  | 8.38   | 7.62  | 7.04  | 8.33  | 11.5    |
| 252964    | Lipogenin    | 24.68  | 14.83   | 6.05   | 16.03  | 17.73 | 20.08 | 19.26 | 16.29   |
| 293632    | Ifitm10      | 884    | 717     | 602    | 642    | 918   | 851   | 773   | 847     |
| 308366    | Zbtb45       | 252    | 233     | 222    | 228    | 275   | 288   | 278   | 273     |
| 63889     | Ptgdr1       | 23.44  | 12.55   | 5.78   | 9.57   | 17.89 | 26.79 | 4.43  | 12.06   |
| 291441    | Skal         | 16     | 12      | 13     | 6      | 15    | 16    | 15    | 10      |
| 367215    | Trem3        | 24.04  | 11.39   | 15.11  | 10.97  | 22.58 | 19.82 | 17.04 | 13.85   |
| 308854    | Chrd12       | 62     | 59      | 64     | 55     | 62    | 78    | 73    | 73      |
| 683603    | Zscan2       | 54     | 50      | 43     | 46     | 59    | 55    | 51    | 65      |
| 309527    | Ch25h        | 60     | 50      | 33     | 86     | 65    | 53    | 89    | 66      |
| 691092    | Ncr3lg1      | 12     | 17      | 17     | 6      | 15    | 16    | 16    | 15      |
| 292844    | Siglec10     | 21     | 3       | 21     | 2.03   | 17    | 19    | 12    | 8.08    |
| 29156     | Capns1       | 871.6  | 918.41  | 850.62 | 692.11 | 910.6 | 959.2 | 1341  | 763.63  |
| 298606    | Slc25a34     | 60     | 44      | 27     | 30     | 56    | 50    | 39    | 47      |
| 680130    | Timp4        | 116    | 106     | 84     | 151    | 185   | 127   | 104   | 129     |
| 25559     | Abcc8        | 232    | 238     | 175    | 253    | 295   | 316   | 214   | 246     |
| 316237    | Mad211bp     | 100    | 109     | 103    | 108    | 133   | 126   | 120   | 122     |
| 102555635 | LOC102555635 | 126.63 | 108.37  | 135    | 150.06 | 149.4 | 156.4 | 154.7 | 160.04  |
| 311169    | Rtn4r12      | 727    | 753     | 588    | 760    | 888   | 892   | 780   | 814     |
| 287867    | Ccdc40       | 17     | 24      | 25     | 22     | 26    | 28    | 23    | 28      |
| 654441    | Cox6b2       | 25     | 14      | 25     | 24     | 26    | 17    | 26    | 36      |
| 58982     | Ncan         | 219    | 230     | 215    | 293    | 251   | 289   | 295   | 307     |

|           |              |        |         |        |        |       |       |       |         |
|-----------|--------------|--------|---------|--------|--------|-------|-------|-------|---------|
| 116490    | Snai1        | 98     | 68      | 82     | 62     | 69    | 90    | 107   | 104     |
| 108348108 | LOC108348108 | 556.21 | 450.5   | 465.71 | 607.52 | 684.8 | 703.7 | 507.6 | 586.62  |
| 367181    | Gad11        | 85     | 85      | 79     | 66     | 62    | 126   | 86    | 102     |
| 25196     | Inhbb        | 228.73 | 272.98  | 111    | 279.52 | 276.1 | 304.9 | 249.6 | 234.41  |
| 308107    | Kptn         | 68     | 57      | 60     | 57     | 59    | 70    | 79    | 81      |
| 362936    | Zfp707       | 81.77  | 79.06   | 54     | 59.84  | 103.2 | 83.48 | 77.38 | 63.97   |
| 170671    | Lhx3         | 11     | 9       | 11     | 5      | 10    | 7     | 10    | 16      |
| 308653    | Nxf2         | 9      | 8       | 9      | 10     | 8     | 6     | 14    | 15      |
| 252921    | Tubg1        | 1147.9 | 1190.71 | 1032.2 | 1163.7 | 1242  | 1393  | 1408  | 1375.09 |
| 103692862 | LOC103692862 | 15     | 18      | 20     | 24     | 26    | 15    | 23    | 28      |
| 306617    | Kbtbd11      | 432    | 683     | 400    | 490    | 747   | 656   | 509   | 484     |
| 293854    | Srpk3        | 23     | 19      | 20     | 20     | 18    | 40    | 27    | 13      |
| 299903    | Slc30a8      | 46     | 39      | 30     | 54     | 56    | 58    | 46    | 42      |
| 299616    | Atp8b3       | 40     | 46      | 42     | 46     | 56    | 49    | 57    | 46      |
| 300950    | Spsb4        | 402.27 | 394.26  | 300.03 | 353.72 | 435.5 | 460.7 | 418.3 | 419.5   |
| 102548633 | LOC102548633 | 35.94  | 32.88   | 32.32  | 16.12  | 43.71 | 14.35 | 21.52 | 60.63   |
| 363823    | Map6d1       | 71.84  | 40      | 41.1   | 62.42  | 73.52 | 53    | 53    | 78      |
| 684314    | Glyctk       | 137    | 115     | 128.99 | 131    | 166   | 127.3 | 139   | 180     |
| 108352191 | LOC108352191 | 35.07  | 39.29   | 54.57  | 33.09  | 60.15 | 54.97 | 36.07 | 42.57   |
| 310463    | Plch1        | 18     | 30      | 25     | 29     | 41    | 28    | 29    | 24      |
| 499223    | Trim30       | 34     | 29      | 41     | 33     | 38    | 51    | 41    | 34      |
| 362175    | RGD1563222   | 35     | 46      | 42     | 29     | 42    | 47    | 47    | 46      |
| 361267    | Akr1c1       | 28     | 22      | 14     | 17     | 11    | 31    | 26    | 29      |
| 102552404 | LOC102552404 | 1      | 2.01    | 0      | 2      | 4     | 0     | 1     | 1       |
| 304353    | Nxpe5l1      | 5.09   | 6.81    | 3.09   | 8.07   | 13.91 | 2.67  | 4.22  | 6.82    |
| 679924    | LOC679924    | 145.04 | 141     | 89     | 110    | 133   | 148   | 151   | 149     |
| 308310    | Tmc4         | 9.54   | 6       | 7      | 0      | 6     | 6     | 7     | 8       |
| 171571    | Grip2        | 42     | 52      | 39     | 58     | 68    | 75    | 48    | 38      |
| 362113    | Pthr1        | 158.87 | 162.5   | 142.45 | 201.61 | 229.7 | 247.5 | 156   | 164.66  |
| 299687    | Ascl4        | 134.02 | 112.31  | 95.1   | 102.34 | 150.5 | 97.36 | 115.5 | 168.81  |
| 303179    | Guk1         | 1351   | 1416    | 1309   | 1242   | 1618  | 1672  | 1467  | 1622    |
| 502125    | Hist1h2ah    | 2.47   | 2.52    | 3.64   | 5.2    | 3.39  | 2.5   | 6.38  | 4.32    |
| 85266     | Prss12       | 628    | 562     | 828    | 401    | 535   | 680   | 754   | 933     |
| 100364673 | LOC100364673 | 2      | 1       | 1      | 1      | 3     | 0     | 0     | 3       |
| 24380     | Gad2         | 1      | 3       | 1      | 0      | 1     | 3     | 0     | 2       |
| 286916    | Testin       | 4      | 2       | 1      | 3      | 2     | 1     | 2     | 7       |
| 298577    | Ubxn10       | 2      | 3       | 5      | 5      | 3     | 3     | 6     | 6       |
| 299255    | Kif4b        | 6      | 5       | 1      | 3      | 4     | 5     | 5     | 4       |
| 299713    | RGD1561102   | 4      | 3       | 4      | 4      | 6     | 6     | 5     | 1       |
| 311491    | Scp2d1       | 1      | 0       | 1      | 3      | 0     | 3     | 2     | 1       |
| 315069    | Fam135b      | 1      | 0       | 0      | 4      | 2     | 1     | 1     | 2       |
| 366214    | Nkx2-2       | 0      | 3       | 1      | 1      | 1     | 3     | 1     | 1       |
| 683598    | Umod1        | 4      | 8       | 7      | 1      | 3     | 7     | 6     | 8       |
| 686030    | LOC686030    | 3      | 5       | 5      | 2      | 4     | 5     | 5     | 4       |
| 689756    | Tnip3        | 1      | 1       | 2      | 1      | 2     | 2     | 2     | 0       |
| 691516    | I117c        | 2      | 2       | 1      | 0      | 1     | 0     | 3     | 2       |
| 103691099 | Thap8        | 15     | 16      | 12     | 7      | 13    | 21    | 14    | 12      |
| 116681    | Dlgap2       | 5      | 9       | 4      | 7      | 11    | 6     | 6     | 7       |
| 290484    | Dct          | 19     | 23      | 12     | 21     | 19    | 26    | 33    | 12      |
| 291437    | Lipg         | 13     | 8       | 2      | 12     | 5     | 9     | 13    | 15      |
| 287647    | Hoxb9        | 70     | 85      | 76     | 80     | 85    | 105   | 104.2 | 79      |
| 301073    | Hhat1        | 669    | 675     | 606    | 658    | 739   | 955   | 749   | 687     |
| 288181    | Gpr15        | 4.52   | 5.23    | 3.2    | 4.33   | 5.79  | 6.5   | 3.32  | 5.13    |
| 498695    | Idnk         | 180.04 | 217.67  | 229.34 | 189.1  | 226.3 | 245   | 262   | 246.55  |
| 497926    | Shisa6       | 39.71  | 40.7    | 36.13  | 36.2   | 60.21 | 42.39 | 38.72 | 42.1    |
| 311218    | Accs         | 69     | 84      | 86     | 79     | 92    | 111   | 98    | 81      |

|           |              |        |        |        |        |       |       |       |        |
|-----------|--------------|--------|--------|--------|--------|-------|-------|-------|--------|
| 24906     | LOC24906     | 174.08 | 145.81 | 211.12 | 49.56  | 243.9 | 187.6 | 157.5 | 108.52 |
| 25561     | Sycp3        | 3.21   | 5.59   | 7.65   | 5.84   | 7.65  | 2.1   | 6.52  | 10.51  |
| 291683    | Pkd212       | 15.48  | 16.05  | 4.65   | 11.32  | 15.77 | 5.38  | 15.58 | 20.35  |
| 108349154 | LOC108349154 | 7.34   | 15     | 10     | 15.85  | 9.03  | 16.53 | 17.35 | 15     |
| 100363502 | LOC100363502 | 359.4  | 477.48 | 475.29 | 308.52 | 430.3 | 580.2 | 0     | 938.07 |
| 102556096 | LOC102556096 | 5.05   | 3.12   | 5.22   | 5.28   | 6.13  | 3.13  | 3.38  | 9.81   |
| 54261     | Kcnn1        | 386    | 455    | 332    | 323    | 476   | 413   | 425   | 485    |
| 24213     | Atp1a3       | 7237   | 10216  | 6681   | 11011  | 10107 | 12561 | 9975  | 9629   |
| 499947    | Cbln4        | 270    | 240    | 192    | 299    | 331   | 290   | 268   | 315    |
| 366951    | Scrt1        | 823    | 751    | 550    | 817    | 1017  | 911   | 852   | 758    |
| 499021    | Pacrg        | 32     | 29     | 34     | 23     | 38    | 38    | 30    | 36     |
| 287534    | Rflnb        | 196    | 213    | 250    | 186    | 234   | 234   | 294   | 255    |
| 24457     | Hoxb8        | 215    | 278    | 241    | 258    | 300   | 346   | 293   | 254.99 |
| 100361902 | Zfp421       | 12.7   | 10.74  | 7.53   | 19.67  | 15.29 | 10.63 | 18.61 | 16.43  |
| 314636    | Tmprss9      | 27     | 30     | 25     | 21     | 26    | 25    | 42    | 31     |
| 690026    | Hils1        | 15     | 7      | 18     | 9      | 8     | 14    | 28    | 9      |
| 296313    | Myl9         | 418    | 344    | 393    | 352    | 372   | 661   | 452   | 329.99 |
| 84574     | Tgfbli1      | 774    | 627    | 613    | 703    | 855   | 876   | 763   | 779    |
| 499747    | Cysrt1       | 68     | 41     | 46     | 55     | 61    | 79    | 60    | 53     |
| 315963    | RGD1310507   | 22     | 23     | 21     | 17     | 32    | 21    | 24    | 23     |
| 499794    | RGD1561736   | 9.34   | 11.95  | 15.16  | 16.27  | 11.24 | 13.25 | 20.39 | 18.64  |
| 295706    | Prg3         | 42     | 28     | 85     | 6      | 71    | 70    | 31    | 22     |
| 500993    | RGD1563941   | 38     | 28     | 22     | 29     | 33    | 36    | 32    | 40     |
| 314313    | Rnf113a2     | 95.02  | 121    | 85     | 64     | 111   | 121   | 107   | 101    |
| 100911511 | LOC100911511 | 274.08 | 180.75 | 37.53  | 22.39  | 358.3 | 0     | 251.1 | 11.2   |
| 304735    | Tmem177      | 95     | 90     | 75     | 80     | 109   | 87    | 116   | 98     |
| 25611     | Otc          | 15     | 16     | 18     | 19     | 26    | 16    | 20    | 20     |
| 29541     | Nthl1        | 77     | 70     | 81     | 63     | 90    | 93    | 78    | 90     |
| 24331     | Cela1        | 33     | 32     | 18     | 43     | 28    | 49    | 31    | 44     |
| 64160     | Baspl        | 2276   | 2098   | 2576   | 2245   | 3359  | 2756  | 2484  | 2496   |
| 100360514 | LOC100360514 | 9.61   | 9.19   | 14.83  | 16.25  | 15.44 | 12.48 | 17.26 | 15.01  |
| 140924    | Ii2rg        | 104    | 83     | 102    | 73     | 113   | 118   | 103   | 103    |
| 293046    | Mesp2        | 22.22  | 21.88  | 26.02  | 20.41  | 18.47 | 23.63 | 37.48 | 29.71  |
| 102554294 | LOC102554294 | 3.4    | 0      | 3.31   | 4.52   | 4.64  | 1.12  | 1.14  | 6.66   |
| 108350818 | LOC108350818 | 3      | 1      | 0      | 2.63   | 1     | 3     | 2.01  | 2      |
| 100359503 | LOC100359503 | 0      | 0      | 1.2    | 0      | 0     | 1.45  | 0     | 0      |
| 301348    | Zap70        | 14     | 7      | 12     | 15     | 20    | 7     | 19    | 12     |
| 315318    | Krt80        | 8      | 10     | 15     | 15     | 12    | 15    | 14    | 17     |
| 317470    | Egfl6        | 3      | 7      | 10     | 4      | 2     | 7     | 17    | 3      |
| 102546589 | LOC102546589 | 18.25  | 20.14  | 15.45  | 13.3   | 23.41 | 10.21 | 21.59 | 25.93  |
| 309665    | Tmprss3      | 5.08   | 3.29   | 13.76  | 6.01   | 11.82 | 9.62  | 4.11  | 8.46   |
| 286889    | Pr18a5       | 2.01   | 2.02   | 3      | 5.85   | 4.1   | 2.05  | 3.42  | 6      |
| 102551692 | LOC102551692 | 1.27   | 0      | 1      | 4      | 0     | 4.8   | 0     | 2.78   |
| 288562    | Tfr2         | 17     | 16     | 17     | 17     | 24    | 13    | 30    | 14     |
| 25116     | Hsd11b1      | 73     | 56     | 74     | 55     | 80    | 87    | 73    | 72     |
| 312226    | RGD1565367   | 24     | 23     | 24     | 34     | 30    | 40    | 31    | 26     |
| 100363484 | Ddit41       | 41     | 37     | 38     | 27     | 47    | 55    | 23    | 48     |
| 54231     | Car2         | 1420   | 1457   | 897    | 1319   | 1424  | 1555  | 1619  | 1564   |
| 64646     | Hist3h2a     | 483.6  | 494.09 | 447.05 | 419.17 | 577   | 555.5 | 491.6 | 607.2  |
| 367620    | MGC116197    | 169.76 | 174.15 | 171.53 | 159.6  | 228.8 | 187.7 | 201.7 | 198.79 |
| 24994     | RT1-S2       | 198.69 | 207.14 | 203.94 | 146.6  | 247.9 | 237.4 | 220.4 | 209.76 |
| 308022    | Mcoln3       | 6      | 3      | 4      | 6      | 5     | 7     | 9     | 2      |
| 310230    | Slc10a5      | 6      | 6      | 2      | 5      | 5     | 6     | 7     | 5      |
| 81644     | Opn1sw       | 3      | 10     | 4      | 2      | 6     | 5     | 5     | 7      |
| 29131     | Cartpt       | 44     | 101    | 85     | 36     | 73    | 119   | 56    | 74     |
| 293451    | Hs3st2       | 1479   | 1367   | 1050   | 1368   | 1629  | 1856  | 1407  | 1481   |

|           |                 |        |         |        |        |       |       |       |         |
|-----------|-----------------|--------|---------|--------|--------|-------|-------|-------|---------|
| 289780    | Ddx56           | 355    | 280     | 255    | 195    | 337   | 328   | 234   | 415     |
| 406039    | Olr1738         | 2      | 3.78    | 0      | 0      | 1     | 0     | 1     | 5       |
| 64539     | Ndufv3          | 1856   | 2136    | 1767   | 1607   | 2357  | 2408  | 2087  | 2069    |
| 302991    | Tekt4           | 21     | 12      | 24     | 28     | 28    | 36    | 16    | 23      |
| 687561    | Anks4b          | 5      | 10      | 9      | 9      | 17    | 4     | 10    | 9       |
| 687031    | Ajap1           | 32     | 29      | 32     | 20     | 30    | 43    | 34    | 30      |
| 100912683 | LOC100912683    | 5.74   | 5.45    | 9.29   | 8.18   | 7.1   | 4.06  | 11.21 | 12.38   |
| 100912526 | Rt19            | 22     | 20      | 23     | 15     | 22    | 23    | 27    | 25      |
| 301265    | Pla2g7          | 1325.7 | 1256.68 | 882.04 | 1110.9 | 1365  | 1367  | 1527  | 1289.6  |
| 293660    | Rhod            | 7.97   | 7.03    | 12.55  | 7.65   | 9.25  | 8     | 16.36 | 9.08    |
| 100909860 | LOC100909860    | 84     | 99      | 101    | 73     | 98    | 115   | 107   | 113     |
| 311548    | Tt119           | 40     | 40.05   | 35.01  | 30.06  | 44.97 | 52.05 | 36    | 43      |
| 408207    | Mcpt813         | 21.55  | 6.31    | 16.01  | 2.14   | 17.66 | 12.57 | 19.24 | 6.35    |
| 108349745 | LOC108349745    | 37.89  | 26.89   | 36.29  | 25.89  | 33.08 | 52.66 | 41.44 | 26.88   |
| 100362149 | LOC100362149    | 47.65  | 95.3    | 47.65  | 280.57 | 238.3 | 0     | 238.3 | 95.3    |
| 304578    | Alkbh2          | 67     | 83      | 64     | 57     | 104   | 77    | 61    | 87      |
| 102546698 | LOC102546698    | 5      | 1       | 5      | 3      | 3     | 7     | 3     | 4       |
| 29530     | Amhr2           | 6      | 3       | 2      | 3      | 1     | 4     | 7     | 5       |
| 307553    | No14            | 13     | 12      | 6      | 11     | 13    | 14    | 16    | 8       |
| 315091    | Spatc1          | 5      | 3       | 1      | 5      | 5     | 2     | 3     | 7       |
| 361228    | Adtrp           | 4      | 3       | 3      | 4      | 6     | 2     | 2     | 7       |
| 108353203 | LOC108353203    | 26     | 12      | 7      | 11     | 10    | 11    | 30    | 17      |
| 497756    | Si              | 42     | 19      | 21     | 44     | 60    | 41    | 28    | 24      |
| 80841     | Fabp7           | 290    | 255     | 321    | 223    | 255   | 222   | 401   | 445     |
| 58826     | Prg2            | 209    | 157     | 405    | 26     | 337   | 349   | 162   | 121     |
| 102555637 | LOC102555637    | 222.58 | 269.4   | 202.08 | 260.42 | 230.6 | 362.7 | 240.9 | 326.44  |
| 293498    | Asphd1          | 307    | 329     | 272    | 327    | 395   | 415   | 370   | 322     |
| 308492    | Wdr62           | 0.35   | 0       | 30.77  | 0      | 0     | 37.85 | 0     | 0       |
| 300117    | Phf21b          | 25     | 21      | 24     | 27     | 35    | 29    | 26    | 28      |
| 117184    | Ctrl            | 25     | 13      | 17     | 5      | 15    | 26    | 17    | 15      |
| 25461     | Hrh2            | 15     | 13      | 12     | 20     | 12    | 28    | 19    | 14      |
| 103690174 | LOC103690174    | 3.87   | 0.61    | 1.69   | 1.99   | 0     | 3.14  | 2.02  | 4.77    |
| 685668    | LOC685668       | 1190.6 | 1093.51 | 911.8  | 865.63 | 1401  | 1192  | 767.4 | 1583.78 |
| 24768     | Scnn1g          | 5      | 1       | 4      | 13     | 4     | 12    | 5     | 7       |
| 298607    | Agmat           | 4      | 8       | 8      | 3      | 7     | 10    | 5     | 6       |
| 503009    | Cdk14           | 114.63 | 231.99  | 142.94 | 134.74 | 252.7 | 238.9 | 136.5 | 131.97  |
| 311800    | Tmem203         | 148    | 130     | 150    | 123    | 143   | 148   | 192   | 188     |
| 117059    | Calb2           | 1141   | 1394    | 230    | 1147   | 958   | 1194  | 1266  | 1346    |
| 103692182 | LOC103692182    | 66.49  | 37.21   | 63.55  | 56.66  | 68.43 | 87.2  | 47.24 | 69.86   |
| 103693254 | LOC103693254    | 96.25  | 86.03   | 71.45  | 73.08  | 99.13 | 113.8 | 90.7  | 94.66   |
| 306327    | Tmem38a         | 481    | 560     | 500    | 481    | 634   | 738   | 542   | 550     |
| 171408    | Dcxr            | 151.13 | 119.76  | 72.28  | 142.24 | 136.3 | 157.7 | 143.5 | 154.1   |
| 685180    | Stx19           | 4.48   | 6.43    | 6      | 7      | 7.54  | 4.03  | 6     | 11.57   |
| 689105    | Ackr1           | 637    | 583     | 634    | 643    | 751   | 915   | 674   | 704     |
| 60575     | Napsa           | 43     | 39      | 58     | 24     | 61    | 49    | 54    | 36      |
| 297814    | Car8            | 176    | 166     | 157    | 161    | 163   | 211   | 182   | 249     |
| 108348124 | NEWGENE_1562416 | 1509   | 1208.26 | 977.79 | 1009.1 | 1410  | 1410  | 1441  | 1478.3  |
| 100911356 | LOC100911356    | 385.76 | 503.28  | 489.69 | 354.84 | 520.2 | 600.1 | 474.7 | 520.8   |
| 316353    | Creg2           | 16     | 22      | 16     | 14     | 26    | 18    | 13    | 26      |
| 103693999 | LOC103693999    | 0      | 0       | 24.75  | 0      | 0     | 0     | 30.21 | 0       |
| 24323     | Edn1            | 20     | 56      | 64     | 50     | 48    | 72    | 74    | 38      |
| 24259     | Chgb            | 2743   | 2745    | 2408   | 3077   | 3440  | 3592  | 3497  | 2870    |
| 291530    | Ccdc68          | 65     | 93      | 65     | 89     | 85    | 76    | 108   | 112     |
| 501048    | Poc1a           | 18     | 28      | 31     | 27     | 28    | 43    | 35    | 21      |
| 361129    | Hapln4          | 1189   | 1318    | 858    | 1661   | 1568  | 1839  | 1466  | 1266    |
| 294321    | Slc37a1         | 492    | 649     | 478    | 489    | 708   | 691   | 581   | 595     |

|           |              |        |         |        |        |       |       |       |          |
|-----------|--------------|--------|---------|--------|--------|-------|-------|-------|----------|
| 311123    | Ttc30a1      | 46.26  | 38.33   | 34.98  | 38.68  | 50.77 | 44.85 | 54.82 | 42.9     |
| 498891    | Fam69c       | 133    | 133     | 141    | 134    | 161   | 150   | 181   | 169      |
| 114203    | Sh2b2        | 29.32  | 40      | 34.07  | 25     | 37.4  | 47.54 | 42    | 29.95    |
| 308318    | Zfp978       | 42.53  | 25.57   | 26.63  | 28.91  | 36.23 | 42.53 | 29.61 | 42.72    |
| 103693683 | LOC103693683 | 47     | 41.64   | 25.48  | 5.42   | 45.06 | 31.67 | 24.44 | 44.92    |
| 361744    | Tmem252      | 41     | 26      | 27     | 23     | 37    | 52    | 35    | 19       |
| 103690612 | LOC103690612 | 3      | 4       | 2      | 0      | 4     | 3     | 3     | 1        |
| 287884    | Sectmlb      | 0      | 2       | 4      | 3      | 2     | 3     | 3     | 3        |
| 295980    | Dcdc5        | 2      | 5       | 2      | 0      | 3     | 3     | 4     | 1        |
| 311720    | Abhd16b      | 3      | 4       | 0      | 2      | 2     | 2     | 3     | 4        |
| 316218    | Gucal1b      | 2      | 2       | 6      | 8      | 6     | 5     | 3     | 8        |
| 360712    | Morc1        | 2      | 5       | 5      | 6      | 5     | 4     | 4     | 9        |
| 360858    | Lhx4         | 4      | 1       | 1      | 3      | 2     | 4     | 3     | 2        |
| 363538    | Tekt5        | 2      | 3       | 3      | 1      | 1     | 5     | 2     | 3        |
| 500576    | Cplane2      | 2      | 2       | 2      | 3      | 2     | 3     | 2     | 4        |
| 688285    | Tmem235      | 11     | 3       | 3      | 10     | 11    | 8     | 6     | 8        |
| 29461     | Vgf          | 1016   | 1065.97 | 1398.1 | 1104.8 | 1405  | 1523  | 1179  | 1498     |
| 100360117 | LOC100360117 | 0      | 22.18   | 47.54  | 35.95  | 44.71 | 41.39 | 43.09 | 0        |
| 680216    | Dna.jb3      | 103    | 103     | 91     | 71     | 108   | 117   | 115   | 110      |
| 360864    | RGD1309106   | 5.41   | 3       | 8.08   | 1.09   | 5.73  | 3.02  | 4.23  | 8.52     |
| 312052    | Steap2       | 141    | 144     | 117    | 153    | 173   | 185   | 116   | 205      |
| 295417    | Slc44a3      | 10.98  | 18.56   | 10.87  | 11.18  | 15.31 | 9.1   | 21.96 | 16.75    |
| 100362783 | LOC100362783 | 6.59   | 5.59    | 6.59   | 0      | 6     | 7.59  | 2.59  | 6.79     |
| 500340    | Styk1        | 3.34   | 6.6     | 4.22   | 2.95   | 8.26  | 6.3   | 2.62  | 3.77     |
| 65197     | Slc2a5       | 60.38  | 53.79   | 54.46  | 62.74  | 73.92 | 69.53 | 76.71 | 63.16    |
| 117023    | Kcns1        | 1025   | 1362    | 1128   | 1264   | 1725  | 1786  | 1239  | 1103     |
| 100911837 | LOC100911837 | 17.08  | 104.7   | 112.97 | 41.1   | 171.2 | 30.19 | 65.08 | 71.36    |
| 282636    | Impa2        | 314    | 330     | 266    | 295    | 379   | 392   | 391   | 314      |
| 299052    | Aldoart2     | 1.03   | 3.09    | 3.1    | 2.06   | 4.13  | 2.11  | 4.12  | 1.01     |
| 499462    | Mfsd4b       | 67.22  | 72.14   | 77.84  | 63.45  | 91.8  | 83.96 | 72.01 | 96.12    |
| 685826    | Rprml        | 36     | 23      | 26     | 17     | 29    | 52    | 28    | 16       |
| 689885    | Klrg2        | 54     | 82      | 53     | 90     | 61    | 110   | 74    | 97       |
| 503049    | Acot5        | 17.16  | 12.59   | 10.45  | 12.3   | 13.58 | 17.01 | 16.97 | 16.81    |
| 100911790 | LOC100911790 | 0      | 6       | 0      | 3.9    | 10    | 0.08  | 0     | 2.06     |
| 680020    | Pcdhb8       | 53.44  | 65.61   | 48.91  | 46.1   | 66.85 | 36.72 | 95.43 | 63.5     |
| 312086    | Pon3         | 10     | 7       | 17     | 19     | 11    | 20    | 21    | 13       |
| 100302372 | LOC100302372 | 72.89  | 67.69   | 72     | 51.64  | 79.18 | 105   | 82    | 58.05    |
| 84416     | Smpx         | 193    | 177     | 111    | 175    | 185   | 196   | 194   | 230      |
| 683506    | Fam83c       | 4.22   | 6.14    | 5.04   | 4.36   | 7.03  | 9.25  | 5.93  | 2.04     |
| 24253     | Cebpb        | 169    | 179     | 177    | 212    | 231   | 254   | 250   | 170      |
| 291085    | Serpinb6a    | 7975.7 | 7568.7  | 7096.7 | 8783.9 | 9889  | 8813  | 7437  | 12450.84 |
| 691041    | Mamstr       | 31     | 28      | 15     | 18     | 36    | 26    | 29    | 22       |
| 103694873 | LOC103694873 | 16.09  | 12.01   | 20.14  | 13.26  | 11.81 | 17.63 | 30.46 | 15.66    |
| 498847    | Pcdhga3      | 178.52 | 188.78  | 256.7  | 230.76 | 296.1 | 270.3 | 216.3 | 268.14   |
| 291965    | Kctd19       | 18     | 14      | 17     | 12     | 19    | 22    | 21    | 13       |
| 114246    | Trpv6        | 64     | 89      | 88     | 77     | 95    | 101   | 92    | 103      |
| 103692173 | LOC103692173 | 146.61 | 456.79  | 429.21 | 329.38 | 362.8 | 246.9 | 373.3 | 692.39   |
| 293613    | RGD1309350   | 6      | 2       | 4      | 1      | 1     | 5     | 7     | 3        |
| 295360    | Kcna10       | 4      | 3       | 2      | 4      | 4     | 5     | 2     | 5        |
| 365657    | Marveld2     | 25     | 27      | 29     | 36     | 42    | 26    | 31    | 45       |
| 497895    | Mrnip        | 44     | 68      | 60     | 49     | 53    | 79    | 71    | 69       |
| 691083    | LOC691083    | 10     | 11      | 9      | 9      | 10    | 13    | 16    | 9        |
| 102552705 | Pcdhgb4      | 37.79  | 32.1    | 49.74  | 48.96  | 53.49 | 52.85 | 44.25 | 56.93    |
| 100909645 | LOC100909645 | 112.75 | 81.2    | 65.26  | 96.83  | 103.6 | 107.2 | 119.1 | 108.38   |
| 79216     | Gdf10        | 51     | 16      | 35     | 32     | 55    | 36    | 32    | 42       |
| 298857    | Adgrf3       | 15.48  | 14.68   | 14.25  | 10.44  | 15.19 | 17.18 | 20.12 | 15.06    |

|           |              |        |         |        |        |       |       |       |         |
|-----------|--------------|--------|---------|--------|--------|-------|-------|-------|---------|
| 289904    | Mss51        | 37     | 49      | 63     | 41     | 60    | 108   | 39    | 27      |
| 362035    | Ndst4        | 621    | 592.01  | 324    | 817    | 730   | 641   | 680   | 849.04  |
| 301299    | RGD1566137   | 0      | 10.9    | 2.55   | 1.81   | 3.25  | 1.95  | 9.31  | 4.29    |
| 64035     | Pyg1         | 272    | 495     | 493    | 424    | 514   | 494   | 545   | 522     |
| 301957    | Efcab1       | 49     | 88      | 84     | 80     | 72    | 81    | 97    | 121     |
| 308760    | Rccd1        | 27     | 24      | 32     | 33     | 27    | 35    | 41    | 40      |
| 292264    | Myct1        | 21     | 21      | 17     | 14     | 25    | 28    | 20    | 17      |
| 360555    | Inca1        | 6.22   | 8.33    | 9.08   | 14.22  | 11.21 | 17.85 | 6.17  | 11.44   |
| 100360582 | Nt5c         | 41     | 32      | 29     | 35     | 48    | 51    | 34    | 36      |
| 54355     | Rassf5       | 983.16 | 1026.21 | 1010.8 | 1082.5 | 1351  | 1341  | 1277  | 1092.99 |
| 315663    | Exph5        | 12     | 31      | 15     | 19     | 29    | 26    | 20    | 20      |
| 288358    | Tssklb       | 9.81   | 5       | 10     | 5      | 11.91 | 8     | 7.87  | 9       |
| 100911625 | LOC100911625 | 2078.8 | 1146.66 | 2131.3 | 1532.2 | 2770  | 2107  | 1686  | 1937.98 |
| 287644    | Phosphol     | 610.41 | 600.25  | 581.39 | 611.69 | 822.6 | 845.2 | 691.8 | 607.17  |
| 311901    | Lhx6         | 22.83  | 8.23    | 14.12  | 12.64  | 19.46 | 23.16 | 14.19 | 14.57   |
| 500273    | LOC500273    | 2.13   | 4.48    | 4.31   | 4.38   | 0     | 5.17  | 5.65  | 8.07    |
| 405201    | Olr1746      | 22.01  | 15.84   | 12.99  | 9.88   | 24.09 | 23.24 | 10.11 | 17.53   |
| 308212    | Dact2        | 238    | 272     | 234    | 239    | 283   | 289   | 327   | 315     |
| 367038    | Aplm2        | 2      | 4       | 1      | 2.01   | 5.12  | 2.01  | 2     | 2       |
| 498827    | RGD1562080   | 21.02  | 23.04   | 19.01  | 35     | 33    | 34    | 27.06 | 27.09   |
| 361422    | Cot11        | 1221   | 1188    | 703    | 1130   | 1166  | 1242  | 1453  | 1380    |
| 302990    | Tpsg1        | 4.05   | 6.21    | 6.12   | 6.15   | 9.33  | 6.17  | 5.06  | 7.29    |
| 103691813 | LOC103691813 | 9      | 12      | 18     | 16     | 28    | 15    | 15    | 10      |
| 100911840 | LOC100911840 | 100.41 | 68.7    | 63.42  | 58.13  | 68.7  | 95.13 | 73.99 | 121.55  |
| 25341     | Tnfrsf11b    | 30.25  | 36.37   | 41.46  | 40.96  | 40.95 | 46.05 | 49.19 | 48.15   |
| 360881    | Dusp23       | 123    | 114     | 96     | 97     | 133   | 152   | 125   | 122     |
| 353302    | Kif15        | 42     | 27      | 43     | 31     | 36    | 46    | 57    | 38      |
| 314443    | Wdr25        | 122.82 | 120.03  | 127.87 | 118.19 | 183.7 | 131.9 | 135.6 | 154.12  |
| 102547160 | LOC102547160 | 21     | 22      | 22     | 19     | 35    | 19    | 19    | 31      |
| 24614     | Orml         | 7      | 6       | 6      | 2      | 9     | 6     | 8     | 3       |
| 252958    | Ppplr32      | 9      | 11      | 9      | 13     | 12    | 12    | 14    | 14      |
| 300678    | Cd3g         | 5      | 5       | 6      | 5      | 7     | 4     | 12    | 3       |
| 499298    | Cabp2        | 7      | 1       | 10     | 3      | 6     | 5     | 7     | 8       |
| 24873     | Vdr          | 10     | 25      | 12     | 16     | 20    | 24    | 19    | 15      |
| 102551050 | LOC102551050 | 5      | 2       | 2.38   | 2      | 7     | 1.37  | 3.31  | 2.41    |
| 309888    | Sim1         | 6.4    | 5.42    | 10.84  | 6.05   | 12.25 | 7.22  | 11.46 | 4.62    |
| 24249     | S100g        | 15     | 11      | 11     | 9      | 7     | 12    | 21    | 17      |
| 498711    | LOC498711    | 0      | 0.99    | 4      | 0.53   | 2.88  | 1     | 0.97  | 1.99    |
| 289596    | Corin        | 22     | 10      | 19     | 20     | 18    | 31    | 22    | 17      |
| 311693    | Cdh26        | 34     | 24      | 17     | 21     | 35    | 28    | 33    | 23      |
| 24209     | Ascl2        | 8      | 14      | 17     | 11     | 17    | 22    | 7     | 16      |
| 310900    | Mttp         | 3      | 10      | 6      | 6      | 4     | 9     | 8     | 10      |
| 690810    | Adat1        | 72     | 56      | 57     | 69     | 78    | 78    | 88    | 71      |
| 680203    | Pcdhb20      | 65.61  | 54.27   | 59.84  | 50.88  | 96.08 | 78.47 | 58.65 | 52.97   |
| 103694864 | LOC103694864 | 186.01 | 194.28  | 196.34 | 177.74 | 210.8 | 219.1 | 281.1 | 225.28  |
| 117022    | I1lr2        | 13     | 5       | 9      | 2      | 12    | 11    | 8     | 5       |
| 316017    | Als2c1       | 81     | 79.28   | 88.97  | 81.01  | 130.2 | 115   | 109   | 55.85   |
| 364786    | Itga8        | 114    | 95      | 131    | 106    | 132   | 178   | 132   | 112     |
| 361824    | Chchd10      | 2032.2 | 2056.46 | 1708.2 | 1711   | 2157  | 2654  | 2007  | 2510.17 |
| 296118    | Fam227b      | 25.45  | 30.24   | 18.36  | 21.33  | 28.11 | 27.55 | 34.65 | 28.19   |
| 680322    | LOC680322    | 1.51   | 0       | 2.64   | 4.17   | 6.57  | 0.32  | 0     | 3.45    |
| 102551694 | Klln         | 11     | 8       | 11     | 7      | 12    | 11    | 11    | 12      |
| 299757    | Nts          | 9      | 11      | 8      | 9      | 11    | 17    | 8     | 10      |
| 367699    | Sowahd       | 11     | 9       | 10     | 7      | 12    | 11    | 8     | 15      |
| 290317    | Sox7         | 30.15  | 22.77   | 24.21  | 30.09  | 32.15 | 43.12 | 37.88 | 20.17   |
| 102549404 | LOC102549404 | 219    | 224     | 197    | 250    | 328   | 283   | 273   | 223     |



|           |                 |        |        |        |        |       |       |       |        |
|-----------|-----------------|--------|--------|--------|--------|-------|-------|-------|--------|
| 681048    | Grxcr2          | 187    | 197    | 268    | 82     | 260   | 282   | 96    | 275    |
| 84046     | Sox11           | 50     | 40     | 52     | 63     | 77    | 68    | 47    | 63     |
| 311168    | Slc43a1         | 42     | 26     | 33     | 22     | 48    | 45    | 32    | 28     |
| 687071    | Etnppl          | 26.7   | 8.14   | 13.49  | 12.14  | 21.59 | 24.07 | 17.79 | 11.77  |
| 108349760 | LOC108349760    | 20.53  | 25     | 13     | 31     | 20.37 | 36    | 29    | 26     |
| 115771    | Usp2            | 201    | 153    | 154    | 172    | 254   | 274   | 177   | 141    |
| 108348159 | LOC108348159    | 15.41  | 10.71  | 8.78   | 8.83   | 16.02 | 12.87 | 12.79 | 12.73  |
| 54300     | Slc12a3         | 167.4  | 144.8  | 135.83 | 161.38 | 190   | 213.7 | 199   | 156    |
| 294228    | RT1-S3          | 845.04 | 864.23 | 728.98 | 395.1  | 939.5 | 1288  | 557   | 744.33 |
| 60417     | Ecell           | 40.77  | 86.04  | 99.21  | 50.34  | 100.2 | 111   | 82.06 | 51.02  |
| 362447    | Clec2g          | 18     | 19     | 10     | 14.7   | 25.01 | 15.88 | 21.99 | 14     |
| 691066    | Tm4sf20         | 14     | 8.89   | 15.55  | 7.56   | 13    | 13    | 15.55 | 15.77  |
| 313575    | Heyl            | 582    | 510    | 437    | 612    | 694   | 584   | 719   | 671    |
| 102547011 | LOC102547011    | 1.01   | 0      | 2.04   | 1.01   | 1.01  | 1.01  | 0     | 3.04   |
| 313729    | Errfil          | 620.99 | 525.43 | 468.58 | 832.42 | 661.4 | 821.7 | 992.5 | 574.88 |
| 367061    | Olr1257         | 3.01   | 0      | 0      | 1      | 2     | 1     | 2     | 0      |
| 24473     | Htr1a           | 18     | 22     | 22     | 19     | 26    | 14    | 29    | 32     |
| 306760    | Dok3            | 54     | 38     | 51     | 35     | 71    | 52    | 42    | 57     |
| 25264     | Nmbr            | 10.13  | 6.06   | 10.04  | 6.05   | 11    | 10.23 | 9.03  | 10     |
| 295144    | Rxfp1           | 33     | 35     | 21     | 24     | 25    | 27    | 44    | 45     |
| 307950    | Map3k21         | 30.27  | 24.63  | 17.16  | 27.34  | 27.05 | 38.89 | 37.4  | 20.7   |
| 306942    | Scgn            | 43     | 44     | 24     | 42     | 52    | 33    | 56    | 50     |
| 408222    | Senp18          | 0      | 0      | 0      | 3.22   | 0     | 0     | 0     | 4.02   |
| 25698     | Ass1            | 897    | 897    | 650    | 1161   | 814   | 1222  | 731   | 1735   |
| 100125372 | Ces1f           | 6      | 2      | 4      | 6      | 7     | 6     | 3     | 6.48   |
| 367747    | Nudt10          | 49.78  | 44.16  | 41.44  | 43.97  | 75.61 | 47.62 | 49.18 | 51.61  |
| 314148    | Clec14a         | 142    | 99     | 108    | 96     | 155   | 145   | 144   | 112    |
| 108350519 | LOC108350519    | 8      | 8      | 12     | 12     | 12    | 7     | 12    | 19     |
| 362701    | Capn13          | 7      | 1      | 6      | 6      | 3     | 7     | 6     | 9      |
| 100911130 | LOC100911130    | 0      | 61.11  | 20.37  | 0      | 20.37 | 40.74 | 20.37 | 20.37  |
| 100911740 | Mrln            | 1      | 4      | 2      | 1      | 4     | 5     | 0     | 1      |
| 102549226 | LOC102549226    | 2      | 0      | 0      | 2      | 2     | 0     | 2     | 1      |
| 102553691 | LOC102553691    | 0      | 2      | 1      | 1      | 1     | 1     | 0     | 3      |
| 102554323 | LOC102554323    | 12     | 12     | 6      | 6      | 10    | 8     | 12    | 15     |
| 102555078 | LOC102555078    | 3      | 1      | 2      | 2      | 4     | 1     | 2     | 3      |
| 108348109 | NEWGENE_1310561 | 0      | 48.73  | 48.73  | 97.46  | 97.46 | 0     | 48.73 | 97.46  |
| 113936    | Cpb2            | 1      | 0      | 1      | 2      | 3     | 0     | 2     | 0      |
| 24559     | Mos             | 3      | 0      | 3      | 6      | 4     | 4     | 4     | 3      |
| 25154     | Pgr             | 25     | 28     | 16     | 39     | 51    | 38    | 18    | 28     |
| 288175    | Tmem30c         | 0      | 1      | 1      | 2      | 0     | 0     | 4     | 1      |
| 289399    | Inava           | 2      | 0      | 2      | 4      | 3     | 5     | 0     | 2      |
| 292310    | Gpr31           | 1      | 2      | 6      | 3      | 5     | 1     | 3     | 6      |
| 293878    | Olr1768         | 2      | 0      | 1      | 1      | 2     | 2     | 1     | 0      |
| 296352    | Wfdc5           | 3      | 0      | 0      | 1      | 4     | 0     | 0     | 1      |
| 297805    | Sdr16c5         | 3      | 6      | 6      | 1      | 7     | 4     | 7     | 2      |
| 301291    | I117f           | 1      | 3      | 0      | 0      | 2     | 0     | 0     | 3      |
| 303287    | Fbxo39          | 2      | 1      | 5      | 4      | 2     | 3     | 4     | 6      |
| 306608    | Proz            | 1      | 2      | 0      | 1      | 1     | 1     | 1     | 2      |
| 309142    | Tesmin          | 0      | 2      | 2      | 0      | 1     | 1     | 1     | 2      |
| 309641    | Tcp11           | 3      | 2      | 4      | 3      | 5     | 5     | 2     | 3      |
| 311793    | Noxa1           | 2      | 4      | 0      | 2      | 2     | 3     | 5     | 0      |
| 312745    | Clec2h          | 0      | 1      | 3      | 0      | 2     | 1     | 2     | 0      |
| 313421    | C8b             | 1      | 2      | 0      | 1      | 3     | 1     | 1     | 0      |
| 365228    | Ffar3           | 2      | 2      | 0      | 0      | 1     | 2     | 1     | 1      |
| 494233    | Vomlr88         | 0      | 1      | 2      | 1      | 4     | 0     | 1     | 0      |
| 497099    | Xkr9            | 0      | 1      | 0      | 3      | 2     | 2     | 0     | 1      |

|           |                 |        |        |        |        |       |       |       |        |
|-----------|-----------------|--------|--------|--------|--------|-------|-------|-------|--------|
| 497990    | Ar15c           | 8      | 5      | 12     | 7      | 9     | 14    | 7     | 10     |
| 498933    | LOC498933       | 1      | 3      | 4      | 0      | 1     | 0     | 1     | 8      |
| 500873    | Fam83a          | 2      | 0      | 1      | 1      | 1     | 0     | 3     | 1      |
| 502308    | Lypd5           | 1      | 0      | 1      | 2      | 2     | 2     | 1     | 0      |
| 502992    | Ldlrad2         | 0      | 2      | 4      | 2      | 1     | 2     | 4     | 3      |
| 63835     | Ctla4           | 2      | 1      | 0      | 1      | 2     | 0     | 3     | 0      |
| 680045    | LOC680045       | 2      | 0      | 0      | 2      | 1     | 2     | 1     | 1      |
| 683753    | Prr32           | 10     | 4      | 9      | 5      | 11    | 10    | 7     | 7      |
| 685900    | Enthd1          | 2      | 3      | 1      | 2      | 3     | 3     | 2     | 2      |
| 686013    | LOC686013       | 25     | 17     | 27     | 19     | 30    | 30    | 21    | 29     |
| 688340    | LOC688340       | 5      | 2      | 3      | 2      | 2     | 2     | 6     | 5      |
| 689230    | LOC689230       | 0      | 3      | 1      | 0      | 1     | 4     | 0     | 0      |
| 81506     | Bst1            | 36     | 51     | 49     | 36     | 66    | 51    | 43    | 55     |
| 103694000 | NEWGENE 1582994 | 261.15 | 318.36 | 366.99 | 251.03 | 305.8 | 389.8 | 294.8 | 507    |
| 89808     | Cx3c11          | 113    | 103    | 134    | 128    | 129   | 129   | 186   | 154    |
| 500578    | Tmem51          | 104    | 113    | 111    | 138    | 135   | 134   | 163   | 151    |
| 363909    | Caln1           | 47     | 71     | 54     | 90     | 79    | 78    | 106   | 65     |
| 286904    | Cyp4f4          | 21.62  | 27.61  | 28.73  | 37.26  | 38.59 | 33    | 24.23 | 48.43  |
| 64865     | Pcdh8           | 51     | 71     | 70     | 58     | 83    | 80    | 65    | 85     |
| 108353290 | LOC108353290    | 32.08  | 32     | 35.48  | 34.53  | 49.38 | 35.22 | 35.67 | 47.63  |
| 102553962 | LOC102553962    | 46.76  | 57.79  | 54.85  | 51.04  | 65.98 | 65.53 | 68.38 | 63.68  |
| 25702     | Pnlip           | 112    | 56     | 83     | 129    | 105   | 116   | 140   | 115    |
| 103692534 | LOC103692534    | 2.5    | 0      | 1.09   | 2.42   | 3.52  | 1.76  | 0     | 2.25   |
| 64037     | Slc22a4         | 13     | 14.09  | 21     | 15.11  | 22.5  | 18.12 | 15.09 | 23.48  |
| 102553138 | LOC102553138    | 1.65   | 4.86   | 5.13   | 1.67   | 0     | 3.31  | 1.7   | 11.67  |
| 292450    | Raet1e          | 3      | 1.07   | 5.02   | 2      | 0     | 2.16  | 5.1   | 6.64   |
| 289280    | Efcab2          | 31.04  | 28.22  | 38.37  | 34.36  | 38.4  | 44.45 | 42.08 | 40.51  |
| 499349    | Fgfbp3          | 107    | 148    | 80     | 91     | 125   | 147   | 120   | 142    |
| 293625    | Pidd1           | 38.84  | 3.81   | 21.92  | 27.39  | 31.22 | 22.15 | 17.77 | 44.15  |
| 290571    | Zfp488          | 23.01  | 36.11  | 17.48  | 34.87  | 21.73 | 40.13 | 45.61 | 32.3   |
| 100360868 | H3f3c           | 292.8  | 12.14  | 48.95  | 569.6  | 17.34 | 304.9 | 36.43 | 799.46 |
| 362712    | Drc1            | 35     | 51     | 42     | 49     | 60    | 65    | 53    | 44     |
| 100912563 | Insm1           | 16.84  | 17.72  | 15.6   | 20.69  | 20.87 | 12.5  | 25    | 30.52  |
| 313495    | Car9            | 3.01   | 9.03   | 9.92   | 7.9    | 7.83  | 5.88  | 11.67 | 12.09  |
| 102554130 | LOC102554130    | 9      | 7      | 6.41   | 9      | 25.02 | 3     | 9     | 2.41   |
| 102548111 | LOC102548111    | 5.46   | 2.15   | 7.78   | 1.05   | 5.44  | 6.45  | 5.45  | 3.3    |
| 108348155 | LOC108348155    | 39.43  | 35.16  | 38.05  | 47.31  | 29.88 | 61.64 | 62.22 | 47.1   |
| 100909582 | LOC100909582    | 15.47  | 15.85  | 19.32  | 31.44  | 34.25 | 23.47 | 25.98 | 19.4   |
| 100910905 | LOC100910905    | 23     | 24     | 16     | 15     | 25    | 18    | 28    | 27     |
| 102552360 | LOC102552360    | 11     | 13     | 6      | 5      | 18    | 16    | 5     | 5      |
| 680344    | Fam189a1        | 66     | 51     | 49     | 71     | 106   | 61    | 68    | 63     |
| 309174    | Tigd3           | 18.19  | 18.77  | 18.46  | 15.09  | 26.67 | 25.93 | 14.44 | 21.62  |
| 65146     | Pirb            | 15.18  | 10.81  | 9.7    | 1.08   | 11.81 | 8.01  | 14.47 | 11.95  |
| 29629     | Gria4           | 460.58 | 305    | 241.96 | 362.57 | 465.7 | 399.6 | 419.6 | 438.15 |
| 29259     | Sell            | 31     | 19     | 44     | 3      | 41    | 33    | 35    | 13     |
| 103693605 | LOC103693605    | 66     | 45     | 33     | 42     | 65    | 50    | 52    | 67     |
| 362584    | Col9a2          | 205    | 204    | 240    | 246    | 217   | 456   | 247   | 206    |
| 685267    | LOC685267       | 6.19   | 13.36  | 4.07   | 5.04   | 6.1   | 8.44  | 7.13  | 14.39  |
| 108353429 | LOC108353429    | 0      | 3      | 3.32   | 1.5    | 0     | 3.8   | 2.39  | 3.65   |
| 24599     | Nos2            | 0      | 3      | 4.75   | 2.58   | 0     | 0     | 9     | 4      |
| 362122    | Morn5           | 7.1    | 12.19  | 11.12  | 9.11   | 17.27 | 7.12  | 11.16 | 14.19  |
| 114508    | Fbp2            | 44     | 24     | 38     | 33     | 40    | 44    | 43    | 48     |
| 171044    | Sstr3           | 6      | 3      | 11     | 7      | 12    | 4     | 13    | 5      |
| 66025     | Lpar3           | 275    | 229    | 177    | 163.01 | 200.5 | 229.6 | 266   | 367.04 |
| 25493     | Nfkb1a          | 583    | 467    | 486    | 807    | 629   | 812   | 938   | 572.99 |
| 691418    | LOC691418       | 34.13  | 26.06  | 25     | 18     | 23.06 | 38.02 | 32    | 36.95  |

|           |              |       |       |       |       |       |       |       |       |
|-----------|--------------|-------|-------|-------|-------|-------|-------|-------|-------|
| 287819    | Ush1g        | 36    | 31    | 27    | 27    | 59    | 42    | 27    | 24.56 |
| 310688    | Sh2d2a       | 12    | 12    | 10    | 12    | 12    | 16    | 16    | 14    |
| 314438    | Degs2        | 46    | 58    | 47    | 29    | 59    | 64    | 55    | 49    |
| 102550241 | LOC102550241 | 10.28 | 15.4  | 11.36 | 16.07 | 21.09 | 14.15 | 15.48 | 16.26 |
| 500120    | Stk31        | 9     | 16    | 10    | 7     | 13    | 7     | 21    | 12    |
| 680191    | LOC680191    | 2.06  | 0.82  | 1.09  | 1.06  | 2.11  | 1.06  | 1.07  | 2.11  |
| 366455    | Mpl          | 37.74 | 31.37 | 39.69 | 43.53 | 51.87 | 34.99 | 42.51 | 62.99 |
| 102547047 | LOC102547047 | 19    | 16    | 14.01 | 17.22 | 17    | 23.8  | 23.84 | 19    |
| 171148    | Slc6a5       | 6     | 4     | 2     | 7     | 6     | 4     | 7     | 7     |
| 24645     | Pgm1         | 1103  | 1043  | 919   | 982   | 1299  | 1491  | 1234  | 1088  |
| 300656    | Trim29       | 5     | 4     | 6     | 4     | 3     | 7     | 7     | 7     |
| 302554    | Glod5        | 7     | 5     | 6     | 1     | 8     | 8     | 5     | 3     |
| 499958    | Linc00176    | 8     | 11    | 7     | 12    | 10    | 7     | 14    | 17    |
| 684771    | Cdca5        | 23    | 17    | 29    | 26    | 30    | 33    | 29    | 28    |
| 690657    | Tmem71       | 5     | 7     | 4     | 3     | 5     | 8     | 8     | 3     |
| 301965    | Tert         | 20    | 15    | 21    | 16    | 22    | 18    | 25    | 26    |
| 296566    | Clic3        | 128   | 120   | 136   | 101   | 147   | 134   | 161   | 171   |
| 100911237 | LOC100911237 | 11.1  | 16.73 | 13    | 15.78 | 20.33 | 13.19 | 23.53 | 14.53 |
| 117260    | Nudt1        | 57    | 30    | 39    | 40    | 57    | 51    | 52    | 50    |
| 100910848 | LOC100910848 | 18.38 | 11.41 | 14.14 | 16.44 | 25.97 | 9.21  | 16.46 | 24.74 |
| 299142    | Syt16        | 78.76 | 73.73 | 74.02 | 67.37 | 101.6 | 72.12 | 115.9 | 82.23 |
| 300242    | Krt7         | 190   | 164   | 172   | 114   | 195   | 214   | 191   | 210   |
| 29182     | Cdh22        | 30    | 36    | 18    | 22    | 42.21 | 34    | 21    | 37    |
| 295117    | Otol1        | 4     | 10    | 6     | 10    | 6     | 15    | 1     | 16    |
| 300461    | Dpy1912      | 7     | 5     | 1     | 2     | 5     | 6     | 5     | 3     |
| 309082    | Clrn3        | 5     | 2     | 5     | 3     | 5     | 5     | 5     | 4     |
| 54225     | Apob         | 6     | 3     | 5     | 1     | 5     | 5     | 4     | 5     |
| 690871    | Ndufaf8      | 129   | 127   | 118   | 120   | 142   | 166   | 155   | 163   |
| 307562    | Dsg2         | 21    | 13    | 18    | 19    | 22    | 18    | 35    | 15    |
| 295934    | Chst1        | 137   | 122   | 133   | 145   | 210   | 179   | 140   | 152   |
| 64041     | Birc5        | 34    | 33    | 39    | 17    | 40    | 47    | 29    | 40    |
| 102556485 | LOC102556485 | 22.16 | 17.9  | 21.3  | 13.33 | 21.62 | 30.01 | 19.91 | 23.19 |
| 361812    | Pnpla1       | 39    | 42    | 23    | 41    | 43    | 40    | 60    | 41    |
| 102556043 | LOC102556043 | 3.15  | 0     | 0     | 2.52  | 0.1   | 0     | 2.58  | 4.52  |
| 361341    | Ccbe1        | 26    | 35    | 35    | 30    | 44    | 62    | 26    | 28    |
| 685732    | Hoxa6        | 14.65 | 5.24  | 3.44  | 0     | 2.05  | 7.51  | 8.28  | 11.8  |
| 303414    | Epx          | 94    | 71    | 197   | 11    | 164   | 206   | 49    | 55    |
| 102551194 | LOC102551194 | 85.44 | 63.81 | 53.62 | 48.17 | 81.21 | 106.5 | 84.95 | 46.39 |
| 102552367 | LOC102552367 | 3.66  | 0     | 20    | 3.15  | 8.97  | 16.47 | 8.65  | 0     |
| 79146     | Begain       | 111   | 96    | 133   | 98    | 161   | 142   | 140   | 114   |
| 499069    | Nlrp4        | 1     | 1.99  | 5.02  | 2     | 3     | 3.25  | 4.48  | 2     |
| 312897    | Msc          | 101   | 78    | 75    | 73    | 126   | 96    | 99    | 95    |
| 24332     | Cela2a       | 4     | 5     | 5     | 8     | 5     | 7     | 9     | 7     |
| 293711    | Hrasls5      | 1     | 4     | 4     | 2     | 4     | 2     | 5     | 3     |
| 303395    | RGD1310166   | 2     | 2     | 4     | 3     | 3     | 4     | 2     | 5     |
| 317379    | Magix        | 15    | 12    | 12    | 16    | 16    | 23    | 14    | 17    |
| 362141    | Slc38a11     | 2     | 1     | 3     | 5     | 1     | 3     | 8     | 2     |
| 499565    | LOC499565    | 5     | 0     | 4     | 2     | 4     | 2     | 4     | 4     |
| 690020    | LOC690020    | 5     | 3     | 3     | 0     | 5     | 2     | 4     | 3     |
| 297025    | Kel          | 20    | 16    | 37    | 4     | 35    | 30    | 17    | 16    |
| 304071    | Sim2         | 8     | 4     | 11    | 10    | 6     | 20    | 8     | 8     |
| 362202    | Epb42        | 35.6  | 29.24 | 45.09 | 16.08 | 45.66 | 46.01 | 37.05 | 31.69 |
| 311443    | Lrrn4        | 3.32  | 3.43  | 5.54  | 4.51  | 10.16 | 1.12  | 7.89  | 2.22  |
| 114856    | Duspl        | 462   | 521   | 344   | 878   | 748   | 810   | 744   | 506   |
| 691141    | LOC691141    | 24    | 18    | 23    | 8     | 20    | 24    | 25    | 24    |
| 499967    | Cct8l1       | 0     | 7     | 8.04  | 12.48 | 7     | 12    | 16.06 | 0     |

|           |              |        |         |        |        |       |       |       |         |
|-----------|--------------|--------|---------|--------|--------|-------|-------|-------|---------|
| 100910668 | LOC100910668 | 9.93   | 3.93    | 1.65   | 5.68   | 10    | 8     | 4     | 5       |
| 100365043 | LOC100365043 | 11.88  | 13.54   | 5.24   | 4.55   | 16.86 | 11.78 | 8.14  | 8.09    |
| 503487    | Zfp92        | 14     | 17      | 7      | 13     | 17    | 21    | 12    | 15      |
| 315907    | Nrk          | 8      | 2       | 4      | 8      | 6     | 8     | 5     | 9.04    |
| 170496    | Lcn2         | 186    | 150     | 220    | 69     | 230   | 187   | 242   | 138     |
| 252922    | Pzp          | 37     | 18      | 26     | 28     | 32    | 32    | 40    | 35      |
| 680531    | Sapcd2       | 23     | 24      | 38.34  | 15     | 42    | 29    | 34.01 | 23      |
| 100134871 | LOC100134871 | 1910   | 930.06  | 2203.8 | 262.68 | 2553  | 1795  | 805.3 | 1616.74 |
| 246233    | Macrodl      | 207    | 169     | 145    | 153    | 223   | 261   | 164   | 212     |
| 680077    | LOC680077    | 4.09   | 8.71    | 9.98   | 6.21   | 7.14  | 10.77 | 9.25  | 9.84    |
| 24953     | Gcgr         | 20     | 30      | 23     | 21     | 21    | 33    | 26    | 40      |
| 690606    | Manscl       | 54     | 59      | 54     | 68     | 78    | 88    | 76    | 58      |
| 100911622 | LOC100911622 | 0      | 9.4     | 9.92   | 17.44  | 27.62 | 9.03  | 0     | 10.28   |
| 89813     | Pdk4         | 121    | 92      | 88     | 128    | 130   | 189   | 124   | 105     |
| 684623    | Gpr52        | 20     | 23      | 19     | 28     | 22    | 27    | 37    | 29      |
| 102553671 | LOC102553671 | 12     | 11      | 19     | 12     | 16    | 15    | 22    | 16      |
| 25410     | Cebpe        | 7      | 4       | 5      | 2      | 8     | 4     | 8     | 3       |
| 304666    | Klf1         | 54     | 25      | 44     | 21     | 51    | 49    | 40    | 44      |
| 364403    | Blk          | 26.39  | 11.3    | 28.18  | 4.04   | 32.87 | 28.08 | 14.65 | 13.78   |
| 102548734 | LOC102548734 | 2.94   | 1.37    | 0      | 1.36   | 7.25  | 0     | 0     | 0       |
| 553129    | Pcdhgal      | 70.01  | 45.34   | 49.88  | 79.31  | 70.15 | 52.09 | 122.3 | 68.2    |
| 501794    | Vom2r60      | 29.57  | 12.75   | 20.05  | 25.05  | 39.95 | 19.55 | 22.98 | 29.33   |
| 108353091 | LOC108353091 | 3.02   | 7.46    | 5      | 2.47   | 5.06  | 7.11  | 6.62  | 4.17    |
| 361004    | Zswim8       | 743.89 | 1044.26 | 847.9  | 1007   | 1348  | 1153  | 1079  | 1080.99 |
| 108351936 | LOC108351936 | 4.29   | 3.89    | 0.99   | 1.23   | 3.3   | 0.04  | 7.88  | 2.09    |
| 296981    | Atp6v0a4     | 75.63  | 90.89   | 98.3   | 93.4   | 95.71 | 126.3 | 134   | 102.46  |
| 102556157 | LOC102556157 | 11.82  | 0       | 46.1   | 24.41  | 0     | 44.09 | 22.03 | 39.28   |
| 303744    | Myadml2      | 63.71  | 57.51   | 44.78  | 76.26  | 82.55 | 81.84 | 77.55 | 68.34   |
| 266776    | Cst12        | 69     | 60      | 51     | 69     | 68    | 73    | 86    | 92      |
| 289586    | Spata18      | 16     | 15      | 18     | 15     | 15    | 25    | 21    | 21      |
| 296184    | Ankef1       | 15     | 9       | 14     | 8      | 10    | 26    | 12    | 11      |
| 404894    | Olr34        | 11     | 8       | 10     | 17     | 17    | 19    | 13    | 10      |
| 50872     | Hpcal4       | 58     | 53      | 62     | 46     | 41    | 74    | 80    | 86      |
| 286938    | Gimap4       | 51     | 27      | 24     | 32     | 43    | 54    | 31    | 44      |
| 300247    | Krt75        | 52.88  | 41      | 36.7   | 52.97  | 59.79 | 65.57 | 55.6  | 54.7    |
| 25756     | Cpt1b        | 69     | 68      | 63     | 64     | 80    | 111   | 75    | 73      |
| 405199    | Olr1748      | 58.48  | 26.15   | 21.53  | 26.43  | 50.44 | 51.9  | 33.48 | 34.45   |
| 89805     | Angpt2       | 183    | 144     | 108    | 120    | 152   | 189   | 197   | 175     |
| 100360244 | LOC100360244 | 9.2    | 11.34   | 5.17   | 8.13   | 7.34  | 11.31 | 11.39 | 13.44   |
| 362998    | Dnajc22      | 57     | 50      | 39     | 40     | 61    | 57    | 63    | 58      |
| 103692939 | LOC103692939 | 10.2   | 0       | 13.88  | 14.18  | 0     | 21.22 | 11.36 | 16.6    |
| 289257    | Sptal        | 61.71  | 51.03   | 95.83  | 37.85  | 136.5 | 77.64 | 57.34 | 45.32   |
| 102554746 | LOC102554746 | 2      | 1       | 3      | 1      | 3     | 0     | 6     | 0       |
| 24278     | Crygd        | 4      | 0       | 2      | 1      | 5     | 1     | 1     | 2       |
| 24717     | Rho          | 12     | 14      | 8      | 8      | 8     | 16    | 15    | 15      |
| 260319    | Brs3         | 2      | 4       | 1      | 0      | 3     | 0     | 2     | 4       |
| 287106    | Prss30       | 3      | 0       | 3      | 1      | 0     | 2     | 3     | 4       |
| 298975    | Scin         | 4      | 3       | 5      | 2      | 5     | 7     | 3     | 3       |
| 302576    | LOC302576    | 1      | 2       | 2      | 2      | 3     | 2     | 3     | 1       |
| 361503    | Eps8l1       | 10     | 11      | 6      | 15     | 15    | 13    | 9     | 17      |
| 498693    | Spata31d1    | 3      | 3       | 4      | 4      | 3     | 7     | 5     | 3       |
| 502733    | Ankrd7       | 3      | 1       | 3      | 0      | 2     | 1     | 2     | 4       |
| 406168    | Fkbp1        | 237    | 282     | 212    | 179    | 294   | 332   | 255   | 289     |
| 500200    | Atoh8        | 45     | 21      | 23     | 16     | 31    | 49    | 27    | 28      |
| 65162     | Dio2         | 58.17  | 63.95   | 86.04  | 72.39  | 69.17 | 80.56 | 145.2 | 65.79   |
| 691447    | Ppplr3e      | 49     | 55      | 53     | 56     | 80    | 62    | 70    | 62      |

|           |                 |        |        |        |        |       |       |       |        |
|-----------|-----------------|--------|--------|--------|--------|-------|-------|-------|--------|
| 287634    | Eme1            | 5.15   | 5.14   | 6.17   | 4.1    | 8.15  | 3.05  | 11.25 | 4      |
| 103689947 | LOC103689947    | 253    | 30.24  | 160    | 133.62 | 248   | 194   | 74.24 | 226    |
| 368057    | 368057          | 5      | 0      | 5.45   | 0      | 0     | 4     | 3.45  | 6      |
| 292760    | Rin1            | 25.01  | 21.83  | 31.12  | 24.38  | 38.4  | 25.39 | 31.17 | 36.78  |
| 312312    | Gimap1          | 22     | 25     | 14     | 12     | 28    | 28    | 14    | 24     |
| 314847    | Best3           | 22.36  | 23.06  | 16.57  | 27.8   | 33.25 | 26.88 | 25.05 | 30.45  |
| 192264    | Ear11           | 9.1    | 0      | 82.45  | 2.78   | 39.54 | 58.02 | 23.96 | 0      |
| 302995    | Haghl           | 117.92 | 112    | 110    | 99.97  | 174   | 127   | 126   | 140    |
| 307796    | Plekhg4         | 33     | 38     | 42     | 25     | 38    | 46    | 44    | 50     |
| 498400    | Hormad2         | 22     | 10     | 25     | 12     | 22    | 25    | 26    | 16     |
| 314396    | Slc24a4         | 44.25  | 37.25  | 21.88  | 43.51  | 59.24 | 42.62 | 49.57 | 38.18  |
| 102548396 | LOC102548396    | 1.2    | 0      | 6.02   | 0      | 4.72  | 1     | 3.6   | 0      |
| 687992    | Saal1           | 2      | 1      | 2      | 2      | 0     | 1     | 3.04  | 5      |
| 100363095 | Henmt1          | 32     | 19     | 14     | 31     | 28    | 29    | 37    | 30     |
| 83686     | Cngbl           | 13     | 15     | 15     | 5      | 20    | 9     | 18    | 15.01  |
| 286925    | Cryba2          | 33     | 36     | 24     | 20     | 32    | 29    | 53    | 32     |
| 498982    | RGD1560020_prec | 33     | 21     | 29     | 6      | 35    | 45    | 21    | 14     |
| 408233    | Spink4          | 17     | 14     | 9      | 25     | 21    | 18    | 21    | 24     |
| 287609    | Tspoap1         | 93.38  | 102.22 | 63.32  | 141.94 | 145.2 | 135.4 | 107.4 | 130.47 |
| 680115    | Hacd1           | 76     | 53     | 48     | 48     | 63    | 87    | 67    | 74     |
| 100911766 | LOC100911766    | 190.37 | 126.46 | 92.16  | 113.35 | 145.8 | 156.2 | 139.5 | 234.19 |
| 363931    | Gtpbp6          | 191.69 | 223.94 | 184.82 | 72.57  | 237.1 | 209.8 | 222.9 | 200.82 |
| 305392    | Ncapg           | 45.18  | 40.38  | 54.01  | 23.82  | 57.62 | 41.64 | 60.49 | 51.63  |
| 102556098 | LOC102556098    | 55.15  | 30.23  | 62.56  | 103.89 | 65.32 | 109.9 | 74.13 | 76.41  |
| 192259    | P1b1            | 8      | 2      | 3      | 4      | 2     | 5     | 10    | 5      |
| 25241     | Aqp5            | 1      | 5      | 6      | 5      | 1     | 7     | 9     | 5      |
| 297932    | Atp6v0d2        | 2      | 2      | 10     | 3      | 3     | 13    | 3     | 3      |
| 294557    | Sh3rf3          | 66.06  | 64.13  | 41.97  | 86.57  | 84.2  | 90.85 | 78.78 | 81.11  |
| 83567     | Mchr1           | 36     | 22     | 32     | 39     | 47    | 36    | 50    | 34     |
| 311832    | Gfilb           | 14.43  | 9.95   | 9.5    | 3.79   | 21.69 | 8.58  | 12.96 | 5.55   |
| 94272     | Clic5           | 167.34 | 156.58 | 162.5  | 179.21 | 210.6 | 302.4 | 199   | 150.24 |
| 25626     | Krt8            | 87     | 76     | 83.99  | 78     | 95    | 102   | 104   | 120    |
| 108352182 | LOC108352182    | 9      | 12     | 8      | 15     | 14    | 17    | 14    | 12     |
| 29517     | Sgk1            | 815    | 686    | 696    | 959    | 866   | 1227  | 1345  | 652    |
| 498190    | Ccdc60          | 6      | 10     | 7      | 4      | 9     | 6     | 11    | 9      |
| 192207    | Ubxn11          | 55     | 44     | 59     | 44     | 63    | 64    | 69    | 66     |
| 494500    | Gsta3           | 28.03  | 28.55  | 19.68  | 21.21  | 32.43 | 33.31 | 21.99 | 38.71  |
| 29168     | Ubd             | 28     | 18     | 11     | 17     | 27    | 23    | 22    | 24     |
| 103689978 | LOC103689978    | 3.19   | 6.41   | 1.51   | 15.12  | 13.48 | 0.8   | 6.68  | 13.07  |
| 679552    | Pjvk            | 7      | 10.07  | 7.87   | 6.24   | 12.31 | 12    | 6.15  | 10     |
| 300682    | Tmprss13        | 18.21  | 11.18  | 8.24   | 10     | 4.06  | 6.19  | 27.96 | 23.63  |
| 299106    | Rpl101          | 29     | 45     | 28     | 45     | 21    | 58    | 51    | 61     |
| 314640    | Tjp3            | 16.01  | 14.03  | 22.01  | 15     | 21.05 | 25.11 | 23    | 18     |
| 317674    | Fzd5            | 9      | 9      | 7      | 15     | 20    | 14    | 5     | 13     |
| 497888    | Fam71b          | 6      | 6      | 2      | 6      | 4     | 6     | 9     | 7      |
| 171144    | Slco4a1         | 14     | 15     | 14     | 17     | 19    | 23    | 21    | 15     |
| 60399     | Slpr5           | 8      | 8      | 9      | 5      | 9     | 11    | 10    | 9      |
| 81819     | Pax8            | 2      | 2      | 4      | 2      | 5     | 4     | 3     | 1      |
| 103690014 | LOC103690014    | 0      | 0      | 65.93  | 0      | 22.64 | 0     | 0     | 63.09  |
| 24851     | Tpml            | 4786   | 4802   | 4918   | 4723   | 6558  | 8645  | 5142  | 4670   |
| 690880    | Fam131c         | 362    | 357    | 287    | 270    | 482   | 348   | 489   | 341    |
| 25551     | Slc2a3          | 186.14 | 58.46  | 43.3   | 366.07 | 184.9 | 232   | 214.2 | 220.6  |
| 300219    | Troap           | 18     | 12     | 25     | 11     | 20    | 30    | 19    | 17     |
| 314321    | Zc2hc1c         | 10     | 10     | 5      | 8      | 8     | 19    | 8     | 8      |
| 365552    | Rsph14          | 34.19  | 22.58  | 31.02  | 28.62  | 38.67 | 44.59 | 35.51 | 33.02  |
| 689656    | Aunip           | 6      | 6      | 8      | 3      | 10    | 8     | 6     | 6      |

|           |              |        |        |        |        |       |       |       |        |
|-----------|--------------|--------|--------|--------|--------|-------|-------|-------|--------|
| 59329     | Sik1         | 67     | 45     | 61     | 162    | 133   | 83    | 147   | 74     |
| 102553814 | LOC102553814 | 45.05  | 26.25  | 19.98  | 37.18  | 39.59 | 50.81 | 34.82 | 42.42  |
| 289797    | Abca13       | 12     | 13     | 17     | 17     | 19    | 14    | 13    | 31     |
| 50693     | Itih3        | 12     | 20     | 13     | 14     | 17    | 25    | 17    | 18     |
| 29733     | Slpr1        | 290.96 | 272.17 | 205.98 | 269.8  | 349.3 | 362.5 | 363.6 | 281.28 |
| 365881    | Ankrd35      | 102    | 119    | 84     | 100    | 133   | 143   | 151   | 102    |
| 300653    | Tecta        | 20     | 17     | 14     | 11     | 26    | 15    | 20    | 20     |
| 116669    | Vwf          | 603    | 595    | 550    | 497    | 638   | 971   | 711   | 613    |
| 313507    | Tal1         | 71     | 63     | 84     | 43     | 103   | 107   | 84    | 47     |
| 24312     | Dhfr         | 147    | 204    | 157    | 182    | 179   | 215   | 269   | 239    |
| 363251    | Nhej1        | 50     | 39     | 53     | 50     | 55    | 57    | 71    | 68     |
| 367152    | Foxl2        | 2      | 4      | 3      | 4      | 3     | 4     | 1     | 9      |
| 499570    | Fabp12       | 4      | 3      | 2      | 4      | 1     | 8     | 5     | 3      |
| 293061    | Saxo2        | 7      | 13     | 2      | 4      | 7     | 11    | 9     | 7      |
| 103691557 | Rfxap11      | 41.06  | 164.25 | 164.25 | 164.25 | 246.4 | 82.13 | 123.2 | 246.37 |
| 502300    | Rnf225       | 5.67   | 15.79  | 6.99   | 7.56   | 20.79 | 4.78  | 15.83 | 5.7    |
| 100361292 | Fam205a      | 1      | 6.78   | 4      | 1.21   | 4.47  | 3     | 7.27  | 2.26   |
| 252854    | Slc5a11      | 28     | 24     | 14     | 18     | 23    | 30    | 27    | 30     |
| 363948    | Cdh20        | 98.68  | 107.48 | 79.68  | 101.84 | 137   | 137   | 118.3 | 115.53 |
| 108353241 | LOC108353241 | 1      | 0      | 1      | 0      | 0     | 0     | 0     | 2.62   |
| 689679    | LOC689679    | 122.71 | 132.92 | 47.5   | 127.66 | 173.4 | 118.4 | 138.3 | 134.33 |
| 498753    | Hist1h2af    | 2.51   | 0.42   | 2.58   | 0      | 5     | 1.04  | 0     | 1.18   |
| 304650    | Misp3        | 46     | 34     | 28     | 27     | 44    | 49    | 37    | 47     |
| 361187    | Asb5         | 13     | 12     | 12     | 8      | 13    | 24    | 13    | 9      |
| 102550986 | LOC102550986 | 53.71  | 43.42  | 35.5   | 39.54  | 68.96 | 48.52 | 67.97 | 40.46  |
| 309178    | Batf2        | 3      | 7      | 3      | 3      | 4     | 6     | 5     | 6      |
| 683410    | Ankrd33      | 9      | 6      | 10     | 7      | 8     | 11    | 12    | 11     |
| 102552988 | LOC102552988 | 11.19  | 6.93   | 1      | 3.69   | 10    | 13.83 | 5.08  | 1.04   |
| 24693     | Ptgs1        | 106    | 93     | 128    | 106.06 | 113.6 | 171   | 176   | 108.02 |
| 313512    | Dmbx1        | 1.33   | 2.32   | 6.46   | 4.54   | 7.24  | 5.9   | 0.99  | 5.13   |
| 102549812 | LOC102549812 | 33     | 24.01  | 43.26  | 41.58  | 47.55 | 38.54 | 52.9  | 47.65  |
| 102548568 | LOC102548568 | 3      | 7      | 6      | 3      | 5     | 8     | 4     | 8      |
| 171011    | Kcng3        | 15     | 10     | 19     | 13     | 22    | 8     | 19    | 26     |
| 287821    | Otop3        | 3      | 6      | 2      | 8      | 5     | 10    | 5     | 5      |
| 288752    | B3gnt4       | 2      | 8      | 4      | 5      | 10    | 7     | 2     | 6      |
| 313471    | Dmrta2       | 7      | 1      | 8      | 3      | 4     | 5     | 11    | 5      |
| 500017    | Asb4         | 4      | 4      | 2      | 9      | 7     | 10    | 2     | 6      |
| 100363350 | Nxpe2        | 30.19  | 30.5   | 32     | 29.27  | 30.79 | 51.56 | 38.41 | 39.72  |
| 25628     | Nkx2-1       | 15.15  | 10.21  | 8.63   | 15.59  | 28.61 | 10.53 | 9.17  | 16.93  |
| 114091    | Fcnb         | 141    | 118    | 211    | 20     | 225   | 206   | 132   | 82     |
| 108351836 | LOC108351836 | 0      | 3.72   | 0      | 0      | 0     | 0     | 0     | 4.9    |
| 360900    | Traf3ip3     | 21.7   | 14.18  | 14.08  | 16.21  | 23.29 | 23.98 | 20.26 | 19.64  |
| 108348059 | LOC108348059 | 20.23  | 18.56  | 18.92  | 8.05   | 11.49 | 39.47 | 16.17 | 19.5   |
| 25332     | Mgmt         | 134    | 124    | 100    | 206    | 261   | 169   | 129   | 184    |
| 309104    | Ifitm6       | 64     | 52     | 74.9   | 26     | 64.94 | 63.97 | 91.89 | 65     |
| 252833    | Gdf7         | 6.05   | 2.03   | 3.09   | 6.07   | 4.27  | 8.06  | 6.19  | 4.2    |
| 308800    | Tyr          | 0      | 1.09   | 1.16   | 1.05   | 2.2   | 1.13  | 0     | 1.02   |
| 307715    | Irx6         | 3      | 2      | 0      | 1      | 2.91  | 1     | 0     | 4      |
| 103689949 | LOC103689949 | 5.09   | 10.18  | 6.36   | 6.36   | 6.36  | 10.18 | 11.46 | 8.91   |
| 289032    | Chit1        | 29.83  | 35.4   | 30.74  | 20.93  | 53.04 | 31.31 | 39.37 | 30.49  |
| 24294     | Cyp11b2      | 18.31  | 20.08  | 27.77  | 40.58  | 44.4  | 35.95 | 30.97 | 29.51  |
| 300474    | Adamts15     | 309.04 | 291.08 | 274.17 | 296.07 | 335.2 | 328   | 483.2 | 397.94 |
| 25225     | Ubal1        | 0.74   | 1.47   | 2.23   | 2.19   | 2.31  | 5     | 0.73  | 0.71   |
| 103689971 | LOC103689971 | 0      | 0      | 0      | 7.04   | 0     | 0     | 9.3   | 0      |
| 25134     | Gnmt         | 29.1   | 14.65  | 12.24  | 31     | 38    | 26    | 21    | 30     |
| 140942    | Ddit4        | 1727   | 927    | 1026   | 1254   | 1324  | 1872  | 1952  | 1382   |



|           |              |       |       |       |       |       |       |       |       |
|-----------|--------------|-------|-------|-------|-------|-------|-------|-------|-------|
| 29447     | Msra         | 135   | 222   | 155   | 167   | 224   | 226   | 238   | 211   |
| 287699    | Krt13        | 13    | 12    | 6     | 6     | 7     | 13    | 14    | 15    |
| 360465    | Ercc411      | 11.64 | 16.94 | 34.06 | 6.61  | 25.34 | 0     | 36.49 | 30.05 |
| 500590    | Tnfrsf9      | 11    | 14    | 13    | 14    | 20    | 11    | 18    | 20    |
| 362510    | Melk         | 6     | 16    | 26    | 7     | 27    | 20    | 12    | 14    |
| 102551882 | LOC102551882 | 5.21  | 2.63  | 10.97 | 8.86  | 7.36  | 4.54  | 12.1  | 12.73 |
| 679581    | LOC679581    | 1.37  | 0     | 1.39  | 1.39  | 2.78  | 1.34  | 1.39  | 0     |
| 113910    | Prnd         | 30    | 17    | 17    | 27    | 28    | 20    | 53    | 20    |
| 501138    | Ankar        | 34    | 25.22 | 25.52 | 31.71 | 34.5  | 35.46 | 40.07 | 44.83 |
| 364814    | Psmas8       | 30.2  | 23.77 | 36.2  | 19.48 | 70.26 | 13.08 | 26.17 | 36.32 |
| 102548076 | LOC102548076 | 66.97 | 53.51 | 36.63 | 22.08 | 75.95 | 30.28 | 57.96 | 74.18 |
| 688845    | Zbtb32       | 4.03  | 3     | 5     | 3     | 7.02  | 2     | 4     | 6.98  |
| 100910134 | LOC100910134 | 11.29 | 7.53  | 4.1   | 14.31 | 17.21 | 10.37 | 9.89  | 12.08 |
| 304325    | Tmem184a     | 2.03  | 2     | 1     | 1     | 3.03  | 1     | 1     | 3     |
| 290623    | Cyp4f18      | 21.14 | 16.16 | 24.77 | 2.01  | 21.04 | 31.1  | 20.07 | 13.13 |
| 287638    | Dlx3         | 33    | 34.04 | 25    | 24.32 | 35    | 38    | 41    | 41    |
| 367455    | Lrg1         | 191   | 166   | 190   | 100   | 270   | 219   | 208   | 165   |
| 362619    | Smpd13b      | 57.66 | 50.49 | 46.36 | 31.65 | 64.98 | 69.58 | 83.62 | 30.02 |
| 364073    | Ddx3y        | 52.28 | 40.19 | 48.22 | 61.3  | 50.38 | 56.26 | 87.37 | 75.3  |
| 100189544 | Nrn11        | 8     | 16    | 11    | 13    | 16    | 22    | 13    | 13    |
| 103690326 | LOC103690326 | 0     | 4     | 2     | 0     | 0     | 5     | 1     | 2     |
| 103691555 | LOC103691555 | 0     | 0     | 1     | 2     | 1     | 1     | 1     | 1     |
| 103694084 | LOC103694084 | 6     | 7     | 11    | 12    | 13    | 11    | 12    | 12    |
| 103694166 | LOC103694166 | 0     | 3     | 0     | 0     | 0     | 1     | 1     | 2     |
| 108348813 | LOC108348813 | 1     | 1     | 0     | 1     | 4     | 0     | 0     | 0     |
| 116544    | Pou2f3       | 2     | 0     | 1     | 6     | 1     | 6     | 3     | 2     |
| 171449    | Zgl6         | 1     | 1     | 1     | 0     | 2     | 2     | 0     | 0     |
| 24411     | Grin2c       | 1     | 5     | 5     | 4     | 9     | 5     | 3     | 3     |
| 25685     | Igfbp1       | 2     | 1     | 0     | 0     | 3     | 0     | 1     | 0     |
| 266612    | Slc4a9       | 4     | 4     | 5     | 5     | 4     | 4     | 4     | 12    |
| 287678    | Krt23        | 0     | 1     | 0     | 2     | 0     | 2     | 2     | 0     |
| 289101    | Shcbp11      | 0     | 0     | 1     | 2     | 0     | 1     | 0     | 3     |
| 291759    | Dsc1         | 4     | 4     | 2     | 2     | 7     | 2     | 2     | 5     |
| 291819    | Car7         | 2     | 1     | 1     | 2     | 2     | 1     | 4     | 1     |
| 29238     | Drd3         | 1     | 2     | 2     | 1     | 0     | 3     | 4     | 1     |
| 293357    | Olr210       | 1     | 0     | 1     | 1     | 0     | 1     | 2     | 1     |
| 293637    | Phlda2       | 2     | 1     | 0     | 0     | 1     | 0     | 2     | 1     |
| 294559    | Oit3         | 0     | 0     | 3     | 0     | 1     | 0     | 2     | 1     |
| 294807    | Rxfp3        | 0     | 2     | 0     | 1     | 1     | 1     | 1     | 1     |
| 296601    | Mymk         | 1     | 3     | 1     | 1     | 2     | 1     | 3     | 2     |
| 301100    | Ooep         | 0     | 0     | 4     | 2     | 2     | 1     | 1     | 4     |
| 310693    | Cd51         | 5     | 4     | 14    | 1     | 12    | 10    | 7     | 3     |
| 311470    | Sel112       | 2     | 1     | 0     | 0     | 2     | 0     | 1     | 1     |
| 315239    | Muc1911      | 1     | 1     | 2     | 2     | 1     | 3     | 2     | 2     |
| 315438    | Deup1        | 1     | 0     | 2     | 0     | 0     | 3     | 1     | 0     |
| 316124    | LOC316124    | 0     | 1     | 0     | 2     | 0     | 3     | 1     | 0     |
| 338418    | Scgb3a1      | 2     | 0     | 1     | 0     | 2     | 1     | 1     | 0     |
| 405014    | Olr86        | 4     | 3     | 4     | 1     | 3     | 4     | 3     | 6     |
| 494247    | Vomlr86      | 0     | 0.5   | 0     | 1     | 0     | 0     | 1     | 1     |
| 497197    | Plcz1        | 0     | 1     | 2     | 0     | 1     | 1     | 0     | 2     |
| 499579    | Dnajc5b      | 5     | 1     | 2     | 4     | 4     | 3     | 6     | 3     |
| 499640    | Wdr49        | 0     | 0     | 1     | 2     | 0     | 0     | 3     | 1     |
| 500927    | Olr1877      | 1     | 2     | 3     | 0     | 2     | 0     | 0     | 6     |
| 502372    | Syce1        | 3     | 1     | 0     | 2     | 2     | 3     | 3     | 0     |
| 64546     | Il12b        | 2     | 1     | 0     | 0     | 0     | 0     | 1     | 3     |
| 679584    | Ccdc27       | 0     | 1     | 1     | 1     | 2     | 0     | 1     | 1     |

|           |              |        |        |        |        |       |       |       |        |
|-----------|--------------|--------|--------|--------|--------|-------|-------|-------|--------|
| 679979    | Cyp2ab1      | 1      | 1      | 1      | 0      | 0     | 2     | 1     | 1      |
| 681145    | I119         | 2      | 0      | 0      | 1      | 0     | 1     | 2     | 1      |
| 685402    | Gal3st2      | 0      | 0      | 0      | 3      | 0     | 0     | 2     | 2      |
| 691496    | Hist3h3      | 1      | 2      | 2      | 1      | 1     | 0     | 2     | 5      |
| 103692171 | LOC103692171 | 227.54 | 75.85  | 113.77 | 151.69 | 227.5 | 341.3 | 113.8 | 75.85  |
| 293302    | Olr155       | 3      | 3      | 4      | 5      | 8     | 5     | 3     | 4.01   |
| 298591    | Igsf21       | 95     | 99     | 79     | 88     | 135   | 130   | 98    | 119    |
| 100362040 | LOC100362040 | 2.15   | 2.14   | 2.18   | 0      | 1.08  | 1.08  | 3.27  | 3.21   |
| 311358    | Serinc4      | 9.35   | 4.85   | 15.25  | 14.98  | 15.67 | 6.24  | 21.48 | 15.95  |
| 103692612 | LOC103692612 | 1.04   | 1.05   | 2.12   | 2.07   | 1.06  | 1.05  | 2.11  | 4.17   |
| 501061    | Tmie         | 51     | 73     | 39     | 42     | 80    | 85    | 55    | 54     |
| 691317    | Draxin       | 13.53  | 13.68  | 17.14  | 16.32  | 26.2  | 9.88  | 21.38 | 23.65  |
| 499985    | RGD1565355   | 14.13  | 19.14  | 31.55  | 3.73   | 28.79 | 32.51 | 30.35 | 0      |
| 24388     | Gfi1         | 12.22  | 20.95  | 23.9   | 4.62   | 28.5  | 20.05 | 20.12 | 13.81  |
| 192109    | Pou3f3       | 7.12   | 1.45   | 1.18   | 1.46   | 3.41  | 4.35  | 2.86  | 4.37   |
| 24582     | Myh11        | 633    | 439    | 542    | 552.99 | 707   | 1130  | 617   | 444    |
| 100911413 | LOC100911413 | 142.67 | 46.92  | 78.88  | 34.96  | 106   | 135   | 102.1 | 62.9   |
| 306285    | Syt15        | 127    | 117    | 134    | 155    | 172   | 181   | 165   | 195    |
| 29413     | Adra1d       | 24     | 25     | 11     | 8      | 30    | 20    | 30    | 11     |
| 64558     | Fzd4         | 307.13 | 265.31 | 241.34 | 274.97 | 373.5 | 446.1 | 409.1 | 229.22 |
| 680025    | Nxf5         | 4.32   | 1.1    | 3.43   | 1.12   | 2.23  | 3.32  | 5.59  | 2.21   |
| 302388    | RGD1560099   | 4.08   | 0      | 0      | 1.02   | 2.03  | 1.01  | 2.04  | 1.75   |
| 295445    | Dkk2         | 10     | 16     | 13     | 17     | 23    | 22    | 15    | 15     |
| 304509    | Cfap73       | 1.01   | 1.02   | 1.02   | 3.08   | 3.09  | 1.04  | 2.04  | 2.04   |
| 316432    | Ica11        | 90     | 66     | 52     | 69     | 92    | 98    | 99    | 82     |
| 102549465 | LOC102549465 | 4.68   | 0      | 1.98   | 6.58   | 2.01  | 9.24  | 0.87  | 5.63   |
| 404644    | Mrgprb5      | 4.71   | 11.68  | 5.69   | 8.68   | 8.11  | 3.5   | 12.01 | 17.62  |
| 100913063 | Cd79a        | 40.09  | 33.58  | 77.34  | 19     | 64.13 | 87.85 | 43.18 | 32.92  |
| 362848    | Pram1        | 36.06  | 36     | 56.08  | 12     | 53.06 | 59.05 | 49    | 27     |
| 65130     | Cldn3        | 19     | 36.94  | 43     | 20.96  | 50    | 37    | 22.96 | 51     |
| 297962    | Srsf12       | 49     | 66     | 50     | 54     | 91    | 72    | 53    | 78     |
| 293522    | Ahsp         | 71     | 46     | 118    | 19     | 151   | 80    | 60    | 50     |
| 286901    | Brinp3       | 79     | 73     | 62     | 75     | 91    | 95    | 128   | 74     |
| 502584    | Nudt17       | 18     | 11     | 18     | 23     | 27    | 18    | 22    | 27     |
| 63887     | Nmu          | 12     | 14     | 19     | 19     | 19    | 19    | 15    | 33     |
| 102556347 | LOC102556347 | 404.19 | 384.1  | 269.61 | 429.88 | 564.8 | 462.7 | 455.7 | 516.33 |
| 314772    | Epyc         | 84     | 95     | 98     | 8      | 82    | 86.02 | 95    | 120.11 |
| 102552378 | LOC102552378 | 0      | 1      | 1      | 0      | 0     | 2.69  | 0     | 0      |
| 298698    | Angpt16      | 16.58  | 17.96  | 16.72  | 17.83  | 30.78 | 17.85 | 28.76 | 15.54  |
| 288135    | Retnlg       | 69     | 77     | 97     | 6      | 135   | 94    | 50    | 56     |
| 100361920 | LOC100361920 | 1.04   | 2.08   | 0      | 0      | 1.06  | 1.06  | 1.04  | 1.04   |
| 293990    | Wnt8b        | 5.29   | 9.49   | 4.68   | 6.51   | 14.88 | 4.09  | 6.93  | 9.06   |
| 108351878 | LOC108351878 | 80.75  | 72.03  | 36.34  | 14.56  | 74.45 | 58.4  | 51.69 | 89.74  |
| 306283    | Anxa8        | 438    | 326    | 275    | 474    | 461   | 432   | 365   | 780    |
| 296197    | Dstn11       | 36.63  | 35.01  | 34.9   | 6.74   | 27.12 | 35.14 | 28.39 | 62     |
| 500944    | Kdm4d12      | 8.72   | 8.36   | 8.81   | 9.08   | 11.54 | 10.75 | 10.44 | 14.45  |
| 100911426 | LOC100911426 | 1.03   | 0      | 0      | 0      | 0     | 0.39  | 0     | 1      |
| 170568    | Dmbt1        | 174.33 | 53.08  | 99.12  | 44.04  | 108.1 | 201   | 105.9 | 85.1   |
| 414787    | RT1-M10-1    | 12.61  | 7      | 6      | 12.01  | 12.35 | 12    | 11.01 | 15.42  |
| 103693118 | LOC103693118 | 5      | 3      | 7.01   | 5      | 4     | 6.01  | 8     | 9      |
| 100912498 | LOC100912498 | 257.34 | 184.32 | 199.27 | 287.16 | 321.3 | 382   | 316.9 | 232.61 |
| 102550306 | LOC102550306 | 12     | 2      | 5      | 1      | 13    | 5     | 3     | 6      |
| 25421     | Crybb1       | 19     | 23     | 17     | 21     | 27    | 25    | 27    | 29     |
| 290409    | Olfm4        | 9      | 15     | 15     | 1      | 10    | 14    | 16    | 14     |
| 365844    | Nup2101      | 16     | 10     | 22     | 12     | 19    | 23    | 22    | 17     |
| 103690486 | LOC103690486 | 2.02   | 4.21   | 8.59   | 8.49   | 11.41 | 8.52  | 5.99  | 5.55   |

|           |              |        |         |        |        |       |       |       |         |
|-----------|--------------|--------|---------|--------|--------|-------|-------|-------|---------|
| 498194    | Mn1          | 12     | 11.01   | 14.02  | 9.04   | 17.25 | 23.94 | 13    | 8.01    |
| 366998    | Nfe2         | 37     | 23      | 35     | 13     | 47    | 36    | 34    | 29      |
| 108348160 | NEWGENE 2134 | 19     | 14      | 10.15  | 17.5   | 25    | 17.5  | 17.5  | 22      |
| 102553014 | LOC102553014 | 3.26   | 0       | 0      | 2.87   | 3.84  | 1.3   | 1.62  | 1.53    |
| 299567    | Pglyrp2      | 6.08   | 1       | 3      | 1      | 3     | 4.05  | 2.94  | 5       |
| 24438     | Hist1h1t     | 4      | 4       | 5      | 4      | 6     | 4     | 6     | 7       |
| 102552387 | LOC102552387 | 0      | 2.27    | 2.8    | 2.61   | 4.3   | 2.9   | 0.12  | 3.08    |
| 499027    | RGD1560718   | 0.55   | 4.54    | 2.06   | 1.06   | 0     | 1.63  | 5.62  | 3.87    |
| 366069    | Myo3b        | 4      | 8       | 6      | 13     | 9     | 9     | 12    | 12      |
| 690076    | Cd300e       | 8      | 9       | 9      | 6      | 15    | 9     | 9     | 10.38   |
| 360457    | Vegfd        | 19.91  | 11.64   | 30.88  | 10.43  | 33.31 | 25.12 | 15.05 | 25.3    |
| 25722     | Scn4a        | 110.5  | 94.45   | 110.65 | 109.11 | 175.5 | 154.4 | 108.5 | 137.51  |
| 114215    | Insl3        | 1      | 5       | 3      | 5      | 3     | 7     | 6     | 3       |
| 25163     | Cdkn2a       | 26     | 22      | 32     | 26     | 40    | 45    | 29    | 30      |
| 108348153 | LOC108348153 | 110.95 | 79.26   | 45.15  | 98.79  | 109.4 | 91.39 | 124.4 | 128.84  |
| 500300    | Depp1        | 120    | 142     | 86     | 226    | 142   | 267   | 235   | 136     |
| 361619    | Hbb-b1       | 498.64 | 233.03  | 516.99 | 81.45  | 707.1 | 462   | 226.4 | 413.12  |
| 288275    | Hunk         | 5      | 5       | 2      | 13     | 8     | 7     | 8     | 11      |
| 295160    | Mnd1         | 5      | 5       | 10     | 5      | 7     | 11    | 7     | 9       |
| 308163    | Ccr6         | 5      | 2       | 2      | 1      | 4.26  | 2     | 5.34  | 2       |
| 108352632 | LOC108352632 | 6.6    | 15.4    | 13.26  | 4.93   | 17.7  | 14.31 | 9.48  | 13.17   |
| 100911585 | LOC100911585 | 9.96   | 2.27    | 12.41  | 14.49  | 10.11 | 12.57 | 12.22 | 18.32   |
| 502618    | LOC502618    | 14.64  | 5.54    | 16.94  | 13.99  | 19.95 | 19.54 | 15.66 | 14.38   |
| 103689931 | LOC103689931 | 919.85 | 842.05  | 26.99  | 667.93 | 742   | 801.1 | 896.5 | 902.74  |
| 103690123 | Hoxa2        | 0      | 40.06   | 6.84   | 1.62   | 40.27 | 1.84  | 15    | 8.98    |
| 405012    | Olr89        | 2.5    | 2       | 0      | 0      | 4.29  | 0     | 0     | 1.84    |
| 500562    | Lin28a       | 13.11  | 2.57    | 11.42  | 9.1    | 11.96 | 10.83 | 17.31 | 9.22    |
| 108353238 | LOC108353238 | 11.18  | 17.21   | 8.51   | 8.71   | 11.96 | 15.14 | 16.97 | 18.08   |
| 499422    | Gstt3        | 588.9  | 541.35  | 780.03 | 949    | 1115  | 1067  | 813   | 900.98  |
| 108348879 | LOC108348879 | 3      | 3       | 2      | 3      | 1     | 2     | 6     | 6       |
| 690276    | LOC690276    | 36     | 25      | 17     | 21     | 39    | 35    | 25    | 36      |
| 690919    | Nrg4         | 2      | 2       | 2      | 5      | 1     | 3     | 7     | 4       |
| 29397     | Ccl11        | 22     | 13      | 9.05   | 8      | 7     | 15    | 36    | 13      |
| 690593    | Vom2r13      | 3      | 5       | 6.15   | 1.83   | 6.91  | 6     | 2.99  | 5.9     |
| 108352109 | LOC108352109 | 55.81  | 27.69   | 37.09  | 59.6   | 73.64 | 65.2  | 51.68 | 55.42   |
| 497195    | Rnase17      | 1.51   | 13.42   | 15.53  | 0.22   | 18.04 | 14.41 | 5.59  | 3.89    |
| 103694210 | LOC103694210 | 54     | 47      | 33     | 54     | 53    | 44    | 75    | 85      |
| 24440     | Hbb          | 2580.4 | 2355.21 | 5907.7 | 421.12 | 6583  | 4468  | 2099  | 2250.8  |
| 108348043 | NEWGENE 2812 | 11.44  | 4.58    | 0      | 10     | 7     | 9.16  | 9     | 10.43   |
| 363085    | Car12        | 23     | 29      | 7      | 28     | 20    | 40    | 32    | 27      |
| 366262    | Rbm38        | 140    | 101     | 173    | 71     | 246   | 216   | 103   | 99      |
| 25085     | Th           | 22     | 17      | 18     | 8      | 20    | 29    | 18    | 22      |
| 301112    | Crb3         | 11     | 12      | 15     | 8      | 16    | 16    | 15    | 16      |
| 100359421 | LOC100359421 | 17.18  | 29.76   | 16.81  | 5.9    | 21.53 | 27.47 | 22.13 | 24.35   |
| 312689    | M6pr         | 300.52 | 218.67  | 2132.1 | 62.14  | 32    | 1056  | 1287  | 1351.73 |
| 102548162 | LOC102548162 | 13     | 12      | 3      | 12     | 9     | 12    | 20    | 14      |
| 290485    | Cldn10       | 14     | 25      | 21     | 12     | 25    | 21    | 30    | 23      |
| 315034    | Fbxo43       | 3      | 1       | 2      | 2      | 2     | 2     | 4     | 3       |
| 683422    | LOC683422    | 4      | 1       | 2      | 1      | 2     | 1     | 5     | 3       |
| 683980    | Krtcap3      | 3      | 2       | 2      | 1      | 1     | 3     | 3     | 4       |
| 84405     | I112a        | 4      | 2       | 1      | 1      | 3     | 4     | 2     | 2       |
| 116547    | S100a8       | 320    | 212     | 453    | 31     | 443   | 318   | 431   | 205     |
| 103693260 | LOC103693260 | 28.03  | 14.03   | 16.03  | 22.01  | 23    | 25.06 | 27.08 | 35      |
| 103690234 | LOC103690234 | 12.62  | 22.4    | 23.09  | 20.44  | 25.11 | 23.9  | 37.62 | 21.4    |
| 102553828 | LOC102553828 | 10.93  | 0       | 0      | 18.94  | 10.26 | 21.52 | 9.34  | 0       |
| 25269     | Pvalb        | 2688   | 2951    | 1703   | 2735   | 3079  | 4788  | 2783  | 3223    |

|           |              |        |        |        |        |       |       |       |         |
|-----------|--------------|--------|--------|--------|--------|-------|-------|-------|---------|
| 288449    | Katnal1      | 131.14 | 74.81  | 70.91  | 17.87  | 140.1 | 100.5 | 70.74 | 94.42   |
| 302884    | MGC105649    | 22     | 15     | 26     | 6      | 19    | 24    | 26    | 26      |
| 102554611 | LOC102554611 | 2      | 1      | 3.48   | 1.1    | 1.9   | 1.37  | 2.16  | 5.01    |
| 100366054 | LOC100366054 | 4.17   | 0      | 5.1    | 0      | 4.9   | 1.73  | 0     | 6.14    |
| 102550455 | LOC102550455 | 18.13  | 18.34  | 16.28  | 8.48   | 23.33 | 24.04 | 16.68 | 20.32   |
| 171105    | Lnpep        | 389.7  | 646.72 | 246.67 | 709.4  | 717.5 | 262.2 | 637.6 | 1128.49 |
| 113882    | Hemgn        | 72.63  | 30.16  | 124.18 | 5.13   | 148   | 82.02 | 48.16 | 42.25   |
| 691362    | Mansc4       | 8      | 2      | 4      | 7      | 8     | 6     | 8     | 7       |
| 408212    | Cpa5         | 3.73   | 12.49  | 8.43   | 9.64   | 12.97 | 12.58 | 13.09 | 8.72    |
| 312331    | Nfe213       | 28     | 26     | 15     | 20     | 24    | 40    | 35    | 24      |
| 102553670 | LOC102553670 | 18.69  | 16.6   | 11.81  | 14.18  | 27.95 | 9.44  | 33.21 | 14.16   |
| 25681     | Col10a1      | 87     | 78     | 83     | 86     | 79    | 224   | 92    | 67      |
| 360816    | Sds1         | 29     | 25     | 36     | 30     | 35    | 34    | 48    | 49      |
| 102552055 | LOC102552055 | 23.01  | 21.01  | 13.22  | 21.08  | 23.07 | 40.07 | 31.2  | 14.03   |
| 102549500 | LOC102549500 | 15.33  | 8.87   | 8.54   | 8.76   | 19.19 | 11.86 | 11.59 | 14.8    |
| 103690128 | LOC103690128 | 10.88  | 8.93   | 2.45   | 7.65   | 10.33 | 14.64 | 7.56  | 8.92    |
| 309110    | Gatd1        | 11.18  | 137.06 | 273.91 | 105.12 | 146.5 | 117.6 | 211.5 | 255.55  |
| 679158    | Sox3         | 22     | 33     | 39     | 25     | 42    | 47    | 39    | 37      |
| 24415     | Grm2         | 7.76   | 11.23  | 16.32  | 8.31   | 24.03 | 9.29  | 16.9  | 10.29   |
| 108351569 | LOC108351569 | 0      | 1.08   | 1      | 1.09   | 0     | 1     | 1.07  | 2.33    |
| 100362981 | LOC100362981 | 4.17   | 0.09   | 3.24   | 2.72   | 6.87  | 1.2   | 1.06  | 5.06    |
| 500085    | Svopl        | 24.22  | 22.13  | 18.17  | 22.13  | 32.44 | 30.22 | 27.28 | 30.37   |
| 100360449 | LOC100360449 | 41.84  | 125.53 | 209.22 | 0      | 157.8 | 209.2 | 83.69 | 72.48   |
| 100911399 | LOC100911399 | 3.61   | 3.1    | 2.37   | 2.46   | 4.54  | 4.61  | 3.4   | 3.49    |
| 108351807 | LOC108351807 | 7.38   | 0      | 0      | 0      | 0.67  | 0     | 0     | 9.59    |
| 303914    | Ildr1        | 10     | 6      | 6      | 19     | 12    | 15    | 14    | 16      |
| 309649    | Rab44        | 8      | 4      | 24     | 5      | 22    | 16    | 14    | 5       |
| 363796    | Iqcg         | 4      | 13     | 14     | 10     | 18    | 14    | 15    | 10      |
| 100360779 | LOC100360779 | 6      | 2.22   | 3      | 5.79   | 6.53  | 4     | 5.38  | 7.74    |
| 289395    | Cr2          | 3      | 1      | 11     | 3      | 8     | 6.03  | 4     | 7       |
| 498659    | RatNP-3b     | 140.31 | 71.87  | 158.09 | 14.38  | 174.8 | 92.27 | 213.4 | 54.96   |
| 688386    | Cox7a212     | 231.24 | 368.18 | 453.26 | 341.21 | 408.5 | 467.4 | 590   | 474.47  |
| 266775    | Serpinb10    | 20     | 14     | 21     | 1      | 33    | 22    | 18    | 5       |
| 316614    | Asb18        | 31     | 21     | 14     | 23     | 24    | 38    | 41    | 21      |
| 690528    | Pou2af1      | 26     | 15     | 42     | 6      | 44    | 44    | 14    | 22      |
| 365398    | Slc22a12     | 8      | 11     | 16     | 13     | 19    | 18    | 17    | 13      |
| 103689986 | LOC103689986 | 353.9  | 142.49 | 236.08 | 223.56 | 416.6 | 366.2 | 174.9 | 377.03  |
| 140584    | Wnt11        | 32     | 35     | 28     | 21     | 43    | 49    | 38    | 32      |
| 108351821 | LOC108351821 | 0      | 2      | 2      | 1.04   | 1.04  | 3     | 1     | 2       |
| 100910944 | LOC100910944 | 137.64 | 121.92 | 230.41 | 91.46  | 206.5 | 84.11 | 110.2 | 412.91  |
| 102546601 | LOC102546601 | 1      | 0      | 3      | 1      | 2     | 3     | 1     | 1       |
| 24261     | Chrnbl       | 20     | 23     | 20     | 22     | 29    | 49    | 23    | 18      |
| 24362     | Fbp1         | 3      | 4      | 2      | 1      | 3     | 2     | 3     | 6       |
| 246358    | Ppbp         | 3      | 0      | 2      | 0      | 6     | 0     | 1     | 0       |
| 24867     | Smr3b        | 5      | 2      | 1      | 2      | 2     | 5     | 4     | 3       |
| 25223     | Tspyl        | 1      | 1      | 2      | 1      | 1     | 0     | 2     | 4       |
| 288053    | Ropn1        | 2      | 2      | 0      | 1      | 1     | 1     | 4     | 1       |
| 289023    | Kiss1        | 3      | 0      | 1      | 1      | 1     | 4     | 1     | 1       |
| 302425    | Awat2        | 1      | 3      | 1      | 0      | 4     | 1     | 2     | 0       |
| 317533    | Srsf8        | 5      | 2      | 0      | 3      | 2     | 6     | 5     | 1       |
| 365337    | Olr202       | 0      | 3      | 2      | 0      | 2     | 2     | 2     | 1       |
| 500997    | RGD1562914   | 0      | 1      | 2      | 2      | 1     | 2     | 1     | 3       |
| 502858    | Gp9          | 1      | 3      | 1      | 0      | 5     | 1     | 0     | 1       |
| 66017     | Fgf20        | 3      | 4      | 0      | 3      | 5     | 2     | 3     | 4       |
| 102555809 | LOC102555809 | 5.77   | 3.83   | 0      | 1.23   | 3.4   | 2.34  | 4.42  | 5.02    |
| 63849     | Mmp8         | 94     | 79     | 129    | 9      | 153   | 112   | 110   | 61      |

|           |                |        |         |        |        |       |       |       |         |
|-----------|----------------|--------|---------|--------|--------|-------|-------|-------|---------|
| 108352537 | LOC108352537   | 8.02   | 5.86    | 8.22   | 10.36  | 14.35 | 15.14 | 4.55  | 11.49   |
| 266770    | Soat2          | 1.51   | 1.07    | 3.22   | 5.85   | 3.17  | 3.04  | 4.2   | 5.94    |
| 315761    | Cilp           | 97     | 57      | 115    | 58     | 149   | 77    | 105   | 128     |
| 689029    | Tm6sf2         | 13     | 11      | 13     | 10     | 9     | 19    | 20    | 18      |
| 25329     | Lhb            | 12     | 9       | 10     | 11     | 15    | 13    | 20    | 11      |
| 360849    | Kif14          | 9      | 4       | 21     | 3      | 13    | 13    | 12    | 14      |
| 498087    | Stfa212        | 21.01  | 10      | 16     | 14.1   | 27    | 13    | 23    | 22.94   |
| 297594    | Cdca3          | 22     | 13      | 53     | 20     | 48    | 43    | 33    | 28      |
| 365466    | Cpn1           | 21     | 22      | 16     | 22     | 31    | 24    | 24    | 35      |
| 361142    | Galnt16        | 7.57   | 3.85    | 3.01   | 4      | 6.35  | 3.7   | 8.98  | 6.91    |
| 114111    | Vegfc          | 21     | 30      | 22     | 20     | 25    | 31    | 37    | 38      |
| 25351     | Slc2a2         | 6      | 5       | 3      | 8      | 10    | 9     | 4     | 8       |
| 308587    | Ntn5           | 2      | 8       | 4      | 8      | 10    | 5     | 8     | 8       |
| 314996    | Klhl38         | 21     | 16      | 11     | 13     | 20    | 29    | 15    | 22      |
| 360504    | Hba2           | 4142.1 | 2761.84 | 6493.8 | 627.24 | 8493  | 5483  | 2440  | 3359.51 |
| 290561    | Tnnc1          | 68     | 55      | 73     | 55     | 71    | 88    | 98    | 97      |
| 103693838 | NEWGENE_621802 | 489.28 | 522.54  | 503.29 | 390.87 | 592.7 | 698.6 | 638.6 | 758.66  |
| 691903    | Ssx1           | 15.63  | 7.02    | 13.28  | 11.14  | 13.02 | 13.73 | 18.45 | 21.22   |
| 288907    | Podn11         | 7.06   | 7.04    | 5.93   | 9.99   | 11.03 | 19    | 7.98  | 4.38    |
| 295246    | Dcst1          | 4      | 6       | 5      | 4      | 8     | 2     | 11.84 | 5       |
| 24174     | Adra2b         | 8      | 9.9     | 7.05   | 9      | 15.9  | 8.02  | 14.07 | 10      |
| 498735    | Fam217a        | 15     | 4       | 4      | 6      | 11    | 10    | 13    | 7       |
| 85257     | Cnga3          | 3      | 4       | 2      | 3.02   | 3     | 2     | 7     | 5       |
| 362218    | Rnf24          | 17     | 17      | 16     | 15     | 22    | 14    | 32    | 24      |
| 499465    | Mett124        | 4      | 5       | 9      | 6      | 12    | 8     | 5     | 9       |
| 100359633 | LOC100359633   | 0      | 0       | 0      | 4.27   | 0     | 1.64  | 4.41  | 0       |
| 689064    | LOC689064      | 654.65 | 377.07  | 828.34 | 124.79 | 1052  | 738.3 | 383.3 | 638.63  |
| 301482    | Abca12         | 14.8   | 7.66    | 7.05   | 9.2    | 20.99 | 9.31  | 17.56 | 7.02    |
| 102548682 | LOC102548682   | 15.99  | 13.51   | 12.17  | 3.54   | 11.42 | 20.46 | 13.53 | 18.73   |
| 502083    | Cldn24         | 1.87   | 1.98    | 0      | 11.2   | 7.53  | 2.55  | 4.7   | 6.6     |
| 24336     | Epor           | 12     | 3       | 15     | 8      | 31    | 11    | 4     | 8       |
| 294094    | Lipk           | 5      | 6       | 4      | 4      | 8     | 7     | 6     | 6       |
| 681056    | Erfe           | 2      | 5       | 9      | 3      | 6     | 9     | 5     | 7       |
| 494021    | Lmcd1          | 68     | 36      | 45     | 45     | 51    | 111   | 76    | 38      |
| 102552838 | Mclr           | 7      | 3       | 5      | 11     | 8     | 14    | 10    | 5       |
| 171078    | Mlxipl         | 7      | 4       | 11     | 4      | 11    | 15    | 7     | 4       |
| 24751     | RT1-01         | 17.95  | 18.51   | 15.32  | 26.43  | 32.25 | 26.99 | 20.15 | 31.93   |
| 100361018 | LOC100361018   | 5.53   | 2       | 6.82   | 0.88   | 5     | 3.06  | 6.86  | 6.77    |
| 100912163 | LOC100912163   | 173.07 | 112.15  | 177.42 | 23.19  | 35.92 | 154.3 | 193.3 | 308.38  |
| 497101    | Xkrx           | 3.91   | 15.71   | 12.64  | 13.01  | 28.66 | 15.39 | 10.86 | 9.64    |
| 29135     | Hpn            | 9      | 21      | 15     | 16     | 21    | 18    | 24    | 24      |
| 367298    | Slc23a3        | 5.86   | 4.19    | 7.52   | 5.76   | 9     | 6.2   | 10.08 | 8       |
| 81668     | Gnrhr          | 3.8    | 2.01    | 0      | 0      | 0.76  | 4.02  | 1.89  | 1.62    |
| 102546495 | LOC102546495   | 0      | 2.81    | 0      | 1.43   | 2.45  | 0     | 0.83  | 2.77    |
| 108352876 | LOC108352876   | 0      | 2.81    | 0      | 1.43   | 2.45  | 0     | 0.83  | 2.77    |
| 102557111 | LOC102557111   | 13.15  | 6.23    | 14.46  | 11.25  | 19.81 | 10.38 | 16.19 | 18      |
| 362638    | Cda            | 22.32  | 7.44    | 14.88  | 7.44   | 7.44  | 22.32 | 14.88 | 29.75   |
| 100362422 | Efcab13        | 1      | 0       | 3      | 3      | 4     | 3     | 2     | 1       |
| 102552731 | LOC102552731   | 2      | 1       | 2      | 2      | 2     | 2     | 4     | 2       |
| 117554    | Pnliprp2       | 1      | 3       | 3      | 0      | 3     | 1     | 3     | 3       |
| 24311     | Ddc            | 9      | 15      | 13     | 5      | 11    | 11    | 13    | 25      |
| 245919    | Impg2          | 6      | 3       | 4      | 8      | 7     | 8     | 13    | 2       |
| 282829    | Tac4           | 4      | 5       | 7      | 5      | 5     | 10    | 8     | 7       |
| 287241    | Olr1387        | 1      | 0       | 1      | 1.5    | 1     | 1     | 3     | 0       |
| 293841    | Xlr4a          | 1      | 2       | 2      | 2      | 2     | 2     | 1     | 5       |
| 308429    | Pinlyp         | 1      | 2       | 2      | 2      | 2     | 5     | 0     | 3       |

|           |                 |        |       |        |       |       |       |       |       |
|-----------|-----------------|--------|-------|--------|-------|-------|-------|-------|-------|
| 312720    | Akap3           | 5      | 5     | 8      | 3     | 7     | 6     | 8     | 9     |
| 498133    | Tex26           | 6      | 10    | 1      | 4     | 6     | 11    | 7     | 6     |
| 500363    | Tuba3b          | 0      | 3.33  | 1      | 2.67  | 5     | 2     | 0     | 3     |
| 691161    | Sh2d6           | 10     | 3     | 5      | 3     | 5     | 10    | 7     | 8     |
| 25748     | Alas2           | 135    | 126   | 245    | 20    | 301   | 229   | 102   | 120   |
| 286995    | Defa5           | 213    | 72    | 162.57 | 11    | 222.7 | 135.4 | 219.5 | 78.76 |
| 54305     | Sstr2           | 51     | 28    | 24     | 29    | 54    | 47    | 42    | 46    |
| 309433    | Sec31b          | 17     | 19    | 20     | 18    | 42    | 32    | 16    | 16    |
| 298961    | Agr2            | 0      | 3.79  | 3.74   | 3.22  | 1.16  | 3.13  | 2.02  | 9.09  |
| 361968    | Tmem144         | 11     | 13    | 14     | 22    | 19    | 21    | 23    | 23    |
| 103693711 | LOC103693711    | 4.01   | 3.03  | 1.01   | 6.01  | 4.02  | 8.09  | 4.02  | 4.03  |
| 303909    | Stfa2           | 10.99  | 0     | 5      | 0     | 0     | 8.93  | 14    | 0     |
| 292393    | RGD1561667      | 1.19   | 3     | 0      | 0     | 3.01  | 1     | 2     | 0     |
| 246138    | Ly6i            | 1.05   | 0     | 1.04   | 0     | 0     | 2     | 0     | 1     |
| 303542    | Ghdc            | 78     | 163   | 73     | 147   | 73    | 145   | 217   | 227   |
| 100912904 | LOC100912904    | 56.59  | 26.12 | 39.74  | 14.01 | 63.83 | 51.88 | 28.63 | 51.72 |
| 103690085 | LOC103690085    | 5.63   | 2.26  | 3.67   | 5     | 5.58  | 1.82  | 11.21 | 5.19  |
| 302373    | Gpr174          | 5      | 3     | 6      | 2     | 5     | 12    | 3     | 3     |
| 307253    | Katnal2         | 8      | 8     | 6      | 10    | 10    | 13    | 12    | 11    |
| 408199    | Sucnr1          | 3      | 4     | 3      | 6     | 7     | 5     | 4     | 7     |
| 497946    | Spns3           | 5      | 4     | 6      | 1     | 7     | 8     | 4     | 4     |
| 316729    | Fam114a111      | 28.02  | 11.09 | 12.32  | 17.14 | 14.45 | 10.79 | 52.53 | 20.82 |
| 192245    | Hspb6           | 286    | 325   | 236    | 294   | 365   | 640   | 329   | 307   |
| 305476    | RGD1308775      | 20.04  | 15.03 | 21.04  | 13    | 21.11 | 24.11 | 30.07 | 24.11 |
| 679990    | Pgm5            | 66     | 37    | 45     | 34    | 62    | 93    | 46    | 61    |
| 171125    | Ptprh           | 6      | 7     | 9      | 3     | 15    | 6     | 5     | 10    |
| 498604    | Fam129c         | 32.18  | 41.14 | 50.25  | 27.75 | 74.91 | 61.03 | 41.38 | 40.62 |
| 102554479 | LOC102554479    | 7      | 4.93  | 10.15  | 8.28  | 14.61 | 8.14  | 14.04 | 6.96  |
| 25123     | Tagln           | 490    | 340   | 467    | 298   | 522   | 933   | 529   | 317   |
| 361818    | Rsph1           | 20     | 31    | 19     | 18    | 53    | 43    | 15    | 16    |
| 24464     | Hp              | 56     | 38    | 74     | 19    | 78    | 71    | 73    | 48    |
| 108350052 | NEWGENE_1592020 | 2      | 3     | 1      | 3     | 4     | 4     | 3     | 2     |
| 29243     | F10             | 11     | 6     | 14     | 5     | 10    | 16    | 9     | 17    |
| 303687    | Evp1            | 47     | 32    | 29     | 45    | 63    | 47    | 53    | 58    |
| 317416    | LOC317416       | 2      | 9     | 4      | 3     | 7     | 9     | 6     | 4     |
| 259244    | LOC259244       | 15.02  | 6.38  | 7      | 5.37  | 18.04 | 12.16 | 13.71 | 4.95  |
| 310483    | Mlf1            | 99     | 73    | 105    | 65    | 132   | 197   | 91    | 75    |
| 311833    | Ak8             | 12     | 4     | 8      | 14    | 12    | 18    | 13    | 12    |
| 689173    | LOC689173       | 4.49   | 4.21  | 4      | 6     | 5.65  | 5.89  | 5.53  | 10    |
| 102549189 | LOC102549189    | 0      | 0     | 1.05   | 0     | 0     | 0     | 1.52  | 0     |
| 299193    | Acot6           | 5.13   | 11.33 | 3.74   | 4.09  | 7.1   | 12.98 | 7.96  | 7.13  |
| 94195     | S100a9          | 651    | 486   | 886    | 52    | 986   | 708   | 903   | 408   |
| 24307     | Cyp4b1          | 23     | 18    | 8      | 9     | 25    | 26    | 18    | 15    |
| 679875    | Mage12          | 12     | 12    | 9      | 25    | 27    | 16    | 25    | 16    |
| 102551447 | LOC102551447    | 0      | 1.4   | 1.44   | 8.69  | 2.84  | 7.22  | 2.78  | 3.87  |
| 499702    | Synpo2          | 92     | 78    | 134    | 154   | 155   | 325   | 109   | 75    |
| 302192    | LOC302192       | 47.41  | 20.83 | 24.17  | 4.82  | 41.7  | 38.01 | 12.81 | 48.49 |
| 29469     | Lbp             | 73     | 57    | 62     | 52    | 102   | 124   | 79    | 49    |
| 108348173 | LOC108348173    | 23.12  | 11.98 | 23.12  | 12.58 | 17.98 | 12.84 | 43.67 | 28.26 |
| 304965    | Fcrla           | 47.19  | 21.85 | 51.87  | 16.75 | 76.28 | 72.48 | 29.19 | 21.88 |
| 690237    | Pot1b           | 156.96 | 66.86 | 72     | 71.95 | 125.9 | 131.7 | 63.91 | 213   |
| 295620    | Upp2            | 5.14   | 4.36  | 1.3    | 1.15  | 8.25  | 3.02  | 2.99  | 3.11  |
| 81514     | Lrrn3           | 920    | 1380  | 767    | 844   | 871   | 1805  | 1756  | 1256  |
| 315162    | Mei1            | 9      | 5     | 5      | 3     | 8     | 9     | 8     | 7     |
| 498267    | Dusp27          | 7      | 6     | 5      | 15    | 9     | 25    | 9     | 5     |
| 681211    | Mogat2          | 276    | 232   | 164    | 202   | 317   | 319   | 277   | 359   |



|           |              |        |         |        |        |       |       |       |         |
|-----------|--------------|--------|---------|--------|--------|-------|-------|-------|---------|
| 108350053 | LOC108350053 | 3.66   | 1.3     | 2.9    | 6.74   | 3.95  | 5.06  | 8.05  | 4.19    |
| 114519    | Nfil3        | 65     | 58      | 63     | 83     | 98    | 107   | 107   | 80      |
| 24397     | Glra2        | 2.02   | 3.06    | 1.1    | 3.83   | 3.97  | 4.54  | 2.07  | 4.01    |
| 29161     | Cav3         | 25     | 20      | 23     | 15     | 22    | 65    | 14    | 20      |
| 683408    | LOC683408    | 2.28   | 3       | 4.85   | 3.78   | 6.58  | 5     | 5.18  | 3.52    |
| 311331    | Spint1       | 42     | 28      | 38     | 27     | 31    | 42    | 74    | 50      |
| 315465    | Ccdc151      | 10     | 4       | 11     | 12     | 17    | 11    | 9     | 17      |
| 306330    | Klf2         | 184    | 156     | 136    | 155    | 216   | 258   | 293   | 154     |
| 246297    | Myocd        | 9.01   | 5       | 3.95   | 7.03   | 12.15 | 5     | 12.1  | 7.23    |
| 290567    | Chat         | 7.33   | 0.69    | 1.88   | 7.88   | 8.83  | 2.95  | 1.4   | 12.78   |
| 25632     | Hba1         | 7792.9 | 5642.16 | 13448  | 1351.3 | 17833 | 11403 | 5072  | 6931.52 |
| 171291    | Kif6         | 3      | 4       | 4      | 2      | 4     | 4     | 5     | 6       |
| 305078    | Lamb3        | 5      | 5       | 1      | 2      | 2     | 9     | 4     | 4       |
| 100360919 | Igll1        | 5      | 9       | 9      | 3      | 16    | 12    | 9     | 1       |
| 102555578 | LOC102555578 | 0      | 0.74    | 0      | 2.12   | 1.04  | 0     | 1.09  | 2.05    |
| 84020     | Kcnq1        | 8      | 6       | 7      | 5      | 19    | 5     | 6     | 8       |
| 29300     | Gata6        | 7      | 1       | 1      | 2      | 1     | 6.09  | 9     | 0       |
| 290257    | Ctsg         | 43     | 16      | 48     | 3      | 69    | 36    | 45    | 11      |
| 300260    | Sp7          | 11.36  | 14.38   | 9.02   | 11.03  | 13.18 | 34.08 | 12.07 | 7.69    |
| 302719    | RGD1563378   | 7.98   | 7.6     | 13.35  | 2.55   | 8.68  | 8.25  | 12.93 | 16.23   |
| 502684    | LOC502684    | 12     | 8       | 1      | 7      | 8     | 5     | 15    | 13      |
| 102549173 | LOC102549173 | 15.98  | 10.53   | 9.9    | 4.17   | 20.22 | 10.3  | 25.78 | 3.16    |
| 103690120 | LOC103690120 | 3.35   | 8.82    | 0      | 2.4    | 2.1   | 7.89  | 9.7   | 1.66    |
| 108353258 | LOC108353258 | 4      | 4       | 4      | 3      | 7     | 5     | 4     | 6       |
| 117048    | Cdh17        | 9      | 17      | 9      | 10     | 18    | 23    | 10    | 15      |
| 287305    | RGD1308564   | 3      | 3       | 8      | 1      | 10    | 4     | 4     | 4       |
| 291005    | Gadd45g      | 111    | 107     | 100    | 162    | 168   | 167   | 212   | 157     |
| 102549738 | LOC102549738 | 2.41   | 0       | 0      | 0      | 0     | 1.16  | 2.38  | 0       |
| 365864    | Tuft1        | 121    | 84      | 77     | 123    | 182   | 170   | 150   | 93      |
| 679818    | LOC679818    | 4.41   | 9       | 18.21  | 11.17  | 19.53 | 7.69  | 20.82 | 14.87   |
| 108349816 | LOC108349816 | 5      | 5       | 2      | 5      | 6     | 4     | 6     | 9       |
| 292794    | Ffar2        | 3      | 8       | 4      | 2      | 11    | 6     | 4     | 4       |
| 301118    | Acer1        | 4      | 5       | 4      | 6      | 5     | 8     | 11    | 4       |
| 366915    | Snx31        | 14     | 7       | 2      | 15     | 10    | 32    | 0     | 14      |
| 367785    | Asb9         | 7      | 5       | 4      | 3      | 7     | 4     | 14    | 3       |
| 314248    | RGD1562381   | 2.12   | 0       | 1.05   | 1.05   | 1.72  | 3.37  | 1.13  | 0       |
| 306871    | Dsp          | 115    | 134     | 111    | 127    | 109   | 84    | 391   | 134     |
| 286958    | Np4          | 170.66 | 89      | 173.04 | 9      | 220.6 | 136   | 219   | 76      |
| 100302373 | Ctxn2        | 16     | 18      | 14     | 13     | 15    | 22    | 33    | 20      |
| 63878     | Stc2         | 4      | 4       | 5      | 8      | 10    | 7     | 7     | 7       |
| 289138    | Tp53i3       | 374    | 143     | 149    | 540    | 465   | 369   | 592   | 355     |
| 299920    | Lrrc6        | 4      | 10      | 4      | 5      | 13    | 1     | 9     | 11      |
| 83683     | Gpr6         | 9      | 3       | 9      | 2      | 11    | 8     | 7     | 8       |
| 100910979 | LOC100910979 | 0      | 32.98   | 5.67   | 16.68  | 6.31  | 5.61  | 33.36 | 36.55   |
| 102553065 | LOC102553065 | 0      | 0       | 1.89   | 2      | 0     | 3     | 2.2   | 0.56    |
| 500448    | RGD1560723   | 31.04  | 20.49   | 25.83  | 23.3   | 59.69 | 37.23 | 18.01 | 34.21   |
| 303575    | Kif18b       | 14     | 20      | 39     | 10     | 33    | 45    | 22    | 23      |
| 499093    | Zfp108       | 6.71   | 4.22    | 16.62  | 11.18  | 14.55 | 7.45  | 20.5  | 14.9    |
| 108352875 | LOC108352875 | 7.6    | 3.36    | 0      | 3.08   | 2.05  | 7.15  | 9.28  | 2.33    |
| 502617    | RGD1564854   | 1      | 2.95    | 3.32   | 1      | 0.88  | 6.67  | 1.94  | 2.78    |
| 81526     | Nov          | 193    | 181     | 202    | 95     | 334   | 245   | 237   | 180     |
| 688698    | Ckmt2        | 109    | 93      | 47     | 91     | 177   | 242   | 41    | 45      |
| 310218    | Car1         | 41     | 15      | 43     | 6      | 74    | 37    | 25    | 20      |
| 298006    | Cc121        | 64     | 60      | 109    | 16     | 100   | 71    | 102   | 97      |
| 108352003 | LOC108352003 | 1.02   | 0       | 0      | 1      | 0     | 1     | 0     | 2.01    |
| 170573    | Slc38a4      | 20     | 13      | 7      | 11     | 22    | 29    | 12    | 13      |

|           |              |       |       |        |        |       |       |       |       |
|-----------|--------------|-------|-------|--------|--------|-------|-------|-------|-------|
| 292168    | Mcoln2       | 12    | 11    | 13     | 15     | 10    | 26    | 20    | 20    |
| 680316    | LOC680316    | 2     | 3.62  | 0      | 0      | 1.39  | 3.99  | 3     | 0     |
| 100364435 | LOC100364435 | 2.36  | 0     | 0      | 4.36   | 6.91  | 0     | 3.12  | 0     |
| 304816    | Lmod1        | 85.04 | 52.06 | 50.74  | 62.81  | 84.88 | 147   | 76.19 | 66.17 |
| 103693608 | LOC103693608 | 0     | 0     | 104.34 | 0      | 21.45 | 61.01 | 30.47 | 42.91 |
| 500910    | Tnfrsf13c    | 8.62  | 14.64 | 8.18   | 5.89   | 20.77 | 18.22 | 10.45 | 6.34  |
| 60351     | Nr1h4        | 15.15 | 18.9  | 13.87  | 17.2   | 32.18 | 17.32 | 17.28 | 30.61 |
| 291582    | Slc27a6      | 84.11 | 82.25 | 96.47  | 104.26 | 183.5 | 172   | 89.8  | 104   |
| 100909464 | LOC100909464 | 9.85  | 6.39  | 0      | 0      | 0     | 17.45 | 0     | 6.86  |
| 108348179 | LOC108348179 | 2     | 0     | 1.44   | 0      | 1.24  | 2.91  | 1     | 0     |
| 497963    | LOC497963    | 8     | 0     | 2.25   | 2.42   | 13    | 6     | 0     | 0     |
| 100359586 | LOC100359586 | 1     | 0     | 0      | 1      | 1     | 1     | 1     | 0     |
| 100910555 | LOC100910555 | 2     | 2     | 0      | 0      | 2     | 2     | 0     | 2     |
| 102552318 | LOC102552318 | 1     | 1     | 0      | 0      | 1     | 1     | 0     | 1     |
| 102552911 | LOC102552911 | 1     | 1     | 1      | 1      | 2     | 0     | 3     | 1     |
| 102555723 | Pgbd2        | 4     | 6     | 6      | 4      | 6     | 6     | 5     | 13    |
| 103693361 | LOC103693361 | 0     | 0     | 0      | 2      | 1     | 0     | 1     | 1     |
| 103694115 | LOC103694115 | 1     | 0     | 0      | 1      | 1     | 0     | 1     | 1     |
| 108351077 | LOC108351077 | 1     | 2     | 1      | 2      | 2     | 2     | 4     | 1     |
| 108352407 | LOC108352407 | 2     | 0     | 0      | 0      | 0     | 1     | 2     | 0     |
| 117522    | Xpnpep2      | 1     | 4     | 4      | 7      | 9     | 7     | 4     | 4     |
| 24476     | Iapp         | 215   | 175   | 164    | 178    | 265   | 217   | 318   | 298   |
| 25229     | Chrm1        | 0     | 0     | 5      | 1      | 2     | 1     | 1     | 5     |
| 25419     | Crp          | 4     | 0     | 2      | 0      | 2     | 3     | 3     | 1     |
| 25517     | Pou1f1       | 0     | 0     | 0      | 2      | 0     | 1     | 1     | 1     |
| 266730    | Slc17a3      | 3     | 0     | 0      | 1      | 1     | 2     | 1     | 2     |
| 266997    | Rln3         | 0     | 0     | 1      | 1      | 0     | 3     | 0     | 0     |
| 286997    | Mapk15       | 3     | 10    | 5      | 4      | 6     | 9     | 9     | 9     |
| 287679    | Krt40        | 1     | 0     | 0      | 1      | 1     | 1     | 0     | 1     |
| 290372    | Fam216b      | 0     | 0     | 0      | 2      | 2     | 0     | 1     | 0     |
| 290467    | Slitrk6      | 3     | 1     | 3      | 1      | 0     | 7     | 4     | 1     |
| 291823    | Cmt1         | 2     | 2     | 0      | 2      | 4     | 3     | 2     | 0     |
| 29471     | Npy4r        | 0     | 0     | 1      | 1      | 0     | 2     | 1     | 0     |
| 296351    | Pabpc11      | 0     | 0     | 1      | 1      | 1     | 0     | 1     | 1     |
| 296706    | Lhx2         | 0     | 0     | 1      | 1      | 0     | 2     | 1     | 0     |
| 300375    | Mbd312       | 0     | 0     | 0      | 2      | 0     | 0     | 1     | 2     |
| 300826    | Khdc3        | 1     | 0     | 3      | 0      | 4     | 0     | 1     | 1     |
| 301034    | Ltf          | 1     | 0     | 1      | 0      | 0     | 2     | 1     | 0     |
| 303528    | Krt34        | 0     | 0     | 0      | 2      | 0     | 0     | 2     | 1     |
| 308766    | Mespl        | 0     | 1     | 0      | 1      | 3     | 0     | 0     | 0     |
| 309095    | Nkx6-2       | 2     | 0     | 2      | 0      | 4     | 1     | 0     | 1     |
| 309227    | Glyat11      | 0     | 2     | 0      | 0      | 0     | 0     | 2     | 1     |
| 309900    | Tulp1        | 0     | 2     | 0      | 0      | 0     | 1     | 0     | 2     |
| 311337    | Ltk          | 4     | 2     | 2      | 4      | 3     | 5     | 6     | 4     |
| 314431    | Spaca5       | 1     | 1     | 0      | 4      | 5     | 1     | 0     | 3     |
| 314649    | Slpr4        | 12    | 7     | 13     | 8      | 29    | 15    | 6     | 10    |
| 314771    | Kera         | 0     | 2     | 4      | 0      | 0     | 8     | 1     | 0     |
| 353251    | Prss21       | 1     | 0     | 0      | 1      | 0     | 0     | 2     | 1     |
| 361902    | Mroh2b       | 0     | 0     | 2      | 0      | 0     | 0     | 2     | 1     |
| 361964    | Zbbx         | 0     | 0     | 0      | 2      | 2     | 0     | 1     | 0     |
| 362052    | Clca2        | 2     | 1     | 1      | 0      | 2     | 1     | 0     | 3     |
| 363686    | Clql1        | 0     | 4     | 1      | 1      | 2     | 3     | 2     | 2     |
| 364302    | Rnase12      | 0     | 1     | 1      | 0      | 1     | 1     | 1     | 0     |
| 494204    | Ly49i4       | 2     | 0     | 0      | 0      | 2     | 0     | 0     | 1     |
| 498352    | Pdc12        | 0     | 1     | 2      | 1      | 2     | 0     | 2     | 2     |
| 498834    | Myo7b        | 5     | 6     | 5      | 2      | 3     | 11    | 5     | 8     |

|           |                 |        |        |        |        |       |       |       |        |
|-----------|-----------------|--------|--------|--------|--------|-------|-------|-------|--------|
| 498870    | Tex43           | 1      | 2      | 3      | 2      | 2     | 3     | 5     | 2      |
| 499879    | Duoxa2          | 0      | 1      | 1      | 0      | 0     | 1     | 2     | 0      |
| 500223    | Mlap            | 0      | 0      | 1      | 1      | 0     | 2     | 0     | 1      |
| 501391    | LOC501391       | 1      | 1      | 0      | 0      | 1     | 1     | 1     | 0      |
| 54314     | Tpo             | 2      | 0      | 0      | 0      | 1     | 1     | 0     | 1      |
| 60414     | Rhd             | 20     | 19     | 50     | 5      | 57    | 41    | 26    | 17     |
| 65029     | Aoc1            | 1      | 0      | 0      | 1      | 1     | 1     | 0     | 1      |
| 685958    | Ccl26           | 0      | 1      | 0      | 1      | 0     | 1     | 1     | 1      |
| 690862    | LOC690862       | 4.1    | 2      | 2      | 2      | 5     | 2.1   | 4     | 4.05   |
| 691259    | Lypd8           | 0      | 0      | 2      | 0      | 1     | 0     | 0     | 2      |
| 84604     | Hamp            | 0      | 0      | 4      | 0      | 1     | 2     | 1     | 2      |
| 103692761 | LOC103692761    | 2      | 2      | 3      | 3      | 3     | 1     | 3     | 8      |
| 170819    | Ii24            | 2      | 1      | 4      | 3      | 2     | 1     | 7     | 5      |
| 25360     | Tshr            | 6      | 3      | 5      | 0      | 5     | 7     | 4     | 5      |
| 295953    | Rag2            | 7      | 8      | 9      | 2      | 11    | 15    | 6     | 7      |
| 300051    | Slc39a4         | 4      | 1      | 4      | 1      | 4     | 4     | 3     | 4      |
| 499306    | Majin           | 5      | 2      | 0      | 3      | 3     | 4     | 4     | 4      |
| 499643    | LOC499643       | 4      | 0      | 3      | 3      | 4     | 3     | 1     | 7      |
| 679534    | RGD1560034      | 3      | 4      | 1      | 2      | 2     | 6     | 6     | 1      |
| 499282    | Cfap46          | 10     | 6      | 7      | 7      | 14.02 | 13    | 7     | 11     |
| 102550584 | LOC102550584    | 2.01   | 0      | 0      | 0      | 0     | 0     | 1.01  | 2.01   |
| 102553424 | Bhmg1           | 0      | 2      | 1      | 1      | 1.01  | 2     | 1     | 2      |
| 100361431 | Syce11          | 4.28   | 0      | 1.05   | 1.06   | 2.18  | 6.36  | 0     | 1.07   |
| 287701    | Krt14           | 2      | 3      | 4      | 2.31   | 1.01  | 4     | 5     | 7      |
| 140930    | Faim            | 140.12 | 135.95 | 120.85 | 142.61 | 190.6 | 231.2 | 164.6 | 226.24 |
| 25033     | Sstr1           | 12     | 22     | 15     | 22     | 24    | 29    | 33    | 21     |
| 100912426 | LOC100912426    | 14.85  | 14.83  | 32.25  | 4.13   | 38.48 | 22.76 | 20.61 | 17.73  |
| 363618    | Hs3st3a1        | 0      | 2.78   | 2.1    | 0      | 5.2   | 2.16  | 0     | 0      |
| 102552640 | LOC102552640    | 115.15 | 173    | 162.69 | 152.98 | 247   | 225.1 | 211   | 227.63 |
| 85253     | Plg             | 10     | 16     | 12     | 13     | 26    | 15    | 11    | 25     |
| 24299     | Cyp2a3          | 50     | 44     | 2      | 72     | 61    | 71    | 54    | 68     |
| 291854    | Adgrg3          | 23     | 16     | 32     | 11     | 47    | 33    | 28    | 16     |
| 117054    | Cd52            | 10     | 8      | 12     | 7      | 21    | 17    | 5     | 13     |
| 690142    | LOC690142       | 3      | 3      | 3      | 5      | 4.21  | 4.99  | 5     | 7      |
| 301127    | Znrf4           | 8      | 10     | 10     | 5      | 12    | 10    | 16    | 12     |
| 501097    | Mdfi            | 24     | 9      | 16     | 13     | 17    | 25    | 22    | 30     |
| 689932    | Ii23r           | 1      | 1      | 1      | 0      | 1     | 1.55  | 1     | 1      |
| 295247    | Dcst2           | 3      | 4      | 1      | 0      | 2     | 1     | 1.16  | 8      |
| 689588    | Oaz3            | 13     | 3      | 6      | 3      | 13    | 7     | 14    | 4      |
| 102555091 | LOC102555091    | 1      | 1      | 1.03   | 1      | 1.59  | 2.19  | 0     | 2.35   |
| 679997    | RGD1565617      | 3.88   | 3      | 3.52   | 0      | 5.83  | 6     | 0     | 4      |
| 688691    | LOC688691       | 4.02   | 1      | 3      | 3.02   | 4     | 5     | 2     | 5.81   |
| 25512     | Phex            | 11     | 13     | 13     | 7      | 17    | 21    | 11    | 18     |
| 291675    | Mzb1            | 8      | 5      | 4      | 4      | 6     | 8     | 7     | 11     |
| 103690045 | NEWGENE_1310139 | 56.38  | 117.13 | 64.67  | 100.44 | 140   | 106.9 | 187.5 | 82.13  |
| 102556703 | LOC102556703    | 9.48   | 10.7   | 0      | 0      | 7.4   | 10.43 | 5     | 7.96   |
| 316088    | Klhl40          | 22     | 37     | 25     | 30     | 41    | 68    | 33    | 32     |
| 102547093 | LOC102547093    | 10.27  | 19.19  | 7.14   | 6.58   | 12.59 | 23.84 | 12.79 | 16.72  |
| 108348062 | LOC108348062    | 128.42 | 267.17 | 121.18 | 0      | 83.18 | 290.4 | 136.2 | 279.36 |
| 474169    | Rnase2          | 7.52   | 13.86  | 16.51  | 2      | 16.87 | 15.97 | 17.45 | 10.73  |
| 405013    | Olr88           | 2.5    | 4      | 4      | 9      | 7.71  | 10    | 6     | 6.16   |
| 56765     | Plvap           | 319    | 162    | 171    | 130    | 321   | 368   | 299   | 210    |
| 613225    | Defa11          | 8.11   | 0      | 8.2    | 1      | 6.21  | 10.77 | 6.35  | 3.19   |
| 24163     | Acr             | 5.06   | 2.03   | 6.72   | 1      | 4.04  | 7.01  | 6.58  | 5.09   |
| 288045    | Zdhhc19         | 36.01  | 24     | 28     | 12     | 39.57 | 49    | 37    | 28     |
| 58981     | Kcnab3          | 12     | 20     | 24     | 13     | 25    | 33    | 31    | 17     |

|           |              |        |        |        |        |       |       |       |        |
|-----------|--------------|--------|--------|--------|--------|-------|-------|-------|--------|
| 29395     | Hmgb2        | 117.68 | 92.35  | 142.64 | 104.16 | 292.9 | 221   | 114.6 | 73.74  |
| 691228    | LOC691228    | 7.15   | 0      | 16.44  | 6.69   | 10.24 | 4.8   | 10.38 | 21.13  |
| 102546903 | LOC102546903 | 0      | 0      | 2.01   | 1.06   | 2.7   | 0     | 0     | 2.02   |
| 100188984 | Zfp951       | 2      | 7.6    | 8.55   | 4.35   | 10.87 | 0     | 16.73 | 7      |
| 108350558 | LOC108350558 | 2      | 19.77  | 10.31  | 27.62  | 39.83 | 29.77 | 22.21 | 0      |
| 308596    | Ush1c        | 5      | 5      | 1      | 2      | 9     | 6     | 2     | 3      |
| 362249    | Cpne1        | 0      | 25.56  | 0      | 21.08  | 68.57 | 0     | 0     | 3.22   |
| 296358    | Matn4        | 3      | 6      | 6      | 8      | 4     | 17    | 10.46 | 4      |
| 688228    | My14         | 21     | 12     | 13     | 13     | 13    | 48    | 15    | 15     |
| 684509    | LOC684509    | 0      | 0      | 0.46   | 0      | 0     | 0     | 0.71  | 0      |
| 83623     | Spag4        | 15.99  | 19.49  | 9.32   | 6.35   | 35.85 | 14.51 | 18.49 | 10.1   |
| 689453    | LOC689453    | 1.11   | 1.48   | 1.52   | 1.17   | 6.83  | 0     | 0     | 1.32   |
| 266705    | Ppp1r17      | 3.08   | 3      | 3.06   | 3.47   | 3     | 2     | 8.43  | 6.04   |
| 114496    | Bik          | 3      | 3      | 2      | 3      | 3     | 3     | 5     | 6      |
| 367745    | Dgkk         | 2      | 1      | 6      | 2      | 3     | 9     | 2     | 3      |
| 85431     | Nox4         | 13     | 6      | 7      | 7      | 13    | 15    | 18    | 5      |
| 65207     | Rhag         | 23     | 12     | 30     | 10     | 56    | 31    | 14    | 15     |
| 365313    | Xrra1        | 4.37   | 8.79   | 4.33   | 4.37   | 6.37  | 8.61  | 8.94  | 9.91   |
| 108353287 | LOC108353287 | 0      | 0      | 0      | 2.81   | 1     | 0     | 0     | 3.35   |
| 305104    | Col9a1       | 88     | 64     | 210    | 120    | 42    | 449   | 146   | 110    |
| 293992    | Pax2         | 3      | 0      | 0      | 2.81   | 2     | 4     | 1.02  | 2      |
| 317395    | Spin2a       | 8      | 3      | 11     | 5.65   | 11    | 6     | 12.97 | 13     |
| 316940    | Spetex-2F    | 0      | 0      | 0      | 2      | 0     | 0     | 1.45  | 1.66   |
| 289243    | Mptx1        | 0      | 5      | 2      | 2      | 3     | 1     | 5     | 5      |
| 29171     | Aqp7         | 9      | 0      | 0      | 0      | 1     | 11    | 1     | 1      |
| 684979    | Hs3st6       | 1      | 3      | 2      | 3      | 1     | 2     | 3     | 8      |
| 108352354 | LOC108352354 | 3      | 2      | 3.13   | 4.12   | 5     | 7     | 1.06  | 6      |
| 681896    | Slc25a18     | 50     | 43     | 38     | 45     | 56    | 76    | 88    | 54     |
| 100912538 | LOC100912538 | 24.41  | 12.91  | 30.11  | 23.13  | 53.86 | 28.33 | 30.48 | 28.52  |
| 100911581 | LOC100911581 | 11.82  | 16.96  | 0      | 7.78   | 10.03 | 10.7  | 6.58  | 29.71  |
| 102550309 | LOC102550309 | 5.23   | 0      | 0      | 0      | 2.94  | 2.25  | 0     | 2.98   |
| 102555858 | LOC102555858 | 5.23   | 0      | 0      | 0      | 2.94  | 2.25  | 0     | 2.98   |
| 368158    | Rorc         | 6.98   | 0      | 2.29   | 1.31   | 0     | 6.56  | 4.4   | 5.57   |
| 108348184 | LOC108348184 | 0      | 7.13   | 0      | 0      | 0     | 0     | 11.14 | 0      |
| 103690782 | Ssx2         | 1      | 2.46   | 0      | 1      | 2     | 2.99  | 1     | 0.99   |
| 252942    | Myh8         | 48.37  | 36.4   | 36.06  | 38.89  | 59.04 | 61.45 | 64.76 | 64.73  |
| 293753    | Ms4a3        | 11     | 6      | 4      | 2      | 15    | 8     | 11    | 2      |
| 117523    | St8sia2      | 30     | 6      | 30     | 33     | 28    | 33    | 59    | 35     |
| 117516    | Tnfsf11      | 0.38   | 0      | 1.38   | 0      | 0.38  | 2.38  | 0     | 0      |
| 25516     | Pnoc         | 14     | 16     | 20     | 15     | 12    | 25    | 23    | 42     |
| 691543    | Katnbl1      | 12.94  | 38.09  | 28.45  | 22.27  | 18.09 | 11.32 | 51.93 | 78.33  |
| 679974    | Tceal6       | 0      | 0      | 4.22   | 15.42  | 14.04 | 3.93  | 5.55  | 7.31   |
| 100362205 | Fndc9        | 5      | 0      | 0      | 2      | 4     | 3     | 3     | 1      |
| 314638    | Creb313      | 1      | 4      | 2      | 0      | 5     | 4     | 0     | 2      |
| 499273    | RGD1563285   | 1      | 1      | 3      | 2      | 2     | 3     | 5     | 1      |
| 500311    | Gdf3         | 2      | 1      | 3      | 1      | 1     | 6     | 3     | 1      |
| 685580    | Prr33        | 18     | 14     | 37     | 13     | 38    | 70    | 13    | 8      |
| 498270    | Ccdc190      | 38     | 19     | 23     | 28     | 43    | 45    | 35    | 47     |
| 404640    | Mrgprx2      | 3.77   | 0.52   | 3.66   | 4.24   | 3.42  | 6.03  | 4     | 5.75   |
| 81633     | Acta2        | 532.92 | 404.01 | 420.88 | 330.98 | 520   | 1142  | 624   | 374.07 |
| 688778    | LOC688778    | 0      | 0      | 1.41   | 2.03   | 1.32  | 2.71  | 1.39  | 0      |
| 100911326 | LOC100911326 | 3.8    | 5.2    | 3.94   | 12.86  | 10.28 | 3.84  | 10.08 | 16.47  |
| 502859    | Kbtbd12      | 17.02  | 10.27  | 8.88   | 11.5   | 21.18 | 34    | 8.78  | 11.19  |
| 24808     | Tacr3        | 3      | 12     | 7      | 4      | 10    | 14    | 8     | 9      |
| 316158    | RGD1559808   | 0.46   | 2.88   | 1.97   | 3.02   | 2.15  | 4.13  | 4.54  | 2.32   |
| 690041    | Xlr3a        | 0      | 0      | 0      | 5.57   | 2.31  | 0     | 6.48  | 0      |

|           |              |        |         |        |        |       |       |       |         |
|-----------|--------------|--------|---------|--------|--------|-------|-------|-------|---------|
| 296269    | Angpt4       | 5      | 3       | 7      | 4      | 7     | 10    | 8     | 5       |
| 367167    | Traip        | 14     | 5       | 8      | 11     | 14    | 9     | 14    | 23      |
| 100911295 | LOC100911295 | 296.64 | 181.28  | 346.07 | 197.76 | 379   | 494.4 | 461.4 | 280.16  |
| 108348085 | LOC108348085 | 98.54  | 0       | 138.03 | 69.02  | 241.5 | 103.5 | 34.51 | 103.53  |
| 114103    | I15ra        | 7      | 2       | 0      | 3      | 2     | 5     | 7     | 5       |
| 499968    | Galnt15      | 4      | 5       | 2      | 1      | 1     | 3     | 5     | 10      |
| 502919    | Igbp1b       | 1      | 3       | 4      | 4      | 2     | 6     | 5     | 6       |
| 100910497 | LOC100910497 | 0      | 8.05    | 6.55   | 12.26  | 0     | 6.81  | 7.05  | 28.68   |
| 498128    | Mcemp1       | 20     | 14      | 26     | 5      | 41    | 19    | 28    | 15      |
| 100911353 | LOC100911353 | 3.47   | 2.24    | 3.28   | 3.59   | 6.63  | 4     | 6     | 3.32    |
| 100363535 | LOC100363535 | 17     | 5.17    | 8.99   | 6.87   | 18    | 14.8  | 12    | 15.55   |
| 108348143 | LOC108348143 | 0      | 43.13   | 24.96  | 48.58  | 78.49 | 39.49 | 37.49 | 29.99   |
| 292778    | Polr2i       | 21.66  | 15.16   | 10.83  | 10.83  | 10.83 | 38.99 | 21.66 | 21.66   |
| 114106    | Bco1         | 21.55  | 19.85   | 18     | 16.06  | 31.26 | 29    | 34    | 26.03   |
| 102548546 | LOC102548546 | 2.01   | 4.24    | 1.29   | 3.92   | 5.23  | 5.09  | 3.89  | 4.07    |
| 171052    | Mmp13        | 140    | 158     | 125    | 118    | 186   | 382   | 270   | 25      |
| 102555039 | LOC102555039 | 36.54  | 8.5     | 12.05  | 16.68  | 19.52 | 47.54 | 8.47  | 42.32   |
| 25304     | Comp         | 154    | 176     | 178    | 175    | 172   | 533   | 198   | 189     |
| 100363294 | LOC100363294 | 0      | 4       | 0      | 1      | 1     | 3     | 1     | 3       |
| 114593    | Nppc         | 1      | 3       | 1      | 0      | 3     | 3     | 1     | 1       |
| 140656    | Albg         | 5      | 0       | 0      | 0      | 3     | 4     | 0     | 1       |
| 24946     | F9           | 2      | 2       | 0      | 1      | 1     | 2     | 3     | 2       |
| 303215    | Fbxw10       | 4      | 4       | 4      | 3      | 3     | 6     | 9     | 6       |
| 309100    | Scgblc1      | 1      | 2       | 0      | 2      | 3     | 1     | 1     | 3       |
| 309217    | Ms4a1        | 15     | 9       | 14     | 2      | 28    | 25    | 7     | 4       |
| 500637    | Dcdc2c       | 2      | 2       | 1      | 0      | 4     | 1     | 3     | 0       |
| 503227    | Iqcf1        | 2      | 1       | 0      | 2      | 1     | 2     | 2     | 3       |
| 100362820 | LOC100362820 | 16.98  | 5       | 8      | 10     | 16    | 15    | 18    | 15      |
| 100363439 | Rps1011      | 510.95 | 1056.98 | 544.8  | 99.18  | 1101  | 977.1 | 519   | 946.34  |
| 113931    | Prrx2        | 23     | 10      | 18     | 12     | 21    | 33    | 17    | 30      |
| 64543     | Sec14l3      | 662.01 | 580.93  | 817.68 | 696.46 | 2041  | 552.6 | 474.8 | 1355.34 |
| 683720    | Krt79        | 6.12   | 6       | 4      | 3      | 2.07  | 11.16 | 9.16  | 8.3     |
| 81648     | Crh          | 221    | 125     | 100    | 134    | 196   | 153   | 277   | 305     |
| 64032     | Ctgf         | 316    | 160     | 184    | 246    | 352   | 520   | 331   | 252     |
| 24638     | Pfkfb1       | 14.03  | 10.23   | 9.03   | 5      | 15.18 | 24.71 | 8.66  | 12.98   |
| 362211    | Mall         | 18     | 23      | 20     | 11     | 15    | 47    | 33    | 21      |
| 363790    | Fbxo40       | 13     | 9       | 16     | 11     | 21    | 36    | 10    | 12      |
| 310213    | Sirpb2       | 0      | 0       | 1.29   | 0      | 1.08  | 0     | 1     | 0       |
| 313126    | Gja10        | 9      | 6       | 7      | 9      | 14    | 17    | 13    | 6       |
| 360479    | LOC360479    | 38     | 30      | 36     | 6      | 52    | 46    | 33    | 46.61   |
| 288979    | C1ql2        | 5      | 2       | 4      | 2      | 3     | 7     | 3     | 8       |
| 498587    | Ldb3         | 393    | 376     | 403    | 439    | 677   | 1070  | 426   | 430     |
| 64555     | Spef2        | 23.72  | 20.1    | 6.7    | 11.73  | 18.43 | 20    | 22    | 40.2    |
| 688972    | Gypa         | 61     | 31      | 79.06  | 7      | 125.2 | 92.84 | 40    | 30.01   |
| 24216     | Atp4a        | 5      | 3       | 3      | 10     | 9     | 12    | 10    | 3       |
| 64317     | Gpx3         | 296    | 211     | 266    | 192    | 258   | 653   | 391   | 261     |
| 304131    | Map3k7c1     | 30     | 33      | 27     | 37     | 34    | 102   | 32    | 38      |
| 680862    | Trem14       | 0      | 6.07    | 3.65   | 1.04   | 4.54  | 8.11  | 2.65  | 2.16    |
| 108349495 | LOC108349495 | 2.46   | 0       | 1.59   | 0      | 6.58  | 0     | 0     | 0       |
| 100910798 | LOC100910798 | 2.69   | 2       | 0      | 0      | 1.13  | 0     | 1.49  | 5       |
| 100362912 | Tmprss12     | 6      | 5       | 3      | 10     | 5     | 12    | 14    | 8       |
| 100911372 | LOC100911372 | 146.81 | 107.66  | 137.02 | 107.66 | 254.5 | 186   | 176.2 | 195.75  |
| 287001    | Olr287       | 8      | 12      | 9      | 14     | 15    | 20    | 20    | 15      |
| 298545    | Cnksr1       | 11     | 2       | 5      | 9      | 13    | 21    | 7     | 3       |
| 680989    | LOC680989    | 12.65  | 18.16   | 15.13  | 5.1    | 15.93 | 24.99 | 19.55 | 22.72   |
| 305341    | Rhoh         | 10     | 16      | 16     | 4      | 25    | 19    | 15    | 16      |

|           |              |       |        |        |        |       |       |       |        |
|-----------|--------------|-------|--------|--------|--------|-------|-------|-------|--------|
| 25342     | Oxtr         | 4.74  | 3.75   | 3.01   | 6.14   | 10.07 | 6.33  | 7.46  | 4.91   |
| 29187     | Cd69         | 7     | 4      | 2      | 6      | 10    | 6     | 5     | 10     |
| 681190    | Kcne5        | 6     | 6      | 2      | 5      | 10    | 6     | 5     | 10     |
| 307310    | Zfp474       | 0     | 0.11   | 0      | 3.99   | 3.49  | 1.06  | 0     | 2.14   |
| 24779     | Slc4a1       | 214.5 | 145    | 408.94 | 33     | 601   | 371   | 192   | 147    |
| 246044    | Otos         | 4     | 3      | 3      | 1      | 7     | 6     | 3     | 2      |
| 364538    | RGD1564941   | 1     | 4      | 3      | 3      | 5     | 4     | 3     | 6      |
| 498232    | Lax1         | 5     | 1      | 5      | 0      | 5     | 4     | 6     | 3      |
| 316632    | Ndufa1011    | 0     | 640.53 | 476.47 | 613.78 | 611.1 | 615.7 | 1041  | 565.57 |
| 679994    | Hist1h3a     | 1.22  | 0      | 2.58   | 1.28   | 4.62  | 2.36  | 0     | 1.34   |
| 289178    | Dpt          | 107   | 129    | 208    | 30     | 201   | 290   | 190   | 96     |
| 406160    | Btnl8        | 0     | 2      | 0      | 0      | 0     | 0     | 3.28  | 0      |
| 25139     | Slc2a4       | 47    | 49     | 54     | 50     | 85    | 147   | 50    | 46     |
| 103694871 | LOC103694871 | 7.85  | 6.38   | 8.68   | 5.02   | 11.87 | 15.84 | 9     | 9.11   |
| 24618     | Reg3b        | 16    | 8      | 15     | 6      | 13    | 15    | 21    | 25     |
| 689695    | Prdm13       | 3     | 1      | 0      | 4      | 4     | 4.16  | 3     | 2      |
| 24981     | RT1-Db2      | 19.37 | 24.83  | 20.63  | 1      | 24.89 | 16.27 | 21.14 | 46.02  |
| 683463    | Lilrb3a      | 23.7  | 1.08   | 36.08  | 32.91  | 8.33  | 0     | 86.39 | 59.97  |
| 171162    | Reg3a        | 12    | 5      | 15     | 8      | 16    | 13    | 7     | 30     |
| 24767     | Scn1b        | 5     | 3      | 10     | 2      | 1     | 17    | 9     | 6      |
| 502596    | Lrit3        | 0     | 0      | 1.01   | 2.05   | 3.03  | 0     | 2.02  | 0      |
| 691464    | Dhrs2        | 15    | 28     | 12     | 18     | 16    | 24    | 63    | 18     |
| 25706     | Cckbr        | 14    | 11     | 12     | 4      | 16    | 19    | 20    | 13     |
| 108348157 | LOC108348157 | 34.25 | 17.12  | 73     | 17.12  | 85.62 | 81    | 34.25 | 34.25  |
| 498918    | Irx5         | 3     | 1.01   | 0      | 5.98   | 4.25  | 9.39  | 0     | 3      |
| 100362109 | LOC100362109 | 1     | 1      | 0      | 1      | 2     | 0     | 0     | 3      |
| 102549582 | LOC102549582 | 0     | 2      | 1      | 0      | 3     | 0     | 2     | 0      |
| 102550809 | Scml1        | 1     | 1      | 0      | 1      | 2     | 1     | 0     | 2      |
| 102552638 | LOC102552638 | 1     | 0      | 0      | 5      | 2     | 3     | 2     | 3      |
| 171049    | Folr1        | 2     | 2      | 1      | 1      | 1     | 5     | 4     | 0      |
| 292152    | Ces2i        | 1     | 0      | 2      | 0      | 0     | 2     | 2     | 1      |
| 292295    | Pabpc6       | 0     | 0      | 1      | 2      | 0     | 2     | 1     | 2      |
| 292325    | B3gnt6       | 7     | 2      | 6      | 6      | 12    | 6     | 7     | 10     |
| 295265    | RGD1359334   | 0     | 1      | 1      | 1      | 1     | 1     | 0     | 3      |
| 29567     | Hes2         | 2     | 1      | 2      | 1      | 3     | 3     | 2     | 2      |
| 300141    | Mov1011      | 1     | 0      | 2      | 0      | 0     | 2     | 3     | 0      |
| 302970    | Prss32       | 1     | 0      | 0      | 2      | 3     | 0     | 2     | 0      |
| 303256    | Tm4sf5       | 0     | 1      | 1      | 1      | 3     | 0     | 1     | 1      |
| 363267    | Daw1         | 0     | 1      | 1      | 1      | 1     | 3     | 1     | 0      |
| 500827    | LOC500827    | 2     | 3      | 0      | 1      | 3     | 2     | 4     | 1      |
| 56823     | Haao         | 1     | 0      | 1      | 4      | 4     | 2     | 2     | 2      |
| 680427    | Tbr1         | 1     | 0      | 2      | 0      | 1     | 1     | 2     | 1      |
| 685365    | Fmo9         | 1     | 1      | 2      | 2      | 1     | 2     | 2     | 5      |
| 688642    | Wbp2n1       | 3     | 0      | 0      | 0      | 1     | 1     | 3     | 0      |
| 689093    | Upk2         | 1     | 1      | 0      | 1      | 1     | 1     | 1     | 2      |
| 690114    | LOC690114    | 0     | 0      | 2      | 1      | 1     | 2     | 2     | 0      |
| 690430    | Nr1h5        | 0     | 2      | 1      | 0      | 2     | 0     | 0     | 3      |
| 171055    | Cd79b        | 38    | 13     | 45     | 6      | 61    | 62    | 32    | 15     |
| 266734    | Npas4        | 2     | 5      | 1      | 16     | 10    | 9     | 14    | 7      |
| 364723    | Hist1h2ao    | 7.95  | 4.91   | 9.8    | 7.87   | 9.26  | 12.33 | 8.13  | 21.19  |
| 29747     | Kcnmb1       | 51.81 | 17.69  | 13.28  | 21.7   | 43.63 | 70.45 | 37.36 | 22.85  |
| 498276    | LOC498276    | 25.09 | 15.56  | 8.82   | 2.58   | 11.91 | 0     | 33.78 | 41.22  |
| 681182    | LOC681182    | 0     | 2.2    | 1.57   | 0      | 0     | 0     | 0     | 6.3    |
| 29301     | Hal          | 35    | 23     | 27     | 16     | 34    | 41    | 46    | 48     |
| 499146    | Spib         | 63    | 33     | 88     | 12     | 112   | 146   | 30    | 40     |
| 365367    | Cd19         | 23    | 13     | 24     | 14     | 45    | 51    | 12    | 16     |



|           |              |       |       |       |        |       |       |       |        |
|-----------|--------------|-------|-------|-------|--------|-------|-------|-------|--------|
| 685183    | LOC685183    | 4.76  | 10.28 | 7.13  | 7.97   | 24.46 | 4.26  | 8.76  | 13.05  |
| 102549344 | LOC102549344 | 1.79  | 1.01  | 3.11  | 0      | 2.18  | 4.59  | 1.12  | 2.03   |
| 25555     | Sstr4        | 5     | 5     | 3     | 12     | 3     | 16    | 11    | 12     |
| 289316    | Lefty2       | 38.31 | 44.09 | 60.54 | 45.5   | 170.8 | 39.53 | 40.38 | 66.56  |
| 102548133 | LOC102548133 | 11.24 | 0     | 8.17  | 0      | 0     | 0     | 32.69 | 0      |
| 102547344 | LOC102547344 | 2.06  | 1.08  | 1.28  | 2.81   | 4.41  | 5     | 1     | 1.8    |
| 103690081 | LOC103690081 | 2.62  | 0     | 1.63  | 1.19   | 2.56  | 2.69  | 2.63  | 1.31   |
| 310625    | Rhbg         | 7     | 11    | 6     | 5      | 7     | 18    | 13    | 11     |
| 367912    | Glra4        | 2     | 9     | 9     | 9      | 10    | 10    | 14    | 15     |
| 312721    | Dyrk4        | 0.53  | 1     | 3.9   | 4.47   | 3.59  | 2.6   | 6.01  | 4.57   |
| 292545    | Nlrp4a       | 2.03  | 1.97  | 0     | 2.13   | 6.38  | 4.01  | 0     | 0.02   |
| 305264    | Ugt2b10      | 2.14  | 1.2   | 0     | 1.07   | 1.99  | 1     | 4.5   | 0      |
| 102554283 | LOC102554283 | 4.09  | 0     | 2.77  | 2.82   | 3.75  | 4.75  | 4.66  | 3.29   |
| 25572     | Tnfrsf4      | 7     | 8     | 4     | 1      | 6     | 7     | 8     | 13     |
| 316624    | Klhl130      | 16    | 14    | 18    | 12     | 29    | 48    | 11    | 14     |
| 499065    | Tarm1        | 2     | 0     | 6     | 2      | 5     | 6     | 3     | 3      |
| 500445    | Fam205c      | 4     | 7     | 7     | 2      | 6     | 11    | 9     | 8      |
| 503103    | Sult6b1      | 5     | 1     | 1     | 3      | 2     | 6     | 3     | 6      |
| 683613    | Krt71        | 3     | 3     | 1     | 3      | 6     | 3     | 4     | 4      |
| 100360647 | LOC100360647 | 12.39 | 4.3   | 4.27  | 8.7    | 0     | 21.84 | 17.45 | 11.17  |
| 687780    | LOC687780    | 12.39 | 4.3   | 4.27  | 8.7    | 0     | 21.84 | 17.45 | 11.17  |
| 266998    | Slc13a5      | 6     | 9     | 6     | 6      | 12    | 13    | 10    | 11     |
| 294312    | Pi16         | 246   | 94    | 177   | 88     | 375   | 245   | 263   | 149    |
| 311029    | Neb          | 230   | 680   | 762   | 288    | 843   | 1932  | 333   | 239    |
| 498875    | Alpk2        | 17    | 11    | 19    | 22     | 28    | 47    | 21    | 22     |
| 316232    | Dlk2         | 7     | 3     | 8     | 7.13   | 15    | 3     | 11    | 14     |
| 103690642 | LOC103690642 | 8.41  | 0     | 5.7   | 5.56   | 23.89 | 0     | 4.32  | 5.5    |
| 24316     | Drd1         | 7     | 1     | 4     | 2      | 4     | 6     | 8     | 6      |
| 25007     | Tacr2        | 3     | 1     | 2     | 1      | 3     | 4     | 4     | 1      |
| 303589    | Efcab3       | 2     | 1     | 3     | 1      | 3     | 2     | 4     | 3      |
| 690470    | Accs1        | 3     | 2     | 1     | 1      | 1     | 5     | 4     | 2      |
| 103693936 | LOC103693936 | 6.68  | 9     | 7     | 9      | 20.64 | 21.87 | 7     | 5      |
| 316010    | Camp         | 91    | 56    | 114   | 2      | 153   | 113   | 122   | 65     |
| 301026    | Ngp          | 345   | 160   | 299   | 36     | 476   | 339   | 446   | 186    |
| 102555319 | LOC102555319 | 1.2   | 57.86 | 66.84 | 112.46 | 107.6 | 122.4 | 46.45 | 134.28 |
| 102549391 | LOC102549391 | 0     | 0     | 1.36  | 1.57   | 1.89  | 0     | 3.16  | 0      |
| 246172    | Nexn         | 97    | 66    | 76    | 117    | 145   | 265   | 129   | 75     |
| 102551890 | LOC102551890 | 3     | 7     | 5     | 7      | 5     | 9     | 12    | 12     |
| 24875     | Vipr1        | 2     | 2     | 3     | 4      | 5     | 8     | 5     | 1      |
| 25623     | Gys2         | 2     | 1     | 5     | 3      | 3     | 8     | 5     | 3      |
| 25699     | Dbh          | 2     | 3     | 3     | 3      | 2     | 8     | 3     | 6      |
| 498222    | LOC498222    | 3     | 4     | 2     | 2      | 5     | 4     | 5     | 5      |
| 501096    | Trem11       | 7     | 2     | 2     | 0      | 13    | 2     | 1     | 3      |
| 502832    | RGD1563231   | 3.12  | 4     | 11.48 | 0      | 10.17 | 14    | 4     | 4      |
| 290221    | Nr1          | 9     | 5     | 7     | 5      | 15    | 14    | 11    | 5      |
| 500377    | Tuba8        | 55    | 43    | 38    | 52     | 67.84 | 120.9 | 70    | 66.88  |
| 108351033 | LOC108351033 | 0     | 2.14  | 0     | 0      | 0     | 1     | 1.13  | 1.58   |
| 102550523 | Fsbp         | 2     | 3     | 7     | 7      | 10    | 9     | 7     | 7      |
| 688459    | LOC688459    | 32    | 15    | 16    | 29     | 50    | 39    | 35    | 36     |
| 103692529 | LOC103692529 | 5     | 10    | 8     | 8      | 10    | 15    | 12    | 17     |
| 100910462 | LOC100910462 | 0     | 1.69  | 1.06  | 0      | 3.7   | 0     | 0     | 1.1    |
| 688800    | Aldh3b2      | 2.46  | 2.48  | 0     | 2.11   | 2.63  | 5.45  | 4.24  | 0      |
| 100360846 | LOC100360846 | 0     | 0     | 0     | 3.46   | 2.59  | 0     | 3.46  | 0      |
| 100909799 | LOC100909799 | 5     | 4     | 4     | 3      | 23    | 3     | 0     | 2      |
| 100909869 | LOC100909869 | 63.67 | 50.51 | 31.98 | 59.04  | 89.01 | 95.2  | 119.4 | 55.49  |
| 102547056 | LOC102547056 | 2     | 0     | 1     | 1      | 0     | 3     | 3     | 1      |

|           |              |        |         |        |        |       |       |       |         |
|-----------|--------------|--------|---------|--------|--------|-------|-------|-------|---------|
| 108353003 | LOC108353003 | 2      | 1       | 0      | 1      | 1     | 1     | 3     | 2       |
| 25710     | Cd3d         | 0      | 2       | 1      | 1      | 1     | 2     | 4     | 0       |
| 290217    | RGD1564324   | 1      | 1       | 1      | 1      | 3     | 0     | 2     | 2       |
| 306725    | Spata31d3    | 1      | 2       | 0      | 1      | 0     | 3     | 3     | 1       |
| 312272    | Mgam         | 1      | 0       | 1.99   | 1.01   | 3.01  | 0     | 2.99  | 1       |
| 500678    | Ccdc196      | 1      | 3       | 0      | 0      | 0     | 3     | 2     | 2       |
| 501617    | Ar113a       | 2      | 0       | 1      | 1      | 3     | 1     | 2     | 1       |
| 64669     | Olah         | 2      | 1       | 1      | 4      | 1     | 4     | 5     | 4       |
| 682829    | Tspo2        | 3      | 0       | 0      | 1      | 4     | 1     | 0     | 2       |
| 685271    | Hmgb4        | 1      | 1       | 0      | 2      | 1     | 1     | 2     | 3       |
| 691448    | Slc25a54     | 2      | 3       | 3      | 4      | 3     | 7     | 7     | 4       |
| 100910934 | LOC100910934 | 0      | 2.97    | 0      | 0      | 2.36  | 0     | 0     | 2.84    |
| 300475    | Adamts8      | 194    | 221     | 153    | 206    | 401   | 333   | 281   | 342     |
| 499402    | RGD1562652   | 10.88  | 16.13   | 7.82   | 5.21   | 23.21 | 16.51 | 9.3   | 21.21   |
| 444983    | Apold1       | 90     | 148     | 74     | 368    | 323   | 303   | 472   | 97      |
| 501679    | RGD1559662   | 9      | 10      | 10     | 0      | 26    | 9     | 13    | 3       |
| 313756    | Plch2        | 7      | 4       | 6      | 4      | 10    | 15    | 6     | 6       |
| 108351580 | LOC108351580 | 7.99   | 12.01   | 5.1    | 12.24  | 17.35 | 17.22 | 13.12 | 18.1    |
| 288038    | Meltf        | 4.16   | 3.08    | 5.18   | 6.74   | 8.99  | 16.44 | 5.24  | 3.11    |
| 114587    | Dlk1         | 8      | 8       | 16     | 6      | 32    | 14    | 7     | 14      |
| 688518    | Pabpc5       | 1      | 5       | 3      | 8      | 12    | 3     | 9     | 6       |
| 100360828 | LOC100360828 | 0      | 0       | 20.97  | 0      | 0     | 0     | 20.39 | 16.68   |
| 286934    | Havcr1       | 0      | 1       | 2      | 1      | 4.08  | 1     | 2     | 0       |
| 81639     | Alox15       | 44     | 34      | 72     | 11     | 111   | 85    | 43    | 46      |
| 303413    | Mpo          | 91     | 32      | 141    | 8      | 170   | 144   | 135   | 33      |
| 302400    | Cdx4         | 0      | 0       | 2      | 0      | 0     | 0     | 1     | 2.55    |
| 25043     | Eln          | 376    | 255     | 316    | 229    | 456   | 808   | 569   | 255     |
| 64507     | Fmod         | 153.78 | 127.15  | 175.84 | 224.25 | 183.6 | 613   | 178   | 235.04  |
| 685378    | Dppa4        | 2      | 4       | 3      | 2.58   | 2.58  | 5     | 5     | 8       |
| 498066    | Sh3bgr       | 145    | 137.17  | 132    | 188    | 235   | 415   | 206   | 215     |
| 690283    | LOC690283    | 16.6   | 12.22   | 15.1   | 19.85  | 43.68 | 19.47 | 18.3  | 32.07   |
| 103689936 | Wbp1111      | 381.19 | 377.73  | 370.94 | 0.06   | 516.9 | 335.6 | 839.8 | 319.23  |
| 297412    | Dusp11       | 55.36  | 23.14   | 23.62  | 27.8   | 65.06 | 59.1  | 59.7  | 47.8    |
| 313776    | Perml        | 25.02  | 31.74   | 12.02  | 30.69  | 41.03 | 67.12 | 36.05 | 33.92   |
| 298485    | Ermap        | 21.52  | 10.87   | 25.92  | 6.11   | 44.27 | 38.23 | 18    | 15      |
| 103694912 | LOC103694912 | 4.39   | 9       | 3.02   | 4.25   | 9.42  | 9.18  | 2.87  | 15.61   |
| 301097    | Vwa5a        | 1480.1 | 2849.88 | 500.75 | 313.17 | 3987  | 581.8 | 2348  | 2329.03 |
| 100361582 | Ttc24        | 0      | 2       | 1      | 2      | 2     | 0     | 5     | 2       |
| 102555308 | LOC102555308 | 0      | 2       | 2      | 1      | 3     | 2     | 2     | 2       |
| 24414     | Grml         | 4      | 5       | 5      | 1      | 10    | 7     | 4     | 6       |
| 29641     | Adam7        | 0      | 4       | 0      | 1      | 4     | 2     | 3     | 0       |
| 296483    | Lkaaeal1     | 1      | 1       | 1      | 2      | 2     | 0     | 3     | 4       |
| 299582    | Olr1088      | 0      | 1       | 1      | 3      | 2     | 1     | 5     | 1       |
| 498497    | Tppp2        | 2      | 3       | 3      | 7      | 3     | 7     | 7     | 10      |
| 500945    | RGD1561795   | 1      | 2       | 1      | 1      | 5     | 1     | 1     | 2       |
| 79211     | Gabrg3       | 4      | 1       | 0      | 5      | 7     | 2     | 5     | 4       |
| 103690166 | LOC103690166 | 3.03   | 0       | 1.01   | 4.07   | 1.02  | 6.54  | 4     | 3.06    |
| 360737    | Tbx1         | 30     | 23      | 40     | 14     | 56    | 37    | 61    | 40      |
| 290880    | Adprh11      | 17     | 7       | 16     | 25     | 20    | 58    | 25    | 15      |
| 691688    | Eid3         | 6      | 2.01    | 2.01   | 6.07   | 8.24  | 5.87  | 8.14  | 6.98    |
| 102549007 | LOC102549007 | 1.02   | 1       | 2      | 1      | 0     | 4.98  | 0     | 4.14    |
| 499189    | Wdr93        | 7      | 7       | 1      | 7      | 10    | 9     | 10    | 11      |
| 680899    | Efcab12      | 4      | 1       | 5      | 1      | 3     | 8     | 7     | 2       |
| 684480    | Btnl9        | 6      | 1       | 2      | 2      | 3     | 13    | 2     | 2       |
| 294279    | Col11a2      | 210.73 | 199.7   | 201.59 | 301.61 | 225.5 | 948.3 | 203.8 | 284.03  |
| 25732     | Acp5         | 54     | 87      | 128    | 85     | 82    | 448   | 67    | 47      |

|           |              |       |       |       |       |       |       |       |        |
|-----------|--------------|-------|-------|-------|-------|-------|-------|-------|--------|
| 108348181 | LOC108348181 | 3.05  | 0     | 5.04  | 5.92  | 11.74 | 4.2   | 6.49  | 3.07   |
| 29609     | Pitx3        | 7     | 9     | 3     | 9     | 12    | 13    | 15    | 11     |
| 310694    | Fcrl2        | 9     | 16    | 38    | 19    | 13    | 19    | 13    | 105    |
| 100363171 | LOC100363171 | 12    | 10    | 10    | 10    | 19    | 16    | 21    | 21     |
| 102550225 | LOC102550225 | 1.02  | 0     | 0     | 0     | 0     | 0     | 0     | 1.87   |
| 294853    | Krt18        | 4     | 1     | 0     | 1     | 5     | 1     | 1     | 4      |
| 298543    | Crybg2       | 2     | 2     | 0     | 2     | 3     | 3     | 3     | 2      |
| 688126    | LOC688126    | 5     | 4     | 1     | 2     | 4     | 4     | 8     | 6      |
| 100911914 | LOC100911914 | 0     | 4.97  | 5.48  | 0     | 10.59 | 2.18  | 0     | 6.52   |
| 499463    | RGD1561777   | 0     | 0     | 3.04  | 3.42  | 2.3   | 4.35  | 0     | 5.32   |
| 102550714 | LOC102550714 | 4     | 10    | 2     | 4     | 10.02 | 12    | 5     | 10.06  |
| 25608     | Lep          | 6     | 0     | 0     | 1     | 1     | 11    | 1     | 0      |
| 497840    | Cps1         | 4     | 2     | 1     | 0     | 3     | 6     | 2     | 2      |
| 100360316 | LOC100360316 | 3.88  | 3.91  | 4.81  | 0     | 0     | 11.45 | 11.97 | 0      |
| 103689962 | LOC103689962 | 2.93  | 0     | 1.4   | 0     | 6.58  | 1.47  | 0     | 0      |
| 84387     | Pglyrp1      | 23    | 16    | 28    | 6     | 46    | 32    | 40    | 18     |
| 498287    | Slamf6       | 6     | 2     | 1.78  | 2     | 10    | 7     | 2     | 3      |
| 363088    | Ccnb2        | 8.64  | 0     | 19.83 | 10.81 | 7.47  | 13.41 | 19.91 | 32.59  |
| 289322    | RGD1564463   | 0     | 0     | 3.04  | 1     | 2.01  | 1.52  | 2.86  | 1.17   |
| 108349804 | LOC108349804 | 0     | 1     | 0.89  | 0     | 0.78  | 1.03  | 0.65  | 1.08   |
| 298559    | Tcea3        | 27    | 22    | 29    | 33    | 55    | 72    | 41    | 40     |
| 313891    | RGD1304963   | 6     | 2     | 5     | 3     | 4     | 16    | 5     | 5      |
| 103690105 | LOC103690105 | 61.52 | 0     | 18.26 | 14.58 | 56.94 | 32.12 | 52.43 | 35.57  |
| 100911917 | LOC100911917 | 59.76 | 51.23 | 59.76 | 42.69 | 102.5 | 93.92 | 59.76 | 145.14 |
| 108348209 | LOC108348209 | 5.52  | 0     | 0     | 0     | 2.56  | 3.74  | 4.1   | 0      |
| 50565     | Hspb7        | 50    | 37    | 21    | 24    | 55    | 130   | 39    | 26     |
| 140939    | Trim63       | 32    | 13    | 19    | 21    | 44    | 74    | 30    | 13     |
| 29191     | Tac3         | 5     | 3     | 4     | 7     | 5     | 12    | 10    | 9      |
| 103690033 | LOC103690033 | 4.25  | 0     | 2.41  | 0     | 5.24  | 2.13  | 5.26  | 0      |
| 100909879 | LOC100909879 | 3.33  | 0     | 0.42  | 0.35  | 2.42  | 4.22  | 1.14  | 0      |
| 83504     | K1           | 3     | 2     | 3     | 2     | 6     | 4     | 4     | 5      |
| 691392    | LOC691392    | 4.52  | 3.44  | 2.76  | 1.15  | 7.15  | 2.72  | 7.69  | 5.03   |
| 313755    | Mme11        | 3     | 3     | 5     | 10    | 6     | 16    | 10    | 8      |
| 100360218 | LOC100360218 | 29.67 | 10.7  | 5.98  | 17.98 | 55.66 | 8.21  | 32.59 | 26.11  |
| 108350572 | LOC108350572 | 1.26  | 0     | 3.21  | 0     | 2.29  | 2.19  | 2.46  | 1.58   |
| 100361098 | LOC100361098 | 1.19  | 0     | 0     | 0     | 2.27  | 0     | 0     | 0      |
| 300795    | Pclaf        | 4     | 4     | 11    | 3     | 12    | 10    | 11    | 9      |
| 315609    | Cd3e         | 3     | 4     | 1     | 3     | 8     | 4     | 4     | 5      |
| 291312    | Ucma         | 20    | 19    | 11    | 9     | 16    | 58    | 23    | 16     |
| 688109    | Tmem239      | 2     | 2     | 4     | 4     | 8     | 2     | 5     | 8      |
| 407762    | Krt85        | 1     | 2     | 1.77  | 2     | 1     | 5     | 2     | 5      |
| 292547    | Vom2r28      | 1.04  | 0     | 0     | 0     | 0     | 0     | 1     | 1      |
| 293140    | Olr35        | 5     | 1     | 4     | 5     | 6     | 6     | 8     | 9      |
| 305423    | Clqtnf7      | 11    | 8.99  | 9.58  | 8     | 26.47 | 23.1  | 12.95 | 10.27  |
| 108353096 | LOC108353096 | 0     | 2.14  | 0     | 0     | 0     | 2.06  | 2.1   | 0      |
| 100910173 | LOC100910173 | 0     | 1.8   | 0     | 0     | 1.68  | 1.82  | 0     | 0      |
| 102554501 | LOC102554501 | 6     | 2     | 2     | 8     | 8     | 13    | 1     | 13     |
| 302845    | Magea11      | 4     | 3     | 5     | 6     | 9     | 11    | 6     | 9      |
| 102556277 | LOC102556277 | 2.75  | 0.2   | 0     | 1.22  | 1.19  | 1.55  | 1.63  | 3.74   |
| 363111    | Ripply2      | 8     | 3     | 4     | 4     | 9     | 13    | 7     | 8      |
| 685961    | Sirpb211     | 0     | 0     | 2.75  | 0     | 2.37  | 1     | 1     | 1      |
| 689118    | 14-Sep       | 0.56  | 0     | 2     | 0     | 0     | 2     | 0     | 3      |
| 108348296 | LOC108348296 | 1.13  | 0     | 0     | 0     | 1.11  | 0     | 0     | 1.1    |
| 680931    | Bmp8a        | 1     | 3.01  | 0     | 1     | 1     | 4.8   | 1     | 3      |
| 108348827 | LOC108348827 | 1     | 0     | 0     | 1.02  | 0     | 2.9   | 1.06  | 0      |
| 298111    | LOC298111    | 2.1   | 1.23  | 1     | 0     | 2.37  | 1.03  | 5.09  | 0      |

|           |              |      |       |       |       |       |       |       |       |
|-----------|--------------|------|-------|-------|-------|-------|-------|-------|-------|
| 306616    | Myom2        | 256  | 348   | 253   | 274   | 357   | 848   | 396   | 624   |
| 102551433 | LOC102551433 | 7    | 8     | 9     | 7     | 22    | 14    | 12    | 13    |
| 315567    | Panx3        | 6    | 10    | 8     | 8     | 18    | 22    | 12    | 11    |
| 113902    | Ces1d        | 23   | 6     | 1     | 5     | 8     | 44    | 11    | 6     |
| 100911492 | LOC100911492 | 9.76 | 11.6  | 7.73  | 8.3   | 25.54 | 16.7  | 19.02 | 12.74 |
| 408216    | Senp17       | 1.72 | 0     | 1.15  | 0     | 1.42  | 0     | 1.82  | 2.46  |
| 80878     | Slc16a3      | 30.3 | 25.67 | 33.05 | 23.32 | 60.13 | 105   | 23.54 | 34.78 |
| 108348117 | LOC108348117 | 5.96 | 0     | 0     | 0     | 11.86 | 0     | 0     | 0     |
| 108351411 | LOC108351411 | 0    | 1     | 1.01  | 1.01  | 3     | 0     | 0     | 3.01  |
| 100911244 | LOC100911244 | 0    | 0     | 1.01  | 0     | 1.01  | 1     | 0     | 0     |
| 680837    | LOC680837    | 0    | 0     | 1.02  | 0     | 0     | 1.02  | 0     | 1.01  |
| 298107    | Mup5         | 8.54 | 4.26  | 2     | 2.63  | 12.13 | 13.28 | 6.98  | 2.31  |
| 307851    | Clec18a      | 2.02 | 0     | 2     | 2     | 2     | 1     | 3     | 6     |
| 108352197 | LOC108352197 | 5    | 0     | 0     | 2     | 5     | 4     | 3.97  | 1     |
| 103689996 | LOC103689996 | 0    | 15.62 | 0     | 7.81  | 7.81  | 23.42 | 7.81  | 7.81  |
| 100359483 | Cylc1        | 0    | 0     | 0     | 1     | 0     | 0     | 1     | 1     |
| 100359720 | Ankrd31      | 1    | 2     | 1     | 0     | 4     | 0     | 0     | 4     |
| 100359907 | LOC100359907 | 0    | 0     | 0     | 1     | 0     | 1     | 1     | 0     |
| 100360091 | Tmem207      | 1    | 0     | 1     | 0     | 2     | 0     | 2     | 0     |
| 100361588 | Wdr95        | 0    | 2     | 0     | 0     | 1     | 1     | 0     | 2     |
| 100910060 | LOC100910060 | 1    | 0     | 0     | 0     | 0     | 1     | 0     | 1     |
| 100910410 | LOC100910410 | 1    | 0     | 0     | 0     | 0     | 0     | 2     | 0     |
| 102546514 | LOC102546514 | 1    | 1     | 3     | 0     | 0     | 4     | 3     | 3     |
| 102547033 | LOC102547033 | 0    | 1     | 0     | 0     | 1     | 0     | 0     | 1     |
| 102547119 | LOC102547119 | 0    | 1     | 0     | 0     | 0     | 1     | 0     | 1     |
| 102551428 | LOC102551428 | 0    | 1     | 0     | 0     | 0     | 1     | 0     | 1     |
| 102551453 | LOC102551453 | 4    | 6     | 1     | 2     | 2     | 7     | 4     | 13    |
| 102552195 | LOC102552195 | 0    | 1.05  | 1.05  | 0     | 0     | 0     | 1.04  | 3.16  |
| 102552569 | LOC102552569 | 0    | 1     | 0     | 0     | 1     | 0     | 1     | 0     |
| 102552627 | LOC102552627 | 0    | 1     | 0     | 0     | 2     | 0     | 0     | 0     |
| 103691634 | LOC103691634 | 1    | 0     | 0     | 0     | 1     | 0     | 0     | 1     |
| 103693129 | LOC103693129 | 1    | 2     | 2     | 0     | 1     | 3     | 1     | 5     |
| 103693291 | Nhlrc4       | 0    | 0     | 2     | 1     | 1     | 2     | 1     | 2     |
| 108348129 | LOC108348129 | 0    | 0     | 0     | 1     | 1     | 0     | 0     | 1     |
| 108348134 | LOC108348134 | 0    | 2     | 0     | 0     | 1     | 0     | 3     | 0     |
| 108350819 | LOC108350819 | 0    | 2     | 1     | 0     | 0     | 1     | 3     | 2     |
| 108352186 | LOC108352186 | 1    | 0     | 0     | 0     | 0     | 1     | 0     | 1     |
| 108352306 | Smim34a      | 0    | 1     | 0     | 0     | 0     | 0     | 1     | 1     |
| 108353095 | LOC108353095 | 0    | 0     | 0     | 1     | 0     | 1     | 1     | 0     |
| 114598    | Clec4f       | 1    | 3     | 0     | 2     | 1     | 2     | 3     | 6     |
| 116556    | Gucy2f       | 0    | 1     | 0     | 0     | 0     | 1     | 1     | 0     |
| 117130    | Grifin       | 9    | 4     | 4     | 1     | 4     | 19    | 7     | 6     |
| 171375    | Atp5f1       | 0    | 0     | 0     | 234.1 | 0     | 0     | 234.1 | 234.1 |
| 171516    | Akr1c3       | 1    | 0     | 0     | 1     | 1     | 0     | 2     | 1     |
| 171551    | Cxcl3        | 1    | 0     | 1     | 1     | 0     | 0     | 5     | 1     |
| 171573    | LOC171573    | 0    | 0     | 0     | 2     | 1     | 0     | 1     | 2     |
| 24152     | Asip         | 0    | 1     | 0     | 0     | 2     | 0     | 0     | 0     |
| 24291     | Ctrb1        | 0    | 1     | 0     | 1     | 0     | 2     | 1     | 1     |
| 24391     | Gh1          | 1    | 0     | 1     | 0     | 0     | 2     | 2     | 0     |
| 246238    | Bpifal       | 0    | 0     | 1     | 0     | 0     | 1     | 1     | 0     |
| 24817     | Hnf1a        | 0    | 1     | 0     | 0     | 1     | 0     | 0     | 1     |
| 25048     | Klkb1        | 1    | 0     | 0     | 0     | 1     | 0     | 1     | 0     |
| 25195     | Drd5         | 0    | 1     | 0     | 0     | 1     | 0     | 1     | 0     |
| 25268     | Proc         | 1    | 0     | 1     | 1     | 2     | 2     | 2     | 0     |
| 252856    | Tcf21        | 0    | 1     | 1     | 1     | 2     | 0     | 1     | 3     |
| 25320     | Gast         | 1    | 1     | 1     | 0     | 0     | 2     | 1     | 3     |

|        |            |   |      |      |      |     |      |      |      |
|--------|------------|---|------|------|------|-----|------|------|------|
| 25534  | Prph2      | 0 | 0    | 1    | 0    | 0   | 0    | 0    | 2    |
| 25723  | Hcrt       | 0 | 1    | 0    | 0    | 0   | 1    | 1    | 0    |
| 266707 | Gjd4       | 0 | 0    | 1    | 0    | 1   | 1    | 0    | 0    |
| 286954 | Ugt2b1     | 0 | 1    | 0    | 0    | 2   | 0    | 0    | 0    |
| 287034 | Tnfrsf17   | 0 | 2    | 1    | 1    | 3   | 1    | 3    | 1    |
| 287425 | Alox12b    | 0 | 0    | 1    | 0    | 1   | 0    | 1    | 0    |
| 287673 | Ccr7       | 0 | 1    | 3    | 2    | 2   | 8    | 2    | 0    |
| 287935 | RGD1308065 | 1 | 0    | 2    | 1    | 4   | 2    | 1    | 1    |
| 288375 | Cd209a     | 0 | 0    | 1    | 0    | 0   | 1    | 1    | 0    |
| 289254 | Olr1592    | 0 | 0    | 1    | 0    | 0   | 0    | 0    | 2    |
| 290670 | Tssk6      | 2 | 2    | 5    | 6    | 9   | 10   | 6    | 5    |
| 291087 | Serpnb6e   | 0 | 2    | 0    | 0    | 1   | 1    | 2    | 0    |
| 29235  | Galr3      | 0 | 1    | 0    | 0    | 1   | 0    | 0    | 1    |
| 29251  | F2         | 0 | 0    | 3    | 0    | 2   | 1    | 3    | 0    |
| 292706 | Tescl      | 2 | 1    | 1    | 0    | 0   | 5    | 1    | 2    |
| 29319  | Gif        | 1 | 0    | 0    | 0    | 0   | 1    | 0    | 1    |
| 293303 | Olr156     | 0 | 1    | 1    | 0    | 2   | 0    | 1    | 1    |
| 294301 | Armc12     | 1 | 0    | 1    | 0    | 1   | 0    | 2    | 1    |
| 29475  | Dio3       | 3 | 0    | 1    | 0    | 3   | 0    | 3    | 2    |
| 295010 | Pabpc41    | 1 | 2    | 2    | 3    | 1   | 3    | 7    | 5    |
| 295071 | RGD1559622 | 0 | 0    | 1    | 0    | 0   | 1    | 1    | 0    |
| 29538  | Ccl20      | 0 | 1    | 0    | 0    | 0   | 0    | 0    | 2    |
| 295710 | Olr439     | 1 | 0    | 0    | 0    | 1   | 0    | 1    | 0    |
| 295929 | Mybpc3     | 0 | 0    | 1    | 0    | 2   | 0    | 0    | 0    |
| 296730 | Crygn      | 0 | 0    | 2    | 1    | 1   | 1    | 3    | 1    |
| 298306 | Cdcp2      | 0 | 0    | 1    | 1    | 0   | 2    | 1    | 1    |
| 301120 | Acsbg2     | 0 | 0    | 0    | 1    | 1   | 0    | 0    | 1    |
| 301510 | Rufy4      | 0 | 4    | 2    | 0    | 3   | 5    | 3    | 1    |
| 302962 | Zscan10    | 1 | 0    | 0    | 1    | 1   | 1    | 1    | 1    |
| 303205 | Slc5a10    | 0 | 2    | 0    | 0    | 1   | 1    | 1    | 1    |
| 303252 | Alox12e    | 0 | 1    | 2    | 0    | 5   | 1    | 0    | 0    |
| 304103 | Olig2      | 0 | 1.01 | 1.14 | 2.18 | 3.2 | 0.99 | 2.31 | 2.16 |
| 305719 | Fezf2      | 1 | 0    | 0    | 0    | 2   | 0    | 0    | 0    |
| 305908 | Rnf17      | 0 | 0    | 0    | 1    | 0   | 1    | 0    | 1    |
| 307614 | Cdh16      | 1 | 0    | 0    | 0    | 0   | 2    | 0    | 0    |
| 310782 | Mybph1     | 1 | 0    | 1    | 2    | 4   | 1    | 0    | 3    |
| 313681 | Lrrc38     | 1 | 2    | 1    | 2    | 3   | 5    | 0    | 4    |
| 314959 | RGD1359449 | 0 | 0    | 1    | 0    | 0   | 1    | 0    | 1    |
| 315497 | Tbx20      | 0 | 0    | 0    | 1    | 1   | 1    | 0    | 0    |
| 363654 | Tmigd1     | 1 | 0    | 0    | 0    | 0   | 2    | 0    | 0    |
| 363866 | Rxfp2      | 3 | 0    | 0    | 3    | 1   | 3    | 6    | 2    |
| 364883 | Cdx1       | 0 | 1    | 1    | 1    | 4   | 1    | 0    | 1    |
| 365153 | Tcte3      | 1 | 0    | 0    | 1    | 1   | 1    | 0    | 2    |
| 365332 | Olr152     | 0 | 1    | 0    | 0    | 0   | 0    | 0    | 2    |
| 366275 | Ptk6       | 0 | 0    | 0    | 1    | 0   | 0    | 2    | 0    |
| 366347 | Cfap206    | 1 | 1    | 2    | 2    | 1   | 1    | 4    | 6    |
| 366377 | Olr854     | 1 | 0    | 0    | 2    | 0   | 0    | 2    | 4    |
| 367415 | Pla2g12b   | 1 | 0    | 0    | 0    | 1   | 0    | 1    | 0    |
| 367994 | Upk3b11    | 0 | 0    | 0    | 1    | 0   | 1    | 1    | 0    |
| 405335 | Olr1366    | 0 | 1    | 1    | 0    | 2   | 1    | 0    | 1    |
| 408213 | Tmprss11c  | 0 | 1    | 0    | 0    | 0   | 1    | 0    | 1    |
| 408225 | Wfdc6b     | 0 | 0    | 0    | 1    | 0   | 1    | 1    | 0    |
| 494249 | Vomlr87    | 0 | 0.5  | 0    | 0    | 0   | 0    | 1    | 0    |
| 494303 | Vomlr42    | 0 | 0    | 1    | 0    | 0   | 0    | 2    | 0    |
| 498231 | LOC498231  | 2 | 3    | 0    | 1    | 4   | 2    | 2    | 4    |
| 498316 | LOC498316  | 0 | 0    | 0    | 1    | 0   | 0    | 1    | 1    |

|           |              |      |       |       |       |       |       |       |       |
|-----------|--------------|------|-------|-------|-------|-------|-------|-------|-------|
| 498534    | RGD1565212   | 0    | 0     | 1     | 0     | 0     | 1     | 1     | 0     |
| 498985    | Themis       | 1    | 0     | 0     | 0     | 1     | 0     | 1     | 0     |
| 499135    | MGC114499    | 0    | 0     | 1     | 0     | 1     | 1     | 0     | 0     |
| 499279    | Tex36        | 1    | 0     | 0     | 0     | 0     | 0     | 2     | 0     |
| 499334    | RGD1560242   | 1    | 0     | 2     | 1     | 1     | 1     | 4     | 2     |
| 499618    | Ccdc169      | 0    | 0     | 1     | 0     | 2     | 0     | 0     | 0     |
| 499993    | Tex47        | 1    | 0     | 0     | 0     | 0     | 0     | 2     | 0     |
| 500761    | Apof         | 1    | 0     | 0     | 0     | 1     | 1     | 0     | 0     |
| 501797    | Cd209e       | 1    | 0     | 0     | 1     | 1     | 0     | 1     | 2     |
| 502960    | RGD1561827   | 0    | 0.5   | 0     | 0     | 1     | 0     | 0     | 0     |
| 502963    | RGD1564637   | 0    | 0.5   | 0     | 0     | 1     | 0     | 0     | 0     |
| 50549     | Cyp4a1       | 0    | 0     | 1     | 1     | 1     | 1     | 1     | 1     |
| 54246     | Cyp2f4       | 2    | 1     | 0     | 0     | 2     | 2     | 1     | 1     |
| 59305     | Tcam1        | 0    | 1     | 0     | 0     | 1     | 0     | 0     | 1     |
| 60583     | Ivl          | 1    | 0     | 1     | 0     | 2     | 1     | 0     | 1     |
| 64564     | Bbox1        | 1    | 3     | 1     | 1     | 4     | 3     | 2     | 3     |
| 65048     | Fat2         | 2    | 0     | 0     | 0     | 2     | 0     | 1     | 1     |
| 66014     | Impg1        | 0    | 1     | 0     | 2     | 2     | 0     | 1     | 3     |
| 680378    | Prss47       | 1    | 0     | 0     | 1     | 0     | 0     | 1     | 3     |
| 680489    | Cldn34e      | 0    | 0     | 1     | 1     | 1     | 2     | 0     | 1     |
| 680640    | Ceacam19     | 0    | 1     | 0     | 0     | 2     | 0     | 0     | 0     |
| 680794    | Timm8a2      | 0    | 0     | 1     | 1     | 1     | 1     | 1     | 1     |
| 682329    | Nkx3-2       | 0    | 2     | 0     | 0     | 0     | 4     | 0     | 0     |
| 685360    | En1          | 1    | 0     | 0     | 3     | 2     | 5     | 1     | 0     |
| 685758    | A4gnt        | 0    | 1     | 0     | 0     | 2     | 0     | 0     | 0     |
| 685999    | Uroc1        | 1    | 0     | 0     | 0     | 0     | 1     | 1     | 0     |
| 688333    | Ptchd3       | 1    | 2     | 1     | 0     | 3     | 0     | 2     | 3     |
| 688422    | Dydc2        | 0    | 0     | 1     | 0     | 0     | 0     | 1     | 1     |
| 688536    | Glyat13      | 0    | 1     | 0     | 0     | 0     | 1     | 1     | 0     |
| 689561    | LOC689561    | 1    | 0     | 0     | 0     | 0     | 2     | 0     | 0     |
| 690028    | I131         | 0    | 1     | 0     | 0     | 0     | 0     | 1     | 1     |
| 690483    | LOC690483    | 1    | 0     | 0     | 0     | 0     | 2     | 0     | 0     |
| 690691    | Vom2r16      | 0    | 0     | 1     | 0     | 0     | 0     | 1     | 1     |
| 691189    | LOC691189    | 1    | 0     | 0     | 0     | 0     | 1     | 0     | 1     |
| 311639    | Zfp334       | 3    | 2     | 2     | 3     | 7     | 6     | 4     | 3     |
| 100909725 | LOC100909725 | 0    | 4.5   | 4.5   | 4.5   | 4.5   | 13.51 | 4.5   | 4.5   |
| 363276    | Snorc        | 23   | 21    | 15    | 13    | 14    | 90    | 21    | 20    |
| 103692758 | LOC103692758 | 0    | 2.02  | 1.9   | 3.11  | 0     | 3.91  | 4.24  | 6.01  |
| 103694169 | LOC103694169 | 0    | 20.49 | 0     | 43.12 | 0     | 74.18 | 53.96 | 0     |
| 103692344 | LOC103692344 | 2.47 | 0     | 0     | 0     | 1     | 0     | 1     | 3     |
| 108350550 | LOC108350550 | 4.94 | 13.48 | 13.91 | 5.73  | 21.24 | 12.29 | 17.75 | 25.85 |
| 108350604 | LOC108350604 | 0    | 5.34  | 0     | 4.54  | 3.6   | 7.18  | 9.29  | 0     |
| 103690190 | LOC103690190 | 6.16 | 6.2   | 7.47  | 3     | 12.35 | 9.27  | 14.8  | 10.01 |
| 29462     | Avpr1b       | 8.66 | 8.66  | 2     | 4.33  | 12    | 15.15 | 10    | 11    |
| 295538    | Depdc1       | 6    | 9     | 8     | 3     | 16    | 17    | 9     | 11    |
| 102547798 | LOC102547798 | 3.48 | 0     | 0     | 1.07  | 2.18  | 2.82  | 2.11  | 2.23  |
| 108353206 | LOC108353206 | 0    | 0     | 12.27 | 0     | 7.61  | 7.83  | 0     | 9.86  |
| 295426    | Myoz2        | 7    | 12    | 12    | 10    | 30    | 30    | 12    | 13    |
| 100911669 | LOC100911669 | 0.66 | 1.02  | 0.69  | 1     | 0.25  | 1     | 4.06  | 1.68  |
| 29385     | Cxcr2        | 5    | 9     | 21    | 2     | 28    | 22    | 16    | 11    |
| 102554581 | LOC102554581 | 0    | 2.23  | 0     | 0     | 0     | 0     | 4.66  | 0     |
| 103690296 | LOC103690296 | 0    | 3     | 4     | 4     | 10    | 7     | 4     | 2     |
| 25172     | Gata1        | 4    | 6     | 11    | 1     | 19    | 14    | 7     | 6     |
| 29387     | Pla2g2c      | 0    | 4     | 2     | 5     | 7     | 6     | 5     | 5     |
| 301711    | Lrrc30       | 3    | 3     | 2     | 3     | 4     | 12    | 5     | 2     |
| 363899    | RGD1562525   | 0.28 | 0     | 2.61  | 0     | 0     | 0.44  | 3.82  | 1.8   |



|           |              |       |        |        |        |       |       |       |        |
|-----------|--------------|-------|--------|--------|--------|-------|-------|-------|--------|
| 100362169 | Fam170b      | 5.39  | 4      | 4      | 9      | 9     | 12    | 13    | 13     |
| 690158    | Fpr2         | 4.02  | 6      | 7      | 2      | 6     | 11    | 11    | 11.94  |
| 295091    | Vom2r46      | 0     | 0      | 1      | 0      | 0     | 0     | 2.1   | 0      |
| 100910503 | LOC100910503 | 1.08  | 0      | 0      | 0      | 0     | 0     | 2.28  | 0      |
| 100910446 | LOC100910446 | 0     | 0      | 111.5  | 0      | 59.21 | 95.39 | 81    | 0      |
| 367316    | Aqp12a       | 1     | 8      | 3      | 5      | 9     | 14    | 7     | 6      |
| 102546754 | LOC102546754 | 2.18  | 2.53   | 3.35   | 3.34   | 11.19 | 5.49  | 2.87  | 4.62   |
| 108348326 | LOC108348326 | 67.02 | 26.28  | 21.59  | 13.18  | 15.4  | 56.45 | 18.21 | 181.57 |
| 360478    | Smim22       | 2     | 4      | 2      | 0      | 5     | 5     | 1     | 6      |
| 367318    | Ano7         | 1     | 4      | 1      | 2      | 0     | 4     | 4     | 9      |
| 29275     | Actc1        | 2.01  | 2      | 2.01   | 2.02   | 4.04  | 9.06  | 1     | 3      |
| 100361261 | Gzmb13       | 1.52  | 3      | 1      | 2      | 3     | 4     | 4     | 5      |
| 501233    | LOC501233    | 0.41  | 0      | 1      | 0      | 2     | 0     | 0     | 1      |
| 313220    | Acnat2       | 3.24  | 0      | 1.68   | 1.15   | 1.16  | 1.87  | 3.9   | 5.99   |
| 680615    | Hist1h2ak    | 1.12  | 0      | 0      | 0      | 1.11  | 0     | 1.28  | 0      |
| 365949    | LOC365949    | 36.62 | 54.14  | 10.28  | 30.28  | 46.7  | 48.77 | 93.65 | 91.25  |
| 691312    | Cyp4f37      | 3.94  | 0      | 3.26   | 3.09   | 2.85  | 8.11  | 5.63  | 5.44   |
| 498274    | Spata46      | 4     | 1      | 0      | 2      | 4     | 2     | 5     | 4      |
| 29576     | Wisp2        | 32    | 27     | 15     | 32     | 101   | 65    | 39    | 24     |
| 499796    | LOC499796    | 1.01  | 0      | 4.03   | 0      | 2.94  | 4.02  | 1     | 2.93   |
| 365550    | Vpreb3       | 13.47 | 6.38   | 11.46  | 5.02   | 25.34 | 35.16 | 9     | 9.11   |
| 292279    | Nox3         | 3     | 2      | 0      | 1      | 3     | 5     | 3     | 2      |
| 302619    | Gpr143       | 3     | 0      | 3      | 0      | 4     | 2     | 4     | 3      |
| 364039    | Mael         | 2     | 2      | 2      | 0      | 0     | 2     | 10    | 1      |
| 500336    | Clec1b       | 2     | 3      | 1      | 0      | 9     | 2     | 2     | 0      |
| 170840    | Slc40a1      | 35.56 | 28.99  | 18.99  | 36.42  | 35.42 | 59.85 | 80.42 | 85.14  |
| 29155     | Capn3        | 11    | 23     | 29     | 22     | 44    | 84    | 25    | 32     |
| 246334    | Tp63         | 1.88  | 1.89   | 0.72   | 2.98   | 4.45  | 3.91  | 4.9   | 3      |
| 100125384 | LOC100125384 | 2.62  | 0      | 0      | 0      | 0.86  | 0     | 3.24  | 1.62   |
| 100359675 | Alpp         | 3.2   | 0      | 0      | 2.04   | 2.08  | 4.26  | 3.1   | 2      |
| 360742    | Dgcr2        | 0     | 0      | 0      | 39.98  | 87.3  | 0     | 0     | 0      |
| 685216    | Wfdc10       | 1     | 2      | 2      | 0      | 3     | 4     | 2     | 2      |
| 685788    | LOC685788    | 1     | 0      | 4      | 0      | 2.01  | 0     | 7     | 2      |
| 500823    | Ccdc38       | 2.02  | 4.59   | 0      | 3.04   | 5.1   | 6     | 4.11  | 6.09   |
| 303468    | Sgca         | 6     | 14     | 17     | 10     | 15    | 69    | 14    | 6      |
| 315111    | Apol2        | 0     | 4.06   | 15.36  | 0      | 22    | 10    | 5     | 6      |
| 102554207 | LOC102554207 | 0     | 2.5    | 4.31   | 3      | 1.5   | 9.74  | 7     | 3.5    |
| 287382    | Mfap4        | 297   | 110.04 | 134.04 | 126.39 | 526   | 422.8 | 337.4 | 198.7  |
| 362662    | Rbp7         | 11    | 7      | 3      | 4      | 9     | 19    | 19    | 9      |
| 500023    | Dlx6         | 3     | 0      | 1      | 0      | 3.18  | 1     | 1     | 3.81   |
| 108353015 | LOC108353015 | 1     | 1      | 0      | 2      | 3     | 1     | 2     | 3      |
| 25386     | Aqp2         | 0     | 0      | 4      | 0      | 3     | 2     | 3     | 1      |
| 303533    | Klh110       | 0     | 0      | 3      | 1      | 3     | 1     | 4     | 1      |
| 500319    | Tuba3a       | 1     | 1.67   | 0      | 1.33   | 0     | 2     | 4     | 3      |
| 500415    | Lrrc69       | 1     | 1      | 0      | 2      | 5     | 3     | 1     | 0      |
| 500946    | Heph11       | 1     | 0      | 2      | 1      | 1     | 3     | 2     | 3      |
| 365368    | Il27         | 1.11  | 2      | 0      | 0      | 1     | 1     | 2     | 3      |
| 171390    | Nlrp6        | 0     | 2.6    | 0      | 1.75   | 0     | 0     | 2.43  | 7.43   |
| 299606    | Elane        | 20    | 6      | 19     | 0      | 41    | 30    | 16    | 15     |
| 303373    | Unc45b       | 14    | 10     | 14     | 13     | 36    | 49    | 14    | 17     |
| 103689995 | LOC103689995 | 7.37  | 3.36   | 0      | 0      | 3.95  | 3.23  | 11.95 | 5.31   |
| 291084    | Nqo2         | 77    | 69     | 69     | 304    | 288   | 243   | 67    | 585    |
| 100361756 | LOC100361756 | 0     | 0      | 0      | 1.2    | 0     | 2.19  | 0.55  | 0      |
| 100909701 | Ccer2        | 7     | 6      | 0      | 1      | 8     | 9     | 5     | 10     |
| 102551468 | LOC102551468 | 2.11  | 0      | 0      | 1.05   | 2.1   | 1.02  | 1.04  | 3.08   |
| 102546845 | LOC102546845 | 0     | 0      | 3.03   | 0      | 2.25  | 2.66  | 1     | 1.08   |

|           |              |       |      |       |       |       |       |       |       |
|-----------|--------------|-------|------|-------|-------|-------|-------|-------|-------|
| 499923    | Efcab8       | 19    | 12   | 14    | 7     | 37    | 19    | 12    | 52    |
| 108353264 | LOC108353264 | 2     | 1    | 0     | 0     | 1     | 5     | 0     | 1     |
| 24236     | C4bpb        | 2     | 3    | 0     | 1     | 2     | 2     | 5     | 5     |
| 29190     | Pdyn         | 0     | 4    | 4     | 1     | 4     | 5     | 4     | 8     |
| 297748    | Jph1         | 20    | 12   | 17    | 17    | 41    | 80    | 18    | 15    |
| 298397    | Olr833       | 2     | 0    | 1     | 0     | 1     | 0     | 1     | 5     |
| 310443    | Gpr87        | 0     | 2    | 0     | 1     | 0     | 2     | 4     | 1     |
| 310632    | Rab25        | 0     | 0    | 2     | 1     | 1     | 3     | 3     | 0     |
| 405020    | Olr1353      | 0     | 1    | 1     | 1     | 3     | 2     | 2     | 0     |
| 500052    | Hyal5        | 1     | 1    | 1     | 0     | 2     | 1     | 3     | 1     |
| 502759    | Nobox        | 1     | 1    | 0     | 1     | 2     | 1     | 0     | 4     |
| 59112     | Hand1        | 1     | 0    | 2     | 0     | 3     | 1     | 1     | 2     |
| 64574     | Chrna10      | 1     | 1    | 1     | 0     | 3     | 1     | 1     | 2     |
| 678708    | LOC678708    | 0     | 2    | 1     | 0     | 2     | 2     | 2     | 1     |
| 688605    | Cc11         | 1     | 0    | 2     | 0     | 0     | 2     | 0     | 5     |
| 690116    | Rgs11        | 0     | 1    | 1     | 1     | 1     | 0     | 3     | 3     |
| 690139    | Rbm24        | 2     | 7    | 7     | 14    | 17    | 34    | 15    | 4     |
| 690813    | LOC690813    | 0     | 2    | 7     | 0     | 4     | 5     | 5     | 7     |
| 689713    | LOC689713    | 0.85  | 0    | 0     | 0     | 0     | 0     | 1     | 1     |
| 100909409 | LOC100909409 | 4.47  | 0    | 2.57  | 0     | 6.65  | 0     | 6.57  | 3.41  |
| 317308    | Zfp3613      | 1.09  | 1.23 | 0.88  | 1.08  | 7.15  | 1.08  | 1.08  | 0.86  |
| 286965    | Abra         | 11    | 32   | 5     | 28    | 42    | 69    | 44    | 26    |
| 85258     | Cnga4        | 4.61  | 1.12 | 5.65  | 5.65  | 18.98 | 9.92  | 6.89  | 4.77  |
| 102554312 | LOC102554312 | 0     | 1.56 | 1.8   | 0     | 1.66  | 3     | 3.36  | 0     |
| 361003    | Dupd1        | 10    | 8    | 5     | 8     | 17    | 40    | 6     | 11    |
| 102552901 | LOC102552901 | 1.59  | 0    | 1     | 2     | 0     | 4     | 2     | 5     |
| 102547755 | Dbf4b        | 1     | 2    | 1     | 1     | 7     | 1     | 2     | 2     |
| 171045    | Mmp3         | 0     | 2    | 3     | 0     | 1     | 4     | 6     | 1     |
| 365778    | LOC365778    | 1     | 3    | 2     | 4     | 3     | 5     | 6     | 10    |
| 499719    | Stpg2        | 5     | 2    | 2     | 1     | 7     | 3     | 6     | 8     |
| 60332     | Akap14       | 1     | 1    | 1     | 2     | 4     | 3     | 2     | 3     |
| 79110     | Mepe         | 2     | 3    | 3     | 2     | 4     | 12    | 3     | 5     |
| 294071    | Hells        | 7.38  | 3.53 | 24.62 | 0     | 28.65 | 19.48 | 27.29 | 10.23 |
| 84576     | Hdac11       | 0     | 1.19 | 0     | 0     | 1.73  | 0     | 0     | 1.15  |
| 24631     | Rhox5        | 1     | 2    | 2     | 2     | 3     | 10    | 1     | 3     |
| 65204     | Cnn1         | 45    | 21   | 7     | 8     | 27    | 116   | 36    | 18    |
| 315962    | Ky           | 24    | 25   | 20    | 39    | 79    | 122   | 32    | 30    |
| 102555476 | LOC102555476 | 0     | 0    | 6.4   | 0     | 1.49  | 0     | 7.51  | 6.63  |
| 309374    | Ankrd2       | 3     | 0    | 4     | 2     | 7     | 14    | 0     | 1     |
| 25334     | Bhlha15      | 2.96  | 5.08 | 2.4   | 4.15  | 7.29  | 12.94 | 6.42  | 9.08  |
| 682419    | LOC682419    | 1     | 0    | 0     | 0     | 1.45  | 0     | 1     | 0     |
| 81687     | Mmp9         | 52    | 46   | 90    | 9     | 126   | 247   | 70    | 47    |
| 108351743 | LOC108351743 | 0     | 3.05 | 0     | 2.03  | 7.09  | 4.06  | 0     | 1.53  |
| 65133     | Aqp3         | 2.22  | 1.25 | 3.06  | 1.2   | 7.59  | 5.33  | 2.36  | 4.04  |
| 100911186 | LOC100911186 | 42.93 | 0    | 0     | 42.93 | 128.8 | 42.93 | 0     | 42.93 |
| 100190895 | Rhox3        | 0     | 1    | 1     | 0     | 1     | 1     | 1     | 2     |
| 100362644 | Slc2a7       | 3     | 0    | 3     | 2     | 5     | 10    | 4     | 1     |
| 100911278 | LOC100911278 | 1     | 0    | 0     | 1     | 1     | 2     | 2     | 0     |
| 171059    | Wfdc18       | 1     | 0    | 1     | 0     | 0     | 0     | 4     | 1     |
| 289439    | Lpcat2b      | 0     | 0    | 1     | 1     | 0     | 1     | 2     | 2     |
| 294210    | Trim10       | 7     | 1    | 9     | 3     | 14    | 19    | 9     | 8     |
| 29679     | Cst8         | 0     | 2    | 0     | 0     | 0     | 1     | 0     | 4     |
| 301168    | Efhb         | 2     | 0    | 2     | 0     | 1     | 2     | 4     | 3     |
| 366598    | Ferd31       | 1     | 1    | 0     | 0     | 3     | 0     | 2     | 0     |
| 406226    | Krt77        | 1     | 2    | 0     | 1     | 1     | 2     | 4     | 3     |
| 414826    | Tesb         | 3     | 1    | 2     | 2     | 5     | 10    | 4     | 1     |

|           |              |       |       |       |       |       |       |       |        |
|-----------|--------------|-------|-------|-------|-------|-------|-------|-------|--------|
| 498992    | Vnn3         | 1     | 0     | 1     | 0     | 2     | 1     | 2     | 0      |
| 60394     | Olig1        | 0     | 1     | 0     | 1     | 1     | 1     | 1     | 2      |
| 63850     | Prlh         | 0     | 1     | 1     | 0     | 2     | 2     | 1     | 0      |
| 685513    | Gngl4        | 0     | 0     | 1     | 1     | 0     | 2     | 2     | 1      |
| 690288    | Dnah14       | 0     | 0     | 2     | 0     | 3     | 0     | 1     | 1      |
| 24585     | Myl3         | 15    | 9     | 9     | 12    | 42    | 54    | 4     | 13     |
| 396527    | Ugt1a2       | 0     | 0     | 3.16  | 0     | 4.79  | 3.17  | 0     | 0      |
| 29266     | Mcpt2        | 0     | 1.03  | 1.02  | 0     | 1.06  | 1     | 3.13  | 0      |
| 687679    | LOC687679    | 0     | 0     | 15.37 | 0     | 0     | 10.87 | 17.13 | 10.98  |
| 690729    | Vom2r19      | 1.33  | 0     | 1.03  | 1     | 2.55  | 4.47  | 1.51  | 0      |
| 103691235 | LOC103691235 | 1     | 3     | 3     | 2     | 4     | 8     | 7     | 4      |
| 24296     | Cypl1a1      | 1     | 3     | 2     | 1     | 2     | 6     | 8     | 2      |
| 301039    | Susd5        | 17    | 13    | 6     | 10    | 8     | 84    | 16    | 11     |
| 102555557 | LOC102555557 | 0     | 22.35 | 0     | 46.36 | 92.51 | 26.52 | 18.23 | 41.37  |
| 102557303 | LOC102557303 | 0     | 2     | 2     | 1     | 1     | 6     | 1     | 5      |
| 108352185 | C10H10orf95  | 0     | 0     | 0     | 1.13  | 2.95  | 0     | 0     | 0      |
| 296153    | Tmc2         | 3     | 0     | 3     | 7     | 8     | 14    | 3     | 9      |
| 103692784 | LOC103692784 | 0     | 1.43  | 1.34  | 0     | 2.55  | 1.33  | 3.37  | 0      |
| 108349865 | LOC108349865 | 0     | 7.62  | 0     | 0.38  | 7.68  | 6.15  | 7.13  | 0      |
| 100911527 | LOC100911527 | 0.7   | 0     | 0     | 0.7   | 2     | 0.7   | 1     | 0      |
| 102550585 | LOC102550585 | 2.69  | 2.19  | 1.5   | 0     | 6.37  | 5.14  | 3.88  | 1.61   |
| 102554647 | Pasd1        | 2     | 0     | 0     | 1     | 3     | 2     | 1     | 2      |
| 301611    | Olr1349      | 0     | 1     | 1     | 1     | 2     | 1     | 3     | 2      |
| 494343    | Tacstd2      | 0     | 0     | 1     | 2     | 2     | 1     | 2     | 3      |
| 64190     | Fxyd4        | 1     | 1     | 0     | 1     | 1     | 1     | 2     | 4      |
| 682010    | MGC93861     | 0     | 0     | 1     | 2     | 1     | 4     | 0     | 3      |
| 691636    | Tex22        | 0     | 2     | 0     | 1     | 2     | 0     | 3     | 3      |
| 103690046 | LOC103690046 | 0     | 0     | 6.56  | 0     | 0     | 0     | 17.7  | 0      |
| 361080    | Ppial4g      | 3.01  | 1.19  | 1.19  | 1.18  | 7.75  | 1.4   | 4.17  | 4.54   |
| 289482    | Naal1        | 13.9  | 10    | 5     | 10    | 6     | 16    | 62    | 21.96  |
| 317608    | Gpr101       | 1.21  | 0.78  | 1.01  | 0.57  | 3.02  | 4.38  | 2.4   | 0      |
| 366142    | Elf5         | 0     | 2     | 1     | 1     | 1     | 3     | 3     | 4      |
| 103693370 | Gsg112       | 1.18  | 0     | 2.26  | 0     | 2.65  | 1.21  | 3.35  | 2.26   |
| 297339    | Capg         | 267   | 375   | 525   | 241   | 821   | 1270  | 1121  | 677    |
| 100360575 | LOC100360575 | 3.01  | 0     | 3.58  | 1.59  | 6.97  | 2.25  | 9.38  | 4      |
| 29195     | Chad         | 33.13 | 25.15 | 33.21 | 19.37 | 24.29 | 241.4 | 22.03 | 20.1   |
| 113917    | Lenep        | 1.4   | 0     | 0     | 1.06  | 1.23  | 1.32  | 1.41  | 2.88   |
| 499461    | Wisp3        | 1.88  | 5.52  | 1.85  | 2.16  | 3.55  | 11.62 | 7.85  | 8.77   |
| 24610     | Odf1         | 2     | 0     | 3     | 0     | 3     | 3     | 3     | 5      |
| 25357     | Thrsp        | 27    | 3     | 0     | 0     | 1     | 62    | 19    | 2      |
| 301378    | Mettl21c     | 0     | 2     | 2     | 1     | 6     | 8     | 0     | 0      |
| 100359528 | RGD1565987   | 14.95 | 1.07  | 0     | 9.36  | 18.15 | 11.74 | 41.36 | 0      |
| 680665    | Fcrl1        | 4.08  | 0.7   | 2.86  | 0     | 7.05  | 7.16  | 3.66  | 3.68   |
| 103689937 | LOC103689937 | 6.62  | 0     | 3.47  | 3.24  | 6.19  | 14.51 | 7.39  | 9.55   |
| 294097    | Lipol        | 0     | 0     | 1.01  | 1.03  | 1     | 2.01  | 0.76  | 2      |
| 57809     | Rpl35a       | 0     | 0     | 44.01 | 0     | 0.03  | 19.9  | 0     | 105.26 |
| 287099    | Cldn9        | 1     | 1     | 1     | 0     | 2     | 2     | 1.55  | 3      |
| 100910755 | LOC100910755 | 0     | 8.49  | 0     | 7.83  | 13.41 | 11.34 | 11.53 | 10.6   |
| 171333    | I112rb1      | 2     | 3     | 1     | 2     | 7     | 10    | 3     | 3      |
| 690861    | Stk33        | 1     | 3     | 1     | 3     | 4     | 9     | 3     | 7      |
| 102549061 | LOC102549061 | 1.68  | 3.68  | 2.21  | 0     | 1.33  | 9.04  | 6.25  | 5.18   |
| 308056    | RGD1311933   | 0     | 1     | 0     | 0     | 0     | 0     | 0     | 2.88   |
| 686087    | LOC686087    | 0     | 0     | 25.09 | 0     | 0     | 73.25 | 0     | 0      |
| 501129    | Tmem182      | 3     | 8     | 6     | 11    | 18    | 47    | 6     | 11     |
| 304447    | RGD1559821   | 0     | 2.13  | 3.02  | 1.22  | 1.23  | 7.28  | 6.77  | 3.48   |
| 295261    | Tmod4        | 38    | 31    | 42    | 28    | 78    | 248   | 37    | 48     |

|           |              |       |      |      |       |      |      |      |       |
|-----------|--------------|-------|------|------|-------|------|------|------|-------|
| 299266    | Asb2         | 20.21 | 16   | 32   | 34.94 | 82   | 152  | 33   | 38.32 |
| 84022     | Ghsr         | 9     | 5    | 10   | 5     | 8    | 39   | 35   | 4     |
| 246298    | Retsat       | 650   | 677  | 650  | 601   | 2129 | 2060 | 2137 | 1349  |
| 502999    | RGD1563334   | 0     | 0    | 1    | 0     | 0    | 1.99 | 1    | 0     |
| 100910138 | LOC100910138 | 0     | 5.55 | 0    | 0     | 0    | 0    | 5.52 | 11.11 |
| 100361147 | Mkrn2os      | 0     | 1    | 0    | 0     | 0    | 0    | 2    | 1     |
| 100365542 | LOC100365542 | 1.34  | 0    | 0    | 0     | 3    | 1.02 | 0    | 0     |
| 100911101 | LOC100911101 | 0     | 0    | 1    | 0     | 1    | 1    | 1    | 0     |
| 102550438 | LOC102550438 | 0     | 0    | 1    | 0     | 1    | 0    | 2    | 0     |
| 102557053 | LOC102557053 | 0     | 0    | 1    | 0     | 1    | 0    | 1    | 1     |
| 108348486 | LOC108348486 | 2     | 0    | 1    | 0     | 5    | 2    | 1    | 1     |
| 108349752 | LOC108349752 | 1     | 3    | 1    | 3     | 8    | 9    | 6    | 1     |
| 116694    | Capn9        | 0     | 1    | 1    | 0     | 3    | 1    | 2    | 0     |
| 117097    | Gpr50        | 0     | 1    | 0    | 1     | 3    | 1    | 1    | 1     |
| 192206    | Prok2        | 1     | 0    | 0    | 0     | 0    | 1    | 2    | 0     |
| 24493     | I11a         | 1     | 0    | 1    | 0     | 0    | 0    | 4    | 2     |
| 25598     | Fabp2        | 1     | 0    | 0    | 1     | 4    | 0    | 2    | 0     |
| 27150     | Kcnh3        | 0     | 0    | 1    | 0     | 2    | 1    | 0    | 0     |
| 287358    | Prss38       | 1     | 0    | 2    | 1     | 2    | 1    | 7    | 2     |
| 287646    | Tt116        | 0     | 1    | 0    | 1     | 2    | 1    | 1    | 2     |
| 288117    | Slc9c1       | 0     | 1    | 0    | 0     | 2    | 0    | 0    | 1     |
| 291678    | Wnt8a        | 0     | 1    | 0    | 0     | 1    | 1    | 0    | 1     |
| 291955    | Ces4a        | 0     | 1    | 0    | 0     | 0    | 2    | 1    | 0     |
| 292126    | Habp2        | 1     | 0    | 0    | 0     | 0    | 0    | 2    | 1     |
| 292477    | Adgb         | 0     | 2    | 0    | 1     | 4    | 2    | 1    | 2     |
| 292858    | Klklc10      | 1     | 0    | 0    | 0     | 0    | 2    | 0    | 1     |
| 295019    | RGD1307595   | 2     | 1    | 2    | 0     | 3    | 7    | 2    | 3     |
| 296289    | Sun5         | 0     | 1    | 0    | 0     | 0    | 1    | 0    | 2     |
| 298581    | Pla2g2e      | 0     | 0    | 0    | 1     | 2    | 0    | 0    | 1     |
| 300199    | Olr1106      | 0     | 1    | 0    | 0     | 0    | 1    | 0    | 2     |
| 301626    | Pdcd1        | 0     | 0.5  | 0    | 0.5   | 1    | 0    | 1    | 1     |
| 304917    | Serpinc1     | 0     | 0    | 1    | 0     | 0    | 0    | 2    | 1     |
| 304991    | Olr1596      | 0     | 0    | 0    | 1     | 1    | 2    | 0    | 0     |
| 308303    | Vom2r23      | 0     | 1    | 0    | 0     | 1    | 2    | 0    | 0     |
| 311505    | Pax1         | 2     | 4    | 1    | 0     | 1    | 14   | 5    | 1     |
| 312102    | Vsig4        | 1     | 1    | 0    | 0     | 1    | 1    | 3    | 1     |
| 314221    | Six6         | 0     | 1    | 0    | 0     | 1    | 1    | 0    | 1     |
| 316579    | Csprs        | 0     | 1    | 1    | 0     | 3    | 1    | 0    | 2     |
| 406018    | Olr1734      | 0     | 0    | 0    | 2     | 2    | 2    | 1    | 1     |
| 500292    | Cidec        | 14    | 5    | 3    | 3     | 1    | 58   | 14   | 2     |
| 500294    | Fancd2os     | 1     | 0    | 0    | 0     | 0    | 0    | 3    | 0     |
| 502918    | Slc15a5      | 1     | 0    | 0    | 0     | 1    | 0    | 1    | 1     |
| 679219    | Esx1         | 1     | 0    | 0    | 0     | 1    | 1    | 1    | 0     |
| 679509    | Vrtn         | 0     | 0    | 0    | 1     | 2    | 1    | 0    | 0     |
| 681924    | Noxred1      | 1     | 0    | 0    | 0     | 0    | 1    | 1    | 1     |
| 685229    | Tal2         | 2     | 0    | 0    | 3     | 3    | 2    | 4    | 6     |
| 688884    | Gpr152       | 2     | 1    | 0    | 0     | 1    | 3    | 4    | 1     |
| 689709    | Frdm1        | 0     | 0    | 0    | 1     | 1    | 0    | 1    | 1     |
| 690311    | LOC690311    | 0     | 0    | 0    | 1     | 1    | 0    | 1    | 1     |
| 691668    | Gzmn         | 0     | 0    | 0    | 1     | 2    | 0    | 1    | 0     |
| 79224     | Serpind1     | 0     | 0    | 1    | 0     | 0    | 1    | 0    | 2     |
| 81509     | Bdkrb1       | 1     | 0    | 0    | 1     | 1    | 4    | 1    | 0     |
| 83808     | Ugt2b35      | 0     | 1    | 0    | 0     | 1    | 2    | 0    | 0     |
| 84608     | Slcola6      | 1     | 0    | 1    | 0     | 2    | 2    | 2    | 0     |
| 100909600 | LOC100909600 | 0     | 0    | 3.25 | 0.75  | 5.75 | 2.51 | 0    | 3.75  |
| 301521    | Cfap65       | 0     | 0    | 2    | 0     | 2    | 1    | 0    | 3.02  |

|           |              |        |       |       |       |       |       |       |       |
|-----------|--------------|--------|-------|-------|-------|-------|-------|-------|-------|
| 103691392 | LOC103691392 | 3.26   | 3.77  | 2.06  | 0     | 4.07  | 8.13  | 4.87  | 10.38 |
| 100361090 | LOC100361090 | 1      | 0     | 0     | 0     | 0     | 0     | 2.01  | 1.01  |
| 24583     | Myh3         | 15.01  | 11.66 | 12.91 | 13.54 | 21.62 | 118   | 6.88  | 14.19 |
| 685128    | Gkn3         | 0      | 0     | 0.83  | 1.19  | 2     | 1.21  | 1.71  | 1.21  |
| 25053     | Cyp2d2       | 0      | 0     | 0     | 2.31  | 1.65  | 1.09  | 1.11  | 3.18  |
| 100911331 | LOC100911331 | 0      | 0     | 1     | 0     | 0     | 1.01  | 2.06  | 0     |
| 498579    | RGD1564899   | 14.99  | 24.12 | 27.98 | 24.98 | 54.95 | 192.9 | 19.07 | 17.23 |
| 100361693 | LOC100361693 | 0      | 0     | 0.77  | 0     | 0     | 0     | 0     | 2.38  |
| 680551    | Apoc4        | 4      | 0     | 2     | 4     | 9     | 8     | 8     | 6     |
| 684993    | Ppp1r35      | 0      | 87    | 48.46 | 0     | 102   | 115   | 109   | 94    |
| 102557105 | LOC102557105 | 0      | 4.08  | 1.99  | 4.84  | 8.87  | 13.2  | 11.8  | 0     |
| 102551626 | LOC102551626 | 0      | 4.55  | 0.87  | 5.17  | 15.94 | 7.14  | 9.96  | 0     |
| 25412     | Col2a1       | 693    | 1025  | 903   | 812   | 642   | 8645  | 666   | 991   |
| 304349    | RGD1559588   | 3.42   | 1     | 4.18  | 2.02  | 15.17 | 4.25  | 2     | 12.66 |
| 103690980 | LOC103690980 | 11.17  | 0     | 0     | 0     | 18.42 | 4.9   | 0     | 12.56 |
| 365298    | Alpk3        | 29     | 19    | 13    | 25    | 71    | 171   | 19    | 17    |
| 498299    | Lefty1       | 1.02   | 1     | 1     | 1     | 4     | 3     | 3     | 3     |
| 691546    | LOC691546    | 0      | 0     | 1.39  | 1.36  | 4.8   | 0     | 1.35  | 2.75  |
| 679629    | Smtnl2       | 7      | 11    | 9     | 6     | 31    | 56    | 13    | 7     |
| 29660     | Pnck         | 2      | 2     | 0     | 0     | 3     | 4     | 3     | 3     |
| 366671    | Fam71d       | 0      | 1     | 1     | 2     | 3     | 5     | 1     | 4     |
| 361214    | RGD1561671   | 0      | 0     | 0.7   | 0     | 0     | 0     | 1.36  | 0.92  |
| 108352370 | LOC108352370 | 0      | 0     | 3.88  | 0     | 4.23  | 3.36  | 2.41  | 2.73  |
| 100912534 | LOC100912534 | 126.58 | 0     | 58.41 | 0     | 160   | 126.6 | 126.6 | 196   |
| 103693502 | LOC103693502 | 0      | 0     | 0     | 4.17  | 13.76 | 0     | 0     | 0     |
| 25629     | Plin1        | 23     | 2     | 1     | 3     | 2     | 67    | 23    | 4     |
| 24477     | Ibsp         | 44     | 59    | 42    | 43    | 111   | 422   | 56    | 42    |
| 294341    | Slc5a4       | 0      | 0     | 2.33  | 0     | 7.84  | 0     | 0     | 0     |
| 680319    | Tceal7       | 6      | 2     | 9     | 4     | 17    | 48    | 3     | 3     |
| 295531    | Tnni3k       | 18     | 23    | 27    | 23    | 20    | 77    | 148   | 64    |
| 304913    | Tnn          | 3      | 7     | 3     | 2     | 8     | 35    | 6     | 2     |
| 25365     | Actg2        | 49     | 9     | 9     | 8     | 35.32 | 160   | 46    | 15.06 |
| 24959     | Pgam2        | 79     | 76    | 91    | 104   | 320   | 681   | 107   | 96    |
| 100911769 | LOC100911769 | 0      | 1.92  | 3.75  | 0     | 4.39  | 0.48  | 14.81 | 0     |
| 100362054 | LOC100362054 | 1      | 0     | 1     | 0     | 3     | 2     | 2     | 0     |
| 114596    | Wap          | 0      | 1     | 0     | 1     | 1     | 0     | 5     | 1     |
| 25539     | Sag          | 0      | 1     | 1     | 0     | 1     | 1     | 4     | 1     |
| 25645     | Adrb3        | 0      | 2     | 0     | 0     | 1     | 5     | 1     | 0     |
| 290325    | Nuggc        | 1      | 0     | 1     | 0     | 0     | 4     | 1     | 2     |
| 295322    | Vtcn1        | 0      | 0     | 2     | 0     | 2     | 3     | 1     | 1     |
| 297795    | Npbwr1       | 0      | 1     | 1     | 0     | 0     | 4     | 2     | 1     |
| 316616    | Iqca1        | 2      | 1     | 0     | 1     | 2     | 5     | 4     | 3     |
| 366463    | Oxct2a       | 0      | 1     | 0     | 1     | 1     | 3     | 3     | 0     |
| 499132    | Rgs9bp       | 1      | 1     | 0     | 0     | 2     | 1     | 3     | 1     |
| 500820    | Slc5a8       | 1      | 1     | 0     | 0     | 1     | 3     | 3     | 0     |
| 680702    | Ripply1      | 1      | 0     | 0     | 1     | 0     | 3     | 1     | 3     |
| 140727    | Cacng6       | 1.83   | 1.6   | 2.11  | 5.46  | 13.57 | 21.52 | 3.08  | 1.17  |
| 690147    | LOC690147    | 0      | 1.12  | 1.56  | 0     | 0     | 0.78  | 4.42  | 4.42  |
| 100910104 | Xirp1        | 7      | 14.45 | 4.16  | 8     | 22    | 73    | 13    | 13    |
| 102553868 | LOC102553868 | 0      | 0     | 0     | 3     | 2     | 9     | 0     | 0     |
| 304551    | Myo18b       | 12.14  | 15    | 18    | 17.66 | 61    | 137.9 | 15    | 16.55 |
| 114108    | Pdlim3       | 38     | 32    | 29    | 26    | 110   | 288   | 42    | 19    |
| 29353     | Phkg1        | 5      | 1     | 10    | 3     | 21    | 39    | 5     | 5     |
| 102550211 | LOC102550211 | 3.88   | 0     | 1.54  | 0     | 7.82  | 3     | 3.55  | 5.65  |
| 305675    | Synpo21      | 25.76  | 17.7  | 19.06 | 27.57 | 85.91 | 183.6 | 41.66 | 22.29 |
| 678817    | LOC678817    | 1      | 0     | 0     | 0     | 0     | 1.71  | 0     | 2     |

|           |              |       |        |        |       |       |       |       |       |
|-----------|--------------|-------|--------|--------|-------|-------|-------|-------|-------|
| 685048    | LOC685048    | 3.42  | 1      | 0      | 2.02  | 6.77  | 2.55  | 2     | 12.65 |
| 310552    | Sfrp2        | 34    | 7      | 4      | 6     | 94    | 39    | 44    | 13    |
| 100364457 | LOC100364457 | 42.84 | 0      | 0      | 0     | 47.73 | 0     | 85.69 | 27.16 |
| 500453    | Pax5         | 4     | 1      | 3      | 1     | 10    | 15    | 7     | 2     |
| 100363454 | LOC100363454 | 0     | 0      | 0      | 2.5   | 2.23  | 0     | 0     | 7.25  |
| 292461    | Raet11       | 0     | 0.94   | 0      | 0     | 2     | 1     | 0     | 0.57  |
| 116648    | Phox2a       | 2.01  | 2.01   | 2.02   | 0     | 14    | 4     | 2.01  | 3.01  |
| 79451     | Fabp4        | 108   | 7      | 17     | 7     | 43    | 380   | 88    | 23    |
| 308637    | Ano5         | 10    | 7      | 4      | 11    | 31    | 75    | 12    | 5     |
| 311167    | Smtnl1       | 7     | 4      | 4      | 7     | 17    | 56    | 4     | 8     |
| 84594     | Nfs1         | 36.72 | 130.25 | 107.39 | 16.54 | 157.6 | 913.8 | 24.74 | 35.58 |
| 684984    | Cd3001g      | 1     | 13     | 0      | 10    | 0     | 20    | 51    | 23    |
| 365241    | Kcna7        | 6     | 5      | 4      | 2     | 13    | 46    | 4     | 4     |
| 366245    | R3hdml       | 3     | 9      | 8      | 2     | 6     | 63    | 5     | 13    |
| 363830    | Vpreb2       | 0.48  | 5.48   | 0      | 0     | 4.12  | 7     | 8     | 4.47  |
| 499670    | RGD1560263   | 0     | 0      | 3.26   | 3.03  | 7.66  | 0     | 13.69 | 3.66  |
| 102556672 | LOC102556672 | 1.31  | 0      | 0      | 0     | 0     | 3.03  | 2.19  | 0     |
| 100911800 | LOC100911800 | 1.52  | 0      | 0      | 0     | 0     | 1.52  | 2     | 2.55  |
| 103693243 | LOC103693243 | 0     | 0      | 1      | 0     | 1     | 0     | 2     | 1     |
| 103695172 | LOC103695172 | 0     | 0      | 0      | 1     | 4     | 0     | 0     | 0     |
| 108348301 | LOC108348301 | 1     | 0      | 0      | 0     | 1     | 0     | 1     | 2     |
| 116506    | Calcr        | 0     | 0      | 0      | 1     | 2     | 2     | 0     | 0     |
| 171497    | Sgk2         | 1     | 0      | 0      | 0     | 1     | 1     | 1     | 1     |
| 24422     | Gsta2        | 0     | 0      | 1      | 0     | 1     | 3     | 0     | 0     |
| 246250    | Retn         | 6     | 1      | 1      | 0     | 5     | 19    | 7     | 1     |
| 25376     | Ambn         | 0     | 0      | 0      | 1     | 0     | 2     | 2     | 0     |
| 25457     | Gpr1         | 0     | 0      | 1      | 0     | 0     | 2     | 0     | 2     |
| 289565    | Arl9         | 1     | 0      | 0      | 0     | 2     | 1     | 0     | 1     |
| 289949    | Fam3d        | 0     | 0      | 0      | 1     | 1     | 0     | 2     | 1     |
| 293267    | Hbel         | 1     | 0      | 0      | 0     | 2     | 2     | 0     | 0     |
| 294661    | S100z        | 1     | 0      | 0      | 0     | 1     | 0     | 1     | 2     |
| 298320    | RGD1561445   | 0     | 0      | 1      | 1     | 3     | 2     | 1     | 2     |
| 300202    | Olr1107      | 0     | 1      | 0      | 0     | 0     | 3     | 0     | 1     |
| 300207    | Tex49        | 1     | 0      | 0      | 0     | 0     | 2     | 0     | 2     |
| 303491    | Hoxb1        | 0     | 1      | 0      | 0     | 0     | 1     | 1     | 2     |
| 306356    | Cilp2        | 6     | 5      | 5      | 1     | 17    | 39    | 8     | 4     |
| 308794    | Cfap161      | 2     | 0      | 0      | 0     | 5     | 1     | 1     | 1     |
| 312913    | Cpa6         | 0     | 0      | 1      | 1     | 2     | 4     | 1     | 1     |
| 313936    | Fam228a      | 0     | 0      | 0      | 2     | 2     | 3     | 1     | 2     |
| 353228    | Zar1         | 0     | 0      | 0      | 1     | 2     | 1     | 0     | 1     |
| 500800    | Ccdc105      | 0     | 1      | 0      | 0     | 0     | 3     | 1     | 0     |
| 501199    | Tmem232      | 2     | 0      | 0      | 0     | 2     | 3     | 2     | 1     |
| 502731    | Vwde         | 0     | 0      | 1      | 0     | 0     | 0     | 2     | 2     |
| 50683     | Sftpc        | 1     | 0      | 0      | 0     | 0     | 1     | 1     | 2     |
| 680018    | Ccdc36       | 1     | 1      | 0      | 0     | 2     | 2     | 4     | 0     |
| 685099    | Meiob        | 0     | 0      | 0      | 1     | 1     | 0     | 1     | 2     |
| 685303    | LOC685303    | 0     | 0      | 1      | 0     | 0     | 1     | 2     | 1     |
| 690282    | Tex28        | 1     | 0      | 0      | 0     | 0     | 1     | 2     | 1     |
| 103693423 | LOC103693423 | 0.99  | 0      | 0      | 1     | 4     | 2     | 2     | 0     |
| 100912611 | LOC100912611 | 0     | 0      | 2.09   | 1.46  | 1.22  | 6     | 4.42  | 2.81  |
| 100361007 | Adig         | 3     | 1      | 1      | 3     | 3     | 21    | 6     | 3     |
| 502573    | RGD1562104   | 0.99  | 0      | 0      | 0     | 0     | 1.65  | 2.48  | 0     |
| 100909462 | LOC100909462 | 0     | 0.26   | 0.33   | 0     | 0     | 0     | 2.47  | 0     |
| 296345    | Jph2         | 24    | 15     | 38     | 26    | 94    | 290   | 36    | 13    |
| 297333    | Smyd1        | 14.55 | 19.48  | 10.17  | 26.36 | 89.11 | 171   | 22.51 | 15.73 |
| 337868    | Myod1        | 1     | 0      | 1      | 3.2   | 4     | 11    | 6     | 1     |



|           |              |       |       |       |       |       |       |       |       |
|-----------|--------------|-------|-------|-------|-------|-------|-------|-------|-------|
| 102555947 | LOC102555947 | 0     | 0     | 0     | 1.06  | 2.73  | 0     | 1.77  | 0     |
| 298795    | LOC298795    | 0     | 3.17  | 0     | 5.26  | 11.63 | 11.17 | 3.9   | 9.25  |
| 100910102 | Catsperb     | 1     | 1     | 1     | 3     | 7     | 5     | 9     | 5     |
| 64104     | Tnmd         | 2     | 0     | 1     | 0     | 1     | 10    | 1     | 1     |
| 680432    | LOC680432    | 0     | 0     | 0     | 1     | 2.81  | 1.53  | 0     | 0     |
| 102554718 | LOC102554718 | 0     | 0     | 0.23  | 0     | 0     | 1     | 0     | 0     |
| 613222    | Defa7        | 0     | 0     | 2.43  | 0     | 2.27  | 2.6   | 3.47  | 2.24  |
| 686092    | Tmem258b     | 1.62  | 0     | 0     | 0     | 2.09  | 3.4   | 0     | 1.58  |
| 102555814 | LOC102555814 | 16.27 | 9.52  | 11.8  | 11.11 | 56.78 | 122.4 | 21.93 | 11.55 |
| 64362     | Des          | 98    | 98    | 139   | 78    | 435   | 1171  | 121   | 104   |
| 298139    | LOC298139    | 2.85  | 2.02  | 3.04  | 2.02  | 7.06  | 27.22 | 6.09  | 4.05  |
| 100364062 | LOC100364062 | 6.92  | 0     | 0     | 4.88  | 19.47 | 21.83 | 7.58  | 4.03  |
| 103694424 | LOC103694424 | 0     | 2     | 0     | 0     | 2     | 5     | 1     | 1     |
| 24498     | Ii6          | 0     | 0     | 1     | 1     | 1     | 3     | 4     | 1     |
| 29148     | Myog         | 0     | 1     | 0     | 1     | 4     | 4     | 0     | 1     |
| 306281    | Ptpn20       | 0     | 1     | 1     | 0     | 3     | 0     | 4     | 2     |
| 310586    | Flg2         | 0     | 1     | 1     | 0     | 1     | 4     | 3     | 1     |
| 501675    | Tmem114      | 2     | 0     | 2     | 0     | 4     | 5     | 2     | 7     |
| 680019    | Trim38       | 0     | 2     | 0     | 0     | 2     | 1     | 2     | 4     |
| 500450    | Tpm2         | 255   | 195   | 224   | 190   | 792   | 2688  | 299   | 179   |
| 309760    | Mypn         | 10    | 16    | 4     | 12    | 46    | 112   | 22    | 13    |
| 103689994 | LOC103689994 | 0     | 0.9   | 0.89  | 0     | 3.91  | 1.47  | 2.88  | 0     |
| 501934    | LOC501934    | 1.82  | 0     | 0     | 0     | 1.76  | 1.41  | 3.63  | 1.6   |
| 316740    | Myom1        | 21    | 14    | 25    | 27    | 108   | 238   | 26    | 31    |
| 364147    | Yipf7        | 1     | 1     | 0     | 1     | 4     | 7     | 3     | 0     |
| 305941    | Sgcg         | 6     | 1     | 4     | 0     | 10    | 35    | 4     | 3     |
| 171409    | Tnnt1        | 6     | 5     | 5     | 4     | 32    | 48    | 8     | 7     |
| 688862    | Ip6k3        | 3     | 1     | 1     | 3     | 8     | 23    | 6     | 1     |
| 102554988 | LOC102554988 | 0     | 0     | 2.83  | 0     | 2.93  | 8.87  | 1.89  | 0     |
| 102550797 | LOC102550797 | 0     | 0     | 0     | 1     | 0     | 2.15  | 2.69  | 0     |
| 24785     | Slc9a4       | 1.03  | 0     | 0     | 0     | 0     | 2     | 0     | 3     |
| 301518    | Prkag3       | 4     | 6     | 2     | 2     | 21    | 37    | 7     | 3     |
| 25295     | Bglap        | 44.01 | 43.12 | 26.35 | 19.8  | 130.2 | 450.1 | 39.9  | 31.9  |
| 308779    | Fsd2         | 5     | 1     | 2     | 2     | 18    | 28    | 0     | 3     |
| 338458    | Obscn        | 23    | 24    | 35    | 44    | 166   | 381   | 39    | 32    |
| 56824     | Ifit1        | 3.13  | 3.2   | 4.38  | 2.19  | 4.29  | 3     | 54.29 | 2.13  |
| 108351974 | LOC108351974 | 0     | 1     | 0     | 0     | 1     | 1     | 2     | 1     |
| 29173     | Csn2         | 0     | 0     | 1     | 0     | 1     | 1     | 1     | 2     |
| 293832    | Magea10      | 0     | 1     | 0     | 0     | 1     | 0     | 3     | 1     |
| 29605     | Myh13        | 0     | 1     | 0     | 0     | 1     | 1     | 2     | 1     |
| 299271    | Serpina16    | 1     | 0     | 0     | 0     | 0     | 1     | 2     | 2     |
| 300923    | Nup62c1      | 1     | 1     | 0     | 0     | 3     | 2     | 3     | 2     |
| 500257    | Chst13       | 1     | 0     | 1     | 0     | 7     | 1     | 1     | 1     |
| 500574    | Pax7         | 1     | 0     | 0     | 0     | 0     | 4     | 1     | 0     |
| 501023    | Gfral        | 0     | 0     | 0     | 1     | 1     | 1     | 1     | 2     |
| 64637     | Hand2        | 0     | 0     | 1     | 0     | 4     | 0     | 1     | 0     |
| 681901    | Utf1         | 1     | 0     | 0     | 0     | 0     | 2     | 3     | 0     |
| 100911132 | LOC100911132 | 0     | 0     | 0     | 1     | 3.01  | 0     | 2.01  | 0     |
| 292316    | Smok2a       | 0     | 0     | 0     | 1     | 1.51  | 1.44  | 2.17  | 0     |
| 365377    | Trim72       | 10    | 9     | 11    | 6     | 40    | 122   | 13    | 10    |
| 302827    | LOC302827    | 0     | 0     | 1     | 0     | 2.06  | 1     | 2.08  | 0     |
| 108348213 | LOC108348213 | 0     | 0     | 1.97  | 0     | 3.51  | 2.8   | 0     | 3.92  |
| 287881    | Ppplr27      | 1     | 1     | 1     | 0     | 2     | 12    | 2     | 0     |
| 301226    | Apobec2      | 15    | 5     | 10    | 7     | 55    | 120   | 16    | 7     |
| 361002    | Duspl3       | 2     | 3     | 3.59  | 6     | 16.24 | 53.29 | 8     | 1.08  |
| 307100    | Calml3       | 7     | 0     | 0     | 0     | 1     | 27    | 10    | 0     |

|           |              |        |        |        |       |       |       |       |       |
|-----------|--------------|--------|--------|--------|-------|-------|-------|-------|-------|
| 246253    | Adipoq       | 40     | 2      | 0      | 2     | 1     | 200   | 39    | 2     |
| 499972    | Asb10        | 0      | 2      | 1      | 1     | 6     | 13    | 2     | 1     |
| 362708    | Trim54       | 10     | 5      | 3      | 6     | 32    | 93    | 3     | 6     |
| 102552549 | LOC102552549 | 0      | 0      | 9.78   | 0     | 17.48 | 9.62  | 17.45 | 10.71 |
| 367059    | RGD1563738   | 0      | 0      | 0.62   | 0     | 1     | 0     | 1.53  | 1     |
| 100912471 | LOC100912471 | 3.54   | 4.68   | 0      | 0     | 5.96  | 0.85  | 36.5  | 4.8   |
| 684988    | LOC684988    | 0      | 17.97  | 0      | 0     | 18.01 | 53.87 | 17.71 | 16.41 |
| 108352829 | LOC108352829 | 9.01   | 0      | 0      | 0     | 27.02 | 9.01  | 9.01  | 9.01  |
| 100910280 | Sdr42e2      | 0      | 1      | 0      | 0     | 1     | 3     | 0     | 2     |
| 102546663 | LOC102546663 | 0      | 0      | 0      | 1     | 0     | 2.84  | 2.16  | 1     |
| 114098    | Ltb4r2       | 1      | 0      | 0      | 0     | 1     | 3     | 1     | 1     |
| 116462    | Ptcra        | 0      | 0      | 0      | 1     | 0     | 0     | 4     | 2     |
| 116472    | I117b        | 0      | 1      | 1      | 0     | 2     | 7     | 1     | 2     |
| 317268    | Arx          | 0      | 0      | 0      | 2     | 1     | 10    | 1     | 0     |
| 365751    | Trim55       | 2      | 2      | 0      | 0     | 8     | 14    | 2     | 0     |
| 499759    | Ccdc187      | 1      | 0      | 0      | 0     | 2     | 3     | 0     | 1     |
| 690388    | Pla2g2f      | 1      | 0      | 0      | 0     | 0     | 1     | 5     | 0     |
| 691300    | RGD1565323   | 0      | 0      | 1      | 0     | 0     | 6     | 0     | 0     |
| 84396     | Atp1b4       | 0      | 2      | 2      | 0     | 0     | 19    | 1     | 4     |
| 287122    | Rpl31        | 5      | 6      | 10     | 7     | 46    | 102   | 13    | 13    |
| 294053    | Ccnj         | 1.82   | 0      | 33.73  | 0     | 98    | 58.5  | 0.07  | 68    |
| 303556    | Lrrc37a      | 0      | 0      | 0      | 1.17  | 1.05  | 3.27  | 0     | 3.12  |
| 688173    | Tcap         | 3      | 2      | 0      | 3     | 13    | 34    | 2     | 2     |
| 29242     | Car4         | 2      | 8      | 1      | 10    | 3     | 38    | 82    | 11    |
| 25312     | Dmp1         | 7      | 9      | 1      | 4     | 26    | 100   | 5     | 6     |
| 292905    | Hrc          | 16.03  | 13.72  | 15.6   | 21.03 | 129   | 276   | 20.14 | 8.57  |
| 117537    | Klhl41       | 15     | 11     | 7      | 14    | 52    | 232   | 14    | 13    |
| 25438     | Eno3         | 73     | 98     | 77     | 103   | 588   | 1547  | 109   | 83    |
| 103690175 | LOC103690175 | 0      | 0      | 28.69  | 0     | 66.34 | 127.2 | 0     | 0     |
| 103690098 | LOC103690098 | 0      | 0      | 0      | 1.29  | 1.27  | 2.56  | 1.45  | 3.51  |
| 117505    | Csrp3        | 0      | 1      | 10     | 2     | 7     | 71    | 7     | 4     |
| 100912172 | LOC100912172 | 0      | 0      | 0      | 0.28  | 0.64  | 0     | 1     | 0.28  |
| 100911148 | LOC100911148 | 0      | 0      | 1.01   | 0     | 0     | 4.06  | 2.95  | 0     |
| 24661     | Pnmt         | 1      | 0      | 0      | 0     | 2     | 1     | 2     | 2     |
| 27064     | Ankrd1       | 2      | 4      | 3      | 4     | 6     | 72    | 8     | 5     |
| 286924    | Gnat3        | 1      | 0      | 0      | 0     | 2     | 0     | 2     | 3     |
| 498005    | Asb16        | 0      | 3      | 0      | 1     | 7     | 19    | 1     | 1     |
| 24701     | Pygm         | 137.12 | 111.14 | 135.13 | 194.2 | 1133  | 2554  | 184.2 | 173.1 |
| 499018    | RGD1560015   | 0      | 0      | 2.44   | 0     | 4.1   | 2     | 5.38  | 6.02  |
| 500036    | Ppplr3a      | 3      | 5      | 0      | 8     | 35    | 71    | 5     | 4     |
| 302666    | Asb11        | 1      | 4      | 3      | 0     | 21    | 33    | 2     | 2     |
| 367176    | RGD1565653   | 0      | 0      | 1.15   | 0     | 3.4   | 2.7   | 2.26  | 0     |
| 108352087 | LOC108352087 | 4      | 7      | 11     | 13    | 53    | 176   | 13    | 16    |
| 684425    | Adssl1       | 23     | 9      | 17     | 12    | 143   | 297   | 19    | 12    |
| 294388    | Stox1        | 0      | 0      | 1      | 0     | 1     | 1     | 3     | 3     |
| 363331    | Plin4        | 15     | 0      | 1      | 2     | 17    | 113   | 12    | 2     |
| 690468    | LOC690468    | 0.33   | 14.43  | 0      | 0     | 43.28 | 18.86 | 38.47 | 19.23 |
| 500267    | Lmod3        | 2      | 2      | 2      | 4     | 23    | 56    | 4     | 2     |
| 259167    | Art5         | 2      | 0      | 0      | 0     | 5.18  | 11    | 1     | 0     |
| 686019    | Casq1        | 46.02  | 28.81  | 42.86  | 53    | 340   | 1042  | 68.01 | 48.01 |
| 690423    | Jsrp1        | 3      | 2      | 1      | 3     | 22    | 49    | 5     | 3     |
| 688915    | Cmya5        | 59     | 30     | 29     | 58    | 401   | 1036  | 63    | 46    |
| 362282    | Pck1         | 16     | 0      | 1      | 0     | 0     | 124   | 26    | 1     |
| 100361706 | LOC100361706 | 0      | 0      | 1      | 0     | 3     | 2     | 3     | 1     |
| 298512    | Rhbd12       | 0      | 2      | 0      | 0     | 5     | 6     | 6     | 1     |
| 309430    | Dmrt2        | 1      | 0      | 0      | 0     | 2     | 6     | 1     | 0     |

|           |              |       |       |       |       |       |       |       |       |
|-----------|--------------|-------|-------|-------|-------|-------|-------|-------|-------|
| 503446    | Asb12        | 1     | 0     | 0     | 1     | 3     | 14    | 1     | 0     |
| 641642    | Defb27       | 0     | 1     | 0     | 0     | 1     | 3     | 2     | 3     |
| 690209    | Nek211       | 0     | 1.19  | 0     | 0     | 9.39  | 0     | 0     | 1.6   |
| 365560    | RGD1566373   | 0     | 0     | 0.51  | 0     | 2.93  | 0     | 1.81  | 0     |
| 291245    | Actn2        | 27.44 | 11.88 | 13.72 | 17.93 | 138.9 | 488.6 | 27.69 | 8.07  |
| 290223    | Fitm1        | 3     | 0     | 1     | 4     | 19    | 53    | 2     | 1     |
| 108352449 | LOC108352449 | 4.11  | 0     | 0     | 0     | 3.69  | 10.22 | 20.42 | 4.66  |
| 54232     | Car3         | 298   | 15    | 7     | 47    | 714   | 2650  | 246   | 48    |
| 103690053 | LOC103690053 | 0     | 0     | 0     | 0     | 0     | 2     | 1     | 2     |
| 24904     | Slc22a1      | 0     | 0     | 0     | 0     | 0     | 2     | 3     | 0     |
| 290458    | Trim52       | 0     | 0     | 0     | 0     | 1     | 1     | 1     | 2     |
| 291179    | Gpr141       | 1     | 0     | 0     | 0     | 4     | 2     | 2     | 2     |
| 302971    | Prss22       | 0     | 0     | 0     | 0     | 0     | 3     | 1     | 1     |
| 303517    | Tns4         | 0     | 0     | 0     | 0     | 1     | 1     | 1     | 2     |
| 494222    | Pfn4         | 0     | 0     | 0     | 0     | 2     | 0     | 2     | 1     |
| 497794    | Mug1         | 0     | 0     | 0     | 0     | 0     | 5     | 0     | 0     |
| 499362    | Lbx1         | 0     | 0     | 0     | 0     | 3     | 2     | 0     | 0     |
| 500418    | Cngb3        | 0     | 0     | 0     | 0     | 0     | 3     | 0     | 2     |
| 83612     | Slc32a1      | 0     | 0     | 0     | 0     | 0     | 3     | 0     | 2     |
| 108348200 | LOC108348200 | 0     | 0     | 0     | 0     | 0     | 1.71  | 3.37  | 0     |
| 102553743 | LOC102553743 | 0     | 0     | 0     | 0     | 2.42  | 0     | 0     | 2.71  |
| 58968     | Acan         | 15    | 11    | 9     | 10    | 11    | 436   | 7     | 10    |
| 100911107 | LOC100911107 | 0     | 0     | 0     | 0     | 1.04  | 3.12  | 0     | 1.04  |
| 367975    | LOC367975    | 0     | 0     | 0     | 1.02  | 0     | 11.12 | 0     | 0     |
| 54284     | Pitx2        | 0     | 0     | 0     | 1     | 1     | 10    | 0     | 0     |
| 25250     | Cox8b        | 3     | 2     | 1     | 1     | 18    | 55    | 5     | 1     |
| 100909899 | LOC100909899 | 0     | 0     | 0     | 2     | 0     | 11.8  | 10.81 | 0     |
| 364558    | Palld        | 1.32  | 1     | 0     | 0     | 9.36  | 17.13 | 0     | 0     |
| 84015     | Ttn          | 128   | 110   | 78    | 148   | 1251  | 3829  | 210   | 145   |
| 114207    | Ryr1         | 21.09 | 15    | 21    | 28.01 | 250   | 704.6 | 30.94 | 24.01 |
| 59299     | Trdn         | 20.7  | 8.96  | 14.35 | 19.13 | 171   | 502.3 | 40.88 | 35.69 |
| 297568    | LOC297568    | 0     | 0     | 0     | 0     | 0     | 5     | 1     | 0     |
| 364745    | Lyz11        | 0     | 0     | 0     | 0     | 3     | 0     | 2     | 1     |
| 54236     | Cd5          | 0     | 0     | 0     | 0     | 2     | 0     | 0     | 4     |
| 689864    | Msgn1        | 0     | 0     | 0     | 0     | 1     | 1     | 2     | 2     |
| 292720    | RGD1563034   | 0     | 0     | 0     | 0     | 0     | 2     | 3.01  | 1     |
| 100362987 | LOC100362987 | 0     | 0     | 0     | 0     | 6.19  | 0     | 0     | 0.05  |
| 311098    | Xirp2        | 25    | 13    | 26    | 30    | 209   | 898   | 44    | 24    |
| 313954    | Matn3        | 2     | 0     | 2     | 2     | 1     | 70    | 2     | 3     |
| 102548594 | LOC102548594 | 0     | 0     | 0     | 0     | 2     | 1     | 0     | 3.39  |
| 682930    | Cacnals      | 6     | 12    | 7.93  | 14    | 143   | 364   | 11    | 8     |
| 303862    | RGD1562415   | 0     | 0     | 0     | 0     | 1.3   | 1.03  | 3.58  | 1.03  |
| 100911675 | LOC100911675 | 0     | 0     | 0     | 0     | 0     | 0     | 0     | 7.01  |
| 100910447 | LOC100910447 | 0     | 0     | 0     | 0     | 3.6   | 3.59  | 0     | 0     |
| 117558    | Mylk2        | 5     | 2     | 18    | 8     | 119   | 322   | 26    | 12    |
| 102548714 | LOC102548714 | 0     | 0     | 0.21  | 0     | 1.14  | 1.92  | 0     | 0     |
| 103689934 | LOC103689934 | 0     | 0     | 0     | 0     | 7.4   | 0     | 0     | 0     |
| 103689985 | LOC103689985 | 1     | 2     | 1     | 4     | 28    | 87    | 4     | 1     |
| 680810    | Lsmem1       | 1     | 2     | 0     | 1     | 15    | 40    | 4     | 1     |
| 364773    | Akr1c13      | 0     | 0     | 0     | 0     | 1.43  | 4.89  | 0     | 1.4   |
| 25714     | Myf6         | 0     | 0     | 1     | 1     | 8     | 22    | 0     | 1     |
| 102550892 | LOC102550892 | 0     | 0     | 0     | 0     | 0     | 0     | 7.79  | 0     |
| 100909696 | LOC100909696 | 0     | 0     | 0     | 0     | 0     | 4     | 0     | 4     |
| 25099     | Foxa2        | 0     | 0     | 0     | 0     | 0     | 8     | 0     | 0     |
| 363831    | Gsc2         | 0     | 0     | 0     | 0     | 2     | 3     | 0     | 3     |
| 362018    | Sypl2        | 4     | 5     | 1     | 6     | 76    | 198   | 5     | 4     |

|           |                 |        |        |        |        |       |       |       |        |
|-----------|-----------------|--------|--------|--------|--------|-------|-------|-------|--------|
| 360730    | Ostn            | 0      | 0      | 0      | 1      | 4     | 14    | 0     | 0      |
| 315833    | Klhl31          | 5.98   | 2.03   | 5.05   | 6.78   | 120.9 | 230.5 | 13.28 | 2.34   |
| 362867    | Mybpc1          | 17     | 19     | 8      | 32     | 261   | 1110  | 34    | 15     |
| 497901    | Leap2           | 0      | 0      | 1.01   | 0      | 5.31  | 14.95 | 0     | 0      |
| 498683    | RGD1564382      | 0      | 0      | 0      | 0      | 0     | 0     | 0     | 10.05  |
| 102548286 | LOC102548286    | 0      | 0      | 0      | 0      | 2.36  | 3.34  | 0.9   | 3.46   |
| 108348058 | NEWGENE_1308612 | 0      | 0      | 0      | 0      | 0     | 0     | 0     | 10.2   |
| 362895    | Stac3           | 1      | 1      | 2      | 1      | 30    | 68    | 3     | 1      |
| 108349691 | LOC108349691    | 0      | 0      | 0      | 0      | 6.62  | 0     | 0     | 3.61   |
| 108348066 | NEWGENE_1586233 | 0      | 0      | 0      | 0      | 0     | 0     | 5.74  | 4.51   |
| 100910021 | LOC100910021    | 0      | 0      | 0      | 0      | 10.36 | 0     | 0     | 0      |
| 310681    | Hjv             | 9.14   | 2.26   | 3.57   | 11.49  | 150.1 | 382.6 | 18.98 | 2.96   |
| 307982    | Nrap            | 5      | 5      | 4      | 12     | 80    | 446   | 11    | 10     |
| 292879    | Mybpc2          | 28.64  | 9.24   | 20.08  | 34.06  | 488.4 | 1412  | 53.9  | 18.7   |
| 689274    | Myoz3           | 0      | 1      | 5      | 1      | 28    | 118   | 6     | 2      |
| 171009    | Actn3           | 20     | 15     | 28     | 57     | 789   | 1821  | 74.99 | 33     |
| 287411    | Dhrs7c          | 2      | 1      | 1      | 1      | 23    | 87    | 2     | 3      |
| 100362432 | LOC100362432    | 0      | 0      | 0      | 0      | 0     | 4.79  | 6.93  | 0      |
| 316330    | Ankrd23         | 10     | 10     | 10     | 14     | 201   | 812   | 23    | 8      |
| 29437     | Acta1           | 210.48 | 144.06 | 148.81 | 399.48 | 5177  | 15597 | 504.9 | 277.08 |
| 366542    | Six2            | 0      | 0      | 0      | 0      | 2     | 5     | 4.01  | 1      |
| 308873    | Art1            | 1      | 0      | 0      | 2      | 20.82 | 51    | 1     | 0      |
| 25278     | Cox6a2          | 3      | 2      | 3      | 11     | 96    | 356   | 19    | 3      |
| 302948    | Sr1             | 2      | 3      | 2      | 11     | 73    | 390   | 12    | 3      |
| 25028     | Ampd1           | 3      | 2      | 3      | 7      | 115   | 285   | 7     | 4      |
| 309772    | Vgl12           | 1      | 0      | 0      | 1      | 14    | 41    | 1     | 1      |
| 296935    | Lmod2           | 1      | 0      | 1      | 3      | 11    | 130   | 2     | 0      |
| 102547059 | LOC102547059    | 0      | 0      | 0      | 0      | 0     | 11.41 | 0     | 4.44   |
| 679565    | LOC679565       | 0      | 0      | 0      | 7.34   | 75.04 | 0     | 90.47 | 74.5   |
| 498440    | Myoz1           | 12     | 1      | 2      | 14     | 274   | 670   | 22    | 7      |
| 102550650 | LOC102550650    | 0      | 0      | 0      | 0      | 0     | 0     | 14.08 | 2.82   |
| 102555131 | LOC102555131    | 0      | 0.12   | 0      | 0      | 0     | 1.07  | 3     | 0      |
| 365009    | Clec3a          | 0      | 1      | 0      | 0      | 0     | 34    | 0     | 0      |
| 287167    | Hba-a1          | 0      | 0      | 1.08   | 8.51   | 225.4 | 68    | 0     | 35.97  |
| 24838     | Tnnt3           | 31     | 30     | 42     | 83     | 1764  | 4419  | 152   | 67     |
| 100362283 | Tmem52          | 0      | 0      | 1      | 1      | 15    | 56    | 2     | 0      |
| 360543    | Myh4            | 33.64  | 9.12   | 11.18  | 114.85 | 2895  | 3166  | 183.1 | 72.16  |
| 116601    | Atp2a1          | 52     | 24.84  | 15     | 167.97 | 2324  | 7243  | 152   | 51     |
| 24584     | My1pf           | 25     | 9      | 11     | 54     | 1023  | 2866  | 94    | 39     |
| 287408    | Myh1            | 17.98  | 23.63  | 7.1    | 145.4  | 1314  | 6801  | 43.17 | 24.35  |
| 102549712 | LOC102549712    | 0      | 0      | 0      | 0      | 0     | 0     | 0     | 21.68  |
| 24265     | Ckm             | 54     | 30     | 8      | 104    | 2612  | 6081  | 173   | 77     |
| 29389     | Tnni2           | 7      | 2      | 5      | 32     | 592   | 1564  | 47    | 17     |
| 102555328 | LOC102555328    | 0.06   | 0      | 0      | 0      | 1.9   | 1.06  | 0     | 0      |
| 103692976 | LOC103692976    | 0      | 0      | 0      | 0      | 0     | 7.12  | 0     | 17.6   |
| 100362623 | Mt1m            | 0      | 0      | 0      | 0      | 0     | 11.57 | 13.33 | 0      |
| 100911313 | LOC100911313    | 0      | 2.33   | 0      | 0      | 0     | 37.07 | 41.47 | 42.45  |
| 100911166 | LOC100911166    | 0      | 0      | 0      | 0      | 0     | 0     | 0     | 26.11  |
| 25708     | Ucp3            | 1      | 0      | 0      | 0      | 23    | 32    | 3     | 1      |
| 296369    | Tnnc2           | 11     | 2      | 5      | 39     | 842   | 2487  | 72    | 37     |
| 304823    | Igfn1           | 2      | 2      | 2      | 0      | 118   | 220   | 19    | 5      |
| 363925    | My12            | 0      | 0      | 0      | 0      | 10    | 15    | 1     | 5      |
| 100361543 | LOC100361543    | 0      | 0      | 0      | 0      | 10.78 | 20.36 | 0     | 0      |
| 100912521 | Nmrk2           | 0      | 0      | 0      | 0      | 8     | 22    | 1     | 1      |
| 56781     | My11            | 22     | 4      | 2      | 56     | 1377  | 3907  | 132   | 39     |
| 29658     | Cacng1          | 1      | 0      | 0      | 0      | 12    | 58    | 2     | 0      |

|           |              |      |      |      |      |       |       |       |        |
|-----------|--------------|------|------|------|------|-------|-------|-------|--------|
| 308622    | Txlnb        | 0    | 1    | 0    | 1    | 40    | 103   | 3     | 0      |
| 100909700 | LOC100909700 | 0    | 0    | 0    | 0    | 0     | 14.5  | 0     | 22.37  |
| 100359951 | LOC100359951 | 0    | 0    | 0    | 0    | 0     | 40.48 | 0     | 0      |
| 103690173 | LOC103690173 | 0    | 0    | 0    | 0    | 0     | 0     | 0     | 44.57  |
| 103694902 | LOC103694902 | 2.37 | 2.29 | 1.73 | 2.36 | 1.19  | 0.96  | 2.36  | 849.02 |
| 108348161 | LOC108348161 | 0    | 0    | 0    | 0    | 0     | 0     | 63.54 | 0      |
| 691644    | Myh2         | 0    | 1.79 | 7.58 | 3.19 | 168.8 | 1437  | 25.09 | 2.39   |
| 59108     | Mb           | 4    | 0    | 0    | 7    | 327   | 1301  | 39    | 5      |
| 100910177 | LOC100910177 | 0    | 0    | 0    | 0    | 23.57 | 0     | 44.76 | 63.82  |
| 291605    | Myot         | 0    | 0    | 0    | 0    | 38.48 | 121.7 | 0     | 0      |
| 100909761 | LOC100909761 | 0    | 1    | 0    | 0    | 110.5 | 334.5 | 4.16  | 2      |
| 100036582 | Olr1867      |      |      |      |      |       |       |       |        |
| 100125595 | Rs1          |      |      |      |      |       |       |       |        |
| 100126231 | Mln          | 0    | 0    | 0    | 0    | 0     | 0     | 1     | 0      |
| 100169711 | Lcn11        |      |      |      |      |       |       |       |        |
| 100270683 | Tas1r2       | 0    | 0    | 0    | 0    | 0     | 0     | 1     | 0      |
| 100271845 | LOC100271845 | 0    | 1    | 0    | 0    | 0     | 0     | 0     | 0      |
| 100310875 | Tas2r110     |      |      |      |      |       |       |       |        |
| 100310876 | Tas2r136     |      |      |      |      |       |       |       |        |
| 100310877 | Tas2r116     |      |      |      |      |       |       |       |        |
| 100310878 | Tas2r106     |      |      |      |      |       |       |       |        |
| 100310879 | Tas2r104     |      |      |      |      |       |       |       |        |
| 100310880 | Tas2r117     |      |      |      |      |       |       |       |        |
| 100310881 | Tas2r129     |      |      |      |      |       |       |       |        |
| 100310885 | Tas2r113     |      |      |      |      |       |       |       |        |
| 100310886 | Tas2r103     |      |      |      |      |       |       |       |        |
| 100312671 | Vomlr60      |      |      |      |      |       |       |       |        |
| 100312735 | Vomlr103     |      |      |      |      |       |       |       |        |
| 100312751 | Vomlr64      |      |      |      |      |       |       |       |        |
| 100312945 | Vomlr17      |      |      |      |      |       |       |       |        |
| 100359452 | LOC100359452 |      |      |      |      |       |       |       |        |
| 100359485 | Ms4a18       |      |      |      |      |       |       |       |        |
| 100359692 | LOC100359692 | 0    | 0    | 0    | 0    | 0     | 1.59  | 0     | 1.18   |
| 100359777 | LOC100359777 |      |      |      |      |       |       |       |        |
| 100359826 | Krtap8-1     | 0    | 0    | 0    | 1    | 0     | 0     | 0     | 0      |
| 100359838 | Rfpl4b       |      |      |      |      |       |       |       |        |
| 100359873 | Olf1r873     |      |      |      |      |       |       |       |        |
| 100359886 | Krtap11-1    | 0    | 0    | 0    | 0    | 1     | 0     | 0     | 0      |
| 100359968 | LOC100359968 |      |      |      |      |       |       |       |        |
| 100360011 | LOC100360011 |      |      |      |      |       |       |       |        |
| 100360049 | LOC100360049 |      |      |      |      |       |       |       |        |
| 100360071 | Nps          | 0    | 0    | 0    | 0    | 1     | 0     | 0     | 0      |
| 100360076 | LOC100360076 |      |      |      |      |       |       |       |        |
| 100360095 | LOC100360095 | 0    | 0    | 0    | 0    | 0     | 0     | 0     | 1      |
| 100360128 | LOC100360128 |      |      |      |      |       |       |       |        |
| 100360143 | LOC100360143 |      |      |      |      |       |       |       |        |
| 100360200 | LOC100360200 |      |      |      |      |       |       |       |        |
| 100360390 | Clfn25       | 0    | 0    | 0    | 1    | 0     | 0     | 0     | 0      |
| 100360477 | LOC100360477 |      |      |      |      |       |       |       |        |
| 100360496 | Fam9b        |      |      |      |      |       |       |       |        |
| 100360521 | LOC100360521 |      |      |      |      |       |       |       |        |
| 100360557 | LOC100360557 |      |      |      |      |       |       |       |        |
| 100360571 | Cpxcr1       |      |      |      |      |       |       |       |        |
| 100360573 | LOC100360573 |      |      |      |      |       |       |       |        |
| 100360574 | LOC100360574 |      |      |      |      |       |       |       |        |
| 100360609 | Olf1r1055    |      |      |      |      |       |       |       |        |

|           |              |      |   |      |   |      |      |   |   |
|-----------|--------------|------|---|------|---|------|------|---|---|
| 100360690 | LOC100360690 | 0    | 2 | 0    | 0 | 0    | 0    | 0 | 0 |
| 100360790 | LOC100360790 | 2    | 1 | 0    | 1 | 0    | 0    | 0 | 0 |
| 100361016 | LOC100361016 |      |   |      |   |      |      |   |   |
| 100361036 | LOC100361036 | 0    | 0 | 1    | 0 | 0    | 0    | 0 | 0 |
| 100361125 | Pom121112    |      |   |      |   |      |      |   |   |
| 100361139 | LOC100361139 |      |   |      |   |      |      |   |   |
| 100361143 | LOC100361143 | 0    | 1 | 0    | 0 | 0    | 0    | 0 | 0 |
| 100361166 | Rgs21        |      |   |      |   |      |      |   |   |
| 100361194 | LOC100361194 | 0    | 1 | 0    | 0 | 0    | 0    | 0 | 0 |
| 100361204 | LOC100361204 | 0    | 0 | 0    | 1 | 0    | 0    | 0 | 0 |
| 100361300 | Spink10      |      |   |      |   |      |      |   |   |
| 100361414 | Pate3        |      |   |      |   |      |      |   |   |
| 100361422 | Cldn34c4     |      |   |      |   |      |      |   |   |
| 100361434 | LOC100361434 |      |   |      |   |      |      |   |   |
| 100361468 | Gzmb12       | 4.48 | 0 | 0    | 0 | 0    | 0    | 0 | 0 |
| 100361492 | LOC100361492 |      |   |      |   |      |      |   |   |
| 100361547 | LOC100361547 |      |   |      |   |      |      |   |   |
| 100361571 | Krtap1-1     |      |   |      |   |      |      |   |   |
| 100361579 | LOC100361579 |      |   |      |   |      |      |   |   |
| 100361623 | RGD1561318   | 0    | 1 | 0    | 0 | 0    | 0    | 0 | 0 |
| 100361626 | Krtap12-2    |      |   |      |   |      |      |   |   |
| 100361639 | RGD1562521   |      |   |      |   |      |      |   |   |
| 100361642 | LOC100361642 |      |   |      |   |      |      |   |   |
| 100361652 | Lce6a        |      |   |      |   |      |      |   |   |
| 100361657 | Patel1       |      |   |      |   |      |      |   |   |
| 100361664 | LOC100361664 |      |   |      |   |      |      |   |   |
| 100361702 | LOC100361702 |      |   |      |   |      |      |   |   |
| 100361739 | LOC100361739 |      |   |      |   |      |      |   |   |
| 100361793 | LOC100361793 |      |   |      |   |      |      |   |   |
| 100361828 | LOC100361828 |      |   |      |   |      |      |   |   |
| 100361854 | LOC100361854 |      |   |      |   |      |      |   |   |
| 100361859 | Lce3d        | 0    | 0 | 0    | 1 | 0    | 0    | 0 | 0 |
| 100361884 | Pr18a3       |      |   |      |   |      |      |   |   |
| 100361907 | LOC100361907 | 0    | 0 | 0    | 0 | 0    | 1    | 0 | 0 |
| 100361944 | LOC100361944 | 0    | 0 | 0    | 0 | 1.86 | 1.67 | 0 | 0 |
| 100361951 | Lce3e        |      |   |      |   |      |      |   |   |
| 100361960 | Cox7b2       |      |   |      |   |      |      |   |   |
| 100361968 | LOC100361968 | 0    | 0 | 0.12 | 0 | 0    | 0    | 0 | 0 |
| 100361969 | LOC100361969 |      |   |      |   |      |      |   |   |
| 100362031 | LOC100362031 |      |   |      |   |      |      |   |   |
| 100362067 | LOC100362067 | 0    | 0 | 0    | 0 | 0    | 0    | 0 | 1 |
| 100362068 | Vomlr-ps112  |      |   |      |   |      |      |   |   |
| 100362078 | LOC100362078 | 0    | 0 | 0    | 0 | 1    | 0    | 0 | 0 |
| 100362122 | LOC100362122 |      |   |      |   |      |      |   |   |
| 100362173 | LOC100362173 |      |   |      |   |      |      |   |   |
| 100362207 | Krtap16-1    |      |   |      |   |      |      |   |   |
| 100362319 | LOC100362319 |      |   |      |   |      |      |   |   |
| 100362350 | LOC100362350 |      |   |      |   |      |      |   |   |
| 100362365 | Tmem210      | 0    | 0 | 0    | 0 | 0    | 1    | 1 | 0 |
| 100362450 | Wfdc17       |      |   |      |   |      |      |   |   |
| 100362477 | Fam90a1      |      |   |      |   |      |      |   |   |
| 100362538 | RGD1306995   |      |   |      |   |      |      |   |   |
| 100362567 | Siglec11     |      |   |      |   |      |      |   |   |
| 100362580 | Spag11b1     | 0    | 0 | 0    | 0 | 1    | 0    | 1 | 0 |
| 100362690 | LOC100362690 |      |   |      |   |      |      |   |   |
| 100362694 | Trim60       | 1    | 0 | 0    | 0 | 0    | 0    | 0 | 0 |



|           |              |   |      |   |   |   |   |      |   |
|-----------|--------------|---|------|---|---|---|---|------|---|
| 100362696 | Fam47a       |   |      |   |   |   |   |      |   |
| 100362724 | LOC100362724 |   |      |   |   |   |   |      |   |
| 100362856 | LOC100362856 |   |      |   |   |   |   |      |   |
| 100362891 | Tex13a       |   |      |   |   |   |   |      |   |
| 100362904 | Bsph2        |   |      |   |   |   |   |      |   |
| 100362949 | LOC100362949 |   |      |   |   |   |   |      |   |
| 100362978 | LOC100362978 | 1 | 0    | 0 | 0 | 0 | 0 | 0    | 0 |
| 100362996 | LOC100362996 |   |      |   |   |   |   |      |   |
| 100363016 | LOC100363016 |   |      |   |   |   |   |      |   |
| 100363043 | LOC100363043 |   |      |   |   |   |   |      |   |
| 100363053 | Tas2r145     |   |      |   |   |   |   |      |   |
| 100363064 | LOC100363064 |   |      |   |   |   |   |      |   |
| 100363125 | LOC100363125 |   |      |   |   |   |   |      |   |
| 100363136 | LOC100363136 |   |      |   |   |   |   |      |   |
| 100363141 | LOC100363141 | 0 | 0    | 0 | 0 | 0 | 0 | 0    | 1 |
| 100363184 | Krtap13-1    |   |      |   |   |   |   |      |   |
| 100363219 | Olr1872      |   |      |   |   |   |   |      |   |
| 100363236 | LOC100363236 |   |      |   |   |   |   |      |   |
| 100363270 | Btbd18       | 0 | 0    | 0 | 0 | 0 | 0 | 1.03 | 0 |
| 100363287 | LOC100363287 |   |      |   |   |   |   |      |   |
| 100363321 | LOC100363321 |   |      |   |   |   |   |      |   |
| 100363333 | LOC100363333 |   |      |   |   |   |   |      |   |
| 100363344 | LOC100363344 |   |      |   |   |   |   |      |   |
| 100363449 | LOC100363449 |   |      |   |   |   |   |      |   |
| 100363500 | LOC100363500 |   |      |   |   |   |   |      |   |
| 100363712 | LOC100363712 |   |      |   |   |   |   |      |   |
| 100363867 | LOC100363867 | 0 | 0    | 0 | 0 | 1 | 0 | 0    | 0 |
| 100363883 | LOC100363883 |   |      |   |   |   |   |      |   |
| 100363914 | LOC100363914 |   |      |   |   |   |   |      |   |
| 100363993 | LOC100363993 | 0 | 0    | 1 | 0 | 0 | 0 | 0    | 0 |
| 100364002 | LOC100364002 | 0 | 1    | 0 | 0 | 0 | 0 | 0    | 0 |
| 100364155 | LOC100364155 |   |      |   |   |   |   |      |   |
| 100364523 | LOC100364523 |   |      |   |   |   |   |      |   |
| 100364550 | Krtap24-1    |   |      |   |   |   |   |      |   |
| 100364613 | Krtap27-1    |   |      |   |   |   |   |      |   |
| 100364835 | LOC100364835 |   |      |   |   |   |   |      |   |
| 100364862 | LOC100364862 |   |      |   |   |   |   |      |   |
| 100364877 | LOC100364877 | 3 | 0    | 0 | 0 | 0 | 0 | 0    | 0 |
| 100365008 | LOC100365008 | 0 | 4.1  | 0 | 0 | 0 | 0 | 0    | 0 |
| 100365199 | Wfdc13       |   |      |   |   |   |   |      |   |
| 100365588 | LOC100365588 |   |      |   |   |   |   |      |   |
| 100365646 | LOC100365646 |   |      |   |   |   |   |      |   |
| 100365887 | LOC100365887 |   |      |   |   |   |   |      |   |
| 100365995 | LOC100365995 |   |      |   |   |   |   |      |   |
| 100366231 | LOC100366231 |   |      |   |   |   |   |      |   |
| 100909401 | Fam181a      |   |      |   |   |   |   |      |   |
| 100909423 | LOC100909423 |   |      |   |   |   |   |      |   |
| 100909425 | LOC100909425 |   |      |   |   |   |   |      |   |
| 100909434 | LOC100909434 |   |      |   |   |   |   |      |   |
| 100909435 | LOC100909435 |   |      |   |   |   |   |      |   |
| 100909438 | LOC100909438 |   |      |   |   |   |   |      |   |
| 100909457 | LOC100909457 | 0 | 0.33 | 0 | 0 | 0 | 0 | 0    | 0 |
| 100909485 | LOC100909485 |   |      |   |   |   |   |      |   |
| 100909486 | LOC100909486 |   |      |   |   |   |   |      |   |
| 100909493 | LOC100909493 |   |      |   |   |   |   |      |   |
| 100909494 | LOC100909494 |   |      |   |   |   |   |      |   |

|           |              |     |      |      |      |   |   |      |      |
|-----------|--------------|-----|------|------|------|---|---|------|------|
| 100909498 | Clec19a      |     |      |      |      |   |   |      |      |
| 100909499 | LOC100909499 | 0   | 0.33 | 0    | 0    | 0 | 0 | 0    | 0    |
| 100909501 | LOC100909501 |     |      |      |      |   |   |      |      |
| 100909517 | LOC100909517 |     |      |      |      |   |   |      |      |
| 100909522 | LOC100909522 |     |      |      |      |   |   |      |      |
| 100909524 | LOC100909524 | 0   | 0    | 0    | 0.16 | 0 | 0 | 0    | 0    |
| 100909526 | LOC100909526 |     |      |      |      |   |   |      |      |
| 100909534 | LOC100909534 |     |      |      |      |   |   |      |      |
| 100909546 | LOC100909546 | 1   | 0    | 2    | 0    | 0 | 0 | 0    | 0    |
| 100909556 | LOC100909556 | 0   | 0    | 0    | 0    | 0 | 0 | 1.82 | 1.42 |
| 100909573 | LOC100909573 |     |      |      |      |   |   |      |      |
| 100909578 | LOC100909578 |     |      |      |      |   |   |      |      |
| 100909585 | LOC100909585 |     |      |      |      |   |   |      |      |
| 100909596 | LOC100909596 |     |      |      |      |   |   |      |      |
| 100909605 | LOC100909605 |     |      |      |      |   |   |      |      |
| 100909609 | LOC100909609 | 0   | 1.3  | 0    | 0    | 0 | 0 | 0    | 0    |
| 100909613 | LOC100909613 |     |      |      |      |   |   |      |      |
| 100909620 | LOC100909620 |     |      |      |      |   |   |      |      |
| 100909622 | Znf442       |     |      |      |      |   |   |      |      |
| 100909660 | LOC100909660 |     |      |      |      |   |   |      |      |
| 100909661 | LOC100909661 |     |      |      |      |   |   |      |      |
| 100909677 | LOC100909677 |     |      |      |      |   |   |      |      |
| 100909683 | LOC100909683 | 0   | 0    | 0    | 0    | 0 | 0 | 1    | 0    |
| 100909692 | LOC100909692 |     |      |      |      |   |   |      |      |
| 100909708 | LOC100909708 |     |      |      |      |   |   |      |      |
| 100909726 | LOC100909726 |     |      |      |      |   |   |      |      |
| 100909736 | LOC100909736 |     |      |      |      |   |   |      |      |
| 100909754 | LOC100909754 |     |      |      |      |   |   |      |      |
| 100909755 | LOC100909755 | 0.5 | 0.5  | 0.5  | 0    | 0 | 0 | 0    | 0    |
| 100909784 | LOC100909784 |     |      |      |      |   |   |      |      |
| 100909796 | LOC100909796 |     |      |      |      |   |   |      |      |
| 100909811 | Dcdc1        |     |      |      |      |   |   |      |      |
| 100909831 | LOC100909831 |     |      |      |      |   |   |      |      |
| 100909833 | LOC100909833 | 0   | 0    | 2.06 | 0    | 0 | 0 | 0    | 0    |
| 100909836 | LOC100909836 |     |      |      |      |   |   |      |      |
| 100909849 | LOC100909849 |     |      |      |      |   |   |      |      |
| 100909858 | LOC100909858 |     |      |      |      |   |   |      |      |
| 100909859 | LOC100909859 | 0   | 1    | 0    | 1    | 0 | 0 | 0    | 0    |
| 100909862 | LOC100909862 |     |      |      |      |   |   |      |      |
| 100909864 | LOC100909864 |     |      |      |      |   |   |      |      |
| 100909884 | LOC100909884 |     |      |      |      |   |   |      |      |
| 100909885 | LOC100909885 |     |      |      |      |   |   |      |      |
| 100909894 | Olr294       |     |      |      |      |   |   |      |      |
| 100909900 | LOC100909900 |     |      |      |      |   |   |      |      |
| 100909916 | LOC100909916 | 0   | 0    | 1.32 | 0    | 0 | 0 | 0    | 0    |
| 100909922 | LOC100909922 |     |      |      |      |   |   |      |      |
| 100909935 | LOC100909935 |     |      |      |      |   |   |      |      |
| 100909936 | LOC100909936 |     |      |      |      |   |   |      |      |
| 100909937 | LOC100909937 |     |      |      |      |   |   |      |      |
| 100909940 | LOC100909940 |     |      |      |      |   |   |      |      |
| 100909943 | LOC100909943 |     |      |      |      |   |   |      |      |
| 100909958 | LOC100909958 |     |      |      |      |   |   |      |      |
| 100909961 | LOC100909961 |     |      |      |      |   |   |      |      |
| 100909966 | LOC100909966 |     |      |      |      |   |   |      |      |
| 100909968 | LOC100909968 |     |      |      |      |   |   |      |      |
| 100909976 | LOC100909976 |     |      |      |      |   |   |      |      |

|           |              |      |     |   |   |      |     |      |   |
|-----------|--------------|------|-----|---|---|------|-----|------|---|
| 100909977 | LOC100909977 | 1    | 0   | 0 | 0 | 0    | 0   | 0    | 0 |
| 100909989 | LOC100909989 |      |     |   |   |      |     |      |   |
| 100909993 | LOC100909993 |      |     |   |   |      |     |      |   |
| 100909996 | 0lr1258      |      |     |   |   |      |     |      |   |
| 100910009 | LOC100910009 |      |     |   |   |      |     |      |   |
| 100910010 | LOC100910010 | 0    | 0   | 0 | 0 | 0    | 0   | 0.14 | 0 |
| 100910026 | LOC100910026 |      |     |   |   |      |     |      |   |
| 100910041 | LOC100910041 | 0    | 0   | 0 | 0 | 0    | 0   | 0.14 | 0 |
| 100910045 | LOC100910045 |      |     |   |   |      |     |      |   |
| 100910049 | LOC100910049 |      |     |   |   |      |     |      |   |
| 100910051 | LOC100910051 |      |     |   |   |      |     |      |   |
| 100910061 | LOC100910061 | 1.49 | 0   | 0 | 0 | 0    | 0   | 0    | 0 |
| 100910067 | LOC100910067 | 0    | 0   | 0 | 0 | 0    | 0   | 1.03 | 0 |
| 100910070 | LOC100910070 |      |     |   |   |      |     |      |   |
| 100910077 | LOC100910077 |      |     |   |   |      |     |      |   |
| 100910078 | LOC100910078 |      |     |   |   |      |     |      |   |
| 100910086 | LOC100910086 |      |     |   |   |      |     |      |   |
| 100910087 | LOC100910087 | 0    | 0.5 | 0 | 0 | 0    | 0   | 0    | 0 |
| 100910108 | LOC100910108 | 0    | 0   | 0 | 0 | 0    | 0   | 0    | 1 |
| 100910111 | LOC100910111 |      |     |   |   |      |     |      |   |
| 100910120 | LOC100910120 |      |     |   |   |      |     |      |   |
| 100910127 | LOC100910127 |      |     |   |   |      |     |      |   |
| 100910128 | LOC100910128 |      |     |   |   |      |     |      |   |
| 100910144 | Ces2         | 0    | 1   | 0 | 0 | 0    | 0   | 0    | 0 |
| 100910145 | LOC100910145 |      |     |   |   |      |     |      |   |
| 100910153 | LOC100910153 |      |     |   |   |      |     |      |   |
| 100910162 | LOC100910162 |      |     |   |   |      |     |      |   |
| 100910165 | LOC100910165 |      |     |   |   |      |     |      |   |
| 100910169 | LOC100910169 |      |     |   |   |      |     |      |   |
| 100910181 | LOC100910181 |      |     |   |   |      |     |      |   |
| 100910184 | LOC100910184 | 0    | 0   | 0 | 0 | 2.33 | 0   | 0    | 0 |
| 100910187 | LOC100910187 |      |     |   |   |      |     |      |   |
| 100910193 | LOC100910193 |      |     |   |   |      |     |      |   |
| 100910199 | LOC100910199 |      |     |   |   |      |     |      |   |
| 100910223 | LOC100910223 |      |     |   |   |      |     |      |   |
| 100910224 | LOC100910224 |      |     |   |   |      |     |      |   |
| 100910227 | LOC100910227 |      |     |   |   |      |     |      |   |
| 100910235 | LOC100910235 |      |     |   |   |      |     |      |   |
| 100910238 | LOC100910238 |      |     |   |   |      |     |      |   |
| 100910245 | LOC100910245 | 0    | 0   | 0 | 0 | 0    | 4.5 | 0    | 0 |
| 100910247 | LOC100910247 | 0    | 0   | 0 | 0 | 1.05 | 0   | 0    | 0 |
| 100910255 | LOC100910255 |      |     |   |   |      |     |      |   |
| 100910256 | LOC100910256 | 0    | 0   | 0 | 0 | 0    | 0   | 0.14 | 0 |
| 100910260 | LOC100910260 |      |     |   |   |      |     |      |   |
| 100910263 | LOC100910263 |      |     |   |   |      |     |      |   |
| 100910292 | LOC100910292 |      |     |   |   |      |     |      |   |
| 100910294 | LOC100910294 |      |     |   |   |      |     |      |   |
| 100910298 | LOC100910298 |      |     |   |   |      |     |      |   |
| 100910314 | LOC100910314 |      |     |   |   |      |     |      |   |
| 100910335 | LOC100910335 | 0    | 0   | 0 | 0 | 0    | 0   | 0.14 | 0 |
| 100910352 | LOC100910352 |      |     |   |   |      |     |      |   |
| 100910363 | LOC100910363 |      |     |   |   |      |     |      |   |
| 100910378 | LOC100910378 |      |     |   |   |      |     |      |   |
| 100910382 | LOC100910382 |      |     |   |   |      |     |      |   |
| 100910401 | LOC100910401 | 0    | 0   | 1 | 1 | 0    | 0   | 0    | 0 |
| 100910402 | LOC100910402 |      |     |   |   |      |     |      |   |

|           |              |      |      |     |      |   |   |      |   |
|-----------|--------------|------|------|-----|------|---|---|------|---|
| 100910409 | LOC100910409 |      |      |     |      |   |   |      |   |
| 100910419 | LOC100910419 | 0    | 2    | 0   | 0    | 0 | 0 | 0    | 0 |
| 100910420 | LOC100910420 |      |      |     |      |   |   |      |   |
| 100910431 | LOC100910431 |      |      |     |      |   |   |      |   |
| 100910439 | LOC100910439 | 0    | 0    | 0   | 0    | 0 | 0 | 0.14 | 0 |
| 100910445 | LOC100910445 | 0    | 0    | 0   | 0    | 0 | 0 | 0.14 | 0 |
| 100910451 | LOC100910451 | 0    | 0    | 0   | 0    | 0 | 0 | 1    | 0 |
| 100910452 | LOC100910452 |      |      |     |      |   |   |      |   |
| 100910456 | LOC100910456 | 0    | 0    | 0   | 0    | 0 | 0 | 0    | 1 |
| 100910467 | LOC100910467 |      |      |     |      |   |   |      |   |
| 100910479 | LOC100910479 |      |      |     |      |   |   |      |   |
| 100910481 | LOC100910481 |      |      |     |      |   |   |      |   |
| 100910488 | LOC100910488 |      |      |     |      |   |   |      |   |
| 100910500 | LOC100910500 |      |      |     |      |   |   |      |   |
| 100910501 | LOC100910501 |      |      |     |      |   |   |      |   |
| 100910509 | LOC100910509 |      |      |     |      |   |   |      |   |
| 100910512 | LOC100910512 |      |      |     |      |   |   |      |   |
| 100910526 | LOC100910526 | 0    | 3.59 | 0   | 1    | 0 | 0 | 0    | 0 |
| 100910543 | LOC100910543 |      |      |     |      |   |   |      |   |
| 100910548 | LOC100910548 |      |      |     |      |   |   |      |   |
| 100910557 | LOC100910557 |      |      |     |      |   |   |      |   |
| 100910566 | LOC100910566 |      |      |     |      |   |   |      |   |
| 100910567 | LOC100910567 |      |      |     |      |   |   |      |   |
| 100910585 | LOC100910585 |      |      |     |      |   |   |      |   |
| 100910599 | LOC100910599 |      |      |     |      |   |   |      |   |
| 100910611 | LOC100910611 |      |      |     |      |   |   |      |   |
| 100910615 | LOC100910615 | 0    | 0    | 0   | 0    | 0 | 1 | 0    | 0 |
| 100910640 | LOC100910640 |      |      |     |      |   |   |      |   |
| 100910647 | LOC100910647 |      |      |     |      |   |   |      |   |
| 100910650 | LOC100910650 | 0    | 0    | 0   | 0    | 3 | 1 | 0    | 0 |
| 100910656 | LOC100910656 |      |      |     |      |   |   |      |   |
| 100910667 | LOC100910667 |      |      |     |      |   |   |      |   |
| 100910682 | LOC100910682 |      |      |     |      |   |   |      |   |
| 100910696 | LOC100910696 |      |      |     |      |   |   |      |   |
| 100910698 | LOC100910698 |      |      |     |      |   |   |      |   |
| 100910710 | LOC100910710 | 1.21 | 0    | 0   | 1.26 | 0 | 0 | 0    | 0 |
| 100910719 | LOC100910719 |      |      |     |      |   |   |      |   |
| 100910721 | LOC100910721 | 0    | 0    | 0   | 0.25 | 0 | 0 | 0    | 0 |
| 100910731 | LOC100910731 |      |      |     |      |   |   |      |   |
| 100910744 | LOC100910744 | 0    | 0    | 0.5 | 0    | 0 | 0 | 0    | 0 |
| 100910780 | Chsy31       |      |      |     |      |   |   |      |   |
| 100910801 | LOC100910801 | 0    | 0    | 0   | 0    | 0 | 0 | 2.22 | 0 |
| 100910813 | Lyg2         |      |      |     |      |   |   |      |   |
| 100910814 | LOC100910814 |      |      |     |      |   |   |      |   |
| 100910822 | LOC100910822 |      |      |     |      |   |   |      |   |
| 100910829 | LOC100910829 | 0.81 | 0    | 0   | 0.76 | 0 | 0 | 0    | 0 |
| 100910837 | LOC100910837 |      |      |     |      |   |   |      |   |
| 100910843 | LOC100910843 |      |      |     |      |   |   |      |   |
| 100910851 | LOC100910851 |      |      |     |      |   |   |      |   |
| 100910858 | LOC100910858 |      |      |     |      |   |   |      |   |
| 100910863 | LOC100910863 |      |      |     |      |   |   |      |   |
| 100910876 | LOC100910876 |      |      |     |      |   |   |      |   |
| 100910877 | LOC100910877 |      |      |     |      |   |   |      |   |
| 100910887 | LOC100910887 |      |      |     |      |   |   |      |   |
| 100910893 | LOC100910893 |      |      |     |      |   |   |      |   |
| 100910894 | LOC100910894 |      |      |     |      |   |   |      |   |

|           |              |   |      |      |   |   |     |   |     |
|-----------|--------------|---|------|------|---|---|-----|---|-----|
| 100910896 | LOC100910896 |   |      |      |   |   |     |   |     |
| 100910899 | LOC100910899 |   |      |      |   |   |     |   |     |
| 100910917 | LOC100910917 |   |      |      |   |   |     |   |     |
| 100910928 | LOC100910928 |   |      |      |   |   |     |   |     |
| 100910936 | LOC100910936 |   |      |      |   |   |     |   |     |
| 100910939 | LOC100910939 |   |      |      |   |   |     |   |     |
| 100910942 | LOC100910942 |   |      |      |   |   |     |   |     |
| 100910953 | LOC100910953 |   |      |      |   |   |     |   |     |
| 100910977 | LOC100910977 |   |      |      |   |   |     |   |     |
| 100910984 | Alkal1       |   |      |      |   |   |     |   |     |
| 100910993 | LOC100910993 |   |      |      |   |   |     |   |     |
| 100910997 | LOC100910997 |   |      |      |   |   |     |   |     |
| 100910999 | LOC100910999 |   |      |      |   |   |     |   |     |
| 100911015 | LOC100911015 |   |      |      |   |   |     |   |     |
| 100911022 | LOC100911022 |   |      |      |   |   |     |   |     |
| 100911027 | LOC100911027 | 0 | 0    | 1.51 | 0 | 0 | 0   | 0 | 0   |
| 100911035 | LOC100911035 |   |      |      |   |   |     |   |     |
| 100911042 | LOC100911042 | 0 | 0    | 0    | 0 | 1 | 1.5 | 0 | 0.5 |
| 100911043 | LOC100911043 |   |      |      |   |   |     |   |     |
| 100911064 | LOC100911064 |   |      |      |   |   |     |   |     |
| 100911106 | LOC100911106 | 0 | 0.13 | 0    | 0 | 0 | 0   | 0 | 0   |
| 100911127 | LOC100911127 |   |      |      |   |   |     |   |     |
| 100911129 | LOC100911129 |   |      |      |   |   |     |   |     |
| 100911147 | LOC100911147 |   |      |      |   |   |     |   |     |
| 100911153 | LOC100911153 |   |      |      |   |   |     |   |     |
| 100911163 | LOC100911163 | 0 | 0    | 0    | 1 | 0 | 0   | 0 | 0   |
| 100911165 | My1k4        |   |      |      |   |   |     |   |     |
| 100911184 | LOC100911184 |   |      |      |   |   |     |   |     |
| 100911204 | LOC100911204 |   |      |      |   |   |     |   |     |
| 100911206 | LOC100911206 |   |      |      |   |   |     |   |     |
| 100911217 | LOC100911217 |   |      |      |   |   |     |   |     |
| 100911229 | LOC100911229 | 0 | 0    | 0    | 0 | 1 | 0   | 0 | 0   |
| 100911241 | LOC100911241 |   |      |      |   |   |     |   |     |
| 100911247 | LOC100911247 |   |      |      |   |   |     |   |     |
| 100911249 | Ifn11        |   |      |      |   |   |     |   |     |
| 100911272 | LOC100911272 |   |      |      |   |   |     |   |     |
| 100911283 | LOC100911283 |   |      |      |   |   |     |   |     |
| 100911315 | LOC100911315 |   |      |      |   |   |     |   |     |
| 100911348 | LOC100911348 |   |      |      |   |   |     |   |     |
| 100911358 | LOC100911358 |   |      |      |   |   |     |   |     |
| 100911359 | LOC100911359 | 1 | 0    | 0    | 0 | 0 | 0   | 0 | 0   |
| 100911366 | LOC100911366 |   |      |      |   |   |     |   |     |
| 100911376 | LOC100911376 |   |      |      |   |   |     |   |     |
| 100911380 | LOC100911380 |   |      |      |   |   |     |   |     |
| 100911394 | LOC100911394 |   |      |      |   |   |     |   |     |
| 100911398 | LOC100911398 |   |      |      |   |   |     |   |     |
| 100911405 | LOC100911405 |   |      |      |   |   |     |   |     |
| 100911434 | LOC100911434 |   |      |      |   |   |     |   |     |
| 100911438 | LOC100911438 |   |      |      |   |   |     |   |     |
| 100911458 | LOC100911458 |   |      |      |   |   |     |   |     |
| 100911463 | LOC100911463 |   |      |      |   |   |     |   |     |
| 100911464 | LOC100911464 |   |      |      |   |   |     |   |     |
| 100911489 | LOC100911489 | 0 | 0    | 1.35 | 0 | 0 | 0   | 0 | 0   |
| 100911495 | LOC100911495 |   |      |      |   |   |     |   |     |
| 100911507 | LOC100911507 |   |      |      |   |   |     |   |     |
| 100911529 | LOC100911529 | 0 | 3    | 0    | 0 | 0 | 0   | 0 | 0   |

|           |              |      |      |      |      |     |      |      |     |
|-----------|--------------|------|------|------|------|-----|------|------|-----|
| 100911547 | LOC100911547 |      |      |      |      |     |      |      |     |
| 100911558 | LOC100911558 |      |      |      |      |     |      |      |     |
| 100911565 | LOC100911565 |      |      |      |      |     |      |      |     |
| 100911569 | LOC100911569 |      |      |      |      |     |      |      |     |
| 100911571 | LOC100911571 |      |      |      |      |     |      |      |     |
| 100911583 | LOC100911583 |      |      |      |      |     |      |      |     |
| 100911586 | LOC100911586 |      |      |      |      |     |      |      |     |
| 100911588 | LOC100911588 | 0    | 0    | 0    | 1.88 | 0   | 0    | 0    | 0   |
| 100911628 | LOC100911628 |      |      |      |      |     |      |      |     |
| 100911649 | LOC100911649 |      |      |      |      |     |      |      |     |
| 100911679 | LOC100911679 |      |      |      |      |     |      |      |     |
| 100911681 | LOC100911681 |      |      |      |      |     |      |      |     |
| 100911689 | LOC100911689 |      |      |      |      |     |      |      |     |
| 100911695 | LOC100911695 | 0    | 0    | 0    | 0    | 1   | 0    | 0    | 0   |
| 100911718 | LOC100911718 |      |      |      |      |     |      |      |     |
| 100911725 | LOC100911725 |      |      |      |      |     |      |      |     |
| 100911727 | LOC100911727 |      |      |      |      |     |      |      |     |
| 100911744 | LOC100911744 |      |      |      |      |     |      |      |     |
| 100911758 | LOC100911758 |      |      |      |      |     |      |      |     |
| 100911772 | LOC100911772 |      |      |      |      |     |      |      |     |
| 100911784 | LOC100911784 |      |      |      |      |     |      |      |     |
| 100911797 | LOC100911797 | 0.51 | 0    | 0    | 0    | 0   | 0    | 0    | 0   |
| 100911801 | LOC100911801 |      |      |      |      |     |      |      |     |
| 100911839 | LOC100911839 |      |      |      |      |     |      |      |     |
| 100911845 | LOC100911845 |      |      |      |      |     |      |      |     |
| 100911857 | LOC100911857 |      |      |      |      |     |      |      |     |
| 100911860 | LOC100911860 |      |      |      |      |     |      |      |     |
| 100911867 | LOC100911867 | 0    | 2.66 | 2.32 | 0    | 0   | 0    | 0    | 0   |
| 100911870 | LOC100911870 |      |      |      |      |     |      |      |     |
| 100911886 | LOC100911886 |      |      |      |      |     |      |      |     |
| 100911888 | LOC100911888 |      |      |      |      |     |      |      |     |
| 100911893 | LOC100911893 |      |      |      |      |     |      |      |     |
| 100911936 | LOC100911936 |      |      |      |      |     |      |      |     |
| 100911937 | LOC100911937 |      |      |      |      |     |      |      |     |
| 100911938 | LOC100911938 | 0    | 0    | 0    | 0    | 0.5 | 0    | 0    | 0   |
| 100911939 | LOC100911939 |      |      |      |      |     |      |      |     |
| 100911941 | LOC100911941 | 0    | 1    | 0    | 0    | 0   | 0    | 0    | 0   |
| 100911944 | LOC100911944 |      |      |      |      |     |      |      |     |
| 100911958 | LOC100911958 | 0    | 0    | 0.5  | 0    | 0   | 0    | 0    | 0   |
| 100911971 | Spata31e1    |      |      |      |      |     |      |      |     |
| 100911976 | LOC100911976 | 0    | 0    | 0    | 0    | 0.5 | 0.5  | 0    | 0.5 |
| 100911982 | LOC100911982 |      |      |      |      |     |      |      |     |
| 100911983 | LOC100911983 | 0    | 0    | 0    | 0    | 0.5 | 0    | 0    | 0   |
| 100911984 | LOC100911984 | 0    | 0.8  | 0    | 0    | 0   | 0    | 0    | 0   |
| 100911988 | LOC100911988 |      |      |      |      |     |      |      |     |
| 100911994 | LOC100911994 | 0    | 0    | 2.8  | 0    | 0   | 0    | 0    | 0   |
| 100911999 | LOC100911999 |      |      |      |      |     |      |      |     |
| 100912013 | LOC100912013 | 0    | 0    | 0    | 0    | 0   | 0.58 | 1.06 | 0   |
| 100912021 | LOC100912021 | 0    | 0    | 0    | 0    | 0   | 0    | 0.32 | 0   |
| 100912026 | LOC100912026 |      |      |      |      |     |      |      |     |
| 100912028 | LOC100912028 |      |      |      |      |     |      |      |     |
| 100912067 | LOC100912067 |      |      |      |      |     |      |      |     |
| 100912097 | LOC100912097 |      |      |      |      |     |      |      |     |
| 100912104 | LOC100912104 |      |      |      |      |     |      |      |     |
| 100912114 | LOC100912114 |      |      |      |      |     |      |      |     |
| 100912135 | LOC100912135 |      |      |      |      |     |      |      |     |





|           |              |     |     |      |   |      |      |      |   |
|-----------|--------------|-----|-----|------|---|------|------|------|---|
| 100912958 | LOC100912958 |     |     |      |   |      |      |      |   |
| 100912998 | LOC100912998 | 0   | 0   | 0    | 0 | 1    | 1    | 0    | 0 |
| 100913013 | LOC100913013 | 0   | 0   | 0    | 0 | 0    | 0    | 1    | 0 |
| 100913081 | Pate-f       |     |     |      |   |      |      |      |   |
| 102546342 | LOC102546342 | 0   | 0   | 0    | 0 | 0    | 0    | 0    | 1 |
| 102546456 | LOC102546456 |     |     |      |   |      |      |      |   |
| 102546467 | LOC102546467 | 1   | 0   | 0    | 0 | 0    | 0    | 0    | 0 |
| 102546505 | LOC102546505 |     |     |      |   |      |      |      |   |
| 102546567 | LOC102546567 |     |     |      |   |      |      |      |   |
| 102546758 | Klk5         |     |     |      |   |      |      |      |   |
| 102546793 | LOC102546793 |     |     |      |   |      |      |      |   |
| 102546819 | LOC102546819 |     |     |      |   |      |      |      |   |
| 102546862 | LOC102546862 | 0   | 0   | 0    | 0 | 0    | 0    | 1    | 0 |
| 102546874 | LOC102546874 | 1   | 0   | 0    | 1 | 0    | 0    | 0    | 0 |
| 102547035 | LOC102547035 |     |     |      |   |      |      |      |   |
| 102547206 | LOC102547206 |     |     |      |   |      |      |      |   |
| 102547221 | LOC102547221 |     |     |      |   |      |      |      |   |
| 102547275 | LOC102547275 |     |     |      |   |      |      |      |   |
| 102547542 | LOC102547542 |     |     |      |   |      |      |      |   |
| 102547604 | LOC102547604 | 0   | 0   | 0    | 0 | 0.78 | 0    | 0    | 0 |
| 102547645 | LOC102547645 |     |     |      |   |      |      |      |   |
| 102547820 | LOC102547820 |     |     |      |   |      |      |      |   |
| 102547850 | LOC102547850 |     |     |      |   |      |      |      |   |
| 102547949 | LOC102547949 |     |     |      |   |      |      |      |   |
| 102548017 | LOC102548017 | 0   | 0   | 0    | 1 | 0    | 0    | 0    | 0 |
| 102548031 | LOC102548031 |     |     |      |   |      |      |      |   |
| 102548071 | LOC102548071 |     |     |      |   |      |      |      |   |
| 102548126 | Armh2        |     |     |      |   |      |      |      |   |
| 102548128 | LOC102548128 | 0   | 0   | 0    | 0 | 1    | 0    | 0    | 0 |
| 102548129 | LOC102548129 | 0   | 0   | 0    | 0 | 0    | 0    | 0    | 2 |
| 102548522 | LOC102548522 |     |     |      |   |      |      |      |   |
| 102548702 | LOC102548702 |     |     |      |   |      |      |      |   |
| 102548729 | LOC102548729 |     |     |      |   |      |      |      |   |
| 102548794 | LOC102548794 |     |     |      |   |      |      |      |   |
| 102548875 | LOC102548875 |     |     |      |   |      |      |      |   |
| 102548912 | LOC102548912 | 0.5 | 0.5 | 0.5  | 0 | 0    | 0    | 0    | 0 |
| 102548978 | LOC102548978 | 0   | 0   | 0    | 0 | 0    | 0    | 1    | 0 |
| 102549010 | Bend2        |     |     |      |   |      |      |      |   |
| 102549220 | LOC102549220 | 0   | 0   | 0    | 1 | 0    | 0    | 0    | 0 |
| 102549229 | LOC102549229 | 0   | 0   | 0    | 0 | 0    | 0    | 1    | 0 |
| 102549291 | LOC102549291 |     |     |      |   |      |      |      |   |
| 102549389 | LOC102549389 | 0   | 0   | 0    | 0 | 1.82 | 2.55 | 0    | 0 |
| 102549607 | LOC102549607 |     |     |      |   |      |      |      |   |
| 102549681 | Plckhg7      | 0   | 0   | 0    | 0 | 1    | 1    | 0    | 0 |
| 102549716 | LOC102549716 | 0   | 0   | 1.07 | 2 | 0    | 0    | 0    | 0 |
| 102549724 | LOC102549724 |     |     |      |   |      |      |      |   |
| 102549785 | LOC102549785 |     |     |      |   |      |      |      |   |
| 102549828 | LOC102549828 |     |     |      |   |      |      |      |   |
| 102549940 | LOC102549940 |     |     |      |   |      |      |      |   |
| 102550080 | LOC102550080 |     |     |      |   |      |      |      |   |
| 102550148 | LOC102550148 | 0   | 0   | 0    | 0 | 0    | 0    | 0.93 | 0 |
| 102550160 | LOC102550160 |     |     |      |   |      |      |      |   |
| 102550257 | LOC102550257 |     |     |      |   |      |      |      |   |
| 102550314 | LOC102550314 |     |     |      |   |      |      |      |   |
| 102550416 | LOC102550416 |     |     |      |   |      |      |      |   |
| 102550466 | LOC102550466 |     |     |      |   |      |      |      |   |

|           |              |   |   |   |   |      |   |      |     |
|-----------|--------------|---|---|---|---|------|---|------|-----|
| 102550512 | LOC102550512 |   |   |   |   |      |   |      |     |
| 102550530 | LOC102550530 |   |   |   |   |      |   |      |     |
| 102550598 | LOC102550598 |   |   |   |   |      |   |      |     |
| 102550654 | LOC102550654 |   |   |   |   |      |   |      |     |
| 102550682 | LOC102550682 |   |   |   |   |      |   |      |     |
| 102550699 | Sprr2d       |   |   |   |   |      |   |      |     |
| 102550708 | LOC102550708 |   |   |   |   |      |   |      |     |
| 102550816 | LOC102550816 |   |   |   |   |      |   |      |     |
| 102550885 | LOC102550885 |   |   |   |   |      |   |      |     |
| 102550890 | LOC102550890 |   |   |   |   |      |   |      |     |
| 102550901 | Krtap2013    |   |   |   |   |      |   |      |     |
| 102550922 | LOC102550922 | 0 | 0 | 0 | 0 | 0    | 0 | 0    | 1   |
| 102550973 | LOC102550973 |   |   |   |   |      |   |      |     |
| 102550988 | LOC102550988 |   |   |   |   |      |   |      |     |
| 102551003 | LOC102551003 |   |   |   |   |      |   |      |     |
| 102551069 | Krtap22-2    |   |   |   |   |      |   |      |     |
| 102551071 | LOC102551071 |   |   |   |   |      |   |      |     |
| 102551102 | LOC102551102 |   |   |   |   |      |   |      |     |
| 102551105 | LOC102551105 |   |   |   |   |      |   |      |     |
| 102551117 | LOC102551117 | 0 | 0 | 1 | 0 | 0    | 0 | 0    | 0   |
| 102551143 | LOC102551143 |   |   |   |   |      |   |      |     |
| 102551166 | LOC102551166 | 0 | 0 | 1 | 0 | 0    | 0 | 0    | 0   |
| 102551175 | LOC102551175 |   |   |   |   |      |   |      |     |
| 102551192 | LOC102551192 |   |   |   |   |      |   |      |     |
| 102551201 | LOC102551201 |   |   |   |   |      |   |      |     |
| 102551241 | LOC102551241 |   |   |   |   |      |   |      |     |
| 102551265 | LOC102551265 |   |   |   |   |      |   |      |     |
| 102551278 | LOC102551278 |   |   |   |   |      |   |      |     |
| 102551296 | LOC102551296 | 0 | 0 | 0 | 0 | 0    | 0 | 0    | 1.9 |
| 102551304 | LOC102551304 |   |   |   |   |      |   |      |     |
| 102551394 | LOC102551394 |   |   |   |   |      |   |      |     |
| 102551397 | LOC102551397 |   |   |   |   |      |   |      |     |
| 102551406 | LOC102551406 |   |   |   |   |      |   |      |     |
| 102551431 | LOC102551431 |   |   |   |   |      |   |      |     |
| 102551497 | LOC102551497 |   |   |   |   |      |   |      |     |
| 102551504 | LOC102551504 |   |   |   |   |      |   |      |     |
| 102551559 | LOC102551559 | 0 | 0 | 0 | 0 | 1    | 0 | 1    | 0   |
| 102551575 | LOC102551575 | 0 | 0 | 0 | 0 | 2.91 | 0 | 0    | 0   |
| 102551620 | LOC102551620 |   |   |   |   |      |   |      |     |
| 102551632 | LOC102551632 | 0 | 0 | 0 | 0 | 0    | 0 | 0.98 | 0   |
| 102551641 | LOC102551641 |   |   |   |   |      |   |      |     |
| 102551679 | LOC102551679 |   |   |   |   |      |   |      |     |
| 102551754 | LOC102551754 |   |   |   |   |      |   |      |     |
| 102551771 | LOC102551771 |   |   |   |   |      |   |      |     |
| 102551823 | LOC102551823 | 1 | 0 | 1 | 0 | 0    | 0 | 0    | 0   |
| 102551847 | LOC102551847 |   |   |   |   |      |   |      |     |
| 102551852 | LOC102551852 |   |   |   |   |      |   |      |     |
| 102551887 | Fam177b      |   |   |   |   |      |   |      |     |
| 102551936 | LOC102551936 |   |   |   |   |      |   |      |     |
| 102551947 | LOC102551947 |   |   |   |   |      |   |      |     |
| 102552046 | LOC102552046 |   |   |   |   |      |   |      |     |
| 102552104 | LOC102552104 |   |   |   |   |      |   |      |     |
| 102552128 | LOC102552128 | 0 | 0 | 0 | 0 | 0    | 0 | 2    | 0   |
| 102552137 | LOC102552137 |   |   |   |   |      |   |      |     |
| 102552143 | LOC102552143 |   |   |   |   |      |   |      |     |
| 102552223 | LOC102552223 |   |   |   |   |      |   |      |     |

|           |              |      |      |   |      |      |      |      |      |
|-----------|--------------|------|------|---|------|------|------|------|------|
| 102552244 | LOC102552244 |      |      |   |      |      |      |      |      |
| 102552286 | LOC102552286 | 0    | 0    | 0 | 0    | 1    | 0    | 0    | 0    |
| 102552311 | LOC102552311 |      |      |   |      |      |      |      |      |
| 102552326 | LOC102552326 |      |      |   |      |      |      |      |      |
| 102552337 | LOC102552337 |      |      |   |      |      |      |      |      |
| 102552348 | LOC102552348 | 1    | 0    | 0 | 1    | 0    | 0    | 0    | 0    |
| 102552384 | LOC102552384 | 1.06 | 0    | 0 | 0    | 0    | 0    | 0    | 0    |
| 102552474 | LOC102552474 |      |      |   |      |      |      |      |      |
| 102552485 | LOC102552485 | 0    | 0    | 1 | 1    | 0    | 0    | 0    | 0    |
| 102552542 | LOC102552542 |      |      |   |      |      |      |      |      |
| 102552619 | LOC102552619 | 0    | 0    | 0 | 0    | 1    | 1    | 0    | 0    |
| 102552651 | LOC102552651 |      |      |   |      |      |      |      |      |
| 102552667 | LOC102552667 | 0    | 0    | 0 | 0    | 1    | 0    | 0    | 0    |
| 102552669 | LOC102552669 |      |      |   |      |      |      |      |      |
| 102552748 | LOC102552748 | 0    | 0    | 0 | 0    | 0    | 1    | 0    | 0    |
| 102552799 | LOC102552799 |      |      |   |      |      |      |      |      |
| 102552844 | LOC102552844 | 0    | 1.57 | 2 | 0    | 0    | 0    | 0    | 0    |
| 102552923 | LOC102552923 |      |      |   |      |      |      |      |      |
| 102552939 | Dynap        |      |      |   |      |      |      |      |      |
| 102552940 | LOC102552940 |      |      |   |      |      |      |      |      |
| 102553035 | LOC102553035 |      |      |   |      |      |      |      |      |
| 102553055 | LOC102553055 | 0    | 0    | 0 | 0    | 1.54 | 0    | 0    | 0    |
| 102553069 | LOC102553069 |      |      |   |      |      |      |      |      |
| 102553110 | LOC102553110 |      |      |   |      |      |      |      |      |
| 102553150 | LOC102553150 | 0    | 0    | 0 | 0    | 0    | 1.59 | 0    | 1.32 |
| 102553250 | LOC102553250 | 0    | 1.57 | 0 | 0    | 0    | 0    | 0    | 0    |
| 102553311 | LOC102553311 |      |      |   |      |      |      |      |      |
| 102553316 | LOC102553316 |      |      |   |      |      |      |      |      |
| 102553324 | LOC102553324 |      |      |   |      |      |      |      |      |
| 102553503 | LOC102553503 |      |      |   |      |      |      |      |      |
| 102553533 | LOC102553533 | 0    | 0    | 0 | 0    | 0    | 0    | 1.21 | 0    |
| 102553538 | LOC102553538 |      |      |   |      |      |      |      |      |
| 102553613 | LOC102553613 | 0    | 2.83 | 0 | 0    | 0    | 0    | 0    | 0    |
| 102553656 | LOC102553656 | 0    | 0    | 0 | 2.31 | 0    | 0    | 0    | 0    |
| 102553745 | Ct47b1       |      |      |   |      |      |      |      |      |
| 102553861 | LOC102553861 |      |      |   |      |      |      |      |      |
| 102553880 | LOC102553880 |      |      |   |      |      |      |      |      |
| 102553892 | LOC102553892 |      |      |   |      |      |      |      |      |
| 102554012 | LOC102554012 |      |      |   |      |      |      |      |      |
| 102554024 | LOC102554024 |      |      |   |      |      |      |      |      |
| 102554041 | LOC102554041 | 0    | 0    | 0 | 1    | 0    | 0    | 0    | 0    |
| 102554065 | LOC102554065 |      |      |   |      |      |      |      |      |
| 102554234 | LOC102554234 | 0    | 0    | 0 | 0    | 0.1  | 0    | 0    | 0    |
| 102554246 | LOC102554246 |      |      |   |      |      |      |      |      |
| 102554287 | LOC102554287 |      |      |   |      |      |      |      |      |
| 102554371 | LOC102554371 |      |      |   |      |      |      |      |      |
| 102554388 | LOC102554388 | 0    | 0    | 1 | 0    | 0    | 0    | 0    | 0    |
| 102554431 | LOC102554431 | 0    | 1    | 0 | 1    | 0    | 0    | 0    | 0    |
| 102554482 | Ins15        |      |      |   |      |      |      |      |      |
| 102554525 | LOC102554525 | 0    | 0    | 0 | 0    | 0    | 1.91 | 0    | 2    |
| 102554576 | LOC102554576 |      |      |   |      |      |      |      |      |
| 102554594 | LOC102554594 | 0    | 2.93 | 0 | 0    | 0    | 0    | 0    | 0    |
| 102554637 | LOC102554637 | 0    | 0    | 0 | 0    | 1    | 0    | 0    | 0    |
| 102554666 | LOC102554666 | 0    | 0    | 0 | 0    | 0    | 0    | 1.6  | 1    |
| 102554672 | LOC102554672 |      |      |   |      |      |      |      |      |
| 102554761 | LOC102554761 | 0    | 0    | 0 | 0    | 0    | 1    | 1    | 1    |

|           |                 |      |     |   |      |   |   |      |      |
|-----------|-----------------|------|-----|---|------|---|---|------|------|
| 102554799 | LOC102554799    |      |     |   |      |   |   |      |      |
| 102554842 | LOC102554842    |      |     |   |      |   |   |      |      |
| 102554851 | Sertm2          |      |     |   |      |   |   |      |      |
| 102554917 | LOC102554917    |      |     |   |      |   |   |      |      |
| 102554937 | LOC102554937    |      |     |   |      |   |   |      |      |
| 102554944 | LOC102554944    | 1    | 0   | 1 | 0    | 0 | 0 | 0    | 0    |
| 102554989 | LOC102554989    |      |     |   |      |   |   |      |      |
| 102555023 | LOC102555023    |      |     |   |      |   |   |      |      |
| 102555114 | LOC102555114    |      |     |   |      |   |   |      |      |
| 102555137 | LOC102555137    |      |     |   |      |   |   |      |      |
| 102555149 | LOC102555149    |      |     |   |      |   |   |      |      |
| 102555170 | Higd1c          | 0    | 0   | 0 | 0    | 0 | 0 | 1    | 0    |
| 102555306 | LOC102555306    |      |     |   |      |   |   |      |      |
| 102555324 | LOC102555324    |      |     |   |      |   |   |      |      |
| 102555445 | LOC102555445    | 1    | 0   | 0 | 1    | 0 | 0 | 0    | 0    |
| 102555481 | LOC102555481    |      |     |   |      |   |   |      |      |
| 102555488 | LOC102555488    |      |     |   |      |   |   |      |      |
| 102555501 | LOC102555501    |      |     |   |      |   |   |      |      |
| 102555511 | LOC102555511    |      |     |   |      |   |   |      |      |
| 102555534 | LOC102555534    |      |     |   |      |   |   |      |      |
| 102555599 | LOC102555599    |      |     |   |      |   |   |      |      |
| 102555760 | LOC102555760    |      |     |   |      |   |   |      |      |
| 102555852 | LOC102555852    |      |     |   |      |   |   |      |      |
| 102556049 | LOC102556049    |      |     |   |      |   |   |      |      |
| 102556120 | LOC102556120    | 0    | 0   | 0 | 0    | 0 | 0 | 0.5  | 0    |
| 102556129 | Ccdc198         |      |     |   |      |   |   |      |      |
| 102556213 | LOC102556213    |      |     |   |      |   |   |      |      |
| 102556288 | LOC102556288    | 0    | 0   | 0 | 0    | 1 | 0 | 0    | 1    |
| 102556339 | LOC102556339    | 2.29 | 0   | 0 | 0    | 0 | 0 | 0    | 0    |
| 102556351 | LOC102556351    | 1    | 0   | 0 | 2.13 | 0 | 0 | 0    | 0    |
| 102556447 | LOC102556447    |      |     |   |      |   |   |      |      |
| 102556474 | LOC102556474    |      |     |   |      |   |   |      |      |
| 102556504 | LOC102556504    | 0    | 0   | 0 | 0    | 0 | 1 | 0    | 2    |
| 102556795 | LOC102556795    |      |     |   |      |   |   |      |      |
| 102557319 | LOC102557319    |      |     |   |      |   |   |      |      |
| 102557406 | LOC102557406    |      |     |   |      |   |   |      |      |
| 102557552 | LOC102557552    | 0    | 0   | 0 | 0    | 0 | 0 | 0    | 2    |
| 103689924 | LOC103689924    |      |     |   |      |   |   |      |      |
| 103689929 | LOC103689929    |      |     |   |      |   |   |      |      |
| 103689939 | LOC103689939    |      |     |   |      |   |   |      |      |
| 103689940 | LOC103689940    |      |     |   |      |   |   |      |      |
| 103689942 | LOC103689942    | 0    | 0   | 0 | 0    | 0 | 0 | 0    | 4.84 |
| 103689943 | LOC103689943    |      |     |   |      |   |   |      |      |
| 103689944 | LOC103689944    |      |     |   |      |   |   |      |      |
| 103689958 | LOC103689958    |      |     |   |      |   |   |      |      |
| 103689960 | LOC103689960    |      |     |   |      |   |   |      |      |
| 103689964 | LOC103689964    |      |     |   |      |   |   |      |      |
| 103689967 | LOC103689967    | 0    | 0   | 0 | 3.11 | 0 | 0 | 0    | 0    |
| 103689976 | LOC103689976    | 0    | 0   | 0 | 0    | 0 | 0 | 0.82 | 1    |
| 103689980 | LOC103689980    |      |     |   |      |   |   |      |      |
| 103689988 | LOC103689988    |      |     |   |      |   |   |      |      |
| 103689989 | LOC103689989    |      |     |   |      |   |   |      |      |
| 103689993 | LOC103689993    |      |     |   |      |   |   |      |      |
| 103689997 | NEWGENE 1311658 | 0    | 0.5 | 0 | 0.5  | 0 | 0 | 0    | 0    |
| 103690010 | Fibcd111        |      |     |   |      |   |   |      |      |
| 103690011 | LOC103690011    |      |     |   |      |   |   |      |      |

|           |                 |      |      |      |   |   |      |      |      |
|-----------|-----------------|------|------|------|---|---|------|------|------|
| 103690015 | LOC103690015    |      |      |      |   |   |      |      |      |
| 103690017 | LOC103690017    | 0    | 0    | 0    | 0 | 0 | 0    | 0    | 1.89 |
| 103690026 | LOC103690026    |      |      |      |   |   |      |      |      |
| 103690036 | LOC103690036    |      |      |      |   |   |      |      |      |
| 103690040 | LOC103690040    | 0    | 0    | 0    | 0 | 0 | 0    | 0    | 2.85 |
| 103690041 | LOC103690041    |      |      |      |   |   |      |      |      |
| 103690042 | LOC103690042    |      |      |      |   |   |      |      |      |
| 103690047 | NEWGENE 1308624 |      |      |      |   |   |      |      |      |
| 103690048 | LOC103690048    |      |      |      |   |   |      |      |      |
| 103690055 | LOC103690055    |      |      |      |   |   |      |      |      |
| 103690060 | LOC103690060    |      |      |      |   |   |      |      |      |
| 103690062 | LOC103690062    |      |      |      |   |   |      |      |      |
| 103690071 | LOC103690071    |      |      |      |   |   |      |      |      |
| 103690072 | LOC103690072    |      |      |      |   |   |      |      |      |
| 103690075 | LOC103690075    |      |      |      |   |   |      |      |      |
| 103690077 | LOC103690077    |      |      |      |   |   |      |      |      |
| 103690079 | LOC103690079    | 0    | 0    | 0    | 0 | 0 | 1.45 | 0    | 0    |
| 103690088 | LOC103690088    |      |      |      |   |   |      |      |      |
| 103690090 | LOC103690090    |      |      |      |   |   |      |      |      |
| 103690093 | Tmc4b           | 2.46 | 0    | 0    | 2 | 0 | 0    | 0    | 0    |
| 103690094 | LOC103690094    | 0.5  | 0.5  | 0.5  | 0 | 0 | 0    | 0    | 0    |
| 103690095 | LOC103690095    |      |      |      |   |   |      |      |      |
| 103690101 | LOC103690101    |      |      |      |   |   |      |      |      |
| 103690115 | LOC103690115    |      |      |      |   |   |      |      |      |
| 103690118 | LOC103690118    | 0    | 0    | 0    | 0 | 0 | 0    | 4.56 | 0    |
| 103690119 | LOC103690119    |      |      |      |   |   |      |      |      |
| 103690133 | LOC103690133    |      |      |      |   |   |      |      |      |
| 103690145 | LOC103690145    | 0.33 | 0    | 0    | 0 | 0 | 0    | 0    | 0    |
| 103690150 | LOC103690150    |      |      |      |   |   |      |      |      |
| 103690167 | Ar114           | 0    | 0    | 0    | 0 | 1 | 0    | 0    | 1    |
| 103690169 | LOC103690169    | 0    | 2.49 | 0    | 0 | 0 | 0    | 0    | 0    |
| 103690172 | LOC103690172    |      |      |      |   |   |      |      |      |
| 103690187 | LOC103690187    |      |      |      |   |   |      |      |      |
| 103690189 | LOC103690189    | 0    | 2.93 | 0    | 0 | 0 | 0    | 0    | 0    |
| 103690194 | LOC103690194    | 0    | 0    | 0    | 0 | 0 | 0    | 0    | 1    |
| 103690209 | Rbmx12          |      |      |      |   |   |      |      |      |
| 103690246 | LOC103690246    |      |      |      |   |   |      |      |      |
| 103690254 | Try5            |      |      |      |   |   |      |      |      |
| 103690255 | LOC103690255    |      |      |      |   |   |      |      |      |
| 103690271 | LOC103690271    |      |      |      |   |   |      |      |      |
| 103690273 | LOC103690273    |      |      |      |   |   |      |      |      |
| 103690280 | LOC103690280    |      |      |      |   |   |      |      |      |
| 103690286 | LOC103690286    |      |      |      |   |   |      |      |      |
| 103690289 | LOC103690289    | 0    | 0    | 0    | 0 | 0 | 0    | 0.6  | 0    |
| 103690291 | LOC103690291    |      |      |      |   |   |      |      |      |
| 103690297 | LOC103690297    |      |      |      |   |   |      |      |      |
| 103690306 | LOC103690306    | 0    | 0    | 0    | 0 | 0 | 0    | 0.5  | 0    |
| 103690319 | LOC103690319    | 2.39 | 0    | 0    | 0 | 0 | 0    | 0    | 0    |
| 103690342 | Evx1            |      |      |      |   |   |      |      |      |
| 103690352 | LOC103690352    |      |      |      |   |   |      |      |      |
| 103690354 | LOC103690354    |      |      |      |   |   |      |      |      |
| 103690355 | LOC103690355    |      |      |      |   |   |      |      |      |
| 103690365 | LOC103690365    |      |      |      |   |   |      |      |      |
| 103690374 | LOC103690374    |      |      |      |   |   |      |      |      |
| 103690375 | LOC103690375    |      |      |      |   |   |      |      |      |
| 103690381 | LOC103690381    | 0    | 1    | 1.09 | 0 | 0 | 0    | 0    | 0    |



|           |              |      |      |   |      |   |   |   |      |
|-----------|--------------|------|------|---|------|---|---|---|------|
| 103690410 | LOC103690410 |      |      |   |      |   |   |   |      |
| 103690462 | LOC103690462 |      |      |   |      |   |   |   |      |
| 103690504 | LOC103690504 | 0    | 1.01 | 0 | 0    | 0 | 0 | 0 | 0    |
| 103690514 | LOC103690514 |      |      |   |      |   |   |   |      |
| 103690545 | LOC103690545 | 0    | 0    | 1 | 0    | 0 | 0 | 0 | 0    |
| 103690588 | LOC103690588 |      |      |   |      |   |   |   |      |
| 103690600 | LOC103690600 |      |      |   |      |   |   |   |      |
| 103690754 | LOC103690754 | 0    | 0    | 0 | 0    | 0 | 0 | 1 | 0    |
| 103690765 | LOC103690765 |      |      |   |      |   |   |   |      |
| 103690810 | LOC103690810 |      |      |   |      |   |   |   |      |
| 103690821 | LOC103690821 |      |      |   |      |   |   |   |      |
| 103690860 | LOC103690860 |      |      |   |      |   |   |   |      |
| 103690862 | LOC103690862 |      |      |   |      |   |   |   |      |
| 103690864 | LOC103690864 |      |      |   |      |   |   |   |      |
| 103690878 | LOC103690878 | 0    | 0    | 1 | 0    | 0 | 0 | 0 | 0    |
| 103690887 | LOC103690887 | 0    | 0    | 0 | 0    | 0 | 0 | 2 | 0    |
| 103690902 | LOC103690902 |      |      |   |      |   |   |   |      |
| 103690904 | LOC103690904 |      |      |   |      |   |   |   |      |
| 103690913 | LOC103690913 |      |      |   |      |   |   |   |      |
| 103690935 | LOC103690935 |      |      |   |      |   |   |   |      |
| 103691020 | LOC103691020 | 0    | 0    | 0 | 1    | 0 | 0 | 0 | 0    |
| 103691064 | LOC103691064 |      |      |   |      |   |   |   |      |
| 103691066 | LOC103691066 |      |      |   |      |   |   |   |      |
| 103691092 | LOC103691092 |      |      |   |      |   |   |   |      |
| 103691095 | Wdr871       |      |      |   |      |   |   |   |      |
| 103691133 | LOC103691133 | 1    | 1    | 0 | 0    | 0 | 0 | 0 | 0    |
| 103691226 | LOC103691226 |      |      |   |      |   |   |   |      |
| 103691249 | LOC103691249 |      |      |   |      |   |   |   |      |
| 103691265 | Krtap5-1     |      |      |   |      |   |   |   |      |
| 103691445 | LOC103691445 |      |      |   |      |   |   |   |      |
| 103691460 | LOC103691460 |      |      |   |      |   |   |   |      |
| 103691468 | LOC103691468 |      |      |   |      |   |   |   |      |
| 103691494 | LOC103691494 |      |      |   |      |   |   |   |      |
| 103691495 | LOC103691495 |      |      |   |      |   |   |   |      |
| 103691498 | LOC103691498 | 2.28 | 0    | 0 | 0    | 0 | 0 | 0 | 0    |
| 103691506 | LOC103691506 |      |      |   |      |   |   |   |      |
| 103691522 | LOC103691522 |      |      |   |      |   |   |   |      |
| 103691547 | LOC103691547 |      |      |   |      |   |   |   |      |
| 103691549 | LOC103691549 | 0    | 0    | 0 | 0    | 1 | 0 | 0 | 0    |
| 103691587 | LOC103691587 |      |      |   |      |   |   |   |      |
| 103691627 | LOC103691627 |      |      |   |      |   |   |   |      |
| 103691715 | LOC103691715 | 0    | 0    | 0 | 0    | 1 | 1 | 0 | 0    |
| 103691749 | LOC103691749 |      |      |   |      |   |   |   |      |
| 103691806 | LOC103691806 | 0    | 0    | 0 | 0    | 1 | 0 | 0 | 0    |
| 103691842 | LOC103691842 |      |      |   |      |   |   |   |      |
| 103691843 | LOC103691843 |      |      |   |      |   |   |   |      |
| 103691873 | LOC103691873 |      |      |   |      |   |   |   |      |
| 103691918 | LOC103691918 |      |      |   |      |   |   |   |      |
| 103691922 | LOC103691922 | 0    | 0    | 0 | 0    | 0 | 0 | 0 | 0.58 |
| 103691948 | LOC103691948 |      |      |   |      |   |   |   |      |
| 103691956 | LOC103691956 | 0    | 0    | 0 | 1    | 0 | 0 | 0 | 0    |
| 103691965 | LOC103691965 |      |      |   |      |   |   |   |      |
| 103691966 | LOC103691966 | 0    | 0    | 0 | 0.22 | 0 | 0 | 0 | 0    |
| 103692008 | LOC103692008 |      |      |   |      |   |   |   |      |
| 103692013 | LOC103692013 |      |      |   |      |   |   |   |      |
| 103692018 | LOC103692018 |      |      |   |      |   |   |   |      |

|           |              |   |      |      |     |   |      |      |      |
|-----------|--------------|---|------|------|-----|---|------|------|------|
| 103692019 | LOC103692019 |   |      |      |     |   |      |      |      |
| 103692039 | LOC103692039 |   |      |      |     |   |      |      |      |
| 103692040 | LOC103692040 |   |      |      |     |   |      |      |      |
| 103692041 | LOC103692041 |   |      |      |     |   |      |      |      |
| 103692042 | LOC103692042 | 0 | 0    | 0    | 0   | 0 | 0.33 | 0    | 0    |
| 103692048 | LOC103692048 | 0 | 0    | 0    | 0   | 1 | 0    | 0    | 1    |
| 103692071 | LOC103692071 | 0 | 0    | 0    | 0   | 1 | 1    | 1.04 | 0    |
| 103692073 | LOC103692073 |   |      |      |     |   |      |      |      |
| 103692138 | LOC103692138 |   |      |      |     |   |      |      |      |
| 103692142 | LOC103692142 |   |      |      |     |   |      |      |      |
| 103692213 | LOC103692213 |   |      |      |     |   |      |      |      |
| 103692309 | LOC103692309 | 0 | 0    | 0    | 0   | 0 | 0    | 0    | 1    |
| 103692345 | LOC103692345 |   |      |      |     |   |      |      |      |
| 103692396 | LOC103692396 | 0 | 0    | 0    | 0   | 0 | 0    | 0    | 1    |
| 103692409 | LOC103692409 |   |      |      |     |   |      |      |      |
| 103692412 | LOC103692412 |   |      |      |     |   |      |      |      |
| 103692417 | LOC103692417 |   |      |      |     |   |      |      |      |
| 103692518 | LOC103692518 |   |      |      |     |   |      |      |      |
| 103692530 | LOC103692530 | 0 | 1    | 0    | 0   | 0 | 0    | 0    | 0    |
| 103692690 | LOC103692690 |   |      |      |     |   |      |      |      |
| 103692726 | LOC103692726 |   |      |      |     |   |      |      |      |
| 103692755 | LOC103692755 |   |      |      |     |   |      |      |      |
| 103692768 | LOC103692768 |   |      |      |     |   |      |      |      |
| 103692831 | LOC103692831 |   |      |      |     |   |      |      |      |
| 103692888 | LOC103692888 |   |      |      |     |   |      |      |      |
| 103692896 | LOC103692896 | 0 | 0    | 0    | 0   | 0 | 0    | 0    | 2    |
| 103692906 | Eif3e        | 0 | 1.02 | 0    | 0   | 0 | 0    | 0    | 0    |
| 103692936 | LOC103692936 |   |      |      |     |   |      |      |      |
| 103692995 | LOC103692995 |   |      |      |     |   |      |      |      |
| 103693001 | LOC103693001 | 0 | 1    | 0.32 | 0   | 0 | 0    | 0    | 0    |
| 103693022 | LOC103693022 |   |      |      |     |   |      |      |      |
| 103693025 | LOC103693025 |   |      |      |     |   |      |      |      |
| 103693040 | LOC103693040 |   |      |      |     |   |      |      |      |
| 103693050 | LOC103693050 |   |      |      |     |   |      |      |      |
| 103693053 | LOC103693053 |   |      |      |     |   |      |      |      |
| 103693054 | LOC103693054 |   |      |      |     |   |      |      |      |
| 103693055 | LOC103693055 |   |      |      |     |   |      |      |      |
| 103693060 | LOC103693060 |   |      |      |     |   |      |      |      |
| 103693161 | LOC103693161 | 0 | 0    | 0    | 0   | 1 | 0    | 0    | 0    |
| 103693173 | LOC103693173 | 0 | 0    | 0    | 0   | 0 | 0    | 0    | 1.38 |
| 103693290 | LOC103693290 |   |      |      |     |   |      |      |      |
| 103693313 | LOC103693313 |   |      |      |     |   |      |      |      |
| 103693383 | LOC103693383 |   |      |      |     |   |      |      |      |
| 103693384 | LOC103693384 | 0 | 0    | 0    | 0   | 0 | 0    | 0    | 0.5  |
| 103693446 | LOC103693446 |   |      |      |     |   |      |      |      |
| 103693451 | LOC103693451 | 0 | 0    | 0    | 0.5 | 0 | 0    | 0    | 0    |
| 103693456 | LOC103693456 |   |      |      |     |   |      |      |      |
| 103693487 | LOC103693487 |   |      |      |     |   |      |      |      |
| 103693512 | LOC103693512 |   |      |      |     |   |      |      |      |
| 103693533 | LOC103693533 |   |      |      |     |   |      |      |      |
| 103693537 | LOC103693537 |   |      |      |     |   |      |      |      |
| 103693538 | LOC103693538 | 0 | 0    | 1    | 0   | 0 | 0    | 0    | 0    |
| 103693566 | LOC103693566 |   |      |      |     |   |      |      |      |
| 103693627 | LOC103693627 |   |      |      |     |   |      |      |      |
| 103693631 | LOC103693631 |   |      |      |     |   |      |      |      |
| 103693685 | LOC103693685 |   |      |      |     |   |      |      |      |

|           |              |      |   |      |   |      |   |   |      |
|-----------|--------------|------|---|------|---|------|---|---|------|
| 103693688 | LOC103693688 | 1.17 | 0 | 0.96 | 0 | 0    | 0 | 0 | 0    |
| 103693728 | LOC103693728 |      |   |      |   |      |   |   |      |
| 103693822 | LOC103693822 |      |   |      |   |      |   |   |      |
| 103693823 | LOC103693823 | 0    | 0 | 0    | 0 | 0    | 0 | 0 | 0.5  |
| 103693919 | LOC103693919 |      |   |      |   |      |   |   |      |
| 103694036 | LOC103694036 |      |   |      |   |      |   |   |      |
| 103694046 | LOC103694046 | 1    | 0 | 0    | 0 | 0    | 0 | 0 | 0    |
| 103694068 | LOC103694068 | 0    | 0 | 0    | 0 | 1    | 0 | 0 | 0    |
| 103694070 | LOC103694070 | 1    | 0 | 0    | 0 | 0    | 0 | 0 | 0    |
| 103694085 | LOC103694085 |      |   |      |   |      |   |   |      |
| 103694104 | LOC103694104 |      |   |      |   |      |   |   |      |
| 103694155 | LOC103694155 | 0    | 0 | 0    | 0 | 1    | 0 | 0 | 0    |
| 103694165 | LOC103694165 |      |   |      |   |      |   |   |      |
| 103694201 | LOC103694201 |      |   |      |   |      |   |   |      |
| 103694215 | LOC103694215 | 0    | 2 | 1    | 0 | 0    | 0 | 0 | 0    |
| 103694250 | LOC103694250 |      |   |      |   |      |   |   |      |
| 103694337 | LOC103694337 |      |   |      |   |      |   |   |      |
| 103694360 | LOC103694360 |      |   |      |   |      |   |   |      |
| 103694370 | LOC103694370 |      |   |      |   |      |   |   |      |
| 103694380 | LOC103694380 |      |   |      |   |      |   |   |      |
| 103694397 | LOC103694397 |      |   |      |   |      |   |   |      |
| 103694398 | LOC103694398 |      |   |      |   |      |   |   |      |
| 103694423 | LOC103694423 | 0    | 0 | 0    | 0 | 0.71 | 1 | 0 | 0.44 |
| 103694484 | LOC103694484 |      |   |      |   |      |   |   |      |
| 103694488 | LOC103694488 |      |   |      |   |      |   |   |      |
| 103694495 | LOC103694495 |      |   |      |   |      |   |   |      |
| 103694517 | LOC103694517 |      |   |      |   |      |   |   |      |
| 103694544 | Rbmy1j       |      |   |      |   |      |   |   |      |
| 103694545 | LOC103694545 |      |   |      |   |      |   |   |      |
| 103694550 | LOC103694550 |      |   |      |   |      |   |   |      |
| 103694554 | LOC103694554 |      |   |      |   |      |   |   |      |
| 103694555 | LOC103694555 |      |   |      |   |      |   |   |      |
| 103694583 | LOC103694583 |      |   |      |   |      |   |   |      |
| 103694584 | LOC103694584 |      |   |      |   |      |   |   |      |
| 103694587 | LOC103694587 | 0    | 0 | 0    | 0 | 1    | 0 | 0 | 0    |
| 103694591 | LOC103694591 |      |   |      |   |      |   |   |      |
| 103694599 | LOC103694599 |      |   |      |   |      |   |   |      |
| 103694600 | LOC103694600 |      |   |      |   |      |   |   |      |
| 103694601 | LOC103694601 |      |   |      |   |      |   |   |      |
| 103694602 | LOC103694602 |      |   |      |   |      |   |   |      |
| 103694603 | LOC103694603 |      |   |      |   |      |   |   |      |
| 103694604 | LOC103694604 |      |   |      |   |      |   |   |      |
| 103694605 | LOC103694605 |      |   |      |   |      |   |   |      |
| 103694606 | LOC103694606 |      |   |      |   |      |   |   |      |
| 103694614 | LOC103694614 |      |   |      |   |      |   |   |      |
| 103694622 | LOC103694622 |      |   |      |   |      |   |   |      |
| 103694624 | LOC103694624 |      |   |      |   |      |   |   |      |
| 103694627 | LOC103694627 |      |   |      |   |      |   |   |      |
| 103694636 | LOC103694636 |      |   |      |   |      |   |   |      |
| 103694637 | LOC103694637 |      |   |      |   |      |   |   |      |
| 103694640 | LOC103694640 |      |   |      |   |      |   |   |      |
| 103694726 | LOC103694726 |      |   |      |   |      |   |   |      |
| 103694730 | LOC103694730 | 0    | 0 | 0.33 | 0 | 0    | 0 | 0 | 0    |
| 103694731 | LOC103694731 | 0    | 0 | 0.33 | 0 | 0    | 0 | 0 | 0    |
| 103694733 | LOC103694733 |      |   |      |   |      |   |   |      |
| 103694745 | LOC103694745 |      |   |      |   |      |   |   |      |

|           |                 |   |   |      |      |      |      |   |      |
|-----------|-----------------|---|---|------|------|------|------|---|------|
| 103694747 | LOC103694747    |   |   |      |      |      |      |   |      |
| 103694768 | LOC103694768    |   |   |      |      |      |      |   |      |
| 103694775 | LOC103694775    |   |   |      |      |      |      |   |      |
| 103694776 | LOC103694776    |   |   |      |      |      |      |   |      |
| 103694825 | LOC103694825    |   |   |      |      |      |      |   |      |
| 103694826 | LOC103694826    |   |   |      |      |      |      |   |      |
| 103694827 | LOC103694827    |   |   |      |      |      |      |   |      |
| 103694829 | LOC103694829    |   |   |      |      |      |      |   |      |
| 103694832 | LOC103694832    |   |   |      |      |      |      |   |      |
| 103694833 | LOC103694833    |   |   |      |      |      |      |   |      |
| 103694836 | LOC103694836    |   |   |      |      |      |      |   |      |
| 103694837 | LOC103694837    |   |   |      |      |      |      |   |      |
| 103694840 | LOC103694840    |   |   |      |      |      |      |   |      |
| 103694842 | LOC103694842    |   |   |      |      |      |      |   |      |
| 103694845 | LOC103694845    |   |   |      |      |      |      |   |      |
| 103694848 | LOC103694848    |   |   |      |      |      |      |   |      |
| 103694849 | LOC103694849    |   |   |      |      |      |      |   |      |
| 103694853 | LOC103694853    |   |   |      |      |      |      |   |      |
| 103694854 | LOC103694854    |   |   |      |      |      |      |   |      |
| 103694860 | LOC103694860    | 0 | 0 | 0    | 0    | 0    | 0    | 0 | 1.26 |
| 103694874 | LOC103694874    |   |   |      |      |      |      |   |      |
| 103694882 | LOC103694882    | 0 | 0 | 0    | 0    | 0    | 0.47 | 0 | 0    |
| 103694883 | LOC103694883    |   |   |      |      |      |      |   |      |
| 103694884 | LOC103694884    |   |   |      |      |      |      |   |      |
| 103694889 | LOC103694889    |   |   |      |      |      |      |   |      |
| 103694891 | LOC103694891    |   |   |      |      |      |      |   |      |
| 103694892 | LOC103694892    |   |   |      |      |      |      |   |      |
| 103694893 | LOC103694893    |   |   |      |      |      |      |   |      |
| 103694897 | LOC103694897    | 0 | 0 | 2.03 | 2.34 | 0    | 0    | 0 | 0    |
| 103694913 | LOC103694913    |   |   |      |      |      |      |   |      |
| 103695096 | LOC103695096    |   |   |      |      |      |      |   |      |
| 103695151 | LOC103695151    |   |   |      |      |      |      |   |      |
| 103695192 | LOC103695192    |   |   |      |      |      |      |   |      |
| 103695338 | LOC103695338    | 0 | 0 | 1    | 1    | 0    | 0    | 0 | 0    |
| 108348032 | LOC108348032    |   |   |      |      |      |      |   |      |
| 108348036 | LOC108348036    |   |   |      |      |      |      |   |      |
| 108348037 | LOC108348037    |   |   |      |      |      |      |   |      |
| 108348038 | LOC108348038    |   |   |      |      |      |      |   |      |
| 108348039 | LOC108348039    |   |   |      |      |      |      |   |      |
| 108348042 | LOC108348042    |   |   |      |      |      |      |   |      |
| 108348050 | LOC108348050    |   |   |      |      |      |      |   |      |
| 108348053 | LOC108348053    | 0 | 0 | 0    | 0    | 0    | 2    | 0 | 0    |
| 108348068 | LOC108348068    |   |   |      |      |      |      |   |      |
| 108348071 | Qrfp            |   |   |      |      |      |      |   |      |
| 108348072 | LOC108348072    |   |   |      |      |      |      |   |      |
| 108348075 | LOC108348075    |   |   |      |      |      |      |   |      |
| 108348077 | LOC108348077    | 0 | 0 | 0    | 0    | 0    | 0    | 0 | 1.12 |
| 108348086 | LOC108348086    |   |   |      |      |      |      |   |      |
| 108348087 | LOC108348087    |   |   |      |      |      |      |   |      |
| 108348088 | LOC108348088    |   |   |      |      |      |      |   |      |
| 108348091 | LOC108348091    |   |   |      |      |      |      |   |      |
| 108348095 | NEWGENE 1308171 |   |   |      |      |      |      |   |      |
| 108348097 | LOC108348097    | 0 | 0 | 0    | 0    | 0.38 | 0    | 0 | 0    |
| 108348103 | LOC108348103    |   |   |      |      |      |      |   |      |
| 108348105 | LOC108348105    |   |   |      |      |      |      |   |      |
| 108348110 | LOC108348110    |   |   |      |      |      |      |   |      |

|           |                 |      |     |   |      |      |   |   |   |
|-----------|-----------------|------|-----|---|------|------|---|---|---|
| 108348116 | LOC108348116    | 0    | 0   | 0 | 1    | 0    | 0 | 0 | 0 |
| 108348119 | LOC108348119    | 0    | 0   | 0 | 0    | 3.85 | 0 | 0 | 0 |
| 108348126 | NEWGENE 1565788 |      |     |   |      |      |   |   |   |
| 108348130 | LOC108348130    |      |     |   |      |      |   |   |   |
| 108348132 | LOC108348132    |      |     |   |      |      |   |   |   |
| 108348133 | LOC108348133    | 0    | 0   | 0 | 0    | 1    | 0 | 0 | 0 |
| 108348135 | LOC108348135    |      |     |   |      |      |   |   |   |
| 108348138 | LOC108348138    | 0    | 0   | 0 | 0    | 0    | 1 | 1 | 1 |
| 108348146 | LOC108348146    |      |     |   |      |      |   |   |   |
| 108348152 | LOC108348152    |      |     |   |      |      |   |   |   |
| 108348163 | LOC108348163    | 0    | 0   | 1 | 0    | 0    | 0 | 0 | 0 |
| 108348164 | LOC108348164    |      |     |   |      |      |   |   |   |
| 108348174 | LOC108348174    |      |     |   |      |      |   |   |   |
| 108348182 | NEWGENE 1310011 |      |     |   |      |      |   |   |   |
| 108348183 | LOC108348183    | 0    | 0   | 0 | 0.22 | 0    | 0 | 0 | 0 |
| 108348196 | LOC108348196    |      |     |   |      |      |   |   |   |
| 108348202 | LOC108348202    | 0    | 0.5 | 0 | 0    | 0    | 0 | 0 | 0 |
| 108348205 | LOC108348205    |      |     |   |      |      |   |   |   |
| 108348212 | LOC108348212    |      |     |   |      |      |   |   |   |
| 108348228 | LOC108348228    |      |     |   |      |      |   |   |   |
| 108348235 | LOC108348235    |      |     |   |      |      |   |   |   |
| 108348237 | LOC108348237    | 0    | 0   | 0 | 0    | 1    | 0 | 1 | 0 |
| 108348238 | LOC108348238    |      |     |   |      |      |   |   |   |
| 108348243 | LOC108348243    |      |     |   |      |      |   |   |   |
| 108348279 | LOC108348279    |      |     |   |      |      |   |   |   |
| 108348324 | LOC108348324    | 1.08 | 0   | 0 | 1.28 | 0    | 0 | 0 | 0 |
| 108348376 | LOC108348376    |      |     |   |      |      |   |   |   |
| 108348428 | LOC108348428    |      |     |   |      |      |   |   |   |
| 108348453 | LOC108348453    |      |     |   |      |      |   |   |   |
| 108348476 | LOC108348476    | 0    | 1   | 0 | 1    | 0    | 0 | 0 | 0 |
| 108348739 | LOC108348739    | 0    | 0   | 2 | 0    | 0    | 0 | 0 | 0 |
| 108348875 | LOC108348875    |      |     |   |      |      |   |   |   |
| 108348882 | LOC108348882    | 0    | 0   | 0 | 1    | 0    | 0 | 0 | 0 |
| 108349003 | LOC108349003    |      |     |   |      |      |   |   |   |
| 108349071 | LOC108349071    |      |     |   |      |      |   |   |   |
| 108349258 | LOC108349258    |      |     |   |      |      |   |   |   |
| 108349399 | LOC108349399    |      |     |   |      |      |   |   |   |
| 108349419 | LOC108349419    |      |     |   |      |      |   |   |   |
| 108349459 | LOC108349459    | 0    | 0   | 0 | 0    | 0.66 | 0 | 0 | 0 |
| 108349543 | LOC108349543    |      |     |   |      |      |   |   |   |
| 108349671 | LOC108349671    |      |     |   |      |      |   |   |   |
| 108349727 | LOC108349727    |      |     |   |      |      |   |   |   |
| 108349734 | LOC108349734    |      |     |   |      |      |   |   |   |
| 108349736 | LOC108349736    |      |     |   |      |      |   |   |   |
| 108349755 | LOC108349755    | 0    | 1   | 0 | 0    | 0    | 0 | 0 | 0 |
| 108349761 | LOC108349761    | 0    | 0   | 1 | 0    | 0    | 0 | 0 | 0 |
| 108349762 | LOC108349762    |      |     |   |      |      |   |   |   |
| 108349763 | Gpr32           |      |     |   |      |      |   |   |   |
| 108349764 | Igsf22          |      |     |   |      |      |   |   |   |
| 108349779 | LOC108349779    |      |     |   |      |      |   |   |   |
| 108349780 | LOC108349780    |      |     |   |      |      |   |   |   |
| 108349786 | LOC108349786    |      |     |   |      |      |   |   |   |
| 108349829 | LOC108349829    |      |     |   |      |      |   |   |   |
| 108349842 | LOC108349842    |      |     |   |      |      |   |   |   |
| 108349926 | LOC108349926    |      |     |   |      |      |   |   |   |
| 108350002 | LOC108350002    |      |     |   |      |      |   |   |   |

|           |                 |      |      |   |   |      |   |      |      |
|-----------|-----------------|------|------|---|---|------|---|------|------|
| 108350036 | LOC108350036    | 0    | 0    | 0 | 1 | 0    | 0 | 0    | 0    |
| 108350113 | LOC108350113    |      |      |   |   |      |   |      |      |
| 108350184 | LOC108350184    |      |      |   |   |      |   |      |      |
| 108350189 | LOC108350189    |      |      |   |   |      |   |      |      |
| 108350190 | LOC108350190    |      |      |   |   |      |   |      |      |
| 108350198 | LOC108350198    |      |      |   |   |      |   |      |      |
| 108350204 | LOC108350204    |      |      |   |   |      |   |      |      |
| 108350225 | LOC108350225    |      |      |   |   |      |   |      |      |
| 108350226 | LOC108350226    |      |      |   |   |      |   |      |      |
| 108350227 | LOC108350227    |      |      |   |   |      |   |      |      |
| 108350228 | LOC108350228    |      |      |   |   |      |   |      |      |
| 108350275 | NEWGENE 2324572 |      |      |   |   |      |   |      |      |
| 108350296 | LOC108350296    | 0    | 0    | 0 | 0 | 1    | 1 | 0    | 1    |
| 108350336 | LOC108350336    |      |      |   |   |      |   |      |      |
| 108350337 | LOC108350337    |      |      |   |   |      |   |      |      |
| 108350338 | LOC108350338    | 0.33 | 0    | 0 | 0 | 0    | 0 | 0    | 0    |
| 108350339 | Lcn1511         |      |      |   |   |      |   |      |      |
| 108350366 | LOC108350366    |      |      |   |   |      |   |      |      |
| 108350385 | LOC108350385    | 0    | 0    | 0 | 0 | 0    | 0 | 0    | 1    |
| 108350389 | LOC108350389    |      |      |   |   |      |   |      |      |
| 108350501 | LOC108350501    |      |      |   |   |      |   |      |      |
| 108350549 | LOC108350549    |      |      |   |   |      |   |      |      |
| 108350574 | LOC108350574    | 0    | 0    | 0 | 0 | 1.79 | 0 | 1    | 0    |
| 108350575 | LOC108350575    |      |      |   |   |      |   |      |      |
| 108350577 | LOC108350577    |      |      |   |   |      |   |      |      |
| 108350578 | LOC108350578    | 0    | 1    | 0 | 0 | 0    | 0 | 0    | 0    |
| 108350623 | LOC108350623    |      |      |   |   |      |   |      |      |
| 108350674 | LOC108350674    |      |      |   |   |      |   |      |      |
| 108350775 | LOC108350775    |      |      |   |   |      |   |      |      |
| 108351017 | LOC108351017    |      |      |   |   |      |   |      |      |
| 108351048 | LOC108351048    | 0    | 0    | 0 | 1 | 0    | 0 | 0    | 0    |
| 108351082 | LOC108351082    | 2.02 | 2.04 | 0 | 0 | 0    | 0 | 0    | 0    |
| 108351087 | LOC108351087    | 0    | 0    | 1 | 0 | 0    | 0 | 0    | 0    |
| 108351094 | LOC108351094    | 0    | 0    | 0 | 0 | 0    | 1 | 0    | 0    |
| 108351095 | LOC108351095    | 0    | 0    | 2 | 0 | 0    | 0 | 0    | 0    |
| 108351099 | LOC108351099    |      |      |   |   |      |   |      |      |
| 108351130 | LOC108351130    | 0    | 0    | 0 | 1 | 0    | 0 | 0    | 0    |
| 108351157 | LOC108351157    | 0    | 0    | 0 | 0 | 1    | 0 | 0    | 0    |
| 108351350 | LOC108351350    |      |      |   |   |      |   |      |      |
| 108351365 | LOC108351365    | 0    | 0    | 0 | 1 | 0    | 0 | 0    | 0    |
| 108351379 | LOC108351379    |      |      |   |   |      |   |      |      |
| 108351410 | LOC108351410    |      |      |   |   |      |   |      |      |
| 108351431 | LOC108351431    | 0    | 0    | 0 | 0 | 0    | 0 | 3.14 | 1.45 |
| 108351565 | LOC108351565    |      |      |   |   |      |   |      |      |
| 108351583 | LOC108351583    |      |      |   |   |      |   |      |      |
| 108351667 | LOC108351667    |      |      |   |   |      |   |      |      |
| 108351811 | LOC108351811    | 0    | 0    | 0 | 0 | 0    | 0 | 0    | 1.01 |
| 108351817 | LOC108351817    |      |      |   |   |      |   |      |      |
| 108351818 | LOC108351818    |      |      |   |   |      |   |      |      |
| 108351823 | LOC108351823    | 0    | 0    | 0 | 1 | 0    | 0 | 0    | 0    |
| 108351911 | LOC108351911    | 0    | 0    | 1 | 0 | 0    | 0 | 0    | 0    |
| 108351962 | LOC108351962    | 0    | 0    | 0 | 0 | 1    | 3 | 0    | 0    |
| 108351982 | LOC108351982    |      |      |   |   |      |   |      |      |
| 108351990 | LOC108351990    |      |      |   |   |      |   |      |      |
| 108351994 | LOC108351994    | 0    | 1    | 1 | 0 | 0    | 0 | 0    | 0    |
| 108352004 | LOC108352004    |      |      |   |   |      |   |      |      |



|           |              |      |     |      |      |   |      |   |      |
|-----------|--------------|------|-----|------|------|---|------|---|------|
| 108352005 | LOC108352005 |      |     |      |      |   |      |   |      |
| 108352008 | LOC108352008 |      |     |      |      |   |      |   |      |
| 108352027 | LOC108352027 |      |     |      |      |   |      |   |      |
| 108352140 | LOC108352140 | 0    | 0   | 0    | 0    | 1 | 0    | 0 | 0    |
| 108352170 | LOC108352170 | 0    | 0   | 0    | 0    | 0 | 0    | 0 | 1.7  |
| 108352180 | LOC108352180 |      |     |      |      |   |      |   |      |
| 108352181 | LOC108352181 |      |     |      |      |   |      |   |      |
| 108352184 | LOC108352184 | 0    | 0   | 0    | 0.5  | 0 | 0    | 0 | 0    |
| 108352189 | LOC108352189 | 0    | 0   | 1.01 | 0    | 0 | 0    | 0 | 0    |
| 108352190 | LOC108352190 | 0    | 0   | 1.07 | 1.07 | 0 | 0    | 0 | 0    |
| 108352221 | LOC108352221 |      |     |      |      |   |      |   |      |
| 108352322 | LOC108352322 | 0    | 1   | 0    | 0    | 0 | 0    | 0 | 0    |
| 108352332 | Hh1a2        | 0    | 0   | 0    | 0    | 0 | 0    | 1 | 0    |
| 108352358 | LOC108352358 | 0    | 0   | 0    | 0    | 0 | 0    | 0 | 1    |
| 108352373 | LOC108352373 |      |     |      |      |   |      |   |      |
| 108352374 | LOC108352374 | 0    | 0   | 1    | 0    | 0 | 0    | 0 | 0    |
| 108352378 | LOC108352378 |      |     |      |      |   |      |   |      |
| 108352388 | LOC108352388 |      |     |      |      |   |      |   |      |
| 108352398 | LOC108352398 |      |     |      |      |   |      |   |      |
| 108352480 | LOC108352480 |      |     |      |      |   |      |   |      |
| 108352488 | LOC108352488 |      |     |      |      |   |      |   |      |
| 108352616 | LOC108352616 |      |     |      |      |   |      |   |      |
| 108352635 | LOC108352635 | 0    | 0   | 0    | 0    | 0 | 0    | 0 | 0.33 |
| 108352638 | LOC108352638 |      |     |      |      |   |      |   |      |
| 108352639 | LOC108352639 | 0    | 0   | 0    | 1.3  | 0 | 0    | 0 | 0    |
| 108352748 | LOC108352748 |      |     |      |      |   |      |   |      |
| 108352750 | LOC108352750 |      |     |      |      |   |      |   |      |
| 108352854 | LOC108352854 |      |     |      |      |   |      |   |      |
| 108353077 | LOC108353077 |      |     |      |      |   |      |   |      |
| 108353078 | LOC108353078 |      |     |      |      |   |      |   |      |
| 108353092 | LOC108353092 |      |     |      |      |   |      |   |      |
| 108353098 | LOC108353098 | 0    | 0   | 0    | 0    | 0 | 0    | 1 | 0    |
| 108353108 | LOC108353108 |      |     |      |      |   |      |   |      |
| 108353140 | LOC108353140 |      |     |      |      |   |      |   |      |
| 108353142 | LOC108353142 | 3.94 | 0   | 0    | 0    | 0 | 0    | 0 | 0    |
| 108353202 | LOC108353202 |      |     |      |      |   |      |   |      |
| 108353251 | LOC108353251 | 0    | 0   | 0    | 0    | 0 | 2.15 | 0 | 0.48 |
| 108353256 | LOC108353256 |      |     |      |      |   |      |   |      |
| 108353266 | LOC108353266 |      |     |      |      |   |      |   |      |
| 108353273 | LOC108353273 |      |     |      |      |   |      |   |      |
| 108353314 | LOC108353314 |      |     |      |      |   |      |   |      |
| 108353315 | LOC108353315 |      |     |      |      |   |      |   |      |
| 108353321 | LOC108353321 |      |     |      |      |   |      |   |      |
| 108353325 | LOC108353325 |      |     |      |      |   |      |   |      |
| 108353326 | LOC108353326 |      |     |      |      |   |      |   |      |
| 108353327 | LOC108353327 |      |     |      |      |   |      |   |      |
| 108353376 | LOC108353376 | 0    | 0   | 0.33 | 0    | 0 | 0    | 0 | 0    |
| 108353386 | LOC108353386 |      |     |      |      |   |      |   |      |
| 108353418 | LOC108353418 |      |     |      |      |   |      |   |      |
| 108353421 | LOC108353421 |      |     |      |      |   |      |   |      |
| 108353422 | LOC108353422 |      |     |      |      |   |      |   |      |
| 108353425 | LOC108353425 | 0.5  | 0.5 | 0.5  | 0    | 0 | 0    | 0 | 0    |
| 113901    | Chia         |      |     |      |      |   |      |   |      |
| 113914    | Taar1        |      |     |      |      |   |      |   |      |
| 113919    | Gpx5         | 0    | 0   | 0    | 0    | 0 | 0    | 0 | 1    |
| 113983    | Pitx1        |      |     |      |      |   |      |   |      |

|        |          |      |   |      |      |   |      |      |   |
|--------|----------|------|---|------|------|---|------|------|---|
| 114109 | Nkx2-5   |      |   |      |      |   |      |      |   |
| 114213 | Rax      |      |   |      |      |   |      |      |   |
| 114498 | Dmrt1    |      |   |      |      |   |      |      |   |
| 114516 | Gira3    |      |   |      |      |   |      |      |   |
| 114595 | Csnls2a  |      |   |      |      |   |      |      |   |
| 114903 | Lim2     |      |   |      |      |   |      |      |   |
| 116469 | Trpv5    | 0    | 0 | 0    | 0    | 1 | 0    | 0    | 0 |
| 116474 | Pr12a1   |      |   |      |      |   |      |      |   |
| 116553 | Il13     | 0    | 0 | 1    | 0    | 0 | 0    | 0    | 0 |
| 116558 | Il9      |      |   |      |      |   |      |      |   |
| 116589 | Serpinb5 |      |   |      |      |   |      |      |   |
| 116592 | Tff2     |      |   |      |      |   |      |      |   |
| 116630 | Csf2     |      |   |      |      |   |      |      |   |
| 116700 | Cga      | 1    | 0 | 1    | 0    | 0 | 0    | 0    | 0 |
| 117037 | Spaml    |      |   |      |      |   |      |      |   |
| 117061 | Mmp10    | 0    | 0 | 0    | 0    | 1 | 1    | 0    | 0 |
| 117098 | Pdha2    |      |   |      |      |   |      |      |   |
| 117179 | Cuzd1    | 0    | 0 | 1    | 0    | 0 | 0    | 0    | 0 |
| 117270 | Tff1     |      |   |      |      |   |      |      |   |
| 124451 | Lhx5     |      |   |      |      |   |      |      |   |
| 156873 | Kcnk15   | 0    | 0 | 0    | 0    | 0 | 2.16 | 2.35 | 0 |
| 170578 | Asz1     |      |   |      |      |   |      |      |   |
| 170582 | Fgf19    |      |   |      |      |   |      |      |   |
| 170583 | Fgf23    | 2    | 0 | 0    | 0    | 0 | 0    | 0    | 0 |
| 170633 | Fgf3     |      |   |      |      |   |      |      |   |
| 170700 | Fgf6     | 0    | 0 | 0    | 0    | 0 | 1    | 0    | 0 |
| 170704 | Hrh4     |      |   |      |      |   |      |      |   |
| 170925 | Slco6b1  |      |   |      |      |   |      |      |   |
| 171016 | Hrg      |      |   |      |      |   |      |      |   |
| 171027 | Svs5     |      |   |      |      |   |      |      |   |
| 171054 | Ccr4     | 0    | 0 | 1    | 0    | 0 | 0    | 0    | 0 |
| 171072 | Sult1c2  |      |   |      |      |   |      |      |   |
| 171074 | Hdgf11   | 0    | 0 | 0.97 | 0.98 | 0 | 0    | 0    | 0 |
| 171080 | Slc17a1  | 1    | 0 | 0    | 0    | 0 | 0    | 0    | 0 |
| 171101 | Grp      |      |   |      |      |   |      |      |   |
| 171149 | Serpini2 |      |   |      |      |   |      |      |   |
| 171290 | Gzmc     | 0    | 1 | 0    | 0    | 0 | 0    | 0    | 0 |
| 171302 | Foxe3    | 1.01 | 1 | 1    | 0    | 0 | 0    | 0    | 0 |
| 171385 | Acmsd    | 0    | 0 | 0    | 0    | 0 | 0    | 1    | 0 |
| 171403 | Spata19  |      |   |      |      |   |      |      |   |
| 171406 | Pr18a9   |      |   |      |      |   |      |      |   |
| 171412 | Defb22   |      |   |      |      |   |      |      |   |
| 171518 | Cyp2c22  | 1    | 0 | 0    | 0    | 0 | 0    | 0    | 0 |
| 171521 | Cyp2c13  |      |   |      |      |   |      |      |   |
| 171556 | Pr15a1   |      |   |      |      |   |      |      |   |
| 192155 | Sftpb    |      |   |      |      |   |      |      |   |
| 192224 | Pr12b1   |      |   |      |      |   |      |      |   |
| 192239 | Svs3a    |      |   |      |      |   |      |      |   |
| 192257 | Ces2e    | 0    | 0 | 0    | 0    | 0 | 1    | 0    | 0 |
| 192271 | Adam6    | 0    | 0 | 0    | 0    | 1 | 1    | 0    | 0 |
| 192274 | Foxe1    |      |   |      |      |   |      |      |   |
| 192646 | Mtnr1b   |      |   |      |      |   |      |      |   |
| 192675 | Bsnd     |      |   |      |      |   |      |      |   |
| 207113 | Tex101   |      |   |      |      |   |      |      |   |
| 24177  | Afp      |      |   |      |      |   |      |      |   |
| 24197  | Alpi     |      |   |      |      |   |      |      |   |

|        |           |      |   |   |      |   |      |   |   |
|--------|-----------|------|---|---|------|---|------|---|---|
| 24257  | Cgm4      |      |   |   |      |   |      |   |   |
| 24269  | Cpa1      | 0    | 0 | 0 | 0    | 0 | 2    | 0 | 0 |
| 24277  | Crygc     |      |   |   |      |   |      |   |   |
| 24279  | Cryge     |      |   |   |      |   |      |   |   |
| 24282  | Pr13d4    |      |   |   |      |   |      |   |   |
| 24283  | Pr13b1    |      |   |   |      |   |      |   |   |
| 24300  | Cyp2b1    | 0    | 0 | 0 | 0    | 0 | 0    | 0 | 1 |
| 24306  | Cyp4a2    | 0    | 0 | 0 | 1    | 0 | 0    | 0 | 0 |
| 24315  | Pr18a2    |      |   |   |      |   |      |   |   |
| 24360  | Fabp1     | 0    | 0 | 1 | 0    | 0 | 0    | 0 | 0 |
| 24366  | Fgb       | 1    | 0 | 0 | 0    | 0 | 0    | 0 | 0 |
| 24481  | Ifnb1     |      |   |   |      |   |      |   |   |
| 24497  | Ii5       | 0    | 2 | 0 | 1    | 0 | 0    | 0 | 0 |
| 24505  | Ins1      | 1    | 0 | 1 | 0    | 0 | 0    | 0 | 0 |
| 24506  | Ins2      | 0    | 0 | 0 | 0    | 0 | 0    | 2 | 1 |
| 24523  | Klk1      |      |   |   |      |   |      |   |   |
| 24538  | Lipc      |      |   |   |      |   |      |   |   |
| 24548  | Mbl1      |      |   |   |      |   |      |   |   |
| 24581  | Mycs      | 0    | 0 | 0 | 0    | 0 | 0    | 1 | 0 |
| 245916 | Cst11     |      |   |   |      |   |      |   |   |
| 24594  | Klk1b3    | 0    | 0 | 0 | 0    | 1 | 0    | 0 | 0 |
| 245985 | Prb3      |      |   |   |      |   |      |   |   |
| 246043 | Klrh1     |      |   |   |      |   |      |   |   |
| 246145 | Pbp2      |      |   |   |      |   |      |   |   |
| 246147 | Ctsq      |      |   |   |      |   |      |   |   |
| 246186 | Fgl1      | 0    | 0 | 2 | 0    | 0 | 0    | 0 | 0 |
| 246214 | Lrit1     | 0    | 0 | 0 | 0    | 0 | 0    | 0 | 1 |
| 246219 | Tas2r126  |      |   |   |      |   |      |   |   |
| 246234 | Slc34a3   | 0    | 0 | 1 | 0    | 0 | 0    | 0 | 0 |
| 246252 | Ces2a     | 0    | 0 | 1 | 0    | 0 | 0    | 0 | 0 |
| 246305 | Spag11a   |      |   |   |      |   |      |   |   |
| 246328 | Serpina4  |      |   |   |      |   |      |   |   |
| 24656  | Pr14a1    |      |   |   |      |   |      |   |   |
| 24657  | Pr16a1    |      |   |   |      |   |      |   |   |
| 24677  | Ppy       |      |   |   |      |   |      |   |   |
| 24683  | Pr1       |      |   |   |      |   |      |   |   |
| 24685  | Prm1      |      |   |   |      |   |      |   |   |
| 24687  | Prp15     |      |   |   |      |   |      |   |   |
| 24691  | Prss1     | 0    | 1 | 0 | 0    | 0 | 0    | 0 | 0 |
| 24694  | Pth       |      |   |   |      |   |      |   |   |
| 24711  | Rbp3      |      |   |   |      |   |      |   |   |
| 24714  | Reg1a     | 0    | 0 | 0 | 1    | 0 | 0    | 0 | 0 |
| 24794  | Serpina3c |      |   |   |      |   |      |   |   |
| 24802  | Svs4      | 0    | 0 | 0 | 0    | 0 | 0    | 1 | 0 |
| 24813  | Tat       |      |   |   |      |   |      |   |   |
| 24829  | Hist1h2ba | 0    | 0 | 0 | 0    | 0 | 1.21 | 0 | 0 |
| 24833  | Spink3    |      |   |   |      |   |      |   |   |
| 24839  | Tnp1      |      |   |   |      |   |      |   |   |
| 24840  | Tnp2      | 0    | 0 | 0 | 0    | 1 | 0    | 0 | 0 |
| 24860  | Ucp1      | 0    | 0 | 0 | 1.46 | 0 | 0    | 0 | 0 |
| 24861  | Ugt1a1    | 3.95 | 0 | 0 | 0    | 0 | 0    | 0 | 0 |
| 24881  | Wnt1      |      |   |   |      |   |      |   |   |
| 24894  | Cyp2a1    |      |   |   |      |   |      |   |   |
| 24895  | Cyp2a2    |      |   |   |      |   |      |   |   |
| 24899  | Smcp      | 0    | 0 | 0 | 0    | 0 | 1    | 0 | 0 |
| 24902  | Sult2a6   |      |   |   |      |   |      |   |   |

|        |           |      |   |   |   |   |   |   |      |
|--------|-----------|------|---|---|---|---|---|---|------|
| 24912  | Sult2a1   | 1    | 0 | 0 | 0 | 0 | 0 | 0 | 0    |
| 24926  | Ceacam3   |      |   |   |   |   |   |   |      |
| 24937  | Kap       | 0    | 0 | 0 | 0 | 0 | 0 | 1 | 0    |
| 24952  | Gcg       | 0    | 0 | 0 | 0 | 0 | 0 | 2 | 0    |
| 25010  | Scgb2a1   | 0    | 0 | 1 | 0 | 0 | 0 | 0 | 0    |
| 25011  | Cyp2c12   |      |   |   |   |   |   |   |      |
| 25013  | Semg1     |      |   |   |   |   |   |   |      |
| 25030  | Andpro    |      |   |   |   |   |   |   |      |
| 25040  | Gip       |      |   |   |   |   |   |   |      |
| 25052  | Prss2     |      |   |   |   |   |   |   |      |
| 25080  | Apoa4     | 0    | 1 | 2 | 0 | 0 | 0 | 0 | 0    |
| 25221  | Sry       | 0    | 0 | 0 | 0 | 0 | 0 | 0 | 0.99 |
| 25254  | Dspp      | 0    | 0 | 0 | 1 | 0 | 0 | 0 | 0    |
| 25258  | Glycam1   | 0    | 0 | 0 | 0 | 0 | 1 | 0 | 0    |
| 25279  | Cyp24a1   | 0    | 1 | 0 | 2 | 0 | 0 | 0 | 0    |
| 252834 | Gdf6      | 0    | 0 | 0 | 0 | 1 | 1 | 0 | 0    |
| 252886 | Foxd4     | 1.01 | 0 | 0 | 0 | 0 | 0 | 0 | 0    |
| 252887 | Olr1413   | 1    | 0 | 0 | 0 | 0 | 0 | 0 | 0    |
| 252899 | Miox      | 0    | 0 | 0 | 0 | 0 | 0 | 0 | 1    |
| 252931 | Cyp3a18   |      |   |   |   |   |   |   |      |
| 25310  | Cyct      |      |   |   |   |   |   |   |      |
| 25325  | Ii10      | 0    | 0 | 0 | 0 | 0 | 1 | 0 | 0    |
| 25331  | Mat1a     | 0    | 0 | 0 | 0 | 2 | 0 | 0 | 1    |
| 25335  | Mmp7      |      |   |   |   |   |   |   |      |
| 25345  | Prm2      |      |   |   |   |   |   |   |      |
| 25350  | Sftpd     |      |   |   |   |   |   |   |      |
| 25354  | Sstr5     |      |   |   |   |   |   |   |      |
| 25373  | Ahsg      | 0    | 0 | 0 | 1 | 0 | 0 | 0 | 0    |
| 25377  | Ambp      |      |   |   |   |   |   |   |      |
| 25401  | Alx1      | 1    | 0 | 0 | 0 | 0 | 0 | 0 | 0    |
| 25411  | Cnga2     |      |   |   |   |   |   |   |      |
| 25422  | Crybb2    |      |   |   |   |   |   |   |      |
| 25428  | Cyp7a1    | 0    | 0 | 0 | 0 | 0 | 1 | 0 | 0    |
| 25440  | Fabp6     |      |   |   |   |   |   |   |      |
| 25447  | Fshb      | 1    | 0 | 0 | 1 | 0 | 0 | 0 | 0    |
| 25449  | Fshr      | 0    | 0 | 0 | 0 | 0 | 0 | 3 | 1    |
| 25474  | Lgals4    | 1    | 0 | 1 | 0 | 0 | 0 | 0 | 0    |
| 25504  | Oxt       |      |   |   |   |   |   |   |      |
| 25509  | Pax6      | 0    | 1 | 0 | 0 | 0 | 0 | 0 | 0    |
| 25540  | Sbp       |      |   |   |   |   |   |   |      |
| 25548  | Slc34a1   | 0    | 1 | 0 | 1 | 0 | 0 | 0 | 0    |
| 25552  | Slc5a1    |      |   |   |   |   |   |   |      |
| 25563  | Tff3      | 0    | 0 | 0 | 0 | 1 | 0 | 0 | 0    |
| 25610  | Csf3      | 0    | 0 | 0 | 1 | 0 | 0 | 0 | 0    |
| 25634  | G6pc      | 0    | 0 | 0 | 1 | 0 | 0 | 0 | 0    |
| 25640  | Hnf1b     | 0    | 0 | 0 | 0 | 0 | 1 | 0 | 0    |
| 25711  | Gucy2c    | 0    | 0 | 0 | 0 | 0 | 0 | 4 | 0    |
| 25712  | Ifng      | 1    | 0 | 0 | 0 | 0 | 0 | 0 | 0    |
| 25753  | Chrng     |      |   |   |   |   |   |   |      |
| 257634 | Lhx1      |      |   |   |   |   |   |   |      |
| 257643 | LOC257643 |      |   |   |   |   |   |   |      |
| 257651 | Prmp5     |      |   |   |   |   |   |   |      |
| 257652 | Prb1      |      |   |   |   |   |   |   |      |
| 259233 | Gpx6      |      |   |   |   |   |   |   |      |
| 266602 | Spink1    |      |   |   |   |   |   |   |      |
| 266607 | Ffar1     |      |   |   |   |   |   |   |      |

|        |           |   |   |   |   |   |   |   |   |
|--------|-----------|---|---|---|---|---|---|---|---|
| 266682 | Cyp3a2    |   |   |   |   |   |   |   |   |
| 266704 | Gzmf      |   |   |   |   |   |   |   |   |
| 266717 | Krt9      |   |   |   |   |   |   |   |   |
| 266738 | Prop1     | 0 | 0 | 0 | 0 | 1 | 0 | 0 | 0 |
| 266782 | Pr13a1    |   |   |   |   |   |   |   |   |
| 266804 | Pr17b1    |   |   |   |   |   |   |   |   |
| 282833 | Zp4       |   |   |   |   |   |   |   |   |
| 286759 | Csn1s2b   |   |   |   |   |   |   |   |   |
| 286892 | Vom1r101  |   |   |   |   |   |   |   |   |
| 286913 | 01r1278   |   |   |   |   |   |   |   |   |
| 286933 | 0bp2b     |   |   |   |   |   |   |   |   |
| 286953 | Cyp2b3    |   |   |   |   |   |   |   |   |
| 286956 | Vom1r97   |   |   |   |   |   |   |   |   |
| 286957 | Vom1r102  |   |   |   |   |   |   |   |   |
| 286959 | 01r1271   |   |   |   |   |   |   |   |   |
| 286960 | LOC286960 |   |   |   |   |   |   |   |   |
| 286961 | Slc22a24  |   |   |   |   |   |   |   |   |
| 286964 | Hsd17b6   |   |   |   |   |   |   |   |   |
| 286981 | Vom2r32   |   |   |   |   |   |   |   |   |
| 286983 | Vom2r40   |   |   |   |   |   |   |   |   |
| 286989 | Ugt2b7    | 0 | 0 | 0 | 0 | 0 | 1 | 0 | 0 |
| 287000 | 01r1361   |   |   |   |   |   |   |   |   |
| 287002 | 01r1082   |   |   |   |   |   |   |   |   |
| 287003 | Tas2r123  |   |   |   |   |   |   |   |   |
| 287006 | Slco6c1   | 0 | 0 | 0 | 0 | 0 | 0 | 1 | 0 |
| 287077 | 01r1358   | 0 | 1 | 0 | 0 | 0 | 0 | 0 | 0 |
| 287080 | 01r1355   |   |   |   |   |   |   |   |   |
| 287081 | 01r1365   |   |   |   |   |   |   |   |   |
| 287082 | 01r1368   |   |   |   |   |   |   |   |   |
| 287083 | 01r1372   |   |   |   |   |   |   |   |   |
| 287084 | 01r1376   |   |   |   |   |   |   |   |   |
| 287086 | 01r1378   | 0 | 0 | 0 | 0 | 0 | 0 | 1 | 0 |
| 287088 | 01r1375   |   |   |   |   |   |   |   |   |
| 287090 | 01r1373   |   |   |   |   |   |   |   |   |
| 287093 | 01r1382   |   |   |   |   |   |   |   |   |
| 287108 | Prss27    | 0 | 0 | 0 | 0 | 0 | 1 | 0 | 0 |
| 287130 | Ptx4      | 0 | 0 | 0 | 0 | 0 | 2 | 0 | 0 |
| 287168 | Hbz       |   |   |   |   |   |   |   |   |
| 287185 | Foxi1     |   |   |   |   |   |   |   |   |
| 287232 | 01r1383   |   |   |   |   |   |   |   |   |
| 287236 | 01r1385   |   |   |   |   |   |   |   |   |
| 287237 | 01r1386   |   |   |   |   |   |   |   |   |
| 287240 | 01r1389   |   |   |   |   |   |   |   |   |
| 287245 | 01r1398   |   |   |   |   |   |   |   |   |
| 287247 | 01r1401   |   |   |   |   |   |   |   |   |
| 287259 | 01r1409   |   |   |   |   |   |   |   |   |
| 287262 | 01r1407   |   |   |   |   |   |   |   |   |
| 287287 | I14       |   |   |   |   |   |   |   |   |
| 287309 | 01r1423   |   |   |   |   |   |   |   |   |
| 287310 | 01r1422   | 0 | 0 | 0 | 0 | 1 | 0 | 0 | 1 |
| 287313 | 01r1418   |   |   |   |   |   |   |   |   |
| 287314 | 01r1416   |   |   |   |   |   |   |   |   |
| 287316 | 01r1425   |   |   |   |   |   |   |   |   |
| 287321 | 01r1432   |   |   |   |   |   |   |   |   |
| 287322 | 01r1434   |   |   |   |   |   |   |   |   |
| 287324 | 01r1436   |   |   |   |   |   |   |   |   |

|        |            |   |   |     |   |   |   |   |   |
|--------|------------|---|---|-----|---|---|---|---|---|
| 287325 | 01r1437    |   |   |     |   |   |   |   |   |
| 287328 | 01r1439    |   |   |     |   |   |   |   |   |
| 287329 | 01r1440    |   |   |     |   |   |   |   |   |
| 287331 | 01r1443    |   |   |     |   |   |   |   |   |
| 287336 | 01r1448    |   |   |     |   |   |   |   |   |
| 287343 | 01r1454    |   |   |     |   |   |   |   |   |
| 287347 | 01r1458    |   |   |     |   |   |   |   |   |
| 287349 | 01r1461    |   |   |     |   |   |   |   |   |
| 287363 | 01r1463    | 0 | 0 | 0   | 0 | 1 | 0 | 0 | 1 |
| 287469 | Foxn1      |   |   |     |   |   |   |   |   |
| 287481 | 01r1467    | 0 | 1 | 0   | 0 | 0 | 0 | 0 | 0 |
| 287484 | 01r1482    |   |   |     |   |   |   |   |   |
| 287487 | 01r1475    |   |   |     |   |   |   |   |   |
| 287489 | 01r1485    |   |   |     |   |   |   |   |   |
| 287496 | 01r1492    |   |   |     |   |   |   |   |   |
| 287501 | 01r1498    |   |   |     |   |   |   |   |   |
| 287502 | 01r1499    |   |   |     |   |   |   |   |   |
| 287506 | 01r1505    |   |   |     |   |   |   |   |   |
| 287508 | 01r1507    |   |   |     |   |   |   |   |   |
| 287509 | 01r1511    |   |   |     |   |   |   |   |   |
| 287511 | 01r1512    |   |   |     |   |   |   |   |   |
| 287513 | 01r1513    |   |   |     |   |   |   |   |   |
| 287514 | 01r1514    |   |   |     |   |   |   |   |   |
| 287516 | 01r1517    |   |   |     |   |   |   |   |   |
| 287517 | 01r1519    |   |   |     |   |   |   |   |   |
| 287520 | 01r1516    |   |   |     |   |   |   |   |   |
| 287557 | Spaca3     |   |   |     |   |   |   |   |   |
| 287570 | Gas212     |   |   |     |   |   |   |   |   |
| 287613 | 01r1521    | 0 | 0 | 0.5 | 0 | 0 | 0 | 0 | 0 |
| 287614 | 01r1522    | 0 | 0 | 0.5 | 0 | 0 | 0 | 0 | 0 |
| 287624 | Kif2b      | 0 | 0 | 0   | 1 | 0 | 0 | 0 | 0 |
| 287675 | Krt24      | 1 | 0 | 0   | 0 | 0 | 0 | 0 | 0 |
| 287697 | Krt35      |   |   |     |   |   |   |   |   |
| 287698 | Krt36      |   |   |     |   |   |   |   |   |
| 287702 | Krt17      |   |   |     |   |   |   |   |   |
| 287730 | Pyy        | 2 | 0 | 0   | 1 | 0 | 0 | 0 | 0 |
| 287741 | FAM187A    | 0 | 0 | 4   | 0 | 0 | 0 | 0 | 0 |
| 287753 | Spp12c     | 0 | 0 | 1   | 0 | 0 | 0 | 0 | 0 |
| 287783 | RGD1559578 |   |   |     |   |   |   |   |   |
| 287820 | Otop2      | 2 | 0 | 1   | 0 | 0 | 0 | 0 | 0 |
| 287920 | St6galnac1 | 0 | 0 | 1   | 0 | 0 | 0 | 0 | 0 |
| 287942 | Crkl       |   |   |     |   |   |   |   |   |
| 287968 | 01r1570    |   |   |     |   |   |   |   |   |
| 287969 | 01r1569    |   |   |     |   |   |   |   |   |
| 287970 | 01r1567    |   |   |     |   |   |   |   |   |
| 287973 | 01r1566    |   |   |     |   |   |   |   |   |
| 288006 | Rtp1       | 0 | 0 | 0   | 0 | 0 | 0 | 1 | 1 |
| 288067 | Csta       |   |   |     |   |   |   |   |   |
| 288075 | Stfa3      | 0 | 0 | 0   | 1 | 0 | 0 | 0 | 0 |
| 288136 | RGD1565996 |   |   |     |   |   |   |   |   |
| 288154 | Hoxd13     | 0 | 0 | 0   | 0 | 1 | 1 | 0 | 0 |
| 288155 | Evx2       |   |   |     |   |   |   |   |   |
| 288184 | 01r1563    |   |   |     |   |   |   |   |   |
| 288185 | 01r1562    |   |   |     |   |   |   |   |   |
| 288186 | 01r1561    |   |   |     |   |   |   |   |   |
| 288187 | 01r1559    |   |   |     |   |   |   |   |   |



|        |           |   |   |   |     |   |   |   |   |
|--------|-----------|---|---|---|-----|---|---|---|---|
| 288190 | 01r1557   |   |   |   |     |   |   |   |   |
| 288192 | 01r1553   |   |   |   |     |   |   |   |   |
| 288196 | 01r1549   |   |   |   |     |   |   |   |   |
| 288198 | 01r1537   |   |   |   |     |   |   |   |   |
| 288199 | 01r1536   |   |   |   |     |   |   |   |   |
| 288244 | Ifitm7    | 0 | 0 | 0 | 1.2 | 0 | 0 | 0 | 0 |
| 288291 | Tmprss15  |   |   |   |     |   |   |   |   |
| 288297 | Krtap15-1 |   |   |   |     |   |   |   |   |
| 288360 | Car15     |   |   |   |     |   |   |   |   |
| 288378 | Clec4m    |   |   |   |     |   |   |   |   |
| 288396 | Vom2r59   |   |   |   |     |   |   |   |   |
| 288457 | Gsx1      |   |   |   |     |   |   |   |   |
| 288517 | Cyp2w1    | 0 | 0 | 0 | 0   | 0 | 1 | 0 | 0 |
| 288521 | LOC288521 |   |   |   |     |   |   |   |   |
| 288736 | Foxn4     |   |   |   |     |   |   |   |   |
| 288789 | 01r875    | 0 | 0 | 0 | 1   | 0 | 0 | 0 | 0 |
| 288790 | 01r880    |   |   |   |     |   |   |   |   |
| 288792 | 01r881    |   |   |   |     |   |   |   |   |
| 288795 | 01r917    |   |   |   |     |   |   |   |   |
| 288797 | 01r905    |   |   |   |     |   |   |   |   |
| 288798 | 01r920    |   |   |   |     |   |   |   |   |
| 288801 | 01r907    |   |   |   |     |   |   |   |   |
| 288803 | 01r883    |   |   |   |     |   |   |   |   |
| 288806 | 01r908    |   |   |   |     |   |   |   |   |
| 288808 | 01r903    |   |   |   |     |   |   |   |   |
| 288810 | 01r901    |   |   |   |     |   |   |   |   |
| 288811 | 01r898    |   |   |   |     |   |   |   |   |
| 288813 | 01r896    |   |   |   |     |   |   |   |   |
| 288816 | 01r892    |   |   |   |     |   |   |   |   |
| 288818 | 01r889    |   |   |   |     |   |   |   |   |
| 288822 | 01r1072   |   |   |   |     |   |   |   |   |
| 288823 | 01r1071   |   |   |   |     |   |   |   |   |
| 288828 | 01r1063   |   |   |   |     |   |   |   |   |
| 288829 | 01r1061   |   |   |   |     |   |   |   |   |
| 288831 | 01r1059   |   |   |   |     |   |   |   |   |
| 288835 | 01r1055   |   |   |   |     |   |   |   |   |
| 288839 | 01r1051   |   |   |   |     |   |   |   |   |
| 288840 | 01r1049   |   |   |   |     |   |   |   |   |
| 288850 | 01r1029   | 0 | 0 | 0 | 0   | 0 | 0 | 0 | 1 |
| 288851 | 01r1024   |   |   |   |     |   |   |   |   |
| 288854 | 01r1020   |   |   |   |     |   |   |   |   |
| 288858 | 01r1016   |   |   |   |     |   |   |   |   |
| 288861 | 01r1012   |   |   |   |     |   |   |   |   |
| 288875 | 01r943    |   |   |   |     |   |   |   |   |
| 288876 | 01r947    |   |   |   |     |   |   |   |   |
| 288878 | 01r950    |   |   |   |     |   |   |   |   |
| 288881 | 01r1002   |   |   |   |     |   |   |   |   |
| 288886 | 01r1006   |   |   |   |     |   |   |   |   |
| 288887 | 01r1007   |   |   |   |     |   |   |   |   |
| 288891 | 01r1000   |   |   |   |     |   |   |   |   |
| 289010 | Zp3r      | 1 | 0 | 0 | 0   | 0 | 0 | 0 | 0 |
| 289055 | F13b      | 0 | 0 | 0 | 0   | 0 | 0 | 1 | 0 |
| 289057 | Cfhr1     |   |   |   |     |   |   |   |   |
| 289239 | 01r1579   | 1 | 0 | 0 | 2   | 0 | 0 | 0 | 0 |
| 289240 | 01r1582   |   |   |   |     |   |   |   |   |
| 289241 | 01r1583   |   |   |   |     |   |   |   |   |

|        |            |   |   |   |      |   |   |   |   |
|--------|------------|---|---|---|------|---|---|---|---|
| 289251 | Olr1589    | 0 | 0 | 0 | 0    | 1 | 0 | 0 | 0 |
| 289255 | Olr1593    | 0 | 0 | 0 | 0    | 0 | 0 | 0 | 1 |
| 289260 | Olr1600    | 0 | 0 | 0 | 0    | 0 | 0 | 1 | 0 |
| 289261 | Olr1601    |   |   |   |      |   |   |   |   |
| 289269 | Becn2      |   |   |   |      |   |   |   |   |
| 289295 | Vom2r30    | 0 | 0 | 0 | 1    | 0 | 0 | 0 | 0 |
| 289329 | Ccdc121    | 0 | 0 | 0 | 1    | 0 | 0 | 0 | 0 |
| 289334 | Ccdc185    | 2 | 0 | 0 | 0    | 0 | 0 | 0 | 0 |
| 289407 | Atp6v1g3   | 0 | 0 | 0 | 0    | 0 | 1 | 0 | 0 |
| 289433 | Vom2r69    |   |   |   |      |   |   |   |   |
| 289481 | Gk2        |   |   |   |      |   |   |   |   |
| 289525 | Enam       |   |   |   |      |   |   |   |   |
| 289526 | Vcsa2      | 0 | 0 | 0 | 0    | 0 | 1 | 0 | 0 |
| 289530 | Prr27      |   |   |   |      |   |   |   |   |
| 289546 | Tmprss11g  |   |   |   |      |   |   |   |   |
| 289662 | Apex211    | 0 | 0 | 0 | 1    | 0 | 0 | 0 | 0 |
| 289701 | RGD1565560 | 0 | 0 | 0 | 0    | 0 | 3 | 1 | 0 |
| 289759 | Myl7       | 0 | 0 | 0 | 0    | 0 | 1 | 0 | 0 |
| 289923 | Olr1605    |   |   |   |      |   |   |   |   |
| 290001 | Olr1624    |   |   |   |      |   |   |   |   |
| 290002 | Olr1626    |   |   |   |      |   |   |   |   |
| 290005 | Olr1630    |   |   |   |      |   |   |   |   |
| 290006 | Olr1608    |   |   |   |      |   |   |   |   |
| 290008 | Olr1610    |   |   |   |      |   |   |   |   |
| 290009 | Olr1611    |   |   |   |      |   |   |   |   |
| 290010 | Olr1612    |   |   |   |      |   |   |   |   |
| 290018 | Olr1620    |   |   |   |      |   |   |   |   |
| 290020 | Olr1621    |   |   |   |      |   |   |   |   |
| 290049 | Olr1640    |   |   |   |      |   |   |   |   |
| 290050 | Olr1641    |   |   |   |      |   |   |   |   |
| 290056 | Olr1645    |   |   |   |      |   |   |   |   |
| 290202 | Olr1646    |   |   |   |      |   |   |   |   |
| 290244 | Mcpt3      | 0 | 0 | 0 | 1.01 | 0 | 0 | 0 | 0 |
| 290344 | Adam28     | 0 | 0 | 0 | 0    | 0 | 1 | 0 | 0 |
| 290493 | Oxgr1      | 0 | 0 | 0 | 0    | 1 | 0 | 0 | 0 |
| 290580 | RGD1563346 |   |   |   |      |   |   |   |   |
| 290583 | RGD1564225 |   |   |   |      |   |   |   |   |
| 290589 | RGD1562641 | 0 | 0 | 0 | 0    | 1 | 0 | 0 | 0 |
| 290638 | B3gnt3     | 0 | 0 | 0 | 0    | 0 | 0 | 1 | 0 |
| 290685 | Tkt12      | 0 | 0 | 0 | 0    | 0 | 0 | 0 | 1 |
| 290757 | F11        |   |   |   |      |   |   |   |   |
| 290763 | Adam26a    |   |   |   |      |   |   |   |   |
| 290766 | Triml2     |   |   |   |      |   |   |   |   |
| 290767 | Triml1     |   |   |   |      |   |   |   |   |
| 290774 | Adam24     | 1 | 0 | 0 | 0    | 0 | 0 | 0 | 0 |
| 290818 | RGD1562638 |   |   |   |      |   |   |   |   |
| 290856 | Defa24     |   |   |   |      |   |   |   |   |
| 290876 | LOC290876  | 0 | 1 | 0 | 0    | 0 | 0 | 0 | 0 |
| 290911 | RGD1564807 |   |   |   |      |   |   |   |   |
| 290916 | RGD1565806 | 0 | 0 | 0 | 0    | 0 | 0 | 0 | 1 |
| 290921 | Gdf2       |   |   |   |      |   |   |   |   |
| 290957 | Olr1653    |   |   |   |      |   |   |   |   |
| 290970 | Cts7       |   |   |   |      |   |   |   |   |
| 290972 | Cts811     |   |   |   |      |   |   |   |   |
| 290975 | Ctsr       | 0 | 0 | 0 | 0    | 0 | 0 | 1 | 1 |
| 290981 | RGD1308751 |   |   |   |      |   |   |   |   |

|        |            |   |   |   |   |      |      |   |      |
|--------|------------|---|---|---|---|------|------|---|------|
| 290989 | Catsper3   | 1 | 0 | 1 | 0 | 0    | 0    | 0 | 0    |
| 291077 | RGD1307537 | 0 | 0 | 0 | 0 | 1    | 0    | 0 | 0    |
| 291161 | 01r1658    | 1 | 0 | 0 | 1 | 0    | 0    | 0 | 0    |
| 291172 | 01r1660    |   |   |   |   |      |      |   |      |
| 291283 | Akr1c2     |   |   |   |   |      |      |   |      |
| 291287 | Tuba13     |   |   |   |   |      |      |   |      |
| 291328 | Slc39a12   |   |   |   |   |      |      |   |      |
| 291361 | 01r1662    |   |   |   |   |      |      |   |      |
| 291468 | Gykl1      |   |   |   |   |      |      |   |      |
| 291470 | Ftmt       |   |   |   |   |      |      |   |      |
| 291585 | Pudp       |   |   |   |   |      |      |   |      |
| 29160  | Amelx      |   |   |   |   |      |      |   |      |
| 291608 | RGD1563060 | 0 | 0 | 0 | 0 | 0    | 1    | 0 | 0    |
| 29170  | Aqp6       | 0 | 0 | 0 | 0 | 1    | 1    | 0 | 0    |
| 29172  | Aqp8       | 0 | 1 | 0 | 1 | 0    | 0    | 0 | 0    |
| 29174  | Ctsj       |   |   |   |   |      |      |   |      |
| 29188  | Csn3       |   |   |   |   |      |      |   |      |
| 291991 | Tmed6      |   |   |   |   |      |      |   |      |
| 29229  | Spt1       |   |   |   |   |      |      |   |      |
| 292311 | Tt112      | 1 | 0 | 0 | 0 | 0    | 0    | 0 | 0    |
| 292324 | 01r387     |   |   |   |   |      |      |   |      |
| 292417 | Vom2r11    |   |   |   |   |      |      |   |      |
| 292419 | Fpr-rs3    | 0 | 0 | 0 | 0 | 0    | 1    | 0 | 0    |
| 292438 | Vom2r2     |   |   |   |   |      |      |   |      |
| 29245  | Klk6       |   |   |   |   |      |      |   |      |
| 292458 | Raet1c     |   |   |   |   |      |      |   |      |
| 292474 | RGD1560633 | 0 | 0 | 0 | 0 | 1.21 | 1.24 | 0 | 1.27 |
| 292516 | Act19b     |   |   |   |   |      |      |   |      |
| 292531 | Vom2r26    | 0 | 0 | 0 | 1 | 0    | 0    | 0 | 0    |
| 292560 | 01r4       | 0 | 0 | 0 | 0 | 0.5  | 0    | 0 | 0    |
| 292561 | 01r5       |   |   |   |   |      |      |   |      |
| 292563 | 01r8       |   |   |   |   |      |      |   |      |
| 292566 | Zscan5b    | 1 | 0 | 0 | 0 | 0    | 0    | 0 | 0    |
| 292572 | RGD1564651 |   |   |   |   |      |      |   |      |
| 292574 | Obox2      |   |   |   |   |      |      |   |      |
| 292577 | Nlrp9      |   |   |   |   |      |      |   |      |
| 292583 | Rfpl4a     | 0 | 0 | 0 | 0 | 1    | 0    | 0 | 2    |
| 292607 | Vom1r53    |   |   |   |   |      |      |   |      |
| 292625 | Crxos1     |   |   |   |   |      |      |   |      |
| 29265  | Mcpt1      | 0 | 0 | 0 | 0 | 0    | 1    | 0 | 0    |
| 292666 | Psg29      |   |   |   |   |      |      |   |      |
| 292668 | Ceacam11   |   |   |   |   |      |      |   |      |
| 292688 | Snrpd21    | 0 | 0 | 0 | 0 | 0    | 0    | 0 | 0.93 |
| 292697 | Apoc2      | 0 | 1 | 2 | 0 | 0    | 0    | 0 | 0    |
| 292711 | RGD1564380 | 0 | 0 | 0 | 0 | 2.03 | 0    | 0 | 1    |
| 292728 | Cyp2b21    |   |   |   |   |      |      |   |      |
| 292801 | Scgb1b24   |   |   |   |   |      |      |   |      |
| 292849 | Klk11      |   |   |   |   |      |      |   |      |
| 292851 | Klk9       | 0 | 0 | 0 | 0 | 0    | 0    | 1 | 0    |
| 292852 | Klk7       | 1 | 0 | 0 | 0 | 0    | 0    | 0 | 0    |
| 292855 | Klk1c12    |   |   |   |   |      |      |   |      |
| 292866 | Klk1c8     | 0 | 0 | 0 | 0 | 0    | 0    | 0 | 1    |
| 292868 | Klk1c9     |   |   |   |   |      |      |   |      |
| 292872 | Klk1c3     | 0 | 0 | 0 | 0 | 0    | 1    | 0 | 0    |
| 292873 | Klk15      |   |   |   |   |      |      |   |      |
| 292928 | RGD1560730 |   |   |   |   |      |      |   |      |

|        |            |   |   |     |   |   |   |     |   |
|--------|------------|---|---|-----|---|---|---|-----|---|
| 292934 | Dbx1       |   |   |     |   |   |   |     |   |
| 292948 | RGD1560303 | 2 | 0 | 0   | 1 | 0 | 0 | 0   | 0 |
| 29295  | Cyp2b12    | 0 | 0 | 0   | 0 | 1 | 0 | 0   | 0 |
| 29298  | Cyp2c7     | 0 | 0 | 0   | 1 | 0 | 0 | 0   | 0 |
| 293048 | Rhcg       | 0 | 1 | 0   | 1 | 0 | 0 | 0   | 0 |
| 293070 | Olr11      | 0 | 0 | 0   | 0 | 0 | 0 | 0.5 | 0 |
| 293072 | Olr10      |   |   |     |   |   |   |     |   |
| 293075 | Olr13      |   |   |     |   |   |   |     |   |
| 293081 | Olr19      |   |   |     |   |   |   |     |   |
| 293083 | Olr20      |   |   |     |   |   |   |     |   |
| 293085 | Olr23      |   |   |     |   |   |   |     |   |
| 293091 | Olr30      |   |   |     |   |   |   |     |   |
| 29310  | Mc3r       |   |   |     |   |   |   |     |   |
| 29311  | Msb        |   |   |     |   |   |   |     |   |
| 293188 | Olr48      |   |   |     |   |   |   |     |   |
| 293189 | Olr47      |   |   |     |   |   |   |     |   |
| 293192 | Olr45      |   |   |     |   |   |   |     |   |
| 293193 | Olr44      |   |   |     |   |   |   |     |   |
| 293195 | Olr41      |   |   |     |   |   |   |     |   |
| 293198 | Olr39      |   |   |     |   |   |   |     |   |
| 293201 | Olr62      | 0 | 0 | 0.5 | 0 | 0 | 0 | 0   | 0 |
| 293205 | Olr56      |   |   |     |   |   |   |     |   |
| 293210 | Olr50      |   |   |     |   |   |   |     |   |
| 293211 | Olr49      |   |   |     |   |   |   |     |   |
| 293214 | Olr68      |   |   |     |   |   |   |     |   |
| 293215 | Olr70      |   |   |     |   |   |   |     |   |
| 293218 | Olr74      |   |   |     |   |   |   |     |   |
| 293221 | Olr78      |   |   |     |   |   |   |     |   |
| 293222 | Olr79      |   |   |     |   |   |   |     |   |
| 293223 | Olr80      |   |   |     |   |   |   |     |   |
| 293224 | Olr81      |   |   |     |   |   |   |     |   |
| 293226 | Olr83      |   |   |     |   |   |   |     |   |
| 293227 | Olr84      |   |   |     |   |   |   |     |   |
| 293228 | Olr85      | 0 | 0 | 0   | 0 | 0 | 0 | 0   | 1 |
| 293232 | Olr91      |   |   |     |   |   |   |     |   |
| 293233 | Olr92      | 0 | 0 | 1   | 0 | 0 | 0 | 0   | 0 |
| 293234 | Olr93      |   |   |     |   |   |   |     |   |
| 293238 | Olr97      |   |   |     |   |   |   |     |   |
| 29324  | Capza3     |   |   |     |   |   |   |     |   |
| 293240 | Olr98      |   |   |     |   |   |   |     |   |
| 293242 | Olr103     |   |   |     |   |   |   |     |   |
| 293243 | Olr104     |   |   |     |   |   |   |     |   |
| 293244 | Olr105     |   |   |     |   |   |   |     |   |
| 293245 | Olr106     |   |   |     |   |   |   |     |   |
| 293246 | Olr107     |   |   |     |   |   |   |     |   |
| 293247 | Olr108     |   |   |     |   |   |   |     |   |
| 293250 | Olr112     | 0 | 0 | 0   | 1 | 0 | 0 | 0   | 0 |
| 293251 | Olr113     |   |   |     |   |   |   |     |   |
| 293253 | Olr115     |   |   |     |   |   |   |     |   |
| 293255 | Olr119     |   |   |     |   |   |   |     |   |
| 293256 | Olr120     |   |   |     |   |   |   |     |   |
| 293257 | Olr121     |   |   |     |   |   |   |     |   |
| 293258 | Olr122     |   |   |     |   |   |   |     |   |
| 293260 | Olr124     |   |   |     |   |   |   |     |   |
| 293262 | Olr126     |   |   |     |   |   |   |     |   |
| 293263 | Olr128     |   |   |     |   |   |   |     |   |

|        |            |   |   |     |   |   |   |   |   |
|--------|------------|---|---|-----|---|---|---|---|---|
| 293268 | 01r130     |   |   |     |   |   |   |   |   |
| 293271 | 01r132     |   |   |     |   |   |   |   |   |
| 293273 | 01r136     |   |   |     |   |   |   |   |   |
| 293278 | 01r139     |   |   |     |   |   |   |   |   |
| 293279 | 01r140     |   |   |     |   |   |   |   |   |
| 293280 | 01r141     |   |   |     |   |   |   |   |   |
| 293281 | 01r143     |   |   |     |   |   |   |   |   |
| 293282 | 01r144     |   |   |     |   |   |   |   |   |
| 293285 | 01r148     |   |   |     |   |   |   |   |   |
| 293287 | Ubqlnl     |   |   |     |   |   |   |   |   |
| 293288 | RGD1310717 | 0 | 0 | 0   | 1 | 0 | 0 | 0 | 0 |
| 293289 | 01r149     |   |   |     |   |   |   |   |   |
| 293301 | 01r153     |   |   |     |   |   |   |   |   |
| 293304 | 01r157     | 0 | 0 | 1   | 0 | 0 | 0 | 0 | 0 |
| 293312 | 01r165     |   |   |     |   |   |   |   |   |
| 293314 | 01r167     |   |   |     |   |   |   |   |   |
| 293315 | 01r168     | 0 | 0 | 0   | 0 | 0 | 0 | 0 | 1 |
| 293316 | 01r170     |   |   |     |   |   |   |   |   |
| 293318 | 01r171     |   |   |     |   |   |   |   |   |
| 293319 | 01r172     |   |   |     |   |   |   |   |   |
| 293321 | 01r176     |   |   |     |   |   |   |   |   |
| 293325 | 01r178     |   |   |     |   |   |   |   |   |
| 293327 | 01r180     |   |   |     |   |   |   |   |   |
| 293328 | 01r183     |   |   |     |   |   |   |   |   |
| 293329 | 01r184     |   |   |     |   |   |   |   |   |
| 293330 | 01r185     |   |   |     |   |   |   |   |   |
| 293333 | 01r189     |   |   |     |   |   |   |   |   |
| 293334 | 01r190     |   |   |     |   |   |   |   |   |
| 293336 | 01r193     |   |   |     |   |   |   |   |   |
| 293338 | 01r196     |   |   |     |   |   |   |   |   |
| 293339 | 01r197     | 0 | 1 | 0   | 0 | 0 | 0 | 0 | 0 |
| 293340 | 01r200     | 0 | 0 | 0   | 0 | 0 | 0 | 1 | 0 |
| 293342 | 01r201     | 0 | 1 | 0   | 0 | 0 | 0 | 0 | 0 |
| 293350 | 01r203     |   |   |     |   |   |   |   |   |
| 293351 | 01r204     |   |   |     |   |   |   |   |   |
| 293353 | 01r206     |   |   |     |   |   |   |   |   |
| 293355 | 01r208     |   |   |     |   |   |   |   |   |
| 293358 | 01r211     | 0 | 1 | 0   | 0 | 0 | 0 | 0 | 0 |
| 293361 | 01r214     | 0 | 0 | 0.5 | 0 | 0 | 0 | 0 | 0 |
| 293362 | 01r215     |   |   |     |   |   |   |   |   |
| 293364 | 01r217     | 0 | 0 | 0   | 0 | 0 | 1 | 0 | 0 |
| 293365 | 01r219     |   |   |     |   |   |   |   |   |
| 293367 | 01r221     |   |   |     |   |   |   |   |   |
| 293368 | 01r222     |   |   |     |   |   |   |   |   |
| 293369 | 01r223     |   |   |     |   |   |   |   |   |
| 293370 | 01r227     |   |   |     |   |   |   |   |   |
| 293373 | 01r229     |   |   |     |   |   |   |   |   |
| 293374 | 01r230     |   |   |     |   |   |   |   |   |
| 293375 | 01r231     |   |   |     |   |   |   |   |   |
| 293377 | 01r233     |   |   |     |   |   |   |   |   |
| 293379 | 01r234     |   |   |     |   |   |   |   |   |
| 293381 | 01r235     |   |   |     |   |   |   |   |   |
| 293382 | 01r237     |   |   |     |   |   |   |   |   |
| 293383 | 01r239     |   |   |     |   |   |   |   |   |
| 293384 | 01r240     |   |   |     |   |   |   |   |   |
| 293387 | 01r242     |   |   |     |   |   |   |   |   |

|        |            |   |   |   |   |   |   |   |   |
|--------|------------|---|---|---|---|---|---|---|---|
| 293389 | 01r244     |   |   |   |   |   |   |   |   |
| 29339  | Apcs       |   |   |   |   |   |   |   |   |
| 293390 | 01r245     |   |   |   |   |   |   |   |   |
| 293391 | 01r246     |   |   |   |   |   |   |   |   |
| 293392 | 01r247     |   |   |   |   |   |   |   |   |
| 293394 | 01r251     |   |   |   |   |   |   |   |   |
| 293398 | 01r252     |   |   |   |   |   |   |   |   |
| 293399 | 01r263     |   |   |   |   |   |   |   |   |
| 293400 | 01r262     |   |   |   |   |   |   |   |   |
| 293402 | 01r259     |   |   |   |   |   |   |   |   |
| 293421 | 01r285     | 0 | 0 | 0 | 0 | 0 | 0 | 0 | 1 |
| 293424 | 01r282     |   |   |   |   |   |   |   |   |
| 293425 | 01r281     |   |   |   |   |   |   |   |   |
| 293429 | 01r279     |   |   |   |   |   |   |   |   |
| 293431 | 01r276     |   |   |   |   |   |   |   |   |
| 293435 | 01r267     |   |   |   |   |   |   |   |   |
| 293437 | 01r270     |   |   |   |   |   |   |   |   |
| 293439 | 01r272     |   |   |   |   |   |   |   |   |
| 293442 | Abca15     | 0 | 1 | 0 | 0 | 0 | 0 | 0 | 0 |
| 29349  | Fgf8       |   |   |   |   |   |   |   |   |
| 293515 | Ctf2       | 0 | 0 | 0 | 0 | 0 | 0 | 1 | 0 |
| 293537 | Hmx3       |   |   |   |   |   |   |   |   |
| 293538 | Hmx2       |   |   |   |   |   |   |   |   |
| 293573 | Mmp21      | 0 | 0 | 0 | 0 | 0 | 0 | 1 | 1 |
| 29359  | Pla2g10    | 0 | 0 | 0 | 1 | 0 | 0 | 0 | 0 |
| 293590 | 01r288     |   |   |   |   |   |   |   |   |
| 293595 | 01r295     |   |   |   |   |   |   |   |   |
| 293596 | 01r297     |   |   |   |   |   |   |   |   |
| 293597 | 01r298     |   |   |   |   |   |   |   |   |
| 293598 | 01r299     |   |   |   |   |   |   |   |   |
| 293600 | 01r302     |   |   |   |   |   |   |   |   |
| 293601 | 01r303     |   |   |   |   |   |   |   |   |
| 293603 | 01r305     |   |   |   |   |   |   |   |   |
| 293605 | 01r307     |   |   |   |   |   |   |   |   |
| 293607 | 01r309     |   |   |   |   |   |   |   |   |
| 293656 | RGD1307603 | 0 | 0 | 0 | 1 | 0 | 0 | 0 | 0 |
| 293669 | Cd248      |   |   |   |   |   |   |   |   |
| 29368  | Fgf17      | 0 | 0 | 0 | 0 | 0 | 1 | 0 | 0 |
| 293739 | Ms4a10     | 0 | 1 | 0 | 0 | 0 | 0 | 0 | 0 |
| 29375  | Uncx       |   |   |   |   |   |   |   |   |
| 293759 | 01r321     |   |   |   |   |   |   |   |   |
| 293761 | 01r323     |   |   |   |   |   |   |   |   |
| 293762 | 01r324     |   |   |   |   |   |   |   |   |
| 293763 | 01r325     |   |   |   |   |   |   |   |   |
| 293764 | 01r326     |   |   |   |   |   |   |   |   |
| 293765 | 01r327     |   |   |   |   |   |   |   |   |
| 293769 | 01r332     | 1 | 0 | 0 | 1 | 0 | 0 | 0 | 0 |
| 293773 | 01r329     |   |   |   |   |   |   |   |   |
| 293781 | 01r338     |   |   |   |   |   |   |   |   |
| 293785 | 01r340     |   |   |   |   |   |   |   |   |
| 293788 | 01r343     |   |   |   |   |   |   |   |   |
| 293789 | 01r346     |   |   |   |   |   |   |   |   |
| 293793 | 01r352     |   |   |   |   |   |   |   |   |
| 293794 | 01r357     |   |   |   |   |   |   |   |   |
| 293803 | 01r371     |   |   |   |   |   |   |   |   |
| 293805 | 01r373     |   |   |   |   |   |   |   |   |



|        |             |   |   |      |   |      |      |      |     |
|--------|-------------|---|---|------|---|------|------|------|-----|
| 293808 | 01r375      |   |   |      |   |      |      |      |     |
| 293809 | 01r376      |   |   |      |   |      |      |      |     |
| 293810 | 01r377      |   |   |      |   |      |      |      |     |
| 293813 | 01r380      |   |   |      |   |      |      |      |     |
| 293815 | 01r382      |   |   |      |   |      |      |      |     |
| 293816 | 01r383      |   |   |      |   |      |      |      |     |
| 293817 | 01r384      | 0 | 0 | 1    | 0 | 0    | 0    | 0    | 0   |
| 293847 | Dusp9       | 1 | 1 | 0    | 1 | 0    | 0    | 0    | 0   |
| 293862 | Fam50a      |   |   |      |   |      |      |      |     |
| 293890 | Mlana       |   |   |      |   |      |      |      |     |
| 293918 | Fmr1nb      | 0 | 0 | 1    | 0 | 0    | 0    | 0    | 0   |
| 293976 | Dmrt3       | 1 | 0 | 0    | 0 | 0    | 0    | 0    | 0   |
| 29410  | Neurog1     |   |   |      |   |      |      |      |     |
| 294109 | 01r385      |   |   |      |   |      |      |      |     |
| 294121 | Taar2       |   |   |      |   |      |      |      |     |
| 294122 | Taar4       | 0 | 0 | 0    | 0 | 0    | 0    | 0    | 1   |
| 294123 | Taar5       |   |   |      |   |      |      |      |     |
| 294124 | Taar6       |   |   |      |   |      |      |      |     |
| 294125 | Taar7a      |   |   |      |   |      |      |      |     |
| 294126 | Taar7b      |   |   |      |   |      |      |      |     |
| 294130 | Taar7h      |   |   |      |   |      |      |      |     |
| 294131 | Taar7g      |   |   |      |   |      |      |      |     |
| 294133 | Taar7e      |   |   |      |   |      |      |      |     |
| 294134 | Taar7d      |   |   |      |   |      |      |      |     |
| 294138 | 01r1671     |   |   |      |   |      |      |      |     |
| 294140 | 01r1668     | 0 | 0 | 0    | 0 | 1    | 0    | 0    | 0   |
| 294143 | 01r1673     |   |   |      |   |      |      |      |     |
| 294150 | 01r1683     |   |   |      |   |      |      |      |     |
| 294151 | 01r1684     |   |   |      |   |      |      |      |     |
| 294152 | 01r1686     |   |   |      |   |      |      |      |     |
| 294155 | 01r1704     | 0 | 2 | 0    | 0 | 0    | 0    | 0    | 0   |
| 294157 | 01r1702     |   |   |      |   |      |      |      |     |
| 294158 | 01r1696     |   |   |      |   |      |      |      |     |
| 294159 | 01r1695     |   |   |      |   |      |      |      |     |
| 294161 | 01r1691     |   |   |      |   |      |      |      |     |
| 294162 | 01r1690     |   |   |      |   |      |      |      |     |
| 294164 | 01r1688     |   |   |      |   |      |      |      |     |
| 294175 | 01r1714     |   |   |      |   |      |      |      |     |
| 294183 | 01r1724     | 0 | 0 | 0    | 1 | 0    | 0    | 0    | 0   |
| 294186 | 01r1729     | 0 | 0 | 0    | 0 | 0    | 0    | 1    | 0   |
| 294245 | Ly6g5c      |   |   |      |   |      |      |      |     |
| 294268 | Btn3a2      | 0 | 0 | 0    | 0 | 0    | 0    | 0    | 1   |
| 294328 | Aire        |   |   |      |   |      |      |      |     |
| 294342 | Slc5a4b     | 0 | 1 | 0    | 0 | 0    | 0    | 0    | 0   |
| 294503 | Nodal       |   |   |      |   |      |      |      |     |
| 29478  | Ndufs6      | 0 | 0 | 2.56 | 0 | 0    | 0    | 0    | 0   |
| 295047 | Rexo111-ps1 |   |   |      |   |      |      |      |     |
| 295076 | Aadac12     |   |   |      |   |      |      |      |     |
| 295180 | Pglyrp3b    |   |   |      |   |      |      |      |     |
| 295190 | Rptn        | 0 | 2 | 1    | 0 | 0    | 0    | 0    | 0   |
| 295199 | RGD1560661  |   |   |      |   |      |      |      |     |
| 29535  | Pdx1        |   |   |      |   |      |      |      |     |
| 295351 | Chi313      |   |   |      |   |      |      |      |     |
| 295352 | RGD1309110  |   |   |      |   |      |      |      |     |
| 295362 | Gstm61      | 0 | 0 | 0    | 0 | 1.88 | 1.07 | 1.06 | 0.7 |
| 295498 | Adh6a       |   |   |      |   |      |      |      |     |

|        |          |   |   |   |   |   |   |   |   |
|--------|----------|---|---|---|---|---|---|---|---|
| 295589 | Tas2r134 |   |   |   |   |   |   |   |   |
| 295711 | 0lr440   |   |   |   |   |   |   |   |   |
| 295712 | 0lr441   |   |   |   |   |   |   |   |   |
| 295713 | 0lr442   |   |   |   |   |   |   |   |   |
| 295714 | Fads211  |   |   |   |   |   |   |   |   |
| 295715 | 0lr443   |   |   |   |   |   |   |   |   |
| 295719 | 0lr447   |   |   |   |   |   |   |   |   |
| 295720 | 0lr448   |   |   |   |   |   |   |   |   |
| 295721 | 0lr450   |   |   |   |   |   |   |   |   |
| 295723 | 0lr453   |   |   |   |   |   |   |   |   |
| 295724 | 0lr454   |   |   |   |   |   |   |   |   |
| 295725 | 0lr455   | 1 | 0 | 0 | 0 | 0 | 0 | 0 | 0 |
| 295729 | 0lr459   |   |   |   |   |   |   |   |   |
| 295730 | 0lr461   |   |   |   |   |   |   |   |   |
| 295732 | 0lr462   |   |   |   |   |   |   |   |   |
| 295734 | 0lr464   |   |   |   |   |   |   |   |   |
| 295735 | 0lr465   |   |   |   |   |   |   |   |   |
| 295736 | 0lr466   |   |   |   |   |   |   |   |   |
| 295739 | 0lr469   |   |   |   |   |   |   |   |   |
| 295741 | 0lr470   |   |   |   |   |   |   |   |   |
| 295743 | 0lr472   |   |   |   |   |   |   |   |   |
| 295744 | 0lr473   |   |   |   |   |   |   |   |   |
| 295746 | 0lr476   |   |   |   |   |   |   |   |   |
| 295747 | 0lr477   |   |   |   |   |   |   |   |   |
| 295748 | 0lr479   |   |   |   |   |   |   |   |   |
| 295750 | 0lr484   |   |   |   |   |   |   |   |   |
| 295751 | 0lr485   |   |   |   |   |   |   |   |   |
| 295754 | 0lr488   |   |   |   |   |   |   |   |   |
| 295758 | 0lr493   |   |   |   |   |   |   |   |   |
| 295759 | 0lr495   |   |   |   |   |   |   |   |   |
| 295763 | 0lr502   |   |   |   |   |   |   |   |   |
| 295765 | 0lr510   |   |   |   |   |   |   |   |   |
| 295766 | 0lr513   |   |   |   |   |   |   |   |   |
| 295767 | 0lr514   |   |   |   |   |   |   |   |   |
| 295768 | 0lr515   | 0 | 0 | 0 | 1 | 0 | 0 | 0 | 0 |
| 295769 | 0lr516   |   |   |   |   |   |   |   |   |
| 295771 | 0lr517   |   |   |   |   |   |   |   |   |
| 295772 | 0lr519   | 0 | 0 | 0 | 0 | 0 | 1 | 2 | 0 |
| 295776 | 0lr528   |   |   |   |   |   |   |   |   |
| 295781 | 0lr526   |   |   |   |   |   |   |   |   |
| 295786 | 0lr530   |   |   |   |   |   |   |   |   |
| 295790 | 0lr539   |   |   |   |   |   |   |   |   |
| 295792 | 0lr540   |   |   |   |   |   |   |   |   |
| 295795 | 0lr550   |   |   |   |   |   |   |   |   |
| 295797 | 0lr554   |   |   |   |   |   |   |   |   |
| 295798 | 0lr555   |   |   |   |   |   |   |   |   |
| 295799 | 0lr558   |   |   |   |   |   |   |   |   |
| 295801 | 0lr560   |   |   |   |   |   |   |   |   |
| 295806 | 0lr567   |   |   |   |   |   |   |   |   |
| 295813 | 0lr575   |   |   |   |   |   |   |   |   |
| 295814 | 0lr576   |   |   |   |   |   |   |   |   |
| 295822 | 0lr588   |   |   |   |   |   |   |   |   |
| 295824 | 0lr592   |   |   |   |   |   |   |   |   |
| 295827 | 0lr597   |   |   |   |   |   |   |   |   |
| 295828 | 0lr598   |   |   |   |   |   |   |   |   |
| 295829 | 0lr602   |   |   |   |   |   |   |   |   |

|        |            |   |   |   |   |   |   |   |   |
|--------|------------|---|---|---|---|---|---|---|---|
| 295834 | 01r607     |   |   |   |   |   |   |   |   |
| 295835 | 01r609     |   |   |   |   |   |   |   |   |
| 295836 | 01r610     |   |   |   |   |   |   |   |   |
| 295839 | 01r614     |   |   |   |   |   |   |   |   |
| 295843 | 01r619     |   |   |   |   |   |   |   |   |
| 295848 | 01r631     |   |   |   |   |   |   |   |   |
| 295852 | 01r639     |   |   |   |   |   |   |   |   |
| 295858 | 01r651     |   |   |   |   |   |   |   |   |
| 295862 | 01r655     |   |   |   |   |   |   |   |   |
| 295863 | 01r657     |   |   |   |   |   |   |   |   |
| 295864 | 01r658     |   |   |   |   |   |   |   |   |
| 295865 | 01r659     |   |   |   |   |   |   |   |   |
| 295869 | 01r663     |   |   |   |   |   |   |   |   |
| 295870 | 01r664     |   |   |   |   |   |   |   |   |
| 295875 | 01r668     |   |   |   |   |   |   |   |   |
| 295876 | 01r669     |   |   |   |   |   |   |   |   |
| 295878 | 01r672     |   |   |   |   |   |   |   |   |
| 295880 | 01r673     |   |   |   |   |   |   |   |   |
| 295881 | 01r674     |   |   |   |   |   |   |   |   |
| 295884 | 01r678     |   |   |   |   |   |   |   |   |
| 295885 | 01r679     |   |   |   |   |   |   |   |   |
| 295890 | 01r684     |   |   |   |   |   |   |   |   |
| 295891 | 01r686     |   |   |   |   |   |   |   |   |
| 295892 | 01r687     |   |   |   |   |   |   |   |   |
| 295896 | 01r694     |   |   |   |   |   |   |   |   |
| 295900 | 01r702     |   |   |   |   |   |   |   |   |
| 295907 | 01r713     |   |   |   |   |   |   |   |   |
| 295910 | 01r718     |   |   |   |   |   |   |   |   |
| 295914 | 01r721     | 0 | 0 | 0 | 1 | 0 | 0 | 0 | 0 |
| 295917 | 01r728     | 0 | 0 | 0 | 0 | 0 | 1 | 0 | 0 |
| 295919 | 01r731     |   |   |   |   |   |   |   |   |
| 295999 | Ankrd30a   |   |   |   |   |   |   |   |   |
| 296001 | 01r748     |   |   |   |   |   |   |   |   |
| 296003 | 01r750     |   |   |   |   |   |   |   |   |
| 296004 | 01r752     |   |   |   |   |   |   |   |   |
| 296005 | 01r754     |   |   |   |   |   |   |   |   |
| 29601  | Gja8       |   |   |   |   |   |   |   |   |
| 296010 | 01r758     |   |   |   |   |   |   |   |   |
| 296016 | 01r763     |   |   |   |   |   |   |   |   |
| 296022 | 01r769     |   |   |   |   |   |   |   |   |
| 296023 | 01r770     |   |   |   |   |   |   |   |   |
| 296026 | 01r773     |   |   |   |   |   |   |   |   |
| 296028 | 01r775     |   |   |   |   |   |   |   |   |
| 296035 | 01r781     |   |   |   |   |   |   |   |   |
| 296037 | 01r783     |   |   |   |   |   |   |   |   |
| 296042 | 01r789     |   |   |   |   |   |   |   |   |
| 296044 | 01r792     |   |   |   |   |   |   |   |   |
| 296220 | Cst11      | 0 | 0 | 0 | 0 | 0 | 1 | 0 | 0 |
| 296229 | P22k15     |   |   |   |   |   |   |   |   |
| 29623  | Ugt2b37    |   |   |   |   |   |   |   |   |
| 296230 | RGD1563136 |   |   |   |   |   |   |   |   |
| 296234 | Cyss       |   |   |   |   |   |   |   |   |
| 296235 | LOC296235  |   |   |   |   |   |   |   |   |
| 296307 | Fer114     | 0 | 0 | 0 | 0 | 0 | 1 | 0 | 1 |
| 29632  | Hsd3b2     | 0 | 0 | 1 | 0 | 0 | 0 | 0 | 0 |
| 296321 | Bpi        | 0 | 0 | 1 | 1 | 0 | 0 | 0 | 0 |

|        |            |   |   |      |      |   |      |      |      |
|--------|------------|---|---|------|------|---|------|------|------|
| 296354 | Svs3b      |   |   |      |      |   |      |      |      |
| 296356 | RGD1563818 | 0 | 0 | 0    | 0    | 0 | 0    | 0.6  | 0    |
| 296366 | Wfdc3      | 1 | 0 | 0    | 1    | 0 | 0    | 0    | 0    |
| 296411 | Fam209a    | 0 | 0 | 0    | 1    | 0 | 0    | 0    | 0    |
| 296455 | Zswim2     |   |   |      |      |   |      |      |      |
| 296504 | Abo2       |   |   |      |      |   |      |      |      |
| 29651  | Aldh1a7    | 0 | 0 | 1.11 | 2.21 | 0 | 0    | 0    | 0    |
| 296535 | Psx1       | 0 | 1 | 0    | 0    | 0 | 0    | 0    | 0    |
| 296541 | Il36a      |   |   |      |      |   |      |      |      |
| 296577 | Glt6d1     | 0 | 0 | 0    | 0    | 0 | 0    | 1    | 0    |
| 296578 | Lcn9       | 0 | 1 | 0    | 0    | 0 | 0    | 0    | 0    |
| 296661 | Olr400     |   |   |      |      |   |      |      |      |
| 296663 | Olr397     | 0 | 0 | 0    | 0    | 0 | 1    | 0    | 0    |
| 296666 | Olr403     |   |   |      |      |   |      |      |      |
| 296667 | Olr404     |   |   |      |      |   |      |      |      |
| 296669 | Olr406     |   |   |      |      |   |      |      |      |
| 296672 | Olr408     |   |   |      |      |   |      |      |      |
| 296675 | Olr411     |   |   |      |      |   |      |      |      |
| 296677 | Olr415     |   |   |      |      |   |      |      |      |
| 296678 | Olr416     |   |   |      |      |   |      |      |      |
| 296679 | Olr417     |   |   |      |      |   |      |      |      |
| 296682 | Olr420     |   |   |      |      |   |      |      |      |
| 296684 | Olr422     | 1 | 0 | 0    | 0    | 0 | 0    | 0    | 0    |
| 296685 | Olr423     |   |   |      |      |   |      |      |      |
| 296686 | Olr424     |   |   |      |      |   |      |      |      |
| 296687 | Olr425     |   |   |      |      |   |      |      |      |
| 296689 | Olr428     |   |   |      |      |   |      |      |      |
| 296690 | Olr429     |   |   |      |      |   |      |      |      |
| 296694 | Olr434     | 0 | 0 | 0    | 0    | 0 | 3    | 1    | 0    |
| 29684  | Klrc2      | 2 | 0 | 0    | 0    | 0 | 0    | 0    | 0    |
| 29689  | Gabrd      | 0 | 0 | 1    | 0    | 0 | 0    | 0    | 0    |
| 29708  | Gabra6     | 0 | 0 | 0    | 0    | 0 | 0    | 1    | 0    |
| 297081 | Svs1       |   |   |      |      |   |      |      |      |
| 297173 | RSA-14-44  | 0 | 0 | 0    | 0    | 1 | 0    | 2    | 0    |
| 297418 | Gkn1       | 0 | 0 | 0    | 0    | 0 | 0    | 1    | 0    |
| 297439 | Vomlr100   |   |   |      |      |   |      |      |      |
| 29749  | Ppp3r2     | 1 | 0 | 0    | 0    | 0 | 0    | 0    | 0    |
| 297572 | Cpamd8     |   |   |      |      |   |      |      |      |
| 297645 | Klrel      | 1 | 0 | 0    | 2    | 0 | 0    | 0    | 0    |
| 297671 | RGD1559532 |   |   |      |      |   |      |      |      |
| 297767 | Rbpjl2     |   |   |      |      |   |      |      |      |
| 297899 | RGD1562036 | 0 | 0 | 0    | 0    | 1 | 0    | 0    | 0    |
| 298038 | Olr853     |   |   |      |      |   |      |      |      |
| 298039 | Olr852     |   |   |      |      |   |      |      |      |
| 298040 | Olr851     | 0 | 0 | 1    | 0    | 0 | 0    | 0    | 0    |
| 298042 | Olr850     |   |   |      |      |   |      |      |      |
| 298044 | Olr848     |   |   |      |      |   |      |      |      |
| 298045 | Olr847     |   |   |      |      |   |      |      |      |
| 298046 | Olr845     |   |   |      |      |   |      |      |      |
| 298049 | Olr841     |   |   |      |      |   |      |      |      |
| 298109 | RGD1566134 | 0 | 0 | 0    | 0    | 0 | 1.56 | 1.61 | 1.31 |
| 298164 | Tex13c     | 0 | 1 | 0    | 0    | 0 | 0    | 0    | 0    |
| 298205 | Ifna4      | 0 | 0 | 0    | 0    | 1 | 0    | 1    | 0    |
| 298210 | Ifna1      | 0 | 0 | 0    | 0    | 0 | 0    | 1    | 0    |
| 298211 | Ifna11     | 0 | 0 | 0    | 0    | 0 | 1    | 0    | 0    |
| 298213 | Ifna2      |   |   |      |      |   |      |      |      |

|        |            |      |      |   |   |      |      |      |      |
|--------|------------|------|------|---|---|------|------|------|------|
| 298232 | Zfp353     |      |      |   |   |      |      |      |      |
| 298331 | RGD1566184 |      |      |   |   |      |      |      |      |
| 298340 | Slc6a14    | 0    | 0    | 1 | 1 | 0    | 0    | 0    | 0    |
| 298346 | Rhox11     |      |      |   |   |      |      |      |      |
| 298352 | Rhox9      |      |      |   |   |      |      |      |      |
| 298423 | Cyp4a3     |      |      |   |   |      |      |      |      |
| 298449 | Klf17      |      |      |   |   |      |      |      |      |
| 298474 | Olr865     |      |      |   |   |      |      |      |      |
| 298475 | Olr866     |      |      |   |   |      |      |      |      |
| 298483 | Lao1       | 1    | 0    | 2 | 1 | 0    | 0    | 0    | 0    |
| 298595 | Padi6      |      |      |   |   |      |      |      |      |
| 298613 | Pramef5    |      |      |   |   |      |      |      |      |
| 298621 | RGD1306186 |      |      |   |   |      |      |      |      |
| 298623 | RGD1308878 | 0    | 1    | 1 | 0 | 0    | 0    | 0    | 0    |
| 298671 | Actrt2     | 0    | 0    | 0 | 0 | 0    | 0    | 0    | 1    |
| 298692 | Tt1110     | 0    | 0    | 0 | 1 | 0    | 0    | 0    | 0    |
| 298724 | Olr990     |      |      |   |   |      |      |      |      |
| 298733 | Olr840     |      |      |   |   |      |      |      |      |
| 298734 | Olr839     | 2.53 | 0    | 0 | 0 | 0    | 0    | 0    | 0    |
| 298892 | RGD1565679 | 0    | 0    | 2 | 0 | 0    | 0    | 0    | 0    |
| 298954 | Prps111    | 0    | 0    | 1 | 0 | 0    | 0    | 0    | 0    |
| 298959 | Agr3       | 0    | 0    | 0 | 0 | 0    | 0    | 0    | 1    |
| 298963 | Lrrc72     | 0    | 0    | 0 | 1 | 0    | 0    | 0    | 0    |
| 299007 | Gpr33      |      |      |   |   |      |      |      |      |
| 299061 | Nkx2-8     |      |      |   |   |      |      |      |      |
| 299172 | RGD1565752 |      |      |   |   |      |      |      |      |
| 299270 | Serpina6   | 0    | 0    | 0 | 0 | 0    | 0    | 0    | 1    |
| 299274 | Serpina9   | 0    | 0    | 2 | 0 | 0    | 0    | 0    | 0    |
| 299276 | Serpina3m  |      |      |   |   |      |      |      |      |
| 299277 | LOC299277  | 1    | 0    | 1 | 2 | 0    | 0    | 0    | 0    |
| 299282 | LOC299282  | 0    | 0    | 0 | 0 | 0    | 1.11 | 1.17 | 1.31 |
| 299306 | RGD1564855 | 0    | 0.88 | 0 | 0 | 0    | 0    | 0    | 0    |
| 299499 | Sp8        |      |      |   |   |      |      |      |      |
| 299553 | Olr1090    |      |      |   |   |      |      |      |      |
| 299555 | Morc2b     | 0    | 0    | 0 | 0 | 0    | 0    | 1    | 0    |
| 299570 | Olr1092    | 0    | 0    | 0 | 0 | 0    | 0    | 0    | 1    |
| 299576 | Olr1095    |      |      |   |   |      |      |      |      |
| 299587 | Casp14     |      |      |   |   |      |      |      |      |
| 299588 | Olr1086    |      |      |   |   |      |      |      |      |
| 299589 | Olr1085    |      |      |   |   |      |      |      |      |
| 299593 | Olr1078    |      |      |   |   |      |      |      |      |
| 299596 | Olr1075    | 0    | 0    | 0 | 0 | 0    | 0    | 0    | 1    |
| 299600 | Odf312     |      |      |   |   |      |      |      |      |
| 299648 | Zfp494     | 0    | 0    | 0 | 1 | 0    | 0    | 0    | 0    |
| 299649 | Vomlr108   |      |      |   |   |      |      |      |      |
| 299683 | Vom2r57    | 0    | 0    | 0 | 0 | 1.62 | 0    | 2    | 1    |
| 299766 | Myf5       |      |      |   |   |      |      |      |      |
| 299889 | Dcstamp    | 0    | 0    | 0 | 1 | 0    | 0    | 0    | 0    |
| 299944 | Slc22a22   | 0    | 0    | 0 | 1 | 0    | 0    | 0    | 0    |
| 299963 | RGD1564515 |      |      |   |   |      |      |      |      |
| 300024 | LOC300024  | 1.03 | 0    | 0 | 0 | 0    | 0    | 0    | 0    |
| 300108 | Pnpla5     | 0    | 0    | 0 | 0 | 1    | 0    | 0    | 0    |
| 300121 | Smc1b      | 0    | 0    | 0 | 0 | 0    | 0    | 1    | 0    |
| 300150 | Klhdc7b    | 0    | 0    | 0 | 1 | 0    | 0    | 0    | 0    |
| 300194 | Olr1102    | 0    | 0    | 0 | 2 | 0    | 0    | 0    | 0    |
| 300205 | Olr1111    |      |      |   |   |      |      |      |      |

|        |            |   |   |   |   |   |   |   |   |
|--------|------------|---|---|---|---|---|---|---|---|
| 300248 | Krt73      |   |   |   |   |   |   |   |   |
| 300262 | Hoxc12     | 1 | 0 | 0 | 0 | 0 | 0 | 0 | 0 |
| 300323 | Zdhhc25    |   |   |   |   |   |   |   |   |
| 300338 | Mmp1b      |   |   |   |   |   |   |   |   |
| 300339 | Mmp1       | 0 | 0 | 0 | 0 | 0 | 1 | 0 | 0 |
| 300340 | Mmp27      | 0 | 0 | 1 | 1 | 0 | 0 | 0 | 0 |
| 300341 | Mmp20      | 0 | 1 | 1 | 0 | 0 | 0 | 0 | 0 |
| 300381 | RGD1304745 |   |   |   |   |   |   |   |   |
| 300389 | Mbd311     |   |   |   |   |   |   |   |   |
| 300392 | Olrl124    |   |   |   |   |   |   |   |   |
| 300395 | Olrl139    |   |   |   |   |   |   |   |   |
| 300400 | Olrl130    |   |   |   |   |   |   |   |   |
| 300405 | Olrl145    |   |   |   |   |   |   |   |   |
| 300407 | Olrl146    |   |   |   |   |   |   |   |   |
| 300408 | Olrl147    |   |   |   |   |   |   |   |   |
| 300411 | Olrl151    |   |   |   |   |   |   |   |   |
| 300414 | Olrl155    |   |   |   |   |   |   |   |   |
| 300425 | Olrl169    |   |   |   |   |   |   |   |   |
| 300524 | Olrl196    |   |   |   |   |   |   |   |   |
| 300529 | Olrl204    |   |   |   |   |   |   |   |   |
| 300538 | Olrl214    |   |   |   |   |   |   |   |   |
| 300540 | Olrl217    |   |   |   |   |   |   |   |   |
| 300548 | Olrl222    |   |   |   |   |   |   |   |   |
| 300551 | Olrl226    |   |   |   |   |   |   |   |   |
| 300552 | Olrl227    |   |   |   |   |   |   |   |   |
| 300554 | Olrl229    |   |   |   |   |   |   |   |   |
| 300557 | Olrl232    | 0 | 0 | 0 | 0 | 0 | 1 | 0 | 0 |
| 300558 | Olrl234    |   |   |   |   |   |   |   |   |
| 300560 | Olrl235    |   |   |   |   |   |   |   |   |
| 300565 | Olrl240    |   |   |   |   |   |   |   |   |
| 300566 | Olrl241    |   |   |   |   |   |   |   |   |
| 300567 | Olrl242    |   |   |   |   |   |   |   |   |
| 300568 | Olrl243    |   |   |   |   |   |   |   |   |
| 300573 | Olrl248    |   |   |   |   |   |   |   |   |
| 300576 | Olrl251    |   |   |   |   |   |   |   |   |
| 300577 | Olrl252    |   |   |   |   |   |   |   |   |
| 300581 | Olrl259    |   |   |   |   |   |   |   |   |
| 300583 | Olrl264    |   |   |   |   |   |   |   |   |
| 300584 | Olrl265    |   |   |   |   |   |   |   |   |
| 300589 | Olrl273    |   |   |   |   |   |   |   |   |
| 300595 | Olrl285    |   |   |   |   |   |   |   |   |
| 300599 | Olrl293    |   |   |   |   |   |   |   |   |
| 300600 | Olrl297    |   |   |   |   |   |   |   |   |
| 300602 | Olrl301    |   |   |   |   |   |   |   |   |
| 300603 | Olrl302    |   |   |   |   |   |   |   |   |
| 300605 | Olrl304    |   |   |   |   |   |   |   |   |
| 300607 | Olrl306    |   |   |   |   |   |   |   |   |
| 300610 | Olrl309    |   |   |   |   |   |   |   |   |
| 300613 | Olrl311    |   |   |   |   |   |   |   |   |
| 300615 | Olrl314    |   |   |   |   |   |   |   |   |
| 300616 | Olrl315    |   |   |   |   |   |   |   |   |
| 300620 | Olrl319    |   |   |   |   |   |   |   |   |
| 300621 | Olrl320    |   |   |   |   |   |   |   |   |
| 300624 | Olrl323    |   |   |   |   |   |   |   |   |
| 300625 | Olrl325    |   |   |   |   |   |   |   |   |
| 300626 | Olrl326    |   |   |   |   |   |   |   |   |



|        |            |   |   |   |   |   |   |   |   |
|--------|------------|---|---|---|---|---|---|---|---|
| 300627 | 01r1327    |   |   |   |   |   |   |   |   |
| 300630 | 01r1330    |   |   |   |   |   |   |   |   |
| 300632 | 01r1332    |   |   |   |   |   |   |   |   |
| 300634 | 01r1334    |   |   |   |   |   |   |   |   |
| 300635 | 01r1335    |   |   |   |   |   |   |   |   |
| 300637 | 01r1337    |   |   |   |   |   |   |   |   |
| 300639 | 01r1339    |   |   |   |   |   |   |   |   |
| 300640 | 01r1340    |   |   |   |   |   |   |   |   |
| 300643 | 01r1341    |   |   |   |   |   |   |   |   |
| 300790 | Slc51b     | 1 | 0 | 1 | 0 | 0 | 0 | 0 | 0 |
| 300954 | Sox14      |   |   |   |   |   |   |   |   |
| 301015 | Fbxw12     |   |   |   |   |   |   |   |   |
| 301027 | Prss42     | 0 | 0 | 0 | 1 | 0 | 0 | 0 | 0 |
| 301066 | Ccr8       |   |   |   |   |   |   |   |   |
| 301101 | Dppa5      |   |   |   |   |   |   |   |   |
| 301106 | Trim42     |   |   |   |   |   |   |   |   |
| 301114 | Slc25a41   |   |   |   |   |   |   |   |   |
| 301137 | Vom2r79    |   |   |   |   |   |   |   |   |
| 301165 | LOC301165  | 0 | 0 | 0 | 0 | 0 | 0 | 0 | 2 |
| 301230 | RGD1565959 |   |   |   |   |   |   |   |   |
| 301284 | Tfap2d     |   |   |   |   |   |   |   |   |
| 301289 | I117a      |   |   |   |   |   |   |   |   |
| 301306 | RGD1309049 |   |   |   |   |   |   |   |   |
| 301468 | Crygb      |   |   |   |   |   |   |   |   |
| 301610 | 01r1344    | 0 | 0 | 0 | 0 | 0 | 1 | 0 | 0 |
| 301816 | Ssty1      | 0 | 2 | 0 | 1 | 0 | 0 | 0 | 0 |
| 302027 | 01r1096    | 0 | 0 | 1 | 1 | 0 | 0 | 0 | 0 |
| 302041 | 01r956     |   |   |   |   |   |   |   |   |
| 302044 | 01r959     |   |   |   |   |   |   |   |   |
| 302045 | 01r962     |   |   |   |   |   |   |   |   |
| 302172 | RGD1563270 |   |   |   |   |   |   |   |   |
| 302228 | LOC302228  |   |   |   |   |   |   |   |   |
| 302244 | RGD1564712 |   |   |   |   |   |   |   |   |
| 302254 | 01r886     |   |   |   |   |   |   |   |   |
| 302311 | RGD1564748 |   |   |   |   |   |   |   |   |
| 302366 | RGD1562871 | 0 | 0 | 0 | 0 | 0 | 0 | 1 | 0 |
| 302367 | RGD1561552 |   |   |   |   |   |   |   |   |
| 302368 | Tent5d     | 0 | 0 | 0 | 0 | 0 | 0 | 1 | 0 |
| 302399 | Zcchc13    |   |   |   |   |   |   |   |   |
| 302426 | Otud6a     | 0 | 0 | 0 | 0 | 0 | 1 | 0 | 0 |
| 302435 | RGD1563590 |   |   |   |   |   |   |   |   |
| 302438 | Mageb11    |   |   |   |   |   |   |   |   |
| 302441 | Mageb6     |   |   |   |   |   |   |   |   |
| 302442 | Mageb5     |   |   |   |   |   |   |   |   |
| 302447 | RGD1563978 |   |   |   |   |   |   |   |   |
| 302448 | RGD1562980 |   |   |   |   |   |   |   |   |
| 302488 | Usp26      |   |   |   |   |   |   |   |   |
| 302536 | RGD1561661 | 0 | 2 | 1 | 1 | 0 | 0 | 0 | 0 |
| 302638 | Magea8     | 0 | 0 | 0 | 0 | 0 | 0 | 0 | 1 |
| 302685 | RGD1560203 | 0 | 1 | 0 | 1 | 0 | 0 | 0 | 0 |
| 302744 | Mageb2     |   |   |   |   |   |   |   |   |
| 302746 | Mageb3     |   |   |   |   |   |   |   |   |
| 302748 | Mageb1     |   |   |   |   |   |   |   |   |
| 302772 | RGD1562485 |   |   |   |   |   |   |   |   |
| 302773 | RGD1563104 |   |   |   |   |   |   |   |   |
| 302776 | RGD1561230 |   |   |   |   |   |   |   |   |

|        |            |      |      |   |   |   |   |   |   |
|--------|------------|------|------|---|---|---|---|---|---|
| 302780 | Rbm31y     |      |      |   |   |   |   |   |   |
| 302783 | H2afb3     |      |      |   |   |   |   |   |   |
| 302796 | Actrt1     |      |      |   |   |   |   |   |   |
| 302821 | Olr1765    |      |      |   |   |   |   |   |   |
| 302823 | Olr1766    |      |      |   |   |   |   |   |   |
| 302824 | Olr1767    |      |      |   |   |   |   |   |   |
| 302825 | Olr1751    |      |      |   |   |   |   |   |   |
| 302860 | Gpr1121    |      |      |   |   |   |   |   |   |
| 302867 | Dusp21     |      |      |   |   |   |   |   |   |
| 302879 | Smptb      | 0    | 0    | 0 | 0 | 0 | 0 | 0 | 1 |
| 302958 | Olr1369    |      |      |   |   |   |   |   |   |
| 303181 | Wnt3a      |      |      |   |   |   |   |   |   |
| 303234 | Ccdc42     |      |      |   |   |   |   |   |   |
| 303296 | Olr1504    |      |      |   |   |   |   |   |   |
| 303479 | Calcoco2   |      |      |   |   |   |   |   |   |
| 303480 | Hoxb13     | 0    | 0    | 0 | 0 | 0 | 1 | 0 | 0 |
| 303530 | Krt16      | 0    | 0    | 0 | 0 | 0 | 1 | 0 | 0 |
| 303729 | Enpp7      |      |      |   |   |   |   |   |   |
| 303835 | Rtp2       |      |      |   |   |   |   |   |   |
| 303861 | Cpn2       |      |      |   |   |   |   |   |   |
| 304026 | Olr1533    |      |      |   |   |   |   |   |   |
| 304125 | Cldn17     | 0    | 1    | 0 | 0 | 0 | 0 | 0 | 0 |
| 304195 | Pcp2       | 1.13 | 1.13 | 0 | 0 | 0 | 0 | 0 | 0 |
| 304508 | Oasl1d     | 0    | 0    | 0 | 0 | 0 | 0 | 0 | 1 |
| 304514 | Tbx5       |      |      |   |   |   |   |   |   |
| 304603 | Apon       | 0    | 0    | 0 | 1 | 0 | 0 | 0 | 0 |
| 304610 | Olr878     |      |      |   |   |   |   |   |   |
| 304633 | Olr1065    |      |      |   |   |   |   |   |   |
| 304688 | Serpinb3   |      |      |   |   |   |   |   |   |
| 304689 | Serpinb11  | 0    | 0    | 0 | 0 | 0 | 1 | 1 | 0 |
| 304985 | Olr1576    |      |      |   |   |   |   |   |   |
| 305123 | Brdt       | 0    | 1    | 1 | 0 | 0 | 0 | 0 | 0 |
| 305711 | Olr1606    |      |      |   |   |   |   |   |   |
| 305844 | Rnasel12   |      |      |   |   |   |   |   |   |
| 306073 | Kbtbd6     |      |      |   |   |   |   |   |   |
| 306168 | Sox21      |      |      |   |   |   |   |   |   |
| 306540 | Got111     | 0    | 0    | 0 | 0 | 0 | 0 | 1 | 0 |
| 306655 | Irx4       | 0    | 0    | 0 | 0 | 0 | 1 | 0 | 0 |
| 306659 | Irx1       | 0    | 0    | 1 | 0 | 0 | 0 | 0 | 0 |
| 306718 | RGD1564657 |      |      |   |   |   |   |   |   |
| 306720 | Ctsm       |      |      |   |   |   |   |   |   |
| 306798 | Nutm2f     | 1    | 0    | 1 | 0 | 0 | 0 | 0 | 0 |
| 306883 | Fam50b     | 1    | 0    | 0 | 0 | 0 | 0 | 0 | 0 |
| 306890 | Serpinb9d  | 0    | 0    | 0 | 0 | 1 | 0 | 0 | 0 |
| 306929 | Pr17a4     |      |      |   |   |   |   |   |   |
| 307092 | Akr1c1     | 1.01 | 0    | 0 | 0 | 0 | 0 | 0 | 0 |
| 307203 | RGD1559726 |      |      |   |   |   |   |   |   |
| 307563 | Dsc3       |      |      |   |   |   |   |   |   |
| 307727 | LOC307727  |      |      |   |   |   |   |   |   |
| 307767 | Frem3      | 0    | 0    | 0 | 0 | 0 | 1 | 0 | 0 |
| 308015 | Clca1      | 0    | 0    | 0 | 0 | 0 | 0 | 1 | 1 |
| 308129 | Iyd        | 0    | 0    | 0 | 0 | 0 | 1 | 0 | 0 |
| 308169 | Tcp10b     |      |      |   |   |   |   |   |   |
| 308248 | Vom2r4     | 0    | 0    | 0 | 0 | 0 | 1 | 0 | 0 |
| 308257 | Vom2r6     | 1.42 | 0    | 0 | 0 | 0 | 0 | 0 | 0 |
| 308344 | Fam71e2    |      |      |   |   |   |   |   |   |

|        |            |   |   |   |   |   |   |      |   |
|--------|------------|---|---|---|---|---|---|------|---|
| 308353 | RGD1564617 |   |   |   |   |   |   |      |   |
| 308394 | Psg16      |   |   |   |   |   |   |      |   |
| 308562 | Klk14      | 0 | 1 | 1 | 1 | 0 | 0 | 0    | 0 |
| 308564 | Klk12      |   |   |   |   |   |   |      |   |
| 308565 | Klk8       |   |   |   |   |   |   |      |   |
| 308717 | Slc35d3    | 0 | 0 | 0 | 0 | 2 | 0 | 1    | 1 |
| 308853 | Olr37      |   |   |   |   |   |   |      |   |
| 308905 | Ubqln3     |   |   |   |   |   |   |      |   |
| 308919 | Ovch2      | 0 | 1 | 0 | 0 | 0 | 0 | 0    | 0 |
| 309028 | RGD1559891 |   |   |   |   |   |   |      |   |
| 309114 | Muc5b      | 0 | 0 | 0 | 0 | 1 | 0 | 0    | 0 |
| 309133 | Mrgprg     |   |   |   |   |   |   |      |   |
| 309221 | Olr318     | 1 | 0 | 0 | 0 | 0 | 0 | 0    | 0 |
| 309222 | Olr319     |   |   |   |   |   |   |      |   |
| 309266 | Pnma5      |   |   |   |   |   |   |      |   |
| 309275 | Trex2      | 0 | 0 | 0 | 0 | 0 | 2 | 0    | 0 |
| 309304 | Pdcd1lg2   | 0 | 0 | 0 | 0 | 0 | 2 | 0    | 1 |
| 309389 | Nkx2-3     | 0 | 0 | 2 | 0 | 0 | 0 | 0    | 0 |
| 309449 | Elov13     |   |   |   |   |   |   |      |   |
| 309528 | Lipm       |   |   |   |   |   |   |      |   |
| 309574 | Olr1687    |   |   |   |   |   |   |      |   |
| 309578 | Olr1709    |   |   |   |   |   |   |      |   |
| 309680 | Dnmt31     |   |   |   |   |   |   |      |   |
| 310575 | Spr3       |   |   |   |   |   |   |      |   |
| 310596 | RGD1565369 |   |   |   |   |   |   |      |   |
| 311031 | RGD1564306 |   |   |   |   |   |   |      |   |
| 311173 | Olr561     |   |   |   |   |   |   |      |   |
| 311175 | Olr601     |   |   |   |   |   |   |      |   |
| 311179 | Olr698     |   |   |   |   |   |   |      |   |
| 311180 | Olr725     |   |   |   |   |   |   |      |   |
| 311559 | Bpifa5     | 1 | 0 | 0 | 1 | 0 | 0 | 0    | 0 |
| 312203 | Klf14      |   |   |   |   |   |   |      |   |
| 312273 | LOC312273  |   |   |   |   |   |   |      |   |
| 312317 | Doxl2      | 0 | 0 | 0 | 0 | 0 | 0 | 1.08 | 0 |
| 313089 | Slc7a13    | 0 | 0 | 0 | 0 | 0 | 0 | 1    | 0 |
| 313163 | RGD1306195 | 0 | 0 | 0 | 0 | 1 | 0 | 0    | 0 |
| 313451 | Rhox4g     |   |   |   |   |   |   |      |   |
| 313484 | Dmrtb1     |   |   |   |   |   |   |      |   |
| 313485 | Skint4     |   |   |   |   |   |   |      |   |
| 313546 | Olr856     |   |   |   |   |   |   |      |   |
| 313596 | Tfap2e     | 0 | 0 | 0 | 3 | 0 | 0 | 0    | 0 |
| 313686 | Aadacl3    |   |   |   |   |   |   |      |   |
| 313688 | Aadacl4    |   |   |   |   |   |   |      |   |
| 314459 | Amn        | 0 | 0 | 0 | 0 | 0 | 2 | 2    | 0 |
| 314539 | Macc1      | 2 | 1 | 1 | 0 | 0 | 0 | 0    | 0 |
| 314659 | Act19      |   |   |   |   |   |   |      |   |
| 314746 | Usp44      |   |   |   |   |   |   |      |   |
| 314848 | Lrrc10     |   |   |   |   |   |   |      |   |
| 314858 | RGD1306282 |   |   |   |   |   |   |      |   |
| 315075 | Ly6d       |   |   |   |   |   |   |      |   |
| 315095 | Tssk5      |   |   |   |   |   |   |      |   |
| 315323 | Krt4       |   |   |   |   |   |   |      |   |
| 315324 | Krt78      |   |   |   |   |   |   |      |   |
| 315337 | Hoxc13     | 0 | 0 | 0 | 2 | 0 | 0 | 0    | 0 |
| 315347 | Gtsf1      |   |   |   |   |   |   |      |   |
| 315350 | Irs4       |   |   |   |   |   |   |      |   |

|        |            |      |      |   |   |   |      |      |      |
|--------|------------|------|------|---|---|---|------|------|------|
| 315452 | Olr1121    |      |      |   |   |   |      |      |      |
| 315571 | Olr1280    |      |      |   |   |   |      |      |      |
| 315572 | Olr1283    |      |      |   |   |   |      |      |      |
| 315573 | Olr1307    |      |      |   |   |   |      |      |      |
| 315650 | Btg4       | 0    | 0    | 0 | 0 | 0 | 0    | 1    | 1    |
| 315915 | Pih1d3     |      |      |   |   |   |      |      |      |
| 315953 | Cldn18     | 0    | 0    | 0 | 0 | 0 | 1    | 0    | 0    |
| 316000 | Act111     |      |      |   |   |   |      |      |      |
| 316142 | Tes1       |      |      |   |   |   |      |      |      |
| 316259 | Opn5       |      |      |   |   |   |      |      |      |
| 316265 | Pgk2       | 0    | 0    | 0 | 1 | 0 | 0    | 0    | 0    |
| 316304 | Lgsn       | 0    | 0    | 0 | 0 | 2 | 0    | 0    | 0    |
| 316409 | Hsfy2      |      |      |   |   |   |      |      |      |
| 316465 | RGD1562431 |      |      |   |   |   |      |      |      |
| 316633 | Olr1346    |      |      |   |   |   |      |      |      |
| 316777 | Txndc2     |      |      |   |   |   |      |      |      |
| 317272 | RGD1563554 |      |      |   |   |   |      |      |      |
| 317274 | Mageb16    |      |      |   |   |   |      |      |      |
| 317297 | Magea9     |      |      |   |   |   |      |      |      |
| 317310 | Ct55       | 0    | 0    | 0 | 0 | 1 | 0    | 0    | 1    |
| 317314 | RGD1561558 |      |      |   |   |   |      |      |      |
| 317316 | Plac1      | 0    | 0    | 1 | 0 | 0 | 0    | 0    | 0    |
| 317356 | LOC317356  | 1.82 | 0    | 0 | 0 | 0 | 0    | 0    | 0    |
| 317456 | LOC317456  |      |      |   |   |   |      |      |      |
| 317471 | Saxo11     | 0    | 0    | 0 | 2 | 0 | 0    | 0    | 0    |
| 317584 | RGD1566225 | 0    | 0    | 0 | 0 | 1 | 0    | 0    | 0    |
| 317597 | RGD1560585 |      |      |   |   |   |      |      |      |
| 317604 | RGD1566008 |      |      |   |   |   |      |      |      |
| 317715 | Gsc        |      |      |   |   |   |      |      |      |
| 319104 | Taar8a     |      |      |   |   |   |      |      |      |
| 338443 | Gpbar1     | 0    | 0    | 0 | 0 | 0 | 1.01 | 0    | 1.01 |
| 353306 | Spata31a5  |      |      |   |   |   |      |      |      |
| 360228 | Wfdc21     |      |      |   |   |   |      |      |      |
| 360229 | Cox8c      |      |      |   |   |   |      |      |      |
| 360395 | Grpcb      |      |      |   |   |   |      |      |      |
| 360506 | RGD1311343 | 0    | 0    | 0 | 0 | 1 | 1    | 0    | 2    |
| 360508 | Smim23     |      |      |   |   |   |      |      |      |
| 360700 | RGD1562683 | 0    | 0    | 0 | 3 | 0 | 0    | 0    | 0    |
| 360731 | Tprg1      |      |      |   |   |   |      |      |      |
| 360790 | Upk3b      |      |      |   |   |   |      |      |      |
| 360873 | Gpa33      |      |      |   |   |   |      |      |      |
| 360933 | LOC360933  | 0    | 0    | 0 | 0 | 0 | 0    | 1.03 | 0    |
| 361012 | Spetex-2E  | 1.27 | 2.75 | 0 | 0 | 0 | 0    | 0    | 0    |
| 361033 | Olr1619    |      |      |   |   |   |      |      |      |
| 361049 | RGD1563302 |      |      |   |   |   |      |      |      |
| 361205 | Lect2      | 0    | 0    | 1 | 0 | 0 | 0    | 0    | 0    |
| 361510 | Sult2a2    |      |      |   |   |   |      |      |      |
| 361516 | Igf13      |      |      |   |   |   |      |      |      |
| 361523 | Cyp2b2     |      |      |   |   |   |      |      |      |
| 361538 | Prodh2     | 1    | 0    | 0 | 0 | 0 | 0    | 0    | 0    |
| 361544 | Etv2       |      |      |   |   |   |      |      |      |
| 361551 | Scgb1b30   |      |      |   |   |   |      |      |      |
| 361638 | Acsml      |      |      |   |   |   |      |      |      |
| 361733 | Ms4a8      | 1    | 0    | 0 | 0 | 0 | 0    | 0    | 0    |
| 361739 | Tmc1       | 0    | 0    | 0 | 2 | 0 | 0    | 0    | 0    |
| 361969 | Fga        | 0    | 0    | 0 | 0 | 0 | 0    | 1    | 0    |

|        |            |   |   |   |   |   |      |   |   |
|--------|------------|---|---|---|---|---|------|---|---|
| 362077 | I11f10     |   |   |   |   |   |      |   |   |
| 362085 | Sohlh1     |   |   |   |   |   |      |   |   |
| 362120 | RGD1308742 |   |   |   |   |   |      |   |   |
| 362231 | Cst9l      |   |   |   |   |   |      |   |   |
| 362267 | Svs6       |   |   |   |   |   |      |   |   |
| 362280 | Tfap2c     |   |   |   |   |   |      |   |   |
| 362346 | Prss37     |   |   |   |   |   |      |   |   |
| 362347 | Try4       |   |   |   |   |   |      |   |   |
| 362433 | RGD1307916 |   |   |   |   |   |      |   |   |
| 362450 | Prp2       |   |   |   |   |   |      |   |   |
| 362451 | RGD1306750 |   |   |   |   |   |      |   |   |
| 362525 | Txndc8     |   |   |   |   |   |      |   |   |
| 362527 | Mup4       | 0 | 0 | 1 | 0 | 0 | 0    | 0 | 0 |
| 362821 | 01r1069    |   |   |   |   |   |      |   |   |
| 362901 | LOC362901  | 1 | 0 | 0 | 0 | 0 | 0    | 0 | 0 |
| 362915 | Anxa13     | 0 | 0 | 2 | 0 | 0 | 0    | 0 | 0 |
| 362921 | LOC362921  | 0 | 0 | 0 | 0 | 0 | 1.03 | 0 | 0 |
| 363041 | Pate4      |   |   |   |   |   |      |   |   |
| 363043 | RGD1304554 |   |   |   |   |   |      |   |   |
| 363044 | RGD1560112 |   |   |   |   |   |      |   |   |
| 363168 | Lyz14      |   |   |   |   |   |      |   |   |
| 363437 | Rhox12     |   |   |   |   |   |      |   |   |
| 363439 | Rhox2      |   |   |   |   |   |      |   |   |
| 363507 | RGD1564845 |   |   |   |   |   |      |   |   |
| 363508 | Vgll1      |   |   |   |   |   |      |   |   |
| 363542 | 12-Sep     |   |   |   |   |   |      |   |   |
| 363546 | 01r1362    |   |   |   |   |   |      |   |   |
| 363549 | 01r1381    |   |   |   |   |   |      |   |   |
| 363585 | 01r1393    | 0 | 0 | 0 | 1 | 0 | 0    | 0 | 0 |
| 363606 | 01r1433    | 2 | 0 | 0 | 0 | 0 | 0    | 0 | 0 |
| 363608 | 01r1457    |   |   |   |   |   |      |   |   |
| 363639 | 01r1481    |   |   |   |   |   |      |   |   |
| 363640 | 01r1493    |   |   |   |   |   |      |   |   |
| 363642 | 01r1509    |   |   |   |   |   |      |   |   |
| 363678 | Krtap3-3   |   |   |   |   |   |      |   |   |
| 363710 | 01r1525    |   |   |   |   |   |      |   |   |
| 363739 | Krtap14l   |   |   |   |   |   |      |   |   |
| 363741 | Krtap7-1   |   |   |   |   |   |      |   |   |
| 363761 | 01r1538    |   |   |   |   |   |      |   |   |
| 363762 | 01r1540    |   |   |   |   |   |      |   |   |
| 363763 | 01r1542    |   |   |   |   |   |      |   |   |
| 363826 | 01r1568    |   |   |   |   |   |      |   |   |
| 363856 | Cd209      | 0 | 1 | 0 | 0 | 0 | 0    | 0 | 0 |
| 364021 | Rgs12h     |   |   |   |   |   |      |   |   |
| 364023 | RGD1561635 | 1 | 0 | 0 | 0 | 0 | 0    | 0 | 0 |
| 364054 | 01r1581    |   |   |   |   |   |      |   |   |
| 364086 | Vom2r70    | 1 | 0 | 0 | 0 | 0 | 0    | 0 | 0 |
| 364129 | RGD1562394 | 0 | 1 | 0 | 0 | 0 | 0    | 0 | 0 |
| 364140 | Gsx2       |   |   |   |   |   |      |   |   |
| 364275 | 01r1607    |   |   |   |   |   |      |   |   |
| 364306 | 01r1643    |   |   |   |   |   |      |   |   |
| 364359 | LOC364359  | 0 | 1 | 0 | 0 | 0 | 0    | 0 | 0 |
| 364418 | Nkx2-6     | 0 | 0 | 1 | 0 | 0 | 0    | 0 | 0 |
| 364513 | Antxr1     |   |   |   |   |   |      |   |   |
| 364599 | Adam341    |   |   |   |   |   |      |   |   |
| 364719 | Prss16     | 0 | 0 | 0 | 0 | 0 | 1    | 0 | 0 |

|        |            |   |   |   |   |     |      |      |   |
|--------|------------|---|---|---|---|-----|------|------|---|
| 364726 | 01r1657    | 0 | 0 | 0 | 0 | 1   | 0    | 0    | 0 |
| 364764 | RGD1564347 |   |   |   |   |     |      |      |   |
| 364774 | Calml5     |   |   |   |   |     |      |      |   |
| 364798 | Potec      |   |   |   |   |     |      |      |   |
| 364841 | Pcdhb1     | 0 | 0 | 0 | 0 | 0   | 0    | 0    | 2 |
| 364906 | Mrps211    | 0 | 0 | 0 | 0 | 0   | 1.36 | 0    | 0 |
| 364910 | Sall3      | 0 | 1 | 1 | 0 | 0   | 0    | 0    | 0 |
| 364979 | 01r1667    | 0 | 0 | 1 | 0 | 0   | 0    | 0    | 0 |
| 365055 | LOC365055  |   |   |   |   |     |      |      |   |
| 365159 | LOC365159  |   |   |   |   |     |      |      |   |
| 365170 | 01r11      |   |   |   |   |     |      |      |   |
| 365175 | 01r6       | 0 | 0 | 0 | 0 | 0.5 | 0    | 0    | 0 |
| 365184 | Nlrp4b     | 0 | 0 | 0 | 0 | 0   | 0.58 | 1.06 | 0 |
| 365190 | Vomlr54    |   |   |   |   |     |      |      |   |
| 365213 | Nanos2     | 0 | 0 | 0 | 0 | 0   | 1    | 0    | 0 |
| 365227 | Upk1a      |   |   |   |   |     |      |      |   |
| 365229 | RGD1561430 |   |   |   |   |     |      |      |   |
| 365265 | Tmprss11b  | 0 | 0 | 0 | 0 | 1   | 0    | 0    | 0 |
| 365302 | 01r12      |   |   |   |   |     |      |      |   |
| 365324 | 01r67      |   |   |   |   |     |      |      |   |
| 365326 | 01r69      | 0 | 1 | 0 | 0 | 0   | 0    | 0    | 0 |
| 365327 | 01r75      |   |   |   |   |     |      |      |   |
| 365328 | 01r82      |   |   |   |   |     |      |      |   |
| 365329 | 01r87      | 0 | 0 | 0 | 0 | 1   | 0    | 0    | 0 |
| 365330 | 01r142     |   |   |   |   |     |      |      |   |
| 365331 | 01r145     |   |   |   |   |     |      |      |   |
| 365334 | 01r158     |   |   |   |   |     |      |      |   |
| 365336 | 01r192     |   |   |   |   |     |      |      |   |
| 365340 | 01r218     | 1 | 0 | 0 | 0 | 0   | 0    | 0    | 0 |
| 365341 | 01r220     |   |   |   |   |     |      |      |   |
| 365342 | 01r224     |   |   |   |   |     |      |      |   |
| 365385 | 01r311     |   |   |   |   |     |      |      |   |
| 365413 | 01r361     |   |   |   |   |     |      |      |   |
| 365523 | 01r1693    |   |   |   |   |     |      |      |   |
| 365528 | Trim40     |   |   |   |   |     |      |      |   |
| 365547 | RGD1561557 | 1 | 0 | 0 | 0 | 0   | 0    | 0    | 0 |
| 365549 | RGD1563815 |   |   |   |   |     |      |      |   |
| 365577 | RGD1559810 |   |   |   |   |     |      |      |   |
| 365791 | LOC365791  |   |   |   |   |     |      |      |   |
| 365854 | Tdpoz1     |   |   |   |   |     |      |      |   |
| 365885 | 01r390     | 0 | 0 | 0 | 0 | 0   | 1    | 0    | 0 |
| 365963 | Lhx8       |   |   |   |   |     |      |      |   |
| 366008 | Lcn8       |   |   |   |   |     |      |      |   |
| 366024 | 01r395     |   |   |   |   |     |      |      |   |
| 366026 | 01r399     |   |   |   |   |     |      |      |   |
| 366082 | Hoxd12     |   |   |   |   |     |      |      |   |
| 366099 | 01r482     |   |   |   |   |     |      |      |   |
| 366100 | 01r522     |   |   |   |   |     |      |      |   |
| 366102 | 01r532     |   |   |   |   |     |      |      |   |
| 366103 | 01r536     |   |   |   |   |     |      |      |   |
| 366104 | 01r541     |   |   |   |   |     |      |      |   |
| 366105 | 01r542     |   |   |   |   |     |      |      |   |
| 366108 | 01r577     |   |   |   |   |     |      |      |   |
| 366109 | 01r578     |   |   |   |   |     |      |      |   |
| 366111 | 01r690     |   |   |   |   |     |      |      |   |
| 366112 | 01r705     |   |   |   |   |     |      |      |   |



|        |            |      |      |      |      |      |   |   |   |
|--------|------------|------|------|------|------|------|---|---|---|
| 366113 | 01r710     |      |      |      |      |      |   |   |   |
| 366114 | 01r722     |      |      |      |      |      |   |   |   |
| 366115 | 01r724     |      |      |      |      |      |   |   |   |
| 366118 | 01r736     |      |      |      |      |      |   |   |   |
| 366120 | 01r741     |      |      |      |      |      |   |   |   |
| 366121 | 01r742     |      |      |      |      |      |   |   |   |
| 366122 | 01r744     |      |      |      |      |      |   |   |   |
| 366123 | 01r745     |      |      |      |      |      |   |   |   |
| 366151 | 01r777     |      |      |      |      |      |   |   |   |
| 366152 | 01r791     |      |      |      |      |      |   |   |   |
| 366158 | Tmco5b     | 0    | 0    | 1    | 0    | 0    | 0 | 0 | 0 |
| 366213 | Nkx2-4     |      |      |      |      |      |   |   |   |
| 366219 | Cst5       |      |      |      |      |      |   |   |   |
| 366244 | Gtsf11     |      |      |      |      |      |   |   |   |
| 366362 | 01r838     |      |      |      |      |      |   |   |   |
| 366441 | Slc5a9     | 1    | 0    | 0    | 0    | 0    | 0 | 0 | 0 |
| 366456 | 01r857     | 0    | 0    | 0    | 0    | 0    | 0 | 1 | 0 |
| 366457 | 01r858     |      |      |      |      |      |   |   |   |
| 366458 | 01r859     |      |      |      |      |      |   |   |   |
| 366498 | RGD1559644 |      |      |      |      |      |   |   |   |
| 366567 | Dna.jc5g   |      |      |      |      |      |   |   |   |
| 366668 | Gphb5      | 0    | 0    | 0    | 1    | 0    | 0 | 0 | 0 |
| 366793 | 01r879     |      |      |      |      |      |   |   |   |
| 366797 | 01r916     |      |      |      |      |      |   |   |   |
| 366798 | 01r921     |      |      |      |      |      |   |   |   |
| 366799 | 01r927     |      |      |      |      |      |   |   |   |
| 366803 | 01r937     |      |      |      |      |      |   |   |   |
| 366804 | 01r960     |      |      |      |      |      |   |   |   |
| 366810 | 01r987     |      |      |      |      |      |   |   |   |
| 366816 | 01r1070    |      |      |      |      |      |   |   |   |
| 366834 | 01r1081    |      |      |      |      |      |   |   |   |
| 366843 | 01r1091    |      |      |      |      |      |   |   |   |
| 366890 | Glipr112   |      |      |      |      |      |   |   |   |
| 366991 | Krt82      |      |      |      |      |      |   |   |   |
| 367012 | Ddil       |      |      |      |      |      |   |   |   |
| 367060 | 01r1230    |      |      |      |      |      |   |   |   |
| 367064 | 01r1294    |      |      |      |      |      |   |   |   |
| 367065 | 01r1295    |      |      |      |      |      |   |   |   |
| 367067 | 01r1328    |      |      |      |      |      |   |   |   |
| 367106 | Foxb1      |      |      |      |      |      |   |   |   |
| 367117 | LOC367117  |      |      |      |      |      |   |   |   |
| 367149 | RGD1561847 | 1.06 | 0    | 0    | 0    | 0    | 0 | 0 | 0 |
| 367254 | RGD1564447 | 0    | 0    | 0    | 0    | 0.35 | 0 | 0 | 0 |
| 367265 | RGD1561618 | 0    | 0    | 0    | 1.15 | 0    | 0 | 0 | 0 |
| 367321 | Slco6d1    |      |      |      |      |      |   |   |   |
| 367391 | Marco      |      |      |      |      |      |   |   |   |
| 367454 | LOC367454  | 0    | 1    | 0    | 0    | 0    | 0 | 0 | 0 |
| 367480 | Vom2r78    |      |      |      |      |      |   |   |   |
| 367515 | LOC367515  | 0    | 0    | 0.99 | 1    | 0    | 0 | 0 | 0 |
| 367734 | Hypm       |      |      |      |      |      |   |   |   |
| 367797 | RGD1563991 | 0    | 0    | 0    | 0    | 4.01 | 0 | 0 | 0 |
| 367830 | LOC367830  |      |      |      |      |      |   |   |   |
| 367858 | LOC367858  | 0    | 3.49 | 0    | 0    | 0    | 0 | 0 | 0 |
| 367869 | RGD1562039 | 0    | 0    | 0    | 0    | 0    | 0 | 0 | 1 |
| 367928 | RGD1565430 |      |      |      |      |      |   |   |   |
| 378939 | Uts2b      | 1    | 0    | 0    | 0    | 0    | 0 | 0 | 0 |

|        |          |   |   |   |   |   |   |   |   |
|--------|----------|---|---|---|---|---|---|---|---|
| 379044 | Qrfp     |   |   |   |   |   |   |   |   |
| 396551 | Ugt1a3   |   |   |   |   |   |   |   |   |
| 396552 | Ugt1a9   |   |   |   |   |   |   |   |   |
| 399475 | Adm2     | 0 | 0 | 0 | 0 | 0 | 0 | 1 | 0 |
| 399679 | Aicda    | 0 | 0 | 0 | 0 | 1 | 0 | 0 | 3 |
| 404645 | Mrgprx21 | 0 | 0 | 0 | 0 | 0 | 0 | 0 | 1 |
| 404783 | Hyal4    | 1 | 0 | 1 | 0 | 0 | 0 | 0 | 0 |
| 404788 | 01r796   |   |   |   |   |   |   |   |   |
| 404789 | 01r795   |   |   |   |   |   |   |   |   |
| 404790 | 01r788   |   |   |   |   |   |   |   |   |
| 404792 | 01r785   |   |   |   |   |   |   |   |   |
| 404793 | 01r784   |   |   |   |   |   |   |   |   |
| 404794 | 01r782   |   |   |   |   |   |   |   |   |
| 404795 | 01r780   |   |   |   |   |   |   |   |   |
| 404796 | 01r778   |   |   |   |   |   |   |   |   |
| 404797 | 01r776   |   |   |   |   |   |   |   |   |
| 404798 | 01r772   |   |   |   |   |   |   |   |   |
| 404799 | 01r771   |   |   |   |   |   |   |   |   |
| 404800 | 01r767   |   |   |   |   |   |   |   |   |
| 404802 | 01r757   |   |   |   |   |   |   |   |   |
| 404803 | 01r756   |   |   |   |   |   |   |   |   |
| 404804 | 01r749   |   |   |   |   |   |   |   |   |
| 404808 | 01r737   |   |   |   |   |   |   |   |   |
| 404809 | 01r734   |   |   |   |   |   |   |   |   |
| 404810 | 01r733   |   |   |   |   |   |   |   |   |
| 404811 | 01r727   |   |   |   |   |   |   |   |   |
| 404812 | 01r726   |   |   |   |   |   |   |   |   |
| 404813 | 01r717   |   |   |   |   |   |   |   |   |
| 404814 | 01r716   |   |   |   |   |   |   |   |   |
| 404815 | 01r715   |   |   |   |   |   |   |   |   |
| 404816 | 01r712   |   |   |   |   |   |   |   |   |
| 404817 | 01r711   |   |   |   |   |   |   |   |   |
| 404818 | 01r704   |   |   |   |   |   |   |   |   |
| 404819 | 01r701   |   |   |   |   |   |   |   |   |
| 404820 | 01r695   |   |   |   |   |   |   |   |   |
| 404821 | 01r693   |   |   |   |   |   |   |   |   |
| 404822 | 01r691   |   |   |   |   |   |   |   |   |
| 404824 | 01r681   |   |   |   |   |   |   |   |   |
| 404825 | 01r675   |   |   |   |   |   |   |   |   |
| 404826 | 01r670   |   |   |   |   |   |   |   |   |
| 404827 | 01r665   |   |   |   |   |   |   |   |   |
| 404828 | 01r660   |   |   |   |   |   |   |   |   |
| 404829 | 01r654   |   |   |   |   |   |   |   |   |
| 404830 | 01r653   |   |   |   |   |   |   |   |   |
| 404831 | 01r652   |   |   |   |   |   |   |   |   |
| 404832 | 01r650   |   |   |   |   |   |   |   |   |
| 404833 | 01r649   |   |   |   |   |   |   |   |   |
| 404834 | 01r648   | 0 | 0 | 0 | 1 | 0 | 0 | 0 | 0 |
| 404835 | 01r646   |   |   |   |   |   |   |   |   |
| 404839 | 01r641   |   |   |   |   |   |   |   |   |
| 404840 | 01r640   |   |   |   |   |   |   |   |   |
| 404841 | 01r636   |   |   |   |   |   |   |   |   |
| 404842 | 01r635   |   |   |   |   |   |   |   |   |
| 404843 | 01r634   |   |   |   |   |   |   |   |   |
| 404844 | 01r633   |   |   |   |   |   |   |   |   |
| 404846 | 01r625   |   |   |   |   |   |   |   |   |

|        |         |  |  |  |  |  |  |  |  |
|--------|---------|--|--|--|--|--|--|--|--|
| 404847 | 01r624  |  |  |  |  |  |  |  |  |
| 404848 | 01r623  |  |  |  |  |  |  |  |  |
| 404849 | 01r621  |  |  |  |  |  |  |  |  |
| 404852 | 01r613  |  |  |  |  |  |  |  |  |
| 404853 | 01r608  |  |  |  |  |  |  |  |  |
| 404855 | 01r604  |  |  |  |  |  |  |  |  |
| 404856 | 01r594  |  |  |  |  |  |  |  |  |
| 404858 | 01r590  |  |  |  |  |  |  |  |  |
| 404859 | 01r587  |  |  |  |  |  |  |  |  |
| 404860 | 01r586  |  |  |  |  |  |  |  |  |
| 404861 | 01r584  |  |  |  |  |  |  |  |  |
| 404862 | 01r582  |  |  |  |  |  |  |  |  |
| 404863 | 01r581  |  |  |  |  |  |  |  |  |
| 404866 | 01r569  |  |  |  |  |  |  |  |  |
| 404867 | 01r566  |  |  |  |  |  |  |  |  |
| 404868 | 01r563  |  |  |  |  |  |  |  |  |
| 404869 | 01r562  |  |  |  |  |  |  |  |  |
| 404870 | 01r559  |  |  |  |  |  |  |  |  |
| 404871 | 01r557  |  |  |  |  |  |  |  |  |
| 404872 | 01r551  |  |  |  |  |  |  |  |  |
| 404874 | 01r537  |  |  |  |  |  |  |  |  |
| 404875 | 01r535  |  |  |  |  |  |  |  |  |
| 404876 | 01r533  |  |  |  |  |  |  |  |  |
| 404877 | 01r529  |  |  |  |  |  |  |  |  |
| 404878 | 01r527  |  |  |  |  |  |  |  |  |
| 404879 | 01r518  |  |  |  |  |  |  |  |  |
| 404880 | 01r508  |  |  |  |  |  |  |  |  |
| 404881 | 01r507  |  |  |  |  |  |  |  |  |
| 404882 | 01r505  |  |  |  |  |  |  |  |  |
| 404884 | 01r500  |  |  |  |  |  |  |  |  |
| 404885 | 01r496  |  |  |  |  |  |  |  |  |
| 404887 | 01r486  |  |  |  |  |  |  |  |  |
| 404888 | 01r483  |  |  |  |  |  |  |  |  |
| 404889 | 01r481  |  |  |  |  |  |  |  |  |
| 404890 | 01r480  |  |  |  |  |  |  |  |  |
| 404891 | 01r475  |  |  |  |  |  |  |  |  |
| 404892 | 01r456  |  |  |  |  |  |  |  |  |
| 404893 | 01r436  |  |  |  |  |  |  |  |  |
| 404895 | 01r32   |  |  |  |  |  |  |  |  |
| 404896 | 01r29   |  |  |  |  |  |  |  |  |
| 404897 | 01r25   |  |  |  |  |  |  |  |  |
| 404898 | 01r24   |  |  |  |  |  |  |  |  |
| 404899 | 01r16   |  |  |  |  |  |  |  |  |
| 404901 | 01r14   |  |  |  |  |  |  |  |  |
| 404902 | 01r1845 |  |  |  |  |  |  |  |  |
| 404903 | 01r1067 |  |  |  |  |  |  |  |  |
| 404904 | 01r1060 |  |  |  |  |  |  |  |  |
| 404920 | 01r1014 |  |  |  |  |  |  |  |  |
| 404924 | 01r996  |  |  |  |  |  |  |  |  |
| 404929 | 01r982  |  |  |  |  |  |  |  |  |
| 404938 | 01r954  |  |  |  |  |  |  |  |  |
| 404948 | 01r922  |  |  |  |  |  |  |  |  |
| 404951 | 01r906  |  |  |  |  |  |  |  |  |
| 404956 | 01r877  |  |  |  |  |  |  |  |  |
| 404958 | 01r1084 |  |  |  |  |  |  |  |  |
| 404959 | 01r1083 |  |  |  |  |  |  |  |  |

|        |         |   |   |   |     |   |   |   |   |
|--------|---------|---|---|---|-----|---|---|---|---|
| 404960 | 01r1079 |   |   |   |     |   |   |   |   |
| 404961 | 01r1076 |   |   |   |     |   |   |   |   |
| 404962 | 01r1523 |   |   |   |     |   |   |   |   |
| 404963 | 01r1520 |   |   |   |     |   |   |   |   |
| 404967 | 01r1501 |   |   |   |     |   |   |   |   |
| 404968 | 01r1496 |   |   |   |     |   |   |   |   |
| 404969 | 01r1491 |   |   |   |     |   |   |   |   |
| 404970 | 01r1490 |   |   |   |     |   |   |   |   |
| 404971 | 01r1488 |   |   |   |     |   |   |   |   |
| 404972 | 01r1486 |   |   |   |     |   |   |   |   |
| 404973 | 01r1479 | 0 | 0 | 0 | 0.5 | 0 | 0 | 0 | 0 |
| 404974 | 01r1471 |   |   |   |     |   |   |   |   |
| 404975 | 01r1470 |   |   |   |     |   |   |   |   |
| 404976 | 01r1469 |   |   |   |     |   |   |   |   |
| 404977 | 01r1468 |   |   |   |     |   |   |   |   |
| 404978 | 01r1558 |   |   |   |     |   |   |   |   |
| 404980 | 01r1555 |   |   |   |     |   |   |   |   |
| 404981 | 01r1551 |   |   |   |     |   |   |   |   |
| 404983 | 01r1541 |   |   |   |     |   |   |   |   |
| 404986 | 01r278  |   |   |   |     |   |   |   |   |
| 404988 | 01r271  |   |   |   |     |   |   |   |   |
| 404989 | 01r268  |   |   |   |     |   |   |   |   |
| 404992 | 01r241  |   |   |   |     |   |   |   |   |
| 404994 | 01r213  |   |   |   |     |   |   |   |   |
| 404995 | 01r209  |   |   |   |     |   |   |   |   |
| 404998 | 01r164  |   |   |   |     |   |   |   |   |
| 404999 | 01r160  |   |   |   |     |   |   |   |   |
| 405001 | 01r150  |   |   |   |     |   |   |   |   |
| 405003 | 01r137  |   |   |   |     |   |   |   |   |
| 405004 | 01r125  |   |   |   |     |   |   |   |   |
| 405006 | 01r111  |   |   |   |     |   |   |   |   |
| 405007 | 01r110  | 0 | 1 | 0 | 0   | 0 | 0 | 0 | 0 |
| 405009 | 01r101  |   |   |   |     |   |   |   |   |
| 405015 | 01r72   |   |   |   |     |   |   |   |   |
| 405017 | 01r60   |   |   |   |     |   |   |   |   |
| 405018 | 01r57   |   |   |   |     |   |   |   |   |
| 405021 | 01r1351 |   |   |   |     |   |   |   |   |
| 405022 | 01r1350 |   |   |   |     |   |   |   |   |
| 405025 | 01r363  |   |   |   |     |   |   |   |   |
| 405026 | 01r360  |   |   |   |     |   |   |   |   |
| 405027 | 01r358  |   |   |   |     |   |   |   |   |
| 405030 | 01r348  |   |   |   |     |   |   |   |   |
| 405031 | 01r347  |   |   |   |     |   |   |   |   |
| 405032 | 01r336  | 0 | 2 | 0 | 1   | 0 | 0 | 0 | 0 |
| 405034 | 01r330  |   |   |   |     |   |   |   |   |
| 405036 | 01r322  |   |   |   |     |   |   |   |   |
| 405039 | 01r310  |   |   |   |     |   |   |   |   |
| 405040 | 01r306  |   |   |   |     |   |   |   |   |
| 405041 | 01r289  |   |   |   |     |   |   |   |   |
| 405043 | 01r7    |   |   |   |     |   |   |   |   |
| 405044 | 01r1460 |   |   |   |     |   |   |   |   |
| 405045 | 01r1459 |   |   |   |     |   |   |   |   |
| 405046 | 01r1455 |   |   |   |     |   |   |   |   |
| 405047 | 01r1453 |   |   |   |     |   |   |   |   |
| 405049 | 01r1450 |   |   |   |     |   |   |   |   |
| 405050 | 01r1449 |   |   |   |     |   |   |   |   |

|        |         |   |   |   |   |   |   |      |   |
|--------|---------|---|---|---|---|---|---|------|---|
| 405051 | 0lr1442 |   |   |   |   |   |   |      |   |
| 405053 | 0lr1435 |   |   |   |   |   |   |      |   |
| 405054 | 0lr1431 |   |   |   |   |   |   |      |   |
| 405056 | 0lr1424 |   |   |   |   |   |   |      |   |
| 405057 | 0lr1421 |   |   |   |   |   |   |      |   |
| 405059 | 0lr1415 |   |   |   |   |   |   |      |   |
| 405060 | 0lr1414 | 0 | 0 | 0 | 0 | 0 | 1 | 0    | 0 |
| 405061 | 0lr1411 |   |   |   |   |   |   |      |   |
| 405062 | 0lr1410 |   |   |   |   |   |   |      |   |
| 405063 | 0lr1408 |   |   |   |   |   |   |      |   |
| 405064 | 0lr1406 |   |   |   |   |   |   |      |   |
| 405065 | 0lr1404 | 0 | 0 | 0 | 0 | 0 | 0 | 1    | 0 |
| 405071 | 0lr131  |   |   |   |   |   |   |      |   |
| 405073 | 0lr1338 |   |   |   |   |   |   |      |   |
| 405074 | 0lr1331 |   |   |   |   |   |   |      |   |
| 405075 | 0lr1329 |   |   |   |   |   |   |      |   |
| 405076 | 0lr1321 |   |   |   |   |   |   |      |   |
| 405077 | 0lr1316 |   |   |   |   |   |   |      |   |
| 405078 | 0lr1313 |   |   |   |   |   |   |      |   |
| 405079 | 0lr1308 |   |   |   |   |   |   |      |   |
| 405080 | 0lr1303 |   |   |   |   |   |   |      |   |
| 405081 | 0lr1291 |   |   |   |   |   |   |      |   |
| 405082 | 0lr1288 |   |   |   |   |   |   |      |   |
| 405084 | 0lr1286 |   |   |   |   |   |   |      |   |
| 405085 | 0lr1275 | 0 | 0 | 0 | 0 | 0 | 0 | 0.14 | 0 |
| 405086 | 0lr1274 |   |   |   |   |   |   |      |   |
| 405088 | 0lr1266 |   |   |   |   |   |   |      |   |
| 405089 | 0lr1262 |   |   |   |   |   |   |      |   |
| 405090 | 0lr1261 |   |   |   |   |   |   |      |   |
| 405091 | 0lr1253 |   |   |   |   |   |   |      |   |
| 405092 | 0lr1250 |   |   |   |   |   |   |      |   |
| 405093 | 0lr1247 |   |   |   |   |   |   |      |   |
| 405094 | 0lr1246 |   |   |   |   |   |   |      |   |
| 405095 | 0lr1245 |   |   |   |   |   |   |      |   |
| 405096 | 0lr1244 |   |   |   |   |   |   |      |   |
| 405097 | 0lr1239 |   |   |   |   |   |   |      |   |
| 405099 | 0lr1231 |   |   |   |   |   |   |      |   |
| 405100 | 0lr1220 | 0 | 0 | 0 | 0 | 0 | 1 | 0    | 0 |
| 405101 | 0lr1213 |   |   |   |   |   |   |      |   |
| 405105 | 0lr1202 |   |   |   |   |   |   |      |   |
| 405106 | 0lr1201 |   |   |   |   |   |   |      |   |
| 405107 | 0lr1199 |   |   |   |   |   |   |      |   |
| 405108 | 0lr1194 |   |   |   |   |   |   |      |   |
| 405111 | 0lr860  |   |   |   |   |   |   |      |   |
| 405112 | 0lr427  |   |   |   |   |   |   |      |   |
| 405113 | 0lr421  |   |   |   |   |   |   |      |   |
| 405114 | 0lr418  |   |   |   |   |   |   |      |   |
| 405115 | 0lr413  |   |   |   |   |   |   |      |   |
| 405116 | 0lr409  |   |   |   |   |   |   |      |   |
| 405117 | 0lr407  |   |   |   |   |   |   |      |   |
| 405118 | 0lr401  |   |   |   |   |   |   |      |   |
| 405119 | 0lr398  |   |   |   |   |   |   |      |   |
| 405120 | 0lr396  |   |   |   |   |   |   |      |   |
| 405121 | 0lr1642 |   |   |   |   |   |   |      |   |
| 405122 | 0lr1639 | 1 | 1 | 0 | 0 | 0 | 0 | 0    | 0 |
| 405123 | 0lr1638 | 0 | 1 | 0 | 0 | 0 | 0 | 0    | 0 |

|        |         |   |   |   |      |   |     |   |   |
|--------|---------|---|---|---|------|---|-----|---|---|
| 405124 | 01r1633 |   |   |   |      |   |     |   |   |
| 405125 | 01r1632 |   |   |   |      |   |     |   |   |
| 405126 | 01r1631 |   |   |   |      |   |     |   |   |
| 405127 | 01r1622 |   |   |   |      |   |     |   |   |
| 405128 | 01r1617 |   |   |   |      |   |     |   |   |
| 405129 | 01r1616 |   |   |   |      |   |     |   |   |
| 405130 | 01r1614 |   |   |   |      |   |     |   |   |
| 405131 | 01r821  |   |   |   |      |   |     |   |   |
| 405132 | 01r819  |   |   |   |      |   |     |   |   |
| 405133 | 01r818  |   |   |   |      |   |     |   |   |
| 405134 | 01r816  |   |   |   |      |   |     |   |   |
| 405136 | 01r813  |   |   |   |      |   |     |   |   |
| 405137 | 01r812  |   |   |   |      |   |     |   |   |
| 405138 | 01r811  |   |   |   |      |   |     |   |   |
| 405139 | 01r809  |   |   |   |      |   |     |   |   |
| 405140 | 01r808  |   |   |   |      |   |     |   |   |
| 405141 | 01r807  |   |   |   |      |   |     |   |   |
| 405143 | 01r803  |   |   |   |      |   |     |   |   |
| 405144 | 01r799  |   |   |   |      |   |     |   |   |
| 405146 | 01r844  |   |   |   |      |   |     |   |   |
| 405147 | 01r386  |   |   |   |      |   |     |   |   |
| 405148 | 01r1380 |   |   |   |      |   |     |   |   |
| 405150 | 01r1364 |   |   |   |      |   |     |   |   |
| 405155 | 01r1186 |   |   |   |      |   |     |   |   |
| 405158 | 01r1179 |   |   |   |      |   |     |   |   |
| 405164 | 01r1166 |   |   |   |      |   |     |   |   |
| 405165 | 01r1165 |   |   |   |      |   |     |   |   |
| 405166 | 01r1163 |   |   |   |      |   |     |   |   |
| 405167 | 01r1162 | 1 | 0 | 0 | 0    | 0 | 0   | 0 | 0 |
| 405168 | 01r1159 | 0 | 0 | 0 | 0    | 0 | 1   | 0 | 0 |
| 405169 | 01r1158 | 0 | 0 | 0 | 0    | 0 | 1   | 1 | 0 |
| 405171 | 01r1156 |   |   |   |      |   |     |   |   |
| 405172 | 01r1149 |   |   |   |      |   |     |   |   |
| 405173 | 01r1148 |   |   |   |      |   |     |   |   |
| 405174 | 01r1144 |   |   |   |      |   |     |   |   |
| 405175 | 01r1142 |   |   |   |      |   |     |   |   |
| 405177 | 01r1135 |   |   |   |      |   |     |   |   |
| 405178 | 01r1129 |   |   |   |      |   |     |   |   |
| 405179 | 01r1126 |   |   |   |      |   |     |   |   |
| 405180 | 01r1125 |   |   |   |      |   |     |   |   |
| 405181 | 01r1122 |   |   |   |      |   |     |   |   |
| 405182 | 01r1118 |   |   |   |      |   |     |   |   |
| 405183 | 01r1117 |   |   |   |      |   |     |   |   |
| 405185 | 01r1115 |   |   |   |      |   |     |   |   |
| 405186 | 01r1710 |   |   |   |      |   |     |   |   |
| 405188 | 01r1705 | 0 | 0 | 0 | 0    | 0 | 0   | 1 | 0 |
| 405189 | 01r1692 |   |   |   |      |   |     |   |   |
| 405190 | 01r1689 |   |   |   |      |   |     |   |   |
| 405191 | 01r1682 |   |   |   |      |   |     |   |   |
| 405192 | 01r1680 |   |   |   |      |   |     |   |   |
| 405193 | 01r1679 |   |   |   |      |   |     |   |   |
| 405194 | 01r1678 |   |   |   |      |   |     |   |   |
| 405196 | 01r1675 |   |   |   |      |   |     |   |   |
| 405198 | 01r1670 |   |   |   |      |   |     |   |   |
| 405202 | 01r1739 | 0 | 0 | 0 | 0    | 0 | 0.5 | 0 | 0 |
| 405203 | 01r1736 | 0 | 0 | 0 | 0.67 | 0 | 0   | 0 | 0 |



|        |         |   |   |   |     |   |   |   |   |
|--------|---------|---|---|---|-----|---|---|---|---|
| 405204 | 01r1726 | 0 | 1 | 0 | 0   | 0 | 0 | 0 | 0 |
| 405205 | 01r1718 |   |   |   |     |   |   |   |   |
| 405208 | 01r832  |   |   |   |     |   |   |   |   |
| 405209 | 01r831  |   |   |   |     |   |   |   |   |
| 405210 | 01r830  |   |   |   |     |   |   |   |   |
| 405211 | 01r829  | 0 | 0 | 1 | 0   | 0 | 0 | 0 | 0 |
| 405212 | 01r827  | 0 | 0 | 0 | 0   | 1 | 0 | 0 | 0 |
| 405213 | 01r826  | 0 | 0 | 0 | 0   | 2 | 0 | 0 | 0 |
| 405214 | 01r825  |   |   |   |     |   |   |   |   |
| 405215 | 01r824  |   |   |   |     |   |   |   |   |
| 405218 | 01r1565 | 0 | 0 | 0 | 1   | 0 | 0 | 0 | 0 |
| 405219 | 01r1602 |   |   |   |     |   |   |   |   |
| 405221 | 01r1598 |   |   |   |     |   |   |   |   |
| 405222 | 01r1597 |   |   |   |     |   |   |   |   |
| 405223 | 01r1591 |   |   |   |     |   |   |   |   |
| 405227 | 01r392  |   |   |   |     |   |   |   |   |
| 405230 | 01r790  |   |   |   |     |   |   |   |   |
| 405231 | 01r786  |   |   |   |     |   |   |   |   |
| 405232 | 01r779  |   |   |   |     |   |   |   |   |
| 405233 | 01r774  |   |   |   |     |   |   |   |   |
| 405234 | 01r768  |   |   |   |     |   |   |   |   |
| 405237 | 01r753  |   |   |   |     |   |   |   |   |
| 405238 | 01r735  |   |   |   |     |   |   |   |   |
| 405239 | 01r714  |   |   |   |     |   |   |   |   |
| 405242 | 01r666  |   |   |   |     |   |   |   |   |
| 405243 | 01r661  |   |   |   |     |   |   |   |   |
| 405245 | 01r611  |   |   |   |     |   |   |   |   |
| 405246 | 01r606  |   |   |   |     |   |   |   |   |
| 405248 | 01r583  |   |   |   |     |   |   |   |   |
| 405249 | 01r556  |   |   |   |     |   |   |   |   |
| 405251 | 01r499  |   |   |   |     |   |   |   |   |
| 405252 | 01r491  |   |   |   |     |   |   |   |   |
| 405253 | 01r490  |   |   |   |     |   |   |   |   |
| 405255 | 01r463  |   |   |   |     |   |   |   |   |
| 405257 | 01r36   |   |   |   |     |   |   |   |   |
| 405258 | 01r27   |   |   |   |     |   |   |   |   |
| 405261 | 01r17   |   |   |   |     |   |   |   |   |
| 405277 | 01r894  |   |   |   |     |   |   |   |   |
| 405280 | 01r1077 |   |   |   |     |   |   |   |   |
| 405281 | 01r1500 |   |   |   |     |   |   |   |   |
| 405285 | 01r1474 |   |   |   |     |   |   |   |   |
| 405286 | 01r1472 | 0 | 0 | 0 | 0.5 | 0 | 0 | 0 | 0 |
| 405287 | 01r1535 |   |   |   |     |   |   |   |   |
| 405290 | 01r260  |   |   |   |     |   |   |   |   |
| 405291 | 01r255  |   |   |   |     |   |   |   |   |
| 405293 | 01r194  |   |   |   |     |   |   |   |   |
| 405294 | 01r179  | 0 | 0 | 0 | 0   | 1 | 0 | 0 | 0 |
| 405295 | 01r162  |   |   |   |     |   |   |   |   |
| 405297 | 01r114  |   |   |   |     |   |   |   |   |
| 405298 | 01r109  |   |   |   |     |   |   |   |   |
| 405301 | 01r1352 |   |   |   |     |   |   |   |   |
| 405303 | 01r339  |   |   |   |     |   |   |   |   |
| 405304 | 01r308  |   |   |   |     |   |   |   |   |
| 405305 | 01r1456 |   |   |   |     |   |   |   |   |
| 405306 | 01r1451 |   |   |   |     |   |   |   |   |
| 405307 | 01r1445 |   |   |   |     |   |   |   |   |

|        |         |   |   |     |   |   |   |   |   |
|--------|---------|---|---|-----|---|---|---|---|---|
| 405311 | 01r1305 |   |   |     |   |   |   |   |   |
| 405312 | 01r1292 |   |   |     |   |   |   |   |   |
| 405313 | 01r1279 |   |   |     |   |   |   |   |   |
| 405314 | 01r1260 |   |   |     |   |   |   |   |   |
| 405315 | 01r1237 |   |   |     |   |   |   |   |   |
| 405316 | 01r1228 |   |   |     |   |   |   |   |   |
| 405318 | 01r1219 |   |   |     |   |   |   |   |   |
| 405319 | 01r1200 |   |   |     |   |   |   |   |   |
| 405321 | 01r419  |   |   |     |   |   |   |   |   |
| 405322 | 01r410  |   |   |     |   |   |   |   |   |
| 405325 | 01r1635 |   |   |     |   |   |   |   |   |
| 405326 | 01r1625 |   |   |     |   |   |   |   |   |
| 405328 | 01r1609 |   |   |     |   |   |   |   |   |
| 405329 | 01r820  |   |   |     |   |   |   |   |   |
| 405330 | 01r810  |   |   |     |   |   |   |   |   |
| 405331 | 01r806  |   |   |     |   |   |   |   |   |
| 405332 | 01r802  |   |   |     |   |   |   |   |   |
| 405333 | 01r1374 |   |   |     |   |   |   |   |   |
| 405334 | 01r1370 |   |   |     |   |   |   |   |   |
| 405337 | 01r1185 |   |   |     |   |   |   |   |   |
| 405339 | 01r1172 |   |   |     |   |   |   |   |   |
| 405340 | 01r1164 |   |   |     |   |   |   |   |   |
| 405341 | 01r1160 | 0 | 0 | 0   | 1 | 0 | 0 | 0 | 0 |
| 405344 | 01r1132 |   |   |     |   |   |   |   |   |
| 405345 | 01r1128 |   |   |     |   |   |   |   |   |
| 405346 | 01r1119 |   |   |     |   |   |   |   |   |
| 405351 | 01r828  |   |   |     |   |   |   |   |   |
| 405352 | 01r823  |   |   |     |   |   |   |   |   |
| 405353 | 01r1108 |   |   |     |   |   |   |   |   |
| 405355 | 01r1590 |   |   |     |   |   |   |   |   |
| 405356 | 01r766  |   |   |     |   |   |   |   |   |
| 405357 | 01r689  |   |   |     |   |   |   |   |   |
| 405362 | 01r1073 |   |   |     |   |   |   |   |   |
| 405363 | 01r264  |   |   |     |   |   |   |   |   |
| 405364 | 01r161  |   |   |     |   |   |   |   |   |
| 405365 | 01r46   |   |   |     |   |   |   |   |   |
| 405366 | 01r378  |   |   |     |   |   |   |   |   |
| 405368 | 01r1417 |   |   |     |   |   |   |   |   |
| 405371 | 01r1615 |   |   |     |   |   |   |   |   |
| 405372 | 01r801  | 0 | 0 | 0   | 0 | 0 | 1 | 0 | 0 |
| 405373 | 01r1171 |   |   |     |   |   |   |   |   |
| 405374 | 01r1681 |   |   |     |   |   |   |   |   |
| 405375 | 01r1664 | 1 | 0 | 0   | 0 | 0 | 0 | 0 | 0 |
| 405378 | 01r53   |   |   |     |   |   |   |   |   |
| 405383 | 01r1560 |   |   |     |   |   |   |   |   |
| 405384 | 01r283  |   |   |     |   |   |   |   |   |
| 405386 | 01r1405 |   |   |     |   |   |   |   |   |
| 405387 | 01r1238 |   |   |     |   |   |   |   |   |
| 405388 | 01r402  |   |   |     |   |   |   |   |   |
| 405389 | 01r1629 |   |   |     |   |   |   |   |   |
| 405390 | 01r1174 |   |   |     |   |   |   |   |   |
| 405391 | 01r1143 |   |   |     |   |   |   |   |   |
| 405392 | 01r205  | 0 | 0 | 0.5 | 0 | 0 | 0 | 0 | 0 |
| 405393 | 01r349  |   |   |     |   |   |   |   |   |
| 405396 | 01r1249 |   |   |     |   |   |   |   |   |
| 405398 | 01r1384 |   |   |     |   |   |   |   |   |

|        |         |   |   |     |   |   |   |   |   |
|--------|---------|---|---|-----|---|---|---|---|---|
| 405904 | 01r51   |   |   |     |   |   |   |   |   |
| 405906 | 01r61   | 0 | 0 | 0.5 | 0 | 0 | 0 | 0 | 0 |
| 405907 | 01r77   | 1 | 0 | 0   | 0 | 0 | 0 | 0 | 0 |
| 405908 | 01r94   |   |   |     |   |   |   |   |   |
| 405909 | 01r95   |   |   |     |   |   |   |   |   |
| 405910 | 01r96   |   |   |     |   |   |   |   |   |
| 405911 | 01r127  |   |   |     |   |   |   |   |   |
| 405912 | 01r129  |   |   |     |   |   |   |   |   |
| 405913 | 01r135  |   |   |     |   |   |   |   |   |
| 405914 | 01r174  |   |   |     |   |   |   |   |   |
| 405915 | 01r175  |   |   |     |   |   |   |   |   |
| 405916 | 01r181  |   |   |     |   |   |   |   |   |
| 405917 | 01r186  |   |   |     |   |   |   |   |   |
| 405918 | 01r188  |   |   |     |   |   |   |   |   |
| 405919 | 01r198  |   |   |     |   |   |   |   |   |
| 405920 | 01r199  |   |   |     |   |   |   |   |   |
| 405921 | 01r232  |   |   |     |   |   |   |   |   |
| 405923 | 01r250  |   |   |     |   |   |   |   |   |
| 405924 | 01r257  |   |   |     |   |   |   |   |   |
| 405925 | 01r304  |   |   |     |   |   |   |   |   |
| 405926 | 01r313  |   |   |     |   |   |   |   |   |
| 405927 | 01r334  |   |   |     |   |   |   |   |   |
| 405928 | 01r341  |   |   |     |   |   |   |   |   |
| 405929 | 01r344  |   |   |     |   |   |   |   |   |
| 405931 | 01r354  |   |   |     |   |   |   |   |   |
| 405932 | 01r365  |   |   |     |   |   |   |   |   |
| 405933 | 01r367  |   |   |     |   |   |   |   |   |
| 405934 | 01r372  |   |   |     |   |   |   |   |   |
| 405935 | 01r374  |   |   |     |   |   |   |   |   |
| 405936 | 01r445  |   |   |     |   |   |   |   |   |
| 405937 | 01r446  |   |   |     |   |   |   |   |   |
| 405939 | 01r531  |   |   |     |   |   |   |   |   |
| 405940 | 01r544  |   |   |     |   |   |   |   |   |
| 405941 | 01r545  |   |   |     |   |   |   |   |   |
| 405942 | 01r546  |   |   |     |   |   |   |   |   |
| 405943 | 01r552  |   |   |     |   |   |   |   |   |
| 405944 | 01r596  |   |   |     |   |   |   |   |   |
| 405946 | 01r629  |   |   |     |   |   |   |   |   |
| 405947 | 01r630  |   |   |     |   |   |   |   |   |
| 405948 | 01r662  |   |   |     |   |   |   |   |   |
| 405949 | 01r671  |   |   |     |   |   |   |   |   |
| 405950 | 01r677  |   |   |     |   |   |   |   |   |
| 405951 | 01r696  |   |   |     |   |   |   |   |   |
| 405952 | 01r697  |   |   |     |   |   |   |   |   |
| 405953 | 01r707  |   |   |     |   |   |   |   |   |
| 405954 | 01r709  |   |   |     |   |   |   |   |   |
| 405955 | 01r720  |   |   |     |   |   |   |   |   |
| 405956 | 01r747  |   |   |     |   |   |   |   |   |
| 405957 | 01r760  |   |   |     |   |   |   |   |   |
| 405961 | 01r862  |   |   |     |   |   |   |   |   |
| 405963 | 01r964  |   |   |     |   |   |   |   |   |
| 405964 | 01r984  |   |   |     |   |   |   |   |   |
| 405965 | 01r1022 |   |   |     |   |   |   |   |   |
| 405966 | 01r1064 |   |   |     |   |   |   |   |   |
| 405967 | 01r1068 |   |   |     |   |   |   |   |   |
| 405969 | 01r1137 |   |   |     |   |   |   |   |   |

|        |         |      |   |   |   |   |   |      |   |
|--------|---------|------|---|---|---|---|---|------|---|
| 405970 | 01r1138 |      |   |   |   |   |   |      |   |
| 405971 | 01r1195 |      |   |   |   |   |   |      |   |
| 405972 | 01r1203 |      |   |   |   |   |   |      |   |
| 405974 | 01r1225 | 0    | 0 | 0 | 0 | 1 | 1 | 1    | 1 |
| 405975 | 01r1233 |      |   |   |   |   |   |      |   |
| 405977 | 01r1256 |      |   |   |   |   |   |      |   |
| 405980 | 01r1318 | 0.99 | 0 | 0 | 0 | 0 | 0 | 0    | 0 |
| 405983 | 01r1391 |      |   |   |   |   |   |      |   |
| 405984 | 01r1392 |      |   |   |   |   |   |      |   |
| 405985 | 01r1394 |      |   |   |   |   |   |      |   |
| 405986 | 01r1395 |      |   |   |   |   |   |      |   |
| 405987 | 01r1396 |      |   |   |   |   |   |      |   |
| 405988 | 01r1397 |      |   |   |   |   |   |      |   |
| 405990 | 01r1399 |      |   |   |   |   |   |      |   |
| 405991 | 01r1400 |      |   |   |   |   |   |      |   |
| 405994 | 01r1515 |      |   |   |   |   |   |      |   |
| 405995 | 01r1528 |      |   |   |   |   |   |      |   |
| 405996 | 01r1529 | 0    | 0 | 0 | 0 | 0 | 0 | 0    | 1 |
| 405998 | 01r1531 |      |   |   |   |   |   |      |   |
| 406000 | 01r1543 |      |   |   |   |   |   |      |   |
| 406001 | 01r1545 |      |   |   |   |   |   |      |   |
| 406002 | 01r1546 |      |   |   |   |   |   |      |   |
| 406003 | 01r1547 |      |   |   |   |   |   |      |   |
| 406004 | 01r1548 |      |   |   |   |   |   |      |   |
| 406008 | 01r1694 |      |   |   |   |   |   |      |   |
| 406010 | 01r1697 |      |   |   |   |   |   |      |   |
| 406011 | 01r1699 |      |   |   |   |   |   |      |   |
| 406012 | 01r1700 |      |   |   |   |   |   |      |   |
| 406013 | 01r1701 | 0    | 0 | 0 | 0 | 0 | 0 | 0    | 1 |
| 406014 | 01r1707 |      |   |   |   |   |   |      |   |
| 406015 | 01r1720 | 1    | 0 | 0 | 0 | 0 | 0 | 0    | 0 |
| 406016 | 01r1722 | 0    | 0 | 0 | 1 | 0 | 0 | 0    | 0 |
| 406021 | 01r1197 |      |   |   |   |   |   |      |   |
| 406024 | 01r1347 |      |   |   |   |   |   |      |   |
| 406035 | 01r1652 | 0    | 0 | 0 | 0 | 0 | 0 | 1    | 0 |
| 406044 | 01r444  |      |   |   |   |   |   |      |   |
| 406045 | 01r468  |      |   |   |   |   |   |      |   |
| 406046 | 01r471  |      |   |   |   |   |   |      |   |
| 406050 | 01r595  |      |   |   |   |   |   |      |   |
| 406053 | 01r637  |      |   |   |   |   |   |      |   |
| 406194 | RT1-T18 | 0    | 0 | 0 | 0 | 0 | 0 | 0.69 | 0 |
| 406199 | Muc13   |      |   |   |   |   |   |      |   |
| 407759 | Kb23    |      |   |   |   |   |   |      |   |
| 407761 | Krt81   | 0    | 0 | 0 | 0 | 0 | 0 | 1    | 0 |
| 408030 | 01r1868 |      |   |   |   |   |   |      |   |
| 408201 | Ctsql2  |      |   |   |   |   |   |      |   |
| 408202 | Abhd12b |      |   |   |   |   |   |      |   |
| 408204 | Prss58  |      |   |   |   |   |   |      |   |
| 408205 | Tryx5   | 0    | 0 | 1 | 0 | 0 | 0 | 0    | 0 |
| 408208 | Mcpt411 | 0    | 0 | 0 | 0 | 0 | 1 | 0    | 0 |
| 408209 | Mcpt113 |      |   |   |   |   |   |      |   |
| 408210 | Klk4    | 0    | 0 | 0 | 0 | 1 | 0 | 0    | 0 |
| 408211 | Klk51   | 0    | 0 | 0 | 0 | 0 | 1 | 0    | 0 |
| 408214 | Stfa211 | 1    | 0 | 0 | 0 | 0 | 0 | 0    | 0 |
| 408215 | Stfa311 |      |   |   |   |   |   |      |   |
| 408224 | Slpil3  |      |   |   |   |   |   |      |   |

|        |          |      |      |   |   |      |      |   |     |
|--------|----------|------|------|---|---|------|------|---|-----|
| 408226 | Wfdc15a  |      |      |   |   |      |      |   |     |
| 408228 | Wfdc9    |      |      |   |   |      |      |   |     |
| 408231 | Spink14  |      |      |   |   |      |      |   |     |
| 408232 | Spint5p  |      |      |   |   |      |      |   |     |
| 408235 | Spink6   |      |      |   |   |      |      |   |     |
| 408236 | Mug2     | 0    | 0    | 0 | 0 | 0    | 0    | 1 | 0   |
| 408237 | Spink7   |      |      |   |   |      |      |   |     |
| 408239 | Mcpt114  | 1.02 | 1    | 0 | 0 | 0    | 0    | 0 | 0   |
| 408242 | Klklc6   |      |      |   |   |      |      |   |     |
| 408244 | Prss45   |      |      |   |   |      |      |   |     |
| 408245 | Prss46   |      |      |   |   |      |      |   |     |
| 408247 | Try10    |      |      |   |   |      |      |   |     |
| 414138 | Lcn6     | 0    | 0    | 1 | 0 | 0    | 0    | 0 | 0   |
| 414785 | RT1-M6-1 | 0    | 0    | 0 | 0 | 1.67 | 1.89 | 0 | 1.4 |
| 415052 | Sfta2    |      |      |   |   |      |      |   |     |
| 432393 | Kprp     |      |      |   |   |      |      |   |     |
| 442921 | Prm3     |      |      |   |   |      |      |   |     |
| 446171 | Smgc     |      |      |   |   |      |      |   |     |
| 450222 | Clec4b2  | 0    | 0    | 1 | 0 | 0    | 0    | 0 | 0   |
| 450226 | Ka11     | 0    | 0    | 0 | 0 | 0.99 | 0    | 0 | 0   |
| 450227 | Krt33b   |      |      |   |   |      |      |   |     |
| 450228 | Krt31    | 0    | 2    | 0 | 0 | 0    | 0    | 0 | 0   |
| 450230 | Krt32    | 0    | 0    | 0 | 0 | 0    | 1    | 0 | 0   |
| 494195 | Ly49s4   | 0    | 0.99 | 0 | 0 | 0    | 0    | 0 | 0   |
| 494224 | Fdcsp    |      |      |   |   |      |      |   |     |
| 494225 | Vomlr20  | 0    | 0    | 0 | 0 | 0    | 0    | 1 | 0   |
| 494226 | Vomlr58  |      |      |   |   |      |      |   |     |
| 494227 | Vomlr79  |      |      |   |   |      |      |   |     |
| 494228 | Vomlr109 |      |      |   |   |      |      |   |     |
| 494229 | Vomlr21  |      |      |   |   |      |      |   |     |
| 494230 | Vomlr30  |      |      |   |   |      |      |   |     |
| 494231 | Vomlr6   |      |      |   |   |      |      |   |     |
| 494234 | Vomlr1   |      |      |   |   |      |      |   |     |
| 494236 | Vomlr4   |      |      |   |   |      |      |   |     |
| 494237 | Vomlr3   |      |      |   |   |      |      |   |     |
| 494238 | Vomlr80  |      |      |   |   |      |      |   |     |
| 494239 | Vomlr70  |      |      |   |   |      |      |   |     |
| 494240 | Vomlr76  |      |      |   |   |      |      |   |     |
| 494241 | Vomlr72  |      |      |   |   |      |      |   |     |
| 494243 | Vomlr71  |      |      |   |   |      |      |   |     |
| 494245 | Vomlr26  |      |      |   |   |      |      |   |     |
| 494246 | Vomlr5   |      |      |   |   |      |      |   |     |
| 494248 | Vomlr84  | 0    | 0    | 1 | 0 | 0    | 0    | 0 | 0   |
| 494251 | Vomlr69  |      |      |   |   |      |      |   |     |
| 494252 | Vomlr22  |      |      |   |   |      |      |   |     |
| 494253 | Vomlr2   |      |      |   |   |      |      |   |     |
| 494254 | Vomlr44  |      |      |   |   |      |      |   |     |
| 494255 | Vomlr68  |      |      |   |   |      |      |   |     |
| 494256 | Vomlr40  |      |      |   |   |      |      |   |     |
| 494258 | Vomlr8   | 0    | 0    | 1 | 0 | 0    | 0    | 0 | 0   |
| 494260 | Vomlr107 |      |      |   |   |      |      |   |     |
| 494261 | Vomlr41  |      |      |   |   |      |      |   |     |
| 494262 | Vomlr74  |      |      |   |   |      |      |   |     |
| 494263 | Vomlr67  |      |      |   |   |      |      |   |     |
| 494264 | Vomlr36  |      |      |   |   |      |      |   |     |
| 494265 | Vomlr94  |      |      |   |   |      |      |   |     |

|        |           |   |   |   |   |   |   |   |   |
|--------|-----------|---|---|---|---|---|---|---|---|
| 494266 | Vomlr47   |   |   |   |   |   |   |   |   |
| 494267 | Vomlr50   |   |   |   |   |   |   |   |   |
| 494268 | Vomlr35   |   |   |   |   |   |   |   |   |
| 494269 | Vomlr49   |   |   |   |   |   |   |   |   |
| 494270 | Vomlr25   |   |   |   |   |   |   |   |   |
| 494271 | Vomlr73   |   |   |   |   |   |   |   |   |
| 494272 | Vomlr37   |   |   |   |   |   |   |   |   |
| 494273 | Vomlr78   |   |   |   |   |   |   |   |   |
| 494274 | Vomlr77   |   |   |   |   |   |   |   |   |
| 494275 | Vomlr96   |   |   |   |   |   |   |   |   |
| 494276 | Vomlr89   |   |   |   |   |   |   |   |   |
| 494277 | Vomlr56   |   |   |   |   |   |   |   |   |
| 494278 | Vomlr52   | 0 | 0 | 1 | 0 | 0 | 0 | 0 | 0 |
| 494279 | Vomlr48   |   |   |   |   |   |   |   |   |
| 494280 | Vomlr43   |   |   |   |   |   |   |   |   |
| 494281 | Vomlr51   |   |   |   |   |   |   |   |   |
| 494282 | Vomlr61   |   |   |   |   |   |   |   |   |
| 494283 | Vomlr24   |   |   |   |   |   |   |   |   |
| 494284 | Vomlr32   |   |   |   |   |   |   |   |   |
| 494286 | Vomlr46   |   |   |   |   |   |   |   |   |
| 494287 | Vomlr45   |   |   |   |   |   |   |   |   |
| 494288 | Vomlr23   | 0 | 0 | 0 | 0 | 0 | 1 | 0 | 0 |
| 494289 | Vomlr62   |   |   |   |   |   |   |   |   |
| 494290 | Vomlr59   |   |   |   |   |   |   |   |   |
| 494291 | Vomlr66   |   |   |   |   |   |   |   |   |
| 494292 | Vomlr29   |   |   |   |   |   |   |   |   |
| 494293 | Vomlr34   |   |   |   |   |   |   |   |   |
| 494294 | Vomlr98   |   |   |   |   |   |   |   |   |
| 494295 | Vomlr95   |   |   |   |   |   |   |   |   |
| 494296 | Vomlr57   |   |   |   |   |   |   |   |   |
| 494297 | Vomlr27   |   |   |   |   |   |   |   |   |
| 494298 | Vomlr19   |   |   |   |   |   |   |   |   |
| 494299 | Vomlr110  |   |   |   |   |   |   |   |   |
| 494300 | Vomlr11   |   |   |   |   |   |   |   |   |
| 494301 | Vomlr83   | 0 | 0 | 0 | 0 | 0 | 1 | 0 | 0 |
| 494302 | Vomlr10   |   |   |   |   |   |   |   |   |
| 494305 | Vomlr15   |   |   |   |   |   |   |   |   |
| 494306 | Vomlr12   |   |   |   |   |   |   |   |   |
| 494307 | Vomlr38   |   |   |   |   |   |   |   |   |
| 494308 | Vomlr28   |   |   |   |   |   |   |   |   |
| 494309 | Vomlr106  |   |   |   |   |   |   |   |   |
| 494310 | Vomlr92   |   |   |   |   |   |   |   |   |
| 494311 | Vomlr63   |   |   |   |   |   |   |   |   |
| 494312 | Vomlr31   |   |   |   |   |   |   |   |   |
| 494313 | Vomlr81   |   |   |   |   |   |   |   |   |
| 494314 | Vomlr75   |   |   |   |   |   |   |   |   |
| 494319 | Taar3     |   |   |   |   |   |   |   |   |
| 494321 | Fam115e   | 0 | 1 | 0 | 0 | 0 | 0 | 0 | 0 |
| 494527 | Scgb2b2   |   |   |   |   |   |   |   |   |
| 494528 | Scgb2b24  |   |   |   |   |   |   |   |   |
| 494535 | Taar7c    |   |   |   |   |   |   |   |   |
| 494538 | LOC494538 |   |   |   |   |   |   |   |   |
| 497041 | Ccdc7     | 0 | 0 | 0 | 0 | 0 | 1 | 0 | 0 |
| 497227 | Muc19     |   |   |   |   |   |   |   |   |
| 497229 | Ang2      |   |   |   |   |   |   |   |   |
| 497787 | Vomlr93   |   |   |   |   |   |   |   |   |



|        |            |   |      |      |   |      |     |   |     |
|--------|------------|---|------|------|---|------|-----|---|-----|
| 497873 | Prss33     | 0 | 1    | 0    | 0 | 0    | 0   | 0 | 0   |
| 497937 | Tmem102    | 0 | 0    | 0    | 0 | 0    | 0   | 1 | 0   |
| 497957 | RGD1565611 |   |      |      |   |      |     |   |     |
| 497995 | Krtap1-5   |   |      |      |   |      |     |   |     |
| 498033 | Tex19.1    |   |      |      |   |      |     |   |     |
| 498063 | Fam243a    | 0 | 0    | 1    | 0 | 0    | 0   | 0 | 0   |
| 498073 | Ccdc54     | 0 | 1    | 0    | 0 | 0    | 0   | 0 | 0   |
| 498074 | Retnlb     |   |      |      |   |      |     |   |     |
| 498075 | Trat1      | 1 | 0    | 0    | 0 | 0    | 0   | 0 | 0   |
| 498096 | Smc1       | 0 | 0    | 0    | 0 | 1    | 1.5 | 0 | 0.5 |
| 498146 | Spdye4     | 0 | 0    | 0    | 0 | 0    | 1   | 0 | 0   |
| 498155 | LOC498155  |   |      |      |   |      |     |   |     |
| 498157 | MGC112692  |   |      |      |   |      |     |   |     |
| 498165 | RGD1562319 | 0 | 1.25 | 0    | 0 | 0    | 0   | 0 | 0   |
| 498167 | RGD1566138 |   |      |      |   |      |     |   |     |
| 498198 | Cyp3a73    |   |      |      |   |      |     |   |     |
| 498209 | Serpib3a   | 0 | 0    | 0    | 0 | 1    | 1   | 2 | 0   |
| 498246 | Rgs13      |   |      |      |   |      |     |   |     |
| 498284 | Itln1      |   |      |      |   |      |     |   |     |
| 498308 | LOC498308  |   |      |      |   |      |     |   |     |
| 498311 | Fam71a     |   |      |      |   |      |     |   |     |
| 498341 | Smr3a      |   |      |      |   |      |     |   |     |
| 498344 | RGD1565664 |   |      |      |   |      |     |   |     |
| 498456 | Sntn       |   |      |      |   |      |     |   |     |
| 498460 | LOC498460  |   |      |      |   |      |     |   |     |
| 498490 | Olr1878    | 0 | 0    | 0    | 0 | 0    | 1   | 0 | 0   |
| 498575 | Hesx1      |   |      |      |   |      |     |   |     |
| 498622 | Anxa10     | 0 | 0    | 0    | 0 | 0    | 0   | 0 | 1   |
| 498633 | Helt       |   |      |      |   |      |     |   |     |
| 498654 | Adam5      | 0 | 0    | 0    | 0 | 0    | 0   | 1 | 1   |
| 498658 | Defa9      |   |      |      |   |      |     |   |     |
| 498660 | Defb52     |   |      |      |   |      |     |   |     |
| 498688 | MGC114246  |   |      |      |   |      |     |   |     |
| 498689 | RGD1564827 |   |      |      |   |      |     |   |     |
| 498719 | Stmnd1     | 0 | 0    | 0    | 0 | 0    | 2   | 2 | 0   |
| 498750 | LOC498750  | 0 | 0    | 0    | 0 | 3.36 | 0   | 0 | 0   |
| 498767 | RGD1560860 |   |      |      |   |      |     |   |     |
| 498789 | RGD1564865 | 0 | 0    | 0    | 0 | 0    | 1   | 0 | 0   |
| 498790 | Akr1c1211  |   |      |      |   |      |     |   |     |
| 498791 | Ucn3       |   |      |      |   |      |     |   |     |
| 498854 | Scgb3a2    |   |      |      |   |      |     |   |     |
| 498855 | RGD1559536 |   |      |      |   |      |     |   |     |
| 498864 | Fam170a    |   |      |      |   |      |     |   |     |
| 498866 | Znf474     |   |      |      |   |      |     |   |     |
| 498914 | RGD1564492 | 0 | 1.14 | 0.03 | 0 | 0    | 0   | 0 | 0   |
| 499097 | RGD1565655 |   |      |      |   |      |     |   |     |
| 499100 | Dmrtc2     |   |      |      |   |      |     |   |     |
| 499140 | Clnd2      |   |      |      |   |      |     |   |     |
| 499147 | Izumo2     | 0 | 0    | 0    | 0 | 0.5  | 0.5 | 0 | 0.5 |
| 499149 | Pth2       | 0 | 0    | 0    | 0 | 0    | 0   | 0 | 1   |
| 499150 | Dkk11      | 0 | 0    | 1    | 0 | 0    | 0   | 0 | 0   |
| 499151 | RGD1562492 | 1 | 0    | 0    | 0 | 0    | 0   | 0 | 0   |
| 499158 | Ccdc179    |   |      |      |   |      |     |   |     |
| 499222 | RGD1562433 |   |      |      |   |      |     |   |     |
| 499234 | Nlrp14     |   |      |      |   |      |     |   |     |
| 499235 | LOC499235  |   |      |      |   |      |     |   |     |

|        |            |      |      |   |      |      |   |   |      |
|--------|------------|------|------|---|------|------|---|---|------|
| 499237 | RGD1562400 |      |      |   |      |      |   |   |      |
| 499238 | RGD1564933 |      |      |   |      |      |   |   |      |
| 499256 | RGD1559600 | 0    | 0    | 0 | 1    | 0    | 0 | 0 | 0    |
| 499276 | LOC499276  |      |      |   |      |      |   |   |      |
| 499297 | RGD1562011 |      |      |   |      |      |   |   |      |
| 499319 | Ms4a13-ps1 |      |      |   |      |      |   |   |      |
| 499345 | Lipn       | 0    | 0    | 1 | 0    | 0    | 0 | 0 | 0    |
| 499353 | Cyp2c24    |      |      |   |      |      |   |   |      |
| 499363 | RGD1564887 |      |      |   |      |      |   |   |      |
| 499367 | Calhm1     |      |      |   |      |      |   |   |      |
| 499397 | Olr1876    |      |      |   |      |      |   |   |      |
| 499400 | RT1-M5     | 0    | 1.01 | 0 | 1.04 | 0    | 0 | 0 | 0    |
| 499510 | Spz1       |      |      |   |      |      |   |   |      |
| 499516 | Tmem174    | 0    | 0    | 1 | 0    | 0    | 0 | 0 | 0    |
| 499528 | Ccno       |      |      |   |      |      |   |   |      |
| 499530 | LOC499530  |      |      |   |      |      |   |   |      |
| 499541 | LOC499541  | 0    | 0    | 1 | 0    | 0    | 0 | 0 | 0    |
| 499542 | LOC499542  | 0    | 0    | 0 | 0    | 0    | 0 | 1 | 0    |
| 499544 | LOC499544  | 0    | 0    | 0 | 0    | 0    | 0 | 0 | 0.98 |
| 499663 | Lcelf      |      |      |   |      |      |   |   |      |
| 499666 | RGD1564972 | 0    | 0    | 0 | 0    | 0    | 1 | 0 | 0    |
| 499675 | Hist2h2ac  | 0    | 0    | 0 | 0    | 4.56 | 0 | 0 | 0    |
| 499744 | I136g      | 0    | 0    | 0 | 0    | 0    | 0 | 0 | 1    |
| 499756 | Lcn10      |      |      |   |      |      |   |   |      |
| 499764 | Gbgt1      |      |      |   |      |      |   |   |      |
| 499836 | RGD1563263 |      |      |   |      |      |   |   |      |
| 499857 | RGD1561276 |      |      |   |      |      |   |   |      |
| 499858 | RGD1566059 |      |      |   |      |      |   |   |      |
| 499860 | Olr765     |      |      |   |      |      |   |   |      |
| 499867 | Phgr1      | 0    | 0    | 0 | 0    | 0    | 1 | 0 | 0    |
| 499906 | RGD1559924 | 0    | 0    | 0 | 1    | 0    | 0 | 0 | 0    |
| 499924 | Bpifb3     | 2    | 0    | 0 | 0    | 0    | 0 | 0 | 0    |
| 499951 | Gata5      | 0    | 0    | 0 | 0    | 0    | 0 | 1 | 0    |
| 499952 | Bhlhe23    |      |      |   |      |      |   |   |      |
| 499953 | Fndc11     | 0    | 0    | 0 | 0    | 0    | 0 | 0 | 1    |
| 500028 | LOC500028  |      |      |   |      |      |   |   |      |
| 500033 | Tas2r71    |      |      |   |      |      |   |   |      |
| 500048 | Fezf1      | 1    | 0    | 0 | 0    | 0    | 0 | 0 | 0    |
| 500051 | Hyal6      | 0    | 0    | 0 | 1    | 0    | 0 | 0 | 0    |
| 500060 | Fam71f2    |      |      |   |      |      |   |   |      |
| 500079 | Stra8      | 0    | 0    | 0 | 0    | 1    | 1 | 0 | 0    |
| 500091 | Tas2r138   |      |      |   |      |      |   |   |      |
| 500092 | Moxd2      | 0    | 0    | 0 | 0    | 1    | 0 | 0 | 0    |
| 500101 | Tas2r144   |      |      |   |      |      |   |   |      |
| 500119 | RGD1563352 |      |      |   |      |      |   |   |      |
| 500129 | Hoxa13     | 0    | 0    | 0 | 1    | 0    | 0 | 0 | 0    |
| 500137 | Neurod6    | 0    | 0    | 0 | 0    | 1    | 0 | 0 | 0    |
| 500197 | Tex37      |      |      |   |      |      |   |   |      |
| 500204 | RGD1562515 | 0    | 1    | 0 | 0    | 0    | 0 | 0 | 0    |
| 500235 | Emx1       |      |      |   |      |      |   |   |      |
| 500237 | Cml2       | 0.83 | 0    | 0 | 0.76 | 0    | 0 | 0 | 0    |
| 500239 | Figla      | 0    | 0    | 0 | 0    | 0    | 0 | 0 | 1    |
| 500253 | Dnajb8     | 0    | 0    | 0 | 0    | 0    | 1 | 0 | 0    |
| 500312 | Vom2r50    | 0    | 1    | 0 | 0    | 0    | 0 | 0 | 0    |
| 500335 | RGD1564770 |      |      |   |      |      |   |   |      |
| 500347 | Tas2r102   |      |      |   |      |      |   |   |      |

|        |            |   |   |   |   |      |      |      |      |
|--------|------------|---|---|---|---|------|------|------|------|
| 500432 | Spaca1     | 0 | 0 | 0 | 0 | 0    | 2    | 0    | 0    |
| 500458 | Cylc2      |   |   |   |   |      |      |      |      |
| 500460 | LOC500460  |   |   |   |   |      |      |      |      |
| 500473 | LOC500473  | 0 | 0 | 0 | 0 | 0    | 1.56 | 1.61 | 1.31 |
| 500491 | Ifna1611   |   |   |   |   |      |      |      |      |
| 500505 | RGD1560146 | 0 | 0 | 0 | 0 | 1    | 0    | 0    | 0    |
| 500511 | Ube2u      | 0 | 0 | 0 | 0 | 0    | 0    | 1    | 0    |
| 500620 | RGD1559683 | 1 | 0 | 0 | 1 | 0    | 0    | 0    | 0    |
| 500659 | Fscb       |   |   |   |   |      |      |      |      |
| 500702 | LOC500702  |   |   |   |   |      |      |      |      |
| 500780 | Olr991     |   |   |   |   |      |      |      |      |
| 500825 | Ccer1      | 0 | 1 | 0 | 0 | 0    | 0    | 0    | 0    |
| 500836 | I122       | 0 | 1 | 0 | 0 | 0    | 0    | 0    | 0    |
| 500876 | LOC500876  | 0 | 0 | 0 | 1 | 0    | 0    | 0    | 0    |
| 500881 | LOC500881  |   |   |   |   |      |      |      |      |
| 500926 | Or10ad1    | 0 | 0 | 0 | 0 | 0    | 4    | 0    | 0    |
| 500928 | H1fnt      |   |   |   |   |      |      |      |      |
| 500948 | LOC500948  |   |   |   |   |      |      |      |      |
| 500980 | Tmem225    |   |   |   |   |      |      |      |      |
| 500982 | Bsx        | 0 | 1 | 0 | 0 | 0    | 0    | 0    | 0    |
| 501010 | Spespl     | 1 | 1 | 1 | 1 | 0    | 0    | 0    | 0    |
| 501060 | Prss44     |   |   |   |   |      |      |      |      |
| 501106 | Adgrf4     |   |   |   |   |      |      |      |      |
| 501121 | Cfc1       |   |   |   |   |      |      |      |      |
| 501143 | Boll       |   |   |   |   |      |      |      |      |
| 501147 | C2cd6      | 0 | 0 | 1 | 0 | 0    | 0    | 0    | 0    |
| 501180 | Tex44      |   |   |   |   |      |      |      |      |
| 501185 | Mab2114    | 0 | 1 | 0 | 1 | 0    | 0    | 0    | 0    |
| 501283 | Plin5      | 0 | 0 | 0 | 0 | 0    | 1    | 0    | 0    |
| 501389 | LOC501389  |   |   |   |   |      |      |      |      |
| 501507 | RGD1560927 | 0 | 0 | 0 | 2 | 0    | 0    | 0    | 0    |
| 501516 | RGD1562289 | 0 | 0 | 0 | 0 | 0    | 0    | 0    | 1.42 |
| 501587 | RGD1565058 |   |   |   |   |      |      |      |      |
| 501599 | LOC501599  |   |   |   |   |      |      |      |      |
| 501618 | LOC501618  |   |   |   |   |      |      |      |      |
| 501621 | Nxf7       |   |   |   |   |      |      |      |      |
| 501642 | RGD1564955 |   |   |   |   |      |      |      |      |
| 501653 | RGD1565692 | 0 | 0 | 0 | 0 | 1.22 | 0    | 1.19 | 0    |
| 501655 | Ctag2      |   |   |   |   |      |      |      |      |
| 501698 | LOC501698  |   |   |   |   |      |      |      |      |
| 501720 | Krtap2-4   |   |   |   |   |      |      |      |      |
| 501721 | RGD1561684 |   |   |   |   |      |      |      |      |
| 501725 | Krtap4-3   |   |   |   |   |      |      |      |      |
| 501735 | Gpr142     |   |   |   |   |      |      |      |      |
| 501745 | Cd300c     | 0 | 0 | 0 | 0 | 3.56 | 0    | 0    | 0    |
| 501765 | Krtap13-2  |   |   |   |   |      |      |      |      |
| 501767 | RGD1562771 |   |   |   |   |      |      |      |      |
| 501768 | Krtap14    |   |   |   |   |      |      |      |      |
| 501793 | Vom2r58    | 0 | 0 | 0 | 0 | 1    | 0    | 0    | 0    |
| 501809 | RGD1566324 |   |   |   |   |      |      |      |      |
| 501816 | Vom2r62    |   |   |   |   |      |      |      |      |
| 501831 | My110      | 0 | 0 | 0 | 1 | 0    | 0    | 0    | 0    |
| 501864 | Mroh9      |   |   |   |   |      |      |      |      |
| 501881 | Vom2r68    | 1 | 0 | 0 | 0 | 0    | 0    | 0    | 0    |
| 501890 | RGD1561699 |   |   |   |   |      |      |      |      |
| 501893 | RGD1562932 | 0 | 0 | 0 | 0 | 0    | 0    | 0    | 1    |

|        |            |      |      |      |   |      |   |      |   |
|--------|------------|------|------|------|---|------|---|------|---|
| 501896 | RGD1565660 | 0    | 0    | 0    | 1 | 0    | 0 | 0    | 0 |
| 501898 | RGD1559654 |      |      |      |   |      |   |      |   |
| 501899 | RGD1561226 |      |      |      |   |      |   |      |   |
| 501900 | RGD1559999 |      |      |      |   |      |   |      |   |
| 501901 | LOC501901  | 0    | 0    | 0    | 0 | 0    | 0 | 0    | 1 |
| 501902 | RGD1562423 |      |      |      |   |      |   |      |   |
| 501903 | RGD1561977 |      |      |      |   |      |   |      |   |
| 501904 | RGD1563483 |      |      |      |   |      |   |      |   |
| 502004 | Gzmb11     | 1    | 1    | 1    | 0 | 0    | 0 | 0    | 0 |
| 502042 | Cphx1      | 1    | 0    | 0    | 0 | 0    | 0 | 0    | 0 |
| 502047 | RGD1565329 |      |      |      |   |      |   |      |   |
| 502056 | RGD1559508 | 0    | 0    | 0    | 0 | 1    | 0 | 1    | 0 |
| 502057 | RGD1560429 |      |      |      |   |      |   |      |   |
| 502058 | RGD1562508 | 1    | 0    | 0    | 0 | 0    | 0 | 0    | 0 |
| 502060 | RGD1563356 |      |      |      |   |      |   |      |   |
| 502122 | Pr12c1     |      |      |      |   |      |   |      |   |
| 502128 | Pom12112   |      |      |      |   |      |   |      |   |
| 502163 | RGD1561114 |      |      |      |   |      |   |      |   |
| 502180 | RGD1561935 | 0    | 0.33 | 0    | 0 | 0    | 0 | 0    | 0 |
| 502213 | Vom2r3     | 0    | 0    | 0    | 0 | 0    | 0 | 1    | 0 |
| 502251 | RGD1561185 | 0.81 | 0    | 0    | 0 | 0    | 0 | 0    | 0 |
| 502286 | Vom2r25    |      |      |      |   |      |   |      |   |
| 502295 | RGD1564236 | 0    | 0    | 0    | 0 | 0    | 0 | 0    | 1 |
| 502338 | Mrgprb2    |      |      |      |   |      |   |      |   |
| 502353 | RGD1561870 | 0    | 0    | 0    | 0 | 0    | 0 | 1    | 1 |
| 502357 | Or51t1     | 0    | 0    | 0    | 0 | 0    | 0 | 0    | 1 |
| 502358 | LOC502358  |      |      |      |   |      |   |      |   |
| 502359 | Hbe2       |      |      |      |   |      |   |      |   |
| 502412 | RGD1562885 | 0    | 1    | 0    | 0 | 0    | 0 | 0    | 0 |
| 502418 | RGD1559903 |      |      |      |   |      |   |      |   |
| 502510 | Ttc231     |      |      |      |   |      |   |      |   |
| 502533 | RGD1561998 |      |      |      |   |      |   |      |   |
| 502549 | RGD1563451 |      |      |      |   |      |   |      |   |
| 502566 | RGD1564313 | 0    | 0    | 0    | 0 | 0    | 0 | 1.21 | 0 |
| 502588 | LOC502588  |      |      |      |   |      |   |      |   |
| 502611 | Lcn3       |      |      |      |   |      |   |      |   |
| 502612 | RGD1564133 | 0.33 | 0    | 0    | 0 | 0    | 0 | 0    | 0 |
| 502647 | Pramel7    |      |      |      |   |      |   |      |   |
| 502648 | Pramel6    | 0    | 0    | 0    | 0 | 1    | 0 | 0    | 0 |
| 502660 | LOC502660  |      |      |      |   |      |   |      |   |
| 502679 | Cst13      |      |      |      |   |      |   |      |   |
| 502725 | RGD1562636 |      |      |      |   |      |   |      |   |
| 502755 | RGD1562066 |      |      |      |   |      |   |      |   |
| 502756 | Tas2r143   | 0    | 0    | 0    | 0 | 0.62 | 0 | 0    | 0 |
| 502757 | Tas2r135   |      |      |      |   |      |   |      |   |
| 502758 | Olr437     |      |      |      |   |      |   |      |   |
| 502846 | Foxi3      |      |      |      |   |      |   |      |   |
| 502857 | Noto       |      |      |      |   |      |   |      |   |
| 502875 | Hlfoo      | 0    | 0    | 0    | 0 | 0    | 0 | 1    | 0 |
| 502891 | Vom2r51    |      |      |      |   |      |   |      |   |
| 502939 | Sdr16c6    |      |      |      |   |      |   |      |   |
| 502959 | RGD1561246 | 0    | 0    | 0    | 0 | 0    | 0 | 0    | 1 |
| 502962 | RGD1564897 |      |      |      |   |      |   |      |   |
| 502968 | Zfp352     | 2    | 0    | 0    | 0 | 0    | 0 | 0    | 0 |
| 502969 | Cyp2j16    | 0    | 1.01 | 1.03 | 0 | 0    | 0 | 0    | 0 |
| 502976 | RGD1561212 | 1    | 0    | 0    | 0 | 0    | 0 | 0    | 0 |

|        |            |      |      |      |      |   |   |   |      |
|--------|------------|------|------|------|------|---|---|---|------|
| 502995 | Oog1       |      |      |      |      |   |   |   |      |
| 502996 | Oog3       |      |      |      |      |   |   |   |      |
| 503116 | LOC503116  | 0    | 0    | 1.56 | 0    | 0 | 0 | 0 | 0    |
| 503124 | Zscan4f    |      |      |      |      |   |   |   |      |
| 503127 | Vom2r56    |      |      |      |      |   |   |   |      |
| 503139 | Glipr111   |      |      |      |      |   |   |   |      |
| 503162 | RGD1565410 | 0.62 | 0    | 0    | 1.03 | 0 | 0 | 0 | 0    |
| 503228 | Iqcf5      |      |      |      |      |   |   |   |      |
| 503229 | Iqcf6      |      |      |      |      |   |   |   |      |
| 503254 | Lyg1       |      |      |      |      |   |   |   |      |
| 503269 | Rab17      |      |      |      |      |   |   |   |      |
| 503423 | Rhox8      |      |      |      |      |   |   |   |      |
| 503441 | mageb111   |      |      |      |      |   |   |   |      |
| 503442 | Mageb7     | 0    | 0    | 0    | 0    | 0 | 0 | 0 | 1    |
| 503444 | RGD1559970 | 0    | 0    | 0    | 0    | 1 | 0 | 1 | 0    |
| 503459 | RGD1565129 |      |      |      |      |   |   |   |      |
| 503464 | Pramel     |      |      |      |      |   |   |   |      |
| 503465 | Pramel3    | 0    | 0    | 0    | 0    | 0 | 1 | 0 | 0    |
| 503466 | RGD1566159 |      |      |      |      |   |   |   |      |
| 503650 | Klri2      | 0    | 1    | 1    | 1    | 0 | 0 | 0 | 0    |
| 503662 | Ly49s5     |      |      |      |      |   |   |   |      |
| 50572  | Slcola1    |      |      |      |      |   |   |   |      |
| 50585  | Bpifa2     |      |      |      |      |   |   |   |      |
| 50682  | Lipf       | 0    | 0    | 0    | 0    | 1 | 1 | 1 | 0    |
| 53950  | Pr13d1     |      |      |      |      |   |   |   |      |
| 54193  | Pbsn       | 0    | 0    | 0    | 0    | 1 | 0 | 0 | 0    |
| 54240  | Chrnd      | 0    | 0    | 0    | 0    | 0 | 1 | 1 | 0    |
| 54254  | Gata4      | 0    | 0    | 1    | 0    | 0 | 0 | 0 | 0    |
| 54256  | Gja6       | 0    | 0    | 0    | 0    | 0 | 1 | 0 | 0    |
| 54258  | Cxcr1      |      |      |      |      |   |   |   |      |
| 54270  | Mcpt4      |      |      |      |      |   |   |   |      |
| 54276  | Neurod2    |      |      |      |      |   |   |   |      |
| 54303  | Bpifa2f    |      |      |      |      |   |   |   |      |
| 56821  | Olr414     |      |      |      |      |   |   |   |      |
| 57021  | Adam3a     |      |      |      |      |   |   |   |      |
| 57029  | Adam18     | 0    | 0    | 0    | 0    | 1 | 0 | 0 | 0    |
| 57298  | Gstm31     | 1.14 | 0    | 0    | 0    | 0 | 0 | 0 | 0    |
| 57300  | Aadac      |      |      |      |      |   |   |   |      |
| 574523 | Ugt1a5     | 0    | 0    | 0    | 0    | 0 | 0 | 0 | 3.44 |
| 58937  | Pr13c1     |      |      |      |      |   |   |   |      |
| 58947  | Hgfac      | 0    | 0    | 0    | 0    | 1 | 0 | 0 | 0    |
| 59088  | Pr18a4     |      |      |      |      |   |   |   |      |
| 59110  | Aipl1      |      |      |      |      |   |   |   |      |
| 59313  | Psgb1      |      |      |      |      |   |   |   |      |
| 59325  | Ereg       |      |      |      |      |   |   |   |      |
| 60329  | Neurog3    |      |      |      |      |   |   |   |      |
| 60353  | Acrv1      |      |      |      |      |   |   |   |      |
| 60372  | Pga5       | 0    | 0    | 0    | 0    | 0 | 1 | 0 | 0    |
| 60446  | Crx        |      |      |      |      |   |   |   |      |
| 60451  | Olr1654    | 0    | 0    | 0    | 0    | 0 | 1 | 1 | 1    |
| 60570  | Npvf       |      |      |      |      |   |   |   |      |
| 60576  | Treh       | 0    | 1.99 | 0    | 0    | 0 | 0 | 0 | 0    |
| 60671  | Gulo       | 1    | 0    | 0    | 1    | 0 | 0 | 0 | 0    |
| 613220 | Defa11     |      |      |      |      |   |   |   |      |
| 613221 | Defa10     | 0    | 0    | 0    | 0    | 0 | 0 | 0 | 0.98 |
| 613223 | Defa6      |      |      |      |      |   |   |   |      |

|        |           |   |   |   |   |   |   |   |   |
|--------|-----------|---|---|---|---|---|---|---|---|
| 613224 | Defa8     |   |   |   |   |   |   |   |   |
| 613267 | Entpd8    | 2 | 0 | 0 | 0 | 0 | 0 | 0 | 0 |
| 619560 | Rup2      | 2 | 0 | 1 | 0 | 0 | 0 | 0 | 0 |
| 619575 | Sohlh2    |   |   |   |   |   |   |   |   |
| 63866  | Asic5     | 0 | 1 | 0 | 1 | 0 | 0 | 0 | 0 |
| 63867  | Ugt2a1    |   |   |   |   |   |   |   |   |
| 64029  | Cabs1     | 0 | 0 | 0 | 0 | 0 | 1 | 0 | 0 |
| 64042  | Nmur2     |   |   |   |   |   |   |   |   |
| 641519 | Defb29    |   |   |   |   |   |   |   |   |
| 641555 | Odam      |   |   |   |   |   |   |   |   |
| 641620 | Defb51    |   |   |   |   |   |   |   |   |
| 641621 | Defb23    | 0 | 0 | 0 | 0 | 1 | 0 | 0 | 0 |
| 641624 | Defb5     |   |   |   |   |   |   |   |   |
| 641626 | Defb13    |   |   |   |   |   |   |   |   |
| 641627 | Defb14    | 0 | 0 | 0 | 0 | 0 | 0 | 0 | 2 |
| 641628 | Defb28    |   |   |   |   |   |   |   |   |
| 641629 | Defb26    |   |   |   |   |   |   |   |   |
| 641630 | Defb11    | 0 | 0 | 0 | 0 | 0 | 1 | 0 | 0 |
| 641631 | Defb2     |   |   |   |   |   |   |   |   |
| 641632 | Defb24    | 0 | 0 | 0 | 0 | 0 | 0 | 0 | 1 |
| 641633 | Defb9     |   |   |   |   |   |   |   |   |
| 641635 | Defb10    |   |   |   |   |   |   |   |   |
| 641636 | Defb21    |   |   |   |   |   |   |   |   |
| 641637 | Defb40    |   |   |   |   |   |   |   |   |
| 641639 | Defb50    |   |   |   |   |   |   |   |   |
| 641641 | Defb20    | 0 | 0 | 0 | 0 | 0 | 1 | 0 | 0 |
| 641643 | Defb12    |   |   |   |   |   |   |   |   |
| 641645 | Defb15    |   |   |   |   |   |   |   |   |
| 641646 | Defb39    |   |   |   |   |   |   |   |   |
| 641647 | Defb33    |   |   |   |   |   |   |   |   |
| 641650 | Defb41    |   |   |   |   |   |   |   |   |
| 641651 | Defb43    |   |   |   |   |   |   |   |   |
| 641652 | Defb44    |   |   |   |   |   |   |   |   |
| 641653 | Defb49    |   |   |   |   |   |   |   |   |
| 641655 | Defb18    |   |   |   |   |   |   |   |   |
| 641656 | Defb30    | 0 | 1 | 0 | 0 | 0 | 0 | 0 | 0 |
| 641657 | Defb42    |   |   |   |   |   |   |   |   |
| 641658 | Defb17    |   |   |   |   |   |   |   |   |
| 641659 | Tpcr12    |   |   |   |   |   |   |   |   |
| 64361  | Pr17a3    |   |   |   |   |   |   |   |   |
| 64368  | Pr18a7    |   |   |   |   |   |   |   |   |
| 64389  | Defb4     |   |   |   |   |   |   |   |   |
| 64509  | Tpbpa     | 0 | 0 | 1 | 0 | 0 | 0 | 0 | 0 |
| 64535  | Fgfbp1    | 0 | 1 | 0 | 0 | 0 | 0 | 0 | 0 |
| 64568  | Galp      | 0 | 0 | 0 | 0 | 0 | 0 | 0 | 1 |
| 64571  | Vax1      | 1 | 1 | 1 | 0 | 0 | 0 | 0 | 0 |
| 64647  | Hist1h2b1 |   |   |   |   |   |   |   |   |
| 64822  | Fabp9     |   |   |   |   |   |   |   |   |
| 65024  | Chrna9    | 0 | 0 | 0 | 0 | 1 | 0 | 1 | 0 |
| 65039  | Lcn1      | 1 | 0 | 1 | 0 | 0 | 0 | 0 | 0 |
| 65051  | Serpina5  |   |   |   |   |   |   |   |   |
| 65140  | Olr226    |   |   |   |   |   |   |   |   |
| 65182  | Oprpn     |   |   |   |   |   |   |   |   |
| 65185  | Sult1c3   |   |   |   |   |   |   |   |   |
| 65192  | Slc27a2   | 0 | 0 | 0 | 0 | 0 | 0 | 0 | 1 |
| 65202  | Slc13a2   | 0 | 0 | 0 | 0 | 1 | 1 | 0 | 0 |



|        |              |   |   |   |   |   |   |      |   |
|--------|--------------|---|---|---|---|---|---|------|---|
| 65270  | Abo3         | 0 | 0 | 0 | 0 | 0 | 0 | 1.04 | 0 |
| 652921 | Defb37       |   |   |   |   |   |   |      |   |
| 652922 | Defb38       |   |   |   |   |   |   |      |   |
| 652926 | Rhoxf10      |   |   |   |   |   |   |      |   |
| 652927 | Ggtall1      | 0 | 0 | 0 | 1 | 0 | 0 | 0    | 0 |
| 654517 | Crispl       |   |   |   |   |   |   |      |   |
| 66019  | Cdx2         |   |   |   |   |   |   |      |   |
| 66029  | Ido1         | 0 | 0 | 1 | 0 | 0 | 0 | 0    | 0 |
| 664710 | Teddm1       |   |   |   |   |   |   |      |   |
| 678740 | Vom2r1       |   |   |   |   |   |   |      |   |
| 678749 | Dgat2l6      |   |   |   |   |   |   |      |   |
| 679520 | Awat1        | 0 | 0 | 1 | 0 | 0 | 0 | 0    | 0 |
| 679557 | Vom2r42      |   |   |   |   |   |   |      |   |
| 679574 | LOC679574    |   |   |   |   |   |   |      |   |
| 679593 | Vom2r43      |   |   |   |   |   |   |      |   |
| 679682 | Eras         |   |   |   |   |   |   |      |   |
| 679691 | Vom2r5       |   |   |   |   |   |   |      |   |
| 679702 | LOC679702    |   |   |   |   |   |   |      |   |
| 679727 | LOC679727    |   |   |   |   |   |   |      |   |
| 679783 | Tmem211      | 0 | 0 | 0 | 0 | 0 | 0 | 0    | 1 |
| 679789 | Olfr1330-ps1 |   |   |   |   |   |   |      |   |
| 679802 | Saxo1        |   |   |   |   |   |   |      |   |
| 679803 | LOC679803    |   |   |   |   |   |   |      |   |
| 679825 | Rrlt         | 0 | 0 | 0 | 0 | 0 | 0 | 0.9  | 0 |
| 679873 | LOC679873    |   |   |   |   |   |   |      |   |
| 679989 | Tcp1lx2      |   |   |   |   |   |   |      |   |
| 680000 | Prame        |   |   |   |   |   |   |      |   |
| 680050 | Tbpl2        |   |   |   |   |   |   |      |   |
| 680060 | Krtap3-2     |   |   |   |   |   |   |      |   |
| 680071 | Krtap3-1     |   |   |   |   |   |   |      |   |
| 680104 | Krtap1-3     |   |   |   |   |   |   |      |   |
| 680112 | LOC680112    | 1 | 0 | 0 | 0 | 0 | 0 | 0    | 0 |
| 680136 | Krtap2-4l    |   |   |   |   |   |   |      |   |
| 680149 | Gngt1        |   |   |   |   |   |   |      |   |
| 680152 | Krtap2-1     |   |   |   |   |   |   |      |   |
| 680160 | LOC680160    |   |   |   |   |   |   |      |   |
| 680164 | Tex35        |   |   |   |   |   |   |      |   |
| 680174 | Svall        |   |   |   |   |   |   |      |   |
| 680188 | Tas2r139     |   |   |   |   |   |   |      |   |
| 680190 | LOC680190    |   |   |   |   |   |   |      |   |
| 680273 | LOC680273    | 0 | 0 | 0 | 1 | 0 | 0 | 0    | 0 |
| 680328 | Krtap9-1     |   |   |   |   |   |   |      |   |
| 680342 | Clbn34b      |   |   |   |   |   |   |      |   |
| 680358 | Olfr1873     |   |   |   |   |   |   |      |   |
| 680370 | Clbn34d      | 0 | 0 | 0 | 0 | 0 | 1 | 0    | 0 |
| 680377 | LOC680377    |   |   |   |   |   |   |      |   |
| 680396 | LOC680396    |   |   |   |   |   |   |      |   |
| 680442 | LOC680442    |   |   |   |   |   |   |      |   |
| 680452 | Arrdc5       |   |   |   |   |   |   |      |   |
| 680454 | Krtap31-1    |   |   |   |   |   |   |      |   |
| 680619 | Trapla       |   |   |   |   |   |   |      |   |
| 680703 | Krtap16-5    |   |   |   |   |   |   |      |   |
| 680718 | Cts8         |   |   |   |   |   |   |      |   |
| 680728 | Casp16       | 1 | 1 | 0 | 2 | 0 | 0 | 0    | 0 |
| 680734 | Ankrd65      |   |   |   |   |   |   |      |   |
| 680754 | Obp2a        |   |   |   |   |   |   |      |   |

|        |            |   |   |   |   |   |   |      |     |
|--------|------------|---|---|---|---|---|---|------|-----|
| 680819 | LOC680819  |   |   |   |   |   |   |      |     |
| 680865 | Tex13b     | 0 | 0 | 2 | 0 | 0 | 0 | 0    | 0   |
| 680885 | LOC680885  |   |   |   |   |   |   |      |     |
| 680912 | Kcnu1      |   |   |   |   |   |   |      |     |
| 680913 | LOC680913  |   |   |   |   |   |   |      |     |
| 680955 | LOC680955  |   |   |   |   |   |   |      |     |
| 681066 | Fth117e    |   |   |   |   |   |   |      |     |
| 681067 | LOC681067  | 0 | 2 | 0 | 0 | 0 | 0 | 0    | 0   |
| 681069 | Pilrb      |   |   |   |   |   |   |      |     |
| 681070 | Fcamr      |   |   |   |   |   |   |      |     |
| 681077 | LOC681077  |   |   |   |   |   |   |      |     |
| 681079 | Vom2r64    |   |   |   |   |   |   |      |     |
| 681107 | LOC681107  | 0 | 1 | 0 | 0 | 0 | 0 | 0    | 0   |
| 681167 | Samt3      |   |   |   |   |   |   |      |     |
| 681194 | Lypd4      |   |   |   |   |   |   |      |     |
| 681210 | MGC94891   |   |   |   |   |   |   |      |     |
| 681241 | LOC681241  |   |   |   |   |   |   |      |     |
| 681263 | Gje1       |   |   |   |   |   |   |      |     |
| 681303 | LOC681303  | 0 | 0 | 1 | 0 | 0 | 0 | 0    | 0   |
| 681344 | Spink9     |   |   |   |   |   |   |      |     |
| 681354 | Mett121c11 | 1 | 1 | 1 | 1 | 0 | 0 | 0    | 0   |
| 681375 | Lcn4       |   |   |   |   |   |   |      |     |
| 681382 | LOC681382  |   |   |   |   |   |   |      |     |
| 681385 | LOC681385  | 0 | 1 | 0 | 0 | 0 | 0 | 0    | 0   |
| 681407 | Rnf148     |   |   |   |   |   |   |      |     |
| 681470 | LOC681470  |   |   |   |   |   |   |      |     |
| 681817 | G6pc2      |   |   |   |   |   |   |      |     |
| 682042 | LOC682042  |   |   |   |   |   |   |      |     |
| 682076 | Mnx1       | 0 | 0 | 0 | 0 | 0 | 0 | 1    | 0   |
| 682138 | Ddx43      | 0 | 0 | 0 | 0 | 0 | 0 | 0    | 1   |
| 682526 | LOC682526  | 0 | 0 | 0 | 0 | 0 | 0 | 0.07 | 1   |
| 682831 | LOC682831  |   |   |   |   |   |   |      |     |
| 682934 | Slc22a16   |   |   |   |   |   |   |      |     |
| 682974 | Hsd3b3     | 0 | 1 | 1 | 0 | 0 | 0 | 0    | 0   |
| 683212 | LOC683212  |   |   |   |   |   |   |      |     |
| 683849 | LOC683849  |   |   |   |   |   |   |      |     |
| 683850 | LOC683850  |   |   |   |   |   |   |      |     |
| 683961 | LOC683961  | 0 | 0 | 0 | 0 | 0 | 0 | 0    | 0.3 |
| 684085 | Nr2e1      |   |   |   |   |   |   |      |     |
| 684107 | LOC684107  |   |   |   |   |   |   |      |     |
| 684158 | Rd3        | 0 | 0 | 0 | 0 | 0 | 0 | 1    | 0   |
| 684170 | LOC684170  |   |   |   |   |   |   |      |     |
| 684171 | LOC684171  |   |   |   |   |   |   |      |     |
| 684179 | LOC684179  | 0 | 0 | 0 | 0 | 1 | 0 | 0    | 0   |
| 684208 | LOC684208  |   |   |   |   |   |   |      |     |
| 684365 | LOC684365  |   |   |   |   |   |   |      |     |
| 684372 | Prr23a     | 0 | 1 | 0 | 0 | 0 | 0 | 0    | 0   |
| 684376 | LOC684376  |   |   |   |   |   |   |      |     |
| 684381 | Prr23d2    |   |   |   |   |   |   |      |     |
| 684395 | LOC684395  |   |   |   |   |   |   |      |     |
| 684403 | LOC684403  | 0 | 0 | 0 | 0 | 0 | 0 | 0.5  | 0   |
| 684444 | LOC684444  |   |   |   |   |   |   |      |     |
| 684466 | LOC684466  |   |   |   |   |   |   |      |     |
| 684471 | LOC684471  |   |   |   |   |   |   |      |     |
| 684539 | LOC684539  |   |   |   |   |   |   |      |     |
| 684589 | Krtap26-1  |   |   |   |   |   |   |      |     |

|        |           |      |      |      |   |     |   |   |      |
|--------|-----------|------|------|------|---|-----|---|---|------|
| 684683 | LOC684683 |      |      |      |   |     |   |   |      |
| 684709 | LOC684709 |      |      |      |   |     |   |   |      |
| 684797 | LOC684797 | 0    | 0    | 0    | 0 | 0   | 0 | 0 | 1.63 |
| 684932 | LOC684932 | 0    | 1    | 0    | 0 | 0   | 0 | 0 | 0    |
| 685069 | LOC685069 |      |      |      |   |     |   |   |      |
| 685161 | Eppin     | 0    | 1.34 | 1.25 | 0 | 0   | 0 | 0 | 0    |
| 685170 | Wfdc8     | 0    | 0    | 0    | 0 | 0   | 0 | 1 | 0    |
| 685171 | LOC685171 |      |      |      |   |     |   |   |      |
| 685199 | LOC685199 |      |      |      |   |     |   |   |      |
| 685201 | Wfdc16    |      |      |      |   |     |   |   |      |
| 685222 | Cyp2b15   |      |      |      |   |     |   |   |      |
| 685226 | LOC685226 | 0    | 1.16 | 0    | 0 | 0   | 0 | 0 | 0    |
| 685279 | LOC685279 | 0    | 0    | 0    | 0 | 1.7 | 0 | 0 | 0    |
| 685291 | LOC685291 | 1.22 | 0    | 0    | 0 | 0   | 0 | 0 | 0    |
| 685304 | Krtap19-5 |      |      |      |   |     |   |   |      |
| 685321 | LOC685321 |      |      |      |   |     |   |   |      |
| 685391 | LOC685391 |      |      |      |   |     |   |   |      |
| 685406 | LOC685406 | 0    | 1    | 0    | 0 | 0   | 0 | 0 | 0    |
| 685501 | LOC685501 |      |      |      |   |     |   |   |      |
| 685544 | LOC685544 |      |      |      |   |     |   |   |      |
| 685557 | Vom2r7    |      |      |      |   |     |   |   |      |
| 685560 | Mogat3    | 0    | 0    | 0    | 0 | 0   | 1 | 1 | 0    |
| 685600 | LOC685600 |      |      |      |   |     |   |   |      |
| 685621 | Prr20e    | 1    | 1    | 0    | 0 | 0   | 0 | 0 | 0    |
| 685641 | Vom2r8    |      |      |      |   |     |   |   |      |
| 685655 | LOC685655 |      |      |      |   |     |   |   |      |
| 685667 | LOC685667 |      |      |      |   |     |   |   |      |
| 685700 | LOC685700 | 0    | 0    | 0    | 0 | 0   | 0 | 1 | 0    |
| 685701 | Fam122c   |      |      |      |   |     |   |   |      |
| 685716 | LOC685716 |      |      |      |   |     |   |   |      |
| 685722 | Znrd1as   |      |      |      |   |     |   |   |      |
| 685723 | Cib3      |      |      |      |   |     |   |   |      |
| 685747 | LOC685747 |      |      |      |   |     |   |   |      |
| 685762 | LOC685762 |      |      |      |   |     |   |   |      |
| 685774 | Samt4     |      |      |      |   |     |   |   |      |
| 685782 | LOC685782 |      |      |      |   |     |   |   |      |
| 685785 | LOC685785 |      |      |      |   |     |   |   |      |
| 685789 | LOC685789 |      |      |      |   |     |   |   |      |
| 685790 | LOC685790 | 0    | 0    | 0    | 1 | 0   | 0 | 0 | 0    |
| 685793 | LOC685793 |      |      |      |   |     |   |   |      |
| 685819 | Samt2     |      |      |      |   |     |   |   |      |
| 685827 | LOC685827 |      |      |      |   |     |   |   |      |
| 685840 | Ifn13     |      |      |      |   |     |   |   |      |
| 685846 | Adam34    |      |      |      |   |     |   |   |      |
| 685880 | Vom1r99   |      |      |      |   |     |   |   |      |
| 685907 | LOC685907 |      |      |      |   |     |   |   |      |
| 685912 | Sprr1b    |      |      |      |   |     |   |   |      |
| 685945 | Vom1r104  |      |      |      |   |     |   |   |      |
| 685964 | LOC685964 |      |      |      |   |     |   |   |      |
| 686031 | LOC686031 | 0    | 0    | 1    | 0 | 0   | 0 | 0 | 0    |
| 686032 | Smlr1     |      |      |      |   |     |   |   |      |
| 686042 | LOC686042 |      |      |      |   |     |   |   |      |
| 686048 | Btn15     | 0    | 0    | 0    | 0 | 0   | 1 | 0 | 1.38 |
| 686095 | LOC686095 |      |      |      |   |     |   |   |      |
| 686125 | Lce11     |      |      |      |   |     |   |   |      |
| 686142 | LOC686142 | 0    | 0    | 0    | 0 | 0   | 1 | 0 | 0    |

|        |           |   |   |   |   |   |   |   |   |
|--------|-----------|---|---|---|---|---|---|---|---|
| 686143 | LOC686143 |   |   |   |   |   |   |   |   |
| 686145 | Vom2r48   |   |   |   |   |   |   |   |   |
| 686209 | LOC686209 |   |   |   |   |   |   |   |   |
| 686254 | Psors1c2  |   |   |   |   |   |   |   |   |
| 686641 | LOC686641 |   |   |   |   |   |   |   |   |
| 686677 | LOC686677 |   |   |   |   |   |   |   |   |
| 686680 | Ms4a5     |   |   |   |   |   |   |   |   |
| 686683 | LOC686683 |   |   |   |   |   |   |   |   |
| 686720 | LOC686720 |   |   |   |   |   |   |   |   |
| 686748 | LOC686748 |   |   |   |   |   |   |   |   |
| 686787 | Olr1874   | 0 | 0 | 0 | 0 | 0 | 0 | 0 | 1 |
| 686841 | Tex33     |   |   |   |   |   |   |   |   |
| 686900 | LOC686900 |   |   |   |   |   |   |   |   |
| 686967 | LOC686967 | 1 | 0 | 0 | 0 | 0 | 0 | 0 | 0 |
| 687065 | LOC687065 |   |   |   |   |   |   |   |   |
| 687082 | LOC687082 |   |   |   |   |   |   |   |   |
| 687088 | LOC687088 |   |   |   |   |   |   |   |   |
| 687092 | LOC687092 |   |   |   |   |   |   |   |   |
| 687097 | LOC687097 |   |   |   |   |   |   |   |   |
| 687119 | LOC687119 | 0 | 0 | 0 | 1 | 0 | 0 | 0 | 0 |
| 687364 | Asb17     |   |   |   |   |   |   |   |   |
| 687631 | LOC687631 |   |   |   |   |   |   |   |   |
| 687880 | LOC687880 |   |   |   |   |   |   |   |   |
| 687881 | LOC687881 |   |   |   |   |   |   |   |   |
| 687893 | LOC687893 |   |   |   |   |   |   |   |   |
| 687896 | LOC687896 |   |   |   |   |   |   |   |   |
| 688171 | LOC688171 |   |   |   |   |   |   |   |   |
| 688176 | LOC688176 |   |   |   |   |   |   |   |   |
| 688282 | LOC688282 | 1 | 0 | 0 | 1 | 0 | 0 | 0 | 0 |
| 688308 | Tspan10   |   |   |   |   |   |   |   |   |
| 688320 | LOC688320 | 1 | 0 | 1 | 0 | 0 | 0 | 0 | 0 |
| 688321 | LOC688321 |   |   |   |   |   |   |   |   |
| 688335 | LOC688335 |   |   |   |   |   |   |   |   |
| 688392 | Vom2r49   |   |   |   |   |   |   |   |   |
| 688413 | Lcelm     | 0 | 0 | 0 | 0 | 0 | 1 | 0 | 0 |
| 688433 | Dydc1     | 0 | 0 | 0 | 0 | 0 | 0 | 0 | 1 |
| 688481 | Efcab9    | 0 | 0 | 0 | 0 | 1 | 0 | 1 | 0 |
| 688657 | LOC688657 |   |   |   |   |   |   |   |   |
| 688702 | LOC688702 |   |   |   |   |   |   |   |   |
| 688755 | LOC688755 |   |   |   |   |   |   |   |   |
| 688794 | Vomlr65   |   |   |   |   |   |   |   |   |
| 688802 | Mcidas    |   |   |   |   |   |   |   |   |
| 688819 | Cib4      | 0 | 0 | 0 | 0 | 0 | 0 | 0 | 1 |
| 688823 | Cdc20b    |   |   |   |   |   |   |   |   |
| 688828 | LOC688828 |   |   |   |   |   |   |   |   |
| 688842 | LOC688842 |   |   |   |   |   |   |   |   |
| 688848 | Tsgal3    |   |   |   |   |   |   |   |   |
| 688887 | Cfhr2     |   |   |   |   |   |   |   |   |
| 688924 | LOC688924 | 0 | 0 | 0 | 0 | 0 | 1 | 0 | 0 |
| 688951 | Cd209c    |   |   |   |   |   |   |   |   |
| 689002 | LOC689002 |   |   |   |   |   |   |   |   |
| 689004 | Clec4g    | 0 | 0 | 0 | 1 | 0 | 0 | 0 | 0 |
| 689060 | Vom2r71   |   |   |   |   |   |   |   |   |
| 689072 | Vom2r72   | 0 | 1 | 0 | 0 | 0 | 0 | 0 | 0 |
| 689077 | Spaca7    |   |   |   |   |   |   |   |   |
| 689101 | Khdc1b    | 0 | 1 | 1 | 0 | 0 | 0 | 0 | 0 |

|        |            |      |      |   |      |      |   |      |      |
|--------|------------|------|------|---|------|------|---|------|------|
| 689103 | Best4      |      |      |   |      |      |   |      |      |
| 689178 | Muc11      |      |      |   |      |      |   |      |      |
| 689199 | Aphh       |      |      |   |      |      |   |      |      |
| 689220 | LOC689220  |      |      |   |      |      |   |      |      |
| 689271 | LOC689271  | 0    | 0    | 0 | 0    | 1.13 | 0 | 0    | 1.15 |
| 689349 | Catsper1   |      |      |   |      |      |   |      |      |
| 689396 | LOC689396  |      |      |   |      |      |   |      |      |
| 689403 | Vom2r65    |      |      |   |      |      |   |      |      |
| 689408 | LOC689408  | 1.48 | 0    | 0 | 1.59 | 0    | 0 | 0    | 0    |
| 689412 | LOC689412  |      |      |   |      |      |   |      |      |
| 689425 | Clps12     |      |      |   |      |      |   |      |      |
| 689462 | Cnbd1      | 0    | 0    | 0 | 1    | 0    | 0 | 0    | 0    |
| 689485 | Vom2r67    | 1.58 | 1.43 | 0 | 0    | 0    | 0 | 0    | 0    |
| 689515 | Clrn2      | 0    | 0    | 0 | 1    | 0    | 0 | 0    | 0    |
| 689569 | LOC689569  |      |      |   |      |      |   |      |      |
| 689570 | Spink13    |      |      |   |      |      |   |      |      |
| 689587 | LOC689587  | 0    | 0    | 0 | 0    | 0    | 2 | 0    | 0    |
| 689589 | LOC689589  |      |      |   |      |      |   |      |      |
| 689594 | Zar11      |      |      |   |      |      |   |      |      |
| 689599 | LOC689599  |      |      |   |      |      |   |      |      |
| 689600 | LOC689600  |      |      |   |      |      |   |      |      |
| 689604 | Stath      |      |      |   |      |      |   |      |      |
| 689618 | LOC689618  | 0    | 0    | 1 | 0    | 0    | 0 | 0    | 0    |
| 689629 | LOC689629  |      |      |   |      |      |   |      |      |
| 689670 | Vom2r73    |      |      |   |      |      |   |      |      |
| 689725 | LOC689725  |      |      |   |      |      |   |      |      |
| 689748 | Tmem213    |      |      |   |      |      |   |      |      |
| 689754 | Ces3a      |      |      |   |      |      |   |      |      |
| 689766 | LOC689766  | 0    | 0    | 0 | 0    | 0    | 1 | 1    | 0    |
| 689798 | LOC689798  |      |      |   |      |      |   |      |      |
| 689801 | Skint1     |      |      |   |      |      |   |      |      |
| 689817 | Klrb1      | 1    | 0    | 0 | 0    | 0    | 0 | 0    | 0    |
| 689840 | LOC689840  |      |      |   |      |      |   |      |      |
| 689858 | Magea4     |      |      |   |      |      |   |      |      |
| 689872 | RGD1564999 | 0    | 0    | 0 | 0    | 0    | 1 | 0    | 0    |
| 689947 | Crygf      | 0    | 0    | 0 | 1    | 0    | 0 | 0    | 0    |
| 689962 | Ccdc182    |      |      |   |      |      |   |      |      |
| 689968 | LOC689968  |      |      |   |      |      |   |      |      |
| 689975 | Dppa1      |      |      |   |      |      |   |      |      |
| 690127 | LOC690127  |      |      |   |      |      |   |      |      |
| 690140 | LOC690140  |      |      |   |      |      |   |      |      |
| 690191 | LOC690191  | 0    | 0    | 0 | 0    | 1    | 2 | 0    | 0    |
| 690198 | Fpr-rs4    |      |      |   |      |      |   |      |      |
| 690206 | LOC690206  | 0    | 0    | 0 | 0    | 0    | 1 | 0    | 0    |
| 690230 | Fpr-rs6    |      |      |   |      |      |   |      |      |
| 690284 | LOC690284  | 0    | 0    | 0 | 0    | 0    | 0 | 1    | 0    |
| 690299 | LOC690299  | 0    | 0    | 0 | 0    | 0    | 0 | 1.02 | 0    |
| 690326 | Lpal2      | 0    | 0    | 0 | 0    | 0    | 2 | 0    | 0    |
| 690334 | Tas2r130   |      |      |   |      |      |   |      |      |
| 690348 | LOC690348  | 1    | 1    | 0 | 0    | 0    | 0 | 0    | 0    |
| 690352 | LOC690352  | 2    | 1    | 0 | 0    | 0    | 0 | 0    | 0    |
| 690383 | Cyp3a71-ps | 1    | 0    | 0 | 0    | 0    | 0 | 0    | 0    |
| 690386 | LOC690386  | 0    | 1    | 0 | 0    | 0    | 0 | 0    | 0    |
| 690402 | Bpifa3     |      |      |   |      |      |   |      |      |
| 690410 | LOC690410  | 0    | 0    | 0 | 0.01 | 0    | 0 | 0    | 0    |
| 690418 | LOC690418  |      |      |   |      |      |   |      |      |

|        |           |   |   |      |   |      |   |   |      |
|--------|-----------|---|---|------|---|------|---|---|------|
| 690425 | LOC690425 |   |   |      |   |      |   |   |      |
| 690431 | LOC690431 |   |   |      |   |      |   |   |      |
| 690433 | Rnf186    |   |   |      |   |      |   |   |      |
| 690448 | Tas2r120  |   |   |      |   |      |   |   |      |
| 690460 | LOC690460 |   |   |      |   |      |   |   |      |
| 690472 | Tas2r124  |   |   |      |   |      |   |   |      |
| 690478 | LOC690478 |   |   |      |   |      |   |   |      |
| 690481 | Tas2r125  |   |   |      |   |      |   |   |      |
| 690572 | Tas2r109  |   |   |      |   |      |   |   |      |
| 690575 | Tc11a     |   |   |      |   |      |   |   |      |
| 690617 | LOC690617 |   |   |      |   |      |   |   |      |
| 690666 | Tmem92    | 0 | 0 | 0    | 0 | 0    | 0 | 2 | 0    |
| 690758 | Vom2r22   | 0 | 0 | 0.97 | 0 | 0    | 0 | 0 | 0    |
| 690764 | LOC690764 |   |   |      |   |      |   |   |      |
| 690767 | Olrl875   |   |   |      |   |      |   |   |      |
| 690816 | Vom2r24   |   |   |      |   |      |   |   |      |
| 690821 | LOC690821 |   |   |      |   |      |   |   |      |
| 690849 | Or7e24    |   |   |      |   |      |   |   |      |
| 690894 | Ifna5     | 1 | 0 | 0    | 0 | 0    | 0 | 0 | 0    |
| 690971 | Ofcc1     | 0 | 0 | 0    | 0 | 0    | 1 | 0 | 0    |
| 691014 | Dppa311   | 0 | 0 | 0    | 0 | 0    | 0 | 0 | 1    |
| 691030 | LOC691030 | 0 | 0 | 1    | 0 | 0    | 0 | 0 | 0    |
| 691051 | Pramef27  |   |   |      |   |      |   |   |      |
| 691058 | Travl2-3  | 0 | 0 | 0    | 0 | 1    | 0 | 0 | 0    |
| 691074 | LOC691074 |   |   |      |   |      |   |   |      |
| 691086 | Nlrp4f    |   |   |      |   |      |   |   |      |
| 691099 | Tex19.2   | 0 | 1 | 0    | 0 | 0    | 0 | 0 | 0    |
| 691110 | LOC691110 | 0 | 0 | 0    | 0 | 0    | 0 | 1 | 0    |
| 691120 | Spaca4    | 0 | 1 | 1    | 0 | 0    | 0 | 0 | 0    |
| 691139 | Pramef17  |   |   |      |   |      |   |   |      |
| 691150 | Pramef20  |   |   |      |   |      |   |   |      |
| 691157 | Pramef12  |   |   |      |   |      |   |   |      |
| 691162 | LOC691162 |   |   |      |   |      |   |   |      |
| 691196 | LOC691196 |   |   |      |   |      |   |   |      |
| 691223 | Pifo      |   |   |      |   |      |   |   |      |
| 691244 | Rhox13    |   |   |      |   |      |   |   |      |
| 691272 | LOC691272 |   |   |      |   |      |   |   |      |
| 691275 | Adad2     | 0 | 0 | 0    | 0 | 0    | 1 | 0 | 0    |
| 691286 | LOC691286 |   |   |      |   |      |   |   |      |
| 691325 | LOC691325 |   |   |      |   |      |   |   |      |
| 691368 | LOC691368 |   |   |      |   |      |   |   |      |
| 691398 | Foxb2     | 0 | 0 | 0    | 1 | 0    | 0 | 0 | 0    |
| 691408 | Sbk3      |   |   |      |   |      |   |   |      |
| 691411 | Sbk2      | 0 | 0 | 0    | 0 | 0    | 4 | 0 | 0    |
| 691442 | Vom2r55   |   |   |      |   |      |   |   |      |
| 691469 | Pr15a2    |   |   |      |   |      |   |   |      |
| 691488 | Hist3h2bb | 0 | 0 | 0    | 0 | 1.49 | 0 | 0 | 1.91 |
| 691495 | LOC691495 |   |   |      |   |      |   |   |      |
| 691520 | LOC691520 |   |   |      |   |      |   |   |      |
| 691551 | LOC691551 | 0 | 0 | 0    | 0 | 0    | 0 | 0 | 1    |
| 691552 | Pr13d2    |   |   |      |   |      |   |   |      |
| 691560 | Vom2r29   |   |   |      |   |      |   |   |      |
| 691592 | LOC691592 |   |   |      |   |      |   |   |      |
| 691642 | LOC691642 | 0 | 0 | 0    | 0 | 1    | 0 | 0 | 0    |
| 691695 | LOC691695 |   |   |      |   |      |   |   |      |
| 691763 | Vom2r33   |   |   |      |   |      |   |   |      |



|           |           |   |   |   |   |   |   |   |      |
|-----------|-----------|---|---|---|---|---|---|---|------|
| 691791    | Vom1r55   |   |   |   |   |   |   |   |      |
| 691813    | Pla2g4c11 | 0 | 0 | 0 | 0 | 0 | 0 | 0 | 3.38 |
| 691850    | LOC691850 |   |   |   |   |   |   |   |      |
| 691860    | Obox1     |   |   |   |   |   |   |   |      |
| 691895    | LOC691895 |   |   |   |   |   |   |   |      |
| 691918    | LOC691918 |   |   |   |   |   |   |   |      |
| 691952    | Terb2     |   |   |   |   |   |   |   |      |
| 691997    | Pebp4     |   |   |   |   |   |   |   |      |
| 78979     | Tas2r119  |   |   |   |   |   |   |   |      |
| 78980     | Tas2r118  |   |   |   |   |   |   |   |      |
| 78981     | Tas2r107  |   |   |   |   |   |   |   |      |
| 78982     | Tas2r114  |   |   |   |   |   |   |   |      |
| 78983     | Tas2r121  |   |   |   |   |   |   |   |      |
| 78984     | Tas2r13   |   |   |   |   |   |   |   |      |
| 78985     | Tas2r105  |   |   |   |   |   |   |   |      |
| 79243     | Hsd17b2   |   |   |   |   |   |   |   |      |
| 79254     | Akap4     |   |   |   |   |   |   |   |      |
| 81712     | Retn1a    |   |   |   |   |   |   |   |      |
| 81760     | Grk1      | 0 | 0 | 0 | 0 | 0 | 1 | 0 | 0    |
| 81806     | Serpina7  | 0 | 0 | 0 | 0 | 0 | 1 | 0 | 0    |
| 81916     | Pdzklip1  | 0 | 0 | 0 | 0 | 1 | 1 | 0 | 0    |
| 83687     | Defb1     |   |   |   |   |   |   |   |      |
| 83711     | Inhbe     | 0 | 0 | 0 | 0 | 0 | 0 | 1 | 0    |
| 84017     | Hmga2     | 0 | 0 | 1 | 0 | 0 | 0 | 0 | 0    |
| 84028     | Pnliprpl  |   |   |   |   |   |   |   |      |
| 84029     | Hao2      |   |   |   |   |   |   |   |      |
| 84377     | Pr17d1    |   |   |   |   |   |   |   |      |
| 84385     | Nr1i2     |   |   |   |   |   |   |   |      |
| 84605     | Sval2     | 0 | 1 | 0 | 0 | 0 | 0 | 0 | 0    |
| 85271     | Zp1       | 1 | 0 | 0 | 0 | 0 | 0 | 0 | 0    |
| 94106     | Vegp2     | 0 | 0 | 0 | 0 | 1 | 0 | 0 | 0    |
| 94164     | Hbg1      |   |   |   |   |   |   |   |      |
| BGIG10116 | 30309     |   |   |   |   |   |   |   |      |
| BGIG10116 | 30313     |   |   |   |   |   |   |   |      |
| BGIG10116 | 30325     |   |   |   |   |   |   |   |      |
| BGIG10116 | 30334     |   |   |   |   |   |   |   |      |
| BGIG10116 | 30458     |   |   |   |   |   |   |   |      |
| BGIG10116 | 30466     |   |   |   |   |   |   |   |      |
| BGIG10116 | 30566     |   |   |   |   |   |   |   |      |
| BGIG10116 | 30630     |   |   |   |   |   |   |   |      |
| BGIG10116 | 30646     |   |   |   |   |   |   |   |      |
| BGIG10116 | 30870     |   |   |   |   |   |   |   |      |
| BGIG10116 | 31140     |   |   |   |   |   |   |   |      |
| BGIG10116 | 31195     |   |   |   |   |   |   |   |      |
| BGIG10116 | 31201     |   |   |   |   |   |   |   |      |
| BGIG10116 | 31210     |   |   |   |   |   |   |   |      |
| BGIG10116 | 31217     |   |   |   |   |   |   |   |      |
| BGIG10116 | 31218     |   |   |   |   |   |   |   |      |
| BGIG10116 | 31220     |   |   |   |   |   |   |   |      |
| BGIG10116 | 31222     |   |   |   |   |   |   |   |      |
| BGIG10116 | 31223     |   |   |   |   |   |   |   |      |
| BGIG10116 | 31451     |   |   |   |   |   |   |   |      |
| BGIG10116 | 31455     |   |   |   |   |   |   |   |      |
| BGIG10116 | 31516     |   |   |   |   |   |   |   |      |
| BGIG10116 | 31517     |   |   |   |   |   |   |   |      |
| BGIG10116 | 31530     |   |   |   |   |   |   |   |      |

|                 |  |  |  |  |  |  |  |  |
|-----------------|--|--|--|--|--|--|--|--|
| BGIG10116 31682 |  |  |  |  |  |  |  |  |
| BGIG10116 31949 |  |  |  |  |  |  |  |  |
| BGIG10116 31984 |  |  |  |  |  |  |  |  |
| BGIG10116 32003 |  |  |  |  |  |  |  |  |
| BGIG10116 32126 |  |  |  |  |  |  |  |  |
| BGIG10116 32133 |  |  |  |  |  |  |  |  |
| BGIG10116 32185 |  |  |  |  |  |  |  |  |
| BGIG10116 32322 |  |  |  |  |  |  |  |  |
| BGIG10116 32324 |  |  |  |  |  |  |  |  |
| BGIG10116 32326 |  |  |  |  |  |  |  |  |
| BGIG10116 32328 |  |  |  |  |  |  |  |  |
| BGIG10116 32333 |  |  |  |  |  |  |  |  |
| BGIG10116 32334 |  |  |  |  |  |  |  |  |
| BGIG10116 32335 |  |  |  |  |  |  |  |  |
| BGIG10116 32337 |  |  |  |  |  |  |  |  |
| BGIG10116 32342 |  |  |  |  |  |  |  |  |
| BGIG10116 32344 |  |  |  |  |  |  |  |  |
| BGIG10116 32345 |  |  |  |  |  |  |  |  |
| BGIG10116 32347 |  |  |  |  |  |  |  |  |
| BGIG10116 32515 |  |  |  |  |  |  |  |  |
| BGIG10116 32691 |  |  |  |  |  |  |  |  |
| BGIG10116 32719 |  |  |  |  |  |  |  |  |
| BGIG10116 32720 |  |  |  |  |  |  |  |  |
| BGIG10116 32721 |  |  |  |  |  |  |  |  |
| BGIG10116 32725 |  |  |  |  |  |  |  |  |
| BGIG10116 32799 |  |  |  |  |  |  |  |  |
| BGIG10116 32808 |  |  |  |  |  |  |  |  |
| BGIG10116 32817 |  |  |  |  |  |  |  |  |
| BGIG10116 32818 |  |  |  |  |  |  |  |  |
| BGIG10116 33008 |  |  |  |  |  |  |  |  |
| BGIG10116 33150 |  |  |  |  |  |  |  |  |
| BGIG10116 33214 |  |  |  |  |  |  |  |  |
| BGIG10116 33261 |  |  |  |  |  |  |  |  |
| BGIG10116 33641 |  |  |  |  |  |  |  |  |
| BGIG10116 33642 |  |  |  |  |  |  |  |  |
| BGIG10116 33760 |  |  |  |  |  |  |  |  |
| BGIG10116 33824 |  |  |  |  |  |  |  |  |
| BGIG10116 33878 |  |  |  |  |  |  |  |  |
| BGIG10116 33934 |  |  |  |  |  |  |  |  |
| BGIG10116 34084 |  |  |  |  |  |  |  |  |
| BGIG10116 34218 |  |  |  |  |  |  |  |  |
| BGIG10116 34238 |  |  |  |  |  |  |  |  |
| BGIG10116 34317 |  |  |  |  |  |  |  |  |
| BGIG10116 34385 |  |  |  |  |  |  |  |  |
| BGIG10116 34404 |  |  |  |  |  |  |  |  |
| BGIG10116 34563 |  |  |  |  |  |  |  |  |
| BGIG10116 34628 |  |  |  |  |  |  |  |  |
| BGIG10116 34649 |  |  |  |  |  |  |  |  |
| BGIG10116 34780 |  |  |  |  |  |  |  |  |
| BGIG10116 34791 |  |  |  |  |  |  |  |  |
| BGIG10116 34928 |  |  |  |  |  |  |  |  |
| BGIG10116 34929 |  |  |  |  |  |  |  |  |
| BGIG10116 34930 |  |  |  |  |  |  |  |  |
| BGIG10116 35119 |  |  |  |  |  |  |  |  |
| BGIG10116 35126 |  |  |  |  |  |  |  |  |
| BGIG10116 35129 |  |  |  |  |  |  |  |  |

|           |       |  |  |  |  |  |  |  |  |
|-----------|-------|--|--|--|--|--|--|--|--|
| BGIG10116 | 35135 |  |  |  |  |  |  |  |  |
| BGIG10116 | 35136 |  |  |  |  |  |  |  |  |
| BGIG10116 | 35137 |  |  |  |  |  |  |  |  |
| BGIG10116 | 35138 |  |  |  |  |  |  |  |  |
| BGIG10116 | 35144 |  |  |  |  |  |  |  |  |
| BGIG10116 | 35145 |  |  |  |  |  |  |  |  |
| BGIG10116 | 35146 |  |  |  |  |  |  |  |  |
| BGIG10116 | 35150 |  |  |  |  |  |  |  |  |
| BGIG10116 | 35161 |  |  |  |  |  |  |  |  |
| BGIG10116 | 35162 |  |  |  |  |  |  |  |  |
| BGIG10116 | 35178 |  |  |  |  |  |  |  |  |
| BGIG10116 | 35180 |  |  |  |  |  |  |  |  |
| BGIG10116 | 35185 |  |  |  |  |  |  |  |  |
| BGIG10116 | 35189 |  |  |  |  |  |  |  |  |
| BGIG10116 | 35195 |  |  |  |  |  |  |  |  |
| BGIG10116 | 35202 |  |  |  |  |  |  |  |  |
| BGIG10116 | 35204 |  |  |  |  |  |  |  |  |
| BGIG10116 | 35216 |  |  |  |  |  |  |  |  |
| BGIG10116 | 35217 |  |  |  |  |  |  |  |  |
| BGIG10116 | 35219 |  |  |  |  |  |  |  |  |
| BGIG10116 | 35224 |  |  |  |  |  |  |  |  |
| BGIG10116 | 35235 |  |  |  |  |  |  |  |  |
| BGIG10116 | 35249 |  |  |  |  |  |  |  |  |
| BGIG10116 | 35250 |  |  |  |  |  |  |  |  |
| BGIG10116 | 35251 |  |  |  |  |  |  |  |  |
| BGIG10116 | 35257 |  |  |  |  |  |  |  |  |
| BGIG10116 | 35268 |  |  |  |  |  |  |  |  |
| BGIG10116 | 35269 |  |  |  |  |  |  |  |  |
| BGIG10116 | 35271 |  |  |  |  |  |  |  |  |
| BGIG10116 | 35272 |  |  |  |  |  |  |  |  |
| BGIG10116 | 35278 |  |  |  |  |  |  |  |  |
| BGIG10116 | 35281 |  |  |  |  |  |  |  |  |
| BGIG10116 | 35292 |  |  |  |  |  |  |  |  |
| BGIG10116 | 35295 |  |  |  |  |  |  |  |  |
| BGIG10116 | 35296 |  |  |  |  |  |  |  |  |
| BGIG10116 | 35297 |  |  |  |  |  |  |  |  |
| BGIG10116 | 35300 |  |  |  |  |  |  |  |  |
| BGIG10116 | 35307 |  |  |  |  |  |  |  |  |
| BGIG10116 | 35318 |  |  |  |  |  |  |  |  |
| BGIG10116 | 35319 |  |  |  |  |  |  |  |  |
| BGIG10116 | 35340 |  |  |  |  |  |  |  |  |
| BGIG10116 | 35341 |  |  |  |  |  |  |  |  |
| BGIG10116 | 35342 |  |  |  |  |  |  |  |  |
| BGIG10116 | 35343 |  |  |  |  |  |  |  |  |
| BGIG10116 | 35344 |  |  |  |  |  |  |  |  |
| BGIG10116 | 35345 |  |  |  |  |  |  |  |  |
| BGIG10116 | 35346 |  |  |  |  |  |  |  |  |
| BGIG10116 | 35347 |  |  |  |  |  |  |  |  |
| BGIG10116 | 35348 |  |  |  |  |  |  |  |  |
| BGIG10116 | 35349 |  |  |  |  |  |  |  |  |
| BGIG10116 | 35350 |  |  |  |  |  |  |  |  |
| BGIG10116 | 35351 |  |  |  |  |  |  |  |  |
| BGIG10116 | 35352 |  |  |  |  |  |  |  |  |
| BGIG10116 | 35353 |  |  |  |  |  |  |  |  |
| BGIG10116 | 35354 |  |  |  |  |  |  |  |  |
| BGIG10116 | 35355 |  |  |  |  |  |  |  |  |

|                 |  |  |  |  |  |  |  |  |
|-----------------|--|--|--|--|--|--|--|--|
| BGIG10116 35356 |  |  |  |  |  |  |  |  |
| BGIG10116 35357 |  |  |  |  |  |  |  |  |
| BGIG10116 35358 |  |  |  |  |  |  |  |  |
| BGIG10116 35359 |  |  |  |  |  |  |  |  |
| BGIG10116 35360 |  |  |  |  |  |  |  |  |
| BGIG10116 35363 |  |  |  |  |  |  |  |  |
| BGIG10116 35368 |  |  |  |  |  |  |  |  |
| BGIG10116 35371 |  |  |  |  |  |  |  |  |
| BGIG10116 35379 |  |  |  |  |  |  |  |  |
| BGIG10116 35386 |  |  |  |  |  |  |  |  |
| BGIG10116 35394 |  |  |  |  |  |  |  |  |
| BGIG10116 35395 |  |  |  |  |  |  |  |  |
| BGIG10116 35396 |  |  |  |  |  |  |  |  |
| BGIG10116 35397 |  |  |  |  |  |  |  |  |
| BGIG10116 35398 |  |  |  |  |  |  |  |  |
| BGIG10116 35399 |  |  |  |  |  |  |  |  |
| BGIG10116 35400 |  |  |  |  |  |  |  |  |
| BGIG10116 35404 |  |  |  |  |  |  |  |  |
| BGIG10116 35407 |  |  |  |  |  |  |  |  |
| BGIG10116 35412 |  |  |  |  |  |  |  |  |
| BGIG10116 35413 |  |  |  |  |  |  |  |  |
| BGIG10116 35428 |  |  |  |  |  |  |  |  |
| BGIG10116 35433 |  |  |  |  |  |  |  |  |
| BGIG10116 35434 |  |  |  |  |  |  |  |  |
| BGIG10116 35435 |  |  |  |  |  |  |  |  |
| BGIG10116 35440 |  |  |  |  |  |  |  |  |
| BGIG10116 35442 |  |  |  |  |  |  |  |  |
| BGIG10116 35443 |  |  |  |  |  |  |  |  |
| BGIG10116 35449 |  |  |  |  |  |  |  |  |
| BGIG10116 35450 |  |  |  |  |  |  |  |  |
| BGIG10116 35451 |  |  |  |  |  |  |  |  |
| BGIG10116 35452 |  |  |  |  |  |  |  |  |
| BGIG10116 35453 |  |  |  |  |  |  |  |  |
| BGIG10116 35454 |  |  |  |  |  |  |  |  |
| BGIG10116 35455 |  |  |  |  |  |  |  |  |
| BGIG10116 35456 |  |  |  |  |  |  |  |  |
| BGIG10116 35457 |  |  |  |  |  |  |  |  |
| BGIG10116 35458 |  |  |  |  |  |  |  |  |
| BGIG10116 35459 |  |  |  |  |  |  |  |  |
| BGIG10116 35460 |  |  |  |  |  |  |  |  |
| BGIG10116 35475 |  |  |  |  |  |  |  |  |
| BGIG10116 35477 |  |  |  |  |  |  |  |  |
| BGIG10116 35481 |  |  |  |  |  |  |  |  |
| BGIG10116 35483 |  |  |  |  |  |  |  |  |
| BGIG10116 35491 |  |  |  |  |  |  |  |  |
| BGIG10116 35492 |  |  |  |  |  |  |  |  |
| BGIG10116 35497 |  |  |  |  |  |  |  |  |
| BGIG10116 35502 |  |  |  |  |  |  |  |  |
| BGIG10116 35503 |  |  |  |  |  |  |  |  |
| BGIG10116 35504 |  |  |  |  |  |  |  |  |
| BGIG10116 35506 |  |  |  |  |  |  |  |  |
| BGIG10116 35507 |  |  |  |  |  |  |  |  |
| BGIG10116 35508 |  |  |  |  |  |  |  |  |
| BGIG10116 35509 |  |  |  |  |  |  |  |  |
| BGIG10116 35511 |  |  |  |  |  |  |  |  |
| BGIG10116 35516 |  |  |  |  |  |  |  |  |

|                 |  |  |  |  |  |  |  |  |
|-----------------|--|--|--|--|--|--|--|--|
| BGIG10116 35518 |  |  |  |  |  |  |  |  |
| BGIG10116 35537 |  |  |  |  |  |  |  |  |
| BGIG10116 35538 |  |  |  |  |  |  |  |  |
| BGIG10116 35539 |  |  |  |  |  |  |  |  |
| BGIG10116 35542 |  |  |  |  |  |  |  |  |
| BGIG10116 35546 |  |  |  |  |  |  |  |  |
| BGIG10116 35559 |  |  |  |  |  |  |  |  |
| BGIG10116 35561 |  |  |  |  |  |  |  |  |
| BGIG10116 35562 |  |  |  |  |  |  |  |  |
| BGIG10116 35563 |  |  |  |  |  |  |  |  |
| BGIG10116 35572 |  |  |  |  |  |  |  |  |
| BGIG10116 35574 |  |  |  |  |  |  |  |  |
| BGIG10116 35580 |  |  |  |  |  |  |  |  |
| BGIG10116 35584 |  |  |  |  |  |  |  |  |
| BGIG10116 35585 |  |  |  |  |  |  |  |  |
| BGIG10116 35586 |  |  |  |  |  |  |  |  |
| BGIG10116 35588 |  |  |  |  |  |  |  |  |
| BGIG10116 35589 |  |  |  |  |  |  |  |  |
| BGIG10116 35590 |  |  |  |  |  |  |  |  |
| BGIG10116 35593 |  |  |  |  |  |  |  |  |
| BGIG10116 35600 |  |  |  |  |  |  |  |  |
| BGIG10116 35612 |  |  |  |  |  |  |  |  |
| BGIG10116 35632 |  |  |  |  |  |  |  |  |
| BGIG10116 35641 |  |  |  |  |  |  |  |  |
| BGIG10116 35643 |  |  |  |  |  |  |  |  |
| BGIG10116 35644 |  |  |  |  |  |  |  |  |
| BGIG10116 35651 |  |  |  |  |  |  |  |  |
| BGIG10116 35652 |  |  |  |  |  |  |  |  |
| BGIG10116 35654 |  |  |  |  |  |  |  |  |
| BGIG10116 35656 |  |  |  |  |  |  |  |  |
| BGIG10116 35660 |  |  |  |  |  |  |  |  |
| BGIG10116 35664 |  |  |  |  |  |  |  |  |
| BGIG10116 35673 |  |  |  |  |  |  |  |  |
| BGIG10116 35674 |  |  |  |  |  |  |  |  |
| BGIG10116 35675 |  |  |  |  |  |  |  |  |
| BGIG10116 35676 |  |  |  |  |  |  |  |  |
| BGIG10116 35677 |  |  |  |  |  |  |  |  |
| BGIG10116 35678 |  |  |  |  |  |  |  |  |
| BGIG10116 35679 |  |  |  |  |  |  |  |  |
| BGIG10116 35680 |  |  |  |  |  |  |  |  |
| BGIG10116 35681 |  |  |  |  |  |  |  |  |
| BGIG10116 35682 |  |  |  |  |  |  |  |  |
| BGIG10116 35683 |  |  |  |  |  |  |  |  |
| BGIG10116 35684 |  |  |  |  |  |  |  |  |
| BGIG10116 35685 |  |  |  |  |  |  |  |  |
| BGIG10116 35686 |  |  |  |  |  |  |  |  |
| BGIG10116 35687 |  |  |  |  |  |  |  |  |
| BGIG10116 35688 |  |  |  |  |  |  |  |  |
| BGIG10116 35690 |  |  |  |  |  |  |  |  |
| BGIG10116 35691 |  |  |  |  |  |  |  |  |
| BGIG10116 35692 |  |  |  |  |  |  |  |  |
| BGIG10116 35693 |  |  |  |  |  |  |  |  |
| BGIG10116 35694 |  |  |  |  |  |  |  |  |
| BGIG10116 35695 |  |  |  |  |  |  |  |  |
| BGIG10116 35696 |  |  |  |  |  |  |  |  |
| BGIG10116 35697 |  |  |  |  |  |  |  |  |

|                 |  |  |  |  |  |  |  |  |
|-----------------|--|--|--|--|--|--|--|--|
| BGIG10116 35698 |  |  |  |  |  |  |  |  |
| BGIG10116 35699 |  |  |  |  |  |  |  |  |
| BGIG10116 35700 |  |  |  |  |  |  |  |  |
| BGIG10116 35701 |  |  |  |  |  |  |  |  |
| BGIG10116 35702 |  |  |  |  |  |  |  |  |
| BGIG10116 35703 |  |  |  |  |  |  |  |  |
| BGIG10116 35704 |  |  |  |  |  |  |  |  |
| BGIG10116 35705 |  |  |  |  |  |  |  |  |
| BGIG10116 35706 |  |  |  |  |  |  |  |  |
| BGIG10116 35708 |  |  |  |  |  |  |  |  |
| BGIG10116 35710 |  |  |  |  |  |  |  |  |
| BGIG10116 35717 |  |  |  |  |  |  |  |  |
| BGIG10116 35719 |  |  |  |  |  |  |  |  |
| BGIG10116 35727 |  |  |  |  |  |  |  |  |
| BGIG10116 35736 |  |  |  |  |  |  |  |  |
| BGIG10116 35737 |  |  |  |  |  |  |  |  |
| BGIG10116 35740 |  |  |  |  |  |  |  |  |
| BGIG10116 35741 |  |  |  |  |  |  |  |  |
| BGIG10116 35764 |  |  |  |  |  |  |  |  |
| BGIG10116 35769 |  |  |  |  |  |  |  |  |
| BGIG10116 35776 |  |  |  |  |  |  |  |  |
| BGIG10116 35782 |  |  |  |  |  |  |  |  |
| BGIG10116 35793 |  |  |  |  |  |  |  |  |
| BGIG10116 35797 |  |  |  |  |  |  |  |  |
| BGIG10116 35800 |  |  |  |  |  |  |  |  |
| BGIG10116 35803 |  |  |  |  |  |  |  |  |
| BGIG10116 35806 |  |  |  |  |  |  |  |  |
| BGIG10116 35817 |  |  |  |  |  |  |  |  |
| BGIG10116 35823 |  |  |  |  |  |  |  |  |
| BGIG10116 35828 |  |  |  |  |  |  |  |  |
| BGIG10116 35843 |  |  |  |  |  |  |  |  |
| BGIG10116 35857 |  |  |  |  |  |  |  |  |
| BGIG10116 35865 |  |  |  |  |  |  |  |  |
| BGIG10116 35867 |  |  |  |  |  |  |  |  |
| BGIG10116 35868 |  |  |  |  |  |  |  |  |
| BGIG10116 35871 |  |  |  |  |  |  |  |  |
| BGIG10116 35872 |  |  |  |  |  |  |  |  |
| BGIG10116 35873 |  |  |  |  |  |  |  |  |
| BGIG10116 35874 |  |  |  |  |  |  |  |  |
| BGIG10116 35877 |  |  |  |  |  |  |  |  |
| BGIG10116 35891 |  |  |  |  |  |  |  |  |
| BGIG10116 35893 |  |  |  |  |  |  |  |  |
| BGIG10116 35897 |  |  |  |  |  |  |  |  |
| BGIG10116 35898 |  |  |  |  |  |  |  |  |
| BGIG10116 35909 |  |  |  |  |  |  |  |  |
| BGIG10116 35910 |  |  |  |  |  |  |  |  |
| BGIG10116 35917 |  |  |  |  |  |  |  |  |
| BGIG10116 35922 |  |  |  |  |  |  |  |  |
| BGIG10116 35923 |  |  |  |  |  |  |  |  |
| BGIG10116 35934 |  |  |  |  |  |  |  |  |
| BGIG10116 35935 |  |  |  |  |  |  |  |  |
| BGIG10116 35938 |  |  |  |  |  |  |  |  |
| BGIG10116 35939 |  |  |  |  |  |  |  |  |
| BGIG10116 35940 |  |  |  |  |  |  |  |  |
| BGIG10116 35946 |  |  |  |  |  |  |  |  |
| BGIG10116 35955 |  |  |  |  |  |  |  |  |



|                 |  |  |  |  |  |  |  |  |
|-----------------|--|--|--|--|--|--|--|--|
| BGIG10116 35961 |  |  |  |  |  |  |  |  |
| BGIG10116 35974 |  |  |  |  |  |  |  |  |
| BGIG10116 35979 |  |  |  |  |  |  |  |  |
| BGIG10116 35985 |  |  |  |  |  |  |  |  |
| BGIG10116 35992 |  |  |  |  |  |  |  |  |
| BGIG10116 35994 |  |  |  |  |  |  |  |  |
| BGIG10116 36011 |  |  |  |  |  |  |  |  |
| BGIG10116 36013 |  |  |  |  |  |  |  |  |
| BGIG10116 36014 |  |  |  |  |  |  |  |  |
| BGIG10116 36023 |  |  |  |  |  |  |  |  |
| BGIG10116 36029 |  |  |  |  |  |  |  |  |
| BGIG10116 36031 |  |  |  |  |  |  |  |  |
| BGIG10116 36032 |  |  |  |  |  |  |  |  |
| BGIG10116 36041 |  |  |  |  |  |  |  |  |
| BGIG10116 36044 |  |  |  |  |  |  |  |  |
| BGIG10116 36050 |  |  |  |  |  |  |  |  |
| BGIG10116 36055 |  |  |  |  |  |  |  |  |
| BGIG10116 36056 |  |  |  |  |  |  |  |  |
| BGIG10116 36057 |  |  |  |  |  |  |  |  |
| BGIG10116 36075 |  |  |  |  |  |  |  |  |
| BGIG10116 36084 |  |  |  |  |  |  |  |  |
| BGIG10116 36085 |  |  |  |  |  |  |  |  |
| BGIG10116 36086 |  |  |  |  |  |  |  |  |
| BGIG10116 36091 |  |  |  |  |  |  |  |  |
| BGIG10116 36103 |  |  |  |  |  |  |  |  |
| BGIG10116 36104 |  |  |  |  |  |  |  |  |
| BGIG10116 36107 |  |  |  |  |  |  |  |  |
| BGIG10116 36109 |  |  |  |  |  |  |  |  |
| BGIG10116 36119 |  |  |  |  |  |  |  |  |
| BGIG10116 36122 |  |  |  |  |  |  |  |  |
| BGIG10116 36123 |  |  |  |  |  |  |  |  |
| BGIG10116 36130 |  |  |  |  |  |  |  |  |
| BGIG10116 36140 |  |  |  |  |  |  |  |  |
| BGIG10116 36154 |  |  |  |  |  |  |  |  |
| BGIG10116 36162 |  |  |  |  |  |  |  |  |
| BGIG10116 36164 |  |  |  |  |  |  |  |  |
| BGIG10116 36170 |  |  |  |  |  |  |  |  |
| BGIG10116 36172 |  |  |  |  |  |  |  |  |
| BGIG10116 36173 |  |  |  |  |  |  |  |  |
| BGIG10116 36174 |  |  |  |  |  |  |  |  |
| BGIG10116 36177 |  |  |  |  |  |  |  |  |
| BGIG10116 36178 |  |  |  |  |  |  |  |  |
| BGIG10116 36179 |  |  |  |  |  |  |  |  |
| BGIG10116 36180 |  |  |  |  |  |  |  |  |
| BGIG10116 36191 |  |  |  |  |  |  |  |  |
| BGIG10116 36193 |  |  |  |  |  |  |  |  |
| BGIG10116 36199 |  |  |  |  |  |  |  |  |
| BGIG10116 36226 |  |  |  |  |  |  |  |  |
| BGIG10116 36227 |  |  |  |  |  |  |  |  |
| BGIG10116 36229 |  |  |  |  |  |  |  |  |
| BGIG10116 36230 |  |  |  |  |  |  |  |  |
| BGIG10116 36234 |  |  |  |  |  |  |  |  |
| BGIG10116 36245 |  |  |  |  |  |  |  |  |
| BGIG10116 36250 |  |  |  |  |  |  |  |  |
| BGIG10116 36252 |  |  |  |  |  |  |  |  |
| BGIG10116 36253 |  |  |  |  |  |  |  |  |

|                 |  |  |  |  |  |  |  |  |
|-----------------|--|--|--|--|--|--|--|--|
| BGIG10116 36260 |  |  |  |  |  |  |  |  |
| BGIG10116 36262 |  |  |  |  |  |  |  |  |
| BGIG10116 36270 |  |  |  |  |  |  |  |  |
| BGIG10116 36271 |  |  |  |  |  |  |  |  |
| BGIG10116 36272 |  |  |  |  |  |  |  |  |
| BGIG10116 36277 |  |  |  |  |  |  |  |  |
| BGIG10116 36284 |  |  |  |  |  |  |  |  |
| BGIG10116 36302 |  |  |  |  |  |  |  |  |
| BGIG10116 36307 |  |  |  |  |  |  |  |  |
| BGIG10116 36309 |  |  |  |  |  |  |  |  |
| BGIG10116 36317 |  |  |  |  |  |  |  |  |
| BGIG10116 36319 |  |  |  |  |  |  |  |  |
| BGIG10116 36323 |  |  |  |  |  |  |  |  |
| BGIG10116 36327 |  |  |  |  |  |  |  |  |
| BGIG10116 36329 |  |  |  |  |  |  |  |  |
| BGIG10116 36330 |  |  |  |  |  |  |  |  |
| BGIG10116 36332 |  |  |  |  |  |  |  |  |
| BGIG10116 36333 |  |  |  |  |  |  |  |  |
| BGIG10116 36336 |  |  |  |  |  |  |  |  |
| BGIG10116 36338 |  |  |  |  |  |  |  |  |
| BGIG10116 36339 |  |  |  |  |  |  |  |  |
| BGIG10116 36340 |  |  |  |  |  |  |  |  |
| BGIG10116 36341 |  |  |  |  |  |  |  |  |
| BGIG10116 36343 |  |  |  |  |  |  |  |  |
| BGIG10116 36344 |  |  |  |  |  |  |  |  |
| BGIG10116 36346 |  |  |  |  |  |  |  |  |
| BGIG10116 36347 |  |  |  |  |  |  |  |  |
| BGIG10116 36348 |  |  |  |  |  |  |  |  |
| BGIG10116 36349 |  |  |  |  |  |  |  |  |
| BGIG10116 36369 |  |  |  |  |  |  |  |  |
| BGIG10116 36392 |  |  |  |  |  |  |  |  |
| BGIG10116 36393 |  |  |  |  |  |  |  |  |
| BGIG10116 36394 |  |  |  |  |  |  |  |  |
| BGIG10116 36395 |  |  |  |  |  |  |  |  |

| Gene ID   | Gene Symbol  | log2<br>(CPIP_DE<br>G_left /<br>Sham_DEG<br>left) | Pvalue (CPI<br>P_DEG_left<br>/<br>Sham_DEG_l<br>eft) | Qvalue<br>(CPIP_DE<br>G_left /<br>Sham_DEG<br>left) |
|-----------|--------------|---------------------------------------------------|------------------------------------------------------|-----------------------------------------------------|
| 317418    | Tsr2         | 16.73632                                          | 3.11E-50                                             | 3.05E-48                                            |
| 100912618 | LOC100912618 | 10.69827                                          | 7.31E-14                                             | 1.77E-12                                            |
| 100910581 | LOC100910581 | 9.114038                                          | 5.79E-53                                             | 6.00E-51                                            |
| 300802    | Aph1b        | 8.77101                                           | 7.20E-44                                             | 5.97E-42                                            |
| 103691556 | LOC103691556 | 7.608251                                          | 6.94E-62                                             | 8.58E-60                                            |
| 102550456 | LOC102550456 | 7.14204                                           | 1.47E-17                                             | 4.65E-16                                            |
| 108349606 | LOC108349606 | 6.691153                                          | 1.47E-13                                             | 3.43E-12                                            |
| 100909868 | LOC100909868 | 6.64655                                           | 0.07437523                                           | 0.18403                                             |
| 100911233 | LOC100911233 | 6.417167                                          | 1.39E-11                                             | 2.65E-10                                            |
| 100912399 | LOC100912399 | 6.383284                                          | 2.33E-11                                             | 4.34E-10                                            |
| 684969    | Potef        | 6.285874                                          | 9.69E-11                                             | 1.68E-09                                            |
| 100910616 | Hmgn5        | 5.972627                                          | 5.74E-09                                             | 7.99E-08                                            |
| 108348106 | LOC108348106 | 5.585249                                          | 3.53E-07                                             | 3.78E-06                                            |
| 100909795 | LOC100909795 | 5.500306                                          | 7.73E-07                                             | 7.81E-06                                            |
| 100911564 | LOC100911564 | 5.395698                                          | 1.93E-06                                             | 1.82E-05                                            |
| 100361265 | LOC100361265 | 5.305012                                          | 7.18E-11                                             | 1.26E-09                                            |
| 690146    | RGD1584023   | 5.005396                                          | 3.66E-05                                             | 2.68E-04                                            |
| 297402    | RGD1560795   | 4.968016                                          | 4.69E-05                                             | 3.36E-04                                            |
| 102552708 | LOC102552708 | 4.87749                                           | 8.35E-05                                             | 5.64E-04                                            |
| 100911713 | LOC100911713 | 4.742541                                          | 1.86E-04                                             | 0.001166                                            |
| 100911814 | LOC100911814 | 4.613866                                          | 3.77E-04                                             | 0.002199                                            |
| 207119    | Rin1         | 4.575583                                          | 4.61E-04                                             | 0.002611                                            |
| 24421     | Gstal        | 4.548662                                          | 5.29E-04                                             | 0.002944                                            |
| 100910240 | LOC100910240 | 4.526255                                          | 5.92E-04                                             | 0.003253                                            |
| 81828     | Zp2          | 4.462125                                          | 2.17E-06                                             | 2.03E-05                                            |
| 100911804 | LOC100911804 | 4.262719                                          | 0.00199569                                           | 0.009441                                            |
| 100912489 | LOC100912489 | 4.256166                                          | 0.00524757                                           | 0.021618                                            |
| 100912564 | LOC100912564 | 4.256166                                          | 0.00524757                                           | 0.021618                                            |
| 502913    | Hist2h4a     | 4.256166                                          | 0.00524757                                           | 0.021618                                            |
| 100361850 | LOC100361850 | 4.172618                                          | 0.00289503                                           | 0.013034                                            |
| 100909964 | LOC100909964 | 4.172618                                          | 0.00289503                                           | 0.013034                                            |
| 103692699 | LOC103692699 | 4.172618                                          | 0.00289503                                           | 0.013034                                            |
| 103694404 | LOC103694404 | 4.101989                                          | 0.00382032                                           | 0.016506                                            |
| 108348231 | LOC108348231 | 4.009889                                          | 0.00538735                                           | 0.022098                                            |
| 498911    | Mt4          | 4.002693                                          | 0.00552941                                           | 0.02254                                             |
| 108351339 | LOC108351339 | 3.997273                                          | 0.00563845                                           | 0.022892                                            |
| 364991    | Slc25a36l1   | 3.968952                                          | 3.86E-11                                             | 6.98E-10                                            |
| 103691102 | C1H19orf84   | 3.810048                                          | 0.01064264                                           | 0.039005                                            |
| 24346     | Ces1c        | 3.810048                                          | 0.01064264                                           | 0.039005                                            |
| 362629    | Il22ra1      | 3.810048                                          | 0.01064264                                           | 0.039005                                            |
| 685849    | LOC685849    | 3.810048                                          | 0.01064264                                           | 0.039005                                            |
| 24856     | Ttr          | 3.78929                                           | 1.20E-15                                             | 3.36E-14                                            |
| 300054    | Foxh1        | 3.597242                                          | 0.02011236                                           | 0.065803                                            |
| 114105    | Cxc12        | 3.587656                                          | 0.02065653                                           | 0.067237                                            |
| 25110     | Klrd1        | 3.587656                                          | 0.00106496                                           | 0.005458                                            |
| 103691013 | LOC103691013 | 3.585249                                          | 0.02079491                                           | 0.067595                                            |
| 679149    | LOC679149    | 3.510488                                          | 7.87E-06                                             | 6.59E-05                                            |
| 108348195 | LOC108348195 | 3.495828                                          | 0.02646138                                           | 0.081612                                            |
| 103690061 | LOC103690061 | 3.477778                                          | 0.02773473                                           | 0.084853                                            |

|           |              |          |            |          |
|-----------|--------------|----------|------------|----------|
| 260324    | Ly49i2       | 3.435653 | 0.03088562 | 0.09224  |
| 689484    | Frg111       | 3.420102 | 0.06173203 | 0.159653 |
| 100910107 | LOC100910107 | 3.403231 | 0.03348706 | 0.098359 |
| 102551539 | LOC102551539 | 3.360245 | 0.00124595 | 0.006249 |
| 286914    | Vom2r27      | 3.339121 | 0.00369571 | 0.016062 |
| 100912038 | LOC100912038 | 3.333252 | 0.0396503  | 0.112506 |
| 102552324 | LOC102552324 | 3.324621 | 0.04046405 | 0.114228 |
| 24620     | Reg3g        | 3.324621 | 0.04046405 | 0.114228 |
| 24933     | Klra22       | 3.324621 | 0.04046405 | 0.114228 |
| 299279    | RGD1565462   | 3.324621 | 0.04046405 | 0.114228 |
| 305840    | Rnase10      | 3.324621 | 0.04046405 | 0.114228 |
| 366568    | Slc30a3      | 3.324621 | 0.00375915 | 0.016295 |
| 494210    | Ly49i7       | 3.324621 | 0.04046405 | 0.114228 |
| 503651    | Klri1        | 3.324621 | 0.00375915 | 0.016295 |
| 300303    | LOC300303    | 3.262816 | 0.11722967 | 0.257662 |
| 500338    | Klrc3        | 3.214484 | 1.01E-04   | 6.72E-04 |
| 60333     | Msln         | 3.200231 | 1.58E-76   | 2.33E-74 |
| 100912262 | LOC100912262 | 3.179282 | 1.19E-07   | 1.38E-06 |
| 103692449 | LOC103692449 | 3.002693 | 0.11300224 | 0.250831 |
| 302964    | Bicd12       | 3.002693 | 0.01331961 | 0.046915 |
| 108352634 | LOC108352634 | 2.997532 | 3.61E-05   | 2.65E-04 |
| 100911251 | LOC100911251 | 2.909584 | 8.45E-04   | 0.004468 |
| 319105    | Taar8c       | 2.891662 | 0.22438716 | 0.407461 |
| 100912019 | LOC100912019 | 2.884614 | 3.35E-04   | 0.00198  |
| 289926    | RGD1565725   | 2.810048 | 0.02507391 | 0.078239 |
| 294197    | Olr1743      | 2.810048 | 0.02507391 | 0.078239 |
| 498109    | Polr2h       | 2.633756 | 2.79E-71   | 3.87E-69 |
| 295041    | Stoml3       | 2.625791 | 4.85E-07   | 5.06E-06 |
| 100909830 | LOC100909830 | 2.587656 | 4.32E-06   | 3.81E-05 |
| 100911818 | LOC100911818 | 2.587656 | 0.04714733 | 0.129123 |
| 29680     | Cyp11a1      | 2.587656 | 0.04714733 | 0.129123 |
| 364680    | Barx1        | 2.587656 | 0.04714733 | 0.129123 |
| 366035    | Wdr38        | 2.587656 | 0.04714733 | 0.129123 |
| 367944    | Zic3         | 2.587656 | 0.04714733 | 0.129123 |
| 100364561 | LOC100364561 | 2.580496 | 0.04693479 | 0.12867  |
| 293347    | Gvinp1       | 2.580002 | 0.02651439 | 0.081749 |
| 100909439 | LOC100909439 | 2.566871 | 0.00131882 | 0.006572 |
| 100911156 | LOC100911156 | 2.467362 | 0.18994911 | 0.362883 |
| 304954    | Uap112       | 2.463465 | 2.34E-10   | 3.93E-09 |
| 315294    | Wnt10b       | 2.462125 | 2.19E-04   | 0.00135  |
| 100910678 | LOC100910678 | 2.453735 | 4.34E-09   | 6.17E-08 |
| 100360880 | Fosb         | 2.453222 | 8.98E-100  | 1.73E-97 |
| 690082    | LOC690082    | 2.335269 | 0.12277235 | 0.266979 |
| 100365810 | LOC100365810 | 2.332842 | 1.65E-13   | 3.84E-12 |
| 100362810 | LOC100362810 | 2.324621 | 0.08842822 | 0.209038 |
| 171371    | Xc11         | 2.324621 | 0.08842822 | 0.209038 |
| 289250    | Olr1588      | 2.324621 | 0.08842822 | 0.209038 |
| 29531     | Hpd          | 2.324621 | 0.08842822 | 0.209038 |
| 297698    | Erp27        | 2.324621 | 0.08842822 | 0.209038 |
| 300458    | Npsr1        | 2.324621 | 0.08842822 | 0.209038 |
| 305999    | Nkx3-1       | 2.324621 | 0.08842822 | 0.209038 |
| 307556    | Ccdc178      | 2.324621 | 0.08842822 | 0.209038 |
| 361342    | Cplx4        | 2.324621 | 0.08842822 | 0.209038 |
| 83790     | Cyp2c23      | 2.324621 | 0.08842822 | 0.209038 |
| 299656    | RGD1560291   | 2.31128  | 0.00898128 | 0.033878 |
| 108349682 | LOC108349682 | 2.311142 | 3.06E-24   | 1.35E-22 |

|           |              |          |            |          |
|-----------|--------------|----------|------------|----------|
| 100911168 | LOC100911168 | 2.295599 | 7.82E-06   | 6.55E-05 |
| 502301    | Vom2r36      | 2.271726 | 0.09898613 | 0.226913 |
| 100909443 | LOC100909443 | 2.248589 | 0.02613907 | 0.080788 |
| 499322    | Fam111a      | 2.231648 | 2.03E-81   | 3.22E-79 |
| 25453     | Gdnf         | 2.225086 | 8.63E-05   | 5.81E-04 |
| 108350810 | LOC108350810 | 2.219924 | 0.11009609 | 0.245467 |
| 100912070 | LOC100912070 | 2.211169 | 8.70E-04   | 0.004584 |
| 406159    | Btnl7        | 2.206566 | 0.06082356 | 0.157732 |
| 494206    | Ly49sil      | 2.198066 | 6.54E-10   | 1.03E-08 |
| 102553785 | LOC102553785 | 2.176887 | 0.00706872 | 0.027729 |
| 499886    | LOC499886    | 2.173237 | 0.01252515 | 0.044604 |
| 29183     | Areg         | 2.172618 | 0.02828065 | 0.086039 |
| 29683     | Klrc1        | 2.162968 | 0.12320029 | 0.267604 |
| 100911728 | LOC100911728 | 2.154458 | 0.05956939 | 0.155177 |
| 360649    | RGD1359290   | 2.139575 | 1.54E-94   | 2.75E-92 |
| 287562    | Cc112        | 2.118171 | 2.43E-04   | 0.001487 |
| 501741    | RGD1565046   | 2.112598 | 0.00176522 | 0.008487 |
| 292918    | Otog         | 2.105981 | 0.03947267 | 0.112119 |
| 290209    | LOC290209    | 2.097851 | 0.02146585 | 0.069338 |
| 103690198 | LOC103690198 | 2.08994  | 0.00355053 | 0.015516 |
| 690784    | LOC690784    | 2.079936 | 0.1439799  | 0.298346 |
| 103690084 | LOC103690084 | 2.079215 | 0.00229231 | 0.010638 |
| 304197    | RGD1564571   | 2.073083 | 0.00114373 | 0.005801 |
| 100360950 | LOC100360950 | 2.065645 | 0.03463859 | 0.100917 |
| 102549227 | LOC102549227 | 2.057876 | 0.13270341 | 0.282037 |
| 116637    | Cc14         | 2.026304 | 0.00161329 | 0.007832 |
| 100909671 | LOC100909671 | 2.023409 | 0.12154501 | 0.264975 |
| 102550845 | LOC102550845 | 2.012889 | 0.09698045 | 0.223499 |
| 302676    | RGD1564836   | 2.006296 | 0.16406574 | 0.327873 |
| 100359930 | LOC100359930 | 2.002693 | 0.16508786 | 0.329087 |
| 102551168 | LOC102551168 | 2.002693 | 0.16508786 | 0.329087 |
| 102557108 | LOC102557108 | 2.002693 | 0.04962794 | 0.134333 |
| 103692315 | LOC103692315 | 2.002693 | 0.04962794 | 0.134333 |
| 103694885 | LOC103694885 | 2.002693 | 0.16508786 | 0.329087 |
| 108348236 | LOC108348236 | 2.002693 | 0.16508786 | 0.329087 |
| 108353019 | LOC108353019 | 2.002693 | 0.16508786 | 0.329087 |
| 287480    | Olr1466      | 2.002693 | 0.16508786 | 0.329087 |
| 294196    | Olr1742      | 2.002693 | 0.16508786 | 0.329087 |
| 297894    | Matn1        | 2.002693 | 0.16508786 | 0.329087 |
| 303817    | RGD1560559   | 2.002693 | 0.16508786 | 0.329087 |
| 306307    | Rgr          | 2.002693 | 0.16508786 | 0.329087 |
| 309583    | Olr1733      | 2.002693 | 0.32630757 | 0.522054 |
| 315451    | Muc16        | 2.002693 | 0.16508786 | 0.329087 |
| 367032    | Olr1193      | 2.002693 | 0.04962794 | 0.134333 |
| 405142    | Olr804       | 2.002693 | 0.16508786 | 0.329087 |
| 499660    | Sprrla       | 2.002693 | 0.16508786 | 0.329087 |
| 500245    | Bmp10        | 2.002693 | 0.16508786 | 0.329087 |
| 500359    | RGD1561551   | 2.002693 | 0.16508786 | 0.329087 |
| 501177    | Gpr55        | 2.002693 | 0.01620053 | 0.05519  |
| 64573     | Trpc2        | 2.002693 | 0.16508786 | 0.329087 |
| 680315    | Fsip2        | 2.002693 | 0.16508786 | 0.329087 |
| 680523    | Tmem236      | 2.002693 | 0.01620053 | 0.05519  |
| 682837    | Muc5ac       | 2.002693 | 0.16508786 | 0.329087 |
| 686106    | Ccdc144b     | 2.002693 | 0.16508786 | 0.329087 |
| 103694586 | LOC103694586 | 1.999967 | 3.64E-04   | 0.002128 |
| 102553148 | Cfap58       | 1.988194 | 0.33103741 | 0.527207 |

|           |              |          |            |          |
|-----------|--------------|----------|------------|----------|
| 309467    | Ccdc147      | 1.988194 | 0.33103741 | 0.527207 |
| 362935    | Ly6a1        | 1.984904 | 0.16597777 | 0.330032 |
| 103690008 | LOC103690008 | 1.923004 | 0.00653293 | 0.026007 |
| 100910308 | LOC100910308 | 1.919407 | 5.32E-75   | 7.73E-73 |
| 494207    | Ly49si2      | 1.912839 | 7.86E-05   | 5.35E-04 |
| 100910243 | LOC100910243 | 1.908301 | 0.25976946 | 0.449224 |
| 54242     | Cpa3         | 1.899934 | 5.77E-31   | 3.38E-29 |
| 108351097 | LOC108351097 | 1.885297 | 0          | 0        |
| 303886    | Muc20        | 1.877162 | 0.02744258 | 0.084128 |
| 309225    | Olr337       | 1.877162 | 0.02744258 | 0.084128 |
| 103690049 | LOC103690049 | 1.872356 | 0.04658102 | 0.127829 |
| 681126    | Krt83        | 1.856689 | 0.07596981 | 0.186979 |
| 100910750 | LOC100910750 | 1.826387 | 2.74E-04   | 0.001655 |
| 100909897 | LOC100909897 | 1.812108 | 0.08568234 | 0.20472  |
| 25305     | Cort         | 1.810048 | 0.08615087 | 0.205491 |
| 296846    | Hepacam2     | 1.810048 | 0.08615087 | 0.205491 |
| 100910095 | LOC100910095 | 1.802924 | 0.35791043 | 0.554901 |
| 690680    | Vom2r15      | 1.796751 | 0.20960002 | 0.387971 |
| 689790    | Clec2d11     | 1.795241 | 6.41E-06   | 5.46E-05 |
| 100912499 | Lilra3       | 1.792135 | 0.00329641 | 0.014549 |
| 684526    | LOC684526    | 1.784693 | 0.44562033 | 0.6383   |
| 100912642 | LOC100912642 | 1.766675 | 0.03326185 | 0.097864 |
| 303782    | Vpreb1       | 1.759382 | 0.00145952 | 0.007192 |
| 192267    | Obp1f        | 1.742541 | 0.04551969 | 0.125677 |
| 100912379 | LOC100912379 | 1.739659 | 0.03235869 | 0.095828 |
| 25680     | Clps         | 1.739659 | 0.04598674 | 0.126691 |
| 289515    | Epgn         | 1.739659 | 0.04598674 | 0.126691 |
| 29165     | Gzmk         | 1.739659 | 0.04598674 | 0.126691 |
| 310611    | Pglyrp4      | 1.739659 | 0.04598674 | 0.126691 |
| 502585    | Cd160        | 1.739659 | 0.04598674 | 0.126691 |
| 171118    | Ces2c        | 1.738216 | 0.04622197 | 0.127211 |
| 288398    | RGD1562451   | 1.730219 | 0.17898716 | 0.34766  |
| 24828     | Hist1h2aa    | 1.722706 | 0.09609782 | 0.22219  |
| 108352834 | LOC108352834 | 1.707565 | 0.26076494 | 0.45021  |
| 100910915 | LOC100910915 | 1.705947 | 0.02578088 | 0.079941 |
| 306748    | Cxcl14       | 1.697574 | 5.58E-67   | 7.33E-65 |
| 497084    | Spetex-2B    | 1.671618 | 0.30200304 | 0.499015 |
| 365807    | Vom2r47      | 1.659806 | 0.21642564 | 0.397668 |
| 108348150 | LOC108348150 | 1.653335 | 2.37E-09   | 3.49E-08 |
| 100910579 | LOC100910579 | 1.645901 | 0.15247901 | 0.310153 |
| 102556085 | LOC102556085 | 1.638419 | 0.00872898 | 0.03305  |
| 100911090 | LOC100911090 | 1.624856 | 3.93E-23   | 1.65E-21 |
| 498067    | RGD1565472   | 1.622302 | 6.24E-04   | 0.003418 |
| 292615    | Vom2r35      | 1.620932 | 0.29297269 | 0.488673 |
| 108348438 | LOC108348438 | 1.605078 | 4.57E-06   | 4.01E-05 |
| 405976    | Olr1254      | 1.602155 | 0.55172741 | 0.731985 |
| 751812    | Ras12-9      | 1.596534 | 0.28377072 | 0.477675 |
| 103690165 | LOC103690165 | 1.591379 | 0.2433529  | 0.431492 |
| 498169    | RGD1561730   | 1.589944 | 2.58E-06   | 2.38E-05 |
| 103689998 | Nupr111      | 1.588134 | 0.00116277 | 0.005886 |
| 100360197 | Rad51ap2     | 1.587656 | 0.30578262 | 0.502232 |
| 100365184 | Prdm14       | 1.587656 | 0.30578262 | 0.502232 |
| 100912573 | Ms4a6e       | 1.587656 | 3.26E-06   | 2.95E-05 |
| 102552016 | LOC102552016 | 1.587656 | 0.14752971 | 0.302998 |
| 102553208 | LOC102553208 | 1.587656 | 0.30578262 | 0.502232 |
| 103690566 | LOC103690566 | 1.587656 | 0.30578262 | 0.502232 |

|           |              |          |            |          |
|-----------|--------------|----------|------------|----------|
| 108349482 | LOC108349482 | 1.587656 | 0.04053815 | 0.114369 |
| 108349722 | LOC108349722 | 1.587656 | 0.30578262 | 0.502232 |
| 116562    | Ii2          | 1.587656 | 0.30578262 | 0.502232 |
| 246073    | Foxi2        | 1.587656 | 0.30578262 | 0.502232 |
| 24835     | Tnf          | 1.587656 | 0.01212276 | 0.043439 |
| 25569     | Trh          | 1.587656 | 0.30578262 | 0.502232 |
| 25593     | Hcrtr1       | 1.587656 | 0.04053815 | 0.114369 |
| 266708    | Gzma         | 1.587656 | 0.30578262 | 0.502232 |
| 288602    | Ervfrd-1     | 1.587656 | 0.07609406 | 0.1872   |
| 290227    | Rec8         | 1.587656 | 0.14752971 | 0.302998 |
| 290338    | Adamdec1     | 1.587656 | 0.30578262 | 0.502232 |
| 292848    | Klk13        | 1.587656 | 0.30578262 | 0.502232 |
| 293594    | Olr292       | 1.587656 | 0.30578262 | 0.502232 |
| 294793    | Ugt3a2       | 1.587656 | 0.14752971 | 0.302998 |
| 301088    | Ccr111       | 1.587656 | 0.30578262 | 0.502232 |
| 304784    | Slc26a9      | 1.587656 | 0.30578262 | 0.502232 |
| 310303    | Kcnmb3       | 1.587656 | 0.30578262 | 0.502232 |
| 311558    | Bpifb6       | 1.587656 | 0.14752971 | 0.302998 |
| 315601    | Foxr1        | 1.587656 | 0.14752971 | 0.302998 |
| 360268    | Sult1e1      | 1.587656 | 0.30578262 | 0.502232 |
| 360719    | Hgd          | 1.587656 | 0.07609406 | 0.1872   |
| 362576    | RGD1305347   | 1.587656 | 0.30578262 | 0.502232 |
| 362623    | Catsper4     | 1.587656 | 0.14752971 | 0.302998 |
| 365384    | Olr286       | 1.587656 | 0.30578262 | 0.502232 |
| 502961    | RGD1559679   | 1.587656 | 0.30578262 | 0.502232 |
| 54282     | Padi1        | 1.587656 | 0.30578262 | 0.502232 |
| 683282    | LOC683282    | 1.587656 | 0.30578262 | 0.502232 |
| 685666    | Vom2r9       | 1.587656 | 0.30578262 | 0.502232 |
| 690212    | Slc16a5      | 1.587656 | 0.30578262 | 0.502232 |
| 691033    | LOC691033    | 1.587656 | 0.30578262 | 0.502232 |
| 78976     | Kiss1r       | 1.587656 | 0.14752971 | 0.302998 |
| 81924     | Cyp8b1       | 1.587656 | 0.30578262 | 0.502232 |
| 83630     | Pax4         | 1.587656 | 0.30578262 | 0.502232 |
| 100910172 | LOC100910172 | 1.575583 | 0.15148799 | 0.308566 |
| 691998    | Nlrp1b       | 1.573442 | 0.30653465 | 0.502492 |
| 100361056 | LOC100361056 | 1.552969 | 0.0348651  | 0.101437 |
| 103690132 | Hoxa1        | 1.551961 | 0.06617645 | 0.168156 |
| 25192     | Klrb1b       | 1.546264 | 0.07202827 | 0.17967  |
| 108349143 | LOC108349143 | 1.534767 | 0.01075667 | 0.039291 |
| 100909648 | LOC100909648 | 1.534707 | 0.18214187 | 0.352136 |
| 59113     | Kmo          | 1.533208 | 0.00329158 | 0.014531 |
| 102546312 | LOC102546312 | 1.531243 | 0.29845648 | 0.495045 |
| 100912336 | LOC100912336 | 1.526255 | 0.00586687 | 0.023695 |
| 687560    | LOC687560    | 1.526255 | 0.00586687 | 0.023695 |
| 305811    | Rcor2        | 1.525546 | 3.07E-17   | 9.53E-16 |
| 502966    | RGD1560539   | 1.523525 | 0.14049918 | 0.293561 |
| 103694886 | LOC103694886 | 1.519176 | 0.00779458 | 0.030105 |
| 687553    | Foxl1        | 1.517267 | 0.01052691 | 0.038689 |
| 100360307 | Fam83g       | 1.505194 | 0.01905184 | 0.062955 |
| 679784    | Slc17a4      | 1.505194 | 0.01905184 | 0.062955 |
| 304407    | Cldn4        | 1.486893 | 0.03435019 | 0.100276 |
| 363215    | Prss39       | 1.485542 | 0.0211085  | 0.068381 |
| 309209    | Vwce         | 1.479498 | 3.28E-05   | 2.44E-04 |
| 305858    | Otx2         | 1.470405 | 1.65E-05   | 1.30E-04 |
| 685860    | Lrr1         | 1.462125 | 0.06493755 | 0.165804 |
| 288456    | RGD1560801   | 1.4463   | 0.36263489 | 0.559085 |



|           |              |          |            |          |
|-----------|--------------|----------|------------|----------|
| 685245    | Ears211      | 1.431034 | 4.73E-05   | 3.39E-04 |
| 108353403 | LOC108353403 | 1.429024 | 0.00421884 | 0.017935 |
| 366992    | Kb15         | 1.421646 | 0.06983749 | 0.17533  |
| 103693626 | LOC103693626 | 1.420149 | 0.12450739 | 0.26949  |
| 24235     | C4bpa        | 1.417731 | 0.1240479  | 0.268908 |
| 288596    | Trim50       | 1.417731 | 0.1240479  | 0.268908 |
| 363768    | Zp1d1        | 1.417731 | 0.1240479  | 0.268908 |
| 494193    | Klra2        | 1.417731 | 0.1240479  | 0.268908 |
| 685963    | LOC685963    | 1.411425 | 6.57E-19   | 2.23E-17 |
| 108352618 | LOC108352618 | 1.406128 | 0.02280109 | 0.072556 |
| 364629    | Tpte2        | 1.396691 | 0.03092844 | 0.092339 |
| 100360774 | LOC100360774 | 1.39433  | 0.38205618 | 0.578859 |
| 301595    | Ugt1a8       | 1.387221 | 5.85E-04   | 0.003219 |
| 498335    | Cxc113       | 1.381765 | 1.03E-33   | 6.57E-32 |
| 289337    | Tlr5         | 1.381205 | 8.23E-18   | 2.65E-16 |
| 25370     | Adora3       | 1.374838 | 0.04329619 | 0.120623 |
| 300124    | Pkdrej       | 1.365263 | 0.02496669 | 0.078007 |
| 365962    | Slc44a5      | 1.365263 | 0.02496669 | 0.078007 |
| 691519    | LOC691519    | 1.365192 | 6.14E-05   | 4.28E-04 |
| 102550614 | LOC102550614 | 1.364514 | 0.07979904 | 0.194096 |
| 100360872 | Mcpt111      | 1.357849 | 1.39E-50   | 1.37E-48 |
| 308428    | Irgc         | 1.35633  | 0.0116837  | 0.042079 |
| 108352174 | LOC108352174 | 1.354587 | 0.13090762 | 0.279218 |
| 292850    | Klk10        | 1.349144 | 0.48478222 | 0.672985 |
| 108352465 | LOC108352465 | 1.337366 | 8.79E-05   | 5.91E-04 |
| 108349728 | LOC108349728 | 1.334806 | 0.11439349 | 0.253152 |
| 100911485 | LOC100911485 | 1.33016  | 6.59E-06   | 5.59E-05 |
| 680920    | LOC680920    | 1.32834  | 0.0413736  | 0.116167 |
| 102547118 | LOC102547118 | 1.324621 | 0.24828608 | 0.436843 |
| 170570    | Acot12       | 1.324621 | 0.10252344 | 0.232988 |
| 245921    | Acvrlc       | 1.324621 | 0.24828608 | 0.436843 |
| 25430     | Dio1         | 1.324621 | 0.24828608 | 0.436843 |
| 25735     | Hnf4a        | 1.324621 | 0.24828608 | 0.436843 |
| 289038    | Mgat4e       | 1.324621 | 0.04553359 | 0.125688 |
| 291558    | RGD1562699   | 1.324621 | 0.24828608 | 0.436843 |
| 29180     | Uts2         | 1.324621 | 0.02094109 | 0.067937 |
| 293741    | Ms4a12       | 1.324621 | 0.00983462 | 0.036568 |
| 29589     | Pou3f4       | 1.324621 | 0.24828608 | 0.436843 |
| 296323    | Arhgap40     | 1.324621 | 0.24828608 | 0.436843 |
| 298881    | Nt5c1b       | 1.324621 | 0.24828608 | 0.436843 |
| 353218    | Tnfsf9       | 1.324621 | 0.02094109 | 0.067937 |
| 66022     | Kcns2        | 1.324621 | 0.04553359 | 0.125688 |
| 680875    | LOC680875    | 1.324621 | 0.24828608 | 0.436843 |
| 681033    | Prss41       | 1.324621 | 0.10252344 | 0.232988 |
| 85259     | Cnga1        | 1.324621 | 0.24828608 | 0.436843 |
| 288995    | Gpr39        | 1.318839 | 0.41679574 | 0.612632 |
| 289309    | Kif28p       | 1.316025 | 0.24971775 | 0.438208 |
| 353303    | Col23a1      | 1.314906 | 0.08718079 | 0.207027 |
| 170847    | Kcnj15       | 1.309009 | 5.86E-35   | 4.00E-33 |
| 685181    | LOC685181    | 1.307797 | 0.10200795 | 0.232108 |
| 59327     | Twist2       | 1.297141 | 6.94E-09   | 9.57E-08 |
| 686129    | LOC686129    | 1.294459 | 0.54557437 | 0.726504 |
| 102547956 | LOC102547956 | 1.288423 | 0.09341722 | 0.217657 |
| 304922    | Fmo6         | 1.287657 | 0.07610674 | 0.187195 |
| 103689957 | LOC103689957 | 1.284574 | 0.0024643  | 0.011325 |
| 170896    | Ucn2         | 1.282801 | 0.03783679 | 0.108207 |

|           |                 |          |            |          |
|-----------|-----------------|----------|------------|----------|
| 303496    | Tbx21           | 1.282801 | 0.03783679 | 0.108207 |
| 301012    | Col7a1          | 1.279534 | 4.83E-12   | 9.67E-11 |
| 316153    | Sult1c2a        | 1.271726 | 0.43738303 | 0.631345 |
| 315870    | Tbx18           | 1.268185 | 7.13E-53   | 7.34E-51 |
| 102547504 | LOC102547504    | 1.265728 | 0.0842417  | 0.202433 |
| 94168     | Spp2            | 1.265728 | 0.0842417  | 0.202433 |
| 689519    | LOC689519       | 1.262929 | 0.03733821 | 0.107062 |
| 103691744 | LOC103691744    | 1.24379  | 1.59E-04   | 0.00101  |
| 103690230 | LOC103690230    | 1.23743  | 0.08315841 | 0.200399 |
| 689346    | LOC689346       | 1.235354 | 0.45345467 | 0.644914 |
| 192107    | Prss8           | 1.22807  | 0.06362416 | 0.163415 |
| 108348553 | LOC108348553    | 1.226434 | 0.0093855  | 0.035166 |
| 246758    | Allc            | 1.225086 | 0.19865917 | 0.373786 |
| 292165    | Wdr63           | 1.225086 | 0.19865917 | 0.373786 |
| 294562    | Pou5f1          | 1.225086 | 0.0690942  | 0.173923 |
| 301075    | Topaz1          | 1.225086 | 0.19865917 | 0.373786 |
| 315190    | Upk3a           | 1.225086 | 0.0690942  | 0.173923 |
| 365226    | Ovol3           | 1.225086 | 0.0690942  | 0.173923 |
| 365362    | Abca14          | 1.225086 | 0.19865917 | 0.373786 |
| 499278    | Fam24a          | 1.225086 | 0.19865917 | 0.373786 |
| 361938    | Intu            | 1.224401 | 0.01007343 | 0.037281 |
| 102553715 | LOC102553715    | 1.221327 | 3.61E-11   | 6.56E-10 |
| 100910018 | LOC100910018    | 1.221228 | 0.27948398 | 0.472967 |
| 310738    | Ngf             | 1.220873 | 2.30E-07   | 2.54E-06 |
| 691194    | Mrgprb3         | 1.220347 | 0.00302082 | 0.013537 |
| 24695     | Pthlh           | 1.218422 | 4.05E-05   | 2.94E-04 |
| 685125    | LOC685125       | 1.211411 | 0.45100699 | 0.642777 |
| 311120    | RGD1565767      | 1.209851 | 0.22800234 | 0.412414 |
| 108352192 | LOC108352192    | 1.209144 | 0.40494228 | 0.602039 |
| 102550375 | LOC102550375    | 1.206118 | 0.05401584 | 0.143477 |
| 103690398 | NEWGENE_1565505 | 1.204327 | 0.02152055 | 0.069438 |
| 108349753 | LOC108349753    | 1.204327 | 0.02152055 | 0.069438 |
| 100911964 | LOC100911964    | 1.203741 | 0.45235774 | 0.644124 |
| 690171    | LOC690171       | 1.198372 | 0.11529623 | 0.254469 |
| 103690344 | LOC103690344    | 1.196231 | 0.46868662 | 0.659339 |
| 311013    | Arsj            | 1.19032  | 0.00235947 | 0.010915 |
| 246075    | Prlhr           | 1.18989  | 0.01538765 | 0.052994 |
| 688900    | Slfn1           | 1.188087 | 5.01E-05   | 3.56E-04 |
| 50669     | Prf1            | 1.187118 | 0.01781717 | 0.059646 |
| 114122    | Vcan            | 1.186785 | 3.60E-98   | 6.72E-96 |
| 102555951 | LOC102555951    | 1.185131 | 0.0117125  | 0.042167 |
| 60584     | Lif             | 1.181031 | 0.00196971 | 0.009334 |
| 362443    | Klrb1a          | 1.177191 | 0.04971323 | 0.134392 |
| 103690099 | LOC103690099    | 1.17646  | 0.05295075 | 0.141042 |
| 25660     | Cd28            | 1.175743 | 3.61E-06   | 3.24E-05 |
| 25656     | Guca2a          | 1.172618 | 0.15918846 | 0.320497 |
| 501738    | Cd3001b         | 1.172618 | 0.15918846 | 0.320497 |
| 25583     | Cryba1          | 1.163886 | 0.08091422 | 0.196407 |
| 25661     | Fn1             | 1.163254 | 0          | 0        |
| 287813    | Igsf7           | 1.162422 | 7.91E-09   | 1.08E-07 |
| 100912132 | LOC100912132    | 1.161004 | 0.33266453 | 0.528715 |
| 292793    | Sbsn            | 1.151557 | 3.79E-23   | 1.60E-21 |
| 29220     | Thbs4           | 1.151461 | 0          | 0        |
| 293779    | Glyat           | 1.145975 | 0.01876497 | 0.062239 |
| 353253    | Kir3dl1         | 1.142741 | 0.48856885 | 0.676171 |
| 140944    | Slc28a3         | 1.140197 | 0.12803855 | 0.274744 |

|           |                 |          |            |          |
|-----------|-----------------|----------|------------|----------|
| 25047     | Fcer1a          | 1.140197 | 0.12803855 | 0.274744 |
| 29391     | Tsx             | 1.140197 | 0.12803855 | 0.274744 |
| 300846    | Tinag           | 1.140197 | 0.12803855 | 0.274744 |
| 690479    | Bpifb5          | 1.138411 | 1.77E-16   | 5.18E-15 |
| 298478    | Olr869          | 1.136445 | 0.20469687 | 0.381677 |
| 360707    | RGD1310935      | 1.131641 | 0.29009655 | 0.485235 |
| 100911660 | LOC100911660    | 1.126563 | 3.03E-07   | 3.28E-06 |
| 103690044 | LOC103690044    | 1.12005  | 0.46922947 | 0.659713 |
| 286912    | Krt20           | 1.118171 | 0.1033756  | 0.234366 |
| 304918    | Zbtb37          | 1.118171 | 0.00478743 | 0.019982 |
| 685440    | Nek5            | 1.118171 | 0.1033756  | 0.234366 |
| 690948    | LOC690948       | 1.11647  | 0.0015106  | 0.007401 |
| 103690125 | NEWGENE_1590969 | 1.108371 | 0.14121895 | 0.294419 |
| 683163    | Tnfsf8          | 1.102229 | 0.08374872 | 0.201515 |
| 685157    | LOC685157       | 1.10149  | 7.70E-07   | 7.79E-06 |
| 108348270 | LOC108348270    | 1.097063 | 0.17821718 | 0.346979 |
| 100910180 | LOC100910180    | 1.095803 | 0.80151025 | 0.89835  |
| 362445    | Clec2d2         | 1.094751 | 0.00982183 | 0.036527 |
| 308099    | Fndc1           | 1.089188 | 5.11E-97   | 9.36E-95 |
| 25542     | Cc13            | 1.086271 | 0.01623497 | 0.055263 |
| 25694     | Has2            | 1.085434 | 1.34E-14   | 3.46E-13 |
| 25627     | Cma1            | 1.08192  | 4.80E-07   | 5.02E-06 |
| 108352430 | C12H7orf61      | 1.07725  | 0.03464923 | 0.100932 |
| 103690078 | LOC103690078    | 1.076694 | 0.43321472 | 0.627659 |
| 310926    | LOC310926       | 1.075839 | 6.01E-64   | 7.63E-62 |
| 366545    | Atp6v1e2        | 1.073083 | 0.04526762 | 0.125117 |
| 501183    | Rbm44           | 1.073083 | 0.04526762 | 0.125117 |
| 405968    | Olr1105         | 1.069808 | 0.0038413  | 0.016582 |
| 108351574 | LOC108351574    | 1.067765 | 0.00759274 | 0.029415 |
| 102552860 | LOC102552860    | 1.067746 | 0.00159694 | 0.007771 |
| 292777    | Tbcb            | 1.066854 | 6.88E-07   | 7.02E-06 |
| 362262    | Emilin3         | 1.064978 | 2.53E-04   | 0.001541 |
| 25292     | Apoc1           | 1.06447  | 0.20975502 | 0.388145 |
| 363071    | Stra6           | 1.064219 | 2.18E-22   | 8.89E-21 |
| 314467    | Rd31            | 1.061587 | 0.03035387 | 0.090923 |
| 367264    | Stat4           | 1.059277 | 0.00182394 | 0.008739 |
| 311783    | I136rn          | 1.057635 | 0.14773953 | 0.3032   |
| 309775    | Nepn            | 1.057141 | 0.00151575 | 0.007423 |
| 681124    | Dnase112        | 1.055038 | 0.07226444 | 0.180141 |
| 679564    | Lypd6           | 1.053319 | 0.0204816  | 0.066805 |
| 497856    | Rmi2            | 1.047087 | 0.01388998 | 0.04853  |
| 266771    | Vomlr90         | 1.044514 | 0.03191619 | 0.094739 |
| 501028    | RGD1560917      | 1.044123 | 0.02312929 | 0.073428 |
| 102547294 | Iqcn            | 1.038317 | 1.17E-04   | 7.69E-04 |
| 25253     | Dpp4            | 1.036951 | 2.10E-45   | 1.78E-43 |
| 287131    | Ccdc154         | 1.036759 | 0.04101488 | 0.115398 |
| 84007     | C3ar1           | 1.035826 | 7.47E-15   | 1.95E-13 |
| 689757    | LOC689757       | 1.033905 | 0.11873442 | 0.260188 |
| 500224    | Lbx2            | 1.03168  | 0.31978519 | 0.514776 |
| 313019    | Tent5b          | 1.030745 | 0.00103358 | 0.005326 |
| 103690024 | LOC103690024    | 1.029066 | 0.05011317 | 0.135147 |
| 108349825 | LOC108349825    | 1.02654  | 0.51043751 | 0.696567 |
| 306079    | LOC306079       | 1.024323 | 0.12309292 | 0.267462 |
| 501031    | RGD1560775      | 1.024069 | 2.31E-05   | 1.76E-04 |
| 102553500 | LOC102553500    | 1.020615 | 0.39872216 | 0.595955 |
| 102553456 | LOC102553456    | 1.020352 | 0.39535107 | 0.592638 |

|           |              |          |            |          |
|-----------|--------------|----------|------------|----------|
| 304729    | Gli2         | 1.017748 | 1.14E-12   | 2.44E-11 |
| 108348191 | LOC108348191 | 1.01624  | 0.33378865 | 0.529839 |
| 305431    | Stk32b       | 1.015077 | 1.70E-10   | 2.89E-09 |
| 681871    | LOC681871    | 1.013473 | 0.23655349 | 0.423497 |
| 287561    | Cc17         | 1.010267 | 9.09E-09   | 1.23E-07 |
| 103693367 | LOC103693367 | 1.005924 | 0.38100271 | 0.577999 |
| 100912450 | LOC100912450 | 1.003655 | 5.51E-10   | 8.78E-09 |
| 100911615 | LOC100911615 | 1.00272  | 3.09E-22   | 1.24E-20 |
| 100328908 | Zfp831       | 1.002693 | 0.15226763 | 0.309889 |
| 100359775 | Bpifa6       | 1.002693 | 0.55892771 | 0.736459 |
| 100361314 | Prr9         | 1.002693 | 0.55892771 | 0.736459 |
| 100361371 | Smco2        | 1.002693 | 0.55892771 | 0.736459 |
| 100365683 | Nr2e3        | 1.002693 | 0.40851153 | 0.604985 |
| 100909643 | LOC100909643 | 1.002693 | 0.55892771 | 0.736459 |
| 100909960 | LOC100909960 | 1.002693 | 0.55892771 | 0.736459 |
| 100911044 | LOC100911044 | 1.002693 | 0.40851153 | 0.604985 |
| 100911639 | LOC100911639 | 1.002693 | 0.55892771 | 0.736459 |
| 100912524 | LOC100912524 | 1.002693 | 0.55892771 | 0.736459 |
| 102547412 | LOC102547412 | 1.002693 | 0.55892771 | 0.736459 |
| 102548161 | LOC102548161 | 1.002693 | 0.1912683  | 0.364398 |
| 102551309 | LOC102551309 | 1.002693 | 0.55892771 | 0.736459 |
| 102554838 | LOC102554838 | 1.002693 | 0.31140847 | 0.506514 |
| 102554931 | LOC102554931 | 1.002693 | 0.55892771 | 0.736459 |
| 103689938 | LOC103689938 | 1.002693 | 0.40851153 | 0.604985 |
| 103690003 | LOC103690003 | 1.002693 | 0.90694961 | 0.960297 |
| 103690116 | LOC103690116 | 1.002693 | 0.4473948  | 0.639639 |
| 108349946 | LOC108349946 | 1.002693 | 0.55892771 | 0.736459 |
| 108349954 | LOC108349954 | 1.002693 | 0.55892771 | 0.736459 |
| 108351843 | Vsig1012     | 1.002693 | 0.55892771 | 0.736459 |
| 108352945 | LOC108352945 | 1.002693 | 0.55892771 | 0.736459 |
| 117232    | Barhl1       | 1.002693 | 0.31140847 | 0.506514 |
| 117518    | Cc117        | 1.002693 | 0.55892771 | 0.736459 |
| 140936    | Rcvrn        | 1.002693 | 0.55892771 | 0.736459 |
| 171028    | Atp12a       | 1.002693 | 0.55892771 | 0.736459 |
| 171179    | Glyat12      | 1.002693 | 0.55892771 | 0.736459 |
| 171496    | Atp2c2       | 1.002693 | 0.24245603 | 0.430363 |
| 171528    | Gzmb         | 1.002693 | 0.24245603 | 0.430363 |
| 24217     | Atp4b        | 1.002693 | 0.55892771 | 0.736459 |
| 24792     | Agxt         | 1.002693 | 0.55892771 | 0.736459 |
| 24903     | Kng2         | 1.002693 | 0.40851153 | 0.604985 |
| 25086     | Cyp2e1       | 1.002693 | 0.24245603 | 0.430363 |
| 25206     | Gucylb2      | 1.002693 | 0.55892771 | 0.736459 |
| 252859    | Mlnr         | 1.002693 | 0.12203946 | 0.265779 |
| 25483     | Msx2         | 1.002693 | 0.55892771 | 0.736459 |
| 25658     | Gckr         | 1.002693 | 0.15226763 | 0.309889 |
| 25726     | Mc5r         | 1.002693 | 0.02876037 | 0.087178 |
| 286976    | Gcnt3        | 1.002693 | 0.40851153 | 0.604985 |
| 289533    | Ugt2a3       | 1.002693 | 0.55892771 | 0.736459 |
| 289720    | Psap11       | 1.002693 | 0.40851153 | 0.604985 |
| 290055    | Olr1644      | 1.002693 | 0.55696876 | 0.736068 |
| 291754    | Dsg4         | 1.002693 | 0.40851153 | 0.604985 |
| 291846    | Prss54       | 1.002693 | 0.55892771 | 0.736459 |
| 293197    | Olr40        | 1.002693 | 0.55892771 | 0.736459 |
| 29323     | Slc6a18      | 1.002693 | 0.55892771 | 0.736459 |
| 293305    | Olr159       | 1.002693 | 0.55892771 | 0.736459 |
| 29646     | Adh4         | 1.002693 | 0.1912683  | 0.364398 |

|        |            |          |            |          |
|--------|------------|----------|------------|----------|
| 299829 | RGD1559995 | 1.002693 | 0.24245603 | 0.430363 |
| 304990 | Olr1595    | 1.002693 | 0.55892771 | 0.736459 |
| 306365 | Potem      | 1.002693 | 0.55892771 | 0.736459 |
| 308190 | Cyp26c1    | 1.002693 | 0.31140847 | 0.506514 |
| 312316 | Dox11      | 1.002693 | 0.00419471 | 0.017852 |
| 313149 | Cfap221    | 1.002693 | 0.55892771 | 0.736459 |
| 313152 | Ifnk       | 1.002693 | 0.55892771 | 0.736459 |
| 313545 | Tmem125    | 1.002693 | 0.24245603 | 0.430363 |
| 315947 | Nme9       | 1.002693 | 0.55892771 | 0.736459 |
| 317221 | Rt13       | 1.002693 | 0.01940073 | 0.063859 |
| 360486 | Linc00514  | 1.002693 | 0.40851153 | 0.604985 |
| 361412 | Adamts18   | 1.002693 | 0.03509934 | 0.101885 |
| 361707 | Tsga10ip   | 1.002693 | 7.87E-04   | 0.004198 |
| 362604 | Tlr12      | 1.002693 | 0.04291438 | 0.119699 |
| 363993 | Gpr25      | 1.002693 | 0.40851153 | 0.604985 |
| 364304 | Rnase1     | 1.002693 | 0.55892771 | 0.736459 |
| 364729 | Nme8       | 1.002693 | 0.55892771 | 0.736459 |
| 364973 | Best2      | 1.002693 | 0.55892771 | 0.736459 |
| 365564 | Atoh7      | 1.002693 | 0.55892771 | 0.736459 |
| 405038 | Olr312     | 1.002693 | 0.55892771 | 0.736459 |
| 405207 | Olr837     | 1.002693 | 0.24245603 | 0.430363 |
| 405216 | Olr1104    | 1.002693 | 0.55892771 | 0.736459 |
| 494499 | Gsta5      | 1.002693 | 0.31140847 | 0.506514 |
| 497651 | Rnase11    | 1.002693 | 0.55892771 | 0.736459 |
| 497970 | Heatr9     | 1.002693 | 0.55892771 | 0.736459 |
| 498275 | Fcrlb      | 1.002693 | 0.31140847 | 0.506514 |
| 498943 | RGD1561415 | 1.002693 | 0.40851153 | 0.604985 |
| 499000 | Zdhhc11    | 1.002693 | 0.1912683  | 0.364398 |
| 499721 | Clca41     | 1.002693 | 0.40851153 | 0.604985 |
| 500409 | Esrp1      | 1.002693 | 0.55892771 | 0.736459 |
| 500513 | RGD1562532 | 1.002693 | 0.55892771 | 0.736459 |
| 500598 | Tnfrsf18   | 1.002693 | 0.1912683  | 0.364398 |
| 501084 | RGD1559960 | 1.002693 | 0.55892771 | 0.736459 |
| 57305  | Uts2r      | 1.002693 | 0.55892771 | 0.736459 |
| 641640 | Defb36     | 1.002693 | 0.31140847 | 0.506514 |
| 64621  | Akp3       | 1.002693 | 0.55892771 | 0.736459 |
| 65050  | Barhl2     | 1.002693 | 0.55892771 | 0.736459 |
| 65132  | Cldn7      | 1.002693 | 0.55892771 | 0.736459 |
| 679834 | Meig1      | 1.002693 | 0.55892771 | 0.736459 |
| 680620 | Pou5f2     | 1.002693 | 0.55892771 | 0.736459 |
| 681290 | LOC681290  | 1.002693 | 0.07954966 | 0.193663 |
| 682006 | Tmem247    | 1.002693 | 0.55892771 | 0.736459 |
| 684545 | Nlrp2      | 1.002693 | 0.55892771 | 0.736459 |
| 685227 | Wfdc11     | 1.002693 | 0.55892771 | 0.736459 |
| 686140 | Fam47e     | 1.002693 | 0.40851153 | 0.604985 |
| 687403 | Acp7       | 1.002693 | 0.55892771 | 0.736459 |
| 687866 | Myo1h      | 1.002693 | 0.55892771 | 0.736459 |
| 688389 | LOC688389  | 1.002693 | 0.55892771 | 0.736459 |
| 688750 | Cd209f     | 1.002693 | 0.40851153 | 0.604985 |
| 689437 | LOC689437  | 1.002693 | 0.55892771 | 0.736459 |
| 689524 | Wdr64      | 1.002693 | 0.31140847 | 0.506514 |
| 690227 | Vom2r77    | 1.002693 | 0.55892771 | 0.736459 |
| 691352 | LOC691352  | 1.002693 | 0.55892771 | 0.736459 |
| 691693 | LOC691693  | 1.002693 | 0.56689729 | 0.736966 |
| 691982 | Tmem95     | 1.002693 | 0.15226763 | 0.309889 |
| 78974  | Six3       | 1.002693 | 0.55892771 | 0.736459 |

|           |                 |          |            |          |
|-----------|-----------------|----------|------------|----------|
| 291615    | Pabpc2          | 0.997134 | 0.03630374 | 0.104647 |
| 503122    | Cyp4f40         | 0.996619 | 0.52672435 | 0.710444 |
| 362951    | RGD1309808      | 0.996384 | 0.0067944  | 0.026846 |
| 103693700 | LOC103693700    | 0.99618  | 0.54116606 | 0.722909 |
| 108352309 | LOC108352309    | 0.995534 | 0.5602752  | 0.73569  |
| 25276     | Sycp1           | 0.995462 | 0.56225637 | 0.733637 |
| 108351325 | LOC108351325    | 0.994232 | 0.4492367  | 0.640973 |
| 108350933 | LOC108350933    | 0.986771 | 0.10049589 | 0.229462 |
| 499413    | Hsf2bp          | 0.981935 | 0.03285963 | 0.09689  |
| 83584     | Casp6           | 0.979103 | 7.29E-05   | 5.00E-04 |
| 100363268 | LOC100363268    | 0.977174 | 3.62E-06   | 3.25E-05 |
| 54271     | Tpsab1          | 0.973547 | 0.00475855 | 0.019879 |
| 292594    | Lilrb4          | 0.973149 | 1.21E-06   | 1.18E-05 |
| 102555622 | LOC102555622    | 0.972062 | 0.5386903  | 0.720714 |
| 25008     | Lta             | 0.969862 | 0.42666137 | 0.621759 |
| 171178    | Adh7            | 0.969526 | 0.00840434 | 0.032063 |
| 81503     | Cxcl1           | 0.967928 | 0.01017483 | 0.037576 |
| 103693258 | LOC103693258    | 0.965219 | 0.54544639 | 0.726435 |
| 108351354 | LOC108351354    | 0.965172 | 0.25833113 | 0.447713 |
| 108348142 | LOC108348142    | 0.961456 | 1.13E-05   | 9.18E-05 |
| 102552889 | LOC102552889    | 0.961324 | 0.0054651  | 0.02234  |
| 103693048 | LOC103693048    | 0.959625 | 0.09881056 | 0.226592 |
| 100910117 | LOC100910117    | 0.954961 | 0.00966817 | 0.036033 |
| 102546376 | LOC102546376    | 0.95399  | 0.00679363 | 0.026849 |
| 103694543 | LOC103694543    | 0.952288 | 0.40097142 | 0.59805  |
| 299685    | Bpifc           | 0.950984 | 0.01465682 | 0.050817 |
| 108348094 | NEWGENE_1306399 | 0.950844 | 5.58E-17   | 1.71E-15 |
| 102548194 | LOC102548194    | 0.949582 | 0.26391252 | 0.454203 |
| 365395    | C1cf1           | 0.949254 | 4.79E-05   | 3.43E-04 |
| 499377    | Plekhs1         | 0.947637 | 0.04667716 | 0.128038 |
| 303148    | Slc36a3         | 0.946523 | 0.26341618 | 0.453677 |
| 100910264 | LOC100910264    | 0.94611  | 0.5547422  | 0.734399 |
| 103690020 | LOC103690020    | 0.944258 | 1.53E-05   | 1.21E-04 |
| 310550    | Dchs2           | 0.9438   | 0.0064768  | 0.025838 |
| 100910669 | LOC100910669    | 0.942712 | 2.02E-08   | 2.59E-07 |
| 100912416 | LOC100912416    | 0.941461 | 5.05E-04   | 0.002831 |
| 501568    | RGD1560207      | 0.941293 | 0.06004629 | 0.15612  |
| 192203    | Fap             | 0.937105 | 4.31E-13   | 9.60E-12 |
| 296499    | Dlx2            | 0.935579 | 0.07382476 | 0.183036 |
| 498491    | Tlr11           | 0.935579 | 0.07382476 | 0.183036 |
| 59300     | Nat8f1          | 0.932662 | 6.50E-04   | 0.003545 |
| 679594    | LOC679594       | 0.930679 | 0.09780693 | 0.224913 |
| 498894    | RGD1560813      | 0.928806 | 0.16620466 | 0.33038  |
| 81737     | Ntf3            | 0.928693 | 0.09103961 | 0.213476 |
| 500534    | Ccdc24          | 0.92768  | 0.07342463 | 0.182317 |
| 286986    | Vom2r75         | 0.92545  | 0.43944885 | 0.632792 |
| 303856    | Atp13a5         | 0.924691 | 5.96E-05   | 4.17E-04 |
| 679817    | Ces1a           | 0.924691 | 0.02046157 | 0.066751 |
| 501998    | Cbln3           | 0.923589 | 0.03567284 | 0.103219 |
| 103690038 | LOC103690038    | 0.923016 | 9.38E-12   | 1.83E-10 |
| 291555    | Atp8b1          | 0.922867 | 1.24E-11   | 2.38E-10 |
| 108351613 | LOC108351613    | 0.92095  | 0.41619887 | 0.612038 |
| 688996    | Kcnk16          | 0.916963 | 0.00725154 | 0.028324 |
| 24237     | C6              | 0.916279 | 5.20E-12   | 1.04E-10 |
| 25194     | Gnrh1           | 0.91523  | 0.0302798  | 0.090758 |
| 361873    | Cxadr11         | 0.914983 | 0.15612611 | 0.315851 |



|           |              |          |            |          |
|-----------|--------------|----------|------------|----------|
| 297756    | LOC297756    | 0.912066 | 0.38895902 | 0.586054 |
| 114768    | Uox          | 0.909584 | 0.14006953 | 0.292936 |
| 500931    | Fam186b      | 0.909584 | 0.14006953 | 0.292936 |
| 100911599 | LOC100911599 | 0.909584 | 5.87E-09   | 8.17E-08 |
| 81508     | Bhmt         | 0.908358 | 0.01149966 | 0.041527 |
| 103694556 | LOC103694556 | 0.908056 | 0.67941217 | 0.82095  |
| 103694557 | LOC103694557 | 0.908056 | 0.67941217 | 0.82095  |
| 113918    | Slc6a20      | 0.905045 | 6.93E-43   | 5.64E-41 |
| 100910720 | LOC100910720 | 0.903337 | 0.12820009 | 0.274921 |
| 310836    | Abca4        | 0.903158 | 5.19E-04   | 0.002897 |
| 24617     | Serpine1     | 0.902676 | 2.12E-23   | 9.03E-22 |
| 29403     | Asgr2        | 0.901764 | 3.31E-10   | 5.41E-09 |
| 60378     | Lypd3        | 0.900814 | 0.01553671 | 0.053411 |
| 192262    | C1s          | 0.89992  | 5.16E-243  | #####    |
| 100363289 | LOC100363289 | 0.897431 | 0.00198803 | 0.009409 |
| 29132     | Atpla4       | 0.89658  | 1.63E-05   | 1.28E-04 |
| 499754    | Ccdc183      | 0.895778 | 0.17508755 | 0.342795 |
| 680522    | Hist1hlb     | 0.895778 | 0.17508755 | 0.342795 |
| 316620    | Mlph         | 0.895778 | 0.05514584 | 0.145929 |
| 690955    | Lilrb3b      | 0.895236 | 3.76E-10   | 6.09E-09 |
| 687345    | LOC687345    | 0.894964 | 0.09081072 | 0.213044 |
| 287140    | Prss34       | 0.891662 | 0.00807122 | 0.030997 |
| 501416    | LOC501416    | 0.890211 | 7.39E-14   | 1.79E-12 |
| 407756    | Btla         | 0.889483 | 2.15E-04   | 0.001325 |
| 309767    | Rsph4a       | 0.887514 | 0.47109805 | 0.661608 |
| 25553     | Slc6a4       | 0.887216 | 0.00974914 | 0.036278 |
| 292401    | Smoc2        | 0.883278 | 5.46E-73   | 7.64E-71 |
| 362119    | C5           | 0.882399 | 0.01178399 | 0.042401 |
| 102549995 | LOC102549995 | 0.881678 | 0.63879359 | 0.793441 |
| 498012    | Ace3         | 0.881423 | 0.18101751 | 0.350639 |
| 108348047 | LOC108348047 | 0.880365 | 5.43E-21   | 2.05E-19 |
| 366270    | Edn3         | 0.878958 | 1.83E-05   | 1.43E-04 |
| 405224    | Olr1587      | 0.878365 | 0.13897957 | 0.291409 |
| 100361556 | LOC100361556 | 0.877162 | 0.22042591 | 0.402513 |
| 289236    | Vsig8        | 0.877162 | 0.22042591 | 0.402513 |
| 296130    | Gpat2        | 0.877162 | 0.22042591 | 0.402513 |
| 311446    | Haol         | 0.877162 | 0.22042591 | 0.402513 |
| 315829    | Fam83b       | 0.877162 | 0.22042591 | 0.402513 |
| 363913    | Fzd10        | 0.877162 | 0.08310059 | 0.200285 |
| 365402    | RGD1566289   | 0.877162 | 0.22042591 | 0.402513 |
| 108351831 | LOC108351831 | 0.877049 | 0.01612278 | 0.054979 |
| 316018    | Rtp3         | 0.873672 | 0.22177791 | 0.404072 |
| 299343    | Tdrd9        | 0.873316 | 0.27649787 | 0.469039 |
| 29142     | Vnn1         | 0.869427 | 0.04117926 | 0.115775 |
| 685590    | LOC685590    | 0.869374 | 1.14E-06   | 1.12E-05 |
| 499949    | Apcdd11      | 0.869044 | 0.12281458 | 0.26704  |
| 501072    | Acaalb       | 0.868472 | 0.3000959  | 0.496726 |
| 363677    | Gjd3         | 0.86519  | 0.10243619 | 0.232887 |
| 102551486 | LOC102551486 | 0.863879 | 0.10287937 | 0.233532 |
| 685394    | Ar114ep1     | 0.863807 | 0.01723436 | 0.058073 |
| 298579    | Pla2g2d      | 0.862891 | 7.69E-10   | 1.21E-08 |
| 365855    | RGD1563667   | 0.862068 | 0.08308928 | 0.200283 |
| 494201    | Oas1e        | 0.861949 | 0.22066663 | 0.402663 |
| 108350568 | LOC108350568 | 0.85943  | 0.21638608 | 0.397672 |
| 24470     | Hsd3b5       | 0.85732  | 0.49844523 | 0.684814 |
| 316137    | Adgre1       | 0.856659 | 2.07E-36   | 1.48E-34 |



|           |              |          |            |          |
|-----------|--------------|----------|------------|----------|
| 362741    | Pax9         | 0.851835 | 5.65E-08   | 6.82E-07 |
| 294093    | Ankrd22      | 0.85069  | 0.28018493 | 0.473669 |
| 680678    | Tcf24        | 0.85069  | 0.28018493 | 0.473669 |
| 108349232 | LOC108349232 | 0.849842 | 0.13809461 | 0.289936 |
| 103690108 | LOC103690108 | 0.848043 | 2.65E-144  | #####    |
| 102551365 | LOC102551365 | 0.846574 | 0.00270622 | 0.012292 |
| 689008    | Fbn2         | 0.845692 | 1.47E-14   | 3.78E-13 |
| 25293     | Aqp4         | 0.841721 | 7.55E-10   | 1.19E-08 |
| 170672    | Nphs2        | 0.838167 | 0.01579632 | 0.054098 |
| 305340    | Rbm47        | 0.83727  | 2.39E-04   | 0.001465 |
| 108351322 | LOC108351322 | 0.832768 | 0.01432594 | 0.049833 |
| 117249    | Dnah3        | 0.832768 | 0.15738484 | 0.317638 |
| 311956    | Wdr86        | 0.832768 | 0.15738484 | 0.317638 |
| 313018    | Kdf1         | 0.831191 | 0.2382108  | 0.425225 |
| 103690143 | LOC103690143 | 0.830512 | 0.50639358 | 0.693084 |
| 83497     | Ocln         | 0.828025 | 5.39E-13   | 1.19E-11 |
| 108349777 | LOC108349777 | 0.827877 | 0.28712773 | 0.481623 |
| 100909612 | LOC100909612 | 0.826443 | 0.50877807 | 0.695248 |
| 688583    | LOC688583    | 0.825318 | 3.22E-06   | 2.92E-05 |
| 102550582 | LOC102550582 | 0.821098 | 0.18989133 | 0.362882 |
| 300718    | Sh2d7        | 0.820723 | 0.00803489 | 0.030895 |
| 100909893 | LOC100909893 | 0.819829 | 0.03388128 | 0.099318 |
| 297584    | Clec4a2      | 0.818269 | 0.020905   | 0.067837 |
| 108353009 | LOC108353009 | 0.81741  | 0.21380298 | 0.394123 |
| 108353010 | LOC108353010 | 0.81741  | 0.21380298 | 0.394123 |
| 24186     | Alb          | 0.817138 | 0.01300278 | 0.046029 |
| 307049    | RGD1564062   | 0.81694  | 0.21728725 | 0.398674 |
| 304966    | Fcgr3a       | 0.815066 | 3.12E-05   | 2.33E-04 |
| 684440    | Tlr8         | 0.815066 | 3.88E-09   | 5.57E-08 |
| 24646     | Abcb1b       | 0.815005 | 9.25E-04   | 0.004835 |
| 102554231 | LOC102554231 | 0.814283 | 0.311202   | 0.506481 |
| 290681    | Nat3         | 0.814121 | 0.09595195 | 0.221988 |
| 108348048 | LOC108348048 | 0.814001 | 1.40E-294  | #####    |
| 502160    | Lvrn         | 0.813152 | 5.70E-20   | 2.02E-18 |
| 29252     | Gzmm         | 0.812869 | 8.96E-05   | 6.01E-04 |
| 25314     | Emp1         | 0.81064  | 4.75E-176  | #####    |
| 102546579 | LOC102546579 | 0.810048 | 0.36108753 | 0.55767  |
| 102548061 | LOC102548061 | 0.810048 | 0.19649782 | 0.371039 |
| 24886     | Tbxas1       | 0.810048 | 1.35E-06   | 1.31E-05 |
| 252898    | Acox2        | 0.810048 | 0.19649782 | 0.371039 |
| 288322    | Lipi         | 0.810048 | 0.36108753 | 0.55767  |
| 303236    | Odf4         | 0.810048 | 0.36108753 | 0.55767  |
| 680246    | Tdgf1        | 0.810048 | 0.36108753 | 0.55767  |
| 687030    | Muc3         | 0.810048 | 0.36108753 | 0.55767  |
| 89810     | Opnlmw       | 0.810048 | 0.36108753 | 0.55767  |
| 89814     | Tnfsf4       | 0.810048 | 0.19649782 | 0.371039 |
| 302369    | Tbx22        | 0.810048 | 0.06776148 | 0.171315 |
| 100909441 | LOC100909441 | 0.809677 | 2.32E-105  | #####    |
| 296510    | Sp5          | 0.809673 | 0.0322953  | 0.095655 |
| 60327     | F13a1        | 0.808412 | 1.48E-24   | 6.71E-23 |
| 291669    | RGD1564574   | 0.807724 | 0.03975673 | 0.112758 |
| 114020    | Nat8f5       | 0.807471 | 1.17E-05   | 9.45E-05 |
| 296149    | Sirpb3       | 0.807009 | 0.1119517  | 0.249079 |
| 494199    | Oas1f        | 0.806895 | 7.59E-10   | 1.19E-08 |
| 501668    | Dmrtcla      | 0.806656 | 2.41E-06   | 2.24E-05 |
| 688913    | Dcun1d2      | 0.805431 | 2.80E-20   | 1.01E-18 |

|           |              |          |            |          |
|-----------|--------------|----------|------------|----------|
| 303384    | Mmp28        | 0.805381 | 6.20E-07   | 6.37E-06 |
| 24370     | Foxg1        | 0.804358 | 0.12866596 | 0.275764 |
| 287136    | Prss29       | 0.804148 | 0.00738108 | 0.028735 |
| 24190     | Aldob        | 0.79916  | 0.04999307 | 0.134956 |
| 679787    | Clec5a       | 0.798528 | 1.18E-07   | 1.36E-06 |
| 103691544 | LOC103691544 | 0.796884 | 0.55551354 | 0.734756 |
| 100362113 | LOC100362113 | 0.796612 | 7.36E-19   | 2.49E-17 |
| 689081    | LOC689081    | 0.796242 | 0.08286637 | 0.199973 |
| 102555392 | LOC102555392 | 0.795574 | 0.36211091 | 0.558571 |
| 103694226 | LOC103694226 | 0.795574 | 0.36211091 | 0.558571 |
| 360918    | Pf4          | 0.792274 | 1.95E-04   | 0.001214 |
| 25616     | Rln1         | 0.791189 | 0.14036277 | 0.293308 |
| 363458    | Col4a6       | 0.791189 | 0.03705339 | 0.106422 |
| 681341    | LOC681341    | 0.789247 | 0.16562632 | 0.329505 |
| 108348812 | LOC108348812 | 0.786607 | 0.21741927 | 0.398801 |
| 113892    | Nat8f3       | 0.786179 | 2.57E-23   | 1.09E-21 |
| 24231     | C2           | 0.785237 | 2.50E-54   | 2.63E-52 |
| 405349    | Olr1737      | 0.785102 | 0.44530119 | 0.638035 |
| 291760    | Dsc2         | 0.784053 | 0.01280836 | 0.045459 |
| 308350    | Lilrb3       | 0.782728 | 1.24E-05   | 1.00E-04 |
| 305269    | Stap1        | 0.782634 | 0.00111637 | 0.005677 |
| 309288    | Rorb         | 0.782581 | 0.03452184 | 0.100684 |
| 29268     | Tpsb2        | 0.782568 | 0.00139151 | 0.006891 |
| 306889    | RGD1564786   | 0.780702 | 0.04479448 | 0.124053 |
| 100361444 | Angptl8      | 0.780301 | 0.2469359  | 0.435574 |
| 117064    | Vip          | 0.780301 | 0.2469359  | 0.435574 |
| 360417    | Ptprq        | 0.780301 | 0.2469359  | 0.435574 |
| 690393    | Tex12        | 0.779504 | 0.00726995 | 0.028384 |
| 685025    | LOC685025    | 0.779435 | 0.00744824 | 0.028926 |
| 25432     | Drd4         | 0.779215 | 0.30376165 | 0.500835 |
| 116487    | Tgfb1        | 0.776824 | 9.72E-262  | #####    |
| 313504    | Foxd2        | 0.775644 | 1.45E-15   | 4.02E-14 |
| 292301    | Tbxt         | 0.775283 | 0.0333176  | 0.09799  |
| 689210    | Spdef        | 0.775283 | 0.0333176  | 0.09799  |
| 100912068 | LOC100912068 | 0.774579 | 5.72E-08   | 6.89E-07 |
| 366452    | Ptch2        | 0.771633 | 5.58E-21   | 2.10E-19 |
| 100911796 | LOC100911796 | 0.770402 | 0.0707723  | 0.17714  |
| 689458    | LOC689458    | 0.769308 | 0.05166036 | 0.138165 |
| 293591    | Scart1       | 0.768228 | 0.17395471 | 0.341262 |
| 25236     | Gpc3         | 0.767987 | 8.51E-172  | #####    |
| 100361947 | Zfp42        | 0.767477 | 0.19661137 | 0.371143 |
| 246266    | Aspg         | 0.765836 | 3.30E-07   | 3.56E-06 |
| 298605    | Tmem82       | 0.764534 | 0.0402947  | 0.113944 |
| 29139     | Dcn          | 0.762996 | 0          | 0        |
| 108348208 | LOC108348208 | 0.762211 | 0.04975503 | 0.134466 |
| 102547257 | LOC102547257 | 0.762207 | 0.15201257 | 0.309535 |
| 293154    | Folr2        | 0.762133 | 3.02E-13   | 6.83E-12 |
| 102547688 | LOC102547688 | 0.762112 | 0.02501138 | 0.078102 |
| 117027    | Ccr3         | 0.761685 | 0.12472369 | 0.269836 |
| 501570    | RGD1565785   | 0.761685 | 0.02991875 | 0.089931 |
| 497796    | LOC497796    | 0.761485 | 0.12310858 | 0.267466 |
| 685357    | Baiap212     | 0.760123 | 0.00590344 | 0.02381  |
| 108348044 | LOC108348044 | 0.759157 | 2.79E-06   | 2.56E-05 |
| 100909455 | LOC100909455 | 0.755524 | 8.03E-05   | 5.45E-04 |
| 293744    | Ms4a7        | 0.754766 | 0.00146412 | 0.007211 |
| 309666    | Ubash3a      | 0.754766 | 2.39E-04   | 0.001462 |

|           |              |          |            |          |
|-----------|--------------|----------|------------|----------|
| 108349172 | LOC108349172 | 0.754014 | 0.57223264 | 0.741322 |
| 298861    | Ptrhd1       | 0.753434 | 4.44E-30   | 2.52E-28 |
| 301227    | Trem2        | 0.752101 | 2.24E-11   | 4.18E-10 |
| 116649    | Kcnj4        | 0.751732 | 4.92E-04   | 0.002763 |
| 306454    | Cldn22       | 0.749006 | 1.21E-04   | 7.92E-04 |
| 102546424 | LOC102546424 | 0.748444 | 0.00215215 | 0.010073 |
| 24653     | Pla2g4a      | 0.748419 | 1.48E-06   | 1.43E-05 |
| 681092    | Pou6f2       | 0.74815  | 0.00662036 | 0.026301 |
| 89829     | Socs3        | 0.747764 | 2.83E-23   | 1.20E-21 |
| 689257    | Adgrd1       | 0.746801 | 6.31E-17   | 1.92E-15 |
| 313831    | Vit          | 0.746679 | 2.54E-34   | 1.68E-32 |
| 295279    | Fcgr1a       | 0.745987 | 6.35E-12   | 1.26E-10 |
| 448830    | Ly96         | 0.745667 | 1.41E-06   | 1.36E-05 |
| 108348113 | Egfl1        | 0.744793 | 0.00571458 | 0.023166 |
| 25021     | Itgam        | 0.743518 | 9.03E-12   | 1.77E-10 |
| 407760    | Krt86        | 0.742541 | 0.40798354 | 0.604861 |
| 108351105 | LOC108351105 | 0.740611 | 7.79E-08   | 9.25E-07 |
| 103690152 | LOC103690152 | 0.739996 | 0.03664718 | 0.105525 |
| 102551208 | Tctex1d4     | 0.739659 | 0.47556598 | 0.665502 |
| 102555817 | LOC102555817 | 0.739659 | 0.47556598 | 0.665502 |
| 103692827 | LOC103692827 | 0.739659 | 0.47556598 | 0.665502 |
| 108348722 | LOC108348722 | 0.739659 | 0.47556598 | 0.665502 |
| 108351813 | LOC108351813 | 0.739659 | 0.21655688 | 0.397851 |
| 24443     | Hdc          | 0.739659 | 0.00187171 | 0.008932 |
| 25069     | Tnfrsf8      | 0.739659 | 0.31298719 | 0.507954 |
| 25294     | Azgp1        | 0.739659 | 0.15360742 | 0.311832 |
| 290595    | LOC290595    | 0.739659 | 0.47556598 | 0.665502 |
| 301266    | Adgrf1       | 0.739659 | 0.31298719 | 0.507954 |
| 304000    | Igsf5        | 0.739659 | 0.31298719 | 0.507954 |
| 305307    | Cwh43        | 0.739659 | 0.47556598 | 0.665502 |
| 367306    | RGD1561755   | 0.739659 | 0.6438161  | 0.797339 |
| 498036    | Csnka2ip     | 0.739659 | 0.47556598 | 0.665502 |
| 498300    | LOC498300    | 0.739659 | 0.47556598 | 0.665502 |
| 499277    | RGD1560958   | 0.739659 | 0.21655688 | 0.397851 |
| 499765    | Cfap77       | 0.739659 | 0.47556598 | 0.665502 |
| 64572     | Vax2         | 0.739659 | 0.47556598 | 0.665502 |
| 685102    | Nkx6-3       | 0.739659 | 0.47556598 | 0.665502 |
| 689108    | Slc25a31     | 0.739659 | 0.47556598 | 0.665502 |
| 84475     | Cxcr3        | 0.739659 | 0.15360742 | 0.311832 |
| 102551737 | LOC102551737 | 0.739659 | 0.05907733 | 0.154275 |
| 296500    | Dlx1         | 0.739659 | 0.00759655 | 0.029421 |
| 498345    | Tmprss11f    | 0.739659 | 0.00759655 | 0.029421 |
| 25239     | Apod         | 0.736333 | 0          | 0        |
| 100359752 | LOC100359752 | 0.735589 | 5.62E-04   | 0.003108 |
| 100364500 | LOC100364500 | 0.73547  | 7.20E-21   | 2.68E-19 |
| 294257    | Cfb          | 0.734606 | 4.76E-12   | 9.55E-11 |
| 108349608 | LOC108349608 | 0.733414 | 7.96E-05   | 5.41E-04 |
| 498241    | RGD1564614   | 0.73044  | 0.4717331  | 0.662158 |
| 361266    | Akr1c12      | 0.730073 | 0.00830827 | 0.031748 |
| 689907    | Ankrd61      | 0.728518 | 0.0389493  | 0.110814 |
| 315039    | Osr2         | 0.725954 | 2.26E-11   | 4.21E-10 |
| 29509     | Slc22a6      | 0.725159 | 3.15E-04   | 0.001869 |
| 681236    | Cd79a1       | 0.725101 | 0.05600296 | 0.147828 |
| 100909794 | LOC100909794 | 0.724417 | 0.0807339  | 0.195995 |
| 170635    | Dhrs9        | 0.722585 | 0.09807641 | 0.225383 |
| 24500     | I19r         | 0.722585 | 0.09807641 | 0.225383 |

|           |              |          |            |          |
|-----------|--------------|----------|------------|----------|
| 394266    | Gjb2         | 0.721917 | 1.23E-20   | 4.52E-19 |
| 117029    | Ccr5         | 0.721805 | 2.76E-11   | 5.12E-10 |
| 103694534 | LOC103694534 | 0.721645 | 0.50723048 | 0.693681 |
| 100365773 | LOC100365773 | 0.720922 | 0.02587472 | 0.080167 |
| 102555624 | LOC102555624 | 0.719071 | 0.18550201 | 0.356929 |
| 300520    | Vsig2        | 0.7189   | 0.13554206 | 0.28579  |
| 686581    | Tmprss11a    | 0.7189   | 0.13554206 | 0.28579  |
| 498638    | Msr1         | 0.718272 | 1.77E-13   | 4.09E-12 |
| 66021     | Cybb         | 0.717021 | 3.62E-13   | 8.09E-12 |
| 65129     | Cldn1        | 0.716612 | 2.30E-94   | 4.06E-92 |
| 305355    | Tlr10        | 0.715987 | 0.13719147 | 0.288358 |
| 100910688 | LOC100910688 | 0.715295 | 1.18E-04   | 7.71E-04 |
| 499271    | Itgax        | 0.71493  | 4.07E-06   | 3.61E-05 |
| 498022    | RGD1559482   | 0.713768 | 4.04E-05   | 2.94E-04 |
| 282586    | Muc6         | 0.713187 | 0.06368698 | 0.163554 |
| 298017    | Actl7a       | 0.713187 | 0.18977878 | 0.362721 |
| 308716    | I120ra       | 0.713187 | 0.18977878 | 0.362721 |
| 304988    | Mnda         | 0.712211 | 6.62E-07   | 6.76E-06 |
| 24379     | Gad1         | 0.710804 | 7.55E-05   | 5.16E-04 |
| 293490    | Gdpd3        | 0.709912 | 0.00590172 | 0.023808 |
| 295012    | RGD1563562   | 0.709071 | 0.41589781 | 0.611832 |
| 363143    | Gnat1        | 0.708962 | 0.08692665 | 0.20694  |
| 687532    | LOC687532    | 0.708497 | 0.08715951 | 0.207002 |
| 408229    | Slpil2       | 0.70679  | 0.24591199 | 0.434291 |
| 292406    | Thbs2        | 0.705935 | 1.34E-75   | 1.96E-73 |
| 24536     | Lepr         | 0.704721 | 1.78E-32   | 1.10E-30 |
| 305842    | Rnase6       | 0.704586 | 0.23785636 | 0.424911 |
| 25383     | Apobec1      | 0.703702 | 5.38E-08   | 6.51E-07 |
| 296179    | Fermt1       | 0.703395 | 0.16487692 | 0.32908  |
| 108348111 | LOC108348111 | 0.703133 | 6.66E-06   | 5.65E-05 |
| 299599    | Theg         | 0.703133 | 0.27109625 | 0.462699 |
| 305236    | Cxcl11       | 0.703133 | 0.27109625 | 0.462699 |
| 140586    | Sox9         | 0.700891 | 6.11E-09   | 8.48E-08 |
| 362431    | Clec4a3      | 0.700255 | 7.42E-08   | 8.83E-07 |
| 500697    | RGD1565693   | 0.700231 | 0.23086756 | 0.416016 |
| 362430    | Clec4a1      | 0.699617 | 3.51E-10   | 5.71E-09 |
| 100912590 | LOC100912590 | 0.699356 | 2.41E-07   | 2.65E-06 |
| 364858    | Stk32a       | 0.697839 | 0.01240615 | 0.044263 |
| 680346    | LOC680346    | 0.693887 | 0.05003233 | 0.135005 |
| 24494     | I11b         | 0.693009 | 0.011105   | 0.0404   |
| 685351    | LOC685351    | 0.692353 | 0.3663386  | 0.562383 |
| 499536    | Ccdc152      | 0.692238 | 0.01243202 | 0.044339 |
| 316638    | Sned1        | 0.69138  | 6.75E-98   | 1.25E-95 |
| 100361584 | Ano2         | 0.690749 | 0.10560624 | 0.237936 |
| 306127    | Acod1        | 0.690454 | 0.10058723 | 0.229561 |
| 297666    | Klra5        | 0.690418 | 0.04760337 | 0.13011  |
| 59323     | Erbb4        | 0.689535 | 5.66E-04   | 0.003128 |
| 108351351 | LOC108351351 | 0.68944  | 0.56548006 | 0.736129 |
| 681319    | Ido2         | 0.68832  | 0.05748154 | 0.150915 |
| 304021    | Col8a1       | 0.686845 | 6.32E-25   | 2.92E-23 |
| 84397     | Tnfaip6      | 0.686831 | 3.49E-04   | 0.002054 |
| 685007    | Unc93a       | 0.685105 | 0.01706857 | 0.057565 |
| 171339    | Dnah1        | 0.684332 | 1.49E-04   | 9.50E-04 |
| 679841    | Dnd1         | 0.683736 | 0.22596209 | 0.409657 |
| 498781    | RGD1561231   | 0.683418 | 5.48E-10   | 8.74E-09 |
| 64552     | Mpeg1        | 0.682384 | 6.84E-52   | 6.86E-50 |

|           |                 |          |            |          |
|-----------|-----------------|----------|------------|----------|
| 114099    | Cysltrl         | 0.682231 | 3.02E-05   | 2.26E-04 |
| 688858    | LOC688858       | 0.682201 | 0.39935264 | 0.596523 |
| 103690021 | NEWGENE_1589866 | 0.681632 | 0.27837791 | 0.471451 |
| 690912    | Fam124b         | 0.681632 | 0.27837791 | 0.471451 |
| 100359656 | LOC100359656    | 0.680765 | 0.4014032  | 0.598343 |
| 103690541 | Fam237a         | 0.680765 | 0.4014032  | 0.598343 |
| 29151     | Ucn             | 0.680765 | 0.4014032  | 0.598343 |
| 295449    | Arhgef38        | 0.680765 | 0.09330106 | 0.21744  |
| 310090    | Ddx4            | 0.680765 | 0.4014032  | 0.598343 |
| 500705    | Efcab11         | 0.680765 | 0.14611416 | 0.301098 |
| 103692570 | LOC103692570    | 0.677302 | 0.02224393 | 0.071247 |
| 266778    | Vom2r44         | 0.676398 | 5.33E-04   | 0.002961 |
| 81682     | Lum             | 0.676214 | 2.00E-271  | #####    |
| 54250     | Fgf2            | 0.674639 | 0.00432411 | 0.018297 |
| 100362830 | LOC100362830    | 0.674299 | 0.04427722 | 0.122853 |
| 24233     | C4a             | 0.673382 | 2.11E-31   | 1.27E-29 |
| 24330     | Egr1            | 0.673238 | 3.35E-39   | 2.54E-37 |
| 500362    | Lmtd1           | 0.670118 | 0.1284481  | 0.275329 |
| 85272     | Bmp7            | 0.668956 | 4.01E-11   | 7.23E-10 |
| 266685    | Ugt2b17         | 0.668878 | 0.09768148 | 0.224706 |
| 102553099 | LOC102553099    | 0.668647 | 0.01317081 | 0.046503 |
| 360747    | Spag6           | 0.668086 | 0.41125787 | 0.606975 |
| 308762    | Tt1113          | 0.667957 | 2.57E-04   | 0.001559 |
| 312701    | Cd163           | 0.667795 | 7.70E-20   | 2.70E-18 |
| 503462    | Trmt2b          | 0.667509 | 0.01873949 | 0.062177 |
| 302586    | LOC302586       | 0.666378 | 0.28709785 | 0.481615 |
| 301365    | I118r1          | 0.665658 | 0.07298583 | 0.181535 |
| 365391    | Trpm5           | 0.665658 | 0.02810133 | 0.08563  |
| 361221    | No18            | 0.665623 | 3.52E-07   | 3.77E-06 |
| 299737    | Ntn4            | 0.665104 | 1.03E-25   | 4.95E-24 |
| 317181    | SrpX2           | 0.664697 | 4.37E-06   | 3.86E-05 |
| 298765    | Zfp3612         | 0.663795 | 0.01804517 | 0.060293 |
| 503146    | RGD1561812      | 0.662811 | 0.17065035 | 0.336652 |
| 300384    | Naalad2         | 0.662618 | 0.0100333  | 0.037158 |
| 474143    | Clec4a          | 0.662618 | 0.0100333  | 0.037158 |
| 103693375 | LOC103693375    | 0.662069 | 0.57870069 | 0.746249 |
| 266684    | Cyp2d1          | 0.660358 | 0.00274543 | 0.012452 |
| 287231    | RGD1559575      | 0.660092 | 1.30E-08   | 1.73E-07 |
| 24826     | Tg              | 0.659806 | 0.06462451 | 0.165249 |
| 299242    | Gpr65           | 0.658739 | 0.03770593 | 0.107889 |
| 679975    | Gpr183          | 0.656802 | 4.22E-05   | 3.05E-04 |
| 103693234 | LOC103693234    | 0.656726 | 0.05294579 | 0.141048 |
| 691382    | Hus1b           | 0.65647  | 0.31702709 | 0.511676 |
| 103690097 | LOC103690097    | 0.655745 | 0.061947   | 0.160014 |
| 292902    | Slc6a16         | 0.65477  | 0.34178052 | 0.538463 |
| 314711    | Spic            | 0.65477  | 0.17881049 | 0.347565 |
| 315074    | RGD1308195      | 0.65477  | 0.34178052 | 0.538463 |
| 366990    | RGD1305207      | 0.65477  | 0.34178052 | 0.538463 |
| 500088    | Rab19           | 0.65477  | 0.34178052 | 0.538463 |
| 688111    | Hsf5            | 0.65477  | 0.05726188 | 0.150421 |
| 114523    | Ntn1            | 0.65477  | 2.84E-14   | 7.16E-13 |
| 307838    | Chst4           | 0.65441  | 0.09294144 | 0.216814 |
| 100912787 | LOC100912787    | 0.653281 | 0.1324681  | 0.281726 |
| 103690032 | LOC103690032    | 0.651816 | 0.34044716 | 0.53714  |
| 100910606 | LOC100910606    | 0.651786 | 0.73735652 | 0.857952 |
| 310869    | Rrh             | 0.651552 | 0.08480883 | 0.203398 |

|           |              |          |            |          |
|-----------|--------------|----------|------------|----------|
| 171452    | Rab3i11      | 0.651471 | 1.02E-12   | 2.19E-11 |
| 685158    | Cfap299      | 0.651221 | 0.02982298 | 0.089728 |
| 494209    | Ly49si3      | 0.650824 | 0.06725324 | 0.170211 |
| 64033     | Ccnd2        | 0.65078  | 1.31E-12   | 2.77E-11 |
| 316061    | Slc22a14     | 0.650392 | 0.05077265 | 0.136394 |
| 406865    | Mpig6b       | 0.650392 | 0.05077265 | 0.136394 |
| 103694852 | LOC103694852 | 0.649365 | 0.32070193 | 0.515859 |
| 103690035 | LOC103690035 | 0.649333 | 0.3377893  | 0.53463  |
| 140594    | Syt14        | 0.649332 | 1.35E-04   | 8.69E-04 |
| 689931    | Mgarp        | 0.649056 | 0.08791915 | 0.208235 |
| 445442    | Thbs1        | 0.64886  | 5.44E-30   | 3.07E-28 |
| 84386     | Slpi         | 0.648856 | 0.00254246 | 0.011643 |
| 316207    | RGD1307182   | 0.648561 | 0.03193273 | 0.094773 |
| 296952    | Kcp          | 0.648423 | 1.36E-06   | 1.32E-05 |
| 64668     | Mbl2         | 0.646344 | 0.30379993 | 0.500854 |
| 94341     | Kcnj13       | 0.646    | 2.91E-07   | 3.16E-06 |
| 311425    | Adam33       | 0.645371 | 1.34E-09   | 2.03E-08 |
| 315979    | Col6a6       | 0.643573 | 2.37E-38   | 1.77E-36 |
| 316559    | Slc19a3      | 0.642797 | 0.00200903 | 0.009487 |
| 103690109 | LOC103690109 | 0.642183 | 0.29146486 | 0.486925 |
| 64825     | N5           | 0.641883 | 0.00103101 | 0.005314 |
| 102552784 | LOC102552784 | 0.641527 | 0.39477803 | 0.592105 |
| 313060    | Spocd1       | 0.640123 | 0.29318733 | 0.488945 |
| 680270    | Ccdc83       | 0.640123 | 0.29318733 | 0.488945 |
| 690888    | Oosp2        | 0.640123 | 0.29318733 | 0.488945 |
| 303566    | LOC303566    | 0.640123 | 0.13713159 | 0.28828  |
| 686596    | LOC686596    | 0.640123 | 0.13713159 | 0.28828  |
| 100360801 | Ddx60        | 0.63795  | 3.62E-06   | 3.25E-05 |
| 114247    | Slfn4        | 0.636201 | 1.81E-26   | 8.98E-25 |
| 100910790 | LOC100910790 | 0.635951 | 0.28620323 | 0.480538 |
| 287098    | Cldn6        | 0.635322 | 0.37752859 | 0.574605 |
| 686050    | LOC686050    | 0.634962 | 0.12043636 | 0.263131 |
| 362417    | I117re       | 0.633826 | 0.00169969 | 0.008203 |
| 361821    | Col6a2       | 0.633438 | 2.32E-181  | #####    |
| 361289    | Colec12      | 0.632999 | 3.54E-22   | 1.41E-20 |
| 299699    | Aldh112      | 0.632582 | 5.18E-05   | 3.67E-04 |
| 298566    | Clqa         | 0.632217 | 2.22E-31   | 1.33E-29 |
| 29200     | Inhba        | 0.631974 | 3.29E-06   | 2.97E-05 |
| 297411    | Tprkb        | 0.631612 | 2.42E-17   | 7.54E-16 |
| 100911422 | LOC100911422 | 0.631601 | 0.01033744 | 0.038103 |
| 100365733 | Tmem262      | 0.630725 | 0.38396597 | 0.580644 |
| 294795    | Caps1        | 0.630725 | 0.2529681  | 0.441512 |
| 102554774 | LOC102554774 | 0.630499 | 0.50407528 | 0.690705 |
| 81523     | Myoc         | 0.629576 | 0          | 0        |
| 100360841 | LOC100360841 | 0.627225 | 0.29180591 | 0.487239 |
| 303666    | Cd300c2      | 0.627006 | 0.03182063 | 0.094514 |
| 103689965 | LOC103689965 | 0.626995 | 3.03E-33   | 1.92E-31 |
| 691499    | Zfp469       | 0.626584 | 1.41E-11   | 2.68E-10 |
| 100912350 | LOC100912350 | 0.626021 | 0.03151242 | 0.093803 |
| 312677    | Ccdc77       | 0.625898 | 6.78E-12   | 1.34E-10 |
| 311426    | Siglec1      | 0.625028 | 2.97E-10   | 4.88E-09 |
| 362550    | Ror1         | 0.623635 | 3.19E-08   | 3.99E-07 |
| 367332    | RGD1566007   | 0.62328  | 0.49628786 | 0.682588 |
| 26296     | Tfec         | 0.622421 | 0.02964252 | 0.089326 |
| 554353    | Gpr34        | 0.62227  | 3.01E-05   | 2.25E-04 |
| 688925    | LOC688925    | 0.621764 | 0.39560747 | 0.592835 |



|           |              |          |            |          |
|-----------|--------------|----------|------------|----------|
| 311835    | Ddx31        | 0.621221 | 1.24E-12   | 2.62E-11 |
| 301232    | RGD1561662   | 0.620194 | 5.74E-04   | 0.003165 |
| 310683    | Itga10       | 0.619365 | 0.00343926 | 0.015113 |
| 102555239 | LOC102555239 | 0.617272 | 0.31267474 | 0.50775  |
| 50621     | Slc23a1      | 0.61567  | 0.16647729 | 0.329992 |
| 100912948 | LOC100912948 | 0.615284 | 0.32484065 | 0.520363 |
| 691249    | LOC691249    | 0.615172 | 0.34939164 | 0.546095 |
| 24188     | Aldh1a1      | 0.615009 | 3.91E-56   | 4.25E-54 |
| 89843     | Cxadr        | 0.614471 | 3.07E-84   | 5.04E-82 |
| 353227    | Zbtb16       | 0.614271 | 4.32E-28   | 2.30E-26 |
| 100270669 | Riad1        | 0.613831 | 0.10916693 | 0.243881 |
| 314652    | RGD1564744   | 0.613732 | 0.12362787 | 0.26841  |
| 689936    | Gpr81        | 0.613419 | 0.00403962 | 0.017289 |
| 100911562 | LOC100911562 | 0.613183 | 0.28434668 | 0.478391 |
| 102556253 | Tdrd15       | 0.612591 | 0.00756716 | 0.02934  |
| 100910978 | LOC100910978 | 0.612193 | 3.35E-13   | 7.52E-12 |
| 60449     | Gnb3         | 0.611903 | 0.01046237 | 0.038504 |
| 361734    | Ms4a4a       | 0.611679 | 0.0645857  | 0.165216 |
| 499991    | Steap4       | 0.611093 | 1.10E-36   | 7.88E-35 |
| 306761    | F12          | 0.610376 | 0.12771446 | 0.274265 |
| 366189    | Tgm3         | 0.610376 | 0.12771446 | 0.274265 |
| 64352     | Gstm5        | 0.61022  | 9.84E-04   | 0.005105 |
| 494200    | Oaslh        | 0.610111 | 0.45309271 | 0.644544 |
| 312279    | Epha1        | 0.609883 | 0.16609837 | 0.330203 |
| 680866    | Tmem45a      | 0.608286 | 0.09328377 | 0.217426 |
| 295703    | Serping1     | 0.607832 | 2.86E-177  | #####    |
| 287392    | Tekt3        | 0.607392 | 2.76E-04   | 0.001665 |
| 102553405 | LOC102553405 | 0.606994 | 9.16E-06   | 7.58E-05 |
| 313233    | Galnt12      | 0.606765 | 0.01954622 | 0.06426  |
| 690416    | Rbbp8nl      | 0.605244 | 0.08296428 | 0.200083 |
| 102554393 | Adamts13     | 0.604463 | 0.00130543 | 0.006513 |
| 102557539 | LOC102557539 | 0.604307 | 0.64117226 | 0.795202 |
| 286926    | Tfpi2        | 0.604144 | 0.01232097 | 0.044017 |
| 102550277 | LOC102550277 | 0.604116 | 1.69E-04   | 0.001068 |
| 290403    | Rubcn1       | 0.602155 | 0.001122   | 0.005701 |
| 685567    | Ppil6        | 0.601847 | 0.03581386 | 0.103517 |
| 60423     | Slc28a2      | 0.601222 | 1.97E-09   | 2.92E-08 |
| 24988     | RT1-M2       | 0.599688 | 0.42577775 | 0.620994 |
| 304382    | RGD1561143   | 0.599208 | 0.04095711 | 0.115286 |
| 317590    | Magec2       | 0.598752 | 0.30517837 | 0.502084 |
| 103692555 | LOC103692555 | 0.598091 | 0.01171541 | 0.04217  |
| 291653    | Pcdhb6       | 0.597902 | 4.67E-04   | 0.002641 |
| 100363472 | LOC100363472 | 0.597673 | 0.32752433 | 0.523165 |
| 24329     | Egfr         | 0.596643 | 4.74E-29   | 2.59E-27 |
| 108348197 | LOC108348197 | 0.595588 | 0.19962068 | 0.375114 |
| 102555503 | LOC102555503 | 0.595518 | 0.01152707 | 0.041602 |
| 24521     | Kcnj1        | 0.594505 | 0.00811145 | 0.031121 |
| 311252    | Pamr1        | 0.593997 | 6.30E-12   | 1.25E-10 |
| 103692301 | LOC103692301 | 0.592409 | 0.57561458 | 0.74378  |
| 311797    | Fam166a      | 0.591976 | 0.22189365 | 0.404205 |
| 301489    | Pi15         | 0.591938 | 0.00441522 | 0.018628 |
| 307414    | MGC108823    | 0.591901 | 1.83E-07   | 2.04E-06 |
| 80899     | Slc21a4      | 0.590058 | 0.52192427 | 0.70627  |
| 317227    | Tlr13        | 0.589617 | 5.51E-07   | 5.72E-06 |
| 687424    | Dtx1         | 0.588519 | 1.63E-26   | 8.15E-25 |
| 311406    | Dusp2        | 0.587656 | 0.10409096 | 0.235469 |



|           |              |          |            |          |
|-----------|--------------|----------|------------|----------|
| 100360476 | Sh2d3a       | 0.587656 | 0.20230271 | 0.378306 |
| 100360666 | Lrtml        | 0.587656 | 0.74991263 | 0.866237 |
| 100360795 | Tmco2        | 0.587656 | 0.65214304 | 0.802356 |
| 100363367 | Dthd1        | 0.587656 | 0.65214304 | 0.802356 |
| 102546838 | LOC102546838 | 0.587656 | 0.65214304 | 0.802356 |
| 102547963 | LOC102547963 | 0.587656 | 0.74991263 | 0.866237 |
| 102549011 | LOC102549011 | 0.587656 | 0.65214304 | 0.802356 |
| 103691649 | LOC103691649 | 0.587656 | 0.52379324 | 0.707794 |
| 103693455 | LOC103693455 | 0.587656 | 0.65214304 | 0.802356 |
| 108349768 | LOC108349768 | 0.587656 | 0.65214304 | 0.802356 |
| 108351090 | LOC108351090 | 0.587656 | 0.52379324 | 0.707794 |
| 108352613 | LOC108352613 | 0.587656 | 0.65214304 | 0.802356 |
| 114552    | Bc12l10      | 0.587656 | 0.52379324 | 0.707794 |
| 140927    | Selenbp1     | 0.587656 | 1.19E-05   | 9.65E-05 |
| 170637    | Samsn1       | 0.587656 | 0.00278808 | 0.012634 |
| 171459    | Gp2          | 0.587656 | 0.65214304 | 0.802356 |
| 24254     | Cel          | 0.587656 | 0.23299843 | 0.418885 |
| 24898     | Slc6a3       | 0.587656 | 0.65214304 | 0.802356 |
| 24938     | Grpr         | 0.587656 | 0.65214304 | 0.802356 |
| 286911    | Prss3        | 0.587656 | 0.65214304 | 0.802356 |
| 287346    | Fam183a      | 0.587656 | 0.65214304 | 0.802356 |
| 287751    | Lyz16        | 0.587656 | 0.65214304 | 0.802356 |
| 287885    | Sectmla      | 0.587656 | 0.17625976 | 0.344471 |
| 289687    | Gba3         | 0.587656 | 0.65214304 | 0.802356 |
| 290425    | RGD1306441   | 0.587656 | 0.65214304 | 0.802356 |
| 293426    | Nlrp10       | 0.587656 | 0.65214304 | 0.802356 |
| 29394     | Gcm1         | 0.587656 | 0.65214304 | 0.802356 |
| 294394    | Gprc6a       | 0.587656 | 0.65214304 | 0.802356 |
| 296138    | Acox1        | 0.587656 | 0.65214304 | 0.802356 |
| 298394    | Olr836       | 0.587656 | 0.65214304 | 0.802356 |
| 300250    | Krt1         | 0.587656 | 0.313459   | 0.508417 |
| 300549    | Olr1223      | 0.587656 | 0.65214304 | 0.802356 |
| 300676    | Ttc36        | 0.587656 | 0.65214304 | 0.802356 |
| 301154    | Vom2r76      | 0.587656 | 0.43492832 | 0.628874 |
| 301233    | Gucala       | 0.587656 | 0.65214304 | 0.802356 |
| 303477    | Igf2bp1      | 0.587656 | 0.52379324 | 0.707794 |
| 304690    | Serpinb13    | 0.587656 | 0.65214304 | 0.802356 |
| 306441    | Spata4       | 0.587656 | 0.65214304 | 0.802356 |
| 309584    | RT1-M4       | 0.587656 | 0.65214304 | 0.802356 |
| 310327    | Qrfpr        | 0.587656 | 0.65214304 | 0.802356 |
| 310902    | LOC310902    | 0.587656 | 0.65214304 | 0.802356 |
| 319106    | Taar8b       | 0.587656 | 0.65214304 | 0.802356 |
| 319107    | Taar9        | 0.587656 | 0.65214304 | 0.802356 |
| 360750    | Ccl25        | 0.587656 | 0.65214304 | 0.802356 |
| 361979    | Tsacc        | 0.587656 | 0.65214304 | 0.802356 |
| 362727    | Efcab10      | 0.587656 | 0.20230271 | 0.378306 |
| 363784    | Tigit        | 0.587656 | 0.65214304 | 0.802356 |
| 367201    | RGD1562392   | 0.587656 | 0.65214304 | 0.802356 |
| 405023    | Olr1345      | 0.587656 | 0.74991263 | 0.866237 |
| 405066    | Olr1388      | 0.587656 | 0.74991263 | 0.866237 |
| 499287    | Ano9         | 0.587656 | 0.43492832 | 0.628874 |
| 500243    | Asprv1       | 0.587656 | 0.52379324 | 0.707794 |
| 501056    | Tmem89       | 0.587656 | 0.65214304 | 0.802356 |
| 554302    | Tas2r108     | 0.587656 | 0.52379324 | 0.707794 |
| 58850     | Nr0b1        | 0.587656 | 0.65214304 | 0.802356 |
| 58980     | Slc13a1      | 0.587656 | 0.52379324 | 0.707794 |

|           |              |          |            |          |
|-----------|--------------|----------|------------|----------|
| 679942    | Angptl1      | 0.587656 | 0.00435779 | 0.018415 |
| 680244    | Tmem139      | 0.587656 | 0.65214304 | 0.802356 |
| 681682    | Ct45a9       | 0.587656 | 0.65214304 | 0.802356 |
| 688155    | B4galnt2     | 0.587656 | 0.26950711 | 0.460833 |
| 690037    | Izumolr      | 0.587656 | 0.23299843 | 0.418885 |
| 117253    | Dnah11       | 0.586122 | 1.74E-12   | 3.63E-11 |
| 498564    | Itgbl1       | 0.584474 | 3.63E-48   | 3.39E-46 |
| 102552068 | LOC102552068 | 0.584383 | 0.09396384 | 0.218503 |
| 171356    | Foxc2        | 0.583879 | 6.52E-11   | 1.14E-09 |
| 108348188 | LOC108348188 | 0.58354  | 0.49381516 | 0.680761 |
| 29169     | Vtn          | 0.583254 | 4.20E-47   | 3.79E-45 |
| 116662    | Ecm1         | 0.583108 | 3.96E-27   | 2.03E-25 |
| 302668    | Ace2         | 0.582503 | 1.03E-09   | 1.58E-08 |
| 502534    | RGD1560162   | 0.582031 | 0.61312447 | 0.773872 |
| 680910    | LOC680910    | 0.581299 | 7.96E-05   | 5.41E-04 |
| 25641     | Igfbp6       | 0.581286 | 3.76E-170  | #####    |
| 309810    | RGD1304770   | 0.581162 | 0.24976507 | 0.438251 |
| 362268    | Rbpjl        | 0.58082  | 0.05215874 | 0.139283 |
| 688022    | LOC688022    | 0.58046  | 0.65572513 | 0.802641 |
| 154516    | Ugt1a7c      | 0.579953 | 6.25E-08   | 7.50E-07 |
| 246239    | Slc15a3      | 0.579703 | 1.93E-06   | 1.83E-05 |
| 311547    | Foxs1        | 0.578939 | 6.49E-16   | 1.84E-14 |
| 296371    | Pltp         | 0.578919 | 4.62E-43   | 3.80E-41 |
| 301562    | Col4a4       | 0.577808 | 0.02851329 | 0.086664 |
| 360857    | Rgs16        | 0.577314 | 1.69E-07   | 1.90E-06 |
| 289048    | Lhx9         | 0.575668 | 0.00869605 | 0.032952 |
| 108348162 | Thpo         | 0.574999 | 0.28444591 | 0.478515 |
| 314322    | Fos          | 0.574093 | 1.20E-13   | 2.82E-12 |
| 302756    | Ppp4r3c      | 0.573156 | 0.66097951 | 0.806171 |
| 287435    | Cd68         | 0.573145 | 1.10E-10   | 1.89E-09 |
| 103690057 | LOC103690057 | 0.573003 | 3.88E-09   | 5.57E-08 |
| 311785    | Psd4         | 0.572593 | 9.29E-05   | 6.20E-04 |
| 25556     | I11r11       | 0.572453 | 9.42E-05   | 6.28E-04 |
| 361493    | Lilrb3l      | 0.571041 | 1.43E-04   | 9.16E-04 |
| 293686    | Slc22a20     | 0.570977 | 0.09630959 | 0.22237  |
| 294932    | Spata16      | 0.570977 | 0.09630959 | 0.22237  |
| 361834    | Cabcocol     | 0.570582 | 0.00444167 | 0.018723 |
| 353317    | Acsm4        | 0.570295 | 0.12246547 | 0.266463 |
| 686932    | Cdhr3        | 0.570034 | 0.00237304 | 0.01097  |
| 685645    | Ces2j        | 0.569734 | 0.72037998 | 0.846943 |
| 24176     | Adrb2        | 0.569226 | 0.00160861 | 0.007817 |
| 300920    | Cl1dn2       | 0.56921  | 0.07679768 | 0.188505 |
| 303505    | Plxdc1       | 0.569089 | 6.54E-10   | 1.03E-08 |
| 25752     | Cd6          | 0.56904  | 0.02651459 | 0.081737 |
| 500594    | LOC500594    | 0.569013 | 0.07063725 | 0.176872 |
| 316399    | Ccdc150      | 0.568291 | 0.0298286  | 0.089731 |
| 100361909 | Ear1         | 0.567752 | 0.09868334 | 0.226355 |
| 100911256 | LOC100911256 | 0.567039 | 0.21723333 | 0.398652 |
| 500046    | Cped1        | 0.56699  | 4.76E-17   | 1.46E-15 |
| 100911993 | LOC100911993 | 0.566866 | 0.05109221 | 0.137146 |
| 100911545 | LOC100911545 | 0.566604 | 6.35E-09   | 8.80E-08 |
| 84382     | Tcf4         | 0.566368 | 4.95E-17   | 1.52E-15 |
| 310444    | P2ry13       | 0.566054 | 1.27E-04   | 8.23E-04 |
| 308569    | Acp4         | 0.565781 | 0.06455457 | 0.165181 |
| 317614    | Map7d3       | 0.565773 | 1.41E-04   | 9.08E-04 |
| 498609    | Lpar2        | 0.56563  | 0.04262398 | 0.119098 |

|           |              |          |            |          |
|-----------|--------------|----------|------------|----------|
| 59107     | Ltbp1        | 0.565406 | 6.88E-20   | 2.42E-18 |
| 24932     | Cd4          | 0.564913 | 1.21E-45   | 1.03E-43 |
| 83727     | Fbn1         | 0.564754 | 7.16E-132  | #####    |
| 100911854 | LOC100911854 | 0.56411  | 0.1945652  | 0.368669 |
| 686539    | Islr         | 0.562453 | 4.74E-61   | 5.82E-59 |
| 25060     | Hk3          | 0.562121 | 0.02191652 | 0.070376 |
| 292746    | Fcgbp11      | 0.562073 | 0.31829807 | 0.513162 |
| 24963     | Hspa11       | 0.559822 | 3.06E-04   | 0.001823 |
| 310663    | Tnfaip812    | 0.559822 | 8.56E-08   | 1.01E-06 |
| 100911041 | Tmem45a1     | 0.559248 | 1.23E-06   | 1.20E-05 |
| 294119    | Moxd1        | 0.559087 | 0.21342934 | 0.393605 |
| 498572    | Spert        | 0.559087 | 0.07848383 | 0.191656 |
| 100910196 | LOC100910196 | 0.557061 | 0.09693339 | 0.223417 |
| 302993    | Sox8         | 0.556976 | 1.85E-07   | 2.07E-06 |
| 108349185 | LOC108349185 | 0.556127 | 1.58E-09   | 2.38E-08 |
| 140589    | Gli1         | 0.555982 | 4.35E-26   | 2.11E-24 |
| 690686    | LOC690686    | 0.555575 | 0.27102895 | 0.462646 |
| 405110    | Olr868       | 0.555234 | 0.713777   | 0.843136 |
| 66020     | Gapdhs       | 0.555234 | 0.10093716 | 0.230139 |
| 102554096 | LOC102554096 | 0.555007 | 0.09175667 | 0.214866 |
| 64512     | Fzd2         | 0.554717 | 1.23E-23   | 5.29E-22 |
| 307106    | Sfmbt2       | 0.55289  | 0.0256979  | 0.079736 |
| 100912428 | LOC100912428 | 0.552784 | 0.22450109 | 0.407629 |
| 108350583 | LOC108350583 | 0.551298 | 8.61E-04   | 0.004539 |
| 309212    | Ptgdr2       | 0.551286 | 0.17035137 | 0.336166 |
| 100911692 | LOC100911692 | 0.55107  | 0.07180594 | 0.179186 |
| 681364    | LOC681364    | 0.551033 | 0.37533161 | 0.572267 |
| 116642    | Slc28a1      | 0.550181 | 0.28505544 | 0.479223 |
| 302538    | Syt15        | 0.550181 | 0.28505544 | 0.479223 |
| 287450    | Slc16a11     | 0.549928 | 3.57E-59   | 4.26E-57 |
| 290361    | Dok2         | 0.549521 | 0.00149636 | 0.007351 |
| 100912012 | Clec3b       | 0.549316 | 3.60E-20   | 1.29E-18 |
| 367216    | Ncr2         | 0.54891  | 0.64751888 | 0.800311 |
| 360565    | Spata22      | 0.547014 | 0.14891523 | 0.304776 |
| 60567     | Syt10        | 0.547014 | 0.14891523 | 0.304776 |
| 500877    | LOC500877    | 0.546834 | 0.18056387 | 0.349902 |
| 307403    | Csflr        | 0.54645  | 1.11E-55   | 1.19E-53 |
| 308445    | Cyp2s1       | 0.545624 | 1.13E-11   | 2.17E-10 |
| 313589    | Rspo1        | 0.545153 | 5.98E-04   | 0.003284 |
| 294706    | Cd180        | 0.544843 | 0.00173562 | 0.008362 |
| 363104    | Cd109        | 0.544843 | 1.25E-04   | 8.14E-04 |
| 363938    | Oas2         | 0.544587 | 0.01561613 | 0.053597 |
| 103693640 | LOC103693640 | 0.543687 | 0.00519847 | 0.021444 |
| 362336    | Fam180a      | 0.543461 | 4.78E-10   | 7.67E-09 |
| 103690834 | LOC103690834 | 0.543262 | 0.33212873 | 0.528327 |
| 363653    | Efcab5       | 0.543262 | 0.33212873 | 0.528327 |
| 102552204 | LOC102552204 | 0.542802 | 0.012851   | 0.045594 |
| 304608    | Mmp19        | 0.542006 | 6.08E-11   | 1.07E-09 |
| 100910474 | LOC100910474 | 0.541779 | 0.54734799 | 0.728357 |
| 498757    | Aoah         | 0.541113 | 0.05917683 | 0.154429 |
| 25646     | Otx1         | 0.540789 | 0.80367258 | 0.89982  |
| 116676    | Aldh1a2      | 0.540543 | 1.16E-07   | 1.35E-06 |
| 360814    | Rasa11       | 0.54035  | 0.10554143 | 0.237874 |
| 360704    | Hmgn1        | 0.540277 | 1.82E-32   | 1.12E-30 |
| 499174    | Cers3        | 0.540213 | 0.14020418 | 0.293073 |
| 24303     | Cyp2d3       | 0.539675 | 0.18455634 | 0.355505 |

|           |                 |          |            |          |
|-----------|-----------------|----------|------------|----------|
| 83837     | Bambi           | 0.538897 | 1.34E-07   | 1.54E-06 |
| 289129    | Tdrd5           | 0.538746 | 0.06686254 | 0.169447 |
| 317468    | Tlr7            | 0.538624 | 8.45E-07   | 8.48E-06 |
| 499249    | Plekha7         | 0.538468 | 4.27E-08   | 5.24E-07 |
| 366859    | Glt8d2          | 0.538361 | 3.31E-06   | 2.99E-05 |
| 498650    | Rab11fip1       | 0.538139 | 8.03E-07   | 8.08E-06 |
| 65053     | Rassf9          | 0.537731 | 0.04295644 | 0.119799 |
| 309621    | RT1-Ba          | 0.53633  | 4.96E-32   | 3.02E-30 |
| 102549803 | Nat8f4          | 0.533886 | 3.79E-05   | 2.77E-04 |
| 103693165 | LOC103693165    | 0.533255 | 0.16473685 | 0.328938 |
| 365901    | Gnat2           | 0.533208 | 0.39005613 | 0.587057 |
| 685479    | S100a7a         | 0.533208 | 0.39005613 | 0.587057 |
| 79438     | Igfals          | 0.533208 | 0.39005613 | 0.587057 |
| 295631    | Pla2r1          | 0.532945 | 0.00105359 | 0.00541  |
| 362634    | Clqc            | 0.532836 | 1.92E-28   | 1.03E-26 |
| 294337    | Col6a1          | 0.532481 | 8.66E-130  | #####    |
| 299038    | Spin4           | 0.532161 | 0.00324602 | 0.01438  |
| 685868    | Otogl           | 0.53182  | 0.44332611 | 0.636162 |
| 315179    | Efcab6          | 0.531803 | 0.01111112 | 0.040411 |
| 685277    | Ildr2           | 0.531803 | 0.01111112 | 0.040411 |
| 303692    | St6galnac2      | 0.53103  | 9.91E-10   | 1.53E-08 |
| 287910    | Ccl6            | 0.53087  | 2.72E-08   | 3.43E-07 |
| 108348057 | NEWGENE_1591402 | 0.530648 | 1.29E-13   | 3.04E-12 |
| 362734    | Stxbp6          | 0.530126 | 1.08E-15   | 3.03E-14 |
| 293561    | Rnf152          | 0.530107 | 4.26E-11   | 7.67E-10 |
| 56822     | Cd86            | 0.52994  | 0.09703112 | 0.223588 |
| 266603    | Aldh1a3         | 0.529624 | 2.03E-06   | 1.91E-05 |
| 312705    | C1r             | 0.529598 | 7.44E-99   | 1.40E-96 |
| 292414    | Vom2r10         | 0.528762 | 0.42198434 | 0.6174   |
| 294027    | Col117a1        | 0.528762 | 0.15575689 | 0.315205 |
| 310553    | Tlr2            | 0.527784 | 4.98E-05   | 3.54E-04 |
| 361832    | Bicc1           | 0.527437 | 5.58E-34   | 3.60E-32 |
| 25389     | Atf3            | 0.527238 | 8.17E-16   | 2.30E-14 |
| 497931    | Pik3r5          | 0.52696  | 0.00762309 | 0.029502 |
| 500902    | RGD1565356      | 0.526954 | 0.03633199 | 0.104713 |
| 311373    | Trim69          | 0.526706 | 0.02374744 | 0.07509  |
| 80848     | Cubn            | 0.526492 | 4.23E-06   | 3.74E-05 |
| 171040    | I111            | 0.526255 | 0.25859617 | 0.447867 |
| 361576    | Tulp2           | 0.526255 | 0.25859617 | 0.447867 |
| 688542    | LOC688542       | 0.52588  | 0.41479701 | 0.610731 |
| 103689945 | LOC103689945    | 0.525792 | 1.86E-42   | 1.50E-40 |
| 287467    | Pitpnm3         | 0.525669 | 5.35E-09   | 7.49E-08 |
| 108350811 | LOC108350811    | 0.524142 | 0.39345925 | 0.590685 |
| 292263    | Fbxo5           | 0.52404  | 0.0095445  | 0.035663 |
| 680813    | Cfap47          | 0.523525 | 0.17803885 | 0.346809 |
| 317219    | P2ry10          | 0.523061 | 0.14989585 | 0.306207 |
| 444985    | Dnmt3b          | 0.5227   | 0.00389721 | 0.016762 |
| 64357     | Cd200r1         | 0.522411 | 0.02334636 | 0.073982 |
| 100361043 | Dytn            | 0.522067 | 0.12515187 | 0.270424 |
| 89830     | Ptch1           | 0.521803 | 3.53E-58   | 4.12E-56 |
| 307415    | RGD1309362      | 0.520933 | 1.05E-17   | 3.33E-16 |
| 303378    | S1fn13          | 0.520864 | 1.83E-26   | 9.06E-25 |
| 24571     | Muc1            | 0.520542 | 0.06413395 | 0.164281 |
| 102555634 | LOC102555634    | 0.520093 | 0.00486285 | 0.020252 |
| 295660    | RGD1564400      | 0.519488 | 1.10E-07   | 1.29E-06 |
| 291327    | Mrc1            | 0.518346 | 3.17E-24   | 1.40E-22 |

|           |              |          |            |          |
|-----------|--------------|----------|------------|----------|
| 293065    | Tmc3         | 0.517267 | 0.03806341 | 0.108716 |
| 24931     | Cd8b         | 0.517267 | 0.46335719 | 0.653943 |
| 259235    | Sdr9c7       | 0.517267 | 0.20402588 | 0.380687 |
| 290753    | Lrp2bp       | 0.517267 | 0.29969611 | 0.496323 |
| 296198    | Banf2        | 0.517267 | 0.46335719 | 0.653943 |
| 364031    | Tnfsf18      | 0.517267 | 0.46335719 | 0.653943 |
| 365748    | Bhlhe22      | 0.517267 | 0.07244923 | 0.180507 |
| 501158    | Spag16       | 0.517267 | 0.46335719 | 0.653943 |
| 690105    | Kncn         | 0.517267 | 0.46335719 | 0.653943 |
| 79111     | Slc27a5      | 0.517267 | 0.46335719 | 0.653943 |
| 361312    | RGD1563159   | 0.517018 | 0.10181723 | 0.231812 |
| 102556463 | LOC102556463 | 0.515927 | 0.12897964 | 0.27625  |
| 315101    | Zfp7         | 0.515769 | 0.00162027 | 0.007856 |
| 102551683 | LOC102551683 | 0.515342 | 0.12130424 | 0.264602 |
| 100912342 | LOC100912342 | 0.515056 | 0.04477623 | 0.124038 |
| 25746     | I12rb        | 0.514903 | 0.04689555 | 0.128581 |
| 25026     | Adm          | 0.513687 | 2.92E-05   | 2.19E-04 |
| 305947    | Kcnrg        | 0.512642 | 0.00214974 | 0.010064 |
| 691993    | Scimp        | 0.511707 | 0.16248192 | 0.325357 |
| 114482    | Nek2         | 0.511509 | 0.03245728 | 0.096031 |
| 691533    | Lilra5       | 0.511273 | 5.76E-04   | 0.003175 |
| 102547665 | LOC102547665 | 0.509225 | 0.22334917 | 0.406118 |
| 503568    | Slc13a4      | 0.508597 | 4.33E-27   | 2.21E-25 |
| 685692    | Gcsam        | 0.507518 | 0.0310238  | 0.092595 |
| 140914    | Olr1         | 0.507485 | 0.01952859 | 0.064224 |
| 102552882 | LOC102552882 | 0.506998 | 0.13094254 | 0.279261 |
| 360655    | Cd300le      | 0.506867 | 2.65E-04   | 0.001607 |
| 498072    | Hmgb211      | 0.506541 | 2.36E-06   | 2.19E-05 |
| 83508     | Timeless     | 0.506356 | 4.14E-04   | 0.002381 |
| 679155    | Zbtb7c       | 0.506356 | 3.70E-06   | 3.31E-05 |
| 245978    | Cklf         | 0.506126 | 0.0098194  | 0.036525 |
| 100363228 | LOC100363228 | 0.505923 | 0.03046509 | 0.091228 |
| 362464    | Arntl2       | 0.505406 | 0.0260684  | 0.080649 |
| 102550588 | LOC102550588 | 0.505231 | 0.00384684 | 0.016598 |
| 117284    | Lrrc7        | 0.505194 | 0.18570244 | 0.357261 |
| 288821    | Neurod4      | 0.505194 | 0.18570244 | 0.357261 |
| 499204    | Ddias        | 0.505194 | 0.10505467 | 0.236945 |
| 680671    | Glis3        | 0.505194 | 0.34938394 | 0.546127 |
| 292077    | Sult5a1      | 0.505066 | 3.30E-12   | 6.71E-11 |
| 298947    | Pik3cg       | 0.504776 | 5.38E-08   | 6.51E-07 |
| 282836    | Cthrc1       | 0.504091 | 8.25E-04   | 0.004369 |
| 361095    | Zic5         | 0.503665 | 0.01884165 | 0.062429 |
| 292060    | Irf8         | 0.503545 | 4.66E-08   | 5.68E-07 |
| 108348074 | LOC108348074 | 0.503411 | 2.25E-92   | 3.94E-90 |
| 305974    | Scara5       | 0.503063 | 4.26E-35   | 2.93E-33 |
| 108349944 | LOC108349944 | 0.502821 | 0.37843993 | 0.575578 |
| 297695    | Wbp11        | 0.502801 | 1.51E-27   | 7.87E-26 |
| 103692302 | LOC103692302 | 0.50272  | 0.24728451 | 0.435987 |
| 364396    | Ar111        | 0.501683 | 0.0031873  | 0.014169 |
| 100912609 | LOC100912609 | 0.501434 | 0.08744614 | 0.207502 |
| 246245    | Fmo2         | 0.501284 | 2.49E-18   | 8.22E-17 |
| 100911932 | LOC100911932 | 0.500872 | 4.77E-07   | 4.99E-06 |
| 108348067 | LOC108348067 | 0.500872 | 4.77E-07   | 4.99E-06 |
| 102551901 | LOC102551901 | 0.5005   | 0.21446846 | 0.395063 |
| 29569     | Pcolce       | 0.50038  | 6.23E-47   | 5.55E-45 |
| 24153     | A2m          | 0.500359 | 7.00E-66   | 9.07E-64 |

|           |              |          |            |          |
|-----------|--------------|----------|------------|----------|
| 117517    | C7           | 0.499992 | 2.74E-34   | 1.81E-32 |
| 65154     | Wispl        | 0.499812 | 2.07E-06   | 1.94E-05 |
| 29687     | Clqb         | 0.499497 | 1.73E-20   | 6.30E-19 |
| 155012    | Cfh          | 0.49926  | 2.94E-33   | 1.87E-31 |
| 64195     | Clec10a      | 0.49853  | 1.09E-11   | 2.11E-10 |
| 102550729 | LOC102550729 | 0.498475 | 0.11888632 | 0.260431 |
| 100363178 | Tmigd3       | 0.497621 | 0.09282412 | 0.2167   |
| 266714    | Myo7a        | 0.496958 | 0.01049765 | 0.038589 |
| 363974    | Nckap5       | 0.496633 | 0.11670656 | 0.256927 |
| 100912756 | LOC100912756 | 0.496278 | 0.36192025 | 0.55839  |
| 690097    | LOC690097    | 0.496269 | 0.00645428 | 0.025754 |
| 502129    | Hist1h2ai    | 0.495237 | 0.30095959 | 0.497852 |
| 25267     | Pdgfra       | 0.495148 | 7.00E-33   | 4.41E-31 |
| 103691841 | LOC103691841 | 0.494284 | 0.31213316 | 0.507346 |
| 287788    | Abca9        | 0.494128 | 1.55E-23   | 6.61E-22 |
| 29269     | Mcpt8        | 0.49406  | 0.01021795 | 0.037684 |
| 29485     | Slc7a3       | 0.49335  | 0.19354589 | 0.367286 |
| 365245    | Saa4         | 0.493138 | 0.59415792 | 0.758631 |
| 103690030 | LOC103690030 | 0.493124 | 0.0013263  | 0.006602 |
| 365977    | Dusp1411     | 0.492886 | 0.31362163 | 0.508594 |
| 685324    | LOC685324    | 0.492451 | 0.02918872 | 0.088266 |
| 50654     | Ctss         | 0.49227  | 7.21E-22   | 2.84E-20 |
| 84403     | Gjb6         | 0.492156 | 2.75E-05   | 2.08E-04 |
| 685899    | Svepl        | 0.491741 | 1.92E-07   | 2.13E-06 |
| 298657    | Car6         | 0.490794 | 0.02161034 | 0.069645 |
| 50563     | Gja5         | 0.490794 | 0.02161034 | 0.069645 |
| 117264    | P2ry6        | 0.49005  | 9.81E-04   | 0.005095 |
| 108349506 | LOC108349506 | 0.489232 | 0.3843288  | 0.581008 |
| 308586    | Sec1         | 0.488832 | 0.16078798 | 0.322949 |
| 498988    | RGD1559962   | 0.488431 | 0.1798112  | 0.348941 |
| 100361913 | LOC100361913 | 0.488321 | 0.00387785 | 0.016692 |
| 103690068 | LOC103690068 | 0.488321 | 0.00387785 | 0.016692 |
| 24268     | Cp           | 0.488293 | 1.70E-42   | 1.37E-40 |
| 154985    | Cyp26a1      | 0.48812  | 0.56062865 | 0.735799 |
| 25100     | Foxa3        | 0.48812  | 0.41054085 | 0.607187 |
| 25343     | Pdc          | 0.48812  | 0.41054085 | 0.607187 |
| 295186    | Crnn         | 0.48812  | 0.56062865 | 0.735799 |
| 295541    | Msh4         | 0.48812  | 0.56062865 | 0.735799 |
| 298225    | Ifne         | 0.48812  | 0.56062865 | 0.735799 |
| 301132    | Cd70         | 0.48812  | 0.56062865 | 0.735799 |
| 304073    | Cldn14       | 0.48812  | 0.19319478 | 0.366912 |
| 306251    | Itih1        | 0.48812  | 0.56062865 | 0.735799 |
| 307036    | Armc4        | 0.48812  | 0.56062865 | 0.735799 |
| 316413    | Als2cr12     | 0.48812  | 0.15404797 | 0.312643 |
| 361725    | Scgb2a2      | 0.48812  | 0.56062865 | 0.735799 |
| 362675    | Tp73         | 0.48812  | 0.56062865 | 0.735799 |
| 64673     | Pip          | 0.48812  | 0.41054085 | 0.607187 |
| 296947    | Fscn3        | 0.48812  | 0.24449853 | 0.432838 |
| 246262    | Sema3d       | 0.487294 | 1.17E-12   | 2.50E-11 |
| 114522    | Stag3        | 0.486565 | 0.28156936 | 0.475187 |
| 684762    | LOC684762    | 0.485701 | 0.05985165 | 0.155742 |
| 361096    | Zic2         | 0.485635 | 1.35E-07   | 1.54E-06 |
| 102553193 | LOC102553193 | 0.484391 | 0.4571627  | 0.648444 |
| 246208    | Ifi47        | 0.484226 | 2.86E-09   | 4.16E-08 |
| 108349573 | LOC108349573 | 0.483944 | 0.6315254  | 0.788165 |
| 300870    | Tent5a       | 0.483635 | 7.54E-09   | 1.03E-07 |



|           |              |          |            |          |
|-----------|--------------|----------|------------|----------|
| 155183    | Skap2        | 0.48357  | 3.93E-14   | 9.80E-13 |
| 63851     | Fgf14        | 0.482839 | 1.66E-05   | 1.30E-04 |
| 100360940 | LOC100360940 | 0.482521 | 0.20141231 | 0.377104 |
| 81686     | Mmp2         | 0.482309 | 2.84E-68   | 3.84E-66 |
| 100361997 | Ect212       | 0.481643 | 0.38481301 | 0.581509 |
| 102550330 | LOC102550330 | 0.480437 | 0.24438287 | 0.432714 |
| 494194    | Klra1        | 0.480277 | 6.61E-04   | 0.003595 |
| 100909709 | LOC100909709 | 0.479475 | 0.05518696 | 0.145997 |
| 116593    | Upb1         | 0.479131 | 0.22126775 | 0.403451 |
| 100912971 | LOC100912971 | 0.478698 | 0.12407578 | 0.268892 |
| 499847    | Prrg4        | 0.478597 | 2.18E-12   | 4.48E-11 |
| 301287    | Pkhd1        | 0.478427 | 0.04163702 | 0.1167   |
| 100364958 | LOC100364958 | 0.478376 | 0.17293689 | 0.34     |
| 298850    | Cenpa        | 0.478031 | 0.10330455 | 0.234358 |
| 338457    | Tlr9         | 0.478031 | 0.10330455 | 0.234358 |
| 685646    | Ropn11       | 0.478031 | 0.10330455 | 0.234358 |
| 117512    | C9           | 0.477778 | 0.719155   | 0.846444 |
| 100101439 | Vom2r21      | 0.477473 | 0.76698649 | 0.877629 |
| 24934     | Klrk1        | 0.477374 | 0.02580436 | 0.079975 |
| 360546    | Efnb3        | 0.477232 | 0.01331522 | 0.046917 |
| 58965     | Ramp1        | 0.477012 | 5.77E-10   | 9.16E-09 |
| 108349832 | LOC108349832 | 0.476625 | 0.63907424 | 0.793634 |
| 29725     | Baat         | 0.476625 | 0.28195179 | 0.47558  |
| 498399    | Sec1414      | 0.476181 | 0.36100303 | 0.557789 |
| 57301     | Ccr1         | 0.474856 | 0.0026372  | 0.01201  |
| 296621    | Phyhd1       | 0.474751 | 4.93E-05   | 3.52E-04 |
| 291359    | Ly86         | 0.474243 | 4.43E-04   | 0.002521 |
| 100361866 | LOC100361866 | 0.473477 | 0.08679562 | 0.206731 |
| 102547271 | LOC102547271 | 0.473223 | 0.23522596 | 0.421596 |
| 306081    | Pcdh20       | 0.473144 | 0.02189544 | 0.070332 |
| 502208    | Slc38a8      | 0.472486 | 0.1600096  | 0.321725 |
| 100363196 | Zfp791       | 0.472179 | 0.07024898 | 0.176062 |
| 102554031 | LOC102554031 | 0.472179 | 0.20051823 | 0.376429 |
| 25674     | G1ra1        | 0.472179 | 0.36538557 | 0.561508 |
| 494235    | Vomlr82      | 0.472179 | 0.36538557 | 0.561508 |
| 691485    | LOC691485    | 0.472179 | 0.36538557 | 0.561508 |
| 309622    | RT1-Bb       | 0.470577 | 2.92E-16   | 8.41E-15 |
| 25022     | Fgfr2        | 0.470125 | 3.47E-11   | 6.33E-10 |
| 100912845 | LOC100912845 | 0.469336 | 0.57402061 | 0.742224 |
| 289076    | Rgs18        | 0.469104 | 7.32E-05   | 5.01E-04 |
| 100363111 | C2cd4d       | 0.469011 | 0.02980474 | 0.089687 |
| 108348115 | Rps19        | 0.468844 | 0.00191113 | 0.009099 |
| 305843    | Ang          | 0.467765 | 0.21990597 | 0.401968 |
| 102554047 | LOC102554047 | 0.467518 | 0.01235922 | 0.04412  |
| 100909521 | LOC100909521 | 0.467235 | 0.00116551 | 0.005897 |
| 100910912 | LOC100910912 | 0.466949 | 0.01654689 | 0.056094 |
| 309837    | Adamts14     | 0.46664  | 1.49E-06   | 1.43E-05 |
| 298972    | Smarcell     | 0.466229 | 0.25579712 | 0.444616 |
| 108350026 | LOC108350026 | 0.466169 | 0.02502133 | 0.07812  |
| 311934    | Ns5atp4      | 0.46609  | 7.61E-04   | 0.00408  |
| 291076    | Eci3         | 0.465715 | 1.25E-09   | 1.90E-08 |
| 102551034 | Crocc2       | 0.465665 | 0.1325103  | 0.281737 |
| 24773     | Sftpa1       | 0.465665 | 0.1325103  | 0.281737 |
| 84352     | Colla2       | 0.465503 | 0          | 0        |
| 399684    | Vkorc111     | 0.465333 | 4.95E-27   | 2.52E-25 |
| 29209     | Casq2        | 0.465037 | 9.23E-04   | 0.004828 |



|           |              |          |            |          |
|-----------|--------------|----------|------------|----------|
| 361735    | Ms4a6a       | 0.464828 | 0.00316285 | 0.014074 |
| 100912218 | LOC100912218 | 0.463391 | 8.95E-05   | 6.00E-04 |
| 116491    | Kcnk6        | 0.462821 | 3.83E-04   | 0.002227 |
| 108350705 | LOC108350705 | 0.462576 | 0.04953849 | 0.134167 |
| 100912943 | LOC100912943 | 0.462125 | 0.48785136 | 0.675596 |
| 113911    | Gucy2d       | 0.462125 | 0.48785136 | 0.675596 |
| 301229    | Trem1        | 0.462125 | 0.32655187 | 0.522269 |
| 171164    | Gbp2         | 0.460315 | 1.18E-23   | 5.08E-22 |
| 64316     | Srpx         | 0.459822 | 1.31E-15   | 3.65E-14 |
| 309108    | Lmntd2       | 0.459193 | 0.48921519 | 0.676672 |
| 294054    | Cc2d2b       | 0.458387 | 0.2565177  | 0.445543 |
| 499588    | Gpr160       | 0.457532 | 0.00371319 | 0.016127 |
| 315174    | Scubel       | 0.456748 | 3.95E-26   | 1.93E-24 |
| 364255    | Spetex-2C    | 0.45586  | 0.28573883 | 0.479927 |
| 113959    | C5ar1        | 0.455486 | 1.55E-06   | 1.48E-05 |
| 315920    | Vsig1        | 0.455206 | 0.29287273 | 0.488613 |
| 64545     | Icos         | 0.455206 | 0.29287273 | 0.488613 |
| 682408    | Cdsn         | 0.45507  | 5.84E-07   | 6.04E-06 |
| 688822    | Tbx10        | 0.455014 | 6.42E-04   | 0.003504 |
| 305354    | Tlr1         | 0.454711 | 0.06048766 | 0.157075 |
| 315259    | Prickle1     | 0.45463  | 2.39E-16   | 6.94E-15 |
| 501346    | LOC501346    | 0.45407  | 1.43E-13   | 3.34E-12 |
| 108350017 | Mindy4b      | 0.4538   | 0.03254455 | 0.096244 |
| 313352    | Dmrtal       | 0.453355 | 0.06274791 | 0.161644 |
| 499864    | RGD1563680   | 0.4533   | 0.02747785 | 0.084202 |
| 315759    | Igdcc3       | 0.453183 | 4.66E-05   | 3.35E-04 |
| 58949     | Ptafr        | 0.453149 | 5.36E-08   | 6.50E-07 |
| 171099    | Rasd2        | 0.452946 | 0.00164508 | 0.007964 |
| 362966    | Nfam1        | 0.451856 | 8.29E-05   | 5.61E-04 |
| 498256    | Ier5         | 0.451842 | 6.07E-08   | 7.29E-07 |
| 102548397 | LOC102548397 | 0.451512 | 0.14319373 | 0.297461 |
| 310540    | Fam198b      | 0.45106  | 1.38E-30   | 7.97E-29 |
| 25119     | Mr1          | 0.450506 | 8.30E-05   | 5.61E-04 |
| 360757    | Medag        | 0.450468 | 3.79E-09   | 5.45E-08 |
| 303380    | S1fn2        | 0.450353 | 1.81E-11   | 3.42E-10 |
| 307805    | Cenpt        | 0.45018  | 0.15670469 | 0.316618 |
| 25677     | Mak          | 0.450152 | 0.42908791 | 0.62403  |
| 293052    | Isg20        | 0.450152 | 0.03642618 | 0.104937 |
| 293676    | Ctsw         | 0.450152 | 0.26344133 | 0.453679 |
| 29458     | Neurod1      | 0.450152 | 0.42908791 | 0.62403  |
| 29634     | Ldhc         | 0.450152 | 0.42908791 | 0.62403  |
| 367345    | Clu11        | 0.450152 | 0.42908791 | 0.62403  |
| 498286    | Slamf1       | 0.450152 | 0.42908791 | 0.62403  |
| 499746    | Stpg3        | 0.450152 | 0.42908791 | 0.62403  |
| 303377    | S1fn5        | 0.449345 | 1.50E-51   | 1.49E-49 |
| 113937    | Clec2d       | 0.44897  | 0.18036458 | 0.349623 |
| 690102    | Hist2h2ab    | 0.448789 | 0.59736924 | 0.760996 |
| 499532    | Tmem267      | 0.447359 | 0.00103418 | 0.005326 |
| 29260     | Tlr4         | 0.446656 | 7.70E-06   | 6.46E-05 |
| 83826     | Nr5a1        | 0.4463   | 0.23755698 | 0.424655 |
| 290655    | Cr1f1        | 0.445765 | 3.49E-14   | 8.72E-13 |
| 60350     | Cd14         | 0.445075 | 2.06E-04   | 0.001276 |
| 299016    | Npas3        | 0.444531 | 0.00997634 | 0.036972 |
| 361954    | Veph1        | 0.444203 | 0.03440861 | 0.100416 |
| 360717    | Gramd1c      | 0.444103 | 0.03279238 | 0.096707 |
| 102551086 | LOC102551086 | 0.443266 | 0.3802719  | 0.577304 |

|           |                 |          |            |          |
|-----------|-----------------|----------|------------|----------|
| 108349261 | LOC108349261    | 0.443266 | 0.21467054 | 0.395263 |
| 108352163 | LOC108352163    | 0.443266 | 0.21467054 | 0.395263 |
| 288478    | Rsph10b         | 0.443266 | 0.3802719  | 0.577304 |
| 691937    | Strc            | 0.443266 | 0.3802719  | 0.577304 |
| 499229    | Gvin1           | 0.443176 | 0.01096254 | 0.039958 |
| 287571    | Taf15           | 0.442289 | 5.23E-11   | 9.32E-10 |
| 499263    | Gsg11           | 0.442115 | 0.00721834 | 0.028211 |
| 292657    | Slc1a5          | 0.440951 | 1.29E-04   | 8.37E-04 |
| 685215    | LOC685215       | 0.440502 | 0.01457023 | 0.050554 |
| 681180    | LOC681180       | 0.440289 | 0.03312296 | 0.09753  |
| 84032     | Col3a1          | 0.440059 | 0          | 0        |
| 81658     | Gabrp           | 0.439748 | 0.33677579 | 0.533513 |
| 685781    | Ddr2            | 0.439475 | 3.15E-31   | 1.87E-29 |
| 363767    | Abi3bp          | 0.439144 | 5.68E-48   | 5.26E-46 |
| 291354    | Enkur           | 0.438792 | 0.17622365 | 0.344435 |
| 292890    | Tsks            | 0.438792 | 0.33889868 | 0.535406 |
| 307917    | Klhdc4          | 0.438792 | 0.0324802  | 0.096083 |
| 100910833 | LOC100910833    | 0.437848 | 0.25135833 | 0.439548 |
| 690930    | Ms4a6c          | 0.437766 | 0.26469771 | 0.45502  |
| 308797    | Cemip           | 0.437764 | 9.30E-14   | 2.22E-12 |
| 683415    | Prss55          | 0.43763  | 0.08920571 | 0.210289 |
| 290350    | Loxl2           | 0.436467 | 7.77E-07   | 7.85E-06 |
| 690492    | Cd33            | 0.43643  | 0.01558048 | 0.053532 |
| 24891     | Abcb4           | 0.435989 | 8.86E-04   | 0.004657 |
| 84348     | Ackr3           | 0.435846 | 3.18E-11   | 5.84E-10 |
| 309925    | Fam81b          | 0.435671 | 0.21381376 | 0.394085 |
| 360553    | Vmol            | 0.435653 | 0.30333033 | 0.500557 |
| 24546     | Slco2a1         | 0.435573 | 4.44E-06   | 3.91E-05 |
| 103692126 | NEWGENE_1587253 | 0.435542 | 0.15262397 | 0.310348 |
| 289104    | Prg4            | 0.434174 | 0.0012199  | 0.006132 |
| 100158223 | Zfp786          | 0.434003 | 4.76E-04   | 0.002688 |
| 100359478 | Tstd1           | 0.433714 | 0.00527327 | 0.02171  |
| 685719    | Dand5           | 0.433328 | 0.27242848 | 0.464328 |
| 689374    | Tkt11           | 0.433328 | 0.12064271 | 0.26343  |
| 100910940 | Evi2b           | 0.433044 | 0.00340551 | 0.014975 |
| 108353135 | LOC108353135    | 0.431945 | 0.57451871 | 0.742566 |
| 114097    | Ltc4s           | 0.431945 | 0.02190884 | 0.070363 |
| 296872    | Eda2r           | 0.431724 | 0.24136691 | 0.429129 |
| 64522     | Slc5a2          | 0.430977 | 0.22267334 | 0.405199 |
| 171163    | Slc6a13         | 0.430897 | 1.65E-07   | 1.87E-06 |
| 171547    | Crispld2        | 0.430505 | 3.04E-56   | 3.32E-54 |
| 100910838 | LOC100910838    | 0.43037  | 0.08003447 | 0.19452  |
| 474348    | Sspo            | 0.430115 | 0.03421832 | 0.10006  |
| 360626    | Krt19           | 0.429508 | 0.00216652 | 0.010128 |
| 363265    | Col4a3          | 0.429463 | 0.00638114 | 0.02551  |
| 108351300 | Rt11            | 0.429103 | 0.00454892 | 0.019129 |
| 291912    | Nod2            | 0.428457 | 0.0642363  | 0.164477 |
| 292884    | Zfp473          | 0.427999 | 0.05884624 | 0.153819 |
| 290604    | RGD1564958      | 0.427492 | 0.08245875 | 0.199293 |
| 24699     | Ptprc           | 0.427426 | 2.99E-08   | 3.76E-07 |
| 287527    | Serpinf2        | 0.427191 | 0.16476551 | 0.328961 |
| 291604    | Dcp2            | 0.427015 | 0.08706308 | 0.207161 |
| 79128     | Dab2            | 0.426646 | 8.98E-22   | 3.51E-20 |
| 24387     | Gfap            | 0.426249 | 6.35E-19   | 2.16E-17 |
| 685433    | Evi2a           | 0.426192 | 3.40E-05   | 2.51E-04 |
| 300228    | Limal           | 0.425934 | 1.30E-13   | 3.05E-12 |

|           |                 |          |            |          |
|-----------|-----------------|----------|------------|----------|
| 309729    | Rtkn2           | 0.425513 | 0.04932853 | 0.133769 |
| 294809    | Adamts12        | 0.425225 | 4.35E-11   | 7.80E-10 |
| 361060    | Ebf2            | 0.424868 | 8.58E-14   | 2.05E-12 |
| 299750    | RGD1565753      | 0.42482  | 0.74959206 | 0.866208 |
| 362792    | Pld4            | 0.424568 | 8.23E-11   | 1.43E-09 |
| 680422    | Fam115c         | 0.42365  | 0.00251377 | 0.011528 |
| 303412    | Rnf43           | 0.423558 | 0.00386349 | 0.016651 |
| 501153    | Zdbf2           | 0.423465 | 0.0612084  | 0.158557 |
| 100911733 | LOC100911733    | 0.423059 | 0.62764813 | 0.784972 |
| 288593    | Ccl24           | 0.421897 | 0.00417167 | 0.017794 |
| 83717     | Omd             | 0.42189  | 1.01E-07   | 1.19E-06 |
| 116718    | Pex12           | 0.421277 | 2.52E-07   | 2.77E-06 |
| 366126    | Spi1            | 0.420976 | 5.16E-05   | 3.66E-04 |
| 500818    | Rfx4            | 0.420919 | 0.01837917 | 0.061162 |
| 282817    | Pycard          | 0.420613 | 0.01321225 | 0.046641 |
| 361206    | Slc25a48        | 0.420056 | 9.75E-05   | 6.48E-04 |
| 100911813 | LOC100911813    | 0.419506 | 0.11537772 | 0.25462  |
| 108350249 | LOC108350249    | 0.419488 | 5.26E-04   | 0.002932 |
| 25494     | Nid1            | 0.419143 | 1.16E-219  | #####    |
| 102553611 | LOC102553611    | 0.419123 | 0.15531385 | 0.314508 |
| 24763     | Acsm3           | 0.418887 | 0.06167663 | 0.159553 |
| 282634    | Pxmp4           | 0.418716 | 2.70E-13   | 6.12E-12 |
| 291861    | Nlrc5           | 0.418445 | 7.44E-05   | 5.09E-04 |
| 291654    | Pcdhb5          | 0.418303 | 0.00405123 | 0.017327 |
| 108348099 | NEWGENE_1359268 | 0.417828 | 0.0202514  | 0.066201 |
| 100361672 | Zc2hc1b         | 0.417731 | 0.70315284 | 0.837207 |
| 100911528 | LOC100911528    | 0.417731 | 0.70315284 | 0.837207 |
| 102551806 | LOC102551806    | 0.417731 | 0.39416198 | 0.59139  |
| 103691796 | LOC103691796    | 0.417731 | 0.70315284 | 0.837207 |
| 108352224 | LOC108352224    | 0.417731 | 0.39416198 | 0.59139  |
| 171161    | Csap1           | 0.417731 | 0.50923518 | 0.695599 |
| 293609    | Olr315          | 0.417731 | 0.70315284 | 0.837207 |
| 294241    | Ly6g6c          | 0.417731 | 0.09670595 | 0.223001 |
| 298567    | Cela3b          | 0.417731 | 0.70315284 | 0.837207 |
| 299637    | Tle6            | 0.417731 | 0.58994795 | 0.755205 |
| 303741    | Fscn2           | 0.417731 | 5.10E-05   | 3.62E-04 |
| 304815    | Elf3            | 0.417731 | 0.70315284 | 0.837207 |
| 308325    | Nlrp5           | 0.417731 | 0.70315284 | 0.837207 |
| 310616    | Creb3l4         | 0.417731 | 0.70315284 | 0.837207 |
| 317051    | Hhip12          | 0.417731 | 0.58994795 | 0.755205 |
| 362879    | Myrf1           | 0.417731 | 0.70315284 | 0.837207 |
| 363681    | Hspb9           | 0.417731 | 0.58994795 | 0.755205 |
| 367901    | Btk             | 0.417731 | 0.03386311 | 0.099295 |
| 497859    | Atf7ip2         | 0.417731 | 0.70315284 | 0.837207 |
| 498102    | Gmnc            | 0.417731 | 0.39416198 | 0.59139  |
| 498152    | LOC498152       | 0.417731 | 0.70315284 | 0.837207 |
| 498608    | Yjefn3          | 0.417731 | 0.58994795 | 0.755205 |
| 499573    | LOC499573       | 0.417731 | 0.70315284 | 0.837207 |
| 500061    | Fam71f1         | 0.417731 | 0.70315284 | 0.837207 |
| 500906    | Cyth4           | 0.417731 | 3.98E-07   | 4.22E-06 |
| 60464     | Fgf16           | 0.417731 | 0.70315284 | 0.837207 |
| 679870    | Capns2          | 0.417731 | 0.28111272 | 0.474711 |
| 680486    | Dazl            | 0.417731 | 0.70315284 | 0.837207 |
| 686084    | LOC686084       | 0.417731 | 0.39416198 | 0.59139  |
| 688328    | Znf750          | 0.417731 | 0.70315284 | 0.837207 |
| 691446    | Tmem190         | 0.417731 | 0.2062804  | 0.383803 |

|           |              |          |            |          |
|-----------|--------------|----------|------------|----------|
| 81753     | Pth2r        | 0.417731 | 0.50923518 | 0.695599 |
| 84494     | Trpc4        | 0.417731 | 0.04769361 | 0.130188 |
| 24418     | Grm5         | 0.417731 | 0.31335311 | 0.508353 |
| 294430    | Calhm6       | 0.417731 | 0.31335311 | 0.508353 |
| 680520    | LOC680520    | 0.417443 | 0.43607938 | 0.630084 |
| 683469    | LOC683469    | 0.416829 | 0.44703258 | 0.639505 |
| 29279     | Meox2        | 0.416578 | 1.04E-04   | 6.89E-04 |
| 305494    | Aebp1        | 0.416372 | 1.77E-57   | 2.03E-55 |
| 367333    | LOC367333    | 0.416036 | 0.36600971 | 0.56224  |
| 312495    | Cyp26b1      | 0.415117 | 8.99E-09   | 1.22E-07 |
| 364206    | Plek         | 0.414921 | 4.62E-04   | 0.002617 |
| 80900     | Slco1a5      | 0.414776 | 0.58939962 | 0.754883 |
| 100910781 | LOC100910781 | 0.414772 | 0.21873691 | 0.400369 |
| 304825    | Crb1         | 0.414671 | 0.01773256 | 0.059436 |
| 25584     | F3           | 0.414531 | 8.62E-10   | 1.34E-08 |
| 246249    | Arhgap4      | 0.414395 | 5.65E-06   | 4.88E-05 |
| 364867    | Ticam2       | 0.414324 | 0.02474619 | 0.077439 |
| 171056    | Cx3cr1       | 0.41372  | 0.00373128 | 0.016198 |
| 308028    | Slc2a12      | 0.413695 | 0.00357907 | 0.015627 |
| 100912139 | LOC100912139 | 0.412977 | 0.59204324 | 0.757047 |
| 306664    | Adamts16     | 0.412713 | 6.36E-06   | 5.43E-05 |
| 79209     | Frk          | 0.412135 | 0.00648725 | 0.025874 |
| 287899    | Adamts2      | 0.411952 | 1.47E-24   | 6.66E-23 |
| 293624    | Irf7         | 0.411363 | 1.78E-11   | 3.37E-10 |
| 81782     | Soat1        | 0.411192 | 1.70E-13   | 3.93E-12 |
| 29152     | Mstn         | 0.411158 | 0.00546195 | 0.022337 |
| 103690106 | LOC103690106 | 0.411069 | 0.01081132 | 0.039467 |
| 298069    | Coll5a1      | 0.410708 | 5.06E-46   | 4.38E-44 |
| 289201    | Lmx1a        | 0.410676 | 0.0019809  | 0.00938  |
| 103693666 | Zbed6        | 0.409923 | 9.49E-23   | 3.92E-21 |
| 309526    | Ifit3        | 0.409813 | 0.00318056 | 0.014149 |
| 100910957 | LOC100910957 | 0.409712 | 7.30E-13   | 1.58E-11 |
| 60589     | Epha8        | 0.409603 | 0.00405135 | 0.017323 |
| 24947     | Gabra3       | 0.409306 | 1.00E-17   | 3.20E-16 |
| 58919     | Ccnd1        | 0.408796 | 2.92E-35   | 2.02E-33 |
| 289237    | Slamf8       | 0.408751 | 0.02578493 | 0.07994  |
| 25051     | Gpllr        | 0.408537 | 0.4757578  | 0.665355 |
| 308113    | Cnksr3       | 0.408378 | 9.16E-08   | 1.08E-06 |
| 114005    | Epm2a        | 0.40795  | 0.02383116 | 0.075305 |
| 499520    | Shisa12b     | 0.40795  | 0.19198867 | 0.36546  |
| 108351679 | LOC108351679 | 0.407721 | 0.33046257 | 0.526798 |
| 681266    | LOC681266    | 0.407375 | 0.55256933 | 0.732796 |
| 299330    | RGD1305298   | 0.407004 | 0.17330907 | 0.340627 |
| 100911180 | LOC100911180 | 0.406805 | 0.01773832 | 0.059435 |
| 84400     | Pre1p        | 0.406538 | 2.37E-43   | 1.95E-41 |
| 25703     | Rbp4         | 0.406091 | 6.16E-10   | 9.73E-09 |
| 301155    | St6gal2      | 0.406049 | 0.00360587 | 0.015722 |
| 317553    | Il1rap11     | 0.406049 | 0.09285849 | 0.2167   |
| 25300     | Cd247        | 0.405893 | 0.16266166 | 0.325614 |
| 108351349 | LOC108351349 | 0.405839 | 0.58085922 | 0.747919 |
| 353252    | Rdh10        | 0.405781 | 2.30E-05   | 1.76E-04 |
| 690865    | Pcdh15       | 0.40553  | 0.18890015 | 0.361605 |
| 292138    | Eno4         | 0.405219 | 0.00259486 | 0.011851 |
| 499415    | Icoslg       | 0.404831 | 2.10E-21   | 8.04E-20 |
| 294051    | Dntt         | 0.404792 | 0.26033686 | 0.449716 |
| 501467    | LOC501467    | 0.404448 | 0.00443933 | 0.018718 |

|           |              |          |            |          |
|-----------|--------------|----------|------------|----------|
| 360524    | Zcchc10      | 0.404056 | 1.53E-04   | 9.77E-04 |
| 365212    | Micb         | 0.403231 | 0.13414975 | 0.284223 |
| 690547    | Adam30       | 0.402866 | 0.2888216  | 0.483697 |
| 316062    | Slc22a13     | 0.40263  | 0.3000334  | 0.496709 |
| 94339     | Mmp23        | 0.402301 | 1.27E-04   | 8.23E-04 |
| 54301     | Slc14a1      | 0.402297 | 4.59E-04   | 0.002603 |
| 100911379 | LOC100911379 | 0.401686 | 0.26401268 | 0.454212 |
| 24508     | Irf1         | 0.401624 | 7.03E-08   | 8.39E-07 |
| 315388    | Tmprss6      | 0.401243 | 0.16217991 | 0.324872 |
| 83820     | Sycp2        | 0.401243 | 0.16217991 | 0.324872 |
| 102552169 | LOC102552169 | 0.40122  | 0.15937052 | 0.320745 |
| 291813    | Cmtm3        | 0.400901 | 3.79E-07   | 4.03E-06 |
| 680338    | Clec12a      | 0.400857 | 0.01680745 | 0.056765 |
| 308954    | Pdzd9        | 0.400688 | 0.00211908 | 0.009945 |
| 303948    | Nepro        | 0.400325 | 5.39E-04   | 0.002993 |
| 299190    | LOC299190    | 0.400243 | 0.63907333 | 0.793684 |
| 102551354 | LOC102551354 | 0.400182 | 0.0316053  | 0.094006 |
| 64043     | Gcnt1        | 0.399627 | 1.54E-08   | 2.03E-07 |
| 25211     | Lyz2         | 0.399535 | 1.83E-188  | #####    |
| 25404     | Cav1         | 0.399281 | 5.70E-100  | 1.12E-97 |
| 367056    | Ccdc15       | 0.398994 | 0.00911359 | 0.034316 |
| 361239    | Bph1         | 0.398622 | 1.22E-05   | 9.84E-05 |
| 498582    | Wdfy4        | 0.398622 | 0.00100669 | 0.005207 |
| 293619    | Pkp3         | 0.398363 | 0.34898862 | 0.545823 |
| 102554913 | LOC102554913 | 0.397756 | 0.67628994 | 0.81871  |
| 497194    | Rnase13      | 0.397553 | 0.12520925 | 0.270517 |
| 171112    | Wfdc1        | 0.397198 | 7.91E-11   | 1.38E-09 |
| 108351645 | LOC108351645 | 0.397077 | 0.71859976 | 0.846313 |
| 362800    | Itgb8        | 0.396945 | 2.57E-131  | #####    |
| 362376    | Herc6        | 0.396585 | 7.22E-07   | 7.35E-06 |
| 500015    | Samd91       | 0.396547 | 1.14E-13   | 2.69E-12 |
| 102555289 | LOC102555289 | 0.396534 | 0.01055737 | 0.038771 |
| 500047    | Wnt16        | 0.396503 | 7.39E-10   | 1.16E-08 |
| 690826    | LOC690826    | 0.395665 | 0.01738529 | 0.058519 |
| 64169     | Necab1       | 0.395611 | 4.01E-35   | 2.77E-33 |
| 25346     | Ros1         | 0.395462 | 0.32130313 | 0.516433 |
| 100912585 | LOC100912585 | 0.395364 | 4.25E-06   | 3.76E-05 |
| 100912365 | LOC100912365 | 0.395011 | 0.40715861 | 0.60392  |
| 287059    | RGD1565166   | 0.395011 | 0.40715861 | 0.60392  |
| 29585     | Gjb3         | 0.395011 | 0.40715861 | 0.60392  |
| 315806    | Prtg         | 0.395011 | 0.40715861 | 0.60392  |
| 499260    | Otoa         | 0.395011 | 0.40715861 | 0.60392  |
| 548326    | Fcmr         | 0.394688 | 1.93E-05   | 1.49E-04 |
| 316976    | Etfbkmt      | 0.394312 | 3.82E-04   | 0.00222  |
| 64513     | Pawr         | 0.394202 | 0.00701792 | 0.027569 |
| 364688    | Sycp21       | 0.393884 | 0.10662367 | 0.239746 |
| 171104    | Gper1        | 0.393483 | 0.05025351 | 0.135286 |
| 500118    | Fam221a      | 0.393483 | 0.05025351 | 0.135286 |
| 293840    | Pnma3        | 0.393139 | 0.13516589 | 0.285329 |
| 306247    | I117rb       | 0.39295  | 7.89E-05   | 5.37E-04 |
| 361752    | Pde6c        | 0.39264  | 0.11686473 | 0.257097 |
| 63840     | Per2         | 0.3922   | 5.85E-10   | 9.27E-09 |
| 314626    | Adamts15     | 0.392085 | 5.07E-09   | 7.16E-08 |
| 100169747 | Phykp1       | 0.392018 | 0.01173625 | 0.042237 |
| 308108    | Zfp541       | 0.391736 | 0.18316006 | 0.353459 |
| 25164     | Cdkn2b       | 0.391645 | 2.57E-09   | 3.75E-08 |

|           |              |          |            |          |
|-----------|--------------|----------|------------|----------|
| 305909    | Cenpj        | 0.391062 | 1.29E-10   | 2.21E-09 |
| 689710    | Hegl         | 0.391043 | 1.05E-18   | 3.54E-17 |
| 102549694 | LOC102549694 | 0.390686 | 2.77E-05   | 2.08E-04 |
| 84358     | Efna2        | 0.390353 | 0.06966677 | 0.174948 |
| 501712    | Slfn3        | 0.390224 | 0.05424167 | 0.143957 |
| 366124    | Agbl2        | 0.389716 | 0.29762889 | 0.494145 |
| 498666    | Tnfsf13b     | 0.389716 | 0.14076494 | 0.293987 |
| 289440    | Ephx4        | 0.389716 | 0.00132633 | 0.0066   |
| 363018    | Cep295       | 0.389321 | 5.73E-13   | 1.26E-11 |
| 309499    | Myof         | 0.389205 | 3.17E-15   | 8.58E-14 |
| 361839    | Ctnna3       | 0.388684 | 3.01E-08   | 3.78E-07 |
| 246774    | Gimap5       | 0.388515 | 0.01096268 | 0.039951 |
| 296959    | Cpa2         | 0.388244 | 0.00745498 | 0.02894  |
| 291549    | Oacyl        | 0.388149 | 0.00428796 | 0.018184 |
| 85250     | Col5a2       | 0.387495 | 1.24E-85   | 2.05E-83 |
| 24373     | Fst          | 0.387357 | 0.03494178 | 0.101598 |
| 361383    | Adgre5       | 0.387273 | 4.21E-08   | 5.17E-07 |
| 313479    | Orc1         | 0.387001 | 0.01251512 | 0.044576 |
| 297077    | Tmem176a     | 0.386656 | 3.14E-200  | #####    |
| 312688    | Usp18        | 0.38648  | 3.27E-04   | 0.001938 |
| 295356    | Slc16a4      | 0.386022 | 0.01030055 | 0.037974 |
| 360604    | Spata20      | 0.386022 | 0.17026421 | 0.336064 |
| 362572    | Artn         | 0.386022 | 0.09304281 | 0.216997 |
| 690743    | Mkl1         | 0.385866 | 3.81E-04   | 0.002218 |
| 309653    | Fgd2         | 0.385583 | 2.49E-04   | 0.001518 |
| 364674    | Tifab        | 0.38549  | 0.00660226 | 0.02624  |
| 310392    | Slc7a11      | 0.385488 | 0.00101565 | 0.005243 |
| 29197     | I118         | 0.385413 | 0.07279276 | 0.181173 |
| 499566    | Car13        | 0.385189 | 3.23E-08   | 4.04E-07 |
| 296257    | Cst7         | 0.385163 | 0.13117116 | 0.279561 |
| 406161    | C4b          | 0.385108 | 6.04E-09   | 8.40E-08 |
| 297891    | Tssk3        | 0.38498  | 0.21471656 | 0.395214 |
| 100361180 | LOC100361180 | 0.384784 | 0.389075   | 0.586183 |
| 307401    | Pde6a        | 0.384564 | 0.24733604 | 0.435997 |
| 245960    | Alg10        | 0.384508 | 7.48E-07   | 7.59E-06 |
| 314349    | Ston2        | 0.384417 | 1.34E-04   | 8.64E-04 |
| 100363116 | LOC100363116 | 0.383863 | 0.02787316 | 0.085085 |
| 65030     | Ephx2        | 0.383401 | 0.00433182 | 0.018325 |
| 687615    | Morn3        | 0.383297 | 0.14403616 | 0.298398 |
| 171360    | Vsx2         | 0.382777 | 0.20385103 | 0.380473 |
| 84012     | Slc1a6       | 0.382724 | 0.08692951 | 0.206921 |
| 54264     | Mafb         | 0.381865 | 2.49E-04   | 0.001514 |
| 103694857 | LOC103694857 | 0.381235 | 0.00318638 | 0.014169 |
| 100362748 | Cfap74       | 0.381205 | 0.5281112  | 0.711156 |
| 108351075 | LOC108351075 | 0.381205 | 0.5281112  | 0.711156 |
| 497083    | Xkr5         | 0.381205 | 0.27450928 | 0.466601 |
| 498365    | Tmem156      | 0.381205 | 0.5281112  | 0.711156 |
| 500673    | Six6os1      | 0.381205 | 0.5281112  | 0.711156 |
| 681249    | Fam72a       | 0.381205 | 0.5281112  | 0.711156 |
| 691215    | LOC691215    | 0.381205 | 0.27450928 | 0.466601 |
| 291936    | Hhip         | 0.381205 | 0.20702647 | 0.384665 |
| 361419    | Dnaaf1       | 0.381205 | 0.37227718 | 0.568657 |
| 685004    | Itga9        | 0.380835 | 1.34E-08   | 1.78E-07 |
| 102546678 | LOC102546678 | 0.380773 | 4.59E-23   | 1.92E-21 |
| 291069    | Ppp1r3g      | 0.379929 | 0.06370694 | 0.163561 |
| 363656    | Bhlha9       | 0.379257 | 0.00946826 | 0.035434 |



|           |              |          |            |          |
|-----------|--------------|----------|------------|----------|
| 314997    | Fer116       | 0.379033 | 0.05311857 | 0.141409 |
| 102547060 | LOC102547060 | 0.378202 | 0.22883682 | 0.413393 |
| 102554658 | LOC102554658 | 0.378202 | 0.22883682 | 0.413393 |
| 498547    | Epstil       | 0.377733 | 0.02540126 | 0.079034 |
| 311642    | Sulf2        | 0.377326 | 3.16E-40   | 2.44E-38 |
| 310810    | Frrs1        | 0.377301 | 0.00208207 | 0.009786 |
| 79557     | Chrna1       | 0.377285 | 0.00666066 | 0.026428 |
| 102556148 | LOC102556148 | 0.377114 | 0.03304914 | 0.097358 |
| 25582     | Agrp         | 0.377089 | 0.30548745 | 0.502505 |
| 688019    | Thap2        | 0.376977 | 8.87E-08   | 1.05E-06 |
| 100912596 | LOC100912596 | 0.376463 | 0.33103644 | 0.527272 |
| 100911365 | LOC100911365 | 0.376336 | 3.62E-08   | 4.48E-07 |
| 102553140 | LOC102553140 | 0.376097 | 0.16138729 | 0.323573 |
| 500995    | RGD1564937   | 0.37542  | 0.56375028 | 0.734932 |
| 171064    | Igsf6        | 0.37517  | 0.02589732 | 0.080197 |
| 305309    | Slc10a4      | 0.374662 | 0.10628981 | 0.239221 |
| 307616    | Cmt2a        | 0.374662 | 0.41935089 | 0.614798 |
| 316254    | Tdrd6        | 0.374662 | 0.41935089 | 0.614798 |
| 102550127 | LOC102550127 | 0.374347 | 0.03001526 | 0.090178 |
| 302396    | Nexmif       | 0.374338 | 0.0043498  | 0.018389 |
| 310843    | Sec24d       | 0.374053 | 2.56E-13   | 5.82E-12 |
| 313993    | Grhl1        | 0.373787 | 0.01671968 | 0.056559 |
| 100909548 | LOC100909548 | 0.373593 | 2.77E-42   | 2.21E-40 |
| 361537    | Tyrobp       | 0.373062 | 6.76E-06   | 5.72E-05 |
| 305427    | Otop1        | 0.372877 | 0.01814625 | 0.060567 |
| 300067    | Sh3bp1       | 0.372847 | 0.00194002 | 0.009214 |
| 100911428 | LOC100911428 | 0.372837 | 0.26505098 | 0.455504 |
| 414783    | RT1-CE4      | 0.372767 | 9.22E-09   | 1.25E-07 |
| 500638    | Fam110c      | 0.372661 | 0.22970323 | 0.414467 |
| 291847    | Ccdc113      | 0.371927 | 0.34106942 | 0.537988 |
| 301271    | Ptchd4       | 0.371927 | 0.09914617 | 0.227061 |
| 314126    | Baz1a        | 0.37113  | 8.81E-05   | 5.92E-04 |
| 307988    | Vwa2         | 0.371081 | 0.15050403 | 0.307169 |
| 499429    | Tbata        | 0.371081 | 0.01276482 | 0.045322 |
| 499656    | RGD1564171   | 0.371081 | 0.15050403 | 0.307169 |
| 286985    | Vom2r31      | 0.370835 | 0.30409906 | 0.501131 |
| 114243    | Nox1         | 0.370774 | 0.30651476 | 0.502503 |
| 287776    | Cep112       | 0.370325 | 0.00385156 | 0.016614 |
| 246247    | Fmo4         | 0.370238 | 0.00721451 | 0.028202 |
| 102551484 | LOC102551484 | 0.370131 | 0.35027873 | 0.546987 |
| 362049    | Unc5c        | 0.370099 | 2.26E-06   | 2.11E-05 |
| 116597    | Opcml        | 0.370051 | 1.38E-21   | 5.34E-20 |
| 685275    | LOC685275    | 0.370023 | 0.36992597 | 0.566247 |
| 365194    | Cabp5        | 0.370013 | 0.48355358 | 0.672063 |
| 100910717 | LOC100910717 | 0.370004 | 1.73E-04   | 0.001092 |
| 303953    | Abhd10       | 0.369898 | 0.00302688 | 0.013558 |
| 103689991 | Ect2l        | 0.369495 | 0.44723825 | 0.639559 |
| 29373     | Bmp2         | 0.369121 | 0.0790398  | 0.192692 |
| 100362909 | Tex52        | 0.368856 | 0.60699896 | 0.76925  |
| 499537    | Fyb1         | 0.36848  | 7.32E-04   | 0.003937 |
| 24410     | Grin2b       | 0.367964 | 3.42E-08   | 4.26E-07 |
| 266761    | Cyp4v3       | 0.367724 | 1.29E-07   | 1.48E-06 |
| 100911319 | LOC100911319 | 0.367155 | 9.08E-33   | 5.69E-31 |
| 498368    | LOC498368    | 0.366907 | 1.55E-04   | 9.88E-04 |
| 100360518 | Hsh2d        | 0.366713 | 0.13550562 | 0.285761 |
| 299639    | Ankrd24      | 0.366311 | 5.26E-04   | 0.002933 |

|           |                |          |            |          |
|-----------|----------------|----------|------------|----------|
| 102555341 | LOC102555341   | 0.365944 | 0.0345928  | 0.100829 |
| 298693    | Isg15          | 0.365791 | 8.72E-04   | 0.00459  |
| 313063    | Rad54b         | 0.365442 | 0.1300501  | 0.277762 |
| 288905    | I127ra         | 0.365339 | 0.38031172 | 0.577272 |
| 117274    | Nr0b2          | 0.365263 | 0.61399924 | 0.774412 |
| 25378     | Amh            | 0.365263 | 0.61399924 | 0.774412 |
| 282839    | Mc2r           | 0.365263 | 0.61399924 | 0.774412 |
| 298602    | Srarp          | 0.365263 | 0.47566554 | 0.665275 |
| 365868    | Hormad1        | 0.365263 | 0.25939902 | 0.448747 |
| 685839    | Dnajb7         | 0.365263 | 0.61399924 | 0.774412 |
| 685936    | Pfn3           | 0.365263 | 0.61399924 | 0.774412 |
| 681408    | Prr19          | 0.365263 | 0.3823362  | 0.579145 |
| 308995    | Itgal          | 0.364699 | 0.00133956 | 0.006661 |
| 305101    | RGD1304622     | 0.364454 | 1.42E-04   | 9.13E-04 |
| 361430    | Piezol         | 0.364314 | 5.27E-11   | 9.38E-10 |
| 171299    | Foxd1          | 0.364029 | 5.89E-04   | 0.003239 |
| 100360238 | LOC100360238   | 0.363985 | 0.34143329 | 0.538161 |
| 102556346 | LOC102556346   | 0.363691 | 0.00672106 | 0.026606 |
| 100911881 | LOC100911881   | 0.363676 | 5.49E-06   | 4.75E-05 |
| 363551    | Zg16b          | 0.36366  | 0.6156543  | 0.775421 |
| 289247    | Olr1584        | 0.363623 | 0.32091912 | 0.516034 |
| 60587     | Dusp4          | 0.363575 | 0.00892755 | 0.033702 |
| 302931    | Eef2kmt        | 0.363342 | 0.01725679 | 0.058128 |
| 102547811 | LOC102547811   | 0.363306 | 0.00141382 | 0.006996 |
| 366988    | Bin2           | 0.363096 | 0.0047653  | 0.019902 |
| 171369    | Cd40           | 0.363058 | 0.06651286 | 0.168808 |
| 502316    | Zfp566         | 0.362793 | 0.00154375 | 0.007535 |
| 292071    | Cdt1           | 0.362737 | 0.03296117 | 0.097129 |
| 360997    | Abcg314        | 0.362546 | 4.12E-10   | 6.64E-09 |
| 361319    | Spink5         | 0.362214 | 0.30072074 | 0.497587 |
| 100362023 | LOC100362023   | 0.362069 | 0.44187854 | 0.63485  |
| 292843    | Siglec5        | 0.3619   | 0.00225031 | 0.010453 |
| 308906    | Trim5          | 0.361348 | 3.20E-08   | 4.00E-07 |
| 80338     | Zbtb10         | 0.361271 | 4.16E-04   | 0.002389 |
| 499975    | Fam126a        | 0.361147 | 8.78E-04   | 0.004619 |
| 100361272 | Ankub1         | 0.361147 | 0.23949058 | 0.426949 |
| 363130    | Astel          | 0.360951 | 8.12E-04   | 0.004306 |
| 293677    | Efemp2         | 0.360823 | 1.55E-10   | 2.63E-09 |
| 100912199 | LOC100912199   | 0.360741 | 0.47837551 | 0.667643 |
| 498330    | Aff1-as1       | 0.360741 | 0.72299503 | 0.848499 |
| 288369    | Pex11g         | 0.360245 | 0.1328849  | 0.282297 |
| 287745    | Plcd3          | 0.360148 | 4.51E-07   | 4.74E-06 |
| 499022    | Qk             | 0.359828 | 2.92E-14   | 7.34E-13 |
| 102551435 | LOC102551435   | 0.359561 | 0.08329596 | 0.200654 |
| 307810    | Esrp2          | 0.359463 | 0.61503523 | 0.775154 |
| 192228    | Haus1          | 0.359251 | 0.00416376 | 0.017772 |
| 679937    | Dram1          | 0.359149 | 0.00145667 | 0.007183 |
| 29455     | Gdf15          | 0.358984 | 0.51192659 | 0.697749 |
| 25683     | Col12a1        | 0.358931 | 6.64E-35   | 4.51E-33 |
| 501116    | LOC501116      | 0.358843 | 1.00E-34   | 6.73E-33 |
| 690246    | LOC690246      | 0.358837 | 0.85160362 | 0.926629 |
| 108348131 | NEWGENE_620180 | 0.358364 | 2.11E-05   | 1.63E-04 |
| 83578     | Pdxk           | 0.357537 | 0.00429164 | 0.018196 |
| 313834    | Prkd3          | 0.357494 | 1.89E-14   | 4.83E-13 |
| 500571    | Kif17          | 0.357358 | 0.14575493 | 0.300715 |
| 500564    | Ldlrap1        | 0.357288 | 0.00257694 | 0.011778 |

|           |              |          |            |          |
|-----------|--------------|----------|------------|----------|
| 311821    | Agpat2       | 0.357226 | 0.02760012 | 0.084509 |
| 103692025 | LOC103692025 | 0.357211 | 0.01376265 | 0.048173 |
| 100362342 | LOC100362342 | 0.356802 | 0.03199792 | 0.094907 |
| 171108    | P2ry14       | 0.356772 | 0.00172825 | 0.008329 |
| 305450    | Sh3bp2       | 0.356701 | 6.32E-04   | 0.003455 |
| 299313    | Uxt          | 0.356626 | 1.42E-09   | 2.14E-08 |
| 266610    | Fadd         | 0.35633  | 0.11511999 | 0.254242 |
| 29482     | Slc1a2       | 0.35633  | 0.43081639 | 0.625087 |
| 296344    | Mybl2        | 0.35633  | 0.11511999 | 0.254242 |
| 316019    | Ccrl2        | 0.35633  | 0.17240961 | 0.339279 |
| 295669    | Cybrd1       | 0.356302 | 9.96E-10   | 1.54E-08 |
| 100912689 | LOC100912689 | 0.355901 | 0.58309176 | 0.749729 |
| 502901    | Clec9a       | 0.355872 | 0.02997461 | 0.090085 |
| 171577    | Epcam        | 0.355617 | 0.31828371 | 0.513183 |
| 679730    | LOC679730    | 0.355297 | 4.35E-04   | 0.002482 |
| 353316    | Gsdme        | 0.354947 | 3.61E-05   | 2.65E-04 |
| 113984    | Nr2f2        | 0.354816 | 5.00E-47   | 4.49E-45 |
| 500561    | Themis2      | 0.354768 | 0.06505462 | 0.166037 |
| 246248    | Fmo5         | 0.354537 | 0.05841852 | 0.15289  |
| 288364    | Qtrt2        | 0.354292 | 0.00119955 | 0.00605  |
| 306548    | Hook3        | 0.354231 | 6.41E-06   | 5.46E-05 |
| 102552895 | LOC102552895 | 0.354202 | 3.20E-09   | 4.63E-08 |
| 103690896 | LOC103690896 | 0.354166 | 0.32046723 | 0.515634 |
| 78964     | Npffr2       | 0.354166 | 0.32046723 | 0.515634 |
| 300696    | Ttc12        | 0.35389  | 0.00192861 | 0.009169 |
| 367195    | LOC367195    | 0.353538 | 0.34702227 | 0.54373  |
| 361084    | Lmo7         | 0.353392 | 6.31E-11   | 1.11E-09 |
| 690286    | Hlf          | 0.353219 | 3.57E-04   | 0.002093 |
| 306950    | Slc17a2      | 0.353191 | 0.24466911 | 0.432979 |
| 103690168 | LOC103690168 | 0.35299  | 0.53694909 | 0.719192 |
| 365851    | RGD1564513   | 0.352859 | 0.65342793 | 0.802407 |
| 296156    | Cpxml        | 0.352636 | 9.24E-07   | 9.23E-06 |
| 679640    | Cntln        | 0.352028 | 3.42E-05   | 2.52E-04 |
| 79242     | Hpgd         | 0.351852 | 0.47782652 | 0.667219 |
| 362508    | Spag8        | 0.351843 | 0.09313344 | 0.217156 |
| 500696    | RGD1563496   | 0.351285 | 0.23814124 | 0.42518  |
| 288937    | Serpnb8      | 0.350941 | 0.0796787  | 0.193878 |
| 691932    | Tgm711       | 0.350617 | 0.54493096 | 0.725952 |
| 296078    | Pak6         | 0.350617 | 0.00553421 | 0.022545 |
| 362402    | Fgd5         | 0.350501 | 4.80E-08   | 5.84E-07 |
| 108350822 | LOC108350822 | 0.350489 | 0.20422221 | 0.380904 |
| 498011    | Mrc2         | 0.350359 | 1.21E-10   | 2.09E-09 |
| 314785    | Tmtc3        | 0.350336 | 5.61E-15   | 1.48E-13 |
| 363093    | Mns1         | 0.349712 | 0.00598573 | 0.024076 |
| 293746    | Ms4a4c       | 0.349188 | 0.32294332 | 0.518151 |
| 24210     | Asgr1        | 0.349144 | 0.12842876 | 0.275318 |
| 290646    | Pde4c        | 0.348986 | 1.92E-07   | 2.13E-06 |
| 102549509 | LOC102549509 | 0.348818 | 0.3512289  | 0.547932 |
| 361749    | I133         | 0.34867  | 2.63E-46   | 2.30E-44 |
| 117242    | Tenm2        | 0.348301 | 7.10E-15   | 1.86E-13 |
| 500896    | Wdr97        | 0.347829 | 0.27093658 | 0.462613 |
| 108348118 | LOC108348118 | 0.347726 | 4.91E-41   | 3.86E-39 |
| 289881    | Dr1          | 0.347095 | 4.44E-10   | 7.14E-09 |
| 252917    | Nr1d1        | 0.346867 | 2.85E-27   | 1.47E-25 |
| 103689941 | LOC103689941 | 0.346688 | 4.00E-06   | 3.56E-05 |
| 293449    | Vwa3a        | 0.346648 | 0.19345473 | 0.367223 |

|           |              |          |            |          |
|-----------|--------------|----------|------------|----------|
| 291130    | Dcdc2        | 0.346226 | 0.00131919 | 0.006572 |
| 100362083 | Zfp866       | 0.346141 | 0.00802221 | 0.030859 |
| 100125363 | Fbxl13       | 0.346042 | 0.36553915 | 0.561608 |
| 29665     | P2rx7        | 0.345923 | 2.16E-15   | 5.92E-14 |
| 299818    | Llph         | 0.345752 | 0.00740287 | 0.028791 |
| 117267    | Slc26a2      | 0.345358 | 9.29E-07   | 9.27E-06 |
| 296409    | Cass4        | 0.34525  | 0.06401769 | 0.164138 |
| 310257    | Samd7        | 0.344697 | 0.47752346 | 0.666894 |
| 363096    | Dnaaf4       | 0.344613 | 0.09651846 | 0.222676 |
| 364405    | Scara3       | 0.344496 | 2.37E-18   | 7.82E-17 |
| 108349054 | LOC108349054 | 0.344371 | 0.63299656 | 0.789174 |
| 500624    | Mfsd2b       | 0.34403  | 0.27043972 | 0.46193  |
| 24689     | Prps2        | 0.343895 | 1.49E-18   | 4.99E-17 |
| 24837     | Tnnt2        | 0.34373  | 0.06703728 | 0.169777 |
| 155268    | Cldn16       | 0.34373  | 0.32761124 | 0.523216 |
| 315564    | Robo3        | 0.34373  | 0.16622808 | 0.329635 |
| 362076    | I136b        | 0.34373  | 0.32761124 | 0.523216 |
| 502201    | Lrrc29       | 0.34373  | 0.32761124 | 0.523216 |
| 83517     | Fcna         | 0.343349 | 0.0117918  | 0.042421 |
| 29473     | Aoc3         | 0.343228 | 9.93E-14   | 2.37E-12 |
| 305139    | Gbp6         | 0.343196 | 0.01454525 | 0.050486 |
| 25693     | Slc18a1      | 0.342969 | 0.10465076 | 0.236314 |
| 100359714 | Phf6         | 0.342927 | 6.63E-16   | 1.87E-14 |
| 316400    | Pgap1        | 0.342889 | 7.07E-04   | 0.003816 |
| 64086     | Csnk1g1      | 0.342769 | 0.00608172 | 0.0244   |
| 29348     | Fgf7         | 0.342665 | 6.45E-11   | 1.13E-09 |
| 363205    | RGD1562107   | 0.34218  | 0.21308678 | 0.39324  |
| 287818    | Cd3001f      | 0.341762 | 0.1055722  | 0.237887 |
| 315658    | Zc3h12c      | 0.341445 | 4.73E-06   | 4.14E-05 |
| 100909950 | LOC100909950 | 0.341148 | 0.644556   | 0.797944 |
| 84588     | Cldn11       | 0.340731 | 1.29E-10   | 2.21E-09 |
| 103691072 | LOC103691072 | 0.340231 | 0.43946808 | 0.632772 |
| 298532    | Tekt2        | 0.339728 | 0.44162288 | 0.634842 |
| 301086    | Xcr1         | 0.339728 | 0.44162288 | 0.634842 |
| 444986    | I122ra2      | 0.339728 | 0.27651797 | 0.46899  |
| 502380    | Pfpl         | 0.339534 | 0.30312927 | 0.500398 |
| 140898    | Arhgef5      | 0.339174 | 0.00943457 | 0.035329 |
| 361226    | Cd83         | 0.338852 | 4.01E-06   | 3.57E-05 |
| 360635    | Etv4         | 0.33885  | 9.62E-06   | 7.93E-05 |
| 367218    | Runx2        | 0.338691 | 0.00120531 | 0.00607  |
| 288054    | Ccdc14       | 0.338579 | 7.97E-04   | 0.004247 |
| 24968     | Psmb8        | 0.338545 | 4.94E-05   | 3.52E-04 |
| 501736    | Cd300a       | 0.337831 | 0.12581343 | 0.271177 |
| 29501     | Slc12a4      | 0.337717 | 8.13E-24   | 3.54E-22 |
| 103694906 | LOC103694906 | 0.337697 | 0.5174071  | 0.702303 |
| 295425    | Usp53        | 0.337672 | 2.19E-18   | 7.25E-17 |
| 102554161 | LOC102554161 | 0.337669 | 0.03902674 | 0.110968 |
| 116740    | B3gnt5       | 0.337391 | 1.23E-06   | 1.21E-05 |
| 305491    | Ankrd36      | 0.337112 | 0.40108461 | 0.598172 |
| 103694879 | LOC103694879 | 0.337055 | 0.02903573 | 0.087901 |
| 680990    | Gdpd4        | 0.336927 | 5.01E-05   | 3.56E-04 |
| 108350654 | LOC108350654 | 0.336882 | 0.00672328 | 0.026604 |
| 498084    | LOC498084    | 0.336544 | 0.16815057 | 0.332651 |
| 363984    | Ikbke        | 0.336471 | 5.78E-04   | 0.003184 |
| 501740    | RGD1562156   | 0.336344 | 0.59886947 | 0.762296 |
| 79425     | C1cnka       | 0.336173 | 0.54219401 | 0.723571 |

|           |              |          |            |          |
|-----------|--------------|----------|------------|----------|
| 25668     | Cd38         | 0.336118 | 6.31E-04   | 0.003452 |
| 24930     | Cd8a         | 0.336117 | 0.39251481 | 0.589825 |
| 100361923 | Ikzf4        | 0.335971 | 0.1342348  | 0.284277 |
| 108350921 | LOC108350921 | 0.335828 | 0.09612389 | 0.222197 |
| 680434    | Dqx1         | 0.335747 | 8.99E-04   | 0.004718 |
| 108348140 | LOC108348140 | 0.335745 | 0.15144972 | 0.308587 |
| 108349748 | LOC108349748 | 0.335468 | 0.21285914 | 0.392896 |
| 103690070 | LOC103690070 | 0.335391 | 0.646411   | 0.799513 |
| 66023     | Gfra4        | 0.335269 | 0.07044713 | 0.176465 |
| 309478    | Zfp518a      | 0.335013 | 7.40E-06   | 6.23E-05 |
| 29504     | Slc22a3      | 0.334315 | 0.10157549 | 0.231372 |
| 308787    | Adamts13     | 0.333934 | 1.94E-08   | 2.50E-07 |
| 303903    | Parp14       | 0.333752 | 1.62E-11   | 3.08E-10 |
| 56826     | Adap2        | 0.333661 | 0.00121918 | 0.00613  |
| 294981    | Spry1        | 0.333197 | 8.94E-04   | 0.004696 |
| 83783     | Sult1a1      | 0.332935 | 1.08E-17   | 3.43E-16 |
| 100361830 | Tram2        | 0.332614 | 0.03832226 | 0.109291 |
| 360733    | Rtp4         | 0.3326   | 4.76E-04   | 0.002688 |
| 307376    | Onecut2      | 0.332577 | 6.42E-13   | 1.40E-11 |
| 500442    | Dnail        | 0.332399 | 0.13784066 | 0.289499 |
| 100912108 | Nupr1        | 0.332396 | 6.39E-09   | 8.85E-08 |
| 84481     | Arid4b       | 0.332242 | 1.05E-13   | 2.51E-12 |
| 140860    | Slco2b1      | 0.332086 | 7.07E-13   | 1.54E-11 |
| 311984    | Gsap         | 0.332064 | 2.06E-04   | 0.001276 |
| 298189    | Bnc2         | 0.331945 | 1.40E-16   | 4.11E-15 |
| 685325    | Ddo          | 0.331778 | 0.45901189 | 0.650292 |
| 500089    | Tas2r137     | 0.331642 | 0.0275434  | 0.084376 |
| 103689946 | LOC103689946 | 0.331525 | 0.43685522 | 0.631061 |
| 361673    | Ifitm3       | 0.331504 | 2.36E-21   | 9.00E-20 |
| 64519     | Entpd1       | 0.331435 | 7.52E-07   | 7.62E-06 |
| 108351043 | LOC108351043 | 0.331255 | 0.72030574 | 0.846908 |
| 85419     | Lyst         | 0.33085  | 1.24E-18   | 4.16E-17 |
| 366078    | Sp9          | 0.330381 | 0.80848384 | 0.90266  |
| 305897    | Nfatc4       | 0.330343 | 0.00290051 | 0.013053 |
| 361641    | Ears2        | 0.329877 | 0.01417044 | 0.049383 |
| 497892    | Sgcd         | 0.329701 | 0.00101719 | 0.005249 |
| 299933    | Dscc1        | 0.329504 | 0.18925713 | 0.362033 |
| 312257    | Dennd2a      | 0.329473 | 9.40E-14   | 2.25E-12 |
| 499843    | LOC499843    | 0.329456 | 0.32796421 | 0.523648 |
| 100912042 | LOC100912042 | 0.329312 | 0.00353229 | 0.015454 |
| 100911034 | LOC100911034 | 0.329198 | 2.23E-19   | 7.74E-18 |
| 314870    | Irak3        | 0.329133 | 3.32E-07   | 3.57E-06 |
| 103691893 | LOC103691893 | 0.329039 | 0.55873287 | 0.737785 |
| 295649    | Figf         | 0.328828 | 6.55E-05   | 4.54E-04 |
| 308990    | LOC308990    | 0.328716 | 0.08616326 | 0.205456 |
| 296129    | Ast1         | 0.32868  | 0.1509165  | 0.307813 |
| 685046    | Erich4       | 0.32868  | 0.1509165  | 0.307813 |
| 296953    | Irf5         | 0.32859  | 0.00116739 | 0.005905 |
| 298884    | Gen1         | 0.328542 | 0.05332929 | 0.141871 |
| 25156     | Vav1         | 0.328094 | 0.02837542 | 0.086286 |
| 287569    | Slfn14       | 0.327991 | 0.33224257 | 0.528353 |
| 499240    | LOC499240    | 0.327709 | 0.10953636 | 0.244534 |
| 117271    | Hrk          | 0.327533 | 0.0168616  | 0.056918 |
| 362339    | Creb3l2      | 0.326398 | 8.74E-13   | 1.89E-11 |
| 313866    | Plekhh2      | 0.326153 | 5.85E-05   | 4.10E-04 |
| 501872    | Cd84         | 0.325802 | 4.82E-06   | 4.21E-05 |

|           |              |          |            |          |
|-----------|--------------|----------|------------|----------|
| 79212     | Slc6a1       | 0.325412 | 5.18E-06   | 4.51E-05 |
| 29694     | Gabrr1       | 0.325327 | 0.11824529 | 0.259475 |
| 54297     | Rgs8         | 0.324885 | 0.00532124 | 0.021893 |
| 100365935 | Cep851       | 0.324863 | 1.38E-06   | 1.33E-05 |
| 102546892 | Prrtlb       | 0.324621 | 0.63418891 | 0.789988 |
| 103691253 | LOC103691253 | 0.324621 | 0.16535075 | 0.329094 |
| 103694522 | LOC103694522 | 0.324621 | 0.73651711 | 0.857682 |
| 171398    | Ust5r        | 0.324621 | 0.73651711 | 0.857682 |
| 24207     | Apoc3        | 0.324621 | 0.40983851 | 0.60636  |
| 24409     | Grin2a       | 0.324621 | 0.37335107 | 0.569909 |
| 24777     | Slc10a1      | 0.324621 | 0.40983851 | 0.60636  |
| 25298     | Cck          | 0.324621 | 0.37335107 | 0.569909 |
| 288751    | Lrrc43       | 0.324621 | 0.63418891 | 0.789988 |
| 290359    | Npm2         | 0.324621 | 0.63418891 | 0.789988 |
| 295277    | Hist2h4      | 0.324621 | 0.73651711 | 0.857682 |
| 295475    | Neurog2      | 0.324621 | 0.63418891 | 0.789988 |
| 303572    | Meioc        | 0.324621 | 0.56004027 | 0.735635 |
| 365363    | Ern2         | 0.324621 | 0.50098651 | 0.687512 |
| 365542    | RT1-D0b      | 0.324621 | 0.22506972 | 0.408389 |
| 366261    | Spo11        | 0.324621 | 0.73651711 | 0.857682 |
| 367080    | Ankk1        | 0.324621 | 0.56004027 | 0.735635 |
| 499589    | Lrrc34       | 0.324621 | 0.63418891 | 0.789988 |
| 499658    | Pglyrp3      | 0.324621 | 0.73651711 | 0.857682 |
| 499715    | LOC499715    | 0.324621 | 0.73651711 | 0.857682 |
| 60325     | Serpib2      | 0.324621 | 0.73651711 | 0.857682 |
| 64827     | Crisp3       | 0.324621 | 0.73651711 | 0.857682 |
| 664630    | Slc6a19      | 0.324621 | 0.73651711 | 0.857682 |
| 681112    | Il20         | 0.324621 | 0.73651711 | 0.857682 |
| 686008    | Tnfrsf22     | 0.324621 | 0.63418891 | 0.789988 |
| 688730    | Gpr84        | 0.324621 | 0.56004027 | 0.735635 |
| 691311    | LOC691311    | 0.324621 | 0.73651711 | 0.857682 |
| 81779     | Sctr         | 0.324621 | 0.63418891 | 0.789988 |
| 89776     | Slc22a7      | 0.324621 | 0.73651711 | 0.857682 |
| 102550256 | LOC102550256 | 0.324621 | 0.4518298  | 0.643685 |
| 307919    | Snai3        | 0.324621 | 0.4518298  | 0.643685 |
| 100911302 | LOC100911302 | 0.324064 | 0.11507935 | 0.254197 |
| 314618    | Arhgap45     | 0.323826 | 6.15E-06   | 5.25E-05 |
| 245920    | Cxcl10       | 0.323443 | 0.00871082 | 0.032995 |
| 100910483 | LOC100910483 | 0.323353 | 0.19744498 | 0.372163 |
| 689421    | Sntb2        | 0.323315 | 0.01276124 | 0.045318 |
| 501026    | Sh3bgrl2     | 0.323196 | 0.07994584 | 0.194404 |
| 29432     | Pak2         | 0.322779 | 2.79E-06   | 2.56E-05 |
| 81773     | Rps10        | 0.322746 | 1.59E-27   | 8.23E-26 |
| 102556297 | LOC102556297 | 0.322352 | 0.12035091 | 0.263035 |
| 689153    | Chn3         | 0.322267 | 0.44587704 | 0.638428 |
| 499933    | Dsn1         | 0.322237 | 0.024439   | 0.076692 |
| 108348169 | LOC108348169 | 0.321877 | 0.0520424  | 0.139011 |
| 299783    | Glipr1       | 0.321817 | 0.01672929 | 0.056561 |
| 302977    | Rnf151       | 0.321644 | 0.10082357 | 0.22999  |
| 25720     | Tcf12        | 0.321288 | 7.29E-17   | 2.21E-15 |
| 498741    | Mboat1       | 0.321098 | 1.70E-09   | 2.55E-08 |
| 365299    | Bnc1         | 0.321078 | 0.09998947 | 0.228635 |
| 298159    | Dcaf1212     | 0.321019 | 0.73917715 | 0.859624 |
| 405098    | Olr1236      | 0.321019 | 0.73917715 | 0.859624 |
| 116466    | Wnt2b        | 0.320647 | 3.09E-05   | 2.31E-04 |
| 83470     | Bmp1         | 0.320356 | 3.05E-21   | 1.16E-19 |



|           |              |          |            |          |
|-----------|--------------|----------|------------|----------|
| 89788     | Gna15        | 0.31955  | 0.07728813 | 0.189319 |
| 497904    | Meikin       | 0.31955  | 0.74101596 | 0.859898 |
| 83469     | Lrp4         | 0.319429 | 1.43E-10   | 2.45E-09 |
| 103692111 | LOC103692111 | 0.319065 | 0.3481012  | 0.544972 |
| 100360487 | Fam131a      | 0.318862 | 4.15E-05   | 3.01E-04 |
| 316415    | Fam126b      | 0.318738 | 9.28E-10   | 1.44E-08 |
| 113955    | Gpnmb        | 0.318425 | 3.45E-08   | 4.29E-07 |
| 289235    | Slamf9       | 0.318308 | 0.01264515 | 0.044981 |
| 102552659 | LOC102552659 | 0.31783  | 0.00800856 | 0.030819 |
| 117539    | I110ra       | 0.317664 | 0.00503197 | 0.020833 |
| 100366216 | LOC100366216 | 0.317421 | 0.02063675 | 0.067196 |
| 499973    | Atg9b        | 0.317416 | 0.58175915 | 0.748521 |
| 297176    | Mad211       | 0.317161 | 0.00216439 | 0.01012  |
| 25118     | Itgal        | 0.316802 | 0.00161138 | 0.007827 |
| 257649    | Cenpf        | 0.316802 | 0.08409133 | 0.202212 |
| 498583    | Frmpd2       | 0.316802 | 0.31860492 | 0.51344  |
| 100360475 | Galnt15      | 0.316557 | 0.09135682 | 0.214114 |
| 296468    | Birc7        | 0.316354 | 0.54016325 | 0.722025 |
| 682431    | Iqcc         | 0.316276 | 0.01247709 | 0.044466 |
| 362598    | Sh3d21       | 0.316193 | 0.0967864  | 0.223159 |
| 291015    | Ogn          | 0.315743 | 1.92E-45   | 1.63E-43 |
| 79129     | Cyba         | 0.31559  | 2.27E-05   | 1.74E-04 |
| 297073    | Rarres2      | 0.315051 | 2.00E-16   | 5.82E-15 |
| 102553986 | LOC102553986 | 0.3148   | 0.0189663  | 0.062765 |
| 289747    | Osm          | 0.314637 | 0.3807099  | 0.577762 |
| 301082    | Cdcp1        | 0.314637 | 0.3807099  | 0.577762 |
| 688297    | Pde6g        | 0.314637 | 0.3807099  | 0.577762 |
| 84024     | Pon1         | 0.314637 | 0.3807099  | 0.577762 |
| 315309    | Tfcp2        | 0.314551 | 1.63E-08   | 2.14E-07 |
| 500527    | Lurap1       | 0.314052 | 9.89E-04   | 0.005127 |
| 100359680 | Lpcat2       | 0.313915 | 1.33E-07   | 1.53E-06 |
| 500386    | RGD1564405   | 0.313304 | 0.23703876 | 0.424007 |
| 24309     | Dbp          | 0.313232 | 4.61E-15   | 1.22E-13 |
| 362415    | Tt113        | 0.313187 | 0.00473767 | 0.019804 |
| 102553858 | LOC102553858 | 0.313033 | 0.41821693 | 0.61401  |
| 680609    | Ebi3         | 0.313026 | 0.07685552 | 0.188599 |
| 103690914 | LOC103690914 | 0.312806 | 0.19052861 | 0.36348  |
| 316711    | Gtf2a11      | 0.312549 | 0.11325365 | 0.251242 |
| 287451    | Slc16a13     | 0.312431 | 5.90E-05   | 4.13E-04 |
| 29520     | Padi3        | 0.312378 | 0.17344622 | 0.34065  |
| 100912479 | LOC100912479 | 0.312285 | 0.5995507  | 0.762857 |
| 679572    | Romo1        | 0.312215 | 5.00E-06   | 4.36E-05 |
| 25570     | Trhr         | 0.312021 | 0.27380481 | 0.465882 |
| 499885    | Itpripl1     | 0.311948 | 0.0028123  | 0.012713 |
| 291649    | Pcdhb10      | 0.311851 | 0.03360586 | 0.098602 |
| 313625    | Myom3        | 0.311738 | 0.01882067 | 0.06237  |
| 25464     | Icam1        | 0.311508 | 4.54E-05   | 3.27E-04 |
| 102550664 | LOC102550664 | 0.311408 | 0.28024083 | 0.473617 |
| 498176    | Bri3bp       | 0.311325 | 0.09284058 | 0.216711 |
| 100911403 | Ms4a4e       | 0.311246 | 0.02566535 | 0.07966  |
| 311071    | Zeb2         | 0.311104 | 1.73E-46   | 1.52E-44 |
| 361122    | Ankle1       | 0.310951 | 0.11875106 | 0.260195 |
| 100359517 | LOC100359517 | 0.310816 | 0.88291161 | 0.946474 |
| 362801    | Garem2       | 0.310816 | 0.46148952 | 0.652371 |
| 363782    | Cfap44       | 0.310816 | 0.46148952 | 0.652371 |
| 685067    | LOC685067    | 0.310781 | 1.33E-06   | 1.29E-05 |

|           |              |          |            |          |
|-----------|--------------|----------|------------|----------|
| 306204    | Flnb         | 0.310531 | 1.69E-30   | 9.72E-29 |
| 171498    | Sgk3         | 0.310266 | 0.00523844 | 0.02159  |
| 361051    | Phf11        | 0.310085 | 0.02144677 | 0.0693   |
| 315191    | Fbln1        | 0.309756 | 5.47E-11   | 9.72E-10 |
| 103690317 | LOC103690317 | 0.309452 | 7.02E-05   | 4.83E-04 |
| 360539    | Slc47a1      | 0.309259 | 0.00418459 | 0.017829 |
| 308346    | Tmem150b     | 0.30909  | 0.17890707 | 0.347611 |
| 499935    | Tti1         | 0.309061 | 3.85E-11   | 6.98E-10 |
| 306264    | Ankrd28      | 0.308964 | 5.48E-23   | 2.28E-21 |
| 682865    | Rab42        | 0.308596 | 0.07076419 | 0.177143 |
| 100365450 | LOC100365450 | 0.307548 | 0.51232291 | 0.697989 |
| 25525     | Pspn         | 0.307548 | 0.35411962 | 0.55102  |
| 499265    | RGD1563217   | 0.307548 | 0.35411962 | 0.55102  |
| 293947    | Arhgap18     | 0.307525 | 3.33E-04   | 0.001964 |
| 361617    | Arap1        | 0.307105 | 1.06E-20   | 3.90E-19 |
| 266715    | Fzd3         | 0.307104 | 6.31E-04   | 0.003452 |
| 100910478 | LOC100910478 | 0.306902 | 0.12711023 | 0.27326  |
| 317237    | Uprrt        | 0.306848 | 5.98E-05   | 4.18E-04 |
| 295619    | Ermm         | 0.306847 | 0.11655343 | 0.256694 |
| 300236    | Smagp        | 0.306847 | 0.11655343 | 0.256694 |
| 297758    | Terf1        | 0.306748 | 1.02E-04   | 6.77E-04 |
| 85311     | Plala        | 0.306474 | 0.02824241 | 0.08595  |
| 24298     | Cyp21a1      | 0.306432 | 0.00101415 | 0.005237 |
| 103690031 | LOC103690031 | 0.306276 | 5.24E-05   | 3.71E-04 |
| 361914    | LOC361914    | 0.306219 | 0.17820228 | 0.346985 |
| 289712    | Evc          | 0.305936 | 4.73E-05   | 3.39E-04 |
| 308068    | Nkd2         | 0.305762 | 1.17E-05   | 9.50E-05 |
| 308232    | Zfp51        | 0.305705 | 0.05560322 | 0.146834 |
| 686611    | Sinhcaf      | 0.305408 | 0.01144054 | 0.041384 |
| 24783     | Slc9a2       | 0.305293 | 0.10286029 | 0.233545 |
| 361105    | Plac9        | 0.305256 | 0.00418066 | 0.017824 |
| 366733    | Diras3       | 0.305256 | 0.38781518 | 0.584979 |
| 286963    | Cyp2d5       | 0.305175 | 0.62600172 | 0.783685 |
| 680177    | Prr22        | 0.305054 | 0.0286057  | 0.086903 |
| 367714    | Rp2          | 0.304966 | 7.20E-04   | 0.003882 |
| 100911109 | LOC100911109 | 0.304932 | 0.30712528 | 0.502898 |
| 363577    | Itk          | 0.304722 | 0.17874178 | 0.347538 |
| 361135    | 1-Mar        | 0.304585 | 0.02814769 | 0.08573  |
| 78962     | Per3         | 0.304542 | 9.70E-11   | 1.68E-09 |
| 100912009 | LOC100912009 | 0.304512 | 0.01244521 | 0.044369 |
| 102553010 | LOC102553010 | 0.304411 | 2.54E-95   | 4.56E-93 |
| 100364132 | Zfp300       | 0.304349 | 0.07423372 | 0.183799 |
| 100360287 | Zfp952       | 0.304077 | 0.00207732 | 0.009766 |
| 689853    | Clec2e       | 0.303878 | 0.15507502 | 0.314092 |
| 500666    | Dact1        | 0.303123 | 9.49E-05   | 6.33E-04 |
| 57022     | Adam4        | 0.302975 | 0.21639055 | 0.397642 |
| 297590    | Vom2r52      | 0.302786 | 0.11824898 | 0.259453 |
| 360692    | RGD1563888   | 0.302726 | 5.63E-04   | 0.003113 |
| 499801    | Ifih1        | 0.302254 | 4.97E-05   | 3.54E-04 |
| 83585     | Gda          | 0.302254 | 3.02E-16   | 8.70E-15 |
| 192208    | Slc38a5      | 0.302254 | 0.26050612 | 0.449967 |
| 501861    | Axdnd1       | 0.302254 | 0.42624518 | 0.621295 |
| 102548694 | LOC102548694 | 0.302254 | 0.13662055 | 0.287539 |
| 108350448 | LOC108350448 | 0.302254 | 0.57370888 | 0.74235  |
| 25704     | I12ra        | 0.302254 | 0.57370888 | 0.74235  |
| 314416    | Ak7          | 0.302254 | 0.57370888 | 0.74235  |

|           |              |          |            |          |
|-----------|--------------|----------|------------|----------|
| 501046    | Bfsp2        | 0.302254 | 0.57370888 | 0.74235  |
| 58813     | Nt5e         | 0.302217 | 3.09E-06   | 2.81E-05 |
| 363292    | Ing5         | 0.301838 | 0.00117054 | 0.005918 |
| 307212    | Cndp1        | 0.301466 | 5.91E-07   | 6.11E-06 |
| 310833    | Arhgap29     | 0.30119  | 1.24E-09   | 1.89E-08 |
| 361746    | Rfx3         | 0.300646 | 6.24E-05   | 4.34E-04 |
| 311170    | Slc43a3      | 0.30051  | 5.10E-11   | 9.11E-10 |
| 29731     | Kcna3        | 0.300237 | 0.03817433 | 0.108967 |
| 100362547 | Aplg2        | 0.300187 | 3.91E-04   | 0.002265 |
| 257646    | Frmd6        | 0.299894 | 1.75E-18   | 5.84E-17 |
| 311764    | Zfp217       | 0.299865 | 3.72E-04   | 0.002173 |
| 25166     | Casp1        | 0.299854 | 0.03387164 | 0.099305 |
| 24649     | Pim1         | 0.299675 | 0.02503284 | 0.07813  |
| 689232    | Nxn12        | 0.299675 | 0.11306834 | 0.25089  |
| 497979    | Tmem100      | 0.299512 | 9.26E-06   | 7.65E-05 |
| 498226    | Pm20d1       | 0.299468 | 0.04920979 | 0.133542 |
| 287719    | Ifi35        | 0.299332 | 1.83E-04   | 0.001144 |
| 311910    | Zbtb26       | 0.299331 | 3.25E-04   | 0.001928 |
| 100910265 | Cdr1         | 0.299286 | 4.46E-04   | 0.002537 |
| 117955    | Slc4a7       | 0.299227 | 1.11E-06   | 1.10E-05 |
| 103693664 | LOC103693664 | 0.299048 | 0.47536662 | 0.665639 |
| 103690154 | LOC103690154 | 0.299042 | 2.57E-06   | 2.38E-05 |
| 408240    | Mcpt812      | 0.298961 | 0.08290987 | 0.199977 |
| 108352965 | LOC108352965 | 0.2989   | 0.00102292 | 0.005275 |
| 312474    | Gcfc2        | 0.298626 | 0.00111022 | 0.005655 |
| 305142    | Abcg313      | 0.298443 | 5.78E-11   | 1.02E-09 |
| 286972    | Ptar1        | 0.298432 | 0.0342917  | 0.100151 |
| 100361818 | Nfatc1       | 0.298427 | 1.64E-08   | 2.14E-07 |
| 414788    | RT1-T24-3    | 0.298394 | 6.43E-06   | 5.47E-05 |
| 24230     | Tspo         | 0.298149 | 0.00125394 | 0.006285 |
| 25651     | Selp         | 0.298149 | 0.14906279 | 0.30493  |
| 290755    | Ccdc110      | 0.298149 | 0.60996449 | 0.771622 |
| 315882    | Zic4         | 0.298149 | 0.47064835 | 0.661122 |
| 103690160 | LOC103690160 | 0.297545 | 1.66E-04   | 0.001051 |
| 685116    | Gbp3         | 0.2975   | 0.1167337  | 0.256957 |
| 100363368 | Poteh        | 0.297409 | 0.1450607  | 0.299803 |
| 689069    | Parvg        | 0.297141 | 0.02564674 | 0.079616 |
| 309368    | Lama2        | 0.296943 | 5.23E-58   | 6.08E-56 |
| 108349516 | LOC108349516 | 0.296808 | 0.1241819  | 0.268969 |
| 306970    | Hist1h2an    | 0.29679  | 0.38477058 | 0.581491 |
| 302705    | Mbtps2       | 0.296692 | 2.26E-06   | 2.11E-05 |
| 690507    | LOC690507    | 0.29646  | 0.61600322 | 0.77545  |
| 310839    | Fnbp11       | 0.296425 | 0.00475789 | 0.01988  |
| 100910033 | LOC100910033 | 0.296308 | 0.38352689 | 0.58021  |
| 361448    | Ginml        | 0.295869 | 1.47E-09   | 2.22E-08 |
| 83575     | Cpz          | 0.295475 | 5.12E-04   | 0.002866 |
| 79429     | Pdgfc        | 0.295247 | 0.08379989 | 0.201588 |
| 315263    | Adamts20     | 0.295231 | 3.85E-12   | 7.82E-11 |
| 361747    | Spata61      | 0.2952   | 0.06325575 | 0.162732 |
| 103690110 | Zfp78        | 0.295048 | 0.0739235  | 0.183245 |
| 294410    | Man1a1       | 0.294773 | 9.52E-09   | 1.29E-07 |
| 305584    | Rel          | 0.29472  | 0.05771688 | 0.151428 |
| 102552482 | LOC102552482 | 0.294291 | 0.00705856 | 0.027706 |
| 24553     | Met          | 0.294105 | 0.00492257 | 0.020447 |
| 102553620 | LOC102553620 | 0.294051 | 0.41976365 | 0.615285 |
| 25273     | Smo          | 0.294033 | 2.95E-07   | 3.20E-06 |

|           |              |          |            |          |
|-----------|--------------|----------|------------|----------|
| 100910879 | LOC100910879 | 0.293614 | 0.69981503 | 0.8354   |
| 100365872 | Eif4ebp3     | 0.293595 | 0.01104031 | 0.040188 |
| 303742    | Faap100      | 0.293454 | 1.52E-04   | 9.71E-04 |
| 314196    | L2hgdh       | 0.293107 | 0.0448437  | 0.124153 |
| 108348165 | NEWGENE_2813 | 0.293059 | 0.0327056  | 0.09654  |
| 689174    | Zbtb34       | 0.292849 | 0.0319371  | 0.094757 |
| 102555942 | LOC102555942 | 0.29281  | 0.14678672 | 0.302124 |
| 690538    | Scai         | 0.292773 | 0.00124102 | 0.006228 |
| 108349109 | LOC108349109 | 0.292672 | 0.22783273 | 0.412185 |
| 83722     | Plk2         | 0.292659 | 1.54E-11   | 2.93E-10 |
| 303538    | Dhx58        | 0.2926   | 0.00631202 | 0.02526  |
| 688637    | LOC688637    | 0.292285 | 3.28E-09   | 4.74E-08 |
| 24612     | Omp          | 0.2922   | 0.36625899 | 0.562396 |
| 292684    | Rsph6a       | 0.2922   | 0.52290554 | 0.707171 |
| 296472    | Srms         | 0.2922   | 0.52290554 | 0.707171 |
| 317324    | MGC114492    | 0.2922   | 0.65144808 | 0.803031 |
| 366206    | Otor         | 0.2922   | 0.65144808 | 0.803031 |
| 498691    | Cts113       | 0.2922   | 0.65144808 | 0.803031 |
| 29363     | Cxcr5        | 0.292042 | 0.25083072 | 0.438787 |
| 310855    | Gstcd        | 0.291814 | 0.02033704 | 0.066413 |
| 502902    | Clec7a       | 0.29179  | 0.00715031 | 0.027997 |
| 293186    | Lyve1        | 0.291708 | 1.16E-05   | 9.40E-05 |
| 290027    | Parp2        | 0.291677 | 3.72E-05   | 2.72E-04 |
| 171575    | Dnase2       | 0.291418 | 2.15E-06   | 2.01E-05 |
| 289211    | Fcgr2b       | 0.291354 | 0.05907313 | 0.154285 |
| 79431     | Bhlhe40      | 0.291198 | 2.58E-07   | 2.82E-06 |
| 315750    | Lct1         | 0.291107 | 0.62206646 | 0.779886 |
| 108351334 | LOC108351334 | 0.290926 | 0.64811816 | 0.800688 |
| 365661    | Erbin        | 0.29069  | 1.05E-18   | 3.53E-17 |
| 81678     | Itpr2        | 0.290496 | 1.33E-05   | 1.06E-04 |
| 498089    | Dtx3l        | 0.290347 | 4.07E-08   | 5.02E-07 |
| 102556967 | LOC102556967 | 0.290202 | 3.47E-06   | 3.12E-05 |
| 499723    | Col24a1      | 0.290043 | 3.44E-10   | 5.62E-09 |
| 102547029 | LOC102547029 | 0.289916 | 0.00484828 | 0.020196 |
| 306110    | Klf12        | 0.289897 | 6.21E-09   | 8.61E-08 |
| 361433    | Cpne7        | 0.289769 | 9.99E-04   | 0.005172 |
| 103694881 | LOC103694881 | 0.289574 | 0.8329277  | 0.916254 |
| 294188    | Olr1731      | 0.289574 | 0.8814251  | 0.945253 |
| 363464    | Piga         | 0.289476 | 0.02062328 | 0.067186 |
| 304960    | Olfml2b      | 0.28932  | 8.53E-14   | 2.05E-12 |
| 362429    | Mfap5        | 0.289263 | 6.29E-09   | 8.71E-08 |
| 25147     | Cyp19a1      | 0.288982 | 0.51449392 | 0.700346 |
| 366792    | Mettl7b      | 0.288928 | 0.16592983 | 0.329971 |
| 102554034 | LOC102554034 | 0.28881  | 6.54E-06   | 5.56E-05 |
| 314654    | Myo1f        | 0.288765 | 9.14E-04   | 0.004791 |
| 102555644 | LOC102555644 | 0.28828  | 0.00567624 | 0.02303  |
| 58917     | Hpx          | 0.288096 | 0.40131873 | 0.598334 |
| 690467    | LOC690467    | 0.288058 | 0.02602853 | 0.080564 |
| 303612    | Polg2        | 0.287574 | 0.07763194 | 0.18999  |
| 301255    | Spats1       | 0.287282 | 0.30909357 | 0.504213 |
| 305604    | Efemp1       | 0.286911 | 2.15E-25   | 1.01E-23 |
| 29415     | Slpr2        | 0.286893 | 6.19E-07   | 6.37E-06 |
| 65191     | Gabre        | 0.28667  | 0.33847041 | 0.535041 |
| 103694855 | LOC103694855 | 0.286578 | 0.01260786 | 0.044856 |
| 499469    | LOC499469    | 0.286559 | 0.29757621 | 0.494144 |
| 685664    | Dnal1        | 0.286351 | 4.61E-05   | 3.31E-04 |

|           |              |          |            |          |
|-----------|--------------|----------|------------|----------|
| 295337    | Bcl2l15      | 0.286339 | 0.43512134 | 0.629081 |
| 367313    | Col6a3       | 0.286307 | 9.75E-21   | 3.61E-19 |
| 309902    | Tet1         | 0.286087 | 0.09437641 | 0.219115 |
| 499697    | Trmt13       | 0.286027 | 0.00314    | 0.013982 |
| 85251     | Col18a1      | 0.285729 | 6.00E-22   | 2.38E-20 |
| 313994    | Klf11        | 0.285693 | 9.25E-06   | 7.64E-05 |
| 170632    | Fgf11        | 0.285573 | 0.07220997 | 0.180099 |
| 315760    | Parp16       | 0.285569 | 0.00696486 | 0.027406 |
| 310405    | Maml3        | 0.285379 | 0.00872401 | 0.033038 |
| 100911104 | LOC100911104 | 0.285368 | 0.16931369 | 0.334535 |
| 313370    | Hook1        | 0.28535  | 0.00103423 | 0.005325 |
| 156117    | Casp12       | 0.285247 | 0.0342153  | 0.100066 |
| 289287    | Gpr137b      | 0.285154 | 1.20E-26   | 6.02E-25 |
| 24273     | Cryaa        | 0.285093 | 0.37207802 | 0.568444 |
| 252959    | Dnah12       | 0.285093 | 0.37207802 | 0.568444 |
| 25450     | Gabbr1       | 0.285093 | 0.07423263 | 0.18382  |
| 59320     | Adcy10       | 0.285093 | 0.37207802 | 0.568444 |
| 499253    | Itiprip12    | 0.285001 | 0.00628462 | 0.025161 |
| 103690137 | LOC103690137 | 0.284591 | 0.03996849 | 0.11319  |
| 315348    | Nckap11      | 0.284174 | 3.41E-05   | 2.52E-04 |
| 362133    | Lypd6b       | 0.284106 | 0.23849235 | 0.425668 |
| 498528    | Shisa2       | 0.284106 | 0.23849235 | 0.425668 |
| 499241    | Scube2       | 0.283713 | 0.15915168 | 0.320491 |
| 679566    | Alkal2       | 0.283713 | 0.15915168 | 0.320491 |
| 25148     | Egr3         | 0.283317 | 6.00E-06   | 5.15E-05 |
| 155696    | Dcbld2       | 0.283097 | 1.27E-25   | 6.03E-24 |
| 102546590 | LOC102546590 | 0.283012 | 0.38076493 | 0.57773  |
| 502217    | Raet1d       | 0.28297  | 0.57142984 | 0.740534 |
| 100124593 | Cxcr6        | 0.282801 | 0.58615068 | 0.752062 |
| 24448     | Hrh1         | 0.282801 | 0.00467067 | 0.019567 |
| 298398    | Fam221b      | 0.282801 | 0.58615068 | 0.752062 |
| 316384    | Cavin2       | 0.282601 | 1.72E-07   | 1.93E-06 |
| 296072    | Spred1       | 0.282491 | 8.52E-17   | 2.56E-15 |
| 81646     | Creb1        | 0.282194 | 7.24E-14   | 1.76E-12 |
| 500124    | LOC500124    | 0.281977 | 0.14097171 | 0.294193 |
| 312358    | Prr15        | 0.281808 | 0.00734198 | 0.028618 |
| 304485    | Hvcn1        | 0.281671 | 0.02211955 | 0.070885 |
| 100361655 | LOC100361655 | 0.281669 | 0.20954986 | 0.387916 |
| 84492     | Tec          | 0.281461 | 6.57E-05   | 4.55E-04 |
| 312510    | Tial         | 0.281453 | 1.36E-09   | 2.06E-08 |
| 65190     | Rsad2        | 0.281342 | 4.81E-04   | 0.002709 |
| 313782    | Fbxl12       | 0.281229 | 0.00921994 | 0.034661 |
| 361112    | Vstm4        | 0.28075  | 0.00330295 | 0.014575 |
| 307986    | Nhlrc2       | 0.280376 | 5.58E-09   | 7.78E-08 |
| 294711    | Ppwd1        | 0.28037  | 7.05E-05   | 4.86E-04 |
| 499762    | Med22        | 0.280279 | 1.62E-05   | 1.27E-04 |
| 102549817 | LOC102549817 | 0.280231 | 0.03051204 | 0.091339 |
| 54257     | Grik2        | 0.280047 | 2.21E-05   | 1.69E-04 |
| 299897    | Trps1        | 0.279731 | 5.26E-04   | 0.002932 |
| 317676    | Lat2         | 0.279701 | 0.09227941 | 0.215772 |
| 298138    | Rasef        | 0.279655 | 0.04804114 | 0.130874 |
| 498492    | Ccnblip1     | 0.27949  | 0.29846095 | 0.494966 |
| 681217    | Zfp862       | 0.279392 | 2.55E-04   | 0.001551 |
| 497894    | Zfp62        | 0.279161 | 3.03E-06   | 2.76E-05 |
| 500131    | Creb5        | 0.279064 | 1.67E-05   | 1.31E-04 |
| 685136    | Spint3       | 0.279025 | 0.56364255 | 0.734943 |

|           |              |          |            |          |
|-----------|--------------|----------|------------|----------|
| 362863    | LOC362863    | 0.278958 | 0.0430387  | 0.119993 |
| 367323    | Nudt12       | 0.278571 | 1.77E-08   | 2.29E-07 |
| 681694    | Liph         | 0.278393 | 0.37649407 | 0.573259 |
| 286915    | Vom2r53      | 0.278328 | 0.53281351 | 0.71496  |
| 305311    | Txk          | 0.278328 | 0.53281351 | 0.71496  |
| 679957    | Gpr18        | 0.278328 | 0.53281351 | 0.71496  |
| 367039    | Dock6        | 0.278197 | 9.20E-12   | 1.80E-10 |
| 362050    | Gbp5         | 0.278111 | 2.47E-05   | 1.88E-04 |
| 100912604 | LOC100912604 | 0.277949 | 0.06457134 | 0.165202 |
| 298185    | Frem1        | 0.277174 | 0.01879042 | 0.062302 |
| 290046    | Hrnnp        | 0.277009 | 2.54E-15   | 6.93E-14 |
| 498331    | Ptpn13       | 0.276973 | 1.48E-17   | 4.66E-16 |
| 103693267 | LOC103693267 | 0.27689  | 0.06788711 | 0.17161  |
| 117240    | Heph         | 0.276868 | 0.00830639 | 0.031747 |
| 317391    | Shroom4      | 0.276754 | 0.00974485 | 0.036269 |
| 282825    | Zfp161       | 0.276624 | 1.07E-05   | 8.72E-05 |
| 305112    | Vom2r66      | 0.276346 | 0.58366956 | 0.750168 |
| 25441     | Fcer1g       | 0.276289 | 3.29E-07   | 3.55E-06 |
| 315651    | RGD1562811   | 0.276258 | 0.1756208  | 0.34361  |
| 306934    | Ripor2       | 0.276213 | 5.57E-05   | 3.92E-04 |
| 296654    | Gsn          | 0.276133 | 8.73E-114  | #####    |
| 500112    | Gimap8       | 0.275738 | 0.00211889 | 0.009947 |
| 25316     | Ms4a2        | 0.275712 | 0.32629821 | 0.522083 |
| 314615    | Prtn3        | 0.275712 | 0.48762321 | 0.675697 |
| 360591    | Prr11        | 0.275712 | 0.22928348 | 0.413788 |
| 310207    | Sema5a       | 0.275411 | 3.80E-59   | 4.49E-57 |
| 681309    | Thbs3        | 0.27541  | 0.00164049 | 0.007946 |
| 306819    | Kdmlb        | 0.274888 | 7.58E-05   | 5.18E-04 |
| 103690058 | LOC103690058 | 0.274733 | 0.33954446 | 0.536115 |
| 304500    | Acad10       | 0.274728 | 0.00149762 | 0.007355 |
| 363113    | Syncrip      | 0.274717 | 3.69E-20   | 1.32E-18 |
| 306469    | Cfap97       | 0.274708 | 2.01E-04   | 0.001246 |
| 312727    | Tspan11      | 0.274085 | 1.99E-05   | 1.54E-04 |
| 296616    | Cercam       | 0.274075 | 0.00103931 | 0.005348 |
| 303130    | Fstl4        | 0.273995 | 0.44844978 | 0.64045  |
| 500113    | Gimap7       | 0.273995 | 0.18921713 | 0.361993 |
| 690368    | Tmem253      | 0.273995 | 0.44844978 | 0.64045  |
| 294770    | Card6        | 0.27389  | 1.41E-06   | 1.37E-05 |
| 685881    | LOC685881    | 0.273809 | 0.40325915 | 0.600287 |
| 103693723 | LOC103693723 | 0.273723 | 0.28598187 | 0.480208 |
| 100910554 | LOC100910554 | 0.273595 | 0.68681143 | 0.826247 |
| 100911456 | LOC100911456 | 0.273543 | 0.07424758 | 0.183809 |
| 314111    | Klh115       | 0.273242 | 0.02420706 | 0.07624  |
| 315306    | Mettl7a      | 0.273036 | 2.55E-09   | 3.73E-08 |
| 306825    | Mylip        | 0.272853 | 4.37E-07   | 4.60E-06 |
| 78972     | Zfp354c      | 0.272803 | 0.00927593 | 0.034844 |
| 25056     | Rbp1         | 0.272644 | 1.10E-04   | 7.23E-04 |
| 60442     | Lin7c        | 0.272627 | 0.00291179 | 0.013094 |
| 114002    | Ndst2        | 0.272557 | 7.08E-05   | 4.87E-04 |
| 361710    | Sipal        | 0.272523 | 1.20E-12   | 2.56E-11 |
| 305967    | Kif13b       | 0.272282 | 1.98E-31   | 1.20E-29 |
| 360518    | Gfpt2        | 0.272242 | 4.72E-05   | 3.38E-04 |
| 307428    | Tnfaip8      | 0.272148 | 0.00554151 | 0.022565 |
| 315863    | Ube3d        | 0.272083 | 0.08597583 | 0.205215 |
| 303905    | Parp9        | 0.272076 | 2.79E-08   | 3.51E-07 |
| 64021     | Gpr173       | 0.27188  | 0.17232311 | 0.339144 |



|           |              |          |            |          |
|-----------|--------------|----------|------------|----------|
| 364837    | Gypc         | 0.271813 | 9.34E-04   | 0.004873 |
| 691138    | Spx          | 0.271131 | 0.74790191 | 0.86478  |
| 81750     | Pros1        | 0.271064 | 2.14E-08   | 2.74E-07 |
| 83580     | Thbd         | 0.27079  | 8.78E-10   | 1.36E-08 |
| 314360    | Galc         | 0.270755 | 1.24E-09   | 1.89E-08 |
| 29141     | Gal          | 0.270711 | 0.0181348  | 0.060539 |
| 308768    | Ticrr        | 0.270627 | 0.33074228 | 0.527068 |
| 301056    | Ctdspl       | 0.27029  | 5.15E-08   | 6.26E-07 |
| 310448    | Igsf10       | 0.270243 | 0.01321305 | 0.046635 |
| 303310    | Hic1         | 0.270166 | 0.00652792 | 0.026004 |
| 311592    | RGD1563354   | 0.269929 | 1.20E-12   | 2.56E-11 |
| 315824    | Bmp5         | 0.269524 | 0.00304664 | 0.013633 |
| 102551899 | LOC102551899 | 0.269369 | 0.12670044 | 0.272656 |
| 502389    | Npm3         | 0.269208 | 0.04679866 | 0.128353 |
| 287285    | Shroom1      | 0.269126 | 0.0442891  | 0.122868 |
| 79049     | Secisbp2     | 0.26911  | 2.33E-04   | 0.001428 |
| 140587    | Sox5         | 0.268582 | 0.00350551 | 0.015355 |
| 294804    | Rai14        | 0.26847  | 4.46E-08   | 5.45E-07 |
| 100910278 | LOC100910278 | 0.268388 | 0.5682749  | 0.738052 |
| 499866    | Fam98b       | 0.268296 | 0.33232284 | 0.528349 |
| 100360380 | LOC100360380 | 0.268241 | 4.90E-05   | 3.50E-04 |
| 311886    | Cntrl        | 0.268038 | 7.26E-05   | 4.98E-04 |
| 317204    | Pcdh11x      | 0.267932 | 0.1511383  | 0.308117 |
| 498282    | Arhgap30     | 0.267705 | 0.03223466 | 0.095505 |
| 295672    | Fkbp7        | 0.267605 | 5.13E-04   | 0.002868 |
| 117036    | Lamc1        | 0.267435 | 4.14E-67   | 5.51E-65 |
| 364514    | Shld2        | 0.267341 | 8.11E-04   | 0.004302 |
| 171146    | Kcnh5        | 0.266936 | 0.05334677 | 0.141898 |
| 102553031 | LOC102553031 | 0.26673  | 0.44483717 | 0.637754 |
| 81507     | Bmpr1a       | 0.266727 | 8.31E-15   | 2.16E-13 |
| 314275    | Slc39a9      | 0.266693 | 1.57E-05   | 1.24E-04 |
| 363328    | Ticam1       | 0.266639 | 0.04423011 | 0.122758 |
| 80881     | Serp1        | 0.266632 | 2.41E-22   | 9.77E-21 |
| 361487    | Zfp52        | 0.266534 | 0.05325605 | 0.141716 |
| 94196     | Rnf138       | 0.266525 | 7.85E-04   | 0.004191 |
| 308444    | Axl          | 0.266233 | 3.28E-15   | 8.85E-14 |
| 360579    | Cc19         | 0.26623  | 0.28150648 | 0.475123 |
| 293566    | Cpxm2        | 0.266132 | 8.23E-09   | 1.12E-07 |
| 306226    | Dux4         | 0.266068 | 0.00109316 | 0.005577 |
| 100362915 | Zfp648       | 0.265728 | 0.76051163 | 0.873553 |
| 100363433 | Srrm5        | 0.265728 | 0.66642109 | 0.810653 |
| 102551929 | LOC102551929 | 0.265728 | 0.66642109 | 0.810653 |
| 102554659 | LOC102554659 | 0.265728 | 0.22640406 | 0.410146 |
| 117551    | Cc122        | 0.265728 | 0.76051163 | 0.873553 |
| 171397    | UST4r        | 0.265728 | 0.76051163 | 0.873553 |
| 24528     | Lalba        | 0.265728 | 0.76051163 | 0.873553 |
| 24616     | Pah          | 0.265728 | 0.66642109 | 0.810653 |
| 266787    | Eaf2         | 0.265728 | 0.76051163 | 0.873553 |
| 297419    | Gkn2         | 0.265728 | 0.66642109 | 0.810653 |
| 306956    | Btn1a1       | 0.265728 | 0.76051163 | 0.873553 |
| 309620    | Btn12        | 0.265728 | 0.76051163 | 0.873553 |
| 310152    | Slc45a2      | 0.265728 | 0.66642109 | 0.810653 |
| 314537    | Abcb5        | 0.265728 | 0.76051163 | 0.873553 |
| 361994    | Bnpl         | 0.265728 | 0.76051163 | 0.873553 |
| 366531    | Ttc39d       | 0.265728 | 0.76051163 | 0.873553 |
| 500531    | Armhl        | 0.265728 | 0.49550853 | 0.682058 |

|           |              |          |            |          |
|-----------|--------------|----------|------------|----------|
| 502900    | Clec12b      | 0.265728 | 0.49550853 | 0.682058 |
| 50546     | Insl6        | 0.265728 | 0.76051163 | 0.873553 |
| 60448     | Htr1f        | 0.265728 | 0.49550853 | 0.682058 |
| 678704    | Atp13a3      | 0.265728 | 0.14379224 | 0.298217 |
| 685355    | L1td1        | 0.265728 | 0.66642109 | 0.810653 |
| 687483    | Tmem217      | 0.265728 | 0.66642109 | 0.810653 |
| 689704    | Vsx1         | 0.265728 | 0.76051163 | 0.873553 |
| 690918    | Tmem215      | 0.265728 | 0.66642109 | 0.810653 |
| 282821    | Has1         | 0.265728 | 0.45528896 | 0.646509 |
| 293743    | Ms4a14       | 0.265728 | 0.54211485 | 0.723567 |
| 29586     | Gjb5         | 0.265728 | 0.36049239 | 0.557361 |
| 303563    | Nags         | 0.265728 | 0.59753772 | 0.761058 |
| 309208    | Lrrc10b      | 0.265728 | 0.54211485 | 0.723567 |
| 407781    | Btnl3        | 0.265728 | 0.54211485 | 0.723567 |
| 79225     | Hes5         | 0.265728 | 0.12749713 | 0.273969 |
| 291647    | Pcdhb14      | 0.26532  | 0.13913744 | 0.291579 |
| 360903    | Fgfr11       | 0.265212 | 0.00331764 | 0.014629 |
| 501150    | RGD1562029   | 0.265186 | 0.05457699 | 0.144625 |
| 114517    | Itga6        | 0.265022 | 2.24E-55   | 2.39E-53 |
| 25615     | Sdc2         | 0.264947 | 1.45E-21   | 5.61E-20 |
| 289419    | Nuak2        | 0.26473  | 0.03504271 | 0.101798 |
| 25473     | Lamb2        | 0.264729 | 1.38E-38   | 1.03E-36 |
| 298184    | Zdhhc21      | 0.264695 | 4.63E-09   | 6.56E-08 |
| 29528     | Vamp3        | 0.264468 | 1.82E-15   | 5.00E-14 |
| 367832    | Zfx          | 0.264415 | 1.61E-07   | 1.82E-06 |
| 246775    | Tnfsf10      | 0.264342 | 0.00327949 | 0.014488 |
| 364594    | Tlr3         | 0.264279 | 0.00248922 | 0.011426 |
| 100909408 | Zfp397       | 0.26398  | 9.99E-05   | 6.63E-04 |
| 361269    | Fam208b      | 0.263859 | 4.09E-06   | 3.63E-05 |
| 361474    | Ipcef1       | 0.263855 | 0.03006802 | 0.09028  |
| 689613    | Mtmr11       | 0.263804 | 2.90E-04   | 0.001732 |
| 100912235 | Mast4        | 0.262878 | 2.42E-05   | 1.84E-04 |
| 685009    | Rnf169       | 0.262822 | 7.61E-06   | 6.39E-05 |
| 679845    | Shc4         | 0.262791 | 1.10E-11   | 2.13E-10 |
| 102551014 | LOC102551014 | 0.262709 | 0.39040203 | 0.587392 |
| 58838     | Sh2b3        | 0.262635 | 3.45E-06   | 3.11E-05 |
| 304498    | Wdr66        | 0.262627 | 0.20723384 | 0.384938 |
| 25408     | Cd80         | 0.262507 | 0.09819367 | 0.225558 |
| 311111    | Nostrin      | 0.262453 | 0.10279884 | 0.233489 |
| 286921    | Akr1b8       | 0.262409 | 0.02709755 | 0.083211 |
| 287423    | Hes7         | 0.262305 | 0.32547746 | 0.521207 |
| 100912481 | LOC100912481 | 0.262283 | 2.96E-11   | 5.47E-10 |
| 306816    | Zfp169       | 0.262213 | 0.02606673 | 0.080657 |
| 289437    | Glmn         | 0.262097 | 1.29E-05   | 1.03E-04 |
| 290326    | Pbk          | 0.26208  | 0.2750379  | 0.467062 |
| 297483    | Shq1         | 0.261989 | 0.07709461 | 0.189112 |
| 316421    | Aox2         | 0.261951 | 0.55054395 | 0.731026 |
| 360627    | Fkbp10       | 0.261444 | 1.44E-06   | 1.39E-05 |
| 114507    | Slc5a3       | 0.261428 | 0.15612706 | 0.315819 |
| 316527    | Wnt10a       | 0.261428 | 0.31594226 | 0.510574 |
| 100910714 | LOC100910714 | 0.261408 | 0.65455531 | 0.80317  |
| 300796    | Snx22        | 0.261349 | 0.22525348 | 0.408606 |
| 289864    | Prorsd1      | 0.261295 | 0.08726409 | 0.207199 |
| 316982    | Resf1        | 0.261263 | 5.13E-09   | 7.23E-08 |
| 100910885 | LOC100910885 | 0.261193 | 0.00958174 | 0.035788 |
| 287949    | Scarf2       | 0.261124 | 2.44E-05   | 1.86E-04 |

|           |              |          |            |          |
|-----------|--------------|----------|------------|----------|
| 24790     | Sp1          | 0.261107 | 1.86E-13   | 4.28E-12 |
| 360905    | Mtf2         | 0.261031 | 4.81E-05   | 3.43E-04 |
| 103690888 | LOC103690888 | 0.261005 | 0.81496628 | 0.907026 |
| 286993    | Taok1        | 0.260952 | 1.92E-08   | 2.47E-07 |
| 499668    | Lingo4       | 0.260773 | 0.04289849 | 0.119672 |
| 291978    | Dus2         | 0.260761 | 4.96E-04   | 0.002788 |
| 64702     | Trim17       | 0.260761 | 0.18806639 | 0.360371 |
| 311401    | Sppl2a       | 0.260726 | 2.90E-09   | 4.21E-08 |
| 305449    | Mfsd10       | 0.260557 | 3.33E-04   | 0.001965 |
| 301083    | RGD1566368   | 0.260553 | 0.15466132 | 0.31342  |
| 363144    | Cdhr4        | 0.26019  | 0.07858557 | 0.191855 |
| 367645    | Pif1         | 0.259937 | 0.39258603 | 0.589839 |
| 294789    | Ranbp31      | 0.259785 | 7.01E-05   | 4.83E-04 |
| 114208    | Skil         | 0.259745 | 3.74E-10   | 6.06E-09 |
| 500068    | Ssmem1       | 0.259535 | 0.21334802 | 0.39357  |
| 310806    | Cdc14a       | 0.259419 | 3.99E-05   | 2.90E-04 |
| 366474    | Coll16a1     | 0.259395 | 1.27E-29   | 7.10E-28 |
| 64459     | Masp2        | 0.259364 | 0.00113432 | 0.005758 |
| 502086    | RGD1564308   | 0.259209 | 0.29956687 | 0.496195 |
| 679346    | Tarbp1       | 0.259074 | 0.02428303 | 0.076416 |
| 310807    | Sass6        | 0.25895  | 0.02468794 | 0.077282 |
| 171380    | Cyp2t1       | 0.258819 | 0.01877867 | 0.062274 |
| 315610    | Jaml         | 0.258803 | 0.23040726 | 0.415344 |
| 363185    | Foxp4        | 0.258743 | 8.98E-06   | 7.44E-05 |
| 309129    | Fcho2        | 0.25856  | 2.18E-06   | 2.04E-05 |
| 305350    | RGD1565119   | 0.258496 | 0.76712125 | 0.877678 |
| 246240    | Ripk3        | 0.25769  | 0.10593023 | 0.238567 |
| 307660    | Ces5a        | 0.25769  | 0.10593023 | 0.238567 |
| 313069    | Rbm12b       | 0.257578 | 0.00145697 | 0.007183 |
| 24747     | RT1-M3-1     | 0.257309 | 2.50E-04   | 0.001523 |
| 501552    | Fancb        | 0.257266 | 0.08484185 | 0.203426 |
| 362418    | Irak2        | 0.25714  | 0.01560861 | 0.053581 |
| 309131    | Slc22a18     | 0.257115 | 0.119164   | 0.26083  |
| 294375    | Reep3        | 0.257052 | 1.30E-23   | 5.58E-22 |
| 690419    | Zfp70911     | 0.257    | 9.43E-04   | 0.004913 |
| 302377    | RGD1560455   | 0.256961 | 0.52203729 | 0.706323 |
| 25094     | Mitf         | 0.256946 | 5.86E-04   | 0.003225 |
| 192281    | Oas1a        | 0.256894 | 0.0156019  | 0.053587 |
| 365583    | Dse          | 0.256678 | 4.16E-06   | 3.68E-05 |
| 310416    | Nhlrc3       | 0.256663 | 1.41E-05   | 1.12E-04 |
| 102557607 | LOC102557607 | 0.25645  | 0.50303266 | 0.689773 |
| 287761    | Prr29        | 0.25645  | 0.3435698  | 0.540009 |
| 100363145 | Stab1        | 0.256329 | 1.69E-09   | 2.53E-08 |
| 307206    | Neto1        | 0.256221 | 0.06153669 | 0.159213 |
| 25380     | Anxa1        | 0.256109 | 4.08E-19   | 1.40E-17 |
| 100359529 | Immp21       | 0.255909 | 0.08565702 | 0.204711 |
| 307618    | Cdh5         | 0.255864 | 1.74E-07   | 1.95E-06 |
| 108348298 | LOC108348298 | 0.255842 | 0.04098062 | 0.115336 |
| 305064    | Ptpn14       | 0.255813 | 2.47E-09   | 3.63E-08 |
| 360711    | Cip2a        | 0.255693 | 0.08578742 | 0.204919 |
| 299858    | Lrp1         | 0.25568  | 1.94E-52   | 1.98E-50 |
| 313922    | Asx12        | 0.255559 | 1.50E-07   | 1.70E-06 |
| 414792    | RT1-CE10     | 0.255435 | 4.47E-11   | 8.00E-10 |
| 501588    | Tex11        | 0.255402 | 0.43269232 | 0.627093 |
| 171414    | Pmfbp1       | 0.255359 | 0.03642325 | 0.104944 |
| 113940    | Gmfg         | 0.255273 | 0.02959029 | 0.089197 |

|           |              |          |            |          |
|-----------|--------------|----------|------------|----------|
| 308865    | Atg16l2      | 0.255267 | 7.23E-04   | 0.003891 |
| 24615     | SI00a4       | 0.255006 | 2.70E-20   | 9.75E-19 |
| 362442    | A2ml1        | 0.25488  | 0.21825595 | 0.39972  |
| 499126    | Igflr1       | 0.254673 | 0.13558815 | 0.285808 |
| 286979    | Zfp455       | 0.254663 | 0.06909713 | 0.173884 |
| 299285    | Clmn         | 0.25464  | 1.15E-05   | 9.36E-05 |
| 103694306 | LOC103694306 | 0.254396 | 0.01183865 | 0.042557 |
| 500688    | Adam411      | 0.25434  | 0.07531603 | 0.185899 |
| 310588    | Tchh         | 0.254232 | 0.39893713 | 0.59623  |
| 361478    | Pnlcd1       | 0.254232 | 0.23290101 | 0.418769 |
| 59316     | Nxph4        | 0.254232 | 0.14400936 | 0.298374 |
| 304807    | Rabif        | 0.25421  | 0.02573004 | 0.079809 |
| 81762     | Rock1        | 0.254052 | 2.16E-13   | 4.93E-12 |
| 301333    | Ptpn18       | 0.253878 | 0.09704873 | 0.223602 |
| 303285    | Traf4        | 0.253684 | 0.00770765 | 0.029806 |
| 679900    | RGD1564247   | 0.25368  | 0.09199395 | 0.215184 |
| 361630    | Tead1        | 0.253583 | 1.66E-22   | 6.76E-21 |
| 259241    | Nr1d2        | 0.253524 | 5.97E-17   | 1.82E-15 |
| 290432    | Setsip       | 0.253167 | 0.58371767 | 0.750128 |
| 360886    | Ahctf1       | 0.253135 | 5.10E-12   | 1.02E-10 |
| 116463    | Akr1b7       | 0.253125 | 0.53954994 | 0.721559 |
| 681086    | Pigf         | 0.253113 | 4.45E-04   | 0.002532 |
| 503429    | Mpc11        | 0.252252 | 0.04018881 | 0.113695 |
| 287715    | Wnk4         | 0.252115 | 7.34E-07   | 7.47E-06 |
| 64025     | Cd244        | 0.252053 | 0.34768549 | 0.544635 |
| 500557    | Nkain1       | 0.252001 | 0.00682594 | 0.026949 |
| 363457    | Col4a5       | 0.251228 | 0.00404606 | 0.017308 |
| 301455    | Pard3b       | 0.250867 | 0.02404742 | 0.07585  |
| 79252     | Adamts1      | 0.250766 | 3.79E-07   | 4.03E-06 |
| 103689927 | LOC103689927 | 0.250745 | 0.04729062 | 0.129404 |
| 103692168 | LOC103692168 | 0.250742 | 0.74763584 | 0.86463  |
| 100363146 | Fam228b      | 0.250621 | 0.30497067 | 0.501959 |
| 287366    | Pld6         | 0.250621 | 0.60801013 | 0.769943 |
| 289001    | Map3k19      | 0.250621 | 0.60801013 | 0.769943 |
| 290729    | Neil3        | 0.250621 | 0.60801013 | 0.769943 |
| 303537    | Zfp385c      | 0.250621 | 0.60801013 | 0.769943 |
| 58978     | Slcolb2      | 0.250435 | 0.12540431 | 0.270724 |
| 688708    | LOC688708    | 0.250345 | 1.04E-04   | 6.87E-04 |
| 684529    | Ctso         | 0.250118 | 0.00166187 | 0.008029 |
| 317599    | Atp11c       | 0.250097 | 1.31E-05   | 1.05E-04 |
| 108348302 | LOC108348302 | 0.250054 | 0.01074329 | 0.039264 |
| 503164    | Apol9a       | 0.250041 | 0.03839975 | 0.109447 |
| 306259    | RGD1564325   | 0.249723 | 0.79274912 | 0.893262 |
| 313774    | Clqtnf12     | 0.249675 | 0.04738782 | 0.129614 |
| 574531    | Lair1        | 0.249654 | 0.2308958  | 0.416027 |
| 50677     | Ptpro        | 0.249531 | 3.68E-05   | 2.70E-04 |
| 316440    | Ino80d       | 0.249494 | 5.01E-09   | 7.08E-08 |
| 688324    | Ccdc57       | 0.249333 | 0.05007334 | 0.135058 |
| 102556989 | LOC102556989 | 0.249333 | 0.53046727 | 0.712917 |
| 29344     | Zfp3611      | 0.249306 | 2.18E-16   | 6.36E-15 |
| 117542    | Baiap2       | 0.249195 | 1.10E-07   | 1.29E-06 |
| 103690007 | LOC103690007 | 0.248723 | 0.00121844 | 0.006128 |
| 315578    | Jhy          | 0.248604 | 0.05593745 | 0.147675 |
| 363425    | Cav2         | 0.248574 | 1.74E-14   | 4.45E-13 |
| 103690827 | Yy2          | 0.248104 | 0.11894809 | 0.260507 |
| 303090    | Irgm         | 0.248091 | 0.00650743 | 0.025938 |

|           |              |          |            |          |
|-----------|--------------|----------|------------|----------|
| 25599     | Cd74         | 0.24809  | 7.49E-34   | 4.82E-32 |
| 362056    | Spata1       | 0.247908 | 0.05303729 | 0.141233 |
| 56764     | Samd13       | 0.247806 | 0.35172493 | 0.548571 |
| 114121    | Ccn11        | 0.247783 | 1.31E-09   | 1.98E-08 |
| 191568    | Naip6        | 0.247695 | 0.27740205 | 0.470029 |
| 307351    | Tubb6        | 0.247568 | 5.87E-06   | 5.05E-05 |
| 360487    | RGD1561157   | 0.247545 | 0.09591169 | 0.221949 |
| 302812    | Zfp280c      | 0.247517 | 1.32E-04   | 8.51E-04 |
| 309986    | Zcchc9       | 0.247355 | 2.88E-09   | 4.18E-08 |
| 102548693 | Zfp28        | 0.247074 | 0.0050295  | 0.020828 |
| 361878    | Tent2        | 0.246953 | 4.04E-05   | 2.93E-04 |
| 84423     | Nrtn         | 0.24693  | 0.20005368 | 0.375779 |
| 362696    | Ttc7a        | 0.246815 | 3.04E-04   | 0.001813 |
| 103690063 | LOC103690063 | 0.246694 | 0.00360908 | 0.015732 |
| 303016    | Crebrf       | 0.246528 | 4.01E-15   | 1.07E-13 |
| 311549    | Xkr7         | 0.246303 | 9.40E-12   | 1.83E-10 |
| 100911069 | Mtfr2        | 0.246147 | 0.14222238 | 0.296122 |
| 691907    | Pla2g4f      | 0.246096 | 0.04240779 | 0.118529 |
| 297682    | Dusp16       | 0.24604  | 2.76E-04   | 0.001665 |
| 291377    | Rttt         | 0.245778 | 0.04006555 | 0.113431 |
| 290644    | Ifi30        | 0.245776 | 5.18E-05   | 3.67E-04 |
| 499602    | Abhd18       | 0.245314 | 0.02002948 | 0.065622 |
| 315852    | Ttk          | 0.245264 | 0.29078555 | 0.486089 |
| 362491    | Ripk2        | 0.2452   | 3.49E-04   | 0.002051 |
| 64036     | Cd55         | 0.24519  | 1.09E-81   | 1.74E-79 |
| 316580    | Sp140        | 0.245017 | 0.00536324 | 0.022028 |
| 84410     | Klf5         | 0.244951 | 6.00E-12   | 1.19E-10 |
| 83500     | Slc22a8      | 0.244666 | 0.17990524 | 0.349052 |
| 108353270 | LOC108353270 | 0.244516 | 0.32241919 | 0.517616 |
| 296115    | Secisbp21    | 0.244478 | 2.20E-103  | #####    |
| 103690092 | LOC103690092 | 0.2443   | 0.30786188 | 0.502419 |
| 114709    | Ifitm2       | 0.244188 | 7.37E-10   | 1.16E-08 |
| 690005    | Zcchc3       | 0.244187 | 0.00108054 | 0.005525 |
| 363062    | Dixdc1       | 0.244069 | 1.74E-04   | 0.001093 |
| 690329    | Lrrn4c1      | 0.243998 | 0.01817855 | 0.060643 |
| 314584    | Zfp563       | 0.243847 | 0.01303465 | 0.046125 |
| 100361631 | Tmem35b      | 0.243701 | 0.47434722 | 0.664651 |
| 259226    | Ppp1r14d     | 0.243701 | 0.67956994 | 0.821011 |
| 500904    | Ncf4         | 0.243701 | 0.05837965 | 0.152851 |
| 102555975 | LOC102555975 | 0.243701 | 0.55912543 | 0.735067 |
| 498079    | Cd96         | 0.243701 | 0.55912543 | 0.735067 |
| 58962     | Hpgds        | 0.243701 | 0.40874719 | 0.60491  |
| 100362641 | Zfp945       | 0.24361  | 0.00401189 | 0.017189 |
| 288022    | Ccdc50       | 0.243279 | 1.25E-17   | 3.96E-16 |
| 310864    | Manba        | 0.243279 | 4.84E-04   | 0.002722 |
| 303101    | Maml1        | 0.243104 | 4.06E-04   | 0.002341 |
| 301434    | Clk1         | 0.24307  | 2.39E-19   | 8.29E-18 |
| 25619     | Plau         | 0.243052 | 0.02163317 | 0.069689 |
| 306460    | Enpp6        | 0.242912 | 0.21487968 | 0.395361 |
| 103694120 | LOC103694120 | 0.242897 | 0.77059662 | 0.879646 |
| 288559    | Sap25        | 0.242697 | 0.06526203 | 0.16641  |
| 116831    | Fxyd3        | 0.242579 | 0.02602859 | 0.080552 |
| 83819     | Slc26a5      | 0.242364 | 0.2592701  | 0.448646 |
| 362557    | Ndc1         | 0.24233  | 8.37E-06   | 6.98E-05 |
| 108348090 | LOC108348090 | 0.242252 | 0.00272941 | 0.012385 |
| 102555832 | LOC102555832 | 0.242137 | 0.13276758 | 0.282111 |

|           |                 |          |            |          |
|-----------|-----------------|----------|------------|----------|
| 108348216 | LOC108348216    | 0.242135 | 0.46140171 | 0.652368 |
| 305835    | Peli2           | 0.242078 | 1.69E-13   | 3.93E-12 |
| 25186     | Efnb1           | 0.241982 | 7.28E-11   | 1.27E-09 |
| 102548800 | LOC102548800    | 0.24196  | 0.47664565 | 0.666108 |
| 294141    | Clic2           | 0.241927 | 0.00969151 | 0.036099 |
| 252971    | Socs1           | 0.2417   | 0.1932998  | 0.366965 |
| 684773    | LOC684773       | 0.241637 | 0.62586914 | 0.783622 |
| 295274    | Hist2h2be       | 0.241607 | 0.00667714 | 0.026487 |
| 25491     | Nes             | 0.241564 | 9.45E-35   | 6.38E-33 |
| 681355    | LOC681355       | 0.241533 | 0.00806838 | 0.030993 |
| 299236    | Flrt2           | 0.241492 | 1.95E-06   | 1.84E-05 |
| 307475    | Gpr151          | 0.24148  | 0.38306461 | 0.579972 |
| 309724    | Tmem26          | 0.241378 | 0.00702216 | 0.02758  |
| 60382     | Arfip1          | 0.241333 | 7.97E-10   | 1.25E-08 |
| 100910577 | LOC100910577    | 0.241288 | 0.00183846 | 0.008797 |
| 308582    | Tead2           | 0.241205 | 0.10021045 | 0.228975 |
| 89783     | Laptm5          | 0.241001 | 2.09E-11   | 3.91E-10 |
| 29175     | Ctsk            | 0.240792 | 7.84E-05   | 5.35E-04 |
| 60460     | Hspa2           | 0.240728 | 6.02E-20   | 2.13E-18 |
| 360420    | Rdh7            | 0.240712 | 0.85432675 | 0.928108 |
| 310019    | Utp15           | 0.240555 | 3.27E-07   | 3.54E-06 |
| 308003    | Rab11fip2       | 0.240295 | 9.53E-05   | 6.35E-04 |
| 116689    | Ptpn6           | 0.240286 | 0.00390276 | 0.016778 |
| 316767    | Ddx11           | 0.240232 | 0.04650671 | 0.127754 |
| 686091    | Ccdc13          | 0.240193 | 0.23183112 | 0.417278 |
| 100912456 | Lilrb1          | 0.239911 | 0.36820193 | 0.564333 |
| 294521    | Ak9             | 0.239733 | 0.51710017 | 0.702012 |
| 497906    | Ccdc69          | 0.239733 | 0.51710017 | 0.702012 |
| 501043    | I120rb          | 0.239733 | 0.19509797 | 0.369348 |
| 289865    | Clhc1           | 0.239733 | 0.26183656 | 0.451528 |
| 498769    | Edaradd         | 0.239383 | 0.41199854 | 0.607739 |
| 498366    | Fam114a1        | 0.239159 | 2.28E-08   | 2.90E-07 |
| 103689975 | LOC103689975    | 0.239139 | 0.08456445 | 0.203017 |
| 102554737 | LOC102554737    | 0.239134 | 0.67644634 | 0.818795 |
| 58808     | Mpp4            | 0.239134 | 0.29681228 | 0.493349 |
| 689537    | Calr4           | 0.238868 | 0.05237843 | 0.139752 |
| 366174    | Catsper2        | 0.238862 | 0.03242956 | 0.095978 |
| 102554874 | LOC102554874    | 0.238855 | 0.64292813 | 0.79655  |
| 363463    | Mospd2          | 0.238829 | 5.54E-08   | 6.68E-07 |
| 291577    | Chsy3           | 0.238761 | 0.15663874 | 0.316585 |
| 291047    | Gcm2            | 0.238685 | 0.33964213 | 0.536181 |
| 25707     | Cntf            | 0.238646 | 7.34E-18   | 2.38E-16 |
| 314814    | Nav3            | 0.238534 | 4.19E-04   | 0.002405 |
| 497078    | Xk              | 0.238468 | 1.10E-05   | 8.98E-05 |
| 103690025 | NEWGENE_1305243 | 0.238465 | 0.04310296 | 0.120137 |
| 25537     | Rock2           | 0.238322 | 6.13E-21   | 2.30E-19 |
| 293545    | Gpr139          | 0.238071 | 0.12656719 | 0.272462 |
| 317322    | Gpc4            | 0.237983 | 8.25E-05   | 5.58E-04 |
| 362261    | Lpin3           | 0.237945 | 0.0199571  | 0.065419 |
| 363455    | Chrd11          | 0.237721 | 0.00157132 | 0.007658 |
| 312113    | Stard8          | 0.237374 | 3.13E-06   | 2.84E-05 |
| 50552     | Zfp292          | 0.237305 | 3.21E-06   | 2.91E-05 |
| 84586     | Fgl2            | 0.237298 | 1.33E-56   | 1.46E-54 |
| 317435    | Shroom2         | 0.237219 | 6.09E-17   | 1.86E-15 |
| 293294    | Trim6           | 0.237159 | 0.61768334 | 0.776641 |
| 316326    | Neurl3          | 0.237159 | 0.48025936 | 0.668949 |



|           |              |          |            |          |
|-----------|--------------|----------|------------|----------|
| 688276    | Tmc8         | 0.237159 | 0.1580171  | 0.318459 |
| 287060    | Sec14l5      | 0.237159 | 0.00106385 | 0.005455 |
| 366031    | Crb2         | 0.237111 | 0.41653111 | 0.612338 |
| 29588     | Pou3f2       | 0.237062 | 1.48E-05   | 1.18E-04 |
| 100912656 | LOC100912656 | 0.23693  | 0.36188887 | 0.558387 |
| 414779    | RT1-CE2      | 0.236789 | 4.45E-04   | 0.002534 |
| 296532    | Spopl        | 0.236731 | 4.29E-09   | 6.12E-08 |
| 100911549 | LOC100911549 | 0.236667 | 0.69853002 | 0.834756 |
| 362817    | Cdk2         | 0.236524 | 0.02579643 | 0.079963 |
| 360920    | Mob1b        | 0.236475 | 0.00103417 | 0.005327 |
| 315646    | Fdxacb1      | 0.236412 | 0.03989839 | 0.113025 |
| 362477    | Rgs20        | 0.236215 | 0.03938079 | 0.111875 |
| 316583    | B3gnt7       | 0.236057 | 0.16793258 | 0.332392 |
| 360595    | Rnft1        | 0.236013 | 8.08E-05   | 5.49E-04 |
| 304388    | Cldn15       | 0.235998 | 0.05052379 | 0.135869 |
| 363035    | Zbtb44       | 0.235961 | 1.21E-05   | 9.81E-05 |
| 287738    | Higd1b       | 0.235893 | 0.36340711 | 0.559913 |
| 303534    | Ttc25        | 0.235893 | 0.36340711 | 0.559913 |
| 499300    | Ptprcap      | 0.235893 | 0.36340711 | 0.559913 |
| 298301    | Mroh7        | 0.23555  | 0.03317027 | 0.09764  |
| 108353166 | LOC108353166 | 0.2355   | 0.01001333 | 0.037095 |
| 310808    | Slc35a3      | 0.235354 | 9.30E-04   | 0.004857 |
| 307740    | Sall1        | 0.235354 | 0.44750738 | 0.63968  |
| 365948    | Bank1        | 0.235354 | 0.44750738 | 0.63968  |
| 24592     | Nf1          | 0.235251 | 1.64E-20   | 5.98E-19 |
| 308222    | Wdr27        | 0.23511  | 0.01047361 | 0.038537 |
| 304833    | Trove2       | 0.234943 | 5.41E-05   | 3.82E-04 |
| 498922    | Cbln1        | 0.234867 | 0.1785569  | 0.347392 |
| 65044     | C1galt1      | 0.234757 | 8.24E-09   | 1.12E-07 |
| 102551633 | LOC102551633 | 0.234701 | 0.12357769 | 0.268332 |
| 100361645 | LOC100361645 | 0.234563 | 1.57E-04   | 9.99E-04 |
| 102550397 | LOC102550397 | 0.234555 | 0.01016673 | 0.037561 |
| 63883     | Kcne3        | 0.234462 | 0.06329703 | 0.162794 |
| 306164    | Tgds         | 0.234424 | 0.00598983 | 0.024087 |
| 304646    | Mgat4d       | 0.234364 | 0.13657113 | 0.287467 |
| 246215    | Tpcn1        | 0.234149 | 5.10E-26   | 2.47E-24 |
| 312846    | Rassf8       | 0.234043 | 1.50E-08   | 1.98E-07 |
| 25575     | Scgbla1      | 0.234019 | 0.56693067 | 0.73696  |
| 29393     | Colla1       | 0.233999 | 1.36E-235  | #####    |
| 116677    | F2r11        | 0.233721 | 0.13162642 | 0.280405 |
| 296972    | Akr1b10      | 0.233663 | 0.0049125  | 0.020414 |
| 691810    | Pla2g4c      | 0.233616 | 0.84617163 | 0.923092 |
| 500076    | Agbl3        | 0.233449 | 0.01484723 | 0.051375 |
| 500133    | Nod1         | 0.233448 | 1.29E-07   | 1.48E-06 |
| 29735     | Slc16a7      | 0.233437 | 9.85E-06   | 8.10E-05 |
| 287388    | Zswim7       | 0.233177 | 0.18010524 | 0.349298 |
| 499156    | Gas2         | 0.232964 | 5.58E-07   | 5.79E-06 |
| 494338    | Trim25       | 0.232909 | 0.00428748 | 0.018186 |
| 291105    | E2f3         | 0.23277  | 0.01403887 | 0.049005 |
| 100912062 | LOC100912062 | 0.232587 | 0.28127895 | 0.474823 |
| 192177    | Unc13d       | 0.23248  | 0.04803815 | 0.130885 |
| 100912536 | Styx         | 0.232308 | 2.23E-05   | 1.71E-04 |
| 289595    | Nfx11        | 0.232232 | 0.00119795 | 0.006045 |
| 191572    | Ahnak        | 0.232217 | 8.02E-171  | #####    |
| 366896    | Tbc1d15      | 0.232111 | 1.24E-09   | 1.89E-08 |
| 688649    | LOC688649    | 0.231965 | 0.00369418 | 0.016059 |

|           |              |          |            |          |
|-----------|--------------|----------|------------|----------|
| 294892    | tGap1        | 0.231894 | 0.29466248 | 0.490889 |
| 100911700 | LOC100911700 | 0.231549 | 0.17691938 | 0.345441 |
| 366029    | Zbtb6        | 0.231264 | 1.27E-04   | 8.23E-04 |
| 298247    | Mysm1        | 0.231117 | 1.33E-09   | 2.02E-08 |
| 25157     | Plagl1       | 0.231009 | 2.19E-08   | 2.80E-07 |
| 100361083 | LOC100361083 | 0.230962 | 0.01200133 | 0.043077 |
| 313033    | Xkr8         | 0.230901 | 0.07556827 | 0.186256 |
| 25601     | Oprm1        | 0.230891 | 0.00874129 | 0.033084 |
| 108351703 | LOC108351703 | 0.230724 | 0.3542028  | 0.551082 |
| 362772    | Btbd7        | 0.230688 | 4.00E-10   | 6.46E-09 |
| 691277    | LOC691277    | 0.230608 | 0.72516425 | 0.849893 |
| 691379    | Ice2         | 0.230471 | 0.00491032 | 0.02041  |
| 63879     | Xiap         | 0.230446 | 3.04E-13   | 6.85E-12 |
| 100911949 | LOC100911949 | 0.230384 | 0.35455227 | 0.551445 |
| 102548478 | LOC102548478 | 0.23033  | 0.05939205 | 0.154842 |
| 294269    | RT1-Da       | 0.230252 | 7.22E-09   | 9.90E-08 |
| 117063    | Ptpn2        | 0.230147 | 0.0020394  | 0.009606 |
| 311936    | Rnf32        | 0.230147 | 0.0020394  | 0.009606 |
| 308406    | Six5         | 0.230121 | 7.80E-04   | 0.004168 |
| 102550424 | LOC102550424 | 0.230104 | 0.45254768 | 0.644201 |
| 64355     | Lsr          | 0.230104 | 0.01752858 | 0.058918 |
| 288093    | Arhgap31     | 0.230091 | 7.61E-09   | 1.04E-07 |
| 81813     | Klf10        | 0.229927 | 5.26E-05   | 3.72E-04 |
| 25514     | Lyplal       | 0.229696 | 2.07E-10   | 3.49E-09 |
| 338477    | Sla          | 0.229202 | 0.24266288 | 0.430469 |
| 311166    | Clp1         | 0.229082 | 0.01777736 | 0.059534 |
| 680915    | Mbd4         | 0.229062 | 0.00216079 | 0.010106 |
| 690358    | Prdm11       | 0.228926 | 0.00690144 | 0.027185 |
| 316130    | Plin3        | 0.228843 | 3.81E-05   | 2.78E-04 |
| 686081    | B3galt2      | 0.228433 | 0.00156193 | 0.007616 |
| 305081    | Cd34         | 0.228417 | 3.93E-04   | 0.002277 |
| 498185    | Slc8b1       | 0.228268 | 2.85E-05   | 2.15E-04 |
| 500011    | Samd9        | 0.228169 | 2.91E-10   | 4.80E-09 |
| 300880    | Cep162       | 0.228113 | 0.00669573 | 0.026539 |
| 24413     | Nr3c1        | 0.227958 | 1.54E-14   | 3.95E-13 |
| 315120    | Card10       | 0.227937 | 0.00179997 | 0.008633 |
| 315912    | Tbc1d8b      | 0.22776  | 7.30E-04   | 0.003929 |
| 305342    | N4bp2        | 0.227464 | 0.0037783  | 0.016354 |
| 29630     | Psmel        | 0.227356 | 5.25E-09   | 7.36E-08 |
| 498130    | Stard13      | 0.227232 | 1.02E-13   | 2.42E-12 |
| 309757    | Sirt1        | 0.227166 | 6.61E-05   | 4.57E-04 |
| 309186    | Fermt3       | 0.226924 | 0.01286525 | 0.045627 |
| 362171    | Prr51        | 0.226785 | 0.15330888 | 0.311342 |
| 315959    | Msl2         | 0.226774 | 1.79E-06   | 1.71E-05 |
| 303272    | Pipox        | 0.226734 | 0.19648073 | 0.37108  |
| 498206    | Tnfrsf11a    | 0.226708 | 0.02414875 | 0.076132 |
| 501203    | Myl12a       | 0.226664 | 4.37E-12   | 8.82E-11 |
| 360589    | Ints2        | 0.226623 | 0.00105983 | 0.005439 |
| 363269    | Sp100        | 0.226619 | 0.11461827 | 0.253472 |
| 100911779 | LOC100911779 | 0.226384 | 0.02241595 | 0.071617 |
| 690559    | Zfp758       | 0.226125 | 0.00240242 | 0.011087 |
| 690374    | Trim47       | 0.226058 | 0.01771587 | 0.059401 |
| 361632    | Pik3c2a      | 0.225962 | 6.66E-12   | 1.32E-10 |
| 246284    | Atrx         | 0.22594  | 6.08E-15   | 1.60E-13 |
| 246115    | Plpp2        | 0.225819 | 0.05379441 | 0.142949 |
| 306926    | RGD1563300   | 0.22574  | 0.72369453 | 0.848954 |

|           |              |          |            |          |
|-----------|--------------|----------|------------|----------|
| 306873    | Rreb1        | 0.225479 | 2.00E-04   | 0.001245 |
| 170520    | Cygb         | 0.225477 | 2.57E-06   | 2.37E-05 |
| 100359945 | Zfp267       | 0.225337 | 5.95E-06   | 5.12E-05 |
| 100911215 | LOC100911215 | 0.225086 | 0.7788272  | 0.88464  |
| 100911925 | LOC100911925 | 0.225086 | 0.7788272  | 0.88464  |
| 103690241 | LOC103690241 | 0.225086 | 0.7788272  | 0.88464  |
| 291752    | Dsg3         | 0.225086 | 0.69123571 | 0.829239 |
| 299908    | Gsdmc        | 0.225086 | 0.7788272  | 0.88464  |
| 300913    | Il1rap12     | 0.225086 | 0.69123571 | 0.829239 |
| 363658    | Cct6b        | 0.225086 | 0.49149449 | 0.678888 |
| 369018    | Ldhal6b      | 0.225086 | 0.7788272  | 0.88464  |
| 65054     | Aqp9         | 0.225086 | 0.62665342 | 0.784037 |
| 108348429 | LOC108348429 | 0.225086 | 0.53000741 | 0.712576 |
| 171151    | Slc25a21     | 0.225086 | 0.53000741 | 0.712576 |
| 365323    | Olr63        | 0.225086 | 0.10666857 | 0.239819 |
| 85483     | Ciita        | 0.225086 | 0.13725049 | 0.28845  |
| 100910540 | LOC100910540 | 0.225065 | 0.02225366 | 0.071254 |
| 362160    | Celf1        | 0.224997 | 6.34E-15   | 1.67E-13 |
| 309380    | Lox14        | 0.224838 | 0.18658115 | 0.358282 |
| 311352    | Adal         | 0.224435 | 0.00553185 | 0.022545 |
| 691172    | Uevld        | 0.224302 | 0.15110864 | 0.30809  |
| 85490     | Col5a1       | 0.224266 | 2.25E-30   | 1.29E-28 |
| 100362733 | Irgm2        | 0.223608 | 8.75E-06   | 7.27E-05 |
| 29146     | Jagl         | 0.223484 | 2.51E-10   | 4.18E-09 |
| 297824    | Dpy1914      | 0.223371 | 2.75E-05   | 2.08E-04 |
| 300711    | Atm          | 0.223281 | 5.39E-07   | 5.60E-06 |
| 103692719 | LOC103692719 | 0.223278 | 0.00272574 | 0.012372 |
| 24517     | Junb         | 0.223265 | 6.09E-07   | 6.27E-06 |
| 298322    | Lonrf3       | 0.223255 | 0.14082731 | 0.294021 |
| 313587    | Zc3h12a      | 0.22314  | 0.09804119 | 0.225343 |
| 29345     | Serpinh1     | 0.223084 | 2.69E-45   | 2.26E-43 |
| 297989    | Ddx58        | 0.223072 | 2.78E-04   | 0.001673 |
| 499342    | Cd274        | 0.223067 | 3.50E-09   | 5.04E-08 |
| 100910807 | LOC100910807 | 0.222743 | 3.13E-04   | 0.001861 |
| 361100    | Top2b        | 0.222732 | 3.37E-11   | 6.16E-10 |
| 310190    | Otulinl      | 0.22273  | 0.00498658 | 0.020677 |
| 315883    | Plscr2       | 0.222678 | 0.05546434 | 0.146589 |
| 302946    | Glis2        | 0.222591 | 1.89E-05   | 1.46E-04 |
| 140433    | Lama5        | 0.222484 | 3.79E-06   | 3.40E-05 |
| 303242    | Dnah2        | 0.222475 | 0.31402906 | 0.508475 |
| 303382    | Ras110b      | 0.222424 | 0.04641645 | 0.127598 |
| 304037    | Ar113b       | 0.222172 | 7.03E-05   | 4.84E-04 |
| 316732    | Smchd1       | 0.222161 | 3.04E-08   | 3.81E-07 |
| 307940    | Disc1        | 0.222074 | 0.00812736 | 0.031163 |
| 100361376 | Kank2        | 0.221812 | 5.47E-12   | 1.09E-10 |
| 502541    | Lor          | 0.221703 | 0.37803927 | 0.575061 |
| 302703    | Klh134       | 0.221417 | 0.00536207 | 0.022028 |
| 494320    | Ccdc8        | 0.221308 | 0.00597789 | 0.024054 |
| 316052    | Eomes        | 0.22107  | 0.6866598  | 0.826117 |
| 305083    | Zfp281       | 0.220989 | 0.00399009 | 0.017107 |
| 301264    | Cyp39a1      | 0.220946 | 0.03563685 | 0.103178 |
| 300060    | Apol11a      | 0.220873 | 0.4312847  | 0.625433 |
| 287918    | Mett123      | 0.220473 | 0.03700449 | 0.106345 |
| 288010    | Lpp          | 0.220321 | 1.61E-10   | 2.73E-09 |
| 100910056 | LOC100910056 | 0.220192 | 1.81E-04   | 0.001138 |
| 306891    | Serpinblb    | 0.220186 | 1.94E-26   | 9.59E-25 |

|           |              |          |            |          |
|-----------|--------------|----------|------------|----------|
| 103690131 | LOC103690131 | 0.220153 | 0.61923266 | 0.777716 |
| 64803     | P2ry12       | 0.220075 | 0.0229976  | 0.073108 |
| 360817    | Med131       | 0.219911 | 7.99E-10   | 1.25E-08 |
| 89828     | Ch11         | 0.219891 | 1.80E-14   | 4.59E-13 |
| 114123    | Sardh        | 0.219674 | 4.30E-04   | 0.002458 |
| 100188934 | Ctxn3        | 0.219672 | 7.66E-06   | 6.43E-05 |
| 289054    | Aspm         | 0.219512 | 0.07221657 | 0.180092 |
| 102546864 | LOC102546864 | 0.219505 | 0.49683833 | 0.683074 |
| 246296    | Lrrc15       | 0.219505 | 0.49683833 | 0.683074 |
| 140935    | Afap1        | 0.219372 | 3.83E-04   | 0.002227 |
| 315675    | Gldn         | 0.219362 | 8.21E-14   | 1.97E-12 |
| 361727    | Tmem216      | 0.219358 | 0.00348269 | 0.015276 |
| 66015     | Adamts4      | 0.219309 | 0.02002108 | 0.065606 |
| 500246    | Arhgap25     | 0.219078 | 0.00893776 | 0.033727 |
| 378467    | Tmem159      | 0.219045 | 2.27E-04   | 0.001397 |
| 25291     | Anxa3        | 0.219034 | 0.0017915  | 0.008594 |
| 252878    | Tnfsf15      | 0.219011 | 0.35810037 | 0.555105 |
| 689377    | Rab20        | 0.219011 | 0.02438146 | 0.076599 |
| 25242     | Arnt         | 0.218968 | 1.57E-05   | 1.23E-04 |
| 100910284 | LOC100910284 | 0.218823 | 0.18794064 | 0.360238 |
| 292734    | Ltbp4        | 0.218808 | 7.36E-11   | 1.28E-09 |
| 85246     | Gas7         | 0.218742 | 8.67E-65   | 1.11E-62 |
| 83472     | Ugdh         | 0.218702 | 4.06E-06   | 3.60E-05 |
| 171334    | I112rb2      | 0.218688 | 0.01799557 | 0.060159 |
| 29464     | Slc6a6       | 0.218665 | 1.25E-05   | 1.00E-04 |
| 367304    | Ap1s3        | 0.218647 | 0.17329747 | 0.340639 |
| 690035    | LOC690035    | 0.218543 | 0.00419396 | 0.017853 |
| 367251    | Ankrd39      | 0.218541 | 0.04405548 | 0.122344 |
| 100360552 | Fzd7         | 0.218519 | 0.06051725 | 0.15713  |
| 497940    | LOC497940    | 0.218422 | 0.02568234 | 0.0797   |
| 361787    | RT1-T24-1    | 0.218263 | 0.26481266 | 0.455177 |
| 316098    | Exosc7       | 0.218199 | 0.03517212 | 0.102065 |
| 246306    | Rmt1         | 0.218189 | 0.68027737 | 0.821448 |
| 287249    | Cnot6        | 0.218068 | 1.17E-11   | 2.25E-10 |
| 29712     | Kcnj2        | 0.218029 | 0.0350694  | 0.101845 |
| 252963    | I113ra1      | 0.218    | 1.94E-10   | 3.28E-09 |
| 100911047 | LOC100911047 | 0.217983 | 0.56828825 | 0.738019 |
| 315958    | Stag1        | 0.217919 | 5.80E-06   | 5.00E-05 |
| 78947     | Gcs1         | 0.217813 | 0.00152266 | 0.007447 |
| 300679    | Mpz12        | 0.217783 | 0.01531451 | 0.05279  |
| 266680    | St18         | 0.217679 | 0.4782176  | 0.667668 |
| 689268    | LOC689268    | 0.217617 | 0.02837581 | 0.086274 |
| 292947    | Arfgef3      | 0.217549 | 2.14E-15   | 5.89E-14 |
| 316370    | Kdelc1       | 0.217477 | 0.00394063 | 0.016922 |
| 306128    | Cln5         | 0.217474 | 0.00324173 | 0.014365 |
| 315508    | Ncapd3       | 0.217432 | 0.00282199 | 0.012745 |
| 310352    | Jade1        | 0.217198 | 1.48E-04   | 9.49E-04 |
| 103689974 | LOC103689974 | 0.217137 | 0.78261341 | 0.887036 |
| 298468    | Olr855       | 0.217137 | 0.84531364 | 0.922737 |
| 309533    | Sorcs1       | 0.217136 | 1.02E-21   | 3.98E-20 |
| 81811     | Thpo         | 0.217125 | 0.62601075 | 0.783645 |
| 316775    | Ankrd12      | 0.217088 | 2.81E-11   | 5.21E-10 |
| 102548320 | LOC102548320 | 0.216916 | 2.07E-04   | 0.001283 |
| 83511     | Slc6a2       | 0.216818 | 0.58133863 | 0.748131 |
| 100910852 | LOC100910852 | 0.216703 | 0.54382347 | 0.725187 |
| 500116    | Tra2a        | 0.216689 | 5.46E-15   | 1.44E-13 |

|           |              |          |            |          |
|-----------|--------------|----------|------------|----------|
| 361650    | Hirip3       | 0.216614 | 0.00287356 | 0.012953 |
| 691375    | Serpine3     | 0.216495 | 0.41884216 | 0.614549 |
| 25402     | Casp3        | 0.2164   | 0.00148961 | 0.007323 |
| 288077    | Hcls1        | 0.2164   | 0.03755945 | 0.107583 |
| 361875    | Atp6ap11     | 0.216351 | 0.10827908 | 0.242381 |
| 679028    | Rbpj         | 0.216334 | 5.17E-10   | 8.27E-09 |
| 306974    | Zkscan8      | 0.216311 | 5.13E-06   | 4.46E-05 |
| 498843    | Pcdhb2       | 0.216153 | 0.24412292 | 0.432415 |
| 500853    | Rgs22        | 0.216097 | 0.3612719  | 0.557661 |
| 314988    | Zhx2         | 0.215777 | 3.95E-04   | 0.002288 |
| 103690050 | LOC103690050 | 0.215719 | 1.71E-04   | 0.001078 |
| 289150    | Cenpl        | 0.215687 | 0.03959418 | 0.112363 |
| 679539    | LOC679539    | 0.215593 | 0.14780531 | 0.30327  |
| 100911730 | LOC100911730 | 0.215551 | 6.19E-18   | 2.01E-16 |
| 246143    | Nradd        | 0.2155   | 0.17808625 | 0.346866 |
| 300852    | Mto1         | 0.215475 | 0.00465485 | 0.019522 |
| 680576    | Tet3         | 0.21543  | 8.64E-06   | 7.18E-05 |
| 102553278 | LOC102553278 | 0.215337 | 0.01891027 | 0.062623 |
| 59086     | Tgfb1        | 0.21513  | 9.42E-04   | 0.004911 |
| 102548514 | LOC102548514 | 0.214768 | 4.52E-04   | 0.002565 |
| 100363520 | LOC100363520 | 0.214667 | 0.15404956 | 0.312613 |
| 362489    | Runx1t1      | 0.214622 | 1.07E-04   | 7.08E-04 |
| 364398    | Trim13       | 0.214512 | 0.00176737 | 0.008496 |
| 171091    | Zbp1         | 0.214502 | 0.10977609 | 0.244926 |
| 100909712 | LOC100909712 | 0.214472 | 0.37260724 | 0.568979 |
| 288227    | Bace2        | 0.214452 | 7.37E-07   | 7.48E-06 |
| 301033    | Lrrc2        | 0.214378 | 0.01292953 | 0.045821 |
| 310132    | Osmr         | 0.214364 | 1.33E-06   | 1.29E-05 |
| 102549174 | LOC102549174 | 0.214197 | 0.63500103 | 0.790276 |
| 108350391 | LOC108350391 | 0.214197 | 0.63500103 | 0.790276 |
| 108350547 | LOC108350547 | 0.214197 | 0.63500103 | 0.790276 |
| 108350563 | Fam180b      | 0.214197 | 0.63500103 | 0.790276 |
| 312793    | Gsg1         | 0.214197 | 0.63500103 | 0.790276 |
| 498328    | Pkd2         | 0.21416  | 5.50E-06   | 4.76E-05 |
| 288204    | Crybg3       | 0.214097 | 4.45E-07   | 4.68E-06 |
| 680155    | Fam208a      | 0.214071 | 3.34E-08   | 4.16E-07 |
| 103689928 | LOC103689928 | 0.214038 | 0.30019353 | 0.496844 |
| 684297    | Kdm7a        | 0.213931 | 1.22E-05   | 9.85E-05 |
| 314836    | Zfc3h1       | 0.213865 | 2.89E-11   | 5.35E-10 |
| 366669    | Syne2        | 0.213854 | 1.12E-13   | 2.66E-12 |
| 296936    | Iqub         | 0.213748 | 0.18917411 | 0.361947 |
| 140928    | Pde11a       | 0.213696 | 0.00546459 | 0.022343 |
| 315072    | Mroh4        | 0.213636 | 0.64930512 | 0.801791 |
| 24165     | Ada          | 0.21359  | 0.0240162  | 0.075777 |
| 89789     | Lbr          | 0.213301 | 0.02309335 | 0.073376 |
| 116711    | Ceacam9      | 0.21326  | 0.37416761 | 0.570721 |
| 311723    | Sox18        | 0.21317  | 0.03692362 | 0.106209 |
| 497932    | Pik3r6       | 0.213167 | 0.13424451 | 0.284234 |
| 171296    | Myo9a        | 0.213033 | 6.97E-13   | 1.52E-11 |
| 252916    | Rab38        | 0.212826 | 0.06684755 | 0.169454 |
| 100363372 | LOC100363372 | 0.212571 | 0.07271612 | 0.181054 |
| 312248    | Ubn2         | 0.212419 | 3.36E-10   | 5.49E-09 |
| 304798    | Mdm4         | 0.212386 | 1.96E-17   | 6.11E-16 |
| 360202    | Ston1        | 0.212281 | 5.71E-07   | 5.92E-06 |
| 29734     | Hspa13       | 0.212276 | 2.88E-05   | 2.16E-04 |
| 246759    | Cxcl9        | 0.212147 | 0.22251244 | 0.404984 |

|           |              |          |            |          |
|-----------|--------------|----------|------------|----------|
| 299356    | Syne3        | 0.211904 | 0.00100948 | 0.005216 |
| 116640    | Tnc          | 0.211856 | 3.35E-14   | 8.40E-13 |
| 498828    | RGD1563861   | 0.211773 | 0.77106042 | 0.880017 |
| 305633    | Antxr2       | 0.211753 | 2.40E-10   | 4.02E-09 |
| 50557     | Pten         | 0.21174  | 2.74E-12   | 5.60E-11 |
| 24750     | RT1-N3       | 0.211696 | 0.00292642 | 0.013151 |
| 367733    | Rpgr         | 0.211527 | 0.01906751 | 0.062991 |
| 500035    | LOC500035    | 0.211507 | 0.23514092 | 0.421523 |
| 81511     | Lat          | 0.21128  | 0.47138161 | 0.661811 |
| 363326    | Dennd1c      | 0.211163 | 0.09784    | 0.224962 |
| 103693583 | LOC103693583 | 0.211047 | 0.22814903 | 0.412601 |
| 103693647 | LOC103693647 | 0.211011 | 0.91334485 | 0.964494 |
| 303970    | Bbx          | 0.210948 | 0.00946352 | 0.035423 |
| 499874    | Mga          | 0.210898 | 1.02E-07   | 1.20E-06 |
| 364785    | Suv39h2      | 0.210687 | 0.00701593 | 0.027567 |
| 287924    | Yars2        | 0.210541 | 0.02970297 | 0.089452 |
| 100362725 | Cdk15        | 0.210385 | 0.18324615 | 0.353589 |
| 288167    | Senp7        | 0.210359 | 1.43E-04   | 9.18E-04 |
| 366140    | Fjx1         | 0.210325 | 0.03109232 | 0.092741 |
| 303946    | Usf3         | 0.210192 | 6.57E-06   | 5.57E-05 |
| 245975    | Setd4        | 0.210137 | 1.16E-05   | 9.43E-05 |
| 310233    | Zfp704       | 0.2101   | 3.85E-04   | 0.002237 |
| 306574    | Slc25a15     | 0.210041 | 0.00635825 | 0.025434 |
| 501559    | Bclaf3       | 0.209981 | 0.00122032 | 0.006132 |
| 309684    | Itgb2        | 0.209955 | 0.02099817 | 0.068058 |
| 56817     | Kcnip2       | 0.209883 | 0.00674291 | 0.026676 |
| 691306    | Tmem202      | 0.209851 | 0.21375073 | 0.394084 |
| 315055    | Dennd3       | 0.209779 | 0.02244845 | 0.071709 |
| 360835    | Cdh19        | 0.209624 | 4.13E-23   | 1.73E-21 |
| 63880     | Dnajc3       | 0.209594 | 1.36E-04   | 8.76E-04 |
| 360764    | Zfp655       | 0.209578 | 1.48E-07   | 1.69E-06 |
| 298686    | Ccn12        | 0.209574 | 1.65E-15   | 4.56E-14 |
| 29591     | Tgfbr1       | 0.209518 | 1.03E-06   | 1.02E-05 |
| 24771     | Sdc4         | 0.209501 | 1.02E-07   | 1.19E-06 |
| 307726    | Chd9         | 0.209417 | 4.49E-12   | 9.03E-11 |
| 100360057 | LOC100360057 | 0.209347 | 0.68839617 | 0.827318 |
| 117515    | 2-Sep        | 0.209266 | 4.19E-26   | 2.04E-24 |
| 314319    | Prox2        | 0.209144 | 0.58800689 | 0.753581 |
| 498115    | Ccdc188      | 0.209144 | 0.44360657 | 0.636469 |
| 689897    | Crygs        | 0.209144 | 0.58800689 | 0.753581 |
| 171043    | Fbxo32       | 0.209144 | 0.25048327 | 0.438461 |
| 298429    | Rad541       | 0.209144 | 0.31083186 | 0.506095 |
| 690895    | Zfp426       | 0.209035 | 1.59E-05   | 1.25E-04 |
| 314964    | Phf2011      | 0.209009 | 1.45E-08   | 1.92E-07 |
| 29302     | Itgb3        | 0.20897  | 0.01255238 | 0.044684 |
| 680586    | Rc3h1        | 0.208942 | 2.39E-13   | 5.44E-12 |
| 361317    | Rbm27        | 0.208942 | 6.16E-05   | 4.30E-04 |
| 363795    | Lmln         | 0.208803 | 1.16E-06   | 1.13E-05 |
| 690155    | LOC690155    | 0.208649 | 6.47E-04   | 0.003528 |
| 304127    | Bach1        | 0.208412 | 0.00153958 | 0.007526 |
| 296653    | Phf19        | 0.208368 | 0.23859456 | 0.425671 |
| 361597    | Fes          | 0.208067 | 0.08363583 | 0.201269 |
| 317218    | Itm2a        | 0.208035 | 1.28E-12   | 2.70E-11 |
| 304832    | Cdc73        | 0.207983 | 0.01852918 | 0.061581 |
| 315084    | Gsdmd        | 0.207983 | 0.01852918 | 0.061581 |
| 361856    | Tube1        | 0.207936 | 0.07869696 | 0.192078 |



|           |              |          |            |          |
|-----------|--------------|----------|------------|----------|
| 303141    | Rapgef6      | 0.207859 | 4.22E-08   | 5.18E-07 |
| 24446     | Hgf          | 0.207854 | 0.0414744  | 0.116364 |
| 288652    | Rilpl2       | 0.207854 | 0.00393602 | 0.016906 |
| 25424     | Ctse         | 0.207808 | 0.20534954 | 0.382482 |
| 360482    | Tfap4        | 0.207678 | 0.02778117 | 0.084913 |
| 288604    | Tmem270      | 0.207513 | 0.41824937 | 0.614011 |
| 316021    | Epm2aip1     | 0.207282 | 1.47E-44   | 1.23E-42 |
| 680611    | Bcl3         | 0.207246 | 0.00897599 | 0.033864 |
| 303250    | Ybx2         | 0.207052 | 0.21678588 | 0.398061 |
| 100364016 | LOC100364016 | 0.207034 | 0.25049326 | 0.438438 |
| 108348215 | LOC108348215 | 0.206973 | 0.69685134 | 0.83343  |
| 494322    | Pms1         | 0.206881 | 0.00796741 | 0.030692 |
| 24575     | Mx1          | 0.206796 | 7.38E-04   | 0.003972 |
| 317165    | LOC317165    | 0.206741 | 0.32328368 | 0.518523 |
| 311655    | Mocs3        | 0.206707 | 0.02230534 | 0.071336 |
| 116744    | Lpar1        | 0.206617 | 2.91E-16   | 8.40E-15 |
| 287464    | Dhx33        | 0.206597 | 0.00494045 | 0.020517 |
| 305509    | Adcy1        | 0.206554 | 6.39E-15   | 1.68E-13 |
| 108353169 | LOC108353169 | 0.206489 | 0.20677238 | 0.384456 |
| 360625    | Krt12        | 0.206227 | 0.54751221 | 0.728423 |
| 679342    | LOC679342    | 0.206227 | 0.39497013 | 0.592206 |
| 296787    | Sema3c       | 0.206072 | 7.13E-17   | 2.16E-15 |
| 117025    | Rhbd11       | 0.206065 | 0.02346811 | 0.074306 |
| 500595    | Smim1        | 0.206059 | 0.0273245  | 0.083813 |
| 365018    | Zcchc14      | 0.206056 | 1.03E-05   | 8.47E-05 |
| 361946    | Supt20h      | 0.206034 | 2.70E-08   | 3.41E-07 |
| 500501    | Caap1        | 0.205841 | 0.00337107 | 0.014834 |
| 29558     | Fcgrt        | 0.205829 | 1.28E-08   | 1.71E-07 |
| 690422    | Tedc1        | 0.205734 | 0.0023676  | 0.010947 |
| 445269    | C5ar2        | 0.205578 | 0.0505497  | 0.13592  |
| 29407     | Tas1r1       | 0.20551  | 0.44753492 | 0.639599 |
| 25322     | Hsd17b1      | 0.205455 | 0.3208452  | 0.516046 |
| 499772    | Ier51        | 0.20534  | 0.01388715 | 0.048537 |
| 361585    | Ube3a        | 0.205224 | 1.31E-11   | 2.52E-10 |
| 207122    | Pkn2         | 0.205214 | 2.19E-07   | 2.42E-06 |
| 171068    | Pou2f1       | 0.205046 | 0.01008688 | 0.037316 |
| 25197     | St6gal1      | 0.204768 | 2.60E-10   | 4.32E-09 |
| 252889    | Tmed7        | 0.204643 | 1.12E-15   | 3.14E-14 |
| 362391    | Mxd1         | 0.204636 | 0.00307778 | 0.013744 |
| 59328     | Smad5        | 0.204579 | 5.37E-08   | 6.51E-07 |
| 498944    | Tsnaxip1     | 0.20444  | 0.5839595  | 0.750287 |
| 29436     | Tfpi         | 0.204367 | 3.47E-05   | 2.56E-04 |
| 294806    | Clqtnf3      | 0.204327 | 0.5118849  | 0.697767 |
| 497955    | Tlcd2        | 0.204327 | 0.42179149 | 0.617307 |
| 681178    | Pcgf5        | 0.204327 | 0.0141205  | 0.049227 |
| 85471     | Gata3        | 0.204327 | 0.5118849  | 0.697767 |
| 503257    | Nemp2        | 0.204327 | 0.10813417 | 0.242199 |
| 100360087 | LOC100360087 | 0.204326 | 3.12E-05   | 2.33E-04 |
| 100911305 | LOC100911305 | 0.204217 | 0.08095014 | 0.196432 |
| 316403    | Mars2        | 0.204217 | 0.08095014 | 0.196432 |
| 305477    | Dusp18       | 0.204162 | 1.36E-10   | 2.33E-09 |
| 298655    | H6pd         | 0.204064 | 9.86E-05   | 6.55E-04 |
| 685081    | LOC685081    | 0.203986 | 0.44219966 | 0.635024 |
| 363126    | Nphp3        | 0.203869 | 0.08676979 | 0.206696 |
| 207120    | Nudt6        | 0.203833 | 0.09921004 | 0.227153 |
| 498850    | Pcdhga12     | 0.203777 | 0.08653319 | 0.206209 |

|           |              |          |            |          |
|-----------|--------------|----------|------------|----------|
| 295171    | Sh3d19       | 0.203741 | 6.30E-20   | 2.22E-18 |
| 689949    | Zfp185       | 0.203741 | 0.28481066 | 0.47896  |
| 363674    | Stac2        | 0.203606 | 0.33515249 | 0.531738 |
| 310258    | Phc3         | 0.20349  | 6.83E-14   | 1.66E-12 |
| 312952    | Impad1       | 0.203472 | 6.43E-06   | 5.47E-05 |
| 100360522 | LOC100360522 | 0.203421 | 1.04E-05   | 8.51E-05 |
| 307452    | RGD1305704   | 0.203283 | 3.36E-06   | 3.03E-05 |
| 291610    | Spry4        | 0.203114 | 9.76E-06   | 8.04E-05 |
| 305353    | Tlr6         | 0.202913 | 0.00909289 | 0.034251 |
| 296311    | Cnbd2        | 0.202794 | 0.03427342 | 0.100159 |
| 25567     | Tnr          | 0.202704 | 7.66E-04   | 0.004101 |
| 301676    | Foxn2        | 0.202621 | 1.27E-05   | 1.02E-04 |
| 100912393 | LOC100912393 | 0.202582 | 0.61390116 | 0.774442 |
| 364993    | Pskh1        | 0.202179 | 0.09620053 | 0.222226 |
| 678739    | Phka2        | 0.202179 | 0.09620053 | 0.222226 |
| 302582    | Klf8         | 0.202085 | 0.01525314 | 0.052617 |
| 116510    | Timp1        | 0.20204  | 5.07E-10   | 8.12E-09 |
| 306278    | Lrrc18       | 0.202002 | 0.59435566 | 0.758731 |
| 364241    | Kcnk5        | 0.202002 | 0.04630879 | 0.127413 |
| 685823    | Xpnpep3      | 0.202001 | 0.00498369 | 0.020669 |
| 54349     | Aox1         | 0.201915 | 2.22E-06   | 2.07E-05 |
| 303991    | Hoxd10       | 0.201908 | 0.02293751 | 0.072953 |
| 60447     | Clock        | 0.201755 | 2.97E-10   | 4.88E-09 |
| 100134827 | Hiatl3       | 0.201722 | 1.13E-07   | 1.31E-06 |
| 301164    | Kat2b        | 0.201682 | 1.39E-12   | 2.93E-11 |
| 170841    | Mutyh        | 0.20164  | 0.10101863 | 0.230297 |
| 287657    | Gpr179       | 0.201629 | 0.46420977 | 0.65488  |
| 290722    | Cep44        | 0.20162  | 0.02399216 | 0.075713 |
| 309243    | Vps13a       | 0.201606 | 1.04E-10   | 1.79E-09 |
| 360899    | Sertad4      | 0.201597 | 0.00192127 | 0.009143 |
| 103690006 | LOC103690006 | 0.20157  | 4.27E-06   | 3.78E-05 |
| 360596    | Msi2         | 0.201567 | 7.00E-09   | 9.63E-08 |
| 301624    | D2hgdh       | 0.201526 | 7.98E-04   | 0.004247 |
| 116663    | Dusp6        | 0.201519 | 2.98E-04   | 0.001776 |
| 192280    | Ppplr3b      | 0.201416 | 0.02814173 | 0.085726 |
| 684015    | Ankmy1       | 0.201411 | 0.05440779 | 0.144277 |
| 312678    | Kdm5a        | 0.20139  | 1.75E-08   | 2.27E-07 |
| 303132    | Aff4         | 0.20134  | 5.23E-24   | 2.29E-22 |
| 100910385 | LOC100910385 | 0.201325 | 0.20824502 | 0.386326 |
| 619382    | Acap2        | 0.201291 | 1.25E-09   | 1.91E-08 |
| 314543    | Gulp1        | 0.201256 | 6.61E-07   | 6.76E-06 |
| 310358    | Plcx3        | 0.201254 | 1.58E-04   | 0.001007 |
| 301431    | Nif311       | 0.201238 | 6.55E-04   | 0.003567 |
| 100912658 | LOC100912658 | 0.201195 | 0.34899928 | 0.545795 |
| 287472    | Tlcl1        | 0.201116 | 0.00309003 | 0.013792 |
| 307169    | Mast1        | 0.201056 | 0.13479373 | 0.28489  |
| 313304    | Stag2        | 0.200946 | 2.53E-12   | 5.18E-11 |
| 83618     | Rest         | 0.200868 | 0.00174465 | 0.008395 |
| 292994    | Tjp1         | 0.200755 | 1.02E-16   | 3.05E-15 |
| 100911515 | LOC100911515 | 0.200715 | 0.00321232 | 0.014254 |
| 102551403 | LOC102551403 | 0.200699 | 0.01086727 | 0.039649 |
| 307251    | Rnf165       | 0.200633 | 0.55291281 | 0.733047 |
| 361975    | Lrba         | 0.200633 | 6.87E-05   | 4.74E-04 |
| 308937    | Wee1         | 0.20059  | 1.98E-05   | 1.53E-04 |
| 308021    | Syde2        | 0.200559 | 0.00431555 | 0.018277 |
| 24914     | Lox          | 0.200554 | 1.30E-04   | 8.41E-04 |

|           |              |          |            |          |
|-----------|--------------|----------|------------|----------|
| 309922    | Rhobtb3      | 0.200522 | 2.26E-08   | 2.89E-07 |
| 292073    | Galns        | 0.200118 | 0.00262889 | 0.011981 |
| 307429    | Dmxl1        | 0.200086 | 4.51E-12   | 9.07E-11 |
| 100364265 | LOC100364265 | 0.199957 | 1.62E-13   | 3.78E-12 |
| 313417    | Wdr78        | 0.19992  | 0.01299751 | 0.046028 |
| 313609    | Pdik11       | 0.199869 | 0.01118355 | 0.040624 |
| 293654    | Doc2g        | 0.199847 | 0.29349597 | 0.489331 |
| 81810     | Tgfbr2       | 0.199775 | 2.24E-26   | 1.11E-24 |
| 64022     | Btc          | 0.19973  | 0.51659902 | 0.701757 |
| 311144    | Itga4        | 0.199454 | 0.03030521 | 0.090792 |
| 500727    | Cdca4        | 0.199397 | 0.01792605 | 0.059969 |
| 29428     | Celf2        | 0.19927  | 2.76E-12   | 5.64E-11 |
| 102553088 | LOC102553088 | 0.199091 | 0.48426517 | 0.672463 |
| 310859    | Tet2         | 0.19906  | 3.26E-05   | 2.42E-04 |
| 140585    | Ryk          | 0.199051 | 6.74E-06   | 5.71E-05 |
| 117050    | Arl5a        | 0.199028 | 1.53E-16   | 4.48E-15 |
| 103692066 | LOC103692066 | 0.198911 | 1.41E-04   | 9.08E-04 |
| 103690114 | LOC103690114 | 0.19885  | 0.03525307 | 0.102245 |
| 103690163 | LOC103690163 | 0.19885  | 0.03525307 | 0.102245 |
| 24807     | Tacr1        | 0.19885  | 0.22853986 | 0.413072 |
| 29650     | Adam10       | 0.198845 | 3.02E-19   | 1.04E-17 |
| 364529    | Calr3        | 0.198721 | 0.14139666 | 0.29466  |
| 59105     | Milr1        | 0.198516 | 0.36816862 | 0.564328 |
| 362191    | Dph6         | 0.198464 | 0.01043374 | 0.038406 |
| 308431    | Phldb3       | 0.198418 | 0.27650073 | 0.469002 |
| 361400    | Nfatc3       | 0.198384 | 1.97E-07   | 2.19E-06 |
| 310418    | Frem2        | 0.198358 | 0.17843571 | 0.347298 |
| 367846    | Sp3          | 0.198342 | 1.58E-06   | 1.51E-05 |
| 305448    | Dok7         | 0.198288 | 0.06370208 | 0.163571 |
| 315131    | Kdelr3       | 0.198234 | 7.30E-06   | 6.15E-05 |
| 314393    | Trip11       | 0.198075 | 3.04E-11   | 5.61E-10 |
| 365266    | Atp10a       | 0.197917 | 0.01767154 | 0.059273 |
| 116598    | Pdia4        | 0.197791 | 1.90E-11   | 3.58E-10 |
| 100911572 | LOC100911572 | 0.197787 | 0.05950079 | 0.155104 |
| 58952     | Cpq          | 0.197777 | 1.59E-08   | 2.08E-07 |
| 317213    | Brwd3        | 0.197682 | 0.01294141 | 0.045855 |
| 302248    | Nid2         | 0.197639 | 1.49E-12   | 3.13E-11 |
| 100909697 | Slc25a51     | 0.197635 | 1.25E-06   | 1.22E-05 |
| 81722     | Ager         | 0.197605 | 0.20651309 | 0.384011 |
| 690489    | Cys1         | 0.197536 | 0.0164281  | 0.05581  |
| 64366     | Calu         | 0.197531 | 4.02E-23   | 1.69E-21 |
| 680317    | Endou        | 0.19751  | 0.36165329 | 0.558114 |
| 304893    | Rasa12       | 0.197439 | 3.81E-07   | 4.05E-06 |
| 500797    | Misp         | 0.197422 | 0.18804389 | 0.360364 |
| 295568    | Hl1f         | 0.197382 | 1.36E-04   | 8.76E-04 |
| 313308    | Thoc2        | 0.19736  | 5.95E-08   | 7.16E-07 |
| 361680    | Lsp1         | 0.197356 | 0.00279172 | 0.012644 |
| 315593    | Tmem136      | 0.197341 | 0.34258575 | 0.539263 |
| 361153    | Fam149a      | 0.19733  | 3.70E-04   | 0.00216  |
| 266762    | Mrgprf       | 0.197221 | 0.0011774  | 0.005951 |
| 499856    | Fibin        | 0.197132 | 0.04511132 | 0.124821 |
| 24941     | Atp7a        | 0.197002 | 1.91E-06   | 1.80E-05 |
| 297480    | Foxp1        | 0.196834 | 2.81E-04   | 0.001687 |
| 25096     | Pld1         | 0.196719 | 1.02E-05   | 8.36E-05 |
| 100361079 | LOC100361079 | 0.196635 | 0.17863646 | 0.34744  |
| 296102    | E113         | 0.196631 | 3.86E-06   | 3.45E-05 |

|           |              |          |            |          |
|-----------|--------------|----------|------------|----------|
| 499401    | Znrclas1     | 0.196554 | 0.03558303 | 0.103053 |
| 315843    | Phip         | 0.19633  | 4.38E-06   | 3.86E-05 |
| 25466     | Illrap       | 0.196325 | 0.00713634 | 0.02796  |
| 288174    | Nit2         | 0.196082 | 5.38E-04   | 0.002986 |
| 116967    | Magt1        | 0.196013 | 0.00490186 | 0.020383 |
| 690745    | 1-Mar        | 0.195983 | 0.01742136 | 0.058599 |
| 304786    | Elk4         | 0.195969 | 5.49E-07   | 5.70E-06 |
| 24459     | Hoxc4        | 0.195932 | 0.01442266 | 0.050142 |
| 25603     | Marcks       | 0.195912 | 8.04E-14   | 1.94E-12 |
| 170630    | Fgf12        | 0.195909 | 7.25E-47   | 6.42E-45 |
| 171070    | Ptpn21       | 0.195908 | 0.0022228  | 0.010345 |
| 80897     | Erap1        | 0.195884 | 6.19E-08   | 7.43E-07 |
| 171135    | Slc31a1      | 0.195855 | 0.00131871 | 0.006573 |
| 499797    | RGD1560248   | 0.195624 | 3.26E-15   | 8.80E-14 |
| 293173    | Far1         | 0.195507 | 5.19E-20   | 1.85E-18 |
| 498097    | Wdr53        | 0.195413 | 0.02195315 | 0.070458 |
| 303019    | Neur11b      | 0.195338 | 0.38504191 | 0.581763 |
| 24367     | Fgg          | 0.195338 | 0.79339402 | 0.893512 |
| 246263    | Acsm2        | 0.195338 | 0.79339402 | 0.893512 |
| 287668    | Lrrc3c       | 0.195338 | 0.79339402 | 0.893512 |
| 291853    | Drc7         | 0.195338 | 0.71109129 | 0.841477 |
| 294255    | Slc44a4      | 0.195338 | 0.52117456 | 0.705607 |
| 29440     | Slc26a4      | 0.195338 | 0.79339402 | 0.893512 |
| 298702    | Icam4        | 0.195338 | 0.79339402 | 0.893512 |
| 304379    | Zan          | 0.195338 | 0.71109129 | 0.841477 |
| 363072    | Tbcd21       | 0.195338 | 0.79339402 | 0.893512 |
| 363493    | Taf71        | 0.195338 | 0.71109129 | 0.841477 |
| 686660    | LOC686660    | 0.195338 | 0.79339402 | 0.893512 |
| 688510    | Ripor3       | 0.195338 | 0.28020165 | 0.473635 |
| 689918    | Sox30        | 0.195338 | 0.79339402 | 0.893512 |
| 80840     | Gpr12        | 0.195338 | 0.79339402 | 0.893512 |
| 501174    | Pid1         | 0.195338 | 0.08233584 | 0.199046 |
| 103694869 | LOC103694869 | 0.195335 | 5.63E-04   | 0.003113 |
| 108353281 | LOC108353281 | 0.195147 | 0.54372266 | 0.725103 |
| 313340    | Dennd4c      | 0.195009 | 9.48E-06   | 7.83E-05 |
| 303638    | Abca8a       | 0.194989 | 6.35E-77   | 9.52E-75 |
| 499539    | Lmbrd2       | 0.194894 | 9.21E-07   | 9.21E-06 |
| 499690    | Tmem167b     | 0.19488  | 0.00502542 | 0.020815 |
| 192350    | Cdk12        | 0.194748 | 2.39E-05   | 1.82E-04 |
| 499255    | Knop1        | 0.19472  | 0.01720195 | 0.057974 |
| 311030    | Stam2        | 0.194715 | 1.75E-04   | 0.001099 |
| 290029    | Pnp          | 0.194686 | 1.34E-08   | 1.78E-07 |
| 83515     | Ptbp3        | 0.194662 | 2.21E-12   | 4.53E-11 |
| 363268    | Fbxo36       | 0.194561 | 0.13320398 | 0.282817 |
| 315291    | Ccnt1        | 0.194504 | 4.14E-04   | 0.002383 |
| 302697    | Eif1ax       | 0.194381 | 2.19E-12   | 4.52E-11 |
| 114861    | Scpep1       | 0.194361 | 5.53E-09   | 7.71E-08 |
| 103693699 | LOC103693699 | 0.194353 | 0.18281315 | 0.353004 |
| 362591    | Mtf1         | 0.194338 | 6.14E-05   | 4.29E-04 |
| 287170    | Snrnp25      | 0.194271 | 0.01049003 | 0.038568 |
| 364994    | Dpep3        | 0.194256 | 0.70305858 | 0.837592 |
| 305850    | Rpgrip1      | 0.194203 | 0.13533501 | 0.285559 |
| 317439    | Wwc3         | 0.19409  | 4.45E-06   | 3.91E-05 |
| 502715    | Lrrc17       | 0.194087 | 0.07593734 | 0.186948 |
| 315297    | Nckap51      | 0.194027 | 5.69E-10   | 9.05E-09 |
| 100910258 | LOC100910258 | 0.194017 | 0.17878397 | 0.347585 |

|           |              |          |            |          |
|-----------|--------------|----------|------------|----------|
| 64630     | Snap23       | 0.193956 | 0.00596435 | 0.024005 |
| 24890     | Esr1         | 0.193835 | 0.062422   | 0.16087  |
| 100910771 | LOC100910771 | 0.193787 | 0.21869161 | 0.400325 |
| 500441    | RGD1561916   | 0.193742 | 0.29676301 | 0.49331  |
| 103692307 | LOC103692307 | 0.193684 | 7.64E-05   | 5.22E-04 |
| 170636    | Pnma1        | 0.193636 | 0.31249675 | 0.507677 |
| 290686    | Tma16        | 0.193636 | 0.01336146 | 0.047045 |
| 29227     | Nfib         | 0.193619 | 1.23E-05   | 9.95E-05 |
| 681429    | Rps271       | 0.193569 | 0.00878333 | 0.03321  |
| 498533    | Fam167a      | 0.193478 | 0.01064637 | 0.038992 |
| 310969    | Ifi44        | 0.193425 | 5.39E-05   | 3.81E-04 |
| 360868    | Sft2d2       | 0.193386 | 1.03E-04   | 6.83E-04 |
| 309003    | Zfp646       | 0.193381 | 1.67E-04   | 0.001056 |
| 363930    | Selplg       | 0.193377 | 0.103631   | 0.234763 |
| 406163    | Gpsm3        | 0.193377 | 0.03563254 | 0.103181 |
| 378947    | Bst2         | 0.193363 | 0.0019001  | 0.009054 |
| 691920    | Stard9       | 0.193318 | 4.70E-07   | 4.92E-06 |
| 360254    | Brca2        | 0.193143 | 0.04730549 | 0.129426 |
| 25252     | Dlg1         | 0.193101 | 5.67E-05   | 3.99E-04 |
| 302965    | Tnfrsf12a    | 0.192893 | 0.06052373 | 0.157104 |
| 680723    | Tmem88b      | 0.192866 | 0.02721204 | 0.083522 |
| 363872    | Zscan25      | 0.192851 | 0.05358984 | 0.142445 |
| 64566     | Wnt5a        | 0.192795 | 0.01009217 | 0.037321 |
| 100126191 | Rab1b        | 0.192782 | 1.33E-09   | 2.02E-08 |
| 689296    | Mis18bp1     | 0.192745 | 0.06855756 | 0.172892 |
| 691921    | LOC691921    | 0.192664 | 0.25683535 | 0.445932 |
| 108349511 | LOC108349511 | 0.192495 | 0.51869439 | 0.703599 |
| 266773    | Zfp709       | 0.192487 | 0.00149779 | 0.007354 |
| 294601    | S1f1         | 0.192335 | 0.02345719 | 0.074284 |
| 361935    | Spata5       | 0.192296 | 0.02440319 | 0.07663  |
| 59266     | Hcn4         | 0.192282 | 0.00586487 | 0.023695 |
| 100174910 | LOC100174910 | 0.192266 | 0.03475518 | 0.10121  |
| 289883    | Tmed5        | 0.192236 | 8.69E-05   | 5.85E-04 |
| 315745    | Fem1b        | 0.192202 | 6.90E-05   | 4.76E-04 |
| 116509    | Slc6a9       | 0.192081 | 0.07130685 | 0.178197 |
| 501658    | Vma21        | 0.191822 | 7.05E-08   | 8.41E-07 |
| 361197    | Ercc612      | 0.191812 | 3.92E-05   | 2.85E-04 |
| 687707    | LOC687707    | 0.191727 | 0.49233308 | 0.679702 |
| 24986     | RT1-Ha       | 0.191663 | 0.84740777 | 0.9237   |
| 299805    | Cnot2        | 0.191662 | 1.62E-08   | 2.13E-07 |
| 290705    | Nek1         | 0.191542 | 1.37E-08   | 1.82E-07 |
| 304336    | RGD1566386   | 0.191511 | 0.02923979 | 0.088364 |
| 307901    | Tlhc1        | 0.191477 | 0.01680014 | 0.05675  |
| 295297    | Etv3         | 0.191439 | 4.93E-05   | 3.51E-04 |
| 313790    | Lacc1        | 0.191361 | 4.05E-06   | 3.60E-05 |
| 300944    | Xrn1         | 0.191322 | 1.74E-05   | 1.36E-04 |
| 500789    | Gipc3        | 0.191227 | 0.06963893 | 0.174924 |
| 24483     | Igf2         | 0.191151 | 3.03E-05   | 2.26E-04 |
| 308821    | Rab30        | 0.191149 | 4.19E-08   | 5.16E-07 |
| 312974    | Chd7         | 0.191078 | 0.00251633 | 0.011537 |
| 100359865 | Hrct1        | 0.190927 | 0.01075229 | 0.03929  |
| 499742    | LOC499742    | 0.190811 | 1.64E-04   | 0.001037 |
| 305828    | Socs4        | 0.190707 | 0.11059068 | 0.246454 |
| 102551085 | Xrcc3        | 0.190641 | 0.00743015 | 0.028873 |
| 102552551 | Smim6        | 0.190562 | 0.39670127 | 0.59396  |
| 108348175 | LOC108348175 | 0.190556 | 1.14E-19   | 4.01E-18 |

|           |              |          |            |          |
|-----------|--------------|----------|------------|----------|
| 309465    | Gsto2        | 0.190469 | 0.02276522 | 0.072466 |
| 24974     | RT1-A2       | 0.190438 | 1.07E-16   | 3.18E-15 |
| 114845    | Klf3         | 0.190382 | 1.46E-05   | 1.16E-04 |
| 282587    | Cttnbp2      | 0.190369 | 2.37E-04   | 0.001454 |
| 681766    | Stpg4        | 0.19032  | 0.56313866 | 0.734386 |
| 317253    | Nhs12        | 0.190266 | 6.04E-04   | 0.003312 |
| 81717     | Ctbp2        | 0.190234 | 0.00599481 | 0.024097 |
| 288106    | Ccdc191      | 0.190152 | 0.16396742 | 0.327746 |
| 310946    | Lrrc40       | 0.190099 | 1.20E-05   | 9.69E-05 |
| 103690064 | LOC103690064 | 0.190093 | 1.23E-07   | 1.42E-06 |
| 291787    | Rbbp8        | 0.190089 | 3.95E-05   | 2.87E-04 |
| 361149    | Ankrd37      | 0.189972 | 0.33373485 | 0.52993  |
| 308594    | Ccdc114      | 0.189779 | 0.43855769 | 0.632273 |
| 299907    | Ext1         | 0.189743 | 9.68E-05   | 6.44E-04 |
| 497923    | Zfp286a      | 0.189732 | 0.04927096 | 0.133651 |
| 54248     | Dgkb         | 0.189668 | 8.99E-05   | 6.02E-04 |
| 685487    | Znrf3        | 0.189656 | 0.22599904 | 0.409685 |
| 65032     | Htr7         | 0.189581 | 0.12784388 | 0.274497 |
| 294429    | Ranbp2       | 0.189578 | 1.06E-17   | 3.36E-16 |
| 316238    | Rsph9        | 0.189462 | 0.28744039 | 0.481978 |
| 365038    | Samd5        | 0.189394 | 0.23717081 | 0.424203 |
| 300743    | Lman11       | 0.189106 | 0.60619014 | 0.768635 |
| 301000    | Uba7         | 0.189106 | 0.03354091 | 0.098472 |
| 307900    | Kcng4        | 0.189054 | 0.00448465 | 0.018892 |
| 362798    | Ncapg2       | 0.188988 | 0.06573728 | 0.167308 |
| 100362123 | Rex2         | 0.188952 | 0.02959382 | 0.089194 |
| 361253    | Sugct        | 0.188912 | 0.15145204 | 0.308558 |
| 309106    | Sigirr       | 0.18879  | 0.26159779 | 0.451198 |
| 102556425 | LOC102556425 | 0.188747 | 0.12383373 | 0.268673 |
| 363985    | Slc41a1      | 0.188619 | 2.63E-06   | 2.43E-05 |
| 100910882 | LOC100910882 | 0.188556 | 1.88E-13   | 4.33E-12 |
| 408223    | Usp54        | 0.188555 | 1.71E-08   | 2.22E-07 |
| 108351267 | LOC108351267 | 0.188448 | 0.34282848 | 0.539512 |
| 293997    | Kazald1      | 0.188439 | 0.27497327 | 0.466994 |
| 304592    | Orai2        | 0.188409 | 4.28E-08   | 5.25E-07 |
| 299811    | Cpsf6        | 0.188267 | 1.43E-12   | 2.99E-11 |
| 360640    | Map3k14      | 0.188249 | 0.04121699 | 0.115864 |
| 103692234 | LOC103692234 | 0.188249 | 0.89175099 | 0.951611 |
| 100911548 | LOC100911548 | 0.188238 | 0.10052516 | 0.229474 |
| 100911986 | LOC100911986 | 0.188178 | 0.29090451 | 0.486245 |
| 312115    | Col28a1      | 0.187984 | 1.48E-12   | 3.11E-11 |
| 24864     | Pgc          | 0.187908 | 0.41646895 | 0.612341 |
| 291539    | Psmg2        | 0.187892 | 0.00212188 | 0.009956 |
| 501647    | Fam122b      | 0.18788  | 0.04591405 | 0.126564 |
| 24603     | Npr1         | 0.187836 | 0.13999327 | 0.292889 |
| 25333     | Mgp          | 0.187831 | 2.38E-16   | 6.92E-15 |
| 295985    | Mettl15      | 0.187767 | 0.05118285 | 0.137331 |
| 100359879 | Tmem91       | 0.187725 | 0.19033428 | 0.363364 |
| 689499    | Stum         | 0.187611 | 0.00367409 | 0.015983 |
| 192205    | Prok1        | 0.187575 | 0.56592216 | 0.736352 |
| 360272    | Slit2        | 0.187469 | 1.17E-09   | 1.79E-08 |
| 100364165 | Nktr         | 0.187441 | 6.37E-14   | 1.56E-12 |
| 363073    | Glce         | 0.187439 | 2.79E-13   | 6.31E-12 |
| 311328    | Rmdn3        | 0.187359 | 6.11E-06   | 5.23E-05 |
| 25749     | Clcn5        | 0.187269 | 0.00135525 | 0.006727 |
| 29427     | Aif1         | 0.187235 | 0.03576723 | 0.103445 |



|           |              |          |            |          |
|-----------|--------------|----------|------------|----------|
| 313387    | Usp1         | 0.187178 | 0.00345397 | 0.015171 |
| 311182    | Nup160       | 0.187177 | 0.00309955 | 0.013828 |
| 688765    | LOC688765    | 0.187124 | 0.07569806 | 0.186503 |
| 108348125 | LOC108348125 | 0.187118 | 0.07564214 | 0.18639  |
| 361394    | Lrrc36       | 0.187118 | 0.23996418 | 0.427353 |
| 29503     | Slc22a2      | 0.187118 | 0.52993567 | 0.712555 |
| 302976    | Noxol        | 0.187118 | 0.83872161 | 0.919547 |
| 103691225 | LOC103691225 | 0.187032 | 0.80576241 | 0.900678 |
| 365238    | LOC365238    | 0.186958 | 0.06326052 | 0.162722 |
| 171120    | Jmjd1c       | 0.186919 | 2.41E-08   | 3.05E-07 |
| 689102    | Chml         | 0.186893 | 0.12948846 | 0.276873 |
| 140938    | Psmc3ip      | 0.186847 | 0.16761903 | 0.33184  |
| 311088    | Cob111       | 0.186824 | 1.78E-04   | 0.001119 |
| 361941    | RGD1359508   | 0.186816 | 0.19139436 | 0.364547 |
| 311093    | Csrnp3       | 0.186799 | 0.12816793 | 0.274914 |
| 309798    | Gcc2         | 0.186793 | 9.11E-08   | 1.07E-06 |
| 363231    | Rftn2        | 0.186644 | 0.01511477 | 0.052196 |
| 360560    | RGD1304728   | 0.186517 | 0.00203258 | 0.009579 |
| 311854    | Tor1b        | 0.186454 | 0.00203904 | 0.009607 |
| 297910    | Slc26a7      | 0.186405 | 0.14148746 | 0.294817 |
| 102555377 | LOC102555377 | 0.186359 | 0.00890799 | 0.033635 |
| 295293    | Pear1        | 0.186346 | 3.53E-07   | 3.78E-06 |
| 361104    | Zcchc24      | 0.186275 | 2.20E-12   | 4.53E-11 |
| 303060    | Pwpp2a       | 0.186155 | 4.69E-04   | 0.002652 |
| 307645    | Adgrg5       | 0.186139 | 0.4694317  | 0.659705 |
| 690693    | Ddx19b       | 0.186063 | 8.95E-05   | 6.01E-04 |
| 293849    | Zfp275       | 0.185947 | 9.55E-04   | 0.004972 |
| 315346    | Itga5        | 0.185915 | 0.00914095 | 0.034398 |
| 294019    | Calhm2       | 0.185842 | 0.07362616 | 0.182746 |
| 102551340 | LOC102551340 | 0.185791 | 0.00149237 | 0.007335 |
| 304850    | Rnf2         | 0.185676 | 3.61E-04   | 0.002114 |
| 65261     | Myo1c        | 0.185626 | 3.03E-09   | 4.39E-08 |
| 363484    | Chic1        | 0.185562 | 8.56E-05   | 5.77E-04 |
| 306137    | Rbm26        | 0.185557 | 1.37E-05   | 1.09E-04 |
| 691981    | Spem1        | 0.185557 | 0.56798577 | 0.737928 |
| 81685     | Mlh1         | 0.185423 | 0.03396407 | 0.09953  |
| 298908    | Kcnf1        | 0.185312 | 0.00171271 | 0.008262 |
| 499716    | Dnajb14      | 0.185145 | 0.00205426 | 0.00966  |
| 304061    | Brwd1        | 0.185129 | 5.68E-06   | 4.90E-05 |
| 100359523 | LOC100359523 | 0.185029 | 0.13177169 | 0.280621 |
| 103693812 | LOC103693812 | 0.185002 | 0.77557557 | 0.882895 |
| 315804    | Rfx7         | 0.184985 | 1.04E-05   | 8.50E-05 |
| 500592    | Tnfrsf25     | 0.184897 | 0.09851901 | 0.226114 |
| 308790    | Mex3b        | 0.184798 | 0.03697182 | 0.106316 |
| 114520    | Strn3        | 0.184729 | 1.64E-08   | 2.14E-07 |
| 24361     | Fancc        | 0.184612 | 0.00409629 | 0.0175   |
| 292064    | Banp         | 0.184555 | 4.11E-06   | 3.64E-05 |
| 103692905 | LOC103692905 | 0.184512 | 0.03816325 | 0.108952 |
| 305467    | Sfi1         | 0.18439  | 3.21E-06   | 2.91E-05 |
| 291635    | Pcdhga7      | 0.184236 | 5.63E-05   | 3.96E-04 |
| 366595    | Syp11        | 0.184233 | 3.59E-07   | 3.84E-06 |
| 688790    | Pmp2         | 0.184222 | 3.65E-47   | 3.31E-45 |
| 294074    | Cep55        | 0.18414  | 0.35899742 | 0.555907 |
| 499110    | Zfp780b      | 0.184107 | 0.01588414 | 0.05434  |
| 65218     | Agap2        | 0.184023 | 0.00108724 | 0.005553 |
| 25426     | Cyp11b1      | 0.183863 | 2.58E-06   | 2.39E-05 |

|           |              |          |            |          |
|-----------|--------------|----------|------------|----------|
| 100361383 | Ecm2         | 0.18382  | 0.02837352 | 0.086294 |
| 498407    | Purb         | 0.183771 | 6.49E-05   | 4.50E-04 |
| 299706    | Nup37        | 0.18371  | 0.0470874  | 0.129014 |
| 306571    | Kat6a        | 0.183702 | 1.81E-07   | 2.03E-06 |
| 108350588 | LOC108350588 | 0.183697 | 0.14694455 | 0.302351 |
| 295340    | Rplp011      | 0.183686 | 0.89495819 | 0.953644 |
| 303443    | Stxbp4       | 0.183657 | 0.00620929 | 0.02487  |
| 25667     | Bmp3         | 0.183501 | 0.37877659 | 0.57586  |
| 361147    | Primpol      | 0.183434 | 0.02437963 | 0.076606 |
| 29360     | Selenop      | 0.183371 | 9.61E-47   | 8.47E-45 |
| 289229    | Vangl2       | 0.183311 | 0.20746889 | 0.385262 |
| 316516    | Tmbim1       | 0.183311 | 1.59E-07   | 1.80E-06 |
| 24811     | Tap1         | 0.183274 | 0.00310243 | 0.013837 |
| 307449    | Mcc          | 0.183266 | 0.71963708 | 0.846802 |
| 365581    | Edar         | 0.183266 | 0.61171751 | 0.773018 |
| 291078    | Prpf4b       | 0.183213 | 1.32E-10   | 2.25E-09 |
| 100529260 | Ankhd1       | 0.183159 | 1.74E-07   | 1.95E-06 |
| 296968    | Lrguk        | 0.18302  | 0.00505239 | 0.020909 |
| 310968    | Ifi441       | 0.182901 | 0.15801375 | 0.318486 |
| 102553002 | Zscan22      | 0.182826 | 0.00165505 | 0.008002 |
| 503053    | LOC503053    | 0.182763 | 0.1940665  | 0.367981 |
| 366791    | Rdh5         | 0.182602 | 0.29619457 | 0.492752 |
| 685451    | Gng13        | 0.182571 | 0.71287706 | 0.842491 |
| 362597    | Evalb        | 0.182514 | 0.01626027 | 0.055319 |
| 499360    | Slf2         | 0.182459 | 8.04E-05   | 5.45E-04 |
| 282822    | Trpc7        | 0.182283 | 0.68779467 | 0.826856 |
| 313418    | Mier1        | 0.182279 | 1.74E-07   | 1.95E-06 |
| 310399    | Naa15        | 0.18227  | 4.71E-12   | 9.45E-11 |
| 689065    | LOC689065    | 0.182268 | 0.61001998 | 0.771641 |
| 299940    | Sntb1        | 0.182216 | 2.01E-07   | 2.24E-06 |
| 298316    | Nkrf1        | 0.182174 | 0.02134609 | 0.068998 |
| 58868     | Fzd1         | 0.182153 | 1.48E-05   | 1.17E-04 |
| 29497     | Ptbp1        | 0.182082 | 5.35E-09   | 7.49E-08 |
| 298487    | Cldn19       | 0.182066 | 3.04E-24   | 1.35E-22 |
| 171436    | Mk1          | 0.182054 | 5.40E-05   | 3.81E-04 |
| 304007    | Cep97        | 0.181963 | 0.00296645 | 0.013309 |
| 59296     | Dnase2b      | 0.181871 | 0.65001557 | 0.802304 |
| 361838    | Hnrnp3       | 0.181761 | 2.93E-04   | 0.00175  |
| 295588    | Rnd3         | 0.181722 | 1.90E-04   | 0.001186 |
| 102554881 | LOC102554881 | 0.181663 | 0.50373226 | 0.690509 |
| 361415    | Dynlrb2      | 0.181663 | 0.50373226 | 0.690509 |
| 691221    | Faxdc2       | 0.181653 | 4.35E-07   | 4.58E-06 |
| 25124     | Stat1        | 0.181609 | 3.47E-12   | 7.06E-11 |
| 308738    | Chd2         | 0.181602 | 2.83E-10   | 4.67E-09 |
| 365770    | Bbs12        | 0.181553 | 0.13350878 | 0.283275 |
| 685202    | Efcc1        | 0.181487 | 9.76E-04   | 0.005068 |
| 499356    | Blnk         | 0.181399 | 0.12971544 | 0.277141 |
| 361388    | Gab1         | 0.181389 | 1.11E-13   | 2.63E-12 |
| 102555274 | Zfp853       | 0.181352 | 0.12198864 | 0.26573  |
| 303963    | Dzip3        | 0.181297 | 8.30E-07   | 8.35E-06 |
| 100359861 | Smim15       | 0.181257 | 1.13E-04   | 7.39E-04 |
| 114110    | Flt4         | 0.181231 | 0.2364265  | 0.423349 |
| 316344    | Rev1         | 0.181186 | 6.86E-04   | 0.003712 |
| 498289    | Opn3         | 0.181031 | 0.02403866 | 0.075835 |
| 299012    | Arhgap5      | 0.180896 | 7.08E-12   | 1.39E-10 |
| 314824    | Osbpl8       | 0.180887 | 3.99E-10   | 6.46E-09 |

|           |              |          |            |          |
|-----------|--------------|----------|------------|----------|
| 29335     | Oprk1        | 0.180879 | 0.00961144 | 0.035864 |
| 102553845 | LOC102553845 | 0.180806 | 0.63522804 | 0.790352 |
| 362739    | Ppp2r3c      | 0.180779 | 2.17E-05   | 1.67E-04 |
| 64679     | Tgm4         | 0.180729 | 0.63009478 | 0.787102 |
| 361245    | Cmahp        | 0.180695 | 0.5734029  | 0.742434 |
| 102555453 | LOC102555453 | 0.180631 | 2.49E-10   | 4.16E-09 |
| 680111    | Rbl1         | 0.180611 | 0.24817405 | 0.436908 |
| 298878    | Osr1         | 0.180597 | 0.15953946 | 0.320983 |
| 294519    | Cep57l1      | 0.18048  | 0.01020002 | 0.037625 |
| 25663     | Il1r1        | 0.180462 | 0.00401725 | 0.017205 |
| 362728    | Twistnb      | 0.180397 | 0.00380903 | 0.016468 |
| 317494    | Nhs          | 0.180373 | 0.00561826 | 0.022829 |
| 100910046 | LOC100910046 | 0.180241 | 2.74E-04   | 0.001654 |
| 300125    | Ttc38        | 0.180225 | 0.00238351 | 0.011013 |
| 89824     | Chi3l1       | 0.180176 | 0.03270067 | 0.096556 |
| 64046     | Mrell1a      | 0.18008  | 0.00161621 | 0.00784  |
| 315798    | Zfp280d      | 0.179986 | 4.56E-06   | 4.01E-05 |
| 312781    | Lrp6         | 0.179953 | 3.29E-06   | 2.97E-05 |
| 304092    | Son          | 0.179905 | 1.64E-35   | 1.14E-33 |
| 314119    | Zxdb         | 0.179637 | 0.00577725 | 0.023395 |
| 312855    | Ppfibp1      | 0.179637 | 3.76E-09   | 5.42E-08 |
| 246301    | Ascl3        | 0.179571 | 0.66339292 | 0.808208 |
| 501996    | Il25         | 0.179571 | 0.66339292 | 0.808208 |
| 83476     | Cyr61        | 0.179538 | 1.94E-04   | 0.001208 |
| 499877    | Ubr1         | 0.179487 | 2.97E-06   | 2.71E-05 |
| 29433     | Pak3         | 0.17945  | 9.14E-09   | 1.24E-07 |
| 25690     | Ahr          | 0.179436 | 1.07E-04   | 7.03E-04 |
| 310812    | Plppr5       | 0.179358 | 0.14309462 | 0.29732  |
| 309460    | Sh3pxd2a     | 0.179317 | 1.68E-29   | 9.29E-28 |
| 313325    | Lad1         | 0.179298 | 0.06754947 | 0.17087  |
| 361598    | Iqgap1       | 0.179281 | 1.35E-12   | 2.85E-11 |
| 259171    | Dclrelc      | 0.179274 | 0.02871236 | 0.087074 |
| 296074    | Fsip1        | 0.179231 | 0.40870575 | 0.604943 |
| 291463    | Ppic         | 0.17909  | 0.0035477  | 0.015507 |
| 313373    | Cyp2j10      | 0.179057 | 0.00805733 | 0.030957 |
| 298476    | Olr867       | 0.179016 | 0.92791908 | 0.973944 |
| 115769    | Tjp2         | 0.178964 | 1.01E-06   | 9.99E-06 |
| 317673    | Bbc3         | 0.178916 | 0.14960866 | 0.305817 |
| 691042    | Sbf2         | 0.178826 | 1.01E-08   | 1.36E-07 |
| 301261    | Enpp4        | 0.178818 | 3.91E-11   | 7.06E-10 |
| 114560    | Rap2a        | 0.178796 | 0.15560799 | 0.315004 |
| 688133    | Mbtd1        | 0.178755 | 0.00194089 | 0.009216 |
| 266670    | Riox2        | 0.178728 | 0.04960726 | 0.134315 |
| 314787    | Cep290       | 0.178676 | 0.00808967 | 0.031056 |
| 304721    | Pdxdc1       | 0.17865  | 4.45E-05   | 3.21E-04 |
| 311494    | Rin2         | 0.178632 | 3.13E-05   | 2.33E-04 |
| 681849    | Mlip         | 0.178623 | 3.88E-12   | 7.87E-11 |
| 102549548 | LOC102549548 | 0.178415 | 0.65868031 | 0.804603 |
| 81818     | Vim          | 0.178395 | 2.37E-136  | #####    |
| 309362    | Dnmbp        | 0.178383 | 0.00723262 | 0.028261 |
| 310086    | Mier3        | 0.178303 | 0.00195224 | 0.00926  |
| 502017    | Dpm3         | 0.17808  | 0.00833022 | 0.031819 |
| 301476    | Ikzf2        | 0.178067 | 0.05470655 | 0.144928 |
| 56759     | Rnase4       | 0.178066 | 4.83E-04   | 0.002722 |
| 301556    | Dock10       | 0.17806  | 3.70E-10   | 6.00E-09 |
| 287662    | Pcgf2        | 0.178006 | 0.01305295 | 0.046164 |

|           |              |          |            |          |
|-----------|--------------|----------|------------|----------|
| 362466    | Bicd1        | 0.177953 | 1.09E-06   | 1.08E-05 |
| 362341    | Zc3hav11     | 0.177935 | 0.14122602 | 0.294369 |
| 290500    | Ggact        | 0.177904 | 0.01898655 | 0.06281  |
| 361308    | Kif20a       | 0.177866 | 0.11459962 | 0.253461 |
| 25262     | Itpr1        | 0.177836 | 0.01478743 | 0.051205 |
| 691002    | Dhdh         | 0.177811 | 0.06741101 | 0.170588 |
| 361091    | Uggt2        | 0.17778  | 0.00813869 | 0.031194 |
| 686412    | Sall4        | 0.17778  | 0.61700935 | 0.776306 |
| 306459    | Stox2        | 0.177641 | 3.98E-07   | 4.22E-06 |
| 360519    | Rasgef1c     | 0.177609 | 6.53E-04   | 0.003557 |
| 103690170 | LOC103690170 | 0.177597 | 0.56799956 | 0.737896 |
| 361753    | Noc3l        | 0.177546 | 0.00162737 | 0.007884 |
| 501699    | Myo15a       | 0.177527 | 0.25218548 | 0.44063  |
| 117057    | Myo1b        | 0.177367 | 5.00E-06   | 4.36E-05 |
| 103694069 | LOC103694069 | 0.177315 | 0.0995859  | 0.227904 |
| 501795    | Prr36        | 0.177298 | 0.2414947  | 0.429276 |
| 308708    | Ttc23        | 0.177191 | 0.00947726 | 0.03544  |
| 498846    | Pcdhga2      | 0.177144 | 9.56E-04   | 0.004979 |
| 140583    | Chek1        | 0.177118 | 0.15798339 | 0.318458 |
| 81809     | Tgfb2        | 0.177031 | 5.64E-04   | 0.003114 |
| 293024    | Akap13       | 0.177028 | 8.70E-11   | 1.51E-09 |
| 266767    | Slc17a8      | 0.177022 | 0.18267844 | 0.352887 |
| 500582    | RGD1565622   | 0.177013 | 0.12225257 | 0.266122 |
| 300225    | Fmn13        | 0.177012 | 0.00429218 | 0.01819  |
| 500057    | Zfp800       | 0.176981 | 0.02631816 | 0.08125  |
| 24337     | ErbB2        | 0.176913 | 6.14E-04   | 0.003364 |
| 103694506 | LOC103694506 | 0.176861 | 0.00962324 | 0.035901 |
| 309164    | Ovol1        | 0.176799 | 0.33527695 | 0.531714 |
| 364395    | Clqtnf9      | 0.176723 | 0.57719678 | 0.744991 |
| 60662     | Fgf5         | 0.176723 | 0.57719678 | 0.744991 |
| 498333    | Bmp2k        | 0.176647 | 1.51E-05   | 1.20E-04 |
| 361646    | LOC361646    | 0.176631 | 0.00204866 | 0.009639 |
| 25029     | Calcr1       | 0.17659  | 5.10E-04   | 0.002856 |
| 363016    | RGD1309534   | 0.176365 | 0.00142455 | 0.00704  |
| 246755    | Bcas1        | 0.176341 | 5.19E-09   | 7.29E-08 |
| 294273    | RT1-DMb      | 0.176155 | 0.03495006 | 0.101591 |
| 83685     | Capn6        | 0.176153 | 0.06033821 | 0.156772 |
| 102551819 | LOC102551819 | 0.176099 | 0.08796177 | 0.208284 |
| 362526    | Dnajc25      | 0.176025 | 0.17291409 | 0.339991 |
| 498831    | RGD1562608   | 0.176006 | 0.00686036 | 0.027068 |
| 309349    | Slitrk2      | 0.176001 | 2.56E-07   | 2.80E-06 |
| 103694558 | LOC103694558 | 0.175902 | 0.02610991 | 0.080725 |
| 114206    | Tmf1         | 0.175876 | 1.85E-08   | 2.39E-07 |
| 304486    | Tctn1        | 0.175848 | 1.56E-05   | 1.23E-04 |
| 689909    | Ccdc62       | 0.175786 | 0.05825538 | 0.15261  |
| 311658    | Nfatc2       | 0.17575  | 0.00719881 | 0.028152 |
| 362106    | Fubp3        | 0.175725 | 1.06E-04   | 7.02E-04 |
| 360840    | Srgap2       | 0.17571  | 1.11E-08   | 1.49E-07 |
| 497886    | Clqtnf2      | 0.175698 | 0.01048126 | 0.038543 |
| 361247    | Hist1h2bd    | 0.17564  | 0.89723373 | 0.954947 |
| 84021     | Irs3         | 0.175617 | 0.14726379 | 0.302779 |
| 58948     | Dlg3         | 0.175563 | 0.01839492 | 0.061204 |
| 287275    | Sec24a       | 0.175446 | 3.12E-05   | 2.33E-04 |
| 501194    | Ppip5k2      | 0.175439 | 0.00461898 | 0.019393 |
| 361927    | Fxr1         | 0.175354 | 8.61E-04   | 0.00454  |
| 103692848 | LOC103692848 | 0.175185 | 0.46765285 | 0.658664 |

|           |              |          |            |          |
|-----------|--------------|----------|------------|----------|
| 289777    | Figl1        | 0.175161 | 0.48261907 | 0.671303 |
| 363170    | Zkscan7      | 0.175115 | 0.06574182 | 0.167297 |
| 313765    | Slc35e2b     | 0.175081 | 1.89E-06   | 1.79E-05 |
| 362342    | Hipk2        | 0.175031 | 1.15E-06   | 1.13E-05 |
| 171100    | Angpt12      | 0.175022 | 3.40E-05   | 2.51E-04 |
| 680076    | Asb14        | 0.175005 | 0.51212882 | 0.697924 |
| 303208    | Specc1       | 0.17497  | 2.66E-04   | 0.001613 |
| 246304    | Cep350       | 0.174883 | 4.74E-05   | 3.39E-04 |
| 25306     | Cpd          | 0.174757 | 3.03E-10   | 4.96E-09 |
| 294667    | Poc5         | 0.174741 | 0.00433369 | 0.018329 |
| 303403    | Med13        | 0.174727 | 4.26E-04   | 0.002438 |
| 360629    | Nt5c3b       | 0.174725 | 0.00145735 | 0.007183 |
| 56266     | Cyp4f1       | 0.1747   | 0.48345912 | 0.672079 |
| 312903    | Tram1        | 0.174582 | 3.62E-10   | 5.87E-09 |
| 79238     | Hmgcl        | 0.174518 | 0.04745128 | 0.129731 |
| 64640     | Rpl30        | 0.174505 | 1.20E-09   | 1.84E-08 |
| 305987    | Dock5        | 0.174504 | 6.42E-11   | 1.13E-09 |
| 301085    | Fyco1        | 0.174492 | 0.0011187  | 0.005688 |
| 310315    | Ccdc39       | 0.174456 | 0.02152587 | 0.069438 |
| 296456    | Itgav        | 0.174407 | 1.09E-25   | 5.20E-24 |
| 305605    | Ccdc88a      | 0.174311 | 5.92E-05   | 4.14E-04 |
| 58820     | Zfp148       | 0.174248 | 9.90E-08   | 1.16E-06 |
| 114202    | Mpp3         | 0.174117 | 0.0302875  | 0.090767 |
| 310363    | Fbxo4        | 0.174116 | 0.19842667 | 0.37357  |
| 287990    | Vps8         | 0.174103 | 3.69E-07   | 3.94E-06 |
| 117255    | Ptpn12       | 0.174065 | 1.68E-07   | 1.89E-06 |
| 689933    | Syce3        | 0.174062 | 0.35448863 | 0.551391 |
| 310538    | Fnip2        | 0.173979 | 5.88E-04   | 0.003234 |
| 25181     | Bgn          | 0.173803 | 7.64E-18   | 2.47E-16 |
| 362366    | Fkbp14       | 0.173778 | 0.00245134 | 0.011274 |
| 361348    | Mro          | 0.173771 | 0.14352088 | 0.297946 |
| 259237    | Dock9        | 0.173663 | 8.88E-15   | 2.31E-13 |
| 309557    | Epb4112      | 0.173562 | 1.27E-21   | 4.92E-20 |
| 103691999 | LOC103691999 | 0.173544 | 0.63456899 | 0.7901   |
| 497903    | Sowaha       | 0.173494 | 0.23606397 | 0.422859 |
| 192242    | Akr1d1       | 0.173426 | 0.19381757 | 0.367655 |
| 29412     | Adrala       | 0.173393 | 0.207876   | 0.385905 |
| 308666    | Cyfip1       | 0.173339 | 3.22E-09   | 4.66E-08 |
| 689253    | Nbeal1       | 0.173206 | 0.0065282  | 0.025999 |
| 84050     | Enpp2        | 0.173181 | 9.50E-05   | 6.33E-04 |
| 100363275 | Adgra2       | 0.173114 | 6.89E-09   | 9.50E-08 |
| 312566    | Adamts9      | 0.173109 | 0.00780269 | 0.03013  |
| 116996    | I116         | 0.172977 | 6.12E-06   | 5.24E-05 |
| 360760    | Pan3         | 0.172729 | 2.67E-06   | 2.46E-05 |
| 100362170 | Zfp964       | 0.17265  | 0.10006172 | 0.228773 |
| 103690962 | LOC103690962 | 0.172618 | 0.45969243 | 0.650869 |
| 108352495 | LOC108352495 | 0.172618 | 0.80533312 | 0.9007   |
| 117182    | Hsd17b3      | 0.172618 | 0.72743889 | 0.85138  |
| 291165    | Nkap1        | 0.172618 | 0.72743889 | 0.85138  |
| 302516    | Nyx          | 0.172618 | 0.72743889 | 0.85138  |
| 304577    | Ung          | 0.172618 | 0.27039051 | 0.461929 |
| 308810    | Ccdc81       | 0.172618 | 0.80533312 | 0.9007   |
| 311613    | L3mbt11      | 0.172618 | 0.25873681 | 0.448008 |
| 315085    | Naprt        | 0.172618 | 0.02228328 | 0.071301 |
| 364620    | Poteg        | 0.172618 | 0.80533312 | 0.9007   |
| 691416    | Aknad1       | 0.172618 | 0.80533312 | 0.9007   |

|           |                 |          |            |          |
|-----------|-----------------|----------|------------|----------|
| 691992    | Gp1ba           | 0.172618 | 0.72743889 | 0.85138  |
| 303735    | Rnf213          | 0.17258  | 1.89E-06   | 1.79E-05 |
| 501157    | Rpe             | 0.172382 | 1.97E-05   | 1.52E-04 |
| 313228    | Invs            | 0.172326 | 0.00992143 | 0.036826 |
| 311146    | Itprid2         | 0.172317 | 1.12E-23   | 4.84E-22 |
| 295263    | Gabpb2          | 0.172245 | 0.12622663 | 0.271883 |
| 306506    | Pragl           | 0.172184 | 0.01822761 | 0.060785 |
| 494344    | Ier2            | 0.172169 | 0.02023016 | 0.066143 |
| 100362347 | Fnip1           | 0.172064 | 2.99E-04   | 0.001782 |
| 317420    | Wnk3            | 0.171974 | 0.17079132 | 0.336825 |
| 24514     | Jak2            | 0.171972 | 1.11E-04   | 7.27E-04 |
| 309381    | Pyroxd2         | 0.171728 | 0.00927919 | 0.03485  |
| 295347    | Rap1a           | 0.171709 | 4.39E-09   | 6.23E-08 |
| 114483    | Cdk6            | 0.171702 | 0.00901514 | 0.033985 |
| 306022    | Fndc3a          | 0.17165  | 1.78E-08   | 2.31E-07 |
| 63843     | P2ry4           | 0.171646 | 0.11555971 | 0.254962 |
| 108348149 | LOC108348149    | 0.171637 | 2.43E-04   | 0.001487 |
| 361948    | Nbea            | 0.171503 | 1.83E-04   | 0.001144 |
| 292085    | Nup133          | 0.171314 | 0.00668714 | 0.026516 |
| 500069    | Cep41           | 0.171271 | 0.05932802 | 0.154718 |
| 300983    | Abhd14b         | 0.171254 | 4.54E-04   | 0.002579 |
| 103692172 | NEWGENE_1562258 | 0.171157 | 0.06593271 | 0.167671 |
| 293971    | RGD1564433      | 0.171104 | 0.78981005 | 0.891479 |
| 362401    | Tmem43          | 0.17108  | 9.22E-07   | 9.22E-06 |
| 79126     | Cfi             | 0.171051 | 0.00880264 | 0.033276 |
| 689926    | Smim5           | 0.170987 | 0.03609235 | 0.104164 |
| 315121    | Cdc42ep1        | 0.170969 | 4.83E-07   | 5.04E-06 |
| 297942    | Pnlsr           | 0.170893 | 1.21E-12   | 2.58E-11 |
| 310749    | Rsbnl           | 0.170872 | 6.79E-04   | 0.003679 |
| 266792    | Zscan26         | 0.1708   | 6.56E-06   | 5.57E-05 |
| 361300    | Mocos           | 0.17076  | 0.00554558 | 0.022577 |
| 64469     | Slc30a4         | 0.170754 | 8.22E-05   | 5.57E-04 |
| 363013    | Tmem123         | 0.170731 | 0.00148709 | 0.007316 |
| 24907     | Dmd             | 0.170708 | 2.66E-20   | 9.63E-19 |
| 66027     | Drp2            | 0.170703 | 1.22E-51   | 1.22E-49 |
| 64475     | P4ha1           | 0.170686 | 4.68E-10   | 7.51E-09 |
| 117108    | B3gat1          | 0.170638 | 0.43837511 | 0.632154 |
| 362630    | Srsf10          | 0.170479 | 7.78E-08   | 9.24E-07 |
| 289625    | Klb             | 0.170421 | 0.46251453 | 0.653117 |
| 681292    | Shld1           | 0.170421 | 0.29878561 | 0.495332 |
| 25478     | Man2a1          | 0.170412 | 0.00136292 | 0.00676  |
| 302424    | Eda             | 0.170403 | 0.00618152 | 0.024764 |
| 686240    | Naa16           | 0.170359 | 0.00376449 | 0.016309 |
| 309307    | RGD1311595      | 0.170337 | 4.14E-04   | 0.002381 |
| 689284    | Rp138           | 0.170302 | 3.43E-11   | 6.26E-10 |
| 100910069 | LOC100910069    | 0.170228 | 0.0116272  | 0.0419   |
| 315903    | U2surp          | 0.170198 | 1.70E-08   | 2.21E-07 |
| 102551957 | LOC102551957    | 0.170162 | 0.72349688 | 0.848879 |
| 497943    | Gltpd2          | 0.170159 | 0.57608087 | 0.74408  |
| 114635    | Trafdl1         | 0.17012  | 7.02E-07   | 7.15E-06 |
| 297508    | Nampt           | 0.170041 | 6.20E-05   | 4.32E-04 |
| 103689969 | Kdm6a           | 0.169901 | 0.00296522 | 0.013306 |
| 362132    | Epc2            | 0.169616 | 0.00115121 | 0.005834 |
| 276720    | Kcnj14          | 0.169525 | 0.09050954 | 0.212521 |
| 361714    | Rasgrp2         | 0.169512 | 0.13213543 | 0.281207 |
| 303247    | Tnk1            | 0.169423 | 0.27927817 | 0.472661 |



|           |              |          |            |          |
|-----------|--------------|----------|------------|----------|
| 313270    | Megf9        | 0.169397 | 1.22E-15   | 3.40E-14 |
| 287406    | Adprm        | 0.169384 | 0.00214627 | 0.010056 |
| 299103    | Klhl28       | 0.169336 | 0.00120195 | 0.006059 |
| 29695     | Gabrr2       | 0.169322 | 0.76570728 | 0.876745 |
| 81516     | Smad7        | 0.169275 | 0.09424352 | 0.218886 |
| 306810    | Susd3        | 0.169052 | 0.41849063 | 0.614128 |
| 362893    | Arhgap9      | 0.169024 | 0.12418341 | 0.268942 |
| 307016    | Arhgap12     | 0.168979 | 9.42E-07   | 9.39E-06 |
| 292139    | Shtn1        | 0.168924 | 1.67E-05   | 1.31E-04 |
| 362971    | Mpped1       | 0.168896 | 0.13603277 | 0.286618 |
| 312896    | Trpa1        | 0.168855 | 3.97E-11   | 7.16E-10 |
| 290212    | Efs          | 0.168776 | 0.00218552 | 0.010202 |
| 360829    | Ankle2       | 0.168649 | 3.89E-04   | 0.002255 |
| 366016    | Nup188       | 0.1684   | 0.00149936 | 0.007356 |
| 500988    | Ddx6         | 0.168369 | 6.77E-14   | 1.65E-12 |
| 303824    | Igf2bp2      | 0.168345 | 0.16848934 | 0.333182 |
| 29388     | Tnni1        | 0.168279 | 0.46529121 | 0.656114 |
| 684996    | Mplkip       | 0.168255 | 0.02484736 | 0.077704 |
| 315045    | Pop1         | 0.168159 | 0.15003908 | 0.306401 |
| 684293    | Syt14        | 0.168068 | 0.00110083 | 0.005613 |
| 313592    | Col8a2       | 0.167934 | 1.53E-06   | 1.47E-05 |
| 29618     | Btg1         | 0.167866 | 2.43E-07   | 2.67E-06 |
| 313128    | Casp8ap2     | 0.167849 | 0.01611081 | 0.054958 |
| 100360982 | Relb         | 0.167799 | 0.04984265 | 0.134646 |
| 84426     | Wnt4         | 0.167753 | 0.39988831 | 0.596902 |
| 308820    | Ccdc90b      | 0.167631 | 0.00859722 | 0.032649 |
| 315594    | Oaf          | 0.167619 | 7.97E-09   | 1.09E-07 |
| 300838    | Tmod3        | 0.1676   | 9.24E-04   | 0.004831 |
| 293118    | Prcp         | 0.167561 | 0.00706755 | 0.02773  |
| 116667    | Map3k1       | 0.167538 | 0.00613317 | 0.024591 |
| 294343    | Zfp280b      | 0.167528 | 0.17871803 | 0.347528 |
| 54223     | Adcy4        | 0.167504 | 0.13440803 | 0.284391 |
| 360463    | Mpv17        | 0.167447 | 0.00218143 | 0.010193 |
| 24605     | Nras         | 0.167416 | 3.19E-11   | 5.86E-10 |
| 365352    | Mical2       | 0.167295 | 1.27E-07   | 1.46E-06 |
| 287550    | Tp53i13      | 0.167229 | 0.03950621 | 0.112197 |
| 498305    | Spata17      | 0.16708  | 0.52107865 | 0.705577 |
| 681008    | Bend4        | 0.166923 | 0.00157326 | 0.007665 |
| 63852     | Pter         | 0.166852 | 0.09658954 | 0.222786 |
| 103694513 | LOC103694513 | 0.166813 | 0.44346487 | 0.636313 |
| 367034    | Zfp266       | 0.166691 | 5.50E-11   | 9.77E-10 |
| 25324     | Htr4         | 0.166579 | 0.03030355 | 0.090801 |
| 108351576 | LOC108351576 | 0.166549 | 0.09795999 | 0.225184 |
| 100911761 | LOC100911761 | 0.166529 | 0.50583675 | 0.69267  |
| 293749    | Ms4a6b1      | 0.166414 | 0.24162969 | 0.429476 |
| 100125361 | Zfp867       | 0.166192 | 0.1646477  | 0.328795 |
| 363261    | Mogat1       | 0.166192 | 0.46802364 | 0.658942 |
| 103694559 | Usp9y        | 0.166192 | 0.83737023 | 0.919071 |
| 59264     | Ltb4r        | 0.166192 | 0.67522925 | 0.81779  |
| 679600    | Xaf1         | 0.166192 | 0.09375135 | 0.218142 |
| 365984    | St6galnac5   | 0.166093 | 0.23868479 | 0.425752 |
| 498605    | Lrrc25       | 0.166057 | 0.08739585 | 0.207434 |
| 25526     | Ptgds        | 0.166038 | 1.71E-32   | 1.06E-30 |
| 310362    | RGD1305938   | 0.165972 | 1.91E-09   | 2.85E-08 |
| 298977    | Zfp277       | 0.165968 | 0.01123207 | 0.040753 |
| 291423    | Setbp1       | 0.165949 | 0.00644713 | 0.02573  |

|           |              |          |            |          |
|-----------|--------------|----------|------------|----------|
| 108351806 | Znf660       | 0.165866 | 0.29833677 | 0.494889 |
| 684173    | Traf5        | 0.165829 | 0.31910088 | 0.514108 |
| 362956    | Triobp       | 0.165801 | 3.74E-06   | 3.35E-05 |
| 156767    | Tnfrsf1b     | 0.165794 | 0.17854254 | 0.347399 |
| 498697    | Klh13        | 0.165752 | 0.36603453 | 0.562188 |
| 313111    | Klh132       | 0.165471 | 4.28E-04   | 0.002451 |
| 309338    | Cstf2t       | 0.165468 | 0.00282887 | 0.01277  |
| 103694018 | LOC103694018 | 0.165374 | 0.22110961 | 0.40324  |
| 684901    | Zfp449       | 0.165316 | 0.02278242 | 0.072509 |
| 500393    | Vxn          | 0.165299 | 0.42914477 | 0.623945 |
| 499016    | Tulp4        | 0.165272 | 4.81E-09   | 6.80E-08 |
| 313138    | Orc3         | 0.165209 | 2.97E-04   | 0.001773 |
| 499929    | Tgif2        | 0.165143 | 0.02898419 | 0.087773 |
| 292771    | Sipa113      | 0.165131 | 2.74E-04   | 0.001654 |
| 64547     | Bcl2l11      | 0.165022 | 0.06383117 | 0.163814 |
| 360674    | Bahcc1       | 0.165001 | 0.0050449  | 0.020882 |
| 311266    | Qser1        | 0.164965 | 1.89E-05   | 1.47E-04 |
| 306957    | Btn2a2       | 0.164882 | 0.25838891 | 0.447731 |
| 360714    | Gtpbp8       | 0.164878 | 0.11838478 | 0.259601 |
| 100911674 | LOC100911674 | 0.164838 | 0.04966902 | 0.134348 |
| 84114     | Agps         | 0.164784 | 3.32E-04   | 0.00196  |
| 690115    | Dnhd1        | 0.164773 | 0.00950647 | 0.035528 |
| 360851    | RGD1566099   | 0.164751 | 0.09030408 | 0.212169 |
| 316351    | Npas2        | 0.16475  | 0.32065266 | 0.515867 |
| 100359823 | Tmem167a     | 0.164689 | 4.24E-09   | 6.06E-08 |
| 691254    | LOC691254    | 0.164676 | 0.00578135 | 0.023402 |
| 102555474 | LOC102555474 | 0.164638 | 0.38023398 | 0.577338 |
| 767613    | Gpr17        | 0.164624 | 0.32659467 | 0.52225  |
| 363476    | Yipf6        | 0.164624 | 1.71E-11   | 3.23E-10 |
| 363294    | Twsg1        | 0.164594 | 4.36E-06   | 3.85E-05 |
| 108351541 | LOC108351541 | 0.164525 | 0.22840125 | 0.4129   |
| 502084    | Rwdd4        | 0.164424 | 7.02E-04   | 0.003794 |
| 690366    | Vangl1       | 0.16441  | 0.00310811 | 0.013856 |
| 29502     | Slc20a2      | 0.164408 | 6.16E-06   | 5.26E-05 |
| 305923    | Zdhhc20      | 0.164277 | 3.95E-04   | 0.002287 |
| 309008    | Inpp5f       | 0.1642   | 7.32E-14   | 1.77E-12 |
| 291540    | Cep76        | 0.164099 | 0.01376391 | 0.048169 |
| 680280    | Gas2l3       | 0.164079 | 4.52E-09   | 6.41E-08 |
| 81515     | Lyn          | 0.163927 | 0.04440044 | 0.123141 |
| 81708     | Aldh6a1      | 0.163911 | 9.01E-09   | 1.22E-07 |
| 64467     | Entpd2       | 0.163859 | 1.23E-14   | 3.17E-13 |
| 89809     | Rfc1         | 0.163629 | 4.52E-07   | 4.75E-06 |
| 494339    | Zfp799       | 0.163612 | 0.01393884 | 0.048674 |
| 108348366 | LOC108348366 | 0.163562 | 0.23161377 | 0.417045 |
| 502285    | Vom2r80      | 0.163561 | 0.54944926 | 0.730031 |
| 60630     | Unc5b        | 0.163408 | 0.00615699 | 0.024676 |
| 53982     | Zfp260       | 0.163397 | 4.54E-05   | 3.27E-04 |
| 100909682 | LOC100909682 | 0.163358 | 0.46232754 | 0.65295  |
| 306066    | Tdrd3        | 0.163291 | 0.00550155 | 0.022441 |
| 690661    | Zfp40        | 0.163271 | 0.00829287 | 0.031708 |
| 301570    | Sp110        | 0.163158 | 0.00863891 | 0.032788 |
| 363490    | RGD1561958   | 0.163158 | 0.63162532 | 0.788187 |
| 171122    | Rab29        | 0.16308  | 0.01016604 | 0.037565 |
| 83498     | Hnrnpab      | 0.163063 | 4.87E-13   | 1.08E-11 |
| 81742     | Pdelc        | 0.162945 | 1.35E-11   | 2.57E-10 |
| 304885    | Fam20b       | 0.162883 | 5.84E-10   | 9.26E-09 |

|           |              |          |            |          |
|-----------|--------------|----------|------------|----------|
| 500686    | Ccdc177      | 0.16284  | 0.24216598 | 0.430189 |
| 684024    | Dusp28       | 0.162801 | 0.09040545 | 0.212328 |
| 64047     | Lrat         | 0.162796 | 0.40545035 | 0.60209  |
| 362484    | Plekhf2      | 0.162777 | 0.00959718 | 0.035832 |
| 297520    | I117rc       | 0.162771 | 0.10438248 | 0.235932 |
| 315211    | Zbed4        | 0.162762 | 0.02311761 | 0.073404 |
| 692004    | Siah3        | 0.162565 | 0.35404413 | 0.551015 |
| 25425     | Ctsh         | 0.162532 | 2.94E-14   | 7.39E-13 |
| 303764    | RGD1310429   | 0.16251  | 1.11E-04   | 7.30E-04 |
| 361032    | Armh4        | 0.16247  | 1.98E-07   | 2.21E-06 |
| 84584     | Ncoa3        | 0.16241  | 1.21E-04   | 7.90E-04 |
| 360914    | Plac8        | 0.162384 | 0.16742514 | 0.331525 |
| 296086    | Ndufaf1      | 0.162382 | 6.55E-04   | 0.003567 |
| 361552    | Wtip         | 0.16235  | 0.03586771 | 0.103626 |
| 688618    | Gxylt2       | 0.16235  | 0.42770416 | 0.62285  |
| 171287    | Epha7        | 0.162327 | 0.03402032 | 0.099634 |
| 308900    | rnf141       | 0.162297 | 2.35E-13   | 5.36E-12 |
| 100364769 | LOC100364769 | 0.162258 | 0.53270871 | 0.714971 |
| 498690    | Ctla2a       | 0.162215 | 0.22730745 | 0.411469 |
| 500846    | LOC500846    | 0.1622   | 0.39079561 | 0.587891 |
| 306994    | Yae1         | 0.162197 | 0.00274436 | 0.01245  |
| 103690779 | LOC103690779 | 0.162149 | 0.11513336 | 0.254228 |
| 682206    | LOC682206    | 0.162059 | 0.00425161 | 0.018054 |
| 500316    | Acrbp        | 0.162049 | 0.33923605 | 0.535851 |
| 108348081 | LOC108348081 | 0.16204  | 0.01421635 | 0.049515 |
| 29547     | Homer2       | 0.162029 | 0.07643321 | 0.187828 |
| 304135    | Adamts5      | 0.162006 | 0.00303129 | 0.013574 |
| 103693051 | LOC103693051 | 0.161989 | 0.78615232 | 0.888931 |
| 361501    | Isoc2b       | 0.161976 | 0.19076374 | 0.363855 |
| 308668    | Nipa1        | 0.16192  | 4.24E-09   | 6.05E-08 |
| 684538    | Echdc3       | 0.161892 | 0.52750538 | 0.711044 |
| 171434    | Phldb1       | 0.161863 | 6.03E-13   | 1.32E-11 |
| 102555826 | Clec20a      | 0.16186  | 0.00795335 | 0.030662 |
| 364018    | Ncf2         | 0.16182  | 0.35352956 | 0.550529 |
| 81517     | Mdk          | 0.161801 | 0.00610109 | 0.024472 |
| 291984    | Dpep2        | 0.1616   | 0.53172846 | 0.714058 |
| 307924    | Zfp276       | 0.16149  | 0.01484541 | 0.051378 |
| 363210    | Phf3         | 0.161421 | 6.81E-06   | 5.76E-05 |
| 306183    | Farpl        | 0.161417 | 9.19E-05   | 6.14E-04 |
| 108349781 | Hs3st4       | 0.161391 | 0.23317846 | 0.418951 |
| 300665    | Hinfp        | 0.161362 | 0.01331914 | 0.046923 |
| 60331     | Atxn3        | 0.161355 | 4.35E-05   | 3.15E-04 |
| 497942    | Cxcl16       | 0.161338 | 0.00451943 | 0.019013 |
| 366205    | Flrt3        | 0.161285 | 0.0061696  | 0.024721 |
| 303173    | Zfp39        | 0.161278 | 0.09757362 | 0.22454  |
| 171159    | Zhx1         | 0.161271 | 1.59E-09   | 2.39E-08 |
| 310695    | Kirrel1      | 0.161271 | 3.11E-10   | 5.09E-09 |
| 117261    | Slc15a1      | 0.161179 | 0.48569581 | 0.673811 |
| 361564    | Fam71e1      | 0.161175 | 0.17392863 | 0.341246 |
| 296117    | Galk2        | 0.161115 | 0.00134449 | 0.00668  |
| 688442    | LOC688442    | 0.161109 | 0.09397363 | 0.218499 |
| 315914    | Morc4        | 0.16103  | 0.02630983 | 0.08125  |
| 308265    | Lats1        | 0.160989 | 1.69E-05   | 1.32E-04 |
| 257650    | LOC257650    | 0.160979 | 0.13506312 | 0.285206 |
| 501127    | Rfx8         | 0.160955 | 0.24338235 | 0.431504 |
| 687266    | Fpgs         | 0.160937 | 0.01066512 | 0.039046 |

|           |              |          |            |          |
|-----------|--------------|----------|------------|----------|
| 25724     | Itgb4        | 0.160861 | 1.08E-62   | 1.35E-60 |
| 310638    | Ash11        | 0.160856 | 2.91E-11   | 5.38E-10 |
| 314800    | Acss3        | 0.160812 | 0.22993101 | 0.414721 |
| 289378    | Tatdn3       | 0.160758 | 0.03677111 | 0.105818 |
| 361505    | Cdc42ep5     | 0.160758 | 0.17159175 | 0.338124 |
| 291044    | Nedd9        | 0.160726 | 0.00100531 | 0.005201 |
| 361183    | Ankrd10      | 0.160689 | 2.27E-05   | 1.74E-04 |
| 102548730 | LOC102548730 | 0.160686 | 0.46170286 | 0.652551 |
| 501854    | Rab7b        | 0.160584 | 0.01190334 | 0.042757 |
| 362325    | Mdfic        | 0.160522 | 0.00141977 | 0.00702  |
| 690435    | LOC690435    | 0.160477 | 0.81672679 | 0.907924 |
| 406170    | Sapcd1       | 0.160474 | 0.21168414 | 0.390993 |
| 102556352 | LOC102556352 | 0.160464 | 0.12369465 | 0.268494 |
| 27080     | Hbp1         | 0.160421 | 3.22E-07   | 3.48E-06 |
| 360492    | Jpt2         | 0.16038  | 0.00280842 | 0.012702 |
| 689914    | Trabd2b      | 0.160265 | 0.00730892 | 0.028501 |
| 102552069 | LOC102552069 | 0.160261 | 0.72752429 | 0.851323 |
| 102553085 | LOC102553085 | 0.160261 | 0.72752429 | 0.851323 |
| 289089    | Ivns1abp     | 0.160259 | 7.56E-25   | 3.47E-23 |
| 294213    | RT1-M1-4     | 0.160235 | 0.68067819 | 0.821776 |
| 29527     | Ptgs2        | 0.160235 | 0.68067819 | 0.821776 |
| 498580    | Tmem273      | 0.160235 | 0.68067819 | 0.821776 |
| 103689954 | LOC103689954 | 0.160146 | 0.02086155 | 0.067742 |
| 293967    | Smc5         | 0.160124 | 8.75E-05   | 5.88E-04 |
| 81651     | Cspg4        | 0.159954 | 3.28E-05   | 2.44E-04 |
| 293935    | Prrg3        | 0.159943 | 2.36E-04   | 0.001448 |
| 685933    | LOC685933    | 0.15993  | 0.03989643 | 0.113036 |
| 100360061 | LOC100360061 | 0.159913 | 0.75148098 | 0.86726  |
| 100909786 | LOC100909786 | 0.159913 | 0.75148098 | 0.86726  |
| 100909537 | Iqck         | 0.159777 | 8.01E-05   | 5.44E-04 |
| 360521    | Rufy1        | 0.159777 | 0.00366135 | 0.015935 |
| 303336    | Wsb1         | 0.159708 | 1.71E-08   | 2.22E-07 |
| 362472    | Cspp1        | 0.159702 | 0.00173853 | 0.008372 |
| 299339    | Tnfaip2      | 0.159663 | 0.13359065 | 0.283354 |
| 362514    | Tstd2        | 0.159641 | 1.75E-04   | 0.001104 |
| 58921     | Foxm1        | 0.159622 | 0.13890043 | 0.291339 |
| 64012     | Rad50        | 0.159479 | 1.92E-05   | 1.49E-04 |
| 29498     | Pts          | 0.159396 | 0.04115386 | 0.115721 |
| 54308     | Slk          | 0.159258 | 1.64E-08   | 2.14E-07 |
| 192178    | Tnrc6b       | 0.159231 | 4.51E-09   | 6.40E-08 |
| 102551257 | LOC102551257 | 0.159214 | 0.09001593 | 0.211753 |
| 79213     | Slc6a11      | 0.159198 | 0.26660913 | 0.45781  |
| 299996    | Matn2        | 0.159117 | 9.37E-26   | 4.51E-24 |
| 300173    | Gxylt1       | 0.159114 | 2.52E-04   | 0.001531 |
| 303634    | Gna13        | 0.159075 | 0.01184377 | 0.042567 |
| 309375    | Marveld1     | 0.159038 | 2.36E-05   | 1.79E-04 |
| 64088     | Snx16        | 0.158947 | 2.74E-05   | 2.07E-04 |
| 502710    | Kmt2c        | 0.158939 | 2.55E-09   | 3.73E-08 |
| 116680    | Ptpru        | 0.158933 | 0.0153092  | 0.052781 |
| 365894    | Trim33       | 0.158929 | 3.69E-05   | 2.70E-04 |
| 296084    | Ino80        | 0.158865 | 2.40E-04   | 0.001465 |
| 114102    | Cdh23        | 0.158813 | 0.50342906 | 0.690167 |
| 364653    | Wdr17        | 0.158564 | 0.16809934 | 0.332584 |
| 59295     | Nucb2        | 0.158544 | 1.10E-05   | 8.96E-05 |
| 361776    | Ccdc172      | 0.158443 | 0.04387307 | 0.121873 |
| 293783    | Lpxn         | 0.158344 | 0.11305163 | 0.250882 |

|           |                 |          |            |          |
|-----------|-----------------|----------|------------|----------|
| 314740    | RGD1565866      | 0.158344 | 0.47853297 | 0.667814 |
| 29459     | Rbbp9           | 0.158266 | 0.02510934 | 0.07833  |
| 50556     | Exoc6           | 0.158233 | 2.40E-05   | 1.82E-04 |
| 108352059 | NEWGENE_6497122 | 0.158211 | 0.07722931 | 0.189272 |
| 619580    | Ctps2           | 0.158116 | 3.57E-07   | 3.82E-06 |
| 24212     | Atpla2          | 0.158054 | 1.85E-41   | 1.47E-39 |
| 309187    | At13            | 0.158023 | 2.35E-07   | 2.59E-06 |
| 100360777 | Mroh8           | 0.158013 | 0.31116166 | 0.506459 |
| 293104    | Eed             | 0.157914 | 0.01071878 | 0.039197 |
| 315217    | Plxnb2          | 0.1579   | 7.06E-08   | 8.41E-07 |
| 298250    | Fggy            | 0.157845 | 0.05955826 | 0.155212 |
| 303803    | Klh124          | 0.157804 | 4.49E-07   | 4.72E-06 |
| 29631     | Bet1            | 0.157797 | 0.00353459 | 0.015457 |
| 102553158 | LOC102553158    | 0.157759 | 0.48400781 | 0.672449 |
| 102555672 | LOC102555672    | 0.157691 | 0.00793998 | 0.030623 |
| 366980    | Arid2           | 0.157645 | 1.21E-04   | 7.90E-04 |
| 301059    | Myd88           | 0.15762  | 0.02160507 | 0.069646 |
| 298366    | Ttc39a          | 0.157536 | 0.13518332 | 0.285334 |
| 688400    | Edi13           | 0.157501 | 1.26E-16   | 3.73E-15 |
| 313969    | Fam84a          | 0.157416 | 0.56397038 | 0.735068 |
| 108348168 | Rlim            | 0.157276 | 2.78E-07   | 3.03E-06 |
| 361871    | Rfesd           | 0.157249 | 0.00241989 | 0.011156 |
| 54410     | Enpp3           | 0.157064 | 0.01359926 | 0.047733 |
| 103693189 | LOC103693189    | 0.15703  | 3.91E-06   | 3.49E-05 |
| 360993    | Ppp4r3b         | 0.156965 | 1.57E-05   | 1.24E-04 |
| 300811    | Bnip2           | 0.156951 | 2.04E-06   | 1.92E-05 |
| 299117    | Nin             | 0.156947 | 2.63E-04   | 0.001597 |
| 317627    | Baz2b           | 0.156932 | 6.02E-05   | 4.21E-04 |
| 298941    | Lamb1           | 0.156909 | 9.96E-24   | 4.32E-22 |
| 503306    | Sowahc          | 0.156893 | 3.95E-06   | 3.52E-05 |
| 498013    | Ern1            | 0.156885 | 0.01648079 | 0.05593  |
| 314764    | Eea1            | 0.156861 | 2.72E-06   | 2.50E-05 |
| 64681     | Mvp             | 0.15683  | 4.45E-06   | 3.91E-05 |
| 310689    | Lrrc71          | 0.156762 | 0.06666469 | 0.169126 |
| 688611    | Cetn4           | 0.156606 | 0.17070075 | 0.336681 |
| 108348078 | LOC108348078    | 0.156579 | 1.51E-06   | 1.45E-05 |
| 309995    | Xrcc4           | 0.156573 | 0.03728695 | 0.106931 |
| 363982    | Yod1            | 0.156569 | 0.23097493 | 0.416131 |
| 293750    | Ms4a6b          | 0.156563 | 0.00594293 | 0.023934 |
| 301436    | Kctd18          | 0.156531 | 0.0021941  | 0.010237 |
| 690893    | Oosp1           | 0.156524 | 0.41274564 | 0.608605 |
| 303801    | Lamp3           | 0.156499 | 0.4810604  | 0.66982  |
| 102548230 | Znf235          | 0.156427 | 0.19713234 | 0.371795 |
| 100909664 | LOC100909664    | 0.15633  | 0.05132048 | 0.137604 |
| 317517    | Ptchd1          | 0.156317 | 0.4579133  | 0.649171 |
| 691280    | LOC691280       | 0.156291 | 0.00323738 | 0.014349 |
| 688555    | Atg10           | 0.156186 | 0.1346598  | 0.28467  |
| 60338     | Fxyd5           | 0.156168 | 0.00502077 | 0.020801 |
| 102548101 | LOC102548101    | 0.156101 | 0.01755438 | 0.058984 |
| 313474    | Eps15           | 0.156081 | 2.22E-18   | 7.32E-17 |
| 64709     | Nucks1          | 0.155904 | 4.31E-10   | 6.94E-09 |
| 685610    | Zfp59           | 0.15583  | 0.03149538 | 0.093797 |
| 117538    | Wipf1           | 0.155824 | 2.69E-06   | 2.48E-05 |
| 498940    | Ces2h           | 0.155811 | 0.63101875 | 0.787894 |
| 363122    | Ppp2r3a         | 0.15576  | 1.19E-04   | 7.79E-04 |
| 361764    | Sema4g          | 0.155743 | 6.05E-05   | 4.23E-04 |

|           |            |          |            |          |
|-----------|------------|----------|------------|----------|
| 64044     | Casp8      | 0.155735 | 0.19721692 | 0.371881 |
| 25296     | Bmp4       | 0.155609 | 0.23747893 | 0.424555 |
| 25672     | Nr3c2      | 0.155574 | 8.73E-04   | 0.004597 |
| 100911395 | Agbl4      | 0.155561 | 0.33742845 | 0.53428  |
| 50554     | Smad4      | 0.155557 | 1.72E-05   | 1.34E-04 |
| 316395    | Hecw2      | 0.155516 | 0.00183896 | 0.008798 |
| 298020    | Tmem245    | 0.15546  | 5.54E-15   | 1.46E-13 |
| 302288    | Fem1c      | 0.155436 | 0.00104846 | 0.005388 |
| 291444    | Prrc1      | 0.155325 | 1.81E-04   | 0.001137 |
| 365297    | Crtc3      | 0.155255 | 4.89E-04   | 0.002748 |
| 295319    | Man1a2     | 0.155167 | 4.49E-08   | 5.49E-07 |
| 24973     | RT1-A1     | 0.154791 | 7.44E-06   | 6.26E-05 |
| 315923    | Lysmd3     | 0.154696 | 0.11321322 | 0.251182 |
| 100361506 | Armc3      | 0.154696 | 0.8153462  | 0.907025 |
| 296610    | Spaca9     | 0.154696 | 0.68584943 | 0.825586 |
| 299206    | Batf       | 0.154696 | 0.74119746 | 0.860004 |
| 309609    | Ly6g6f     | 0.154696 | 0.8153462  | 0.907025 |
| 317271    | Mageb4     | 0.154696 | 0.8153462  | 0.907025 |
| 361192    | RGD1308544 | 0.154696 | 0.8153462  | 0.907025 |
| 361993    | Them5      | 0.154696 | 0.68584943 | 0.825586 |
| 498060    | RGD1562726 | 0.154696 | 0.64045011 | 0.79441  |
| 499964    | En2        | 0.154696 | 0.8153462  | 0.907025 |
| 500895    | Iqank1     | 0.154696 | 0.8153462  | 0.907025 |
| 681325    | LOC681325  | 0.154696 | 0.8153462  | 0.907025 |
| 140473    | Ackr2      | 0.154696 | 0.60153131 | 0.764866 |
| 245955    | Lgals3bp   | 0.154621 | 4.01E-09   | 5.75E-08 |
| 362624    | Selenon    | 0.154618 | 8.09E-09   | 1.10E-07 |
| 114486    | Braf       | 0.154576 | 2.07E-05   | 1.60E-04 |
| 362017    | Cyb561d1   | 0.154442 | 0.06400601 | 0.16413  |
| 25277     | Mfge8      | 0.154271 | 1.80E-05   | 1.41E-04 |
| 170907    | Serinc5    | 0.154256 | 2.53E-09   | 3.70E-08 |
| 315523    | Nfrkb      | 0.154192 | 8.28E-05   | 5.60E-04 |
| 113970    | Magi2      | 0.154188 | 0.00348366 | 0.015277 |
| 25204     | Pcsk1      | 0.154177 | 1.80E-08   | 2.33E-07 |
| 307393    | Sh3tc2     | 0.154146 | 8.95E-04   | 0.0047   |
| 29186     | Cd63       | 0.15407  | 1.14E-10   | 1.96E-09 |
| 362602    | Zmym6      | 0.154022 | 0.00548708 | 0.022396 |
| 298934    | Adi1       | 0.153655 | 0.01605224 | 0.054807 |
| 364666    | Cdk20      | 0.153635 | 0.04383544 | 0.121786 |
| 316526    | Wnt6       | 0.153616 | 0.00305413 | 0.013657 |
| 680478    | Lrrc19     | 0.15359  | 0.75030941 | 0.866407 |
| 309816    | Lama4      | 0.153565 | 1.99E-12   | 4.11E-11 |
| 294322    | Pknnox1    | 0.153542 | 0.0095694  | 0.035749 |
| 313662    | Mfap2      | 0.153504 | 0.14118069 | 0.294436 |
| 100365370 | Ctdsp2     | 0.153453 | 5.72E-11   | 1.02E-09 |
| 363684    | Meox1      | 0.153295 | 0.1752053  | 0.342938 |
| 303008    | Rhbdf1     | 0.153277 | 8.91E-08   | 1.05E-06 |
| 29383     | Fah        | 0.153274 | 0.05704959 | 0.149988 |
| 117526    | Tbp        | 0.153176 | 0.0212622  | 0.068762 |
| 308361    | Zfp329     | 0.153159 | 0.02075467 | 0.067476 |
| 498514    | RGD1565222 | 0.15311  | 0.14168177 | 0.295157 |
| 502784    | Gprin3     | 0.152952 | 0.24745913 | 0.436134 |
| 116499    | Fgf4       | 0.152936 | 0.08791145 | 0.208269 |
| 293617    | Ifitm5     | 0.152936 | 0.48600216 | 0.674089 |
| 363472    | Prrgl      | 0.152855 | 1.54E-04   | 9.82E-04 |
| 304758    | Ccnt2      | 0.152791 | 4.42E-08   | 5.40E-07 |



|           |              |          |            |          |
|-----------|--------------|----------|------------|----------|
| 108351567 | LOC108351567 | 0.152774 | 0.59136234 | 0.756431 |
| 313837    | Qpct         | 0.152759 | 0.10423302 | 0.235678 |
| 681383    | Lrmda        | 0.152733 | 0.1612887  | 0.323409 |
| 652957    | Csf2ra       | 0.152688 | 0.06550666 | 0.166855 |
| 304507    | Oasli        | 0.152639 | 0.37535233 | 0.572253 |
| 500000    | Cldn12       | 0.152589 | 0.00185687 | 0.008874 |
| 103694908 | LOC103694908 | 0.152567 | 0.21927041 | 0.400961 |
| 314979    | Deptor       | 0.152512 | 2.13E-13   | 4.88E-12 |
| 298019    | Ctnnal1      | 0.152419 | 1.92E-12   | 3.98E-11 |
| 303690    | Rhbdf2       | 0.152393 | 0.0193825  | 0.063821 |
| 313566    | Rlf          | 0.152275 | 6.79E-04   | 0.003679 |
| 501317    | LOC501317    | 0.152241 | 0.22173699 | 0.404036 |
| 293939    | Erlin1       | 0.152179 | 0.01149882 | 0.041531 |
| 679906    | Trpm7        | 0.152178 | 9.12E-08   | 1.07E-06 |
| 108351482 | LOC108351482 | 0.152155 | 0.32841535 | 0.524017 |
| 360590    | Ypel2        | 0.152128 | 1.44E-05   | 1.15E-04 |
| 290741    | Dctd         | 0.152071 | 0.32584406 | 0.521531 |
| 363089    | Mindy2       | 0.152044 | 3.84E-15   | 1.03E-13 |
| 365277    | Asb7         | 0.151977 | 0.01517677 | 0.052401 |
| 313860    | Pkdcc        | 0.151927 | 0.0096541  | 0.035995 |
| 295248    | Zbtb7b       | 0.151887 | 0.01430969 | 0.049804 |
| 102553001 | LOC102553001 | 0.151876 | 0.06995989 | 0.175545 |
| 362182    | Rcn1         | 0.15164  | 5.36E-12   | 1.07E-10 |
| 29610     | Tgfbr3       | 0.151632 | 9.34E-08   | 1.10E-06 |
| 361773    | Ccdc186      | 0.151621 | 2.21E-09   | 3.26E-08 |
| 296474    | Helz2        | 0.151557 | 0.02828265 | 0.086031 |
| 24324     | Edn2         | 0.151537 | 0.68253684 | 0.823185 |
| 314690    | Washc4       | 0.151469 | 5.91E-11   | 1.05E-09 |
| 102554748 | LOC102554748 | 0.151434 | 0.14383925 | 0.298282 |
| 64155     | Scn7a        | 0.151362 | 5.53E-74   | 7.98E-72 |
| 102550291 | LOC102550291 | 0.151358 | 0.08621874 | 0.205563 |
| 81746     | Pggt1b       | 0.15132  | 0.00327652 | 0.014482 |
| 687508    | LOC687508    | 0.151317 | 0.12899983 | 0.276231 |
| 299145    | Rhoj         | 0.151273 | 1.47E-04   | 9.43E-04 |
| 362465    | Tmtc1        | 0.151204 | 2.01E-11   | 3.77E-10 |
| 363611    | Iba57        | 0.15118  | 0.11180416 | 0.248809 |
| 25617     | Hspa5        | 0.151152 | 2.35E-31   | 1.40E-29 |
| 64322     | Dap          | 0.151089 | 5.09E-05   | 3.61E-04 |
| 361276    | Cdnf         | 0.151085 | 0.40522763 | 0.6019   |
| 685472    | Lrrtm2       | 0.151073 | 0.02445435 | 0.076702 |
| 315341    | Hoxc5        | 0.150944 | 0.24862529 | 0.436855 |
| 116670    | Ppp1r12a     | 0.1509   | 4.27E-08   | 5.24E-07 |
| 108351873 | LOC108351873 | 0.150814 | 0.76430405 | 0.875875 |
| 312478    | Loxl3        | 0.150792 | 0.04437335 | 0.123083 |
| 689972    | Piwil4       | 0.150792 | 0.64462009 | 0.797971 |
| 362152    | Hnrnpa3      | 0.150769 | 4.51E-25   | 2.09E-23 |
| 360799    | Nupr2        | 0.150669 | 0.19929856 | 0.37473  |
| 114120    | Gngl2        | 0.150644 | 8.93E-06   | 7.40E-05 |
| 362229    | Xrn2         | 0.15064  | 2.68E-04   | 0.001621 |
| 102550203 | LOC102550203 | 0.150604 | 0.39655466 | 0.593881 |
| 296750    | Rint1        | 0.150579 | 0.00210634 | 0.009893 |
| 304109    | Tiam1        | 0.150577 | 0.00331531 | 0.014623 |
| 103689983 | LOC103689983 | 0.150453 | 0.00214794 | 0.010058 |
| 290315    | Tdh          | 0.150447 | 0.44484569 | 0.637718 |
| 314171    | Prpf39       | 0.150251 | 2.11E-04   | 0.001306 |
| 311487    | Polr3f       | 0.150073 | 0.00124855 | 0.006261 |

|           |                |          |            |          |
|-----------|----------------|----------|------------|----------|
| 361159    | Eri1           | 0.149911 | 0.0079998  | 0.030798 |
| 252919    | Slc38a3        | 0.149847 | 0.35775112 | 0.55479  |
| 103690178 | LOC103690178   | 0.149823 | 0.04519001 | 0.124985 |
| 289052    | Zbtb41         | 0.149733 | 0.00186209 | 0.008895 |
| 315510    | Igsf9b         | 0.149691 | 0.02435046 | 0.076552 |
| 404641    | Mas11          | 0.149614 | 0.19408507 | 0.367979 |
| 295602    | Rif1           | 0.149609 | 0.06004353 | 0.156134 |
| 311412    | Anapc1         | 0.149568 | 2.17E-06   | 2.03E-05 |
| 368070    | Pnn            | 0.149557 | 1.13E-06   | 1.11E-05 |
| 24218     | Atp7b          | 0.149535 | 0.29255903 | 0.488325 |
| 303233    | Cfap52         | 0.149535 | 0.57370908 | 0.742225 |
| 315763    | Mtfmt          | 0.149535 | 0.05640819 | 0.148588 |
| 294299    | Tead3          | 0.149526 | 0.09598869 | 0.222019 |
| 304477    | Kntc1          | 0.149495 | 0.10851053 | 0.242699 |
| 103689932 | NEWGENE_621351 | 0.14948  | 8.65E-48   | 7.96E-46 |
| 302670    | Zrsr2          | 0.149469 | 0.00477602 | 0.019943 |
| 362368    | Ggct           | 0.149458 | 0.0641298  | 0.164315 |
| 499179    | LOC499179      | 0.14945  | 0.05820361 | 0.152537 |
| 302470    | F8             | 0.149406 | 0.0014207  | 0.007022 |
| 316599    | Usp40          | 0.149406 | 0.0014252  | 0.007041 |
| 314862    | Dyrk2          | 0.149392 | 0.01865116 | 0.061937 |
| 81740     | Pcm1           | 0.149301 | 6.42E-10   | 1.01E-08 |
| 313449    | Upf3b          | 0.149282 | 0.00127711 | 0.006386 |
| 108348336 | LOC108348336   | 0.149279 | 0.25726187 | 0.446225 |
| 690625    | Oc90           | 0.149269 | 0.61256439 | 0.773421 |
| 500762    | Tmem198b       | 0.14921  | 0.040281   | 0.113939 |
| 691658    | LOC691658      | 0.14918  | 4.24E-04   | 0.002428 |
| 497930    | Scol           | 0.149146 | 0.00945264 | 0.035389 |
| 24918     | Stat5a         | 0.149134 | 0.01672013 | 0.05655  |
| 293057    | Whamm          | 0.149106 | 0.0806838  | 0.195898 |
| 317423    | FAM120C        | 0.149064 | 1.31E-05   | 1.05E-04 |
| 691610    | Zfp770         | 0.148998 | 0.01571042 | 0.053862 |
| 293019    | Arrdc4         | 0.148941 | 9.20E-04   | 0.004815 |
| 312398    | Smarcad1       | 0.148931 | 8.82E-04   | 0.004639 |
| 685203    | LOC685203      | 0.148891 | 0.15753568 | 0.317758 |
| 314169    | Togaram1       | 0.148772 | 1.46E-06   | 1.41E-05 |
| 500108    | Zfp398         | 0.148698 | 0.06708517 | 0.169831 |
| 317344    | RGD1565685     | 0.14867  | 0.00202954 | 0.009575 |
| 310166    | RGD1564125     | 0.148646 | 0.06836287 | 0.172538 |
| 300189    | Rpap3          | 0.148634 | 7.93E-05   | 5.40E-04 |
| 301346    | Sema4c         | 0.148566 | 6.67E-07   | 6.80E-06 |
| 360602    | Luc713         | 0.148494 | 2.37E-10   | 3.96E-09 |
| 301081    | Zdhhc3         | 0.148451 | 1.01E-09   | 1.56E-08 |
| 306424    | Mfap31         | 0.148405 | 1.05E-17   | 3.33E-16 |
| 25162     | Sp4            | 0.148386 | 0.08684443 | 0.206796 |
| 102552880 | LOC102552880   | 0.148325 | 0.00166004 | 0.008022 |
| 311968    | Kmt2e          | 0.148102 | 2.13E-09   | 3.15E-08 |
| 313488    | Reck           | 0.148087 | 1.03E-06   | 1.02E-05 |
| 24718     | Reln           | 0.148032 | 5.62E-20   | 2.00E-18 |
| 294800    | Rad1           | 0.147971 | 0.14343838 | 0.29784  |
| 100364335 | LOC100364335   | 0.147888 | 8.07E-13   | 1.75E-11 |
| 367072    | Arhgef12       | 0.147669 | 3.90E-06   | 3.48E-05 |
| 691125    | Atp8b5p        | 0.147567 | 0.37681173 | 0.573697 |
| 108348112 | LOC108348112   | 0.147557 | 7.23E-06   | 6.10E-05 |
| 307029    | Wac            | 0.147517 | 8.52E-08   | 1.01E-06 |
| 303251    | Dvl2           | 0.147475 | 0.04971638 | 0.134381 |

|           |              |          |            |          |
|-----------|--------------|----------|------------|----------|
| 287526    | Serpinf1     | 0.147469 | 1.63E-05   | 1.28E-04 |
| 689800    | LOC689800    | 0.147434 | 0.60402162 | 0.767111 |
| 363131    | Pik3r4       | 0.147392 | 1.28E-04   | 8.31E-04 |
| 311134    | Ccdc141      | 0.14736  | 2.10E-04   | 0.001301 |
| 308376    | Adgrg6       | 0.147274 | 7.04E-09   | 9.68E-08 |
| 116666    | Lman1        | 0.147245 | 1.61E-05   | 1.26E-04 |
| 295528    | Erich3       | 0.147245 | 4.16E-07   | 4.40E-06 |
| 306451    | Tenm3        | 0.147169 | 2.95E-07   | 3.20E-06 |
| 291211    | Ggps1        | 0.147166 | 5.70E-06   | 4.91E-05 |
| 361237    | Cdyl         | 0.147165 | 0.0315635  | 0.093911 |
| 362756    | Pigh         | 0.147154 | 0.00638629 | 0.025525 |
| 54404     | Itih4        | 0.147083 | 0.74730597 | 0.864485 |
| 65200     | Slc16a8      | 0.147083 | 0.74730597 | 0.864485 |
| 362581    | Scmh1        | 0.147057 | 0.00755626 | 0.029303 |
| 499655    | Cks1b        | 0.147037 | 0.03426046 | 0.100137 |
| 499210    | Acer3        | 0.146944 | 1.71E-06   | 1.64E-05 |
| 292044    | Cdyl2        | 0.146923 | 0.00184981 | 0.008845 |
| 305972    | Zfp395       | 0.146904 | 0.01225889 | 0.043852 |
| 312947    | Tgs1         | 0.146811 | 0.01910418 | 0.063046 |
| 29261     | Tyms         | 0.146806 | 0.20511825 | 0.382238 |
| 294744    | Gpx8         | 0.146773 | 0.00192418 | 0.009152 |
| 296219    | Nxt1         | 0.146633 | 0.19814988 | 0.373197 |
| 362516    | Msantd3      | 0.146483 | 0.02589597 | 0.080206 |
| 308839    | Rsf1         | 0.146469 | 3.28E-04   | 0.001942 |
| 266674    | Cyp4a8       | 0.146442 | 0.52389176 | 0.707726 |
| 170946    | Marf1        | 0.146435 | 7.96E-13   | 1.73E-11 |
| 305600    | Fanc1        | 0.146312 | 0.14600199 | 0.300932 |
| 362096    | Setx         | 0.146275 | 2.53E-06   | 2.34E-05 |
| 296090    | Sptbn5       | 0.146232 | 6.50E-14   | 1.58E-12 |
| 54272     | Mcpt9        | 0.146205 | 0.68495162 | 0.824948 |
| 297822    | Tp53inp1     | 0.146201 | 0.00455906 | 0.019167 |
| 681288    | T2           | 0.146185 | 0.36357741 | 0.56004  |
| 100363074 | Acot11       | 0.146166 | 0.21820273 | 0.399661 |
| 140931    | Hnrnp1       | 0.146163 | 3.45E-11   | 6.29E-10 |
| 85252     | Xpo1         | 0.146141 | 2.03E-08   | 2.61E-07 |
| 296280    | Tspy26       | 0.146109 | 0.13451734 | 0.284559 |
| 100125373 | Pnrc2        | 0.146083 | 4.49E-05   | 3.24E-04 |
| 306866    | Slc35b3      | 0.146074 | 0.01250168 | 0.044545 |
| 311598    | Fam83d       | 0.146058 | 0.54803646 | 0.728713 |
| 295971    | Depdc7       | 0.146058 | 0.17920077 | 0.347969 |
| 103694328 | LOC103694328 | 0.146052 | 1.56E-05   | 1.23E-04 |
| 308516    | Rhpn2        | 0.14598  | 0.12066316 | 0.263445 |
| 291182    | Stard3nl     | 0.145955 | 1.85E-05   | 1.44E-04 |
| 498819    | Greb11       | 0.14592  | 0.05091162 | 0.136719 |
| 363443    | Ndp          | 0.145918 | 0.01271699 | 0.045186 |
| 100312982 | Ddx3         | 0.145824 | 8.06E-07   | 8.11E-06 |
| 679087    | LOC679087    | 0.14581  | 0.11032671 | 0.245924 |
| 300470    | Thyn1        | 0.145777 | 0.00122973 | 0.006178 |
| 117547    | Ncr1         | 0.145657 | 0.60791413 | 0.77     |
| 102552170 | LOC102552170 | 0.145651 | 0.61215781 | 0.773216 |
| 291324    | Trdmt1       | 0.145626 | 0.01595056 | 0.054538 |
| 64456     | Spon1        | 0.14561  | 0.00120362 | 0.006063 |
| 315265    | Twf1         | 0.145593 | 2.15E-06   | 2.01E-05 |
| 500973    | Slc37a2      | 0.14551  | 0.02343376 | 0.074222 |
| 317346    | Bcor         | 0.145501 | 0.01599506 | 0.054651 |
| 100910732 | LOC100910732 | 0.145455 | 1.36E-07   | 1.56E-06 |

|           |              |          |            |          |
|-----------|--------------|----------|------------|----------|
| 291023    | Id4          | 0.145421 | 2.74E-04   | 0.001653 |
| 361241    | Serpinb9     | 0.145411 | 3.55E-11   | 6.45E-10 |
| 691397    | Smg1         | 0.145248 | 5.45E-10   | 8.71E-09 |
| 308496    | Nfkbid       | 0.145138 | 0.452836   | 0.644467 |
| 108350407 | LOC108350407 | 0.145125 | 0.34290347 | 0.539496 |
| 302566    | Usp27x       | 0.145101 | 0.23813257 | 0.425205 |
| 287989    | Ephb3        | 0.145083 | 0.06177327 | 0.159738 |
| 363886    | Cnpy4        | 0.144946 | 0.02369862 | 0.074949 |
| 83518     | Aplnr        | 0.144936 | 0.20106601 | 0.37664  |
| 365895    | Hipk1        | 0.144818 | 6.25E-11   | 1.10E-09 |
| 310743    | Olfml3       | 0.144761 | 0.00183323 | 0.008779 |
| 498806    | Myo3a        | 0.144759 | 0.0230973  | 0.073376 |
| 100912151 | LOC100912151 | 0.144719 | 0.01203851 | 0.04317  |
| 25153     | Mas1         | 0.144712 | 0.49773773 | 0.684039 |
| 65187     | Gabrq        | 0.144712 | 0.57983325 | 0.747355 |
| 315840    | Myo6         | 0.144712 | 3.92E-06   | 3.50E-05 |
| 116591    | Fcgr2a       | 0.144688 | 0.32418939 | 0.519713 |
| 50555     | Ugt8         | 0.144521 | 2.52E-19   | 8.74E-18 |
| 26295     | Ogt          | 0.144452 | 3.58E-15   | 9.61E-14 |
| 25528     | Sirpa        | 0.144418 | 1.99E-05   | 1.54E-04 |
| 497009    | Naaa         | 0.144363 | 0.01339867 | 0.047142 |
| 497974    | Myo19        | 0.144295 | 0.04130764 | 0.115999 |
| 688146    | Rsad1        | 0.144247 | 0.31288316 | 0.507915 |
| 304862    | Tpr          | 0.144242 | 1.70E-09   | 2.54E-08 |
| 59303     | Tmem33       | 0.144176 | 1.29E-05   | 1.03E-04 |
| 363554    | Msln1        | 0.144156 | 0.42622377 | 0.621311 |
| 298074    | Xpa          | 0.144113 | 0.08218851 | 0.198816 |
| 360511    | Pank3        | 0.144002 | 9.04E-21   | 3.36E-19 |
| 103691573 | LOC103691573 | 0.143983 | 0.38735537 | 0.584424 |
| 25470     | Kcna5        | 0.143935 | 0.02803422 | 0.085467 |
| 25289     | Adcy6        | 0.143909 | 1.35E-04   | 8.70E-04 |
| 29263     | Acvr2a       | 0.143889 | 1.03E-05   | 8.44E-05 |
| 501100    | Crip3        | 0.143887 | 0.84729666 | 0.923684 |
| 293618    | Ifitm1       | 0.143875 | 0.00221395 | 0.010314 |
| 361605    | Pcf11        | 0.143837 | 0.00160553 | 0.007806 |
| 56763     | Srekl        | 0.14379  | 1.46E-06   | 1.41E-05 |
| 300518    | Robo4        | 0.143777 | 0.68370348 | 0.824018 |
| 114510    | Mllt3        | 0.143753 | 0.03500499 | 0.101704 |
| 302499    | C1galt1c1    | 0.143741 | 0.0012577  | 0.006302 |
| 689500    | Mcts2        | 0.143712 | 0.03459605 | 0.100824 |
| 309009    | Mcmbp        | 0.143706 | 0.00814342 | 0.031206 |
| 498004    | Cfap97d1     | 0.143644 | 0.88815714 | 0.949851 |
| 100912447 | Nynrin       | 0.143623 | 0.00534642 | 0.021987 |
| 304883    | Abl2         | 0.143587 | 7.40E-04   | 0.003977 |
| 296137    | Bub1         | 0.143556 | 0.20282841 | 0.37901  |
| 682914    | Zfp326       | 0.143527 | 0.01327822 | 0.046813 |
| 499157    | Svip         | 0.143483 | 1.65E-11   | 3.13E-10 |
| 308901    | Trim21       | 0.143452 | 0.02514022 | 0.078401 |
| 288354    | Zfp654       | 0.143445 | 0.01220979 | 0.043718 |
| 362540    | Hacd4        | 0.143362 | 0.00305708 | 0.013661 |
| 306515    | Mboat4       | 0.143354 | 0.35361604 | 0.550574 |
| 25687     | Caldl        | 0.143324 | 6.45E-14   | 1.58E-12 |
| 29308     | Arl4a        | 0.143291 | 0.00237386 | 0.010971 |
| 103690155 | LOC103690155 | 0.143262 | 0.12491333 | 0.270062 |
| 293953    | R3hcc11      | 0.143229 | 0.12370588 | 0.268457 |
| 100360623 | Iqgap2       | 0.14321  | 3.04E-04   | 0.001811 |

|           |              |          |            |          |
|-----------|--------------|----------|------------|----------|
| 108348771 | LOC108348771 | 0.143126 | 0.33215882 | 0.528308 |
| 500943    | Arhgap42     | 0.143044 | 8.35E-04   | 0.004419 |
| 81816     | Ube2b        | 0.142994 | 1.25E-13   | 2.94E-12 |
| 171493    | Osgin1       | 0.142985 | 0.27100107 | 0.46264  |
| 498630    | Wwc2         | 0.142957 | 1.45E-04   | 9.29E-04 |
| 100125370 | Nadk         | 0.142895 | 3.27E-05   | 2.43E-04 |
| 362226    | Sec23b       | 0.142887 | 0.0034998  | 0.01534  |
| 291527    | Stard6       | 0.142803 | 0.20042549 | 0.376366 |
| 310670    | Adamts14     | 0.14277  | 1.59E-06   | 1.52E-05 |
| 500616    | Socs5        | 0.142763 | 6.74E-08   | 8.07E-07 |
| 308581    | Ccdc155      | 0.142737 | 0.53251156 | 0.714757 |
| 494340    | Zfp868       | 0.142712 | 0.0048289  | 0.020124 |
| 294030    | Sfr1         | 0.14271  | 1.49E-05   | 1.18E-04 |
| 60627     | Exoc5        | 0.142581 | 2.92E-05   | 2.19E-04 |
| 361730    | Tkfc         | 0.142525 | 0.09496416 | 0.220131 |
| 308282    | Shprh        | 0.142516 | 0.00234228 | 0.010843 |
| 300900    | Plscr4       | 0.142445 | 0.00385703 | 0.016631 |
| 116684    | Oplah        | 0.142412 | 0.00994527 | 0.036893 |
| 102552729 | LOC102552729 | 0.142321 | 0.62916827 | 0.786254 |
| 362857    | Tmem263      | 0.142121 | 9.27E-05   | 6.19E-04 |
| 289501    | Sowahb       | 0.142075 | 0.24844032 | 0.436691 |
| 363502    | Mid2         | 0.142032 | 1.06E-05   | 8.66E-05 |
| 307604    | Elac1        | 0.142008 | 0.07591157 | 0.186908 |
| 307151    | Bmil         | 0.141905 | 2.22E-04   | 0.00137  |
| 366352    | Mob3b        | 0.141811 | 0.00119885 | 0.006048 |
| 499254    | Tmc7         | 0.141786 | 0.00114697 | 0.005816 |
| 79124     | Anxa4        | 0.141678 | 3.48E-11   | 6.34E-10 |
| 313961    | Smc6         | 0.14167  | 5.67E-05   | 3.99E-04 |
| 308173    | Kif13a       | 0.141638 | 1.60E-04   | 0.001012 |
| 297554    | Csgalnact2   | 0.141597 | 0.01313485 | 0.046402 |
| 686117    | Meis1        | 0.141478 | 0.21329551 | 0.393511 |
| 287362    | Nlrp3        | 0.141405 | 0.25195724 | 0.440272 |
| 315427    | Sesn3        | 0.141404 | 5.24E-15   | 1.39E-13 |
| 362359    | Mpp6         | 0.141365 | 6.94E-05   | 4.79E-04 |
| 307829    | Zfhx3        | 0.141361 | 5.55E-07   | 5.76E-06 |
| 108348055 | LOC108348055 | 0.141338 | 0.72126207 | 0.847405 |
| 314265    | Zfyve26      | 0.14123  | 0.00162015 | 0.007857 |
| 679894    | LOC679894    | 0.1412   | 0.01089389 | 0.039738 |
| 64199     | Gng11        | 0.14112  | 0.100606   | 0.229576 |
| 499807    | Dcaf17       | 0.141109 | 9.70E-04   | 0.005042 |
| 84493     | Fmo3         | 0.140922 | 0.26723666 | 0.458433 |
| 310461    | Dhx36        | 0.140891 | 2.00E-06   | 1.89E-05 |
| 298786    | Slc30a6      | 0.140782 | 0.03438965 | 0.100376 |
| 308845    | Thap12       | 0.140717 | 7.62E-04   | 0.004082 |
| 266706    | Gjc1         | 0.140703 | 0.25565771 | 0.444495 |
| 315108    | Apol3        | 0.140667 | 0.23820893 | 0.425261 |
| 100909590 | LOC100909590 | 0.140654 | 0.53414104 | 0.716035 |
| 363854    | Elavl1       | 0.140604 | 0.02817527 | 0.085787 |
| 287706    | Klh111       | 0.140575 | 0.00328912 | 0.014524 |
| 24948     | Fmr1         | 0.140515 | 1.52E-04   | 9.71E-04 |
| 681371    | Nufip2       | 0.14047  | 1.77E-09   | 2.65E-08 |
| 654496    | Fubp1        | 0.140453 | 1.24E-06   | 1.21E-05 |
| 305556    | Ehbp1        | 0.14043  | 2.85E-08   | 3.59E-07 |
| 313641    | Hspg2        | 0.140423 | 5.67E-37   | 4.12E-35 |
| 363014    | Yap1         | 0.140418 | 2.59E-07   | 2.83E-06 |
| 307820    | Nfat5        | 0.140417 | 6.25E-11   | 1.10E-09 |

|           |              |          |            |          |
|-----------|--------------|----------|------------|----------|
| 266808    | Lrrcc1       | 0.140399 | 0.0725894  | 0.180785 |
| 25423     | Ctsc         | 0.140393 | 9.88E-04   | 0.00512  |
| 29548     | Homer3       | 0.140392 | 0.01092826 | 0.039856 |
| 287269    | Clk4         | 0.140217 | 3.96E-04   | 0.002287 |
| 100362908 | LOC100362908 | 0.140197 | 0.82389795 | 0.911269 |
| 102552996 | LOC102552996 | 0.140197 | 0.82389795 | 0.911269 |
| 289167    | Mettl11b     | 0.140197 | 0.82389795 | 0.911269 |
| 297596    | Lag3         | 0.140197 | 0.61876456 | 0.777461 |
| 362136    | Dapl1        | 0.140197 | 0.82389795 | 0.911269 |
| 365544    | Umodl1       | 0.140197 | 0.61876456 | 0.777461 |
| 60422     | Slc18a3      | 0.140197 | 0.82389795 | 0.911269 |
| 282708    | Afm          | 0.140197 | 0.75298102 | 0.868176 |
| 499848    | Ccdc73       | 0.140197 | 0.52907251 | 0.711846 |
| 689978    | Nrsn2        | 0.140197 | 0.21533756 | 0.396012 |
| 29584     | Gjb1         | 0.140103 | 0.00848272 | 0.032317 |
| 309953    | Tmem161b     | 0.140086 | 0.0156738  | 0.053756 |
| 108348102 | LOC108348102 | 0.140074 | 0.01565619 | 0.053715 |
| 102546572 | LOC102546572 | 0.140051 | 5.14E-07   | 5.35E-06 |
| 288414    | Rfc3         | 0.140012 | 0.06094308 | 0.157978 |
| 81784     | Ssr3         | 0.139987 | 5.20E-08   | 6.31E-07 |
| 286984    | Vom2r18      | 0.139972 | 0.76863999 | 0.87836  |
| 85241     | Polal        | 0.139833 | 0.18236341 | 0.352493 |
| 314246    | Zbtb1        | 0.139772 | 2.17E-04   | 0.001338 |
| 306380    | Psd3         | 0.139732 | 2.07E-10   | 3.49E-09 |
| 680591    | Lrch2        | 0.13959  | 0.14534839 | 0.300202 |
| 308306    | Eif5b        | 0.139571 | 1.14E-06   | 1.12E-05 |
| 301415    | Ankrd44      | 0.139546 | 0.01000819 | 0.037083 |
| 362264    | Srsf6        | 0.139532 | 5.90E-09   | 8.21E-08 |
| 83718     | Clic4        | 0.139472 | 0.00472435 | 0.019753 |
| 363445    | Usp9x        | 0.139464 | 2.54E-35   | 1.76E-33 |
| 29362     | Tef          | 0.139324 | 2.77E-08   | 3.49E-07 |
| 25050     | Camk4        | 0.139291 | 8.50E-06   | 7.08E-05 |
| 65037     | Mertk        | 0.139236 | 0.01429637 | 0.049767 |
| 297757    | Sbspon       | 0.139228 | 8.17E-05   | 5.54E-04 |
| 170915    | Ep300        | 0.139188 | 6.59E-06   | 5.59E-05 |
| 311580    | Samhd1       | 0.139156 | 0.11692178 | 0.257163 |
| 289088    | Swt1         | 0.138913 | 0.02050774 | 0.066856 |
| 499264    | Apobr        | 0.138891 | 0.31131997 | 0.506543 |
| 362046    | Dappl        | 0.138887 | 0.4009074  | 0.598001 |
| 57027     | Adam17       | 0.138814 | 4.67E-05   | 3.35E-04 |
| 306998    | Cdk13        | 0.138802 | 2.74E-04   | 0.001654 |
| 116668    | Myt11        | 0.138777 | 0.00215326 | 0.010076 |
| 691922    | Nt5dc3       | 0.138773 | 9.67E-05   | 6.44E-04 |
| 24681     | Prkcg        | 0.138668 | 0.33349711 | 0.529597 |
| 680201    | Zfp322a      | 0.138654 | 0.02113372 | 0.068428 |
| 316742    | Tgif1        | 0.138625 | 0.2036124  | 0.380139 |
| 299626    | Gadd45b      | 0.13862  | 0.05694307 | 0.14979  |
| 103690074 | LOC103690074 | 0.138577 | 0.2106787  | 0.389475 |
| 316211    | Usp49        | 0.138549 | 0.09483996 | 0.220003 |
| 501515    | Tut7         | 0.138535 | 4.84E-06   | 4.23E-05 |
| 305882    | Haus4        | 0.138443 | 0.03023492 | 0.090695 |
| 314713    | Utp20        | 0.138411 | 0.00353306 | 0.015454 |
| 292737    | Blvrb        | 0.13834  | 0.00630991 | 0.025257 |
| 362978    | Creld2       | 0.138238 | 0.07257877 | 0.180782 |
| 619582    | Tmem69       | 0.138078 | 0.00369401 | 0.016062 |
| 29540     | Hsd17b7      | 0.138076 | 0.00133924 | 0.006661 |



|           |              |          |            |          |
|-----------|--------------|----------|------------|----------|
| 498404    | Ccdc117      | 0.138009 | 0.08984587 | 0.21151  |
| 292127    | Dclrela      | 0.137911 | 0.04160012 | 0.116631 |
| 315864    | Dopla        | 0.137849 | 5.35E-05   | 3.78E-04 |
| 364827    | Zscan30      | 0.13781  | 0.04702774 | 0.128907 |
| 81921     | Sh3gl3       | 0.137697 | 0.02517693 | 0.078477 |
| 366203    | Esf1         | 0.137691 | 0.00300289 | 0.013466 |
| 84472     | Ilf3         | 0.137677 | 1.89E-05   | 1.47E-04 |
| 293736    | Myrf         | 0.137661 | 0.01127695 | 0.040885 |
| 245953    | Tmem37       | 0.137623 | 0.62193712 | 0.779776 |
| 79011     | Camkv        | 0.137566 | 0.14360513 | 0.298023 |
| 690728    | Ints13       | 0.137501 | 0.01410388 | 0.049178 |
| 312491    | Zfp638       | 0.137399 | 9.22E-07   | 9.22E-06 |
| 29486     | Smc3         | 0.137373 | 7.50E-05   | 5.13E-04 |
| 100909461 | LOC100909461 | 0.137311 | 0.83537633 | 0.918205 |
| 291002    | Cdhr2        | 0.13729  | 0.10881475 | 0.243265 |
| 498411    | Hus1         | 0.137286 | 0.00386822 | 0.01666  |
| 288744    | RGD1306556   | 0.137242 | 0.00941942 | 0.035279 |
| 297387    | Mob1a        | 0.137238 | 2.74E-04   | 0.001654 |
| 29419     | Numb         | 0.137229 | 0.00727209 | 0.028386 |
| 294274    | RT1-DMa      | 0.137127 | 0.06361128 | 0.163404 |
| 313388    | Dock7        | 0.137045 | 9.52E-07   | 9.48E-06 |
| 362763    | Lin52        | 0.137028 | 0.02394317 | 0.075571 |
| 362520    | Fktn         | 0.136942 | 1.20E-06   | 1.18E-05 |
| 56766     | Leprot       | 0.136898 | 8.53E-05   | 5.75E-04 |
| 24944     | Lamp2        | 0.136882 | 1.86E-25   | 8.75E-24 |
| 25705     | Zeb1         | 0.136873 | 3.49E-08   | 4.33E-07 |
| 366783    | Alkbh8       | 0.136791 | 0.05244217 | 0.139883 |
| 691517    | Megf11       | 0.136764 | 1.55E-06   | 1.48E-05 |
| 306618    | Arhgef10     | 0.136751 | 5.30E-09   | 7.43E-08 |
| 64618     | Zic1         | 0.136711 | 0.14482951 | 0.299357 |
| 85432     | Ddx52        | 0.136648 | 0.06222139 | 0.160548 |
| 282635    | Mbn11        | 0.136627 | 4.82E-06   | 4.21E-05 |
| 361659    | Plekha1      | 0.136514 | 1.04E-06   | 1.03E-05 |
| 24504     | Inha         | 0.13651  | 0.14062874 | 0.293735 |
| 315871    | Snx14        | 0.136465 | 0.00775168 | 0.029951 |
| 290823    | Erlin2       | 0.136445 | 0.00240518 | 0.011094 |
| 24223     | B2m          | 0.136408 | 7.21E-43   | 5.84E-41 |
| 171154    | Serpina10    | 0.136248 | 0.39791309 | 0.595166 |
| 362343    | Parp12       | 0.136238 | 0.05907184 | 0.154303 |
| 103691134 | Flt3lg       | 0.136147 | 0.30352471 | 0.500617 |
| 100911216 | LOC100911216 | 0.136075 | 4.07E-04   | 0.002351 |
| 303112    | N4bp3        | 0.136029 | 0.39701697 | 0.594199 |
| 25750     | Maob         | 0.135995 | 5.92E-07   | 6.11E-06 |
| 432363    | Slco4c1      | 0.13596  | 0.59129125 | 0.756441 |
| 682978    | Nudt13       | 0.13596  | 0.35234372 | 0.549446 |
| 100362814 | LOC100362814 | 0.135958 | 1.14E-05   | 9.24E-05 |
| 303448    | LOC303448    | 0.135722 | 0.08680685 | 0.206732 |
| 311872    | Zbtb43       | 0.1357   | 0.05158045 | 0.138126 |
| 499770    | Spout1       | 0.135675 | 0.02463401 | 0.077126 |
| 307615    | Terb1        | 0.135656 | 0.65944466 | 0.80502  |
| 299830    | Lrig3        | 0.135529 | 0.09843743 | 0.226036 |
| 311909    | Rc3h2        | 0.135516 | 9.58E-06   | 7.91E-05 |
| 312365    | Mindy4       | 0.135483 | 0.01970273 | 0.064707 |
| 100361114 | Zfp869       | 0.135438 | 0.01777501 | 0.059537 |
| 25643     | Gnai3        | 0.135338 | 6.65E-09   | 9.18E-08 |
| 686098    | Sorbs1       | 0.135311 | 9.08E-36   | 6.36E-34 |

|           |                 |          |            |          |
|-----------|-----------------|----------|------------|----------|
| 305171    | Lin54           | 0.135306 | 0.0073946  | 0.028764 |
| 103689950 | NEWGENE_1306455 | 0.135228 | 3.18E-08   | 3.98E-07 |
| 100912372 | Tcaf2           | 0.135208 | 0.89279617 | 0.952406 |
| 362095    | Gtf3c5          | 0.135171 | 0.00373176 | 0.016197 |
| 361346    | LOC361346       | 0.135144 | 0.01908211 | 0.063006 |
| 303312    | Wdr81           | 0.135113 | 0.00585504 | 0.023665 |
| 83629     | Slc12a2         | 0.135037 | 2.87E-14   | 7.23E-13 |
| 500623    | Wdcp            | 0.134963 | 0.03419702 | 0.100028 |
| 360863    | Suco            | 0.134949 | 3.00E-04   | 0.001788 |
| 497865    | Rbm2511         | 0.134941 | 1.24E-04   | 8.06E-04 |
| 309407    | Trpm3           | 0.134914 | 9.07E-06   | 7.51E-05 |
| 252858    | Frmd4b          | 0.134909 | 0.00655016 | 0.02606  |
| 114555    | Casp4           | 0.134874 | 0.03830985 | 0.109272 |
| 294270    | RT1-Db1         | 0.134864 | 0.00253922 | 0.011633 |
| 688517    | Mut             | 0.134848 | 1.90E-06   | 1.80E-05 |
| 499617    | Rfxap           | 0.134834 | 0.09279699 | 0.216716 |
| 315648    | Ppp2r1b         | 0.134822 | 0.0718156  | 0.179186 |
| 25742     | S100b           | 0.134771 | 5.15E-102  | 1.02E-99 |
| 299557    | RGD1310212      | 0.134748 | 0.42139428 | 0.616868 |
| 361944    | Elf2            | 0.134722 | 0.01035579 | 0.038156 |
| 362912    | Der11           | 0.134657 | 6.68E-05   | 4.61E-04 |
| 317579    | Utp14a          | 0.134644 | 0.02756151 | 0.084404 |
| 100909505 | LOC100909505    | 0.13464  | 0.01147182 | 0.041465 |
| 362501    | Topors          | 0.134595 | 0.01067269 | 0.039066 |
| 296199    | Snx5            | 0.134528 | 1.45E-06   | 1.40E-05 |
| 306222    | Lsm5            | 0.134519 | 0.22467474 | 0.407867 |
| 293645    | Ppfial          | 0.134516 | 5.85E-05   | 4.10E-04 |
| 299153    | Ppplr36         | 0.134295 | 0.00741527 | 0.028827 |
| 287612    | Mks1            | 0.134285 | 0.1219695  | 0.265749 |
| 312437    | Krcc1           | 0.134172 | 0.00356833 | 0.015587 |
| 85420     | Prkcq           | 0.134131 | 0.00670387 | 0.02656  |
| 360845    | Zc3h11a         | 0.134036 | 6.07E-06   | 5.20E-05 |
| 680424    | Pex10           | 0.133945 | 0.14965994 | 0.305889 |
| 315911    | Rnf128          | 0.133944 | 0.0901443  | 0.211924 |
| 100363332 | Card11          | 0.133938 | 0.26716395 | 0.458349 |
| 259222    | Npb             | 0.133938 | 0.66339766 | 0.808111 |
| 315615    | Dscaml1         | 0.133938 | 0.41550989 | 0.611686 |
| 81677     | Itpka           | 0.133938 | 0.75827111 | 0.872005 |
| 83568     | Naalad11        | 0.133938 | 0.66339766 | 0.808111 |
| 305625    | Slc49a3         | 0.133938 | 0.2863849  | 0.480673 |
| 83720     | Fat1            | 0.133889 | 7.89E-08   | 9.37E-07 |
| 306886    | Ripk1           | 0.133828 | 0.01931392 | 0.063628 |
| 24706     | Rarb            | 0.133811 | 0.13591016 | 0.286392 |
| 314320    | Mlh3            | 0.133782 | 0.03072453 | 0.09186  |
| 498898    | Dok6            | 0.133757 | 0.21156591 | 0.390812 |
| 307927    | Taf5l           | 0.133736 | 0.03428604 | 0.100165 |
| 360204    | Zfp24           | 0.133633 | 7.56E-06   | 6.35E-05 |
| 363227    | Nabp1           | 0.133624 | 0.18026976 | 0.34951  |
| 291921    | N4bp1           | 0.133588 | 0.00165939 | 0.008021 |
| 316731    | Mettl4          | 0.133587 | 0.37020222 | 0.566533 |
| 297504    | Edem1           | 0.133528 | 5.70E-06   | 4.91E-05 |
| 303637    | Abca8           | 0.13343  | 0.00137197 | 0.006797 |
| 288016    | P3h2            | 0.133263 | 0.15809686 | 0.318586 |
| 314128    | RGD1304624      | 0.133257 | 0.31928275 | 0.514271 |
| 362553    | Tctex1d1        | 0.133254 | 0.20701862 | 0.384688 |
| 288353    | Cggbp1          | 0.13323  | 1.62E-04   | 0.001027 |

|           |              |          |            |          |
|-----------|--------------|----------|------------|----------|
| 314259    | Mpp5         | 0.133185 | 2.33E-05   | 1.77E-04 |
| 252941    | Hdgfl3       | 0.133159 | 4.27E-04   | 0.002446 |
| 360820    | Pxn          | 0.13311  | 8.29E-07   | 8.33E-06 |
| 108348069 | LOC108348069 | 0.133099 | 0.28016548 | 0.4737   |
| 64570     | Nat8         | 0.13309  | 0.9208099  | 0.969689 |
| 362153    | Cwc22        | 0.133043 | 0.0342601  | 0.100151 |
| 313115    | Uf11         | 0.13303  | 0.00239335 | 0.011053 |
| 296511    | Alx4         | 0.132977 | 0.6949628  | 0.83185  |
| 316101    | Limd1        | 0.132892 | 0.00470589 | 0.019702 |
| 296789    | Sema3e       | 0.132845 | 0.02782703 | 0.084971 |
| 102556119 | Znf354b      | 0.132822 | 0.27097243 | 0.462633 |
| 315326    | Tns2         | 0.132771 | 1.26E-05   | 1.02E-04 |
| 25614     | Ptk2         | 0.132678 | 3.12E-04   | 0.001855 |
| 299347    | Brf1         | 0.132601 | 0.00281155 | 0.012713 |
| 689134    | Sec61g       | 0.1326   | 0.0056236  | 0.022841 |
| 294854    | Dnah5        | 0.132461 | 0.54042254 | 0.72227  |
| 688452    | Spaca6       | 0.132434 | 0.03703724 | 0.106391 |
| 362107    | Aif11        | 0.132398 | 7.16E-05   | 4.92E-04 |
| 315716    | Cd276        | 0.132391 | 0.00326174 | 0.01444  |
| 100360772 | Zfp17        | 0.132375 | 0.06557895 | 0.16695  |
| 25631     | Smad3        | 0.132313 | 0.07235464 | 0.180319 |
| 361621    | Olfml1       | 0.132295 | 2.96E-06   | 2.70E-05 |
| 306254    | Pbrm1        | 0.132256 | 1.95E-06   | 1.84E-05 |
| 315114    | Clqtnf6      | 0.132253 | 0.16103725 | 0.32328  |
| 361813    | Stk38        | 0.132248 | 0.00326545 | 0.014449 |
| 140590    | Bmpr2        | 0.132179 | 7.53E-21   | 2.80E-19 |
| 192181    | Podxl        | 0.132177 | 0.00101566 | 0.005242 |
| 680127    | Tirap        | 0.132087 | 0.20100801 | 0.376569 |
| 691394    | Chst14       | 0.132078 | 0.18275622 | 0.35293  |
| 296290    | Bpifb2       | 0.131976 | 0.70825073 | 0.839707 |
| 64354     | Htr6         | 0.131976 | 0.70825073 | 0.839707 |
| 78960     | Prx          | 0.131952 | 3.04E-57   | 3.40E-55 |
| 288105    | Zbtb20       | 0.131892 | 0.14295942 | 0.297331 |
| 691538    | Rnpc3        | 0.131892 | 0.01117341 | 0.040595 |
| 316258    | Cd2ap        | 0.131856 | 1.07E-04   | 7.03E-04 |
| 307213    | Zfp407       | 0.131788 | 0.01664576 | 0.056379 |
| 679082    | Arhgap19     | 0.131773 | 6.54E-05   | 4.53E-04 |
| 303399    | Tbx4         | 0.131755 | 0.66553706 | 0.810069 |
| 84685     | Ppp1r9a      | 0.131732 | 3.84E-06   | 3.44E-05 |
| 306071    | Lcp1         | 0.131722 | 4.92E-13   | 1.09E-11 |
| 305244    | Thap6        | 0.131681 | 0.05043085 | 0.135696 |
| 25105     | Nppb         | 0.131591 | 0.49509463 | 0.681735 |
| 57341     | Parva        | 0.131535 | 1.45E-15   | 4.02E-14 |
| 29365     | Mpdz         | 0.131529 | 9.60E-07   | 9.56E-06 |
| 363139    | Zmynd10      | 0.131495 | 0.29072729 | 0.486077 |
| 85426     | Slc5a7       | 0.131476 | 0.09258526 | 0.216328 |
| 315696    | Snx33        | 0.131412 | 0.02439184 | 0.076607 |
| 296866    | Gpr165       | 0.131278 | 0.47479902 | 0.665138 |
| 304291    | Zdhhc4       | 0.131217 | 0.04572607 | 0.126156 |
| 690752    | Med121       | 0.131195 | 0.04943258 | 0.133975 |
| 498795    | Ccdc3        | 0.131192 | 0.13156943 | 0.280315 |
| 304297    | Sdk1         | 0.131192 | 0.04266058 | 0.119113 |
| 58834     | Dlc1         | 0.13119  | 5.27E-06   | 4.58E-05 |
| 29224     | Cbr1         | 0.131118 | 0.00471318 | 0.019724 |
| 313519    | Gpbp111      | 0.131095 | 1.47E-05   | 1.16E-04 |
| 29203     | Foxd3        | 0.13106  | 0.01073281 | 0.039241 |

|           |              |          |            |          |
|-----------|--------------|----------|------------|----------|
| 315308    | Csrnp2       | 0.131042 | 0.00614069 | 0.024616 |
| 296560    | Uap111       | 0.130988 | 0.03400326 | 0.099614 |
| 308624    | Heca         | 0.130947 | 7.65E-04   | 0.004098 |
| 310131    | Rictor       | 0.130866 | 4.26E-04   | 0.00244  |
| 361845    | Eif4ebp2     | 0.130771 | 0.0066996  | 0.026549 |
| 309945    | Arrdc3       | 0.130715 | 3.81E-04   | 0.002216 |
| 690825    | Gngt2        | 0.130701 | 0.51887977 | 0.7037   |
| 100302447 | Cox16        | 0.130701 | 0.00782022 | 0.030192 |
| 498701    | RGD1566359   | 0.130672 | 1.78E-09   | 2.66E-08 |
| 29409     | Mag          | 0.130621 | 9.35E-04   | 0.00488  |
| 305343    | Pds5a        | 0.130537 | 6.88E-06   | 5.81E-05 |
| 100910200 | LOC100910200 | 0.13047  | 0.5827209  | 0.749505 |
| 103691261 | LOC103691261 | 0.130449 | 0.63097483 | 0.787917 |
| 171026    | Akap5        | 0.130449 | 0.63097483 | 0.787917 |
| 300193    | Senp1        | 0.130431 | 0.01589906 | 0.054382 |
| 494125    | Rcn3         | 0.130388 | 2.09E-04   | 0.001294 |
| 65205     | Mmp16        | 0.130296 | 0.04657845 | 0.127841 |
| 361819    | RGD1566085   | 0.130253 | 0.00471779 | 0.019734 |
| 85254     | Slc44a1      | 0.130239 | 1.50E-25   | 7.14E-24 |
| 360869    | Tipr1        | 0.130218 | 7.80E-04   | 0.004169 |
| 307446    | Ythdc2       | 0.130202 | 0.00109081 | 0.005568 |
| 362332    | Flnc         | 0.130166 | 0.01873418 | 0.06217  |
| 305332    | Limch1       | 0.130166 | 3.47E-13   | 7.76E-12 |
| 117275    | Chrd         | 0.130154 | 0.30342808 | 0.500545 |
| 309475    | Tm9sf3       | 0.130125 | 4.64E-17   | 1.43E-15 |
| 84411     | Ick          | 0.130116 | 0.00157436 | 0.007668 |
| 360503    | Luc71        | 0.130096 | 4.20E-07   | 4.43E-06 |
| 100363314 | LOC100363314 | 0.130073 | 0.55530636 | 0.734686 |
| 310091    | Slc38a9      | 0.130026 | 0.00537355 | 0.022061 |
| 290907    | Lig4         | 0.130024 | 0.00303476 | 0.013586 |
| 25230     | Add3         | 0.129911 | 3.15E-12   | 6.42E-11 |
| 680782    | Spcs3        | 0.129783 | 0.07098093 | 0.177616 |
| 302528    | RGD1559951   | 0.12976  | 0.02924538 | 0.088353 |
| 362404    | Suclg2       | 0.129647 | 0.00233426 | 0.010814 |
| 362866    | Chpt1        | 0.129593 | 0.0297647  | 0.089595 |
| 686610    | Tb12         | 0.129592 | 0.00233919 | 0.010831 |
| 302495    | Rap2c        | 0.129579 | 1.26E-05   | 1.01E-04 |
| 691493    | Zwilch       | 0.129566 | 0.11695454 | 0.257205 |
| 360824    | Wscd2        | 0.129454 | 0.5452079  | 0.726219 |
| 288280    | Ncam2        | 0.12942  | 0.01906941 | 0.062986 |
| 690654    | Wars2        | 0.129393 | 0.03916433 | 0.111326 |
| 363162    | Cmc1         | 0.129365 | 0.24926346 | 0.437734 |
| 360468    | Emp2         | 0.129306 | 7.58E-06   | 6.37E-05 |
| 303601    | Cyb561       | 0.129288 | 0.02239055 | 0.07156  |
| 102556082 | LOC102556082 | 0.129274 | 0.7342237  | 0.856662 |
| 500502    | Eqtn         | 0.129269 | 0.16112604 | 0.323185 |
| 499124    | Zfp14        | 0.129227 | 0.14640347 | 0.301498 |
| 84359     | Dffb         | 0.129182 | 0.30520162 | 0.502079 |
| 24232     | C3           | 0.129105 | 0.13070016 | 0.2789   |
| 29633     | Ndst1        | 0.129092 | 1.60E-06   | 1.53E-05 |
| 29199     | Hfe          | 0.12901  | 0.42403557 | 0.619473 |
| 292681    | Nova2        | 0.12901  | 0.42403557 | 0.619473 |
| 365668    | Mtrex        | 0.128944 | 7.86E-05   | 5.36E-04 |
| 297514    | Setd5        | 0.128927 | 2.75E-07   | 3.00E-06 |
| 498112    | Yeats2       | 0.128926 | 0.01120372 | 0.040666 |
| 314587    | Zfp472       | 0.128906 | 0.33377904 | 0.529912 |

|           |              |          |            |          |
|-----------|--------------|----------|------------|----------|
| 681647    | Lysmd4       | 0.128883 | 0.03271341 | 0.096548 |
| 108349536 | LOC108349536 | 0.128881 | 0.02933131 | 0.088585 |
| 29596     | Ifrd1        | 0.128793 | 0.01312043 | 0.04636  |
| 63847     | Fxyd6        | 0.128779 | 1.64E-13   | 3.81E-12 |
| 289635    | Rel11        | 0.128758 | 0.00369198 | 0.016057 |
| 689954    | Setd7        | 0.128708 | 0.00230201 | 0.01068  |
| 308140    | Tfb1m        | 0.128625 | 0.00384363 | 0.016588 |
| 24950     | Srd5a1       | 0.128597 | 0.00107446 | 0.0055   |
| 313842    | Hnrnp11      | 0.128597 | 0.00107446 | 0.0055   |
| 25270     | Abcd3        | 0.128527 | 1.20E-07   | 1.39E-06 |
| 306238    | Ccdc66       | 0.128505 | 0.02687698 | 0.08264  |
| 24915     | Pdlim4       | 0.128488 | 1.02E-04   | 6.77E-04 |
| 302363    | Sh3bgr1      | 0.128371 | 3.71E-15   | 9.94E-14 |
| 103691527 | LOC103691527 | 0.128315 | 0.00119314 | 0.006023 |
| 302855    | RbmX         | 0.128312 | 0.00123507 | 0.006201 |
| 498095    | Tctex1d2     | 0.128309 | 0.11327731 | 0.251266 |
| 364712    | Sox4         | 0.128305 | 4.52E-04   | 0.002565 |
| 308118    | Rgs17        | 0.128224 | 0.01005354 | 0.037215 |
| 501779    | Cd200r11     | 0.128224 | 0.87002623 | 0.938524 |
| 108348955 | LOC108348955 | 0.128224 | 0.63383827 | 0.789758 |
| 140638    | Apoa5        | 0.128224 | 0.83130994 | 0.915373 |
| 292755    | Nccrp1       | 0.128224 | 0.83130994 | 0.915373 |
| 317189    | Diaph2       | 0.128224 | 0.30696145 | 0.503018 |
| 53949     | Chrm5        | 0.128224 | 0.83130994 | 0.915373 |
| 685153    | Wfdc6a       | 0.128224 | 0.83130994 | 0.915373 |
| 689388    | Ptx3         | 0.128224 | 0.76321747 | 0.875051 |
| 84399     | Ihh          | 0.128224 | 0.83130994 | 0.915373 |
| 308918    | Ppfibp2      | 0.128218 | 0.00579643 | 0.023438 |
| 689106    | Vstm2a       | 0.128163 | 0.00449102 | 0.01891  |
| 286994    | Lgr4         | 0.128123 | 9.83E-06   | 8.09E-05 |
| 690516    | Smurf1       | 0.128119 | 1.37E-05   | 1.09E-04 |
| 25205     | I16st        | 0.128103 | 1.88E-19   | 6.56E-18 |
| 100911831 | Zfp182       | 0.128089 | 0.05533671 | 0.146312 |
| 307724    | Rpgrip11     | 0.128028 | 0.02491871 | 0.077914 |
| 313434    | Akap17b      | 0.128023 | 0.00657509 | 0.026137 |
| 291534    | Rnmt         | 0.128021 | 3.75E-05   | 2.75E-04 |
| 306014    | Reep4        | 0.128006 | 0.13231282 | 0.281521 |
| 24482     | Igf1         | 0.128004 | 2.88E-05   | 2.17E-04 |
| 362871    | Elk3         | 0.12797  | 0.0275267  | 0.084338 |
| 315532    | Fli1         | 0.127936 | 0.04847139 | 0.131896 |
| 360600    | Spag9        | 0.127927 | 1.35E-24   | 6.12E-23 |
| 102550403 | LOC102550403 | 0.127925 | 0.61905381 | 0.777645 |
| 303348    | Atad5        | 0.127904 | 0.21475219 | 0.395241 |
| 309035    | Dcun1d3      | 0.127799 | 0.01203421 | 0.04317  |
| 299759    | Lrriq1       | 0.12777  | 0.29751172 | 0.49408  |
| 303747    | Cd7          | 0.127751 | 0.30783627 | 0.50242  |
| 682988    | Med18        | 0.127739 | 0.12900831 | 0.276218 |
| 363070    | Fam219b      | 0.127738 | 5.74E-05   | 4.03E-04 |
| 361458    | Akap7        | 0.127729 | 0.31863081 | 0.513438 |
| 108352957 | LOC108352957 | 0.127708 | 0.17616385 | 0.344354 |
| 294009    | Cuedc2       | 0.127685 | 0.03264215 | 0.096458 |
| 103693480 | LOC103693480 | 0.127679 | 0.00190462 | 0.009071 |
| 290501    | Tmtc4        | 0.127655 | 7.86E-06   | 6.58E-05 |
| 298890    | Fam49a       | 0.127641 | 0.11170642 | 0.24865  |
| 304056    | Zbtb21       | 0.127594 | 0.01254453 | 0.044665 |
| 116545    | Pou6f1       | 0.127585 | 0.00366129 | 0.015938 |

|           |              |          |            |          |
|-----------|--------------|----------|------------|----------|
| 114901    | Sorbs2       | 0.127513 | 0.00589414 | 0.023783 |
| 84486     | Sf3b1        | 0.127466 | 6.46E-14   | 1.58E-12 |
| 64026     | Casp7        | 0.127273 | 0.19027614 | 0.363326 |
| 500464    | Epb4114b     | 0.127255 | 0.0045181  | 0.019012 |
| 310324    | Dcun1d1      | 0.127239 | 8.92E-05   | 5.99E-04 |
| 64466     | Cited1       | 0.127141 | 0.50231888 | 0.688993 |
| 102549471 | LOC102549471 | 0.127021 | 0.27054521 | 0.462069 |
| 305419    | Pi4k2b       | 0.127021 | 0.09236654 | 0.215923 |
| 497039    | Amy2a3       | 0.127021 | 0.94927856 | 0.9876   |
| 497961    | Nlk          | 0.126964 | 2.08E-05   | 1.60E-04 |
| 313706    | Ubiad1       | 0.126951 | 0.13005506 | 0.277741 |
| 246235    | Slc36a2      | 0.12688  | 6.98E-04   | 0.003772 |
| 361109    | Dcpl1a       | 0.126764 | 0.19756087 | 0.372271 |
| 687001    | Hdac9        | 0.126756 | 0.0157501  | 0.053969 |
| 362988    | Cpne8        | 0.126744 | 5.00E-04   | 0.002806 |
| 363337    | LOC363337    | 0.126699 | 0.04278538 | 0.119427 |
| 309457    | Pcgf6        | 0.126682 | 0.21026958 | 0.388946 |
| 679504    | Nemp1        | 0.126682 | 0.42815403 | 0.623266 |
| 500584    | LOC500584    | 0.126646 | 0.05919773 | 0.154462 |
| 312927    | Rblcc1       | 0.126628 | 6.89E-08   | 8.23E-07 |
| 317183    | Pcdh19       | 0.126626 | 0.02778769 | 0.084919 |
| 102555172 | Tmppe        | 0.12659  | 0.22395836 | 0.406915 |
| 361953    | Lekr1        | 0.126565 | 0.44535198 | 0.63806  |
| 100362110 | LOC100362110 | 0.126544 | 8.29E-14   | 1.99E-12 |
| 361381    | Rad23a       | 0.126508 | 6.70E-05   | 4.63E-04 |
| 499821    | Fam171b      | 0.126481 | 8.42E-10   | 1.31E-08 |
| 25459     | Hmgbl        | 0.126455 | 8.03E-06   | 6.71E-05 |
| 313581    | Utp11        | 0.126443 | 9.97E-04   | 0.005165 |
| 309728    | Arid5b       | 0.126346 | 0.04984401 | 0.13463  |
| 315394    | Kbtbd3       | 0.126155 | 5.46E-05   | 3.85E-04 |
| 297604    | Ltbr         | 0.126149 | 6.71E-04   | 0.003642 |
| 309053    | Relch        | 0.126117 | 5.32E-06   | 4.62E-05 |
| 288306    | Usp16        | 0.126112 | 0.01258083 | 0.044769 |
| 364706    | Foxc1        | 0.125917 | 0.07785962 | 0.190425 |
| 360703    | Vps26c       | 0.12589  | 0.00591121 | 0.023836 |
| 290794    | Tnks         | 0.125869 | 7.49E-04   | 0.004022 |
| 299700    | RGD1563365   | 0.125812 | 0.18193392 | 0.351948 |
| 691429    | Shisa7       | 0.12577  | 0.13504038 | 0.28519  |
| 362706    | Rbks         | 0.125767 | 0.13613927 | 0.286779 |
| 306977    | Zkscan3      | 0.125742 | 0.02612146 | 0.080747 |
| 303504    | Mllt6        | 0.125727 | 4.99E-04   | 0.0028   |
| 100359832 | Fam104b      | 0.125701 | 0.07320075 | 0.181903 |
| 301446    | Carf         | 0.125675 | 0.03065535 | 0.091682 |
| 84428     | Dctn4        | 0.125651 | 3.42E-13   | 7.65E-12 |
| 361568    | Rras         | 0.125627 | 0.01391147 | 0.048587 |
| 64824     | Nab1         | 0.12556  | 8.68E-06   | 7.22E-05 |
| 309452    | Nfkb2        | 0.12555  | 0.04794523 | 0.130651 |
| 116651    | E2f5         | 0.12555  | 0.14408765 | 0.298439 |
| 50645     | Rab27a       | 0.125414 | 0.01246118 | 0.044418 |
| 497984    | Zfp652       | 0.125414 | 0.12972538 | 0.277131 |
| 292770    | Spint2       | 0.125396 | 0.08228368 | 0.198996 |
| 500337    | Clecl1a      | 0.125313 | 0.22625682 | 0.409957 |
| 100910839 | Luzp2        | 0.125303 | 4.99E-06   | 4.36E-05 |
| 362317    | Krit1        | 0.125299 | 5.38E-04   | 0.002987 |
| 288111    | Spic1        | 0.125224 | 0.23358709 | 0.419606 |
| 100361710 | Setdb2       | 0.125202 | 0.05804797 | 0.152213 |



|           |              |          |            |          |
|-----------|--------------|----------|------------|----------|
| 501665    | Slc10a3      | 0.125177 | 0.03714384 | 0.106649 |
| 304887    | Ralgsps2     | 0.125159 | 0.0597094  | 0.155457 |
| 360548    | Tnfsf12      | 0.125147 | 0.0033671  | 0.014824 |
| 313243    | Exosc3       | 0.125115 | 0.19499037 | 0.369254 |
| 282584    | Mtmr9        | 0.125099 | 2.62E-05   | 1.98E-04 |
| 499056    | Znf761       | 0.125072 | 0.25570394 | 0.444494 |
| 292999    | Chsy1        | 0.125029 | 0.01643674 | 0.05582  |
| 360773    | Sun1         | 0.12494  | 7.64E-04   | 0.004093 |
| 29357     | Smad2        | 0.12491  | 0.00101892 | 0.005256 |
| 361476    | Rsph3        | 0.124828 | 0.18879276 | 0.361435 |
| 308894    | Rassf10      | 0.124795 | 0.24182168 | 0.429697 |
| 311716    | Col20a1      | 0.124785 | 0.22030193 | 0.402422 |
| 313917    | Abhd1        | 0.124707 | 0.0041868  | 0.017834 |
| 307594    | Mib1         | 0.124684 | 0.00386711 | 0.016659 |
| 116554    | Mapk8        | 0.12467  | 9.16E-07   | 9.17E-06 |
| 315639    | Usp28        | 0.12466  | 0.01112458 | 0.04044  |
| 192352    | Ss18l1       | 0.124593 | 0.19537203 | 0.36972  |
| 366232    | Rem1         | 0.124534 | 0.31386666 | 0.508861 |
| 103691988 | LOC103691988 | 0.124411 | 0.16638151 | 0.329836 |
| 499281    | Lrrc27       | 0.124409 | 0.29394712 | 0.489955 |
| 500824    | Fgd6         | 0.124406 | 0.08212552 | 0.19879  |
| 100363266 | Igip         | 0.124333 | 2.44E-10   | 4.07E-09 |
| 363849    | Hira         | 0.124288 | 0.01151952 | 0.04159  |
| 365871    | Ciart        | 0.124255 | 0.40141698 | 0.598246 |
| 246776    | Filip1       | 0.124235 | 0.00225484 | 0.010471 |
| 117521    | Scaper       | 0.124211 | 0.00280501 | 0.012695 |
| 85261     | Mterf1       | 0.124177 | 0.02451905 | 0.076867 |
| 500981    | Zfp202       | 0.124157 | 0.19035521 | 0.363367 |
| 363578    | Havcr2       | 0.124121 | 0.75635436 | 0.870642 |
| 307764    | Usp38        | 0.124098 | 0.0113041  | 0.040968 |
| 362297    | Rbm33        | 0.124078 | 2.20E-05   | 1.69E-04 |
| 289324    | Cnih4        | 0.124071 | 2.08E-04   | 0.00129  |
| 361512    | Ehd2         | 0.124    | 0.00116799 | 0.005907 |
| 363334    | Stap2        | 0.124    | 0.34866013 | 0.545533 |
| 687813    | Traf1        | 0.124    | 0.50752667 | 0.693887 |
| 100909998 | LOC100909998 | 0.12388  | 0.3877862  | 0.584981 |
| 100909569 | LOC100909569 | 0.123877 | 0.39272063 | 0.589902 |
| 305896    | Irf9         | 0.123785 | 0.00246917 | 0.011342 |
| 102554586 | Tmem265      | 0.123709 | 0.43350328 | 0.627886 |
| 499270    | Prss53       | 0.123646 | 0.28244608 | 0.476034 |
| 361271    | Upf2         | 0.123639 | 0.00431699 | 0.018279 |
| 682469    | Kdm3b        | 0.123625 | 3.41E-04   | 0.002009 |
| 366196    | Cr1s1        | 0.123585 | 0.0314509  | 0.093679 |
| 366894    | Trhde        | 0.123569 | 0.38366472 | 0.580327 |
| 313208    | Fsd11        | 0.123528 | 8.64E-10   | 1.34E-08 |
| 307296    | Zfp608       | 0.123522 | 0.01625335 | 0.055306 |
| 306141    | Spry2        | 0.12341  | 0.01671135 | 0.056561 |
| 83805     | Src          | 0.12338  | 7.01E-06   | 5.92E-05 |
| 100363276 | Arhgap6      | 0.123375 | 0.45101444 | 0.642739 |
| 81647     | Atf2         | 0.123267 | 0.00213292 | 0.01     |
| 305960    | Xkr6         | 0.123235 | 0.48874182 | 0.676263 |
| 310589    | RGD1566337   | 0.123213 | 0.65907236 | 0.804875 |
| 313851    | Thumpd2      | 0.123189 | 0.13965141 | 0.292335 |
| 102550396 | LOC102550396 | 0.123178 | 0.00474098 | 0.019814 |
| 303346    | Nsrp1        | 0.123073 | 0.02332198 | 0.073929 |
| 298441    | Nasp         | 0.123051 | 0.06350124 | 0.163253 |

|           |              |          |            |          |
|-----------|--------------|----------|------------|----------|
| 309306    | Ric1         | 0.123022 | 0.0020052  | 0.009476 |
| 309887    | Ascc3        | 0.122988 | 0.0024883  | 0.011425 |
| 373540    | I118rap      | 0.122988 | 0.76785541 | 0.877806 |
| 474146    | Hcst         | 0.122988 | 0.76785541 | 0.877806 |
| 29516     | Pde3b        | 0.122898 | 0.02882443 | 0.087331 |
| 293526    | Ate1         | 0.122881 | 1.54E-04   | 9.82E-04 |
| 361930    | Bbs7         | 0.122865 | 0.05886815 | 0.153855 |
| 312560    | Xpc          | 0.122854 | 0.02658068 | 0.081914 |
| 314374    | Foxn3        | 0.122791 | 6.71E-04   | 0.003641 |
| 288702    | Unc119b      | 0.122776 | 0.00233667 | 0.010822 |
| 304074    | Morc3        | 0.122711 | 0.00326908 | 0.014455 |
| 500032    | Thsd7a       | 0.122616 | 5.85E-09   | 8.14E-08 |
| 500258    | RGD1560289   | 0.122581 | 0.07224276 | 0.180134 |
| 500551    | S100pbb      | 0.122499 | 0.0034703  | 0.015232 |
| 297408    | Alms1        | 0.122493 | 0.00494863 | 0.020546 |
| 286932    | Vps54        | 0.122464 | 0.00254059 | 0.011637 |
| 302711    | Tb11x        | 0.122454 | 1.86E-06   | 1.77E-05 |
| 81529     | Pdela        | 0.122433 | 0.1623887  | 0.325204 |
| 54278     | Nr4a2        | 0.122394 | 0.04376622 | 0.121665 |
| 303888    | Osbp111      | 0.122254 | 0.01522205 | 0.052538 |
| 102550657 | LOC102550657 | 0.122194 | 0.26928525 | 0.460744 |
| 288091    | Poglut1      | 0.122108 | 8.95E-04   | 0.004699 |
| 311661    | Zfp64        | 0.122032 | 0.03486887 | 0.101432 |
| 116639    | Cux1         | 0.122021 | 4.21E-08   | 5.18E-07 |
| 361697    | Tbcd10c      | 0.121992 | 0.64202178 | 0.796074 |
| 81710     | Msx1         | 0.121992 | 0.64202178 | 0.796074 |
| 497198    | Impact       | 0.121989 | 2.95E-07   | 3.21E-06 |
| 287750    | Prp211       | 0.121979 | 0.03379542 | 0.099112 |
| 362170    | Api5         | 0.121964 | 9.93E-07   | 9.87E-06 |
| 64040     | Aldh9a1      | 0.121948 | 5.23E-04   | 0.002918 |
| 317546    | Tab3         | 0.121947 | 0.00204838 | 0.00964  |
| 311731    | Scrn3        | 0.121889 | 1.75E-04   | 0.001103 |
| 313838    | Cdc42ep3     | 0.121883 | 0.07784853 | 0.190422 |
| 360726    | Fytt1        | 0.121764 | 3.24E-07   | 3.50E-06 |
| 312912    | Prex2        | 0.121758 | 6.44E-05   | 4.47E-04 |
| 117514    | Txnip        | 0.121735 | 1.23E-09   | 1.88E-08 |
| 444984    | Dnmt3a       | 0.121728 | 0.00355421 | 0.015529 |
| 315344    | Smug1        | 0.12162  | 0.0116     | 0.041818 |
| 360961    | Mxd4         | 0.121568 | 1.74E-07   | 1.95E-06 |
| 363069    | Ppcdc        | 0.121565 | 0.08774578 | 0.207902 |
| 363198    | Cenpq        | 0.12153  | 0.39222099 | 0.58943  |
| 316312    | Zfp451       | 0.121492 | 0.00161436 | 0.007835 |
| 64515     | Cdc20        | 0.121475 | 0.37848115 | 0.575549 |
| 245986    | Gng8         | 0.12145  | 0.26393695 | 0.454163 |
| 24251     | Cd53         | 0.121416 | 0.04848384 | 0.131911 |
| 361554    | Lsm14a       | 0.121403 | 3.89E-04   | 0.002255 |
| 314028    | Cb111        | 0.121384 | 0.01345948 | 0.047312 |
| 100362565 | LOC100362565 | 0.121368 | 0.35832141 | 0.555312 |
| 289233    | Pex19        | 0.121325 | 3.03E-08   | 3.80E-07 |
| 293165    | Sox6         | 0.121282 | 0.11438194 | 0.253156 |
| 498952    | Zfp1         | 0.121263 | 0.14116336 | 0.294464 |
| 313348    | Klh19        | 0.121173 | 5.99E-10   | 9.49E-09 |
| 56083     | Tgm2         | 0.121169 | 0.00399286 | 0.017115 |
| 365494    | Nanos1       | 0.121095 | 0.07516573 | 0.1856   |
| 191571    | Fat3         | 0.121038 | 0.02386865 | 0.075386 |
| 306104    | Pibf1        | 0.120962 | 0.04359337 | 0.121326 |

|           |                 |          |            |          |
|-----------|-----------------|----------|------------|----------|
| 432392    | Fut8            | 0.120959 | 7.03E-07   | 7.16E-06 |
| 299194    | Ptgr2           | 0.120957 | 0.00272159 | 0.012356 |
| 313620    | Srrml           | 0.120892 | 2.39E-08   | 3.03E-07 |
| 303313    | Scarfl          | 0.120875 | 0.34290698 | 0.539457 |
| 364788    | Arl5b           | 0.120869 | 0.00481435 | 0.020072 |
| 192649    | Prokr2          | 0.120789 | 0.02693023 | 0.082777 |
| 108349769 | LOC108349769    | 0.120749 | 0.23470489 | 0.421058 |
| 500972    | Stt3a           | 0.120707 | 2.99E-06   | 2.73E-05 |
| 500950    | Zfp317          | 0.120706 | 0.02180084 | 0.070135 |
| 117550    | Kif5b           | 0.12059  | 3.62E-31   | 2.14E-29 |
| 500077    | Cyren           | 0.120569 | 0.20127361 | 0.376992 |
| 303511    | Ikzf3           | 0.12053  | 0.67934722 | 0.820976 |
| 310626    | Tmem79          | 0.12053  | 0.67934722 | 0.820976 |
| 501664    | Fam3a           | 0.120483 | 0.00214704 | 0.010057 |
| 360990    | Usp34           | 0.120449 | 4.11E-10   | 6.63E-09 |
| 312371    | Avl9            | 0.120411 | 3.29E-05   | 2.44E-04 |
| 58954     | Klf6            | 0.120392 | 1.62E-06   | 1.55E-05 |
| 294190    | Olr1735         | 0.120388 | 0.93212922 | 0.97648  |
| 83574     | Rxrg            | 0.12037  | 0.01903656 | 0.062932 |
| 310958    | Zzz3            | 0.120363 | 0.00333012 | 0.014681 |
| 308476    | Capn12          | 0.120333 | 0.62847587 | 0.785646 |
| 302680    | Txlng           | 0.120331 | 0.01656713 | 0.056153 |
| 171071    | Ppp1r15a        | 0.120321 | 2.71E-04   | 0.001638 |
| 288416    | N4bp212         | 0.120154 | 0.01234794 | 0.044096 |
| 170908    | Tesk2           | 0.120146 | 0.121933   | 0.2657   |
| 108348092 | NEWGENE 1582771 | 0.12008  | 0.06028554 | 0.156657 |
| 63912     | Fam129a         | 0.120011 | 4.85E-05   | 3.46E-04 |
| 297804    | Plagl1          | 0.119965 | 0.14877421 | 0.304929 |
| 313433    | RGD1564541      | 0.119963 | 0.01598566 | 0.054629 |
| 308283    | Fbxo30          | 0.119925 | 0.00541204 | 0.022166 |
| 311726    | Pcmt2           | 0.119896 | 2.21E-04   | 0.001363 |
| 312562    | Rbsn            | 0.119878 | 2.89E-04   | 0.001731 |
| 362793    | Clba1           | 0.119877 | 0.23636265 | 0.423275 |
| 691777    | Lrrc75a         | 0.119802 | 0.04809426 | 0.130982 |
| 192211    | Prom2           | 0.119733 | 0.61382858 | 0.774402 |
| 679711    | LOC679711       | 0.119722 | 0.03980291 | 0.112855 |
| 683788    | Fscn1           | 0.119713 | 1.91E-04   | 0.001192 |
| 689890    | Srsf1           | 0.11971  | 8.94E-09   | 1.21E-07 |
| 314245    | Zbtb25          | 0.119666 | 0.00670905 | 0.02657  |
| 309144    | Ppp6r3          | 0.119656 | 1.92E-04   | 0.001195 |
| 25403     | Cast            | 0.119626 | 1.60E-12   | 3.34E-11 |
| 83824     | Cxhc4           | 0.119607 | 0.01596918 | 0.054582 |
| 291699    | Stard4          | 0.119591 | 3.14E-04   | 0.001868 |
| 366957    | Rac2            | 0.119405 | 0.13419404 | 0.284254 |
| 100910772 | Cox7a1          | 0.11934  | 0.54384298 | 0.725162 |
| 24842     | Tp53            | 0.119333 | 0.00636199 | 0.025444 |
| 287554    | Tefm            | 0.119248 | 0.2944711  | 0.490656 |
| 361167    | Bag4            | 0.119202 | 0.05963789 | 0.155334 |
| 59115     | Ninj2           | 0.119103 | 0.51583356 | 0.701317 |
| 288532    | Mcm7            | 0.119064 | 0.07920052 | 0.193035 |
| 311551    | Pofut1          | 0.119058 | 0.1830526  | 0.353323 |
| 300860    | Senp6           | 0.119042 | 2.46E-07   | 2.71E-06 |
| 311327    | Kn11            | 0.11898  | 0.32464942 | 0.520166 |
| 680581    | Rbm41           | 0.11898  | 0.32464942 | 0.520166 |
| 24525     | Kras            | 0.118942 | 2.05E-07   | 2.27E-06 |
| 89842     | Mbtps1          | 0.118927 | 1.34E-06   | 1.31E-05 |

|           |              |          |            |          |
|-----------|--------------|----------|------------|----------|
| 362187    | Ccdc34       | 0.118915 | 0.30460644 | 0.501489 |
| 303206    | Ulk2         | 0.11889  | 1.33E-07   | 1.53E-06 |
| 298031    | Susd1        | 0.118886 | 0.29518623 | 0.491504 |
| 502097    | Dkk4         | 0.118761 | 0.10338566 | 0.234347 |
| 24208     | Ar           | 0.118694 | 0.19697005 | 0.371562 |
| 289491    | Mrpl1        | 0.118673 | 0.17916794 | 0.347941 |
| 310614    | Gatad2b      | 0.118596 | 0.0189281  | 0.06266  |
| 360611    | Copz2        | 0.118557 | 0.08192021 | 0.198394 |
| 171457    | Cep170       | 0.118545 | 2.26E-09   | 3.33E-08 |
| 83617     | Hipk3        | 0.118426 | 7.84E-07   | 7.91E-06 |
| 362862    | Hsp90b1      | 0.118396 | 6.09E-21   | 2.29E-19 |
| 500629    | Rdh14        | 0.118345 | 0.03494688 | 0.101597 |
| 301416    | Coq10b       | 0.118321 | 0.02311189 | 0.07341  |
| 303057    | Slu7         | 0.118311 | 8.95E-04   | 0.004699 |
| 100911140 | LOC100911140 | 0.118171 | 0.88491684 | 0.947397 |
| 300649    | Crtam        | 0.118171 | 0.83781273 | 0.919345 |
| 301057    | Vill         | 0.118171 | 0.83781273 | 0.919345 |
| 315215    | Mlc1         | 0.118171 | 0.83781273 | 0.919345 |
| 492821    | Pmaip1       | 0.118171 | 0.47827809 | 0.667654 |
| 497761    | Cd2          | 0.118171 | 0.7229364  | 0.848482 |
| 498664    | Tex29        | 0.118171 | 0.83781273 | 0.919345 |
| 685680    | LOC685680    | 0.118171 | 0.83781273 | 0.919345 |
| 102555083 | LOC102555083 | 0.118171 | 0.60176458 | 0.765086 |
| 114093    | St14         | 0.118171 | 0.46049715 | 0.651863 |
| 300884    | Trim43a      | 0.118171 | 0.77221538 | 0.880781 |
| 312401    | Ndnf         | 0.118171 | 0.58811851 | 0.753648 |
| 315652    | Colca2       | 0.118171 | 0.77221538 | 0.880781 |
| 362948    | Zfp647       | 0.118171 | 0.60176458 | 0.765086 |
| 304429    | Psph         | 0.118171 | 0.09632535 | 0.222366 |
| 287765    | Ddx5         | 0.118149 | 5.09E-27   | 2.59E-25 |
| 308959    | Usp31        | 0.118141 | 2.87E-04   | 0.001719 |
| 298032    | Inip         | 0.118094 | 0.02483017 | 0.077676 |
| 100361585 | RGD1310951   | 0.11808  | 0.10646936 | 0.239484 |
| 304423    | Tyw1         | 0.11804  | 0.08473505 | 0.203298 |
| 24797     | Sst          | 0.118017 | 2.70E-05   | 2.04E-04 |
| 313481    | Tut4         | 0.117899 | 0.091786   | 0.214908 |
| 500964    | Prdm10       | 0.117837 | 0.10623212 | 0.239176 |
| 103690016 | LOC103690016 | 0.117816 | 0.0729043  | 0.18138  |
| 293949    | Hoga1        | 0.117795 | 0.17922857 | 0.347987 |
| 499337    | Dock8        | 0.117784 | 0.11588257 | 0.255615 |
| 25511     | Pemt         | 0.117752 | 0.33784582 | 0.53463  |
| 100909750 | LOC100909750 | 0.117691 | 0.02869158 | 0.087053 |
| 300231    | Dip2b        | 0.11769  | 9.71E-05   | 6.46E-04 |
| 310760    | Cttnbp2n1    | 0.117664 | 4.40E-05   | 3.18E-04 |
| 289026    | Sox13        | 0.117655 | 0.02239076 | 0.071549 |
| 116722    | Psmd10       | 0.117639 | 0.14079939 | 0.293995 |
| 293488    | Sgf29        | 0.117629 | 0.05970629 | 0.15547  |
| 362740    | Mbip         | 0.117586 | 0.10506555 | 0.236942 |
| 24852     | Tpm4         | 0.117561 | 1.39E-05   | 1.10E-04 |
| 306872    | Cage1        | 0.117557 | 0.42908443 | 0.624191 |
| 313876    | Birc6        | 0.117536 | 2.85E-08   | 3.59E-07 |
| 100359484 | Zfp628       | 0.117495 | 0.09233168 | 0.215868 |
| 498858    | Ccdc112      | 0.11743  | 0.10809496 | 0.242168 |
| 316129    | Uhrf1        | 0.117405 | 0.47967263 | 0.668278 |
| 294925    | Fndc3b       | 0.117386 | 2.87E-04   | 0.001719 |
| 307547    | Zfp35        | 0.11721  | 0.04329187 | 0.120628 |

|           |              |          |            |          |
|-----------|--------------|----------|------------|----------|
| 25609     | Tub          | 0.117156 | 0.1962843  | 0.370893 |
| 499443    | Lims1        | 0.117152 | 6.07E-06   | 5.21E-05 |
| 305268    | Uba6         | 0.117135 | 1.53E-05   | 1.21E-04 |
| 292267    | Armt1        | 0.117121 | 0.01966607 | 0.064609 |
| 499508    | Zfyve16      | 0.1171   | 0.01144092 | 0.041377 |
| 296757    | Napepld      | 0.117095 | 0.09379202 | 0.218184 |
| 652955    | Rnf130       | 0.117083 | 0.00256484 | 0.011734 |
| 246152    | Wdr44        | 0.117074 | 0.00104054 | 0.005352 |
| 362078    | Ehmt1        | 0.117035 | 0.0206705  | 0.067271 |
| 315666    | Npat         | 0.116955 | 0.02121152 | 0.068633 |
| 290959    | Slc35d2      | 0.116951 | 0.171881   | 0.338553 |
| 246212    | Sipa111      | 0.116903 | 3.93E-04   | 0.002278 |
| 361886    | Adamts6      | 0.116864 | 0.44621199 | 0.638763 |
| 83803     | Prkab1       | 0.116837 | 0.04609658 | 0.126884 |
| 289344    | Hhat         | 0.116814 | 0.55477348 | 0.734389 |
| 26956     | Ak3          | 0.116799 | 6.67E-04   | 0.003626 |
| 313087    | Cpne3        | 0.116796 | 1.05E-11   | 2.04E-10 |
| 303919    | Lrrc58       | 0.116752 | 0.00349282 | 0.015313 |
| 100360601 | LOC100360601 | 0.116746 | 0.41802143 | 0.613865 |
| 25467     | Irs1         | 0.116708 | 0.29177782 | 0.487234 |
| 685258    | Eny2         | 0.116707 | 3.26E-04   | 0.001935 |
| 108353205 | LOC108353205 | 0.116681 | 0.11830884 | 0.259495 |
| 689176    | Tmem64       | 0.116659 | 0.01243394 | 0.044337 |
| 287747    | Spata32      | 0.11665  | 0.61832085 | 0.777135 |
| 502603    | Srsf11       | 0.116619 | 7.03E-06   | 5.93E-05 |
| 307667    | Hmgxb4       | 0.116613 | 0.06553143 | 0.166851 |
| 363172    | Lars2        | 0.116596 | 0.01650455 | 0.05598  |
| 310764    | Inka2        | 0.116583 | 7.94E-05   | 5.40E-04 |
| 361843    | Aifm2        | 0.116546 | 0.06762927 | 0.171026 |
| 313130    | Pm20d2       | 0.116513 | 0.17751287 | 0.346067 |
| 314180    | Mdga2        | 0.116457 | 0.02792177 | 0.085206 |
| 310506    | Ppm11        | 0.11645  | 3.55E-08   | 4.40E-07 |
| 679812    | Plekhg1      | 0.116357 | 0.01867928 | 0.06202  |
| 293627    | Tspan4       | 0.116354 | 0.07796283 | 0.190579 |
| 309591    | Trim39       | 0.11635  | 0.04769787 | 0.130181 |
| 25315     | Ephx1        | 0.116239 | 0.00152149 | 0.007445 |
| 316369    | Nck2         | 0.116154 | 0.08341877 | 0.200899 |
| 25369     | Adora2a      | 0.116151 | 0.1733172  | 0.340607 |
| 366153    | Nutml        | 0.116119 | 0.25848301 | 0.447854 |
| 294235    | Ier3         | 0.116106 | 0.09920972 | 0.227179 |
| 362713    | Selenoi      | 0.116089 | 4.30E-04   | 0.002461 |
| 499330    | Nmrk1        | 0.116058 | 0.16530449 | 0.329071 |
| 291597    | Trim36       | 0.116048 | 1.20E-09   | 1.84E-08 |
| 500086    | Ttc26        | 0.116012 | 0.08117857 | 0.196923 |
| 288242    | Chaf1b       | 0.115995 | 0.44496341 | 0.637791 |
| 360681    | Narf         | 0.115984 | 0.0019983  | 0.009446 |
| 365192    | Zfp324       | 0.115983 | 0.14894562 | 0.304723 |
| 290300    | Tnfrsf19     | 0.115904 | 0.56629849 | 0.73654  |
| 29645     | Ptprj        | 0.11588  | 9.86E-04   | 0.005115 |
| 298875    | Laptm4a      | 0.115796 | 3.28E-17   | 1.02E-15 |
| 499442    | Ccdc138      | 0.115791 | 0.27409872 | 0.466215 |
| 64563     | Nphs1        | 0.115788 | 0.58014349 | 0.747705 |
| 308908    | RGD1561034   | 0.115787 | 0.37701666 | 0.573918 |
| 100360606 | Zranb1       | 0.11578  | 0.00135336 | 0.006719 |
| 308807    | Prss23       | 0.11577  | 0.06485349 | 0.165679 |
| 690899    | Vsir         | 0.11575  | 0.00397622 | 0.017059 |

|           |              |          |            |          |
|-----------|--------------|----------|------------|----------|
| 312965    | Ubxn2b       | 0.115695 | 0.0369975  | 0.106357 |
| 298443    | Toe1         | 0.115619 | 0.19030073 | 0.363336 |
| 315634    | Rbm7         | 0.115601 | 0.04840242 | 0.131746 |
| 304543    | Mlec         | 0.115599 | 1.28E-12   | 2.70E-11 |
| 65134     | Stx5         | 0.115594 | 0.00574824 | 0.023293 |
| 302811    | Elf4         | 0.115586 | 0.31531064 | 0.509943 |
| 315434    | Ankrd49      | 0.115557 | 0.06509476 | 0.166117 |
| 102552783 | Ac1576       | 0.115524 | 0.3543621  | 0.55124  |
| 84587     | Plcl1        | 0.115475 | 0.06299356 | 0.162189 |
| 362011    | Dram2        | 0.115417 | 0.01626932 | 0.05534  |
| 690512    | Tt114        | 0.115382 | 0.02431839 | 0.076502 |
| 295496    | Trmt10a      | 0.115362 | 0.0129194  | 0.045794 |
| 362924    | St3gall      | 0.115332 | 0.01556653 | 0.053494 |
| 497958    | Gemin4       | 0.115329 | 0.05224341 | 0.13945  |
| 361238    | Pxdc1        | 0.115314 | 0.11717755 | 0.257577 |
| 314249    | Plekhg3      | 0.115308 | 2.38E-04   | 0.001459 |
| 298075    | Ncbp1        | 0.115308 | 6.34E-04   | 0.003465 |
| 688705    | Dgki         | 0.115303 | 4.42E-16   | 1.26E-14 |
| 691246    | Rnf207       | 0.11528  | 0.26839753 | 0.459638 |
| 306487    | Mtus1        | 0.115267 | 1.42E-07   | 1.63E-06 |
| 29534     | Pex2         | 0.115204 | 0.06714161 | 0.169951 |
| 287615    | Vezf1        | 0.115197 | 0.00123876 | 0.006218 |
| 100360457 | Fmn2         | 0.115183 | 0.00465252 | 0.019517 |
| 100362554 | Otulin       | 0.115168 | 0.01527957 | 0.052689 |
| 680515    | Ckap2l       | 0.115168 | 0.54424007 | 0.725438 |
| 503169    | RGD1564963   | 0.115163 | 0.38104843 | 0.578022 |
| 25454     | Gfra1        | 0.115136 | 4.59E-14   | 1.14E-12 |
| 310667    | Cers2        | 0.115131 | 7.42E-07   | 7.54E-06 |
| 361326    | Dtdw2        | 0.115125 | 0.32928945 | 0.525148 |
| 84006     | Prkci        | 0.115118 | 4.56E-05   | 3.28E-04 |
| 685072    | Rarg         | 0.115092 | 0.00499533 | 0.020709 |
| 117259    | Tra2b        | 0.115001 | 8.10E-06   | 6.76E-05 |
| 309595    | Mdc1         | 0.114983 | 0.07261459 | 0.180824 |
| 378794    | Trmt11       | 0.114925 | 0.31392409 | 0.508911 |
| 309361    | Chuk         | 0.114888 | 0.01167781 | 0.042066 |
| 171337    | Rap1b        | 0.114847 | 2.17E-10   | 3.64E-09 |
| 297417    | Gfpt1        | 0.114779 | 9.84E-05   | 6.54E-04 |
| 58821     | Zranb2       | 0.114736 | 1.18E-06   | 1.15E-05 |
| 306672    | Tent4a       | 0.114724 | 0.0131651  | 0.046492 |
| 102556047 | LOC102556047 | 0.114704 | 0.00107569 | 0.005504 |
| 298598    | Necap2       | 0.114615 | 0.00697316 | 0.027433 |
| 102551716 | Nkain2       | 0.114478 | 2.64E-05   | 2.00E-04 |
| 103694079 | LOC103694079 | 0.114449 | 0.02534542 | 0.078899 |
| 308503    | RGD1563307   | 0.114437 | 0.1437304  | 0.298218 |
| 360949    | Cpeb2        | 0.114416 | 4.78E-08   | 5.82E-07 |
| 289754    | Xbp1         | 0.114406 | 1.01E-05   | 8.32E-05 |
| 308923    | Ahi1         | 0.114348 | 0.04743627 | 0.129728 |
| 300901    | Plod2        | 0.114339 | 0.01243087 | 0.044343 |
| 497975    | Znhit3       | 0.114336 | 0.05313862 | 0.141443 |
| 171433    | Micu2        | 0.114288 | 9.99E-04   | 0.005173 |
| 315509    | Jam3         | 0.114282 | 0.00111545 | 0.005677 |
| 81666     | Gnaq         | 0.114282 | 9.32E-05   | 6.22E-04 |
| 310261    | Eif5a2       | 0.114217 | 8.34E-17   | 2.50E-15 |
| 309126    | Tnpo1        | 0.11421  | 2.02E-06   | 1.90E-05 |
| 310467    | Tiparp       | 0.114181 | 0.00577993 | 0.023401 |
| 299510    | Zbtb39       | 0.114136 | 0.08552125 | 0.204591 |



|           |              |          |            |          |
|-----------|--------------|----------|------------|----------|
| 305310    | Slain2       | 0.114106 | 1.70E-04   | 0.001075 |
| 365407    | Cpsf7        | 0.114095 | 7.94E-04   | 0.004231 |
| 300996    | Rbm5         | 0.113994 | 1.57E-05   | 1.24E-04 |
| 500985    | Cbl          | 0.113976 | 5.34E-06   | 4.64E-05 |
| 297998    | Nudt2        | 0.11394  | 0.00547941 | 0.022375 |
| 311919    | Golga1       | 0.113929 | 0.00662315 | 0.026306 |
| 296995    | Mrps33       | 0.113929 | 0.00915386 | 0.034433 |
| 497976    | Rad51c       | 0.113896 | 0.31478581 | 0.509267 |
| 64521     | Tspan2       | 0.113869 | 4.13E-05   | 2.99E-04 |
| 25275     | Cnp          | 0.113834 | 4.41E-14   | 1.10E-12 |
| 501285    | Yju2         | 0.113819 | 0.01796278 | 0.06007  |
| 501059    | Kif9         | 0.113739 | 0.21319051 | 0.393355 |
| 365371    | Tbx6         | 0.113725 | 0.77632376 | 0.883166 |
| 292767    | Catsperg     | 0.113718 | 0.29369972 | 0.489585 |
| 362303    | Klh17        | 0.113621 | 6.41E-04   | 0.003496 |
| 291164    | Zkscan4      | 0.113476 | 0.32553465 | 0.521255 |
| 498840    | Tmem173      | 0.113474 | 0.40799094 | 0.604825 |
| 499437    | Mcm9         | 0.11344  | 0.12012204 | 0.262595 |
| 287076    | Zfp263       | 0.113394 | 0.13325445 | 0.282861 |
| 304863    | Odr4         | 0.113349 | 0.00154362 | 0.007536 |
| 499068    | Zfp583       | 0.113342 | 0.12905349 | 0.276284 |
| 25695     | Cebpd        | 0.113317 | 0.03150389 | 0.093807 |
| 85240     | Plcb2        | 0.1133   | 0.54900399 | 0.729643 |
| 83537     | Smpd2        | 0.113284 | 0.28021889 | 0.473622 |
| 361999    | Anp32e       | 0.113281 | 3.80E-05   | 2.78E-04 |
| 292155    | Hs2st1       | 0.113277 | 2.24E-05   | 1.72E-04 |
| 302378    | Lpar4        | 0.113252 | 0.54752583 | 0.728364 |
| 304268    | Ras111a      | 0.113252 | 0.54752583 | 0.728364 |
| 310775    | Lrif1        | 0.113242 | 0.04832079 | 0.131561 |
| 301737    | Fer          | 0.113214 | 0.01408332 | 0.049124 |
| 498412    | Sun3         | 0.113181 | 0.7626691  | 0.874686 |
| 294978    | RGD1307100   | 0.113162 | 2.10E-10   | 3.53E-09 |
| 305579    | RGD1305110   | 0.113133 | 1.17E-07   | 1.36E-06 |
| 310378    | Nnt          | 0.113073 | 0.0190319  | 0.062928 |
| 291409    | Zfp236       | 0.11295  | 0.01909559 | 0.063029 |
| 100359678 | Armcx4       | 0.112868 | 0.00857528 | 0.032598 |
| 65157     | Amot12       | 0.112806 | 0.01671401 | 0.05656  |
| 689997    | Fam91a1      | 0.112731 | 3.86E-06   | 3.45E-05 |
| 312812    | Eps8         | 0.112695 | 0.03766482 | 0.107804 |
| 293166    | Insc         | 0.112677 | 0.04443893 | 0.123211 |
| 311348    | Cdan1        | 0.112674 | 0.03214231 | 0.095291 |
| 298874    | Pum2         | 0.112631 | 9.51E-08   | 1.12E-06 |
| 302953    | Slx4         | 0.112556 | 0.01372311 | 0.048061 |
| 686298    | Ppm1m        | 0.112517 | 0.19524683 | 0.369556 |
| 294962    | Gnb4         | 0.112474 | 0.00514995 | 0.021271 |
| 102552000 | LOC102552000 | 0.11244  | 0.03304065 | 0.097348 |
| 304150    | Usp25        | 0.112412 | 9.24E-05   | 6.18E-04 |
| 85247     | S100a6       | 0.112389 | 1.74E-10   | 2.94E-09 |
| 85270     | Tekt1        | 0.112318 | 0.62475602 | 0.782589 |
| 25290     | Alox5        | 0.112313 | 0.39260811 | 0.589826 |
| 170910    | Mtdh         | 0.112288 | 3.98E-05   | 2.89E-04 |
| 291259    | Zmynd11      | 0.11227  | 1.81E-05   | 1.41E-04 |
| 29411     | Ppt1         | 0.112254 | 1.33E-05   | 1.06E-04 |
| 29647     | Cask         | 0.112226 | 0.01904846 | 0.06296  |
| 54267     | Maf          | 0.112198 | 1.44E-07   | 1.64E-06 |
| 361688    | Kmt5b        | 0.112144 | 0.00310948 | 0.013859 |

|           |              |          |            |          |
|-----------|--------------|----------|------------|----------|
| 25126     | Stat5b       | 0.112034 | 0.01159789 | 0.041818 |
| 365548    | Pttglip      | 0.112002 | 6.44E-07   | 6.60E-06 |
| 311987    | Rsbnl1       | 0.111964 | 0.06446544 | 0.165019 |
| 192223    | Opn4         | 0.111922 | 0.36098429 | 0.55785  |
| 362040    | Ostc         | 0.111815 | 3.73E-04   | 0.002174 |
| 501015    | C2cd4b       | 0.111793 | 0.26570544 | 0.456505 |
| 303617    | Bptf         | 0.111764 | 1.44E-04   | 9.26E-04 |
| 207118    | Bod111       | 0.111763 | 2.72E-04   | 0.001645 |
| 313131    | Rngtt        | 0.111756 | 0.0242171  | 0.076246 |
| 103690018 | LOC103690018 | 0.111745 | 0.12395437 | 0.268843 |
| 498385    | Lcor1        | 0.1117   | 0.06478853 | 0.165557 |
| 501039    | Slc25a36     | 0.111646 | 1.87E-06   | 1.77E-05 |
| 25689     | Htr5a        | 0.111628 | 0.69050665 | 0.828756 |
| 287774    | Apoh         | 0.111628 | 0.57337073 | 0.742443 |
| 288308    | Ltn1         | 0.111599 | 1.69E-04   | 0.001068 |
| 301076    | Zfp445       | 0.111593 | 3.54E-04   | 0.002079 |
| 25097     | Pld2         | 0.11155  | 0.01295416 | 0.045891 |
| 64831     | Ireb2        | 0.111511 | 9.25E-05   | 6.18E-04 |
| 312182    | Rbm28        | 0.111493 | 0.03957581 | 0.112328 |
| 306814    | Phf2         | 0.111434 | 0.00377584 | 0.016347 |
| 291091    | Serpinb1a    | 0.111433 | 5.26E-12   | 1.05E-10 |
| 302502    | Cul4b        | 0.111375 | 1.45E-04   | 9.30E-04 |
| 360574    | Utp6         | 0.111354 | 0.00106406 | 0.005455 |
| 498823    | Ankrd29      | 0.111233 | 4.02E-04   | 0.002323 |
| 108350772 | LOC108350772 | 0.111218 | 0.65677692 | 0.80336  |
| 287127    | Cramp1       | 0.11116  | 0.02770154 | 0.084765 |
| 293514    | Bcl7c        | 0.111069 | 0.06245824 | 0.160941 |
| 313593    | Ago3         | 0.11104  | 0.00506502 | 0.020952 |
| 317371    | Was          | 0.110946 | 0.49170981 | 0.679087 |
| 122799    | Rps25        | 0.110923 | 1.64E-07   | 1.85E-06 |
| 25359     | Tmpo         | 0.110825 | 0.00147058 | 0.007237 |
| 63845     | Tmeff1       | 0.110813 | 0.00907406 | 0.034194 |
| 297123    | Fkbp9        | 0.110806 | 3.51E-05   | 2.58E-04 |
| 64370     | Metap2       | 0.110796 | 5.41E-05   | 3.82E-04 |
| 361580    | Gtf2h1       | 0.110692 | 0.00433577 | 0.018334 |
| 299008    | Nubpl        | 0.110676 | 0.27752812 | 0.4702   |
| 310621    | Iqgap3       | 0.110641 | 0.26973637 | 0.461143 |
| 361103    | Zmiz1        | 0.110635 | 9.80E-07   | 9.74E-06 |
| 299139    | Slc38a6      | 0.110609 | 0.33156817 | 0.52781  |
| 297705    | Aebp2        | 0.110594 | 0.00849952 | 0.032375 |
| 311403    | Mtfr1        | 0.110591 | 0.14004534 | 0.292934 |
| 290270    | Mphosph8     | 0.110555 | 7.87E-05   | 5.36E-04 |
| 679822    | LOC679822    | 0.11054  | 0.84063119 | 0.920475 |
| 81638     | Agtrlb       | 0.110538 | 0.70311527 | 0.837607 |
| 100910371 | LOC100910371 | 0.110534 | 0.46563682 | 0.656504 |
| 308631    | Nhs11        | 0.110531 | 0.31236982 | 0.507601 |
| 101241893 | Trim34       | 0.110497 | 0.18388494 | 0.354462 |
| 362263    | Ptprt        | 0.110473 | 3.37E-04   | 0.001991 |
| 85424     | Elf1         | 0.11045  | 0.05355269 | 0.142366 |
| 100365928 | Fam166b      | 0.110438 | 0.77307115 | 0.881309 |
| 363146    | Dalrd3       | 0.110427 | 0.04769326 | 0.130206 |
| 307271    | Mex3c        | 0.110356 | 0.00240563 | 0.011093 |
| 312046    | Dbf4         | 0.11028  | 0.49515026 | 0.681762 |
| 288589    | Rasa4        | 0.110222 | 0.47560598 | 0.665241 |
| 287954    | Dgcr8        | 0.110217 | 0.02353925 | 0.074506 |
| 362609    | Pum1         | 0.110214 | 5.73E-04   | 0.003161 |

|           |           |          |            |          |
|-----------|-----------|----------|------------|----------|
| 304827    | Kcnt2     | 0.110188 | 0.14233729 | 0.296329 |
| 315728    | Thsd4     | 0.110182 | 9.67E-07   | 9.63E-06 |
| 83830     | Gtf2a1    | 0.110154 | 0.00342013 | 0.015033 |
| 361015    | Atxn7     | 0.110134 | 0.05719691 | 0.150292 |
| 312135    | Tmem168   | 0.110086 | 0.01544233 | 0.053134 |
| 293038    | Zfp592    | 0.110035 | 0.00374241 | 0.016236 |
| 84590     | Rab27b    | 0.110029 | 0.00128986 | 0.006444 |
| 362779    | Vrk1      | 0.110013 | 0.12891841 | 0.27615  |
| 171574    | Dnm3      | 0.110012 | 3.52E-19   | 1.21E-17 |
| 282838    | Gm2a      | 0.110002 | 2.02E-05   | 1.56E-04 |
| 497991    | Med1      | 0.109899 | 0.00194225 | 0.00922  |
| 309156    | Bbs1      | 0.109875 | 0.02104906 | 0.0682   |
| 363017    | Taf1d     | 0.109847 | 0.17747428 | 0.346028 |
| 289315    | Sde2      | 0.109808 | 0.06953426 | 0.17473  |
| 361057    | Ints6     | 0.109743 | 0.04442892 | 0.123202 |
| 170945    | Chrna2    | 0.109609 | 0.84357652 | 0.922083 |
| 287799    | Cpsf41    | 0.109609 | 0.84357652 | 0.922083 |
| 29244     | Gch1      | 0.109609 | 0.62885758 | 0.785969 |
| 298288    | C8a       | 0.109609 | 0.84357652 | 0.922083 |
| 300776    | Iqch      | 0.109609 | 0.78020358 | 0.885544 |
| 312668    | Cacna2d4  | 0.109609 | 0.84357652 | 0.922083 |
| 502306    | Igsf23    | 0.109609 | 0.78020358 | 0.885544 |
| 689055    | Rad51ap1  | 0.109609 | 0.40250125 | 0.599627 |
| 691670    | LOC691670 | 0.109609 | 0.84357652 | 0.922083 |
| 80722     | Sost      | 0.109609 | 0.84357652 | 0.922083 |
| 84018     | Synj2     | 0.109609 | 0.13629078 | 0.287035 |
| 298682    | Atad3a    | 0.109593 | 0.03432903 | 0.100245 |
| 102552199 | Tgm7      | 0.109579 | 0.20988715 | 0.388351 |
| 296285    | Commd7    | 0.109507 | 0.01689171 | 0.057009 |
| 171121    | Ppp6c     | 0.109476 | 1.59E-05   | 1.25E-04 |
| 299636    | Tle2      | 0.109395 | 0.23048195 | 0.415439 |
| 25358     | Timp3     | 0.10939  | 3.57E-27   | 1.84E-25 |
| 363188    | Ubr2      | 0.109389 | 1.80E-04   | 0.00113  |
| 308968    | Rbbp6     | 0.109385 | 9.12E-04   | 0.004782 |
| 360534    | Trim11    | 0.109361 | 0.11483222 | 0.253798 |
| 25111     | Chrm4     | 0.109337 | 0.40228668 | 0.599401 |
| 310677    | Otud7b    | 0.109333 | 2.04E-04   | 0.001263 |
| 302553    | Suv39h1   | 0.109303 | 0.13206482 | 0.281088 |
| 680258    | Zfp748    | 0.109268 | 0.07995229 | 0.19437  |
| 361391    | Cbfb      | 0.109268 | 1.25E-09   | 1.91E-08 |
| 65189     | Stk3      | 0.109178 | 0.03886872 | 0.110634 |
| 685928    | Zc3h10    | 0.109144 | 0.10441894 | 0.235987 |
| 362004    | Gdap2     | 0.109121 | 0.00861618 | 0.032708 |
| 114612    | Ddx39b    | 0.109089 | 2.67E-07   | 2.92E-06 |
| 316235    | Polh      | 0.109058 | 0.19678833 | 0.371404 |
| 688903    | Nme5      | 0.108983 | 0.3893145  | 0.586219 |
| 246174    | Fgd4      | 0.108924 | 0.0591764  | 0.154449 |
| 64550     | Top1      | 0.108923 | 0.00947088 | 0.035437 |
| 58852     | Nr1h3     | 0.108918 | 0.13749996 | 0.288943 |
| 171407    | Gprasp1   | 0.108906 | 1.87E-06   | 1.77E-05 |
| 29144     | Canx      | 0.108898 | 3.32E-36   | 2.35E-34 |
| 500350    | LOC500350 | 0.108858 | 0.32285672 | 0.518056 |
| 294975    | Exosc9    | 0.108855 | 0.00988145 | 0.036713 |
| 304470    | Sbno1     | 0.108822 | 4.00E-06   | 3.56E-05 |
| 691143    | LOC691143 | 0.108822 | 0.37920864 | 0.576333 |
| 301038    | Ubp1      | 0.108819 | 6.56E-04   | 0.003568 |

|           |                 |          |            |          |
|-----------|-----------------|----------|------------|----------|
| 303211    | Mmgt2           | 0.108813 | 0.06360461 | 0.163409 |
| 81661     | Gmfb            | 0.108804 | 2.37E-14   | 6.03E-13 |
| 288620    | Cct6a           | 0.108772 | 1.02E-07   | 1.20E-06 |
| 287418    | Arhgef15        | 0.108772 | 0.18133972 | 0.351084 |
| 25597     | Rasa2           | 0.108707 | 0.12479795 | 0.269966 |
| 313429    | Pars2           | 0.108684 | 0.25186386 | 0.440149 |
| 293828    | Mphosph10       | 0.108656 | 0.05058218 | 0.135969 |
| 367252    | Mgat4a          | 0.108609 | 0.01162308 | 0.041893 |
| 24530     | Lcat            | 0.1086   | 0.04028106 | 0.113922 |
| 286973    | Elavl2          | 0.108542 | 1.34E-12   | 2.83E-11 |
| 170842    | Tob1            | 0.108503 | 0.01618802 | 0.055182 |
| 360734    | Dnajb11         | 0.108498 | 0.00366441 | 0.015944 |
| 300284    | Alg13           | 0.108459 | 0.14455064 | 0.298976 |
| 360894    | RGD1310587      | 0.108436 | 0.02696004 | 0.082842 |
| 691113    | LOC691113       | 0.108409 | 0.10850262 | 0.242738 |
| 311530    | Nanp            | 0.108403 | 0.31695338 | 0.511601 |
| 108348214 | NEWGENE_1565644 | 0.108391 | 0.04639941 | 0.127588 |
| 25676     | Rasa1           | 0.108357 | 5.17E-04   | 0.002891 |
| 304860    | Np1             | 0.108325 | 0.12544503 | 0.27072  |
| 366889    | Zdhhc17         | 0.108295 | 3.36E-05   | 2.49E-04 |
| 497811    | Xdh             | 0.108294 | 0.02167145 | 0.069777 |
| 366300    | Pcmt1           | 0.108288 | 1.35E-05   | 1.08E-04 |
| 294787    | Nipbl           | 0.108276 | 0.00111907 | 0.005688 |
| 302935    | Ubn1            | 0.108261 | 0.00850159 | 0.032376 |
| 289453    | Abcg311         | 0.108255 | 0.00110312 | 0.005622 |
| 293452    | Palb2           | 0.108209 | 0.42502849 | 0.620234 |
| 306279    | Arhgap22        | 0.108127 | 0.01532392 | 0.052803 |
| 289085    | Edem3           | 0.108101 | 4.66E-05   | 3.35E-04 |
| 84404     | Gemin2          | 0.108089 | 0.23963245 | 0.426962 |
| 367021    | Fam76b          | 0.108084 | 0.07595081 | 0.186957 |
| 295678    | Sestd1          | 0.108073 | 2.37E-04   | 0.001453 |
| 108353138 | LOC108353138    | 0.108056 | 0.61494031 | 0.775137 |
| 308215    | Chd1            | 0.108046 | 0.01829794 | 0.060966 |
| 305955    | Zc3h13          | 0.107985 | 0.00195233 | 0.009258 |
| 170698    | Slcola2         | 0.107979 | 0.00390851 | 0.016799 |
| 295596    | Orc4            | 0.107915 | 1.87E-04   | 0.001167 |
| 362955    | Nol12           | 0.107913 | 0.18412049 | 0.354881 |
| 301010    | Slc26a6         | 0.107848 | 0.1231929  | 0.267618 |
| 312251    | Luc712          | 0.107829 | 4.66E-07   | 4.88E-06 |
| 297486    | Ppp4r2          | 0.10781  | 7.13E-04   | 0.003848 |
| 290556    | Gn13            | 0.107779 | 0.02454059 | 0.076909 |
| 192204    | Ehd4            | 0.107761 | 1.64E-04   | 0.001036 |
| 114024    | Acs13           | 0.107727 | 3.52E-05   | 2.59E-04 |
| 313770    | Mxra8           | 0.10772  | 4.67E-05   | 3.35E-04 |
| 498355    | Grxcr1          | 0.107663 | 0.69563903 | 0.832398 |
| 688018    | Zfp106          | 0.107636 | 3.91E-12   | 7.92E-11 |
| 361802    | Hsd17b8         | 0.107569 | 0.12673633 | 0.272703 |
| 25301     | Cebpg           | 0.107536 | 9.65E-04   | 0.00502  |
| 362686    | Cebpz           | 0.107494 | 0.00404187 | 0.017294 |
| 309512    | Tnks2           | 0.107491 | 2.06E-04   | 0.001277 |
| 295062    | Wwtr1           | 0.10749  | 0.06672353 | 0.169208 |
| 64823     | Csnk1g3         | 0.107457 | 5.76E-05   | 4.05E-04 |
| 292095    | Ttc13           | 0.107451 | 0.01287088 | 0.045639 |
| 304014    | Adgrg7          | 0.107428 | 0.68258379 | 0.823189 |
| 498265    | LOC498265       | 0.107407 | 0.56892988 | 0.73855  |
| 363225    | RGD1305645      | 0.107391 | 0.14374311 | 0.298212 |

|           |              |          |            |          |
|-----------|--------------|----------|------------|----------|
| 102550789 | LOC102550789 | 0.107343 | 0.59270771 | 0.757694 |
| 302937    | Anks3        | 0.107274 | 0.05969202 | 0.155454 |
| 294606    | Fam172a      | 0.107139 | 0.00295493 | 0.013263 |
| 315723    | Senp8        | 0.10712  | 0.30183209 | 0.498819 |
| 29487     | Gstt2        | 0.107074 | 0.07960839 | 0.193756 |
| 305539    | Spred2       | 0.107054 | 0.04773248 | 0.130239 |
| 289594    | Nipal1       | 0.10703  | 0.40794668 | 0.604948 |
| 501126    | Vwa3b        | 0.10703  | 0.73549126 | 0.857222 |
| 59302     | Bmp15        | 0.10703  | 0.73549126 | 0.857222 |
| 54286     | Prkg1        | 0.106977 | 0.0413058  | 0.116011 |
| 24205     | Apc          | 0.10693  | 2.22E-10   | 3.73E-09 |
| 66012     | Gucyla2      | 0.106904 | 0.38333054 | 0.580144 |
| 303469    | Dlx4         | 0.106899 | 0.74964026 | 0.866212 |
| 312159    | Fam3c        | 0.106864 | 0.00128035 | 0.0064   |
| 314545    | Wdr75        | 0.106864 | 0.01203451 | 0.043163 |
| 316482    | Crispld1     | 0.106793 | 0.20524906 | 0.38237  |
| 312132    | Tmem106b     | 0.10677  | 7.55E-04   | 0.004052 |
| 171564    | Pbld1        | 0.106711 | 0.25976858 | 0.449264 |
| 102554045 | LOC102554045 | 0.106677 | 0.81649865 | 0.907777 |
| 25479     | Vps35        | 0.106663 | 2.12E-13   | 4.86E-12 |
| 192179    | Gpm6b        | 0.106593 | 6.76E-23   | 2.80E-21 |
| 25281     | Nup153       | 0.106589 | 0.0012985  | 0.006484 |
| 102550851 | LOC102550851 | 0.10658  | 0.08685326 | 0.206791 |
| 246282    | Zfp91        | 0.106567 | 2.27E-06   | 2.11E-05 |
| 301516    | Stk36        | 0.106529 | 0.2184083  | 0.399922 |
| 305012    | Kif26b       | 0.106512 | 0.06952498 | 0.174753 |
| 294283    | Rgl2         | 0.106489 | 0.04037462 | 0.114119 |
| 363517    | Plxb3        | 0.106463 | 2.14E-04   | 0.001323 |
| 362251    | Rbm39        | 0.106459 | 2.63E-06   | 2.43E-05 |
| 432360    | Sgce         | 0.106454 | 0.00593789 | 0.023919 |
| 170911    | Pik3ca       | 0.106425 | 6.43E-05   | 4.47E-04 |
| 306455    | Cdkn2aip     | 0.10642  | 0.07818366 | 0.191045 |
| 362751    | Tmx1         | 0.1064   | 4.42E-05   | 3.19E-04 |
| 688405    | Cdk2ap2      | 0.106343 | 0.03317516 | 0.097639 |
| 308692    | Peg12        | 0.106321 | 0.78283009 | 0.887124 |
| 100911798 | Seh1l        | 0.106287 | 0.01803774 | 0.060279 |
| 498873    | MGC105567    | 0.106233 | 0.19639932 | 0.370964 |
| 290533    | Slmap        | 0.106232 | 1.22E-05   | 9.87E-05 |
| 296281    | Plagl2       | 0.106198 | 0.19241995 | 0.366025 |
| 312574    | Lrig1        | 0.106097 | 0.01560556 | 0.05358  |
| 294065    | Kcnv2        | 0.106095 | 0.34137287 | 0.538199 |
| 361449    | Ppil4        | 0.106089 | 0.05453153 | 0.144545 |
| 294924    | Mecom        | 0.106076 | 0.30648036 | 0.50249  |
| 680229    | Sgcb         | 0.106058 | 4.40E-06   | 3.88E-05 |
| 287159    | Pigq         | 0.106025 | 7.93E-05   | 5.39E-04 |
| 117060    | Ubr5         | 0.105993 | 2.22E-09   | 3.28E-08 |
| 108350812 | LOC108350812 | 0.10599  | 0.54732203 | 0.728373 |
| 252832    | Zc3hav1      | 0.105973 | 0.00109177 | 0.005571 |
| 289277    | Desi2        | 0.105967 | 0.05165817 | 0.138198 |
| 366959    | Gcat         | 0.105937 | 0.26944021 | 0.46076  |
| 299331    | Hsp90aa1     | 0.105926 | 3.49E-119  | #####    |
| 24812     | Tap2         | 0.1059   | 0.10783978 | 0.241625 |
| 65144     | Pdzk1        | 0.105899 | 0.11493436 | 0.253906 |
| 641520    | Popdc3       | 0.105858 | 0.0478753  | 0.130497 |
| 102548228 | Bivm         | 0.105852 | 0.03832586 | 0.109285 |
| 304266    | Gbp1         | 0.105845 | 0.82761935 | 0.913316 |

|           |              |          |            |          |
|-----------|--------------|----------|------------|----------|
| 362925    | Zfat         | 0.10583  | 0.07370977 | 0.182882 |
| 103690550 | LOC103690550 | 0.105787 | 0.78387503 | 0.887832 |
| 689721    | Rnf212       | 0.105787 | 0.69810461 | 0.834405 |
| 499653    | Gon4l        | 0.10574  | 0.01336753 | 0.047058 |
| 298168    | Tenm1        | 0.105691 | 0.05379845 | 0.14294  |
| 79127     | Dck          | 0.105682 | 0.2514587  | 0.439643 |
| 501550    | Trappc2      | 0.105674 | 1.35E-05   | 1.08E-04 |
| 304157    | Nrip1        | 0.105665 | 0.00371744 | 0.016142 |
| 292483    | Stx11        | 0.105627 | 0.35267084 | 0.549596 |
| 54287     | Eif2ak2      | 0.105624 | 0.00357473 | 0.015611 |
| 305624    | Pcgf3        | 0.105608 | 0.04922027 | 0.133552 |
| 308266    | Zc3h12d      | 0.105593 | 0.60260774 | 0.765877 |
| 365216    | Cadm4        | 0.10558  | 5.36E-09   | 7.48E-08 |
| 689826    | Ncmap        | 0.105525 | 1.02E-05   | 8.36E-05 |
| 102553119 | Mettl21a     | 0.105488 | 0.36377129 | 0.560293 |
| 361689    | Unc93b1      | 0.105487 | 0.05520291 | 0.145999 |
| 25744     | Nf2          | 0.105469 | 0.00253712 | 0.011626 |
| 102556337 | LOC102556337 | 0.105452 | 1.15E-04   | 7.52E-04 |
| 361243    | Cdkal1       | 0.1054   | 0.23271126 | 0.418507 |
| 353229    | Sgms1        | 0.105363 | 0.01562223 | 0.053608 |
| 304799    | Ppp1r15b     | 0.105353 | 0.00529662 | 0.021801 |
| 29624     | Alox5ap      | 0.105347 | 0.33317609 | 0.529175 |
| 299976    | Rrm2b        | 0.105334 | 0.09821197 | 0.225545 |
| 691506    | Ttc19        | 0.105315 | 7.55E-04   | 0.004052 |
| 314614    | Plppr3       | 0.105282 | 0.1428755  | 0.297189 |
| 100362634 | Kmt2d        | 0.105258 | 1.71E-07   | 1.92E-06 |
| 296884    | Glcci1       | 0.105231 | 0.05425923 | 0.143963 |
| 289758    | Polr2d       | 0.105223 | 0.16304714 | 0.326283 |
| 362184    | Dnajc24      | 0.105208 | 0.23312615 | 0.418936 |
| 303702    | Engase       | 0.105203 | 0.1081284  | 0.242214 |
| 305497    | Cobl         | 0.105171 | 5.98E-04   | 0.003284 |
| 500364    | Sspn         | 0.105121 | 0.02724594 | 0.083599 |
| 170900    | Rbm14        | 0.105117 | 0.05956746 | 0.155193 |
| 102547287 | LOC102547287 | 0.105086 | 0.13651363 | 0.287409 |
| 291677    | Dnajc18      | 0.105079 | 0.03496491 | 0.101603 |
| 682999    | Aida         | 0.105022 | 4.56E-05   | 3.28E-04 |
| 691387    | LOC691387    | 0.104993 | 2.08E-08   | 2.67E-07 |
| 310659    | Rfx5         | 0.104981 | 0.03582312 | 0.103528 |
| 29662     | Gdi2         | 0.10497  | 2.07E-15   | 5.69E-14 |
| 65166     | Sec11a       | 0.104966 | 0.01915314 | 0.063197 |
| 498549    | Akap11       | 0.104905 | 1.09E-12   | 2.33E-11 |
| 498386    | Cc2d2a       | 0.104892 | 0.05587513 | 0.147531 |
| 310250    | Zfhx4        | 0.104892 | 0.11384059 | 0.252192 |
| 499800    | Ly75         | 0.104874 | 0.2219249  | 0.404107 |
| 687713    | Gucd1        | 0.104848 | 0.25328718 | 0.441826 |
| 171387    | Rnf39        | 0.104834 | 0.52266941 | 0.706927 |
| 314830    | Krr1         | 0.104804 | 0.1638644  | 0.327574 |
| 81505     | Emp3         | 0.104782 | 0.00107386 | 0.005499 |
| 83534     | Tpp1         | 0.104726 | 3.38E-04   | 0.001994 |
| 300691    | Nnmt         | 0.104719 | 0.05483388 | 0.145225 |
| 25549     | Slc18a2      | 0.104661 | 5.36E-04   | 0.002976 |
| 501512    | RGD1559731   | 0.104573 | 0.31629489 | 0.511058 |
| 361086    | Scel         | 0.104573 | 0.228444   | 0.412938 |
| 114217    | Yme111       | 0.104552 | 4.10E-04   | 0.002365 |
| 291314    | Sephs1       | 0.104533 | 0.00968238 | 0.036072 |
| 312828    | Etnk1        | 0.104519 | 9.44E-12   | 1.83E-10 |



|           |              |          |            |          |
|-----------|--------------|----------|------------|----------|
| 100360619 | LOC100360619 | 0.104499 | 0.87648201 | 0.942552 |
| 25046     | Pigr         | 0.104473 | 0.64449229 | 0.797917 |
| 100362279 | Trappc31     | 0.104423 | 0.08475316 | 0.203316 |
| 100910575 | LOC100910575 | 0.104422 | 0.50033376 | 0.686962 |
| 25049     | Atxn1        | 0.104363 | 0.22753137 | 0.411757 |
| 89816     | Picalm       | 0.10434  | 8.60E-12   | 1.69E-10 |
| 500030    | Phf14        | 0.104338 | 4.42E-04   | 0.002519 |
| 25718     | Igflr        | 0.104326 | 0.00804792 | 0.030933 |
| 684274    | Mtif3        | 0.104316 | 0.10851029 | 0.242727 |
| 140668    | Abcc3        | 0.104302 | 0.19767871 | 0.372457 |
| 94267     | Nudt4        | 0.104275 | 1.42E-06   | 1.37E-05 |
| 315036    | Vps13b       | 0.10426  | 3.03E-04   | 0.001803 |
| 287379    | Shmt1        | 0.104231 | 0.61044934 | 0.771928 |
| 360609    | Cbx1         | 0.104169 | 0.01919139 | 0.063312 |
| 29508     | Nfya         | 0.104146 | 0.07772566 | 0.19017  |
| 287129    | Tmem204      | 0.104139 | 0.15347702 | 0.31165  |
| 680537    | Nsd2         | 0.104133 | 3.50E-06   | 3.14E-05 |
| 84487     | Slc17a6      | 0.104111 | 2.51E-07   | 2.76E-06 |
| 108351875 | LOC108351875 | 0.104029 | 0.72203141 | 0.847891 |
| 362498    | Mdn1         | 0.104015 | 0.00907412 | 0.034187 |
| 103692804 | LOC103692804 | 0.103977 | 0.80086882 | 0.897948 |
| 292690    | Ppmln        | 0.103977 | 0.70050688 | 0.83586  |
| 108349754 | LOC108349754 | 0.103932 | 0.7851595  | 0.888336 |
| 25372     | Grk3         | 0.103896 | 0.01291762 | 0.045796 |
| 499313    | Zbtb3        | 0.103872 | 0.42803347 | 0.623186 |
| 100911807 | LOC100911807 | 0.103822 | 0.64149206 | 0.795495 |
| 499677    | Lix11        | 0.103819 | 0.01431379 | 0.049809 |
| 691145    | Immp11       | 0.103796 | 0.17859564 | 0.347396 |
| 303754    | Rab40b       | 0.103723 | 0.30941652 | 0.504481 |
| 114248    | Pde6h        | 0.103679 | 0.81465337 | 0.906784 |
| 83507     | Parg         | 0.103609 | 0.01363728 | 0.047822 |
| 361018    | Fam107a      | 0.103608 | 0.01338143 | 0.04709  |
| 100365679 | Dennd5b      | 0.103555 | 0.12764055 | 0.274153 |
| 288264    | Ifnar1       | 0.103528 | 1.96E-05   | 1.52E-04 |
| 309081    | Dock1        | 0.103476 | 0.00172764 | 0.008328 |
| 100911597 | Myh9         | 0.103456 | 3.20E-06   | 2.90E-05 |
| 313757    | Ski          | 0.103353 | 3.61E-04   | 0.002115 |
| 83840     | Rps6kb1      | 0.103348 | 0.01009184 | 0.037327 |
| 688041    | Suz12        | 0.103287 | 0.0054694  | 0.022353 |
| 299180    | Med6         | 0.103257 | 0.08452008 | 0.202936 |
| 502736    | Cpa4         | 0.103241 | 0.8181026  | 0.908605 |
| 317163    | Eif1a        | 0.103241 | 3.86E-04   | 0.002239 |
| 59087     | Nxf1         | 0.103225 | 1.17E-04   | 7.67E-04 |
| 500526    | Mknk1        | 0.103189 | 0.02891086 | 0.087565 |
| 302422    | Pdzd11       | 0.103186 | 0.02104015 | 0.068183 |
| 362505    | Cc127        | 0.103154 | 0.29403646 | 0.490061 |
| 287585    | Ppml1d       | 0.103138 | 0.1346127  | 0.284634 |
| 65168     | Scamp2       | 0.103122 | 0.02775451 | 0.084872 |
| 367235    | Fam135a      | 0.103121 | 0.0122508  | 0.043832 |
| 317589    | Stk26        | 0.103097 | 0.27261563 | 0.464605 |
| 311715    | Tcf15        | 0.102998 | 0.56575978 | 0.736393 |
| 288771    | Rbms2        | 0.102911 | 0.0012602  | 0.006311 |
| 298024    | Akap2        | 0.1029   | 6.33E-06   | 5.40E-05 |
| 500247    | Aplf         | 0.102898 | 0.1318969  | 0.280793 |
| 171058    | Rab3c        | 0.102793 | 0.00104046 | 0.005353 |
| 307189    | Neb1         | 0.102785 | 0.07445485 | 0.184155 |

|           |              |          |            |          |
|-----------|--------------|----------|------------|----------|
| 361282    | Plxdc2       | 0.102748 | 2.40E-07   | 2.64E-06 |
| 81527     | Nrp2         | 0.102704 | 5.56E-06   | 4.80E-05 |
| 301665    | Srbd1        | 0.102625 | 0.03479217 | 0.101271 |
| 25562     | Eloa         | 0.102607 | 0.01440171 | 0.050079 |
| 100361684 | Simc1        | 0.102502 | 0.17250798 | 0.339402 |
| 362324    | Mios         | 0.102459 | 0.13911919 | 0.291573 |
| 266774    | Zfp597       | 0.102451 | 0.28773003 | 0.482336 |
| 25600     | Utrn         | 0.102443 | 2.09E-14   | 5.31E-13 |
| 287798    | MGC95210     | 0.102423 | 0.24603342 | 0.434385 |
| 360959    | Htra3        | 0.102329 | 0.1129302  | 0.250759 |
| 100912115 | LOC100912115 | 0.102295 | 0.00592688 | 0.023889 |
| 303292    | Ankfy1       | 0.102284 | 1.88E-05   | 1.46E-04 |
| 293589    | Paox         | 0.102282 | 0.03023823 | 0.090691 |
| 360571    | Rab34        | 0.102277 | 0.02299768 | 0.073096 |
| 117106    | Scarb2       | 0.102264 | 1.56E-04   | 9.90E-04 |
| 317464    | Msl3         | 0.102234 | 0.01475116 | 0.051107 |
| 25083     | Adra2a       | 0.102229 | 0.32163108 | 0.516786 |
| 306231    | Pde12        | 0.102229 | 0.28823881 | 0.483019 |
| 64565     | Tmprss11d    | 0.102229 | 0.70284848 | 0.837604 |
| 25554     | Snai2        | 0.102229 | 0.7411206  | 0.859967 |
| 282580    | Stab2        | 0.102229 | 0.84873007 | 0.924797 |
| 294395    | Rfx6         | 0.102229 | 0.84873007 | 0.924797 |
| 361658    | Btbd16       | 0.102229 | 0.61380587 | 0.77445  |
| 685612    | Col26a1      | 0.102229 | 0.61380587 | 0.77445  |
| 315530    | Arhgap32     | 0.102153 | 3.41E-04   | 0.002009 |
| 317432    | Kdm5c        | 0.102083 | 0.00347778 | 0.015258 |
| 679110    | Frat2        | 0.102081 | 0.17090051 | 0.336936 |
| 498764    | Jcad         | 0.10204  | 0.00992542 | 0.036834 |
| 310877    | Tifa         | 0.102036 | 0.10833333 | 0.242445 |
| 685082    | Zfp318       | 0.102009 | 0.0091704  | 0.034489 |
| 309969    | Ap3b1        | 0.102002 | 2.89E-04   | 0.001728 |
| 317335    | Ddx3x        | 0.101983 | 8.10E-14   | 1.95E-12 |
| 64551     | 7-Sep        | 0.101967 | 3.25E-13   | 7.29E-12 |
| 404658    | Mrgprb4      | 0.101937 | 0.02347427 | 0.074313 |
| 298033    | Snx30        | 0.101918 | 0.04576598 | 0.126229 |
| 299198    | Fcf1         | 0.10191  | 0.03053179 | 0.09137  |
| 83789     | Rps2         | 0.101841 | 3.25E-15   | 8.78E-14 |
| 114765    | Wbp4         | 0.101821 | 6.73E-04   | 0.003652 |
| 113992    | Ugt1a6       | 0.101765 | 0.24345786 | 0.431517 |
| 29750     | Galnt7       | 0.101762 | 0.1761034  | 0.344306 |
| 64200     | Hnrnpf       | 0.10176  | 9.93E-06   | 8.17E-05 |
| 171111    | Rab26        | 0.101703 | 0.49271411 | 0.680178 |
| 681943    | Tmed8        | 0.101691 | 0.00242804 | 0.011189 |
| 362519    | Smc2         | 0.101685 | 0.07154074 | 0.178664 |
| 361047    | Ska3         | 0.101668 | 0.27282133 | 0.464831 |
| 305583    | Pus10        | 0.101663 | 0.05072627 | 0.136317 |
| 64016     | Qtrt1        | 0.10166  | 0.35139067 | 0.54814  |
| 305270    | Cenpc        | 0.101646 | 0.08499116 | 0.203733 |
| 681578    | Rnf13        | 0.101632 | 4.09E-07   | 4.33E-06 |
| 497988    | Hoxb4        | 0.101579 | 0.38355158 | 0.580202 |
| 81645     | Chrm2        | 0.101563 | 0.22343047 | 0.406228 |
| 292949    | Perp         | 0.101544 | 0.01790512 | 0.059909 |
| 360893    | Taf1a        | 0.101523 | 0.30597204 | 0.501829 |
| 307485    | Taf7         | 0.101492 | 0.24762029 | 0.436296 |
| 29386     | Mecp2        | 0.101366 | 9.02E-05   | 6.04E-04 |
| 314721    | Anks1b       | 0.101358 | 0.00678839 | 0.026839 |

|           |              |          |            |          |
|-----------|--------------|----------|------------|----------|
| 29682     | Kcnq3        | 0.10127  | 0.09356819 | 0.217796 |
| 81510     | Mia          | 0.101257 | 0.61544942 | 0.775368 |
| 680419    | Rsu1         | 0.101224 | 4.22E-04   | 0.002419 |
| 686295    | Wdr82        | 0.101201 | 0.00657504 | 0.026142 |
| 25336     | Nfyb         | 0.101193 | 0.05179195 | 0.138497 |
| 29556     | Myh6         | 0.101187 | 0.03627392 | 0.104577 |
| 100365363 | LOC100365363 | 0.101147 | 0.27736648 | 0.47001  |
| 363735    | Gabpa        | 0.101142 | 0.0085403  | 0.032498 |
| 314075    | Pnpla8       | 0.101121 | 6.58E-07   | 6.73E-06 |
| 302972    | Amdhd2       | 0.101065 | 0.11251525 | 0.250012 |
| 498642    | Rbpms        | 0.101042 | 0.12364753 | 0.268422 |
| 361846    | Vps26a       | 0.100973 | 1.36E-04   | 8.76E-04 |
| 313591    | Thrap3       | 0.100964 | 9.24E-06   | 7.64E-05 |
| 81660     | Gatm         | 0.100933 | 3.58E-04   | 0.002101 |
| 367909    | Tceal8       | 0.100922 | 1.85E-04   | 0.001158 |
| 499445    | Calhm4       | 0.100874 | 0.67175021 | 0.815157 |
| 502292    | Zfp773-ps1   | 0.100874 | 0.67175021 | 0.815157 |
| 450231    | Krt42        | 0.100866 | 0.80541311 | 0.900499 |
| 498269    | Fam78b       | 0.100831 | 0.03343793 | 0.09826  |
| 685374    | Ankrd13c     | 0.100804 | 8.99E-05   | 6.02E-04 |
| 170895    | Cetn3        | 0.100799 | 0.04344797 | 0.120992 |
| 312030    | Scaf11       | 0.100657 | 8.42E-04   | 0.004455 |
| 365037    | Sash1        | 0.100653 | 0.00177474 | 0.008527 |
| 114212    | Chek2        | 0.100639 | 0.44139689 | 0.634637 |
| 108350576 | LOC108350576 | 0.100577 | 0.50040929 | 0.687017 |
| 406867    | Ly6g5b       | 0.100541 | 0.70513186 | 0.838279 |
| 362799    | Rapgef5      | 0.100492 | 0.00662822 | 0.026321 |
| 100911190 | LOC100911190 | 0.100439 | 0.61185229 | 0.773086 |
| 25313     | Egf          | 0.100409 | 0.52705878 | 0.710643 |
| 306630    | Abhd13       | 0.100393 | 0.06828663 | 0.172437 |
| 308871    | Rnf121       | 0.10039  | 0.16087409 | 0.323054 |
| 317425    | Phf8         | 0.100376 | 0.00726802 | 0.028382 |
| 498301    | Wdr26        | 0.100345 | 1.90E-05   | 1.48E-04 |
| 100910990 | LOC100910990 | 0.100327 | 0.0097317  | 0.036228 |
| 113976    | Acs14        | 0.100304 | 9.11E-04   | 0.004774 |
| 102556092 | LOC102556092 | 0.100284 | 6.52E-04   | 0.003552 |
| 103693197 | LOC103693197 | 0.100268 | 0.86662735 | 0.935865 |
| 308912    | Dchs1        | 0.100249 | 0.17725227 | 0.345701 |
| 366507    | Lzic         | 0.100243 | 0.02591607 | 0.080242 |
| 364681    | Rnf144b      | 0.100196 | 0.1847145  | 0.355737 |
| 54400     | Bet11        | 0.100097 | 0.08733486 | 0.207341 |
| 100363539 | Mrpl33       | 0.100097 | 0.07307273 | 0.181728 |
| 85274     | Prdx4        | 0.100095 | 0.03407177 | 0.099738 |
| 100911312 | LOC100911312 | 0.100078 | 0.34522593 | 0.541762 |
| 316034    | Cnot10       | 0.100044 | 0.01596156 | 0.054566 |
| 681185    | Cenph        | 0.099991 | 0.74379406 | 0.861652 |
| 306587    | Tcta         | 0.099957 | 0.00221528 | 0.010318 |
| 691105    | Fancg        | 0.099948 | 0.37993108 | 0.576971 |
| 368062    | Ankib1       | 0.099924 | 0.00115    | 0.00583  |
| 102552463 | Zfp446       | 0.099923 | 0.07293383 | 0.18143  |
| 308944    | St5          | 0.099913 | 0.00810787 | 0.031113 |
| 690263    | Tmem179b     | 0.099898 | 0.19560848 | 0.370057 |
| 316519    | Slc11a1      | 0.09988  | 0.40797422 | 0.604894 |
| 102551980 | LOC102551980 | 0.099863 | 0.26926105 | 0.460744 |
| 682967    | Tmx3         | 0.099842 | 2.87E-06   | 2.63E-05 |
| 499806    | Erich2       | 0.099834 | 0.48049571 | 0.669229 |

|           |              |          |            |          |
|-----------|--------------|----------|------------|----------|
| 287929    | Mzt2b        | 0.099827 | 0.03888017 | 0.11065  |
| 298374    | Prpf38a      | 0.099785 | 0.08221457 | 0.198854 |
| 293546    | Gprc5b       | 0.099771 | 0.00192642 | 0.009161 |
| 686781    | Ppp1r13l     | 0.099718 | 0.23332103 | 0.419168 |
| 287191    | Rars         | 0.099708 | 0.00261942 | 0.011943 |
| 362093    | Wdr5         | 0.099604 | 0.09412283 | 0.218739 |
| 65196     | B4galt6      | 0.099569 | 0.00738363 | 0.028733 |
| 689249    | Rspryl       | 0.099555 | 0.08255859 | 0.199483 |
| 310643    | Efna4        | 0.099555 | 0.67372181 | 0.816535 |
| 305911    | Zmym5        | 0.099535 | 0.00220261 | 0.010269 |
| 364458    | Kctd12       | 0.099456 | 4.79E-11   | 8.57E-10 |
| 313438    | Dock11       | 0.099445 | 4.16E-08   | 5.12E-07 |
| 289400    | Camsap2      | 0.099407 | 2.96E-10   | 4.88E-09 |
| 298079    | Aldh1b1      | 0.099369 | 0.48149107 | 0.670321 |
| 497933    | Slc25a35     | 0.099369 | 0.3195051  | 0.514455 |
| 117186    | Sh3bp5       | 0.099365 | 0.05127671 | 0.137544 |
| 309928    | Mctp1        | 0.099363 | 0.02497761 | 0.078022 |
| 313391    | Atg4c        | 0.09936  | 0.05994464 | 0.15592  |
| 361314    | Arap3        | 0.099297 | 0.01539188 | 0.052999 |
| 501125    | Fam178b      | 0.099295 | 0.43027186 | 0.624488 |
| 25165     | Zfp386       | 0.099277 | 0.07372893 | 0.182906 |
| 314894    | Mon2         | 0.099271 | 0.00128744 | 0.006434 |
| 310753    | Lrig2        | 0.099245 | 0.00435258 | 0.018397 |
| 361028    | Mapklip1l    | 0.099201 | 0.02649414 | 0.0817   |
| 290537    | Appl1        | 0.099168 | 2.26E-04   | 0.001391 |
| 365462    | Lcor         | 0.099148 | 0.07202168 | 0.179677 |
| 309548    | Shoc2        | 0.099123 | 8.53E-04   | 0.004503 |
| 29614     | Psme2        | 0.099093 | 0.00327169 | 0.014464 |
| 691149    | Capza1       | 0.099051 | 1.29E-08   | 1.72E-07 |
| 362547    | Alg6         | 0.099049 | 0.12701938 | 0.273127 |
| 680668    | Tpk1         | 0.099044 | 0.18790318 | 0.360203 |
| 317312    | Mospd1       | 0.09901  | 0.00870185 | 0.032967 |
| 297342    | Elmod3       | 0.098973 | 0.28105236 | 0.474651 |
| 288080    | Stxbp5l      | 0.09896  | 0.13616535 | 0.286803 |
| 310791    | Slc25a24     | 0.098952 | 0.01505134 | 0.051986 |
| 498034    | Fn3k         | 0.098909 | 0.40122681 | 0.598244 |
| 679805    | Mei4         | 0.098909 | 0.79066184 | 0.891965 |
| 81676     | Hnmt         | 0.098909 | 0.64567752 | 0.798865 |
| 500693    | Bbof1        | 0.098811 | 0.32431098 | 0.519864 |
| 307801    | Gfod2        | 0.098794 | 5.60E-04   | 0.0031   |
| 680663    | LOC680663    | 0.098726 | 0.79445455 | 0.893808 |
| 360612    | Scrn2        | 0.098708 | 0.28879721 | 0.483699 |
| 291095    | Gmds         | 0.098689 | 0.10915269 | 0.243878 |
| 304431    | Sfswap       | 0.098646 | 0.01121381 | 0.040695 |
| 315989    | Manf         | 0.098589 | 0.00543988 | 0.022261 |
| 363167    | Ulk4         | 0.098509 | 0.28927076 | 0.484279 |
| 501038    | LOC501038    | 0.098485 | 0.05622219 | 0.148242 |
| 29577     | Hes1         | 0.098422 | 0.15034204 | 0.306921 |
| 84582     | Hdac7        | 0.098413 | 0.04372528 | 0.121622 |
| 362166    | Phf21a       | 0.098404 | 0.08097807 | 0.196462 |
| 84429     | Kcnk9        | 0.098377 | 0.51664888 | 0.701674 |
| 313155    | RGD1359108   | 0.098325 | 0.00160927 | 0.007818 |
| 102555183 | LOC102555183 | 0.098296 | 0.02417133 | 0.07619  |
| 363528    | 363528       | 0.098264 | 0.38441068 | 0.58104  |
| 79214     | Galnt1       | 0.098258 | 0.00146859 | 0.007229 |
| 293860    | Flna         | 0.098177 | 8.06E-08   | 9.54E-07 |

|           |                 |          |            |          |
|-----------|-----------------|----------|------------|----------|
| 64206     | Tdo2            | 0.098174 | 0.50010552 | 0.686699 |
| 303926    | Igsf11          | 0.098075 | 4.78E-05   | 3.42E-04 |
| 291962    | Elmo3           | 0.098071 | 0.41518359 | 0.611253 |
| 691657    | Crip1           | 0.097976 | 0.01126159 | 0.040837 |
| 494219    | Eogt            | 0.09793  | 0.03542466 | 0.102673 |
| 315987    | Dcaf1           | 0.097928 | 0.01446802 | 0.050245 |
| 108349551 | NEWGENE_1309147 | 0.097887 | 0.70634481 | 0.839355 |
| 117250    | Dnah6           | 0.097851 | 0.64739823 | 0.80024  |
| 361916    | Chmp4c          | 0.097851 | 0.74638013 | 0.86386  |
| 685750    | Aldh8a1         | 0.097851 | 0.64739823 | 0.80024  |
| 364996    | Chtf8           | 0.097783 | 0.00375457 | 0.016281 |
| 25285     | Igfbp5          | 0.097766 | 0.00129674 | 0.006477 |
| 64030     | Kit             | 0.097765 | 0.00220383 | 0.010272 |
| 310914    | Bmpr1b          | 0.09774  | 0.1253511  | 0.27067  |
| 314910    | Nab2            | 0.097673 | 0.0089031  | 0.033623 |
| 304300    | Pap01b          | 0.097667 | 0.64989631 | 0.802209 |
| 287475    | Med31           | 0.09765  | 0.11098106 | 0.247151 |
| 303342    | Ssh2            | 0.097648 | 0.00742053 | 0.028842 |
| 117056    | H3f3b           | 0.097643 | 7.60E-10   | 1.19E-08 |
| 361180    | Grtp1           | 0.09759  | 0.1963591  | 0.370924 |
| 56819     | Extl3           | 0.097572 | 2.07E-04   | 0.001283 |
| 60628     | Cxcr4           | 0.097542 | 0.08029718 | 0.195084 |
| 498188    | RGD1562310      | 0.09746  | 0.1966486  | 0.371177 |
| 367308    | Alpg            | 0.097449 | 0.33145807 | 0.527679 |
| 361967    | Ppid            | 0.097337 | 0.00350359 | 0.01535  |
| 25506     | P4hb            | 0.097333 | 5.32E-09   | 7.45E-08 |
| 108353410 | LOC108353410    | 0.09733  | 0.70953323 | 0.840208 |
| 81758     | Rbl2            | 0.097327 | 0.00308309 | 0.013764 |
| 685882    | Syndig11        | 0.097302 | 0.0161072  | 0.054955 |
| 29627     | Gria2           | 0.097281 | 0.02226751 | 0.071275 |
| 295704    | Ube216          | 0.097271 | 0.05759698 | 0.151155 |
| 78971     | Birc3           | 0.097252 | 0.54329748 | 0.724739 |
| 24284     | Csn1s1          | 0.097239 | 0.4427576  | 0.635586 |
| 25065     | Slc12a1         | 0.097158 | 0.57667731 | 0.744749 |
| 300126    | Gtse1           | 0.097158 | 0.42983271 | 0.624421 |
| 89784     | Idi1            | 0.097128 | 1.32E-06   | 1.29E-05 |
| 100125368 | LOC100125368    | 0.097122 | 0.40038787 | 0.597414 |
| 311191    | Ckap5           | 0.097081 | 4.33E-09   | 6.17E-08 |
| 102553842 | Hoxd11          | 0.097072 | 0.3621795  | 0.558609 |
| 29515     | Atn1            | 0.097068 | 4.40E-05   | 3.18E-04 |
| 301517    | Cyp27a1         | 0.097052 | 0.10047154 | 0.229462 |
| 500308    | Cecr2           | 0.097049 | 0.21733116 | 0.398716 |
| 299848    | RGD1565117      | 0.097047 | 0.67478734 | 0.817462 |
| 259224    | Npw             | 0.097021 | 0.67755253 | 0.819561 |
| 29237     | Penk            | 0.097021 | 0.30843406 | 0.503267 |
| 293112    | Crebzf          | 0.096963 | 0.00183692 | 0.008792 |
| 362165    | Creb311         | 0.096959 | 0.00856298 | 0.032571 |
| 114116    | Cdc42bpa        | 0.096932 | 5.48E-06   | 4.74E-05 |
| 64019     | Pag1            | 0.096909 | 0.53763497 | 0.719757 |
| 287595    | Dhx40           | 0.096854 | 0.00656667 | 0.02612  |
| 313574    | Nt5c1a          | 0.096784 | 0.41585573 | 0.611817 |
| 362607    | Kpna6           | 0.09678  | 0.02634876 | 0.081331 |
| 307947    | Set             | 0.096693 | 2.01E-04   | 0.001248 |
| 300834    | Wdr72           | 0.096669 | 0.62334021 | 0.781175 |
| 685611    | Phldb2          | 0.096641 | 0.33953892 | 0.536151 |
| 100364027 | Hkdc1           | 0.096611 | 0.47231405 | 0.66268  |

|           |              |          |            |          |
|-----------|--------------|----------|------------|----------|
| 308501    | Cd22         | 0.09661  | 0.07929022 | 0.19313  |
| 290946    | Fastkd3      | 0.096589 | 0.17271744 | 0.339744 |
| 100360342 | Msh6         | 0.09655  | 0.11295445 | 0.250783 |
| 291797    | Thoc1        | 0.096549 | 0.06497969 | 0.16589  |
| 311578    | Sogal        | 0.096542 | 0.23489986 | 0.421249 |
| 363448    | Dynlt3       | 0.096528 | 4.59E-14   | 1.14E-12 |
| 299802    | Lgr5         | 0.096527 | 9.40E-04   | 0.004903 |
| 313906    | Zfp512       | 0.096515 | 0.01558708 | 0.053545 |
| 289997    | Dlgap5       | 0.096475 | 0.33524341 | 0.531749 |
| 29232     | Clcn2        | 0.096472 | 0.01920056 | 0.063331 |
| 362112    | Tor2a        | 0.096453 | 0.12633315 | 0.272081 |
| 64013     | Pdcl         | 0.096403 | 0.05745273 | 0.15086  |
| 497918    | Smcr8        | 0.096391 | 0.11574206 | 0.255335 |
| 59075     | Grk5         | 0.096376 | 0.00319525 | 0.014202 |
| 315686    | Peak1        | 0.096288 | 1.63E-04   | 0.001036 |
| 100911887 | LOC100911887 | 0.096263 | 0.84051837 | 0.920404 |
| 56003     | 3-Sep        | 0.096254 | 0.05534599 | 0.146317 |
| 102552920 | LOC102552920 | 0.096202 | 0.07667591 | 0.188328 |
| 373544    | Ermp1        | 0.096196 | 2.24E-05   | 1.71E-04 |
| 501033    | LOC501033    | 0.096159 | 0.04078178 | 0.115014 |
| 311604    | Zhx3         | 0.096117 | 0.02181264 | 0.070149 |
| 83624     | Ppig         | 0.09611  | 7.17E-04   | 0.003868 |
| 311567    | Itch         | 0.096101 | 1.36E-04   | 8.75E-04 |
| 25348     | Rps29        | 0.096095 | 1.99E-07   | 2.21E-06 |
| 140866    | Dgka         | 0.09606  | 0.04531369 | 0.125181 |
| 309774    | Gopc         | 0.096036 | 0.00181859 | 0.00872  |
| 316001    | Inka1        | 0.096026 | 0.33633911 | 0.53291  |
| 683722    | Fgfr1op      | 0.09594  | 0.0335963  | 0.098589 |
| 100362684 | LOC100362684 | 0.095927 | 0.51934667 | 0.704083 |
| 252885    | Hoxc6        | 0.095841 | 0.10739053 | 0.240958 |
| 292964    | Rpl36a       | 0.09581  | 0.00281603 | 0.012724 |
| 102552675 | LOC102552675 | 0.095803 | 0.7938069  | 0.893449 |
| 287070    | Nlrc3        | 0.095803 | 0.7938069  | 0.893449 |
| 302328    | Pof1b        | 0.095803 | 0.85337277 | 0.927786 |
| 308436    | Cxcl17       | 0.095803 | 0.85337277 | 0.927786 |
| 499926    | Bpifb1       | 0.095803 | 0.85337277 | 0.927786 |
| 56227     | Espn         | 0.095803 | 0.85337277 | 0.927786 |
| 64576     | Ptpv         | 0.095803 | 0.60115444 | 0.764438 |
| 65135     | Dpys         | 0.095803 | 0.7938069  | 0.893449 |
| 290354    | Pdlim2       | 0.095803 | 0.32809355 | 0.523767 |
| 292124    | Tectb        | 0.095677 | 0.73608425 | 0.857572 |
| 252924    | Nr2c1        | 0.095645 | 0.04863845 | 0.132275 |
| 300862    | Irak1bp1     | 0.095636 | 0.2678757  | 0.458992 |
| 291964    | Fhod1        | 0.095635 | 0.19347077 | 0.367217 |
| 365652    | Col4a3bp     | 0.09559  | 9.31E-07   | 9.28E-06 |
| 362627    | Rcan3        | 0.09553  | 0.22085868 | 0.402859 |
| 286928    | Abi2         | 0.095493 | 4.08E-04   | 0.002351 |
| 317241    | Rlim         | 0.095465 | 0.00385577 | 0.016629 |
| 297498    | Crbn         | 0.095465 | 9.97E-12   | 1.93E-10 |
| 361920    | Ythdf3       | 0.095424 | 8.70E-04   | 0.004585 |
| 308362    | Zfp110       | 0.095415 | 0.0067089  | 0.026575 |
| 685462    | Emid1        | 0.095363 | 0.03151272 | 0.09379  |
| 290365    | Nudt15       | 0.09536  | 0.33797192 | 0.534563 |
| 29511     | Padi2        | 0.095315 | 0.00362122 | 0.015778 |
| 311437    | Rassf2       | 0.095257 | 0.07466129 | 0.18457  |
| 24560     | Cd200        | 0.095254 | 9.74E-06   | 8.03E-05 |



|           |              |          |            |          |
|-----------|--------------|----------|------------|----------|
| 362892    | Mbd6         | 0.095238 | 0.0029299  | 0.01316  |
| 297392    | Tex261       | 0.095232 | 2.89E-04   | 0.001727 |
| 362559    | Zygl1b       | 0.095229 | 2.05E-04   | 0.00127  |
| 302642    | Sat1         | 0.095184 | 2.73E-06   | 2.51E-05 |
| 291705    | Iws1         | 0.095149 | 0.11552318 | 0.254911 |
| 79121     | Arf6         | 0.095121 | 0.00760684 | 0.029452 |
| 291071    | Rpp40        | 0.095117 | 0.08582005 | 0.204972 |
| 246325    | Kcnh8        | 0.095101 | 0.44766963 | 0.639744 |
| 266760    | Nalcn        | 0.095057 | 2.31E-04   | 0.001418 |
| 308482    | Zfp84        | 0.095033 | 0.06650907 | 0.168821 |
| 315664    | Kdelc2       | 0.095002 | 0.00906382 | 0.034162 |
| 65165     | Tmed2        | 0.095001 | 1.21E-05   | 9.80E-05 |
| 24954     | Insr         | 0.094964 | 0.12098038 | 0.263956 |
| 364205    | Fbxo48       | 0.094948 | 0.4082124  | 0.605012 |
| 116502    | Bak1         | 0.094929 | 0.11105367 | 0.247284 |
| 554172    | Pxdn         | 0.094924 | 2.65E-04   | 0.001606 |
| 361039    | Lmln2        | 0.094831 | 0.7681306  | 0.877936 |
| 59077     | Grk4         | 0.09483  | 0.42944368 | 0.624189 |
| 24680     | Prkca        | 0.09477  | 1.86E-13   | 4.29E-12 |
| 64157     | Ddah1        | 0.094755 | 1.78E-06   | 1.70E-05 |
| 360860    | Cop1         | 0.094739 | 0.00320966 | 0.014249 |
| 108348107 | LOC108348107 | 0.094705 | 0.86007285 | 0.931587 |
| 303029    | Ranbp17      | 0.094689 | 0.20294357 | 0.379151 |
| 362731    | Snx13        | 0.094683 | 1.27E-04   | 8.23E-04 |
| 360969    | Castor1      | 0.094672 | 0.23370405 | 0.419698 |
| 294799    | Brix1        | 0.094661 | 0.1046319  | 0.2363   |
| 286900    | Selenos      | 0.094651 | 0.00918877 | 0.034551 |
| 498028    | Cep295nl     | 0.094616 | 0.68124086 | 0.821986 |
| 499486    | Gpr150       | 0.09461  | 0.59976188 | 0.763024 |
| 117279    | Cflar        | 0.094596 | 0.00735223 | 0.028652 |
| 503027    | Map4k5       | 0.094554 | 9.65E-04   | 0.005018 |
| 304302    | Tnrc18       | 0.094546 | 8.60E-04   | 0.004538 |
| 499419    | RGD1564149   | 0.094536 | 0.79212324 | 0.892873 |
| 291469    | Srfbp1       | 0.094532 | 0.12446139 | 0.269421 |
| 406195    | Tcf19        | 0.094506 | 0.29899342 | 0.495547 |
| 100359558 | Fam177a1     | 0.094498 | 0.00794948 | 0.030654 |
| 83619     | Nfe212       | 0.094488 | 0.00383859 | 0.016574 |
| 103690937 | LOC103690937 | 0.094472 | 0.00169479 | 0.008184 |
| 85491     | Vamp7        | 0.094462 | 5.18E-05   | 3.67E-04 |
| 679272    | 9-Mar        | 0.094447 | 0.09449112 | 0.219301 |
| 309858    | Sec63        | 0.094414 | 3.06E-05   | 2.29E-04 |
| 58942     | Cacnb4       | 0.094378 | 1.37E-04   | 8.82E-04 |
| 363466    | Reps2        | 0.094366 | 3.54E-04   | 0.00208  |
| 362456    | Arhgdib      | 0.09435  | 0.05434444 | 0.144129 |
| 300258    | Myg1         | 0.094338 | 0.06014619 | 0.156316 |
| 302640    | Acot9        | 0.094334 | 0.0015418  | 0.007531 |
| 684439    | Cenpo        | 0.094324 | 0.60389349 | 0.767101 |
| 361601    | Abhd17c      | 0.094287 | 0.10530015 | 0.237415 |
| 100910202 | Crnk11       | 0.094259 | 0.28070056 | 0.474183 |
| 362224    | Kat14        | 0.094217 | 0.24044839 | 0.427936 |
| 298533    | Ago4         | 0.094184 | 0.37577089 | 0.572525 |
| 367171    | Map4         | 0.09413  | 4.49E-17   | 1.39E-15 |
| 499893    | Ap5s1        | 0.094116 | 0.40109256 | 0.598137 |
| 314859    | Mdm1         | 0.094034 | 0.24671507 | 0.435346 |
| 117051    | Arfrp1       | 0.094016 | 0.01864919 | 0.061942 |
| 29555     | Vipr2        | 0.094008 | 0.37980359 | 0.576869 |

|           |              |          |            |          |
|-----------|--------------|----------|------------|----------|
| 294392    | Kpna5        | 0.093983 | 0.03272998 | 0.096567 |
| 309312    | Gldc         | 0.093976 | 0.34337048 | 0.539785 |
| 65027     | Chd8         | 0.093922 | 8.07E-04   | 0.004283 |
| 311020    | Rbm43        | 0.093873 | 0.28622098 | 0.480525 |
| 360807    | Rsrc2        | 0.093781 | 0.01125801 | 0.040832 |
| 293844    | Haus7        | 0.093771 | 0.17495053 | 0.342615 |
| 288092    | Tmem39a      | 0.093758 | 0.21481262 | 0.395276 |
| 685925    | Rs11         | 0.093752 | 0.38261852 | 0.579527 |
| 302678    | Syap1        | 0.093742 | 0.01584962 | 0.054242 |
| 679578    | Ldlrad4      | 0.093695 | 0.09163363 | 0.214684 |
| 362802    | Atp6v1c2     | 0.093594 | 0.35480539 | 0.551614 |
| 108348061 | LOC108348061 | 0.093585 | 0.00389412 | 0.016753 |
| 315880    | Tbc1d2b      | 0.093559 | 0.02573312 | 0.079806 |
| 290235    | Nop9         | 0.093426 | 0.12936414 | 0.2767   |
| 314352    | Sel11        | 0.093362 | 1.85E-06   | 1.76E-05 |
| 303763    | Zfp207       | 0.09334  | 3.27E-05   | 2.43E-04 |
| 301363    | Map4k4       | 0.093315 | 1.51E-08   | 1.99E-07 |
| 103693553 | LOC103693553 | 0.093307 | 0.7263173  | 0.850877 |
| 311550    | Ccm21        | 0.09328  | 0.19261418 | 0.366284 |
| 298376    | Gpx7         | 0.093272 | 0.13536484 | 0.28559  |
| 316090    | Fam198a      | 0.093244 | 0.52712619 | 0.710684 |
| 25625     | Tnfrsf1a     | 0.093221 | 0.00471992 | 0.019739 |
| 100912615 | LOC100912615 | 0.093188 | 0.60399482 | 0.767179 |
| 359726    | Rnase1       | 0.093128 | 0.03355412 | 0.09848  |
| 680466    | Plpp5        | 0.093109 | 0.18870362 | 0.361301 |
| 361073    | Cog3         | 0.093099 | 0.01523247 | 0.052555 |
| 310811    | Palmd        | 0.093061 | 0.01887774 | 0.062526 |
| 362699    | Yipf4        | 0.093048 | 0.00398974 | 0.01711  |
| 311508    | Gzfl         | 0.093036 | 0.10756616 | 0.241182 |
| 498327    | Abcg3        | 0.093007 | 0.36110136 | 0.557488 |
| 171411    | Tmem176b     | 0.092893 | 1.20E-24   | 5.49E-23 |
| 292016    | Cmtr2        | 0.092891 | 0.27464622 | 0.466729 |
| 499974    | Nup12        | 0.092891 | 0.30303443 | 0.500329 |
| 363676    | Zpbp2        | 0.092891 | 0.71575312 | 0.844318 |
| 25508     | Pam          | 0.092885 | 1.12E-08   | 1.50E-07 |
| 252894    | Pcdhga4      | 0.092837 | 0.41844901 | 0.614114 |
| 50692     | Plaur        | 0.092834 | 0.20262259 | 0.378737 |
| 259269    | Erc2         | 0.0928   | 0.06569749 | 0.167229 |
| 361389    | Anapc10      | 0.092782 | 0.07748536 | 0.189655 |
| 103694875 | LOC103694875 | 0.092754 | 0.3892897  | 0.586274 |
| 311368    | Ctdspl2      | 0.092726 | 0.45322662 | 0.644686 |
| 444982    | Eml5         | 0.092691 | 0.14619276 | 0.301227 |
| 313905    | Supt71       | 0.09269  | 0.33584058 | 0.53243  |
| 688777    | Grpel2       | 0.092675 | 0.10823083 | 0.24233  |
| 29177     | Hpca         | 0.09265  | 0.18647464 | 0.358186 |
| 311059    | 7-Mar        | 0.092608 | 0.00153689 | 0.007515 |
| 312381    | Ppmlk        | 0.092581 | 0.01831797 | 0.061023 |
| 300160    | Lrrk2        | 0.092498 | 0.00145416 | 0.007175 |
| 361700    | Kdm2a        | 0.092468 | 1.27E-04   | 8.23E-04 |
| 102553270 | LOC102553270 | 0.092331 | 0.56592066 | 0.736401 |
| 293544    | Pdilt        | 0.092331 | 0.68479526 | 0.824812 |
| 303375    | Rad51d       | 0.092331 | 0.14330186 | 0.297653 |
| 680726    | Rbms3        | 0.092312 | 1.64E-04   | 0.001039 |
| 102547920 | LOC102547920 | 0.092266 | 0.50302378 | 0.68981  |
| 365703    | Zfr          | 0.092163 | 1.11E-08   | 1.49E-07 |
| 498953    | Tmem170a     | 0.092155 | 0.42919418 | 0.62397  |

|           |              |          |            |          |
|-----------|--------------|----------|------------|----------|
| 288651    | Gtf2h3       | 0.092136 | 0.1500252  | 0.306405 |
| 498415    | Zpbp         | 0.092128 | 0.54754027 | 0.728256 |
| 305913    | Zmym2        | 0.092125 | 5.56E-04   | 0.003079 |
| 368042    | Btaf1        | 0.092107 | 0.01743245 | 0.058626 |
| 304859    | Dhx9         | 0.092036 | 1.48E-04   | 9.50E-04 |
| 360673    | Tepsin       | 0.092034 | 0.06851657 | 0.172834 |
| 360956    | Tbc1d14      | 0.092015 | 0.00152212 | 0.007446 |
| 308663    | Tubgcp5      | 0.091987 | 0.03264231 | 0.096443 |
| 289711    | Evc2         | 0.091961 | 0.40637498 | 0.60304  |
| 361442    | Sipal12      | 0.091938 | 0.00500643 | 0.02075  |
| 293508    | Prkacb       | 0.09193  | 1.83E-13   | 4.24E-12 |
| 310685    | Polr3c       | 0.091925 | 0.04042063 | 0.114232 |
| 310508    | B3galnt1     | 0.091885 | 0.04544949 | 0.125502 |
| 24252     | Cebpa        | 0.091864 | 0.4299018  | 0.624331 |
| 309732    | Ado          | 0.091864 | 0.26428279 | 0.454553 |
| 289307    | Tfb2m        | 0.091852 | 0.0299003  | 0.08989  |
| 295607    | Prpf40a      | 0.091835 | 0.00737194 | 0.028706 |
| 83839     | Calb1        | 0.091756 | 0.34698835 | 0.543722 |
| 681004    | Paxbp1       | 0.091745 | 0.04835294 | 0.13163  |
| 297885    | Zbtb8os      | 0.091741 | 0.08258912 | 0.199532 |
| 83422     | Pias2        | 0.091722 | 0.03834339 | 0.109319 |
| 299256    | Cpsf2        | 0.091644 | 0.00285205 | 0.012868 |
| 287112    | Abca17       | 0.091589 | 0.70318178 | 0.836745 |
| 170699    | Atp2c1       | 0.091548 | 3.88E-09   | 5.57E-08 |
| 29560     | Hif1a        | 0.091532 | 4.89E-04   | 0.002749 |
| 363249    | Ctdsp1       | 0.091528 | 4.18E-04   | 0.002398 |
| 294673    | Hexb         | 0.09152  | 0.01566642 | 0.05374  |
| 297872    | Syt11        | 0.091503 | 0.71773211 | 0.845684 |
| 315250    | Pdzrn4       | 0.091503 | 0.71773211 | 0.845684 |
| 310960    | Usp33        | 0.091481 | 6.12E-06   | 5.24E-05 |
| 686774    | LOC686774    | 0.091477 | 0.02267627 | 0.072219 |
| 100910823 | Der12        | 0.091475 | 0.02636737 | 0.081375 |
| 154968    | Oga          | 0.091467 | 1.75E-06   | 1.67E-05 |
| 360720    | Rabl3        | 0.091461 | 0.14208432 | 0.295867 |
| 295245    | Slc50a1      | 0.091398 | 0.1926917  | 0.366322 |
| 368066    | Inmt         | 0.091398 | 0.51483612 | 0.700561 |
| 363972    | Dpp10        | 0.091393 | 1.50E-10   | 2.55E-09 |
| 108348101 | LOC108348101 | 0.09139  | 0.32110183 | 0.516153 |
| 63888     | A4galt       | 0.09138  | 0.01301796 | 0.046075 |
| 78965     | Csf1         | 0.091345 | 0.06551399 | 0.166851 |
| 498100    | Mb21d2       | 0.091315 | 0.19722135 | 0.371852 |
| 360992    | Pnpt1        | 0.091293 | 0.01305965 | 0.046179 |
| 311349    | Ttbk2        | 0.09125  | 2.10E-08   | 2.69E-07 |
| 312656    | 8-Mar        | 0.091245 | 0.00487695 | 0.020298 |
| 64301     | Smn1         | 0.091211 | 0.17685841 | 0.345428 |
| 100361238 | Rasgef1b     | 0.091162 | 0.47049198 | 0.660952 |
| 497863    | Tmem186      | 0.091154 | 0.09972016 | 0.228101 |
| 362618    | Fam76a       | 0.091151 | 0.06281393 | 0.161792 |
| 299488    | Esy2         | 0.091129 | 1.82E-06   | 1.73E-05 |
| 108348073 | Eif5         | 0.091057 | 7.22E-11   | 1.26E-09 |
| 312603    | Rybp         | 0.091026 | 0.01271373 | 0.045183 |
| 690303    | Magohb       | 0.091002 | 0.43200765 | 0.626291 |
| 362138    | Rbms1        | 0.090987 | 0.00255223 | 0.011682 |
| 50655     | Aco1         | 0.090953 | 0.0194943  | 0.064122 |
| 498803    | Otud1        | 0.090885 | 0.23208256 | 0.417573 |
| 362479    | Tcea1        | 0.090881 | 0.00195041 | 0.009256 |

|           |                 |          |            |          |
|-----------|-----------------|----------|------------|----------|
| 652928    | Rbm12           | 0.090868 | 0.11603049 | 0.255764 |
| 685756    | Tmem229a        | 0.090852 | 4.60E-06   | 4.04E-05 |
| 100359977 | Cd16412         | 0.090824 | 0.4712902  | 0.661731 |
| 64314     | Casp2           | 0.090794 | 0.14050435 | 0.293539 |
| 293060    | Btbd1           | 0.09079  | 3.33E-05   | 2.47E-04 |
| 305035    | Angel2          | 0.09078  | 0.06685237 | 0.169444 |
| 315333    | Atf7            | 0.09077  | 0.00210471 | 0.009888 |
| 368175    | RGD1565071      | 0.090705 | 0.35839148 | 0.555376 |
| 314993    | Atad2           | 0.090704 | 0.26102415 | 0.450494 |
| 25489     | Nedd4           | 0.090662 | 7.55E-30   | 4.25E-28 |
| 361034    | Arhgef40        | 0.090623 | 1.16E-04   | 7.63E-04 |
| 287380    | Dhrs7b          | 0.090558 | 0.06408593 | 0.164247 |
| 311860    | Ab11            | 0.090554 | 0.016631   | 0.056339 |
| 311795    | Tor4a           | 0.090514 | 0.36885084 | 0.564964 |
| 310644    | Pbxip1          | 0.090511 | 4.98E-04   | 0.002795 |
| 288257    | Donson          | 0.090504 | 0.25379023 | 0.44246  |
| 315305    | Atf1            | 0.090433 | 0.11478734 | 0.253729 |
| 500514    | Fyb2            | 0.090387 | 0.69997093 | 0.835534 |
| 362088    | Snpc4           | 0.090292 | 0.26207417 | 0.451774 |
| 298309    | Lrrc42          | 0.090272 | 0.08053253 | 0.195605 |
| 29157     | Ccng2           | 0.090191 | 0.0259211  | 0.080245 |
| 100359836 | Kirrel2         | 0.090156 | 0.79966284 | 0.89723  |
| 291947    | Prmt9           | 0.090156 | 0.10415788 | 0.235536 |
| 300761    | Gramd2a         | 0.090156 | 0.66025142 | 0.805541 |
| 307305    | Prdm6           | 0.090156 | 0.48704546 | 0.675142 |
| 307390    | Fbxo38          | 0.090156 | 0.02115841 | 0.068484 |
| 317203    | Rps6ka6         | 0.090156 | 0.24483466 | 0.433192 |
| 360615    | Fbxo47          | 0.090156 | 0.85758281 | 0.930106 |
| 407758    | Krt26           | 0.090156 | 0.47287493 | 0.663223 |
| 501036    | Plscr5          | 0.090156 | 0.71966682 | 0.84668  |
| 683593    | Jmy             | 0.090129 | 0.00579615 | 0.023442 |
| 60563     | Hr              | 0.090127 | 0.01636953 | 0.055621 |
| 300888    | Tmed3           | 0.090125 | 0.02003917 | 0.065609 |
| 266772    | Klhl12          | 0.090124 | 0.0291438  | 0.088158 |
| 301323    | Prim2           | 0.090119 | 0.3250271  | 0.520574 |
| 686922    | Gstt4           | 0.090043 | 0.90214546 | 0.957819 |
| 360952    | Tmem128         | 0.090037 | 0.04220884 | 0.118025 |
| 116655    | Hnrnp           | 0.090035 | 0.00131351 | 0.006552 |
| 103690051 | NEWGENE_1304700 | 0.089977 | 0.28713945 | 0.4816   |
| 361574    | Snrnp70         | 0.08996  | 1.25E-05   | 1.00E-04 |
| 494445    | Srsf2           | 0.089955 | 2.86E-07   | 3.11E-06 |
| 289693    | Dhx15           | 0.089928 | 1.12E-04   | 7.34E-04 |
| 294912    | Sec62           | 0.089924 | 4.30E-08   | 5.27E-07 |
| 363084    | Usp3            | 0.089878 | 0.2693478  | 0.460768 |
| 292019    | Sf3b3           | 0.089838 | 0.02099011 | 0.068044 |
| 360895    | Rrp15           | 0.089836 | 0.30343205 | 0.500508 |
| 364654    | Rnf170          | 0.089821 | 0.00758009 | 0.029378 |
| 306966    | Zfp184          | 0.08981  | 0.51871766 | 0.703581 |
| 362269    | Pcif1           | 0.089795 | 0.10008312 | 0.228794 |
| 29483     | Slcla3          | 0.089779 | 0.13403752 | 0.28408  |
| 83726     | Ctcf            | 0.089777 | 0.01238936 | 0.04422  |
| 499878    | Mfap1a          | 0.089768 | 0.03676055 | 0.105804 |
| 289388    | G0s2            | 0.08975  | 0.51853144 | 0.703428 |
| 65161     | Litaf           | 0.089744 | 0.0103555  | 0.038162 |
| 690369    | I115ra          | 0.08974  | 0.65859097 | 0.804546 |
| 85237     | Ptp4a2          | 0.089736 | 2.08E-05   | 1.60E-04 |

|           |              |          |            |          |
|-----------|--------------|----------|------------|----------|
| 314306    | Elmsan1      | 0.089716 | 0.03168482 | 0.094199 |
| 100312983 | Kdm5d        | 0.089689 | 0.0342843  | 0.100176 |
| 498962    | Acsf3        | 0.089677 | 0.09313599 | 0.217135 |
| 301419    | Tyw5         | 0.089671 | 0.31657934 | 0.511084 |
| 293058    | Ramac        | 0.089646 | 0.08437641 | 0.202693 |
| 299949    | Tbc1d31      | 0.089644 | 0.12888518 | 0.27611  |
| 363232    | Bzw1         | 0.089625 | 2.04E-07   | 2.26E-06 |
| 310707    | Chd11        | 0.089616 | 0.263814   | 0.454157 |
| 289809    | Pno1         | 0.089598 | 0.09904252 | 0.22696  |
| 259225    | Ppp1r14b     | 0.089527 | 0.0862668  | 0.205652 |
| 314417    | Papola       | 0.089512 | 5.94E-05   | 4.15E-04 |
| 685909    | H2afv        | 0.089433 | 0.09444757 | 0.219253 |
| 498257    | Fam163a      | 0.089383 | 0.29740055 | 0.493982 |
| 289606    | Gabra2       | 0.089338 | 2.70E-07   | 2.95E-06 |
| 361925    | Actl6a       | 0.08931  | 0.17272837 | 0.339731 |
| 679571    | Hmg111       | 0.089284 | 6.09E-05   | 4.25E-04 |
| 303165    | Zfp672       | 0.08928  | 0.13782513 | 0.289498 |
| 114200    | P3h1         | 0.089202 | 0.0939783  | 0.218483 |
| 300088    | Polr3h       | 0.089198 | 0.06866291 | 0.173112 |
| 294734    | Gpbp1        | 0.089197 | 8.52E-04   | 0.0045   |
| 365465    | Cwf1911      | 0.08913  | 0.13366216 | 0.283474 |
| 100359583 | LOC100359583 | 0.08913  | 5.51E-04   | 0.003058 |
| 117058    | Pou2f2       | 0.089108 | 0.68989261 | 0.828228 |
| 297595    | P3h3         | 0.089051 | 0.00844195 | 0.032181 |
| 293505    | Cd2bp2       | 0.089049 | 0.00218211 | 0.010191 |
| 81684     | Mipep        | 0.089023 | 0.07898262 | 0.192602 |
| 315936    | Zbtb38       | 0.088961 | 0.00418997 | 0.01784  |
| 314619    | Sbno2        | 0.088952 | 0.03117184 | 0.092935 |
| 60336     | Arpp19       | 0.088943 | 1.25E-08   | 1.67E-07 |
| 305938    | Spata13      | 0.088941 | 0.00249086 | 0.011431 |
| 295305    | Acp6         | 0.088918 | 0.27183999 | 0.463532 |
| 303577    | Acbd4        | 0.088906 | 0.06512834 | 0.16618  |
| 316214    | Tfeb         | 0.088873 | 0.17847531 | 0.347339 |
| 690032    | Wdr4         | 0.088789 | 0.24833191 | 0.436662 |
| 102554605 | LOC102554605 | 0.088767 | 0.07523294 | 0.185718 |
| 364475    | Dzip1        | 0.08875  | 0.00336955 | 0.014831 |
| 289734    | Smtn         | 0.088741 | 0.00925789 | 0.03479  |
| 360739    | Ranbp1       | 0.08872  | 6.65E-04   | 0.003613 |
| 103693932 | LOC103693932 | 0.088713 | 0.90284474 | 0.957761 |
| 691335    | 6-Sep        | 0.08869  | 0.00108559 | 0.005547 |
| 300215    | Lmbr11       | 0.088658 | 0.13762489 | 0.289109 |
| 360775    | Zfp157       | 0.088656 | 0.15658711 | 0.316515 |
| 304982    | Igsf9        | 0.088612 | 0.32436056 | 0.5199   |
| 24848     | Tph1         | 0.088607 | 0.2742989  | 0.466431 |
| 114767    | Ptpre        | 0.088578 | 0.04093201 | 0.115233 |
| 287930    | Top3b        | 0.08852  | 0.06836045 | 0.172555 |
| 301235    | Bicral       | 0.088501 | 0.03406721 | 0.09974  |
| 85255     | Hac11        | 0.088449 | 0.1455727  | 0.300469 |
| 81783     | Ssb          | 0.088424 | 3.10E-04   | 0.001843 |
| 60337     | Npff         | 0.088423 | 0.75814919 | 0.871996 |
| 680210    | Psca         | 0.088423 | 0.75814919 | 0.871996 |
| 414065    | Nanog        | 0.08834  | 0.84377233 | 0.922059 |
| 689621    | Lsmem2       | 0.088316 | 0.14268763 | 0.296896 |
| 315795    | Cgn11        | 0.088278 | 2.15E-05   | 1.65E-04 |
| 308326    | Zfp667       | 0.088235 | 0.35611872 | 0.553294 |
| 315447    | Chordc1      | 0.088191 | 0.00312606 | 0.013923 |

|           |              |          |            |          |
|-----------|--------------|----------|------------|----------|
| 311115    | Ubr3         | 0.088173 | 9.80E-09   | 1.32E-07 |
| 362564    | Bend5        | 0.088163 | 0.5221362  | 0.706356 |
| 500874    | Tmem65       | 0.088149 | 5.43E-06   | 4.70E-05 |
| 306547    | Thap1        | 0.088129 | 0.39466008 | 0.591975 |
| 81002     | Trim23       | 0.088089 | 0.00519759 | 0.021445 |
| 298318    | Slc25a43     | 0.088083 | 0.67953323 | 0.821018 |
| 81820     | Doc2b        | 0.088058 | 0.07486694 | 0.184982 |
| 298086    | Zcchc7       | 0.08801  | 0.08548966 | 0.204542 |
| 309758    | Herc4        | 0.087921 | 0.06178652 | 0.159751 |
| 312077    | Golga3       | 0.087902 | 0.00113678 | 0.005767 |
| 312299    | Ezh2         | 0.087877 | 0.3013762  | 0.498325 |
| 64364     | Pllp         | 0.087867 | 1.49E-04   | 9.51E-04 |
| 81656     | Dpyd         | 0.087735 | 0.07956004 | 0.193663 |
| 100361503 | Zfp717       | 0.087689 | 7.15E-04   | 0.003861 |
| 313027    | Eya3         | 0.087668 | 0.00257036 | 0.011753 |
| 296136    | Nphp1        | 0.087629 | 0.19754471 | 0.372278 |
| 303439    | Mmd          | 0.087599 | 0.03308657 | 0.097438 |
| 108349244 | LOC108349244 | 0.087595 | 0.43195298 | 0.626259 |
| 100361733 | Ociad2       | 0.087582 | 0.40654806 | 0.603203 |
| 362474    | Adhfe1       | 0.087582 | 0.57577002 | 0.74388  |
| 688390    | LOC688390    | 0.087582 | 0.80239489 | 0.898865 |
| 691807    | LOC691807    | 0.087573 | 0.00370573 | 0.016102 |
| 304277    | Cpsf4        | 0.087533 | 0.20645974 | 0.384024 |
| 100910508 | Zfp41        | 0.087523 | 0.19424974 | 0.368255 |
| 685697    | Supt3h       | 0.087497 | 0.03199547 | 0.094915 |
| 289928    | RGD1306063   | 0.087463 | 0.01505085 | 0.051994 |
| 81655     | Dync11i2     | 0.087393 | 6.00E-10   | 9.49E-09 |
| 50719     | Slc7a5       | 0.087392 | 0.00111593 | 0.005678 |
| 314381    | Nrde2        | 0.087371 | 0.17458387 | 0.342179 |
| 317370    | Wdr13        | 0.08737  | 0.00164971 | 0.007982 |
| 363140    | Rassf1       | 0.087338 | 0.20695036 | 0.384674 |
| 362962    | Cbx7         | 0.087321 | 0.01744163 | 0.058647 |
| 362586    | Trit1        | 0.087303 | 0.15965053 | 0.321105 |
| 680445    | Mbnl2        | 0.087296 | 1.18E-12   | 2.52E-11 |
| 307343    | Fam210a      | 0.087295 | 0.01143514 | 0.041372 |
| 682908    | Rcc1         | 0.087252 | 0.29099185 | 0.486348 |
| 100360594 | Fanci        | 0.087251 | 0.37859376 | 0.575628 |
| 298068    | Sec61b       | 0.087173 | 0.11659101 | 0.256732 |
| 100909445 | Ube2w        | 0.087151 | 0.01047624 | 0.03854  |
| 361354    | Fbxo15       | 0.087086 | 0.69314492 | 0.830562 |
| 291958    | B3gnt9       | 0.087015 | 0.30575529 | 0.502772 |
| 366014    | Zdhhc12      | 0.086971 | 0.3102904  | 0.505429 |
| 299514    | Mterf3       | 0.086945 | 0.14013757 | 0.292998 |
| 499636    | RGD1563962   | 0.086935 | 0.04953142 | 0.134167 |
| 688478    | Commd2       | 0.086935 | 0.10971674 | 0.244822 |
| 300359    | Ccdc82       | 0.086923 | 0.11709908 | 0.257434 |
| 81768     | Rpl22        | 0.086902 | 0.00359336 | 0.015675 |
| 102549542 | LOC102549542 | 0.086867 | 6.35E-08   | 7.61E-07 |
| 498150    | Brat1        | 0.086838 | 0.09287171 | 0.216704 |
| 29491     | Itsn1        | 0.086822 | 0.01226432 | 0.043864 |
| 500723    | Zfp839       | 0.086779 | 0.40609469 | 0.602718 |
| 366588    | Colec11      | 0.086758 | 0.66613083 | 0.810585 |
| 29611     | Dbt          | 0.086729 | 0.02949282 | 0.088945 |
| 364183    | Bloc1s4      | 0.08671  | 0.3045058  | 0.501367 |
| 24590     | Mme          | 0.086683 | 0.0985927  | 0.226201 |
| 685579    | Rrm1         | 0.086664 | 0.07122705 | 0.178021 |



|           |              |          |            |          |
|-----------|--------------|----------|------------|----------|
| 317380    | Prickle3     | 0.086645 | 0.34314229 | 0.539649 |
| 309103    | Pgghg        | 0.086632 | 0.27165605 | 0.46326  |
| 29257     | Rpl9         | 0.086613 | 1.87E-06   | 1.78E-05 |
| 364154    | Smiml4       | 0.086587 | 1.25E-05   | 1.00E-04 |
| 313563    | Exo5         | 0.086525 | 0.42015689 | 0.61553  |
| 81524     | Nflx         | 0.08652  | 0.02951202 | 0.088989 |
| 100912032 | Rps27a       | 0.086511 | 5.99E-08   | 7.20E-07 |
| 361151    | Ufsp2        | 0.086485 | 0.00805112 | 0.030939 |
| 304656    | Ccdc130      | 0.086479 | 0.16481546 | 0.329026 |
| 292156    | Sh3glb1      | 0.086429 | 4.84E-05   | 3.46E-04 |
| 286918    | Mx2          | 0.086407 | 0.00519584 | 0.021442 |
| 297725    | Tm7sf3       | 0.08636  | 0.03825271 | 0.109142 |
| 290230    | Mdp1         | 0.086345 | 0.19266664 | 0.366347 |
| 364410    | Kctd9        | 0.086344 | 0.00150796 | 0.00739  |
| 309070    | Uros         | 0.086327 | 0.21867826 | 0.400339 |
| 293504    | Qprt         | 0.086318 | 0.2851497  | 0.479318 |
| 365755    | Tbllxr1      | 0.086269 | 9.81E-04   | 0.005094 |
| 103690502 | LOC103690502 | 0.086214 | 0.03272737 | 0.096575 |
| 304204    | Snapc2       | 0.086206 | 0.01112607 | 0.040438 |
| 316035    | Cmtm6        | 0.086183 | 0.00288455 | 0.013    |
| 292148    | Eif3a        | 0.086132 | 2.46E-06   | 2.28E-05 |
| 171305    | Clk3         | 0.08612  | 0.01757749 | 0.059041 |
| 362910    | Samd12       | 0.086109 | 0.49667237 | 0.68292  |
| 362537    | Snapc3       | 0.086049 | 0.06334218 | 0.162888 |
| 78956     | Scn9a        | 0.086032 | 1.22E-12   | 2.59E-11 |
| 308598    | Hps5         | 0.086018 | 0.08888997 | 0.209882 |
| 60396     | Cdk13        | 0.086015 | 0.5794757  | 0.747046 |
| 300441    | Tmem205      | 0.085978 | 0.06585743 | 0.167524 |
| 309295    | Ikbkg        | 0.085967 | 0.09994972 | 0.228571 |
| 494345    | Pdcd10       | 0.085946 | 0.00173683 | 0.008366 |
| 313216    | Rnf20        | 0.085908 | 0.00278407 | 0.012618 |
| 288028    | Tmem44       | 0.085866 | 0.68883459 | 0.827584 |
| 100910751 | Mtg1         | 0.085844 | 0.14547344 | 0.300297 |
| 170465    | Acaa2        | 0.085806 | 0.00652764 | 0.026008 |
| 362736    | Hectd1       | 0.085802 | 7.43E-06   | 6.25E-05 |
| 171096    | Cst6         | 0.085764 | 0.27399143 | 0.466074 |
| 362020    | RGD1309139   | 0.085748 | 0.48976793 | 0.67724  |
| 362392    | Snrnp27      | 0.085683 | 0.08149132 | 0.197556 |
| 290348    | Synb         | 0.085616 | 0.52848906 | 0.711313 |
| 306253    | Glt8d1       | 0.085579 | 0.0640452  | 0.164186 |
| 300674    | Arcn1        | 0.085562 | 2.10E-06   | 1.97E-05 |
| 24660     | Pmp22        | 0.085544 | 8.30E-130  | #####    |
| 54299     | Ncor1        | 0.085503 | 5.08E-04   | 0.002846 |
| 689883    | Setdb1       | 0.085485 | 0.0297132  | 0.089454 |
| 300687    | Bud13        | 0.085471 | 0.24075157 | 0.428355 |
| 308942    | Dennd5a      | 0.085417 | 1.10E-07   | 1.29E-06 |
| 156826    | Eya2         | 0.085392 | 0.26893294 | 0.46043  |
| 316452    | Ccnyl1       | 0.08537  | 0.15563637 | 0.315028 |
| 316820    | LOC316820    | 0.085351 | 0.47898793 | 0.66752  |
| 25235     | Ghr          | 0.085327 | 0.01658336 | 0.056188 |
| 298312    | Yipf1        | 0.085317 | 0.00821556 | 0.03145  |
| 690599    | Mxra7        | 0.085298 | 0.02548712 | 0.079223 |
| 316219    | Trerf1       | 0.085254 | 0.23288734 | 0.418784 |
| 24825     | Tf           | 0.085215 | 0.00193934 | 0.009213 |
| 100359562 | Mroh6        | 0.085155 | 0.80500868 | 0.900654 |
| 116467    | Tm4sf4       | 0.085155 | 0.72699377 | 0.851251 |

|           |              |          |            |          |
|-----------|--------------|----------|------------|----------|
| 25129     | Egr4         | 0.085155 | 0.86142258 | 0.932439 |
| 287824    | Trim80       | 0.085155 | 0.80500868 | 0.900654 |
| 302579    | RGD1565862   | 0.085155 | 0.86142258 | 0.932439 |
| 498486    | Gnpnat1      | 0.085155 | 0.30172734 | 0.498733 |
| 500832    | Bbs10        | 0.085155 | 0.2468927  | 0.435579 |
| 502916    | Rerg         | 0.085155 | 0.66894824 | 0.812508 |
| 171361    | Eef1a1       | 0.085137 | 3.84E-59   | 4.51E-57 |
| 311575    | Phf20        | 0.085122 | 7.67E-04   | 0.004105 |
| 362129    | Gtdc1        | 0.085097 | 0.11628293 | 0.256202 |
| 360663    | Unk          | 0.085092 | 0.13332376 | 0.282977 |
| 361977    | Isg2012      | 0.08509  | 0.27222148 | 0.4641   |
| 100912286 | Leng9        | 0.08508  | 0.37150857 | 0.568076 |
| 246314    | Tor1aip1     | 0.085054 | 0.09055191 | 0.212594 |
| 292130    | Afap112      | 0.08505  | 9.95E-04   | 0.005157 |
| 299762    | Tmtc2        | 0.085047 | 0.02175299 | 0.069993 |
| 293113    | Tmem126a     | 0.08504  | 0.19110131 | 0.364353 |
| 499846    | Tcp1111      | 0.085016 | 2.78E-04   | 0.001674 |
| 363142    | Sema3b       | 0.08499  | 2.14E-12   | 4.42E-11 |
| 406166    | Egf18        | 0.084937 | 5.97E-06   | 5.13E-05 |
| 299521    | Camkmt       | 0.084935 | 0.16308509 | 0.326324 |
| 60374     | Lmna         | 0.084927 | 2.08E-05   | 1.60E-04 |
| 361541    | Proser3      | 0.084894 | 0.15544271 | 0.314703 |
| 293059    | RGD1305713   | 0.084893 | 0.10051619 | 0.229481 |
| 361059    | Ccdc25       | 0.084877 | 0.03690317 | 0.106166 |
| 360389    | Zfp422       | 0.084858 | 0.12139421 | 0.264738 |
| 678772    | Casdl        | 0.084837 | 0.00743023 | 0.028868 |
| 310056    | Ipo11        | 0.084818 | 0.00240096 | 0.011082 |
| 299625    | Lmb2         | 0.084809 | 0.32451022 | 0.520052 |
| 360917    | Cnot61       | 0.0848   | 0.15697888 | 0.317004 |
| 314879    | Xpot         | 0.08472  | 3.59E-04   | 0.002102 |
| 362804    | Cwf1912      | 0.0847   | 0.0892155  | 0.210286 |
| 362511    | Fbxo10       | 0.084696 | 0.21372676 | 0.394077 |
| 315969    | Topbp1       | 0.084675 | 0.1047801  | 0.23655  |
| 266606    | Tor1a        | 0.084646 | 0.0950135  | 0.220191 |
| 362483    | MGC94199     | 0.084635 | 0.11724638 | 0.257669 |
| 24382     | Ganc         | 0.084577 | 0.09282034 | 0.216744 |
| 102555303 | LOC102555303 | 0.08457  | 0.96075218 | 0.995946 |
| 362151    | Lnpk         | 0.084552 | 0.00440522 | 0.018594 |
| 498038    | Vg113        | 0.084537 | 0.05078321 | 0.136393 |
| 289855    | Ccdc85a      | 0.084524 | 0.10183149 | 0.231817 |
| 291318    | Nmt2         | 0.084509 | 0.00150403 | 0.007377 |
| 680227    | LOC680227    | 0.084509 | 0.05972725 | 0.155482 |
| 309004    | Vkorc1       | 0.084473 | 0.10091198 | 0.230136 |
| 288659    | Vps37b       | 0.084466 | 0.17444956 | 0.341986 |
| 309051    | Pign         | 0.084459 | 0.04248328 | 0.118723 |
| 24246     | Camk2d       | 0.084384 | 2.48E-04   | 0.001512 |
| 24772     | Cxcl12       | 0.084363 | 0.02444319 | 0.076692 |
| 362041    | Rpl134       | 0.084354 | 2.17E-04   | 0.001337 |
| 266688    | Rab8b        | 0.084347 | 0.21459507 | 0.395258 |
| 308584    | Plekha4      | 0.084338 | 2.38E-09   | 3.50E-08 |
| 361755    | Aldh18a1     | 0.084337 | 0.04160578 | 0.11663  |
| 315655    | Rdx          | 0.08433  | 0.00383088 | 0.016544 |
| 288003    | Rfc4         | 0.084307 | 0.24918212 | 0.437712 |
| 408200    | Pan2         | 0.084277 | 0.10929515 | 0.24411  |
| 297607    | RGD1311164   | 0.084267 | 0.16803074 | 0.332534 |
| 302810    | Bcor11       | 0.084267 | 0.16803074 | 0.332534 |

|           |              |          |            |          |
|-----------|--------------|----------|------------|----------|
| 290401    | Esd          | 0.084228 | 0.02124093 | 0.068705 |
| 24180     | Agtr1a       | 0.084185 | 0.43412091 | 0.62835  |
| 362719    | Asap2        | 0.084143 | 0.05287379 | 0.140876 |
| 366170    | Tmem87a      | 0.08411  | 0.03200784 | 0.094922 |
| 54350     | Scfd1        | 0.084061 | 0.01322014 | 0.046651 |
| 361377    | Phkb         | 0.084018 | 0.00867535 | 0.032887 |
| 304935    | Tbx19        | 0.083992 | 0.65523596 | 0.8023   |
| 499214    | Coa4         | 0.083926 | 0.25070281 | 0.438724 |
| 362974    | RGD1304694   | 0.083918 | 4.95E-05   | 3.53E-04 |
| 114851    | Cdkn1a       | 0.083889 | 0.31946389 | 0.514432 |
| 499136    | LOC499136    | 0.083878 | 0.06407385 | 0.164238 |
| 687192    | Gid4         | 0.083841 | 4.48E-04   | 0.002545 |
| 306229    | Dennd6a      | 0.083841 | 0.01782251 | 0.059654 |
| 361814    | Srsf3        | 0.083836 | 0.00109685 | 0.005594 |
| 291228    | Mkx          | 0.08383  | 0.42724803 | 0.622376 |
| 100362202 | Znf408       | 0.083814 | 0.25537341 | 0.444204 |
| 362896    | Stat6        | 0.083738 | 0.00458653 | 0.01927  |
| 499317    | Tmem258      | 0.083681 | 0.13708735 | 0.288266 |
| 363174    | Sgo1         | 0.083613 | 0.67168895 | 0.815213 |
| 312382    | Abcg2        | 0.083553 | 0.09340283 | 0.21765  |
| 680039    | LOC680039    | 0.083548 | 0.00181921 | 0.008721 |
| 300955    | Nck1         | 0.083527 | 0.07636978 | 0.187697 |
| 498796    | Fam107b      | 0.083516 | 0.04128822 | 0.115978 |
| 497948    | Trpv3        | 0.083424 | 0.23794884 | 0.424996 |
| 286931    | Unc13c       | 0.083422 | 0.01749372 | 0.058812 |
| 682964    | Zfp551       | 0.083381 | 0.53326774 | 0.715268 |
| 295663    | Phospho2     | 0.08336  | 0.06626267 | 0.16833  |
| 292729    | Snrpa        | 0.083331 | 0.23137624 | 0.416735 |
| 298648    | Tardbp       | 0.08331  | 4.55E-04   | 0.00258  |
| 171552    | Prpf18       | 0.0833   | 0.01324931 | 0.046737 |
| 501110    | Gsta6        | 0.083287 | 0.28756186 | 0.482139 |
| 297801    | Xkr4         | 0.083279 | 0.42904984 | 0.624236 |
| 113929    | Nup88        | 0.083183 | 0.05269235 | 0.140491 |
| 361035    | Mettl3       | 0.08317  | 0.01541841 | 0.053062 |
| 296758    | Armc10       | 0.083167 | 0.06082852 | 0.157724 |
| 299841    | Rxylt1       | 0.083095 | 0.10760018 | 0.24123  |
| 363450    | Ftsj1        | 0.083095 | 0.35289295 | 0.549852 |
| 292087    | Urb2         | 0.083063 | 0.31271158 | 0.507766 |
| 266729    | Dab1         | 0.08301  | 0.11814338 | 0.259311 |
| 301525    | Glb11        | 0.083008 | 0.20895503 | 0.386965 |
| 310544    | Map9         | 0.083004 | 7.52E-04   | 0.004034 |
| 298385    | Magoh        | 0.082991 | 0.14917372 | 0.305124 |
| 360748    | Prkdc        | 0.082919 | 0.02926474 | 0.088398 |
| 100909715 | LOC100909715 | 0.082918 | 0.65844836 | 0.804475 |
| 305451    | Tnip2        | 0.082864 | 0.3453724  | 0.541948 |
| 310548    | Rbm46        | 0.082864 | 0.26421323 | 0.454474 |
| 362722    | Tmem18       | 0.082864 | 0.2231519  | 0.405992 |
| 308004    | Fam204a      | 0.082851 | 0.15286137 | 0.310698 |
| 683522    | Tead4        | 0.082815 | 0.43106689 | 0.625213 |
| 308899    | Mrv1         | 0.082807 | 0.2821436  | 0.475777 |
| 102548728 | LOC102548728 | 0.082786 | 0.66458817 | 0.809173 |
| 681031    | Snrpg        | 0.082785 | 0.23476627 | 0.421129 |
| 362003    | Gpr89b       | 0.082745 | 0.0132496  | 0.046729 |
| 290947    | Mtrr         | 0.082738 | 0.07632472 | 0.18761  |
| 303883    | Lrch3        | 0.082729 | 0.0049532  | 0.020556 |
| 60445     | Tsc1         | 0.082709 | 0.01009444 | 0.037323 |

|           |              |          |            |          |
|-----------|--------------|----------|------------|----------|
| 363127    | Dnajc13      | 0.082672 | 9.03E-04   | 0.004735 |
| 499567    | RGD1565641   | 0.082662 | 0.10648096 | 0.239453 |
| 290577    | Wapl         | 0.082559 | 0.01578757 | 0.054078 |
| 300514    | Ei24         | 0.082559 | 9.25E-04   | 0.004835 |
| 311713    | Mrgbp        | 0.082558 | 0.20135963 | 0.377042 |
| 298182    | Tyrp1        | 0.082556 | 1.37E-16   | 4.02E-15 |
| 304549    | Oas12        | 0.082538 | 0.15752169 | 0.317763 |
| 313974    | Trib2        | 0.082513 | 0.00272002 | 0.012352 |
| 366975    | Pphln1       | 0.082493 | 0.01653834 | 0.056075 |
| 360563    | Ncbp3        | 0.082461 | 0.25425547 | 0.442947 |
| 313427    | Usp24        | 0.082433 | 0.01154865 | 0.041664 |
| 498560    | Uchl3        | 0.082378 | 0.11979779 | 0.261976 |
| 100034253 |              | 0.082366 | 0.00431906 | 0.018283 |
| 362626    | Rsrp1        | 0.082363 | 9.99E-04   | 0.005172 |
| 363067    | Sin3a        | 0.08234  | 0.04398835 | 0.122176 |
| 25486     | Myo9b        | 0.082326 | 6.78E-04   | 0.003676 |
| 304546    | Git2         | 0.082305 | 0.01371512 | 0.048042 |
| 108349010 | LOC108349010 | 0.082304 | 7.78E-04   | 0.004155 |
| 296925    | Aass         | 0.082282 | 0.45422669 | 0.64553  |
| 29318     | Ddt          | 0.082223 | 0.0152115  | 0.052511 |
| 362048    | Tspan5       | 0.082155 | 0.00853752 | 0.032493 |
| 296813    | Slc25a40     | 0.082128 | 0.26627221 | 0.457396 |
| 304743    | Ccdc93       | 0.082088 | 0.03694378 | 0.106251 |
| 499895    | Slx4ip       | 0.082027 | 0.36986648 | 0.566201 |
| 293017    | Bclaf1       | 0.082027 | 2.85E-04   | 0.001707 |
| 27100     | Gfer         | 0.081984 | 0.18369061 | 0.35416  |
| 307170    | Acbd5        | 0.081978 | 0.00161569 | 0.00784  |
| 171394    | Clstn2       | 0.081972 | 0.03827605 | 0.109192 |
| 680014    | Escol        | 0.08195  | 0.12072877 | 0.263528 |
| 140588    | Gli3         | 0.08192  | 0.65034136 | 0.802498 |
| 313551    | RGD1564804   | 0.08192  | 0.26685717 | 0.458153 |
| 304208    | Cers4        | 0.081916 | 0.01741307 | 0.058582 |
| 84360     | Clcn3        | 0.081893 | 8.53E-05   | 5.76E-04 |
| 362700    | Spast        | 0.081872 | 0.01070867 | 0.039168 |
| 364976    | Syce2        | 0.081864 | 0.57000937 | 0.739447 |
| 304695    | Zcchc2       | 0.081833 | 0.0500102  | 0.134984 |
| 294753    | Mocs2        | 0.081814 | 0.02311451 | 0.073406 |
| 290284    | Sap18        | 0.081784 | 0.25420881 | 0.442906 |
| 313024    | Wasf2        | 0.081752 | 0.00627134 | 0.025113 |
| 24166     | Adcyap1      | 0.081743 | 0.00333894 | 0.014717 |
| 366856    | Mterf2       | 0.08174  | 0.42701831 | 0.622089 |
| 316009    | Plxnb1       | 0.081739 | 0.01979322 | 0.064949 |
| 29600     | Atp2b4       | 0.081734 | 0.00987645 | 0.036702 |
| 192647    | Mfn1         | 0.081716 | 0.03313249 | 0.097543 |
| 100360302 | Sec16a       | 0.081702 | 0.00258887 | 0.011829 |
| 314850    | Frs2         | 0.081638 | 0.01456494 | 0.050545 |
| 100359464 | Zfp420       | 0.081586 | 0.15321745 | 0.31119  |
| 309812    | Rev3l        | 0.081579 | 0.09913056 | 0.227052 |
| 25481     | Mmp11        | 0.081495 | 0.4942351  | 0.681044 |
| 300442    | Ccdc159      | 0.081436 | 0.41260923 | 0.608451 |
| 361548    | Dmkn         | 0.081431 | 0.85780378 | 0.930187 |
| 686326    | Ifnar2       | 0.081426 | 0.15293186 | 0.310775 |
| 293989    | Cyp2c6v1     | 0.081417 | 0.89561073 | 0.953966 |
| 367793    | Scml2        | 0.081405 | 0.67566351 | 0.818263 |
| 500707    | Tc2n         | 0.081368 | 0.45665768 | 0.647969 |
| 360643    | Cdc27        | 0.081365 | 0.00228735 | 0.010617 |

|           |                 |          |            |          |
|-----------|-----------------|----------|------------|----------|
| 24936     | Cd9             | 0.081362 | 7.90E-12   | 1.55E-10 |
| 362938    | Scrib           | 0.081255 | 0.00996944 | 0.036954 |
| 299825    | Gns             | 0.081169 | 6.80E-04   | 0.003683 |
| 24855     | Tsc2            | 0.08113  | 0.00657094 | 0.026131 |
| 292464    | Katnal          | 0.081106 | 0.34245625 | 0.539193 |
| 500281    | Setmar          | 0.0811   | 0.43461803 | 0.628831 |
| 84031     | Chn2            | 0.081095 | 0.11598086 | 0.255743 |
| 94270     | Nnat            | 0.081043 | 0.00291368 | 0.0131   |
| 298683    | Vwal            | 0.081037 | 3.28E-06   | 2.96E-05 |
| 308537    | Uri1            | 0.081013 | 0.0779452  | 0.190585 |
| 365458    | Fra10ac1        | 0.08101  | 0.21048885 | 0.3892   |
| 315473    | RGD1561444      | 0.08096  | 0.3352084  | 0.531738 |
| 288707    | Gltp            | 0.080874 | 0.00875925 | 0.033139 |
| 100911610 | LOC100911610    | 0.080872 | 0.25034307 | 0.438296 |
| 499940    | Tp53tg5         | 0.080865 | 0.82180039 | 0.909688 |
| 294687    | Bdp1            | 0.080817 | 0.04529229 | 0.12514  |
| 24705     | Rara            | 0.080789 | 0.14431758 | 0.298656 |
| 24884     | Yes1            | 0.080778 | 0.02524094 | 0.078664 |
| 307845    | Mtss11          | 0.080774 | 4.35E-04   | 0.002486 |
| 309962    | Pde8b           | 0.080735 | 0.10851842 | 0.242688 |
| 53372     | Nup54           | 0.080696 | 0.18767456 | 0.359873 |
| 500005    | Gatad1          | 0.080601 | 0.01374038 | 0.048104 |
| 170943    | Slc25a10        | 0.080585 | 0.03082686 | 0.092094 |
| 363442    | Fundc1          | 0.080549 | 0.0039892  | 0.017111 |
| 362289    | Lime1           | 0.080468 | 0.14397234 | 0.298363 |
| 64531     | Synj2bp         | 0.080464 | 1.73E-04   | 0.001089 |
| 361929    | Atp11b          | 0.080458 | 0.03221848 | 0.095487 |
| 25618     | Acadsb          | 0.080295 | 4.40E-04   | 0.00251  |
| 100365504 | Sf3b6           | 0.080281 | 0.10555426 | 0.237875 |
| 310192    | Trio            | 0.080176 | 0.0010906  | 0.005569 |
| 108349907 | LOC108349907    | 0.080172 | 0.57042125 | 0.739831 |
| 680692    | Golm1           | 0.080172 | 0.24011484 | 0.427542 |
| 305851    | Supt16h         | 0.080148 | 0.00441536 | 0.018625 |
| 288906    | Rfx1            | 0.080109 | 0.20634138 | 0.383879 |
| 310682    | Pex11b          | 0.080084 | 0.10644771 | 0.239463 |
| 306252    | Nek4            | 0.080068 | 0.27518826 | 0.467234 |
| 691170    | LOC691170       | 0.080047 | 0.19694424 | 0.371551 |
| 102551177 | LOC102551177    | 0.08004  | 0.84451996 | 0.9224   |
| 84431     | Asah1           | 0.080038 | 2.25E-04   | 0.001385 |
| 500227    | LOC500227       | 0.079975 | 0.56425039 | 0.735383 |
| 114846    | Gstol           | 0.079974 | 0.01200704 | 0.043089 |
| 308561    | Zfp819          | 0.079965 | 0.77458565 | 0.882243 |
| 362223    | Snrpb2          | 0.079924 | 0.06476769 | 0.165526 |
| 307024    | Zfp438          | 0.079913 | 0.49830986 | 0.684677 |
| 619561    | Acsf2           | 0.07989  | 0.10043448 | 0.229432 |
| 65034     | Pdzd2           | 0.079888 | 0.0209724  | 0.068009 |
| 314730    | Ikbip           | 0.079875 | 0.18620678 | 0.357888 |
| 619566    | Cdca71          | 0.079859 | 0.58307534 | 0.749809 |
| 29598     | Atp2b1          | 0.079831 | 4.02E-07   | 4.26E-06 |
| 313125    | Bach2           | 0.079818 | 0.46082727 | 0.652088 |
| 108348199 | NEWGENE_1306210 | 0.079815 | 2.31E-04   | 0.001421 |
| 310756    | Mov10           | 0.079811 | 0.33110532 | 0.527205 |
| 499672    | Cdc42sel        | 0.079796 | 0.00479197 | 0.019996 |
| 313098    | Usp45           | 0.079792 | 0.01619954 | 0.055201 |
| 307178    | Arhgap21        | 0.07979  | 7.61E-04   | 0.004081 |
| 100910079 | LOC100910079    | 0.079789 | 0.41720955 | 0.612957 |

|           |              |          |            |          |
|-----------|--------------|----------|------------|----------|
| 289584    | Usp46        | 0.079787 | 0.00397196 | 0.017045 |
| 291975    | Enkd1        | 0.07977  | 0.61185759 | 0.773042 |
| 499418    | Spatc11      | 0.079728 | 0.66326562 | 0.808131 |
| 311257    | Nat10        | 0.079704 | 0.17959737 | 0.348632 |
| 300062    | Ift27        | 0.079676 | 0.23667975 | 0.423564 |
| 310314    | Ttc14        | 0.079617 | 0.12828921 | 0.27505  |
| 298066    | Erp44        | 0.079612 | 0.02050451 | 0.066856 |
| 365619    | Arsk         | 0.079601 | 0.2975976  | 0.494137 |
| 361917    | Zfand1       | 0.079562 | 0.33183441 | 0.528101 |
| 691422    | LOC691422    | 0.079556 | 0.27597977 | 0.468285 |
| 309957    | Mef2a        | 0.07955  | 7.40E-04   | 0.003978 |
| 363158    | Crtap        | 0.079504 | 0.2330975  | 0.418964 |
| 317398    | Usp51        | 0.079423 | 0.87419269 | 0.940834 |
| 54318     | Eif2s1       | 0.079391 | 0.01378012 | 0.048208 |
| 314157    | Fbxo33       | 0.079376 | 0.17042221 | 0.336271 |
| 246273    | Trib3        | 0.079315 | 0.770169   | 0.879316 |
| 65160     | Clnsla       | 0.07927  | 0.03824788 | 0.109145 |
| 361452    | Ltv1         | 0.079241 | 0.1469568  | 0.302311 |
| 303394    | Usp32        | 0.079236 | 5.54E-06   | 4.79E-05 |
| 305466    | Prr141       | 0.079225 | 0.01433037 | 0.04984  |
| 310377    | RGD1306227   | 0.079191 | 0.57615249 | 0.744122 |
| 54320     | Pdpm         | 0.079142 | 0.0028273  | 0.012766 |
| 497896    | Zfp879       | 0.079127 | 0.63347688 | 0.789514 |
| 114021    | Ebnalbp2     | 0.079097 | 0.17710431 | 0.345589 |
| 103690073 | LOC103690073 | 0.079089 | 0.74759662 | 0.864637 |
| 116482    | Sacm11       | 0.079062 | 8.69E-05   | 5.85E-04 |
| 100912216 | Prcd         | 0.079057 | 0.67745024 | 0.819541 |
| 295072    | RGD1560324   | 0.079055 | 0.88558845 | 0.947903 |
| 80773     | Cyb5b        | 0.079034 | 0.01039385 | 0.038274 |
| 84577     | Hdac2        | 0.079029 | 0.00293628 | 0.013183 |
| 100909604 | LOC100909604 | 0.078943 | 0.19225559 | 0.365785 |
| 308650    | Hnrnp2       | 0.078936 | 0.00256789 | 0.011745 |
| 306941    | Carmil1      | 0.078925 | 0.05055846 | 0.135924 |
| 294091    | Ifit2        | 0.078856 | 0.22083219 | 0.40285  |
| 303552    | Rundc1       | 0.078793 | 0.1049115  | 0.236763 |
| 29423     | Gap43        | 0.078793 | 2.74E-07   | 2.99E-06 |
| 500132    | Plekha8      | 0.078714 | 0.20852322 | 0.386692 |
| 298144    | Kdm4c        | 0.078712 | 0.16009101 | 0.321821 |
| 307348    | Spire1       | 0.078694 | 5.95E-04   | 0.00327  |
| 315216    | Selenoo      | 0.078693 | 0.05455323 | 0.144582 |
| 102556290 | LOC102556290 | 0.078686 | 0.70628513 | 0.839336 |
| 315981    | Col6a4       | 0.078642 | 0.81221835 | 0.905185 |
| 680867    | Tmem191c     | 0.078642 | 0.45250288 | 0.644186 |
| 171050    | Mob4         | 0.078636 | 0.00261513 | 0.011935 |
| 361052    | Cdadcl       | 0.078593 | 0.03150405 | 0.093793 |
| 304881    | Torlaip2     | 0.078578 | 0.00700356 | 0.02753  |
| 301013    | Shisa5       | 0.078573 | 0.00424224 | 0.018018 |
| 83781     | Lgals3       | 0.078541 | 1.02E-05   | 8.36E-05 |
| 290364    | Itm2b        | 0.078498 | 3.54E-14   | 8.84E-13 |
| 363509    | Arhgef6      | 0.07848  | 0.02245296 | 0.071712 |
| 289615    | Atp8a1       | 0.078458 | 1.71E-06   | 1.64E-05 |
| 79251     | Aspa         | 0.078413 | 0.07455253 | 0.184349 |
| 305164    | Wdfy3        | 0.078367 | 4.52E-07   | 4.75E-06 |
| 361686    | Osbpl5       | 0.078291 | 0.00386461 | 0.016652 |
| 298767    | Dync2l1l     | 0.078285 | 0.29520814 | 0.491497 |
| 311536    | Slc52a3      | 0.078284 | 0.6390543  | 0.793713 |



|           |              |          |            |          |
|-----------|--------------|----------|------------|----------|
| 690634    | Fbxo3        | 0.078275 | 9.60E-04   | 0.004996 |
| 298091    | Slc31a2      | 0.078274 | 0.38380935 | 0.580499 |
| 103691564 | LOC103691564 | 0.0782   | 0.47723037 | 0.666631 |
| 301442    | Sumo1        | 0.078189 | 0.00749627 | 0.029089 |
| 361842    | Sarla        | 0.078164 | 3.64E-04   | 0.002128 |
| 56042     | Uso1         | 0.078163 | 1.46E-04   | 9.36E-04 |
| 304983    | Tagln2       | 0.078151 | 2.87E-09   | 4.18E-08 |
| 100909586 | LOC100909586 | 0.078113 | 0.92692892 | 0.973388 |
| 314205    | Arid4a       | 0.078106 | 0.14978126 | 0.306038 |
| 295107    | Smc4         | 0.078082 | 0.07017108 | 0.175959 |
| 54245     | Crk          | 0.07808  | 4.60E-07   | 4.83E-06 |
| 303885    | Rubcn        | 0.078075 | 0.00113484 | 0.005759 |
| 303599    | Tanc2        | 0.078032 | 1.01E-04   | 6.67E-04 |
| 315058    | Chrac1       | 0.078032 | 0.3934679  | 0.590652 |
| 58840     | Mapk6        | 0.077874 | 0.02153401 | 0.069452 |
| 500054    | Pot1         | 0.07786  | 0.27296765 | 0.464956 |
| 116549    | Csnk2a1      | 0.077842 | 1.68E-05   | 1.31E-04 |
| 305549    | Pelil1       | 0.077825 | 0.1477605  | 0.303211 |
| 315000    | Rnf139       | 0.07781  | 0.0838484  | 0.201679 |
| 690244    | Sumo2        | 0.077763 | 5.31E-04   | 0.002952 |
| 266806    | Erc1         | 0.077752 | 0.01523145 | 0.052561 |
| 298199    | Plin2        | 0.077729 | 0.00518557 | 0.021404 |
| 361924    | Mynn         | 0.07771  | 0.20309909 | 0.379367 |
| 498594    | Lrit2        | 0.077681 | 0.24141805 | 0.42918  |
| 300652    | Sorl1        | 0.077664 | 5.03E-04   | 0.002817 |
| 315740    | Kif23        | 0.077655 | 0.63675012 | 0.791573 |
| 100360437 | Nsun3        | 0.077571 | 0.72961156 | 0.852639 |
| 24239     | Cacnalc      | 0.077522 | 0.01147241 | 0.041452 |
| 367092    | Arid3b       | 0.077493 | 0.41385081 | 0.609715 |
| 361526    | Sertad1      | 0.077484 | 0.33078696 | 0.527051 |
| 171085    | Pcsk4        | 0.077461 | 0.36103074 | 0.557786 |
| 108348127 | LOC108348127 | 0.077437 | 0.37642682 | 0.573249 |
| 307035    | Mpp7         | 0.077391 | 0.33828182 | 0.535009 |
| 288783    | Ormdl2       | 0.077387 | 0.08762649 | 0.207697 |
| 311630    | Zswim3       | 0.077348 | 0.2970827  | 0.493669 |
| 102551184 | LOC102551184 | 0.077291 | 0.75666022 | 0.870783 |
| 303037    | Spdl1        | 0.077283 | 0.54810237 | 0.728699 |
| 360540    | Akap10       | 0.077242 | 0.11741497 | 0.25798  |
| 305918    | Ift88        | 0.077211 | 0.12163022 | 0.2651   |
| 29492     | Notch2       | 0.077172 | 0.00991131 | 0.03681  |
| 293343    | Fam160a2     | 0.077149 | 0.12714621 | 0.273307 |
| 100365779 | Zfp605       | 0.077141 | 0.45090032 | 0.642721 |
| 114023    | Copb1        | 0.077127 | 0.00231866 | 0.010747 |
| 689991    | Unc80        | 0.077086 | 1.45E-04   | 9.31E-04 |
| 81680     | Lifr         | 0.077068 | 6.04E-07   | 6.23E-06 |
| 299043    | Eapp         | 0.077061 | 0.08980261 | 0.211434 |
| 295344    | St7l         | 0.077051 | 0.08528804 | 0.204162 |
| 310999    | Plekhg5      | 0.077046 | 0.11869824 | 0.260139 |
| 83842     | Crot         | 0.077036 | 0.00461911 | 0.01939  |
| 361338    | Fech         | 0.077026 | 0.0348333  | 0.101375 |
| 308667    | Nipa2        | 0.076949 | 0.01614329 | 0.055039 |
| 309069    | Edrf1        | 0.076936 | 0.18706235 | 0.359025 |
| 100360066 | Evi5         | 0.076907 | 3.30E-05   | 2.45E-04 |
| 362356    | Cull1        | 0.076834 | 3.33E-05   | 2.47E-04 |
| 100361658 | Usp37        | 0.076804 | 0.07142923 | 0.178433 |
| 291445    | Megf10       | 0.076782 | 0.00764474 | 0.02958  |

|           |            |          |            |          |
|-----------|------------|----------|------------|----------|
| 679712    | Myef2      | 0.076772 | 0.00373396 | 0.016203 |
| 306404    | Spock3     | 0.07676  | 0.02943798 | 0.088865 |
| 289175    | Slc19a2    | 0.076734 | 0.10565037 | 0.238007 |
| 499725    | Rpf1       | 0.076725 | 0.21658519 | 0.397807 |
| 366872    | Cep83      | 0.076694 | 0.03578526 | 0.103482 |
| 288118    | Tmprss7    | 0.076694 | 0.86818423 | 0.937281 |
| 301351    | RGD1310819 | 0.076694 | 0.68435272 | 0.824461 |
| 500577    | Fhad1      | 0.076694 | 0.68435272 | 0.824461 |
| 114485    | Dmtf1      | 0.076694 | 0.00868449 | 0.032915 |
| 305684    | Samd8      | 0.0766   | 0.00318387 | 0.014161 |
| 360471    | Usp7       | 0.076575 | 2.72E-04   | 0.001647 |
| 300782    | Ints14     | 0.076426 | 0.06187163 | 0.159927 |
| 85421     | Prkd1      | 0.07642  | 0.06192209 | 0.160014 |
| 317593    | RGD1561327 | 0.076418 | 0.04970154 | 0.134417 |
| 292022    | Ddx19a     | 0.076413 | 0.07545824 | 0.186105 |
| 304138    | Cyrr1      | 0.076407 | 0.14089015 | 0.29412  |
| 289014    | Mapkapk2   | 0.076348 | 0.05803157 | 0.152191 |
| 308718    | Pex7       | 0.076237 | 0.34177704 | 0.538569 |
| 117280    | Hnrnpu     | 0.076205 | 1.51E-07   | 1.71E-06 |
| 305288    | Cep135     | 0.07618  | 0.43778972 | 0.631644 |
| 308341    | Ssc5d      | 0.076071 | 0.12226429 | 0.266117 |
| 24929     | Ptger3     | 0.076067 | 0.48308283 | 0.671654 |
| 308509    | RGD1308428 | 0.076007 | 0.01715817 | 0.057837 |
| 289424    | Xpr1       | 0.075942 | 0.1525691  | 0.310303 |
| 170927    | Clcc1      | 0.075936 | 0.07156757 | 0.178708 |
| 687022    | Sec22c     | 0.075891 | 0.00716084 | 0.028027 |
| 301430    | Orc2       | 0.07587  | 0.06708213 | 0.169846 |
| 362923    | Efr3a      | 0.075866 | 2.13E-04   | 0.001313 |
| 680200    | LOC680200  | 0.075831 | 0.70959415 | 0.840228 |
| 360466    | Zc3h7a     | 0.075796 | 0.04923427 | 0.133571 |
| 311483    | Rrbp1      | 0.075782 | 0.00141617 | 0.007005 |
| 292188    | Rnf217     | 0.075727 | 0.35839342 | 0.555333 |
| 85430     | Herpud1    | 0.075716 | 0.0268983  | 0.082692 |
| 296501    | Hat1       | 0.075638 | 0.1453838  | 0.30021  |
| 361995    | Prpf3      | 0.075589 | 0.12208788 | 0.265855 |
| 289219    | Ppox       | 0.075572 | 0.29729969 | 0.493857 |
| 64171     | Card9      | 0.075572 | 0.61338801 | 0.774102 |
| 25256     | Fmo1       | 0.075568 | 0.1120206  | 0.249145 |
| 688318    | Lrrc45     | 0.075563 | 0.08063205 | 0.195822 |
| 306306    | Ccser2     | 0.075551 | 3.52E-11   | 6.40E-10 |
| 299247    | Cpg1       | 0.07555  | 0.42315728 | 0.618593 |
| 116477    | Wnk1       | 0.075548 | 6.37E-06   | 5.43E-05 |
| 293698    | Ccdc88b    | 0.075514 | 0.47272801 | 0.663114 |
| 361667    | Dhx32      | 0.075514 | 0.06811673 | 0.172076 |
| 298018    | Fam206a    | 0.075457 | 0.14787939 | 0.303324 |
| 310710    | Sec22b     | 0.075457 | 0.02801815 | 0.085445 |
| 691018    | Hsd17b14   | 0.07545  | 0.77548688 | 0.8829   |
| 498205    | LOC498205  | 0.07545  | 0.94430452 | 0.984631 |
| 313981    | Nol10      | 0.07545  | 0.12456411 | 0.269521 |
| 291736    | Rprd1a     | 0.07543  | 0.00358029 | 0.015625 |
| 303241    | Chd3       | 0.075429 | 7.84E-04   | 0.004188 |
| 100360412 | Dnajc1     | 0.075378 | 0.33720238 | 0.534056 |
| 295428    | Mettl14    | 0.075372 | 0.08431647 | 0.202574 |
| 306767    | Ar110      | 0.075371 | 0.19500352 | 0.369243 |
| 288486    | Zfp12      | 0.075346 | 0.1891308  | 0.361901 |
| 361895    | Elovl7     | 0.075286 | 0.00501413 | 0.020778 |

|           |              |          |            |          |
|-----------|--------------|----------|------------|----------|
| 310376    | Nim1k        | 0.075262 | 0.55318687 | 0.733258 |
| 295088    | Gmps         | 0.075227 | 0.0935664  | 0.217818 |
| 100910299 | Larp4        | 0.075205 | 0.14350496 | 0.297945 |
| 305120    | Rpap2        | 0.075202 | 0.20127769 | 0.376963 |
| 292090    | Galnt2       | 0.075121 | 0.00442472 | 0.01866  |
| 302492    | Mbn13        | 0.075111 | 0.59743672 | 0.761032 |
| 316561    | Sphkap       | 0.075074 | 0.00457077 | 0.019212 |
| 100910130 | LOC100910130 | 0.075038 | 0.18547716 | 0.356918 |
| 25444     | Fgf9         | 0.075037 | 0.21907638 | 0.400721 |
| 84485     | Ccs          | 0.075024 | 0.20336665 | 0.379829 |
| 313375    | Cyp2j3       | 0.075    | 0.10616185 | 0.239046 |
| 311112    | Fastkd1      | 0.074996 | 0.1793912  | 0.348268 |
| 50864     | Ntm          | 0.074987 | 0.14424256 | 0.29863  |
| 361233    | Ssr1         | 0.074986 | 0.00285884 | 0.012896 |
| 287361    | Zfp496       | 0.074908 | 0.21945908 | 0.401267 |
| 307503    | Etf1         | 0.074843 | 0.0060554  | 0.024305 |
| 311047    | Cytip        | 0.074843 | 0.64269595 | 0.796418 |
| 499113    | Selenov      | 0.074843 | 0.81656429 | 0.907797 |
| 295654    | Ttc21b       | 0.074808 | 0.12404538 | 0.268979 |
| 289707    | Lyar         | 0.074803 | 0.27131682 | 0.462889 |
| 25263     | Mal          | 0.074781 | 2.21E-08   | 2.82E-07 |
| 80850     | Gng2         | 0.074764 | 1.50E-08   | 1.98E-07 |
| 501088    | Tbc1d5       | 0.074745 | 0.03278168 | 0.09669  |
| 286761    | Vcpipl       | 0.074725 | 0.05505574 | 0.145731 |
| 365042    | Rab32        | 0.074723 | 0.52557458 | 0.709446 |
| 316008    | Ccdc51       | 0.07468  | 0.35293182 | 0.549868 |
| 29317     | Csrp2        | 0.074657 | 0.37764375 | 0.574642 |
| 25107     | Avpr1a       | 0.074643 | 0.62311385 | 0.780943 |
| 108353265 | LOC108353265 | 0.074617 | 0.74169269 | 0.860212 |
| 362283    | Stx16        | 0.074612 | 0.01100173 | 0.040078 |
| 84511     | Slcolc1      | 0.074609 | 0.43218957 | 0.626507 |
| 499709    | Gar1         | 0.074586 | 0.45300431 | 0.644466 |
| 313702    | Mad212       | 0.074553 | 0.36200479 | 0.558476 |
| 117254    | Prdx1        | 0.074544 | 1.52E-05   | 1.20E-04 |
| 100912483 | LOC100912483 | 0.074544 | 0.57064333 | 0.739917 |
| 501925    | Slc2a9       | 0.074526 | 0.49973094 | 0.686234 |
| 361055    | Kpna3        | 0.074471 | 0.00772579 | 0.029864 |
| 307491    | Hars2        | 0.074454 | 0.07550151 | 0.186163 |
| 25622     | Ptpn11       | 0.074434 | 3.28E-04   | 0.001945 |
| 54244     | Crebbp       | 0.074431 | 0.12494041 | 0.27009  |
| 353233    | Nsmaf        | 0.074429 | 0.09525687 | 0.220702 |
| 81632     | Abat         | 0.074344 | 0.03986173 | 0.112954 |
| 29150     | Matr3        | 0.074344 | 4.00E-06   | 3.56E-05 |
| 171015    | Cyb5r4       | 0.074261 | 0.1365534  | 0.287461 |
| 114095    | Stxbp3       | 0.074224 | 0.09569711 | 0.221479 |
| 299027    | Eif2s3       | 0.074223 | 5.31E-04   | 0.002954 |
| 58966     | Ramp2        | 0.074222 | 0.02432646 | 0.076515 |
| 252855    | Sfpq         | 0.074195 | 0.00665337 | 0.026404 |
| 497897    | Zfp2         | 0.074156 | 0.40503436 | 0.602082 |
| 689256    | Tpd5211      | 0.074128 | 0.30178553 | 0.498786 |
| 313914    | Gtf3c2       | 0.074118 | 0.0307911  | 0.092016 |
| 246097    | Fas          | 0.074108 | 0.50089158 | 0.68758  |
| 289080    | Rgl1         | 0.074101 | 0.00353813 | 0.015469 |
| 305391    | Med28        | 0.07409  | 0.1369879  | 0.288153 |
| 361324    | Sema6a       | 0.074078 | 0.06693269 | 0.169557 |
| 315744    | Itgall       | 0.074065 | 0.51625718 | 0.701643 |

|           |              |          |            |          |
|-----------|--------------|----------|------------|----------|
| 363614    | Natd1        | 0.073955 | 0.28214831 | 0.475743 |
| 192227    | Ptgr1        | 0.073952 | 0.57211822 | 0.741274 |
| 294408    | Asfla        | 0.073952 | 0.23959014 | 0.426967 |
| 366251    | Slc2a10      | 0.073951 | 0.63625881 | 0.791169 |
| 683570    | Gnpda1       | 0.07391  | 0.19563625 | 0.370073 |
| 192359    | Zc3h14       | 0.073889 | 0.01447074 | 0.050245 |
| 305614    | Sptbn1       | 0.073872 | 1.78E-34   | 1.18E-32 |
| 687029    | Ss1812       | 0.07386  | 0.18217068 | 0.352156 |
| 313494    | Tln1         | 0.073843 | 4.18E-05   | 3.03E-04 |
| 498995    | Ncoa7        | 0.073833 | 2.96E-08   | 3.72E-07 |
| 287405    | Tmem220      | 0.073827 | 0.54205988 | 0.723646 |
| 498727    | Nol7         | 0.073761 | 0.11821539 | 0.259439 |
| 60384     | Copb2        | 0.073749 | 0.00432022 | 0.018284 |
| 361849    | Ccar1        | 0.07374  | 0.02115354 | 0.06848  |
| 25248     | Cnr1         | 0.073735 | 0.0982095  | 0.225567 |
| 366960    | Maff         | 0.073733 | 0.5147887  | 0.700547 |
| 294090    | Ifit1bl      | 0.073669 | 0.56822588 | 0.738039 |
| 298558    | Zfp46        | 0.073601 | 0.04776034 | 0.130277 |
| 171123    | Rph3a1       | 0.073577 | 0.66688911 | 0.810679 |
| 25637     | Ptger1       | 0.073534 | 0.43539894 | 0.629387 |
| 316457    | Pikfyve      | 0.073526 | 0.00720569 | 0.028173 |
| 304741    | Tfcp2l1      | 0.073515 | 0.26460454 | 0.454942 |
| 60581     | Acaca        | 0.073491 | 0.00105162 | 0.005401 |
| 360866    | Scyl3        | 0.073465 | 0.1692485  | 0.334441 |
| 364535    | Tmem161a     | 0.07344  | 0.2157667  | 0.396725 |
| 311346    | Lrrc57       | 0.073434 | 0.11215192 | 0.249408 |
| 100364240 | Btbd8        | 0.073433 | 0.07229983 | 0.180205 |
| 102554315 | LOC102554315 | 0.073416 | 0.16486113 | 0.329083 |
| 310097    | Snx18        | 0.073406 | 0.02433751 | 0.076524 |
| 307505    | Ctnna1       | 0.073282 | 1.33E-05   | 1.06E-04 |
| 299872    | Eif3e11      | 0.073277 | 0.00245421 | 0.011282 |
| 108351491 | LOC108351491 | 0.073222 | 0.76272307 | 0.874695 |
| 296293    | Cbfa2t2      | 0.073167 | 0.07311439 | 0.181807 |
| 24942     | Chm          | 0.073149 | 0.09966781 | 0.228036 |
| 114561    | Pitpnb       | 0.073094 | 0.00417526 | 0.017805 |
| 100361104 | LOC100361104 | 0.073083 | 0.77881375 | 0.884783 |
| 114125    | Dl13         | 0.073083 | 0.87118176 | 0.939186 |
| 289199    | Lrrc52       | 0.073083 | 0.87118176 | 0.939186 |
| 291427    | Loxhd1       | 0.073083 | 0.87118176 | 0.939186 |
| 297386    | Slc4a5       | 0.073083 | 0.87118176 | 0.939186 |
| 29755     | Colq         | 0.073083 | 0.55877065 | 0.737783 |
| 300019    | Gml          | 0.073083 | 0.87118176 | 0.939186 |
| 367074    | Tmprss4      | 0.073083 | 0.87118176 | 0.939186 |
| 680799    | Ccdc166      | 0.073083 | 0.87118176 | 0.939186 |
| 474154    | Rbm4b        | 0.073046 | 0.33217602 | 0.528292 |
| 317191    | Apool        | 0.073022 | 0.22103234 | 0.403137 |
| 102552497 | Pcdhgb6      | 0.073017 | 0.52018315 | 0.704816 |
| 296304    | Edem2        | 0.07297  | 0.20566891 | 0.38289  |
| 298916    | Cpsf3        | 0.072936 | 0.07971531 | 0.193942 |
| 305227    | 11-Sep       | 0.072934 | 0.01976278 | 0.064871 |
| 25679     | Itpr3        | 0.072931 | 6.30E-05   | 4.38E-04 |
| 361718    | Naa40        | 0.072919 | 0.45790356 | 0.649205 |
| 311670    | Cstf1        | 0.072917 | 0.20215084 | 0.378226 |
| 170902    | Zfp347       | 0.072907 | 0.25009761 | 0.438592 |
| 315858    | Ibtk         | 0.072852 | 0.09869676 | 0.226358 |
| 679692    | Lpgat1       | 0.072793 | 0.00323251 | 0.014337 |

|           |              |          |            |          |
|-----------|--------------|----------|------------|----------|
| 364144    | Fryl         | 0.072778 | 8.37E-04   | 0.004427 |
| 292781    | Syne4        | 0.072762 | 0.44703829 | 0.639466 |
| 296099    | Tp53bp1      | 0.07267  | 0.00127138 | 0.00636  |
| 100362836 | Poc1b        | 0.072668 | 0.23779094 | 0.424953 |
| 100362678 | Epc1         | 0.072664 | 0.09592592 | 0.221955 |
| 361959    | Kpna4        | 0.072656 | 0.01969206 | 0.064684 |
| 291526    | Pol1         | 0.072656 | 0.5177561  | 0.702627 |
| 29253     | Maoa         | 0.072619 | 0.01936851 | 0.063786 |
| 301549    | Wdfy1        | 0.072618 | 0.00215882 | 0.010099 |
| 303212    | Zfp287       | 0.072618 | 0.18064308 | 0.35002  |
| 294883    | Raly1        | 0.072617 | 0.02063036 | 0.067186 |
| 25337     | Nfyc         | 0.072603 | 0.06035703 | 0.156778 |
| 362831    | Dot11        | 0.072594 | 0.04152466 | 0.116454 |
| 103693210 | 103693210    | 0.07255  | 0.02186578 | 0.070272 |
| 300516    | Tmem218      | 0.072515 | 0.23516482 | 0.421526 |
| 29347     | Faah         | 0.072511 | 0.34296296 | 0.539456 |
| 301374    | RGD1310553   | 0.072507 | 0.15632272 | 0.316081 |
| 170899    | Kcnk2        | 0.072505 | 0.21466999 | 0.395319 |
| 309016    | Wdr11        | 0.072484 | 0.04941496 | 0.133966 |
| 313865    | Thada        | 0.072481 | 0.12958067 | 0.277008 |
| 315769    | Trip4        | 0.07239  | 0.09344109 | 0.21766  |
| 64440     | Syt4         | 0.07237  | 6.95E-08   | 8.30E-07 |
| 103691373 | Frat1        | 0.072367 | 0.38998942 | 0.587096 |
| 246217    | Ngef         | 0.072265 | 0.23594042 | 0.422678 |
| 309357    | Tmem185a     | 0.072262 | 0.12391904 | 0.268797 |
| 500318    | Cd27         | 0.072259 | 0.76818905 | 0.87795  |
| 246268    | Oas1b        | 0.072236 | 0.30937473 | 0.504499 |
| 305150    | Hsd17b13     | 0.072234 | 0.74707376 | 0.864295 |
| 361810    | Fkbp5        | 0.072172 | 0.06206043 | 0.160285 |
| 366697    | Sptlc2       | 0.072163 | 5.88E-04   | 0.003234 |
| 170956    | Ythdc1       | 0.072148 | 0.0335148  | 0.09841  |
| 298370    | Txndc12      | 0.072087 | 0.04630119 | 0.12741  |
| 298065    | Tex10        | 0.072067 | 0.11200524 | 0.249169 |
| 171129    | Uggt1        | 0.072027 | 0.00543788 | 0.022258 |
| 100361558 | LOC100361558 | 0.072011 | 2.68E-04   | 0.001621 |
| 113948    | Bbs2         | 0.07201  | 0.07414585 | 0.183677 |
| 171107    | Arr3         | 0.071956 | 0.74240366 | 0.860722 |
| 58959     | Crhr1        | 0.071956 | 0.78041684 | 0.885654 |
| 316317    | Imp4         | 0.071927 | 0.17886631 | 0.347603 |
| 497815    | Nrcam        | 0.071924 | 3.56E-05   | 2.61E-04 |
| 102551838 | LOC102551838 | 0.071921 | 0.85554076 | 0.928949 |
| 54230     | Btg3         | 0.071921 | 0.36267939 | 0.559109 |
| 316575    | Trip12       | 0.071915 | 2.71E-05   | 2.05E-04 |
| 64394     | Zmat3        | 0.071905 | 0.00842798 | 0.032147 |
| 289196    | Tmco1        | 0.071898 | 0.02676293 | 0.082329 |
| 24192     | Akr1b1       | 0.071884 | 1.84E-06   | 1.75E-05 |
| 300756    | Arih1        | 0.071862 | 0.00148949 | 0.007326 |
| 291618    | Kctd16       | 0.071833 | 0.15689515 | 0.316868 |
| 108352427 | LOC108352427 | 0.07182  | 0.76093167 | 0.873693 |
| 316406    | RGD1306941   | 0.071811 | 0.03340591 | 0.098197 |
| 295106    | Ift80        | 0.071791 | 0.11904747 | 0.260694 |
| 311748    | Metap1d      | 0.071786 | 0.56214431 | 0.733592 |
| 100910867 | Cfap69       | 0.07178  | 0.28625111 | 0.480533 |
| 81748     | Pls3         | 0.071768 | 3.32E-07   | 3.57E-06 |
| 25132     | Myo5b        | 0.071759 | 0.39501711 | 0.59223  |
| 25245     | Bdkrb2       | 0.071754 | 0.17561543 | 0.343635 |

|           |              |          |            |          |
|-----------|--------------|----------|------------|----------|
| 64133     | Xylt1        | 0.071721 | 0.60708755 | 0.76926  |
| 81640     | Amd1         | 0.071691 | 0.00104862 | 0.005387 |
| 24679     | Prkar2b      | 0.071655 | 9.94E-05   | 6.60E-04 |
| 362724    | Sh3yl1       | 0.071655 | 0.35614346 | 0.553288 |
| 500901    | Arhgap39     | 0.07165  | 0.00232849 | 0.01079  |
| 24419     | Grm6         | 0.071526 | 0.52815481 | 0.711064 |
| 295690    | Dna_jc10     | 0.07147  | 1.22E-05   | 9.87E-05 |
| 315145    | Fam83f       | 0.07143  | 0.19932073 | 0.374735 |
| 681284    | Hmgn5b       | 0.071413 | 0.55337636 | 0.733356 |
| 679168    | Fam199x      | 0.071406 | 0.69446831 | 0.831624 |
| 685679    | Nme4         | 0.071406 | 0.74842369 | 0.865173 |
| 311607    | Chd6         | 0.071391 | 0.00174961 | 0.008417 |
| 498390    | Zfp518b      | 0.071358 | 0.10374331 | 0.234934 |
| 315758    | Dpp8         | 0.071321 | 5.99E-06   | 5.14E-05 |
| 361859    | Cdc40        | 0.07131  | 0.18633025 | 0.358089 |
| 360850    | Nek7         | 0.071291 | 2.90E-06   | 2.65E-05 |
| 83627     | Galnt5       | 0.071248 | 0.12238877 | 0.266327 |
| 60430     | Mc11         | 0.071209 | 0.05721338 | 0.150314 |
| 361939    | Mfsd8        | 0.071205 | 0.05160599 | 0.138155 |
| 103691035 | LOC103691035 | 0.071125 | 0.93131325 | 0.975786 |
| 361315    | Yipf5        | 0.071103 | 0.03583004 | 0.103533 |
| 502935    | Eya1         | 0.07108  | 0.7205022  | 0.846983 |
| 681359    | E4f1         | 0.07104  | 0.20405193 | 0.380698 |
| 360725    | Snx4         | 0.070988 | 0.0305218  | 0.091354 |
| 501560    | Rps6ka3      | 0.070984 | 1.95E-04   | 0.001212 |
| 171090    | Giot1        | 0.070982 | 0.31842912 | 0.513287 |
| 304054    | Prdm15       | 0.070975 | 0.34286934 | 0.539531 |
| 501195    | RGD1562136   | 0.070953 | 0.01467178 | 0.05086  |
| 100909657 | LOC100909657 | 0.070923 | 0.33092272 | 0.527179 |
| 290648    | Pgpep1       | 0.070896 | 0.25089238 | 0.438814 |
| 315141    | Mief1        | 0.070885 | 0.04594421 | 0.126629 |
| 305472    | Pik3ip1      | 0.070874 | 0.01560355 | 0.053583 |
| 366461    | Ppih         | 0.070865 | 0.24035261 | 0.427845 |
| 100359687 | LOC100359687 | 0.070863 | 0.27280353 | 0.464842 |
| 102547932 | Zfp623       | 0.070853 | 0.37457473 | 0.571159 |
| 311880    | Gapvd1       | 0.070711 | 0.00724101 | 0.028288 |
| 50659     | Nr2c2        | 0.07067  | 0.11236352 | 0.249821 |
| 315702    | RGD1305464   | 0.07067  | 0.45420623 | 0.645549 |
| 502642    | Selenoh      | 0.070665 | 0.29525701 | 0.491536 |
| 171576    | Bub1b        | 0.070597 | 0.74974983 | 0.866233 |
| 29316     | Adora2b      | 0.070597 | 0.52351298 | 0.707716 |
| 619385    | Ncoa4        | 0.070597 | 3.82E-04   | 0.002222 |
| 362173    | Caprin1      | 0.07059  | 5.19E-09   | 7.29E-08 |
| 307848    | Fuk          | 0.070576 | 0.33206176 | 0.528286 |
| 314384    | Rps6ka5      | 0.070536 | 0.06911327 | 0.173902 |
| 310982    | Tt117        | 0.070533 | 7.47E-24   | 3.27E-22 |
| 361522    | Hnrnpull1    | 0.070509 | 0.00601488 | 0.024162 |
| 100361234 | Btbd19       | 0.070493 | 0.44467537 | 0.63757  |
| 288504    | Snx8         | 0.070483 | 0.3017055  | 0.49874  |
| 362092    | Brd3         | 0.070459 | 0.07965195 | 0.193837 |
| 114489    | Dag1         | 0.0704   | 4.80E-12   | 9.61E-11 |
| 316639    | Farp2        | 0.070384 | 0.04169419 | 0.116843 |
| 316013    | Setd2        | 0.070365 | 0.0273524  | 0.083872 |
| 311573    | Cep250       | 0.070309 | 0.18610437 | 0.357763 |
| 100909679 | LOC100909679 | 0.070215 | 0.71369691 | 0.843094 |
| 24770     | Cc12         | 0.07017  | 0.25149772 | 0.439671 |



|           |              |          |            |          |
|-----------|--------------|----------|------------|----------|
| 680404    | C1ql3        | 0.070121 | 0.61517553 | 0.775177 |
| 365903    | Fam102b      | 0.070093 | 0.00106202 | 0.005449 |
| 84379     | Rab6a        | 0.070066 | 7.87E-15   | 2.05E-13 |
| 362428    | Rimklb       | 0.070033 | 0.09416123 | 0.218749 |
| 296840    | Rbm48        | 0.070027 | 0.47874028 | 0.668006 |
| 299284    | Dicer1       | 0.070018 | 0.03119059 | 0.092976 |
| 314388    | Ppp4r3a      | 0.069945 | 0.09002161 | 0.21174  |
| 100910996 | LOC100910996 | 0.069912 | 0.218847   | 0.400494 |
| 308742    | Mctp2        | 0.069856 | 0.01065597 | 0.03902  |
| 361462    | Hddc2        | 0.069853 | 0.18748126 | 0.359611 |
| 300965    | Srprb        | 0.069852 | 0.18431755 | 0.355153 |
| 292756    | Pak4         | 0.069849 | 0.18174792 | 0.351696 |
| 155192    | Abcg8        | 0.069808 | 0.78351006 | 0.887524 |
| 298845    | Emilin1      | 0.069808 | 0.32187002 | 0.517039 |
| 313170    | Kif24        | 0.069808 | 0.75105285 | 0.867107 |
| 500356    | Rergl        | 0.069808 | 0.87396384 | 0.940747 |
| 54190     | Rabep1       | 0.069764 | 0.00280818 | 0.012704 |
| 29613     | Ntrk3        | 0.069715 | 0.11112065 | 0.247404 |
| 289820    | Actr2        | 0.069662 | 5.40E-08   | 6.54E-07 |
| 100158232 | Zfp9         | 0.069631 | 0.144193   | 0.29856  |
| 361990    | Chtop        | 0.069623 | 0.00713879 | 0.027963 |
| 362549    | Efcab7       | 0.069582 | 0.43723402 | 0.631273 |
| 363924    | Rad9b        | 0.069573 | 0.39942662 | 0.59654  |
| 64298     | Rpl31        | 0.069568 | 3.29E-04   | 0.001948 |
| 290291    | Cab391       | 0.06956  | 0.00418714 | 0.017832 |
| 24827     | Tgfa         | 0.069528 | 0.1085268  | 0.242679 |
| 362367    | Znrf2        | 0.0695   | 0.04949361 | 0.134102 |
| 64562     | Prkab2       | 0.069466 | 0.00786926 | 0.030363 |
| 313365    | Ift74        | 0.069442 | 0.3562068  | 0.553296 |
| 25475     | Lgals5       | 0.069432 | 0.63654725 | 0.791425 |
| 363672    | Sp6          | 0.069419 | 0.52685831 | 0.710574 |
| 81757     | Rala         | 0.069406 | 0.00135886 | 0.006743 |
| 102548231 | LOC102548231 | 0.069401 | 0.46641571 | 0.657456 |
| 498081    | Slc35a5      | 0.069389 | 0.08708878 | 0.207196 |
| 65033     | Stx12        | 0.069372 | 1.05E-04   | 6.96E-04 |
| 140568    | Chst10       | 0.069368 | 0.27093641 | 0.462654 |
| 59326     | Rapgef3      | 0.069357 | 0.23779549 | 0.424922 |
| 303602    | Dcaf7        | 0.069321 | 0.00402233 | 0.017222 |
| 688622    | I131ra       | 0.069243 | 0.00496539 | 0.020603 |
| 192263    | Pigl         | 0.06923  | 0.47353006 | 0.663848 |
| 100911751 | LOC100911751 | 0.069224 | 0.74786253 | 0.864787 |
| 683667    | Sri          | 0.069187 | 7.33E-05   | 5.02E-04 |
| 100910854 | LOC100910854 | 0.069174 | 0.39668196 | 0.593978 |
| 304378    | Gigyf1       | 0.069134 | 0.05114994 | 0.137262 |
| 307745    | Tent4b       | 0.069131 | 0.06459595 | 0.16522  |
| 84356     | Abcd2        | 0.069119 | 0.07841672 | 0.191517 |
| 315762    | Ras112       | 0.06911  | 0.35611268 | 0.55333  |
| 360697    | Ifngr2       | 0.069106 | 0.08411929 | 0.202254 |
| 293667    | B4gat1       | 0.069087 | 0.08576947 | 0.204902 |
| 295446    | Tbck         | 0.069087 | 0.1342891  | 0.284297 |
| 310669    | Golph31      | 0.06908  | 0.2484988  | 0.436713 |
| 291209    | Hecw1        | 0.069001 | 1.89E-04   | 0.001182 |
| 691501    | Snpc5        | 0.068992 | 0.14121992 | 0.294389 |
| 315891    | RGD1309079   | 0.068977 | 0.10773969 | 0.241486 |
| 293754    | Mrpl16       | 0.068921 | 0.1779708  | 0.346747 |
| 289668    | Lap3         | 0.068913 | 0.02624895 | 0.081075 |

|           |              |          |            |          |
|-----------|--------------|----------|------------|----------|
| 312440    | Kdm3a        | 0.068905 | 0.08953741 | 0.210966 |
| 117544    | Ppat         | 0.068902 | 0.14508927 | 0.299797 |
| 683758    | Klrb1c       | 0.068852 | 0.9044754  | 0.958263 |
| 25409     | Cdh6         | 0.068816 | 0.13502265 | 0.285184 |
| 116555    | Nup107       | 0.068796 | 0.16968044 | 0.335085 |
| 102547626 | LOC102547626 | 0.068706 | 0.78864022 | 0.890581 |
| 311415    | Zc3h6        | 0.068688 | 0.36654428 | 0.562517 |
| 450229    | Krt27        | 0.068607 | 0.79382577 | 0.893365 |
| 29597     | P2ry2        | 0.068587 | 0.16292945 | 0.326081 |
| 171018    | Zfp384       | 0.06855  | 0.08895466 | 0.210009 |
| 307766    | Smarca5      | 0.068535 | 0.00682562 | 0.026953 |
| 500266    | Fam19a1      | 0.068481 | 0.38930727 | 0.586254 |
| 103693914 | LOC103693914 | 0.068471 | 0.8357677  | 0.918159 |
| 316810    | Gtf3c3       | 0.068459 | 0.12964569 | 0.277054 |
| 310820    | Ptbp2        | 0.068445 | 0.00487166 | 0.02028  |
| 64365     | Tcn2         | 0.068418 | 0.03270541 | 0.096555 |
| 305956    | Wdfy2        | 0.068413 | 0.00562031 | 0.022833 |
| 501563    | Prkx         | 0.068402 | 0.02249674 | 0.071755 |
| 100910636 | LOC100910636 | 0.068363 | 0.59626943 | 0.759951 |
| 688581    | Elmod2       | 0.068361 | 0.14945446 | 0.3056   |
| 114107    | Kremen1      | 0.06833  | 0.38202167 | 0.578853 |
| 302864    | Mmgt1        | 0.06832  | 8.06E-04   | 0.004279 |
| 287726    | Rdm1         | 0.068282 | 0.61966154 | 0.777844 |
| 362733    | Etv1         | 0.068262 | 3.42E-05   | 2.52E-04 |
| 314523    | Wdr60        | 0.068241 | 0.33985898 | 0.536345 |
| 361506    | Leng8        | 0.068173 | 5.34E-06   | 4.64E-05 |
| 685504    | Clgn         | 0.06815  | 4.14E-04   | 0.002382 |
| 361986    | Slc39a1      | 0.068145 | 0.03160269 | 0.094013 |
| 361285    | Mllt10       | 0.068142 | 0.0898727  | 0.211547 |
| 499583    | Naalad12     | 0.068112 | 0.51669186 | 0.701683 |
| 63994     | Arhgap17     | 0.068103 | 0.02664304 | 0.08208  |
| 363054    | Mpz13        | 0.068096 | 0.53066301 | 0.712979 |
| 25122     | Scnn1a       | 0.068068 | 0.70154352 | 0.836729 |
| 362969    | Ttll1        | 0.068041 | 0.06765179 | 0.171061 |
| 59322     | Cnksr2       | 0.068041 | 0.24449172 | 0.432866 |
| 25255     | Dyrk1a       | 0.068031 | 0.02418056 | 0.076194 |
| 363151    | Ccdc12       | 0.068003 | 0.37554847 | 0.572323 |
| 366693    | Rbm25        | 0.067997 | 0.02069733 | 0.067324 |
| 361481    | Prr18        | 0.067924 | 0.32722529 | 0.522863 |
| 308909    | Smpd1        | 0.0679   | 0.00204583 | 0.00963  |
| 292816    | Zfp507       | 0.06788  | 0.28007418 | 0.473587 |
| 116650    | Srp54a       | 0.06784  | 0.03058297 | 0.091494 |
| 500795    | RGD1562114   | 0.067788 | 0.50695449 | 0.693603 |
| 54227     | Arpc1b       | 0.067782 | 0.00712485 | 0.027926 |
| 414786    | RT1-M1-2     | 0.067747 | 0.75419232 | 0.869151 |
| 300857    | Tmem30a      | 0.067728 | 1.97E-10   | 3.32E-09 |
| 100362121 | Ddb2         | 0.067727 | 0.53173125 | 0.714011 |
| 300030    | Rhpn1        | 0.067684 | 0.02191836 | 0.07037  |
| 362304    | Orc5         | 0.067671 | 0.1338737  | 0.283796 |
| 311913    | Dennd1a      | 0.067609 | 0.17886962 | 0.347574 |
| 291750    | Trappc8      | 0.067598 | 0.01428722 | 0.049744 |
| 307474    | Tcerg1       | 0.067581 | 0.00436395 | 0.018436 |
| 24778     | Slc2a1       | 0.067571 | 0.0102814  | 0.037911 |
| 312777    | Etv6         | 0.067544 | 0.65875881 | 0.804647 |
| 100360406 | Tsr1         | 0.067518 | 0.08539385 | 0.204338 |
| 310658    | Pogz         | 0.067507 | 0.08994546 | 0.211666 |

|           |              |          |            |          |
|-----------|--------------|----------|------------|----------|
| 304019    | Tbc1d23      | 0.067498 | 0.04123558 | 0.115865 |
| 500841    | RGD1561648   | 0.067456 | 0.63784229 | 0.792569 |
| 313663    | Crocc        | 0.067454 | 0.44785371 | 0.639863 |
| 367838    | Zc4h2        | 0.067415 | 0.18258494 | 0.352778 |
| 81802     | Stx3         | 0.067388 | 0.26535605 | 0.455946 |
| 297930    | Wwp1         | 0.067387 | 0.02779139 | 0.084917 |
| 296954    | Tnpo3        | 0.067243 | 0.0103608  | 0.038159 |
| 305025    | Tp53bp2      | 0.067234 | 0.24366887 | 0.431811 |
| 83572     | Pafahlb1     | 0.067232 | 2.28E-20   | 8.30E-19 |
| 311419    | Stk35        | 0.067221 | 0.20913403 | 0.387221 |
| 116483    | Dars         | 0.067189 | 0.02922077 | 0.088335 |
| 299668    | RGD1566251   | 0.067169 | 0.08161253 | 0.197749 |
| 311163    | Ctnnd1       | 0.067119 | 3.66E-04   | 0.002138 |
| 295217    | Snapin       | 0.067116 | 0.01954134 | 0.064255 |
| 58823     | Nckap1       | 0.067098 | 2.52E-10   | 4.19E-09 |
| 305127    | Zfp644       | 0.067087 | 0.04007545 | 0.113425 |
| 363098    | Ccpg1        | 0.067071 | 0.00242897 | 0.01119  |
| 114638    | Hps1         | 0.067062 | 0.35049657 | 0.547148 |
| 680259    | Fam171a1     | 0.067054 | 5.55E-04   | 0.003075 |
| 295334    | Bcas2        | 0.067034 | 0.19952876 | 0.374978 |
| 170849    | Zfp111       | 0.067029 | 0.46146067 | 0.652403 |
| 309196    | Ttc9c        | 0.067009 | 0.02198977 | 0.070552 |
| 363629    | Cyb5d1       | 0.066974 | 0.16573822 | 0.329693 |
| 312480    | Pcgf1        | 0.066954 | 0.4398594  | 0.633144 |
| 287356    | Mrpl55       | 0.066926 | 0.15422724 | 0.312874 |
| 312439    | Rmnd5a       | 0.066909 | 0.00690765 | 0.027204 |
| 312664    | Rasgef1a     | 0.066898 | 0.0955669  | 0.221285 |
| 85244     | Spa17        | 0.066883 | 0.28162249 | 0.475235 |
| 366169    | Rtf1         | 0.06688  | 0.04463283 | 0.123695 |
| 306492    | Cnot7        | 0.066839 | 0.01927712 | 0.063518 |
| 304733    | Epb4115      | 0.066824 | 0.48724579 | 0.675322 |
| 54302     | Slc14a2      | 0.066824 | 0.87655462 | 0.942524 |
| 310460    | Arhgef26     | 0.066768 | 0.26747253 | 0.458631 |
| 500384    | Tmem70       | 0.066747 | 0.11338694 | 0.251421 |
| 361767    | Poll         | 0.066727 | 0.14533504 | 0.300207 |
| 309097    | Adgral       | 0.066709 | 0.25670575 | 0.445748 |
| 108348083 | LOC108348083 | 0.066639 | 0.47194369 | 0.662356 |
| 103693495 | Oxld1        | 0.066634 | 0.54796902 | 0.728674 |
| 64031     | Pdcd4        | 0.066579 | 0.01345532 | 0.047306 |
| 294390    | Zup1         | 0.066525 | 0.33931334 | 0.535884 |
| 282843    | Sorbs3       | 0.066433 | 0.03401419 | 0.099631 |
| 498136    | Mtus2        | 0.066407 | 0.36649051 | 0.56248  |
| 114119    | Gng10        | 0.066377 | 0.07414187 | 0.183691 |
| 305831    | Atg14        | 0.06637  | 0.34779053 | 0.544665 |
| 29524     | Limk2        | 0.066368 | 0.0919792  | 0.215202 |
| 81634     | Actn1        | 0.066298 | 0.1959766  | 0.370496 |
| 300710    | Ddx10        | 0.066295 | 0.1398813  | 0.292687 |
| 306375    | Csgalnact1   | 0.066284 | 0.08992491 | 0.211644 |
| 65195     | Kcnd3        | 0.066282 | 7.94E-04   | 0.004233 |
| 261736    | Cops2        | 0.06623  | 1.23E-05   | 9.89E-05 |
| 315606    | Kmt2a        | 0.066223 | 0.01773521 | 0.059435 |
| 317368    | Porcn        | 0.066109 | 0.19284942 | 0.366512 |
| 685859    | Ubxn2a       | 0.066108 | 0.00516536 | 0.02133  |
| 29500     | Slc10a2      | 0.066081 | 0.06229855 | 0.160617 |
| 367915    | Rab9b        | 0.066043 | 0.00270569 | 0.012292 |
| 498310    | Ns11         | 0.066019 | 0.68282535 | 0.823324 |

|           |                 |          |            |          |
|-----------|-----------------|----------|------------|----------|
| 296370    | Ctsa            | 0.066004 | 6.17E-05   | 4.30E-04 |
| 102554398 | LOC102554398    | 0.065972 | 0.48571264 | 0.673785 |
| 310935    | Fpgt            | 0.065968 | 0.29506331 | 0.491342 |
| 360792    | Styx11          | 0.065926 | 0.55974617 | 0.735451 |
| 291841    | Cnot1           | 0.065887 | 0.00593118 | 0.023902 |
| 108348063 | NEWGENE_1309551 | 0.06588  | 0.42264682 | 0.618037 |
| 309135    | Ano1            | 0.065868 | 0.39383286 | 0.59106  |
| 102554622 | LOC102554622    | 0.065855 | 3.61E-04   | 0.002115 |
| 360667    | Mfsd11          | 0.065854 | 0.07363677 | 0.182749 |
| 312937    | Cyld            | 0.065792 | 0.11240894 | 0.249834 |
| 362890    | Tspan31         | 0.065786 | 0.03264402 | 0.096433 |
| 293650    | Tcirg1          | 0.065775 | 0.11077047 | 0.246768 |
| 171057    | Cbwd1           | 0.065772 | 0.3831634  | 0.580075 |
| 362044    | Cenpe           | 0.065745 | 0.57839082 | 0.746001 |
| 100362710 | Tiam2           | 0.065745 | 0.30428975 | 0.501141 |
| 303088    | Trim41          | 0.065708 | 0.08745409 | 0.207495 |
| 362687    | Srsf7           | 0.065654 | 0.05284454 | 0.140837 |
| 100125385 | Mroh1           | 0.065645 | 0.34238992 | 0.539133 |
| 114906    | Pkia            | 0.065608 | 0.00261525 | 0.01193  |
| 499309    | RGD1560108      | 0.065572 | 0.11469641 | 0.253616 |
| 314297    | Papln           | 0.065554 | 0.03184705 | 0.094563 |
| 362118    | Mvb12b          | 0.065518 | 3.72E-04   | 0.002169 |
| 286978    | Tmsb15b2        | 0.065504 | 0.25383715 | 0.442501 |
| 296913    | Lsm8            | 0.065501 | 0.34289802 | 0.539532 |
| 309255    | Mtmr10          | 0.065497 | 0.16877961 | 0.333687 |
| 362383    | Rpia            | 0.065429 | 0.41580542 | 0.611838 |
| 498949    | Phlpp2          | 0.065408 | 0.21511603 | 0.39572  |
| 50681     | Acox1           | 0.065369 | 0.02988349 | 0.089853 |
| 291276    | LOC291276       | 0.065349 | 0.94947419 | 0.987696 |
| 314399    | Ubr7            | 0.065345 | 0.16661342 | 0.330193 |
| 100911486 | LOC100911486    | 0.065324 | 0.92355179 | 0.971234 |
| 687565    | Denr            | 0.065297 | 0.08712139 | 0.206938 |
| 678726    | Fbx118          | 0.065286 | 0.3718049  | 0.568301 |
| 367289    | Kansl11         | 0.065259 | 0.27441306 | 0.466541 |
| 361390    | Abce1           | 0.065211 | 0.00150644 | 0.007387 |
| 296708    | Olfml2a         | 0.065147 | 0.00466111 | 0.01954  |
| 309429    | Kank1           | 0.065081 | 0.05165575 | 0.138211 |
| 116543    | Ebf1            | 0.065064 | 0.00352774 | 0.015438 |
| 80843     | Sec61a1         | 0.064994 | 0.005792   | 0.023435 |
| 260323    | Snx27           | 0.064985 | 0.00594462 | 0.023936 |
| 100147704 | Usp43           | 0.064978 | 0.79064702 | 0.892001 |
| 499798    | Arl6ip6         | 0.064978 | 0.55277214 | 0.732963 |
| 114839    | Ccnc            | 0.064966 | 0.05882297 | 0.153822 |
| 29390     | Ptpmt1          | 0.064913 | 0.20422675 | 0.380875 |
| 301079    | RGD1311745      | 0.064903 | 0.35803464 | 0.555048 |
| 304923    | Gorab           | 0.064849 | 0.3599677  | 0.556731 |
| 114513    | Rasgrf2         | 0.064815 | 0.61164317 | 0.772976 |
| 102546968 | LOC102546968    | 0.064815 | 0.51289186 | 0.698464 |
| 78961     | Golph3          | 0.064806 | 0.00962949 | 0.035917 |
| 305884    | Acin1           | 0.064759 | 0.00464928 | 0.019512 |
| 362515    | Anks6           | 0.064754 | 0.23799048 | 0.425031 |
| 312166    | Cadps2          | 0.064742 | 0.07341444 | 0.182316 |
| 304601    | Baz2a           | 0.064728 | 0.06222699 | 0.160541 |
| 361425    | Emc8            | 0.064708 | 0.31583033 | 0.51048  |
| 79249     | Abi1            | 0.064658 | 0.02495115 | 0.077977 |
| 29546     | Homer1          | 0.064643 | 0.28947546 | 0.484537 |

|           |              |          |            |          |
|-----------|--------------|----------|------------|----------|
| 309010    | Sec23ip      | 0.064604 | 0.0823173  | 0.199027 |
| 24766     | Scn2a        | 0.064592 | 0.28681112 | 0.481177 |
| 290549    | Selenok      | 0.064538 | 0.04152064 | 0.11646  |
| 85384     | Sos2         | 0.064486 | 0.1024557  | 0.232904 |
| 308236    | Zfp53        | 0.064465 | 0.63161467 | 0.788225 |
| 367307    | Dis312       | 0.064462 | 0.28029107 | 0.473618 |
| 306792    | Slpr3        | 0.064439 | 0.00162655 | 0.007882 |
| 246244    | Tax1bp1      | 0.06443  | 3.85E-05   | 2.81E-04 |
| 291212    | B3galnt2     | 0.064426 | 0.2668522  | 0.458186 |
| 24564     | Mpz          | 0.06442  | 1.46E-184  | #####    |
| 291689    | Cdc23        | 0.064402 | 0.05265231 | 0.140404 |
| 100360508 | LOC100360508 | 0.064363 | 0.00192132 | 0.009141 |
| 260325    | Homez        | 0.064356 | 0.62947945 | 0.78654  |
| 499751    | Man1b1       | 0.064352 | 0.00236606 | 0.010943 |
| 313611    | Pafah2       | 0.064298 | 0.33776942 | 0.534643 |
| 192110    | Pou3f1       | 0.064291 | 0.33481934 | 0.531298 |
| 140915    | Slco3a1      | 0.064255 | 0.04137759 | 0.116161 |
| 683007    | Mia3         | 0.064233 | 0.01325854 | 0.046752 |
| 64465     | Cdc42        | 0.064227 | 1.24E-07   | 1.43E-06 |
| 171455    | Exoc2        | 0.064222 | 0.00363084 | 0.015813 |
| 312649    | Tsen2        | 0.064219 | 0.48490467 | 0.673106 |
| 83731     | Kcnma1       | 0.064206 | 0.14481277 | 0.299355 |
| 192243    | Golgb1       | 0.064196 | 0.00275283 | 0.012483 |
| 293344    | Arfip2       | 0.064171 | 0.01899676 | 0.062822 |
| 305816    | Ddhd1        | 0.064147 | 0.06296246 | 0.162131 |
| 297522    | Sec13        | 0.064141 | 0.10694986 | 0.240252 |
| 29372     | Rasa3        | 0.064123 | 0.15076359 | 0.307551 |
| 79215     | Mtpn         | 0.064122 | 0.01095771 | 0.039948 |
| 288064    | Kpna1        | 0.064112 | 0.01068098 | 0.039089 |
| 292610    | Zfp606       | 0.064094 | 0.43749719 | 0.631366 |
| 691774    | Lpar6        | 0.064094 | 0.47509854 | 0.665459 |
| 171134    | Lgals2       | 0.064094 | 0.87897466 | 0.944113 |
| 25655     | Gja4         | 0.064094 | 0.56885393 | 0.738502 |
| 361321    | Atg12        | 0.064073 | 0.01671963 | 0.056569 |
| 103690102 | LOC103690102 | 0.064052 | 0.56296406 | 0.73436  |
| 310155    | Mtmr12       | 0.064051 | 0.20636245 | 0.383881 |
| 54265     | Llgl1        | 0.064035 | 0.07677582 | 0.188476 |
| 60427     | Kitlg        | 0.064002 | 0.00728381 | 0.02842  |
| 100362965 | LOC100362965 | 0.063966 | 0.39412045 | 0.591445 |
| 360670    | Slc26a11     | 0.063957 | 0.50729976 | 0.693676 |
| 362007    | Sike1        | 0.063931 | 0.17373548 | 0.341007 |
| 117045    | Eif4e        | 0.063907 | 0.00924336 | 0.034742 |
| 288617    | Tpst1        | 0.063906 | 0.17378794 | 0.341075 |
| 83836     | Nde1         | 0.06386  | 0.41659876 | 0.61239  |
| 302980    | Fahd1        | 0.063791 | 0.31912964 | 0.514068 |
| 315764    | Plekho2      | 0.06376  | 0.10376286 | 0.23495  |
| 314436    | Elk1         | 0.063756 | 0.18259577 | 0.352763 |
| 688673    | Pomt2        | 0.063752 | 0.20649264 | 0.384011 |
| 360687    | Cadm2        | 0.063675 | 0.39802614 | 0.595289 |
| 316067    | Xylb         | 0.06362  | 0.14339844 | 0.297789 |
| 25492     | Nfia         | 0.063605 | 0.26937891 | 0.460697 |
| 303245    | Senp3        | 0.0636   | 0.06585667 | 0.167545 |
| 363634    | Kctd11       | 0.063468 | 0.39588475 | 0.593204 |
| 29366     | Serpine2     | 0.063432 | 0.00125944 | 0.006309 |
| 116636    | Eif4ebp1     | 0.063371 | 0.44891113 | 0.640749 |
| 116633    | Akap8        | 0.063363 | 0.06188893 | 0.15995  |

|           |              |          |            |          |
|-----------|--------------|----------|------------|----------|
| 296182    | Tmx4         | 0.063307 | 2.09E-04   | 0.001292 |
| 362918    | Mtssl        | 0.063306 | 0.08317248 | 0.200407 |
| 114553    | Ncf1         | 0.063301 | 0.25150321 | 0.43964  |
| 291309    | Usp6nl       | 0.063251 | 0.01359161 | 0.047724 |
| 316412    | Tmem237      | 0.063251 | 0.11754155 | 0.258228 |
| 309513    | Ppplr3c      | 0.063235 | 0.34475321 | 0.541288 |
| 100364568 | Rprd2        | 0.063208 | 0.09753231 | 0.224472 |
| 29721     | Hivep2       | 0.063195 | 0.02764862 | 0.08463  |
| 25439     | F2r          | 0.063143 | 0.06010159 | 0.156221 |
| 308577    | Fuz          | 0.063125 | 0.32410382 | 0.519619 |
| 290447    | Mycbp2       | 0.063119 | 2.29E-05   | 1.75E-04 |
| 362876    | Ppfia2       | 0.063105 | 0.15117647 | 0.308162 |
| 315439    | Slc36a4      | 0.063069 | 0.14839436 | 0.304216 |
| 317617    | Hdx          | 0.063066 | 0.73546548 | 0.857297 |
| 498999    | Ahrr         | 0.063066 | 0.73546548 | 0.857297 |
| 301674    | Fbxo11       | 0.063038 | 0.01652541 | 0.056041 |
| 308602    | Tmem86a      | 0.062971 | 0.54587164 | 0.726697 |
| 293117    | Ankrd42      | 0.062942 | 0.29064834 | 0.48603  |
| 300308    | LOC300308    | 0.06293  | 0.56026498 | 0.735727 |
| 317612    | Htatsf1      | 0.062928 | 0.09683952 | 0.223228 |
| 85385     | Shc1         | 0.062899 | 0.00108622 | 0.005549 |
| 54705     | Pdp1         | 0.062897 | 0.09555083 | 0.221302 |
| 290746    | Trappc11     | 0.062861 | 0.05634803 | 0.148471 |
| 117087    | Stim2        | 0.062729 | 0.02968284 | 0.089434 |
| 314798    | Mettl25      | 0.062727 | 0.52968981 | 0.712375 |
| 116464    | Ncoa6        | 0.062708 | 0.05329127 | 0.14179  |
| 298186    | Ttc39b       | 0.062705 | 0.12619008 | 0.271896 |
| 307926    | Ccsap        | 0.062696 | 0.47332104 | 0.663702 |
| 310013    | Fam169a      | 0.062675 | 0.17514152 | 0.342848 |
| 309242    | Gna14        | 0.062656 | 0.00407949 | 0.01744  |
| 100151767 | Nkapd1       | 0.062642 | 0.25136761 | 0.439524 |
| 25227     | Arsb         | 0.06264  | 0.16250016 | 0.325359 |
| 363460    | Fgd1         | 0.062602 | 0.3882994  | 0.585524 |
| 171494    | Aplg1        | 0.062584 | 0.02020183 | 0.066062 |
| 114511    | Emb          | 0.062569 | 0.11944604 | 0.261357 |
| 685619    | LOC685619    | 0.062531 | 0.26207575 | 0.451736 |
| 310533    | Rapgef2      | 0.062501 | 0.09000334 | 0.21175  |
| 100911664 | LOC100911664 | 0.062485 | 2.12E-04   | 0.001308 |
| 286919    | Cdk5rap2     | 0.062475 | 0.18685523 | 0.358772 |
| 300791    | Spg21        | 0.062443 | 0.06460442 | 0.16522  |
| 310137    | Cplane1      | 0.062405 | 0.05203343 | 0.139006 |
| 308864    | Fchsd2       | 0.062393 | 0.11810782 | 0.259263 |
| 500855    | Zfp706       | 0.06238  | 0.05278644 | 0.140702 |
| 294917    | Tnik         | 0.062356 | 0.04703196 | 0.1289   |
| 373066    | Ift81        | 0.06233  | 0.24844921 | 0.436666 |
| 678774    | LOC678774    | 0.06232  | 0.16667174 | 0.330274 |
| 25497     | Nup50        | 0.062288 | 0.11352678 | 0.251643 |
| 29223     | Ak4          | 0.062282 | 0.57412287 | 0.742306 |
| 293410    | Swap70       | 0.06224  | 0.08218529 | 0.198834 |
| 317256    | Taf1         | 0.062222 | 0.02226605 | 0.071282 |
| 24943     | Plp1         | 0.062202 | 5.18E-11   | 9.24E-10 |
| 499624    | Tsc22d2      | 0.062198 | 0.09196523 | 0.215222 |
| 298442    | Ccdc163      | 0.062194 | 0.54824742 | 0.728841 |
| 363171    | Tmem42       | 0.062179 | 0.33656019 | 0.533216 |
| 58976     | Slc30a1      | 0.062176 | 0.38862058 | 0.58573  |
| 293829    | Mcee         | 0.062139 | 0.31963399 | 0.514576 |



|           |           |          |            |          |
|-----------|-----------|----------|------------|----------|
| 499328    | Rfk       | 0.062135 | 0.01220762 | 0.043718 |
| 364682    | Nhlrc1    | 0.062107 | 0.57463777 | 0.742669 |
| 685574    | LOC685574 | 0.062107 | 0.33100526 | 0.527266 |
| 362256    | Snhg11    | 0.062105 | 1.31E-04   | 8.46E-04 |
| 363165    | Csrnp1    | 0.062027 | 0.61906394 | 0.777607 |
| 300985    | Parp3     | 0.061934 | 0.13403943 | 0.284053 |
| 295394    | Dph5      | 0.061933 | 0.37550795 | 0.572353 |
| 79120     | Arf4      | 0.061874 | 0.00261516 | 0.011932 |
| 308939    | Ipo7      | 0.061865 | 0.0111972  | 0.04065  |
| 306357    | Gmip      | 0.061828 | 0.28988745 | 0.484928 |
| 690806    | Smim13    | 0.061786 | 0.01497273 | 0.051771 |
| 311372    | Spg11     | 0.061771 | 0.10412121 | 0.235509 |
| 360647    | Icam2     | 0.061759 | 0.57566123 | 0.74379  |
| 499593    | Sox2      | 0.061699 | 0.16554572 | 0.329414 |
| 363160    | Stt3b     | 0.061672 | 0.05126949 | 0.137544 |
| 500282    | Arl8b     | 0.061645 | 3.24E-07   | 3.50E-06 |
| 306586    | Amt       | 0.061587 | 0.33876683 | 0.535376 |
| 500050    | Asb15     | 0.061587 | 0.79581984 | 0.894552 |
| 288108    | Naa50     | 0.061575 | 0.24801273 | 0.436786 |
| 54243     | Cr11      | 0.061573 | 0.04878002 | 0.132565 |
| 311279    | Ar114ep   | 0.061571 | 0.08450401 | 0.202948 |
| 293067    | Zfand6    | 0.061554 | 0.07111582 | 0.177813 |
| 362361    | Hnrnpa2b1 | 0.061525 | 0.00330619 | 0.014586 |
| 363287    | Hdac4     | 0.06145  | 0.07742343 | 0.189528 |
| 294421    | Serinc1   | 0.061411 | 1.53E-16   | 4.48E-15 |
| 297602    | Tapbp1    | 0.061348 | 0.29168454 | 0.487164 |
| 171139    | Timm9     | 0.061339 | 0.42198725 | 0.617357 |
| 308789    | Ef11      | 0.061332 | 0.30669117 | 0.502705 |
| 63996     | Smcla     | 0.061267 | 0.00686714 | 0.027078 |
| 290028    | Osgep     | 0.061246 | 0.49472991 | 0.681381 |
| 497619    | Fut10     | 0.061246 | 0.57718074 | 0.745046 |
| 307839    | Zfp612    | 0.061238 | 0.03896507 | 0.110842 |
| 246769    | Hint3     | 0.061236 | 0.38498494 | 0.581723 |
| 307956    | Rbm34     | 0.061222 | 0.28851857 | 0.483275 |
| 29637     | Hmgcs1    | 0.061216 | 4.47E-15   | 1.19E-13 |
| 360581    | Tada2a    | 0.061172 | 0.31249846 | 0.507637 |
| 64538     | Ilkap     | 0.061163 | 0.2039649  | 0.380648 |
| 309514    | Hectd2    | 0.061159 | 0.35243349 | 0.549496 |
| 290280    | Xpo4      | 0.061142 | 0.12558223 | 0.270801 |
| 366192    | Fastkd5   | 0.061139 | 0.44952773 | 0.641197 |
| 309891    | 10-Sep    | 0.06113  | 0.14892712 | 0.304718 |
| 307148    | Nsun6     | 0.06111  | 0.56430027 | 0.735297 |
| 289143    | Mrps14    | 0.061079 | 0.24514294 | 0.433254 |
| 303175    | Hist3h2ba | 0.061067 | 0.34946625 | 0.546077 |
| 294709    | Trappc13  | 0.061055 | 0.04652754 | 0.127738 |
| 84357     | Sh3kbp1   | 0.060993 | 0.01629049 | 0.055392 |
| 315423    | Cep57     | 0.060956 | 0.2980368  | 0.49465  |
| 100363253 | Nt5c2     | 0.060952 | 0.04932969 | 0.133753 |
| 641452    | Ube2d2    | 0.06094  | 0.03345027 | 0.098281 |
| 117282    | Hnrnpk    | 0.060909 | 3.80E-06   | 3.40E-05 |
| 312981    | Asph      | 0.060886 | 0.02234807 | 0.071449 |
| 117272    | Prpsap2   | 0.060872 | 0.09941109 | 0.227586 |
| 24326     | Ednra     | 0.060869 | 0.37452418 | 0.571128 |
| 309172    | Frm8      | 0.060839 | 0.0107364  | 0.039247 |
| 293454    | Ubf1      | 0.060806 | 0.06449724 | 0.165079 |
| 315771    | Herc1     | 0.060804 | 2.45E-04   | 0.001495 |

|           |                 |          |            |          |
|-----------|-----------------|----------|------------|----------|
| 314190    | Klhdc1          | 0.060796 | 0.4962433  | 0.682576 |
| 116478    | Kidins220       | 0.060795 | 6.25E-07   | 6.43E-06 |
| 296374    | Zmynd8          | 0.060792 | 0.02186361 | 0.070277 |
| 297093    | Cbx3            | 0.060748 | 0.02148099 | 0.06934  |
| 25533     | Rabggtb         | 0.060688 | 0.09199206 | 0.215206 |
| 81662     | Gnal1           | 0.060661 | 0.31443341 | 0.508913 |
| 308291    | Phactr2         | 0.060649 | 0.01829589 | 0.06097  |
| 316157    | Pp2d1           | 0.060621 | 0.1804624  | 0.349777 |
| 81663     | Gnal2           | 0.060621 | 0.00106648 | 0.005464 |
| 171083    | Itfgl           | 0.060612 | 5.39E-06   | 4.68E-05 |
| 291132    | Gpld1           | 0.060592 | 0.36811657 | 0.564293 |
| 500837    | Helb            | 0.060568 | 0.28985043 | 0.484909 |
| 100911928 | LOC100911928    | 0.060564 | 0.85267818 | 0.927428 |
| 310773    | Cept1           | 0.060561 | 0.07431912 | 0.183939 |
| 287834    | Recql5          | 0.060537 | 0.32022188 | 0.515391 |
| 689844    | Maml2           | 0.060523 | 0.16349094 | 0.326862 |
| 64678     | Tfrc            | 0.060499 | 6.88E-04   | 0.00372  |
| 294643    | Lhfp12          | 0.060485 | 0.08358451 | 0.201171 |
| 309400    | Cemip2          | 0.060453 | 0.04647759 | 0.127693 |
| 100192313 | Atxn713b        | 0.060445 | 8.45E-04   | 0.004468 |
| 686234    | Mtrf1           | 0.06044  | 0.36778318 | 0.563918 |
| 114514    | Clasp2          | 0.060437 | 5.24E-05   | 3.71E-04 |
| 288238    | Pigp            | 0.060422 | 0.16252263 | 0.32537  |
| 100911537 | LOC100911537    | 0.060409 | 0.9666039  | 0.999401 |
| 361726    | Sdhaf2          | 0.060407 | 0.01410137 | 0.049178 |
| 25265     | P2ry1           | 0.060387 | 0.12402442 | 0.268964 |
| 291737    | Ino80c          | 0.060273 | 0.06061763 | 0.157262 |
| 282840    | Atf5            | 0.060224 | 0.00713471 | 0.027959 |
| 299138    | Six4            | 0.060217 | 0.03475826 | 0.101203 |
| 304914    | Rabgap11        | 0.060197 | 0.01229657 | 0.043954 |
| 308761    | Prc1            | 0.060179 | 0.5671446  | 0.737036 |
| 83689     | Cd164           | 0.06017  | 3.21E-07   | 3.48E-06 |
| 689079    | Ar115           | 0.060153 | 0.23310451 | 0.418937 |
| 81815     | Tpp2            | 0.060125 | 0.00784556 | 0.030283 |
| 316426    | Spats21         | 0.060113 | 0.21660782 | 0.397772 |
| 305826    | Samd4a          | 0.060071 | 0.54272319 | 0.724176 |
| 362426    | Bms1            | 0.060058 | 0.14392245 | 0.298324 |
| 171329    | Usp15           | 0.060045 | 0.02060633 | 0.067154 |
| 362115    | Fam129b         | 0.060024 | 0.02080653 | 0.067621 |
| 29468     | Pdia3           | 0.060002 | 3.73E-07   | 3.97E-06 |
| 288309    | N6amt1          | 0.059979 | 0.55512761 | 0.734501 |
| 310630    | Sema4a          | 0.059968 | 0.45195411 | 0.643597 |
| 500913    | Shisall         | 0.059967 | 0.02187797 | 0.0703   |
| 316524    | Zfp142          | 0.059959 | 0.06356668 | 0.163378 |
| 684998    | LOC684998       | 0.059918 | 0.38302202 | 0.579953 |
| 252891    | Sra1            | 0.059902 | 0.24952608 | 0.437953 |
| 361074    | Slc25a30        | 0.059759 | 0.23510863 | 0.421505 |
| 29719     | Kcnj16          | 0.059758 | 0.79638579 | 0.895029 |
| 25635     | Mc4r            | 0.059724 | 0.74200175 | 0.860465 |
| 287716    | Psme3           | 0.059658 | 0.01461531 | 0.050701 |
| 103690404 | NEWGENE_1310847 | 0.059646 | 0.57437701 | 0.742484 |
| 316611    | Agap1           | 0.05964  | 0.01018032 | 0.037574 |
| 303614    | Smurf2          | 0.059596 | 0.11958754 | 0.261606 |
| 685695    | MacroD2         | 0.059588 | 0.19116224 | 0.364433 |
| 685834    | Znf740          | 0.059571 | 0.09751752 | 0.224465 |
| 363487    | RGD1566265      | 0.059556 | 0.40557264 | 0.602224 |

|           |              |          |            |          |
|-----------|--------------|----------|------------|----------|
| 290994    | Lman2        | 0.059542 | 0.13955328 | 0.292226 |
| 680717    | Zfp703       | 0.059537 | 0.25482772 | 0.443498 |
| 103693620 | LOC103693620 | 0.059468 | 0.790484   | 0.89187  |
| 305070    | Tmem206      | 0.059448 | 0.35893618 | 0.555858 |
| 502994    | Pramef8      | 0.059436 | 0.58259694 | 0.749396 |
| 302969    | Srrm2        | 0.059433 | 1.75E-08   | 2.27E-07 |
| 102551095 | LOC102551095 | 0.05942  | 0.41351398 | 0.60936  |
| 307855    | Fa2h         | 0.059412 | 0.00948213 | 0.035451 |
| 302313    | Tspan6       | 0.059408 | 0.17575886 | 0.343774 |
| 363661    | Mrm1         | 0.059356 | 0.37978058 | 0.57688  |
| 314718    | Actr6        | 0.059354 | 0.17342253 | 0.340674 |
| 299116    | Sav1         | 0.059353 | 0.16850994 | 0.333189 |
| 100362640 | Rps4x        | 0.059329 | 4.75E-05   | 3.40E-04 |
| 363229    | Slc39a10     | 0.059312 | 0.02952268 | 0.089007 |
| 317508    | Map7d2       | 0.059302 | 2.12E-07   | 2.34E-06 |
| 289822    | Cep68        | 0.059298 | 0.09377257 | 0.218165 |
| 689788    | Prdm5        | 0.059277 | 0.7193441  | 0.846562 |
| 288239    | Ripply3      | 0.059277 | 0.88337041 | 0.946486 |
| 500907    | Rps19bp1     | 0.059277 | 0.56992616 | 0.73939  |
| 686075    | Gapt         | 0.059277 | 0.83564882 | 0.918134 |
| 100361513 | Gcc1         | 0.059276 | 0.31558451 | 0.51017  |
| 108350839 | LOC108350839 | 0.059258 | 0.44311833 | 0.63596  |
| 100302453 | Mettl9       | 0.059216 | 0.07643792 | 0.187816 |
| 307398    | Arhgef37     | 0.05915  | 0.2201497  | 0.402221 |
| 360715    | Boc          | 0.059147 | 0.22687401 | 0.410763 |
| 500430    | Ankrd6       | 0.059145 | 0.23032852 | 0.415241 |
| 313825    | Vps13d       | 0.059122 | 0.0093077  | 0.034922 |
| 25399     | Cacna2d1     | 0.059062 | 0.00100915 | 0.005216 |
| 117152    | Cand1        | 0.059036 | 0.00138386 | 0.006855 |
| 81641     | Anpep        | 0.059031 | 0.44679821 | 0.639314 |
| 297783    | Mybl1        | 0.05895  | 0.4470966  | 0.639453 |
| 362906    | Nudcd1       | 0.058921 | 0.24939986 | 0.437852 |
| 498934    | Lsm6         | 0.058921 | 0.63598652 | 0.790934 |
| 493810    | Capza2       | 0.058918 | 0.00101224 | 0.005229 |
| 289168    | Kifap3       | 0.058914 | 1.13E-06   | 1.11E-05 |
| 362573    | Szt2         | 0.05889  | 0.09416083 | 0.218774 |
| 29700     | Pcbd1        | 0.058885 | 0.16533993 | 0.329107 |
| 362828    | Spp12b       | 0.058863 | 0.09175613 | 0.214891 |
| 192129    | Vmp1         | 0.05883  | 0.01611128 | 0.05495  |
| 363194    | Xpo5         | 0.058808 | 0.1288108  | 0.276013 |
| 298643    | Miip         | 0.058805 | 0.48653914 | 0.674686 |
| 84496     | Stau1        | 0.058802 | 0.03293476 | 0.097066 |
| 25482     | Mras         | 0.058784 | 0.04289668 | 0.119685 |
| 286906    | Pdia6        | 0.058741 | 0.0025893  | 0.011829 |
| 303476    | Abi3         | 0.058727 | 0.77021146 | 0.879312 |
| 289382    | Ints7        | 0.058718 | 0.25048309 | 0.438501 |
| 308843    | Tsku         | 0.058699 | 0.52447174 | 0.708258 |
| 500006    | Pex1         | 0.058681 | 0.2219014  | 0.404142 |
| 303592    | Tlk2         | 0.058645 | 0.07881646 | 0.192296 |
| 24511     | Itgb1        | 0.058606 | 6.87E-07   | 7.00E-06 |
| 288731    | Pgam5        | 0.058596 | 0.26652264 | 0.457744 |
| 117553    | Uba3         | 0.058589 | 0.00884546 | 0.033412 |
| 499067    | Smim17       | 0.058582 | 0.08214566 | 0.198788 |
| 303010    | Cpeb4        | 0.058565 | 0.0146562  | 0.050824 |
| 102549506 | LOC102549506 | 0.058547 | 0.72092598 | 0.847272 |
| 363783    | Zdhhc23      | 0.058547 | 0.66174482 | 0.806691 |

|           |              |          |            |          |
|-----------|--------------|----------|------------|----------|
| 140926    | Daxx         | 0.058541 | 0.2434306  | 0.431509 |
| 116456    | Dnajc2       | 0.058527 | 0.12968541 | 0.277107 |
| 81738     | Nup98        | 0.058514 | 0.09391281 | 0.218411 |
| 289350    | Rab3gap2     | 0.05845  | 0.0214831  | 0.069335 |
| 29728     | Mcm4         | 0.058436 | 0.29339919 | 0.489213 |
| 364605    | Sgcz         | 0.058403 | 0.74463943 | 0.862264 |
| 246046    | Lmbrd1       | 0.058379 | 0.00539316 | 0.022117 |
| 314743    | Cdk17        | 0.058378 | 0.2026752  | 0.378761 |
| 685545    | Mcrip2       | 0.058341 | 0.7000897  | 0.835571 |
| 497954    | Ovca2        | 0.058334 | 0.40419422 | 0.601209 |
| 287126    | Mrps34       | 0.058311 | 0.25560567 | 0.444486 |
| 311911    | Rabgap1      | 0.058303 | 0.01769926 | 0.059356 |
| 84491     | Qsox1        | 0.0583   | 0.10368493 | 0.234829 |
| 310288    | Hps3         | 0.058299 | 0.16069278 | 0.322826 |
| 102548459 | LOC102548459 | 0.058273 | 0.72019029 | 0.846877 |
| 25594     | Ppplcb       | 0.058237 | 2.52E-04   | 0.001533 |
| 499014    | Zdhhc14      | 0.058192 | 0.20703186 | 0.384638 |
| 116683    | Efna5        | 0.058147 | 0.1420792  | 0.295888 |
| 79559     | Alcam        | 0.058145 | 0.00126198 | 0.006318 |
| 362612    | Srsf4        | 0.058139 | 0.132698   | 0.282057 |
| 287543    | Tnfaip1      | 0.058108 | 0.01706078 | 0.057549 |
| 24831     | Thrb         | 0.0581   | 0.4190261  | 0.614677 |
| 116600    | Cacnb2       | 0.057926 | 0.61581294 | 0.775364 |
| 54241     | Cltc         | 0.057912 | 9.05E-15   | 2.35E-13 |
| 309331    | Uhrf2        | 0.057911 | 0.09808747 | 0.225368 |
| 289632    | Pgm2         | 0.057872 | 0.27352232 | 0.465609 |
| 294774    | Ttc33        | 0.05785  | 0.08508685 | 0.203859 |
| 140923    | Bnip3l       | 0.05783  | 0.00182972 | 0.008764 |
| 502020    | Lrch1        | 0.057824 | 0.24667624 | 0.435318 |
| 361181    | Cul4a        | 0.057809 | 0.04744198 | 0.129725 |
| 25406     | Cd44         | 0.057798 | 0.0018989  | 0.00905  |
| 89821     | Trpc1        | 0.057788 | 0.13937405 | 0.291947 |
| 309098    | Tubgcp2      | 0.057725 | 0.05417063 | 0.143808 |
| 499339    | Pum3         | 0.057671 | 0.1603641  | 0.322336 |
| 291464    | Snx2         | 0.057666 | 0.02342766 | 0.074215 |
| 171136    | Cblb         | 0.057656 | 0.09498434 | 0.220151 |
| 83825     | Dclk1        | 0.057653 | 0.00154837 | 0.007553 |
| 289900    | Fam149b1     | 0.05765  | 0.14371089 | 0.29821  |
| 306809    | Bicd2        | 0.057635 | 0.00466467 | 0.019551 |
| 366065    | Cers6        | 0.057609 | 0.42037581 | 0.615661 |
| 89820     | Prmt3        | 0.057604 | 0.18213261 | 0.352154 |
| 313061    | Virma        | 0.057504 | 0.15441543 | 0.313222 |
| 304337    | Zfp68        | 0.057481 | 0.0691817  | 0.174051 |
| 366381    | Cdc26        | 0.057461 | 0.22324025 | 0.406076 |
| 360745    | Lztr1        | 0.057458 | 0.02483522 | 0.077679 |
| 364052    | Pea15        | 0.057453 | 2.96E-13   | 6.69E-12 |
| 114487    | Wnt2         | 0.057436 | 0.70220469 | 0.83723  |
| 500625    | Atad2b       | 0.057436 | 0.70220469 | 0.83723  |
| 362156    | Zdhhc5       | 0.057417 | 0.04646989 | 0.12769  |
| 24908     | Dnajb9       | 0.057406 | 0.06756381 | 0.170883 |
| 286970    | Abca5        | 0.057388 | 0.02209654 | 0.070847 |
| 499891    | RGD1565616   | 0.057385 | 0.03214103 | 0.095302 |
| 287773    | Helz         | 0.057378 | 0.17788267 | 0.346611 |
| 654482    | Cfap300      | 0.05737  | 0.54001877 | 0.721933 |
| 117513    | Sec22a       | 0.057347 | 0.42897177 | 0.624218 |
| 290997    | Uimc1        | 0.057344 | 0.25939037 | 0.448773 |

|           |              |          |            |          |
|-----------|--------------|----------|------------|----------|
| 366698    | Adck1        | 0.057239 | 0.50850767 | 0.695029 |
| 297865    | Dsel         | 0.057175 | 0.26005946 | 0.449522 |
| 312199    | Klhdc10      | 0.057171 | 0.00714318 | 0.027975 |
| 81745     | Pdpk1        | 0.057163 | 0.00134344 | 0.006677 |
| 317407    | Bhlhb9       | 0.057157 | 0.13815674 | 0.290035 |
| 25044     | Sds          | 0.057141 | 0.77310227 | 0.881291 |
| 304299    | Radi1        | 0.057141 | 0.42217637 | 0.617491 |
| 54319     | Ezr          | 0.057113 | 0.08159142 | 0.197723 |
| 29215     | Arg2         | 0.057099 | 0.31308283 | 0.508023 |
| 300963    | Cep63        | 0.057087 | 0.37439757 | 0.57098  |
| 305021    | Sccpdh       | 0.057078 | 0.01140097 | 0.04128  |
| 117257    | Gpr176       | 0.057061 | 0.30356154 | 0.500635 |
| 500244    | Aak1         | 0.057055 | 2.79E-04   | 0.001675 |
| 245922    | Nup58        | 0.057035 | 0.20626889 | 0.383819 |
| 102550577 | LOC102550577 | 0.057033 | 0.91340843 | 0.964508 |
| 363521    | Taz          | 0.057013 | 0.31841961 | 0.513315 |
| 298936    | Sntg2        | 0.057008 | 0.77362334 | 0.881674 |
| 306038    | Enox1        | 0.056964 | 0.19513259 | 0.369377 |
| 290805    | Wrn          | 0.056949 | 0.21910771 | 0.40074  |
| 306262    | Btd          | 0.056933 | 0.2319212  | 0.417362 |
| 24962     | Cth          | 0.056919 | 0.64974222 | 0.802122 |
| 366593    | Dus4l        | 0.056885 | 0.68409791 | 0.824285 |
| 313413    | Sgip1        | 0.056857 | 0.03173313 | 0.094298 |
| 29284     | Rps14        | 0.056848 | 0.00440849 | 0.018604 |
| 288908    | Cc2d1a       | 0.056783 | 0.12487132 | 0.270002 |
| 313067    | Tmem67       | 0.056704 | 0.35192192 | 0.548833 |
| 311362    | Frmf5        | 0.0567   | 0.38229555 | 0.57913  |
| 498119    | Spidr        | 0.056671 | 0.60463986 | 0.767742 |
| 360932    | Atp10d       | 0.056616 | 0.42421063 | 0.619515 |
| 294715    | Rgs7bp       | 0.056565 | 5.02E-06   | 4.37E-05 |
| 363284    | Ube2f        | 0.056537 | 0.21724843 | 0.398641 |
| 84599     | Tmed10       | 0.056502 | 0.01585004 | 0.054234 |
| 305586    | Papalg       | 0.05648  | 0.34715881 | 0.543899 |
| 361760    | Cutc         | 0.056465 | 0.51124678 | 0.697221 |
| 171086    | Trak2        | 0.056447 | 0.00350059 | 0.01534  |
| 367236    | Col19a1      | 0.056442 | 0.44023421 | 0.633492 |
| 361508    | Mzf1         | 0.056425 | 0.40339449 | 0.600254 |
| 683687    | Snx9         | 0.056422 | 0.25918754 | 0.448544 |
| 308519    | Dpy1913      | 0.056395 | 0.20228966 | 0.378337 |
| 307217    | Tshz1        | 0.05636  | 0.19195451 | 0.365431 |
| 307643    | Usb1         | 0.056357 | 0.42521849 | 0.620416 |
| 25340     | Npy5r        | 0.056298 | 0.61998532 | 0.778148 |
| 116645    | Plaa         | 0.05629  | 0.04190994 | 0.117361 |
| 291877    | Nudt21       | 0.056241 | 0.0376742  | 0.107814 |
| 287931    | Ppm1f        | 0.056222 | 0.01963511 | 0.064519 |
| 25130     | Stx2         | 0.05618  | 0.05051161 | 0.135856 |
| 317486    | RGD1565844   | 0.056133 | 0.83979521 | 0.920089 |
| 688613    | LOC688613    | 0.056133 | 0.62047406 | 0.778505 |
| 690297    | Pwp2         | 0.056111 | 0.33769135 | 0.534563 |
| 361624    | Akip1        | 0.056095 | 0.4859887  | 0.674119 |
| 315496    | Dpy1911      | 0.056081 | 0.07619783 | 0.187371 |
| 360991    | Vrk2         | 0.056077 | 0.77315886 | 0.881303 |
| 311430    | Mavs         | 0.056063 | 0.22867222 | 0.413194 |
| 548106    | Pcdhb19      | 0.056052 | 0.61014253 | 0.771745 |
| 24650     | Pkd1         | 0.05605  | 0.00345336 | 0.015172 |
| 499407    | LOC499407    | 0.056046 | 0.82131779 | 0.909842 |

|           |              |          |            |          |
|-----------|--------------|----------|------------|----------|
| 361295    | Ss18         | 0.056043 | 0.1341032  | 0.284156 |
| 100910088 | LOC100910088 | 0.056014 | 0.4752187  | 0.66553  |
| 299923    | Ndrg1        | 0.056012 | 6.40E-09   | 8.86E-08 |
| 363135    | Rad5412      | 0.056009 | 0.33698337 | 0.533798 |
| 24624     | Pccb         | 0.056008 | 0.18288674 | 0.353074 |
| 192235    | Hyou1        | 0.055996 | 0.0181009  | 0.060437 |
| 29374     | Cct4         | 0.055993 | 0.00200825 | 0.009486 |
| 288150    | Mtx2         | 0.055972 | 0.15029599 | 0.30686  |
| 691729    | Spata511     | 0.05596  | 0.66149201 | 0.806537 |
| 108348145 | LOC108348145 | 0.055942 | 0.51908937 | 0.703884 |
| 311546    | Tpx2         | 0.055935 | 0.58046712 | 0.747919 |
| 306516    | Gtf2e2       | 0.055925 | 0.25467645 | 0.443396 |
| 114114    | Dnm11        | 0.055913 | 5.90E-05   | 4.13E-04 |
| 314212    | Daam1        | 0.055908 | 0.08155729 | 0.197666 |
| 316552    | Rnf1112      | 0.055905 | 0.04483536 | 0.124148 |
| 295143    | Etfhd        | 0.05588  | 0.12944091 | 0.276833 |
| 361070    | Xpo7         | 0.055796 | 0.030274   | 0.09077  |
| 362766    | Alkbh1       | 0.055784 | 0.35877248 | 0.55583  |
| 291034    | Mcur1        | 0.055779 | 0.47610101 | 0.665737 |
| 304817    | Ipo9         | 0.055745 | 0.0285909  | 0.086872 |
| 140932    | Bnip1        | 0.055721 | 0.42771155 | 0.622813 |
| 681023    | Qsox2        | 0.055667 | 0.23607244 | 0.422835 |
| 365793    | Rab33b       | 0.055653 | 0.17682012 | 0.345389 |
| 362204    | Casc4        | 0.05565  | 0.01473987 | 0.051077 |
| 103691376 | LOC103691376 | 0.055646 | 0.81776293 | 0.90844  |
| 29185     | Cd37         | 0.055642 | 0.56907986 | 0.738695 |
| 299957    | Nsmce2       | 0.055583 | 0.36227413 | 0.55871  |
| 291914    | Cnep1r1      | 0.055534 | 0.24437066 | 0.432733 |
| 680945    | Sdf211       | 0.055497 | 0.47830571 | 0.667644 |
| 29507     | Cox7a2       | 0.055497 | 0.03060347 | 0.091541 |
| 64189     | Pafah1b2     | 0.055485 | 4.18E-04   | 0.002398 |
| 83536     | Mkln1        | 0.055468 | 0.07583475 | 0.186767 |
| 293570    | Abraxas2     | 0.055468 | 0.11201384 | 0.249159 |
| 108351581 | LOC108351581 | 0.055444 | 0.48785117 | 0.675669 |
| 294988    | Ankrd50      | 0.055388 | 0.0434989  | 0.121099 |
| 296302    | Eif2s2       | 0.055345 | 0.02204263 | 0.070686 |
| 304941    | Pogk         | 0.055338 | 0.03545384 | 0.102742 |
| 65209     | Dync2h1      | 0.055328 | 0.30266587 | 0.499807 |
| 363513    | Ids          | 0.055305 | 2.11E-06   | 1.98E-05 |
| 365057    | Map3k5       | 0.055267 | 0.29707675 | 0.493702 |
| 689142    | Snx29        | 0.055202 | 0.17142297 | 0.337826 |
| 79426     | Zfp36        | 0.055182 | 0.17381878 | 0.3411   |
| 100361294 | Tyk2         | 0.055169 | 0.25883186 | 0.448091 |
| 108353146 | LOC108353146 | 0.055161 | 0.88726506 | 0.949137 |
| 353250    | Niacr1       | 0.055161 | 0.88726506 | 0.949137 |
| 366518    | Tnfrsf14     | 0.055123 | 0.78945311 | 0.891235 |
| 691209    | Slc12a6      | 0.055087 | 0.03717083 | 0.106695 |
| 288734    | Chfr         | 0.05508  | 0.12382018 | 0.268674 |
| 295384    | Prmt6        | 0.055074 | 0.40232576 | 0.599413 |
| 309167    | Pcnx3        | 0.055066 | 0.09255908 | 0.216293 |
| 290627    | Use1         | 0.05506  | 0.10365434 | 0.234788 |
| 25288     | Acs11        | 0.055037 | 0.03173114 | 0.094307 |
| 360557    | Nlrpla       | 0.055006 | 0.55311096 | 0.733208 |
| 291057    | Eef1e1       | 0.05498  | 0.26122934 | 0.450767 |
| 102553442 | LOC102553442 | 0.05495  | 0.94138457 | 0.982878 |
| 498160    | Zkscan1      | 0.054946 | 0.26518648 | 0.455696 |



|           |              |          |            |          |
|-----------|--------------|----------|------------|----------|
| 353307    | Slc29a3      | 0.054944 | 0.40251661 | 0.599603 |
| 65156     | Dhodh        | 0.054937 | 0.55962926 | 0.735348 |
| 103691238 | LOC103691238 | 0.054885 | 0.64394053 | 0.797441 |
| 306096    | Dach1        | 0.05488  | 0.46242669 | 0.653041 |
| 102556057 | LOC102556057 | 0.054844 | 0.76603247 | 0.877012 |
| 364981    | Scoc         | 0.05482  | 2.94E-04   | 0.001755 |
| 290651    | Isyna1       | 0.05479  | 0.18746743 | 0.359621 |
| 365527    | RT1-M6-2     | 0.054684 | 0.7773908  | 0.883958 |
| 83792     | Scd2         | 0.054675 | 1.06E-45   | 9.09E-44 |
| 290232    | Tinf2        | 0.054663 | 0.31096182 | 0.506263 |
| 362685    | Gpatch11     | 0.054636 | 0.11352947 | 0.25162  |
| 300836    | Fam214a      | 0.054629 | 0.23440908 | 0.420646 |
| 304218    | Pds5b        | 0.054596 | 0.02188709 | 0.070317 |
| 500419    | Rmdn1        | 0.054499 | 0.39121791 | 0.588201 |
| 84391     | Kif2a        | 0.054488 | 0.01815754 | 0.060583 |
| 312651    | Ift122       | 0.054476 | 0.25224117 | 0.440647 |
| 498489    | Naa30        | 0.054447 | 0.1696635  | 0.335087 |
| 64846     | Slc13a3      | 0.054438 | 0.16097817 | 0.323229 |
| 313385    | Kank4        | 0.054314 | 0.02221247 | 0.071158 |
| 500288    | Thumpd3      | 0.054303 | 0.12962137 | 0.277064 |
| 81512     | Cnmd         | 0.054302 | 0.00638927 | 0.025526 |
| 170851    | Map2k1       | 0.054268 | 0.01339963 | 0.047136 |
| 296851    | Pon2         | 0.054257 | 0.02768027 | 0.084713 |
| 24356     | Ets1         | 0.054256 | 0.28406183 | 0.477996 |
| 303274    | Phf12        | 0.054248 | 0.22013685 | 0.402236 |
| 362295    | Lmbr1        | 0.054244 | 0.34543709 | 0.542004 |
| 64471     | Plekhh1      | 0.054239 | 8.77E-07   | 8.78E-06 |
| 81803     | Stx4         | 0.054236 | 0.19146657 | 0.364648 |
| 680778    | Rt14         | 0.054224 | 0.5987847  | 0.762239 |
| 362495    | Ndufaf4      | 0.054206 | 0.31534437 | 0.509954 |
| 64442     | St3gal2      | 0.054202 | 0.04209351 | 0.117772 |
| 309532    | Atad1        | 0.054175 | 0.01621158 | 0.055213 |
| 303606    | Ccdc47       | 0.054174 | 3.28E-04   | 0.001942 |
| 315330    | Esp11        | 0.054173 | 0.71497852 | 0.844032 |
| 287766    | Cep95        | 0.054154 | 0.43737569 | 0.631382 |
| 498030    | Anapc11      | 0.05415  | 0.17476642 | 0.34236  |
| 360953    | Stx18        | 0.054137 | 0.17082261 | 0.336852 |
| 500040    | Tes          | 0.054133 | 0.0940547  | 0.218608 |
| 246142    | Bmf          | 0.054113 | 0.48241713 | 0.67112  |
| 307548    | Dtna         | 0.054091 | 0.08602067 | 0.20527  |
| 246294    | Optn         | 0.05409  | 0.00535892 | 0.02202  |
| 302290    | Ap3s1        | 0.054056 | 0.03614794 | 0.104293 |
| 100361891 | Rab5a11      | 0.053978 | 0.01628642 | 0.055388 |
| 84593     | Cetn2        | 0.053943 | 0.11827383 | 0.259478 |
| 288124    | Nectin3      | 0.053933 | 0.19595373 | 0.370489 |
| 690254    | Polr3gl      | 0.053919 | 0.52043201 | 0.705103 |
| 362617    | Ahdcl        | 0.053908 | 0.19570813 | 0.370172 |
| 100910768 | LOC100910768 | 0.053893 | 0.00813368 | 0.031181 |
| 498003    | Dusp3        | 0.053883 | 3.46E-04   | 0.002038 |
| 83724     | Ncoa2        | 0.053869 | 0.06399435 | 0.164122 |
| 303915    | Iqcb1        | 0.05385  | 0.35251794 | 0.549538 |
| 361857    | Traf3ip2     | 0.053826 | 0.31534655 | 0.509915 |
| 24651     | Pklr         | 0.053784 | 0.7270346  | 0.851246 |
| 362636    | Usp48        | 0.053778 | 0.03013902 | 0.090465 |
| 192272    | Acot2        | 0.053775 | 0.31636798 | 0.511132 |
| 89825     | Nap111       | 0.053758 | 1.25E-05   | 1.01E-04 |

|           |              |          |            |          |
|-----------|--------------|----------|------------|----------|
| 171138    | Kcne2        | 0.053734 | 0.75493073 | 0.869686 |
| 314228    | Snapc1       | 0.053717 | 0.46695576 | 0.657925 |
| 498941    | Fbxl8        | 0.053717 | 0.67449505 | 0.81716  |
| 361674    | Eps812       | 0.053677 | 0.65809221 | 0.804246 |
| 361645    | Nsmce1       | 0.053677 | 0.32238106 | 0.517598 |
| 308322    | Zim1         | 0.053651 | 0.80789393 | 0.902213 |
| 304005    | Nfkbiz       | 0.053542 | 0.69257982 | 0.830302 |
| 308971    | Tnrc6a       | 0.05354  | 0.04015169 | 0.113607 |
| 303238    | Ctcl         | 0.053514 | 0.11386163 | 0.25218  |
| 362277    | Rnf114       | 0.053514 | 0.12739177 | 0.273804 |
| 24674     | Ppp3ca       | 0.053513 | 3.35E-05   | 2.48E-04 |
| 108349548 | LOC108349548 | 0.053504 | 0.3232207  | 0.518465 |
| 191569    | Pde9a        | 0.053438 | 0.58860052 | 0.754113 |
| 503252    | Coa5         | 0.053423 | 0.02806842 | 0.085557 |
| 304176    | MGC95208     | 0.053385 | 0.46826263 | 0.658889 |
| 362545    | Tm2d1        | 0.053379 | 0.1152183  | 0.254356 |
| 362530    | Akna         | 0.053319 | 0.43002114 | 0.624314 |
| 312790    | Gprc5a       | 0.053319 | 0.8436024  | 0.921926 |
| 307526    | Ammecr11     | 0.053268 | 0.15501356 | 0.314001 |
| 252853    | Stx17        | 0.05326  | 0.25742617 | 0.446388 |
| 100361660 | Zfp617       | 0.053257 | 0.63125791 | 0.78809  |
| 685707    | Nav1         | 0.053237 | 1.93E-04   | 0.001205 |
| 289992    | Fermt2       | 0.053219 | 0.00164433 | 0.007962 |
| 500651    | Sptssa       | 0.053213 | 0.16339503 | 0.326739 |
| 116599    | Blvra        | 0.053204 | 0.22136574 | 0.403552 |
| 103689959 | Armh3        | 0.05319  | 0.17215697 | 0.338957 |
| 310652    | Tdrkh        | 0.05312  | 0.08703255 | 0.20714  |
| 319110    | Hrnpr        | 0.053111 | 0.12875657 | 0.275928 |
| 307200    | Socs6        | 0.053042 | 0.4339802  | 0.62829  |
| 252895    | Pcdhga9      | 0.053034 | 0.57378735 | 0.742276 |
| 361065    | Bin3         | 0.052979 | 0.29369491 | 0.48962  |
| 24640     | Pfkfb2       | 0.052947 | 0.15848285 | 0.319296 |
| 100909824 | LOC100909824 | 0.052901 | 0.57837255 | 0.746028 |
| 362197    | Mapkbp1      | 0.052898 | 0.30594846 | 0.501833 |
| 100911685 | LOC100911685 | 0.052891 | 0.3666942  | 0.562702 |
| 191574    | Akr1c14      | 0.05285  | 0.59054951 | 0.755721 |
| 361692    | Nudt8        | 0.05285  | 0.59054951 | 0.755721 |
| 24390     | B4galt1      | 0.052844 | 0.39812119 | 0.595384 |
| 84430     | Pomt1        | 0.052796 | 0.34112793 | 0.537991 |
| 103689968 | LOC103689968 | 0.052772 | 0.00535094 | 0.021996 |
| 24499     | Il6r         | 0.052757 | 0.48766314 | 0.675605 |
| 64018     | Slc33a1      | 0.052748 | 0.20605284 | 0.383492 |
| 298841    | Atraid       | 0.052734 | 0.32164993 | 0.516729 |
| 192361    | Ppplr2       | 0.052714 | 6.52E-07   | 6.68E-06 |
| 683923    | Bend3        | 0.052705 | 0.58991999 | 0.755296 |
| 287522    | Smg6         | 0.052702 | 0.2735277  | 0.465576 |
| 679890    | Gpkow        | 0.052665 | 0.18009811 | 0.34932  |
| 692032    | Mzt1         | 0.052625 | 0.29103012 | 0.48637  |
| 29424     | Htt          | 0.052601 | 0.01418781 | 0.049434 |
| 684934    | Ccdc9        | 0.052596 | 0.18369164 | 0.354126 |
| 290551    | Chdh         | 0.052569 | 0.29974319 | 0.496314 |
| 305853    | Rab2b        | 0.052528 | 0.01555061 | 0.053449 |
| 310200    | Ankrd33b     | 0.052446 | 0.78190582 | 0.886709 |
| 690911    | Spen         | 0.05242  | 0.1118412  | 0.248863 |
| 315722    | Adpgk        | 0.052411 | 0.30008765 | 0.496755 |
| 316557    | Rhbdd1       | 0.052373 | 0.41315422 | 0.609019 |

|           |              |          |            |          |
|-----------|--------------|----------|------------|----------|
| 362567    | Pomgnt1      | 0.052339 | 0.08025108 | 0.194996 |
| 303753    | Foxk2        | 0.05227  | 0.11369763 | 0.251963 |
| 364033    | Vamp4        | 0.052241 | 0.01061141 | 0.038939 |
| 84473     | Ddx20        | 0.052228 | 0.36499647 | 0.561227 |
| 56785     | Ralgap1      | 0.052223 | 0.01765548 | 0.05923  |
| 252892    | Lgil         | 0.052166 | 0.09191555 | 0.215185 |
| 307382    | Napg         | 0.052067 | 0.00701133 | 0.027555 |
| 305865    | Slc35f4      | 0.052059 | 0.64732809 | 0.800335 |
| 311846    | Lrrc8a       | 0.052047 | 0.01390937 | 0.048588 |
| 303678    | Caskin2      | 0.052034 | 0.02734497 | 0.083862 |
| 362886    | Rassf3       | 0.051992 | 0.36602372 | 0.562216 |
| 299732    | Lta4h        | 0.051987 | 0.1278682  | 0.274518 |
| 361980    | Khdc4        | 0.051972 | 0.2265     | 0.410203 |
| 362212    | Tmem87b      | 0.051965 | 0.03619674 | 0.104402 |
| 84580     | Hdac5        | 0.051958 | 0.12041148 | 0.263107 |
| 24913     | Pla2g16      | 0.051921 | 0.09485833 | 0.220019 |
| 691814    | Mrpl57       | 0.051893 | 0.2812025  | 0.474736 |
| 362286    | Dido1        | 0.051851 | 0.133064   | 0.282583 |
| 292097    | Arv1         | 0.051848 | 0.42212016 | 0.617456 |
| 116459    | Serpini1     | 0.051848 | 0.09969631 | 0.228074 |
| 24791     | Sparc        | 0.051844 | 7.63E-25   | 3.49E-23 |
| 680068    | Dmrtclb      | 0.051806 | 0.52292256 | 0.707119 |
| 94273     | Mgat2        | 0.051743 | 0.24648359 | 0.435058 |
| 266681    | Tmprss5      | 0.051727 | 0.00328161 | 0.014494 |
| 60670     | Fut4         | 0.051714 | 0.59435243 | 0.758777 |
| 499280    | Mapklip1     | 0.051704 | 0.26400597 | 0.454241 |
| 360702    | Ttc3         | 0.051695 | 2.96E-06   | 2.71E-05 |
| 679532    | Elovl1       | 0.051682 | 0.01199231 | 0.043061 |
| 500413    | Triqk        | 0.05168  | 0.26776048 | 0.458836 |
| 303519    | Krt25        | 0.051656 | 0.7736407  | 0.881641 |
| 89826     | Rpe65        | 0.051652 | 0.79151834 | 0.892403 |
| 304794    | Rbbp5        | 0.051633 | 0.1495596  | 0.30575  |
| 310879    | Alpk1        | 0.051565 | 0.36237625 | 0.558777 |
| 291133    | Aldh5a1      | 0.051543 | 0.21102308 | 0.389923 |
| 171116    | Opal         | 0.051528 | 0.00159139 | 0.007747 |
| 155173    | Sdf4         | 0.051526 | 0.03496215 | 0.101611 |
| 309454    | Mfsd13a      | 0.051513 | 0.4037974  | 0.600759 |
| 64202     | Calr         | 0.051448 | 3.25E-06   | 2.94E-05 |
| 25054     | Ntrk2        | 0.051446 | 6.16E-05   | 4.30E-04 |
| 64830     | Unc13b       | 0.051446 | 0.52963458 | 0.712351 |
| 103693024 | Zfp558       | 0.051438 | 0.70295926 | 0.837579 |
| 289560    | Igfbp7       | 0.051386 | 0.00183685 | 0.008794 |
| 312890    | Gdap1        | 0.051357 | 0.00991305 | 0.036802 |
| 292898    | Pih1d1       | 0.051345 | 0.47495696 | 0.66531  |
| 498014    | RGD1565033   | 0.051268 | 0.29286133 | 0.488658 |
| 292811    | Cep89        | 0.051208 | 0.49377063 | 0.680749 |
| 102550026 | LOC102550026 | 0.051196 | 0.55622732 | 0.735445 |
| 291145    | Hist1h1a     | 0.051192 | 0.89334032 | 0.952826 |
| 108352464 | LOC108352464 | 0.051192 | 0.69871734 | 0.834823 |
| 362635    | Zbtb40       | 0.05117  | 0.33835297 | 0.534988 |
| 297381    | Wbp1         | 0.05114  | 0.29664319 | 0.493197 |
| 81522     | Mtr          | 0.051134 | 0.33836533 | 0.534963 |
| 292820    | Zfp536       | 0.051122 | 0.38120865 | 0.578173 |
| 171402    | Elovl6       | 0.051098 | 0.79337796 | 0.893759 |
| 315714    | Loxl1        | 0.051085 | 0.46377902 | 0.65432  |
| 192357    | Gmpr2        | 0.051081 | 0.23663605 | 0.423565 |

|           |              |          |            |          |
|-----------|--------------|----------|------------|----------|
| 290234    | Dhrs1        | 0.051081 | 0.36451458 | 0.560712 |
| 266758    | Sec11c       | 0.051051 | 0.18283602 | 0.353012 |
| 312270    | RGD1563986   | 0.051025 | 0.57319589 | 0.742317 |
| 307236    | Adnp2        | 0.05101  | 0.34896979 | 0.545839 |
| 365382    | Inpp5a       | 0.050985 | 0.32005505 | 0.515166 |
| 689092    | Gcnt6        | 0.050975 | 0.85263755 | 0.927436 |
| 29670     | Psm3         | 0.05091  | 0.00654748 | 0.026054 |
| 25145     | Cd24         | 0.050908 | 0.01357786 | 0.047684 |
| 305424    | Fbx15        | 0.050889 | 0.11283656 | 0.250609 |
| 100362805 | Txndc5       | 0.05085  | 0.05807082 | 0.152252 |
| 295975    | Eif3m        | 0.050845 | 0.06499149 | 0.165898 |
| 689364    | Chmp1b       | 0.050844 | 0.14527457 | 0.300114 |
| 64001     | Cyb5a        | 0.050828 | 0.06803819 | 0.171923 |
| 362980    | Tubgcp6      | 0.050826 | 0.34411571 | 0.540688 |
| 303554    | Nbr1         | 0.050825 | 0.00736989 | 0.028709 |
| 304091    | I110rb       | 0.050788 | 0.34488993 | 0.541414 |
| 65151     | Rida         | 0.050721 | 0.34518919 | 0.541794 |
| 315222    | Arsa         | 0.050686 | 0.15313513 | 0.311089 |
| 287110    | Tbc1d24      | 0.050666 | 0.43404258 | 0.628285 |
| 363452    | Otud5        | 0.050645 | 0.05297052 | 0.141074 |
| 501005    | Cplx3        | 0.050596 | 0.84439858 | 0.922426 |
| 680264    | Catsperd     | 0.050588 | 0.7003183  | 0.835739 |
| 680354    | Tceal9       | 0.050543 | 0.09909899 | 0.227007 |
| 171069    | Usmg5        | 0.050535 | 0.08564847 | 0.204716 |
| 307075    | Wdr37        | 0.050532 | 0.10116753 | 0.230609 |
| 60383     | Rbck1        | 0.050494 | 0.11687884 | 0.257098 |
| 290645    | Mpv1712      | 0.050434 | 0.5642725  | 0.735361 |
| 690344    | Uqcc3        | 0.050431 | 0.46432801 | 0.654998 |
| 296178    | Mcm8         | 0.050426 | 0.65224758 | 0.801423 |
| 60582     | I11rn        | 0.050411 | 0.79741838 | 0.895714 |
| 292710    | Ethe1        | 0.050379 | 0.40872919 | 0.604931 |
| 290831    | Nsd3         | 0.050351 | 0.08478312 | 0.203362 |
| 116641    | Lgals8       | 0.050306 | 0.00301397 | 0.013509 |
| 450235    | Adgre4       | 0.050259 | 0.79687087 | 0.895258 |
| 307039    | Rab18        | 0.050255 | 0.01571607 | 0.053872 |
| 311341    | Pla2g4b      | 0.050248 | 0.41609934 | 0.612034 |
| 140674    | Gabrg1       | 0.050226 | 0.05158466 | 0.138118 |
| 365355    | Rras2        | 0.050194 | 0.39118119 | 0.588192 |
| 361685    | Tnfrsf26     | 0.050182 | 0.77988333 | 0.885365 |
| 64554     | Slc7a2       | 0.050149 | 0.34988603 | 0.546598 |
| 498420    | Etaal1       | 0.050146 | 0.59943889 | 0.762766 |
| 100359595 | Tbc1d32      | 0.050145 | 0.44332072 | 0.636202 |
| 308850    | Klh135       | 0.050114 | 0.70390234 | 0.837393 |
| 301555    | Cul3         | 0.050106 | 0.00984644 | 0.036605 |
| 691556    | Zbtb42       | 0.050087 | 0.48871795 | 0.676279 |
| 317399    | Ddx21        | 0.050083 | 0.14418845 | 0.298616 |
| 685814    | Cnpy2        | 0.05008  | 0.25989486 | 0.44936  |
| 362394    | Isyl1        | 0.050067 | 0.51605747 | 0.701471 |
| 103691872 | LOC103691872 | 0.050064 | 0.17851957 | 0.34739  |
| 310178    | Myo10        | 0.050049 | 0.13162659 | 0.280375 |
| 83788     | 9-Sep        | 0.050046 | 0.02225319 | 0.071265 |
| 689414    | Slc25a42     | 0.050027 | 0.31106441 | 0.506344 |
| 170577    | Mark3        | 0.049999 | 0.10199771 | 0.232112 |
| 294072    | Slc35g1      | 0.049999 | 0.89235121 | 0.952038 |
| 316022    | Trank1       | 0.049999 | 0.84822387 | 0.924431 |
| 266809    | Sc1t1        | 0.049999 | 0.56586135 | 0.736424 |

|           |              |          |            |          |
|-----------|--------------|----------|------------|----------|
| 299909    | Fam49b       | 0.049999 | 0.08791513 | 0.208252 |
| 100912748 | LOC100912748 | 0.049962 | 0.80558631 | 0.900586 |
| 362416    | Rpusd3       | 0.04996  | 0.38348742 | 0.580197 |
| 362288    | Rtel1        | 0.049952 | 0.12155722 | 0.264972 |
| 361775    | Trub1        | 0.049947 | 0.45876944 | 0.650046 |
| 362178    | Cstf3        | 0.049886 | 0.38670167 | 0.583854 |
| 310341    | Fat4         | 0.049865 | 0.54185307 | 0.723573 |
| 287622    | Tom111       | 0.049857 | 0.24381234 | 0.432025 |
| 291293    | Fbh1         | 0.049835 | 0.04653155 | 0.12773  |
| 303135    | 8-Sep        | 0.049804 | 0.00116239 | 0.005886 |
| 362273    | Cse11        | 0.049749 | 0.04425179 | 0.1228   |
| 108348139 | LOC108348139 | 0.049672 | 0.90395375 | 0.95803  |
| 81718     | Cdo1         | 0.049671 | 0.29202264 | 0.487515 |
| 306129    | Fbx13        | 0.049641 | 0.08899461 | 0.210077 |
| 50678     | Pde3a        | 0.049632 | 0.57132878 | 0.740503 |
| 100910506 | LOC100910506 | 0.04962  | 0.11923108 | 0.260946 |
| 361176    | Upf3a        | 0.049598 | 0.26276163 | 0.452714 |
| 684441    | Pin4         | 0.049583 | 0.35034935 | 0.547053 |
| 310698    | Dclk2        | 0.049572 | 0.03237588 | 0.095864 |
| 309165    | Rela         | 0.049569 | 0.17771574 | 0.346321 |
| 361092    | Stk24        | 0.049566 | 0.21591348 | 0.396956 |
| 25193     | Ccnd3        | 0.049551 | 0.17141617 | 0.337848 |
| 64633     | Rab5a        | 0.049544 | 0.69769061 | 0.834119 |
| 29635     | Timm44       | 0.049526 | 0.23409303 | 0.420277 |
| 311334    | Exd1         | 0.049485 | 0.64889067 | 0.801383 |
| 299899    | Eif3h        | 0.049418 | 0.03891149 | 0.110723 |
| 287772    | Psm12        | 0.04941  | 0.01945103 | 0.064002 |
| 307652    | Fam192a      | 0.049342 | 0.23787953 | 0.424912 |
| 64624     | Cul5         | 0.049326 | 0.13356407 | 0.283329 |
| 100912059 | LOC100912059 | 0.049294 | 0.10455313 | 0.236248 |
| 501659    | RGD1561481   | 0.049294 | 0.10455313 | 0.236248 |
| 287101    | Pkmyt1       | 0.049294 | 0.62790091 | 0.785185 |
| 306619    | Cln8         | 0.049254 | 0.38955044 | 0.586481 |
| 308009    | Fam45a       | 0.04921  | 0.10821545 | 0.242352 |
| 299002    | G2e3         | 0.04918  | 0.5338109  | 0.715794 |
| 100174909 | Smim11       | 0.049168 | 0.65609816 | 0.802942 |
| 25323     | Htr1d        | 0.049146 | 0.34251536 | 0.539242 |
| 365023    | Ankrd11      | 0.049138 | 0.01345169 | 0.047302 |
| 291624    | Lars         | 0.049134 | 0.01601073 | 0.054695 |
| 315608    | Ube4a        | 0.049097 | 0.0041232  | 0.017607 |
| 289180    | Gpr161       | 0.049069 | 0.04235893 | 0.11841  |
| 297066    | Zfp212       | 0.049006 | 0.55284763 | 0.733012 |
| 84350     | Dnmt1        | 0.048983 | 0.31316546 | 0.508113 |
| 298227    | Mtap         | 0.048981 | 0.21658223 | 0.39784  |
| 306562    | Tacc1        | 0.048978 | 3.79E-04   | 0.002209 |
| 365493    | Cacul1       | 0.048946 | 0.03238721 | 0.095883 |
| 364049    | Slamf7       | 0.048927 | 0.69376927 | 0.831048 |
| 293156    | Lrrc51       | 0.048864 | 0.70494764 | 0.838113 |
| 170512    | Ifi27        | 0.048824 | 0.00480144 | 0.020031 |
| 100362321 | Smim19       | 0.048746 | 0.20968104 | 0.388083 |
| 314717    | Scyl2        | 0.048739 | 0.10736334 | 0.240926 |
| 25027     | Slc16a1      | 0.048735 | 0.02448517 | 0.076786 |
| 296399    | Zfp93        | 0.048722 | 0.89155439 | 0.951561 |
| 362790    | Inf2         | 0.048705 | 0.03348345 | 0.098364 |
| 309647    | Brpf3        | 0.048685 | 0.45681748 | 0.6481   |
| 296911    | ST7          | 0.048672 | 0.50404877 | 0.690719 |

|           |              |          |            |          |
|-----------|--------------|----------|------------|----------|
| 79119     | Arf2         | 0.04863  | 0.37560839 | 0.572323 |
| 363603    | Cnot8        | 0.048574 | 0.12507058 | 0.27031  |
| 246237    | Plekha5      | 0.048557 | 0.09033283 | 0.21221  |
| 108349819 | LOC108349819 | 0.048497 | 0.89387758 | 0.953079 |
| 287479    | Shpk         | 0.048497 | 0.37085208 | 0.567345 |
| 683512    | Uqcc1        | 0.048478 | 0.10235397 | 0.232812 |
| 303547    | Ezh1         | 0.048475 | 0.03053864 | 0.091376 |
| 291060    | Snrnp48      | 0.048414 | 0.2367429  | 0.423637 |
| 100364990 | Pdssl1       | 0.0484   | 0.6057359  | 0.768366 |
| 365627    | Mblac2       | 0.048379 | 0.3932017  | 0.590485 |
| 313052    | Epb41        | 0.048366 | 0.08064758 | 0.195835 |
| 25352     | Sod3         | 0.048351 | 0.01018933 | 0.037593 |
| 113927    | Csnk1a1      | 0.048342 | 0.07554124 | 0.186213 |
| 25017     | Myo5a        | 0.048341 | 8.03E-04   | 0.004271 |
| 102554884 | Rcor1        | 0.048311 | 0.23957646 | 0.426982 |
| 314198    | Cdk11        | 0.048279 | 0.19472257 | 0.368894 |
| 363169    | Tcaim        | 0.04825  | 0.22243414 | 0.40488  |
| 308911    | Rrp8         | 0.048226 | 0.5945918  | 0.75893  |
| 303755    | Fn3krp       | 0.048223 | 0.23699252 | 0.424004 |
| 362257    | Ralgapb      | 0.048218 | 0.00912789 | 0.034363 |
| 309147    | Aldh3b1      | 0.048211 | 0.61567013 | 0.775389 |
| 499644    | LOC499644    | 0.048205 | 0.19743577 | 0.372183 |
| 81869     | Gstm7        | 0.048186 | 0.06295598 | 0.162136 |
| 170920    | Map4k3       | 0.048147 | 0.17724824 | 0.345728 |
| 289608    | Gnpda2       | 0.048121 | 0.19290797 | 0.366587 |
| 316342    | Lipt1        | 0.048117 | 0.76700477 | 0.877597 |
| 84014     | Ralbp1       | 0.048112 | 0.01891359 | 0.062623 |
| 315713    | Pml          | 0.048107 | 0.41887834 | 0.614508 |
| 300128    | Celsr1       | 0.048107 | 0.22048523 | 0.402448 |
| 313200    | Hsd12        | 0.048069 | 0.04006735 | 0.113419 |
| 289457    | Klh18        | 0.048059 | 0.36763585 | 0.563829 |
| 361076    | Dgkh         | 0.048047 | 2.98E-06   | 2.72E-05 |
| 293551    | Arl6ip1      | 0.048038 | 8.01E-04   | 0.004262 |
| 289757    | Polm         | 0.048017 | 0.60708093 | 0.769303 |
| 366064    | B3galt1      | 0.048007 | 0.20788747 | 0.385889 |
| 290829    | Ash21        | 0.047981 | 0.15108023 | 0.308065 |
| 29143     | Grn          | 0.047979 | 0.07911813 | 0.192859 |
| 100910795 | LOC100910795 | 0.047942 | 0.57370642 | 0.742473 |
| 25577     | Ywhaq        | 0.04788  | 7.88E-06   | 6.59E-05 |
| 292548    | Zfp418       | 0.047875 | 0.49659607 | 0.682864 |
| 499155    | Fancf        | 0.04786  | 0.57380491 | 0.742248 |
| 25151     | Igf2r        | 0.04783  | 0.10927755 | 0.244099 |
| 366954    | Zfp251       | 0.047818 | 0.31706792 | 0.511699 |
| 311024    | Kif5c        | 0.047784 | 1.29E-06   | 1.25E-05 |
| 293871    | Carnmt1      | 0.047781 | 0.45363628 | 0.645076 |
| 287222    | Timd2        | 0.047777 | 0.86327755 | 0.933147 |
| 66030     | Synpr        | 0.047698 | 0.00151629 | 0.007424 |
| 362556    | Ttc4         | 0.047693 | 0.17766767 | 0.346334 |
| 79244     | Hsd17b4      | 0.047618 | 0.05765379 | 0.151284 |
| 498351    | Srp72        | 0.047608 | 0.19076903 | 0.363829 |
| 311326    | Rpusd2       | 0.047605 | 0.61057563 | 0.771934 |
| 313341    | Pigo         | 0.047597 | 0.56436236 | 0.735327 |
| 29254     | Mg11         | 0.047547 | 3.36E-04   | 0.001982 |
| 288666    | Vps29        | 0.047493 | 0.06372372 | 0.163582 |
| 360985    | Tmem17       | 0.047491 | 0.39766359 | 0.59484  |
| 102555330 | LOC102555330 | 0.047477 | 0.90308562 | 0.95783  |



|           |              |          |            |          |
|-----------|--------------|----------|------------|----------|
| 103694571 | LOC103694571 | 0.047477 | 0.90308562 | 0.95783  |
| 362463    | Fgfr1lop2    | 0.047472 | 0.0611209  | 0.158352 |
| 307498    | Pura         | 0.047462 | 0.1801524  | 0.349354 |
| 291411    | Atp9b        | 0.047432 | 0.03327303 | 0.097882 |
| 362353    | Tcaf1        | 0.047414 | 0.07718329 | 0.189183 |
| 364834    | Polr2d       | 0.047405 | 0.50097008 | 0.687539 |
| 29476     | Glg1         | 0.047369 | 0.01266842 | 0.045055 |
| 498685    | Prxl2c       | 0.047362 | 0.29828833 | 0.494938 |
| 305135    | Lrrc8b       | 0.047304 | 0.02763688 | 0.084608 |
| 315916    | Frmpd3       | 0.047295 | 0.31444648 | 0.508848 |
| 102551828 | LOC102551828 | 0.047283 | 0.62185406 | 0.779774 |
| 29467     | Ddit3        | 0.047256 | 0.364192   | 0.560805 |
| 315997    | Rbm6         | 0.047203 | 0.26705892 | 0.458417 |
| 497929    | Pirt         | 0.047194 | 4.48E-08   | 5.48E-07 |
| 309859    | Scml4        | 0.047193 | 0.34802808 | 0.544903 |
| 290875    | Cdc16        | 0.047174 | 0.241847   | 0.429702 |
| 297415    | Fam136a      | 0.047173 | 0.59840179 | 0.761802 |
| 303067    | Thg11        | 0.047168 | 0.58721035 | 0.75294  |
| 362490    | Pip4p2       | 0.04716  | 0.13036222 | 0.278273 |
| 287437    | Tnfsf13      | 0.047159 | 0.56604812 | 0.736466 |
| 83571     | Cdkn1b       | 0.047154 | 0.03343419 | 0.098265 |
| 25697     | Ctsl         | 0.047148 | 0.00423234 | 0.01798  |
| 102549842 | LOC102549842 | 0.047146 | 0.46898078 | 0.659656 |
| 361788    | Prr3         | 0.047127 | 0.27426736 | 0.466419 |
| 100302405 | Zfp958       | 0.047092 | 0.22778439 | 0.412137 |
| 287113    | Rnps1        | 0.047087 | 0.06901732 | 0.173821 |
| 681037    | Preli2       | 0.047087 | 0.64857217 | 0.801093 |
| 116727    | Gp1bb        | 0.047087 | 0.9790081  | 1        |
| 24882     | Wnt3         | 0.047087 | 0.89533043 | 0.953881 |
| 291640    | Slc25a2      | 0.047087 | 0.81974508 | 0.90921  |
| 304984    | Cfap45       | 0.047087 | 0.89533043 | 0.953881 |
| 682147    | Cgas         | 0.047087 | 0.89533043 | 0.953881 |
| 25319     | Fth1         | 0.047073 | 7.35E-31   | 4.28E-29 |
| 366953    | Tonsl        | 0.047066 | 0.63170084 | 0.788126 |
| 297911    | Otud6b       | 0.047051 | 0.10960088 | 0.244621 |
| 288583    | Plod3        | 0.047017 | 0.17313914 | 0.340363 |
| 308449    | Hipk4        | 0.047002 | 0.59902446 | 0.762417 |
| 361473    | Mtrf11       | 0.047002 | 0.59902446 | 0.762417 |
| 292305    | Sft2d1       | 0.046992 | 0.32103231 | 0.516129 |
| 29414     | Akt3         | 0.046973 | 0.1018129  | 0.23183  |
| 245974    | Commd5       | 0.046967 | 0.54926326 | 0.729835 |
| 302999    | Prr35        | 0.046936 | 0.69351314 | 0.830846 |
| 362726    | Atxn711      | 0.046932 | 0.26070662 | 0.45015  |
| 29496     | Erbb3        | 0.046907 | 0.01670919 | 0.056564 |
| 170904    | Stk17b       | 0.046861 | 0.5775878  | 0.745268 |
| 171451    | 2-Mar        | 0.046832 | 0.31008356 | 0.505222 |
| 314310    | Zfp410       | 0.046774 | 0.23629191 | 0.423188 |
| 317343    | Med14        | 0.046717 | 0.13460093 | 0.284641 |
| 84009     | Kalrn        | 0.04671  | 0.24403304 | 0.432296 |
| 81807     | Elob         | 0.046706 | 0.03483994 | 0.101379 |
| 116725    | Ube2n        | 0.046681 | 0.00994298 | 0.036891 |
| 116657    | Cplx2        | 0.046646 | 0.06463073 | 0.165243 |
| 100910725 | LOC100910725 | 0.046637 | 0.98190186 | 1        |
| 116654    | Exoc4        | 0.046611 | 0.05539845 | 0.146435 |
| 296128    | Stard7       | 0.046586 | 0.09646886 | 0.222589 |
| 295061    | Tm4sf1       | 0.046576 | 0.42592699 | 0.621069 |

|           |              |          |            |          |
|-----------|--------------|----------|------------|----------|
| 295050    | Exosc8       | 0.046476 | 0.6443959  | 0.797901 |
| 312824    | Recql        | 0.046442 | 0.19384629 | 0.367673 |
| 298101    | Col27a1      | 0.046438 | 0.32800434 | 0.523669 |
| 498416    | Grb10        | 0.046369 | 0.29969938 | 0.496285 |
| 311422    | Itpa         | 0.046365 | 0.13344729 | 0.283176 |
| 366163    | Aqr          | 0.046339 | 0.16511279 | 0.328793 |
| 171485    | Cd9912       | 0.046294 | 0.00496543 | 0.020598 |
| 60562     | Stx6         | 0.046223 | 0.13906121 | 0.291516 |
| 29699     | Prkar2a      | 0.046221 | 0.03340083 | 0.098197 |
| 363266    | Agfgl        | 0.046109 | 0.0326178  | 0.096401 |
| 315417    | Jrkl         | 0.046108 | 0.56007    | 0.735572 |
| 299204    | Nek9         | 0.046072 | 0.0427729  | 0.119409 |
| 300083    | Slc25a17     | 0.046055 | 0.18007193 | 0.349304 |
| 312309    | Zfp775       | 0.046045 | 0.38121683 | 0.578139 |
| 366376    | Frrs11       | 0.046043 | 0.5323975  | 0.714704 |
| 108348148 | Gstm3        | 0.045993 | 0.44463573 | 0.637609 |
| 289311    | Mixl1        | 0.045992 | 0.87507015 | 0.941459 |
| 313242    | Dcaf10       | 0.045977 | 0.39915088 | 0.596456 |
| 58927     | Rpl36        | 0.045974 | 0.07158156 | 0.178719 |
| 307487    | Pcdhb21      | 0.045971 | 0.831975   | 0.915523 |
| 681433    | Rgmb         | 0.04595  | 0.00259949 | 0.011869 |
| 25113     | Ddn          | 0.045947 | 0.4416363  | 0.63479  |
| 360980    | Tns3         | 0.045936 | 0.0060596  | 0.024316 |
| 688749    | Tulp3        | 0.045935 | 0.24601018 | 0.434384 |
| 363040    | St3gal4      | 0.045878 | 0.23700625 | 0.423989 |
| 25390     | Atp1b3       | 0.045851 | 2.70E-06   | 2.48E-05 |
| 297065    | Zfp282       | 0.045833 | 0.42563598 | 0.620882 |
| 306764    | Nsd1         | 0.045792 | 0.01648217 | 0.055924 |
| 362646    | Fbxo42       | 0.045776 | 0.2081112  | 0.386153 |
| 362578    | Svbp         | 0.045762 | 0.68143775 | 0.822172 |
| 303785    | Rimbp3       | 0.045762 | 0.89671528 | 0.954688 |
| 311374    | Duoxa1       | 0.045762 | 0.89671528 | 0.954688 |
| 289380    | Nenf         | 0.045745 | 0.26100216 | 0.450579 |
| 100362548 | Elp3         | 0.045738 | 0.1028141  | 0.233468 |
| 308751    | Wdr73        | 0.045701 | 0.55217588 | 0.732427 |
| 108348233 | LOC108348233 | 0.045662 | 0.79889346 | 0.896842 |
| 361970    | Trim2        | 0.045599 | 6.50E-04   | 0.003545 |
| 64441     | Hsf2         | 0.045588 | 0.15923592 | 0.320508 |
| 689399    | Cenpw        | 0.04557  | 0.83673507 | 0.918691 |
| 681315    | Tmem230      | 0.045563 | 0.08151833 | 0.197597 |
| 266802    | Alk          | 0.04554  | 0.26200399 | 0.451756 |
| 307905    | Usp10        | 0.04554  | 0.26200399 | 0.451756 |
| 499691    | Prpf38b      | 0.045491 | 0.19772828 | 0.372513 |
| 315970    | Cdv3         | 0.045476 | 0.03580492 | 0.103507 |
| 29439     | Jtb          | 0.045466 | 0.33280388 | 0.528849 |
| 305940    | Sacs         | 0.045457 | 0.00639061 | 0.025526 |
| 310631    | Mex3a        | 0.045443 | 0.79580955 | 0.894593 |
| 337920    | Naglt1       | 0.045436 | 0.61737546 | 0.776356 |
| 500750    | Tmem196      | 0.045422 | 0.47861486 | 0.66788  |
| 304791    | Dstyk        | 0.045417 | 0.12059688 | 0.263391 |
| 100911248 | LOC100911248 | 0.045412 | 0.09074662 | 0.212972 |
| 24667     | Ppm1b        | 0.045408 | 0.06149148 | 0.159139 |
| 288471    | Trrap        | 0.045407 | 0.05183703 | 0.138598 |
| 25678     | Ddr1         | 0.045357 | 0.07323946 | 0.181952 |
| 294203    | Olr1749      | 0.045355 | 0.8986905  | 0.955803 |
| 103694540 | LOC103694540 | 0.045338 | 0.98213994 | 1        |

|           |              |          |            |          |
|-----------|--------------|----------|------------|----------|
| 292808    | Pepd         | 0.045265 | 0.17555542 | 0.343553 |
| 303611    | Tex2         | 0.045264 | 0.0411391  | 0.115696 |
| 363099    | Rsl24d1      | 0.045232 | 0.21809551 | 0.399503 |
| 100360750 | LOC100360750 | 0.045227 | 0.54915528 | 0.729742 |
| 682507    | Wasl         | 0.045213 | 0.04462545 | 0.123693 |
| 108348064 | LOC108348064 | 0.045212 | 0.41698555 | 0.612722 |
| 81825     | Cirbp        | 0.045207 | 0.24830669 | 0.436658 |
| 84353     | Ctnnb1       | 0.045205 | 3.93E-04   | 0.002277 |
| 306203    | Pxk          | 0.045171 | 0.19037195 | 0.363363 |
| 140607    | Pip4k2c      | 0.045169 | 0.30966463 | 0.504669 |
| 306103    | Dis3         | 0.045165 | 0.45187511 | 0.643533 |
| 289500    | Ccni         | 0.045152 | 0.00571    | 0.023152 |
| 303700    | Usp36        | 0.045146 | 0.44538818 | 0.638064 |
| 100909776 | LOC100909776 | 0.045129 | 0.85527913 | 0.928824 |
| 313210    | Abca1        | 0.045129 | 0.04850429 | 0.131929 |
| 58964     | Nme6         | 0.045129 | 0.71527993 | 0.844283 |
| 688839    | LOC688839    | 0.045109 | 0.7406421  | 0.86067  |
| 294993    | Hspa41       | 0.045039 | 0.01222655 | 0.043761 |
| 314336    | Ddx41        | 0.044918 | 0.30510653 | 0.502096 |
| 312195    | Nrf1         | 0.044885 | 0.44675534 | 0.639301 |
| 362294    | Ube3c        | 0.044883 | 0.01137884 | 0.041207 |
| 246332    | Uhmk1        | 0.044864 | 0.00140653 | 0.006961 |
| 84479     | Synrg        | 0.044858 | 0.16419171 | 0.328022 |
| 287156    | Rhot2        | 0.044844 | 0.23580954 | 0.422523 |
| 311881    | Fbxw2        | 0.044842 | 0.14261483 | 0.296777 |
| 288616    | Tmem248      | 0.044819 | 0.12290998 | 0.267125 |
| 307008    | RGD1308147   | 0.044815 | 0.25931546 | 0.448684 |
| 300813    | Rnf111       | 0.044807 | 0.25325662 | 0.441813 |
| 365314    | Lipt2        | 0.044757 | 0.77390836 | 0.881841 |
| 311570    | Myh7b        | 0.044745 | 0.51361414 | 0.699348 |
| 58967     | Sfmbt1       | 0.044706 | 0.4286419  | 0.623929 |
| 314616    | Arid3a       | 0.044694 | 0.49446723 | 0.681167 |
| 498272    | Uap1         | 0.044641 | 0.35430539 | 0.551196 |
| 406868    | G4           | 0.04461  | 0.59678262 | 0.760453 |
| 301373    | Tgfbrap1     | 0.044581 | 0.30027794 | 0.496898 |
| 294594    | Spata9       | 0.044564 | 0.37439511 | 0.571022 |
| 304193    | Arhgef18     | 0.044543 | 0.25387788 | 0.442491 |
| 170912    | Alcf         | 0.044514 | 0.89803714 | 0.955481 |
| 362759    | Exd2         | 0.044514 | 0.28025084 | 0.473592 |
| 304572    | Fbrs11       | 0.044444 | 0.33375161 | 0.529912 |
| 64622     | Adnp         | 0.044438 | 0.07602221 | 0.187084 |
| 306734    | Rmi1         | 0.044423 | 0.28074507 | 0.474216 |
| 500636    | Rnf144a      | 0.044413 | 0.18341725 | 0.353812 |
| 56064     | Nptn         | 0.044408 | 3.26E-04   | 0.001935 |
| 310005    | Aggf1        | 0.044363 | 0.37540776 | 0.572292 |
| 100912537 | LOC100912537 | 0.044328 | 0.6447132  | 0.798009 |
| 309486    | Tctn3        | 0.044328 | 0.6447132  | 0.798009 |
| 361071    | Sucla2       | 0.044311 | 0.01568339 | 0.053779 |
| 24708     | Rb1          | 0.044281 | 0.17229613 | 0.339126 |
| 296312    | Aar2         | 0.044279 | 0.44310638 | 0.635991 |
| 291927    | Orc6         | 0.044272 | 0.6860719  | 0.825723 |
| 314981    | Col14a1      | 0.044236 | 0.06220893 | 0.160538 |
| 681361    | Pisd         | 0.0442   | 0.30557236 | 0.502558 |
| 293142    | Spcs2        | 0.044165 | 0.08874073 | 0.209634 |
| 691899    | Fbrs         | 0.044117 | 0.20192138 | 0.377834 |
| 117042    | Rpl6         | 0.044113 | 0.00844028 | 0.032188 |

|           |              |          |            |          |
|-----------|--------------|----------|------------|----------|
| 298732    | Glis1        | 0.044113 | 0.82508312 | 0.911732 |
| 24655     | Plcd1        | 0.044059 | 0.33143223 | 0.527682 |
| 310244    | Zc2hcla      | 0.044039 | 0.02906412 | 0.087959 |
| 288182    | Cldnd1       | 0.044034 | 0.11243358 | 0.24986  |
| 316275    | Paqr8        | 0.044013 | 0.06533896 | 0.166539 |
| 122772    | Rps20        | 0.043994 | 0.05431923 | 0.144082 |
| 25476     | Lgals9       | 0.043987 | 0.44401249 | 0.636955 |
| 289827    | Ugp2         | 0.043966 | 0.10276132 | 0.233431 |
| 363055    | Cep164       | 0.043965 | 0.27967474 | 0.473206 |
| 498425    | Zrsr1        | 0.04394  | 0.27000838 | 0.461401 |
| 57025     | Adam15       | 0.043923 | 0.10721171 | 0.240812 |
| 685001    | Cnpy1        | 0.043916 | 0.75511325 | 0.869686 |
| 295922    | Mtch2        | 0.043907 | 0.03505664 | 0.101823 |
| 308870    | Numa1        | 0.043899 | 0.03244605 | 0.096012 |
| 100909476 | LOC100909476 | 0.04389  | 0.70222294 | 0.837173 |
| 84480     | Bnip3        | 0.043816 | 4.98E-04   | 0.002795 |
| 361258    | Cul2         | 0.043814 | 0.07875199 | 0.192163 |
| 289603    | CommD8       | 0.043814 | 0.38830636 | 0.585488 |
| 293678    | Mus81        | 0.043807 | 0.5086854  | 0.695222 |
| 363858    | Trappc5      | 0.043793 | 0.22507931 | 0.408368 |
| 304401    | Ssc4d        | 0.043787 | 0.65483773 | 0.803465 |
| 366619    | Dtd2         | 0.043781 | 0.64662974 | 0.799679 |
| 192252    | Dctpp1       | 0.043769 | 0.71915111 | 0.846492 |
| 361328    | Snx24        | 0.043743 | 0.36404266 | 0.56062  |
| 293184    | Ctr9         | 0.043738 | 0.08470075 | 0.203241 |
| 58923     | Mefv         | 0.043721 | 0.70304859 | 0.837633 |
| 307362    | Zfp532       | 0.04361  | 0.22593575 | 0.409648 |
| 310917    | Gbp4         | 0.043589 | 0.74220233 | 0.860541 |
| 363412    | Zfp609       | 0.043582 | 0.1718649  | 0.338557 |
| 171501    | Rnf38        | 0.043568 | 0.2449364  | 0.433291 |
| 24437     | H1f0         | 0.043563 | 0.09616101 | 0.222229 |
| 287280    | Skp1         | 0.043561 | 5.85E-07   | 6.05E-06 |
| 363633    | Polr2a       | 0.043527 | 0.0555132  | 0.146677 |
| 207123    | RGD621098    | 0.0435   | 0.41132524 | 0.60698  |
| 246781    | Ptpn7        | 0.043479 | 0.71998599 | 0.84682  |
| 498166    | Gal3st4      | 0.043479 | 0.71998599 | 0.84682  |
| 684270    | LOC684270    | 0.043479 | 0.61217954 | 0.773192 |
| 311183    | Fnbp4        | 0.043475 | 0.25110667 | 0.439148 |
| 25592     | Agrn         | 0.043471 | 0.07676588 | 0.188476 |
| 103690089 | LOC103690089 | 0.043425 | 0.20078691 | 0.37634  |
| 81767     | Rpl19        | 0.043405 | 0.00265848 | 0.012092 |
| 361403    | Terf2        | 0.043366 | 0.48772852 | 0.675647 |
| 54321     | Cnn3         | 0.043365 | 0.00334849 | 0.014752 |
| 170816    | Olr59        | 0.043335 | 0.89930047 | 0.956131 |
| 315137    | Apobec3      | 0.043335 | 0.85796769 | 0.930153 |
| 315164    | Cenpm        | 0.043335 | 0.80019841 | 0.897619 |
| 304317    | Amz1         | 0.043335 | 0.50310131 | 0.689817 |
| 362142    | Bbs5         | 0.043335 | 0.59134531 | 0.75646  |
| 362608    | Tmem39b      | 0.043335 | 0.61272877 | 0.773475 |
| 266611    | Ptpn9        | 0.04333  | 0.08837704 | 0.209086 |
| 361037    | Mrpl52       | 0.04329  | 0.22879072 | 0.413369 |
| 84476     | Strbp        | 0.043284 | 0.04576184 | 0.126236 |
| 192348    | Fnbp1        | 0.043271 | 0.06615344 | 0.16812  |
| 361791    | Nrm          | 0.043237 | 0.6696513  | 0.813206 |
| 25271     | Rxra         | 0.043215 | 0.58171242 | 0.748511 |
| 680971    | Ddhd2        | 0.043198 | 0.08737408 | 0.207409 |

|           |              |          |            |          |
|-----------|--------------|----------|------------|----------|
| 305339    | Nsun7        | 0.043149 | 0.7065062  | 0.839389 |
| 298425    | Efcab14      | 0.043147 | 0.1546675  | 0.3134   |
| 305351    | Klh15        | 0.043145 | 0.30490673 | 0.501897 |
| 298748    | Ndufaf7      | 0.043132 | 0.34470386 | 0.541345 |
| 361628    | Eif4g2       | 0.043093 | 4.00E-11   | 7.21E-10 |
| 81918     | Pard3        | 0.043087 | 0.34928224 | 0.546103 |
| 29441     | Por          | 0.043063 | 0.13827201 | 0.290245 |
| 29288     | Rps3a        | 0.043057 | 0.00360954 | 0.015731 |
| 84027     | Gsk3b        | 0.042976 | 7.96E-04   | 0.00424  |
| 293735    | Best1        | 0.042967 | 0.73877377 | 0.859338 |
| 313678    | Prdm2        | 0.042957 | 0.07049353 | 0.176558 |
| 100361765 | Hoxb2        | 0.042957 | 0.59285988 | 0.757837 |
| 83628     | Cd82         | 0.04293  | 0.05932462 | 0.15473  |
| 286974    | Chst15       | 0.042889 | 0.13396875 | 0.283966 |
| 361571    | Aldh16a1     | 0.042878 | 0.51432313 | 0.700163 |
| 366608    | Dock4        | 0.042866 | 0.35935229 | 0.556231 |
| 300077    | Gtpbp1       | 0.042854 | 0.42592009 | 0.621106 |
| 298280    | Slc35d1      | 0.042806 | 0.4766158  | 0.666115 |
| 303536    | Dnajc7       | 0.042799 | 0.03797792 | 0.108569 |
| 498749    | Tdp2         | 0.042796 | 0.4039857  | 0.600946 |
| 361272    | Dhtkd1       | 0.042789 | 0.48893237 | 0.676429 |
| 103693953 | LOC103693953 | 0.042782 | 0.75838363 | 0.872029 |
| 361661    | Pstk         | 0.042741 | 0.58365072 | 0.750194 |
| 406162    | Notch4       | 0.042734 | 0.49106592 | 0.678493 |
| 257645    | Itgb5        | 0.042717 | 0.07373416 | 0.182895 |
| 24375     | Fuca1        | 0.042704 | 0.23054841 | 0.415519 |
| 360637    | Ccdc43       | 0.042624 | 0.41714466 | 0.612909 |
| 84474     | Ddx1         | 0.042599 | 0.02707134 | 0.083144 |
| 103691005 | LOC103691005 | 0.042583 | 0.42920251 | 0.623934 |
| 100910007 | Zfp30        | 0.042533 | 0.82658499 | 0.912968 |
| 50993     | Rab10        | 0.042511 | 0.00866365 | 0.032862 |
| 501160    | Vwc21        | 0.042507 | 0.19452878 | 0.368674 |
| 312516    | Gmcl1        | 0.042499 | 0.10304411 | 0.233879 |
| 301361    | Lonrf2       | 0.042455 | 0.01673099 | 0.056557 |
| 94189     | Gosr1        | 0.042437 | 0.23190981 | 0.417381 |
| 100312984 | Eif2s3y      | 0.042429 | 0.09610862 | 0.222188 |
| 84351     | Ikbkb        | 0.042395 | 0.40604907 | 0.602697 |
| 192246    | Phf5a        | 0.042369 | 0.44624314 | 0.63876  |
| 114633    | Plcel        | 0.042342 | 0.25987695 | 0.44937  |
| 294012    | Borcs7       | 0.042334 | 0.10152942 | 0.231323 |
| 360823    | Ankrd13a     | 0.042326 | 0.14586268 | 0.300807 |
| 309696    | Bcr          | 0.042323 | 0.11337479 | 0.251423 |
| 295461    | Sec24b       | 0.042322 | 0.14593945 | 0.300868 |
| 171525    | Polk         | 0.042283 | 0.61144212 | 0.772773 |
| 287541    | Ift20        | 0.04228  | 0.27863164 | 0.471692 |
| 498529    | Amer2        | 0.042267 | 0.54002896 | 0.721896 |
| 366952    | Cpsf1        | 0.042235 | 0.25463835 | 0.443371 |
| 361170    | Adam32       | 0.042222 | 0.90050934 | 0.957042 |
| 296060    | Arhgap11a    | 0.042222 | 0.70761985 | 0.839246 |
| 680409    | Prodh1       | 0.042208 | 0.26058126 | 0.450015 |
| 288774    | Stat2        | 0.042194 | 0.17275181 | 0.339742 |
| 307133    | Hspa14       | 0.042189 | 0.47280703 | 0.663176 |
| 293528    | Nsmce4a      | 0.042186 | 0.49366963 | 0.680757 |
| 317275    | Rpl1711      | 0.042184 | 0.16981756 | 0.335287 |
| 302415    | Foxo4        | 0.042182 | 0.37202557 | 0.568455 |
| 362749    | Atp5s        | 0.042177 | 0.54043242 | 0.722233 |

|           |              |          |            |          |
|-----------|--------------|----------|------------|----------|
| 304763    | R3hdm1       | 0.042162 | 0.19209597 | 0.365591 |
| 362203    | Tubgcp4      | 0.04216  | 0.3630644  | 0.559521 |
| 66013     | Arhgef9      | 0.042156 | 0.2235436  | 0.406317 |
| 301014    | Atrip        | 0.042137 | 0.59986999 | 0.763059 |
| 297755    | Rpl7         | 0.042123 | 0.00865869 | 0.03285  |
| 362950    | Rbfox2       | 0.042118 | 0.19121734 | 0.364465 |
| 313618    | Macol        | 0.04211  | 0.17866958 | 0.347469 |
| 309041    | Thumpd1      | 0.042046 | 0.24472795 | 0.433043 |
| 56820     | Ramp3        | 0.042006 | 0.49452672 | 0.681199 |
| 314407    | LOC314407    | 0.041997 | 0.57260157 | 0.741699 |
| 362551    | Raver2       | 0.041974 | 0.61590701 | 0.77538  |
| 309912    | Rtn4ip1      | 0.041968 | 0.46726264 | 0.658211 |
| 315409    | Cep126       | 0.041947 | 0.41374926 | 0.609613 |
| 363247    | Xrcc5        | 0.041931 | 0.25058598 | 0.43856  |
| 315591    | Tbcel        | 0.041928 | 0.21500759 | 0.395558 |
| 361465    | Echdc1       | 0.041911 | 0.40328003 | 0.600271 |
| 682920    | Phactr4      | 0.041864 | 0.51760146 | 0.702467 |
| 100310874 | Parpbp       | 0.041859 | 0.88328778 | 0.946451 |
| 307494    | Wdr55        | 0.04184  | 0.62093214 | 0.778823 |
| 64020     | Gpr85        | 0.041832 | 0.55931407 | 0.735137 |
| 362375    | Lanc12       | 0.04181  | 0.16409657 | 0.3279   |
| 81764     | Rpl10        | 0.041789 | 0.00347191 | 0.015236 |
| 362934    | Ly6e         | 0.041787 | 0.10999274 | 0.245323 |
| 102552823 | LOC102552823 | 0.041786 | 0.76210701 | 0.874462 |
| 308652    | Smox         | 0.041763 | 0.29802177 | 0.494668 |
| 100911462 | Txn14a       | 0.041753 | 0.36432869 | 0.560517 |
| 361414    | Vat11        | 0.04174  | 3.52E-05   | 2.59E-04 |
| 299314    | Cfp          | 0.041728 | 0.65393811 | 0.802775 |
| 361848    | Ddx50        | 0.041696 | 0.32386799 | 0.519285 |
| 365691    | Egflam       | 0.041692 | 0.27416457 | 0.466285 |
| 286998    | Zfand4       | 0.041687 | 0.66682055 | 0.810699 |
| 317252    | Ercc61       | 0.041687 | 0.86048497 | 0.931874 |
| 103694910 | LOC103694910 | 0.041684 | 0.29498796 | 0.49126  |
| 366964    | Tcf20        | 0.041675 | 0.19299959 | 0.366688 |
| 65248     | Prkaa1       | 0.041666 | 0.06594211 | 0.167673 |
| 289456    | Hsd17b11     | 0.041665 | 0.09015344 | 0.21192  |
| 361323    | Commd10      | 0.041636 | 0.34008764 | 0.536662 |
| 170820    | Prdm4        | 0.04163  | 0.19269493 | 0.366292 |
| 688288    | Eif4a3       | 0.041552 | 0.22163822 | 0.403933 |
| 363074    | RGD1309779   | 0.041549 | 0.58858693 | 0.754147 |
| 266716    | Zscan12      | 0.041513 | 0.6309495  | 0.787963 |
| 301128    | Kdm4b        | 0.041471 | 0.19552488 | 0.369936 |
| 501926    | Zmat5        | 0.041452 | 0.61504494 | 0.775115 |
| 499563    | Zfp458       | 0.041431 | 0.78449049 | 0.88779  |
| 502320    | Faap24       | 0.041357 | 0.76108736 | 0.873714 |
| 308384    | Sae1         | 0.041354 | 0.11064223 | 0.24654  |
| 689755    | Ccdc167      | 0.041339 | 0.76171125 | 0.874061 |
| 360763    | Usp12        | 0.041325 | 0.35681769 | 0.553883 |
| 298943    | Bcap29       | 0.041313 | 0.2538627  | 0.442506 |
| 296603    | Vav2         | 0.041295 | 0.17347959 | 0.340645 |
| 100911260 | LOC100911260 | 0.04128  | 0.22063498 | 0.402644 |
| 294018    | Taf5         | 0.041261 | 0.68164451 | 0.822369 |
| 298744    | Crim1        | 0.041214 | 0.44204795 | 0.63495  |
| 315879    | Adamts7      | 0.041209 | 0.53653131 | 0.718734 |
| 100910875 | LOC100910875 | 0.04117  | 0.53121951 | 0.713425 |
| 295378    | Vav3         | 0.041167 | 0.48458968 | 0.672816 |



|           |              |          |            |          |
|-----------|--------------|----------|------------|----------|
| 287631    | Wfikkn2      | 0.041167 | 0.83054385 | 0.915324 |
| 308064    | Cep72        | 0.041167 | 0.90166741 | 0.957739 |
| 303200    | Map2k3       | 0.041166 | 0.52869409 | 0.711538 |
| 102546648 | LOC102546648 | 0.041158 | 0.66455451 | 0.809184 |
| 313997    | Mboat2       | 0.041141 | 0.07134871 | 0.178278 |
| 65028     | Dnaj1        | 0.041128 | 0.00134216 | 0.006672 |
| 301887    | Cdh12        | 0.041097 | 0.62218911 | 0.779989 |
| 94266     | Rps27        | 0.041073 | 0.09096819 | 0.213361 |
| 50690     | Slc6a8       | 0.041058 | 0.06860701 | 0.172994 |
| 365215    | Smg9         | 0.041043 | 0.42950869 | 0.624141 |
| 252900    | Dgat2        | 0.040968 | 0.42989799 | 0.624421 |
| 291850    | Tepp         | 0.040964 | 0.61581533 | 0.775316 |
| 290912    | Arglu1       | 0.040936 | 0.22485265 | 0.408073 |
| 108351885 | LOC108351885 | 0.040931 | 0.39270833 | 0.58993  |
| 29278     | Laspl        | 0.040926 | 0.02884264 | 0.087372 |
| 114205    | Crcp         | 0.040926 | 0.44750992 | 0.639612 |
| 64367     | Ppib         | 0.040906 | 0.13672148 | 0.287688 |
| 684189    | Trim68       | 0.040862 | 0.69700465 | 0.833561 |
| 246766    | Ggtal        | 0.040834 | 0.18492143 | 0.356028 |
| 295455    | Slc39a8      | 0.040829 | 0.42989821 | 0.624374 |
| 100909512 | LOC100909512 | 0.040804 | 0.58649446 | 0.752428 |
| 361769    | Sufu         | 0.040783 | 0.45428242 | 0.645513 |
| 291694    | Fam13b       | 0.040735 | 0.01445924 | 0.050233 |
| 501349    | LOC501349    | 0.04072  | 0.7139703  | 0.843155 |
| 24412     | Grin2d       | 0.040694 | 0.75698862 | 0.871056 |
| 25283     | Gclc         | 0.040661 | 0.25459501 | 0.443376 |
| 246303    | Serbpl       | 0.040651 | 0.05163489 | 0.138174 |
| 306322    | Entr1        | 0.040649 | 0.12759887 | 0.274156 |
| 362434    | Lpcat3       | 0.040636 | 0.28233178 | 0.475884 |
| 298552    | Tmem50a      | 0.040575 | 0.05883086 | 0.153821 |
| 306471    | Snx25        | 0.040533 | 0.30473898 | 0.501664 |
| 24818     | Tcp1         | 0.04052  | 0.01602823 | 0.054745 |
| 363485    | Pbdc1        | 0.040519 | 0.46198737 | 0.65276  |
| 295625    | Pkp4         | 0.040518 | 0.25262763 | 0.44116  |
| 499966    | Xrcc2        | 0.04047  | 0.65851587 | 0.804505 |
| 301574    | Cab39        | 0.040459 | 0.00246531 | 0.011327 |
| 307833    | Ist1         | 0.040424 | 0.11081504 | 0.246839 |
| 313245    | Polr1e       | 0.040374 | 0.59353514 | 0.758344 |
| 314168    | RGD1307621   | 0.040364 | 0.69864199 | 0.834785 |
| 25246     | Bsg          | 0.040352 | 5.08E-05   | 3.61E-04 |
| 64530     | Cnbp         | 0.040342 | 0.0085095  | 0.0324   |
| 316348    | Pdc13        | 0.040336 | 0.32751375 | 0.523192 |
| 303164    | Zfp692       | 0.040324 | 0.49655601 | 0.682859 |
| 294449    | Hs3st5       | 0.040322 | 0.45063965 | 0.642494 |
| 289152    | Ankrd45      | 0.040297 | 0.69786149 | 0.834166 |
| 361310    | Pfdn1        | 0.040243 | 0.12674299 | 0.272686 |
| 690450    | Taf1b        | 0.040238 | 0.64736699 | 0.800331 |
| 305827    | Wdhd1        | 0.040229 | 0.62487222 | 0.782683 |
| 296207    | Smim26       | 0.040206 | 0.53319705 | 0.715223 |
| 294232    | Dhx16        | 0.040168 | 0.43977692 | 0.633121 |
| 304495    | Kdm2b        | 0.040168 | 0.54135335 | 0.723007 |
| 108348147 | LOC108348147 | 0.040156 | 0.51137115 | 0.697291 |
| 311631    | Zswim1       | 0.040151 | 0.53448108 | 0.716441 |
| 361255    | Tbce         | 0.04015  | 0.17195147 | 0.338657 |
| 310512    | Nmd3         | 0.040144 | 0.43424204 | 0.62843  |
| 311502    | Kiz          | 0.040134 | 0.51081912 | 0.696738 |

|           |              |          |            |          |
|-----------|--------------|----------|------------|----------|
| 25231     | Onecut1      | 0.040131 | 0.32696557 | 0.522536 |
| 252893    | Dnah7        | 0.040115 | 0.86191654 | 0.93247  |
| 65158     | Rab2a        | 0.040099 | 0.00683225 | 0.026968 |
| 298098    | Pole3        | 0.040093 | 0.21520094 | 0.395799 |
| 308977    | I121r        | 0.040087 | 0.82351032 | 0.911105 |
| 690285    | Tmem223      | 0.040072 | 0.30387559 | 0.500936 |
| 690976    | Cnn2         | 0.040039 | 0.63664848 | 0.791499 |
| 296147    | Chchd5       | 0.039981 | 0.49736044 | 0.683669 |
| 79114     | Fgfr1        | 0.039968 | 0.00972194 | 0.036198 |
| 500863    | Rspo2        | 0.039957 | 0.22323476 | 0.406104 |
| 288779    | Rab5b        | 0.039952 | 0.00100825 | 0.005212 |
| 79256     | Hnrnpd       | 0.039911 | 0.23767365 | 0.424784 |
| 289270    | Pld5         | 0.039866 | 0.62632438 | 0.783883 |
| 299104    | Fkbp3        | 0.039866 | 0.01149192 | 0.041514 |
| 298699    | Ppan         | 0.039855 | 0.45909295 | 0.650359 |
| 364670    | RGD1559908   | 0.039847 | 0.68527308 | 0.825126 |
| 307081    | Pitrm1       | 0.039839 | 0.10064362 | 0.229634 |
| 114104    | Asah2        | 0.039825 | 0.26921987 | 0.460715 |
| 65026     | Rwdd3        | 0.039688 | 0.70088072 | 0.836148 |
| 79237     | Hhex         | 0.039688 | 0.80804729 | 0.902278 |
| 361182    | Pcid2        | 0.039674 | 0.36629609 | 0.562408 |
| 619577    | Rnf14        | 0.03967  | 0.0016523  | 0.007993 |
| 296709    | Rpl35        | 0.039661 | 0.02676978 | 0.082337 |
| 84394     | Dcx          | 0.039616 | 0.61317056 | 0.773879 |
| 311450    | Pak7         | 0.039569 | 0.73152089 | 0.854136 |
| 362013    | Ahcy11       | 0.039556 | 0.03027931 | 0.090771 |
| 89815     | Syng2        | 0.039544 | 0.56084453 | 0.735778 |
| 312907    | Slco5a1      | 0.039541 | 0.20243552 | 0.378461 |
| 25448     | Cenpi        | 0.03953  | 0.76646706 | 0.877404 |
| 367902    | Armcx3       | 0.039519 | 0.0413882  | 0.116157 |
| 311209    | Tp53i11      | 0.039512 | 0.37879933 | 0.575849 |
| 140655    | Rps16        | 0.039447 | 0.00262351 | 0.011959 |
| 286910    | Smim3        | 0.039441 | 0.432471   | 0.626867 |
| 294603    | RGD1560883   | 0.039434 | 0.66234451 | 0.807267 |
| 170955    | Zfp483       | 0.039426 | 0.71637783 | 0.844689 |
| 300032    | Zc3h3        | 0.039418 | 0.52168163 | 0.706092 |
| 299828    | Atp23        | 0.039405 | 0.70182163 | 0.836956 |
| 360632    | Retreg3      | 0.03933  | 0.43307228 | 0.6275   |
| 308478    | Spred3       | 0.039282 | 0.42258355 | 0.617992 |
| 81776     | Rps24        | 0.039282 | 0.02156656 | 0.069545 |
| 313564    | Zmpste24     | 0.039279 | 0.15405584 | 0.312593 |
| 83611     | Apba3        | 0.039254 | 0.44976068 | 0.641337 |
| 84482     | Foxo1        | 0.039253 | 0.53001182 | 0.712506 |
| 499903    | Napb         | 0.039236 | 0.00120143 | 0.006058 |
| 266780    | Rimbp2       | 0.039228 | 0.39764642 | 0.594861 |
| 306197    | Tm9sf2       | 0.039222 | 0.04138155 | 0.116155 |
| 305910    | Pspc1        | 0.039219 | 0.39297035 | 0.59023  |
| 171106    | I11r12       | 0.039219 | 0.90384423 | 0.958127 |
| 362732    | Agmo         | 0.039187 | 0.51548324 | 0.700991 |
| 289338    | Disp1        | 0.039172 | 0.35370175 | 0.550662 |
| 304569    | Ep400        | 0.039161 | 0.18636977 | 0.358092 |
| 500034    | Bmt2         | 0.039135 | 0.68895458 | 0.827571 |
| 312703    | Pex5         | 0.039133 | 0.33795198 | 0.534665 |
| 361466    | Tppp         | 0.039129 | 0.15285621 | 0.310721 |
| 108351137 | LOC108351137 | 0.039099 | 0.81870788 | 0.90896  |
| 691976    | Slc35g3      | 0.039099 | 0.90788318 | 0.960965 |

|           |              |          |            |          |
|-----------|--------------|----------|------------|----------|
| 315524    | Tmem45b      | 0.039082 | 0.28652479 | 0.480781 |
| 295549    | Dna.jb4      | 0.039038 | 0.12802837 | 0.2748   |
| 294693    | Gtf2h2       | 0.039015 | 0.60913886 | 0.770834 |
| 294565    | Fam13c       | 0.038996 | 0.39755156 | 0.594813 |
| 364601    | Micu3        | 0.038993 | 0.09941966 | 0.227578 |
| 29274     | Rnf4         | 0.038927 | 0.10151683 | 0.231322 |
| 100359574 | LOC100359574 | 0.038911 | 0.52655357 | 0.710314 |
| 288479    | Pms2         | 0.038905 | 0.47643355 | 0.665958 |
| 305367    | Arap2        | 0.038882 | 0.32107818 | 0.516159 |
| 259218    | Rwdd1        | 0.038876 | 0.32563796 | 0.521333 |
| 56816     | Prkn         | 0.038853 | 0.70367119 | 0.83717  |
| 315134    | Josd1        | 0.03884  | 0.35970532 | 0.556642 |
| 315158    | Zc3h7b       | 0.03884  | 0.02988343 | 0.089867 |
| 312563    | Prickle2     | 0.038825 | 0.33232147 | 0.528391 |
| 296461    | Osbpl2       | 0.038794 | 0.23169659 | 0.417115 |
| 361029    | Ktn1         | 0.038779 | 0.02852948 | 0.086699 |
| 310062    | Zswim6       | 0.038764 | 0.27368126 | 0.465713 |
| 304654    | RGD1306072   | 0.038745 | 0.64241443 | 0.796328 |
| 314600    | Zfp955a      | 0.038735 | 0.40045509 | 0.597467 |
| 78963     | Apaf1        | 0.038714 | 0.53986545 | 0.72188  |
| 307483    | Diaph1       | 0.038686 | 0.38214807 | 0.578952 |
| 89819     | Bud31        | 0.038677 | 0.30334617 | 0.50054  |
| 362398    | Plxna1       | 0.038659 | 0.14429366 | 0.298639 |
| 361256    | Svil         | 0.038645 | 0.25249973 | 0.440977 |
| 290668    | Mau2         | 0.038636 | 0.20094897 | 0.376532 |
| 295930    | RGD1309540   | 0.038635 | 0.15416326 | 0.312777 |
| 305420    | Anapc4       | 0.038625 | 0.17641449 | 0.344702 |
| 304978    | Copa         | 0.038624 | 0.04357887 | 0.121304 |
| 295211    | S100a5       | 0.038613 | 0.835432   | 0.918213 |
| 266759    | Hspa4        | 0.038611 | 0.00838357 | 0.032003 |
| 100912008 | LOC100912008 | 0.03858  | 0.73469025 | 0.856996 |
| 303113    | Jade2        | 0.038573 | 0.35713627 | 0.554242 |
| 681913    | Gstz1        | 0.03856  | 0.49949079 | 0.685953 |
| 361363    | Ccdc102a     | 0.038539 | 0.55716531 | 0.736276 |
| 171126    | Ap3m1        | 0.038518 | 0.15484382 | 0.313723 |
| 502227    | Gtf2h5       | 0.038503 | 0.29636941 | 0.492914 |
| 81785     | Ssrp1        | 0.038482 | 0.14245701 | 0.296513 |
| 619346    | Surf4        | 0.038476 | 0.07115399 | 0.177862 |
| 24539     | Lp1          | 0.038473 | 0.48505744 | 0.673171 |
| 309550    | L3mbt13      | 0.03845  | 0.59241805 | 0.757476 |
| 102552166 | LOC102552166 | 0.038445 | 0.76384367 | 0.875558 |
| 364630    | Thsd1        | 0.038441 | 0.66775759 | 0.811424 |
| 315210    | Brd1         | 0.038441 | 0.33828823 | 0.534975 |
| 362425    | Zfp637       | 0.038437 | 0.30320232 | 0.500476 |
| 161452    | Lef1         | 0.038435 | 0.71556188 | 0.844197 |
| 84471     | Snx1         | 0.0384   | 0.24112339 | 0.428776 |
| 310784    | Taf13        | 0.038383 | 0.2817084  | 0.475338 |
| 303553    | Rnd2         | 0.03838  | 0.4382624  | 0.632039 |
| 312320    | Igf2bp3      | 0.038317 | 0.90486879 | 0.95852  |
| 313234    | Tbc1d2       | 0.038317 | 0.76971573 | 0.879062 |
| 689526    | LOC689526    | 0.038317 | 0.97867991 | 1        |
| 502503    | Serf1        | 0.038296 | 0.28221304 | 0.475726 |
| 293415    | Tmem9b       | 0.038293 | 0.14881702 | 0.304984 |
| 302526    | Atp6ap2      | 0.038292 | 0.11396744 | 0.252356 |
| 291075    | Eci2         | 0.038285 | 0.38345735 | 0.580197 |
| 312654    | Tmcc1        | 0.03827  | 0.37139637 | 0.567995 |

|           |              |          |            |          |
|-----------|--------------|----------|------------|----------|
| 304010    | Zbtb11       | 0.038261 | 0.32454059 | 0.520057 |
| 293047    | Kif7         | 0.038259 | 0.6436888  | 0.797285 |
| 297728    | Ergic2       | 0.038209 | 0.26014941 | 0.449596 |
| 102547414 | LOC102547414 | 0.038171 | 0.96703473 | 0.99963  |
| 373541    | Taf9         | 0.038144 | 0.20930242 | 0.387495 |
| 292810    | Gpatch1      | 0.03812  | 0.50679297 | 0.693431 |
| 84484     | Slc4a4       | 0.038114 | 0.05314949 | 0.141452 |
| 311224    | Ttc17        | 0.03811  | 0.24033395 | 0.427852 |
| 25595     | Map2         | 0.038106 | 9.64E-04   | 0.005016 |
| 500390    | RGD1564053   | 0.038101 | 0.2499395  | 0.438395 |
| 362409    | Sumf1        | 0.038088 | 0.27467769 | 0.4667   |
| 683626    | Lbh          | 0.038088 | 0.10688564 | 0.240165 |
| 66031     | Wdr7         | 0.038079 | 0.03412437 | 0.099877 |
| 289504    | Sdad1        | 0.038068 | 0.65571938 | 0.802685 |
| 140943    | Ppp4r1       | 0.038056 | 0.29581877 | 0.492213 |
| 287063    | Nmrall       | 0.038053 | 0.67845345 | 0.820234 |
| 246150    | Akap9        | 0.038021 | 0.14877132 | 0.304956 |
| 60443     | Epn2         | 0.038017 | 0.07469356 | 0.184625 |
| 690217    | Pcnx4        | 0.037985 | 0.34475227 | 0.541331 |
| 312690    | Phc1         | 0.037971 | 0.47554452 | 0.66579  |
| 360937    | Tbc1d1       | 0.03796  | 0.37319628 | 0.569741 |
| 25260     | Gstt1        | 0.037931 | 0.72119352 | 0.847377 |
| 308993    | Sephs2       | 0.037883 | 0.42005292 | 0.615472 |
| 306260    | Capn7        | 0.037837 | 0.24931072 | 0.437736 |
| 362058    | Migal        | 0.037778 | 0.08604908 | 0.205287 |
| 64188     | Mafg         | 0.037754 | 0.06424701 | 0.164482 |
| 100912076 | LOC100912076 | 0.037723 | 0.72261155 | 0.848363 |
| 309804    | Cdk19        | 0.037654 | 0.24786763 | 0.436571 |
| 310326    | Arse         | 0.037636 | 0.60539984 | 0.768144 |
| 79113     | Fgr          | 0.037627 | 0.79100458 | 0.891982 |
| 29192     | Psen1        | 0.037613 | 0.12913402 | 0.276332 |
| 361684    | Nap114       | 0.037543 | 0.07317861 | 0.181872 |
| 308490    | Ddx18        | 0.03754  | 0.50979292 | 0.696111 |
| 309673    | Rrp1b        | 0.03754  | 0.50979292 | 0.696111 |
| 361042    | Pck2         | 0.037536 | 0.38433125 | 0.580966 |
| 361014    | Ngly1        | 0.037534 | 0.26407325 | 0.454275 |
| 29222     | Ptma         | 0.037529 | 0.00851698 | 0.032422 |
| 100362458 | Gigyf2       | 0.037462 | 0.27148374 | 0.463132 |
| 311926    | Lrp1b        | 0.037459 | 0.66979623 | 0.813278 |
| 305240    | G3bp2        | 0.037453 | 0.00534721 | 0.021986 |
| 362958    | Mical11      | 0.037443 | 0.16119243 | 0.323285 |
| 360593    | Ppm1e        | 0.037405 | 0.5104971  | 0.696548 |
| 297893    | Hdac1        | 0.037383 | 0.34192118 | 0.538573 |
| 363760    | Arl6         | 0.03737  | 0.41797665 | 0.613847 |
| 314288    | Pcnx1        | 0.037362 | 0.03428949 | 0.10016  |
| 81805     | Suox         | 0.037336 | 0.49152767 | 0.678885 |
| 305895    | Dcaf11       | 0.037329 | 0.14281286 | 0.297091 |
| 306165    | Gpr180       | 0.037327 | 0.24310307 | 0.43121  |
| 316455    | Plekhm3      | 0.037321 | 0.0473849  | 0.129624 |
| 29184     | Cd36         | 0.037315 | 0.58725036 | 0.752941 |
| 24800     | Sts          | 0.037297 | 0.5110577  | 0.697013 |
| 117273    | Rhoa         | 0.037295 | 9.62E-04   | 0.005007 |
| 681908    | Samd15       | 0.037274 | 0.81229268 | 0.905108 |
| 362593    | Gn12         | 0.037242 | 0.27690031 | 0.469471 |
| 360994    | Chac2        | 0.037226 | 0.55542409 | 0.734791 |
| 686506    | Lyrn7        | 0.037213 | 0.33725751 | 0.534054 |

|           |              |          |            |          |
|-----------|--------------|----------|------------|----------|
| 114632    | Aimp1        | 0.037196 | 0.29472452 | 0.490907 |
| 292763    | Map4k1       | 0.037182 | 0.77280324 | 0.881161 |
| 299864    | Ebag9        | 0.037182 | 0.38641211 | 0.583463 |
| 313840    | Rmdn2        | 0.037182 | 0.61703121 | 0.776282 |
| 362522    | Zfp462       | 0.037178 | 0.31850892 | 0.513328 |
| 282547    | Mrgprx1      | 0.037154 | 0.40801576 | 0.604815 |
| 302863    | Slc9a6       | 0.037121 | 0.05518707 | 0.145977 |
| 100360054 | Vstml        | 0.037108 | 0.95212006 | 0.989044 |
| 309646    | Slc26a8      | 0.037101 | 0.61699436 | 0.776338 |
| 24392     | Gja1         | 0.037087 | 0.35057025 | 0.547218 |
| 303828    | Etv5         | 0.037035 | 0.18836795 | 0.36084  |
| 299199    | Ylpm1        | 0.037018 | 0.22807356 | 0.412503 |
| 314992    | RGD1310852   | 0.037008 | 0.6964835  | 0.833199 |
| 305177    | Enoph1       | 0.037002 | 0.24919814 | 0.4377   |
| 367146    | Gk5          | 0.036999 | 0.8053756  | 0.900615 |
| 117104    | Ppp2r2a      | 0.036964 | 0.11783152 | 0.258776 |
| 291450    | Aldh7a1      | 0.036963 | 0.36254839 | 0.558997 |
| 300253    | Eif4b        | 0.036963 | 0.04865556 | 0.132302 |
| 315170    | Poldip3      | 0.036955 | 0.23984647 | 0.427224 |
| 303304    | Sgsm2        | 0.036947 | 0.2962184  | 0.492749 |
| 29313     | Clec11a      | 0.036943 | 0.73959816 | 0.85993  |
| 308381    | Zswim9       | 0.036923 | 0.59929379 | 0.762683 |
| 25507     | Pcsk6        | 0.036884 | 0.44127321 | 0.634507 |
| 58814     | Tmod2        | 0.036858 | 0.04099258 | 0.115352 |
| 361549    | Lgi4         | 0.036853 | 0.00686647 | 0.027086 |
| 298439    | Ipp          | 0.036817 | 0.47756687 | 0.666906 |
| 170546    | Ryr3         | 0.036801 | 0.45813025 | 0.649382 |
| 296050    | Emc7         | 0.036765 | 0.16232089 | 0.325103 |
| 292686    | Fbxo46       | 0.036764 | 0.67246706 | 0.815585 |
| 315988    | Rbm15b       | 0.036762 | 0.50059118 | 0.687217 |
| 117021    | Nup155       | 0.036751 | 0.37193919 | 0.568415 |
| 245903    | Magi3        | 0.036735 | 0.10538132 | 0.23757  |
| 362137    | Wdsub1       | 0.036731 | 0.56583991 | 0.736446 |
| 311118    | Tlk1         | 0.036712 | 0.12445428 | 0.269436 |
| 100359829 | Smpd5        | 0.036687 | 0.56800415 | 0.737851 |
| 293103    | Hikeshi      | 0.036682 | 0.46447389 | 0.655155 |
| 294230    | Mrps18b      | 0.036679 | 0.35253036 | 0.549512 |
| 679958    | Slc9b2       | 0.036641 | 0.83931094 | 0.91977  |
| 170928    | Necab2       | 0.036641 | 0.69780485 | 0.834151 |
| 305679    | Vcl          | 0.036624 | 0.07094242 | 0.177542 |
| 498798    | Stam         | 0.036619 | 0.15871558 | 0.319697 |
| 301121    | Rfx2         | 0.036574 | 0.80595706 | 0.900631 |
| 689443    | Tbc1d22a     | 0.036561 | 0.52178683 | 0.706185 |
| 360842    | Plekha6      | 0.036553 | 0.02074092 | 0.067443 |
| 296126    | Snrnp200     | 0.036505 | 0.08955054 | 0.210971 |
| 690182    | LOC690182    | 0.036496 | 0.83063514 | 0.915107 |
| 115768    | Zfp37        | 0.036482 | 0.71012597 | 0.840701 |
| 360915    | Cops4        | 0.036465 | 0.10734274 | 0.240964 |
| 252960    | Mrgprx3      | 0.036453 | 0.47153667 | 0.661931 |
| 312372    | Kbtbd2       | 0.036445 | 0.17639872 | 0.344707 |
| 100909595 | LOC100909595 | 0.036408 | 0.2300444  | 0.414886 |
| 25604     | Pcmt1        | 0.036407 | 0.01336984 | 0.047058 |
| 360634    | Plekhh3      | 0.036407 | 0.49609642 | 0.682473 |
| 362789    | Zfyve21      | 0.036376 | 0.48386195 | 0.672295 |
| 103694552 | LOC103694552 | 0.036375 | 0.83113845 | 0.915396 |
| 83523     | Impa1        | 0.03633  | 0.23888184 | 0.426063 |

|           |            |          |            |          |
|-----------|------------|----------|------------|----------|
| 317405    | Gprasp2    | 0.036314 | 0.19717852 | 0.371845 |
| 362884    | Tmbim4     | 0.036311 | 0.36647824 | 0.562506 |
| 29276     | Csrp1      | 0.036308 | 0.01713466 | 0.057778 |
| 293721    | Ganab      | 0.036305 | 0.06527145 | 0.166412 |
| 312490    | Paip2b     | 0.0363   | 0.18930502 | 0.362088 |
| 288042    | Fbxo45     | 0.036289 | 0.24030501 | 0.42784  |
| 140934    | Elp1       | 0.036263 | 0.27676416 | 0.469282 |
| 113894    | Sqstm1     | 0.036254 | 3.38E-04   | 0.001994 |
| 117258    | Cntn1      | 0.036249 | 9.83E-05   | 6.54E-04 |
| 361467    | Lpcat1     | 0.036208 | 0.40568293 | 0.602341 |
| 361626    | Tmem41b    | 0.036178 | 0.14094216 | 0.294164 |
| 309441    | Twnk       | 0.036176 | 0.4275414  | 0.622755 |
| 290802    | Ubxn8      | 0.036163 | 0.47969857 | 0.668217 |
| 502421    | Slc35f1    | 0.036151 | 0.18977555 | 0.36277  |
| 246324    | Rab31      | 0.03615  | 0.24227686 | 0.430345 |
| 64627     | Hist1h4b   | 0.036116 | 0.46273973 | 0.653387 |
| 362905    | Emc2       | 0.036114 | 0.17500897 | 0.342694 |
| 691984    | Gpc6       | 0.036103 | 0.47350002 | 0.663855 |
| 294963    | Mrpl47     | 0.036089 | 0.49319092 | 0.680442 |
| 289323    | Nv1        | 0.036072 | 0.65629329 | 0.802975 |
| 500007    | LOC500007  | 0.036061 | 0.90610938 | 0.95962  |
| 680944    | Rbmx11     | 0.036037 | 0.75051209 | 0.866588 |
| 64154     | Gosr2      | 0.036021 | 0.1870567  | 0.359086 |
| 363675    | Stard3     | 0.035949 | 0.33504304 | 0.531608 |
| 361201    | RGD1311345 | 0.035922 | 0.34888269 | 0.545792 |
| 685398    | Ppplr26    | 0.035886 | 0.54585246 | 0.726722 |
| 81716     | Ggcx       | 0.035879 | 0.46336199 | 0.65378  |
| 313139    | Slc35a1    | 0.035859 | 0.54400167 | 0.725272 |
| 305178    | Hnrnpd1    | 0.035856 | 0.11487163 | 0.253797 |
| 446170    | Dear       | 0.035829 | 0.92113726 | 0.96998  |
| 683206    | Tnfaip3    | 0.035806 | 0.66470413 | 0.809211 |
| 287643    | Spop       | 0.03577  | 0.11329614 | 0.251278 |
| 296158    | Pced1a     | 0.035752 | 0.49344679 | 0.680548 |
| 683504    | Zfp639     | 0.035734 | 0.57073749 | 0.739989 |
| 29673     | Psm6       | 0.035706 | 0.09284372 | 0.216692 |
| 29240     | Polb       | 0.035703 | 0.53329116 | 0.715249 |
| 315272    | Ano6       | 0.035679 | 0.18728176 | 0.359301 |
| 299209    | Ift43      | 0.035654 | 0.70139284 | 0.836602 |
| 365022    | Rnf166     | 0.035648 | 0.56325016 | 0.734481 |
| 170821    | Atxn10     | 0.035613 | 0.02877451 | 0.087207 |
| 81830     | Rab11a     | 0.035602 | 0.0224951  | 0.071762 |
| 100912096 | Zfp113     | 0.035577 | 0.7439133  | 0.861633 |
| 303608    | Ftsj3      | 0.035561 | 0.44891498 | 0.640706 |
| 24547     | Mbp        | 0.035545 | 1.58E-15   | 4.37E-14 |
| 25023     | Prkcb      | 0.035539 | 0.14078419 | 0.293995 |
| 361223    | Fgd3       | 0.035483 | 0.77750807 | 0.883933 |
| 29304     | Rps6       | 0.035462 | 0.00996375 | 0.03694  |
| 60466     | Stx7       | 0.035459 | 0.03116886 | 0.092941 |
| 366532    | Dhx57      | 0.035457 | 0.15106829 | 0.308073 |
| 360904    | Idua       | 0.035454 | 0.24988269 | 0.438377 |
| 307774    | Otud4      | 0.035426 | 0.28787728 | 0.48254  |
| 27256     | Cntn6      | 0.035409 | 0.71552717 | 0.844261 |
| 24161     | Acpl       | 0.035372 | 0.09194582 | 0.215203 |
| 297530    | Washc2c    | 0.035365 | 0.04638676 | 0.127572 |
| 29595     | Htr2a      | 0.035298 | 0.81796578 | 0.908559 |
| 315133    | Ddx17      | 0.035286 | 0.1062933  | 0.239201 |



|           |              |          |            |          |
|-----------|--------------|----------|------------|----------|
| 29149     | Strn         | 0.035276 | 0.14014621 | 0.292984 |
| 500323    | Parp11       | 0.035273 | 0.65028344 | 0.80253  |
| 29521     | Scamp1       | 0.035273 | 0.04776347 | 0.130267 |
| 689488    | LOC689488    | 0.035252 | 0.96330638 | 0.997454 |
| 291948    | Pgrmc1       | 0.035243 | 0.07926429 | 0.193091 |
| 192251    | Gpr149       | 0.035241 | 0.34550838 | 0.542027 |
| 297592    | Spsb2        | 0.035216 | 0.60520182 | 0.768046 |
| 363707    | Srp68        | 0.035206 | 0.25610165 | 0.445064 |
| 85382     | Ngb          | 0.035206 | 0.74509774 | 0.86269  |
| 316064    | Oxsr1        | 0.035174 | 0.16075598 | 0.322919 |
| 361303    | Lims2        | 0.035172 | 0.21790206 | 0.399302 |
| 100912165 | LOC100912165 | 0.035171 | 0.79567324 | 0.894492 |
| 500261    | Magi1        | 0.035156 | 0.12643597 | 0.272241 |
| 114089    | Inpp5e       | 0.035155 | 0.49068981 | 0.678072 |
| 301352    | Mrpl30       | 0.035153 | 0.82630201 | 0.912814 |
| 365380    | Jakmip3      | 0.03514  | 0.53627129 | 0.718487 |
| 300724    | Fbxo22       | 0.034967 | 0.39976639 | 0.596767 |
| 296865    | Las11        | 0.034959 | 0.3872362  | 0.584429 |
| 296259    | Acss1        | 0.034938 | 0.49750612 | 0.68377  |
| 64553     | Akap6        | 0.034907 | 0.00264722 | 0.012053 |
| 362642    | Pqlc2        | 0.034878 | 0.44191545 | 0.634856 |
| 314949    | Rad21        | 0.034877 | 0.10465091 | 0.236286 |
| 366962    | Grap2        | 0.034874 | 0.84286951 | 0.921866 |
| 25565     | Tle4         | 0.034816 | 0.31504962 | 0.509608 |
| 84420     | Adcy7        | 0.034814 | 0.4139312  | 0.609786 |
| 100910231 | Zfp82        | 0.034814 | 0.53094487 | 0.713156 |
| 295448    | Ints12       | 0.034775 | 0.61667866 | 0.776095 |
| 500105    | Cntnap2      | 0.034775 | 0.05491815 | 0.145408 |
| 25309     | Cycs         | 0.034758 | 0.04565345 | 0.125974 |
| 688999    | Hoxd9        | 0.034744 | 0.51161926 | 0.697579 |
| 25725     | Prkar1a      | 0.034714 | 7.17E-04   | 0.003867 |
| 378774    | Pigw         | 0.034695 | 0.69245964 | 0.830315 |
| 360577    | Nxn          | 0.034652 | 0.27899432 | 0.472222 |
| 360498    | Jmjd8        | 0.034598 | 0.38716989 | 0.584376 |
| 288058    | Hacd2        | 0.034597 | 0.48534799 | 0.673476 |
| 24242     | Calml        | 0.034516 | 9.45E-10   | 1.47E-08 |
| 103694861 | LOC103694861 | 0.034463 | 0.82169701 | 0.90968  |
| 363255    | Ankzf1       | 0.034444 | 0.46130228 | 0.65247  |
| 363164    | Wdr48        | 0.034442 | 0.24583728 | 0.434199 |
| 310633    | Ubqln4       | 0.034424 | 0.26005518 | 0.449555 |
| 295647    | Gca          | 0.034423 | 0.46774728 | 0.65865  |
| 280670    | Lzts3        | 0.034372 | 0.44065942 | 0.633864 |
| 309391    | Cox15        | 0.034365 | 0.33700006 | 0.53378  |
| 687358    | Tvp23b       | 0.03435  | 0.47224883 | 0.662686 |
| 83614     | Pias3        | 0.03434  | 0.44586177 | 0.638454 |
| 361044    | Sdr39u1      | 0.034311 | 0.48376679 | 0.672212 |
| 288661    | Zcchc8       | 0.034282 | 0.54086558 | 0.722609 |
| 292622    | Bicra        | 0.034275 | 0.42673141 | 0.621813 |
| 500909    | Ccdc134      | 0.034275 | 0.70943505 | 0.840248 |
| 303158    | Larpl        | 0.034233 | 0.01185399 | 0.042596 |
| 296081    | Ccdc32       | 0.034229 | 0.2473195  | 0.436009 |
| 300786    | Clpx         | 0.034206 | 0.44166764 | 0.634739 |
| 364190    | Ras110a      | 0.034172 | 0.78121628 | 0.886191 |
| 297336    | Usp39        | 0.034167 | 0.47438353 | 0.664653 |
| 102553760 | LOC102553760 | 0.034166 | 0.80362821 | 0.899824 |
| 681367    | LOC681367    | 0.034164 | 0.7665098  | 0.877347 |

|           |              |          |            |          |
|-----------|--------------|----------|------------|----------|
| 308060    | Ccdc127      | 0.03416  | 0.39204717 | 0.589215 |
| 685233    | Gpatch8      | 0.034156 | 0.23719015 | 0.424198 |
| 499108    | Sertad3      | 0.034143 | 0.74853057 | 0.865244 |
| 500575    | Szrd1        | 0.034069 | 0.28007079 | 0.473624 |
| 365875    | Bolal        | 0.034058 | 0.69492772 | 0.831913 |
| 681665    | Ints61       | 0.034045 | 0.55641948 | 0.735546 |
| 305571    | B3gnt2       | 0.034044 | 0.25295174 | 0.441524 |
| 299258    | Golga5       | 0.03402  | 0.44781126 | 0.63985  |
| 297867    | Aridla       | 0.034007 | 0.15624387 | 0.315989 |
| 311553    | Asxl1        | 0.033997 | 0.33378776 | 0.529881 |
| 305922    | Lats2        | 0.033991 | 0.17465723 | 0.342252 |
| 499095    | Zfp94        | 0.033987 | 0.70794781 | 0.839531 |
| 140544    | Pcyt1a       | 0.033981 | 0.1631958  | 0.326443 |
| 501569    | Tmem47       | 0.033975 | 0.0841328  | 0.202261 |
| 364754    | Fzd8         | 0.033966 | 0.46904909 | 0.659606 |
| 64666     | Taok2        | 0.033958 | 0.09352338 | 0.217745 |
| 24479     | Idh1         | 0.033939 | 0.05219129 | 0.13933  |
| 361213    | Sptlc1       | 0.033917 | 0.36228041 | 0.558675 |
| 303396    | Appbp2       | 0.033915 | 0.20134235 | 0.377047 |
| 432358    | Elavl4       | 0.033903 | 0.02247155 | 0.071759 |
| 298851    | Slc35f6      | 0.03384  | 0.39826037 | 0.595499 |
| 311391    | Cep152       | 0.033832 | 0.7821877  | 0.886818 |
| 361631    | Cyp2r1       | 0.03382  | 0.82209512 | 0.909856 |
| 300807    | Rora         | 0.033818 | 0.69298921 | 0.830427 |
| 368088    | Dgkd         | 0.033807 | 0.32212253 | 0.517357 |
| 313934    | Itsn2        | 0.033801 | 0.14725568 | 0.302795 |
| 289874    | Erlecl       | 0.033799 | 0.1480195  | 0.303546 |
| 83582     | Polr1b       | 0.033752 | 0.6053855  | 0.768177 |
| 305482    | Mtmr3        | 0.03375  | 0.23488475 | 0.421262 |
| 298859    | Dnajc27      | 0.033725 | 0.20224866 | 0.378335 |
| 25387     | Arrb1        | 0.033708 | 0.03743446 | 0.107273 |
| 362668    | Zbtb48       | 0.033646 | 0.73554765 | 0.857209 |
| 288993    | Slc35f5      | 0.033631 | 0.41696268 | 0.612736 |
| 300797    | Ciao2a       | 0.033628 | 0.67386293 | 0.816654 |
| 103689966 | LOC103689966 | 0.033564 | 0.76915955 | 0.878637 |
| 293774    | Dtx4         | 0.033551 | 0.22991707 | 0.414735 |
| 362587    | Macf1        | 0.033536 | 0.06132534 | 0.158752 |
| 56725     | Cript        | 0.033506 | 0.25640907 | 0.445436 |
| 361612    | P4ha3        | 0.033496 | 0.71723249 | 0.845383 |
| 171152    | Taf9b        | 0.033479 | 0.40837633 | 0.605208 |
| 171147    | Slc2a13      | 0.033457 | 0.48306518 | 0.671727 |
| 102551140 | LOC102551140 | 0.033435 | 0.54368119 | 0.725099 |
| 685465    | Polr3g       | 0.033417 | 0.0996181  | 0.22795  |
| 171128    | Gchfr        | 0.03339  | 0.78345774 | 0.887624 |
| 293922    | Aff2         | 0.033351 | 0.47929994 | 0.667857 |
| 303493    | Snx11        | 0.033292 | 0.3738276  | 0.570339 |
| 60391     | Nrxn1        | 0.033288 | 0.18030526 | 0.349543 |
| 363220    | Aff3         | 0.033224 | 0.33053048 | 0.526818 |
| 192269    | Sub1         | 0.033203 | 0.06900055 | 0.173825 |
| 365085    | LOC365085    | 0.033195 | 0.52649253 | 0.710282 |
| 501706    | Mis12        | 0.03316  | 0.32360773 | 0.518955 |
| 25216     | Sdc1         | 0.033159 | 0.76731032 | 0.877736 |
| 363275    | Eif4e2       | 0.033147 | 0.52702408 | 0.710647 |
| 498233    | Lgr6         | 0.033131 | 0.72369226 | 0.849003 |
| 54269     | Mcpt10       | 0.033106 | 0.8393632  | 0.919774 |
| 362987    | Rab12        | 0.033089 | 0.54737847 | 0.728346 |

|           |              |          |            |          |
|-----------|--------------|----------|------------|----------|
| 309300    | RGD1565057   | 0.033067 | 0.91106397 | 0.963207 |
| 364835    | Sft2d3       | 0.033067 | 0.73755666 | 0.858132 |
| 498515    | Cdh24        | 0.033014 | 0.69901824 | 0.834973 |
| 314855    | Cpm          | 0.033011 | 0.43384198 | 0.628233 |
| 682457    | Txlna        | 0.032992 | 0.25976327 | 0.449295 |
| 679641    | Cfap57       | 0.032976 | 0.7678786  | 0.877753 |
| 309809    | RGD1310495   | 0.032975 | 0.8957384  | 0.954048 |
| 499882    | Eid1         | 0.032881 | 0.08304954 | 0.200212 |
| 116551    | Pdk1         | 0.032874 | 0.51504621 | 0.700547 |
| 680991    | Tubg2        | 0.032856 | 0.48829647 | 0.675942 |
| 246302    | Pcyox1       | 0.032843 | 0.16838596 | 0.333013 |
| 305935    | Mtmr6        | 0.032841 | 0.01331473 | 0.046924 |
| 362702    | Lclat1       | 0.032836 | 0.52242526 | 0.706697 |
| 259243    | Kcnip4       | 0.032818 | 0.24085447 | 0.428458 |
| 688968    | Ecd          | 0.032783 | 0.54907155 | 0.729682 |
| 691171    | Ulk3         | 0.032778 | 0.70258342 | 0.837393 |
| 314312    | Entpd5       | 0.032761 | 0.3966231  | 0.593937 |
| 361570    | Prrg2        | 0.032751 | 0.8750299  | 0.941469 |
| 500538    | Ybx1         | 0.03272  | 0.0495629  | 0.134214 |
| 685405    | Fam53c       | 0.032688 | 0.33590823 | 0.532449 |
| 308106    | Map3k4       | 0.032679 | 0.40158699 | 0.598453 |
| 140665    | Rab3d        | 0.03265  | 0.20366755 | 0.380205 |
| 690262    | Yaf2         | 0.032635 | 0.24854212 | 0.436749 |
| 500692    | Heatr4       | 0.032575 | 0.87626336 | 0.942424 |
| 683630    | Mat2b        | 0.032569 | 0.36387464 | 0.560407 |
| 117556    | Sv2b         | 0.032535 | 0.03615466 | 0.104297 |
| 63839     | Fhl2         | 0.032529 | 0.67827336 | 0.82012  |
| 541589    | Kyat3        | 0.032477 | 0.64782964 | 0.800384 |
| 304529    | Vsig10       | 0.032469 | 0.60336328 | 0.766735 |
| 292027    | Cfdp1        | 0.032465 | 0.33105544 | 0.52717  |
| 691380    | Psrc1        | 0.032441 | 0.91183155 | 0.963644 |
| 83833     | Smarcd2      | 0.032441 | 0.41153218 | 0.607192 |
| 301345    | Cnnm3        | 0.032438 | 0.42407109 | 0.619453 |
| 116632    | Nat2         | 0.032431 | 0.87682154 | 0.942758 |
| 287302    | Mrpl22       | 0.032414 | 0.59552871 | 0.759261 |
| 25059     | Hk2          | 0.0324   | 0.67409984 | 0.816837 |
| 94203     | Pgf          | 0.032339 | 0.70169865 | 0.836862 |
| 304445    | Glt1d1       | 0.032334 | 0.59594001 | 0.759633 |
| 296284    | Kif3b        | 0.032289 | 0.22418374 | 0.407131 |
| 362374    | Voppl        | 0.032267 | 0.1394279  | 0.291995 |
| 117548    | Kif1b        | 0.032249 | 2.05E-04   | 0.001275 |
| 305242    | Cdk12        | 0.032245 | 0.17485586 | 0.3425   |
| 311193    | Arhgap1      | 0.032242 | 0.30582331 | 0.501715 |
| 499994    | Zfp804b      | 0.032232 | 0.77521334 | 0.882747 |
| 363212    | Bend6        | 0.03223  | 0.11675438 | 0.256943 |
| 685179    | Smarcc2      | 0.032223 | 0.0750526  | 0.185369 |
| 103689999 | LOC103689999 | 0.032221 | 0.27526368 | 0.467278 |
| 24561     | Mpg          | 0.032219 | 0.71428658 | 0.843372 |
| 100911320 | LOC100911320 | 0.032217 | 0.72353514 | 0.848871 |
| 85428     | Rhoq         | 0.032177 | 0.1327103  | 0.28202  |
| 684112    | Sik3         | 0.03215  | 0.35964087 | 0.556587 |
| 292381    | Lix1         | 0.032137 | 0.72734251 | 0.851398 |
| 304063    | Ets2         | 0.032137 | 0.60504968 | 0.767955 |
| 304539    | Sirt4        | 0.032129 | 0.77965631 | 0.885212 |
| 50622     | Slc23a2      | 0.032124 | 0.29564447 | 0.492052 |
| 293950    | Morn4        | 0.032121 | 0.40526886 | 0.601914 |

|           |              |          |            |          |
|-----------|--------------|----------|------------|----------|
| 360476    | Nagpa        | 0.03211  | 0.71470864 | 0.843818 |
| 305031    | Brox         | 0.032079 | 0.15207811 | 0.309635 |
| 360699    | Dnajc28      | 0.032062 | 0.75540321 | 0.869862 |
| 362065    | Wls          | 0.032061 | 0.11390186 | 0.25224  |
| 296188    | Sptlc3       | 0.032027 | 0.63133393 | 0.788081 |
| 502988    | Sesn2        | 0.031992 | 0.6567791  | 0.803311 |
| 287530    | Prpf8        | 0.031973 | 0.03791943 | 0.108418 |
| 25460     | Hmmr         | 0.031971 | 0.74140486 | 0.860087 |
| 360620    | Wipf2        | 0.031971 | 0.50925825 | 0.695555 |
| 83427     | Rack1        | 0.03197  | 0.05840871 | 0.152885 |
| 313707    | Exosc10      | 0.031902 | 0.4067304  | 0.603426 |
| 307582    | Lama3        | 0.031893 | 0.52791233 | 0.711039 |
| 307096    | Akr1c19      | 0.031851 | 0.56834806 | 0.737996 |
| 361420    | Taf1c        | 0.031805 | 0.65093518 | 0.80271  |
| 500262    | Kbtbd8       | 0.031781 | 0.72866413 | 0.851793 |
| 688757    | Tmem200b     | 0.03177  | 0.86368799 | 0.933379 |
| 108349256 | Soga3        | 0.03176  | 0.17351395 | 0.340678 |
| 361715    | Rps6ka4      | 0.031751 | 0.52875075 | 0.711514 |
| 363064    | Wdr61        | 0.031736 | 0.38800664 | 0.585175 |
| 287739    | Eftud2       | 0.031723 | 0.25908956 | 0.448415 |
| 317259    | Nono         | 0.031723 | 0.14588518 | 0.300821 |
| 500199    | Ptcd3        | 0.031715 | 0.34254195 | 0.539239 |
| 314453    | Wdr20        | 0.031681 | 0.54433708 | 0.725465 |
| 299566    | Cyp4f39      | 0.031672 | 0.56219544 | 0.733608 |
| 309031    | Ikzf5        | 0.03167  | 0.38845367 | 0.585571 |
| 311441    | Trmt6        | 0.031652 | 0.5840366  | 0.750336 |
| 116590    | Mapk1        | 0.031632 | 0.0367288  | 0.105729 |
| 312227    | Cnot4        | 0.031632 | 0.33469732 | 0.531148 |
| 108348156 | NEWGENE_2116 | 0.031569 | 0.49107737 | 0.67846  |
| 81800     | St13         | 0.031566 | 0.02551195 | 0.079288 |
| 361729    | Cyb561a3     | 0.031561 | 0.59996493 | 0.763129 |
| 25613     | Ptprz1       | 0.031552 | 0.15716247 | 0.31724  |
| 365946    | Slc9b1       | 0.031548 | 0.87711843 | 0.942917 |
| 295707    | Tnks1bp1     | 0.031538 | 0.14695368 | 0.302337 |
| 361217    | Spin1        | 0.031531 | 0.67797371 | 0.819862 |
| 299113    | Klhdc2       | 0.031514 | 0.19125439 | 0.364499 |
| 309002    | Zfp668       | 0.031482 | 0.69650922 | 0.833177 |
| 100125364 | LOC100125364 | 0.031435 | 0.36142967 | 0.557814 |
| 502886    | Foxj2        | 0.03143  | 0.4416472  | 0.634757 |
| 361745    | Smarca2      | 0.031429 | 0.19542382 | 0.369781 |
| 502348    | Stard5       | 0.031405 | 0.82725868 | 0.913077 |
| 291061    | Riok1        | 0.031382 | 0.48210518 | 0.670833 |
| 313493    | Rgp1         | 0.031338 | 0.34547482 | 0.542019 |
| 678741    | Zc3h4        | 0.031331 | 0.38527755 | 0.582027 |
| 293497    | Kctd13       | 0.031319 | 0.55058426 | 0.730978 |
| 360919    | LOC360919    | 0.031262 | 0.85041027 | 0.925966 |
| 102552698 | LOC102552698 | 0.031262 | 0.98495321 | 1        |
| 499123    | Zfp569       | 0.031262 | 0.98495321 | 1        |
| 365468    | Lzts2        | 0.031223 | 0.45286266 | 0.644409 |
| 362094    | Mrps2        | 0.031204 | 0.45100002 | 0.642815 |
| 306626    | Ing1         | 0.031182 | 0.68405396 | 0.824284 |
| 313035    | Dnajc8       | 0.031154 | 0.25635461 | 0.445382 |
| 303280    | RGD1307929   | 0.031131 | 0.05113075 | 0.13723  |
| 295105    | Schip1       | 0.031118 | 0.21713864 | 0.398516 |
| 316216    | Taf8         | 0.031109 | 0.6103426  | 0.771947 |
| 290552    | Rft1         | 0.031041 | 0.67617366 | 0.818621 |

|           |              |          |            |          |
|-----------|--------------|----------|------------|----------|
| 290905    | Col4a1       | 0.030989 | 0.01907436 | 0.062991 |
| 294595    | Ttc37        | 0.030972 | 0.28116235 | 0.474711 |
| 300361    | Cwc15        | 0.030971 | 0.19455174 | 0.36868  |
| 79208     | Epha5        | 0.030935 | 0.5595029  | 0.735233 |
| 308392    | Strn4        | 0.03091  | 0.35466261 | 0.551482 |
| 294712    | Cenpk        | 0.030907 | 0.85744016 | 0.930057 |
| 685076    | Pgm211       | 0.030889 | 0.00867178 | 0.032886 |
| 688466    | Usp21        | 0.030823 | 0.58095725 | 0.747893 |
| 84380     | Dhh          | 0.030822 | 0.22896395 | 0.413446 |
| 81759     | Renbp        | 0.030799 | 0.70792165 | 0.839552 |
| 102553866 | LOC102553866 | 0.030791 | 0.75753409 | 0.871473 |
| 303630    | Wipi1        | 0.030765 | 0.44578013 | 0.638433 |
| 246232    | Uxs1         | 0.030752 | 0.2569738  | 0.44601  |
| 103693222 | LOC103693222 | 0.030708 | 0.91399023 | 0.964855 |
| 297455    | Lsm3         | 0.030684 | 0.60459312 | 0.767734 |
| 309150    | Carns1       | 0.030669 | 0.41920357 | 0.614795 |
| 361043    | Tm9sf1       | 0.030665 | 0.50580256 | 0.692673 |
| 499615    | Lhfp16       | 0.030656 | 0.39164143 | 0.588792 |
| 282845    | Rnf34        | 0.030635 | 0.46920503 | 0.659776 |
| 302987    | Unk1         | 0.030528 | 0.46991328 | 0.660236 |
| 246326    | Zdhhc2       | 0.030465 | 0.02460542 | 0.077087 |
| 25513     | Pik3r1       | 0.030452 | 0.05987307 | 0.155776 |
| 690746    | Spagl7       | 0.030428 | 0.95542871 | 0.991723 |
| 25675     | Hmgcr        | 0.030357 | 0.11427158 | 0.252941 |
| 365476    | Cfap43       | 0.03035  | 0.85237781 | 0.927207 |
| 312640    | Emc3         | 0.030338 | 0.19126122 | 0.364476 |
| 314856    | Mdm2         | 0.030336 | 0.50233935 | 0.688971 |
| 500882    | RGD1564548   | 0.030332 | 0.96168885 | 0.996592 |
| 296956    | Ube2h        | 0.030324 | 0.13169147 | 0.280481 |
| 305365    | Slc25a52     | 0.030318 | 0.87259654 | 0.939913 |
| 367384    | B3gnt11      | 0.030287 | 0.62664093 | 0.784073 |
| 686189    | Cabyr        | 0.030279 | 0.49727472 | 0.6836   |
| 287276    | Sar1b        | 0.030249 | 0.42209476 | 0.617466 |
| 300751    | Rec114       | 0.030242 | 0.87705851 | 0.942906 |
| 311591    | Rprd1b       | 0.030242 | 0.55035623 | 0.730828 |
| 301004    | Qrich1       | 0.03024  | 0.36273882 | 0.55911  |
| 65035     | Nr1i3        | 0.030239 | 0.87445373 | 0.941062 |
| 305443    | Trmt44       | 0.030174 | 0.74785625 | 0.864832 |
| 303586    | Wnt9b        | 0.030171 | 0.87925536 | 0.944255 |
| 302899    | Txndc11      | 0.030163 | 0.5484578  | 0.729019 |
| 63868     | Hspd1        | 0.03016  | 0.06131557 | 0.158749 |
| 298942    | Dld          | 0.030157 | 0.11705161 | 0.257359 |
| 81536     | Sgpp1        | 0.03014  | 0.30692066 | 0.502995 |
| 308523    | Tshz3        | 0.030136 | 0.49287239 | 0.680348 |
| 29578     | Hnrnpa1      | 0.030127 | 0.08281335 | 0.199871 |
| 307270    | Me2          | 0.030119 | 0.3652387  | 0.561373 |
| 29561     | Lsamp        | 0.030116 | 0.16514507 | 0.328823 |
| 100188933 | Fam229b      | 0.030099 | 0.7770303  | 0.883706 |
| 288165    | Pcnp         | 0.03008  | 0.12455556 | 0.269533 |
| 81707     | Mmp14        | 0.030037 | 0.19939098 | 0.374793 |
| 100361520 | Rpl37a       | 0.030021 | 0.16820921 | 0.332698 |
| 314942    | Csmd3        | 0.030001 | 0.79347898 | 0.893291 |
| 299334    | Cinp         | 0.029936 | 0.51602611 | 0.701479 |
| 315023    | Slc25a32     | 0.029913 | 0.65083776 | 0.802642 |
| 304851    | Trmt11       | 0.029881 | 0.55899076 | 0.735017 |
| 300850    | Gsta4        | 0.02986  | 0.50735258 | 0.693699 |

|           |              |          |            |          |
|-----------|--------------|----------|------------|----------|
| 316327    | Arid5a       | 0.029831 | 0.72963914 | 0.852619 |
| 689043    | Fam19a4      | 0.029829 | 0.7491142  | 0.865866 |
| 307288    | Gramd2b      | 0.029819 | 0.6698581  | 0.813302 |
| 304809    | Kdm5b        | 0.029816 | 0.44214145 | 0.635036 |
| 308267    | Tab2         | 0.029797 | 0.30415744 | 0.501053 |
| 362919    | Washc5       | 0.02978  | 0.18333643 | 0.353727 |
| 25233     | Akt2         | 0.029766 | 0.38533586 | 0.582069 |
| 266766    | Rcan1        | 0.029757 | 0.27518949 | 0.467194 |
| 317413    | Morf4l2      | 0.029744 | 0.06605475 | 0.167892 |
| 50568     | Cspg5        | 0.02966  | 0.74973395 | 0.866267 |
| 297708    | Pyroxd1      | 0.02965  | 0.6327756  | 0.789157 |
| 305287    | Exoc1        | 0.029642 | 0.25669714 | 0.445773 |
| 498008    | Hexim1       | 0.02962  | 0.45240051 | 0.644136 |
| 170922    | Ilk          | 0.029609 | 0.13586685 | 0.286332 |
| 305417    | Lgi2         | 0.029585 | 0.50175667 | 0.68842  |
| 306665    | Ice1         | 0.029573 | 0.26756674 | 0.458627 |
| 499285    | Adam8        | 0.029559 | 0.75226526 | 0.867718 |
| 308890    | Btbd10       | 0.029502 | 0.4112708  | 0.606947 |
| 114113    | Pafah1b3     | 0.029499 | 0.55480726 | 0.734332 |
| 365802    | Selenot      | 0.02949  | 0.04640495 | 0.127585 |
| 266732    | Npc1         | 0.029436 | 0.38735524 | 0.58447  |
| 304920    | Klhl20       | 0.029427 | 0.32826766 | 0.523869 |
| 499219    | LOC499219    | 0.029397 | 0.93739794 | 0.980435 |
| 361409    | Rfwd3        | 0.029388 | 0.72543989 | 0.850059 |
| 300197    | Zfp641       | 0.029371 | 0.72006339 | 0.846833 |
| 363520    | Irak1        | 0.029367 | 0.25835816 | 0.447719 |
| 301535    | Stk11ip      | 0.029351 | 0.51974362 | 0.704421 |
| 309642    | Def6         | 0.02934  | 0.69216851 | 0.830018 |
| 25469     | Kcna4        | 0.029296 | 0.49341939 | 0.68056  |
| 316737    | Lpin2        | 0.029293 | 0.49318076 | 0.680477 |
| 299612    | RGD1359127   | 0.029217 | 0.64526211 | 0.798403 |
| 362316    | Cdk14        | 0.029207 | 0.05468399 | 0.144888 |
| 366265    | Rab22a       | 0.029127 | 0.38910729 | 0.586138 |
| 295543    | Pigk         | 0.029112 | 0.37093664 | 0.567383 |
| 140661    | Rplp1        | 0.029109 | 0.04931701 | 0.133757 |
| 303369    | Lig3         | 0.029079 | 0.41101561 | 0.607748 |
| 292768    | Yif1b        | 0.029073 | 0.45069206 | 0.64252  |
| 292765    | Ggn          | 0.029071 | 0.8860327  | 0.948272 |
| 686103    | Frg1         | 0.029059 | 0.60336343 | 0.766684 |
| 25135     | Ncl          | 0.029045 | 0.07447862 | 0.18419  |
| 89827     | Ddx39a       | 0.028973 | 0.68364321 | 0.823998 |
| 305552    | Wdpcp        | 0.028951 | 0.75235098 | 0.867764 |
| 100360752 | Ccdc122      | 0.028929 | 0.85478096 | 0.928336 |
| 58854     | Psmb4        | 0.028927 | 0.14304403 | 0.297475 |
| 108348189 | LOC108348189 | 0.028927 | 0.82880044 | 0.914143 |
| 361418    | Hsd1l        | 0.028919 | 0.22885919 | 0.413375 |
| 338474    | Tmem132a     | 0.028889 | 0.38277152 | 0.579666 |
| 296360    | Pigt         | 0.028885 | 0.1922421  | 0.365832 |
| 362427    | Mical3       | 0.028771 | 0.45382569 | 0.645201 |
| 171357    | Ptprg        | 0.028759 | 0.50717678 | 0.693658 |
| 83577     | Itgae        | 0.028756 | 0.78144596 | 0.886346 |
| 289924    | Psmd6        | 0.028756 | 0.11096275 | 0.247139 |
| 81920     | Ube2d3       | 0.028712 | 0.03252988 | 0.096216 |
| 295342    | Rhoc         | 0.028712 | 0.29467081 | 0.49086  |
| 116465    | Ifngr1       | 0.028711 | 0.33973403 | 0.536237 |
| 100909392 | LOC100909392 | 0.028684 | 0.715596   | 0.844185 |



|           |              |          |            |          |
|-----------|--------------|----------|------------|----------|
| 100125374 | Adat3        | 0.028682 | 0.85723306 | 0.929939 |
| 308473    | Samd4b       | 0.028675 | 0.38432078 | 0.581042 |
| 499529    | Ndufs4       | 0.028641 | 0.25550096 | 0.444385 |
| 29709     | Gabrg2       | 0.028561 | 0.10749847 | 0.241087 |
| 313048    | Rbbp4        | 0.028558 | 0.35921582 | 0.556155 |
| 117557    | Tpm3         | 0.028497 | 0.17972626 | 0.348811 |
| 303024    | Fbxw11       | 0.028468 | 0.12962821 | 0.277047 |
| 25024     | Gipr         | 0.028456 | 0.88265705 | 0.946361 |
| 292750    | Plekhg2      | 0.028425 | 0.23425596 | 0.420451 |
| 365865    | Pip5k1a      | 0.028422 | 0.5094162  | 0.695721 |
| 103690996 | LOC103690996 | 0.028411 | 0.2968281  | 0.493332 |
| 103693323 | LOC103693323 | 0.028399 | 0.26897532 | 0.460379 |
| 287150    | Fam173a      | 0.028396 | 0.64946197 | 0.80188  |
| 303774    | Tnrc6c       | 0.028347 | 0.40089002 | 0.598022 |
| 29194     | Chka         | 0.028347 | 0.37106271 | 0.56753  |
| 192154    | Hip1         | 0.028322 | 0.2703521  | 0.461905 |
| 116631    | Nat1         | 0.028281 | 0.81560744 | 0.907051 |
| 64634     | Sh3bp4       | 0.028274 | 0.5104066  | 0.696574 |
| 690853    | Aatk         | 0.028265 | 0.02098177 | 0.068028 |
| 298675    | Rer1         | 0.028248 | 0.39097007 | 0.588014 |
| 100912391 | LOC100912391 | 0.028187 | 0.97250328 | 1        |
| 289312    | Acbd3        | 0.028116 | 0.30907711 | 0.504229 |
| 305854    | Sall2        | 0.028113 | 0.53913405 | 0.721155 |
| 305501    | Ikzf1        | 0.028104 | 0.81503973 | 0.907055 |
| 66018     | Pdgfd        | 0.028094 | 0.7427913  | 0.860962 |
| 311114    | Klh123       | 0.028079 | 0.60890221 | 0.770637 |
| 294287    | Phf1         | 0.028004 | 0.45490141 | 0.646103 |
| 307540    | Celf4        | 0.027978 | 0.33767769 | 0.534631 |
| 312559    | Chchd4       | 0.027958 | 0.74246026 | 0.86063  |
| 363875    | Rac1         | 0.027953 | 0.01754129 | 0.058951 |
| 79248     | Abca2        | 0.027948 | 0.03717114 | 0.106679 |
| 362697    | Ppp1r21      | 0.027945 | 0.45533079 | 0.64652  |
| 116500    | Snap29       | 0.027927 | 0.3457128  | 0.542214 |
| 315689    | Hmg20a       | 0.027878 | 0.38689151 | 0.584094 |
| 81732     | Actr3        | 0.027852 | 0.06315734 | 0.162545 |
| 103694537 | LOC103694537 | 0.02781  | 0.71233148 | 0.84216  |
| 360777    | RGD1563400   | 0.027772 | 0.87856943 | 0.943784 |
| 100188936 | Ormdl1       | 0.027772 | 0.72016759 | 0.846903 |
| 303604    | Map3k3       | 0.027736 | 0.48883127 | 0.676338 |
| 308739    | Rgma         | 0.027722 | 0.63640445 | 0.791299 |
| 313049    | Zbtb8a       | 0.027712 | 0.80054464 | 0.897849 |
| 361634    | Ccp110       | 0.027637 | 0.42876608 | 0.624062 |
| 361485    | Ermard       | 0.027631 | 0.54808299 | 0.728724 |
| 364975    | Gcdh         | 0.027623 | 0.46201704 | 0.652753 |
| 299824    | Tbc1d30      | 0.027561 | 0.5795229  | 0.747057 |
| 499766    | Ttf1         | 0.027519 | 0.71084452 | 0.841394 |
| 25596     | Rpn1         | 0.027518 | 0.09352335 | 0.217771 |
| 292404    | Phf10        | 0.027508 | 0.63676844 | 0.791545 |
| 289993    | Cdkn3        | 0.027497 | 0.85870312 | 0.930685 |
| 296618    | Wdr34        | 0.027497 | 0.72180174 | 0.84783  |
| 498453    | LOC498453    | 0.027411 | 0.71831946 | 0.846088 |
| 362485    | Ccne2        | 0.027408 | 0.77158886 | 0.880409 |
| 360682    | Wdr45b       | 0.027394 | 0.40806285 | 0.604837 |
| 311478    | Kif16b       | 0.027385 | 0.38730223 | 0.584483 |
| 100912964 | LOC100912964 | 0.027355 | 0.9183224  | 0.967765 |
| 304203    | Lrrc8e       | 0.027355 | 0.88469223 | 0.94721  |

|           |              |          |            |          |
|-----------|--------------|----------|------------|----------|
| 679837    | Adam12       | 0.027329 | 0.72643928 | 0.850968 |
| 688540    | Mast3        | 0.027312 | 0.3654318  | 0.561488 |
| 312667    | Ankrd26      | 0.027291 | 0.71186601 | 0.841819 |
| 687008    | Pcca         | 0.027279 | 0.63094723 | 0.788012 |
| 124440    | Rpl141       | 0.027274 | 0.06908699 | 0.173951 |
| 305610    | Em16         | 0.027251 | 0.56930478 | 0.738886 |
| 303201    | Usp22        | 0.027241 | 0.29887533 | 0.495437 |
| 308896    | Usp47        | 0.027237 | 0.26823769 | 0.459447 |
| 291996    | Nob1         | 0.027185 | 0.54829692 | 0.728856 |
| 689779    | Tctn2        | 0.027122 | 0.73358964 | 0.856027 |
| 499015    | Serac1       | 0.027119 | 0.57581183 | 0.743884 |
| 29480     | Rgs4         | 0.027055 | 4.88E-05   | 3.48E-04 |
| 360619    | Gsdma        | 0.027027 | 0.77673133 | 0.883472 |
| 100366030 | LOC100366030 | 0.026989 | 0.88943475 | 0.950364 |
| 366790    | Pym1         | 0.026984 | 0.65683705 | 0.80333  |
| 307249    | RGD1308601   | 0.026962 | 0.54425187 | 0.725403 |
| 316663    | Fbx117       | 0.026926 | 0.59000322 | 0.755149 |
| 314273    | Dcaf5        | 0.026917 | 0.37408837 | 0.570646 |
| 361365    | Polr2c       | 0.026842 | 0.55911441 | 0.735128 |
| 498517    | Khyn         | 0.026828 | 0.66623267 | 0.810657 |
| 84026     | Dna ja2      | 0.026824 | 0.20857149 | 0.386631 |
| 316602    | Hjurp        | 0.026806 | 0.76045913 | 0.873835 |
| 25379     | Anp32a       | 0.026789 | 0.54129282 | 0.722976 |
| 25574     | Ubtf         | 0.026722 | 0.32274774 | 0.517968 |
| 308345    | Kmt5c        | 0.026668 | 0.52427385 | 0.708091 |
| 361184    | Cars2        | 0.02665  | 0.66715899 | 0.810903 |
| 315579    | Ubash3b      | 0.02665  | 0.07108172 | 0.177774 |
| 362900    | Rnf19a       | 0.02664  | 0.2207064  | 0.402697 |
| 362671    | RGD1304567   | 0.026639 | 0.72553643 | 0.850119 |
| 292721    | Erf          | 0.026621 | 0.53765302 | 0.71973  |
| 287979    | Par1         | 0.026611 | 0.59194661 | 0.757025 |
| 292306    | Rnaset2      | 0.026608 | 0.51660216 | 0.701661 |
| 102553825 | LOC102553825 | 0.026606 | 0.66738891 | 0.811131 |
| 685284    | Hspb11       | 0.026602 | 0.76697931 | 0.877674 |
| 303673    | Mrpl58       | 0.026566 | 0.57929061 | 0.746858 |
| 108348098 | LOC108348098 | 0.026549 | 0.65448377 | 0.803134 |
| 84013     | Hsd17b12     | 0.026532 | 0.23128831 | 0.416616 |
| 100322884 | Nemf         | 0.026525 | 0.36860573 | 0.564634 |
| 300114    | Rt16         | 0.026475 | 0.30736595 | 0.503119 |
| 108348727 | LOC108348727 | 0.026464 | 0.90688231 | 0.960279 |
| 309565    | Med23        | 0.026459 | 0.55574706 | 0.734963 |
| 290749    | Irf2         | 0.026454 | 0.56147432 | 0.733119 |
| 171562    | Erola        | 0.026447 | 0.48244233 | 0.671106 |
| 116699    | Inpp4b       | 0.02643  | 0.7174396  | 0.845522 |
| 24874     | Vhl          | 0.026392 | 0.45386518 | 0.645209 |
| 25696     | Vldlr        | 0.026378 | 0.49373896 | 0.680754 |
| 306504    | Trmt9b       | 0.02636  | 0.71608237 | 0.844393 |
| 83835     | Chic2        | 0.026317 | 0.78970729 | 0.891416 |
| 102551846 | Zfp174       | 0.026282 | 0.81507686 | 0.907043 |
| 369017    | Krt5         | 0.02627  | 0.93049217 | 0.97557  |
| 171102    | Cdc25a       | 0.026259 | 0.6692049  | 0.812768 |
| 140654    | Rps3         | 0.026251 | 0.17431863 | 0.341799 |
| 116564    | Npr2         | 0.026244 | 0.20566887 | 0.382927 |
| 363136    | Tmem115      | 0.026218 | 0.52499283 | 0.708912 |
| 363243    | Klf7         | 0.026212 | 0.30125427 | 0.498167 |
| 289623    | Ube2k        | 0.026191 | 0.26015306 | 0.449561 |

|           |              |          |            |          |
|-----------|--------------|----------|------------|----------|
| 140639    | Nploc4       | 0.026181 | 0.22746877 | 0.411683 |
| 291439    | Mbd1         | 0.026179 | 0.50960011 | 0.695922 |
| 100910528 | LOC100910528 | 0.026179 | 0.70601062 | 0.839062 |
| 116568    | Ggt1         | 0.026152 | 0.91993177 | 0.968979 |
| 361171    | Golga7       | 0.026121 | 0.17291254 | 0.340023 |
| 287417    | Rpl26        | 0.026117 | 0.10396413 | 0.235266 |
| 170567    | Slc38a1      | 0.026102 | 0.22522827 | 0.408599 |
| 64196     | Safb         | 0.026082 | 0.43708066 | 0.631243 |
| 365601    | Atg5         | 0.026048 | 0.52567089 | 0.709525 |
| 103694158 | LOC103694158 | 0.026044 | 0.97882174 | 1        |
| 308965    | Chp2         | 0.02601  | 0.57053558 | 0.739828 |
| 29258     | Rps7         | 0.025983 | 0.09668889 | 0.222989 |
| 291031    | Fam8a1       | 0.025945 | 0.23260098 | 0.418387 |
| 100361188 | Etfrf1       | 0.025907 | 0.73638199 | 0.857866 |
| 24398     | Gls          | 0.025863 | 0.05656189 | 0.148911 |
| 360572    | Rpl23a       | 0.025854 | 0.06321856 | 0.162658 |
| 83712     | Rbbp7        | 0.02583  | 0.18723721 | 0.359252 |
| 287709    | Rab5c        | 0.025812 | 0.1811225  | 0.350771 |
| 103694867 | LOC103694867 | 0.025794 | 0.88848001 | 0.94993  |
| 288700    | Rab35        | 0.025782 | 0.40329547 | 0.600247 |
| 360998    | LOC360998    | 0.02578  | 0.58701898 | 0.752796 |
| 114211    | Mtnrla       | 0.025777 | 0.9204402  | 0.969407 |
| 298436    | Tspan1       | 0.025777 | 0.86265452 | 0.933003 |
| 296462    | Mtg2         | 0.02574  | 0.65531202 | 0.80229  |
| 26955     | Afdn         | 0.025729 | 0.46332958 | 0.654074 |
| 171413    | Spata6       | 0.025664 | 0.61124017 | 0.77262  |
| 680825    | LOC680825    | 0.025654 | 0.98052244 | 1        |
| 140925    | As3mt        | 0.025654 | 0.72989381 | 0.852759 |
| 497994    | Krt222       | 0.025648 | 0.65016699 | 0.802439 |
| 81022     | Stxbp5       | 0.025643 | 0.33768667 | 0.5346   |
| 25578     | Ywhaz        | 0.025637 | 1.36E-05   | 1.09E-04 |
| 286897    | Dpy30        | 0.025634 | 0.54996194 | 0.730559 |
| 315283    | Pced1b       | 0.025633 | 0.73590356 | 0.857414 |
| 117043    | RragB        | 0.025623 | 0.58061347 | 0.747754 |
| 25670     | I115         | 0.025619 | 0.82831441 | 0.913766 |
| 117541    | Smu1         | 0.025612 | 0.4856812  | 0.67384  |
| 64313     | Oat          | 0.025597 | 0.21805687 | 0.399509 |
| 171060    | I113ra2      | 0.025594 | 0.88802274 | 0.949814 |
| 25747     | Ppara        | 0.025591 | 0.72663813 | 0.851044 |
| 360564    | Tax1bp3      | 0.025588 | 0.31228945 | 0.507557 |
| 310849    | Sgms2        | 0.025577 | 0.74130323 | 0.860022 |
| 304766    | Ubxn4        | 0.025576 | 0.21230189 | 0.391982 |
| 25664     | Pparg        | 0.025503 | 0.84240369 | 0.921568 |
| 296394    | Dpml         | 0.025493 | 0.50492642 | 0.691623 |
| 304731    | Tmem185b     | 0.025413 | 0.62678663 | 0.784152 |
| 25530     | Rab12        | 0.025413 | 0.742009   | 0.860421 |
| 287420    | Pfas         | 0.025367 | 0.49060968 | 0.67801  |
| 25468     | Kcna2        | 0.025362 | 0.00490857 | 0.020407 |
| 286971    | Fut11        | 0.025334 | 0.76619354 | 0.877143 |
| 313873    | Fam98a       | 0.025296 | 0.39736201 | 0.594576 |
| 83828     | Gtf2a2       | 0.025282 | 0.65577999 | 0.802656 |
| 170905    | Lfng         | 0.025267 | 0.68312472 | 0.823477 |
| 291320    | Mindy3       | 0.025247 | 0.12440011 | 0.26938  |
| 493865    | Gimap9       | 0.025246 | 0.85125596 | 0.926516 |
| 292537    | Oscar        | 0.025238 | 0.92730978 | 0.973627 |
| 500989    | Zpr1         | 0.025236 | 0.52134297 | 0.705785 |

|           |              |          |            |          |
|-----------|--------------|----------|------------|----------|
| 292199    | Kiaa0408L    | 0.025228 | 0.14589526 | 0.300809 |
| 25109     | Cd1d1        | 0.025177 | 0.86405843 | 0.933567 |
| 367214    | Oard1        | 0.025177 | 0.7320334  | 0.854577 |
| 303639    | Abca6        | 0.025139 | 0.39956764 | 0.596704 |
| 81519     | Mgat1        | 0.025136 | 0.54794048 | 0.728687 |
| 29361     | Sox10        | 0.025135 | 0.18144505 | 0.351252 |
| 286888    | Wfdc2        | 0.02509  | 0.84274977 | 0.921841 |
| 307459    | Arhgap26     | 0.025071 | 0.58367974 | 0.75013  |
| 300663    | Ccdc153      | 0.025065 | 0.92968634 | 0.975047 |
| 499020    | Wtap         | 0.025061 | 0.34142234 | 0.538188 |
| 50577     | Galr1        | 0.025061 | 0.794095   | 0.893509 |
| 63997     | Slc29a1      | 0.025041 | 0.68430884 | 0.824487 |
| 361344    | Mppe1        | 0.025034 | 0.61512276 | 0.775161 |
| 304017    | Tomm70       | 0.025034 | 0.24672037 | 0.435315 |
| 364823    | Klhl14       | 0.024987 | 0.80529889 | 0.900847 |
| 85434     | Cdc5l        | 0.024958 | 0.44561331 | 0.638338 |
| 170751    | Xpnpep1      | 0.024952 | 0.37260503 | 0.569021 |
| 29398     | Stk10        | 0.024939 | 0.58559065 | 0.751572 |
| 308069    | Slc12a7      | 0.024932 | 0.46139616 | 0.652408 |
| 299246    | Ttc8         | 0.024929 | 0.72270113 | 0.848415 |
| 360772    | Zfand2a      | 0.024922 | 0.38944828 | 0.586374 |
| 311647    | Prex1        | 0.024912 | 0.33251608 | 0.528612 |
| 29241     | Adcy8        | 0.024908 | 0.67638416 | 0.818772 |
| 288647    | Dhx37        | 0.024889 | 0.66005757 | 0.805407 |
| 311529    | Ninl         | 0.024889 | 0.78087899 | 0.885914 |
| 84589     | Rab9a        | 0.024885 | 0.606051   | 0.76856  |
| 690253    | Preli3a      | 0.024872 | 0.61838039 | 0.777158 |
| 24600     | Nos3         | 0.024871 | 0.77194587 | 0.880658 |
| 58940     | H2afz        | 0.024867 | 0.53924014 | 0.721246 |
| 100362980 | LOC100362980 | 0.024841 | 0.68623337 | 0.825865 |
| 362164    | Atg13        | 0.024832 | 0.36784719 | 0.563971 |
| 315126    | RGD1359634   | 0.024778 | 0.79929274 | 0.89692  |
| 246136    | Man2c1       | 0.024737 | 0.5401754  | 0.72199  |
| 286975    | Skap1        | 0.02472  | 0.92188909 | 0.970396 |
| 59268     | Ip6k2        | 0.02472  | 0.46709805 | 0.658077 |
| 292101    | Sprtn        | 0.024675 | 0.70434354 | 0.837656 |
| 100911682 | Actl10       | 0.024636 | 0.7818354  | 0.886682 |
| 24854     | Clu          | 0.024623 | 0.00174371 | 0.008392 |
| 301622    | Dtymk        | 0.024612 | 0.58581946 | 0.751764 |
| 50998     | Coil         | 0.024566 | 0.72440816 | 0.849372 |
| 313583    | Sf3a3        | 0.024557 | 0.56297067 | 0.734318 |
| 362228    | Naa20        | 0.024553 | 0.49819016 | 0.684562 |
| 289352    | Eprs         | 0.024529 | 0.13465274 | 0.284687 |
| 108348230 | LOC108348230 | 0.024512 | 0.79462371 | 0.893735 |
| 300211    | Fkbp11       | 0.02447  | 0.84520573 | 0.922672 |
| 286936    | Pcytlb       | 0.024435 | 0.26746399 | 0.458658 |
| 84686     | Ppp1r9b      | 0.024391 | 0.26819329 | 0.459412 |
| 24775     | Shbg         | 0.024388 | 0.8112858  | 0.904887 |
| 155918    | Lcp2         | 0.024373 | 0.77441126 | 0.88215  |
| 94167     | Prdx6        | 0.02437  | 0.41158647 | 0.607225 |
| 500233    | Exoc6b       | 0.024324 | 0.24592647 | 0.434276 |
| 362787    | Mok          | 0.024323 | 0.82765573 | 0.913303 |
| 305452    | Fam193a      | 0.024304 | 0.45298064 | 0.644481 |
| 288587    | Alkbh4       | 0.02428  | 0.81164589 | 0.904864 |
| 289990    | Psmc6        | 0.024271 | 0.20300372 | 0.379226 |
| 498902    | Cmt4         | 0.024264 | 0.7258364  | 0.850366 |

|           |              |          |            |          |
|-----------|--------------|----------|------------|----------|
| 498418    | Wdr92        | 0.024249 | 0.7159969  | 0.844397 |
| 684122    | Asap3        | 0.024226 | 0.66380794 | 0.80843  |
| 689765    | B3glct       | 0.024221 | 0.5884375  | 0.754006 |
| 289362    | Gpatch2      | 0.02418  | 0.62949297 | 0.786505 |
| 313219    | Zfp189       | 0.024099 | 0.75911674 | 0.872714 |
| 497867    | Nudt16l1     | 0.024093 | 0.63478447 | 0.790265 |
| 287721    | Vat1         | 0.024089 | 0.06926916 | 0.174225 |
| 685539    | Gtf3c4       | 0.024076 | 0.56913215 | 0.738712 |
| 311468    | Taspl        | 0.024055 | 0.76247326 | 0.874725 |
| 297481    | Eif4e3       | 0.024017 | 0.68723751 | 0.826551 |
| 304294    | Rnf216       | 0.024016 | 0.58982319 | 0.755273 |
| 314386    | Gpr68        | 0.024013 | 0.61906486 | 0.777557 |
| 313582    | Fhl3         | 0.02401  | 0.74814406 | 0.864955 |
| 502479    | Afg1l        | 0.024004 | 0.82863387 | 0.914012 |
| 685243    | Ackr4        | 0.023989 | 0.88847053 | 0.949973 |
| 287986    | Eif4g1       | 0.023975 | 0.05697263 | 0.149847 |
| 296121    | Usp8         | 0.023955 | 0.26109941 | 0.450583 |
| 361957    | Mfsd1        | 0.023954 | 0.43909329 | 0.632806 |
| 81520     | Marcks11     | 0.023939 | 0.31231847 | 0.507561 |
| 305544    | Aftph        | 0.023931 | 0.37845012 | 0.575548 |
| 103692087 | Atp6v1fnb    | 0.023913 | 0.91926694 | 0.968439 |
| 311799    | Ndor1        | 0.023898 | 0.72757809 | 0.851202 |
| 291406    | Zfp516       | 0.023891 | 0.53620336 | 0.718446 |
| 296619    | Pkn3         | 0.023874 | 0.80478525 | 0.900643 |
| 361401    | Pla2g15      | 0.023811 | 0.650948   | 0.802674 |
| 287109    | Kctd5        | 0.023799 | 0.46642534 | 0.657421 |
| 304290    | Kdelr2       | 0.023786 | 0.49537761 | 0.681977 |
| 304282    | Baiap211     | 0.023785 | 0.48688724 | 0.674972 |
| 94201     | Cdk4         | 0.023755 | 0.48296557 | 0.671638 |
| 311396    | Atp8b4       | 0.023755 | 0.92323334 | 0.971167 |
| 295500    | Metap1       | 0.023755 | 0.50884532 | 0.695241 |
| 287531    | Rilp         | 0.023748 | 0.8368123  | 0.918723 |
| 361005    | Chchd1       | 0.023744 | 0.60387972 | 0.767135 |
| 292543    | LOC292543    | 0.023734 | 0.97024049 | 1        |
| 313554    | Foxj3        | 0.023699 | 0.50525677 | 0.691976 |
| 116696    | St8sia4      | 0.023678 | 0.84738779 | 0.923731 |
| 500558    | Gmeb1        | 0.023678 | 0.7388786  | 0.859408 |
| 500847    | Dtx3         | 0.023643 | 0.48801844 | 0.675753 |
| 296091    | Pla2g4e      | 0.023633 | 0.82977706 | 0.914796 |
| 308795    | Tlnrd1       | 0.023612 | 0.58666318 | 0.752492 |
| 362599    | Trappc3      | 0.023591 | 0.48843979 | 0.676091 |
| 311361    | Wdr76        | 0.023527 | 0.78607616 | 0.888898 |
| 83531     | Vdac2        | 0.023511 | 0.14136679 | 0.29463  |
| 361274    | Nudt5        | 0.023423 | 0.74652477 | 0.863974 |
| 312444    | Immt         | 0.023416 | 0.23164695 | 0.417065 |
| 689130    | LOC689130    | 0.023409 | 0.06410734 | 0.164279 |
| 311952    | Galnt11      | 0.023383 | 0.49010984 | 0.677565 |
| 102550609 | LOC102550609 | 0.023362 | 0.91248118 | 0.96417  |
| 81531     | Pfn2         | 0.023358 | 0.29076004 | 0.486089 |
| 294499    | Fam241b      | 0.023339 | 0.6859592  | 0.825639 |
| 500368    | Far2         | 0.023313 | 0.8168743  | 0.907982 |
| 312108    | Ophn1        | 0.023309 | 0.49916539 | 0.685556 |
| 360803    | Snrnp35      | 0.023285 | 0.70237769 | 0.837252 |
| 116501    | Slc9a3r2     | 0.023283 | 0.27113445 | 0.462702 |
| 25363     | Acadv1       | 0.02325  | 0.38731231 | 0.584452 |
| 309197    | Hnrnpul2     | 0.0232   | 0.35003291 | 0.546693 |

|           |              |          |            |          |
|-----------|--------------|----------|------------|----------|
| 315741    | Paqr5        | 0.02319  | 0.59052158 | 0.755761 |
| 313594    | Ago1         | 0.023185 | 0.60100962 | 0.764305 |
| 83841     | Sdcbp        | 0.023182 | 0.02291068 | 0.07288  |
| 58815     | Glrx3        | 0.023165 | 0.19969251 | 0.375212 |
| 246323    | Aard         | 0.023157 | 0.89279072 | 0.952453 |
| 289994    | Cnih1        | 0.023153 | 0.26996089 | 0.461402 |
| 361811    | Srpk1        | 0.023141 | 0.42538643 | 0.620566 |
| 690777    | Rufy2        | 0.023121 | 0.30978752 | 0.504826 |
| 29726     | Slc22a5      | 0.02312  | 0.70405174 | 0.837466 |
| 360464    | Parn         | 0.023092 | 0.65527434 | 0.802295 |
| 365252    | Zdhhc13      | 0.02308  | 0.62751338 | 0.784855 |
| 498434    | Gpr75        | 0.023075 | 0.80123544 | 0.898148 |
| 363068    | Comm4        | 0.023052 | 0.58480255 | 0.750864 |
| 314548    | Osgep11      | 0.023048 | 0.64210811 | 0.796052 |
| 294900    | Tpd52        | 0.023037 | 0.0940536  | 0.218632 |
| 363584    | RGD1560464   | 0.022978 | 0.67902987 | 0.820827 |
| 296751    | Pus7         | 0.022973 | 0.73502665 | 0.857231 |
| 102238592 | Ak6          | 0.022895 | 0.77374903 | 0.881712 |
| 25621     | Cd81         | 0.022873 | 0.00964729 | 0.035977 |
| 306991    | Vps41        | 0.022816 | 0.08631718 | 0.20572  |
| 362957    | Ankrd54      | 0.022769 | 0.75369947 | 0.868688 |
| 498193    | Fam222a      | 0.022769 | 0.78953954 | 0.89128  |
| 100196907 | Tmem59       | 0.022764 | 0.165389   | 0.329136 |
| 83765     | Rtn4         | 0.022748 | 5.17E-04   | 0.002889 |
| 362973    | Parvb        | 0.022736 | 0.28287277 | 0.476585 |
| 117268    | Khdrbs1      | 0.022728 | 0.36454679 | 0.560717 |
| 363004    | Prr13        | 0.022717 | 0.32824174 | 0.523916 |
| 114481    | Dnajc14      | 0.022712 | 0.42903644 | 0.624265 |
| 81754     | Rab1a        | 0.022685 | 0.16901016 | 0.334074 |
| 58974     | Gabarap      | 0.022564 | 0.19629413 | 0.370875 |
| 362683    | Heatr5b      | 0.022557 | 0.48868378 | 0.676281 |
| 361719    | Spindoc      | 0.022543 | 0.75472574 | 0.869661 |
| 362275    | B4galt5      | 0.02252  | 0.60605622 | 0.768516 |
| 291733    | Slc39a6      | 0.022518 | 0.45847266 | 0.649722 |
| 297995    | Chmp5        | 0.022503 | 0.36922898 | 0.565407 |
| 680080    | Tomm5        | 0.022378 | 0.45967875 | 0.650898 |
| 499083    | Zscan18      | 0.022367 | 0.74502868 | 0.862662 |
| 363545    | Naa60        | 0.022355 | 0.44144424 | 0.634657 |
| 287877    | Pycr1        | 0.022256 | 0.85138521 | 0.92655  |
| 299827    | Tbk1         | 0.022247 | 0.52526776 | 0.709132 |
| 361202    | Gkap1        | 0.022238 | 0.66049638 | 0.805736 |
| 310635    | Arhgef2      | 0.022202 | 0.54420307 | 0.725439 |
| 307893    | Gan          | 0.022198 | 0.62802997 | 0.785244 |
| 291713    | Rit2         | 0.022193 | 0.44717528 | 0.639517 |
| 100359967 | Zfp560       | 0.022181 | 0.71714303 | 0.84533  |
| 363213    | Ccdc115      | 0.022137 | 0.68200011 | 0.822642 |
| 690585    | Alyref       | 0.022135 | 0.5857855  | 0.751771 |
| 24710     | Rbp2         | 0.022059 | 0.85194661 | 0.926949 |
| 361799    | Dxo          | 0.022059 | 0.804989   | 0.900712 |
| 102547753 | LOC102547753 | 0.022052 | 0.90431163 | 0.958249 |
| 363720    | Chmp2b       | 0.022036 | 0.52696497 | 0.710617 |
| 498951    | I134         | 0.022022 | 0.57724539 | 0.744978 |
| 360854    | Arpc5        | 0.022018 | 0.23965563 | 0.426964 |
| 362566    | Lrrc41       | 0.022016 | 0.48924703 | 0.676667 |
| 114524    | Ntn3         | 0.022015 | 0.81934467 | 0.909137 |
| 501069    | Golga4       | 0.022009 | 0.381803   | 0.578614 |



|           |              |          |            |          |
|-----------|--------------|----------|------------|----------|
| 303122    | RGD1310352   | 0.021993 | 0.35618946 | 0.553314 |
| 313166    | Nfx1         | 0.021984 | 0.51749929 | 0.702378 |
| 300723    | Hykk         | 0.021981 | 0.84434994 | 0.922426 |
| 297902    | Gem          | 0.021972 | 0.87181104 | 0.939545 |
| 361625    | Nrip3        | 0.021966 | 0.18990897 | 0.362879 |
| 497757    | Gucylal      | 0.021944 | 0.77999497 | 0.885439 |
| 553106    | Ncald        | 0.021938 | 0.19817526 | 0.373171 |
| 295661    | Spc25        | 0.02193  | 0.89527057 | 0.953923 |
| 304332    | Dnaaf5       | 0.021904 | 0.72822389 | 0.851487 |
| 27137     | Eif2ak1      | 0.021902 | 0.45425463 | 0.645522 |
| 298992    | Nova1        | 0.021885 | 0.76879785 | 0.878488 |
| 84424     | Tle3         | 0.021878 | 0.55644896 | 0.735534 |
| 25062     | Gpd2         | 0.02187  | 0.48193835 | 0.670797 |
| 296753    | Srp2         | 0.02187  | 0.35980764 | 0.556619 |
| 685888    | Sdhaf4       | 0.02187  | 0.71878268 | 0.846319 |
| 102553881 | LOC102553881 | 0.021856 | 0.72411786 | 0.849136 |
| 499956    | Uck11        | 0.021855 | 0.64886024 | 0.801397 |
| 317646    | Rpl13a       | 0.021849 | 0.09063484 | 0.212736 |
| 114766    | Phb2         | 0.021818 | 0.4539595  | 0.645295 |
| 84488     | Fgf13        | 0.021753 | 0.0498075  | 0.13457  |
| 291565    | Afap111      | 0.021651 | 0.71994086 | 0.846845 |
| 114859    | Eif2ak4      | 0.021625 | 0.65034827 | 0.802454 |
| 25317     | Fgf1         | 0.021618 | 0.01491219 | 0.051571 |
| 361178    | Tfdp1        | 0.021614 | 0.62448971 | 0.782358 |
| 362393    | Antxr1       | 0.021599 | 0.671718   | 0.815196 |
| 108350133 | LOC108350133 | 0.021592 | 0.42325138 | 0.618683 |
| 306695    | Zfp367       | 0.021567 | 0.70316412 | 0.836776 |
| 690211    | Dip2a        | 0.021558 | 0.53084881 | 0.713128 |
| 363159    | Gpd11        | 0.021552 | 0.69506773 | 0.831923 |
| 302671    | Ap1s2        | 0.021514 | 0.14192414 | 0.295598 |
| 304545    | Oasl         | 0.021503 | 0.83648487 | 0.918575 |
| 58946     | Robo1        | 0.0215   | 0.62527784 | 0.783088 |
| 315422    | Mtmr2        | 0.021495 | 0.30213604 | 0.499062 |
| 362883    | Slc35e3      | 0.021484 | 0.47113095 | 0.661605 |
| 25418     | Dpysl3       | 0.021467 | 0.22909127 | 0.413598 |
| 100360638 | Zfp780b-ps1  | 0.021449 | 0.77892372 | 0.884486 |
| 360462    | Ntan1        | 0.021437 | 0.35265365 | 0.549614 |
| 117520    | Oxr1         | 0.021429 | 0.08528617 | 0.204183 |
| 498174    | Nipsnap2     | 0.021425 | 0.40111207 | 0.598119 |
| 140808    | Manea        | 0.021419 | 0.53198133 | 0.714297 |
| 619374    | Jam2         | 0.021346 | 0.48344918 | 0.672114 |
| 94165     | Cabin1       | 0.021301 | 0.51984779 | 0.704512 |
| 288785    | Bloc1s1      | 0.021275 | 0.62683174 | 0.784157 |
| 301246    | Polr1c       | 0.021224 | 0.73127281 | 0.854056 |
| 308508    | Uba2         | 0.021222 | 0.46629364 | 0.657333 |
| 114118    | Gng4         | 0.021187 | 0.55551976 | 0.734713 |
| 499979    | Fam185a      | 0.021174 | 0.71208069 | 0.841968 |
| 89803     | Sfrp4        | 0.021162 | 0.74099829 | 0.85993  |
| 100365921 | LOC100365921 | 0.02116  | 0.79542094 | 0.894314 |
| 680711    | Nxpe5        | 0.02115  | 0.96418772 | 0.998149 |
| 108348225 | LOC108348225 | 0.021131 | 0.85461953 | 0.928267 |
| 246327    | Prim1        | 0.021129 | 0.61878096 | 0.777405 |
| 362746    | Dnaaf2       | 0.021126 | 0.73803835 | 0.858535 |
| 25445     | Fos11        | 0.021072 | 0.89703525 | 0.954815 |
| 287925    | Pkp2         | 0.021072 | 0.89703525 | 0.954815 |
| 360718    | Popdc2       | 0.021072 | 0.87406975 | 0.940808 |

|           |              |          |            |          |
|-----------|--------------|----------|------------|----------|
| 297334    | Mrpl35       | 0.021039 | 0.63731922 | 0.792126 |
| 687147    | Ric3         | 0.02103  | 0.47243295 | 0.662798 |
| 316736    | Emilin2      | 0.021025 | 0.83802696 | 0.919262 |
| 140693    | Plcd4        | 0.020993 | 0.37367719 | 0.570247 |
| 316005    | Arih2        | 0.020988 | 0.53758322 | 0.719738 |
| 287608    | Supt4h1      | 0.020973 | 0.59985302 | 0.763089 |
| 291946    | Tmem184c     | 0.02097  | 0.27989482 | 0.473368 |
| 29484     | Slc3a1       | 0.02096  | 0.9607881  | 0.995929 |
| 500361    | Lrmp         | 0.020956 | 0.8972767  | 0.954939 |
| 294680    | Btf3         | 0.020911 | 0.23432564 | 0.420536 |
| 64525     | Eloc         | 0.020908 | 0.40886635 | 0.60504  |
| 303740    | Slc38a10     | 0.02085  | 0.51948527 | 0.70412  |
| 679713    | Brpf1        | 0.02079  | 0.69949297 | 0.83533  |
| 192256    | Pja2         | 0.020779 | 0.03932389 | 0.11173  |
| 291942    | Slc10a7      | 0.020772 | 0.76428781 | 0.875909 |
| 362809    | Ptges3       | 0.020733 | 0.22401912 | 0.406987 |
| 501105    | Ankrd66      | 0.020727 | 0.89775204 | 0.955231 |
| 308796    | Mesd         | 0.020687 | 0.47466816 | 0.665003 |
| 295692    | Nup35        | 0.020647 | 0.73428887 | 0.85658  |
| 307923    | Vps9d1       | 0.020636 | 0.60791416 | 0.769949 |
| 368120    | Zkscan2      | 0.020615 | 0.92776654 | 0.973838 |
| 498225    | Eif2d        | 0.020605 | 0.64504812 | 0.798242 |
| 361407    | Cog4         | 0.020587 | 0.44199717 | 0.634925 |
| 293638    | Cars         | 0.02052  | 0.63210186 | 0.788523 |
| 294708    | Sgtb         | 0.020519 | 0.28263072 | 0.476303 |
| 306860    | Gcnt2        | 0.020506 | 0.40569639 | 0.602267 |
| 287443    | Acap1        | 0.020505 | 0.89821756 | 0.955513 |
| 311856    | Usp20        | 0.020504 | 0.28278613 | 0.476481 |
| 299982    | Ankrd46      | 0.020422 | 0.23493769 | 0.421278 |
| 116679    | Cgrrf1       | 0.020408 | 0.70975436 | 0.840365 |
| 103694121 | LOC103694121 | 0.020395 | 0.92809366 | 0.97402  |
| 301381    | Tex30        | 0.020395 | 0.84007995 | 0.920083 |
| 302808    | Zdhhc9       | 0.020325 | 0.50394264 | 0.690722 |
| 302950    | Adcy9        | 0.020291 | 0.63984753 | 0.793818 |
| 83526     | Atrn         | 0.020289 | 0.25025983 | 0.438191 |
| 282835    | Wrnip1       | 0.020278 | 0.6591898  | 0.804864 |
| 315732    | Uaca         | 0.020276 | 0.53713017 | 0.719283 |
| 309410    | Mamdc2       | 0.020242 | 0.6801717  | 0.821477 |
| 288516    | Eif3b        | 0.020193 | 0.3992108  | 0.596498 |
| 85265     | Ajuba        | 0.020135 | 0.73699544 | 0.857741 |
| 58918     | Casp9        | 0.020096 | 0.65385542 | 0.802725 |
| 367763    | Tmem164      | 0.020068 | 0.45010022 | 0.641773 |
| 89786     | Cox17        | 0.020036 | 0.61237864 | 0.773341 |
| 362403    | Slc25a26     | 0.020019 | 0.83043888 | 0.915314 |
| 25368     | Adk          | 0.020018 | 0.34767812 | 0.544668 |
| 84607     | Socs2        | 0.020015 | 0.67370308 | 0.816564 |
| 361261    | Ccny         | 0.019993 | 0.58119298 | 0.748146 |
| 108349349 | LOC108349349 | 0.019971 | 0.95058718 | 0.98826  |
| 502633    | Mettl8       | 0.019971 | 0.85802355 | 0.93016  |
| 314941    | Lrp12        | 0.019952 | 0.68200878 | 0.8226   |
| 309419    | Pip5k1b      | 0.019924 | 0.74731881 | 0.864421 |
| 59319     | Ambra1       | 0.019904 | 0.54464735 | 0.725777 |
| 314683    | Tcp1112      | 0.019895 | 0.70400065 | 0.837457 |
| 94197     | Rab14        | 0.019861 | 0.24457736 | 0.432857 |
| 246060    | Cdkn1c       | 0.019848 | 0.84188388 | 0.921158 |
| 100912459 | LOC100912459 | 0.019803 | 0.80983351 | 0.90369  |

|           |              |          |            |          |
|-----------|--------------|----------|------------|----------|
| 29448     | Rab7a        | 0.019797 | 0.09532263 | 0.220827 |
| 307641    | Csnk2a2      | 0.019777 | 0.58291872 | 0.749709 |
| 310174    | Cdh18        | 0.019776 | 0.67608919 | 0.818623 |
| 360761    | Lnx2         | 0.019767 | 0.757696   | 0.871607 |
| 305458    | Tmem129      | 0.019731 | 0.71367846 | 0.843124 |
| 315165    | Naga         | 0.019723 | 0.57907742 | 0.746634 |
| 691572    | Ubap11       | 0.019723 | 0.92431617 | 0.971555 |
| 312213    | Plxna4       | 0.019654 | 0.44962387 | 0.641286 |
| 361020    | Rpp14        | 0.019624 | 0.63167008 | 0.788191 |
| 288621    | Mrps17       | 0.019598 | 0.69890189 | 0.834886 |
| 25498     | Npm1         | 0.019588 | 0.33193522 | 0.528173 |
| 287456    | Med11        | 0.019585 | 0.77597283 | 0.883084 |
| 304024    | Cpox         | 0.019567 | 0.74003528 | 0.860228 |
| 619549    | Plpp6        | 0.019554 | 0.73133087 | 0.854071 |
| 360928    | Dcun1d4      | 0.019537 | 0.43379624 | 0.628215 |
| 293673    | Eiflad       | 0.019536 | 0.67751601 | 0.819569 |
| 313323    | Psip1        | 0.019493 | 0.45247142 | 0.644189 |
| 60434     | Bcl2l2       | 0.019489 | 0.29830875 | 0.494886 |
| 368178    | Hoxc9        | 0.019425 | 0.76935815 | 0.878706 |
| 83576     | Sort1        | 0.019424 | 0.34307278 | 0.539584 |
| 300891    | Morf411      | 0.019417 | 0.10255087 | 0.233009 |
| 84402     | Sfrp1        | 0.019387 | 0.52371871 | 0.707894 |
| 303021    | Sh3pxd2b     | 0.019376 | 0.51248879 | 0.698115 |
| 298687    | Aurkaip1     | 0.019344 | 0.60682979 | 0.769087 |
| 64532     | Adcy5        | 0.019341 | 0.58131343 | 0.74825  |
| 365924    | Tmem56       | 0.01931  | 0.36615072 | 0.562321 |
| 360475    | Alg1         | 0.019299 | 0.77836951 | 0.884542 |
| 287436    | Eif4a1       | 0.019298 | 0.20789008 | 0.385856 |
| 363630    | Kdm6b        | 0.019287 | 0.59689562 | 0.760546 |
| 315088    | RGD1311188   | 0.019277 | 0.86342658 | 0.933202 |
| 307545    | Elp2         | 0.019272 | 0.42490251 | 0.620192 |
| 307524    | Wdr33        | 0.01925  | 0.65967235 | 0.805092 |
| 361740    | RGD1359158   | 0.019249 | 0.71200402 | 0.84193  |
| 297601    | Mrpl51       | 0.019219 | 0.5738431  | 0.742247 |
| 313445    | Klhl13       | 0.01921  | 0.54632152 | 0.727194 |
| 293663    | Rbm4         | 0.01921  | 0.70667089 | 0.83948  |
| 83532     | Vdac3        | 0.0192   | 0.17218381 | 0.338975 |
| 81822     | Actb         | 0.019168 | 0.00901423 | 0.033989 |
| 690632    | Gcn111       | 0.019106 | 0.49644164 | 0.682751 |
| 103692531 | LOC103692531 | 0.019082 | 0.82071293 | 0.909595 |
| 293674    | Drap1        | 0.019073 | 0.51237622 | 0.698012 |
| 295333    | Dennd2c      | 0.019057 | 0.8792624  | 0.944183 |
| 363001    | Bcdin3d      | 0.019057 | 0.8792624  | 0.944183 |
| 316012    | Klhl18       | 0.019051 | 0.69493544 | 0.83187  |
| 317444    | Hccs         | 0.019023 | 0.70238265 | 0.837206 |
| 494192    | Mycbpap      | 0.019012 | 0.77136502 | 0.880259 |
| 103693494 | LOC103693494 | 0.018995 | 0.98151278 | 1        |
| 100188932 | Ost4         | 0.018995 | 0.41419549 | 0.60994  |
| 102547431 | LOC102547431 | 0.018989 | 0.94547065 | 0.985253 |
| 81808     | Nr2f1        | 0.018957 | 0.54857887 | 0.729129 |
| 502674    | Dstn         | 0.018918 | 0.17697992 | 0.345488 |
| 252857    | Rapgef4      | 0.018892 | 0.39186232 | 0.589031 |
| 360779    | Lrch4        | 0.01888  | 0.55349644 | 0.733362 |
| 499934    | Manbal       | 0.018866 | 0.5760074  | 0.744036 |
| 108348154 | LOC108348154 | 0.018819 | 0.78241972 | 0.88687  |
| 500306    | B4galnt3     | 0.018813 | 0.84534782 | 0.922722 |

|           |              |          |            |          |
|-----------|--------------|----------|------------|----------|
| 293418    | Rpl27a       | 0.018761 | 0.26711214 | 0.458467 |
| 314843    | Ptprb        | 0.018751 | 0.60367711 | 0.766929 |
| 50658     | Mapk9        | 0.018738 | 0.28771698 | 0.482357 |
| 362036    | Ank2         | 0.018734 | 0.00729404 | 0.028449 |
| 114764    | Mapre1       | 0.018716 | 0.39868252 | 0.595943 |
| 295365    | Amigo1       | 0.018696 | 0.30149281 | 0.498431 |
| 302920    | Rbfox1       | 0.018695 | 0.27325766 | 0.465325 |
| 313689    | Dhrs3        | 0.018635 | 0.78349714 | 0.887563 |
| 305198    | Prdm8        | 0.018613 | 0.65893588 | 0.80476  |
| 84470     | Gnpat        | 0.018606 | 0.59736539 | 0.761042 |
| 81814     | Tmsb4x       | 0.018603 | 0.00177299 | 0.00852  |
| 294864    | Cct5         | 0.018586 | 0.22191985 | 0.404137 |
| 259271    | Aptx         | 0.018576 | 0.79461373 | 0.893776 |
| 364983    | Rnf150       | 0.018547 | 0.83178317 | 0.915418 |
| 361844    | H2afy2       | 0.018499 | 0.78689229 | 0.889504 |
| 362967    | Rrp7a        | 0.018496 | 0.55346368 | 0.733369 |
| 287427    | Trappc1      | 0.018484 | 0.39370972 | 0.590921 |
| 313647    | Hp1bp3       | 0.018477 | 0.37952627 | 0.576724 |
| 296167    | Pank2        | 0.018461 | 0.80661107 | 0.901124 |
| 305002    | Sdccag8      | 0.018461 | 0.80661107 | 0.901124 |
| 367073    | Trappc4      | 0.018433 | 0.56612497 | 0.736465 |
| 313658    | Ubr4         | 0.018407 | 0.14596727 | 0.300893 |
| 299197    | Are11        | 0.01836  | 0.35976374 | 0.556687 |
| 361262    | Heatr1       | 0.01835  | 0.81138863 | 0.90463  |
| 307757    | Neto2        | 0.018347 | 0.79564733 | 0.894516 |
| 294339    | Mcm3ap       | 0.018331 | 0.58054307 | 0.747916 |
| 81749     | Prkch        | 0.01829  | 0.81955951 | 0.909216 |
| 25167     | Ptpra        | 0.018276 | 0.32570697 | 0.521356 |
| 288921    | Fbxw9        | 0.018242 | 0.81975222 | 0.909165 |
| 63865     | Lgmn         | 0.018214 | 0.23914935 | 0.426421 |
| 500157    | RGD1560028   | 0.018184 | 0.80580263 | 0.90067  |
| 84477     | Gab2         | 0.018175 | 0.57731728 | 0.74502  |
| 291908    | Tox3         | 0.018169 | 0.77551701 | 0.882881 |
| 83834     | Nrn1         | 0.018164 | 0.18102669 | 0.350621 |
| 299147    | Ppp2r5e      | 0.018131 | 0.49190303 | 0.679305 |
| 298914    | Itgblbp1     | 0.018129 | 0.55447976 | 0.734205 |
| 363020    | Smco4        | 0.018099 | 0.92858566 | 0.974322 |
| 548104    | Pcdhb17      | 0.018077 | 0.85197055 | 0.926923 |
| 691307    | Lrrc39       | 0.018068 | 0.9296234  | 0.975035 |
| 364705    | Serpina6b    | 0.018036 | 0.93518609 | 0.978767 |
| 293886    | Cdc37l1      | 0.018031 | 0.49289054 | 0.680323 |
| 679819    | Glpr2        | 0.018025 | 0.84803201 | 0.924274 |
| 29355     | Pkn1         | 0.017989 | 0.65046744 | 0.802497 |
| 102555439 | LOC102555439 | 0.017914 | 0.82107359 | 0.909836 |
| 298342    | Nkap         | 0.01786  | 0.80918439 | 0.90323  |
| 60357     | Prom1        | 0.01786  | 0.73272437 | 0.855227 |
| 100359512 | Vtilb        | 0.017853 | 0.64010206 | 0.794082 |
| 296384    | Znfx1        | 0.017837 | 0.49146466 | 0.678896 |
| 312154    | Ing3         | 0.017786 | 0.77742462 | 0.883943 |
| 282834    | Chmp3        | 0.017785 | 0.34647812 | 0.543056 |
| 317409    | MGC109340    | 0.017777 | 0.66764711 | 0.811341 |
| 309168    | Map3k11      | 0.017748 | 0.59486233 | 0.758767 |
| 363478    | Snx12        | 0.017732 | 0.68309584 | 0.823494 |
| 361652    | Srcap        | 0.017666 | 0.44394728 | 0.63691  |
| 309626    | Ring1        | 0.017613 | 0.70421468 | 0.837607 |
| 298514    | Rragc        | 0.017608 | 0.43932571 | 0.632662 |

|           |              |          |            |          |
|-----------|--------------|----------|------------|----------|
| 79220     | Grid2        | 0.017592 | 0.79907468 | 0.896781 |
| 362631    | Rpl11        | 0.017561 | 0.33179015 | 0.528075 |
| 313598    | Zmym4        | 0.01754  | 0.60621025 | 0.768609 |
| 25520     | Prkag1       | 0.017517 | 0.56989865 | 0.739405 |
| 287463    | Rpain        | 0.01749  | 0.84987686 | 0.925755 |
| 310194    | Kat8         | 0.017438 | 0.70755142 | 0.839218 |
| 296278    | Pdrg1        | 0.017373 | 0.57119974 | 0.740387 |
| 296306    | Ergic3       | 0.017363 | 0.53894202 | 0.720949 |
| 294810    | Tars         | 0.017349 | 0.55479776 | 0.734371 |
| 287454    | Alox12       | 0.01734  | 0.93277927 | 0.976999 |
| 306376    | Sh2d4a       | 0.017335 | 0.870267   | 0.938572 |
| 289125    | Acbd6        | 0.017283 | 0.75322128 | 0.868295 |
| 500536    | Hyi          | 0.017242 | 0.80068529 | 0.897954 |
| 405103    | Olr1206      | 0.017193 | 0.99329338 | 1        |
| 362943    | Adck5        | 0.017193 | 0.81207698 | 0.905133 |
| 689479    | LOC689479    | 0.017184 | 0.93471843 | 0.978492 |
| 295243    | Krtcap2      | 0.017173 | 0.68880865 | 0.827605 |
| 25347     | Rpl39        | 0.017165 | 0.6519028  | 0.803124 |
| 291567    | Ppargc1b     | 0.0171   | 0.88838939 | 0.949993 |
| 363005    | Pcbp2        | 0.017017 | 0.27969572 | 0.473157 |
| 93662     | Cdhr1        | 0.017017 | 0.8017236  | 0.898483 |
| 25692     | Plat         | 0.016997 | 0.34930528 | 0.546094 |
| 29563     | Crabp2       | 0.016931 | 0.78564799 | 0.888572 |
| 59265     | Phlpp1       | 0.016906 | 0.65809331 | 0.804196 |
| 29643     | Sv2c         | 0.016891 | 0.01826291 | 0.060882 |
| 171569    | Spon2        | 0.016863 | 0.80438205 | 0.900509 |
| 25437     | Emd          | 0.016847 | 0.75509341 | 0.869716 |
| 50566     | Greml        | 0.016838 | 0.90617104 | 0.959632 |
| 306687    | Mfsd14b      | 0.016829 | 0.6373623  | 0.792128 |
| 362737    | Heatr5a      | 0.016821 | 0.55164714 | 0.731981 |
| 297453    | Hdac11       | 0.016811 | 0.58932193 | 0.754835 |
| 50594     | Nb11         | 0.016809 | 0.24839547 | 0.436733 |
| 289051    | Dennd1b      | 0.016797 | 0.58500358 | 0.75097  |
| 100909840 | LOC100909840 | 0.016793 | 0.21468113 | 0.395225 |
| 308669    | Herc2        | 0.016772 | 0.32649568 | 0.522267 |
| 311051    | Ccdc148      | 0.016769 | 0.93368619 | 0.977842 |
| 362154    | Zc3h15       | 0.016758 | 0.41990533 | 0.615398 |
| 25499     | Nrdc         | 0.01672  | 0.43696105 | 0.631166 |
| 685232    | Atp6v1a      | 0.016675 | 0.20695119 | 0.384638 |
| 287212    | Rnf145       | 0.016654 | 0.55345042 | 0.733403 |
| 60577     | Slc15a2      | 0.016653 | 0.76480382 | 0.87629  |
| 289833    | Fam161a      | 0.016633 | 0.93390342 | 0.978016 |
| 29285     | Rps15        | 0.016628 | 0.30338707 | 0.500564 |
| 316842    | Metrn1       | 0.016571 | 0.76526126 | 0.876339 |
| 688905    | Mtx3         | 0.016568 | 0.55026573 | 0.73081  |
| 298676    | Morn1        | 0.016566 | 0.86847166 | 0.937538 |
| 289522    | Cox18        | 0.016556 | 0.82663596 | 0.912972 |
| 100361568 | Hilpda       | 0.016543 | 0.88602454 | 0.948316 |
| 309176    | Mrpl49       | 0.016534 | 0.69152004 | 0.829397 |
| 24551     | Mdh1         | 0.016526 | 0.15741538 | 0.317649 |
| 503052    | Vash1        | 0.016468 | 0.47687595 | 0.666234 |
| 287367    | Cops3        | 0.016441 | 0.55165006 | 0.731934 |
| 58817     | Sec23a       | 0.016424 | 0.34862147 | 0.545518 |
| 286917    | Phax         | 0.016418 | 0.70537309 | 0.838409 |
| 81801     | Stc1         | 0.016335 | 0.88327003 | 0.946485 |
| 25496     | Notch1       | 0.016333 | 0.51679225 | 0.701769 |

|           |              |          |            |          |
|-----------|--------------|----------|------------|----------|
| 29479     | Odf2         | 0.016296 | 0.69969789 | 0.835365 |
| 302247    | Rtraf        | 0.016263 | 0.50430053 | 0.690915 |
| 29367     | Chkb         | 0.01626  | 0.68112824 | 0.821955 |
| 361790    | Ppp1r18      | 0.016218 | 0.6320906  | 0.788561 |
| 297406    | Cct7         | 0.016217 | 0.37683398 | 0.573685 |
| 297561    | Rad52        | 0.016145 | 0.86980966 | 0.93845  |
| 686310    | Ephb4        | 0.016114 | 0.80594485 | 0.90067  |
| 287607    | Mtmr4        | 0.016066 | 0.45079022 | 0.642612 |
| 307858    | Ldhd         | 0.016059 | 0.7629794  | 0.874936 |
| 303701    | Clqtnf1      | 0.016027 | 0.7147955  | 0.843868 |
| 116508    | Nrxn3        | 0.016018 | 0.60538277 | 0.768225 |
| 302434    | MGC114483    | 0.016    | 0.94791641 | 0.98683  |
| 309458    | Pdcd11       | 0.015992 | 0.70068372 | 0.835966 |
| 292067    | Zc3h18       | 0.01598  | 0.68927952 | 0.827857 |
| 316628    | Asb1         | 0.015938 | 0.45337925 | 0.644855 |
| 291339    | CommD3       | 0.015919 | 0.58046514 | 0.747967 |
| 502749    | Agk          | 0.015897 | 0.76902232 | 0.878586 |
| 298103    | Atp6v1g1     | 0.015852 | 0.38087669 | 0.577854 |
| 295224    | mrpl24       | 0.015842 | 0.6968049  | 0.833479 |
| 287457    | Zmynd15      | 0.015836 | 0.93050655 | 0.975531 |
| 361169    | Letm2        | 0.015824 | 0.81813828 | 0.908592 |
| 311236    | Lrrc4c       | 0.015794 | 0.6073993  | 0.769604 |
| 292074    | Trappc21     | 0.015774 | 0.61434529 | 0.774592 |
| 288233    | Wrb          | 0.015771 | 0.52940786 | 0.712147 |
| 361907    | Fbx17        | 0.015726 | 0.85610381 | 0.929349 |
| 291796    | Usp14        | 0.015721 | 0.27130501 | 0.46291  |
| 102549747 | LOC102549747 | 0.01572  | 0.91171021 | 0.963569 |
| 84550     | Slc24a2      | 0.015714 | 0.20016191 | 0.375945 |
| 500537    | Tmem269      | 0.015693 | 0.91488035 | 0.965259 |
| 291553    | Nedd41       | 0.01567  | 0.42989429 | 0.624463 |
| 362271    | Elmo2        | 0.015668 | 0.6154282  | 0.775392 |
| 316085    | Trak1        | 0.015666 | 0.42039468 | 0.615641 |
| 316376    | Inpp1        | 0.015643 | 0.78838921 | 0.890351 |
| 686883    | Larp7        | 0.01564  | 0.68505458 | 0.82502  |
| 499900    | Zfp133       | 0.015609 | 0.79818762 | 0.896367 |
| 690300    | Cox11        | 0.015585 | 0.844519   | 0.922451 |
| 303798    | Arvcf        | 0.015576 | 0.5564184  | 0.735595 |
| 313744    | Nol9         | 0.015563 | 0.71269114 | 0.84248  |
| 114559    | Arhgef7      | 0.015561 | 0.51496301 | 0.700584 |
| 64443     | Gpr88        | 0.015519 | 0.85349018 | 0.927675 |
| 365243    | Sergef       | 0.015489 | 0.81964579 | 0.909206 |
| 362279    | Pard6b       | 0.015479 | 0.88898624 | 0.950258 |
| 498538    | Trim35       | 0.015467 | 0.46837386 | 0.658997 |
| 494202    | Oas3         | 0.015451 | 0.93486009 | 0.978533 |
| 362453    | Crebl2       | 0.015445 | 0.56146623 | 0.733159 |
| 691123    | Fam19a3      | 0.015402 | 0.60587932 | 0.768445 |
| 291556    | Nars         | 0.015304 | 0.25646393 | 0.44549  |
| 317376    | Tfe3         | 0.015297 | 0.66575448 | 0.81023  |
| 59117     | Ago2         | 0.015293 | 0.857663   | 0.93014  |
| 688993    | Kctd7        | 0.015275 | 0.84431621 | 0.922442 |
| 29554     | Pdha1        | 0.015244 | 0.19815949 | 0.373178 |
| 408243    | Ece2         | 0.015235 | 0.66063799 | 0.805806 |
| 361212    | Rnf44        | 0.015223 | 0.53855695 | 0.720636 |
| 361459    | Clvs2        | 0.01522  | 0.8897165  | 0.950558 |
| 361450    | Ust          | 0.015219 | 0.6082258  | 0.769985 |
| 300982    | Abhd14a      | 0.015171 | 0.82108751 | 0.909798 |



|           |              |          |            |          |
|-----------|--------------|----------|------------|----------|
| 313339    | Acer2        | 0.015171 | 0.80584661 | 0.900666 |
| 114711    | Gne          | 0.015169 | 0.76482546 | 0.876262 |
| 302500    | Mctsl        | 0.015165 | 0.74168911 | 0.86026  |
| 294282    | Rps18        | 0.015132 | 0.58303662 | 0.74981  |
| 498015    | Pitpnc1      | 0.015113 | 0.24167127 | 0.42951  |
| 501619    | Armex1       | 0.015107 | 0.52637411 | 0.710173 |
| 293149    | Mrpl48       | 0.015097 | 0.66812621 | 0.811768 |
| 691337    | Stk381       | 0.015049 | 0.65943953 | 0.805066 |
| 24170     | Add1         | 0.01501  | 0.23226735 | 0.417866 |
| 64468     | Hyal2        | 0.015007 | 0.78270498 | 0.887087 |
| 280671    | Txndc9       | 0.014986 | 0.66827334 | 0.811895 |
| 25307     | Cst3         | 0.014984 | 0.01672243 | 0.056548 |
| 680747    | Mrpl20       | 0.014967 | 0.71550932 | 0.844397 |
| 293823    | Prune2       | 0.014956 | 0.00380302 | 0.016454 |
| 295231    | Glmp         | 0.014932 | 0.71575566 | 0.844269 |
| 288371    | Mcoln1       | 0.014862 | 0.62947035 | 0.78658  |
| 300754    | Bbs4         | 0.014844 | 0.6987529  | 0.834813 |
| 300772    | Pias1        | 0.014839 | 0.7667791  | 0.87755  |
| 362625    | Man1c1       | 0.014823 | 0.76097418 | 0.873636 |
| 252920    | Olfm3        | 0.014817 | 0.87410845 | 0.940797 |
| 103689925 | LOC103689925 | 0.0148   | 0.83546246 | 0.918114 |
| 103692128 | LOC103692128 | 0.0148   | 0.83546246 | 0.918114 |
| 24669     | Ppp1cc       | 0.014789 | 0.41282314 | 0.608672 |
| 310903    | Adh6         | 0.014785 | 0.97905613 | 1        |
| 299735    | Amdhd1       | 0.01473  | 0.88949767 | 0.950378 |
| 691231    | Gemin5       | 0.014724 | 0.78426641 | 0.887748 |
| 313949    | Ldah         | 0.0147   | 0.64959932 | 0.801998 |
| 363152    | Stac         | 0.014608 | 0.54165899 | 0.723364 |
| 312255    | Slc37a3      | 0.014588 | 0.61272192 | 0.773518 |
| 100360577 | LOC100360577 | 0.014567 | 0.93727046 | 0.980383 |
| 100912525 | Hoxa4        | 0.014567 | 0.93727046 | 0.980383 |
| 362424    | Tmem72       | 0.014567 | 0.78513709 | 0.888364 |
| 291840    | Slc38a7      | 0.014514 | 0.72523794 | 0.849927 |
| 500996    | Layn         | 0.014501 | 0.77647723 | 0.883235 |
| 64701     | Rpn2         | 0.014497 | 0.41646524 | 0.612383 |
| 683674    | LOC683674    | 0.014492 | 0.81371902 | 0.906115 |
| 309918    | E112         | 0.014474 | 0.65441525 | 0.803102 |
| 313529    | Tmem53       | 0.014461 | 0.84945491 | 0.925454 |
| 361724    | Mta2         | 0.014375 | 0.69542656 | 0.832196 |
| 493574    | Ispd         | 0.014356 | 0.80453758 | 0.900577 |
| 309639    | Anks1a       | 0.014353 | 0.60784247 | 0.770012 |
| 103690162 | Eid2b        | 0.014263 | 0.86142965 | 0.932367 |
| 25700     | Ide          | 0.014252 | 0.63045357 | 0.787498 |
| 140671    | Phkg2        | 0.014251 | 0.60882527 | 0.770642 |
| 117041    | Nln          | 0.014237 | 0.78431127 | 0.88764  |
| 685152    | Atp8b2       | 0.014224 | 0.58133567 | 0.748178 |
| 308000    | Pdzd8        | 0.014207 | 0.40522466 | 0.601942 |
| 641386    | Ap5z1        | 0.014207 | 0.79241612 | 0.892992 |
| 501095    | Rftn1        | 0.014197 | 0.90695001 | 0.960244 |
| 102550344 | Kmt2b        | 0.014189 | 0.70867169 | 0.839814 |
| 100361517 | Psmg3        | 0.014181 | 0.78729246 | 0.889692 |
| 306055    | Pcdh17       | 0.014162 | 0.62873025 | 0.785861 |
| 310375    | Zfp131       | 0.01415  | 0.72714744 | 0.851326 |
| 307412    | RGD1305184   | 0.014108 | 0.96177988 | 0.996632 |
| 29581     | Htr2b        | 0.014102 | 0.95750446 | 0.993228 |
| 364637    | Fbxo25       | 0.014093 | 0.73481957 | 0.857094 |

|           |              |          |            |          |
|-----------|--------------|----------|------------|----------|
| 29702     | Eif2ak3      | 0.014084 | 0.6976901  | 0.834171 |
| 289342    | Rps6kc1      | 0.014083 | 0.63169523 | 0.788171 |
| 361822    | Ybey         | 0.014072 | 0.85547668 | 0.928933 |
| 361882    | Arhgef28     | 0.01406  | 0.6812051  | 0.821995 |
| 362248    | Procr        | 0.014053 | 0.91258822 | 0.96423  |
| 498576    | I117rd       | 0.014033 | 0.79694393 | 0.895287 |
| 498358    | Slc30a9      | 0.014031 | 0.40338272 | 0.600283 |
| 301253    | Tmem151b     | 0.014021 | 0.72133911 | 0.847443 |
| 170501    | Galnt10      | 0.013973 | 0.76419197 | 0.875852 |
| 114029    | Megf8        | 0.013964 | 0.51681141 | 0.701745 |
| 102554867 | LOC102554867 | 0.013921 | 0.93835106 | 0.981055 |
| 246756    | Tradd        | 0.013903 | 0.8627604  | 0.932853 |
| 299196    | Abcd4        | 0.013897 | 0.87684516 | 0.94273  |
| 360811    | Naa25        | 0.013894 | 0.69911572 | 0.835037 |
| 303874    | Senp5        | 0.013869 | 0.50125916 | 0.687836 |
| 360796    | Rcc11        | 0.013861 | 0.86264496 | 0.933046 |
| 170913    | Abcb1a       | 0.013805 | 0.74434523 | 0.861976 |
| 50646     | Ptk2b        | 0.013803 | 0.70860093 | 0.839782 |
| 303968    | Ift57        | 0.013793 | 0.80260075 | 0.899043 |
| 362615    | Gpatch3      | 0.013791 | 0.91320908 | 0.964458 |
| 57033     | Adam22       | 0.013782 | 0.30938927 | 0.504479 |
| 309194    | Taf6l        | 0.013772 | 0.87878592 | 0.943964 |
| 303792    | Klh122       | 0.013757 | 0.73058659 | 0.853412 |
| 679462    | Tspan15      | 0.013736 | 0.69477441 | 0.831834 |
| 304132    | Rwdd2b       | 0.013706 | 0.82783648 | 0.91345  |
| 81643     | Atic         | 0.013665 | 0.61119738 | 0.772617 |
| 64523     | Tep1         | 0.013664 | 0.68983661 | 0.828213 |
| 287593    | Ptrh2        | 0.013629 | 0.81209473 | 0.9051   |
| 298104    | Tmem268      | 0.013593 | 0.83929334 | 0.919803 |
| 361668    | Ebf3         | 0.013592 | 0.69321009 | 0.830587 |
| 313539    | Kdm4a        | 0.013587 | 0.66462996 | 0.809172 |
| 306400    | Arhgap35     | 0.013568 | 0.30947405 | 0.504488 |
| 288444    | Hsph1        | 0.013557 | 0.29111576 | 0.486385 |
| 690751    | Wdr59        | 0.013508 | 0.80193871 | 0.898672 |
| 296049    | Emc4         | 0.013494 | 0.55195167 | 0.732232 |
| 360942    | Pcdh7        | 0.013467 | 0.60028026 | 0.763428 |
| 296966    | Chchd3       | 0.013453 | 0.64686295 | 0.799864 |
| 100362311 | Arhgap33     | 0.013443 | 0.83961776 | 0.92     |
| 363028    | Spc24        | 0.01342  | 0.93919579 | 0.981669 |
| 681740    | Jarid2       | 0.013414 | 0.81961034 | 0.909219 |
| 362814    | Rnf41        | 0.013412 | 0.61430031 | 0.774586 |
| 29748     | Ppp3r1       | 0.013411 | 0.37551342 | 0.572315 |
| 303607    | Ddx42        | 0.013401 | 0.61709829 | 0.776264 |
| 312946    | Tmem68       | 0.013376 | 0.80050714 | 0.897913 |
| 24214     | Atp1b2       | 0.01337  | 0.46496314 | 0.655797 |
| 361367    | Amfr         | 0.013369 | 0.43723077 | 0.631316 |
| 680066    | Lemd3        | 0.013367 | 0.81925304 | 0.909088 |
| 305470    | Drg1         | 0.013359 | 0.72667452 | 0.851034 |
| 79423     | Stmn4        | 0.013341 | 0.80979571 | 0.903754 |
| 83477     | Bcl10        | 0.013341 | 0.80070283 | 0.897921 |
| 691853    | Cox10        | 0.013316 | 0.78389731 | 0.887805 |
| 362735    | Coch         | 0.013301 | 0.91437579 | 0.964941 |
| 296731    | Nub1         | 0.013271 | 0.52208829 | 0.706342 |
| 246116    | Ptpn4        | 0.013263 | 0.79248384 | 0.893015 |
| 298369    | Osbp19       | 0.013236 | 0.49457466 | 0.681216 |
| 24654     | Plcb1        | 0.013211 | 0.79277659 | 0.89324  |

|           |              |          |            |          |
|-----------|--------------|----------|------------|----------|
| 362778    | Gskip        | 0.013165 | 0.70842765 | 0.839682 |
| 306879    | Fars2        | 0.013138 | 0.83050226 | 0.915331 |
| 65170     | Scamp4       | 0.013136 | 0.72843742 | 0.851685 |
| 304275    | Zkscan5      | 0.013125 | 0.84135839 | 0.921059 |
| 313430    | Fam151a      | 0.013075 | 0.92363393 | 0.971159 |
| 303398    | Tbx2         | 0.013062 | 0.72317604 | 0.848659 |
| 192147    | Polr2m       | 0.013043 | 0.55508698 | 0.734498 |
| 298384    | RGD1559786   | 0.012962 | 0.71799095 | 0.845806 |
| 114506    | Ankh         | 0.012947 | 0.58015968 | 0.747675 |
| 361877    | Ssbp2        | 0.012943 | 0.69573677 | 0.832463 |
| 300208    | Ddx23        | 0.012933 | 0.68025335 | 0.821471 |
| 288489    | Rbak         | 0.012924 | 0.91016298 | 0.962575 |
| 365387    | Odf3         | 0.012919 | 0.93571607 | 0.979214 |
| 500798    | C2cd4c       | 0.012911 | 0.95092271 | 0.988231 |
| 304951    | Nuf2         | 0.012889 | 0.94009794 | 0.982073 |
| 307067    | Dip2c        | 0.012873 | 0.61830386 | 0.777165 |
| 362037    | Aplar        | 0.012777 | 0.59449268 | 0.758855 |
| 313722    | Spsb1        | 0.012752 | 0.78909352 | 0.890935 |
| 116659    | Dync1i2      | 0.012741 | 0.20716663 | 0.384851 |
| 307050    | Mtpap        | 0.012738 | 0.83239378 | 0.915826 |
| 499755    | Tmem141      | 0.012712 | 0.88113254 | 0.945099 |
| 170921    | Itga2        | 0.012688 | 0.90319401 | 0.957811 |
| 309650    | Cpne5        | 0.012629 | 0.85780782 | 0.930138 |
| 170926    | Cysltr2      | 0.012589 | 0.75870506 | 0.872346 |
| 85472     | Polg         | 0.012503 | 0.69857708 | 0.83476  |
| 498350    | Theg1        | 0.012471 | 0.97418213 | 1        |
| 108348096 | LOC108348096 | 0.012435 | 0.83271461 | 0.916126 |
| 498849    | Pcdhga10     | 0.012426 | 0.80808851 | 0.902272 |
| 313498    | Cd72         | 0.012415 | 0.92255394 | 0.970613 |
| 292100    | RGD1562218   | 0.012403 | 0.80586532 | 0.900634 |
| 361569    | Prr12        | 0.012403 | 0.72816615 | 0.851524 |
| 314251    | Sptb         | 0.012365 | 0.51057586 | 0.696556 |
| 100363065 | Zfp11        | 0.012353 | 0.89751794 | 0.955089 |
| 246280    | Slc15a4      | 0.012348 | 0.78191853 | 0.886671 |
| 170739    | Kcnh7        | 0.012304 | 0.55754513 | 0.736523 |
| 171137    | Khsrp        | 0.012263 | 0.73528087 | 0.85737  |
| 500790    | Cactin       | 0.012255 | 0.84327904 | 0.922049 |
| 25328     | Lamp1        | 0.012254 | 0.23120363 | 0.416503 |
| 313929    | Ncoa1        | 0.012253 | 0.62065299 | 0.778678 |
| 288498    | Wipi2        | 0.01222  | 0.7752872  | 0.882778 |
| 303564    | Tmem101      | 0.012212 | 0.819125   | 0.909052 |
| 25318     | Fnta         | 0.012202 | 0.57475648 | 0.742772 |
| 312192    | Ahcyl2       | 0.012194 | 0.57816146 | 0.745857 |
| 81763     | Rpl5         | 0.012165 | 0.43811594 | 0.631924 |
| 362757    | Rdh11        | 0.012147 | 0.75501146 | 0.869727 |
| 100910753 | Dnttip2      | 0.012082 | 0.75546491 | 0.869828 |
| 103692368 | Palm2        | 0.012042 | 0.88414209 | 0.946833 |
| 100911224 | LOC100911224 | 0.01203  | 0.9412814  | 0.982824 |
| 245981    | Rpl15        | 0.01202  | 0.47733734 | 0.666732 |
| 290224    | Emc9         | 0.012016 | 0.88350463 | 0.946523 |
| 315957    | Slc35g2      | 0.011932 | 0.82646087 | 0.912884 |
| 245966    | Tmem150a     | 0.01193  | 0.83634994 | 0.918533 |
| 361111    | Smim4        | 0.011912 | 0.94177618 | 0.983017 |
| 365410    | Osbp         | 0.011896 | 0.66122925 | 0.80632  |
| 64670     | Gabarapl2    | 0.01188  | 0.66653762 | 0.81051  |
| 292058    | Gins2        | 0.011862 | 0.87965561 | 0.944206 |

|           |              |          |            |          |
|-----------|--------------|----------|------------|----------|
| 79223     | Gk           | 0.011786 | 0.75110456 | 0.867114 |
| 260416    | Carhsp1      | 0.011785 | 0.66170712 | 0.806696 |
| 313819    | Mast2        | 0.011774 | 0.63336074 | 0.789473 |
| 290206    | Psmbl1       | 0.011759 | 0.94624386 | 0.985628 |
| 170844    | Taf2         | 0.011695 | 0.76478154 | 0.876317 |
| 298836    | Snx17        | 0.011684 | 0.71680897 | 0.845145 |
| 100909704 | LOC100909704 | 0.011682 | 0.9870588  | 1        |
| 310074    | Depdclb      | 0.011682 | 0.94217332 | 0.983243 |
| 364648    | Shcbp1       | 0.011682 | 0.94217332 | 0.983243 |
| 315676    | Dmxl2        | 0.011659 | 0.48683308 | 0.674946 |
| 64205     | Rplp0        | 0.011595 | 0.31010511 | 0.505214 |
| 498703    | Fam193b      | 0.011556 | 0.75914788 | 0.872697 |
| 302661    | Ofd1         | 0.011555 | 0.85961761 | 0.931358 |
| 300994    | Ifrd2        | 0.011553 | 0.90040053 | 0.957034 |
| 362819    | Sarnp        | 0.011514 | 0.72470055 | 0.84961  |
| 303183    | Snap47       | 0.011502 | 0.81088104 | 0.904488 |
| 303684    | Trim65       | 0.0115   | 0.86194807 | 0.932451 |
| 83626     | Ugcg         | 0.011484 | 0.65180574 | 0.803108 |
| 84019     | Nae1         | 0.011474 | 0.7800968  | 0.885501 |
| 84508     | Rnf103       | 0.011466 | 0.72403775 | 0.849095 |
| 679140    | Exosc1       | 0.011402 | 0.86014563 | 0.931612 |
| 302559    | Wdr45        | 0.011395 | 0.82010374 | 0.909237 |
| 66028     | Arl6ip5      | 0.011394 | 0.71384851 | 0.843168 |
| 100145871 | Adh5         | 0.011358 | 0.70894867 | 0.84009  |
| 171048    | Tspan8       | 0.011348 | 0.43920252 | 0.632581 |
| 310159    | Drosha       | 0.011325 | 0.65820718 | 0.804231 |
| 313101    | Fbxl4        | 0.011319 | 0.80371047 | 0.89981  |
| 83721     | Dvl1         | 0.011317 | 0.72282035 | 0.848451 |
| 64625     | Bid          | 0.011299 | 0.71983431 | 0.846772 |
| 290744    | Ing2         | 0.011296 | 0.87262673 | 0.939892 |
| 362856    | Pwp1         | 0.01127  | 0.84966542 | 0.925578 |
| 100362441 | Gpr82        | 0.011265 | 0.98104664 | 1        |
| 108350028 | LOC108350028 | 0.011259 | 0.93931487 | 0.981685 |
| 362235    | Syndig1      | 0.011238 | 0.90134124 | 0.957659 |
| 362657    | Mthfr        | 0.011191 | 0.77124376 | 0.880174 |
| 314903    | Srgap1       | 0.011187 | 0.69071279 | 0.828899 |
| 114124    | Akap1        | 0.011138 | 0.80476799 | 0.900676 |
| 362320    | Fam133b      | 0.011128 | 0.81298114 | 0.905399 |
| 362762    | Dcaf4        | 0.011089 | 0.86145711 | 0.932344 |
| 362606    | Sync         | 0.011089 | 0.67417263 | 0.816874 |
| 293694    | Map4k2       | 0.011067 | 0.75017304 | 0.866354 |
| 287592    | Tubd1        | 0.011066 | 0.92223491 | 0.970546 |
| 56011     | Ywhab        | 0.011055 | 0.16680574 | 0.330436 |
| 362161    | Rapsn        | 0.011033 | 0.9198809  | 0.968979 |
| 54252     | Mid1         | 0.011019 | 0.83110497 | 0.915412 |
| 361985    | LOC361985    | 0.011006 | 0.71222637 | 0.842088 |
| 100362572 | Mpv171       | 0.011002 | 0.81875247 | 0.908903 |
| 297768    | Lactb2       | 0.010995 | 0.79038127 | 0.891807 |
| 287441    | Zbtb4        | 0.01098  | 0.55218697 | 0.732391 |
| 365841    | Slc25a44     | 0.010977 | 0.80217901 | 0.898676 |
| 29210     | Epha3        | 0.010961 | 0.94342409 | 0.984036 |
| 365797    | Ufm1         | 0.010953 | 0.75711369 | 0.871095 |
| 310526    | Golim4       | 0.010899 | 0.65057663 | 0.802476 |
| 295674    | Plekha3      | 0.010849 | 0.79872203 | 0.896808 |
| 311384    | Sema6d       | 0.010785 | 0.66682255 | 0.81065  |
| 498704    | Prr7         | 0.010767 | 0.88532101 | 0.947723 |

|           |              |          |            |          |
|-----------|--------------|----------|------------|----------|
| 303676    | Slc25a19     | 0.010767 | 0.87844912 | 0.943708 |
| 301544    | Farsb        | 0.010752 | 0.71406686 | 0.843165 |
| 361988    | Ints3        | 0.01074  | 0.73532879 | 0.857373 |
| 364382    | Prmt5        | 0.010716 | 0.7468721  | 0.864166 |
| 691947    | Eif3j        | 0.010711 | 0.67262833 | 0.815677 |
| 288595    | Nsun5        | 0.010708 | 0.86305783 | 0.933016 |
| 300659    | Rnf26        | 0.010704 | 0.79293658 | 0.893314 |
| 315994    | Mapkapk3     | 0.010692 | 0.85227891 | 0.927152 |
| 314300    | Riox1        | 0.010665 | 0.90257751 | 0.958011 |
| 691318    | Ppp2r5c      | 0.010654 | 0.53994549 | 0.721886 |
| 246042    | Nifk         | 0.010637 | 0.77205063 | 0.880725 |
| 288305    | Cct8         | 0.010635 | 0.48774453 | 0.67562  |
| 680616    | Ppp1r16b     | 0.010633 | 0.75530501 | 0.869802 |
| 297523    | Vgll4        | 0.010632 | 0.77208604 | 0.880713 |
| 100910486 | LOC100910486 | 0.010613 | 0.9862793  | 1        |
| 103694868 | LOC103694868 | 0.010613 | 0.9862793  | 1        |
| 287707    | Nkiras2      | 0.010608 | 0.8332052  | 0.916348 |
| 83806     | Psm1         | 0.010594 | 0.45768823 | 0.648948 |
| 360800    | Sumf2        | 0.010584 | 0.90329989 | 0.95787  |
| 300472    | Vps26b       | 0.010553 | 0.68281236 | 0.823361 |
| 360426    | Pla2g6       | 0.010542 | 0.71086711 | 0.841369 |
| 294862    | 6-Mar        | 0.010526 | 0.52601118 | 0.709783 |
| 499587    | Slc7a14      | 0.010523 | 0.84302522 | 0.921877 |
| 304580    | Ssh1         | 0.010506 | 0.80080866 | 0.897986 |
| 24516     | Jun          | 0.010465 | 0.68363809 | 0.824044 |
| 100363310 | Cystm1       | 0.010447 | 0.68824242 | 0.827185 |
| 686393    | Pradcl       | 0.010445 | 0.91862279 | 0.967974 |
| 309510    | Cpeb3        | 0.010426 | 0.65056727 | 0.802517 |
| 58963     | Htr3b        | 0.010417 | 0.60807967 | 0.769903 |
| 291925    | RGD1308706   | 0.010417 | 0.85352558 | 0.927608 |
| 497983    | Fam117a      | 0.010411 | 0.85355231 | 0.927584 |
| 312616    | Trnt1        | 0.01035  | 0.80019477 | 0.897668 |
| 286898    | Npc2         | 0.010325 | 0.62619439 | 0.783772 |
| 300463    | Herpud2      | 0.010307 | 0.80202332 | 0.898608 |
| 305577    | Ahsa2        | 0.010305 | 0.79797953 | 0.896292 |
| 161477    | Rps13        | 0.010275 | 0.69282712 | 0.83039  |
| 282712    | Slc6a15      | 0.01026  | 0.58582933 | 0.751726 |
| 304884    | Tor3a        | 0.010257 | 0.84673189 | 0.923386 |
| 246255    | Ppp2r2d      | 0.010231 | 0.75636489 | 0.870601 |
| 498591    | RGD1559804   | 0.010227 | 0.99217308 | 1        |
| 313548    | Zfp691       | 0.010227 | 0.90436846 | 0.958256 |
| 29669     | Psm2         | 0.010184 | 0.64213938 | 0.796039 |
| 301543    | Sgpp2        | 0.010179 | 0.62077316 | 0.778726 |
| 685879    | Jazf1        | 0.01016  | 0.85468822 | 0.928288 |
| 683927    | Cstf2        | 0.01015  | 0.7760433  | 0.883111 |
| 116647    | Nlgn1        | 0.010141 | 0.84410857 | 0.922321 |
| 100909844 | LOC100909844 | 0.010135 | 0.98439228 | 1        |
| 296762    | Phtf2        | 0.010126 | 0.82691462 | 0.913015 |
| 108348120 | LOC108348120 | 0.010098 | 0.87269189 | 0.939909 |
| 29539     | Aldh2        | 0.010091 | 0.6871297  | 0.826474 |
| 300849    | Fbxo9        | 0.010084 | 0.74050459 | 0.860668 |
| 291541    | Cidea        | 0.010035 | 0.94503093 | 0.985011 |
| 64373     | Rhob         | 0.010005 | 0.59361774 | 0.758399 |
| 60334     | Ensa         | 0.009995 | 0.62976578 | 0.786794 |
| 363187    | Mrps10       | 0.009954 | 0.87778454 | 0.943314 |
| 287054    | Mettl22      | 0.009952 | 0.84578013 | 0.922982 |

|           |              |          |            |          |
|-----------|--------------|----------|------------|----------|
| 100365259 | LOC100365259 | 0.009939 | 0.87784043 | 0.943321 |
| 363235    | Als2         | 0.009922 | 0.79030957 | 0.891779 |
| 294320    | Glo1         | 0.009912 | 0.65623101 | 0.80295  |
| 291794    | Snrpd1       | 0.009905 | 0.81984827 | 0.909113 |
| 63881     | Rapgef1      | 0.009865 | 0.72078414 | 0.847209 |
| 362548    | Itgb3bp      | 0.009835 | 0.89182672 | 0.951638 |
| 365590    | Zbtb24       | 0.009814 | 0.89081011 | 0.951086 |
| 296599    | Cacfd1       | 0.009811 | 0.84798494 | 0.924276 |
| 311569    | Acss2        | 0.009798 | 0.64986036 | 0.802216 |
| 684055    | Urad         | 0.009783 | 0.99454255 | 1        |
| 289724    | Nop14        | 0.009714 | 0.82912126 | 0.914391 |
| 29332     | Stmn1        | 0.009706 | 0.51275387 | 0.698426 |
| 296969    | Slc35b4      | 0.009675 | 0.75474769 | 0.869633 |
| 363273    | Cops7b       | 0.009646 | 0.84417205 | 0.922337 |
| 84392     | Kif3a        | 0.009645 | 0.53003964 | 0.712493 |
| 116698    | Trim28       | 0.00964  | 0.70459587 | 0.837747 |
| 117543    | Decr1        | 0.009617 | 0.85713413 | 0.929884 |
| 117180    | Csdel        | 0.009608 | 0.55389379 | 0.733735 |
| 361030    | Tmem260      | 0.009589 | 0.79921367 | 0.896884 |
| 287710    | Cavin1       | 0.009557 | 0.71931674 | 0.846582 |
| 113922    | Selenof      | 0.009555 | 0.56174586 | 0.733172 |
| 289318    | Tmem63a      | 0.009482 | 0.90658452 | 0.960017 |
| 64053     | Dlg2         | 0.009457 | 0.68877865 | 0.827673 |
| 689560    | Ryr2         | 0.009446 | 0.71240854 | 0.842199 |
| 364678    | Sfxn1        | 0.009444 | 0.70634552 | 0.839303 |
| 689820    | Kmt5a        | 0.009432 | 0.64353211 | 0.797195 |
| 303514    | Msl1         | 0.00943  | 0.68903255 | 0.827613 |
| 300158    | Kif21a       | 0.009425 | 0.32236116 | 0.517653 |
| 64638     | Rpl28        | 0.009394 | 0.62646754 | 0.783959 |
| 313861    | Eml4         | 0.009372 | 0.78718019 | 0.889671 |
| 287532    | Slc43a2      | 0.009355 | 0.78084324 | 0.885926 |
| 287927    | Ube2v2       | 0.009322 | 0.69427814 | 0.831501 |
| 29671     | Psma4        | 0.009307 | 0.69018119 | 0.828418 |
| 103691034 | Peg3         | 0.009305 | 0.42694056 | 0.622023 |
| 315776    | Tln2         | 0.00927  | 0.57890684 | 0.746465 |
| 619573    | Fam104a      | 0.009269 | 0.76886246 | 0.878456 |
| 360496    | Ciao3        | 0.009261 | 0.86910971 | 0.937961 |
| 362902    | Dcaf13       | 0.009253 | 0.85876312 | 0.930697 |
| 288526    | Akap17a      | 0.009246 | 0.79452839 | 0.893733 |
| 497874    | RGD1565784   | 0.009236 | 0.85883877 | 0.930673 |
| 361174    | Alg11        | 0.009235 | 0.71880589 | 0.846242 |
| 313409    | Dnajc6       | 0.009197 | 0.59702353 | 0.760658 |
| 310672    | Tars2        | 0.009196 | 0.80165656 | 0.898461 |
| 316328    | Kansl3       | 0.009194 | 0.73712357 | 0.857733 |
| 304714    | Rrn3         | 0.009166 | 0.76907147 | 0.87859  |
| 619345    | Surf2        | 0.009149 | 0.85627167 | 0.929478 |
| 305408    | Adgra3       | 0.009137 | 0.88089283 | 0.945161 |
| 102548503 | LOC102548503 | 0.009122 | 0.92899594 | 0.974484 |
| 117088    | Adarb2       | 0.009114 | 0.9393774  | 0.981697 |
| 362750    | At11         | 0.00908  | 0.51660038 | 0.701708 |
| 360497    | Wdr24        | 0.009073 | 0.8499755  | 0.92581  |
| 25136     | Gfra2        | 0.009069 | 0.69877929 | 0.834792 |
| 108350443 | Inafm2       | 0.00904  | 0.88125512 | 0.945177 |
| 25435     | Eef2k        | 0.009011 | 0.80279802 | 0.899158 |
| 298867    | Klh129       | 0.00897  | 0.84150598 | 0.920903 |
| 245956    | Scn3b        | 0.008951 | 0.70831424 | 0.839652 |



|           |              |          |            |          |
|-----------|--------------|----------|------------|----------|
| 305888    | Zfhx2        | 0.008947 | 0.78990864 | 0.891538 |
| 288701    | Srsf9        | 0.008934 | 0.90819364 | 0.961186 |
| 24849     | Tpil         | 0.00893  | 0.47414367 | 0.664415 |
| 503018    | Wdr35        | 0.008912 | 0.85073585 | 0.926214 |
| 315554    | Pus3         | 0.008905 | 0.89416656 | 0.95312  |
| 362769    | Dglucy       | 0.008855 | 0.90484896 | 0.958552 |
| 303068    | Adam19       | 0.008839 | 0.59367484 | 0.758319 |
| 81672     | Grm7         | 0.008835 | 0.82687054 | 0.913019 |
| 100909827 | Kbtbd7       | 0.00883  | 0.88204204 | 0.945754 |
| 361375    | Heatr3       | 0.008791 | 0.86997386 | 0.938574 |
| 313928    | Efr3b        | 0.008784 | 0.69093105 | 0.829056 |
| 690043    | Rnf168       | 0.008771 | 0.8608892  | 0.932047 |
| 363002    | Smarcd1      | 0.008759 | 0.76157098 | 0.874005 |
| 116646    | Tpt1         | 0.008743 | 0.35652854 | 0.55357  |
| 293960    | Zfand5       | 0.008715 | 0.63678587 | 0.791515 |
| 679898    | Zmat2        | 0.008708 | 0.76751495 | 0.877759 |
| 307070    | Larp4b       | 0.008694 | 0.70002424 | 0.835545 |
| 102557190 | LOC102557190 | 0.008673 | 0.98100679 | 1        |
| 364137    | Tmem165      | 0.008669 | 0.82667355 | 0.91296  |
| 108350349 | LOC108350349 | 0.00863  | 0.92570334 | 0.972369 |
| 499071    | Ccdc106      | 0.008618 | 0.92573191 | 0.972345 |
| 29307     | Gpr182       | 0.008618 | 0.94744661 | 0.986665 |
| 361296    | Rnf125       | 0.008613 | 0.88284345 | 0.946507 |
| 100909598 | Pigbos1      | 0.008602 | 0.94058524 | 0.98242  |
| 29705     | Gabra1       | 0.0086   | 0.75204575 | 0.867622 |
| 296320    | Ctnnb11      | 0.008597 | 0.84335121 | 0.922075 |
| 312477    | Dok1         | 0.008594 | 0.94748682 | 0.986652 |
| 498183    | Mapkapk5     | 0.008589 | 0.84339052 | 0.922065 |
| 54283     | Pfkfb4       | 0.00857  | 0.88300297 | 0.946465 |
| 300120    | Fam118a      | 0.008565 | 0.88302053 | 0.946431 |
| 360831    | Abhd11       | 0.008564 | 0.89209711 | 0.951873 |
| 100362324 | Dhx29        | 0.008555 | 0.82729182 | 0.913061 |
| 100909597 | LOC100909597 | 0.008535 | 0.88289752 | 0.946512 |
| 690085    | Bcl7a        | 0.008415 | 0.85303638 | 0.927658 |
| 308568    | Fv1          | 0.008371 | 0.83991065 | 0.920109 |
| 367242    | Rab23        | 0.008358 | 0.81763876 | 0.908408 |
| 313867    | Lrpprc       | 0.008348 | 0.6800582  | 0.821392 |
| 140929    | Pde7b        | 0.008311 | 0.89382637 | 0.953078 |
| 301575    | Itm2c        | 0.008268 | 0.43074701 | 0.625034 |
| 363077    | Dis3l        | 0.00825  | 0.85378722 | 0.927786 |
| 287871    | Rptor        | 0.00824  | 0.77646623 | 0.883276 |
| 500219    | Lrrtm4       | 0.008232 | 0.91019992 | 0.962561 |
| 116643    | Vcp          | 0.008204 | 0.38125328 | 0.578103 |
| 299121    | Actr10       | 0.008146 | 0.70428529 | 0.837639 |
| 499314    | Tut1         | 0.008143 | 0.89666548 | 0.954715 |
| 500367    | Klhl42       | 0.008134 | 0.87365169 | 0.94073  |
| 362031    | Alg14        | 0.008121 | 0.86367655 | 0.93342  |
| 299971    | Atp6v1c1     | 0.008079 | 0.67445016 | 0.817158 |
| 360950    | Wdr1         | 0.008016 | 0.60762665 | 0.769841 |
| 362237    | Tbcd20       | 0.00797  | 0.83036713 | 0.915288 |
| 681059    | Vps25        | 0.007962 | 0.75678623 | 0.870876 |
| 291691    | Brd8         | 0.007943 | 0.8382806  | 0.919328 |
| 117095    | Bhlhe41      | 0.007904 | 0.81621013 | 0.907615 |
| 363236    | Fam117b      | 0.007883 | 0.76252448 | 0.874678 |
| 24400     | Gnb1         | 0.007867 | 0.32236477 | 0.517615 |
| 100363225 | LOC100363225 | 0.007807 | 0.939382   | 0.981648 |

|           |              |          |            |          |
|-----------|--------------|----------|------------|----------|
| 294318    | Btbd9        | 0.00777  | 0.83912135 | 0.919668 |
| 24626     | Pde4b        | 0.007717 | 0.91160036 | 0.963507 |
| 498154    | LOC498154    | 0.007609 | 0.92800575 | 0.973982 |
| 688885    | Nol11        | 0.007573 | 0.86600081 | 0.935401 |
| 294698    | Slc30a5      | 0.007539 | 0.85688884 | 0.92983  |
| 259274    | Nmt1         | 0.007537 | 0.77015375 | 0.879351 |
| 363836    | Ube213       | 0.007454 | 0.6164765  | 0.775994 |
| 288236    | Psmg1        | 0.007431 | 0.85733288 | 0.929994 |
| 361600    | Tm6sf1       | 0.007419 | 0.75028553 | 0.866431 |
| 85238     | Synj1        | 0.00741  | 0.59244772 | 0.757463 |
| 314325    | Gpatch21     | 0.007408 | 0.89437128 | 0.953232 |
| 295443    | Papss1       | 0.007402 | 0.71524389 | 0.844293 |
| 140726    | Cacng5       | 0.007398 | 0.86658468 | 0.935872 |
| 498559    | CommD6       | 0.007371 | 0.85766487 | 0.930089 |
| 361695    | Tmem134      | 0.00737  | 0.87649901 | 0.942517 |
| 298410    | Cmpk1        | 0.007368 | 0.72390251 | 0.849041 |
| 102548541 | LOC102548541 | 0.007341 | 0.93999715 | 0.982021 |
| 100911235 | Med7         | 0.00731  | 0.91264591 | 0.964237 |
| 108348257 | LOC108348257 | 0.007299 | 0.9768527  | 1        |
| 29140     | Snn          | 0.007267 | 0.73948707 | 0.859853 |
| 64631     | Ube2g1       | 0.007254 | 0.81295888 | 0.905427 |
| 366017    | Exosc2       | 0.007244 | 0.92876026 | 0.974398 |
| 304488    | Pptc7        | 0.007228 | 0.77883752 | 0.884494 |
| 303823    | Map3k13      | 0.007214 | 0.89388003 | 0.953028 |
| 299188    | Zfyve1       | 0.007153 | 0.84194308 | 0.92117  |
| 50663     | Calm2        | 0.007147 | 0.48431454 | 0.672483 |
| 266709    | Pkig         | 0.007138 | 0.82715456 | 0.913121 |
| 100912259 | LOC100912259 | 0.007121 | 0.94590166 | 0.985379 |
| 309060    | Fam53b       | 0.007114 | 0.85011672 | 0.925858 |
| 689116    | Ncbp2        | 0.007106 | 0.85280552 | 0.927513 |
| 368002    | Baz1b        | 0.007071 | 0.82054045 | 0.909562 |
| 310158    | RGD1306502   | 0.007051 | 0.84552029 | 0.922804 |
| 26954     | Rheb         | 0.007049 | 0.71386628 | 0.843137 |
| 294948    | Armc1        | 0.007044 | 0.82066671 | 0.909649 |
| 81513     | Lig1         | 0.007024 | 0.88926423 | 0.950342 |
| 287119    | Zfp598       | 0.007    | 0.8590263  | 0.930824 |
| 373542    | Stk25        | 0.006981 | 0.74674991 | 0.86413  |
| 29653     | Gpam         | 0.006951 | 0.67055654 | 0.814046 |
| 102547219 | Mosmo        | 0.00692  | 0.91371441 | 0.96467  |
| 290637    | Colgalt1     | 0.006912 | 0.8212853  | 0.909859 |
| 366492    | Epha2        | 0.006857 | 0.95011717 | 0.988041 |
| 64474     | Hdlbp        | 0.006845 | 0.47908083 | 0.6676   |
| 117560    | Klf9         | 0.006821 | 0.83570262 | 0.91814  |
| 25456     | GlrB         | 0.006802 | 0.69489643 | 0.831927 |
| 690183    | LOC690183    | 0.006793 | 0.89887483 | 0.955892 |
| 29532     | Ighmbp2      | 0.006779 | 0.86879161 | 0.93783  |
| 500117    | Ccdc126      | 0.006711 | 0.86005995 | 0.931626 |
| 24248     | Cat          | 0.006692 | 0.73692427 | 0.857711 |
| 103690054 | LOC103690054 | 0.00668  | 0.93604107 | 0.979339 |
| 25374     | Alad         | 0.006668 | 0.90089565 | 0.9574   |
| 690349    | RGD1597339   | 0.006651 | 0.92986009 | 0.975122 |
| 103689984 | Tbc1d12      | 0.006573 | 0.93104429 | 0.975665 |
| 117582    | Tmem158      | 0.006564 | 0.86054463 | 0.931886 |
| 298906    | Pqlc3        | 0.006564 | 0.78658385 | 0.889261 |
| 360461    | Fopn1        | 0.006501 | 0.86965448 | 0.938389 |
| 688590    | Rundc3b      | 0.006485 | 0.88973621 | 0.950526 |

|           |              |          |            |          |
|-----------|--------------|----------|------------|----------|
| 307527    | Sap130       | 0.006447 | 0.86980863 | 0.938502 |
| 303281    | Supt6h       | 0.006424 | 0.71828856 | 0.846104 |
| 360853    | Uchl5        | 0.006416 | 0.88990076 | 0.950595 |
| 301513    | Cnot9        | 0.006409 | 0.8899188  | 0.950508 |
| 307380    | Piezo2       | 0.0064   | 0.56369278 | 0.734958 |
| 362021    | Gpsm2        | 0.006399 | 0.87951376 | 0.944266 |
| 300029    | Top1mt       | 0.006393 | 0.93026991 | 0.975444 |
| 297685    | Ddx47        | 0.006382 | 0.86998749 | 0.938536 |
| 311462    | Btbd3        | 0.006377 | 0.76766198 | 0.877822 |
| 102551660 | Eml3         | 0.006372 | 0.87958154 | 0.944286 |
| 64473     | Bpnt1        | 0.006372 | 0.78746469 | 0.889781 |
| 293448    | Uqcrc2       | 0.006366 | 0.72958604 | 0.852661 |
| 288654    | Mphosph9     | 0.006341 | 0.95071515 | 0.988231 |
| 303584    | Plekhm1      | 0.006318 | 0.90166328 | 0.957788 |
| 362738    | Snx6         | 0.006262 | 0.79345265 | 0.893314 |
| 361662    | Bub3         | 0.006204 | 0.89036847 | 0.950775 |
| 24627     | Pde4d        | 0.006199 | 0.84545837 | 0.92279  |
| 317235    | Zdhhc15      | 0.006195 | 0.8380285  | 0.919211 |
| 299810    | Yeats4       | 0.006182 | 0.90192096 | 0.957848 |
| 360584    | Ggnbp2       | 0.006155 | 0.80540635 | 0.900597 |
| 79449     | Rpl21        | 0.0061   | 0.68889713 | 0.827606 |
| 687750    | Fam102a      | 0.006083 | 0.83126379 | 0.915481 |
| 24684     | Prlr         | 0.006058 | 0.97699379 | 1        |
| 25612     | Asns         | 0.00602  | 0.81418215 | 0.906471 |
| 246760    | Mafk         | 0.006019 | 0.90219319 | 0.957763 |
| 192247    | Sez6         | 0.005992 | 0.88041162 | 0.944804 |
| 287446    | Elp5         | 0.005966 | 0.91531304 | 0.965395 |
| 303831    | Eif4a2       | 0.005965 | 0.53310647 | 0.715152 |
| 100366044 | LOC100366044 | 0.005953 | 0.78864712 | 0.890536 |
| 291340    | Spag61       | 0.005947 | 0.98704369 | 1        |
| 287466    | Wscd1        | 0.005947 | 0.96469709 | 0.998405 |
| 24703     | Raf1         | 0.005902 | 0.82496029 | 0.91165  |
| 24822     | Tmbim6       | 0.005898 | 0.71283291 | 0.842491 |
| 64124     | Adgrl4       | 0.005885 | 0.93088861 | 0.975663 |
| 499883    | Gabpb1       | 0.005821 | 0.92840824 | 0.974243 |
| 24420     | Gspt1        | 0.005817 | 0.83546152 | 0.918193 |
| 366227    | Apmap        | 0.005798 | 0.89104596 | 0.951125 |
| 299730    | Nedd1        | 0.005786 | 0.95115962 | 0.988316 |
| 308126    | Zbtb2        | 0.00576  | 0.95117355 | 0.988276 |
| 295284    | Rbm8a        | 0.005756 | 0.88077469 | 0.945087 |
| 313648    | Ddost        | 0.005747 | 0.81879643 | 0.908899 |
| 362293    | Dnajb6       | 0.005739 | 0.84304209 | 0.921843 |
| 311355    | Ppip5k1      | 0.00562  | 0.88091726 | 0.945134 |
| 116470    | Stx1a        | 0.005546 | 0.90269236 | 0.957919 |
| 64516     | Vps45        | 0.005534 | 0.88097685 | 0.945038 |
| 502228    | Tmem181      | 0.005524 | 0.86273958 | 0.932883 |
| 303193    | Alkbh5       | 0.005506 | 0.93112025 | 0.975637 |
| 310665    | Mindy1       | 0.005454 | 0.90272477 | 0.957793 |
| 292008    | Txn14b       | 0.005453 | 0.90272505 | 0.95774  |
| 681370    | Bricd5       | 0.005441 | 0.98805753 | 1        |
| 305968    | Hmbox1       | 0.005426 | 0.66036508 | 0.805628 |
| 360698    | Tmem50b      | 0.005401 | 0.80107461 | 0.898073 |
| 502872    | Jagn1        | 0.005394 | 0.90273213 | 0.957695 |
| 310071    | Ercc8        | 0.005364 | 0.91571084 | 0.965708 |
| 296380    | Arfgef2      | 0.005352 | 0.80107093 | 0.898122 |
| 116552    | Plod1        | 0.005313 | 0.84675926 | 0.923363 |

|           |              |          |            |          |
|-----------|--------------|----------|------------|----------|
| 360921    | Rufy3        | 0.005301 | 0.60652071 | 0.768798 |
| 295230    | Cct3         | 0.005294 | 0.78992495 | 0.891503 |
| 305152    | Aff1         | 0.005279 | 0.90344097 | 0.95786  |
| 287042    | Nubp1        | 0.005239 | 0.9188179  | 0.968073 |
| 85332     | Cavin3       | 0.005237 | 0.83228778 | 0.915762 |
| 306274    | Ercc6        | 0.005237 | 0.92346217 | 0.971247 |
| 171150    | Cdk7         | 0.005236 | 0.9311076  | 0.975678 |
| 29676     | Psmb3        | 0.005211 | 0.81904398 | 0.909015 |
| 361374    | Brd7         | 0.005199 | 0.88094189 | 0.945107 |
| 313278    | Ptprd        | 0.005195 | 0.90266599 | 0.957998 |
| 312083    | Vps50        | 0.005193 | 0.81775557 | 0.908485 |
| 361607    | Emsy         | 0.005102 | 0.90591076 | 0.959517 |
| 79428     | Luzp1        | 0.005086 | 0.83911647 | 0.919715 |
| 24267     | Comt         | 0.005083 | 0.81630098 | 0.907663 |
| 50662     | Runx1        | 0.005072 | 0.9005067  | 0.957093 |
| 691889    | Atp8a2       | 0.005002 | 0.58413914 | 0.750417 |
| 365699    | Nadk2        | 0.004994 | 0.93092319 | 0.975592 |
| 307128    | Frmd4a       | 0.004982 | 0.91543231 | 0.965467 |
| 367865    | RGD1560821   | 0.004958 | 0.93244682 | 0.976705 |
| 303580    | Hexim2       | 0.004932 | 0.94915026 | 0.987575 |
| 83467     | Slit3        | 0.004909 | 0.93080933 | 0.975634 |
| 309326    | Ranbp6       | 0.004899 | 0.84601607 | 0.923187 |
| 171115    | Pde5a        | 0.004845 | 0.9307028  | 0.975576 |
| 25037     | Mobp         | 0.00482  | 0.98527226 | 1        |
| 500573    | Tmco4        | 0.00481  | 0.95092267 | 0.988285 |
| 316233    | Tjap1        | 0.004757 | 0.9149653  | 0.965242 |
| 295283    | Ankrd34a     | 0.004741 | 0.96486671 | 0.998527 |
| 25349     | Scn2b        | 0.004722 | 0.87834742 | 0.943706 |
| 498394    | Msantd1      | 0.004706 | 0.97742349 | 1        |
| 60665     | Cxcl6        | 0.004697 | 0.98292702 | 1        |
| 29218     | Rcn2         | 0.004695 | 0.87015876 | 0.938561 |
| 108351838 | LOC108351838 | 0.004693 | 0.9930286  | 1        |
| 303353    | Psm11        | 0.004636 | 0.83727279 | 0.919123 |
| 102556298 | LOC102556298 | 0.004631 | 0.96649433 | 0.999342 |
| 362595    | Oscpl        | 0.004614 | 0.93032569 | 0.975449 |
| 65049     | Megf6        | 0.004613 | 0.961389   | 0.996444 |
| 362205    | Shf          | 0.004585 | 0.91439907 | 0.964912 |
| 296159    | Vps16        | 0.004554 | 0.90107356 | 0.957482 |
| 311039    | Galnt13      | 0.004545 | 0.90102693 | 0.957486 |
| 54259     | Inpp5d       | 0.00453  | 0.9141682  | 0.964882 |
| 305848    | Zfp219       | 0.004511 | 0.88075222 | 0.945116 |
| 116693    | Cyth3        | 0.004511 | 0.86267735 | 0.932922 |
| 140670    | Ap2b1        | 0.004444 | 0.6953829  | 0.832196 |
| 288925    | Wdr83os      | 0.004406 | 0.91354921 | 0.964603 |
| 108348241 | LOC108348241 | 0.004394 | 0.9858451  | 1        |
| 311730    | Gpr155       | 0.004385 | 0.90010443 | 0.956826 |
| 24922     | Gabbr3       | 0.004382 | 0.91753641 | 0.967258 |
| 362219    | Gpcpd1       | 0.004381 | 0.86806685 | 0.937207 |
| 301509    | Tns1         | 0.004366 | 0.67334422 | 0.816337 |
| 306011    | Piwil2       | 0.004353 | 0.94984136 | 0.987916 |
| 362015    | Ampd2        | 0.004328 | 0.91308129 | 0.96443  |
| 362844    | Brd4         | 0.004327 | 0.84677206 | 0.923324 |
| 364032    | Pigc         | 0.004304 | 0.92885611 | 0.974444 |
| 50560     | Ip6k1        | 0.004303 | 0.82684881 | 0.913048 |
| 29562     | Prps1        | 0.004279 | 0.87070121 | 0.938934 |
| 292328    | RGD1562747   | 0.004278 | 0.92870547 | 0.974394 |

|           |              |          |            |          |
|-----------|--------------|----------|------------|----------|
| 313604    | Zmyml        | 0.004276 | 0.94496995 | 0.985055 |
| 170714    | Dynlrb1      | 0.004271 | 0.76649595 | 0.877384 |
| 29582     | Mgat3        | 0.004266 | 0.83363232 | 0.916659 |
| 295027    | Pcdh18       | 0.004242 | 0.94940169 | 0.987674 |
| 296512    | Fmn1         | 0.004179 | 0.91300238 | 0.964453 |
| 299159    | Atp6v1d      | 0.004137 | 0.83162639 | 0.915351 |
| 297566    | Atp6v1e1     | 0.004126 | 0.79129238 | 0.892201 |
| 300266    | Cbx5         | 0.004121 | 0.94880475 | 0.987485 |
| 29364     | Cd47         | 0.0041   | 0.82364464 | 0.911147 |
| 83615     | Atp6ap1      | 0.004092 | 0.77884718 | 0.884452 |
| 293700    | Trmt112      | 0.004091 | 0.90271958 | 0.957841 |
| 290558    | Nt5dc2       | 0.004042 | 0.94532937 | 0.98516  |
| 361191    | Nsun2        | 0.00403  | 0.89673148 | 0.954626 |
| 362274    | Ddx27        | 0.004027 | 0.92398785 | 0.971371 |
| 362162    | Arfgap2      | 0.004005 | 0.9112718  | 0.96332  |
| 301742    | Copg2        | 0.003983 | 0.85347376 | 0.92771  |
| 292028    | Kars         | 0.003951 | 0.87235729 | 0.939868 |
| 498678    | Ccdc71       | 0.003949 | 0.92371356 | 0.971189 |
| 364136    | Aasdh        | 0.003942 | 0.94763636 | 0.9867   |
| 691966    | Sqor         | 0.003927 | 0.94752    | 0.986633 |
| 298792    | Ypel5        | 0.003922 | 0.82706211 | 0.913072 |
| 361244    | RGD1307443   | 0.003895 | 0.83428852 | 0.917221 |
| 314675    | Btbd11       | 0.003884 | 0.92533849 | 0.972093 |
| 690294    | Tmem169      | 0.003875 | 0.94709228 | 0.986349 |
| 689688    | Atg2a        | 0.00385  | 0.89396009 | 0.953007 |
| 309451    | Gbf1         | 0.003849 | 0.84148821 | 0.92099  |
| 294307    | Kctd20       | 0.003827 | 0.9220155  | 0.970476 |
| 361088    | Rnf219       | 0.003823 | 0.94660829 | 0.985899 |
| 81574     | Scn1a        | 0.003799 | 0.83273014 | 0.91609  |
| 312915    | Arfgef1      | 0.003788 | 0.83975312 | 0.920095 |
| 100911383 | LOC100911383 | 0.003776 | 0.99460966 | 1        |
| 296466    | Gid8         | 0.003771 | 0.92380395 | 0.971231 |
| 360722    | Pdia5        | 0.003758 | 0.96453429 | 0.998345 |
| 311387    | Slc24a5      | 0.003742 | 0.98914518 | 1        |
| 300095    | Srebf2       | 0.003723 | 0.84680671 | 0.923309 |
| 304286    | Lmtk2        | 0.003706 | 0.91647429 | 0.966299 |
| 362665    | Camta1       | 0.003641 | 0.83306422 | 0.916298 |
| 303351    | Rhot1        | 0.003629 | 0.88890558 | 0.950225 |
| 364634    | Csmd1        | 0.003614 | 0.90334478 | 0.957811 |
| 311429    | Spef1        | 0.003599 | 0.93776822 | 0.980715 |
| 363254    | Atg9a        | 0.003558 | 0.87345182 | 0.940568 |
| 304055    | C2cd2        | 0.003545 | 0.91863212 | 0.967931 |
| 361413    | Nudt7        | 0.003506 | 0.94227887 | 0.983164 |
| 305645    | Dlg5         | 0.0035   | 0.9182929  | 0.967788 |
| 100362431 | Ttc30a       | 0.003483 | 0.97983718 | 1        |
| 100911196 | LOC100911196 | 0.003474 | 0.94165306 | 0.982996 |
| 678769    | Atg4a        | 0.003468 | 0.94152295 | 0.982968 |
| 307480    | Dele1        | 0.003447 | 0.89761024 | 0.955134 |
| 315708    | Edc3         | 0.0034   | 0.93997062 | 0.982047 |
| 316108    | Snupn        | 0.003365 | 0.96342081 | 0.997464 |
| 59101     | P3h4         | 0.003362 | 0.95950433 | 0.994869 |
| 500037    | Foxp2        | 0.00336  | 0.97480645 | 1        |
| 312728    | Tspan9       | 0.003356 | 0.9135786  | 0.964581 |
| 25541     | Scp2         | 0.003355 | 0.85077004 | 0.926198 |
| 25183     | Gdi1         | 0.003353 | 0.71690464 | 0.845153 |
| 678893    | Susd6        | 0.003353 | 0.86935847 | 0.938123 |

|           |              |          |            |          |
|-----------|--------------|----------|------------|----------|
| 103694865 | LOC103694865 | 0.003325 | 0.95522089 | 0.991562 |
| 311842    | Zer1         | 0.003252 | 0.90881641 | 0.961578 |
| 29753     | Ywhae        | 0.003218 | 0.69193299 | 0.829788 |
| 298524    | Dnal1l       | 0.003196 | 0.98840232 | 1        |
| 306607    | Tmco3        | 0.003141 | 0.92535619 | 0.972058 |
| 690073    | Nbas         | 0.003117 | 0.92894397 | 0.974483 |
| 362399    | Zxdc         | 0.003101 | 0.95440442 | 0.990876 |
| 305502    | Tmed4        | 0.003097 | 0.92771864 | 0.973841 |
| 360642    | Kansl1       | 0.003072 | 0.92594731 | 0.972464 |
| 298596    | Sdhd         | 0.003011 | 0.88809221 | 0.949835 |
| 100366024 | Prdm16       | 0.003006 | 0.95211305 | 0.98909  |
| 24917     | Kpnb1        | 0.002977 | 0.88302957 | 0.946387 |
| 360654    | Dnai2        | 0.00295  | 0.98776275 | 1        |
| 686779    | Caprin2      | 0.002944 | 0.91287759 | 0.964375 |
| 25701     | Mxl1         | 0.002944 | 0.91285254 | 0.964402 |
| 304962    | Atf6         | 0.002819 | 0.90267258 | 0.957952 |
| 290986    | Agtpbp1      | 0.002796 | 0.81834954 | 0.908721 |
| 501065    | Cmtm7        | 0.00275  | 0.97034809 | 1        |
| 361751    | Rnls         | 0.002746 | 0.98222602 | 1        |
| 305317    | Guf1         | 0.002717 | 0.94804747 | 0.986859 |
| 64463     | Surf1        | 0.002707 | 0.96592064 | 0.999074 |
| 100312665 | Vomlr9       | 0.002693 | 0.99894673 | 1        |
| 100322897 | Prr30        | 0.002693 | 0.99894673 | 1        |
| 100359438 | Zfp683       | 0.002693 | 0.99894673 | 1        |
| 100359479 | LOC100359479 | 0.002693 | 0.99894673 | 1        |
| 100359924 | LOC100359924 | 0.002693 | 0.99666927 | 1        |
| 100360209 | LOC100360209 | 0.002693 | 0.99851045 | 1        |
| 100360296 | LOC100360296 | 0.002693 | 0.99894673 | 1        |
| 100360426 | LOC100360426 | 0.002693 | 0.99851045 | 1        |
| 100360640 | Pxt1         | 0.002693 | 0.99851045 | 1        |
| 100360933 | LOC100360933 | 0.002693 | 0.99578694 | 1        |
| 100362588 | Izumo3       | 0.002693 | 0.99851045 | 1        |
| 100362817 | Cdrt4        | 0.002693 | 0.99894673 | 1        |
| 100363110 | LOC100363110 | 0.002693 | 0.99894673 | 1        |
| 100363193 | LOC100363193 | 0.002693 | 0.99233219 | 1        |
| 100363238 | Lrcoil       | 0.002693 | 0.99817568 | 1        |
| 100363341 | Lrriq4       | 0.002693 | 0.99894673 | 1        |
| 100363492 | Ly6k         | 0.002693 | 0.99752986 | 1        |
| 100909489 | Trpc5os      | 0.002693 | 0.99894673 | 1        |
| 100909913 | LOC100909913 | 0.002693 | 0.99337702 | 1        |
| 100909947 | LOC100909947 | 0.002693 | 0.99851045 | 1        |
| 100910057 | LOC100910057 | 0.002693 | 0.99894673 | 1        |
| 100910068 | LOC100910068 | 0.002693 | 0.99752986 | 1        |
| 100910205 | Prss50       | 0.002693 | 0.99702091 | 1        |
| 100910565 | LOC100910565 | 0.002693 | 0.99894673 | 1        |
| 100910679 | LOC100910679 | 0.002693 | 0.99894673 | 1        |
| 100910819 | LOC100910819 | 0.002693 | 0.99810411 | 1        |
| 100911002 | LOC100911002 | 0.002693 | 0.99851045 | 1        |
| 100911264 | LOC100911264 | 0.002693 | 0.99721331 | 1        |
| 100911842 | LOC100911842 | 0.002693 | 0.99894673 | 1        |
| 100912282 | LOC100912282 | 0.002693 | 0.98563953 | 1        |
| 100912302 | Sox1         | 0.002693 | 0.99894673 | 1        |
| 100912849 | LOC100912849 | 0.002693 | 0.99817568 | 1        |
| 102546454 | LOC102546454 | 0.002693 | 0.99873169 | 1        |
| 102546484 | LOC102546484 | 0.002693 | 0.99894673 | 1        |
| 102546724 | Tex51        | 0.002693 | 0.99894673 | 1        |



|           |                 |          |            |          |
|-----------|-----------------|----------|------------|----------|
| 102546830 | LOC102546830    | 0.002693 | 0.99817568 | 1        |
| 102548013 | Ccdc168         | 0.002693 | 0.99742003 | 1        |
| 102548067 | LOC102548067    | 0.002693 | 0.99817568 | 1        |
| 102550872 | LOC102550872    | 0.002693 | 0.99789346 | 1        |
| 102551064 | LOC102551064    | 0.002693 | 0.99721331 | 1        |
| 102552663 | LOC102552663    | 0.002693 | 0.99650671 | 1        |
| 102553196 | LOC102553196    | 0.002693 | 0.99817568 | 1        |
| 102554121 | LOC102554121    | 0.002693 | 0.99894673 | 1        |
| 102554898 | LOC102554898    | 0.002693 | 0.99789346 | 1        |
| 102555994 | LOC102555994    | 0.002693 | 0.99894673 | 1        |
| 102556175 | LOC102556175    | 0.002693 | 0.99894673 | 1        |
| 102556486 | LOC102556486    | 0.002693 | 0.99894673 | 1        |
| 102557137 | LOC102557137    | 0.002693 | 0.98890345 | 1        |
| 103690606 | LOC103690606    | 0.002693 | 0.99925523 | 0.99957  |
| 103690842 | LOC103690842    | 0.002693 | 0.99702091 | 1        |
| 103690877 | LOC103690877    | 0.002693 | 0.99894673 | 1        |
| 103691264 | LOC103691264    | 0.002693 | 0.99894673 | 1        |
| 103692077 | LOC103692077    | 0.002693 | 0.99817568 | 1        |
| 103692109 | Smkr1           | 0.002693 | 0.99851045 | 1        |
| 103692131 | Hoxa11          | 0.002693 | 0.99569834 | 1        |
| 103693021 | LOC103693021    | 0.002693 | 0.99817568 | 1        |
| 103693237 | LOC103693237    | 0.002693 | 0.99894673 | 1        |
| 103694381 | LOC103694381    | 0.002693 | 0.99613866 | 1        |
| 103694516 | LOC103694516    | 0.002693 | 0.99894673 | 1        |
| 103695246 | LOC103695246    | 0.002693 | 0.99894673 | 1        |
| 108348045 | NEWGENE 1310680 | 0.002693 | 0.97248289 | 1        |
| 108348079 | LOC108348079    | 0.002693 | 0.99250706 | 1        |
| 108348082 | LOC108348082    | 0.002693 | 0.993863   | 1        |
| 108348104 | NEWGENE 1308310 | 0.002693 | 0.99925523 | 0.99957  |
| 108348170 | NEWGENE 1307313 | 0.002693 | 0.99894673 | 1        |
| 108348288 | LOC108348288    | 0.002693 | 0.99894673 | 1        |
| 108348808 | LOC108348808    | 0.002693 | 0.99894673 | 1        |
| 108349632 | LOC108349632    | 0.002693 | 0.99851045 | 1        |
| 108351244 | LOC108351244    | 0.002693 | 0.99851045 | 1        |
| 108351992 | LOC108351992    | 0.002693 | 0.99851045 | 1        |
| 108353197 | LOC108353197    | 0.002693 | 0.99789346 | 1        |
| 108353379 | LOC108353379    | 0.002693 | 0.99894673 | 1        |
| 114027    | Dao             | 0.002693 | 0.99650671 | 1        |
| 114500    | Gbx2            | 0.002693 | 0.99817568 | 1        |
| 114628    | Abcg5           | 0.002693 | 0.99325585 | 1        |
| 114629    | Slc26a3         | 0.002693 | 0.99442666 | 1        |
| 114858    | Shc3            | 0.002693 | 0.98676118 | 1        |
| 116475    | Ift172          | 0.002693 | 0.94364908 | 0.984217 |
| 117033    | Mmp12           | 0.002693 | 0.99851045 | 1        |
| 117034    | Ptf1a           | 0.002693 | 0.99540892 | 1        |
| 170580    | Fgf21           | 0.002693 | 0.99505975 | 1        |
| 171075    | Fcer2           | 0.002693 | 0.99702091 | 1        |
| 171158    | Gpha2           | 0.002693 | 0.99505975 | 1        |
| 171304    | Kif11           | 0.002693 | 0.98113082 | 1        |
| 191570    | Serpina12       | 0.002693 | 0.99894673 | 1        |
| 192273    | Slc22a25        | 0.002693 | 0.99742003 | 1        |
| 24221     | Avp             | 0.002693 | 0.99764482 | 1        |
| 24271     | Cpb1            | 0.002693 | 0.99851045 | 1        |
| 24297     | Cyp1a2          | 0.002693 | 0.99851045 | 1        |
| 24335     | Epo             | 0.002693 | 0.99894673 | 1        |
| 24384     | Gc              | 0.002693 | 0.99721331 | 1        |

|        |             |          |            |          |
|--------|-------------|----------|------------|----------|
| 24385  | Gck         | 0.002693 | 0.99702091 | 1        |
| 24495  | Ii3         | 0.002693 | 0.99894673 | 1        |
| 24572  | Muc2        | 0.002693 | 0.99350727 | 1        |
| 245917 | Sycn        | 0.002693 | 0.99894673 | 1        |
| 245926 | Scaf8       | 0.002693 | 0.93758103 | 0.980573 |
| 24613  | Oprd1       | 0.002693 | 0.99011969 | 1        |
| 246149 | Gbx1        | 0.002693 | 0.99494872 | 1        |
| 246271 | Fev         | 0.002693 | 0.99721331 | 1        |
| 24641  | Flg         | 0.002693 | 0.99666927 | 1        |
| 24841  | Klklc2      | 0.002693 | 0.99817568 | 1        |
| 24883  | Wt1         | 0.002693 | 0.99894673 | 1        |
| 25128  | Umod        | 0.002693 | 0.99894673 | 1        |
| 25251  | Cyp2g1      | 0.002693 | 0.99721331 | 1        |
| 25471  | Kcne1       | 0.002693 | 0.99894673 | 1        |
| 25571  | Ttpa        | 0.002693 | 0.99285646 | 1        |
| 25642  | Cyp3a23/3a1 | 0.002693 | 0.99851045 | 1        |
| 25649  | Apoa2       | 0.002693 | 0.99764482 | 1        |
| 25653  | Tshb        | 0.002693 | 0.99721331 | 1        |
| 25727  | Mep1b       | 0.002693 | 0.99851045 | 1        |
| 25730  | Ntf4        | 0.002693 | 0.99817568 | 1        |
| 260320 | F7          | 0.002693 | 0.99894673 | 1        |
| 287278 | Cdkn2aipn1  | 0.002693 | 0.94077919 | 0.982569 |
| 287610 | Lpo         | 0.002693 | 0.99894673 | 1        |
| 287700 | Krt15       | 0.002693 | 0.99894673 | 1        |
| 287974 | Klhl6       | 0.002693 | 0.98684523 | 1        |
| 288001 | Kng1        | 0.002693 | 0.99789346 | 1        |
| 288588 | Polr2j      | 0.002693 | 0.95557241 | 0.991818 |
| 288597 | Fkbp6       | 0.002693 | 0.99851045 | 1        |
| 289035 | LOC289035   | 0.002693 | 0.99817568 | 1        |
| 289227 | Ly9         | 0.002693 | 0.99666927 | 1        |
| 290003 | Olr1627     | 0.002693 | 0.99894673 | 1        |
| 291755 | Dsg1        | 0.002693 | 0.99764482 | 1        |
| 291929 | Olr1666     | 0.002693 | 0.99894673 | 1        |
| 291944 | Ttc29       | 0.002693 | 0.99317411 | 1        |
| 292172 | Eya4        | 0.002693 | 0.98925902 | 1        |
| 29221  | Arg1        | 0.002693 | 0.98518    | 1        |
| 292559 | Olr3        | 0.002693 | 0.99894673 | 1        |
| 292701 | Ceacam20    | 0.002693 | 0.99894673 | 1        |
| 292757 | Fbxo17      | 0.002693 | 0.99635137 | 1        |
| 29277  | Cyp2c11     | 0.002693 | 0.99894673 | 1        |
| 292809 | Wdr88       | 0.002693 | 0.99851045 | 1        |
| 293130 | Ndufc2      | 0.002693 | 0.9276507  | 0.973824 |
| 293309 | Olr163      | 0.002693 | 0.99894673 | 1        |
| 293568 | Nkx1-2      | 0.002693 | 0.99894673 | 1        |
| 293623 | Rassf7      | 0.002693 | 0.98643019 | 1        |
| 293634 | Tmem171     | 0.002693 | 0.99650671 | 1        |
| 293703 | Nudt22      | 0.002693 | 0.97164564 | 1        |
| 293731 | Scgbld4     | 0.002693 | 0.99894673 | 1        |
| 293812 | Olr379      | 0.002693 | 0.99894673 | 1        |
| 293937 | Pkd211      | 0.002693 | 0.99620239 | 1        |
| 294075 | Ffar4       | 0.002693 | 0.99764482 | 1        |
| 294166 | Olr1708     | 0.002693 | 0.99894673 | 1        |
| 294187 | Olr1730     | 0.002693 | 0.99764482 | 1        |
| 294198 | Olr1744     | 0.002693 | 0.99721331 | 1        |
| 294640 | Otp         | 0.002693 | 0.99851045 | 1        |
| 294732 | Actb12      | 0.002693 | 0.99851045 | 1        |

|        |            |          |            |          |
|--------|------------|----------|------------|----------|
| 294979 | Adad1      | 0.002693 | 0.99605904 | 1        |
| 295176 | S100vp     | 0.002693 | 0.99851045 | 1        |
| 29518  | Lgals7     | 0.002693 | 0.99894673 | 1        |
| 295361 | Eps813     | 0.002693 | 0.99925523 | 0.99957  |
| 29552  | Lcn5       | 0.002693 | 0.99894673 | 1        |
| 295728 | Olr458     | 0.002693 | 0.99894673 | 1        |
| 296201 | Ovo12      | 0.002693 | 0.99894673 | 1        |
| 296836 | Lrrd1      | 0.002693 | 0.99789346 | 1        |
| 296867 | Pgr151     | 0.002693 | 0.99789346 | 1        |
| 297444 | Cfap100    | 0.002693 | 0.95937399 | 0.994788 |
| 297576 | Dppa3      | 0.002693 | 0.99702091 | 1        |
| 297960 | Rragd      | 0.002693 | 0.97624055 | 1        |
| 298077 | RGD1305807 | 0.002693 | 0.99789346 | 1        |
| 298392 | Ccin       | 0.002693 | 0.99851045 | 1        |
| 298396 | Olr834     | 0.002693 | 0.99894673 | 1        |
| 298981 | Nkx1-1     | 0.002693 | 0.99894673 | 1        |
| 299152 | Tex21      | 0.002693 | 0.99528966 | 1        |
| 299265 | RGD1309028 | 0.002693 | 0.99894673 | 1        |
| 299586 | Olr1087    | 0.002693 | 0.99894673 | 1        |
| 299756 | Mgat4c     | 0.002693 | 0.98647112 | 1        |
| 299928 | Colec10    | 0.002693 | 0.99851045 | 1        |
| 300016 | Slurp1     | 0.002693 | 0.99666927 | 1        |
| 300122 | Ribc2      | 0.002693 | 0.99817568 | 1        |
| 301042 | Trim71     | 0.002693 | 0.99851045 | 1        |
| 301133 | Tnfsf14    | 0.002693 | 0.99635137 | 1        |
| 301225 | Unc5c1     | 0.002693 | 0.99721331 | 1        |
| 301269 | Adgrf2     | 0.002693 | 0.99894673 | 1        |
| 301280 | Cyp2ac1    | 0.002693 | 0.99894673 | 1        |
| 302087 | Olr1218    | 0.002693 | 0.99650671 | 1        |
| 302432 | RGD1561382 | 0.002693 | 0.99894673 | 1        |
| 302591 | Nxf3       | 0.002693 | 0.99565727 | 1        |
| 302645 | RGD1566060 | 0.002693 | 0.99894673 | 1        |
| 302813 | Gpr119     | 0.002693 | 0.99894673 | 1        |
| 302954 | Olr1356    | 0.002693 | 0.99894673 | 1        |
| 303330 | Tmem97     | 0.002693 | 0.96144423 | 0.996447 |
| 303523 | Krt39      | 0.002693 | 0.99851045 | 1        |
| 303887 | Muc4       | 0.002693 | 0.99817568 | 1        |
| 304050 | Fam3b      | 0.002693 | 0.99452709 | 1        |
| 304124 | Cldn8      | 0.002693 | 0.99894673 | 1        |
| 304484 | Ccdc63     | 0.002693 | 0.99894673 | 1        |
| 304692 | Serpinb12  | 0.002693 | 0.99894673 | 1        |
| 305073 | Dtl        | 0.002693 | 0.99266189 | 1        |
| 305103 | Fcrl6      | 0.002693 | 0.99894673 | 1        |
| 305265 | Tmprss11e  | 0.002693 | 0.99894673 | 1        |
| 305606 | Mtif2      | 0.002693 | 0.96935374 | 1        |
| 305841 | Olr1637    | 0.002693 | 0.99789346 | 1        |
| 305846 | Slc39a2    | 0.002693 | 0.99894673 | 1        |
| 306436 | Fbxo8      | 0.002693 | 0.95767842 | 0.993247 |
| 307865 | Cntnap4    | 0.002693 | 0.96458949 | 0.998348 |
| 307920 | Pabpn11    | 0.002693 | 0.99894673 | 1        |
| 308551 | Vom2r38    | 0.002693 | 0.99894673 | 1        |
| 308831 | Tenm4      | 0.002693 | 0.95578474 | 0.991985 |
| 309201 | Rom1       | 0.002693 | 0.97106519 | 1        |
| 311325 | Knstrn     | 0.002693 | 0.99023261 | 1        |
| 311399 | Usp50      | 0.002693 | 0.99553137 | 1        |
| 311803 | Lrrc26     | 0.002693 | 0.99764482 | 1        |

|        |            |          |            |          |
|--------|------------|----------|------------|----------|
| 311825 | Stkld1     | 0.002693 | 0.99817568 | 1        |
| 313225 | Cavin4     | 0.002693 | 0.99325585 | 1        |
| 313254 | Kif12      | 0.002693 | 0.99894673 | 1        |
| 313552 | Zmynd12    | 0.002693 | 0.9899527  | 1        |
| 314406 | Serpinalf  | 0.002693 | 0.99851045 | 1        |
| 315071 | Col22a1    | 0.002693 | 0.98212686 | 1        |
| 315196 | Wnt7b      | 0.002693 | 0.99635137 | 1        |
| 315320 | Krt84      | 0.002693 | 0.99894673 | 1        |
| 315748 | Skor1      | 0.002693 | 0.99894673 | 1        |
| 316014 | Nbeal2     | 0.002693 | 0.9674595  | 0.99996  |
| 316318 | Prss40     | 0.002693 | 0.99894673 | 1        |
| 317161 | Mospd4     | 0.002693 | 0.99851045 | 1        |
| 317224 | Fndc3c1    | 0.002693 | 0.99851045 | 1        |
| 317270 | Mageb18    | 0.002693 | 0.99817568 | 1        |
| 317389 | Ccnb3      | 0.002693 | 0.99894673 | 1        |
| 360445 | Crisp2     | 0.002693 | 0.99894673 | 1        |
| 361257 | RGD1564129 | 0.002693 | 0.99851045 | 1        |
| 361275 | Bend7      | 0.002693 | 0.9887053  | 1        |
| 361332 | Adamts19   | 0.002693 | 0.9968402  | 1        |
| 361584 | Siglech    | 0.002693 | 0.99764482 | 1        |
| 361757 | Opalin     | 0.002693 | 0.99742003 | 1        |
| 362319 | Tmbim7     | 0.002693 | 0.99702091 | 1        |
| 362580 | Ccdc30     | 0.002693 | 0.98855893 | 1        |
| 362653 | Ctrc       | 0.002693 | 0.99635137 | 1        |
| 362858 | Polr3b     | 0.002693 | 0.95072898 | 0.988192 |
| 363060 | Plet1      | 0.002693 | 0.99817568 | 1        |
| 363270 | Spata3     | 0.002693 | 0.99817568 | 1        |
| 363274 | Prss56     | 0.002693 | 0.99894673 | 1        |
| 363453 | Ppplr3f    | 0.002693 | 0.98667766 | 1        |
| 363483 | Dmrtc1c1   | 0.002693 | 0.99894673 | 1        |
| 363627 | Rnf222     | 0.002693 | 0.99894673 | 1        |
| 363991 | Asc15      | 0.002693 | 0.99851045 | 1        |
| 364029 | Slc9c2     | 0.002693 | 0.99789346 | 1        |
| 364134 | Tecr1      | 0.002693 | 0.99817568 | 1        |
| 364152 | Phox2b     | 0.002693 | 0.99851045 | 1        |
| 364301 | Rnase9     | 0.002693 | 0.99817568 | 1        |
| 364303 | Rnase111   | 0.002693 | 0.99851045 | 1        |
| 364707 | Foxf2      | 0.002693 | 0.99462939 | 1        |
| 365217 | Cnfn       | 0.002693 | 0.99817568 | 1        |
| 365280 | Pgpep11    | 0.002693 | 0.9968402  | 1        |
| 365322 | Olr43      | 0.002693 | 0.99894673 | 1        |
| 365333 | Olr154     | 0.002693 | 0.99851045 | 1        |
| 365394 | Cabp4      | 0.002693 | 0.98875451 | 1        |
| 365408 | Ms4a15     | 0.002693 | 0.99817568 | 1        |
| 365460 | Tl12       | 0.002693 | 0.99413569 | 1        |
| 365900 | Alx3       | 0.002693 | 0.99894673 | 1        |
| 366089 | RGD1564319 | 0.002693 | 0.99894673 | 1        |
| 366116 | Olr729     | 0.002693 | 0.99894673 | 1        |
| 366836 | Ephx3      | 0.002693 | 0.9968402  | 1        |
| 366891 | Caps2      | 0.002693 | 0.99817568 | 1        |
| 367086 | Sln        | 0.002693 | 0.99817568 | 1        |
| 367196 | Acad8      | 0.002693 | 0.96499862 | 0.998446 |
| 367753 | Luzp4      | 0.002693 | 0.99817568 | 1        |
| 404643 | Mrgprb13   | 0.002693 | 0.99894673 | 1        |
| 404943 | Olr931     | 0.002693 | 0.99894673 | 1        |
| 405152 | Olr1192    | 0.002693 | 0.99894673 | 1        |

|        |            |          |            |          |
|--------|------------|----------|------------|----------|
| 405993 | Olr1462    | 0.002693 | 0.99894673 | 1        |
| 405997 | Olr1530    | 0.002693 | 0.99925523 | 0.99957  |
| 405999 | Olr1532    | 0.002693 | 0.99925523 | 0.99957  |
| 406227 | Krt72      | 0.002693 | 0.99851045 | 1        |
| 407757 | Krt76      | 0.002693 | 0.99592072 | 1        |
| 408206 | Ggt6       | 0.002693 | 0.99851045 | 1        |
| 408218 | Capn11     | 0.002693 | 0.99851045 | 1        |
| 408227 | Wfdc12     | 0.002693 | 0.99894673 | 1        |
| 408241 | Prss57     | 0.002693 | 0.99789346 | 1        |
| 445583 | Reg4       | 0.002693 | 0.99894673 | 1        |
| 450223 | Clec4e     | 0.002693 | 0.9968402  | 1        |
| 494208 | Ly49i3     | 0.002693 | 0.99894673 | 1        |
| 494211 | Ly49i5     | 0.002693 | 0.99894673 | 1        |
| 494244 | Bin2a      | 0.002693 | 0.99721331 | 1        |
| 494250 | Vomlr85    | 0.002693 | 0.99894673 | 1        |
| 494259 | Vomlr7     | 0.002693 | 0.99894673 | 1        |
| 497196 | NMS        | 0.002693 | 0.99764482 | 1        |
| 497862 | RGD1564086 | 0.002693 | 0.99789346 | 1        |
| 497913 | Gjc2       | 0.002693 | 0.99046245 | 1        |
| 497938 | LOC497938  | 0.002693 | 0.99894673 | 1        |
| 498006 | Ccdc103    | 0.002693 | 0.99742003 | 1        |
| 498129 | Tex45      | 0.002693 | 0.99894673 | 1        |
| 498230 | Golt1a     | 0.002693 | 0.99666927 | 1        |
| 498236 | LOC498236  | 0.002693 | 0.99789346 | 1        |
| 498251 | Apobec4    | 0.002693 | 0.99894673 | 1        |
| 498339 | LOC498339  | 0.002693 | 0.99894673 | 1        |
| 498423 | Sertad2    | 0.002693 | 0.9411631  | 0.982754 |
| 498607 | Mef2b      | 0.002693 | 0.99473368 | 1        |
| 498699 | RGD1562024 | 0.002693 | 0.99894673 | 1        |
| 498705 | LOC498705  | 0.002693 | 0.99894673 | 1        |
| 498836 | LOC498836  | 0.002693 | 0.99851045 | 1        |
| 498950 | Marveld3   | 0.002693 | 0.99789346 | 1        |
| 499072 | Tmem238    | 0.002693 | 0.98253484 | 1        |
| 499152 | Izumol     | 0.002693 | 0.9968402  | 1        |
| 499303 | Kcnk7      | 0.002693 | 0.99317411 | 1        |
| 499657 | S100a712   | 0.002693 | 0.99894673 | 1        |
| 499865 | Tmco5a     | 0.002693 | 0.99894673 | 1        |
| 499925 | Bpifb4     | 0.002693 | 0.99742003 | 1        |
| 499990 | Tmem243    | 0.002693 | 0.97112271 | 1        |
| 500139 | Itprid1    | 0.002693 | 0.99851045 | 1        |
| 500156 | Atoh1      | 0.002693 | 0.99894673 | 1        |
| 500349 | Gprc5d     | 0.002693 | 0.99742003 | 1        |
| 500366 | Rep15      | 0.002693 | 0.99764482 | 1        |
| 500434 | RGD1563056 | 0.002693 | 0.99226019 | 1        |
| 500449 | Sit1       | 0.002693 | 0.99540892 | 1        |
| 500554 | Fam229a    | 0.002693 | 0.99442666 | 1        |
| 500724 | Lbhd2      | 0.002693 | 0.99894673 | 1        |
| 500938 | RGD1563200 | 0.002693 | 0.99894673 | 1        |
| 500961 | Glb113     | 0.002693 | 0.99817568 | 1        |
| 501049 | Gpr62      | 0.002693 | 0.99473368 | 1        |
| 501050 | Iqcf3      | 0.002693 | 0.99894673 | 1        |
| 501070 | Dlec1      | 0.002693 | 0.99204811 | 1        |
| 502113 | Spata31d1b | 0.002693 | 0.99894673 | 1        |
| 502689 | Tldc2      | 0.002693 | 0.99565727 | 1        |
| 502852 | Cd207      | 0.002693 | 0.99894673 | 1        |
| 502946 | Arid3c     | 0.002693 | 0.99721331 | 1        |

|        |           |          |            |   |
|--------|-----------|----------|------------|---|
| 502970 | Angpt13   | 0.002693 | 0.99894673 | 1 |
| 503435 | Cldn34a   | 0.002693 | 0.99894673 | 1 |
| 541457 | Dbx2      | 0.002693 | 0.99851045 | 1 |
| 55939  | Apom      | 0.002693 | 0.99255236 | 1 |
| 56806  | Adam2     | 0.002693 | 0.99894673 | 1 |
| 57395  | Cltrn     | 0.002693 | 0.99894673 | 1 |
| 58975  | Klrg1     | 0.002693 | 0.99851045 | 1 |
| 60432  | Glp2r     | 0.002693 | 0.99894673 | 1 |
| 60566  | Syt8      | 0.002693 | 0.9968402  | 1 |
| 60574  | Prap1     | 0.002693 | 0.99817568 | 1 |
| 64027  | Bspry     | 0.002693 | 0.98392358 | 1 |
| 64055  | Guca2b    | 0.002693 | 0.99894673 | 1 |
| 641644 | Defb25    | 0.002693 | 0.99817568 | 1 |
| 64186  | Ascl1     | 0.002693 | 0.99894673 | 1 |
| 64349  | Crybb3    | 0.002693 | 0.99817568 | 1 |
| 64549  | Inhbc     | 0.002693 | 0.99851045 | 1 |
| 64680  | Crhr2     | 0.002693 | 0.98875451 | 1 |
| 65241  | Trnau1ap  | 0.002693 | 0.96948058 | 1 |
| 679247 | Eef1akmt3 | 0.002693 | 0.99817568 | 1 |
| 679701 | Barx2     | 0.002693 | 0.99764482 | 1 |
| 679932 | Nxph2     | 0.002693 | 0.99851045 | 1 |
| 680697 | Fcrl5     | 0.002693 | 0.99851045 | 1 |
| 680923 | Pvrig     | 0.002693 | 0.99894673 | 1 |
| 681006 | LOC681006 | 0.002693 | 0.99894673 | 1 |
| 681377 | Rp1       | 0.002693 | 0.99894673 | 1 |
| 681398 | Fam174b   | 0.002693 | 0.98427231 | 1 |
| 684972 | Fam25a    | 0.002693 | 0.99894673 | 1 |
| 685080 | Nipsnap3a | 0.002693 | 0.99894673 | 1 |
| 685463 | LOC685463 | 0.002693 | 0.99894673 | 1 |
| 685524 | Frg2      | 0.002693 | 0.99894673 | 1 |
| 685767 | LOC685767 | 0.002693 | 0.99894673 | 1 |
| 685940 | Samd3     | 0.002693 | 0.99817568 | 1 |
| 687472 | Wdr87     | 0.002693 | 0.99894673 | 1 |
| 689048 | Fam187b   | 0.002693 | 0.99817568 | 1 |
| 689090 | Khdc1     | 0.002693 | 0.99789346 | 1 |
| 689151 | Ccdc87    | 0.002693 | 0.99666927 | 1 |
| 689717 | Cpo       | 0.002693 | 0.99851045 | 1 |
| 689792 | Skint8    | 0.002693 | 0.99894673 | 1 |
| 689869 | Tas2r140  | 0.002693 | 0.99894673 | 1 |
| 689917 | Gpr21     | 0.002693 | 0.99721331 | 1 |
| 689927 | LOC689927 | 0.002693 | 0.99894673 | 1 |
| 690235 | LOC690235 | 0.002693 | 0.99894673 | 1 |
| 690252 | Cnih3     | 0.002693 | 0.99368044 | 1 |
| 690356 | Vom2r37   | 0.002693 | 0.99851045 | 1 |
| 690415 | LOC690415 | 0.002693 | 0.99894673 | 1 |
| 690504 | Kpna7     | 0.002693 | 0.99894673 | 1 |
| 690544 | Cby3      | 0.002693 | 0.99413569 | 1 |
| 690906 | Lilrc2    | 0.002693 | 0.99592072 | 1 |
| 690953 | Rdh8      | 0.002693 | 0.99894673 | 1 |
| 691044 | LOC691044 | 0.002693 | 0.99894673 | 1 |
| 691438 | Vom2r54   | 0.002693 | 0.99894673 | 1 |
| 691722 | LOC691722 | 0.002693 | 0.99540892 | 1 |
| 691750 | Tmem107   | 0.002693 | 0.98200319 | 1 |
| 691905 | Pla2g4d   | 0.002693 | 0.99894673 | 1 |
| 691909 | Ccdc189   | 0.002693 | 0.98962677 | 1 |
| 691970 | LOC691970 | 0.002693 | 0.99851045 | 1 |



|           |                 |          |            |          |
|-----------|-----------------|----------|------------|----------|
| 78951     | Hspb3           | 0.002693 | 0.99385849 | 1        |
| 78969     | Trib1           | 0.002693 | 0.9719009  | 1        |
| 81635     | Adar            | 0.002693 | 0.91621898 | 0.966136 |
| 81673     | Gtf2b           | 0.002693 | 0.94900733 | 0.987588 |
| 83784     | Agxt2           | 0.002693 | 0.99894673 | 1        |
| 84349     | Cd40lg          | 0.002693 | 0.99851045 | 1        |
| 84592     | Cetn1           | 0.002693 | 0.99894673 | 1        |
| 84597     | Fut9            | 0.002693 | 0.99764482 | 1        |
| 89833     | Ftcd            | 0.002693 | 0.99620239 | 1        |
| 94199     | Dpep1           | 0.002693 | 0.9968402  | 1        |
| 29228     | Nfic            | 0.002685 | 0.87071938 | 0.9389   |
| 303194    | Top3a           | 0.002583 | 0.97689771 | 1        |
| 361828    | Specc11         | 0.002476 | 0.92121108 | 0.970004 |
| 363544    | Cluap1          | 0.002447 | 0.95611379 | 0.992218 |
| 295234    | Lamt2           | 0.002309 | 0.94473204 | 0.984969 |
| 100911865 | LOC100911865    | 0.002307 | 0.99220861 | 1        |
| 108348166 | NEWGENE_1309446 | 0.002272 | 0.98960327 | 1        |
| 25125     | Stat3           | 0.002261 | 0.87537164 | 0.94173  |
| 84598     | Jak1            | 0.002187 | 0.85814164 | 0.930183 |
| 24924     | Ptn             | 0.002179 | 0.85808364 | 0.930173 |
| 117855    | Sf1             | 0.002178 | 0.92205683 | 0.970465 |
| 361577    | Kdelr1          | 0.002071 | 0.94489913 | 0.985035 |
| 302489    | Hs6st2          | 0.002061 | 0.94562526 | 0.985307 |
| 299135    | Dhrs7           | 0.002054 | 0.95615986 | 0.992212 |
| 678766    | Rhou            | 0.002023 | 0.96238183 | 0.996822 |
| 291703    | Ercc3           | 0.001982 | 0.95068923 | 0.988258 |
| 308023    | Ssx2ip          | 0.001923 | 0.94158347 | 0.982977 |
| 114100    | Sc5d            | 0.00188  | 0.89991142 | 0.956674 |
| 85267     | Slc24a3         | 0.001852 | 0.95761141 | 0.993285 |
| 298681    | Ssu72           | 0.00184  | 0.92761512 | 0.97384  |
| 314621    | Stk11           | 0.00183  | 0.95314791 | 0.98968  |
| 294079    | 5-Mar           | 0.001773 | 0.94514875 | 0.98508  |
| 58924     | Fut2            | 0.001762 | 0.99530342 | 1        |
| 289561    | Polr2b          | 0.001731 | 0.95213062 | 0.989001 |
| 296488    | Ola1            | 0.001714 | 0.92729027 | 0.97366  |
| 291295    | Rbm17           | 0.001695 | 0.96436492 | 0.998279 |
| 79255     | Atf4            | 0.001677 | 0.91819736 | 0.96774  |
| 170933    | Syf2            | 0.0016   | 0.96785113 | 1        |
| 307657    | Ogfod1          | 0.00159  | 0.97752002 | 1        |
| 116741    | Pcdha4          | 0.001583 | 0.90928692 | 0.961916 |
| 301005    | Impdh2          | 0.00157  | 0.96189587 | 0.996644 |
| 300947    | Tfdp2           | 0.001566 | 0.96207628 | 0.996776 |
| 301440    | Cdk15           | 0.001558 | 0.98182608 | 1        |
| 680737    | Snrpf           | 0.001538 | 0.97875342 | 1        |
| 287552    | Blmh            | 0.001537 | 0.96997084 | 1        |
| 365345    | Cyb5r2          | 0.001515 | 0.97226098 | 1        |
| 305066    | Prox1           | 0.001492 | 0.99649943 | 1        |
| 362188    | Slc5a12         | 0.001492 | 0.99797894 | 1        |
| 303488    | Hoxb3           | 0.00149  | 0.97951481 | 1        |
| 116674    | Jdp2            | 0.001486 | 0.9799235  | 1        |
| 305977    | Pnma2           | 0.001474 | 0.95214116 | 0.988958 |
| 362460    | Golt1b          | 0.001473 | 0.98018935 | 1        |
| 117044    | Rraga           | 0.001417 | 0.95073614 | 0.988145 |
| 29625     | Crhbp           | 0.001388 | 0.99687608 | 1        |
| 361956    | Rsrc1           | 0.001376 | 0.96914937 | 1        |
| 294007    | Pprc1           | 0.001371 | 0.97495962 | 1        |

|           |              |          |            |          |
|-----------|--------------|----------|------------|----------|
| 366984    | Cers5        | 0.001362 | 0.96495011 | 0.998559 |
| 500921    | Tmem117      | 0.001361 | 0.9649979  | 0.9985   |
| 362774    | Serpina11    | 0.001309 | 0.98346709 | 1        |
| 293888    | Plgrkt       | 0.001238 | 0.98475289 | 1        |
| 313477    | Zfyve9       | 0.001167 | 0.96564336 | 0.998896 |
| 294972    | Mccc1        | 0.001166 | 0.9859887  | 1        |
| 294276    | Brd2         | 0.001142 | 0.96242278 | 0.99681  |
| 365872    | Aph1a        | 0.001134 | 0.97664082 | 1        |
| 362894    | R3hdm2       | 0.001134 | 0.95955983 | 0.994873 |
| 25639     | Fkbpla       | 0.001125 | 0.91897542 | 0.968185 |
| 690586    | Ankrd40      | 0.001106 | 0.94786098 | 0.98688  |
| 100360821 | LOC100360821 | 0.001097 | 0.99871104 | 1        |
| 300075    | Tomm22       | 0.001059 | 0.96988335 | 1        |
| 306765    | Zfp346       | 0.001029 | 0.98323903 | 1        |
| 266803    | Sostdc1      | 0.001014 | 0.97401398 | 1        |
| 288269    | Cfap298      | 0.001012 | 0.98360894 | 1        |
| 288762    | Mtm1         | 0.001005 | 0.98064149 | 1        |
| 361399    | Edc4         | 9.65E-04 | 0.97820991 | 1        |
| 300320    | L3mbt12      | 9.59E-04 | 0.97651929 | 1        |
| 313121    | Map3k7       | 9.38E-04 | 0.9768456  | 1        |
| 680423    | Aup1         | 8.37E-04 | 0.97584487 | 1        |
| 691631    | Pacs2        | 8.35E-04 | 0.94989469 | 0.987917 |
| 294311    | RGD735065    | 8.35E-04 | 0.9777294  | 1        |
| 100362333 | LOC100362333 | 8.01E-04 | 0.99084672 | 1        |
| 288978    | LOC288978    | 8.00E-04 | 0.99408134 | 1        |
| 360668    | Sec1411      | 7.80E-04 | 0.96867722 | 1        |
| 310785    | Wdr47        | 7.16E-04 | 0.97379739 | 1        |
| 64310     | Arf1         | 7.03E-04 | 0.95619281 | 0.992192 |
| 305256    | Grsf1        | 6.97E-04 | 0.97357653 | 1        |
| 117140    | Hivep1       | 6.91E-04 | 0.98299562 | 1        |
| 304740    | Clasp1       | 6.89E-04 | 0.96501128 | 0.998405 |
| 295051    | Alg5         | 6.71E-04 | 0.99008271 | 1        |
| 288770    | Naca         | 6.46E-04 | 0.97401686 | 1        |
| 362835    | Reep6        | 6.45E-04 | 0.99061013 | 1        |
| 364081    | Irf6         | 6.34E-04 | 0.98863776 | 1        |
| 288667    | Fam216a      | 6.22E-04 | 0.98716172 | 1        |
| 289034    | Tmem183a     | 5.65E-04 | 0.9818154  | 1        |
| 294400    | Nus1         | 5.43E-04 | 0.98141459 | 1        |
| 680860    | Eppk1        | 5.42E-04 | 0.99809889 | 1        |
| 114558    | Becn1        | 5.25E-04 | 0.98235361 | 1        |
| 362849    | 2-Mar        | 5.12E-04 | 0.98216929 | 1        |
| 25709     | Hmbs         | 4.95E-04 | 0.99141737 | 1        |
| 286927    | Stk16        | 4.70E-04 | 0.99064653 | 1        |
| 361439    | Abcb10       | 4.46E-04 | 0.99374821 | 1        |
| 314061    | Uvssa        | 3.63E-04 | 0.9969842  | 1        |
| 315150    | Adsl         | 3.54E-04 | 0.99285917 | 1        |
| 301250    | Mrpl14       | 2.71E-04 | 0.99634705 | 1        |
| 287177    | Ergic1       | 2.39E-04 | 0.99441226 | 1        |
| 306962    | Hist1h2ac    | 2.36E-04 | 0.99961218 | 0.999665 |
| 100366237 | Pfdn4        | 1.93E-04 | 0.99595561 | 1        |
| 361227    | Tbcd7        | 1.89E-04 | 0.99660797 | 1        |
| 362061    | Cryz         | 1.38E-04 | 0.99872127 | 1        |
| 367930    | Rbm2         | 1.33E-04 | 0.9987645  | 1        |
| 282585    | Mrfap1       | 1.28E-04 | 0.99221423 | 1        |
| 155423    | Anxa7        | 1.27E-04 | 0.99502347 | 1        |
| 108348180 | LOC108348180 | 1.17E-04 | 0.99707907 | 1        |

|           |              |          |            |          |
|-----------|--------------|----------|------------|----------|
| 306628    | Col4a2       | 1.11E-04 | 0.99454583 | 1        |
| 54304     | Ssbp1        | 6.55E-05 | 0.99915162 | 0.999677 |
| 362824    | Mfsd12       | 6.48E-05 | 0.9980304  | 1        |
| 100360533 | Fam57a       | 3.09E-05 | 0.99950601 | 0.999611 |
| 301337    | Plekhb2      | 1.73E-05 | 0.99884769 | 1        |
| 79463     | Timm22       | #####    | 0.99906029 | 0.999743 |
| 296076    | Srp14        | #####    | 0.99848193 | 1        |
| 315756    | Dennd4a      | #####    | 0.99831562 | 1        |
| 306198    | Clybl        | #####    | 0.99924976 | 0.999722 |
| 314553    | Ptdss1       | #####    | 0.99763028 | 1        |
| 292915    | Sult2b1      | #####    | 0.99945199 | 0.999609 |
| 362990    | Zcrb1        | #####    | 0.99806689 | 1        |
| 311786    | Traf2        | #####    | 0.99881122 | 1        |
| 361866    | Hace1        | #####    | 0.99804915 | 1        |
| 100910106 | LOC100910106 | #####    | 0.99915139 | 0.999729 |
| 113947    | Maged2       | #####    | 0.99566574 | 1        |
| 311359    | Hypk         | #####    | 0.9967709  | 1        |
| 364902    | Epg5         | #####    | 0.99703497 | 1        |
| 361923    | Rpl2211      | #####    | 0.99755317 | 1        |
| 289144    | Cacybp       | #####    | 0.993353   | 1        |
| 64198     | Pmpcb        | #####    | 0.9957458  | 1        |
| 108352515 | LOC108352515 | #####    | 0.99911438 | 0.999744 |
| 689712    | Tmed11       | #####    | 0.99982961 | 0.99983  |
| 304081    | Clic6        | #####    | 0.9976527  | 1        |
| 287642    | Slc35b1      | #####    | 0.99246808 | 1        |
| 171358    | Camklg       | #####    | 0.99724796 | 1        |
| 310664    | Prune1       | #####    | 0.99048685 | 1        |
| 362513    | Shb          | #####    | 0.99709439 | 1        |
| 300105    | Tt1112       | #####    | 0.99478903 | 1        |
| 29495     | Dlg4         | #####    | 0.98648854 | 1        |
| 24781     | Slc4a3       | #####    | 0.99115909 | 1        |
| 300149    | Ncaph2       | #####    | 0.98714961 | 1        |
| 301126    | Safb2        | #####    | 0.99042279 | 1        |
| 307235    | Rbfa         | #####    | 0.99330319 | 1        |
| 288333    | Gbe1         | #####    | 0.98825807 | 1        |
| 299809    | Cct2         | #####    | 0.97716458 | 1        |
| 29290     | Adora1       | #####    | 0.98873561 | 1        |
| 25149     | Esr2         | #####    | 0.99871676 | 1        |
| 108348201 | LOC108348201 | #####    | 0.99757966 | 1        |
| 500695    | Snw1         | #####    | 0.98967031 | 1        |
| 363091    | Myzap        | #####    | 0.99791534 | 1        |
| 117535    | Chd4         | #####    | 0.97339583 | 1        |
| 500956    | LOC500956    | #####    | 0.99135216 | 1        |
| 293856    | Pdzd4        | #####    | 0.99028316 | 1        |
| 308408    | Gpr4         | #####    | 0.99630415 | 1        |
| 29672     | Psma5        | #####    | 0.98464728 | 1        |
| 259273    | Kcnq5        | #####    | 0.98516292 | 1        |
| 290363    | Rcbtb2       | #####    | 0.99108185 | 1        |
| 81659     | Gak          | #####    | 0.9765901  | 1        |
| 25490     | Nedd8        | #####    | 0.97764737 | 1        |
| 289095    | Nmnat2       | #####    | 0.984051   | 1        |
| 114862    | Cacnalh      | #####    | 0.98053579 | 1        |
| 679203    | Nelfcd       | #####    | 0.98300235 | 1        |
| 171010    | Ppp1r14c     | #####    | 0.99088351 | 1        |
| 290555    | Spcs1        | #####    | 0.97583968 | 1        |
| 192218    | Kat5         | #####    | 0.97748867 | 1        |

|           |              |          |            |          |
|-----------|--------------|----------|------------|----------|
| 498122    | LOC498122    | #####    | 0.99132311 | 1        |
| 679651    | Tmem178b     | #####    | 0.96814007 | 1        |
| 289353    | Slc30a10     | #####    | 0.98950263 | 1        |
| 309262    | Nsdh1        | #####    | 0.96597858 | 0.99908  |
| 117053    | Rps15a       | #####    | 0.96358179 | 0.997576 |
| 338475    | Nrep         | #####    | 0.97482733 | 1        |
| 311857    | Gpr107       | #####    | 0.97147778 | 1        |
| 311061    | Itgb6        | #####    | 0.98910344 | 1        |
| 363286    | Traf3ip1     | -0.00105 | 0.98860877 | 1        |
| 302327    | Zfp711       | -0.00106 | 0.99188089 | 1        |
| 24967     | Psmb9        | -0.0011  | 0.99162235 | 1        |
| 360762    | Polr1d       | -0.0011  | 0.98541483 | 1        |
| 363494    | Gla          | -0.00111 | 0.9707022  | 1        |
| 192356    | Unc50        | -0.00114 | 0.98062476 | 1        |
| 300257    | Pfdn5        | -0.00116 | 0.97222612 | 1        |
| 313511    | Mob3c        | -0.00118 | 0.99378731 | 1        |
| 100359982 | Mpc2         | -0.00119 | 0.97168029 | 1        |
| 100910418 | LOC100910418 | -0.00119 | 0.99689062 | 1        |
| 300803    | Lactb        | -0.00121 | 0.98717248 | 1        |
| 290939    | Med10        | -0.00126 | 0.97698497 | 1        |
| 366448    | Uqcrh        | -0.00127 | 0.95472345 | 0.991153 |
| 116721    | Abcc5        | -0.00129 | 0.93578371 | 0.979123 |
| 54290     | Rgs10        | -0.00137 | 0.94844158 | 0.987215 |
| 316687    | Gin1         | -0.00138 | 0.98561931 | 1        |
| 298609    | Efhd2        | -0.00139 | 0.97164274 | 1        |
| 108348192 | LOC108348192 | -0.0014  | 0.99039439 | 1        |
| 25671     | Smad1        | -0.00141 | 0.97534786 | 1        |
| 499417    | Sumo3        | -0.00142 | 0.95119933 | 0.988249 |
| 313022    | Map3k6       | -0.00143 | 0.9895123  | 1        |
| 298451    | Atp6v0b      | -0.00144 | 0.96673006 | 0.999423 |
| 682937    | Wasf3        | -0.00145 | 0.97201351 | 1        |
| 619574    | Cybc1        | -0.00146 | 0.96601631 | 0.999065 |
| 291849    | Zfp319       | -0.00148 | 0.9848135  | 1        |
| 679921    | Vasn         | -0.00149 | 0.98129669 | 1        |
| 25458     | Gss          | -0.00149 | 0.96937668 | 1        |
| 116723    | Pip4k2a      | -0.00151 | 0.9404284  | 0.98231  |
| 103690508 | LOC103690508 | -0.00151 | 0.99621506 | 1        |
| 364386    | Rnf31        | -0.00152 | 0.97545511 | 1        |
| 85262     | Slc25a27     | -0.00153 | 0.96878537 | 1        |
| 288256    | Cryz11       | -0.00153 | 0.9686561  | 1        |
| 406864    | Clic1        | -0.00156 | 0.95655433 | 0.992513 |
| 299507    | Asnsd1       | -0.00157 | 0.94958839 | 0.987761 |
| 498297    | Cnst         | -0.00159 | 0.93961536 | 0.981838 |
| 81733     | Nell1        | -0.00163 | 0.94790893 | 0.986876 |
| 361006    | Cfap70       | -0.00163 | 0.98834097 | 1        |
| 502525    | Dnajc19      | -0.00164 | 0.9763175  | 1        |
| 24919     | Yy1          | -0.00165 | 0.97126178 | 1        |
| 500941    | Msantd4      | -0.00167 | 0.95716363 | 0.992929 |
| 498675    | LOC498675    | -0.00168 | 0.99415228 | 1        |
| 304469    | Rilpl1       | -0.00171 | 0.97298356 | 1        |
| 64159     | Sptan1       | -0.00173 | 0.76988463 | 0.879149 |
| 117263    | Psmc1        | -0.00173 | 0.91200694 | 0.963776 |
| 298012    | Rad23b       | -0.00175 | 0.90308057 | 0.957904 |
| 81654     | Dlat         | -0.00178 | 0.94416847 | 0.984543 |
| 81770     | Rpl37        | -0.00179 | 0.9426417  | 0.983435 |
| 192209    | Spdya        | -0.0018  | 0.99088844 | 1        |

|           |              |          |            |          |
|-----------|--------------|----------|------------|----------|
| 314751    | Tmcc3        | -0.0018  | 0.96209076 | 0.996683 |
| 102554639 | LOC102554639 | -0.00188 | 0.98524373 | 1        |
| 24675     | Ppp3cb       | -0.00195 | 0.9149975  | 0.965223 |
| 500226    | Wdr54        | -0.00196 | 0.95273824 | 0.989362 |
| 287537    | Abr          | -0.00197 | 0.90447733 | 0.958212 |
| 296648    | Mapkap1      | -0.00201 | 0.95432412 | 0.990847 |
| 100362819 | LOC100362819 | -0.00203 | 0.96331761 | 0.997411 |
| 499818    | Ppp1r1c      | -0.00207 | 0.85562339 | 0.928986 |
| 100360781 | LOC100360781 | -0.00209 | 0.99319175 | 1        |
| 25407     | Cd59         | -0.00215 | 0.81182401 | 0.90501  |
| 315338    | Hoxc10       | -0.00217 | 0.97074879 | 1        |
| 83799     | Dpp7         | -0.00218 | 0.93779373 | 0.980688 |
| 303293    | Cyb5d2       | -0.00223 | 0.97316296 | 1        |
| 691455    | Calml4       | -0.00225 | 0.96644687 | 0.999347 |
| 25682     | Ppard        | -0.00225 | 0.95671131 | 0.992622 |
| 79130     | Dnajc5       | -0.00225 | 0.88298183 | 0.946496 |
| 24565     | Abcc1        | -0.00225 | 0.9568903  | 0.992699 |
| 360481    | Dnajc3       | -0.00226 | 0.93608037 | 0.979326 |
| 83465     | Celsr2       | -0.00226 | 0.90721165 | 0.960361 |
| 171350    | Pabpc1       | -0.00228 | 0.88376885 | 0.946593 |
| 24672     | Ppp2ca       | -0.00231 | 0.87026633 | 0.938624 |
| 291963    | Tmem208      | -0.00232 | 0.96558102 | 0.998886 |
| 103693257 | LOC103693257 | -0.00233 | 0.98643747 | 1        |
| 103692170 | LOC103692170 | -0.00233 | 0.98454139 | 1        |
| 297380    | Ccdc142      | -0.00233 | 0.98454139 | 1        |
| 360514    | Ublcp1       | -0.00235 | 0.91500819 | 0.96518  |
| 365823    | Fstl5        | -0.00235 | 0.96890996 | 1        |
| 140945    | Rtn3         | -0.00236 | 0.67349473 | 0.816468 |
| 103693419 | LOC103693419 | -0.00238 | 0.98237993 | 1        |
| 292892    | Irf3         | -0.00241 | 0.94284837 | 0.983597 |
| 57302     | Cnr2         | -0.00243 | 0.9788177  | 1        |
| 56768     | Pclo         | -0.00245 | 0.93091924 | 0.975641 |
| 303901    | Sema5b       | -0.00249 | 0.98377092 | 1        |
| 286905    | Cyp4f5       | -0.00254 | 0.98312314 | 1        |
| 304284    | Bri3         | -0.00254 | 0.95059812 | 0.988217 |
| 362051    | Lmo4         | -0.00256 | 0.92419382 | 0.971533 |
| 362412    | Rad18        | -0.00256 | 0.97652413 | 1        |
| 688786    | Pet100       | -0.00258 | 0.94401215 | 0.984434 |
| 360916    | Tmem150c     | -0.00262 | 0.90927775 | 0.961959 |
| 59073     | Lxn          | -0.00263 | 0.84222074 | 0.921421 |
| 289740    | Pes1         | -0.00277 | 0.93181518 | 0.976258 |
| 315345    | Copz1        | -0.00283 | 0.89459307 | 0.953362 |
| 289443    | Lrrc8c       | -0.00283 | 0.9059163  | 0.959469 |
| 100911832 | Rtl5         | -0.00284 | 0.9456927  | 0.985323 |
| 140922    | Txn11        | -0.00287 | 0.87799185 | 0.94343  |
| 361618    | Stim1        | -0.00288 | 0.91703106 | 0.966779 |
| 140666    | Rcan2        | -0.00295 | 0.84141203 | 0.921012 |
| 314456    | Tecpr2       | -0.00297 | 0.92234556 | 0.970501 |
| 316313    | Dst          | -0.00299 | 0.65070446 | 0.80253  |
| 317377    | Ccdc120      | -0.00304 | 0.98112934 | 1        |
| 361436    | Afg3l1       | -0.00307 | 0.94974639 | 0.987871 |
| 293098    | Tmem135      | -0.00308 | 0.93981543 | 0.981939 |
| 289276    | Adss         | -0.0031  | 0.89218029 | 0.951909 |
| 305105    | Fbxo28       | -0.00311 | 0.94581087 | 0.985392 |
| 303470    | Kat7         | -0.00311 | 0.88846607 | 0.950022 |
| 688314    | Cenpx        | -0.00313 | 0.96665578 | 0.999401 |

|           |              |          |            |          |
|-----------|--------------|----------|------------|----------|
| 171081    | Csf2rb       | -0.00314 | 0.98070976 | 1        |
| 81774     | Rps11        | -0.00316 | 0.86486858 | 0.93439  |
| 360867    | Ccdc181      | -0.00317 | 0.95238146 | 0.989045 |
| 102551311 | LOC102551311 | -0.00318 | 0.98357359 | 1        |
| 296624    | Dolpp1       | -0.0032  | 0.93807613 | 0.980821 |
| 499783    | Garnl3       | -0.00321 | 0.89822032 | 0.955463 |
| 287476    | Zzef1        | -0.00322 | 0.89094699 | 0.951073 |
| 25647     | I17          | -0.00323 | 0.98028209 | 1        |
| 102557071 | LOC102557071 | -0.00325 | 0.99114247 | 1        |
| 65183     | Aldh3a2      | -0.00327 | 0.87941649 | 0.944268 |
| 65274     | Nup62        | -0.00329 | 0.93925367 | 0.981675 |
| 25716     | Syt1         | -0.0033  | 0.83148967 | 0.915307 |
| 155205    | Slc36a1      | -0.00333 | 0.90390395 | 0.958084 |
| 89812     | Pip4k2b      | -0.00334 | 0.86678185 | 0.935926 |
| 306817    | Dek          | -0.00334 | 0.9362232  | 0.979422 |
| 498406    | Mrps24       | -0.00334 | 0.95485468 | 0.991236 |
| 688681    | Tgfbr31      | -0.00338 | 0.97962468 | 1        |
| 287830    | Nup85        | -0.00339 | 0.95915121 | 0.994666 |
| 303419    | Cuedc1       | -0.00343 | 0.945621   | 0.985356 |
| 171087    | Mpc1         | -0.00343 | 0.86405321 | 0.933615 |
| 363024    | Slc44a2      | -0.00345 | 0.82964208 | 0.914753 |
| 108350451 | LOC108350451 | -0.00346 | 0.99585726 | 1        |
| 304012    | Trmt10c      | -0.00346 | 0.94924947 | 0.987624 |
| 619581    | Nicn1        | -0.00347 | 0.88856051 | 0.949963 |
| 362845    | Zfp870       | -0.00347 | 0.96608252 | 0.999079 |
| 315037    | Atmin        | -0.00349 | 0.90968636 | 0.962231 |
| 306647    | Champ1       | -0.00351 | 0.92989337 | 0.975103 |
| 313482    | Zygl1a       | -0.00351 | 0.98286607 | 1        |
| 361635    | Vps351       | -0.00355 | 0.90821222 | 0.961153 |
| 171400    | Elov15       | -0.0036  | 0.77932799 | 0.884892 |
| 296612    | Med27        | -0.00366 | 0.93501092 | 0.978637 |
| 289521    | Ankrd17      | -0.00366 | 0.84006094 | 0.920168 |
| 299738    | Vezt         | -0.00367 | 0.85913862 | 0.930892 |
| 304663    | Lyl1         | -0.00368 | 0.97836633 | 1        |
| 311855    | RGD1305178   | -0.00368 | 0.8965314  | 0.954679 |
| 311847    | Dolk         | -0.0037  | 0.93484805 | 0.978574 |
| 56814     | Slc24a1      | -0.0037  | 0.98219331 | 1        |
| 25249     | Coq7         | -0.00378 | 0.96178412 | 0.996582 |
| 362600    | Adprh12      | -0.00381 | 0.95042517 | 0.988253 |
| 25420     | Cryab        | -0.00383 | 0.8260304  | 0.91262  |
| 108348065 | LOC108348065 | -0.00384 | 0.94100125 | 0.982666 |
| 84581     | Hdac6        | -0.00384 | 0.94100125 | 0.982666 |
| 307992    | Atrn11       | -0.00387 | 0.79082668 | 0.891887 |
| 309678    | Trappc10     | -0.00392 | 0.86669375 | 0.935884 |
| 65137     | Ruvbl1       | -0.00394 | 0.93241769 | 0.976728 |
| 60379     | Col5a3       | -0.00394 | 0.72797273 | 0.851507 |
| 362770    | Ccdc88c      | -0.00396 | 0.9677871  | 1        |
| 305889    | Thtpa        | -0.00402 | 0.88989642 | 0.950644 |
| 308588    | Car11        | -0.00403 | 0.92351463 | 0.971248 |
| 84389     | Ccnh         | -0.00409 | 0.94295829 | 0.983604 |
| 300732    | Pstpip1      | -0.00413 | 0.96680833 | 0.99945  |
| 85243     | Pik3cb       | -0.00414 | 0.91328965 | 0.964489 |
| 65042     | Sfxn3        | -0.00419 | 0.83464082 | 0.917503 |
| 691155    | Ccdc6        | -0.00419 | 0.87715855 | 0.942907 |
| 301617    | Pask         | -0.00423 | 0.97613963 | 1        |
| 288455    | Pomp         | -0.00424 | 0.88632314 | 0.948423 |



|           |              |          |            |          |
|-----------|--------------|----------|------------|----------|
| 499651    | Etv31        | -0.00426 | 0.99760056 | 1        |
| 499308    | Flrt1        | -0.00427 | 0.94521774 | 0.985098 |
| 314598    | Wiz          | -0.0043  | 0.87961633 | 0.94427  |
| 362260    | Dhx35        | -0.0043  | 0.94085031 | 0.982589 |
| 64226     | Mlst8        | -0.00434 | 0.89698325 | 0.95484  |
| 140595    | Gpr83        | -0.00435 | 0.97399853 | 1        |
| 64470     | Ddb1         | -0.00438 | 0.78751696 | 0.889788 |
| 500287    | Srgap3       | -0.0044  | 0.84240732 | 0.921519 |
| 25045     | Dbi          | -0.00441 | 0.75922678 | 0.872735 |
| 116455    | Atp6v0a2     | -0.00442 | 0.92227169 | 0.970531 |
| 297699    | Strap        | -0.00442 | 0.85460111 | 0.9283   |
| 294520    | Mical1       | -0.00443 | 0.86386496 | 0.933517 |
| 81744     | Pde7a        | -0.00444 | 0.94584791 | 0.985377 |
| 114589    | Cntn5        | -0.00445 | 0.96504254 | 0.998383 |
| 64307     | Rpl24        | -0.00448 | 0.84408476 | 0.922347 |
| 690354    | Lymr2        | -0.0045  | 0.93411478 | 0.978129 |
| 308755    | Blm          | -0.00453 | 0.94996646 | 0.987938 |
| 299900    | Utp23        | -0.00456 | 0.96446374 | 0.998327 |
| 361050    | Rcbtb1       | -0.00456 | 0.88306853 | 0.946376 |
| 299346    | Nudt14       | -0.00457 | 0.93837742 | 0.981029 |
| 367949    | RGD1560171   | -0.00457 | 0.97479896 | 1        |
| 501454    | Oaz2         | -0.00459 | 0.80626053 | 0.900811 |
| 361251    | Elmo1        | -0.00461 | 0.787831   | 0.889931 |
| 300079    | Rpl3         | -0.00462 | 0.73764886 | 0.858135 |
| 681012    | Smg5         | -0.00464 | 0.84604266 | 0.923163 |
| 100361269 | Snrpa1       | -0.00467 | 0.94892761 | 0.987559 |
| 29716     | Cacna1d      | -0.00467 | 0.92336663 | 0.971254 |
| 361783    | Zfp57        | -0.0047  | 0.96228758 | 0.996778 |
| 293148    | C2cd3        | -0.0047  | 0.93212717 | 0.976531 |
| 313777    | Noc2l        | -0.00472 | 0.89446145 | 0.953275 |
| 363869    | Ubl3         | -0.00477 | 0.76155977 | 0.874045 |
| 500655    | Timm17a11    | -0.00483 | 0.96917983 | 1        |
| 683381    | Sin3b        | -0.00487 | 0.90177198 | 0.957796 |
| 362813    | Nabp2        | -0.00489 | 0.87962719 | 0.944228 |
| 307091    | Akr1e2       | -0.00492 | 0.93519516 | 0.978722 |
| 293160    | RGD1311703   | -0.005   | 0.84717728 | 0.923607 |
| 363799    | Xxylt1       | -0.00501 | 0.90359467 | 0.957969 |
| 690188    | Fam168b      | -0.00503 | 0.77966868 | 0.885174 |
| 84551     | Slc7a8       | -0.00503 | 0.88934084 | 0.950317 |
| 688685    | Pheta2       | -0.00504 | 0.97307612 | 1        |
| 299131    | Dhrs711      | -0.00505 | 0.96207931 | 0.996725 |
| 100911576 | LOC100911576 | -0.00505 | 0.81375563 | 0.906102 |
| 691031    | Cdc42se2     | -0.00507 | 0.8690704  | 0.938025 |
| 100912936 | Hoxd8        | -0.00507 | 0.92363203 | 0.971211 |
| 298653    | Nmnat1       | -0.0051  | 0.93844362 | 0.981044 |
| 287383    | B9d1         | -0.00514 | 0.94870712 | 0.987437 |
| 298705    | Raver1       | -0.00519 | 0.88395212 | 0.946736 |
| 293502    | Kif22        | -0.00523 | 0.96096738 | 0.996061 |
| 303321    | Ccnq         | -0.00524 | 0.94474458 | 0.984928 |
| 361615    | Relt         | -0.00526 | 0.95207119 | 0.989101 |
| 64472     | Naa35        | -0.00527 | 0.88933124 | 0.95036  |
| 500864    | Tmem74       | -0.00528 | 0.90395914 | 0.957982 |
| 171092    | G3bp1        | -0.00533 | 0.82011159 | 0.909193 |
| 360741    | Ess2         | -0.00541 | 0.91094622 | 0.963136 |
| 499669    | Celf3        | -0.00542 | 0.95102154 | 0.988226 |
| 290408    | Sugt1        | -0.00542 | 0.86119282 | 0.932269 |

|           |              |          |            |          |
|-----------|--------------|----------|------------|----------|
| 311622    | Stk4         | -0.00543 | 0.91431086 | 0.964979 |
| 294515    | Foxo3        | -0.0055  | 0.90142848 | 0.957699 |
| 114216    | S100a3       | -0.00551 | 0.95052781 | 0.988252 |
| 311826    | Rexo4        | -0.00553 | 0.91403554 | 0.964849 |
| 103694538 | LOC103694538 | -0.00554 | 0.95579489 | 0.991941 |
| 312538    | Mcm2         | -0.00555 | 0.94261862 | 0.983465 |
| 301343    | Lman21       | -0.00557 | 0.95929345 | 0.994759 |
| 360672    | Cep131       | -0.00557 | 0.91377865 | 0.964685 |
| 362012    | Strip1       | -0.0056  | 0.85351692 | 0.927651 |
| 304181    | Tssk2        | -0.00562 | 0.99498416 | 1        |
| 315484    | Bbs9         | -0.00564 | 0.92337519 | 0.971209 |
| 498192    | RGD1560398   | -0.00567 | 0.81737274 | 0.908218 |
| 171439    | Bzw2         | -0.00569 | 0.9285564  | 0.974345 |
| 309692    | Pcnt         | -0.00571 | 0.89890837 | 0.955874 |
| 353256    | Gtf2i        | -0.00575 | 0.724857   | 0.849637 |
| 298399    | Gba2         | -0.00581 | 0.87197783 | 0.939672 |
| 310612    | Ilf2         | -0.00585 | 0.84654407 | 0.923287 |
| 295357    | Lamtor5      | -0.00591 | 0.89664726 | 0.954749 |
| 192225    | Spata7       | -0.00591 | 0.92678176 | 0.973287 |
| 103694491 | LOC103694491 | -0.00592 | 0.95764779 | 0.993269 |
| 315673    | Tnfaip813    | -0.00594 | 0.97013886 | 1        |
| 314004    | Cmpk2        | -0.00596 | 0.8882824  | 0.949932 |
| 685144    | Sec24c       | -0.00597 | 0.80663892 | 0.901076 |
| 316640    | Atg4b        | -0.00598 | 0.81574096 | 0.907146 |
| 362265    | Ift52        | -0.006   | 0.86885094 | 0.937841 |
| 290679    | Ints10       | -0.00601 | 0.89107842 | 0.951106 |
| 313786    | Fdx2         | -0.00602 | 0.89536801 | 0.953814 |
| 314904    | Arhgef25     | -0.00604 | 0.82962856 | 0.914791 |
| 108351053 | LOC108351053 | -0.00609 | 0.9253059  | 0.972139 |
| 305861    | Ap5m1        | -0.00609 | 0.9253059  | 0.972139 |
| 305837    | Ttc5         | -0.00612 | 0.88184197 | 0.945646 |
| 25433     | Hbegf        | -0.00613 | 0.89865369 | 0.955817 |
| 362423    | Rassf4       | -0.00615 | 0.78754729 | 0.889769 |
| 681389    | Cops9        | -0.00615 | 0.8414246  | 0.920973 |
| 680308    | Mthfd2       | -0.00621 | 0.9243723  | 0.97156  |
| 362291    | Myt1         | -0.00622 | 0.87827346 | 0.943679 |
| 299851    | Mars         | -0.00624 | 0.81461282 | 0.906792 |
| 305710    | Nek10        | -0.00624 | 0.96899745 | 1        |
| 308998    | Zfp629       | -0.00625 | 0.92186892 | 0.970429 |
| 289392    | Plxna2       | -0.00626 | 0.74808999 | 0.864945 |
| 360659    | Mif4gd       | -0.00627 | 0.93786279 | 0.980706 |
| 298317    | Ube2a        | -0.00628 | 0.84837877 | 0.924546 |
| 679747    | Tma7         | -0.00628 | 0.81939646 | 0.909088 |
| 362461    | C2cd5        | -0.00629 | 0.83885976 | 0.919593 |
| 360161    | Nek6         | -0.0063  | 0.8359894  | 0.918349 |
| 315697    | Imp3         | -0.00631 | 0.90144843 | 0.957666 |
| 287424    | Aloxe3       | -0.00634 | 0.98464351 | 1        |
| 363253    | Zfand2b      | -0.00636 | 0.88721668 | 0.949165 |
| 361765    | Btrc         | -0.00636 | 0.79185723 | 0.892732 |
| 287524    | Rpal         | -0.00638 | 0.83191425 | 0.915509 |
| 114300    | Gtpbp4       | -0.00638 | 0.92221986 | 0.970583 |
| 81735     | Neol         | -0.0064  | 0.83444373 | 0.917339 |
| 681415    | Erh          | -0.0064  | 0.87840848 | 0.943718 |
| 83632     | Deaf1        | -0.00641 | 0.85150326 | 0.926573 |
| 361883    | Mrps27       | -0.00641 | 0.88661532 | 0.948682 |
| 688939    | Ccdc149      | -0.00642 | 0.89093046 | 0.951108 |

|           |              |          |            |          |
|-----------|--------------|----------|------------|----------|
| 298147    | Dmac1        | -0.00648 | 0.92230695 | 0.970514 |
| 100911757 | Tshz2        | -0.00649 | 0.63285852 | 0.789105 |
| 297890    | Bsdcl        | -0.00654 | 0.82485749 | 0.911642 |
| 290798    | Dctn6        | -0.00656 | 0.78544398 | 0.888552 |
| 246299    | Gtf3a        | -0.00658 | 0.90711788 | 0.960315 |
| 303226    | Zfp18        | -0.00658 | 0.92829689 | 0.97418  |
| 288041    | Pigx         | -0.00661 | 0.89359352 | 0.952883 |
| 500392    | Mcmdc2       | -0.00662 | 0.9418133  | 0.983002 |
| 301458    | Ndufs1       | -0.00663 | 0.70447262 | 0.837705 |
| 363031    | Anln         | -0.00665 | 0.9616452  | 0.996601 |
| 289469    | Mrps18c      | -0.00667 | 0.90309115 | 0.957755 |
| 300675    | Ift46        | -0.00669 | 0.86302105 | 0.933029 |
| 289231    | Ncstn        | -0.0067  | 0.78716253 | 0.889757 |
| 363058    | Cadml        | -0.00671 | 0.67739291 | 0.819628 |
| 290842    | Gins4        | -0.00673 | 0.94366508 | 0.984179 |
| 100912924 | Tigd2        | -0.00675 | 0.92024065 | 0.96925  |
| 287470    | Sdf2         | -0.00675 | 0.8200869  | 0.909271 |
| 252827    | Cdk5rap1     | -0.00679 | 0.9020143  | 0.957894 |
| 84023     | Ptger4       | -0.00679 | 0.91813702 | 0.96773  |
| 315644    | Bco2         | -0.00683 | 0.97390506 | 1        |
| 114499    | Hdgf         | -0.00686 | 0.79639984 | 0.894992 |
| 304573    | Pole         | -0.00687 | 0.94288602 | 0.983582 |
| 298452    | Dph2         | -0.00688 | 0.93403675 | 0.978101 |
| 60465     | Ctnn         | -0.00689 | 0.74217223 | 0.860558 |
| 292925    | Tsg101       | -0.00693 | 0.75982571 | 0.873318 |
| 291999    | Wwp2         | -0.00694 | 0.87619271 | 0.942401 |
| 102547146 | LOC102547146 | -0.00697 | 0.9766814  | 1        |
| 282844    | Rffl         | -0.00698 | 0.89051458 | 0.950824 |
| 499652    | Rit1         | -0.007   | 0.8247357  | 0.91156  |
| 310780    | Gpr61        | -0.007   | 0.94220592 | 0.983142 |
| 595134    | Akirin1      | -0.00702 | 0.75589139 | 0.870214 |
| 60398     | Fhit         | -0.00702 | 0.94209144 | 0.983238 |
| 294362    | Cisd1        | -0.00703 | 0.818204   | 0.908612 |
| 298071    | Nans         | -0.00705 | 0.79806101 | 0.89633  |
| 304591    | Dtx2         | -0.00707 | 0.91785224 | 0.967537 |
| 266604    | Alox15b      | -0.00708 | 0.98038368 | 1        |
| 298517    | Mrps15       | -0.00711 | 0.83176828 | 0.915455 |
| 24377     | G6pd         | -0.00711 | 0.74326035 | 0.861296 |
| 84407     | Cdh11        | -0.00711 | 0.76263749 | 0.874702 |
| 29744     | Sema6c       | -0.00713 | 0.83635139 | 0.918482 |
| 363115    | Slc9a9       | -0.00714 | 0.66108322 | 0.806194 |
| 317381    | Ccdc22       | -0.00719 | 0.8992479  | 0.956129 |
| 288029    | Lsg1         | -0.00719 | 0.89834364 | 0.955541 |
| 497915    | Drg2         | -0.00721 | 0.82460613 | 0.911628 |
| 295251    | Pygo2        | -0.00722 | 0.8412652  | 0.92101  |
| 287953    | Trmt2a       | -0.00725 | 0.90365851 | 0.957984 |
| 24803     | Vamp2        | -0.00726 | 0.52114545 | 0.705617 |
| 362344    | Ndufb2       | -0.00729 | 0.83336404 | 0.916417 |
| 313558    | Foxo6        | -0.00729 | 0.9657372  | 0.998939 |
| 100310845 | Uty          | -0.00729 | 0.95680243 | 0.992662 |
| 363222    | Rnf149       | -0.0073  | 0.85137865 | 0.926596 |
| 684192    | Rcor3        | -0.00731 | 0.92140624 | 0.970049 |
| 24609     | Odc1         | -0.00731 | 0.7880801  | 0.890107 |
| 192210    | Dnajc21      | -0.00733 | 0.88129589 | 0.945167 |
| 690441    | Atp5mf       | -0.00735 | 0.67121179 | 0.814685 |
| 297109    | Mturn        | -0.00738 | 0.5686561  | 0.738295 |

|           |              |          |            |          |
|-----------|--------------|----------|------------|----------|
| 317628    | Apex2        | -0.00743 | 0.9509725  | 0.988229 |
| 290214    | Cmtm5        | -0.00748 | 0.80795009 | 0.902223 |
| 287659    | Socs7        | -0.00748 | 0.81726692 | 0.908207 |
| 25102     | Chrna5       | -0.00754 | 0.91484696 | 0.965278 |
| 691835    | Kctd4        | -0.00754 | 0.95052494 | 0.988303 |
| 309638    | Taf11        | -0.00757 | 0.89293506 | 0.952501 |
| 688746    | Hdhd3        | -0.00758 | 0.95037438 | 0.988254 |
| 102550189 | Samd1        | -0.00759 | 0.89482326 | 0.953554 |
| 685425    | Odf2l        | -0.00764 | 0.92271427 | 0.970675 |
| 293044    | Zfp710       | -0.00767 | 0.85201142 | 0.926914 |
| 102554620 | LOC102554620 | -0.00772 | 0.99129351 | 1        |
| 25538     | Rps5         | -0.00775 | 0.72729351 | 0.851393 |
| 316228    | Cul9         | -0.00776 | 0.81684889 | 0.908007 |
| 313167    | No16         | -0.0078  | 0.79649863 | 0.895051 |
| 301113    | Slc25a23     | -0.00783 | 0.83306429 | 0.916246 |
| 116685    | Lmb1         | -0.00797 | 0.94903819 | 0.987566 |
| 363156    | Fbx12        | -0.00797 | 0.78145223 | 0.8863   |
| 502894    | Tigar        | -0.00801 | 0.81966648 | 0.909176 |
| 360592    | Trim37       | -0.00802 | 0.59389256 | 0.758445 |
| 287768    | Smndc1       | -0.00803 | 0.8596841  | 0.931377 |
| 100909688 | LOC100909688 | -0.00806 | 0.94220282 | 0.983193 |
| 103690850 | CXHXorf65    | -0.00809 | 0.99366351 | 1        |
| 309153    | Rce1         | -0.00811 | 0.91039011 | 0.962708 |
| 362281    | Rae1         | -0.00813 | 0.84957994 | 0.925538 |
| 300328    | Aasdhppt     | -0.00813 | 0.83730104 | 0.919048 |
| 498143    | RGD1565131   | -0.00813 | 0.90864336 | 0.961555 |
| 81778     | S100a10      | -0.00815 | 0.42769145 | 0.622879 |
| 365396    | Ssh3         | -0.00816 | 0.86301868 | 0.933079 |
| 312503    | Smyd5        | -0.00819 | 0.85794329 | 0.930179 |
| 59103     | Ptges        | -0.00819 | 0.96312339 | 0.997427 |
| 360613    | Cwc25        | -0.0082  | 0.87754875 | 0.943114 |
| 363027    | Yipf2        | -0.00825 | 0.85834129 | 0.930346 |
| 108348122 | LOC108348122 | -0.00828 | 0.45944762 | 0.650668 |
| 291180    | Epdr1        | -0.00836 | 0.55863621 | 0.737759 |
| 360855    | Smg7         | -0.00837 | 0.77541037 | 0.882865 |
| 498475    | Ptgdr        | -0.00837 | 0.93350879 | 0.97771  |
| 311405    | Tmem127      | -0.00839 | 0.66741893 | 0.811116 |
| 363193    | Ppp2r5d      | -0.00839 | 0.76322704 | 0.87501  |
| 28298     | Rpl32        | -0.00841 | 0.65054113 | 0.802536 |
| 291100    | Irf4         | -0.00842 | 0.92515487 | 0.972061 |
| 499288    | Mob2         | -0.00843 | 0.84619632 | 0.923066 |
| 314647    | Celf5        | -0.00845 | 0.8830808  | 0.946335 |
| 360664    | Ten1         | -0.00846 | 0.90802524 | 0.961062 |
| 102555189 | LOC102555189 | -0.00849 | 0.98640694 | 1        |
| 81922     | Sh3g11       | -0.00852 | 0.81645842 | 0.907785 |
| 29454     | Gdf11        | -0.00853 | 0.83212287 | 0.915633 |
| 363118    | Nmnat3       | -0.00853 | 0.962183   | 0.996724 |
| 368044    | Atp6v1g2     | -0.00858 | 0.58753885 | 0.753209 |
| 307124    | Camk1d       | -0.00859 | 0.83989397 | 0.920144 |
| 362897    | Uqcrb        | -0.00859 | 0.73900965 | 0.859508 |
| 58945     | Dynl11       | -0.0086  | 0.52510662 | 0.708965 |
| 686179    | Ttc39c       | -0.0086  | 0.81540536 | 0.906879 |
| 80849     | Inpp4a       | -0.00863 | 0.68734914 | 0.826581 |
| 29543     | Timp2        | -0.00867 | 0.41310041 | 0.608987 |
| 114637    | Hmgn2        | -0.00868 | 0.76135451 | 0.873862 |
| 309656    | Cmtr1        | -0.00869 | 0.73967786 | 0.85997  |

|           |              |          |            |          |
|-----------|--------------|----------|------------|----------|
| 116743    | Sh3gl2       | -0.00887 | 0.72478321 | 0.849603 |
| 294088    | Pank1        | -0.0089  | 0.85662808 | 0.929653 |
| 286990    | Tox4         | -0.00892 | 0.74654716 | 0.863948 |
| 304802    | Optc         | -0.00893 | 0.96632283 | 0.999273 |
| 24520     | Kcna1        | -0.00896 | 0.6869921  | 0.826413 |
| 24887     | Bax          | -0.00898 | 0.86503262 | 0.934514 |
| 501841    | Coro1c       | -0.00899 | 0.71397955 | 0.843114 |
| 360768    | Ccz1b        | -0.00901 | 0.82220762 | 0.909875 |
| 300757    | Hexa         | -0.00901 | 0.72105434 | 0.847266 |
| 680172    | Mbd2         | -0.00904 | 0.71061025 | 0.841169 |
| 361089    | Ndfip2       | -0.00904 | 0.59341128 | 0.758237 |
| 78959     | Akr1a1       | -0.00906 | 0.43106709 | 0.625165 |
| 287836    | Fbf1         | -0.00911 | 0.85344575 | 0.927733 |
| 25522     | Prkcz        | -0.00912 | 0.69959003 | 0.835394 |
| 294431    | Calhm5       | -0.00913 | 0.92123669 | 0.969977 |
| 360570    | Myo18a       | -0.00916 | 0.62044011 | 0.778514 |
| 245924    | Scaf4        | -0.00925 | 0.82789762 | 0.913412 |
| 298549    | Mtfr11       | -0.00925 | 0.73533131 | 0.857324 |
| 24533     | Ldha         | -0.00934 | 0.4354928  | 0.629427 |
| 81771     | Rps6ka1      | -0.00934 | 0.84607845 | 0.923149 |
| 314634    | Plekhj1      | -0.00936 | 0.88106792 | 0.945082 |
| 301119    | Mllt1        | -0.00937 | 0.82672432 | 0.912963 |
| 501162    | Mreg         | -0.00938 | 0.90202967 | 0.957856 |
| 287598    | Ska2         | -0.0094  | 0.91041072 | 0.962677 |
| 305230    | Shroom3      | -0.00941 | 0.87718594 | 0.942883 |
| 690214    | Pdf          | -0.00941 | 0.90181525 | 0.957789 |
| 60328     | Mark2        | -0.00944 | 0.75888162 | 0.872496 |
| 29286     | Rps17        | -0.00945 | 0.69261544 | 0.830293 |
| 686323    | Trip6        | -0.00946 | 0.90149215 | 0.957659 |
| 81664     | Gnai2        | -0.00947 | 0.37647591 | 0.573278 |
| 66026     | Trpv4        | -0.00948 | 0.95965453 | 0.99489  |
| 688621    | Tslp         | -0.00948 | 0.95965453 | 0.99489  |
| 308335    | U2af2        | -0.00954 | 0.70651636 | 0.839349 |
| 65271     | Mgat5        | -0.00954 | 0.87255053 | 0.939917 |
| 362045    | Lamtor3      | -0.00959 | 0.82894567 | 0.91425  |
| 295252    | Ube2q1       | -0.00961 | 0.70022133 | 0.835676 |
| 311651    | Slc9a8       | -0.00961 | 0.81087987 | 0.90454  |
| 360406    | Ptprf        | -0.00962 | 0.50699197 | 0.693554 |
| 54260     | Itpkb        | -0.00963 | 0.653166   | 0.802189 |
| 499731    | Tyw3         | -0.00969 | 0.92924708 | 0.974694 |
| 295952    | RGD1309730   | -0.00969 | 0.85335678 | 0.927901 |
| 114590    | Ubqln1       | -0.00975 | 0.46900434 | 0.65964  |
| 313588    | Snip1        | -0.00976 | 0.88343608 | 0.946503 |
| 291129    | Nrsn1        | -0.00978 | 0.71280762 | 0.842514 |
| 362360    | Osbpl3       | -0.0098  | 0.6022087  | 0.765472 |
| 363644    | Glod4        | -0.0098  | 0.72055528 | 0.846993 |
| 315548    | Srpra        | -0.00981 | 0.58471209 | 0.750849 |
| 311404    | Ap4e1        | -0.00982 | 0.88375045 | 0.946627 |
| 79245     | Hsf1         | -0.00984 | 0.79984979 | 0.897387 |
| 296346    | Oser1        | -0.00988 | 0.84073112 | 0.920479 |
| 100125367 | LOC100125367 | -0.00989 | 0.91144664 | 0.963451 |
| 360906    | Fam69a       | -0.0099  | 0.82137861 | 0.909803 |
| 689088    | Ldlrad1      | -0.00996 | 0.94598764 | 0.985415 |
| 360968    | Tbc1d10a     | -0.00996 | 0.85668705 | 0.929664 |
| 290641    | Rpl18a       | -0.00996 | 0.47343817 | 0.663817 |
| 287734    | Atxn713      | -0.00997 | 0.59364285 | 0.758329 |

|           |              |          |            |          |
|-----------|--------------|----------|------------|----------|
| 314397    | Rin3         | -0.01    | 0.85636712 | 0.929529 |
| 116596    | Map3k8       | -0.01002 | 0.95828255 | 0.993819 |
| 103694878 | LOC103694878 | -0.01002 | 0.96313646 | 0.997386 |
| 293144    | Pold3        | -0.01005 | 0.91653807 | 0.966312 |
| 366624    | Cf12         | -0.01007 | 0.57188144 | 0.741068 |
| 314999    | Trmt12       | -0.01007 | 0.91639687 | 0.966271 |
| 58971     | Fxyd1        | -0.01008 | 0.66051605 | 0.805709 |
| 304342    | Zscan21      | -0.01009 | 0.86167601 | 0.932422 |
| 24552     | Me1          | -0.0101  | 0.56805025 | 0.737861 |
| 25738     | Plcg1        | -0.01011 | 0.6738639  | 0.816603 |
| 266686    | Dhrs4        | -0.01013 | 0.88918144 | 0.950306 |
| 498107    | RGD1562339   | -0.01013 | 0.66169024 | 0.806728 |
| 363000    | Prpf40b      | -0.0102  | 0.78343912 | 0.887655 |
| 301065    | Ttc21a       | -0.01025 | 0.94022255 | 0.982149 |
| 315617    | Sidt2        | -0.01026 | 0.66398819 | 0.808597 |
| 287703    | Eif1         | -0.01027 | 0.43397299 | 0.628327 |
| 367090    | Neil1        | -0.01028 | 0.92439189 | 0.971527 |
| 310034    | Rad17        | -0.01031 | 0.85987979 | 0.931536 |
| 313264    | Trim32       | -0.01031 | 0.78603973 | 0.88891  |
| 295235    | Ssr2         | -0.01033 | 0.74245946 | 0.860682 |
| 309773    | Dcbld1       | -0.01044 | 0.87216332 | 0.939765 |
| 306417    | Sh3rf1       | -0.01046 | 0.87206608 | 0.939714 |
| 291802    | Zfp136       | -0.01047 | 0.9248889  | 0.971889 |
| 100910872 | Naa80        | -0.01047 | 0.81738658 | 0.908181 |
| 309136    | Lto1         | -0.01048 | 0.80999911 | 0.903822 |
| 100912578 | LOC100912578 | -0.01051 | 0.77346074 | 0.881594 |
| 353304    | Pigu         | -0.01052 | 0.81916775 | 0.909046 |
| 311903    | Mrrf         | -0.01054 | 0.73295354 | 0.855389 |
| 365813    | Trim59       | -0.01054 | 0.91407996 | 0.964842 |
| 64372     | Timm8b       | -0.01054 | 0.72974298 | 0.852635 |
| 65136     | Rps8         | -0.01064 | 0.52945379 | 0.712158 |
| 25366     | Acvr2b       | -0.01065 | 0.85651472 | 0.929583 |
| 58920     | Gpc1         | -0.01065 | 0.55655463 | 0.735622 |
| 291571    | Tcof1        | -0.01066 | 0.80350081 | 0.899734 |
| 307500    | Psd2         | -0.01067 | 0.97292514 | 1        |
| 303214    | Trim16       | -0.01067 | 0.83885279 | 0.919638 |
| 29456     | Map1b        | -0.01068 | 2.41E-04   | 0.001473 |
| 303669    | Nat9         | -0.0107  | 0.83301621 | 0.916299 |
| 79032     | Mrs2         | -0.01073 | 0.86313423 | 0.933045 |
| 294718    | Dimt1        | -0.01073 | 0.86394605 | 0.933552 |
| 498266    | Blzf1        | -0.01075 | 0.85004611 | 0.925834 |
| 252923    | Tsga10       | -0.01076 | 0.91303069 | 0.96443  |
| 287478    | Ctns         | -0.01076 | 0.75008766 | 0.866308 |
| 298541    | Dhdds        | -0.01079 | 0.68768014 | 0.82677  |
| 171458    | Ipmk         | -0.0108  | 0.82175528 | 0.909691 |
| 498869    | RGD1560341   | -0.01082 | 0.80085461 | 0.897985 |
| 100911734 | LOC100911734 | -0.01082 | 0.78049964 | 0.885695 |
| 60376     | Plrg1        | -0.01084 | 0.78815803 | 0.890142 |
| 296655    | Stom         | -0.01085 | 0.8279703  | 0.913439 |
| 100363531 | LOC100363531 | -0.01085 | 0.99380571 | 1        |
| 360494    | Tsr3         | -0.01087 | 0.8690874  | 0.93799  |
| 312787    | Gpr19        | -0.01092 | 0.91226724 | 0.963998 |
| 83501     | Cdh2         | -0.01092 | 0.55026367 | 0.730858 |
| 25737     | Pcna         | -0.01097 | 0.80970851 | 0.903709 |
| 171440    | Abtb2        | -0.011   | 0.73701667 | 0.857714 |
| 363059    | Zw10         | -0.01105 | 0.86073045 | 0.931981 |



|           |              |          |            |          |
|-----------|--------------|----------|------------|----------|
| 113886    | Kif1c        | -0.01106 | 0.68439337 | 0.824432 |
| 306722    | Dapk1        | -0.01112 | 0.7025863  | 0.837344 |
| 100303643 | Fcgbp        | -0.01113 | 0.90995721 | 0.962411 |
| 313725    | Gpr157       | -0.01115 | 0.8888225  | 0.950189 |
| 313478    | Cc2d1b       | -0.01119 | 0.65215119 | 0.801356 |
| 29236     | Rpsa         | -0.01124 | 0.37631556 | 0.573217 |
| 300980    | Dusp7        | -0.01125 | 0.80741627 | 0.901785 |
| 294331    | Ube2g2       | -0.01125 | 0.80682698 | 0.901233 |
| 291388    | Cbln2        | -0.01126 | 0.71935754 | 0.846525 |
| 102554977 | LOC102554977 | -0.01138 | 0.99549369 | 1        |
| 362575    | Med8         | -0.01138 | 0.88996852 | 0.950508 |
| 363241    | Eef1b2       | -0.01141 | 0.63852972 | 0.793268 |
| 307302    | Cep120       | -0.01141 | 0.72395856 | 0.849054 |
| 362335    | Nup205       | -0.01142 | 0.82087097 | 0.909664 |
| 367153    | Cep70        | -0.01144 | 0.89921413 | 0.956146 |
| 29380     | Phlda1       | -0.01146 | 0.82611301 | 0.912659 |
| 259270    | Zfp335       | -0.01148 | 0.7349434  | 0.857186 |
| 25405     | Ccng1        | -0.01151 | 0.45912566 | 0.650357 |
| 287419    | Rangrf       | -0.01156 | 0.90925334 | 0.961987 |
| 308757    | Man2a2       | -0.01157 | 0.6420497  | 0.796031 |
| 362832    | Izumo4       | -0.01158 | 0.92421014 | 0.971497 |
| 501103    | Slc35b2      | -0.0116  | 0.78872059 | 0.890566 |
| 292747    | Fb1          | -0.01162 | 0.82470417 | 0.911578 |
| 100910318 | Trappc2b     | -0.01164 | 0.81335716 | 0.905765 |
| 108351723 | LOC108351723 | -0.01166 | 0.93907909 | 0.981601 |
| 252939    | Gpr3711      | -0.01166 | 0.57748454 | 0.745186 |
| 307997    | Hspa12a      | -0.01167 | 0.17476141 | 0.342386 |
| 678759    | Ndufa10      | -0.01171 | 0.50622639 | 0.693055 |
| 500843    | RGD1565498   | -0.01172 | 0.81855945 | 0.908901 |
| 85263     | Slc25a14     | -0.01175 | 0.83559419 | 0.918127 |
| 288692    | Wsb2         | -0.01177 | 0.42452387 | 0.619782 |
| 24240     | Cad          | -0.01178 | 0.77761205 | 0.883945 |
| 100361133 | Mycbp        | -0.0118  | 0.79889165 | 0.896893 |
| 361778    | Sfxn4        | -0.01182 | 0.83504648 | 0.917896 |
| 361789    | Atat1        | -0.01184 | 0.79102907 | 0.891957 |
| 362855    | Rtcb         | -0.01186 | 0.65117331 | 0.8029   |
| 363009    | Uhrflbp11    | -0.01187 | 0.54556856 | 0.726547 |
| 59074     | Stx8         | -0.01187 | 0.81046561 | 0.904289 |
| 306589    | Klhdc8b      | -0.01189 | 0.78143117 | 0.886382 |
| 687127    | Zfp526       | -0.01193 | 0.86177059 | 0.932471 |
| 84556     | Rims1        | -0.01195 | 0.6757493  | 0.818315 |
| 290850    | Mrps31       | -0.012   | 0.82139245 | 0.909766 |
| 25573     | Ube2i        | -0.01203 | 0.5734333  | 0.742372 |
| 298982    | Maea         | -0.01204 | 0.58176201 | 0.748474 |
| 140941    | Siah1        | -0.01207 | 0.78385978 | 0.887868 |
| 297961    | Ube2j1       | -0.01207 | 0.48736986 | 0.675445 |
| 361666    | Bccip        | -0.0121  | 0.84171973 | 0.921084 |
| 362185    | Mpped2       | -0.01212 | 0.76096059 | 0.873673 |
| 304813    | Ppp1r12b     | -0.01212 | 0.62191687 | 0.779802 |
| 311545    | Hml3         | -0.01213 | 0.62860376 | 0.785755 |
| 361293    | Riok3        | -0.01214 | 0.62587417 | 0.783577 |
| 361798    | Ehmt2        | -0.01215 | 0.65033325 | 0.80254  |
| 83709     | Git1         | -0.01218 | 0.46837697 | 0.658952 |
| 25745     | Myh9l1       | -0.01219 | 0.44459085 | 0.637593 |
| 303073    | Cyfip2       | -0.01221 | 0.32264772 | 0.517895 |
| 100360914 | Fbxw7        | -0.01223 | 0.64590383 | 0.799041 |

|           |                 |          |            |          |
|-----------|-----------------|----------|------------|----------|
| 305887    | Ngdn            | -0.01229 | 0.80197312 | 0.898657 |
| 680835    | LOC680835       | -0.0123  | 0.62658078 | 0.784049 |
| 361649    | Atxn21          | -0.01232 | 0.51840761 | 0.703361 |
| 309256    | Fan1            | -0.01232 | 0.87553015 | 0.941795 |
| 361795    | Ltb             | -0.01233 | 0.9527861  | 0.989358 |
| 290864    | Usp4            | -0.01233 | 0.6328076  | 0.789145 |
| 363056    | Rnf214          | -0.01233 | 0.63828434 | 0.793015 |
| 287442    | Tmem256         | -0.01233 | 0.85141079 | 0.926525 |
| 296562    | Npdc1           | -0.01234 | 0.40316065 | 0.600234 |
| 498140    | Cdk8            | -0.01235 | 0.77623875 | 0.883228 |
| 497941    | Gps2            | -0.01238 | 0.79368574 | 0.893418 |
| 192275    | Dad1            | -0.01239 | 0.61187253 | 0.772958 |
| 313253    | Zfp618          | -0.01242 | 0.85577722 | 0.9291   |
| 83516     | Ppargcla        | -0.01242 | 0.78546015 | 0.888465 |
| 84383     | Timm8a1         | -0.01245 | 0.8005149  | 0.897868 |
| 308067    | Brd9            | -0.01246 | 0.7044323  | 0.837709 |
| 60421     | Prmt1           | -0.01247 | 0.68991986 | 0.828208 |
| 685332    | Rpp30           | -0.01248 | 0.78458339 | 0.887843 |
| 290803    | Tex15           | -0.01249 | 0.90498775 | 0.958592 |
| 311350    | Tmem62          | -0.0125  | 0.75643762 | 0.870632 |
| 305258    | Utp3            | -0.01251 | 0.76978366 | 0.879087 |
| 300974    | Mrpl3           | -0.01255 | 0.77409323 | 0.881999 |
| 500324    | Cracr2a         | -0.01257 | 0.95222973 | 0.988942 |
| 192277    | Stip1           | -0.01262 | 0.38544432 | 0.582186 |
| 303456    | Utp18           | -0.01263 | 0.82216609 | 0.909882 |
| 499768    | Tbcd13          | -0.01267 | 0.6467048  | 0.79972  |
| 299207    | Erg28           | -0.01269 | 0.77722391 | 0.883821 |
| 311151    | Dusp19          | -0.01274 | 0.90390787 | 0.958035 |
| 24224     | Bcl2            | -0.01275 | 0.90302611 | 0.9579   |
| 287429    | Naa38           | -0.01279 | 0.66298458 | 0.807995 |
| 291609    | Ndfip1          | -0.01281 | 0.1991699  | 0.374525 |
| 124323    | Rps23           | -0.01287 | 0.55382945 | 0.733752 |
| 361833    | Ank3            | -0.01288 | 0.36850606 | 0.564527 |
| 311844    | Kyat1           | -0.0129  | 0.8264072  | 0.912878 |
| 24171     | Add2            | -0.01293 | 0.27447283 | 0.466601 |
| 29717     | Cacnalg         | -0.01293 | 0.91839104 | 0.967784 |
| 315645    | Pih1d2          | -0.01294 | 0.78724492 | 0.889691 |
| 103689921 | NEWGENE_1306267 | -0.01296 | 0.9178613  | 0.967493 |
| 314401    | Unc79           | -0.01297 | 0.78428462 | 0.887715 |
| 293671    | Sf3b2           | -0.01299 | 0.53349316 | 0.715419 |
| 81755     | Rab3b           | -0.01302 | 0.88095624 | 0.945069 |
| 303407    | Gdpd1           | -0.01302 | 0.76931075 | 0.878731 |
| 64514     | Eif2b1          | -0.01302 | 0.76931075 | 0.878731 |
| 367767    | Mageh1          | -0.01303 | 0.81272682 | 0.905327 |
| 362002    | Rnf115          | -0.01306 | 0.6408014  | 0.794794 |
| 89806     | Tiel            | -0.01306 | 0.79490643 | 0.893841 |
| 25547     | St8sia3         | -0.01307 | 0.73707178 | 0.857725 |
| 361309    | Paip2           | -0.01308 | 0.47611086 | 0.665702 |
| 316023    | Dclk3           | -0.0131  | 0.86222933 | 0.932649 |
| 313743    | Klh121          | -0.0131  | 0.73681106 | 0.857684 |
| 292554    | Aurkc           | -0.01312 | 0.90224373 | 0.95771  |
| 315160    | Desi1           | -0.01312 | 0.69770274 | 0.834081 |
| 362688    | Gemin6          | -0.01315 | 0.85877365 | 0.930656 |
| 288482    | Usp42           | -0.01315 | 0.81225366 | 0.905171 |
| 364070    | Iars2           | -0.01316 | 0.58382402 | 0.750214 |
| 306768    | Nop16           | -0.01317 | 0.74734171 | 0.864395 |

|           |              |          |            |          |
|-----------|--------------|----------|------------|----------|
| 288065    | Ccdc58       | -0.01318 | 0.89047922 | 0.95084  |
| 100361633 | Cd300ld      | -0.0132  | 0.97972714 | 1        |
| 365024    | Chmpla       | -0.01323 | 0.583257   | 0.74984  |
| 24334     | Eno2         | -0.01324 | 0.1772846  | 0.345693 |
| 301123    | Ndufa11      | -0.01328 | 0.60989758 | 0.77164  |
| 94268     | Efna1        | -0.01329 | 0.80446725 | 0.900551 |
| 364656    | Mrpl36       | -0.0133  | 0.82967672 | 0.914739 |
| 108349732 | LOC108349732 | -0.01331 | 0.94914155 | 0.98762  |
| 316051    | Azi2         | -0.01332 | 0.6810253  | 0.822039 |
| 293666    | mrpl11       | -0.01333 | 0.79823787 | 0.896317 |
| 362818    | Pmel         | -0.01334 | 0.90129519 | 0.957664 |
| 292244    | Mrpl18       | -0.0134  | 0.78636591 | 0.889067 |
| 361655    | Tial1        | -0.01343 | 0.74617414 | 0.863726 |
| 688966    | Borcs8       | -0.01346 | 0.83618707 | 0.91846  |
| 367085    | Arhgap20     | -0.01346 | 0.84071115 | 0.92051  |
| 25686     | Gnail        | -0.01347 | 0.59666837 | 0.760358 |
| 685045    | Abrac1       | -0.01347 | 0.80907443 | 0.903161 |
| 308518    | Nudt19       | -0.01353 | 0.79956448 | 0.897172 |
| 361677    | Tollip       | -0.01355 | 0.52726755 | 0.710824 |
| 117026    | Apbb3        | -0.01357 | 0.63324445 | 0.78938  |
| 116675    | Pgap2        | -0.01359 | 0.80852018 | 0.902648 |
| 140592    | Ppfia4       | -0.01359 | 0.70287984 | 0.837589 |
| 298141    | Frmd3        | -0.01362 | 0.70835547 | 0.839648 |
| 310848    | Cyp2u1       | -0.01363 | 0.78428798 | 0.887667 |
| 309399    | Abhd17b      | -0.01364 | 0.6875023  | 0.826609 |
| 361809    | Zfp523       | -0.01365 | 0.751575   | 0.86729  |
| 246773    | Lrrc3        | -0.01365 | 0.82069636 | 0.909629 |
| 365842    | Clk2         | -0.01365 | 0.7785816  | 0.884678 |
| 373065    | Ddx24        | -0.01367 | 0.57118147 | 0.740413 |
| 307798    | Acd          | -0.01373 | 0.7948335  | 0.893865 |
| 303244    | Mpdu1        | -0.01376 | 0.66016192 | 0.805483 |
| 361273    | Sec61a2      | -0.01379 | 0.60206633 | 0.765393 |
| 54238     | Cdkn2c       | -0.01379 | 0.88753771 | 0.949349 |
| 116687    | Dnase113     | -0.01383 | 0.96322082 | 0.99742  |
| 498599    | Slc35e1      | -0.01383 | 0.71590616 | 0.844342 |
| 24666     | Ppmla        | -0.01386 | 0.53866772 | 0.720734 |
| 100911440 | LOC100911440 | -0.01387 | 0.69741576 | 0.834    |
| 316231    | Abcc10       | -0.01387 | 0.85641417 | 0.929527 |
| 24784     | Slc9a3       | -0.01388 | 0.81237412 | 0.905093 |
| 360645    | Taco1        | -0.01395 | 0.88682319 | 0.948851 |
| 309140    | Mrpl21       | -0.01399 | 0.8402286  | 0.92014  |
| 362614    | Gpn2         | -0.01399 | 0.8569035  | 0.929793 |
| 313520    | Mmachc       | -0.01407 | 0.82463901 | 0.911612 |
| 29675     | Psmb2        | -0.01407 | 0.60591927 | 0.768445 |
| 360302    | Ptprk        | -0.01409 | 0.77090187 | 0.879942 |
| 360623    | Krt28        | -0.01409 | 0.8464874  | 0.923278 |
| 303188    | Rail         | -0.01411 | 0.67819307 | 0.820075 |
| 311486    | Dzank1       | -0.01412 | 0.7112373  | 0.841284 |
| 682390    | Eif3i        | -0.01413 | 0.69253642 | 0.830303 |
| 361732    | Tmem109      | -0.01417 | 0.74329335 | 0.861229 |
| 114209    | Phyh         | -0.01417 | 0.63934786 | 0.793663 |
| 366618    | Ap4s1        | -0.01418 | 0.84711642 | 0.923594 |
| 680987    | Ciao2b       | -0.01419 | 0.72920358 | 0.852319 |
| 25587     | Id2          | -0.01419 | 0.79092941 | 0.89195  |
| 362214    | Nop56        | -0.0142  | 0.58784009 | 0.753494 |
| 680451    | Nrbp2        | -0.0142  | 0.24391772 | 0.432172 |

|           |              |          |            |          |
|-----------|--------------|----------|------------|----------|
| 307816    | Tango6       | -0.01422 | 0.83096764 | 0.915367 |
| 29737     | Kcnab1       | -0.01424 | 0.48523561 | 0.673369 |
| 296637    | Prrc2b       | -0.01425 | 0.34314418 | 0.539607 |
| 288585    | Ift22        | -0.01425 | 0.79652533 | 0.894975 |
| 294560    | Mcu          | -0.01428 | 0.64495123 | 0.798226 |
| 140933    | Trpc5        | -0.0143  | 0.89749668 | 0.95512  |
| 25455     | Ggh          | -0.0143  | 0.82390162 | 0.911114 |
| 295053    | Spart        | -0.01432 | 0.64437268 | 0.797924 |
| 304670    | Tnpo2        | -0.01438 | 0.41688736 | 0.612672 |
| 502225    | Lrrc14b      | -0.01438 | 0.91065088 | 0.962877 |
| 300069    | Eif31        | -0.01438 | 0.5721824  | 0.741307 |
| 682902    | Taf12        | -0.0144  | 0.75584624 | 0.870215 |
| 296300    | Zfp341       | -0.0144  | 0.83753464 | 0.919198 |
| 310856    | Ppa2         | -0.0144  | 0.73149732 | 0.854213 |
| 113960    | Cdc42bpb     | -0.01441 | 0.48108228 | 0.669801 |
| 306352    | Armc6        | -0.01442 | 0.83811314 | 0.91925  |
| 245983    | I111ral      | -0.01444 | 0.72649863 | 0.850985 |
| 291580    | RGD1312005   | -0.01446 | 0.65293098 | 0.802056 |
| 291317    | Rpp38        | -0.01446 | 0.88443823 | 0.946991 |
| 116686    | Gsr          | -0.01448 | 0.62033322 | 0.778482 |
| 79558     | Acvr1        | -0.0145  | 0.76009379 | 0.873521 |
| 313845    | Sos1         | -0.01456 | 0.55940294 | 0.735152 |
| 303275    | Dhrs13       | -0.01456 | 0.84478026 | 0.922525 |
| 287961    | Cdc45        | -0.01458 | 0.94791918 | 0.986779 |
| 311743    | Map3k20      | -0.01458 | 0.81380793 | 0.906108 |
| 295586    | Clcn6        | -0.01459 | 0.42993516 | 0.624284 |
| 293615    | Sirt3        | -0.0146  | 0.78758039 | 0.889754 |
| 362437    | Iffo1        | -0.01464 | 0.55491977 | 0.73443  |
| 361378    | Man2b1       | -0.01465 | 0.67502009 | 0.817588 |
| 296565    | Paxx         | -0.01468 | 0.70643681 | 0.839359 |
| 683713    | Gal3st1      | -0.01469 | 0.80613648 | 0.900726 |
| 290963    | Npepo        | -0.0147  | 0.68975147 | 0.828267 |
| 288321    | Rbm11        | -0.01472 | 0.59649221 | 0.760184 |
| 311215    | Ext2         | -0.01472 | 0.67789067 | 0.819866 |
| 291874    | Nup93        | -0.01472 | 0.7138789  | 0.8431   |
| 361387    | Zfp330       | -0.01473 | 0.73764429 | 0.858182 |
| 24673     | Ppp2cb       | -0.01479 | 0.40638048 | 0.603001 |
| 297428    | Copg1        | -0.01479 | 0.25082306 | 0.438814 |
| 100912608 | LOC100912608 | -0.01479 | 0.80199664 | 0.898631 |
| 361606    | Aamdc        | -0.01479 | 0.92579212 | 0.972355 |
| 102548917 | LOC102548917 | -0.01483 | 0.87166287 | 0.939439 |
| 64526     | Ech1         | -0.01488 | 0.52842215 | 0.711323 |
| 85425     | Tdrd7        | -0.0149  | 0.59969941 | 0.762995 |
| 81521     | Msn          | -0.01491 | 0.43710392 | 0.631229 |
| 494346    | Preli3b      | -0.01492 | 0.68724359 | 0.826506 |
| 81761     | Rnpep        | -0.01493 | 0.74060174 | 0.860676 |
| 64353     | Pdlim5       | -0.01494 | 0.65068695 | 0.80256  |
| 312607    | Pdzrn3       | -0.01496 | 0.75290792 | 0.868144 |
| 84575     | Fads1        | -0.01497 | 0.30417697 | 0.501042 |
| 291671    | Hspa9        | -0.01498 | 0.32692662 | 0.522517 |
| 363781    | Plcx2        | -0.01501 | 0.44181369 | 0.634805 |
| 59102     | Rpa2         | -0.01506 | 0.85069915 | 0.926227 |
| 290596    | Ghitm        | -0.01508 | 0.30424276 | 0.501107 |
| 299905    | Med30        | -0.01509 | 0.80465055 | 0.900598 |
| 680752    | Ccdc74a      | -0.01515 | 0.83031765 | 0.915286 |
| 307742    | Snx20        | -0.01523 | 0.92454806 | 0.971638 |

|           |              |          |            |          |
|-----------|--------------|----------|------------|----------|
| 681352    | Letmd1       | -0.01525 | 0.6321305  | 0.788507 |
| 316335    | Tmem131      | -0.0153  | 0.57430097 | 0.742436 |
| 300235    | Dazap2       | -0.01532 | 0.40272739 | 0.599777 |
| 25579     | Map3k12      | -0.01535 | 0.60913948 | 0.770783 |
| 361532    | Sirt2        | -0.01536 | 0.42416729 | 0.619499 |
| 100360977 | LOC100360977 | -0.01537 | 0.85711161 | 0.929918 |
| 116665    | Rere         | -0.01538 | 0.50704779 | 0.693581 |
| 366138    | Ldlrad3      | -0.0154  | 0.83325185 | 0.916346 |
| 301124    | LOC301124    | -0.0154  | 0.54334541 | 0.724752 |
| 361640    | Polr3e       | -0.01541 | 0.76301862 | 0.874929 |
| 64152     | Chp1         | -0.01552 | 0.17835919 | 0.34722  |
| 289278    | Cox20        | -0.01553 | 0.80519291 | 0.900781 |
| 116697    | Pabpn1       | -0.01555 | 0.57342182 | 0.742408 |
| 60664     | Pik3r3       | -0.01559 | 0.69913907 | 0.835012 |
| 24468     | Hspa8        | -0.01561 | 0.00127007 | 0.006355 |
| 117049    | Rab28        | -0.01564 | 0.66325773 | 0.808225 |
| 29384     | H2afy        | -0.01568 | 0.63356039 | 0.789567 |
| 300455    | Bmper        | -0.01569 | 0.89164213 | 0.951548 |
| 100910342 | Bbip1        | -0.01569 | 0.85698679 | 0.92983  |
| 300052    | Vps28        | -0.01575 | 0.57335759 | 0.742476 |
| 84595     | Nucb1        | -0.0158  | 0.25747486 | 0.446432 |
| 24686     | Prnp         | -0.01583 | 0.07534892 | 0.185932 |
| 103690203 | Znf48        | -0.01585 | 0.80486879 | 0.90063  |
| 293489    | Slx1b        | -0.01586 | 0.72169862 | 0.847761 |
| 296349    | Ttpal        | -0.01587 | 0.6314837  | 0.788165 |
| 25743     | Kcnj6        | -0.01587 | 0.75314297 | 0.868257 |
| 25019     | Xrcc6        | -0.01588 | 0.72653929 | 0.85098  |
| 54263     | Kcnn3        | -0.01588 | 0.7405782  | 0.860701 |
| 304567    | Pus1         | -0.01592 | 0.81188939 | 0.90503  |
| 312647    | Atg7         | -0.01592 | 0.79713392 | 0.895447 |
| 691075    | Mrpl10       | -0.01593 | 0.65433242 | 0.803104 |
| 100364162 | Rnf1111      | -0.01595 | 0.62767893 | 0.784959 |
| 687711    | Snrpd3       | -0.01599 | 0.6968433  | 0.833472 |
| 287173    | Bod1         | -0.01599 | 0.79664318 | 0.895055 |
| 360882    | Cadm3        | -0.01602 | 0.06534182 | 0.166524 |
| 171445    | Akr7a2       | -0.01604 | 0.7249639  | 0.84971  |
| 100911417 | LOC100911417 | -0.01605 | 0.40609613 | 0.602673 |
| 309029    | RGD1305014   | -0.01605 | 0.80346565 | 0.899747 |
| 24424     | Gstm2        | -0.01609 | 0.63297905 | 0.789204 |
| 361242    | Dusp22       | -0.0161  | 0.6782869  | 0.820085 |
| 94170     | Atp6v0e1     | -0.01612 | 0.66566191 | 0.810169 |
| 287822    | Hid1         | -0.01612 | 0.43012608 | 0.624371 |
| 360495    | Lmf1         | -0.01618 | 0.76249057 | 0.874692 |
| 681193    | LOC681193    | -0.01619 | 0.86265473 | 0.932951 |
| 24162     | Acp2         | -0.01623 | 0.57261485 | 0.741666 |
| 315203    | Gramd4       | -0.01625 | 0.70816576 | 0.839685 |
| 498886    | RGD1562987   | -0.01625 | 0.52158034 | 0.706006 |
| 364148    | Kctd8        | -0.01626 | 0.62295708 | 0.780797 |
| 689248    | Ecsr         | -0.01627 | 0.77422751 | 0.882046 |
| 641521    | Lrrc4        | -0.01631 | 0.78057744 | 0.88573  |
| 296596    | Rpl7a        | -0.01633 | 0.32596177 | 0.521632 |
| 295382    | Ntng1        | -0.01635 | 0.64737974 | 0.800295 |
| 102547413 | LOC102547413 | -0.01637 | 0.81527964 | 0.907216 |
| 499941    | Dbnidd2      | -0.01639 | 0.53735413 | 0.719482 |
| 266608    | Fzd9         | -0.01642 | 0.92124436 | 0.969932 |
| 501907    | RGD1559459   | -0.01643 | 0.9710037  | 1        |

|           |              |          |            |          |
|-----------|--------------|----------|------------|----------|
| 361709    | Ap5b1        | -0.01645 | 0.75817453 | 0.871946 |
| 60418     | Gde1         | -0.01646 | 0.44499007 | 0.637781 |
| 362240    | No141        | -0.01647 | 0.46876176 | 0.659396 |
| 100910434 | Chad1        | -0.01647 | 0.65780581 | 0.803947 |
| 294239    | Ddah2        | -0.01652 | 0.53807619 | 0.720145 |
| 24158     | Acadm        | -0.01657 | 0.57396099 | 0.742298 |
| 293691    | Snx15        | -0.01659 | 0.77844957 | 0.884581 |
| 360230    | Stk40        | -0.01665 | 0.62181991 | 0.779783 |
| 315352    | Nxt2         | -0.01668 | 0.87376414 | 0.940798 |
| 498002    | RGD1561590   | -0.01673 | 0.7219684  | 0.847973 |
| 291848    | Mmp15        | -0.01677 | 0.25567959 | 0.444493 |
| 287151    | Metrn        | -0.01677 | 0.62036324 | 0.778469 |
| 100360100 | Taf3         | -0.0168  | 0.77026825 | 0.879324 |
| 54294     | Rgs5         | -0.0168  | 0.77688622 | 0.883595 |
| 64185     | Cap1         | -0.01682 | 0.14479064 | 0.299374 |
| 297332    | Thns12       | -0.01682 | 0.80599526 | 0.900621 |
| 290666    | Sugp1        | -0.01683 | 0.65381588 | 0.80278  |
| 305076    | Utp25        | -0.01683 | 0.74518284 | 0.862736 |
| 303918    | Gtf2e1       | -0.01685 | 0.76340157 | 0.875157 |
| 367100    | Smad6        | -0.01685 | 0.90219522 | 0.957712 |
| 681234    | Dbr1         | -0.01685 | 0.83144385 | 0.915362 |
| 311944    | Paxip1       | -0.01686 | 0.72433445 | 0.849338 |
| 499380    | Emx2         | -0.0169  | 0.97803867 | 1        |
| 500694    | Isca2        | -0.0169  | 0.66126879 | 0.806317 |
| 307234    | Kcng2        | -0.01695 | 0.7827207  | 0.887052 |
| 362278    | Tmem189      | -0.01696 | 0.29188662 | 0.487331 |
| 290564    | Mettl6       | -0.01698 | 0.82401142 | 0.91113  |
| 304271    | Rnf6         | -0.01699 | 0.59364167 | 0.758378 |
| 171155    | Hadhb        | -0.01717 | 0.30673986 | 0.502742 |
| 171565    | Stampb       | -0.01721 | 0.61546893 | 0.775341 |
| 686590    | Iqsec1       | -0.01721 | 0.33791619 | 0.534653 |
| 363327    | Vmac         | -0.01724 | 0.75405559 | 0.869046 |
| 84409     | Robo2        | -0.01724 | 0.28849929 | 0.483285 |
| 103690141 | LOC103690141 | -0.01726 | 0.86199757 | 0.932452 |
| 171581    | Rhov         | -0.01728 | 0.72995268 | 0.852776 |
| 500569    | Kdmla        | -0.01728 | 0.6572543  | 0.803789 |
| 25012     | Snap25       | -0.0173  | 0.00290168 | 0.013055 |
| 502632    | Mettl5       | -0.0173  | 0.77589874 | 0.883105 |
| 54296     | Rgs7         | -0.01733 | 0.59624337 | 0.759969 |
| 308339    | Zfp579       | -0.01733 | 0.79487273 | 0.893856 |
| 311718    | Zbtb46       | -0.01736 | 0.82859165 | 0.914018 |
| 307821    | Psmd7        | -0.01738 | 0.41209171 | 0.607782 |
| 245918    | Cgref1       | -0.01747 | 0.67737998 | 0.819665 |
| 684800    | Smap1        | -0.01747 | 0.38141016 | 0.578248 |
| 360650    | Amz2         | -0.01747 | 0.52500274 | 0.708875 |
| 367746    | LOC367746    | -0.01752 | 0.96726571 | 0.999814 |
| 300644    | Gramd1b      | -0.01753 | 0.22140651 | 0.403588 |
| 363522    | Dnase111     | -0.01754 | 0.77858596 | 0.88463  |
| 309169    | Ehbp111      | -0.01754 | 0.67205502 | 0.815345 |
| 361898    | Ankrd55      | -0.01755 | 0.79236428 | 0.892986 |
| 108352362 | Cxx1a        | -0.01759 | 0.85326388 | 0.927853 |
| 108348250 | LOC108348250 | -0.01761 | 0.71897198 | 0.846385 |
| 315461    | Tmed1        | -0.01761 | 0.77191934 | 0.880681 |
| 290692    | Klhl2        | -0.01768 | 0.67996495 | 0.821331 |
| 260430    | Gpr156       | -0.01771 | 0.8954579  | 0.953856 |
| 314681    | Ric8b        | -0.01774 | 0.57137619 | 0.740514 |



|           |              |          |            |          |
|-----------|--------------|----------|------------|----------|
| 300759    | Parp6        | -0.01776 | 0.35651214 | 0.553589 |
| 25385     | Faslg        | -0.01777 | 0.94170125 | 0.982993 |
| 114115    | P2rx2        | -0.01788 | 0.83556615 | 0.918149 |
| 365191    | Chmp2a       | -0.01789 | 0.58952561 | 0.754994 |
| 297994    | Bag1         | -0.01792 | 0.5190752  | 0.703915 |
| 287962    | Mrpl40       | -0.01793 | 0.71878858 | 0.846274 |
| 300713    | Slc35f2      | -0.01794 | 0.84577131 | 0.923025 |
| 308404    | Irf2bp1      | -0.01794 | 0.67742054 | 0.819558 |
| 309596    | Vars2        | -0.01796 | 0.7550847  | 0.869759 |
| 103690164 | LOC103690164 | -0.01798 | 0.87253961 | 0.939958 |
| 308576    | Pnkp         | -0.01798 | 0.78296669 | 0.887226 |
| 100910143 | LOC100910143 | -0.01799 | 0.72688937 | 0.851207 |
| 305626    | Pigg         | -0.01799 | 0.72688937 | 0.851207 |
| 364240    | Dnajc9       | -0.01802 | 0.741665   | 0.860284 |
| 312694    | Necap1       | -0.01804 | 0.38792606 | 0.5851   |
| 287178    | Ubtd2        | -0.01807 | 0.6577594  | 0.803942 |
| 300035    | Pycr3        | -0.0181  | 0.71906782 | 0.846446 |
| 366468    | Lsm10        | -0.01811 | 0.84461048 | 0.922393 |
| 314586    | Zfp763       | -0.01814 | 0.80857184 | 0.902652 |
| 502727    | RGD1563349   | -0.01814 | 0.47551128 | 0.665793 |
| 361038    | RGD1308430   | -0.01817 | 0.77613491 | 0.883162 |
| 361110    | Tmem110      | -0.01819 | 0.74038074 | 0.860577 |
| 315033    | Spag1        | -0.01819 | 0.84454743 | 0.922377 |
| 288615    | Sbds         | -0.01821 | 0.5207734  | 0.705415 |
| 688981    | LOC688981    | -0.01822 | 0.9778628  | 1        |
| 360962    | Tacc3        | -0.01822 | 0.86329178 | 0.93311  |
| 113898    | Prdx5        | -0.01826 | 0.37275355 | 0.569111 |
| 497936    | Tmem88       | -0.01832 | 0.81280646 | 0.905363 |
| 60450     | Matk         | -0.01841 | 0.7654     | 0.876446 |
| 289372    | Smyd2        | -0.01842 | 0.46930944 | 0.659631 |
| 299075    | Trappc6b     | -0.01842 | 0.60889369 | 0.770677 |
| 100192314 | Inafm1       | -0.01845 | 0.79584756 | 0.89453  |
| 360505    | Npr13        | -0.01848 | 0.70853178 | 0.839753 |
| 81741     | Cdk16        | -0.01855 | 0.2156998  | 0.39664  |
| 366734    | Bag5         | -0.01856 | 0.62889048 | 0.785958 |
| 100362495 | Haus5        | -0.01858 | 0.82201863 | 0.909877 |
| 171415    | Atg3         | -0.0186  | 0.5514259  | 0.731738 |
| 140593    | Siah2        | -0.01862 | 0.81233202 | 0.905099 |
| 65139     | Rps12        | -0.01862 | 0.37774404 | 0.574749 |
| 100359662 | Ankdd1b      | -0.01866 | 0.88991205 | 0.950554 |
| 116484    | Txn1         | -0.01866 | 0.41209154 | 0.607829 |
| 103690149 | LOC103690149 | -0.01868 | 0.71113168 | 0.841316 |
| 307492    | Hars         | -0.01873 | 0.35301843 | 0.549958 |
| 308051    | Rnf146       | -0.01876 | 0.62096979 | 0.778819 |
| 296279    | Tm9sf4       | -0.01876 | 0.59387391 | 0.758522 |
| 294518    | Sesn1        | -0.01882 | 0.64590534 | 0.798991 |
| 83730     | Vamp8        | -0.01886 | 0.84139513 | 0.921047 |
| 29752     | Fau          | -0.0189  | 0.30514024 | 0.502108 |
| 406866    | Ly6g6e       | -0.01892 | 0.84904514 | 0.925061 |
| 84591     | Pick1        | -0.01896 | 0.71602725 | 0.84438  |
| 308390    | Fkrp         | -0.01897 | 0.63562378 | 0.790793 |
| 365388    | Psmd13       | -0.01899 | 0.43444904 | 0.628682 |
| 360946    | Zcchc4       | -0.019   | 0.8362296  | 0.918454 |
| 302817    | Enox2        | -0.019   | 0.81976992 | 0.909132 |
| 683983    | Nup43        | -0.01903 | 0.79231925 | 0.893041 |
| 296480    | Tpd5212      | -0.01903 | 0.44043345 | 0.633682 |

|           |              |          |            |          |
|-----------|--------------|----------|------------|----------|
| 363519    | Hcfc1        | -0.01905 | 0.52745945 | 0.711032 |
| 81747     | Pi4kb        | -0.01912 | 0.53585389 | 0.718079 |
| 364952    | Nkd1         | -0.01915 | 0.69977354 | 0.835403 |
| 304530    | Taok3        | -0.01915 | 0.67104754 | 0.814538 |
| 291000    | Faf2         | -0.01916 | 0.47668204 | 0.66611  |
| 299261    | Moap1        | -0.01919 | 0.53968854 | 0.721694 |
| 312451    | Tcf7l1       | -0.01919 | 0.70827594 | 0.839659 |
| 360622    | Igfbp4       | -0.0192  | 0.46976503 | 0.660125 |
| 116504    | Mprip        | -0.0192  | 0.12091085 | 0.263834 |
| 366854    | Fbxo7        | -0.01923 | 0.54396741 | 0.725277 |
| 100910275 | LOC100910275 | -0.01923 | 0.41181497 | 0.607515 |
| 313666    | Zbtb17       | -0.01927 | 0.73213176 | 0.85464  |
| 117017    | Polr2g       | -0.01927 | 0.61568801 | 0.775361 |
| 494520    | Ggnbp1       | -0.01933 | 0.93887226 | 0.981438 |
| 310615    | Crtc2        | -0.01934 | 0.61496678 | 0.775119 |
| 171145    | Eif2b3       | -0.01935 | 0.70703094 | 0.838705 |
| 304285    | Tecpr1       | -0.01937 | 0.4249084  | 0.620153 |
| 301020    | Smarcc1      | -0.01938 | 0.55990306 | 0.735556 |
| 192351    | Fbxo6        | -0.01942 | 0.66365191 | 0.808291 |
| 305845    | Mettl17      | -0.01942 | 0.82786857 | 0.913432 |
| 60661     | Max          | -0.01944 | 0.51390416 | 0.699693 |
| 246117    | Mcfd2        | -0.01945 | 0.70039041 | 0.835773 |
| 299201    | Dlst         | -0.01947 | 0.30087796 | 0.497761 |
| 373545    | Prkag2       | -0.01947 | 0.41345337 | 0.609318 |
| 245709    | Exoc8        | -0.01951 | 0.6697439  | 0.813267 |
| 79433     | Myh10        | -0.01955 | 0.21336202 | 0.393557 |
| 29381     | Acvrlb       | -0.0196  | 0.6659543  | 0.810422 |
| 500280    | Lrrn1        | -0.0196  | 0.14447762 | 0.298922 |
| 363259    | Obsl1        | -0.01961 | 0.69347455 | 0.830852 |
| 83688     | Taldo1       | -0.01965 | 0.356322   | 0.553384 |
| 81715     | Camlg        | -0.01978 | 0.55758591 | 0.736525 |
| 299691    | Cry1         | -0.01981 | 0.82598048 | 0.912618 |
| 296973    | Bpgm         | -0.01981 | 0.52148416 | 0.705925 |
| 301552    | Mrpl44       | -0.01983 | 0.70913817 | 0.839949 |
| 362358    | Krba1        | -0.01984 | 0.69158776 | 0.829426 |
| 362666    | Dnajc11      | -0.01988 | 0.5027581  | 0.689496 |
| 307642    | Cfap20       | -0.01992 | 0.58133391 | 0.748226 |
| 287840    | Ubald2       | -0.01993 | 0.63982872 | 0.793846 |
| 292814    | Pdcd5        | -0.01996 | 0.56168014 | 0.733137 |
| 171131    | Chrn3        | -0.01998 | 0.53198874 | 0.714256 |
| 499814    | Ttc30b       | -0.01999 | 0.74002764 | 0.860271 |
| 102553032 | LOC102553032 | -0.02003 | 0.99117434 | 1        |
| 306766    | LOC306766    | -0.02004 | 0.34436112 | 0.540895 |
| 501201    | Tmem200c     | -0.02004 | 0.77774095 | 0.884039 |
| 287835    | Galk1        | -0.02005 | 0.68978907 | 0.828208 |
| 500555    | Zcchc17      | -0.02006 | 0.4944538  | 0.681197 |
| 308703    | Lrrk1        | -0.02007 | 0.70951847 | 0.840242 |
| 361728    | Tmem138      | -0.0201  | 0.86088384 | 0.932094 |
| 103690884 | LOC103690884 | -0.0201  | 0.79363834 | 0.893418 |
| 315189    | Prr5         | -0.0201  | 0.64765185 | 0.800268 |
| 685448    | Pcp4l1       | -0.02012 | 0.63931738 | 0.793729 |
| 54234     | Cacna1e      | -0.02013 | 0.72234173 | 0.848098 |
| 308709    | Synm         | -0.02015 | 0.06993175 | 0.175497 |
| 100158225 | Tedc2        | -0.02016 | 0.79410669 | 0.89347  |
| 317247    | Nap112       | -0.02016 | 0.38387961 | 0.58056  |
| 365155    | Prdm9        | -0.02021 | 0.91148049 | 0.963434 |

|           |              |          |            |          |
|-----------|--------------|----------|------------|----------|
| 114700    | Cyp27b1      | -0.02023 | 0.95222804 | 0.988994 |
| 294691    | Naip5        | -0.0203  | 0.75324468 | 0.868269 |
| 314623    | Midn         | -0.02031 | 0.48359571 | 0.672023 |
| 366012    | Trub2        | -0.02031 | 0.70537255 | 0.838461 |
| 102551518 | LOC102551518 | -0.02034 | 0.82339162 | 0.911026 |
| 29154     | Capn2        | -0.02035 | 0.0985459  | 0.226149 |
| 83499     | Psm4         | -0.02035 | 0.36089409 | 0.557756 |
| 362246    | Tp53inp2     | -0.02037 | 0.37730347 | 0.574308 |
| 686980    | Srrt         | -0.02038 | 0.56165943 | 0.73316  |
| 161476    | Hspb2        | -0.02039 | 0.77574661 | 0.883037 |
| 25480     | Mip          | -0.02039 | 0.80317413 | 0.899527 |
| 29513     | Mapk13       | -0.02042 | 0.91434819 | 0.964965 |
| 307859    | Chst5        | -0.02046 | 0.81247878 | 0.905104 |
| 362194    | Bahd1        | -0.0205  | 0.51038834 | 0.696599 |
| 360630    | Naglu        | -0.02052 | 0.72289692 | 0.848488 |
| 289508    | Rchyl        | -0.02057 | 0.64258814 | 0.796388 |
| 297393    | Nagk         | -0.02057 | 0.52922801 | 0.711955 |
| 117096    | Nlgn2        | -0.02059 | 0.45614525 | 0.647484 |
| 24787     | Sod2         | -0.0206  | 0.2291016  | 0.413538 |
| 59106     | Ltbp2        | -0.02062 | 0.82206526 | 0.909876 |
| 288718    | Tfip11       | -0.02064 | 0.57714055 | 0.745045 |
| 304522    | Fbxw8        | -0.02066 | 0.47108507 | 0.661638 |
| 65142     | Arl2         | -0.02066 | 0.57358557 | 0.742468 |
| 89817     | Sh2b1        | -0.02066 | 0.54440924 | 0.725511 |
| 360967    | Rnf185       | -0.02068 | 0.64244153 | 0.79631  |
| 60586     | Clcn4        | -0.02071 | 0.30208465 | 0.49902  |
| 29715     | Slc8a1       | -0.02072 | 0.65879175 | 0.804636 |
| 307199    | Cd226        | -0.02077 | 0.89004727 | 0.950538 |
| 362865    | Gnptab       | -0.02077 | 0.43792439 | 0.631743 |
| 287656    | Mrpl45       | -0.02078 | 0.54411435 | 0.725372 |
| 294456    | Nt5dc1       | -0.02081 | 0.82116877 | 0.909835 |
| 24629     | Pdgfrb       | -0.02083 | 0.47180494 | 0.66221  |
| 295395    | Rtca         | -0.02083 | 0.43339436 | 0.627871 |
| 65040     | Dlgap1       | -0.02085 | 0.61732095 | 0.77639  |
| 360515    | Clint1       | -0.02087 | 0.40993075 | 0.606426 |
| 288985    | Insig2       | -0.02089 | 0.71001784 | 0.840625 |
| 311456    | Mkks         | -0.02091 | 0.59503863 | 0.75889  |
| 314961    | Asap1        | -0.02093 | 0.31353171 | 0.508491 |
| 414784    | RT1-T24-4    | -0.02094 | 0.60682349 | 0.76913  |
| 171500    | Stau2        | -0.02099 | 0.24338447 | 0.431468 |
| 308961    | Dctn5        | -0.021   | 0.34890431 | 0.545781 |
| 294881    | Slc7a12      | -0.021   | 0.97689614 | 1        |
| 366909    | Slc26a10     | -0.02104 | 0.86118655 | 0.932316 |
| 684028    | Cryga        | -0.02106 | 0.87219786 | 0.939749 |
| 25055     | Lipa         | -0.02106 | 0.24971495 | 0.438244 |
| 64476     | Mfn2         | -0.02109 | 0.22975668 | 0.414524 |
| 304293    | Zfp316       | -0.0211  | 0.76319317 | 0.875076 |
| 286988    | Pnrc1        | -0.0211  | 0.54670658 | 0.727605 |
| 690343    | Zfp141       | -0.02112 | 0.80115709 | 0.898113 |
| 291659    | Ik           | -0.02112 | 0.34384188 | 0.540303 |
| 362891    | Os9          | -0.02113 | 0.21089362 | 0.389759 |
| 100362022 | Zfp27        | -0.02113 | 0.83066042 | 0.915081 |
| 102554066 | LOC102554066 | -0.02115 | 0.93572664 | 0.979144 |
| 24172     | Adh1         | -0.02115 | 0.93572664 | 0.979144 |
| 93646     | Sec31a       | -0.02116 | 0.40845485 | 0.605277 |
| 94269     | Fez2         | -0.02118 | 0.44907212 | 0.640883 |

|           |              |          |            |          |
|-----------|--------------|----------|------------|----------|
| 301062    | Exog         | -0.02118 | 0.69632759 | 0.833065 |
| 25652     | Ptgfr        | -0.02121 | 0.71794478 | 0.845803 |
| 245958    | Atp5fle      | -0.02126 | 0.39854936 | 0.595837 |
| 294512    | Ascc1        | -0.02128 | 0.64575206 | 0.798905 |
| 500990    | LOC500990    | -0.02129 | 0.97499769 | 1        |
| 317598    | Mcf2         | -0.02129 | 0.84287479 | 0.921819 |
| 689397    | Sssca1       | -0.0213  | 0.56706832 | 0.737088 |
| 313843    | Galm         | -0.02134 | 0.7028982  | 0.837558 |
| 298096    | Wdr31        | -0.02135 | 0.87120716 | 0.939001 |
| 314214    | L3hypdh      | -0.02135 | 0.90873061 | 0.961594 |
| 317580    | Rab33a       | -0.02136 | 0.74326619 | 0.86125  |
| 292762    | Eif3k        | -0.02138 | 0.47930473 | 0.667815 |
| 117039    | Gps1         | -0.02139 | 0.35115727 | 0.547955 |
| 246144    | I13ra        | -0.02141 | 0.78774621 | 0.889888 |
| 24957     | Glul         | -0.02141 | 0.13493647 | 0.285129 |
| 100911519 | LOC100911519 | -0.02145 | 0.82000675 | 0.909235 |
| 312652    | Plxnd1       | -0.02147 | 0.25850702 | 0.447855 |
| 140937    | Higd1a       | -0.02151 | 0.56108223 | 0.732708 |
| 308061    | Pdcd6        | -0.02152 | 0.51810515 | 0.703    |
| 191573    | Grin3a       | -0.02155 | 0.85541552 | 0.928919 |
| 500545    | Cdca8        | -0.02155 | 0.87053713 | 0.93881  |
| 288240    | Hlcs         | -0.02158 | 0.5149093  | 0.700561 |
| 171384    | Trpm8        | -0.0216  | 0.32330232 | 0.518509 |
| 60381     | Tsn          | -0.0216  | 0.7221447  | 0.847971 |
| 306255    | Nisch        | -0.02161 | 0.04175499 | 0.116962 |
| 304579    | Usp30        | -0.02162 | 0.63916573 | 0.793696 |
| 311414    | Zc3h8        | -0.02164 | 0.79622838 | 0.894905 |
| 300259    | Aaas         | -0.0217  | 0.70121402 | 0.836494 |
| 502531    | Eif2a        | -0.02171 | 0.5697612  | 0.739277 |
| 108351076 | LOC108351076 | -0.02178 | 0.86273326 | 0.93293  |
| 299295    | Setd3        | -0.02182 | 0.20493928 | 0.38198  |
| 64559     | Slc22a23     | -0.02185 | 0.34562988 | 0.542173 |
| 293180    | Micalc1      | -0.02197 | 0.93436508 | 0.978311 |
| 311113    | Ccdc173      | -0.02197 | 0.93436508 | 0.978311 |
| 361102    | Polr3a       | -0.02199 | 0.58468814 | 0.750869 |
| 100361574 | Polr2k       | -0.02201 | 0.65158721 | 0.802943 |
| 100362005 | Grcc10       | -0.02204 | 0.40386774 | 0.600817 |
| 500126    | Hoxa7        | -0.02207 | 0.76717803 | 0.87769  |
| 302395    | Abcb7        | -0.0221  | 0.79389031 | 0.893385 |
| 364838    | Reep5        | -0.02211 | 1.93E-04   | 0.001204 |
| 29642     | Slc38a2      | -0.02211 | 0.11889193 | 0.260414 |
| 287146    | Chtf18       | -0.02216 | 0.88398231 | 0.946716 |
| 100360621 | I14i1        | -0.02217 | 0.83787822 | 0.919205 |
| 117035    | Slc25a20     | -0.02222 | 0.52092761 | 0.705523 |
| 303653    | Cdc42ep4     | -0.02222 | 0.50404547 | 0.690764 |
| 294288    | Cuta         | -0.02224 | 0.52771611 | 0.710825 |
| 301514    | Bcs11        | -0.02227 | 0.75617659 | 0.87049  |
| 117536    | Nsmf         | -0.02228 | 0.36517164 | 0.561315 |
| 691534    | Nop10        | -0.02229 | 0.31417482 | 0.508581 |
| 102556781 | LOC102556781 | -0.02229 | 0.96496122 | 0.998516 |
| 100361774 | Ralgps1      | -0.02229 | 0.76740529 | 0.877739 |
| 54348     | Stk39        | -0.02231 | 0.14102387 | 0.29427  |
| 316102    | Lztf11       | -0.02231 | 0.67791147 | 0.819839 |
| 292228    | Tmem242      | -0.02235 | 0.60248583 | 0.765773 |
| 171566    | Nme7         | -0.02238 | 0.68527189 | 0.825177 |
| 308857    | Dnajb13      | -0.02238 | 0.87647784 | 0.942601 |

|        |           |          |            |          |
|--------|-----------|----------|------------|----------|
| 114004 | Ppp1r14a  | -0.0224  | 0.867777   | 0.936947 |
| 361565 | Vrk3      | -0.02241 | 0.60306808 | 0.766411 |
| 501584 | Amer1     | -0.02244 | 0.68945876 | 0.827968 |
| 362238 | Dusp15    | -0.02245 | 0.22472646 | 0.407922 |
| 289021 | Pik3c2b   | -0.02246 | 0.74680243 | 0.864138 |
| 362149 | Cir1      | -0.02246 | 0.58919201 | 0.75477  |
| 25176  | Slc25a5   | -0.02246 | 0.16678366 | 0.330461 |
| 294380 | Lrrtm3    | -0.02246 | 0.84019004 | 0.920151 |
| 297459 | Mrps25    | -0.02247 | 0.68288029 | 0.823286 |
| 314224 | Tmem30b   | -0.0225  | 0.73077969 | 0.853585 |
| 309911 | Qrs11     | -0.02254 | 0.802103   | 0.898644 |
| 445371 | Kcnk18    | -0.02255 | 0.75453346 | 0.869492 |
| 316033 | Glb1      | -0.02257 | 0.54506707 | 0.726083 |
| 303478 | Ube2z     | -0.02261 | 0.24990695 | 0.438379 |
| 170917 | Cry2      | -0.02262 | 0.35985674 | 0.55665  |
| 301242 | Ptk7      | -0.02264 | 0.54982785 | 0.730432 |
| 314897 | Ppmlh     | -0.02264 | 0.47127966 | 0.661765 |
| 299628 | Mrpl54    | -0.02264 | 0.59177845 | 0.756861 |
| 24780  | Slc4a2    | -0.02267 | 0.34900106 | 0.545753 |
| 24260  | Chrm3     | -0.02269 | 0.83727717 | 0.919075 |
| 50599  | Kcnj3     | -0.0227  | 0.69407178 | 0.831306 |
| 689197 | Kin       | -0.02271 | 0.82435417 | 0.911403 |
| 25566  | Tmod1     | -0.02273 | 0.18482281 | 0.35591  |
| 683420 | LOC683420 | -0.02277 | 0.67729943 | 0.819619 |
| 294258 | Nelfe     | -0.02284 | 0.65042733 | 0.8025   |
| 500475 | LOC500475 | -0.02284 | 0.83669258 | 0.918698 |
| 308201 | Riok2     | -0.02286 | 0.69291682 | 0.830445 |
| 361434 | Cdk10     | -0.02289 | 0.51048871 | 0.696586 |
| 681021 | Paqr6     | -0.02292 | 0.41617434 | 0.612049 |
| 306030 | Med4      | -0.02292 | 0.6924812  | 0.830289 |
| 313524 | Zswim5    | -0.02293 | 0.55493471 | 0.734399 |
| 316333 | Actr1b    | -0.02294 | 0.12601562 | 0.271582 |
| 64639  | Bad       | -0.02294 | 0.62800439 | 0.785263 |
| 685079 | Sys1      | -0.02298 | 0.68286168 | 0.823316 |
| 192117 | Syngap1   | -0.02299 | 0.6549774  | 0.803585 |
| 300519 | Esam      | -0.02299 | 0.74358629 | 0.861464 |
| 60564  | Syt9      | -0.023   | 0.53101517 | 0.713201 |
| 312826 | Cmas      | -0.02303 | 0.27465712 | 0.466706 |
| 54281  | Furin     | -0.02304 | 0.51600337 | 0.701498 |
| 292535 | Leng1     | -0.02306 | 0.73221372 | 0.854683 |
| 292944 | Reps1     | -0.02312 | 0.52572276 | 0.709545 |
| 304503 | Hectd4    | -0.02315 | 0.18444574 | 0.355328 |
| 316242 | Tctel1    | -0.02316 | 0.60399936 | 0.767134 |
| 296583 | Nacc2     | -0.02318 | 0.08259074 | 0.19951  |
| 171297 | Nlgn3     | -0.0232  | 0.48722953 | 0.675348 |
| 315851 | Elovl4    | -0.0232  | 0.38398215 | 0.580622 |
| 314304 | Acot3     | -0.0232  | 0.75114523 | 0.867056 |
| 29667  | Srsf5     | -0.02321 | 0.25468149 | 0.443365 |
| 308837 | Ints4     | -0.02321 | 0.49368811 | 0.680733 |
| 308875 | Rhog      | -0.02321 | 0.4621364  | 0.652777 |
| 680933 | LOC680933 | -0.02321 | 0.82953192 | 0.914791 |
| 498805 | Thns11    | -0.02322 | 0.76861169 | 0.87838  |
| 303356 | Tmem98    | -0.02325 | 0.79877436 | 0.896814 |
| 309444 | Fbxw4     | -0.02325 | 0.60430983 | 0.767426 |
| 79210  | Fstl1     | -0.02326 | 1.99E-05   | 1.54E-04 |
| 84578  | Hdac3     | -0.02326 | 0.52103747 | 0.705572 |

|           |                 |          |            |          |
|-----------|-----------------|----------|------------|----------|
| 288025    | Hrasls          | -0.02328 | 0.87946748 | 0.94427  |
| 293852    | Bcap31          | -0.02329 | 0.2147651  | 0.395227 |
| 113965    | Hadh            | -0.0233  | 0.40208752 | 0.599152 |
| 108351584 | LOC108351584    | -0.0233  | 0.7417595  | 0.860237 |
| 64619     | Zbtb18          | -0.02338 | 0.43738618 | 0.631301 |
| 257648    | Cacna1b         | -0.02338 | 0.22678668 | 0.410644 |
| 297832    | Cntnap5a        | -0.02339 | 0.93447402 | 0.978344 |
| 361987    | Dennd4b         | -0.02341 | 0.49495456 | 0.681591 |
| 360871    | Mpz11           | -0.02343 | 0.46901208 | 0.659602 |
| 140868    | Fabp5           | -0.0235  | 0.17565526 | 0.343642 |
| 503165    | Arfgap3         | -0.02351 | 0.44732589 | 0.639589 |
| 24426     | Gstp1           | -0.02353 | 0.31535338 | 0.509882 |
| 298784    | Nlrc4           | -0.02354 | 0.91490538 | 0.965232 |
| 81636     | Adcy2           | -0.02354 | 0.63934037 | 0.793706 |
| 297082    | Malsu1          | -0.02355 | 0.70911315 | 0.839971 |
| 171378    | Ppp3cc          | -0.02357 | 0.53561261 | 0.717806 |
| 100911374 | LOC100911374    | -0.02359 | 0.75208448 | 0.867615 |
| 360834    | Vps4b           | -0.02359 | 0.29895069 | 0.495519 |
| 500270    | Ier3ip1         | -0.02362 | 0.88197498 | 0.945736 |
| 619436    | Med24           | -0.0237  | 0.44238757 | 0.635246 |
| 362648    | Arhgef19        | -0.02371 | 0.73934027 | 0.859735 |
| 116479    | F11r            | -0.02373 | 0.71120375 | 0.841297 |
| 689314    | Mapk11          | -0.02373 | 0.39009387 | 0.587021 |
| 301579    | Armc9           | -0.02374 | 0.56589383 | 0.736416 |
| 296211    | Ralgapa2        | -0.02379 | 0.54283596 | 0.724276 |
| 309025    | Tacc2           | -0.0238  | 0.41411943 | 0.609922 |
| 64520     | Mtal            | -0.02381 | 0.44409783 | 0.63703  |
| 246047    | Calcocol        | -0.02381 | 0.48090247 | 0.669649 |
| 100909955 | LOC100909955    | -0.02382 | 0.97523096 | 1        |
| 103693219 | NEWGENE_1308196 | -0.02384 | 0.62066893 | 0.778647 |
| 85482     | Nbn             | -0.02386 | 0.47392527 | 0.664158 |
| 50558     | Npepps          | -0.02391 | 0.14650512 | 0.301675 |
| 305471    | Patz1           | -0.02392 | 0.58986779 | 0.75528  |
| 89823     | Trpc6           | -0.02392 | 0.81935802 | 0.909098 |
| 308218    | Fam120b         | -0.02393 | 0.37754533 | 0.574585 |
| 363045    | Siae            | -0.02397 | 0.6594861  | 0.805019 |
| 312200    | Tmem209         | -0.02397 | 0.67854147 | 0.820288 |
| 361384    | Dnajb1          | -0.02399 | 0.42806416 | 0.623183 |
| 293408    | Hbs11           | -0.024   | 0.22477151 | 0.407965 |
| 81674     | Gtf2f2          | -0.024   | 0.75516415 | 0.869692 |
| 305464    | Depdc5          | -0.02401 | 0.33721242 | 0.534027 |
| 64511     | Fntb            | -0.02406 | 0.41922552 | 0.61478  |
| 367302    | Kcne4           | -0.02408 | 0.75475027 | 0.869584 |
| 313346    | Focad           | -0.0241  | 0.51163127 | 0.697546 |
| 65038     | Inpp11          | -0.02412 | 0.46211909 | 0.652801 |
| 81024     | Ical            | -0.02417 | 0.49776769 | 0.684031 |
| 282826    | Elac2           | -0.02417 | 0.54752975 | 0.728293 |
| 29233     | C1cn7           | -0.02423 | 0.49014202 | 0.677561 |
| 294252    | Msh5            | -0.02427 | 0.93065635 | 0.975608 |
| 64896     | Nolc1           | -0.02427 | 0.27706763 | 0.469671 |
| 80977     | Syt13           | -0.02427 | 0.93065635 | 0.975608 |
| 500420    | Tstd3           | -0.0243  | 0.48656757 | 0.674676 |
| 366434    | Btf314          | -0.02432 | 0.61678499 | 0.776177 |
| 690195    | Primal          | -0.02432 | 0.61301013 | 0.773779 |
| 300988    | Tex264          | -0.02433 | 0.41910622 | 0.6147   |
| 114557    | Wif1            | -0.02434 | 0.80531095 | 0.900807 |



|           |              |          |            |          |
|-----------|--------------|----------|------------|----------|
| 362384    | Reep1        | -0.02434 | 0.00576381 | 0.023351 |
| 79462     | Txn2         | -0.0244  | 0.46210523 | 0.652829 |
| 363481    | Hdac8        | -0.02441 | 0.77171232 | 0.880497 |
| 360874    | Tada1        | -0.02441 | 0.71110799 | 0.841392 |
| 498945    | Zfp90        | -0.02443 | 0.72201349 | 0.847974 |
| 290843    | Gpat4        | -0.02444 | 0.4178663  | 0.613779 |
| 310803    | Extl2        | -0.02445 | 0.40376785 | 0.600762 |
| 304645    | Tbc1d9       | -0.02447 | 0.23448624 | 0.420745 |
| 366004    | Rnf224       | -0.02447 | 0.97485989 | 1        |
| 100909954 | LOC100909954 | -0.02448 | 0.67703712 | 0.819458 |
| 29340     | Prkce        | -0.02451 | 0.31123386 | 0.50649  |
| 295686    | Ube2e3       | -0.02453 | 0.41820884 | 0.614046 |
| 293129    | Alg8         | -0.02455 | 0.77149381 | 0.880353 |
| 266689    | Cyp4f6       | -0.02459 | 0.68706733 | 0.826451 |
| 365389    | Lrrc56       | -0.02462 | 0.87925453 | 0.944307 |
| 289264    | Grem2        | -0.02468 | 0.45618302 | 0.647489 |
| 300146    | Ppp6r2       | -0.0247  | 0.31097179 | 0.506236 |
| 309828    | Tspyl4       | -0.0247  | 0.21635969 | 0.397662 |
| 78966     | Arhgef11     | -0.0247  | 0.17719132 | 0.345688 |
| 29677     | Psmc3        | -0.02472 | 0.16123638 | 0.323339 |
| 501702    | Cenpv        | -0.02473 | 0.79198067 | 0.892818 |
| 58970     | Degs1        | -0.02474 | 0.17172303 | 0.338347 |
| 303163    | Igtp         | -0.02475 | 0.72821989 | 0.851535 |
| 100360427 | E2f4         | -0.02478 | 0.63145332 | 0.788179 |
| 298300    | Ttc22        | -0.02479 | 0.92985591 | 0.975171 |
| 287299    | Mfap3        | -0.02479 | 0.78073297 | 0.885854 |
| 299607    | Med16        | -0.02489 | 0.44790361 | 0.639838 |
| 689030    | Tbpl1        | -0.02489 | 0.57682497 | 0.744839 |
| 361126    | Sugp2        | -0.0249  | 0.34370283 | 0.540129 |
| 290303    | Spryd7       | -0.02493 | 0.42107004 | 0.616536 |
| 315611    | Scn4b        | -0.02494 | 0.02795724 | 0.0853   |
| 361888    | Sreklipl     | -0.02495 | 0.90333595 | 0.957855 |
| 292584    | Fiz1         | -0.02495 | 0.63425049 | 0.789755 |
| 362419    | Tamm41       | -0.02497 | 0.71553293 | 0.844215 |
| 290527    | Anxa11       | -0.02499 | 0.22171779 | 0.404039 |
| 102548778 | Parp10       | -0.02499 | 0.74382252 | 0.861633 |
| 116673    | Sdc3         | -0.02504 | 0.038758   | 0.110369 |
| 116565    | Lrpap1       | -0.02509 | 0.34621303 | 0.54273  |
| 297388    | Bola3        | -0.02509 | 0.65135778 | 0.803024 |
| 681024    | Ndufa4       | -0.0251  | 0.13321298 | 0.282805 |
| 64028     | Tsnax        | -0.02511 | 0.26997895 | 0.461392 |
| 314046    | Ankmy2       | -0.02513 | 0.43339632 | 0.627826 |
| 252879    | Cdk11b       | -0.02514 | 0.38462121 | 0.581312 |
| 63836     | Actn4        | -0.02514 | 0.06414224 | 0.16428  |
| 102548559 | Vcpkmt       | -0.02514 | 0.73115885 | 0.853975 |
| 289159    | Mettl13      | -0.02515 | 0.61569375 | 0.775317 |
| 246211    | Hsd3b7       | -0.02515 | 0.71309184 | 0.842588 |
| 298594    | Rcc2         | -0.02516 | 0.2901742  | 0.485323 |
| 26962     | Rpl8         | -0.0252  | 0.13214894 | 0.281204 |
| 64363     | Araf         | -0.02521 | 0.30734015 | 0.50312  |
| 25416     | Dpysl2       | -0.02527 | 0.01299238 | 0.046018 |
| 64302     | Rpl4         | -0.02532 | 0.04264451 | 0.119138 |
| 296119    | Dtwd1        | -0.02532 | 0.77822314 | 0.884429 |
| 685269    | Itga2b       | -0.02532 | 0.8774066  | 0.943014 |
| 294204    | Olr1750      | -0.02541 | 0.92714747 | 0.973564 |
| 307938    | Trim67       | -0.02555 | 0.77487313 | 0.882465 |

|           |            |          |            |          |
|-----------|------------|----------|------------|----------|
| 309643    | Fance      | -0.02556 | 0.68165802 | 0.822333 |
| 29606     | Pcsk7      | -0.02558 | 0.56161475 | 0.733202 |
| 681989    | Vipas39    | -0.02559 | 0.45679633 | 0.648118 |
| 307913    | Gsel       | -0.02559 | 0.58963491 | 0.755083 |
| 171113    | Blcap      | -0.02563 | 0.49325232 | 0.680477 |
| 309207    | Dagla      | -0.02572 | 0.25289014 | 0.441457 |
| 300677    | Atp5mg     | -0.02575 | 0.20030296 | 0.376173 |
| 288669    | Arpc3      | -0.02576 | 0.22392695 | 0.406897 |
| 361094    | Ubac2      | -0.0258  | 0.55060759 | 0.730958 |
| 362703    | Wdr43      | -0.02584 | 0.61044216 | 0.77197  |
| 365684    | Paip1      | -0.02585 | 0.3954428  | 0.592635 |
| 291939    | Mmaa       | -0.02589 | 0.77266025 | 0.881051 |
| 29701     | Scn11a     | -0.02593 | 0.03862605 | 0.110059 |
| 684830    | Ttc32      | -0.02599 | 0.83991131 | 0.920057 |
| 500351    | RGD1562378 | -0.026   | 0.70794866 | 0.83948  |
| 114850    | Wnt7a      | -0.026   | 0.78631919 | 0.889067 |
| 691678    | Tmem121    | -0.02602 | 0.7176664  | 0.845685 |
| 245957    | Ddx46      | -0.02604 | 0.4044257  | 0.601506 |
| 29287     | Rps19      | -0.02606 | 0.28465819 | 0.478788 |
| 300186    | Amigo2     | -0.02608 | 0.61184453 | 0.773128 |
| 502176    | LOC502176  | -0.02613 | 0.94498429 | 0.985016 |
| 113975    | Pom121     | -0.02615 | 0.45473649 | 0.645917 |
| 102550196 | Gcnt7      | -0.02617 | 0.89084404 | 0.951069 |
| 501869    | Sh2d1b     | -0.02617 | 0.87313403 | 0.940332 |
| 300733    | Tspan3     | -0.0262  | 0.11006719 | 0.24546  |
| 363237    | Wdr12      | -0.02626 | 0.52906535 | 0.711887 |
| 29648     | Nudc       | -0.02628 | 0.22900901 | 0.413488 |
| 315731    | Larp6      | -0.02632 | 0.6696183  | 0.813218 |
| 78967     | Mcam       | -0.02635 | 0.05672264 | 0.149293 |
| 78973     | Senp2      | -0.02635 | 0.39858552 | 0.595845 |
| 24716     | Ret        | -0.02637 | 0.00570792 | 0.023149 |
| 289934    | Oxsm       | -0.02637 | 0.69133123 | 0.829275 |
| 307410    | Rbm22      | -0.02637 | 0.5457937  | 0.726746 |
| 316764    | Mtcl1      | -0.02639 | 0.4459774  | 0.638524 |
| 315047    | Laptm4b    | -0.02639 | 0.23907075 | 0.42636  |
| 305131    | Lrrc8d     | -0.0264  | 0.33272037 | 0.52876  |
| 288088    | Ndufb4     | -0.02641 | 0.26753324 | 0.458653 |
| 287447    | Ctdnep1    | -0.02643 | 0.40054634 | 0.597556 |
| 362524    | Ptpn3      | -0.02644 | 0.42352453 | 0.618987 |
| 171365    | Snrpb      | -0.02644 | 0.55452498 | 0.734214 |
| 289878    | Pde6b      | -0.02645 | 0.92731989 | 0.973584 |
| 314330    | Cipc       | -0.02645 | 0.39758649 | 0.594818 |
| 363855    | Map2k7     | -0.02649 | 0.61705515 | 0.776261 |
| 287398    | Map2k4     | -0.0265  | 0.40265293 | 0.599713 |
| 252934    | Cox5a      | -0.02656 | 0.107424   | 0.240976 |
| 499507    | Fam151b    | -0.02658 | 0.69016552 | 0.828451 |
| 306012    | Polr3d     | -0.02662 | 0.39326638 | 0.590489 |
| 94198     | Psmbl      | -0.02662 | 0.14620576 | 0.301221 |
| 29219     | Snca       | -0.02663 | 0.35048108 | 0.547169 |
| 85242     | Pola2      | -0.02665 | 0.78349514 | 0.887613 |
| 680549    | Pknox2     | -0.02671 | 0.45623928 | 0.64752  |
| 155430    | Hey2       | -0.02675 | 0.45255277 | 0.644161 |
| 294973    | Acad9      | -0.02678 | 0.47327081 | 0.66368  |
| 308336    | Zfp580     | -0.02681 | 0.61475391 | 0.774953 |
| 306549    | Pomk       | -0.02684 | 0.3910066  | 0.588023 |
| 502957    | Ccdc171    | -0.02688 | 0.71273236 | 0.842477 |

|           |              |          |            |          |
|-----------|--------------|----------|------------|----------|
| 362125    | Nr6a1        | -0.02694 | 0.67289673 | 0.815847 |
| 171503    | Camk1        | -0.02697 | 0.55308296 | 0.733222 |
| 363662    | Bcas3        | -0.02699 | 0.3763955  | 0.573247 |
| 25179     | Idh3g        | -0.027   | 0.20238152 | 0.378397 |
| 100361134 | Shisa9       | -0.027   | 0.74930499 | 0.865929 |
| 290615    | RGD1311847   | -0.027   | 0.72043111 | 0.846951 |
| 311676    | Pmepal       | -0.02702 | 0.36098864 | 0.557812 |
| 25518     | Ppia         | -0.02708 | 1.27E-05   | 1.02E-04 |
| 362134    | Mmadhc       | -0.02711 | 0.55384874 | 0.733726 |
| 498910    | Arl2bp       | -0.02713 | 0.21342537 | 0.393636 |
| 100363455 | Zfp69        | -0.02715 | 0.84612072 | 0.923142 |
| 100359937 | LOC100359937 | -0.02724 | 0.09270755 | 0.21656  |
| 83471     | Prep         | -0.02725 | 0.30586206 | 0.501735 |
| 308430    | Zfp575       | -0.02726 | 0.87240501 | 0.939866 |
| 290783    | Tusc3        | -0.02726 | 0.33295197 | 0.528951 |
| 59312     | Shank3       | -0.02727 | 0.5832531  | 0.749886 |
| 303670    | Tmem104      | -0.02727 | 0.44444682 | 0.637482 |
| 362322    | Slc25a13     | -0.02727 | 0.6564813  | 0.80305  |
| 252902    | Dync11i1     | -0.02727 | 0.2052174  | 0.382348 |
| 306387    | Naf1         | -0.02728 | 0.75834815 | 0.872041 |
| 81775     | Rps21        | -0.02729 | 0.28638856 | 0.480637 |
| 362199    | Vps39        | -0.02738 | 0.27488613 | 0.466971 |
| 291844    | Setd6        | -0.02741 | 0.80563865 | 0.900592 |
| 192270    | Plpp3        | -0.02742 | 0.23781294 | 0.424913 |
| 316096    | Zfp105       | -0.02747 | 0.74703804 | 0.864306 |
| 299799    | Rab21        | -0.02752 | 0.36109587 | 0.557525 |
| 311130    | Prkra        | -0.02759 | 0.54526    | 0.726238 |
| 295961    | Apip         | -0.02765 | 0.66848939 | 0.812106 |
| 313436    | Zcchc12      | -0.02765 | 0.56227409 | 0.73361  |
| 140669    | Abcb6        | -0.02767 | 0.48420618 | 0.672479 |
| 305149    | Nudt9        | -0.02767 | 0.46167371 | 0.652559 |
| 498987    | Tmem200a     | -0.02768 | 0.65385111 | 0.802772 |
| 684322    | Kcmf1        | -0.0277  | 0.32658332 | 0.522276 |
| 287474    | Txndc17      | -0.0277  | 0.44964116 | 0.641262 |
| 64462     | Csnk1d       | -0.02776 | 0.09192793 | 0.215188 |
| 286899    | Hsbp1        | -0.02777 | 0.06676204 | 0.169283 |
| 414793    | RT1-CE3      | -0.02779 | 0.58051404 | 0.747929 |
| 80278     | Cdk5rap3     | -0.0278  | 0.51612115 | 0.701508 |
| 300726    | Etfa         | -0.02783 | 0.25881833 | 0.448109 |
| 289717    | Tada2b       | -0.02786 | 0.44936051 | 0.641102 |
| 314030    | Cog5         | -0.02787 | 0.51994346 | 0.704591 |
| 363599    | Tnip1        | -0.0279  | 0.3627147  | 0.559118 |
| 24765     | Scg2         | -0.02791 | 0.03318222 | 0.097645 |
| 360709    | Tfg          | -0.02793 | 0.13420945 | 0.284255 |
| 680178    | Cldn20       | -0.02797 | 0.81227064 | 0.905137 |
| 83533     | Aifm1        | -0.028   | 0.49008671 | 0.677583 |
| 313236    | Trim14       | -0.028   | 0.89413944 | 0.953145 |
| 171456    | Nsa2         | -0.02801 | 0.20547088 | 0.382634 |
| 140725    | Cacng4       | -0.02803 | 0.71542644 | 0.844404 |
| 309456    | Wbp11        | -0.02806 | 0.33630016 | 0.532893 |
| 309628    | Wdr46        | -0.02808 | 0.55628573 | 0.735471 |
| 60326     | Kcnv1        | -0.02816 | 0.62383226 | 0.781637 |
| 315298    | Racgap1      | -0.02818 | 0.58083675 | 0.74794  |
| 297516    | Cpne9        | -0.02819 | 0.72382735 | 0.849005 |
| 362217    | Cenpb        | -0.02828 | 0.23526066 | 0.421618 |
| 361542    | U2af114      | -0.02829 | 0.48290725 | 0.671606 |

|           |              |          |            |          |
|-----------|--------------|----------|------------|----------|
| 308776    | Pde8a        | -0.0283  | 0.67213507 | 0.81539  |
| 108348322 | LOC108348322 | -0.02833 | 0.9245573  | 0.971594 |
| 360559    | Pimreg       | -0.02833 | 0.89346692 | 0.952801 |
| 84497     | Dgat1        | -0.02835 | 0.59203179 | 0.757084 |
| 294025    | Stn1         | -0.02836 | 0.59787359 | 0.761333 |
| 289568    | RGD1311575   | -0.02837 | 0.20866213 | 0.386723 |
| 309377    | Sfrp5        | -0.02839 | 0.02113148 | 0.068432 |
| 691426    | Tmem201      | -0.02842 | 0.64917915 | 0.801687 |
| 25581     | Psmc2        | -0.02843 | 0.09640493 | 0.222522 |
| 289590    | Ociad1       | -0.02845 | 0.08563899 | 0.204719 |
| 317498    | Ppef1        | -0.02845 | 0.14566871 | 0.300603 |
| 306582    | Agpat5       | -0.02847 | 0.50629994 | 0.693056 |
| 100359821 | Zik1         | -0.02848 | 0.72226932 | 0.848065 |
| 362455    | Fam234b      | -0.02849 | 0.30647346 | 0.502521 |
| 299053    | Brms11       | -0.0285  | 0.42017916 | 0.615468 |
| 680021    | Grhpr        | -0.02852 | 0.75263358 | 0.867933 |
| 296272    | Tcf15        | -0.02854 | 0.88004972 | 0.944522 |
| 25529     | Ptprs        | -0.02861 | 0.05215126 | 0.139282 |
| 290669    | Gatad2a      | -0.02861 | 0.36644344 | 0.562498 |
| 304104    | Urb1         | -0.02862 | 0.55726394 | 0.736355 |
| 313775    | RGD1311517   | -0.02862 | 0.72163623 | 0.84774  |
| 117020    | Mcf21        | -0.02864 | 0.23419008 | 0.420372 |
| 654495    | Zdhhc16      | -0.02866 | 0.64771181 | 0.80029  |
| 291006    | Diras2       | -0.02866 | 0.34586778 | 0.542233 |
| 691712    | LOC691712    | -0.02867 | 0.83158726 | 0.915361 |
| 295229    | Naxe         | -0.02869 | 0.56729244 | 0.737178 |
| 314612    | Shc2         | -0.02871 | 0.19746858 | 0.372171 |
| 296710    | Arpc51       | -0.02872 | 0.32605115 | 0.521731 |
| 297029    | Gstk1        | -0.02875 | 0.5128676  | 0.698481 |
| 108348051 | LOC108348051 | -0.02877 | 0.24700497 | 0.435575 |
| 259242    | Wipf3        | -0.02877 | 0.12411093 | 0.268876 |
| 100216475 | Hexdc        | -0.02877 | 0.67925298 | 0.82094  |
| 362432    | Clec4d       | -0.02878 | 0.89417789 | 0.953079 |
| 317260    | Zmym3        | -0.02884 | 0.32043414 | 0.515646 |
| 303393    | Cox7b        | -0.02884 | 0.21389511 | 0.394197 |
| 81518     | Mef2d        | -0.02889 | 0.26930753 | 0.46074  |
| 367112    | Hmgcl11      | -0.02892 | 0.64694196 | 0.79991  |
| 291824    | Tk2          | -0.02893 | 0.58798422 | 0.753628 |
| 300045    | Exosc4       | -0.02896 | 0.72970411 | 0.852642 |
| 303260    | Spag7        | -0.029   | 0.46066543 | 0.651908 |
| 315139    | Tab1         | -0.02902 | 0.55429865 | 0.734016 |
| 691153    | Epop         | -0.02902 | 0.92357979 | 0.97121  |
| 361654    | RGD1310127   | -0.02905 | 0.4650657  | 0.655893 |
| 266631    | Rbm45        | -0.02907 | 0.61140638 | 0.772779 |
| 100360682 | Snrpe        | -0.02907 | 0.50584371 | 0.69263  |
| 303056    | Atp10b       | -0.0291  | 0.78580543 | 0.888697 |
| 304490    | Anapc7       | -0.02912 | 0.54326593 | 0.724748 |
| 360983    | Lgals1       | -0.02916 | 0.26019365 | 0.449591 |
| 363110    | Rwdd2a       | -0.02917 | 0.86527412 | 0.934722 |
| 29230     | Sqle         | -0.02918 | 0.11862443 | 0.260037 |
| 361520    | Dmac2        | -0.02919 | 0.4835529  | 0.672111 |
| 289084    | RGD1309104   | -0.0292  | 0.40256061 | 0.599622 |
| 361736    | Pat11        | -0.02921 | 0.49600359 | 0.682395 |
| 100534597 | Cenps        | -0.02927 | 0.74922175 | 0.865886 |
| 686132    | Hmcn2        | -0.02928 | 0.78512056 | 0.888398 |
| 316424    | Aox4         | -0.02929 | 0.72813373 | 0.851539 |

|           |              |          |            |          |
|-----------|--------------|----------|------------|----------|
| 289664    | Ldb2         | -0.02929 | 0.16744216 | 0.331525 |
| 360483    | RGD1561796   | -0.02929 | 0.85404212 | 0.927851 |
| 64529     | Ctsb         | -0.02932 | 6.82E-08   | 8.16E-07 |
| 307779    | Rbmxt1       | -0.02935 | 0.56063464 | 0.735553 |
| 171347    | Mat2a        | -0.02937 | 0.3789932  | 0.576097 |
| 54322     | Cox6c        | -0.02938 | 0.13785329 | 0.289493 |
| 366276    | Prpf6        | -0.02939 | 0.35152601 | 0.548306 |
| 292724    | Ccdc97       | -0.0294  | 0.39655147 | 0.593923 |
| 304570    | Ddx51        | -0.02945 | 0.67993609 | 0.821401 |
| 24416     | Grm3         | -0.02946 | 0.65413302 | 0.802911 |
| 114488    | Rbm3         | -0.02952 | 0.37197729 | 0.568427 |
| 24513     | Ivd          | -0.02953 | 0.39541924 | 0.592647 |
| 292160    | Znhit6       | -0.02955 | 0.6082219  | 0.770032 |
| 296467    | Ythdf1       | -0.02959 | 0.32280512 | 0.518017 |
| 171396    | Sulf1        | -0.02959 | 0.61439666 | 0.774605 |
| 25524     | Psap         | -0.0296  | 1.21E-07   | 1.40E-06 |
| 117596    | Atp6v1b2     | -0.02966 | 0.00844042 | 0.032182 |
| 501007    | RGD1562618   | -0.02966 | 0.34152348 | 0.538258 |
| 683519    | Mrps22       | -0.02966 | 0.52440229 | 0.708215 |
| 83785     | Vegfa        | -0.02968 | 0.28540792 | 0.479583 |
| 298584    | Capzb        | -0.02968 | 0.05700455 | 0.14991  |
| 288533    | Taf6         | -0.0297  | 0.44767304 | 0.639701 |
| 246295    | Cep104       | -0.0297  | 0.29747743 | 0.494066 |
| 313535    | Eri3         | -0.02972 | 0.21469248 | 0.395208 |
| 102546990 | LOC102546990 | -0.02973 | 0.92257137 | 0.970578 |
| 688717    | Slirp        | -0.02973 | 0.58556437 | 0.751589 |
| 291019    | Fam120a      | -0.02977 | 0.09561855 | 0.221351 |
| 306439    | Gpm6a        | -0.02979 | 0.38707827 | 0.58433  |
| 360547    | Sat2         | -0.0298  | 0.65561819 | 0.802613 |
| 681177    | LOC681177    | -0.02983 | 0.77244174 | 0.88096  |
| 296558    | Anapc2       | -0.02986 | 0.15700155 | 0.317016 |
| 84495     | Xrcc1        | -0.02986 | 0.49521367 | 0.6818   |
| 282581    | Fzd6         | -0.02987 | 0.77494137 | 0.88249  |
| 360477    | Glyr1        | -0.02987 | 0.3606426  | 0.557548 |
| 117103    | Rab8a        | -0.02992 | 0.41775811 | 0.613668 |
| 500111    | Lrrc61       | -0.02995 | 0.44679844 | 0.639266 |
| 499010    | Syne1        | -0.02995 | 0.07893659 | 0.192515 |
| 303811    | Dvl3         | -0.02996 | 0.25499148 | 0.443661 |
| 29434     | Rasgrp1      | -0.02997 | 0.51183478 | 0.697773 |
| 58812     | Apln         | -0.02997 | 0.86572119 | 0.935152 |
| 287134    | Gnptg        | -0.02997 | 0.4495094  | 0.641218 |
| 288611    | Galnt17      | -0.02998 | 0.34128601 | 0.538107 |
| 307210    | Timm21       | -0.02999 | 0.58662852 | 0.752549 |
| 292041    | Wwox         | -0.02999 | 0.59326786 | 0.758308 |
| 29283     | Rpl29        | -0.03    | 0.07994977 | 0.194388 |
| 363915    | Tmem132c     | -0.03    | 0.43099436 | 0.625203 |
| 363109    | Pgm3         | -0.03004 | 0.57444661 | 0.742523 |
| 310720    | Wdr3         | -0.03005 | 0.63918134 | 0.793663 |
| 406167    | Prrt1        | -0.03009 | 0.37273361 | 0.569126 |
| 306576    | Nek3         | -0.0301  | 0.75700567 | 0.871023 |
| 499431    | Col13a1      | -0.0301  | 0.84485201 | 0.922498 |
| 298586    | Mrto4        | -0.03016 | 0.55739447 | 0.736426 |
| 24185     | Akt1         | -0.0302  | 0.08510767 | 0.203884 |
| 360616    | Ppp1r1b      | -0.03021 | 0.59748791 | 0.761046 |
| 683402    | Ap3s2        | -0.03025 | 0.30341853 | 0.500572 |
| 312754    | Ppp2r5a      | -0.03027 | 0.52969193 | 0.712328 |

|           |              |          |            |          |
|-----------|--------------|----------|------------|----------|
| 365381    | Stk32c       | -0.03027 | 0.51025827 | 0.696522 |
| 309607    | RT1-CE5      | -0.03028 | 0.32199328 | 0.517193 |
| 81005     | Nptxr        | -0.03029 | 0.05128269 | 0.137541 |
| 307248    | Pstpip2      | -0.0303  | 0.72328933 | 0.84874  |
| 266711    | Lzts1        | -0.0303  | 0.49223904 | 0.679621 |
| 303652    | Cog1         | -0.0303  | 0.39825422 | 0.595536 |
| 60373     | Nop58        | -0.03031 | 0.43924965 | 0.632601 |
| 100294508 | LOC100294508 | -0.03035 | 0.20811853 | 0.386129 |
| 313241    | Mcart1       | -0.03036 | 0.27283834 | 0.464777 |
| 103690139 | LOC103690139 | -0.03037 | 0.82359406 | 0.911144 |
| 684327    | LOC684327    | -0.0304  | 0.08523111 | 0.204102 |
| 300981    | Acy1         | -0.03045 | 0.45726032 | 0.648535 |
| 445268    | Ufc1         | -0.03046 | 0.29945198 | 0.496048 |
| 311332    | Dl14         | -0.03047 | 0.75541677 | 0.869825 |
| 305246    | Ppef2        | -0.03048 | 0.81293401 | 0.905452 |
| 290562    | Sema3g       | -0.03049 | 0.27843118 | 0.471479 |
| 303501    | Arhgap23     | -0.03049 | 0.23062048 | 0.41561  |
| 100359642 | Chmp4b       | -0.03054 | 0.36040143 | 0.557266 |
| 64315     | Cd151        | -0.03056 | 0.03333361 | 0.098014 |
| 25427     | Cyp51        | -0.03065 | 0.0067547  | 0.026717 |
| 363083    | Fbxl22       | -0.03067 | 0.84484901 | 0.922547 |
| 691898    | Prr14        | -0.03067 | 0.55867384 | 0.737758 |
| 294797    | I17r         | -0.03067 | 0.36490437 | 0.561131 |
| 296883    | Rpa3         | -0.03068 | 0.7429722  | 0.861119 |
| 295214    | S100a1       | -0.03069 | 0.67484616 | 0.817482 |
| 306599    | Tubgcp3      | -0.0307  | 0.43614831 | 0.630135 |
| 59315     | Nxph3        | -0.03073 | 0.73176107 | 0.854364 |
| 362517    | Mrpl50       | -0.03074 | 0.59405763 | 0.758554 |
| 302612    | Tspyl2       | -0.03075 | 0.29919563 | 0.495753 |
| 313056    | Snrnp40      | -0.03077 | 0.5938843  | 0.758485 |
| 64039     | Fbxl20       | -0.03078 | 0.23360864 | 0.419566 |
| 300206    | Kans12       | -0.03084 | 0.29110349 | 0.486407 |
| 100911668 | LOC100911668 | -0.03085 | 0.55321522 | 0.733219 |
| 103692129 | Hoxa10       | -0.03085 | 0.55321522 | 0.733219 |
| 313525    | Hectd3       | -0.03091 | 0.24234697 | 0.43043  |
| 366061    | Galnt3       | -0.03092 | 0.7928149  | 0.89323  |
| 497778    | Dut          | -0.03092 | 0.51499115 | 0.700572 |
| 64845     | Gphn         | -0.03093 | 0.41287424 | 0.6087   |
| 361614    | Fam168a      | -0.03094 | 0.08534646 | 0.204276 |
| 680252    | Dmwd         | -0.03095 | 0.34332448 | 0.539757 |
| 680858    | Tmem40       | -0.03097 | 0.88495947 | 0.947389 |
| 103694877 | LOC103694877 | -0.031   | 0.74126935 | 0.860035 |
| 29282     | Rpl23        | -0.031   | 0.14102853 | 0.294247 |
| 29723     | Slc19a1      | -0.03101 | 0.6908271  | 0.828984 |
| 305751    | Nkiras1      | -0.03101 | 0.26432924 | 0.454592 |
| 360822    | Sppl3        | -0.03101 | 0.30138546 | 0.498297 |
| 501083    | Pdcd6ip      | -0.03101 | 0.05130659 | 0.137586 |
| 688429    | Arhgap10     | -0.03104 | 0.44920262 | 0.641021 |
| 296315    | Rab5if       | -0.03105 | 0.35119828 | 0.547929 |
| 360550    | Phf23        | -0.03105 | 0.41884883 | 0.614512 |
| 116839    | Rims2        | -0.03108 | 0.36357624 | 0.560083 |
| 305428    | Zbtb49       | -0.03112 | 0.80719363 | 0.90159  |
| 311078    | Psm14        | -0.03112 | 0.26339269 | 0.453719 |
| 287984    | Psm2         | -0.03114 | 0.03762219 | 0.107714 |
| 108348046 | LOC108348046 | -0.03117 | 0.36734986 | 0.563481 |
| 303743    | Notum        | -0.03125 | 0.92045471 | 0.969368 |



|           |              |          |            |          |
|-----------|--------------|----------|------------|----------|
| 691979    | Esco2        | -0.03125 | 0.77759844 | 0.883983 |
| 171442    | Svop         | -0.03128 | 0.34984973 | 0.546586 |
| 288606    | Gtf2ird2     | -0.03132 | 0.63746269 | 0.792149 |
| 304410    | Castor2      | -0.03134 | 0.4399174  | 0.633179 |
| 310815    | Snx7         | -0.03139 | 0.20265887 | 0.378767 |
| 100911959 | LOC100911959 | -0.03139 | 0.75807035 | 0.871985 |
| 64510     | Rbm10        | -0.03141 | 0.4304475  | 0.624647 |
| 117524    | Ccnf         | -0.03141 | 0.82282404 | 0.910451 |
| 58958     | Nup210       | -0.03145 | 0.72849551 | 0.851648 |
| 297784    | Rrs1         | -0.03148 | 0.64592164 | 0.798959 |
| 368001    | Bcl7b        | -0.03149 | 0.44122694 | 0.634489 |
| 690163    | Oxct1        | -0.03151 | 0.10849549 | 0.242751 |
| 292462    | Lrp11        | -0.03151 | 0.02444619 | 0.076689 |
| 497672    | Brca1        | -0.03152 | 0.76343832 | 0.875146 |
| 170923    | Rap2b        | -0.03152 | 0.8604629  | 0.931903 |
| 294672    | Gfm2         | -0.03153 | 0.58437576 | 0.750569 |
| 100360017 | Mrps6        | -0.03154 | 0.55845245 | 0.737619 |
| 286896    | Sgpl1        | -0.03163 | 0.25734638 | 0.446331 |
| 363065    | Ube2q2       | -0.03163 | 0.31481793 | 0.509276 |
| 293653    | Acy3         | -0.03164 | 0.64504752 | 0.798293 |
| 499391    | Gemin7       | -0.03164 | 0.72560926 | 0.850152 |
| 170538    | Prkcd        | -0.03165 | 0.1241343  | 0.268896 |
| 362201    | Ccndbp1      | -0.03167 | 0.40007236 | 0.59713  |
| 313610    | Extl1        | -0.03168 | 0.83402307 | 0.916982 |
| 304919    | Dars2        | -0.03168 | 0.66104249 | 0.806196 |
| 367033    | Zfp26        | -0.03169 | 0.63499925 | 0.790429 |
| 304709    | Bfar         | -0.0317  | 0.43720961 | 0.631333 |
| 290706    | Hpf1         | -0.03173 | 0.51915813 | 0.703928 |
| 315949    | Armc8        | -0.03173 | 0.35341123 | 0.550435 |
| 81008     | Itga7        | -0.03177 | 0.04659675 | 0.127854 |
| 294010    | Actrla       | -0.0318  | 0.0042787  | 0.018157 |
| 59317     | Epb4111      | -0.03189 | 0.0069767  | 0.027441 |
| 309415    | Fam189a2     | -0.0319  | 0.50792114 | 0.694376 |
| 363447    | Tspan7       | -0.03191 | 0.01645299 | 0.055855 |
| 29568     | Map2k5       | -0.03196 | 0.46182688 | 0.652581 |
| 58961     | Azin1        | -0.03196 | 0.05028374 | 0.135338 |
| 691931    | Fam241a      | -0.03198 | 0.7616518  | 0.874045 |
| 308592    | Grwd1        | -0.03199 | 0.64306174 | 0.796664 |
| 290322    | Ints9        | -0.03199 | 0.47218044 | 0.662639 |
| 313211    | Nipsnap3b    | -0.03203 | 0.43700269 | 0.631178 |
| 83588     | Kcns3        | -0.03203 | 0.22622802 | 0.409944 |
| 302557    | Pqbp1        | -0.03205 | 0.48307393 | 0.67169  |
| 305000    | Exo1         | -0.03207 | 0.91934253 | 0.968465 |
| 362110    | Cdk9         | -0.03209 | 0.294745   | 0.490898 |
| 298689    | Ube2j2       | -0.0321  | 0.31345361 | 0.508451 |
| 500532    | Rnf220       | -0.03212 | 0.24246673 | 0.430241 |
| 252918    | Spag5        | -0.03213 | 0.6853177  | 0.825076 |
| 94172     | Slc27a1      | -0.03214 | 0.15688744 | 0.316886 |
| 313235    | Coro2a       | -0.03218 | 0.15514754 | 0.314205 |
| 307811    | Slc7a6       | -0.03219 | 0.50094985 | 0.687561 |
| 361679    | Dusp8        | -0.0322  | 0.52100354 | 0.705576 |
| 25429     | Cyp7b1       | -0.03224 | 0.82037062 | 0.909427 |
| 301618    | Ppp1r7       | -0.03224 | 0.24659541 | 0.435215 |
| 100125362 | LOC100125362 | -0.03225 | 0.08584975 | 0.204991 |
| 300839    | Lysmd2       | -0.03227 | 0.31954193 | 0.514471 |
| 289810    | C1d          | -0.03227 | 0.47246852 | 0.662799 |

|           |              |          |            |          |
|-----------|--------------|----------|------------|----------|
| 100362331 | Ndufa4l2     | -0.03228 | 0.83894774 | 0.91961  |
| 289796    | Pkd1l1       | -0.03228 | 0.83894774 | 0.91961  |
| 314555    | Tspyl5       | -0.0323  | 0.40539282 | 0.602051 |
| 679934    | Brk1         | -0.03232 | 0.15994894 | 0.321637 |
| 24399     | Glud1        | -0.03237 | 0.02341061 | 0.074173 |
| 313510    | Atpaf1       | -0.03237 | 0.38340229 | 0.58016  |
| 293652    | Ndufs8       | -0.03238 | 0.30395999 | 0.501032 |
| 680532    | Sem1         | -0.03238 | 0.47613607 | 0.665689 |
| 689988    | Sox12        | -0.03242 | 0.61777007 | 0.776647 |
| 29580     | Fdft1        | -0.03246 | 0.04305752 | 0.120028 |
| 25715     | Slc11a2      | -0.03249 | 0.44180366 | 0.634839 |
| 102552182 | LOC102552182 | -0.0325  | 0.61735374 | 0.77638  |
| 83809     | Nsf11c       | -0.0325  | 0.11483475 | 0.253774 |
| 29559     | Grik1        | -0.0325  | 0.09619689 | 0.222258 |
| 100361457 | LOC100361457 | -0.03252 | 5.23E-05   | 3.70E-04 |
| 315478    | Snx19        | -0.03253 | 0.11240227 | 0.249848 |
| 499724    | RGD1560065   | -0.03255 | 0.51338968 | 0.699092 |
| 360610    | Nfe2l1       | -0.03256 | 0.00341745 | 0.015024 |
| 308846    | Uvrag        | -0.03258 | 0.39043406 | 0.587394 |
| 290673    | Atp13a1      | -0.03258 | 0.34640954 | 0.542993 |
| 25257     | Gamt         | -0.0326  | 0.44455487 | 0.637589 |
| 102555033 | LOC102555033 | -0.03262 | 0.85294913 | 0.927616 |
| 114096    | Idh3a        | -0.03265 | 0.02881121 | 0.087305 |
| 315952    | Dzip11       | -0.03266 | 0.76719899 | 0.877661 |
| 246768    | Cby1         | -0.03267 | 0.49748928 | 0.683796 |
| 29234     | Galr2        | -0.03268 | 0.69520259 | 0.832033 |
| 500991    | Nxpe4        | -0.03271 | 0.83781468 | 0.919188 |
| 362720    | Rrm2         | -0.0328  | 0.7117415  | 0.841724 |
| 369016    | Myadm        | -0.03281 | 0.13431206 | 0.284314 |
| 304547    | Tchp         | -0.03281 | 0.58092654 | 0.747904 |
| 500102    | Fam131b      | -0.03288 | 0.07139339 | 0.178366 |
| 685867    | Myl6         | -0.03292 | 0.0054063  | 0.022157 |
| 300129    | Cerk         | -0.03292 | 0.14739292 | 0.302913 |
| 299938    | Mrpl13       | -0.03292 | 0.43286183 | 0.627243 |
| 364844    | Pcdhgb7      | -0.03297 | 0.61250172 | 0.773445 |
| 312638    | Creld1       | -0.03299 | 0.14304697 | 0.297448 |
| 83513     | Mmp24        | -0.03301 | 0.26801324 | 0.459186 |
| 294043    | Sorcs3       | -0.03302 | 0.47604035 | 0.665701 |
| 361453    | Adat2        | -0.03304 | 0.77102324 | 0.880027 |
| 24404     | Gpx1         | -0.03309 | 0.27150208 | 0.463122 |
| 289657    | Tbc1d19      | -0.0331  | 0.3129199  | 0.507931 |
| 246772    | Vps4a        | -0.03312 | 0.1712054  | 0.337502 |
| 290381    | Vwa8         | -0.03313 | 0.27329716 | 0.465309 |
| 361472    | Mthfd11      | -0.03315 | 0.49411406 | 0.680926 |
| 316039    | Osbpl10      | -0.03316 | 0.18541472 | 0.356833 |
| 360537    | Tom1l2       | -0.03321 | 0.00268307 | 0.012195 |
| 361853    | Fam184a      | -0.03322 | 0.56559827 | 0.736233 |
| 679693    | Med12        | -0.03327 | 0.298561   | 0.495089 |
| 113990    | Hmgn3        | -0.03328 | 0.4835661  | 0.672031 |
| 314280    | Smoc1        | -0.03331 | 0.46940111 | 0.659711 |
| 360491    | Traf7        | -0.03332 | 0.37394345 | 0.57047  |
| 293150    | Stard10      | -0.03335 | 0.27163914 | 0.463273 |
| 365567    | Micul        | -0.03337 | 0.05645668 | 0.148675 |
| 314627    | Plk5         | -0.03338 | 0.88367717 | 0.946602 |
| 361794    | Nfkbil1      | -0.03339 | 0.57030339 | 0.739728 |
| 301511    | Arpc2        | -0.03339 | 0.0163686  | 0.055628 |

|           |              |          |            |          |
|-----------|--------------|----------|------------|----------|
| 499191    | Ngrn         | -0.03339 | 0.20497788 | 0.382014 |
| 501282    | Mydgf        | -0.03346 | 0.45943102 | 0.650693 |
| 295401    | Plppr4       | -0.03349 | 0.51213792 | 0.697887 |
| 29392     | Bace1        | -0.03352 | 0.27895365 | 0.472196 |
| 307948    | Map10        | -0.03353 | 0.85744573 | 0.93001  |
| 362588    | Ndufs5       | -0.03353 | 0.11862159 | 0.260061 |
| 81657     | Gabbr1       | -0.03354 | 6.86E-04   | 0.003712 |
| 298557    | Pithd1       | -0.03354 | 0.16402089 | 0.327818 |
| 100360936 | Anapc16      | -0.03354 | 0.54097168 | 0.7227   |
| 108348052 | LOC108348052 | -0.03355 | 0.7155145  | 0.844351 |
| 295695    | Zfp804a      | -0.03356 | 0.43340028 | 0.627784 |
| 25266     | Pdgfa        | -0.03357 | 0.35328965 | 0.55029  |
| 362103    | Ntmt1        | -0.03358 | 0.62635496 | 0.78387  |
| 494521    | Kctd10       | -0.03358 | 0.12251807 | 0.266547 |
| 100911848 | LOC100911848 | -0.03359 | 0.74417702 | 0.861886 |
| 498001    | Cntd1        | -0.0336  | 0.76389839 | 0.875568 |
| 501003    | RGD1563578   | -0.0336  | 0.82395472 | 0.91112  |
| 363291    | Thap4        | -0.03362 | 0.56944947 | 0.739023 |
| 301245    | Yipf3        | -0.03363 | 0.21256013 | 0.392382 |
| 310306    | Usp13        | -0.03365 | 0.15650342 | 0.316379 |
| 680248    | Nudt11       | -0.0337  | 0.42313537 | 0.618609 |
| 679221    | Mapre2       | -0.0337  | 0.0059942  | 0.0241   |
| 298652    | Ube4b        | -0.0337  | 0.07402823 | 0.183457 |
| 287722    | Tmem106a     | -0.03374 | 0.51579173 | 0.70131  |
| 50672     | Ednrb        | -0.03375 | 0.14892465 | 0.304746 |
| 116717    | Trip10       | -0.03376 | 0.40497288 | 0.602038 |
| 50685     | Myl12b       | -0.03377 | 0.03759986 | 0.107666 |
| 286937    | Pex5l        | -0.0338  | 0.34264413 | 0.539311 |
| 307585    | Cables1      | -0.0338  | 0.56831851 | 0.738008 |
| 303332    | Tmem199      | -0.03382 | 0.3483587  | 0.545286 |
| 100910121 | LOC100910121 | -0.0339  | 0.81072876 | 0.90453  |
| 296372    | Ncoa5        | -0.03393 | 0.43885769 | 0.632562 |
| 300053    | Kifc2        | -0.03404 | 0.33780945 | 0.534617 |
| 171046    | Tcf3         | -0.03409 | 0.47314001 | 0.663546 |
| 364388    | Cideb        | -0.03413 | 0.81709031 | 0.908117 |
| 501231    | Vwc2         | -0.03414 | 0.85605948 | 0.929354 |
| 680133    | Tbcl8        | -0.03415 | 0.5184927  | 0.703426 |
| 289181    | Dcaf6        | -0.0342  | 0.16556216 | 0.329412 |
| 680594    | Dph3         | -0.0342  | 0.44076444 | 0.633967 |
| 29489     | Dync1h1      | -0.03422 | 1.63E-06   | 1.56E-05 |
| 289502    | Ccdc158      | -0.03422 | 0.72812473 | 0.85158  |
| 81765     | Rpl13        | -0.03423 | 0.04479439 | 0.124071 |
| 58845     | Igbp1        | -0.03424 | 0.36693189 | 0.563021 |
| 50545     | Dpf1         | -0.03425 | 0.75299048 | 0.868134 |
| 679091    | Mettl1       | -0.03426 | 0.65357671 | 0.802538 |
| 292534    | Tsen34       | -0.03426 | 0.32829321 | 0.523866 |
| 25238     | Grk2         | -0.03428 | 0.1650254  | 0.329307 |
| 681282    | LOC681282    | -0.0343  | 0.63870301 | 0.79338  |
| 85489     | Twist1       | -0.03437 | 0.78096526 | 0.885959 |
| 290426    | Klh11        | -0.03438 | 0.71575893 | 0.844221 |
| 287125    | Nubp2        | -0.03439 | 0.43146019 | 0.625593 |
| 266712    | Rnf40        | -0.03441 | 0.3691254  | 0.565294 |
| 103692165 | LOC103692165 | -0.03444 | 0.21062772 | 0.389419 |
| 292894    | Nosip        | -0.03448 | 0.43490876 | 0.628917 |
| 140910    | Msmo1        | -0.03448 | 0.04633654 | 0.127452 |
| 689593    | Dnajb2       | -0.03453 | 0.05307424 | 0.141311 |

|           |              |          |            |          |
|-----------|--------------|----------|------------|----------|
| 171443    | Slc12a9      | -0.03458 | 0.60546082 | 0.76817  |
| 298757    | Atl2         | -0.0346  | 0.34851632 | 0.545398 |
| 140946    | Paics        | -0.0346  | 0.17461819 | 0.342211 |
| 288778    | Pa2g4        | -0.0346  | 0.28204006 | 0.475644 |
| 360662    | Sap30bp      | -0.03461 | 0.34842518 | 0.545345 |
| 307989    | Ablim1       | -0.03462 | 0.01531672 | 0.052788 |
| 286922    | Fads3        | -0.03464 | 0.27496727 | 0.467025 |
| 291670    | Cxxc5        | -0.03464 | 0.26753703 | 0.458618 |
| 100362764 | Ddx55        | -0.03469 | 0.62837293 | 0.785569 |
| 140940    | Arf3         | -0.03469 | 0.00538215 | 0.022086 |
| 367113    | Lrrc1        | -0.03471 | 0.70325733 | 0.836782 |
| 60571     | Mybbpla      | -0.03471 | 0.23270348 | 0.418532 |
| 291772    | Kctd1        | -0.03478 | 0.46094665 | 0.65216  |
| 114521    | Tdg          | -0.03478 | 0.4165275  | 0.61238  |
| 292699    | Cblc         | -0.03478 | 0.91576349 | 0.96571  |
| 25388     | Arrb2        | -0.03482 | 0.26058923 | 0.449988 |
| 312706    | Emg1         | -0.03482 | 0.53951099 | 0.721558 |
| 117243    | Acs16        | -0.03484 | 0.08659203 | 0.206324 |
| 500915    | Fam19a5      | -0.03484 | 0.2897374  | 0.484933 |
| 293016    | Map7         | -0.03485 | 0.17642984 | 0.344697 |
| 407764    | St6galnac4   | -0.03489 | 0.58195759 | 0.748675 |
| 259170    | Casc3        | -0.03492 | 0.26839826 | 0.459598 |
| 29745     | Sema4f       | -0.03493 | 0.23857195 | 0.42571  |
| 316122    | Abhd5        | -0.03493 | 0.3255391  | 0.521218 |
| 679383    | Sepsecs      | -0.03494 | 0.55495896 | 0.73438  |
| 84509     | Ran          | -0.03494 | 0.03132697 | 0.093368 |
| 171366    | Ppp4c        | -0.03495 | 0.39258178 | 0.589879 |
| 246254    | Gpsm1        | -0.03496 | 0.36485484 | 0.5611   |
| 50689     | Mapk3        | -0.03496 | 1.52E-05   | 1.20E-04 |
| 287661    | Cisd3        | -0.03497 | 0.38171465 | 0.578572 |
| 300721    | Dnaj4        | -0.03507 | 0.13297867 | 0.282465 |
| 687696    | Stambpl1     | -0.03513 | 0.39489175 | 0.592136 |
| 363123    | Rab6b        | -0.03517 | 1.80E-07   | 2.01E-06 |
| 297900    | Pef1         | -0.03517 | 0.21127589 | 0.390314 |
| 360826    | Hscb         | -0.03521 | 0.60963025 | 0.771353 |
| 114613    | Slc5a5       | -0.03524 | 0.77716739 | 0.883809 |
| 292485    | Fuca2        | -0.03525 | 0.42950055 | 0.624177 |
| 309434    | Hif1an       | -0.03526 | 0.52845911 | 0.711323 |
| 308836    | Kctd14       | -0.03527 | 0.7940552  | 0.893517 |
| 360972    | Thoc5        | -0.03527 | 0.35283981 | 0.549815 |
| 498888    | Siglec15     | -0.03527 | 0.8801996  | 0.94463  |
| 292624    | Nop53        | -0.0353  | 0.22234613 | 0.404758 |
| 246246    | Pnpla7       | -0.03532 | 0.52817808 | 0.711045 |
| 367314    | Lrrfip1      | -0.03536 | 0.24242104 | 0.430441 |
| 299310    | Ndufb11      | -0.03544 | 0.24582725 | 0.434222 |
| 60356     | Csad         | -0.03545 | 0.3888958  | 0.586052 |
| 103694866 | LOC103694866 | -0.03546 | 0.39929719 | 0.596487 |
| 498957    | Klhl36       | -0.03548 | 0.7353341  | 0.857275 |
| 309674    | Rrp1         | -0.03549 | 0.35767358 | 0.55476  |
| 292413    | Fpr3         | -0.03553 | 0.97586124 | 1        |
| 681062    | Slbp         | -0.03556 | 0.44017613 | 0.633456 |
| 303693    | Mgat5b       | -0.03562 | 0.58486636 | 0.750895 |
| 685699    | LOC685699    | -0.03564 | 0.90732634 | 0.960429 |
| 361402    | Prmt7        | -0.03565 | 0.5088305  | 0.69527  |
| 315136    | Cbx6         | -0.03565 | 0.01386553 | 0.04848  |
| 316435    | Cyp20a1      | -0.03567 | 0.48198003 | 0.670806 |

|           |              |          |            |          |
|-----------|--------------|----------|------------|----------|
| 29421     | Urod         | -0.0357  | 0.28105233 | 0.474693 |
| 293620    | Ptdss2       | -0.0357  | 0.22674529 | 0.410608 |
| 498278    | Cfap126      | -0.03578 | 0.77631583 | 0.88321  |
| 691069    | Pkd112       | -0.03578 | 0.91448088 | 0.964945 |
| 79107     | Duox2        | -0.03579 | 0.76881166 | 0.878451 |
| 362441    | Itfg2        | -0.03583 | 0.60629916 | 0.768568 |
| 363219    | Mitd1        | -0.03583 | 0.62238164 | 0.780179 |
| 24611     | Gnal         | -0.03586 | 0.02181064 | 0.070154 |
| 498606    | Kxd1         | -0.03591 | 0.30739002 | 0.503115 |
| 295928    | Slc39a13     | -0.03596 | 0.30697633 | 0.503    |
| 117107    | Zbtb7a       | -0.03601 | 0.10673713 | 0.239916 |
| 688634    | Kat6b        | -0.03602 | 0.42386091 | 0.619384 |
| 360746    | Ppil2        | -0.03604 | 0.35047901 | 0.54721  |
| 58827     | Mest         | -0.03605 | 0.27856386 | 0.47162  |
| 25392     | Atp5if1      | -0.03605 | 0.0519137  | 0.138745 |
| 313231    | Alg2         | -0.03606 | 0.04976983 | 0.134487 |
| 361613    | Ppme1        | -0.03607 | 0.0587619  | 0.153704 |
| 683955    | Flvcr1       | -0.03609 | 0.73297964 | 0.855367 |
| 361879    | Wdr41        | -0.03609 | 0.39180468 | 0.58899  |
| 309681    | Cfap410      | -0.0361  | 0.26215764 | 0.451796 |
| 84478     | Ufd1         | -0.03613 | 0.18908155 | 0.361879 |
| 65096     | Adgrl1       | -0.03617 | 0.10516293 | 0.237133 |
| 306091    | Pcdh9        | -0.0362  | 0.18420988 | 0.355017 |
| 367903    | Armcx2       | -0.03621 | 0.0779563  | 0.190588 |
| 25075     | Htr1b        | -0.03624 | 0.6464169  | 0.799468 |
| 102556031 | Coa6         | -0.03626 | 0.56300297 | 0.73431  |
| 114591    | Dpp3         | -0.03628 | 0.09722064 | 0.223944 |
| 682058    | Nom1         | -0.03632 | 0.44219035 | 0.635059 |
| 294504    | Ppa1         | -0.03635 | 0.07901184 | 0.192649 |
| 296350    | Serinc3      | -0.03635 | 0.00245165 | 0.011273 |
| 363103    | Slc17a5      | -0.03636 | 0.43039851 | 0.624624 |
| 252881    | Exoc3        | -0.03636 | 0.24128333 | 0.429021 |
| 497921    | Slc47a2      | -0.03638 | 0.77438664 | 0.882175 |
| 502782    | Pigy         | -0.03639 | 0.29860102 | 0.495112 |
| 314655    | Adamts10     | -0.03639 | 0.37151172 | 0.568035 |
| 306182    | Ipo5         | -0.0364  | 0.06222766 | 0.160521 |
| 362533    | Tle1         | -0.03651 | 0.26288904 | 0.452892 |
| 294783    | Wdr70        | -0.03656 | 0.52245459 | 0.706687 |
| 304900    | Astn1        | -0.03657 | 0.15778221 | 0.318154 |
| 303076    | Surf6        | -0.03657 | 0.53250946 | 0.714804 |
| 293500    | Pagr1        | -0.03658 | 0.38883635 | 0.586008 |
| 298646    | Agtrap       | -0.0366  | 0.49075566 | 0.678114 |
| 102557368 | LOC102557368 | -0.03662 | 0.92498185 | 0.971933 |
| 100233213 | Insyn2       | -0.03668 | 0.65633124 | 0.80297  |
| 171454    | Nacc1        | -0.03668 | 0.07589999 | 0.186904 |
| 310746    | Ap4b1        | -0.03671 | 0.40302934 | 0.600086 |
| 313742    | Phf13        | -0.03672 | 0.63504727 | 0.790179 |
| 306261    | Eaf1         | -0.03672 | 0.21890422 | 0.40056  |
| 300445    | Prkcsh       | -0.03677 | 0.10674079 | 0.239896 |
| 308913    | Egln1        | -0.03681 | 0.2771751  | 0.469769 |
| 361531    | Paf1         | -0.03682 | 0.31187613 | 0.507015 |
| 498024    | Kctd2        | -0.03685 | 0.37545643 | 0.57232  |
| 266713    | Mnat1        | -0.03688 | 0.42257558 | 0.618027 |
| 314329    | Irf2bpl      | -0.03689 | 0.34108842 | 0.537973 |
| 362952    | Eif3d        | -0.0369  | 0.26714866 | 0.458447 |
| 103689948 | LOC103689948 | -0.03696 | 0.91518551 | 0.965314 |

|           |              |          |            |          |
|-----------|--------------|----------|------------|----------|
| 24465     | Hprt1        | -0.03701 | 0.3037387  | 0.50084  |
| 83782     | Nme2         | -0.03707 | 0.04917715 | 0.133473 |
| 361774    | Fam160b1     | -0.03708 | 0.31863522 | 0.513402 |
| 361801    | Rxrb         | -0.03709 | 0.31240324 | 0.507612 |
| 304023    | St3gal6      | -0.03711 | 0.44807023 | 0.640028 |
| 294014    | Cnnm2        | -0.03713 | 0.50523714 | 0.691999 |
| 79240     | Nr4a1        | -0.03714 | 0.19327228 | 0.366986 |
| 108348229 | LOC108348229 | -0.0372  | 0.54210776 | 0.723659 |
| 363272    | Pde6d        | -0.03721 | 0.26339738 | 0.453686 |
| 360821    | Gatc         | -0.03723 | 0.18150929 | 0.351305 |
| 501167    | Gmppa        | -0.03724 | 0.45683491 | 0.648076 |
| 305438    | Sorcs2       | -0.03727 | 0.13338278 | 0.283071 |
| 360801    | Ncor2        | -0.03731 | 0.01118766 | 0.040623 |
| 689955    | LOC689955    | -0.03734 | 2.62E-10   | 4.34E-09 |
| 362791    | Sival        | -0.03735 | 0.67043963 | 0.813956 |
| 502643    | Ypel4        | -0.03738 | 0.45590296 | 0.647236 |
| 306969    | Hist1h2bf    | -0.03751 | 0.96273389 | 0.997078 |
| 100360757 | Ctcf1        | -0.03757 | 0.78716361 | 0.889705 |
| 304761    | Zranb3       | -0.03758 | 0.60834286 | 0.770082 |
| 301512    | Aamp         | -0.03762 | 0.12032235 | 0.263002 |
| 301252    | Hsp90ab1     | -0.03763 | 8.62E-13   | 1.86E-11 |
| 684035    | Rnpepl1      | -0.03767 | 0.30884534 | 0.503894 |
| 362590    | Inpp5b       | -0.03767 | 0.34224848 | 0.538955 |
| 691799    | I117d        | -0.03769 | 0.53870846 | 0.720687 |
| 297383    | Rtkn         | -0.03772 | 0.19495248 | 0.369219 |
| 303499    | Sp2          | -0.03773 | 0.44881683 | 0.640854 |
| 64371     | Prdx3        | -0.0378  | 0.15053343 | 0.307147 |
| 292007    | Dhx38        | -0.03781 | 0.43881716 | 0.632552 |
| 362438    | Ncapd2       | -0.03783 | 0.59405142 | 0.758597 |
| 25061     | Crabp1       | -0.03784 | 0.71362111 | 0.843109 |
| 60323     | Arhgef1      | -0.03787 | 0.21404855 | 0.394365 |
| 689054    | Lin28b       | -0.03789 | 0.74383346 | 0.861593 |
| 170929    | Bcl2a1       | -0.03795 | 0.87546826 | 0.941781 |
| 246331    | Nrpl         | -0.03797 | 0.24074457 | 0.428383 |
| 171432    | Tmem14c      | -0.03798 | 0.1594729  | 0.320883 |
| 308765    | Arpin        | -0.038   | 0.58695834 | 0.752769 |
| 319113    | Yrdc         | -0.03803 | 0.56427462 | 0.735314 |
| 306945    | Hist1h2bh    | -0.03806 | 0.16163272 | 0.324031 |
| 100910596 | LOC100910596 | -0.03814 | 0.78549023 | 0.888446 |
| 498402    | Ascc2        | -0.03815 | 0.54955741 | 0.730124 |
| 306257    | Bap1         | -0.03816 | 0.05147427 | 0.137958 |
| 100362346 | Mta3         | -0.0382  | 0.17896559 | 0.347654 |
| 363989    | Phlda3       | -0.03824 | 0.12919601 | 0.276434 |
| 170897    | Sphk1        | -0.03826 | 0.46032261 | 0.651713 |
| 313030    | Ppp1r8       | -0.03827 | 0.41336155 | 0.60923  |
| 290657    | Klh126       | -0.03828 | 0.38776212 | 0.584991 |
| 301460    | Adam23       | -0.03831 | 2.92E-05   | 2.19E-04 |
| 81730     | Fez1         | -0.03833 | 0.00557065 | 0.022665 |
| 305386    | Tapt1        | -0.03836 | 0.36888858 | 0.564977 |
| 114495    | Map2k6       | -0.03841 | 0.57706717 | 0.745051 |
| 293455    | Gga2         | -0.03843 | 0.26935602 | 0.460699 |
| 362622    | Cep85        | -0.03844 | 0.43776924 | 0.631663 |
| 687183    | Kri1         | -0.03844 | 0.41611423 | 0.612008 |
| 311187    | Pacsin3      | -0.03844 | 0.45417568 | 0.645554 |
| 293152    | Art2b        | -0.03845 | 0.92249829 | 0.970608 |
| 24206     | Apeh         | -0.03847 | 0.18974884 | 0.362755 |



|           |              |          |            |          |
|-----------|--------------|----------|------------|----------|
| 83474     | Tfam         | -0.03849 | 0.5276205  | 0.710746 |
| 363061    | Sdhd         | -0.03851 | 0.16436636 | 0.328336 |
| 100302465 | LOC100302465 | -0.03853 | 0.87446482 | 0.941021 |
| 65272     | Kcnk10       | -0.03857 | 0.59794588 | 0.761375 |
| 296649    | Rabepk       | -0.03861 | 0.45816645 | 0.649385 |
| 303190    | Atpaf2       | -0.03861 | 0.55396033 | 0.733721 |
| 102546809 | Smim35       | -0.03865 | 0.72344894 | 0.848875 |
| 290995    | Preli1       | -0.03866 | 0.0842329  | 0.202476 |
| 500400    | Fam110b      | -0.0387  | 0.35773898 | 0.554816 |
| 289753    | Rhbdd3       | -0.03873 | 0.46785161 | 0.658749 |
| 314917    | Pkhd111      | -0.03873 | 0.8461569  | 0.923129 |
| 303660    | Btbd17       | -0.03875 | 0.90989512 | 0.962399 |
| 316241    | Nfkbie       | -0.03876 | 0.48401231 | 0.672406 |
| 363595    | Tcf7         | -0.03877 | 0.75135571 | 0.867247 |
| 29757     | Atp6v0a1     | -0.03877 | 0.00243561 | 0.011213 |
| 362776    | Glrx5        | -0.03883 | 0.25487278 | 0.443495 |
| 293692    | Ehd1         | -0.03893 | 0.10273505 | 0.2334   |
| 287444    | Eif5a        | -0.03894 | 0.00113007 | 0.005738 |
| 103691033 | LOC103691033 | -0.03895 | 0.61533131 | 0.775322 |
| 314788    | RGD1307947   | -0.03896 | 0.50849329 | 0.695059 |
| 100360334 | Fhod3        | -0.03897 | 0.18197456 | 0.35192  |
| 303659    | Kif19        | -0.03898 | 0.14630422 | 0.301391 |
| 304558    | Ttc28        | -0.03903 | 0.37965569 | 0.576782 |
| 100362470 | Mrtfb        | -0.03905 | 0.8208571  | 0.909702 |
| 306564    | Htra4        | -0.03907 | 0.27653402 | 0.468975 |
| 361190    | Usp19        | -0.03912 | 0.08357606 | 0.201176 |
| 292640    | Vtal         | -0.03913 | 0.22111813 | 0.403217 |
| 29602     | Ptgfrn       | -0.03913 | 0.19394125 | 0.367816 |
| 291906    | Aktip        | -0.03921 | 0.07577127 | 0.186659 |
| 83583     | Rabac1       | -0.03921 | 0.03902212 | 0.110972 |
| 100911699 | LOC100911699 | -0.03921 | 0.93970486 | 0.981877 |
| 58851     | Nr1h2        | -0.03923 | 0.12910946 | 0.276373 |
| 102555038 | LOC102555038 | -0.03924 | 0.86070115 | 0.932002 |
| 94271     | Atp5pf       | -0.03928 | 0.07646033 | 0.187847 |
| 313644    | Raplgap      | -0.03928 | 0.04217161 | 0.117955 |
| 367172    | Dhx30        | -0.0393  | 0.14557505 | 0.300442 |
| 306594    | McpH1        | -0.03939 | 0.67234077 | 0.815536 |
| 170914    | Nap113       | -0.0394  | 0.18594284 | 0.357525 |
| 307366    | Malt1        | -0.0394  | 0.63129008 | 0.788078 |
| 296162    | DdrGk1       | -0.03942 | 0.20974559 | 0.388165 |
| 641434    | Atp5pd       | -0.03944 | 0.05201588 | 0.138979 |
| 302593    | Tceal1       | -0.03947 | 0.45807445 | 0.649351 |
| 296639    | Ciz1         | -0.03953 | 0.26711817 | 0.458436 |
| 100360501 | Rnh1         | -0.03956 | 0.1431499  | 0.297403 |
| 294508    | PalD1        | -0.03959 | 0.40513767 | 0.602189 |
| 293128    | Nars2        | -0.03961 | 0.58665203 | 0.752528 |
| 100912582 | LOC100912582 | -0.03961 | 0.69056865 | 0.828778 |
| 84489     | Fgfr3        | -0.03962 | 0.79985536 | 0.89734  |
| 140662    | Rplp2        | -0.03964 | 0.07726196 | 0.189279 |
| 310348    | Larplb       | -0.03967 | 0.21774987 | 0.399215 |
| 300089    | Pmm1         | -0.03967 | 0.08195193 | 0.198446 |
| 140720    | BaalC        | -0.03969 | 0.39962778 | 0.596653 |
| 363332    | Ubxn6        | -0.03973 | 0.20602788 | 0.383483 |
| 246311    | Pdp2         | -0.03974 | 0.62991109 | 0.786924 |
| 361836    | Slc25a16     | -0.03978 | 0.23199929 | 0.417463 |
| 498159    | Spry3        | -0.03979 | 0.41726709 | 0.612994 |

|           |                 |          |            |          |
|-----------|-----------------|----------|------------|----------|
| 29640     | Dpm2            | -0.0398  | 0.46134668 | 0.652435 |
| 25488     | Ndufa5          | -0.03985 | 0.18468189 | 0.355711 |
| 311427    | Hspa12b         | -0.03988 | 0.34458689 | 0.541205 |
| 307861    | Terf2ip         | -0.03993 | 0.2241026  | 0.407061 |
| 361107    | Actr8           | -0.03994 | 0.28818325 | 0.482968 |
| 289397    | Kif21b          | -0.03994 | 0.24100499 | 0.428606 |
| 296564    | Fut7            | -0.03995 | 0.78026503 | 0.885534 |
| 25591     | Parp1           | -0.03997 | 0.08819726 | 0.208738 |
| 108348076 | NEWGENE_1308105 | -0.04    | 0.3360416  | 0.532616 |
| 619558    | Fam134b         | -0.04003 | 0.16912543 | 0.334232 |
| 315992    | Dock3           | -0.04007 | 0.12912101 | 0.276367 |
| 498972    | Cpne2           | -0.04007 | 0.23583759 | 0.422533 |
| 362385    | Pole4           | -0.04009 | 0.36510594 | 0.561259 |
| 100910792 | LOC100910792    | -0.04016 | 0.07400938 | 0.183434 |
| 58822     | Csnkle          | -0.04017 | 0.20517258 | 0.382302 |
| 24697     | Ptpn1           | -0.04024 | 0.53809324 | 0.720117 |
| 691135    | LOC691135       | -0.04025 | 0.70350917 | 0.83703  |
| 29565     | Eef2            | -0.04025 | 3.65E-08   | 4.52E-07 |
| 298933    | Rnaseh1         | -0.04029 | 0.65770704 | 0.80393  |
| 64060     | Vps33b          | -0.04031 | 0.46921529 | 0.659742 |
| 259275    | Ostf1           | -0.04032 | 0.02453053 | 0.07689  |
| 360971    | Nipsnap1        | -0.04033 | 0.11950149 | 0.261448 |
| 293456    | Cog7            | -0.04034 | 0.34773667 | 0.54467  |
| 309280    | Plxna3          | -0.04034 | 0.14572823 | 0.300693 |
| 303298    | Raplgap2        | -0.04037 | 0.0344442  | 0.100504 |
| 302325    | Sat11           | -0.04038 | 0.90881633 | 0.961632 |
| 313050    | Lck             | -0.04038 | 0.84275185 | 0.92179  |
| 303259    | Mink1           | -0.04041 | 0.00588912 | 0.023767 |
| 245925    | Phrf1           | -0.04045 | 0.22922465 | 0.413721 |
| 297720    | Casc1           | -0.04045 | 0.59493235 | 0.758806 |
| 298203    | Stoml2          | -0.04045 | 0.24923309 | 0.437721 |
| 303350    | Rnf135          | -0.04046 | 0.68035548 | 0.821491 |
| 295161    | Fhdcl           | -0.04047 | 0.34433028 | 0.540892 |
| 290614    | Cherp           | -0.04049 | 0.28395477 | 0.477858 |
| 306804    | Iars            | -0.0405  | 0.04813468 | 0.131073 |
| 311802    | Ssna1           | -0.04052 | 0.36622724 | 0.562393 |
| 114087    | Banf1           | -0.04054 | 0.26831776 | 0.459542 |
| 360531    | Sap301          | -0.04056 | 0.14270311 | 0.296895 |
| 293722    | B3gat3          | -0.04058 | 0.03094141 | 0.092363 |
| 303248    | Neurl4          | -0.04065 | 0.17226867 | 0.339107 |
| 100361928 | Tmem198         | -0.04069 | 0.56529209 | 0.735985 |
| 64120     | Kcnk13          | -0.0407  | 0.81806256 | 0.908614 |
| 100362255 | Adgrv1          | -0.04071 | 0.55000502 | 0.730565 |
| 81528     | Ogg1            | -0.04074 | 0.56031102 | 0.735686 |
| 313977    | Lpin1           | -0.04076 | 0.05995474 | 0.155925 |
| 498814    | Mtcp1           | -0.04078 | 0.82729653 | 0.913013 |
| 65025     | Rims3           | -0.04079 | 0.33879249 | 0.535372 |
| 313450    | Rnf113a1        | -0.0408  | 0.72956001 | 0.852683 |
| 680476    | Bloc1s3         | -0.04081 | 0.57256469 | 0.741701 |
| 102546764 | LOC102546764    | -0.04087 | 0.49889365 | 0.68538  |
| 292658    | Prkd2           | -0.04088 | 0.67765847 | 0.819637 |
| 305441    | Sh3tc1          | -0.0409  | 0.79652344 | 0.895026 |
| 63864     | Hsd17b10        | -0.04092 | 0.24636382 | 0.434887 |
| 29163     | Cdh9            | -0.04092 | 0.57201775 | 0.741195 |
| 117262    | Psmc4           | -0.04098 | 0.07997004 | 0.194388 |
| 301563    | Mff             | -0.04102 | 0.04514169 | 0.124887 |

|           |              |          |            |          |
|-----------|--------------|----------|------------|----------|
| 301221    | Mocs1        | -0.04109 | 0.50663725 | 0.693268 |
| 302562    | Plp2         | -0.0411  | 0.19984653 | 0.375464 |
| 683077    | Pja1         | -0.0411  | 0.01551722 | 0.053383 |
| 299569    | Akap81       | -0.04112 | 0.21092182 | 0.389774 |
| 245961    | Dmgdh        | -0.04114 | 0.68862945 | 0.827546 |
| 314704    | Hcfc2        | -0.04114 | 0.53330356 | 0.715215 |
| 679811    | LOC679811    | -0.04115 | 0.1854065  | 0.356854 |
| 293056    | Cpeb1        | -0.04122 | 0.04560861 | 0.125868 |
| 303372    | Nle1         | -0.04122 | 0.66482167 | 0.809302 |
| 24215     | Atp2b2       | -0.04125 | 0.05788396 | 0.151825 |
| 78958     | Bcam         | -0.04126 | 7.62E-04   | 0.004082 |
| 81649     | Mapk14       | -0.04128 | 0.19329381 | 0.36699  |
| 298712    | Gpalpp1      | -0.04135 | 0.54670382 | 0.727652 |
| 65031     | Doc2a        | -0.04137 | 0.46321284 | 0.653958 |
| 307579    | Zfp521       | -0.04139 | 0.36079647 | 0.557696 |
| 680309    | Snrpd2       | -0.0414  | 0.28724063 | 0.481728 |
| 290396    | Diaph3       | -0.04143 | 0.65293419 | 0.802008 |
| 291709    | Slc25a46     | -0.04143 | 0.07344177 | 0.182336 |
| 315599    | Nlrx1        | -0.04145 | 0.42104522 | 0.616547 |
| 58853     | Nr4a3        | -0.04149 | 0.78202422 | 0.886738 |
| 103694872 | LOC103694872 | -0.04149 | 0.17034845 | 0.336195 |
| 303306    | Srr          | -0.04154 | 0.47522753 | 0.665493 |
| 100363361 | LOC100363361 | -0.04155 | 0.38843804 | 0.585593 |
| 294930    | Nceh1        | -0.04157 | 0.22886559 | 0.413347 |
| 311245    | Traf6        | -0.04158 | 0.69963102 | 0.835338 |
| 300968    | Uba5         | -0.04161 | 0.20809939 | 0.386169 |
| 313699    | RGD1305350   | -0.04161 | 0.18964613 | 0.362595 |
| 257647    | Slc35a4      | -0.04163 | 0.15956736 | 0.321006 |
| 29134     | Axin2        | -0.04163 | 0.6118724  | 0.773009 |
| 117251    | Dnah9        | -0.0417  | 0.79445564 | 0.893757 |
| 170668    | Rasgrp4      | -0.0417  | 0.84006924 | 0.920124 |
| 310727    | Cd101        | -0.0417  | 0.86912267 | 0.937922 |
| 362502    | Ubap1        | -0.04173 | 0.21740369 | 0.398811 |
| 252962    | Phtf1        | -0.04174 | 0.10643088 | 0.239454 |
| 689432    | Mrps21       | -0.04182 | 0.30701053 | 0.502969 |
| 102555298 | Wdr90        | -0.04185 | 0.6512828  | 0.802983 |
| 54292     | Rgs12        | -0.04186 | 0.45884542 | 0.650105 |
| 309447    | Ldb1         | -0.04186 | 0.18147079 | 0.351267 |
| 360658    | Gga3         | -0.04192 | 0.16103526 | 0.32331  |
| 54398     | Ppt2         | -0.04193 | 0.33885162 | 0.535377 |
| 291352    | Gpr158       | -0.04196 | 0.00761558 | 0.029479 |
| 25284     | Amacr        | -0.04197 | 0.51510659 | 0.700579 |
| 29153     | Capn1        | -0.04198 | 0.02470037 | 0.077308 |
| 362641    | Minos1       | -0.042   | 0.1849486  | 0.356044 |
| 29666     | Psmb6        | -0.04203 | 0.03956863 | 0.112324 |
| 296131    | Fahd2a       | -0.04204 | 0.43249353 | 0.626852 |
| 499689    | Gstm4        | -0.04205 | 0.3507476  | 0.547405 |
| 406230    | Rpp21        | -0.04206 | 0.51463256 | 0.700434 |
| 56611     | Anxa2        | -0.04207 | 9.87E-09   | 1.33E-07 |
| 100190936 | Rnf123       | -0.04209 | 0.08750204 | 0.207505 |
| 311791    | Zmynd19      | -0.0421  | 0.5598038  | 0.735476 |
| 292597    | Ttyh1        | -0.04213 | 0.0032017  | 0.014224 |
| 24522     | Zfp354a      | -0.04213 | 0.69373156 | 0.831055 |
| 685131    | Meal         | -0.04217 | 0.10638888 | 0.239388 |
| 365176    | Zfp787       | -0.04218 | 0.57399479 | 0.742292 |
| 500331    | LOC500331    | -0.0422  | 0.36703611 | 0.56309  |

|           |            |          |            |          |
|-----------|------------|----------|------------|----------|
| 24596     | Ngfr       | -0.04227 | 8.41E-07   | 8.45E-06 |
| 29477     | Mapt       | -0.04227 | 8.11E-05   | 5.49E-04 |
| 294207    | Ppp1r11    | -0.04235 | 0.07174606 | 0.179107 |
| 103693432 | Ptges31    | -0.0424  | 0.76042862 | 0.873853 |
| 60568     | Syt11      | -0.0424  | 1.80E-09   | 2.68E-08 |
| 684352    | Twf2       | -0.04246 | 0.44584285 | 0.638475 |
| 296864    | Zc3h12b    | -0.04254 | 0.79233351 | 0.893005 |
| 499209    | Kctd21     | -0.04254 | 0.55605029 | 0.735262 |
| 300521    | Tbrg1      | -0.04259 | 0.25330557 | 0.441817 |
| 689574    | LOC689574  | -0.04269 | 0.19624709 | 0.370897 |
| 293181    | Galnt18    | -0.0427  | 0.16270963 | 0.325676 |
| 679126    | Zcchc18    | -0.04271 | 0.0205022  | 0.06686  |
| 291966    | Tppp3      | -0.04271 | 1.27E-07   | 1.46E-06 |
| 246185    | Dus11      | -0.04279 | 0.44944365 | 0.641173 |
| 292788    | Psenen     | -0.0428  | 0.16523197 | 0.328961 |
| 303000    | Capn15     | -0.0428  | 0.30954305 | 0.504514 |
| 140657    | Faf1       | -0.04286 | 0.20096854 | 0.376532 |
| 360631    | Mlx        | -0.04288 | 0.18092455 | 0.35053  |
| 687633    | Ube3b      | -0.04292 | 0.01698763 | 0.057313 |
| 171435    | Aagab      | -0.04299 | 0.19586924 | 0.370403 |
| 78975     | Prkaa2     | -0.04301 | 0.18353338 | 0.353928 |
| 498967    | RGD1559896 | -0.04301 | 0.07001051 | 0.175649 |
| 362528    | Fkbp15     | -0.04303 | 0.19267738 | 0.366331 |
| 29202     | Epha6      | -0.04303 | 0.60557124 | 0.768259 |
| 295324    | Ttf2       | -0.04306 | 0.51626061 | 0.701597 |
| 361207    | Tmed9      | -0.04307 | 0.15350409 | 0.311672 |
| 312301    | Zfp956     | -0.04307 | 0.61712427 | 0.776245 |
| 289036    | Adipor1    | -0.04309 | 0.00707433 | 0.027745 |
| 302540    | Lancl3     | -0.04311 | 0.72202944 | 0.84794  |
| 311496    | Cfap61     | -0.04311 | 0.83726679 | 0.919169 |
| 291171    | Trim27     | -0.04319 | 0.30397356 | 0.501011 |
| 287535    | Vps53      | -0.04324 | 0.08748155 | 0.207509 |
| 361800    | Stk19      | -0.04326 | 0.59523307 | 0.759037 |
| 685620    | Tomm7      | -0.04328 | 0.17711901 | 0.345583 |
| 81859     | Sharpin    | -0.04328 | 0.18049948 | 0.349813 |
| 294762    | Parp8      | -0.04329 | 0.25693098 | 0.446017 |
| 316212    | Prickle4   | -0.04331 | 0.64525357 | 0.798444 |
| 297357    | Ctnna2     | -0.04333 | 0.05048926 | 0.135834 |
| 295629    | Cd302      | -0.04339 | 0.44062741 | 0.633866 |
| 299208    | Tt115      | -0.04343 | 0.190375   | 0.363332 |
| 291394    | Cndp2      | -0.04345 | 0.07535263 | 0.185917 |
| 65201     | Clip1      | -0.0435  | 0.11291557 | 0.250755 |
| 688912    | Mrps16     | -0.04354 | 0.42907674 | 0.624228 |
| 314465    | Ppp1r13b   | -0.04356 | 0.20700655 | 0.384703 |
| 362172    | Trim44     | -0.04356 | 0.34779381 | 0.544625 |
| 287069    | Trap1      | -0.04357 | 0.09415487 | 0.218787 |
| 362946    | MGC94207   | -0.04359 | 0.26866151 | 0.460007 |
| 60341     | Camkk1     | -0.04365 | 0.18200265 | 0.351938 |
| 64351     | Ykt6       | -0.04371 | 0.08344502 | 0.200937 |
| 501281    | Ranbp3     | -0.04371 | 0.18523277 | 0.356555 |
| 300025    | Ly6h       | -0.04374 | 0.75187728 | 0.867533 |
| 292751    | Med29      | -0.04375 | 0.34667112 | 0.543314 |
| 360891    | Enah       | -0.0438  | 0.03507021 | 0.101831 |
| 305792    | Kctd6      | -0.04382 | 0.36714061 | 0.563205 |
| 305984    | Cdca2      | -0.04385 | 0.81086739 | 0.904579 |
| 684233    | Rbm15      | -0.04385 | 0.70514952 | 0.838248 |

|           |              |          |            |          |
|-----------|--------------|----------|------------|----------|
| 361840    | Spock2       | -0.04385 | 4.27E-11   | 7.67E-10 |
| 289859    | Cfap36       | -0.04387 | 0.05743932 | 0.150846 |
| 29599     | Atp2b3       | -0.04389 | 0.0384361  | 0.109534 |
| 294674    | Enc1         | -0.04391 | 0.55745502 | 0.736455 |
| 497978    | Dgke         | -0.04395 | 0.17798087 | 0.346731 |
| 192241    | Atp5po       | -0.04396 | 0.02377279 | 0.075146 |
| 500394    | Sntg1        | -0.04397 | 0.83667372 | 0.91873  |
| 288772    | Spryd4       | -0.04399 | 0.57401155 | 0.742263 |
| 25084     | Il4r         | -0.04402 | 0.50440631 | 0.69101  |
| 100911970 | Mipol1       | -0.04404 | 0.58208769 | 0.748792 |
| 312246    | RGD1306271   | -0.04404 | 0.48058966 | 0.669262 |
| 361370    | Tom1         | -0.04405 | 0.12224366 | 0.266133 |
| 289950    | Pdhh         | -0.04405 | 0.02631593 | 0.081256 |
| 500711    | Ppp4r4       | -0.04407 | 0.36502925 | 0.561232 |
| 304555    | Hps4         | -0.0441  | 0.3301559  | 0.526442 |
| 361025    | Txndc16      | -0.04412 | 0.33314685 | 0.529217 |
| 314380    | Tdp1         | -0.04413 | 0.63105095 | 0.787883 |
| 362812    | Slc39a5      | -0.0442  | 0.32533868 | 0.521029 |
| 299202    | Rps6k11      | -0.04421 | 0.36294031 | 0.559375 |
| 361825    | Smarcb1      | -0.04422 | 0.18863375 | 0.361203 |
| 25620     | Crem         | -0.04426 | 0.47390753 | 0.664182 |
| 64204     | Plec         | -0.04426 | 1.09E-05   | 8.89E-05 |
| 363289    | Mterf4       | -0.04426 | 0.50315317 | 0.689839 |
| 171093    | Shank2       | -0.04427 | 0.22835715 | 0.412859 |
| 108351182 | LOC108351182 | -0.04428 | 0.65268442 | 0.801908 |
| 307973    | Def8         | -0.04431 | 0.29770487 | 0.494228 |
| 363015    | Endod1       | -0.04433 | 8.05E-06   | 6.72E-05 |
| 360618    | Ormdl3       | -0.04434 | 0.19296672 | 0.366662 |
| 364050    | Dcaf8        | -0.04434 | 0.09363506 | 0.217898 |
| 296478    | Zgpat        | -0.04436 | 0.47011322 | 0.660468 |
| 315904    | Paqr9        | -0.04436 | 0.37635606 | 0.573233 |
| 407784    | Rnf5         | -0.0444  | 0.13245349 | 0.281726 |
| 303734    | Tbc1d16      | -0.04443 | 0.43489149 | 0.62894  |
| 303002    | Rab11fip3    | -0.04444 | 0.06357719 | 0.163382 |
| 500900    | Lrrc14       | -0.04445 | 0.45164743 | 0.643545 |
| 103692002 | LOC103692002 | -0.04447 | 0.42392141 | 0.619425 |
| 192126    | Dab2ip       | -0.04447 | 0.04759098 | 0.130095 |
| 315287    | Asb8         | -0.04448 | 0.13085355 | 0.279134 |
| 157074    | Sdha         | -0.04451 | 0.00746302 | 0.028965 |
| 303902    | Dirc2        | -0.04451 | 0.17406866 | 0.341415 |
| 500546    | RGD1560436   | -0.04452 | 0.68093638 | 0.821983 |
| 85493     | Abcf1        | -0.04453 | 0.0762161  | 0.187392 |
| 170670    | Hadha        | -0.04456 | 0.00867339 | 0.032886 |
| 679127    | Rrp12        | -0.04459 | 0.32309219 | 0.518303 |
| 25557     | Star         | -0.04461 | 0.90388912 | 0.958121 |
| 312641    | Fancd2       | -0.04461 | 0.6888008  | 0.827647 |
| 85494     | Tpral        | -0.04461 | 0.35777397 | 0.55478  |
| 295923    | Ndufs3       | -0.04462 | 0.11869796 | 0.260168 |
| 246771    | Slc25a25     | -0.04464 | 0.0907981  | 0.213041 |
| 689161    | Gabarapl1    | -0.04465 | 5.86E-07   | 6.05E-06 |
| 499474    | Ostml        | -0.04469 | 0.21997352 | 0.402053 |
| 294385    | Supv311      | -0.04469 | 0.34519409 | 0.541757 |
| 102547612 | LOC102547612 | -0.04478 | 0.91118573 | 0.963282 |
| 499913    | Abhd12       | -0.04478 | 0.0032122  | 0.014257 |
| 65041     | Clpb         | -0.04478 | 0.29796155 | 0.494611 |
| 691026    | Aspscr1      | -0.04479 | 0.1761048  | 0.344274 |

|           |              |          |            |          |
|-----------|--------------|----------|------------|----------|
| 308134    | Tmem35a      | -0.04482 | 0.04171584 | 0.116887 |
| 360034    | Myrip        | -0.04483 | 0.46554325 | 0.65642  |
| 361984    | Ubp21        | -0.04486 | 0.02248873 | 0.071766 |
| 259229    | Ppmlg        | -0.04487 | 0.17565839 | 0.343613 |
| 288671    | Anapc5       | -0.04488 | 0.00550853 | 0.022465 |
| 192349    | Caly         | -0.04491 | 0.35609364 | 0.553346 |
| 65052     | Pik3c3       | -0.04491 | 0.14449671 | 0.298929 |
| 303567    | Tmub2        | -0.04493 | 0.11910588 | 0.260792 |
| 298771    | Prepl        | -0.04495 | 7.69E-04   | 0.004115 |
| 313705    | Disp3        | -0.04498 | 0.50654316 | 0.693239 |
| 116808    | Pcdh12       | -0.045   | 0.73151489 | 0.854182 |
| 498963    | Spata2L      | -0.04503 | 0.53606465 | 0.718311 |
| 304334    | Fam20c       | -0.04504 | 0.16808789 | 0.332596 |
| 311692    | Fam217b      | -0.04504 | 0.3860987  | 0.583036 |
| 305203    | Paqr3        | -0.04507 | 0.30770615 | 0.502251 |
| 688047    | Lyc2         | -0.04507 | 0.73969669 | 0.859939 |
| 192362    | Lamc2        | -0.04514 | 0.71549454 | 0.844432 |
| 103694903 | LOC103694903 | -0.04517 | 0.27777    | 0.470568 |
| 170566    | Slc16a10     | -0.04526 | 0.7522652  | 0.86777  |
| 309111    | Slc25a22     | -0.04527 | 0.16320331 | 0.326424 |
| 29525     | Pitpna       | -0.04527 | 0.00244271 | 0.011242 |
| 361423    | Fam92b       | -0.04527 | 0.78408565 | 0.887596 |
| 687346    | Brap         | -0.04528 | 0.05830957 | 0.15271  |
| 364064    | Pycr2        | -0.04529 | 0.47149138 | 0.661916 |
| 293485    | Cln3         | -0.04529 | 0.4194403  | 0.614858 |
| 290635    | Mvb12a       | -0.04535 | 0.18958885 | 0.362522 |
| 300286    | Lhfp11       | -0.04538 | 0.32225645 | 0.517529 |
| 112400    | Nrg1         | -0.0454  | 0.00996192 | 0.036947 |
| 682445    | Ccdc28b      | -0.0454  | 0.73031367 | 0.853145 |
| 29382     | Ctbp1        | -0.04541 | 0.00893729 | 0.033732 |
| 308869    | Lamtor1      | -0.04542 | 0.05645536 | 0.148692 |
| 25031     | Plcb4        | -0.04556 | 0.26463672 | 0.454956 |
| 58983     | Rabggta      | -0.04558 | 0.33621851 | 0.532852 |
| 288051    | Umps         | -0.04559 | 0.32477079 | 0.520294 |
| 117038    | Mt3          | -0.04559 | 0.0245151  | 0.076867 |
| 498356    | Shisa3       | -0.0456  | 0.45747332 | 0.648788 |
| 25757     | Cpt1a        | -0.04564 | 0.02184684 | 0.070235 |
| 474147    | Mib2         | -0.04565 | 0.22391053 | 0.406906 |
| 102549397 | LOC102549397 | -0.04567 | 0.80923066 | 0.903229 |
| 313749    | Nphp4        | -0.0457  | 0.48172555 | 0.670599 |
| 361063    | Entpd4       | -0.04571 | 0.00429441 | 0.018195 |
| 308337    | Zfp865       | -0.04573 | 0.60891593 | 0.770603 |
| 362084    | Rabl6        | -0.04573 | 0.02693996 | 0.082794 |
| 103689992 | Rps911       | -0.04575 | 0.12048461 | 0.263191 |
| 81772     | Rps9         | -0.04575 | 0.12048461 | 0.263191 |
| 289218    | Ndufs2       | -0.04581 | 0.00577111 | 0.023375 |
| 83838     | Ltbp3        | -0.04584 | 0.03239851 | 0.095901 |
| 25739     | Pygb         | -0.04585 | 7.58E-07   | 7.67E-06 |
| 315600    | Vps11        | -0.04586 | 0.03759069 | 0.107656 |
| 294250    | Prrc2a       | -0.04587 | 5.27E-04   | 0.002938 |
| 686809    | Exoc312      | -0.04589 | 0.78404527 | 0.887629 |
| 691849    | Ccpg1os      | -0.04589 | 0.78404527 | 0.887629 |
| 287727    | Dhx8         | -0.0459  | 0.21519646 | 0.395829 |
| 312492    | Dysf         | -0.04593 | 0.02776419 | 0.084888 |
| 366602    | Tspan13      | -0.046   | 0.01446622 | 0.050248 |
| 684961    | Zmat4        | -0.04601 | 0.72848567 | 0.851689 |



|           |                 |          |            |          |
|-----------|-----------------|----------|------------|----------|
| 304278    | Ptcd1           | -0.04601 | 0.44613078 | 0.638695 |
| 83462     | Dynlt1          | -0.04603 | 0.36698113 | 0.563051 |
| 501266    | LOC501266       | -0.04608 | 0.33230109 | 0.528402 |
| 300191    | Slc48a1         | -0.04608 | 0.06480723 | 0.165583 |
| 680883    | Lrtm2           | -0.04609 | 0.55677622 | 0.735864 |
| 29622     | Ralgs           | -0.04612 | 0.06669938 | 0.169191 |
| 288740    | Iscu            | -0.04614 | 0.00588245 | 0.023751 |
| 361643    | Lcmt1           | -0.04618 | 0.25690858 | 0.446019 |
| 25673     | Anxa5           | -0.04621 | 2.43E-09   | 3.57E-08 |
| 292082    | Tcf25           | -0.04621 | 6.71E-05   | 4.63E-04 |
| 100361092 | Malrd1          | -0.04622 | 0.86188083 | 0.932484 |
| 100912347 | LOC100912347    | -0.04622 | 0.9020891  | 0.957839 |
| 287533    | Inpp5k          | -0.04622 | 0.1483932  | 0.304247 |
| 309145    | RGD1311946      | -0.04622 | 0.49336552 | 0.680584 |
| 59116     | Dbil5           | -0.04622 | 0.9020891  | 0.957839 |
| 691531    | Rps28           | -0.04632 | 0.16061985 | 0.322714 |
| 305235    | Art3            | -0.04636 | 0.0292431  | 0.08836  |
| 360833    | Kdsr            | -0.04637 | 0.36074608 | 0.557663 |
| 307180    | Txndc15         | -0.04645 | 0.08740056 | 0.20742  |
| 108348178 | NEWGENE_1309258 | -0.04649 | 0.3396608  | 0.536166 |
| 301067    | Slc25a38        | -0.0465  | 0.28193152 | 0.475588 |
| 690164    | Harbil          | -0.0465  | 0.4374505  | 0.631346 |
| 311959    | Abcf2           | -0.04652 | 0.06005853 | 0.156131 |
| 103690981 | LOC103690981    | -0.04655 | 0.97797053 | 1        |
| 304719    | Ercc4           | -0.04655 | 0.25725981 | 0.446262 |
| 83519     | Pex3            | -0.04659 | 0.17591192 | 0.343967 |
| 684828    | LOC684828       | -0.04663 | 0.81082823 | 0.904588 |
| 687739    | Naif1           | -0.04663 | 0.66851053 | 0.81208  |
| 500668    | Ccdc175         | -0.04663 | 0.58040323 | 0.747938 |
| 25150     | Fyn             | -0.04664 | 0.03255307 | 0.096254 |
| 288153    | Hoxd4           | -0.04664 | 0.50093097 | 0.687584 |
| 64134     | Xylt2           | -0.04668 | 0.14335333 | 0.297728 |
| 292588    | Ube2s           | -0.04668 | 0.06974867 | 0.17513  |
| 29336     | Sigmar1         | -0.0467  | 0.03072749 | 0.091854 |
| 261738    | Clrn1           | -0.04675 | 0.39613508 | 0.593486 |
| 25734     | Hck             | -0.04678 | 0.57047686 | 0.739802 |
| 289217    | Sdhc            | -0.04685 | 0.07322318 | 0.181935 |
| 64192     | Qdpr            | -0.04691 | 0.02261876 | 0.07206  |
| 83586     | Usf1            | -0.04693 | 0.18163734 | 0.351517 |
| 54312     | Timm23          | -0.04693 | 0.09135439 | 0.214135 |
| 307868    | Mon1b           | -0.04696 | 0.16579223 | 0.329766 |
| 293702    | Fkbp2           | -0.04698 | 0.15709891 | 0.317145 |
| 29693     | Atp2a2          | -0.04701 | 4.15E-04   | 0.002385 |
| 606294    | Kif1bp          | -0.04701 | 0.05651776 | 0.148815 |
| 298573    | Eif4g3          | -0.04703 | 0.00692527 | 0.027267 |
| 81727     | Mvk             | -0.04705 | 0.17016717 | 0.335907 |
| 29416     | Aadat           | -0.04706 | 0.72536692 | 0.850025 |
| 690848    | Uqcr11          | -0.04706 | 0.07823603 | 0.191149 |
| 65206     | Kcnn4           | -0.04711 | 0.52054223 | 0.705152 |
| 288557    | Mospd3          | -0.04713 | 0.37944407 | 0.576645 |
| 300763    | Lrrc49          | -0.04713 | 0.00553388 | 0.022549 |
| 311721    | Zfp512b         | -0.04721 | 0.22045086 | 0.402424 |
| 679357    | Irf2bp2         | -0.04723 | 0.31572297 | 0.51035  |
| 207126    | Muc13           | -0.04723 | 0.96861007 | 1        |
| 65043     | Rpl14           | -0.04724 | 0.01362939 | 0.047812 |
| 296410    | Rtfdc1          | -0.04724 | 0.07763792 | 0.18998  |

|           |           |          |            |          |
|-----------|-----------|----------|------------|----------|
| 100362059 | Ttc16     | -0.04725 | 0.73682724 | 0.85765  |
| 29271     | Cf11      | -0.04727 | 6.61E-10   | 1.04E-08 |
| 315135    | Sun2      | -0.04729 | 0.01332003 | 0.046908 |
| 305291    | Srd5a3    | -0.0473  | 0.10043597 | 0.229408 |
| 116656    | Cdc123    | -0.0473  | 0.10544673 | 0.237689 |
| 24916     | Rnf112    | -0.04731 | 0.13233996 | 0.281548 |
| 313913    | Zfp513    | -0.04732 | 0.38321634 | 0.580109 |
| 364298    | Pip4p1    | -0.04737 | 0.0935794  | 0.217795 |
| 315166    | Smdt1     | -0.04743 | 0.06742378 | 0.170597 |
| 295325    | Igsf3     | -0.04745 | 0.04375775 | 0.121659 |
| 24434     | Gusb      | -0.04752 | 0.4941061  | 0.680965 |
| 60660     | Ppp2r2b   | -0.04763 | 0.01835447 | 0.061112 |
| 293476    | Xpo6      | -0.04767 | 0.06520009 | 0.166319 |
| 171335    | Cox8a     | -0.04769 | 0.00408237 | 0.017448 |
| 192229    | Cep19     | -0.0477  | 0.14462228 | 0.299091 |
| 652929    | Cd99      | -0.04775 | 0.13044567 | 0.27842  |
| 81817     | Usf2      | -0.04777 | 0.09642398 | 0.222539 |
| 100361529 | Rad9a     | -0.04782 | 0.45830109 | 0.649527 |
| 362704    | Babam2    | -0.04783 | 0.14988655 | 0.306221 |
| 299618    | Mknk2     | -0.04783 | 0.10240054 | 0.232862 |
| 298555    | Grhl3     | -0.04787 | 0.50723553 | 0.693638 |
| 287731    | Lsm12     | -0.0479  | 0.12219919 | 0.266066 |
| 360652    | Sdk2      | -0.04791 | 0.3125665  | 0.507704 |
| 306102    | Bora      | -0.04793 | 0.72280435 | 0.848484 |
| 500567    | LOC500567 | -0.04793 | 0.90019902 | 0.956873 |
| 291137    | Gmn       | -0.04793 | 0.60510029 | 0.767968 |
| 685187    | LOC685187 | -0.04798 | 0.85402339 | 0.927884 |
| 24460     | Hoxc8     | -0.04801 | 0.63360796 | 0.789523 |
| 309629    | Pfdn6     | -0.04804 | 0.18195173 | 0.351911 |
| 308999    | Fbxl19    | -0.04804 | 0.21859014 | 0.400216 |
| 502776    | Scrn1     | -0.04805 | 4.08E-04   | 0.002355 |
| 287633    | Lrrc59    | -0.04806 | 0.02229248 | 0.071307 |
| 297968    | Akirin2   | -0.04806 | 0.12275708 | 0.266976 |
| 59267     | Syt7      | -0.04807 | 0.00152008 | 0.00744  |
| 297797    | Atp6v1h   | -0.04807 | 0.01946633 | 0.064041 |
| 24567     | Mt1       | -0.04808 | 0.53830058 | 0.720344 |
| 361454    | Ccdc28a   | -0.04811 | 0.13095895 | 0.279265 |
| 29593     | Ckmt1     | -0.04814 | 6.16E-04   | 0.003378 |
| 500255    | Eefsec    | -0.04814 | 0.33427421 | 0.530565 |
| 687118    | Dedd2     | -0.04815 | 0.30728875 | 0.503079 |
| 81729     | Rpl10a    | -0.04815 | 0.01533653 | 0.052837 |
| 690769    | Znrf1     | -0.04816 | 0.21802688 | 0.399492 |
| 406165    | Agpat1    | -0.04817 | 0.01157321 | 0.041745 |
| 309630    | Zbtb22    | -0.04817 | 0.23551977 | 0.422043 |
| 302982    | Eme2      | -0.04818 | 0.30703906 | 0.502886 |
| 298590    | Klhdc7a   | -0.0483  | 0.69932142 | 0.835178 |
| 25217     | Tapbp     | -0.0483  | 0.31379539 | 0.508789 |
| 297952    | Gpr63     | -0.04832 | 0.62078626 | 0.778692 |
| 291974    | Ripor1    | -0.04833 | 0.04773928 | 0.130238 |
| 25721     | Got2      | -0.04834 | 1.18E-04   | 7.71E-04 |
| 364686    | Ranbp9    | -0.04838 | 0.14309043 | 0.297344 |
| 293725    | Eef1g     | -0.0484  | 4.56E-05   | 3.28E-04 |
| 25035     | Cyb5r3    | -0.04841 | 1.22E-04   | 7.93E-04 |
| 316477    | Smarc11   | -0.04842 | 0.4353993  | 0.62934  |
| 498131    | N4bp211   | -0.04843 | 0.6190174  | 0.777651 |
| 25589     | Kdr       | -0.04844 | 0.35857316 | 0.555567 |

|           |              |          |            |          |
|-----------|--------------|----------|------------|----------|
| 360594    | Mrps23       | -0.04845 | 0.23149296 | 0.416867 |
| 303922    | Timmdc1      | -0.04848 | 0.34945012 | 0.546096 |
| 84583     | Rgs2         | -0.0485  | 0.55391088 | 0.733707 |
| 501688    | Lsm11        | -0.04851 | 0.26203249 | 0.451743 |
| 500679    | Rad51b       | -0.04853 | 0.82692913 | 0.912978 |
| 690437    | Catip        | -0.04861 | 0.83614283 | 0.918465 |
| 362840    | R3hdm4       | -0.04863 | 0.08205096 | 0.198635 |
| 689639    | Tdrd12       | -0.04865 | 0.77745497 | 0.883925 |
| 316425    | Sgo2         | -0.04866 | 0.88627286 | 0.948422 |
| 362643    | Emc1         | -0.04868 | 0.05399709 | 0.143447 |
| 362710    | Agbl5        | -0.04869 | 0.53773487 | 0.719789 |
| 541462    | Sprn         | -0.04871 | 0.16945672 | 0.334748 |
| 294260    | Skiv21       | -0.04872 | 0.12639137 | 0.272176 |
| 679068    | Tsfm         | -0.04872 | 0.41795149 | 0.613857 |
| 288622    | Zbed5        | -0.04875 | 0.28895323 | 0.483875 |
| 293733    | Incenp       | -0.04877 | 0.15707818 | 0.317137 |
| 299954    | Ndufb9       | -0.04877 | 0.03418624 | 0.100027 |
| 361195    | Cdc14b       | -0.04881 | 0.48917644 | 0.676668 |
| 364420    | Tnfrsf10b    | -0.04884 | 0.85785165 | 0.930133 |
| 298576    | Mull1        | -0.04886 | 0.34216184 | 0.538863 |
| 363441    | Ndufa1       | -0.04886 | 0.23664078 | 0.423534 |
| 192648    | Prokr1       | -0.04892 | 0.46648659 | 0.65741  |
| 290868    | Qars         | -0.04894 | 0.08052937 | 0.195623 |
| 108348128 | LOC108348128 | -0.04895 | 0.73580149 | 0.857347 |
| 688393    | Gpn1         | -0.04899 | 0.28172528 | 0.475282 |
| 362652    | Dnajc16      | -0.04899 | 0.35570092 | 0.552826 |
| 308983    | Nfatc2ip     | -0.04902 | 0.6882007  | 0.827187 |
| 171140    | Camk2g       | -0.04906 | 2.83E-04   | 0.001696 |
| 366995    | Tbca         | -0.0491  | 0.07686753 | 0.188579 |
| 311637    | Slc35c2      | -0.04912 | 0.24785901 | 0.436596 |
| 56646     | Lgals1       | -0.04912 | 8.85E-09   | 1.20E-07 |
| 140547    | Echs1        | -0.04928 | 0.13606255 | 0.286649 |
| 306009    | Slc39a14     | -0.04929 | 0.33957214 | 0.536115 |
| 282546    | Arid1b       | -0.04929 | 0.13631159 | 0.287047 |
| 81827     | Psmc5        | -0.0493  | 0.00578744 | 0.023422 |
| 29338     | Prdx2        | -0.04932 | 2.51E-05   | 1.91E-04 |
| 499758    | Tmem250      | -0.04935 | 0.08840487 | 0.209126 |
| 50665     | Tmsb10       | -0.04936 | 1.01E-08   | 1.36E-07 |
| 54395     | Cr1f3        | -0.04937 | 0.28656444 | 0.480805 |
| 64312     | Aplp2        | -0.0494  | 6.03E-07   | 6.22E-06 |
| 308434    | Zfp574       | -0.0494  | 0.34032714 | 0.536995 |
| 306575    | Ckap2        | -0.04946 | 0.75481594 | 0.869607 |
| 100366017 | Ube2e1       | -0.04947 | 0.11239824 | 0.249869 |
| 497798    | Lmo3         | -0.0495  | 0.73575594 | 0.857347 |
| 314969    | Nop2         | -0.04952 | 0.30001157 | 0.496716 |
| 309686    | Pofut2       | -0.04956 | 0.20408904 | 0.38073  |
| 81728     | Ndufv2       | -0.04957 | 0.01356368 | 0.047643 |
| 499017    | Syt13        | -0.04962 | 0.36170982 | 0.558156 |
| 292847    | Ctuf1        | -0.04966 | 0.59832396 | 0.761754 |
| 296623    | Miga2        | -0.04967 | 0.09470656 | 0.219774 |
| 64664     | Arl3         | -0.04968 | 0.08562938 | 0.204722 |
| 362029    | Ag1          | -0.04974 | 0.01328767 | 0.046838 |
| 316164    | Satb1        | -0.04974 | 0.16781939 | 0.332202 |
| 317576    | Ocr1         | -0.04976 | 0.18583188 | 0.357347 |
| 60347     | Cep78        | -0.04977 | 0.53086323 | 0.713097 |
| 680844    | Trem12       | -0.04977 | 0.89821089 | 0.95556  |

|           |              |          |            |          |
|-----------|--------------|----------|------------|----------|
| 362287    | Slc17a9      | -0.04977 | 0.82465092 | 0.911572 |
| 64829     | Unc13a       | -0.04979 | 0.09725549 | 0.223997 |
| 288591    | Tmem120a     | -0.0498  | 0.22224242 | 0.404608 |
| 297597    | Ing4         | -0.0498  | 0.24948553 | 0.437922 |
| 291022    | Ptpdc1       | -0.04982 | 0.13556468 | 0.28579  |
| 362111    | Sh2d3c       | -0.04989 | 0.25323053 | 0.441848 |
| 245980    | Nr2f6        | -0.0499  | 0.26101451 | 0.450559 |
| 313453    | Tmem255a     | -0.0499  | 1.88E-04   | 0.001172 |
| 103693266 | Rsl1d111     | -0.04996 | 0.26744409 | 0.458685 |
| 302898    | Rsl1d1       | -0.04996 | 0.26744409 | 0.458685 |
| 312670    | Adipor2      | -0.04999 | 0.08335638 | 0.200774 |
| 684755    | Zfp11        | -0.05001 | 0.27493933 | 0.467019 |
| 89818     | Vamp5        | -0.05005 | 0.73428764 | 0.856631 |
| 246757    | Klhl17       | -0.05008 | 0.26638001 | 0.45754  |
| 296301    | Raly         | -0.05009 | 0.02722012 | 0.083533 |
| 29713     | Kcnj5        | -0.05011 | 0.61811268 | 0.776976 |
| 100362172 | LOC100362172 | -0.05025 | 0.79002073 | 0.891559 |
| 361771    | Zdhhc6       | -0.05026 | 0.30744825 | 0.501916 |
| 499671    | Lysmd1       | -0.05029 | 0.43398455 | 0.628248 |
| 302473    | Slitrk4      | -0.0503  | 0.28527191 | 0.479481 |
| 362504    | Dctn3        | -0.05031 | 0.04718016 | 0.129157 |
| 79239     | Hmox2        | -0.05032 | 0.04030894 | 0.113967 |
| 63995     | Dusp10       | -0.05034 | 0.59570492 | 0.759384 |
| 362454    | Hebp1        | -0.05036 | 0.53704549 | 0.719271 |
| 291355    | Prtfcd1      | -0.05037 | 0.26812565 | 0.459337 |
| 497900    | Rmnd5b       | -0.05039 | 0.34926918 | 0.546127 |
| 297458    | Ccdc174      | -0.05039 | 0.49566657 | 0.682029 |
| 29322     | Plcb3        | -0.0504  | 0.00106295 | 0.005452 |
| 292072    | Aprt         | -0.05043 | 0.22691219 | 0.410793 |
| 252961    | Tank         | -0.05044 | 0.31436402 | 0.508844 |
| 64300     | Mthfd1       | -0.05046 | 0.23857749 | 0.42568  |
| 680656    | Fndc10       | -0.0505  | 0.13712282 | 0.288309 |
| 362216    | Mrps26       | -0.0505  | 0.31404048 | 0.50845  |
| 288259    | Gart         | -0.05053 | 0.14465445 | 0.299125 |
| 299186    | Dpf3         | -0.05055 | 0.77306176 | 0.881351 |
| 684097    | Snx3         | -0.05055 | 0.00231294 | 0.010726 |
| 289736    | Morc2        | -0.05059 | 0.25448132 | 0.443219 |
| 500633    | Greb1        | -0.05062 | 0.60567804 | 0.768343 |
| 691484    | Eri2         | -0.05064 | 0.60583025 | 0.768434 |
| 689959    | LOC689959    | -0.05065 | 0.56371259 | 0.734933 |
| 296761    | Tmem60       | -0.05067 | 0.31456194 | 0.508992 |
| 313496    | Ccdc107      | -0.05067 | 0.07499757 | 0.185257 |
| 288656    | Arl6ip4      | -0.05069 | 0.18779875 | 0.360075 |
| 300177    | Irak4        | -0.05071 | 0.5087223  | 0.695222 |
| 362414    | Tada3        | -0.05074 | 0.19855039 | 0.373729 |
| 289752    | Ewsr1        | -0.05074 | 0.11601052 | 0.255779 |
| 103690130 | Hoxa3        | -0.05074 | 0.72096119 | 0.847234 |
| 108348320 | LOC108348320 | -0.05074 | 0.72096119 | 0.847234 |
| 688394    | Mab2111      | -0.05075 | 0.6543988  | 0.803133 |
| 361711    | Dpf2         | -0.05081 | 0.03106785 | 0.092712 |
| 287208    | Ttc1         | -0.05082 | 0.01725219 | 0.058123 |
| 360743    | Med15        | -0.05083 | 0.09487212 | 0.220024 |
| 29425     | Psmb5        | -0.05085 | 0.02145518 | 0.069315 |
| 117276    | Pfkfb3       | -0.05086 | 0.02551234 | 0.079276 |
| 361443    | Ntpcr        | -0.05087 | 0.36999979 | 0.566314 |
| 680266    | Gnb11        | -0.05089 | 0.62821778 | 0.785427 |

|           |              |          |            |          |
|-----------|--------------|----------|------------|----------|
| 687090    | Tprg11       | -0.05089 | 3.25E-04   | 0.001932 |
| 309252    | Otud7a       | -0.05092 | 0.2143305  | 0.394847 |
| 689938    | Ndufc1       | -0.05092 | 0.24944619 | 0.437893 |
| 287521    | Mnt          | -0.05094 | 0.1268471  | 0.272849 |
| 299743    | Mrpl42       | -0.05097 | 0.17365308 | 0.340916 |
| 300084    | Rbx1         | -0.05098 | 0.0574924  | 0.150923 |
| 309586    | Trim26       | -0.05106 | 0.144531   | 0.298967 |
| 307404    | Arsi         | -0.05108 | 0.82229266 | 0.909916 |
| 363278    | Atg16l1      | -0.05112 | 0.11449816 | 0.253295 |
| 364900    | Ctif         | -0.05115 | 0.16588732 | 0.329921 |
| 170587    | Cs           | -0.05116 | 0.00740862 | 0.028807 |
| 502663    | Serf2        | -0.05117 | 0.0030731  | 0.013726 |
| 303836    | Bcl6         | -0.05117 | 0.25470571 | 0.443366 |
| 29376     | Irs2         | -0.0512  | 0.06238294 | 0.160813 |
| 360638    | Adam11       | -0.05122 | 9.31E-04   | 0.004861 |
| 207117    | Dnah8        | -0.05125 | 0.79502671 | 0.893924 |
| 29668     | Psmal        | -0.05127 | 0.02441215 | 0.076632 |
| 94173     | Idh3B        | -0.05131 | 0.00416224 | 0.01777  |
| 288529    | Gjc3         | -0.05131 | 0.5330389  | 0.715112 |
| 302826    | Frmd7        | -0.05131 | 0.69962852 | 0.835387 |
| 171063    | Gtf3c1       | -0.05133 | 0.01486266 | 0.051419 |
| 308409    | Opa3         | -0.05134 | 0.25085439 | 0.438788 |
| 116458    | Ipo13        | -0.05134 | 0.13972138 | 0.292385 |
| 313490    | Tmem8b       | -0.05135 | 0.07614542 | 0.187266 |
| 364843    | Pcdhga8      | -0.05135 | 0.51947317 | 0.704154 |
| 100363129 | LOC100363129 | -0.05137 | 0.82985695 | 0.914831 |
| 293491    | Ypel3        | -0.05137 | 0.00269933 | 0.012266 |
| 691938    | Fam124a      | -0.05138 | 0.49913001 | 0.685557 |
| 300741    | Mpi          | -0.05138 | 0.08710943 | 0.206935 |
| 367166    | Hyal1        | -0.05145 | 0.24199429 | 0.429924 |
| 108348123 | LOC108348123 | -0.05145 | 0.71551894 | 0.844303 |
| 117281    | Ppp2r1a      | -0.05145 | 7.08E-06   | 5.98E-05 |
| 291206    | Mrpl32       | -0.05145 | 0.33879557 | 0.535332 |
| 25532     | Rab4a        | -0.05148 | 0.04279519 | 0.119436 |
| 303240    | Cntrob       | -0.05149 | 0.67218497 | 0.815399 |
| 303515    | Rapgef11     | -0.05151 | 0.45434995 | 0.645464 |
| 691024    | Fam219a      | -0.05151 | 0.00222541 | 0.010355 |
| 259248    | Slc16a2      | -0.05151 | 0.51490132 | 0.7006   |
| 29474     | Coro1b       | -0.05151 | 0.02781302 | 0.084956 |
| 25014     | Acat1        | -0.05157 | 0.04906251 | 0.1332   |
| 24184     | Ak2          | -0.05162 | 0.38174729 | 0.578575 |
| 288657    | Ogfod2       | -0.05162 | 0.47512058 | 0.665441 |
| 113961    | Gorasp2      | -0.05163 | 0.03288818 | 0.096944 |
| 25356     | Cntn2        | -0.05169 | 6.48E-06   | 5.51E-05 |
| 301463    | Fastkd2      | -0.05174 | 0.30100638 | 0.497887 |
| 65278     | Csnklg2      | -0.05175 | 0.01009481 | 0.037317 |
| 24769     | Sct          | -0.05175 | 0.89611565 | 0.954343 |
| 499468    | RGD1561147   | -0.05175 | 0.89611565 | 0.954343 |
| 81919     | Fut1         | -0.05175 | 0.89611565 | 0.954343 |
| 292764    | Fam98c       | -0.05181 | 0.43956606 | 0.632865 |
| 309000    | Orai3        | -0.05181 | 0.46120065 | 0.652471 |
| 116658    | Cntn4        | -0.05184 | 0.26747393 | 0.458592 |
| 295341    | Ppmlj        | -0.05186 | 0.04374366 | 0.121656 |
| 680647    | Fam19a2      | -0.05187 | 0.09217955 | 0.215565 |
| 362247    | Trpc4ap      | -0.05189 | 0.0079656  | 0.030691 |
| 298544    | Sh3bgr13     | -0.05191 | 1.17E-06   | 1.14E-05 |

|           |            |          |            |          |
|-----------|------------|----------|------------|----------|
| 679038    | Rtl8a      | -0.05192 | 0.0336583  | 0.09874  |
| 304655    | Zswim4     | -0.05192 | 0.42011695 | 0.615519 |
| 297113    | Gars       | -0.05193 | 0.00325363 | 0.014407 |
| 297376    | Htra2      | -0.05194 | 0.18645317 | 0.35818  |
| 100364984 | Rab37      | -0.05194 | 0.13511302 | 0.285249 |
| 305055    | Kctd3      | -0.05196 | 0.11837323 | 0.259606 |
| 29292     | Ft11       | -0.05197 | 1.69E-08   | 2.20E-07 |
| 25243     | Arnt2      | -0.05199 | 0.14667136 | 0.301952 |
| 29435     | Ssr4       | -0.052   | 0.18618241 | 0.357877 |
| 306505    | Lonrf1     | -0.052   | 0.23304135 | 0.418903 |
| 140675    | Gabra4     | -0.05201 | 0.71117934 | 0.84132  |
| 94342     | Bag6       | -0.05202 | 0.00537332 | 0.022064 |
| 170837    | Snrk       | -0.05205 | 0.08231559 | 0.199048 |
| 362102    | Ptpa       | -0.05206 | 0.00203058 | 0.009577 |
| 298447    | Dmap1      | -0.05216 | 0.32653113 | 0.52228  |
| 81751     | Psen2      | -0.05217 | 0.03815056 | 0.108932 |
| 301131    | Tnfaip811  | -0.05218 | 0.65991447 | 0.805284 |
| 684536    | Gba        | -0.05219 | 0.01386836 | 0.048481 |
| 117256    | Ppp2r2c    | -0.0522  | 0.04524867 | 0.12511  |
| 114588    | Cdh4       | -0.05221 | 0.34428238 | 0.540861 |
| 287805    | Gprc5c     | -0.05222 | 0.19632239 | 0.370892 |
| 100233176 | Gon7       | -0.05227 | 0.20684414 | 0.384514 |
| 316530    | Cnppd1     | -0.05227 | 0.13010754 | 0.277791 |
| 290632    | Mrpl34     | -0.05227 | 0.43097029 | 0.625216 |
| 289582    | Fip111     | -0.05233 | 0.16456589 | 0.328666 |
| 365361    | Lyrml      | -0.05236 | 0.30323469 | 0.500486 |
| 311055    | Tanc1      | -0.05239 | 0.01713773 | 0.057778 |
| 680558    | Tmem241    | -0.05239 | 0.63562777 | 0.790746 |
| 302986    | Telo2      | -0.0524  | 0.31688244 | 0.51153  |
| 360459    | RGD1305733 | -0.05241 | 0.00481634 | 0.020076 |
| 83764     | Flot2      | -0.05245 | 1.48E-04   | 9.46E-04 |
| 364476    | Hs6st3     | -0.05249 | 0.56648126 | 0.736727 |
| 252929    | Ctsz       | -0.0525  | 0.10949624 | 0.244502 |
| 317341    | Ube2q21    | -0.0525  | 0.51066843 | 0.696607 |
| 60590     | Grm8       | -0.0525  | 0.51066843 | 0.696607 |
| 501099    | Srf        | -0.05251 | 0.23928443 | 0.426622 |
| 499390    | Clasrp     | -0.05261 | 0.18783805 | 0.360114 |
| 288515    | Micall2    | -0.05261 | 0.44251282 | 0.63533  |
| 292935    | Htatip2    | -0.05264 | 0.16902554 | 0.334069 |
| 313668    | Ddi2       | -0.05265 | 0.04492198 | 0.124352 |
| 24586     | Ncam1      | -0.05266 | 2.68E-04   | 0.001621 |
| 687539    | Mthfsd     | -0.0527  | 0.53637629 | 0.718577 |
| 501555    | Rai2       | -0.05275 | 0.54341844 | 0.724799 |
| 310417    | Proser1    | -0.05277 | 0.28388792 | 0.477788 |
| 287371    | Drc3       | -0.0528  | 0.4698534  | 0.660201 |
| 498153    | Gpr146     | -0.0528  | 0.21398199 | 0.394319 |
| 363221    | Cnot11     | -0.05285 | 0.27283004 | 0.464804 |
| 192234    | Eif2b5     | -0.05289 | 0.0888277  | 0.209787 |
| 170906    | Zdhhc7     | -0.0529  | 0.09901322 | 0.22692  |
| 29691     | Pdelb      | -0.05294 | 0.61682451 | 0.776176 |
| 361698    | Pold4      | -0.05294 | 0.52628741 | 0.710106 |
| 81525     | Nfkbib     | -0.05298 | 0.35977448 | 0.556658 |
| 303337    | Rab11fip4  | -0.05299 | 0.02248136 | 0.071754 |
| 362645    | Atp13a2    | -0.05299 | 5.30E-04   | 0.002947 |
| 293648    | Mrgprd     | -0.05301 | 0.08507416 | 0.203855 |
| 287596    | Smg8       | -0.05302 | 0.40298747 | 0.60007  |



|           |              |          |            |          |
|-----------|--------------|----------|------------|----------|
| 361438    | Gas8         | -0.05305 | 0.63342138 | 0.789497 |
| 691703    | C2cd4a       | -0.0531  | 0.74155878 | 0.860214 |
| 295645    | Slc4a10      | -0.05316 | 0.7456694  | 0.863194 |
| 317296    | Mtmr1        | -0.0532  | 0.27820772 | 0.471226 |
| 294297    | Scube3       | -0.0532  | 0.45361506 | 0.645094 |
| 60395     | Trpc3        | -0.05322 | 0.28544033 | 0.479553 |
| 684527    | Crtc1        | -0.05322 | 0.05149212 | 0.137967 |
| 288710    | Rnf10        | -0.05323 | 1.04E-04   | 6.91E-04 |
| 302973    | Abca3        | -0.05324 | 8.04E-04   | 0.00427  |
| 305234    | Stbd1        | -0.05328 | 0.16058948 | 0.322687 |
| 83620     | Cit          | -0.05328 | 0.31263561 | 0.507773 |
| 360576    | Trarg1       | -0.05333 | 2.25E-08   | 2.87E-07 |
| 289587    | Lrrc66       | -0.05334 | 0.79077364 | 0.89188  |
| 100158233 | Slc35a2      | -0.05335 | 0.22959687 | 0.414314 |
| 313021    | Tmem222      | -0.05342 | 0.250257   | 0.438226 |
| 294513    | Dnajb12      | -0.05351 | 0.09079155 | 0.213051 |
| 29181     | Cdh10        | -0.05354 | 0.50634002 | 0.693061 |
| 100910864 | LOC100910864 | -0.05356 | 0.71149052 | 0.841479 |
| 266609    | Bles03       | -0.05361 | 0.13543994 | 0.285685 |
| 26989     | Cadps        | -0.05361 | 9.81E-04   | 0.005092 |
| 192152    | Tgoln2       | -0.05362 | 0.00323389 | 0.01434  |
| 282824    | Elavl3       | -0.05363 | 0.06814581 | 0.172104 |
| 295635    | Arhgap15     | -0.05365 | 0.71108213 | 0.841571 |
| 312373    | Nt5c3a       | -0.05365 | 0.20186963 | 0.377811 |
| 361555    | Ankrd27      | -0.05366 | 0.10201729 | 0.232101 |
| 64533     | Pnpo         | -0.05367 | 0.11342717 | 0.251452 |
| 29544     | Tspyl1       | -0.05367 | 0.02816676 | 0.085775 |
| 303497    | Osbpl7       | -0.0537  | 0.30242536 | 0.499496 |
| 500446    | Phf24        | -0.05371 | 4.45E-17   | 1.37E-15 |
| 100911575 | LOC100911575 | -0.05374 | 0.41582532 | 0.61182  |
| 100362124 | Ift140       | -0.05382 | 0.2086492  | 0.386737 |
| 311129    | Osbpl6       | -0.05384 | 0.06926842 | 0.174246 |
| 102553506 | LOC102553506 | -0.05389 | 0.89390305 | 0.953    |
| 302822    | Igsf1        | -0.05389 | 0.85039879 | 0.926032 |
| 499368    | Calhm3       | -0.05389 | 0.85039879 | 0.926032 |
| 294281    | Slc39a7      | -0.05396 | 0.04885661 | 0.132735 |
| 312800    | Atf7ip       | -0.05399 | 0.08261818 | 0.199551 |
| 308589    | Sphk2        | -0.05401 | 0.0381802  | 0.108968 |
| 291940    | Zfp827       | -0.05405 | 0.16943375 | 0.334737 |
| 360549    | Plscr3       | -0.05408 | 0.12619928 | 0.271885 |
| 687808    | Slc16a9      | -0.0541  | 0.44966585 | 0.641249 |
| 290985    | Isca1        | -0.0541  | 0.01014688 | 0.037502 |
| 64464     | Timm10       | -0.0541  | 0.3351799  | 0.531737 |
| 689523    | Lin9         | -0.05411 | 0.65639411 | 0.802995 |
| 64524     | Tkt          | -0.05414 | 8.24E-05   | 5.58E-04 |
| 89804     | Tek          | -0.05417 | 0.30909872 | 0.504178 |
| 362811    | Ankrd52      | -0.05422 | 0.02970559 | 0.089446 |
| 359959    | Rheb11       | -0.05424 | 0.61195191 | 0.773007 |
| 687575    | U2af1        | -0.05428 | 0.22827349 | 0.412787 |
| 100360679 | LOC100360679 | -0.05429 | 0.51872847 | 0.703545 |
| 116692    | Cyth2        | -0.0543  | 0.07023366 | 0.176046 |
| 295701    | Tmx2         | -0.05431 | 6.71E-04   | 0.003641 |
| 171355    | Pou4f2       | -0.05432 | 0.36136684 | 0.557762 |
| 498431    | RGD1562229   | -0.05434 | 0.76454935 | 0.876104 |
| 310909    | Rap1gds1     | -0.05434 | 5.01E-07   | 5.22E-06 |
| 303787    | Slc7a4       | -0.05443 | 0.44119649 | 0.634493 |

|           |              |          |            |          |
|-----------|--------------|----------|------------|----------|
| 24175     | Adra2c       | -0.05445 | 0.37375105 | 0.570268 |
| 246187    | Slc7a6os     | -0.05446 | 0.35788701 | 0.55491  |
| 363195    | Gtpbp2       | -0.05447 | 0.13921618 | 0.29168  |
| 361160    | Leprotl1     | -0.05447 | 0.13688086 | 0.287991 |
| 292696    | Clptm1       | -0.05448 | 0.00140239 | 0.006943 |
| 293614    | Ric8a        | -0.0545  | 0.0118351  | 0.042552 |
| 316087    | Zbtb47       | -0.05452 | 0.03723251 | 0.106807 |
| 54251     | Flt1         | -0.05457 | 0.18194636 | 0.351937 |
| 362899    | Nipal2       | -0.05472 | 0.26760252 | 0.458647 |
| 292766    | Psm8         | -0.05476 | 0.00351574 | 0.015389 |
| 314633    | Ap3d1        | -0.05478 | 3.00E-05   | 2.25E-04 |
| 680047    | Pcdhb9       | -0.05478 | 0.61223685 | 0.773213 |
| 313053    | Ythdf2       | -0.05492 | 0.13521166 | 0.285362 |
| 303343    | Abhd15       | -0.05498 | 0.78545371 | 0.888511 |
| 499094    | Zfp61        | -0.05505 | 0.22158507 | 0.403875 |
| 682033    | Ppp2r3b      | -0.05506 | 0.42492927 | 0.620136 |
| 113956    | Pecr         | -0.05508 | 0.39355327 | 0.590733 |
| 29309     | Coq3         | -0.05509 | 0.28042559 | 0.473761 |
| 25095     | Ampd3        | -0.05515 | 0.17489725 | 0.342546 |
| 301388    | Mfsd6        | -0.05515 | 1.27E-04   | 8.23E-04 |
| 100910054 | Nkrf         | -0.05517 | 0.67365343 | 0.816556 |
| 65262     | Atp5fla      | -0.0552  | 1.66E-07   | 1.87E-06 |
| 360838    | Lypd1        | -0.0552  | 0.36766014 | 0.563821 |
| 170916    | Lonpl        | -0.05524 | 0.04410101 | 0.122453 |
| 305714    | Thoc7        | -0.05525 | 0.13184955 | 0.280724 |
| 497040    | Prss36       | -0.05525 | 0.76254138 | 0.874645 |
| 362364    | Tril         | -0.05526 | 0.02610898 | 0.080748 |
| 307649    | Ciapin1      | -0.05527 | 0.0876953  | 0.207834 |
| 297879    | Zfp362       | -0.05529 | 0.24812023 | 0.436894 |
| 362833    | Mob3a        | -0.05536 | 0.09012199 | 0.211898 |
| 100911661 | LOC100911661 | -0.05538 | 0.51648212 | 0.701648 |
| 300057    | Recq14       | -0.05541 | 0.68476654 | 0.824829 |
| 315329    | Mfsd5        | -0.05542 | 0.14669877 | 0.301976 |
| 293710    | Lgals12      | -0.0555  | 0.87496184 | 0.941449 |
| 361066    | RGD1308117   | -0.05553 | 0.52186633 | 0.706242 |
| 308415    | Ercc2        | -0.05554 | 0.34672162 | 0.543348 |
| 299129    | Lrrc9        | -0.05561 | 0.63861491 | 0.793322 |
| 688298    | Ccdc137      | -0.05564 | 0.36805215 | 0.56424  |
| 296580    | Camsap1      | -0.05567 | 0.02809789 | 0.085634 |
| 364419    | Chmp7        | -0.05572 | 0.06488004 | 0.165702 |
| 501047    | Col6a5       | -0.05573 | 0.24452972 | 0.432813 |
| 29542     | Pebp1        | -0.05574 | 8.18E-07   | 8.23E-06 |
| 360677    | Mcrip1       | -0.05578 | 0.10686042 | 0.240136 |
| 25367     | Adarb1       | -0.05579 | 0.0307616  | 0.091942 |
| 314694    | Chst11       | -0.05584 | 0.09282264 | 0.216723 |
| 192183    | Nectin1      | -0.05584 | 0.07940822 | 0.193343 |
| 305156    | Arhgap24     | -0.05588 | 0.29239973 | 0.488102 |
| 303539    | Kat2a        | -0.05588 | 0.05703724 | 0.149976 |
| 102553763 | Znf768       | -0.05591 | 0.40445402 | 0.601501 |
| 304512    | Rbm19        | -0.05591 | 0.43478027 | 0.628827 |
| 116777    | Cdh3         | -0.05595 | 0.30026557 | 0.49692  |
| 294961    | Kcnmb2       | -0.05596 | 0.66708749 | 0.810868 |
| 310704    | Bcl9         | -0.05599 | 0.1827272  | 0.352909 |
| 361351    | Hdhd2        | -0.05606 | 0.13914634 | 0.291566 |
| 300822    | Tex9         | -0.05606 | 0.26155128 | 0.451159 |
| 29603     | Bckdk        | -0.05607 | 0.11910846 | 0.260768 |

|           |              |          |            |          |
|-----------|--------------|----------|------------|----------|
| 690229    | Wdr74        | -0.05609 | 0.36631829 | 0.562397 |
| 362098    | Gle1         | -0.05611 | 0.21691961 | 0.39823  |
| 315093    | Maf1         | -0.05613 | 0.0494185  | 0.133956 |
| 100362155 | Cyhr1        | -0.05615 | 0.35020806 | 0.546922 |
| 288447    | Usp11        | -0.05615 | 0.18645177 | 0.358214 |
| 681458    | LOC681458    | -0.05616 | 0.25248821 | 0.440998 |
| 25232     | Tyro3        | -0.05619 | 0.08466393 | 0.203179 |
| 282832    | Ccr9         | -0.0562  | 0.89319044 | 0.95272  |
| 365834    | Fam160a1     | -0.0562  | 0.89156138 | 0.951515 |
| 687105    | Arhgef16     | -0.0562  | 0.7183294  | 0.846047 |
| 192260    | Cdipt        | -0.05621 | 2.27E-04   | 0.001397 |
| 140673    | Napa         | -0.05621 | 2.87E-04   | 0.001721 |
| 308632    | Hebp2        | -0.05628 | 0.00573433 | 0.023241 |
| 297570    | Pex26        | -0.05628 | 0.45490396 | 0.646059 |
| 108353239 | LOC108353239 | -0.05631 | 0.45113988 | 0.64287  |
| 314441    | Slc25a29     | -0.05635 | 0.43995087 | 0.633179 |
| 303518    | Smarce1      | -0.05636 | 0.06052318 | 0.157124 |
| 686911    | Exoc11       | -0.05637 | 0.06129922 | 0.158728 |
| 498545    | Tsc22d1      | -0.05638 | 1.71E-07   | 1.92E-06 |
| 292874    | RGD1309036   | -0.05639 | 0.68403821 | 0.824317 |
| 83505     | St3gal5      | -0.05639 | 0.09011431 | 0.211906 |
| 116550    | Atp5f1c      | -0.05642 | 0.00284632 | 0.012846 |
| 311671    | Npep11       | -0.05644 | 0.19002355 | 0.362989 |
| 29272     | Dpp6         | -0.05646 | 1.10E-06   | 1.08E-05 |
| 246307    | Asrgl1       | -0.05652 | 0.10822377 | 0.242342 |
| 363228    | Tmeff2       | -0.05653 | 0.10565866 | 0.237998 |
| 302032    | Amn1         | -0.05655 | 0.33837975 | 0.534942 |
| 308320    | Zfp772       | -0.05658 | 0.31055923 | 0.505781 |
| 171293    | Ctsd         | -0.05658 | 2.56E-09   | 3.74E-08 |
| 311902    | Rbm18        | -0.05662 | 0.0598865  | 0.15579  |
| 94202     | Ptprr        | -0.05663 | 0.07432397 | 0.183927 |
| 316249    | Enpp5        | -0.05664 | 0.0098983  | 0.036769 |
| 314442    | Wars         | -0.05664 | 9.41E-04   | 0.004908 |
| 305373    | Hmgb3        | -0.05665 | 0.19084007 | 0.363928 |
| 312054    | Gtpbp10      | -0.05666 | 0.53038664 | 0.712859 |
| 102551714 | LOC102551714 | -0.05668 | 0.63736812 | 0.792083 |
| 684304    | Mrpl39       | -0.05669 | 0.35828199 | 0.555296 |
| 293050    | Abhd2        | -0.05669 | 0.01084809 | 0.039586 |
| 116493    | Gripap1      | -0.0567  | 0.02167526 | 0.069778 |
| 291414    | Ctdpl        | -0.05673 | 0.24177744 | 0.429659 |
| 361504    | Rdh13        | -0.05675 | 0.33787565 | 0.534633 |
| 102552101 | LOC102552101 | -0.05677 | 0.83819952 | 0.919292 |
| 287746    | Fmn11        | -0.05679 | 0.04493012 | 0.124356 |
| 317374    | Timm17b      | -0.05683 | 0.48756426 | 0.675665 |
| 362388    | Mrpl53       | -0.05687 | 0.25557935 | 0.444481 |
| 102556446 | LOC102556446 | -0.05687 | 0.89034682 | 0.950805 |
| 290541    | Arhgef3      | -0.0569  | 0.19056965 | 0.363522 |
| 25751     | Dnm2         | -0.0569  | 0.03700297 | 0.106357 |
| 315112    | Foxred2      | -0.05693 | 0.66426736 | 0.808886 |
| 315218    | Lmf2         | -0.05694 | 0.05982284 | 0.155688 |
| 365224    | Zfp74        | -0.05694 | 0.38199781 | 0.578863 |
| 266600    | Csdc2        | -0.05696 | 0.0206302  | 0.067197 |
| 108352882 | LOC108352882 | -0.05701 | 0.97316019 | 1        |
| 497935    | RGD1563441   | -0.05701 | 0.81195351 | 0.905048 |
| 245959    | Slc25a3      | -0.05703 | 9.11E-06   | 7.54E-05 |
| 684258    | Chchd7       | -0.05711 | 0.41603914 | 0.611992 |

|           |              |          |            |          |
|-----------|--------------|----------|------------|----------|
| 311840    | Urm1         | -0.05713 | 0.15301468 | 0.310911 |
| 292687    | Qpctl        | -0.05722 | 0.24713289 | 0.43576  |
| 304344    | Ap4ml        | -0.05725 | 0.42969127 | 0.624263 |
| 315996    | Sema3f       | -0.05726 | 0.17966614 | 0.34873  |
| 499779    | Swi5         | -0.05727 | 0.06042452 | 0.156932 |
| 84469     | Maged1       | -0.05727 | 2.73E-05   | 2.06E-04 |
| 24804     | Syp          | -0.05727 | 1.05E-09   | 1.61E-08 |
| 64023     | Maspl        | -0.05738 | 0.32031317 | 0.515495 |
| 307852    | Pdpr         | -0.05741 | 0.27387859 | 0.465965 |
| 64156     | Uba52        | -0.05743 | 4.20E-04   | 0.002411 |
| 315212    | Alg12        | -0.05743 | 0.48203213 | 0.67078  |
| 124461    | Pacsin2      | -0.05743 | 0.00375382 | 0.016281 |
| 58857     | Vapa         | -0.05746 | 7.20E-04   | 0.003881 |
| 312680    | Hdhd5        | -0.05756 | 0.39479479 | 0.592083 |
| 114554    | Pi4k2a       | -0.05757 | 0.06548753 | 0.166829 |
| 289046    | Tmem9        | -0.05758 | 0.13700166 | 0.28815  |
| 25244     | Bckdha       | -0.05758 | 0.12569914 | 0.271022 |
| 290277    | Cryl1        | -0.05758 | 0.58074662 | 0.747875 |
| 50567     | Slc3a2       | -0.05766 | 0.00439284 | 0.018546 |
| 64369     | Plpp1        | -0.05767 | 0.01377576 | 0.048201 |
| 299050    | RGD1305089   | -0.05769 | 0.39422595 | 0.59137  |
| 300046    | Gpaal        | -0.05771 | 0.1207521  | 0.263518 |
| 60431     | Vapb         | -0.05775 | 8.95E-04   | 0.004699 |
| 500251    | Hmces        | -0.0578  | 0.29625025 | 0.492759 |
| 299739    | Ndufa12      | -0.05782 | 0.08447812 | 0.202912 |
| 63837     | Tagln3       | -0.05782 | 0.00542008 | 0.022189 |
| 303311    | Rtn4r11      | -0.05783 | 0.01482368 | 0.051321 |
| 303583    | Arhgap27     | -0.05784 | 0.17067635 | 0.336668 |
| 303196    | Tmem11       | -0.05786 | 0.23694679 | 0.423962 |
| 29158     | Fbln5        | -0.05788 | 0.00190115 | 0.009056 |
| 363006    | Tarbp2       | -0.05789 | 0.22740551 | 0.411608 |
| 80846     | Hnrnp1       | -0.05792 | 0.00326846 | 0.014459 |
| 288719    | Tpst2        | -0.05792 | 0.2183222  | 0.399803 |
| 301024    | Scap         | -0.05792 | 0.01644092 | 0.055824 |
| 100125378 | Nudcd3       | -0.05795 | 0.4192335  | 0.614745 |
| 170818    | Icmt         | -0.05795 | 0.15377962 | 0.312132 |
| 25669     | Cpe          | -0.05799 | 4.69E-06   | 4.11E-05 |
| 291987    | Utp4         | -0.05801 | 0.23313326 | 0.41891  |
| 287845    | Dnah17       | -0.05801 | 0.50492297 | 0.691668 |
| 684980    | Tsc22d4      | -0.05802 | 0.04380631 | 0.121759 |
| 290775    | Vps37a       | -0.05802 | 0.31287915 | 0.507952 |
| 25484     | Myo1e        | -0.05804 | 0.02011076 | 0.065809 |
| 54293     | Rgs3         | -0.05807 | 4.74E-06   | 4.15E-05 |
| 94188     | Zfp423       | -0.05808 | 0.2747947  | 0.466857 |
| 361858    | Gtf3c6       | -0.05812 | 0.43981523 | 0.633128 |
| 688163    | Prr151       | -0.05813 | 0.67721172 | 0.819565 |
| 64187     | Ar11         | -0.05814 | 0.06486712 | 0.165691 |
| 688495    | Smim7        | -0.05816 | 0.06125927 | 0.158646 |
| 108348293 | LOC108348293 | -0.0582  | 0.673508   | 0.816432 |
| 685068    | Gemin711     | -0.0582  | 0.51555964 | 0.701045 |
| 301515    | Rnf25        | -0.05821 | 0.22007539 | 0.402162 |
| 311876    | Pbx3         | -0.05821 | 0.2083276  | 0.386404 |
| 691001    | Ndufa3       | -0.05822 | 0.10189865 | 0.231942 |
| 312682    | Bcl2l13      | -0.05822 | 0.13141193 | 0.280011 |
| 100912034 | LOC100912034 | -0.05823 | 0.61560602 | 0.775411 |
| 688841    | Fam155b      | -0.05824 | 0.19261376 | 0.36632  |

|           |              |          |            |          |
|-----------|--------------|----------|------------|----------|
| 303596    | 10-Mar       | -0.05827 | 0.73361605 | 0.856005 |
| 81769     | Rpl36al      | -0.05829 | 0.08973161 | 0.211319 |
| 56718     | Mtor         | -0.05831 | 0.02502525 | 0.078119 |
| 288599    | Eif4h        | -0.05834 | 8.67E-05   | 5.84E-04 |
| 360678    | Arhgdia      | -0.05837 | 2.44E-11   | 4.54E-10 |
| 362781    | Hhip11       | -0.0584  | 0.30951593 | 0.504513 |
| 290519    | Thoc3        | -0.05843 | 0.20226412 | 0.378326 |
| 619579    | Nrbp1        | -0.05845 | 0.00933197 | 0.034999 |
| 140610    | Brinp1       | -0.05845 | 0.20291838 | 0.379141 |
| 102549059 | LOC102549059 | -0.05846 | 0.5236476  | 0.707848 |
| 108348137 | LOC108348137 | -0.05849 | 0.28501757 | 0.479223 |
| 85248     | Kif3c        | -0.05849 | 2.30E-04   | 0.001414 |
| 291440    | Cxxc1        | -0.05849 | 0.19934094 | 0.374736 |
| 361991    | S100a16      | -0.05851 | 0.31077197 | 0.506041 |
| 25218     | Vps52        | -0.05858 | 0.03748405 | 0.107383 |
| 295241    | Mtx1         | -0.05861 | 0.14385477 | 0.298281 |
| 170848    | Kcnq2        | -0.05861 | 5.27E-04   | 0.002937 |
| 29231     | Ciao1        | -0.05863 | 0.10155555 | 0.231355 |
| 108350166 | LOC108350166 | -0.05863 | 0.85454407 | 0.928291 |
| 691589    | Chd5         | -0.05866 | 0.08269121 | 0.199677 |
| 313978    | E2f6         | -0.05867 | 0.09092977 | 0.213297 |
| 25624     | Vamp1        | -0.05869 | 7.10E-17   | 2.16E-15 |
| 304323    | Mrm2         | -0.0587  | 0.61358585 | 0.774249 |
| 114493    | Cacnalf      | -0.05871 | 0.88907722 | 0.950275 |
| 499361    | Tlx1         | -0.05871 | 0.88907722 | 0.950275 |
| 292536    | Prpf31       | -0.05871 | 0.16309366 | 0.326273 |
| 361185    | Naxd         | -0.05875 | 0.29641364 | 0.492944 |
| 192276    | Coro7        | -0.05877 | 0.04383375 | 0.1218   |
| 502750    | Wee2         | -0.05882 | 0.8466102  | 0.923306 |
| 303923    | B4galt4      | -0.05882 | 0.33850405 | 0.535049 |
| 81739     | P2rx3        | -0.05887 | 2.26E-08   | 2.88E-07 |
| 100361946 | Lrrc74b      | -0.05889 | 0.65818658 | 0.804258 |
| 308654    | Zmat1        | -0.05892 | 0.30549532 | 0.502475 |
| 83522     | Acox3        | -0.05893 | 0.04783533 | 0.130444 |
| 79116     | Apex1        | -0.05896 | 0.0912096  | 0.213848 |
| 313038    | Phc2         | -0.05896 | 0.0064972  | 0.025909 |
| 81734     | Nell2        | -0.05898 | 0.16635624 | 0.32982  |
| 64360     | Mrpl23       | -0.05899 | 0.34295203 | 0.539483 |
| 300673    | Bcl1l1       | -0.059   | 0.10824408 | 0.242331 |
| 50551     | Txnrd2       | -0.05909 | 0.34045005 | 0.5371   |
| 362592    | RGD1559909   | -0.0591  | 0.27436199 | 0.466496 |
| 302656    | Frmpd4       | -0.05914 | 0.06399242 | 0.164139 |
| 288518    | Get4         | -0.05919 | 0.08217611 | 0.198837 |
| 291784    | Rmc1         | -0.05919 | 0.03540952 | 0.102644 |
| 361162    | Purg         | -0.05919 | 0.12648158 | 0.272309 |
| 100359816 | Setd1b       | -0.0592  | 0.14535688 | 0.300187 |
| 689226    | Ube2r2       | -0.05929 | 0.01404963 | 0.049024 |
| 293427    | Eif3f        | -0.05932 | 0.0106118  | 0.038933 |
| 290659    | Cope         | -0.05933 | 0.01210914 | 0.043406 |
| 79250     | Aco2         | -0.05936 | 2.48E-08   | 3.14E-07 |
| 619393    | Dnajc12      | -0.0594  | 0.34123312 | 0.538113 |
| 100910729 | Islr2        | -0.05941 | 0.58675235 | 0.752556 |
| 363145    | Gmppb        | -0.05942 | 0.35699833 | 0.554073 |
| 290834    | Adam9        | -0.05942 | 0.02038464 | 0.066523 |
| 316356    | Mfsd9        | -0.05945 | 0.24700324 | 0.435612 |
| 298400    | Creb3        | -0.05946 | 0.00930269 | 0.03491  |

|           |              |          |            |          |
|-----------|--------------|----------|------------|----------|
| 691056    | Lmtk3        | -0.05947 | 0.39005085 | 0.587142 |
| 498596    | Nrg3         | -0.05948 | 0.12578714 | 0.271151 |
| 116563    | Ap2m1        | -0.05948 | 8.73E-10   | 1.36E-08 |
| 83581     | Polr1a       | -0.05951 | 0.2301063  | 0.414919 |
| 313615    | Paqr7        | -0.05951 | 0.0846483  | 0.203192 |
| 308100    | Acat2        | -0.05953 | 0.01760603 | 0.059106 |
| 294292    | Nudt3        | -0.05958 | 8.09E-04   | 0.004291 |
| 683684    | Fam156b      | -0.05959 | 0.80764678 | 0.90199  |
| 292792    | Tmem147      | -0.05961 | 0.2927828  | 0.488613 |
| 680891    | Sf3b5        | -0.05977 | 0.11844238 | 0.259698 |
| 298506    | Myc1         | -0.05977 | 0.65617525 | 0.802934 |
| 293042    | Sema4b       | -0.0598  | 0.13970198 | 0.292376 |
| 117519    | Keap1        | -0.05982 | 0.05098655 | 0.136901 |
| 497770    | Scn3a        | -0.05984 | 0.26995673 | 0.461437 |
| 296733    | Chpf2        | -0.05985 | 0.06388322 | 0.163904 |
| 309071    | Fank1        | -0.05987 | 0.76124379 | 0.873788 |
| 363288    | Kif1a        | -0.05991 | 2.79E-15   | 7.58E-14 |
| 304315    | Ttyh3        | -0.05991 | 0.04012297 | 0.113543 |
| 298694    | Plekhn1      | -0.05995 | 0.58498587 | 0.750998 |
| 81681     | Lss          | -0.05998 | 0.07717629 | 0.189191 |
| 56082     | Gorasp1      | -0.05998 | 0.12709029 | 0.273248 |
| 25338     | Nin1         | -0.06004 | 0.17587267 | 0.343926 |
| 100910623 | LOC100910623 | -0.06004 | 0.84181644 | 0.921137 |
| 300948    | Rnf7         | -0.06005 | 0.07107176 | 0.177773 |
| 314478    | Ahnak2       | -0.06007 | 2.34E-14   | 5.96E-13 |
| 140908    | Cdk5         | -0.06008 | 0.01431401 | 0.049801 |
| 299707    | Washc3       | -0.06014 | 0.23401292 | 0.420173 |
| 499331    | LOC499331    | -0.06014 | 0.29930785 | 0.495895 |
| 25719     | Scg5         | -0.06017 | 7.84E-04   | 0.004187 |
| 690898    | Sh3bp51      | -0.06018 | 0.01300264 | 0.046037 |
| 114634    | Six1         | -0.06018 | 0.02377811 | 0.07515  |
| 24668     | Ppplca       | -0.06019 | 0.00115393 | 0.005846 |
| 500317    | Lpar5        | -0.06021 | 0.42401758 | 0.619518 |
| 364430    | Nufip1       | -0.06022 | 0.27358961 | 0.46564  |
| 100362555 | Sptssb       | -0.06024 | 0.5171263  | 0.701972 |
| 312711    | Pianp        | -0.06025 | 0.12146596 | 0.264864 |
| 681123    | Tomm6        | -0.06025 | 0.04892876 | 0.132893 |
| 63938     | Hibadh       | -0.06029 | 0.0684359  | 0.172676 |
| 24877     | Vsn11        | -0.06031 | 7.72E-05   | 5.27E-04 |
| 25361     | Vcam1        | -0.06031 | 0.43446671 | 0.62866  |
| 305461    | Fam53a       | -0.06036 | 0.60990844 | 0.771603 |
| 25550     | Slc1a1       | -0.06039 | 0.68891467 | 0.827575 |
| 296634    | Nup214       | -0.06043 | 0.05816119 | 0.152447 |
| 306527    | Dusp26       | -0.06044 | 0.0040925  | 0.017487 |
| 313040    | Csmd2        | -0.06045 | 0.19434617 | 0.368401 |
| 362836    | Dazap1       | -0.06047 | 0.09028755 | 0.212156 |
| 65138     | Adrml        | -0.06053 | 0.01230662 | 0.043974 |
| 365839    | LOC365839    | -0.06054 | 0.75203977 | 0.867668 |
| 501539    | Ammecr1      | -0.06055 | 0.7112583  | 0.841257 |
| 25287     | Acad1        | -0.06056 | 0.00827342 | 0.031646 |
| 298095    | Prpf4        | -0.06056 | 0.28032541 | 0.473634 |
| 25717     | Tgfb3        | -0.06056 | 0.18609268 | 0.357777 |
| 361208    | Rab24        | -0.06057 | 0.13182811 | 0.28071  |
| 364901    | St8sia5      | -0.06057 | 0.33984724 | 0.536371 |
| 681381    | Zcwpw2       | -0.06058 | 0.01136776 | 0.041175 |
| 259221    | Osbpl1a      | -0.0606  | 0.01666985 | 0.05645  |



|           |              |          |            |          |
|-----------|--------------|----------|------------|----------|
| 25112     | Gadd45a      | -0.0606  | 0.20186889 | 0.377847 |
| 103694635 | LOC103694635 | -0.06062 | 0.65187714 | 0.803144 |
| 170724    | Anp32b       | -0.06062 | 0.04651439 | 0.127757 |
| 303796    | Zdhhc8       | -0.06063 | 0.0112997  | 0.04096  |
| 307759    | Gpt2         | -0.06063 | 0.07016986 | 0.175979 |
| 102556957 | LOC102556957 | -0.06066 | 0.83147491 | 0.915343 |
| 497010    | Eng          | -0.06067 | 0.12485751 | 0.270002 |
| 306270    | Oxnad1       | -0.06071 | 0.27973095 | 0.473175 |
| 170667    | Atp6v0c      | -0.06071 | 4.21E-09   | 6.01E-08 |
| 296651    | Psm5         | -0.06071 | 0.11998991 | 0.262366 |
| 309014    | Plpp4        | -0.06071 | 0.42938029 | 0.624145 |
| 25446     | Fosl2        | -0.06073 | 0.68803384 | 0.827091 |
| 305623    | Tmem175      | -0.06075 | 0.10753234 | 0.241134 |
| 294964    | Ndufb5       | -0.0608  | 0.02027866 | 0.066279 |
| 292735    | Shkbp1       | -0.06083 | 0.3571544  | 0.554225 |
| 291952    | Ces2g        | -0.06084 | 0.87478205 | 0.941309 |
| 290660    | Ddx49        | -0.06084 | 0.1785794  | 0.3474   |
| 290923    | Aga          | -0.06085 | 0.17523566 | 0.342962 |
| 300092    | Nhp211       | -0.06088 | 0.12151147 | 0.264933 |
| 301285    | Tfap2b       | -0.06092 | 0.87319001 | 0.940339 |
| 25740     | Gnaz         | -0.06092 | 0.0181562  | 0.06059  |
| 79218     | Gng5         | -0.06094 | 0.47360745 | 0.663908 |
| 295264    | Mllt11       | -0.06096 | 1.09E-06   | 1.08E-05 |
| 686104    | Eif4e1b      | -0.06098 | 0.81891159 | 0.908921 |
| 406169    | Atf6b        | -0.06101 | 0.02780899 | 0.084957 |
| 690945    | Dera         | -0.06104 | 0.15671931 | 0.316614 |
| 114017    | Gfml         | -0.06106 | 0.11734623 | 0.257858 |
| 308958    | Cdr2         | -0.06114 | 0.03897496 | 0.110854 |
| 317385    | Fus          | -0.06115 | 0.00804422 | 0.030925 |
| 681091    | Ccdc157      | -0.0612  | 0.48501974 | 0.673167 |
| 292486    | Aig1         | -0.06128 | 0.03418368 | 0.100035 |
| 367315    | Gpr35        | -0.06129 | 0.20485337 | 0.381894 |
| 81824     | Arp1a        | -0.06133 | 0.00288728 | 0.013009 |
| 311165    | Med19        | -0.06133 | 0.17372755 | 0.341027 |
| 499335    | Fxn          | -0.06139 | 0.28112609 | 0.474692 |
| 294767    | Mrps30       | -0.06139 | 0.09715244 | 0.223814 |
| 300517    | Hepacam      | -0.06141 | 0.04042433 | 0.114209 |
| 292409    | Fpr1         | -0.06144 | 0.8046254  | 0.900622 |
| 310781    | Atxn712      | -0.06144 | 0.42651334 | 0.621591 |
| 500549    | Zscan20      | -0.06144 | 0.49339055 | 0.680569 |
| 503194    | Glb112       | -0.06147 | 0.43014721 | 0.624354 |
| 299211    | Zdhhc22      | -0.06149 | 0.30284502 | 0.500059 |
| 296271    | Srxn1        | -0.06153 | 0.02034073 | 0.066413 |
| 294154    | LOC294154    | -0.06156 | 1.73E-04   | 0.00109  |
| 25636     | Prkaca       | -0.0616  | 6.82E-04   | 0.003694 |
| 140734    | Dynl12       | -0.0616  | 1.92E-11   | 3.62E-10 |
| 363474    | Apoo         | -0.06164 | 0.18717843 | 0.359211 |
| 29718     | Kcnj10       | -0.06169 | 0.03670577 | 0.105678 |
| 102556178 | LOC102556178 | -0.06171 | 0.90953994 | 0.96213  |
| 407765    | St6galnac6   | -0.06173 | 0.05148575 | 0.137969 |
| 79563     | Grpel1       | -0.06175 | 0.15214434 | 0.309737 |
| 287523    | Dph1         | -0.06176 | 0.33188141 | 0.528132 |
| 361648    | Spns1        | -0.06177 | 0.12790275 | 0.274561 |
| 25521     | Prkar1b      | -0.06177 | 2.31E-07   | 2.54E-06 |
| 85423     | Tfpt         | -0.06177 | 0.26726036 | 0.458432 |
| 498729    | C17h6orf52   | -0.06177 | 0.63570172 | 0.790683 |

|           |              |          |            |          |
|-----------|--------------|----------|------------|----------|
| 50687     | L1cam        | -0.06177 | 1.31E-08   | 1.74E-07 |
| 306157    | Gpc5         | -0.06179 | 0.24814188 | 0.436892 |
| 309036    | Rexo5        | -0.0618  | 0.68535103 | 0.825064 |
| 685634    | Smim12       | -0.0618  | 0.09480063 | 0.219966 |
| 260321    | Fkbp4        | -0.06181 | 1.36E-07   | 1.56E-06 |
| 287544    | Poldip2      | -0.06181 | 0.02203222 | 0.070676 |
| 64635     | Snd1         | -0.06183 | 0.01875901 | 0.062231 |
| 288527    | Asmt1        | -0.06185 | 0.19165267 | 0.36493  |
| 85333     | Slc25a4      | -0.06189 | 2.76E-12   | 5.64E-11 |
| 291905    | Fto          | -0.06192 | 0.14754952 | 0.302876 |
| 688174    | Pgap3        | -0.06192 | 0.54293865 | 0.724362 |
| 50561     | Resp18       | -0.06196 | 0.00393447 | 0.016903 |
| 100361939 | Rnaseh2c     | -0.06198 | 0.56605406 | 0.736423 |
| 304756    | RGD1563709   | -0.06207 | 0.8934669  | 0.952855 |
| 364624    | Lsml         | -0.06209 | 0.29604197 | 0.492541 |
| 301111    | Ano10        | -0.06211 | 0.00540917 | 0.022159 |
| 303300    | Cluh         | -0.06212 | 5.72E-04   | 0.003155 |
| 85309     | Folh1        | -0.06212 | 0.14103544 | 0.294229 |
| 304805    | Cyb5r1       | -0.06217 | 2.39E-05   | 1.82E-04 |
| 58935     | Gas6         | -0.06218 | 9.96E-05   | 6.62E-04 |
| 361301    | Tpgs2        | -0.06223 | 4.68E-04   | 0.002644 |
| 85245     | Kpna2        | -0.06224 | 0.13484749 | 0.284972 |
| 315549    | Fam118b      | -0.06226 | 0.44666565 | 0.639221 |
| 25371     | Adprh        | -0.06231 | 0.1330728  | 0.28257  |
| 301295    | Efhc1        | -0.0624  | 0.35076704 | 0.547391 |
| 171352    | Cyp3a9       | -0.06242 | 0.61848063 | 0.777233 |
| 301130    | Dpp9         | -0.0625  | 0.01078723 | 0.039395 |
| 155437    | Hey1         | -0.06254 | 0.43761082 | 0.631482 |
| 288454    | Slc46a3      | -0.06268 | 0.58920665 | 0.754738 |
| 684050    | PCOLCE2      | -0.06277 | 0.3796621  | 0.576746 |
| 300221    | Spats2       | -0.06279 | 0.07787489 | 0.190438 |
| 170944    | Dkc1         | -0.06279 | 0.09208828 | 0.215378 |
| 192255    | Ubb          | -0.06279 | 8.17E-27   | 4.11E-25 |
| 690660    | Hint1        | -0.0628  | 0.00104356 | 0.005366 |
| 366360    | Myorg        | -0.06289 | 0.02294614 | 0.072969 |
| 102549491 | LOC102549491 | -0.0629  | 0.83799817 | 0.919283 |
| 81821     | Dgkz         | -0.06297 | 3.45E-08   | 4.29E-07 |
| 261730    | Aurka        | -0.06299 | 0.23983728 | 0.427247 |
| 689404    | Amtn         | -0.063   | 0.84150442 | 0.920955 |
| 24923     | Stx1b        | -0.06302 | 1.33E-05   | 1.06E-04 |
| 301309    | Adgrb3       | -0.06302 | 0.13438402 | 0.284372 |
| 100360358 | Tmem251      | -0.06303 | 0.46803591 | 0.658619 |
| 311185    | Kbtbd4       | -0.06303 | 0.33292641 | 0.528955 |
| 312710    | Cops7a       | -0.06309 | 0.00286573 | 0.012924 |
| 306000    | Slc25a37     | -0.0631  | 0.21912859 | 0.40074  |
| 685174    | Cnpy3        | -0.06312 | 0.05605582 | 0.147947 |
| 498171    | Prkrip1      | -0.06312 | 0.31057415 | 0.505762 |
| 288665    | Cux2         | -0.06313 | 0.30569139 | 0.502711 |
| 116690    | Nfasc        | -0.06314 | 3.69E-07   | 3.94E-06 |
| 287375    | Flii         | -0.06316 | 8.03E-04   | 0.004271 |
| 84347     | Cacng2       | -0.06316 | 0.11704951 | 0.257385 |
| 362859    | Ckap4        | -0.06318 | 0.04042133 | 0.114217 |
| 310511    | RGD1563620   | -0.06319 | 0.77359992 | 0.8817   |
| 498667    | Fam155a      | -0.06321 | 0.06952919 | 0.17474  |
| 81736     | Nfkb1        | -0.06322 | 0.08631481 | 0.20574  |
| 306004    | Rhobtb2      | -0.06324 | 0.02755145 | 0.084387 |

|           |              |          |            |          |
|-----------|--------------|----------|------------|----------|
| 297096    | Snx10        | -0.06324 | 2.11E-05   | 1.62E-04 |
| 81812     | Thra         | -0.06326 | 0.00104362 | 0.005365 |
| 308468    | Dyrk1b       | -0.06327 | 0.16652377 | 0.330049 |
| 313560    | Ctsp1        | -0.0633  | 0.02922231 | 0.088325 |
| 100361138 | Dgkq         | -0.06332 | 0.07559857 | 0.186306 |
| 499425    | Zfp365       | -0.06332 | 0.14091762 | 0.294145 |
| 171133    | Gcsh         | -0.06335 | 0.07848795 | 0.191641 |
| 282827    | Aip          | -0.06336 | 0.05614278 | 0.148135 |
| 305479    | Sf3a1        | -0.06337 | 0.02607527 | 0.080657 |
| 60335     | Tgm1         | -0.0634  | 0.8014735  | 0.898362 |
| 291922    | Lonp2        | -0.06342 | 0.01475491 | 0.051111 |
| 293938    | Bloc1s2      | -0.06345 | 0.08242003 | 0.199224 |
| 171548    | Dkk3         | -0.06347 | 0.00689109 | 0.027155 |
| 297372    | Mrpl19       | -0.06348 | 0.25269059 | 0.44123  |
| 313950    | Hs1bp3       | -0.0635  | 0.19376367 | 0.367589 |
| 102552331 | LOC102552331 | -0.06354 | 0.70058026 | 0.835895 |
| 361502    | Ppp6r1       | -0.06355 | 1.59E-04   | 0.001009 |
| 50664     | Gnao1        | -0.06355 | 1.85E-08   | 2.39E-07 |
| 170824    | Steap3       | -0.06358 | 0.02745872 | 0.084157 |
| 309157    | Peli3        | -0.06361 | 0.22909546 | 0.413566 |
| 498179    | RGD1563482   | -0.06363 | 0.49403918 | 0.680971 |
| 103689982 | Mboat711     | -0.06364 | 0.18119257 | 0.350853 |
| 308309    | Mboat7       | -0.06364 | 0.18119257 | 0.350853 |
| 361807    | Lemd2        | -0.06376 | 0.22189827 | 0.404175 |
| 362227    | Dtd1         | -0.06379 | 0.06059754 | 0.157232 |
| 301068    | Eif1b        | -0.06391 | 0.00338484 | 0.014891 |
| 85260     | Entpd6       | -0.06392 | 0.09027848 | 0.212161 |
| 303185    | Flcn         | -0.06394 | 0.09900333 | 0.226925 |
| 316643    | Chchd2       | -0.06395 | 0.00471391 | 0.019722 |
| 294048    | Pik3ap1      | -0.06396 | 0.51427566 | 0.700149 |
| 364510    | Phf7         | -0.06399 | 0.38143435 | 0.578239 |
| 266735    | Adgrg2       | -0.06399 | 0.02031879 | 0.066376 |
| 314243    | Wdr89        | -0.06399 | 0.56712705 | 0.737064 |
| 361808    | Snrpc        | -0.06401 | 0.13305619 | 0.282598 |
| 502367    | Bola2        | -0.06401 | 0.05859983 | 0.153301 |
| 361940    | Pgrmc2       | -0.06412 | 0.02644472 | 0.081574 |
| 308593    | Tmem143      | -0.06413 | 0.17816326 | 0.346945 |
| 266807    | Duox1        | -0.06416 | 0.81698044 | 0.908047 |
| 361704    | Ctsf         | -0.06423 | 0.00173854 | 0.00837  |
| 24244     | Calm3        | -0.06427 | 2.58E-07   | 2.83E-06 |
| 83800     | Clta         | -0.06431 | 8.11E-05   | 5.50E-04 |
| 309860    | Sobp         | -0.06435 | 0.10328864 | 0.234378 |
| 499129    | Kctd15       | -0.06435 | 0.17996715 | 0.349137 |
| 300837    | Leo1         | -0.06435 | 0.08124781 | 0.197041 |
| 116546    | Ralb         | -0.06436 | 0.12660533 | 0.272483 |
| 64390     | Prpsap1      | -0.06438 | 0.08674908 | 0.206672 |
| 306147    | Slitrk1      | -0.06439 | 0.0549299  | 0.145418 |
| 100363280 | Tmem74bos    | -0.06442 | 0.88361718 | 0.946591 |
| 24179     | Agt          | -0.06443 | 0.48425138 | 0.672493 |
| 500690    | Map3k9       | -0.06448 | 0.03020636 | 0.090624 |
| 291159    | Hist1h2a11   | -0.06458 | 0.81246881 | 0.905146 |
| 299203    | Acyp1        | -0.06458 | 0.26022451 | 0.449603 |
| 25353     | Spp1         | -0.0646  | 4.09E-14   | 1.02E-12 |
| 113938    | Snurf        | -0.06463 | 7.21E-09   | 9.89E-08 |
| 680415    | Pappa2       | -0.06466 | 0.38837204 | 0.58554  |
| 312225    | Wdr91        | -0.06468 | 0.21008604 | 0.388644 |

|           |              |          |            |          |
|-----------|--------------|----------|------------|----------|
| 292673    | Ercc1        | -0.06474 | 0.13368351 | 0.283456 |
| 108349973 | LOC108349973 | -0.06475 | 0.90437364 | 0.958208 |
| 690068    | Tatdn1       | -0.06475 | 0.36557783 | 0.561622 |
| 314432    | Uba1         | -0.06478 | 2.28E-08   | 2.90E-07 |
| 315668    | Rab39a       | -0.06478 | 0.28974098 | 0.484896 |
| 246074    | Scd          | -0.06478 | 3.15E-06   | 2.86E-05 |
| 362678    | Faap20       | -0.06481 | 0.30400594 | 0.501021 |
| 293023    | Klh125       | -0.06481 | 0.43131799 | 0.625434 |
| 292876    | Josd2        | -0.06492 | 0.0842357  | 0.202457 |
| 81670     | Gpt          | -0.06495 | 0.53283383 | 0.714887 |
| 300033    | Eef1d        | -0.06497 | 0.02360256 | 0.074682 |
| 293864    | Ubl4a        | -0.06506 | 0.05952899 | 0.155157 |
| 29751     | Sema3a       | -0.06509 | 0.80277284 | 0.899183 |
| 192268    | Gls2         | -0.06514 | 0.12956466 | 0.277005 |
| 299694    | Nuak1        | -0.06516 | 0.25402467 | 0.442666 |
| 362539    | Adamts11     | -0.06517 | 0.14693703 | 0.302368 |
| 313806    | Rnf19b       | -0.0652  | 0.0353881  | 0.102598 |
| 296570    | Edf1         | -0.0652  | 0.00154347 | 0.007537 |
| 83502     | Cdh1         | -0.06523 | 2.01E-06   | 1.90E-05 |
| 291403    | Zadh2        | -0.06526 | 0.2111276  | 0.390078 |
| 50866     | Rab4b        | -0.06538 | 0.00668625 | 0.026518 |
| 361041    | Carmil3      | -0.06541 | 0.02039604 | 0.066548 |
| 313874    | Rasgrp3      | -0.06545 | 0.31125494 | 0.506481 |
| 299979    | Grhl2        | -0.06548 | 0.79818121 | 0.896412 |
| 170796    | Grin3b       | -0.06548 | 0.50198845 | 0.688688 |
| 311796    | Nelfb        | -0.06555 | 0.00320929 | 0.014254 |
| 297525    | Mkrn2        | -0.06555 | 0.0533955  | 0.142008 |
| 304582    | Sart3        | -0.06557 | 0.21973849 | 0.401739 |
| 103690112 | LOC103690112 | -0.06558 | 0.62412556 | 0.781953 |
| 685384    | Rnf180       | -0.06559 | 0.22304752 | 0.405841 |
| 81766     | Rpl18        | -0.06565 | 0.00858925 | 0.032632 |
| 296408    | Fam210b      | -0.06568 | 0.24051957 | 0.428022 |
| 315054    | Slc45a4      | -0.0657  | 0.01081252 | 0.039464 |
| 64161     | Pi4ka        | -0.06571 | 8.92E-06   | 7.40E-05 |
| 301418    | Maip1        | -0.06573 | 0.3193766  | 0.514335 |
| 314906    | Kif5a        | -0.06576 | 4.68E-13   | 1.04E-11 |
| 312303    | Zfp746       | -0.06576 | 0.25335161 | 0.441776 |
| 64527     | Pdap1        | -0.06577 | 0.00928884 | 0.034865 |
| 313672    | Kazn         | -0.06578 | 0.0183511  | 0.061112 |
| 117030    | Erp29        | -0.06578 | 0.08212654 | 0.198767 |
| 498234    | Arl8a        | -0.06582 | 1.98E-07   | 2.20E-06 |
| 286996    | Zfp689       | -0.06583 | 0.35638108 | 0.553431 |
| 361815    | Rnf8         | -0.06584 | 0.18270595 | 0.352904 |
| 50686     | Gsk3a        | -0.06584 | 0.00178261 | 0.00856  |
| 497878    | Nsg2         | -0.06585 | 4.08E-08   | 5.03E-07 |
| 301634    | Fam174a      | -0.06587 | 0.13666364 | 0.287598 |
| 362788    | Traf3        | -0.06591 | 0.01789267 | 0.059878 |
| 103692127 | LOC103692127 | -0.06593 | 0.50401836 | 0.690776 |
| 314644    | Dohh         | -0.06601 | 0.07226195 | 0.180158 |
| 500221    | Evala        | -0.06602 | 0.83392178 | 0.916924 |
| 308690    | Ndn          | -0.06604 | 2.90E-06   | 2.65E-05 |
| 680448    | Pcdhgb5      | -0.0661  | 0.48200993 | 0.670799 |
| 140724    | Cacng3       | -0.06618 | 0.40850742 | 0.605308 |
| 64203     | Bcat2        | -0.06618 | 0.05882243 | 0.153841 |
| 293668    | Brms1        | -0.06624 | 0.05526145 | 0.146134 |
| 81917     | Hiplr        | -0.06625 | 0.03176894 | 0.094375 |

|           |            |          |            |          |
|-----------|------------|----------|------------|----------|
| 100360041 | Zfp366     | -0.06625 | 0.69432781 | 0.831508 |
| 289335    | Susd4      | -0.06626 | 5.01E-05   | 3.56E-04 |
| 29354     | Pla2g5     | -0.06628 | 0.23463582 | 0.420974 |
| 307481    | Pcdh1      | -0.06638 | 0.03458392 | 0.100834 |
| 362711    | Tmem214    | -0.06639 | 0.03885543 | 0.110613 |
| 317575    | Smarca1    | -0.06641 | 0.1948058  | 0.368978 |
| 100360120 | Smim1011   | -0.06645 | 0.35910796 | 0.556033 |
| 364974    | Rnaseh2a   | -0.06646 | 0.07029056 | 0.176143 |
| 360646    | Limd2      | -0.0665  | 0.19450155 | 0.368659 |
| 691995    | LOC691995  | -0.0665  | 0.123704   | 0.268484 |
| 288917    | Farsa      | -0.0665  | 0.13281385 | 0.282178 |
| 362081    | Fbxw5      | -0.06654 | 0.03024836 | 0.090707 |
| 294289    | Zbtb9      | -0.06655 | 0.33336849 | 0.529437 |
| 300018    | Lynx1      | -0.06655 | 1.88E-09   | 2.80E-08 |
| 24896     | Gnas       | -0.06658 | 3.25E-28   | 1.74E-26 |
| 361087    | Slain1     | -0.06662 | 0.30715686 | 0.502906 |
| 314262    | Plekhhl1   | -0.06664 | 0.11633009 | 0.256276 |
| 25120     | Aanat      | -0.06665 | 0.76598863 | 0.877014 |
| 303635    | Fam20a     | -0.06668 | 0.41433911 | 0.610104 |
| 502091    | Rnf122     | -0.06669 | 0.36462338 | 0.560789 |
| 365592    | Pdss2      | -0.06671 | 0.26893622 | 0.460395 |
| 302934    | Ppl        | -0.06685 | 0.55057249 | 0.731013 |
| 362252    | Scand1     | -0.06685 | 0.06321641 | 0.162675 |
| 64303     | Pfn1       | -0.06688 | 1.41E-05   | 1.12E-04 |
| 311171    | Lrrc55     | -0.06689 | 0.06225328 | 0.160543 |
| 303830    | Tbccd1     | -0.06693 | 0.20831394 | 0.386417 |
| 360912    | Helq       | -0.06697 | 0.39084564 | 0.58792  |
| 81826     | Slc20a1    | -0.06699 | 0.00263164 | 0.011987 |
| 29512     | Padi4      | -0.067   | 0.83102928 | 0.915382 |
| 29681     | Clqbp      | -0.06708 | 0.02493476 | 0.077939 |
| 310880    | Zgrf1      | -0.0671  | 0.4560785  | 0.647437 |
| 84401     | Puf60      | -0.0671  | 6.74E-04   | 0.003656 |
| 362829    | Lsm7       | -0.06711 | 0.21398863 | 0.394293 |
| 295238    | Dap3       | -0.06712 | 0.15630047 | 0.316069 |
| 308572    | Myh14      | -0.06716 | 0.00249474 | 0.011446 |
| 25415     | Crmp1      | -0.06716 | 0.00844327 | 0.03218  |
| 308417    | Nectin2    | -0.06718 | 0.10412903 | 0.235499 |
| 84008     | Cntnap1    | -0.06718 | 1.11E-06   | 1.09E-05 |
| 313296    | Dcaf1211   | -0.06725 | 0.27784181 | 0.470648 |
| 294696    | Mrps36     | -0.06735 | 0.07735371 | 0.189431 |
| 690820    | Klf16      | -0.06737 | 0.20049596 | 0.376461 |
| 307514    | Epb4114a   | -0.06744 | 0.18582405 | 0.357368 |
| 308976    | Kdm8       | -0.06747 | 0.24545534 | 0.433726 |
| 366311    | Clvs1      | -0.0675  | 0.26443805 | 0.454738 |
| 311862    | Lamc3      | -0.06754 | 0.3499635  | 0.54663  |
| 751787    | Flad1      | -0.06759 | 0.05716008 | 0.150216 |
| 360526    | P4ha2      | -0.06762 | 0.32493526 | 0.52047  |
| 299127    | Jkamp      | -0.06768 | 0.01166085 | 0.042013 |
| 266733    | Slc12a8    | -0.0677  | 0.71292753 | 0.842472 |
| 298084    | Zbtb5      | -0.0677  | 0.3421181  | 0.538839 |
| 308868    | Lrtomt     | -0.0677  | 0.63479252 | 0.790223 |
| 311742    | Cdca7      | -0.0677  | 0.71292753 | 0.842472 |
| 311852    | RGD1311084 | -0.0677  | 0.69106748 | 0.829168 |
| 361594    | Aen        | -0.0677  | 0.36746195 | 0.563607 |
| 500986    | Pdzd3      | -0.0677  | 0.79473751 | 0.89381  |
| 686035    | LOC686035  | -0.0677  | 0.97320651 | 1        |

|        |            |          |            |          |
|--------|------------|----------|------------|----------|
| 288704 | RGD1311899 | -0.06775 | 4.62E-04   | 0.002617 |
| 308435 | Cic        | -0.06775 | 4.51E-05   | 3.25E-04 |
| 361884 | Mccc2      | -0.06776 | 0.17885446 | 0.347615 |
| 310769 | Wdr77      | -0.06776 | 0.08200399 | 0.198546 |
| 84510  | Stmn2      | -0.06779 | 4.94E-39   | 3.73E-37 |
| 360810 | Gpn3       | -0.06781 | 0.24421357 | 0.432495 |
| 295462 | Mcub       | -0.06781 | 0.26894968 | 0.460376 |
| 117099 | Bdh1       | -0.06786 | 0.23991261 | 0.427302 |
| 288832 | Olr1058    | -0.06787 | 0.94637268 | 0.985708 |
| 59076  | Grk6       | -0.06787 | 0.03476223 | 0.101199 |
| 361364 | Dok4       | -0.06794 | 2.86E-05   | 2.15E-04 |
| 288031 | Fam43a     | -0.06795 | 0.38334169 | 0.580115 |
| 246120 | Plbd2      | -0.06796 | 2.27E-05   | 1.74E-04 |
| 292069 | Ctu2       | -0.06798 | 0.4608329  | 0.652048 |
| 360480 | Cdip1      | -0.068   | 0.00244473 | 0.011246 |
| 367145 | Chst2      | -0.06803 | 0.00110873 | 0.005649 |
| 313811 | Dnajb5     | -0.06804 | 0.20765364 | 0.38553  |
| 286930 | Dlgap4     | -0.0681  | 0.03883386 | 0.110568 |
| 140667 | Ap3m2      | -0.06813 | 0.29643788 | 0.492942 |
| 305338 | Apbb2      | -0.06813 | 0.00758056 | 0.029374 |
| 361637 | Acsm5      | -0.06813 | 0.89343998 | 0.952879 |
| 294333 | Fam207a    | -0.06817 | 0.15759758 | 0.317849 |
| 297903 | Fam92a     | -0.06817 | 0.15967791 | 0.321126 |
| 502317 | Aplp1      | -0.06819 | 5.78E-04   | 0.003183 |
| 362558 | Lrp8       | -0.06821 | 0.05138921 | 0.137749 |
| 502291 | RGD1562625 | -0.06824 | 0.75171216 | 0.867395 |
| 85435  | Smad9      | -0.06824 | 0.0054727  | 0.022362 |
| 360839 | Tmem163    | -0.06825 | 0.10883117 | 0.243273 |
| 361056 | Rnaseh2b   | -0.06825 | 0.25896989 | 0.448249 |
| 500295 | Tatdn2     | -0.06828 | 0.04848805 | 0.131903 |
| 502990 | Nipal3     | -0.06829 | 0.01004252 | 0.037181 |
| 310838 | Bcar3      | -0.06831 | 0.12747913 | 0.273961 |
| 171374 | Atp5f1b    | -0.06835 | 5.00E-21   | 1.89E-19 |
| 311423 | Slc4a11    | -0.06838 | 0.25851833 | 0.447834 |
| 83425  | Akap12     | -0.06841 | 2.30E-25   | 1.08E-23 |
| 310662 | Scnml      | -0.06843 | 0.3855442  | 0.582291 |
| 294313 | Mtch1      | -0.06843 | 1.20E-07   | 1.38E-06 |
| 113906 | Hspb8      | -0.06846 | 4.92E-06   | 4.29E-05 |
| 312709 | Mlf2       | -0.06846 | 2.98E-06   | 2.72E-05 |
| 500552 | RGD1561149 | -0.06849 | 0.00668962 | 0.02652  |
| 114592 | Aurkb      | -0.06857 | 0.76234183 | 0.874627 |
| 362941 | Fbxl6      | -0.06859 | 0.39976025 | 0.596804 |
| 360804 | Cdk2ap1    | -0.0686  | 0.00254975 | 0.011673 |
| 315167 | Ndufa6     | -0.06861 | 0.03467379 | 0.100988 |
| 362481 | Tox        | -0.06868 | 0.39196887 | 0.589144 |
| 288563 | Actl6b     | -0.0687  | 0.19594404 | 0.370508 |
| 301709 | Arhgap28   | -0.0687  | 0.04843762 | 0.131823 |
| 366473 | Azin2      | -0.06871 | 0.14436146 | 0.298714 |
| 363112 | Mrap2      | -0.06875 | 0.02005357 | 0.065633 |
| 65171  | Scamp5     | -0.06876 | 0.0014255  | 0.007041 |
| 295490 | Emcn       | -0.06878 | 0.20191625 | 0.377861 |
| 304528 | Rfc5       | -0.0688  | 0.35940886 | 0.556273 |
| 359725 | Cbr4       | -0.06883 | 0.33795419 | 0.534624 |
| 171492 | Map3k2     | -0.06886 | 0.64938211 | 0.801834 |
| 298003 | Gal t      | -0.06886 | 0.17260662 | 0.339561 |
| 287827 | Armc7      | -0.06886 | 0.40278871 | 0.599821 |



|           |              |          |            |          |
|-----------|--------------|----------|------------|----------|
| 292708    | Irgq         | -0.06888 | 3.47E-04   | 0.002042 |
| 361651    | Prrt2        | -0.0689  | 0.00184525 | 0.008825 |
| 361410    | Tmem231      | -0.0689  | 0.14378542 | 0.298235 |
| 304201    | Evi5l        | -0.0689  | 0.0278205  | 0.084965 |
| 100363436 | Mdfic2       | -0.06891 | 0.02802561 | 0.085454 |
| 293693    | Cdc42bpg     | -0.06891 | 0.46719858 | 0.65817  |
| 288913    | LOC288913    | -0.06892 | 0.07925023 | 0.193131 |
| 690966    | Polr2e       | -0.06893 | 0.03287806 | 0.096929 |
| 29337     | Plcg2        | -0.06894 | 0.57046054 | 0.739831 |
| 171103    | Cdc25b       | -0.06895 | 0.0081635  | 0.031276 |
| 362963    | Sgsm3        | -0.06901 | 0.09652918 | 0.222674 |
| 81823     | Cib1         | -0.06908 | 0.34942882 | 0.546108 |
| 24383     | Gapdh        | -0.06909 | 2.42E-49   | 2.30E-47 |
| 81725     | Musk         | -0.0691  | 0.73426352 | 0.856656 |
| 302998    | Mettl26      | -0.06911 | 0.38118046 | 0.578176 |
| 681096    | Nxpe3        | -0.06916 | 0.04045639 | 0.114265 |
| 312258    | Adck2        | -0.0692  | 0.20368335 | 0.380197 |
| 298688    | Ints11       | -0.06923 | 0.1253256  | 0.270646 |
| 260326    | Adgrg1       | -0.06925 | 1.13E-05   | 9.17E-05 |
| 301173    | Plcl2        | -0.06926 | 0.33796724 | 0.5346   |
| 287097    | Hcfclrl      | -0.06926 | 9.28E-04   | 0.00485  |
| 84016     | Grip1        | -0.06927 | 0.1909623  | 0.364125 |
| 288584    | Fis1         | -0.0693  | 0.00146164 | 0.0072   |
| 83725     | Wfs1         | -0.06939 | 0.00829744 | 0.031719 |
| 24401     | Got1         | -0.06942 | 1.89E-05   | 1.46E-04 |
| 291981    | Nutf2        | -0.06943 | 0.00458083 | 0.01925  |
| 691193    | Elof1        | -0.06943 | 0.18749143 | 0.359595 |
| 297990    | Ndufb6       | -0.06944 | 0.02668241 | 0.082161 |
| 502414    | Tbc1d22b     | -0.06944 | 0.09844707 | 0.226031 |
| 58844     | Grb14        | -0.06945 | 0.09197245 | 0.215213 |
| 108352187 | LOC108352187 | -0.06946 | 0.8032106  | 0.899515 |
| 503214    | Rbpms2       | -0.06946 | 0.66680124 | 0.810727 |
| 684555    | Gp6          | -0.06946 | 0.82955608 | 0.914764 |
| 361435    | Fanca        | -0.06948 | 0.51463047 | 0.700482 |
| 500715    | Ccnk         | -0.06948 | 0.07891853 | 0.192495 |
| 252880    | Drgx         | -0.06953 | 0.00686652 | 0.027081 |
| 287803    | Ttyh2        | -0.06958 | 0.15292486 | 0.310794 |
| 56777     | Adam1a       | -0.06961 | 0.61101549 | 0.772439 |
| 361578    | Nomol        | -0.06961 | 8.41E-04   | 0.004449 |
| 298762    | Cox7a2l      | -0.06964 | 1.04E-05   | 8.54E-05 |
| 367083    | Alg9         | -0.06966 | 0.17004917 | 0.335709 |
| 315327    | Spryd3       | -0.06967 | 3.48E-05   | 2.56E-04 |
| 293049    | Rlbp1        | -0.0697  | 0.55851011 | 0.737644 |
| 289783    | Zmiz2        | -0.06972 | 0.05014474 | 0.135193 |
| 365571    | Tysnd1       | -0.06979 | 0.28543511 | 0.479586 |
| 89811     | Vegfb        | -0.06979 | 0.03598317 | 0.103912 |
| 25297     | Cacnb3       | -0.06983 | 2.26E-08   | 2.88E-07 |
| 689852    | Psmf1        | -0.06987 | 0.01007718 | 0.037288 |
| 362721    | Eipr1        | -0.0699  | 0.12115221 | 0.264301 |
| 25247     | Nsg1         | -0.06992 | 3.96E-04   | 0.002288 |
| 306007    | Ccar2        | -0.06997 | 0.03566962 | 0.103241 |
| 288663    | Atxn2        | -0.06999 | 0.00346297 | 0.015207 |
| 365096    | Acat211      | -0.07002 | 0.06413185 | 0.164298 |
| 306117    | Tbc1d4       | -0.07002 | 0.13419158 | 0.28428  |
| 29674     | Psm7         | -0.07004 | 0.00102776 | 0.005299 |
| 360785    | Ap1s1        | -0.07007 | 0.00314342 | 0.013991 |

|           |              |          |            |          |
|-----------|--------------|----------|------------|----------|
| 297969    | Rars2        | -0.07011 | 0.41829998 | 0.614038 |
| 499358    | Scd4         | -0.07011 | 0.76737593 | 0.877758 |
| 294291    | Smim29       | -0.07016 | 0.1240918  | 0.268896 |
| 113958    | Mrps7        | -0.0702  | 0.03781555 | 0.108186 |
| 307056    | Anln1        | -0.07021 | 0.80541279 | 0.900551 |
| 685029    | Anapc13      | -0.07026 | 0.24785629 | 0.436631 |
| 306508    | Mfhas1       | -0.07026 | 0.00314057 | 0.013981 |
| 313557    | Hivep3       | -0.07028 | 0.0851656  | 0.203971 |
| 360926    | Lnx1         | -0.07029 | 0.17895378 | 0.347666 |
| 25272     | Mapk10       | -0.07031 | 1.11E-07   | 1.29E-06 |
| 83589     | Apba1        | -0.07032 | 6.33E-06   | 5.40E-05 |
| 305795    | Abhd6        | -0.07034 | 0.11639026 | 0.256379 |
| 679135    | Slc25a53     | -0.07037 | 0.5954953  | 0.759269 |
| 308416    | Tomm40       | -0.07046 | 0.02261744 | 0.072068 |
| 406196    | Cchcr1       | -0.07046 | 0.19627914 | 0.37092  |
| 296190    | Ndufaf5      | -0.07051 | 0.11768675 | 0.258517 |
| 100912195 | LOC100912195 | -0.07053 | 0.04372098 | 0.121628 |
| 296849    | Pdk3         | -0.07053 | 0.06108378 | 0.158278 |
| 291969    | Atp6v0d1     | -0.07054 | 4.74E-09   | 6.70E-08 |
| 360815    | Ddx54        | -0.07057 | 0.05152792 | 0.138043 |
| 292804    | Gpi          | -0.07061 | 3.96E-13   | 8.82E-12 |
| 302913    | RGD1309748   | -0.07063 | 0.0068603  | 0.027073 |
| 100359731 | Tipin1       | -0.07066 | 0.66321219 | 0.808221 |
| 294004    | Dpcd         | -0.07069 | 0.06252485 | 0.161091 |
| 361431    | Cbfa2t3      | -0.07069 | 0.31376232 | 0.508778 |
| 29264     | Clip2        | -0.07071 | 1.53E-05   | 1.21E-04 |
| 58819     | Txnrd1       | -0.07081 | 0.00146727 | 0.007224 |
| 81504     | Grb2         | -0.07082 | 7.09E-05   | 4.88E-04 |
| 306805    | Aspn         | -0.07082 | 0.52078817 | 0.705384 |
| 29328     | Gpx4         | -0.07082 | 1.49E-07   | 1.70E-06 |
| 310645    | Pmvk         | -0.07083 | 0.03090167 | 0.092274 |
| 499497    | Mef2c        | -0.07083 | 0.09908108 | 0.226994 |
| 289785    | Myo1g        | -0.07084 | 0.66359636 | 0.808275 |
| 287044    | Clec16a      | -0.07085 | 0.0225772  | 0.071976 |
| 24642     | Pgam1        | -0.07086 | 3.25E-11   | 5.95E-10 |
| 63885     | Pde10a       | -0.07089 | 0.30208126 | 0.499058 |
| 306840    | Sirt5        | -0.0709  | 0.01017146 | 0.037571 |
| 303875    | Nrros        | -0.0709  | 0.41557394 | 0.611733 |
| 114210    | Spata2       | -0.07096 | 0.07811549 | 0.190928 |
| 288741    | Ficd         | -0.07103 | 0.13542884 | 0.285694 |
| 300967    | Tmem108      | -0.07105 | 0.24081236 | 0.428423 |
| 690000    | LOC690000    | -0.0711  | 0.06540838 | 0.166671 |
| 361567    | Bcl2l12      | -0.07112 | 0.51125505 | 0.697183 |
| 315807    | Pigb         | -0.07113 | 0.6328349  | 0.789127 |
| 503035    | Tmem229b     | -0.0712  | 2.29E-05   | 1.75E-04 |
| 171082    | Atp5mc2      | -0.07122 | 0.00679922 | 0.02686  |
| 307395    | Ablim3       | -0.07129 | 0.01064629 | 0.039    |
| 363498    | Bex2         | -0.0713  | 0.0048891  | 0.020339 |
| 405982    | Olr1343      | -0.07131 | 0.91311312 | 0.96441  |
| 103691065 | Bsph1        | -0.07131 | 0.97247489 | 1        |
| 296152    | Tgm6         | -0.07131 | 0.87736639 | 0.943024 |
| 313653    | Vwa5b1       | -0.07131 | 0.82725351 | 0.913151 |
| 316521    | Vil1         | -0.07131 | 0.82725351 | 0.913151 |
| 307850    | Exosc6       | -0.07133 | 0.39911038 | 0.596442 |
| 681219    | Cox14        | -0.07139 | 0.07175632 | 0.179109 |
| 362326    | Tspan12      | -0.0714  | 0.00293626 | 0.013186 |

|           |              |          |            |          |
|-----------|--------------|----------|------------|----------|
| 299156    | Rab15        | -0.07144 | 6.61E-04   | 0.003595 |
| 361517    | Vasp         | -0.07151 | 0.00996292 | 0.036944 |
| 497972    | Heatr6       | -0.07152 | 0.25608981 | 0.445084 |
| 300866    | Lca5         | -0.07153 | 0.42477129 | 0.620048 |
| 313772    | Acap3        | -0.07156 | 0.03701636 | 0.106347 |
| 100911951 | LOC100911951 | -0.07158 | 0.00677406 | 0.026788 |
| 25104     | Pc           | -0.07158 | 0.01106699 | 0.04027  |
| 25713     | Itgb7        | -0.07158 | 0.65175957 | 0.803103 |
| 81652     | Ctbs         | -0.0716  | 0.14887675 | 0.305074 |
| 54226     | App          | -0.07161 | 1.13E-18   | 3.81E-17 |
| 353230    | Lhfpl4       | -0.07166 | 0.04303687 | 0.120005 |
| 299338    | Exoc3l4      | -0.07168 | 0.82425948 | 0.911351 |
| 288683    | Rita1        | -0.07168 | 0.0307207  | 0.091863 |
| 307511    | Cdc25c       | -0.07168 | 0.31271573 | 0.50773  |
| 305812    | Gpr137c      | -0.07177 | 0.32148945 | 0.516602 |
| 25098     | Foxa1        | -0.07179 | 0.87572198 | 0.941948 |
| 305455    | Nelfa        | -0.0719  | 0.19161066 | 0.364886 |
| 290796    | Saraf        | -0.07197 | 1.68E-04   | 0.00106  |
| 360819    | Suds3        | -0.07197 | 0.01364924 | 0.047855 |
| 436582    | Atp6v0e2     | -0.07197 | 1.28E-05   | 1.02E-04 |
| 498145    | Fam220a      | -0.07201 | 0.09771765 | 0.224762 |
| 100361417 | Tbcd         | -0.07205 | 1.18E-04   | 7.69E-04 |
| 304375    | Agfg2        | -0.07206 | 0.08996426 | 0.211684 |
| 309651    | Ppil1        | -0.07207 | 0.24983385 | 0.438331 |
| 290529    | Tmem254      | -0.07212 | 0.13032097 | 0.278216 |
| 171495    | Capn5        | -0.07217 | 2.26E-08   | 2.88E-07 |
| 299850    | Dctn2        | -0.07218 | 2.62E-08   | 3.31E-07 |
| 171073    | Hdgf12       | -0.07218 | 0.03516189 | 0.102051 |
| 171114    | Ndrg2        | -0.0722  | 1.93E-08   | 2.49E-07 |
| 304077    | Dop1b        | -0.0722  | 0.00381269 | 0.01648  |
| 24406     | Grik4        | -0.07221 | 0.12035733 | 0.263018 |
| 287873    | Chmp6        | -0.07225 | 0.05624273 | 0.148235 |
| 499780    | RGD1561113   | -0.07225 | 1.28E-04   | 8.27E-04 |
| 100301568 | Abo          | -0.0723  | 0.37960508 | 0.576751 |
| 689963    | Tmem52b      | -0.07235 | 0.82133077 | 0.909803 |
| 306152    | Slitrk5      | -0.07238 | 0.06873861 | 0.173257 |
| 363632    | Sox15        | -0.0724  | 0.84842904 | 0.924548 |
| 363333    | Chaf1a       | -0.07241 | 0.35747904 | 0.554548 |
| 304537    | Bicd11       | -0.07242 | 0.16414714 | 0.327967 |
| 25280     | St8sial      | -0.07243 | 0.24863281 | 0.436828 |
| 303100    | Mgat4b       | -0.07247 | 0.02698909 | 0.082918 |
| 302983    | Mapk8ip3     | -0.07248 | 2.23E-13   | 5.09E-12 |
| 316123    | Gtf2f1       | -0.07248 | 0.01985314 | 0.065134 |
| 100360180 | Pgd          | -0.07252 | 0.00260715 | 0.011902 |
| 81709     | Msh2         | -0.07255 | 0.25702424 | 0.446016 |
| 298508    | Ppie         | -0.07257 | 0.27570539 | 0.467903 |
| 310745    | Dclrelb      | -0.07259 | 0.22765987 | 0.411951 |
| 690161    | Hfml         | -0.07259 | 0.78734552 | 0.8897   |
| 679668    | LRRTM1       | -0.07263 | 0.15834132 | 0.319045 |
| 84596     | Srm          | -0.07263 | 0.09746451 | 0.22437  |
| 312675    | Fbxl14       | -0.07264 | 0.14235578 | 0.296335 |
| 56084     | Hgs          | -0.07273 | 5.35E-04   | 0.002975 |
| 311621    | Tomm34       | -0.07275 | 0.00105892 | 0.005436 |
| 24805     | Syt2         | -0.07277 | 1.71E-04   | 0.001079 |
| 313169    | Ubap2        | -0.07277 | 2.83E-04   | 0.001696 |
| 100911859 | Hoxc11       | -0.0728  | 0.57387211 | 0.742234 |

|           |              |          |            |          |
|-----------|--------------|----------|------------|----------|
| 29663     | Ap1b1        | -0.07283 | 3.99E-04   | 0.002307 |
| 103690028 | LOC103690028 | -0.0729  | 0.58902178 | 0.754602 |
| 293621    | Hras         | -0.07294 | 0.00698479 | 0.027468 |
| 29659     | P2rx4        | -0.07298 | 0.07275433 | 0.181101 |
| 311562    | Necab3       | -0.073   | 9.33E-04   | 0.004871 |
| 311338    | Rpap1        | -0.07301 | 0.20441607 | 0.381191 |
| 363129    | Nudt16       | -0.07303 | 0.19118238 | 0.364435 |
| 300240    | Atg101       | -0.07307 | 0.10119833 | 0.230651 |
| 305454    | Zfyve28      | -0.07308 | 0.00422784 | 0.017965 |
| 362754    | Trmt5        | -0.07314 | 0.25500654 | 0.443647 |
| 102552527 | LOC102552527 | -0.07319 | 0.30996807 | 0.505077 |
| 361268    | Asb13        | -0.0732  | 0.32864132 | 0.524334 |
| 287357    | Wnt9a        | -0.07322 | 0.26392058 | 0.454176 |
| 297954    | Fhl5         | -0.07326 | 0.82486432 | 0.911596 |
| 292888    | Ptov1        | -0.07332 | 4.60E-05   | 3.30E-04 |
| 81829     | Mdh2         | -0.07341 | 3.77E-08   | 4.65E-07 |
| 311839    | Slc27a4      | -0.07345 | 0.00279227 | 0.012641 |
| 29564     | Dync11l      | -0.07348 | 1.14E-06   | 1.12E-05 |
| 29592     | Bcat1        | -0.0735  | 8.06E-29   | 4.37E-27 |
| 24191     | Aldoc        | -0.07353 | 6.02E-11   | 1.07E-09 |
| 303745    | Sirt7        | -0.0737  | 0.24870285 | 0.43691  |
| 103689922 | LOC103689922 | -0.07381 | 0.45378133 | 0.64521  |
| 79241     | Hoxa5        | -0.07381 | 0.45378133 | 0.64521  |
| 314164    | Lrfn5        | -0.07386 | 0.02259823 | 0.072031 |
| 171437    | Dnrtip1      | -0.07386 | 0.12762157 | 0.274174 |
| 302022    | LOC302022    | -0.07386 | 0.08960973 | 0.211084 |
| 361887    | Cwc27        | -0.07388 | 0.25708015 | 0.445991 |
| 305540    | Slc1a4       | -0.07388 | 0.08255804 | 0.199507 |
| 25101     | Chrna3       | -0.07391 | 0.03494147 | 0.101613 |
| 690442    | Tmem116      | -0.07393 | 0.78538199 | 0.888535 |
| 102557427 | LOC102557427 | -0.07393 | 0.49394876 | 0.680896 |
| 25391     | Atp2a3       | -0.07402 | 0.14742262 | 0.302942 |
| 681300    | LOC681300    | -0.07402 | 0.59145064 | 0.756493 |
| 81925     | Cds1         | -0.07405 | 0.04139302 | 0.116153 |
| 79117     | Arf5         | -0.07405 | 2.73E-04   | 0.001648 |
| 85383     | Nol3         | -0.07407 | 0.04892658 | 0.132906 |
| 116720    | Pik3c2g      | -0.07409 | 0.51636475 | 0.701689 |
| 406164    | Pbx2         | -0.0741  | 0.03572147 | 0.103329 |
| 290642    | Ccdc124      | -0.07411 | 0.02318233 | 0.07356  |
| 361717    | Dnajc4       | -0.07415 | 0.34475208 | 0.541376 |
| 291202    | Hax1         | -0.07418 | 0.10960016 | 0.244648 |
| 314630    | Rexo1        | -0.0742  | 0.02782913 | 0.084964 |
| 685607    | Pfdn2        | -0.07423 | 0.01643491 | 0.055824 |
| 361664    | Eef1akmt2    | -0.07427 | 0.42787081 | 0.622997 |
| 100362785 | Ankdd1a      | -0.07427 | 0.75261889 | 0.867968 |
| 170551    | Slc5a6       | -0.07429 | 0.02543471 | 0.079112 |
| 289728    | RGD1560394   | -0.07431 | 0.28498273 | 0.479207 |
| 303746    | Mrpl12       | -0.07434 | 0.04963866 | 0.134304 |
| 308777    | Ap3b2        | -0.07445 | 2.04E-07   | 2.26E-06 |
| 298298    | Dhcr24       | -0.07446 | 1.98E-06   | 1.86E-05 |
| 25527     | Ptgis        | -0.07447 | 0.6177296  | 0.776648 |
| 25330     | Lipe         | -0.07449 | 0.06468617 | 0.165362 |
| 364380    | Abhd4        | -0.07453 | 4.13E-19   | 1.42E-17 |
| 100911483 | Ndufa13      | -0.07457 | 0.01758758 | 0.059065 |
| 293991    | Ndufb8       | -0.07457 | 8.29E-04   | 0.00439  |
| 306600    | Atp11a       | -0.0746  | 2.45E-14   | 6.20E-13 |

|           |              |          |            |          |
|-----------|--------------|----------|------------|----------|
| 116644    | Rtn1         | -0.07464 | 2.56E-20   | 9.29E-19 |
| 300668    | Dpagt1       | -0.07466 | 0.01211937 | 0.043435 |
| 310201    | Cmb1         | -0.07469 | 0.24545075 | 0.433758 |
| 170919    | Agpat4       | -0.07469 | 0.01582635 | 0.054191 |
| 266601    | Tomm20       | -0.0747  | 0.00161288 | 0.007832 |
| 502764    | Zfp777       | -0.07474 | 0.12133306 | 0.264634 |
| 362981    | Hdac10       | -0.07477 | 0.18578895 | 0.357337 |
| 24788     | Sord         | -0.07479 | 0.01924558 | 0.063436 |
| 308495    | Lrfn3        | -0.07483 | 0.21659042 | 0.397779 |
| 500947    | Vstm5        | -0.0749  | 0.12688507 | 0.2729   |
| 641525    | Pcdhgc5      | -0.07491 | 0.15010467 | 0.306502 |
| 289369    | Ush2a        | -0.07493 | 0.68740514 | 0.826596 |
| 499626    | Erich6       | -0.07493 | 0.66649555 | 0.810511 |
| 79227     | Thoc6        | -0.07494 | 0.19688036 | 0.371504 |
| 56081     | Scaf1        | -0.07495 | 3.67E-05   | 2.69E-04 |
| 289831    | Commd1       | -0.07495 | 0.01538003 | 0.052978 |
| 361675    | Cend1        | -0.07496 | 1.78E-11   | 3.37E-10 |
| 363023    | Mrpl4        | -0.07498 | 0.0419157  | 0.11736  |
| 29138     | Bsn          | -0.07499 | 0.00399769 | 0.017132 |
| 305453    | Cfap99       | -0.075   | 0.45284591 | 0.644433 |
| 103689987 | Mfsd14a      | -0.07506 | 0.18658094 | 0.358317 |
| 79125     | Anxa6        | -0.07507 | 1.46E-18   | 4.90E-17 |
| 84005     | Eif2b2       | -0.07507 | 0.02164668 | 0.069709 |
| 500242    | Pcbp1        | -0.07507 | 2.38E-05   | 1.81E-04 |
| 362302    | Abcb8        | -0.0751  | 0.05099477 | 0.136904 |
| 114245    | Hcn3         | -0.07523 | 0.15232014 | 0.309929 |
| 114504    | Msx3         | -0.07531 | 0.87387986 | 0.94079  |
| 365183    | Fcar         | -0.07531 | 0.87387986 | 0.94079  |
| 365390    | Tspan32      | -0.07531 | 0.87387986 | 0.94079  |
| 498229    | Tmem81       | -0.07531 | 0.75089113 | 0.866973 |
| 60667     | Gpr20        | -0.07531 | 0.87387986 | 0.94079  |
| 619550    | Gpr153       | -0.07532 | 0.09606615 | 0.222144 |
| 289081    | Colgalt2     | -0.07533 | 0.01017939 | 0.037578 |
| 102552073 | LOC102552073 | -0.07545 | 0.81875205 | 0.908956 |
| 683891    | Ccdc160      | -0.07548 | 0.42685518 | 0.621946 |
| 64358     | Kcna6        | -0.07549 | 1.50E-04   | 9.58E-04 |
| 24314     | Nqo1         | -0.07552 | 0.01418834 | 0.049427 |
| 316077    | Entpd3       | -0.07561 | 0.00437251 | 0.018464 |
| 690345    | Srp9         | -0.07564 | 0.05711388 | 0.150136 |
| 81667     | Gnb2         | -0.07565 | 5.63E-06   | 4.86E-05 |
| 360793    | Rhbdd2       | -0.07566 | 0.04687745 | 0.12855  |
| 288152    | Hoxd3        | -0.07572 | 0.53272947 | 0.714948 |
| 25202     | Gucylb1      | -0.07578 | 0.40797299 | 0.60494  |
| 298801    | Clip4        | -0.07579 | 0.11676241 | 0.256931 |
| 171381    | Psd          | -0.07582 | 0.42577891 | 0.620948 |
| 293863    | Lage3        | -0.07585 | 0.01062669 | 0.038973 |
| 300047    | Cycl         | -0.07586 | 2.91E-04   | 0.001741 |
| 306844    | Phactr1      | -0.07587 | 0.14418906 | 0.298584 |
| 246274    | Faim2        | -0.07587 | 5.76E-06   | 4.96E-05 |
| 303772    | Slc16a6      | -0.0759  | 0.04948667 | 0.134103 |
| 66016     | Kcnmb4       | -0.07593 | 0.35261459 | 0.549599 |
| 296318    | Ndr3         | -0.07595 | 0.00466952 | 0.019567 |
| 291673    | Sil1         | -0.07596 | 0.07581728 | 0.186749 |
| 304822    | Pkp1         | -0.07597 | 0.15595547 | 0.315573 |
| 298696    | Pin1         | -0.07601 | 2.37E-04   | 0.001454 |
| 50676     | Slc6a12      | -0.07613 | 0.78217637 | 0.886858 |

|           |              |          |            |          |
|-----------|--------------|----------|------------|----------|
| 24451     | Hmox1        | -0.07615 | 0.19464044 | 0.368775 |
| 116724    | Epb4113      | -0.07617 | 5.53E-27   | 2.79E-25 |
| 314332    | Tmem63c      | -0.07618 | 1.86E-05   | 1.45E-04 |
| 500899    | Mfsd3        | -0.07622 | 0.15312724 | 0.311106 |
| 690137    | Tmem120b     | -0.07626 | 0.24038614 | 0.427865 |
| 65208     | Dpysl5       | -0.07635 | 8.65E-07   | 8.67E-06 |
| 292845    | Etfb         | -0.07638 | 0.04868566 | 0.132365 |
| 292875    | Aspdh        | -0.07638 | 0.74913006 | 0.865832 |
| 29739     | Gclm         | -0.07639 | 0.01304593 | 0.046148 |
| 365222    | Lrfn1        | -0.07639 | 0.05050057 | 0.135845 |
| 305248    | Mthfd21      | -0.07644 | 0.48565927 | 0.673858 |
| 81530     | Pdk2         | -0.07647 | 0.03135789 | 0.093431 |
| 305468    | Eif4enif1    | -0.07648 | 0.0480804  | 0.130963 |
| 171143    | Trpm4        | -0.07653 | 0.14972904 | 0.305997 |
| 363022    | Zfp846       | -0.07668 | 0.02872565 | 0.087101 |
| 25485     | Myold        | -0.0767  | 0.15177231 | 0.309112 |
| 102555457 | LOC102555457 | -0.07674 | 0.44728947 | 0.639585 |
| 366508    | Pik3cd       | -0.07676 | 0.02203733 | 0.070681 |
| 85496     | Enpp1        | -0.07683 | 0.15120947 | 0.308163 |
| 679869    | Tcf712       | -0.07684 | 0.28195486 | 0.475543 |
| 192226    | Cand2        | -0.07685 | 0.3960207  | 0.593361 |
| 306636    | Efnb2        | -0.07693 | 0.24263745 | 0.430464 |
| 338401    | Crip2        | -0.07694 | 4.09E-10   | 6.61E-09 |
| 56281     | Mrpl37       | -0.07696 | 0.0410409  | 0.115437 |
| 64632     | Exoc7        | -0.077   | 0.1380087  | 0.289788 |
| 25308     | Cstb         | -0.07701 | 0.00489932 | 0.020377 |
| 308398    | Ppplr37      | -0.07706 | 0.00265396 | 0.012075 |
| 171079    | B3galt4      | -0.07711 | 0.5777913  | 0.74548  |
| 363462    | Gemin8       | -0.07717 | 0.28628048 | 0.48054  |
| 688813    | Ddal         | -0.07718 | 4.60E-04   | 0.002607 |
| 366277    | Polr3k       | -0.07723 | 0.07333937 | 0.182177 |
| 310269    | Egfem1       | -0.07723 | 0.4300363  | 0.624289 |
| 81650     | Csnk2b       | -0.07725 | 0.00186739 | 0.008916 |
| 25203     | Ccnb1        | -0.07726 | 0.44278068 | 0.635571 |
| 309301    | Rcl1         | -0.07729 | 0.26501866 | 0.45549  |
| 688869    | Cox6b1       | -0.0773  | 1.74E-05   | 1.36E-04 |
| 298528    | Epha10       | -0.07735 | 0.50697021 | 0.693574 |
| 288753    | Diablo       | -0.07737 | 1.48E-04   | 9.46E-04 |
| 363516    | Abcd1        | -0.07738 | 0.25331634 | 0.441755 |
| 361416    | Cenpn        | -0.0774  | 0.22829376 | 0.412784 |
| 314641    | Pip5k1c      | -0.0774  | 2.34E-08   | 2.97E-07 |
| 363239    | Raph1        | -0.07743 | 0.01571627 | 0.053863 |
| 364675    | B4galt7      | -0.07744 | 0.11777098 | 0.258672 |
| 116635    | Scg3         | -0.07746 | 1.68E-11   | 3.19E-10 |
| 108349796 | LOC108349796 | -0.07748 | 0.71338457 | 0.842882 |
| 303376    | Fndc8        | -0.07748 | 0.81980283 | 0.909115 |
| 308701    | Tarsl2       | -0.07748 | 0.1307729  | 0.279024 |
| 313020    | Wdte1        | -0.07754 | 4.63E-04   | 0.00262  |
| 304244    | Fry          | -0.07757 | 4.37E-04   | 0.002494 |
| 29616     | Ptpm         | -0.07758 | 0.01584524 | 0.054237 |
| 362176    | Lmo2         | -0.07759 | 0.30796154 | 0.502539 |
| 361120    | Eps15l1      | -0.07761 | 0.00812055 | 0.031149 |
| 309866    | Crybg1       | -0.07763 | 0.5323177  | 0.714648 |
| 298201    | Fam214b      | -0.07763 | 0.03953148 | 0.112236 |
| 29179     | Syn2         | -0.07766 | 6.47E-06   | 5.50E-05 |
| 108351600 | LOC108351600 | -0.07768 | 0.59267849 | 0.757707 |



|        |            |          |            |          |
|--------|------------|----------|------------|----------|
| 311864 | Uck1       | -0.07769 | 0.07018936 | 0.175982 |
| 296267 | Snph       | -0.07769 | 1.93E-04   | 0.001203 |
| 306347 | Ell        | -0.07769 | 0.15260647 | 0.310346 |
| 498600 | Fam32a     | -0.07786 | 0.00119225 | 0.00602  |
| 360975 | Ogdh       | -0.0779  | 4.19E-08   | 5.16E-07 |
| 171386 | Avpil      | -0.07797 | 0.11521223 | 0.254372 |
| 54268  | Mapk4      | -0.078   | 0.13850488 | 0.290605 |
| 60462  | Batf3      | -0.07805 | 0.66790832 | 0.811555 |
| 361816 | Zfand3     | -0.07805 | 2.46E-04   | 0.001502 |
| 288923 | Dhps       | -0.07807 | 0.06632508 | 0.168421 |
| 83466  | Celsr3     | -0.0781  | 0.00650555 | 0.025936 |
| 64347  | Sncg       | -0.07824 | 3.12E-46   | 2.72E-44 |
| 171499 | Crlf2      | -0.07825 | 0.21754916 | 0.398924 |
| 25501  | Nxph1      | -0.0783  | 0.4474716  | 0.639701 |
| 363283 | Cops8      | -0.07832 | 0.00633731 | 0.025356 |
| 246770 | Gtf2ird1   | -0.07839 | 0.11445228 | 0.253223 |
| 25666  | Dgkg       | -0.07848 | 0.01182503 | 0.042524 |
| 257644 | Zwint      | -0.07851 | 3.58E-47   | 3.27E-45 |
| 306015 | Fam160b2   | -0.07853 | 0.02718413 | 0.083463 |
| 363216 | Cnnm4      | -0.07854 | 0.02947616 | 0.088938 |
| 282837 | Fibp       | -0.0786  | 0.03597962 | 0.103917 |
| 25344  | Phb        | -0.0786  | 7.98E-04   | 0.004246 |
| 305957 | Neil2      | -0.07861 | 0.74550351 | 0.863055 |
| 84354  | Ssbp3      | -0.07865 | 3.28E-05   | 2.44E-04 |
| 310653 | mrpl9      | -0.07881 | 0.06703983 | 0.169761 |
| 361588 | Lrrc28     | -0.07884 | 0.04652096 | 0.127738 |
| 360567 | Ccdc92b    | -0.07885 | 0.09423212 | 0.218887 |
| 288514 | Ints1      | -0.07889 | 0.00550032 | 0.022441 |
| 94194  | Cox5b      | -0.07891 | 1.81E-04   | 0.001137 |
| 24225  | Bdnf       | -0.07892 | 0.11485689 | 0.253794 |
| 363192 | Klhdc3     | -0.07893 | 0.00218422 | 0.010198 |
| 58960  | Map2k2     | -0.07898 | 0.00436466 | 0.018435 |
| 50938  | Cdon       | -0.07899 | 0.29168922 | 0.487129 |
| 29211  | Sptbn2     | -0.079   | 5.31E-05   | 3.75E-04 |
| 94174  | Tinagl1    | -0.07903 | 0.17332034 | 0.340578 |
| 60324  | Synpo      | -0.07906 | 3.94E-04   | 0.002282 |
| 362983 | Dennd6b    | -0.07907 | 0.14540893 | 0.300229 |
| 362594 | Meaf6      | -0.07911 | 0.04265244 | 0.119143 |
| 301384 | Hibch      | -0.07911 | 0.10346375 | 0.234468 |
| 29573  | Slc37a4    | -0.07913 | 0.08911068 | 0.210325 |
| 498890 | RGD1560212 | -0.07913 | 0.00154047 | 0.007526 |
| 360554 | Rnf167     | -0.07913 | 0.00826759 | 0.031637 |
| 266813 | Prrxl      | -0.07914 | 0.49583044 | 0.682206 |
| 316578 | Slc16a14   | -0.0792  | 0.1470285  | 0.302426 |
| 310411 | Cog6       | -0.07922 | 0.15277029 | 0.31058  |
| 445415 | S100a11    | -0.07924 | 8.44E-05   | 5.70E-04 |
| 306353 | Rfxank     | -0.07925 | 0.31912228 | 0.514099 |
| 140447 | Slc8a2     | -0.07927 | 0.09646077 | 0.222597 |
| 266764 | Tbkbp1     | -0.0793  | 0.08288828 | 0.199976 |
| 310801 | Slc30a7    | -0.07936 | 0.43412674 | 0.628311 |
| 292078 | Spata33    | -0.07938 | 0.42425572 | 0.619533 |
| 312916 | Cops5      | -0.0794  | 9.65E-04   | 0.005018 |
| 64045  | Glrx       | -0.07941 | 9.15E-04   | 0.004792 |
| 56029  | Srcin1     | -0.07942 | 0.11177752 | 0.248779 |
| 60416  | Pfkip      | -0.07943 | 1.21E-16   | 3.59E-15 |
| 298782 | Ttc27      | -0.07943 | 0.08703421 | 0.207118 |

|           |              |          |            |          |
|-----------|--------------|----------|------------|----------|
| 24484     | Igfbp3       | -0.07944 | 0.10457732 | 0.23626  |
| 315430    | Amotl1       | -0.07945 | 0.00520619 | 0.021466 |
| 289357    | Lyplal1      | -0.07949 | 0.24843237 | 0.436717 |
| 85256     | Slc2a8       | -0.07957 | 0.03649106 | 0.105108 |
| 681418    | Ndufb10      | -0.07958 | 2.75E-04   | 0.001659 |
| 100909599 | LOC100909599 | -0.0796  | 0.90271294 | 0.957888 |
| 64544     | B3gat2       | -0.0796  | 0.2174836  | 0.398881 |
| 103693780 | LOC103693780 | -0.07964 | 0.004836   | 0.020149 |
| 84609     | Sema6b       | -0.07965 | 0.20480169 | 0.381835 |
| 27139     | Rps26        | -0.07968 | 0.05004612 | 0.135023 |
| 100362606 | Akain1       | -0.07968 | 0.17344936 | 0.340621 |
| 103693393 | LOC103693393 | -0.07976 | 0.39094384 | 0.588021 |
| 24888     | Bc12l1       | -0.07976 | 0.00326878 | 0.014457 |
| 287603    | Tex14        | -0.07977 | 0.87010804 | 0.93856  |
| 311532    | Sdcbp2       | -0.07977 | 0.81711748 | 0.908094 |
| 363555    | Wfikkn1      | -0.07977 | 0.6652786  | 0.809806 |
| 500954    | Ub15         | -0.07981 | 0.00941715 | 0.035277 |
| 292654    | Tmem160      | -0.07982 | 0.13380706 | 0.283686 |
| 103690129 | LOC103690129 | -0.07983 | 0.52415473 | 0.707981 |
| 304343    | Cops6        | -0.07988 | 2.82E-04   | 0.001692 |
| 29579     | Esytl        | -0.07989 | 5.15E-09   | 7.25E-08 |
| 288924    | Wdr83        | -0.07996 | 0.21213025 | 0.391741 |
| 303872    | Pigz         | -0.07999 | 0.16309172 | 0.326303 |
| 641316    | Aldh4a1      | -0.08    | 0.09978942 | 0.228232 |
| 310344    | Plk4         | -0.08003 | 0.32570661 | 0.521399 |
| 360797    | Rabgef1      | -0.08017 | 0.06059662 | 0.157251 |
| 100911225 | LOC100911225 | -0.08021 | 0.37857463 | 0.575645 |
| 362994    | Ccdc65       | -0.08021 | 0.35357587 | 0.550556 |
| 308311    | Cnot3        | -0.08021 | 0.05263375 | 0.140374 |
| 619440    | Aarsd1       | -0.08026 | 0.04158361 | 0.116602 |
| 689172    | Tmem25       | -0.08027 | 0.00593257 | 0.023902 |
| 83631     | Dedd         | -0.08028 | 0.07112437 | 0.177811 |
| 64306     | Rpl27        | -0.08031 | 5.69E-04   | 0.00314  |
| 245976    | Xab2         | -0.08031 | 0.06035579 | 0.156797 |
| 297432    | Abtb1        | -0.08033 | 0.07341113 | 0.182331 |
| 303920    | Maats1       | -0.08036 | 0.64244607 | 0.796264 |
| 306842    | Gfod1        | -0.08042 | 2.99E-05   | 2.24E-04 |
| 689582    | Kdm4d        | -0.08046 | 0.6342439  | 0.789798 |
| 296588    | Pmpca        | -0.08049 | 0.00382069 | 0.016504 |
| 361712    | Syvn1        | -0.08055 | 0.00380674 | 0.016462 |
| 500889    | Mroh5        | -0.08057 | 0.81528826 | 0.907173 |
| 362965    | Rangap1      | -0.08063 | 8.92E-06   | 7.41E-05 |
| 295326    | Mab2113      | -0.08064 | 0.44054576 | 0.633796 |
| 303089    | Trim7        | -0.08067 | 0.21034655 | 0.38905  |
| 102550385 | LOC102550385 | -0.08068 | 0.08450623 | 0.202928 |
| 286895    | Brinp2       | -0.08073 | 0.06691883 | 0.169545 |
| 500378    | Chtop11      | -0.08074 | 0.14747174 | 0.30301  |
| 297416    | Nful         | -0.08082 | 0.12681908 | 0.272819 |
| 363496    | Armcx6       | -0.08087 | 0.14249869 | 0.296567 |
| 300015    | Them6        | -0.0809  | 1.23E-06   | 1.20E-05 |
| 305251    | Rassf6       | -0.08097 | 0.62357937 | 0.781372 |
| 300768    | Coro2b       | -0.08097 | 1.13E-07   | 1.31E-06 |
| 296390    | Ube2v1       | -0.08097 | 3.91E-07   | 4.15E-06 |
| 309446    | Hps6         | -0.08098 | 0.11593477 | 0.255671 |
| 65164     | Htra1        | -0.08099 | 2.15E-10   | 3.62E-09 |
| 301382    | Ercc5        | -0.08101 | 0.20062315 | 0.376514 |

|           |              |          |            |          |
|-----------|--------------|----------|------------|----------|
| 498728    | Elov12       | -0.08112 | 2.74E-06   | 2.52E-05 |
| 64015     | Khdrbs3      | -0.08113 | 0.04477216 | 0.124045 |
| 114022    | Glrx2        | -0.08117 | 0.00786638 | 0.030358 |
| 100362940 | Snx21        | -0.08119 | 0.00420084 | 0.01787  |
| 362377    | Herc3        | -0.08119 | 3.02E-05   | 2.26E-04 |
| 25650     | Atp1b1       | -0.08121 | 4.54E-29   | 2.48E-27 |
| 100909732 | LOC100909732 | -0.08124 | 0.59519766 | 0.759042 |
| 300147    | Sbf1         | -0.08127 | 1.67E-05   | 1.31E-04 |
| 292023    | Aars         | -0.08131 | 5.09E-09   | 7.17E-08 |
| 65046     | Ap2s1        | -0.08135 | 1.12E-04   | 7.34E-04 |
| 25311     | Dcc          | -0.08137 | 0.56712035 | 0.737106 |
| 683404    | LOC683404    | -0.08137 | 0.77476438 | 0.882394 |
| 64350     | Itgad        | -0.0814  | 0.85401467 | 0.927927 |
| 102557590 | LOC102557590 | -0.08144 | 0.69467391 | 0.831766 |
| 24439     | Hagh         | -0.08149 | 0.00639637 | 0.025544 |
| 315546    | Kirrel3      | -0.08149 | 0.01152575 | 0.041605 |
| 315500    | Eepd1        | -0.08152 | 4.26E-04   | 0.002438 |
| 315159    | Tob2         | -0.08162 | 0.14390042 | 0.298344 |
| 83529     | Vdac1        | -0.08162 | 5.46E-09   | 7.63E-08 |
| 296469    | Nkain4       | -0.08175 | 0.30104221 | 0.497903 |
| 171549    | Klc3         | -0.08175 | 0.71758226 | 0.845638 |
| 58856     | Ddx25        | -0.08185 | 0.05883642 | 0.153815 |
| 681996    | Ahsa1        | -0.08187 | 3.95E-05   | 2.88E-04 |
| 170898    | Tmlhe        | -0.08188 | 0.34845108 | 0.545341 |
| 65984     | Aacs         | -0.08188 | 9.16E-04   | 0.004798 |
| 29710     | Scn8a        | -0.08196 | 1.25E-04   | 8.11E-04 |
| 310687    | Prcc         | -0.08217 | 0.01886123 | 0.062483 |
| 288750    | Tmem132d     | -0.0822  | 0.81431928 | 0.906545 |
| 366013    | Coq4         | -0.0822  | 0.37953183 | 0.576686 |
| 690079    | Tex38        | -0.0822  | 0.81431928 | 0.906545 |
| 314678    | Fhl4         | -0.08221 | 0.65967049 | 0.805141 |
| 114503    | Pou4f1       | -0.08229 | 7.42E-06   | 6.25E-05 |
| 362825    | Hmg20b       | -0.08232 | 0.09165645 | 0.214711 |
| 102555079 | Poln         | -0.08247 | 0.56378242 | 0.734924 |
| 25240     | Aqp1         | -0.0825  | 4.62E-04   | 0.002615 |
| 29430     | Hap1         | -0.08252 | 0.29871297 | 0.495255 |
| 297076    | Gimap6       | -0.08255 | 0.65967245 | 0.80504  |
| 361705    | Cnih2        | -0.08264 | 0.13636281 | 0.287123 |
| 362242    | Snta1        | -0.08266 | 0.02669578 | 0.082189 |
| 297099    | Hoxa9        | -0.08271 | 0.2537221  | 0.442382 |
| 365372    | Tbc1d10b     | -0.08273 | 5.55E-04   | 0.003078 |
| 103694905 | LOC103694905 | -0.08273 | 0.38826023 | 0.585511 |
| 363252    | Retreg2      | -0.0828  | 1.55E-04   | 9.87E-04 |
| 293705    | Otub1        | -0.08294 | 1.65E-04   | 0.001041 |
| 361196    | Habp4        | -0.08296 | 1.26E-04   | 8.18E-04 |
| 295338    | Ptpn22       | -0.08304 | 0.77246321 | 0.880905 |
| 296200    | Mgme1        | -0.08304 | 0.56305522 | 0.734328 |
| 309871    | Prdm1        | -0.08304 | 0.68259379 | 0.823149 |
| 314264    | Rdh12        | -0.08304 | 0.77246321 | 0.880905 |
| 499205    | Fam181b      | -0.08307 | 0.22855211 | 0.413016 |
| 360509    | Dock2        | -0.08307 | 0.19508579 | 0.369362 |
| 140722    | Caskin1      | -0.08308 | 1.48E-07   | 1.69E-06 |
| 362378    | Fam13a       | -0.08317 | 0.09311647 | 0.217143 |
| 295323    | Trim45       | -0.08321 | 0.36000519 | 0.556744 |
| 299643    | Ndufa7       | -0.08323 | 0.02122148 | 0.068653 |
| 361064    | R3hcc1       | -0.08325 | 0.05039281 | 0.135613 |

|           |              |          |            |          |
|-----------|--------------|----------|------------|----------|
| 312511    | RGD1306746   | -0.08325 | 0.15606123 | 0.315753 |
| 299611    | Apc2         | -0.08327 | 4.17E-07   | 4.40E-06 |
| 64536     | Esm1         | -0.0833  | 0.42994975 | 0.624258 |
| 302552    | Tbc1d25      | -0.08332 | 0.12946348 | 0.276851 |
| 685890    | Srrm3        | -0.08334 | 0.02826003 | 0.08599  |
| 313771    | Cptp         | -0.08336 | 0.00588902 | 0.023772 |
| 363646    | Eral1        | -0.08338 | 0.097673   | 0.224714 |
| 306570    | Ank1         | -0.08344 | 1.13E-08   | 1.51E-07 |
| 25400     | Camk2a       | -0.08347 | 0.03595167 | 0.103852 |
| 64158     | Tubala       | -0.08352 | 1.25E-126  | #####    |
| 117024    | Crym         | -0.08356 | 0.1769077  | 0.345453 |
| 315286    | Tmem106c     | -0.08358 | 0.14686721 | 0.302257 |
| 498295    | Smyd3        | -0.08362 | 0.34322186 | 0.539685 |
| 306542    | Brf2         | -0.08364 | 0.27715609 | 0.469779 |
| 686505    | Atg4d        | -0.08367 | 0.0621257  | 0.160366 |
| 306332    | Aplm1        | -0.0837  | 3.05E-04   | 0.001817 |
| 494223    | Fbxl16       | -0.08374 | 1.61E-04   | 0.001018 |
| 287653    | Lrrc46       | -0.08384 | 0.48908422 | 0.67659  |
| 312863    | Ccdc91       | -0.08386 | 0.02532333 | 0.078843 |
| 364534    | Ssbp4        | -0.08388 | 0.02773752 | 0.084848 |
| 316256    | Tnfrsf21     | -0.08391 | 2.74E-10   | 4.53E-09 |
| 58953     | Sult4a1      | -0.08392 | 1.84E-17   | 5.75E-16 |
| 361682    | Tssc4        | -0.08392 | 0.09488432 | 0.220026 |
| 84408     | Cdh8         | -0.08393 | 0.28849423 | 0.483319 |
| 306771    | Tspan17      | -0.08398 | 1.46E-10   | 2.49E-09 |
| 367562    | Gaa          | -0.08399 | 1.53E-05   | 1.21E-04 |
| 499420    | Prmt2        | -0.08405 | 0.00802677 | 0.03087  |
| 317366    | Pim2         | -0.08406 | 0.12816916 | 0.274885 |
| 304775    | Dyrk3        | -0.08411 | 0.50144576 | 0.688043 |
| 678743    | Tl11         | -0.08412 | 0.14651258 | 0.301658 |
| 310674    | Plekho1      | -0.08412 | 0.004694   | 0.019661 |
| 171553    | A3galt2      | -0.08414 | 4.51E-05   | 3.25E-04 |
| 287433    | Fxr2         | -0.08418 | 2.29E-06   | 2.13E-05 |
| 294436    | Rpf2         | -0.08434 | 0.15048052 | 0.307171 |
| 300666    | C2cd21       | -0.08434 | 3.91E-04   | 0.002265 |
| 192360    | Eml2         | -0.08438 | 1.26E-04   | 8.17E-04 |
| 29256     | Oprl1        | -0.08442 | 0.03106953 | 0.092702 |
| 85497     | Klf15        | -0.08444 | 0.13202895 | 0.281043 |
| 29460     | Tesk1        | -0.08445 | 0.01275511 | 0.045304 |
| 79123     | Asic1        | -0.08446 | 2.79E-07   | 3.04E-06 |
| 287525    | Smyd4        | -0.08449 | 0.35935068 | 0.556274 |
| 691278    | Triap1       | -0.0845  | 0.1349411  | 0.285107 |
| 24472     | Hspala       | -0.08458 | 0.56797439 | 0.737964 |
| 306324    | Tspan14      | -0.08458 | 0.04460032 | 0.123641 |
| 313667    | Plekhm2      | -0.08465 | 0.00255864 | 0.011708 |
| 103690002 | LOC103690002 | -0.08475 | 0.55550659 | 0.734798 |
| 108353263 | LOC108353263 | -0.08477 | 0.86600896 | 0.93533  |
| 311861    | Fibcd1       | -0.08477 | 0.86600896 | 0.93533  |
| 500640    | Ccdc711      | -0.08485 | 0.16084255 | 0.323025 |
| 100362027 | LOC100362027 | -0.08486 | 0.07023278 | 0.176067 |
| 171142    | Ehhadh       | -0.08488 | 0.27272274 | 0.464746 |
| 688736    | Kiaa08951    | -0.0849  | 3.50E-04   | 0.002057 |
| 361945    | Postn        | -0.08494 | 0.33935129 | 0.535899 |
| 287453    | Rnasek       | -0.08497 | 2.97E-05   | 2.22E-04 |
| 85492     | Psmb7        | -0.08498 | 1.77E-07   | 1.98E-06 |
| 25451     | Gabbrb2      | -0.08499 | 0.18185125 | 0.35186  |

|           |              |          |            |          |
|-----------|--------------|----------|------------|----------|
| 360551    | Bcl6b        | -0.08505 | 0.4612867  | 0.65252  |
| 365960    | Gipc2        | -0.08505 | 0.4612867  | 0.65252  |
| 298575    | Pink1        | -0.0851  | 7.43E-04   | 0.003994 |
| 64119     | Kcnk12       | -0.08512 | 0.25665974 | 0.445749 |
| 501146    | Stradb       | -0.0853  | 0.0585119  | 0.153113 |
| 300289    | Amot         | -0.08534 | 0.10249867 | 0.232974 |
| 59109     | Ntrk1        | -0.08535 | 1.02E-08   | 1.37E-07 |
| 363285    | Scly         | -0.08539 | 0.22197756 | 0.404165 |
| 171447    | Adgrl2       | -0.08544 | 0.0420526  | 0.117674 |
| 24806     | Tac1         | -0.08545 | 1.97E-08   | 2.53E-07 |
| 685088    | She          | -0.08548 | 0.05230647 | 0.139579 |
| 287637    | Samd14       | -0.08549 | 7.57E-04   | 0.004058 |
| 366848    | Kank3        | -0.08557 | 0.28356609 | 0.477373 |
| 25302     | Chrna7       | -0.08558 | 0.00153999 | 0.007526 |
| 296470    | Pdpf         | -0.0856  | 4.79E-04   | 0.002703 |
| 288525    | Dhrsx        | -0.08566 | 0.09313663 | 0.21711  |
| 316205    | Lrfn2        | -0.08569 | 0.3608577  | 0.557745 |
| 315073    | Jrk          | -0.08572 | 0.16170109 | 0.3241   |
| 83708     | Mybph        | -0.08573 | 0.03765071 | 0.10778  |
| 366333    | Faxc         | -0.08574 | 0.26022969 | 0.449571 |
| 684259    | Rusc2        | -0.08577 | 1.11E-05   | 9.04E-05 |
| 290228    | Ipo4         | -0.08586 | 2.78E-04   | 0.001673 |
| 313045    | Trim62       | -0.08587 | 0.01921328 | 0.063362 |
| 307907    | RGD1304884   | -0.08588 | 1.51E-13   | 3.53E-12 |
| 290925    | Coprs        | -0.08591 | 0.09950771 | 0.227752 |
| 171061    | Mrpl17       | -0.08599 | 6.60E-05   | 4.57E-04 |
| 362975    | Cdpl1        | -0.08599 | 0.42529175 | 0.620475 |
| 309139    | Tpcn2        | -0.08606 | 0.08287979 | 0.19998  |
| 309170    | Fam89b       | -0.0861  | 8.09E-05   | 5.48E-04 |
| 65036     | Bche         | -0.08612 | 0.4046503  | 0.601699 |
| 300443    | Plppr2       | -0.08613 | 0.00680928 | 0.026894 |
| 301240    | Mrpl2        | -0.0862  | 0.17334046 | 0.340583 |
| 289094    | Hmcn1        | -0.08625 | 0.22406993 | 0.40704  |
| 300748    | Stoml1       | -0.08626 | 0.0010082  | 0.005213 |
| 690961    | Cog2         | -0.0863  | 0.04531626 | 0.12517  |
| 361623    | Trim66       | -0.08635 | 0.4386616  | 0.632375 |
| 58842     | Preb         | -0.08636 | 6.39E-04   | 0.003491 |
| 360520    | Tbcd9b       | -0.08643 | 1.39E-08   | 1.85E-07 |
| 296161    | Ubox5        | -0.08644 | 0.07151871 | 0.178633 |
| 56782     | Srgn         | -0.0865  | 0.12543166 | 0.270721 |
| 192213    | Rasgrf1      | -0.08654 | 0.19401571 | 0.367921 |
| 64457     | Ndr4         | -0.08655 | 5.93E-60   | 7.14E-58 |
| 361396    | Ranbp10      | -0.08657 | 0.00809869 | 0.031084 |
| 291325    | St8sia6      | -0.08657 | 0.67608498 | 0.81867  |
| 365985    | LOC365985    | -0.08659 | 7.20E-04   | 0.003881 |
| 100188937 | Cox7c        | -0.08659 | 2.74E-04   | 0.001654 |
| 25282     | Cox6a1       | -0.08663 | 9.39E-12   | 1.83E-10 |
| 288545    | RGD1305455   | -0.08667 | 4.14E-04   | 0.002382 |
| 364855    | Pou4f3       | -0.08668 | 0.04901699 | 0.133114 |
| 170673    | Palm         | -0.08677 | 3.05E-06   | 2.77E-05 |
| 293684    | Scyl1        | -0.08681 | 8.83E-04   | 0.004643 |
| 102551408 | LOC102551408 | -0.08686 | 0.64117354 | 0.795152 |
| 24407     | Grik5        | -0.08687 | 0.02460566 | 0.077075 |
| 304971    | Tomm401      | -0.08689 | 0.0042035  | 0.017878 |
| 25558     | Stxbp1       | -0.0869  | 3.35E-28   | 1.79E-26 |
| 103691871 | LOC103691871 | -0.08694 | 0.70227887 | 0.837187 |

|           |              |          |            |          |
|-----------|--------------|----------|------------|----------|
| 102555469 | LOC102555469 | -0.08695 | 0.4100795  | 0.606599 |
| 681944    | Mpnd         | -0.08707 | 0.02362657 | 0.074746 |
| 312936    | Sox17        | -0.08715 | 0.13499112 | 0.285181 |
| 360575    | Ankrd13b     | -0.08715 | 0.0105425  | 0.038731 |
| 84468     | Chst3        | -0.08722 | 0.06848735 | 0.172783 |
| 688292    | Card14       | -0.08725 | 0.57004467 | 0.739443 |
| 60355     | Nsf          | -0.08729 | 3.07E-13   | 6.93E-12 |
| 308763    | Gdpgp1       | -0.08736 | 0.29288715 | 0.488573 |
| 309112    | Cracr2b      | -0.08737 | 0.46729102 | 0.658203 |
| 293719    | Ubxn1        | -0.08741 | 1.84E-04   | 0.001152 |
| 294324    | Agpat3       | -0.08744 | 6.18E-07   | 6.36E-06 |
| 306622    | Erich1       | -0.08745 | 0.23006756 | 0.414888 |
| 24577     | Myc          | -0.08745 | 0.22078253 | 0.402798 |
| 171109    | Dusp5        | -0.08745 | 0.20351815 | 0.38     |
| 103691267 | LOC103691267 | -0.08752 | 0.00549492 | 0.022424 |
| 292886    | Tbc1d17      | -0.08756 | 0.02661444 | 0.082005 |
| 65169     | Scamp3       | -0.08756 | 3.40E-04   | 0.002006 |
| 29639     | Fxyd2        | -0.0876  | 2.07E-09   | 3.06E-08 |
| 266976    | Rims4        | -0.08763 | 0.21608056 | 0.397225 |
| 309105    | B4galnt4     | -0.08763 | 0.07312899 | 0.181796 |
| 305349    | Wdr19        | -0.08766 | 0.10149867 | 0.231308 |
| 364845    | Pcdhgb8      | -0.08778 | 0.15180565 | 0.309147 |
| 65179     | Ppp5c        | -0.08779 | 2.22E-04   | 0.001366 |
| 100362315 | LOC100362315 | -0.08779 | 0.27723726 | 0.469833 |
| 64665     | Flot1        | -0.0878  | 7.72E-08   | 9.18E-07 |
| 64862     | Map11c3b     | -0.08781 | 6.83E-21   | 2.55E-19 |
| 305880    | Lrp10        | -0.08782 | 3.39E-05   | 2.51E-04 |
| 360843    | Etnk2        | -0.08782 | 0.60621216 | 0.76856  |
| 360569    | Mrm3         | -0.08785 | 0.27113754 | 0.462666 |
| 366478    | Pigv         | -0.0879  | 0.23175248 | 0.417176 |
| 300799    | Dapk2        | -0.08798 | 0.33089928 | 0.527186 |
| 64107     | Npffr1       | -0.08798 | 0.52003538 | 0.704666 |
| 291661    | Tmco6        | -0.088   | 0.21193261 | 0.391414 |
| 116691    | Cyth1        | -0.08803 | 0.03391597 | 0.099404 |
| 292683    | Sympk        | -0.08804 | 5.72E-05   | 4.02E-04 |
| 363138    | Npr12        | -0.08805 | 0.0793084  | 0.193149 |
| 362873    | Plxnc1       | -0.08809 | 3.64E-04   | 0.002129 |
| 306349    | Tmem591      | -0.08812 | 6.13E-06   | 5.24E-05 |
| 289716    | Ccdc96       | -0.08813 | 0.48492205 | 0.673081 |
| 685691    | Eid2         | -0.08819 | 0.04786968 | 0.130501 |
| 305457    | Letm1        | -0.0882  | 0.00429211 | 0.018193 |
| 308453    | Coq8b        | -0.08822 | 0.06834751 | 0.172545 |
| 500540    | Slfn11       | -0.08822 | 0.62616349 | 0.783785 |
| 363133    | Pcbp4        | -0.08823 | 6.37E-11   | 1.12E-09 |
| 501181    | Efhd1        | -0.08823 | 0.19225243 | 0.365816 |
| 83506     | Camkk2       | -0.08823 | 0.25869225 | 0.447972 |
| 680624    | LOC680624    | -0.08824 | 0.88541106 | 0.947766 |
| 300664    | Abcg4        | -0.08824 | 0.00320944 | 0.014251 |
| 245977    | Adgrf5       | -0.08828 | 0.01365841 | 0.04787  |
| 791259    | Car14        | -0.08836 | 0.44078297 | 0.633946 |
| 316916    | Clptm11      | -0.08837 | 1.23E-04   | 8.05E-04 |
| 360753    | Pnpla6       | -0.08839 | 0.00204077 | 0.009609 |
| 499125    | Sdhaf1       | -0.08841 | 0.04079258 | 0.114857 |
| 100137086 | Jmjd7        | -0.08845 | 0.60487373 | 0.767988 |
| 367160    | Cpne4        | -0.08848 | 3.81E-05   | 2.78E-04 |
| 295691    | Frzb         | -0.08852 | 0.3612519  | 0.557675 |



|           |              |          |            |          |
|-----------|--------------|----------|------------|----------|
| 25073     | Scarb1       | -0.08854 | 0.01679844 | 0.056755 |
| 114636    | Zyx          | -0.08868 | 0.00154502 | 0.007539 |
| 100910536 | Elf2         | -0.0887  | 0.33622464 | 0.532817 |
| 686432    | Ly6l         | -0.08873 | 0.64764393 | 0.800362 |
| 312634    | Mtmr14       | -0.08876 | 0.03433519 | 0.100247 |
| 305830    | Fbxo34       | -0.08882 | 0.01873114 | 0.062171 |
| 500087    | Fmc1         | -0.08882 | 0.17725711 | 0.345675 |
| 681820    | Erich5       | -0.08883 | 0.73285431 | 0.855326 |
| 682102    | LOC682102    | -0.08894 | 0.62471329 | 0.782587 |
| 83633     | Gabbr2       | -0.08896 | 1.66E-09   | 2.49E-08 |
| 298700    | Eif3g        | -0.08896 | 8.62E-04   | 0.004546 |
| 313262    | Pappal       | -0.08901 | 0.26215628 | 0.451834 |
| 29457     | Map6         | -0.08902 | 3.69E-08   | 4.56E-07 |
| 500153    | Ccser1       | -0.08907 | 0.48054945 | 0.669255 |
| 305581    | Pex13        | -0.08909 | 0.11041117 | 0.246083 |
| 298381    | Echdc2       | -0.0891  | 0.60352274 | 0.766835 |
| 300993    | Hyal3        | -0.08912 | 0.14823497 | 0.303955 |
| 304318    | Iqce         | -0.08913 | 0.06811327 | 0.17209  |
| 305475    | Osbp2        | -0.08914 | 0.02705211 | 0.083098 |
| 362440    | Ndufa9       | -0.08915 | 1.15E-04   | 7.53E-04 |
| 361286    | Msrb2        | -0.08915 | 0.07884239 | 0.192334 |
| 362087    | Ubac1        | -0.0892  | 0.00217938 | 0.010186 |
| 316507    | Shd          | -0.08921 | 0.07874431 | 0.192169 |
| 316273    | Mcm3         | -0.08923 | 0.43847541 | 0.632203 |
| 314648    | Ncln         | -0.08929 | 0.00111073 | 0.005656 |
| 314639    | Zfr2         | -0.08931 | 0.05359062 | 0.142427 |
| 361694    | Pitpnml      | -0.08936 | 0.00223771 | 0.0104   |
| 498709    | Cks2         | -0.08942 | 0.67095542 | 0.814478 |
| 292787    | Lin37        | -0.08944 | 0.13834322 | 0.290362 |
| 501403    | Cbx4         | -0.08945 | 0.10945834 | 0.244446 |
| 290652    | Fkbp8        | -0.08951 | 2.96E-10   | 4.88E-09 |
| 313783    | Olfm2        | -0.08953 | 0.1354632  | 0.285703 |
| 679907    | Pam16        | -0.08956 | 0.05936295 | 0.154787 |
| 103694097 | Pgbd1        | -0.08957 | 0.54581358 | 0.726721 |
| 499171    | Klf13        | -0.08959 | 0.34983479 | 0.546608 |
| 361495    | Usp29        | -0.08967 | 0.1900657  | 0.36296  |
| 498662    | Tdrp         | -0.0897  | 0.00800941 | 0.030816 |
| 29443     | Ahcy         | -0.08972 | 0.00611491 | 0.024523 |
| 171572    | Tt1          | -0.08978 | 6.63E-15   | 1.74E-13 |
| 108349535 | LOC108349535 | -0.08979 | 0.90415285 | 0.958134 |
| 303698    | Pgs1         | -0.08982 | 3.51E-04   | 0.002063 |
| 300036    | Tsta3        | -0.08985 | 0.05006879 | 0.135065 |
| 100911825 | LOC100911825 | -0.08987 | 0.60354134 | 0.766808 |
| 301701    | Ndc80        | -0.08996 | 0.53049441 | 0.712903 |
| 688272    | Rnf157       | -0.09    | 1.06E-14   | 2.74E-13 |
| 303812    | Vwa5b2       | -0.09003 | 0.00121382 | 0.006109 |
| 100912141 | Tro          | -0.09009 | 0.01267144 | 0.045057 |
| 304667    | Rtbdn        | -0.0901  | 0.44788954 | 0.639866 |
| 25728     | Apoe         | -0.09013 | 8.51E-118  | #####    |
| 300989    | Hemk1        | -0.09014 | 0.41400875 | 0.609854 |
| 299857    | Shmt2        | -0.09019 | 0.00770443 | 0.029799 |
| 171041    | Klc1         | -0.09025 | 1.82E-57   | 2.07E-55 |
| 304542    | Coq5         | -0.09026 | 0.03002977 | 0.090179 |
| 287645    | Snf8         | -0.09036 | 0.00986542 | 0.036668 |
| 117092    | Serpinb7     | -0.09042 | 0.86153136 | 0.932345 |
| 288909    | Nanos3       | -0.09042 | 0.86153136 | 0.932345 |

|           |              |          |            |          |
|-----------|--------------|----------|------------|----------|
| 408246    | C1rl         | -0.09042 | 0.64445009 | 0.797917 |
| 291793    | Abhd3        | -0.09051 | 0.01730316 | 0.058274 |
| 140581    | Patj         | -0.09052 | 1.16E-05   | 9.45E-05 |
| 363076    | Tipin        | -0.09053 | 0.42436314 | 0.619642 |
| 288743    | Sgsm1        | -0.09057 | 5.21E-04   | 0.002909 |
| 293649    | Lrp5         | -0.09062 | 0.10334145 | 0.234386 |
| 246310    | Arfgap1      | -0.09063 | 0.01423791 | 0.049581 |
| 316136    | Gpr108       | -0.09065 | 0.01282528 | 0.045511 |
| 305628    | Ccdc18       | -0.09066 | 0.63422623 | 0.789828 |
| 29422     | Chrne        | -0.09068 | 0.12288557 | 0.267103 |
| 360467    | Tvp23a       | -0.09072 | 0.07098494 | 0.177602 |
| 287635    | Mrpl27       | -0.09073 | 0.0620787  | 0.160289 |
| 29201     | Ctf1         | -0.09073 | 0.4462542  | 0.638728 |
| 308451    | Itpkc        | -0.09082 | 0.24089184 | 0.428485 |
| 364879    | Isoc1        | -0.09083 | 0.01180587 | 0.042463 |
| 684811    | Arhgef101    | -0.09084 | 1.95E-04   | 0.001212 |
| 361219    | Fbxw17       | -0.09085 | 0.1463635  | 0.301448 |
| 689625    | Slc25a45     | -0.09086 | 0.1493064  | 0.305363 |
| 103690156 | LOC103690156 | -0.09088 | 0.01978673 | 0.064939 |
| 100360015 | Car10        | -0.09092 | 7.94E-04   | 0.004233 |
| 314670    | RGD1564409   | -0.09094 | 0.76111677 | 0.873695 |
| 311021    | Nmi          | -0.09095 | 0.30765754 | 0.502215 |
| 367743    | Praf2        | -0.09097 | 1.73E-06   | 1.65E-05 |
| 116457    | Mapk8ipl     | -0.09102 | 1.06E-22   | 4.36E-21 |
| 287545    | Sarm1        | -0.09103 | 4.14E-04   | 0.002381 |
| 103690005 | LOC103690005 | -0.09104 | 6.33E-04   | 0.003462 |
| 501002    | Tmem266      | -0.09109 | 0.59939244 | 0.762758 |
| 362837    | Ndufs7       | -0.0911  | 0.00242136 | 0.01116  |
| 287273    | Nhp2         | -0.09112 | 0.1903902  | 0.363288 |
| 246767    | Cyp4x1       | -0.09113 | 0.09122845 | 0.213866 |
| 304785    | Slc45a3      | -0.09117 | 0.48348933 | 0.672072 |
| 114562    | Cdc37        | -0.0912  | 2.35E-06   | 2.18E-05 |
| 100360664 | Rrp36        | -0.09122 | 0.07065562 | 0.176894 |
| 161475    | PsmD9        | -0.09123 | 0.01142564 | 0.041353 |
| 680036    | MsrB3        | -0.09126 | 0.15224122 | 0.309901 |
| 297337    | Rnf181       | -0.09127 | 6.55E-04   | 0.003568 |
| 103690082 | LOC103690082 | -0.09128 | 5.81E-05   | 4.08E-04 |
| 304479    | Mlxip        | -0.09135 | 0.05786523 | 0.151797 |
| 312275    | Ephb6        | -0.09135 | 0.00743467 | 0.028879 |
| 360878    | Klhdc9       | -0.09136 | 0.67492355 | 0.817523 |
| 290877    | Tmem255b     | -0.09139 | 0.18934681 | 0.362132 |
| 315707    | Csk          | -0.09143 | 1.52E-05   | 1.20E-04 |
| 689046    | Ccdc84       | -0.09159 | 0.32824851 | 0.523883 |
| 294251    | Ncr3         | -0.09161 | 0.84620172 | 0.923019 |
| 287556    | Rhbd13       | -0.09162 | 0.12577575 | 0.271157 |
| 94340     | Acs15        | -0.09163 | 0.01277634 | 0.045354 |
| 503000    | Ctnnbip1     | -0.09164 | 0.01018814 | 0.037596 |
| 25326     | Jak3         | -0.09166 | 0.24394523 | 0.43218  |
| 100360867 | Ypel1        | -0.09167 | 0.1744451  | 0.342012 |
| 114597    | Suclg1       | -0.09167 | 2.05E-05   | 1.58E-04 |
| 361437    | DbnDd1       | -0.09173 | 0.1306149  | 0.27875  |
| 366001    | Arrdc1       | -0.09174 | 0.00705998 | 0.027706 |
| 362944    | Ppp1r16a     | -0.09178 | 0.07443957 | 0.184141 |
| 287199    | Nudcd2       | -0.09182 | 0.20485536 | 0.381861 |
| 366466    | Maneal       | -0.09185 | 0.00197589 | 0.009359 |
| 58934     | Pdcd2        | -0.09188 | 0.13836305 | 0.290372 |

|           |              |          |            |          |
|-----------|--------------|----------|------------|----------|
| 361128    | Nr2c2ap      | -0.09192 | 0.02531896 | 0.078842 |
| 64304     | Acads        | -0.09192 | 0.02515114 | 0.078422 |
| 309376    | Zfyve27      | -0.09196 | 2.57E-06   | 2.38E-05 |
| 312488    | Atp6v1b1     | -0.09199 | 0.87967617 | 0.944175 |
| 84355     | Atox1        | -0.092   | 0.00969329 | 0.036099 |
| 362959    | Tmem184b     | -0.09202 | 6.75E-06   | 5.71E-05 |
| 301254    | Aars2        | -0.09208 | 0.11972407 | 0.261845 |
| 64667     | Sgta         | -0.09214 | 7.31E-05   | 5.01E-04 |
| 682812    | Dcaf12       | -0.09214 | 0.0225043  | 0.071767 |
| 100361126 | RGD2320734   | -0.09217 | 0.2478032  | 0.436578 |
| 314622    | Cbarp        | -0.09218 | 1.42E-04   | 9.12E-04 |
| 29571     | Scn10a       | -0.09219 | 4.13E-22   | 1.64E-20 |
| 679154    | Gareml       | -0.09219 | 0.32662394 | 0.522253 |
| 116560    | Kcnj9        | -0.09223 | 0.44640165 | 0.638891 |
| 296988    | Mkrn1        | -0.09232 | 3.61E-05   | 2.65E-04 |
| 56769     | Ndufaf3      | -0.09233 | 0.08406637 | 0.202178 |
| 291960    | Hsf4         | -0.09237 | 0.02036423 | 0.066467 |
| 64391     | Dapk3        | -0.09237 | 0.0137914  | 0.048238 |
| 295956    | CommD9       | -0.09242 | 0.03619918 | 0.104393 |
| 311827    | Adamts12     | -0.09246 | 0.41875956 | 0.614475 |
| 100910811 | Tmem249      | -0.09246 | 0.7599     | 0.873351 |
| 307644    | Kifc3        | -0.09249 | 0.11008049 | 0.245461 |
| 301008    | P4htm        | -0.09251 | 0.00176281 | 0.008478 |
| 292661    | Ptgir        | -0.09255 | 0.05515484 | 0.145933 |
| 300719    | Cib2         | -0.09258 | 3.94E-05   | 2.87E-04 |
| 102554302 | LOC102554302 | -0.09259 | 0.33196774 | 0.528181 |
| 303565    | G6pc3        | -0.09269 | 4.10E-04   | 0.002364 |
| 25648     | Slc7a1       | -0.09273 | 6.43E-04   | 0.003509 |
| 501052    | Tusc2        | -0.09278 | 3.21E-06   | 2.91E-05 |
| 306750    | Fbxl21       | -0.09281 | 0.52918701 | 0.71195  |
| 266975    | Sars         | -0.09282 | 3.43E-08   | 4.27E-07 |
| 681708    | Tmem41a      | -0.09293 | 0.00932262 | 0.034971 |
| 246272    | Cant1        | -0.09295 | 0.01760821 | 0.059103 |
| 301249    | Mrps18a      | -0.09296 | 0.0105313  | 0.038697 |
| 303277    | Pigs         | -0.09298 | 0.00249662 | 0.011452 |
| 311617    | Fitm2        | -0.09301 | 0.01229223 | 0.043947 |
| 54133     | Pdlim1       | -0.09302 | 0.00690021 | 0.027185 |
| 301117    | Clpp         | -0.09303 | 0.05450737 | 0.144501 |
| 315463    | Timm29       | -0.09305 | 2.40E-04   | 0.00147  |
| 100360692 | Pbld2        | -0.0931  | 0.59527104 | 0.759034 |
| 114505    | Klf4         | -0.09315 | 0.20151889 | 0.377266 |
| 300111    | Samm50       | -0.09316 | 0.00191205 | 0.009101 |
| 83527     | Dbn1         | -0.09319 | 2.19E-05   | 1.68E-04 |
| 292878    | Emc10        | -0.0932  | 3.90E-05   | 2.84E-04 |
| 192249    | Ehd3         | -0.09333 | 3.52E-15   | 9.45E-14 |
| 64832     | Cplx1        | -0.09337 | 4.30E-37   | 3.13E-35 |
| 100360417 | Rusc1        | -0.09345 | 1.51E-08   | 1.98E-07 |
| 302915    | Pmm2         | -0.09351 | 0.00187328 | 0.008937 |
| 103693563 | LOC103693563 | -0.09357 | 0.04042449 | 0.114192 |
| 117089    | Bex3         | -0.09359 | 2.67E-04   | 0.001618 |
| 296551    | Mrpl41       | -0.09363 | 0.00751898 | 0.029165 |
| 313085    | Osgin2       | -0.09369 | 0.17241615 | 0.339257 |
| 316794    | Brcc3        | -0.0937  | 0.04361807 | 0.121377 |
| 691857    | Pygo1        | -0.09374 | 0.49133491 | 0.678766 |
| 499076    | Ppp1r12c     | -0.09375 | 1.06E-04   | 6.98E-04 |
| 287462    | Camta2       | -0.09384 | 9.81E-07   | 9.75E-06 |

|           |              |          |            |          |
|-----------|--------------|----------|------------|----------|
| 116745    | Kcnh6        | -0.09394 | 0.04174621 | 0.116954 |
| 363153    | Arpp21       | -0.09398 | 0.02800949 | 0.085433 |
| 25502     | Oaz1         | -0.09399 | 9.80E-12   | 1.90E-10 |
| 310537    | RGD1560010   | -0.094   | 0.31761113 | 0.512489 |
| 306490    | Mtmr7        | -0.09401 | 3.43E-05   | 2.53E-04 |
| 65199     | Kcnip3       | -0.09402 | 2.57E-09   | 3.75E-08 |
| 365972    | Bhmt2        | -0.09408 | 0.77577268 | 0.883014 |
| 25510     | Pcp4         | -0.09409 | 2.63E-16   | 7.59E-15 |
| 500685    | Plekhd1      | -0.09411 | 8.96E-06   | 7.42E-05 |
| 24159     | Acly         | -0.09413 | 2.39E-16   | 6.93E-15 |
| 317578    | Sash3        | -0.09417 | 0.49031119 | 0.677696 |
| 310641    | Trim46       | -0.09417 | 0.01808099 | 0.060381 |
| 361831    | Ube2d1       | -0.09422 | 0.00421249 | 0.017912 |
| 29678     | Sart1        | -0.0943  | 0.00662891 | 0.026318 |
| 83535     | Kcnj11       | -0.09433 | 0.2168018  | 0.398052 |
| 192645    | Wbp2         | -0.09437 | 2.07E-21   | 7.95E-20 |
| 311336    | Nusap1       | -0.09441 | 0.55419559 | 0.733982 |
| 56780     | Acpp         | -0.09447 | 1.12E-04   | 7.34E-04 |
| 25121     | Pcsk2        | -0.0945  | 4.48E-04   | 0.002544 |
| 641315    | Iffo2        | -0.09452 | 0.49428821 | 0.681068 |
| 360958    | Ablim2       | -0.09457 | 0.0071591  | 0.028026 |
| 290279    | Eeflakmt1    | -0.09457 | 0.13255706 | 0.281789 |
| 303689    | Ube2o        | -0.09457 | 7.90E-12   | 1.55E-10 |
| 317431    | Ribc1        | -0.0946  | 0.48928186 | 0.676642 |
| 450225    | Krt10        | -0.0946  | 0.48928186 | 0.676642 |
| 116498    | F2r13        | -0.0946  | 0.75714952 | 0.871083 |
| 365546    | Tspear       | -0.0946  | 0.66188516 | 0.80681  |
| 85327     | Lin7a        | -0.0946  | 0.413279   | 0.609156 |
| 103691294 | LOC103691294 | -0.09466 | 0.82128394 | 0.90991  |
| 312502    | Rab11fip5    | -0.09468 | 3.30E-07   | 3.56E-06 |
| 305506    | Eif6         | -0.0947  | 0.00390268 | 0.016782 |
| 361069    | Dmtn         | -0.09477 | 2.64E-10   | 4.38E-09 |
| 79115     | Evl          | -0.09478 | 8.73E-05   | 5.87E-04 |
| 498433    | Psme4        | -0.09478 | 1.31E-06   | 1.27E-05 |
| 192248    | Cdh13        | -0.09478 | 2.46E-04   | 0.001498 |
| 361722    | Bsc12        | -0.09486 | 7.83E-06   | 6.56E-05 |
| 29445     | Cox4i1       | -0.09489 | 4.71E-13   | 1.04E-11 |
| 289083    | Tsen15       | -0.09489 | 0.04646719 | 0.127719 |
| 25576     | Ywhah        | -0.09489 | 7.34E-61   | 8.96E-59 |
| 362667    | Thap3        | -0.0949  | 0.23032033 | 0.415266 |
| 500911    | Serh12       | -0.09493 | 0.04471389 | 0.123902 |
| 685989    | LOC685989    | -0.09496 | 0.78799467 | 0.890063 |
| 308443    | B9d2         | -0.09498 | 0.22003319 | 0.402124 |
| 103693389 | LOC103693389 | -0.09504 | 0.48824686 | 0.675922 |
| 56778     | Ly6c         | -0.09506 | 0.71738732 | 0.845513 |
| 305478    | Rnf215       | -0.09509 | 0.03457487 | 0.100824 |
| 295270    | Sf3b4        | -0.09512 | 0.033512   | 0.098417 |
| 288044    | Tm4sf19      | -0.09515 | 0.72024712 | 0.846892 |
| 54237     | Cdk1         | -0.09515 | 0.61252643 | 0.773425 |
| 362672    | Lrrc47       | -0.09521 | 0.02557684 | 0.079438 |
| 679119    | Bmp8b        | -0.09523 | 0.93457312 | 0.978394 |
| 308441    | Exosc5       | -0.09531 | 0.14541468 | 0.300208 |
| 361796    | Abhd16a      | -0.09539 | 4.13E-04   | 0.002377 |
| 295430    | Ndst3        | -0.09542 | 0.11624657 | 0.256151 |
| 25545     | Selenow      | -0.09543 | 2.64E-11   | 4.91E-10 |
| 103694037 | LOC103694037 | -0.09553 | 0.74076446 | 0.859711 |

|           |              |          |            |          |
|-----------|--------------|----------|------------|----------|
| 450224    | Omg          | -0.09564 | 0.01923599 | 0.063415 |
| 100912566 | LOC100912566 | -0.09567 | 8.47E-05   | 5.72E-04 |
| 266805    | Has3         | -0.0957  | 0.48613803 | 0.674179 |
| 308458    | Sptbn4       | -0.0957  | 0.00218643 | 0.010203 |
| 309613    | Zbtb12       | -0.09571 | 0.53383846 | 0.715781 |
| 362436    | Gpr162       | -0.09575 | 0.03977025 | 0.112779 |
| 652956    | Mpp1         | -0.09579 | 0.00107872 | 0.005517 |
| 25736     | Kcnb1        | -0.0958  | 0.00376275 | 0.016305 |
| 100360645 | LOC100360645 | -0.0958  | 1.17E-32   | 7.27E-31 |
| 684871    | LOC684871    | -0.09586 | 0.35462306 | 0.551465 |
| 291648    | Pcdhb11      | -0.09587 | 0.38272929 | 0.579648 |
| 498546    | Serp2        | -0.09603 | 0.03728681 | 0.106947 |
| 64445     | St3gal3      | -0.09637 | 0.06870738 | 0.173201 |
| 316209    | Med20        | -0.09637 | 0.02941545 | 0.088811 |
| 286894    | Parm1        | -0.09638 | 2.10E-07   | 2.33E-06 |
| 303569    | Rundc3a      | -0.09642 | 6.13E-10   | 9.69E-09 |
| 292268    | Rmnd1        | -0.09644 | 0.02524957 | 0.078665 |
| 305166    | Gpat3        | -0.09652 | 0.24241371 | 0.430468 |
| 293484    | Eif3c        | -0.09652 | 1.79E-09   | 2.67E-08 |
| 361013    | Ube2e2       | -0.09654 | 0.0224921  | 0.071764 |
| 58839     | Nrbf2        | -0.09654 | 0.04728657 | 0.129411 |
| 102550903 | Ufsp1        | -0.09655 | 0.02086646 | 0.067747 |
| 116782    | Pcdhgc3      | -0.09656 | 1.71E-05   | 1.34E-04 |
| 500572    | Otud3        | -0.09664 | 0.2925871  | 0.488329 |
| 25339     | Npr3         | -0.09674 | 0.00312573 | 0.013925 |
| 362851    | Cd320        | -0.09678 | 0.05071771 | 0.136314 |
| 308405    | Dmpk         | -0.09681 | 0.00837246 | 0.031967 |
| 300074    | Fam227a      | -0.09684 | 0.45627213 | 0.647519 |
| 501145    | Satb2        | -0.09684 | 0.71781743 | 0.845706 |
| 690038    | Bag2         | -0.09701 | 0.25269782 | 0.441202 |
| 362518    | Tmem246      | -0.09703 | 0.0019963  | 0.009439 |
| 103690067 | LOC103690067 | -0.09705 | 0.06193227 | 0.160019 |
| 311254    | Pdhx         | -0.09708 | 0.03108763 | 0.092742 |
| 361224    | Card19       | -0.0971  | 0.01359868 | 0.04774  |
| 298944    | Gpr22        | -0.09723 | 0.08761313 | 0.207691 |
| 500485    | Cer1         | -0.09725 | 0.80545247 | 0.90049  |
| 60377     | Lin7b        | -0.09727 | 0.10312742 | 0.23404  |
| 316226    | Klc4         | -0.09727 | 0.03969551 | 0.112601 |
| 295213    | S100a13      | -0.09731 | 0.03601281 | 0.103982 |
| 29246     | Stmn3        | -0.09732 | 8.01E-22   | 3.14E-20 |
| 290811    | Tti2         | -0.09735 | 0.17577364 | 0.343768 |
| 613226    | Slc6a17      | -0.09736 | 2.04E-07   | 2.26E-06 |
| 494196    | Ly49s6       | -0.09736 | 0.75645599 | 0.870601 |
| 64194     | Insig1       | -0.09738 | 1.81E-08   | 2.34E-07 |
| 83579     | Gnb5         | -0.09742 | 0.00141679 | 0.007007 |
| 691093    | Tpgs1        | -0.09747 | 0.00861038 | 0.032692 |
| 24628     | Pdgfb        | -0.09747 | 0.17879113 | 0.347563 |
| 29619     | Btg2         | -0.09748 | 0.07415843 | 0.183684 |
| 24255     | Cftr         | -0.09751 | 0.64849873 | 0.801054 |
| 296587    | Dnlz         | -0.09756 | 0.05668517 | 0.149215 |
| 114214    | Dffa         | -0.09759 | 2.16E-06   | 2.02E-05 |
| 685322    | Uqcr10       | -0.09765 | 0.00991157 | 0.036804 |
| 689025    | Mrps28       | -0.09766 | 0.45433333 | 0.645489 |
| 83616     | Trim3        | -0.09773 | 4.31E-04   | 0.002465 |
| 689711    | Rflna        | -0.09777 | 0.48191495 | 0.670813 |
| 64201     | Slc25a11     | -0.0978  | 0.00157061 | 0.007656 |

|           |                 |          |            |          |
|-----------|-----------------|----------|------------|----------|
| 24644     | Pgk1            | -0.09785 | 2.11E-12   | 4.36E-11 |
| 313633    | Ephb2           | -0.09789 | 0.37231406 | 0.568668 |
| 288691    | Ksr2            | -0.0979  | 0.08136876 | 0.197309 |
| 302975    | Syngn3          | -0.09793 | 3.14E-08   | 3.93E-07 |
| 363081    | Igdcc4          | -0.09793 | 0.00882968 | 0.033365 |
| 116548    | Pcsk5           | -0.09795 | 0.13111819 | 0.279479 |
| 260327    | Fndc5           | -0.09797 | 0.02409025 | 0.07596  |
| 60349     | Nr5a2           | -0.098   | 0.65609986 | 0.802893 |
| 29743     | Slc25a1         | -0.0981  | 3.13E-05   | 2.33E-04 |
| 93667     | Olfm1           | -0.09817 | 2.20E-13   | 5.04E-12 |
| 361604    | Syt12           | -0.09817 | 5.53E-10   | 8.81E-09 |
| 684516    | Kcnc4           | -0.09822 | 3.13E-05   | 2.33E-04 |
| 64345     | Hif3a           | -0.09824 | 0.68400429 | 0.824328 |
| 25274     | Tst             | -0.09825 | 0.03868962 | 0.11019  |
| 108348056 | NEWGENE_1306714 | -0.09828 | 0.26004471 | 0.449578 |
| 292569    | Zfp444          | -0.09832 | 0.04988998 | 0.134735 |
| 682105    | Reep2           | -0.09836 | 2.56E-10   | 4.26E-09 |
| 25237     | Acvrl1          | -0.09837 | 0.11591485 | 0.255657 |
| 288564    | Pop7            | -0.09837 | 0.14507156 | 0.299793 |
| 54279     | Cntn3           | -0.09838 | 0.1617632  | 0.32419  |
| 288109    | Sidtl           | -0.09839 | 0.5847202  | 0.750809 |
| 63848     | Fxyd7           | -0.09841 | 2.80E-14   | 7.05E-13 |
| 303685    | Mrpl38          | -0.09844 | 0.02420459 | 0.076245 |
| 308178    | Vps37c          | -0.09857 | 0.03273374 | 0.096564 |
| 29216     | Lrp2            | -0.09859 | 0.46574464 | 0.656607 |
| 117018    | Kcnh2           | -0.0986  | 3.77E-07   | 4.01E-06 |
| 114518    | Slc7a10         | -0.0988  | 0.7247641  | 0.849633 |
| 309525    | Slc16a12        | -0.09887 | 0.09616084 | 0.222255 |
| 297593    | Usp5            | -0.09891 | 4.58E-15   | 1.22E-13 |
| 297846    | Cntnap5c        | -0.09897 | 0.15501186 | 0.314031 |
| 502374    | Polr21          | -0.099   | 0.04418037 | 0.122637 |
| 287982    | Abcf3           | -0.09903 | 2.32E-05   | 1.77E-04 |
| 103692785 | LOC103692785    | -0.09905 | 0.24622833 | 0.434688 |
| 25066     | PVR             | -0.09912 | 0.26601405 | 0.456994 |
| 498523    | RGD1565170      | -0.09914 | 0.89813992 | 0.955537 |
| 29333     | Cd46            | -0.09916 | 0.35720927 | 0.55422  |
| 100362102 | Lsm14b          | -0.09917 | 6.70E-04   | 0.003636 |
| 691770    | Ankrd63         | -0.09919 | 0.75137529 | 0.867217 |
| 445271    | Jph4            | -0.09921 | 5.53E-07   | 5.74E-06 |
| 297518    | Arpc4           | -0.09937 | 4.48E-09   | 6.36E-08 |
| 360617    | Mien1           | -0.09938 | 9.54E-04   | 0.004972 |
| 63834     | Capn10          | -0.0994  | 0.05157981 | 0.138143 |
| 364878    | 3-Mar           | -0.09944 | 0.47823145 | 0.667638 |
| 305685    | Comtd1          | -0.09949 | 0.02390044 | 0.075449 |
| 287876    | Actg1           | -0.0995  | 1.35E-70   | 1.84E-68 |
| 304474    | Pitpnm2         | -0.09951 | 2.24E-12   | 4.60E-11 |
| 287120    | Tb13            | -0.09953 | 0.0159394  | 0.05451  |
| 361527    | Pld3            | -0.09964 | 1.02E-07   | 1.19E-06 |
| 79246     | Htr3a           | -0.09984 | 4.54E-06   | 3.99E-05 |
| 293586    | Zfp511          | -0.09989 | 0.16326694 | 0.326517 |
| 362301    | Tmub1           | -0.09996 | 0.0479321  | 0.130633 |
| 292732    | Numb1           | -0.1     | 9.32E-06   | 7.69E-05 |
| 301606    | Espn1           | -0.10006 | 0.70451297 | 0.837701 |
| 29214     | Tubb5           | -0.10007 | 1.46E-54   | 1.55E-52 |
| 301432    | Ppil3           | -0.10007 | 0.10240745 | 0.23285  |
| 108348912 | LOC108348912    | -0.1001  | 0.3829097  | 0.579829 |



|           |              |          |            |          |
|-----------|--------------|----------|------------|----------|
| 299647    | Zfp414       | -0.10018 | 0.06874866 | 0.173259 |
| 293704    | Trpt1        | -0.10032 | 0.15142302 | 0.308565 |
| 89791     | Ncdn         | -0.10032 | 2.59E-30   | 1.48E-28 |
| 315746    | Cln6         | -0.10033 | 0.00604508 | 0.024268 |
| 314613    | Rnf126       | -0.1004  | 0.01405826 | 0.049046 |
| 316626    | Hes6         | -0.1004  | 0.09555624 | 0.221288 |
| 680874    | Rnf223       | -0.10041 | 0.27961967 | 0.473155 |
| 499781    | Cfap157      | -0.10045 | 0.25471792 | 0.443347 |
| 100910754 | LOC100910754 | -0.10052 | 0.63584771 | 0.790813 |
| 59114     | Slc9a3r1     | -0.10053 | 1.22E-04   | 7.97E-04 |
| 311866    | Lrsam1       | -0.10053 | 8.52E-07   | 8.54E-06 |
| 291234    | Mki67        | -0.10053 | 0.12062819 | 0.263429 |
| 315405    | Dcun1d5      | -0.10056 | 0.02018299 | 0.066012 |
| 171124    | Mms19        | -0.10057 | 1.00E-04   | 6.63E-04 |
| 24816     | Tbxa2r       | -0.10059 | 0.4878058  | 0.675655 |
| 289745    | Mtfp1        | -0.10068 | 0.50629465 | 0.693098 |
| 300744    | Ub17         | -0.10072 | 4.24E-05   | 3.07E-04 |
| 364069    | Hlx          | -0.10074 | 0.38713618 | 0.584371 |
| 117540    | Plscr1       | -0.10076 | 0.44706462 | 0.639455 |
| 306868    | Bloc1s5      | -0.10091 | 0.00959176 | 0.035819 |
| 290370    | Dnajc15      | -0.10091 | 0.02678736 | 0.082378 |
| 497857    | Dexi         | -0.10094 | 0.00416535 | 0.017771 |
| 362826    | Atcay        | -0.10101 | 6.40E-07   | 6.57E-06 |
| 246216    | Prpf19       | -0.10104 | 1.43E-09   | 2.16E-08 |
| 100911871 | LOC100911871 | -0.10104 | 0.56963959 | 0.73922  |
| 499688    | Gstm6        | -0.1011  | 0.47389701 | 0.664216 |
| 100910806 | Trim15       | -0.10114 | 0.33929043 | 0.535892 |
| 306344    | Arrdc2       | -0.10114 | 0.15238349 | 0.309992 |
| 291852    | Katnb1       | -0.10121 | 0.00310342 | 0.013839 |
| 29270     | Spr          | -0.10124 | 0.06239759 | 0.160829 |
| 29533     | Pxmp2        | -0.10129 | 0.39683004 | 0.594013 |
| 29884     | Bok          | -0.1013  | 0.01388853 | 0.048533 |
| 103689977 | LOC103689977 | -0.10131 | 0.39620119 | 0.593492 |
| 316539    | Epha4        | -0.10139 | 0.35759782 | 0.554687 |
| 298917    | Iah1         | -0.10139 | 0.07925363 | 0.19309  |
| 399489    | E2f1         | -0.10142 | 0.08263056 | 0.199556 |
| 287155    | Stub1        | -0.10144 | 7.97E-07   | 8.03E-06 |
| 102546889 | LOC102546889 | -0.10148 | 0.46650816 | 0.657343 |
| 297799    | Mrpl15       | -0.1015  | 0.01490938 | 0.051571 |
| 300078    | Dna14        | -0.10153 | 0.09481823 | 0.21998  |
| 360827    | Ulk1         | -0.10153 | 0.00111594 | 0.005677 |
| 432367    | Npc111       | -0.10164 | 0.74834107 | 0.86513  |
| 353305    | Tbx3         | -0.10174 | 0.05639235 | 0.148567 |
| 83525     | Ogfr         | -0.10179 | 0.01041171 | 0.038332 |
| 361215    | Auh          | -0.10193 | 3.46E-06   | 3.11E-05 |
| 310486    | Rarres1      | -0.10194 | 3.54E-05   | 2.60E-04 |
| 84422     | Gfra3        | -0.10197 | 5.09E-04   | 0.002849 |
| 140635    | Flt3         | -0.10198 | 0.03579901 | 0.103506 |
| 689730    | LOC689730    | -0.102   | 0.92177937 | 0.970388 |
| 361627    | Zfp143       | -0.10206 | 0.14713699 | 0.302616 |
| 299154    | Churc1       | -0.10212 | 0.14053772 | 0.293577 |
| 688811    | Slc25a28     | -0.10215 | 0.03355005 | 0.098483 |
| 84030     | Chn1         | -0.10216 | 3.07E-06   | 2.80E-05 |
| 108350662 | LOC108350662 | -0.1022  | 0.18903114 | 0.361819 |
| 315973    | Acad11       | -0.10221 | 0.14354763 | 0.297969 |
| 296658    | Ndufa8       | -0.10225 | 7.41E-06   | 6.23E-05 |

|           |              |          |            |          |
|-----------|--------------|----------|------------|----------|
| 296957    | Zc3hc1       | -0.10235 | 0.09848983 | 0.226074 |
| 361974    | Gatb         | -0.10241 | 0.05914474 | 0.154409 |
| 293655    | Ndufv1       | -0.10244 | 1.15E-06   | 1.13E-05 |
| 24832     | Thy1         | -0.10247 | 2.18E-73   | 3.12E-71 |
| 306759    | Spock1       | -0.10248 | 3.59E-04   | 0.002104 |
| 25152     | Map1a        | -0.10251 | 4.26E-87   | 7.18E-85 |
| 100912292 | Enho         | -0.10255 | 0.04413811 | 0.122538 |
| 687758    | Pip5k11      | -0.10261 | 0.13957316 | 0.292203 |
| 360977    | Tbrg4        | -0.10268 | 0.01214378 | 0.043506 |
| 361972    | Tmem154      | -0.10273 | 0.13933179 | 0.29189  |
| 298848    | Mapre3       | -0.10287 | 1.73E-10   | 2.93E-09 |
| 500689    | Ttc9         | -0.10288 | 7.15E-09   | 9.81E-08 |
| 691393    | Oxa11        | -0.10308 | 1.55E-04   | 9.89E-04 |
| 60565     | Syt6         | -0.10309 | 0.10383861 | 0.235093 |
| 316444    | Mdh1b        | -0.1031  | 0.62154395 | 0.779488 |
| 497967    | Zfp830       | -0.10316 | 0.25624664 | 0.445235 |
| 290626    | Haus8        | -0.10318 | 0.27668766 | 0.469194 |
| 54311     | Timm17a      | -0.10327 | 0.0017252  | 0.008318 |
| 29740     | Eci1         | -0.10332 | 0.08146296 | 0.197513 |
| 298072    | Trmo         | -0.10335 | 0.57517354 | 0.743261 |
| 687861    | Mmab         | -0.1034  | 0.06988831 | 0.175412 |
| 303180    | RGD1304587   | -0.10342 | 0.14120486 | 0.294454 |
| 78968     | Srebf1       | -0.10345 | 7.27E-05   | 4.99E-04 |
| 64534     | Pim3         | -0.10347 | 0.00555992 | 0.022631 |
| 103690013 | LOC103690013 | -0.10349 | 0.14395597 | 0.298361 |
| 108350059 | LOC108350059 | -0.10354 | 0.09238199 | 0.215932 |
| 298805    | Slc4a1ap     | -0.10357 | 0.00598444 | 0.024076 |
| 24659     | Pmch         | -0.10362 | 0.90700183 | 0.960245 |
| 304947    | Pbx1         | -0.10369 | 0.10744686 | 0.240999 |
| 293631    | Brsk2        | -0.10379 | 0.00394739 | 0.016947 |
| 117277    | Epn1         | -0.10381 | 3.06E-06   | 2.79E-05 |
| 291990    | Cog8         | -0.10387 | 0.00732214 | 0.028547 |
| 245962    | Cd48         | -0.10389 | 2.17E-08   | 2.77E-07 |
| 727679    | Pdpx         | -0.10396 | 0.01147219 | 0.041459 |
| 310661    | Vps72        | -0.10405 | 0.02654332 | 0.081812 |
| 81675     | Gyg1         | -0.10408 | 1.48E-09   | 2.22E-08 |
| 316131    | Fem1a        | -0.10414 | 0.00710382 | 0.027849 |
| 108352018 | LOC108352018 | -0.10422 | 0.85117177 | 0.92653  |
| 25081     | Apoa1        | -0.10422 | 0.85117177 | 0.92653  |
| 310587    | Hrnrr        | -0.10422 | 0.79074772 | 0.891956 |
| 310772    | Dennd2d      | -0.10422 | 0.79074772 | 0.891956 |
| 313183    | Actl7b       | -0.10422 | 0.85117177 | 0.92653  |
| 499732    | Lrriq3       | -0.10422 | 0.70747664 | 0.839181 |
| 64305     | Sult1b1      | -0.10422 | 0.79074772 | 0.891956 |
| 291967    | Zdhhc1       | -0.10422 | 0.03984659 | 0.112928 |
| 500528    | Ccdc17       | -0.10422 | 0.30411015 | 0.501106 |
| 310640    | Fam189b      | -0.10433 | 6.05E-27   | 3.05E-25 |
| 500801    | Cyp4f17      | -0.10441 | 0.1034162  | 0.234388 |
| 313047    | Yars         | -0.10445 | 9.81E-06   | 8.08E-05 |
| 497986    | Hoxb6        | -0.10445 | 0.12657958 | 0.272458 |
| 293345    | Taf10        | -0.10447 | 0.00264961 | 0.012058 |
| 497959    | Proca1       | -0.1045  | 0.31165921 | 0.506706 |
| 293599    | Olr300       | -0.10455 | 0.6771118  | 0.819496 |
| 29417     | Men1         | -0.10468 | 3.27E-04   | 0.00194  |
| 29553     | Kcnk3        | -0.1047  | 0.27023175 | 0.461741 |
| 687295    | Timm50       | -0.10473 | 0.00480323 | 0.020035 |

|           |              |          |            |          |
|-----------|--------------|----------|------------|----------|
| 25659     | Khk          | -0.10474 | 0.01958038 | 0.06435  |
| 288717    | Srrd         | -0.10477 | 0.25331411 | 0.441792 |
| 100361053 | Hbq1b        | -0.10478 | 0.557302   | 0.736355 |
| 498309    | Vash2        | -0.10485 | 0.51198412 | 0.697777 |
| 291685    | Srp19        | -0.10494 | 0.00774937 | 0.029949 |
| 64561     | Phka1        | -0.10509 | 0.0105902  | 0.038876 |
| 497876    | Mrpl28       | -0.10516 | 0.00696012 | 0.027393 |
| 288920    | Trir         | -0.10523 | 3.26E-04   | 0.001935 |
| 100909474 | LOC100909474 | -0.1053  | 0.76781796 | 0.877842 |
| 303059    | Ccnj1        | -0.10537 | 0.61764495 | 0.776644 |
| 362272    | Tp53rk       | -0.10537 | 0.37036038 | 0.566729 |
| 50522     | Ubc          | -0.10541 | 2.61E-47   | 2.39E-45 |
| 29738     | Kcnab2       | -0.10541 | 1.03E-39   | 7.85E-38 |
| 304361    | Mepce        | -0.10543 | 0.0668887  | 0.169491 |
| 116468    | Rfc2         | -0.10544 | 0.20049597 | 0.376424 |
| 84573     | Otof         | -0.10554 | 0.0816799  | 0.197888 |
| 100911238 | LOC100911238 | -0.10561 | 2.09E-04   | 0.001294 |
| 298490    | Ppcs         | -0.10566 | 0.06553032 | 0.166871 |
| 362838    | Mum1         | -0.10566 | 0.01499041 | 0.051823 |
| 689995    | Ppplr3d      | -0.10579 | 0.00828623 | 0.031689 |
| 309420    | Fam122a      | -0.10581 | 0.12451442 | 0.269475 |
| 102547078 | LOC102547078 | -0.10583 | 0.67240818 | 0.815566 |
| 117278    | Ebp          | -0.10588 | 0.03039376 | 0.091028 |
| 60371     | Birc2        | -0.10591 | 0.00708037 | 0.027763 |
| 497914    | Med9         | -0.10596 | 0.01738612 | 0.058512 |
| 79434     | Rab11b       | -0.10596 | 1.13E-11   | 2.18E-10 |
| 688721    | Lrfn4        | -0.10598 | 0.02004726 | 0.065624 |
| 307171    | Apbb1ip      | -0.10601 | 0.25611818 | 0.445052 |
| 368084    | Bud23        | -0.10603 | 0.07414051 | 0.183711 |
| 29688     | Minpp1       | -0.10604 | 0.00757562 | 0.029367 |
| 25434     | Sparc11      | -0.1061  | 1.44E-14   | 3.71E-13 |
| 681287    | Map7d1       | -0.10616 | 1.23E-09   | 1.88E-08 |
| 303333    | Slc46a1      | -0.10617 | 0.0114086  | 0.0413   |
| 57233     | Isl2         | -0.10619 | 1.29E-05   | 1.04E-04 |
| 314596    | Rasa13       | -0.1062  | 0.08535384 | 0.204268 |
| 289197    | Mgst3        | -0.10623 | 3.62E-07   | 3.87E-06 |
| 287940    | Hic2         | -0.10624 | 0.41071229 | 0.607347 |
| 59294     | Pold1        | -0.10624 | 0.28378924 | 0.477664 |
| 362765    | Angell1      | -0.10637 | 9.29E-04   | 0.004854 |
| 313173    | Cntfr        | -0.10644 | 4.19E-04   | 0.002402 |
| 300999    | Mst1r        | -0.10646 | 0.19347564 | 0.367189 |
| 24534     | Ldhd         | -0.10648 | 3.94E-16   | 1.12E-14 |
| 102547897 | LOC102547897 | -0.10651 | 0.19817616 | 0.373135 |
| 170845    | Ndel1        | -0.10656 | 1.01E-06   | 9.99E-06 |
| 311299    | Aven         | -0.10658 | 0.02422199 | 0.076249 |
| 299269    | Ifi2712b     | -0.1066  | 5.77E-05   | 4.05E-04 |
| 299312    | LOC299312    | -0.10663 | 0.3165262  | 0.511041 |
| 306284    | Gprin2       | -0.10664 | 0.31160153 | 0.506655 |
| 100364350 | Nwd1         | -0.10674 | 0.17084667 | 0.336865 |
| 100910438 | LOC100910438 | -0.10676 | 0.20607349 | 0.383493 |
| 100366121 | Smim24       | -0.10678 | 0.5661832  | 0.736491 |
| 367328    | Washc1       | -0.10686 | 0.00812067 | 0.031143 |
| 171047    | Dnph1        | -0.10693 | 0.51018632 | 0.696473 |
| 29481     | Rgs9         | -0.10693 | 0.56846149 | 0.738093 |
| 300886    | Mthfs        | -0.10693 | 0.15120814 | 0.308193 |
| 29722     | Apbb1        | -0.10703 | 7.20E-13   | 1.57E-11 |

|           |              |          |            |          |
|-----------|--------------|----------|------------|----------|
| 24211     | Atp1a1       | -0.10705 | 6.86E-126  | #####    |
| 500959    | LOC500959    | -0.10708 | 0.00451384 | 0.018998 |
| 362331    | Ccdc136      | -0.10712 | 4.86E-07   | 5.07E-06 |
| 170641    | Adgrl3       | -0.10712 | 7.15E-04   | 0.003862 |
| 29707     | Gabra5       | -0.10713 | 0.21749916 | 0.398871 |
| 499194    | Nmb          | -0.10714 | 0.00228304 | 0.0106   |
| 303786    | Aifm3        | -0.10717 | 0.01606164 | 0.05483  |
| 497902    | Uqcrq        | -0.10727 | 6.61E-05   | 4.58E-04 |
| 306288    | Mmrn2        | -0.10737 | 0.05554373 | 0.146717 |
| 314131    | Insm2        | -0.1074  | 0.0261506  | 0.080811 |
| 171519    | Calcb        | -0.10741 | 6.64E-07   | 6.78E-06 |
| 301007    | Wdr6         | -0.10746 | 5.75E-07   | 5.96E-06 |
| 360580    | Dusp14       | -0.10747 | 0.14004501 | 0.292965 |
| 83514     | Tsc22d3      | -0.10752 | 2.00E-11   | 3.76E-10 |
| 291655    | Pcdhb4       | -0.10756 | 0.52694227 | 0.710637 |
| 309855    | Fig4         | -0.10756 | 4.92E-04   | 0.002765 |
| 85268     | Hrh3         | -0.10757 | 0.17466784 | 0.342238 |
| 304289    | Daglb        | -0.10768 | 0.01463605 | 0.050764 |
| 297821    | Ndufaf6      | -0.10768 | 0.16887869 | 0.333848 |
| 246146    | Hspbp1       | -0.1077  | 3.46E-05   | 2.55E-04 |
| 291660    | Ndufa2       | -0.10774 | 0.00663289 | 0.026328 |
| 362827    | Pias4        | -0.10781 | 0.01820672 | 0.060726 |
| 299609    | Abca7        | -0.10781 | 7.32E-11   | 1.28E-09 |
| 25741     | Pfkl         | -0.10788 | 8.91E-05   | 5.98E-04 |
| 83807     | Ybx3         | -0.1079  | 1.80E-05   | 1.41E-04 |
| 309179    | Ppp2r5b      | -0.10796 | 5.69E-13   | 1.25E-11 |
| 103690221 | Nyap2        | -0.10798 | 0.10029534 | 0.229142 |
| 306526    | Mak16        | -0.10802 | 0.05227047 | 0.139503 |
| 102552805 | LOC102552805 | -0.10803 | 0.27632727 | 0.468791 |
| 292758    | Mrps12       | -0.10804 | 0.05476943 | 0.145074 |
| 302963    | Mmp25        | -0.10805 | 0.09788295 | 0.225034 |
| 304979    | Igsf8        | -0.1081  | 0.00459176 | 0.019283 |
| 65047     | Slit1        | -0.10819 | 4.78E-06   | 4.18E-05 |
| 25729     | Ccnel        | -0.10823 | 0.22063277 | 0.402679 |
| 680477    | Haus3        | -0.10832 | 0.10960597 | 0.244603 |
| 155140    | Il23a        | -0.10834 | 0.7018939  | 0.83699  |
| 25605     | Hcrtr2       | -0.10834 | 0.78665578 | 0.889289 |
| 292912    | Rasip1       | -0.10838 | 0.06207234 | 0.160294 |
| 84011     | Atp9a        | -0.1084  | 7.51E-22   | 2.95E-20 |
| 102548600 | LOC102548600 | -0.10844 | 0.35555968 | 0.552651 |
| 360776    | Lamtor4      | -0.10847 | 4.84E-04   | 0.002724 |
| 294303    | Lhfp15       | -0.10857 | 0.01274951 | 0.045293 |
| 85239     | Mlycd        | -0.10861 | 0.030158   | 0.090507 |
| 307479    | Jakmip2      | -0.10862 | 0.00327674 | 0.014479 |
| 296083    | Vps18        | -0.10865 | 0.01353264 | 0.047543 |
| 59085     | As1          | -0.10892 | 0.03709802 | 0.106534 |
| 300438    | Ldlr         | -0.10899 | 1.40E-07   | 1.60E-06 |
| 29526     | Pla2g1b      | -0.10901 | 0.69746302 | 0.834004 |
| 363029    | Swsap1       | -0.10902 | 0.11073584 | 0.24672  |
| 294846    | Zfp622       | -0.10903 | 0.02513245 | 0.07839  |
| 81781     | Snrpn        | -0.10905 | 0.01017821 | 0.037581 |
| 292051    | Cmip         | -0.10906 | 1.38E-07   | 1.57E-06 |
| 309200    | Ints5        | -0.10917 | 0.03608628 | 0.104178 |
| 56813     | Pthlr        | -0.10919 | 0.04213792 | 0.117878 |
| 306960    | Abt1         | -0.1092  | 0.08566105 | 0.204694 |
| 317396    | Ubqln2       | -0.1092  | 8.00E-08   | 9.48E-07 |

|           |              |          |            |          |
|-----------|--------------|----------|------------|----------|
| 691842    | Maz          | -0.10922 | 0.00116463 | 0.005894 |
| 309593    | Gn11         | -0.10934 | 3.84E-04   | 0.002231 |
| 289786    | Nacad        | -0.10934 | 2.78E-22   | 1.12E-20 |
| 307842    | Vac14        | -0.10938 | 1.32E-04   | 8.54E-04 |
| 102552540 | LOC102552540 | -0.10938 | 0.10280843 | 0.233483 |
| 58950     | Fkbp1b       | -0.10941 | 2.40E-16   | 6.93E-15 |
| 685656    | Kti12        | -0.10942 | 0.15001851 | 0.306425 |
| 94193     | Madd         | -0.10946 | 1.37E-06   | 1.33E-05 |
| 100362120 | Catsperz     | -0.10952 | 0.52329901 | 0.707502 |
| 246281    | Asmt         | -0.10952 | 0.52329901 | 0.707502 |
| 688600    | Tcf23        | -0.10952 | 0.32886873 | 0.524565 |
| 29704     | Pacsin1      | -0.10958 | 4.79E-05   | 3.43E-04 |
| 678880    | Rtl8b        | -0.1096  | 0.00514071 | 0.021237 |
| 103691319 | CIH9orf66    | -0.10961 | 0.93672899 | 0.979897 |
| 307350    | Afg3l2       | -0.10962 | 1.30E-04   | 8.41E-04 |
| 259272    | Msi1         | -0.10964 | 0.38917152 | 0.586189 |
| 362834    | Mbd3         | -0.10966 | 9.04E-04   | 0.004739 |
| 292889    | Med25        | -0.10967 | 3.88E-05   | 2.83E-04 |
| 305493    | Urgcp        | -0.10969 | 0.00222801 | 0.010365 |
| 25546     | Shox2        | -0.10978 | 0.02213657 | 0.070927 |
| 291773    | Taf4b        | -0.10978 | 0.08288928 | 0.199953 |
| 303879    | Slc51a       | -0.10986 | 0.09728791 | 0.224045 |
| 64508     | Adcy3        | -0.10996 | 0.00305136 | 0.013648 |
| 114501    | Lmx1b        | -0.11001 | 0.4867671  | 0.674904 |
| 500587    | Fbxo44       | -0.11002 | 2.53E-06   | 2.34E-05 |
| 499185    | Mrps11       | -0.11003 | 0.02906929 | 0.087961 |
| 304376    | Nyap1        | -0.11007 | 8.53E-04   | 0.004504 |
| 288272    | Mis18a       | -0.11009 | 0.31026751 | 0.505435 |
| 360955    | Man2b2       | -0.11012 | 2.56E-04   | 0.001553 |
| 83510     | Lypla2       | -0.11013 | 6.03E-05   | 4.22E-04 |
| 116695    | Kcnd1        | -0.11019 | 4.16E-12   | 8.40E-11 |
| 60663     | Insrr        | -0.11024 | 0.04284997 | 0.119572 |
| 296571    | Phpt1        | -0.11029 | 0.02003373 | 0.065625 |
| 680262    | Hyls1        | -0.11032 | 0.26715522 | 0.458417 |
| 684785    | Plekha2      | -0.11052 | 0.02870951 | 0.08708  |
| 310025    | Ptcd2        | -0.11058 | 0.11613016 | 0.255924 |
| 311203    | Pex16        | -0.11059 | 0.02865824 | 0.087049 |
| 500084    | Trim24       | -0.11066 | 0.05887345 | 0.153848 |
| 29167     | Dctn1        | -0.11068 | 8.16E-37   | 5.91E-35 |
| 306782    | Ror2         | -0.11071 | 0.25227264 | 0.440662 |
| 363471    | Pnpla4       | -0.11076 | 0.41151763 | 0.607217 |
| 100912380 | LOC100912380 | -0.11078 | 3.74E-22   | 1.49E-20 |
| 24782     | Slc9a1       | -0.11078 | 3.11E-05   | 2.32E-04 |
| 288176    | Cmss1        | -0.11084 | 0.14734167 | 0.302873 |
| 103693239 | Ar14c        | -0.11084 | 0.00305576 | 0.013658 |
| 308393    | Pnma8b       | -0.11101 | 0.01035895 | 0.03816  |
| 63886     | Abcb9        | -0.11114 | 6.40E-04   | 0.003495 |
| 309790    | Msl13l2      | -0.11123 | 0.1835607  | 0.353945 |
| 292988    | Mkrn3        | -0.11126 | 0.63462722 | 0.790121 |
| 688843    | Nap115       | -0.11126 | 4.38E-15   | 1.17E-13 |
| 308579    | Cpt1c        | -0.11135 | 0.00239457 | 0.011056 |
| 103693776 | LOC103693776 | -0.11146 | 5.25E-06   | 4.57E-05 |
| 314617    | Wdr18        | -0.11153 | 0.0085933  | 0.032641 |
| 299620    | Sf3a2        | -0.11155 | 0.0085694  | 0.032582 |
| 300142    | Trabd        | -0.11156 | 0.01772067 | 0.059407 |
| 498465    | LOC498465    | -0.11157 | 0.76680586 | 0.877528 |

|           |              |          |            |          |
|-----------|--------------|----------|------------|----------|
| 361992    | Them4        | -0.11157 | 0.07672291 | 0.188395 |
| 362298    | Actr3b       | -0.11158 | 0.01972725 | 0.064766 |
| 301334    | Arhgef4      | -0.11173 | 7.96E-15   | 2.07E-13 |
| 310732    | Slc22a15     | -0.11176 | 0.16201901 | 0.3246   |
| 65210     | Cyp2j4       | -0.11191 | 0.36971707 | 0.566018 |
| 499114    | Fbxo27       | -0.11195 | 0.11385184 | 0.252188 |
| 171441    | Yif1a        | -0.11196 | 0.02425597 | 0.076344 |
| 114031    | Fstl3        | -0.11205 | 0.33028118 | 0.526553 |
| 50671     | Fasn         | -0.11207 | 2.88E-24   | 1.28E-22 |
| 497934    | Borcs6       | -0.11209 | 0.00807661 | 0.031012 |
| 311324    | Disp2        | -0.11214 | 1.29E-10   | 2.21E-09 |
| 171379    | Smarca4      | -0.11216 | 1.01E-08   | 1.35E-07 |
| 315939    | Pxylp1       | -0.1122  | 0.05888328 | 0.153853 |
| 304575    | Plcxdl       | -0.11223 | 0.78339551 | 0.887659 |
| 102553587 | Peg10        | -0.11224 | 0.42167605 | 0.617233 |
| 363518    | Naa10        | -0.11224 | 0.07237866 | 0.180355 |
| 289733    | Pla2g3       | -0.11228 | 0.00548267 | 0.022383 |
| 305505    | Ccm2         | -0.1123  | 0.00205417 | 0.009662 |
| 500059    | Prprt4       | -0.11232 | 0.38328594 | 0.580169 |
| 192180    | Nip7         | -0.11232 | 0.21757751 | 0.398937 |
| 29714     | Ptprn2       | -0.11239 | 3.31E-04   | 0.001957 |
| 83613     | Nefl         | -0.1124  | 0          | 0        |
| 288912    | Mri1         | -0.11258 | 0.0238599  | 0.075371 |
| 171160    | Hopx         | -0.11274 | 2.58E-05   | 1.95E-04 |
| 289562    | Noa1         | -0.11278 | 0.0353673  | 0.102553 |
| 102549235 | LOC102549235 | -0.11278 | 0.78233087 | 0.886874 |
| 108350942 | LOC108350942 | -0.11278 | 0.78233087 | 0.886874 |
| 24182     | Agtr2        | -0.11278 | 0.78233087 | 0.886874 |
| 292129    | Tdrd1        | -0.11278 | 0.51702305 | 0.701982 |
| 29446     | Ghrh         | -0.11278 | 0.84511002 | 0.922674 |
| 315820    | Myo5c        | -0.11278 | 0.58056071 | 0.747787 |
| 362042    | Gimd1        | -0.11278 | 0.84511002 | 0.922674 |
| 362047    | RGD1309170   | -0.11278 | 0.84511002 | 0.922674 |
| 290789    | Cldn23       | -0.11278 | 0.63226875 | 0.788628 |
| 116489    | Kcnk4        | -0.11285 | 0.01079808 | 0.039427 |
| 361550    | Gramd1a      | -0.11304 | 1.86E-05   | 1.45E-04 |
| 299511    | Rdh16        | -0.11306 | 0.45450158 | 0.645632 |
| 361131    | Pbx4         | -0.11319 | 0.34791825 | 0.544775 |
| 294422    | Smpd13a      | -0.11323 | 0.07279476 | 0.181155 |
| 298500    | Smad2        | -0.11336 | 4.66E-07   | 4.88E-06 |
| 289633    | Nwd2         | -0.11338 | 0.00199379 | 0.009434 |
| 361358    | Bean1        | -0.11341 | 3.48E-10   | 5.66E-09 |
| 362284    | Phactr3      | -0.11345 | 0.07250793 | 0.18063  |
| 366515    | Wrap73       | -0.11352 | 0.08748853 | 0.207499 |
| 305963    | Pinx1        | -0.11366 | 0.20171518 | 0.377596 |
| 289193    | Fmo13        | -0.11367 | 0.89884766 | 0.955917 |
| 681410    | LOC681410    | -0.11378 | 4.62E-06   | 4.05E-05 |
| 306340    | Ano8         | -0.11386 | 1.83E-04   | 0.001146 |
| 306243    | Cacna2d3     | -0.11394 | 1.15E-05   | 9.34E-05 |
| 300689    | Rexo2        | -0.11397 | 3.22E-05   | 2.40E-04 |
| 313156    | Lingo2       | -0.11403 | 0.18753214 | 0.359636 |
| 64444     | Isl1         | -0.11405 | 0.01238941 | 0.044211 |
| 192253    | Myo16        | -0.11412 | 0.3677644  | 0.563935 |
| 24245     | Camk2b       | -0.11415 | 2.86E-06   | 2.62E-05 |
| 102549836 | LOC102549836 | -0.11417 | 0.3070213  | 0.502922 |
| 29189     | Fdx1         | -0.11417 | 0.3070213  | 0.502922 |



|           |              |          |            |          |
|-----------|--------------|----------|------------|----------|
| 64517     | Thop1        | -0.11417 | 0.00520442 | 0.021463 |
| 360754    | Zfp358       | -0.11423 | 0.02919451 | 0.088269 |
| 308571    | Lrrc4b       | -0.11424 | 1.87E-04   | 0.001167 |
| 500925    | Ccdc184      | -0.11424 | 0.04006134 | 0.113436 |
| 171039    | Rph3a        | -0.11425 | 9.05E-32   | 5.49E-30 |
| 117287    | Park7        | -0.11427 | 1.64E-08   | 2.14E-07 |
| 116486    | Sec1412      | -0.11438 | 0.00178562 | 0.008572 |
| 294236    | Gtf2h4       | -0.11443 | 0.09043958 | 0.212382 |
| 313717    | Clstn1       | -0.11456 | 3.54E-29   | 1.94E-27 |
| 296635    | Plpp7        | -0.1147  | 0.14760957 | 0.302966 |
| 304521    | Rnft2        | -0.11472 | 1.59E-05   | 1.25E-04 |
| 24333     | Eno1         | -0.11479 | 2.04E-31   | 1.23E-29 |
| 79247     | Htr5b        | -0.11483 | 0.36945515 | 0.565662 |
| 293701    | Esrra        | -0.11491 | 0.00448524 | 0.01889  |
| 170588    | Acot8        | -0.11493 | 0.08301364 | 0.200177 |
| 308097    | Tagap        | -0.11496 | 0.47690009 | 0.666219 |
| 25058     | Hk1          | -0.11501 | 9.14E-18   | 2.94E-16 |
| 680465    | Trappc6a     | -0.11503 | 0.20092771 | 0.376529 |
| 29575     | Tcea2        | -0.11509 | 5.55E-05   | 3.91E-04 |
| 311615    | Tox2         | -0.11514 | 0.0028699  | 0.01294  |
| 502334    | Ceacam18     | -0.11514 | 0.69293097 | 0.83041  |
| 65275     | Gpr27        | -0.11514 | 0.42966671 | 0.624275 |
| 29145     | Ctxn1        | -0.11525 | 1.28E-04   | 8.30E-04 |
| 50592     | Grial        | -0.11527 | 0.38917855 | 0.586153 |
| 313892    | Togaram2     | -0.11536 | 0.51216327 | 0.697847 |
| 84393     | Kif4a        | -0.11536 | 0.51216327 | 0.697847 |
| 84388     | I118bp       | -0.11542 | 0.12259796 | 0.266691 |
| 287115    | Pgp          | -0.11542 | 2.86E-05   | 2.15E-04 |
| 83610     | Apba2        | -0.11554 | 2.72E-05   | 2.05E-04 |
| 29466     | Aes          | -0.11558 | 1.94E-25   | 9.14E-24 |
| 116561    | Cltb         | -0.11573 | 2.28E-12   | 4.67E-11 |
| 25413     | Cpt2         | -0.11575 | 0.0122737  | 0.043889 |
| 299800    | Tmem19       | -0.11576 | 0.02441028 | 0.076639 |
| 300446    | Zfp653       | -0.11589 | 0.14179949 | 0.29537  |
| 29452     | Epas1        | -0.11593 | 1.65E-07   | 1.86E-06 |
| 680440    | Nkpd1        | -0.11595 | 0.62742114 | 0.784792 |
| 60352     | Mapk12       | -0.11596 | 1.05E-04   | 6.92E-04 |
| 287828    | Jpt1         | -0.11597 | 3.35E-07   | 3.60E-06 |
| 114028    | Ctnnd2       | -0.11597 | 1.14E-04   | 7.50E-04 |
| 116728    | 5-Sep        | -0.116   | 5.02E-17   | 1.54E-15 |
| 314405    | Otub2        | -0.11603 | 0.18857933 | 0.361136 |
| 303730    | Cbx2         | -0.11604 | 0.24090055 | 0.42846  |
| 362053    | Clca4        | -0.11611 | 0.77595596 | 0.883117 |
| 252928    | Timm13       | -0.11617 | 0.00203253 | 0.009582 |
| 100910270 | LOC100910270 | -0.11618 | 0.42295746 | 0.618396 |
| 432361    | Nrg2         | -0.1162  | 0.08584242 | 0.204999 |
| 24338     | Ephb1        | -0.11624 | 0.00947523 | 0.035439 |
| 170843    | Khdrbs2      | -0.11625 | 0.51051302 | 0.69652  |
| 313244    | Frmpd1       | -0.11661 | 1.33E-09   | 2.02E-08 |
| 362768    | Ttc7b        | -0.11665 | 1.08E-05   | 8.85E-05 |
| 171097    | Adap1        | -0.11669 | 4.86E-10   | 7.79E-09 |
| 100363376 | Cmc2         | -0.11672 | 0.05927813 | 0.154651 |
| 116671    | Cdk5r1       | -0.11675 | 0.07176279 | 0.179101 |
| 79435     | Ube2d4       | -0.11676 | 0.74068242 | 0.860665 |
| 359728    | Rab40c       | -0.11686 | 0.02128554 | 0.068826 |
| 54239     | Chrn2        | -0.11689 | 2.82E-05   | 2.12E-04 |

|           |              |          |            |          |
|-----------|--------------|----------|------------|----------|
| 289778    | RGD1309870   | -0.11694 | 0.71976749 | 0.846746 |
| 290658    | Cers1        | -0.11699 | 0.00858207 | 0.032614 |
| 306351    | Gdf1         | -0.11699 | 0.00858207 | 0.032614 |
| 682787    | Sumo4        | -0.117   | 0.04992989 | 0.134805 |
| 100188944 | Pnkd         | -0.11708 | 8.40E-13   | 1.82E-11 |
| 685244    | Iqsec2       | -0.11713 | 5.04E-04   | 0.002826 |
| 291434    | Rpl17        | -0.11718 | 1.55E-11   | 2.94E-10 |
| 155151    | Corola       | -0.11719 | 3.98E-04   | 0.002298 |
| 117016    | Mark1        | -0.1173  | 5.05E-06   | 4.40E-05 |
| 362783    | Eml1         | -0.11735 | 4.34E-09   | 6.17E-08 |
| 312504    | Fbxo41       | -0.11737 | 0.037375   | 0.107119 |
| 317232    | Magee1       | -0.11741 | 2.60E-07   | 2.84E-06 |
| 306808    | Ippk         | -0.11742 | 0.13559785 | 0.285797 |
| 291103    | Uqcrfs1      | -0.11745 | 7.71E-07   | 7.80E-06 |
| 25398     | Cacnala      | -0.11752 | 1.77E-07   | 1.98E-06 |
| 102548151 | LOC102548151 | -0.1176  | 0.68977104 | 0.828238 |
| 366631    | RGD1560556   | -0.1176  | 0.62492924 | 0.782703 |
| 499603    | RGD1565989   | -0.1176  | 0.77774968 | 0.88397  |
| 682968    | Isx          | -0.1176  | 0.77774968 | 0.88397  |
| 315119    | Mfng         | -0.1176  | 0.39712918 | 0.594321 |
| 298873    | Slc7a15      | -0.11767 | 0.1042686  | 0.235731 |
| 64528     | Golga2       | -0.11769 | 2.82E-09   | 4.10E-08 |
| 102554102 | Trim30c      | -0.11777 | 0.82540063 | 0.91203  |
| 361672    | Kndc1        | -0.11792 | 0.01199748 | 0.043071 |
| 499870    | Rad51        | -0.11794 | 0.4388671  | 0.632528 |
| 361232    | Pak1ip1      | -0.11795 | 0.18994166 | 0.362905 |
| 103693202 | LOC103693202 | -0.11798 | 0.63078085 | 0.787856 |
| 500929    | Tuba1b       | -0.11802 | 1.74E-154  | #####    |
| 140728    | Cacng7       | -0.11804 | 1.14E-07   | 1.33E-06 |
| 25665     | Scn5a        | -0.11808 | 0.38122032 | 0.578099 |
| 291983    | Psmb10       | -0.11812 | 0.02418088 | 0.076183 |
| 83801     | Ptms         | -0.11819 | 1.11E-24   | 5.09E-23 |
| 315220    | Mapk8ip2     | -0.1182  | 2.40E-22   | 9.76E-21 |
| 116664    | Atp6v1f      | -0.11821 | 3.03E-07   | 3.28E-06 |
| 299195    | Coq6         | -0.11823 | 0.02195169 | 0.070465 |
| 25364     | Asic2        | -0.11825 | 0.02821217 | 0.085872 |
| 81752     | Ptger2       | -0.11832 | 0.35889846 | 0.55589  |
| 309459    | Neur11       | -0.11835 | 1.03E-04   | 6.84E-04 |
| 56827     | Cacnali      | -0.11841 | 0.22786725 | 0.412209 |
| 290771    | Pdgfr1       | -0.11844 | 0.32643244 | 0.52221  |
| 103693794 | LOC103693794 | -0.11847 | 0.64030934 | 0.794287 |
| 100359592 | Palm3        | -0.11851 | 2.61E-04   | 0.001585 |
| 295310    | Zfp697       | -0.11851 | 0.27974577 | 0.473158 |
| 24588     | Nefm         | -0.11853 | 0          | 0        |
| 83791     | Fdps         | -0.11858 | 1.75E-18   | 5.83E-17 |
| 499558    | 11-Mar       | -0.11858 | 0.11452066 | 0.253315 |
| 315695    | Odf311       | -0.11861 | 0.65398079 | 0.802776 |
| 293494    | Ino80e       | -0.11867 | 0.00223404 | 0.010388 |
| 29213     | Tubb4a       | -0.11873 | 4.46E-41   | 3.53E-39 |
| 29463     | Ptp4a1       | -0.11873 | 7.50E-04   | 0.004025 |
| 404280    | Mid1ip1      | -0.11875 | 3.18E-11   | 5.84E-10 |
| 361528    | Ttc9b        | -0.11876 | 0.00365153 | 0.015899 |
| 301529    | Dnpep        | -0.11885 | 2.75E-06   | 2.52E-05 |
| 690795    | H2afj        | -0.11894 | 0.1829964  | 0.35325  |
| 303794    | Dgcr6        | -0.11895 | 1.39E-04   | 8.97E-04 |
| 500709    | Itpk1        | -0.11908 | 3.45E-06   | 3.11E-05 |

|           |              |          |            |          |
|-----------|--------------|----------|------------|----------|
| 140591    | Ppfia3       | -0.11909 | 4.08E-06   | 3.62E-05 |
| 497987    | Hoxb5        | -0.1191  | 0.20398078 | 0.38064  |
| 360636    | Slc25a39     | -0.11911 | 1.91E-07   | 2.13E-06 |
| 171088    | Inpp5j       | -0.11914 | 0.00125021 | 0.006267 |
| 500566    | Stpgl        | -0.11914 | 0.18808875 | 0.360377 |
| 289007    | Thsd7b       | -0.11922 | 0.05133848 | 0.137633 |
| 302967    | Paqr4        | -0.11922 | 8.50E-11   | 1.48E-09 |
| 445541    | Repin1       | -0.11926 | 0.00798724 | 0.030756 |
| 100361465 | Pate2        | -0.1193  | 0.72767055 | 0.851232 |
| 314328    | Lrrc74a      | -0.1193  | 0.72767055 | 0.851232 |
| 689035    | Cyb5r1       | -0.1193  | 0.62239002 | 0.780138 |
| 29657     | Arntl        | -0.11934 | 0.06375238 | 0.163634 |
| 25495     | Nog          | -0.11938 | 0.16950751 | 0.334813 |
| 501624    | Bex4         | -0.11938 | 0.20336832 | 0.379795 |
| 362810    | Coq10a       | -0.11939 | 0.03175663 | 0.094353 |
| 286920    | Asic3        | -0.11947 | 4.44E-10   | 7.14E-09 |
| 108348136 | LOC108348136 | -0.1195  | 0.01234382 | 0.04409  |
| 65180     | Kcnd2        | -0.11955 | 0.46177397 | 0.652604 |
| 300222    | Mcrs1        | -0.11963 | 0.00231305 | 0.010723 |
| 117252    | Dnah10       | -0.11965 | 0.01619849 | 0.055208 |
| 313878    | Galnt14      | -0.11965 | 3.09E-04   | 0.001841 |
| 246264    | Zfp382       | -0.1197  | 0.04265699 | 0.119121 |
| 309373    | Ubt1         | -0.11971 | 0.01363563 | 0.047825 |
| 117265    | Pex6         | -0.1198  | 0.01187533 | 0.042665 |
| 311616    | Gdap111      | -0.11983 | 1.20E-05   | 9.69E-05 |
| 500793    | Btbd2        | -0.11998 | 1.55E-09   | 2.33E-08 |
| 81613     | Ceacam1      | -0.12006 | 0.1349974  | 0.285163 |
| 25630     | Pkm          | -0.12007 | 2.65E-63   | 3.35E-61 |
| 300066    | Ggal         | -0.1201  | 3.27E-06   | 2.95E-05 |
| 501582    | Gspt2        | -0.12013 | 0.07724139 | 0.189277 |
| 156435    | Tmprss2      | -0.12014 | 0.56532008 | 0.735971 |
| 29465     | Trpv2        | -0.12014 | 3.55E-05   | 2.60E-04 |
| 102548695 | LOC102548695 | -0.12014 | 0.05677349 | 0.149406 |
| 293628    | Chid1        | -0.12015 | 0.02227071 | 0.071273 |
| 362169    | Alkbh3       | -0.12016 | 3.86E-05   | 2.81E-04 |
| 361368    | Largel       | -0.12029 | 2.59E-13   | 5.89E-12 |
| 114630    | Atp5mc3      | -0.1203  | 9.93E-11   | 1.72E-09 |
| 288499    | Slc29a4      | -0.12033 | 0.01649012 | 0.055941 |
| 294286    | Kifc1        | -0.12037 | 0.46649291 | 0.65737  |
| 498909    | Coq9         | -0.12042 | 0.00195588 | 0.009273 |
| 291081    | Tubb2b       | -0.12043 | 1.34E-29   | 7.47E-28 |
| 282819    | Ppif         | -0.12043 | 0.08794638 | 0.208274 |
| 304298    | Foxk1        | -0.12048 | 0.19571289 | 0.370144 |
| 102553890 | LOC102553890 | -0.12052 | 0.90216217 | 0.957784 |
| 500305    | Dcp1b        | -0.12058 | 0.12696279 | 0.273036 |
| 310256    | Lrrc31       | -0.1206  | 0.42383923 | 0.6194   |
| 315059    | Trappc9      | -0.12065 | 5.87E-04   | 0.00323  |
| 311848    | Sh3glb2      | -0.12067 | 4.69E-14   | 1.16E-12 |
| 25638     | Pde4a        | -0.12069 | 0.31191309 | 0.507032 |
| 100361647 | Galnt6       | -0.12079 | 0.10828626 | 0.242368 |
| 297437    | Txnrd3       | -0.12079 | 0.00540909 | 0.022164 |
| 310721    | Tent5c       | -0.12086 | 0.30705596 | 0.50287  |
| 303790    | Smpd4        | -0.12087 | 0.00351051 | 0.015373 |
| 501923    | Smim20       | -0.1209  | 0.05617259 | 0.148173 |
| 311849    | Crat         | -0.12095 | 2.20E-09   | 3.24E-08 |
| 307916    | Jph3         | -0.12098 | 5.08E-09   | 7.16E-08 |

|           |                 |          |            |          |
|-----------|-----------------|----------|------------|----------|
| 81743     | Pde2a           | -0.12102 | 1.53E-05   | 1.21E-04 |
| 24518     | Jund            | -0.12104 | 1.98E-08   | 2.55E-07 |
| 25590     | Chrna4          | -0.12104 | 0.61980195 | 0.777969 |
| 293665    | Zdhhc24         | -0.12118 | 0.14390154 | 0.298313 |
| 171053    | Pank4           | -0.12123 | 0.00638867 | 0.025529 |
| 100912294 | LOC100912294    | -0.12129 | 0.40026371 | 0.597369 |
| 314637    | Slc39a3         | -0.1213  | 0.07520195 | 0.185665 |
| 363197    | Tmem63b         | -0.12131 | 1.33E-11   | 2.54E-10 |
| 689616    | Apcdd1          | -0.12135 | 0.00321872 | 0.014279 |
| 313595    | RGD1563072      | -0.12141 | 0.02969172 | 0.089446 |
| 363082    | Pdcd7           | -0.12156 | 0.00563346 | 0.022876 |
| 361696    | Rps6kb2         | -0.12157 | 0.02163883 | 0.069696 |
| 114860    | Gale            | -0.12157 | 0.00537944 | 0.02208  |
| 83681     | Cish            | -0.12163 | 0.02320126 | 0.073608 |
| 290640    | Map1s           | -0.12165 | 2.41E-04   | 0.001471 |
| 366826    | Diras1          | -0.12165 | 1.17E-07   | 1.36E-06 |
| 300447    | Ecsit           | -0.12175 | 0.00131732 | 0.006569 |
| 64569     | Lst1            | -0.12181 | 0.69280051 | 0.830462 |
| 683460    | Proser2         | -0.12182 | 0.29661502 | 0.493193 |
| 360738    | Tango2          | -0.12194 | 4.13E-07   | 4.37E-06 |
| 299608    | Tmem259         | -0.12199 | 5.52E-06   | 4.77E-05 |
| 292739    | RGD1307554      | -0.122   | 0.05238241 | 0.139743 |
| 29205     | Syngn1          | -0.12202 | 4.42E-04   | 0.002519 |
| 58979     | Gng7            | -0.12205 | 0.01609859 | 0.054936 |
| 29147     | Jag2            | -0.12213 | 2.21E-06   | 2.07E-05 |
| 296134    | Mrps5           | -0.12217 | 0.00937055 | 0.035117 |
| 298081    | Trmt10b         | -0.12231 | 0.1922942  | 0.365822 |
| 364224    | Acyp2           | -0.12236 | 8.00E-04   | 0.004256 |
| 690367    | Btbd6           | -0.12239 | 4.41E-06   | 3.89E-05 |
| 54702     | Egln3           | -0.12245 | 0.06185353 | 0.159902 |
| 689074    | Camsap3         | -0.1225  | 0.00213754 | 0.01002  |
| 81653     | Dbn1            | -0.1225  | 4.33E-11   | 7.78E-10 |
| 303631    | Arsg            | -0.12251 | 0.15865607 | 0.319611 |
| 362090    | Fam69b          | -0.12253 | 1.04E-05   | 8.50E-05 |
| 103692164 | NEWGENE_1595506 | -0.12254 | 0.00195995 | 0.00929  |
| 171119    | Dscam           | -0.1227  | 0.06986135 | 0.175367 |
| 100363510 | LOC100363510    | -0.12284 | 0.83829657 | 0.919213 |
| 24715     | Ren             | -0.12284 | 0.72374016 | 0.848955 |
| 303070    | Nipal4          | -0.12284 | 0.83829657 | 0.919213 |
| 303167    | Trim58          | -0.12284 | 0.83829657 | 0.919213 |
| 364899    | Cfap53          | -0.12284 | 0.56380064 | 0.734897 |
| 689856    | L3mbt14         | -0.12284 | 0.83829657 | 0.919213 |
| 29545     | Uchl1           | -0.12288 | 4.63E-143  | #####    |
| 688785    | Trim8           | -0.12289 | 5.67E-05   | 3.99E-04 |
| 24183     | Ak1             | -0.12309 | 2.46E-06   | 2.28E-05 |
| 309637    | Uhrf1bp1        | -0.12311 | 0.00386035 | 0.016641 |
| 25462     | Hspe1           | -0.12323 | 6.25E-04   | 0.003424 |
| 287477    | Emc6            | -0.12326 | 0.00772561 | 0.029869 |
| 25103     | Chrn4           | -0.12341 | 0.11927057 | 0.261003 |
| 310519    | Slitrk3         | -0.12342 | 2.26E-06   | 2.11E-05 |
| 140608    | Atp5me          | -0.12345 | 0.00121653 | 0.006121 |
| 116660    | Ptprn           | -0.12353 | 5.08E-19   | 1.74E-17 |
| 500110    | Zfp467          | -0.12358 | 0.02554769 | 0.07936  |
| 362285    | Col9a3          | -0.12361 | 0.00107798 | 0.005514 |
| 60668     | Amph            | -0.1237  | 3.39E-05   | 2.51E-04 |
| 308704    | Lins1           | -0.12372 | 0.1475364  | 0.302881 |

|           |              |          |            |          |
|-----------|--------------|----------|------------|----------|
| 54315     | Ucp2         | -0.12375 | 4.75E-16   | 1.35E-14 |
| 296600    | Slc2a6       | -0.12376 | 1.96E-04   | 0.001217 |
| 100361931 | Tmem221      | -0.12383 | 0.75960903 | 0.873122 |
| 292671    | Mil11        | -0.12385 | 0.68531183 | 0.825121 |
| 65153     | Ncs1         | -0.12385 | 4.52E-04   | 0.002566 |
| 287670    | Psm3         | -0.12388 | 3.02E-10   | 4.96E-09 |
| 25417     | Dpysl4       | -0.12389 | 5.98E-08   | 7.20E-07 |
| 364427    | Lrrc63       | -0.12394 | 0.35923985 | 0.556147 |
| 100912478 | LOC100912478 | -0.12405 | 0.02252912 | 0.071834 |
| 83512     | Fads2        | -0.12406 | 2.71E-09   | 3.95E-08 |
| 362196    | Chac1        | -0.12406 | 0.06489191 | 0.16571  |
| 688502    | Prmt8        | -0.12412 | 0.11305056 | 0.250909 |
| 81804     | Stxbp2       | -0.12422 | 0.24563384 | 0.433961 |
| 24664     | Pomc         | -0.12422 | 0.56157155 | 0.733196 |
| 292907    | Ruvbl2       | -0.12434 | 0.00534534 | 0.021987 |
| 304020    | Filip11      | -0.12436 | 0.08963287 | 0.211113 |
| 500225    | Ino80b       | -0.12439 | 0.07544911 | 0.186106 |
| 684558    | Upf1         | -0.1244  | 3.47E-05   | 2.55E-04 |
| 292680    | Ccdc61       | -0.12442 | 0.18312069 | 0.353418 |
| 361671    | Pwmp2b       | -0.12446 | 0.01063075 | 0.03898  |
| 117241    | Pop5         | -0.12448 | 0.13109032 | 0.279482 |
| 360552    | Pelp1        | -0.1245  | 3.42E-04   | 0.002012 |
| 296368    | Ube2c        | -0.12454 | 0.45870058 | 0.649996 |
| 309159    | Klc2         | -0.12467 | 1.45E-29   | 8.07E-28 |
| 500286    | Ssuh2        | -0.12469 | 0.61447274 | 0.77465  |
| 500608    | Arhgef33     | -0.12469 | 0.4762551  | 0.665806 |
| 287452    | RGD1308134   | -0.12471 | 0.04233533 | 0.118361 |
| 360872    | Rcsd1        | -0.12481 | 0.02196323 | 0.070478 |
| 308543    | Plekhf1      | -0.12481 | 0.02542104 | 0.079083 |
| 24786     | Sod1         | -0.12485 | 7.48E-17   | 2.26E-15 |
| 117019    | Eif2b4       | -0.12485 | 0.00222044 | 0.010337 |
| 102550932 | Tigd4        | -0.12486 | 0.49493002 | 0.681607 |
| 499871    | Zfyve19      | -0.1249  | 0.0850731  | 0.203878 |
| 170901    | Efna3        | -0.12507 | 0.30311602 | 0.50042  |
| 289185    | Cregl        | -0.12509 | 0.01221611 | 0.043732 |
| 307482    | Fchsd1       | -0.1251  | 0.00311111 | 0.013863 |
| 64076     | Slc26a1      | -0.12514 | 0.28835162 | 0.483165 |
| 498830    | MGC116121    | -0.12522 | 0.08466201 | 0.203199 |
| 366431    | Tceanc2      | -0.12523 | 0.06697735 | 0.169648 |
| 690914    | Muc15        | -0.12531 | 0.68816657 | 0.827198 |
| 361137    | Tmem192      | -0.12533 | 0.00469935 | 0.019679 |
| 308988    | Sez612       | -0.12536 | 1.86E-12   | 3.85E-11 |
| 298377    | Coa7         | -0.12537 | 0.17135889 | 0.33777  |
| 362535    | Lurap11      | -0.1254  | 0.03917142 | 0.11133  |
| 299714    | Ano4         | -0.12545 | 2.98E-06   | 2.72E-05 |
| 304396    | Lrwd1        | -0.12552 | 0.06665783 | 0.169131 |
| 64636     | Ntsr2        | -0.12556 | 0.18636359 | 0.358117 |
| 687694    | Elp4         | -0.12558 | 0.12925819 | 0.276536 |
| 300091    | RGD1306782   | -0.12563 | 0.55931026 | 0.735183 |
| 24157     | Acaala       | -0.12573 | 0.00551411 | 0.022483 |
| 288626    | Mmp17        | -0.12577 | 0.0583579  | 0.152815 |
| 302938    | Mgrn1        | -0.12589 | 5.36E-08   | 6.51E-07 |
| 362881    | RGD1306474   | -0.12598 | 0.75286614 | 0.868148 |
| 83817     | Ache         | -0.12599 | 1.10E-16   | 3.27E-15 |
| 353498    | Cyp11b3      | -0.12604 | 0.90263997 | 0.958024 |
| 309722    | Rhobtb1      | -0.12613 | 0.1611031  | 0.323378 |

|           |              |          |            |          |
|-----------|--------------|----------|------------|----------|
| 100911510 | LOC100911510 | -0.12618 | 0.583849   | 0.750196 |
| 360896    | Esrrg        | -0.12622 | 0.00208844 | 0.009814 |
| 291135    | Acot13       | -0.12629 | 0.09516638 | 0.220519 |
| 60629     | Unc5a        | -0.12639 | 0.11798702 | 0.259027 |
| 362914    | Wdyhvl       | -0.1264  | 0.10872369 | 0.24309  |
| 59324     | Kcnk1        | -0.12646 | 7.78E-06   | 6.52E-05 |
| 114101    | Cds2         | -0.12654 | 2.52E-06   | 2.33E-05 |
| 408230    | Wfdc15b      | -0.12659 | 0.71964515 | 0.846733 |
| 60393     | Sult1d1      | -0.12659 | 0.71964515 | 0.846733 |
| 300238    | Figl12       | -0.12664 | 0.40955082 | 0.606005 |
| 311865    | Ptges2       | -0.12674 | 0.00960079 | 0.035831 |
| 288271    | Mrap         | -0.12694 | 0.01307744 | 0.046233 |
| 362245    | Map11c3a     | -0.12695 | 4.13E-18   | 1.35E-16 |
| 29431     | Pak1         | -0.12711 | 3.49E-10   | 5.68E-09 |
| 361500    | Nat14        | -0.12716 | 0.17651985 | 0.344837 |
| 295052    | Ccnal        | -0.12721 | 0.38507693 | 0.58177  |
| 308493    | Clip3        | -0.12725 | 1.39E-20   | 5.08E-19 |
| 294568    | Wasf1        | -0.12726 | 1.54E-06   | 1.48E-05 |
| 292995    | Tm2d3        | -0.12728 | 0.05683087 | 0.149536 |
| 689984    | Gpr137       | -0.12731 | 1.52E-07   | 1.73E-06 |
| 171460    | Hspbap1      | -0.12737 | 0.21876155 | 0.400376 |
| 103689951 | LOC103689951 | -0.12744 | 0.06389755 | 0.163918 |
| 311204    | Slc35c1      | -0.12747 | 0.00304567 | 0.013632 |
| 309259    | Nsmce3       | -0.12751 | 0.03567207 | 0.103233 |
| 117062    | Hmgal        | -0.12752 | 9.78E-07   | 9.73E-06 |
| 290999    | Higd2a       | -0.12753 | 1.04E-04   | 6.89E-04 |
| 502694    | Dok5         | -0.12758 | 0.12283276 | 0.267049 |
| 689637    | Pdcd21       | -0.1276  | 0.14120722 | 0.294426 |
| 309901    | Phyhip1      | -0.1277  | 1.74E-21   | 6.70E-20 |
| 308578    | Ap2a1        | -0.12771 | 3.06E-19   | 1.06E-17 |
| 293114    | Tmem126b     | -0.12778 | 0.04580577 | 0.126302 |
| 315670    | Elmod1       | -0.12782 | 8.22E-04   | 0.004357 |
| 298296    | Pcsk9        | -0.12786 | 0.17198851 | 0.338695 |
| 690315    | Derl3        | -0.12793 | 0.3650496  | 0.561218 |
| 315094    | Hgh1         | -0.12794 | 0.03914524 | 0.111288 |
| 299617    | Abhd17a      | -0.12811 | 1.54E-08   | 2.03E-07 |
| 302421    | Gdpd2        | -0.12815 | 0.01539497 | 0.053    |
| 288914    | Trmt1        | -0.12817 | 0.00145588 | 0.007181 |
| 679944    | Alkbh7       | -0.12822 | 0.04909208 | 0.133261 |
| 683897    | LOC683897    | -0.12827 | 0.01825519 | 0.060867 |
| 688990    | Trnp1        | -0.12831 | 3.71E-25   | 1.72E-23 |
| 362562    | 362562       | -0.12833 | 0.2941692  | 0.490196 |
| 301427    | Ndufb3       | -0.12838 | 7.84E-05   | 5.35E-04 |
| 94338     | Smpd3        | -0.1284  | 1.54E-05   | 1.21E-04 |
| 296741    | Fastk        | -0.12845 | 1.50E-06   | 1.44E-05 |
| 257642    | LOC257642    | -0.12855 | 0.67614949 | 0.818644 |
| 303924    | Upk1b        | -0.12855 | 0.76770752 | 0.877795 |
| 307472    | Sh3rf2       | -0.12855 | 0.76770752 | 0.877795 |
| 304301    | Mmd2         | -0.12862 | 2.14E-09   | 3.17E-08 |
| 313058    | Adgrb2       | -0.1287  | 0.0082051  | 0.031417 |
| 307797    | Carmil2      | -0.12877 | 8.59E-08   | 1.01E-06 |
| 494342    | B4galt3      | -0.12878 | 0.00818611 | 0.03135  |
| 317630    | Bloc1s6      | -0.12893 | 0.01870826 | 0.062105 |
| 100911261 | LOC100911261 | -0.12896 | 0.0021139  | 0.009926 |
| 287473    | Nek8         | -0.12898 | 0.12005163 | 0.262471 |
| 266777    | Nptx1        | -0.12901 | 2.78E-18   | 9.16E-17 |



|           |              |          |            |          |
|-----------|--------------|----------|------------|----------|
| 287005    | Camk2n1      | -0.12903 | 0.13895677 | 0.291425 |
| 368128    | Hpse2        | -0.12907 | 0.43572151 | 0.629614 |
| 103694863 | LOC103694863 | -0.1291  | 2.57E-07   | 2.82E-06 |
| 311210    | Tspan18      | -0.12915 | 4.09E-06   | 3.63E-05 |
| 679312    | Tubb1        | -0.12918 | 0.76658249 | 0.877378 |
| 303749    | Ogfod3       | -0.12922 | 0.12383476 | 0.268645 |
| 362186    | Kif18a       | -0.12922 | 0.52984605 | 0.712485 |
| 24368     | Fh           | -0.12927 | 3.44E-05   | 2.54E-04 |
| 362521    | Tmem38b      | -0.1295  | 0.19623395 | 0.370909 |
| 690407    | Rab36        | -0.12952 | 0.06900509 | 0.173813 |
| 361976    | Rrnad1       | -0.12956 | 0.06421327 | 0.16444  |
| 65045     | Ppp1r10      | -0.12965 | 1.39E-04   | 8.92E-04 |
| 25731     | Syt3         | -0.1297  | 2.25E-05   | 1.73E-04 |
| 25414     | Bcar1        | -0.12974 | 4.20E-05   | 3.04E-04 |
| 304078    | Cbr3         | -0.12979 | 0.18796366 | 0.360246 |
| 362650    | Fblim1       | -0.12983 | 0.46177942 | 0.652563 |
| 171563    | Nav2         | -0.12984 | 4.62E-04   | 0.002615 |
| 294329    | Trpm2        | -0.12988 | 0.0021815  | 0.01019  |
| 85249     | Pex11a       | -0.12989 | 0.07480443 | 0.184851 |
| 316573    | Dner         | -0.12991 | 6.04E-18   | 1.97E-16 |
| 501661    | F8a1         | -0.13004 | 0.00506206 | 0.020944 |
| 680122    | Sap30        | -0.13006 | 0.30332771 | 0.500596 |
| 304330    | Cox19        | -0.13016 | 0.00636898 | 0.025467 |
| 191575    | Nme1         | -0.13023 | 3.35E-07   | 3.60E-06 |
| 363465    | Pir          | -0.13028 | 0.0030112  | 0.0135   |
| 24678     | Pkib         | -0.13031 | 0.01251154 | 0.044572 |
| 103690393 | LOC103690393 | -0.13039 | 0.26458798 | 0.454955 |
| 301011    | Uqcrc1       | -0.13045 | 1.61E-13   | 3.76E-12 |
| 360488    | Flywch1      | -0.13048 | 5.21E-19   | 1.78E-17 |
| 362842    | Syde1        | -0.13057 | 0.00737007 | 0.028704 |
| 29711     | Bckdhh       | -0.13071 | 0.00545845 | 0.022332 |
| 29754     | Atp5mc1      | -0.13073 | 3.32E-07   | 3.57E-06 |
| 299638    | Sirt6        | -0.13075 | 0.00143169 | 0.007068 |
| 64828     | B4galnt1     | -0.13075 | 0.00379886 | 0.016439 |
| 317196    | Klh14        | -0.13083 | 0.39924732 | 0.596459 |
| 59314     | Camk2n2      | -0.13086 | 0.10846483 | 0.242711 |
| 300992    | Cacna2d2     | -0.13087 | 1.63E-07   | 1.84E-06 |
| 297433    | Podx12       | -0.13095 | 1.12E-04   | 7.38E-04 |
| 100911357 | LOC100911357 | -0.13108 | 0.21216578 | 0.391768 |
| 296554    | Tubb4b       | -0.13123 | 3.39E-73   | 4.79E-71 |
| 293012    | Olig3        | -0.13124 | 0.86181876 | 0.93247  |
| 690987    | Gys1         | -0.13124 | 2.71E-06   | 2.49E-05 |
| 500826    | Galnt4       | -0.13126 | 0.3704663  | 0.566846 |
| 292780    | Alkbh6       | -0.1314  | 0.10783799 | 0.241649 |
| 287061    | Rogdi        | -0.13142 | 1.70E-08   | 2.21E-07 |
| 303731    | Cbx8         | -0.13142 | 0.21807438 | 0.399502 |
| 302941    | Ubal1        | -0.13146 | 2.16E-04   | 0.001332 |
| 60444     | Kcnt1        | -0.13147 | 7.70E-08   | 9.16E-07 |
| 266668    | Grina        | -0.13149 | 3.90E-40   | 3.01E-38 |
| 499073    | Brsk1        | -0.13152 | 3.36E-16   | 9.63E-15 |
| 298521    | Grik3        | -0.13153 | 0.18695077 | 0.358919 |
| 501628    | Tceal3       | -0.13153 | 0.01675513 | 0.056628 |
| 156275    | Ggt7         | -0.13154 | 1.78E-12   | 3.71E-11 |
| 171062    | Nkg7         | -0.13161 | 0.67247222 | 0.81554  |
| 304653    | Dcaf15       | -0.13173 | 0.01630789 | 0.055442 |
| 362452    | Borcs5       | -0.13173 | 0.01805671 | 0.060321 |

|           |              |          |            |          |
|-----------|--------------|----------|------------|----------|
| 309177    | Znhit2       | -0.13197 | 0.01938587 | 0.063821 |
| 360818    | Fbxo21       | -0.13201 | 8.75E-06   | 7.27E-05 |
| 499745    | Nrarp        | -0.13203 | 0.00103798 | 0.005343 |
| 307396    | Pcyox11      | -0.13203 | 1.13E-05   | 9.20E-05 |
| 363469    | Sms          | -0.13204 | 1.06E-04   | 7.01E-04 |
| 64677     | Srd5a2       | -0.13217 | 0.08596881 | 0.205224 |
| 171373    | Slc12a5      | -0.13224 | 0.63563807 | 0.790681 |
| 81780     | Cc15         | -0.13224 | 0.63563807 | 0.790681 |
| 293897    | Dkk1         | -0.13229 | 0.75324991 | 0.868223 |
| 24984     | RT1-DOa      | -0.13231 | 0.64273259 | 0.796411 |
| 501506    | Zbtb33       | -0.13232 | 0.36310777 | 0.559543 |
| 288484    | Grid2ip      | -0.13236 | 0.09244622 | 0.216056 |
| 293453    | Ndufab1      | -0.13246 | 2.88E-06   | 2.63E-05 |
| 680770    | Skida1       | -0.13248 | 0.1604175  | 0.322375 |
| 24795     | Serpina3n    | -0.13253 | 0.39015518 | 0.587067 |
| 307486    | Pcdhb22      | -0.13261 | 0.28898694 | 0.483889 |
| 298546    | Zfp593       | -0.13262 | 0.0591039  | 0.154323 |
| 497944    | Zfp3         | -0.13266 | 0.2984575  | 0.495003 |
| 367277    | LOC367277    | -0.13272 | 0.24352582 | 0.431598 |
| 680102    | Mab2112      | -0.13272 | 0.00326487 | 0.01445  |
| 641528    | Dtnbp1       | -0.13281 | 0.05161531 | 0.138141 |
| 362083    | Ajml         | -0.13283 | 4.39E-04   | 0.002503 |
| 314462    | Trmt61a      | -0.13311 | 0.0575512  | 0.151056 |
| 191595    | Syt12        | -0.13311 | 0.09681125 | 0.22319  |
| 361385    | Ndufb7       | -0.13313 | 1.30E-04   | 8.39E-04 |
| 362145    | Slc25a12     | -0.13315 | 6.34E-10   | 1.00E-08 |
| 65152     | Pfkm         | -0.13356 | 1.07E-20   | 3.95E-19 |
| 295255    | RGD1560510   | -0.13363 | 0.94367411 | 0.984135 |
| 304581    | Tmem119      | -0.13373 | 0.46038096 | 0.651747 |
| 305886    | Slc22a17     | -0.13378 | 9.99E-21   | 3.69E-19 |
| 287432    | Wrap53       | -0.13394 | 0.06473665 | 0.165469 |
| 300783    | Hacd3        | -0.13395 | 1.69E-12   | 3.52E-11 |
| 313255    | Whrn         | -0.13398 | 4.79E-04   | 0.002703 |
| 89841     | Pcyt2        | -0.13401 | 2.34E-05   | 1.79E-04 |
| 100910708 | LOC100910708 | -0.13403 | 0.07814494 | 0.190975 |
| 361068    | Nudt18       | -0.13414 | 0.02095746 | 0.067973 |
| 170909    | Erg          | -0.13417 | 0.16678986 | 0.330439 |
| 298282    | Oma1         | -0.13419 | 0.32792931 | 0.523637 |
| 499931    | Sla2         | -0.13423 | 0.69465744 | 0.831798 |
| 252860    | Zfp394       | -0.13433 | 0.0535382  | 0.142347 |
| 246153    | Kcnc2        | -0.13444 | 0.0042519  | 0.018051 |
| 191576    | Tecr         | -0.13447 | 2.48E-57   | 2.79E-55 |
| 293996    | Pdzd7        | -0.13447 | 0.07686608 | 0.1886   |
| 314642    | Fzr1         | -0.13448 | 3.57E-04   | 0.002095 |
| 25041     | P2rx6        | -0.13461 | 0.00160438 | 0.007803 |
| 500865    | Sybu         | -0.13463 | 1.62E-06   | 1.55E-05 |
| 94204     | Ecel         | -0.13469 | 9.89E-12   | 1.92E-10 |
| 362843    | Ilvb1        | -0.13477 | 9.00E-05   | 6.03E-04 |
| 100362089 | Zfp663       | -0.13481 | 0.32679016 | 0.522475 |
| 102552047 | LOC102552047 | -0.13481 | 0.4778868  | 0.667255 |
| 116682    | Kynu         | -0.13481 | 0.83055946 | 0.915182 |
| 25503     | Ocm2         | -0.13481 | 0.83055946 | 0.915182 |
| 287414    | Mfsd61       | -0.13481 | 0.83055946 | 0.915182 |
| 29248     | Tnni3        | -0.13481 | 0.83055946 | 0.915182 |
| 29692     | Pla2g2a      | -0.13481 | 0.66867421 | 0.812227 |
| 300017    | Lypd2        | -0.13481 | 0.83055946 | 0.915182 |

|           |              |          |            |          |
|-----------|--------------|----------|------------|----------|
| 315597    | Mfrp         | -0.13481 | 0.76218006 | 0.874494 |
| 689415    | Mt2A         | -0.13481 | 0.19855134 | 0.373694 |
| 690319    | LOC690319    | -0.13481 | 0.63230638 | 0.788623 |
| 688699    | Prdm12       | -0.13482 | 1.36E-12   | 2.86E-11 |
| 362681    | Pus11        | -0.13487 | 0.00579513 | 0.023443 |
| 25531     | Rab3a        | -0.13487 | 1.78E-37   | 1.31E-35 |
| 297971    | Smim8        | -0.13497 | 0.05547597 | 0.146599 |
| 79253     | Avil         | -0.13504 | 3.32E-52   | 3.34E-50 |
| 353255    | Nadsyn1      | -0.13508 | 0.03488676 | 0.101469 |
| 56010     | Ywhag        | -0.13511 | 3.77E-127  | #####    |
| 306338    | Abhd8        | -0.13514 | 1.57E-07   | 1.78E-06 |
| 103693430 | LOC103693430 | -0.13516 | 0.08015234 | 0.194781 |
| 297389    | Dguok        | -0.13517 | 0.02461823 | 0.077101 |
| 54309     | Syt5         | -0.13522 | 4.70E-04   | 0.002656 |
| 314140    | LOC314140    | -0.13527 | 0.04127174 | 0.115949 |
| 309161    | Ccdc85b      | -0.1353  | 4.27E-04   | 0.002446 |
| 294790    | Skp2         | -0.13541 | 0.3144424  | 0.508885 |
| 682404    | Tmem234      | -0.13557 | 0.07464785 | 0.18456  |
| 293688    | Tm7sf2       | -0.13559 | 2.77E-04   | 0.001668 |
| 289402    | Ddx59        | -0.13564 | 0.03641787 | 0.104945 |
| 315999    | Mon1a        | -0.13569 | 0.00264958 | 0.012061 |
| 298894    | Mycn         | -0.13572 | 0.2475585  | 0.436268 |
| 100909857 | LOC100909857 | -0.13573 | 0.06905193 | 0.173885 |
| 361515    | Pnma8a       | -0.1358  | 0.10735646 | 0.240967 |
| 290631    | Babam1       | -0.13584 | 4.47E-05   | 3.23E-04 |
| 287711    | Coasy        | -0.13594 | 5.71E-04   | 0.00315  |
| 302669    | Car5b        | -0.13596 | 0.07422859 | 0.183834 |
| 102555217 | LOC102555217 | -0.13597 | 0.41999023 | 0.615475 |
| 100909793 | Smim18       | -0.13603 | 0.06092333 | 0.157948 |
| 308457    | Egln2        | -0.13618 | 2.08E-08   | 2.67E-07 |
| 305970    | Fbxo16       | -0.1362  | 0.10436677 | 0.235925 |
| 680712    | Scx          | -0.13623 | 0.10742304 | 0.241003 |
| 300317    | Kctd17       | -0.13623 | 3.41E-06   | 3.07E-05 |
| 361545    | Rbm42        | -0.13625 | 5.70E-05   | 4.00E-04 |
| 314013    | Trappc12     | -0.13635 | 6.41E-07   | 6.57E-06 |
| 303222    | Arhgap44     | -0.13645 | 1.39E-10   | 2.38E-09 |
| 289222    | Nit1         | -0.13655 | 1.23E-04   | 8.05E-04 |
| 100911408 | LOC100911408 | -0.13655 | 0.3213335  | 0.516439 |
| 362300    | Agap3        | -0.13658 | 1.81E-15   | 5.00E-14 |
| 360721    | Fam162a      | -0.13691 | 1.58E-07   | 1.79E-06 |
| 65178     | Snap91       | -0.13693 | 3.38E-26   | 1.66E-24 |
| 58977     | Ppp1r1a      | -0.13697 | 7.95E-06   | 6.65E-05 |
| 360947    | Pacrgl       | -0.13698 | 0.23743335 | 0.424514 |
| 29885     | Rab3ip       | -0.13713 | 8.05E-04   | 0.004276 |
| 79219     | Grid1        | -0.13714 | 0.05683691 | 0.149532 |
| 81637     | Ap2a2        | -0.1372  | 9.34E-28   | 4.91E-26 |
| 108351956 | LOC108351956 | -0.13726 | 1.51E-08   | 1.99E-07 |
| 288916    | Gadd45gip1   | -0.13743 | 8.15E-04   | 0.00432  |
| 363616    | Grap         | -0.13748 | 0.39680541 | 0.59407  |
| 295237    | Mstol        | -0.13749 | 0.00178978 | 0.008588 |
| 29741     | Pik3r2       | -0.13752 | 2.91E-07   | 3.16E-06 |
| 361509    | Ube2m        | -0.13765 | 4.76E-13   | 1.06E-11 |
| 294103    | Papss2       | -0.1377  | 0.03522726 | 0.102194 |
| 26760     | Akr7a3       | -0.13772 | 0.03799251 | 0.108595 |
| 310787    | Fndc7        | -0.13784 | 0.20248048 | 0.378508 |
| 293054    | Mrpl46       | -0.13802 | 0.02132952 | 0.068956 |

|           |              |          |            |          |
|-----------|--------------|----------|------------|----------|
| 85269     | Nme3         | -0.13804 | 0.05422864 | 0.143942 |
| 295315    | Tbx15        | -0.13817 | 0.25155458 | 0.43969  |
| 307102    | Ankrd16      | -0.13817 | 0.22029366 | 0.402445 |
| 684903    | Dhx34        | -0.13817 | 0.02433148 | 0.076518 |
| 364948    | Asphd2       | -0.13829 | 0.01059295 | 0.038879 |
| 500992    | Nxpe1        | -0.13836 | 0.23907396 | 0.426326 |
| 100362241 | Plekhg6      | -0.13855 | 0.35725526 | 0.554246 |
| 294336    | Pcbp3        | -0.13857 | 9.57E-22   | 3.73E-20 |
| 683470    | Gas1         | -0.13879 | 0.09810036 | 0.22537  |
| 294326    | Gatd3a       | -0.13889 | 2.13E-11   | 3.99E-10 |
| 362220    | Lamp5        | -0.13892 | 3.31E-04   | 0.001955 |
| 84384     | Timm10b      | -0.13898 | 0.04964605 | 0.134305 |
| 316091    | Pomgnt2      | -0.13899 | 1.94E-04   | 0.001208 |
| 100912599 | LOC100912599 | -0.13902 | 0.01310153 | 0.046306 |
| 679739    | LOC679739    | -0.13902 | 0.01310153 | 0.046306 |
| 100911847 | LOC100911847 | -0.13903 | 0.02524493 | 0.078663 |
| 290308    | Dleu7        | -0.13913 | 0.0322203  | 0.095478 |
| 102546394 | LOC102546394 | -0.13918 | 0.20413787 | 0.380784 |
| 317170    | Slc9a7       | -0.13921 | 0.0186354  | 0.061907 |
| 298504    | Mfsd2a       | -0.13925 | 9.21E-04   | 0.004821 |
| 313506    | Stil         | -0.13956 | 0.31043862 | 0.505628 |
| 297436    | Chchd6       | -0.13957 | 5.59E-04   | 0.003096 |
| 289486    | Fras1        | -0.13961 | 0.03567585 | 0.103212 |
| 689986    | LOC689986    | -0.13962 | 0.15669443 | 0.316631 |
| 114512    | Aatf         | -0.13969 | 0.03981651 | 0.11286  |
| 292017    | Hydin        | -0.1397  | 0.12336446 | 0.267899 |
| 364995    | Ddx28        | -0.13979 | 0.06125581 | 0.158659 |
| 79112     | Pigm         | -0.13986 | 0.0068858  | 0.02714  |
| 308472    | Supt5h       | -0.13988 | 3.12E-12   | 6.35E-11 |
| 300444    | Rgl3         | -0.13991 | 0.13083042 | 0.279116 |
| 680006    | Mad111       | -0.14022 | 0.00235935 | 0.010917 |
| 679949    | Ube2ql1      | -0.14023 | 2.54E-05   | 1.93E-04 |
| 362039    | Pla2g12a     | -0.14028 | 0.00926403 | 0.034806 |
| 311184    | Clqtnf4      | -0.14039 | 0.14732315 | 0.302868 |
| 24423     | Gstm1        | -0.14049 | 1.05E-09   | 1.61E-08 |
| 304280    | Tmem130      | -0.14053 | 1.53E-22   | 6.24E-21 |
| 24310     | Ace          | -0.14056 | 0.0988815  | 0.2267   |
| 140729    | Cacng8       | -0.14067 | 0.56289231 | 0.734316 |
| 304944    | Uck2         | -0.14074 | 7.30E-05   | 5.01E-04 |
| 58936     | Plk3         | -0.1408  | 0.00565216 | 0.022942 |
| 100359498 | LOC100359498 | -0.14098 | 0.01106033 | 0.040253 |
| 498332    | Coq2         | -0.14102 | 5.34E-05   | 3.78E-04 |
| 314930    | Zfpm2        | -0.14104 | 0.30440208 | 0.50124  |
| 314472    | Tmem179      | -0.14108 | 1.47E-09   | 2.22E-08 |
| 498736    | Tubb2a       | -0.14109 | 8.12E-77   | 1.21E-74 |
| 117552    | Ptpn23       | -0.14117 | 1.80E-06   | 1.72E-05 |
| 303671    | Fads6        | -0.14123 | 0.00189305 | 0.009027 |
| 500726    | Cep170b      | -0.14127 | 4.04E-17   | 1.25E-15 |
| 100362197 | LOC100362197 | -0.14138 | 0.04876376 | 0.13254  |
| 361352    | Pqlc1        | -0.14138 | 5.38E-13   | 1.19E-11 |
| 498398    | Selenom      | -0.14142 | 2.64E-11   | 4.90E-10 |
| 108348240 | LOC108348240 | -0.1415  | 0.81888297 | 0.908942 |
| 353231    | Spg7         | -0.14159 | 2.94E-06   | 2.69E-05 |
| 300367    | Med17        | -0.14169 | 0.00800131 | 0.030797 |
| 293507    | 1-Sep        | -0.1417  | 0.24548341 | 0.433735 |
| 366489    | Sh2d5        | -0.1417  | 0.53473905 | 0.716736 |

|           |              |          |            |          |
|-----------|--------------|----------|------------|----------|
| 114117    | Gng3         | -0.14179 | 1.08E-40   | 8.50E-39 |
| 83503     | Polr2f       | -0.14187 | 0.00149822 | 0.007354 |
| 362613    | Zdhhc18      | -0.14188 | 1.83E-06   | 1.74E-05 |
| 361663    | Lhpp         | -0.14196 | 3.85E-05   | 2.81E-04 |
| 83823     | Gipc1        | -0.142   | 6.70E-09   | 9.24E-08 |
| 361288    | Fundc2       | -0.14204 | 2.84E-04   | 0.001705 |
| 310846    | Tram111      | -0.14207 | 0.01697011 | 0.057264 |
| 296627    | Asb6         | -0.14208 | 0.00427331 | 0.018138 |
| 362945    | Lrrc24       | -0.1421  | 0.00336172 | 0.014807 |
| 641603    | Slc41a3      | -0.14247 | 0.01125413 | 0.040826 |
| 311329    | Dnajc17      | -0.14248 | 0.14631366 | 0.301378 |
| 24503     | Ina          | -0.14289 | 1.79E-12   | 3.73E-11 |
| 308440    | B3gnt8       | -0.14295 | 0.01756978 | 0.059026 |
| 100270678 | Spns2        | -0.14299 | 0.0050849  | 0.021025 |
| 361118    | Prxl2a       | -0.14309 | 7.21E-04   | 0.003884 |
| 360656    | Cdr21        | -0.14311 | 1.35E-16   | 3.99E-15 |
| 290647    | Lsm4         | -0.14312 | 5.00E-05   | 3.55E-04 |
| 102551565 | LOC102551565 | -0.14316 | 0.94437719 | 0.984653 |
| 292700    | Ceacam16     | -0.14329 | 0.28978648 | 0.48493  |
| 108349002 | LOC108349002 | -0.14344 | 0.79821469 | 0.896344 |
| 497912    | Btnl10       | -0.1435  | 0.47751373 | 0.666929 |
| 81679     | Jup          | -0.1436  | 6.33E-21   | 2.37E-19 |
| 288289    | Chod1        | -0.14363 | 0.02869443 | 0.087048 |
| 303907    | Wdr5b        | -0.14365 | 0.2260632  | 0.409723 |
| 102551647 | LOC102551647 | -0.14373 | 0.45539772 | 0.646567 |
| 65276     | Nmur1        | -0.14375 | 0.44488388 | 0.637725 |
| 404781    | Iqsec3       | -0.14378 | 5.83E-05   | 4.09E-04 |
| 353118    | MAST1        | -0.14379 | 2.59E-22   | 1.04E-20 |
| 50871     | Hpcal1       | -0.14384 | 4.95E-10   | 7.92E-09 |
| 50688     | Cacnb1       | -0.144   | 1.53E-06   | 1.47E-05 |
| 688737    | Gpr171       | -0.14415 | 0.50655124 | 0.6932   |
| 362846    | RGD1560314   | -0.14415 | 0.58759048 | 0.753225 |
| 500606    | Morn2        | -0.14415 | 0.39116796 | 0.588219 |
| 683514    | Ppp1r42      | -0.14415 | 0.70135954 | 0.836615 |
| 287009    | Ceacam4      | -0.14438 | 0.60002112 | 0.76315  |
| 288689    | Tesc         | -0.14442 | 7.95E-05   | 5.41E-04 |
| 312707    | Lrrc23       | -0.14445 | 0.12899761 | 0.276258 |
| 65172     | Limk1        | -0.14446 | 4.60E-21   | 1.74E-19 |
| 306348    | Rex1bd       | -0.1445  | 0.00243402 | 0.011208 |
| 100911068 | LOC100911068 | -0.14457 | 0.09598005 | 0.222026 |
| 246258    | Slc45a1      | -0.1446  | 1.45E-08   | 1.92E-07 |
| 313521    | Hpd1         | -0.14465 | 0.11680143 | 0.256987 |
| 100049583 | Trex1        | -0.14467 | 0.05160692 | 0.138138 |
| 296395    | Kcng1        | -0.14468 | 8.77E-04   | 0.004613 |
| 83635     | Gmeb2        | -0.14469 | 0.17723084 | 0.34573  |
| 64183     | Pde4dip      | -0.14483 | 7.98E-17   | 2.41E-15 |
| 292831    | Pop4         | -0.14497 | 0.00136275 | 0.006761 |
| 54289     | Rgs1         | -0.14506 | 0.46131677 | 0.652442 |
| 25585     | Id3          | -0.14512 | 7.06E-05   | 4.86E-04 |
| 363137    | Cyb561d2     | -0.14515 | 0.00481392 | 0.020075 |
| 25187     | Htr2c        | -0.14524 | 0.28646418 | 0.480722 |
| 365360    | Tmc5         | -0.14533 | 0.29968944 | 0.496355 |
| 25146     | Cyp17a1      | -0.14538 | 0.67739949 | 0.819584 |
| 499518    | Ccdc125      | -0.14541 | 0.37371051 | 0.570252 |
| 684148    | Lsm2         | -0.14541 | 0.02933598 | 0.088585 |
| 103690158 | LOC103690158 | -0.14543 | 0.54490109 | 0.726014 |

|           |              |          |            |          |
|-----------|--------------|----------|------------|----------|
| 246279    | Zfp180       | -0.14545 | 1.12E-20   | 4.12E-19 |
| 308410    | Rtn2         | -0.14562 | 1.85E-11   | 3.48E-10 |
| 116557    | Foxj1        | -0.14563 | 0.35880731 | 0.555816 |
| 289468    | Abraxas1     | -0.14563 | 0.35880731 | 0.555816 |
| 362605    | Tmem54       | -0.14566 | 0.0023543  | 0.010896 |
| 140694    | Dnm1         | -0.14566 | 1.17E-40   | 9.12E-39 |
| 170634    | Tas1r3       | -0.14572 | 0.78934636 | 0.891167 |
| 156726    | Runx3        | -0.14575 | 0.13969356 | 0.292391 |
| 24834     | Tk1          | -0.14588 | 0.20763153 | 0.385526 |
| 499090    | Mypop        | -0.14593 | 6.90E-04   | 0.003731 |
| 499749    | Tprn         | -0.14607 | 0.0768512  | 0.188612 |
| 500410    | RGD1559441   | -0.14609 | 0.09546263 | 0.221125 |
| 689623    | Psmg4        | -0.14624 | 0.06193728 | 0.16001  |
| 408217    | Usp11        | -0.14636 | 1.08E-05   | 8.81E-05 |
| 64455     | Rasd1        | -0.14641 | 0.18190279 | 0.351924 |
| 361943    | Pcdh10       | -0.14643 | 1.69E-04   | 0.001068 |
| 103693768 | LOC103693768 | -0.14645 | 0.02796354 | 0.085306 |
| 315926    | Pls1         | -0.14646 | 3.35E-08   | 4.18E-07 |
| 361881    | Zbed3        | -0.14651 | 0.13424208 | 0.284261 |
| 108348167 | LOC108348167 | -0.14653 | 0.29810224 | 0.494716 |
| 89787     | Lrp3         | -0.14659 | 1.16E-07   | 1.35E-06 |
| 24587     | Nefh         | -0.14663 | 0          | 0        |
| 201097    | Hist1h1d     | -0.14663 | 0.73538783 | 0.857285 |
| 304648    | Asf1b        | -0.14668 | 0.5842661  | 0.750479 |
| 287983    | Alg3         | -0.14677 | 0.00230833 | 0.010707 |
| 362329    | Impdh1       | -0.14678 | 2.85E-25   | 1.33E-23 |
| 316213    | Frs3         | -0.14684 | 0.00967594 | 0.036055 |
| 295037    | Mgst2        | -0.14688 | 0.42026668 | 0.615549 |
| 25523     | Prkg2        | -0.14696 | 0.12530762 | 0.270668 |
| 689945    | LOC689945    | -0.14696 | 0.48822224 | 0.675937 |
| 100362471 | Tmem240      | -0.14699 | 0.30514213 | 0.502068 |
| 364755    | Ero1b        | -0.14704 | 2.79E-04   | 0.001677 |
| 292098    | Pgbd5        | -0.14727 | 1.13E-06   | 1.11E-05 |
| 316229    | Ttbk1        | -0.14736 | 1.21E-04   | 7.93E-04 |
| 360945    | Sel113       | -0.14739 | 8.26E-04   | 0.004374 |
| 100911956 | LOC100911956 | -0.1474  | 0.04869376 | 0.132368 |
| 500354    | LOC500354    | -0.14767 | 0.19891198 | 0.374077 |
| 29566     | Ggt5         | -0.14769 | 0.01153358 | 0.041617 |
| 84398     | Cd93         | -0.14771 | 0.02571583 | 0.079778 |
| 687536    | Foxf1        | -0.14772 | 0.47837014 | 0.667685 |
| 311703    | Cables2      | -0.14776 | 2.30E-11   | 4.30E-10 |
| 100359753 | Dnaaf3       | -0.1478  | 0.30413935 | 0.50111  |
| 315151    | Mrtfa        | -0.14785 | 2.69E-04   | 0.001631 |
| 309453    | Fbxl15       | -0.14797 | 0.02874714 | 0.087152 |
| 295090    | Vom2r45      | -0.14799 | 0.93804365 | 0.980841 |
| 691431    | Slc25a33     | -0.14804 | 0.00108431 | 0.005542 |
| 25303     | Abcc2        | -0.14809 | 0.41833666 | 0.614044 |
| 404660    | Mrgpre       | -0.14835 | 0.00120199 | 0.006058 |
| 79131     | Fabp3        | -0.14838 | 4.38E-04   | 0.002501 |
| 500249    | Rab43        | -0.14847 | 0.32723497 | 0.522791 |
| 103690147 | LOC103690147 | -0.14861 | 0.29576466 | 0.492166 |
| 300990    | RGD1307461   | -0.14876 | 0.00291779 | 0.013115 |
| 313491    | Hint2        | -0.14878 | 0.0055371  | 0.022552 |
| 298787    | Memo1        | -0.14881 | 6.17E-05   | 4.30E-04 |
| 362782    | Cyp46a1      | -0.14881 | 0.16496805 | 0.329227 |
| 102557179 | LOC102557179 | -0.14883 | 0.79447924 | 0.89373  |



|           |              |          |            |          |
|-----------|--------------|----------|------------|----------|
| 100359972 | LOC100359972 | -0.14931 | 0.82166589 | 0.909857 |
| 103692813 | LOC103692813 | -0.14931 | 0.82166589 | 0.909857 |
| 103693041 | LOC103693041 | -0.14931 | 0.82166589 | 0.909857 |
| 116569    | Lct          | -0.14931 | 0.82166589 | 0.909857 |
| 300220    | Clql4        | -0.14931 | 0.61424996 | 0.774574 |
| 365763    | Actrt3       | -0.14931 | 0.82166589 | 0.909857 |
| 500348    | Bcl2l14      | -0.14931 | 0.82166589 | 0.909857 |
| 682416    | Dcdc2b       | -0.14931 | 0.82166589 | 0.909857 |
| 102547505 | LOC102547505 | -0.14931 | 0.7499026  | 0.866357 |
| 287936    | Ccdc116      | -0.14931 | 0.69623394 | 0.833005 |
| 300034    | Tigd5        | -0.14931 | 0.29040454 | 0.485665 |
| 311760    | Ism1         | -0.14931 | 0.58086465 | 0.747875 |
| 361230    | Tmem170b     | -0.14931 | 0.498908   | 0.685326 |
| 499918    | Rspo4        | -0.14931 | 0.498908   | 0.685326 |
| 59304     | Gdf9         | -0.14931 | 0.65212951 | 0.803351 |
| 687208    | Vps37d       | -0.14931 | 0.14407543 | 0.298446 |
| 304571    | Galnt9       | -0.14938 | 4.65E-04   | 0.00263  |
| 290628    | Ocell1       | -0.14939 | 0.00224364 | 0.010425 |
| 25443     | Fgf10        | -0.14941 | 0.34281211 | 0.53953  |
| 114705    | Rgs14        | -0.1495  | 0.18345777 | 0.353818 |
| 498726    | Rnf182       | -0.14962 | 0.02138603 | 0.069115 |
| 314799    | Ccdc59       | -0.14962 | 0.06101745 | 0.158127 |
| 100360754 | LOC100360754 | -0.14967 | 0.58710238 | 0.752852 |
| 299602    | Cdc34        | -0.14985 | 1.66E-06   | 1.59E-05 |
| 686999    | Mphosph6     | -0.15006 | 0.03611433 | 0.104212 |
| 294747    | RGD1561161   | -0.15016 | 0.32445531 | 0.520008 |
| 302890    | Cpped1       | -0.15025 | 0.01324616 | 0.046735 |
| 24598     | Nos1         | -0.15033 | 0.20790575 | 0.385847 |
| 361653    | Armc5        | -0.15039 | 4.79E-04   | 0.002703 |
| 315598    | Clqtnf5      | -0.15048 | 0.01762039 | 0.059133 |
| 64672     | Pln          | -0.15051 | 0.23959781 | 0.426941 |
| 311535    | Fam110a      | -0.15055 | 0.24842215 | 0.43674  |
| 292887    | Akt1s1       | -0.15085 | 6.83E-08   | 8.17E-07 |
| 24241     | Calca        | -0.15088 | 4.69E-67   | 6.20E-65 |
| 295965    | Ehf          | -0.15101 | 0.42171425 | 0.617242 |
| 24604     | Npy          | -0.15102 | 0.32305405 | 0.518285 |
| 245965    | Atp5f1d      | -0.15107 | 8.95E-34   | 5.74E-32 |
| 171444    | Pacs1        | -0.15107 | 2.90E-05   | 2.18E-04 |
| 307639    | Gins3        | -0.15111 | 0.23863914 | 0.42571  |
| 361441    | Fam89a       | -0.15119 | 4.17E-04   | 0.002398 |
| 64460     | Pex14        | -0.15127 | 1.86E-05   | 1.45E-04 |
| 296098    | Lcmt2        | -0.1513  | 0.10048781 | 0.229471 |
| 312849    | Med21        | -0.15136 | 0.03425272 | 0.100145 |
| 689207    | Prob1        | -0.15143 | 0.11788935 | 0.258873 |
| 64461     | Decr2        | -0.15144 | 0.02388426 | 0.07541  |
| 291885    | Mcm5         | -0.15155 | 0.22130251 | 0.403476 |
| 364227    | Asb3         | -0.15157 | 0.02030424 | 0.066351 |
| 100911776 | LOC100911776 | -0.15162 | 0.19890998 | 0.37411  |
| 286908    | Pdlim7       | -0.15174 | 1.02E-13   | 2.43E-12 |
| 288480    | Aimp2        | -0.15185 | 1.35E-04   | 8.69E-04 |
| 362861    | Slc41a2      | -0.15191 | 4.95E-07   | 5.16E-06 |
| 113995    | P2rx5        | -0.15196 | 0.00979036 | 0.036425 |
| 309523    | Kif20b       | -0.15203 | 0.33448522 | 0.530856 |
| 360606    | Itga3        | -0.15207 | 1.63E-08   | 2.14E-07 |
| 690136    | Zfp939       | -0.15215 | 0.43809136 | 0.631936 |
| 300758    | Celf6        | -0.15217 | 1.95E-04   | 0.001212 |

|           |              |          |            |          |
|-----------|--------------|----------|------------|----------|
| 315311    | Slc4a8       | -0.15225 | 0.0072759  | 0.028395 |
| 261737    | Sfxn5        | -0.15226 | 0.00865306 | 0.032835 |
| 100361814 | LOC100361814 | -0.15244 | 0.54189591 | 0.723579 |
| 316221    | Tbcc         | -0.15244 | 0.00178775 | 0.008581 |
| 364676    | Gprin1       | -0.15244 | 0.02720498 | 0.083514 |
| 246209    | Kif27        | -0.15258 | 0.09099411 | 0.213395 |
| 685474    | Zfp385a      | -0.1526  | 4.38E-08   | 5.36E-07 |
| 313536    | B4galt2      | -0.15268 | 0.018364   | 0.061133 |
| 298267    | Cachd1       | -0.15279 | 0.02325923 | 0.073767 |
| 499630    | RGD1565059   | -0.1528  | 0.11792593 | 0.258923 |
| 288919    | Asna1        | -0.15283 | 1.47E-07   | 1.68E-06 |
| 108350747 | LOC108350747 | -0.15283 | 0.69376931 | 0.830996 |
| 685059    | Msrbl        | -0.15288 | 3.27E-04   | 0.00194  |
| 309544    | Rbm20        | -0.15289 | 0.25024459 | 0.438244 |
| 64057     | Hapln2       | -0.1529  | 0.06798052 | 0.171823 |
| 363026    | Carm1        | -0.15301 | 4.97E-08   | 6.04E-07 |
| 100362176 | LOC100362176 | -0.15306 | 4.27E-09   | 6.10E-08 |
| 288475    | Nptx2        | -0.15314 | 7.04E-09   | 9.69E-08 |
| 252915    | Mxd3         | -0.15343 | 0.64761338 | 0.800376 |
| 100360077 | Znhit1       | -0.15368 | 8.46E-05   | 5.71E-04 |
| 498000    | Coa3         | -0.15381 | 5.37E-06   | 4.66E-05 |
| 100036765 | Ccdc92       | -0.15401 | 7.06E-50   | 6.86E-48 |
| 309611    | Vwa7         | -0.15405 | 4.99E-16   | 1.41E-14 |
| 29510     | Pctp         | -0.15408 | 0.00422759 | 0.017968 |
| 306862    | Tfap2a       | -0.15409 | 0.12442869 | 0.269412 |
| 294679    | Ankra2       | -0.15415 | 0.07671551 | 0.188401 |
| 367808    | Ptges311     | -0.15419 | 0.54468292 | 0.725774 |
| 288057    | Mylk         | -0.15427 | 4.18E-04   | 0.002402 |
| 302981    | Spsb3        | -0.1544  | 2.56E-05   | 1.94E-04 |
| 361805    | Uqcc2        | -0.15467 | 5.86E-04   | 0.003228 |
| 363682    | Ccr10        | -0.15472 | 0.32710606 | 0.522716 |
| 499211    | Gdpd5        | -0.15481 | 3.53E-06   | 3.17E-05 |
| 308016    | Clca5        | -0.15485 | 0.3299719  | 0.526192 |
| 65198     | Kcnh1        | -0.15487 | 4.72E-05   | 3.38E-04 |
| 365603    | Bves         | -0.15493 | 0.05822797 | 0.152559 |
| 113893    | Sncb         | -0.15494 | 8.57E-18   | 2.76E-16 |
| 309378    | Golga7b      | -0.15496 | 0.00449379 | 0.018918 |
| 307309    | Sncaip       | -0.15501 | 0.17409943 | 0.34144  |
| 310395    | Noct         | -0.15504 | 0.0727402  | 0.18109  |
| 308387    | Npas1        | -0.1551  | 0.27042078 | 0.46194  |
| 361327    | Prr16        | -0.15519 | 0.34324453 | 0.539676 |
| 690130    | Rhof         | -0.15528 | 2.57E-05   | 1.95E-04 |
| 307237    | Pard6g       | -0.15533 | 0.10353489 | 0.234573 |
| 290553    | Mustn1       | -0.15534 | 0.07985298 | 0.194203 |
| 116595    | Nrxn2        | -0.15561 | 7.17E-22   | 2.83E-20 |
| 500870    | Mtbp         | -0.15583 | 0.2341067  | 0.420262 |
| 64017     | Enpep        | -0.15592 | 0.03809979 | 0.108803 |
| 690965    | Ccdc85c      | -0.15598 | 6.46E-05   | 4.48E-04 |
| 685169    | Fam163b      | -0.156   | 0.60628962 | 0.768607 |
| 84395     | Slc34a2      | -0.156   | 0.30265576 | 0.499833 |
| 84427     | Grb7         | -0.15603 | 0.40574851 | 0.602298 |
| 360533    | Rnf187       | -0.15608 | 1.81E-40   | 1.41E-38 |
| 306811    | Wnk2         | -0.1561  | 4.28E-07   | 4.51E-06 |
| 313713    | Casz1        | -0.15617 | 1.24E-06   | 1.21E-05 |
| 311836    | Ntng2        | -0.15618 | 3.04E-09   | 4.41E-08 |
| 304368    | Zcwpw1       | -0.15637 | 0.88688248 | 0.948861 |

|           |              |          |            |          |
|-----------|--------------|----------|------------|----------|
| 316201    | Daam2        | -0.15647 | 2.88E-12   | 5.86E-11 |
| 25394     | Bfsp1        | -0.15671 | 0.24806956 | 0.436846 |
| 81721     | Chrna6       | -0.15683 | 3.74E-04   | 0.00218  |
| 306544    | Plpbp        | -0.15694 | 0.00186915 | 0.008922 |
| 499088    | Dact3        | -0.15709 | 2.78E-04   | 0.001672 |
| 681337    | Acot4        | -0.15727 | 0.25286075 | 0.441446 |
| 301035    | Lrrfip2      | -0.15728 | 1.39E-06   | 1.34E-05 |
| 25114     | Fgfr4        | -0.15738 | 0.266863   | 0.458122 |
| 102551788 | LOC102551788 | -0.15744 | 0.80983144 | 0.903741 |
| 287944    | Thap7        | -0.15749 | 0.00370918 | 0.016113 |
| 500893    | Gli4         | -0.15755 | 0.0861575  | 0.205468 |
| 25654     | Col11a1      | -0.15763 | 4.74E-06   | 4.15E-05 |
| 100910460 | Ccdc180      | -0.15777 | 0.74304553 | 0.861125 |
| 299305    | Jade3        | -0.15777 | 0.35381016 | 0.550741 |
| 365769    | Il21         | -0.15777 | 0.74304553 | 0.861125 |
| 361596    | Idh2         | -0.15789 | 6.25E-05   | 4.35E-04 |
| 308759    | Unc45a       | -0.15795 | 3.13E-06   | 2.84E-05 |
| 499748    | Rnf208       | -0.15801 | 1.59E-04   | 0.00101  |
| 295457    | Cisd2        | -0.15803 | 7.49E-07   | 7.60E-06 |
| 301371    | Mrps9        | -0.15804 | 3.76E-04   | 0.00219  |
| 64014     | Duspl2       | -0.15813 | 0.10079571 | 0.229954 |
| 300115    | Arhgap8      | -0.15832 | 0.104054   | 0.235413 |
| 100912052 | LOC100912052 | -0.15833 | 0.74635905 | 0.863888 |
| 316325    | Hs6st1       | -0.15858 | 4.16E-11   | 7.48E-10 |
| 315219    | Tymp         | -0.15863 | 0.01921826 | 0.063368 |
| 290833    | Tm2d2        | -0.15867 | 3.72E-07   | 3.96E-06 |
| 100361460 | Insyn2b      | -0.15889 | 0.00687619 | 0.027108 |
| 315691    | Lingo1       | -0.15911 | 2.47E-11   | 4.60E-10 |
| 25159     | Gata2        | -0.15923 | 0.19474511 | 0.3689   |
| 360828    | Noc4l        | -0.15928 | 0.01257049 | 0.04474  |
| 108348323 | LOC108348323 | -0.15934 | 0.13753859 | 0.288992 |
| 293738    | Ccdc86       | -0.15935 | 0.03717342 | 0.10667  |
| 103691004 | LOC103691004 | -0.15937 | 0.41232251 | 0.608075 |
| 360605    | Epn3         | -0.15941 | 4.43E-09   | 6.29E-08 |
| 85264     | Abcg1        | -0.15949 | 1.34E-11   | 2.57E-10 |
| 299210    | Esrrb        | -0.15958 | 0.08379239 | 0.201595 |
| 307126    | Mcm10        | -0.15958 | 0.60213018 | 0.765423 |
| 293135    | Lrrc32       | -0.15959 | 0.04220827 | 0.118041 |
| 296732    | Smarcd3      | -0.15976 | 0.00281266 | 0.012712 |
| 108348121 | LOC108348121 | -0.15986 | 0.55588038 | 0.735088 |
| 364060    | Rpl3011      | -0.15986 | 0.68019715 | 0.821456 |
| 497985    | Hoxb7        | -0.15994 | 0.09883141 | 0.226613 |
| 100909856 | LOC100909856 | -0.15995 | 0.10482046 | 0.236585 |
| 688319    | Rac3         | -0.16004 | 4.50E-06   | 3.96E-05 |
| 309158    | Tmem151a     | -0.1602  | 1.24E-17   | 3.93E-16 |
| 679886    | Chmp4b11     | -0.16023 | 1.55E-08   | 2.03E-07 |
| 100361087 | LOC100361087 | -0.16025 | 0.4383918  | 0.63213  |
| 24173     | Adra1b       | -0.16025 | 0.27312627 | 0.465163 |
| 291676    | Spata24      | -0.16025 | 0.27312627 | 0.465163 |
| 301650    | Cntnap5b     | -0.16028 | 0.31935974 | 0.514351 |
| 103693015 | LOC103693015 | -0.16036 | 1.07E-06   | 1.06E-05 |
| 25472     | Kcnj8        | -0.1605  | 0.29568846 | 0.492082 |
| 307949    | Pcnx2        | -0.1605  | 3.05E-15   | 8.29E-14 |
| 362960    | Dmc1         | -0.16051 | 0.51641669 | 0.701709 |
| 305434    | Jakmip1      | -0.16053 | 1.36E-07   | 1.55E-06 |
| 171522    | Cyp2d4       | -0.16061 | 0.04375634 | 0.121673 |

|           |              |          |            |          |
|-----------|--------------|----------|------------|----------|
| 108348151 | LOC108348151 | -0.1607  | 0.13705685 | 0.288234 |
| 100360291 | Zglp1        | -0.16081 | 0.68518211 | 0.825121 |
| 287359    | Jmjd4        | -0.16081 | 0.32069596 | 0.515893 |
| 100911516 | LOC100911516 | -0.16081 | 6.30E-04   | 0.00345  |
| 499430    | Lrrc20       | -0.16101 | 0.00910645 | 0.034296 |
| 364738    | Gabpb11      | -0.1611  | 0.24004343 | 0.427455 |
| 314323    | Flvcr2       | -0.16117 | 0.02977644 | 0.089616 |
| 24591     | Neu1         | -0.16121 | 0.00158748 | 0.00773  |
| 311428    | RGD1311739   | -0.16128 | 8.92E-08   | 1.05E-06 |
| 362937    | Fam83h       | -0.16133 | 0.00267813 | 0.012176 |
| 108352474 | LOC108352474 | -0.16139 | 0.76747295 | 0.877764 |
| 24408     | Grin1        | -0.16165 | 8.23E-13   | 1.78E-11 |
| 303882    | Tnk2         | -0.16172 | 3.97E-19   | 1.37E-17 |
| 680498    | LOC680498    | -0.16174 | 0.69137025 | 0.82927  |
| 24688     | Prph         | -0.16192 | 1.74E-197  | #####    |
| 301009    | Nckipsd      | -0.16198 | 1.49E-08   | 1.97E-07 |
| 291433    | Dym          | -0.16209 | 1.35E-12   | 2.83E-11 |
| 304322    | Chst12       | -0.16225 | 6.41E-05   | 4.45E-04 |
| 314756    | Cradd        | -0.16238 | 0.33255538 | 0.52863  |
| 83509     | Slc7a7       | -0.16238 | 1.36E-07   | 1.56E-06 |
| 171410    | Acsbg1       | -0.16248 | 1.75E-13   | 4.06E-12 |
| 361894    | Ndufaf2      | -0.16254 | 0.01445629 | 0.050232 |
| 25133     | Pcdhb12      | -0.16259 | 0.42274599 | 0.618134 |
| 246118    | Tubb3        | -0.16284 | 0          | 0        |
| 24250     | Cbs          | -0.16289 | 0.31752758 | 0.512397 |
| 315665    | RGD1311251   | -0.16289 | 0.47969743 | 0.668264 |
| 361560    | Vstm2b       | -0.16314 | 0.01340227 | 0.047137 |
| 103692716 | LOC103692716 | -0.16324 | 3.16E-11   | 5.81E-10 |
| 290612    | Sh2d4b       | -0.16332 | 0.59784301 | 0.761345 |
| 81642     | Abcc6        | -0.1636  | 0.21986283 | 0.401928 |
| 114490    | Cited2       | -0.16368 | 0.00201267 | 0.009502 |
| 287606    | 4-Sep        | -0.16376 | 3.62E-11   | 6.56E-10 |
| 305348    | Lias         | -0.16376 | 0.00418079 | 0.017821 |
| 117028    | Bin1         | -0.16376 | 4.57E-16   | 1.30E-14 |
| 289727    | Nat81        | -0.1638  | 2.36E-45   | 1.99E-43 |
| 59293     | Rgs19        | -0.16385 | 5.30E-04   | 0.002951 |
| 24318     | Drd2         | -0.16396 | 0.0249309  | 0.07794  |
| 117549    | Gpr37        | -0.16403 | 0.00160835 | 0.007818 |
| 298510    | Pabpc4       | -0.16407 | 2.05E-06   | 1.93E-05 |
| 103692167 | LOC103692167 | -0.1642  | 0.04520323 | 0.125003 |
| 83684     | Tpbg         | -0.16425 | 0.17411226 | 0.34143  |
| 361313    | Rel12        | -0.16433 | 5.62E-13   | 1.24E-11 |
| 499782    | Rpl12        | -0.16446 | 1.10E-09   | 1.69E-08 |
| 306013    | Lgi3         | -0.1645  | 9.64E-28   | 5.06E-26 |
| 24258     | Chga         | -0.16461 | 1.51E-17   | 4.75E-16 |
| 64458     | Scrg1        | -0.1647  | 0.13898823 | 0.291395 |
| 499584    | LOC499584    | -0.16482 | 0.57867102 | 0.746261 |
| 100911795 | Erich6b      | -0.16489 | 0.59096222 | 0.756071 |
| 498392    | Cyt11        | -0.16493 | 0.06629082 | 0.168379 |
| 108352836 | LOC108352836 | -0.16503 | 0.47678075 | 0.66615  |
| 24796     | Spn          | -0.16504 | 0.22414154 | 0.407093 |
| 290851    | Vps36        | -0.16513 | 7.95E-07   | 8.01E-06 |
| 363687    | Mett12b      | -0.16523 | 0.02517237 | 0.078476 |
| 680602    | Lcn12        | -0.16525 | 0.45296754 | 0.64451  |
| 308556    | Vsig101      | -0.16532 | 9.60E-05   | 6.39E-04 |
| 289020    | Lrrn2        | -0.16538 | 5.48E-08   | 6.63E-07 |

|           |              |          |            |          |
|-----------|--------------|----------|------------|----------|
| 687064    | Col25a1      | -0.16543 | 0.43096742 | 0.625259 |
| 681050    | Pmf1         | -0.16558 | 0.24450462 | 0.432809 |
| 501742    | RGD1562667   | -0.16578 | 0.79206681 | 0.892863 |
| 291923    | Abcc12       | -0.16581 | 0.20840939 | 0.386518 |
| 117269    | Rps6ka2      | -0.16585 | 2.69E-14   | 6.79E-13 |
| 690050    | Tpmt         | -0.16593 | 1.26E-04   | 8.18E-04 |
| 290229    | Tssk4        | -0.16609 | 0.18489863 | 0.35602  |
| 691320    | LOC691320    | -0.16617 | 0.48853735 | 0.676177 |
| 303605    | Strada       | -0.16625 | 3.67E-04   | 0.002144 |
| 360887    | Coq8a        | -0.16629 | 0.00377527 | 0.016348 |
| 84406     | Hs3st1       | -0.16633 | 0.11424383 | 0.252909 |
| 84683     | Cox4i2       | -0.1664  | 0.24331872 | 0.431472 |
| 117100    | Slc6a7       | -0.16645 | 0.23782154 | 0.424888 |
| 24949     | Syn1         | -0.16671 | 4.31E-38   | 3.19E-36 |
| 25644     | Bmp6         | -0.16674 | 0.03190211 | 0.094712 |
| 361784    | Znrd1        | -0.16687 | 0.07429567 | 0.183904 |
| 102553659 | LOC102553659 | -0.16702 | 0.7442066  | 0.861868 |
| 291926    | Mylk3        | -0.16723 | 0.67920726 | 0.820963 |
| 292786    | RGD1560986   | -0.16723 | 0.8112914  | 0.904707 |
| 301045    | Cmtm8        | -0.16723 | 0.47381758 | 0.664154 |
| 304458    | Tmem132b     | -0.16723 | 0.13102898 | 0.279383 |
| 315163    | Shisa8       | -0.16723 | 0.67920726 | 0.820963 |
| 361586    | Trpm1        | -0.16723 | 0.7356208  | 0.857242 |
| 364853    | Plac8l1      | -0.16723 | 0.8112914  | 0.904707 |
| 365744    | Hnf4g        | -0.16723 | 0.8112914  | 0.904707 |
| 499607    | LOC499607    | -0.16723 | 0.8112914  | 0.904707 |
| 681395    | Rnf133       | -0.16723 | 0.8112914  | 0.904707 |
| 689322    | Shisa12a     | -0.16723 | 0.8112914  | 0.904707 |
| 315264    | Pus7l        | -0.16746 | 0.10336413 | 0.234381 |
| 155812    | Trim9        | -0.1675  | 3.48E-04   | 0.002049 |
| 361602    | Me3          | -0.16771 | 0.00704765 | 0.027669 |
| 102555598 | LOC102555598 | -0.16781 | 0.77872926 | 0.88474  |
| 362850    | Angptl4      | -0.16784 | 0.05198131 | 0.138906 |
| 311807    | Bmyc         | -0.16807 | 0.00873754 | 0.033076 |
| 100360205 | LOC100360205 | -0.16818 | 0.0035791  | 0.015623 |
| 303878    | Ubxn7        | -0.16825 | 0.21239829 | 0.392122 |
| 305687    | Zfp503       | -0.16829 | 0.01054354 | 0.038727 |
| 682225    | LOC682225    | -0.1683  | 0.31618257 | 0.510919 |
| 100361323 | Astn2        | -0.16843 | 1.38E-04   | 8.89E-04 |
| 497960    | Fam222b      | -0.16859 | 4.57E-08   | 5.58E-07 |
| 286758    | Aqp11        | -0.16873 | 0.01268358 | 0.045092 |
| 79430     | C1cnkb       | -0.16888 | 0.26958308 | 0.460922 |
| 117559    | Sv2a         | -0.16893 | 2.68E-08   | 3.38E-07 |
| 308557    | Igln5        | -0.16907 | 1.43E-05   | 1.14E-04 |
| 500563    | Fam110d      | -0.16907 | 0.26011245 | 0.449573 |
| 103692169 | LOC103692169 | -0.1691  | 0.1595967  | 0.321031 |
| 140448    | Slc8a3       | -0.16919 | 0.00243182 | 0.0112   |
| 360973    | Gas2l1       | -0.1692  | 3.41E-18   | 1.12E-16 |
| 29628     | Gria3        | -0.16926 | 0.0056565  | 0.022955 |
| 679321    | Slc35f3      | -0.16926 | 0.02266809 | 0.072205 |
| 116653    | Cap2         | -0.16937 | 0.06963935 | 0.174902 |
| 25544     | Sele         | -0.16946 | 0.53505109 | 0.717104 |
| 499927    | RGD1561517   | -0.16949 | 0.4708067  | 0.661296 |
| 108349776 | LOC108349776 | -0.1695  | 0.72447037 | 0.849393 |
| 309570    | Slc18b1      | -0.16953 | 0.00323394 | 0.014337 |
| 103693540 | LOC103693540 | -0.16962 | 0.3214176  | 0.51653  |

|           |              |          |            |          |
|-----------|--------------|----------|------------|----------|
| 84390     | Hcn1         | -0.16969 | 6.36E-07   | 6.53E-06 |
| 361708    | Snx32        | -0.1697  | 7.27E-05   | 4.99E-04 |
| 362972    | Pnpla3       | -0.16985 | 8.37E-06   | 6.98E-05 |
| 100911453 | LOC100911453 | -0.16988 | 0.21904821 | 0.400708 |
| 192254    | Grasp        | -0.16992 | 0.07971772 | 0.193923 |
| 309175    | Cdc42ep2     | -0.16998 | 4.50E-06   | 3.96E-05 |
| 290636    | Pgls         | -0.17011 | 3.03E-04   | 0.001804 |
| 680407    | Mark4        | -0.1705  | 4.60E-10   | 7.40E-09 |
| 680312    | Hist1h2bk    | -0.17057 | 0.26169245 | 0.451321 |
| 266605    | Dcps         | -0.17068 | 0.02285222 | 0.072706 |
| 680282    | Tceal5       | -0.17076 | 0.03458515 | 0.100823 |
| 367295    | 4-Mar        | -0.17078 | 0.01834178 | 0.061091 |
| 80754     | Rabep2       | -0.17082 | 1.36E-05   | 1.08E-04 |
| 685844    | Sh2d1b2      | -0.17088 | 0.21461307 | 0.395252 |
| 64626     | Rem2         | -0.17093 | 0.00131812 | 0.006572 |
| 103691272 | LOC103691272 | -0.17095 | 0.55424941 | 0.734002 |
| 287564    | Tmem132e     | -0.17103 | 3.43E-15   | 9.23E-14 |
| 299613    | Mex3d        | -0.17109 | 3.62E-04   | 0.002119 |
| 56825     | Cym          | -0.17123 | 0.33833999 | 0.535012 |
| 306534    | Unc5d        | -0.17125 | 0.14974671 | 0.306001 |
| 406228    | Krt2         | -0.17134 | 0.44464647 | 0.637577 |
| 362942    | Slc52a2      | -0.1714  | 0.01778635 | 0.059554 |
| 500307    | Tmem121b     | -0.17179 | 0.22854167 | 0.413036 |
| 24256     | Psg19        | -0.17203 | 0.69281399 | 0.830426 |
| 65277     | Vtila        | -0.1721  | 0.02228563 | 0.071297 |
| 362979    | Panx2        | -0.17221 | 1.34E-13   | 3.13E-12 |
| 681200    | Skor2        | -0.17224 | 0.00470763 | 0.019705 |
| 502576    | RGD1560554   | -0.17241 | 0.65337259 | 0.802391 |
| 366274    | Ntsr1        | -0.17257 | 0.022098   | 0.070839 |
| 102547039 | LOC102547039 | -0.17279 | 0.41407383 | 0.609902 |
| 691504    | Zfpml        | -0.17297 | 6.95E-05   | 4.79E-04 |
| 308758    | Hddc3        | -0.17318 | 0.00915383 | 0.03444  |
| 288664    | Pheta1       | -0.17322 | 0.02111595 | 0.068393 |
| 689576    | Nkain3       | -0.17325 | 0.26990055 | 0.461382 |
| 501828    | RGD1566006   | -0.17329 | 0.81859573 | 0.908888 |
| 102553382 | LOC102553382 | -0.17346 | 0.44179305 | 0.634871 |
| 292206    | Trip13       | -0.17347 | 0.35250736 | 0.549566 |
| 311137    | Zfp385b      | -0.17353 | 1.94E-06   | 1.83E-05 |
| 108348093 | LOC108348093 | -0.17363 | 0.84445732 | 0.922437 |
| 309659    | Mdgal        | -0.1737  | 7.21E-04   | 0.003884 |
| 291961    | Exoc311      | -0.17374 | 0.05023993 | 0.135393 |
| 681825    | Vbp1         | -0.17388 | 6.60E-08   | 7.91E-07 |
| 29130     | Syn3         | -0.17392 | 0.03656008 | 0.105291 |
| 24167     | Adcyap1r1    | -0.17415 | 0.08180104 | 0.198131 |
| 308420    | Zfp112       | -0.17415 | 0.12883586 | 0.276035 |
| 25684     | Mep1a        | -0.17418 | 0.67289533 | 0.815897 |
| 171341    | Mgst1        | -0.17425 | 4.16E-07   | 4.40E-06 |
| 314457    | Ankrd9       | -0.17437 | 0.00834111 | 0.031854 |
| 497962    | Lym9         | -0.17455 | 0.00223252 | 0.010383 |
| 298496    | Kcnq4        | -0.17471 | 2.84E-04   | 0.001705 |
| 360583    | Dhrs11       | -0.1748  | 0.02610927 | 0.080736 |
| 311287    | Ano3         | -0.17511 | 4.53E-14   | 1.12E-12 |
| 313017    | Sfn          | -0.17523 | 0.18957634 | 0.362535 |
| 314480    | Gpr132       | -0.1753  | 0.37794173 | 0.574981 |
| 84600     | Rag1         | -0.1753  | 0.37794173 | 0.574981 |
| 363150    | Elp6         | -0.17532 | 0.00292934 | 0.013161 |



|           |              |          |            |          |
|-----------|--------------|----------|------------|----------|
| 60669     | Cmklr1       | -0.17561 | 0.05915998 | 0.154427 |
| 680906    | Fam169b      | -0.17564 | 0.58414551 | 0.750374 |
| 501230    | LOC501230    | -0.17573 | 0.23250351 | 0.418252 |
| 29686     | Scn1b        | -0.1758  | 3.65E-38   | 2.71E-36 |
| 117052    | Kcnj12       | -0.17583 | 8.42E-06   | 7.01E-05 |
| 295458    | Bdh2         | -0.17595 | 0.18705895 | 0.359054 |
| 299509    | Myo1a        | -0.176   | 0.00213966 | 0.010027 |
| 287095    | Zfp13        | -0.17614 | 0.10010362 | 0.228813 |
| 64557     | Bard1        | -0.17628 | 0.51646587 | 0.701701 |
| 689786    | Catspere     | -0.17628 | 0.51646587 | 0.701701 |
| 25177     | Fhl1         | -0.17652 | 1.18E-11   | 2.26E-10 |
| 108348144 | LOC108348144 | -0.17661 | 0.30120446 | 0.498128 |
| 298518    | Csf3r        | -0.17668 | 0.10692833 | 0.240232 |
| 114244    | Hcn2         | -0.17673 | 8.27E-17   | 2.49E-15 |
| 680329    | LOC680329    | -0.17686 | 0.2492719  | 0.437708 |
| 117101    | Kcnc3        | -0.17695 | 1.55E-17   | 4.85E-16 |
| 113907    | Sbk1         | -0.17699 | 8.01E-09   | 1.09E-07 |
| 108352198 | LOC108352198 | -0.17707 | 0.10287681 | 0.233555 |
| 103690023 | LOC103690023 | -0.17709 | 0.25440092 | 0.443139 |
| 689039    | LOC689039    | -0.17709 | 0.25440092 | 0.443139 |
| 310655    | Cgn          | -0.17713 | 0.17816278 | 0.346979 |
| 301115    | Ak5          | -0.17714 | 0.72874774 | 0.851838 |
| 60666     | Gpd1         | -0.17715 | 2.99E-07   | 3.24E-06 |
| 363324    | LOC363324    | -0.1772  | 7.70E-04   | 0.004119 |
| 301506    | Fsd1         | -0.17729 | 0.00121704 | 0.006122 |
| 691468    | RGD1561277   | -0.17737 | 0.01069312 | 0.039118 |
| 498281    | Nectin4      | -0.17739 | 0.23807631 | 0.425144 |
| 59318     | Negr1        | -0.17761 | 0.02406265 | 0.075886 |
| 295327    | Nhlh2        | -0.17762 | 0.10647792 | 0.239475 |
| 64387     | Ccdc80       | -0.17783 | 0.00189537 | 0.009036 |
| 65193     | Nkx6-1       | -0.17788 | 0.72754463 | 0.851242 |
| 688553    | LOC688553    | -0.17788 | 0.72754463 | 0.851242 |
| 360848    | Shisa4       | -0.17788 | 4.32E-09   | 6.15E-08 |
| 685729    | Pcbd2        | -0.17807 | 0.02033325 | 0.066412 |
| 307806    | Thap11       | -0.17812 | 0.00538692 | 0.022101 |
| 288512    | Elf1         | -0.17825 | 9.11E-07   | 9.13E-06 |
| 690308    | Tsen54       | -0.17838 | 0.01925989 | 0.063472 |
| 102549710 | Samd11       | -0.17842 | 0.01222821 | 0.043759 |
| 114502    | Pax3         | -0.17844 | 0.54490412 | 0.725967 |
| 362334    | Tmem140      | -0.17866 | 0.07439217 | 0.184048 |
| 308834    | Usp35        | -0.17873 | 1.15E-08   | 1.54E-07 |
| 305691    | Zfp385d      | -0.17874 | 0.01100465 | 0.040077 |
| 315173    | Mcat         | -0.17874 | 0.01100465 | 0.040077 |
| 100360856 | LOC100360856 | -0.1788  | 0.00947502 | 0.035445 |
| 362841    | Mier2        | -0.17885 | 0.0015584  | 0.0076   |
| 500066    | Strip2       | -0.17901 | 0.02641599 | 0.081499 |
| 170924    | Abcc4        | -0.17905 | 5.54E-05   | 3.90E-04 |
| 24203     | Amyla        | -0.17906 | 0.57707031 | 0.745004 |
| 307925    | Spire2       | -0.17924 | 1.22E-12   | 2.59E-11 |
| 306328    | Med26        | -0.17925 | 0.05166026 | 0.138184 |
| 689996    | Tomm201      | -0.17939 | 0.79893859 | 0.89684  |
| 363563    | Fb111        | -0.17948 | 1.86E-04   | 0.001166 |
| 100911693 | LOC100911693 | -0.17952 | 0.10083471 | 0.229988 |
| 310678    | Hist2h3c2    | -0.17968 | 0.53072216 | 0.713008 |
| 688407    | Mett127      | -0.17983 | 0.11269972 | 0.250363 |
| 361519    | Zfp428       | -0.17995 | 0.00248761 | 0.011424 |

|           |              |          |            |          |
|-----------|--------------|----------|------------|----------|
| 684681    | Hist1hlc     | -0.18044 | 5.48E-27   | 2.77E-25 |
| 293874    | Trpm6        | -0.18053 | 0.04538236 | 0.125335 |
| 293481    | Tufm         | -0.18059 | 6.76E-11   | 1.19E-09 |
| 84010     | D111         | -0.18061 | 0.25525068 | 0.444031 |
| 497916    | Mief2        | -0.1807  | 0.01056865 | 0.038805 |
| 498959    | Fbxo31       | -0.18076 | 5.67E-12   | 1.13E-10 |
| 29369     | Fgf18        | -0.18091 | 0.06066986 | 0.157376 |
| 288161    | B3galt5      | -0.18095 | 0.01840085 | 0.061213 |
| 298690    | B3galt6      | -0.18095 | 0.04509626 | 0.124798 |
| 307799    | Pard6a       | -0.18109 | 0.05218708 | 0.139339 |
| 361277    | Acbd7        | -0.18109 | 0.21042647 | 0.38916  |
| 100360464 | Arxes2       | -0.18151 | 0.03678291 | 0.105836 |
| 315705    | Rpp25        | -0.18173 | 0.29069833 | 0.486071 |
| 100910207 | LOC100910207 | -0.18175 | 0.00182244 | 0.008734 |
| 309390    | Entpd7       | -0.18196 | 0.41981684 | 0.615316 |
| 299341    | Apopt1       | -0.18204 | 7.98E-04   | 0.004248 |
| 499957    | Samd10       | -0.18209 | 0.00418148 | 0.01782  |
| 291157    | Hist1h2bo    | -0.1821  | 0.59814177 | 0.761573 |
| 293587    | Fuom         | -0.18215 | 0.64764481 | 0.800311 |
| 304346    | Mblac1       | -0.18222 | 0.04603535 | 0.12677  |
| 304928    | Mettl18      | -0.18222 | 0.31850638 | 0.513368 |
| 116719    | Acacb        | -0.18238 | 0.01351826 | 0.047501 |
| 500152    | Mmrn1        | -0.18242 | 0.23144571 | 0.416821 |
| 245963    | Egfl7        | -0.18243 | 0.01230238 | 0.043967 |
| 294231    | RGD1302996   | -0.18244 | 1.09E-10   | 1.87E-09 |
| 680403    | Hist1h2bc11  | -0.18244 | 0.7170015  | 0.845215 |
| 117183    | Rgcc         | -0.18252 | 0.00159345 | 0.007756 |
| 294208    | Trim31       | -0.18253 | 0.41842278 | 0.614123 |
| 364208    | Cnrip1       | -0.18275 | 1.54E-08   | 2.03E-07 |
| 314423    | Bcl11b       | -0.18291 | 0.08828301 | 0.208915 |
| 314213    | Gpr135       | -0.18297 | 0.15746704 | 0.317703 |
| 497899    | LOC497899    | -0.18297 | 0.15746704 | 0.317703 |
| 362100    | Endog        | -0.18342 | 0.06523888 | 0.166373 |
| 83810     | Trpv1        | -0.18348 | 1.67E-16   | 4.89E-15 |
| 100363494 | LOC100363494 | -0.1835  | 1.66E-07   | 1.87E-06 |
| 100233177 | Zfp949       | -0.18355 | 0.03624612 | 0.104513 |
| 500252    | Hlfx         | -0.18363 | 3.51E-08   | 4.36E-07 |
| 114639    | Zp3          | -0.18372 | 0.61648732 | 0.775931 |
| 25431     | Dlx5         | -0.18372 | 0.61648732 | 0.775931 |
| 307897    | Sdr42e1      | -0.18372 | 0.26275559 | 0.452744 |
| 315435    | Panx1        | -0.18375 | 9.87E-04   | 0.00512  |
| 304554    | Sez6l        | -0.1839  | 0.01099982 | 0.040079 |
| 287148    | Rpusd1       | -0.18391 | 0.00458771 | 0.019271 |
| 29331     | Hapln1       | -0.18397 | 4.02E-07   | 4.26E-06 |
| 414790    | RT1-CE13     | -0.18398 | 0.11235512 | 0.249831 |
| 316003    | Amigo3       | -0.18402 | 6.44E-06   | 5.48E-05 |
| 308992    | Zfp771       | -0.18413 | 1.61E-05   | 1.26E-04 |
| 287094    | Zfp213       | -0.18417 | 0.0145345  | 0.050457 |
| 362676    | Prxl2b       | -0.18418 | 1.69E-04   | 0.001068 |
| 361054    | Ebpl         | -0.1842  | 0.00768691 | 0.029737 |
| 298534    | Clspn        | -0.18423 | 0.53803111 | 0.720135 |
| 100363112 | LOC100363112 | -0.18447 | 0.42017131 | 0.615504 |
| 108348070 | LOC108348070 | -0.18475 | 0.58140037 | 0.74816  |
| 114491    | Cited4       | -0.18493 | 0.57423773 | 0.742404 |
| 688293    | Sgsh         | -0.18509 | 0.16165403 | 0.32404  |
| 681936    | Ism2         | -0.18558 | 0.01271229 | 0.045186 |

|           |              |          |            |          |
|-----------|--------------|----------|------------|----------|
| 305095    | Tmcc2        | -0.18567 | 3.25E-08   | 4.05E-07 |
| 691414    | LOC691414    | -0.18567 | 6.07E-06   | 5.20E-05 |
| 293524    | Bag3         | -0.18574 | 6.56E-28   | 3.46E-26 |
| 170579    | Fgf22        | -0.18575 | 0.53735222 | 0.71953  |
| 499470    | Armc2        | -0.18575 | 0.28535477 | 0.479536 |
| 303004    | Tmem8a       | -0.18576 | 5.23E-07   | 5.44E-06 |
| 25327     | Kcnc1        | -0.18579 | 2.31E-05   | 1.76E-04 |
| 680751    | Ebf4         | -0.18581 | 0.03924983 | 0.111536 |
| 502908    | LOC502908    | -0.18584 | 0.860049   | 0.931667 |
| 29758     | St6galnac3   | -0.18585 | 0.09859478 | 0.226179 |
| 25261     | Id1          | -0.18599 | 0.00244326 | 0.011242 |
| 365179    | Zfp524       | -0.18638 | 0.0200383  | 0.065617 |
| 498228    | Mfsd4a       | -0.18639 | 0.14785987 | 0.303317 |
| 292722    | Tmem145      | -0.18644 | 6.20E-05   | 4.32E-04 |
| 293493    | Fam57b       | -0.18646 | 5.28E-34   | 3.42E-32 |
| 415064    | Gpank1       | -0.18651 | 0.00478397 | 0.019972 |
| 293107    | Ccdc89       | -0.18662 | 0.38150953 | 0.578307 |
| 690131    | Hist2h2aa2   | -0.18665 | 7.07E-05   | 4.86E-04 |
| 102551000 | LOC102551000 | -0.18671 | 0.81487976 | 0.906983 |
| 300889    | Ankrd34c     | -0.18672 | 0.05271986 | 0.140544 |
| 499099    | Cd177        | -0.18675 | 0.19705853 | 0.371693 |
| 100910047 | Gfy          | -0.18683 | 3.37E-11   | 6.16E-10 |
| 24799     | Eef1a2       | -0.18685 | 6.98E-129  | #####    |
| 499505    | Msh3         | -0.18705 | 0.00278889 | 0.012634 |
| 299604    | Polrmt       | -0.18706 | 6.08E-04   | 0.003335 |
| 29204     | Neu2         | -0.18713 | 0.44828009 | 0.64028  |
| 360665    | Jmjd6        | -0.18722 | 0.01476268 | 0.051128 |
| 684111    | E2f2         | -0.18728 | 0.05625299 | 0.148241 |
| 497881    | Tlx3         | -0.18732 | 3.01E-09   | 4.37E-08 |
| 289801    | Upp1         | -0.18741 | 0.25795538 | 0.447184 |
| 688283    | Afmid        | -0.18746 | 0.03994206 | 0.113132 |
| 117105    | Kcnb2        | -0.18747 | 0.00169161 | 0.008171 |
| 690333    | Sertm1       | -0.18753 | 2.90E-05   | 2.18E-04 |
| 296048    | Lpcat4       | -0.18753 | 4.64E-12   | 9.33E-11 |
| 308775    | Det1         | -0.18755 | 0.06544145 | 0.166733 |
| 360639    | Dcakd        | -0.18769 | 2.56E-08   | 3.24E-07 |
| 25393     | Bcan         | -0.18778 | 1.55E-14   | 3.98E-13 |
| 54295     | Rgs6         | -0.18784 | 4.34E-04   | 0.002482 |
| 679806    | Fer115       | -0.18791 | 0.20534143 | 0.382505 |
| 113912    | Rtn4r        | -0.18804 | 0.00876576 | 0.033157 |
| 286923    | Dlgap3       | -0.18807 | 1.01E-10   | 1.74E-09 |
| 24264     | Ckb          | -0.18833 | 6.57E-100  | 1.28E-97 |
| 304669    | Hook2        | -0.18842 | 0.07289077 | 0.18137  |
| 103692792 | LOC103692792 | -0.18851 | 0.00556944 | 0.022665 |
| 499980    | Ccdc146      | -0.18866 | 0.30699987 | 0.502995 |
| 290633    | Gtpbp3       | -0.18873 | 0.00928844 | 0.034871 |
| 305096    | Klhdc8a      | -0.18877 | 0.04067243 | 0.114723 |
| 304496    | Orail        | -0.18888 | 0.00239059 | 0.011043 |
| 300050    | Bop1         | -0.18908 | 1.37E-05   | 1.09E-04 |
| 25688     | C1cn1        | -0.18914 | 0.01404752 | 0.049026 |
| 316290    | Ogfrl1       | -0.18924 | 1.18E-07   | 1.37E-06 |
| 287847    | Rbfox3       | -0.18928 | 3.15E-16   | 9.05E-15 |
| 312679    | I117ra       | -0.1893  | 2.62E-05   | 1.98E-04 |
| 360908    | Cdc7         | -0.18931 | 0.10783401 | 0.241668 |
| 100361898 | LOC100361898 | -0.18946 | 0.22182899 | 0.404126 |
| 114509    | Mapk7        | -0.1895  | 5.26E-04   | 0.002934 |

|           |              |          |            |          |
|-----------|--------------|----------|------------|----------|
| 108348114 | LOC108348114 | -0.18979 | 0.00212884 | 0.009984 |
| 24602     | Nppa         | -0.18995 | 0.0875486  | 0.207564 |
| 287102    | Kremen2      | -0.18995 | 0.79896753 | 0.896767 |
| 290032    | Eddm3b       | -0.18995 | 0.71871482 | 0.846344 |
| 295518    | Clnk         | -0.18995 | 0.71871482 | 0.846344 |
| 296608    | RGD1306233   | -0.18995 | 0.65912259 | 0.804859 |
| 299316    | Slc25a47     | -0.18995 | 0.65912259 | 0.804859 |
| 315712    | Ccdc33       | -0.18995 | 0.79896753 | 0.896767 |
| 58922     | Sebox        | -0.18995 | 0.79896753 | 0.896767 |
| 79217     | Gja3         | -0.18995 | 0.71871482 | 0.846344 |
| 100359918 | Lnp1         | -0.18995 | 0.61049489 | 0.771909 |
| 25117     | Hsd11b2      | -0.18995 | 0.39828384 | 0.595487 |
| 25633     | Dnase1       | -0.18995 | 0.61049489 | 0.771909 |
| 108348080 | LOC108348080 | -0.18997 | 0.03162382 | 0.094047 |
| 64191     | Dhcr7        | -0.19004 | 8.23E-10   | 1.28E-08 |
| 108352650 | LOC108352650 | -0.1901  | 0.56161816 | 0.733156 |
| 316758    | Lama1        | -0.19012 | 0.43518079 | 0.629119 |
| 362911    | Mal2         | -0.19015 | 0.00280653 | 0.012699 |
| 65155     | Alas1        | -0.19036 | 6.79E-08   | 8.13E-07 |
| 56761     | Notch3       | -0.19066 | 4.30E-05   | 3.11E-04 |
| 362628    | Ifnlr1       | -0.19084 | 0.02774112 | 0.084845 |
| 363206    | Tmem14a      | -0.19113 | 0.0189906  | 0.062813 |
| 690126    | LOC690126    | -0.19143 | 0.07109025 | 0.177772 |
| 362258    | Actr5        | -0.19145 | 0.06520194 | 0.166301 |
| 304929    | F5           | -0.19158 | 0.30624447 | 0.502189 |
| 64537     | Hpse         | -0.1916  | 0.00130286 | 0.006504 |
| 362931    | Adgrb1       | -0.19162 | 1.14E-08   | 1.52E-07 |
| 687827    | Haspin       | -0.19175 | 0.16818656 | 0.332687 |
| 102554194 | LOC102554194 | -0.19186 | 0.01584166 | 0.054234 |
| 64356     | Nrgn         | -0.19195 | 0.3559225  | 0.553125 |
| 171393    | Clstn3       | -0.19239 | 1.39E-22   | 5.71E-21 |
| 85275     | Mpp2         | -0.19264 | 4.51E-05   | 3.25E-04 |
| 306790    | Sema4d       | -0.19265 | 2.33E-06   | 2.16E-05 |
| 315711    | Sema7a       | -0.19287 | 2.08E-25   | 9.74E-24 |
| 296545    | C8g          | -0.19305 | 0.19792108 | 0.372839 |
| 363256    | Speg         | -0.1932  | 4.17E-06   | 3.69E-05 |
| 252882    | Mamdc4       | -0.19323 | 0.30414341 | 0.501074 |
| 286939    | Clmp         | -0.19352 | 1.69E-15   | 4.67E-14 |
| 108353318 | LOC108353318 | -0.19356 | 0.3715071  | 0.568119 |
| 79122     | Fdxr         | -0.1936  | 0.02911198 | 0.088076 |
| 362760    | Galnt16      | -0.19363 | 0.06899615 | 0.173837 |
| 361921    | Ect2         | -0.1937  | 0.23850936 | 0.425638 |
| 311311    | Meis2        | -0.19375 | 5.61E-04   | 0.003105 |
| 102556459 | LOC102556459 | -0.19383 | 0.3715628  | 0.568067 |
| 103690027 | Aspn11       | -0.19387 | 0.62730613 | 0.784699 |
| 24247     | Casr         | -0.1939  | 2.74E-10   | 4.54E-09 |
| 29636     | F2r12        | -0.19397 | 3.88E-04   | 0.002253 |
| 114090    | Egr2         | -0.19402 | 2.37E-06   | 2.20E-05 |
| 81756     | Rab13        | -0.19422 | 0.02671391 | 0.082232 |
| 290639    | Fchol        | -0.19446 | 1.56E-05   | 1.23E-04 |
| 60433     | Rfng         | -0.19451 | 2.00E-08   | 2.57E-07 |
| 114515    | Lanc11       | -0.19455 | 4.77E-14   | 1.18E-12 |
| 66024     | Npy2r        | -0.19458 | 0.01111462 | 0.040412 |
| 293155    | Anapc15      | -0.19462 | 3.53E-04   | 0.002075 |
| 65081     | Vps33a       | -0.19496 | 1.76E-06   | 1.68E-05 |
| 25009     | Vars         | -0.1951  | 8.77E-12   | 1.72E-10 |

|           |              |          |            |          |
|-----------|--------------|----------|------------|----------|
| 100192205 | Hsbp111      | -0.19515 | 0.09303502 | 0.217006 |
| 368153    | RT1-CE7      | -0.19537 | 0.00279192 | 0.012642 |
| 359727    | Bysl         | -0.19571 | 6.25E-04   | 0.003423 |
| 290356    | Phyhip       | -0.19575 | 0.00545927 | 0.022331 |
| 252897    | Pcdhgall     | -0.19577 | 0.00276955 | 0.012556 |
| 306657    | Irx2         | -0.19596 | 0.44511626 | 0.637818 |
| 365511    | Zfp296       | -0.19611 | 0.4402716  | 0.633497 |
| 309440    | Mrpl43       | -0.19628 | 1.08E-05   | 8.85E-05 |
| 65023     | Kcnip1       | -0.19642 | 2.82E-10   | 4.67E-09 |
| 304374    | Fbxo24       | -0.19662 | 0.3693022  | 0.565474 |
| 685055    | Atr          | -0.19669 | 6.96E-12   | 1.37E-10 |
| 314473    | Kif26a       | -0.19698 | 0.05017103 | 0.135245 |
| 171084    | Nat8b        | -0.19698 | 0.57344269 | 0.742334 |
| 313650    | Fam43b       | -0.19701 | 2.33E-09   | 3.44E-08 |
| 315978    | Nek11        | -0.19725 | 0.08808218 | 0.208492 |
| 500474    | Rnf183       | -0.19736 | 0.71690339 | 0.845204 |
| 26759     | Acot7        | -0.19744 | 3.20E-52   | 3.24E-50 |
| 499421    | RGD1564162   | -0.19748 | 0.52050898 | 0.705157 |
| 361016    | LOC361016    | -0.19761 | 0.05185118 | 0.138617 |
| 116638    | Slc17a7      | -0.19779 | 2.89E-32   | 1.76E-30 |
| 54233     | Car5a        | -0.19788 | 0.34356198 | 0.540041 |
| 24417     | Grm4         | -0.19829 | 5.96E-04   | 0.003274 |
| 81726     | Mvd          | -0.19834 | 1.61E-08   | 2.11E-07 |
| 305253    | Adamts3      | -0.19847 | 0.02064171 | 0.0672   |
| 245979    | Lmo1         | -0.19853 | 0.03051022 | 0.091348 |
| 688286    | LOC688286    | -0.19856 | 0.19280676 | 0.366468 |
| 366491    | Spata21      | -0.1987  | 0.43466923 | 0.628762 |
| 282583    | Fbln2        | -0.19872 | 4.83E-68   | 6.47E-66 |
| 29685     | Mcm6         | -0.19874 | 0.07717356 | 0.189208 |
| 100912338 | LOC100912338 | -0.19894 | 0.65158008 | 0.803038 |
| 292916    | Syngn4       | -0.19894 | 0.65158008 | 0.803038 |
| 499586    | Tmem212      | -0.19894 | 0.65158008 | 0.803038 |
| 690755    | Lingo3       | -0.19894 | 0.52307409 | 0.707273 |
| 689439    | LOC689439    | -0.19897 | 0.41413579 | 0.609899 |
| 54262     | Kcnn2        | -0.19914 | 0.00568619 | 0.023066 |
| 290629    | Ushbp1       | -0.19915 | 0.08357327 | 0.201195 |
| 29470     | Mecr         | -0.19928 | 0.0167784  | 0.056697 |
| 682360    | Fam167b      | -0.1995  | 0.28171978 | 0.475315 |
| 316533    | Chpf         | -0.19969 | 2.55E-26   | 1.26E-24 |
| 171051    | Cabp1        | -0.20001 | 2.39E-23   | 1.02E-21 |
| 305705    | Lrrc3b       | -0.20012 | 0.04728297 | 0.12942  |
| 360323    | RT1-N2       | -0.20056 | 0.01384757 | 0.048426 |
| 315789    | Fam81a       | -0.20061 | 0.00178096 | 0.008554 |
| 297694    | Plbd1        | -0.20071 | 0.08592943 | 0.205156 |
| 681043    | Acnat1       | -0.20077 | 0.7319662  | 0.854551 |
| 294754    | Pelo         | -0.2008  | 7.88E-06   | 6.59E-05 |
| 103694876 | LOC103694876 | -0.2011  | 0.06799753 | 0.171844 |
| 171554    | Cdhr5        | -0.20118 | 0.27967518 | 0.473165 |
| 363912    | Piwill       | -0.20171 | 0.35992058 | 0.556703 |
| 363301    | LOC363301    | -0.2018  | 0.02905339 | 0.087941 |
| 316531    | Tuba4a       | -0.20185 | 5.95E-65   | 7.66E-63 |
| 501122    | Amer3        | -0.20194 | 6.38E-04   | 0.003484 |
| 29326     | Gpx2         | -0.20218 | 6.99E-13   | 1.52E-11 |
| 360243    | Top2a        | -0.20224 | 0.04527226 | 0.125103 |
| 501502    | Sh2d1a       | -0.20228 | 0.38407148 | 0.580711 |
| 64628     | Hes3         | -0.20231 | 0.30706759 | 0.502846 |

|           |              |          |            |          |
|-----------|--------------|----------|------------|----------|
| 680842    | RT1-M1-5     | -0.2025  | 0.71056613 | 0.841169 |
| 500622    | RGD1565766   | -0.20294 | 0.31412268 | 0.50854  |
| 500987    | H2afx        | -0.20333 | 1.81E-05   | 1.41E-04 |
| 498353    | Scfd2        | -0.20333 | 5.26E-04   | 0.002932 |
| 59301     | Ghr1         | -0.20376 | 0.51802774 | 0.702945 |
| 25375     | Aldh3a1      | -0.20376 | 0.5976562  | 0.761158 |
| 25477     | Lhcgr        | -0.20376 | 0.70900514 | 0.840052 |
| 366432    | Slc1a7       | -0.20376 | 0.70900514 | 0.840052 |
| 498065    | Lca5l        | -0.20376 | 0.70900514 | 0.840052 |
| 25259     | Gp5          | -0.20396 | 0.30507249 | 0.502083 |
| 108349568 | LOC108349568 | -0.20406 | 0.65290863 | 0.80208  |
| 108352688 | LOC108352688 | -0.20409 | 0.34775329 | 0.544651 |
| 29583     | Pecam1       | -0.20412 | 7.74E-04   | 0.00414  |
| 362255    | Vstm21       | -0.20447 | 7.75E-17   | 2.34E-15 |
| 192153    | Gpr26        | -0.20469 | 0.13459896 | 0.284668 |
| 360661    | Llgl2        | -0.20485 | 0.09021545 | 0.212039 |
| 498997    | Rspo3        | -0.20511 | 0.37986204 | 0.576912 |
| 303559    | Arl4d        | -0.20525 | 0.09390822 | 0.218427 |
| 499943    | Spata25      | -0.2053  | 0.80484816 | 0.90066  |
| 170509    | Cyp3a62      | -0.20534 | 0.51499645 | 0.700529 |
| 25662     | Igfbp2       | -0.20534 | 1.28E-08   | 1.71E-07 |
| 499917    | Tmem74b      | -0.20557 | 0.32163457 | 0.516748 |
| 307098    | Net1         | -0.2056  | 6.61E-07   | 6.76E-06 |
| 296145    | Fbln7        | -0.20571 | 0.20349284 | 0.37999  |
| 266769    | Gpr3         | -0.20589 | 0.16039569 | 0.322366 |
| 308724    | Agbl1        | -0.20589 | 0.48276005 | 0.67145  |
| 83521     | Rrad         | -0.20589 | 0.32090744 | 0.516059 |
| 102557478 | LOC102557478 | -0.20591 | 0.70200554 | 0.837071 |
| 366949    | Mafa         | -0.20603 | 8.51E-04   | 0.004495 |
| 363120    | Esyt3        | -0.2064  | 0.27344979 | 0.465527 |
| 292541    | Nlrp12       | -0.20647 | 0.67201007 | 0.815343 |
| 192172    | Mpst         | -0.20655 | 1.78E-04   | 0.001119 |
| 103690052 | LOC103690052 | -0.20673 | 0.70907073 | 0.84     |
| 103694870 | LOC103694870 | -0.20673 | 0.70907073 | 0.84     |
| 108349537 | LOC108349537 | -0.20676 | 0.8842294  | 0.946847 |
| 108353041 | LOC108353041 | -0.20676 | 0.8842294  | 0.946847 |
| 313785    | Icam5        | -0.20676 | 0.55221131 | 0.732372 |
| 315550    | Rpusd4       | -0.20704 | 0.00526884 | 0.021696 |
| 103690019 | LOC103690019 | -0.20728 | 0.42765234 | 0.622869 |
| 499839    | RGD1564664   | -0.20774 | 2.92E-13   | 6.61E-12 |
| 302996    | Ccdc78       | -0.20793 | 0.55549444 | 0.734833 |
| 291356    | Et14         | -0.20798 | 1.33E-22   | 5.47E-21 |
| 362976    | Trmu         | -0.20823 | 0.02456999 | 0.076988 |
| 24189     | Aldoa        | -0.20833 | 2.88E-241  | #####    |
| 361424    | RGD1309651   | -0.20836 | 0.2005674  | 0.376484 |
| 499506    | Ankrd34b     | -0.20839 | 0.061717   | 0.159636 |
| 295219    | Slc27a3      | -0.2084  | 0.00263001 | 0.011983 |
| 106146145 | Baiap3       | -0.20881 | 0.51282563 | 0.698474 |
| 25106     | Rgn          | -0.20881 | 0.3546933  | 0.551485 |
| 497860    | Rpl391       | -0.20881 | 0.64353504 | 0.797146 |
| 362715    | Dtnb         | -0.20892 | 8.57E-09   | 1.17E-07 |
| 499561    | Fam173b      | -0.20925 | 0.00149349 | 0.007338 |
| 500065    | Tspan33      | -0.20925 | 0.0667097  | 0.169195 |
| 317382    | Foxp3        | -0.20954 | 0.58514272 | 0.751098 |
| 25362     | Slc30a2      | -0.20985 | 0.39698982 | 0.594206 |
| 108348172 | LOC108348172 | -0.20994 | 7.67E-07   | 7.77E-06 |



|           |              |          |            |          |
|-----------|--------------|----------|------------|----------|
| 108348185 | NEWGENE 2724 | -0.21007 | 0.71111162 | 0.841344 |
| 317675    | Tph2         | -0.21034 | 0.00511456 | 0.021134 |
| 298002    | Rpp251       | -0.21055 | 0.01806625 | 0.060342 |
| 360970    | Cabp7        | -0.2106  | 0.00660473 | 0.026244 |
| 689823    | Rad2111      | -0.21071 | 0.37336539 | 0.569862 |
| 100910954 | LOC100910954 | -0.21086 | 0.7762921  | 0.883236 |
| 85273     | Fbxo2        | -0.21092 | 3.91E-48   | 3.64E-46 |
| 114032    | Kcnh4        | -0.21143 | 0.59076302 | 0.755867 |
| 24925     | Adrb1        | -0.21143 | 0.44697602 | 0.639473 |
| 64826     | Foxq1        | -0.21143 | 0.28216799 | 0.475734 |
| 308463    | Map3k10      | -0.2115  | 2.17E-12   | 4.49E-11 |
| 362860    | Appl2        | -0.21168 | 1.16E-07   | 1.35E-06 |
| 691478    | Cpne6        | -0.21175 | 5.05E-57   | 5.62E-55 |
| 685184    | LOC685184    | -0.21205 | 0.331633   | 0.527869 |
| 25155     | Syk          | -0.21209 | 0.02161621 | 0.069647 |
| 29499     | Shh          | -0.21215 | 4.51E-06   | 3.96E-05 |
| 117185    | Neu3         | -0.21215 | 0.08602524 | 0.205256 |
| 296985    | Clec21       | -0.21216 | 6.75E-50   | 6.60E-48 |
| 499914    | Gins1        | -0.2122  | 0.13368065 | 0.283482 |
| 501630    | Mum111       | -0.21222 | 0.02322168 | 0.07366  |
| 298404    | Arhgef39     | -0.21223 | 0.27227093 | 0.464142 |
| 313108    | Mms221       | -0.21232 | 0.25298937 | 0.441509 |
| 100360722 | Sirpd        | -0.21235 | 0.77454474 | 0.882249 |
| 108348049 | LOC108348049 | -0.21285 | 0.06620195 | 0.168199 |
| 360960    | Hmx1         | -0.2129  | 0.05893583 | 0.153969 |
| 366517    | Ttc34        | -0.21304 | 0.54617507 | 0.72705  |
| 64348     | Cryba4       | -0.21304 | 0.39339301 | 0.590632 |
| 363134    | Rrp9         | -0.21308 | 0.00200521 | 0.009474 |
| 102550773 | LOC102550773 | -0.21317 | 0.45493235 | 0.646051 |
| 302083    | RGD1562660   | -0.21336 | 0.00136645 | 0.006774 |
| 361699    | Ankrd13d     | -0.21342 | 9.75E-11   | 1.69E-09 |
| 367786    | Bmx          | -0.21362 | 0.37004562 | 0.566339 |
| 305302    | Ras111b      | -0.21366 | 0.00877802 | 0.033196 |
| 680117    | Tlx2         | -0.21374 | 8.31E-09   | 1.13E-07 |
| 171517    | Gpc2         | -0.21454 | 0.328778   | 0.524486 |
| 301372    | Gpr45        | -0.21454 | 0.328778   | 0.524486 |
| 305589    | Bcl11a       | -0.2148  | 0.01827021 | 0.060895 |
| 303039    | Wwc1         | -0.21498 | 0.05011945 | 0.135144 |
| 680110    | Rprm         | -0.21505 | 8.21E-08   | 9.71E-07 |
| 502873    | Prrt3        | -0.21518 | 1.84E-10   | 3.12E-09 |
| 246333    | Pcsk1n       | -0.21524 | 5.63E-84   | 9.16E-82 |
| 681186    | LOC681186    | -0.21531 | 0.8539861  | 0.927949 |
| 24566     | Mst1         | -0.21549 | 0.44260486 | 0.635415 |
| 302819    | Arhgap36     | -0.21568 | 1.19E-05   | 9.65E-05 |
| 493909    | Aox3         | -0.21569 | 0.21307301 | 0.393253 |
| 500553    | Zbtb8b       | -0.21581 | 0.16598873 | 0.330019 |
| 287796    | Slc39a11     | -0.21653 | 0.00487931 | 0.020303 |
| 29644     | Ptpn5        | -0.21655 | 0.00199573 | 0.009438 |
| 266687    | Slc35e4      | -0.21692 | 7.80E-07   | 7.87E-06 |
| 361514    | Meis3        | -0.21692 | 3.34E-05   | 2.48E-04 |
| 102553495 | LOC102553495 | -0.21718 | 0.15673355 | 0.316609 |
| 313057    | Serinc2      | -0.21731 | 2.09E-04   | 0.001292 |
| 58835     | Phgdh        | -0.21786 | 3.46E-22   | 1.38E-20 |
| 290566    | Ogdh1        | -0.21799 | 0.00309726 | 0.013821 |
| 308607    | E2f8         | -0.21845 | 0.40452296 | 0.601557 |
| 684792    | LOC684792    | -0.21863 | 1.57E-04   | 0.001    |

|           |              |          |            |          |
|-----------|--------------|----------|------------|----------|
| 29557     | Myh7         | -0.21868 | 2.35E-04   | 0.001439 |
| 360573    | Ksr1         | -0.21871 | 0.42961015 | 0.624241 |
| 681316    | Tpbgl        | -0.21888 | 2.27E-15   | 6.21E-14 |
| 102555167 | LOC102555167 | -0.21898 | 6.43E-23   | 2.67E-21 |
| 689746    | Tt1111       | -0.21906 | 0.00444584 | 0.018737 |
| 311202    | Large2       | -0.21944 | 0.34139459 | 0.538189 |
| 100910163 | LOC100910163 | -0.21955 | 0.56190634 | 0.733331 |
| 361432    | Cdh15        | -0.21958 | 3.95E-11   | 7.14E-10 |
| 102548506 | LOC102548506 | -0.2197  | 0.78398734 | 0.887748 |
| 108351016 | LOC108351016 | -0.2197  | 0.78398734 | 0.887748 |
| 192258    | Gabrr3       | -0.2197  | 0.69825763 | 0.834509 |
| 25321     | Ghrhr        | -0.2197  | 0.78398734 | 0.887748 |
| 292266    | Ccdc170      | -0.2197  | 0.58351802 | 0.750074 |
| 298062    | Plppr1       | -0.2197  | 0.43813445 | 0.631902 |
| 301016    | Spink8       | -0.2197  | 0.69825763 | 0.834509 |
| 302302    | Chst7        | -0.2197  | 0.20904094 | 0.387087 |
| 309203    | Scgb1d2      | -0.2197  | 0.78398734 | 0.887748 |
| 362506    | Ccl19        | -0.2197  | 0.53989896 | 0.721874 |
| 64193     | Pttg1        | -0.2197  | 0.28837718 | 0.483166 |
| 83928     | Fetub        | -0.2197  | 0.78398734 | 0.887748 |
| 307721    | Irx3         | -0.21986 | 0.48988526 | 0.677353 |
| 295228    | Gpatch4      | -0.22033 | 0.04175968 | 0.116958 |
| 680493    | Cd3eap       | -0.2204  | 0.00338872 | 0.014905 |
| 108351828 | Arih2os      | -0.22058 | 0.37251728 | 0.568933 |
| 25560     | Abcc9        | -0.22078 | 0.0040119  | 0.017185 |
| 102547212 | LOC102547212 | -0.22107 | 0.43469562 | 0.628752 |
| 368190    | Dnajc30      | -0.22111 | 8.55E-04   | 0.004511 |
| 291770    | Chst9        | -0.2212  | 0.02231689 | 0.071361 |
| 500352    | Smco3        | -0.22125 | 0.0301776  | 0.090552 |
| 24558     | Mog          | -0.22148 | 0.02238783 | 0.071564 |
| 293894    | Tpd5213      | -0.22158 | 0.33290404 | 0.528964 |
| 498848    | RGD1560482   | -0.22167 | 0.45966609 | 0.650929 |
| 288079    | Polq         | -0.22201 | 0.28582696 | 0.479991 |
| 287368    | Nt5m         | -0.22228 | 6.11E-06   | 5.23E-05 |
| 291656    | Pcdhb3       | -0.2224  | 0.01739797 | 0.058541 |
| 103691059 | LOC103691059 | -0.22248 | 0.29149873 | 0.486939 |
| 54323     | Arc          | -0.22275 | 0.03715126 | 0.106654 |
| 502774    | Cpv1         | -0.22287 | 0.35978684 | 0.556632 |
| 100365744 | Lrrc75b      | -0.22352 | 1.08E-06   | 1.07E-05 |
| 297727    | Mrps35       | -0.22401 | 3.27E-07   | 3.53E-06 |
| 689830    | Anxa9        | -0.22404 | 0.09346552 | 0.217663 |
| 302405    | Pabpc112a    | -0.22454 | 8.45E-04   | 0.004468 |
| 103693341 | Tnfrsf13b    | -0.22472 | 0.46319885 | 0.653986 |
| 108349347 | LOC108349347 | -0.22492 | 0.42113105 | 0.616578 |
| 100911855 | LOC100911855 | -0.22542 | 0.58728592 | 0.752936 |
| 299112    | Pole2        | -0.22558 | 0.33587611 | 0.532442 |
| 25515     | Plk1         | -0.22584 | 0.18250217 | 0.352725 |
| 362691    | Tmem178a     | -0.22598 | 0.06214551 | 0.160396 |
| 25505     | P2rx1        | -0.22613 | 0.35626343 | 0.553339 |
| 54266     | Madcam1      | -0.22613 | 0.19202072 | 0.365484 |
| 501297    | LOC501297    | -0.22656 | 2.94E-04   | 0.001756 |
| 288026    | Atp13a4      | -0.22695 | 0.06453967 | 0.165165 |
| 302392    | Magee2       | -0.22712 | 0.14793005 | 0.303395 |
| 309387    | Cnnm1        | -0.22717 | 6.81E-14   | 1.66E-12 |
| 108352200 | C10H5orf58   | -0.22719 | 0.75243245 | 0.867806 |
| 50564     | Gjd2         | -0.22731 | 0.29672411 | 0.493288 |

|           |              |          |            |          |
|-----------|--------------|----------|------------|----------|
| 102546596 | LOC102546596 | -0.22734 | 0.77296843 | 0.881297 |
| 25108     | Avpr2        | -0.22739 | 0.2225868  | 0.40508  |
| 298426    | Nsun4        | -0.22753 | 4.83E-04   | 0.002718 |
| 103690059 | LOC103690059 | -0.22759 | 0.01837599 | 0.061162 |
| 314260    | Plek2        | -0.22769 | 0.4920221  | 0.679371 |
| 314818    | E2f7         | -0.22779 | 0.19037669 | 0.363299 |
| 302507    | Efhc2        | -0.22805 | 0.0254348  | 0.0791   |
| 501101    | Lrrc73       | -0.2282  | 2.48E-04   | 0.001509 |
| 501396    | LOC501396    | -0.22824 | 0.01075481 | 0.039291 |
| 303218    | Hs3st3b1     | -0.22825 | 0.32274422 | 0.518006 |
| 304987    | Aim2         | -0.22832 | 0.44921333 | 0.640988 |
| 302333    | Dach2        | -0.22832 | 0.38328613 | 0.580123 |
| 311633    | Neur12       | -0.22848 | 0.25009354 | 0.438625 |
| 103693564 | LOC103693564 | -0.22862 | 0.17839227 | 0.347249 |
| 303965    | Myh15        | -0.22863 | 0.57589008 | 0.743935 |
| 360588    | Brip1        | -0.22863 | 0.4288807  | 0.624181 |
| 79222     | Gucy2e       | -0.22863 | 0.33259199 | 0.528644 |
| 117533    | Gmpr         | -0.22915 | 3.25E-10   | 5.31E-09 |
| 500917    | Odf3b        | -0.22925 | 0.12501097 | 0.270212 |
| 306342    | Nxn11        | -0.22929 | 0.35819306 | 0.555204 |
| 100911672 | LOC100911672 | -0.22981 | 1.37E-05   | 1.09E-04 |
| 361669    | Tcerg11      | -0.22988 | 0.0021236  | 0.009962 |
| 291637    | Pcdhga5      | -0.23026 | 0.02301678 | 0.073144 |
| 294335    | Susd2        | -0.23035 | 8.66E-111  | #####    |
| 100361389 | Fam171a2     | -0.2304  | 2.17E-11   | 4.07E-10 |
| 298034    | Slc46a2      | -0.2308  | 0.07925079 | 0.193108 |
| 502143    | Idi2         | -0.2308  | 0.88605406 | 0.948241 |
| 303140    | LOC303140    | -0.23088 | 0.14480683 | 0.299375 |
| 117055    | Gjb4         | -0.23103 | 0.7279966  | 0.851483 |
| 29162     | Cdh7         | -0.23137 | 0.00583284 | 0.02358  |
| 24471     | Hspb1        | -0.23146 | 5.05E-47   | 4.51E-45 |
| 103692273 | LOC103692273 | -0.23152 | 4.58E-04   | 0.002595 |
| 289459    | Slc10a6      | -0.23177 | 0.27538161 | 0.467437 |
| 686977    | RGD1624210   | -0.23177 | 0.85015251 | 0.925844 |
| 108352751 | LOC108352751 | -0.23177 | 0.62569201 | 0.783503 |
| 245708    | Gucy2g       | -0.23177 | 0.62569201 | 0.783503 |
| 312806    | Art4         | -0.23177 | 0.62569201 | 0.783503 |
| 366366    | Igfbp11      | -0.23177 | 0.49028697 | 0.677712 |
| 78957     | Shank1       | -0.23184 | 1.86E-04   | 0.001166 |
| 494198    | Oas1k        | -0.23226 | 0.54192031 | 0.72351  |
| 24450     | Hmgcs2       | -0.23256 | 1.06E-15   | 2.98E-14 |
| 294011    | Sfxn2        | -0.23258 | 0.08798888 | 0.208323 |
| 282582    | Wnt5b        | -0.23268 | 0.29103232 | 0.486331 |
| 690610    | Tmem86b      | -0.23287 | 0.12285945 | 0.267077 |
| 114494    | Ccna2        | -0.23292 | 0.05021816 | 0.135353 |
| 685488    | LOC685488    | -0.23311 | 0.29406209 | 0.490061 |
| 308773    | Hapln3       | -0.23319 | 0.27151622 | 0.463105 |
| 499302    | Gal3st3      | -0.23319 | 0.13474299 | 0.284815 |
| 24648     | Serpinal     | -0.23327 | 6.68E-04   | 0.003629 |
| 192189    | Syt17        | -0.23337 | 0.42408926 | 0.619432 |
| 252835    | Gdf5         | -0.23337 | 0.25828763 | 0.447678 |
| 501558    | Map3k15      | -0.23353 | 0.42567365 | 0.62089  |
| 304053    | Ripk4        | -0.23375 | 0.0773397  | 0.189421 |
| 686753    | Npnt         | -0.23379 | 0.01795088 | 0.060041 |
| 317258    | Itgblbp2     | -0.23435 | 0.52656017 | 0.710273 |
| 63882     | Asic4        | -0.23435 | 0.37048082 | 0.566823 |

|           |              |          |            |          |
|-----------|--------------|----------|------------|----------|
| 501747    | Qrich2       | -0.23435 | 0.25698744 | 0.445993 |
| 300218    | Tubalc       | -0.23469 | 4.68E-34   | 3.05E-32 |
| 100362676 | Klh133       | -0.23519 | 0.00416429 | 0.01777  |
| 102552503 | LOC102552503 | -0.23547 | 0.50710662 | 0.693611 |
| 108353163 | LOC108353163 | -0.23547 | 0.45259509 | 0.644173 |
| 100911402 | LOC100911402 | -0.23555 | 9.40E-12   | 1.83E-10 |
| 245982    | Coro6        | -0.23593 | 7.39E-08   | 8.80E-07 |
| 301122    | Dus31        | -0.23607 | 1.01E-04   | 6.72E-04 |
| 366229    | Scrt2        | -0.23616 | 4.47E-20   | 1.59E-18 |
| 108349479 | LOC108349479 | -0.23617 | 0.01578595 | 0.054082 |
| 415062    | Ly6g6d       | -0.23617 | 0.2928176  | 0.488628 |
| 29358     | Npylr        | -0.23623 | 9.95E-13   | 2.14E-11 |
| 64392     | Aldh111      | -0.23627 | 0.04651953 | 0.127753 |
| 302583    | Foxr2        | -0.23634 | 0.44503947 | 0.637756 |
| 501164    | Cdk5r2       | -0.23662 | 3.61E-30   | 2.05E-28 |
| 65194     | Slc29a2      | -0.23738 | 0.01095449 | 0.039944 |
| 308511    | Chst8        | -0.23797 | 0.00193298 | 0.009185 |
| 100364194 | LOC100364194 | -0.23831 | 0.68627141 | 0.82578  |
| 116726    | Slc7a9       | -0.23831 | 0.68627141 | 0.82578  |
| 292913    | Fam83e       | -0.23831 | 0.56784411 | 0.737845 |
| 499971    | Iqca11       | -0.23831 | 0.68627141 | 0.82578  |
| 83569     | Abcb11       | -0.23831 | 0.68627141 | 0.82578  |
| 170808    | Capn8        | -0.23831 | 0.48417064 | 0.672503 |
| 171529    | Kif2c        | -0.23831 | 0.32246807 | 0.51765  |
| 300027    | Gpihbp1      | -0.23831 | 0.22560374 | 0.409163 |
| 360847    | Ube2t        | -0.23831 | 0.48417064 | 0.672503 |
| 500516    | Lexm         | -0.23831 | 0.07829767 | 0.19125  |
| 288151    | Hoxd1        | -0.23839 | 3.31E-06   | 2.99E-05 |
| 100362216 | LOC100362216 | -0.2385  | 0.22646049 | 0.41017  |
| 103690039 | LOC103690039 | -0.23852 | 0.27508004 | 0.467092 |
| 89868     | Sec16b       | -0.23853 | 0.00535127 | 0.021993 |
| 362993    | Rnd1         | -0.23854 | 0.00641302 | 0.0256   |
| 293820    | Psat1        | -0.23896 | 3.69E-07   | 3.94E-06 |
| 192363    | Noslapp      | -0.23899 | 0.02672415 | 0.08225  |
| 102554500 | LOC102554500 | -0.23908 | 0.65963795 | 0.805153 |
| 102554600 | LOC102554600 | -0.23948 | 0.37625567 | 0.573171 |
| 50559     | Acot1        | -0.23962 | 3.76E-04   | 0.002193 |
| 315866    | Prss35       | -0.24    | 0.03698715 | 0.106344 |
| 102549615 | LOC102549615 | -0.24007 | 1.39E-08   | 1.85E-07 |
| 297738    | Steap1       | -0.24016 | 0.3416165  | 0.53836  |
| 293004    | Adamts17     | -0.24023 | 2.42E-05   | 1.84E-04 |
| 100362967 | LOC100362967 | -0.24042 | 0.61348298 | 0.774171 |
| 690845    | Rps4y2       | -0.24048 | 0.00540561 | 0.022159 |
| 690566    | Vom2r12      | -0.24051 | 0.73513918 | 0.85731  |
| 500585    | RGD1561413   | -0.24057 | 0.32362113 | 0.518933 |
| 100910735 | Oaslq        | -0.24074 | 0.09147268 | 0.214359 |
| 54249     | Cfd          | -0.24177 | 0.01158528 | 0.04178  |
| 687399    | LOC687399    | -0.24204 | 0.17695984 | 0.345484 |
| 192215    | Slc9a5       | -0.24228 | 0.0233441  | 0.073987 |
| 691354    | LOC691354    | -0.24242 | 0.51945987 | 0.704186 |
| 361046    | Parp4        | -0.24263 | 1.18E-41   | 9.43E-40 |
| 89807     | Angpt1       | -0.24269 | 0.02436621 | 0.076577 |
| 100909510 | Tsen3411     | -0.24288 | 1.93E-04   | 0.001201 |
| 367782    | Tceanc       | -0.24306 | 0.29829486 | 0.494906 |
| 408234    | Spink2       | -0.24342 | 0.52195224 | 0.706258 |
| 103692166 | LOC103692166 | -0.24349 | 0.08511972 | 0.203887 |

|           |              |          |            |          |
|-----------|--------------|----------|------------|----------|
| 362323    | Sdhaf3       | -0.24359 | 0.05826501 | 0.152614 |
| 360621    | Cdc6         | -0.2437  | 0.15532514 | 0.314498 |
| 311416    | RGD1561442   | -0.24389 | 0.02181485 | 0.070144 |
| 84490     | Fen1         | -0.24392 | 6.28E-04   | 0.003437 |
| 316642    | Neu4         | -0.24395 | 0.65301532 | 0.802056 |
| 365877    | Hist2h2aa3   | -0.24401 | 0.03520158 | 0.102135 |
| 688311    | Ar116        | -0.24403 | 2.80E-07   | 3.05E-06 |
| 362930    | Ptp4a3       | -0.24407 | 1.51E-07   | 1.71E-06 |
| 29402     | Unc119       | -0.24448 | 3.78E-04   | 0.002199 |
| 306464    | Cenpu        | -0.24473 | 0.42517362 | 0.620398 |
| 102554444 | LOC102554444 | -0.24501 | 0.48811534 | 0.675838 |
| 287938    | Ydjc         | -0.24523 | 0.00172249 | 0.008307 |
| 497891    | Timd4        | -0.24523 | 0.6157437  | 0.775328 |
| 65131     | Cldn5        | -0.24534 | 2.51E-09   | 3.68E-08 |
| 100910288 | LOC100910288 | -0.2454  | 0.41909495 | 0.614731 |
| 689619    | Nrip2        | -0.24543 | 9.24E-05   | 6.18E-04 |
| 289671    | Fam184b      | -0.24554 | 0.00541699 | 0.022182 |
| 304725    | LOC304725    | -0.24562 | 0.05443053 | 0.144317 |
| 287422    | Per1         | -0.24568 | 6.92E-13   | 1.51E-11 |
| 293444    | Abca16       | -0.24596 | 0.27212969 | 0.463985 |
| 502907    | LOC502907    | -0.24599 | 0.89933484 | 0.956114 |
| 292759    | Sars2        | -0.24611 | 4.32E-04   | 0.00247  |
| 289230    | Nhlh1        | -0.24614 | 0.47629056 | 0.665807 |
| 361676    | Pnpla2       | -0.24651 | 4.11E-15   | 1.10E-13 |
| 363032    | Rp9          | -0.24651 | 0.0296966  | 0.089447 |
| 289019    | Cdk18        | -0.24667 | 0.0093391  | 0.035019 |
| 360695    | Evalc        | -0.24676 | 5.57E-04   | 0.003086 |
| 25586     | Alpl         | -0.24712 | 9.62E-10   | 1.49E-08 |
| 24889     | Cckar        | -0.24728 | 0.0294397  | 0.088856 |
| 499776    | Fam78a       | -0.24753 | 0.03952963 | 0.112247 |
| 81683     | Mif          | -0.2485  | 3.81E-31   | 2.25E-29 |
| 291652    | Pcdhb7       | -0.24893 | 0.02463097 | 0.077129 |
| 171438    | Crtac1       | -0.24906 | 3.40E-06   | 3.06E-05 |
| 259247    | Obp3         | -0.24932 | 0.8429078  | 0.921802 |
| 114492    | Ccl28        | -0.24942 | 0.49191953 | 0.679278 |
| 252964    | Lipogenin    | -0.2496  | 0.31585633 | 0.510479 |
| 293632    | Ifitm10      | -0.24974 | 9.05E-12   | 1.77E-10 |
| 308366    | Zbtb45       | -0.25002 | 9.05E-05   | 6.05E-04 |
| 63889     | Ptgdr1       | -0.25005 | 0.35890723 | 0.555858 |
| 291441    | Skal         | -0.25007 | 0.37999416 | 0.57702  |
| 367215    | Trem3        | -0.2501  | 0.31516475 | 0.509751 |
| 308854    | Chrd12       | -0.25029 | 0.04707628 | 0.129003 |
| 683603    | Zscan2       | -0.25034 | 0.07491362 | 0.185073 |
| 309527    | Ch25h        | -0.25086 | 0.0518706  | 0.138649 |
| 691092    | Ncr3lg1      | -0.25106 | 0.35380139 | 0.550772 |
| 292844    | Siglec10     | -0.25121 | 0.37758162 | 0.574594 |
| 29156     | Capns1       | -0.2513  | 1.08E-13   | 2.57E-12 |
| 298606    | Slc25a34     | -0.25135 | 0.10235868 | 0.232794 |
| 680130    | Timp4        | -0.25137 | 0.00591717 | 0.023855 |
| 25559     | Abcc8        | -0.25148 | 1.13E-04   | 7.44E-04 |
| 316237    | Mad211bp     | -0.25173 | 0.00822963 | 0.031498 |
| 102555635 | LOC102555635 | -0.25194 | 0.0032494  | 0.014392 |
| 311169    | Rtn4r12      | -0.25198 | 6.68E-12   | 1.32E-10 |
| 287867    | Ccdc40       | -0.25212 | 0.2256892  | 0.40926  |
| 654441    | Cox6b2       | -0.25212 | 0.2256892  | 0.40926  |
| 58982     | Ncan         | -0.25228 | 6.39E-05   | 4.44E-04 |

|           |              |          |            |          |
|-----------|--------------|----------|------------|----------|
| 116490    | Snai1        | -0.25256 | 0.02272043 | 0.072335 |
| 108348108 | LOC108348108 | -0.25269 | 3.55E-09   | 5.12E-08 |
| 367181    | Gad11        | -0.25269 | 0.02158591 | 0.069596 |
| 25196     | Inhbb        | -0.2527  | 1.10E-04   | 7.25E-04 |
| 308107    | Kptn         | -0.25337 | 0.04343553 | 0.120975 |
| 362936    | Zfp707       | -0.25352 | 0.03132932 | 0.09336  |
| 170671    | Lhx3         | -0.25365 | 0.43550974 | 0.62938  |
| 308653    | Nxf2         | -0.25365 | 0.43550974 | 0.62938  |
| 252921    | Tubg1        | -0.25391 | 1.92E-18   | 6.38E-17 |
| 103692862 | LOC103692862 | -0.25408 | 0.25324812 | 0.441839 |
| 306617    | Kbtbd11      | -0.25433 | 5.35E-09   | 7.49E-08 |
| 293854    | Srpk3        | -0.25446 | 0.23765876 | 0.424797 |
| 299903    | Slc30a8      | -0.25464 | 0.08979773 | 0.211449 |
| 299616    | Atp8b3       | -0.2548  | 0.08497224 | 0.203713 |
| 300950    | Spsb4        | -0.25517 | 6.34E-07   | 6.51E-06 |
| 102548633 | LOC102548633 | -0.25518 | 0.15669439 | 0.316664 |
| 363823    | Map6d1       | -0.25524 | 0.05488348 | 0.145336 |
| 684314    | Glyctk       | -0.25538 | 0.00305842 | 0.013664 |
| 108352191 | LOC108352191 | -0.25541 | 0.09565644 | 0.221412 |
| 310463    | Plch1        | -0.25562 | 0.18575068 | 0.357299 |
| 499223    | Trim30       | -0.25683 | 0.12328271 | 0.267752 |
| 362175    | RGD1563222   | -0.25717 | 0.10403252 | 0.235393 |
| 361267    | Akr1c1       | -0.25737 | 0.23497819 | 0.42131  |
| 102552404 | LOC102552404 | -0.25746 | 0.76763394 | 0.877842 |
| 304353    | Nxpe5l1      | -0.25763 | 0.52585756 | 0.709626 |
| 679924    | LOC679924    | -0.25777 | 0.00360384 | 0.015717 |
| 308310    | Tmc4         | -0.25778 | 0.53030965 | 0.712806 |
| 171571    | Grip2        | -0.25908 | 0.06629993 | 0.16838  |
| 362113    | Ptrh1        | -0.25912 | 6.08E-04   | 0.003333 |
| 299687    | Ascl4        | -0.2593  | 0.00508448 | 0.021028 |
| 303179    | Guk1         | -0.25975 | 2.56E-22   | 1.04E-20 |
| 502125    | Hist1h2ah    | -0.25982 | 0.62016214 | 0.778319 |
| 85266     | Prss12       | -0.25994 | 5.45E-11   | 9.70E-10 |
| 100364673 | LOC100364673 | -0.26034 | 0.76522229 | 0.876506 |
| 24380     | Gad2         | -0.26034 | 0.76522229 | 0.876506 |
| 286916    | Testin       | -0.26034 | 0.67278653 | 0.815817 |
| 298577    | Ubxn10       | -0.26034 | 0.60498685 | 0.768004 |
| 299255    | Kif4b        | -0.26034 | 0.60498685 | 0.768004 |
| 299713    | RGD1561102   | -0.26034 | 0.60498685 | 0.768004 |
| 311491    | Scp2d1       | -0.26034 | 0.76522229 | 0.876506 |
| 315069    | Fam135b      | -0.26034 | 0.76522229 | 0.876506 |
| 366214    | Nkx2-2       | -0.26034 | 0.76522229 | 0.876506 |
| 683598    | Umod1        | -0.26034 | 0.55033362 | 0.730849 |
| 686030    | LOC686030    | -0.26034 | 0.60498685 | 0.768004 |
| 689756    | Tnip3        | -0.26034 | 0.76522229 | 0.876506 |
| 691516    | I117c        | -0.26034 | 0.76522229 | 0.876506 |
| 103691099 | Thap8        | -0.26034 | 0.34498999 | 0.541526 |
| 116681    | Dlgap2       | -0.26034 | 0.50428852 | 0.690948 |
| 290484    | Dct          | -0.26034 | 0.2474399  | 0.43614  |
| 291437    | Lipg         | -0.26034 | 0.42946869 | 0.624178 |
| 287647    | Hoxb9        | -0.2605  | 0.01843949 | 0.06132  |
| 301073    | Hhat1        | -0.26053 | 8.76E-12   | 1.72E-10 |
| 288181    | Gpr15        | -0.26062 | 0.57835909 | 0.746061 |
| 498695    | Idnk         | -0.26102 | 1.30E-04   | 8.43E-04 |
| 497926    | Shisa6       | -0.26138 | 0.09743443 | 0.224328 |
| 311218    | Accs         | -0.26185 | 0.01657404 | 0.056166 |



|           |              |          |            |          |
|-----------|--------------|----------|------------|----------|
| 24906     | LOC24906     | -0.26191 | 0.00120305 | 0.006061 |
| 25561     | Sycp3        | -0.26207 | 0.52549729 | 0.709392 |
| 291683    | Pkd212       | -0.26236 | 0.35344948 | 0.550449 |
| 108349154 | LOC108349154 | -0.26239 | 0.3499366  | 0.546632 |
| 100363502 | LOC100363502 | -0.26308 | 5.46E-08   | 6.60E-07 |
| 102556096 | LOC102556096 | -0.2633  | 0.5592754  | 0.735188 |
| 54261     | Kcnn1        | -0.26339 | 1.71E-07   | 1.92E-06 |
| 24213     | Atp1a3       | -0.26369 | 4.16E-142  | #####    |
| 499947    | Cbln4        | -0.2637  | 1.85E-05   | 1.44E-04 |
| 366951    | Scrt1        | -0.26393 | 2.02E-13   | 4.65E-12 |
| 499021    | Pacrg        | -0.26441 | 0.14035812 | 0.29333  |
| 287534    | Rflnb        | -0.2646  | 7.86E-05   | 5.36E-04 |
| 24457     | Hoxb8        | -0.26469 | 1.87E-05   | 1.45E-04 |
| 100361902 | Zfp421       | -0.26489 | 0.33316776 | 0.529206 |
| 314636    | Tmprss9      | -0.265   | 0.1673456  | 0.331402 |
| 690026    | Hils1        | -0.26524 | 0.34045814 | 0.537068 |
| 296313    | Myl9         | -0.26559 | 1.20E-07   | 1.38E-06 |
| 84574     | Tgfb1i1      | -0.26591 | 1.10E-12   | 2.36E-11 |
| 499747    | Cysrt1       | -0.26605 | 0.04772812 | 0.130245 |
| 315963    | RGD1310507   | -0.26612 | 0.21313795 | 0.393296 |
| 499794    | RGD1561736   | -0.26617 | 0.32100243 | 0.516124 |
| 295706    | Prg3         | -0.2663  | 0.08270969 | 0.199697 |
| 500993    | RGD1563941   | -0.26649 | 0.13879434 | 0.291149 |
| 314313    | Rnf113a2     | -0.26683 | 0.0088405  | 0.0334   |
| 100911511 | LOC100911511 | -0.2671  | 0.00185617 | 0.008873 |
| 304735    | Tmem177      | -0.2674  | 0.01132852 | 0.041049 |
| 25611     | Otc          | -0.2674  | 0.25741563 | 0.446411 |
| 29541     | Nthl1        | -0.26776 | 0.01896872 | 0.062762 |
| 24331     | Cela1        | -0.26795 | 0.12234911 | 0.266271 |
| 64160     | Baspl        | -0.26829 | 7.03E-40   | 5.38E-38 |
| 100360514 | LOC100360514 | -0.26837 | 0.33022708 | 0.526511 |
| 140924    | I12rg        | -0.26895 | 0.00856506 | 0.032572 |
| 293046    | Mesp2        | -0.269   | 0.18852928 | 0.361076 |
| 102554294 | LOC102554294 | -0.26931 | 0.64287856 | 0.79654  |
| 108350818 | LOC108350818 | -0.2701  | 0.72081258 | 0.847191 |
| 100359503 | LOC100359503 | -0.27033 | 0.87905139 | 0.944142 |
| 301348    | Zap70        | -0.27033 | 0.33583883 | 0.532494 |
| 315318    | Krt80        | -0.27033 | 0.33583883 | 0.532494 |
| 317470    | Egfl6        | -0.27033 | 0.4961668  | 0.682521 |
| 102546589 | LOC102546589 | -0.27055 | 0.25461065 | 0.443363 |
| 309665    | Tmprss3      | -0.27064 | 0.46063389 | 0.651911 |
| 286889    | Pr18a5       | -0.27094 | 0.61726175 | 0.776367 |
| 102551692 | LOC102551692 | -0.27104 | 0.72723934 | 0.851381 |
| 288562    | Tfr2         | -0.27107 | 0.25415146 | 0.442847 |
| 25116     | Hsd11b1      | -0.27148 | 0.02500817 | 0.078104 |
| 312226    | RGD1565367   | -0.27175 | 0.15235238 | 0.309962 |
| 100363484 | Ddit41       | -0.27206 | 0.0944555  | 0.219245 |
| 54231     | Car2         | -0.27219 | 1.76E-23   | 7.53E-22 |
| 64646     | Hist3h2a     | -0.2724  | 1.82E-09   | 2.71E-08 |
| 367620    | MGC116197    | -0.27256 | 2.72E-04   | 0.001646 |
| 24994     | RT1-S2       | -0.27271 | 1.15E-04   | 7.56E-04 |
| 308022    | Mcoln3       | -0.27294 | 0.54077218 | 0.722585 |
| 310230    | Slc10a5      | -0.27294 | 0.54077218 | 0.722585 |
| 81644     | Opn1sw       | -0.27294 | 0.54077218 | 0.722585 |
| 29131     | Cartpt       | -0.27294 | 0.02210417 | 0.070847 |
| 293451    | Hs3st2       | -0.27312 | 2.24E-24   | 1.00E-22 |

|           |                 |          |            |          |
|-----------|-----------------|----------|------------|----------|
| 289780    | Ddx56           | -0.27358 | 3.60E-06   | 3.23E-05 |
| 406039    | Olr1738         | -0.27359 | 0.73521424 | 0.857345 |
| 64539     | Ndufv3          | -0.27363 | 1.42E-33   | 9.05E-32 |
| 302991    | Tekt4           | -0.27442 | 0.19325084 | 0.366982 |
| 687561    | Anks4b          | -0.27484 | 0.41681407 | 0.612612 |
| 687031    | Ajap1           | -0.27516 | 0.13249415 | 0.28175  |
| 100912683 | LOC100912683    | -0.27528 | 0.44847659 | 0.640417 |
| 100912526 | Rt19            | -0.27529 | 0.20537197 | 0.382487 |
| 301265    | Pla2g7          | -0.27552 | 9.17E-22   | 3.58E-20 |
| 293660    | Rhod            | -0.27563 | 0.40028563 | 0.597355 |
| 100909860 | LOC100909860    | -0.27575 | 0.00736481 | 0.028695 |
| 311548    | Tt119           | -0.2758  | 0.08746185 | 0.207488 |
| 408207    | Mcpt813         | -0.27614 | 0.33529563 | 0.531699 |
| 108349745 | LOC108349745    | -0.27642 | 0.10910265 | 0.243823 |
| 100362149 | LOC100362149    | -0.27657 | 0.00201293 | 0.009501 |
| 304578    | Alkbh2          | -0.2771  | 0.01893119 | 0.06266  |
| 102546698 | LOC102546698    | -0.27741 | 0.59330505 | 0.758228 |
| 29530     | Amhr2           | -0.27741 | 0.59330505 | 0.758228 |
| 307553    | No14            | -0.27741 | 0.35496244 | 0.551768 |
| 315091    | Spatc1          | -0.27741 | 0.59330505 | 0.758228 |
| 361228    | Adtrp           | -0.27741 | 0.59330505 | 0.758228 |
| 108353203 | LOC108353203    | -0.27741 | 0.28547279 | 0.479565 |
| 497756    | Si              | -0.27741 | 0.10912033 | 0.243834 |
| 80841     | Fabp7           | -0.27812 | 2.33E-06   | 2.17E-05 |
| 58826     | Prg2            | -0.27922 | 4.97E-05   | 3.54E-04 |
| 102555637 | LOC102555637    | -0.27938 | 8.90E-06   | 7.39E-05 |
| 293498    | Asphd1          | -0.27968 | 4.22E-07   | 4.45E-06 |
| 308492    | Wdr62           | -0.27976 | 0.4218103  | 0.617287 |
| 300117    | Phf21b          | -0.28004 | 0.15570174 | 0.315126 |
| 117184    | Ctrl            | -0.28024 | 0.26382144 | 0.454108 |
| 25461     | Hrh2            | -0.28024 | 0.26382144 | 0.454108 |
| 103690174 | LOC103690174    | -0.28053 | 0.67995369 | 0.82137  |
| 685668    | LOC685668       | -0.28093 | 3.04E-20   | 1.10E-18 |
| 24768     | Scnn1g          | -0.2811  | 0.48764922 | 0.67566  |
| 298607    | Agmat           | -0.2811  | 0.48764922 | 0.67566  |
| 503009    | Cdk14           | -0.28128 | 2.96E-04   | 0.001771 |
| 311800    | Tmem203         | -0.28157 | 6.66E-04   | 0.003622 |
| 117059    | Calb2           | -0.28157 | 1.21E-19   | 4.24E-18 |
| 103692182 | LOC103692182    | -0.28186 | 0.02987897 | 0.089868 |
| 103693254 | LOC103693254    | -0.28249 | 0.00854257 | 0.0325   |
| 306327    | Tmem38a         | -0.28253 | 6.06E-11   | 1.07E-09 |
| 171408    | Dcxr            | -0.28255 | 0.00134692 | 0.006691 |
| 685180    | Stx19           | -0.28269 | 0.47655246 | 0.666075 |
| 689105    | Ackr1           | -0.28308 | 3.21E-13   | 7.22E-12 |
| 60575     | Napsa           | -0.28361 | 0.06138771 | 0.158892 |
| 297814    | Car8            | -0.28383 | 1.73E-04   | 0.001089 |
| 108348124 | NEWGENE_1562416 | -0.28438 | 9.39E-24   | 4.08E-22 |
| 100911356 | LOC100911356    | -0.28478 | 1.01E-09   | 1.55E-08 |
| 316353    | Creg2           | -0.28488 | 0.22618365 | 0.409903 |
| 103693999 | LOC103693999    | -0.2849  | 0.46526862 | 0.65613  |
| 24323     | Edn1            | -0.28543 | 0.04265259 | 0.119126 |
| 24259     | Chgb            | -0.28547 | 1.43E-53   | 1.49E-51 |
| 291530    | Ccdc68          | -0.28555 | 0.00935612 | 0.035076 |
| 501048    | Poc1a           | -0.28555 | 0.13351281 | 0.283252 |
| 361129    | Hapln4          | -0.2859  | 1.56E-25   | 7.39E-24 |
| 294321    | Slc37a1         | -0.286   | 1.32E-11   | 2.53E-10 |

|           |              |          |            |          |
|-----------|--------------|----------|------------|----------|
| 311123    | Ttc30a1      | -0.28624 | 0.06352559 | 0.163294 |
| 498891    | Fam69c       | -0.28633 | 6.00E-04   | 0.00329  |
| 114203    | Sh2b2        | -0.28653 | 0.09431777 | 0.219005 |
| 308318    | Zfp978       | -0.28657 | 0.10057736 | 0.229566 |
| 103693683 | LOC103693683 | -0.28667 | 0.10626633 | 0.239225 |
| 361744    | Tmem252      | -0.28681 | 0.10986787 | 0.245102 |
| 103690612 | LOC103690612 | -0.28681 | 0.65745948 | 0.803834 |
| 287884    | Sectmlb      | -0.28681 | 0.65745948 | 0.803834 |
| 295980    | Dcdc5        | -0.28681 | 0.65745948 | 0.803834 |
| 311720    | Abhd16b      | -0.28681 | 0.65745948 | 0.803834 |
| 316218    | Gucalb       | -0.28681 | 0.53059664 | 0.712965 |
| 360712    | Morc1        | -0.28681 | 0.53059664 | 0.712965 |
| 360858    | Lhx4         | -0.28681 | 0.65745948 | 0.803834 |
| 363538    | Tekt5        | -0.28681 | 0.65745948 | 0.803834 |
| 500576    | Cplane2      | -0.28681 | 0.65745948 | 0.803834 |
| 688285    | Tmem235      | -0.28681 | 0.44246815 | 0.635314 |
| 29461     | Vgf          | -0.28711 | 1.25E-23   | 5.37E-22 |
| 100360117 | LOC100360117 | -0.28724 | 0.12807134 | 0.274737 |
| 680216    | Dna.jb3      | -0.28753 | 0.00447122 | 0.018839 |
| 360864    | RGD1309106   | -0.28771 | 0.53409545 | 0.716025 |
| 312052    | Steap2       | -0.28823 | 4.65E-04   | 0.00263  |
| 295417    | Slc44a3      | -0.28831 | 0.28575794 | 0.479917 |
| 100362783 | LOC100362783 | -0.28863 | 0.51917064 | 0.703894 |
| 500340    | Styk1        | -0.28942 | 0.53708644 | 0.719275 |
| 65197     | Slc2a5       | -0.28954 | 0.02316446 | 0.073516 |
| 117023    | Kcns1        | -0.28977 | 5.20E-25   | 2.40E-23 |
| 100911837 | LOC100911837 | -0.28989 | 0.01304378 | 0.046149 |
| 282636    | Impa2        | -0.28997 | 2.10E-07   | 2.33E-06 |
| 299052    | Aldoart2     | -0.29034 | 0.64832727 | 0.800895 |
| 499462    | Mfsd4b       | -0.29048 | 0.01209233 | 0.043354 |
| 685826    | Rprml        | -0.29067 | 0.13006455 | 0.277731 |
| 689885    | Klrg2        | -0.29104 | 0.01217324 | 0.043603 |
| 503049    | Acot5        | -0.29138 | 0.27620929 | 0.468633 |
| 100911790 | LOC100911790 | -0.29157 | 0.63608674 | 0.791007 |
| 680020    | Pcdhb8       | -0.29161 | 0.02776899 | 0.084889 |
| 312086    | Pon3         | -0.29175 | 0.27328382 | 0.465328 |
| 100302372 | LOC100302372 | -0.29258 | 0.01415146 | 0.049325 |
| 84416     | Smpx         | -0.2926  | 1.11E-04   | 7.28E-04 |
| 683506    | Fam83c       | -0.29271 | 0.50207478 | 0.688757 |
| 24253     | Cebpb        | -0.29356 | 3.92E-05   | 2.86E-04 |
| 291085    | Serpinb6a    | -0.29358 | 6.77E-159  | #####    |
| 691041    | Mamstr       | -0.29392 | 0.14576294 | 0.300699 |
| 103694873 | LOC103694873 | -0.29434 | 0.23360576 | 0.4196   |
| 498847    | Pcdhga3      | -0.29522 | 8.41E-06   | 7.01E-05 |
| 291965    | Kctd19       | -0.29539 | 0.23377238 | 0.419781 |
| 114246    | Trpv6        | -0.29545 | 0.0065436  | 0.026044 |
| 103692173 | LOC103692173 | -0.29611 | 1.69E-08   | 2.20E-07 |
| 293613    | RGD1309350   | -0.29687 | 0.58055703 | 0.747858 |
| 295360    | Kcna10       | -0.29687 | 0.58055703 | 0.747858 |
| 365657    | Marveld2     | -0.29687 | 0.09737499 | 0.224218 |
| 497895    | Mrnip        | -0.29687 | 0.02270792 | 0.072308 |
| 691083    | LOC691083    | -0.29687 | 0.33852603 | 0.53504  |
| 102552705 | Pcdhgb4      | -0.29704 | 0.04646831 | 0.127704 |
| 100909645 | LOC100909645 | -0.29709 | 0.00380309 | 0.01645  |
| 79216     | Gdf10        | -0.29754 | 0.07535589 | 0.185901 |
| 298857    | Adgrf3       | -0.29777 | 0.25484575 | 0.443488 |

|           |              |          |            |          |
|-----------|--------------|----------|------------|----------|
| 289904    | Mss51        | -0.29782 | 0.03404088 | 0.099678 |
| 362035    | Ndst4        | -0.29826 | 7.87E-14   | 1.90E-12 |
| 301299    | RGD1566137   | -0.29828 | 0.54738382 | 0.728303 |
| 64035     | Pyg1         | -0.29853 | 2.51E-10   | 4.19E-09 |
| 301957    | Efcab1       | -0.29896 | 0.00739234 | 0.028761 |
| 308760    | Rccd1        | -0.2992  | 0.0960639  | 0.222166 |
| 292264    | Myct1        | -0.29934 | 0.18654485 | 0.358284 |
| 360555    | Inca1        | -0.29951 | 0.3412534  | 0.5381   |
| 100360582 | Nt5c         | -0.30015 | 0.06956863 | 0.174793 |
| 54355     | Rassf5       | -0.30031 | 2.89E-23   | 1.22E-21 |
| 315663    | Exph5        | -0.30038 | 0.17334425 | 0.340555 |
| 288358    | Tssk1b       | -0.30043 | 0.39681408 | 0.594036 |
| 100911625 | LOC100911625 | -0.3005  | 5.50E-38   | 4.06E-36 |
| 287644    | Phosphol     | -0.30091 | 2.51E-14   | 6.35E-13 |
| 311901    | Lhx6         | -0.30126 | 0.23661679 | 0.423571 |
| 500273    | LOC500273    | -0.3014  | 0.54246483 | 0.723882 |
| 405201    | Olr1746      | -0.30145 | 0.22489749 | 0.408116 |
| 308212    | Dact2        | -0.30181 | 1.01E-06   | 1.00E-05 |
| 367038    | Ap1m2        | -0.30216 | 0.63931541 | 0.793778 |
| 498827    | RGD1562080   | -0.30222 | 0.12198801 | 0.265759 |
| 361422    | Cot11        | -0.3024  | 2.49E-24   | 1.11E-22 |
| 302990    | Tpsg1        | -0.30314 | 0.45711193 | 0.648421 |
| 103691813 | LOC103691813 | -0.30341 | 0.24485283 | 0.433184 |
| 100911840 | LOC100911840 | -0.30344 | 0.00750067 | 0.0291   |
| 25341     | Tnfrsf11b    | -0.30398 | 0.0550927  | 0.145809 |
| 360881    | Dusp23       | -0.3044  | 0.001103   | 0.005623 |
| 353302    | Kif15        | -0.30504 | 0.05932145 | 0.154743 |
| 314443    | Wdr25        | -0.30539 | 4.81E-04   | 0.002709 |
| 102547160 | LOC102547160 | -0.30543 | 0.14782164 | 0.303271 |
| 24614     | Orml         | -0.30543 | 0.46929041 | 0.659702 |
| 252958    | Ppp1r32      | -0.30543 | 0.30613138 | 0.502047 |
| 300678    | Cd3g         | -0.30543 | 0.46929041 | 0.659702 |
| 499298    | Cabp2        | -0.30543 | 0.46929041 | 0.659702 |
| 24873     | Vdr          | -0.30543 | 0.21007058 | 0.388653 |
| 102551050 | LOC102551050 | -0.30548 | 0.59418117 | 0.75861  |
| 309888    | Sim1         | -0.3056  | 0.39720935 | 0.594394 |
| 24249     | S100g        | -0.30663 | 0.28217331 | 0.475701 |
| 498711    | LOC498711    | -0.30663 | 0.70948585 | 0.840256 |
| 289596    | Corin        | -0.30699 | 0.18098098 | 0.350603 |
| 311693    | Cdh26        | -0.30716 | 0.11960313 | 0.26161  |
| 24209     | Ascl2        | -0.30765 | 0.26053304 | 0.449973 |
| 310900    | Mttp         | -0.30765 | 0.4262713  | 0.621285 |
| 690810    | Adat1        | -0.30783 | 0.01116429 | 0.040569 |
| 680203    | Pcdhb20      | -0.30879 | 0.01527806 | 0.052693 |
| 103694864 | LOC103694864 | -0.30893 | 1.14E-05   | 9.24E-05 |
| 117022    | I11r2        | -0.30925 | 0.38891777 | 0.586038 |
| 316017    | Als2c1       | -0.30936 | 0.00362978 | 0.015812 |
| 364786    | Itga8        | -0.31015 | 7.01E-04   | 0.003789 |
| 361824    | Chchd10      | -0.31042 | 4.87E-44   | 4.05E-42 |
| 296118    | Fam227b      | -0.31044 | 0.11668785 | 0.256916 |
| 680322    | LOC680322    | -0.31089 | 0.64260432 | 0.796356 |
| 102551694 | K11n         | -0.31142 | 0.32690301 | 0.522567 |
| 299757    | Nts          | -0.31142 | 0.32690301 | 0.522567 |
| 367699    | Sowahd       | -0.31142 | 0.32690301 | 0.522567 |
| 290317    | Sox7         | -0.31163 | 0.09490361 | 0.220017 |
| 102549404 | LOC102549404 | -0.31208 | 1.44E-06   | 1.39E-05 |

|           |                 |          |            |          |
|-----------|-----------------|----------|------------|----------|
| 681048    | Grxcr2          | -0.31214 | 1.20E-05   | 9.72E-05 |
| 84046     | Sox11           | -0.31218 | 0.02068922 | 0.06732  |
| 311168    | Slc43a1         | -0.31218 | 0.073115   | 0.181785 |
| 687071    | Etnppl          | -0.3122  | 0.20887791 | 0.38686  |
| 108349760 | LOC108349760    | -0.31222 | 0.12621715 | 0.271893 |
| 115771    | Usp2            | -0.31243 | 2.47E-05   | 1.88E-04 |
| 108348159 | LOC108348159    | -0.31256 | 0.28465464 | 0.478824 |
| 54300     | Slc12a3         | -0.31339 | 6.19E-05   | 4.31E-04 |
| 294228    | RT1-S3          | -0.31407 | 4.88E-18   | 1.59E-16 |
| 60417     | Ecell           | -0.31447 | 0.00678904 | 0.026836 |
| 362447    | Clec2g          | -0.31464 | 0.20060153 | 0.376511 |
| 691066    | Tm4sf20         | -0.31471 | 0.26901964 | 0.460413 |
| 313575    | Heyl            | -0.31478 | 4.60E-14   | 1.14E-12 |
| 102547011 | LOC102547011    | -0.31496 | 0.74241599 | 0.860684 |
| 313729    | Errfil          | -0.31506 | 6.91E-16   | 1.95E-14 |
| 367061    | Olr1257         | -0.31563 | 0.74339829 | 0.861298 |
| 24473     | Htr1a           | -0.31567 | 0.14117158 | 0.294449 |
| 306760    | Dok3            | -0.31599 | 0.02899039 | 0.087778 |
| 25264     | Nmbr            | -0.31601 | 0.35238788 | 0.54947  |
| 295144    | Rxfp1           | -0.31668 | 0.08118837 | 0.196922 |
| 307950    | Map3k21         | -0.31679 | 0.10180644 | 0.231843 |
| 306942    | Scgn            | -0.31735 | 0.04198626 | 0.117541 |
| 408222    | Senp18          | -0.31744 | 0.76790424 | 0.87773  |
| 25698     | Ass1            | -0.31787 | 4.64E-23   | 1.94E-21 |
| 100125372 | Ces1f           | -0.31795 | 0.48459032 | 0.672767 |
| 367747    | Nudt10          | -0.31816 | 0.02726204 | 0.083635 |
| 314148    | Clec14a         | -0.31859 | 4.97E-04   | 0.002789 |
| 108350519 | LOC108350519    | -0.31923 | 0.29539792 | 0.491727 |
| 362701    | Capn13          | -0.31923 | 0.45937072 | 0.650656 |
| 100911130 | LOC100911130    | -0.31923 | 0.13533442 | 0.285589 |
| 100911740 | Mrln            | -0.31923 | 0.63982512 | 0.794049 |
| 102549226 | LOC102549226    | -0.31923 | 0.74073068 | 0.860196 |
| 102553691 | LOC102553691    | -0.31923 | 0.74073068 | 0.860196 |
| 102554323 | LOC102554323    | -0.31923 | 0.32087669 | 0.516053 |
| 102555078 | LOC102555078    | -0.31923 | 0.63982512 | 0.794049 |
| 108348109 | NEWGENE_1310561 | -0.31923 | 0.02089843 | 0.067839 |
| 113936    | Cpb2            | -0.31923 | 0.74073068 | 0.860196 |
| 24559     | Mos             | -0.31923 | 0.5665694  | 0.736691 |
| 25154     | Pgr             | -0.31923 | 0.08555341 | 0.204643 |
| 288175    | Tmem30c         | -0.31923 | 0.74073068 | 0.860196 |
| 289399    | Inava           | -0.31923 | 0.63982512 | 0.794049 |
| 292310    | Gpr31           | -0.31923 | 0.5665694  | 0.736691 |
| 293878    | Olr1768         | -0.31923 | 0.74073068 | 0.860196 |
| 296352    | Wfdc5           | -0.31923 | 0.74073068 | 0.860196 |
| 297805    | Sdr16c5         | -0.31923 | 0.50811745 | 0.694595 |
| 301291    | I117f           | -0.31923 | 0.74073068 | 0.860196 |
| 303287    | Fbxo39          | -0.31923 | 0.5665694  | 0.736691 |
| 306608    | Proz            | -0.31923 | 0.74073068 | 0.860196 |
| 309142    | Tesmin          | -0.31923 | 0.74073068 | 0.860196 |
| 309641    | Tcp11           | -0.31923 | 0.5665694  | 0.736691 |
| 311793    | Noxa1           | -0.31923 | 0.63982512 | 0.794049 |
| 312745    | Clec2h          | -0.31923 | 0.74073068 | 0.860196 |
| 313421    | C8b             | -0.31923 | 0.74073068 | 0.860196 |
| 365228    | Ffar3           | -0.31923 | 0.74073068 | 0.860196 |
| 494233    | Vomlr88         | -0.31923 | 0.74073068 | 0.860196 |
| 497099    | Xkr9            | -0.31923 | 0.74073068 | 0.860196 |

|           |                 |          |            |          |
|-----------|-----------------|----------|------------|----------|
| 497990    | Ar15c           | -0.31923 | 0.34933146 | 0.54609  |
| 498933    | LOC498933       | -0.31923 | 0.63982512 | 0.794049 |
| 500873    | Fam83a          | -0.31923 | 0.74073068 | 0.860196 |
| 502308    | Lypd5           | -0.31923 | 0.74073068 | 0.860196 |
| 502992    | Ldlrad2         | -0.31923 | 0.63982512 | 0.794049 |
| 63835     | Ctla4           | -0.31923 | 0.74073068 | 0.860196 |
| 680045    | LOC680045       | -0.31923 | 0.74073068 | 0.860196 |
| 683753    | Prr32           | -0.31923 | 0.38133348 | 0.578178 |
| 685900    | Enthd1          | -0.31923 | 0.63982512 | 0.794049 |
| 686013    | LOC686013       | -0.31923 | 0.1206638  | 0.263416 |
| 688340    | LOC688340       | -0.31923 | 0.5665694  | 0.736691 |
| 689230    | LOC689230       | -0.31923 | 0.74073068 | 0.860196 |
| 81506     | Bst1            | -0.31923 | 0.03002452 | 0.090192 |
| 103694000 | NEWGENE_1582994 | -0.31971 | 9.79E-09   | 1.32E-07 |
| 89808     | Cx3c11          | -0.32044 | 2.82E-04   | 0.001691 |
| 500578    | Tmem51          | -0.32047 | 3.36E-04   | 0.001981 |
| 363909    | Caln1           | -0.32144 | 0.00698781 | 0.027474 |
| 286904    | Cyp4f4          | -0.32149 | 0.07359842 | 0.182701 |
| 64865     | Pcdh8           | -0.32154 | 0.00839291 | 0.032033 |
| 108353290 | LOC108353290    | -0.32171 | 0.05342734 | 0.142073 |
| 102553962 | LOC102553962    | -0.32208 | 0.01540879 | 0.053038 |
| 25702     | Pnlip           | -0.32227 | 0.00112418 | 0.005709 |
| 103692534 | LOC103692534    | -0.32259 | 0.68173872 | 0.822379 |
| 64037     | Slc22a4         | -0.3227  | 0.18341188 | 0.353837 |
| 102553138 | LOC102553138    | -0.32292 | 0.5412446  | 0.722963 |
| 292450    | Raet1e          | -0.32313 | 0.57680648 | 0.744866 |
| 289280    | Efcab2          | -0.32319 | 0.0541582  | 0.143795 |
| 499349    | Fgfbp3          | -0.32329 | 5.39E-04   | 0.002992 |
| 293625    | Pidd1           | -0.3235  | 0.10763987 | 0.24129  |
| 290571    | Zfp488          | -0.32371 | 0.07629919 | 0.187572 |
| 100360868 | H3f3c           | -0.3239  | 3.30E-07   | 3.56E-06 |
| 362712    | Drc1            | -0.32412 | 0.02531041 | 0.078829 |
| 100912563 | Insm1           | -0.32456 | 0.15645044 | 0.316306 |
| 313495    | Car9            | -0.32483 | 0.3571628  | 0.554193 |
| 102554130 | LOC102554130    | -0.32538 | 0.34411603 | 0.540644 |
| 102548111 | LOC102548111    | -0.32554 | 0.49346693 | 0.680527 |
| 108348155 | LOC108348155    | -0.32573 | 0.03256757 | 0.096282 |
| 100909582 | LOC100909582    | -0.32625 | 0.12510976 | 0.270364 |
| 100910905 | LOC100910905    | -0.32661 | 0.13443418 | 0.284414 |
| 102552360 | LOC102552360    | -0.32746 | 0.31469986 | 0.509172 |
| 680344    | Fam189a1        | -0.32773 | 0.00882881 | 0.033369 |
| 309174    | Tigd3           | -0.32776 | 0.15316317 | 0.311113 |
| 65146     | Pirb            | -0.32792 | 0.30204397 | 0.499039 |
| 29629     | Gria4           | -0.328   | 2.95E-10   | 4.85E-09 |
| 29259     | Sell            | -0.32813 | 0.0934608  | 0.217679 |
| 103693605 | LOC103693605    | -0.32851 | 0.02003693 | 0.065624 |
| 362584    | Col9a2          | -0.32855 | 3.36E-07   | 3.60E-06 |
| 685267    | LOC685267       | -0.32867 | 0.3610523  | 0.557774 |
| 108353429 | LOC108353429    | -0.3288  | 0.63315114 | 0.789315 |
| 24599     | Nos2            | -0.32898 | 0.58307825 | 0.749762 |
| 362122    | Morn5           | -0.32913 | 0.28276187 | 0.476482 |
| 114508    | Fbp2            | -0.32958 | 0.04365924 | 0.121474 |
| 171044    | Sstr3           | -0.32988 | 0.37347695 | 0.569987 |
| 66025     | Lpar3           | -0.3302  | 6.33E-07   | 6.50E-06 |
| 25493     | Nfkbia          | -0.33064 | 9.51E-17   | 2.85E-15 |
| 691418    | LOC691418       | -0.33085 | 0.0809399  | 0.196445 |



|           |              |          |            |          |
|-----------|--------------|----------|------------|----------|
| 287819    | Ush1g        | -0.33168 | 0.05810813 | 0.152329 |
| 310688    | Sh2d2a       | -0.33173 | 0.24259691 | 0.430432 |
| 314438    | Degs2        | -0.332   | 0.02069311 | 0.067322 |
| 102550241 | LOC102550241 | -0.33205 | 0.20879147 | 0.386737 |
| 500120    | Stk31        | -0.33291 | 0.26238364 | 0.452144 |
| 680191    | LOC680191    | -0.3335  | 0.69757513 | 0.834086 |
| 366455    | Mpl          | -0.33392 | 0.03225181 | 0.095541 |
| 102547047 | LOC102547047 | -0.33401 | 0.15784554 | 0.318214 |
| 171148    | Slc6a5       | -0.33434 | 0.44889692 | 0.640849 |
| 24645     | Pgm1         | -0.33434 | 2.14E-28   | 1.15E-26 |
| 300656    | Trim29       | -0.33434 | 0.44889692 | 0.640849 |
| 302554    | Glod5        | -0.33434 | 0.44889692 | 0.640849 |
| 499958    | Linc00176    | -0.33434 | 0.28420501 | 0.478195 |
| 684771    | Cdca5        | -0.33434 | 0.09040307 | 0.212349 |
| 690657    | Tmem71       | -0.33434 | 0.44889692 | 0.640849 |
| 301965    | Tert         | -0.33518 | 0.13940491 | 0.291979 |
| 296566    | Clic3        | -0.33521 | 1.25E-04   | 8.13E-04 |
| 100911237 | LOC100911237 | -0.33581 | 0.18912584 | 0.361927 |
| 117260    | Nudt1        | -0.33651 | 0.02421557 | 0.076254 |
| 100910848 | LOC100910848 | -0.33667 | 0.17390305 | 0.341231 |
| 299142    | Syt16        | -0.33699 | 0.00267164 | 0.012149 |
| 300242    | Krt7         | -0.33716 | 9.24E-06   | 7.64E-05 |
| 29182     | Cdh22        | -0.33773 | 0.07063197 | 0.176882 |
| 295117    | Otol1        | -0.33834 | 0.3352487  | 0.531713 |
| 300461    | Dpy1912      | -0.33834 | 0.49564061 | 0.682092 |
| 309082    | Clrn3        | -0.33834 | 0.49564061 | 0.682092 |
| 54225     | Apob         | -0.33834 | 0.49564061 | 0.682092 |
| 690871    | Ndufaf8      | -0.33896 | 8.94E-05   | 6.00E-04 |
| 307562    | Dsg2         | -0.33941 | 0.13692162 | 0.288045 |
| 295934    | Chst1        | -0.34004 | 4.16E-05   | 3.02E-04 |
| 64041     | Birc5        | -0.34019 | 0.04971172 | 0.134407 |
| 102556485 | LOC102556485 | -0.34021 | 0.12618444 | 0.271915 |
| 361812    | Pnpla1       | -0.34096 | 0.03269581 | 0.096556 |
| 102556043 | LOC102556043 | -0.34195 | 0.67182036 | 0.815164 |
| 361341    | Ccbe1        | -0.34195 | 0.04581304 | 0.126304 |
| 685732    | Hoxa6        | -0.34267 | 0.38909992 | 0.586174 |
| 303414    | Epx          | -0.34302 | 5.66E-04   | 0.003126 |
| 102551194 | LOC102551194 | -0.34322 | 0.00465501 | 0.019519 |
| 102552367 | LOC102552367 | -0.34388 | 0.35406628 | 0.551004 |
| 79146     | Begain       | -0.34405 | 1.78E-04   | 0.001121 |
| 499069    | Nlrp4        | -0.3441  | 0.57095878 | 0.740225 |
| 312897    | Msc          | -0.3446  | 0.00118    | 0.005961 |
| 24332     | Cela2a       | -0.34523 | 0.39924285 | 0.5965   |
| 293711    | Hras1s5      | -0.34523 | 0.55112662 | 0.731494 |
| 303395    | RGD1310166   | -0.34523 | 0.55112662 | 0.731494 |
| 317379    | Magix        | -0.34523 | 0.18257786 | 0.3528   |
| 362141    | Slc38a11     | -0.34523 | 0.55112662 | 0.731494 |
| 499565    | LOC499565    | -0.34523 | 0.55112662 | 0.731494 |
| 690020    | LOC690020    | -0.34523 | 0.55112662 | 0.731494 |
| 297025    | Kel          | -0.34523 | 0.11478147 | 0.253745 |
| 304071    | Sim2         | -0.34523 | 0.30187144 | 0.498841 |
| 362202    | Epb42        | -0.34553 | 0.04345209 | 0.120986 |
| 311443    | Lrrn4        | -0.34578 | 0.46057997 | 0.651884 |
| 114856    | Duspl        | -0.34607 | 2.65E-17   | 8.22E-16 |
| 691141    | LOC691141    | -0.34664 | 0.1230238  | 0.267342 |
| 499967    | Cct811       | -0.34665 | 0.34367243 | 0.540126 |

|           |              |          |            |          |
|-----------|--------------|----------|------------|----------|
| 100910668 | LOC100910668 | -0.34688 | 0.40568643 | 0.6023   |
| 100365043 | LOC100365043 | -0.34707 | 0.28350742 | 0.477316 |
| 503487    | Zfp92        | -0.34725 | 0.19655263 | 0.371069 |
| 315907    | Nrk          | -0.34729 | 0.39626767 | 0.593544 |
| 170496    | Lcn2         | -0.34803 | 5.85E-06   | 5.03E-05 |
| 252922    | Pzp          | -0.34806 | 0.05839902 | 0.152881 |
| 680531    | Sapcd2       | -0.34867 | 0.06886816 | 0.173537 |
| 100134871 | LOC100134871 | -0.34888 | 5.20E-40   | 4.00E-38 |
| 246233    | Macrodl      | -0.34889 | 2.38E-06   | 2.21E-05 |
| 680077    | LOC680077    | -0.34928 | 0.32723475 | 0.522834 |
| 24953     | Gcgr         | -0.34961 | 0.07740995 | 0.189544 |
| 690606    | Manscl       | -0.34961 | 0.00523572 | 0.021583 |
| 100911622 | LOC100911622 | -0.34968 | 0.26935125 | 0.460732 |
| 89813     | Pdk4         | -0.3505  | 1.55E-04   | 9.88E-04 |
| 684623    | Gpr52        | -0.35094 | 0.08275225 | 0.199749 |
| 102553671 | LOC102553671 | -0.35094 | 0.17898887 | 0.347628 |
| 25410     | Cebpe        | -0.35094 | 0.43781614 | 0.631635 |
| 304666    | Klf1         | -0.35094 | 0.02819662 | 0.085838 |
| 364403    | Blk          | -0.35176 | 0.12531077 | 0.270645 |
| 102548734 | LOC102548734 | -0.35194 | 0.66227425 | 0.807233 |
| 553129    | Pcdhgal      | -0.35197 | 0.00412188 | 0.017605 |
| 501794    | Vom2r60      | -0.35232 | 0.08597811 | 0.205195 |
| 108353091 | LOC108353091 | -0.35245 | 0.43637675 | 0.630418 |
| 361004    | Zswim8       | -0.35271 | 1.29E-28   | 6.96E-27 |
| 108351936 | LOC108351936 | -0.35323 | 0.55261352 | 0.732804 |
| 296981    | Atp6v0a4     | -0.35332 | 4.90E-04   | 0.002755 |
| 102556157 | LOC102556157 | -0.35369 | 0.09429766 | 0.218985 |
| 303744    | Myadml2      | -0.35432 | 0.00403355 | 0.017267 |
| 266776    | Cst12        | -0.35472 | 0.0035148  | 0.015388 |
| 289586    | Spata18      | -0.35486 | 0.13877964 | 0.29115  |
| 296184    | Ankef1       | -0.35639 | 0.20739163 | 0.385175 |
| 404894    | Olr34        | -0.35639 | 0.20739163 | 0.385175 |
| 50872     | Hpcal4       | -0.35695 | 0.00586014 | 0.023681 |
| 286938    | Gimap4       | -0.35748 | 0.0308613  | 0.092182 |
| 300247    | Krt75        | -0.35784 | 0.01142707 | 0.041351 |
| 25756     | Cpt1b        | -0.35805 | 0.00240245 | 0.011084 |
| 405199    | Olr1748      | -0.35816 | 0.03141422 | 0.093584 |
| 89805     | Angpt2       | -0.35872 | 1.03E-05   | 8.48E-05 |
| 100360244 | LOC100360244 | -0.35893 | 0.27590912 | 0.468207 |
| 362998    | Dnajc22      | -0.35901 | 0.01061695 | 0.038944 |
| 103692939 | LOC103692939 | -0.35954 | 0.24579312 | 0.434202 |
| 289257    | Spta1        | -0.35981 | 0.00320047 | 0.014221 |
| 102554746 | LOC102554746 | -0.35988 | 0.61923495 | 0.777539 |
| 24278     | Crygd        | -0.35988 | 0.61923495 | 0.777539 |
| 24717     | Rho          | -0.35988 | 0.22351394 | 0.406321 |
| 260319    | Brs3         | -0.35988 | 0.61923495 | 0.777539 |
| 287106    | Prss30       | -0.35988 | 0.61923495 | 0.777539 |
| 298975    | Scin         | -0.35988 | 0.48219777 | 0.670888 |
| 302576    | LOC302576    | -0.35988 | 0.61923495 | 0.777539 |
| 361503    | Eps811       | -0.35988 | 0.22351394 | 0.406321 |
| 498693    | Spata31d1    | -0.35988 | 0.48219777 | 0.670888 |
| 502733    | Ankrd7       | -0.35988 | 0.61923495 | 0.777539 |
| 406168    | Fkbp1        | -0.35988 | 1.46E-08   | 1.93E-07 |
| 500200    | Atoh8        | -0.35988 | 0.05427665 | 0.143989 |
| 65162     | Dio2         | -0.35989 | 0.00165469 | 0.008002 |
| 691447    | Ppplr3e      | -0.36063 | 0.00600898 | 0.024149 |

|           |                 |          |            |          |
|-----------|-----------------|----------|------------|----------|
| 287634    | Eme1            | -0.36073 | 0.39321156 | 0.590453 |
| 103689947 | LOC103689947    | -0.36097 | 6.02E-06   | 5.17E-05 |
| 368057    | 368057          | -0.36141 | 0.54191721 | 0.723557 |
| 292760    | Rin1            | -0.36163 | 0.05614299 | 0.148115 |
| 312312    | Gimap1          | -0.36207 | 0.10627474 | 0.239216 |
| 314847    | Best3           | -0.3622  | 0.07313904 | 0.181798 |
| 192264    | Ear11           | -0.36271 | 0.06584338 | 0.167533 |
| 302995    | Hagh1           | -0.36351 | 6.84E-05   | 4.73E-04 |
| 307796    | Plekhg4         | -0.36452 | 0.0253079  | 0.078834 |
| 498400    | Hormad2         | -0.36452 | 0.11374916 | 0.252048 |
| 314396    | Slc24a4         | -0.36561 | 0.02061696 | 0.067177 |
| 102548396 | LOC102548396    | -0.36564 | 0.60775912 | 0.769958 |
| 687992    | Saal1           | -0.36627 | 0.6126248  | 0.773446 |
| 100363095 | Henmt1          | -0.36654 | 0.06058221 | 0.157235 |
| 83686     | Cngb1           | -0.36677 | 0.18424283 | 0.355044 |
| 286925    | Cryba2          | -0.36695 | 0.04151514 | 0.116461 |
| 498982    | RGD1560020_prec | -0.36706 | 0.07036354 | 0.176279 |
| 408233    | Spink4          | -0.36726 | 0.12178779 | 0.265413 |
| 287609    | Tspoap1         | -0.36819 | 1.17E-04   | 7.64E-04 |
| 680115    | Hacd1           | -0.3684  | 0.00387261 | 0.016675 |
| 100911766 | LOC100911766    | -0.36853 | 1.07E-05   | 8.75E-05 |
| 363931    | Gtpbp6          | -0.36863 | 5.77E-07   | 5.97E-06 |
| 305392    | Ncapg           | -0.36883 | 0.01372567 | 0.048061 |
| 102556098 | LOC102556098    | -0.36884 | 0.00221617 | 0.01032  |
| 192259    | P1b1            | -0.36928 | 0.42606838 | 0.62118  |
| 25241     | Aqp5            | -0.36928 | 0.42606838 | 0.62118  |
| 297932    | Atp6v0d2        | -0.36928 | 0.42606838 | 0.62118  |
| 294557    | Sh3rf3          | -0.36976 | 0.0018742  | 0.008939 |
| 83567     | Mchr1           | -0.36978 | 0.02810896 | 0.08564  |
| 311832    | Gfilb           | -0.37018 | 0.23486896 | 0.421273 |
| 94272     | Clic5           | -0.37066 | 5.72E-07   | 5.93E-06 |
| 25626     | Krt8            | -0.37073 | 4.75E-04   | 0.00268  |
| 108352182 | LOC108352182    | -0.37077 | 0.19844262 | 0.373563 |
| 29517     | Sgk1            | -0.37131 | 1.05E-27   | 5.48E-26 |
| 498190    | Ccdc60          | -0.3717  | 0.31244811 | 0.507642 |
| 192207    | Ubxn11          | -0.37252 | 0.00561748 | 0.022831 |
| 494500    | Gsta3           | -0.37273 | 0.05425002 | 0.143959 |
| 29168     | Ubd             | -0.37282 | 0.09343091 | 0.217663 |
| 103689978 | LOC103689978    | -0.3729  | 0.31779696 | 0.512745 |
| 679552    | Pjvk            | -0.37318 | 0.27567951 | 0.467901 |
| 300682    | Tmprss13        | -0.37398 | 0.1769076  | 0.345489 |
| 299106    | Rpl101          | -0.37506 | 0.01733165 | 0.058359 |
| 314640    | Tjp3            | -0.37574 | 0.10736048 | 0.240947 |
| 317674    | Fzd5            | -0.37582 | 0.21351636 | 0.393728 |
| 497888    | Fam71b          | -0.37582 | 0.37907147 | 0.57617  |
| 171144    | Slco4a1         | -0.37582 | 0.12762692 | 0.274155 |
| 60399     | Slpr5           | -0.37582 | 0.28134805 | 0.474898 |
| 81819     | Pax8            | -0.37582 | 0.53395697 | 0.71589  |
| 103690014 | LOC103690014    | -0.37617 | 0.10990042 | 0.245146 |
| 24851     | Tpml            | -0.37682 | 9.27E-165  | #####    |
| 690880    | Fam131c         | -0.37686 | 1.83E-12   | 3.80E-11 |
| 25551     | Slc2a3          | -0.37841 | 4.05E-07   | 4.28E-06 |
| 300219    | Troap           | -0.37918 | 0.10672083 | 0.239908 |
| 314321    | Zc2hc1c         | -0.37918 | 0.25401975 | 0.442698 |
| 365552    | Rsph14          | -0.38017 | 0.03168976 | 0.094199 |
| 689656    | Aunip           | -0.38064 | 0.33898984 | 0.535506 |

|           |              |          |            |          |
|-----------|--------------|----------|------------|----------|
| 59329     | Sik1         | -0.38078 | 2.62E-04   | 0.001588 |
| 102553814 | LOC102553814 | -0.38135 | 0.02355836 | 0.074554 |
| 289797    | Abca13       | -0.38145 | 0.12480478 | 0.269934 |
| 50693     | Itih3        | -0.38145 | 0.12480478 | 0.269934 |
| 29733     | Slpr1        | -0.38237 | 1.06E-10   | 1.83E-09 |
| 365881    | Ankrd35      | -0.38265 | 5.46E-05   | 3.85E-04 |
| 300653    | Tecta        | -0.38296 | 0.11408463 | 0.252586 |
| 116669    | Vwf          | -0.38297 | 1.93E-21   | 7.43E-20 |
| 313507    | Tal1         | -0.38303 | 0.00118451 | 0.005982 |
| 24312     | Dhfr         | -0.38384 | 1.26E-07   | 1.46E-06 |
| 363251    | Nhej1        | -0.38389 | 0.00530699 | 0.021839 |
| 367152    | Foxl2        | -0.38433 | 0.46765828 | 0.658598 |
| 499570    | Fabp12       | -0.38433 | 0.46765828 | 0.658598 |
| 293061    | Saxo2        | -0.38433 | 0.30435663 | 0.501208 |
| 103691557 | Rfxap11      | -0.38433 | 3.25E-06   | 2.94E-05 |
| 502300    | Rnf225       | -0.38464 | 0.22634689 | 0.410081 |
| 100361292 | Fam205a      | -0.38544 | 0.46645913 | 0.65742  |
| 252854    | Slc5a11      | -0.38635 | 0.06337402 | 0.162948 |
| 363948    | Cdh20        | -0.38667 | 6.55E-05   | 4.54E-04 |
| 108353241 | LOC108353241 | -0.38687 | 0.7741981  | 0.882065 |
| 689679    | LOC689679    | -0.38696 | 2.54E-05   | 1.92E-04 |
| 498753    | Hist1h2af    | -0.38725 | 0.63358934 | 0.789551 |
| 304650    | Misp3        | -0.3881  | 0.018031   | 0.060267 |
| 361187    | Asb5         | -0.3881  | 0.17212064 | 0.33892  |
| 102550986 | LOC102550986 | -0.38922 | 0.00738316 | 0.028737 |
| 309178    | Batf2        | -0.38962 | 0.41358525 | 0.609418 |
| 683410    | Ankrd33      | -0.38962 | 0.24757397 | 0.436255 |
| 102552988 | LOC102552988 | -0.3902  | 0.32820199 | 0.523896 |
| 24693     | Ptgs1        | -0.39028 | 2.03E-05   | 1.57E-04 |
| 313512    | Dmbx1        | -0.39201 | 0.43100538 | 0.625171 |
| 102549812 | LOC102549812 | -0.3932  | 0.01396036 | 0.04874  |
| 102548568 | LOC102548568 | -0.39324 | 0.36823708 | 0.564251 |
| 171011    | Kcng3        | -0.39324 | 0.11912282 | 0.260769 |
| 287821    | Otop3        | -0.39324 | 0.36823708 | 0.564251 |
| 288752    | B3gnt4       | -0.39324 | 0.36823708 | 0.564251 |
| 313471    | Dmrta2       | -0.39324 | 0.36823708 | 0.564251 |
| 500017    | Asb4         | -0.39324 | 0.36823708 | 0.564251 |
| 100363350 | Nxpe2        | -0.39329 | 0.02260739 | 0.072048 |
| 25628     | Nkx2-1       | -0.39331 | 0.14601026 | 0.300916 |
| 114091    | Fcnb         | -0.39382 | 4.72E-06   | 4.14E-05 |
| 108351836 | LOC108351836 | -0.39479 | 0.6892943  | 0.827823 |
| 360900    | Traf3ip3     | -0.39496 | 0.09159807 | 0.214627 |
| 108348059 | LOC108348059 | -0.39496 | 0.09260727 | 0.216352 |
| 25332     | Mgmt         | -0.39497 | 8.42E-07   | 8.45E-06 |
| 309104    | Ifitm6       | -0.39528 | 0.00223544 | 0.010391 |
| 252833    | Gdf7         | -0.39551 | 0.38847242 | 0.585553 |
| 308800    | Tyr          | -0.39586 | 0.7056847  | 0.838727 |
| 307715    | Irx6         | -0.39602 | 0.61042853 | 0.772004 |
| 103689949 | LOC103689949 | -0.39641 | 0.27067456 | 0.462249 |
| 289032    | Chit1        | -0.39693 | 0.02417965 | 0.076204 |
| 24294     | Cyp11b2      | -0.39716 | 0.03112875 | 0.092835 |
| 300474    | Adamts15     | -0.39734 | 9.28E-13   | 2.00E-11 |
| 25225     | Ubal1        | -0.39758 | 0.59071889 | 0.755861 |
| 103689971 | LOC103689971 | -0.39896 | 0.57805227 | 0.745767 |
| 25134     | Gnmt         | -0.40002 | 0.04990234 | 0.13475  |
| 140942    | Ddit4        | -0.40163 | 9.17E-50   | 8.87E-48 |

|           |              |          |            |          |
|-----------|--------------|----------|------------|----------|
| 29447     | Msra         | -0.40222 | 3.58E-08   | 4.44E-07 |
| 287699    | Krt13        | -0.40256 | 0.19792325 | 0.372807 |
| 360465    | Ercc411      | -0.40524 | 0.07607438 | 0.187188 |
| 500590    | Tnfrsf9      | -0.40539 | 0.1240988  | 0.268881 |
| 362510    | Melk         | -0.40577 | 0.11339423 | 0.251408 |
| 102551882 | LOC102551882 | -0.40594 | 0.26126904 | 0.450754 |
| 679581    | LOC679581    | -0.40625 | 0.6632627  | 0.808179 |
| 113910    | Prnd         | -0.40838 | 0.04033075 | 0.114012 |
| 501138    | Ankar        | -0.40856 | 0.02031225 | 0.066366 |
| 364814    | Psm8         | -0.40869 | 0.02428993 | 0.076425 |
| 102548076 | LOC102548076 | -0.40902 | 0.00395141 | 0.016961 |
| 688845    | Zbtb32       | -0.40946 | 0.40335543 | 0.600289 |
| 100910134 | LOC100910134 | -0.40973 | 0.18814087 | 0.360441 |
| 304325    | Tmem184a     | -0.41055 | 0.59555525 | 0.759244 |
| 290623    | Cyp4f18      | -0.41065 | 0.08348075 | 0.200998 |
| 287638    | Dlx3         | -0.41098 | 0.01957763 | 0.064352 |
| 367455    | Lrg1         | -0.41123 | 3.63E-08   | 4.49E-07 |
| 362619    | Smpd13b      | -0.41227 | 0.00305131 | 0.013651 |
| 364073    | Ddx3y        | -0.41229 | 0.00202799 | 0.00957  |
| 100189544 | Nrn11        | -0.41234 | 0.13242264 | 0.281692 |
| 103690326 | LOC103690326 | -0.41234 | 0.5947522  | 0.758881 |
| 103691555 | LOC103691555 | -0.41234 | 0.70680238 | 0.839035 |
| 103694084 | LOC103694084 | -0.41234 | 0.19256241 | 0.366259 |
| 103694166 | LOC103694166 | -0.41234 | 0.70680238 | 0.839035 |
| 108348813 | LOC108348813 | -0.41234 | 0.70680238 | 0.839035 |
| 116544    | Pou2f3       | -0.41234 | 0.51471219 | 0.700493 |
| 171449    | Zg16         | -0.41234 | 0.70680238 | 0.839035 |
| 24411     | Grin2c       | -0.41234 | 0.4002885  | 0.597312 |
| 25685     | Igfbp1       | -0.41234 | 0.70680238 | 0.839035 |
| 266612    | Slc4a9       | -0.41234 | 0.35684915 | 0.553887 |
| 287678    | Krt23        | -0.41234 | 0.70680238 | 0.839035 |
| 289101    | Shcbp11      | -0.41234 | 0.70680238 | 0.839035 |
| 291759    | Dsc1         | -0.41234 | 0.45186577 | 0.643616 |
| 291819    | Car7         | -0.41234 | 0.5947522  | 0.758881 |
| 29238     | Drd3         | -0.41234 | 0.5947522  | 0.758881 |
| 293357    | Olr210       | -0.41234 | 0.70680238 | 0.839035 |
| 293637    | Phlda2       | -0.41234 | 0.70680238 | 0.839035 |
| 294559    | Oit3         | -0.41234 | 0.70680238 | 0.839035 |
| 294807    | Rxfp3        | -0.41234 | 0.70680238 | 0.839035 |
| 296601    | Mymk         | -0.41234 | 0.5947522  | 0.758881 |
| 301100    | Ooep         | -0.41234 | 0.5947522  | 0.758881 |
| 310693    | Cd51         | -0.41234 | 0.28736291 | 0.48189  |
| 311470    | Sel112       | -0.41234 | 0.70680238 | 0.839035 |
| 315239    | Muc1911      | -0.41234 | 0.5947522  | 0.758881 |
| 315438    | Deup1        | -0.41234 | 0.70680238 | 0.839035 |
| 316124    | LOC316124    | -0.41234 | 0.70680238 | 0.839035 |
| 338418    | Scgb3a1      | -0.41234 | 0.70680238 | 0.839035 |
| 405014    | Olr86        | -0.41234 | 0.45186577 | 0.643616 |
| 494247    | Vomlr86      | -0.41234 | 0.79025378 | 0.891769 |
| 497197    | Plcz1        | -0.41234 | 0.70680238 | 0.839035 |
| 499579    | Dnajc5b      | -0.41234 | 0.45186577 | 0.643616 |
| 499640    | Wdr49        | -0.41234 | 0.70680238 | 0.839035 |
| 500927    | Olr1877      | -0.41234 | 0.5947522  | 0.758881 |
| 502372    | Syce1        | -0.41234 | 0.5947522  | 0.758881 |
| 64546     | Il12b        | -0.41234 | 0.70680238 | 0.839035 |
| 679584    | Ccdc27       | -0.41234 | 0.70680238 | 0.839035 |

|           |              |          |            |          |
|-----------|--------------|----------|------------|----------|
| 679979    | Cyp2ab1      | -0.41234 | 0.70680238 | 0.839035 |
| 681145    | I119         | -0.41234 | 0.70680238 | 0.839035 |
| 685402    | Gal3st2      | -0.41234 | 0.70680238 | 0.839035 |
| 691496    | Hist3h3      | -0.41234 | 0.5947522  | 0.758881 |
| 103692171 | LOC103692171 | -0.41235 | 2.22E-07   | 2.45E-06 |
| 293302    | Olr155       | -0.41307 | 0.39940607 | 0.596556 |
| 298591    | Igsf21       | -0.41434 | 3.36E-05   | 2.49E-04 |
| 100362040 | LOC100362040 | -0.41457 | 0.57848162 | 0.746068 |
| 311358    | Serinc4      | -0.41478 | 0.14518837 | 0.299969 |
| 103692612 | LOC103692612 | -0.41521 | 0.58349148 | 0.750091 |
| 501061    | Tmie         | -0.41586 | 0.00170188 | 0.008212 |
| 691317    | Draxin       | -0.4162  | 0.08753394 | 0.207555 |
| 499985    | RGD1565355   | -0.41628 | 0.06929305 | 0.174262 |
| 24388     | Gfi1         | -0.41631 | 0.08482559 | 0.203413 |
| 192109    | Pou3f3       | -0.41652 | 0.4623274  | 0.652998 |
| 24582     | Myh11        | -0.41668 | 1.55E-24   | 7.01E-23 |
| 100911413 | LOC100911413 | -0.41707 | 1.28E-04   | 8.32E-04 |
| 306285    | Syt15        | -0.41707 | 3.86E-07   | 4.11E-06 |
| 29413     | Adra1d       | -0.41764 | 0.06944543 | 0.174576 |
| 64558     | Fzd4         | -0.41847 | 3.34E-13   | 7.49E-12 |
| 680025    | Nxf5         | -0.41848 | 0.48600599 | 0.674045 |
| 302388    | RGD1560099   | -0.4187  | 0.61809858 | 0.777009 |
| 295445    | Dkk2         | -0.41877 | 0.09846551 | 0.226046 |
| 304509    | Cfap73       | -0.4188  | 0.58456671 | 0.750764 |
| 316432    | Ica11        | -0.41884 | 2.37E-04   | 0.001454 |
| 102549465 | LOC102549465 | -0.42022 | 0.42000042 | 0.615443 |
| 404644    | Mrgprb5      | -0.4203  | 0.21892352 | 0.400557 |
| 100913063 | Cd79a        | -0.42123 | 0.00376595 | 0.016312 |
| 362848    | Pram1        | -0.42201 | 0.00839852 | 0.032048 |
| 65130     | Cldn3        | -0.42218 | 0.01473294 | 0.051063 |
| 297962    | Srsf12       | -0.42219 | 9.80E-04   | 0.005089 |
| 293522    | Ahsp         | -0.42225 | 3.85E-04   | 0.002234 |
| 286901    | Brinp3       | -0.42229 | 1.52E-04   | 9.71E-04 |
| 502584    | Nudt17       | -0.42261 | 0.06210271 | 0.160329 |
| 63887     | Nmu          | -0.42357 | 0.07374976 | 0.18291  |
| 102556347 | LOC102556347 | -0.42374 | 6.39E-18   | 2.07E-16 |
| 314772    | Epyc         | -0.42418 | 1.57E-04   | 0.001    |
| 102552378 | LOC102552378 | -0.42491 | 0.75110692 | 0.867065 |
| 298698    | Angpt16      | -0.42497 | 0.06224928 | 0.160555 |
| 288135    | Retnlg       | -0.42532 | 3.96E-04   | 0.002289 |
| 100361920 | LOC100361920 | -0.42615 | 0.69107512 | 0.829125 |
| 293990    | Wnt8b        | -0.42617 | 0.25155987 | 0.439658 |
| 108351878 | LOC108351878 | -0.42665 | 0.0013048  | 0.006512 |
| 306283    | Anxa8        | -0.42705 | 1.77E-18   | 5.88E-17 |
| 296197    | Dstn11       | -0.42764 | 0.01623681 | 0.055259 |
| 500944    | Kdm4d12      | -0.42936 | 0.17984906 | 0.348979 |
| 100911426 | LOC100911426 | -0.42975 | 0.81777924 | 0.908405 |
| 170568    | Dmbt1        | -0.42978 | 1.24E-05   | 9.98E-05 |
| 414787    | RT1-M10-1    | -0.43007 | 0.16345126 | 0.326817 |
| 103693118 | LOC103693118 | -0.43008 | 0.30945313 | 0.504497 |
| 100912498 | LOC100912498 | -0.43008 | 4.46E-12   | 8.98E-11 |
| 102550306 | LOC102550306 | -0.43027 | 0.30934813 | 0.504499 |
| 25421     | Crybb1       | -0.43027 | 0.04203408 | 0.11764  |
| 290409    | Olfm4        | -0.43027 | 0.1505258  | 0.307164 |
| 365844    | Nup2101      | -0.43027 | 0.07827438 | 0.191218 |
| 103690486 | LOC103690486 | -0.43033 | 0.27234297 | 0.464224 |



|           |              |          |            |          |
|-----------|--------------|----------|------------|----------|
| 498194    | Mn1          | -0.43039 | 0.12273356 | 0.266955 |
| 366998    | Nfe2         | -0.43224 | 0.01759575 | 0.059082 |
| 108348160 | NEWGENE_2134 | -0.43242 | 0.07510236 | 0.185467 |
| 102553014 | LOC102553014 | -0.43279 | 0.57114848 | 0.740421 |
| 299567    | Pglyrp2      | -0.43335 | 0.44576786 | 0.638463 |
| 24438     | Hist1h1t     | -0.43341 | 0.34486138 | 0.541413 |
| 102552387 | LOC102552387 | -0.43471 | 0.52415216 | 0.708027 |
| 499027    | RGD1560718   | -0.43501 | 0.50986095 | 0.696129 |
| 366069    | Myo3b        | -0.43543 | 0.19985142 | 0.375436 |
| 690076    | Cd300e       | -0.43626 | 0.19183122 | 0.365233 |
| 360457    | Vegfd        | -0.4364  | 0.04882926 | 0.13268  |
| 25722     | Scn4a        | -0.43657 | 1.95E-06   | 1.84E-05 |
| 114215    | Ins13        | -0.43788 | 0.38608825 | 0.583066 |
| 25163     | Cdkn2a       | -0.43931 | 0.01669679 | 0.056532 |
| 108348153 | LOC108348153 | -0.43953 | 2.12E-05   | 1.63E-04 |
| 500300    | Depp1        | -0.43973 | 2.47E-08   | 3.14E-07 |
| 361619    | Hbb-b1       | -0.44068 | 1.79E-17   | 5.61E-16 |
| 288275    | Hunk         | -0.44091 | 0.24326708 | 0.43144  |
| 295160    | Mnd1         | -0.44091 | 0.24326708 | 0.43144  |
| 308163    | Ccr6         | -0.44091 | 0.46052252 | 0.651851 |
| 108352632 | LOC108352632 | -0.44096 | 0.13897266 | 0.291426 |
| 100911585 | LOC100911585 | -0.441   | 0.14425064 | 0.298615 |
| 502618    | LOC502618    | -0.44134 | 0.09489365 | 0.220021 |
| 103689931 | LOC103689931 | -0.44141 | 5.11E-31   | 3.00E-29 |
| 103690123 | Hoxa2        | -0.44316 | 0.1021542  | 0.232385 |
| 405012    | Olr89        | -0.44327 | 0.61855145 | 0.777271 |
| 500562    | Lin28a       | -0.44349 | 0.15767003 | 0.317961 |
| 108353238 | LOC108353238 | -0.44371 | 0.11254643 | 0.250052 |
| 499422    | Gstt3        | -0.44377 | 3.24E-36   | 2.30E-34 |
| 108348879 | LOC108348879 | -0.44477 | 0.43463137 | 0.628778 |
| 690276    | LOC690276    | -0.44477 | 0.01908458 | 0.063003 |
| 690919    | Nrg4         | -0.44477 | 0.43463137 | 0.628778 |
| 29397     | Cc111        | -0.44523 | 0.08886342 | 0.209845 |
| 690593    | Vom2r13      | -0.44537 | 0.3456524  | 0.542164 |
| 108352109 | LOC108352109 | -0.44609 | 0.00151224 | 0.007408 |
| 497195    | Rnase17      | -0.44799 | 0.18851064 | 0.361077 |
| 103694210 | LOC103694210 | -0.44834 | 0.00112222 | 0.005701 |
| 24440     | Hbb          | -0.44851 | 1.82E-140  | #####    |
| 108348043 | NEWGENE_2812 | -0.44916 | 0.22458807 | 0.407748 |
| 363085    | Car12        | -0.44918 | 0.02636822 | 0.081365 |
| 366262    | Rbm38        | -0.45051 | 1.44E-07   | 1.64E-06 |
| 25085     | Th           | -0.45067 | 0.05405389 | 0.143558 |
| 301112    | Crb3         | -0.45102 | 0.10481556 | 0.236602 |
| 100359421 | LOC100359421 | -0.45238 | 0.04525483 | 0.125109 |
| 312689    | M6pr         | -0.45485 | 3.03E-36   | 2.16E-34 |
| 102548162 | LOC102548162 | -0.45674 | 0.12523965 | 0.270552 |
| 290485    | Cldn10       | -0.45674 | 0.03969267 | 0.112609 |
| 315034    | Fbxo43       | -0.45674 | 0.49293763 | 0.680265 |
| 683422    | LOC683422    | -0.45674 | 0.49293763 | 0.680265 |
| 683980    | Krtcap3      | -0.45674 | 0.49293763 | 0.680265 |
| 84405     | I112a        | -0.45674 | 0.49293763 | 0.680265 |
| 116547    | S100a8       | -0.45674 | 1.10E-14   | 2.85E-13 |
| 103693260 | LOC103693260 | -0.45677 | 0.03002802 | 0.090188 |
| 103690234 | LOC103690234 | -0.45706 | 0.03154975 | 0.093885 |
| 102553828 | LOC102553828 | -0.45845 | 0.18344483 | 0.353829 |
| 25269     | Pvalb        | -0.45852 | 6.62E-132  | #####    |

|           |              |          |            |          |
|-----------|--------------|----------|------------|----------|
| 288449    | Katnal1      | -0.45861 | 2.91E-05   | 2.19E-04 |
| 302884    | MGC105649    | -0.45864 | 0.04310775 | 0.120133 |
| 102554611 | LOC102554611 | -0.45916 | 0.50207953 | 0.688714 |
| 100366054 | LOC100366054 | -0.45942 | 0.45763386 | 0.648919 |
| 102550455 | LOC102550455 | -0.4598  | 0.05605813 | 0.147932 |
| 171105    | Lnpep        | -0.45993 | 1.12E-27   | 5.86E-26 |
| 113882    | Hemgn        | -0.46243 | 1.82E-04   | 0.001141 |
| 691362    | Mansc4       | -0.46297 | 0.25963922 | 0.449122 |
| 408212    | Cpa5         | -0.46319 | 0.14953908 | 0.30574  |
| 312331    | Nfe213       | -0.46409 | 0.01998285 | 0.065492 |
| 102553670 | LOC102553670 | -0.46527 | 0.05287229 | 0.140892 |
| 25681     | Col10a1      | -0.46535 | 6.17E-06   | 5.27E-05 |
| 360816    | Sds1         | -0.46546 | 0.00672298 | 0.026608 |
| 102552055 | LOC102552055 | -0.46582 | 0.02842205 | 0.0864   |
| 102549500 | LOC102549500 | -0.46625 | 0.11031385 | 0.245924 |
| 103690128 | LOC103690128 | -0.46805 | 0.17343365 | 0.34066  |
| 309110    | Gatd1        | -0.46877 | 1.03E-08   | 1.39E-07 |
| 679158    | Sox3         | -0.46881 | 0.00652848 | 0.025995 |
| 24415     | Grm2         | -0.46949 | 0.09907371 | 0.227004 |
| 108351569 | LOC108351569 | -0.47033 | 0.65596507 | 0.802831 |
| 100362981 | LOC100362981 | -0.47079 | 0.42328112 | 0.618679 |
| 500085    | Svopl        | -0.47079 | 0.01972087 | 0.064756 |
| 100360449 | LOC100360449 | -0.47173 | 1.11E-06   | 1.09E-05 |
| 100911399 | LOC100911399 | -0.47234 | 0.39315099 | 0.590455 |
| 108351807 | LOC108351807 | -0.47264 | 0.49438264 | 0.681149 |
| 303914    | Ildr1        | -0.47264 | 0.10724877 | 0.240839 |
| 309649    | Rab44        | -0.47264 | 0.10724877 | 0.240839 |
| 363796    | Iqcg         | -0.47264 | 0.10724877 | 0.240839 |
| 100360779 | LOC100360779 | -0.47276 | 0.29939105 | 0.49599  |
| 289395    | Cr2          | -0.47297 | 0.2855155  | 0.479595 |
| 498659    | RatNP-3b     | -0.47432 | 7.33E-07   | 7.46E-06 |
| 688386    | Cox7a212     | -0.47446 | 4.08E-21   | 1.55E-19 |
| 266775    | Serp1b10     | -0.47535 | 0.05821427 | 0.152544 |
| 316614    | Asb18        | -0.47577 | 0.01684521 | 0.056877 |
| 690528    | Pou2af1      | -0.47577 | 0.01684521 | 0.056877 |
| 365398    | Slc22a12     | -0.47843 | 0.07741598 | 0.189534 |
| 103689986 | LOC103689986 | -0.47875 | 3.11E-15   | 8.43E-14 |
| 140584    | Wnt11        | -0.47918 | 0.00596341 | 0.024006 |
| 108351821 | LOC108351821 | -0.47946 | 0.56628041 | 0.736567 |
| 100910944 | LOC100910944 | -0.4822  | 5.70E-10   | 9.07E-09 |
| 102546601 | LOC102546601 | -0.48273 | 0.56496242 | 0.735858 |
| 24261     | Chrnbl       | -0.48273 | 0.01765418 | 0.059236 |
| 24362     | Fbp1         | -0.48273 | 0.4157248  | 0.611837 |
| 246358    | Ppbp         | -0.48273 | 0.56496242 | 0.735858 |
| 24867     | Smr3b        | -0.48273 | 0.4157248  | 0.611837 |
| 25223     | Tspyl        | -0.48273 | 0.56496242 | 0.735858 |
| 288053    | Ropn1        | -0.48273 | 0.56496242 | 0.735858 |
| 289023    | Kiss1        | -0.48273 | 0.56496242 | 0.735858 |
| 302425    | Awat2        | -0.48273 | 0.56496242 | 0.735858 |
| 317533    | Srsf8        | -0.48273 | 0.4157248  | 0.611837 |
| 365337    | Olr202       | -0.48273 | 0.56496242 | 0.735858 |
| 500997    | RGD1562914   | -0.48273 | 0.56496242 | 0.735858 |
| 502858    | Gp9          | -0.48273 | 0.56496242 | 0.735858 |
| 66017     | Fgf20        | -0.48273 | 0.4157248  | 0.611837 |
| 102555809 | LOC102555809 | -0.48445 | 0.39520386 | 0.592464 |
| 63849     | Mmp8         | -0.48472 | 5.14E-06   | 4.47E-05 |

|           |                |          |            |          |
|-----------|----------------|----------|------------|----------|
| 108352537 | LOC108352537   | -0.48546 | 0.14013525 | 0.293025 |
| 266770    | Soat2          | -0.48627 | 0.37593311 | 0.572726 |
| 315761    | Cilp           | -0.48651 | 2.69E-06   | 2.48E-05 |
| 689029    | Tm6sf2         | -0.48711 | 0.07478788 | 0.184835 |
| 25329     | Lhb            | -0.48763 | 0.09174277 | 0.214886 |
| 360849    | Kif14          | -0.48829 | 0.11295538 | 0.250756 |
| 498087    | Stfa212        | -0.48923 | 0.04122469 | 0.115851 |
| 297594    | Cdca3          | -0.49035 | 0.00652051 | 0.025985 |
| 365466    | Cpn1           | -0.49035 | 0.01847662 | 0.061422 |
| 361142    | Galnt16        | -0.49043 | 0.26101923 | 0.450527 |
| 114111    | Vegfc          | -0.49157 | 0.01136558 | 0.041175 |
| 25351     | Slc2a2         | -0.49207 | 0.2177646  | 0.399184 |
| 308587    | Ntn5           | -0.49207 | 0.2177646  | 0.399184 |
| 314996    | Klhl38         | -0.49283 | 0.0398074  | 0.112851 |
| 360504    | Hba2           | -0.49311 | 1.29E-213  | #####    |
| 290561    | Tnnc1          | -0.49337 | 2.98E-05   | 2.23E-04 |
| 103693838 | NEWGENE_621802 | -0.49363 | 1.16E-30   | 6.71E-29 |
| 691903    | Ssx1           | -0.49412 | 0.07015219 | 0.175958 |
| 288907    | Podn11         | -0.49511 | 0.1472355  | 0.302786 |
| 295246    | Dcst1          | -0.49569 | 0.24828156 | 0.437057 |
| 24174     | Adra2b         | -0.49663 | 0.12199212 | 0.265707 |
| 498735    | Fam217a        | -0.49688 | 0.15269852 | 0.310467 |
| 85257     | Cnga3          | -0.4974  | 0.35666394 | 0.553735 |
| 362218    | Rnf24          | -0.4985  | 0.03166754 | 0.094162 |
| 499465    | Mett124        | -0.49981 | 0.19043647 | 0.36334  |
| 100359633 | LOC100359633   | -0.50001 | 0.58060662 | 0.747796 |
| 689064    | LOC689064      | -0.50016 | 9.76E-33   | 6.09E-31 |
| 301482    | Abca12         | -0.50088 | 0.09557636 | 0.22128  |
| 102548682 | LOC102548682   | -0.50189 | 0.07105378 | 0.177751 |
| 502083    | Cldn24         | -0.50381 | 0.29564167 | 0.49209  |
| 24336     | Epor           | -0.50427 | 0.09621815 | 0.222226 |
| 294094    | Lipk           | -0.50427 | 0.23949436 | 0.426896 |
| 681056    | Erfe           | -0.50427 | 0.23949436 | 0.426896 |
| 494021    | Lmcd1          | -0.50592 | 1.62E-04   | 0.001026 |
| 102552838 | Mclr           | -0.50632 | 0.16695047 | 0.330671 |
| 171078    | Mlxipl         | -0.50632 | 0.16695047 | 0.330671 |
| 24751     | RT1-01         | -0.50659 | 0.01646475 | 0.055885 |
| 100361018 | LOC100361018   | -0.50742 | 0.28901928 | 0.483901 |
| 100912163 | LOC100912163   | -0.50744 | 2.12E-09   | 3.13E-08 |
| 497101    | Xkrx           | -0.50917 | 0.06652896 | 0.168827 |
| 29135     | Hpn            | -0.50951 | 0.03305087 | 0.097348 |
| 367298    | Slc23a3        | -0.50978 | 0.18720001 | 0.359217 |
| 81668     | Gnrhr          | -0.51014 | 0.51009284 | 0.696396 |
| 102546495 | LOC102546495   | -0.51018 | 0.57360803 | 0.742422 |
| 108352876 | LOC108352876   | -0.51018 | 0.57360803 | 0.742422 |
| 102557111 | LOC102557111   | -0.51111 | 0.06594468 | 0.167657 |
| 362638    | Cda            | -0.51169 | 0.04785973 | 0.130492 |
| 100362422 | Efcab13        | -0.51188 | 0.4680268  | 0.658776 |
| 102552731 | LOC102552731   | -0.51188 | 0.4680268  | 0.658776 |
| 117554    | Pnliprp2       | -0.51188 | 0.4680268  | 0.658776 |
| 24311     | Ddc            | -0.51188 | 0.07547305 | 0.186117 |
| 245919    | Impg2          | -0.51188 | 0.20877615 | 0.386822 |
| 282829    | Tac4           | -0.51188 | 0.20877615 | 0.386822 |
| 287241    | Olr1387        | -0.51188 | 0.60785154 | 0.769972 |
| 293841    | Xlr4a          | -0.51188 | 0.4680268  | 0.658776 |
| 308429    | Pinlyp         | -0.51188 | 0.4680268  | 0.658776 |

|           |                 |          |            |          |
|-----------|-----------------|----------|------------|----------|
| 312720    | Akap3           | -0.51188 | 0.20877615 | 0.386822 |
| 498133    | Tex26           | -0.51188 | 0.20877615 | 0.386822 |
| 500363    | Tuba3b          | -0.51188 | 0.4680268  | 0.658776 |
| 691161    | Sh2d6           | -0.51188 | 0.20877615 | 0.386822 |
| 25748     | Alas2           | -0.51298 | 2.87E-10   | 4.74E-09 |
| 286995    | Defa5           | -0.51476 | 3.43E-09   | 4.95E-08 |
| 54305     | Sstr2           | -0.51515 | 0.00150729 | 0.007389 |
| 309433    | Sec31b          | -0.51577 | 0.01735709 | 0.058435 |
| 298961    | Agr2            | -0.5159  | 0.36440521 | 0.560589 |
| 361968    | Tmem144         | -0.51668 | 0.03184703 | 0.094578 |
| 103693711 | LOC103693711    | -0.51721 | 0.29827365 | 0.494957 |
| 303909    | Stfa2           | -0.51737 | 0.26715917 | 0.458383 |
| 292393    | RGD1561667      | -0.51772 | 0.56974139 | 0.739301 |
| 246138    | Ly6i            | -0.51877 | 0.68742977 | 0.826574 |
| 303542    | Ghdc            | -0.51937 | 2.19E-09   | 3.23E-08 |
| 100912904 | LOC100912904    | -0.52012 | 0.00111269 | 0.005665 |
| 103690085 | LOC103690085    | -0.52057 | 0.25560952 | 0.444452 |
| 302373    | Gpr174          | -0.52087 | 0.26350216 | 0.453702 |
| 307253    | Katnal2         | -0.52087 | 0.11380817 | 0.252149 |
| 408199    | Sucnr1          | -0.52087 | 0.26350216 | 0.453702 |
| 497946    | Spns3           | -0.52087 | 0.26350216 | 0.453702 |
| 316729    | Fam114a111      | -0.52117 | 0.02054552 | 0.066967 |
| 192245    | Hspb6           | -0.52158 | 3.18E-21   | 1.21E-19 |
| 305476    | RGD1308775      | -0.52166 | 0.0199276  | 0.065345 |
| 679990    | Pgm5            | -0.52294 | 1.52E-04   | 9.71E-04 |
| 171125    | Ptprh           | -0.52338 | 0.16001327 | 0.321699 |
| 498604    | Fam129c         | -0.52363 | 5.43E-04   | 0.003013 |
| 102554479 | LOC102554479    | -0.52442 | 0.12073371 | 0.263508 |
| 25123     | Tagln           | -0.52601 | 1.57E-29   | 8.67E-28 |
| 361818    | Rsph1           | -0.52656 | 0.00796459 | 0.030699 |
| 24464     | Hp              | -0.52723 | 1.07E-04   | 7.07E-04 |
| 108350052 | NEWGENE_1592020 | -0.52782 | 0.39486244 | 0.592138 |
| 29243     | F10             | -0.52782 | 0.08881814 | 0.209791 |
| 303687    | Evp1            | -0.52782 | 4.51E-04   | 0.002565 |
| 317416    | LOC317416       | -0.52782 | 0.22887616 | 0.413327 |
| 259244    | LOC259244       | -0.53022 | 0.09766296 | 0.224718 |
| 310483    | Mlf1            | -0.53074 | 1.32E-07   | 1.51E-06 |
| 311833    | Ak8             | -0.53074 | 0.07860343 | 0.191874 |
| 689173    | LOC689173       | -0.53096 | 0.21705212 | 0.398434 |
| 102549189 | LOC102549189    | -0.53099 | 0.76988986 | 0.879103 |
| 299193    | Acot6           | -0.53129 | 0.15918943 | 0.320448 |
| 94195     | S100a9          | -0.53156 | 9.51E-39   | 7.16E-37 |
| 24307     | Cyp4b1          | -0.53164 | 0.02948081 | 0.08893  |
| 679875    | Mage12          | -0.53164 | 0.02948081 | 0.08893  |
| 102551447 | LOC102551447    | -0.53263 | 0.33075209 | 0.527039 |
| 499702    | Synpo2          | -0.53314 | 8.44E-10   | 1.31E-08 |
| 302192    | LOC302192       | -0.53363 | 0.00465216 | 0.01952  |
| 29469     | Lbp             | -0.53417 | 7.18E-06   | 6.05E-05 |
| 108348173 | LOC108348173    | -0.53462 | 0.0155211  | 0.053386 |
| 304965    | Fcrla           | -0.53497 | 7.33E-04   | 0.003945 |
| 690237    | Pot1b           | -0.53667 | 3.05E-08   | 3.82E-07 |
| 295620    | Upp2            | -0.53689 | 0.31787778 | 0.512832 |
| 81514     | Lrrn3           | -0.53769 | 3.21E-73   | 4.56E-71 |
| 315162    | Mei1            | -0.53788 | 0.17447814 | 0.342007 |
| 498267    | Dusp27          | -0.53788 | 0.09628283 | 0.222348 |
| 681211    | Mogat2          | -0.5387  | 1.00E-17   | 3.21E-16 |

|           |              |          |            |          |
|-----------|--------------|----------|------------|----------|
| 108350053 | LOC108350053 | -0.5388  | 0.26772155 | 0.45881  |
| 114519    | Nfil3        | -0.54055 | 1.80E-06   | 1.72E-05 |
| 24397     | Glra2        | -0.54084 | 0.35677828 | 0.553867 |
| 29161     | Cav3         | -0.54113 | 0.0079288  | 0.030586 |
| 683408    | LOC683408    | -0.54124 | 0.276958   | 0.469527 |
| 311331    | Spint1       | -0.54254 | 6.84E-04   | 0.003704 |
| 315465    | Ccdc151      | -0.54274 | 0.075323   | 0.185892 |
| 306330    | Klf2         | -0.54287 | 2.03E-13   | 4.68E-12 |
| 246297    | Myocd        | -0.54306 | 0.14358667 | 0.298017 |
| 290567    | Chat         | -0.54334 | 0.21706778 | 0.398425 |
| 25632     | Hba1         | -0.54386 | 0          | 0        |
| 171291    | Kif6         | -0.54479 | 0.28979793 | 0.484885 |
| 305078    | Lamb3        | -0.54479 | 0.28979793 | 0.484885 |
| 100360919 | Igll1        | -0.54479 | 0.13438359 | 0.284418 |
| 102555578 | LOC102555578 | -0.54479 | 0.61953396 | 0.777735 |
| 84020     | Kcnq1        | -0.54479 | 0.13438359 | 0.284418 |
| 29300     | Gata6        | -0.54597 | 0.32904806 | 0.524807 |
| 290257    | Ctsg         | -0.54686 | 0.00198787 | 0.009411 |
| 300260    | Sp7          | -0.54687 | 0.04604671 | 0.126765 |
| 302719    | RGD1563378   | -0.54732 | 0.09779449 | 0.224912 |
| 502684    | LOC502684    | -0.5475  | 0.11828612 | 0.259475 |
| 102549173 | LOC102549173 | -0.54846 | 0.05956096 | 0.155197 |
| 103690120 | LOC103690120 | -0.54854 | 0.25885309 | 0.448087 |
| 108353258 | LOC108353258 | -0.54985 | 0.25070711 | 0.438671 |
| 117048    | Cdh17        | -0.54985 | 0.0466469  | 0.127973 |
| 287305    | RGD1308564   | -0.54985 | 0.25070711 | 0.438671 |
| 291005    | Gadd45g      | -0.54985 | 8.16E-11   | 1.42E-09 |
| 102549738 | LOC102549738 | -0.55202 | 0.64379076 | 0.797359 |
| 365864    | Tuft1        | -0.55227 | 2.01E-09   | 2.97E-08 |
| 679818    | LOC679818    | -0.55332 | 0.05076517 | 0.136403 |
| 108349816 | LOC108349816 | -0.5537  | 0.21787313 | 0.399307 |
| 292794    | Ffar2        | -0.5537  | 0.21787313 | 0.399307 |
| 301118    | Acer1        | -0.55673 | 0.19002744 | 0.362942 |
| 366915    | Snx31        | -0.55673 | 0.0638359  | 0.163804 |
| 367785    | Asb9         | -0.55673 | 0.19002744 | 0.362942 |
| 314248    | RGD1562381   | -0.55698 | 0.53663533 | 0.718823 |
| 306871    | Dsp          | -0.55737 | 3.07E-11   | 5.66E-10 |
| 286958    | Np4          | -0.5582  | 2.34E-10   | 3.93E-09 |
| 100302373 | Ctxn2        | -0.55842 | 0.01847523 | 0.061428 |
| 63878     | Stc2         | -0.55919 | 0.16623578 | 0.329616 |
| 289138    | Tp53i3       | -0.55976 | 8.35E-26   | 4.03E-24 |
| 299920    | Lrrc6        | -0.56121 | 0.14578722 | 0.3007   |
| 83683     | Gpr6         | -0.56121 | 0.14578722 | 0.3007   |
| 100910979 | LOC100910979 | -0.56187 | 0.02388266 | 0.075418 |
| 102553065 | LOC102553065 | -0.56361 | 0.54783611 | 0.728599 |
| 500448    | RGD1560723   | -0.56448 | 0.00219503 | 0.010239 |
| 303575    | Kif18b       | -0.56478 | 0.00539396 | 0.022116 |
| 499093    | Zfp108       | -0.56491 | 0.05727648 | 0.150439 |
| 108352875 | LOC108352875 | -0.56504 | 0.252215   | 0.440642 |
| 502617    | RGD1564854   | -0.56648 | 0.37819832 | 0.575257 |
| 81526     | Nov          | -0.56714 | 1.90E-15   | 5.22E-14 |
| 688698    | Ckmt2        | -0.56806 | 1.45E-08   | 1.92E-07 |
| 310218    | Car1         | -0.56846 | 0.00162133 | 0.007859 |
| 298006    | Cc121        | -0.56869 | 1.20E-06   | 1.17E-05 |
| 108352003 | LOC108352003 | -0.57271 | 0.65936742 | 0.805029 |
| 170573    | Slc38a4      | -0.57281 | 0.02674513 | 0.082294 |

|           |              |          |            |          |
|-----------|--------------|----------|------------|----------|
| 292168    | Mcoln2       | -0.57281 | 0.02674513 | 0.082294 |
| 680316    | LOC680316    | -0.57369 | 0.46136688 | 0.652416 |
| 100364435 | LOC100364435 | -0.5751  | 0.41929784 | 0.614792 |
| 304816    | Lmod1        | -0.57556 | 7.94E-07   | 8.01E-06 |
| 103693608 | LOC103693608 | -0.57608 | 0.0014305  | 0.007064 |
| 500910    | Tnfrsf13c    | -0.57672 | 0.05620358 | 0.148213 |
| 60351     | Nr1h4        | -0.57798 | 0.01147078 | 0.041469 |
| 291582    | Slc27a6      | -0.57853 | 1.87E-09   | 2.79E-08 |
| 100909464 | LOC100909464 | -0.5793  | 0.20564158 | 0.382914 |
| 108348179 | LOC108348179 | -0.57947 | 0.56010582 | 0.735569 |
| 497963    | LOC497963    | -0.58189 | 0.26126841 | 0.450793 |
| 100359586 | LOC100359586 | -0.58227 | 0.6551242  | 0.802963 |
| 100910555 | LOC100910555 | -0.58227 | 0.52760546 | 0.710952 |
| 102552318 | LOC102552318 | -0.58227 | 0.6551242  | 0.802963 |
| 102552911 | LOC102552911 | -0.58227 | 0.52760546 | 0.710952 |
| 102555723 | Pgbd2        | -0.58227 | 0.15781831 | 0.318193 |
| 103693361 | LOC103693361 | -0.58227 | 0.6551242  | 0.802963 |
| 103694115 | LOC103694115 | -0.58227 | 0.6551242  | 0.802963 |
| 108351077 | LOC108351077 | -0.58227 | 0.43915014 | 0.632696 |
| 108352407 | LOC108352407 | -0.58227 | 0.6551242  | 0.802963 |
| 117522    | Xpnp2        | -0.58227 | 0.20647018 | 0.384006 |
| 24476     | Iapp         | -0.58227 | 1.28E-17   | 4.06E-16 |
| 25229     | Chrm1        | -0.58227 | 0.43915014 | 0.632696 |
| 25419     | Crp          | -0.58227 | 0.43915014 | 0.632696 |
| 25517     | Pou1f1       | -0.58227 | 0.6551242  | 0.802963 |
| 266730    | Slc17a3      | -0.58227 | 0.52760546 | 0.710952 |
| 266997    | Rln3         | -0.58227 | 0.6551242  | 0.802963 |
| 286997    | Mapk15       | -0.58227 | 0.13850342 | 0.290634 |
| 287679    | Krt40        | -0.58227 | 0.6551242  | 0.802963 |
| 290372    | Fam216b      | -0.58227 | 0.6551242  | 0.802963 |
| 290467    | Slitrk6      | -0.58227 | 0.37169119 | 0.568195 |
| 291823    | Cmt1         | -0.58227 | 0.43915014 | 0.632696 |
| 29471     | Npy4r        | -0.58227 | 0.6551242  | 0.802963 |
| 296351    | Pabpc11      | -0.58227 | 0.6551242  | 0.802963 |
| 296706    | Lhx2         | -0.58227 | 0.6551242  | 0.802963 |
| 300375    | Mbd312       | -0.58227 | 0.6551242  | 0.802963 |
| 300826    | Khdc3        | -0.58227 | 0.52760546 | 0.710952 |
| 301034    | Ltf          | -0.58227 | 0.6551242  | 0.802963 |
| 303528    | Krt34        | -0.58227 | 0.6551242  | 0.802963 |
| 308766    | Mespl        | -0.58227 | 0.6551242  | 0.802963 |
| 309095    | Nkx6-2       | -0.58227 | 0.52760546 | 0.710952 |
| 309227    | Glyat11      | -0.58227 | 0.6551242  | 0.802963 |
| 309900    | Tulp1        | -0.58227 | 0.6551242  | 0.802963 |
| 311337    | Ltk          | -0.58227 | 0.27392127 | 0.465996 |
| 314431    | Spaca5       | -0.58227 | 0.43915014 | 0.632696 |
| 314649    | Slpr4        | -0.58227 | 0.04577063 | 0.126224 |
| 314771    | Kera         | -0.58227 | 0.43915014 | 0.632696 |
| 353251    | Prss21       | -0.58227 | 0.6551242  | 0.802963 |
| 361902    | Mroh2b       | -0.58227 | 0.6551242  | 0.802963 |
| 361964    | Zbbx         | -0.58227 | 0.6551242  | 0.802963 |
| 362052    | Clca2        | -0.58227 | 0.52760546 | 0.710952 |
| 363686    | Clql1        | -0.58227 | 0.43915014 | 0.632696 |
| 364302    | Rnase12      | -0.58227 | 0.6551242  | 0.802963 |
| 494204    | Ly49i4       | -0.58227 | 0.6551242  | 0.802963 |
| 498352    | Pdc12        | -0.58227 | 0.52760546 | 0.710952 |
| 498834    | Myo7b        | -0.58227 | 0.18025669 | 0.34952  |



|           |                 |          |            |          |
|-----------|-----------------|----------|------------|----------|
| 498870    | Tex43           | -0.58227 | 0.37169119 | 0.568195 |
| 499879    | Duoxa2          | -0.58227 | 0.6551242  | 0.802963 |
| 500223    | Mlap            | -0.58227 | 0.6551242  | 0.802963 |
| 501391    | LOC501391       | -0.58227 | 0.6551242  | 0.802963 |
| 54314     | Tpo             | -0.58227 | 0.6551242  | 0.802963 |
| 60414     | Rhd             | -0.58227 | 0.00219779 | 0.010249 |
| 65029     | Aoc1            | -0.58227 | 0.6551242  | 0.802963 |
| 685958    | Cc126           | -0.58227 | 0.6551242  | 0.802963 |
| 690862    | LOC690862       | -0.58227 | 0.31550767 | 0.510089 |
| 691259    | Lypd8           | -0.58227 | 0.6551242  | 0.802963 |
| 84604     | Hamp            | -0.58227 | 0.52760546 | 0.710952 |
| 103692761 | LOC103692761    | -0.58227 | 0.31791535 | 0.512741 |
| 170819    | I124            | -0.58227 | 0.31791535 | 0.512741 |
| 25360     | Tshr            | -0.58227 | 0.23730963 | 0.424372 |
| 295953    | Rag2            | -0.58227 | 0.10730233 | 0.240902 |
| 300051    | Slc39a4         | -0.58227 | 0.31791535 | 0.512741 |
| 499306    | Majin           | -0.58227 | 0.31791535 | 0.512741 |
| 499643    | LOC499643       | -0.58227 | 0.31791535 | 0.512741 |
| 679534    | RGD1560034      | -0.58227 | 0.31791535 | 0.512741 |
| 499282    | Cfap46          | -0.58291 | 0.0832763  | 0.200632 |
| 102550584 | LOC102550584    | -0.58466 | 0.65285836 | 0.80207  |
| 102553424 | Bhmg1           | -0.58467 | 0.52573111 | 0.709506 |
| 100361431 | Sycc11          | -0.58603 | 0.42136667 | 0.616875 |
| 287701    | Krt14           | -0.58609 | 0.28469304 | 0.478804 |
| 140930    | Faim            | -0.58817 | 1.19E-13   | 2.81E-12 |
| 25033     | Sstr1           | -0.58903 | 0.00703265 | 0.027616 |
| 100912426 | LOC100912426    | -0.58939 | 0.0092794  | 0.034843 |
| 363618    | Hs3st3a1        | -0.59013 | 0.47889426 | 0.667438 |
| 102552640 | LOC102552640    | -0.59027 | 3.31E-15   | 8.92E-14 |
| 85253     | Plg             | -0.59167 | 0.02169642 | 0.069834 |
| 24299     | Cyp2a3          | -0.59367 | 2.89E-05   | 2.17E-04 |
| 291854    | Adgrg3          | -0.59395 | 0.00346365 | 0.015206 |
| 117054    | Cd52            | -0.59521 | 0.04904095 | 0.13316  |
| 690142    | LOC690142       | -0.59594 | 0.22537406 | 0.408786 |
| 301127    | Znrf4           | -0.59677 | 0.0622965  | 0.160633 |
| 501097    | Mdfi            | -0.5977  | 0.01047905 | 0.038543 |
| 689932    | I123r           | -0.59821 | 0.57304676 | 0.742174 |
| 295247    | Dcst2           | -0.60138 | 0.35460884 | 0.551488 |
| 689588    | Oaz3            | -0.60138 | 0.1017562  | 0.231756 |
| 102555091 | LOC102555091    | -0.60241 | 0.51037159 | 0.696626 |
| 679997    | RGD1565617      | -0.60338 | 0.28944734 | 0.484532 |
| 688691    | LOC688691       | -0.60389 | 0.27463718 | 0.466756 |
| 25512     | Phex            | -0.60396 | 0.02916553 | 0.08821  |
| 291675    | Mzb1            | -0.60499 | 0.13111116 | 0.279495 |
| 103690045 | NEWGENE_1310139 | -0.60663 | 1.20E-09   | 1.84E-08 |
| 102556703 | LOC102556703    | -0.60684 | 0.13755036 | 0.288985 |
| 316088    | Klhl40          | -0.60736 | 4.11E-04   | 0.002369 |
| 102547093 | LOC102547093    | -0.6081  | 0.02946813 | 0.088927 |
| 108348062 | LOC108348062    | -0.60816 | 4.97E-14   | 1.22E-12 |
| 474169    | Rnase2          | -0.61056 | 0.03555682 | 0.102993 |
| 405013    | Olr88           | -0.61253 | 0.14024607 | 0.293128 |
| 56765     | Plvap           | -0.61269 | 9.39E-21   | 3.48E-19 |
| 613225    | Defa11          | -0.61278 | 0.16446156 | 0.328492 |
| 24163     | Acr             | -0.6147  | 0.19692335 | 0.371548 |
| 288045    | Zdhhc19         | -0.61606 | 7.75E-04   | 0.004145 |
| 58981     | Kcnab3          | -0.6167  | 0.00518547 | 0.021408 |

|           |              |          |            |          |
|-----------|--------------|----------|------------|----------|
| 29395     | Hmgb2        | -0.6177  | 5.79E-13   | 1.27E-11 |
| 691228    | LOC691228    | -0.61772 | 0.06357844 | 0.163364 |
| 102546903 | LOC102546903 | -0.61785 | 0.55463014 | 0.734302 |
| 100188984 | Zfp951       | -0.61815 | 0.10951541 | 0.244516 |
| 108350558 | LOC108350558 | -0.61823 | 0.00912852 | 0.034358 |
| 308596    | Ush1c        | -0.6188  | 0.22327355 | 0.40602  |
| 362249    | Cpne1        | -0.61952 | 0.02089965 | 0.067831 |
| 296358    | Matn4        | -0.62187 | 0.10335069 | 0.234379 |
| 688228    | My14         | -0.62246 | 0.00901391 | 0.033994 |
| 684509    | LOC684509    | -0.62349 | 0.817301   | 0.908192 |
| 83623     | Spag4        | -0.62351 | 0.01484435 | 0.051383 |
| 689453    | LOC689453    | -0.62357 | 0.43375301 | 0.6282   |
| 266705    | Ppp1r17      | -0.62399 | 0.22603943 | 0.409719 |
| 114496    | Bik          | -0.62534 | 0.25704353 | 0.445989 |
| 367745    | Dgkk         | -0.62534 | 0.25704353 | 0.445989 |
| 85431     | Nox4         | -0.62534 | 0.04963244 | 0.134307 |
| 65207     | Rhag         | -0.62647 | 0.00302243 | 0.013541 |
| 365313    | Xrra1        | -0.62732 | 0.10885169 | 0.243291 |
| 108353287 | LOC108353287 | -0.62775 | 0.5650856  | 0.735766 |
| 305104    | Col9a1       | -0.62938 | 4.14E-14   | 1.03E-12 |
| 293992    | Pax2         | -0.6319  | 0.40467509 | 0.601689 |
| 317395    | Spin2a       | -0.63336 | 0.06837483 | 0.172545 |
| 316940    | Spetex-2F    | -0.63422 | 0.62349244 | 0.781314 |
| 289243    | Mptx1        | -0.63474 | 0.29726813 | 0.493891 |
| 29171     | Aqp7         | -0.63474 | 0.29726813 | 0.493891 |
| 684979    | Hs3st6       | -0.63474 | 0.29726813 | 0.493891 |
| 108352354 | LOC108352354 | -0.63507 | 0.22370183 | 0.406566 |
| 681896    | Slc25a18     | -0.63591 | 3.86E-06   | 3.45E-05 |
| 100912538 | LOC100912538 | -0.638   | 8.84E-04   | 0.004645 |
| 100911581 | LOC100911581 | -0.63851 | 0.0344609  | 0.100522 |
| 102550309 | LOC102550309 | -0.64083 | 0.42195333 | 0.617425 |
| 102555858 | LOC102555858 | -0.64083 | 0.42195333 | 0.617425 |
| 368158    | Rorc         | -0.64105 | 0.2532042  | 0.441843 |
| 108348184 | LOC108348184 | -0.64108 | 0.34822781 | 0.545126 |
| 103690782 | Ssx2         | -0.64349 | 0.45627828 | 0.647479 |
| 252942    | Myh8         | -0.64357 | 8.24E-06   | 6.87E-05 |
| 293753    | Ms4a3        | -0.64367 | 0.09058585 | 0.212647 |
| 117523    | St8sia2      | -0.64407 | 4.42E-04   | 0.002519 |
| 117516    | Tnfsf11      | -0.6464  | 0.63810817 | 0.792848 |
| 25516     | Pnoc         | -0.64736 | 0.00419506 | 0.01785  |
| 691543    | Katnbl1      | -0.64737 | 3.41E-04   | 0.002007 |
| 679974    | Tceal6       | -0.64785 | 0.11523047 | 0.254354 |
| 100362205 | Fndc9        | -0.64938 | 0.34576672 | 0.542187 |
| 314638    | Creb313      | -0.64938 | 0.34576672 | 0.542187 |
| 499273    | RGD1563285   | -0.64938 | 0.34576672 | 0.542187 |
| 500311    | Gdf3         | -0.64938 | 0.34576672 | 0.542187 |
| 685580    | Prr33        | -0.65098 | 0.00121305 | 0.006107 |
| 498270    | Ccdc190      | -0.65181 | 2.00E-04   | 0.001244 |
| 404640    | Mrgprx2      | -0.65271 | 0.21082621 | 0.38971  |
| 81633     | Acta2        | -0.65273 | 4.22E-49   | 3.98E-47 |
| 688778    | LOC688778    | -0.65319 | 0.50588543 | 0.692638 |
| 100911326 | LOC100911326 | -0.6539  | 0.06813872 | 0.172109 |
| 502859    | Kbtbd12      | -0.654   | 0.01314263 | 0.046421 |
| 24808     | Tacr3        | -0.65442 | 0.06683813 | 0.169453 |
| 316158    | RGD1559808   | -0.65488 | 0.2991728  | 0.495758 |
| 690041    | Xlr3a        | -0.65549 | 0.3954117  | 0.592682 |

|           |              |          |            |          |
|-----------|--------------|----------|------------|----------|
| 296269    | Angpt4       | -0.65627 | 0.11602679 | 0.255785 |
| 367167    | Traip        | -0.65627 | 0.02623743 | 0.081053 |
| 100911295 | LOC100911295 | -0.65781 | 6.91E-31   | 4.04E-29 |
| 108348085 | LOC108348085 | -0.65797 | 2.59E-10   | 4.31E-09 |
| 114103    | I15ra        | -0.66027 | 0.20856322 | 0.386691 |
| 499968    | Galnt15      | -0.66027 | 0.20856322 | 0.386691 |
| 502919    | Igbp1b       | -0.66027 | 0.20856322 | 0.386691 |
| 100910497 | LOC100910497 | -0.66067 | 0.05974792 | 0.155514 |
| 498128    | Mcomp1       | -0.66144 | 0.00336241 | 0.014806 |
| 100911353 | LOC100911353 | -0.66256 | 0.1961702  | 0.370825 |
| 100363535 | LOC100363535 | -0.66352 | 0.02438824 | 0.076608 |
| 108348143 | LOC108348143 | -0.66598 | 7.53E-05   | 5.15E-04 |
| 292778    | Polr2i       | -0.66876 | 0.00486384 | 0.020252 |
| 114106    | Bco1         | -0.67004 | 0.00134821 | 0.006695 |
| 102548546 | LOC102548546 | -0.67097 | 0.21088844 | 0.389787 |
| 171052    | Mmp13        | -0.67104 | 8.16E-18   | 2.63E-16 |
| 102555039 | LOC102555039 | -0.67315 | 0.00144325 | 0.007123 |
| 25304     | Comp         | -0.67432 | 2.66E-22   | 1.07E-20 |
| 100363294 | LOC100363294 | -0.67538 | 0.40513909 | 0.602003 |
| 114593    | Nppc         | -0.67538 | 0.40513909 | 0.602003 |
| 140656    | Albg         | -0.67538 | 0.40513909 | 0.602003 |
| 24946     | F9           | -0.67538 | 0.40513909 | 0.602003 |
| 303215    | Fbxw10       | -0.67538 | 0.14933211 | 0.305383 |
| 309100    | Scgblc1      | -0.67538 | 0.40513909 | 0.602003 |
| 309217    | Ms4a1        | -0.67538 | 0.01854243 | 0.061609 |
| 500637    | Dcdc2c       | -0.67538 | 0.40513909 | 0.602003 |
| 503227    | Iqcf1        | -0.67538 | 0.40513909 | 0.602003 |
| 100362820 | LOC100362820 | -0.6761  | 0.01843191 | 0.061306 |
| 100363439 | Rps1011      | -0.67703 | 5.19E-69   | 7.06E-67 |
| 113931    | Prrx2        | -0.67824 | 0.00298782 | 0.013402 |
| 64543     | Sec14l3      | -0.67927 | 3.55E-86   | 5.92E-84 |
| 683720    | Krt79        | -0.67999 | 0.10093272 | 0.230156 |
| 81648     | Crh          | -0.68003 | 1.64E-19   | 5.71E-18 |
| 64032     | Ctgf         | -0.68074 | 1.23E-29   | 6.89E-28 |
| 24638     | Pfkfb1       | -0.68163 | 0.01993521 | 0.065358 |
| 362211    | Mall         | -0.68536 | 0.00132143 | 0.006579 |
| 363790    | Fbxo40       | -0.68638 | 0.00796466 | 0.030693 |
| 310213    | Sirpb2       | -0.68652 | 0.66672142 | 0.810682 |
| 313126    | Gja10        | -0.68697 | 0.03463005 | 0.100907 |
| 360479    | LOC360479    | -0.68852 | 6.62E-05   | 4.58E-04 |
| 288979    | C1ql2        | -0.68918 | 0.16973647 | 0.335161 |
| 498587    | Ldb3         | -0.68953 | 8.44E-53   | 8.64E-51 |
| 64555     | Spef2        | -0.69022 | 0.00261549 | 0.011928 |
| 688972    | Gypa         | -0.69126 | 3.42E-07   | 3.67E-06 |
| 24216     | Atp4a        | -0.69245 | 0.07936455 | 0.193261 |
| 64317     | Gpx3         | -0.69302 | 1.13E-32   | 7.04E-31 |
| 304131    | Map3k7c1     | -0.69512 | 1.47E-05   | 1.17E-04 |
| 680862    | Trem14       | -0.69568 | 0.2068168  | 0.384501 |
| 108349495 | LOC108349495 | -0.69747 | 0.43733105 | 0.631365 |
| 100910798 | LOC100910798 | -0.69751 | 0.40322363 | 0.600281 |
| 100362912 | Tmprss12     | -0.69775 | 0.05854551 | 0.15318  |
| 100911372 | LOC100911372 | -0.69993 | 4.85E-18   | 1.58E-16 |
| 287001    | Olr287       | -0.70032 | 0.01100792 | 0.040078 |
| 298545    | Cnksr1       | -0.70185 | 0.04342769 | 0.120971 |
| 680989    | LOC680989    | -0.70209 | 0.00547315 | 0.022359 |
| 305341    | Rhoh         | -0.70256 | 0.00831336 | 0.031761 |

|           |              |          |            |          |
|-----------|--------------|----------|------------|----------|
| 25342     | Oxtr         | -0.70302 | 0.10195359 | 0.232039 |
| 29187     | Cd69         | -0.70358 | 0.08935106 | 0.210566 |
| 681190    | Kcne5        | -0.70358 | 0.08935106 | 0.210566 |
| 307310    | Zfp474       | -0.70369 | 0.42993487 | 0.624332 |
| 24779     | Slc4a1       | -0.70731 | 1.27E-28   | 6.85E-27 |
| 246044    | Otos         | -0.7078  | 0.19314547 | 0.366892 |
| 364538    | RGD1564941   | -0.7078  | 0.19314547 | 0.366892 |
| 498232    | Lax1         | -0.7078  | 0.19314547 | 0.366892 |
| 316632    | Ndufa1011    | -0.70867 | 4.62E-60   | 5.61E-58 |
| 679994    | Hist1h3a     | -0.70906 | 0.37555416 | 0.572286 |
| 289178    | Dpt          | -0.71033 | 9.76E-18   | 3.13E-16 |
| 406160    | Btnl8        | -0.711   | 0.57704312 | 0.74507  |
| 25139     | Slc2a4       | -0.711   | 2.45E-08   | 3.10E-07 |
| 103694871 | LOC103694871 | -0.71147 | 0.03700753 | 0.106338 |
| 24618     | Reg3b        | -0.71491 | 0.00777299 | 0.030028 |
| 689695    | Prdm13       | -0.71539 | 0.26136858 | 0.450884 |
| 24981     | RT1-Db2      | -0.71579 | 0.00126466 | 0.00633  |
| 683463    | Lilrb3a      | -0.71949 | 1.09E-04   | 7.17E-04 |
| 171162    | Reg3a        | -0.71977 | 0.01144673 | 0.04139  |
| 24767     | Scn1b        | -0.71977 | 0.07375975 | 0.182911 |
| 502596    | Lrit3        | -0.72006 | 0.48409493 | 0.672472 |
| 691464    | Dhrs2        | -0.72635 | 5.58E-04   | 0.003089 |
| 25706     | Cckbr        | -0.72722 | 0.00959785 | 0.035827 |
| 108348157 | LOC108348157 | -0.73    | 1.35E-06   | 1.31E-05 |
| 498918    | Irx5         | -0.73341 | 0.19679828 | 0.371386 |
| 100362109 | LOC100362109 | -0.73427 | 0.47878605 | 0.667678 |
| 102549582 | LOC102549582 | -0.73427 | 0.47878605 | 0.667678 |
| 102550809 | Scml1        | -0.73427 | 0.47878605 | 0.667678 |
| 102552638 | LOC102552638 | -0.73427 | 0.31652434 | 0.51119  |
| 171049    | Folr1        | -0.73427 | 0.31652434 | 0.51119  |
| 292152    | Ces2i        | -0.73427 | 0.47878605 | 0.667678 |
| 292295    | Pabpc6       | -0.73427 | 0.47878605 | 0.667678 |
| 292325    | B3gnt6       | -0.73427 | 0.06094826 | 0.157969 |
| 295265    | RGD1359334   | -0.73427 | 0.47878605 | 0.667678 |
| 29567     | Hes2         | -0.73427 | 0.31652434 | 0.51119  |
| 300141    | Mov1011      | -0.73427 | 0.47878605 | 0.667678 |
| 302970    | Prss32       | -0.73427 | 0.47878605 | 0.667678 |
| 303256    | Tm4sf5       | -0.73427 | 0.47878605 | 0.667678 |
| 363267    | Daw1         | -0.73427 | 0.47878605 | 0.667678 |
| 500827    | LOC500827    | -0.73427 | 0.31652434 | 0.51119  |
| 56823     | Haa0         | -0.73427 | 0.31652434 | 0.51119  |
| 680427    | Tbr1         | -0.73427 | 0.47878605 | 0.667678 |
| 685365    | Fmo9         | -0.73427 | 0.31652434 | 0.51119  |
| 688642    | Wbp2n1       | -0.73427 | 0.47878605 | 0.667678 |
| 689093    | Upk2         | -0.73427 | 0.47878605 | 0.667678 |
| 690114    | LOC690114    | -0.73427 | 0.47878605 | 0.667678 |
| 690430    | Nr1h5        | -0.73427 | 0.47878605 | 0.667678 |
| 171055    | Cd79b        | -0.73427 | 3.63E-05   | 2.66E-04 |
| 266734    | Npas4        | -0.73427 | 0.04515025 | 0.124893 |
| 364723    | Hist1h2ao    | -0.73503 | 0.02369595 | 0.074953 |
| 29747     | Kcnmb1       | -0.73557 | 2.81E-05   | 2.12E-04 |
| 498276    | LOC498276    | -0.73693 | 0.00305479 | 0.013657 |
| 681182    | LOC681182    | -0.73809 | 0.42450809 | 0.619807 |
| 29301     | Hal          | -0.73997 | 3.39E-05   | 2.51E-04 |
| 499146    | Spib         | -0.74015 | 7.63E-09   | 1.04E-07 |
| 365367    | Cd19         | -0.74205 | 3.71E-04   | 0.002169 |

|           |              |          |            |          |
|-----------|--------------|----------|------------|----------|
| 685183    | LOC685183    | -0.74277 | 0.02295144 | 0.072973 |
| 102549344 | LOC102549344 | -0.74449 | 0.31263782 | 0.507733 |
| 25555     | Sstr4        | -0.74577 | 0.03746041 | 0.107332 |
| 289316    | Lefty2       | -0.74887 | 9.50E-09   | 1.28E-07 |
| 102548133 | LOC102548133 | -0.74936 | 0.06527725 | 0.166404 |
| 102547344 | LOC102547344 | -0.7533  | 0.25774736 | 0.446864 |
| 103690081 | LOC103690081 | -0.75376 | 0.32591761 | 0.521605 |
| 310625    | Rhbg         | -0.75404 | 0.02326308 | 0.073761 |
| 367912    | Glra4        | -0.75404 | 0.02326308 | 0.073761 |
| 312721    | Dyrk4        | -0.75769 | 0.18251825 | 0.35272  |
| 292545    | Nlrp4a       | -0.76132 | 0.29158989 | 0.487049 |
| 305264    | Ugt2b10      | -0.76149 | 0.3709149  | 0.567396 |
| 102554283 | LOC102554283 | -0.76232 | 0.18442315 | 0.35532  |
| 25572     | Tnfrsf4      | -0.76284 | 0.05622456 | 0.148217 |
| 316624    | Klhl30       | -0.76284 | 9.43E-04   | 0.004914 |
| 499065    | Tarm1        | -0.76284 | 0.17699273 | 0.345442 |
| 500445    | Fam205c      | -0.76284 | 0.05622456 | 0.148217 |
| 503103    | Sult6b1      | -0.76284 | 0.17699273 | 0.345442 |
| 683613    | Krt71        | -0.76284 | 0.17699273 | 0.345442 |
| 100360647 | LOC100360647 | -0.76393 | 0.01986663 | 0.065161 |
| 687780    | LOC687780    | -0.76393 | 0.01986663 | 0.065161 |
| 266998    | Slc13a5      | -0.76598 | 0.0258313  | 0.080045 |
| 294312    | Pi16         | -0.76774 | 3.79E-26   | 1.85E-24 |
| 311029    | Neb          | -0.76932 | 3.47E-81   | 5.47E-79 |
| 498875    | Alpk2        | -0.77143 | 3.29E-04   | 0.001946 |
| 316232    | Dlk2         | -0.77223 | 0.03000142 | 0.090151 |
| 103690642 | LOC103690642 | -0.77449 | 0.05407177 | 0.143586 |
| 24316     | Drd1         | -0.77491 | 0.10392693 | 0.235265 |
| 25007     | Tacr2        | -0.77491 | 0.25021344 | 0.438714 |
| 303589    | Efcab3       | -0.77491 | 0.25021344 | 0.438714 |
| 690470    | Accs1        | -0.77491 | 0.25021344 | 0.438714 |
| 103693936 | LOC103693936 | -0.78026 | 0.01369139 | 0.047977 |
| 316010    | Camp         | -0.78175 | 1.09E-12   | 2.34E-11 |
| 301026    | Ngp          | -0.78191 | 4.29E-37   | 3.15E-35 |
| 102555319 | LOC102555319 | -0.78228 | 1.18E-11   | 2.28E-10 |
| 102549391 | LOC102549391 | -0.78269 | 0.45181994 | 0.643743 |
| 246172    | Nexn         | -0.78367 | 9.97E-17   | 2.98E-15 |
| 102551890 | LOC102551890 | -0.7858  | 0.03836078 | 0.109352 |
| 24875     | Vipr1        | -0.7858  | 0.14308386 | 0.297428 |
| 25623     | Gys2         | -0.7858  | 0.14308386 | 0.297428 |
| 25699     | Dbh          | -0.7858  | 0.14308386 | 0.297428 |
| 498222    | LOC498222    | -0.7858  | 0.14308386 | 0.297428 |
| 501096    | Trem11       | -0.7858  | 0.14308386 | 0.297428 |
| 502832    | RGD1563231   | -0.78772 | 0.05619545 | 0.148212 |
| 290221    | Nr1          | -0.78872 | 0.02376588 | 0.075136 |
| 500377    | Tuba8        | -0.78985 | 1.13E-09   | 1.74E-08 |
| 108351033 | LOC108351033 | -0.79112 | 0.51512762 | 0.700557 |
| 102550523 | Fsbp         | -0.79377 | 0.05155729 | 0.138102 |
| 688459    | LOC688459    | -0.79567 | 1.74E-05   | 1.36E-04 |
| 103692529 | LOC103692529 | -0.798   | 0.01235664 | 0.044119 |
| 100910462 | LOC100910462 | -0.80091 | 0.45431899 | 0.645517 |
| 688800    | Aldh3b2      | -0.80261 | 0.22977894 | 0.414525 |
| 100360846 | LOC100360846 | -0.80347 | 0.39959706 | 0.596654 |
| 100909799 | LOC100909799 | -0.80466 | 0.06960951 | 0.174873 |
| 100909869 | LOC100909869 | -0.80466 | 8.15E-11   | 1.42E-09 |
| 102547056 | LOC102547056 | -0.80466 | 0.36428965 | 0.560706 |

|           |              |          |            |          |
|-----------|--------------|----------|------------|----------|
| 108353003 | LOC108353003 | -0.80466 | 0.36428965 | 0.560706 |
| 25710     | Cd3d         | -0.80466 | 0.36428965 | 0.560706 |
| 290217    | RGD1564324   | -0.80466 | 0.36428965 | 0.560706 |
| 306725    | Spata31d3    | -0.80466 | 0.36428965 | 0.560706 |
| 312272    | Mgam         | -0.80466 | 0.36428965 | 0.560706 |
| 500678    | Ccdc196      | -0.80466 | 0.36428965 | 0.560706 |
| 501617    | Ar113a       | -0.80466 | 0.36428965 | 0.560706 |
| 64669     | Olah         | -0.80466 | 0.1994903  | 0.374943 |
| 682829    | Tspo2        | -0.80466 | 0.36428965 | 0.560706 |
| 685271    | Hmgb4        | -0.80466 | 0.36428965 | 0.560706 |
| 691448    | Slc25a54     | -0.80466 | 0.11610046 | 0.255889 |
| 100910934 | LOC100910934 | -0.80536 | 0.43391684 | 0.628294 |
| 300475    | Adamts8      | -0.80732 | 8.95E-37   | 6.46E-35 |
| 499402    | RGD1562652   | -0.80795 | 0.00393029 | 0.016889 |
| 444983    | Apold1       | -0.81071 | 8.24E-33   | 5.18E-31 |
| 501679    | RGD1559662   | -0.81175 | 0.01361285 | 0.047763 |
| 313756    | Plch2        | -0.81444 | 0.03507056 | 0.101817 |
| 108351580 | LOC108351580 | -0.81445 | 0.00494877 | 0.020543 |
| 288038    | Meltf        | -0.81538 | 0.04382759 | 0.1218   |
| 114587    | Dlk1         | -0.81547 | 0.00452394 | 0.019028 |
| 688518    | Pabpc5       | -0.81673 | 0.05712907 | 0.150155 |
| 100360828 | LOC100360828 | -0.81923 | 0.03399086 | 0.099593 |
| 286934    | Havcr1       | -0.82106 | 0.35323165 | 0.550245 |
| 81639     | Alox15       | -0.82121 | 3.84E-09   | 5.52E-08 |
| 303413    | Mpo          | -0.82273 | 1.68E-14   | 4.30E-13 |
| 302400    | Cdx4         | -0.82513 | 0.509155   | 0.695564 |
| 25043     | Eln          | -0.82554 | 9.68E-58   | 1.12E-55 |
| 64507     | Fmod         | -0.82606 | 3.20E-34   | 2.10E-32 |
| 685378    | Dppa4        | -0.82691 | 0.1112887  | 0.247749 |
| 498066    | Sh3bgr       | -0.82802 | 1.31E-30   | 7.56E-29 |
| 690283    | LOC690283    | -0.8293  | 1.77E-04   | 0.001115 |
| 103689936 | Wbp1111      | -0.82934 | 4.08E-56   | 4.42E-54 |
| 297412    | Dusp11       | -0.83169 | 7.91E-08   | 9.38E-07 |
| 313776    | Perml        | -0.83782 | 2.16E-06   | 2.02E-05 |
| 298485    | Ermap        | -0.83962 | 1.32E-04   | 8.55E-04 |
| 103694912 | LOC103694912 | -0.84111 | 0.03009399 | 0.090344 |
| 301097    | Vwa5a        | -0.84314 | 4.10E-258  | #####    |
| 100361582 | Ttc24        | -0.8453  | 0.28324153 | 0.477016 |
| 102555308 | LOC102555308 | -0.8453  | 0.28324153 | 0.477016 |
| 24414     | Grml         | -0.8453  | 0.06308316 | 0.162387 |
| 29641     | Adam7        | -0.8453  | 0.28324153 | 0.477016 |
| 296483    | Lkaear1      | -0.8453  | 0.28324153 | 0.477016 |
| 299582    | Olr1088      | -0.8453  | 0.28324153 | 0.477016 |
| 498497    | Tppp2        | -0.8453  | 0.06308316 | 0.162387 |
| 500945    | RGD1561795   | -0.8453  | 0.28324153 | 0.477016 |
| 79211     | Gabrg3       | -0.8453  | 0.12912927 | 0.276353 |
| 103690166 | LOC103690166 | -0.84748 | 0.17048058 | 0.336352 |
| 360737    | Tbx1         | -0.85575 | 4.79E-07   | 5.01E-06 |
| 290880    | Adprh11      | -0.85758 | 8.37E-05   | 5.65E-04 |
| 691688    | Eid3         | -0.85859 | 0.05002866 | 0.135014 |
| 102549007 | LOC102549007 | -0.85865 | 0.27363941 | 0.465683 |
| 499189    | Wdr93        | -0.8598  | 0.0217187  | 0.069894 |
| 680899    | Efcab12      | -0.8598  | 0.10459197 | 0.236251 |
| 684480    | Btnl9        | -0.8598  | 0.10459197 | 0.236251 |
| 294279    | Col11a2      | -0.86028 | 1.45E-49   | 1.39E-47 |
| 25732     | Acp5         | -0.86062 | 3.05E-20   | 1.10E-18 |



|           |              |          |            |          |
|-----------|--------------|----------|------------|----------|
| 108348181 | LOC108348181 | -0.86135 | 0.06644482 | 0.168681 |
| 29609     | Pitx3        | -0.86238 | 0.00936856 | 0.035116 |
| 310694    | Fcrl2        | -0.86857 | 7.35E-06   | 6.19E-05 |
| 100363171 | LOC100363171 | -0.87178 | 0.00127217 | 0.006363 |
| 102550225 | LOC102550225 | -0.87178 | 0.61556824 | 0.775415 |
| 294853    | Krt18        | -0.87178 | 0.22327291 | 0.406077 |
| 298543    | Crybg2       | -0.87178 | 0.22327291 | 0.406077 |
| 688126    | LOC688126    | -0.87178 | 0.08500974 | 0.203752 |
| 100911914 | LOC100911914 | -0.88166 | 0.1034709  | 0.234456 |
| 499463    | RGD1561777   | -0.88712 | 0.19727062 | 0.371908 |
| 102550714 | LOC102550714 | -0.88795 | 0.02313956 | 0.073449 |
| 25608     | Lep          | -0.89039 | 0.17769629 | 0.346336 |
| 497840    | Cps1         | -0.89039 | 0.17769629 | 0.346336 |
| 100360316 | LOC100360316 | -0.89162 | 0.07010002 | 0.17585  |
| 103689962 | LOC103689962 | -0.89193 | 0.28813909 | 0.482937 |
| 84387     | Pglyrp1      | -0.89494 | 1.20E-05   | 9.68E-05 |
| 498287    | Slamf6       | -0.89847 | 0.07724871 | 0.189271 |
| 363088    | Ccnb2        | -0.8989  | 0.00124577 | 0.00625  |
| 289322    | RGD1564463   | -0.90134 | 0.29901802 | 0.495545 |
| 108349804 | LOC108349804 | -0.90267 | 0.47674315 | 0.666146 |
| 298559    | Tcea3        | -0.90333 | 4.83E-08   | 5.87E-07 |
| 313891    | RGD1304963   | -0.9042  | 0.03804589 | 0.108682 |
| 103690105 | LOC103690105 | -0.9053  | 4.54E-07   | 4.77E-06 |
| 100911917 | LOC100911917 | -0.90805 | 2.66E-14   | 6.73E-13 |
| 108348209 | LOC108348209 | -0.91115 | 0.21897452 | 0.400612 |
| 50565     | Hspb7        | -0.9187  | 1.29E-09   | 1.96E-08 |
| 140939    | Trim63       | -0.91883 | 1.11E-06   | 1.10E-05 |
| 29191     | Tac3         | -0.9193  | 0.02120734 | 0.068631 |
| 103690033 | LOC103690033 | -0.92057 | 0.17180591 | 0.338476 |
| 100909879 | LOC100909879 | -0.92145 | 0.2831327  | 0.47698  |
| 83504     | K1           | -0.92331 | 0.09293066 | 0.216815 |
| 691392    | LOC691392    | -0.92567 | 0.0663662  | 0.168503 |
| 313755    | Mme11        | -0.92692 | 0.01445299 | 0.050229 |
| 100360218 | LOC100360218 | -0.92735 | 1.84E-05   | 1.44E-04 |
| 108350572 | LOC108350572 | -0.92789 | 0.2585714  | 0.447885 |
| 100361098 | LOC100361098 | -0.92904 | 0.55937942 | 0.735172 |
| 300795    | Pclaf        | -0.93019 | 0.01194955 | 0.042915 |
| 315609    | Cd3e         | -0.93019 | 0.07550161 | 0.18614  |
| 291312    | Ucma         | -0.93484 | 3.47E-05   | 2.56E-04 |
| 688109    | Tmem239      | -0.93591 | 0.06152654 | 0.159208 |
| 407762    | Krt85        | -0.93859 | 0.15882675 | 0.319887 |
| 292547    | Vom2r28      | -0.94072 | 0.57977222 | 0.747327 |
| 293140    | Olr35        | -0.9484  | 0.03376485 | 0.099038 |
| 305423    | Clqtnf7      | -0.95147 | 7.45E-04   | 0.004004 |
| 108353096 | LOC108353096 | -0.95628 | 0.41816835 | 0.614034 |
| 100910173 | LOC100910173 | -0.95666 | 0.45756803 | 0.648874 |
| 102554501 | LOC102554501 | -0.95666 | 0.01881776 | 0.062376 |
| 302845    | Magea11      | -0.95666 | 0.01881776 | 0.062376 |
| 102556277 | LOC102556277 | -0.95696 | 0.25802053 | 0.447256 |
| 363111    | Ripply2      | -0.95883 | 0.01552601 | 0.053393 |
| 685961    | Sirpb211     | -0.9628  | 0.35493226 | 0.551766 |
| 689118    | 14-Sep       | -0.96309 | 0.37193546 | 0.568454 |
| 108348296 | LOC108348296 | -0.96503 | 0.55211612 | 0.732399 |
| 680931    | Bmp8a        | -0.96528 | 0.21043906 | 0.389146 |
| 108348827 | LOC108348827 | -0.96845 | 0.42471338 | 0.620011 |
| 298111    | LOC298111    | -0.9687  | 0.24236443 | 0.430421 |

|           |              |          |            |          |
|-----------|--------------|----------|------------|----------|
| 306616    | Myom2        | -0.97351 | 1.57E-80   | 2.43E-78 |
| 102551433 | LOC102551433 | -0.97385 | 0.00164637 | 0.007968 |
| 315567    | Panx3        | -0.97459 | 0.00137063 | 0.006793 |
| 113902    | Ces1d        | -0.97655 | 7.93E-04   | 0.004228 |
| 100911492 | LOC100911492 | -0.98218 | 4.81E-04   | 0.002708 |
| 408216    | Senp17       | -0.98722 | 0.33049772 | 0.52681  |
| 80878     | Slc16a3      | -0.98965 | 1.02E-09   | 1.58E-08 |
| 108348117 | LOC108348117 | -0.99003 | 0.15943121 | 0.320833 |
| 108351411 | LOC108351411 | -0.99012 | 0.31650806 | 0.511315 |
| 100911244 | LOC100911244 | -0.99015 | 0.56239935 | 0.733723 |
| 680837    | LOC680837    | -0.99022 | 0.56043838 | 0.735802 |
| 298107    | Mup5         | -0.99067 | 0.01604267 | 0.054784 |
| 307851    | Clec18a      | -0.99251 | 0.15613187 | 0.315796 |
| 108352197 | LOC108352197 | -0.99421 | 0.12543159 | 0.270752 |
| 103689996 | LOC103689996 | -0.997   | 0.00491252 | 0.02041  |
| 100359483 | Cylc1        | -0.99731 | 0.56104147 | 0.734341 |
| 100359720 | Ankrd31      | -0.99731 | 0.24499566 | 0.433195 |
| 100359907 | LOC100359907 | -0.99731 | 0.56104147 | 0.734341 |
| 100360091 | Tmem207      | -0.99731 | 0.41103384 | 0.607209 |
| 100361588 | Wdr95        | -0.99731 | 0.41103384 | 0.607209 |
| 100910060 | LOC100910060 | -0.99731 | 0.56104147 | 0.734341 |
| 100910410 | LOC100910410 | -0.99731 | 0.56104147 | 0.734341 |
| 102546514 | LOC102546514 | -0.99731 | 0.19366412 | 0.367455 |
| 102547033 | LOC102547033 | -0.99731 | 0.56104147 | 0.734341 |
| 102547119 | LOC102547119 | -0.99731 | 0.56104147 | 0.734341 |
| 102551428 | LOC102551428 | -0.99731 | 0.56104147 | 0.734341 |
| 102551453 | LOC102551453 | -0.99731 | 0.03609194 | 0.104179 |
| 102552195 | LOC102552195 | -0.99731 | 0.39957703 | 0.596671 |
| 102552569 | LOC102552569 | -0.99731 | 0.56104147 | 0.734341 |
| 102552627 | LOC102552627 | -0.99731 | 0.56104147 | 0.734341 |
| 103691634 | LOC103691634 | -0.99731 | 0.56104147 | 0.734341 |
| 103693129 | LOC103693129 | -0.99731 | 0.19366412 | 0.367455 |
| 103693291 | Nhlrc4       | -0.99731 | 0.31401506 | 0.508755 |
| 108348129 | LOC108348129 | -0.99731 | 0.56104147 | 0.734341 |
| 108348134 | LOC108348134 | -0.99731 | 0.41103384 | 0.607209 |
| 108350819 | LOC108350819 | -0.99731 | 0.31401506 | 0.508755 |
| 108352186 | LOC108352186 | -0.99731 | 0.56104147 | 0.734341 |
| 108352306 | Smim34a      | -0.99731 | 0.56104147 | 0.734341 |
| 108353095 | LOC108353095 | -0.99731 | 0.56104147 | 0.734341 |
| 114598    | Clec4f       | -0.99731 | 0.15448212 | 0.313207 |
| 116556    | Gucy2f       | -0.99731 | 0.56104147 | 0.734341 |
| 117130    | Grifin       | -0.99731 | 0.01365446 | 0.047865 |
| 171375    | Atp5f1       | -0.99731 | 5.89E-19   | 2.01E-17 |
| 171516    | Akr1c3       | -0.99731 | 0.41103384 | 0.607209 |
| 171551    | Cxcl3        | -0.99731 | 0.31401506 | 0.508755 |
| 171573    | LOC171573    | -0.99731 | 0.41103384 | 0.607209 |
| 24152     | Asip         | -0.99731 | 0.56104147 | 0.734341 |
| 24291     | Ctrb1        | -0.99731 | 0.41103384 | 0.607209 |
| 24391     | Gh1          | -0.99731 | 0.41103384 | 0.607209 |
| 246238    | Bpifal       | -0.99731 | 0.56104147 | 0.734341 |
| 24817     | Hnf1a        | -0.99731 | 0.56104147 | 0.734341 |
| 25048     | Klkb1        | -0.99731 | 0.56104147 | 0.734341 |
| 25195     | Drd5         | -0.99731 | 0.56104147 | 0.734341 |
| 25268     | Proc         | -0.99731 | 0.31401506 | 0.508755 |
| 252856    | Tcf21        | -0.99731 | 0.31401506 | 0.508755 |
| 25320     | Gast         | -0.99731 | 0.31401506 | 0.508755 |

|        |            |          |            |          |
|--------|------------|----------|------------|----------|
| 25534  | Prph2      | -0.99731 | 0.56104147 | 0.734341 |
| 25723  | Hcrt       | -0.99731 | 0.56104147 | 0.734341 |
| 266707 | Gjd4       | -0.99731 | 0.56104147 | 0.734341 |
| 286954 | Ugt2b1     | -0.99731 | 0.56104147 | 0.734341 |
| 287034 | Tnfrsf17   | -0.99731 | 0.24499566 | 0.433195 |
| 287425 | Alox12b    | -0.99731 | 0.56104147 | 0.734341 |
| 287673 | Ccr7       | -0.99731 | 0.15448212 | 0.313207 |
| 287935 | RGD1308065 | -0.99731 | 0.24499566 | 0.433195 |
| 288375 | Cd209a     | -0.99731 | 0.56104147 | 0.734341 |
| 289254 | Olr1592    | -0.99731 | 0.56104147 | 0.734341 |
| 290670 | Tssk6      | -0.99731 | 0.02436356 | 0.076581 |
| 291087 | Serpinc6e  | -0.99731 | 0.41103384 | 0.607209 |
| 29235  | Galr3      | -0.99731 | 0.56104147 | 0.734341 |
| 29251  | F2         | -0.99731 | 0.31401506 | 0.508755 |
| 292706 | Tesc1      | -0.99731 | 0.24499566 | 0.433195 |
| 29319  | Gif        | -0.99731 | 0.56104147 | 0.734341 |
| 293303 | Olr156     | -0.99731 | 0.41103384 | 0.607209 |
| 294301 | Armc12     | -0.99731 | 0.41103384 | 0.607209 |
| 29475  | Dio3       | -0.99731 | 0.24499566 | 0.433195 |
| 295010 | Pabpc41    | -0.99731 | 0.10014493 | 0.22888  |
| 295071 | RGD1559622 | -0.99731 | 0.56104147 | 0.734341 |
| 29538  | Ccl20      | -0.99731 | 0.56104147 | 0.734341 |
| 295710 | Olr439     | -0.99731 | 0.56104147 | 0.734341 |
| 295929 | Mybpc3     | -0.99731 | 0.56104147 | 0.734341 |
| 296730 | Crygn      | -0.99731 | 0.31401506 | 0.508755 |
| 298306 | Cdcp2      | -0.99731 | 0.41103384 | 0.607209 |
| 301120 | Acsbg2     | -0.99731 | 0.56104147 | 0.734341 |
| 301510 | Rufy4      | -0.99731 | 0.15448212 | 0.313207 |
| 302962 | Zscan10    | -0.99731 | 0.41103384 | 0.607209 |
| 303205 | Slc5a10    | -0.99731 | 0.41103384 | 0.607209 |
| 303252 | Alox12e    | -0.99731 | 0.31401506 | 0.508755 |
| 304103 | Olig2      | -0.99731 | 0.22643352 | 0.41016  |
| 305719 | Fezf2      | -0.99731 | 0.56104147 | 0.734341 |
| 305908 | Rnf17      | -0.99731 | 0.56104147 | 0.734341 |
| 307614 | Cdh16      | -0.99731 | 0.56104147 | 0.734341 |
| 310782 | Mybph1     | -0.99731 | 0.24499566 | 0.433195 |
| 313681 | Lrrc38     | -0.99731 | 0.15448212 | 0.313207 |
| 314959 | RGD1359449 | -0.99731 | 0.56104147 | 0.734341 |
| 315497 | Tbx20      | -0.99731 | 0.56104147 | 0.734341 |
| 363654 | Tmigd1     | -0.99731 | 0.56104147 | 0.734341 |
| 363866 | Rxfp2      | -0.99731 | 0.15448212 | 0.313207 |
| 364883 | Cdx1       | -0.99731 | 0.31401506 | 0.508755 |
| 365153 | Tcte3      | -0.99731 | 0.41103384 | 0.607209 |
| 365332 | Olr152     | -0.99731 | 0.56104147 | 0.734341 |
| 366275 | Ptk6       | -0.99731 | 0.56104147 | 0.734341 |
| 366347 | Cfap206    | -0.99731 | 0.15448212 | 0.313207 |
| 366377 | Olr854     | -0.99731 | 0.31401506 | 0.508755 |
| 367415 | Pla2g12b   | -0.99731 | 0.56104147 | 0.734341 |
| 367994 | Upk3b11    | -0.99731 | 0.56104147 | 0.734341 |
| 405335 | Olr1366    | -0.99731 | 0.41103384 | 0.607209 |
| 408213 | Tmprss11c  | -0.99731 | 0.56104147 | 0.734341 |
| 408225 | Wfdc6b     | -0.99731 | 0.56104147 | 0.734341 |
| 494249 | Vomlr87    | -0.99731 | 0.6810448  | 0.821958 |
| 494303 | Vomlr42    | -0.99731 | 0.56104147 | 0.734341 |
| 498231 | LOC498231  | -0.99731 | 0.15448212 | 0.313207 |
| 498316 | LOC498316  | -0.99731 | 0.56104147 | 0.734341 |

|           |              |          |            |          |
|-----------|--------------|----------|------------|----------|
| 498534    | RGD1565212   | -0.99731 | 0.56104147 | 0.734341 |
| 498985    | Themis       | -0.99731 | 0.56104147 | 0.734341 |
| 499135    | MGC114499    | -0.99731 | 0.56104147 | 0.734341 |
| 499279    | Tex36        | -0.99731 | 0.56104147 | 0.734341 |
| 499334    | RGD1560242   | -0.99731 | 0.24499566 | 0.433195 |
| 499618    | Ccdc169      | -0.99731 | 0.56104147 | 0.734341 |
| 499993    | Tex47        | -0.99731 | 0.56104147 | 0.734341 |
| 500761    | Apof         | -0.99731 | 0.56104147 | 0.734341 |
| 501797    | Cd209e       | -0.99731 | 0.41103384 | 0.607209 |
| 502960    | RGD1561827   | -0.99731 | 0.6810448  | 0.821958 |
| 502963    | RGD1564637   | -0.99731 | 0.6810448  | 0.821958 |
| 50549     | Cyp4a1       | -0.99731 | 0.41103384 | 0.607209 |
| 54246     | Cyp2f4       | -0.99731 | 0.31401506 | 0.508755 |
| 59305     | Tcam1        | -0.99731 | 0.56104147 | 0.734341 |
| 60583     | Ivl          | -0.99731 | 0.41103384 | 0.607209 |
| 64564     | Bbox1        | -0.99731 | 0.15448212 | 0.313207 |
| 65048     | Fat2         | -0.99731 | 0.41103384 | 0.607209 |
| 66014     | Impg1        | -0.99731 | 0.31401506 | 0.508755 |
| 680378    | Prss47       | -0.99731 | 0.41103384 | 0.607209 |
| 680489    | Cldn34e      | -0.99731 | 0.41103384 | 0.607209 |
| 680640    | Ceacam19     | -0.99731 | 0.56104147 | 0.734341 |
| 680794    | Timm8a2      | -0.99731 | 0.41103384 | 0.607209 |
| 682329    | Nkx3-2       | -0.99731 | 0.41103384 | 0.607209 |
| 685360    | En1          | -0.99731 | 0.24499566 | 0.433195 |
| 685758    | A4gnt        | -0.99731 | 0.56104147 | 0.734341 |
| 685999    | Uroc1        | -0.99731 | 0.56104147 | 0.734341 |
| 688333    | Ptchd3       | -0.99731 | 0.24499566 | 0.433195 |
| 688422    | Dydc2        | -0.99731 | 0.56104147 | 0.734341 |
| 688536    | Glyat13      | -0.99731 | 0.56104147 | 0.734341 |
| 689561    | LOC689561    | -0.99731 | 0.56104147 | 0.734341 |
| 690028    | I131         | -0.99731 | 0.56104147 | 0.734341 |
| 690483    | LOC690483    | -0.99731 | 0.56104147 | 0.734341 |
| 690691    | Vom2r16      | -0.99731 | 0.56104147 | 0.734341 |
| 691189    | LOC691189    | -0.99731 | 0.56104147 | 0.734341 |
| 311639    | Zfp334       | -0.99731 | 0.06603041 | 0.167852 |
| 100909725 | LOC100909725 | -0.99784 | 0.03258519 | 0.096319 |
| 363276    | Snorc        | -1.00729 | 6.02E-07   | 6.21E-06 |
| 103692758 | LOC103692758 | -1.00753 | 0.11880301 | 0.260279 |
| 103694169 | LOC103694169 | -1.0077  | 2.69E-06   | 2.48E-05 |
| 103692344 | LOC103692344 | -1.01472 | 0.35115995 | 0.547914 |
| 108350550 | LOC108350550 | -1.01632 | 2.46E-04   | 0.001499 |
| 108350604 | LOC108350604 | -1.01976 | 0.06071244 | 0.157465 |
| 103690190 | LOC103690190 | -1.02143 | 0.00428229 | 0.018168 |
| 29462     | Avpr1b       | -1.023   | 0.00358331 | 0.015634 |
| 295538    | Depdc1       | -1.02479 | 0.00221153 | 0.010306 |
| 102547798 | LOC102547798 | -1.03486 | 0.19530675 | 0.369633 |
| 108353206 | LOC108353206 | -1.04131 | 0.0321689  | 0.095355 |
| 295426    | Myoz2        | -1.04915 | 7.79E-05   | 5.31E-04 |
| 100911669 | LOC100911669 | -1.04985 | 0.25695692 | 0.446021 |
| 29385     | Cxcr2        | -1.05464 | 1.59E-04   | 0.00101  |
| 102554581 | LOC102554581 | -1.06059 | 0.35065321 | 0.547303 |
| 103690296 | LOC103690296 | -1.06144 | 0.03800121 | 0.108587 |
| 25172     | Gata1        | -1.06144 | 0.00334334 | 0.014732 |
| 29387     | Pla2g2c      | -1.06144 | 0.03800121 | 0.108587 |
| 301711    | Lrrc30       | -1.06144 | 0.03800121 | 0.108587 |
| 363899    | RGD1562525   | -1.06555 | 0.28534548 | 0.479563 |

|           |              |          |            |          |
|-----------|--------------|----------|------------|----------|
| 100362169 | Fam170b      | -1.06711 | 0.00289265 | 0.01303  |
| 690158    | Fpr2         | -1.06762 | 0.00601143 | 0.024154 |
| 295091    | Vom2r46      | -1.0677  | 0.52872073 | 0.711524 |
| 100910503 | LOC100910503 | -1.07531 | 0.50911764 | 0.695563 |
| 100910446 | LOC100910446 | -1.0766  | 1.84E-11   | 3.48E-10 |
| 367316    | Aqp12a       | -1.07977 | 0.00848182 | 0.03232  |
| 102546754 | LOC102546754 | -1.08149 | 0.03080161 | 0.092033 |
| 108348326 | LOC108348326 | -1.08202 | 4.40E-13   | 9.77E-12 |
| 360478    | Smim22       | -1.08477 | 0.06942366 | 0.174556 |
| 367318    | Ano7         | -1.08477 | 0.06942366 | 0.174556 |
| 29275     | Actc1        | -1.08604 | 0.06834725 | 0.172567 |
| 100361261 | Gzmb13       | -1.08657 | 0.07776222 | 0.190235 |
| 501233    | LOC501233    | -1.08657 | 0.44501231 | 0.637765 |
| 313220    | Acnat2       | -1.08714 | 0.11281603 | 0.250593 |
| 680615    | Hist1h2ak    | -1.09082 | 0.49406371 | 0.680956 |
| 365949    | LOC365949    | -1.09155 | 1.25E-13   | 2.95E-12 |
| 691312    | Cyp4f37      | -1.09553 | 0.03720563 | 0.106746 |
| 498274    | Spata46      | -1.09684 | 0.0852715  | 0.204173 |
| 29576     | Wisp2        | -1.10859 | 1.18E-11   | 2.27E-10 |
| 499796    | LOC499796    | -1.10881 | 0.13908016 | 0.291523 |
| 365550    | Vpreb3       | -1.11086 | 6.89E-05   | 4.75E-04 |
| 292279    | Nox3         | -1.11278 | 0.10504802 | 0.237    |
| 302619    | Gpr143       | -1.11278 | 0.10504802 | 0.237    |
| 364039    | Mael         | -1.11278 | 0.10504802 | 0.237    |
| 500336    | Clec1b       | -1.11278 | 0.10504802 | 0.237    |
| 170840    | Slc40a1      | -1.11786 | 3.17E-13   | 7.14E-12 |
| 29155     | Capn3        | -1.1193  | 8.08E-10   | 1.26E-08 |
| 246334    | Tp63         | -1.11945 | 0.06853224 | 0.172851 |
| 100125384 | LOC100125384 | -1.12376 | 0.27850064 | 0.471554 |
| 100359675 | Alpp         | -1.12376 | 0.12538077 | 0.270704 |
| 360742    | Dgcr2        | -1.12401 | 2.29E-05   | 1.75E-04 |
| 685216    | Wfdc10       | -1.13481 | 0.12985029 | 0.277366 |
| 685788    | LOC685788    | -1.13612 | 0.12932051 | 0.276638 |
| 500823    | Ccdc38       | -1.13956 | 0.03444495 | 0.100491 |
| 303468    | Sgca         | -1.14316 | 2.80E-06   | 2.57E-05 |
| 315111    | Apol2        | -1.1441  | 0.00257469 | 0.01177  |
| 102554207 | LOC102554207 | -1.14533 | 0.03193412 | 0.094762 |
| 287382    | Mfap4        | -1.15085 | 7.38E-71   | 1.02E-68 |
| 362662    | Rbp7         | -1.16081 | 5.01E-04   | 0.002809 |
| 500023    | Dlx6         | -1.16563 | 0.16180557 | 0.324241 |
| 108353015 | LOC108353015 | -1.16723 | 0.16111267 | 0.323278 |
| 25386     | Aqp2         | -1.16723 | 0.16111267 | 0.323278 |
| 303533    | Klh110       | -1.16723 | 0.16111267 | 0.323278 |
| 500319    | Tuba3a       | -1.16723 | 0.16111267 | 0.323278 |
| 500415    | Lrrc69       | -1.16723 | 0.16111267 | 0.323278 |
| 500946    | Heph11       | -1.16723 | 0.16111267 | 0.323278 |
| 365368    | I127         | -1.16775 | 0.21634699 | 0.397677 |
| 171390    | Nlrp6        | -1.17788 | 0.13956419 | 0.292216 |
| 299606    | Elane        | -1.17788 | 2.02E-06   | 1.90E-05 |
| 303373    | Unc45b       | -1.18286 | 3.69E-07   | 3.94E-06 |
| 103689995 | LOC103689995 | -1.1849  | 0.01943662 | 0.063966 |
| 291084    | Nqo2         | -1.18595 | 1.58E-59   | 1.90E-57 |
| 100361756 | LOC100361756 | -1.18845 | 0.43282009 | 0.62723  |
| 100909701 | Ccer2        | -1.18995 | 0.00729127 | 0.028444 |
| 102551468 | LOC102551468 | -1.19337 | 0.20082217 | 0.376369 |
| 102546845 | LOC102546845 | -1.20328 | 0.20580119 | 0.383099 |

|           |              |          |            |          |
|-----------|--------------|----------|------------|----------|
| 499923    | Efcab8       | -1.20376 | 1.57E-07   | 1.78E-06 |
| 108353264 | LOC108353264 | -1.2197  | 0.20064037 | 0.376306 |
| 24236     | C4bpb        | -1.2197  | 0.07032518 | 0.176206 |
| 29190     | Pdyn         | -1.2197  | 0.02665343 | 0.082092 |
| 297748    | Jph1         | -1.2197  | 1.94E-09   | 2.89E-08 |
| 298397    | Olr833       | -1.2197  | 0.20064037 | 0.376306 |
| 310443    | Gpr87        | -1.2197  | 0.20064037 | 0.376306 |
| 310632    | Rab25        | -1.2197  | 0.20064037 | 0.376306 |
| 405020    | Olr1353      | -1.2197  | 0.20064037 | 0.376306 |
| 500052    | Hyal5        | -1.2197  | 0.20064037 | 0.376306 |
| 502759    | Nobox        | -1.2197  | 0.20064037 | 0.376306 |
| 59112     | Hand1        | -1.2197  | 0.20064037 | 0.376306 |
| 64574     | Chrna10      | -1.2197  | 0.20064037 | 0.376306 |
| 678708    | LOC678708    | -1.2197  | 0.20064037 | 0.376306 |
| 688605    | Cc11         | -1.2197  | 0.20064037 | 0.376306 |
| 690116    | Rgs11        | -1.2197  | 0.20064037 | 0.376306 |
| 690139    | Rbm24        | -1.2197  | 5.19E-05   | 3.68E-04 |
| 690813    | LOC690813    | -1.2197  | 0.02665343 | 0.082092 |
| 689713    | LOC689713    | -1.23177 | 0.49058975 | 0.678032 |
| 100909409 | LOC100909409 | -1.23745 | 0.04603752 | 0.126758 |
| 317308    | Zfp3613      | -1.24594 | 0.11675132 | 0.256966 |
| 286965    | Abra         | -1.24923 | 3.34E-11   | 6.11E-10 |
| 85258     | Cnga4        | -1.24929 | 0.00169487 | 0.008182 |
| 102554312 | LOC102554312 | -1.25245 | 0.16192809 | 0.324452 |
| 361003    | Dupd1        | -1.25256 | 2.15E-05   | 1.65E-04 |
| 102552901 | LOC102552901 | -1.25824 | 0.10019573 | 0.228969 |
| 102547755 | Dbf4b        | -1.26034 | 0.0855707  | 0.204633 |
| 171045    | Mmp3         | -1.26034 | 0.0855707  | 0.204633 |
| 365778    | LOC365778    | -1.26034 | 0.01504174 | 0.051981 |
| 499719    | Stpg2        | -1.26034 | 0.01504174 | 0.051981 |
| 60332     | Akap14       | -1.26034 | 0.0855707  | 0.204633 |
| 79110     | Mepe         | -1.26034 | 0.01504174 | 0.051981 |
| 294071    | Hells        | -1.26672 | 4.00E-06   | 3.56E-05 |
| 84576     | Hdac11       | -1.27241 | 0.39613566 | 0.59344  |
| 24631     | Rhox5        | -1.27741 | 0.03864958 | 0.110093 |
| 65204     | Cnn1         | -1.27951 | 1.81E-12   | 3.76E-11 |
| 315962    | Ky           | -1.28134 | 3.55E-16   | 1.01E-14 |
| 102555476 | LOC102555476 | -1.28548 | 0.04630992 | 0.127397 |
| 309374    | Ankrd2       | -1.28681 | 0.01798735 | 0.060142 |
| 25334     | Bhlha15      | -1.28946 | 0.00252864 | 0.01159  |
| 682419    | LOC682419    | -1.29009 | 0.42889608 | 0.624156 |
| 81687     | Mmp9         | -1.31189 | 8.93E-30   | 5.01E-28 |
| 108351743 | LOC108351743 | -1.31696 | 0.06745291 | 0.170648 |
| 65133     | Aqp3         | -1.31886 | 0.02383806 | 0.075314 |
| 100911186 | LOC100911186 | -1.31917 | 4.95E-14   | 1.22E-12 |
| 100190895 | Rhox3        | -1.31923 | 0.25021497 | 0.438434 |
| 100362644 | Slc2a7       | -1.31923 | 0.02146778 | 0.069327 |
| 100911278 | LOC100911278 | -1.31923 | 0.25021497 | 0.438434 |
| 171059    | Wfdc18       | -1.31923 | 0.25021497 | 0.438434 |
| 289439    | Lpcat2b      | -1.31923 | 0.25021497 | 0.438434 |
| 294210    | Trim10       | -1.31923 | 2.77E-04   | 0.001667 |
| 29679     | Cst8         | -1.31923 | 0.25021497 | 0.438434 |
| 301168    | Efhb         | -1.31923 | 0.10392806 | 0.235226 |
| 366598    | Ferd31       | -1.31923 | 0.25021497 | 0.438434 |
| 406226    | Krt77        | -1.31923 | 0.10392806 | 0.235226 |
| 414826    | Tesb         | -1.31923 | 0.02146778 | 0.069327 |



|           |              |          |            |          |
|-----------|--------------|----------|------------|----------|
| 498992    | Vnn3         | -1.31923 | 0.25021497 | 0.438434 |
| 60394     | Olig1        | -1.31923 | 0.25021497 | 0.438434 |
| 63850     | Prlh         | -1.31923 | 0.25021497 | 0.438434 |
| 685513    | Gngl4        | -1.31923 | 0.25021497 | 0.438434 |
| 690288    | Dnah14       | -1.31923 | 0.25021497 | 0.438434 |
| 24585     | Myl3         | -1.32563 | 4.10E-08   | 5.05E-07 |
| 396527    | Ugt1a2       | -1.33015 | 0.14428217 | 0.298647 |
| 29266     | Mcpt2        | -1.33742 | 0.23646043 | 0.42337  |
| 687679    | LOC687679    | -1.33992 | 0.00115751 | 0.005863 |
| 690729    | Vom2r19      | -1.34139 | 0.12820809 | 0.274907 |
| 103691235 | LOC103691235 | -1.35094 | 0.0120205  | 0.043129 |
| 24296     | Cyp1a1       | -1.35988 | 0.02554418 | 0.079362 |
| 301039    | Susd5        | -1.36856 | 7.94E-09   | 1.09E-07 |
| 102555557 | LOC102555557 | -1.37569 | 1.27E-12   | 2.70E-11 |
| 102557303 | LOC102557303 | -1.37582 | 0.05553119 | 0.146704 |
| 108352185 | C10H10orf95  | -1.3817  | 0.36016068 | 0.556939 |
| 296153    | Tmc2         | -1.38433 | 0.00186429 | 0.008903 |
| 103692784 | LOC103692784 | -1.3854  | 0.15059207 | 0.307234 |
| 108349865 | LOC108349865 | -1.38687 | 0.01444255 | 0.050202 |
| 100911527 | LOC100911527 | -1.39941 | 0.30078454 | 0.497649 |
| 102550585 | LOC102550585 | -1.41121 | 0.025606   | 0.079502 |
| 102554647 | Pasd1        | -1.41234 | 0.12548313 | 0.270694 |
| 301611    | Olr1349      | -1.41234 | 0.12548313 | 0.270694 |
| 494343    | Tacstd2      | -1.41234 | 0.12548313 | 0.270694 |
| 64190     | Fxyd4        | -1.41234 | 0.12548313 | 0.270694 |
| 682010    | MGC93861     | -1.41234 | 0.12548313 | 0.270694 |
| 691636    | Tex22        | -1.41234 | 0.12548313 | 0.270694 |
| 103690046 | LOC103690046 | -1.42929 | 0.02147167 | 0.069322 |
| 361080    | Ppial4g      | -1.44007 | 0.02017693 | 0.066003 |
| 289482    | Naal1        | -1.44298 | 1.45E-08   | 1.92E-07 |
| 317608    | Gpr101       | -1.45416 | 0.08302541 | 0.20018  |
| 366142    | Elf5         | -1.45674 | 0.06593166 | 0.167691 |
| 103693370 | Gsg112       | -1.45826 | 0.0877199  | 0.207867 |
| 297339    | Capg         | -1.46306 | 1.16E-263  | #####    |
| 100360575 | LOC100360575 | -1.46346 | 0.008172   | 0.031302 |
| 29195     | Chad         | -1.47061 | 1.17E-22   | 4.79E-21 |
| 113917    | Lenep        | -1.47264 | 0.14377906 | 0.298254 |
| 499461    | Wisp3        | -1.47558 | 0.00159827 | 0.007775 |
| 24610     | Odf1         | -1.48273 | 0.03554671 | 0.102987 |
| 25357     | Thrsp        | -1.48273 | 2.62E-07   | 2.86E-06 |
| 301378    | Mettl21c     | -1.48273 | 0.03554671 | 0.102987 |
| 100359528 | RGD1565987   | -1.4865  | 2.02E-06   | 1.90E-05 |
| 680665    | Fcrl1        | -1.49335 | 0.00874547 | 0.033093 |
| 103689937 | LOC103689937 | -1.4949  | 5.25E-04   | 0.002929 |
| 294097    | Lipo1        | -1.49731 | 0.17404348 | 0.341401 |
| 57809     | Rpl35a       | -1.50552 | 2.05E-10   | 3.46E-09 |
| 287099    | Cldn9        | -1.50827 | 0.09618305 | 0.222253 |
| 100910755 | LOC100910755 | -1.51964 | 8.96E-05   | 6.01E-04 |
| 171333    | I112rb1      | -1.52087 | 0.00604359 | 0.02427  |
| 690861    | Stk33        | -1.52087 | 0.00604359 | 0.02427  |
| 102549061 | LOC102549061 | -1.52327 | 0.00745212 | 0.028935 |
| 308056    | RGD1311933   | -1.52338 | 0.3307172  | 0.527072 |
| 686087    | LOC686087    | -1.54302 | 7.35E-07   | 7.47E-06 |
| 501129    | Tmem182      | -1.5475  | 1.52E-07   | 1.72E-06 |
| 304447    | RGD1559821   | -1.5556  | 0.01170622 | 0.042153 |
| 295261    | Tmod4        | -1.56136 | 2.69E-32   | 1.65E-30 |

|           |              |          |            |          |
|-----------|--------------|----------|------------|----------|
| 299266    | Asb2         | -1.56288 | 1.89E-24   | 8.48E-23 |
| 84022     | Ghsr         | -1.56559 | 5.87E-08   | 7.07E-07 |
| 246298    | Retsat       | -1.57122 | 0          | 0        |
| 502999    | RGD1563334   | -1.57745 | 0.30930538 | 0.504472 |
| 100910138 | LOC100910138 | -1.58054 | 0.01634567 | 0.05556  |
| 100361147 | Mkrn2os      | -1.58227 | 0.30742653 | 0.502527 |
| 100365542 | LOC100365542 | -1.58227 | 0.23741504 | 0.424521 |
| 100911101 | LOC100911101 | -1.58227 | 0.30742653 | 0.502527 |
| 102550438 | LOC102550438 | -1.58227 | 0.30742653 | 0.502527 |
| 102557053 | LOC102557053 | -1.58227 | 0.30742653 | 0.502527 |
| 108348486 | LOC108348486 | -1.58227 | 0.07709519 | 0.189065 |
| 108349752 | LOC108349752 | -1.58227 | 0.00389185 | 0.016747 |
| 116694    | Capn9        | -1.58227 | 0.14890825 | 0.304958 |
| 117097    | Gpr50        | -1.58227 | 0.14890825 | 0.304958 |
| 192206    | Prok2        | -1.58227 | 0.30742653 | 0.502527 |
| 24493     | I11a         | -1.58227 | 0.14890825 | 0.304958 |
| 25598     | Fabp2        | -1.58227 | 0.14890825 | 0.304958 |
| 27150     | Kcnh3        | -1.58227 | 0.30742653 | 0.502527 |
| 287358    | Prss38       | -1.58227 | 0.04122362 | 0.115865 |
| 287646    | Tt116        | -1.58227 | 0.14890825 | 0.304958 |
| 288117    | Slc9c1       | -1.58227 | 0.30742653 | 0.502527 |
| 291678    | Wnt8a        | -1.58227 | 0.30742653 | 0.502527 |
| 291955    | Ces4a        | -1.58227 | 0.30742653 | 0.502527 |
| 292126    | Habp2        | -1.58227 | 0.30742653 | 0.502527 |
| 292477    | Adgb         | -1.58227 | 0.07709519 | 0.189065 |
| 292858    | Klk1c10      | -1.58227 | 0.30742653 | 0.502527 |
| 295019    | RGD1307595   | -1.58227 | 0.02247674 | 0.071758 |
| 296289    | Sun5         | -1.58227 | 0.30742653 | 0.502527 |
| 298581    | Pla2g2e      | -1.58227 | 0.30742653 | 0.502527 |
| 300199    | Olr1106      | -1.58227 | 0.30742653 | 0.502527 |
| 301626    | Pdcd1        | -1.58227 | 0.30742653 | 0.502527 |
| 304917    | Serpinc1     | -1.58227 | 0.30742653 | 0.502527 |
| 304991    | Olr1596      | -1.58227 | 0.30742653 | 0.502527 |
| 308303    | Vom2r23      | -1.58227 | 0.30742653 | 0.502527 |
| 311505    | Pax1         | -1.58227 | 0.00692663 | 0.027267 |
| 312102    | Vsig4        | -1.58227 | 0.14890825 | 0.304958 |
| 314221    | Six6         | -1.58227 | 0.30742653 | 0.502527 |
| 316579    | Csprs        | -1.58227 | 0.14890825 | 0.304958 |
| 406018    | Olr1734      | -1.58227 | 0.14890825 | 0.304958 |
| 500292    | Cidec        | -1.58227 | 3.34E-07   | 3.59E-06 |
| 500294    | Fancd2os     | -1.58227 | 0.30742653 | 0.502527 |
| 502918    | Slc15a5      | -1.58227 | 0.30742653 | 0.502527 |
| 679219    | Esx1         | -1.58227 | 0.30742653 | 0.502527 |
| 679509    | Vrtn         | -1.58227 | 0.30742653 | 0.502527 |
| 681924    | Noxred1      | -1.58227 | 0.30742653 | 0.502527 |
| 685229    | Tal2         | -1.58227 | 0.02247674 | 0.071758 |
| 688884    | Gpr152       | -1.58227 | 0.07709519 | 0.189065 |
| 689709    | Frdm1        | -1.58227 | 0.30742653 | 0.502527 |
| 690311    | LOC690311    | -1.58227 | 0.30742653 | 0.502527 |
| 691668    | Gzmn         | -1.58227 | 0.30742653 | 0.502527 |
| 79224     | Serpind1     | -1.58227 | 0.30742653 | 0.502527 |
| 81509     | Bdkrb1       | -1.58227 | 0.14890825 | 0.304958 |
| 83808     | Ugt2b35      | -1.58227 | 0.30742653 | 0.502527 |
| 84608     | Slcola6      | -1.58227 | 0.14890825 | 0.304958 |
| 100909600 | LOC100909600 | -1.58347 | 0.04102774 | 0.115417 |
| 301521    | Cfap65       | -1.58707 | 0.14734231 | 0.302842 |

|           |              |          |            |          |
|-----------|--------------|----------|------------|----------|
| 103691392 | LOC103691392 | -1.59176 | 0.0019304  | 0.009175 |
| 100361090 | LOC100361090 | -1.59186 | 0.30370181 | 0.500823 |
| 24583     | Myh3         | -1.5939  | 5.98E-14   | 1.47E-12 |
| 685128    | Gkn3         | -1.59884 | 0.14156104 | 0.294938 |
| 25053     | Cyp2d2       | -1.60294 | 0.11476414 | 0.253736 |
| 100911331 | LOC100911331 | -1.61555 | 0.29457966 | 0.490794 |
| 498579    | RGD1564899   | -1.62321 | 4.59E-24   | 2.02E-22 |
| 100361693 | LOC100361693 | -1.62534 | 0.35399147 | 0.550978 |
| 680551    | Apoc4        | -1.62957 | 8.04E-04   | 0.004272 |
| 684993    | Ppp1r35      | -1.62983 | 5.71E-35   | 3.91E-33 |
| 102557105 | LOC102557105 | -1.63166 | 4.54E-04   | 0.002578 |
| 102551626 | LOC102551626 | -1.63882 | 5.13E-04   | 0.002868 |
| 25412     | Col2a1       | -1.66991 | 0          | 0        |
| 304349    | RGD1559588   | -1.67945 | 3.30E-04   | 0.001954 |
| 103690980 | LOC103690980 | -1.68086 | 2.28E-04   | 0.001399 |
| 365298    | Alpk3        | -1.68998 | 7.06E-25   | 3.25E-23 |
| 498299    | Lefty1       | -1.69055 | 0.02589215 | 0.080208 |
| 691546    | LOC691546    | -1.69168 | 0.06515304 | 0.166221 |
| 679629    | Smtn12       | -1.69438 | 1.54E-10   | 2.61E-09 |
| 29660     | Pnck         | -1.69775 | 0.02544888 | 0.079124 |
| 366671    | Fam71d       | -1.69775 | 0.02544888 | 0.079124 |
| 361214    | RGD1561671   | -1.70091 | 0.34874584 | 0.545623 |
| 108352370 | LOC108352370 | -1.71141 | 0.02616739 | 0.08085  |
| 100912534 | LOC100912534 | -1.71668 | 1.28E-53   | 1.34E-51 |
| 103693502 | LOC103693502 | -1.71967 | 0.02035366 | 0.066444 |
| 25629     | Plin1        | -1.72429 | 8.31E-10   | 1.30E-08 |
| 24477     | Ibsp         | -1.74421 | 1.10E-56   | 1.21E-54 |
| 294341    | Slc5a4       | -1.74783 | 0.0765544  | 0.188053 |
| 680319    | Tceal7       | -1.75474 | 9.08E-08   | 1.07E-06 |
| 295531    | Tnni3k       | -1.76098 | 5.30E-29   | 2.88E-27 |
| 304913    | Tnn          | -1.76284 | 5.52E-06   | 4.77E-05 |
| 25365     | Actg2        | -1.77068 | 1.62E-24   | 7.28E-23 |
| 24959     | Pgam2        | -1.77972 | 1.98E-109  | #####    |
| 100911769 | LOC100911769 | -1.79262 | 0.00429533 | 0.018195 |
| 100362054 | LOC100362054 | -1.80466 | 0.08708959 | 0.207043 |
| 114596    | Wap          | -1.80466 | 0.08708959 | 0.207043 |
| 25539     | Sag          | -1.80466 | 0.08708959 | 0.207043 |
| 25645     | Adrb3        | -1.80466 | 0.08708959 | 0.207043 |
| 290325    | Nuggc        | -1.80466 | 0.08708959 | 0.207043 |
| 295322    | Vtcn1        | -1.80466 | 0.08708959 | 0.207043 |
| 297795    | Npbwr1       | -1.80466 | 0.08708959 | 0.207043 |
| 316616    | Iqca1        | -1.80466 | 0.01553526 | 0.053416 |
| 366463    | Oxct2a       | -1.80466 | 0.08708959 | 0.207043 |
| 499132    | Rgs9bp       | -1.80466 | 0.08708959 | 0.207043 |
| 500820    | Slc5a8       | -1.80466 | 0.08708959 | 0.207043 |
| 680702    | Ripply1      | -1.80466 | 0.08708959 | 0.207043 |
| 140727    | Cacng6       | -1.8358  | 4.06E-05   | 2.95E-04 |
| 690147    | LOC690147    | -1.84111 | 0.04201445 | 0.117602 |
| 100910104 | Xirp1        | -1.84535 | 5.09E-13   | 1.12E-11 |
| 102553868 | LOC102553868 | -1.87178 | 0.02788957 | 0.085121 |
| 304551    | Myo18b       | -1.87311 | 7.51E-24   | 3.28E-22 |
| 114108    | Pdlim3       | -1.87387 | 7.45E-46   | 6.42E-44 |
| 29353     | Phkg1        | -1.87866 | 2.69E-08   | 3.39E-07 |
| 102550211 | LOC102550211 | -1.88238 | 0.00290396 | 0.013062 |
| 305675    | Synpo21      | -1.88534 | 4.75E-34   | 3.09E-32 |
| 678817    | LOC678817    | -1.88873 | 0.19887517 | 0.374082 |

|           |              |          |            |          |
|-----------|--------------|----------|------------|----------|
| 685048    | LOC685048    | -1.8934  | 0.00107134 | 0.005488 |
| 310552    | Sfrp2        | -1.89474 | 3.15E-20   | 1.13E-18 |
| 100364457 | LOC100364457 | -1.90357 | 1.95E-17   | 6.08E-16 |
| 500453    | Pax5         | -1.91484 | 8.66E-05   | 5.84E-04 |
| 100363454 | LOC100363454 | -1.92027 | 0.03783579 | 0.108228 |
| 292461    | Raet11       | -1.9225  | 0.20218943 | 0.378261 |
| 116648    | Phox2a       | -1.92757 | 0.00117782 | 0.005952 |
| 79451     | Fabp4        | -1.93906 | 1.85E-55   | 1.98E-53 |
| 308637    | Ano5         | -1.93982 | 5.05E-14   | 1.24E-12 |
| 311167    | Smtnl1       | -1.94727 | 3.47E-10   | 5.65E-09 |
| 84594     | Nfs1         | -1.95727 | 7.52E-117  | #####    |
| 684984    | Cd3001g      | -1.96693 | 3.05E-11   | 5.63E-10 |
| 365241    | Kcna7        | -1.97593 | 1.84E-08   | 2.38E-07 |
| 366245    | R3hdml       | -1.98082 | 1.35E-10   | 2.31E-09 |
| 363830    | Vpreb2       | -1.9821  | 8.22E-04   | 0.004357 |
| 499670    | RGD1560263   | -1.98868 | 5.57E-04   | 0.003083 |
| 102556672 | LOC102556672 | -1.99179 | 0.11441333 | 0.253166 |
| 100911800 | LOC100911800 | -1.99493 | 0.08836121 | 0.209074 |
| 103693243 | LOC103693243 | -1.99731 | 0.1662275  | 0.330029 |
| 103695172 | LOC103695172 | -1.99731 | 0.1662275  | 0.330029 |
| 108348301 | LOC108348301 | -1.99731 | 0.1662275  | 0.330029 |
| 116506    | Calcr        | -1.99731 | 0.1662275  | 0.330029 |
| 171497    | Sgk2         | -1.99731 | 0.1662275  | 0.330029 |
| 24422     | Gsta2        | -1.99731 | 0.1662275  | 0.330029 |
| 246250    | Retn         | -1.99731 | 9.01E-05   | 6.03E-04 |
| 25376     | Ambn         | -1.99731 | 0.1662275  | 0.330029 |
| 25457     | Gpr1         | -1.99731 | 0.1662275  | 0.330029 |
| 289565    | Arl9         | -1.99731 | 0.1662275  | 0.330029 |
| 289949    | Fam3d        | -1.99731 | 0.1662275  | 0.330029 |
| 293267    | Hbe1         | -1.99731 | 0.1662275  | 0.330029 |
| 294661    | S100z        | -1.99731 | 0.1662275  | 0.330029 |
| 298320    | RGD1561445   | -1.99731 | 0.05024449 | 0.135338 |
| 300202    | Olr1107      | -1.99731 | 0.1662275  | 0.330029 |
| 300207    | Tex49        | -1.99731 | 0.1662275  | 0.330029 |
| 303491    | Hoxb1        | -1.99731 | 0.1662275  | 0.330029 |
| 306356    | Cilp2        | -1.99731 | 1.14E-08   | 1.53E-07 |
| 308794    | Cfap161      | -1.99731 | 0.05024449 | 0.135338 |
| 312913    | Cpa6         | -1.99731 | 0.05024449 | 0.135338 |
| 313936    | Fam228a      | -1.99731 | 0.05024449 | 0.135338 |
| 353228    | Zar1         | -1.99731 | 0.1662275  | 0.330029 |
| 500800    | Ccdc105      | -1.99731 | 0.1662275  | 0.330029 |
| 501199    | Tmem232      | -1.99731 | 0.05024449 | 0.135338 |
| 502731    | Vwde         | -1.99731 | 0.1662275  | 0.330029 |
| 50683     | Sftpc        | -1.99731 | 0.1662275  | 0.330029 |
| 680018    | Ccdc36       | -1.99731 | 0.05024449 | 0.135338 |
| 685099    | Meiob        | -1.99731 | 0.1662275  | 0.330029 |
| 685303    | LOC685303    | -1.99731 | 0.1662275  | 0.330029 |
| 690282    | Tex28        | -1.99731 | 0.1662275  | 0.330029 |
| 103693423 | LOC103693423 | -2.00454 | 0.04970377 | 0.134404 |
| 100912611 | LOC100912611 | -2.02249 | 0.00798048 | 0.030736 |
| 100361007 | Adig         | -2.0417  | 5.49E-05   | 3.87E-04 |
| 502573    | RGD1562104   | -2.05795 | 0.15148547 | 0.308594 |
| 100909462 | LOC100909462 | -2.06303 | 0.26657995 | 0.457801 |
| 296345    | Jph2         | -2.06903 | 3.73E-49   | 3.53E-47 |
| 297333    | Smyd1        | -2.07754 | 1.38E-34   | 9.28E-33 |
| 337868    | Myod1        | -2.07823 | 8.65E-04   | 0.004556 |

|           |              |          |            |          |
|-----------|--------------|----------|------------|----------|
| 102555947 | LOC102555947 | -2.08317 | 0.1313209  | 0.279849 |
| 298795    | LOC298795    | -2.08969 | 1.93E-05   | 1.49E-04 |
| 100910102 | Catsperb     | -2.11278 | 2.52E-04   | 0.001536 |
| 64104     | Tnmd         | -2.11278 | 0.00965892 | 0.036006 |
| 680432    | LOC680432    | -2.115   | 0.13459789 | 0.284698 |
| 102554718 | LOC102554718 | -2.1176  | 0.47228602 | 0.66269  |
| 613222    | Defa7        | -2.11962 | 0.01931845 | 0.063632 |
| 686092    | Tmem258b     | -2.12302 | 0.05558809 | 0.146814 |
| 102555814 | LOC102555814 | -2.12366 | 8.65E-26   | 4.17E-24 |
| 64362     | Des          | -2.14572 | 3.58E-211  | #####    |
| 298139    | LOC298139    | -2.15865 | 1.24E-06   | 1.21E-05 |
| 100364062 | LOC100364062 | -2.16206 | 1.18E-07   | 1.37E-06 |
| 103694424 | LOC103694424 | -2.16723 | 0.02867448 | 0.08705  |
| 24498     | I16          | -2.16723 | 0.02867448 | 0.08705  |
| 29148     | Myog         | -2.16723 | 0.02867448 | 0.08705  |
| 306281    | Ptpn20       | -2.16723 | 0.02867448 | 0.08705  |
| 310586    | Flg2         | -2.16723 | 0.02867448 | 0.08705  |
| 501675    | Tmem114      | -2.16723 | 0.00197341 | 0.009349 |
| 680019    | Trim38       | -2.16723 | 0.02867448 | 0.08705  |
| 500450    | Tpm2         | -2.19298 | 0          | 0        |
| 309760    | Mypn         | -2.19745 | 1.62E-24   | 7.28E-23 |
| 103689994 | LOC103689994 | -2.20349 | 0.03419418 | 0.100035 |
| 501934    | LOC501934    | -2.20376 | 0.03269513 | 0.096569 |
| 316740    | Myom1        | -2.209   | 1.17E-49   | 1.12E-47 |
| 364147    | Yipf7        | -2.2197  | 0.00561252 | 0.022815 |
| 305941    | Sgcg         | -2.23831 | 8.09E-08   | 9.57E-07 |
| 171409    | Tnnt1        | -2.24523 | 3.72E-13   | 8.29E-12 |
| 688862    | Ip6k3        | -2.24523 | 4.33E-06   | 3.82E-05 |
| 102554988 | LOC102554988 | -2.27156 | 0.00547495 | 0.022361 |
| 102550797 | LOC102550797 | -2.27231 | 0.09854994 | 0.226131 |
| 24785     | Slc9a4       | -2.27659 | 0.09277828 | 0.216699 |
| 301518    | Prkag3       | -2.27741 | 5.64E-10   | 8.97E-09 |
| 25295     | Bglap        | -2.28801 | 1.28E-82   | 2.07E-80 |
| 308779    | Fsd2         | -2.29009 | 1.29E-07   | 1.48E-06 |
| 338458    | Obscn        | -2.29149 | 1.56E-78   | 2.37E-76 |
| 56824     | Ifit1        | -2.30146 | 1.54E-09   | 2.33E-08 |
| 108351974 | LOC108351974 | -2.31923 | 0.08916859 | 0.210331 |
| 29173     | Csn2         | -2.31923 | 0.08916859 | 0.210331 |
| 293832    | Magea10      | -2.31923 | 0.08916859 | 0.210331 |
| 29605     | Myh13        | -2.31923 | 0.08916859 | 0.210331 |
| 299271    | Serpina16    | -2.31923 | 0.08916859 | 0.210331 |
| 300923    | Nup62c1      | -2.31923 | 0.0162221  | 0.055234 |
| 500257    | Chst13       | -2.31923 | 0.0162221  | 0.055234 |
| 500574    | Pax7         | -2.31923 | 0.08916859 | 0.210331 |
| 501023    | Gfra1        | -2.31923 | 0.08916859 | 0.210331 |
| 64637     | Hand2        | -2.31923 | 0.08916859 | 0.210331 |
| 681901    | Utf1         | -2.31923 | 0.08916859 | 0.210331 |
| 100911132 | LOC100911132 | -2.32499 | 0.08805979 | 0.208465 |
| 292316    | Smok2a       | -2.35345 | 0.082717   | 0.199689 |
| 365377    | Trim72       | -2.35876 | 1.56E-25   | 7.38E-24 |
| 302827    | LOC302827    | -2.35908 | 0.08168756 | 0.197881 |
| 108348213 | LOC108348213 | -2.37385 | 0.01369448 | 0.047979 |
| 287881    | Ppp1r27      | -2.41234 | 0.00185732 | 0.008874 |
| 301226    | Apobec2      | -2.41721 | 5.90E-28   | 3.12E-26 |
| 361002    | Dusp13       | -2.42704 | 4.43E-12   | 8.94E-11 |
| 307100    | Calml3       | -2.43788 | 1.40E-06   | 1.35E-05 |

|           |              |          |            |          |
|-----------|--------------|----------|------------|----------|
| 246253    | Adipoq       | -2.45674 | 2.10E-34   | 1.40E-32 |
| 499972    | Asb10        | -2.45674 | 2.26E-04   | 0.001391 |
| 362708    | Trim54       | -2.47843 | 5.81E-20   | 2.06E-18 |
| 102552549 | LOC102552549 | -2.49564 | 3.69E-09   | 5.31E-08 |
| 367059    | RGD1563738   | -2.50663 | 0.13509236 | 0.285237 |
| 100912471 | LOC100912471 | -2.54643 | 2.61E-08   | 3.30E-07 |
| 684988    | LOC684988    | -2.55771 | 1.21E-16   | 3.59E-15 |
| 108352829 | LOC108352829 | -2.582   | 2.77E-09   | 4.03E-08 |
| 100910280 | Sdr42e2      | -2.58227 | 0.04760897 | 0.130051 |
| 102546663 | LOC102546663 | -2.58227 | 0.04760897 | 0.130051 |
| 114098    | Ltb4r2       | -2.58227 | 0.04760897 | 0.130051 |
| 116462    | Ptcra        | -2.58227 | 0.04760897 | 0.130051 |
| 116472    | I117b        | -2.58227 | 0.00508918 | 0.021036 |
| 317268    | Arx          | -2.58227 | 0.00508918 | 0.021036 |
| 365751    | Trim55       | -2.58227 | 7.44E-05   | 5.09E-04 |
| 499759    | Ccdc187      | -2.58227 | 0.04760897 | 0.130051 |
| 690388    | Pla2g2f      | -2.58227 | 0.04760897 | 0.130051 |
| 691300    | RGD1565323   | -2.58227 | 0.04760897 | 0.130051 |
| 84396     | Atp1b4       | -2.58227 | 7.44E-05   | 5.09E-04 |
| 287122    | Rpl13l       | -2.6329  | 4.22E-27   | 2.16E-25 |
| 294053    | Ccnj         | -2.65655 | 8.23E-35   | 5.58E-33 |
| 303556    | Lrrc37a      | -2.6661  | 0.02479785 | 0.077587 |
| 688173    | Tcap         | -2.66973 | 4.08E-09   | 5.84E-08 |
| 29242     | Car4         | -2.67108 | 1.50E-21   | 5.77E-20 |
| 25312     | Dmp1         | -2.70302 | 2.93E-22   | 1.18E-20 |
| 292905    | Hrc          | -2.70505 | 7.96E-67   | 1.04E-64 |
| 117537    | Klhl41       | -2.72349 | 8.99E-49   | 8.43E-47 |
| 25438     | Eno3         | -2.72623 | 0          | 0        |
| 103690175 | LOC103690175 | -2.75147 | 2.53E-31   | 1.51E-29 |
| 103690098 | LOC103690098 | -2.7658  | 0.01286181 | 0.045624 |
| 117505    | Csrp3        | -2.7726  | 2.27E-15   | 6.20E-14 |
| 100912172 | LOC100912172 | -2.77491 | 0.24418295 | 0.432481 |
| 100911148 | LOC100911148 | -2.79237 | 0.02558151 | 0.079439 |
| 24661     | Pnmt         | -2.80466 | 0.02535388 | 0.078906 |
| 27064     | Ankrd1       | -2.80466 | 7.51E-16   | 2.12E-14 |
| 286924    | Gnat3        | -2.80466 | 0.02535388 | 0.078906 |
| 498005    | Asb16        | -2.80466 | 7.75E-06   | 6.50E-05 |
| 24701     | Pygm         | -2.80484 | 0          | 0        |
| 499018    | RGD1560015   | -2.83971 | 3.74E-04   | 0.002181 |
| 500036    | Ppp1r3a      | -2.8428  | 7.13E-20   | 2.51E-18 |
| 302666    | Asb11        | -2.85529 | 8.29E-11   | 1.44E-09 |
| 367176    | RGD1565653   | -2.85918 | 0.01360164 | 0.047732 |
| 108352087 | LOC108352087 | -2.87925 | 4.65E-43   | 3.80E-41 |
| 684425    | Adssl1       | -2.94615 | 7.58E-79   | 1.16E-76 |
| 294388    | Stox1        | -2.99731 | 0.01348613 | 0.047397 |
| 363331    | Plin4        | -2.99731 | 1.04E-25   | 4.99E-24 |
| 690468    | LOC690468    | -3.01865 | 8.39E-22   | 3.29E-20 |
| 500267    | Lmod3        | -3.08477 | 3.25E-16   | 9.32E-15 |
| 259167    | Art5         | -3.09996 | 2.35E-04   | 0.001439 |
| 686019    | Casq1        | -3.13107 | 5.64E-261  | #####    |
| 690423    | Jsrp1        | -3.13116 | 2.29E-15   | 6.24E-14 |
| 688915    | Cmya5        | -3.1322  | 2.52E-269  | #####    |
| 362282    | Pck1         | -3.14863 | 4.49E-28   | 2.38E-26 |
| 100361706 | LOC100361706 | -3.16723 | 0.00717193 | 0.028059 |
| 298512    | Rhbd12       | -3.16723 | 1.43E-04   | 9.19E-04 |
| 309430    | Dmrt2        | -3.16723 | 0.00717193 | 0.028059 |



|           |              |          |            |          |
|-----------|--------------|----------|------------|----------|
| 503446    | Asb12        | -3.16723 | 1.43E-04   | 9.19E-04 |
| 641642    | Defb27       | -3.16723 | 0.00717193 | 0.028059 |
| 690209    | Nek211       | -3.20446 | 0.00281939 | 0.012736 |
| 365560    | RGD1566373   | -3.21362 | 0.04952938 | 0.13418  |
| 291245    | Actn2        | -3.22145 | 1.23E-119  | #####    |
| 290223    | Fitm1        | -3.22613 | 5.04E-15   | 1.34E-13 |
| 108352449 | LOC108352449 | -3.2432  | 1.55E-08   | 2.04E-07 |
| 54232     | Car3         | -3.31451 | 0          | 0        |
| 103690053 | LOC103690053 | -3.31923 | 0.0407898  | 0.114943 |
| 24904     | Slc22a1      | -3.31923 | 0.0407898  | 0.114943 |
| 290458    | Trim52       | -3.31923 | 0.0407898  | 0.114943 |
| 291179    | Gpr141       | -3.31923 | 0.0038158  | 0.01649  |
| 302971    | Prss22       | -3.31923 | 0.0407898  | 0.114943 |
| 303517    | Tns4         | -3.31923 | 0.0407898  | 0.114943 |
| 494222    | Pfn4         | -3.31923 | 0.0407898  | 0.114943 |
| 497794    | Mug1         | -3.31923 | 0.0407898  | 0.114943 |
| 499362    | Lbx1         | -3.31923 | 0.0407898  | 0.114943 |
| 500418    | Cngb3        | -3.31923 | 0.0407898  | 0.114943 |
| 83612     | Slc32a1      | -3.31923 | 0.0407898  | 0.114943 |
| 108348200 | LOC108348200 | -3.34214 | 0.0386434  | 0.110092 |
| 102553743 | LOC102553743 | -3.35627 | 0.03736087 | 0.107095 |
| 58968     | Acan         | -3.36343 | 2.15E-87   | 3.68E-85 |
| 100911107 | LOC100911107 | -3.37582 | 0.03563803 | 0.103166 |
| 367975    | LOC367975    | -3.44382 | 0.00195084 | 0.009256 |
| 54284     | Pitx2        | -3.45674 | 0.00203212 | 0.009582 |
| 25250     | Cox8b        | -3.49373 | 1.01E-16   | 3.01E-15 |
| 100909899 | LOC100909899 | -3.4962  | 8.84E-06   | 7.35E-05 |
| 364558    | Palld        | -3.51056 | 1.45E-06   | 1.40E-05 |
| 84015     | Ttn          | -3.54739 | 0          | 0        |
| 114207    | Ryr1         | -3.56583 | 1.01E-196  | #####    |
| 59299     | Trdn         | -3.56732 | 1.11E-146  | #####    |
| 297568    | LOC297568    | -3.58227 | 0.02084781 | 0.067726 |
| 364745    | Lyz11        | -3.58227 | 0.02084781 | 0.067726 |
| 54236     | Cd5          | -3.58227 | 0.02084781 | 0.067726 |
| 689864    | Msgn1        | -3.58227 | 0.02084781 | 0.067726 |
| 292720    | RGD1563034   | -3.58467 | 0.02070934 | 0.067351 |
| 100362987 | LOC100362987 | -3.63885 | 0.01777094 | 0.059533 |
| 311098    | Xirp2        | -3.64116 | 3.48E-232  | #####    |
| 313954    | Matn3        | -3.66027 | 1.13E-16   | 3.35E-15 |
| 102548594 | LOC102548594 | -3.67312 | 0.01608719 | 0.054907 |
| 682930    | Cacna1s      | -3.71682 | 1.32E-106  | #####    |
| 303862    | RGD1562415   | -3.79224 | 0.01118656 | 0.040627 |
| 100911675 | LOC100911675 | -3.80672 | 0.01068305 | 0.039089 |
| 100910447 | LOC100910447 | -3.8433  | 0.00949169 | 0.03548  |
| 117558    | Mylk2        | -3.85679 | 1.04E-99   | 1.99E-97 |
| 102548714 | LOC102548714 | -3.86238 | 0.0900897  | 0.211874 |
| 103689934 | LOC103689934 | -3.88483 | 0.00827139 | 0.031645 |
| 103689985 | LOC103689985 | -3.9042  | 1.72E-26   | 8.56E-25 |
| 680810    | Lsmem1       | -3.9042  | 5.01E-14   | 1.23E-12 |
| 364773    | Akr1c13      | -3.94591 | 0.00671125 | 0.026573 |
| 25714     | Myf6         | -3.9515  | 5.49E-08   | 6.63E-07 |
| 102550892 | LOC102550892 | -3.95893 | 0.00641199 | 0.025601 |
| 100909696 | LOC100909696 | -3.99731 | 0.00559321 | 0.022747 |
| 25099     | Foxa2        | -3.99731 | 0.00559321 | 0.022747 |
| 363831    | Gsc2         | -3.99731 | 0.00559321 | 0.022747 |
| 362018    | Syp12        | -4.14196 | 2.88E-62   | 3.58E-60 |

|           |                 |          |            |          |
|-----------|-----------------|----------|------------|----------|
| 360730    | Ostn            | -4.16723 | 2.59E-05   | 1.96E-04 |
| 315833    | Klhl31          | -4.20656 | 7.19E-81   | 1.12E-78 |
| 362867    | Mybpc1          | -4.22105 | 9.93E-308  | #####    |
| 497901    | Leap2           | -4.32351 | 6.58E-06   | 5.58E-05 |
| 498683    | RGD1564382      | -4.32643 | 0.0014991  | 0.007356 |
| 102548286 | LOC102548286    | -4.32787 | 0.00148961 | 0.007325 |
| 108348058 | NEWGENE_1308612 | -4.3478  | 0.00136296 | 0.006758 |
| 362895    | Stac3           | -4.3478  | 4.20E-24   | 1.85E-22 |
| 108349691 | LOC108349691    | -4.35204 | 0.00133728 | 0.006653 |
| 108348066 | NEWGENE_1586233 | -4.35486 | 0.00132043 | 0.006576 |
| 100910021 | LOC100910021    | -4.37026 | 0.00123155 | 0.006185 |
| 310681    | Hjv             | -4.38697 | 8.06E-124  | #####    |
| 307982    | Nrap            | -4.39226 | 3.28E-122  | #####    |
| 292879    | Mybpc2          | -4.4193  | 0          | 0        |
| 689274    | Myoz3           | -4.45674 | 6.07E-36   | 4.26E-34 |
| 171009    | Actn3           | -4.49874 | 0          | 0        |
| 287411    | Dhrs7c          | -4.52087 | 1.98E-27   | 1.03E-25 |
| 100362432 | LOC100362432    | -4.54821 | 5.24E-04   | 0.002923 |
| 316330    | Ankrd23         | -4.56578 | 2.08E-235  | #####    |
| 29437     | Acta1           | -4.57484 | 0          | 0        |
| 366542    | Six2            | -4.58347 | 4.37E-04   | 0.002493 |
| 308873    | Art1            | -4.59861 | 4.51E-18   | 1.47E-16 |
| 25278     | Cox6a2          | -4.63812 | 1.15E-108  | #####    |
| 302948    | Sr1             | -4.72825 | 2.38E-110  | #####    |
| 25028     | Ampd1           | -4.77341 | 1.81E-95   | 3.29E-93 |
| 309772    | Vgl12           | -4.8302  | 1.03E-14   | 2.66E-13 |
| 296935    | Lmod2           | -4.83525 | 1.58E-34   | 1.06E-32 |
| 102547059 | LOC102547059    | -4.98372 | 4.16E-05   | 3.01E-04 |
| 679565    | LOC679565       | -5.02848 | 2.16E-57   | 2.45E-55 |
| 498440    | Myoz1           | -5.06562 | 3.48E-227  | #####    |
| 102550650 | LOC102550650    | -5.07626 | 2.22E-05   | 1.70E-04 |
| 102555131 | LOC102555131    | -5.08123 | 0.03734574 | 0.107068 |
| 365009    | Clec3a          | -5.08477 | 1.77E-09   | 2.64E-08 |
| 287167    | Hba-a1          | -5.09934 | 2.47E-78   | 3.73E-76 |
| 24838     | Tnnt3           | -5.10245 | 0          | 0        |
| 100362283 | Tmem52          | -5.18713 | 9.79E-19   | 3.31E-17 |
| 360543    | Myh4            | -5.22301 | 0          | 0        |
| 116601    | Atp2a1          | -5.23013 | 0          | 0        |
| 24584     | My1pf           | -5.34165 | 0          | 0        |
| 287408    | Myh1            | -5.39489 | 0          | 0        |
| 102549712 | LOC102549712    | -5.4356  | 1.34E-06   | 1.30E-05 |
| 24265     | Ckm             | -5.50914 | 0          | 0        |
| 29389     | Tnni2           | -5.59009 | 0          | 0        |
| 102555328 | LOC102555328    | -5.6218  | 0.07365717 | 0.182775 |
| 103692976 | LOC103692976    | -5.62491 | 2.35E-07   | 2.59E-06 |
| 100362623 | Mt1m            | -5.63538 | 2.12E-07   | 2.35E-06 |
| 100911313 | LOC100911313    | -5.69572 | 2.67E-30   | 1.52E-28 |
| 100911166 | LOC100911166    | -5.70384 | 1.07E-07   | 1.25E-06 |
| 25708     | Ucp3            | -5.87995 | 1.38E-15   | 3.84E-14 |
| 296369    | Tnnc2           | -5.91177 | 0          | 0        |
| 304823    | Igfn1           | -5.91219 | 4.24E-87   | 7.21E-85 |
| 363925    | My12            | -5.9515  | 7.13E-09   | 9.79E-08 |
| 100361543 | LOC100361543    | -5.958   | 6.60E-09   | 9.12E-08 |
| 100912521 | Nmrk2           | -5.99731 | 4.13E-09   | 5.91E-08 |
| 56781     | My11            | -6.01835 | 0          | 0        |
| 29658     | Cacng1          | -6.16723 | 1.31E-18   | 4.38E-17 |

|           |              |          |           |          |
|-----------|--------------|----------|-----------|----------|
| 308622    | Txlnb        | -6.18713 | 4.77E-36  | 3.36E-34 |
| 100909700 | LOC100909700 | -6.20168 | 3.01E-10  | 4.93E-09 |
| 100359951 | LOC100359951 | -6.33644 | 4.48E-11  | 8.02E-10 |
| 103690173 | LOC103690173 | -6.47531 | 5.36E-12  | 1.07E-10 |
| 103694902 | LOC103694902 | -6.60532 | 5.43E-199 | #####    |
| 108348161 | LOC108348161 | -6.9869  | 4.29E-16  | 1.22E-14 |
| 691644    | Myh2         | -7.02013 | 0         | 0        |
| 59108     | Mb           | -7.24523 | 0         | 0        |
| 100910177 | LOC100910177 | -8.04334 | 2.60E-29  | 1.43E-27 |
| 291605    | Myot         | -8.32104 | 3.07E-34  | 2.02E-32 |
| 100909761 | LOC100909761 | -8.8148  | 3.23E-88  | 5.59E-86 |
| 100036582 | Olrl867      |          |           |          |
| 100125595 | Rs1          |          |           |          |
| 100126231 | Mln          |          |           |          |
| 100169711 | Lcn11        |          |           |          |
| 100270683 | Taslr2       |          |           |          |
| 100271845 | LOC100271845 |          |           |          |
| 100310875 | Tas2r110     |          |           |          |
| 100310876 | Tas2r136     |          |           |          |
| 100310877 | Tas2r116     |          |           |          |
| 100310878 | Tas2r106     |          |           |          |
| 100310879 | Tas2r104     |          |           |          |
| 100310880 | Tas2r117     |          |           |          |
| 100310881 | Tas2r129     |          |           |          |
| 100310885 | Tas2r113     |          |           |          |
| 100310886 | Tas2r103     |          |           |          |
| 100312671 | Vomlr60      |          |           |          |
| 100312735 | Vomlr103     |          |           |          |
| 100312751 | Vomlr64      |          |           |          |
| 100312945 | Vomlr17      |          |           |          |
| 100359452 | LOC100359452 |          |           |          |
| 100359485 | Ms4a18       |          |           |          |
| 100359692 | LOC100359692 |          |           |          |
| 100359777 | LOC100359777 |          |           |          |
| 100359826 | Krtap8-1     |          |           |          |
| 100359838 | Rfpl4b       |          |           |          |
| 100359873 | Olfr873      |          |           |          |
| 100359886 | Krtap11-1    |          |           |          |
| 100359968 | LOC100359968 |          |           |          |
| 100360011 | LOC100360011 |          |           |          |
| 100360049 | LOC100360049 |          |           |          |
| 100360071 | Nps          |          |           |          |
| 100360076 | LOC100360076 |          |           |          |
| 100360095 | LOC100360095 |          |           |          |
| 100360128 | LOC100360128 |          |           |          |
| 100360143 | LOC100360143 |          |           |          |
| 100360200 | LOC100360200 |          |           |          |
| 100360390 | Cl1dn25      |          |           |          |
| 100360477 | LOC100360477 |          |           |          |
| 100360496 | Fam9b        |          |           |          |
| 100360521 | LOC100360521 |          |           |          |
| 100360557 | LOC100360557 |          |           |          |
| 100360571 | Cpxcr1       |          |           |          |
| 100360573 | LOC100360573 |          |           |          |
| 100360574 | LOC100360574 |          |           |          |
| 100360609 | Olfr1055     |          |           |          |

|           |              |  |  |  |
|-----------|--------------|--|--|--|
| 100360690 | LOC100360690 |  |  |  |
| 100360790 | LOC100360790 |  |  |  |
| 100361016 | LOC100361016 |  |  |  |
| 100361036 | LOC100361036 |  |  |  |
| 100361125 | Pom121112    |  |  |  |
| 100361139 | LOC100361139 |  |  |  |
| 100361143 | LOC100361143 |  |  |  |
| 100361166 | Rgs21        |  |  |  |
| 100361194 | LOC100361194 |  |  |  |
| 100361204 | LOC100361204 |  |  |  |
| 100361300 | Spink10      |  |  |  |
| 100361414 | Pate3        |  |  |  |
| 100361422 | C1dn34c4     |  |  |  |
| 100361434 | LOC100361434 |  |  |  |
| 100361468 | Gzmb12       |  |  |  |
| 100361492 | LOC100361492 |  |  |  |
| 100361547 | LOC100361547 |  |  |  |
| 100361571 | Krtap1-1     |  |  |  |
| 100361579 | LOC100361579 |  |  |  |
| 100361623 | RGD1561318   |  |  |  |
| 100361626 | Krtap12-2    |  |  |  |
| 100361639 | RGD1562521   |  |  |  |
| 100361642 | LOC100361642 |  |  |  |
| 100361652 | Lce6a        |  |  |  |
| 100361657 | Pate1        |  |  |  |
| 100361664 | LOC100361664 |  |  |  |
| 100361702 | LOC100361702 |  |  |  |
| 100361739 | LOC100361739 |  |  |  |
| 100361793 | LOC100361793 |  |  |  |
| 100361828 | LOC100361828 |  |  |  |
| 100361854 | LOC100361854 |  |  |  |
| 100361859 | Lce3d        |  |  |  |
| 100361884 | Pr18a3       |  |  |  |
| 100361907 | LOC100361907 |  |  |  |
| 100361944 | LOC100361944 |  |  |  |
| 100361951 | Lce3e        |  |  |  |
| 100361960 | Cox7b2       |  |  |  |
| 100361968 | LOC100361968 |  |  |  |
| 100361969 | LOC100361969 |  |  |  |
| 100362031 | LOC100362031 |  |  |  |
| 100362067 | LOC100362067 |  |  |  |
| 100362068 | Vom1r-ps112  |  |  |  |
| 100362078 | LOC100362078 |  |  |  |
| 100362122 | LOC100362122 |  |  |  |
| 100362173 | LOC100362173 |  |  |  |
| 100362207 | Krtap16-1    |  |  |  |
| 100362319 | LOC100362319 |  |  |  |
| 100362350 | LOC100362350 |  |  |  |
| 100362365 | Tmem210      |  |  |  |
| 100362450 | Wfdc17       |  |  |  |
| 100362477 | Fam90a1      |  |  |  |
| 100362538 | RGD1306995   |  |  |  |
| 100362567 | Siglec11     |  |  |  |
| 100362580 | Spag11b1     |  |  |  |
| 100362690 | LOC100362690 |  |  |  |
| 100362694 | Trim60       |  |  |  |

|           |              |  |  |  |
|-----------|--------------|--|--|--|
| 100362696 | Fam47a       |  |  |  |
| 100362724 | LOC100362724 |  |  |  |
| 100362856 | LOC100362856 |  |  |  |
| 100362891 | Tex13a       |  |  |  |
| 100362904 | Bsph2        |  |  |  |
| 100362949 | LOC100362949 |  |  |  |
| 100362978 | LOC100362978 |  |  |  |
| 100362996 | LOC100362996 |  |  |  |
| 100363016 | LOC100363016 |  |  |  |
| 100363043 | LOC100363043 |  |  |  |
| 100363053 | Tas2r145     |  |  |  |
| 100363064 | LOC100363064 |  |  |  |
| 100363125 | LOC100363125 |  |  |  |
| 100363136 | LOC100363136 |  |  |  |
| 100363141 | LOC100363141 |  |  |  |
| 100363184 | Krtap13-1    |  |  |  |
| 100363219 | Olrl872      |  |  |  |
| 100363236 | LOC100363236 |  |  |  |
| 100363270 | Btbd18       |  |  |  |
| 100363287 | LOC100363287 |  |  |  |
| 100363321 | LOC100363321 |  |  |  |
| 100363333 | LOC100363333 |  |  |  |
| 100363344 | LOC100363344 |  |  |  |
| 100363449 | LOC100363449 |  |  |  |
| 100363500 | LOC100363500 |  |  |  |
| 100363712 | LOC100363712 |  |  |  |
| 100363867 | LOC100363867 |  |  |  |
| 100363883 | LOC100363883 |  |  |  |
| 100363914 | LOC100363914 |  |  |  |
| 100363993 | LOC100363993 |  |  |  |
| 100364002 | LOC100364002 |  |  |  |
| 100364155 | LOC100364155 |  |  |  |
| 100364523 | LOC100364523 |  |  |  |
| 100364550 | Krtap24-1    |  |  |  |
| 100364613 | Krtap27-1    |  |  |  |
| 100364835 | LOC100364835 |  |  |  |
| 100364862 | LOC100364862 |  |  |  |
| 100364877 | LOC100364877 |  |  |  |
| 100365008 | LOC100365008 |  |  |  |
| 100365199 | Wfdc13       |  |  |  |
| 100365588 | LOC100365588 |  |  |  |
| 100365646 | LOC100365646 |  |  |  |
| 100365887 | LOC100365887 |  |  |  |
| 100365995 | LOC100365995 |  |  |  |
| 100366231 | LOC100366231 |  |  |  |
| 100909401 | Fam181a      |  |  |  |
| 100909423 | LOC100909423 |  |  |  |
| 100909425 | LOC100909425 |  |  |  |
| 100909434 | LOC100909434 |  |  |  |
| 100909435 | LOC100909435 |  |  |  |
| 100909438 | LOC100909438 |  |  |  |
| 100909457 | LOC100909457 |  |  |  |
| 100909485 | LOC100909485 |  |  |  |
| 100909486 | LOC100909486 |  |  |  |
| 100909493 | LOC100909493 |  |  |  |
| 100909494 | LOC100909494 |  |  |  |

|           |              |  |  |  |
|-----------|--------------|--|--|--|
| 100909498 | Clec19a      |  |  |  |
| 100909499 | LOC100909499 |  |  |  |
| 100909501 | LOC100909501 |  |  |  |
| 100909517 | LOC100909517 |  |  |  |
| 100909522 | LOC100909522 |  |  |  |
| 100909524 | LOC100909524 |  |  |  |
| 100909526 | LOC100909526 |  |  |  |
| 100909534 | LOC100909534 |  |  |  |
| 100909546 | LOC100909546 |  |  |  |
| 100909556 | LOC100909556 |  |  |  |
| 100909573 | LOC100909573 |  |  |  |
| 100909578 | LOC100909578 |  |  |  |
| 100909585 | LOC100909585 |  |  |  |
| 100909596 | LOC100909596 |  |  |  |
| 100909605 | LOC100909605 |  |  |  |
| 100909609 | LOC100909609 |  |  |  |
| 100909613 | LOC100909613 |  |  |  |
| 100909620 | LOC100909620 |  |  |  |
| 100909622 | Znf442       |  |  |  |
| 100909660 | LOC100909660 |  |  |  |
| 100909661 | LOC100909661 |  |  |  |
| 100909677 | LOC100909677 |  |  |  |
| 100909683 | LOC100909683 |  |  |  |
| 100909692 | LOC100909692 |  |  |  |
| 100909708 | LOC100909708 |  |  |  |
| 100909726 | LOC100909726 |  |  |  |
| 100909736 | LOC100909736 |  |  |  |
| 100909754 | LOC100909754 |  |  |  |
| 100909755 | LOC100909755 |  |  |  |
| 100909784 | LOC100909784 |  |  |  |
| 100909796 | LOC100909796 |  |  |  |
| 100909811 | Dcdc1        |  |  |  |
| 100909831 | LOC100909831 |  |  |  |
| 100909833 | LOC100909833 |  |  |  |
| 100909836 | LOC100909836 |  |  |  |
| 100909849 | LOC100909849 |  |  |  |
| 100909858 | LOC100909858 |  |  |  |
| 100909859 | LOC100909859 |  |  |  |
| 100909862 | LOC100909862 |  |  |  |
| 100909864 | LOC100909864 |  |  |  |
| 100909884 | LOC100909884 |  |  |  |
| 100909885 | LOC100909885 |  |  |  |
| 100909894 | Olr294       |  |  |  |
| 100909900 | LOC100909900 |  |  |  |
| 100909916 | LOC100909916 |  |  |  |
| 100909922 | LOC100909922 |  |  |  |
| 100909935 | LOC100909935 |  |  |  |
| 100909936 | LOC100909936 |  |  |  |
| 100909937 | LOC100909937 |  |  |  |
| 100909940 | LOC100909940 |  |  |  |
| 100909943 | LOC100909943 |  |  |  |
| 100909958 | LOC100909958 |  |  |  |
| 100909961 | LOC100909961 |  |  |  |
| 100909966 | LOC100909966 |  |  |  |
| 100909968 | LOC100909968 |  |  |  |
| 100909976 | LOC100909976 |  |  |  |



|           |              |  |  |  |
|-----------|--------------|--|--|--|
| 100909977 | LOC100909977 |  |  |  |
| 100909989 | LOC100909989 |  |  |  |
| 100909993 | LOC100909993 |  |  |  |
| 100909996 | 0lr1258      |  |  |  |
| 100910009 | LOC100910009 |  |  |  |
| 100910010 | LOC100910010 |  |  |  |
| 100910026 | LOC100910026 |  |  |  |
| 100910041 | LOC100910041 |  |  |  |
| 100910045 | LOC100910045 |  |  |  |
| 100910049 | LOC100910049 |  |  |  |
| 100910051 | LOC100910051 |  |  |  |
| 100910061 | LOC100910061 |  |  |  |
| 100910067 | LOC100910067 |  |  |  |
| 100910070 | LOC100910070 |  |  |  |
| 100910077 | LOC100910077 |  |  |  |
| 100910078 | LOC100910078 |  |  |  |
| 100910086 | LOC100910086 |  |  |  |
| 100910087 | LOC100910087 |  |  |  |
| 100910108 | LOC100910108 |  |  |  |
| 100910111 | LOC100910111 |  |  |  |
| 100910120 | LOC100910120 |  |  |  |
| 100910127 | LOC100910127 |  |  |  |
| 100910128 | LOC100910128 |  |  |  |
| 100910144 | Ces2         |  |  |  |
| 100910145 | LOC100910145 |  |  |  |
| 100910153 | LOC100910153 |  |  |  |
| 100910162 | LOC100910162 |  |  |  |
| 100910165 | LOC100910165 |  |  |  |
| 100910169 | LOC100910169 |  |  |  |
| 100910181 | LOC100910181 |  |  |  |
| 100910184 | LOC100910184 |  |  |  |
| 100910187 | LOC100910187 |  |  |  |
| 100910193 | LOC100910193 |  |  |  |
| 100910199 | LOC100910199 |  |  |  |
| 100910223 | LOC100910223 |  |  |  |
| 100910224 | LOC100910224 |  |  |  |
| 100910227 | LOC100910227 |  |  |  |
| 100910235 | LOC100910235 |  |  |  |
| 100910238 | LOC100910238 |  |  |  |
| 100910245 | LOC100910245 |  |  |  |
| 100910247 | LOC100910247 |  |  |  |
| 100910255 | LOC100910255 |  |  |  |
| 100910256 | LOC100910256 |  |  |  |
| 100910260 | LOC100910260 |  |  |  |
| 100910263 | LOC100910263 |  |  |  |
| 100910292 | LOC100910292 |  |  |  |
| 100910294 | LOC100910294 |  |  |  |
| 100910298 | LOC100910298 |  |  |  |
| 100910314 | LOC100910314 |  |  |  |
| 100910335 | LOC100910335 |  |  |  |
| 100910352 | LOC100910352 |  |  |  |
| 100910363 | LOC100910363 |  |  |  |
| 100910378 | LOC100910378 |  |  |  |
| 100910382 | LOC100910382 |  |  |  |
| 100910401 | LOC100910401 |  |  |  |
| 100910402 | LOC100910402 |  |  |  |

|           |              |  |  |  |
|-----------|--------------|--|--|--|
| 100910409 | LOC100910409 |  |  |  |
| 100910419 | LOC100910419 |  |  |  |
| 100910420 | LOC100910420 |  |  |  |
| 100910431 | LOC100910431 |  |  |  |
| 100910439 | LOC100910439 |  |  |  |
| 100910445 | LOC100910445 |  |  |  |
| 100910451 | LOC100910451 |  |  |  |
| 100910452 | LOC100910452 |  |  |  |
| 100910456 | LOC100910456 |  |  |  |
| 100910467 | LOC100910467 |  |  |  |
| 100910479 | LOC100910479 |  |  |  |
| 100910481 | LOC100910481 |  |  |  |
| 100910488 | LOC100910488 |  |  |  |
| 100910500 | LOC100910500 |  |  |  |
| 100910501 | LOC100910501 |  |  |  |
| 100910509 | LOC100910509 |  |  |  |
| 100910512 | LOC100910512 |  |  |  |
| 100910526 | LOC100910526 |  |  |  |
| 100910543 | LOC100910543 |  |  |  |
| 100910548 | LOC100910548 |  |  |  |
| 100910557 | LOC100910557 |  |  |  |
| 100910566 | LOC100910566 |  |  |  |
| 100910567 | LOC100910567 |  |  |  |
| 100910585 | LOC100910585 |  |  |  |
| 100910599 | LOC100910599 |  |  |  |
| 100910611 | LOC100910611 |  |  |  |
| 100910615 | LOC100910615 |  |  |  |
| 100910640 | LOC100910640 |  |  |  |
| 100910647 | LOC100910647 |  |  |  |
| 100910650 | LOC100910650 |  |  |  |
| 100910656 | LOC100910656 |  |  |  |
| 100910667 | LOC100910667 |  |  |  |
| 100910682 | LOC100910682 |  |  |  |
| 100910696 | LOC100910696 |  |  |  |
| 100910698 | LOC100910698 |  |  |  |
| 100910710 | LOC100910710 |  |  |  |
| 100910719 | LOC100910719 |  |  |  |
| 100910721 | LOC100910721 |  |  |  |
| 100910731 | LOC100910731 |  |  |  |
| 100910744 | LOC100910744 |  |  |  |
| 100910780 | Chsy31       |  |  |  |
| 100910801 | LOC100910801 |  |  |  |
| 100910813 | Lyg2         |  |  |  |
| 100910814 | LOC100910814 |  |  |  |
| 100910822 | LOC100910822 |  |  |  |
| 100910829 | LOC100910829 |  |  |  |
| 100910837 | LOC100910837 |  |  |  |
| 100910843 | LOC100910843 |  |  |  |
| 100910851 | LOC100910851 |  |  |  |
| 100910858 | LOC100910858 |  |  |  |
| 100910863 | LOC100910863 |  |  |  |
| 100910876 | LOC100910876 |  |  |  |
| 100910877 | LOC100910877 |  |  |  |
| 100910887 | LOC100910887 |  |  |  |
| 100910893 | LOC100910893 |  |  |  |
| 100910894 | LOC100910894 |  |  |  |

|           |              |  |  |  |
|-----------|--------------|--|--|--|
| 100910896 | LOC100910896 |  |  |  |
| 100910899 | LOC100910899 |  |  |  |
| 100910917 | LOC100910917 |  |  |  |
| 100910928 | LOC100910928 |  |  |  |
| 100910936 | LOC100910936 |  |  |  |
| 100910939 | LOC100910939 |  |  |  |
| 100910942 | LOC100910942 |  |  |  |
| 100910953 | LOC100910953 |  |  |  |
| 100910977 | LOC100910977 |  |  |  |
| 100910984 | Alkal1       |  |  |  |
| 100910993 | LOC100910993 |  |  |  |
| 100910997 | LOC100910997 |  |  |  |
| 100910999 | LOC100910999 |  |  |  |
| 100911015 | LOC100911015 |  |  |  |
| 100911022 | LOC100911022 |  |  |  |
| 100911027 | LOC100911027 |  |  |  |
| 100911035 | LOC100911035 |  |  |  |
| 100911042 | LOC100911042 |  |  |  |
| 100911043 | LOC100911043 |  |  |  |
| 100911064 | LOC100911064 |  |  |  |
| 100911106 | LOC100911106 |  |  |  |
| 100911127 | LOC100911127 |  |  |  |
| 100911129 | LOC100911129 |  |  |  |
| 100911147 | LOC100911147 |  |  |  |
| 100911153 | LOC100911153 |  |  |  |
| 100911163 | LOC100911163 |  |  |  |
| 100911165 | Myk4         |  |  |  |
| 100911184 | LOC100911184 |  |  |  |
| 100911204 | LOC100911204 |  |  |  |
| 100911206 | LOC100911206 |  |  |  |
| 100911217 | LOC100911217 |  |  |  |
| 100911229 | LOC100911229 |  |  |  |
| 100911241 | LOC100911241 |  |  |  |
| 100911247 | LOC100911247 |  |  |  |
| 100911249 | Ifn11        |  |  |  |
| 100911272 | LOC100911272 |  |  |  |
| 100911283 | LOC100911283 |  |  |  |
| 100911315 | LOC100911315 |  |  |  |
| 100911348 | LOC100911348 |  |  |  |
| 100911358 | LOC100911358 |  |  |  |
| 100911359 | LOC100911359 |  |  |  |
| 100911366 | LOC100911366 |  |  |  |
| 100911376 | LOC100911376 |  |  |  |
| 100911380 | LOC100911380 |  |  |  |
| 100911394 | LOC100911394 |  |  |  |
| 100911398 | LOC100911398 |  |  |  |
| 100911405 | LOC100911405 |  |  |  |
| 100911434 | LOC100911434 |  |  |  |
| 100911438 | LOC100911438 |  |  |  |
| 100911458 | LOC100911458 |  |  |  |
| 100911463 | LOC100911463 |  |  |  |
| 100911464 | LOC100911464 |  |  |  |
| 100911489 | LOC100911489 |  |  |  |
| 100911495 | LOC100911495 |  |  |  |
| 100911507 | LOC100911507 |  |  |  |
| 100911529 | LOC100911529 |  |  |  |

|           |              |  |  |  |
|-----------|--------------|--|--|--|
| 100911547 | LOC100911547 |  |  |  |
| 100911558 | LOC100911558 |  |  |  |
| 100911565 | LOC100911565 |  |  |  |
| 100911569 | LOC100911569 |  |  |  |
| 100911571 | LOC100911571 |  |  |  |
| 100911583 | LOC100911583 |  |  |  |
| 100911586 | LOC100911586 |  |  |  |
| 100911588 | LOC100911588 |  |  |  |
| 100911628 | LOC100911628 |  |  |  |
| 100911649 | LOC100911649 |  |  |  |
| 100911679 | LOC100911679 |  |  |  |
| 100911681 | LOC100911681 |  |  |  |
| 100911689 | LOC100911689 |  |  |  |
| 100911695 | LOC100911695 |  |  |  |
| 100911718 | LOC100911718 |  |  |  |
| 100911725 | LOC100911725 |  |  |  |
| 100911727 | LOC100911727 |  |  |  |
| 100911744 | LOC100911744 |  |  |  |
| 100911758 | LOC100911758 |  |  |  |
| 100911772 | LOC100911772 |  |  |  |
| 100911784 | LOC100911784 |  |  |  |
| 100911797 | LOC100911797 |  |  |  |
| 100911801 | LOC100911801 |  |  |  |
| 100911839 | LOC100911839 |  |  |  |
| 100911845 | LOC100911845 |  |  |  |
| 100911857 | LOC100911857 |  |  |  |
| 100911860 | LOC100911860 |  |  |  |
| 100911867 | LOC100911867 |  |  |  |
| 100911870 | LOC100911870 |  |  |  |
| 100911886 | LOC100911886 |  |  |  |
| 100911888 | LOC100911888 |  |  |  |
| 100911893 | LOC100911893 |  |  |  |
| 100911936 | LOC100911936 |  |  |  |
| 100911937 | LOC100911937 |  |  |  |
| 100911938 | LOC100911938 |  |  |  |
| 100911939 | LOC100911939 |  |  |  |
| 100911941 | LOC100911941 |  |  |  |
| 100911944 | LOC100911944 |  |  |  |
| 100911958 | LOC100911958 |  |  |  |
| 100911971 | Spata31e1    |  |  |  |
| 100911976 | LOC100911976 |  |  |  |
| 100911982 | LOC100911982 |  |  |  |
| 100911983 | LOC100911983 |  |  |  |
| 100911984 | LOC100911984 |  |  |  |
| 100911988 | LOC100911988 |  |  |  |
| 100911994 | LOC100911994 |  |  |  |
| 100911999 | LOC100911999 |  |  |  |
| 100912013 | LOC100912013 |  |  |  |
| 100912021 | LOC100912021 |  |  |  |
| 100912026 | LOC100912026 |  |  |  |
| 100912028 | LOC100912028 |  |  |  |
| 100912067 | LOC100912067 |  |  |  |
| 100912097 | LOC100912097 |  |  |  |
| 100912104 | LOC100912104 |  |  |  |
| 100912114 | LOC100912114 |  |  |  |
| 100912135 | LOC100912135 |  |  |  |

|           |              |  |  |  |
|-----------|--------------|--|--|--|
| 100912152 | LOC100912152 |  |  |  |
| 100912159 | LOC100912159 |  |  |  |
| 100912186 | LOC100912186 |  |  |  |
| 100912196 | LOC100912196 |  |  |  |
| 100912217 | LOC100912217 |  |  |  |
| 100912228 | LOC100912228 |  |  |  |
| 100912233 | LOC100912233 |  |  |  |
| 100912245 | LOC100912245 |  |  |  |
| 100912252 | LOC100912252 |  |  |  |
| 100912261 | LOC100912261 |  |  |  |
| 100912265 | LOC100912265 |  |  |  |
| 100912272 | LOC100912272 |  |  |  |
| 100912289 | Fam9c        |  |  |  |
| 100912306 | LOC100912306 |  |  |  |
| 100912314 | LOC100912314 |  |  |  |
| 100912317 | LOC100912317 |  |  |  |
| 100912321 | LOC100912321 |  |  |  |
| 100912327 | LOC100912327 |  |  |  |
| 100912340 | LOC100912340 |  |  |  |
| 100912348 | LOC100912348 |  |  |  |
| 100912356 | LOC100912356 |  |  |  |
| 100912361 | LOC100912361 |  |  |  |
| 100912371 | LOC100912371 |  |  |  |
| 100912388 | LOC100912388 |  |  |  |
| 100912401 | LOC100912401 |  |  |  |
| 100912405 | LOC100912405 |  |  |  |
| 100912408 | LOC100912408 |  |  |  |
| 100912415 | LOC100912415 |  |  |  |
| 100912421 | LOC100912421 |  |  |  |
| 100912425 | LOC100912425 |  |  |  |
| 100912432 | LOC100912432 |  |  |  |
| 100912441 | LOC100912441 |  |  |  |
| 100912474 | LOC100912474 |  |  |  |
| 100912475 | LOC100912475 |  |  |  |
| 100912477 | LOC100912477 |  |  |  |
| 100912482 | LOC100912482 |  |  |  |
| 100912484 | LOC100912484 |  |  |  |
| 100912485 | LOC100912485 |  |  |  |
| 100912488 | LOC100912488 |  |  |  |
| 100912491 | LOC100912491 |  |  |  |
| 100912505 | LOC100912505 |  |  |  |
| 100912507 | LOC100912507 |  |  |  |
| 100912509 | LOC100912509 |  |  |  |
| 100912515 | LOC100912515 |  |  |  |
| 100912527 | LOC100912527 |  |  |  |
| 100912529 | LOC100912529 |  |  |  |
| 100912540 | LOC100912540 |  |  |  |
| 100912543 | LOC100912543 |  |  |  |
| 100912549 | LOC100912549 |  |  |  |
| 100912555 | LOC100912555 |  |  |  |
| 100912571 | LOC100912571 |  |  |  |
| 100912580 | LOC100912580 |  |  |  |
| 100912581 | LOC100912581 |  |  |  |
| 100912586 | LOC100912586 |  |  |  |
| 100912605 | LOC100912605 |  |  |  |
| 100912831 | LOC100912831 |  |  |  |

|           |              |  |  |  |
|-----------|--------------|--|--|--|
| 100912958 | LOC100912958 |  |  |  |
| 100912998 | LOC100912998 |  |  |  |
| 100913013 | LOC100913013 |  |  |  |
| 100913081 | Pate-f       |  |  |  |
| 102546342 | LOC102546342 |  |  |  |
| 102546456 | LOC102546456 |  |  |  |
| 102546467 | LOC102546467 |  |  |  |
| 102546505 | LOC102546505 |  |  |  |
| 102546567 | LOC102546567 |  |  |  |
| 102546758 | Klk5         |  |  |  |
| 102546793 | LOC102546793 |  |  |  |
| 102546819 | LOC102546819 |  |  |  |
| 102546862 | LOC102546862 |  |  |  |
| 102546874 | LOC102546874 |  |  |  |
| 102547035 | LOC102547035 |  |  |  |
| 102547206 | LOC102547206 |  |  |  |
| 102547221 | LOC102547221 |  |  |  |
| 102547275 | LOC102547275 |  |  |  |
| 102547542 | LOC102547542 |  |  |  |
| 102547604 | LOC102547604 |  |  |  |
| 102547645 | LOC102547645 |  |  |  |
| 102547820 | LOC102547820 |  |  |  |
| 102547850 | LOC102547850 |  |  |  |
| 102547949 | LOC102547949 |  |  |  |
| 102548017 | LOC102548017 |  |  |  |
| 102548031 | LOC102548031 |  |  |  |
| 102548071 | LOC102548071 |  |  |  |
| 102548126 | Armh2        |  |  |  |
| 102548128 | LOC102548128 |  |  |  |
| 102548129 | LOC102548129 |  |  |  |
| 102548522 | LOC102548522 |  |  |  |
| 102548702 | LOC102548702 |  |  |  |
| 102548729 | LOC102548729 |  |  |  |
| 102548794 | LOC102548794 |  |  |  |
| 102548875 | LOC102548875 |  |  |  |
| 102548912 | LOC102548912 |  |  |  |
| 102548978 | LOC102548978 |  |  |  |
| 102549010 | Bend2        |  |  |  |
| 102549220 | LOC102549220 |  |  |  |
| 102549229 | LOC102549229 |  |  |  |
| 102549291 | LOC102549291 |  |  |  |
| 102549389 | LOC102549389 |  |  |  |
| 102549607 | LOC102549607 |  |  |  |
| 102549681 | Plckhg7      |  |  |  |
| 102549716 | LOC102549716 |  |  |  |
| 102549724 | LOC102549724 |  |  |  |
| 102549785 | LOC102549785 |  |  |  |
| 102549828 | LOC102549828 |  |  |  |
| 102549940 | LOC102549940 |  |  |  |
| 102550080 | LOC102550080 |  |  |  |
| 102550148 | LOC102550148 |  |  |  |
| 102550160 | LOC102550160 |  |  |  |
| 102550257 | LOC102550257 |  |  |  |
| 102550314 | LOC102550314 |  |  |  |
| 102550416 | LOC102550416 |  |  |  |
| 102550466 | LOC102550466 |  |  |  |



|           |              |  |  |  |
|-----------|--------------|--|--|--|
| 102550512 | LOC102550512 |  |  |  |
| 102550530 | LOC102550530 |  |  |  |
| 102550598 | LOC102550598 |  |  |  |
| 102550654 | LOC102550654 |  |  |  |
| 102550682 | LOC102550682 |  |  |  |
| 102550699 | Spr2d        |  |  |  |
| 102550708 | LOC102550708 |  |  |  |
| 102550816 | LOC102550816 |  |  |  |
| 102550885 | LOC102550885 |  |  |  |
| 102550890 | LOC102550890 |  |  |  |
| 102550901 | Krtap2013    |  |  |  |
| 102550922 | LOC102550922 |  |  |  |
| 102550973 | LOC102550973 |  |  |  |
| 102550988 | LOC102550988 |  |  |  |
| 102551003 | LOC102551003 |  |  |  |
| 102551069 | Krtap22-2    |  |  |  |
| 102551071 | LOC102551071 |  |  |  |
| 102551102 | LOC102551102 |  |  |  |
| 102551105 | LOC102551105 |  |  |  |
| 102551117 | LOC102551117 |  |  |  |
| 102551143 | LOC102551143 |  |  |  |
| 102551166 | LOC102551166 |  |  |  |
| 102551175 | LOC102551175 |  |  |  |
| 102551192 | LOC102551192 |  |  |  |
| 102551201 | LOC102551201 |  |  |  |
| 102551241 | LOC102551241 |  |  |  |
| 102551265 | LOC102551265 |  |  |  |
| 102551278 | LOC102551278 |  |  |  |
| 102551296 | LOC102551296 |  |  |  |
| 102551304 | LOC102551304 |  |  |  |
| 102551394 | LOC102551394 |  |  |  |
| 102551397 | LOC102551397 |  |  |  |
| 102551406 | LOC102551406 |  |  |  |
| 102551431 | LOC102551431 |  |  |  |
| 102551497 | LOC102551497 |  |  |  |
| 102551504 | LOC102551504 |  |  |  |
| 102551559 | LOC102551559 |  |  |  |
| 102551575 | LOC102551575 |  |  |  |
| 102551620 | LOC102551620 |  |  |  |
| 102551632 | LOC102551632 |  |  |  |
| 102551641 | LOC102551641 |  |  |  |
| 102551679 | LOC102551679 |  |  |  |
| 102551754 | LOC102551754 |  |  |  |
| 102551771 | LOC102551771 |  |  |  |
| 102551823 | LOC102551823 |  |  |  |
| 102551847 | LOC102551847 |  |  |  |
| 102551852 | LOC102551852 |  |  |  |
| 102551887 | Fam177b      |  |  |  |
| 102551936 | LOC102551936 |  |  |  |
| 102551947 | LOC102551947 |  |  |  |
| 102552046 | LOC102552046 |  |  |  |
| 102552104 | LOC102552104 |  |  |  |
| 102552128 | LOC102552128 |  |  |  |
| 102552137 | LOC102552137 |  |  |  |
| 102552143 | LOC102552143 |  |  |  |
| 102552223 | LOC102552223 |  |  |  |

|           |              |  |  |  |
|-----------|--------------|--|--|--|
| 102552244 | LOC102552244 |  |  |  |
| 102552286 | LOC102552286 |  |  |  |
| 102552311 | LOC102552311 |  |  |  |
| 102552326 | LOC102552326 |  |  |  |
| 102552337 | LOC102552337 |  |  |  |
| 102552348 | LOC102552348 |  |  |  |
| 102552384 | LOC102552384 |  |  |  |
| 102552474 | LOC102552474 |  |  |  |
| 102552485 | LOC102552485 |  |  |  |
| 102552542 | LOC102552542 |  |  |  |
| 102552619 | LOC102552619 |  |  |  |
| 102552651 | LOC102552651 |  |  |  |
| 102552667 | LOC102552667 |  |  |  |
| 102552669 | LOC102552669 |  |  |  |
| 102552748 | LOC102552748 |  |  |  |
| 102552799 | LOC102552799 |  |  |  |
| 102552844 | LOC102552844 |  |  |  |
| 102552923 | LOC102552923 |  |  |  |
| 102552939 | Dynap        |  |  |  |
| 102552940 | LOC102552940 |  |  |  |
| 102553035 | LOC102553035 |  |  |  |
| 102553055 | LOC102553055 |  |  |  |
| 102553069 | LOC102553069 |  |  |  |
| 102553110 | LOC102553110 |  |  |  |
| 102553150 | LOC102553150 |  |  |  |
| 102553250 | LOC102553250 |  |  |  |
| 102553311 | LOC102553311 |  |  |  |
| 102553316 | LOC102553316 |  |  |  |
| 102553324 | LOC102553324 |  |  |  |
| 102553503 | LOC102553503 |  |  |  |
| 102553533 | LOC102553533 |  |  |  |
| 102553538 | LOC102553538 |  |  |  |
| 102553613 | LOC102553613 |  |  |  |
| 102553656 | LOC102553656 |  |  |  |
| 102553745 | Ct47b1       |  |  |  |
| 102553861 | LOC102553861 |  |  |  |
| 102553880 | LOC102553880 |  |  |  |
| 102553892 | LOC102553892 |  |  |  |
| 102554012 | LOC102554012 |  |  |  |
| 102554024 | LOC102554024 |  |  |  |
| 102554041 | LOC102554041 |  |  |  |
| 102554065 | LOC102554065 |  |  |  |
| 102554234 | LOC102554234 |  |  |  |
| 102554246 | LOC102554246 |  |  |  |
| 102554287 | LOC102554287 |  |  |  |
| 102554371 | LOC102554371 |  |  |  |
| 102554388 | LOC102554388 |  |  |  |
| 102554431 | LOC102554431 |  |  |  |
| 102554482 | Ins15        |  |  |  |
| 102554525 | LOC102554525 |  |  |  |
| 102554576 | LOC102554576 |  |  |  |
| 102554594 | LOC102554594 |  |  |  |
| 102554637 | LOC102554637 |  |  |  |
| 102554666 | LOC102554666 |  |  |  |
| 102554672 | LOC102554672 |  |  |  |
| 102554761 | LOC102554761 |  |  |  |

|           |                 |  |  |  |
|-----------|-----------------|--|--|--|
| 102554799 | LOC102554799    |  |  |  |
| 102554842 | LOC102554842    |  |  |  |
| 102554851 | Sertm2          |  |  |  |
| 102554917 | LOC102554917    |  |  |  |
| 102554937 | LOC102554937    |  |  |  |
| 102554944 | LOC102554944    |  |  |  |
| 102554989 | LOC102554989    |  |  |  |
| 102555023 | LOC102555023    |  |  |  |
| 102555114 | LOC102555114    |  |  |  |
| 102555137 | LOC102555137    |  |  |  |
| 102555149 | LOC102555149    |  |  |  |
| 102555170 | Higd1c          |  |  |  |
| 102555306 | LOC102555306    |  |  |  |
| 102555324 | LOC102555324    |  |  |  |
| 102555445 | LOC102555445    |  |  |  |
| 102555481 | LOC102555481    |  |  |  |
| 102555488 | LOC102555488    |  |  |  |
| 102555501 | LOC102555501    |  |  |  |
| 102555511 | LOC102555511    |  |  |  |
| 102555534 | LOC102555534    |  |  |  |
| 102555599 | LOC102555599    |  |  |  |
| 102555760 | LOC102555760    |  |  |  |
| 102555852 | LOC102555852    |  |  |  |
| 102556049 | LOC102556049    |  |  |  |
| 102556120 | LOC102556120    |  |  |  |
| 102556129 | Ccdc198         |  |  |  |
| 102556213 | LOC102556213    |  |  |  |
| 102556288 | LOC102556288    |  |  |  |
| 102556339 | LOC102556339    |  |  |  |
| 102556351 | LOC102556351    |  |  |  |
| 102556447 | LOC102556447    |  |  |  |
| 102556474 | LOC102556474    |  |  |  |
| 102556504 | LOC102556504    |  |  |  |
| 102556795 | LOC102556795    |  |  |  |
| 102557319 | LOC102557319    |  |  |  |
| 102557406 | LOC102557406    |  |  |  |
| 102557552 | LOC102557552    |  |  |  |
| 103689924 | LOC103689924    |  |  |  |
| 103689929 | LOC103689929    |  |  |  |
| 103689939 | LOC103689939    |  |  |  |
| 103689940 | LOC103689940    |  |  |  |
| 103689942 | LOC103689942    |  |  |  |
| 103689943 | LOC103689943    |  |  |  |
| 103689944 | LOC103689944    |  |  |  |
| 103689958 | LOC103689958    |  |  |  |
| 103689960 | LOC103689960    |  |  |  |
| 103689964 | LOC103689964    |  |  |  |
| 103689967 | LOC103689967    |  |  |  |
| 103689976 | LOC103689976    |  |  |  |
| 103689980 | LOC103689980    |  |  |  |
| 103689988 | LOC103689988    |  |  |  |
| 103689989 | LOC103689989    |  |  |  |
| 103689993 | LOC103689993    |  |  |  |
| 103689997 | NEWGENE 1311658 |  |  |  |
| 103690010 | Fibcd111        |  |  |  |
| 103690011 | LOC103690011    |  |  |  |

|           |                 |  |  |  |
|-----------|-----------------|--|--|--|
| 103690015 | LOC103690015    |  |  |  |
| 103690017 | LOC103690017    |  |  |  |
| 103690026 | LOC103690026    |  |  |  |
| 103690036 | LOC103690036    |  |  |  |
| 103690040 | LOC103690040    |  |  |  |
| 103690041 | LOC103690041    |  |  |  |
| 103690042 | LOC103690042    |  |  |  |
| 103690047 | NEWGENE 1308624 |  |  |  |
| 103690048 | LOC103690048    |  |  |  |
| 103690055 | LOC103690055    |  |  |  |
| 103690060 | LOC103690060    |  |  |  |
| 103690062 | LOC103690062    |  |  |  |
| 103690071 | LOC103690071    |  |  |  |
| 103690072 | LOC103690072    |  |  |  |
| 103690075 | LOC103690075    |  |  |  |
| 103690077 | LOC103690077    |  |  |  |
| 103690079 | LOC103690079    |  |  |  |
| 103690088 | LOC103690088    |  |  |  |
| 103690090 | LOC103690090    |  |  |  |
| 103690093 | Tmc4b           |  |  |  |
| 103690094 | LOC103690094    |  |  |  |
| 103690095 | LOC103690095    |  |  |  |
| 103690101 | LOC103690101    |  |  |  |
| 103690115 | LOC103690115    |  |  |  |
| 103690118 | LOC103690118    |  |  |  |
| 103690119 | LOC103690119    |  |  |  |
| 103690133 | LOC103690133    |  |  |  |
| 103690145 | LOC103690145    |  |  |  |
| 103690150 | LOC103690150    |  |  |  |
| 103690167 | Ar114           |  |  |  |
| 103690169 | LOC103690169    |  |  |  |
| 103690172 | LOC103690172    |  |  |  |
| 103690187 | LOC103690187    |  |  |  |
| 103690189 | LOC103690189    |  |  |  |
| 103690194 | LOC103690194    |  |  |  |
| 103690209 | Rbmx12          |  |  |  |
| 103690246 | LOC103690246    |  |  |  |
| 103690254 | Try5            |  |  |  |
| 103690255 | LOC103690255    |  |  |  |
| 103690271 | LOC103690271    |  |  |  |
| 103690273 | LOC103690273    |  |  |  |
| 103690280 | LOC103690280    |  |  |  |
| 103690286 | LOC103690286    |  |  |  |
| 103690289 | LOC103690289    |  |  |  |
| 103690291 | LOC103690291    |  |  |  |
| 103690297 | LOC103690297    |  |  |  |
| 103690306 | LOC103690306    |  |  |  |
| 103690319 | LOC103690319    |  |  |  |
| 103690342 | Evx1            |  |  |  |
| 103690352 | LOC103690352    |  |  |  |
| 103690354 | LOC103690354    |  |  |  |
| 103690355 | LOC103690355    |  |  |  |
| 103690365 | LOC103690365    |  |  |  |
| 103690374 | LOC103690374    |  |  |  |
| 103690375 | LOC103690375    |  |  |  |
| 103690381 | LOC103690381    |  |  |  |

|           |              |  |  |  |
|-----------|--------------|--|--|--|
| 103690410 | LOC103690410 |  |  |  |
| 103690462 | LOC103690462 |  |  |  |
| 103690504 | LOC103690504 |  |  |  |
| 103690514 | LOC103690514 |  |  |  |
| 103690545 | LOC103690545 |  |  |  |
| 103690588 | LOC103690588 |  |  |  |
| 103690600 | LOC103690600 |  |  |  |
| 103690754 | LOC103690754 |  |  |  |
| 103690765 | LOC103690765 |  |  |  |
| 103690810 | LOC103690810 |  |  |  |
| 103690821 | LOC103690821 |  |  |  |
| 103690860 | LOC103690860 |  |  |  |
| 103690862 | LOC103690862 |  |  |  |
| 103690864 | LOC103690864 |  |  |  |
| 103690878 | LOC103690878 |  |  |  |
| 103690887 | LOC103690887 |  |  |  |
| 103690902 | LOC103690902 |  |  |  |
| 103690904 | LOC103690904 |  |  |  |
| 103690913 | LOC103690913 |  |  |  |
| 103690935 | LOC103690935 |  |  |  |
| 103691020 | LOC103691020 |  |  |  |
| 103691064 | LOC103691064 |  |  |  |
| 103691066 | LOC103691066 |  |  |  |
| 103691092 | LOC103691092 |  |  |  |
| 103691095 | Wdr871       |  |  |  |
| 103691133 | LOC103691133 |  |  |  |
| 103691226 | LOC103691226 |  |  |  |
| 103691249 | LOC103691249 |  |  |  |
| 103691265 | Krtap5-1     |  |  |  |
| 103691445 | LOC103691445 |  |  |  |
| 103691460 | LOC103691460 |  |  |  |
| 103691468 | LOC103691468 |  |  |  |
| 103691494 | LOC103691494 |  |  |  |
| 103691495 | LOC103691495 |  |  |  |
| 103691498 | LOC103691498 |  |  |  |
| 103691506 | LOC103691506 |  |  |  |
| 103691522 | LOC103691522 |  |  |  |
| 103691547 | LOC103691547 |  |  |  |
| 103691549 | LOC103691549 |  |  |  |
| 103691587 | LOC103691587 |  |  |  |
| 103691627 | LOC103691627 |  |  |  |
| 103691715 | LOC103691715 |  |  |  |
| 103691749 | LOC103691749 |  |  |  |
| 103691806 | LOC103691806 |  |  |  |
| 103691842 | LOC103691842 |  |  |  |
| 103691843 | LOC103691843 |  |  |  |
| 103691873 | LOC103691873 |  |  |  |
| 103691918 | LOC103691918 |  |  |  |
| 103691922 | LOC103691922 |  |  |  |
| 103691948 | LOC103691948 |  |  |  |
| 103691956 | LOC103691956 |  |  |  |
| 103691965 | LOC103691965 |  |  |  |
| 103691966 | LOC103691966 |  |  |  |
| 103692008 | LOC103692008 |  |  |  |
| 103692013 | LOC103692013 |  |  |  |
| 103692018 | LOC103692018 |  |  |  |

|           |              |  |  |  |
|-----------|--------------|--|--|--|
| 103692019 | LOC103692019 |  |  |  |
| 103692039 | LOC103692039 |  |  |  |
| 103692040 | LOC103692040 |  |  |  |
| 103692041 | LOC103692041 |  |  |  |
| 103692042 | LOC103692042 |  |  |  |
| 103692048 | LOC103692048 |  |  |  |
| 103692071 | LOC103692071 |  |  |  |
| 103692073 | LOC103692073 |  |  |  |
| 103692138 | LOC103692138 |  |  |  |
| 103692142 | LOC103692142 |  |  |  |
| 103692213 | LOC103692213 |  |  |  |
| 103692309 | LOC103692309 |  |  |  |
| 103692345 | LOC103692345 |  |  |  |
| 103692396 | LOC103692396 |  |  |  |
| 103692409 | LOC103692409 |  |  |  |
| 103692412 | LOC103692412 |  |  |  |
| 103692417 | LOC103692417 |  |  |  |
| 103692518 | LOC103692518 |  |  |  |
| 103692530 | LOC103692530 |  |  |  |
| 103692690 | LOC103692690 |  |  |  |
| 103692726 | LOC103692726 |  |  |  |
| 103692755 | LOC103692755 |  |  |  |
| 103692768 | LOC103692768 |  |  |  |
| 103692831 | LOC103692831 |  |  |  |
| 103692888 | LOC103692888 |  |  |  |
| 103692896 | LOC103692896 |  |  |  |
| 103692906 | Eif3e        |  |  |  |
| 103692936 | LOC103692936 |  |  |  |
| 103692995 | LOC103692995 |  |  |  |
| 103693001 | LOC103693001 |  |  |  |
| 103693022 | LOC103693022 |  |  |  |
| 103693025 | LOC103693025 |  |  |  |
| 103693040 | LOC103693040 |  |  |  |
| 103693050 | LOC103693050 |  |  |  |
| 103693053 | LOC103693053 |  |  |  |
| 103693054 | LOC103693054 |  |  |  |
| 103693055 | LOC103693055 |  |  |  |
| 103693060 | LOC103693060 |  |  |  |
| 103693161 | LOC103693161 |  |  |  |
| 103693173 | LOC103693173 |  |  |  |
| 103693290 | LOC103693290 |  |  |  |
| 103693313 | LOC103693313 |  |  |  |
| 103693383 | LOC103693383 |  |  |  |
| 103693384 | LOC103693384 |  |  |  |
| 103693446 | LOC103693446 |  |  |  |
| 103693451 | LOC103693451 |  |  |  |
| 103693456 | LOC103693456 |  |  |  |
| 103693487 | LOC103693487 |  |  |  |
| 103693512 | LOC103693512 |  |  |  |
| 103693533 | LOC103693533 |  |  |  |
| 103693537 | LOC103693537 |  |  |  |
| 103693538 | LOC103693538 |  |  |  |
| 103693566 | LOC103693566 |  |  |  |
| 103693627 | LOC103693627 |  |  |  |
| 103693631 | LOC103693631 |  |  |  |
| 103693685 | LOC103693685 |  |  |  |



|           |              |  |  |  |
|-----------|--------------|--|--|--|
| 103693688 | LOC103693688 |  |  |  |
| 103693728 | LOC103693728 |  |  |  |
| 103693822 | LOC103693822 |  |  |  |
| 103693823 | LOC103693823 |  |  |  |
| 103693919 | LOC103693919 |  |  |  |
| 103694036 | LOC103694036 |  |  |  |
| 103694046 | LOC103694046 |  |  |  |
| 103694068 | LOC103694068 |  |  |  |
| 103694070 | LOC103694070 |  |  |  |
| 103694085 | LOC103694085 |  |  |  |
| 103694104 | LOC103694104 |  |  |  |
| 103694155 | LOC103694155 |  |  |  |
| 103694165 | LOC103694165 |  |  |  |
| 103694201 | LOC103694201 |  |  |  |
| 103694215 | LOC103694215 |  |  |  |
| 103694250 | LOC103694250 |  |  |  |
| 103694337 | LOC103694337 |  |  |  |
| 103694360 | LOC103694360 |  |  |  |
| 103694370 | LOC103694370 |  |  |  |
| 103694380 | LOC103694380 |  |  |  |
| 103694397 | LOC103694397 |  |  |  |
| 103694398 | LOC103694398 |  |  |  |
| 103694423 | LOC103694423 |  |  |  |
| 103694484 | LOC103694484 |  |  |  |
| 103694488 | LOC103694488 |  |  |  |
| 103694495 | LOC103694495 |  |  |  |
| 103694517 | LOC103694517 |  |  |  |
| 103694544 | Rbmy1j       |  |  |  |
| 103694545 | LOC103694545 |  |  |  |
| 103694550 | LOC103694550 |  |  |  |
| 103694554 | LOC103694554 |  |  |  |
| 103694555 | LOC103694555 |  |  |  |
| 103694583 | LOC103694583 |  |  |  |
| 103694584 | LOC103694584 |  |  |  |
| 103694587 | LOC103694587 |  |  |  |
| 103694591 | LOC103694591 |  |  |  |
| 103694599 | LOC103694599 |  |  |  |
| 103694600 | LOC103694600 |  |  |  |
| 103694601 | LOC103694601 |  |  |  |
| 103694602 | LOC103694602 |  |  |  |
| 103694603 | LOC103694603 |  |  |  |
| 103694604 | LOC103694604 |  |  |  |
| 103694605 | LOC103694605 |  |  |  |
| 103694606 | LOC103694606 |  |  |  |
| 103694614 | LOC103694614 |  |  |  |
| 103694622 | LOC103694622 |  |  |  |
| 103694624 | LOC103694624 |  |  |  |
| 103694627 | LOC103694627 |  |  |  |
| 103694636 | LOC103694636 |  |  |  |
| 103694637 | LOC103694637 |  |  |  |
| 103694640 | LOC103694640 |  |  |  |
| 103694726 | LOC103694726 |  |  |  |
| 103694730 | LOC103694730 |  |  |  |
| 103694731 | LOC103694731 |  |  |  |
| 103694733 | LOC103694733 |  |  |  |
| 103694745 | LOC103694745 |  |  |  |

|           |                 |  |  |  |
|-----------|-----------------|--|--|--|
| 103694747 | LOC103694747    |  |  |  |
| 103694768 | LOC103694768    |  |  |  |
| 103694775 | LOC103694775    |  |  |  |
| 103694776 | LOC103694776    |  |  |  |
| 103694825 | LOC103694825    |  |  |  |
| 103694826 | LOC103694826    |  |  |  |
| 103694827 | LOC103694827    |  |  |  |
| 103694829 | LOC103694829    |  |  |  |
| 103694832 | LOC103694832    |  |  |  |
| 103694833 | LOC103694833    |  |  |  |
| 103694836 | LOC103694836    |  |  |  |
| 103694837 | LOC103694837    |  |  |  |
| 103694840 | LOC103694840    |  |  |  |
| 103694842 | LOC103694842    |  |  |  |
| 103694845 | LOC103694845    |  |  |  |
| 103694848 | LOC103694848    |  |  |  |
| 103694849 | LOC103694849    |  |  |  |
| 103694853 | LOC103694853    |  |  |  |
| 103694854 | LOC103694854    |  |  |  |
| 103694860 | LOC103694860    |  |  |  |
| 103694874 | LOC103694874    |  |  |  |
| 103694882 | LOC103694882    |  |  |  |
| 103694883 | LOC103694883    |  |  |  |
| 103694884 | LOC103694884    |  |  |  |
| 103694889 | LOC103694889    |  |  |  |
| 103694891 | LOC103694891    |  |  |  |
| 103694892 | LOC103694892    |  |  |  |
| 103694893 | LOC103694893    |  |  |  |
| 103694897 | LOC103694897    |  |  |  |
| 103694913 | LOC103694913    |  |  |  |
| 103695096 | LOC103695096    |  |  |  |
| 103695151 | LOC103695151    |  |  |  |
| 103695192 | LOC103695192    |  |  |  |
| 103695338 | LOC103695338    |  |  |  |
| 108348032 | LOC108348032    |  |  |  |
| 108348036 | LOC108348036    |  |  |  |
| 108348037 | LOC108348037    |  |  |  |
| 108348038 | LOC108348038    |  |  |  |
| 108348039 | LOC108348039    |  |  |  |
| 108348042 | LOC108348042    |  |  |  |
| 108348050 | LOC108348050    |  |  |  |
| 108348053 | LOC108348053    |  |  |  |
| 108348068 | LOC108348068    |  |  |  |
| 108348071 | Qrfp            |  |  |  |
| 108348072 | LOC108348072    |  |  |  |
| 108348075 | LOC108348075    |  |  |  |
| 108348077 | LOC108348077    |  |  |  |
| 108348086 | LOC108348086    |  |  |  |
| 108348087 | LOC108348087    |  |  |  |
| 108348088 | LOC108348088    |  |  |  |
| 108348091 | LOC108348091    |  |  |  |
| 108348095 | NEWGENE 1308171 |  |  |  |
| 108348097 | LOC108348097    |  |  |  |
| 108348103 | LOC108348103    |  |  |  |
| 108348105 | LOC108348105    |  |  |  |
| 108348110 | LOC108348110    |  |  |  |

|           |                 |  |  |  |
|-----------|-----------------|--|--|--|
| 108348116 | LOC108348116    |  |  |  |
| 108348119 | LOC108348119    |  |  |  |
| 108348126 | NEWGENE 1565788 |  |  |  |
| 108348130 | LOC108348130    |  |  |  |
| 108348132 | LOC108348132    |  |  |  |
| 108348133 | LOC108348133    |  |  |  |
| 108348135 | LOC108348135    |  |  |  |
| 108348138 | LOC108348138    |  |  |  |
| 108348146 | LOC108348146    |  |  |  |
| 108348152 | LOC108348152    |  |  |  |
| 108348163 | LOC108348163    |  |  |  |
| 108348164 | LOC108348164    |  |  |  |
| 108348174 | LOC108348174    |  |  |  |
| 108348182 | NEWGENE 1310011 |  |  |  |
| 108348183 | LOC108348183    |  |  |  |
| 108348196 | LOC108348196    |  |  |  |
| 108348202 | LOC108348202    |  |  |  |
| 108348205 | LOC108348205    |  |  |  |
| 108348212 | LOC108348212    |  |  |  |
| 108348228 | LOC108348228    |  |  |  |
| 108348235 | LOC108348235    |  |  |  |
| 108348237 | LOC108348237    |  |  |  |
| 108348238 | LOC108348238    |  |  |  |
| 108348243 | LOC108348243    |  |  |  |
| 108348279 | LOC108348279    |  |  |  |
| 108348324 | LOC108348324    |  |  |  |
| 108348376 | LOC108348376    |  |  |  |
| 108348428 | LOC108348428    |  |  |  |
| 108348453 | LOC108348453    |  |  |  |
| 108348476 | LOC108348476    |  |  |  |
| 108348739 | LOC108348739    |  |  |  |
| 108348875 | LOC108348875    |  |  |  |
| 108348882 | LOC108348882    |  |  |  |
| 108349003 | LOC108349003    |  |  |  |
| 108349071 | LOC108349071    |  |  |  |
| 108349258 | LOC108349258    |  |  |  |
| 108349399 | LOC108349399    |  |  |  |
| 108349419 | LOC108349419    |  |  |  |
| 108349459 | LOC108349459    |  |  |  |
| 108349543 | LOC108349543    |  |  |  |
| 108349671 | LOC108349671    |  |  |  |
| 108349727 | LOC108349727    |  |  |  |
| 108349734 | LOC108349734    |  |  |  |
| 108349736 | LOC108349736    |  |  |  |
| 108349755 | LOC108349755    |  |  |  |
| 108349761 | LOC108349761    |  |  |  |
| 108349762 | LOC108349762    |  |  |  |
| 108349763 | Gpr32           |  |  |  |
| 108349764 | Igsf22          |  |  |  |
| 108349779 | LOC108349779    |  |  |  |
| 108349780 | LOC108349780    |  |  |  |
| 108349786 | LOC108349786    |  |  |  |
| 108349829 | LOC108349829    |  |  |  |
| 108349842 | LOC108349842    |  |  |  |
| 108349926 | LOC108349926    |  |  |  |
| 108350002 | LOC108350002    |  |  |  |

|           |                 |  |  |  |
|-----------|-----------------|--|--|--|
| 108350036 | LOC108350036    |  |  |  |
| 108350113 | LOC108350113    |  |  |  |
| 108350184 | LOC108350184    |  |  |  |
| 108350189 | LOC108350189    |  |  |  |
| 108350190 | LOC108350190    |  |  |  |
| 108350198 | LOC108350198    |  |  |  |
| 108350204 | LOC108350204    |  |  |  |
| 108350225 | LOC108350225    |  |  |  |
| 108350226 | LOC108350226    |  |  |  |
| 108350227 | LOC108350227    |  |  |  |
| 108350228 | LOC108350228    |  |  |  |
| 108350275 | NEWGENE_2324572 |  |  |  |
| 108350296 | LOC108350296    |  |  |  |
| 108350336 | LOC108350336    |  |  |  |
| 108350337 | LOC108350337    |  |  |  |
| 108350338 | LOC108350338    |  |  |  |
| 108350339 | Lcn1511         |  |  |  |
| 108350366 | LOC108350366    |  |  |  |
| 108350385 | LOC108350385    |  |  |  |
| 108350389 | LOC108350389    |  |  |  |
| 108350501 | LOC108350501    |  |  |  |
| 108350549 | LOC108350549    |  |  |  |
| 108350574 | LOC108350574    |  |  |  |
| 108350575 | LOC108350575    |  |  |  |
| 108350577 | LOC108350577    |  |  |  |
| 108350578 | LOC108350578    |  |  |  |
| 108350623 | LOC108350623    |  |  |  |
| 108350674 | LOC108350674    |  |  |  |
| 108350775 | LOC108350775    |  |  |  |
| 108351017 | LOC108351017    |  |  |  |
| 108351048 | LOC108351048    |  |  |  |
| 108351082 | LOC108351082    |  |  |  |
| 108351087 | LOC108351087    |  |  |  |
| 108351094 | LOC108351094    |  |  |  |
| 108351095 | LOC108351095    |  |  |  |
| 108351099 | LOC108351099    |  |  |  |
| 108351130 | LOC108351130    |  |  |  |
| 108351157 | LOC108351157    |  |  |  |
| 108351350 | LOC108351350    |  |  |  |
| 108351365 | LOC108351365    |  |  |  |
| 108351379 | LOC108351379    |  |  |  |
| 108351410 | LOC108351410    |  |  |  |
| 108351431 | LOC108351431    |  |  |  |
| 108351565 | LOC108351565    |  |  |  |
| 108351583 | LOC108351583    |  |  |  |
| 108351667 | LOC108351667    |  |  |  |
| 108351811 | LOC108351811    |  |  |  |
| 108351817 | LOC108351817    |  |  |  |
| 108351818 | LOC108351818    |  |  |  |
| 108351823 | LOC108351823    |  |  |  |
| 108351911 | LOC108351911    |  |  |  |
| 108351962 | LOC108351962    |  |  |  |
| 108351982 | LOC108351982    |  |  |  |
| 108351990 | LOC108351990    |  |  |  |
| 108351994 | LOC108351994    |  |  |  |
| 108352004 | LOC108352004    |  |  |  |

|           |              |  |  |  |
|-----------|--------------|--|--|--|
| 108352005 | LOC108352005 |  |  |  |
| 108352008 | LOC108352008 |  |  |  |
| 108352027 | LOC108352027 |  |  |  |
| 108352140 | LOC108352140 |  |  |  |
| 108352170 | LOC108352170 |  |  |  |
| 108352180 | LOC108352180 |  |  |  |
| 108352181 | LOC108352181 |  |  |  |
| 108352184 | LOC108352184 |  |  |  |
| 108352189 | LOC108352189 |  |  |  |
| 108352190 | LOC108352190 |  |  |  |
| 108352221 | LOC108352221 |  |  |  |
| 108352322 | LOC108352322 |  |  |  |
| 108352332 | Hh1a2        |  |  |  |
| 108352358 | LOC108352358 |  |  |  |
| 108352373 | LOC108352373 |  |  |  |
| 108352374 | LOC108352374 |  |  |  |
| 108352378 | LOC108352378 |  |  |  |
| 108352388 | LOC108352388 |  |  |  |
| 108352398 | LOC108352398 |  |  |  |
| 108352480 | LOC108352480 |  |  |  |
| 108352488 | LOC108352488 |  |  |  |
| 108352616 | LOC108352616 |  |  |  |
| 108352635 | LOC108352635 |  |  |  |
| 108352638 | LOC108352638 |  |  |  |
| 108352639 | LOC108352639 |  |  |  |
| 108352748 | LOC108352748 |  |  |  |
| 108352750 | LOC108352750 |  |  |  |
| 108352854 | LOC108352854 |  |  |  |
| 108353077 | LOC108353077 |  |  |  |
| 108353078 | LOC108353078 |  |  |  |
| 108353092 | LOC108353092 |  |  |  |
| 108353098 | LOC108353098 |  |  |  |
| 108353108 | LOC108353108 |  |  |  |
| 108353140 | LOC108353140 |  |  |  |
| 108353142 | LOC108353142 |  |  |  |
| 108353202 | LOC108353202 |  |  |  |
| 108353251 | LOC108353251 |  |  |  |
| 108353256 | LOC108353256 |  |  |  |
| 108353266 | LOC108353266 |  |  |  |
| 108353273 | LOC108353273 |  |  |  |
| 108353314 | LOC108353314 |  |  |  |
| 108353315 | LOC108353315 |  |  |  |
| 108353321 | LOC108353321 |  |  |  |
| 108353325 | LOC108353325 |  |  |  |
| 108353326 | LOC108353326 |  |  |  |
| 108353327 | LOC108353327 |  |  |  |
| 108353376 | LOC108353376 |  |  |  |
| 108353386 | LOC108353386 |  |  |  |
| 108353418 | LOC108353418 |  |  |  |
| 108353421 | LOC108353421 |  |  |  |
| 108353422 | LOC108353422 |  |  |  |
| 108353425 | LOC108353425 |  |  |  |
| 113901    | Chia         |  |  |  |
| 113914    | Taar1        |  |  |  |
| 113919    | Gpx5         |  |  |  |
| 113983    | Pitx1        |  |  |  |

|        |          |  |  |  |
|--------|----------|--|--|--|
| 114109 | Nkx2-5   |  |  |  |
| 114213 | Rax      |  |  |  |
| 114498 | Dmrt1    |  |  |  |
| 114516 | Gira3    |  |  |  |
| 114595 | Csnls2a  |  |  |  |
| 114903 | Lim2     |  |  |  |
| 116469 | Trpv5    |  |  |  |
| 116474 | Pr12a1   |  |  |  |
| 116553 | I113     |  |  |  |
| 116558 | I19      |  |  |  |
| 116589 | Serpinb5 |  |  |  |
| 116592 | Tff2     |  |  |  |
| 116630 | Csf2     |  |  |  |
| 116700 | Cga      |  |  |  |
| 117037 | Spam1    |  |  |  |
| 117061 | Mmp10    |  |  |  |
| 117098 | Pdha2    |  |  |  |
| 117179 | Cuzd1    |  |  |  |
| 117270 | Tff1     |  |  |  |
| 124451 | Lhx5     |  |  |  |
| 156873 | Kcnk15   |  |  |  |
| 170578 | Asz1     |  |  |  |
| 170582 | Fgf19    |  |  |  |
| 170583 | Fgf23    |  |  |  |
| 170633 | Fgf3     |  |  |  |
| 170700 | Fgf6     |  |  |  |
| 170704 | Hrh4     |  |  |  |
| 170925 | Slco6b1  |  |  |  |
| 171016 | Hrg      |  |  |  |
| 171027 | Svs5     |  |  |  |
| 171054 | Ccr4     |  |  |  |
| 171072 | Sult1c2  |  |  |  |
| 171074 | Hdgf11   |  |  |  |
| 171080 | Slc17a1  |  |  |  |
| 171101 | Grp      |  |  |  |
| 171149 | Serpini2 |  |  |  |
| 171290 | Gzmc     |  |  |  |
| 171302 | Foxe3    |  |  |  |
| 171385 | Acmsd    |  |  |  |
| 171403 | Spata19  |  |  |  |
| 171406 | Pr18a9   |  |  |  |
| 171412 | Defb22   |  |  |  |
| 171518 | Cyp2c22  |  |  |  |
| 171521 | Cyp2c13  |  |  |  |
| 171556 | Pr15a1   |  |  |  |
| 192155 | Sftpb    |  |  |  |
| 192224 | Pr12b1   |  |  |  |
| 192239 | Svs3a    |  |  |  |
| 192257 | Ces2e    |  |  |  |
| 192271 | Adam6    |  |  |  |
| 192274 | Foxe1    |  |  |  |
| 192646 | Mtnr1b   |  |  |  |
| 192675 | Bsnd     |  |  |  |
| 207113 | Tex101   |  |  |  |
| 24177  | Afp      |  |  |  |
| 24197  | Alpi     |  |  |  |



|        |           |  |  |  |
|--------|-----------|--|--|--|
| 24257  | Cgm4      |  |  |  |
| 24269  | Cpa1      |  |  |  |
| 24277  | Crygc     |  |  |  |
| 24279  | Cryge     |  |  |  |
| 24282  | Pr13d4    |  |  |  |
| 24283  | Pr13b1    |  |  |  |
| 24300  | Cyp2b1    |  |  |  |
| 24306  | Cyp4a2    |  |  |  |
| 24315  | Pr18a2    |  |  |  |
| 24360  | Fabp1     |  |  |  |
| 24366  | Fgb       |  |  |  |
| 24481  | Ifnb1     |  |  |  |
| 24497  | Ii5       |  |  |  |
| 24505  | Ins1      |  |  |  |
| 24506  | Ins2      |  |  |  |
| 24523  | Klk1      |  |  |  |
| 24538  | Lipc      |  |  |  |
| 24548  | Mbl1      |  |  |  |
| 24581  | Mycs      |  |  |  |
| 245916 | Cst11     |  |  |  |
| 24594  | Klk1b3    |  |  |  |
| 245985 | Prb3      |  |  |  |
| 246043 | Klrl1     |  |  |  |
| 246145 | Pbp2      |  |  |  |
| 246147 | Ctsq      |  |  |  |
| 246186 | Fgl1      |  |  |  |
| 246214 | Lrit1     |  |  |  |
| 246219 | Tas2r126  |  |  |  |
| 246234 | Slc34a3   |  |  |  |
| 246252 | Ces2a     |  |  |  |
| 246305 | Spag11a   |  |  |  |
| 246328 | Serpina4  |  |  |  |
| 24656  | Pr14a1    |  |  |  |
| 24657  | Pr16a1    |  |  |  |
| 24677  | Ppy       |  |  |  |
| 24683  | Pr1       |  |  |  |
| 24685  | Prml      |  |  |  |
| 24687  | Prp15     |  |  |  |
| 24691  | Prss1     |  |  |  |
| 24694  | Pth       |  |  |  |
| 24711  | Rbp3      |  |  |  |
| 24714  | Reg1a     |  |  |  |
| 24794  | Serpina3c |  |  |  |
| 24802  | Svs4      |  |  |  |
| 24813  | Tat       |  |  |  |
| 24829  | Hist1h2ba |  |  |  |
| 24833  | Spink3    |  |  |  |
| 24839  | Tnp1      |  |  |  |
| 24840  | Tnp2      |  |  |  |
| 24860  | Ucp1      |  |  |  |
| 24861  | Ugt1a1    |  |  |  |
| 24881  | Wnt1      |  |  |  |
| 24894  | Cyp2a1    |  |  |  |
| 24895  | Cyp2a2    |  |  |  |
| 24899  | Smcp      |  |  |  |
| 24902  | Sult2a6   |  |  |  |

|        |           |  |  |  |
|--------|-----------|--|--|--|
| 24912  | Sult2a1   |  |  |  |
| 24926  | Ceacam3   |  |  |  |
| 24937  | Kap       |  |  |  |
| 24952  | Gcg       |  |  |  |
| 25010  | Scgb2a1   |  |  |  |
| 25011  | Cyp2c12   |  |  |  |
| 25013  | Semg1     |  |  |  |
| 25030  | Andpro    |  |  |  |
| 25040  | Gip       |  |  |  |
| 25052  | Prss2     |  |  |  |
| 25080  | Apoa4     |  |  |  |
| 25221  | Sry       |  |  |  |
| 25254  | Dspp      |  |  |  |
| 25258  | Glycam1   |  |  |  |
| 25279  | Cyp24a1   |  |  |  |
| 252834 | Gdf6      |  |  |  |
| 252886 | Foxd4     |  |  |  |
| 252887 | Olr1413   |  |  |  |
| 252899 | Miox      |  |  |  |
| 252931 | Cyp3a18   |  |  |  |
| 25310  | Cyct      |  |  |  |
| 25325  | I110      |  |  |  |
| 25331  | Mat1a     |  |  |  |
| 25335  | Mmp7      |  |  |  |
| 25345  | Prm2      |  |  |  |
| 25350  | Sftpd     |  |  |  |
| 25354  | Sstr5     |  |  |  |
| 25373  | Ahsg      |  |  |  |
| 25377  | Ambp      |  |  |  |
| 25401  | Alx1      |  |  |  |
| 25411  | Cnga2     |  |  |  |
| 25422  | Crybb2    |  |  |  |
| 25428  | Cyp7a1    |  |  |  |
| 25440  | Fabp6     |  |  |  |
| 25447  | Fshb      |  |  |  |
| 25449  | Fshr      |  |  |  |
| 25474  | Lgals4    |  |  |  |
| 25504  | Oxt       |  |  |  |
| 25509  | Pax6      |  |  |  |
| 25540  | Sbp       |  |  |  |
| 25548  | Slc34a1   |  |  |  |
| 25552  | Slc5a1    |  |  |  |
| 25563  | Tff3      |  |  |  |
| 25610  | Csf3      |  |  |  |
| 25634  | G6pc      |  |  |  |
| 25640  | Hnf1b     |  |  |  |
| 25711  | Gucy2c    |  |  |  |
| 25712  | Ifng      |  |  |  |
| 25753  | Chrng     |  |  |  |
| 257634 | Lhx1      |  |  |  |
| 257643 | LOC257643 |  |  |  |
| 257651 | Prpmp5    |  |  |  |
| 257652 | Prb1      |  |  |  |
| 259233 | Gpx6      |  |  |  |
| 266602 | Spink1    |  |  |  |
| 266607 | Ffar1     |  |  |  |

|        |           |  |  |  |
|--------|-----------|--|--|--|
| 266682 | Cyp3a2    |  |  |  |
| 266704 | Gzmf      |  |  |  |
| 266717 | Krt9      |  |  |  |
| 266738 | Prop1     |  |  |  |
| 266782 | Pr13a1    |  |  |  |
| 266804 | Pr17b1    |  |  |  |
| 282833 | Zp4       |  |  |  |
| 286759 | Csn1s2b   |  |  |  |
| 286892 | Vom1r101  |  |  |  |
| 286913 | 01r1278   |  |  |  |
| 286933 | 0bp2b     |  |  |  |
| 286953 | Cyp2b3    |  |  |  |
| 286956 | Vom1r97   |  |  |  |
| 286957 | Vom1r102  |  |  |  |
| 286959 | 01r1271   |  |  |  |
| 286960 | LOC286960 |  |  |  |
| 286961 | Slc22a24  |  |  |  |
| 286964 | Hsd17b6   |  |  |  |
| 286981 | Vom2r32   |  |  |  |
| 286983 | Vom2r40   |  |  |  |
| 286989 | Ugt2b7    |  |  |  |
| 287000 | 01r1361   |  |  |  |
| 287002 | 01r1082   |  |  |  |
| 287003 | Tas2r123  |  |  |  |
| 287006 | Slco6c1   |  |  |  |
| 287077 | 01r1358   |  |  |  |
| 287080 | 01r1355   |  |  |  |
| 287081 | 01r1365   |  |  |  |
| 287082 | 01r1368   |  |  |  |
| 287083 | 01r1372   |  |  |  |
| 287084 | 01r1376   |  |  |  |
| 287086 | 01r1378   |  |  |  |
| 287088 | 01r1375   |  |  |  |
| 287090 | 01r1373   |  |  |  |
| 287093 | 01r1382   |  |  |  |
| 287108 | Prss27    |  |  |  |
| 287130 | Ptx4      |  |  |  |
| 287168 | Hbz       |  |  |  |
| 287185 | Foxi1     |  |  |  |
| 287232 | 01r1383   |  |  |  |
| 287236 | 01r1385   |  |  |  |
| 287237 | 01r1386   |  |  |  |
| 287240 | 01r1389   |  |  |  |
| 287245 | 01r1398   |  |  |  |
| 287247 | 01r1401   |  |  |  |
| 287259 | 01r1409   |  |  |  |
| 287262 | 01r1407   |  |  |  |
| 287287 | I14       |  |  |  |
| 287309 | 01r1423   |  |  |  |
| 287310 | 01r1422   |  |  |  |
| 287313 | 01r1418   |  |  |  |
| 287314 | 01r1416   |  |  |  |
| 287316 | 01r1425   |  |  |  |
| 287321 | 01r1432   |  |  |  |
| 287322 | 01r1434   |  |  |  |
| 287324 | 01r1436   |  |  |  |

|        |            |  |  |  |
|--------|------------|--|--|--|
| 287325 | 01r1437    |  |  |  |
| 287328 | 01r1439    |  |  |  |
| 287329 | 01r1440    |  |  |  |
| 287331 | 01r1443    |  |  |  |
| 287336 | 01r1448    |  |  |  |
| 287343 | 01r1454    |  |  |  |
| 287347 | 01r1458    |  |  |  |
| 287349 | 01r1461    |  |  |  |
| 287363 | 01r1463    |  |  |  |
| 287469 | Foxn1      |  |  |  |
| 287481 | 01r1467    |  |  |  |
| 287484 | 01r1482    |  |  |  |
| 287487 | 01r1475    |  |  |  |
| 287489 | 01r1485    |  |  |  |
| 287496 | 01r1492    |  |  |  |
| 287501 | 01r1498    |  |  |  |
| 287502 | 01r1499    |  |  |  |
| 287506 | 01r1505    |  |  |  |
| 287508 | 01r1507    |  |  |  |
| 287509 | 01r1511    |  |  |  |
| 287511 | 01r1512    |  |  |  |
| 287513 | 01r1513    |  |  |  |
| 287514 | 01r1514    |  |  |  |
| 287516 | 01r1517    |  |  |  |
| 287517 | 01r1519    |  |  |  |
| 287520 | 01r1516    |  |  |  |
| 287557 | Spaca3     |  |  |  |
| 287570 | Gas212     |  |  |  |
| 287613 | 01r1521    |  |  |  |
| 287614 | 01r1522    |  |  |  |
| 287624 | Kif2b      |  |  |  |
| 287675 | Krt24      |  |  |  |
| 287697 | Krt35      |  |  |  |
| 287698 | Krt36      |  |  |  |
| 287702 | Krt17      |  |  |  |
| 287730 | Pyy        |  |  |  |
| 287741 | FAM187A    |  |  |  |
| 287753 | Sspl2c     |  |  |  |
| 287783 | RGD1559578 |  |  |  |
| 287820 | Otop2      |  |  |  |
| 287920 | St6galnac1 |  |  |  |
| 287942 | Crkl       |  |  |  |
| 287968 | 01r1570    |  |  |  |
| 287969 | 01r1569    |  |  |  |
| 287970 | 01r1567    |  |  |  |
| 287973 | 01r1566    |  |  |  |
| 288006 | Rtpl       |  |  |  |
| 288067 | Csta       |  |  |  |
| 288075 | Stfa3      |  |  |  |
| 288136 | RGD1565996 |  |  |  |
| 288154 | Hoxd13     |  |  |  |
| 288155 | Evx2       |  |  |  |
| 288184 | 01r1563    |  |  |  |
| 288185 | 01r1562    |  |  |  |
| 288186 | 01r1561    |  |  |  |
| 288187 | 01r1559    |  |  |  |

|        |           |  |  |  |
|--------|-----------|--|--|--|
| 288190 | 01r1557   |  |  |  |
| 288192 | 01r1553   |  |  |  |
| 288196 | 01r1549   |  |  |  |
| 288198 | 01r1537   |  |  |  |
| 288199 | 01r1536   |  |  |  |
| 288244 | Ifitm7    |  |  |  |
| 288291 | Tmprss15  |  |  |  |
| 288297 | Krtap15-1 |  |  |  |
| 288360 | Car15     |  |  |  |
| 288378 | Clec4m    |  |  |  |
| 288396 | Vom2r59   |  |  |  |
| 288457 | Gsx1      |  |  |  |
| 288517 | Cyp2w1    |  |  |  |
| 288521 | LOC288521 |  |  |  |
| 288736 | Foxn4     |  |  |  |
| 288789 | 01r875    |  |  |  |
| 288790 | 01r880    |  |  |  |
| 288792 | 01r881    |  |  |  |
| 288795 | 01r917    |  |  |  |
| 288797 | 01r905    |  |  |  |
| 288798 | 01r920    |  |  |  |
| 288801 | 01r907    |  |  |  |
| 288803 | 01r883    |  |  |  |
| 288806 | 01r908    |  |  |  |
| 288808 | 01r903    |  |  |  |
| 288810 | 01r901    |  |  |  |
| 288811 | 01r898    |  |  |  |
| 288813 | 01r896    |  |  |  |
| 288816 | 01r892    |  |  |  |
| 288818 | 01r889    |  |  |  |
| 288822 | 01r1072   |  |  |  |
| 288823 | 01r1071   |  |  |  |
| 288828 | 01r1063   |  |  |  |
| 288829 | 01r1061   |  |  |  |
| 288831 | 01r1059   |  |  |  |
| 288835 | 01r1055   |  |  |  |
| 288839 | 01r1051   |  |  |  |
| 288840 | 01r1049   |  |  |  |
| 288850 | 01r1029   |  |  |  |
| 288851 | 01r1024   |  |  |  |
| 288854 | 01r1020   |  |  |  |
| 288858 | 01r1016   |  |  |  |
| 288861 | 01r1012   |  |  |  |
| 288875 | 01r943    |  |  |  |
| 288876 | 01r947    |  |  |  |
| 288878 | 01r950    |  |  |  |
| 288881 | 01r1002   |  |  |  |
| 288886 | 01r1006   |  |  |  |
| 288887 | 01r1007   |  |  |  |
| 288891 | 01r1000   |  |  |  |
| 289010 | Zp3r      |  |  |  |
| 289055 | F13b      |  |  |  |
| 289057 | Cfhr1     |  |  |  |
| 289239 | 01r1579   |  |  |  |
| 289240 | 01r1582   |  |  |  |
| 289241 | 01r1583   |  |  |  |

|        |            |  |  |  |
|--------|------------|--|--|--|
| 289251 | 01r1589    |  |  |  |
| 289255 | 01r1593    |  |  |  |
| 289260 | 01r1600    |  |  |  |
| 289261 | 01r1601    |  |  |  |
| 289269 | Becn2      |  |  |  |
| 289295 | Vom2r30    |  |  |  |
| 289329 | Ccdc121    |  |  |  |
| 289334 | Ccdc185    |  |  |  |
| 289407 | Atp6v1g3   |  |  |  |
| 289433 | Vom2r69    |  |  |  |
| 289481 | Gk2        |  |  |  |
| 289525 | Enam       |  |  |  |
| 289526 | Vcsa2      |  |  |  |
| 289530 | Prr27      |  |  |  |
| 289546 | Tmprss11g  |  |  |  |
| 289662 | Apex211    |  |  |  |
| 289701 | RGD1565560 |  |  |  |
| 289759 | My17       |  |  |  |
| 289923 | 01r1605    |  |  |  |
| 290001 | 01r1624    |  |  |  |
| 290002 | 01r1626    |  |  |  |
| 290005 | 01r1630    |  |  |  |
| 290006 | 01r1608    |  |  |  |
| 290008 | 01r1610    |  |  |  |
| 290009 | 01r1611    |  |  |  |
| 290010 | 01r1612    |  |  |  |
| 290018 | 01r1620    |  |  |  |
| 290020 | 01r1621    |  |  |  |
| 290049 | 01r1640    |  |  |  |
| 290050 | 01r1641    |  |  |  |
| 290056 | 01r1645    |  |  |  |
| 290202 | 01r1646    |  |  |  |
| 290244 | Mcpt3      |  |  |  |
| 290344 | Adam28     |  |  |  |
| 290493 | Oxgr1      |  |  |  |
| 290580 | RGD1563346 |  |  |  |
| 290583 | RGD1564225 |  |  |  |
| 290589 | RGD1562641 |  |  |  |
| 290638 | B3gnt3     |  |  |  |
| 290685 | Tkt12      |  |  |  |
| 290757 | F11        |  |  |  |
| 290763 | Adam26a    |  |  |  |
| 290766 | Triml2     |  |  |  |
| 290767 | Triml1     |  |  |  |
| 290774 | Adam24     |  |  |  |
| 290818 | RGD1562638 |  |  |  |
| 290856 | Defa24     |  |  |  |
| 290876 | LOC290876  |  |  |  |
| 290911 | RGD1564807 |  |  |  |
| 290916 | RGD1565806 |  |  |  |
| 290921 | Gdf2       |  |  |  |
| 290957 | 01r1653    |  |  |  |
| 290970 | Cts7       |  |  |  |
| 290972 | Cts811     |  |  |  |
| 290975 | Ctsr       |  |  |  |
| 290981 | RGD1308751 |  |  |  |



|        |            |  |  |  |
|--------|------------|--|--|--|
| 290989 | Catsper3   |  |  |  |
| 291077 | RGD1307537 |  |  |  |
| 291161 | Olr1658    |  |  |  |
| 291172 | Olr1660    |  |  |  |
| 291283 | Akr1c2     |  |  |  |
| 291287 | Tuba13     |  |  |  |
| 291328 | Slc39a12   |  |  |  |
| 291361 | Olr1662    |  |  |  |
| 291468 | Gykl1      |  |  |  |
| 291470 | Ftmt       |  |  |  |
| 291585 | Pudp       |  |  |  |
| 29160  | Amelx      |  |  |  |
| 291608 | RGD1563060 |  |  |  |
| 29170  | Aqp6       |  |  |  |
| 29172  | Aqp8       |  |  |  |
| 29174  | Ctsj       |  |  |  |
| 29188  | Csn3       |  |  |  |
| 291991 | Tmed6      |  |  |  |
| 29229  | Spt1       |  |  |  |
| 292311 | Tt112      |  |  |  |
| 292324 | Olr387     |  |  |  |
| 292417 | Vom2r11    |  |  |  |
| 292419 | Fpr-rs3    |  |  |  |
| 292438 | Vom2r2     |  |  |  |
| 29245  | Klk6       |  |  |  |
| 292458 | Raet1c     |  |  |  |
| 292474 | RGD1560633 |  |  |  |
| 292516 | Act19b     |  |  |  |
| 292531 | Vom2r26    |  |  |  |
| 292560 | Olr4       |  |  |  |
| 292561 | Olr5       |  |  |  |
| 292563 | Olr8       |  |  |  |
| 292566 | Zscan5b    |  |  |  |
| 292572 | RGD1564651 |  |  |  |
| 292574 | Obox2      |  |  |  |
| 292577 | Nlrp9      |  |  |  |
| 292583 | Rfpl4a     |  |  |  |
| 292607 | Vom1r53    |  |  |  |
| 292625 | Crxos1     |  |  |  |
| 29265  | Mcpt1      |  |  |  |
| 292666 | Psg29      |  |  |  |
| 292668 | Ceacam11   |  |  |  |
| 292688 | Snrpd21    |  |  |  |
| 292697 | Apoc2      |  |  |  |
| 292711 | RGD1564380 |  |  |  |
| 292728 | Cyp2b21    |  |  |  |
| 292801 | Scgb1b24   |  |  |  |
| 292849 | Klk11      |  |  |  |
| 292851 | Klk9       |  |  |  |
| 292852 | Klk7       |  |  |  |
| 292855 | Klk1c12    |  |  |  |
| 292866 | Klk1c8     |  |  |  |
| 292868 | Klk1c9     |  |  |  |
| 292872 | Klk1c3     |  |  |  |
| 292873 | Klk15      |  |  |  |
| 292928 | RGD1560730 |  |  |  |

|        |            |  |  |  |
|--------|------------|--|--|--|
| 292934 | Dbx1       |  |  |  |
| 292948 | RGD1560303 |  |  |  |
| 29295  | Cyp2b12    |  |  |  |
| 29298  | Cyp2c7     |  |  |  |
| 293048 | Rhcg       |  |  |  |
| 293070 | 01r11      |  |  |  |
| 293072 | 01r10      |  |  |  |
| 293075 | 01r13      |  |  |  |
| 293081 | 01r19      |  |  |  |
| 293083 | 01r20      |  |  |  |
| 293085 | 01r23      |  |  |  |
| 293091 | 01r30      |  |  |  |
| 29310  | Mc3r       |  |  |  |
| 29311  | Msb        |  |  |  |
| 293188 | 01r48      |  |  |  |
| 293189 | 01r47      |  |  |  |
| 293192 | 01r45      |  |  |  |
| 293193 | 01r44      |  |  |  |
| 293195 | 01r41      |  |  |  |
| 293198 | 01r39      |  |  |  |
| 293201 | 01r62      |  |  |  |
| 293205 | 01r56      |  |  |  |
| 293210 | 01r50      |  |  |  |
| 293211 | 01r49      |  |  |  |
| 293214 | 01r68      |  |  |  |
| 293215 | 01r70      |  |  |  |
| 293218 | 01r74      |  |  |  |
| 293221 | 01r78      |  |  |  |
| 293222 | 01r79      |  |  |  |
| 293223 | 01r80      |  |  |  |
| 293224 | 01r81      |  |  |  |
| 293226 | 01r83      |  |  |  |
| 293227 | 01r84      |  |  |  |
| 293228 | 01r85      |  |  |  |
| 293232 | 01r91      |  |  |  |
| 293233 | 01r92      |  |  |  |
| 293234 | 01r93      |  |  |  |
| 293238 | 01r97      |  |  |  |
| 29324  | Capza3     |  |  |  |
| 293240 | 01r98      |  |  |  |
| 293242 | 01r103     |  |  |  |
| 293243 | 01r104     |  |  |  |
| 293244 | 01r105     |  |  |  |
| 293245 | 01r106     |  |  |  |
| 293246 | 01r107     |  |  |  |
| 293247 | 01r108     |  |  |  |
| 293250 | 01r112     |  |  |  |
| 293251 | 01r113     |  |  |  |
| 293253 | 01r115     |  |  |  |
| 293255 | 01r119     |  |  |  |
| 293256 | 01r120     |  |  |  |
| 293257 | 01r121     |  |  |  |
| 293258 | 01r122     |  |  |  |
| 293260 | 01r124     |  |  |  |
| 293262 | 01r126     |  |  |  |
| 293263 | 01r128     |  |  |  |

|        |            |  |  |  |
|--------|------------|--|--|--|
| 293268 | 01r130     |  |  |  |
| 293271 | 01r132     |  |  |  |
| 293273 | 01r136     |  |  |  |
| 293278 | 01r139     |  |  |  |
| 293279 | 01r140     |  |  |  |
| 293280 | 01r141     |  |  |  |
| 293281 | 01r143     |  |  |  |
| 293282 | 01r144     |  |  |  |
| 293285 | 01r148     |  |  |  |
| 293287 | Ubqlnl     |  |  |  |
| 293288 | RGD1310717 |  |  |  |
| 293289 | 01r149     |  |  |  |
| 293301 | 01r153     |  |  |  |
| 293304 | 01r157     |  |  |  |
| 293312 | 01r165     |  |  |  |
| 293314 | 01r167     |  |  |  |
| 293315 | 01r168     |  |  |  |
| 293316 | 01r170     |  |  |  |
| 293318 | 01r171     |  |  |  |
| 293319 | 01r172     |  |  |  |
| 293321 | 01r176     |  |  |  |
| 293325 | 01r178     |  |  |  |
| 293327 | 01r180     |  |  |  |
| 293328 | 01r183     |  |  |  |
| 293329 | 01r184     |  |  |  |
| 293330 | 01r185     |  |  |  |
| 293333 | 01r189     |  |  |  |
| 293334 | 01r190     |  |  |  |
| 293336 | 01r193     |  |  |  |
| 293338 | 01r196     |  |  |  |
| 293339 | 01r197     |  |  |  |
| 293340 | 01r200     |  |  |  |
| 293342 | 01r201     |  |  |  |
| 293350 | 01r203     |  |  |  |
| 293351 | 01r204     |  |  |  |
| 293353 | 01r206     |  |  |  |
| 293355 | 01r208     |  |  |  |
| 293358 | 01r211     |  |  |  |
| 293361 | 01r214     |  |  |  |
| 293362 | 01r215     |  |  |  |
| 293364 | 01r217     |  |  |  |
| 293365 | 01r219     |  |  |  |
| 293367 | 01r221     |  |  |  |
| 293368 | 01r222     |  |  |  |
| 293369 | 01r223     |  |  |  |
| 293370 | 01r227     |  |  |  |
| 293373 | 01r229     |  |  |  |
| 293374 | 01r230     |  |  |  |
| 293375 | 01r231     |  |  |  |
| 293377 | 01r233     |  |  |  |
| 293379 | 01r234     |  |  |  |
| 293381 | 01r235     |  |  |  |
| 293382 | 01r237     |  |  |  |
| 293383 | 01r239     |  |  |  |
| 293384 | 01r240     |  |  |  |
| 293387 | 01r242     |  |  |  |

|        |            |  |  |  |
|--------|------------|--|--|--|
| 293389 | 01r244     |  |  |  |
| 29339  | Apcs       |  |  |  |
| 293390 | 01r245     |  |  |  |
| 293391 | 01r246     |  |  |  |
| 293392 | 01r247     |  |  |  |
| 293394 | 01r251     |  |  |  |
| 293398 | 01r252     |  |  |  |
| 293399 | 01r263     |  |  |  |
| 293400 | 01r262     |  |  |  |
| 293402 | 01r259     |  |  |  |
| 293421 | 01r285     |  |  |  |
| 293424 | 01r282     |  |  |  |
| 293425 | 01r281     |  |  |  |
| 293429 | 01r279     |  |  |  |
| 293431 | 01r276     |  |  |  |
| 293435 | 01r267     |  |  |  |
| 293437 | 01r270     |  |  |  |
| 293439 | 01r272     |  |  |  |
| 293442 | Abca15     |  |  |  |
| 29349  | Fgf8       |  |  |  |
| 293515 | Ctf2       |  |  |  |
| 293537 | Hmx3       |  |  |  |
| 293538 | Hmx2       |  |  |  |
| 293573 | Mmp21      |  |  |  |
| 29359  | Pla2g10    |  |  |  |
| 293590 | 01r288     |  |  |  |
| 293595 | 01r295     |  |  |  |
| 293596 | 01r297     |  |  |  |
| 293597 | 01r298     |  |  |  |
| 293598 | 01r299     |  |  |  |
| 293600 | 01r302     |  |  |  |
| 293601 | 01r303     |  |  |  |
| 293603 | 01r305     |  |  |  |
| 293605 | 01r307     |  |  |  |
| 293607 | 01r309     |  |  |  |
| 293656 | RGD1307603 |  |  |  |
| 293669 | Cd248      |  |  |  |
| 29368  | Fgf17      |  |  |  |
| 293739 | Ms4a10     |  |  |  |
| 29375  | Uncx       |  |  |  |
| 293759 | 01r321     |  |  |  |
| 293761 | 01r323     |  |  |  |
| 293762 | 01r324     |  |  |  |
| 293763 | 01r325     |  |  |  |
| 293764 | 01r326     |  |  |  |
| 293765 | 01r327     |  |  |  |
| 293769 | 01r332     |  |  |  |
| 293773 | 01r329     |  |  |  |
| 293781 | 01r338     |  |  |  |
| 293785 | 01r340     |  |  |  |
| 293788 | 01r343     |  |  |  |
| 293789 | 01r346     |  |  |  |
| 293793 | 01r352     |  |  |  |
| 293794 | 01r357     |  |  |  |
| 293803 | 01r371     |  |  |  |
| 293805 | 01r373     |  |  |  |

|        |             |  |  |  |
|--------|-------------|--|--|--|
| 293808 | Olr375      |  |  |  |
| 293809 | Olr376      |  |  |  |
| 293810 | Olr377      |  |  |  |
| 293813 | Olr380      |  |  |  |
| 293815 | Olr382      |  |  |  |
| 293816 | Olr383      |  |  |  |
| 293817 | Olr384      |  |  |  |
| 293847 | Dusp9       |  |  |  |
| 293862 | Fam50a      |  |  |  |
| 293890 | Mlana       |  |  |  |
| 293918 | Fmr1nb      |  |  |  |
| 293976 | Dmrt3       |  |  |  |
| 29410  | Neurog1     |  |  |  |
| 294109 | Olr385      |  |  |  |
| 294121 | Taar2       |  |  |  |
| 294122 | Taar4       |  |  |  |
| 294123 | Taar5       |  |  |  |
| 294124 | Taar6       |  |  |  |
| 294125 | Taar7a      |  |  |  |
| 294126 | Taar7b      |  |  |  |
| 294130 | Taar7h      |  |  |  |
| 294131 | Taar7g      |  |  |  |
| 294133 | Taar7e      |  |  |  |
| 294134 | Taar7d      |  |  |  |
| 294138 | Olr1671     |  |  |  |
| 294140 | Olr1668     |  |  |  |
| 294143 | Olr1673     |  |  |  |
| 294150 | Olr1683     |  |  |  |
| 294151 | Olr1684     |  |  |  |
| 294152 | Olr1686     |  |  |  |
| 294155 | Olr1704     |  |  |  |
| 294157 | Olr1702     |  |  |  |
| 294158 | Olr1696     |  |  |  |
| 294159 | Olr1695     |  |  |  |
| 294161 | Olr1691     |  |  |  |
| 294162 | Olr1690     |  |  |  |
| 294164 | Olr1688     |  |  |  |
| 294175 | Olr1714     |  |  |  |
| 294183 | Olr1724     |  |  |  |
| 294186 | Olr1729     |  |  |  |
| 294245 | Ly6g5c      |  |  |  |
| 294268 | Btn3a2      |  |  |  |
| 294328 | Aire        |  |  |  |
| 294342 | Slc5a4b     |  |  |  |
| 294503 | Nodal       |  |  |  |
| 29478  | Ndufs6      |  |  |  |
| 295047 | Rexo111-ps1 |  |  |  |
| 295076 | Aadac12     |  |  |  |
| 295180 | Pglyrp3b    |  |  |  |
| 295190 | Rptn        |  |  |  |
| 295199 | RGD1560661  |  |  |  |
| 29535  | Pdx1        |  |  |  |
| 295351 | Chi313      |  |  |  |
| 295352 | RGD1309110  |  |  |  |
| 295362 | Gstm61      |  |  |  |
| 295498 | Adh6a       |  |  |  |

|        |          |  |  |  |
|--------|----------|--|--|--|
| 295589 | Tas2r134 |  |  |  |
| 295711 | 0lr440   |  |  |  |
| 295712 | 0lr441   |  |  |  |
| 295713 | 0lr442   |  |  |  |
| 295714 | Fads211  |  |  |  |
| 295715 | 0lr443   |  |  |  |
| 295719 | 0lr447   |  |  |  |
| 295720 | 0lr448   |  |  |  |
| 295721 | 0lr450   |  |  |  |
| 295723 | 0lr453   |  |  |  |
| 295724 | 0lr454   |  |  |  |
| 295725 | 0lr455   |  |  |  |
| 295729 | 0lr459   |  |  |  |
| 295730 | 0lr461   |  |  |  |
| 295732 | 0lr462   |  |  |  |
| 295734 | 0lr464   |  |  |  |
| 295735 | 0lr465   |  |  |  |
| 295736 | 0lr466   |  |  |  |
| 295739 | 0lr469   |  |  |  |
| 295741 | 0lr470   |  |  |  |
| 295743 | 0lr472   |  |  |  |
| 295744 | 0lr473   |  |  |  |
| 295746 | 0lr476   |  |  |  |
| 295747 | 0lr477   |  |  |  |
| 295748 | 0lr479   |  |  |  |
| 295750 | 0lr484   |  |  |  |
| 295751 | 0lr485   |  |  |  |
| 295754 | 0lr488   |  |  |  |
| 295758 | 0lr493   |  |  |  |
| 295759 | 0lr495   |  |  |  |
| 295763 | 0lr502   |  |  |  |
| 295765 | 0lr510   |  |  |  |
| 295766 | 0lr513   |  |  |  |
| 295767 | 0lr514   |  |  |  |
| 295768 | 0lr515   |  |  |  |
| 295769 | 0lr516   |  |  |  |
| 295771 | 0lr517   |  |  |  |
| 295772 | 0lr519   |  |  |  |
| 295776 | 0lr528   |  |  |  |
| 295781 | 0lr526   |  |  |  |
| 295786 | 0lr530   |  |  |  |
| 295790 | 0lr539   |  |  |  |
| 295792 | 0lr540   |  |  |  |
| 295795 | 0lr550   |  |  |  |
| 295797 | 0lr554   |  |  |  |
| 295798 | 0lr555   |  |  |  |
| 295799 | 0lr558   |  |  |  |
| 295801 | 0lr560   |  |  |  |
| 295806 | 0lr567   |  |  |  |
| 295813 | 0lr575   |  |  |  |
| 295814 | 0lr576   |  |  |  |
| 295822 | 0lr588   |  |  |  |
| 295824 | 0lr592   |  |  |  |
| 295827 | 0lr597   |  |  |  |
| 295828 | 0lr598   |  |  |  |
| 295829 | 0lr602   |  |  |  |



|        |            |  |  |  |
|--------|------------|--|--|--|
| 295834 | 01r607     |  |  |  |
| 295835 | 01r609     |  |  |  |
| 295836 | 01r610     |  |  |  |
| 295839 | 01r614     |  |  |  |
| 295843 | 01r619     |  |  |  |
| 295848 | 01r631     |  |  |  |
| 295852 | 01r639     |  |  |  |
| 295858 | 01r651     |  |  |  |
| 295862 | 01r655     |  |  |  |
| 295863 | 01r657     |  |  |  |
| 295864 | 01r658     |  |  |  |
| 295865 | 01r659     |  |  |  |
| 295869 | 01r663     |  |  |  |
| 295870 | 01r664     |  |  |  |
| 295875 | 01r668     |  |  |  |
| 295876 | 01r669     |  |  |  |
| 295878 | 01r672     |  |  |  |
| 295880 | 01r673     |  |  |  |
| 295881 | 01r674     |  |  |  |
| 295884 | 01r678     |  |  |  |
| 295885 | 01r679     |  |  |  |
| 295890 | 01r684     |  |  |  |
| 295891 | 01r686     |  |  |  |
| 295892 | 01r687     |  |  |  |
| 295896 | 01r694     |  |  |  |
| 295900 | 01r702     |  |  |  |
| 295907 | 01r713     |  |  |  |
| 295910 | 01r718     |  |  |  |
| 295914 | 01r721     |  |  |  |
| 295917 | 01r728     |  |  |  |
| 295919 | 01r731     |  |  |  |
| 295999 | Ankrd30a   |  |  |  |
| 296001 | 01r748     |  |  |  |
| 296003 | 01r750     |  |  |  |
| 296004 | 01r752     |  |  |  |
| 296005 | 01r754     |  |  |  |
| 29601  | Gja8       |  |  |  |
| 296010 | 01r758     |  |  |  |
| 296016 | 01r763     |  |  |  |
| 296022 | 01r769     |  |  |  |
| 296023 | 01r770     |  |  |  |
| 296026 | 01r773     |  |  |  |
| 296028 | 01r775     |  |  |  |
| 296035 | 01r781     |  |  |  |
| 296037 | 01r783     |  |  |  |
| 296042 | 01r789     |  |  |  |
| 296044 | 01r792     |  |  |  |
| 296220 | Cst11      |  |  |  |
| 296229 | P22k15     |  |  |  |
| 29623  | Ugt2b37    |  |  |  |
| 296230 | RGD1563136 |  |  |  |
| 296234 | Cyss       |  |  |  |
| 296235 | LOC296235  |  |  |  |
| 296307 | Fer114     |  |  |  |
| 29632  | Hsd3b2     |  |  |  |
| 296321 | Bpi        |  |  |  |

|        |            |  |  |  |
|--------|------------|--|--|--|
| 296354 | Svs3b      |  |  |  |
| 296356 | RGD1563818 |  |  |  |
| 296366 | Wfdc3      |  |  |  |
| 296411 | Fam209a    |  |  |  |
| 296455 | Zswim2     |  |  |  |
| 296504 | Abo2       |  |  |  |
| 29651  | Aldh1a7    |  |  |  |
| 296535 | Psx1       |  |  |  |
| 296541 | Il36a      |  |  |  |
| 296577 | Gltd1      |  |  |  |
| 296578 | Lcn9       |  |  |  |
| 296661 | Olr400     |  |  |  |
| 296663 | Olr397     |  |  |  |
| 296666 | Olr403     |  |  |  |
| 296667 | Olr404     |  |  |  |
| 296669 | Olr406     |  |  |  |
| 296672 | Olr408     |  |  |  |
| 296675 | Olr411     |  |  |  |
| 296677 | Olr415     |  |  |  |
| 296678 | Olr416     |  |  |  |
| 296679 | Olr417     |  |  |  |
| 296682 | Olr420     |  |  |  |
| 296684 | Olr422     |  |  |  |
| 296685 | Olr423     |  |  |  |
| 296686 | Olr424     |  |  |  |
| 296687 | Olr425     |  |  |  |
| 296689 | Olr428     |  |  |  |
| 296690 | Olr429     |  |  |  |
| 296694 | Olr434     |  |  |  |
| 29684  | Klrc2      |  |  |  |
| 29689  | Gabrd      |  |  |  |
| 29708  | Gabra6     |  |  |  |
| 297081 | Svs1       |  |  |  |
| 297173 | RSA-14-44  |  |  |  |
| 297418 | Gkn1       |  |  |  |
| 297439 | Vomlr100   |  |  |  |
| 29749  | Ppp3r2     |  |  |  |
| 297572 | Cpamd8     |  |  |  |
| 297645 | Klrel      |  |  |  |
| 297671 | RGD1559532 |  |  |  |
| 297767 | Rbpjl2     |  |  |  |
| 297899 | RGD1562036 |  |  |  |
| 298038 | Olr853     |  |  |  |
| 298039 | Olr852     |  |  |  |
| 298040 | Olr851     |  |  |  |
| 298042 | Olr850     |  |  |  |
| 298044 | Olr848     |  |  |  |
| 298045 | Olr847     |  |  |  |
| 298046 | Olr845     |  |  |  |
| 298049 | Olr841     |  |  |  |
| 298109 | RGD1566134 |  |  |  |
| 298164 | Tex13c     |  |  |  |
| 298205 | Ifna4      |  |  |  |
| 298210 | Ifna1      |  |  |  |
| 298211 | Ifna11     |  |  |  |
| 298213 | Ifna2      |  |  |  |

|        |            |  |  |  |
|--------|------------|--|--|--|
| 298232 | Zfp353     |  |  |  |
| 298331 | RGD1566184 |  |  |  |
| 298340 | Slc6a14    |  |  |  |
| 298346 | Rhox11     |  |  |  |
| 298352 | Rhox9      |  |  |  |
| 298423 | Cyp4a3     |  |  |  |
| 298449 | Klf17      |  |  |  |
| 298474 | Olr865     |  |  |  |
| 298475 | Olr866     |  |  |  |
| 298483 | Lao1       |  |  |  |
| 298595 | Padi6      |  |  |  |
| 298613 | Pramef5    |  |  |  |
| 298621 | RGD1306186 |  |  |  |
| 298623 | RGD1308878 |  |  |  |
| 298671 | Actrt2     |  |  |  |
| 298692 | Tt1110     |  |  |  |
| 298724 | Olr990     |  |  |  |
| 298733 | Olr840     |  |  |  |
| 298734 | Olr839     |  |  |  |
| 298892 | RGD1565679 |  |  |  |
| 298954 | Prps111    |  |  |  |
| 298959 | Agr3       |  |  |  |
| 298963 | Lrrc72     |  |  |  |
| 299007 | Gpr33      |  |  |  |
| 299061 | Nkx2-8     |  |  |  |
| 299172 | RGD1565752 |  |  |  |
| 299270 | Serpina6   |  |  |  |
| 299274 | Serpina9   |  |  |  |
| 299276 | Serpina3m  |  |  |  |
| 299277 | LOC299277  |  |  |  |
| 299282 | LOC299282  |  |  |  |
| 299306 | RGD1564855 |  |  |  |
| 299499 | Sp8        |  |  |  |
| 299553 | Olr1090    |  |  |  |
| 299555 | Morc2b     |  |  |  |
| 299570 | Olr1092    |  |  |  |
| 299576 | Olr1095    |  |  |  |
| 299587 | Casp14     |  |  |  |
| 299588 | Olr1086    |  |  |  |
| 299589 | Olr1085    |  |  |  |
| 299593 | Olr1078    |  |  |  |
| 299596 | Olr1075    |  |  |  |
| 299600 | Odf312     |  |  |  |
| 299648 | Zfp494     |  |  |  |
| 299649 | Vom1r108   |  |  |  |
| 299683 | Vom2r57    |  |  |  |
| 299766 | Myf5       |  |  |  |
| 299889 | Dcstamp    |  |  |  |
| 299944 | Slc22a22   |  |  |  |
| 299963 | RGD1564515 |  |  |  |
| 300024 | LOC300024  |  |  |  |
| 300108 | Pnpla5     |  |  |  |
| 300121 | Smc1b      |  |  |  |
| 300150 | Klhdc7b    |  |  |  |
| 300194 | Olr1102    |  |  |  |
| 300205 | Olr1111    |  |  |  |

|        |            |  |  |  |
|--------|------------|--|--|--|
| 300248 | Krt73      |  |  |  |
| 300262 | Hoxc12     |  |  |  |
| 300323 | Zdhhc25    |  |  |  |
| 300338 | Mmp1b      |  |  |  |
| 300339 | Mmp1       |  |  |  |
| 300340 | Mmp27      |  |  |  |
| 300341 | Mmp20      |  |  |  |
| 300381 | RGD1304745 |  |  |  |
| 300389 | Mbd311     |  |  |  |
| 300392 | 01r1124    |  |  |  |
| 300395 | 01r1139    |  |  |  |
| 300400 | 01r1130    |  |  |  |
| 300405 | 01r1145    |  |  |  |
| 300407 | 01r1146    |  |  |  |
| 300408 | 01r1147    |  |  |  |
| 300411 | 01r1151    |  |  |  |
| 300414 | 01r1155    |  |  |  |
| 300425 | 01r1169    |  |  |  |
| 300524 | 01r1196    |  |  |  |
| 300529 | 01r1204    |  |  |  |
| 300538 | 01r1214    |  |  |  |
| 300540 | 01r1217    |  |  |  |
| 300548 | 01r1222    |  |  |  |
| 300551 | 01r1226    |  |  |  |
| 300552 | 01r1227    |  |  |  |
| 300554 | 01r1229    |  |  |  |
| 300557 | 01r1232    |  |  |  |
| 300558 | 01r1234    |  |  |  |
| 300560 | 01r1235    |  |  |  |
| 300565 | 01r1240    |  |  |  |
| 300566 | 01r1241    |  |  |  |
| 300567 | 01r1242    |  |  |  |
| 300568 | 01r1243    |  |  |  |
| 300573 | 01r1248    |  |  |  |
| 300576 | 01r1251    |  |  |  |
| 300577 | 01r1252    |  |  |  |
| 300581 | 01r1259    |  |  |  |
| 300583 | 01r1264    |  |  |  |
| 300584 | 01r1265    |  |  |  |
| 300589 | 01r1273    |  |  |  |
| 300595 | 01r1285    |  |  |  |
| 300599 | 01r1293    |  |  |  |
| 300600 | 01r1297    |  |  |  |
| 300602 | 01r1301    |  |  |  |
| 300603 | 01r1302    |  |  |  |
| 300605 | 01r1304    |  |  |  |
| 300607 | 01r1306    |  |  |  |
| 300610 | 01r1309    |  |  |  |
| 300613 | 01r1311    |  |  |  |
| 300615 | 01r1314    |  |  |  |
| 300616 | 01r1315    |  |  |  |
| 300620 | 01r1319    |  |  |  |
| 300621 | 01r1320    |  |  |  |
| 300624 | 01r1323    |  |  |  |
| 300625 | 01r1325    |  |  |  |
| 300626 | 01r1326    |  |  |  |

|        |            |  |  |  |
|--------|------------|--|--|--|
| 300627 | 01r1327    |  |  |  |
| 300630 | 01r1330    |  |  |  |
| 300632 | 01r1332    |  |  |  |
| 300634 | 01r1334    |  |  |  |
| 300635 | 01r1335    |  |  |  |
| 300637 | 01r1337    |  |  |  |
| 300639 | 01r1339    |  |  |  |
| 300640 | 01r1340    |  |  |  |
| 300643 | 01r1341    |  |  |  |
| 300790 | Slc51b     |  |  |  |
| 300954 | Sox14      |  |  |  |
| 301015 | Fbxw12     |  |  |  |
| 301027 | Prss42     |  |  |  |
| 301066 | Ccr8       |  |  |  |
| 301101 | Dppa5      |  |  |  |
| 301106 | Trim42     |  |  |  |
| 301114 | Slc25a41   |  |  |  |
| 301137 | Vom2r79    |  |  |  |
| 301165 | LOC301165  |  |  |  |
| 301230 | RGD1565959 |  |  |  |
| 301284 | Tfap2d     |  |  |  |
| 301289 | I117a      |  |  |  |
| 301306 | RGD1309049 |  |  |  |
| 301468 | Crygb      |  |  |  |
| 301610 | 01r1344    |  |  |  |
| 301816 | Sstyl      |  |  |  |
| 302027 | 01r1096    |  |  |  |
| 302041 | 01r956     |  |  |  |
| 302044 | 01r959     |  |  |  |
| 302045 | 01r962     |  |  |  |
| 302172 | RGD1563270 |  |  |  |
| 302228 | LOC302228  |  |  |  |
| 302244 | RGD1564712 |  |  |  |
| 302254 | 01r886     |  |  |  |
| 302311 | RGD1564748 |  |  |  |
| 302366 | RGD1562871 |  |  |  |
| 302367 | RGD1561552 |  |  |  |
| 302368 | Tent5d     |  |  |  |
| 302399 | Zcchc13    |  |  |  |
| 302426 | Otud6a     |  |  |  |
| 302435 | RGD1563590 |  |  |  |
| 302438 | Mageb11    |  |  |  |
| 302441 | Mageb6     |  |  |  |
| 302442 | Mageb5     |  |  |  |
| 302447 | RGD1563978 |  |  |  |
| 302448 | RGD1562980 |  |  |  |
| 302488 | Usp26      |  |  |  |
| 302536 | RGD1561661 |  |  |  |
| 302638 | Magea8     |  |  |  |
| 302685 | RGD1560203 |  |  |  |
| 302744 | Mageb2     |  |  |  |
| 302746 | Mageb3     |  |  |  |
| 302748 | Mageb1     |  |  |  |
| 302772 | RGD1562485 |  |  |  |
| 302773 | RGD1563104 |  |  |  |
| 302776 | RGD1561230 |  |  |  |

|        |            |  |  |  |
|--------|------------|--|--|--|
| 302780 | Rbm31y     |  |  |  |
| 302783 | H2afb3     |  |  |  |
| 302796 | Actrt1     |  |  |  |
| 302821 | Olr1765    |  |  |  |
| 302823 | Olr1766    |  |  |  |
| 302824 | Olr1767    |  |  |  |
| 302825 | Olr1751    |  |  |  |
| 302860 | Gpr1121    |  |  |  |
| 302867 | Dusp21     |  |  |  |
| 302879 | Smptb      |  |  |  |
| 302958 | Olr1369    |  |  |  |
| 303181 | Wnt3a      |  |  |  |
| 303234 | Ccdc42     |  |  |  |
| 303296 | Olr1504    |  |  |  |
| 303479 | Calcoco2   |  |  |  |
| 303480 | Hoxb13     |  |  |  |
| 303530 | Krt16      |  |  |  |
| 303729 | Enpp7      |  |  |  |
| 303835 | Rtp2       |  |  |  |
| 303861 | Cpn2       |  |  |  |
| 304026 | Olr1533    |  |  |  |
| 304125 | Cldn17     |  |  |  |
| 304195 | Pcp2       |  |  |  |
| 304508 | Oasl1      |  |  |  |
| 304514 | Tbx5       |  |  |  |
| 304603 | Apon       |  |  |  |
| 304610 | Olr878     |  |  |  |
| 304633 | Olr1065    |  |  |  |
| 304688 | Serpinb3   |  |  |  |
| 304689 | Serpinb11  |  |  |  |
| 304985 | Olr1576    |  |  |  |
| 305123 | Brd1       |  |  |  |
| 305711 | Olr1606    |  |  |  |
| 305844 | Rnaseh2b   |  |  |  |
| 306073 | Kbtbd6     |  |  |  |
| 306168 | Sox21      |  |  |  |
| 306540 | Got1l1     |  |  |  |
| 306655 | Irx4       |  |  |  |
| 306659 | Irx1       |  |  |  |
| 306718 | RGD1564657 |  |  |  |
| 306720 | Ctsm       |  |  |  |
| 306798 | Nutm2f     |  |  |  |
| 306883 | Fam50b     |  |  |  |
| 306890 | Serpinb9d  |  |  |  |
| 306929 | Pr17a4     |  |  |  |
| 307092 | Akr1c1     |  |  |  |
| 307203 | RGD1559726 |  |  |  |
| 307563 | Dsc3       |  |  |  |
| 307727 | LOC307727  |  |  |  |
| 307767 | Frem3      |  |  |  |
| 308015 | Clca1      |  |  |  |
| 308129 | Iyd        |  |  |  |
| 308169 | Tcp10b     |  |  |  |
| 308248 | Vom2r4     |  |  |  |
| 308257 | Vom2r6     |  |  |  |
| 308344 | Fam71e2    |  |  |  |



|        |            |  |  |  |
|--------|------------|--|--|--|
| 308353 | RGD1564617 |  |  |  |
| 308394 | Psg16      |  |  |  |
| 308562 | Klk14      |  |  |  |
| 308564 | Klk12      |  |  |  |
| 308565 | Klk8       |  |  |  |
| 308717 | Slc35d3    |  |  |  |
| 308853 | Olr37      |  |  |  |
| 308905 | Ubqln3     |  |  |  |
| 308919 | Ovch2      |  |  |  |
| 309028 | RGD1559891 |  |  |  |
| 309114 | Muc5b      |  |  |  |
| 309133 | Mrgprg     |  |  |  |
| 309221 | Olr318     |  |  |  |
| 309222 | Olr319     |  |  |  |
| 309266 | Pnma5      |  |  |  |
| 309275 | Trex2      |  |  |  |
| 309304 | Pdcd11g2   |  |  |  |
| 309389 | Nkx2-3     |  |  |  |
| 309449 | Elov13     |  |  |  |
| 309528 | Lipm       |  |  |  |
| 309574 | Olr1687    |  |  |  |
| 309578 | Olr1709    |  |  |  |
| 309680 | Dnmt3l     |  |  |  |
| 310575 | Sprr3      |  |  |  |
| 310596 | RGD1565369 |  |  |  |
| 311031 | RGD1564306 |  |  |  |
| 311173 | Olr561     |  |  |  |
| 311175 | Olr601     |  |  |  |
| 311179 | Olr698     |  |  |  |
| 311180 | Olr725     |  |  |  |
| 311559 | Bpifa5     |  |  |  |
| 312203 | Klf14      |  |  |  |
| 312273 | LOC312273  |  |  |  |
| 312317 | Doxl2      |  |  |  |
| 313089 | Slc7a13    |  |  |  |
| 313163 | RGD1306195 |  |  |  |
| 313451 | Rhox4g     |  |  |  |
| 313484 | Dmrtb1     |  |  |  |
| 313485 | Skint4     |  |  |  |
| 313546 | Olr856     |  |  |  |
| 313596 | Tfap2e     |  |  |  |
| 313686 | Aadacl3    |  |  |  |
| 313688 | Aadacl4    |  |  |  |
| 314459 | Amn        |  |  |  |
| 314539 | Macc1      |  |  |  |
| 314659 | Act19      |  |  |  |
| 314746 | Usp44      |  |  |  |
| 314848 | Lrrc10     |  |  |  |
| 314858 | RGD1306282 |  |  |  |
| 315075 | Ly6d       |  |  |  |
| 315095 | Tssk5      |  |  |  |
| 315323 | Krt4       |  |  |  |
| 315324 | Krt78      |  |  |  |
| 315337 | Hoxc13     |  |  |  |
| 315347 | Gtsf1      |  |  |  |
| 315350 | Irs4       |  |  |  |

|        |            |  |  |  |
|--------|------------|--|--|--|
| 315452 | Olr1121    |  |  |  |
| 315571 | Olr1280    |  |  |  |
| 315572 | Olr1283    |  |  |  |
| 315573 | Olr1307    |  |  |  |
| 315650 | Btg4       |  |  |  |
| 315915 | Pih1d3     |  |  |  |
| 315953 | Cldn18     |  |  |  |
| 316000 | Act111     |  |  |  |
| 316142 | Tesl       |  |  |  |
| 316259 | Opn5       |  |  |  |
| 316265 | Pgk2       |  |  |  |
| 316304 | Lgsn       |  |  |  |
| 316409 | Hsfy2      |  |  |  |
| 316465 | RGD1562431 |  |  |  |
| 316633 | Olr1346    |  |  |  |
| 316777 | Txndc2     |  |  |  |
| 317272 | RGD1563554 |  |  |  |
| 317274 | Mageb16    |  |  |  |
| 317297 | Magea9     |  |  |  |
| 317310 | Ct55       |  |  |  |
| 317314 | RGD1561558 |  |  |  |
| 317316 | Plac1      |  |  |  |
| 317356 | LOC317356  |  |  |  |
| 317456 | LOC317456  |  |  |  |
| 317471 | Saxo11     |  |  |  |
| 317584 | RGD1566225 |  |  |  |
| 317597 | RGD1560585 |  |  |  |
| 317604 | RGD1566008 |  |  |  |
| 317715 | Gsc        |  |  |  |
| 319104 | Taar8a     |  |  |  |
| 338443 | Gpbar1     |  |  |  |
| 353306 | Spata31a5  |  |  |  |
| 360228 | Wfdc21     |  |  |  |
| 360229 | Cox8c      |  |  |  |
| 360395 | Grpcb      |  |  |  |
| 360506 | RGD1311343 |  |  |  |
| 360508 | Smim23     |  |  |  |
| 360700 | RGD1562683 |  |  |  |
| 360731 | Tprg1      |  |  |  |
| 360790 | Upk3b      |  |  |  |
| 360873 | Gpa33      |  |  |  |
| 360933 | LOC360933  |  |  |  |
| 361012 | Spetex-2E  |  |  |  |
| 361033 | Olr1619    |  |  |  |
| 361049 | RGD1563302 |  |  |  |
| 361205 | Lect2      |  |  |  |
| 361510 | Sult2a2    |  |  |  |
| 361516 | Igf13      |  |  |  |
| 361523 | Cyp2b2     |  |  |  |
| 361538 | Prodh2     |  |  |  |
| 361544 | Etv2       |  |  |  |
| 361551 | Scgb1b30   |  |  |  |
| 361638 | Acsml      |  |  |  |
| 361733 | Ms4a8      |  |  |  |
| 361739 | Tmc1       |  |  |  |
| 361969 | Fga        |  |  |  |

|        |            |  |  |  |
|--------|------------|--|--|--|
| 362077 | I11f10     |  |  |  |
| 362085 | Sohlh1     |  |  |  |
| 362120 | RGD1308742 |  |  |  |
| 362231 | Cst9l      |  |  |  |
| 362267 | Svs6       |  |  |  |
| 362280 | Tfap2c     |  |  |  |
| 362346 | Prss37     |  |  |  |
| 362347 | Try4       |  |  |  |
| 362433 | RGD1307916 |  |  |  |
| 362450 | Prp2       |  |  |  |
| 362451 | RGD1306750 |  |  |  |
| 362525 | Txndc8     |  |  |  |
| 362527 | Mup4       |  |  |  |
| 362821 | Olr1069    |  |  |  |
| 362901 | LOC362901  |  |  |  |
| 362915 | Anxa13     |  |  |  |
| 362921 | LOC362921  |  |  |  |
| 363041 | Pate4      |  |  |  |
| 363043 | RGD1304554 |  |  |  |
| 363044 | RGD1560112 |  |  |  |
| 363168 | Lyz14      |  |  |  |
| 363437 | Rhox12     |  |  |  |
| 363439 | Rhox2      |  |  |  |
| 363507 | RGD1564845 |  |  |  |
| 363508 | Vgll1      |  |  |  |
| 363542 | 12-Sep     |  |  |  |
| 363546 | Olr1362    |  |  |  |
| 363549 | Olr1381    |  |  |  |
| 363585 | Olr1393    |  |  |  |
| 363606 | Olr1433    |  |  |  |
| 363608 | Olr1457    |  |  |  |
| 363639 | Olr1481    |  |  |  |
| 363640 | Olr1493    |  |  |  |
| 363642 | Olr1509    |  |  |  |
| 363678 | Krtap3-3   |  |  |  |
| 363710 | Olr1525    |  |  |  |
| 363739 | Krtap14l   |  |  |  |
| 363741 | Krtap7-1   |  |  |  |
| 363761 | Olr1538    |  |  |  |
| 363762 | Olr1540    |  |  |  |
| 363763 | Olr1542    |  |  |  |
| 363826 | Olr1568    |  |  |  |
| 363856 | Cd209      |  |  |  |
| 364021 | Rgs12h     |  |  |  |
| 364023 | RGD1561635 |  |  |  |
| 364054 | Olr1581    |  |  |  |
| 364086 | Vom2r70    |  |  |  |
| 364129 | RGD1562394 |  |  |  |
| 364140 | Gsx2       |  |  |  |
| 364275 | Olr1607    |  |  |  |
| 364306 | Olr1643    |  |  |  |
| 364359 | LOC364359  |  |  |  |
| 364418 | Nkx2-6     |  |  |  |
| 364513 | Antxr1     |  |  |  |
| 364599 | Adam34l    |  |  |  |
| 364719 | Prss16     |  |  |  |

|        |            |  |  |  |
|--------|------------|--|--|--|
| 364726 | Olr1657    |  |  |  |
| 364764 | RGD1564347 |  |  |  |
| 364774 | Calml5     |  |  |  |
| 364798 | Potec      |  |  |  |
| 364841 | Pcdhb1     |  |  |  |
| 364906 | Mrps211    |  |  |  |
| 364910 | Sa113      |  |  |  |
| 364979 | Olr1667    |  |  |  |
| 365055 | LOC365055  |  |  |  |
| 365159 | LOC365159  |  |  |  |
| 365170 | Olr11      |  |  |  |
| 365175 | Olr6       |  |  |  |
| 365184 | Nlrp4b     |  |  |  |
| 365190 | Vomlr54    |  |  |  |
| 365213 | Nanos2     |  |  |  |
| 365227 | Upk1a      |  |  |  |
| 365229 | RGD1561430 |  |  |  |
| 365265 | Tmprss11b  |  |  |  |
| 365302 | Olr12      |  |  |  |
| 365324 | Olr67      |  |  |  |
| 365326 | Olr69      |  |  |  |
| 365327 | Olr75      |  |  |  |
| 365328 | Olr82      |  |  |  |
| 365329 | Olr87      |  |  |  |
| 365330 | Olr142     |  |  |  |
| 365331 | Olr145     |  |  |  |
| 365334 | Olr158     |  |  |  |
| 365336 | Olr192     |  |  |  |
| 365340 | Olr218     |  |  |  |
| 365341 | Olr220     |  |  |  |
| 365342 | Olr224     |  |  |  |
| 365385 | Olr311     |  |  |  |
| 365413 | Olr361     |  |  |  |
| 365523 | Olr1693    |  |  |  |
| 365528 | Trim40     |  |  |  |
| 365547 | RGD1561557 |  |  |  |
| 365549 | RGD1563815 |  |  |  |
| 365577 | RGD1559810 |  |  |  |
| 365791 | LOC365791  |  |  |  |
| 365854 | Tdpoz1     |  |  |  |
| 365885 | Olr390     |  |  |  |
| 365963 | Lhx8       |  |  |  |
| 366008 | Lcn8       |  |  |  |
| 366024 | Olr395     |  |  |  |
| 366026 | Olr399     |  |  |  |
| 366082 | Hoxd12     |  |  |  |
| 366099 | Olr482     |  |  |  |
| 366100 | Olr522     |  |  |  |
| 366102 | Olr532     |  |  |  |
| 366103 | Olr536     |  |  |  |
| 366104 | Olr541     |  |  |  |
| 366105 | Olr542     |  |  |  |
| 366108 | Olr577     |  |  |  |
| 366109 | Olr578     |  |  |  |
| 366111 | Olr690     |  |  |  |
| 366112 | Olr705     |  |  |  |

|        |            |  |  |  |
|--------|------------|--|--|--|
| 366113 | 01r710     |  |  |  |
| 366114 | 01r722     |  |  |  |
| 366115 | 01r724     |  |  |  |
| 366118 | 01r736     |  |  |  |
| 366120 | 01r741     |  |  |  |
| 366121 | 01r742     |  |  |  |
| 366122 | 01r744     |  |  |  |
| 366123 | 01r745     |  |  |  |
| 366151 | 01r777     |  |  |  |
| 366152 | 01r791     |  |  |  |
| 366158 | Tmco5b     |  |  |  |
| 366213 | Nkx2-4     |  |  |  |
| 366219 | Cst5       |  |  |  |
| 366244 | Gtsf11     |  |  |  |
| 366362 | 01r838     |  |  |  |
| 366441 | Slc5a9     |  |  |  |
| 366456 | 01r857     |  |  |  |
| 366457 | 01r858     |  |  |  |
| 366458 | 01r859     |  |  |  |
| 366498 | RGD1559644 |  |  |  |
| 366567 | Dna.jc5g   |  |  |  |
| 366668 | Gphb5      |  |  |  |
| 366793 | 01r879     |  |  |  |
| 366797 | 01r916     |  |  |  |
| 366798 | 01r921     |  |  |  |
| 366799 | 01r927     |  |  |  |
| 366803 | 01r937     |  |  |  |
| 366804 | 01r960     |  |  |  |
| 366810 | 01r987     |  |  |  |
| 366816 | 01r1070    |  |  |  |
| 366834 | 01r1081    |  |  |  |
| 366843 | 01r1091    |  |  |  |
| 366890 | Glipr112   |  |  |  |
| 366991 | Krt82      |  |  |  |
| 367012 | Ddi1       |  |  |  |
| 367060 | 01r1230    |  |  |  |
| 367064 | 01r1294    |  |  |  |
| 367065 | 01r1295    |  |  |  |
| 367067 | 01r1328    |  |  |  |
| 367106 | Foxb1      |  |  |  |
| 367117 | LOC367117  |  |  |  |
| 367149 | RGD1561847 |  |  |  |
| 367254 | RGD1564447 |  |  |  |
| 367265 | RGD1561618 |  |  |  |
| 367321 | Slco6d1    |  |  |  |
| 367391 | Marco      |  |  |  |
| 367454 | LOC367454  |  |  |  |
| 367480 | Vom2r78    |  |  |  |
| 367515 | LOC367515  |  |  |  |
| 367734 | Hypm       |  |  |  |
| 367797 | RGD1563991 |  |  |  |
| 367830 | LOC367830  |  |  |  |
| 367858 | LOC367858  |  |  |  |
| 367869 | RGD1562039 |  |  |  |
| 367928 | RGD1565430 |  |  |  |
| 378939 | Uts2b      |  |  |  |

|        |          |  |  |  |
|--------|----------|--|--|--|
| 379044 | Qrfp     |  |  |  |
| 396551 | Ugt1a3   |  |  |  |
| 396552 | Ugt1a9   |  |  |  |
| 399475 | Adm2     |  |  |  |
| 399679 | Aicda    |  |  |  |
| 404645 | Mrgprx21 |  |  |  |
| 404783 | Hyal4    |  |  |  |
| 404788 | 01r796   |  |  |  |
| 404789 | 01r795   |  |  |  |
| 404790 | 01r788   |  |  |  |
| 404792 | 01r785   |  |  |  |
| 404793 | 01r784   |  |  |  |
| 404794 | 01r782   |  |  |  |
| 404795 | 01r780   |  |  |  |
| 404796 | 01r778   |  |  |  |
| 404797 | 01r776   |  |  |  |
| 404798 | 01r772   |  |  |  |
| 404799 | 01r771   |  |  |  |
| 404800 | 01r767   |  |  |  |
| 404802 | 01r757   |  |  |  |
| 404803 | 01r756   |  |  |  |
| 404804 | 01r749   |  |  |  |
| 404808 | 01r737   |  |  |  |
| 404809 | 01r734   |  |  |  |
| 404810 | 01r733   |  |  |  |
| 404811 | 01r727   |  |  |  |
| 404812 | 01r726   |  |  |  |
| 404813 | 01r717   |  |  |  |
| 404814 | 01r716   |  |  |  |
| 404815 | 01r715   |  |  |  |
| 404816 | 01r712   |  |  |  |
| 404817 | 01r711   |  |  |  |
| 404818 | 01r704   |  |  |  |
| 404819 | 01r701   |  |  |  |
| 404820 | 01r695   |  |  |  |
| 404821 | 01r693   |  |  |  |
| 404822 | 01r691   |  |  |  |
| 404824 | 01r681   |  |  |  |
| 404825 | 01r675   |  |  |  |
| 404826 | 01r670   |  |  |  |
| 404827 | 01r665   |  |  |  |
| 404828 | 01r660   |  |  |  |
| 404829 | 01r654   |  |  |  |
| 404830 | 01r653   |  |  |  |
| 404831 | 01r652   |  |  |  |
| 404832 | 01r650   |  |  |  |
| 404833 | 01r649   |  |  |  |
| 404834 | 01r648   |  |  |  |
| 404835 | 01r646   |  |  |  |
| 404839 | 01r641   |  |  |  |
| 404840 | 01r640   |  |  |  |
| 404841 | 01r636   |  |  |  |
| 404842 | 01r635   |  |  |  |
| 404843 | 01r634   |  |  |  |
| 404844 | 01r633   |  |  |  |
| 404846 | 01r625   |  |  |  |



|        |         |  |  |  |
|--------|---------|--|--|--|
| 404847 | 01r624  |  |  |  |
| 404848 | 01r623  |  |  |  |
| 404849 | 01r621  |  |  |  |
| 404852 | 01r613  |  |  |  |
| 404853 | 01r608  |  |  |  |
| 404855 | 01r604  |  |  |  |
| 404856 | 01r594  |  |  |  |
| 404858 | 01r590  |  |  |  |
| 404859 | 01r587  |  |  |  |
| 404860 | 01r586  |  |  |  |
| 404861 | 01r584  |  |  |  |
| 404862 | 01r582  |  |  |  |
| 404863 | 01r581  |  |  |  |
| 404866 | 01r569  |  |  |  |
| 404867 | 01r566  |  |  |  |
| 404868 | 01r563  |  |  |  |
| 404869 | 01r562  |  |  |  |
| 404870 | 01r559  |  |  |  |
| 404871 | 01r557  |  |  |  |
| 404872 | 01r551  |  |  |  |
| 404874 | 01r537  |  |  |  |
| 404875 | 01r535  |  |  |  |
| 404876 | 01r533  |  |  |  |
| 404877 | 01r529  |  |  |  |
| 404878 | 01r527  |  |  |  |
| 404879 | 01r518  |  |  |  |
| 404880 | 01r508  |  |  |  |
| 404881 | 01r507  |  |  |  |
| 404882 | 01r505  |  |  |  |
| 404884 | 01r500  |  |  |  |
| 404885 | 01r496  |  |  |  |
| 404887 | 01r486  |  |  |  |
| 404888 | 01r483  |  |  |  |
| 404889 | 01r481  |  |  |  |
| 404890 | 01r480  |  |  |  |
| 404891 | 01r475  |  |  |  |
| 404892 | 01r456  |  |  |  |
| 404893 | 01r436  |  |  |  |
| 404895 | 01r32   |  |  |  |
| 404896 | 01r29   |  |  |  |
| 404897 | 01r25   |  |  |  |
| 404898 | 01r24   |  |  |  |
| 404899 | 01r16   |  |  |  |
| 404901 | 01r14   |  |  |  |
| 404902 | 01r1845 |  |  |  |
| 404903 | 01r1067 |  |  |  |
| 404904 | 01r1060 |  |  |  |
| 404920 | 01r1014 |  |  |  |
| 404924 | 01r996  |  |  |  |
| 404929 | 01r982  |  |  |  |
| 404938 | 01r954  |  |  |  |
| 404948 | 01r922  |  |  |  |
| 404951 | 01r906  |  |  |  |
| 404956 | 01r877  |  |  |  |
| 404958 | 01r1084 |  |  |  |
| 404959 | 01r1083 |  |  |  |

|        |         |  |  |  |
|--------|---------|--|--|--|
| 404960 | 01r1079 |  |  |  |
| 404961 | 01r1076 |  |  |  |
| 404962 | 01r1523 |  |  |  |
| 404963 | 01r1520 |  |  |  |
| 404967 | 01r1501 |  |  |  |
| 404968 | 01r1496 |  |  |  |
| 404969 | 01r1491 |  |  |  |
| 404970 | 01r1490 |  |  |  |
| 404971 | 01r1488 |  |  |  |
| 404972 | 01r1486 |  |  |  |
| 404973 | 01r1479 |  |  |  |
| 404974 | 01r1471 |  |  |  |
| 404975 | 01r1470 |  |  |  |
| 404976 | 01r1469 |  |  |  |
| 404977 | 01r1468 |  |  |  |
| 404978 | 01r1558 |  |  |  |
| 404980 | 01r1555 |  |  |  |
| 404981 | 01r1551 |  |  |  |
| 404983 | 01r1541 |  |  |  |
| 404986 | 01r278  |  |  |  |
| 404988 | 01r271  |  |  |  |
| 404989 | 01r268  |  |  |  |
| 404992 | 01r241  |  |  |  |
| 404994 | 01r213  |  |  |  |
| 404995 | 01r209  |  |  |  |
| 404998 | 01r164  |  |  |  |
| 404999 | 01r160  |  |  |  |
| 405001 | 01r150  |  |  |  |
| 405003 | 01r137  |  |  |  |
| 405004 | 01r125  |  |  |  |
| 405006 | 01r111  |  |  |  |
| 405007 | 01r110  |  |  |  |
| 405009 | 01r101  |  |  |  |
| 405015 | 01r72   |  |  |  |
| 405017 | 01r60   |  |  |  |
| 405018 | 01r57   |  |  |  |
| 405021 | 01r1351 |  |  |  |
| 405022 | 01r1350 |  |  |  |
| 405025 | 01r363  |  |  |  |
| 405026 | 01r360  |  |  |  |
| 405027 | 01r358  |  |  |  |
| 405030 | 01r348  |  |  |  |
| 405031 | 01r347  |  |  |  |
| 405032 | 01r336  |  |  |  |
| 405034 | 01r330  |  |  |  |
| 405036 | 01r322  |  |  |  |
| 405039 | 01r310  |  |  |  |
| 405040 | 01r306  |  |  |  |
| 405041 | 01r289  |  |  |  |
| 405043 | 01r7    |  |  |  |
| 405044 | 01r1460 |  |  |  |
| 405045 | 01r1459 |  |  |  |
| 405046 | 01r1455 |  |  |  |
| 405047 | 01r1453 |  |  |  |
| 405049 | 01r1450 |  |  |  |
| 405050 | 01r1449 |  |  |  |

|        |         |  |  |  |
|--------|---------|--|--|--|
| 405051 | 01r1442 |  |  |  |
| 405053 | 01r1435 |  |  |  |
| 405054 | 01r1431 |  |  |  |
| 405056 | 01r1424 |  |  |  |
| 405057 | 01r1421 |  |  |  |
| 405059 | 01r1415 |  |  |  |
| 405060 | 01r1414 |  |  |  |
| 405061 | 01r1411 |  |  |  |
| 405062 | 01r1410 |  |  |  |
| 405063 | 01r1408 |  |  |  |
| 405064 | 01r1406 |  |  |  |
| 405065 | 01r1404 |  |  |  |
| 405071 | 01r131  |  |  |  |
| 405073 | 01r1338 |  |  |  |
| 405074 | 01r1331 |  |  |  |
| 405075 | 01r1329 |  |  |  |
| 405076 | 01r1321 |  |  |  |
| 405077 | 01r1316 |  |  |  |
| 405078 | 01r1313 |  |  |  |
| 405079 | 01r1308 |  |  |  |
| 405080 | 01r1303 |  |  |  |
| 405081 | 01r1291 |  |  |  |
| 405082 | 01r1288 |  |  |  |
| 405084 | 01r1286 |  |  |  |
| 405085 | 01r1275 |  |  |  |
| 405086 | 01r1274 |  |  |  |
| 405088 | 01r1266 |  |  |  |
| 405089 | 01r1262 |  |  |  |
| 405090 | 01r1261 |  |  |  |
| 405091 | 01r1253 |  |  |  |
| 405092 | 01r1250 |  |  |  |
| 405093 | 01r1247 |  |  |  |
| 405094 | 01r1246 |  |  |  |
| 405095 | 01r1245 |  |  |  |
| 405096 | 01r1244 |  |  |  |
| 405097 | 01r1239 |  |  |  |
| 405099 | 01r1231 |  |  |  |
| 405100 | 01r1220 |  |  |  |
| 405101 | 01r1213 |  |  |  |
| 405105 | 01r1202 |  |  |  |
| 405106 | 01r1201 |  |  |  |
| 405107 | 01r1199 |  |  |  |
| 405108 | 01r1194 |  |  |  |
| 405111 | 01r860  |  |  |  |
| 405112 | 01r427  |  |  |  |
| 405113 | 01r421  |  |  |  |
| 405114 | 01r418  |  |  |  |
| 405115 | 01r413  |  |  |  |
| 405116 | 01r409  |  |  |  |
| 405117 | 01r407  |  |  |  |
| 405118 | 01r401  |  |  |  |
| 405119 | 01r398  |  |  |  |
| 405120 | 01r396  |  |  |  |
| 405121 | 01r1642 |  |  |  |
| 405122 | 01r1639 |  |  |  |
| 405123 | 01r1638 |  |  |  |

|        |         |  |  |  |
|--------|---------|--|--|--|
| 405124 | 01r1633 |  |  |  |
| 405125 | 01r1632 |  |  |  |
| 405126 | 01r1631 |  |  |  |
| 405127 | 01r1622 |  |  |  |
| 405128 | 01r1617 |  |  |  |
| 405129 | 01r1616 |  |  |  |
| 405130 | 01r1614 |  |  |  |
| 405131 | 01r821  |  |  |  |
| 405132 | 01r819  |  |  |  |
| 405133 | 01r818  |  |  |  |
| 405134 | 01r816  |  |  |  |
| 405136 | 01r813  |  |  |  |
| 405137 | 01r812  |  |  |  |
| 405138 | 01r811  |  |  |  |
| 405139 | 01r809  |  |  |  |
| 405140 | 01r808  |  |  |  |
| 405141 | 01r807  |  |  |  |
| 405143 | 01r803  |  |  |  |
| 405144 | 01r799  |  |  |  |
| 405146 | 01r844  |  |  |  |
| 405147 | 01r386  |  |  |  |
| 405148 | 01r1380 |  |  |  |
| 405150 | 01r1364 |  |  |  |
| 405155 | 01r1186 |  |  |  |
| 405158 | 01r1179 |  |  |  |
| 405164 | 01r1166 |  |  |  |
| 405165 | 01r1165 |  |  |  |
| 405166 | 01r1163 |  |  |  |
| 405167 | 01r1162 |  |  |  |
| 405168 | 01r1159 |  |  |  |
| 405169 | 01r1158 |  |  |  |
| 405171 | 01r1156 |  |  |  |
| 405172 | 01r1149 |  |  |  |
| 405173 | 01r1148 |  |  |  |
| 405174 | 01r1144 |  |  |  |
| 405175 | 01r1142 |  |  |  |
| 405177 | 01r1135 |  |  |  |
| 405178 | 01r1129 |  |  |  |
| 405179 | 01r1126 |  |  |  |
| 405180 | 01r1125 |  |  |  |
| 405181 | 01r1122 |  |  |  |
| 405182 | 01r1118 |  |  |  |
| 405183 | 01r1117 |  |  |  |
| 405185 | 01r1115 |  |  |  |
| 405186 | 01r1710 |  |  |  |
| 405188 | 01r1705 |  |  |  |
| 405189 | 01r1692 |  |  |  |
| 405190 | 01r1689 |  |  |  |
| 405191 | 01r1682 |  |  |  |
| 405192 | 01r1680 |  |  |  |
| 405193 | 01r1679 |  |  |  |
| 405194 | 01r1678 |  |  |  |
| 405196 | 01r1675 |  |  |  |
| 405198 | 01r1670 |  |  |  |
| 405202 | 01r1739 |  |  |  |
| 405203 | 01r1736 |  |  |  |

|        |         |  |  |  |
|--------|---------|--|--|--|
| 405204 | 01r1726 |  |  |  |
| 405205 | 01r1718 |  |  |  |
| 405208 | 01r832  |  |  |  |
| 405209 | 01r831  |  |  |  |
| 405210 | 01r830  |  |  |  |
| 405211 | 01r829  |  |  |  |
| 405212 | 01r827  |  |  |  |
| 405213 | 01r826  |  |  |  |
| 405214 | 01r825  |  |  |  |
| 405215 | 01r824  |  |  |  |
| 405218 | 01r1565 |  |  |  |
| 405219 | 01r1602 |  |  |  |
| 405221 | 01r1598 |  |  |  |
| 405222 | 01r1597 |  |  |  |
| 405223 | 01r1591 |  |  |  |
| 405227 | 01r392  |  |  |  |
| 405230 | 01r790  |  |  |  |
| 405231 | 01r786  |  |  |  |
| 405232 | 01r779  |  |  |  |
| 405233 | 01r774  |  |  |  |
| 405234 | 01r768  |  |  |  |
| 405237 | 01r753  |  |  |  |
| 405238 | 01r735  |  |  |  |
| 405239 | 01r714  |  |  |  |
| 405242 | 01r666  |  |  |  |
| 405243 | 01r661  |  |  |  |
| 405245 | 01r611  |  |  |  |
| 405246 | 01r606  |  |  |  |
| 405248 | 01r583  |  |  |  |
| 405249 | 01r556  |  |  |  |
| 405251 | 01r499  |  |  |  |
| 405252 | 01r491  |  |  |  |
| 405253 | 01r490  |  |  |  |
| 405255 | 01r463  |  |  |  |
| 405257 | 01r36   |  |  |  |
| 405258 | 01r27   |  |  |  |
| 405261 | 01r17   |  |  |  |
| 405277 | 01r894  |  |  |  |
| 405280 | 01r1077 |  |  |  |
| 405281 | 01r1500 |  |  |  |
| 405285 | 01r1474 |  |  |  |
| 405286 | 01r1472 |  |  |  |
| 405287 | 01r1535 |  |  |  |
| 405290 | 01r260  |  |  |  |
| 405291 | 01r255  |  |  |  |
| 405293 | 01r194  |  |  |  |
| 405294 | 01r179  |  |  |  |
| 405295 | 01r162  |  |  |  |
| 405297 | 01r114  |  |  |  |
| 405298 | 01r109  |  |  |  |
| 405301 | 01r1352 |  |  |  |
| 405303 | 01r339  |  |  |  |
| 405304 | 01r308  |  |  |  |
| 405305 | 01r1456 |  |  |  |
| 405306 | 01r1451 |  |  |  |
| 405307 | 01r1445 |  |  |  |

|        |         |  |  |  |
|--------|---------|--|--|--|
| 405311 | 01r1305 |  |  |  |
| 405312 | 01r1292 |  |  |  |
| 405313 | 01r1279 |  |  |  |
| 405314 | 01r1260 |  |  |  |
| 405315 | 01r1237 |  |  |  |
| 405316 | 01r1228 |  |  |  |
| 405318 | 01r1219 |  |  |  |
| 405319 | 01r1200 |  |  |  |
| 405321 | 01r419  |  |  |  |
| 405322 | 01r410  |  |  |  |
| 405325 | 01r1635 |  |  |  |
| 405326 | 01r1625 |  |  |  |
| 405328 | 01r1609 |  |  |  |
| 405329 | 01r820  |  |  |  |
| 405330 | 01r810  |  |  |  |
| 405331 | 01r806  |  |  |  |
| 405332 | 01r802  |  |  |  |
| 405333 | 01r1374 |  |  |  |
| 405334 | 01r1370 |  |  |  |
| 405337 | 01r1185 |  |  |  |
| 405339 | 01r1172 |  |  |  |
| 405340 | 01r1164 |  |  |  |
| 405341 | 01r1160 |  |  |  |
| 405344 | 01r1132 |  |  |  |
| 405345 | 01r1128 |  |  |  |
| 405346 | 01r1119 |  |  |  |
| 405351 | 01r828  |  |  |  |
| 405352 | 01r823  |  |  |  |
| 405353 | 01r1108 |  |  |  |
| 405355 | 01r1590 |  |  |  |
| 405356 | 01r766  |  |  |  |
| 405357 | 01r689  |  |  |  |
| 405362 | 01r1073 |  |  |  |
| 405363 | 01r264  |  |  |  |
| 405364 | 01r161  |  |  |  |
| 405365 | 01r46   |  |  |  |
| 405366 | 01r378  |  |  |  |
| 405368 | 01r1417 |  |  |  |
| 405371 | 01r1615 |  |  |  |
| 405372 | 01r801  |  |  |  |
| 405373 | 01r1171 |  |  |  |
| 405374 | 01r1681 |  |  |  |
| 405375 | 01r1664 |  |  |  |
| 405378 | 01r53   |  |  |  |
| 405383 | 01r1560 |  |  |  |
| 405384 | 01r283  |  |  |  |
| 405386 | 01r1405 |  |  |  |
| 405387 | 01r1238 |  |  |  |
| 405388 | 01r402  |  |  |  |
| 405389 | 01r1629 |  |  |  |
| 405390 | 01r1174 |  |  |  |
| 405391 | 01r1143 |  |  |  |
| 405392 | 01r205  |  |  |  |
| 405393 | 01r349  |  |  |  |
| 405396 | 01r1249 |  |  |  |
| 405398 | 01r1384 |  |  |  |



|        |         |  |  |  |
|--------|---------|--|--|--|
| 405904 | 01r51   |  |  |  |
| 405906 | 01r61   |  |  |  |
| 405907 | 01r77   |  |  |  |
| 405908 | 01r94   |  |  |  |
| 405909 | 01r95   |  |  |  |
| 405910 | 01r96   |  |  |  |
| 405911 | 01r127  |  |  |  |
| 405912 | 01r129  |  |  |  |
| 405913 | 01r135  |  |  |  |
| 405914 | 01r174  |  |  |  |
| 405915 | 01r175  |  |  |  |
| 405916 | 01r181  |  |  |  |
| 405917 | 01r186  |  |  |  |
| 405918 | 01r188  |  |  |  |
| 405919 | 01r198  |  |  |  |
| 405920 | 01r199  |  |  |  |
| 405921 | 01r232  |  |  |  |
| 405923 | 01r250  |  |  |  |
| 405924 | 01r257  |  |  |  |
| 405925 | 01r304  |  |  |  |
| 405926 | 01r313  |  |  |  |
| 405927 | 01r334  |  |  |  |
| 405928 | 01r341  |  |  |  |
| 405929 | 01r344  |  |  |  |
| 405931 | 01r354  |  |  |  |
| 405932 | 01r365  |  |  |  |
| 405933 | 01r367  |  |  |  |
| 405934 | 01r372  |  |  |  |
| 405935 | 01r374  |  |  |  |
| 405936 | 01r445  |  |  |  |
| 405937 | 01r446  |  |  |  |
| 405939 | 01r531  |  |  |  |
| 405940 | 01r544  |  |  |  |
| 405941 | 01r545  |  |  |  |
| 405942 | 01r546  |  |  |  |
| 405943 | 01r552  |  |  |  |
| 405944 | 01r596  |  |  |  |
| 405946 | 01r629  |  |  |  |
| 405947 | 01r630  |  |  |  |
| 405948 | 01r662  |  |  |  |
| 405949 | 01r671  |  |  |  |
| 405950 | 01r677  |  |  |  |
| 405951 | 01r696  |  |  |  |
| 405952 | 01r697  |  |  |  |
| 405953 | 01r707  |  |  |  |
| 405954 | 01r709  |  |  |  |
| 405955 | 01r720  |  |  |  |
| 405956 | 01r747  |  |  |  |
| 405957 | 01r760  |  |  |  |
| 405961 | 01r862  |  |  |  |
| 405963 | 01r964  |  |  |  |
| 405964 | 01r984  |  |  |  |
| 405965 | 01r1022 |  |  |  |
| 405966 | 01r1064 |  |  |  |
| 405967 | 01r1068 |  |  |  |
| 405969 | 01r1137 |  |  |  |

|        |         |  |  |  |
|--------|---------|--|--|--|
| 405970 | 01r1138 |  |  |  |
| 405971 | 01r1195 |  |  |  |
| 405972 | 01r1203 |  |  |  |
| 405974 | 01r1225 |  |  |  |
| 405975 | 01r1233 |  |  |  |
| 405977 | 01r1256 |  |  |  |
| 405980 | 01r1318 |  |  |  |
| 405983 | 01r1391 |  |  |  |
| 405984 | 01r1392 |  |  |  |
| 405985 | 01r1394 |  |  |  |
| 405986 | 01r1395 |  |  |  |
| 405987 | 01r1396 |  |  |  |
| 405988 | 01r1397 |  |  |  |
| 405990 | 01r1399 |  |  |  |
| 405991 | 01r1400 |  |  |  |
| 405994 | 01r1515 |  |  |  |
| 405995 | 01r1528 |  |  |  |
| 405996 | 01r1529 |  |  |  |
| 405998 | 01r1531 |  |  |  |
| 406000 | 01r1543 |  |  |  |
| 406001 | 01r1545 |  |  |  |
| 406002 | 01r1546 |  |  |  |
| 406003 | 01r1547 |  |  |  |
| 406004 | 01r1548 |  |  |  |
| 406008 | 01r1694 |  |  |  |
| 406010 | 01r1697 |  |  |  |
| 406011 | 01r1699 |  |  |  |
| 406012 | 01r1700 |  |  |  |
| 406013 | 01r1701 |  |  |  |
| 406014 | 01r1707 |  |  |  |
| 406015 | 01r1720 |  |  |  |
| 406016 | 01r1722 |  |  |  |
| 406021 | 01r1197 |  |  |  |
| 406024 | 01r1347 |  |  |  |
| 406035 | 01r1652 |  |  |  |
| 406044 | 01r444  |  |  |  |
| 406045 | 01r468  |  |  |  |
| 406046 | 01r471  |  |  |  |
| 406050 | 01r595  |  |  |  |
| 406053 | 01r637  |  |  |  |
| 406194 | RT1-T18 |  |  |  |
| 406199 | Muc13   |  |  |  |
| 407759 | Kb23    |  |  |  |
| 407761 | Krt81   |  |  |  |
| 408030 | 01r1868 |  |  |  |
| 408201 | Ctsql2  |  |  |  |
| 408202 | Abhd12b |  |  |  |
| 408204 | Prss58  |  |  |  |
| 408205 | Tryx5   |  |  |  |
| 408208 | Mcpt411 |  |  |  |
| 408209 | Mcpt113 |  |  |  |
| 408210 | Klk4    |  |  |  |
| 408211 | Klk51   |  |  |  |
| 408214 | Stfa211 |  |  |  |
| 408215 | Stfa311 |  |  |  |
| 408224 | Slpil3  |  |  |  |

|        |          |  |  |  |
|--------|----------|--|--|--|
| 408226 | Wfdc15a  |  |  |  |
| 408228 | Wfdc9    |  |  |  |
| 408231 | Spink14  |  |  |  |
| 408232 | Spint5p  |  |  |  |
| 408235 | Spink6   |  |  |  |
| 408236 | Mug2     |  |  |  |
| 408237 | Spink7   |  |  |  |
| 408239 | Mcpt114  |  |  |  |
| 408242 | Klklc6   |  |  |  |
| 408244 | Prss45   |  |  |  |
| 408245 | Prss46   |  |  |  |
| 408247 | Try10    |  |  |  |
| 414138 | Lcn6     |  |  |  |
| 414785 | RT1-M6-1 |  |  |  |
| 415052 | Sfta2    |  |  |  |
| 432393 | Kprp     |  |  |  |
| 442921 | Prm3     |  |  |  |
| 446171 | Smgc     |  |  |  |
| 450222 | Clec4b2  |  |  |  |
| 450226 | Ka11     |  |  |  |
| 450227 | Krt33b   |  |  |  |
| 450228 | Krt31    |  |  |  |
| 450230 | Krt32    |  |  |  |
| 494195 | Ly49s4   |  |  |  |
| 494224 | Fdcsp    |  |  |  |
| 494225 | Vomlr20  |  |  |  |
| 494226 | Vomlr58  |  |  |  |
| 494227 | Vomlr79  |  |  |  |
| 494228 | Vomlr109 |  |  |  |
| 494229 | Vomlr21  |  |  |  |
| 494230 | Vomlr30  |  |  |  |
| 494231 | Vomlr6   |  |  |  |
| 494234 | Vomlr1   |  |  |  |
| 494236 | Vomlr4   |  |  |  |
| 494237 | Vomlr3   |  |  |  |
| 494238 | Vomlr80  |  |  |  |
| 494239 | Vomlr70  |  |  |  |
| 494240 | Vomlr76  |  |  |  |
| 494241 | Vomlr72  |  |  |  |
| 494243 | Vomlr71  |  |  |  |
| 494245 | Vomlr26  |  |  |  |
| 494246 | Vomlr5   |  |  |  |
| 494248 | Vomlr84  |  |  |  |
| 494251 | Vomlr69  |  |  |  |
| 494252 | Vomlr22  |  |  |  |
| 494253 | Vomlr2   |  |  |  |
| 494254 | Vomlr44  |  |  |  |
| 494255 | Vomlr68  |  |  |  |
| 494256 | Vomlr40  |  |  |  |
| 494258 | Vomlr8   |  |  |  |
| 494260 | Vomlr107 |  |  |  |
| 494261 | Vomlr41  |  |  |  |
| 494262 | Vomlr74  |  |  |  |
| 494263 | Vomlr67  |  |  |  |
| 494264 | Vomlr36  |  |  |  |
| 494265 | Vomlr94  |  |  |  |

|        |           |  |  |  |
|--------|-----------|--|--|--|
| 494266 | Vomlr47   |  |  |  |
| 494267 | Vomlr50   |  |  |  |
| 494268 | Vomlr35   |  |  |  |
| 494269 | Vomlr49   |  |  |  |
| 494270 | Vomlr25   |  |  |  |
| 494271 | Vomlr73   |  |  |  |
| 494272 | Vomlr37   |  |  |  |
| 494273 | Vomlr78   |  |  |  |
| 494274 | Vomlr77   |  |  |  |
| 494275 | Vomlr96   |  |  |  |
| 494276 | Vomlr89   |  |  |  |
| 494277 | Vomlr56   |  |  |  |
| 494278 | Vomlr52   |  |  |  |
| 494279 | Vomlr48   |  |  |  |
| 494280 | Vomlr43   |  |  |  |
| 494281 | Vomlr51   |  |  |  |
| 494282 | Vomlr61   |  |  |  |
| 494283 | Vomlr24   |  |  |  |
| 494284 | Vomlr32   |  |  |  |
| 494286 | Vomlr46   |  |  |  |
| 494287 | Vomlr45   |  |  |  |
| 494288 | Vomlr23   |  |  |  |
| 494289 | Vomlr62   |  |  |  |
| 494290 | Vomlr59   |  |  |  |
| 494291 | Vomlr66   |  |  |  |
| 494292 | Vomlr29   |  |  |  |
| 494293 | Vomlr34   |  |  |  |
| 494294 | Vomlr98   |  |  |  |
| 494295 | Vomlr95   |  |  |  |
| 494296 | Vomlr57   |  |  |  |
| 494297 | Vomlr27   |  |  |  |
| 494298 | Vomlr19   |  |  |  |
| 494299 | Vomlr110  |  |  |  |
| 494300 | Vomlr11   |  |  |  |
| 494301 | Vomlr83   |  |  |  |
| 494302 | Vomlr10   |  |  |  |
| 494305 | Vomlr15   |  |  |  |
| 494306 | Vomlr12   |  |  |  |
| 494307 | Vomlr38   |  |  |  |
| 494308 | Vomlr28   |  |  |  |
| 494309 | Vomlr106  |  |  |  |
| 494310 | Vomlr92   |  |  |  |
| 494311 | Vomlr63   |  |  |  |
| 494312 | Vomlr31   |  |  |  |
| 494313 | Vomlr81   |  |  |  |
| 494314 | Vomlr75   |  |  |  |
| 494319 | Taar3     |  |  |  |
| 494321 | Fam15e    |  |  |  |
| 494527 | Scgb2b2   |  |  |  |
| 494528 | Scgb2b24  |  |  |  |
| 494535 | Taar7c    |  |  |  |
| 494538 | LOC494538 |  |  |  |
| 497041 | Ccdc7     |  |  |  |
| 497227 | Muc19     |  |  |  |
| 497229 | Ang2      |  |  |  |
| 497787 | Vomlr93   |  |  |  |

|        |            |  |  |  |
|--------|------------|--|--|--|
| 497873 | Prss33     |  |  |  |
| 497937 | Tmem102    |  |  |  |
| 497957 | RGD1565611 |  |  |  |
| 497995 | Krtap1-5   |  |  |  |
| 498033 | Tex19.1    |  |  |  |
| 498063 | Fam243a    |  |  |  |
| 498073 | Ccdc54     |  |  |  |
| 498074 | Retnlb     |  |  |  |
| 498075 | Trat1      |  |  |  |
| 498096 | Smc1       |  |  |  |
| 498146 | Spdye4     |  |  |  |
| 498155 | LOC498155  |  |  |  |
| 498157 | MGC112692  |  |  |  |
| 498165 | RGD1562319 |  |  |  |
| 498167 | RGD1566138 |  |  |  |
| 498198 | Cyp3a73    |  |  |  |
| 498209 | Serpinb3a  |  |  |  |
| 498246 | Rgs13      |  |  |  |
| 498284 | Itln1      |  |  |  |
| 498308 | LOC498308  |  |  |  |
| 498311 | Fam71a     |  |  |  |
| 498341 | Smr3a      |  |  |  |
| 498344 | RGD1565664 |  |  |  |
| 498456 | Sntn       |  |  |  |
| 498460 | LOC498460  |  |  |  |
| 498490 | Olr1878    |  |  |  |
| 498575 | Hesx1      |  |  |  |
| 498622 | Anxa10     |  |  |  |
| 498633 | Hel1       |  |  |  |
| 498654 | Adam5      |  |  |  |
| 498658 | Defa9      |  |  |  |
| 498660 | Defb52     |  |  |  |
| 498688 | MGC114246  |  |  |  |
| 498689 | RGD1564827 |  |  |  |
| 498719 | Stmnd1     |  |  |  |
| 498750 | LOC498750  |  |  |  |
| 498767 | RGD1560860 |  |  |  |
| 498789 | RGD1564865 |  |  |  |
| 498790 | Akr1c1211  |  |  |  |
| 498791 | Ucn3       |  |  |  |
| 498854 | Scgb3a2    |  |  |  |
| 498855 | RGD1559536 |  |  |  |
| 498864 | Fam170a    |  |  |  |
| 498866 | Znf474     |  |  |  |
| 498914 | RGD1564492 |  |  |  |
| 499097 | RGD1565655 |  |  |  |
| 499100 | Dmrtc2     |  |  |  |
| 499140 | Clnd2      |  |  |  |
| 499147 | Izumo2     |  |  |  |
| 499149 | Pth2       |  |  |  |
| 499150 | Dkk1       |  |  |  |
| 499151 | RGD1562492 |  |  |  |
| 499158 | Ccdc179    |  |  |  |
| 499222 | RGD1562433 |  |  |  |
| 499234 | Nlrp14     |  |  |  |
| 499235 | LOC499235  |  |  |  |

|        |            |  |  |  |
|--------|------------|--|--|--|
| 499237 | RGD1562400 |  |  |  |
| 499238 | RGD1564933 |  |  |  |
| 499256 | RGD1559600 |  |  |  |
| 499276 | LOC499276  |  |  |  |
| 499297 | RGD1562011 |  |  |  |
| 499319 | Ms4a13-ps1 |  |  |  |
| 499345 | Lipn       |  |  |  |
| 499353 | Cyp2c24    |  |  |  |
| 499363 | RGD1564887 |  |  |  |
| 499367 | Calhm1     |  |  |  |
| 499397 | Olr1876    |  |  |  |
| 499400 | RT1-M5     |  |  |  |
| 499510 | Spz1       |  |  |  |
| 499516 | Tmem174    |  |  |  |
| 499528 | Ccno       |  |  |  |
| 499530 | LOC499530  |  |  |  |
| 499541 | LOC499541  |  |  |  |
| 499542 | LOC499542  |  |  |  |
| 499544 | LOC499544  |  |  |  |
| 499663 | Lcelf      |  |  |  |
| 499666 | RGD1564972 |  |  |  |
| 499675 | Hist2h2ac  |  |  |  |
| 499744 | I136g      |  |  |  |
| 499756 | Lcn10      |  |  |  |
| 499764 | Gbgt1      |  |  |  |
| 499836 | RGD1563263 |  |  |  |
| 499857 | RGD1561276 |  |  |  |
| 499858 | RGD1566059 |  |  |  |
| 499860 | Olr765     |  |  |  |
| 499867 | Phgr1      |  |  |  |
| 499906 | RGD1559924 |  |  |  |
| 499924 | Bpifb3     |  |  |  |
| 499951 | Gata5      |  |  |  |
| 499952 | Bhlhe23    |  |  |  |
| 499953 | Fndc11     |  |  |  |
| 500028 | LOC500028  |  |  |  |
| 500033 | Tas2r71    |  |  |  |
| 500048 | Fezf1      |  |  |  |
| 500051 | Hyal6      |  |  |  |
| 500060 | Fam71f2    |  |  |  |
| 500079 | Stra8      |  |  |  |
| 500091 | Tas2r138   |  |  |  |
| 500092 | Moxd2      |  |  |  |
| 500101 | Tas2r144   |  |  |  |
| 500119 | RGD1563352 |  |  |  |
| 500129 | Hoxa13     |  |  |  |
| 500137 | Neurod6    |  |  |  |
| 500197 | Tex37      |  |  |  |
| 500204 | RGD1562515 |  |  |  |
| 500235 | Emx1       |  |  |  |
| 500237 | Cm12       |  |  |  |
| 500239 | Figla      |  |  |  |
| 500253 | Dnajb8     |  |  |  |
| 500312 | Vom2r50    |  |  |  |
| 500335 | RGD1564770 |  |  |  |
| 500347 | Tas2r102   |  |  |  |



|        |            |  |  |  |
|--------|------------|--|--|--|
| 500432 | Spaca1     |  |  |  |
| 500458 | Cylc2      |  |  |  |
| 500460 | LOC500460  |  |  |  |
| 500473 | LOC500473  |  |  |  |
| 500491 | Ifna1611   |  |  |  |
| 500505 | RGD1560146 |  |  |  |
| 500511 | Ube2u      |  |  |  |
| 500620 | RGD1559683 |  |  |  |
| 500659 | Fscb       |  |  |  |
| 500702 | LOC500702  |  |  |  |
| 500780 | 01r991     |  |  |  |
| 500825 | Ccer1      |  |  |  |
| 500836 | I122       |  |  |  |
| 500876 | LOC500876  |  |  |  |
| 500881 | LOC500881  |  |  |  |
| 500926 | Or10ad1    |  |  |  |
| 500928 | H1fnt      |  |  |  |
| 500948 | LOC500948  |  |  |  |
| 500980 | Tmem225    |  |  |  |
| 500982 | Bsx        |  |  |  |
| 501010 | Spespl     |  |  |  |
| 501060 | Prss44     |  |  |  |
| 501106 | Adgrf4     |  |  |  |
| 501121 | Cfc1       |  |  |  |
| 501143 | Boll       |  |  |  |
| 501147 | C2cd6      |  |  |  |
| 501180 | Tex44      |  |  |  |
| 501185 | Mab2114    |  |  |  |
| 501283 | Plin5      |  |  |  |
| 501389 | LOC501389  |  |  |  |
| 501507 | RGD1560927 |  |  |  |
| 501516 | RGD1562289 |  |  |  |
| 501587 | RGD1565058 |  |  |  |
| 501599 | LOC501599  |  |  |  |
| 501618 | LOC501618  |  |  |  |
| 501621 | Nxf7       |  |  |  |
| 501642 | RGD1564955 |  |  |  |
| 501653 | RGD1565692 |  |  |  |
| 501655 | Ctag2      |  |  |  |
| 501698 | LOC501698  |  |  |  |
| 501720 | Krtap2-4   |  |  |  |
| 501721 | RGD1561684 |  |  |  |
| 501725 | Krtap4-3   |  |  |  |
| 501735 | Gpr142     |  |  |  |
| 501745 | Cd300c     |  |  |  |
| 501765 | Krtap13-2  |  |  |  |
| 501767 | RGD1562771 |  |  |  |
| 501768 | Krtap14    |  |  |  |
| 501793 | Vom2r58    |  |  |  |
| 501809 | RGD1566324 |  |  |  |
| 501816 | Vom2r62    |  |  |  |
| 501831 | My110      |  |  |  |
| 501864 | Mroh9      |  |  |  |
| 501881 | Vom2r68    |  |  |  |
| 501890 | RGD1561699 |  |  |  |
| 501893 | RGD1562932 |  |  |  |

|        |            |  |  |  |
|--------|------------|--|--|--|
| 501896 | RGD1565660 |  |  |  |
| 501898 | RGD1559654 |  |  |  |
| 501899 | RGD1561226 |  |  |  |
| 501900 | RGD1559999 |  |  |  |
| 501901 | LOC501901  |  |  |  |
| 501902 | RGD1562423 |  |  |  |
| 501903 | RGD1561977 |  |  |  |
| 501904 | RGD1563483 |  |  |  |
| 502004 | Gzmb11     |  |  |  |
| 502042 | Cphx1      |  |  |  |
| 502047 | RGD1565329 |  |  |  |
| 502056 | RGD1559508 |  |  |  |
| 502057 | RGD1560429 |  |  |  |
| 502058 | RGD1562508 |  |  |  |
| 502060 | RGD1563356 |  |  |  |
| 502122 | Pr12c1     |  |  |  |
| 502128 | Pom12112   |  |  |  |
| 502163 | RGD1561114 |  |  |  |
| 502180 | RGD1561935 |  |  |  |
| 502213 | Vom2r3     |  |  |  |
| 502251 | RGD1561185 |  |  |  |
| 502286 | Vom2r25    |  |  |  |
| 502295 | RGD1564236 |  |  |  |
| 502338 | Mrgprb2    |  |  |  |
| 502353 | RGD1561870 |  |  |  |
| 502357 | Or51t1     |  |  |  |
| 502358 | LOC502358  |  |  |  |
| 502359 | Hbe2       |  |  |  |
| 502412 | RGD1562885 |  |  |  |
| 502418 | RGD1559903 |  |  |  |
| 502510 | Ttc231     |  |  |  |
| 502533 | RGD1561998 |  |  |  |
| 502549 | RGD1563451 |  |  |  |
| 502566 | RGD1564313 |  |  |  |
| 502588 | LOC502588  |  |  |  |
| 502611 | Lcn3       |  |  |  |
| 502612 | RGD1564133 |  |  |  |
| 502647 | Pram17     |  |  |  |
| 502648 | Pram16     |  |  |  |
| 502660 | LOC502660  |  |  |  |
| 502679 | Cst13      |  |  |  |
| 502725 | RGD1562636 |  |  |  |
| 502755 | RGD1562066 |  |  |  |
| 502756 | Tas2r143   |  |  |  |
| 502757 | Tas2r135   |  |  |  |
| 502758 | Olr437     |  |  |  |
| 502846 | Foxi3      |  |  |  |
| 502857 | Noto       |  |  |  |
| 502875 | H1foo      |  |  |  |
| 502891 | Vom2r51    |  |  |  |
| 502939 | Sdr16c6    |  |  |  |
| 502959 | RGD1561246 |  |  |  |
| 502962 | RGD1564897 |  |  |  |
| 502968 | Zfp352     |  |  |  |
| 502969 | Cyp2j16    |  |  |  |
| 502976 | RGD1561212 |  |  |  |

|        |            |  |  |  |
|--------|------------|--|--|--|
| 502995 | Oog1       |  |  |  |
| 502996 | Oog3       |  |  |  |
| 503116 | LOC503116  |  |  |  |
| 503124 | Zscan4f    |  |  |  |
| 503127 | Vom2r56    |  |  |  |
| 503139 | Glipr111   |  |  |  |
| 503162 | RGD1565410 |  |  |  |
| 503228 | Iqcf5      |  |  |  |
| 503229 | Iqcf6      |  |  |  |
| 503254 | Lyg1       |  |  |  |
| 503269 | Rab17      |  |  |  |
| 503423 | Rhox8      |  |  |  |
| 503441 | mageb111   |  |  |  |
| 503442 | Mageb7     |  |  |  |
| 503444 | RGD1559970 |  |  |  |
| 503459 | RGD1565129 |  |  |  |
| 503464 | Pramel     |  |  |  |
| 503465 | Pramel3    |  |  |  |
| 503466 | RGD1566159 |  |  |  |
| 503650 | Klri2      |  |  |  |
| 503662 | Ly49s5     |  |  |  |
| 50572  | Slcola1    |  |  |  |
| 50585  | Bpifa2     |  |  |  |
| 50682  | Lipf       |  |  |  |
| 53950  | Pr13d1     |  |  |  |
| 54193  | Pbsn       |  |  |  |
| 54240  | Chrnd      |  |  |  |
| 54254  | Gata4      |  |  |  |
| 54256  | Gja6       |  |  |  |
| 54258  | Cxcr1      |  |  |  |
| 54270  | Mcpt4      |  |  |  |
| 54276  | Neurod2    |  |  |  |
| 54303  | Bpifa2f    |  |  |  |
| 56821  | Olr414     |  |  |  |
| 57021  | Adam3a     |  |  |  |
| 57029  | Adam18     |  |  |  |
| 57298  | Gstm31     |  |  |  |
| 57300  | Aadac      |  |  |  |
| 574523 | Ugt1a5     |  |  |  |
| 58937  | Pr13c1     |  |  |  |
| 58947  | Hgfac      |  |  |  |
| 59088  | Pr18a4     |  |  |  |
| 59110  | Aipl1      |  |  |  |
| 59313  | Psgb1      |  |  |  |
| 59325  | Ereg       |  |  |  |
| 60329  | Neurog3    |  |  |  |
| 60353  | Acrv1      |  |  |  |
| 60372  | Pga5       |  |  |  |
| 60446  | Crx        |  |  |  |
| 60451  | Olr1654    |  |  |  |
| 60570  | Npvf       |  |  |  |
| 60576  | Treh       |  |  |  |
| 60671  | Gulo       |  |  |  |
| 613220 | Defa11     |  |  |  |
| 613221 | Defa10     |  |  |  |
| 613223 | Defa6      |  |  |  |

|        |           |  |  |  |
|--------|-----------|--|--|--|
| 613224 | Defa8     |  |  |  |
| 613267 | Entpd8    |  |  |  |
| 619560 | Rup2      |  |  |  |
| 619575 | Sohlh2    |  |  |  |
| 63866  | Asic5     |  |  |  |
| 63867  | Ugt2a1    |  |  |  |
| 64029  | Cabs1     |  |  |  |
| 64042  | Nmur2     |  |  |  |
| 641519 | Defb29    |  |  |  |
| 641555 | Odam      |  |  |  |
| 641620 | Defb51    |  |  |  |
| 641621 | Defb23    |  |  |  |
| 641624 | Defb5     |  |  |  |
| 641626 | Defb13    |  |  |  |
| 641627 | Defb14    |  |  |  |
| 641628 | Defb28    |  |  |  |
| 641629 | Defb26    |  |  |  |
| 641630 | Defb11    |  |  |  |
| 641631 | Defb2     |  |  |  |
| 641632 | Defb24    |  |  |  |
| 641633 | Defb9     |  |  |  |
| 641635 | Defb10    |  |  |  |
| 641636 | Defb21    |  |  |  |
| 641637 | Defb40    |  |  |  |
| 641639 | Defb50    |  |  |  |
| 641641 | Defb20    |  |  |  |
| 641643 | Defb12    |  |  |  |
| 641645 | Defb15    |  |  |  |
| 641646 | Defb39    |  |  |  |
| 641647 | Defb33    |  |  |  |
| 641650 | Defb41    |  |  |  |
| 641651 | Defb43    |  |  |  |
| 641652 | Defb44    |  |  |  |
| 641653 | Defb49    |  |  |  |
| 641655 | Defb18    |  |  |  |
| 641656 | Defb30    |  |  |  |
| 641657 | Defb42    |  |  |  |
| 641658 | Defb17    |  |  |  |
| 641659 | Tpcr12    |  |  |  |
| 64361  | Pr17a3    |  |  |  |
| 64368  | Pr18a7    |  |  |  |
| 64389  | Defb4     |  |  |  |
| 64509  | Tpbpa     |  |  |  |
| 64535  | Fgfbp1    |  |  |  |
| 64568  | Galp      |  |  |  |
| 64571  | Vax1      |  |  |  |
| 64647  | Hist1h2b1 |  |  |  |
| 64822  | Fabp9     |  |  |  |
| 65024  | Chrna9    |  |  |  |
| 65039  | Lcn1      |  |  |  |
| 65051  | Serpina5  |  |  |  |
| 65140  | Olr226    |  |  |  |
| 65182  | Oprpn     |  |  |  |
| 65185  | Sult1c3   |  |  |  |
| 65192  | Slc27a2   |  |  |  |
| 65202  | Slc13a2   |  |  |  |

|        |              |  |  |  |
|--------|--------------|--|--|--|
| 65270  | Abo3         |  |  |  |
| 652921 | Defb37       |  |  |  |
| 652922 | Defb38       |  |  |  |
| 652926 | Rhoxf10      |  |  |  |
| 652927 | Ggtall1      |  |  |  |
| 654517 | Crispl       |  |  |  |
| 66019  | Cdx2         |  |  |  |
| 66029  | Idol         |  |  |  |
| 664710 | Teddm1       |  |  |  |
| 678740 | Vom2r1       |  |  |  |
| 678749 | Dgat2l6      |  |  |  |
| 679520 | Awat1        |  |  |  |
| 679557 | Vom2r42      |  |  |  |
| 679574 | LOC679574    |  |  |  |
| 679593 | Vom2r43      |  |  |  |
| 679682 | Eras         |  |  |  |
| 679691 | Vom2r5       |  |  |  |
| 679702 | LOC679702    |  |  |  |
| 679727 | LOC679727    |  |  |  |
| 679783 | Tmem211      |  |  |  |
| 679789 | Olfr1330-ps1 |  |  |  |
| 679802 | Saxo1        |  |  |  |
| 679803 | LOC679803    |  |  |  |
| 679825 | Rrlt         |  |  |  |
| 679873 | LOC679873    |  |  |  |
| 679989 | Tcp11x2      |  |  |  |
| 680000 | Prame        |  |  |  |
| 680050 | Tbpl2        |  |  |  |
| 680060 | Krtap3-2     |  |  |  |
| 680071 | Krtap3-1     |  |  |  |
| 680104 | Krtap1-3     |  |  |  |
| 680112 | LOC680112    |  |  |  |
| 680136 | Krtap2-4l    |  |  |  |
| 680149 | Gngt1        |  |  |  |
| 680152 | Krtap2-1     |  |  |  |
| 680160 | LOC680160    |  |  |  |
| 680164 | Tex35        |  |  |  |
| 680174 | Svall        |  |  |  |
| 680188 | Tas2r139     |  |  |  |
| 680190 | LOC680190    |  |  |  |
| 680273 | LOC680273    |  |  |  |
| 680328 | Krtap9-1     |  |  |  |
| 680342 | Clbn34b      |  |  |  |
| 680358 | Olfr1873     |  |  |  |
| 680370 | Clbn34d      |  |  |  |
| 680377 | LOC680377    |  |  |  |
| 680396 | LOC680396    |  |  |  |
| 680442 | LOC680442    |  |  |  |
| 680452 | Arrdc5       |  |  |  |
| 680454 | Krtap31-1    |  |  |  |
| 680619 | Trapla       |  |  |  |
| 680703 | Krtap16-5    |  |  |  |
| 680718 | Cts8         |  |  |  |
| 680728 | Casp16       |  |  |  |
| 680734 | Ankrd65      |  |  |  |
| 680754 | Obp2a        |  |  |  |

|        |             |  |  |  |
|--------|-------------|--|--|--|
| 680819 | LOC680819   |  |  |  |
| 680865 | Tex13b      |  |  |  |
| 680885 | LOC680885   |  |  |  |
| 680912 | Kcnu1       |  |  |  |
| 680913 | LOC680913   |  |  |  |
| 680955 | LOC680955   |  |  |  |
| 681066 | Fthl17e     |  |  |  |
| 681067 | LOC681067   |  |  |  |
| 681069 | Pilrb       |  |  |  |
| 681070 | Fcamr       |  |  |  |
| 681077 | LOC681077   |  |  |  |
| 681079 | Vom2r64     |  |  |  |
| 681107 | LOC681107   |  |  |  |
| 681167 | Samt3       |  |  |  |
| 681194 | Lypd4       |  |  |  |
| 681210 | MGC94891    |  |  |  |
| 681241 | LOC681241   |  |  |  |
| 681263 | Gje1        |  |  |  |
| 681303 | LOC681303   |  |  |  |
| 681344 | Spink9      |  |  |  |
| 681354 | Mettl121c11 |  |  |  |
| 681375 | Lcn4        |  |  |  |
| 681382 | LOC681382   |  |  |  |
| 681385 | LOC681385   |  |  |  |
| 681407 | Rnf148      |  |  |  |
| 681470 | LOC681470   |  |  |  |
| 681817 | G6pc2       |  |  |  |
| 682042 | LOC682042   |  |  |  |
| 682076 | Mnx1        |  |  |  |
| 682138 | Ddx43       |  |  |  |
| 682526 | LOC682526   |  |  |  |
| 682831 | LOC682831   |  |  |  |
| 682934 | Slc22a16    |  |  |  |
| 682974 | Hsd3b3      |  |  |  |
| 683212 | LOC683212   |  |  |  |
| 683849 | LOC683849   |  |  |  |
| 683850 | LOC683850   |  |  |  |
| 683961 | LOC683961   |  |  |  |
| 684085 | Nr2e1       |  |  |  |
| 684107 | LOC684107   |  |  |  |
| 684158 | Rd3         |  |  |  |
| 684170 | LOC684170   |  |  |  |
| 684171 | LOC684171   |  |  |  |
| 684179 | LOC684179   |  |  |  |
| 684208 | LOC684208   |  |  |  |
| 684365 | LOC684365   |  |  |  |
| 684372 | Prr23a      |  |  |  |
| 684376 | LOC684376   |  |  |  |
| 684381 | Prr23d2     |  |  |  |
| 684395 | LOC684395   |  |  |  |
| 684403 | LOC684403   |  |  |  |
| 684444 | LOC684444   |  |  |  |
| 684466 | LOC684466   |  |  |  |
| 684471 | LOC684471   |  |  |  |
| 684539 | LOC684539   |  |  |  |
| 684589 | Krtap26-1   |  |  |  |



|        |           |  |  |  |
|--------|-----------|--|--|--|
| 684683 | LOC684683 |  |  |  |
| 684709 | LOC684709 |  |  |  |
| 684797 | LOC684797 |  |  |  |
| 684932 | LOC684932 |  |  |  |
| 685069 | LOC685069 |  |  |  |
| 685161 | Eppin     |  |  |  |
| 685170 | Wfdc8     |  |  |  |
| 685171 | LOC685171 |  |  |  |
| 685199 | LOC685199 |  |  |  |
| 685201 | Wfdc16    |  |  |  |
| 685222 | Cyp2b15   |  |  |  |
| 685226 | LOC685226 |  |  |  |
| 685279 | LOC685279 |  |  |  |
| 685291 | LOC685291 |  |  |  |
| 685304 | Krtap19-5 |  |  |  |
| 685321 | LOC685321 |  |  |  |
| 685391 | LOC685391 |  |  |  |
| 685406 | LOC685406 |  |  |  |
| 685501 | LOC685501 |  |  |  |
| 685544 | LOC685544 |  |  |  |
| 685557 | Vom2r7    |  |  |  |
| 685560 | Mogat3    |  |  |  |
| 685600 | LOC685600 |  |  |  |
| 685621 | Prr20e    |  |  |  |
| 685641 | Vom2r8    |  |  |  |
| 685655 | LOC685655 |  |  |  |
| 685667 | LOC685667 |  |  |  |
| 685700 | LOC685700 |  |  |  |
| 685701 | Fam122c   |  |  |  |
| 685716 | LOC685716 |  |  |  |
| 685722 | Znrd1as   |  |  |  |
| 685723 | Cib3      |  |  |  |
| 685747 | LOC685747 |  |  |  |
| 685762 | LOC685762 |  |  |  |
| 685774 | Samt4     |  |  |  |
| 685782 | LOC685782 |  |  |  |
| 685785 | LOC685785 |  |  |  |
| 685789 | LOC685789 |  |  |  |
| 685790 | LOC685790 |  |  |  |
| 685793 | LOC685793 |  |  |  |
| 685819 | Samt2     |  |  |  |
| 685827 | LOC685827 |  |  |  |
| 685840 | Ifn13     |  |  |  |
| 685846 | Adam34    |  |  |  |
| 685880 | Vom1r99   |  |  |  |
| 685907 | LOC685907 |  |  |  |
| 685912 | Sprr1b    |  |  |  |
| 685945 | Vom1r104  |  |  |  |
| 685964 | LOC685964 |  |  |  |
| 686031 | LOC686031 |  |  |  |
| 686032 | Smlr1     |  |  |  |
| 686042 | LOC686042 |  |  |  |
| 686048 | Btn15     |  |  |  |
| 686095 | LOC686095 |  |  |  |
| 686125 | Lce11     |  |  |  |
| 686142 | LOC686142 |  |  |  |

|        |           |  |  |  |
|--------|-----------|--|--|--|
| 686143 | LOC686143 |  |  |  |
| 686145 | Vom2r48   |  |  |  |
| 686209 | LOC686209 |  |  |  |
| 686254 | Psors1c2  |  |  |  |
| 686641 | LOC686641 |  |  |  |
| 686677 | LOC686677 |  |  |  |
| 686680 | Ms4a5     |  |  |  |
| 686683 | LOC686683 |  |  |  |
| 686720 | LOC686720 |  |  |  |
| 686748 | LOC686748 |  |  |  |
| 686787 | 01r1874   |  |  |  |
| 686841 | Tex33     |  |  |  |
| 686900 | LOC686900 |  |  |  |
| 686967 | LOC686967 |  |  |  |
| 687065 | LOC687065 |  |  |  |
| 687082 | LOC687082 |  |  |  |
| 687088 | LOC687088 |  |  |  |
| 687092 | LOC687092 |  |  |  |
| 687097 | LOC687097 |  |  |  |
| 687119 | LOC687119 |  |  |  |
| 687364 | Asb17     |  |  |  |
| 687631 | LOC687631 |  |  |  |
| 687880 | LOC687880 |  |  |  |
| 687881 | LOC687881 |  |  |  |
| 687893 | LOC687893 |  |  |  |
| 687896 | LOC687896 |  |  |  |
| 688171 | LOC688171 |  |  |  |
| 688176 | LOC688176 |  |  |  |
| 688282 | LOC688282 |  |  |  |
| 688308 | Tspan10   |  |  |  |
| 688320 | LOC688320 |  |  |  |
| 688321 | LOC688321 |  |  |  |
| 688335 | LOC688335 |  |  |  |
| 688392 | Vom2r49   |  |  |  |
| 688413 | Lcelm     |  |  |  |
| 688433 | Dydc1     |  |  |  |
| 688481 | Efcab9    |  |  |  |
| 688657 | LOC688657 |  |  |  |
| 688702 | LOC688702 |  |  |  |
| 688755 | LOC688755 |  |  |  |
| 688794 | Vom1r65   |  |  |  |
| 688802 | Mcidas    |  |  |  |
| 688819 | Cib4      |  |  |  |
| 688823 | Cdc20b    |  |  |  |
| 688828 | LOC688828 |  |  |  |
| 688842 | LOC688842 |  |  |  |
| 688848 | Tsga13    |  |  |  |
| 688887 | Cfhr2     |  |  |  |
| 688924 | LOC688924 |  |  |  |
| 688951 | Cd209c    |  |  |  |
| 689002 | LOC689002 |  |  |  |
| 689004 | Clec4g    |  |  |  |
| 689060 | Vom2r71   |  |  |  |
| 689072 | Vom2r72   |  |  |  |
| 689077 | Spaca7    |  |  |  |
| 689101 | Khdc1b    |  |  |  |

|        |            |  |  |  |
|--------|------------|--|--|--|
| 689103 | Best4      |  |  |  |
| 689178 | Muc11      |  |  |  |
| 689199 | Apbh       |  |  |  |
| 689220 | LOC689220  |  |  |  |
| 689271 | LOC689271  |  |  |  |
| 689349 | Catsper1   |  |  |  |
| 689396 | LOC689396  |  |  |  |
| 689403 | Vom2r65    |  |  |  |
| 689408 | LOC689408  |  |  |  |
| 689412 | LOC689412  |  |  |  |
| 689425 | Clps12     |  |  |  |
| 689462 | Cnbd1      |  |  |  |
| 689485 | Vom2r67    |  |  |  |
| 689515 | Clrn2      |  |  |  |
| 689569 | LOC689569  |  |  |  |
| 689570 | Spink13    |  |  |  |
| 689587 | LOC689587  |  |  |  |
| 689589 | LOC689589  |  |  |  |
| 689594 | Zar11      |  |  |  |
| 689599 | LOC689599  |  |  |  |
| 689600 | LOC689600  |  |  |  |
| 689604 | Stath      |  |  |  |
| 689618 | LOC689618  |  |  |  |
| 689629 | LOC689629  |  |  |  |
| 689670 | Vom2r73    |  |  |  |
| 689725 | LOC689725  |  |  |  |
| 689748 | Tmem213    |  |  |  |
| 689754 | Ces3a      |  |  |  |
| 689766 | LOC689766  |  |  |  |
| 689798 | LOC689798  |  |  |  |
| 689801 | Skint1     |  |  |  |
| 689817 | Klrb1      |  |  |  |
| 689840 | LOC689840  |  |  |  |
| 689858 | Magea4     |  |  |  |
| 689872 | RGD1564999 |  |  |  |
| 689947 | Crygf      |  |  |  |
| 689962 | Ccdc182    |  |  |  |
| 689968 | LOC689968  |  |  |  |
| 689975 | Dppa1      |  |  |  |
| 690127 | LOC690127  |  |  |  |
| 690140 | LOC690140  |  |  |  |
| 690191 | LOC690191  |  |  |  |
| 690198 | Fpr-rs4    |  |  |  |
| 690206 | LOC690206  |  |  |  |
| 690230 | Fpr-rs6    |  |  |  |
| 690284 | LOC690284  |  |  |  |
| 690299 | LOC690299  |  |  |  |
| 690326 | Lpal2      |  |  |  |
| 690334 | Tas2r130   |  |  |  |
| 690348 | LOC690348  |  |  |  |
| 690352 | LOC690352  |  |  |  |
| 690383 | Cyp3a71-ps |  |  |  |
| 690386 | LOC690386  |  |  |  |
| 690402 | Bpifa3     |  |  |  |
| 690410 | LOC690410  |  |  |  |
| 690418 | LOC690418  |  |  |  |

|        |           |  |  |  |
|--------|-----------|--|--|--|
| 690425 | LOC690425 |  |  |  |
| 690431 | LOC690431 |  |  |  |
| 690433 | Rnf186    |  |  |  |
| 690448 | Tas2r120  |  |  |  |
| 690460 | LOC690460 |  |  |  |
| 690472 | Tas2r124  |  |  |  |
| 690478 | LOC690478 |  |  |  |
| 690481 | Tas2r125  |  |  |  |
| 690572 | Tas2r109  |  |  |  |
| 690575 | Tc11a     |  |  |  |
| 690617 | LOC690617 |  |  |  |
| 690666 | Tmem92    |  |  |  |
| 690758 | Vom2r22   |  |  |  |
| 690764 | LOC690764 |  |  |  |
| 690767 | Olr1875   |  |  |  |
| 690816 | Vom2r24   |  |  |  |
| 690821 | LOC690821 |  |  |  |
| 690849 | Or7e24    |  |  |  |
| 690894 | Ifna5     |  |  |  |
| 690971 | Ofcc1     |  |  |  |
| 691014 | Dppa311   |  |  |  |
| 691030 | LOC691030 |  |  |  |
| 691051 | Pramef27  |  |  |  |
| 691058 | Trav12-3  |  |  |  |
| 691074 | LOC691074 |  |  |  |
| 691086 | Nlrp4f    |  |  |  |
| 691099 | Tex19.2   |  |  |  |
| 691110 | LOC691110 |  |  |  |
| 691120 | Spaca4    |  |  |  |
| 691139 | Pramef17  |  |  |  |
| 691150 | Pramef20  |  |  |  |
| 691157 | Pramef12  |  |  |  |
| 691162 | LOC691162 |  |  |  |
| 691196 | LOC691196 |  |  |  |
| 691223 | Pifo      |  |  |  |
| 691244 | Rhox13    |  |  |  |
| 691272 | LOC691272 |  |  |  |
| 691275 | Adad2     |  |  |  |
| 691286 | LOC691286 |  |  |  |
| 691325 | LOC691325 |  |  |  |
| 691368 | LOC691368 |  |  |  |
| 691398 | Foxb2     |  |  |  |
| 691408 | Sbk3      |  |  |  |
| 691411 | Sbk2      |  |  |  |
| 691442 | Vom2r55   |  |  |  |
| 691469 | Pr15a2    |  |  |  |
| 691488 | Hist3h2bb |  |  |  |
| 691495 | LOC691495 |  |  |  |
| 691520 | LOC691520 |  |  |  |
| 691551 | LOC691551 |  |  |  |
| 691552 | Pr13d2    |  |  |  |
| 691560 | Vom2r29   |  |  |  |
| 691592 | LOC691592 |  |  |  |
| 691642 | LOC691642 |  |  |  |
| 691695 | LOC691695 |  |  |  |
| 691763 | Vom2r33   |  |  |  |

|           |           |  |  |  |
|-----------|-----------|--|--|--|
| 691791    | Vom1r55   |  |  |  |
| 691813    | Pla2g4c11 |  |  |  |
| 691850    | LOC691850 |  |  |  |
| 691860    | Obox1     |  |  |  |
| 691895    | LOC691895 |  |  |  |
| 691918    | LOC691918 |  |  |  |
| 691952    | Terb2     |  |  |  |
| 691997    | Pebp4     |  |  |  |
| 78979     | Tas2r119  |  |  |  |
| 78980     | Tas2r118  |  |  |  |
| 78981     | Tas2r107  |  |  |  |
| 78982     | Tas2r114  |  |  |  |
| 78983     | Tas2r121  |  |  |  |
| 78984     | Tas2r13   |  |  |  |
| 78985     | Tas2r105  |  |  |  |
| 79243     | Hsd17b2   |  |  |  |
| 79254     | Akap4     |  |  |  |
| 81712     | Retn1a    |  |  |  |
| 81760     | Grk1      |  |  |  |
| 81806     | Serpina7  |  |  |  |
| 81916     | Pdzklip1  |  |  |  |
| 83687     | Defb1     |  |  |  |
| 83711     | Inhbe     |  |  |  |
| 84017     | Hmga2     |  |  |  |
| 84028     | Pnliprpl  |  |  |  |
| 84029     | Hao2      |  |  |  |
| 84377     | Pr17d1    |  |  |  |
| 84385     | Nr1i2     |  |  |  |
| 84605     | Sval2     |  |  |  |
| 85271     | Zp1       |  |  |  |
| 94106     | Vegp2     |  |  |  |
| 94164     | Hbg1      |  |  |  |
| BGIG10116 | 30309     |  |  |  |
| BGIG10116 | 30313     |  |  |  |
| BGIG10116 | 30325     |  |  |  |
| BGIG10116 | 30334     |  |  |  |
| BGIG10116 | 30458     |  |  |  |
| BGIG10116 | 30466     |  |  |  |
| BGIG10116 | 30566     |  |  |  |
| BGIG10116 | 30630     |  |  |  |
| BGIG10116 | 30646     |  |  |  |
| BGIG10116 | 30870     |  |  |  |
| BGIG10116 | 31140     |  |  |  |
| BGIG10116 | 31195     |  |  |  |
| BGIG10116 | 31201     |  |  |  |
| BGIG10116 | 31210     |  |  |  |
| BGIG10116 | 31217     |  |  |  |
| BGIG10116 | 31218     |  |  |  |
| BGIG10116 | 31220     |  |  |  |
| BGIG10116 | 31222     |  |  |  |
| BGIG10116 | 31223     |  |  |  |
| BGIG10116 | 31451     |  |  |  |
| BGIG10116 | 31455     |  |  |  |
| BGIG10116 | 31516     |  |  |  |
| BGIG10116 | 31517     |  |  |  |
| BGIG10116 | 31530     |  |  |  |

|                 |  |  |  |
|-----------------|--|--|--|
| BGIG10116 31682 |  |  |  |
| BGIG10116 31949 |  |  |  |
| BGIG10116 31984 |  |  |  |
| BGIG10116 32003 |  |  |  |
| BGIG10116 32126 |  |  |  |
| BGIG10116 32133 |  |  |  |
| BGIG10116 32185 |  |  |  |
| BGIG10116 32322 |  |  |  |
| BGIG10116 32324 |  |  |  |
| BGIG10116 32326 |  |  |  |
| BGIG10116 32328 |  |  |  |
| BGIG10116 32333 |  |  |  |
| BGIG10116 32334 |  |  |  |
| BGIG10116 32335 |  |  |  |
| BGIG10116 32337 |  |  |  |
| BGIG10116 32342 |  |  |  |
| BGIG10116 32344 |  |  |  |
| BGIG10116 32345 |  |  |  |
| BGIG10116 32347 |  |  |  |
| BGIG10116 32515 |  |  |  |
| BGIG10116 32691 |  |  |  |
| BGIG10116 32719 |  |  |  |
| BGIG10116 32720 |  |  |  |
| BGIG10116 32721 |  |  |  |
| BGIG10116 32725 |  |  |  |
| BGIG10116 32799 |  |  |  |
| BGIG10116 32808 |  |  |  |
| BGIG10116 32817 |  |  |  |
| BGIG10116 32818 |  |  |  |
| BGIG10116 33008 |  |  |  |
| BGIG10116 33150 |  |  |  |
| BGIG10116 33214 |  |  |  |
| BGIG10116 33261 |  |  |  |
| BGIG10116 33641 |  |  |  |
| BGIG10116 33642 |  |  |  |
| BGIG10116 33760 |  |  |  |
| BGIG10116 33824 |  |  |  |
| BGIG10116 33878 |  |  |  |
| BGIG10116 33934 |  |  |  |
| BGIG10116 34084 |  |  |  |
| BGIG10116 34218 |  |  |  |
| BGIG10116 34238 |  |  |  |
| BGIG10116 34317 |  |  |  |
| BGIG10116 34385 |  |  |  |
| BGIG10116 34404 |  |  |  |
| BGIG10116 34563 |  |  |  |
| BGIG10116 34628 |  |  |  |
| BGIG10116 34649 |  |  |  |
| BGIG10116 34780 |  |  |  |
| BGIG10116 34791 |  |  |  |
| BGIG10116 34928 |  |  |  |
| BGIG10116 34929 |  |  |  |
| BGIG10116 34930 |  |  |  |
| BGIG10116 35119 |  |  |  |
| BGIG10116 35126 |  |  |  |
| BGIG10116 35129 |  |  |  |

|           |       |  |  |  |
|-----------|-------|--|--|--|
| BGIG10116 | 35135 |  |  |  |
| BGIG10116 | 35136 |  |  |  |
| BGIG10116 | 35137 |  |  |  |
| BGIG10116 | 35138 |  |  |  |
| BGIG10116 | 35144 |  |  |  |
| BGIG10116 | 35145 |  |  |  |
| BGIG10116 | 35146 |  |  |  |
| BGIG10116 | 35150 |  |  |  |
| BGIG10116 | 35161 |  |  |  |
| BGIG10116 | 35162 |  |  |  |
| BGIG10116 | 35178 |  |  |  |
| BGIG10116 | 35180 |  |  |  |
| BGIG10116 | 35185 |  |  |  |
| BGIG10116 | 35189 |  |  |  |
| BGIG10116 | 35195 |  |  |  |
| BGIG10116 | 35202 |  |  |  |
| BGIG10116 | 35204 |  |  |  |
| BGIG10116 | 35216 |  |  |  |
| BGIG10116 | 35217 |  |  |  |
| BGIG10116 | 35219 |  |  |  |
| BGIG10116 | 35224 |  |  |  |
| BGIG10116 | 35235 |  |  |  |
| BGIG10116 | 35249 |  |  |  |
| BGIG10116 | 35250 |  |  |  |
| BGIG10116 | 35251 |  |  |  |
| BGIG10116 | 35257 |  |  |  |
| BGIG10116 | 35268 |  |  |  |
| BGIG10116 | 35269 |  |  |  |
| BGIG10116 | 35271 |  |  |  |
| BGIG10116 | 35272 |  |  |  |
| BGIG10116 | 35278 |  |  |  |
| BGIG10116 | 35281 |  |  |  |
| BGIG10116 | 35292 |  |  |  |
| BGIG10116 | 35295 |  |  |  |
| BGIG10116 | 35296 |  |  |  |
| BGIG10116 | 35297 |  |  |  |
| BGIG10116 | 35300 |  |  |  |
| BGIG10116 | 35307 |  |  |  |
| BGIG10116 | 35318 |  |  |  |
| BGIG10116 | 35319 |  |  |  |
| BGIG10116 | 35340 |  |  |  |
| BGIG10116 | 35341 |  |  |  |
| BGIG10116 | 35342 |  |  |  |
| BGIG10116 | 35343 |  |  |  |
| BGIG10116 | 35344 |  |  |  |
| BGIG10116 | 35345 |  |  |  |
| BGIG10116 | 35346 |  |  |  |
| BGIG10116 | 35347 |  |  |  |
| BGIG10116 | 35348 |  |  |  |
| BGIG10116 | 35349 |  |  |  |
| BGIG10116 | 35350 |  |  |  |
| BGIG10116 | 35351 |  |  |  |
| BGIG10116 | 35352 |  |  |  |
| BGIG10116 | 35353 |  |  |  |
| BGIG10116 | 35354 |  |  |  |
| BGIG10116 | 35355 |  |  |  |



|           |       |  |  |  |
|-----------|-------|--|--|--|
| BGIG10116 | 35356 |  |  |  |
| BGIG10116 | 35357 |  |  |  |
| BGIG10116 | 35358 |  |  |  |
| BGIG10116 | 35359 |  |  |  |
| BGIG10116 | 35360 |  |  |  |
| BGIG10116 | 35363 |  |  |  |
| BGIG10116 | 35368 |  |  |  |
| BGIG10116 | 35371 |  |  |  |
| BGIG10116 | 35379 |  |  |  |
| BGIG10116 | 35386 |  |  |  |
| BGIG10116 | 35394 |  |  |  |
| BGIG10116 | 35395 |  |  |  |
| BGIG10116 | 35396 |  |  |  |
| BGIG10116 | 35397 |  |  |  |
| BGIG10116 | 35398 |  |  |  |
| BGIG10116 | 35399 |  |  |  |
| BGIG10116 | 35400 |  |  |  |
| BGIG10116 | 35404 |  |  |  |
| BGIG10116 | 35407 |  |  |  |
| BGIG10116 | 35412 |  |  |  |
| BGIG10116 | 35413 |  |  |  |
| BGIG10116 | 35428 |  |  |  |
| BGIG10116 | 35433 |  |  |  |
| BGIG10116 | 35434 |  |  |  |
| BGIG10116 | 35435 |  |  |  |
| BGIG10116 | 35440 |  |  |  |
| BGIG10116 | 35442 |  |  |  |
| BGIG10116 | 35443 |  |  |  |
| BGIG10116 | 35449 |  |  |  |
| BGIG10116 | 35450 |  |  |  |
| BGIG10116 | 35451 |  |  |  |
| BGIG10116 | 35452 |  |  |  |
| BGIG10116 | 35453 |  |  |  |
| BGIG10116 | 35454 |  |  |  |
| BGIG10116 | 35455 |  |  |  |
| BGIG10116 | 35456 |  |  |  |
| BGIG10116 | 35457 |  |  |  |
| BGIG10116 | 35458 |  |  |  |
| BGIG10116 | 35459 |  |  |  |
| BGIG10116 | 35460 |  |  |  |
| BGIG10116 | 35475 |  |  |  |
| BGIG10116 | 35477 |  |  |  |
| BGIG10116 | 35481 |  |  |  |
| BGIG10116 | 35483 |  |  |  |
| BGIG10116 | 35491 |  |  |  |
| BGIG10116 | 35492 |  |  |  |
| BGIG10116 | 35497 |  |  |  |
| BGIG10116 | 35502 |  |  |  |
| BGIG10116 | 35503 |  |  |  |
| BGIG10116 | 35504 |  |  |  |
| BGIG10116 | 35506 |  |  |  |
| BGIG10116 | 35507 |  |  |  |
| BGIG10116 | 35508 |  |  |  |
| BGIG10116 | 35509 |  |  |  |
| BGIG10116 | 35511 |  |  |  |
| BGIG10116 | 35516 |  |  |  |

|           |       |  |  |  |
|-----------|-------|--|--|--|
| BGIG10116 | 35518 |  |  |  |
| BGIG10116 | 35537 |  |  |  |
| BGIG10116 | 35538 |  |  |  |
| BGIG10116 | 35539 |  |  |  |
| BGIG10116 | 35542 |  |  |  |
| BGIG10116 | 35546 |  |  |  |
| BGIG10116 | 35559 |  |  |  |
| BGIG10116 | 35561 |  |  |  |
| BGIG10116 | 35562 |  |  |  |
| BGIG10116 | 35563 |  |  |  |
| BGIG10116 | 35572 |  |  |  |
| BGIG10116 | 35574 |  |  |  |
| BGIG10116 | 35580 |  |  |  |
| BGIG10116 | 35584 |  |  |  |
| BGIG10116 | 35585 |  |  |  |
| BGIG10116 | 35586 |  |  |  |
| BGIG10116 | 35588 |  |  |  |
| BGIG10116 | 35589 |  |  |  |
| BGIG10116 | 35590 |  |  |  |
| BGIG10116 | 35593 |  |  |  |
| BGIG10116 | 35600 |  |  |  |
| BGIG10116 | 35612 |  |  |  |
| BGIG10116 | 35632 |  |  |  |
| BGIG10116 | 35641 |  |  |  |
| BGIG10116 | 35643 |  |  |  |
| BGIG10116 | 35644 |  |  |  |
| BGIG10116 | 35651 |  |  |  |
| BGIG10116 | 35652 |  |  |  |
| BGIG10116 | 35654 |  |  |  |
| BGIG10116 | 35656 |  |  |  |
| BGIG10116 | 35660 |  |  |  |
| BGIG10116 | 35664 |  |  |  |
| BGIG10116 | 35673 |  |  |  |
| BGIG10116 | 35674 |  |  |  |
| BGIG10116 | 35675 |  |  |  |
| BGIG10116 | 35676 |  |  |  |
| BGIG10116 | 35677 |  |  |  |
| BGIG10116 | 35678 |  |  |  |
| BGIG10116 | 35679 |  |  |  |
| BGIG10116 | 35680 |  |  |  |
| BGIG10116 | 35681 |  |  |  |
| BGIG10116 | 35682 |  |  |  |
| BGIG10116 | 35683 |  |  |  |
| BGIG10116 | 35684 |  |  |  |
| BGIG10116 | 35685 |  |  |  |
| BGIG10116 | 35686 |  |  |  |
| BGIG10116 | 35687 |  |  |  |
| BGIG10116 | 35688 |  |  |  |
| BGIG10116 | 35690 |  |  |  |
| BGIG10116 | 35691 |  |  |  |
| BGIG10116 | 35692 |  |  |  |
| BGIG10116 | 35693 |  |  |  |
| BGIG10116 | 35694 |  |  |  |
| BGIG10116 | 35695 |  |  |  |
| BGIG10116 | 35696 |  |  |  |
| BGIG10116 | 35697 |  |  |  |

|                 |  |  |  |
|-----------------|--|--|--|
| BGIG10116 35698 |  |  |  |
| BGIG10116 35699 |  |  |  |
| BGIG10116 35700 |  |  |  |
| BGIG10116 35701 |  |  |  |
| BGIG10116 35702 |  |  |  |
| BGIG10116 35703 |  |  |  |
| BGIG10116 35704 |  |  |  |
| BGIG10116 35705 |  |  |  |
| BGIG10116 35706 |  |  |  |
| BGIG10116 35708 |  |  |  |
| BGIG10116 35710 |  |  |  |
| BGIG10116 35717 |  |  |  |
| BGIG10116 35719 |  |  |  |
| BGIG10116 35727 |  |  |  |
| BGIG10116 35736 |  |  |  |
| BGIG10116 35737 |  |  |  |
| BGIG10116 35740 |  |  |  |
| BGIG10116 35741 |  |  |  |
| BGIG10116 35764 |  |  |  |
| BGIG10116 35769 |  |  |  |
| BGIG10116 35776 |  |  |  |
| BGIG10116 35782 |  |  |  |
| BGIG10116 35793 |  |  |  |
| BGIG10116 35797 |  |  |  |
| BGIG10116 35800 |  |  |  |
| BGIG10116 35803 |  |  |  |
| BGIG10116 35806 |  |  |  |
| BGIG10116 35817 |  |  |  |
| BGIG10116 35823 |  |  |  |
| BGIG10116 35828 |  |  |  |
| BGIG10116 35843 |  |  |  |
| BGIG10116 35857 |  |  |  |
| BGIG10116 35865 |  |  |  |
| BGIG10116 35867 |  |  |  |
| BGIG10116 35868 |  |  |  |
| BGIG10116 35871 |  |  |  |
| BGIG10116 35872 |  |  |  |
| BGIG10116 35873 |  |  |  |
| BGIG10116 35874 |  |  |  |
| BGIG10116 35877 |  |  |  |
| BGIG10116 35891 |  |  |  |
| BGIG10116 35893 |  |  |  |
| BGIG10116 35897 |  |  |  |
| BGIG10116 35898 |  |  |  |
| BGIG10116 35909 |  |  |  |
| BGIG10116 35910 |  |  |  |
| BGIG10116 35917 |  |  |  |
| BGIG10116 35922 |  |  |  |
| BGIG10116 35923 |  |  |  |
| BGIG10116 35934 |  |  |  |
| BGIG10116 35935 |  |  |  |
| BGIG10116 35938 |  |  |  |
| BGIG10116 35939 |  |  |  |
| BGIG10116 35940 |  |  |  |
| BGIG10116 35946 |  |  |  |
| BGIG10116 35955 |  |  |  |

|                 |  |  |  |
|-----------------|--|--|--|
| BGIG10116 35961 |  |  |  |
| BGIG10116 35974 |  |  |  |
| BGIG10116 35979 |  |  |  |
| BGIG10116 35985 |  |  |  |
| BGIG10116 35992 |  |  |  |
| BGIG10116 35994 |  |  |  |
| BGIG10116 36011 |  |  |  |
| BGIG10116 36013 |  |  |  |
| BGIG10116 36014 |  |  |  |
| BGIG10116 36023 |  |  |  |
| BGIG10116 36029 |  |  |  |
| BGIG10116 36031 |  |  |  |
| BGIG10116 36032 |  |  |  |
| BGIG10116 36041 |  |  |  |
| BGIG10116 36044 |  |  |  |
| BGIG10116 36050 |  |  |  |
| BGIG10116 36055 |  |  |  |
| BGIG10116 36056 |  |  |  |
| BGIG10116 36057 |  |  |  |
| BGIG10116 36075 |  |  |  |
| BGIG10116 36084 |  |  |  |
| BGIG10116 36085 |  |  |  |
| BGIG10116 36086 |  |  |  |
| BGIG10116 36091 |  |  |  |
| BGIG10116 36103 |  |  |  |
| BGIG10116 36104 |  |  |  |
| BGIG10116 36107 |  |  |  |
| BGIG10116 36109 |  |  |  |
| BGIG10116 36119 |  |  |  |
| BGIG10116 36122 |  |  |  |
| BGIG10116 36123 |  |  |  |
| BGIG10116 36130 |  |  |  |
| BGIG10116 36140 |  |  |  |
| BGIG10116 36154 |  |  |  |
| BGIG10116 36162 |  |  |  |
| BGIG10116 36164 |  |  |  |
| BGIG10116 36170 |  |  |  |
| BGIG10116 36172 |  |  |  |
| BGIG10116 36173 |  |  |  |
| BGIG10116 36174 |  |  |  |
| BGIG10116 36177 |  |  |  |
| BGIG10116 36178 |  |  |  |
| BGIG10116 36179 |  |  |  |
| BGIG10116 36180 |  |  |  |
| BGIG10116 36191 |  |  |  |
| BGIG10116 36193 |  |  |  |
| BGIG10116 36199 |  |  |  |
| BGIG10116 36226 |  |  |  |
| BGIG10116 36227 |  |  |  |
| BGIG10116 36229 |  |  |  |
| BGIG10116 36230 |  |  |  |
| BGIG10116 36234 |  |  |  |
| BGIG10116 36245 |  |  |  |
| BGIG10116 36250 |  |  |  |
| BGIG10116 36252 |  |  |  |
| BGIG10116 36253 |  |  |  |

|                 |  |  |  |
|-----------------|--|--|--|
| BGIG10116 36260 |  |  |  |
| BGIG10116 36262 |  |  |  |
| BGIG10116 36270 |  |  |  |
| BGIG10116 36271 |  |  |  |
| BGIG10116 36272 |  |  |  |
| BGIG10116 36277 |  |  |  |
| BGIG10116 36284 |  |  |  |
| BGIG10116 36302 |  |  |  |
| BGIG10116 36307 |  |  |  |
| BGIG10116 36309 |  |  |  |
| BGIG10116 36317 |  |  |  |
| BGIG10116 36319 |  |  |  |
| BGIG10116 36323 |  |  |  |
| BGIG10116 36327 |  |  |  |
| BGIG10116 36329 |  |  |  |
| BGIG10116 36330 |  |  |  |
| BGIG10116 36332 |  |  |  |
| BGIG10116 36333 |  |  |  |
| BGIG10116 36336 |  |  |  |
| BGIG10116 36338 |  |  |  |
| BGIG10116 36339 |  |  |  |
| BGIG10116 36340 |  |  |  |
| BGIG10116 36341 |  |  |  |
| BGIG10116 36343 |  |  |  |
| BGIG10116 36344 |  |  |  |
| BGIG10116 36346 |  |  |  |
| BGIG10116 36347 |  |  |  |
| BGIG10116 36348 |  |  |  |
| BGIG10116 36349 |  |  |  |
| BGIG10116 36369 |  |  |  |
| BGIG10116 36392 |  |  |  |
| BGIG10116 36393 |  |  |  |
| BGIG10116 36394 |  |  |  |
| BGIG10116 36395 |  |  |  |

## Suppl. Table 5 All DEGs

| Gene ID   | Gene Symbol  | Type | CPIP1<br>Read<br>Count | CPIP2<br>Read<br>Count | CPIP3<br>Read<br>Count | CPIP4<br>Read<br>Count | Sham1<br>Read<br>Count | Sham2<br>Read<br>Count |
|-----------|--------------|------|------------------------|------------------------|------------------------|------------------------|------------------------|------------------------|
| 100361265 | LOC100361265 | mRNA | 20.33                  | 14.16                  | 0.97                   | 4                      | 1                      | 0                      |
| 304954    | Uap112       | mRNA | 9.56                   | 24.79                  | 5.52                   | 24.76                  | 0                      | 0                      |
| 108349682 | LOC108349682 | mRNA | 0                      | 70.6                   | 72.25                  | 36.12                  | 36.13                  | 0                      |
| 685963    | LOC685963    | mRNA | 60.5                   | 60.7                   | 78.04                  | 69.37                  | 0                      | 40.47                  |
| 691519    | LOC691519    | mRNA | 10.35                  | 12.6                   | 17.96                  | 16.61                  | 4.11                   | 10.04                  |
| 59327     | Twist2       | mRNA | 25                     | 29                     | 54                     | 22                     | 5                      | 12                     |
| 688900    | Slfn1        | mRNA | 24.03                  | 16.73                  | 20                     | 12.38                  | 11.5                   | 7.11                   |
| 25660     | Cd28         | mRNA | 17                     | 20                     | 29.07                  | 30.98                  | 9                      | 9.03                   |
| 29220     | Thbs4        | mRNA | 1071                   | 1624                   | 3045                   | 1435                   | 486                    | 772                    |
| 100911660 | LOC100911660 | mRNA | 30.32                  | 38.47                  | 26.38                  | 31.84                  | 20.35                  | 13.52                  |
| 304729    | Gli2         | mRNA | 72                     | 57                     | 76                     | 84                     | 33                     | 38                     |
| 305431    | Stk32b       | mRNA | 47                     | 64                     | 76                     | 47                     | 20                     | 30                     |
| 291555    | Atp8b1       | mRNA | 54.74                  | 57.74                  | 124.35                 | 71.83                  | 29.96                  | 50.34                  |
| 29403     | Asgr2        | mRNA | 78                     | 61                     | 77                     | 60                     | 24                     | 25                     |
| 292401    | Smoc2        | mRNA | 439                    | 373                    | 814                    | 738                    | 279                    | 353                    |
| 83497     | Ocln         | mRNA | 100.57                 | 77.2                   | 112.65                 | 130.31                 | 36.74                  | 37.71                  |
| 502160    | Lvrn         | mRNA | 146                    | 173                    | 203                    | 176                    | 70                     | 77                     |
| 114020    | Nat8f5       | mRNA | 42.78                  | 33.51                  | 31.05                  | 54.84                  | 25.62                  | 13.18                  |
| 679787    | Clec5a       | mRNA | 67.01                  | 39.57                  | 66.17                  | 68.6                   | 35.09                  | 29                     |
| 29139     | Dcn          | mRNA | 15622                  | 16782                  | 22653                  | 17216                  | 6427                   | 8904                   |
| 295279    | Fcgr1a       | mRNA | 103                    | 103                    | 137                    | 114                    | 58                     | 46                     |
| 100364500 | LOC100364500 | mRNA | 232.15                 | 151.54                 | 229.06                 | 258.4                  | 115.69                 | 113.46                 |
| 315039    | Osr2         | mRNA | 86                     | 111                    | 166                    | 91                     | 53                     | 57                     |
| 117029    | Ccr5         | mRNA | 135.83                 | 76.78                  | 136.57                 | 105.36                 | 70.03                  | 52.91                  |
| 66021     | Cybb         | mRNA | 133                    | 111                    | 185                    | 119                    | 71                     | 72                     |
| 65129     | Cldn1        | mRNA | 1116                   | 815                    | 1137                   | 1341                   | 466                    | 432                    |
| 140586    | Sox9         | mRNA | 64.86                  | 85.46                  | 114                    | 100.51                 | 33                     | 62.72                  |
| 362430    | Clec4a1      | mRNA | 102.26                 | 108.15                 | 118                    | 97.86                  | 60                     | 43.95                  |
| 316638    | Sned1        | mRNA | 950.95                 | 1135.49                | 1440.62                | 1347.78                | 569.54                 | 772.7                  |
| 311426    | Siglec1      | mRNA | 108.63                 | 114.52                 | 164.23                 | 137.42                 | 78.81                  | 89.78                  |
| 306616    | Myom2        | mRNA | 256                    | 348                    | 253                    | 274                    | 357                    | 848                    |
| 365949    | LOC365949    | mRNA | 36.62                  | 54.14                  | 10.28                  | 30.28                  | 46.7                   | 48.77                  |
| 287382    | Mfap4        | mRNA | 297                    | 110.04                 | 134.04                 | 126.39                 | 526                    | 422.8                  |
| 297339    | Capg         | mRNA | 267                    | 375                    | 525                    | 241                    | 821                    | 1270                   |
| 246298    | Retsat       | mRNA | 650                    | 677                    | 650                    | 601                    | 2129                   | 2060                   |
| 29437     | Acta1        | mRNA | 210.48                 | 144.06                 | 148.81                 | 399.48                 | 5177.32                | 15597.39               |
| 24838     | Tnnt3        | mRNA | 31                     | 30                     | 42                     | 83                     | 1764                   | 4419                   |
| 360543    | Myh4         | mRNA | 33.64                  | 9.12                   | 11.18                  | 114.85                 | 2894.57                | 3166.12                |
| 100912521 | Nmrk2        | mRNA | 0                      | 0                      | 0                      | 0                      | 8                      | 22                     |
| 317418    | Tsr2         | mRNA | 0                      | 239.86                 | 470.02                 | 379.86                 | 0                      | 0.01                   |
| 100912618 | LOC100912618 | mRNA | 0                      | 61.85                  | 0                      | 21.07                  | 0                      | 0                      |
| 100910581 | LOC100910581 | mRNA | 119                    | 0                      | 65.54                  | 92                     | 0                      | 0                      |
| 300802    | Aph1b        | mRNA | 0                      | 0                      | 121.81                 | 96.21                  | 0                      | 0                      |
| 103691556 | LOC103691556 | mRNA | 0                      | 3.78                   | 0                      | 272.78                 | 0                      | 1.25                   |
| 102550456 | LOC102550456 | mRNA | 70.49                  | 0                      | 0                      | 0                      | 0                      | 0                      |
| 108349606 | LOC108349606 | mRNA | 0                      | 32.58                  | 0                      | 18.99                  | 0                      | 0                      |
| 100911233 | LOC100911233 | mRNA | 0                      | 13.86                  | 20.69                  | 8.1                    | 0                      | 0                      |
| 100912399 | LOC100912399 | mRNA | 13.04                  | 9.9                    | 18.72                  | 0                      | 0                      | 0                      |
| 684969    | Potef        | mRNA | 0                      | 0                      | 17.74                  | 21.2                   | 0                      | 0                      |

|           |                                                                                                    |      |        |        |         |        |        |        |
|-----------|----------------------------------------------------------------------------------------------------|------|--------|--------|---------|--------|--------|--------|
| 100910616 | Hmgn5                                                                                              | mRNA | 0      | 11.41  | 15.97   | 3.96   | 0      | 0      |
| 108348106 | LOC108348106                                                                                       | mRNA | 0      | 0      | 23.96   | 0      | 0      | 0      |
| 100909795 | LOC100909795                                                                                       | mRNA | 0      | 0      | 0       | 22.59  | 0      | 0      |
| 100911564 | LOC100911564                                                                                       | mRNA | 5.9    | 10.35  | 4.76    | 0      | 0      | 0      |
| 690146    | RGD1584023                                                                                         | mRNA | 10.05  | 0      | 5.98    | 0      | 0      | 0      |
| 297402    | RGD1560795                                                                                         | mRNA | 7.78   | 0      | 7.84    | 0      | 0      | 0      |
| 102552708 | LOC102552708                                                                                       | mRNA | 6.88   | 4.82   | 2.97    | 0      | 0      | 0      |
| 81828     | Zp2                                                                                                | mRNA | 0      | 1      | 0       | 21     | 0      | 1      |
| 364991    | Slc25a36l1                                                                                         | mRNA | 0      | 28.43  | 17.21   | 0      | 0      | 0      |
| 24856     | Ttr                                                                                                | mRNA | 31     | 2      | 35      | 1      | 3      | 1      |
| 679149    | LOC679149                                                                                          | mRNA | 9.74   | 2      | 10.01   | 1      | 1      | 1      |
| 500338    | Klrc3                                                                                              | mRNA | 6.53   | 5      | 2       | 5      | 0      | 1      |
| 60333     | Msln                                                                                               | mRNA | 0      | 39     | 371     | 12     | 3      | 10     |
| 100912262 | LOC100912262                                                                                       | mRNA | 0      | 19.82  | 0       | 14.9   | 0      | 0      |
| 108352634 | LOC108352634                                                                                       | mRNA | 9.33   | 0.35   | 12.62   | 0.02   | 0.27   | 0.19   |
| 498109    | Polr2h                                                                                             | mRNA | 47.42  | 154    | 107.59  | 167    | 0      | 25.42  |
| 295041    | Stoml3                                                                                             | mRNA | 4.89   | 3.86   | 23.2    | 6      | 0      | 1.01   |
| 100909830 | LOC100909830                                                                                       | mRNA | 16.08  | 0      | 10.72   | 5.36   | 5.36   | 0      |
| 100910678 | LOC100910678                                                                                       | mRNA | 32.83  | 10     | 0       | 12.89  | 0      | 0      |
| 100360880 | Fosb                                                                                               | mRNA | 44     | 29     | 33      | 621    | 37     | 44     |
| 100365810 | LOC100365810                                                                                       | mRNA | 0      | 16.87  | 48.98   | 27.43  | 16.78  | 0.49   |
| 100911168 | LOC100911168                                                                                       | mRNA | 0      | 6.31   | 15.23   | 13.4   | 3.04   | 0      |
| 499322    | Fam111a                                                                                            | mRNA | 37     | 32     | 50      | 542    | 35     | 39     |
| 25453     | Gdnf                                                                                               | mRNA | 1      | 4      | 20      | 3      | 0      | 1      |
| 494206    | Ly49si1                                                                                            | mRNA | 51.29  | 2.1    | 7.46    | 9.5    | 3.61   | 1.17   |
| 360649    | RGD1359290                                                                                         | mRNA | 372.23 | 159.41 | 151.03  | 128.78 | 0      | 1.36   |
| 100910308 | LOC100910308                                                                                       | mRNA | 125.14 | 238.42 | 200.84  | 172.79 | 0      | 100.29 |
| 494207    | Ly49si2                                                                                            | mRNA | 5.52   | 5.77   | 16.49   | 6.61   | 0      | 4.77   |
| 54242     | Cpa3                                                                                               | mRNA | 10     | 57     | 199     | 32     | 21     | 14     |
| 108351097 | LOC108351097                                                                                       | mRNA | 173.69 | 133.17 | 3013.93 | 146.25 | 254.78 | 441.13 |
| 689790    | Clec2d11                                                                                           | mRNA | 3      | 8.83   | 32.18   | 4.94   | 0      | 5.12   |
| 306748    | Cxcl14                                                                                             | mRNA | 53     | 183    | 508     | 33     | 33     | 126    |
| 108348150 | LOC108348150                                                                                       | mRNA | 14.79  | 53.94  | 14.42   | 13.02  | 15.91  | 0      |
| 100911090 | LOC100911090                                                                                       | mRNA | 133.82 | 67     | 70.63   | 0      | 0.01   | 0      |
| 108348438 | LOC108348438                                                                                       | mRNA | 10.99  | 18.42  | 15.94   | 13.8   | 0      | 1      |
| 498169    | RGD1561730                                                                                         | mRNA | 7.68   | 17.63  | 32.46   | 5.33   | 7.81   | 0      |
| 100912573 | Ms4a6e                                                                                             | mRNA | 0      | 20.65  | 41.3    | 0      | 0      | 0      |
| 305811    | Rcor2                                                                                              | mRNA | 120.85 | 0      | 34.31   | 61.02  | 0      | 48.86  |
| 309209    | Vwce                                                                                               | mRNA | 9.53   | 8      | 20.59   | 16.6   | 0      | 8.58   |
| 305858    | Otx2                                                                                               | mRNA | 10.63  | 17.15  | 13.18   | 18.45  | 5.14   | 5.33   |
| 685245    | Ears2l1                                                                                            | mRNA | 13.86  | 0      | 22.85   | 18.49  | 12.32  | 8.19   |
| 498335    | Cxcl13                                                                                             | mRNA | 84     | 95     | 272     | 64     | 42     | 36     |
| 289337    | Tlr5                                                                                               | mRNA | 20     | 49     | 162     | 29     | 14     | 29     |
| 100360872 | Mcpt1l1                                                                                            | mRNA | 39.98  | 166.97 | 502.98  | 97.99  | 44.94  | 80     |
| 108352465 | LOC108352465                                                                                       | mRNA | 19.4   | 13.3   | 15.32   | 8.83   | 4.7    | 6.59   |
| 100911485 | LOC100911485                                                                                       | mRNA | 22.53  | 38.66  | 7.48    | 7.02   | 7.69   | 7.61   |
| 170847    | Kcnj15                                                                                             | mRNA | 100.02 | 62.03  | 221.58  | 197.67 | 43.84  | 36.02  |
| 301012    | Col7a1                                                                                             | mRNA | 24     | 26     | 126     | 13     | 14     | 25     |
| 315870    | Tbx18                                                                                              | mRNA | 144    | 182    | 369     | 245    | 57     | 74     |
| 102553715 | LOC102553715                                                                                       | mRNA | 0      | 55.96  | 55.96   | 74.61  | 0      | 24.2   |
| 310738    | Ngf                                                                                                | mRNA | 18     | 10     | 46      | 40     | 2      | 6      |
| 24695     | Pthlh                                                                                              | mRNA | 23     | 8      | 29      | 12     | 5      | 8      |
| 114122    | Vcan                                                                                               | mRNA | 157    | 467    | 1107    | 239    | 139    | 224    |
| 25661     | <td>mRNA</td> <td>2436</td> <td>5396</td> <td>18430</td> <td>4833</td> <td>2076</td> <td>4806</td> | mRNA | 2436   | 5396   | 18430   | 4833   | 2076   | 4806   |
| 287813    | Igsf7                                                                                              | mRNA | 23.41  | 26.86  | 71.57   | 31.49  | 13.14  | 6.5    |
| 292793    | Sbsn                                                                                               | mRNA | 31     | 112    | 253     | 63     | 38     | 78     |



|           |               |      |         |         |         |         |        |         |
|-----------|---------------|------|---------|---------|---------|---------|--------|---------|
| 690479    | Bpifb5        | mRNA | 51      | 100     | 93      | 79      | 2      | 52      |
| 685157    | LOC685157     | mRNA | 24.59   | 38.59   | 36.18   | 23.32   | 36.56  | 0       |
| 308099    | Fndc1         | mRNA | 209     | 433     | 1298    | 294     | 147    | 287     |
| 25694     | Has2          | mRNA | 53      | 91      | 111     | 50      | 28     | 34      |
| 25627     | Cma1          | mRNA | 9       | 25      | 78      | 19      | 12     | 21      |
| 310926    | LOC310926     | mRNA | 134.3   | 118.83  | 1126.07 | 107.75  | 183.2  | 288.86  |
| 292777    | Tbcb          | mRNA | 43.6    | 30.91   | 12.5    | 43.34   | 6.21   | 31.25   |
| 363071    | Stra6         | mRNA | 60      | 61      | 256     | 126     | 36     | 33      |
| 102547294 | Iqcn          | mRNA | 15      | 17      | 34      | 16      | 10     | 11      |
| 25253     | Dpp4          | mRNA | 161     | 201     | 573     | 173     | 69     | 110     |
| 84007     | C3ar1         | mRNA | 59.4    | 73      | 137.15  | 66.07   | 21.4   | 26.97   |
| 501031    | RGD1560775    | mRNA | 30.2    | 18.15   | 20.58   | 32.38   | 20.97  | 14.32   |
| 287561    | Cc17          | mRNA | 34      | 36      | 42      | 79      | 17     | 13      |
| 100912450 | LOC100912450  | mRNA | 111.59  | 32.4    | 19.28   | 61.74   | 8.03   | 28.72   |
| 100911615 | LOC100911615  | mRNA | 0       | 550.63  | 0       | 0       | 0      | 0       |
| 83584     | Casp6         | mRNA | 21.23   | 36.97   | 14.02   | 23.62   | 13.37  | 28.38   |
| 100363268 | LOC100363268  | mRNA | 64.22   | 66.9    | 0       | 0       | 44.75  | 0       |
| 292594    | Lilrb4        | mRNA | 46      | 28      | 55      | 16      | 17     | 25      |
| 108348142 | LOC108348142  | mRNA | 35.82   | 41.55   | 18.66   | 25.02   | 10.6   | 13.08   |
| 108348094 | NEWGENE_13063 | mRNA | 106.18  | 119     | 116.27  | 107     | 0      | 58.5    |
| 365395    | Clcf1         | mRNA | 16      | 17      | 56      | 17      | 9      | 13      |
| 103690020 | LOC103690020  | mRNA | 39.34   | 40.03   | 27.17   | 14.42   | 4.7    | 10.63   |
| 100910669 | LOC100910669  | mRNA | 31      | 39.51   | 53.99   | 79.73   | 47.51  | 20.19   |
| 192203    | Fap           | mRNA | 57      | 71      | 147     | 69      | 26     | 51      |
| 303856    | Atp13a5       | mRNA | 24      | 15      | 16      | 53      | 5      | 4       |
| 103690038 | LOC103690038  | mRNA | 0       | 0       | 91.29   | 220.96  | 0      | 0       |
| 24237     | C6            | mRNA | 43      | 36      | 223     | 22      | 34     | 36      |
| 100911599 | LOC100911599  | mRNA | 81.31   | 49.13   | 72.36   | 30.6    | 21.27  | 39.92   |
| 113918    | Slc6a20       | mRNA | 277.96  | 121.66  | 227.73  | 681.98  | 44.95  | 83.45   |
| 24617     | Serpine1      | mRNA | 88.47   | 106.57  | 311.23  | 187.04  | 82.87  | 123.77  |
| 192262    | C1s           | mRNA | 1512    | 1505    | 2972    | 1785    | 632    | 954     |
| 29132     | Atp1a4        | mRNA | 38.64   | 20.71   | 23.25   | 48.55   | 13.71  | 9.03    |
| 690955    | Lilrb3b       | mRNA | 76.59   | 115     | 78.28   | 7.78    | 54.7   | 40.68   |
| 501416    | LOC501416     | mRNA | 128.19  | 124.1   | 114.94  | 32.59   | 53.15  | 37      |
| 108348047 | LOC108348047  | mRNA | 97.96   | 189.62  | 234.3   | 121.47  | 74.68  | 73.02   |
| 366270    | Edn3          | mRNA | 25      | 22      | 67      | 20      | 13     | 18      |
| 685590    | LOC685590     | mRNA | 54.32   | 26.75   | 18.35   | 76.69   | 40.59  | 26.72   |
| 298579    | Pla2g2d       | mRNA | 30      | 52      | 171     | 32      | 25     | 41      |
| 316137    | Adgre1        | mRNA | 191     | 279     | 447     | 294     | 107    | 132     |
| 362741    | Pax9          | mRNA | 54.98   | 41      | 48      | 83      | 18     | 19      |
| 103690108 | LOC103690108  | mRNA | 1216.14 | 505.68  | 1452.47 | 1901.53 | 480.25 | 552.08  |
| 689008    | Fbn2          | mRNA | 68      | 100     | 173     | 120     | 42     | 43      |
| 25293     | Aqp4          | mRNA | 123.58  | 15.22   | 65.07   | 93.74   | 27     | 47.54   |
| 688583    | LOC688583     | mRNA | 62.87   | 36.02   | 62.51   | 14.79   | 32.27  | 21.57   |
| 684440    | Tlr8          | mRNA | 58      | 65      | 104     | 61      | 27     | 18      |
| 304966    | Fcgr3a        | mRNA | 39      | 23      | 52      | 30      | 17     | 21      |
| 108348048 | LOC108348048  | mRNA | 2637.89 | 1198.12 | 3404.25 | 3956.83 | 70.28  | 3358.18 |
| 29252     | Gzmm          | mRNA | 41      | 31      | 23      | 33      | 13     | 12      |
| 25314     | Emp1          | mRNA | 1098    | 1363    | 3017    | 1229    | 647    | 989     |
| 24886     | Tbxas1        | mRNA | 37      | 43      | 83      | 33      | 21     | 28      |
| 100909441 | LOC100909441  | mRNA | 914.67  | 1036.04 | 752.14  | 1288.45 | 0      | 704.06  |
| 60327     | F13a1         | mRNA | 153     | 149     | 495     | 84      | 87     | 129     |
| 494199    | Oas1f         | mRNA | 117.32  | 105.63  | 68.47   | 28.48   | 30.15  | 37.2    |
| 501668    | Dmrtcla       | mRNA | 55.22   | 40.72   | 77.1    | 14.94   | 34.55  | 34.23   |
| 688913    | Dcun1d2       | mRNA | 263.85  | 157.64  | 87.01   | 212.97  | 178.2  | 128.17  |
| 303384    | Mmp28         | mRNA | 37.99   | 67.72   | 47.66   | 57.26   | 14.19  | 57.92   |

|           |              |      |        |        |        |        |        |        |
|-----------|--------------|------|--------|--------|--------|--------|--------|--------|
| 100362113 | LOC100362113 | mRNA | 192.9  | 179.05 | 181.22 | 126.28 | 109.41 | 47.2   |
| 113892    | Nat8f3       | mRNA | 248.39 | 195.27 | 131.17 | 299.6  | 100.52 | 119.74 |
| 24231     | C2           | mRNA | 398    | 493    | 805    | 437    | 220    | 322    |
| 308350    | Lilrb3       | mRNA | 18     | 74     | 49     | 29     | 32     | 23     |
| 116487    | Tgfb1        | mRNA | 1896   | 2518   | 3532   | 2828   | 1106   | 1339   |
| 313504    | Foxd2        | mRNA | 143.95 | 124    | 166.3  | 141.91 | 61     | 57.56  |
| 100912068 | LOC100912068 | mRNA | 66.86  | 61.2   | 75.46  | 63.55  | 27.13  | 31.13  |
| 366452    | Ptch2        | mRNA | 157    | 177    | 234    | 238    | 64     | 91     |
| 25236     | Gpc3         | mRNA | 1139   | 1525   | 2631   | 1888   | 537    | 958    |
| 246266    | Aspg         | mRNA | 36     | 74     | 97     | 34     | 19     | 46     |
| 293154    | Folr2        | mRNA | 94     | 110    | 211    | 81     | 46     | 61     |
| 108348044 | LOC108348044 | mRNA | 37.12  | 42     | 89.86  | 37.12  | 21     | 33     |
| 100909455 | LOC100909455 | mRNA | 45.18  | 23.29  | 51.11  | 27.63  | 11.05  | 21.62  |
| 298861    | Ptchd1       | mRNA | 411.13 | 262.53 | 291.13 | 270.28 | 237.97 | 133.42 |
| 301227    | Trem2        | mRNA | 81     | 105    | 168    | 73     | 60     | 45     |
| 306454    | Cldn22       | mRNA | 53.13  | 22.02  | 34     | 32.8   | 9.47   | 16.45  |
| 24653     | Pla2g4a      | mRNA | 37     | 39     | 92     | 55     | 28     | 21     |
| 89829     | Socs3        | mRNA | 142    | 176    | 325    | 309    | 145    | 153    |
| 689257    | Adgrd1       | mRNA | 178    | 124    | 216    | 157    | 68     | 97     |
| 313831    | Vit          | mRNA | 243    | 334    | 491    | 374    | 118    | 209    |
| 448830    | Ly96         | mRNA | 72.02  | 38.3   | 58.75  | 56.3   | 32.42  | 30.53  |
| 25021     | Itgam        | mRNA | 79.17  | 100.74 | 215    | 58     | 67.02  | 53     |
| 108351105 | LOC108351105 | mRNA | 54.82  | 60     | 78     | 90     | 19     | 24.43  |
| 25239     | Apod         | mRNA | 19875  | 24987  | 40158  | 18965  | 10232  | 14373  |
| 294257    | Cfb          | mRNA | 94     | 104    | 192    | 85     | 62     | 68     |
| 108349608 | LOC108349608 | mRNA | 29.82  | 62.08  | 42.31  | 21     | 23.36  | 6      |
| 394266    | Gjb2         | mRNA | 166    | 72     | 244    | 407    | 48     | 57     |
| 498638    | Msr1         | mRNA | 96.86  | 106.67 | 251.93 | 105.43 | 78.02  | 55.99  |
| 100910688 | LOC100910688 | mRNA | 50.52  | 29.41  | 50.67  | 23.82  | 15.47  | 15.95  |
| 499271    | Itgax        | mRNA | 46     | 52.65  | 69.74  | 52.95  | 25.81  | 20.93  |
| 498022    | RGD1559482   | mRNA | 18.22  | 36.1   | 85.52  | 36.32  | 27.45  | 35.25  |
| 304988    | Mnda         | mRNA | 60.71  | 67.71  | 94.91  | 36.12  | 27.27  | 43.14  |
| 24379     | Gad1         | mRNA | 37     | 43     | 29     | 56     | 15     | 21     |
| 292406    | Thbs2        | mRNA | 415    | 765    | 1781   | 647    | 374    | 667    |
| 24536     | Lepr         | mRNA | 316    | 275    | 505.22 | 409    | 153.19 | 128.08 |
| 25383     | Apobec1      | mRNA | 55     | 81     | 133    | 48     | 39     | 45     |
| 108348111 | LOC108348111 | mRNA | 33.5   | 83.75  | 50.25  | 50.25  | 33.5   | 50.25  |
| 362431    | Clec4a3      | mRNA | 85     | 80     | 95     | 53     | 37     | 38     |
| 100912590 | LOC100912590 | mRNA | 90.31  | 18.06  | 54.18  | 126.43 | 33.82  | 54.18  |
| 304021    | Col8a1       | mRNA | 157    | 193    | 629    | 210    | 192    | 146    |
| 171339    | Dnah1        | mRNA | 47     | 40     | 44     | 31     | 22     | 30     |
| 498781    | RGD1561231   | mRNA | 45.49  | 123.72 | 145.84 | 119.38 | 54.53  | 65.75  |
| 64552     | Mpeg1        | mRNA | 562.86 | 666.92 | 801.13 | 568.18 | 329.53 | 326    |
| 114099    | Cysl1r1      | mRNA | 34     | 47     | 70     | 46     | 19     | 24     |
| 81682     | Lum          | mRNA | 3019   | 2925   | 4754   | 3545   | 1467   | 1917   |
| 24233     | C4a          | mRNA | 251.87 | 328.46 | 755.23 | 238.38 | 195.26 | 298.85 |
| 24330     | Egr1         | mRNA | 272    | 239    | 177    | 1300   | 354    | 316    |
| 85272     | Bmp7         | mRNA | 72     | 105    | 231    | 103    | 54     | 74     |
| 312701    | Cd163        | mRNA | 272    | 201    | 346    | 158.08 | 153    | 206.98 |
| 361221    | No18         | mRNA | 111.67 | 50.57  | 13.18  | 131.28 | 22.82  | 67.75  |
| 299737    | Ntn4         | mRNA | 228    | 327    | 436    | 310    | 164    | 188    |
| 317181    | Srpx2        | mRNA | 37     | 60     | 116    | 37     | 19     | 37     |
| 287231    | RGD1559575   | mRNA | 98     | 66     | 123    | 101    | 51     | 41     |
| 679975    | Gpr183       | mRNA | 51     | 46     | 54     | 52     | 20     | 20     |
| 114523    | Ntn1         | mRNA | 150    | 87     | 243    | 224    | 78     | 88     |
| 171452    | Rab31l1      | mRNA | 141    | 130    | 157    | 196    | 65     | 91     |

|           |               |      |        |         |        |        |         |         |
|-----------|---------------|------|--------|---------|--------|--------|---------|---------|
| 64033     | Ccnd2         | mRNA | 100    | 116     | 240    | 163    | 69      | 103     |
| 140594    | Syt14         | mRNA | 37.01  | 41      | 64.03  | 38.01  | 19.01   | 29      |
| 445442    | Thbs1         | mRNA | 246    | 236     | 466    | 653    | 268     | 184     |
| 296952    | Kcp           | mRNA | 35     | 61      | 128    | 65     | 26      | 59      |
| 94341     | Kcnj13        | mRNA | 91     | 47      | 76     | 114    | 33      | 30      |
| 311425    | Adam33        | mRNA | 132    | 77      | 127    | 123    | 50      | 74      |
| 315979    | Col6a6        | mRNA | 404.09 | 360.64  | 645.16 | 694.56 | 275.67  | 291.21  |
| 100360801 | Ddx60         | mRNA | 58.15  | 69.39   | 63.12  | 82.83  | 44.12   | 69.13   |
| 114247    | Slnf4         | mRNA | 376.31 | 329.52  | 397.92 | 348.25 | 369.61  | 232.69  |
| 361821    | Col6a2        | mRNA | 2192   | 2336    | 3570   | 2547   | 1173    | 1885    |
| 361289    | Colec12       | mRNA | 225    | 278     | 431    | 278    | 126     | 162     |
| 299699    | Aldh112       | mRNA | 52     | 46      | 64     | 50     | 31      | 43      |
| 298566    | C1qa          | mRNA | 378    | 356     | 692    | 333    | 228     | 236     |
| 29200     | Inhba         | mRNA | 48.5   | 38.53   | 129.25 | 64.2   | 29      | 46.37   |
| 297411    | Tprkb         | mRNA | 139.78 | 204.79  | 452.72 | 133.94 | 218.7   | 44.62   |
| 81523     | Myoc          | mRNA | 5509   | 6926    | 8155   | 6122   | 2429    | 3541    |
| 103689965 | LOC103689965  | mRNA | 263.59 | 428.84  | 866.72 | 338.1  | 232.5   | 465.37  |
| 691499    | Zfp469        | mRNA | 106    | 109     | 244    | 142    | 73      | 117     |
| 312677    | Ccdc77        | mRNA | 254    | 145     | 155    | 67     | 136     | 63      |
| 362550    | Ror1          | mRNA | 78     | 83      | 108    | 137    | 49      | 45      |
| 554353    | Gpr34         | mRNA | 43     | 54      | 82     | 53     | 32      | 25      |
| 311835    | Ddx31         | mRNA | 106    | 166     | 212    | 190    | 114     | 102     |
| 24188     | Aldh1a1       | mRNA | 698    | 861     | 959.89 | 871.79 | 377     | 466     |
| 89843     | Cxadr         | mRNA | 1075   | 914     | 1560   | 1605.1 | 545     | 600     |
| 353227    | Zbtb16        | mRNA | 657.98 | 310.05  | 355.22 | 323.43 | 311.23  | 454.06  |
| 100910978 | LOC100910978  | mRNA | 151.71 | 168.21  | 165.13 | 241.93 | 104.24  | 172.83  |
| 499991    | Steap4        | mRNA | 467    | 498     | 594    | 644    | 277     | 323     |
| 295703    | Serping1      | mRNA | 2195   | 2223    | 3664   | 3115   | 1280    | 1597    |
| 102553405 | LOC102553405  | mRNA | 59.8   | 57.32   | 92.61  | 64.4   | 47.95   | 44.91   |
| 60423     | Slc28a2       | mRNA | 139.74 | 132.35  | 158.9  | 79.21  | 82      | 108     |
| 24329     | Egfr          | mRNA | 374.28 | 357.38  | 518.49 | 547.65 | 196.13  | 240.67  |
| 311252    | Pamr1         | mRNA | 113    | 146     | 302    | 123    | 70      | 142     |
| 307414    | MGC108823     | mRNA | 119.99 | 68.34   | 114.97 | 93.19  | 54.98   | 74.98   |
| 317227    | Tlr13         | mRNA | 90     | 91      | 100    | 87     | 47      | 44      |
| 687424    | Dtx1          | mRNA | 362    | 353     | 485    | 472    | 165     | 231     |
| 140927    | Selenbp1      | mRNA | 0      | 188.76  | 0      | 94.38  | 0       | 0       |
| 117253    | Dnah11        | mRNA | 136.96 | 156.16  | 255.24 | 189.65 | 80.68   | 112.19  |
| 140930    | Faim          | mRNA | 140.12 | 135.95  | 120.85 | 142.61 | 190.61  | 231.15  |
| 102552640 | LOC102552640  | mRNA | 115.15 | 173     | 162.69 | 152.98 | 247     | 225.14  |
| 24299     | Cyp2a3        | mRNA | 50     | 44      | 2      | 72     | 61      | 71      |
| 103690045 | NEWGENE_13101 | mRNA | 56.38  | 117.13  | 64.67  | 100.44 | 140     | 106.91  |
| 108348062 | LOC108348062  | mRNA | 128.42 | 267.17  | 121.18 | 0      | 83.18   | 290.43  |
| 56765     | Plvap         | mRNA | 319    | 162     | 171    | 130    | 321     | 368     |
| 29395     | Hmgb2         | mRNA | 117.68 | 92.35   | 142.64 | 104.16 | 292.89  | 221.01  |
| 305104    | Col9a1        | mRNA | 88     | 64      | 210    | 120    | 42      | 449     |
| 681896    | Slc25a18      | mRNA | 50     | 43      | 38     | 45     | 56      | 76      |
| 252942    | Myh8          | mRNA | 48.37  | 36.4    | 36.06  | 38.89  | 59.04   | 61.45   |
| 81633     | Acta2         | mRNA | 532.92 | 404.01  | 420.88 | 330.98 | 519.98  | 1141.94 |
| 100911295 | LOC100911295  | mRNA | 296.64 | 181.28  | 346.07 | 197.76 | 379.03  | 494.39  |
| 108348085 | LOC108348085  | mRNA | 98.54  | 0       | 138.03 | 69.02  | 241.51  | 103.53  |
| 108348143 | LOC108348143  | mRNA | 0      | 43.13   | 24.96  | 48.58  | 78.49   | 39.49   |
| 171052    | Mmp13         | mRNA | 140    | 158     | 125    | 118    | 186     | 382     |
| 25304     | Comp          | mRNA | 154    | 176     | 178    | 175    | 172     | 533     |
| 100363439 | Rps1011       | mRNA | 510.95 | 1056.98 | 544.8  | 99.18  | 1100.75 | 977.05  |
| 64543     | Sec1413       | mRNA | 662.01 | 580.93  | 817.68 | 696.46 | 2040.53 | 552.62  |
| 81648     | Crh           | mRNA | 221    | 125     | 100    | 134    | 196     | 153     |

|           |              |      |         |         |        |        |         |        |
|-----------|--------------|------|---------|---------|--------|--------|---------|--------|
| 64032     | Ctgf         | mRNA | 316     | 160     | 184    | 246    | 352     | 520    |
| 360479    | LOC360479    | mRNA | 38      | 30      | 36     | 6      | 52      | 46     |
| 498587    | Ldb3         | mRNA | 393     | 376     | 403    | 439    | 677     | 1070   |
| 688972    | Gypa         | mRNA | 61      | 31      | 79.06  | 7      | 125.2   | 92.84  |
| 64317     | Gpx3         | mRNA | 296     | 211     | 266    | 192    | 258     | 653    |
| 304131    | Map3k7c1     | mRNA | 30      | 33      | 27     | 37     | 34      | 102    |
| 100911372 | LOC100911372 | mRNA | 146.81  | 107.66  | 137.02 | 107.66 | 254.47  | 185.96 |
| 24779     | Slc4a1       | mRNA | 214.5   | 145     | 408.94 | 33     | 601     | 371    |
| 316632    | Ndufa1011    | mRNA | 0       | 640.53  | 476.47 | 613.78 | 611.12  | 615.72 |
| 289178    | Dpt          | mRNA | 107     | 129     | 208    | 30     | 201     | 290    |
| 25139     | Slc2a4       | mRNA | 47      | 49      | 54     | 50     | 85      | 147    |
| 683463    | Lilrb3a      | mRNA | 23.7    | 1.08    | 36.08  | 32.91  | 8.33    | 0      |
| 108348157 | LOC108348157 | mRNA | 34.25   | 17.12   | 73     | 17.12  | 85.62   | 81     |
| 171055    | Cd79b        | mRNA | 38      | 13      | 45     | 6      | 61      | 62     |
| 29747     | Kcnmb1       | mRNA | 51.81   | 17.69   | 13.28  | 21.7   | 43.63   | 70.45  |
| 29301     | Hal          | mRNA | 35      | 23      | 27     | 16     | 34      | 41     |
| 499146    | Spib         | mRNA | 63      | 33      | 88     | 12     | 112     | 146    |
| 289316    | Lefty2       | mRNA | 38.31   | 44.09   | 60.54  | 45.5   | 170.79  | 39.53  |
| 294312    | Pi16         | mRNA | 246     | 94      | 177    | 88     | 375     | 245    |
| 311029    | Neb          | mRNA | 230     | 680     | 762    | 288    | 843     | 1932   |
| 316010    | Camp         | mRNA | 91      | 56      | 114    | 2      | 153     | 113    |
| 301026    | Ngp          | mRNA | 345     | 160     | 299    | 36     | 476     | 339    |
| 102555319 | LOC102555319 | mRNA | 1.2     | 57.86   | 66.84  | 112.46 | 107.56  | 122.42 |
| 246172    | Nexn         | mRNA | 97      | 66      | 76     | 117    | 145     | 265    |
| 500377    | Tuba8        | mRNA | 55      | 43      | 38     | 52     | 67.84   | 120.92 |
| 688459    | LOC688459    | mRNA | 32      | 15      | 16     | 29     | 50      | 39     |
| 100909869 | LOC100909869 | mRNA | 63.67   | 50.51   | 31.98  | 59.04  | 89.01   | 95.2   |
| 300475    | Adamts8      | mRNA | 194     | 221     | 153    | 206    | 401     | 333    |
| 444983    | Apold1       | mRNA | 90      | 148     | 74     | 368    | 323     | 303    |
| 81639     | Alox15       | mRNA | 44      | 34      | 72     | 11     | 111     | 85     |
| 303413    | Mpo          | mRNA | 91      | 32      | 141    | 8      | 170     | 144    |
| 25043     | Eln          | mRNA | 376     | 255     | 316    | 229    | 456     | 808    |
| 64507     | Fmod         | mRNA | 153.78  | 127.15  | 175.84 | 224.25 | 183.57  | 613.01 |
| 498066    | Sh3bgr       | mRNA | 145     | 137.17  | 132    | 188    | 235     | 415    |
| 103689936 | Wbp1111      | mRNA | 381.19  | 377.73  | 370.94 | 0.06   | 516.85  | 335.55 |
| 297412    | Dusp11       | mRNA | 55.36   | 23.14   | 23.62  | 27.8   | 65.06   | 59.1   |
| 313776    | Perml        | mRNA | 25.02   | 31.74   | 12.02  | 30.69  | 41.03   | 67.12  |
| 298485    | Ermap        | mRNA | 21.52   | 10.87   | 25.92  | 6.11   | 44.27   | 38.23  |
| 301097    | Vwa5a        | mRNA | 1480.11 | 2849.88 | 500.75 | 313.17 | 3986.72 | 581.82 |
| 360737    | Tbx1         | mRNA | 30      | 23      | 40     | 14     | 56      | 37     |
| 290880    | Adprh11      | mRNA | 17      | 7       | 16     | 25     | 20      | 58     |
| 294279    | Col11a2      | mRNA | 210.73  | 199.7   | 201.59 | 301.61 | 225.52  | 948.3  |
| 25732     | Acp5         | mRNA | 54      | 87      | 128    | 85     | 82      | 448    |
| 310694    | Fcrl2        | mRNA | 9       | 16      | 38     | 19     | 13      | 19     |
| 84387     | Pglyrp1      | mRNA | 23      | 16      | 28     | 6      | 46      | 32     |
| 298559    | Tcea3        | mRNA | 27      | 22      | 29     | 33     | 55      | 72     |
| 103690105 | LOC103690105 | mRNA | 61.52   | 0       | 18.26  | 14.58  | 56.94   | 32.12  |
| 100911917 | LOC100911917 | mRNA | 59.76   | 51.23   | 59.76  | 42.69  | 102.45  | 93.92  |
| 50565     | Hspb7        | mRNA | 50      | 37      | 21     | 24     | 55      | 130    |
| 140939    | Trim63       | mRNA | 32      | 13      | 19     | 21     | 44      | 74     |
| 100360218 | LOC100360218 | mRNA | 29.67   | 10.7    | 5.98   | 17.98  | 55.66   | 8.21   |
| 291312    | Ucma         | mRNA | 20      | 19      | 11     | 9      | 16      | 58     |
| 80878     | Slc16a3      | mRNA | 30.3    | 25.67   | 33.05  | 23.32  | 60.13   | 105.04 |
| 171375    | Atp5f1       | mRNA | 0       | 0       | 0      | 234.1  | 0       | 0      |
| 363276    | Snorc        | mRNA | 23      | 21      | 15     | 13     | 14      | 90     |
| 103694169 | LOC103694169 | mRNA | 0       | 20.49   | 0      | 43.12  | 0       | 74.18  |

|           |              |      |        |       |       |       |        |        |
|-----------|--------------|------|--------|-------|-------|-------|--------|--------|
| 295426    | Myoz2        | mRNA | 7      | 12    | 12    | 10    | 30     | 30     |
| 100910446 | LOC100910446 | mRNA | 0      | 0     | 111.5 | 0     | 59.21  | 95.39  |
| 108348326 | LOC108348326 | mRNA | 67.02  | 26.28 | 21.59 | 13.18 | 15.4   | 56.45  |
| 29576     | Wisp2        | mRNA | 32     | 27    | 15    | 32    | 101    | 65     |
| 365550    | Vpreb3       | mRNA | 13.47  | 6.38  | 11.46 | 5.02  | 25.34  | 35.16  |
| 170840    | Slc40a1      | mRNA | 35.56  | 28.99 | 18.99 | 36.42 | 35.42  | 59.85  |
| 29155     | Capn3        | mRNA | 11     | 23    | 29    | 22    | 44     | 84     |
| 360742    | Dgcr2        | mRNA | 0      | 0     | 0     | 39.98 | 87.3   | 0      |
| 303468    | Sgca         | mRNA | 6      | 14    | 17    | 10    | 15     | 69     |
| 299606    | Elane        | mRNA | 20     | 6     | 19    | 0     | 41     | 30     |
| 303373    | Unc45b       | mRNA | 14     | 10    | 14    | 13    | 36     | 49     |
| 291084    | Nqo2         | mRNA | 77     | 69    | 69    | 304   | 288    | 243    |
| 499923    | Efcab8       | mRNA | 19     | 12    | 14    | 7     | 37     | 19     |
| 297748    | Jph1         | mRNA | 20     | 12    | 17    | 17    | 41     | 80     |
| 690139    | Rbm24        | mRNA | 2      | 7     | 7     | 14    | 17     | 34     |
| 286965    | Abra         | mRNA | 11     | 32    | 5     | 28    | 42     | 69     |
| 361003    | Dupd1        | mRNA | 10     | 8     | 5     | 8     | 17     | 40     |
| 294071    | Hells        | mRNA | 7.38   | 3.53  | 24.62 | 0     | 28.65  | 19.48  |
| 65204     | Cnn1         | mRNA | 45     | 21    | 7     | 8     | 27     | 116    |
| 315962    | Ky           | mRNA | 24     | 25    | 20    | 39    | 79     | 122    |
| 81687     | Mmp9         | mRNA | 52     | 46    | 90    | 9     | 126    | 247    |
| 100911186 | LOC100911186 | mRNA | 42.93  | 0     | 0     | 42.93 | 128.78 | 42.93  |
| 24585     | Myl3         | mRNA | 15     | 9     | 9     | 12    | 42     | 54     |
| 301039    | Susd5        | mRNA | 17     | 13    | 6     | 10    | 8      | 84     |
| 102555557 | LOC102555557 | mRNA | 0      | 22.35 | 0     | 46.36 | 92.51  | 26.52  |
| 289482    | Naa11        | mRNA | 13.9   | 10    | 5     | 10    | 6      | 16     |
| 29195     | Chad         | mRNA | 33.13  | 25.15 | 33.21 | 19.37 | 24.29  | 241.39 |
| 25357     | Thrsp        | mRNA | 27     | 3     | 0     | 0     | 1      | 62     |
| 100359528 | RGD1565987   | mRNA | 14.95  | 1.07  | 0     | 9.36  | 18.15  | 11.74  |
| 57809     | Rpl35a       | mRNA | 0      | 0     | 44.01 | 0     | 0.03   | 19.9   |
| 100910755 | LOC100910755 | mRNA | 0      | 8.49  | 0     | 7.83  | 13.41  | 11.34  |
| 686087    | LOC686087    | mRNA | 0      | 0     | 25.09 | 0     | 0      | 73.25  |
| 501129    | Tmem182      | mRNA | 3      | 8     | 6     | 11    | 18     | 47     |
| 295261    | Tmod4        | mRNA | 38     | 31    | 42    | 28    | 78     | 248    |
| 299266    | Asb2         | mRNA | 20.21  | 16    | 32    | 34.94 | 82     | 152    |
| 84022     | Ghsr         | mRNA | 9      | 5     | 10    | 5     | 8      | 39     |
| 500292    | Cidec        | mRNA | 14     | 5     | 3     | 3     | 1      | 58     |
| 24583     | Myh3         | mRNA | 15.01  | 11.66 | 12.91 | 13.54 | 21.62  | 117.96 |
| 498579    | RGD1564899   | mRNA | 14.99  | 24.12 | 27.98 | 24.98 | 54.95  | 192.91 |
| 684993    | Ppp1r35      | mRNA | 0      | 87    | 48.46 | 0     | 102    | 115    |
| 25412     | Col2a1       | mRNA | 693    | 1025  | 903   | 812   | 642    | 8645   |
| 365298    | Alpk3        | mRNA | 29     | 19    | 13    | 25    | 71     | 171    |
| 679629    | Smtnl2       | mRNA | 7      | 11    | 9     | 6     | 31     | 56     |
| 100912534 | LOC100912534 | mRNA | 126.58 | 0     | 58.41 | 0     | 160    | 126.58 |
| 25629     | Plin1        | mRNA | 23     | 2     | 1     | 3     | 2      | 67     |
| 24477     | Ibsp         | mRNA | 44     | 59    | 42    | 43    | 111    | 422    |
| 680319    | Tceal7       | mRNA | 6      | 2     | 9     | 4     | 17     | 48     |
| 295531    | Tnni3k       | mRNA | 18     | 23    | 27    | 23    | 20     | 77     |
| 304913    | Tnn          | mRNA | 3      | 7     | 3     | 2     | 8      | 35     |
| 25365     | Actg2        | mRNA | 49     | 9     | 9     | 8     | 35.32  | 160.01 |
| 24959     | Pgam2        | mRNA | 79     | 76    | 91    | 104   | 320    | 681    |
| 140727    | Cacng6       | mRNA | 1.83   | 1.6   | 2.11  | 5.46  | 13.57  | 21.52  |
| 100910104 | Xirp1        | mRNA | 7      | 14.45 | 4.16  | 8     | 22     | 73     |
| 304551    | Myo18b       | mRNA | 12.14  | 15    | 18    | 17.66 | 61     | 137.93 |
| 114108    | Pdlim3       | mRNA | 38     | 32    | 29    | 26    | 110    | 288    |
| 29353     | Phkg1        | mRNA | 5      | 1     | 10    | 3     | 21     | 39     |

|           |              |      |       |        |        |       |        |        |
|-----------|--------------|------|-------|--------|--------|-------|--------|--------|
| 305675    | Synpo21      | mRNA | 25.76 | 17.7   | 19.06  | 27.57 | 85.91  | 183.59 |
| 310552    | Sfrp2        | mRNA | 34    | 7      | 4      | 6     | 94     | 39     |
| 100364457 | LOC100364457 | mRNA | 42.84 | 0      | 0      | 0     | 47.73  | 0      |
| 500453    | Pax5         | mRNA | 4     | 1      | 3      | 1     | 10     | 15     |
| 79451     | Fabp4        | mRNA | 108   | 7      | 17     | 7     | 43     | 380    |
| 308637    | Ano5         | mRNA | 10    | 7      | 4      | 11    | 31     | 75     |
| 311167    | Smtn11       | mRNA | 7     | 4      | 4      | 7     | 17     | 56     |
| 84594     | Nfs1         | mRNA | 36.72 | 130.25 | 107.39 | 16.54 | 157.64 | 913.79 |
| 684984    | Cd3001g      | mRNA | 1     | 13     | 0      | 10    | 0      | 20     |
| 365241    | Kcna7        | mRNA | 6     | 5      | 4      | 2     | 13     | 46     |
| 366245    | R3hdml       | mRNA | 3     | 9      | 8      | 2     | 6      | 63     |
| 246250    | Retn         | mRNA | 6     | 1      | 1      | 0     | 5      | 19     |
| 306356    | Cilp2        | mRNA | 6     | 5      | 5      | 1     | 17     | 39     |
| 100361007 | Adig         | mRNA | 3     | 1      | 1      | 3     | 3      | 21     |
| 296345    | Jph2         | mRNA | 24    | 15     | 38     | 26    | 94     | 290    |
| 297333    | Smyd1        | mRNA | 14.55 | 19.48  | 10.17  | 26.36 | 89.11  | 171.03 |
| 298795    | LOC298795    | mRNA | 0     | 3.17   | 0      | 5.26  | 11.63  | 11.17  |
| 102555814 | LOC102555814 | mRNA | 16.27 | 9.52   | 11.8   | 11.11 | 56.78  | 122.37 |
| 64362     | Des          | mRNA | 98    | 98     | 139    | 78    | 435    | 1171   |
| 298139    | LOC298139    | mRNA | 2.85  | 2.02   | 3.04   | 2.02  | 7.06   | 27.22  |
| 100364062 | LOC100364062 | mRNA | 6.92  | 0      | 0      | 4.88  | 19.47  | 21.83  |
| 500450    | Tpm2         | mRNA | 255   | 195    | 224    | 190   | 792    | 2688   |
| 309760    | Mypn         | mRNA | 10    | 16     | 4      | 12    | 46     | 112    |
| 316740    | Myom1        | mRNA | 21    | 14     | 25     | 27    | 108    | 238    |
| 305941    | Sgcg         | mRNA | 6     | 1      | 4      | 0     | 10     | 35     |
| 171409    | Tnnt1        | mRNA | 6     | 5      | 5      | 4     | 32     | 48     |
| 688862    | Ip6k3        | mRNA | 3     | 1      | 1      | 3     | 8      | 23     |
| 301518    | Prkag3       | mRNA | 4     | 6      | 2      | 2     | 21     | 37     |
| 25295     | Bglap        | mRNA | 44.01 | 43.12  | 26.35  | 19.8  | 130.19 | 450.14 |
| 308779    | Fsd2         | mRNA | 5     | 1      | 2      | 2     | 18     | 28     |
| 338458    | Obscn        | mRNA | 23    | 24     | 35     | 44    | 166    | 381    |
| 56824     | Ifit1        | mRNA | 3.13  | 3.2    | 4.38   | 2.19  | 4.29   | 3      |
| 365377    | Trim72       | mRNA | 10    | 9      | 11     | 6     | 40     | 122    |
| 301226    | Apobec2      | mRNA | 15    | 5      | 10     | 7     | 55     | 120    |
| 361002    | Duspl3       | mRNA | 2     | 3      | 3.59   | 6     | 16.24  | 53.29  |
| 307100    | Calml3       | mRNA | 7     | 0      | 0      | 0     | 1      | 27     |
| 246253    | Adipoq       | mRNA | 40    | 2      | 0      | 2     | 1      | 200    |
| 362708    | Trim54       | mRNA | 10    | 5      | 3      | 6     | 32     | 93     |
| 102552549 | LOC102552549 | mRNA | 0     | 0      | 9.78   | 0     | 17.48  | 9.62   |
| 100912471 | LOC100912471 | mRNA | 3.54  | 4.68   | 0      | 0     | 5.96   | 0.85   |
| 684988    | LOC684988    | mRNA | 0     | 17.97  | 0      | 0     | 18.01  | 53.87  |
| 108352829 | LOC108352829 | mRNA | 9.01  | 0      | 0      | 0     | 27.02  | 9.01   |
| 365751    | Trim55       | mRNA | 2     | 2      | 0      | 0     | 8      | 14     |
| 84396     | Atp1b4       | mRNA | 0     | 2      | 2      | 0     | 0      | 19     |
| 287122    | Rpl31        | mRNA | 5     | 6      | 10     | 7     | 46     | 102    |
| 294053    | Ccnj         | mRNA | 1.82  | 0      | 33.73  | 0     | 98     | 58.5   |
| 688173    | Tcap         | mRNA | 3     | 2      | 0      | 3     | 13     | 34     |
| 29242     | Car4         | mRNA | 2     | 8      | 1      | 10    | 3      | 38     |
| 25312     | Dmp1         | mRNA | 7     | 9      | 1      | 4     | 26     | 100    |
| 292905    | Hrc          | mRNA | 16.03 | 13.72  | 15.6   | 21.03 | 128.98 | 275.97 |
| 117537    | Klhl141      | mRNA | 15    | 11     | 7      | 14    | 52     | 232    |
| 25438     | Eno3         | mRNA | 73    | 98     | 77     | 103   | 588    | 1547   |
| 103690175 | LOC103690175 | mRNA | 0     | 0      | 28.69  | 0     | 66.34  | 127.22 |
| 117505    | Csrp3        | mRNA | 0     | 1      | 10     | 2     | 7      | 71     |
| 27064     | Ankrd1       | mRNA | 2     | 4      | 3      | 4     | 6      | 72     |
| 498005    | Asb16        | mRNA | 0     | 3      | 0      | 1     | 7      | 19     |



|           |              |      |        |        |        |       |         |         |
|-----------|--------------|------|--------|--------|--------|-------|---------|---------|
| 24701     | Pygm         | mRNA | 137.12 | 111.14 | 135.13 | 194.2 | 1132.69 | 2553.65 |
| 500036    | Ppplr3a      | mRNA | 3      | 5      | 0      | 8     | 35      | 71      |
| 302666    | Asb11        | mRNA | 1      | 4      | 3      | 0     | 21      | 33      |
| 108352087 | LOC108352087 | mRNA | 4      | 7      | 11     | 13    | 53      | 176     |
| 684425    | Adssl1       | mRNA | 23     | 9      | 17     | 12    | 143     | 297     |
| 363331    | Plin4        | mRNA | 15     | 0      | 1      | 2     | 17      | 113     |
| 690468    | LOC690468    | mRNA | 0.33   | 14.43  | 0      | 0     | 43.28   | 18.86   |
| 500267    | Lmod3        | mRNA | 2      | 2      | 2      | 4     | 23      | 56      |
| 686019    | Casq1        | mRNA | 46.02  | 28.81  | 42.86  | 53    | 340.04  | 1042.12 |
| 690423    | Jsrp1        | mRNA | 3      | 2      | 1      | 3     | 22      | 49      |
| 688915    | Cmya5        | mRNA | 59     | 30     | 29     | 58    | 401     | 1036    |
| 362282    | Pck1         | mRNA | 16     | 0      | 1      | 0     | 0       | 124.04  |
| 298512    | Rhbd12       | mRNA | 0      | 2      | 0      | 0     | 5       | 6       |
| 503446    | Asb12        | mRNA | 1      | 0      | 0      | 1     | 3       | 14      |
| 291245    | Actn2        | mRNA | 27.44  | 11.88  | 13.72  | 17.93 | 138.88  | 488.55  |
| 290223    | Fitm1        | mRNA | 3      | 0      | 1      | 4     | 19      | 53      |
| 108352449 | LOC108352449 | mRNA | 4.11   | 0      | 0      | 0     | 3.69    | 10.22   |
| 54232     | Car3         | mRNA | 298    | 15     | 7      | 47    | 714     | 2650    |
| 58968     | Acan         | mRNA | 15     | 11     | 9      | 10    | 11      | 436     |
| 25250     | Cox8b        | mRNA | 3      | 2      | 1      | 1     | 18      | 55      |
| 100909899 | LOC100909899 | mRNA | 0      | 0      | 0      | 2     | 0       | 11.8    |
| 364558    | Palld        | mRNA | 1.32   | 1      | 0      | 0     | 9.36    | 17.13   |
| 84015     | Ttn          | mRNA | 128    | 110    | 78     | 148   | 1251    | 3829    |
| 114207    | Ryr1         | mRNA | 21.09  | 15     | 21     | 28.01 | 250.04  | 704.64  |
| 59299     | Trdn         | mRNA | 20.7   | 8.96   | 14.35  | 19.13 | 171.04  | 502.26  |
| 311098    | Xirp2        | mRNA | 25     | 13     | 26     | 30    | 209     | 898     |
| 313954    | Matn3        | mRNA | 2      | 0      | 2      | 2     | 1       | 70      |
| 682930    | Cacnals      | mRNA | 6      | 12     | 7.93   | 14    | 143     | 364     |
| 117558    | Mylk2        | mRNA | 5      | 2      | 18     | 8     | 119     | 322     |
| 103689985 | LOC103689985 | mRNA | 1      | 2      | 1      | 4     | 28      | 87      |
| 680810    | Lsmem1       | mRNA | 1      | 2      | 0      | 1     | 15      | 40      |
| 25714     | Myf6         | mRNA | 0      | 0      | 1      | 1     | 8       | 22      |
| 362018    | Syp12        | mRNA | 4      | 5      | 1      | 6     | 76      | 198     |
| 360730    | Ostn         | mRNA | 0      | 0      | 0      | 1     | 4       | 14      |
| 315833    | Klhl31       | mRNA | 5.98   | 2.03   | 5.05   | 6.78  | 120.91  | 230.46  |
| 362867    | Mybpc1       | mRNA | 17     | 19     | 8      | 32    | 261     | 1110    |
| 497901    | Leap2        | mRNA | 0      | 0      | 1.01   | 0     | 5.31    | 14.95   |
| 362895    | Stac3        | mRNA | 1      | 1      | 2      | 1     | 30      | 68      |
| 310681    | Hjv          | mRNA | 9.14   | 2.26   | 3.57   | 11.49 | 150.09  | 382.61  |
| 307982    | Nrap         | mRNA | 5      | 5      | 4      | 12    | 80      | 446     |
| 292879    | Mybpc2       | mRNA | 28.64  | 9.24   | 20.08  | 34.06 | 488.35  | 1411.63 |
| 689274    | Myoz3        | mRNA | 0      | 1      | 5      | 1     | 28      | 118     |
| 171009    | Actn3        | mRNA | 20     | 15     | 28     | 57    | 789     | 1821    |
| 287411    | Dhrs7c       | mRNA | 2      | 1      | 1      | 1     | 23      | 87      |
| 316330    | Ankrd23      | mRNA | 10     | 10     | 10     | 14    | 201     | 812     |
| 308873    | Art1         | mRNA | 1      | 0      | 0      | 2     | 20.82   | 51      |
| 25278     | Cox6a2       | mRNA | 3      | 2      | 3      | 11    | 96      | 356     |
| 302948    | Sr1          | mRNA | 2      | 3      | 2      | 11    | 73      | 390     |
| 25028     | Ampd1        | mRNA | 3      | 2      | 3      | 7     | 115     | 285     |
| 309772    | Vg112        | mRNA | 1      | 0      | 0      | 1     | 14      | 41      |
| 296935    | Lmod2        | mRNA | 1      | 0      | 1      | 3     | 11      | 130     |
| 102547059 | LOC102547059 | mRNA | 0      | 0      | 0      | 0     | 0       | 11.41   |
| 679565    | LOC679565    | mRNA | 0      | 0      | 0      | 7.34  | 75.04   | 0       |
| 498440    | Myoz1        | mRNA | 12     | 1      | 2      | 14    | 274     | 670     |
| 102550650 | LOC102550650 | mRNA | 0      | 0      | 0      | 0     | 0       | 0       |
| 365009    | Clec3a       | mRNA | 0      | 1      | 0      | 0     | 0       | 34      |



|           |              |      |       |       |      |        |         |         |
|-----------|--------------|------|-------|-------|------|--------|---------|---------|
| 287167    | Hba-a1       | mRNA | 0     | 0     | 1.08 | 8.51   | 225.4   | 68      |
| 100362283 | Tmem52       | mRNA | 0     | 0     | 1    | 1      | 15      | 56      |
| 116601    | Atp2a1       | mRNA | 52    | 24.84 | 15   | 167.97 | 2323.99 | 7242.98 |
| 24584     | Mylpf        | mRNA | 25    | 9     | 11   | 54     | 1023    | 2866    |
| 287408    | Myh1         | mRNA | 17.98 | 23.63 | 7.1  | 145.4  | 1313.52 | 6801.37 |
| 102549712 | LOC102549712 | mRNA | 0     | 0     | 0    | 0      | 0       | 0       |
| 24265     | Ckm          | mRNA | 54    | 30    | 8    | 104    | 2612    | 6081    |
| 29389     | Tnni2        | mRNA | 7     | 2     | 5    | 32     | 592     | 1564    |
| 103692976 | LOC103692976 | mRNA | 0     | 0     | 0    | 0      | 0       | 7.12    |
| 100362623 | Mt1m         | mRNA | 0     | 0     | 0    | 0      | 0       | 11.57   |
| 100911313 | LOC100911313 | mRNA | 0     | 2.33  | 0    | 0      | 0       | 37.07   |
| 100911166 | LOC100911166 | mRNA | 0     | 0     | 0    | 0      | 0       | 0       |
| 25708     | Ucp3         | mRNA | 1     | 0     | 0    | 0      | 23      | 32      |
| 296369    | Tnnc2        | mRNA | 11    | 2     | 5    | 39     | 842     | 2487    |
| 304823    | Igfn1        | mRNA | 2     | 2     | 2    | 0      | 118     | 220     |
| 363925    | My12         | mRNA | 0     | 0     | 0    | 0      | 10      | 15      |
| 100361543 | LOC100361543 | mRNA | 0     | 0     | 0    | 0      | 10.78   | 20.36   |
| 56781     | <b>My11</b>  | mRNA | 22    | 4     | 2    | 56     | 1377    | 3907    |
| 29658     | Cacng1       | mRNA | 1     | 0     | 0    | 0      | 12      | 58      |
| 308622    | Tx1nb        | mRNA | 0     | 1     | 0    | 1      | 40      | 103     |
| 100909700 | LOC100909700 | mRNA | 0     | 0     | 0    | 0      | 0       | 14.5    |
| 100359951 | LOC100359951 | mRNA | 0     | 0     | 0    | 0      | 0       | 40.48   |
| 103690173 | LOC103690173 | mRNA | 0     | 0     | 0    | 0      | 0       | 0       |
| 103694902 | LOC103694902 | mRNA | 2.37  | 2.29  | 1.73 | 2.36   | 1.19    | 0.96    |
| 108348161 | LOC108348161 | mRNA | 0     | 0     | 0    | 0      | 0       | 0       |
| 691644    | Myh2         | mRNA | 0     | 1.79  | 7.58 | 3.19   | 168.76  | 1437.08 |
| 59108     | Mb           | mRNA | 4     | 0     | 0    | 7      | 327     | 1301    |
| 100910177 | LOC100910177 | mRNA | 0     | 0     | 0    | 0      | 23.57   | 0       |
| 291605    | Myot         | mRNA | 0     | 0     | 0    | 0      | 38.48   | 121.72  |
| 100909761 | LOC100909761 | mRNA | 0     | 1     | 0    | 0      | 110.52  | 334.48  |

| Gene ID   | Gene Symbol  | Sham3<br>Read<br>Count | Sham4<br>Read<br>Count | log2<br>(CPIP_DEG_<br>_left /<br>Sham_DEG_<br>left) | Pvalue (C<br>PIP_DEG_<br>left /<br>Sham_DEG_<br>left) | Qvalue<br>(CPIP_DE<br>G_left /<br>Sham_DEG<br>left) |
|-----------|--------------|------------------------|------------------------|-----------------------------------------------------|-------------------------------------------------------|-----------------------------------------------------|
| 100361265 | LOC100361265 | 0                      | 0                      | 5.3050124                                           | 7.18E-11                                              | 1.26E-09                                            |
| 304954    | Uap112       | 0                      | 11.74                  | 2.4634649                                           | 2.34E-10                                              | 3.93E-09                                            |
| 108349682 | LOC108349682 | 0                      | 0                      | 2.3111419                                           | 3.06E-24                                              | 1.35E-22                                            |
| 685963    | LOC685963    | 20.23                  | 40.47                  | 1.4114248                                           | 6.57E-19                                              | 2.23E-17                                            |
| 691519    | LOC691519    | 5                      | 3.22                   | 1.3651917                                           | 6.14E-05                                              | 4.28E-04                                            |
| 59327     | Twist2       | 18                     | 18                     | 1.2971407                                           | 6.94E-09                                              | 9.57E-08                                            |
| 688900    | Slfn1        | 7.34                   | 6.21                   | 1.1880865                                           | 5.01E-05                                              | 3.56E-04                                            |
| 25660     | Cd28         | 9.01                   | 16                     | 1.1757435                                           | 3.61E-06                                              | 3.24E-05                                            |
| 29220     | Thbs4        | 1587                   | 391                    | 1.1514606                                           | 0                                                     | 0                                                   |
| 100911660 | LOC100911660 | 10.64                  | 13.77                  | 1.1265626                                           | 3.03E-07                                              | 3.28E-06                                            |
| 304729    | Gli2         | 36                     | 36                     | 1.0177477                                           | 1.14E-12                                              | 2.44E-11                                            |
| 305431    | Stk32b       | 29                     | 37                     | 1.0150771                                           | 1.70E-10                                              | 2.89E-09                                            |
| 291555    | Atp8b1       | 47.34                  | 35.47                  | 0.9228666                                           | 1.24E-11                                              | 2.38E-10                                            |
| 29403     | Asgr2        | 54                     | 45                     | 0.9017644                                           | 3.31E-10                                              | 5.41E-09                                            |
| 292401    | Smoc2        | 415                    | 237                    | 0.8832782                                           | 5.46E-73                                              | 7.64E-71                                            |
| 83497     | Ocln         | 80.85                  | 82.14                  | 0.828025                                            | 5.39E-13                                              | 1.19E-11                                            |
| 502160    | Lvrn         | 150                    | 101                    | 0.8131519                                           | 5.70E-20                                              | 2.02E-18                                            |
| 114020    | Nat8f5       | 28.32                  | 25.72                  | 0.8074708                                           | 1.17E-05                                              | 9.45E-05                                            |
| 679787    | Clec5a       | 42.72                  | 32.21                  | 0.7985277                                           | 1.18E-07                                              | 1.36E-06                                            |
| 29139     | Dcn          | 14791                  | 12546                  | 0.7629956                                           | 0                                                     | 0                                                   |
| 295279    | Fcgr1a       | 80                     | 89                     | 0.7459865                                           | 6.35E-12                                              | 1.26E-10                                            |
| 100364500 | LOC100364500 | 193.36                 | 101.7                  | 0.7354696                                           | 7.20E-21                                              | 2.68E-19                                            |
| 315039    | Osr2         | 84                     | 81                     | 0.725954                                            | 2.26E-11                                              | 4.21E-10                                            |
| 117029    | Ccr5         | 61.47                  | 91.71                  | 0.7218052                                           | 2.76E-11                                              | 5.12E-10                                            |
| 66021     | Cybb         | 95                     | 96                     | 0.7170211                                           | 3.62E-13                                              | 8.09E-12                                            |
| 65129     | Cldn1        | 938                    | 852                    | 0.7166117                                           | 2.30E-94                                              | 4.06E-92                                            |
| 140586    | Sox9         | 71.36                  | 57.78                  | 0.7008907                                           | 6.11E-09                                              | 8.48E-08                                            |
| 362430    | Clec4a1      | 82.01                  | 77                     | 0.6996175                                           | 3.51E-10                                              | 5.71E-09                                            |
| 316638    | Sned1        | 888.73                 | 793.47                 | 0.6913802                                           | 6.75E-98                                              | 1.25E-95                                            |
| 311426    | Siglec1      | 84.31                  | 88.02                  | 0.6250278                                           | 2.97E-10                                              | 4.88E-09                                            |
| 306616    | Myom2        | 396                    | 624                    | -0.973513                                           | 1.57E-80                                              | 2.43E-78                                            |
| 365949    | LOC365949    | 93.65                  | 91.25                  | -1.091552                                           | 1.25E-13                                              | 2.95E-12                                            |
| 287382    | Mfap4        | 337.35                 | 198.7                  | -1.150849                                           | 7.38E-71                                              | 1.02E-68                                            |
| 297339    | Capg         | 1121                   | 677                    | -1.463059                                           | #####                                                 | #####                                               |
| 246298    | Retsat       | 2137                   | 1349                   | -1.571221                                           | 0                                                     | 0                                                   |
| 29437     | Acta1        | 504.91                 | 277.08                 | -4.574845                                           | 0                                                     | 0                                                   |
| 24838     | Tnnt3        | 152                    | 67                     | -5.102455                                           | 0                                                     | 0                                                   |
| 360543    | Myh4         | 183.1                  | 72.16                  | -5.223005                                           | 0                                                     | 0                                                   |
| 100912521 | Nmrk2        | 1                      | 1                      | -5.997307                                           | 4.13E-09                                              | 5.91E-08                                            |
| 317418    | Tsr2         | 0                      | 0                      | 16.736318                                           | 3.11E-50                                              | 3.05E-48                                            |
| 100912618 | LOC100912618 | 0                      | 0.05                   | 10.69827                                            | 7.31E-14                                              | 1.77E-12                                            |
| 100910581 | LOC100910581 | 0                      | 0                      | 9.1140377                                           | 5.79E-53                                              | 6.00E-51                                            |
| 300802    | Aph1b        | 0                      | 0                      | 8.77101                                             | 7.20E-44                                              | 5.97E-42                                            |
| 103691556 | LOC103691556 | 0                      | 0.17                   | 7.6082511                                           | 6.94E-62                                              | 8.58E-60                                            |
| 102550456 | LOC102550456 | 0                      | 0                      | 7.14204                                             | 1.47E-17                                              | 4.65E-16                                            |
| 108349606 | LOC108349606 | 0                      | 0                      | 6.6911535                                           | 1.47E-13                                              | 3.43E-12                                            |
| 100911233 | LOC100911233 | 0                      | 0                      | 6.4171672                                           | 1.39E-11                                              | 2.65E-10                                            |
| 100912399 | LOC100912399 | 0                      | 0                      | 6.3832843                                           | 2.33E-11                                              | 4.34E-10                                            |
| 684969    | Potef        | 0                      | 0                      | 6.2858743                                           | 9.69E-11                                              | 1.68E-09                                            |

|           |              |        |        |           |          |          |
|-----------|--------------|--------|--------|-----------|----------|----------|
| 100910616 | Hmgn5        | 0      | 0      | 5.9726266 | 5.74E-09 | 7.99E-08 |
| 108348106 | LOC108348106 | 0      | 0      | 5.5852493 | 3.53E-07 | 3.78E-06 |
| 100909795 | LOC100909795 | 0      | 0      | 5.5003057 | 7.73E-07 | 7.81E-06 |
| 100911564 | LOC100911564 | 0      | 0      | 5.3956976 | 1.93E-06 | 1.82E-05 |
| 690146    | RGD1584023   | 0      | 0      | 5.0053958 | 3.66E-05 | 2.68E-04 |
| 297402    | RGD1560795   | 0      | 0      | 4.9680159 | 4.69E-05 | 3.36E-04 |
| 102552708 | LOC102552708 | 0      | 0      | 4.8774903 | 8.35E-05 | 5.64E-04 |
| 81828     | Zp2          | 0      | 0      | 4.4621249 | 2.17E-06 | 2.03E-05 |
| 364991    | Slc25a3611   | 2.92   | 0      | 3.9689518 | 3.86E-11 | 6.98E-10 |
| 24856     | Ttr          | 1      | 0      | 3.7892897 | 1.20E-15 | 3.36E-14 |
| 679149    | LOC679149    | 0      | 0      | 3.510488  | 7.87E-06 | 6.59E-05 |
| 500338    | Klrc3        | 1      | 0      | 3.2144843 | 1.01E-04 | 6.72E-04 |
| 60333     | Msln         | 29     | 4      | 3.2002306 | 1.58E-76 | 2.33E-74 |
| 100912262 | LOC100912262 | 3.84   | 0      | 3.1792821 | 1.19E-07 | 1.38E-06 |
| 108352634 | LOC108352634 | 0.33   | 2.01   | 2.9975316 | 3.61E-05 | 2.65E-04 |
| 498109    | Polr2h       | 51.42  | 0      | 2.6337558 | 2.79E-71 | 3.87E-69 |
| 295041    | Stoml3       | 2.04   | 3.11   | 2.625791  | 4.85E-07 | 5.06E-06 |
| 100909830 | LOC100909830 | 0      | 0      | 2.5876558 | 4.32E-06 | 3.81E-05 |
| 100910678 | LOC100910678 | 0      | 10.19  | 2.4537345 | 4.34E-09 | 6.17E-08 |
| 100360880 | Fosb         | 32     | 20     | 2.4532224 | #####    | 1.73E-97 |
| 100365810 | LOC100365810 | 1.28   | 0      | 2.3328419 | 1.65E-13 | 3.84E-12 |
| 100911168 | LOC100911168 | 0      | 4.09   | 2.295599  | 7.82E-06 | 6.55E-05 |
| 499322    | Fam111a      | 36     | 31     | 2.2316484 | 2.03E-81 | 3.22E-79 |
| 25453     | Gdnf         | 3      | 2      | 2.2250858 | 8.63E-05 | 5.81E-04 |
| 494206    | Ly49sil      | 4.4    | 6.18   | 2.1980655 | 6.54E-10 | 1.03E-08 |
| 360649    | RGD1359290   | 0      | 183.14 | 2.1395747 | 1.54E-94 | 2.75E-92 |
| 100910308 | LOC100910308 | 94.96  | 0      | 1.9194073 | 5.32E-75 | 7.73E-73 |
| 494207    | Ly49si2      | 1.72   | 2.66   | 1.9128388 | 7.86E-05 | 5.35E-04 |
| 54242     | Cpa3         | 34     | 11     | 1.8999338 | 5.77E-31 | 3.38E-29 |
| 108351097 | LOC108351097 | 151.95 | 92.38  | 1.8852968 | 0        | 0        |
| 689790    | Clec2d11     | 3.3    | 5.71   | 1.7952407 | 6.41E-06 | 5.46E-05 |
| 306748    | Cxcl14       | 55     | 26     | 1.6975735 | 5.58E-67 | 7.33E-65 |
| 108348150 | LOC108348150 | 14.72  | 0      | 1.6533349 | 2.37E-09 | 3.49E-08 |
| 100911090 | LOC100911090 | 88.17  | 0      | 1.6248564 | 3.93E-23 | 1.65E-21 |
| 108348438 | LOC108348438 | 0      | 18.48  | 1.6050778 | 4.57E-06 | 4.01E-05 |
| 498169    | RGD1561730   | 5.03   | 8.16   | 1.589944  | 2.58E-06 | 2.38E-05 |
| 100912573 | Ms4a6e       | 0      | 20.65  | 1.5876558 | 3.26E-06 | 2.95E-05 |
| 305811    | Rcor2        | 0      | 26.37  | 1.5255464 | 3.07E-17 | 9.53E-16 |
| 309209    | Vwce         | 4.19   | 6.89   | 1.4794982 | 3.28E-05 | 2.44E-04 |
| 305858    | Otx2         | 4.09   | 6.92   | 1.4704051 | 1.65E-05 | 1.30E-04 |
| 685245    | Ears211      | 0      | 0      | 1.4310341 | 4.73E-05 | 3.39E-04 |
| 498335    | Cxcl13       | 52     | 68     | 1.3817653 | 1.03E-33 | 6.57E-32 |
| 289337    | Tlr5         | 48     | 9      | 1.381205  | 8.23E-18 | 2.65E-16 |
| 100360872 | Mcpt111      | 130.87 | 60     | 1.3578489 | 1.39E-50 | 1.37E-48 |
| 108352465 | LOC108352465 | 1.65   | 9.6    | 1.3373662 | 8.79E-05 | 5.91E-04 |
| 100911485 | LOC100911485 | 0      | 14.86  | 1.3301596 | 6.59E-06 | 5.59E-05 |
| 170847    | Kcnj15       | 78.82  | 76.37  | 1.3090086 | 5.86E-35 | 4.00E-33 |
| 301012    | Col7a1       | 21     | 18     | 1.2795335 | 4.83E-12 | 9.67E-11 |
| 315870    | Tbx18        | 165    | 95     | 1.2681855 | 7.13E-53 | 7.34E-51 |
| 102553715 | LOC102553715 | 18.65  | 37.3   | 1.2213266 | 3.61E-11 | 6.56E-10 |
| 310738    | Ngf          | 18     | 23     | 1.2208735 | 2.30E-07 | 2.54E-06 |
| 24695     | Pthlh        | 9      | 9      | 1.218422  | 4.05E-05 | 2.94E-04 |
| 114122    | Vcan         | 342    | 162    | 1.1867851 | 3.60E-98 | 6.72E-96 |
| 25661     | Fn1          | 4275   | 2753   | 1.1632535 | 0        | 0        |
| 287813    | Igsf7        | 28.41  | 20.58  | 1.1624221 | 7.91E-09 | 1.08E-07 |
| 292793    | Sbsn         | 61     | 30     | 1.1515567 | 3.79E-23 | 1.60E-21 |

|           |                |         |         |           |          |          |
|-----------|----------------|---------|---------|-----------|----------|----------|
| 690479    | Bpifb5         | 89      | 4       | 1.1384113 | 1.77E-16 | 5.18E-15 |
| 685157    | LOC685157      | 1.43    | 19.29   | 1.10149   | 7.70E-07 | 7.79E-06 |
| 308099    | Fndc1          | 393     | 225     | 1.0891878 | 5.11E-97 | 9.36E-95 |
| 25694     | Has2           | 46      | 36      | 1.0854338 | 1.34E-14 | 3.46E-13 |
| 25627     | Cma1           | 22      | 7       | 1.08192   | 4.80E-07 | 5.02E-06 |
| 310926    | LOC310926      | 142.05  | 92.61   | 1.0758388 | 6.01E-64 | 7.63E-62 |
| 292777    | Tbcb           | 18.69   | 6.19    | 1.0668539 | 6.88E-07 | 7.02E-06 |
| 363071    | Stra6          | 77      | 95      | 1.0642186 | 2.18E-22 | 8.89E-21 |
| 102547294 | Iqcn           | 9       | 10      | 1.0383172 | 1.17E-04 | 7.69E-04 |
| 25253     | Dpp4           | 225     | 137     | 1.0369507 | 2.10E-45 | 1.78E-43 |
| 84007     | C3ar1          | 42.59   | 73.04   | 1.0358262 | 7.47E-15 | 1.95E-13 |
| 501031    | RGD1560775     | 6.21    | 8.41    | 1.0240691 | 2.31E-05 | 1.76E-04 |
| 287561    | Cc17           | 31      | 34      | 1.0102665 | 9.09E-09 | 1.23E-07 |
| 100912450 | LOC100912450   | 30.84   | 44.84   | 1.0036554 | 5.51E-10 | 8.78E-09 |
| 100911615 | LOC100911615   | 0       | 275.31  | 1.0027195 | 3.09E-22 | 1.24E-20 |
| 83584     | Casp6          | 6.96    | 0       | 0.9791033 | 7.29E-05 | 5.00E-04 |
| 100363268 | LOC100363268   | 0       | 21.98   | 0.9771737 | 3.62E-06 | 3.25E-05 |
| 292594    | Lilrb4         | 7       | 25      | 0.9731491 | 1.21E-06 | 1.18E-05 |
| 108348142 | LOC108348142   | 20.69   | 17.91   | 0.9614556 | 1.13E-05 | 9.18E-05 |
| 108348094 | NEWGENE_130639 | 105.93  | 68      | 0.9508442 | 5.58E-17 | 1.71E-15 |
| 365395    | Clcf1          | 20      | 13      | 0.9492541 | 4.79E-05 | 3.43E-04 |
| 103690020 | LOC103690020   | 13.44   | 34.21   | 0.9442577 | 1.53E-05 | 1.21E-04 |
| 100910669 | LOC100910669   | 21.95   | 16.8    | 0.9427122 | 2.02E-08 | 2.59E-07 |
| 192203    | Fap            | 66      | 37      | 0.937105  | 4.31E-13 | 9.60E-12 |
| 303856    | Atp13a5        | 21      | 27      | 0.9246908 | 5.96E-05 | 4.17E-04 |
| 103690038 | LOC103690038   | 0       | 164.99  | 0.9230163 | 9.38E-12 | 1.83E-10 |
| 24237     | C6             | 58      | 44      | 0.9162786 | 5.20E-12 | 1.04E-10 |
| 100911599 | LOC100911599   | 38.02   | 25.27   | 0.9095839 | 5.87E-09 | 8.17E-08 |
| 113918    | Slc6a20        | 191.08  | 381.03  | 0.9050445 | 6.93E-43 | 5.64E-41 |
| 24617     | Serpine1       | 121.11  | 43.79   | 0.9026764 | 2.12E-23 | 9.03E-22 |
| 192262    | C1s            | 1517    | 1071    | 0.8999198 | #####    | #####    |
| 29132     | Atp1a4         | 32.06   | 15.78   | 0.8965798 | 1.63E-05 | 1.28E-04 |
| 690955    | Lilrb3b        | 16.26   | 37.92   | 0.8952363 | 3.76E-10 | 6.09E-09 |
| 501416    | LOC501416      | 53.25   | 72.72   | 0.8902114 | 7.39E-14 | 1.79E-12 |
| 108348047 | LOC108348047   | 89.03   | 113.41  | 0.8803653 | 5.43E-21 | 2.05E-19 |
| 366270    | Edn3           | 20      | 22      | 0.878958  | 1.83E-05 | 1.43E-04 |
| 685590    | LOC685590      | 15.48   | 13.79   | 0.8693738 | 1.14E-06 | 1.12E-05 |
| 298579    | Pla2g2d        | 54      | 37      | 0.8628907 | 7.69E-10 | 1.21E-08 |
| 316137    | Adgre1         | 218     | 213     | 0.8566592 | 2.07E-36 | 1.48E-34 |
| 362741    | Pax9           | 52      | 37      | 0.8518348 | 5.65E-08 | 6.82E-07 |
| 103690108 | LOC103690108   | 1225.06 | 567.69  | 0.8480425 | #####    | #####    |
| 689008    | Fbn2           | 87      | 85      | 0.8456917 | 1.47E-14 | 3.78E-13 |
| 25293     | Aqp4           | 16.52   | 75.31   | 0.841721  | 7.55E-10 | 1.19E-08 |
| 688583    | LOC688583      | 21.79   | 23.99   | 0.8253181 | 3.22E-06 | 2.92E-05 |
| 684440    | Tlr8           | 61      | 58      | 0.8150663 | 3.88E-09 | 5.57E-08 |
| 304966    | Fcgr3a         | 15      | 29      | 0.8150663 | 3.12E-05 | 2.33E-04 |
| 108348048 | LOC108348048   | 1492.4  | 1459.97 | 0.8140012 | #####    | #####    |
| 29252     | Gzmm           | 18      | 30      | 0.8128688 | 8.96E-05 | 6.01E-04 |
| 25314     | Emp1           | 1185    | 1010    | 0.8106399 | #####    | #####    |
| 24886     | Tbxas1         | 30      | 33      | 0.8100483 | 1.35E-06 | 1.31E-05 |
| 100909441 | LOC100909441   | 731.58  | 845.69  | 0.8096769 | #####    | #####    |
| 60327     | F13a1          | 170     | 118     | 0.8084116 | 1.48E-24 | 6.71E-23 |
| 494199    | Oas1f          | 79.4    | 36.45   | 0.8068948 | 7.59E-10 | 1.19E-08 |
| 501668    | Dmrtcla        | 31.71   | 7.18    | 0.8066562 | 2.41E-06 | 2.24E-05 |
| 688913    | Dcun1d2        | 107.22  | 0       | 0.8054314 | 2.80E-20 | 1.01E-18 |
| 303384    | Mmp28          | 29.92   | 18.72   | 0.8053811 | 6.20E-07 | 6.37E-06 |

|           |              |        |        |           |          |          |
|-----------|--------------|--------|--------|-----------|----------|----------|
| 100362113 | LOC100362113 | 132.34 | 102.94 | 0.796612  | 7.36E-19 | 2.49E-17 |
| 113892    | Nat8f3       | 153.05 | 134.7  | 0.7861793 | 2.57E-23 | 1.09E-21 |
| 24231     | C2           | 376    | 322    | 0.7852372 | 2.50E-54 | 2.63E-52 |
| 308350    | Lilrb3       | 32     | 12     | 0.7827276 | 1.24E-05 | 1.00E-04 |
| 116487    | Tgfb1        | 1932   | 1923   | 0.7768236 | #####    | #####    |
| 313504    | Foxd2        | 85.85  | 132.77 | 0.7756439 | 1.45E-15 | 4.02E-14 |
| 100912068 | LOC100912068 | 60.15  | 38     | 0.7745785 | 5.72E-08 | 6.89E-07 |
| 366452    | Ptch2        | 161    | 157    | 0.771633  | 5.58E-21 | 2.10E-19 |
| 25236     | Gpc3         | 1538   | 1193   | 0.7679871 | #####    | #####    |
| 246266    | Aspg         | 47     | 30     | 0.7658355 | 3.30E-07 | 3.56E-06 |
| 293154    | Folr2        | 96     | 90     | 0.7621328 | 3.02E-13 | 6.83E-12 |
| 108348044 | LOC108348044 | 30     | 38     | 0.7591567 | 2.79E-06 | 2.56E-05 |
| 100909455 | LOC100909455 | 10.98  | 43.71  | 0.7555242 | 8.03E-05 | 5.45E-04 |
| 298861    | Ptrhd1       | 173.45 | 189.16 | 0.7534342 | 4.44E-30 | 2.52E-28 |
| 301227    | Trem2        | 67     | 82     | 0.7521009 | 2.24E-11 | 4.18E-10 |
| 306454    | Cldn22       | 33.3   | 25.4   | 0.7490056 | 1.21E-04 | 7.92E-04 |
| 24653     | Pla2g4a      | 56     | 27.99  | 0.7484193 | 1.48E-06 | 1.43E-05 |
| 89829     | Socs3        | 117    | 153    | 0.747764  | 2.83E-23 | 1.20E-21 |
| 689257    | Adgrd1       | 101    | 137    | 0.746801  | 6.31E-17 | 1.92E-15 |
| 313831    | Vit          | 292    | 242    | 0.7466794 | 2.54E-34 | 1.68E-32 |
| 448830    | Ly96         | 37.12  | 34.59  | 0.7456674 | 1.41E-06 | 1.36E-05 |
| 25021     | Itgam        | 86     | 65     | 0.7435184 | 9.03E-12 | 1.77E-10 |
| 108351105 | LOC108351105 | 64.15  | 62     | 0.7406114 | 7.79E-08 | 9.25E-07 |
| 25239     | Apod         | 21182  | 16748  | 0.736333  | 0        | 0        |
| 294257    | Cfb          | 91     | 65     | 0.7346057 | 4.76E-12 | 9.55E-11 |
| 108349608 | LOC108349608 | 10.87  | 53.3   | 0.7334137 | 7.96E-05 | 5.41E-04 |
| 394266    | Gjb2         | 191    | 244    | 0.7219173 | 1.23E-20 | 4.52E-19 |
| 498638    | Msr1         | 101.16 | 106.39 | 0.7182722 | 1.77E-13 | 4.09E-12 |
| 100910688 | LOC100910688 | 26.32  | 36.49  | 0.7152946 | 1.18E-04 | 7.71E-04 |
| 499271    | Itgax        | 55.4   | 32.96  | 0.7149298 | 4.07E-06 | 3.61E-05 |
| 498022    | RGD1559482   | 33.98  | 10.93  | 0.7137676 | 4.04E-05 | 2.94E-04 |
| 304988    | Mnda         | 44.7   | 43.55  | 0.7122114 | 6.62E-07 | 6.76E-06 |
| 24379     | Gad1         | 24     | 41     | 0.7108041 | 7.55E-05 | 5.16E-04 |
| 292406    | Thbs2        | 646    | 529    | 0.7059348 | 1.34E-75 | 1.96E-73 |
| 24536     | Lepr         | 354.55 | 289.45 | 0.7047214 | 1.78E-32 | 1.10E-30 |
| 25383     | Apobec1      | 48     | 63     | 0.703702  | 5.38E-08 | 6.51E-07 |
| 108348111 | LOC108348111 | 33.5   | 16.75  | 0.703133  | 6.66E-06 | 5.65E-05 |
| 362431    | Clec4a3      | 57     | 61     | 0.7002551 | 7.42E-08 | 8.83E-07 |
| 100912590 | LOC100912590 | 36.12  | 54.18  | 0.6993563 | 2.41E-07 | 2.65E-06 |
| 304021    | Col8a1       | 271    | 131    | 0.6868449 | 6.32E-25 | 2.92E-23 |
| 171339    | Dnah1        | 28     | 21     | 0.6843318 | 1.49E-04 | 9.50E-04 |
| 498781    | RGD1561231   | 79.6   | 71.14  | 0.6834177 | 5.48E-10 | 8.74E-09 |
| 64552     | Mpeg1        | 466.04 | 501.04 | 0.6823836 | 6.84E-52 | 6.86E-50 |
| 114099    | Cysltr1      | 45     | 35     | 0.6822306 | 3.02E-05 | 2.26E-04 |
| 81682     | Lum          | 3023   | 2523   | 0.6762143 | #####    | #####    |
| 24233     | C4a          | 215.79 | 278.86 | 0.6733816 | 2.11E-31 | 1.27E-29 |
| 24330     | Egr1         | 311    | 268    | 0.6732376 | 3.35E-39 | 2.54E-37 |
| 85272     | Bmp7         | 93     | 101    | 0.6689559 | 4.01E-11 | 7.23E-10 |
| 312701    | Cd163        | 146.21 | 110    | 0.6677947 | 7.70E-20 | 2.70E-18 |
| 361221    | No18         | 32.25  | 70.89  | 0.6656231 | 3.52E-07 | 3.77E-06 |
| 299737    | Ntn4         | 263    | 207    | 0.665104  | 1.03E-25 | 4.95E-24 |
| 317181    | SrpX2        | 55     | 47     | 0.6646969 | 4.37E-06 | 3.86E-05 |
| 287231    | RGD1559575   | 78     | 76     | 0.6600917 | 1.30E-08 | 1.73E-07 |
| 679975    | Gpr183       | 35     | 54     | 0.656802  | 4.22E-05 | 3.05E-04 |
| 114523    | Ntn1         | 169    | 113    | 0.65477   | 2.84E-14 | 7.16E-13 |
| 171452    | Rab31l1      | 119    | 123    | 0.6514709 | 1.02E-12 | 2.19E-11 |

|           |                |         |         |           |          |          |
|-----------|----------------|---------|---------|-----------|----------|----------|
| 64033     | Ccnd2          | 140     | 83      | 0.6507801 | 1.31E-12 | 2.77E-11 |
| 140594    | Syt14          | 33      | 34      | 0.6493316 | 1.35E-04 | 8.69E-04 |
| 445442    | Thbs1          | 316     | 255     | 0.6488605 | 5.44E-30 | 3.07E-28 |
| 296952    | Kcp            | 54.72   | 45      | 0.6484227 | 1.36E-06 | 1.32E-05 |
| 94341     | Kcnj13         | 66      | 81      | 0.6459998 | 2.91E-07 | 3.16E-06 |
| 311425    | Adam33         | 96      | 74      | 0.6453713 | 1.34E-09 | 2.03E-08 |
| 315979    | Col6a6         | 419.15  | 363.6   | 0.6435726 | 2.37E-38 | 1.77E-36 |
| 100360801 | Ddx60          | 28.81   | 34.02   | 0.6379504 | 3.62E-06 | 3.25E-05 |
| 114247    | Slnf4          | 97.99   | 235.68  | 0.6362006 | 1.81E-26 | 8.98E-25 |
| 361821    | Col6a2         | 2143    | 1674    | 0.6334377 | #####    | #####    |
| 361289    | Colec12        | 271     | 224     | 0.6329988 | 3.54E-22 | 1.41E-20 |
| 299699    | Aldh112        | 38      | 25      | 0.6325817 | 5.18E-05 | 3.67E-04 |
| 298566    | C1qa           | 334     | 339     | 0.6322166 | 2.22E-31 | 1.33E-29 |
| 29200     | Inhba          | 59.42   | 46.54   | 0.6319736 | 3.29E-06 | 2.97E-05 |
| 297411    | Tprkb          | 38.26   | 300.61  | 0.6316121 | 2.42E-17 | 7.54E-16 |
| 81523     | Myoc           | 5595    | 5733    | 0.6295761 | 0        | 0        |
| 103689965 | LOC103689965   | 277.51  | 255.43  | 0.6269951 | 3.03E-33 | 1.92E-31 |
| 691499    | Zfp469         | 107     | 93      | 0.6265842 | 1.41E-11 | 2.68E-10 |
| 312677    | Ccdc77         | 66.12   | 138.05  | 0.6258983 | 6.78E-12 | 1.34E-10 |
| 362550    | Ror1           | 105     | 65      | 0.6236351 | 3.19E-08 | 3.99E-07 |
| 554353    | Gpr34          | 35      | 59      | 0.6222696 | 3.01E-05 | 2.25E-04 |
| 311835    | Ddx31          | 109     | 114     | 0.621221  | 1.24E-12 | 2.62E-11 |
| 24188     | Aldh1a1        | 704     | 671     | 0.6150086 | 3.91E-56 | 4.25E-54 |
| 89843     | Cxadr          | 1169.79 | 1058    | 0.6144714 | 3.07E-84 | 5.04E-82 |
| 353227    | Zbtb16         | 145.44  | 166.99  | 0.6142711 | 4.32E-28 | 2.30E-26 |
| 100910978 | LOC100910978   | 153.12  | 46.29   | 0.6121933 | 3.35E-13 | 7.52E-12 |
| 499991    | Steap4         | 424     | 421     | 0.6110933 | 1.10E-36 | 7.88E-35 |
| 295703    | Serping1       | 2347    | 2137    | 0.6078319 | #####    | #####    |
| 102553405 | LOC102553405   | 56.62   | 30.84   | 0.6069941 | 9.16E-06 | 7.58E-05 |
| 60423     | Slc28a2        | 84.01   | 62.94   | 0.6012217 | 1.97E-09 | 2.92E-08 |
| 24329     | Egfr           | 431.45  | 322.84  | 0.5966434 | 4.74E-29 | 2.59E-27 |
| 311252    | Pamr1          | 113     | 129     | 0.5939974 | 6.30E-12 | 1.25E-10 |
| 307414    | MGC108823      | 63.2    | 70.39   | 0.5919011 | 1.83E-07 | 2.04E-06 |
| 317227    | Tlr13          | 76      | 78      | 0.5896173 | 5.51E-07 | 5.72E-06 |
| 687424    | Dtx1           | 371     | 347     | 0.5885189 | 1.63E-26 | 8.15E-25 |
| 140927    | Selenbp1       | 188.76  | 0       | 0.5876558 | 1.19E-05 | 9.65E-05 |
| 117253    | Dnah11         | 175.66  | 124     | 0.5861221 | 1.74E-12 | 3.63E-11 |
| 140930    | Faim           | 164.61  | 226.24  | -0.588167 | 1.19E-13 | 2.81E-12 |
| 102552640 | LOC102552640   | 211     | 227.63  | -0.590275 | 3.31E-15 | 8.92E-14 |
| 24299     | Cyp2a3         | 54      | 68      | -0.593674 | 2.89E-05 | 2.17E-04 |
| 103690045 | NEWGENE_131013 | 187.54  | 82.13   | -0.606631 | 1.20E-09 | 1.84E-08 |
| 108348062 | LOC108348062   | 136.22  | 279.36  | -0.608157 | 4.97E-14 | 1.22E-12 |
| 56765     | Plvap          | 299     | 210     | -0.612694 | 9.39E-21 | 3.48E-19 |
| 29395     | Hmgb2          | 114.64  | 73.74   | -0.617696 | 5.79E-13 | 1.27E-11 |
| 305104    | Col9a1         | 146     | 110     | -0.629382 | 4.14E-14 | 1.03E-12 |
| 681896    | Slc25a18       | 88      | 54      | -0.635907 | 3.86E-06 | 3.45E-05 |
| 252942    | Myh8           | 64.76   | 64.73   | -0.643574 | 8.24E-06 | 6.87E-05 |
| 81633     | Acta2          | 623.98  | 374.07  | -0.652727 | 4.22E-49 | 3.98E-47 |
| 100911295 | LOC100911295   | 461.43  | 280.16  | -0.657808 | 6.91E-31 | 4.04E-29 |
| 108348085 | LOC108348085   | 34.51   | 103.53  | -0.657971 | 2.59E-10 | 4.31E-09 |
| 108348143 | LOC108348143   | 37.49   | 29.99   | -0.665981 | 7.53E-05 | 5.15E-04 |
| 171052    | Mmp13          | 270     | 25      | -0.671039 | 8.16E-18 | 2.63E-16 |
| 25304     | Comp           | 198     | 189     | -0.674322 | 2.66E-22 | 1.07E-20 |
| 100363439 | Rps1011        | 518.98  | 946.34  | -0.677034 | 5.19E-69 | 7.06E-67 |
| 64543     | Sec1413        | 474.75  | 1355.34 | -0.679269 | 3.55E-86 | 5.92E-84 |
| 81648     | Crh            | 277     | 305     | -0.680035 | 1.64E-19 | 5.71E-18 |



|           |              |         |         |           |          |          |
|-----------|--------------|---------|---------|-----------|----------|----------|
| 64032     | Ctgf         | 331     | 252     | -0.680743 | 1.23E-29 | 6.89E-28 |
| 360479    | LOC360479    | 33      | 46.61   | -0.688516 | 6.62E-05 | 4.58E-04 |
| 498587    | Ldb3         | 426     | 430     | -0.689525 | 8.44E-53 | 8.64E-51 |
| 688972    | Gypa         | 40      | 30.01   | -0.691262 | 3.42E-07 | 3.67E-06 |
| 64317     | Gpx3         | 391     | 261     | -0.693024 | 1.13E-32 | 7.04E-31 |
| 304131    | Map3k7c1     | 32      | 38      | -0.695123 | 1.47E-05 | 1.17E-04 |
| 100911372 | LOC100911372 | 176.17  | 195.75  | -0.699935 | 4.85E-18 | 1.58E-16 |
| 24779     | Slc4a1       | 192     | 147     | -0.707308 | 1.27E-28 | 6.85E-27 |
| 316632    | Ndufa1011    | 1041.49 | 565.57  | -0.708673 | 4.62E-60 | 5.61E-58 |
| 289178    | Dpt          | 190     | 96      | -0.710334 | 9.76E-18 | 3.13E-16 |
| 25139     | Slc2a4       | 50      | 46      | -0.711002 | 2.45E-08 | 3.10E-07 |
| 683463    | Lilrb3a      | 86.39   | 59.97   | -0.719488 | 1.09E-04 | 7.17E-04 |
| 108348157 | LOC108348157 | 34.25   | 34.25   | -0.730004 | 1.35E-06 | 1.31E-05 |
| 171055    | Cd79b        | 32      | 15      | -0.734272 | 3.63E-05 | 2.66E-04 |
| 29747     | Kcnmb1       | 37.36   | 22.85   | -0.73557  | 2.81E-05 | 2.12E-04 |
| 29301     | Hal          | 46      | 48      | -0.739975 | 3.39E-05 | 2.51E-04 |
| 499146    | Spib         | 30      | 40      | -0.740149 | 7.63E-09 | 1.04E-07 |
| 289316    | Lefty2       | 40.38   | 66.56   | -0.748867 | 9.50E-09 | 1.28E-07 |
| 294312    | Pi16         | 263     | 149     | -0.767743 | 3.79E-26 | 1.85E-24 |
| 311029    | Neb          | 333     | 239     | -0.769322 | 3.47E-81 | 5.47E-79 |
| 316010    | Camp         | 122     | 65      | -0.781755 | 1.09E-12 | 2.34E-11 |
| 301026    | Ngp          | 446     | 186     | -0.78191  | 4.29E-37 | 3.15E-35 |
| 102555319 | LOC102555319 | 46.45   | 134.28  | -0.782285 | 1.18E-11 | 2.28E-10 |
| 246172    | Nexn         | 129     | 75      | -0.783668 | 9.97E-17 | 2.98E-15 |
| 500377    | Tuba8        | 70      | 66.88   | -0.789852 | 1.13E-09 | 1.74E-08 |
| 688459    | LOC688459    | 35      | 36      | -0.795673 | 1.74E-05 | 1.36E-04 |
| 100909869 | LOC100909869 | 119.4   | 55.49   | -0.804662 | 8.15E-11 | 1.42E-09 |
| 300475    | Adamts8      | 281     | 342     | -0.807322 | 8.95E-37 | 6.46E-35 |
| 444983    | Apold1       | 472     | 97      | -0.810711 | 8.24E-33 | 5.18E-31 |
| 81639     | Alox15       | 43      | 46      | -0.821208 | 3.84E-09 | 5.52E-08 |
| 303413    | Mpo          | 135     | 33      | -0.822733 | 1.68E-14 | 4.30E-13 |
| 25043     | Eln          | 569     | 255     | -0.82554  | 9.68E-58 | 1.12E-55 |
| 64507     | Fmod         | 177.97  | 235.04  | -0.826056 | 3.20E-34 | 2.10E-32 |
| 498066    | Sh3bgr       | 206     | 215     | -0.828022 | 1.31E-30 | 7.56E-29 |
| 103689936 | Wbp1111      | 839.84  | 319.23  | -0.829336 | 4.08E-56 | 4.42E-54 |
| 297412    | Dusp11       | 59.7    | 47.8    | -0.831692 | 7.91E-08 | 9.38E-07 |
| 313776    | Perml        | 36.05   | 33.92   | -0.837823 | 2.16E-06 | 2.02E-05 |
| 298485    | Ermap        | 18      | 15      | -0.839619 | 1.32E-04 | 8.55E-04 |
| 301097    | Vwa5a        | 2347.6  | 2329.03 | -0.843141 | #####    | #####    |
| 360737    | Tbx1         | 61      | 40      | -0.855753 | 4.79E-07 | 5.01E-06 |
| 290880    | Adprh11      | 25      | 15      | -0.857582 | 8.37E-05 | 5.65E-04 |
| 294279    | Col11a2      | 203.84  | 284.03  | -0.860276 | 1.45E-49 | 1.39E-47 |
| 25732     | Acp5         | 67      | 47      | -0.860618 | 3.05E-20 | 1.10E-18 |
| 310694    | Fcrl2        | 13      | 105     | -0.868573 | 7.35E-06 | 6.19E-05 |
| 84387     | Pglyrp1      | 40      | 18      | -0.894945 | 1.20E-05 | 9.68E-05 |
| 298559    | Tcea3        | 41      | 40      | -0.903331 | 4.83E-08 | 5.87E-07 |
| 103690105 | LOC103690105 | 52.43   | 35.57   | -0.905298 | 4.54E-07 | 4.77E-06 |
| 100911917 | LOC100911917 | 59.76   | 145.14  | -0.908049 | 2.66E-14 | 6.73E-13 |
| 50565     | Hspb7        | 39      | 26      | -0.918697 | 1.29E-09 | 1.96E-08 |
| 140939    | Trim63       | 30      | 13      | -0.918833 | 1.11E-06 | 1.10E-05 |
| 100360218 | LOC100360218 | 32.59   | 26.11   | -0.927349 | 1.84E-05 | 1.44E-04 |
| 291312    | Ucma         | 23      | 16      | -0.934843 | 3.47E-05 | 2.56E-04 |
| 80878     | Slc16a3      | 23.54   | 34.78   | -0.989645 | 1.02E-09 | 1.58E-08 |
| 171375    | Atp5f1       | 234.1   | 234.1   | -0.997307 | 5.89E-19 | 2.01E-17 |
| 363276    | Snorc        | 21      | 20      | -1.007291 | 6.02E-07 | 6.21E-06 |
| 103694169 | LOC103694169 | 53.96   | 0       | -1.007702 | 2.69E-06 | 2.48E-05 |



|           |              |        |        |           |          |          |
|-----------|--------------|--------|--------|-----------|----------|----------|
| 295426    | Myoz2        | 12     | 13     | -1.049146 | 7.79E-05 | 5.31E-04 |
| 100910446 | LOC100910446 | 81     | 0      | -1.076602 | 1.84E-11 | 3.48E-10 |
| 108348326 | LOC108348326 | 18.21  | 181.57 | -1.082017 | 4.40E-13 | 9.77E-12 |
| 29576     | Wisp2        | 39     | 24     | -1.10859  | 1.18E-11 | 2.27E-10 |
| 365550    | Vpreb3       | 9      | 9.11   | -1.110858 | 6.89E-05 | 4.75E-04 |
| 170840    | Slc40a1      | 80.42  | 85.14  | -1.117863 | 3.17E-13 | 7.14E-12 |
| 29155     | Capn3        | 25     | 32     | -1.119297 | 8.08E-10 | 1.26E-08 |
| 360742    | Dgcr2        | 0      | 0      | -1.12401  | 2.29E-05 | 1.75E-04 |
| 303468    | Sgca         | 14     | 6      | -1.143158 | 2.80E-06 | 2.57E-05 |
| 299606    | Elane        | 16     | 15     | -1.177879 | 2.02E-06 | 1.90E-05 |
| 303373    | Unc45b       | 14     | 17     | -1.182862 | 3.69E-07 | 3.94E-06 |
| 291084    | Nqo2         | 67     | 585    | -1.18595  | 1.58E-59 | 1.90E-57 |
| 499923    | Efcab8       | 12     | 52     | -1.203758 | 1.57E-07 | 1.78E-06 |
| 297748    | Jph1         | 18     | 15     | -1.219699 | 1.94E-09 | 2.89E-08 |
| 690139    | Rbm24        | 15     | 4      | -1.219699 | 5.19E-05 | 3.68E-04 |
| 286965    | Abra         | 44     | 26     | -1.249225 | 3.34E-11 | 6.11E-10 |
| 361003    | Dupd1        | 6      | 11     | -1.252564 | 2.15E-05 | 1.65E-04 |
| 294071    | Hells        | 27.29  | 10.23  | -1.266722 | 4.00E-06 | 3.56E-05 |
| 65204     | Cnn1         | 36     | 18     | -1.279508 | 1.81E-12 | 3.76E-11 |
| 315962    | Ky           | 32     | 30     | -1.281338 | 3.55E-16 | 1.01E-14 |
| 81687     | Mmp9         | 70     | 47     | -1.311893 | 8.93E-30 | 5.01E-28 |
| 100911186 | LOC100911186 | 0      | 42.93  | -1.319168 | 4.95E-14 | 1.22E-12 |
| 24585     | My13         | 4      | 13     | -1.325633 | 4.10E-08 | 5.05E-07 |
| 301039    | Susd5        | 16     | 11     | -1.368562 | 7.94E-09 | 1.09E-07 |
| 102555557 | LOC102555557 | 18.23  | 41.37  | -1.375689 | 1.27E-12 | 2.70E-11 |
| 289482    | Naa11        | 62     | 21.96  | -1.442984 | 1.45E-08 | 1.92E-07 |
| 29195     | Chad         | 22.03  | 20.1   | -1.470608 | 1.17E-22 | 4.79E-21 |
| 25357     | Thrsp        | 19     | 2      | -1.482733 | 2.62E-07 | 2.86E-06 |
| 100359528 | RGD1565987   | 41.36  | 0      | -1.486505 | 2.02E-06 | 1.90E-05 |
| 57809     | Rpl35a       | 0      | 105.26 | -1.505523 | 2.05E-10 | 3.46E-09 |
| 100910755 | LOC100910755 | 11.53  | 10.6   | -1.519638 | 8.96E-05 | 6.01E-04 |
| 686087    | LOC686087    | 0      | 0      | -1.543023 | 7.35E-07 | 7.47E-06 |
| 501129    | Tmem182      | 6      | 11     | -1.547504 | 1.52E-07 | 1.72E-06 |
| 295261    | Tmod4        | 37     | 48     | -1.56136  | 2.69E-32 | 1.65E-30 |
| 299266    | Asb2         | 33     | 38.32  | -1.562885 | 1.89E-24 | 8.48E-23 |
| 84022     | Ghsr         | 35     | 4      | -1.56559  | 5.87E-08 | 7.07E-07 |
| 500292    | Cidec        | 14     | 2      | -1.582269 | 3.34E-07 | 3.59E-06 |
| 24583     | Myh3         | 6.88   | 14.19  | -1.593901 | 5.98E-14 | 1.47E-12 |
| 498579    | RGD1564899   | 19.07  | 17.23  | -1.623207 | 4.59E-24 | 2.02E-22 |
| 684993    | Ppplr35      | 109    | 94     | -1.629829 | 5.71E-35 | 3.91E-33 |
| 25412     | Col2a1       | 666    | 991    | -1.669905 | 0        | 0        |
| 365298    | Alpk3        | 19     | 17     | -1.689983 | 7.06E-25 | 3.25E-23 |
| 679629    | Smtnl2       | 13     | 7      | -1.69438  | 1.54E-10 | 2.61E-09 |
| 100912534 | LOC100912534 | 126.58 | 196    | -1.716681 | 1.28E-53 | 1.34E-51 |
| 25629     | Plin1        | 23     | 4      | -1.724288 | 8.31E-10 | 1.30E-08 |
| 24477     | Ibsp         | 56     | 42     | -1.744214 | 1.10E-56 | 1.21E-54 |
| 680319    | Tceal7       | 3      | 3      | -1.754736 | 9.08E-08 | 1.07E-06 |
| 295531    | Tnni3k       | 148    | 64     | -1.760975 | 5.30E-29 | 2.88E-27 |
| 304913    | Tnn          | 6      | 2      | -1.762841 | 5.52E-06 | 4.77E-05 |
| 25365     | Actg2        | 46     | 15.06  | -1.770684 | 1.62E-24 | 7.28E-23 |
| 24959     | Pgam2        | 107    | 96     | -1.779715 | #####    | #####    |
| 140727    | Cacng6       | 3.08   | 1.17   | -1.8358   | 4.06E-05 | 2.95E-04 |
| 100910104 | Xirp1        | 13     | 13     | -1.845351 | 5.09E-13 | 1.12E-11 |
| 304551    | Myo18b       | 15     | 16.55  | -1.873112 | 7.51E-24 | 3.28E-22 |
| 114108    | Pdlim3       | 42     | 19     | -1.873873 | 7.45E-46 | 6.42E-44 |
| 29353     | Phkg1        | 5      | 5      | -1.878662 | 2.69E-08 | 3.39E-07 |

|           |              |       |       |           |          |          |
|-----------|--------------|-------|-------|-----------|----------|----------|
| 305675    | Synpo21      | 41.66 | 22.29 | -1.885338 | 4.75E-34 | 3.09E-32 |
| 310552    | Sfrp2        | 44    | 13    | -1.894737 | 3.15E-20 | 1.13E-18 |
| 100364457 | LOC100364457 | 85.69 | 27.16 | -1.903569 | 1.95E-17 | 6.08E-16 |
| 500453    | Pax5         | 7     | 2     | -1.914845 | 8.66E-05 | 5.84E-04 |
| 79451     | Fabp4        | 88    | 23    | -1.939062 | 1.85E-55 | 1.98E-53 |
| 308637    | Ano5         | 12    | 5     | -1.939821 | 5.05E-14 | 1.24E-12 |
| 311167    | Smtnl1       | 4     | 8     | -1.947266 | 3.47E-10 | 5.65E-09 |
| 84594     | Nfs1         | 24.74 | 35.58 | -1.957267 | #####    | #####    |
| 684984    | Cd300lg      | 51    | 23    | -1.966933 | 3.05E-11 | 5.63E-10 |
| 365241    | Kcna7        | 4     | 4     | -1.975933 | 1.84E-08 | 2.38E-07 |
| 366245    | R3hdml       | 5     | 13    | -1.980819 | 1.35E-10 | 2.31E-09 |
| 246250    | Retn         | 7     | 1     | -1.997307 | 9.01E-05 | 6.03E-04 |
| 306356    | Cilp2        | 8     | 4     | -1.997307 | 1.14E-08 | 1.53E-07 |
| 100361007 | Adig         | 6     | 3     | -2.041701 | 5.49E-05 | 3.87E-04 |
| 296345    | Jph2         | 36    | 13    | -2.069029 | 3.73E-49 | 3.53E-47 |
| 297333    | Smyd1        | 22.51 | 15.73 | -2.077535 | 1.38E-34 | 9.28E-33 |
| 298795    | LOC298795    | 3.9   | 9.25  | -2.089694 | 1.93E-05 | 1.49E-04 |
| 102555814 | LOC102555814 | 21.93 | 11.55 | -2.123658 | 8.65E-26 | 4.17E-24 |
| 64362     | Des          | 121   | 104   | -2.145725 | #####    | #####    |
| 298139    | LOC298139    | 6.09  | 4.05  | -2.15865  | 1.24E-06 | 1.21E-05 |
| 100364062 | LOC100364062 | 7.58  | 4.03  | -2.16206  | 1.18E-07 | 1.37E-06 |
| 500450    | Tpm2         | 299   | 179   | -2.192975 | 0        | 0        |
| 309760    | Mypn         | 22    | 13    | -2.197446 | 1.62E-24 | 7.28E-23 |
| 316740    | Myom1        | 26    | 31    | -2.208999 | 1.17E-49 | 1.12E-47 |
| 305941    | Sgcg         | 4     | 3     | -2.238315 | 8.09E-08 | 9.57E-07 |
| 171409    | Tnnt1        | 8     | 7     | -2.245234 | 3.72E-13 | 8.29E-12 |
| 688862    | Ip6k3        | 6     | 1     | -2.245234 | 4.33E-06 | 3.82E-05 |
| 301518    | Prkag3       | 7     | 3     | -2.277415 | 5.64E-10 | 8.97E-09 |
| 25295     | Bglap        | 39.9  | 31.9  | -2.288006 | 1.28E-82 | 2.07E-80 |
| 308779    | Fsd2         | 0     | 3     | -2.290088 | 1.29E-07 | 1.48E-06 |
| 338458    | Obscn        | 39    | 32    | -2.29149  | 1.56E-78 | 2.37E-76 |
| 56824     | Ifit1        | 54.29 | 2.13  | -2.301455 | 1.54E-09 | 2.33E-08 |
| 365377    | Trim72       | 13    | 10    | -2.358763 | 1.56E-25 | 7.38E-24 |
| 301226    | Apobec2      | 16    | 7     | -2.41721  | 5.90E-28 | 3.12E-26 |
| 361002    | Duspl3       | 8     | 1.08  | -2.42704  | 4.43E-12 | 8.94E-11 |
| 307100    | Calml3       | 10    | 0     | -2.437879 | 1.40E-06 | 1.35E-05 |
| 246253    | Adipoq       | 39    | 2     | -2.456738 | 2.10E-34 | 1.40E-32 |
| 362708    | Trim54       | 3     | 6     | -2.478433 | 5.81E-20 | 2.06E-18 |
| 102552549 | LOC102552549 | 17.45 | 10.71 | -2.495636 | 3.69E-09 | 5.31E-08 |
| 100912471 | LOC100912471 | 36.5  | 4.8   | -2.546433 | 2.61E-08 | 3.30E-07 |
| 684988    | LOC684988    | 17.71 | 16.41 | -2.557709 | 1.21E-16 | 3.59E-15 |
| 108352829 | LOC108352829 | 9.01  | 9.01  | -2.582002 | 2.77E-09 | 4.03E-08 |
| 365751    | Trim55       | 2     | 0     | -2.582269 | 7.44E-05 | 5.09E-04 |
| 84396     | Atp1b4       | 1     | 4     | -2.582269 | 7.44E-05 | 5.09E-04 |
| 287122    | Rpl13l       | 13    | 13    | -2.632895 | 4.22E-27 | 2.16E-25 |
| 294053    | Ccnj         | 0.07  | 68    | -2.65655  | 8.23E-35 | 5.58E-33 |
| 688173    | Tcap         | 2     | 2     | -2.669732 | 4.08E-09 | 5.84E-08 |
| 29242     | Car4         | 82    | 11    | -2.671078 | 1.50E-21 | 5.77E-20 |
| 25312     | Dmp1         | 5     | 6     | -2.703021 | 2.93E-22 | 1.18E-20 |
| 292905    | Hrc          | 20.14 | 8.57  | -2.705051 | 7.96E-67 | 1.04E-64 |
| 117537    | Klhl14l      | 14    | 13    | -2.723489 | 8.99E-49 | 8.43E-47 |
| 25438     | Eno3         | 109   | 83    | -2.726235 | 0        | 0        |
| 103690175 | LOC103690175 | 0     | 0     | -2.751468 | 2.53E-31 | 1.51E-29 |
| 117505    | Csrp3        | 7     | 4     | -2.7726   | 2.27E-15 | 6.20E-14 |
| 27064     | Ankrd1       | 8     | 5     | -2.804662 | 7.51E-16 | 2.12E-14 |
| 498005    | Asb16        | 1     | 1     | -2.804662 | 7.75E-06 | 6.50E-05 |

|           |              |        |       |           |          |          |
|-----------|--------------|--------|-------|-----------|----------|----------|
| 24701     | Pygm         | 184.19 | 173.1 | -2.80484  | 0        | 0        |
| 500036    | Ppplr3a      | 5      | 4     | -2.842797 | 7.13E-20 | 2.51E-18 |
| 302666    | Asb11        | 2      | 2     | -2.855288 | 8.29E-11 | 1.44E-09 |
| 108352087 | LOC108352087 | 13     | 16    | -2.879251 | 4.65E-43 | 3.80E-41 |
| 684425    | Adssl1       | 19     | 12    | -2.946153 | 7.58E-79 | 1.16E-76 |
| 363331    | Plin4        | 12     | 2     | -2.997307 | 1.04E-25 | 4.99E-24 |
| 690468    | LOC690468    | 38.47  | 19.23 | -3.018652 | 8.39E-22 | 3.29E-20 |
| 500267    | Lmod3        | 4      | 2     | -3.08477  | 3.25E-16 | 9.32E-15 |
| 686019    | Casq1        | 68.01  | 48.01 | -3.131067 | #####    | #####    |
| 690423    | Jsrp1        | 5      | 3     | -3.131162 | 2.29E-15 | 6.24E-14 |
| 688915    | Cmya5        | 63     | 46    | -3.1322   | #####    | #####    |
| 362282    | Pck1         | 26     | 1     | -3.148631 | 4.49E-28 | 2.38E-26 |
| 298512    | Rhbd12       | 6      | 1     | -3.167232 | 1.43E-04 | 9.19E-04 |
| 503446    | Asb12        | 1      | 0     | -3.167232 | 1.43E-04 | 9.19E-04 |
| 291245    | Actn2        | 27.69  | 8.07  | -3.221448 | #####    | #####    |
| 290223    | Fitml        | 2      | 1     | -3.226125 | 5.04E-15 | 1.34E-13 |
| 108352449 | LOC108352449 | 20.42  | 4.66  | -3.243201 | 1.55E-08 | 2.04E-07 |
| 54232     | Car3         | 246    | 48    | -3.31451  | 0        | 0        |
| 58968     | Acan         | 7      | 10    | -3.363435 | 2.15E-87 | 3.68E-85 |
| 25250     | Cox8b        | 5      | 1     | -3.493732 | 1.01E-16 | 3.01E-15 |
| 100909899 | LOC100909899 | 10.81  | 0     | -3.496196 | 8.84E-06 | 7.35E-05 |
| 364558    | Palld        | 0      | 0     | -3.510558 | 1.45E-06 | 1.40E-05 |
| 84015     | Ttn          | 210    | 145   | -3.54739  | 0        | 0        |
| 114207    | Ryr1         | 30.94  | 24.01 | -3.56583  | #####    | #####    |
| 59299     | Trdn         | 40.88  | 35.69 | -3.567321 | #####    | #####    |
| 311098    | Xirp2        | 44     | 24    | -3.641163 | #####    | #####    |
| 313954    | Matn3        | 2      | 3     | -3.660272 | 1.13E-16 | 3.35E-15 |
| 682930    | Cacnals      | 11     | 8     | -3.716824 | #####    | #####    |
| 117558    | Mylk2        | 26     | 12    | -3.856794 | 1.04E-99 | 1.99E-97 |
| 103689985 | LOC103689985 | 4      | 1     | -3.904197 | 1.72E-26 | 8.56E-25 |
| 680810    | Lsmem1       | 4      | 1     | -3.904197 | 5.01E-14 | 1.23E-12 |
| 25714     | Myf6         | 0      | 1     | -3.951503 | 5.49E-08 | 6.63E-07 |
| 362018    | Syp12        | 5      | 4     | -4.141965 | 2.88E-62 | 3.58E-60 |
| 360730    | Ostn         | 0      | 0     | -4.167232 | 2.59E-05 | 1.96E-04 |
| 315833    | Klhl31       | 13.28  | 2.34  | -4.206563 | 7.19E-81 | 1.12E-78 |
| 362867    | Mybpc1       | 34     | 15    | -4.221054 | #####    | #####    |
| 497901    | Leap2        | 0      | 0     | -4.323514 | 6.58E-06 | 5.58E-05 |
| 362895    | Stac3        | 3      | 1     | -4.347804 | 4.20E-24 | 1.85E-22 |
| 310681    | Hjv          | 18.98  | 2.96  | -4.386973 | #####    | #####    |
| 307982    | Nrap         | 11     | 10    | -4.392264 | #####    | #####    |
| 292879    | Mybpc2       | 53.9   | 18.7  | -4.419299 | 0        | 0        |
| 689274    | Myoz3        | 6      | 2     | -4.456738 | 6.07E-36 | 4.26E-34 |
| 171009    | Actn3        | 74.99  | 33    | -4.498741 | 0        | 0        |
| 287411    | Dhrs7c       | 2      | 3     | -4.520869 | 1.98E-27 | 1.03E-25 |
| 316330    | Ankrd23      | 23     | 8     | -4.565781 | #####    | #####    |
| 308873    | Art1         | 1      | 0     | -4.598607 | 4.51E-18 | 1.47E-16 |
| 25278     | Cox6a2       | 19     | 3     | -4.638122 | #####    | #####    |
| 302948    | Sr1          | 12     | 3     | -4.728248 | #####    | #####    |
| 25028     | Ampd1        | 7      | 4     | -4.773411 | 1.81E-95 | 3.29E-93 |
| 309772    | Vgl12        | 1      | 1     | -4.830197 | 1.03E-14 | 2.66E-13 |
| 296935    | Lmod2        | 2      | 0     | -4.83525  | 1.58E-34 | 1.06E-32 |
| 102547059 | LOC102547059 | 0      | 4.44  | -4.983718 | 4.16E-05 | 3.01E-04 |
| 679565    | LOC679565    | 90.47  | 74.5  | -5.028477 | 2.16E-57 | 2.45E-55 |
| 498440    | Myoz1        | 22     | 7     | -5.065622 | #####    | #####    |
| 102550650 | LOC102550650 | 14.08  | 2.82  | -5.076258 | 2.22E-05 | 1.70E-04 |
| 365009    | Clec3a       | 0      | 0     | -5.08477  | 1.77E-09 | 2.64E-08 |

|           |              |       |        |           |          |          |
|-----------|--------------|-------|--------|-----------|----------|----------|
| 287167    | Hba-a1       | 0     | 35.97  | -5.099341 | 2.47E-78 | 3.73E-76 |
| 100362283 | Tmem52       | 2     | 0      | -5.187131 | 9.79E-19 | 3.31E-17 |
| 116601    | Atp2a1       | 152   | 51     | -5.230132 | 0        | 0        |
| 24584     | Mylpf        | 94    | 39     | -5.341647 | 0        | 0        |
| 287408    | Myh1         | 43.17 | 24.35  | -5.394886 | 0        | 0        |
| 102549712 | LOC102549712 | 0     | 21.68  | -5.4356   | 1.34E-06 | 1.30E-05 |
| 24265     | Ckm          | 173   | 77     | -5.50914  | 0        | 0        |
| 29389     | Tnni2        | 47    | 17     | -5.590089 | 0        | 0        |
| 103692976 | LOC103692976 | 0     | 17.6   | -5.624914 | 2.35E-07 | 2.59E-06 |
| 100362623 | Mt1m         | 13.33 | 0      | -5.635381 | 2.12E-07 | 2.35E-06 |
| 100911313 | LOC100911313 | 41.47 | 42.45  | -5.695721 | 2.67E-30 | 1.52E-28 |
| 100911166 | LOC100911166 | 0     | 26.11  | -5.703837 | 1.07E-07 | 1.25E-06 |
| 25708     | Ucp3         | 3     | 1      | -5.87995  | 1.38E-15 | 3.84E-14 |
| 296369    | Tnnc2        | 72    | 37     | -5.91177  | 0        | 0        |
| 304823    | Igfn1        | 19    | 5      | -5.91219  | 4.24E-87 | 7.21E-85 |
| 363925    | My12         | 1     | 5      | -5.951503 | 7.13E-09 | 9.79E-08 |
| 100361543 | LOC100361543 | 0     | 0      | -5.958004 | 6.60E-09 | 9.12E-08 |
| 56781     | My11         | 132   | 39     | -6.018353 | 0        | 0        |
| 29658     | Cacng1       | 2     | 0      | -6.167232 | 1.31E-18 | 4.38E-17 |
| 308622    | Txlnb        | 3     | 0      | -6.187131 | 4.77E-36 | 3.36E-34 |
| 100909700 | LOC100909700 | 0     | 22.37  | -6.201682 | 3.01E-10 | 4.93E-09 |
| 100359951 | LOC100359951 | 0     | 0      | -6.336444 | 4.48E-11 | 8.02E-10 |
| 103690173 | LOC103690173 | 0     | 44.57  | -6.475308 | 5.36E-12 | 1.07E-10 |
| 103694902 | LOC103694902 | 2.36  | 849.02 | -6.605322 | #####    | #####    |
| 108348161 | LOC108348161 | 63.54 | 0      | -6.9869   | 4.29E-16 | 1.22E-14 |
| 691644    | Myh2         | 25.09 | 2.39   | -7.020134 | 0        | 0        |
| 59108     | Mb           | 39    | 5      | -7.245234 | 0        | 0        |
| 100910177 | LOC100910177 | 44.76 | 63.82  | -8.043339 | 2.60E-29 | 1.43E-27 |
| 291605    | Myot         | 0     | 0      | -8.321037 | 3.07E-34 | 2.02E-32 |
| 100909761 | LOC100909761 | 4.16  | 2      | -8.814802 | 3.23E-88 | 5.59E-86 |

## Suppl. Table 6 The DEGs of GO analysis

| Suppl. Table 6 The DEGs of GO analysis       |              |      |             |                   |                  |                                      |                                        |                                        |
|----------------------------------------------|--------------|------|-------------|-------------------|------------------|--------------------------------------|----------------------------------------|----------------------------------------|
| Upregulated-BP                               |              |      |             |                   |                  |                                      |                                        |                                        |
| Gene ID                                      | Gene Symbol  | Type | GO_P Term   | GO_P Term Level1  | GO_P Term Level2 | log2 (CPIP_DEG_left / Sham_DEG_left) | Pvalue (CPIP_DEG_left / Sham_DEG_left) | Qvalue (CPIP_DEG_left / Sham_DEG_left) |
| <b>immune system process</b>                 |              |      |             |                   |                  |                                      |                                        |                                        |
| 100364500                                    | LOC100364500 | mRNA | GO:0002474/ | biological proces | immune syst      | 0.73546961                           | 7.20E-21                               | 2.68E-19                               |
| 192262                                       | C1s          | mRNA | GO:0045087/ | biological proces | development      | 0.89991984                           | 5.16E-243                              | 2.29E-240                              |
| 24233                                        | C4a          | mRNA | GO:0045087/ | biological proces | positive re      | 0.67338159                           | 2.11E-31                               | 1.27E-29                               |
| 24237                                        | C6           | mRNA | GO:0045087/ | biological proces | positive re      | 0.91627858                           | 5.20E-12                               | 1.04E-10                               |
| 287813                                       | Igsf7        | mRNA | GO:0002376/ | biological proces | positive re      | 1.16242207                           | 7.91E-09                               | 1.08E-07                               |
| 289337                                       | Tlr5         | mRNA | GO:0045429/ | biological proces | reproductic      | 1.38120495                           | 8.23E-18                               | 2.65E-16                               |
| 29252                                        | Gzmm         | mRNA | GO:0045087/ | biological proces | cellular pr      | 0.81286877                           | 8.96E-05                               | 6.01E-04                               |
| 295703                                       | Serping1     | mRNA | GO:0007568/ | biological proces | development      | 0.6078319                            | 2.86E-177                              | 9.25E-175                              |
| 298566                                       | C1qa         | mRNA | GO:0045087/ | biological proces | positive re      | 0.63221656                           | 2.22E-31                               | 1.33E-29                               |
| 316137                                       | Adgre1       | mRNA | GO:0007166/ | biological proces | cellular pr      | 0.85665919                           | 2.07E-36                               | 1.48E-34                               |
| 498022                                       | RGD1559482   | mRNA | GO:0002376/ | biological proces | positive re      | 0.71376755                           | 4.04E-05                               | 2.94E-04                               |
| 679975                                       | Gpr183       | mRNA | GO:0006959/ | biological proces | positive re      | 0.65680199                           | 4.22E-05                               | 3.05E-04                               |
| 684440                                       | Tlr8         | mRNA | GO:0045359/ | biological proces | multi-organ      | 0.81506633                           | 3.88E-09                               | 5.57E-08                               |
| 690955                                       | Lilrb3b      | mRNA | GO:0002376/ | biological proces | immune syst      | 0.89523635                           | 3.76E-10                               | 6.09E-09                               |
| <b>innate immune response</b>                |              |      |             |                   |                  |                                      |                                        |                                        |
| 100360801                                    | Ddx60        | mRNA | GO:0051607/ | biological proces | multi-organ      | 0.63795036                           | 3.62E-06                               | 3.25E-05                               |
| 192262                                       | C1s          | mRNA | GO:0045087/ | biological proces | development      | 0.89991984                           | 5.16E-243                              | 2.29E-240                              |
| 24233                                        | C4a          | mRNA | GO:0045087/ | biological proces | positive re      | 0.67338159                           | 2.11E-31                               | 1.27E-29                               |
| 24237                                        | C6           | mRNA | GO:0045087/ | biological proces | positive re      | 0.91627858                           | 5.20E-12                               | 1.04E-10                               |
| 289337                                       | Tlr5         | mRNA | GO:0045429/ | biological proces | reproductic      | 1.38120495                           | 8.23E-18                               | 2.65E-16                               |
| 29252                                        | Gzmm         | mRNA | GO:0045087/ | biological proces | cellular pr      | 0.81286877                           | 8.96E-05                               | 6.01E-04                               |
| 295703                                       | Serping1     | mRNA | GO:0007568/ | biological proces | development      | 0.6078319                            | 2.86E-177                              | 9.25E-175                              |
| 298566                                       | C1qa         | mRNA | GO:0045087/ | biological proces | positive re      | 0.63221656                           | 2.22E-31                               | 1.33E-29                               |
| 362431                                       | Clec4a3      | mRNA | GO:0001818/ | biological proces | cellular pr      | 0.70025514                           | 7.42E-08                               | 8.83E-07                               |
| 448830                                       | Ly96         | mRNA | GO:0045087/ | biological proces | immune syst      | 0.74566744                           | 1.41E-06                               | 1.36E-05                               |
| 66021                                        | Cybb         | mRNA | GO:1990776/ | biological proces | development      | 0.71702112                           | 3.62E-13                               | 8.09E-12                               |
| 679787                                       | Clec5a       | mRNA | GO:0045087/ | biological proces | multi-organ      | 0.79852771                           | 1.18E-07                               | 1.36E-06                               |
| 684440                                       | Tlr8         | mRNA | GO:0045359/ | biological proces | multi-organ      | 0.81506633                           | 3.88E-09                               | 5.57E-08                               |
| 685590                                       | LOC685590    | mRNA | GO:0030168/ | biological proces | positive re      | 0.86937379                           | 1.14E-06                               | 1.12E-05                               |
| 688583                                       | LOC688583    | mRNA | GO:0006351/ | biological proces | development      | 0.82531806                           | 3.22E-06                               | 2.92E-05                               |
| <b>eyelid development in camera-type eye</b> |              |      |             |                   |                  |                                      |                                        |                                        |
| 24329                                        | Egfr         | mRNA | GO:0042743/ | biological proces | reproductic      | 0.59664343                           | 4.74E-29                               | 2.59E-27                               |
| 29200                                        | Inhba        | mRNA | GO:0032270/ | biological proces | reproductic      | 0.6319736                            | 3.29E-06                               | 2.97E-05                               |
| 315039                                       | Osr2         | mRNA | GO:0030154/ | biological proces | positive re      | 0.72595401                           | 2.26E-11                               | 4.21E-10                               |
| 363071                                       | Stra6        | mRNA | GO:0048745/ | biological proces | reproductic      | 1.06421858                           | 2.18E-22                               | 8.89E-21                               |
| <b>cell adhesion</b>                         |              |      |             |                   |                  |                                      |                                        |                                        |
| 102553715                                    | LOC102553715 | mRNA | GO:0071493/ | biological proces | cellular pr      | 1.22132658                           | 3.61E-11                               | 6.56E-10                               |
| 114122                                       | Vcan         | mRNA | GO:0031103/ | biological proces | development      | 1.18678506                           | 3.60E-98                               | 6.72E-96                               |
| 116487                                       | Tgfbi        | mRNA | GO:0030198/ | biological proces | development      | 0.77682357                           | 9.72E-262                              | 4.63E-259                              |
| 25021                                        | Itgam        | mRNA | GO:0007155/ | biological proces | cellular pr      | 0.7435184                            | 9.03E-12                               | 1.77E-10                               |
| 25253                                        | Dpp4         | mRNA | GO:0002709/ | biological proces | positive re      | 1.03695071                           | 2.10E-45                               | 1.78E-43                               |
| 25661                                        | Fn1          | mRNA | GO:1904646/ | biological proces | multi-organ      | 1.16325353                           | 0                                      | 0                                      |
| 29220                                        | Thbs4        | mRNA | GO:0001938/ | biological proces | development      | 1.15146055                           | 0                                      | 0                                      |
| 292406                                       | Thbs2        | mRNA | GO:0016525/ | biological proces | positive re      | 0.70593479                           | 1.34E-75                               | 1.96E-73                               |
| 293154                                       | Folr2        | mRNA | GO:0007342/ | biological proces | reproductic      | 0.76213279                           | 3.02E-13                               | 6.83E-12                               |
| 311426                                       | Siglec1      | mRNA | GO:2001238/ | biological proces | positive re      | 0.62502781                           | 2.97E-10                               | 4.88E-09                               |
| 315979                                       | Col16a6      | mRNA | GO:0007155/ | biological proces | biological       | 0.64357261                           | 2.37E-38                               | 1.77E-36                               |
| 317181                                       | SrpX2        | mRNA | GO:0048870/ | biological proces | positive re      | 0.66469687                           | 4.37E-06                               | 3.86E-05                               |
| 445442                                       | Thbs1        | mRNA | GO:0032695/ | biological proces | development      | 0.64886049                           | 5.44E-30                               | 3.07E-28                               |
| 494206                                       | Ly49sil      | mRNA | GO:0007155/ | biological proces | biological       | 2.19806554                           | 6.54E-10                               | 1.03E-08                               |
| 494207                                       | Ly49si2      | mRNA | GO:0007155/ | biological proces | biological       | 1.9128388                            | 7.86E-05                               | 5.35E-04                               |
| 60333                                        | Msln         | mRNA | GO:0031016/ | biological proces | development      | 3.20023056                           | 1.58E-76                               | 2.33E-74                               |
| 89843                                        | Cxadr        | mRNA | GO:0086067/ | biological proces | reproductic      | 0.61447136                           | 3.07E-84                               | 5.04E-82                               |
| <b>response to lipopolysaccharide</b>        |              |      |             |                   |                  |                                      |                                        |                                        |
| 102547294                                    | Iqcn         | mRNA | GO:0009416/ | biological proces | multi-organ      | 1.03831724                           | 1.17E-04                               | 7.69E-04                               |
| 108351097                                    | LOC108351097 | mRNA | GO:0014067/ | biological proces | multi-organ      | 1.88529685                           | 0                                      | 0                                      |
| 117029                                       | Ccr5         | mRNA | GO:0060139/ | biological proces | multi-organ      | 0.7218052                            | 2.76E-11                               | 5.12E-10                               |
| 24188                                        | Aldh1a1      | mRNA | GO:0048048/ | biological proces | reproductic      | 0.6150086                            | 3.91E-56                               | 4.25E-54                               |
| 24617                                        | Serpine1     | mRNA | GO:0050729/ | biological proces | reproductic      | 0.90267636                           | 2.12E-23                               | 9.03E-22                               |
| 24653                                        | Pla2g4a      | mRNA | GO:0050729/ | biological proces | reproductic      | 0.74841927                           | 1.48E-06                               | 1.43E-05                               |

|                                                                  |              |      |             |                   |             |            |           |           |
|------------------------------------------------------------------|--------------|------|-------------|-------------------|-------------|------------|-----------|-----------|
| 29139                                                            | Dcn          | mRNA | GO:0007568/ | biological proces | reproductic | 0.76299562 | 0         | 0         |
| 294257                                                           | Cfb          | mRNA | GO:0006958/ | biological proces | multi-organ | 0.7346057  | 4.76E-12  | 9.55E-11  |
| 310738                                                           | Ngf          | mRNA | GO:0007568/ | biological proces | multi-organ | 1.2208735  | 2.30E-07  | 2.54E-06  |
| 394266                                                           | Gjb2         | mRNA | GO:0007267/ | biological proces | reproductic | 0.72191734 | 1.23E-20  | 4.52E-19  |
| 65129                                                            | Cldn1        | mRNA | GO:0007568/ | biological proces | multi-organ | 0.71661167 | 2.30E-94  | 4.06E-92  |
| 89829                                                            | Socs3        | mRNA | GO:0035556/ | biological proces | reproductic | 0.74776397 | 2.83E-23  | 1.20E-21  |
| <b>inflammatory response</b>                                     |              |      |             |                   |             |            |           |           |
| 10368965                                                         | LOC103689965 | mRNA | GO:0010951/ | biological proces | positive re | 0.62699505 | 3.03E-33  | 1.92E-31  |
| 114099                                                           | Cysltrl      | mRNA | GO:0006935/ | biological proces | positive re | 0.68223064 | 3.02E-05  | 2.26E-04  |
| 117029                                                           | Ccr5         | mRNA | GO:0060139/ | biological proces | multi-organ | 0.7218052  | 2.76E-11  | 5.12E-10  |
| 24233                                                            | C4a          | mRNA | GO:0045087/ | biological proces | positive re | 0.67338159 | 2.11E-31  | 1.27E-29  |
| 287561                                                           | Cc17         | mRNA | GO:0006935/ | biological proces | positive re | 1.01026655 | 9.09E-09  | 1.23E-07  |
| 310738                                                           | Ngf          | mRNA | GO:0007568/ | biological proces | multi-organ | 1.2208735  | 2.30E-07  | 2.54E-06  |
| 445442                                                           | Thbs1        | mRNA | GO:0032695/ | biological proces | development | 0.64886049 | 5.44E-30  | 3.07E-28  |
| 498335                                                           | Cxcl13       | mRNA | GO:0006935/ | biological proces | multi-organ | 1.38176533 | 1.03E-33  | 6.57E-32  |
| 66021                                                            | Cybb         | mRNA | GO:1990776/ | biological proces | development | 0.71702112 | 3.62E-13  | 8.09E-12  |
| 684440                                                           | Tlr8         | mRNA | GO:0045359/ | biological proces | multi-organ | 0.81506633 | 3.88E-09  | 5.57E-08  |
| 685590                                                           | LOC685590    | mRNA | GO:0030168/ | biological proces | positive re | 0.86937379 | 1.14E-06  | 1.12E-05  |
| 84007                                                            | C3ar1        | mRNA | GO:0006935/ | biological proces | development | 1.0358262  | 7.47E-15  | 1.95E-13  |
| <b>complement activation, classical pathway</b>                  |              |      |             |                   |             |            |           |           |
| 192262                                                           | C1s          | mRNA | GO:0045087/ | biological proces | development | 0.89991984 | 5.16E-243 | 2.29E-240 |
| 24231                                                            | C2           | mRNA | GO:0006958/ | biological proces | positive re | 0.78523717 | 2.50E-54  | 2.63E-52  |
| 24233                                                            | C4a          | mRNA | GO:0045087/ | biological proces | positive re | 0.67338159 | 2.11E-31  | 1.27E-29  |
| 24237                                                            | C6           | mRNA | GO:0045087/ | biological proces | positive re | 0.91627858 | 5.20E-12  | 1.04E-10  |
| 294257                                                           | Cfb          | mRNA | GO:0006958/ | biological proces | multi-organ | 0.7346057  | 4.76E-12  | 9.55E-11  |
| 295703                                                           | Serping1     | mRNA | GO:0007568/ | biological proces | development | 0.6078319  | 2.86E-177 | 9.25E-175 |
| 298566                                                           | Clqa         | mRNA | GO:0045087/ | biological proces | positive re | 0.63221656 | 2.22E-31  | 1.33E-29  |
| <b>negative regulation of extracellular matrix disassembly</b>   |              |      |             |                   |             |            |           |           |
| 192203                                                           | Fap          | mRNA | GO:0097325/ | biological proces | positive re | 0.93710499 | 4.31E-13  | 9.60E-12  |
| 25253                                                            | Dpp4         | mRNA | GO:0002709/ | biological proces | positive re | 1.03695071 | 2.10E-45  | 1.78E-43  |
| <b>negative regulation of smooth muscle cell-matrix adhesion</b> |              |      |             |                   |             |            |           |           |
| 24617                                                            | Serpine1     | mRNA | GO:0050729/ | biological proces | reproductic | 0.90267636 | 2.12E-23  | 9.03E-22  |
| 25239                                                            | Apod         | mRNA | GO:0007420/ | biological proces | development | 0.73633298 | 0         | 0         |
| <b>immune response</b>                                           |              |      |             |                   |             |            |           |           |
| 100364500                                                        | LOC100364500 | mRNA | GO:0002474/ | biological proces | immune syst | 0.73546961 | 7.20E-21  | 2.68E-19  |
| 103690020                                                        | LOC103690020 | mRNA | GO:0006955/ | biological proces | cellular pr | 0.94425771 | 1.53E-05  | 1.21E-04  |
| 103690108                                                        | LOC103690108 | mRNA | GO:0002474/ | biological proces | immune syst | 0.84804252 | 2.65E-144 | 7.43E-142 |
| 117029                                                           | Ccr5         | mRNA | GO:0060139/ | biological proces | multi-organ | 0.7218052  | 2.76E-11  | 5.12E-10  |
| 24237                                                            | C6           | mRNA | GO:0045087/ | biological proces | positive re | 0.91627858 | 5.20E-12  | 1.04E-10  |
| 25660                                                            | Cd28         | mRNA | GO:0045060/ | biological proces | development | 1.17574346 | 3.61E-06  | 3.24E-05  |
| 287561                                                           | Cc17         | mRNA | GO:0006935/ | biological proces | positive re | 1.01026655 | 9.09E-09  | 1.23E-07  |
| 306748                                                           | Cxcl14       | mRNA | GO:0006955/ | biological proces | positive re | 1.69757352 | 5.58E-67  | 7.33E-65  |
| 361289                                                           | Collec12     | mRNA | GO:0060355/ | biological proces | positive re | 0.63299882 | 3.54E-22  | 1.41E-20  |
| 445442                                                           | Thbs1        | mRNA | GO:0032695/ | biological proces | development | 0.64886049 | 5.44E-30  | 3.07E-28  |
| 494199                                                           | Oas1f        | mRNA | GO:0006955/ | biological proces | multi-organ | 0.80689482 | 7.59E-10  | 1.19E-08  |
| 498335                                                           | Cxcl13       | mRNA | GO:0006935/ | biological proces | multi-organ | 1.38176533 | 1.03E-33  | 6.57E-32  |
| 684440                                                           | Tlr8         | mRNA | GO:0045359/ | biological proces | multi-organ | 0.81506633 | 3.88E-09  | 5.57E-08  |



| <b>Upregulated-MF</b>                           |              |      |             |                  |                  |                                      |                                        |                                        |
|-------------------------------------------------|--------------|------|-------------|------------------|------------------|--------------------------------------|----------------------------------------|----------------------------------------|
| Gene ID                                         | Gene Symbol  | Type | GO_F Term   | GO_F Term Level1 | GO_F Term Level2 | log2 (CPIP_DEG_left / Sham_DEG_left) | Pvalue (CPIP_DEG_left / Sham_DEG_left) | Qvalue (CPIP_DEG_left / Sham_DEG_left) |
| <b>low-density lipoprotein particle binding</b> |              |      |             |                  |                  |                                      |                                        |                                        |
| 114122                                          | Vcan         | mRNA | GO:0005540/ | molecular_f      | binding          | 1.18678506                           | 3.60E-98                               | 6.72E-96                               |
| 361289                                          | Colecl2      | mRNA | GO:0030246/ | molecular_f      | binding+++n      | 0.63299882                           | 3.54E-22                               | 1.41E-20                               |
| 445442                                          | Thbs1        | mRNA | GO:0017134/ | molecular_f      | binding          | 0.64886049                           | 5.44E-30                               | 3.07E-28                               |
| 498638                                          | Msr1         | mRNA | GO:0001540/ | molecular_f      | cargo recep      | 0.71827216                           | 1.77E-13                               | 4.09E-12                               |
| <b>carbohydrate binding</b>                     |              |      |             |                  |                  |                                      |                                        |                                        |
| 114122                                          | Vcan         | mRNA | GO:0005540/ | molecular_f      | binding          | 1.18678506                           | 3.60E-98                               | 6.72E-96                               |
| 29403                                           | Asgr2        | mRNA | GO:0030246/ | molecular_f      | binding          | 0.90176442                           | 3.31E-10                               | 5.41E-09                               |
| 304954                                          | Uap112       | mRNA | GO:0030246/ | molecular_f      | binding+++c      | 2.46346491                           | 2.34E-10                               | 3.93E-09                               |
| 311426                                          | Siglec1      | mRNA | GO:0030246/ | molecular_f      | binding          | 0.62502781                           | 2.97E-10                               | 4.88E-09                               |
| 361289                                          | Colecl2      | mRNA | GO:0030246/ | molecular_f      | binding+++n      | 0.63299882                           | 3.54E-22                               | 1.41E-20                               |
| 362430                                          | Clec4a1      | mRNA | GO:0030246/ | molecular_f      | binding          | 0.69961749                           | 3.51E-10                               | 5.71E-09                               |
| 362431                                          | Clec4a3      | mRNA | GO:0030246/ | molecular_f      | binding          | 0.70025514                           | 7.42E-08                               | 8.83E-07                               |
| 494206                                          | Ly49si1      | mRNA | GO:0030246/ | molecular_f      | binding          | 2.19806554                           | 6.54E-10                               | 1.03E-08                               |
| 494207                                          | Ly49si2      | mRNA | GO:0030246/ | molecular_f      | binding          | 1.9128388                            | 7.86E-05                               | 5.35E-04                               |
| 500338                                          | Klrc3        | mRNA | GO:0030246/ | molecular_f      | binding          | 3.21448431                           | 1.01E-04                               | 6.72E-04                               |
| 679787                                          | Clec5a       | mRNA | GO:0030246/ | molecular_f      | binding+++h      | 0.79852771                           | 1.18E-07                               | 1.36E-06                               |
| 689790                                          | Clec2d11     | mRNA | GO:0030246/ | molecular_f      | binding          | 1.79524072                           | 6.41E-06                               | 5.46E-05                               |
| <b>heparin binding</b>                          |              |      |             |                  |                  |                                      |                                        |                                        |
| 100910978                                       | LOC100910978 | mRNA | GO:0070052/ | molecular_f      | binding          | 0.61219334                           | 3.35E-13                               | 7.52E-12                               |
| 25661                                           | Fn1          | mRNA | GO:0008022/ | molecular_f      | binding+++s      | 1.16325353                           | 0                                      | 0                                      |
| 287561                                          | Cc17         | mRNA | GO:0031726/ | molecular_f      | binding+++n      | 1.01026655                           | 9.09E-09                               | 1.23E-07                               |
| 29220                                           | Thbs4        | mRNA | GO:0043237/ | molecular_f      | binding+++n      | 1.15146055                           | 0                                      | 0                                      |
| 292401                                          | Smoc2        | mRNA | GO:0008201/ | molecular_f      | binding          | 0.88327816                           | 5.46E-73                               | 7.64E-71                               |
| 298579                                          | Pla2g2d      | mRNA | GO:0004623/ | molecular_f      | binding+++c      | 0.86289069                           | 7.69E-10                               | 1.21E-08                               |
| 445442                                          | Thbs1        | mRNA | GO:0017134/ | molecular_f      | binding          | 0.64886049                           | 5.44E-30                               | 3.07E-28                               |
| 85272                                           | Bmp7         | mRNA | GO:0005160/ | molecular_f      | binding+++n      | 0.66895593                           | 4.01E-11                               | 7.23E-10                               |
| <b>integrin binding</b>                         |              |      |             |                  |                  |                                      |                                        |                                        |
| 116487                                          | Tgfbi        | mRNA | GO:0003674/ | molecular_f      | binding+++n      | 0.77682357                           | 9.72E-262                              | 4.63E-259                              |
| 192203                                          | Fap          | mRNA | GO:0004175/ | molecular_f      | binding+++c      | 0.93710499                           | 4.31E-13                               | 9.60E-12                               |
| 24329                                           | Egfr         | mRNA | GO:0030235/ | molecular_f      | binding+++c      | 0.59664343                           | 4.74E-29                               | 2.59E-27                               |
| 25661                                           | Fn1          | mRNA | GO:0008022/ | molecular_f      | binding+++s      | 1.16325353                           | 0                                      | 0                                      |
| 29220                                           | Thbs4        | mRNA | GO:0043237/ | molecular_f      | binding+++n      | 1.15146055                           | 0                                      | 0                                      |
| 445442                                          | Thbs1        | mRNA | GO:0017134/ | molecular_f      | binding          | 0.64886049                           | 5.44E-30                               | 3.07E-28                               |
| 89843                                           | Cxadr        | mRNA | GO:0008013/ | molecular_f      | binding          | 0.61447136                           | 3.07E-84                               | 5.04E-82                               |
| <b>serine-type peptidase activity</b>           |              |      |             |                  |                  |                                      |                                        |                                        |
| 100360872                                       | Mcpt111      | mRNA | GO:0008233/ | molecular_f      | catalytic a      | 1.35784892                           | 1.39E-50                               | 1.37E-48                               |
| 192203                                          | Fap          | mRNA | GO:0004175/ | molecular_f      | binding+++c      | 0.93710499                           | 4.31E-13                               | 9.60E-12                               |
| 192262                                          | C1s          | mRNA | GO:0008233/ | molecular_f      | binding+++c      | 0.89991984                           | 5.16E-243                              | 2.29E-240                              |
| 24231                                           | C2           | mRNA | GO:0008233/ | molecular_f      | binding+++c      | 0.78523717                           | 2.50E-54                               | 2.63E-52                               |
| 25253                                           | Dpp4         | mRNA | GO:0002020/ | molecular_f      | binding+++c      | 1.03695071                           | 2.10E-45                               | 1.78E-43                               |
| 25627                                           | Cma1         | mRNA | GO:0008233/ | molecular_f      | binding+++c      | 1.08192002                           | 4.80E-07                               | 5.02E-06                               |
| 29252                                           | Gzmm         | mRNA | GO:0004175/ | molecular_f      | catalytic a      | 0.81286877                           | 8.96E-05                               | 6.01E-04                               |
| 294257                                          | Cfb          | mRNA | GO:0004930/ | molecular_f      | catalytic a      | 0.7346057                            | 4.76E-12                               | 9.55E-11                               |
| <b>collagen binding</b>                         |              |      |             |                  |                  |                                      |                                        |                                        |
| 116487                                          | Tgfbi        | mRNA | GO:0003674/ | molecular_f      | binding+++n      | 0.77682357                           | 9.72E-262                              | 4.63E-259                              |
| 25253                                           | Dpp4         | mRNA | GO:0002020/ | molecular_f      | binding+++c      | 1.03695071                           | 2.10E-45                               | 1.78E-43                               |
| 29139                                           | Dcn          | mRNA | GO:0047485/ | molecular_f      | binding          | 0.76299562                           | 0                                      | 0                                      |
| 29220                                           | Thbs4        | mRNA | GO:0043237/ | molecular_f      | binding+++n      | 1.15146055                           | 0                                      | 0                                      |
| 81682                                           | Lum          | mRNA | GO:0003674/ | molecular_f      | binding+++n      | 0.6762143                            | 2.00E-271                              | 1.03E-268                              |
| <b>peptidase activity</b>                       |              |      |             |                  |                  |                                      |                                        |                                        |
| 100360872                                       | Mcpt111      | mRNA | GO:0008233/ | molecular_f      | catalytic a      | 1.35784892                           | 1.39E-50                               | 1.37E-48                               |
| 192203                                          | Fap          | mRNA | GO:0004175/ | molecular_f      | binding+++c      | 0.93710499                           | 4.31E-13                               | 9.60E-12                               |





| Upregulated-CC              |              |      |           |                  |                  |                                       |                                        |                                         |
|-----------------------------|--------------|------|-----------|------------------|------------------|---------------------------------------|----------------------------------------|-----------------------------------------|
| Gene ID                     | Gene Symbol  | Type | GO_C Term | GO_C Term Level1 | GO_C Term Level2 | log2 (CPIP_DE G_left / Sham_DEG left) | Pvalue (CPIP_DEG_left / Sham_DEG_left) | Qvalue (CPIP_DE G_left / Sham_DEG_left) |
| <b>extracellular region</b> |              |      |           |                  |                  |                                       |                                        |                                         |
| 1E+08                       | Mcpt111      | mRNA | GO:000561 | cellular compo   | extracell        | 1.357849                              | 1.39E-50                               | 1.37E-48                                |
| 1.03E+08                    | LOC102553715 | mRNA | GO:000152 | cellular compo   | extracell        | 1.221327                              | 3.61E-11                               | 6.56E-10                                |
| 1.04E+08                    | LOC103689965 | mRNA | GO:000561 | cellular compo   | extracell        | 0.626995                              | 3.03E-33                               | 1.92E-31                                |
| 114122                      | Vcan         | mRNA | GO:006202 | cellular compo   | extracell        | 1.186785                              | 3.60E-98                               | 6.72E-96                                |
| 114523                      | Ntn1         | mRNA | GO:000557 | cellular compo   | extracell        | 0.65477                               | 2.84E-14                               | 7.16E-13                                |
| 192262                      | C1s          | mRNA | GO:000561 | cellular compo   | extracell        | 0.89992                               | #####                                  | #####                                   |
| 24231                       | C2           | mRNA | GO:000557 | cellular compo   | extracell        | 0.785237                              | 2.50E-54                               | 2.63E-52                                |
| 24233                       | C4a          | mRNA | GO:003042 | cellular compo   | extracell        | 0.673382                              | 2.11E-31                               | 1.27E-29                                |
| 24237                       | C6           | mRNA | GO:000561 | cellular compo   | extracell        | 0.916279                              | 5.20E-12                               | 1.04E-10                                |
| 24536                       | Lepr         | mRNA | GO:001602 | cellular compo   | extracell        | 0.704721                              | 1.78E-32                               | 1.10E-30                                |
| 24617                       | Serpine1     | mRNA | GO:004258 | cellular compo   | extracell        | 0.902676                              | 2.12E-23                               | 9.03E-22                                |
| 24695                       | Pthlh        | mRNA | GO:000557 | cellular compo   | organelle        | 1.218422                              | 4.05E-05                               | 2.94E-04                                |
| 24856                       | Ttr          | mRNA | GO:000561 | cellular compo   | extracell        | 3.78929                               | 1.20E-15                               | 3.36E-14                                |
| 25239                       | Apod         | mRNA | GO:000578 | cellular compo   | extracell        | 0.736333                              | 0                                      | 0                                       |
| 25253                       | Dpp4         | mRNA | GO:001602 | cellular compo   | organelle        | 1.036951                              | 2.10E-45                               | 1.78E-43                                |
| 25453                       | Gdnf         | mRNA | GO:000561 | cellular compo   | extracell        | 2.225086                              | 8.63E-05                               | 5.81E-04                                |
| 25627                       | Cma1         | mRNA | GO:000561 | cellular compo   | extracell        | 1.08192                               | 4.80E-07                               | 5.02E-06                                |
| 25661                       | Fn1          | mRNA | GO:007006 | cellular compo   | extracell        | 1.163254                              | 0                                      | 0                                       |
| 287561                      | Ccl17        | mRNA | GO:000561 | cellular compo   | extracell        | 1.010267                              | 9.09E-09                               | 1.23E-07                                |
| 29139                       | Dcn          | mRNA | GO:000558 | cellular compo   | extracell        | 0.762996                              | 0                                      | 0                                       |
| 29200                       | Inhba        | mRNA | GO:000561 | cellular compo   | extracell        | 0.631974                              | 3.29E-06                               | 2.97E-05                                |
| 29220                       | Thbs4        | mRNA | GO:000578 | cellular compo   | extracell        | 1.151461                              | 0                                      | 0                                       |
| 292406                      | Thbs2        | mRNA | GO:003109 | cellular compo   | extracell        | 0.705935                              | 1.34E-75                               | 1.96E-73                                |
| 29252                       | Gzmm         | mRNA | GO:000557 | cellular compo   | extracell        | 0.812869                              | 8.96E-05                               | 6.01E-04                                |
| 292793                      | Sbsn         | mRNA | GO:000557 | cellular compo   | cell part        | 1.151557                              | 3.79E-23                               | 1.60E-21                                |
| 294257                      | Cfb          | mRNA | GO:001602 | cellular compo   | extracell        | 0.734606                              | 4.76E-12                               | 9.55E-11                                |
| 295703                      | Serping1     | mRNA | GO:000561 | cellular compo   | extracell        | 0.607832                              | #####                                  | #####                                   |
| 298566                      | Clqa         | mRNA | GO:000557 | cellular compo   | protein-c        | 0.632217                              | 2.22E-31                               | 1.33E-29                                |
| 298579                      | Pla2g2d      | mRNA | GO:000557 | cellular compo   | extracell        | 0.862891                              | 7.69E-10                               | 1.21E-08                                |
| 299737                      | Ntn4         | mRNA | GO:000557 | cellular compo   | extracell        | 0.665104                              | 1.03E-25                               | 4.95E-24                                |
| 304021                      | Col8a1       | mRNA | GO:000561 | cellular compo   | extracell        | 0.686845                              | 6.32E-25                               | 2.92E-23                                |
| 306748                      | Cxcl14       | mRNA | GO:000557 | cellular compo   | organelle        | 1.697574                              | 5.58E-67                               | 7.33E-65                                |
| 308099                      | Fndc1        | mRNA | GO:001660 | cellular compo   | organelle        | 1.089188                              | 5.11E-97                               | 9.36E-95                                |
| 309209                      | Vwce         | mRNA | GO:000557 | cellular compo   | cell part        | 1.479498                              | 3.28E-05                               | 2.44E-04                                |
| 310738                      | Ngf          | mRNA | GO:003042 | cellular compo   | synapse p        | 1.220873                              | 2.30E-07                               | 2.54E-06                                |
| 315979                      | Col6a6       | mRNA | GO:000557 | cellular compo   | extracell        | 0.643573                              | 2.37E-38                               | 1.77E-36                                |
| 316638                      | Sned1        | mRNA | GO:000557 | cellular compo   | extracell        | 0.69138                               | 6.75E-98                               | 1.25E-95                                |
| 317181                      | Srpx2        | mRNA | GO:003005 | cellular compo   | synapse p        | 0.664697                              | 4.37E-06                               | 3.86E-05                                |
| 361821                      | Col6a2       | mRNA | GO:004238 | cellular compo   | extracell        | 0.633438                              | #####                                  | #####                                   |
| 365395                      | Clcf1        | mRNA | GO:009705 | cellular compo   | extracell        | 0.949254                              | 4.79E-05                               | 3.43E-04                                |
| 366270                      | Edn3         | mRNA | GO:000557 | cellular compo   | extracell        | 0.878958                              | 1.83E-05                               | 1.43E-04                                |
| 445442                      | Thbs1        | mRNA | GO:003109 | cellular compo   | extracell        | 0.64886                               | 5.44E-30                               | 3.07E-28                                |
| 498335                      | Cxcl13       | mRNA | GO:000561 | cellular compo   | extracell        | 1.381765                              | 1.03E-33                               | 6.57E-32                                |
| 60327                       | F13a1        | mRNA | GO:000557 | cellular compo   | cell part        | 0.808412                              | 1.48E-24                               | 6.71E-23                                |
| 60333                       | Msln         | mRNA | GO:001602 | cellular compo   | extracell        | 3.200231                              | 1.58E-76                               | 2.33E-74                                |
| 689008                      | Fbn2         | mRNA | GO:006202 | cellular compo   | extracell        | 0.845692                              | 1.47E-14                               | 3.78E-13                                |
| 81523                       | Myoc         | mRNA | GO:000578 | cellular compo   | extracell        | 0.629576                              | 0                                      | 0                                       |
| 81682                       | Lum          | mRNA | GO:006202 | cellular compo   | extracell        | 0.676214                              | #####                                  | #####                                   |
| 81828                       | Zp2          | mRNA | GO:001602 | cellular compo   | extracell        | 4.462125                              | 2.17E-06                               | 2.03E-05                                |

|                                                 |              |      |           |                |           |          |          |          |
|-------------------------------------------------|--------------|------|-----------|----------------|-----------|----------|----------|----------|
| 85272                                           | Bmp7         | mRNA | GO:006202 | cellular compo | extracell | 0.668956 | 4.01E-11 | 7.23E-10 |
| <b>extracellular matrix</b>                     |              |      |           |                |           |          |          |          |
| 1.01E+08                                        | LOC100910978 | mRNA | GO:003101 | cellular compo | extracell | 0.612193 | 3.35E-13 | 7.52E-12 |
| 1.03E+08                                        | LOC102553715 | mRNA | GO:000152 | cellular compo | extracell | 1.221327 | 3.61E-11 | 6.56E-10 |
| 114122                                          | Vcan         | mRNA | GO:006202 | cellular compo | extracell | 1.186785 | 3.60E-98 | 6.72E-96 |
| 114523                                          | Ntn1         | mRNA | GO:000557 | cellular compo | extracell | 0.65477  | 2.84E-14 | 7.16E-13 |
| 116487                                          | Tgfbi        | mRNA | GO:000580 | cellular compo | extracell | 0.776824 | #####    | #####    |
| 25661                                           | Fn1          | mRNA | GO:007006 | cellular compo | extracell | 1.163254 | 0        | 0        |
| 29139                                           | Dcn          | mRNA | GO:000558 | cellular compo | extracell | 0.762996 | 0        | 0        |
| 29220                                           | Thbs4        | mRNA | GO:000578 | cellular compo | extracell | 1.151461 | 0        | 0        |
| 292401                                          | Smoc2        | mRNA | GO:006202 | cellular compo | extracell | 0.883278 | 5.46E-73 | 7.64E-71 |
| 292406                                          | Thbs2        | mRNA | GO:003109 | cellular compo | extracell | 0.705935 | 1.34E-75 | 1.96E-73 |
| 301012                                          | Col7a1       | mRNA | GO:000557 | cellular compo | extracell | 1.279534 | 4.83E-12 | 9.67E-11 |
| 303384                                          | Mmp28        | mRNA | GO:003101 | cellular compo | extracell | 0.805381 | 6.20E-07 | 6.37E-06 |
| 304021                                          | Col8a1       | mRNA | GO:000561 | cellular compo | extracell | 0.686845 | 6.32E-25 | 2.92E-23 |
| 313831                                          | Vit          | mRNA | GO:006202 | cellular compo | extracell | 0.746679 | 2.54E-34 | 1.68E-32 |
| 315979                                          | Col6a6       | mRNA | GO:000557 | cellular compo | extracell | 0.643573 | 2.37E-38 | 1.77E-36 |
| 361821                                          | Col6a2       | mRNA | GO:004238 | cellular compo | extracell | 0.633438 | #####    | #####    |
| 445442                                          | Thbs1        | mRNA | GO:003109 | cellular compo | extracell | 0.64886  | 5.44E-30 | 3.07E-28 |
| 689008                                          | Fbn2         | mRNA | GO:006202 | cellular compo | extracell | 0.845692 | 1.47E-14 | 3.78E-13 |
| 81682                                           | Lum          | mRNA | GO:006202 | cellular compo | extracell | 0.676214 | #####    | #####    |
| <b>collagen-containing extracellular matrix</b> |              |      |           |                |           |          |          |          |
| 114122                                          | Vcan         | mRNA | GO:006202 | cellular compo | extracell | 1.186785 | 3.60E-98 | 6.72E-96 |
| 24617                                           | Serpine1     | mRNA | GO:004258 | cellular compo | extracell | 0.902676 | 2.12E-23 | 9.03E-22 |
| 25236                                           | Gpc3         | mRNA | GO:000557 | cellular compo | extracell | 0.767987 | #####    | #####    |
| 25661                                           | Fn1          | mRNA | GO:007006 | cellular compo | extracell | 1.163254 | 0        | 0        |
| 29220                                           | Thbs4        | mRNA | GO:000578 | cellular compo | extracell | 1.151461 | 0        | 0        |
| 292401                                          | Smoc2        | mRNA | GO:006202 | cellular compo | extracell | 0.883278 | 5.46E-73 | 7.64E-71 |
| 313831                                          | Vit          | mRNA | GO:006202 | cellular compo | extracell | 0.746679 | 2.54E-34 | 1.68E-32 |
| 689008                                          | Fbn2         | mRNA | GO:006202 | cellular compo | extracell | 0.845692 | 1.47E-14 | 3.78E-13 |
| 81523                                           | Myoc         | mRNA | GO:000578 | cellular compo | extracell | 0.629576 | 0        | 0        |
| 81682                                           | Lum          | mRNA | GO:006202 | cellular compo | extracell | 0.676214 | #####    | #####    |
| 81828                                           | Zp2          | mRNA | GO:001602 | cellular compo | extracell | 4.462125 | 2.17E-06 | 2.03E-05 |
| 85272                                           | Bmp7         | mRNA | GO:006202 | cellular compo | extracell | 0.668956 | 4.01E-11 | 7.23E-10 |
| <b>extracellular space</b>                      |              |      |           |                |           |          |          |          |
| 1E+08                                           | Mcpt111      | mRNA | GO:000561 | cellular compo | extracell | 1.357849 | 1.39E-50 | 1.37E-48 |
| 1.03E+08                                        | LOC102553715 | mRNA | GO:000152 | cellular compo | extracell | 1.221327 | 3.61E-11 | 6.56E-10 |
| 1.04E+08                                        | LOC103689965 | mRNA | GO:000561 | cellular compo | extracell | 0.626995 | 3.03E-33 | 1.92E-31 |
| 116487                                          | Tgfbi        | mRNA | GO:000580 | cellular compo | extracell | 0.776824 | #####    | #####    |
| 192203                                          | Fap          | mRNA | GO:000561 | cellular compo | extracell | 0.937105 | 4.31E-13 | 9.60E-12 |
| 192262                                          | C1s          | mRNA | GO:000561 | cellular compo | extracell | 0.89992  | #####    | #####    |
| 24233                                           | C4a          | mRNA | GO:003042 | cellular compo | extracell | 0.673382 | 2.11E-31 | 1.27E-29 |
| 24237                                           | C6           | mRNA | GO:000561 | cellular compo | extracell | 0.916279 | 5.20E-12 | 1.04E-10 |
| 24536                                           | Lepr         | mRNA | GO:001602 | cellular compo | extracell | 0.704721 | 1.78E-32 | 1.10E-30 |
| 24617                                           | Serpine1     | mRNA | GO:004258 | cellular compo | extracell | 0.902676 | 2.12E-23 | 9.03E-22 |
| 24856                                           | Ttr          | mRNA | GO:000561 | cellular compo | extracell | 3.78929  | 1.20E-15 | 3.36E-14 |
| 25239                                           | Apod         | mRNA | GO:000578 | cellular compo | extracell | 0.736333 | 0        | 0        |
| 25453                                           | Gdnf         | mRNA | GO:000561 | cellular compo | extracell | 2.225086 | 8.63E-05 | 5.81E-04 |
| 25627                                           | Cma1         | mRNA | GO:000561 | cellular compo | extracell | 1.08192  | 4.80E-07 | 5.02E-06 |
| 25661                                           | Fn1          | mRNA | GO:007006 | cellular compo | extracell | 1.163254 | 0        | 0        |
| 287561                                          | Cc17         | mRNA | GO:000561 | cellular compo | extracell | 1.010267 | 9.09E-09 | 1.23E-07 |
| 29200                                           | Inhba        | mRNA | GO:000561 | cellular compo | extracell | 0.631974 | 3.29E-06 | 2.97E-05 |
| 29220                                           | Thbs4        | mRNA | GO:000578 | cellular compo | extracell | 1.151461 | 0        | 0        |
| 292401                                          | Smoc2        | mRNA | GO:006202 | cellular compo | extracell | 0.883278 | 5.46E-73 | 7.64E-71 |
| 292406                                          | Thbs2        | mRNA | GO:003109 | cellular compo | extracell | 0.705935 | 1.34E-75 | 1.96E-73 |
| 294257                                          | Cfb          | mRNA | GO:001602 | cellular compo | extracell | 0.734606 | 4.76E-12 | 9.55E-11 |

|                                         |              |      |           |                |           |          |          |          |
|-----------------------------------------|--------------|------|-----------|----------------|-----------|----------|----------|----------|
| 295703                                  | Serping1     | mRNA | GO:000561 | cellular compo | extracell | 0.607832 | #####    | #####    |
| 296952                                  | Kcp          | mRNA | GO:000561 | cellular compo | extracell | 0.648423 | 1.36E-06 | 1.32E-05 |
| 301012                                  | Col7a1       | mRNA | GO:000557 | cellular compo | extracell | 1.279534 | 4.83E-12 | 9.67E-11 |
| 304021                                  | Col8a1       | mRNA | GO:000561 | cellular compo | extracell | 0.686845 | 6.32E-25 | 2.92E-23 |
| 310738                                  | Ngf          | mRNA | GO:003042 | cellular compo | synapse p | 1.220873 | 2.30E-07 | 2.54E-06 |
| 311252                                  | Pamr1        | mRNA | GO:000561 | cellular compo | extracell | 0.593997 | 6.30E-12 | 1.25E-10 |
| 313831                                  | Vit          | mRNA | GO:006202 | cellular compo | extracell | 0.746679 | 2.54E-34 | 1.68E-32 |
| 317181                                  | Srpx2        | mRNA | GO:003005 | cellular compo | synapse p | 0.664697 | 4.37E-06 | 3.86E-05 |
| 361821                                  | Col6a2       | mRNA | GO:004238 | cellular compo | extracell | 0.633438 | #####    | #####    |
| 445442                                  | Thbs1        | mRNA | GO:003109 | cellular compo | extracell | 0.64886  | 5.44E-30 | 3.07E-28 |
| 448830                                  | Ly96         | mRNA | GO:000561 | cellular compo | extracell | 0.745667 | 1.41E-06 | 1.36E-05 |
| 498335                                  | Cxcl13       | mRNA | GO:000561 | cellular compo | extracell | 1.381765 | 1.03E-33 | 6.57E-32 |
| 54242                                   | Cpa3         | mRNA | GO:003013 | cellular compo | extracell | 1.899934 | 5.77E-31 | 3.38E-29 |
| 60333                                   | Msln         | mRNA | GO:001602 | cellular compo | extracell | 3.200231 | 1.58E-76 | 2.33E-74 |
| 679149                                  | LOC679149    | mRNA | GO:000561 | cellular compo | extracell | 3.510488 | 7.87E-06 | 6.59E-05 |
| 81523                                   | Myoc         | mRNA | GO:000578 | cellular compo | extracell | 0.629576 | 0        | 0        |
| 85272                                   | Bmp7         | mRNA | GO:006202 | cellular compo | extracell | 0.668956 | 4.01E-11 | 7.23E-10 |
| <b>basement membrane</b>                |              |      |           |                |           |          |          |          |
| 114523                                  | Ntn1         | mRNA | GO:000557 | cellular compo | extracell | 0.65477  | 2.84E-14 | 7.16E-13 |
| 116487                                  | Tgfbi        | mRNA | GO:000580 | cellular compo | extracell | 0.776824 | #####    | #####    |
| 25661                                   | Fn1          | mRNA | GO:007006 | cellular compo | extracell | 1.163254 | 0        | 0        |
| 29220                                   | Thbs4        | mRNA | GO:000578 | cellular compo | extracell | 1.151461 | 0        | 0        |
| 292401                                  | Smoc2        | mRNA | GO:006202 | cellular compo | extracell | 0.883278 | 5.46E-73 | 7.64E-71 |
| 292406                                  | Thbs2        | mRNA | GO:003109 | cellular compo | extracell | 0.705935 | 1.34E-75 | 1.96E-73 |
| 299737                                  | Ntn4         | mRNA | GO:000557 | cellular compo | extracell | 0.665104 | 1.03E-25 | 4.95E-24 |
| <b>external side of plasma membrane</b> |              |      |           |                |           |          |          |          |
| 117029                                  | Ccr5         | mRNA | GO:001602 | cellular compo | organelle | 0.721805 | 2.76E-11 | 5.12E-10 |
| 24536                                   | Lepr         | mRNA | GO:001602 | cellular compo | extracell | 0.704721 | 1.78E-32 | 1.10E-30 |
| 25293                                   | Aqp4         | mRNA | GO:004238 | cellular compo | protein-c | 0.841721 | 7.55E-10 | 1.19E-08 |
| 25660                                   | Cd28         | mRNA | GO:009863 | cellular compo | protein-c | 1.175743 | 3.61E-06 | 3.24E-05 |
| 304966                                  | Fcgr3a       | mRNA | GO:001602 | cellular compo | cell part | 0.815066 | 3.12E-05 | 2.33E-04 |
| 312701                                  | Cd163        | mRNA | GO:001602 | cellular compo | cell part | 0.667795 | 7.70E-20 | 2.70E-18 |
| 316137                                  | Adgre1       | mRNA | GO:001602 | cellular compo | cell part | 0.856659 | 2.07E-36 | 1.48E-34 |
| 445442                                  | Thbs1        | mRNA | GO:003109 | cellular compo | extracell | 0.64886  | 5.44E-30 | 3.07E-28 |
| 494207                                  | Ly49si2      | mRNA | GO:000989 | cellular compo | cell part | 1.912839 | 7.86E-05 | 5.35E-04 |
| 499271                                  | Itgax        | mRNA | GO:000998 | cellular compo | protein-c | 0.71493  | 4.07E-06 | 3.61E-05 |
| 684440                                  | Tlr8         | mRNA | GO:001602 | cellular compo | cell part | 0.815066 | 3.88E-09 | 5.57E-08 |
| <b>collagen trimer</b>                  |              |      |           |                |           |          |          |          |
| 298566                                  | Clqa         | mRNA | GO:000557 | cellular compo | protein-c | 0.632217 | 2.22E-31 | 1.33E-29 |
| 301012                                  | Col7a1       | mRNA | GO:000557 | cellular compo | extracell | 1.279534 | 4.83E-12 | 9.67E-11 |
| 304021                                  | Col8a1       | mRNA | GO:000561 | cellular compo | extracell | 0.686845 | 6.32E-25 | 2.92E-23 |
| 361289                                  | Colec12      | mRNA | GO:001602 | cellular compo | protein-c | 0.632999 | 3.54E-22 | 1.41E-20 |
| 361821                                  | Col6a2       | mRNA | GO:004238 | cellular compo | extracell | 0.633438 | #####    | #####    |
| <b>invadopodium membrane</b>            |              |      |           |                |           |          |          |          |
| 192203                                  | Fap          | mRNA | GO:000561 | cellular compo | extracell | 0.937105 | 4.31E-13 | 9.60E-12 |
| 25253                                   | Dpp4         | mRNA | GO:001602 | cellular compo | organelle | 1.036951 | 2.10E-45 | 1.78E-43 |
| <b>fibrinogen complex</b>               |              |      |           |                |           |          |          |          |
| 25661                                   | Fn1          | mRNA | GO:007006 | cellular compo | extracell | 1.163254 | 0        | 0        |
| 445442                                  | Thbs1        | mRNA | GO:003109 | cellular compo | extracell | 0.64886  | 5.44E-30 | 3.07E-28 |
| <b>cell surface</b>                     |              |      |           |                |           |          |          |          |
| 1.08E+08                                | LOC108348047 | mRNA | GO:000998 | cellular compo | cell part | 0.880365 | 5.43E-21 | 2.05E-19 |
| 114122                                  | Vcan         | mRNA | GO:006202 | cellular compo | extracell | 1.186785 | 3.60E-98 | 6.72E-96 |
| 117029                                  | Ccr5         | mRNA | GO:001602 | cellular compo | organelle | 0.721805 | 2.76E-11 | 5.12E-10 |
| 192203                                  | Fap          | mRNA | GO:000561 | cellular compo | extracell | 0.937105 | 4.31E-13 | 9.60E-12 |
| 24329                                   | Egfr         | mRNA | GO:001602 | cellular compo | protein-c | 0.596643 | 4.74E-29 | 2.59E-27 |
| 25253                                   | Dpp4         | mRNA | GO:001602 | cellular compo | organelle | 1.036951 | 2.10E-45 | 1.78E-43 |





| <b>Downregulated-BP</b>       |             |      |           |                  |                  |                                       |                                        |                                        |
|-------------------------------|-------------|------|-----------|------------------|------------------|---------------------------------------|----------------------------------------|----------------------------------------|
| Gene ID                       | Gene Symbol | Type | GO_P Term | GO_P Term Level1 | GO_P Term Level2 | log2 (CPIP_DE G_left / Sham_DEG left) | Pvalue (CPIP_DEG_left / Sham_DEG_left) | Qvalue (CPIP_DEG_left / Sham_DEG_left) |
| <b>muscle contraction</b>     |             |      |           |                  |                  |                                       |                                        |                                        |
| 114207                        | Ryr1        | mRNA | GO:007131 | biological proc  | developme        | -3.56583                              | #####                                  | #####                                  |
| 117558                        | Mylk2       | mRNA | GO:000694 | biological proc  | developme        | -3.85679                              | 1.04E-99                               | 1.99E-97                               |
| 140939                        | Trim63      | mRNA | GO:001487 | biological proc  | cellular         | -0.91883                              | 1.11E-06                               | 1.10E-05                               |
| 171009                        | Actn3       | mRNA | GO:004874 | biological proc  | developme        | -4.49874                              | 0                                      | 0                                      |
| 171409                        | Tnnt1       | mRNA | GO:004521 | biological proc  | developme        | -2.24523                              | 3.72E-13                               | 8.29E-12                               |
| 24584                         | Mylpf       | mRNA | GO:006104 | biological proc  | developme        | -5.34165                              | 0                                      | 0                                      |
| 24585                         | My13        | mRNA | GO:000694 | biological proc  | developme        | -1.32563                              | 4.10E-08                               | 5.05E-07                               |
| 24838                         | Tnnt3       | mRNA | GO:000693 | biological proc  | multicell        | -5.10245                              | 0                                      | 0                                      |
| 287408                        | Myh1        | mRNA | GO:000693 | biological proc  | multicell        | -5.39489                              | 0                                      | 0                                      |
| 291245                        | Actn2       | mRNA | GO:004521 | biological proc  | developme        | -3.22145                              | #####                                  | #####                                  |
| 292879                        | Mybpc2      | mRNA | GO:004521 | biological proc  | developme        | -4.4193                               | 0                                      | 0                                      |
| 29389                         | Tnni2       | mRNA | GO:000693 | biological proc  | positive         | -5.59009                              | 0                                      | 0                                      |
| 295261                        | Tmod4       | mRNA | GO:003023 | biological proc  | developme        | -1.56136                              | 2.69E-32                               | 1.65E-30                               |
| 296935                        | Lmod2       | mRNA | GO:004521 | biological proc  | positive         | -4.83525                              | 1.58E-34                               | 1.06E-32                               |
| 306616                        | Myom2       | mRNA | GO:004521 | biological proc  | developme        | -0.97351                              | 1.57E-80                               | 2.43E-78                               |
| 316740                        | Myom1       | mRNA | GO:004521 | biological proc  | positive         | -2.209                                | 1.17E-49                               | 1.12E-47                               |
| 362867                        | Mybpc1      | mRNA | GO:004521 | biological proc  | developme        | -4.22105                              | #####                                  | #####                                  |
| 500267                        | Lmod3       | mRNA | GO:000694 | biological proc  | positive         | -3.08477                              | 3.25E-16                               | 9.32E-15                               |
| 56781                         | My11        | mRNA | GO:007258 | biological proc  | positive         | -6.01835                              | 0                                      | 0                                      |
| 682930                        | Cacnals     | mRNA | GO:003476 | biological proc  | cellular         | -3.71682                              | #####                                  | #####                                  |
| 691644                        | Myh2        | mRNA | GO:000694 | biological proc  | cellular         | -7.02013                              | 0                                      | 0                                      |
| 81633                         | Acta2       | mRNA | GO:007037 | biological proc  | multi-org        | -0.65273                              | 4.22E-49                               | 3.98E-47                               |
| 84015                         | Ttn         | mRNA | GO:004521 | biological proc  | positive         | -3.54739                              | 0                                      | 0                                      |
| <b>sarcomere organization</b> |             |      |           |                  |                  |                                       |                                        |                                        |
| 117537                        | Klhl41      | mRNA | GO:004521 | biological proc  | developme        | -2.72349                              | 8.99E-49                               | 8.43E-47                               |
| 171409                        | Tnnt1       | mRNA | GO:004521 | biological proc  | developme        | -2.24523                              | 3.72E-13                               | 8.29E-12                               |
| 291245                        | Actn2       | mRNA | GO:004521 | biological proc  | developme        | -3.22145                              | #####                                  | #####                                  |
| 29155                         | Capn3       | mRNA | GO:004521 | biological proc  | positive         | -1.1193                               | 8.08E-10                               | 1.26E-08                               |
| 292879                        | Mybpc2      | mRNA | GO:004521 | biological proc  | developme        | -4.4193                               | 0                                      | 0                                      |
| 295426                        | Myoz2       | mRNA | GO:004521 | biological proc  | developme        | -1.04915                              | 7.79E-05                               | 5.31E-04                               |
| 296935                        | Lmod2       | mRNA | GO:004521 | biological proc  | positive         | -4.83525                              | 1.58E-34                               | 1.06E-32                               |
| 306616                        | Myom2       | mRNA | GO:004521 | biological proc  | developme        | -0.97351                              | 1.57E-80                               | 2.43E-78                               |
| 309760                        | Mypn        | mRNA | GO:004521 | biological proc  | developme        | -2.19745                              | 1.62E-24                               | 7.28E-23                               |
| 316740                        | Myom1       | mRNA | GO:004521 | biological proc  | positive         | -2.209                                | 1.17E-49                               | 1.12E-47                               |
| 362867                        | Mybpc1      | mRNA | GO:004521 | biological proc  | developme        | -4.22105                              | #####                                  | #####                                  |
| 498440                        | Myoz1       | mRNA | GO:004521 | biological proc  | developme        | -5.06562                              | #####                                  | #####                                  |
| 498587                        | Ldb3        | mRNA | GO:004521 | biological proc  | developme        | -0.68953                              | 8.44E-53                               | 8.64E-51                               |
| 686019                        | Casq1       | mRNA | GO:004521 | biological proc  | positive         | -3.13107                              | #####                                  | #####                                  |
| 688173                        | Tcap        | mRNA | GO:004521 | biological proc  | developme        | -2.66973                              | 4.08E-09                               | 5.84E-08                               |
| 84015                         | Ttn         | mRNA | GO:004521 | biological proc  | positive         | -3.54739                              | 0                                      | 0                                      |
| <b>ossification</b>           |             |      |           |                  |                  |                                       |                                        |                                        |
| 171052                        | Mmp13       | mRNA | GO:002261 | biological proc  | reproduct        | -0.67104                              | 8.16E-18                               | 2.63E-16                               |
| 24477                         | Ibsp        | mRNA | GO:003028 | biological proc  | positive         | -1.74421                              | 1.10E-56                               | 1.21E-54                               |
| 25295                         | Bglap       | mRNA | GO:003050 | biological proc  | developme        | -2.28801                              | 1.28E-82                               | 2.07E-80                               |
| 25304                         | Comp        | mRNA | GO:003050 | biological proc  | positive         | -0.67432                              | 2.66E-22                               | 1.07E-20                               |
| 25312                         | Dmp1        | mRNA | GO:007017 | biological proc  | developme        | -2.70302                              | 2.93E-22                               | 1.18E-20                               |
| 25412                         | Col2a1      | mRNA | GO:000741 | biological proc  | developme        | -1.66991                              | 0                                      | 0                                      |
| 25732                         | Acp5        | mRNA | GO:006034 | biological proc  | multi-org        | -0.86062                              | 3.05E-20                               | 1.10E-18                               |
| 360730                        | Ostn        | mRNA | GO:003015 | biological proc  | developme        | -4.16723                              | 2.59E-05                               | 1.96E-04                               |

|                                                       |           |      |           |                 |           |          |          |          |
|-------------------------------------------------------|-----------|------|-----------|-----------------|-----------|----------|----------|----------|
| 365009                                                | Clec3a    | mRNA | GO:000150 | biological proc | multicell | -5.08477 | 1.77E-09 | 2.64E-08 |
| 58968                                                 | Acan      | mRNA | GO:000741 | biological proc | developme | -3.36343 | 2.15E-87 | 3.68E-85 |
| 64032                                                 | Ctgf      | mRNA | GO:003015 | biological proc | positive  | -0.68074 | 1.23E-29 | 6.89E-28 |
| 682930                                                | Cacnals   | mRNA | GO:003476 | biological proc | cellular  | -3.71682 | #####    | #####    |
| 690468                                                | LOC690468 | mRNA | GO:000641 | biological proc | developme | -3.01865 | 8.39E-22 | 3.29E-20 |
| 81639                                                 | Alox15    | mRNA | GO:003028 | biological proc | positive  | -0.82121 | 3.84E-09 | 5.52E-08 |
| 81687                                                 | Mmp9      | mRNA | GO:190470 | biological proc | reproduct | -1.31189 | 8.93E-30 | 5.01E-28 |
| <b>skeletal muscle thin filament assembly</b>         |           |      |           |                 |           |          |          |          |
| 292879                                                | Mybpc2    | mRNA | GO:004521 | biological proc | developme | -4.4193  | 0        | 0        |
| 29437                                                 | Acta1     | mRNA | GO:007141 | biological proc | developme | -4.57484 | 0        | 0        |
| 306616                                                | Myom2     | mRNA | GO:004521 | biological proc | developme | -0.97351 | 1.57E-80 | 2.43E-78 |
| 316740                                                | Myom1     | mRNA | GO:004521 | biological proc | positive  | -2.209   | 1.17E-49 | 1.12E-47 |
| 362867                                                | Mybpc1    | mRNA | GO:004521 | biological proc | developme | -4.22105 | #####    | #####    |
| 500267                                                | Lmod3     | mRNA | GO:000694 | biological proc | positive  | -3.08477 | 3.25E-16 | 9.32E-15 |
| 688173                                                | Tcap      | mRNA | GO:004521 | biological proc | developme | -2.66973 | 4.08E-09 | 5.84E-08 |
| 84015                                                 | Ttn       | mRNA | GO:004521 | biological proc | positive  | -3.54739 | 0        | 0        |
| <b>cardiac muscle tissue morphogenesis</b>            |           |      |           |                 |           |          |          |          |
| 117558                                                | Mylk2     | mRNA | GO:000694 | biological proc | developme | -3.85679 | 1.04E-99 | 1.99E-97 |
| 27064                                                 | Ankrd1    | mRNA | GO:004589 | biological proc | multi-org | -2.80466 | 7.51E-16 | 2.12E-14 |
| 292879                                                | Mybpc2    | mRNA | GO:004521 | biological proc | developme | -4.4193  | 0        | 0        |
| 306616                                                | Myom2     | mRNA | GO:004521 | biological proc | developme | -0.97351 | 1.57E-80 | 2.43E-78 |
| 316740                                                | Myom1     | mRNA | GO:004521 | biological proc | positive  | -2.209   | 1.17E-49 | 1.12E-47 |
| 362867                                                | Mybpc1    | mRNA | GO:004521 | biological proc | developme | -4.22105 | #####    | #####    |
| 688173                                                | Tcap      | mRNA | GO:004521 | biological proc | developme | -2.66973 | 4.08E-09 | 5.84E-08 |
| 84015                                                 | Ttn       | mRNA | GO:004521 | biological proc | positive  | -3.54739 | 0        | 0        |
| <b>cardiac myofibril assembly</b>                     |           |      |           |                 |           |          |          |          |
| 117505                                                | Csrp3     | mRNA | GO:003015 | biological proc | positive  | -2.7726  | 2.27E-15 | 6.20E-14 |
| 24584                                                 | Mylpf     | mRNA | GO:006104 | biological proc | developme | -5.34165 | 0        | 0        |
| 292879                                                | Mybpc2    | mRNA | GO:004521 | biological proc | developme | -4.4193  | 0        | 0        |
| 306616                                                | Myom2     | mRNA | GO:004521 | biological proc | developme | -0.97351 | 1.57E-80 | 2.43E-78 |
| 316740                                                | Myom1     | mRNA | GO:004521 | biological proc | positive  | -2.209   | 1.17E-49 | 1.12E-47 |
| 362867                                                | Mybpc1    | mRNA | GO:004521 | biological proc | developme | -4.22105 | #####    | #####    |
| 688173                                                | Tcap      | mRNA | GO:004521 | biological proc | developme | -2.66973 | 4.08E-09 | 5.84E-08 |
| 84015                                                 | Ttn       | mRNA | GO:004521 | biological proc | positive  | -3.54739 | 0        | 0        |
| <b>skeletal muscle contraction</b>                    |           |      |           |                 |           |          |          |          |
| 171409                                                | Tnnt1     | mRNA | GO:004521 | biological proc | developme | -2.24523 | 3.72E-13 | 8.29E-12 |
| 24583                                                 | Myh3      | mRNA | GO:004603 | biological proc | cellular  | -1.5939  | 5.98E-14 | 1.47E-12 |
| 24838                                                 | Tnnt3     | mRNA | GO:000693 | biological proc | multicell | -5.10245 | 0        | 0        |
| 252942                                                | Myh8      | mRNA | GO:004603 | biological proc | cellular  | -0.64357 | 8.24E-06 | 6.87E-05 |
| 29389                                                 | Tnni2     | mRNA | GO:000693 | biological proc | positive  | -5.59009 | 0        | 0        |
| 296369                                                | Tnnc2     | mRNA | GO:000693 | biological proc | multicell | -5.91177 | 0        | 0        |
| 362895                                                | Stac3     | mRNA | GO:003555 | biological proc | positive  | -4.3478  | 4.20E-24 | 1.85E-22 |
| 688173                                                | Tcap      | mRNA | GO:004521 | biological proc | developme | -2.66973 | 4.08E-09 | 5.84E-08 |
| 690423                                                | Jsrp1     | mRNA | GO:006031 | biological proc | cellular  | -3.13116 | 2.29E-15 | 6.24E-14 |
| <b>skeletal muscle myosin thick filament assembly</b> |           |      |           |                 |           |          |          |          |
| 292879                                                | Mybpc2    | mRNA | GO:004521 | biological proc | developme | -4.4193  | 0        | 0        |
| 306616                                                | Myom2     | mRNA | GO:004521 | biological proc | developme | -0.97351 | 1.57E-80 | 2.43E-78 |
| 316740                                                | Myom1     | mRNA | GO:004521 | biological proc | positive  | -2.209   | 1.17E-49 | 1.12E-47 |
| 362867                                                | Mybpc1    | mRNA | GO:004521 | biological proc | developme | -4.22105 | #####    | #####    |
| 688173                                                | Tcap      | mRNA | GO:004521 | biological proc | developme | -2.66973 | 4.08E-09 | 5.84E-08 |
| 84015                                                 | Ttn       | mRNA | GO:004521 | biological proc | positive  | -3.54739 | 0        | 0        |
| <b>cardiac muscle fiber development</b>               |           |      |           |                 |           |          |          |          |
| 292879                                                | Mybpc2    | mRNA | GO:004521 | biological proc | developme | -4.4193  | 0        | 0        |
| 304551                                                | Myo18b    | mRNA | GO:000170 | biological proc | developme | -1.87311 | 7.51E-24 | 3.28E-22 |
| 306616                                                | Myom2     | mRNA | GO:004521 | biological proc | developme | -0.97351 | 1.57E-80 | 2.43E-78 |
| 316740                                                | Myom1     | mRNA | GO:004521 | biological proc | positive  | -2.209   | 1.17E-49 | 1.12E-47 |



|                                   |        |      |           |                 |           |          |          |          |
|-----------------------------------|--------|------|-----------|-----------------|-----------|----------|----------|----------|
| 362867                            | Mybpc1 | mRNA | GO:004521 | biological proc | developme | -4.22105 | #####    | #####    |
| 688173                            | Tcap   | mRNA | GO:004521 | biological proc | developme | -2.66973 | 4.08E-09 | 5.84E-08 |
| 84015                             | Ttn    | mRNA | GO:004521 | biological proc | positive  | -3.54739 | 0        | 0        |
| <b>cardiac muscle contraction</b> |        |      |           |                 |           |          |          |          |
| 117505                            | Csrp3  | mRNA | GO:003015 | biological proc | positive  | -2.7726  | 2.27E-15 | 6.20E-14 |
| 171409                            | Tnnt1  | mRNA | GO:004521 | biological proc | developme | -2.24523 | 3.72E-13 | 8.29E-12 |
| 24584                             | Mylpf  | mRNA | GO:006104 | biological proc | developme | -5.34165 | 0        | 0        |
| 24585                             | My13   | mRNA | GO:000694 | biological proc | developme | -1.32563 | 4.10E-08 | 5.05E-07 |
| 29389                             | Tnni2  | mRNA | GO:000693 | biological proc | positive  | -5.59009 | 0        | 0        |
| 363925                            | My12   | mRNA | GO:000202 | biological proc | developme | -5.9515  | 7.13E-09 | 9.79E-08 |
| 56781                             | My11   | mRNA | GO:007258 | biological proc | positive  | -6.01835 | 0        | 0        |
| 688173                            | Tcap   | mRNA | GO:004521 | biological proc | developme | -2.66973 | 4.08E-09 | 5.84E-08 |
| 84015                             | Ttn    | mRNA | GO:004521 | biological proc | positive  | -3.54739 | 0        | 0        |

| <b>Downregulated-MF</b>                 |             |      |           |                    |                                  |                                       |                                        |                                         |
|-----------------------------------------|-------------|------|-----------|--------------------|----------------------------------|---------------------------------------|----------------------------------------|-----------------------------------------|
| Gene ID                                 | Gene Symbol | Type | GO_F Term | GO_F Term Level1   | GO_F Term Level2                 | log2 (CPIP_DE G_left / Sham_DEG left) | Pvalue (CPIP_DEG_left / Sham_DEG_left) | Qvalue (CPIP_DE G_left / Sham_DEG_left) |
| <b>actin binding</b>                    |             |      |           |                    |                                  |                                       |                                        |                                         |
| 1.01E+08                                | LOC100909   | mRNA | GO:005139 | molecular function | binding                          | -3.4962                               | 8.84E-06                               | 7.35E-05                                |
| 1.01E+08                                | Xirp1       | mRNA | GO:000377 | molecular function | binding                          | -1.84535                              | 5.09E-13                               | 1.12E-11                                |
| 117505                                  | Csrp3       | mRNA | GO:004280 | molecular function | binding++                        | -2.7726                               | 2.27E-15                               | 6.20E-14                                |
| 171009                                  | Actn3       | mRNA | GO:000377 | molecular function | binding                          | -4.49874                              | 0                                      | 0                                       |
| 24583                                   | Myh3        | mRNA | GO:000377 | molecular function | binding++                        | -1.5939                               | 5.98E-14                               | 1.47E-12                                |
| 246172                                  | Nexn        | mRNA | GO:000377 | molecular function | binding++                        | -0.78367                              | 9.97E-17                               | 2.98E-15                                |
| 24779                                   | Slc4a1      | mRNA | GO:000377 | molecular function | transport                        | -0.70731                              | 1.27E-28                               | 6.85E-27                                |
| 252942                                  | Myh8        | mRNA | GO:000377 | molecular function | binding++                        | -0.64357                              | 8.24E-06                               | 6.87E-05                                |
| 286965                                  | Abra        | mRNA | GO:000377 | molecular function | binding                          | -1.24923                              | 3.34E-11                               | 6.11E-10                                |
| 291245                                  | Actn2       | mRNA | GO:000377 | molecular function | transcription                    | -3.22145                              | #####                                  | #####                                   |
| 29389                                   | Tnni2       | mRNA | GO:000377 | molecular function | binding++                        | -5.59009                              | 0                                      | 0                                       |
| 295426                                  | Myoz2       | mRNA | GO:000377 | molecular function | binding                          | -1.04915                              | 7.79E-05                               | 5.31E-04                                |
| 296369                                  | Tnnc2       | mRNA | GO:000377 | molecular function | binding                          | -5.91177                              | 0                                      | 0                                       |
| 296935                                  | Lmod2       | mRNA | GO:000552 | molecular function | binding                          | -4.83525                              | 1.58E-34                               | 1.06E-32                                |
| 297339                                  | Capg        | mRNA | GO:000377 | molecular function | binding                          | -1.46306                              | #####                                  | #####                                   |
| 304551                                  | Myo18b      | mRNA | GO:000377 | molecular function | binding++                        | -1.87311                              | 7.51E-24                               | 3.28E-22                                |
| 305675                                  | Synpo21     | mRNA | GO:000377 | molecular function | binding                          | -1.88534                              | 4.75E-34                               | 3.09E-32                                |
| 307982                                  | Nrap        | mRNA | GO:000377 | molecular function | binding                          | -4.39226                              | #####                                  | #####                                   |
| 311029                                  | Neb         | mRNA | GO:000377 | molecular function | binding                          | -0.76932                              | 3.47E-81                               | 5.47E-79                                |
| 311098                                  | Xirp2       | mRNA | GO:000377 | molecular function | binding                          | -3.64116                              | #####                                  | #####                                   |
| 360543                                  | Myh4        | mRNA | GO:000377 | molecular function | binding++                        | -5.22301                              | 0                                      | 0                                       |
| 362867                                  | Mybpc1      | mRNA | GO:000377 | molecular function | binding++                        | -4.22105                              | #####                                  | #####                                   |
| 364558                                  | Palld       | mRNA | GO:000377 | molecular function | binding                          | -3.51056                              | 1.45E-06                               | 1.40E-05                                |
| 498440                                  | Myoz1       | mRNA | GO:000377 | molecular function | binding++                        | -5.06562                              | #####                                  | #####                                   |
| 500450                                  | Tpm2        | mRNA | GO:000377 | molecular function | binding                          | -2.19298                              | 0                                      | 0                                       |
| 65204                                   | Cnn1        | mRNA | GO:000377 | molecular function | binding                          | -1.27951                              | 1.81E-12                               | 3.76E-11                                |
| 689274                                  | Myoz3       | mRNA | GO:000377 | molecular function | binding                          | -4.45674                              | 6.07E-36                               | 4.26E-34                                |
| 691644                                  | Myh2        | mRNA | GO:000377 | molecular function | binding++                        | -7.02013                              | 0                                      | 0                                       |
| <b>structural constituent of muscle</b> |             |      |           |                    |                                  |                                       |                                        |                                         |
| 117505                                  | Csrp3       | mRNA | GO:004280 | molecular function | binding++                        | -2.7726                               | 2.27E-15                               | 6.20E-14                                |
| 24584                                   | Mylpf       | mRNA | GO:000378 | molecular function | binding++                        | -5.34165                              | 0                                      | 0                                       |
| 246172                                  | Nexn        | mRNA | GO:000377 | molecular function | binding++                        | -0.78367                              | 9.97E-17                               | 2.98E-15                                |
| 29155                                   | Capn3       | mRNA | GO:003294 | molecular function | binding++                        | -1.1193                               | 8.08E-10                               | 1.26E-08                                |
| 292879                                  | Mybpc2      | mRNA | GO:005137 | molecular function | binding++                        | -4.4193                               | 0                                      | 0                                       |
| 297748                                  | Jph1        | mRNA | GO:001527 | molecular function | transport                        | -1.2197                               | 1.94E-09                               | 2.89E-08                                |
| 306616                                  | Myom2       | mRNA | GO:005137 | molecular function | binding++                        | -0.97351                              | 1.57E-80                               | 2.43E-78                                |
| 316740                                  | Myom1       | mRNA | GO:005137 | molecular function | binding++                        | -2.209                                | 1.17E-49                               | 1.12E-47                                |
| 362867                                  | Mybpc1      | mRNA | GO:000377 | molecular function | binding++                        | -4.22105                              | #####                                  | #####                                   |
| 84015                                   | Ttn         | mRNA | GO:004280 | molecular function | structural constituent of muscle | -3.54739                              | 0                                      | 0                                       |
| <b>actin filament binding</b>           |             |      |           |                    |                                  |                                       |                                        |                                         |
| 171009                                  | Actn3       | mRNA | GO:000377 | molecular function | binding                          | -4.49874                              | 0                                      | 0                                       |
| 24583                                   | Myh3        | mRNA | GO:000377 | molecular function | binding++                        | -1.5939                               | 5.98E-14                               | 1.47E-12                                |
| 246172                                  | Nexn        | mRNA | GO:000377 | molecular function | binding++                        | -0.78367                              | 9.97E-17                               | 2.98E-15                                |
| 252942                                  | Myh8        | mRNA | GO:000377 | molecular function | binding++                        | -0.64357                              | 8.24E-06                               | 6.87E-05                                |
| 287408                                  | Myh1        | mRNA | GO:005101 | molecular function | binding++                        | -5.39489                              | 0                                      | 0                                       |
| 291245                                  | Actn2       | mRNA | GO:000377 | molecular function | transcription                    | -3.22145                              | #####                                  | #####                                   |
| 292879                                  | Mybpc2      | mRNA | GO:005137 | molecular function | binding++                        | -4.4193                               | 0                                      | 0                                       |
| 295261                                  | Tmod4       | mRNA | GO:000552 | molecular function | binding                          | -1.56136                              | 2.69E-32                               | 1.65E-30                                |
| 296369                                  | Tnnc2       | mRNA | GO:000377 | molecular function | binding                          | -5.91177                              | 0                                      | 0                                       |

|                                     |           |      |           |                    |               |          |          |          |
|-------------------------------------|-----------|------|-----------|--------------------|---------------|----------|----------|----------|
| 297339                              | Capg      | mRNA | GO:000377 | molecular function | binding       | -1.46306 | #####    | #####    |
| 306616                              | Myom2     | mRNA | GO:005137 | molecular function | binding++     | -0.97351 | 1.57E-80 | 2.43E-78 |
| 307982                              | Nrap      | mRNA | GO:000377 | molecular function | binding       | -4.39226 | #####    | #####    |
| 311029                              | Neb       | mRNA | GO:000377 | molecular function | binding       | -0.76932 | 3.47E-81 | 5.47E-79 |
| 311098                              | Xirp2     | mRNA | GO:000377 | molecular function | binding       | -3.64116 | #####    | #####    |
| 316740                              | Myom1     | mRNA | GO:005137 | molecular function | binding++     | -2.209   | 1.17E-49 | 1.12E-47 |
| 360543                              | Myh4      | mRNA | GO:000377 | molecular function | binding++     | -5.22301 | 0        | 0        |
| 362867                              | Mybpc1    | mRNA | GO:000377 | molecular function | binding++     | -4.22105 | #####    | #####    |
| 500450                              | Tpm2      | mRNA | GO:000377 | molecular function | binding       | -2.19298 | 0        | 0        |
| 684425                              | Adss11    | mRNA | GO:001687 | molecular function | binding++     | -2.94615 | 7.58E-79 | 1.16E-76 |
| 691644                              | Myh2      | mRNA | GO:000377 | molecular function | binding++     | -7.02013 | 0        | 0        |
| 84015                               | Ttn       | mRNA | GO:004280 | molecular function | structural    | -3.54739 | 0        | 0        |
| <b>titin binding</b>                |           |      |           |                    |               |          |          |          |
| 1.08E+08                            | LOC108352 | mRNA | GO:000467 | molecular function | binding++     | -2.87925 | 4.65E-43 | 3.80E-41 |
| 140939                              | Trim63    | mRNA | GO:000484 | molecular function | binding++     | -0.91883 | 1.11E-06 | 1.10E-05 |
| 27064                               | Ankrd1    | mRNA | GO:000203 | molecular function | transcription | -2.80466 | 7.51E-16 | 2.12E-14 |
| 291245                              | Actn2     | mRNA | GO:000377 | molecular function | transcription | -3.22145 | #####    | #####    |
| 29155                               | Capn3     | mRNA | GO:003294 | molecular function | binding++     | -1.1193  | 8.08E-10 | 1.26E-08 |
| 295531                              | Tnni3k    | mRNA | GO:000467 | molecular function | binding++     | -1.76098 | 5.30E-29 | 2.88E-27 |
| 316330                              | Ankrd23   | mRNA | GO:000367 | molecular function | binding++     | -4.56578 | #####    | #####    |
| <b>muscle alpha-actinin binding</b> |           |      |           |                    |               |          |          |          |
| 292879                              | Mybpc2    | mRNA | GO:005137 | molecular function | binding++     | -4.4193  | 0        | 0        |
| 306616                              | Myom2     | mRNA | GO:005137 | molecular function | binding++     | -0.97351 | 1.57E-80 | 2.43E-78 |
| 307982                              | Nrap      | mRNA | GO:000377 | molecular function | binding       | -4.39226 | #####    | #####    |
| 309760                              | Mypn      | mRNA | GO:005137 | molecular function | binding       | -2.19745 | 1.62E-24 | 7.28E-23 |
| 316740                              | Myom1     | mRNA | GO:005137 | molecular function | binding++     | -2.209   | 1.17E-49 | 1.12E-47 |
| 362867                              | Mybpc1    | mRNA | GO:000377 | molecular function | binding++     | -4.22105 | #####    | #####    |
| 498587                              | Ldb3      | mRNA | GO:005137 | molecular function | binding++     | -0.68953 | 8.44E-53 | 8.64E-51 |
| 84015                               | Ttn       | mRNA | GO:004280 | molecular function | structural    | -3.54739 | 0        | 0        |
| <b>telethonin binding</b>           |           |      |           |                    |               |          |          |          |
| 117505                              | Csrp3     | mRNA | GO:004280 | molecular function | binding++     | -2.7726  | 2.27E-15 | 6.20E-14 |
| 295426                              | Myoz2     | mRNA | GO:000377 | molecular function | binding       | -1.04915 | 7.79E-05 | 5.31E-04 |
| 498440                              | Myoz1     | mRNA | GO:000377 | molecular function | binding++     | -5.06562 | #####    | #####    |
| 689274                              | Myoz3     | mRNA | GO:000377 | molecular function | binding       | -4.45674 | 6.07E-36 | 4.26E-34 |
| 84015                               | Ttn       | mRNA | GO:004280 | molecular function | structural    | -3.54739 | 0        | 0        |
| <b>tropomyosin binding</b>          |           |      |           |                    |               |          |          |          |
| 171409                              | Tnnt1     | mRNA | GO:000552 | molecular function | binding++     | -2.24523 | 3.72E-13 | 8.29E-12 |
| 24838                               | Tnnt3     | mRNA | GO:000552 | molecular function | binding       | -5.10245 | 0        | 0        |
| 295261                              | Tmod4     | mRNA | GO:000552 | molecular function | binding       | -1.56136 | 2.69E-32 | 1.65E-30 |
| 296935                              | Lmod2     | mRNA | GO:000552 | molecular function | binding       | -4.83525 | 1.58E-34 | 1.06E-32 |
| 311167                              | Smtn11    | mRNA | GO:000552 | molecular function | binding       | -1.94727 | 3.47E-10 | 5.65E-09 |
| 500267                              | Lmod3     | mRNA | GO:000552 | molecular function | binding       | -3.08477 | 3.25E-16 | 9.32E-15 |
| <b>FATZ binding</b>                 |           |      |           |                    |               |          |          |          |
| 291245                              | Actn2     | mRNA | GO:000377 | molecular function | transcription | -3.22145 | #####    | #####    |
| 295426                              | Myoz2     | mRNA | GO:000377 | molecular function | binding       | -1.04915 | 7.79E-05 | 5.31E-04 |
| 498440                              | Myoz1     | mRNA | GO:000377 | molecular function | binding++     | -5.06562 | #####    | #####    |
| 689274                              | Myoz3     | mRNA | GO:000377 | molecular function | binding       | -4.45674 | 6.07E-36 | 4.26E-34 |
| <b>calmodulin binding</b>           |           |      |           |                    |               |          |          |          |
| 1.08E+08                            | LOC108352 | mRNA | GO:000467 | molecular function | binding++     | -2.87925 | 4.65E-43 | 3.80E-41 |
| 114207                              | Ryr1      | mRNA | GO:000202 | molecular function | transport     | -3.56583 | #####    | #####    |
| 117558                              | Mylk2     | mRNA | GO:000467 | molecular function | binding++     | -3.85679 | 1.04E-99 | 1.99E-97 |
| 24583                               | Myh3      | mRNA | GO:000377 | molecular function | binding++     | -1.5939  | 5.98E-14 | 1.47E-12 |
| 287408                              | Myh1      | mRNA | GO:005101 | molecular function | binding++     | -5.39489 | 0        | 0        |
| 29353                               | Phkg1     | mRNA | GO:000468 | molecular function | binding++     | -1.87866 | 2.69E-08 | 3.39E-07 |
| 311167                              | Smtn11    | mRNA | GO:000552 | molecular function | binding       | -1.94727 | 3.47E-10 | 5.65E-09 |
| 360543                              | Myh4      | mRNA | GO:000377 | molecular function | binding++     | -5.22301 | 0        | 0        |

|                           |         |      |           |                 |           |          |          |          |
|---------------------------|---------|------|-----------|-----------------|-----------|----------|----------|----------|
| 65204                     | Cnn1    | mRNA | GO:000377 | molecular funct | binding   | -1.27951 | 1.81E-12 | 3.76E-11 |
| 682930                    | Cacnals | mRNA | GO:000524 | molecular funct | binding++ | -3.71682 | #####    | #####    |
| 84015                     | Ttn     | mRNA | GO:004280 | molecular funct | structura | -3.54739 | 0        | 0        |
| <b>troponin T binding</b> |         |      |           |                 |           |          |          |          |
| 171409                    | Tnnt1   | mRNA | GO:000552 | molecular funct | binding++ | -2.24523 | 3.72E-13 | 8.29E-12 |
| 24838                     | Tnnt3   | mRNA | GO:000552 | molecular funct | binding   | -5.10245 | 0        | 0        |
| 29389                     | Tnni2   | mRNA | GO:000377 | molecular funct | binding++ | -5.59009 | 0        | 0        |

| Downregulated-CC |              |      |           |                  |                  |                                       |                                        |                                         |
|------------------|--------------|------|-----------|------------------|------------------|---------------------------------------|----------------------------------------|-----------------------------------------|
| Gene ID          | Gene Symbol  | Type | GO_C Term | GO_C Term Level1 | GO_C Term Level2 | log2 (CPIP_DE G_left / Sham_DEG left) | Pvalue (CPIP_DEG_left / Sham_DEG_left) | Qvalue (CPIP_DE G_left / Sham_DEG_left) |
| <b>Z disc</b>    |              |      |           |                  |                  |                                       |                                        |                                         |
| 1.01E+08         | LOC100909899 | mRNA | GO:003001 | cellular compo   | supramole        | -3.4962                               | 8.84E-06                               | 7.35E-05                                |
| 1.08E+08         | LOC108352087 | mRNA | GO:003001 | cellular compo   | extracell        | -2.87925                              | 4.65E-43                               | 3.80E-41                                |
| 114108           | Pdlim3       | mRNA | GO:003001 | cellular compo   | supramole        | -1.87387                              | 7.45E-46                               | 6.42E-44                                |
| 114207           | Ryr1         | mRNA | GO:003301 | cellular compo   | protein-c        | -3.56583                              | #####                                  | #####                                   |
| 117505           | Csrp3        | mRNA | GO:003001 | cellular compo   | supramole        | -2.7726                               | 2.27E-15                               | 6.20E-14                                |
| 140939           | Trim63       | mRNA | GO:003143 | cellular compo   | supramole        | -0.91883                              | 1.11E-06                               | 1.10E-05                                |
| 171009           | Actn3        | mRNA | GO:000590 | cellular compo   | supramole        | -4.49874                              | 0                                      | 0                                       |
| 246172           | Nexn         | mRNA | GO:000592 | cellular compo   | supramole        | -0.78367                              | 9.97E-17                               | 2.98E-15                                |
| 24779            | Slc4a1       | mRNA | GO:001602 | cellular compo   | supramole        | -0.70731                              | 1.27E-28                               | 6.85E-27                                |
| 291245           | Actn2        | mRNA | GO:003086 | cellular compo   | synapse p        | -3.22145                              | #####                                  | #####                                   |
| 29155            | Capn3        | mRNA | GO:000582 | cellular compo   | protein-c        | -1.1193                               | 8.08E-10                               | 1.26E-08                                |
| 292879           | Mybpc2       | mRNA | GO:000586 | cellular compo   | supramole        | -4.4193                               | 0                                      | 0                                       |
| 295426           | Myoz2        | mRNA | GO:001562 | cellular compo   | supramole        | -1.04915                              | 7.79E-05                               | 5.31E-04                                |
| 296345           | Jph2         | mRNA | GO:003301 | cellular compo   | protein-c        | -2.06903                              | 3.73E-49                               | 3.53E-47                                |
| 297748           | Jph1         | mRNA | GO:001602 | cellular compo   | protein-c        | -1.2197                               | 1.94E-09                               | 2.89E-08                                |
| 304551           | Myo18b       | mRNA | GO:001646 | cellular compo   | supramole        | -1.87311                              | 7.51E-24                               | 3.28E-22                                |
| 304823           | Igfn1        | mRNA | GO:003001 | cellular compo   | supramole        | -5.91219                              | 4.24E-87                               | 7.21E-85                                |
| 305675           | Synpo21      | mRNA | GO:001660 | cellular compo   | supramole        | -1.88534                              | 4.75E-34                               | 3.09E-32                                |
| 306616           | Myom2        | mRNA | GO:000586 | cellular compo   | supramole        | -0.97351                              | 1.57E-80                               | 2.43E-78                                |
| 307982           | Nrap         | mRNA | GO:000591 | cellular compo   | supramole        | -4.39226                              | #####                                  | #####                                   |
| 309760           | Mypn         | mRNA | GO:003167 | cellular compo   | supramole        | -2.19745                              | 1.62E-24                               | 7.28E-23                                |
| 311029           | Neb          | mRNA | GO:004329 | cellular compo   | supramole        | -0.76932                              | 3.47E-81                               | 5.47E-79                                |
| 315962           | Ky           | mRNA | GO:003001 | cellular compo   | supramole        | -1.28134                              | 3.55E-16                               | 1.01E-14                                |
| 316740           | Myom1        | mRNA | GO:000586 | cellular compo   | supramole        | -2.209                                | 1.17E-49                               | 1.12E-47                                |
| 338458           | Obscn        | mRNA | GO:003258 | cellular compo   | supramole        | -2.29149                              | 1.56E-78                               | 2.37E-76                                |
| 362708           | Trim54       | mRNA | GO:003001 | cellular compo   | protein-c        | -2.47843                              | 5.81E-20                               | 2.06E-18                                |
| 362867           | Mybpc1       | mRNA | GO:000586 | cellular compo   | protein-c        | -4.22105                              | #####                                  | #####                                   |
| 364558           | Palld        | mRNA | GO:003001 | cellular compo   | supramole        | -3.51056                              | 1.45E-06                               | 1.40E-05                                |
| 498440           | Myoz1        | mRNA | GO:001562 | cellular compo   | supramole        | -5.06562                              | #####                                  | #####                                   |
| 498579           | RGD1564899   | mRNA | GO:003001 | cellular compo   | supramole        | -1.62321                              | 4.59E-24                               | 2.02E-22                                |
| 498587           | Ldb3         | mRNA | GO:003001 | cellular compo   | supramole        | -0.68953                              | 8.44E-53                               | 8.64E-51                                |
| 64362            | Des          | mRNA | GO:004238 | cellular compo   | supramole        | -2.14572                              | #####                                  | #####                                   |
| 686019           | Casq1        | mRNA | GO:003301 | cellular compo   | supramole        | -3.13107                              | #####                                  | #####                                   |
| 688173           | Tcap         | mRNA | GO:003001 | cellular compo   | supramole        | -2.66973                              | 4.08E-09                               | 5.84E-08                                |
| 689274           | Myoz3        | mRNA | GO:001562 | cellular compo   | supramole        | -4.45674                              | 6.07E-36                               | 4.26E-34                                |
| 84015            | Ttn          | mRNA | GO:003001 | cellular compo   | supramole        | -3.54739                              | 0                                      | 0                                       |
| <b>myofibril</b> |              |      |           |                  |                  |                                       |                                        |                                         |
| 24583            | Myh3         | mRNA | GO:004329 | cellular compo   | supramole        | -1.5939                               | 5.98E-14                               | 1.47E-12                                |
| 24584            | Mylpf        | mRNA | GO:001562 | cellular compo   | supramole        | -5.34165                              | 0                                      | 0                                       |
| 252942           | Myh8         | mRNA | GO:000557 | cellular compo   | supramole        | -0.64357                              | 8.24E-06                               | 6.87E-05                                |
| 27064            | Ankrd1       | mRNA | GO:003167 | cellular compo   | supramole        | -2.80466                              | 7.51E-16                               | 2.12E-14                                |
| 286965           | Abra         | mRNA | GO:001562 | cellular compo   | supramole        | -1.24923                              | 3.34E-11                               | 6.11E-10                                |
| 29155            | Capn3        | mRNA | GO:000582 | cellular compo   | protein-c        | -1.1193                               | 8.08E-10                               | 1.26E-08                                |
| 295261           | Tmod4        | mRNA | GO:000586 | cellular compo   | supramole        | -1.56136                              | 2.69E-32                               | 1.65E-30                                |
| 296935           | Lmod2        | mRNA | GO:000586 | cellular compo   | supramole        | -4.83525                              | 1.58E-34                               | 1.06E-32                                |
| 307982           | Nrap         | mRNA | GO:000591 | cellular compo   | supramole        | -4.39226                              | #####                                  | #####                                   |
| 311029           | Neb          | mRNA | GO:004329 | cellular compo   | supramole        | -0.76932                              | 3.47E-81                               | 5.47E-79                                |
| 316330           | Ankrd23      | mRNA | GO:001470 | cellular compo   | supramole        | -4.56578                              | #####                                  | #####                                   |
| 360543           | Myh4         | mRNA | GO:000557 | cellular compo   | supramole        | -5.22301                              | 0                                      | 0                                       |



|                                      |              |      |           |                |           |          |          |          |
|--------------------------------------|--------------|------|-----------|----------------|-----------|----------|----------|----------|
| 363925                               | My12         | mRNA | GO:004329 | cellular compo | supramole | -5.9515  | 7.13E-09 | 9.79E-08 |
| 500267                               | Lmod3        | mRNA | GO:000586 | cellular compo | supramole | -3.08477 | 3.25E-16 | 9.32E-15 |
| 56781                                | My11         | mRNA | GO:000590 | cellular compo | supramole | -6.01835 | 0        | 0        |
| 686019                               | Casq1        | mRNA | GO:003301 | cellular compo | supramole | -3.13107 | #####    | #####    |
| 84015                                | Ttn          | mRNA | GO:003001 | cellular compo | supramole | -3.54739 | 0        | 0        |
| <b>M band</b>                        |              |      |           |                |           |          |          |          |
| 1.08E+08                             | LOC108352087 | mRNA | GO:003001 | cellular compo | extracell | -2.87925 | 4.65E-43 | 3.80E-41 |
| 117537                               | Klh141       | mRNA | GO:003301 | cellular compo | protein-c | -2.72349 | 8.99E-49 | 8.43E-47 |
| 140939                               | Trim63       | mRNA | GO:003143 | cellular compo | supramole | -0.91883 | 1.11E-06 | 1.10E-05 |
| 292879                               | Mybpc2       | mRNA | GO:000586 | cellular compo | supramole | -4.4193  | 0        | 0        |
| 296935                               | Lmod2        | mRNA | GO:000586 | cellular compo | supramole | -4.83525 | 1.58E-34 | 1.06E-32 |
| 306616                               | Myom2        | mRNA | GO:000586 | cellular compo | supramole | -0.97351 | 1.57E-80 | 2.43E-78 |
| 311167                               | Smtnl1       | mRNA | GO:003143 | cellular compo | protein-c | -1.94727 | 3.47E-10 | 5.65E-09 |
| 316740                               | Myom1        | mRNA | GO:000586 | cellular compo | supramole | -2.209   | 1.17E-49 | 1.12E-47 |
| 338458                               | Obscn        | mRNA | GO:003258 | cellular compo | supramole | -2.29149 | 1.56E-78 | 2.37E-76 |
| 362867                               | Mybpc1       | mRNA | GO:000586 | cellular compo | protein-c | -4.22105 | #####    | #####    |
| 500267                               | Lmod3        | mRNA | GO:000586 | cellular compo | supramole | -3.08477 | 3.25E-16 | 9.32E-15 |
| 688915                               | Cmya5        | mRNA | GO:004847 | cellular compo | supramole | -3.1322  | #####    | #####    |
| 84015                                | Ttn          | mRNA | GO:003001 | cellular compo | supramole | -3.54739 | 0        | 0        |
| <b>I band</b>                        |              |      |           |                |           |          |          |          |
| 114207                               | Ryr1         | mRNA | GO:003301 | cellular compo | protein-c | -3.56583 | #####    | #####    |
| 116601                               | Atp2a1       | mRNA | GO:004847 | cellular compo | supramole | -5.23013 | 0        | 0        |
| 24585                                | My13         | mRNA | GO:003167 | cellular compo | supramole | -1.32563 | 4.10E-08 | 5.05E-07 |
| 27064                                | Ankrd1       | mRNA | GO:003167 | cellular compo | supramole | -2.80466 | 7.51E-16 | 2.12E-14 |
| 295531                               | Tnni3k       | mRNA | GO:003167 | cellular compo | supramole | -1.76098 | 5.30E-29 | 2.88E-27 |
| 309760                               | Mypn         | mRNA | GO:003167 | cellular compo | supramole | -2.19745 | 1.62E-24 | 7.28E-23 |
| 311167                               | Smtnl1       | mRNA | GO:003143 | cellular compo | protein-c | -1.94727 | 3.47E-10 | 5.65E-09 |
| 682930                               | Cacnals      | mRNA | GO:004238 | cellular compo | synapse p | -3.71682 | #####    | #####    |
| 686019                               | Casq1        | mRNA | GO:003301 | cellular compo | supramole | -3.13107 | #####    | #####    |
| 688173                               | Tcap         | mRNA | GO:003001 | cellular compo | supramole | -2.66973 | 4.08E-09 | 5.84E-08 |
| 84015                                | Ttn          | mRNA | GO:003001 | cellular compo | supramole | -3.54739 | 0        | 0        |
| <b>sarcomere</b>                     |              |      |           |                |           |          |          |          |
| 1.08E+08                             | LOC108352087 | mRNA | GO:003001 | cellular compo | extracell | -2.87925 | 4.65E-43 | 3.80E-41 |
| 117505                               | Csrp3        | mRNA | GO:003001 | cellular compo | supramole | -2.7726  | 2.27E-15 | 6.20E-14 |
| 171009                               | Actn3        | mRNA | GO:000590 | cellular compo | supramole | -4.49874 | 0        | 0        |
| 286965                               | Abra         | mRNA | GO:001562 | cellular compo | supramole | -1.24923 | 3.34E-11 | 6.11E-10 |
| 291245                               | Actn2        | mRNA | GO:003086 | cellular compo | synapse p | -3.22145 | #####    | #####    |
| 292879                               | Mybpc2       | mRNA | GO:000586 | cellular compo | supramole | -4.4193  | 0        | 0        |
| 29437                                | Acta1        | mRNA | GO:000557 | cellular compo | supramole | -4.57484 | 0        | 0        |
| 296935                               | Lmod2        | mRNA | GO:000586 | cellular compo | supramole | -4.83525 | 1.58E-34 | 1.06E-32 |
| 304823                               | Igfn1        | mRNA | GO:003001 | cellular compo | supramole | -5.91219 | 4.24E-87 | 7.21E-85 |
| 306616                               | Myom2        | mRNA | GO:000586 | cellular compo | supramole | -0.97351 | 1.57E-80 | 2.43E-78 |
| 316740                               | Myom1        | mRNA | GO:000586 | cellular compo | supramole | -2.209   | 1.17E-49 | 1.12E-47 |
| 338458                               | Obscn        | mRNA | GO:003258 | cellular compo | supramole | -2.29149 | 1.56E-78 | 2.37E-76 |
| 362867                               | Mybpc1       | mRNA | GO:000586 | cellular compo | protein-c | -4.22105 | #####    | #####    |
| 84015                                | Ttn          | mRNA | GO:003001 | cellular compo | supramole | -3.54739 | 0        | 0        |
| <b>striated muscle thin filament</b> |              |      |           |                |           |          |          |          |
| 292879                               | Mybpc2       | mRNA | GO:000586 | cellular compo | supramole | -4.4193  | 0        | 0        |
| 29437                                | Acta1        | mRNA | GO:000557 | cellular compo | supramole | -4.57484 | 0        | 0        |
| 295261                               | Tmod4        | mRNA | GO:000586 | cellular compo | supramole | -1.56136 | 2.69E-32 | 1.65E-30 |
| 296935                               | Lmod2        | mRNA | GO:000586 | cellular compo | supramole | -4.83525 | 1.58E-34 | 1.06E-32 |
| 306616                               | Myom2        | mRNA | GO:000586 | cellular compo | supramole | -0.97351 | 1.57E-80 | 2.43E-78 |
| 316740                               | Myom1        | mRNA | GO:000586 | cellular compo | supramole | -2.209   | 1.17E-49 | 1.12E-47 |
| 362867                               | Mybpc1       | mRNA | GO:000586 | cellular compo | protein-c | -4.22105 | #####    | #####    |
| 500267                               | Lmod3        | mRNA | GO:000586 | cellular compo | supramole | -3.08477 | 3.25E-16 | 9.32E-15 |
| 84015                                | Ttn          | mRNA | GO:003001 | cellular compo | supramole | -3.54739 | 0        | 0        |

|                               |              |      |           |                |           |          |          |          |
|-------------------------------|--------------|------|-----------|----------------|-----------|----------|----------|----------|
| <b>sarcoplasmic reticulum</b> |              |      |           |                |           |          |          |          |
| 114207                        | Ryr1         | mRNA | G0:003301 | cellular compo | protein-c | -3.56583 | #####    | #####    |
| 116601                        | Atp2a1       | mRNA | G0:004847 | cellular compo | supramole | -5.23013 | 0        | 0        |
| 117537                        | Klh141       | mRNA | G0:003301 | cellular compo | protein-c | -2.72349 | 8.99E-49 | 8.43E-47 |
| 24701                         | Pygm         | mRNA | G0:001652 | cellular compo | organelle | -2.80484 | 0        | 0        |
| 25139                         | Slc2a4       | mRNA | G0:004238 | cellular compo | synapse p | -0.711   | 2.45E-08 | 3.10E-07 |
| 29242                         | Car4         | mRNA | G0:004238 | cellular compo | extracell | -2.67108 | 1.50E-21 | 5.77E-20 |
| 296345                        | Jph2         | mRNA | G0:003301 | cellular compo | protein-c | -2.06903 | 3.73E-49 | 3.53E-47 |
| 297748                        | Jph1         | mRNA | G0:001602 | cellular compo | protein-c | -1.2197  | 1.94E-09 | 2.89E-08 |
| 59299                         | Trdn         | mRNA | G0:003301 | cellular compo | protein-c | -3.56732 | #####    | #####    |
| 686019                        | Casq1        | mRNA | G0:003301 | cellular compo | supramole | -3.13107 | #####    | #####    |
| 690423                        | Jsrp1        | mRNA | G0:001652 | cellular compo | organelle | -3.13116 | 2.29E-15 | 6.24E-14 |
| <b>contractile fiber</b>      |              |      |           |                |           |          |          |          |
| 140939                        | Trim63       | mRNA | G0:003143 | cellular compo | supramole | -0.91883 | 1.11E-06 | 1.10E-05 |
| 24583                         | Myh3         | mRNA | G0:004329 | cellular compo | supramole | -1.5939  | 5.98E-14 | 1.47E-12 |
| 24584                         | Mylpf        | mRNA | G0:001562 | cellular compo | supramole | -5.34165 | 0        | 0        |
| 311029                        | Neb          | mRNA | G0:004329 | cellular compo | supramole | -0.76932 | 3.47E-81 | 5.47E-79 |
| 311167                        | Smtnl1       | mRNA | G0:003143 | cellular compo | protein-c | -1.94727 | 3.47E-10 | 5.65E-09 |
| 363925                        | My12         | mRNA | G0:004329 | cellular compo | supramole | -5.9515  | 7.13E-09 | 9.79E-08 |
| 56781                         | My11         | mRNA | G0:000590 | cellular compo | supramole | -6.01835 | 0        | 0        |
| 64362                         | Des          | mRNA | G0:004238 | cellular compo | supramole | -2.14572 | #####    | #####    |
| <b>sarcolemma</b>             |              |      |           |                |           |          |          |          |
| 1.01E+08                      | LOC100909899 | mRNA | G0:003001 | cellular compo | supramole | -3.4962  | 8.84E-06 | 7.35E-05 |
| 1.08E+08                      | LOC108352087 | mRNA | G0:003001 | cellular compo | extracell | -2.87925 | 4.65E-43 | 3.80E-41 |
| 114207                        | Ryr1         | mRNA | G0:003301 | cellular compo | protein-c | -3.56583 | #####    | #####    |
| 25139                         | Slc2a4       | mRNA | G0:004238 | cellular compo | synapse p | -0.711   | 2.45E-08 | 3.10E-07 |
| 29242                         | Car4         | mRNA | G0:004238 | cellular compo | extracell | -2.67108 | 1.50E-21 | 5.77E-20 |
| 29658                         | Cacng1       | mRNA | G0:004238 | cellular compo | protein-c | -6.16723 | 1.31E-18 | 4.38E-17 |
| 303468                        | Sgca         | mRNA | G0:004238 | cellular compo | protein-c | -1.14316 | 2.80E-06 | 2.57E-05 |
| 305941                        | Sgcg         | mRNA | G0:004238 | cellular compo | protein-c | -2.23831 | 8.09E-08 | 9.57E-07 |
| 365377                        | Trim72       | mRNA | G0:004238 | cellular compo | organelle | -2.35876 | 1.56E-25 | 7.38E-24 |
| 59299                         | Trdn         | mRNA | G0:003301 | cellular compo | protein-c | -3.56732 | #####    | #####    |
| 64362                         | Des          | mRNA | G0:004238 | cellular compo | supramole | -2.14572 | #####    | #####    |
| 682930                        | Cacnals      | mRNA | G0:004238 | cellular compo | synapse p | -3.71682 | #####    | #####    |
| 686019                        | Casq1        | mRNA | G0:003301 | cellular compo | supramole | -3.13107 | #####    | #####    |
| 81639                         | Alox15       | mRNA | G0:004238 | cellular compo | organelle | -0.82121 | 3.84E-09 | 5.52E-08 |
| <b>myosin filament</b>        |              |      |           |                |           |          |          |          |
| 24583                         | Myh3         | mRNA | G0:004329 | cellular compo | supramole | -1.5939  | 5.98E-14 | 1.47E-12 |
| 252942                        | Myh8         | mRNA | G0:000557 | cellular compo | supramole | -0.64357 | 8.24E-06 | 6.87E-05 |
| 25365                         | Actg2        | mRNA | G0:000557 | cellular compo | protein-c | -1.77068 | 1.62E-24 | 7.28E-23 |
| 287408                        | Myh1         | mRNA | G0:001470 | cellular compo | supramole | -5.39489 | 0        | 0        |
| 360543                        | Myh4         | mRNA | G0:000557 | cellular compo | supramole | -5.22301 | 0        | 0        |
| 362867                        | Mybpc1       | mRNA | G0:000586 | cellular compo | protein-c | -4.22105 | #####    | #####    |
| <b>extracellular matrix</b>   |              |      |           |                |           |          |          |          |
| 1E+08                         | LOC100364062 | mRNA | G0:000573 | cellular compo | extracell | -2.16206 | 1.18E-07 | 1.37E-06 |
| 171052                        | Mmp13        | mRNA | G0:000561 | cellular compo | extracell | -0.67104 | 8.16E-18 | 2.63E-16 |
| 24477                         | Ibsp         | mRNA | G0:000561 | cellular compo | extracell | -1.74421 | 1.10E-56 | 1.21E-54 |
| 25043                         | Eln          | mRNA | G0:007195 | cellular compo | extracell | -0.82554 | 9.68E-58 | 1.12E-55 |
| 25312                         | Dmp1         | mRNA | G0:000557 | cellular compo | extracell | -2.70302 | 2.93E-22 | 1.18E-20 |
| 25412                         | Col2a1       | mRNA | G0:006202 | cellular compo | extracell | -1.66991 | 0        | 0        |
| 287382                        | Mfap4        | mRNA | G0:000152 | cellular compo | extracell | -1.15085 | 7.38E-71 | 1.02E-68 |
| 289178                        | Dpt          | mRNA | G0:000561 | cellular compo | extracell | -0.71033 | 9.76E-18 | 3.13E-16 |
| 291312                        | Ucma         | mRNA | G0:000557 | cellular compo | extracell | -0.93484 | 3.47E-05 | 2.56E-04 |
| 29195                         | Chad         | mRNA | G0:001602 | cellular compo | extracell | -1.47061 | 1.17E-22 | 4.79E-21 |
| 294279                        | Coll1a2      | mRNA | G0:000557 | cellular compo | extracell | -0.86028 | 1.45E-49 | 1.39E-47 |
| 29576                         | Wisp2        | mRNA | G0:000561 | cellular compo | extracell | -1.10859 | 1.18E-11 | 2.27E-10 |



|        |        |      |           |                |           |          |          |          |
|--------|--------|------|-----------|----------------|-----------|----------|----------|----------|
| 304913 | Tnn    | mRNA | GO:004302 | cellular compo | synapse p | -1.76284 | 5.52E-06 | 4.77E-05 |
| 305104 | Col9a1 | mRNA | GO:000557 | cellular compo | extracell | -0.62938 | 4.14E-14 | 1.03E-12 |
| 313954 | Matn3  | mRNA | GO:000557 | cellular compo | extracell | -3.66027 | 1.13E-16 | 3.35E-15 |
| 58968  | Acan   | mRNA | GO:009896 | cellular compo | extracell | -3.36343 | 2.15E-87 | 3.68E-85 |
| 64032  | Ctgf   | mRNA | GO:000580 | cellular compo | extracell | -0.68074 | 1.23E-29 | 6.89E-28 |
| 81687  | Mmp9   | mRNA | GO:000561 | cellular compo | extracell | -1.31189 | 8.93E-30 | 5.01E-28 |

| <b>Suppl. Table 7 The DEGs of KEGG analysis</b> |              |      |                   |                          |                          |                                      |                                        |                                        |
|-------------------------------------------------|--------------|------|-------------------|--------------------------|--------------------------|--------------------------------------|----------------------------------------|----------------------------------------|
| <b>Upregulated</b>                              |              |      |                   |                          |                          |                                      |                                        |                                        |
| Gene ID                                         | Gene Symbol  | Type | kegg_pathway_term | KEGG Pathway Term Level1 | KEGG Pathway Term Level2 | log2 (CPIP_DEG_left / Sham_DEG_left) | Pvalue (CPIP_DEG_left / Sham_DEG_left) | Qvalue (CPIP_DEG_left / Sham_DEG_left) |
| <b>Complement and coagulation cascades</b>      |              |      |                   |                          |                          |                                      |                                        |                                        |
| 103689965                                       | LOC103689965 | mRNA | 04610///Con       | Organismal               | Immune system            | 0.62699505                           | 3.03E-33                               | 1.92E-31                               |
| 192262                                          | C1s          | mRNA | 04610///Con       | Organismal               | Immune system            | 0.89991984                           | 5.16E-243                              | 2.29E-240                              |
| 24231                                           | C2           | mRNA | 04610///Con       | Organismal               | Immune system            | 0.78523717                           | 2.50E-54                               | 2.63E-52                               |
| 24233                                           | C4a          | mRNA | 04610///Con       | Organismal               | Immune system            | 0.67338159                           | 2.11E-31                               | 1.27E-29                               |
| 24237                                           | C6           | mRNA | 04610///Con       | Organismal               | Immune system            | 0.91627858                           | 5.20E-12                               | 1.04E-10                               |
| 24617                                           | Serpine1     | mRNA | 04218///Cel       | Organismal               | Cell growth and          | 0.90267636                           | 2.12E-23                               | 9.03E-22                               |
| 25021                                           | Itgam        | mRNA | 04640///Hen       | Organismal               | Transport and c          | 0.7435184                            | 9.03E-12                               | 1.77E-10                               |
| 294257                                          | Cfb          | mRNA | 04610///Con       | Organismal               | Immune system            | 0.7346057                            | 4.76E-12                               | 9.55E-11                               |
| 295703                                          | Serping1     | mRNA | 04610///Con       | Organismal               | Immune system            | 0.6078319                            | 2.86E-177                              | 9.25E-175                              |
| 298566                                          | C1qa         | mRNA | 04610///Con       | Organismal               | Immune system            | 0.63221656                           | 2.22E-31                               | 1.33E-29                               |
| 499271                                          | Itgax        | mRNA | 04810///Reg       | Cellular Pr              | Cell motility++          | 0.71492985                           | 4.07E-06                               | 3.61E-05                               |
| 60327                                           | F13a1        | mRNA | 04610///Con       | Organismal               | Immune system            | 0.80841161                           | 1.48E-24                               | 6.71E-23                               |
| 84007                                           | C3ar1        | mRNA | 04080///Neu       | Organismal               | Signaling molec          | 1.0358262                            | 7.47E-15                               | 1.95E-13                               |
| <b>Phagosome</b>                                |              |      |                   |                          |                          |                                      |                                        |                                        |
| 100364500                                       | LOC100364500 | mRNA | 04514///Cel       | Organismal               | Cell growth and          | 0.73546961                           | 7.20E-21                               | 2.68E-19                               |
| 100909441                                       | LOC100909441 | mRNA | 04145///Pha       | Cellular Pr              | Cell growth and          | 0.8096769                            | 2.32E-105                              | 4.70E-103                              |
| 103690020                                       | LOC103690020 | mRNA | 04640///Hen       | Cellular Pr              | Transport and c          | 0.94425771                           | 1.53E-05                               | 1.21E-04                               |
| 103690108                                       | LOC103690108 | mRNA | 04514///Cel       | Organismal               | Cell growth and          | 0.84804252                           | 2.65E-144                              | 7.43E-142                              |
| 108348047                                       | LOC108348047 | mRNA | 04650///Nat       | Organismal               | Transport and c          | 0.88036526                           | 5.43E-21                               | 2.05E-19                               |
| 25021                                           | Itgam        | mRNA | 04640///Hen       | Organismal               | Transport and c          | 0.7435184                            | 9.03E-12                               | 1.77E-10                               |
| 29220                                           | Thbs4        | mRNA | 04145///Pha       | Cellular Pr              | Transport and c          | 1.15146055                           | 0                                      | 0                                      |
| 292406                                          | Thbs2        | mRNA | 04145///Pha       | Cellular Pr              | Transport and c          | 0.70593479                           | 1.34E-75                               | 1.96E-73                               |
| 295279                                          | Fcgr1a       | mRNA | 04640///Hen       | Organismal               | Transport and c          | 0.74598654                           | 6.35E-12                               | 1.26E-10                               |
| 304966                                          | Fcgr3a       | mRNA | 04145///Pha       | Organismal               | Transport and c          | 0.81506633                           | 3.12E-05                               | 2.33E-04                               |
| 361289                                          | Colec12      | mRNA | 04145///Pha       | Cellular Pr              | Transport and c          | 0.63299882                           | 3.54E-22                               | 1.41E-20                               |
| 445442                                          | Thbs1        | mRNA | 04145///Pha       | Cellular Pr              | Cell growth and          | 0.64886049                           | 5.44E-30                               | 3.07E-28                               |
| 498638                                          | Msr1         | mRNA | 04145///Pha       | Cellular Pr              | Transport and c          | 0.71827216                           | 1.77E-13                               | 4.09E-12                               |
| 66021                                           | Cybb         | mRNA | 04217///Nec       | Organismal               | Cell growth and          | 0.71702112                           | 3.62E-13                               | 8.09E-12                               |
| 684969                                          | Potef        | mRNA | 04714///The       | Organismal               | Cell growth and          | 6.28587431                           | 9.69E-11                               | 1.68E-09                               |
| <b>Osteoclast differentiation</b>               |              |      |                   |                          |                          |                                      |                                        |                                        |
| 100360880                                       | Fosb         | mRNA | 04657///IL-       | Organismal               | Immune system++          | 2.45322245                           | 8.98E-100                              | 1.73E-97                               |
| 102547294                                       | Iqcn         | mRNA | 04657///IL-       | Organismal               | Endocrine syste          | 1.03831724                           | 1.17E-04                               | 7.69E-04                               |
| 108348047                                       | LOC108348047 | mRNA | 04650///Nat       | Organismal               | Transport and c          | 0.88036526                           | 5.43E-21                               | 2.05E-19                               |
| 292594                                          | Lilrb4       | mRNA | 04380///Ost       | Organismal               | Development              | 0.97314905                           | 1.21E-06                               | 1.18E-05                               |
| 295279                                          | Fcgr1a       | mRNA | 04640///Hen       | Organismal               | Transport and c          | 0.74598654                           | 6.35E-12                               | 1.26E-10                               |
| 301227                                          | Trem2        | mRNA | 04380///Ost       | Organismal               | Development              | 0.7521009                            | 2.24E-11                               | 4.18E-10                               |
| 304966                                          | Fcgr3a       | mRNA | 04145///Pha       | Organismal               | Transport and c          | 0.81506633                           | 3.12E-05                               | 2.33E-04                               |
| 308350                                          | Lilrb3       | mRNA | 04380///Ost       | Organismal               | Development              | 0.78272765                           | 1.24E-05                               | 1.00E-04                               |
| 685590                                          | LOC685590    | mRNA | 04213///Lon       | Cellular Pr              | Nervous system+          | 0.86937379                           | 1.14E-06                               | 1.12E-05                               |
| 690955                                          | Lilrb3b      | mRNA | 04380///Ost       | Organismal               | Development              | 0.89523635                           | 3.76E-10                               | 6.09E-09                               |
| 89829                                           | Socs3        | mRNA | 04917///Pro       | Genetic Inf              | Endocrine syste          | 0.74776397                           | 2.83E-23                               | 1.20E-21                               |
| <b>ECM-receptor interaction</b>                 |              |      |                   |                          |                          |                                      |                                        |                                        |
| 103690020                                       | LOC103690020 | mRNA | 04640///Hen       | Cellular Pr              | Transport and c          | 0.94425771                           | 1.53E-05                               | 1.21E-04                               |
| 25661                                           | Fn1          | mRNA | 04510///Foc       | Cellular Pr              | Cellular commun          | 1.16325353                           | 0                                      | 0                                      |
| 29220                                           | Thbs4        | mRNA | 04145///Pha       | Cellular Pr              | Transport and c          | 1.15146055                           | 0                                      | 0                                      |
| 292406                                          | Thbs2        | mRNA | 04145///Pha       | Cellular Pr              | Transport and c          | 0.70593479                           | 1.34E-75                               | 1.96E-73                               |
| 315979                                          | Col6a6       | mRNA | 04974///Pro       | Organismal               | Digestive syste          | 0.64357261                           | 2.37E-38                               | 1.77E-36                               |
| 361821                                          | Col6a2       | mRNA | 04974///Pro       | Organismal               | Digestive syste          | 0.63343766                           | 2.32E-181                              | 7.60E-179                              |
| 445442                                          | Thbs1        | mRNA | 04145///Pha       | Cellular Pr              | Cell growth and          | 0.64886049                           | 5.44E-30                               | 3.07E-28                               |
| <b>Protein digestion and absorption</b>         |              |      |                   |                          |                          |                                      |                                        |                                        |

|                                               |              |      |             |             |                  |            |           |           |
|-----------------------------------------------|--------------|------|-------------|-------------|------------------|------------|-----------|-----------|
| 25253                                         | Dpp4         | mRNA | 04974///Prc | Organismal  | Digestive system | 1.03695071 | 2.10E-45  | 1.78E-43  |
| 29132                                         | Atp1a4       | mRNA | 04918///Thy | Organismal  | Excretory system | 0.8965798  | 1.63E-05  | 1.28E-04  |
| 301012                                        | Col17a1      | mRNA | 04974///Prc | Organismal  | Digestive system | 1.27953353 | 4.83E-12  | 9.67E-11  |
| 315979                                        | Col16a6      | mRNA | 04974///Prc | Organismal  | Digestive system | 0.64357261 | 2.37E-38  | 1.77E-36  |
| 361821                                        | Col16a2      | mRNA | 04974///Prc | Organismal  | Digestive system | 0.63343766 | 2.32E-181 | 7.60E-179 |
| 54242                                         | Cpa3         | mRNA | 04974///Prc | Organismal  | Digestive system | 1.89993375 | 5.77E-31  | 3.38E-29  |
| 94341                                         | Kcnj13       | mRNA | 04974///Prc | Organismal  | Digestive system | 0.64599982 | 2.91E-07  | 3.16E-06  |
| <b>Focal adhesion</b>                         |              |      |             |             |                  |            |           |           |
| 24329                                         | Egfr         | mRNA | 04012///Erb | Organismal  | Cell growth and  | 0.59664343 | 4.74E-29  | 2.59E-27  |
| 25661                                         | Fn1          | mRNA | 04510///Foc | Cellular Pr | Cellular commun  | 1.16325353 | 0         | 0         |
| 29220                                         | Thbs4        | mRNA | 04145///Pha | Cellular Pr | Transport and c  | 1.15146055 | 0         | 0         |
| 292406                                        | Thbs2        | mRNA | 04145///Pha | Cellular Pr | Transport and c  | 0.70593479 | 1.34E-75  | 1.96E-73  |
| 315979                                        | Col16a6      | mRNA | 04974///Prc | Organismal  | Digestive system | 0.64357261 | 2.37E-38  | 1.77E-36  |
| 361821                                        | Col16a2      | mRNA | 04974///Prc | Organismal  | Digestive system | 0.63343766 | 2.32E-181 | 7.60E-179 |
| 445442                                        | Thbs1        | mRNA | 04145///Pha | Cellular Pr | Cell growth and  | 0.64886049 | 5.44E-30  | 3.07E-28  |
| 64033                                         | Cend2        | mRNA | 04917///Prc | Organismal  | Cell growth and  | 0.65078009 | 1.31E-12  | 2.77E-11  |
| 684969                                        | Potef        | mRNA | 04714///The | Organismal  | Cell growth and  | 6.28587431 | 9.69E-11  | 1.68E-09  |
| 685590                                        | LOC685590    | mRNA | 04213///Lon | Cellular Pr | Nervous system+  | 0.86937379 | 1.14E-06  | 1.12E-05  |
| <b>Cell adhesion molecules (CAMs)</b>         |              |      |             |             |                  |            |           |           |
| 100364500                                     | LOC100364500 | mRNA | 04514///Cel | Organismal  | Cell growth and  | 0.73546961 | 7.20E-21  | 2.68E-19  |
| 103690108                                     | LOC103690108 | mRNA | 04514///Cel | Organismal  | Cell growth and  | 0.84804252 | 2.65E-144 | 7.43E-142 |
| 114122                                        | Vcan         | mRNA | 04514///Cel | Environment | Signaling molec  | 1.18678506 | 3.60E-98  | 6.72E-96  |
| 25021                                         | Itgam        | mRNA | 04640///Hen | Organismal  | Transport and c  | 0.7435184  | 9.03E-12  | 1.77E-10  |
| 25660                                         | Cd28         | mRNA | 04660///T c | Organismal  | Signaling molec  | 1.17574346 | 3.61E-06  | 3.24E-05  |
| 306454                                        | C1dn22       | mRNA | 04514///Cel | Organismal  | Cellular commun  | 0.74900559 | 1.21E-04  | 7.92E-04  |
| 311426                                        | Siglec1      | mRNA | 04514///Cel | Environment | Signaling molec  | 0.62502781 | 2.97E-10  | 4.88E-09  |
| 65129                                         | C1dn1        | mRNA | 04514///Cel | Organismal  | Cellular commun  | 0.71661167 | 2.30E-94  | 4.06E-92  |
| 83497                                         | Ocln         | mRNA | 04514///Cel | Organismal  | Cellular commun  | 0.82802502 | 5.39E-13  | 1.19E-11  |
| <b>Leukocyte transendothelial migration</b>   |              |      |             |             |                  |            |           |           |
| 25021                                         | Itgam        | mRNA | 04640///Hen | Organismal  | Transport and c  | 0.7435184  | 9.03E-12  | 1.77E-10  |
| 306454                                        | C1dn22       | mRNA | 04514///Cel | Organismal  | Cellular commun  | 0.74900559 | 1.21E-04  | 7.92E-04  |
| 65129                                         | C1dn1        | mRNA | 04514///Cel | Organismal  | Cellular commun  | 0.71661167 | 2.30E-94  | 4.06E-92  |
| 66021                                         | Cybb         | mRNA | 04217///Nec | Organismal  | Cell growth and  | 0.71702112 | 3.62E-13  | 8.09E-12  |
| 684969                                        | Potef        | mRNA | 04714///The | Organismal  | Cell growth and  | 6.28587431 | 9.69E-11  | 1.68E-09  |
| 685590                                        | LOC685590    | mRNA | 04213///Lon | Cellular Pr | Nervous system+  | 0.86937379 | 1.14E-06  | 1.12E-05  |
| 83497                                         | Ocln         | mRNA | 04514///Cel | Organismal  | Cellular commun  | 0.82802502 | 5.39E-13  | 1.19E-11  |
| <b>TGF-beta signaling pathway</b>             |              |      |             |             |                  |            |           |           |
| 103691556                                     | LOC103691556 | mRNA | 04350///TGF | Cellular Pr | Cellular commun  | 7.6082511  | 6.94E-62  | 8.58E-60  |
| 29139                                         | Dcn          | mRNA | 04350///TGF | Environment | Signal transduc  | 0.76299562 | 0         | 0         |
| 29200                                         | Inhba        | mRNA | 04350///TGF | Cellular Pr | Cellular commun  | 0.6319736  | 3.29E-06  | 2.97E-05  |
| 445442                                        | Thbs1        | mRNA | 04145///Pha | Cellular Pr | Cell growth and  | 0.64886049 | 5.44E-30  | 3.07E-28  |
| 85272                                         | Bmp7         | mRNA | 04360///Axc | Organismal  | Signaling molec  | 0.66895593 | 4.01E-11  | 7.23E-10  |
| <b>Cytokine-cytokine receptor interaction</b> |              |      |             |             |                  |            |           |           |
| 117029                                        | Ccr5         | mRNA | 04144///End | Cellular Pr | Transport and c  | 0.7218052  | 2.76E-11  | 5.12E-10  |
| 24536                                         | Lepr         | mRNA | 04080///Neu | Organismal  | Signaling molec  | 0.70472137 | 1.78E-32  | 1.10E-30  |
| 287561                                        | Cc17         | mRNA | 04657///IL- | Organismal  | Signaling molec  | 1.01026655 | 9.09E-09  | 1.23E-07  |
| 29200                                         | Inhba        | mRNA | 04350///TGF | Cellular Pr | Cellular commun  | 0.6319736  | 3.29E-06  | 2.97E-05  |
| 306748                                        | Cxc114       | mRNA | 04060///Cyt | Organismal  | Signaling molec  | 1.69757352 | 5.58E-67  | 7.33E-65  |
| 310738                                        | Ngf          | mRNA | 04750///Inf | Organismal  | Nervous system+  | 1.2208735  | 2.30E-07  | 2.54E-06  |
| 365395                                        | C1cf1        | mRNA | 04060///Cyt | Environment | Signaling molec  | 0.94925407 | 4.79E-05  | 3.43E-04  |
| 498335                                        | Cxc113       | mRNA | 04060///Cyt | Organismal  | Signaling molec  | 1.38176533 | 1.03E-33  | 6.57E-32  |
| 85272                                         | Bmp7         | mRNA | 04360///Axc | Organismal  | Signaling molec  | 0.66895593 | 4.01E-11  | 7.23E-10  |
| <b>Downregulated</b>                          |              |      |             |             |                  |            |           |           |

| Gene ID                                       | Gene Symbol  | Type | kegg_pathway_term | KEGG Pathway Term Level1 | KEGG Pathway Term Level2 | log2 (CPIP_DEG_left / Sham_DEG_left) | Pvalue (CPIP_DEG_left / Sham_DEG_left) | Qvalue (CPIP_DEG_left / Sham_DEG_left) |
|-----------------------------------------------|--------------|------|-------------------|--------------------------|--------------------------|--------------------------------------|----------------------------------------|----------------------------------------|
| <b>Cardiac muscle contraction</b>             |              |      |                   |                          |                          |                                      |                                        |                                        |
| 140727                                        | Cacng6       | mRNA | 04921///Oxy       | Organismal               | Endocrine system         | -1.8358001                           | 4.06E-05                               | 2.95E-04                               |
| 24585                                         | My13         | mRNA | 04261///Adr       | Organismal               | Circulatory system       | -1.3256325                           | 4.10E-08                               | 5.05E-07                               |
| 25250                                         | Cox8b        | mRNA | 04714///The       | Organismal               | Global and overview      | -3.4937325                           | 1.01E-16                               | 3.01E-15                               |
| 25278                                         | Cox6a2       | mRNA | 04714///The       | Organismal               | Global and overview      | -4.6381224                           | 1.15E-108                              | 2.38E-106                              |
| 29658                                         | Cacng1       | mRNA | 04921///Oxy       | Organismal               | Endocrine system         | -6.1672317                           | 1.31E-18                               | 4.38E-17                               |
| 363925                                        | My12         | mRNA | 04510///Foc       | Cellular Process         | Cellular communication   | -5.951503                            | 7.13E-09                               | 9.79E-08                               |
| 500450                                        | Tpm2         | mRNA | 04261///Adr       | Organismal               | Circulatory system       | -2.1929751                           | 0                                      | 0                                      |
| 682930                                        | Cacnals      | mRNA | 04723///Ret       | Organismal               | Nervous system+          | -3.7168245                           | 1.32E-106                              | 2.71E-104                              |
| 84396                                         | Atp1b4       | mRNA | 04918///Thy       | Organismal               | Excretory system         | -2.5822692                           | 7.44E-05                               | 5.09E-04                               |
| <b>Apelin signaling pathway</b>               |              |      |                   |                          |                          |                                      |                                        |                                        |
| 100911372                                     | LOC100911372 | mRNA | 04714///The       | Genetic Information      | Endocrine system         | -0.6999347                           | 4.85E-18                               | 1.58E-16                               |
| 103689985                                     | LOC103689985 | mRNA | 04020///Cal       | Cellular Process         | Digestive system         | -3.9041973                           | 1.72E-26                               | 8.56E-25                               |
| 114207                                        | Ryr1         | mRNA | 04020///Cal       | Organismal               | Nervous system+          | -3.5658304                           | 1.01E-196                              | 3.49E-194                              |
| 117558                                        | My1k2        | mRNA | 04020///Cal       | Cellular Process         | Digestive system         | -3.8567944                           | 1.04E-99                               | 1.99E-97                               |
| 24585                                         | My13         | mRNA | 04261///Adr       | Organismal               | Circulatory system       | -1.3256325                           | 4.10E-08                               | 5.05E-07                               |
| 25629                                         | Plin1        | mRNA | 04714///The       | Organismal               | Endocrine system         | -1.7242882                           | 8.31E-10                               | 1.30E-08                               |
| 301518                                        | Prkag3       | mRNA | 04213///Lon       | Cellular Process         | Cellular communication   | -2.2774146                           | 5.64E-10                               | 8.97E-09                               |
| 307100                                        | Calml3       | mRNA | 04922///Glu       | Organismal               | Nervous system+          | -2.4378793                           | 1.40E-06                               | 1.35E-05                               |
| 363925                                        | My12         | mRNA | 04510///Foc       | Cellular Process         | Cellular communication   | -5.951503                            | 7.13E-09                               | 9.79E-08                               |
| 64032                                         | Ctgf         | mRNA | 04390///Hip       | Environment              | Signal transduction      | -0.6807429                           | 1.23E-29                               | 6.89E-28                               |
| 81633                                         | Acta2        | mRNA | 04926///Rel       | Organismal               | Endocrine system         | -0.6527267                           | 4.22E-49                               | 3.98E-47                               |
| <b>Glucagon signaling pathway</b>             |              |      |                   |                          |                          |                                      |                                        |                                        |
| 100364062                                     | LOC100364062 | mRNA | 04922///Glu       | Organismal               | Global and overview      | -2.1620602                           | 1.18E-07                               | 1.37E-06                               |
| 100912471                                     | LOC100912471 | mRNA | 04922///Glu       | Organismal               | Global and overview      | -2.5464332                           | 2.61E-08                               | 3.30E-07                               |
| 24701                                         | Pygm         | mRNA | 04217///Nec       | Organismal               | Global and overview      | -2.80484                             | 0                                      | 0                                      |
| 24959                                         | Pgam2        | mRNA | 04922///Glu       | Organismal               | Global and overview      | -1.7797152                           | 1.98E-109                              | 4.14E-107                              |
| 29353                                         | Phkg1        | mRNA | 04922///Glu       | Organismal               | Endocrine system         | -1.8786622                           | 2.69E-08                               | 3.39E-07                               |
| 301518                                        | Prkag3       | mRNA | 04213///Lon       | Cellular Process         | Cellular communication   | -2.2774146                           | 5.64E-10                               | 8.97E-09                               |
| 307100                                        | Calml3       | mRNA | 04922///Glu       | Organismal               | Nervous system+          | -2.4378793                           | 1.40E-06                               | 1.35E-05                               |
| 362282                                        | Pck1         | mRNA | 04922///Glu       | Organismal               | Global and overview      | -3.1486307                           | 4.49E-28                               | 2.38E-26                               |
| <b>Focal adhesion</b>                         |              |      |                   |                          |                          |                                      |                                        |                                        |
| 103689985                                     | LOC103689985 | mRNA | 04020///Cal       | Cellular Process         | Digestive system         | -3.9041973                           | 1.72E-26                               | 8.56E-25                               |
| 117558                                        | My1k2        | mRNA | 04020///Cal       | Cellular Process         | Digestive system         | -3.8567944                           | 1.04E-99                               | 1.99E-97                               |
| 24477                                         | Ibsp         | mRNA | 04510///Foc       | Cellular Process         | Cellular communication   | -1.744214                            | 1.10E-56                               | 1.21E-54                               |
| 24584                                         | My1pf        | mRNA | 04510///Foc       | Organismal               | Cellular communication   | -5.3416474                           | 0                                      | 0                                      |
| 25304                                         | Comp         | mRNA | 04145///Pha       | Cellular Process         | Transport and c          | -0.674322                            | 2.66E-22                               | 1.07E-20                               |
| 25412                                         | Col2a1       | mRNA | 04974///Prc       | Organismal               | Digestive system         | -1.669905                            | 0                                      | 0                                      |
| 29195                                         | Chad         | mRNA | 04510///Foc       | Cellular Process         | Cellular communication   | -1.4706079                           | 1.17E-22                               | 4.79E-21                               |
| 304913                                        | Tnn          | mRNA | 04510///Foc       | Cellular Process         | Cellular communication   | -1.7628414                           | 5.52E-06                               | 4.77E-05                               |
| 305104                                        | Col19a1      | mRNA | 04974///Prc       | Organismal               | Digestive system         | -0.6293818                           | 4.14E-14                               | 1.03E-12                               |
| 363925                                        | My12         | mRNA | 04510///Foc       | Cellular Process         | Cellular communication   | -5.951503                            | 7.13E-09                               | 9.79E-08                               |
| <b>Adrenergic signaling in cardiomyocytes</b> |              |      |                   |                          |                          |                                      |                                        |                                        |
| 140727                                        | Cacng6       | mRNA | 04921///Oxy       | Organismal               | Endocrine system         | -1.8358001                           | 4.06E-05                               | 2.95E-04                               |
| 24585                                         | My13         | mRNA | 04261///Adr       | Organismal               | Circulatory system       | -1.3256325                           | 4.10E-08                               | 5.05E-07                               |
| 29658                                         | Cacng1       | mRNA | 04921///Oxy       | Organismal               | Endocrine system         | -6.1672317                           | 1.31E-18                               | 4.38E-17                               |
| 307100                                        | Calml3       | mRNA | 04922///Glu       | Organismal               | Nervous system+          | -2.4378793                           | 1.40E-06                               | 1.35E-05                               |
| 363925                                        | My12         | mRNA | 04510///Foc       | Cellular Process         | Cellular communication   | -5.951503                            | 7.13E-09                               | 9.79E-08                               |
| 500450                                        | Tpm2         | mRNA | 04261///Adr       | Organismal               | Circulatory system       | -2.1929751                           | 0                                      | 0                                      |
| 682930                                        | Cacnals      | mRNA | 04723///Ret       | Organismal               | Nervous system+          | -3.7168245                           | 1.32E-106                              | 2.71E-104                              |
| 84396                                         | Atp1b4       | mRNA | 04918///Thy       | Organismal               | Excretory system         | -2.5822692                           | 7.44E-05                               | 5.09E-04                               |
| <b>Insulin signaling pathway</b>              |              |      |                   |                          |                          |                                      |                                        |                                        |
| 100911372                                     | LOC100911372 | mRNA | 04714///The       | Genetic Information      | Endocrine system         | -0.6999347                           | 4.85E-18                               | 1.58E-16                               |
| 24701                                         | Pygm         | mRNA | 04217///Nec       | Organismal               | Global and overview      | -2.80484                             | 0                                      | 0                                      |



| <b>Downregulated</b>                          |              |      |                   |                          |                          |                                      |                                        |                                        |
|-----------------------------------------------|--------------|------|-------------------|--------------------------|--------------------------|--------------------------------------|----------------------------------------|----------------------------------------|
| Gene ID                                       | Gene Symbol  | Type | kegg_pathway_term | KEGG Pathway Term Level1 | KEGG Pathway Term Level2 | log2 (CPIP_DEG_left / Sham_DEG_left) | Pvalue (CPIP_DEG_left / Sham_DEG_left) | Qvalue (CPIP_DEG_left / Sham_DEG_left) |
| <b>Cardiac muscle contraction</b>             |              |      |                   |                          |                          |                                      |                                        |                                        |
| 140727                                        | Cacng6       | mRNA | 04921///Oxy       | Organismal               | Endocrine s              | -1.8358001                           | 4.06E-05                               | 2.95E-04                               |
| 24585                                         | My13         | mRNA | 04261///Adr       | Organismal               | Circulatory              | -1.3256325                           | 4.10E-08                               | 5.05E-07                               |
| 25250                                         | Cox8b        | mRNA | 04714///The       | Organismal               | Global and               | -3.4937325                           | 1.01E-16                               | 3.01E-15                               |
| 25278                                         | Cox6a2       | mRNA | 04714///The       | Organismal               | Global and               | -4.6381224                           | 1.15E-108                              | 2.38E-106                              |
| 29658                                         | Cacng1       | mRNA | 04921///Oxy       | Organismal               | Endocrine s              | -6.1672317                           | 1.31E-18                               | 4.38E-17                               |
| 363925                                        | My12         | mRNA | 04510///Foc       | Cellular Pr              | Cellular co              | -5.951503                            | 7.13E-09                               | 9.79E-08                               |
| 500450                                        | Tpm2         | mRNA | 04261///Adr       | Organismal               | Circulatory              | -2.1929751                           | 0                                      | 0                                      |
| 682930                                        | Cacnals      | mRNA | 04723///Ret       | Organismal               | Nervous sys              | -3.7168245                           | 1.32E-106                              | 2.71E-104                              |
| 84396                                         | Atp1b4       | mRNA | 04918///Thy       | Organismal               | Excretory s              | -2.5822692                           | 7.44E-05                               | 5.09E-04                               |
| <b>Apelin signaling pathway</b>               |              |      |                   |                          |                          |                                      |                                        |                                        |
| 100911372                                     | LOC100911372 | mRNA | 04714///The       | Genetic Inf              | Endocrine s              | -0.6999347                           | 4.85E-18                               | 1.58E-16                               |
| 103689985                                     | LOC103689985 | mRNA | 04020///Cal       | Cellular Pr              | Digestive s              | -3.9041973                           | 1.72E-26                               | 8.56E-25                               |
| 114207                                        | Ryr1         | mRNA | 04020///Cal       | Organismal               | Nervous sys              | -3.5658304                           | 1.01E-196                              | 3.49E-194                              |
| 117558                                        | My1k2        | mRNA | 04020///Cal       | Cellular Pr              | Digestive s              | -3.8567944                           | 1.04E-99                               | 1.99E-97                               |
| 24585                                         | My13         | mRNA | 04261///Adr       | Organismal               | Circulatory              | -1.3256325                           | 4.10E-08                               | 5.05E-07                               |
| 25629                                         | Plin1        | mRNA | 04714///The       | Organismal               | Endocrine s              | -1.7242882                           | 8.31E-10                               | 1.30E-08                               |
| 301518                                        | Prkag3       | mRNA | 04213///Lon       | Cellular Pr              | Cellular co              | -2.2774146                           | 5.64E-10                               | 8.97E-09                               |
| 307100                                        | Calml3       | mRNA | 04922///Glu       | Organismal               | Nervous sys              | -2.4378793                           | 1.40E-06                               | 1.35E-05                               |
| 363925                                        | My12         | mRNA | 04510///Foc       | Cellular Pr              | Cellular co              | -5.951503                            | 7.13E-09                               | 9.79E-08                               |
| 64032                                         | Ctgf         | mRNA | 04390///Hip       | Environment              | Signal tran              | -0.6807429                           | 1.23E-29                               | 6.89E-28                               |
| 81633                                         | Acta2        | mRNA | 04926///Rel       | Organismal               | Endocrine s              | -0.6527267                           | 4.22E-49                               | 3.98E-47                               |
| <b>Glucagon signaling pathway</b>             |              |      |                   |                          |                          |                                      |                                        |                                        |
| 100364062                                     | LOC100364062 | mRNA | 04922///Glu       | Organismal               | Global and               | -2.1620602                           | 1.18E-07                               | 1.37E-06                               |
| 100912471                                     | LOC100912471 | mRNA | 04922///Glu       | Organismal               | Global and               | -2.5464332                           | 2.61E-08                               | 3.30E-07                               |
| 24701                                         | Pygm         | mRNA | 04217///Nec       | Organismal               | Global and               | -2.80484                             | 0                                      | 0                                      |
| 24959                                         | Pgam2        | mRNA | 04922///Glu       | Organismal               | Global and               | -1.7797152                           | 1.98E-109                              | 4.14E-107                              |
| 29353                                         | Phkg1        | mRNA | 04922///Glu       | Organismal               | Endocrine s              | -1.8786622                           | 2.69E-08                               | 3.39E-07                               |
| 301518                                        | Prkag3       | mRNA | 04213///Lon       | Cellular Pr              | Cellular co              | -2.2774146                           | 5.64E-10                               | 8.97E-09                               |
| 307100                                        | Calml3       | mRNA | 04922///Glu       | Organismal               | Nervous sys              | -2.4378793                           | 1.40E-06                               | 1.35E-05                               |
| 362282                                        | Pck1         | mRNA | 04922///Glu       | Organismal               | Global and               | -3.1486307                           | 4.49E-28                               | 2.38E-26                               |
| <b>Focal adhesion</b>                         |              |      |                   |                          |                          |                                      |                                        |                                        |
| 103689985                                     | LOC103689985 | mRNA | 04020///Cal       | Cellular Pr              | Digestive s              | -3.9041973                           | 1.72E-26                               | 8.56E-25                               |
| 117558                                        | My1k2        | mRNA | 04020///Cal       | Cellular Pr              | Digestive s              | -3.8567944                           | 1.04E-99                               | 1.99E-97                               |
| 24477                                         | Ibsp         | mRNA | 04510///Foc       | Cellular Pr              | Cellular co              | -1.744214                            | 1.10E-56                               | 1.21E-54                               |
| 24584                                         | My1pf        | mRNA | 04510///Foc       | Organismal               | Cellular co              | -5.3416474                           | 0                                      | 0                                      |
| 25304                                         | Comp         | mRNA | 04145///Pha       | Cellular Pr              | Transport a              | -0.674322                            | 2.66E-22                               | 1.07E-20                               |
| 25412                                         | Col2a1       | mRNA | 04974///Prc       | Organismal               | Digestive s              | -1.669905                            | 0                                      | 0                                      |
| 29195                                         | Chad         | mRNA | 04510///Foc       | Cellular Pr              | Cellular co              | -1.4706079                           | 1.17E-22                               | 4.79E-21                               |
| 304913                                        | Tnn          | mRNA | 04510///Foc       | Cellular Pr              | Cellular co              | -1.7628414                           | 5.52E-06                               | 4.77E-05                               |
| 305104                                        | Col9a1       | mRNA | 04974///Prc       | Organismal               | Digestive s              | -0.6293818                           | 4.14E-14                               | 1.03E-12                               |
| 363925                                        | My12         | mRNA | 04510///Foc       | Cellular Pr              | Cellular co              | -5.951503                            | 7.13E-09                               | 9.79E-08                               |
| <b>Adrenergic signaling in cardiomyocytes</b> |              |      |                   |                          |                          |                                      |                                        |                                        |
| 140727                                        | Cacng6       | mRNA | 04921///Oxy       | Organismal               | Endocrine s              | -1.8358001                           | 4.06E-05                               | 2.95E-04                               |
| 24585                                         | My13         | mRNA | 04261///Adr       | Organismal               | Circulatory              | -1.3256325                           | 4.10E-08                               | 5.05E-07                               |
| 29658                                         | Cacng1       | mRNA | 04921///Oxy       | Organismal               | Endocrine s              | -6.1672317                           | 1.31E-18                               | 4.38E-17                               |
| 307100                                        | Calml3       | mRNA | 04922///Glu       | Organismal               | Nervous sys              | -2.4378793                           | 1.40E-06                               | 1.35E-05                               |
| 363925                                        | My12         | mRNA | 04510///Foc       | Cellular Pr              | Cellular co              | -5.951503                            | 7.13E-09                               | 9.79E-08                               |
| 500450                                        | Tpm2         | mRNA | 04261///Adr       | Organismal               | Circulatory              | -2.1929751                           | 0                                      | 0                                      |
| 682930                                        | Cacnals      | mRNA | 04723///Ret       | Organismal               | Nervous sys              | -3.7168245                           | 1.32E-106                              | 2.71E-104                              |
| 84396                                         | Atp1b4       | mRNA | 04918///Thy       | Organismal               | Excretory s              | -2.5822692                           | 7.44E-05                               | 5.09E-04                               |
| <b>Insulin signaling pathway</b>              |              |      |                   |                          |                          |                                      |                                        |                                        |
| 100911372                                     | LOC100911372 | mRNA | 04714///The       | Genetic Inf              | Endocrine s              | -0.6999347                           | 4.85E-18                               | 1.58E-16                               |



|                                           |              |      |             |             |             |            |           |           |
|-------------------------------------------|--------------|------|-------------|-------------|-------------|------------|-----------|-----------|
| 24701                                     | Pygm         | mRNA | 04217///Nec | Organismal  | Global and  | -2.80484   | 0         | 0         |
| 25139                                     | Slc2a4       | mRNA | 04920///Adi | Organismal  | Endocrine s | -0.7110025 | 2.45E-08  | 3.10E-07  |
| 29353                                     | Phkg1        | mRNA | 04922///Glu | Organismal  | Endocrine s | -1.8786622 | 2.69E-08  | 3.39E-07  |
| 301518                                    | Prkag3       | mRNA | 04213///Lon | Cellular Pr | Cellular cc | -2.2774146 | 5.64E-10  | 8.97E-09  |
| 307100                                    | Calml3       | mRNA | 04922///Glu | Organismal  | Nervous sys | -2.4378793 | 1.40E-06  | 1.35E-05  |
| 362282                                    | Pck1         | mRNA | 04922///Glu | Organismal  | Global and  | -3.1486307 | 4.49E-28  | 2.38E-26  |
| 500036                                    | Ppp1r3a      | mRNA | 04910///Ins | Organismal  | Endocrine s | -2.8427967 | 7.13E-20  | 2.51E-18  |
| <b>Calcium signaling pathway</b>          |              |      |             |             |             |            |           |           |
| 103689985                                 | LOC103689985 | mRNA | 04020///Cal | Cellular Pr | Digestive s | -3.9041973 | 1.72E-26  | 8.56E-25  |
| 108352449                                 | LOC108352449 | mRNA | 04621///NOE | Organismal  | Signaling n | -3.2432005 | 1.55E-08  | 2.04E-07  |
| 114207                                    | Ryr1         | mRNA | 04020///Cal | Organismal  | Nervous sys | -3.5658304 | 1.01E-196 | 3.49E-194 |
| 116601                                    | Atp2a1       | mRNA | 04020///Cal | Organismal  | Digestive s | -5.2301319 | 0         | 0         |
| 117558                                    | Mylk2        | mRNA | 04020///Cal | Cellular Pr | Digestive s | -3.8567944 | 1.04E-99  | 1.99E-97  |
| 29353                                     | Phkg1        | mRNA | 04922///Glu | Organismal  | Endocrine s | -1.8786622 | 2.69E-08  | 3.39E-07  |
| 296369                                    | Tnnc2        | mRNA | 04020///Cal | Environment | Signal tran | -5.9117705 | 0         | 0         |
| 307100                                    | Calml3       | mRNA | 04922///Glu | Organismal  | Nervous sys | -2.4378793 | 1.40E-06  | 1.35E-05  |
| 682930                                    | Cacnals      | mRNA | 04723///Ret | Organismal  | Nervous sys | -3.7168245 | 1.32E-106 | 2.71E-104 |
| <b>Vascular smooth muscle contraction</b> |              |      |             |             |             |            |           |           |
| 103689985                                 | LOC103689985 | mRNA | 04020///Cal | Cellular Pr | Digestive s | -3.9041973 | 1.72E-26  | 8.56E-25  |
| 117558                                    | Mylk2        | mRNA | 04020///Cal | Cellular Pr | Digestive s | -3.8567944 | 1.04E-99  | 1.99E-97  |
| 25365                                     | Actg2        | mRNA | 04270///Vas | Organismal  | Circulatory | -1.7706842 | 1.62E-24  | 7.28E-23  |
| 29747                                     | Kcnmb1       | mRNA | 04911///Ins | Organismal  | Endocrine s | -0.7355697 | 2.81E-05  | 2.12E-04  |
| 307100                                    | Calml3       | mRNA | 04922///Glu | Organismal  | Nervous sys | -2.4378793 | 1.40E-06  | 1.35E-05  |
| 682930                                    | Cacnals      | mRNA | 04723///Ret | Organismal  | Nervous sys | -3.7168245 | 1.32E-106 | 2.71E-104 |
| 81633                                     | Acta2        | mRNA | 04926///Rel | Organismal  | Endocrine s | -0.6527267 | 4.22E-49  | 3.98E-47  |
| <b>ECM-receptor interaction</b>           |              |      |             |             |             |            |           |           |
| 24477                                     | Ibsp         | mRNA | 04510///Foc | Cellular Pr | Cellular cc | -1.744214  | 1.10E-56  | 1.21E-54  |
| 25304                                     | Comp         | mRNA | 04145///Pha | Cellular Pr | Transport a | -0.674322  | 2.66E-22  | 1.07E-20  |
| 25412                                     | Col2a1       | mRNA | 04974///Pro | Organismal  | Digestive s | -1.669905  | 0         | 0         |
| 29195                                     | Chad         | mRNA | 04510///Foc | Cellular Pr | Cellular cc | -1.4706079 | 1.17E-22  | 4.79E-21  |
| 304913                                    | Tnn          | mRNA | 04510///Foc | Cellular Pr | Cellular cc | -1.7628414 | 5.52E-06  | 4.77E-05  |
| 305104                                    | Col9a1       | mRNA | 04974///Pro | Organismal  | Digestive s | -0.6293818 | 4.14E-14  | 1.03E-12  |
| <b>Oxytocin signaling pathway</b>         |              |      |             |             |             |            |           |           |
| 103689985                                 | LOC103689985 | mRNA | 04020///Cal | Cellular Pr | Digestive s | -3.9041973 | 1.72E-26  | 8.56E-25  |
| 114207                                    | Ryr1         | mRNA | 04020///Cal | Organismal  | Nervous sys | -3.5658304 | 1.01E-196 | 3.49E-194 |
| 117558                                    | Mylk2        | mRNA | 04020///Cal | Cellular Pr | Digestive s | -3.8567944 | 1.04E-99  | 1.99E-97  |
| 140727                                    | Cacng6       | mRNA | 04921///Oxy | Organismal  | Endocrine s | -1.8358001 | 4.06E-05  | 2.95E-04  |
| 29658                                     | Cacng1       | mRNA | 04921///Oxy | Organismal  | Endocrine s | -6.1672317 | 1.31E-18  | 4.38E-17  |
| 301518                                    | Prkag3       | mRNA | 04213///Lon | Cellular Pr | Cellular cc | -2.2774146 | 5.64E-10  | 8.97E-09  |
| 307100                                    | Calml3       | mRNA | 04922///Glu | Organismal  | Nervous sys | -2.4378793 | 1.40E-06  | 1.35E-05  |
| 682930                                    | Cacnals      | mRNA | 04723///Ret | Organismal  | Nervous sys | -3.7168245 | 1.32E-106 | 2.71E-104 |



**Suppl. Table 8 The gene list of overlapping of DEG&PG SN VL**

| <b>DEGs&amp;PG</b> |                                      |                                        |                                        |
|--------------------|--------------------------------------|----------------------------------------|----------------------------------------|
| Gene name          | log2 (CPIP_DEG_left / Sham_DEG_left) | Pvalue (CPIP_DEG_left / Sham_DEG_left) | Qvalue (CPIP_DEG_left / Sham_DEG_left) |
| Gad1               | 0.710804                             | 7.55E-05                               | 5.16E-04                               |
| Egfr               | 0.596643                             | 4.74E-29                               | 2.59E-27                               |
| Thbs4              | 1.151461                             | 0                                      | 0                                      |
| Crh                | -0.68003                             | 1.64E-19                               | 5.71E-18                               |
| Aqp4               | 0.841721                             | 7.55E-10                               | 1.19E-08                               |
| Gdnf               | 2.225086                             | 8.63E-05                               | 5.81E-04                               |
| Lepr               | 0.704721                             | 1.78E-32                               | 1.10E-30                               |
| Pla2g4a            | 0.748419                             | 1.48E-06                               | 1.43E-05                               |
| Cybb               | 0.717021                             | 3.62E-13                               | 8.09E-12                               |
| Stoml3             | 2.625791                             | 4.85E-07                               | 5.06E-06                               |
| Ngf                | 1.220873                             | 2.30E-07                               | 2.54E-06                               |
| Mmp9               | -1.31189                             | 8.93E-30                               | 5.01E-28                               |
| Col11a2            | -0.86028                             | 1.45E-49                               | 1.39E-47                               |
| Fosb               | 2.453222                             | #####                                  | 1.73E-97                               |
| Mpo                | -0.82273                             | 1.68E-14                               | 4.30E-13                               |
| Col9a1             | -0.62938                             | 4.14E-14                               | 1.03E-12                               |
| Itgam              | 0.743518                             | 9.03E-12                               | 1.77E-10                               |
| Egr1               | 0.673238                             | 3.35E-39                               | 2.54E-37                               |
| Dpp4               | 1.036951                             | 2.10E-45                               | 1.78E-43                               |
|                    |                                      |                                        |                                        |
|                    |                                      |                                        |                                        |
| <b>DEGs&amp;SN</b> |                                      |                                        |                                        |
| Gene name          | log2 (CPIP_DEG_left / Sham_DEG_left) | Pvalue (CPIP_DEG_left / Sham_DEG_left) | Qvalue (CPIP_DEG_left / Sham_DEG_left) |
| Hal                | -0.73997                             | 3.39E-05                               | 2.51E-04                               |
| Eno3               | -2.72623                             | 0                                      | 0                                      |
| Kcnmb1             | -0.73557                             | 2.81E-05                               | 2.12E-04                               |
| Faim               | -0.58817                             | 1.19E-13                               | 2.81E-12                               |
|                    |                                      |                                        |                                        |
|                    |                                      |                                        |                                        |
| <b>DEGs&amp;VL</b> |                                      |                                        |                                        |
| Gene name          | log2 (CPIP_DEG_left / Sham_DEG_left) | Pvalue (CPIP_DEG_left / Sham_DEG_left) | Qvalue (CPIP_DEG_left / Sham_DEG_left) |
| Fosb               | 2.453222                             | #####                                  | 1.73E-97                               |
| Smyd1              | -2.07754                             | 1.38E-34                               | 9.28E-33                               |
| Hal                | -0.73997                             | 3.39E-05                               | 2.51E-04                               |
| Socs3              | 0.747764                             | 2.83E-23                               | 1.20E-21                               |
| Kcnmb1             | -0.73557                             | 2.81E-05                               | 2.12E-04                               |
| Egr1               | 0.673238                             | 3.35E-39                               | 2.54E-37                               |

|      |          |          |          |
|------|----------|----------|----------|
| Gpx3 | -0.69302 | 1.13E-32 | 7.04E-31 |
|      |          |          |          |
